# Supplementary material for: The Effects of an Extemporaneous Speech Dual-task on Older Adult Gait Control
Source: Research Square preprint supplement (doi:10.21203/rs.3.rs-7674245/v1), 2025-11-18
Supplement: Supplementary file 55 [file DT4Walk4.xlsx]

## Sheet: Sheet1
Trajectories
		04:LFHD			04:RFHD			04:LBHD			04:RBHD			04:C7			04:T10			04:CLAV			04:STRN			04:RBAK			04:LSHO			04:LUPA			04:LELB			04:LFRM			04:LWRA			04:LWRB			04:LFIN
Frame	Sub Frame	X	Y	Z	X	Y	Z	X	Y	Z	X	Y	Z	X	Y	Z	X	Y	Z	X	Y	Z	X	Y	Z	X	Y	Z	X	Y	Z	X	Y	Z	X	Y	Z	X	Y	Z	X	Y	Z	X	Y	Z	X	Y	Z
		mm	mm	mm	mm	mm	mm	mm	mm	mm	mm	mm	mm	mm	mm	mm	mm	mm	mm	mm	mm	mm	mm	mm	mm	mm	mm	mm	mm	mm	mm	mm	mm	mm	mm	mm	mm	mm	mm	mm	mm	mm	mm	mm	mm	mm	mm	mm	mm
836	0	232.748	-2105.26	1581.55	350.308	-2101.29	1587.8	238.471	-2273.48	1542.68	346.017	-2266.98	1543.29	298.098	-2264.47	1442.83	300.731	-2328.53	1157.08	288.885	-2136.4	1357.35	291.576	-2057	1168.76	383.594	-2339.19	1233.63	112.588	-2199.4	1368.34	46.3899	-2234.08	1122.59	45.944	-2240.36	1048.1	2.02162	-2170.33	895.428	24.434	-2121.74	823.376	8.74255	-2189.54	801.65	-9.62979	-2133.78	746.323
837	0	231.645	-2095.97	1582.13	349.197	-2091.88	1588.6	237.746	-2264.31	1543.23	345.325	-2257.68	1544.05	297.087	-2255.26	1443.65	299.117	-2320.36	1158.55	288.393	-2127.31	1357.94	291.496	-2048.4	1168.86	381.92	-2330.79	1234.54	111.767	-2189.27	1369.28	45.0567	-2223.85	1123.64	44.4101	-2229.76	1048.99	1.08005	-2158.62	896.495	23.7336	-2109.82	824.949	7.63767	-2177.37	802.765	-10.4932	-2120.96	747.873
838	0	230.886	-2086.75	1582.87	348.366	-2082.66	1589.32	237.178	-2255.07	1543.89	344.883	-2248.33	1544.6	296.21	-2245.91	1444.54	297.322	-2311.45	1159.41	288.067	-2118.18	1358.37	291.415	-2039.72	1168.93	380.249	-2322.43	1235.36	111.161	-2179.13	1370.22	43.6503	-2213.59	1124.89	43.0741	-2219.02	1050.14	0.082257	-2146.94	897.914	23.0172	-2097.73	826.61	6.59545	-2165.12	803.93	-11.1472	-2108.27	749.512
839	0	230.419	-2077.6	1583.53	347.697	-2073.32	1589.99	236.612	-2245.86	1544.67	344.361	-2239.09	1545.47	295.297	-2236.74	1445.54	295.555	-2302.78	1160.54	287.708	-2109.29	1358.92	290.847	-2031.15	1169.09	378.604	-2314.2	1236.47	110.561	-2169.11	1371.22	42.2451	-2203.16	1126.15	41.4424	-2208.43	1051.08	-0.998341	-2134.91	899.35	22.5702	-2085.78	828.359	5.38398	-2152.59	805.169	-11.9309	-2095.14	751.338
840	0	229.949	-2068.34	1584.1	347.458	-2064	1590.66	236.192	-2236.62	1545.5	343.845	-2229.88	1546.32	294.461	-2227.59	1446.42	293.847	-2294.16	1161.73	287.489	-2100.32	1359.37	291.043	-2022.69	1169.47	376.934	-2305.99	1237.46	109.869	-2159.1	1372.02	40.8402	-2192.6	1127.18	39.9752	-2197.66	1052.13	-1.91798	-2123.09	900.721	22.1272	-2073.37	829.995	4.55544	-2140.02	806.476	-12.406	-2082.08	752.973
841	0	229.736	-2059.12	1584.84	347.307	-2054.92	1591.13	235.806	-2227.55	1546.34	343.492	-2220.84	1546.91	293.584	-2218.54	1447.26	292.165	-2285.77	1162.66	287.119	-2091.54	1359.81	290.754	-2014.23	1169.66	375.33	-2297.95	1238.35	109.427	-2149.24	1372.95	39.5546	-2181.96	1128.38	38.3448	-2187	1053.12	-2.70927	-2111.03	902.01	21.6982	-2061.21	831.722	3.66692	-2127.5	807.766	-12.8942	-2068.9	754.75
842	0	229.831	-2049.94	1585.52	347.216	-2045.76	1591.58	235.547	-2218.34	1547.24	343.179	-2211.88	1547.68	292.739	-2209.62	1448.16	290.558	-2277.23	1163.74	286.846	-2082.75	1360.43	290.632	-2005.98	1170.13	373.725	-2289.95	1239.34	108.817	-2139.42	1373.85	38.1574	-2171.24	1129.48	36.8707	-2176.07	1054.16	-3.53872	-2098.93	903.48	21.3067	-2048.84	833.602	2.66676	-2114.8	809.026	-13.1702	-2055.67	756.592
843	0	230.044	-2040.6	1586.11	347.416	-2036.62	1591.88	235.187	-2209.19	1548.14	343.03	-2202.85	1548.31	291.851	-2200.48	1448.95	289.04	-2269.02	1164.74	286.547	-2074.16	1360.83	290.429	-1997.72	1170.52	372.183	-2281.92	1240.25	108.32	-2129.67	1374.65	37.0189	-2160.49	1130.49	35.3629	-2165.16	1055.27	-4.34619	-2086.72	904.903	21.2125	-2036.39	835.44	1.98333	-2102	810.412	-13.3984	-2042.21	758.304
844	0	230.307	-2031.31	1586.68	347.666	-2027.71	1592.17	235.03	-2199.97	1549.08	342.732	-2193.98	1549.05	291.022	-2191.79	1449.71	287.626	-2260.72	1165.62	286.309	-2065.54	1361.37	290.171	-1989.54	1170.97	370.714	-2274.02	1241.2	107.832	-2120.14	1375.47	35.7288	-2149.63	1131.65	33.7353	-2154.36	1056.3	-4.86815	-2074.48	906.359	21.0783	-2023.99	837.223	1.23672	-2089.13	811.709	-13.4736	-2028.92	760.149
845	0	230.683	-2022.12	1587.32	348.117	-2018.83	1592.34	234.812	-2190.94	1550.04	342.555	-2185.18	1549.65	290.276	-2183.08	1450.44	286.252	-2252.49	1166.43	286.059	-2057.06	1361.97	290.079	-1981.42	1171.59	369.238	-2266.16	1241.96	107.387	-2110.72	1376.43	34.5161	-2138.74	1132.68	32.4183	-2143.48	1057.51	-5.33121	-2062.08	907.86	21.195	-2011.53	839.159	0.250281	-2076.58	813.121	-13.6112	-2015.58	762.197
846	0	231.082	-2012.96	1587.77	348.62	-2009.94	1592.48	234.652	-2181.83	1551.02	342.433	-2176.39	1550.32	289.539	-2174.52	1451.15	284.773	-2244.79	1166.96	285.823	-2048.65	1362.37	290.009	-1973.33	1172.18	367.737	-2258.37	1242.77	106.795	-2101.45	1377.3	33.4056	-2127.71	1133.79	30.9566	-2132.65	1058.43	-5.89349	-2049.79	909.406	21.1576	-1999.11	841.031	-0.534761	-2063.75	814.733	-13.4869	-2002.12	763.945
847	0	231.617	-2003.81	1588.07	349.19	-2001.04	1592.54	234.492	-2172.82	1551.9	342.325	-2167.67	1550.91	288.784	-2165.96	1451.79	283.553	-2236.37	1167.9	285.618	-2040.25	1362.81	290.168	-1965.68	1172.47	366.377	-2250.59	1243.45	106.495	-2091.99	1377.94	32.4087	-2116.86	1134.7	29.6273	-2121.68	1059.37	-6.20798	-2037.42	910.725	21.359	-1986.42	842.777	-0.874951	-2050.56	816.046	-13.3654	-1988.5	765.737
848	0	231.955	-1994.61	1588.3	349.761	-1992.41	1592.45	234.461	-2163.89	1552.73	342.205	-2159.12	1551.32	288.112	-2157.62	1452.25	282.341	-2228.61	1168.36	285.334	-2031.92	1363.12	290.264	-1957.63	1172.58	365.041	-2242.9	1243.97	106.049	-2082.88	1378.63	31.4742	-2106.09	1135.49	28.5674	-2110.79	1060.06	-6.57018	-2025.21	912.034	21.3453	-1973.98	844.685	-1.37073	-2037.72	817.354	-13.2592	-1975.2	767.508
849	0	232.559	-1985.59	1588.55	350.331	-1983.72	1592.18	234.373	-2155.09	1553.48	342.171	-2150.53	1551.7	287.54	-2149.23	1452.61	281.219	-2220.76	1168.71	285.225	-2023.62	1363.39	290.433	-1949.86	1172.99	363.793	-2235.2	1244.35	105.777	-2073.76	1379.33	30.7188	-2095.32	1136.37	27.4882	-2099.91	1060.88	-6.81314	-2012.9	913.506	21.651	-1961.53	846.434	-1.67221	-2024.84	818.538	-12.9284	-1961.73	769.21
850	0	233.096	-1976.6	1588.6	350.879	-1975.02	1591.96	234.355	-2146.25	1554.13	342.093	-2141.95	1552.06	286.922	-2140.88	1452.98	280.193	-2212.35	1169.34	285.045	-2015.35	1363.64	290.753	-1942.08	1173.33	362.601	-2227.46	1244.79	105.424	-2064.6	1379.69	29.8652	-2084.73	1136.9	26.5444	-2089.19	1061.39	-7.08664	-2000.73	914.683	21.7304	-1949.12	848.136	-2.05634	-2011.87	819.671	-12.7	-1948.32	770.857
851	0	233.649	-1967.75	1588.44	351.439	-1966.45	1591.52	234.392	-2137.5	1554.61	342.19	-2133.45	1552.27	286.391	-2132.58	1453.12	279.163	-2204.51	1169.62	285.169	-2007.06	1363.66	290.846	-1934.14	1173.43	361.513	-2219.8	1245.03	105.235	-2055.71	1380.03	29.1252	-2074.26	1137.4	25.7014	-2078.56	1061.79	-7.20802	-1988.62	915.776	22.1292	-1936.59	849.641	-2.00918	-1999	820.47	-12.3863	-1934.94	772.415
852	0	234.192	-1959.01	1588.24	352.125	-1957.85	1590.84	234.601	-2128.84	1554.86	342.347	-2125.09	1552.07	285.966	-2124.35	1453.08	278.231	-2196.7	1169.65	285.19	-1998.96	1363.44	290.695	-1926.16	1173.39	360.476	-2212.13	1245.01	105.138	-2046.81	1380.06	28.4488	-2063.95	1137.71	24.9284	-2067.97	1061.99	-7.21714	-1976.58	916.672	22.6995	-1924.4	850.939	-2.09697	-1986.35	821.504	-11.8994	-1921.82	773.799
853	0	234.9	-1950.23	1587.89	352.749	-1949.3	1590.17	234.786	-2120.22	1555.09	342.569	-2116.68	1551.99	285.575	-2115.99	1453	277.406	-2188.93	1169.7	285.172	-1990.71	1363.06	291.007	-1918.2	1173.2	359.546	-2204.39	1245.01	104.787	-2037.94	1380.03	28.0402	-2053.78	1137.83	24.298	-2057.34	1062.17	-7.24982	-1964.82	917.426	22.8929	-1911.92	852.345	-1.98669	-1973.52	822.121	-11.3332	-1908.48	775.047
854	0	235.625	-1941.42	1587.47	353.356	-1940.78	1589.49	235.053	-2111.44	1555.07	342.816	-2108.16	1551.78	285.236	-2107.67	1452.9	276.542	-2180.99	1169.73	285.191	-1982.48	1362.65	291.295	-1910.33	1172.77	358.687	-2196.69	1245.06	104.874	-2029.12	1379.81	27.5973	-2043.68	1137.9	23.7352	-2046.69	1062.1	-7.01332	-1952.72	918.085	23.6605	-1899.67	853.368	-1.77203	-1960.65	822.449	-10.9084	-1895.24	776.294
855	0	236.439	-1932.77	1586.95	353.927	-1932.61	1588.52	235.377	-2102.81	1554.99	343.145	-2099.79	1551.42	285.036	-2099.36	1452.57	275.759	-2173.24	1169.52	285.199	-1974.17	1362.2	291.447	-1902.42	1172.27	357.999	-2188.96	1244.85	104.84	-2020.39	1379.39	27.1743	-2033.75	1137.64	23.2554	-2036.23	1061.82	-6.8349	-1940.91	918.48	24.1834	-1887.53	854.29	-1.57747	-1948.09	823.12	-10.2247	-1882.33	777.32
856	0	237.318	-1924.1	1586.49	355.034	-1923.92	1587.6	235.845	-2094.2	1554.76	343.598	-2091.41	1550.77	284.836	-2091.05	1452.13	275.128	-2165.69	1169.14	285.408	-1966.04	1361.61	291.847	-1894.5	1171.59	357.397	-2181.15	1244.42	104.873	-2011.83	1379.02	26.9572	-2023.95	1137.34	22.9036	-2025.81	1061.62	-6.40104	-1929.22	918.737	25.0679	-1875.41	855.075	-1.26606	-1935.86	823.683	-9.47613	-1869.19	778.208
857	0	238.142	-1915.42	1585.95	355.921	-1915.36	1586.49	236.377	-2085.6	1554.54	344.142	-2083.05	1550.11	284.749	-2082.67	1451.69	274.588	-2157.94	1168.79	285.531	-1957.67	1360.97	292.329	-1886.85	1170.49	356.926	-2173.23	1244.1	105.008	-2003.14	1378.38	26.6601	-2014.2	1137.08	22.6927	-2015.39	1061.2	-6.04632	-1917.46	919.131	25.8698	-1863.4	855.775	-0.706131	-1923.21	823.802	-8.63329	-1856.36	779.076
858	0	239.225	-1906.69	1585.25	356.968	-1907.03	1585.53	236.928	-2077.01	1554.2	344.732	-2074.63	1549.36	284.761	-2074.25	1451.08	274.134	-2150.29	1168.39	285.847	-1949.33	1360.18	292.562	-1878.83	1169.99	356.578	-2165.17	1243.56	105.051	-1994.65	1377.66	26.5323	-2004.68	1136.54	22.4968	-2005.03	1060.5	-5.54311	-1905.82	919.197	26.6857	-1851.53	856.538	-0.155678	-1910.84	823.961	-7.78255	-1843.47	779.756
859	0	240.282	-1898.08	1584.53	358.127	-1898.65	1584.25	237.72	-2068.45	1553.66	345.344	-2066.2	1548.33	284.917	-2065.78	1450.33	273.803	-2142.54	1167.73	285.947	-1941.02	1359.3	293.067	-1870.95	1169.01	356.478	-2157.13	1242.86	105.289	-1985.99	1376.85	26.5991	-1995.31	1135.86	22.5457	-1994.79	1059.8	-4.94084	-1894.35	919.425	27.7545	-1839.58	857.065	0.468532	-1898.61	823.866	-6.93318	-1830.98	780.476
860	0	241.535	-1889.54	1583.76	359.332	-1890.2	1582.79	238.555	-2059.9	1553.07	346.122	-2057.75	1547.21	285.178	-2057.28	1449.55	273.753	-2134.7	1167.04	286.403	-1932.64	1358.38	293.265	-1862.98	1168.03	356.558	-2149.09	1242.21	105.67	-1977.38	1376	26.6675	-1985.75	1135.16	22.6354	-1984.58	1059.15	-4.24832	-1882.89	919.423	28.689	-1827.86	857.547	1.17678	-1886.31	824.001	-5.83084	-1818.28	781.199
861	0	242.673	-1880.86	1582.82	360.399	-1881.98	1581.32	239.52	-2051.27	1552.3	347.073	-2049.29	1546.08	285.516	-2048.58	1448.71	273.83	-2126.75	1166.43	286.731	-1924.08	1357.2	293.694	-1854.9	1166.47	356.75	-2140.91	1241.51	106.049	-1968.72	1375.01	26.8805	-1976.36	1134.31	22.7568	-1974.39	1058.44	-3.46821	-1871.4	919.341	29.8136	-1816.27	857.854	1.87537	-1874.36	823.962	-4.56817	-1805.83	781.614
862	0	243.962	-1872.21	1581.95	361.715	-1873.12	1580.12	240.453	-2042.67	1551.49	348.109	-2040.72	1544.73	285.951	-2039.92	1447.78	274.031	-2118.83	1165.58	287.261	-1915.44	1356.27	293.945	-1846.6	1165.18	357.108	-2132.58	1240.76	106.505	-1960.04	1373.92	27.1523	-1967.21	1133.43	22.9864	-1964.25	1057.57	-2.69775	-1860.2	919.115	30.9972	-1804.66	858.17	2.83836	-1862.45	823.744	-3.31061	-1793.62	781.78
863	0	245.339	-1863.76	1580.88	362.96	-1864.48	1578.49	241.573	-2034.11	1550.49	349.132	-2032.24	1543.23	286.57	-2031.22	1446.63	274.412	-2111.07	1164.49	287.913	-1906.95	1354.88	294.385	-1838.49	1163.98	357.66	-2124.21	1239.76	107.075	-1951.55	1372.88	27.4851	-1958.04	1132.45	23.291	-1954.17	1056.68	-1.69745	-1849.02	918.869	32.2545	-1793.29	858.29	3.88495	-1850.71	823.513	-1.94803	-1781.55	781.967
864	0	246.803	-1855.13	1579.88	364.341	-1856.17	1576.97	242.728	-2025.51	1549.32	350.401	-2023.76	1541.76	287.303	-2022.46	1445.54	275	-2102.95	1163.57	288.358	-1898.3	1353.56	294.586	-1830.27	1162.3	358.311	-2115.84	1238.82	107.667	-1942.84	1371.86	27.9163	-1949.02	1131.54	23.5127	-1944.14	1055.8	-0.810792	-1838.01	918.606	33.4674	-1782.07	858.349	4.91396	-1839.07	823.149	-0.513814	-1769.58	782.197
865	0	248.298	-1846.43	1578.87	365.941	-1847.57	1575.59	243.991	-2016.82	1548.26	351.603	-2015.16	1540.14	288.095	-2013.63	1444.45	275.808	-2094.79	1162.96	289.162	-1889.46	1352.29	294.89	-1821.81	1160.96	359.073	-2107.26	1237.78	108.421	-1934.25	1370.7	28.5088	-1939.92	1130.53	23.8994	-1934.24	1054.72	0.123952	-1826.99	918.261	34.7902	-1770.94	858.485	6.04385	-1827.48	822.779	0.880244	-1757.75	782.167
866	0	250.011	-1837.91	1577.83	367.51	-1839.12	1573.99	245.302	-2008.18	1546.97	352.879	-2006.51	1538.38	289.043	-2004.74	1443.21	276.742	-2086.56	1161.86	289.841	-1880.55	1350.95	295.209	-1813.51	1159.49	359.939	-2098.64	1236.65	109.309	-1925.49	1369.52	29.098	-1930.86	1129.55	24.4005	-1924.31	1053.73	1.10563	-1816.18	917.735	36.1489	-1759.76	858.354	7.19483	-1816.07	822.233	2.5855	-1746.07	781.958
867	0	251.857	-1829.19	1576.8	369.345	-1830.63	1572.29	246.792	-1999.49	1545.59	354.264	-1997.93	1536.67	290.141	-1995.82	1441.9	277.775	-2078.13	1160.66	290.808	-1871.89	1349.43	295.839	-1804.91	1157.67	361.04	-2090	1235.48	110.102	-1916.78	1368.47	29.7792	-1921.89	1128.58	24.93	-1914.45	1052.78	2.04194	-1805.44	917.411	37.2077	-1748.82	858.496	8.44703	-1804.78	821.809	4.07557	-1734.58	782.049
868	0	253.558	-1820.44	1575.63	371.086	-1821.95	1570.71	248.294	-1990.8	1544.39	355.738	-1989.35	1534.87	291.261	-1986.78	1440.58	278.816	-2069.6	1159.53	291.711	-1862.91	1348.09	296.394	-1796.5	1156.56	362.07	-2081.29	1234.24	111.148	-1907.84	1367.36	30.5002	-1912.73	1127.48	25.5095	-1904.41	1051.82	3.00772	-1794.7	917.055	38.4533	-1737.84	858.246	9.49344	-1793.58	821.465	5.58902	-1723.31	781.846
869	0	255.574	-1811.72	1574.4	372.914	-1813.29	1569.09	249.849	-1982.01	1543.07	357.361	-1980.72	1533.24	292.562	-1977.67	1439.35	279.895	-2060.98	1158.43	292.749	-1854.09	1346.67	296.856	-1787.71	1154.83	363.169	-2072.37	1232.98	112.208	-1899.01	1366.13	31.3205	-1903.76	1126.4	26.1325	-1894.49	1050.82	3.92884	-1784.09	916.332	39.5979	-1727.02	858.264	10.4671	-1782.49	820.803	7.1447	-1711.96	781.585
870	0	257.565	-1803.07	1573.06	374.978	-1804.66	1567.31	251.672	-1973.25	1541.77	359.146	-1972.08	1531.49	293.978	-1968.54	1437.99	281.12	-2052.23	1157.22	293.77	-1845.07	1345	297.596	-1779.07	1153.15	364.354	-2063.46	1231.62	113.52	-1890.16	1364.85	32.1926	-1894.53	1125.44	26.8827	-1884.78	1049.92	4.89564	-1773.48	915.905	40.6449	-1716.3	858.095	11.5372	-1771.43	820.478	8.71377	-1700.82	781.13
871	0	259.664	-1794.25	1571.78	377.075	-1795.98	1565.41	253.702	-1964.53	1540.56	360.984	-1963.35	1529.65	295.56	-1959.38	1436.58	282.273	-2043.6	1155.95	295.082	-1835.84	1343.3	298.516	-1770.25	1151.47	365.506	-2054.56	1230.2	114.861	-1881.24	1363.67	33.2999	-1885.33	1124.4	27.9104	-1875.03	1048.98	5.55556	-1763.02	915.641	41.6756	-1705.58	857.988	12.3563	-1760.51	819.983	10.0894	-1689.79	781.001
872	0	261.793	-1785.35	1570.54	379.31	-1787.29	1563.61	255.713	-1955.75	1539.45	362.981	-1954.56	1528.03	297.174	-1950.25	1435.22	283.518	-2034.68	1154.7	296.503	-1827.28	1341.52	299.005	-1761.4	1149.65	366.759	-2045.4	1228.77	116.363	-1872.47	1362.54	34.2613	-1876	1123.54	28.6214	-1865.26	1048.14	6.53612	-1752.58	915.341	42.5038	-1694.98	857.872	13.2451	-1749.59	819.832	11.2707	-1678.99	780.781
873	0	264.242	-1776.68	1569.34	381.464	-1778.45	1561.69	257.886	-1946.97	1538.39	365.222	-1945.68	1526.41	298.928	-1941.04	1433.88	284.689	-2025.72	1153.46	297.929	-1817.72	1340.4	300.163	-1752.35	1148.07	368.066	-2036.33	1227.38	117.83	-1863.52	1361.52	35.4006	-1866.57	1122.84	29.6361	-1855.69	1047.53	7.33662	-1742.27	915.2	43.3865	-1684.32	857.967	13.775	-1738.95	819.749	12.6953	-1668.13	780.603
874	0	266.766	-1767.83	1568.27	383.953	-1769.76	1559.87	260.463	-1938.11	1537.28	367.619	-1936.89	1524.57	300.778	-1931.98	1432.6	285.995	-2016.76	1152.13	299.425	-1808.6	1339.12	301.04	-1743.08	1146.68	369.416	-2027.04	1225.78	119.533	-1854.72	1360.67	36.6222	-1857.2	1122.38	30.566	-1846.16	1047.12	8.22794	-1732.15	915.03	44.1148	-1674.03	858.122	14.5641	-1728.37	819.598	13.731	-1657.56	780.638
875	0	269.486	-1759.05	1567.35	386.675	-1760.96	1558.05	262.841	-1929.43	1536.38	370.042	-1928.14	1523.09	302.776	-1922.74	1431.29	287.314	-2007.5	1150.88	300.932	-1799.35	1337.86	302.069	-1734	1145.65	370.851	-2017.72	1224.29	121.201	-1845.72	1359.89	37.7586	-1847.58	1121.89	31.4517	-1836.64	1046.62	9.01244	-1722.1	915.175	44.9898	-1663.81	858.376	15.0818	-1717.96	819.752	14.591	-1647.07	780.965
876	0	272.328	-1750.18	1566.44	389.512	-1752.02	1556.44	265.59	-1920.45	1535.44	372.562	-1919.21	1521.43	304.929	-1913.42	1430.05	288.781	-1998.27	1149.71	302.561	-1789.87	1336.72	303.13	-1724.65	1144.29	372.401	-2008.23	1222.83	122.91	-1836.62	1359.32	39.003	-1838.07	1121.58	32.3885	-1827.27	1046.3	9.6062	-1712.03	915.298	45.5765	-1653.68	858.711	15.6487	-1707.64	819.856	15.31	-1636.58	781.24
877	0	275.263	-1741.4	1565.59	392.231	-1743.14	1554.86	268.395	-1911.66	1534.65	375.327	-1910.3	1519.95	307.12	-1904.12	1428.87	290.299	-1988.82	1148.61	304.402	-1780.56	1335.86	303.988	-1715.13	1143.39	374.046	-1998.68	1221.47	124.762	-1827.53	1358.8	40.2544	-1828.51	1121.57	33.2375	-1817.85	1046.28	10.2979	-1702.13	915.702	46.3104	-1643.48	859.178	16.0952	-1697.44	820.123	15.9669	-1626.39	781.642
878	0	278.309	-1732.36	1564.88	395.38	-1734.19	1553.28	271.328	-1902.75	1533.82	378.163	-1901.32	1518.24	309.461	-1894.78	1427.75	291.95	-1979.39	1147.25	306.414	-1771.14	1334.8	305.363	-1705.72	1142.78	375.794	-1989.02	1219.97	126.787	-1818.3	1358.49	41.5663	-1818.92	1121.59	34.0725	-1808.64	1046.27	10.9749	-1692.42	916.099	46.7562	-1633.77	859.687	16.4582	-1687.42	820.679	16.5376	-1616.29	782.345
879	0	281.525	-1723.38	1564.43	398.476	-1725.08	1551.87	274.323	-1893.71	1533	380.984	-1892.27	1516.82	311.871	-1885.32	1426.76	293.678	-1969.7	1146.52	308.273	-1761.34	1334.31	306.502	-1696.06	1142.21	377.662	-1979.54	1218.93	128.832	-1809.02	1358.49	42.7556	-1809.46	1121.97	34.8822	-1799.33	1046.64	11.5311	-1682.7	916.735	47.4123	-1624	860.321	16.8041	-1677.5	821.208	16.9426	-1606.22	783.094
880	0	284.988	-1714.45	1564.08	401.817	-1716.07	1550.93	277.345	-1884.66	1532.3	384.031	-1883.1	1515.44	314.318	-1875.67	1425.9	295.493	-1959.87	1145.61	310.337	-1751.81	1333.55	307.657	-1686.15	1141.31	379.404	-1969.24	1217.59	130.923	-1799.41	1358.37	43.9674	-1799.85	1122.14	35.6292	-1790.3	1046.82	12.045	-1673.25	917.273	47.7482	-1614.37	860.991	17.0448	-1667.8	821.888	17.078	-1596.36	783.907
881	0	288.402	-1705.44	1563.77	405.038	-1707.05	1549.85	280.451	-1875.56	1531.61	387.017	-1874.11	1514.02	316.872	-1866.14	1425.12	297.324	-1950	1144.77	312.328	-1741.64	1333.07	309.044	-1676.18	1140.93	381.257	-1959.33	1216.42	133.222	-1789.9	1358.45	45.2605	-1790.67	1122.61	36.3456	-1781.24	1047.46	12.4765	-1663.97	917.843	48.0055	-1605.08	861.613	17.3123	-1658.33	822.417	17.2404	-1586.85	784.701
882	0	291.895	-1696.34	1563.74	408.517	-1698.17	1548.87	283.796	-1866.36	1531.02	390.108	-1865.02	1512.71	319.493	-1856.37	1424.55	299.258	-1940.23	1144.16	314.576	-1731.76	1332.63	310.309	-1666.15	1140.64	383.214	-1949.43	1215.55	135.408	-1780.2	1358.69	46.4009	-1781.36	1123.3	37.1916	-1772.31	1048.04	12.9662	-1654.88	918.676	48.4255	-1595.66	862.525	17.595	-1649.08	823.37	17.1379	-1577.37	785.755
883	0	295.583	-1687.41	1563.98	412.014	-1689.08	1548.36	287.017	-1857.18	1530.57	393.25	-1855.81	1511.59	322.176	-1846.59	1424.19	301.164	-1930.02	1143.81	316.931	-1722.01	1332.36	311.877	-1655.76	1140.43	385.059	-1939.23	1214.78	137.804	-1770.08	1359.25	47.6768	-1772.31	1124.05	37.9249	-1763.33	1048.95	13.237	-1645.96	919.557	48.5525	-1586.65	863.299	17.6928	-1639.97	824.325	17.0349	-1568.35	786.954
884	0	299.204	-1678.17	1564.53	415.515	-1679.85	1548.01	290.121	-1847.98	1530.51	396.42	-1846.49	1510.78	324.773	-1836.65	1424.08	303.029	-1919.83	1143.63	319.278	-1711.94	1332.55	313.4	-1645.34	1140.46	386.986	-1929.06	1214.39	140.257	-1760.11	1359.81	48.7447	-1763.22	1125.21	38.7008	-1754.71	1050.1	13.529	-1637.25	920.674	48.5197	-1577.81	864.381	17.8077	-1631.17	825.245	16.6159	-1559.35	788.272
885	0	302.861	-1668.92	1565.15	419.204	-1671.05	1547.91	293.52	-1838.7	1530.56	399.54	-1837.26	1510.01	327.417	-1826.94	1424.12	304.824	-1909.67	1143.71	321.59	-1701.88	1332.96	314.905	-1634.75	1141.09	388.833	-1918.94	1214	142.563	-1749.92	1360.78	50.1138	-1754.44	1126.55	39.5206	-1745.95	1051.19	13.8572	-1628.56	921.84	48.4254	-1569.17	865.579	18.0148	-1622.71	826.461	16.2098	-1550.85	789.566
886	0	306.651	-1659.88	1566.2	422.744	-1661.98	1548.04	296.788	-1829.39	1530.84	402.655	-1828.05	1509.59	329.944	-1817.04	1424.36	306.51	-1899.33	1143.96	323.938	-1692.08	1333.47	316.848	-1624.02	1141.81	390.57	-1908.85	1213.88	144.862	-1739.73	1362.06	51.3301	-1745.44	1127.99	40.46	-1737.24	1052.5	14.1445	-1620.22	923.076	48.3733	-1560.81	866.702	18.1127	-1614.44	827.635	15.8052	-1542.56	790.992
887	0	310.332	-1650.63	1567.42	426.376	-1652.83	1548.4	299.976	-1819.96	1531.41	405.727	-1818.65	1509.53	332.444	-1807.24	1425.04	308.136	-1888.75	1144.56	326.221	-1682.16	1334.4	318.607	-1613.32	1142.78	392.232	-1898.5	1214.15	147.34	-1729.56	1363.13	52.4942	-1736.54	1129.57	41.4132	-1728.71	1054.15	14.4025	-1612.09	924.372	48.1548	-1552.54	867.999	18.1829	-1606.34	828.86	15.3411	-1534.48	792.271
888	0	313.99	-1641.26	1568.64	429.974	-1643.71	1548.89	302.926	-1810.61	1532.42	408.687	-1809.52	1509.8	334.902	-1797.58	1425.79	309.735	-1878.24	1145.34	328.533	-1672.12	1335.54	320.519	-1602.79	1143.87	393.85	-1888.33	1214.54	149.692	-1719.59	1364.52	53.9535	-1727.73	1131.26	42.4314	-1720.18	1055.89	14.6668	-1603.98	925.697	48.0416	-1544.48	869.148	18.4628	-1598.57	830.094	14.8076	-1526.65	793.471
889	0	317.672	-1631.98	1570.17	433.507	-1634.63	1549.45	306.13	-1801.15	1533.54	411.485	-1800.38	1510.1	337.251	-1788.11	1426.61	311.273	-1867.69	1145.76	330.805	-1662.41	1336.77	322.443	-1592.44	1145.3	395.566	-1878.18	1215.06	151.97	-1709.77	1366.01	55.4205	-1718.62	1133.16	43.4664	-1711.71	1057.79	14.9546	-1596.19	927.104	47.9643	-1536.65	870.335	18.4944	-1591.04	831.736	14.3349	-1519.12	794.809
890	0	321.417	-1622.57	1571.75	437.001	-1625.7	1550.31	308.962	-1791.66	1534.94	414.196	-1791.01	1510.85	339.63	-1778.58	1427.72	312.872	-1857.15	1146.9	333.023	-1652.69	1338.3	324.527	-1581.79	1147.08	397.283	-1867.92	1215.71	154.409	-1700.08	1367.62	56.9038	-1709.66	1135.09	44.774	-1703.35	1059.88	15.31	-1588.47	928.653	47.7541	-1528.98	871.649	18.5182	-1583.65	833.276	13.8308	-1511.9	796.19
891	0	324.967	-1613.1	1573.49	440.299	-1616.63	1551.35	311.631	-1782.13	1536.68	416.785	-1782.12	1511.95	341.888	-1769.08	1429.08	314.404	-1846.79	1148.18	335.09	-1643.05	1339.99	326.235	-1571.73	1148.8	399.096	-1857.72	1216.7	156.4	-1690.57	1369.49	58.5422	-1700.51	1137.17	46.1119	-1695	1061.81	15.5977	-1580.94	930.261	47.567	-1521.55	872.788	18.4646	-1576.48	834.88	13.349	-1504.87	797.597
892	0	328.349	-1603.69	1575.27	443.58	-1607.78	1552.46	314.094	-1772.64	1538.34	419.101	-1772.99	1513.08	344.117	-1759.65	1430.41	315.983	-1836.52	1149.1	337.184	-1633.52	1341.74	328.04	-1561.56	1151.03	400.902	-1847.54	1217.65	158.574	-1681.18	1371.24	60.2102	-1691.46	1139.21	47.4967	-1686.79	1063.95	15.9249	-1573.51	931.842	47.5271	-1514.21	874.16	18.6017	-1569.57	836.581	12.8352	-1498.13	798.862
893	0	331.597	-1594.4	1577.12	446.826	-1598.99	1553.59	316.381	-1763.31	1540.22	421.279	-1763.86	1514.28	346.276	-1750.42	1431.78	317.591	-1826.66	1150.54	339.241	-1624.02	1343.78	329.807	-1551.48	1153.19	402.836	-1837.63	1218.8	160.595	-1672.18	1373.32	61.8749	-1682.34	1141.45	48.7655	-1678.74	1066.25	16.4036	-1566.31	933.657	47.4502	-1507.12	875.434	18.6946	-1562.78	838.225	12.3977	-1491.57	800.308
894	0	334.631	-1584.93	1578.88	449.663	-1590.27	1554.86	318.444	-1753.81	1541.99	423.272	-1755.3	1515.68	348.347	-1741.19	1433.29	319.19	-1816.97	1151.98	340.95	-1614.56	1345.56	331.269	-1541.68	1155.47	404.783	-1827.66	1219.9	162.393	-1662.97	1375.26	63.6244	-1673.17	1143.55	50.3639	-1670.71	1068.27	16.9538	-1559.23	935.494	47.4279	-1500.08	876.705	18.7585	-1556.05	839.888	11.8539	-1485.23	801.712
895	0	337.718	-1575.62	1580.48	452.562	-1581.59	1556.18	320.219	-1744.39	1543.93	424.948	-1746.47	1517.18	350.488	-1731.82	1434.83	320.896	-1807.27	1153.42	342.688	-1605.42	1347.66	332.793	-1531.83	1157.69	406.616	-1817.64	1221.12	164.073	-1654.27	1377.32	65.2744	-1664.27	1145.62	51.7472	-1662.78	1070.39	17.3958	-1552.17	937.17	47.364	-1493.04	878.173	18.8983	-1549.45	841.594	11.4446	-1478.7	802.884
896	0	340.536	-1566.32	1582.04	455.331	-1573	1557.31	321.86	-1734.95	1545.45	426.396	-1737.74	1518.48	352.312	-1722.81	1436.16	322.592	-1797.83	1154.76	344.192	-1596.06	1349.18	334.036	-1522.49	1159.54	408.562	-1807.89	1222.26	165.904	-1645.49	1379.11	66.9954	-1655.41	1147.36	53.1328	-1655.1	1072.32	18.0977	-1545.15	938.649	47.4425	-1486.28	879.136	19.075	-1542.92	843.061	11.2731	-1472.53	803.961
897	0	343.012	-1557.14	1583.57	457.672	-1564.52	1558.45	323.23	-1725.64	1547.08	427.73	-1729.04	1519.71	354.155	-1713.62	1437.5	324.3	-1788.66	1156.05	345.875	-1587.06	1350.74	335.296	-1513.24	1161.37	410.511	-1798.37	1223.54	167.407	-1636.8	1380.78	68.6468	-1646.77	1148.89	54.6103	-1647.39	1074.25	18.6505	-1538.29	940.078	47.7781	-1479.64	880.114	19.3597	-1536.65	844.386	11.0074	-1466.58	804.893
898	0	345.334	-1547.84	1584.87	459.853	-1555.83	1559.62	324.506	-1716.28	1548.61	428.944	-1720.31	1521.08	355.82	-1704.44	1438.96	325.976	-1779.47	1157.47	347.087	-1577.75	1352.07	336.064	-1504.24	1162.77	412.26	-1788.76	1224.82	168.801	-1628.29	1382.29	70.2151	-1638.3	1150.33	55.9246	-1639.71	1075.92	19.3417	-1531.48	941.23	47.8713	-1473.02	880.815	19.7983	-1530.42	845.779	10.7113	-1460.51	805.803
899	0	347.314	-1538.68	1586.19	461.735	-1547.29	1560.75	325.614	-1706.97	1549.91	430.058	-1711.56	1522.22	357.467	-1695.34	1440.3	327.637	-1770.62	1158.82	348.182	-1568.84	1353.26	336.83	-1495.36	1163.8	414.122	-1779.51	1226.14	170.196	-1619.83	1383.52	71.7934	-1630.26	1151.67	57.3603	-1632.14	1077.28	20.0669	-1524.89	942.195	48.2515	-1466.52	881.321	20.0442	-1524.2	846.739	10.616	-1454.7	806.383
900	0	349.09	-1529.6	1587.38	463.626	-1538.67	1561.72	326.763	-1697.9	1551.14	431.109	-1702.86	1523.25	359.076	-1686.36	1441.45	329.325	-1761.9	1160.09	349.331	-1559.96	1354.41	337.53	-1486.65	1164.87	415.914	-1770.36	1227.36	171.366	-1611.51	1384.9	73.1466	-1622.54	1152.86	58.686	-1624.75	1078.56	20.8822	-1518.5	942.833	48.6168	-1460.2	881.745	19.8291	-1517.98	848.154	10.6963	-1448.96	806.877
901	0	350.655	-1520.39	1588.65	464.947	-1530.03	1562.63	327.763	-1688.79	1552.38	432.017	-1693.72	1524.25	360.493	-1677.36	1442.68	330.975	-1753.27	1161.38	350.125	-1551.06	1355.59	337.959	-1478.14	1165.84	417.66	-1761.37	1228.6	172.384	-1603.23	1386.22	74.4958	-1615.03	1153.84	60.013	-1617.47	1079.85	21.8004	-1512.01	943.603	48.9871	-1453.94	882.166	21.2129	-1512.22	848.468	10.7723	-1443.21	807.538
902	0	351.943	-1511.52	1589.82	466.309	-1521.17	1563.76	328.685	-1679.72	1553.55	433.011	-1685.13	1525.43	361.777	-1668.38	1443.93	332.567	-1744.62	1162.67	350.884	-1542.22	1356.75	338.26	-1469.62	1166.85	419.454	-1752.38	1229.97	173.422	-1595.06	1387.27	75.6411	-1607.7	1154.98	61.2747	-1610.5	1080.7	22.5713	-1505.75	944.183	49.6303	-1447.86	882.471	22.1837	-1506.44	849.054	10.9449	-1437.58	807.938
903	0	352.769	-1502.57	1590.74	467.324	-1512.24	1564.74	329.494	-1670.82	1554.76	433.854	-1676.25	1526.53	363.001	-1659.5	1444.99	334.2	-1736.13	1163.82	351.553	-1533.47	1357.78	338.589	-1461.11	1167.8	421.171	-1743.64	1231.2	174.23	-1587.08	1388.3	76.7547	-1600.65	1155.75	62.62	-1603.62	1081.39	23.4754	-1499.56	944.606	50.1361	-1441.87	882.711	23.0484	-1500.65	849.27	11.0292	-1431.95	808.466
904	0	353.654	-1493.6	1591.58	468.103	-1503.4	1565.48	330.407	-1662.01	1555.9	434.653	-1667.34	1527.43	364.054	-1650.7	1446.06	335.748	-1727.64	1164.6	351.897	-1524.83	1358.51	338.67	-1452.76	1168.53	422.811	-1734.86	1232.34	174.979	-1579.26	1389.15	77.879	-1593.97	1156.46	64.0143	-1596.92	1081.97	24.3657	-1493.45	944.931	50.7456	-1435.82	882.898	23.84	-1495.32	849.584	11.5487	-1426.57	808.696
905	0	354.266	-1484.69	1592.42	468.688	-1494.25	1566.23	331.335	-1653.13	1557.03	435.487	-1658.49	1528.71	365.288	-1641.82	1447.07	337.423	-1719.24	1165.76	352.387	-1516.36	1359.43	338.725	-1444.36	1169.11	424.404	-1726.16	1233.51	175.639	-1571.53	1390.12	78.9968	-1587.49	1156.98	65.3501	-1590.39	1082.44	25.4785	-1487.62	945.1	51.7489	-1430.18	882.759	25.068	-1489.67	849.67	12.451	-1421.4	808.554
906	0	354.649	-1475.84	1593.14	469.028	-1485.09	1566.98	332.059	-1644.33	1558.23	436.284	-1649.48	1529.87	366.089	-1633.28	1448.12	338.989	-1710.89	1166.89	352.776	-1507.84	1360.12	338.675	-1436.16	1169.72	425.955	-1717.39	1234.73	176.224	-1563.96	1390.76	80.0412	-1580.97	1157.48	66.779	-1584.08	1082.82	26.4519	-1481.53	945.344	52.6459	-1424.51	882.577	26.5736	-1484.21	849.556	13.3263	-1415.94	808.373
907	0	354.878	-1466.97	1593.77	469.227	-1476.02	1567.57	332.844	-1635.62	1559.28	437.047	-1640.5	1530.93	366.948	-1624.64	1448.96	340.546	-1702.7	1167.93	353.115	-1499.39	1360.78	338.773	-1427.97	1170.27	427.565	-1708.77	1235.72	176.79	-1556.3	1391.39	81.1165	-1574.83	1157.64	68.2239	-1577.71	1083.12	27.3734	-1475.96	945.18	53.607	-1418.93	882.189	28.2557	-1478.92	849.394	14.4018	-1410.67	808.111
908	0	354.956	-1458.21	1594.26	469.236	-1466.73	1568.06	333.46	-1627.07	1560.21	437.746	-1631.61	1531.87	367.827	-1616.12	1449.69	341.983	-1694.57	1168.66	353.329	-1491.03	1361.38	338.811	-1419.83	1170.82	429.12	-1700.18	1236.62	177.408	-1548.88	1391.96	82.2187	-1568.82	1158.02	69.6577	-1571.77	1083.25	28.5755	-1470.48	944.924	54.72	-1413.59	881.95	29.8187	-1473.57	849.205	15.7658	-1405.65	807.658
909	0	354.724	-1449.49	1594.65	469.156	-1457.48	1568.69	334.094	-1618.46	1561.04	438.42	-1622.58	1532.9	368.707	-1607.44	1450.46	343.327	-1686.41	1169.43	353.475	-1482.42	1362.13	338.7	-1411.84	1171.28	430.658	-1691.51	1237.53	177.919	-1541.43	1392.42	83.1362	-1562.67	1158.31	70.9942	-1565.69	1083.47	29.6862	-1465.06	944.653	55.6735	-1408.16	881.651	31.3459	-1468.35	848.848	17.0281	-1400.77	807.228
910	0	354.327	-1440.74	1595.06	468.943	-1448.26	1569.32	334.566	-1609.81	1561.79	438.971	-1613.57	1533.81	369.39	-1598.95	1451.13	344.621	-1678.16	1170.07	353.663	-1474.27	1362.55	338.595	-1403.7	1172.08	432.156	-1682.81	1238.34	178.294	-1534.09	1392.87	84.1089	-1556.87	1158.43	72.3573	-1559.8	1083.56	30.9794	-1459.91	944.262	56.7028	-1402.84	881.33	32.9033	-1463.32	848.618	18.2915	-1395.87	806.644
911	0	353.829	-1431.94	1595.43	468.573	-1439.04	1569.74	335.171	-1601.31	1562.48	439.61	-1604.69	1534.64	369.952	-1590.61	1451.67	345.926	-1670.09	1170.56	353.709	-1465.75	1363.13	338.614	-1395.7	1172.78	433.543	-1674.06	1238.95	178.562	-1526.88	1393.25	85.1064	-1550.86	1158.58	73.7567	-1553.96	1083.42	32.0838	-1454.87	943.946	57.784	-1397.77	880.898	34.6637	-1458.41	848.188	19.6648	-1391.04	805.966
912	0	353.385	-1423.18	1595.6	468.111	-1429.68	1570.1	335.544	-1592.86	1563.06	440.11	-1595.58	1535.3	370.529	-1582.14	1452.12	347.182	-1661.78	1170.84	353.799	-1457.35	1363.57	338.454	-1387.68	1173.34	434.958	-1665.36	1239.5	178.894	-1519.48	1393.46	86.2437	-1545.15	1158.62	75.2125	-1548.32	1083.37	33.2065	-1449.65	943.614	58.8187	-1392.5	880.374	36.3956	-1453.4	847.635	21.2865	-1386.29	805.052
913	0	352.715	-1414.53	1595.66	467.43	-1420.39	1570.51	335.978	-1584.36	1563.59	440.622	-1586.52	1536.04	371.123	-1573.51	1452.51	348.298	-1653.63	1171.24	353.541	-1448.96	1363.98	338.246	-1379.7	1173.66	436.297	-1656.65	1240.05	179.159	-1512.23	1393.63	87.169	-1539.22	1158.44	76.4265	-1542.51	1083.12	34.3501	-1444.69	942.872	60.0607	-1387.32	879.684	38.0657	-1448.29	847.008	22.834	-1381.57	804.149
914	0	351.849	-1406	1595.56	466.686	-1411.15	1570.73	336.384	-1575.92	1563.96	441.07	-1577.65	1536.6	371.447	-1565.11	1452.79	349.406	-1645.46	1171.49	353.384	-1440.65	1364.08	337.907	-1371.62	1173.72	437.564	-1647.99	1240.5	179.21	-1504.83	1393.67	88.1574	-1533.45	1158.05	77.8526	-1536.85	1082.69	35.7717	-1439.71	941.896	61.1812	-1382.24	878.886	39.5586	-1443.5	846.157	24.5611	-1376.97	803.009
915	0	350.875	-1397.5	1595.49	465.786	-1401.85	1570.74	336.686	-1567.53	1564.11	441.42	-1568.44	1536.97	371.814	-1556.68	1452.86	350.525	-1637.47	1171.37	353.313	-1432.34	1364.11	337.785	-1363.66	1173.6	438.808	-1639.36	1240.72	179.42	-1497.58	1393.5	89.1397	-1527.6	1157.55	79.1095	-1531.19	1082.07	36.9211	-1434.62	940.999	62.4568	-1377.28	877.781	41.2107	-1438.83	845.165	26.1522	-1372.33	801.788
916	0	349.797	-1388.9	1595.19	464.921	-1392.46	1570.66	336.911	-1559.13	1564.19	441.755	-1559.52	1537.31	372.161	-1548.15	1452.92	351.507	-1629.34	1171.33	353.115	-1423.93	1364.08	337.604	-1355.67	1173.48	439.875	-1630.71	1240.84	179.442	-1490.17	1393.17	90.1708	-1521.83	1156.91	80.4486	-1525.6	1081.38	38.2149	-1429.68	939.933	63.6242	-1372.3	876.598	42.7881	-1434.21	844.001	27.6643	-1367.75	800.43
917	0	349.015	-1380.21	1594.78	464.03	-1383.18	1570.58	337.119	-1550.57	1564.25	441.945	-1550.42	1537.65	372.384	-1539.52	1452.91	352.5	-1621.06	1171.5	352.972	-1415.49	1363.75	337.299	-1347.58	1173.17	440.995	-1621.94	1241.1	179.455	-1482.67	1392.74	91.0273	-1515.89	1156.23	81.6575	-1519.77	1080.75	39.4966	-1424.54	938.591	64.9191	-1367.3	875.33	44.716	-1429.38	842.884	29.5599	-1363.3	798.599
918	0	348.038	-1371.52	1594.22	463.023	-1373.83	1570.26	337.131	-1542.07	1564.16	441.992	-1541.16	1537.68	372.615	-1530.96	1452.74	353.408	-1612.86	1171.31	352.707	-1407.08	1363.31	336.912	-1339.45	1172.45	442.041	-1613.26	1241.14	179.492	-1475.18	1392.23	92.0299	-1510.08	1155.35	82.8234	-1514.03	1079.97	41.1927	-1419.73	937.15	66.2461	-1362.27	873.844	46.5758	-1424.55	841.602	31.0588	-1358.59	797.04
919	0	347.017	-1362.72	1593.76	462.033	-1364.62	1569.76	337.054	-1533.59	1564.01	441.982	-1532.2	1537.63	372.776	-1522.36	1452.48	354.256	-1604.62	1170.97	352.338	-1398.74	1362.87	336.509	-1331.33	1172.01	442.97	-1604.59	1241.02	179.425	-1467.6	1391.66	92.9821	-1504.08	1154.56	84.0434	-1508.31	1079.04	42.371	-1414.63	935.669	67.5181	-1357.36	872.267	48.267	-1419.93	840.105	32.7495	-1354.26	795.477
920	0	345.984	-1354.08	1593.08	461.146	-1355.33	1569.44	336.832	-1524.94	1563.79	441.797	-1523.15	1537.6	372.911	-1513.54	1452.11	355.092	-1596.1	1170.79	351.834	-1390.24	1362.33	336.051	-1323.17	1171.47	443.745	-1595.82	1240.9	179.268	-1459.83	1391	93.7864	-1497.97	1153.56	85.0928	-1502.35	1077.93	43.5653	-1409.4	934.161	68.7679	-1352.48	870.706	49.816	-1415.16	838.624	34.1685	-1349.71	793.648
921	0	344.947	-1345.25	1592.36	460.103	-1346.04	1568.93	336.46	-1516.11	1563.43	441.454	-1513.57	1537.48	372.702	-1504.84	1451.77	355.825	-1587.64	1170.48	351.427	-1381.59	1361.9	335.47	-1314.84	1170.72	444.49	-1587.03	1240.76	179.335	-1452.02	1390.13	94.4285	-1491.83	1152.55	86.1438	-1496.39	1076.8	44.5867	-1404.28	932.566	70.0662	-1347.56	868.815	51.3467	-1410.3	837.16	35.8543	-1345.26	791.596
922	0	343.808	-1336.34	1591.57	459.196	-1337.01	1568.17	336.006	-1507.34	1563.01	441.024	-1504.87	1537.21	372.619	-1496.16	1451.17	356.555	-1579.2	1169.87	351.004	-1372.99	1361.2	335.043	-1306.64	1170.03	445.072	-1578.26	1240.36	179.025	-1444.19	1389.28	95.0532	-1485.54	1151.53	87.1724	-1490.43	1075.66	45.7938	-1399.16	930.787	71.0564	-1342.47	867.033	52.8365	-1405.67	835.351	37.0579	-1340.86	789.635
923	0	342.89	-1327.36	1590.56	458.263	-1328.02	1567.3	335.299	-1498.42	1562.49	440.371	-1495.92	1536.85	372.607	-1487.3	1450.48	357.055	-1570.57	1169.17	350.444	-1364.4	1360.34	334.594	-1298.35	1168.95	445.551	-1569.45	1239.81	178.896	-1436.26	1388.36	95.7473	-1479.23	1150.31	88.1836	-1484.3	1074.45	46.7976	-1394.07	929.051	72.2756	-1337.48	864.865	54.3917	-1401.02	833.585	38.5613	-1336.53	787.435
924	0	342.087	-1318.14	1589.36	457.483	-1318.9	1566.3	334.426	-1489.35	1561.9	439.468	-1487.02	1536.48	372.157	-1478.49	1449.73	357.49	-1561.99	1168.37	349.848	-1355.73	1359.38	333.965	-1289.94	1168.06	445.897	-1560.62	1239.29	178.296	-1428.09	1387.3	96.1913	-1472.68	1149.14	89.115	-1478.11	1073.11	47.8143	-1388.62	927.087	73.2134	-1332.22	862.887	55.5482	-1396.2	831.685	39.7974	-1331.98	785.305
925	0	341.344	-1308.83	1587.93	456.812	-1309.93	1565.28	333.272	-1480.16	1561.24	438.458	-1478.15	1536.04	371.807	-1469.65	1448.93	357.895	-1552.73	1167.6	349.248	-1347.38	1357.95	333.325	-1281.41	1166.89	446.178	-1551.74	1238.58	177.872	-1419.96	1385.94	96.7358	-1465.93	1147.77	89.8675	-1471.62	1071.83	48.8285	-1383.36	924.985	74.3718	-1327.59	860.378	56.7069	-1391.36	829.801	41.3899	-1327.66	782.492
926	0	340.588	-1299.6	1586.57	455.984	-1301.09	1563.97	332.022	-1470.94	1560.42	437.174	-1469.3	1535.32	371.529	-1460.59	1447.81	358.212	-1543.89	1166.55	348.639	-1338.28	1356.91	332.843	-1272.89	1165.48	446.336	-1542.86	1237.7	177.289	-1411.6	1384.62	97.0667	-1459.01	1146.18	90.6648	-1465.29	1070.38	49.6889	-1377.97	922.651	75.3017	-1322.53	857.91	57.7443	-1386.69	827.705	42.4158	-1323.22	779.84
927	0	339.761	-1290.2	1585	455.162	-1292.32	1562.69	330.644	-1461.57	1559.4	435.807	-1460.19	1534.63	370.946	-1451.6	1446.72	358.422	-1535.01	1165.32	348.016	-1329.47	1355.56	332.459	-1264.24	1164.14	446.353	-1533.95	1236.81	176.708	-1403.04	1383.19	97.2372	-1452.2	1144.67	91.2801	-1458.72	1068.83	50.3107	-1372.27	920.567	76.0113	-1317.4	855.339	58.7003	-1381.73	825.586	43.8181	-1318.68	776.867
928	0	338.945	-1280.7	1583.28	454.434	-1283.31	1561.44	329.083	-1452.14	1558.33	434.463	-1451.54	1533.91	370.131	-1442.64	1445.63	358.581	-1525.09	1164.3	347.293	-1320.5	1354.11	331.865	-1255.35	1162.75	446.221	-1525.01	1235.89	176.248	-1394.33	1381.54	97.242	-1445.04	1142.94	91.6845	-1451.84	1067.23	50.9498	-1366.76	918.063	76.6649	-1312.09	852.618	59.3752	-1376.66	823.471	44.5536	-1314.01	774.199
929	0	337.936	-1271.32	1581.58	453.461	-1274.34	1560.13	327.625	-1442.72	1557.03	432.96	-1442.66	1532.95	369.587	-1433.43	1444.22	359.054	-1515.85	1162.94	346.625	-1311.45	1352.73	331.244	-1246.46	1161.09	445.997	-1516.05	1234.74	175.52	-1385.44	1379.88	97.4843	-1437.65	1141.24	92.0415	-1444.88	1065.53	51.3925	-1360.97	915.733	77.133	-1306.89	849.816	59.9707	-1371.56	821.173	45.6796	-1309.62	771.148
930	0	336.642	-1261.96	1579.83	452.414	-1265.43	1558.81	325.958	-1433.42	1555.62	431.454	-1433.64	1531.8	368.766	-1424.41	1442.73	359.325	-1505.5	1161.44	346.024	-1302.33	1351.35	330.887	-1237.42	1159.78	445.634	-1507.13	1233.38	174.683	-1376.6	1378.12	97.1808	-1430.2	1139.72	92.3216	-1437.83	1063.7	51.5936	-1355.24	913.384	77.2877	-1301.47	847.148	60.5389	-1366.59	818.738	46.2036	-1304.87	768.323
931	0	335.378	-1252.5	1578.04	451.151	-1256.41	1557.48	324.205	-1424.01	1554	429.779	-1424.64	1530.75	367.847	-1415.15	1441.17	359.162	-1495.71	1159.96	345.18	-1293.13	1349.75	330.333	-1228.19	1158.28	445.155	-1498.21	1232.04	173.688	-1367.31	1376.55	96.9989	-1422.59	1137.93	92.3636	-1430.54	1061.98	51.5808	-1349.21	910.955	77.2967	-1295.89	844.461	60.6715	-1361.32	816.272	46.5082	-1300.14	765.459
932	0	333.829	-1243.06	1576.13	449.666	-1247.26	1556.01	322.413	-1414.61	1552.38	428.092	-1415.44	1529.53	366.837	-1405.94	1439.57	358.414	-1486.43	1158.32	344.402	-1283.98	1348.1	329.832	-1218.92	1156.46	444.455	-1489.15	1230.59	172.921	-1358.03	1374.39	97.3098	-1414.48	1135.6	92.2758	-1423.02	1059.94	51.4689	-1343.13	908.461	77.147	-1290.29	841.425	60.7633	-1355.83	813.887	46.5516	-1295.35	762.418
933	0	332.071	-1233.76	1574.03	448.18	-1238.03	1554.54	320.724	-1405.25	1550.43	426.467	-1406.28	1527.97	365.765	-1396.66	1437.7	357.59	-1478.09	1156.36	343.636	-1274.62	1346.25	329.398	-1209.55	1154.45	443.561	-1480.07	1228.84	172.123	-1348.66	1372.23	96.4719	-1406.58	1133.8	92.1696	-1415.28	1057.87	51.3419	-1336.86	905.494	76.8433	-1284.51	838.101	60.6364	-1350.41	811.254	46.8288	-1290.6	758.819
934	0	330.176	-1224.46	1571.96	446.223	-1228.72	1552.82	318.959	-1396.04	1548.5	424.813	-1396.99	1526.42	364.469	-1387.43	1435.86	356.754	-1468.38	1154.59	342.693	-1265.22	1344.19	329.08	-1200.11	1152.6	442.605	-1471.01	1227.13	170.805	-1338.95	1369.96	96.1592	-1397.98	1131.51	91.9467	-1407.39	1055.87	50.814	-1330.24	902.838	76.263	-1278.6	834.841	60.3699	-1344.78	808.682	46.78	-1285.54	755.338
935	0	327.978	-1215.1	1569.9	444.242	-1219.17	1551.14	317.168	-1386.72	1546.51	423.17	-1387.61	1524.95	363.034	-1378.05	1434.06	355.828	-1458.94	1152.85	341.669	-1255.8	1342.33	328.619	-1190.46	1150.44	441.477	-1461.8	1225.48	170.059	-1329.27	1367.71	95.1537	-1389.34	1129.39	91.4591	-1399.13	1053.75	50.2596	-1323.52	899.985	75.7765	-1272.49	831.392	59.7462	-1338.99	806.045	46.3644	-1280.34	751.923
936	0	325.713	-1205.96	1567.84	441.999	-1209.72	1549.68	315.384	-1377.5	1544.52	421.348	-1378.11	1523.38	361.444	-1368.67	1432.27	354.738	-1449.21	1151.02	340.727	-1246.43	1340.03	328.269	-1180.89	1148.49	440.169	-1452.52	1223.75	168.613	-1319.26	1365.39	94.763	-1380.33	1127.08	90.9516	-1390.5	1051.64	49.5257	-1316.58	897.222	74.887	-1266.19	827.981	58.9347	-1333.05	803.544	45.9456	-1275.04	748.516
937	0	323.292	-1196.75	1565.87	439.479	-1200.18	1548.15	313.528	-1368.38	1542.47	419.65	-1368.7	1521.72	359.77	-1359.2	1430.41	353.403	-1439.66	1149.08	339.719	-1236.86	1338.16	327.917	-1171.23	1146.48	438.801	-1443.14	1222.03	167.034	-1309.25	1363.07	93.5492	-1371.16	1124.83	90.3064	-1381.72	1049.42	48.6572	-1309.47	894.397	73.9972	-1259.72	824.792	57.9529	-1326.92	800.862	45.1092	-1269.76	745.071
938	0	320.546	-1187.45	1564.23	436.91	-1190.48	1546.89	311.587	-1359.19	1540.58	417.763	-1359.06	1520.22	357.896	-1349.55	1428.65	352.112	-1429.83	1147.24	338.168	-1226.84	1336.72	327.635	-1161.49	1144.71	437.399	-1433.67	1220.5	165.617	-1299.03	1360.87	92.7724	-1361.5	1122.68	89.6631	-1372.64	1047.17	47.5499	-1302.11	891.736	73.0551	-1253.1	821.449	56.8379	-1320.66	798.268	43.8163	-1264.44	741.901
939	0	317.802	-1178.14	1562.6	434.202	-1180.81	1545.8	309.608	-1349.87	1538.82	415.801	-1349.28	1518.94	356.066	-1339.85	1427.11	350.751	-1420.33	1145.54	336.901	-1216.99	1335.16	327.181	-1151.83	1143.04	435.834	-1424.05	1219.18	164.296	-1288.72	1358.59	91.8143	-1351.71	1120.26	88.8025	-1363.2	1045.21	46.5551	-1294.33	889.029	71.5548	-1246.48	818.127	55.5029	-1314.13	795.83	42.3436	-1258.58	738.849
940	0	314.836	-1168.86	1561.15	431.446	-1170.92	1544.85	307.427	-1340.57	1537.09	413.781	-1339.6	1517.58	353.965	-1330.05	1425.58	349.355	-1410.54	1144.01	335.475	-1207.31	1333.6	326.814	-1141.92	1141.4	434.139	-1414.3	1217.71	162.21	-1278.57	1356.52	90.2041	-1341.68	1118.22	88.0018	-1353.38	1042.92	45.44	-1286.57	886.262	70.4195	-1239.35	814.794	54.02	-1307.43	793.315	40.7241	-1252.63	735.814
941	0	311.738	-1159.4	1559.74	428.565	-1161.02	1543.82	305.269	-1331.2	1535.41	411.661	-1329.76	1516.38	351.85	-1320.25	1424.09	347.954	-1400.1	1142.53	333.709	-1197.14	1332.26	326.118	-1131.95	1139.85	432.498	-1404.49	1216.52	160.658	-1268.38	1354.45	89.0181	-1331.04	1116.1	87.1333	-1343.5	1040.7	44.0266	-1278.55	883.861	68.9256	-1232.19	811.542	52.4032	-1300.61	791.033	38.7779	-1246.7	733.008
942	0	308.635	-1149.95	1558.44	425.417	-1151.03	1543.02	302.896	-1321.72	1534.02	409.513	-1319.94	1515.37	349.561	-1310.32	1422.91	346.407	-1389.84	1141.3	331.975	-1187.11	1331	325.332	-1121.87	1138.45	430.757	-1394.49	1215.53	158.693	-1257.84	1352.46	87.9928	-1320.2	1113.66	86.0479	-1333.26	1038.86	42.4959	-1270.12	881.458	67.3131	-1224.76	808.26	50.559	-1293.35	788.796	36.6708	-1240.28	730.114
943	0	305.62	-1140.41	1557.23	422.255	-1140.9	1542.34	300.354	-1312.18	1532.67	406.966	-1309.75	1514.4	347.138	-1300.37	1421.86	344.849	-1379.42	1140.14	330.19	-1176.9	1329.78	324.269	-1111.65	1136.92	429.033	-1384.33	1214.65	156.639	-1247.49	1350.49	86.6411	-1309.2	1111.44	84.9986	-1322.7	1036.87	41.0897	-1261.5	878.857	65.3021	-1217.21	805.042	48.5324	-1285.89	786.708	34.6084	-1233.56	727.303
944	0	302.195	-1130.8	1556.21	419.017	-1130.91	1541.81	297.731	-1302.5	1531.47	404.371	-1299.71	1513.59	344.664	-1290.5	1420.88	343.419	-1369.01	1139	328.114	-1166.76	1328.68	323.135	-1101.18	1136.01	427.279	-1374.16	1213.78	154.698	-1237.32	1348.79	85.229	-1298.09	1109.16	83.9871	-1312.03	1034.98	39.7165	-1252.85	876.479	63.7687	-1209.2	802.018	46.499	-1278.26	784.775	32.0508	-1226.67	724.83
945	0	298.811	-1121.03	1555.77	415.687	-1120.89	1541.69	295.007	-1292.77	1530.64	401.583	-1289.67	1513.17	342.007	-1280.41	1420.19	342.001	-1358.55	1138.06	326.055	-1156.66	1328.12	321.825	-1090.44	1135.5	425.561	-1363.86	1213.2	152.411	-1226.83	1347.38	83.9105	-1286.63	1107.22	82.8404	-1301.15	1033.21	38.1761	-1243.67	874.662	61.7856	-1201.11	799.422	44.4114	-1270.37	783.11	29.5782	-1219.68	722.75
946	0	295.3	-1111.11	1555.56	412.324	-1110.78	1542.1	291.947	-1282.81	1530.08	398.858	-1279.67	1513.29	339.589	-1270.28	1419.79	340.613	-1347.85	1137.61	323.885	-1146.24	1328	320.335	-1079.49	1135.33	423.877	-1353.38	1212.98	150.209	-1216.38	1346.2	82.4179	-1275.1	1105.83	81.8367	-1289.95	1031.89	36.4113	-1234.33	872.968	59.7195	-1192.72	797.155	42.5536	-1262.16	781.754	26.8997	-1212.22	720.967
947	0	291.749	-1101.2	1555.45	408.865	-1100.62	1542.93	288.884	-1272.86	1529.83	395.723	-1269.39	1513.79	337.084	-1260.06	1419.75	339.264	-1336.87	1137.34	321.93	-1136.01	1327.97	318.831	-1068.48	1135.68	422.286	-1342.73	1213.04	147.988	-1205.98	1345.49	80.8424	-1263.49	1104.63	80.5777	-1278.56	1030.81	34.7627	-1224.84	871.729	57.4303	-1184.18	795.258	40.3572	-1253.56	780.9	24.0201	-1204.32	719.92
948	0	287.981	-1091.31	1555.7	405.216	-1090.55	1543.92	285.682	-1263.01	1529.8	392.676	-1259.32	1514.47	334.658	-1249.93	1419.9	338.078	-1325.95	1137.13	319.779	-1125.72	1328.44	317.304	-1057.36	1136.44	420.729	-1332.08	1213.1	145.692	-1195.63	1345.03	79.5391	-1251.99	1103.78	79.607	-1267.14	1029.98	33.1656	-1215.04	870.789	55.3962	-1175.07	793.764	38.3269	-1244.82	780.109	21.4768	-1196.48	719.005
949	0	284.304	-1081.32	1556.32	401.531	-1080.38	1545.36	282.467	-1253.07	1530.06	389.513	-1249.18	1515.52	332.331	-1239.77	1420.37	336.976	-1315.47	1137.2	317.732	-1115.37	1329.33	315.927	-1046.07	1137.46	419.303	-1321.42	1213.77	143.707	-1185.27	1344.92	78.2073	-1240.53	1103.19	78.499	-1255.5	1029.36	31.4283	-1204.82	870.557	53.5529	-1165.62	792.719	36.1082	-1235.56	779.988	18.6291	-1187.93	718.632
950	0	280.392	-1071.38	1557.13	397.736	-1070.14	1547.33	279.15	-1243	1530.64	386.548	-1239.06	1516.99	329.988	-1229.46	1421.23	335.591	-1303.96	1138.1	315.694	-1104.84	1330.4	314.376	-1034.95	1138.71	417.842	-1310.66	1214.77	141.706	-1174.84	1345.06	76.8288	-1228.8	1103.06	77.3621	-1243.86	1029.36	29.7315	-1194.36	870.549	51.0683	-1156.02	792.285	33.9399	-1225.93	780.302	15.5387	-1179.06	718.586
951	0	276.5	-1061.52	1557.91	393.89	-1059.84	1549.17	276.018	-1233.09	1531.32	383.55	-1228.83	1518.76	327.881	-1219.23	1422.27	334.314	-1292.99	1139.05	313.738	-1094.12	1331.87	313.168	-1023.87	1140.03	416.435	-1299.97	1215.92	139.794	-1164.42	1345.49	75.495	-1217.3	1103.07	76.304	-1232.27	1029.73	28.0937	-1183.72	870.804	49.0772	-1145.81	792.224	31.9394	-1215.74	780.802	13.1917	-1169.57	719.093
952	0	272.601	-1051.84	1558.74	389.931	-1049.57	1551.16	273.091	-1223.31	1532.04	380.657	-1218.61	1520.39	325.804	-1209.06	1423.35	333.219	-1282.15	1139.92	311.898	-1083.82	1333.15	311.841	-1012.84	1141.81	415.118	-1289.28	1217.06	138.027	-1154.23	1346.23	74.4418	-1205.7	1103.45	75.3107	-1220.89	1030.15	26.4898	-1172.72	871.489	47.1712	-1135.17	792.498	29.977	-1205.35	781.658	10.5719	-1159.57	719.791
953	0	268.436	-1042.32	1559.78	385.969	-1039.35	1553.26	270.262	-1213.62	1532.89	377.693	-1208.39	1522.51	323.766	-1198.91	1424.6	331.87	-1271.23	1141.06	310.227	-1073.37	1334.69	310.488	-1001.92	1143.59	413.706	-1278.62	1218.44	136.203	-1143.79	1347.11	73.1624	-1194.35	1104.09	74.0864	-1209.35	1031.04	24.7663	-1161.41	872.669	45.1956	-1124.14	793.151	27.8929	-1194.41	782.839	8.22791	-1148.95	720.473
954	0	264.564	-1032.85	1560.65	381.993	-1029.07	1555.47	267.613	-1204.07	1533.8	375.126	-1197.9	1524.41	321.89	-1188.79	1425.95	330.447	-1260.96	1142.21	308.619	-1063.01	1336.21	309.462	-991.163	1145.36	412.261	-1268	1219.81	134.576	-1133.31	1348.09	72.001	-1183.07	1104.79	72.8047	-1197.83	1032.01	23.09	-1149.94	873.757	43.1593	-1112.72	794.149	25.8353	-1182.9	784.09	5.91917	-1137.76	721.567
955	0	260.696	-1023.36	1561.63	378.121	-1018.8	1557.57	265.394	-1194.68	1534.8	373.164	-1187.78	1526.43	320.111	-1178.8	1427.27	329.086	-1249.78	1143.58	307.304	-1053	1337.65	308.437	-980.41	1147.17	410.773	-1257.62	1221.2	132.939	-1122.91	1349.36	70.7216	-1171.97	1105.84	71.4157	-1186.37	1033.12	21.5417	-1138.31	875.071	41.3529	-1100.81	795.494	23.9932	-1171.06	785.455	3.54179	-1126.21	722.958
956	0	256.973	-1014.22	1562.88	374.412	-1008.59	1559.87	263.482	-1185.44	1535.8	371.093	-1177.54	1528.49	318.511	-1168.9	1428.57	327.602	-1239.67	1144.48	305.826	-1042.54	1339.71	307.512	-969.831	1149.31	409.257	-1247.42	1222.41	131.458	-1112.54	1350.73	69.1427	-1161.01	1107.09	69.8806	-1175.05	1034.24	19.6856	-1126.35	876.644	39.6624	-1088.59	796.985	22.3957	-1159.03	786.73	1.6733	-1113.82	724.529
957	0	253.428	-1005.18	1564.03	370.775	-998.402	1562.18	261.807	-1176.29	1536.91	369.595	-1167.39	1530.55	317.084	-1159.07	1429.92	326.045	-1228.65	1145.88	304.779	-1032.4	1341.46	306.656	-959.239	1151.37	407.612	-1237.38	1223.65	130.12	-1102.07	1352.04	67.762	-1150.03	1108.48	68.2966	-1163.61	1035.53	18.0301	-1114.25	878.068	38.0215	-1076.08	798.694	20.5706	-1146.32	788.107	-0.204564	-1101.19	726.286
958	0	250.129	-996.27	1565.1	367.443	-988.145	1564.37	260.457	-1167.19	1538.06	368.26	-1157.2	1532.7	315.601	-1149.27	1431.26	324.436	-1218.18	1147.09	303.667	-1022.73	1342.9	305.752	-948.794	1153.22	405.964	-1227.45	1224.88	129.35	-1091.82	1353.21	65.9934	-1139.1	1110	66.5044	-1152.16	1036.8	16.2867	-1101.91	879.732	36.304	-1063.21	800.499	18.8887	-1133.36	789.506	-1.95179	-1087.63	727.982
959	0	246.848	-987.458	1566.13	364.252	-977.993	1566.36	259.482	-1158.26	1539.01	366.94	-1146.44	1534.39	314.234	-1139.59	1432.37	322.701	-1207.99	1147.93	302.868	-1012.5	1344.76	305.293	-938.453	1154.91	404.234	-1217.94	1225.76	127.962	-1081.27	1354.64	64.5254	-1128.19	1111.29	64.6949	-1140.78	1038.05	14.5543	-1089.22	881.17	34.7038	-1050.06	802.388	17.172	-1119.97	790.722	-3.57618	-1073.74	729.61
960	0	243.764	-978.732	1567.19	361.194	-967.929	1568.23	258.804	-1149.39	1539.86	366.136	-1136.58	1536.16	312.975	-1129.93	1433.33	321.073	-1198.12	1148.85	302.084	-1002.81	1346.06	304.705	-928.311	1156.39	402.52	-1208.47	1226.78	127.01	-1070.69	1355.84	62.7293	-1117.28	1112.77	62.9316	-1129.27	1039.13	12.9573	-1076.52	882.691	33.2227	-1036.58	804.22	15.7017	-1106.33	791.799	-5.09724	-1059.47	731.298
961	0	241.268	-970.301	1568.14	358.355	-957.838	1570.03	258.19	-1140.51	1540.92	365.446	-1126.39	1537.99	311.764	-1120.21	1434.65	319.188	-1188.18	1150.04	301.378	-993.128	1347.17	304.373	-918.377	1157.65	400.636	-1199.06	1227.75	125.969	-1060.08	1357.14	60.5941	-1106.42	1114.22	60.8342	-1117.67	1040.63	11.2084	-1063.28	884.27	31.9502	-1022.64	806.196	13.9142	-1092.43	793.188	-6.58211	-1044.53	732.935
962	0	238.856	-961.488	1568.92	355.9	-947.812	1571.67	257.835	-1131.63	1541.91	364.993	-1116.14	1539.63	310.715	-1110.61	1435.79	317.379	-1178.45	1151.14	301.05	-983.64	1348.13	304.018	-908.518	1158.72	398.825	-1189.82	1228.74	125.187	-1049.29	1358.43	59.2317	-1094.99	1115.63	58.9818	-1106	1041.79	9.82089	-1050.01	885.682	30.6349	-1008.79	808.201	12.3792	-1078.13	794.572	-7.74597	-1029.34	734.709
963	0	236.749	-952.656	1569.81	353.669	-937.937	1572.99	257.678	-1122.71	1542.71	364.55	-1106.13	1540.92	309.652	-1101.04	1436.91	315.476	-1169.05	1152.17	300.569	-974.11	1349.17	303.931	-898.885	1159.55	396.972	-1180.87	1229.68	124.397	-1038.55	1359.66	57.2265	-1083.97	1117.11	56.9837	-1094.45	1043.21	8.37997	-1036.48	887.293	29.8195	-994.449	810.319	11.0366	-1063.62	795.842	-8.76719	-1013.92	736.587
964	0	235.02	-944.018	1570.75	351.76	-928.196	1574.42	257.579	-1113.79	1543.63	364.217	-1096.16	1542.26	308.666	-1091.52	1437.97	313.461	-1159.62	1153.23	300.256	-964.616	1350.09	303.707	-889.469	1160.39	395.06	-1171.94	1230.55	123.948	-1027.77	1361.06	55.8042	-1072.46	1118.61	55.02	-1082.61	1044.43	6.84736	-1022.68	889.116	28.4807	-980.09	812.827	9.51118	-1048.86	797.229	-9.65098	-998.107	738.566
965	0	233.531	-934.979	1571.61	350.095	-918.433	1575.73	257.368	-1104.79	1544.64	364.081	-1086.36	1543.73	307.754	-1082	1439.07	311.507	-1150.19	1154.56	300.009	-955.288	1351.16	303.777	-880.132	1161.23	393.224	-1163.09	1231.56	123.141	-1017.09	1362.29	53.8739	-1061.16	1120.29	52.8905	-1070.74	1045.97	5.55513	-1008.75	890.959	27.9011	-965.313	815.275	8.10256	-1033.8	798.817	-10.4106	-981.937	740.686
966	0	232.419	-926.022	1572.5	348.836	-908.637	1576.96	257.404	-1095.72	1545.65	363.995	-1076.53	1544.99	306.916	-1072.58	1440.19	309.61	-1140.99	1155.73	299.717	-945.943	1352.07	303.812	-871.14	1161.93	391.414	-1154.29	1232.63	122.671	-1006.61	1363.57	52.4219	-1049.49	1121.7	50.9998	-1058.76	1047.25	4.26191	-994.689	892.781	27.1263	-950.48	817.775	6.90674	-1018.6	800.371	-11.1702	-965.746	742.903
967	0	231.554	-917.214	1573.39	347.86	-899.136	1577.96	257.321	-1086.66	1546.62	363.801	-1067.01	1546.17	306.084	-1063.28	1441.22	307.695	-1131.97	1156.68	299.548	-936.747	1353.11	303.896	-861.974	1162.8	389.576	-1145.55	1233.43	122.202	-996.146	1364.84	50.7222	-1037.76	1123.3	48.969	-1046.73	1048.46	3.11134	-980.453	894.64	26.4709	-935.562	820.295	5.8182	-1003.28	801.702	-11.4879	-949.522	744.987
968	0	230.886	-907.952	1574.22	347.182	-889.627	1579.01	257.225	-1077.52	1547.9	363.66	-1057.38	1547.48	305.289	-1054.07	1442.36	305.851	-1123.16	1157.88	299.294	-927.691	1354.13	303.963	-853.084	1163.69	387.895	-1137.1	1234.5	121.701	-985.836	1366.24	49.2787	-1025.86	1124.75	47.0916	-1034.59	1049.84	2.05815	-966.015	896.532	25.9034	-920.449	822.824	4.75233	-987.712	803.377	-12.5465	-932.634	747.781
969	0	230.673	-898.698	1575.06	346.887	-880.05	1579.85	257.223	-1068.2	1549.29	363.562	-1047.96	1548.7	304.502	-1044.89	1443.43	304.099	-1114.33	1159.12	299.099	-918.564	1355.06	304.084	-844.206	1164.53	386.282	-1128.46	1235.57	121.231	-975.594	1367.36	47.8602	-1014.12	1126.17	45.3393	-1022.2	1051.1	1.15139	-951.479	898.314	25.509	-905.178	825.47	3.93176	-971.984	804.958	-13.0068	-915.854	750.247
970	0	230.429	-889.401	1575.97	346.831	-870.743	1580.32	257.013	-1058.95	1550.75	363.56	-1038.8	1549.92	303.817	-1035.97	1444.48	302.459	-1105.46	1160.07	298.816	-909.761	1355.88	304.107	-835.418	1165.35	384.64	-1119.84	1236.38	120.7	-965.646	1368.61	46.5643	-1002.01	1127.3	43.5344	-1009.93	1052.34	0.218108	-936.808	900.267	24.932	-890.066	828.048	3.1405	-956.222	806.563	-13.3406	-898.998	752.672
971	0	230.704	-879.976	1576.79	347.024	-861.487	1580.6	256.966	-1049.71	1552.03	363.351	-1029.59	1550.81	302.98	-1027.04	1445.38	300.861	-1096.88	1160.99	298.696	-900.867	1356.73	304.072	-826.644	1166.21	383.024	-1111.67	1237.18	120.27	-955.685	1369.67	45.1754	-989.929	1128.48	41.9038	-997.697	1053.38	-0.385858	-922.132	902.149	24.8638	-874.674	830.521	2.59771	-940.418	808.08	-13.2516	-882.267	755.067
972	0	231.054	-870.405	1577.53	347.422	-852.25	1580.84	256.711	-1040.27	1553.55	363.135	-1020.43	1551.85	302.163	-1018.15	1446.25	299.306	-1088.03	1162.05	298.447	-891.988	1357.44	304.1	-818.128	1167.03	381.527	-1103.17	1238.13	119.801	-945.871	1370.78	44.0664	-977.802	1129.64	40.2299	-985.146	1054.64	-0.876451	-907.367	903.948	24.73	-859.273	832.939	1.88602	-924.511	809.874	-13.4327	-865.447	757.491
973	0	231.505	-860.858	1578.18	348.022	-843.239	1580.99	256.411	-1030.97	1554.91	362.906	-1011.63	1552.7	301.434	-1009.34	1447.09	297.845	-1079.54	1162.67	298	-883.303	1358.11	303.821	-809.544	1167.81	380.147	-1094.7	1238.93	119.311	-936.366	1371.67	43.0282	-965.712	1130.53	38.7951	-972.53	1055.57	-1.20248	-892.52	905.756	24.9025	-843.782	835.438	1.5362	-908.516	811.495	-13.605	-848.401	760.09
974	0	232.381	-851.166	1578.85	348.878	-834.278	1581.05	256.1	-1021.47	1555.95	362.572	-1002.84	1553.25	300.663	-1000.62	1447.72	296.372	-1070.74	1163.27	297.88	-874.491	1358.76	303.696	-801.012	1168.62	378.775	-1086.43	1239.5	118.868	-926.819	1372.67	41.8937	-953.703	1131.63	37.3478	-960.141	1056.62	-1.58228	-877.702	907.687	25.1334	-828.439	838.141	1.25388	-892.521	813.188	-13.2669	-831.569	762.456
975	0	233.225	-841.553	1579.57	349.803	-825.568	1581.13	255.526	-1012.2	1556.96	362.204	-994.308	1553.65	300.004	-991.881	1448.3	295.158	-1061.79	1164.01	297.572	-865.72	1359.36	303.476	-792.605	1169.47	377.502	-1077.76	1239.89	118.289	-917.513	1373.67	40.8375	-941.76	1132.66	36.1131	-947.557	1057.42	-1.7088	-862.945	909.521	25.4367	-813.001	840.712	1.0408	-876.559	814.685	-13.0127	-814.767	765.138
976	0	234.113	-831.811	1580.19	351.003	-816.781	1581.29	254.966	-1002.7	1557.86	361.868	-985.834	1554.13	299.437	-982.969	1448.8	294.119	-1053.1	1164.62	297.212	-856.98	1359.95	303.16	-784.26	1170.1	376.279	-1069.67	1240.66	117.858	-908.038	1374.41	39.9358	-929.675	1133.58	34.8896	-934.971	1058.28	-1.86367	-848.244	911.346	25.7922	-797.573	843.213	0.977803	-860.54	816.354	-12.6751	-797.929	767.744
977	0	235.276	-822.123	1580.56	352.335	-808.232	1581.27	254.437	-993.213	1558.56	361.415	-977.496	1554.37	298.813	-974.319	1449.18	293.146	-1044.73	1164.87	296.898	-848.354	1360.3	302.82	-775.691	1170.53	375.237	-1061.28	1241.02	117.381	-898.726	1375.04	38.923	-917.92	1134.37	33.9072	-922.573	1058.82	-1.76733	-833.4	913.093	26.4385	-782.12	845.692	1.26099	-844.641	817.847	-12.1971	-781.366	770.253
978	0	236.647	-812.516	1580.89	353.607	-799.878	1581.01	253.728	-983.815	1559.09	360.741	-969.018	1554.42	298.387	-965.471	1449.39	292.235	-1036.15	1165.06	296.602	-839.627	1360.41	302.508	-767.349	1170.67	374.355	-1052.85	1241.19	117.108	-889.385	1375.51	38.1715	-906.383	1134.96	32.8505	-910.227	1059.33	-1.57149	-818.743	914.778	27.0116	-766.78	848.205	1.47624	-828.713	819.255	-11.3294	-764.559	772.56
979	0	237.923	-802.802	1581.1	354.92	-791.434	1580.67	253.093	-974.289	1559.37	360.321	-960.885	1554.34	297.913	-956.578	1449.61	291.408	-1027.52	1165.51	296.671	-830.709	1360.29	302.312	-758.961	1170.38	373.473	-1044.37	1241.35	116.816	-879.931	1375.69	37.4792	-894.783	1135.49	32.1104	-897.861	1059.79	-1.74809	-804.017	916.451	27.7998	-751.515	850.503	1.99717	-812.81	820.645	-10.545	-747.826	774.945
980	0	239.117	-793.103	1581.05	356.425	-783.055	1580.3	252.312	-964.806	1559.55	359.798	-952.687	1554.21	297.619	-947.663	1449.62	290.668	-1018.98	1165.77	296.464	-821.978	1360.02	302.229	-750.46	1169.84	372.771	-1035.84	1241.5	116.676	-870.579	1375.71	36.8703	-883.386	1135.53	31.2719	-885.726	1060.06	-1.34126	-789.373	917.85	28.647	-736.206	852.763	2.61622	-796.757	822.109	-9.53172	-731.151	777.22
981	0	240.57	-783.479	1580.88	357.858	-774.805	1579.75	251.707	-955.248	1559.54	359.224	-944.43	1553.74	297.265	-938.489	1449.45	290.094	-1010.71	1165.78	296.466	-813.131	1359.58	301.928	-742.048	1169.22	372.19	-1027.31	1241.49	116.586	-861.138	1375.53	36.3389	-872.327	1135.63	30.9891	-873.528	1060.12	-0.814786	-775.075	919.11	29.7303	-720.88	855.172	3.5941	-780.889	823.426	-8.20713	-714.51	779.38
982	0	241.875	-773.83	1580.83	359.316	-766.493	1579.16	250.976	-945.734	1559.33	358.521	-936.127	1553.15	297.009	-929.463	1449.22	289.485	-1002.5	1165.67	296.455	-804.254	1359.05	301.947	-733.55	1168.58	371.678	-1018.79	1241.36	116.612	-851.78	1375.39	35.8236	-861.387	1135.78	30.4375	-861.691	1060.22	-0.227108	-760.679	920.461	30.9182	-705.703	857.579	4.1212	-765.251	824.688	-6.4683	-697.982	781.466
983	0	243.224	-764.077	1580.7	360.856	-758.189	1578.71	250.184	-936.079	1559.05	357.977	-927.849	1552.56	296.885	-920.36	1449.03	288.931	-994.048	1165.51	296.599	-795.322	1358.57	301.947	-725.062	1167.79	371.137	-1010.23	1241.31	116.456	-842.415	1375	35.4983	-850.639	1135.71	30.0234	-849.997	1059.88	0.518548	-746.596	921.77	32.1302	-690.624	859.966	5.09689	-749.321	826.415	-4.84731	-681.499	783.92
984	0	244.778	-754.447	1580.37	362.374	-749.816	1578.19	249.619	-926.36	1558.55	357.402	-919.417	1551.74	296.844	-911.241	1448.69	288.529	-985.743	1165.38	296.605	-786.416	1357.9	302.035	-716.458	1166.9	370.852	-1001.67	1241.12	116.672	-832.977	1374.52	35.0426	-840.188	1135.56	29.218	-838.598	1059.73	1.18781	-732.499	923.038	33.6053	-675.651	862.468	6.89014	-733.616	827.522	-2.9454	-665.11	786.26
985	0	246.259	-744.745	1579.99	363.9	-741.507	1577.51	249.042	-916.817	1557.95	356.854	-910.982	1550.8	296.948	-902.054	1448.24	288.21	-977.461	1165.19	296.988	-777.38	1357.27	302.181	-708.036	1166.01	370.679	-993.149	1240.8	116.748	-823.775	1374	34.6617	-829.806	1135.44	29.0099	-826.904	1059.43	2.10619	-718.56	924.283	35.2177	-660.827	864.923	8.1697	-717.932	828.746	-1.17225	-648.589	788.972
986	0	247.627	-735.022	1579.51	365.352	-733.106	1576.75	248.747	-907.268	1557.16	356.448	-902.595	1550	297.084	-892.843	1447.63	288.048	-969.054	1164.82	297.23	-768.446	1356.41	302.565	-699.393	1165.11	370.538	-984.416	1240.43	117.102	-814.538	1373.38	34.5136	-819.576	1135.13	28.4248	-815.655	1059.15	3.17819	-704.792	925.438	36.9897	-646.127	867.445	10.0014	-702.44	829.966	1.12541	-632.38	791.412
987	0	249.041	-725.39	1578.83	366.717	-724.574	1576.01	248.373	-897.63	1556.32	356.235	-893.871	1548.96	297.362	-883.527	1447.06	287.984	-960.608	1164.49	297.602	-759.24	1355.39	302.878	-690.783	1163.94	370.632	-975.681	1240.01	117.411	-805.069	1372.56	34.3519	-809.406	1134.73	28.5298	-804.143	1058.54	4.42632	-691.047	926.547	38.9795	-631.583	869.882	12.0597	-687.054	831.064	3.93299	-616.275	793.642
988	0	250.307	-715.817	1577.91	368.109	-715.947	1575.08	248.112	-887.936	1555.2	356.021	-885.097	1547.78	297.643	-874.283	1446.32	288.053	-952.125	1163.89	298.168	-750.17	1354.3	303.39	-682.192	1162.78	370.755	-966.858	1239.43	117.798	-795.893	1371.52	34.3795	-799.514	1134.06	28.1497	-793.098	1058.01	5.73291	-677.249	927.493	41.0695	-617.156	872.101	14.0981	-671.827	832.256	6.45707	-600.131	796.094
989	0	251.372	-706.295	1576.83	369.184	-707.269	1573.81	248.221	-878.353	1553.98	355.853	-876.378	1546.57	298.144	-865.002	1445.34	288.179	-943.706	1163.1	298.578	-741.072	1353.07	303.895	-673.583	1161.4	371.145	-958.075	1238.64	118.415	-786.586	1370.38	34.5357	-789.449	1133.29	28.2077	-782.066	1057.25	7.28717	-663.676	928.413	43.3497	-602.875	874.395	16.2045	-656.58	833.491	9.75511	-584.251	798.214
990	0	252.429	-696.809	1575.72	370.177	-698.408	1572.68	248.271	-868.833	1552.85	356.11	-867.464	1545.35	298.737	-855.625	1444.34	288.594	-935.08	1162.32	299.191	-731.85	1351.62	304.449	-664.809	1160.08	371.553	-949.11	1237.83	119.026	-777.381	1369.21	34.7989	-779.554	1132.45	28.1093	-770.951	1056.5	8.95087	-650.19	929.311	45.741	-588.758	876.657	18.5617	-641.58	834.672	12.7695	-568.528	800.651
991	0	253.501	-687.421	1574.48	371.252	-689.321	1571.68	248.653	-859.304	1551.54	356.529	-858.356	1544.23	299.415	-846.328	1443.33	288.966	-926.472	1161.48	300.012	-722.696	1350.43	305.011	-656.061	1158.71	372.135	-940.093	1236.99	119.637	-768.227	1368.01	34.9613	-769.716	1131.55	28.3078	-759.979	1055.77	10.5144	-636.841	930.22	48.1928	-574.812	878.923	20.6891	-626.591	835.921	16.0073	-552.994	802.996
992	0	254.466	-677.903	1573.11	372.197	-680.153	1570.44	249.35	-849.853	1550.04	357.131	-848.94	1542.94	300.314	-836.973	1442.1	289.54	-917.556	1160.2	300.765	-713.477	1349.06	305.764	-647.366	1157.33	372.909	-931.093	1235.88	120.496	-758.989	1366.74	35.4136	-759.85	1130.63	28.3849	-749.09	1054.79	12.3501	-623.433	931.227	50.8243	-561.02	881.161	23.1522	-611.826	837.1	19.4388	-537.578	805.331
993	0	255.325	-668.661	1571.76	373.009	-670.836	1569.07	250.23	-840.627	1548.51	358.028	-839.626	1541.46	301.332	-827.597	1440.73	290.232	-908.867	1158.85	301.472	-704.19	1347.61	306.452	-638.331	1155.86	373.812	-921.948	1234.6	121.385	-749.833	1365.39	35.9822	-750.138	1129.54	28.8439	-738.171	1053.81	14.0828	-610.382	932.026	53.475	-547.428	883.283	25.7795	-597.218	838.181	22.8274	-522.439	807.665
994	0	256.043	-659.45	1570.27	373.872	-661.415	1567.79	251.333	-831.364	1546.9	359.024	-830.097	1540	302.33	-818.254	1439.39	291.181	-900.389	1157.89	302.636	-694.874	1346.17	307.134	-629.293	1154.37	374.698	-912.677	1233.31	122.336	-740.741	1364.11	36.5498	-740.263	1128.49	29.0911	-727.231	1052.8	16.132	-597.306	932.727	56.1873	-533.955	885.409	28.5561	-582.802	839.117	26.5391	-507.477	809.806
995	0	256.84	-650.167	1568.78	374.74	-651.844	1566.6	252.551	-821.989	1545.23	360.517	-820.539	1538.54	303.465	-808.833	1437.98	292.149	-891.521	1156.69	303.644	-685.492	1344.58	307.861	-620.241	1152.8	375.785	-903.37	1232	123.31	-731.598	1362.73	37.1811	-730.476	1127.36	29.7167	-716.332	1051.67	18.051	-584.624	933.325	58.8394	-520.672	887.293	31.2598	-568.599	840.052	30.3483	-492.873	811.781
996	0	257.743	-641.094	1567.22	375.627	-642.177	1565.13	254.335	-812.805	1543.42	362.142	-810.947	1536.76	304.827	-799.274	1436.4	293.172	-882.295	1155.12	304.651	-676.04	1342.94	308.45	-611.142	1151.04	376.983	-894.09	1230.49	124.546	-722.437	1361.15	38.0155	-720.684	1126.05	30.4555	-705.507	1050.56	20.1328	-571.862	933.83	61.512	-507.673	889.031	34.4268	-554.782	840.753	33.7513	-478.505	813.946
997	0	258.708	-631.892	1565.66	376.426	-632.488	1563.64	256.245	-803.705	1541.42	363.905	-801.246	1534.97	306.219	-789.679	1434.89	294.598	-873.734	1153.95	305.852	-666.617	1341.31	309.36	-601.985	1149.33	378.223	-884.671	1228.94	125.706	-713.219	1359.81	39.0508	-710.741	1124.86	31.6531	-694.503	1049.45	22.3098	-559.497	934.279	64.2039	-494.845	890.707	37.366	-541.158	841.482	37.3907	-464.353	815.934
998	0	259.587	-622.877	1564.25	377.419	-622.579	1562.35	258.422	-794.546	1539.57	366.205	-791.261	1533.16	307.701	-780.056	1433.54	295.956	-864.61	1152.73	306.996	-657.098	1339.46	310.135	-592.701	1147.49	379.497	-875.19	1227.52	127.048	-703.889	1358.47	40.175	-700.746	1123.72	32.5352	-683.669	1048.44	24.7376	-547.306	934.511	66.8637	-482.242	892.322	40.0941	-527.744	842.328	41.1112	-450.659	817.465
999	0	260.537	-614.032	1562.87	378.466	-612.607	1561.06	260.86	-785.604	1537.8	368.653	-781.322	1531.38	309.532	-770.385	1432.18	297.443	-855.322	1151.5	308.242	-647.441	1337.8	310.864	-583.313	1145.58	380.827	-865.541	1226.08	128.434	-694.616	1357.15	41.523	-690.822	1122.58	33.5812	-673.269	1047.52	26.7857	-535.266	934.944	69.4959	-469.976	893.663	43.0944	-514.723	842.94	44.4666	-437.264	819.155
1000	0	261.682	-605.114	1561.59	379.469	-602.598	1559.65	263.654	-776.685	1535.9	371.356	-771.372	1529.5	311.162	-760.565	1430.66	298.89	-845.5	1149.87	309.69	-637.706	1336.15	311.646	-573.927	1143.87	382.313	-855.982	1224.54	129.951	-685.2	1355.99	43.0096	-680.836	1121.48	35.0311	-662.548	1046.5	29.2045	-523.496	935.216	72.0658	-457.838	895.032	46.0268	-502.079	843.6	48.252	-424.561	820.426
1001	0	262.899	-596.157	1560.49	380.649	-592.54	1558.38	266.678	-767.728	1534.25	374.344	-761.429	1527.78	313.181	-750.759	1429.33	300.625	-836.27	1148.93	311.106	-627.967	1334.7	312.294	-564.306	1142.2	383.9	-846.263	1223.16	131.547	-675.68	1355.03	44.5279	-670.816	1120.57	36.4975	-652.049	1045.71	31.3725	-512.067	935.585	74.712	-446.138	896.308	48.8757	-489.677	844.296	51.1461	-411.926	822.072
1002	0	264.272	-587.279	1559.48	382.006	-582.385	1557.34	269.821	-758.681	1532.88	377.311	-751.225	1526.21	315.119	-740.903	1428.14	302.285	-826.51	1147.89	312.608	-618.135	1333.49	313.199	-554.607	1140.83	385.53	-836.362	1221.86	133.327	-666.119	1354.27	46.1298	-660.708	1119.82	37.8148	-641.946	1044.94	33.8104	-500.663	935.874	77.3016	-434.666	897.464	51.9658	-477.816	844.695	54.271	-399.781	823.507
1003	0	265.878	-578.499	1558.59	383.519	-572.217	1556.17	273.085	-749.751	1531.67	380.555	-741.029	1524.64	317.333	-731.126	1426.99	304.081	-816.655	1146.79	314.431	-608.219	1332.4	314.161	-544.685	1139.64	387.159	-826.418	1220.52	135.125	-656.479	1353.64	47.8927	-650.745	1119.24	39.4447	-631.774	1044.45	36.0992	-489.786	936.152	79.7995	-423.507	898.455	54.8777	-466.175	845.282	57.2871	-387.971	824.805
1004	0	267.589	-569.516	1557.96	385.258	-562.119	1555.13	276.546	-740.731	1530.49	383.88	-730.815	1523.12	319.657	-721.225	1425.84	305.796	-806.502	1145.48	316.187	-598.211	1331.49	315.274	-534.795	1138.92	388.921	-816.399	1219.18	136.928	-646.672	1353.25	49.6879	-640.779	1118.87	41.2366	-621.653	1044.06	38.4405	-478.929	936.519	82.3637	-412.587	899.448	57.6819	-455.002	845.801	60.2619	-376.576	825.921
1005	0	269.573	-560.423	1557.44	387.137	-552.03	1554.25	279.969	-731.53	1529.42	387.273	-720.688	1521.83	321.69	-711.265	1424.88	307.618	-796.674	1144.76	318.02	-588.15	1330.72	316.61	-524.676	1138.03	390.643	-806.195	1217.94	138.866	-636.752	1352.97	51.6199	-630.769	1118.53	42.8366	-611.559	1043.62	40.8664	-468.311	936.862	84.8415	-402.04	900.231	60.4013	-443.915	846.202	62.8798	-365.477	827.168
1006	0	271.789	-551.228	1556.93	389.264	-541.926	1553.48	283.386	-722.136	1528.46	390.511	-710.567	1520.65	324.013	-701.29	1423.93	309.336	-786.343	1143.78	320.023	-577.939	1330	317.887	-514.38	1137.53	392.249	-795.86	1216.71	140.972	-626.793	1352.59	53.4584	-620.791	1118.14	44.6374	-601.723	1043.31	43.128	-457.994	936.963	87.3456	-391.667	900.725	62.8559	-433.284	846.527	65.6095	-354.753	827.908
1007	0	274.214	-541.961	1556.56	391.667	-531.905	1552.73	286.813	-712.746	1527.53	393.945	-700.394	1519.28	326.276	-691.13	1422.97	311.11	-776.14	1142.74	322.126	-567.679	1329.39	319.481	-503.803	1137.17	393.986	-785.386	1215.38	143.08	-616.722	1352.4	55.49	-610.821	1117.81	46.4502	-591.967	1043.09	45.2882	-447.924	936.97	89.7974	-381.503	901.083	65.273	-422.948	846.735	68.7524	-344.439	828.151
1008	0	276.864	-532.597	1556.54	394.193	-521.973	1552.16	290.275	-703.175	1526.68	397.382	-690.462	1518.03	328.809	-680.927	1422.22	312.927	-765.75	1141.84	324.263	-557.351	1328.88	321.205	-492.975	1136.97	395.69	-774.804	1214.16	145.246	-606.35	1352.35	57.5821	-600.884	1117.68	48.4585	-582.325	1042.86	47.5667	-438.028	936.984	92.2081	-371.614	901.23	67.5996	-412.798	846.803	71.0022	-334.241	828.697
1009	0	279.803	-523.066	1556.73	397	-512.026	1552	293.531	-693.536	1526.12	400.537	-680.299	1517.16	330.951	-670.877	1421.79	314.62	-755.56	1141.28	326.347	-546.954	1328.68	323.027	-481.876	1136.99	397.353	-764.058	1213.19	147.437	-595.784	1352.44	59.5741	-590.913	1117.51	50.342	-572.589	1042.69	49.7886	-428.196	936.896	94.6798	-361.911	901.228	69.6932	-402.889	846.882	73.3813	-324.348	828.914
1010	0	282.792	-513.485	1557.27	400.021	-502.204	1552.02	296.755	-683.758	1525.7	403.74	-670.211	1516.33	333.402	-660.584	1421.45	316.606	-744.818	1140.82	328.682	-536.361	1328.73	324.851	-470.62	1137.21	399.02	-753.179	1212.41	149.529	-585.107	1352.73	61.6603	-581.02	1117.61	52.394	-563.055	1042.82	52.0785	-418.497	936.637	97.2102	-352.54	900.96	71.6021	-393.327	846.768	75.5455	-314.826	829.148
1011	0	285.932	-503.847	1557.9	403.265	-492.447	1552.21	299.998	-673.854	1525.32	406.86	-660.316	1515.46	335.768	-650.046	1421.09	318.56	-734.023	1140.25	331.193	-525.725	1328.84	326.894	-459.077	1137.59	400.594	-742.384	1211.73	151.78	-574.125	1353.13	63.6849	-571.307	1117.88	54.3761	-553.571	1042.76	54.3449	-409.102	936.482	99.5587	-343.439	900.58	73.4808	-384.203	846.415	77.7593	-305.73	828.911
1012	0	289.415	-494.05	1558.88	406.629	-482.723	1552.64	303.066	-663.905	1525.23	409.859	-650.47	1514.97	338.035	-639.583	1421.11	320.544	-723.161	1140.21	333.453	-514.977	1329.27	329.042	-447.459	1138.09	402.172	-731.464	1211.27	154.086	-562.944	1353.75	65.8256	-561.346	1118.26	56.4185	-544.086	1043.05	56.3518	-399.923	936.332	101.783	-334.612	899.947	75.1896	-375.368	846.067	79.4172	-296.824	828.879
1013	0	292.879	-484.111	1560.07	410.158	-473.012	1553.28	305.997	-653.864	1525.44	412.843	-640.662	1514.65	340.201	-629.037	1421.52	322.249	-712.703	1140.68	335.872	-504.247	1330.06	331.154	-435.834	1138.91	403.529	-720.441	1211.2	156.308	-551.693	1354.64	67.7301	-551.741	1119.01	58.456	-534.563	1043.52	58.3484	-390.959	936.085	103.872	-326.109	899.253	76.7388	-366.921	845.446	81.0966	-288.414	828.406
1014	0	296.554	-474.181	1561.53	413.889	-463.323	1554.21	308.808	-643.796	1525.74	415.814	-630.738	1514.38	342.361	-618.359	1422.21	323.915	-701.443	1141.19	338.309	-493.34	1330.94	333.488	-424.059	1139.88	404.931	-709.459	1211.32	158.61	-540.194	1355.81	70.0086	-541.727	1119.85	60.6281	-525.039	1044.31	60.2361	-382.253	935.777	105.788	-317.896	898.091	78.1584	-358.992	844.768	82.2809	-280.512	827.706
1015	0	300.343	-464.113	1563.16	417.646	-453.844	1554.98	311.551	-633.537	1526.36	418.471	-620.949	1514.28	344.625	-607.828	1422.9	325.485	-690.123	1141.71	340.883	-482.577	1331.9	335.927	-412.612	1140.87	406.412	-698.498	1211.68	161.073	-528.723	1357.01	72.3904	-531.541	1120.82	62.9679	-515.592	1045.06	62.0693	-373.834	935.357	107.386	-309.917	896.814	79.4695	-351.479	843.992	83.6172	-273.05	826.287
1016	0	304.226	-453.839	1564.87	421.448	-444.306	1555.9	314.195	-623.226	1527.2	421.063	-611.131	1514.62	346.779	-597.187	1423.89	326.978	-678.82	1142.64	343.081	-471.841	1333.11	338.42	-401.077	1142.11	407.875	-687.51	1212.34	163.583	-517.313	1358.33	74.6049	-521.308	1122.22	65.2111	-506.077	1046.29	63.7739	-365.76	934.846	108.795	-302.268	895.326	80.8127	-344.402	843.1	84.6348	-265.988	824.856
1017	0	308.15	-443.594	1566.63	425.347	-434.758	1557.04	316.622	-612.795	1528.29	423.443	-601.545	1515.11	349.067	-586.646	1425.06	328.319	-667.328	1143.71	345.553	-461.163	1334.45	340.74	-389.93	1143.39	409.428	-676.556	1213.26	165.819	-505.991	1359.88	76.6812	-511.001	1123.67	67.4961	-496.508	1047.68	65.4084	-357.81	934.105	109.934	-294.805	893.628	81.9138	-337.708	842.142	85.3494	-259.467	822.828
1018	0	311.947	-433.217	1568.43	429.186	-425.318	1558.06	318.87	-602.407	1529.5	425.839	-591.9	1515.6	351.339	-576.212	1426.33	329.801	-655.956	1144.82	347.937	-450.49	1335.76	343.177	-378.952	1145.01	411.056	-665.651	1214.2	168.293	-495.031	1361.48	79.1492	-500.426	1125.17	70.009	-486.974	1049.15	66.7417	-350.231	933.491	110.939	-287.55	891.864	83.0156	-331.428	841.165	86.1711	-253.391	820.54
1019	0	315.821	-422.902	1570.39	432.929	-415.921	1559.19	321.069	-592.112	1531.11	428.136	-582.343	1516.51	353.6	-565.907	1427.65	331.284	-644.951	1146.17	350.229	-440.015	1337.46	345.459	-368.155	1146.68	412.783	-654.848	1215.27	170.622	-484.245	1363.32	81.7413	-489.517	1126.77	72.5113	-477.502	1050.67	68.0757	-342.901	932.911	111.625	-280.575	890.116	83.6371	-325.376	840.208	86.6356	-247.549	818.299
1020	0	319.523	-412.515	1572.28	436.622	-406.54	1560.41	323.167	-581.804	1532.62	430.098	-572.807	1517.45	355.674	-555.837	1429.22	332.822	-634.026	1147.54	352.401	-429.708	1339.09	347.512	-357.502	1148.67	414.638	-644.129	1216.54	172.913	-473.688	1365.22	84.2911	-478.595	1128.6	75.1066	-467.997	1052.38	69.2224	-335.576	932.366	112.043	-273.747	888.285	84.2407	-319.595	839.364	86.7318	-242.148	816.003
1021	0	323.22	-402.3	1574.09	440.253	-397.158	1561.66	325.304	-571.372	1534.3	431.816	-563.279	1518.62	358.15	-545.496	1430.6	334.45	-623.361	1149.06	354.587	-419.434	1340.79	349.404	-347.046	1150.55	416.5	-633.475	1217.76	174.993	-463.458	1367.27	86.8126	-467.577	1130.46	77.6804	-458.522	1054.14	70.1155	-328.522	931.976	112.511	-267.197	886.477	84.3379	-313.99	838.588	86.727	-237.033	813.642
1022	0	326.687	-391.941	1575.95	443.776	-387.88	1562.79	326.915	-561.051	1535.88	433.695	-553.885	1519.49	360.22	-535.544	1432.02	336.156	-613.029	1150.5	356.648	-409.308	1342.49	351.235	-336.619	1152.54	418.507	-622.978	1218.97	177.108	-453.479	1369.1	89.3728	-456.514	1132.38	80.4108	-449.19	1055.8	71.1367	-321.491	931.653	112.738	-260.757	884.724	84.1897	-308.645	837.885	86.7576	-232.274	811.118
1023	0	330.042	-381.694	1577.68	447.097	-378.713	1563.84	328.618	-550.67	1537.47	435.258	-544.573	1520.6	362.574	-525.474	1433.36	338.033	-602.93	1151.83	358.555	-399.358	1344	352.778	-326.618	1154.51	420.421	-612.606	1220.1	178.982	-443.78	1371.25	91.9062	-445.491	1134.13	82.9708	-439.872	1057.61	71.7423	-314.718	931.516	112.873	-254.476	882.937	83.9082	-303.414	837.256	86.1573	-227.713	809.055
1024	0	333.303	-371.412	1579.34	450.437	-369.472	1565.04	330.131	-540.349	1539.09	436.652	-535.236	1521.78	364.494	-515.584	1434.9	339.851	-592.968	1153.37	360.366	-389.507	1345.55	353.925	-317.127	1155.7	422.431	-602.338	1221.46	180.704	-434.161	1372.88	94.329	-434.363	1135.74	85.3682	-430.552	1059.34	72.4922	-307.852	931.286	112.869	-248.48	881.047	83.3699	-298.255	836.812	85.5644	-223.299	806.684
1025	0	336.443	-361.201	1580.71	453.411	-360.31	1565.94	331.545	-530.077	1540.66	438.033	-525.803	1522.85	366.658	-505.827	1436.24	341.902	-583.355	1154.89	361.995	-379.746	1346.73	355.335	-307.265	1157.37	424.526	-592.32	1222.72	182.643	-424.994	1374.45	96.8128	-423.527	1137.08	87.7719	-421.323	1060.89	73.3048	-301.046	930.905	113.218	-242.607	879.009	82.9159	-293.287	836.275	84.8408	-219.114	804.496
1026	0	339.37	-351.019	1582.02	456.136	-351.143	1566.7	332.953	-519.844	1541.98	439.378	-516.528	1523.84	368.673	-496.25	1437.46	343.95	-573.966	1156.11	363.57	-370.241	1347.81	356.322	-297.998	1158.32	426.592	-582.41	1223.81	184.46	-415.927	1375.81	99.2204	-412.966	1138.19	89.944	-412.222	1062.45	73.9449	-294.381	930.697	113.319	-236.876	877.012	81.9171	-288.239	835.879	84.3562	-214.808	802.143
1027	0	342.06	-340.927	1583.42	458.753	-342.019	1567.68	334.234	-509.664	1543.46	440.646	-507.186	1524.99	370.639	-486.652	1438.81	346.002	-564.772	1157.49	364.996	-360.79	1348.89	357.033	-288.846	1159.17	428.744	-572.629	1225.18	185.918	-406.998	1377.3	101.445	-402.859	1139.51	91.915	-403.152	1063.98	74.6421	-287.714	930.672	113.455	-231.297	875.078	80.8308	-283.36	835.702	83.3824	-210.629	800.3
1028	0	344.477	-330.927	1584.53	461.137	-332.722	1568.7	335.55	-499.646	1544.88	442.01	-497.862	1526.31	372.571	-477.07	1440.14	347.944	-555.696	1159.05	366.309	-351.455	1350.03	357.951	-279.82	1160.06	430.85	-562.891	1226.34	187.455	-398.279	1378.65	103.403	-393.312	1140.73	93.6662	-394.266	1065.58	75.2116	-281.128	930.689	113.516	-225.896	873.337	79.7359	-278.407	835.603	82.1763	-206.719	798.84
1029	0	346.569	-321	1585.57	463.383	-323.304	1569.63	337.033	-489.791	1546.23	443.359	-488.57	1527.44	374.399	-467.679	1441.33	349.868	-547.184	1160.51	367.444	-342.31	1350.95	358.401	-270.875	1160.89	432.802	-553.527	1227.72	188.874	-389.82	1379.97	105.213	-384.392	1141.89	95.2723	-385.623	1066.94	75.577	-274.796	930.802	113.559	-220.547	871.746	78.5434	-273.548	835.575	80.8829	-202.69	797.356
1030	0	348.487	-311.288	1586.48	465.289	-313.925	1570.5	338.516	-480.195	1547.46	444.826	-479.147	1528.69	376.234	-458.533	1442.46	351.809	-538.389	1161.71	368.533	-333.275	1351.88	358.715	-262.116	1161.74	434.816	-544.314	1228.96	190.198	-381.405	1381.22	106.818	-375.963	1143.04	96.7453	-377.424	1068.21	76.0116	-268.459	931.117	113.315	-215.245	870.538	77.3282	-268.729	835.85	79.2703	-198.91	796.438
1031	0	350.175	-301.676	1587.5	466.83	-304.355	1571.38	340.172	-470.669	1548.92	446.468	-469.701	1530.04	377.951	-449.514	1443.74	353.683	-529.465	1163.08	369.687	-324.306	1353.01	358.988	-253.355	1162.49	436.846	-535.065	1230.13	191.556	-373.263	1382.56	108.086	-368.118	1144.28	98.0701	-369.576	1069.58	76.1978	-262.091	931.634	112.878	-210.044	869.489	76.0918	-264.066	836.33	77.7471	-195.037	795.573
1032	0	351.508	-292.247	1588.33	468.251	-294.67	1572.38	341.848	-461.394	1550.24	448.374	-460.173	1531.5	379.811	-440.374	1444.92	355.541	-520.633	1164.3	370.747	-315.468	1354.05	359.427	-244.532	1163.64	438.83	-526.096	1231.45	192.783	-365.2	1383.84	109.259	-360.7	1145.43	99.5877	-361.996	1070.66	76.1882	-256.058	932.185	111.876	-205.229	868.956	74.835	-259.469	836.876	75.7874	-191.358	795.17
1033	0	352.516	-283.044	1589.08	469.309	-284.79	1573.2	343.928	-452.27	1551.51	450.324	-450.589	1532.7	381.315	-431.546	1445.93	357.325	-511.987	1165.49	371.651	-306.764	1354.95	359.53	-235.904	1164.52	440.874	-517.161	1232.5	194.026	-357.264	1384.93	110.308	-353.943	1146.53	100.439	-355.273	1071.95	75.9719	-250.335	932.906	110.769	-200.255	868.547	73.0977	-255.209	837.615	73.9092	-187.589	795.037
1034	0	353.237	-273.922	1589.87	469.993	-275.206	1573.94	346.021	-443.443	1552.75	452.371	-440.93	1534.08	383.202	-422.698	1447.01	359.077	-503.532	1166.56	372.59	-298.234	1355.82	359.802	-227.174	1165.6	442.838	-508.492	1233.72	195.388	-349.554	1386.2	111.09	-347.625	1147.72	101.32	-348.828	1073.13	75.3842	-244.907	933.831	109.314	-195.18	868.746	71.9999	-250.769	838.441	71.7373	-183.898	795.066
1035	0	353.874	-265.011	1590.68	470.645	-265.07	1574.97	348.149	-434.661	1553.95	454.567	-431.221	1535.38	384.634	-414.095	1448.08	360.657	-494.953	1167.76	373.551	-289.667	1356.71	360.012	-218.787	1166.55	444.778	-499.629	1234.73	196.588	-341.891	1387.4	111.685	-341.713	1148.96	102.121	-342.67	1074.54	74.3119	-239.848	934.841	107.592	-190.429	868.998	70.6997	-246.288	839.476	69.4195	-180.208	795.366
1036	0	354.314	-256.218	1591.32	471.09	-255.06	1575.81	350.55	-426.041	1555.01	457.091	-421.504	1536.65	386.5	-405.423	1449.09	362.275	-486.613	1168.75	374.526	-281.239	1357.52	360.191	-210.264	1167.38	446.655	-490.945	1235.72	197.843	-334.342	1388.48	112.142	-336.245	1150.27	102.666	-337.007	1075.67	73.117	-235.032	935.753	105.536	-185.558	869.441	69.1538	-242.029	840.59	67.0877	-176.297	795.832
1037	0	354.695	-247.563	1591.9	471.416	-245.109	1576.6	352.994	-417.557	1555.95	459.379	-411.732	1537.59	388.345	-397.177	1449.85	363.718	-478.361	1169.47	375.443	-272.875	1358.42	360.572	-201.859	1168.5	448.56	-482.436	1236.34	199.207	-326.898	1389.6	112.476	-331.041	1151.53	103.242	-331.563	1076.97	71.6113	-230.412	936.833	103.143	-180.733	870.451	67.8157	-237.805	841.717	64.5246	-172.465	796.801
1038	0	354.752	-239.055	1592.62	471.539	-235.161	1577.57	355.352	-409.036	1556.55	461.585	-402.012	1538.69	390.049	-388.645	1450.54	365.176	-470.098	1170.01	376.468	-264.512	1359.3	360.796	-193.521	1169.62	450.184	-473.832	1237.18	200.234	-319.505	1390.9	112.735	-326.05	1152.97	103.565	-326.316	1078.21	69.8184	-226.132	938.113	100.711	-175.981	871.579	65.8883	-233.803	842.996	61.701	-168.583	798.011
1039	0	354.754	-230.711	1593.22	471.757	-225.149	1578.65	357.704	-400.662	1557.19	463.956	-392.216	1539.52	391.754	-380.308	1451.14	366.401	-461.795	1170.75	377.386	-256.205	1360.01	361.245	-185.209	1170.71	451.806	-465.074	1237.64	201.41	-312.123	1391.89	113.028	-321.19	1154.34	103.72	-321.202	1079.58	67.9317	-221.884	939.364	97.9242	-171.197	872.767	64.2128	-229.551	844.317	58.8084	-164.455	799.31
1040	0	354.888	-222.524	1593.77	471.669	-215.355	1579.47	360.039	-392.333	1557.66	466.345	-382.452	1540.17	393.395	-372.059	1451.66	367.464	-453.435	1171.07	378.252	-247.984	1360.64	361.526	-176.999	1171.56	453.345	-456.413	1238.04	202.832	-304.769	1392.61	113.148	-316.421	1155.64	103.833	-316.249	1080.77	65.9284	-217.799	940.591	95.2464	-166.398	873.999	62.6099	-225.234	845.565	55.8248	-160.192	800.787
1041	0	354.756	-214.328	1594.29	471.504	-205.642	1580.17	362.433	-384.157	1557.83	468.395	-372.709	1540.7	394.762	-363.603	1452	368.062	-444.831	1171.44	379.143	-239.755	1361.17	361.907	-168.719	1172.31	454.902	-447.909	1238.19	203.671	-297.393	1393.63	113.098	-311.852	1156.84	103.795	-311.342	1081.99	64.0673	-213.675	941.778	92.5039	-161.652	875.338	60.878	-221.028	846.705	52.7472	-155.868	802.409
1042	0	354.703	-206.311	1594.84	471.376	-195.987	1580.91	364.599	-375.875	1557.98	470.548	-363.056	1541.02	396.163	-355.315	1452.4	369.095	-436.482	1171.63	380.029	-231.503	1361.74	362.401	-160.452	1172.88	456.196	-439.471	1238.46	204.772	-289.968	1394.39	113.328	-306.929	1157.97	103.661	-306.383	1083.13	62.1502	-209.361	942.944	89.9532	-156.885	876.5	59.2019	-216.59	847.852	49.2009	-151.18	804.397
1043	0	354.871	-198.364	1595.14	471.331	-186.42	1581.56	366.587	-367.592	1558.11	472.536	-353.383	1541.3	397.775	-347.112	1452.62	369.824	-426.907	1171.53	380.791	-223.344	1362.09	362.641	-152.349	1173.2	457.582	-430.829	1238.64	205.796	-282.59	1394.94	113.067	-302.28	1159.22	103.402	-301.334	1084.29	60.3984	-204.922	944.084	87.3892	-152.025	877.693	57.4794	-212.094	849.017	45.7132	-146.304	806.287
1044	0	354.956	-190.295	1595.5	471.308	-177.121	1581.98	368.546	-359.446	1558.1	474.296	-343.977	1541.45	398.995	-338.721	1452.74	370.882	-419.887	1172.02	381.579	-215.135	1362.29	363.015	-144.148	1173.43	458.731	-422.352	1238.71	206.699	-275.077	1395.4	113.351	-297.402	1160.1	103.23	-296.247	1085.25	58.7559	-200.384	945.085	84.9541	-147.165	878.649	55.6953	-207.541	849.977	42.2431	-141.432	808.295
1045	0	355.104	-182.387	1595.87	471.31	-167.912	1582.36	370.221	-351.015	1557.91	475.873	-334.758	1541.21	400.094	-330.441	1452.77	371.643	-411.028	1171.71	382.232	-206.892	1362.43	363.378	-136.139	1173.5	459.944	-414.011	1238.7	207.608	-267.59	1395.67	113.43	-292.305	1160.99	102.917	-291.122	1086.15	57.123	-195.658	946.076	82.3128	-142.287	879.542	53.8132	-202.938	850.793	38.274	-136.679	810.538
1046	0	355.253	-174.028	1596.18	471.467	-158.919	1582.77	371.605	-342.648	1557.75	477.111	-325.486	1541.14	401.122	-322.029	1452.79	372.314	-403.473	1172.07	382.685	-198.658	1362.45	363.634	-128.052	1173.49	460.94	-405.652	1238.75	208.324	-260.004	1395.96	113.543	-287.031	1161.82	102.5	-285.809	1086.95	55.3402	-190.854	946.974	79.8689	-137.345	880.432	51.8861	-198.221	851.643	34.5131	-131.768	812.462
1047	0	355.643	-165.901	1596.41	471.763	-150.002	1583.04	372.775	-334.25	1557.44	478.224	-316.477	1540.87	402.127	-313.658	1452.81	372.915	-395.101	1172.2	383.215	-190.473	1362.35	363.721	-119.906	1173.38	461.86	-397.096	1238.69	208.952	-252.239	1396.04	113.583	-281.547	1162.41	102.095	-280.382	1087.68	53.7722	-185.709	947.724	77.0281	-132.267	881.277	49.9803	-193.447	852.39	30.546	-126.909	814.539
1048	0	356.012	-157.68	1596.55	472.133	-141.446	1583.14	373.611	-325.866	1556.85	478.962	-307.715	1540.17	402.821	-305.073	1452.58	373.628	-386.99	1171.86	383.654	-182.197	1362.18	363.871	-111.897	1173.03	462.77	-388.776	1238.35	209.63	-244.671	1395.98	113.733	-275.946	1162.86	101.785	-274.846	1088.14	52.0103	-180.756	948.404	74.6421	-127.072	881.781	48.1671	-188.725	852.857	26.7566	-122.095	816.27
1049	0	356.582	-149.294	1596.68	472.597	-132.909	1583.2	374.201	-317.218	1556.18	479.497	-299.01	1539.54	403.636	-296.696	1452.27	374.27	-378.538	1171.54	383.999	-173.961	1361.97	363.971	-103.626	1172.74	463.551	-380.53	1238.08	210.044	-236.87	1395.98	113.763	-270.082	1163.31	101.477	-269.198	1088.61	50.2438	-175.827	949.048	71.7063	-121.994	882.375	46.3089	-183.875	853.274	22.5414	-117.395	818.049
1050	0	357.12	-140.781	1596.74	473.3	-124.65	1583.37	374.399	-308.482	1555.45	479.883	-290.465	1538.92	404.274	-288.207	1452.01	374.598	-369.963	1171.32	384.195	-165.631	1361.69	364.061	-95.3432	1172.46	464.161	-372.062	1237.9	210.472	-229.017	1395.85	113.771	-264.02	1163.69	101.01	-263.27	1089.01	48.44	-170.677	949.525	68.7367	-116.699	882.876	44.3794	-178.946	853.698	18.6138	-112.806	819.413
1051	0	357.715	-132.221	1596.66	473.989	-116.361	1583.32	374.254	-299.814	1554.49	479.775	-282.149	1538.01	404.821	-279.683	1451.49	374.92	-360.969	1170.6	384.397	-157.175	1361.34	363.885	-86.8941	1172.18	464.757	-363.604	1237.45	210.742	-221.119	1395.48	113.929	-257.7	1163.79	100.649	-257.273	1089.12	46.5204	-165.594	949.799	65.562	-111.414	883.123	42.5882	-173.838	853.815	14.59	-108.202	820.583
1052	0	358.407	-123.67	1596.46	474.68	-108.303	1583.03	374.235	-291.037	1553.48	479.715	-273.852	1536.87	405.173	-271.155	1450.86	375.13	-352.164	1169.72	384.459	-148.88	1360.89	363.778	-78.5839	1171.44	465.29	-355.023	1236.74	210.982	-213.165	1394.88	113.877	-251.216	1163.71	100.267	-251.138	1089.14	44.4719	-160.482	949.902	62.6497	-105.922	883.387	40.7061	-168.817	853.806	10.9159	-103.48	821.394
1053	0	359.091	-114.872	1596.25	475.468	-100.328	1582.82	373.716	-282.168	1552.59	479.192	-265.549	1535.9	405.441	-262.541	1450.19	375.628	-344.01	1169.3	384.483	-140.459	1360.34	363.482	-70.3254	1170.63	465.493	-346.486	1236.17	211.403	-204.981	1394.08	113.644	-244.364	1163.55	99.8479	-244.798	1089.08	42.7166	-155.009	949.73	59.6253	-100.317	883.163	39.0485	-163.608	853.525	7.38569	-98.8069	821.969
1054	0	359.818	-106.023	1595.89	476.302	-92.2473	1582.42	372.915	-273.234	1551.51	478.679	-257.44	1534.9	405.535	-253.78	1449.47	375.781	-335.38	1168.64	384.501	-131.936	1359.63	363.33	-61.7924	1169.95	465.729	-337.882	1235.51	211.22	-196.722	1393.43	113.604	-237.351	1163.15	99.338	-238.221	1088.92	40.7103	-149.565	949.469	56.7542	-94.6672	882.719	37.0175	-158.246	853.323	4.00349	-94.1755	821.991
1055	0	360.384	-97.0595	1595.45	476.931	-84.3638	1581.78	372.315	-264.255	1550.31	477.88	-249.316	1533.61	405.659	-245.077	1448.61	375.944	-327.324	1167.99	384.301	-123.359	1358.86	363.092	-52.9759	1169.05	465.949	-329.478	1234.69	211.16	-188.466	1392.69	113.363	-230.101	1162.6	98.907	-231.489	1088.51	38.7528	-144.064	949.062	53.6155	-89.1042	882.244	34.8892	-152.911	853.026	0.485747	-89.4497	821.939
1056	0	360.827	-88.03	1594.87	477.506	-76.5013	1581.04	371.173	-255.293	1549	476.903	-241.237	1532.24	405.592	-236.325	1447.56	375.963	-318.688	1166.95	384.233	-114.728	1358.18	362.723	-44.5474	1167.98	466.003	-320.841	1233.72	211.152	-179.998	1391.75	113.059	-222.71	1162.04	98.3747	-224.624	1088.03	36.8143	-138.339	948.461	50.7737	-83.4092	881.489	32.7159	-147.557	852.707	-2.46818	-84.5488	821.722
1057	0	361.11	-79.0123	1594.03	477.894	-68.5587	1580.26	369.969	-246.223	1547.67	475.818	-233.069	1531.07	405.396	-227.498	1446.56	375.775	-309.768	1166.02	383.974	-105.974	1357.24	362.246	-36.5883	1166.58	465.937	-311.977	1232.77	210.806	-171.402	1390.7	112.562	-215.034	1161.47	97.792	-217.363	1087.44	34.9598	-132.324	947.835	48.2037	-77.5738	880.493	30.9768	-141.924	851.855	-5.13618	-79.8909	820.453
1058	0	361.25	-69.9896	1592.99	478.25	-60.391	1579.39	368.759	-237.13	1546.37	474.671	-224.839	1529.76	405.165	-218.633	1445.48	375.542	-300.934	1164.94	383.605	-97.147	1356.09	361.948	-27.6467	1165.17	465.734	-303.128	1231.82	210.464	-162.768	1389.61	112.111	-207.139	1160.68	97.1531	-209.948	1086.76	33.2274	-126.157	946.917	45.6755	-71.4985	879.366	28.8417	-136.346	851.159	-7.89079	-74.8719	819.806
1059	0	361.09	-60.9588	1591.89	478.025	-52.2271	1578.31	367.491	-228.079	1544.8	473.546	-216.529	1528.27	404.817	-209.65	1444.07	375.165	-292.092	1163.56	383.291	-88.2855	1355.04	361.438	-18.5552	1164.19	465.526	-294.278	1230.58	210.093	-153.935	1388.2	111.799	-199.291	1159.66	96.4814	-202.386	1085.85	31.4708	-119.885	945.954	43.1438	-65.5194	877.999	26.9247	-130.673	850.164	-10.56	-69.7166	818.688
1060	0	360.695	-51.9943	1590.58	477.691	-43.9153	1577.29	366.283	-219.025	1543.32	472.368	-208.016	1527.05	404.254	-200.826	1442.81	374.742	-282.306	1161.92	382.79	-79.2834	1353.71	360.755	-10.0286	1162.4	465.285	-285.342	1229.11	209.558	-145.032	1386.94	111.219	-191.036	1158.47	95.8219	-194.549	1084.82	29.7078	-113.383	944.732	40.3409	-59.3851	876.549	24.9291	-124.868	848.98	-13.3337	-64.5718	817.316
1061	0	359.965	-43.0134	1589.43	477.049	-35.2756	1576.29	365.024	-209.887	1541.71	471.12	-199.283	1525.77	403.643	-191.749	1441.52	374.273	-274.015	1160.84	382.248	-70.2292	1352.42	360.353	-0.809001	1161.19	464.541	-276.502	1228.06	208.873	-135.957	1385.46	110.226	-182.591	1157.37	95.0719	-186.484	1083.73	27.947	-106.69	943.351	38.0947	-53.1702	874.706	23.0464	-118.911	847.643	-15.7905	-59.1721	815.842
1062	0	359.091	-34.0803	1587.97	476.126	-26.4917	1575.2	363.859	-200.876	1540.12	470.157	-190.394	1524.24	402.939	-182.687	1440.02	373.612	-264.663	1159.65	381.625	-61.1865	1350.91	359.655	8.40961	1159.47	464.008	-267.392	1226.63	208.24	-126.748	1383.88	109.489	-173.94	1155.97	94.2636	-178.226	1082.42	26.5024	-100.022	941.655	35.844	-46.848	872.634	21.3949	-112.739	846.118	-18.3005	-53.7334	814.205
1063	0	357.631	-25.2342	1586.52	474.855	-17.5556	1573.97	362.778	-191.949	1538.45	469.06	-181.428	1522.85	401.969	-173.696	1438.55	373.01	-255.831	1157.92	380.921	-51.9713	1349.42	359.369	17.6429	1157.94	463.271	-258.427	1225.33	207.451	-117.487	1382.12	108.691	-165.274	1154.45	93.4943	-169.848	1080.98	24.781	-92.9692	939.964	33.2944	-40.2519	870.661	19.437	-106.61	844.62	-20.7692	-48.2275	812.281
1064	0	356.151	-16.3754	1585.31	473.225	-8.54612	1572.74	361.618	-183.042	1536.82	467.951	-172.238	1521.58	400.84	-164.403	1437.21	372.209	-246.148	1156.36	380.021	-42.6928	1347.98	358.938	27.09	1156.37	462.511	-249.331	1223.94	206.365	-108.112	1380.63	107.838	-156.424	1152.81	92.6622	-161.213	1079.48	23.1063	-85.7519	938.439	30.8465	-33.5508	868.542	17.653	-100.208	842.967	-23.1813	-42.4883	810.217
1065	0	354.238	-7.40766	1583.79	471.489	0.846125	1571.65	360.414	-174.133	1535.48	466.645	-162.914	1520.27	399.534	-155.284	1435.84	371.35	-236.803	1154.91	379.069	-33.3104	1346.57	358.494	36.708	1155.1	461.507	-240.187	1222.61	205.072	-98.5518	1378.81	107.169	-147.31	1151.11	91.8558	-152.343	1077.98	21.6355	-78.2565	936.498	28.9496	-26.8333	866.171	15.9172	-93.7077	841.201	-25.4545	-36.5699	808.018
1066	0	352.196	1.40492	1582.57	469.456	10.2529	1570.5	359.296	-165.272	1533.98	465.567	-153.49	1518.97	398.006	-146.09	1434.41	370.34	-227.393	1153.52	377.952	-23.9231	1345.19	357.906	46.1067	1153.49	460.403	-230.861	1221.23	203.915	-88.98	1377.17	106.009	-138.094	1149.34	91.0116	-143.318	1076.14	19.7492	-70.9406	934.579	26.8212	-19.8318	863.791	14.2488	-87.104	839.305	-27.5927	-30.6285	805.66
1067	0	350.104	10.1818	1581.15	467.125	19.7603	1569.33	358.149	-156.399	1532.67	464.258	-144.032	1517.83	396.341	-136.754	1433.07	369.194	-217.392	1152.03	376.642	-14.3881	1343.95	357.432	55.8008	1152.16	459.24	-221.546	1220.07	202.343	-79.3024	1375.4	104.959	-128.716	1147.42	90.1687	-134.141	1074.32	18.2794	-63.2864	932.486	24.6761	-12.7079	861.356	12.8606	-80.2051	837.152	-29.5742	-24.3828	803.201
1068	0	347.686	19.0973	1580.12	464.709	29.4045	1568.37	356.674	-147.477	1531.53	462.839	-134.379	1516.79	394.414	-127.354	1431.92	368.077	-207.385	1150.67	375.204	-4.78499	1342.87	356.894	65.4667	1151.05	457.891	-211.885	1219.06	200.762	-69.6619	1373.6	103.851	-119.118	1145.57	89.245	-124.791	1072.56	16.7445	-55.4855	930.468	22.5496	-5.36224	858.944	11.4224	-73.1161	835.172	-31.4699	-18.1254	800.627
1069	0	345.227	28.074	1579.07	462.217	39.0277	1567.54	355.094	-138.364	1530.54	461.085	-124.742	1515.82	392.363	-117.806	1430.87	366.897	-197.437	1149.45	373.594	4.8887	1341.81	356.508	75.3378	1149.97	456.633	-202.1	1218.12	199.031	-59.7741	1371.95	102.699	-109.294	1143.68	88.3162	-115.254	1070.68	15.3582	-47.3322	928.408	20.4874	2.09668	856.372	9.98075	-65.8211	833.099	-33.4581	-11.6476	798.032
1070	0	342.665	37.2774	1578.03	459.667	48.6722	1566.68	353.157	-129.06	1529.32	459.128	-115.081	1514.87	390.259	-108.284	1429.74	365.711	-187.278	1148.17	371.898	14.6779	1340.9	355.934	85.245	1148.94	455.331	-192.26	1217.12	197.248	-50.0252	1370.03	101.598	-99.3746	1141.54	87.4643	-105.614	1068.65	13.7663	-39.4363	926.347	18.3648	9.68527	854.034	8.67778	-58.4434	831.022	-35.0444	-5.05661	795.241
1071	0	340.011	46.6649	1577.21	456.976	58.1946	1565.97	350.891	-119.652	1528.26	456.995	-105.471	1514.03	388.094	-98.6571	1428.7	364.564	-176.963	1146.87	369.966	24.4961	1339.9	355.281	95.3017	1148.16	453.908	-182.271	1216.2	195.33	-40.2751	1368.35	100.358	-89.3005	1139.57	86.6978	-95.8818	1066.66	12.7004	-30.9606	924.037	16.3622	17.7353	851.607	7.57146	-50.7911	828.987	-36.5084	1.90014	792.481
1072	0	337.411	56.1113	1576.33	454.399	67.7816	1565.44	348.407	-110.174	1527.44	454.403	-95.7945	1513.36	385.761	-88.8406	1427.87	363.322	-166.542	1145.77	368.132	34.5249	1339.3	354.376	105.505	1147.26	452.516	-171.926	1215.44	193.416	-30.2829	1366.61	99.1048	-79.0602	1137.62	85.833	-86.0354	1064.71	11.2014	-22.4816	921.921	14.6658	25.9458	849.155	6.70133	-42.7483	826.868	-37.6813	9.17508	789.815
1073	0	334.815	65.7857	1575.52	451.753	77.2837	1564.9	345.519	-100.313	1526.41	451.812	-86.1598	1512.62	383.432	-79.0824	1427.01	362.211	-155.842	1144.65	366.172	44.5209	1338.54	353.453	115.995	1146.72	451.204	-161.659	1214.73	192.075	-20.3921	1364.69	97.9036	-68.7078	1135.54	85.1064	-76.1208	1062.78	10.38	-13.6839	919.536	13.4594	34.2779	846.449	5.95865	-34.5422	824.837	-38.8048	16.6153	787.126
1074	0	332.059	75.617	1574.64	449.068	86.6276	1564.33	342.558	-90.6428	1525.5	448.816	-76.7266	1512.07	381.139	-69.3687	1426.04	360.833	-145.348	1143.43	364.119	54.6221	1337.86	352.287	126.65	1146.22	449.705	-151.18	1213.78	189.495	-10.5343	1363.34	96.747	-58.3649	1133.38	84.4274	-66.1989	1060.66	9.46892	-4.85586	917.311	12.2336	42.8249	844.09	5.37163	-26.1696	822.534	-39.6943	24.3132	784.469
1075	0	329.498	85.4816	1573.8	446.59	96.0743	1564.19	339.269	-80.6623	1524.81	445.523	-67.417	1511.91	378.694	-59.5155	1425.24	360.02	-134.231	1142.14	362.225	64.8404	1337.53	350.946	137.614	1145.91	448.269	-140.508	1212.9	187.363	-0.414665	1361.88	95.5887	-48.0686	1131.48	83.7534	-56.1291	1058.72	8.50579	4.20112	915.32	10.8397	51.7812	841.807	5.09067	-17.4548	820.394	-40.4593	32.2718	781.964
1076	0	326.723	95.564	1573.57	444.008	105.305	1564.42	335.813	-70.7626	1524.36	442.3	-58.064	1511.95	376.272	-49.7101	1424.59	358.881	-122.98	1141.02	360.138	75.217	1337.15	349.534	148.976	1146.12	446.87	-129.719	1212.09	185.302	9.83958	1360.57	94.4344	-37.6864	1129.73	83.0372	-45.9443	1056.98	7.81833	13.4349	913.208	10.1198	60.6315	839.434	4.88367	-8.58658	818.44	-40.878	40.5806	779.541
1077	0	324.136	105.629	1573.62	441.532	114.674	1564.99	332.322	-60.4804	1524.1	438.938	-48.6319	1512.17	373.861	-39.6721	1424.01	357.752	-111.719	1139.88	358.128	85.5143	1337.1	348.097	160.502	1146.44	445.322	-118.678	1211.27	183.106	20.189	1359.53	93.3235	-27.3353	1128.04	82.4064	-35.5218	1055.18	7.43226	22.7421	911.16	9.39043	69.772	837.35	4.78405	0.436265	816.332	-41.1453	49.166	777.241
1078	0	321.456	115.7	1573.85	438.86	123.86	1565.88	328.883	-50.4061	1523.94	435.686	-39.3393	1512.8	371.548	-29.6866	1423.77	356.668	-100.392	1139.12	356.133	95.9874	1337.47	346.752	172.288	1147.04	443.977	-107.691	1210.79	181.082	30.4762	1358.6	92.4311	-16.9818	1126.66	82.0194	-25.0134	1053.55	6.99266	32.4504	909.336	8.80165	79.2364	835.548	5.04909	9.68868	814.532	-41.1608	58.0104	774.911
1079	0	318.485	125.575	1574.06	436.216	133.215	1567.02	325.491	-40.4378	1523.94	432.368	-29.8832	1513.63	369.404	-19.562	1423.74	355.576	-88.8692	1138.51	354.311	106.52	1338.07	345.321	184.168	1147.83	442.735	-96.455	1210.58	179.17	40.9256	1358.04	91.5911	-6.61428	1125.58	81.6155	-14.3786	1052.32	6.9616	42.362	907.798	8.41323	89.0252	833.988	5.41596	19.2324	812.947	-40.8342	67.2584	772.784
1080	0	315.713	135.574	1574.58	433.429	142.579	1568.5	322.157	-30.3047	1524.12	429.193	-20.2717	1514.53	367.267	-9.19631	1423.99	354.603	-77.4425	1138.37	352.576	117.141	1338.7	343.97	195.999	1148.68	441.638	-85.1827	1210.78	177.294	51.4099	1357.77	90.7931	4.08722	1124.76	81.2261	-3.497	1051.39	6.8007	52.4994	906.448	8.66711	98.9842	832.374	5.87199	29.1158	811.633	-40.0899	76.8635	770.911
1081	0	312.697	145.369	1575.44	430.485	151.988	1570.13	319.01	-20.2849	1524.38	425.99	-10.649	1515.53	365.312	1.16083	1424.51	353.723	-65.917	1138.45	350.811	127.828	1339.59	342.611	207.732	1149.66	440.405	-73.7965	1211.09	175.537	62.0815	1357.62	90.2136	14.8384	1124.04	81.1053	7.40548	1050.61	7.14021	62.8865	905.311	8.96376	109.057	831.361	6.70406	39.3088	810.448	-38.9928	86.7353	768.973
1082	0	309.875	155.136	1576.22	427.496	161.547	1571.73	315.939	-10.2529	1524.66	423.136	-0.798961	1516.59	363.34	11.7536	1425.27	352.921	-54.6455	1138.89	349.219	138.531	1340.59	341.371	219.308	1150.84	439.052	-62.6467	1211.71	174.395	72.6104	1357.7	89.7416	25.7615	1123.62	81.1001	18.3572	1050.19	7.60385	73.4299	904.44	9.98939	119.486	830.154	7.58829	49.6247	809.587	-37.6775	96.8512	767.104
1083	0	306.693	164.861	1577.3	424.482	171.25	1573.77	313.239	-0.375282	1525.09	420.412	8.95795	1517.95	361.541	22.2319	1426.34	351.792	-43.2961	1139.79	347.631	149.225	1341.88	340.289	230.665	1152.37	437.733	-51.5901	1212.89	172.455	83.4396	1358.3	89.252	36.9709	1123.6	81.0311	29.5914	1050.12	8.13391	84.272	904.114	10.6333	130.125	829.749	8.57687	60.2519	809.366	-36.025	107.444	765.911
1084	0	303.877	174.51	1578.37	421.554	181.012	1575.78	310.618	9.61448	1525.56	417.988	18.9975	1519.19	359.655	32.8414	1427.48	350.856	-32.2042	1141.08	346.113	159.907	1343.26	339.312	241.806	1153.82	436.494	-40.7543	1214.33	171.083	94.3139	1359.06	88.7406	48.3887	1123.77	81.0215	40.7592	1050.38	8.86066	95.2656	903.976	11.7088	141.142	829.68	10.1281	71.4317	809.131	-34.153	118.265	764.754
1085	0	300.846	184.158	1579.67	418.657	190.729	1577.81	308.407	19.372	1526.12	415.762	29.0189	1520.42	357.962	43.3502	1428.75	349.623	-21.0192	1142.27	344.811	170.492	1344.75	338.402	252.639	1155.42	435.153	-29.9842	1215.64	169.319	105.199	1360.18	88.598	59.8662	1124.07	81.3221	52.0316	1050.66	9.80838	106.495	903.792	12.9146	152.422	829.707	11.7223	82.6971	808.98	-31.9126	129.52	763.862
1086	0	298.015	193.73	1581.01	415.78	200.644	1579.93	306.298	29.1957	1526.93	413.653	39.0601	1522.03	356.174	53.838	1430.29	348.457	-9.99164	1143.91	343.501	180.945	1346.43	337.517	263.309	1157.15	433.924	-19.7225	1217.4	167.826	116.071	1361.41	88.1443	71.2272	1124.73	81.186	63.3663	1051.18	10.8624	117.684	904.062	14.0566	164.165	830.116	13.4586	94.3659	809.148	-29.5422	141.18	763.243
1087	0	295.336	203.264	1582	413.182	210.696	1581.92	304.396	38.9179	1527.93	411.809	49.064	1523.75	354.589	64.1733	1431.76	347.187	1.29526	1145.48	342.326	191.275	1347.92	336.796	273.695	1158.76	432.448	-9.49553	1219.01	166.521	127.061	1362.62	87.6783	82.771	1125.47	81.092	74.6167	1052.05	11.9523	129.492	904.347	15.5466	176.015	830.548	15.2649	106.43	809.265	-26.9488	153.299	762.717
1088	0	292.73	212.882	1582.94	410.608	220.675	1583.69	302.928	48.5018	1528.87	410.229	59.0969	1525.28	353.049	74.2613	1433.08	346.006	12.3438	1146.94	341.223	201.413	1349.22	336.254	283.851	1160.22	431.03	0.409956	1220.57	165.505	137.893	1363.78	87.3554	94.3973	1126.13	81.1538	86.0867	1052.61	13.1717	141.527	904.629	17.6028	188.238	830.782	17.31	118.769	809.577	-24.2845	165.931	762.248
1089	0	290.425	222.485	1583.81	408.224	230.635	1585.19	301.552	58.042	1529.75	408.788	69.156	1526.94	351.52	84.2354	1434.34	344.743	23.3388	1148.2	340.321	211.362	1350.56	335.778	293.875	1161.58	429.588	10.0574	1221.87	164.131	148.729	1365	86.8869	105.925	1126.76	81.2413	97.6169	1053.14	14.5099	153.741	904.865	19.71	200.825	831.22	19.1115	131.329	809.683	-21.5149	178.993	761.862
1090	0	288.299	231.902	1584.71	406.108	240.731	1586.82	300.245	67.6414	1530.79	407.579	79.0488	1528.63	350.025	94.0335	1435.53	343.349	34.1432	1149.53	339.524	221.172	1351.9	335.579	303.78	1162.9	427.883	19.4964	1223.13	162.852	159.552	1366.23	86.2914	117.363	1127.52	80.9753	109.014	1053.91	15.5525	166.147	905.08	21.9279	213.672	831.772	20.875	144.39	810.039	-18.7668	192.473	761.642
1091	0	286.169	241.536	1585.46	403.905	250.768	1588.24	299.235	77.2037	1532	406.519	89.0491	1530.3	348.732	103.707	1436.69	341.508	44.4982	1150.86	338.836	230.885	1353.09	335.421	313.447	1163.88	426.278	28.8933	1224.38	161.909	170.202	1367.27	85.9377	128.931	1128.22	80.5854	120.657	1054.55	16.8387	179.029	905.336	23.8329	226.909	832.361	22.662	157.651	810.168	-15.6714	206.666	761.311
1092	0	284.386	251.105	1586.03	401.978	260.785	1589.42	298.585	86.666	1533.04	405.689	98.9849	1531.81	347.407	113.242	1437.76	339.391	54.39	1151.76	338.302	240.455	1354.09	335.321	322.783	1164.66	424.417	37.9906	1225.37	161.02	180.887	1368.13	85.1175	140.576	1128.84	80.2972	132.214	1054.94	18.395	192.257	905.347	26.406	240.524	832.881	24.5673	171.319	810.239	-12.674	221.127	761.017
1093	0	282.661	260.528	1586.76	400.177	270.688	1590.46	297.945	95.895	1533.92	404.89	108.833	1533.17	346.211	122.749	1438.75	337.58	63.7527	1152.67	337.878	249.853	1355.06	335.438	332.305	1165.55	422.505	46.9241	1226.23	160.13	191.464	1369.04	84.3001	152.107	1129.36	79.8779	143.928	1055.33	19.6357	205.566	905.753	29.2106	254.02	833.441	26.1852	185.013	810.378	-9.43418	235.909	760.844
1094	0	281.053	269.912	1587.58	398.701	280.68	1591.7	297.11	105.259	1534.95	404.204	118.72	1534.65	345.015	132.218	1439.8	335.951	72.941	1153.73	337.461	259.193	1356.09	335.567	341.547	1166.43	420.663	55.8043	1227.28	159.331	201.929	1370.13	83.3453	163.612	1130.13	79.4628	155.65	1055.84	20.8045	219.132	906.202	31.5614	268.007	834.388	27.7999	199.138	810.799	-6.33181	251.107	761.165
1095	0	279.759	279.359	1588.36	397.399	290.659	1592.87	296.495	114.665	1536.07	403.647	128.601	1536.12	343.859	141.641	1440.86	334.195	81.9116	1155	337.108	268.464	1357.07	335.711	350.64	1167.27	418.875	64.4482	1228.42	158.45	212.292	1371.17	82.4845	175.412	1130.89	78.6542	167.434	1056.36	21.7202	232.686	906.911	34.09	281.896	835.504	29.3875	213.538	811.184	-3.2173	266.532	761.672
1096	0	278.523	288.726	1589.04	396.153	300.493	1593.81	296.284	124.024	1537.07	403.092	138.302	1537.22	342.779	151.028	1441.84	332.448	90.589	1155.91	336.763	277.679	1357.87	335.956	359.625	1167.98	417.206	72.9464	1229.38	157.681	222.692	1372.04	81.6646	187.034	1131.51	77.9451	179.14	1056.92	22.9213	246.63	907.416	36.4179	296.271	836.845	31.195	228.177	811.416	0.017496	282.262	762.047
1097	0	277.411	298.159	1589.8	394.931	310.278	1594.59	295.744	133.317	1538.09	402.617	148.069	1538.42	341.721	160.347	1442.95	330.742	99.253	1156.97	336.395	286.776	1358.72	336.146	368.612	1168.72	415.39	81.3932	1230.46	156.978	233.01	1373.1	80.5245	198.62	1132.39	77.0688	190.95	1057.53	24.5121	260.823	908.133	39.3334	310.601	838.189	32.7775	242.817	812.057	3.3346	298.297	762.796
1098	0	276.476	307.584	1590.49	394.035	320.078	1595.43	295.348	142.512	1539.27	402.171	157.78	1539.7	340.644	169.687	1444.12	329.314	107.564	1158.49	336.05	295.801	1359.57	336.263	377.155	1169.18	413.616	89.8404	1231.78	156.334	243.182	1374.22	79.8641	210.33	1133.27	76.168	202.596	1058.36	25.8403	275.087	908.923	41.9678	325.313	839.795	34.6164	258.3	812.855	7.03942	314.703	763.845
1099	0	275.817	317.116	1591.15	393.352	329.829	1596.17	295.073	151.897	1540.47	401.943	167.446	1540.95	339.663	178.919	1445.22	327.796	115.849	1159.8	335.681	304.758	1360.37	336.392	385.878	1169.8	412.033	98.1887	1233.12	155.864	253.271	1375.08	78.8286	221.901	1134.25	75.2055	214.527	1059.18	27.1924	289.379	909.926	44.7277	339.953	841.641	36.2711	273.008	813.789	10.4635	331.093	765.128
1100	0	275.494	326.708	1591.87	392.742	339.388	1596.7	294.481	161.371	1541.55	401.365	176.92	1541.96	338.713	187.994	1446.4	326.229	124.172	1160.94	335.298	313.641	1361.26	336.368	394.344	1170.46	410.446	106.511	1234.28	155.648	263.172	1375.93	78.0901	233.256	1135.3	74.3305	226.263	1059.95	28.4553	303.634	911.362	47.1914	354.711	843.75	38.022	288.647	814.968	13.6573	347.547	766.799
1101	0	275.15	336.391	1592.68	392.453	348.946	1597.33	294.044	170.821	1542.77	400.796	186.224	1543.04	337.77	197.012	1447.51	324.718	132.68	1162.22	334.87	322.475	1362.22	336.3	402.42	1171.07	408.92	114.729	1235.49	154.798	272.984	1377.14	77.1103	244.586	1136.46	73.2269	237.796	1060.9	29.6896	317.922	912.899	50.0472	369.669	846.158	39.7492	304.045	816.372	17.0448	364.382	768.577
1102	0	274.846	346.296	1593.45	392.335	358.525	1597.93	293.155	180.331	1544.04	400.194	195.531	1544.03	336.801	206.024	1448.51	323.271	141.345	1163.42	334.414	331.199	1363.01	336.199	410.871	1171.87	407.509	123.077	1236.78	154.178	282.632	1378.07	76.2434	255.826	1137.38	72.228	249.306	1061.83	30.9045	332.342	914.267	52.2797	384.539	848.598	41.4415	319.711	817.791	20.2346	381.148	770.771
1103	0	274.773	356.136	1594.07	392.241	367.878	1598.29	292.509	189.923	1545.12	399.335	204.843	1544.74	335.828	214.923	1449.4	321.879	150.073	1164.4	333.903	339.916	1363.66	335.976	419.035	1172.37	406.214	131.242	1237.9	153.62	292.155	1378.85	75.5412	266.972	1138.2	71.1614	260.963	1062.62	32.1908	346.503	915.798	54.9083	399.582	851.092	43.0385	335.414	819.213	23.4107	397.961	773.181
1104	0	274.822	365.981	1594.72	392.223	377.177	1598.64	291.481	199.584	1545.89	398.475	214.016	1545.43	334.958	223.763	1450.23	320.694	158.795	1165.28	333.317	348.452	1364.26	335.605	427.224	1173.12	404.942	139.564	1238.67	152.897	301.518	1379.8	74.6953	277.909	1139.1	70.2313	272.184	1063.27	33.2905	360.739	917.452	57.1482	414.435	853.87	44.816	351.082	820.759	26.3743	414.851	775.648
1105	0	274.908	375.747	1595.28	392.321	386.342	1599.12	290.498	209.276	1546.63	397.683	223.09	1546.11	334.067	232.528	1450.91	319.525	167.571	1166.04	332.845	357.075	1364.83	335.275	435.397	1173.83	403.692	147.874	1239.44	152.231	310.813	1380.57	73.76	288.555	1139.92	69.1372	283.444	1064	34.2314	374.909	919.298	59.4424	429.503	856.838	46.5833	366.87	822.4	29.246	431.719	778.373
1106	0	274.848	385.59	1595.74	392.539	395.38	1599.47	289.461	219.084	1547.33	396.718	232.194	1546.65	333.267	241.343	1451.45	318.715	175.987	1166.73	332.315	365.69	1365.15	334.881	443.404	1174.13	402.546	156.27	1240.18	151.623	319.927	1381.1	73.1452	299.254	1140.43	68.0875	294.571	1064.52	35.3446	389.052	920.751	61.7768	444.543	859.599	48.3971	382.824	824.008	31.834	448.629	781.247
1107	0	274.94	395.344	1596.04	392.64	404.398	1599.58	288.46	228.847	1547.77	395.834	241.164	1546.99	332.501	250.08	1451.76	317.826	184.305	1167.06	331.838	374.261	1365.26	334.506	451.592	1174.35	401.537	164.546	1240.69	151.029	328.916	1381.35	72.1541	309.72	1140.87	67.1783	305.717	1064.6	36.5821	403.128	922.217	63.91	459.441	862.609	50.401	398.609	825.526	34.3635	465.572	784.463
1108	0	275.008	405.163	1596.23	392.668	413.357	1599.64	287.522	238.599	1547.95	394.809	250.116	1547.2	331.812	258.864	1451.98	317.136	192.298	1167.29	331.227	382.748	1365.32	334.131	459.754	1174.48	400.644	172.691	1241.1	150.458	337.767	1381.41	71.139	319.999	1141.09	66.1582	316.882	1064.52	37.7643	417.003	923.635	66.2114	474.583	865.422	52.1497	414.457	827.108	36.8154	482.576	787.373
1109	0	275.053	414.907	1596.31	392.759	422.366	1599.79	286.428	248.143	1548.14	393.829	259.141	1547.36	331.022	267.664	1452.22	316.38	200.517	1167.61	330.682	391.286	1365.27	333.865	467.946	1174.42	399.722	180.94	1241.5	149.79	346.642	1381.47	70.1429	330.159	1141.2	65.1908	327.864	1064.54	38.604	431.142	925.221	68.348	489.489	868.387	53.6964	430.511	828.732	39.0818	499.405	790.681
1110	0	275.112	424.603	1596.3	392.749	431.359	1599.85	285.395	257.915	1548.21	392.981	268.177	1547.34	330.397	276.543	1452.33	315.82	208.673	1167.89	330.274	399.735	1365.03	333.536	476.123	1174.1	398.935	189.183	1241.86	149.29	355.562	1381.24	69.3242	340.248	1141.14	64.1745	338.778	1064.36	39.6924	445.093	926.551	70.4656	504.368	871.207	55.4464	446.471	830.376	41.4529	516.275	793.844
1111	0	275.024	434.223	1596.15	392.687	440.276	1599.62	284.622	267.47	1547.89	392.131	277.178	1547	329.88	285.396	1452.23	315.426	216.611	1167.92	329.903	408.242	1364.71	333.293	484.229	1173.34	398.285	197.433	1241.86	149.028	364.39	1380.73	68.4021	350.165	1141.02	63.385	349.836	1063.89	40.9317	459.085	927.913	72.6138	519.108	874.106	57.3197	462.135	831.845	43.79	532.962	797.284
1112	0	274.809	443.685	1595.93	392.499	449.276	1599.34	283.828	276.931	1547.54	391.369	286.17	1546.7	329.332	294.254	1452.15	314.951	224.562	1168.03	329.491	416.798	1364.37	333.044	492.441	1172.65	397.71	205.679	1242.01	148.671	373.236	1380.26	67.5077	359.952	1140.73	62.729	360.873	1063.59	42.0165	472.991	929.425	74.5765	533.638	876.944	58.7479	477.529	833.646	46.1149	549.542	800.401
1113	0	274.591	453.029	1595.63	392.361	458.303	1599.09	283.093	286.451	1547.1	390.762	295.303	1546.34	328.887	303.168	1452.02	314.498	232.598	1168.06	329.036	425.307	1363.91	332.874	500.674	1171.82	397.28	213.903	1242.21	148.273	382.115	1379.66	66.7114	369.743	1140.48	61.9328	371.657	1063.22	43.2952	486.547	930.605	76.7407	548.131	879.997	60.6499	493.307	835.56	48.4064	565.782	803.885
1114	0	274.246	462.305	1595.14	392.083	467.416	1598.71	282.524	295.694	1546.48	390.196	304.41	1545.75	328.466	312.028	1451.7	314.256	240.393	1167.92	328.757	433.848	1363.28	332.691	508.917	1170.82	396.911	222.483	1242.09	147.868	390.888	1379.11	66.2907	379.445	1140.04	61.3717	382.5	1062.79	44.394	500.216	932.207	78.5949	562.38	882.806	61.9847	508.427	837.564	50.7717	581.82	807.123
1115	0	273.93	471.52	1594.64	391.627	476.489	1598.28	282.004	304.853	1545.83	389.702	313.58	1545.17	328.105	320.894	1451.29	313.988	248.409	1167.58	328.462	442.446	1362.63	332.616	517.216	1169.98	396.632	230.845	1241.91	147.567	399.493	1378.25	66.1594	389.262	1139.4	61.0446	393.477	1062.06	45.6328	513.668	933.635	80.5368	576.433	885.879	64.1866	523.523	839.134	53.1063	597.709	810.291
1116	0	273.617	480.712	1594.07	391.357	485.66	1597.85	281.659	314.376	1545.22	389.311	322.84	1544.54	327.818	329.835	1450.84	313.978	256.32	1167.26	328.279	451.096	1362.08	332.449	525.505	1169.09	396.527	239.154	1241.71	147.385	408.082	1377.39	65.6599	398.877	1138.83	60.5434	404.267	1061.56	46.746	527.006	935.06	82.6003	590.533	888.553	66.0716	538.68	840.835	55.3362	613.092	813.437
1117	0	273.232	489.854	1593.4	391.038	494.988	1597.22	281.417	323.363	1544.34	389.152	332.18	1543.85	327.689	338.723	1450.27	313.911	264.415	1166.95	328.06	459.698	1361.39	332.336	533.776	1168.06	396.432	247.802	1241.44	147.064	416.722	1376.62	65.4068	408.473	1138.2	60.2486	415.127	1060.98	47.9077	540.162	936.426	84.1651	603.957	891.208	67.6487	553.058	842.452	57.4692	628.32	816.547
1118	0	272.806	499.018	1592.58	390.709	504.196	1596.41	281.29	332.549	1543.33	388.969	341.464	1542.94	327.584	347.575	1449.59	313.971	272.601	1166.29	327.932	468.296	1360.54	332.447	542.084	1167.21	396.541	256.395	1240.86	147.065	425.149	1375.51	65.3741	418.057	1137.25	60.1479	426.037	1060.07	49.306	553.074	937.478	86.0172	617.624	893.753	69.9857	567.799	843.813	59.8767	643.269	819.442
1119	0	272.43	508.322	1591.77	390.372	513.475	1595.65	281.186	341.748	1542.26	388.758	350.712	1542.02	327.616	356.408	1448.78	314.309	280.626	1165.61	327.804	476.924	1359.8	332.346	550.413	1166.09	396.789	264.905	1240.22	147.043	433.61	1374.48	65.4718	427.488	1136.31	60.0185	436.622	1059.28	50.406	565.882	938.643	87.8813	631.03	896.237	71.8288	581.901	845.417	62.177	658.209	822.078
1120	0	272.209	517.473	1590.68	390.199	522.869	1594.83	281.091	351.06	1541.26	388.685	360.015	1541	327.797	365.439	1447.86	314.542	288.864	1164.92	327.779	485.544	1358.77	332.423	558.877	1165.05	397.08	273.709	1239.53	147.036	442.043	1373.26	65.4843	437.014	1135.13	60.1297	447.468	1058.3	51.6965	578.488	939.552	89.6641	644.25	898.429	73.6028	596.145	846.694	64.6003	672.593	824.672
1121	0	272.051	526.693	1589.45	389.928	532.25	1593.72	281.015	360.371	1540.17	388.717	369.515	1540.02	328.1	374.231	1446.86	315.105	296.964	1164.1	327.762	494.202	1357.66	332.381	567.26	1163.81	397.542	282.476	1238.73	147.566	450.277	1371.7	65.9369	446.731	1133.97	60.1486	458.146	1057.47	52.9821	591.007	940.097	91.3701	657.164	900.397	75.3919	609.958	847.973	66.7659	686.96	827.169
1122	0	271.97	535.967	1588.33	389.801	541.564	1592.53	281.347	369.483	1538.83	388.866	378.786	1538.81	328.332	383.15	1445.68	315.405	305.567	1162.79	327.907	502.898	1356.54	332.442	575.79	1162.66	398.06	291.188	1237.66	147.466	458.641	1370.47	66.327	456.359	1132.48	60.5404	468.751	1056.16	54.2542	603.404	940.759	93.302	669.977	902.424	77.2661	623.731	849.078	69.0628	701.177	829.402
1123	0	272.104	545.214	1586.95	389.835	550.907	1591.31	281.598	378.623	1537.52	389.24	388.076	1537.6	328.731	391.951	1444.55	316.204	313.58	1161.68	328.023	511.629	1355.18	332.337	584.372	1161.34	398.669	300.081	1236.57	147.841	466.865	1369.1	66.6159	465.692	1131.23	61.0138	479.375	1055.06	55.5413	615.595	941.343	95.1979	682.583	904.171	78.9413	637.231	850.126	71.3407	714.945	831.637
1124	0	272.285	554.444	1585.55	389.888	560.277	1589.99	281.949	387.941	1536.33	389.572	397.529	1536.44	329.288	400.814	1443.32	316.916	321.958	1160.58	328.185	520.49	1353.96	332.348	593.079	1160.09	399.393	309.038	1235.54	147.984	475.244	1367.89	67.1631	475.197	1129.87	61.2925	489.83	1053.87	56.8168	627.703	941.788	97.0734	695.04	905.614	80.5344	650.459	850.984	73.5486	728.62	833.691
1125	0	272.473	563.773	1584.04	390.16	569.756	1588.65	282.6	397.187	1535.01	390.154	406.977	1535.06	329.736	409.91	1441.97	317.742	330.26	1159.29	328.412	529.38	1352.37	332.247	601.778	1158.53	400.249	318.013	1234.19	148.455	483.536	1366.28	67.3704	484.447	1128.58	62.1787	500.311	1052.59	58.2025	639.621	942.157	99.0319	707.229	906.883	82.2069	663.518	851.89	75.6265	741.881	835.395
1126	0	272.779	572.831	1582.62	390.477	579.289	1586.99	283.349	406.327	1533.67	390.796	416.389	1533.8	330.117	418.727	1440.52	318.554	338.738	1158.02	328.774	538.313	1350.96	332.313	610.599	1157.04	400.932	327.181	1232.8	148.972	492.019	1364.84	68.4194	493.91	1126.92	62.782	510.5	1051.27	59.7286	651.324	942.391	100.922	719.104	908.123	83.9069	676.262	852.302	77.6353	754.797	837.254
1127	0	273.245	582.019	1581.26	390.95	588.772	1585.62	283.992	415.585	1532.49	391.574	425.742	1532.55	330.886	427.732	1439.36	319.491	347.145	1156.97	329.1	547.336	1349.5	332.27	619.368	1155.34	401.86	336.094	1231.55	149.523	500.527	1363.5	68.9931	503.333	1125.73	63.5359	520.899	1050.26	61.1739	662.884	942.77	102.756	730.724	909.106	85.3714	688.621	852.97	79.6963	767.408	838.792
1128	0	273.864	591.507	1579.76	391.504	598.232	1584.06	284.929	424.804	1531.29	392.439	435.206	1531.29	331.684	436.949	1438.14	320.515	355.954	1155.86	329.536	556.441	1348.02	332.336	628.302	1153.84	402.682	345.317	1230.27	149.96	509.267	1362.31	69.6076	512.729	1124.4	64.1347	531.099	1049.13	62.8762	674.015	942.734	104.678	742.091	909.931	87.2274	700.64	853.186	81.6881	779.531	839.867
1129	0	274.747	600.849	1578.26	392.338	607.879	1582.47	286.094	433.965	1530.2	393.534	444.654	1529.92	332.617	446.15	1436.82	321.589	364.647	1154.6	330.127	565.593	1346.52	332.362	637.284	1152.1	403.596	354.52	1228.88	150.674	517.862	1360.98	70.5642	522.043	1123.18	65.1713	541.31	1048.03	64.185	685.2	942.747	106.429	753.25	910.407	88.7043	712.092	853.617	83.5266	791.325	840.775
1130	0	275.43	609.969	1576.95	393.26	617.518	1580.94	287.203	443.334	1529.13	394.622	454.138	1528.76	333.592	455.444	1435.53	322.443	373.622	1153.39	330.807	574.923	1345.09	332.466	646.457	1150.63	404.549	363.639	1227.68	151.078	526.801	1360.03	71.5772	531.666	1121.93	65.9714	551.159	1046.98	65.7357	696.052	942.681	108.155	763.976	910.774	90.7093	723.335	853.739	85.2839	802.674	841.452
1131	0	276.584	619.554	1575.69	394.135	626.928	1579.6	288.417	452.651	1528.15	395.738	463.645	1527.71	334.579	464.675	1434.48	323.207	382.96	1152.38	331.608	584.217	1343.95	332.839	655.54	1149.31	405.449	372.785	1226.72	152.13	535.755	1359.05	72.4319	541.04	1121.1	67.0412	561.336	1046.26	67.3024	706.531	942.575	109.838	774.418	910.954	92.1086	733.964	853.707	87.2007	813.52	841.9
1132	0	277.799	628.934	1574.63	395.423	636.629	1578.45	289.596	462.102	1527.28	397.019	473.14	1526.65	335.807	474.088	1433.41	324.261	391.996	1151.53	332.411	593.548	1342.78	333.159	664.812	1148.12	406.358	381.963	1225.71	153.094	545.007	1358.2	73.481	550.432	1120.25	67.9355	571.227	1045.51	68.7901	716.815	942.285	111.53	784.717	910.878	93.7103	744.482	853.426	88.9613	824.028	842.014
1133	0	278.905	638.277	1573.7	396.711	646.127	1577.24	291.008	471.548	1526.28	398.216	482.65	1525.53	337.187	483.715	1432.36	325.193	401.396	1150.37	333.361	603.018	1341.88	333.632	674.176	1147.08	407.364	391.28	1224.48	154.059	554.173	1357.49	74.6351	560.02	1119.38	69.1243	580.887	1044.65	70.239	726.686	941.832	113.254	794.458	910.617	95.7753	754.717	852.872	90.5717	834.129	841.871
1134	0	280.599	648.032	1572.79	398.184	655.737	1576.12	292.382	481.12	1525.55	399.54	492.144	1524.66	338.598	493.137	1431.46	326.053	411.145	1149.38	334.479	612.585	1341.12	334.228	683.658	1146.38	408.193	401.034	1223.34	155.042	563.391	1357.14	75.7664	569.238	1118.91	70.3132	590.623	1044.28	71.6345	736.387	941.342	114.893	804.011	910.31	96.7311	764.186	852.691	92.3294	843.891	841.698
1135	0	282.068	657.758	1572.13	399.829	665.207	1575.36	293.545	490.83	1525	400.958	501.73	1523.94	339.865	502.685	1430.76	327.042	420.587	1148.8	335.556	622.242	1340.42	334.993	693.327	1145.67	409.074	410.858	1222.37	156.636	573.162	1356.63	76.8396	578.817	1118.58	71.1975	600.028	1043.97	72.913	745.792	940.861	116.632	813.366	909.616	98.4442	773.671	852	93.8685	853.156	841.296
1136	0	283.677	667.367	1571.58	401.525	674.832	1574.56	295.048	500.543	1524.41	402.29	511.295	1523.13	341.352	512.235	1429.95	328.007	430.537	1147.94	336.849	632.021	1339.7	335.795	703.148	1145.04	410.224	420.649	1221.31	157.597	582.568	1356.45	78.1717	588.292	1118.1	72.4605	609.472	1043.55	74.3512	754.974	940.12	118.285	822.46	908.678	99.6842	782.639	851.091	95.422	862.208	840.252
1137	0	285.558	677.205	1571.04	403.273	684.411	1573.86	296.502	510.225	1523.86	403.84	520.783	1522.47	342.713	521.854	1429.2	328.922	440.436	1147.04	338.099	641.883	1339.25	336.877	713.27	1144.86	411.095	430.713	1220.18	158.818	592.487	1356.28	79.2996	597.512	1117.75	73.6025	618.754	1043.16	75.688	763.802	939.286	119.777	831.102	907.624	100.312	791.033	850.403	96.9877	870.887	839.015
1138	0	287.267	686.808	1570.84	405.167	694.025	1573.46	298.098	520.034	1523.59	405.378	530.43	1522.02	343.915	531.471	1428.7	329.898	450.515	1146.46	339.594	651.784	1338.94	337.911	723.647	1144.78	411.91	440.858	1219.33	160.069	602.378	1356.25	80.5005	607.033	1117.67	74.7906	627.721	1043.02	76.8391	772.545	938.446	121.213	839.602	906.14	101.369	799.32	849.246	98.3139	879.091	837.751
1139	0	289.376	696.619	1570.82	407.08	703.696	1573.29	299.864	529.777	1523.52	407.154	540.14	1521.82	345.409	541.192	1428.37	330.99	460.76	1146.12	340.944	661.892	1338.81	339.042	734.155	1144.92	412.902	451.06	1218.68	161.723	612.4	1356.33	81.7187	616.429	1117.7	75.9753	636.847	1043.04	77.9873	781.128	937.596	122.664	847.794	904.733	101.839	807.268	848.291	99.5737	886.916	836.115
1140	0	291.174	706.278	1570.99	409.09	713.417	1573.3	301.611	539.656	1523.52	408.909	549.894	1521.57	346.912	551.125	1428.14	332.115	471.226	1145.68	342.428	672.013	1338.8	340.212	744.976	1145.11	413.727	461.055	1218.08	162.923	622.667	1356.54	82.7902	625.855	1117.84	77.2845	645.812	1042.88	79.2362	789.328	936.436	123.939	855.727	902.949	102.582	814.92	846.835	100.747	894.468	834.133
1141	0	293.337	716.131	1571.33	411.054	723.079	1573.37	303.567	549.351	1523.72	410.859	559.717	1521.52	348.2	560.811	1428.03	333.128	481.676	1145.35	343.886	682.141	1339.06	341.358	755.934	1145.61	414.728	471.415	1217.57	164.422	633.149	1356.95	84.326	635.336	1118.04	78.5119	654.595	1042.79	80.154	797.354	935.49	124.839	863.095	900.983	103.017	822.181	845.606	101.77	901.494	832.028
1142	0	295.325	725.768	1572.09	413.153	732.909	1573.82	305.563	559.232	1524.14	412.887	569.459	1521.78	349.725	570.791	1428.17	334.252	492.126	1145.41	345.482	692.509	1339.59	342.648	766.982	1146.33	415.793	482.053	1217.41	165.944	643.564	1357.6	85.3328	644.805	1118.67	79.6917	663.383	1043.24	81.0271	805.083	934.342	125.844	870.34	899.091	103.574	829.077	843.937	102.682	908.164	829.619
1143	0	297.277	735.615	1573.12	415.249	742.593	1574.41	307.524	568.954	1524.83	414.83	579.3	1522.2	351.058	580.848	1428.6	335.111	502.912	1145.71	346.853	702.701	1340.22	343.994	778.105	1147.16	416.54	492.558	1217.52	167.296	654.049	1358.55	86.6193	654.348	1119.31	81.2426	672.151	1043.7	81.9817	812.542	933.122	126.803	877.192	896.765	103.57	835.15	842.564	103.254	914.321	827.052
1144	0	299.442	745.464	1574.22	417.548	752.427	1575.03	309.67	578.829	1525.62	417.079	589.424	1522.65	352.65	590.901	1429.16	335.925	513.958	1145.87	348.259	713	1340.97	345.325	789.117	1148.1	417.248	502.838	1217.67	168.879	664.901	1359.47	88.0447	664.102	1120.17	82.5963	681.046	1044.28	82.9307	819.549	931.748	127.546	883.698	894.192	103.995	841.189	840.644	103.818	919.9	824.044
1145	0	301.653	755.008	1575.51	419.75	762.201	1576.01	311.594	588.583	1526.73	419.128	599.275	1523.32	353.99	600.836	1429.88	336.911	524.474	1146.5	349.711	723.313	1342.2	346.625	800.073	1149.28	418.103	513.59	1217.84	170.495	675.48	1360.81	89.5036	673.859	1121.34	84.143	689.591	1045.27	83.701	826.489	930.684	128.363	889.836	891.621	103.966	846.472	839.021	104.196	925.005	821.12
1146	0	303.971	765.039	1577.12	422.03	771.882	1577.04	313.727	598.45	1527.94	421.179	609.097	1524.21	355.566	611.096	1430.94	337.57	535.523	1147.35	351.173	733.534	1343.53	347.881	810.838	1150.75	419.045	523.927	1218.69	171.652	685.847	1362.41	90.9077	683.636	1122.81	85.5914	698.219	1046.38	84.5114	833.052	929.605	129.243	895.709	888.944	103.415	851.245	837.809	104.536	929.694	817.926
1147	0	306.334	774.807	1578.71	424.462	781.781	1578.02	315.54	608.379	1529.47	423.189	619	1525.08	356.958	620.978	1432.08	338.395	546.393	1148.52	352.691	743.828	1344.84	349.169	821.583	1152.34	420.032	534.334	1219.67	173.346	696.429	1363.97	92.1383	693.634	1124.32	87.0936	706.952	1047.83	85.3394	839.428	928.455	130.078	901.02	886.155	103.196	855.997	836.013	104.598	934.044	814.818
1148	0	308.645	784.581	1580.48	426.79	791.236	1579.17	317.444	618.275	1530.71	424.886	628.663	1525.92	358.341	630.946	1433.16	339.081	557.208	1149.48	353.85	753.712	1346.05	350.227	832.069	1153.85	420.946	544.823	1220.4	174.453	706.694	1365.84	93.8745	703.656	1125.81	89.1598	715.444	1049.1	86.1284	845.463	927.452	130.986	906.1	883.151	102.315	860.214	834.786	104.822	937.824	811.533
1149	0	311.431	794.378	1582	429.279	800.865	1580.19	318.987	628.168	1532.33	426.595	638.181	1526.86	359.745	640.9	1434.52	339.759	567.8	1150.72	355.295	763.945	1347.83	351.299	842.37	1155.39	421.808	555.268	1221.53	175.854	716.887	1367.62	95.7837	713.816	1127.49	90.5754	723.781	1050.67	86.8896	851.311	926.423	132.15	910.678	880.091	101.147	864.562	833.559	104.809	941.489	808.498
1150	0	313.67	804.53	1583.84	431.771	810.383	1581.2	320.494	638.182	1533.88	428.039	647.821	1527.94	361.072	650.736	1435.88	340.625	578.256	1152.17	356.382	773.776	1349.32	352.282	852.51	1157.21	422.974	565.569	1222.72	177.121	726.693	1369.48	96.9255	723.737	1129.25	92.1737	732.133	1052.42	87.6847	857.088	925.673	133.557	914.823	876.982	99.6575	868.88	832.793	104.809	944.971	805.726
1151	0	316.216	814.414	1585.26	434.269	819.647	1582.17	321.759	647.962	1535.4	429.366	657.166	1528.78	362.454	660.555	1437.08	341.636	588.302	1153.26	357.63	783.727	1350.74	353.204	862.453	1158.89	424.287	575.613	1223.9	178.125	736.587	1371.32	99.0851	733.957	1130.85	93.8302	740.318	1054.06	88.5762	862.874	925.1	135.367	918.495	873.672	97.5873	873.138	832.053	105.014	948.373	803.035
1152	0	318.49	824.314	1586.9	436.765	828.952	1582.93	322.967	657.963	1536.78	430.496	666.421	1529.55	363.796	670.345	1438.39	342.784	597.975	1154.45	358.586	793.401	1352.2	353.894	872.113	1160.35	425.593	585.81	1224.93	179.06	745.841	1373.04	100.447	743.866	1132.37	95.5911	748.504	1055.47	89.3952	868.696	924.621	137.329	921.966	870.631	94.9758	877.435	831.861	105.439	951.677	800.438
1153	0	320.888	834.416	1588.2	439.062	838.084	1583.61	323.923	667.876	1538.22	431.528	675.438	1530.32	364.801	679.802	1439.42	343.678	607.54	1155.63	359.438	803.007	1353.43	354.544	881.577	1161.82	426.568	595.836	1225.95	180.195	755.217	1374.51	102.008	753.766	1133.77	96.933	756.788	1056.76	90.1824	874.714	924.14	139.347	925.096	867.407	92.4317	882.2	831.436	106.276	954.91	797.629
1154	0	323.088	844.335	1589.46	441.399	847.403	1584.27	324.883	677.7	1539.68	432.481	684.707	1531.23	366.011	689.43	1440.6	344.691	616.913	1156.98	360.229	812.668	1354.45	355.021	890.992	1162.99	427.962	605.62	1227.11	181.372	764.257	1375.49	103.23	763.165	1134.8	98.2444	765.01	1058.34	91.1683	880.937	923.71	141.241	927.684	863.926	89.999	887.442	831.588	107.245	958.001	794.833
1155	0	325.251	854.094	1590.4	443.521	856.531	1584.76	325.693	687.542	1540.91	433.262	693.833	1531.89	367.122	698.798	1441.58	345.853	626.188	1157.82	360.768	821.968	1355.31	355.326	900.209	1163.9	429.284	615.41	1227.99	182.069	772.919	1376.66	104.67	772.677	1135.63	99.4952	773.018	1059.37	92.1172	887.036	923.159	142.837	929.548	859.988	86.9777	892.747	831.55	108.365	960.766	791.797
1156	0	327.186	864.079	1591.46	445.456	865.697	1585.13	326.36	697.29	1542.09	433.963	702.98	1532.53	368.041	708.07	1442.48	346.876	635.573	1158.58	361.376	831.191	1356.27	355.463	909.304	1164.6	430.583	625.026	1228.79	182.751	781.411	1377.59	105.659	781.479	1136.39	100.448	781.116	1060.3	93.1226	893.208	922.612	144.49	931.289	856.421	84.3868	898.291	831.48	109.722	963.188	788.798
1157	0	328.822	873.809	1592.53	447.37	875.001	1585.6	327.184	706.995	1543.36	434.663	712.113	1533.29	369.06	717.453	1443.4	348.192	644.324	1159.76	361.876	840.389	1357.12	355.431	918.277	1165.23	432.078	634.413	1229.87	183.218	789.851	1378.48	106.44	789.875	1137.18	101.233	789.211	1061.23	94.1691	899.513	921.943	145.882	933.046	852.982	82.481	903.884	831.827	111.27	965.289	785.649
1158	0	330.413	883.628	1593.31	448.633	883.928	1585.81	327.834	716.62	1544.62	435.328	721.249	1533.96	370.007	726.604	1444.33	349.401	653.19	1160.68	362.211	849.464	1357.77	355.211	927.077	1165.74	433.318	643.787	1230.8	183.767	798.029	1379.3	107.128	798.078	1137.88	101.994	797.026	1061.87	95.2096	905.404	921.265	147.032	934.276	849.587	80.236	909.652	832.104	112.405	967.091	782.56
1159	0	331.739	893.269	1593.96	450.03	893.073	1585.96	328.366	726.149	1545.63	435.536	729.988	1534.42	370.687	735.705	1445.1	350.728	661.845	1161.54	362.263	858.157	1358.28	354.717	935.768	1166.12	434.784	652.793	1231.57	183.959	806.152	1380.1	107.613	805.638	1138.45	102.655	804.71	1062.37	96.2331	911.255	920.702	147.946	935.613	846.762	78.5695	915.148	832.114	113.324	968.504	779.452
1160	0	332.862	902.852	1594.58	451.256	902.388	1586.13	329.06	735.574	1546.75	436.078	739.131	1535.19	371.276	744.601	1445.79	352.111	670.317	1162.23	362.451	867.085	1358.96	354.203	944.325	1166.49	436.053	662.019	1232.49	184.343	814.15	1380.75	108.165	812.875	1138.85	103.097	812.086	1062.91	97.0289	916.955	920.132	148.001	937.004	844.483	76.9442	920.435	832.579	113.949	969.856	776.707
1161	0	333.876	912.441	1595.16	452.177	911.675	1586.28	329.657	745.036	1548.04	436.585	748.383	1535.98	371.813	753.556	1446.63	353.319	678.87	1163.31	362.402	875.925	1359.37	353.671	952.823	1166.69	437.326	670.747	1233.45	184.629	822.034	1381.33	108.521	819.808	1139.24	103.445	819.166	1063.49	97.886	922.447	919.546	147.987	938.403	841.914	75.7979	925.392	832.935	113.997	970.973	774.143
1162	0	334.734	921.988	1595.53	452.972	921.245	1586.33	330.054	754.307	1549.18	437.209	757.651	1536.78	372.722	762.52	1447.46	354.604	687.219	1164.25	362.412	884.655	1359.78	352.884	961.423	1167.08	438.58	679.734	1234.41	184.915	829.949	1381.92	108.875	826.37	1139.61	103.92	825.788	1063.95	98.2701	927.625	918.958	147.449	940.42	840.05	74.468	929.925	833.198	113.998	971.648	771.372
1163	0	335.134	931.398	1595.86	453.332	930.663	1586.34	330.769	763.479	1550.25	437.658	766.838	1537.67	373.109	771.362	1448.16	355.847	695.493	1164.93	362.28	893.278	1360.12	352.274	969.744	1167.4	439.848	688.417	1235.3	185.416	837.734	1382.39	109.299	832.72	1139.97	104.5	832.079	1064.38	98.1506	932.045	918.56	146.817	942.177	838.413	73.3247	933.841	833.109	113.059	972.716	769.254
1164	0	335.475	940.885	1596.11	453.601	940.301	1586.44	331.239	772.752	1551.51	438.183	776.136	1538.63	373.547	780.105	1448.92	356.915	703.912	1165.67	362.242	902.073	1360.65	351.704	978.07	1167.87	440.993	697.226	1236.12	185.298	845.539	1383.15	109.63	838.616	1140.36	104.957	837.991	1065.09	98.2291	936.297	917.968	145.993	945.162	837.259	72.2085	937.167	833.044	111.672	973.952	767.643
1165	0	335.505	950.254	1596.32	453.563	950.02	1586.55	331.682	781.859	1552.53	438.617	785.544	1539.6	373.986	788.908	1449.68	358.064	712.188	1166.74	362.107	910.744	1361.08	351.233	986.254	1168.35	442.052	706.011	1237.11	185.384	853.319	1383.89	110.057	844.292	1140.73	105.324	843.509	1065.68	97.101	940.21	917.643	144.503	947.876	836.48	70.892	940.066	833.031	109.724	975.647	766.157
1166	0	335.226	959.465	1596.45	453.377	959.641	1586.72	332.117	790.866	1553.43	438.898	794.854	1540.47	374.783	797.717	1450.34	358.902	720.449	1167.46	362.006	919.243	1361.37	350.629	994.461	1169.02	443.181	714.63	1238	185.818	860.864	1384.42	110.277	849.554	1141.21	105.695	848.577	1066.16	96.0334	943.907	917.501	143.087	951.385	836.056	69.333	942.376	833.117	107.438	977.378	765.38
1167	0	334.827	968.754	1596.59	452.856	969.222	1586.91	332.425	799.853	1554.33	439.255	804.295	1541.49	375.2	806.439	1451.01	359.799	728.771	1167.99	361.904	927.963	1362.07	350.004	1002.56	1169.74	444.058	723.422	1238.61	185.677	868.401	1385.28	110.236	854.404	1141.93	106.154	853.446	1066.59	94.104	947.219	917.6	140.758	954.815	836.092	67.6829	944.369	833.12	104.498	979.211	764.954
1168	0	334.255	977.95	1596.66	452.381	979.088	1587.21	332.66	808.82	1555.25	439.562	813.741	1542.49	375.549	814.971	1451.57	360.48	737.143	1168.82	361.794	936.631	1362.61	349.544	1010.71	1170.39	445.163	732.15	1239.35	185.883	876.042	1385.93	110.395	859.268	1142.65	106.447	857.982	1067.43	92.3994	950.262	917.616	138.983	958.561	836.025	66.0213	946.129	833.127	101.85	981.54	764.846
1169	0	333.539	987.233	1596.59	451.661	988.806	1587.46	332.696	817.863	1556	439.677	823.205	1543.35	376.061	823.853	1452.05	360.993	745.511	1169.35	361.612	945.11	1362.9	348.995	1018.7	1170.89	445.89	740.956	1240.06	185.771	883.569	1386.63	110.633	864.251	1143.24	106.531	862.49	1068.19	90.1828	953.256	917.588	136.547	962.661	836.48	64.2111	947.656	833.19	98.7661	983.919	764.678
1170	0	332.61	996.353	1596.48	450.575	998.434	1587.43	332.906	826.825	1556.51	439.77	832.686	1544.03	376.419	832.561	1452.33	361.627	753.693	1169.67	361.374	953.728	1363.12	348.507	1026.66	1171.22	446.625	749.611	1240.53	185.902	891.274	1387.04	110.776	869.032	1143.76	106.677	866.89	1068.77	87.9824	956.101	917.709	134.296	966.415	836.324	62.6581	949.092	832.935	95.4988	986.609	764.878
1171	0	331.505	1005.51	1596.29	449.438	1008.09	1587.4	332.911	835.756	1556.87	439.746	842.178	1544.7	376.795	841.413	1452.66	362.145	762.047	1170	361.125	962.244	1363.27	348.054	1034.68	1171.42	447.329	758.48	1240.89	185.693	899.035	1387.5	110.565	873.681	1144.25	106.609	871.171	1069.29	85.6497	958.885	917.802	131.115	971.113	836.902	60.8934	950.494	832.714	92.3868	989.328	765.051
1172	0	330.477	1014.4	1595.92	448.392	1017.87	1587.46	332.829	844.664	1557.19	439.729	851.684	1545.24	377.047	850.237	1452.95	362.547	770.244	1170.38	360.887	971.009	1363.33	347.494	1042.8	1171.41	448.083	767.238	1241.4	186.044	906.829	1387.51	110.383	878.468	1144.74	106.548	875.448	1069.77	83.2953	961.783	917.781	129.36	975.635	836.988	59.3306	951.908	832.313	89.4835	992.338	765.011
1173	0	329.306	1022.94	1595.46	447.296	1027.52	1587.3	332.67	853.553	1557.31	439.421	861.13	1545.61	376.873	859.209	1453.06	363.143	778.583	1170.77	360.618	979.574	1363.02	346.979	1050.93	1171.25	448.782	776.167	1241.77	185.638	914.638	1387.68	110.162	883.296	1145.13	106.364	879.737	1070.18	80.9932	964.674	917.554	126.607	980.621	837.195	57.8447	953.442	831.818	86.6238	995.54	764.997
1174	0	328.17	1032.04	1594.99	446.166	1037.03	1586.95	332.219	862.521	1557.34	439.027	870.432	1545.81	377.078	868.121	1453.06	363.635	786.973	1170.8	360.153	988.428	1362.94	346.507	1059.15	1170.98	449.255	785.154	1241.78	186.392	922.64	1387.21	109.993	888.29	1145.35	106.026	884.281	1070.48	78.8687	967.312	917.323	124.182	985.013	836.835	56.65	955.061	831.212	83.66	998.778	765.04
1175	0	327.161	1041.32	1594.54	445.113	1046.34	1586.52	331.774	871.544	1557.22	438.479	879.79	1545.86	377.028	877.132	1453.07	364.009	795.318	1170.8	359.651	997.114	1362.46	345.934	1067.37	1170.44	450.082	793.731	1241.96	185.587	930.525	1387.2	109.646	893.393	1145.53	105.579	888.818	1070.62	76.9677	970.286	916.848	121.639	989.386	836.851	55.6399	956.879	830.501	80.9089	1002.26	764.838
1176	0	326.414	1050.49	1593.83	444.239	1055.7	1586.06	331.042	880.722	1557.05	437.856	888.968	1545.7	377.11	886.315	1452.89	364.382	803.888	1170.93	359.145	1005.88	1361.86	345.367	1075.62	1169.79	450.495	802.65	1242.14	185.173	938.562	1386.87	109.26	898.693	1145.63	105.058	893.546	1070.68	74.8317	973.449	916.4	119.034	994.216	836.702	54.5724	959.07	829.871	78.2092	1005.68	764.774
1177	0	325.738	1059.9	1593.15	443.546	1064.85	1585.59	330.049	889.942	1556.68	436.983	898.066	1545.34	376.94	895.467	1452.57	364.833	812.53	1170.71	358.554	1014.88	1361.43	344.691	1083.94	1169.16	450.943	811.507	1242.15	185.12	946.733	1386.18	108.894	904.013	1145.51	104.609	898.282	1070.52	72.9998	976.805	915.943	116.693	998.786	836.32	54.0976	961.15	828.995	75.8314	1009.5	764.451
1178	0	324.813	1069.25	1592.54	442.938	1073.92	1584.97	329.03	899.341	1556.04	435.804	907.133	1544.97	376.391	904.484	1452.15	365.022	821.202	1170.44	357.93	1023.87	1360.73	343.803	1092.37	1168.26	451.296	820.338	1242.01	184.608	955.008	1385.63	108.334	909.405	1145.32	104.176	903.194	1070.31	71.1874	980.223	915.339	114.397	1003.35	835.915	53.0622	963.894	828.012	73.2758	1013.2	764.167
1179	0	324.371	1078.62	1591.56	442.351	1082.85	1584.17	327.703	908.767	1555.36	434.608	915.978	1544.47	376.191	913.808	1451.74	365.285	829.958	1170.1	357.281	1032.93	1359.86	342.948	1100.72	1167.43	451.546	828.932	1242.03	183.913	963.254	1384.75	107.973	915.136	1145.01	103.625	908.267	1070.08	69.6515	983.94	914.619	112.195	1008.1	835.361	52.389	966.801	827.137	71.0929	1017.2	763.757
1180	0	323.78	1088.46	1590.54	441.884	1091.8	1583.44	326.305	918.319	1554.53	433.177	925.005	1543.77	375.598	923.077	1451.11	365.375	838.852	1169.68	356.52	1042.03	1358.88	342.073	1109.31	1166.2	451.61	837.823	1241.74	183.454	971.845	1383.81	107.447	920.999	1144.59	103.035	913.492	1069.62	68.4603	987.948	913.58	110.356	1013.08	834.818	51.7204	969.917	826.195	68.8092	1021.48	763.255
1181	0	323.135	1097.73	1589.5	441.269	1100.53	1582.45	324.722	927.806	1553.55	431.812	933.906	1542.91	374.843	932.294	1450.26	365.505	847.977	1168.97	355.678	1051.14	1357.72	341.044	1117.89	1165.21	451.785	846.83	1241.24	182.907	980.405	1382.69	107	926.92	1143.95	102.466	918.803	1068.99	67.3132	992.28	912.595	108.518	1017.84	833.87	51.1254	973.471	825.249	66.5763	1025.72	762.725
1182	0	322.363	1107.39	1588.34	440.555	1109.5	1581.4	323.136	937.351	1552.42	430.298	942.781	1542.07	374.325	941.763	1449.49	365.543	857.243	1168.08	354.654	1060.25	1356.62	340.051	1126.55	1164	451.504	855.833	1240.61	181.654	989.048	1381.95	106.575	933.202	1143.32	101.981	924.466	1068.43	66.2711	996.923	911.565	107.568	1022.19	832.616	50.5548	977.258	824.023	64.7054	1029.92	761.972
1183	0	321.549	1116.94	1586.96	439.723	1118.46	1580.47	321.573	946.85	1551.19	428.803	951.696	1541.01	373.428	951.149	1448.52	365.49	866.818	1167.34	353.666	1069.37	1355.3	338.976	1135.33	1162.72	451.311	864.904	1240.04	180.888	997.95	1380.68	106.338	939.517	1142.5	101.436	930.387	1067.72	65.2397	1001.36	910.654	106.348	1026.97	831.449	49.9327	981.351	822.948	63.3258	1034.21	760.864
1184	0	320.342	1126.45	1585.56	438.77	1127.83	1579.29	320.202	956.234	1549.77	427.364	960.888	1539.83	372.611	960.645	1447.47	365.493	876.757	1166.3	352.741	1078.82	1353.96	338.014	1144.17	1161.24	450.829	874.013	1239.11	180.178	1007.07	1379.23	105.733	946.386	1141.74	100.85	936.529	1066.97	64.335	1006.38	909.293	105.165	1032.07	830.028	49.1954	985.588	821.783	61.9005	1038.78	759.764
1185	0	319.045	1135.7	1583.97	437.36	1136.96	1577.96	318.897	965.585	1548.17	426.064	970.317	1538.43	371.658	970.146	1446.24	365.588	886.58	1165.21	351.877	1088.32	1352.49	337.098	1153.09	1159.72	450.293	882.985	1238.17	178.831	1016.14	1378.07	105.247	953.17	1140.8	100.416	942.968	1066.08	63.5355	1011.56	907.914	104.339	1037.16	828.511	48.5522	990.251	820.609	60.611	1043.45	758.316
1186	0	317.536	1145.05	1582.45	435.835	1146.22	1576.62	317.633	974.982	1546.49	424.768	979.524	1537.09	370.728	979.749	1444.98	365.194	896.287	1164.19	350.702	1097.65	1351.04	336.022	1162	1158.21	449.377	892.264	1237.15	178.638	1025.45	1376.44	104.546	960.315	1139.93	99.8299	949.675	1065.18	62.826	1017.18	906.531	103.492	1042.31	826.939	47.943	995.402	819.279	59.5009	1048.15	756.968
1187	0	315.919	1154.24	1580.9	434.18	1155.68	1575.43	316.404	984.275	1544.84	423.591	988.997	1535.56	369.512	989.329	1443.64	363.983	905.304	1163.11	349.487	1107.09	1349.61	335.125	1171.02	1156.74	448.666	901.506	1236.05	176.74	1034.92	1375.2	103.878	967.996	1138.87	99.3095	956.689	1064.29	62.0089	1023.02	905.048	102.636	1047.61	825.219	47.1895	1000.32	817.984	58.4905	1052.95	755.48
1188	0	313.919	1163.47	1579.24	432.317	1165.32	1573.85	315.258	993.44	1542.98	422.403	998.691	1533.95	368.191	998.847	1442.16	362.969	914.315	1161.69	348.45	1116.57	1348.07	334.127	1180.15	1155.12	447.593	910.743	1234.73	175.794	1044.61	1373.54	103.208	975.886	1137.58	98.6722	964.188	1062.98	61.1646	1028.93	903.457	101.815	1053.1	823.506	46.477	1005.85	816.32	57.5699	1057.92	753.712
1189	0	311.986	1172.54	1577.44	430.335	1175.08	1572.29	314.044	1002.56	1541.14	421.175	1008.38	1532.18	366.551	1008.26	1440.62	361.649	923.222	1160.3	347.266	1126.28	1346.32	333.142	1189.39	1153.24	446.41	919.94	1233.3	174.107	1054.01	1371.98	102.296	984.134	1136.09	97.9296	971.88	1061.58	60.4546	1035.4	901.639	101.172	1058.86	821.41	45.7094	1011.58	814.775	56.941	1063.2	751.597
1190	0	309.784	1181.68	1575.6	428.072	1184.81	1570.64	312.752	1011.66	1539.27	419.941	1018.05	1530.56	365.068	1017.96	1439.04	360.281	932.588	1158.74	345.79	1135.79	1344.53	332.199	1198.8	1151.57	445.086	929.14	1232	172.843	1063.91	1370.23	101.473	992.698	1134.69	97.2755	979.794	1060.19	59.7314	1042.12	899.635	100.386	1064.69	819.242	44.8194	1017.6	813.177	56.3346	1068.53	749.263
1191	0	307.683	1190.59	1573.6	425.734	1194.52	1569.05	311.469	1020.8	1537.3	418.647	1027.85	1528.76	363.62	1027.65	1437.41	358.905	942.472	1157.15	344.398	1145.46	1342.77	331.23	1208.37	1149.73	443.6	938.517	1230.58	171.738	1073.77	1368.17	100.357	1001.73	1132.96	96.2836	988.177	1058.74	58.861	1049.19	897.407	99.6967	1070.87	816.888	43.7962	1023.98	811.367	56.1628	1073.95	746.631
1192	0	305.19	1199.71	1571.72	423.286	1204.29	1567.35	310.122	1029.95	1535.12	417.322	1037.61	1526.78	361.841	1037.01	1435.63	357.326	952.168	1155.46	343.096	1155.22	1340.82	330.398	1217.88	1147.86	442.116	947.979	1228.87	169.968	1083.83	1366.26	99.1405	1010.92	1130.92	95.51	996.767	1056.79	57.9521	1056.58	895.221	99.0826	1077.29	814.386	42.7437	1030.49	809.411	55.456	1079.77	744.046
1193	0	302.571	1208.72	1570.08	420.622	1214.01	1565.78	308.713	1039.1	1533.09	415.794	1047.52	1524.93	360.048	1046.7	1433.84	355.746	961.814	1153.8	341.576	1165.05	1338.96	329.544	1227.61	1146.04	440.489	957.409	1227.32	168.727	1093.9	1364.17	97.9477	1020.56	1129.02	94.3834	1005.73	1054.97	57.1211	1064.18	892.88	98.3091	1083.89	811.765	41.7414	1037.6	807.251	54.9611	1085.62	741.351
1194	0	300.124	1217.58	1568.21	418.061	1223.84	1564.38	307.237	1048.26	1531.11	414.246	1057.33	1523.21	357.795	1056.16	1432.34	353.932	971.498	1152.26	339.776	1174.67	1337.39	328.491	1237.29	1144.34	438.633	966.841	1225.89	166.631	1104.01	1362.32	96.4374	1030.63	1126.92	93.2063	1015.12	1053.27	56.0127	1072.18	890.517	97.4694	1090.71	809.183	40.5163	1044.86	805.206	54.5176	1091.88	738.497
1195	0	297.435	1226.59	1566.59	415.27	1233.59	1563.12	305.563	1057.47	1529.14	412.727	1067.02	1521.42	356.093	1066.23	1430.66	352.077	981.173	1150.7	338.097	1184.6	1335.75	327.533	1247.06	1142.59	436.672	976.661	1224.37	164.333	1114.12	1360.49	94.9403	1040.79	1124.83	91.9303	1024.69	1051.21	55.0089	1080.48	887.998	96.803	1098.18	806.654	39.3322	1052.45	803.167	54.0769	1098.24	735.605
1196	0	294.627	1235.64	1565.05	412.461	1243.25	1561.71	303.853	1066.69	1527.07	410.908	1076.92	1519.63	353.845	1075.89	1429.09	350.139	990.634	1149.13	336.312	1194.52	1334.22	326.57	1256.86	1140.99	434.611	986.47	1222.73	162.681	1124.42	1358.41	93.2823	1051.39	1122.6	90.6538	1034.7	1049.1	54.0244	1089.01	885.474	96.0528	1105.65	803.899	38.1229	1060.27	800.808	54.0108	1104.87	732.606
1197	0	291.849	1244.76	1563.85	409.46	1252.83	1560.48	301.834	1075.93	1525.29	409.088	1086.62	1517.94	351.341	1085.39	1427.76	348.48	1001.31	1147.54	334.242	1204.33	1332.74	325.421	1266.68	1139.53	432.529	996.272	1221.35	160.06	1134.63	1356.82	91.5531	1062.16	1120.51	89.1742	1044.97	1047.23	52.9853	1098.01	883.174	95.3025	1113.28	801.266	36.8983	1068.67	798.754	53.5383	1111.89	729.884
1198	0	289.021	1253.84	1562.67	406.938	1262.36	1559.75	299.659	1085.23	1523.75	406.761	1096.27	1516.56	348.6	1094.87	1426.54	346.018	1011.17	1146.3	332.103	1214.31	1331.65	324.165	1276.75	1138.12	430.296	1006.32	1220.11	158.181	1144.92	1355	89.8052	1073.26	1118.53	87.5108	1055.5	1045.31	51.9	1107.26	880.937	94.4552	1121.46	799.05	35.5027	1077.36	796.81	52.945	1119.15	727.374
1199	0	286.127	1262.9	1561.66	403.964	1271.87	1558.76	297.251	1094.49	1522.21	404.509	1105.92	1515.29	346.153	1104.64	1425.2	343.883	1021.4	1144.75	329.913	1224.32	1330.66	322.833	1286.84	1137.17	428.092	1016.37	1218.83	155.6	1155.07	1353.44	87.5714	1084.37	1116.71	85.9329	1066.32	1043.59	50.7656	1116.87	878.857	93.6619	1129.95	796.861	33.9476	1086.52	795.006	52.3452	1126.86	724.987
1200	0	283.228	1272.07	1560.93	401.187	1281.19	1558.31	294.814	1103.74	1520.82	401.548	1115.54	1513.93	343.463	1114.23	1424.13	341.807	1031.82	1143.58	327.535	1234.48	1329.76	321.06	1297.29	1136.3	425.716	1026.66	1217.48	153.649	1165.22	1351.92	85.6848	1095.51	1114.8	84.2745	1077.09	1041.66	49.6468	1126.87	876.808	92.7834	1138.85	794.651	32.4345	1096.08	793.227	51.7939	1135.05	722.592
1201	0	280.429	1281.28	1560.69	398.26	1290.51	1558.1	292.21	1113.06	1519.93	399.184	1124.94	1513.19	340.73	1123.83	1423.43	339.522	1042.35	1142.49	325.051	1244.52	1329.2	319.231	1307.97	1135.89	423.406	1036.97	1216.63	150.605	1175.38	1351.08	83.7293	1106.77	1113.07	82.596	1088.2	1040.09	48.5012	1137.24	874.993	91.8463	1148	792.672	30.8773	1106.15	791.845	51.249	1143.81	720.606
1202	0	277.565	1290.54	1560.76	395.475	1299.91	1558.4	289.365	1122.53	1519.34	396.523	1134.56	1512.78	337.947	1133.53	1423.09	337.473	1052.67	1142.06	322.571	1254.84	1329.07	317.191	1318.82	1135.79	421.147	1047.34	1216.3	148.158	1185.69	1350.22	81.8399	1118.26	1111.85	80.9558	1099.55	1038.94	47.3072	1148.03	873.477	90.742	1157.3	791.131	29.2761	1116.68	790.702	50.6624	1153.03	718.855
1203	0	274.673	1299.66	1561.11	392.414	1309.13	1558.85	286.7	1131.85	1518.88	393.489	1144.07	1512.51	335.379	1143.24	1422.99	335.584	1063.09	1141.69	320.132	1265.18	1329.36	315.169	1329.77	1136.24	419.054	1057.86	1216.09	145.562	1195.93	1349.93	79.798	1129.64	1110.9	79.3254	1110.91	1037.96	46.0889	1158.89	872.282	90.0393	1168.07	789.857	27.7036	1127.54	789.638	49.8771	1162.63	717.583
1204	0	271.786	1308.77	1561.86	389.572	1318.35	1559.88	283.927	1141.26	1518.73	391.026	1153.39	1512.52	332.383	1152.88	1423.23	333.646	1073.62	1141.56	317.536	1275.27	1330.03	312.956	1340.66	1137.07	417.045	1067.94	1216.45	142.864	1206.15	1349.92	77.7316	1140.93	1110.28	77.6423	1122.52	1037.35	44.981	1170.21	871.519	89.0179	1177.56	788.942	26.0785	1138.67	789.096	49.0252	1172.91	716.658
1205	0	268.738	1317.92	1563.18	386.485	1327.41	1561.44	281.073	1150.63	1518.94	388.059	1162.84	1512.97	329.838	1162.82	1424.06	331.645	1084.96	1141.86	314.889	1285.41	1331.18	310.903	1351.62	1138.34	415.029	1078.54	1217.24	140.759	1216.38	1350.17	75.635	1152.55	1110.18	75.9691	1134.42	1036.99	43.7445	1181.94	871.241	88.0259	1189.22	788.684	24.5558	1150.38	789.082	48.0527	1183.68	716.357
1206	0	265.719	1326.89	1564.77	383.622	1336.49	1563.43	278.472	1160.1	1519.49	385.172	1172.32	1513.86	327.137	1172.68	1425.09	329.84	1095.03	1143	312.514	1295.55	1332.69	308.871	1362.33	1139.95	413.112	1089.13	1218.32	137.875	1226.66	1351.21	73.7306	1164.22	1110.53	74.2789	1146.41	1037.36	42.4498	1193.89	871.543	87.1401	1198.71	788.982	22.9572	1162.51	789.522	47.0848	1195.12	716.48
1207	0	262.729	1335.73	1566.48	380.297	1345.55	1565.34	275.608	1169.07	1520.18	382.354	1181.6	1514.87	324.373	1182.47	1426.44	327.982	1104.56	1144.43	310.053	1305.68	1334.55	306.991	1373.06	1142.01	411.049	1099.32	1219.91	135.786	1236.87	1352.25	71.8803	1175.86	1111.07	72.6446	1158.36	1037.83	41.1075	1206.2	872.213	85.7899	1210.17	789.456	21.485	1174.8	790.254	45.8638	1206.99	717.175
1208	0	259.519	1344.36	1568.52	377.165	1354.33	1567.58	272.96	1178.09	1521.25	379.964	1190.61	1516.31	321.693	1192.06	1428.09	326.122	1114.86	1145.96	307.618	1315.56	1336.69	305.046	1383.63	1144.32	409.2	1109.48	1221.76	132.867	1247	1353.87	69.9372	1187.48	1111.98	71.0022	1170.29	1038.64	39.727	1218.69	873.436	84.8417	1222.77	790.651	19.8242	1187.74	791.362	44.7182	1219.44	718.298
1209	0	256.386	1352.85	1570.52	374.266	1363.28	1570.09	270.512	1186.94	1522.61	377.549	1199.93	1518.01	319.582	1201.85	1429.97	324.093	1125.19	1147.86	305.321	1325.33	1338.96	303.334	1394.01	1146.89	407.221	1119.68	1223.72	131.019	1257.22	1355.41	68.1218	1199.34	1113.25	69.2256	1182.21	1039.96	38.3076	1231.48	874.982	83.4884	1235.51	792.413	18.1315	1201.08	792.874	43.398	1232.48	719.543
1210	0	253.485	1361.24	1572.5	371.241	1372.07	1572.26	268.035	1195.71	1524.01	374.748	1208.97	1519.55	317.144	1211.33	1431.76	322.218	1135.41	1149.67	303.167	1335.1	1341.32	301.807	1403.89	1149.34	405.453	1129.68	1225.59	128.773	1267.17	1357.23	66.3232	1211.05	1114.63	67.4219	1194.26	1041.34	36.6819	1244.7	876.675	82.4214	1248.88	794.226	16.4845	1214.69	794.441	41.6536	1246.17	721.351
1211	0	250.667	1369.65	1574.32	368.352	1380.78	1574.49	265.666	1204.12	1525.44	372.653	1217.66	1521.43	314.888	1220.64	1433.44	320.32	1146.12	1150.95	301.216	1344.76	1343.45	300.387	1414.33	1151.88	403.445	1139.58	1227.38	127.011	1276.97	1358.88	64.5511	1222.68	1115.9	65.5596	1206.23	1042.64	35.2049	1257.95	878.389	80.9839	1262.79	795.801	14.8782	1228.76	795.997	40.4313	1260.32	722.774
1212	0	247.942	1377.94	1576.1	365.425	1389.39	1576.58	263.591	1212.56	1526.87	370.324	1226.48	1523.04	312.558	1229.66	1435.15	318.271	1155.38	1152.76	299.218	1354.17	1345.74	298.888	1424.29	1154.61	401.494	1149.19	1229.19	124.693	1286.71	1360.98	62.7145	1234.16	1117.28	63.6481	1218.14	1044.15	33.5145	1271.68	880.296	79.0487	1276.91	797.709	13.1783	1243.17	797.565	38.7171	1275.2	724.526
1213	0	245.325	1386.01	1577.83	362.788	1397.83	1578.66	261.558	1220.85	1528.2	368.267	1235.2	1524.73	310.4	1238.64	1436.83	316.296	1165.21	1154.29	297.356	1363.56	1347.91	297.762	1434.2	1157.14	399.598	1158.79	1230.79	122.239	1296.44	1362.84	60.6203	1245.63	1118.84	61.6442	1230.08	1045.65	31.8305	1285.63	882.033	77.4388	1292.05	799.684	11.5239	1257.91	799.192	37.2256	1290.53	726.279
1214	0	242.781	1393.79	1579.56	360.204	1406.1	1580.63	259.797	1229.06	1529.27	366.655	1243.68	1526.21	308.475	1247.51	1438.15	314.136	1175.35	1155.33	295.6	1372.67	1349.91	296.571	1444.03	1159.46	397.64	1168.23	1232.07	120.389	1306.13	1364.58	58.6796	1257.09	1120.2	59.4934	1242.07	1046.85	29.8624	1299.46	883.928	75.2924	1307.19	801.665	9.65193	1272.85	800.739	35.5317	1306.18	728.15
1215	0	240.529	1401.63	1581.27	357.849	1414.25	1582.54	258.106	1237.19	1530.13	364.8	1251.93	1527.33	306.498	1256.24	1439.4	312.089	1184.17	1156.67	294.009	1381.77	1351.92	295.563	1453.5	1161.8	395.703	1177.41	1233.27	118.568	1315.7	1366.23	56.6096	1268.41	1121.51	57.2394	1253.97	1047.93	28.1338	1313.6	885.792	73.8517	1321.79	803.463	8.42589	1287.83	802.084	33.8243	1322.25	730.172
1216	0	238.397	1409.4	1582.92	355.694	1422.41	1584.43	256.506	1245.27	1530.92	363.172	1260.63	1528.5	304.545	1264.94	1440.67	310.077	1193.42	1157.68	292.572	1390.97	1353.73	294.634	1463.1	1163.94	393.56	1186.39	1234.43	116.868	1325.42	1367.78	54.3214	1279.78	1122.82	55.0566	1265.94	1049	26.134	1327.83	887.619	71.6521	1338.07	805.729	6.48117	1303.31	803.461	32.0981	1338.92	732.16
1217	0	236.323	1417.07	1584.51	353.701	1430.48	1586.26	255.018	1253.33	1531.67	361.607	1269.03	1529.4	302.719	1273.73	1441.86	307.985	1202.78	1159.1	291.23	1400.1	1355.33	293.824	1472.27	1165.55	391.369	1195.36	1235.57	115.257	1335.08	1369.16	52.1923	1291.09	1124.12	52.6677	1278.08	1050.11	24.2922	1342.14	889.278	70.1729	1354.43	808.018	5.01951	1319.18	804.686	30.3147	1356.08	734.349
1218	0	234.502	1424.62	1586.01	351.87	1438.37	1587.89	253.661	1261.24	1532.21	360.307	1277.03	1530.11	301.027	1282.51	1442.97	305.512	1211.35	1160.09	289.955	1408.89	1356.7	293.147	1481.49	1166.93	389.269	1204.04	1236.63	113.64	1344.85	1370.58	49.955	1302.27	1125.28	50.3676	1290.18	1050.98	22.2865	1356.68	891.001	68.2197	1370.2	810.105	3.55201	1334.93	805.854	28.5542	1373.25	736.593
1219	0	232.952	1432.26	1587.4	350.129	1446.17	1589.18	252.367	1269.12	1532.7	358.75	1285.2	1530.66	299.363	1291.25	1444.1	303.536	1220.34	1160.86	288.772	1417.7	1358.05	292.536	1490.44	1168.06	387.103	1212.48	1237.71	112.576	1354.68	1371.6	47.7275	1313.54	1126.26	47.976	1302.29	1051.7	20.6755	1371.24	892.636	66.4123	1385.96	812.065	2.07824	1350.78	807.08	27.0825	1391.02	738.747
1220	0	231.541	1440.08	1588.71	348.813	1453.98	1590.57	250.954	1277.11	1533.32	357.385	1293.38	1531.01	297.672	1299.89	1445.26	301.085	1228.69	1162.16	287.672	1426.43	1359.3	291.907	1499.26	1168.99	384.955	1220.93	1238.93	111.313	1364.47	1372.68	45.6439	1324.89	1127.44	45.5484	1314.34	1052.67	18.7244	1385.72	894.396	65.1117	1402.42	814.375	0.538379	1366.87	808.424	25.5	1408.97	741.383
1221	0	230.373	1447.89	1589.87	347.628	1461.74	1591.78	249.701	1285.09	1533.94	355.987	1301.61	1531.66	296.037	1308.53	1446.39	298.96	1237.11	1163.32	286.633	1435.04	1360.47	291.346	1507.78	1169.65	382.905	1229.13	1240.07	109.698	1374.11	1373.84	43.4939	1336.17	1128.67	43.095	1326.51	1053.65	17.1744	1400.72	896.122	63.8544	1418.23	816.558	-0.842884	1383	809.867	24.1196	1427.16	744.06
1222	0	229.323	1455.72	1591.12	346.621	1469.4	1592.93	248.403	1293.09	1534.46	354.863	1309.13	1532.23	294.507	1317.06	1447.41	296.906	1246.18	1164.09	285.77	1443.7	1361.72	290.822	1516.22	1170.4	380.882	1237.19	1241.15	109.288	1383.7	1374.58	41.3567	1347.32	1129.73	40.5685	1338.59	1054.64	15.6524	1415.33	898.055	62.1804	1434.11	818.842	-2.06888	1399.25	811.278	22.877	1445.39	746.95
1223	0	228.414	1463.62	1592.47	345.866	1477.05	1594.08	247.024	1301.22	1535.14	353.507	1317.03	1532.74	292.97	1325.49	1448.54	294.718	1253.71	1165.49	284.807	1452.11	1362.95	290.312	1524.73	1171.26	378.91	1245.19	1242.36	107.501	1393.14	1375.93	39.2712	1358.57	1130.98	38.276	1350.65	1055.53	14.0231	1429.93	900.075	60.6711	1450.28	821.575	-3.03912	1415.44	812.886	21.4929	1463.59	750.258
1224	0	227.638	1471.63	1593.73	345.138	1484.67	1595.15	245.621	1309.39	1535.78	352.201	1324.92	1533.25	291.472	1333.93	1449.68	293.069	1262	1166.76	283.73	1460.43	1364.05	289.734	1533	1172.12	377.031	1253.13	1243.7	106.317	1402.46	1377.04	37.0237	1369.67	1132.28	35.9108	1362.72	1056.57	12.5788	1444.68	902.306	60.0336	1466.01	824.354	-4.20609	1431.73	814.815	20.243	1481.93	753.71
1225	0	226.936	1479.75	1594.94	344.511	1492.25	1596.06	244.231	1317.6	1536.31	350.79	1332.6	1533.59	290.014	1342.22	1450.68	291.243	1270.3	1167.96	282.918	1468.82	1365.24	289.198	1541.23	1173	375.188	1260.94	1244.8	105.505	1411.78	1378.05	35.2139	1380.88	1133.39	33.6514	1374.85	1057.66	11.447	1459.54	904.454	58.6702	1482.19	827.324	-5.11407	1448.15	816.681	19.026	1500.15	757.358
1226	0	226.42	1487.83	1595.91	344.037	1499.76	1596.99	242.786	1325.8	1536.78	349.457	1340.36	1533.94	288.547	1350.32	1451.67	289.357	1277.76	1168.88	281.976	1476.93	1366.31	288.403	1549.29	1174.04	373.403	1268.87	1245.86	104.374	1420.83	1379.11	33.3788	1392.18	1134.54	31.4442	1386.8	1058.77	10.2522	1474.24	906.853	57.6653	1498.08	830.159	-6.36923	1464.46	818.704	18.0222	1518.37	761.194
1227	0	225.984	1496.06	1596.99	343.627	1507.2	1597.93	241.212	1334.07	1537.36	348.043	1347.93	1534.4	287.098	1358.5	1452.64	287.551	1286.52	1169.74	280.755	1485.03	1367.3	287.67	1557.23	1175.06	371.722	1276.69	1247	103.636	1429.73	1380.2	31.6151	1403.35	1135.71	29.2867	1398.67	1059.89	9.14802	1488.77	909.354	56.9281	1514.28	833.36	-7.26897	1480.75	820.983	17.0477	1536.41	765.132
1228	0	225.604	1504.24	1598.01	343.342	1514.6	1598.78	239.62	1342.3	1537.85	346.545	1355.56	1534.63	285.777	1366.61	1453.5	285.932	1293.87	1170.95	279.868	1493.1	1368.27	286.874	1565.19	1176.08	370.099	1284.47	1247.97	102.145	1438.56	1381.47	29.9358	1414.47	1136.95	27.1819	1410.41	1061	8.0249	1503.23	911.899	55.7881	1530.15	836.538	-8.13384	1496.99	823.397	16.2261	1554.29	769.211
1229	0	225.147	1512.33	1598.99	343.006	1522.06	1599.48	238.11	1350.58	1538.2	345.006	1363.18	1534.6	284.44	1374.67	1454.13	284.568	1301.75	1171.61	278.974	1501.15	1369.19	286.04	1573.11	1177.18	368.387	1292.52	1248.64	100.908	1447.16	1382.57	28.2544	1425.53	1138.12	25.3474	1422.11	1062.01	7.04932	1518.02	914.458	55.1459	1546.18	840.051	-8.58532	1513.25	825.718	15.4198	1571.99	773.211
1230	0	224.602	1520.4	1599.8	342.67	1529.46	1600.13	236.549	1358.74	1538.52	343.533	1370.63	1534.86	283.319	1382.68	1454.77	283.007	1309.6	1172.25	278.282	1509.38	1370.16	285.221	1581.03	1178.23	367.155	1300.12	1249.37	99.983	1455.77	1383.52	26.8527	1436.57	1139.17	23.4381	1433.65	1063.05	6.32622	1532.44	917.009	54.4677	1561.84	843.416	-9.2167	1529.24	828.135	14.7887	1589.36	777.357
1231	0	224.321	1528.53	1600.51	342.28	1536.83	1600.73	235.031	1366.85	1538.89	342.034	1378.1	1535.21	282.042	1390.65	1455.4	281.784	1317.96	1172.75	277.311	1517.37	1370.9	284.403	1589.11	1179.17	365.734	1307.97	1250.09	98.8112	1464.1	1384.43	25.4714	1447.59	1140.18	21.7256	1445.29	1064.02	5.42174	1546.78	919.686	53.7871	1577.2	846.633	-10.2334	1545.33	830.651	14.2413	1606.57	781.44
1232	0	223.764	1536.49	1601.05	341.842	1544.15	1601.16	233.544	1374.89	1539.21	340.556	1385.64	1535.31	281.006	1398.71	1455.93	280.582	1325.35	1173.49	276.517	1525.42	1371.51	283.546	1596.85	1179.71	364.452	1315.93	1250.67	98.0182	1472.65	1385.1	23.9856	1458.36	1141.11	20.0837	1456.82	1064.88	4.6276	1560.81	922.157	53.2318	1592.54	849.915	-10.4833	1561.02	833.185	13.6457	1623.47	785.37
1233	0	223.168	1544.52	1601.45	341.246	1551.51	1601.48	232.169	1382.93	1539.26	339.24	1393.21	1535.39	279.987	1406.78	1456.2	279.704	1332.88	1173.87	275.728	1533.53	1372.03	282.881	1605.07	1180.32	363.43	1323.42	1251.11	97.1578	1481.06	1385.61	22.613	1468.91	1141.71	18.6689	1468.28	1065.42	3.9386	1574.8	924.519	52.712	1607.67	852.944	-11.0412	1576.79	835.425	13.3896	1640.17	789.241
1234	0	222.645	1552.61	1601.77	340.7	1559.05	1601.85	230.86	1391.01	1539.31	338.053	1400.7	1535.62	279.082	1414.86	1456.57	278.57	1341.03	1174.32	274.911	1541.48	1372.42	282.023	1612.78	1180.62	362.431	1331.25	1251.6	96.3369	1489.46	1386.08	21.3026	1479.44	1142.32	17.2978	1479.7	1065.98	3.31453	1588.81	926.782	52.3127	1622.97	856.103	-11.4505	1592.22	837.716	12.9151	1656.64	792.993
1235	0	222.026	1560.62	1601.94	340.058	1566.55	1602.18	229.6	1399.11	1539.35	336.726	1408.27	1535.8	278.081	1422.88	1456.91	277.657	1348.44	1174.87	274.213	1549.55	1372.69	281.331	1620.57	1180.78	361.455	1339.06	1252.07	95.5015	1497.8	1386.4	20.2757	1489.97	1142.84	15.954	1491.08	1066.57	2.71639	1602.42	929.007	52.0394	1637.7	859.077	-11.5051	1607.35	840.001	12.7597	1672.66	796.604
1236	0	221.461	1568.67	1601.9	339.589	1574.2	1602.33	228.469	1407.1	1539.18	335.632	1415.9	1535.59	277.441	1431.11	1457.01	276.703	1356.21	1175.23	273.64	1557.7	1372.68	280.534	1628.3	1180.58	360.583	1346.81	1252.35	94.8386	1506.12	1386.54	19.1283	1500.11	1143.25	14.7769	1502.32	1066.95	2.10827	1615.81	930.988	51.7054	1652.25	861.775	-11.8824	1622.31	842.027	12.6004	1688.5	800.079
1237	0	220.729	1576.58	1601.9	339.02	1581.81	1602.3	227.448	1415.28	1538.79	334.778	1423.63	1535.31	276.677	1439.22	1457.06	275.828	1363.9	1175.32	273.055	1565.92	1372.42	279.852	1636.21	1180.36	359.757	1354.53	1252.52	94.0998	1514.45	1386.66	18.1245	1510.21	1143.42	13.8788	1513.57	1067.11	1.87747	1629.25	932.836	51.6576	1666.86	864.616	-11.8492	1637.01	843.982	12.6493	1703.93	803.331
1238	0	220.262	1584.63	1601.82	338.568	1589.4	1602.39	226.499	1423.39	1538.39	334.002	1431.36	1535.06	275.923	1447.66	1457.2	275.079	1371.65	1175.57	272.426	1574.09	1372.19	279.237	1644.05	1180.21	359.056	1362.34	1252.87	93.3981	1522.7	1386.71	17.2745	1520.23	1143.56	12.9366	1524.71	1067.32	1.42822	1642.19	934.774	51.6938	1681.21	867.302	-11.7006	1651.43	845.92	12.7125	1719.08	806.62
1239	0	219.707	1592.55	1601.73	338.267	1597.17	1602.63	225.547	1431.57	1538.03	333.01	1439.23	1534.82	275.415	1455.98	1457.2	274.331	1379.19	1175.84	271.774	1582.27	1371.77	278.535	1651.79	1179.81	358.433	1370.3	1253.08	92.8082	1531	1386.45	16.5847	1530.13	1143.81	12.1799	1535.72	1067.53	1.14375	1655.15	936.453	51.5249	1694.84	869.801	-11.8602	1665.69	847.761	12.748	1733.86	809.676
1240	0	219.319	1600.64	1601.56	337.823	1604.84	1602.48	224.712	1439.72	1537.46	332.279	1447.12	1534.25	274.92	1464.39	1457.02	273.789	1386.97	1175.83	271.286	1590.51	1371.13	278.046	1659.82	1179.39	357.777	1378.35	1253.06	92.2417	1539.3	1386.14	15.8628	1539.76	1143.75	11.4414	1546.62	1067.45	1.02302	1667.77	938.029	51.6009	1708.33	872.091	-11.9495	1679.39	849.338	12.891	1748.4	812.547
1241	0	218.915	1608.77	1601.1	337.418	1612.56	1602.05	224.072	1447.87	1536.6	331.658	1454.95	1533.56	274.452	1472.8	1456.64	273.27	1394.72	1175.71	270.878	1598.92	1370.23	277.731	1667.6	1178.82	357.408	1386.05	1253	91.7168	1547.51	1385.82	15.2686	1549.42	1143.44	11.0752	1557.4	1067.19	1.03725	1680.06	939.323	51.6765	1721.46	874.041	-11.0726	1693.15	850.804	13.1112	1762.36	815.073
1242	0	218.669	1616.87	1600.69	337.315	1620.36	1601.82	223.322	1456.15	1536.04	331.043	1462.95	1533.07	273.945	1481.2	1456.37	272.826	1402.48	1175.6	270.555	1607.38	1369.41	277.386	1675.6	1178.22	357.038	1394.16	1252.92	91.3344	1555.73	1385.12	14.8611	1558.95	1143.26	10.388	1567.97	1067.17	1.06109	1692.28	940.663	51.839	1734.47	876.007	-11.1212	1706.33	852.173	13.4251	1776.08	817.647
1243	0	218.59	1625.11	1600.17	337.13	1628.17	1601.39	223.019	1464.41	1535.17	330.539	1471	1532.43	273.652	1489.76	1456.03	272.391	1410.27	1175.37	270.028	1615.71	1368.39	276.738	1683.18	1177.23	356.747	1402.21	1252.71	91.0551	1563.97	1384.54	14.4897	1568.44	1142.79	10.1093	1578.6	1066.88	1.24262	1704.41	941.679	52.2339	1747.27	877.767	-10.8668	1719.2	853.425	13.8305	1789.54	819.773
1244	0	218.66	1633.4	1599.52	336.977	1636.19	1600.55	222.666	1472.74	1534.21	330.198	1479	1531.64	273.525	1498.27	1455.34	272.284	1418.18	1174.9	269.791	1624.12	1367.4	276.331	1691.31	1176.23	356.554	1410.36	1252.24	90.8029	1572.16	1383.71	14.4543	1577.94	1142.2	9.82428	1588.93	1066.36	1.42254	1715.97	942.492	52.5697	1759.48	879.002	-10.3866	1731.88	854.258	14.203	1802.54	821.653
1245	0	218.621	1641.57	1598.64	337.02	1644.22	1599.75	222.247	1480.98	1533.44	329.836	1486.88	1530.8	273.353	1506.73	1454.62	272.385	1426.3	1174.32	269.596	1632.68	1366.21	275.966	1699.25	1175.21	356.47	1418.61	1251.69	90.534	1580.45	1382.8	14.2131	1587.05	1141.32	9.74444	1599.32	1065.8	1.86606	1727.66	943.183	53.1281	1771.65	880.237	-10.0071	1744.18	854.976	14.7462	1815.31	823.349
1246	0	218.728	1649.98	1597.76	337.219	1652.36	1598.94	222.027	1489.39	1532.56	329.74	1495.08	1530.13	273.332	1515.35	1453.94	272.079	1434.17	1173.76	269.344	1641.04	1365	275.454	1706.06	1173.44	356.382	1426.91	1251.13	90.4246	1588.75	1381.93	14.2556	1596.35	1140.63	9.55041	1609.56	1065.29	2.17067	1739	943.609	53.6251	1783.41	881.161	-9.64036	1756.13	855.698	15.3892	1827.79	824.612
1247	0	219.083	1658.4	1596.78	337.327	1660.41	1598.04	221.965	1497.8	1531.68	329.631	1503.27	1528.98	273.497	1523.98	1453.1	272.106	1442.22	1173.12	269.29	1649.56	1363.81	275.111	1714.32	1172.31	356.461	1435.18	1250.38	90.4133	1597.11	1380.81	14.2173	1605.3	1139.65	9.48571	1619.59	1064.58	2.57491	1750.04	943.746	54.2151	1794.79	881.799	-9.20406	1767.78	856.119	16.0639	1839.68	825.862
1248	0	219.106	1666.73	1595.92	337.849	1668.77	1597.15	222.072	1506.24	1530.59	329.592	1511.59	1527.87	273.619	1532.49	1452.13	272.327	1450.35	1172.29	269.425	1658.11	1362.52	274.86	1722.32	1170.96	356.731	1443.46	1249.67	90.431	1605.37	1379.95	14.3825	1614.38	1138.78	9.46631	1629.39	1063.83	2.93921	1760.55	943.994	54.8917	1805.86	882.443	-8.28907	1779.47	856.207	16.8959	1851.32	826.742
1249	0	219.515	1675.26	1595.05	338.123	1677.02	1596.17	222.134	1514.7	1529.5	329.866	1519.86	1526.9	273.933	1541.14	1451.1	272.467	1458.38	1171.36	269.348	1666.45	1361.34	274.719	1730.54	1169.6	356.896	1451.89	1248.73	90.641	1613.75	1378.84	14.4694	1623.24	1137.73	9.63057	1639.12	1062.99	3.4201	1771.21	943.962	55.5499	1816.49	882.68	-7.64957	1790.43	856.378	17.7215	1862.54	827.399
1250	0	220.123	1683.69	1593.94	338.709	1685.39	1595.14	222.424	1523.37	1528.43	330.059	1528.38	1525.66	274.278	1549.83	1450.1	272.704	1466.58	1170.61	269.622	1675.1	1359.92	274.569	1738.67	1168.1	357.153	1460.41	1247.75	90.7156	1622.12	1377.83	14.5642	1632.09	1136.81	9.79144	1648.82	1062.15	4.04588	1781.42	943.731	56.4412	1827.02	882.806	-7.06134	1801.12	856.232	18.7349	1873.45	827.726
1251	0	220.632	1692.39	1592.77	339.213	1693.84	1593.91	222.73	1531.9	1527.05	330.443	1536.86	1524.34	274.671	1558.61	1448.87	272.797	1474.59	1169.5	269.847	1683.67	1358.41	274.281	1746.85	1166.44	357.462	1468.91	1246.58	91.225	1630.65	1376.51	15.0337	1641	1135.63	9.97235	1658.34	1061.16	4.75503	1791.42	943.268	57.3911	1837.28	882.624	-6.22552	1811.46	855.859	19.6323	1883.84	827.656
1252	0	221.209	1700.98	1591.48	339.88	1702.4	1592.67	223.348	1540.63	1525.68	330.909	1545.33	1522.94	275.17	1567.27	1447.57	273.073	1482.66	1168.28	270.142	1692.33	1356.95	274.382	1755.46	1164.78	357.772	1477.37	1245.39	91.633	1639.15	1375.21	15.3775	1649.68	1134.35	10.3791	1667.59	1060.11	5.47935	1801.2	942.611	58.244	1847.01	882.055	-5.42368	1821.6	855.193	20.7456	1893.94	827.357
1253	0	222.133	1709.61	1590.3	340.485	1710.79	1591.4	224.003	1549.38	1524.38	331.588	1554.07	1521.62	275.748	1576.14	1446.4	273.312	1490.87	1167.14	270.6	1701.04	1355.44	274.471	1763.99	1163.2	358.177	1486.05	1244.06	92.2197	1647.72	1373.97	15.9134	1658.6	1133.28	10.7944	1676.79	1058.97	6.40972	1810.76	941.864	59.2043	1856.44	881.453	-4.47824	1831.3	854.537	21.8667	1903.61	826.729
1254	0	223.063	1718.35	1589.28	341.542	1719.61	1590.34	224.909	1558.15	1523.09	332.379	1562.77	1520.19	276.404	1585.11	1445.21	273.72	1499.38	1166.06	271.16	1709.83	1353.98	274.624	1772.52	1161.61	358.51	1494.73	1242.71	92.6818	1656.34	1372.78	16.3367	1667.23	1132	11.4132	1685.76	1057.7	7.21457	1820.04	940.826	60.1702	1865.57	880.438	-3.68826	1840.76	853.531	23.039	1912.92	825.908
1255	0	223.747	1727.03	1588.14	342.095	1728.06	1588.8	225.879	1566.91	1521.7	333.365	1571.79	1518.85	277.299	1593.94	1443.82	274.189	1508.05	1164.86	271.663	1718.51	1352.45	274.982	1781.3	1159.95	358.983	1503.47	1241.45	93.3884	1665.09	1371.6	16.9485	1676.03	1130.91	11.8826	1694.56	1056.54	8.06764	1828.92	939.876	61.1979	1874.36	879.371	-2.68683	1849.61	852.464	24.1528	1921.81	824.734
1256	0	224.964	1735.78	1586.98	343.366	1737.01	1587.67	227.037	1575.78	1520.45	334.291	1580.71	1517.35	278.082	1603.02	1442.68	274.685	1516.81	1163.53	272.363	1727.5	1351.17	275.119	1789.8	1158.43	359.369	1512.25	1240.1	93.8776	1673.86	1370.49	17.6586	1684.66	1129.6	12.5045	1703.27	1055.41	8.92526	1837.59	938.546	62.0479	1882.68	877.968	-1.88405	1858.19	851.157	25.2781	1930.2	823.421
1257	0	226.223	1744.55	1585.83	344.666	1745.93	1586.51	228.119	1584.64	1519.24	335.511	1589.65	1516.05	278.679	1611.78	1441.55	274.925	1525.46	1162.59	273.121	1736.33	1349.7	275.634	1798.71	1157.08	359.838	1521.05	1238.88	94.768	1682.91	1369.35	18.1243	1693.28	1128.7	13.2072	1711.73	1054.28	9.92237	1845.99	937.077	63.4372	1890.99	876.602	-0.835289	1866.62	849.695	26.593	1938.41	821.837
1258	0	227.397	1753.48	1584.95	345.862	1754.84	1585.13	229.295	1593.44	1518.24	336.784	1598.66	1514.75	279.599	1620.89	1440.39	275.418	1534.37	1161.52	274.029	1745.48	1348.43	275.873	1807.52	1155.61	360.304	1529.9	1237.64	95.5371	1691.98	1368.36	18.9363	1701.93	1127.59	13.8125	1720.17	1053.2	10.926	1853.92	935.516	64.3863	1898.42	874.711	0.090152	1874.33	848.124	27.7275	1945.94	819.955
1259	0	229.377	1762.43	1583.87	347.498	1764.42	1584.13	230.809	1602.52	1517.08	338.166	1607.72	1513.49	280.467	1630.24	1439.3	275.755	1543.25	1160.37	274.833	1754.47	1347.23	276.479	1816.71	1154.33	360.77	1538.94	1236.37	96.473	1701.16	1367.41	19.7804	1710.4	1126.57	14.7042	1728.43	1052.04	11.9069	1861.57	933.836	65.4786	1905.76	872.828	1.08111	1881.62	846.15	29.0012	1953.03	817.836
1260	0	230.643	1771.49	1583.01	349.067	1773.58	1583.07	232.249	1611.6	1516.12	339.643	1616.66	1512.19	281.618	1639.26	1438.07	276.181	1552.11	1159.19	275.69	1763.47	1346.1	276.905	1825.61	1153.24	361.077	1547.89	1235.14	97.3511	1710.45	1366.69	20.5887	1718.87	1125.48	15.463	1736.7	1050.99	13.0711	1869.22	932.008	66.7151	1912.71	870.722	2.22882	1888.67	844.2	30.1271	1959.77	815.506
1261	0	232.31	1780.57	1582.35	350.626	1782.66	1582.02	233.825	1620.72	1515.46	341.113	1626.06	1511.32	282.65	1648.62	1437.17	276.62	1561.17	1158.4	276.84	1772.7	1345.12	277.258	1834.45	1151.99	361.624	1557.12	1234.07	98.2273	1719.87	1365.9	21.2249	1727.28	1124.93	16.1993	1744.63	1050.12	14.2358	1876.38	930.121	67.7884	1919.31	868.332	3.40474	1895.24	842.22	31.5536	1966.12	812.893
1262	0	233.991	1789.75	1581.6	352.306	1791.75	1580.95	235.265	1629.89	1514.61	342.68	1635.26	1510.22	283.76	1657.9	1436.24	277.085	1570.48	1157.48	277.91	1782.07	1344.22	278.181	1844.04	1151.03	361.946	1566.22	1232.9	99.246	1729.42	1365.33	22.2045	1735.87	1123.91	17.1051	1752.73	1049.15	15.1455	1883.32	928.01	69.1247	1925.73	865.928	4.40786	1901.59	839.961	32.8711	1972.1	810.097
1263	0	235.817	1799.04	1580.87	353.942	1800.79	1579.9	236.924	1639.15	1513.84	344.245	1644.6	1509.24	284.915	1667.21	1435.31	277.552	1579.78	1156.56	279.021	1791.38	1343.42	278.887	1853.52	1150.13	362.388	1575.4	1231.76	100.377	1739.2	1364.77	23.2701	1744.46	1123.25	18.1234	1760.64	1048.19	16.0953	1889.92	925.892	70.3263	1931.69	863.36	5.49269	1907.37	837.592	34.2512	1977.89	807.121
1264	0	237.705	1808.45	1580.26	356.1	1810.36	1579.15	238.516	1648.56	1513.31	345.819	1653.86	1508.39	285.976	1676.88	1434.66	277.919	1589.31	1155.74	280.224	1800.67	1342.85	279.823	1863.08	1149.52	362.838	1584.79	1230.8	101.513	1748.99	1364.21	24.167	1752.86	1122.58	19.1212	1768.45	1047.5	17.1727	1896.5	923.905	71.3795	1937.21	860.701	6.47927	1913.04	835.365	35.6453	1983.01	804.007
1265	0	239.65	1817.97	1579.78	358.413	1819.95	1578.55	240.136	1658.05	1512.91	347.57	1663.13	1507.71	287.158	1686.15	1433.98	278.551	1599.16	1155.09	281.584	1810.21	1342.22	281.028	1872.8	1148.84	363.387	1594.39	1229.83	102.711	1758.83	1363.84	25.1889	1761.37	1122.16	20.3599	1776.45	1046.95	18.0739	1902.97	921.658	72.6852	1942.62	857.797	7.47152	1918.52	832.924	37.0016	1987.67	800.456
1266	0	241.634	1827.47	1579.26	360.336	1829.32	1577.77	241.791	1667.55	1512.29	349.1	1672.37	1506.88	288.551	1695.56	1433.22	279.275	1609.08	1154.12	283.104	1819.86	1341.75	282.251	1882.92	1148.46	363.913	1604.43	1228.63	104.035	1768.79	1363.65	26.3504	1769.76	1121.84	21.4213	1783.93	1046.39	19.6118	1908.88	919.37	73.7265	1947.56	854.923	8.25417	1923.39	830.599	38.4897	1992.13	797.019
1267	0	243.564	1836.96	1578.87	362.145	1838.55	1576.95	243.591	1677.06	1511.68	350.88	1681.78	1506.21	289.948	1704.97	1432.47	279.777	1619.1	1153.19	284.466	1829.57	1341.48	283.471	1892.93	1148.28	364.693	1614.27	1227.49	105.358	1778.65	1363.52	27.6428	1778.37	1121.55	22.7928	1791.67	1045.78	20.6205	1914.8	917.221	74.9421	1952.39	852.051	8.74348	1928.26	828.255	39.5698	1996.11	793.416
1268	0	245.516	1846.49	1578.62	364.192	1847.92	1576.75	245.361	1686.54	1511.43	352.568	1691.17	1505.72	291.285	1714.52	1431.86	280.518	1629.34	1152.53	286.022	1839.33	1341.33	284.798	1903.23	1148.43	365.576	1624.12	1226.54	106.33	1788.58	1363.6	28.7542	1786.86	1121.36	24.1699	1799.11	1045.35	21.528	1920.4	915.214	75.5414	1956.31	848.933	9.62998	1932.63	826.198	40.6972	1999.67	789.899
1269	0	247.472	1856.01	1578.55	366.84	1858.01	1576.84	247.266	1696.14	1511.35	354.52	1701.1	1505.52	292.969	1724.15	1431.45	281.557	1639.82	1151.83	287.557	1849.13	1341.31	286.046	1913.87	1148.5	366.686	1634.35	1225.73	108.124	1798.45	1363.45	29.87	1795.56	1121.41	25.4661	1806.55	1045.2	22.4404	1925.83	913.337	76.9165	1960.77	846.225	10.0143	1936.9	824.014	41.7798	2002.88	786.303
1270	0	249.546	1865.51	1578.62	368.833	1867.52	1576.7	249.198	1705.71	1511.2	356.292	1710.49	1505.16	294.394	1733.72	1431.14	282.341	1650.31	1151.05	289.214	1859.08	1341.35	287.379	1924.56	1148.69	367.674	1644.56	1224.83	109.464	1808.48	1363.75	31.4954	1804.29	1121.28	27.029	1814.02	1045.03	23.5743	1931.09	911.289	77.9132	1964.89	843.425	11.0583	1941	821.999	42.6317	2005.94	782.766
1271	0	251.577	1875.08	1578.79	370.595	1876.85	1576.5	251.25	1715.35	1511.27	358.404	1720.17	1505.16	295.979	1743.69	1431.09	283.699	1660.98	1150.66	290.768	1869.08	1341.6	288.693	1935.57	1149	368.509	1654.83	1224.19	111.085	1818.64	1364.06	32.8926	1812.81	1121.59	28.5765	1821.13	1045.06	24.6853	1936.27	909.475	78.0911	1968.16	840.621	11.5471	1944.75	820.141	43.7297	2008.37	779.145
1272	0	253.612	1884.64	1579.21	372.738	1886.39	1576.83	253.205	1725.03	1511.56	360.487	1730.02	1505.26	297.655	1753.38	1431.06	284.657	1671.81	1150.57	292.455	1879.12	1341.97	289.725	1946.38	1149.56	369.461	1665.2	1223.75	112.59	1829.06	1364.65	34.3654	1821.54	1122.02	30.0788	1828.5	1045.46	25.5698	1940.94	907.917	79.5544	1971.53	838.033	12.0645	1948.1	818.512	44.5996	2010.74	775.863
1273	0	255.933	1894.25	1579.82	374.984	1896.18	1577.15	255.281	1734.68	1511.93	362.536	1739.69	1505.42	299.122	1763.19	1431.28	285.935	1682.63	1150.68	294.054	1889.24	1342.4	290.943	1957.64	1150.12	370.405	1675.45	1223.5	114.195	1839.39	1365.41	36.0259	1830.27	1122.47	31.5758	1835.65	1045.92	26.8198	1945.85	906.263	79.9755	1974.72	835.616	12.6398	1951.23	817.054	45.227	2012.53	772.745
1274	0	258.072	1903.86	1580.53	376.547	1905.38	1577.12	257.467	1744.31	1512.38	364.631	1749.61	1505.71	300.933	1773.25	1431.59	286.818	1693.33	1150.74	295.556	1899.43	1343.09	292.476	1969.14	1151.03	371.314	1685.81	1223.44	115.822	1849.85	1366.45	37.5385	1838.9	1123.17	33.3573	1843.03	1046.57	27.8001	1950.26	905.027	81.3142	1977.48	833.106	13.0797	1954.21	815.707	45.9554	2014.11	769.729
1275	0	260.759	1913.5	1581.41	378.764	1915.05	1577.77	259.515	1753.88	1513.15	366.716	1759.37	1506.18	302.333	1783.01	1432.24	288.139	1704.25	1151.36	296.948	1909.56	1344.23	293.346	1979.28	1151.88	372.306	1696.03	1223.69	117.231	1860.12	1367.57	38.8624	1847.46	1124.15	34.7638	1850.26	1047.58	28.9336	1954.72	903.98	81.9819	1980.19	831.284	13.6491	1956.75	814.816	46.3413	2015.4	767.112
1276	0	263.031	1923.08	1582.64	381.128	1924.67	1578.63	261.616	1763.69	1514.27	368.543	1768.81	1506.78	303.976	1792.92	1433.17	288.875	1714.79	1152.04	298.442	1919.65	1345.31	294.52	1990.41	1153.23	373.136	1706.19	1224.27	118.67	1870.56	1368.83	40.5343	1856.37	1125.5	36.3811	1857.44	1048.93	29.9599	1959.06	903.265	82.6126	1982.45	829.573	13.9793	1959.23	814.287	46.8421	2016.58	764.928
1277	0	265.034	1932.74	1584.06	383.392	1934.34	1579.39	263.633	1773.35	1515.28	370.773	1778.89	1507.36	305.394	1803.18	1434.22	289.918	1725.25	1153.05	299.972	1929.64	1346.47	295.706	2000.48	1154.38	374.159	1716.79	1224.86	120.201	1880.62	1370.49	41.9893	1865.15	1126.94	38.0042	1864.97	1050.24	31.1163	1963.19	902.846	83.2413	1984.71	828.187	14.2773	1961.71	813.925	47.382	2017.54	762.879
1278	0	267.41	1942.4	1585.51	385.719	1943.99	1580.37	265.609	1783.09	1516.42	372.682	1788.43	1508.05	306.952	1812.65	1435.13	290.57	1735.21	1154.03	301.344	1939.47	1347.87	296.689	2010.92	1155.86	375.318	1726.56	1225.83	121.567	1890.95	1372.22	43.2316	1873.66	1128.43	39.4589	1872.03	1051.94	31.9475	1967.47	902.687	84.0169	1986.93	827.166	14.5436	1964.24	813.883	47.7298	2018.27	761.142
1279	0	269.664	1952.1	1587.24	388.043	1953.55	1581.41	267.559	1792.84	1518.06	374.469	1798.26	1509.01	308.454	1822.71	1436.65	291.527	1745.27	1155.34	302.635	1949.28	1349.37	297.713	2020.83	1157.4	376.396	1736.56	1227.03	122.937	1900.78	1373.86	44.7029	1882.37	1130.25	40.6967	1879.16	1053.92	32.9018	1971.69	902.905	84.0573	1989.52	826.69	14.6802	1966.82	814.372	48.1438	2019.02	759.721
1280	0	271.869	1961.84	1588.5	390.376	1963.24	1582.3	269.058	1802.58	1519.61	376.288	1807.76	1510.07	310.067	1831.97	1437.77	292.48	1754.93	1156.55	303.892	1958.94	1350.8	298.744	2030.84	1159.05	377.401	1746.44	1228.02	124.187	1910.45	1375.79	46.4494	1891.28	1132.05	42.0326	1886.39	1055.87	33.2577	1976.03	903.33	84.8542	1991.7	826.283	14.444	1969.68	815.182	48.5164	2019.85	758.529
1281	0	274.078	1971.57	1589.79	392.443	1972.87	1582.91	270.69	1812.27	1520.95	377.936	1817.46	1511.02	311.363	1841.57	1438.95	293.199	1764.54	1157.62	305.046	1968.3	1352.22	299.739	2040.6	1160.62	378.742	1756.37	1228.97	125.517	1919.78	1377.27	47.564	1899.55	1133.65	43.4685	1893.48	1057.67	34.009	1980.63	903.993	84.8223	1994.38	826.261	14.2699	1972.81	816.051	48.6452	2020.66	757.44
1282	0	276.095	1981.3	1591.17	394.328	1982.52	1583.58	272.376	1821.84	1522.6	379.23	1826.9	1512.01	312.647	1850.7	1440.06	294.166	1773.97	1158.74	306.044	1977.64	1353.43	300.561	2049.97	1162.08	380.116	1766.09	1229.93	126.689	1928.77	1378.98	48.8564	1908.03	1135.63	44.639	1900.47	1059.56	34.2513	1985.27	904.802	84.8201	1998.16	826.511	14.0051	1976.16	817.109	48.8407	2021.69	756.488
1283	0	277.915	1990.99	1592.17	396.293	1991.95	1584.21	273.734	1831.37	1524.06	380.788	1836.37	1513.24	314.12	1860.02	1441.19	295.394	1783.23	1159.92	306.979	1986.92	1354.53	301.104	2058.99	1163.42	381.534	1775.78	1230.88	127.941	1937.58	1380.5	49.7599	1916.21	1137.19	45.5975	1907.29	1061.5	34.6483	1990.45	905.628	84.7043	2001.25	826.982	13.5131	1980.07	818.438	48.8946	2023.01	755.736
1284	0	279.638	2000.62	1593.07	397.985	2001.56	1584.69	275.103	1840.79	1525.5	382.051	1845.67	1514.15	315.58	1869.33	1442.11	296.437	1792.26	1160.8	308.03	1996.06	1355.57	301.701	2068.24	1164.59	382.915	1785.4	1231.54	128.885	1945.98	1381.71	50.663	1924.31	1138.78	46.4883	1914.01	1063.13	34.7602	1995.15	906.668	84.3071	2005.03	827.409	12.9017	1984.28	819.675	48.6585	2024.32	754.997
1285	0	281.322	2010.29	1593.97	399.484	2011.05	1585.09	276.153	1850.17	1526.9	383.235	1854.89	1515.05	317.02	1878.33	1443	297.74	1801.09	1161.71	308.728	2004.91	1356.48	302.064	2077.12	1165.62	384.369	1794.77	1232.26	129.824	1954.18	1382.93	51.4487	1931.89	1140.17	47.1685	1920.74	1064.48	34.5398	2000.51	907.472	83.408	2009.32	828	12.1423	1988.61	820.781	48.2108	2026.16	754.522
1286	0	282.765	2019.92	1594.79	400.966	2020.37	1585.48	277.24	1859.67	1528.22	384.256	1864.19	1516.11	318.157	1886.91	1443.85	299.183	1809.7	1162.56	309.285	2013.72	1357.25	302.066	2085.84	1166.53	385.78	1803.96	1233.02	130.693	1962.03	1383.98	52.2285	1939.48	1141.28	47.8102	1927.38	1065.88	34.382	2005.72	908.235	82.3176	2013.17	828.3	11.3512	1993.27	821.892	47.4534	2028.24	754.207
1287	0	284.118	2029.47	1595.57	402.403	2029.89	1585.75	278.123	1869.03	1529.55	385.147	1873.38	1517.07	319.509	1895.92	1444.71	300.463	1818.17	1163.5	309.793	2022.56	1357.98	302.07	2094.42	1167.06	387.213	1813.14	1233.82	131.499	1969.72	1384.87	52.8323	1946.52	1142.21	48.2636	1933.93	1067.14	33.9204	2011.35	908.979	81.7965	2018.32	828.769	10.3456	1998	823.207	46.9065	2030.47	753.854
1288	0	285.904	2039.03	1596	403.599	2039.23	1585.96	279.127	1878.4	1530.96	385.977	1882.45	1518.05	320.501	1904.43	1445.39	301.972	1826.57	1164.29	310.064	2031.04	1358.57	301.801	2102.85	1167.57	388.859	1822.15	1234.47	132.151	1977.06	1385.66	53.36	1953.29	1143.04	48.7257	1940.3	1068.04	33.1739	2016.59	909.814	81.4186	2023.48	829.2	9.27605	2003.14	824.315	46.0312	2033.28	753.702
1289	0	286.992	2048.52	1596.57	404.71	2048.46	1586.08	279.895	1887.56	1532.23	386.697	1891.57	1518.96	321.763	1913.06	1446.18	303.69	1834.85	1164.98	310.346	2039.53	1359.25	301.336	2111.07	1168.09	390.442	1830.94	1235.23	132.585	1984.29	1386.53	53.7163	1959.57	1143.88	49.1438	1946.5	1068.88	32.6624	2022.43	910.633	80.4203	2028.17	829.827	8.34416	2008	825.345	44.4558	2036.63	753.973
1290	0	287.957	2057.99	1597.14	405.657	2057.74	1586.29	280.335	1896.63	1533.57	387.167	1900.49	1520.01	322.658	1921.52	1446.99	305.277	1843.12	1165.66	310.371	2047.95	1359.92	300.744	2119.31	1168.68	392.07	1839.65	1236.11	133.097	1991.33	1387.28	53.9218	1965.36	1144.77	49.4404	1952.38	1069.81	31.9349	2027.66	911.575	79.0658	2034.25	830.771	7.20929	2012.82	826.543	42.8411	2041.01	754.656
1291	0	288.794	2067.44	1597.66	406.601	2067.12	1586.52	281.003	1905.89	1535.06	387.828	1909.48	1521.11	323.65	1929.95	1447.81	306.98	1851.25	1166.59	310.384	2056.08	1360.47	300.189	2127.43	1169.13	393.6	1848.25	1236.92	133.584	1998.27	1387.89	54.2583	1971	1145.65	49.6172	1958.21	1070.75	30.9683	2033.33	912.449	78.1296	2039.16	831.425	6.00598	2018.1	827.709	41.1033	2045.71	755.359
1292	0	289.632	2076.95	1597.95	407.322	2076.31	1586.41	281.376	1914.92	1536.6	388.519	1918.36	1522.35	324.454	1938.15	1448.52	308.558	1859.16	1167.36	310.356	2064.33	1360.96	299.333	2135.16	1169.47	395.338	1856.72	1237.76	133.894	2005.1	1388.62	54.6025	1976.46	1146.35	49.9721	1963.98	1071.53	29.8734	2038.44	913.326	76.7875	2045.43	832.011	5.10439	2023.11	828.689	39.2807	2050.54	756.249
1293	0	290.274	2086.3	1598.21	407.843	2085.48	1586.47	281.645	1923.78	1538.06	388.654	1927.02	1523.67	325.297	1946.38	1449.26	310.405	1867.3	1168.25	310.152	2072.22	1361.55	298.45	2142.87	1170.07	396.856	1865.08	1238.71	134.246	2011.76	1389.29	54.4407	1981.2	1147.29	50.3217	1969.45	1072.33	29.0307	2044.03	914.252	75.3523	2050.61	832.589	4.10415	2028.07	829.733	37.1428	2056.3	757.387
1294	0	290.821	2095.67	1598.46	408.267	2094.68	1586.64	281.931	1932.65	1539.73	388.949	1935.82	1525.2	326.133	1954.41	1450.16	311.772	1874.97	1169.07	310.028	2080.09	1362.22	297.681	2150.45	1170.71	398.401	1873.36	1239.65	134.687	2018.26	1390.03	55.0538	1986.36	1148.23	50.4883	1974.73	1073.33	27.7268	2049.19	915.419	74.028	2057.04	833.669	2.87211	2033.37	830.955	35.2888	2062.58	758.643
1295	0	291.124	2105.01	1598.58	408.674	2103.74	1586.76	282.17	1941.49	1541.41	389.139	1944.51	1526.83	326.944	1962.42	1450.98	313.424	1882.61	1169.98	309.933	2087.91	1362.83	297.015	2158.01	1171.41	399.892	1881.7	1240.46	134.981	2024.69	1390.85	55.0513	1990.75	1149.19	50.8417	1980.18	1074.33	26.6897	2054.61	916.531	72.5527	2062.93	834.777	1.89649	2038.52	832.121	33.7324	2068.85	759.904
1296	0	291.187	2114.24	1598.58	408.786	2112.77	1586.73	282.22	1950.3	1542.9	389.211	1953.07	1528.42	327.678	1970.34	1451.55	314.605	1890.35	1170.45	309.837	2095.72	1363.38	296.339	2165.49	1172.07	401.467	1889.94	1241.18	136.307	2030.98	1391.31	55.3643	1995.41	1150	51.1468	1985.35	1075.19	25.42	2059.86	917.638	71.0883	2069.09	835.608	0.680716	2043.47	833.245	31.5111	2075.93	761.54
1297	0	291.159	2123.45	1598.5	408.736	2121.87	1586.88	282.06	1959.04	1544.39	389.154	1961.35	1530.03	328.368	1978.17	1452.25	315.835	1898.62	1170.83	309.654	2103.29	1363.99	295.727	2172.97	1172.99	402.832	1898.21	1241.88	135.841	2037.27	1392.23	55.7067	2000.09	1150.79	51.3179	1990.55	1075.97	24.3253	2065.13	918.742	69.6875	2075.54	836.76	-0.303362	2048.85	834.287	29.8801	2083.1	763.038
1298	0	291.009	2132.62	1598.42	408.704	2130.68	1587.1	281.934	1967.66	1545.76	389.004	1969.76	1531.57	328.866	1985.8	1452.81	316.946	1906.22	1171.3	309.436	2110.8	1364.64	295.206	2180.33	1173.92	404.124	1906.41	1242.41	136.139	2043.51	1392.85	55.8531	2004.64	1151.76	51.4779	1995.65	1076.87	23.1257	2070.65	919.951	67.7872	2082.22	838.226	-1.37307	2054.18	835.42	27.7198	2090.7	764.943
1299	0	290.724	2141.53	1598.36	408.54	2139.51	1587.28	281.691	1976.19	1546.86	388.734	1978.3	1532.89	329.585	1993.42	1453.22	317.913	1913.9	1171.77	309.39	2118.23	1365.12	294.922	2187.45	1174.56	405.461	1914.67	1242.74	136.468	2049.76	1393.35	56.2356	2009.53	1152.62	51.5952	2000.73	1077.55	21.908	2075.9	921.153	66.3814	2089	839.455	-2.1349	2059.79	836.272	25.7613	2098.4	766.888
1300	0	290.429	2150.48	1598.25	408.131	2148.28	1587.49	281.331	1984.91	1547.82	388.363	1986.75	1534.1	330.27	2001.09	1453.54	319.066	1921.89	1172.1	309.292	2125.73	1365.54	294.451	2194.63	1175.22	406.623	1922.67	1243.01	137.507	2055.98	1393.39	56.453	2014.31	1153.29	51.8231	2005.82	1078.12	20.9097	2081.49	922.178	65.0434	2095.87	840.571	-2.72595	2065.28	836.965	23.8389	2106.19	768.693
1301	0	289.954	2159.36	1597.97	407.72	2156.92	1587.65	280.71	1993.47	1548.66	387.874	1995.04	1535.33	330.654	2008.6	1453.85	319.82	1929.52	1172.25	309.073	2133.24	1365.81	293.942	2201.84	1175.71	407.592	1930.67	1243.3	136.718	2062.15	1394.04	56.9231	2019.43	1153.7	51.8071	2010.88	1078.69	19.8085	2087.03	923.106	63.8091	2102.79	841.62	-3.31095	2071.01	837.654	21.9117	2114.27	770.406
1302	0	289.355	2168.19	1597.67	407.272	2165.5	1587.72	280.151	2002	1549.37	387.415	2003.29	1536.34	331.212	2016.28	1454.01	320.927	1937.41	1172.42	308.864	2140.75	1365.87	293.574	2209.15	1175.96	408.597	1938.79	1243.52	137.435	2068.63	1393.9	57.1634	2024.55	1154.02	51.9264	2016.07	1079.09	18.8861	2092.79	923.771	62.4914	2110.28	842.573	-3.67384	2077.02	838.144	20.1349	2122.49	771.942
1303	0	288.805	2177.01	1597.26	406.597	2174.12	1587.6	279.597	2010.48	1549.77	386.793	2011.54	1537.14	331.502	2023.71	1454.05	322.191	1945.62	1172.45	308.648	2148.16	1365.77	293.146	2216.58	1175.85	409.429	1946.7	1243.55	137.514	2075.02	1393.8	58.0624	2029.89	1153.9	51.8963	2021.28	1079.31	18.2242	2098.77	924.253	61.0556	2118	843.296	-3.35887	2082.93	838.314	18.4563	2130.53	773.303
1304	0	288.228	2185.67	1596.47	405.893	2182.7	1587.45	278.873	2018.9	1550.18	386.053	2019.74	1538.03	331.757	2031.29	1454.05	323.375	1953.74	1172.29	308.319	2155.67	1365.72	292.67	2224.08	1175.78	410.239	1954.62	1243.63	138.085	2081.53	1393.42	57.8369	2035.26	1154.01	52.1068	2026.7	1079.33	17.4654	2104.52	924.697	59.9725	2125.6	843.864	-3.62125	2088.92	838.553	16.7943	2138.71	774.624
1305	0	287.547	2194.3	1595.83	405.255	2191.09	1587.37	278.171	2027.43	1550.58	385.382	2027.98	1538.79	332.151	2039.05	1454.03	324.389	1961.85	1172.35	308.131	2163.22	1365.67	292.126	2231.49	1175.65	410.893	1962.48	1243.75	138.253	2088.1	1393.46	57.8733	2040.67	1154.13	51.6406	2031.91	1079.65	16.8367	2110.63	925.087	58.9622	2133.2	844.702	-3.75449	2095.22	838.747	15.2353	2146.81	775.921
1306	0	286.783	2202.81	1595.04	404.575	2199.38	1587.3	277.374	2035.77	1550.76	384.778	2036.16	1539.34	332.433	2046.72	1453.99	324.958	1969.14	1172.04	307.865	2170.74	1365.43	291.66	2238.85	1175.33	411.558	1970.48	1243.59	138.135	2094.76	1393.39	58.0833	2046.31	1154.16	51.9391	2037.69	1079.45	16.3531	2116.85	925.333	58.1341	2140.76	845.446	-3.62289	2101.72	838.779	13.9547	2154.93	777.13
1307	0	285.872	2211.44	1594.31	403.747	2207.81	1586.84	276.669	2044.04	1550.62	383.993	2044.29	1539.7	332.638	2054.42	1453.68	325.479	1976.39	1171.85	307.637	2178.37	1365.17	291.139	2246.2	1174.97	412.112	1978.35	1243.34	137.878	2101.54	1393.05	58.1968	2051.85	1154.01	51.9539	2043.38	1079.23	15.8485	2123.04	925.525	57.5511	2148.59	846.196	-3.24106	2108.19	838.484	12.758	2163.05	778.271
1308	0	284.917	2219.91	1593.48	402.929	2216.09	1586.66	275.807	2052.43	1550.52	382.992	2052.4	1540.21	332.62	2062.05	1453.32	325.821	1984.12	1171.62	307.192	2185.96	1364.89	290.519	2253.66	1174.8	412.569	1986.2	1243.16	137.263	2108.27	1392.71	58.2676	2057.57	1153.97	51.8995	2049.1	1078.97	15.408	2129.33	925.762	56.8182	2156.15	846.67	-3.09009	2114.79	838.329	11.6454	2170.83	779.331
1309	0	284.1	2228.37	1592.64	402.177	2224.44	1586.6	274.721	2060.75	1550.49	382.083	2060.53	1540.63	332.614	2069.85	1453.05	326.325	1991.77	1171.34	306.722	2193.42	1364.5	289.924	2260.98	1174.49	412.906	1994.09	1242.87	137.868	2115.35	1392.31	58.4778	2063.58	1153.75	51.4644	2054.86	1078.92	14.987	2135.67	925.925	56.3422	2164.01	847.398	-2.69445	2121.61	837.985	10.8566	2178.92	780.4
1310	0	283.167	2236.88	1591.62	401.426	2232.69	1586.11	273.898	2069.17	1550.11	381.292	2068.63	1540.8	332.762	2077.72	1452.58	326.33	1999.48	1170.72	306.312	2201.05	1363.99	289.085	2268.4	1173.95	413.234	2002.03	1242.51	137.476	2122.33	1391.82	58.7472	2069.6	1153.28	51.5598	2061.14	1078.44	14.7871	2142.27	925.786	55.9637	2171.72	847.749	-2.24767	2128.52	837.58	10.0554	2186.84	781.059
1311	0	282.366	2245.33	1590.57	400.38	2241.03	1585.49	272.946	2077.5	1549.52	380.39	2076.81	1540.65	332.476	2085.36	1451.99	326.521	2007.2	1170.02	305.775	2208.85	1363.34	288.458	2275.9	1173.44	413.948	2010.48	1241.98	137.24	2129.48	1391.18	58.8311	2075.84	1152.94	51.6466	2067.45	1077.82	14.8015	2149.05	925.446	55.7409	2179.35	847.746	-1.70822	2135.62	836.929	9.59227	2194.78	781.233
1312	0	281.323	2253.92	1589.27	399.286	2249.51	1584.74	272.013	2085.75	1549.08	379.506	2085.02	1540.63	332.168	2093.17	1451.44	326.726	2014.68	1169.59	305.339	2216.54	1362.62	287.556	2283.43	1172.65	413.878	2018.36	1241.53	136.918	2136.63	1390.77	58.6895	2082.27	1152.26	51.5449	2073.77	1077.27	14.689	2156.07	924.854	55.5301	2187.48	847.538	-1.07101	2142.44	836.17	9.65012	2202.79	781.132
1313	0	280.332	2262.56	1587.91	398.24	2258.05	1583.97	270.975	2094.17	1548.38	378.482	2093.39	1540.49	331.917	2101.07	1450.75	326.541	2022.77	1168.83	304.449	2224.12	1361.68	286.782	2291.24	1171.67	413.885	2026.27	1240.76	136.491	2144.1	1389.68	58.6204	2088.95	1151.7	51.3332	2080.38	1076.53	14.8884	2163.27	924.032	55.6023	2195.23	847.091	-0.54238	2149.98	835.486	9.85567	2210.86	780.659
1314	0	279.032	2270.93	1586.69	397.089	2266.47	1582.99	269.921	2102.48	1547.56	377.351	2101.82	1539.99	331.501	2108.93	1449.74	326.768	2031.06	1168.11	304.001	2232.11	1360.61	286.273	2299.15	1170.65	413.614	2034.17	1239.84	135.828	2151.47	1388.96	58.3998	2095.79	1150.7	51.3358	2087.06	1075.58	14.9057	2170.62	923.037	55.602	2203.42	846.566	-0.135496	2157.23	834.356	9.96199	2218.73	779.968
1315	0	277.972	2279.36	1585.28	395.821	2274.78	1582.21	268.857	2110.81	1546.43	376.387	2110.01	1539.42	330.897	2116.82	1448.83	326.387	2038.92	1166.8	303.323	2240.01	1359.81	285.5	2306.98	1169.85	413.317	2042.15	1238.89	135.424	2159.17	1387.67	58.1213	2102.76	1149.71	51.2317	2093.98	1074.37	14.796	2177.85	922.228	55.6083	2210.99	845.889	0.059035	2165.1	833.218	10.6141	2226.68	779.083
1316	0	276.665	2287.57	1583.9	394.502	2283.22	1581.52	267.849	2119.12	1545.48	375.447	2118.19	1538.97	330.267	2124.79	1447.84	325.748	2046.91	1165.71	302.706	2248.01	1358.87	284.618	2314.73	1168.92	412.795	2050.05	1238.05	134.697	2166.78	1386.84	57.8124	2110.03	1148.5	51.0461	2101.08	1073.3	14.5651	2185.16	921.238	55.734	2219.03	845.292	0.329145	2173.21	832.228	10.8214	2234.51	778.291
1317	0	275.118	2295.91	1582.75	393.16	2291.62	1580.74	266.708	2127.31	1544.34	374.344	2126.55	1538.21	329.609	2132.87	1446.84	325.172	2055.1	1164.9	301.726	2255.89	1357.88	283.952	2322.94	1167.88	412.281	2058.07	1237.06	134.178	2174.73	1385.49	57.395	2117.32	1147.51	50.5875	2108.23	1072.08	14.2185	2192.84	920.336	55.9059	2227.2	844.694	0.648556	2180.96	830.813	11.2618	2242.49	777.099
1318	0	273.499	2304.25	1581.18	391.634	2299.99	1579.61	265.418	2135.63	1543.06	372.954	2135.02	1537.34	328.882	2140.87	1445.48	324.33	2063.29	1163.55	301.093	2263.94	1356.68	283.274	2331.16	1166.62	411.589	2066.1	1235.75	133.414	2182.77	1383.84	56.8407	2124.87	1145.95	50.3481	2115.61	1070.53	14.3792	2200.47	918.631	56.1503	2234.91	843.277	0.87176	2189.07	829.167	11.9097	2250.5	775.624
1319	0	271.785	2312.56	1579.56	389.95	2308.38	1578.42	264.053	2143.79	1541.87	371.569	2143.31	1536.47	327.947	2149.04	1444.14	323.948	2071.49	1162.23	300.213	2271.96	1355.4	282.543	2339.31	1165.35	410.721	2074.07	1234.47	131.97	2190.61	1382.57	56.3453	2132.64	1144.28	49.9075	2123.28	1068.87	14.1908	2208.2	917.098	56.3248	2242.92	841.869	1.06039	2197.03	827.507	12.6165	2258.29	773.961
1320	0	270.216	2321	1577.77	388.336	2316.88	1577.1	262.438	2151.97	1540.74	370.319	2151.45	1535.77	326.963	2157.13	1442.85	323.263	2079.86	1160.78	299.313	2279.98	1354.04	282.08	2347.91	1163.87	409.868	2082.2	1233.12	131.674	2199.2	1380.78	55.6946	2140.64	1142.73	49.334	2131.24	1067.23	14.136	2216.26	915.208	56.7609	2250.56	840.208	1.3663	2204.89	825.536	13.4545	2266.4	771.933
1321	0	268.354	2329.24	1575.84	386.491	2325.29	1575.76	261.034	2160.28	1539.38	368.757	2159.66	1534.81	325.721	2165.27	1441.46	322.437	2088.21	1159.49	298.578	2288.47	1352.56	281.303	2356.26	1162.31	408.928	2090.18	1231.89	130.409	2207.36	1379.11	55.0135	2148.68	1141.02	48.6846	2139.22	1065.4	14.1245	2224.44	913.058	56.8416	2258.35	838.101	1.46598	2213.23	823.536	14.423	2274.23	769.607
1322	0	266.386	2337.81	1573.97	384.485	2333.71	1574.12	259.348	2168.43	1537.81	366.835	2168.06	1533.73	324.332	2173.27	1439.91	321.428	2096.56	1158.11	297.721	2296.75	1351.1	280.641	2364.94	1160.71	407.852	2098.16	1230.3	129.455	2216	1377.31	54.3098	2156.98	1138.92	48.1389	2147.51	1063.34	13.9372	2232.67	910.88	56.5024	2266.22	835.933	1.49322	2221.32	821.247	14.8416	2282.46	767.108
1323	0	264.431	2346.35	1572.03	382.422	2342.19	1572.65	257.119	2176.88	1536.46	364.783	2176.33	1532.8	323.033	2181.54	1438.38	319.833	2104.94	1156.15	296.565	2304.78	1349.69	280.145	2373.51	1159.06	406.595	2106.3	1228.73	128.128	2224.39	1375.39	53.2728	2165.41	1136.97	47.4718	2155.99	1061.25	13.7983	2241.25	908.641	57.0659	2274.39	833.522	1.26449	2229.82	819.043	15.4771	2290.38	764.623
1324	0	262.449	2354.79	1570.19	380.359	2350.59	1571.4	254.953	2185.41	1535.09	362.724	2184.53	1531.99	321.494	2189.6	1436.91	318.834	2113.7	1154.64	295.681	2313.09	1348.25	279.705	2382.31	1157.56	405.283	2114.43	1227.35	126.861	2233.02	1373.5	52.3628	2174.17	1134.86	46.6704	2164.7	1059.25	13.5377	2249.67	906.308	57.161	2282.51	831.285	0.81509	2238.29	816.864	16.0005	2298.58	762.082
1325	0	260.344	2363.56	1568.32	378.336	2358.9	1570.08	252.427	2193.98	1533.83	360.108	2192.82	1531.12	319.689	2197.7	1435.44	317.627	2122.36	1152.99	294.425	2321.29	1346.96	278.907	2390.74	1156.05	403.732	2122.77	1225.87	125.453	2241.64	1371.42	51.362	2182.99	1132.67	45.8203	2173.55	1057.03	13.1847	2258.42	903.916	57.0891	2290.65	828.827	0.571613	2246.82	814.36	16.5772	2306.63	759.274
1326	0	257.998	2372.23	1566.63	375.985	2367.15	1569.09	249.818	2202.58	1532.51	357.567	2201.02	1530.4	317.741	2205.89	1434.06	316.476	2130.92	1151.37	292.805	2329.38	1345.68	278.433	2399.53	1154.73	402.207	2130.95	1224.55	123.966	2250.36	1369.48	50.4	2192.19	1130.41	44.9943	2182.7	1054.7	12.8853	2267.22	901.497	57.1358	2299.05	826.316	0.085581	2255.34	811.922	16.8327	2314.61	756.496
1327	0	255.769	2381.07	1564.91	373.609	2375.46	1568.04	246.849	2211.32	1531.28	354.506	2209.38	1529.74	315.839	2214.21	1432.73	314.467	2139.82	1149.94	291.447	2337.9	1344.6	277.823	2408.17	1153.53	400.543	2139.47	1223.31	122.007	2259	1367.73	49.2587	2201.6	1128.25	44.0724	2192.06	1052.6	12.2893	2275.99	899.117	56.8477	2307.01	823.656	-0.389321	2264.04	809.637	16.9859	2322.74	753.684
1328	0	253.505	2390.26	1563.56	371.271	2383.78	1567.2	243.798	2220.19	1530.15	351.552	2217.62	1529.25	313.798	2222.54	1431.48	313.242	2148.76	1148.78	289.94	2346.69	1343.44	277.26	2417.1	1152.35	398.94	2147.96	1222.19	120.473	2268.02	1365.71	48.0127	2211.12	1126.17	43.1522	2201.6	1050.48	11.9058	2285.03	896.56	56.6347	2315.44	821.154	-1.03512	2272.7	807.252	16.8573	2330.65	750.934
1329	0	250.983	2399.27	1561.99	368.651	2392.24	1566.26	240.82	2229.18	1528.95	348.362	2226.07	1528.72	311.387	2230.94	1430.42	311.855	2157.94	1147.5	288.245	2355.22	1342.47	276.289	2425.87	1151.17	397.097	2156.59	1221.11	118.525	2276.64	1363.81	46.9008	2220.8	1123.82	42.1634	2211.22	1048.1	11.3504	2294.23	894.09	56.2266	2323.54	818.33	-1.71807	2281.48	804.8	16.6448	2338.88	748.17
1330	0	248.535	2408.25	1560.45	365.809	2400.7	1565.54	237.436	2238.18	1527.94	345.032	2234.5	1528.41	309.103	2239.34	1429.39	310.042	2166.87	1146	286.279	2363.82	1341.72	275.178	2434.84	1150.47	395.361	2165.29	1220.27	116.436	2285.66	1362.16	45.5666	2230.65	1121.54	41.2237	2221.08	1045.92	10.7051	2303.21	891.675	55.8457	2332.55	815.702	-2.59396	2290.06	802.453	16.2278	2347.01	745.414
1331	0	245.62	2417.33	1559.18	362.991	2409.25	1565.05	233.995	2247.17	1527.03	341.603	2242.95	1528.12	306.578	2247.75	1428.48	308.54	2176.19	1145.2	284.083	2372.3	1340.84	274.073	2443.9	1149.72	393.471	2174.19	1219.53	114.316	2294.47	1360.69	44.2346	2240.84	1119.57	40.2638	2231.24	1044.05	10.0768	2312.53	889.327	55.3998	2340.43	812.875	-3.56795	2299.05	800.337	15.71	2355.21	742.639
1332	0	242.811	2426.36	1558.03	360.079	2418.05	1564.68	230.709	2256.23	1526.04	338.314	2251.84	1527.73	303.855	2256.29	1427.75	307.263	2185.55	1144.21	282.179	2381.36	1340.15	272.76	2453.15	1149.17	391.671	2183.15	1218.88	112.005	2303.53	1359.19	42.8274	2251.04	1117.65	39.3102	2241.42	1042.13	9.42095	2322.06	886.997	54.8607	2349.1	810.336	-4.56577	2307.82	798.274	15.1642	2363.48	739.964
1333	0	239.725	2435.56	1557.4	356.889	2426.82	1564.56	227.416	2265.49	1525.31	334.903	2260.63	1527.57	301.375	2264.93	1427.13	305.193	2195	1143.36	279.879	2390.04	1339.75	271.526	2462.64	1149.01	389.735	2192.31	1218.27	109.681	2312.52	1358.01	41.5111	2261.29	1115.76	38.3586	2251.67	1040.31	8.61688	2331.33	884.825	54.1786	2357.52	807.81	-5.47372	2316.69	796.376	14.4324	2371.5	737.517
1334	0	236.807	2444.66	1556.77	353.577	2435.63	1564.89	224.025	2274.58	1524.7	331.549	2269.45	1527.95	298.576	2273.51	1426.91	303.981	2204.55	1143.04	277.73	2399.28	1339.68	269.861	2472.18	1149.1	387.662	2201.36	1218.19	107.302	2321.65	1357.27	40.1458	2271.57	1114.28	37.3271	2262.17	1038.95	7.60694	2340.71	883.01	53.4851	2366.3	805.67	-6.3782	2325.64	794.685	13.6135	2379.87	735.371
1335	0	233.493	2453.82	1556.38	350.449	2444.33	1565.48	220.599	2283.64	1524.18	328.123	2278.3	1528.25	295.809	2282.21	1426.75	301.803	2214.02	1142.58	275.478	2408.25	1339.84	268.434	2481.96	1149.46	385.621	2210.69	1218.05	104.866	2330.99	1356.55	38.7411	2281.86	1113.07	36.2594	2272.72	1037.82	6.55512	2350.19	881.425	52.5996	2374.82	803.811	-7.64898	2334.51	793.375	12.6258	2388.23	733.596
1336	0	229.986	2462.4	1556.34	347.157	2453.04	1566.15	217.097	2292.74	1523.84	324.621	2287.21	1528.36	293.018	2291.07	1426.75	300.189	2223.56	1142.24	273.253	2417.49	1340.09	267.048	2491.82	1149.96	383.674	2220.04	1218.11	102.51	2340.36	1355.79	37.2106	2292.16	1112.03	35.1574	2283.35	1036.79	5.59722	2359.8	880.13	51.7483	2383.95	802.391	-8.85955	2343.65	792.091	11.4563	2396.49	731.969
1337	0	226.566	2471.24	1556.87	343.825	2461.61	1567.31	213.556	2301.86	1523.4	321.137	2295.9	1528.69	290.222	2300.01	1427.06	298.304	2233.3	1142.45	271.137	2427.05	1340.91	265.567	2501.84	1150.92	381.495	2229.33	1218.46	99.8927	2349.88	1355.7	35.7633	2302.42	1111.27	34.0747	2294.07	1035.89	4.57756	2369.52	879.093	50.6498	2392.48	800.933	-9.93311	2352.63	791.064	10.4047	2405.03	730.596
1338	0	223.593	2480.18	1557.78	340.557	2470	1569.04	209.944	2311.01	1523.41	317.288	2304.61	1529.24	287.154	2309.15	1427.77	296.494	2242.84	1143.05	268.799	2436.19	1341.83	264.162	2511.66	1152	379.204	2238.56	1219.48	97.6477	2359.71	1355.45	34.1891	2313.1	1110.7	32.8473	2305.08	1035.52	3.41345	2379.32	878.455	49.5486	2401.77	800.065	-11.312	2361.86	790.617	9.20743	2413.59	729.671
1339	0	220.303	2488.81	1559.05	337.37	2478.21	1571	206.126	2320.12	1523.41	313.773	2313.13	1529.89	284.356	2318.28	1428.71	294.402	2252.67	1144.03	266.463	2445.46	1342.91	262.947	2521.55	1153.26	377.119	2247.78	1220.77	95.0248	2369.54	1355.9	32.6029	2323.71	1110.56	31.5505	2315.86	1035.43	2.11631	2389.24	878.032	48.5089	2411	799.64	-12.6264	2371.44	790.414	8.06614	2422.3	728.787
1340	0	217.344	2497.52	1560.46	334.168	2486.26	1572.88	202.653	2329.16	1523.52	309.92	2321.61	1530.47	281.446	2327.52	1429.81	292.528	2262.31	1145.15	264.374	2454.74	1344.05	261.976	2531.38	1154.49	374.932	2257.01	1222.18	92.9371	2379.5	1355.89	31.2222	2334.36	1110.57	30.2311	2326.53	1035.38	1.01621	2399.34	877.914	47.2055	2420.26	799.192	-13.9402	2381.08	790.293	6.90286	2431.22	728.374
1341	0	214.214	2506.13	1562.17	330.881	2494.24	1575.22	198.944	2338.25	1523.73	306.03	2330.07	1531.39	278.501	2336.71	1431.27	290.301	2271.8	1146.58	262.207	2464.11	1345.41	260.913	2540.86	1155.99	372.8	2265.89	1223.93	90.412	2389.53	1356.62	29.5932	2345.22	1110.75	29.2462	2337.84	1035.71	-0.323127	2409.66	878.051	45.9912	2429.85	798.931	-15.3007	2390.9	790.571	5.78079	2440.26	728.01
1342	0	211.397	2514.66	1563.96	327.805	2502.11	1577.69	195.154	2347.23	1524.24	302.387	2338.18	1532.56	275.688	2345.83	1432.89	288.53	2281.01	1148.19	260.309	2473.3	1346.94	260.121	2550.1	1157.5	370.619	2274.76	1226.05	88.0387	2399.51	1357.55	27.8209	2356.04	1111.26	27.7244	2348.81	1036.48	-1.52758	2420.14	878.479	44.8175	2440.05	799.306	-16.7836	2400.89	791.297	4.65875	2449.63	727.974
1343	0	208.498	2523.12	1565.67	324.738	2509.74	1580.24	191.662	2355.97	1524.81	298.732	2346.41	1533.8	272.863	2354.91	1434.54	286.748	2290	1150.01	258.466	2482.44	1348.63	259.398	2559.5	1159.2	368.668	2283.44	1228.17	85.8741	2409.35	1358.36	26.1744	2366.87	1112.07	26.6522	2360.08	1037.14	-2.92319	2430.78	879.015	43.4966	2450.29	799.866	-18.382	2411.32	792.047	3.47763	2459.27	728.143
1344	0	205.859	2531.4	1567.2	321.732	2517.35	1582.46	188.102	2364.71	1525.18	295.225	2354.4	1534.77	270.381	2363.83	1436.08	284.772	2298.98	1151.63	256.974	2491.54	1350.21	258.913	2568.56	1160.88	366.443	2292.17	1230.01	83.912	2419.17	1359.03	24.7388	2378.16	1112.53	25.0095	2370.59	1037.76	-4.37948	2441.47	879.843	42.0543	2460.6	800.368	-19.9066	2421.82	792.822	2.15964	2469.09	728.487
1345	0	203.069	2539.63	1568.82	318.917	2524.72	1584.87	184.815	2373.38	1525.61	291.48	2362.37	1536.02	267.679	2372.48	1437.58	282.963	2307.79	1153.1	255.483	2500.4	1351.87	258.537	2577.41	1162.54	364.356	2300.53	1231.87	82.0304	2428.95	1359.87	23.2292	2389.37	1113.25	23.6824	2381.63	1038.59	-5.87608	2452.17	880.818	40.0622	2471.03	801.459	-21.6739	2432.48	793.846	0.746531	2479.16	729.079
1346	0	200.797	2547.87	1570.34	316.387	2531.99	1587.32	181.435	2381.94	1526.26	288.084	2369.96	1537.44	265.414	2381.04	1439.04	280.935	2316.64	1154.58	253.979	2509.04	1353.48	257.984	2586.22	1164.39	362.362	2308.75	1233.67	80.2777	2438.65	1360.76	21.2989	2400.28	1114.36	22.2146	2392.83	1039.6	-7.33992	2463.29	881.851	38.7509	2481.96	802.329	-23.3174	2443.6	795.038	-0.823958	2489.5	729.907
1347	0	198.599	2555.95	1571.59	313.941	2539.14	1589.55	178.214	2390.55	1526.73	284.534	2377.57	1538.81	263.074	2389.41	1440.35	279.028	2325.71	1156	252.761	2517.57	1355.02	257.693	2594.92	1166.11	360.275	2316.95	1235.17	78.5801	2448.25	1361.65	19.7292	2411.46	1114.96	20.8693	2403.74	1040.42	-8.80249	2474.64	883.018	37.354	2493.58	803.506	-24.8722	2454.82	796.204	-2.52007	2500.14	730.794
1348	0	196.616	2564.24	1572.74	311.701	2546.29	1591.54	175.057	2399.21	1527.13	281.266	2385.07	1539.89	260.929	2397.57	1441.47	277.187	2333.92	1156.86	251.616	2525.86	1356.37	257.473	2603.39	1167.6	358.334	2324.76	1236.36	76.9713	2457.56	1362.52	17.983	2422.74	1115.61	19.1933	2414.43	1041.06	-10.2977	2485.66	884.026	35.7459	2504.78	804.519	-26.5252	2466.17	797.043	-4.38394	2511.07	731.756
1349	0	194.656	2572.3	1573.89	309.697	2553.42	1593.27	172.185	2407.6	1527.65	277.954	2392.64	1541.11	259.01	2405.72	1442.6	275.038	2342.01	1157.83	250.784	2534.12	1357.71	257.353	2611.81	1169.01	356.167	2332.62	1237.42	75.3605	2466.82	1363.5	16.2998	2433.49	1116.61	17.5438	2425.27	1041.74	-11.5719	2497.32	885.11	34.1121	2516.11	805.363	-28.2247	2477.71	798.207	-6.40106	2522.35	732.903
1350	0	193.253	2580.71	1574.8	307.987	2560.64	1594.82	169.609	2416.7	1528.59	275.05	2400.18	1542.58	257.197	2413.65	1443.71	273.216	2350.24	1159.09	249.884	2542.26	1358.86	257.171	2619.96	1170.1	354.094	2340.22	1238.6	73.9507	2475.92	1364.2	15.14	2444.83	1117.17	16.1459	2436.26	1042.51	-12.9627	2508.53	886.136	32.8283	2528.07	806.449	-29.6425	2489.6	799.328	-8.41934	2533.99	734.175
1351	0	191.909	2588.89	1575.46	306.447	2567.98	1596.04	167.151	2425.12	1529.44	272.34	2407.68	1543.95	255.363	2421.62	1444.78	271.697	2358.01	1160.15	249.154	2550.16	1359.99	257.066	2628.16	1171.08	352.078	2347.75	1239.59	72.3026	2485.12	1365.03	13.0749	2455.1	1117.92	14.7734	2447.22	1043.09	-14.0127	2520.23	887.037	31.4685	2539.46	807.396	-31.2496	2501.33	800.189	-10.4123	2546.24	735.497
1352	0	190.989	2597.37	1575.96	305.094	2575.42	1596.96	164.801	2433.65	1530.45	269.604	2415.36	1545.44	253.595	2429.28	1445.83	269.43	2365.9	1161.12	248.279	2558.01	1361.03	256.711	2635.89	1171.86	350.104	2355.06	1240.6	71.6564	2494.22	1365.4	11.3508	2465.5	1118.83	13.2909	2458.03	1043.71	-15.2669	2531.76	887.915	30.2345	2551.39	808.08	-32.5576	2513.27	801.165	-12.3695	2558.84	736.977
1353	0	190.242	2605.9	1576.4	304.058	2583.06	1597.86	162.633	2442.14	1531.76	267.238	2422.92	1546.98	252.017	2436.93	1446.9	267.242	2373.44	1162.08	247.446	2565.69	1361.96	256.604	2643.74	1172.62	348.095	2362.19	1241.69	69.7504	2502.81	1366.42	10.253	2476.02	1119.38	11.809	2468.72	1044.52	-16.1834	2543.45	888.871	28.8733	2562.96	809	-33.9528	2525.18	802.407	-14.4535	2571.69	738.684
1354	0	189.487	2614.46	1576.97	303.272	2590.79	1598.55	160.638	2450.73	1533.24	265.252	2430.56	1548.65	250.426	2444.36	1447.94	265.392	2380.78	1163.19	246.64	2573.05	1362.93	256.371	2651.29	1173.38	346.129	2369.29	1242.72	69.1986	2511.28	1367.09	8.88102	2486.31	1119.99	10.329	2479.52	1045.23	-17.4582	2554.92	890.021	27.5973	2575.24	810.278	-35.3377	2537.07	803.315	-16.6378	2584.75	740.687
1355	0	189.029	2623.06	1577.4	302.679	2598.7	1599.12	158.901	2459.41	1534.66	263.392	2438.25	1550.26	248.944	2451.67	1448.9	263.649	2388.21	1164.11	245.868	2580.37	1363.93	255.852	2658.54	1174.3	344.134	2376.35	1243.63	67.5226	2519.68	1368.09	7.524	2496.43	1120.85	8.99935	2490.17	1045.91	-18.4049	2566.48	891.221	25.8361	2587.09	811.359	-36.4623	2548.76	804.245	-18.9096	2598.1	743.083
1356	0	188.658	2631.69	1577.98	302.22	2606.62	1599.77	157.42	2467.93	1536.43	261.63	2446.07	1552.14	247.435	2458.92	1450	262.034	2395.73	1165.25	245.403	2587.91	1365.45	255.237	2665.82	1175.53	342.272	2383.31	1244.75	66.4296	2527.58	1369.04	6.26585	2506.39	1122.08	7.73212	2500.64	1046.82	-19.7826	2577.83	892.884	24.3916	2599.39	813.267	-37.4895	2560.58	805.497	-21.399	2611.54	745.978
1357	0	188.361	2640.18	1578.27	302.034	2614.73	1600.15	156.149	2476.36	1538.48	260.193	2454.48	1554.14	246.035	2466.12	1451.07	260.416	2402.71	1166.36	244.2	2594.91	1366.42	254.618	2672.94	1176.83	340.524	2390.24	1245.8	65.2527	2535.46	1370.13	5.13296	2516.19	1123.15	6.33072	2510.84	1047.91	-20.9983	2589.24	894.649	22.9061	2612.29	815.53	-38.5341	2572.25	806.626	-23.9603	2625.1	749.072
1358	0	188.169	2648.93	1578.34	301.886	2623.06	1599.98	154.628	2484.41	1540.6	259.085	2462.12	1556	244.701	2473.2	1451.94	258.862	2409.93	1167.13	243.279	2602.07	1367.34	253.808	2679.94	1177.97	338.931	2397.08	1246.63	64.9458	2543.13	1370.7	4.01446	2525.66	1124.05	4.9223	2520.78	1048.89	-22.4428	2600.39	896.38	20.637	2624.96	817.604	-39.3119	2583.74	807.84	-26.4948	2638.97	752.156
1359	0	188.156	2657.51	1578.17	301.713	2631.29	1599.71	153.542	2492.88	1542.49	258.008	2470.13	1557.85	243.396	2480.32	1452.67	257.299	2417.12	1167.83	242.368	2609.2	1368.1	252.991	2686.82	1179.05	337.366	2403.78	1247.29	62.8833	2550.44	1372.06	3.04069	2535.03	1124.88	3.67523	2530.61	1049.7	-23.9466	2611.67	898.224	18.4961	2637.97	819.911	-40.0756	2595.25	808.936	-29.0172	2652.7	755.382
1360	0	188.177	2666.09	1577.99	301.774	2639.55	1599.23	152.468	2501.15	1544.33	256.971	2478.17	1559.51	242.144	2487.43	1453.37	255.986	2424.19	1168.44	241.458	2616.32	1368.7	252.107	2693.76	1180.11	335.941	2410.59	1247.98	61.7471	2557.82	1372.99	1.6065	2544.02	1125.94	2.26848	2540.05	1050.79	-25.2949	2622.84	899.978	16.6786	2651.65	822.722	-40.6452	2607.13	810.433	-31.8463	2666.58	758.726
1361	0	188.142	2674.49	1577.8	301.776	2647.7	1598.97	151.748	2509.39	1546.01	256.168	2486.32	1561	240.928	2494.55	1453.96	254.731	2431.14	1169.15	240.513	2623.45	1369.13	251.179	2700.66	1181.03	334.594	2417.53	1248.6	61.4083	2565.17	1373.61	0.26255	2552.55	1126.76	0.809535	2549.21	1051.81	-27.0393	2633.63	901.834	14.2493	2664.96	825.463	-41.0797	2619.04	811.688	-34.254	2680.33	762.046
1362	0	188.107	2682.74	1577.79	301.678	2655.75	1598.5	151.188	2517.51	1547.04	255.561	2494.22	1561.75	239.88	2501.74	1454.36	253.293	2438.37	1169.61	239.68	2630.66	1369.38	250.103	2707.55	1181.8	333.425	2424.54	1248.95	59.756	2572.47	1374.5	-0.835039	2561.07	1127.56	-0.526337	2557.93	1052.49	-28.5061	2644.72	903.687	11.5929	2678.45	828.507	-41.0863	2631.05	812.834	-36.5365	2693.73	765.238
1363	0	187.806	2690.68	1577.93	301.475	2663.67	1598.23	150.685	2525.34	1547.79	255.126	2501.96	1562.19	239.005	2508.93	1454.66	252.547	2445.24	1169.78	238.741	2637.99	1369.66	249.129	2714.41	1182.44	332.241	2431.52	1249.19	58.7731	2579.7	1375.15	-2.55959	2569.14	1128.37	-2.06069	2566.88	1052.99	-30.1172	2655.69	905.566	9.60111	2692.25	831.702	-41.0467	2643.38	814.174	-38.9317	2707.62	768.757
1364	0	187.613	2698.41	1578.07	301.26	2671.34	1598.33	150.208	2533.16	1548.39	254.65	2509.63	1562.56	238.116	2516.3	1454.9	251.32	2452.27	1169.93	237.906	2645.42	1369.87	248.007	2721.21	1182.8	331.167	2438.6	1249.43	57.6636	2586.98	1375.68	-3.8002	2576.99	1128.96	-3.72333	2575.34	1053.51	-31.8308	2666.29	907.413	7.64293	2706.12	835.073	-40.994	2655.66	815.378	-41.0225	2720.94	772.037
1365	0	187.322	2706.02	1578.48	301.078	2678.99	1598.2	149.801	2540.72	1548.83	254.446	2517.38	1562.65	237.332	2523.82	1455.09	250.308	2459.19	1170.27	237.102	2652.94	1369.81	246.966	2728.12	1182.79	330.214	2445.69	1249.68	57.0624	2594.47	1375.82	-5.13	2584.75	1129.5	-5.10245	2583.99	1054.08	-33.3996	2677.16	909.184	5.60933	2719.45	838.357	-41.0472	2668	816.719	-43.0953	2734.64	775.589
1366	0	186.889	2713.42	1578.7	300.86	2686.5	1598.25	149.396	2548.16	1548.83	254.177	2524.84	1562.24	236.746	2531.52	1455.19	249.71	2466.31	1170.64	236.387	2660.39	1369.7	245.917	2735.1	1182.55	329.459	2452.74	1249.9	56.2981	2601.9	1375.86	-7.15059	2592.05	1130.06	-6.79288	2592.17	1054.06	-34.8106	2688.11	910.81	3.66821	2733.1	841.741	-40.6108	2680.54	817.9	-44.7303	2748	778.744
1367	0	186.663	2720.84	1578.91	300.554	2693.81	1598.18	149.254	2555.53	1548.51	254.043	2532.25	1561.76	236.193	2539.17	1455.27	248.992	2473.08	1170.62	235.768	2667.94	1369.49	245.013	2742.1	1181.94	328.8	2459.96	1250.02	56.2242	2609.19	1375.83	-8.3749	2599.49	1130.31	-8.33264	2600.45	1054.17	-36.2364	2698.83	912.354	1.49827	2746.2	845.042	-40.322	2693.29	819.21	-46.0956	2761.41	781.845
1368	0	186.285	2728.14	1579.04	300.32	2701.21	1597.99	149.036	2562.93	1548.1	253.835	2539.69	1561.15	235.735	2546.91	1455.17	248.441	2479.78	1170.74	235.08	2675.39	1368.84	244.05	2748.97	1181.09	328.224	2467.2	1250.14	55.8463	2616.92	1375.63	-9.72546	2606.7	1130.2	-9.7741	2608.59	1054.12	-37.4471	2709.58	913.706	0.144463	2759.23	848.303	-40.3991	2705.49	820.415	-47.464	2774.75	784.725
1369	0	186.037	2735.32	1579.17	300.095	2708.51	1597.89	149.074	2570.03	1547.45	253.692	2547.06	1560.43	235.337	2554.75	1455.03	248.269	2486.81	1170.81	234.575	2682.96	1368.23	243.359	2756.19	1179.97	327.86	2474.6	1250.16	55.061	2624.34	1375.32	-10.9356	2613.86	1130.45	-11.2706	2616.91	1054.14	-38.6823	2720.29	915.092	-1.12394	2771.84	851.202	-40.1799	2718.06	821.718	-48.4598	2787.74	787.39
1370	0	185.756	2742.51	1579.17	299.87	2715.78	1597.51	148.742	2577.42	1546.97	253.562	2554.37	1559.43	234.994	2562.47	1454.88	247.491	2493.4	1170.74	233.962	2690.45	1367.65	242.593	2763.4	1178.98	327.586	2481.94	1250.13	54.4576	2631.65	1375.17	-11.2402	2620.89	1129.97	-12.7561	2624.91	1053.82	-39.8383	2730.71	916.386	-2.86454	2784.07	854.077	-39.8903	2730.24	822.779	-49.276	2800.61	790.087
1371	0	185.54	2749.87	1579.17	299.711	2722.98	1597.23	148.758	2584.75	1546.28	253.324	2561.57	1558.74	234.655	2570.27	1454.62	247.177	2500.39	1170.58	233.167	2697.55	1366.9	241.853	2770.51	1178.02	327.382	2489.2	1250.09	54.3547	2639.22	1374.42	-13.2032	2627.84	1130.17	-14.0548	2633.17	1053.65	-40.9273	2740.97	917.787	-4.07227	2795.93	857.031	-39.8661	2742.4	823.99	-49.9378	2813.43	792.844
1372	0	185.522	2756.93	1578.95	299.722	2730.2	1596.97	148.566	2591.94	1545.95	253.378	2569.03	1557.98	234.504	2578	1454.25	246.759	2507.17	1170.54	232.94	2705.39	1366.42	241.322	2777.68	1177.08	327.378	2496.57	1249.94	53.222	2646.39	1374.23	-14.27	2634.9	1130.11	-15.4978	2641.43	1053.39	-41.8445	2751.46	919.134	-5.03775	2807.64	859.714	-39.9651	2754.48	825.179	-50.433	2826.05	795.5
1373	0	185.328	2764.24	1578.76	299.789	2737.65	1596.32	148.615	2599.44	1545.51	253.612	2576.44	1557.23	234.392	2585.64	1453.77	247.126	2514.41	1170.13	232.403	2712.57	1365.68	240.845	2784.84	1176.11	327.515	2503.99	1249.65	52.2244	2653.63	1373.68	-14.3714	2641.94	1129.29	-16.6978	2649.63	1053.01	-42.6224	2761.8	920.158	-5.85336	2819.07	862.134	-39.8833	2766.49	826.274	-50.565	2838.23	797.676
1374	0	185.454	2771.74	1578.3	299.731	2745.17	1595.51	148.744	2606.71	1545.02	253.873	2583.96	1556.4	234.292	2593.31	1453.25	247.304	2521.5	1169.65	232.485	2720.7	1365.21	240.249	2791.91	1175.12	327.659	2511.44	1249.18	52.819	2660.68	1372.86	-15.5177	2649.25	1129.3	-17.7432	2657.82	1052.59	-43.2686	2771.76	920.962	-6.38064	2830.34	864.335	-39.8882	2777.96	827.286	-50.572	2850.54	799.766
1375	0	185.217	2778.92	1577.55	299.709	2752.95	1594.63	149.089	2613.91	1544.63	254.185	2591.6	1555.86	234.193	2600.91	1452.75	247.303	2529.09	1169.11	232.075	2728.17	1364.47	239.769	2799.32	1174.4	327.813	2518.98	1248.8	53.3711	2667.86	1371.75	-16.4164	2656.67	1128.65	-18.8116	2666.16	1052.1	-44.0209	2781.71	921.81	-6.76901	2841.31	866.381	-39.8915	2789.6	828.22	-50.4499	2862.7	801.644
1376	0	185.345	2786.4	1576.83	299.954	2760.9	1593.72	149.438	2621.24	1544.39	254.701	2599.41	1555.18	234.378	2608.53	1452.02	247.646	2536.45	1168.57	232.596	2736.38	1363.98	239.233	2806.34	1173.59	328.039	2526.65	1248.13	52.2606	2674.62	1371.44	-17.2627	2664.06	1128.48	-19.9026	2674.53	1051.74	-44.4871	2791.66	922.678	-7.15759	2851.96	868.121	-40.1898	2800.91	829.228	-50.2518	2874.33	803.299
1377	0	185.252	2793.94	1576.06	300.018	2769.04	1592.48	150.143	2628.69	1543.96	255.485	2607.14	1554.49	234.546	2616.05	1451.12	248.023	2543.85	1167.71	232.132	2743.57	1362.95	238.962	2813.73	1172.73	328.401	2534.45	1247.35	53.0237	2681.49	1370.2	-16.6606	2671.82	1127.26	-20.7021	2682.94	1051.23	-44.8829	2801.71	923.292	-7.23768	2862.34	869.567	-40.2876	2811.72	829.876	-50.1539	2885.52	804.77
1378	0	185.338	2801.64	1575.09	300.13	2777.29	1591.22	150.795	2635.85	1543.7	256.538	2615.05	1553.95	234.888	2623.58	1450.34	248.644	2551.38	1167.03	232.159	2751.32	1362.19	238.525	2820.9	1171.86	328.807	2542.09	1246.67	52.4758	2688.37	1369.69	-17.1152	2679.49	1126.7	-21.4479	2691.29	1050.7	-45.1444	2811.41	923.717	-7.16115	2873.05	871.031	-40.3261	2822.25	830.557	-49.6797	2896.58	805.935
1379	0	185.43	2809.3	1574	300.389	2785.69	1589.78	151.541	2643.23	1543.58	257.388	2623.03	1553.42	235.157	2631.03	1449.53	248.833	2559.01	1166.32	232.092	2758.81	1361.33	238.121	2828.17	1170.91	329.377	2549.84	1245.9	53.3835	2695.38	1368.44	-17.8405	2687.43	1126.32	-22.0671	2699.71	1050.19	-45.27	2821.21	924.34	-7.25337	2882.88	872.058	-40.7147	2832.97	831.374	-49.1798	2907.32	806.979
1380	0	185.545	2816.91	1573	300.841	2794.17	1588.58	152.504	2650.84	1543.33	258.291	2631.11	1552.8	235.539	2638.72	1448.6	249.26	2566.48	1165.46	232.039	2766.36	1360.23	237.889	2835.8	1170.04	329.984	2557.71	1244.99	52.5779	2702.23	1367.97	-17.5909	2695.27	1125.43	-22.463	2708.06	1049.56	-45.2433	2830.7	924.744	-6.98712	2892.55	872.811	-40.9861	2843.15	831.985	-48.6967	2918.02	807.768
1381	0	185.825	2824.62	1571.87	301.12	2802.47	1587.04	153.77	2658.23	1542.45	259.367	2639.27	1551.83	236.083	2646.46	1447.61	250.435	2573.9	1164.22	232.365	2774.24	1359.36	237.623	2843.03	1168.94	330.668	2565.6	1243.92	52.8882	2709.13	1366.97	-17.0678	2703.28	1124.69	-22.4717	2716.53	1049	-45.1766	2840.3	925.088	-6.10559	2902.62	873.55	-41.2056	2853.15	832.391	-48.1779	2927.87	808.238
[truncated: 69 more columns]

## Sheet: Sheet2
Devices
		025370 - Force			025370 - Moment			025370 - CoP			027571 - Force			027571 - Moment			027571 - CoP			037720 - Force			037720 - Moment			037720 - CoP
Frame	Sub Frame	Fx	Fy	Fz	Mx	My	Mz	Cx	Cy	Cz	Fx	Fy	Fz	Mx	My	Mz	Cx	Cy	Cz	Fx	Fy	Fz	Mx	My	Mz	Cx	Cy	Cz
		N	N	N	N.mm	N.mm	N.mm	mm	mm	mm	N	N	N	N.mm	N.mm	N.mm	mm	mm	mm	N	N	N	N.mm	N.mm	N.mm	mm	mm	mm
836	0	0	0	0	0	0	0	200	300	0	0	0	0	0	0	0	200	903	0	0	0	0	0	0	0	603	903	0
836	1	0	0	0	0	0	0	200	300	0	0	0	0	0	0	0	200	903	0	0	0	0	0	0	0	603	903	0
836	2	0	0	0	0	0	0	200	300	0	0	0	0	0	0	0	200	903	0	0	0	0	0	0	0	603	903	0
836	3	0	0	0	0	0	0	200	300	0	0	0	0	0	0	0	200	903	0	0	0	0	0	0	0	603	903	0
836	4	0	0	0	0	0	0	200	300	0	0	0	0	0	0	0	200	903	0	0	0	0	0	0	0	603	903	0
836	5	0	0	0	0	0	0	200	300	0	0	0	0	0	0	0	200	903	0	0	0	0	0	0	0	603	903	0
836	6	0	0	0	0	0	0	200	300	0	0	0	0	0	0	0	200	903	0	0	0	0	0	0	0	603	903	0
836	7	0	0	0	0	0	0	200	300	0	0	0	0	0	0	0	200	903	0	0	0	0	0	0	0	603	903	0
836	8	0	0	0	0	0	0	200	300	0	0	0	0	0	0	0	200	903	0	0	0	0	0	0	0	603	903	0
836	9	0	0	0	0	0	0	200	300	0	0	0	0	0	0	0	200	903	0	0	0	0	0	0	0	603	903	0
837	0	0	0	0	0	0	0	200	300	0	0	0	0	0	0	0	200	903	0	0	0	0	0	0	0	603	903	0
837	1	0	0	0	0	0	0	200	300	0	0	0	0	0	0	0	200	903	0	0	0	0	0	0	0	603	903	0
837	2	0	0	0	0	0	0	200	300	0	0	0	0	0	0	0	200	903	0	0	0	0	0	0	0	603	903	0
837	3	0	0	0	0	0	0	200	300	0	0	0	0	0	0	0	200	903	0	0	0	0	0	0	0	603	903	0
837	4	0	0	0	0	0	0	200	300	0	0	0	0	0	0	0	200	903	0	0	0	0	0	0	0	603	903	0
837	5	0	0	0	0	0	0	200	300	0	0	0	0	0	0	0	200	903	0	0	0	0	0	0	0	603	903	0
837	6	0	0	0	0	0	0	200	300	0	0	0	0	0	0	0	200	903	0	0	0	0	0	0	0	603	903	0
837	7	0	0	0	0	0	0	200	300	0	0	0	0	0	0	0	200	903	0	0	0	0	0	0	0	603	903	0
837	8	0	0	0	0	0	0	200	300	0	0	0	0	0	0	0	200	903	0	0	0	0	0	0	0	603	903	0
837	9	0	0	0	0	0	0	200	300	0	0	0	0	0	0	0	200	903	0	0	0	0	0	0	0	603	903	0
838	0	0	0	0	0	0	0	200	300	0	0	0	0	0	0	0	200	903	0	0	0	0	0	0	0	603	903	0
838	1	0	0	0	0	0	0	200	300	0	0	0	0	0	0	0	200	903	0	0	0	0	0	0	0	603	903	0
838	2	0	0	0	0	0	0	200	300	0	0	0	0	0	0	0	200	903	0	0	0	0	0	0	0	603	903	0
838	3	0	0	0	0	0	0	200	300	0	0	0	0	0	0	0	200	903	0	0	0	0	0	0	0	603	903	0
838	4	0	0	0	0	0	0	200	300	0	0	0	0	0	0	0	200	903	0	0	0	0	0	0	0	603	903	0
838	5	0	0	0	0	0	0	200	300	0	0	0	0	0	0	0	200	903	0	0	0	0	0	0	0	603	903	0
838	6	0	0	0	0	0	0	200	300	0	0	0	0	0	0	0	200	903	0	0	0	0	0	0	0	603	903	0
838	7	0	0	0	0	0	0	200	300	0	0	0	0	0	0	0	200	903	0	0	0	0	0	0	0	603	903	0
838	8	0	0	0	0	0	0	200	300	0	0	0	0	0	0	0	200	903	0	0	0	0	0	0	0	603	903	0
838	9	0	0	0	0	0	0	200	300	0	0	0	0	0	0	0	200	903	0	0	0	0	0	0	0	603	903	0
839	0	0	0	0	0	0	0	200	300	0	0	0	0	0	0	0	200	903	0	0	0	0	0	0	0	603	903	0
839	1	0	0	0	0	0	0	200	300	0	0	0	0	0	0	0	200	903	0	0	0	0	0	0	0	603	903	0
839	2	0	0	0	0	0	0	200	300	0	0	0	0	0	0	0	200	903	0	0	0	0	0	0	0	603	903	0
839	3	0	0	0	0	0	0	200	300	0	0	0	0	0	0	0	200	903	0	0	0	0	0	0	0	603	903	0
839	4	0	0	0	0	0	0	200	300	0	0	0	0	0	0	0	200	903	0	0	0	0	0	0	0	603	903	0
839	5	0	0	0	0	0	0	200	300	0	0	0	0	0	0	0	200	903	0	0	0	0	0	0	0	603	903	0
839	6	0	0	0	0	0	0	200	300	0	0	0	0	0	0	0	200	903	0	0	0	0	0	0	0	603	903	0
839	7	0	0	0	0	0	0	200	300	0	0	0	0	0	0	0	200	903	0	0	0	0	0	0	0	603	903	0
839	8	0	0	0	0	0	0	200	300	0	0	0	0	0	0	0	200	903	0	0	0	0	0	0	0	603	903	0
839	9	0	0	0	0	0	0	200	300	0	0	0	0	0	0	0	200	903	0	0	0	0	0	0	0	603	903	0
840	0	0	0	0	0	0	0	200	300	0	0	0	0	0	0	0	200	903	0	0	0	0	0	0	0	603	903	0
840	1	0	0	0	0	0	0	200	300	0	0	0	0	0	0	0	200	903	0	0	0	0	0	0	0	603	903	0
840	2	0	0	0	0	0	0	200	300	0	0	0	0	0	0	0	200	903	0	0	0	0	0	0	0	603	903	0
840	3	0	0	0	0	0	0	200	300	0	0	0	0	0	0	0	200	903	0	0	0	0	0	0	0	603	903	0
840	4	0	0	0	0	0	0	200	300	0	0	0	0	0	0	0	200	903	0	0	0	0	0	0	0	603	903	0
840	5	0	0	0	0	0	0	200	300	0	0	0	0	0	0	0	200	903	0	0	0	0	0	0	0	603	903	0
840	6	0	0	0	0	0	0	200	300	0	0	0	0	0	0	0	200	903	0	0	0	0	0	0	0	603	903	0
840	7	0	0	0	0	0	0	200	300	0	0	0	0	0	0	0	200	903	0	0	0	0	0	0	0	603	903	0
840	8	0	0	0	0	0	0	200	300	0	0	0	0	0	0	0	200	903	0	0	0	0	0	0	0	603	903	0
840	9	0	0	0	0	0	0	200	300	0	0	0	0	0	0	0	200	903	0	0	0	0	0	0	0	603	903	0
841	0	0	0	0	0	0	0	200	300	0	0	0	0	0	0	0	200	903	0	0	0	0	0	0	0	603	903	0
841	1	0	0	0	0	0	0	200	300	0	0	0	0	0	0	0	200	903	0	0	0	0	0	0	0	603	903	0
841	2	0	0	0	0	0	0	200	300	0	0	0	0	0	0	0	200	903	0	0	0	0	0	0	0	603	903	0
841	3	0	0	0	0	0	0	200	300	0	0	0	0	0	0	0	200	903	0	0	0	0	0	0	0	603	903	0
841	4	0	0	0	0	0	0	200	300	0	0	0	0	0	0	0	200	903	0	0	0	0	0	0	0	603	903	0
841	5	0	0	0	0	0	0	200	300	0	0	0	0	0	0	0	200	903	0	0	0	0	0	0	0	603	903	0
841	6	0	0	0	0	0	0	200	300	0	0	0	0	0	0	0	200	903	0	0	0	0	0	0	0	603	903	0
841	7	0	0	0	0	0	0	200	300	0	0	0	0	0	0	0	200	903	0	0	0	0	0	0	0	603	903	0
841	8	0	0	0	0	0	0	200	300	0	0	0	0	0	0	0	200	903	0	0	0	0	0	0	0	603	903	0
841	9	0	0	0	0	0	0	200	300	0	0	0	0	0	0	0	200	903	0	0	0	0	0	0	0	603	903	0
842	0	0	0	0	0	0	0	200	300	0	0	0	0	0	0	0	200	903	0	0	0	0	0	0	0	603	903	0
842	1	0	0	0	0	0	0	200	300	0	0	0	0	0	0	0	200	903	0	0	0	0	0	0	0	603	903	0
842	2	0	0	0	0	0	0	200	300	0	0	0	0	0	0	0	200	903	0	0	0	0	0	0	0	603	903	0
842	3	0	0	0	0	0	0	200	300	0	0	0	0	0	0	0	200	903	0	0	0	0	0	0	0	603	903	0
842	4	0	0	0	0	0	0	200	300	0	0	0	0	0	0	0	200	903	0	0	0	0	0	0	0	603	903	0
842	5	0	0	0	0	0	0	200	300	0	0	0	0	0	0	0	200	903	0	0	0	0	0	0	0	603	903	0
842	6	0	0	0	0	0	0	200	300	0	0	0	0	0	0	0	200	903	0	0	0	0	0	0	0	603	903	0
842	7	0	0	0	0	0	0	200	300	0	0	0	0	0	0	0	200	903	0	0	0	0	0	0	0	603	903	0
842	8	0	0	0	0	0	0	200	300	0	0	0	0	0	0	0	200	903	0	0	0	0	0	0	0	603	903	0
842	9	0	0	0	0	0	0	200	300	0	0	0	0	0	0	0	200	903	0	0	0	0	0	0	0	603	903	0
843	0	0	0	0	0	0	0	200	300	0	0	0	0	0	0	0	200	903	0	0	0	0	0	0	0	603	903	0
843	1	0	0	0	0	0	0	200	300	0	0	0	0	0	0	0	200	903	0	0	0	0	0	0	0	603	903	0
843	2	0	0	0	0	0	0	200	300	0	0	0	0	0	0	0	200	903	0	0	0	0	0	0	0	603	903	0
843	3	0	0	0	0	0	0	200	300	0	0	0	0	0	0	0	200	903	0	0	0	0	0	0	0	603	903	0
843	4	0	0	0	0	0	0	200	300	0	0	0	0	0	0	0	200	903	0	0	0	0	0	0	0	603	903	0
843	5	0	0	0	0	0	0	200	300	0	0	0	0	0	0	0	200	903	0	0	0	0	0	0	0	603	903	0
843	6	0	0	0	0	0	0	200	300	0	0	0	0	0	0	0	200	903	0	0	0	0	0	0	0	603	903	0
843	7	0	0	0	0	0	0	200	300	0	0	0	0	0	0	0	200	903	0	0	0	0	0	0	0	603	903	0
843	8	0	0	0	0	0	0	200	300	0	0	0	0	0	0	0	200	903	0	0	0	0	0	0	0	603	903	0
843	9	0	0	0	0	0	0	200	300	0	0	0	0	0	0	0	200	903	0	0	0	0	0	0	0	603	903	0
844	0	0	0	0	0	0	0	200	300	0	0	0	0	0	0	0	200	903	0	0	0	0	0	0	0	603	903	0
844	1	0	0	0	0	0	0	200	300	0	0	0	0	0	0	0	200	903	0	0	0	0	0	0	0	603	903	0
844	2	0	0	0	0	0	0	200	300	0	0	0	0	0	0	0	200	903	0	0	0	0	0	0	0	603	903	0
844	3	0	0	0	0	0	0	200	300	0	0	0	0	0	0	0	200	903	0	0	0	0	0	0	0	603	903	0
844	4	0	0	0	0	0	0	200	300	0	0	0	0	0	0	0	200	903	0	0	0	0	0	0	0	603	903	0
844	5	0	0	0	0	0	0	200	300	0	0	0	0	0	0	0	200	903	0	0	0	0	0	0	0	603	903	0
844	6	0	0	0	0	0	0	200	300	0	0	0	0	0	0	0	200	903	0	0	0	0	0	0	0	603	903	0
844	7	0	0	0	0	0	0	200	300	0	0	0	0	0	0	0	200	903	0	0	0	0	0	0	0	603	903	0
844	8	0	0	0	0	0	0	200	300	0	0	0	0	0	0	0	200	903	0	0	0	0	0	0	0	603	903	0
844	9	0	0	0	0	0	0	200	300	0	0	0	0	0	0	0	200	903	0	0	0	0	0	0	0	603	903	0
845	0	0	0	0	0	0	0	200	300	0	0	0	0	0	0	0	200	903	0	0	0	0	0	0	0	603	903	0
845	1	0	0	0	0	0	0	200	300	0	0	0	0	0	0	0	200	903	0	0	0	0	0	0	0	603	903	0
845	2	0	0	0	0	0	0	200	300	0	0	0	0	0	0	0	200	903	0	0	0	0	0	0	0	603	903	0
845	3	0	0	0	0	0	0	200	300	0	0	0	0	0	0	0	200	903	0	0	0	0	0	0	0	603	903	0
845	4	0	0	0	0	0	0	200	300	0	0	0	0	0	0	0	200	903	0	0	0	0	0	0	0	603	903	0
845	5	0	0	0	0	0	0	200	300	0	0	0	0	0	0	0	200	903	0	0	0	0	0	0	0	603	903	0
845	6	0	0	0	0	0	0	200	300	0	0	0	0	0	0	0	200	903	0	0	0	0	0	0	0	603	903	0
845	7	0	0	0	0	0	0	200	300	0	0	0	0	0	0	0	200	903	0	0	0	0	0	0	0	603	903	0
845	8	0	0	0	0	0	0	200	300	0	0	0	0	0	0	0	200	903	0	0	0	0	0	0	0	603	903	0
845	9	0	0	0	0	0	0	200	300	0	0	0	0	0	0	0	200	903	0	0	0	0	0	0	0	603	903	0
846	0	0	0	0	0	0	0	200	300	0	0	0	0	0	0	0	200	903	0	0	0	0	0	0	0	603	903	0
846	1	0	0	0	0	0	0	200	300	0	0	0	0	0	0	0	200	903	0	0	0	0	0	0	0	603	903	0
846	2	0	0	0	0	0	0	200	300	0	0	0	0	0	0	0	200	903	0	0	0	0	0	0	0	603	903	0
846	3	0	0	0	0	0	0	200	300	0	0	0	0	0	0	0	200	903	0	0	0	0	0	0	0	603	903	0
846	4	0	0	0	0	0	0	200	300	0	0	0	0	0	0	0	200	903	0	0	0	0	0	0	0	603	903	0
846	5	0	0	0	0	0	0	200	300	0	0	0	0	0	0	0	200	903	0	0	0	0	0	0	0	603	903	0
846	6	0	0	0	0	0	0	200	300	0	0	0	0	0	0	0	200	903	0	0	0	0	0	0	0	603	903	0
846	7	0	0	0	0	0	0	200	300	0	0	0	0	0	0	0	200	903	0	0	0	0	0	0	0	603	903	0
846	8	0	0	0	0	0	0	200	300	0	0	0	0	0	0	0	200	903	0	0	0	0	0	0	0	603	903	0
846	9	0	0	0	0	0	0	200	300	0	0	0	0	0	0	0	200	903	0	0	0	0	0	0	0	603	903	0
847	0	0	0	0	0	0	0	200	300	0	0	0	0	0	0	0	200	903	0	0	0	0	0	0	0	603	903	0
847	1	0	0	0	0	0	0	200	300	0	0	0	0	0	0	0	200	903	0	0	0	0	0	0	0	603	903	0
847	2	0	0	0	0	0	0	200	300	0	0	0	0	0	0	0	200	903	0	0	0	0	0	0	0	603	903	0
847	3	0	0	0	0	0	0	200	300	0	0	0	0	0	0	0	200	903	0	0	0	0	0	0	0	603	903	0
847	4	0	0	0	0	0	0	200	300	0	0	0	0	0	0	0	200	903	0	0	0	0	0	0	0	603	903	0
847	5	0	0	0	0	0	0	200	300	0	0	0	0	0	0	0	200	903	0	0	0	0	0	0	0	603	903	0
847	6	0	0	0	0	0	0	200	300	0	0	0	0	0	0	0	200	903	0	0	0	0	0	0	0	603	903	0
847	7	0	0	0	0	0	0	200	300	0	0	0	0	0	0	0	200	903	0	0	0	0	0	0	0	603	903	0
847	8	0	0	0	0	0	0	200	300	0	0	0	0	0	0	0	200	903	0	0	0	0	0	0	0	603	903	0
847	9	0	0	0	0	0	0	200	300	0	0	0	0	0	0	0	200	903	0	0	0	0	0	0	0	603	903	0
848	0	0	0	0	0	0	0	200	300	0	0	0	0	0	0	0	200	903	0	0	0	0	0	0	0	603	903	0
848	1	0	0	0	0	0	0	200	300	0	0	0	0	0	0	0	200	903	0	0	0	0	0	0	0	603	903	0
848	2	0	0	0	0	0	0	200	300	0	0	0	0	0	0	0	200	903	0	0	0	0	0	0	0	603	903	0
848	3	0	0	0	0	0	0	200	300	0	0	0	0	0	0	0	200	903	0	0	0	0	0	0	0	603	903	0
848	4	0	0	0	0	0	0	200	300	0	0	0	0	0	0	0	200	903	0	0	0	0	0	0	0	603	903	0
848	5	0	0	0	0	0	0	200	300	0	0	0	0	0	0	0	200	903	0	0	0	0	0	0	0	603	903	0
848	6	0	0	0	0	0	0	200	300	0	0	0	0	0	0	0	200	903	0	0	0	0	0	0	0	603	903	0
848	7	0	0	0	0	0	0	200	300	0	0	0	0	0	0	0	200	903	0	0	0	0	0	0	0	603	903	0
848	8	0	0	0	0	0	0	200	300	0	0	0	0	0	0	0	200	903	0	0	0	0	0	0	0	603	903	0
848	9	0	0	0	0	0	0	200	300	0	0	0	0	0	0	0	200	903	0	0	0	0	0	0	0	603	903	0
849	0	0	0	0	0	0	0	200	300	0	0	0	0	0	0	0	200	903	0	0	0	0	0	0	0	603	903	0
849	1	0	0	0	0	0	0	200	300	0	0	0	0	0	0	0	200	903	0	0	0	0	0	0	0	603	903	0
849	2	0	0	0	0	0	0	200	300	0	0	0	0	0	0	0	200	903	0	0	0	0	0	0	0	603	903	0
849	3	0	0	0	0	0	0	200	300	0	0	0	0	0	0	0	200	903	0	0	0	0	0	0	0	603	903	0
849	4	0	0	0	0	0	0	200	300	0	0	0	0	0	0	0	200	903	0	0	0	0	0	0	0	603	903	0
849	5	0	0	0	0	0	0	200	300	0	0	0	0	0	0	0	200	903	0	0	0	0	0	0	0	603	903	0
849	6	0	0	0	0	0	0	200	300	0	0	0	0	0	0	0	200	903	0	0	0	0	0	0	0	603	903	0
849	7	0	0	0	0	0	0	200	300	0	0	0	0	0	0	0	200	903	0	0	0	0	0	0	0	603	903	0
849	8	0	0	0	0	0	0	200	300	0	0	0	0	0	0	0	200	903	0	0	0	0	0	0	0	603	903	0
849	9	0	0	0	0	0	0	200	300	0	0	0	0	0	0	0	200	903	0	0	0	0	0	0	0	603	903	0
850	0	0	0	0	0	0	0	200	300	0	0	0	0	0	0	0	200	903	0	0	0	0	0	0	0	603	903	0
850	1	0	0	0	0	0	0	200	300	0	0	0	0	0	0	0	200	903	0	0	0	0	0	0	0	603	903	0
850	2	0	0	0	0	0	0	200	300	0	0	0	0	0	0	0	200	903	0	0	0	0	0	0	0	603	903	0
850	3	0	0	0	0	0	0	200	300	0	0	0	0	0	0	0	200	903	0	0	0	0	0	0	0	603	903	0
850	4	0	0	0	0	0	0	200	300	0	0	0	0	0	0	0	200	903	0	0	0	0	0	0	0	603	903	0
850	5	0	0	0	0	0	0	200	300	0	0	0	0	0	0	0	200	903	0	0	0	0	0	0	0	603	903	0
850	6	0	0	0	0	0	0	200	300	0	0	0	0	0	0	0	200	903	0	0	0	0	0	0	0	603	903	0
850	7	0	0	0	0	0	0	200	300	0	0	0	0	0	0	0	200	903	0	0	0	0	0	0	0	603	903	0
850	8	0	0	0	0	0	0	200	300	0	0	0	0	0	0	0	200	903	0	0	0	0	0	0	0	603	903	0
850	9	0	0	0	0	0	0	200	300	0	0	0	0	0	0	0	200	903	0	0	0	0	0	0	0	603	903	0
851	0	0	0	0	0	0	0	200	300	0	0	0	0	0	0	0	200	903	0	0	0	0	0	0	0	603	903	0
851	1	0	0	0	0	0	0	200	300	0	0	0	0	0	0	0	200	903	0	0	0	0	0	0	0	603	903	0
851	2	0	0	0	0	0	0	200	300	0	0	0	0	0	0	0	200	903	0	0	0	0	0	0	0	603	903	0
851	3	0	0	0	0	0	0	200	300	0	0	0	0	0	0	0	200	903	0	0	0	0	0	0	0	603	903	0
851	4	0	0	0	0	0	0	200	300	0	0	0	0	0	0	0	200	903	0	0	0	0	0	0	0	603	903	0
851	5	0	0	0	0	0	0	200	300	0	0	0	0	0	0	0	200	903	0	0	0	0	0	0	0	603	903	0
851	6	0	0	0	0	0	0	200	300	0	0	0	0	0	0	0	200	903	0	0	0	0	0	0	0	603	903	0
851	7	0	0	0	0	0	0	200	300	0	0	0	0	0	0	0	200	903	0	0	0	0	0	0	0	603	903	0
851	8	0	0	0	0	0	0	200	300	0	0	0	0	0	0	0	200	903	0	0	0	0	0	0	0	603	903	0
851	9	0	0	0	0	0	0	200	300	0	0	0	0	0	0	0	200	903	0	0	0	0	0	0	0	603	903	0
852	0	0	0	0	0	0	0	200	300	0	0	0	0	0	0	0	200	903	0	0	0	0	0	0	0	603	903	0
852	1	0	0	0	0	0	0	200	300	0	0	0	0	0	0	0	200	903	0	0	0	0	0	0	0	603	903	0
852	2	0	0	0	0	0	0	200	300	0	0	0	0	0	0	0	200	903	0	0	0	0	0	0	0	603	903	0
852	3	0	0	0	0	0	0	200	300	0	0	0	0	0	0	0	200	903	0	0	0	0	0	0	0	603	903	0
852	4	0	0	0	0	0	0	200	300	0	0	0	0	0	0	0	200	903	0	0	0	0	0	0	0	603	903	0
852	5	0	0	0	0	0	0	200	300	0	0	0	0	0	0	0	200	903	0	0	0	0	0	0	0	603	903	0
852	6	0	0	0	0	0	0	200	300	0	0	0	0	0	0	0	200	903	0	0	0	0	0	0	0	603	903	0
852	7	0	0	0	0	0	0	200	300	0	0	0	0	0	0	0	200	903	0	0	0	0	0	0	0	603	903	0
852	8	0	0	0	0	0	0	200	300	0	0	0	0	0	0	0	200	903	0	0	0	0	0	0	0	603	903	0
852	9	0	0	0	0	0	0	200	300	0	0	0	0	0	0	0	200	903	0	0	0	0	0	0	0	603	903	0
853	0	0	0	0	0	0	0	200	300	0	0	0	0	0	0	0	200	903	0	0	0	0	0	0	0	603	903	0
853	1	0	0	0	0	0	0	200	300	0	0	0	0	0	0	0	200	903	0	0	0	0	0	0	0	603	903	0
853	2	0	0	0	0	0	0	200	300	0	0	0	0	0	0	0	200	903	0	0	0	0	0	0	0	603	903	0
853	3	0	0	0	0	0	0	200	300	0	0	0	0	0	0	0	200	903	0	0	0	0	0	0	0	603	903	0
853	4	0	0	0	0	0	0	200	300	0	0	0	0	0	0	0	200	903	0	0	0	0	0	0	0	603	903	0
853	5	0	0	0	0	0	0	200	300	0	0	0	0	0	0	0	200	903	0	0	0	0	0	0	0	603	903	0
853	6	0	0	0	0	0	0	200	300	0	0	0	0	0	0	0	200	903	0	0	0	0	0	0	0	603	903	0
853	7	0	0	0	0	0	0	200	300	0	0	0	0	0	0	0	200	903	0	0	0	0	0	0	0	603	903	0
853	8	0	0	0	0	0	0	200	300	0	0	0	0	0	0	0	200	903	0	0	0	0	0	0	0	603	903	0
853	9	0	0	0	0	0	0	200	300	0	0	0	0	0	0	0	200	903	0	0	0	0	0	0	0	603	903	0
854	0	0	0	0	0	0	0	200	300	0	0	0	0	0	0	0	200	903	0	0	0	0	0	0	0	603	903	0
854	1	0	0	0	0	0	0	200	300	0	0	0	0	0	0	0	200	903	0	0	0	0	0	0	0	603	903	0
854	2	0	0	0	0	0	0	200	300	0	0	0	0	0	0	0	200	903	0	0	0	0	0	0	0	603	903	0
854	3	0	0	0	0	0	0	200	300	0	0	0	0	0	0	0	200	903	0	0	0	0	0	0	0	603	903	0
854	4	0	0	0	0	0	0	200	300	0	0	0	0	0	0	0	200	903	0	0	0	0	0	0	0	603	903	0
854	5	0	0	0	0	0	0	200	300	0	0	0	0	0	0	0	200	903	0	0	0	0	0	0	0	603	903	0
854	6	0	0	0	0	0	0	200	300	0	0	0	0	0	0	0	200	903	0	0	0	0	0	0	0	603	903	0
854	7	0	0	0	0	0	0	200	300	0	0	0	0	0	0	0	200	903	0	0	0	0	0	0	0	603	903	0
854	8	0	0	0	0	0	0	200	300	0	0	0	0	0	0	0	200	903	0	0	0	0	0	0	0	603	903	0
854	9	0	0	0	0	0	0	200	300	0	0	0	0	0	0	0	200	903	0	0	0	0	0	0	0	603	903	0
855	0	0	0	0	0	0	0	200	300	0	0	0	0	0	0	0	200	903	0	0	0	0	0	0	0	603	903	0
855	1	0	0	0	0	0	0	200	300	0	0	0	0	0	0	0	200	903	0	0	0	0	0	0	0	603	903	0
855	2	0	0	0	0	0	0	200	300	0	0	0	0	0	0	0	200	903	0	0	0	0	0	0	0	603	903	0
855	3	0	0	0	0	0	0	200	300	0	0	0	0	0	0	0	200	903	0	0	0	0	0	0	0	603	903	0
855	4	0	0	0	0	0	0	200	300	0	0	0	0	0	0	0	200	903	0	0	0	0	0	0	0	603	903	0
855	5	0	0	0	0	0	0	200	300	0	0	0	0	0	0	0	200	903	0	0	0	0	0	0	0	603	903	0
855	6	0	0	0	0	0	0	200	300	0	0	0	0	0	0	0	200	903	0	0	0	0	0	0	0	603	903	0
855	7	0	0	0	0	0	0	200	300	0	0	0	0	0	0	0	200	903	0	0	0	0	0	0	0	603	903	0
855	8	0	0	0	0	0	0	200	300	0	0	0	0	0	0	0	200	903	0	0	0	0	0	0	0	603	903	0
855	9	0	0	0	0	0	0	200	300	0	0	0	0	0	0	0	200	903	0	0	0	0	0	0	0	603	903	0
856	0	0	0	0	0	0	0	200	300	0	0	0	0	0	0	0	200	903	0	0	0	0	0	0	0	603	903	0
856	1	0	0	0	0	0	0	200	300	0	0	0	0	0	0	0	200	903	0	0	0	0	0	0	0	603	903	0
856	2	0	0	0	0	0	0	200	300	0	0	0	0	0	0	0	200	903	0	0	0	0	0	0	0	603	903	0
856	3	0	0	0	0	0	0	200	300	0	0	0	0	0	0	0	200	903	0	0	0	0	0	0	0	603	903	0
856	4	0	0	0	0	0	0	200	300	0	0	0	0	0	0	0	200	903	0	0	0	0	0	0	0	603	903	0
856	5	0	0	0	0	0	0	200	300	0	0	0	0	0	0	0	200	903	0	0	0	0	0	0	0	603	903	0
856	6	0	0	0	0	0	0	200	300	0	0	0	0	0	0	0	200	903	0	0	0	0	0	0	0	603	903	0
856	7	0	0	0	0	0	0	200	300	0	0	0	0	0	0	0	200	903	0	0	0	0	0	0	0	603	903	0
856	8	0	0	0	0	0	0	200	300	0	0	0	0	0	0	0	200	903	0	0	0	0	0	0	0	603	903	0
856	9	0	0	0	0	0	0	200	300	0	0	0	0	0	0	0	200	903	0	0	0	0	0	0	0	603	903	0
857	0	0	0	0	0	0	0	200	300	0	0	0	0	0	0	0	200	903	0	0	0	0	0	0	0	603	903	0
857	1	0	0	0	0	0	0	200	300	0	0	0	0	0	0	0	200	903	0	0	0	0	0	0	0	603	903	0
857	2	0	0	0	0	0	0	200	300	0	0	0	0	0	0	0	200	903	0	0	0	0	0	0	0	603	903	0
857	3	0	0	0	0	0	0	200	300	0	0	0	0	0	0	0	200	903	0	0	0	0	0	0	0	603	903	0
857	4	0	0	0	0	0	0	200	300	0	0	0	0	0	0	0	200	903	0	0	0	0	0	0	0	603	903	0
857	5	0	0	0	0	0	0	200	300	0	0	0	0	0	0	0	200	903	0	0	0	0	0	0	0	603	903	0
857	6	0	0	0	0	0	0	200	300	0	0	0	0	0	0	0	200	903	0	0	0	0	0	0	0	603	903	0
857	7	0	0	0	0	0	0	200	300	0	0	0	0	0	0	0	200	903	0	0	0	0	0	0	0	603	903	0
857	8	0	0	0	0	0	0	200	300	0	0	0	0	0	0	0	200	903	0	0	0	0	0	0	0	603	903	0
857	9	0	0	0	0	0	0	200	300	0	0	0	0	0	0	0	200	903	0	0	0	0	0	0	0	603	903	0
858	0	0	0	0	0	0	0	200	300	0	0	0	0	0	0	0	200	903	0	0	0	0	0	0	0	603	903	0
858	1	0	0	0	0	0	0	200	300	0	0	0	0	0	0	0	200	903	0	0	0	0	0	0	0	603	903	0
858	2	0	0	0	0	0	0	200	300	0	0	0	0	0	0	0	200	903	0	0	0	0	0	0	0	603	903	0
858	3	0	0	0	0	0	0	200	300	0	0	0	0	0	0	0	200	903	0	0	0	0	0	0	0	603	903	0
858	4	0	0	0	0	0	0	200	300	0	0	0	0	0	0	0	200	903	0	0	0	0	0	0	0	603	903	0
858	5	0	0	0	0	0	0	200	300	0	0	0	0	0	0	0	200	903	0	0	0	0	0	0	0	603	903	0
858	6	0	0	0	0	0	0	200	300	0	0	0	0	0	0	0	200	903	0	0	0	0	0	0	0	603	903	0
858	7	0	0	0	0	0	0	200	300	0	0	0	0	0	0	0	200	903	0	0	0	0	0	0	0	603	903	0
858	8	0	0	0	0	0	0	200	300	0	0	0	0	0	0	0	200	903	0	0	0	0	0	0	0	603	903	0
858	9	0	0	0	0	0	0	200	300	0	0	0	0	0	0	0	200	903	0	0	0	0	0	0	0	603	903	0
859	0	0	0	0	0	0	0	200	300	0	0	0	0	0	0	0	200	903	0	0	0	0	0	0	0	603	903	0
859	1	0	0	0	0	0	0	200	300	0	0	0	0	0	0	0	200	903	0	0	0	0	0	0	0	603	903	0
859	2	0	0	0	0	0	0	200	300	0	0	0	0	0	0	0	200	903	0	0	0	0	0	0	0	603	903	0
859	3	0	0	0	0	0	0	200	300	0	0	0	0	0	0	0	200	903	0	0	0	0	0	0	0	603	903	0
859	4	0	0	0	0	0	0	200	300	0	0	0	0	0	0	0	200	903	0	0	0	0	0	0	0	603	903	0
859	5	0	0	0	0	0	0	200	300	0	0	0	0	0	0	0	200	903	0	0	0	0	0	0	0	603	903	0
859	6	0	0	0	0	0	0	200	300	0	0	0	0	0	0	0	200	903	0	0	0	0	0	0	0	603	903	0
859	7	0	0	0	0	0	0	200	300	0	0	0	0	0	0	0	200	903	0	0	0	0	0	0	0	603	903	0
859	8	0	0	0	0	0	0	200	300	0	0	0	0	0	0	0	200	903	0	0	0	0	0	0	0	603	903	0
859	9	0	0	0	0	0	0	200	300	0	0	0	0	0	0	0	200	903	0	0	0	0	0	0	0	603	903	0
860	0	0	0	0	0	0	0	200	300	0	0	0	0	0	0	0	200	903	0	0	0	0	0	0	0	603	903	0
860	1	0	0	0	0	0	0	200	300	0	0	0	0	0	0	0	200	903	0	0	0	0	0	0	0	603	903	0
860	2	0	0	0	0	0	0	200	300	0	0	0	0	0	0	0	200	903	0	0	0	0	0	0	0	603	903	0
860	3	0	0	0	0	0	0	200	300	0	0	0	0	0	0	0	200	903	0	0	0	0	0	0	0	603	903	0
860	4	0	0	0	0	0	0	200	300	0	0	0	0	0	0	0	200	903	0	0	0	0	0	0	0	603	903	0
860	5	0	0	0	0	0	0	200	300	0	0	0	0	0	0	0	200	903	0	0	0	0	0	0	0	603	903	0
860	6	0	0	0	0	0	0	200	300	0	0	0	0	0	0	0	200	903	0	0	0	0	0	0	0	603	903	0
860	7	0	0	0	0	0	0	200	300	0	0	0	0	0	0	0	200	903	0	0	0	0	0	0	0	603	903	0
860	8	0	0	0	0	0	0	200	300	0	0	0	0	0	0	0	200	903	0	0	0	0	0	0	0	603	903	0
860	9	0	0	0	0	0	0	200	300	0	0	0	0	0	0	0	200	903	0	0	0	0	0	0	0	603	903	0
861	0	0	0	0	0	0	0	200	300	0	0	0	0	0	0	0	200	903	0	0	0	0	0	0	0	603	903	0
861	1	0	0	0	0	0	0	200	300	0	0	0	0	0	0	0	200	903	0	0	0	0	0	0	0	603	903	0
861	2	0	0	0	0	0	0	200	300	0	0	0	0	0	0	0	200	903	0	0	0	0	0	0	0	603	903	0
861	3	0	0	0	0	0	0	200	300	0	0	0	0	0	0	0	200	903	0	0	0	0	0	0	0	603	903	0
861	4	0	0	0	0	0	0	200	300	0	0	0	0	0	0	0	200	903	0	0	0	0	0	0	0	603	903	0
861	5	0	0	0	0	0	0	200	300	0	0	0	0	0	0	0	200	903	0	0	0	0	0	0	0	603	903	0
861	6	0	0	0	0	0	0	200	300	0	0	0	0	0	0	0	200	903	0	0	0	0	0	0	0	603	903	0
861	7	0	0	0	0	0	0	200	300	0	0	0	0	0	0	0	200	903	0	0	0	0	0	0	0	603	903	0
861	8	0	0	0	0	0	0	200	300	0	0	0	0	0	0	0	200	903	0	0	0	0	0	0	0	603	903	0
861	9	0	0	0	0	0	0	200	300	0	0	0	0	0	0	0	200	903	0	0	0	0	0	0	0	603	903	0
862	0	0	0	0	0	0	0	200	300	0	0	0	0	0	0	0	200	903	0	0	0	0	0	0	0	603	903	0
862	1	0	0	0	0	0	0	200	300	0	0	0	0	0	0	0	200	903	0	0	0	0	0	0	0	603	903	0
862	2	0	0	0	0	0	0	200	300	0	0	0	0	0	0	0	200	903	0	0	0	0	0	0	0	603	903	0
862	3	0	0	0	0	0	0	200	300	0	0	0	0	0	0	0	200	903	0	0	0	0	0	0	0	603	903	0
862	4	0	0	0	0	0	0	200	300	0	0	0	0	0	0	0	200	903	0	0	0	0	0	0	0	603	903	0
862	5	0	0	0	0	0	0	200	300	0	0	0	0	0	0	0	200	903	0	0	0	0	0	0	0	603	903	0
862	6	0	0	0	0	0	0	200	300	0	0	0	0	0	0	0	200	903	0	0	0	0	0	0	0	603	903	0
862	7	0	0	0	0	0	0	200	300	0	0	0	0	0	0	0	200	903	0	0	0	0	0	0	0	603	903	0
862	8	0	0	0	0	0	0	200	300	0	0	0	0	0	0	0	200	903	0	0	0	0	0	0	0	603	903	0
862	9	0	0	0	0	0	0	200	300	0	0	0	0	0	0	0	200	903	0	0	0	0	0	0	0	603	903	0
863	0	0	0	0	0	0	0	200	300	0	0	0	0	0	0	0	200	903	0	0	0	0	0	0	0	603	903	0
863	1	0	0	0	0	0	0	200	300	0	0	0	0	0	0	0	200	903	0	0	0	0	0	0	0	603	903	0
863	2	0	0	0	0	0	0	200	300	0	0	0	0	0	0	0	200	903	0	0	0	0	0	0	0	603	903	0
863	3	0	0	0	0	0	0	200	300	0	0	0	0	0	0	0	200	903	0	0	0	0	0	0	0	603	903	0
863	4	0	0	0	0	0	0	200	300	0	0	0	0	0	0	0	200	903	0	0	0	0	0	0	0	603	903	0
863	5	0	0	0	0	0	0	200	300	0	0	0	0	0	0	0	200	903	0	0	0	0	0	0	0	603	903	0
863	6	0	0	0	0	0	0	200	300	0	0	0	0	0	0	0	200	903	0	0	0	0	0	0	0	603	903	0
863	7	0	0	0	0	0	0	200	300	0	0	0	0	0	0	0	200	903	0	0	0	0	0	0	0	603	903	0
863	8	0	0	0	0	0	0	200	300	0	0	0	0	0	0	0	200	903	0	0	0	0	0	0	0	603	903	0
863	9	0	0	0	0	0	0	200	300	0	0	0	0	0	0	0	200	903	0	0	0	0	0	0	0	603	903	0
864	0	0	0	0	0	0	0	200	300	0	0	0	0	0	0	0	200	903	0	0	0	0	0	0	0	603	903	0
864	1	0	0	0	0	0	0	200	300	0	0	0	0	0	0	0	200	903	0	0	0	0	0	0	0	603	903	0
864	2	0	0	0	0	0	0	200	300	0	0	0	0	0	0	0	200	903	0	0	0	0	0	0	0	603	903	0
864	3	0	0	0	0	0	0	200	300	0	0	0	0	0	0	0	200	903	0	0	0	0	0	0	0	603	903	0
864	4	0	0	0	0	0	0	200	300	0	0	0	0	0	0	0	200	903	0	0	0	0	0	0	0	603	903	0
864	5	0	0	0	0	0	0	200	300	0	0	0	0	0	0	0	200	903	0	0	0	0	0	0	0	603	903	0
864	6	0	0	0	0	0	0	200	300	0	0	0	0	0	0	0	200	903	0	0	0	0	0	0	0	603	903	0
864	7	0	0	0	0	0	0	200	300	0	0	0	0	0	0	0	200	903	0	0	0	0	0	0	0	603	903	0
864	8	0	0	0	0	0	0	200	300	0	0	0	0	0	0	0	200	903	0	0	0	0	0	0	0	603	903	0
864	9	0	0	0	0	0	0	200	300	0	0	0	0	0	0	0	200	903	0	0	0	0	0	0	0	603	903	0
865	0	0	0	0	0	0	0	200	300	0	0	0	0	0	0	0	200	903	0	0	0	0	0	0	0	603	903	0
865	1	0	0	0	0	0	0	200	300	0	0	0	0	0	0	0	200	903	0	0	0	0	0	0	0	603	903	0
865	2	0	0	0	0	0	0	200	300	0	0	0	0	0	0	0	200	903	0	0	0	0	0	0	0	603	903	0
865	3	0	0	0	0	0	0	200	300	0	0	0	0	0	0	0	200	903	0	0	0	0	0	0	0	603	903	0
865	4	0	0	0	0	0	0	200	300	0	0	0	0	0	0	0	200	903	0	0	0	0	0	0	0	603	903	0
865	5	0	0	0	0	0	0	200	300	0	0	0	0	0	0	0	200	903	0	0	0	0	0	0	0	603	903	0
865	6	0	0	0	0	0	0	200	300	0	0	0	0	0	0	0	200	903	0	0	0	0	0	0	0	603	903	0
865	7	0	0	0	0	0	0	200	300	0	0	0	0	0	0	0	200	903	0	0	0	0	0	0	0	603	903	0
865	8	0	0	0	0	0	0	200	300	0	0	0	0	0	0	0	200	903	0	0	0	0	0	0	0	603	903	0
865	9	0	0	0	0	0	0	200	300	0	0	0	0	0	0	0	200	903	0	0	0	0	0	0	0	603	903	0
866	0	0	0	0	0	0	0	200	300	0	0	0	0	0	0	0	200	903	0	0	0	0	0	0	0	603	903	0
866	1	0	0	0	0	0	0	200	300	0	0	0	0	0	0	0	200	903	0	0	0	0	0	0	0	603	903	0
866	2	0	0	0	0	0	0	200	300	0	0	0	0	0	0	0	200	903	0	0	0	0	0	0	0	603	903	0
866	3	0	0	0	0	0	0	200	300	0	0	0	0	0	0	0	200	903	0	0	0	0	0	0	0	603	903	0
866	4	0	0	0	0	0	0	200	300	0	0	0	0	0	0	0	200	903	0	0	0	0	0	0	0	603	903	0
866	5	0	0	0	0	0	0	200	300	0	0	0	0	0	0	0	200	903	0	0	0	0	0	0	0	603	903	0
866	6	0	0	0	0	0	0	200	300	0	0	0	0	0	0	0	200	903	0	0	0	0	0	0	0	603	903	0
866	7	0	0	0	0	0	0	200	300	0	0	0	0	0	0	0	200	903	0	0	0	0	0	0	0	603	903	0
866	8	0	0	0	0	0	0	200	300	0	0	0	0	0	0	0	200	903	0	0	0	0	0	0	0	603	903	0
866	9	0	0	0	0	0	0	200	300	0	0	0	0	0	0	0	200	903	0	0	0	0	0	0	0	603	903	0
867	0	0	0	0	0	0	0	200	300	0	0	0	0	0	0	0	200	903	0	0	0	0	0	0	0	603	903	0
867	1	0	0	0	0	0	0	200	300	0	0	0	0	0	0	0	200	903	0	0	0	0	0	0	0	603	903	0
867	2	0	0	0	0	0	0	200	300	0	0	0	0	0	0	0	200	903	0	0	0	0	0	0	0	603	903	0
867	3	0	0	0	0	0	0	200	300	0	0	0	0	0	0	0	200	903	0	0	0	0	0	0	0	603	903	0
867	4	0	0	0	0	0	0	200	300	0	0	0	0	0	0	0	200	903	0	0	0	0	0	0	0	603	903	0
867	5	0	0	0	0	0	0	200	300	0	0	0	0	0	0	0	200	903	0	0	0	0	0	0	0	603	903	0
867	6	0	0	0	0	0	0	200	300	0	0	0	0	0	0	0	200	903	0	0	0	0	0	0	0	603	903	0
867	7	0	0	0	0	0	0	200	300	0	0	0	0	0	0	0	200	903	0	0	0	0	0	0	0	603	903	0
867	8	0	0	0	0	0	0	200	300	0	0	0	0	0	0	0	200	903	0	0	0	0	0	0	0	603	903	0
867	9	0	0	0	0	0	0	200	300	0	0	0	0	0	0	0	200	903	0	0	0	0	0	0	0	603	903	0
868	0	0	0	0	0	0	0	200	300	0	0	0	0	0	0	0	200	903	0	0	0	0	0	0	0	603	903	0
868	1	0	0	0	0	0	0	200	300	0	0	0	0	0	0	0	200	903	0	0	0	0	0	0	0	603	903	0
868	2	0	0	0	0	0	0	200	300	0	0	0	0	0	0	0	200	903	0	0	0	0	0	0	0	603	903	0
868	3	0	0	0	0	0	0	200	300	0	0	0	0	0	0	0	200	903	0	0	0	0	0	0	0	603	903	0
868	4	0	0	0	0	0	0	200	300	0	0	0	0	0	0	0	200	903	0	0	0	0	0	0	0	603	903	0
868	5	0	0	0	0	0	0	200	300	0	0	0	0	0	0	0	200	903	0	0	0	0	0	0	0	603	903	0
868	6	0	0	0	0	0	0	200	300	0	0	0	0	0	0	0	200	903	0	0	0	0	0	0	0	603	903	0
868	7	0	0	0	0	0	0	200	300	0	0	0	0	0	0	0	200	903	0	0	0	0	0	0	0	603	903	0
868	8	0	0	0	0	0	0	200	300	0	0	0	0	0	0	0	200	903	0	0	0	0	0	0	0	603	903	0
868	9	0	0	0	0	0	0	200	300	0	0	0	0	0	0	0	200	903	0	0	0	0	0	0	0	603	903	0
869	0	0	0	0	0	0	0	200	300	0	0	0	0	0	0	0	200	903	0	0	0	0	0	0	0	603	903	0
869	1	0	0	0	0	0	0	200	300	0	0	0	0	0	0	0	200	903	0	0	0	0	0	0	0	603	903	0
869	2	0	0	0	0	0	0	200	300	0	0	0	0	0	0	0	200	903	0	0	0	0	0	0	0	603	903	0
869	3	0	0	0	0	0	0	200	300	0	0	0	0	0	0	0	200	903	0	0	0	0	0	0	0	603	903	0
869	4	0	0	0	0	0	0	200	300	0	0	0	0	0	0	0	200	903	0	0	0	0	0	0	0	603	903	0
869	5	0	0	0	0	0	0	200	300	0	0	0	0	0	0	0	200	903	0	0	0	0	0	0	0	603	903	0
869	6	0	0	0	0	0	0	200	300	0	0	0	0	0	0	0	200	903	0	0	0	0	0	0	0	603	903	0
869	7	0	0	0	0	0	0	200	300	0	0	0	0	0	0	0	200	903	0	0	0	0	0	0	0	603	903	0
869	8	0	0	0	0	0	0	200	300	0	0	0	0	0	0	0	200	903	0	0	0	0	0	0	0	603	903	0
869	9	0	0	0	0	0	0	200	300	0	0	0	0	0	0	0	200	903	0	0	0	0	0	0	0	603	903	0
870	0	0	0	0	0	0	0	200	300	0	0	0	0	0	0	0	200	903	0	0	0	0	0	0	0	603	903	0
870	1	0	0	0	0	0	0	200	300	0	0	0	0	0	0	0	200	903	0	0	0	0	0	0	0	603	903	0
870	2	0	0	0	0	0	0	200	300	0	0	0	0	0	0	0	200	903	0	0	0	0	0	0	0	603	903	0
870	3	0	0	0	0	0	0	200	300	0	0	0	0	0	0	0	200	903	0	0	0	0	0	0	0	603	903	0
870	4	0	0	0	0	0	0	200	300	0	0	0	0	0	0	0	200	903	0	0	0	0	0	0	0	603	903	0
870	5	0	0	0	0	0	0	200	300	0	0	0	0	0	0	0	200	903	0	0	0	0	0	0	0	603	903	0
870	6	0	0	0	0	0	0	200	300	0	0	0	0	0	0	0	200	903	0	0	0	0	0	0	0	603	903	0
870	7	0	0	0	0	0	0	200	300	0	0	0	0	0	0	0	200	903	0	0	0	0	0	0	0	603	903	0
870	8	0	0	0	0	0	0	200	300	0	0	0	0	0	0	0	200	903	0	0	0	0	0	0	0	603	903	0
870	9	0	0	0	0	0	0	200	300	0	0	0	0	0	0	0	200	903	0	0	0	0	0	0	0	603	903	0
871	0	0	0	0	0	0	0	200	300	0	0	0	0	0	0	0	200	903	0	0	0	0	0	0	0	603	903	0
871	1	0	0	0	0	0	0	200	300	0	0	0	0	0	0	0	200	903	0	0	0	0	0	0	0	603	903	0
871	2	0	0	0	0	0	0	200	300	0	0	0	0	0	0	0	200	903	0	0	0	0	0	0	0	603	903	0
871	3	0	0	0	0	0	0	200	300	0	0	0	0	0	0	0	200	903	0	0	0	0	0	0	0	603	903	0
871	4	0	0	0	0	0	0	200	300	0	0	0	0	0	0	0	200	903	0	0	0	0	0	0	0	603	903	0
871	5	0	0	0	0	0	0	200	300	0	0	0	0	0	0	0	200	903	0	0	0	0	0	0	0	603	903	0
871	6	0	0	0	0	0	0	200	300	0	0	0	0	0	0	0	200	903	0	0	0	0	0	0	0	603	903	0
871	7	0	0	0	0	0	0	200	300	0	0	0	0	0	0	0	200	903	0	0	0	0	0	0	0	603	903	0
871	8	0	0	0	0	0	0	200	300	0	0	0	0	0	0	0	200	903	0	0	0	0	0	0	0	603	903	0
871	9	0	0	0	0	0	0	200	300	0	0	0	0	0	0	0	200	903	0	0	0	0	0	0	0	603	903	0
872	0	0	0	0	0	0	0	200	300	0	0	0	0	0	0	0	200	903	0	0	0	0	0	0	0	603	903	0
872	1	0	0	0	0	0	0	200	300	0	0	0	0	0	0	0	200	903	0	0	0	0	0	0	0	603	903	0
872	2	0	0	0	0	0	0	200	300	0	0	0	0	0	0	0	200	903	0	0	0	0	0	0	0	603	903	0
872	3	0	0	0	0	0	0	200	300	0	0	0	0	0	0	0	200	903	0	0	0	0	0	0	0	603	903	0
872	4	0	0	0	0	0	0	200	300	0	0	0	0	0	0	0	200	903	0	0	0	0	0	0	0	603	903	0
872	5	0	0	0	0	0	0	200	300	0	0	0	0	0	0	0	200	903	0	0	0	0	0	0	0	603	903	0
872	6	0	0	0	0	0	0	200	300	0	0	0	0	0	0	0	200	903	0	0	0	0	0	0	0	603	903	0
872	7	0	0	0	0	0	0	200	300	0	0	0	0	0	0	0	200	903	0	0	0	0	0	0	0	603	903	0
872	8	0	0	0	0	0	0	200	300	0	0	0	0	0	0	0	200	903	0	0	0	0	0	0	0	603	903	0
872	9	0	0	0	0	0	0	200	300	0	0	0	0	0	0	0	200	903	0	0	0	0	0	0	0	603	903	0
873	0	0	0	0	0	0	0	200	300	0	0	0	0	0	0	0	200	903	0	0	0	0	0	0	0	603	903	0
873	1	0	0	0	0	0	0	200	300	0	0	0	0	0	0	0	200	903	0	0	0	0	0	0	0	603	903	0
873	2	0	0	0	0	0	0	200	300	0	0	0	0	0	0	0	200	903	0	0	0	0	0	0	0	603	903	0
873	3	0	0	0	0	0	0	200	300	0	0	0	0	0	0	0	200	903	0	0	0	0	0	0	0	603	903	0
873	4	0	0	0	0	0	0	200	300	0	0	0	0	0	0	0	200	903	0	0	0	0	0	0	0	603	903	0
873	5	0	0	0	0	0	0	200	300	0	0	0	0	0	0	0	200	903	0	0	0	0	0	0	0	603	903	0
873	6	0	0	0	0	0	0	200	300	0	0	0	0	0	0	0	200	903	0	0	0	0	0	0	0	603	903	0
873	7	0	0	0	0	0	0	200	300	0	0	0	0	0	0	0	200	903	0	0	0	0	0	0	0	603	903	0
873	8	0	0	0	0	0	0	200	300	0	0	0	0	0	0	0	200	903	0	0	0	0	0	0	0	603	903	0
873	9	0	0	0	0	0	0	200	300	0	0	0	0	0	0	0	200	903	0	0	0	0	0	0	0	603	903	0
874	0	0	0	0	0	0	0	200	300	0	0	0	0	0	0	0	200	903	0	0	0	0	0	0	0	603	903	0
874	1	0	0	0	0	0	0	200	300	0	0	0	0	0	0	0	200	903	0	0	0	0	0	0	0	603	903	0
874	2	0	0	0	0	0	0	200	300	0	0	0	0	0	0	0	200	903	0	0	0	0	0	0	0	603	903	0
874	3	0	0	0	0	0	0	200	300	0	0	0	0	0	0	0	200	903	0	0	0	0	0	0	0	603	903	0
874	4	0	0	0	0	0	0	200	300	0	0	0	0	0	0	0	200	903	0	0	0	0	0	0	0	603	903	0
874	5	0	0	0	0	0	0	200	300	0	0	0	0	0	0	0	200	903	0	0	0	0	0	0	0	603	903	0
874	6	0	0	0	0	0	0	200	300	0	0	0	0	0	0	0	200	903	0	0	0	0	0	0	0	603	903	0
874	7	0	0	0	0	0	0	200	300	0	0	0	0	0	0	0	200	903	0	0	0	0	0	0	0	603	903	0
874	8	0	0	0	0	0	0	200	300	0	0	0	0	0	0	0	200	903	0	0	0	0	0	0	0	603	903	0
874	9	0	0	0	0	0	0	200	300	0	0	0	0	0	0	0	200	903	0	0	0	0	0	0	0	603	903	0
875	0	0	0	0	0	0	0	200	300	0	0	0	0	0	0	0	200	903	0	0	0	0	0	0	0	603	903	0
875	1	0	0	0	0	0	0	200	300	0	0	0	0	0	0	0	200	903	0	0	0	0	0	0	0	603	903	0
875	2	0	0	0	0	0	0	200	300	0	0	0	0	0	0	0	200	903	0	0	0	0	0	0	0	603	903	0
875	3	0	0	0	0	0	0	200	300	0	0	0	0	0	0	0	200	903	0	0	0	0	0	0	0	603	903	0
875	4	0	0	0	0	0	0	200	300	0	0	0	0	0	0	0	200	903	0	0	0	0	0	0	0	603	903	0
875	5	0	0	0	0	0	0	200	300	0	0	0	0	0	0	0	200	903	0	0	0	0	0	0	0	603	903	0
875	6	0	0	0	0	0	0	200	300	0	0	0	0	0	0	0	200	903	0	0	0	0	0	0	0	603	903	0
875	7	0	0	0	0	0	0	200	300	0	0	0	0	0	0	0	200	903	0	0	0	0	0	0	0	603	903	0
875	8	0	0	0	0	0	0	200	300	0	0	0	0	0	0	0	200	903	0	0	0	0	0	0	0	603	903	0
875	9	0	0	0	0	0	0	200	300	0	0	0	0	0	0	0	200	903	0	0	0	0	0	0	0	603	903	0
876	0	0	0	0	0	0	0	200	300	0	0	0	0	0	0	0	200	903	0	0	0	0	0	0	0	603	903	0
876	1	0	0	0	0	0	0	200	300	0	0	0	0	0	0	0	200	903	0	0	0	0	0	0	0	603	903	0
876	2	0	0	0	0	0	0	200	300	0	0	0	0	0	0	0	200	903	0	0	0	0	0	0	0	603	903	0
876	3	0	0	0	0	0	0	200	300	0	0	0	0	0	0	0	200	903	0	0	0	0	0	0	0	603	903	0
876	4	0	0	0	0	0	0	200	300	0	0	0	0	0	0	0	200	903	0	0	0	0	0	0	0	603	903	0
876	5	0	0	0	0	0	0	200	300	0	0	0	0	0	0	0	200	903	0	0	0	0	0	0	0	603	903	0
876	6	0	0	0	0	0	0	200	300	0	0	0	0	0	0	0	200	903	0	0	0	0	0	0	0	603	903	0
876	7	0	0	0	0	0	0	200	300	0	0	0	0	0	0	0	200	903	0	0	0	0	0	0	0	603	903	0
876	8	0	0	0	0	0	0	200	300	0	0	0	0	0	0	0	200	903	0	0	0	0	0	0	0	603	903	0
876	9	0	0	0	0	0	0	200	300	0	0	0	0	0	0	0	200	903	0	0	0	0	0	0	0	603	903	0
877	0	0	0	0	0	0	0	200	300	0	0	0	0	0	0	0	200	903	0	0	0	0	0	0	0	603	903	0
877	1	0	0	0	0	0	0	200	300	0	0	0	0	0	0	0	200	903	0	0	0	0	0	0	0	603	903	0
877	2	0	0	0	0	0	0	200	300	0	0	0	0	0	0	0	200	903	0	0	0	0	0	0	0	603	903	0
877	3	0	0	0	0	0	0	200	300	0	0	0	0	0	0	0	200	903	0	0	0	0	0	0	0	603	903	0
877	4	0	0	0	0	0	0	200	300	0	0	0	0	0	0	0	200	903	0	0	0	0	0	0	0	603	903	0
877	5	0	0	0	0	0	0	200	300	0	0	0	0	0	0	0	200	903	0	0	0	0	0	0	0	603	903	0
877	6	0	0	0	0	0	0	200	300	0	0	0	0	0	0	0	200	903	0	0	0	0	0	0	0	603	903	0
877	7	0	0	0	0	0	0	200	300	0	0	0	0	0	0	0	200	903	0	0	0	0	0	0	0	603	903	0
877	8	0	0	0	0	0	0	200	300	0	0	0	0	0	0	0	200	903	0	0	0	0	0	0	0	603	903	0
877	9	0	0	0	0	0	0	200	300	0	0	0	0	0	0	0	200	903	0	0	0	0	0	0	0	603	903	0
878	0	0	0	0	0	0	0	200	300	0	0	0	0	0	0	0	200	903	0	0	0	0	0	0	0	603	903	0
878	1	0	0	0	0	0	0	200	300	0	0	0	0	0	0	0	200	903	0	0	0	0	0	0	0	603	903	0
878	2	0	0	0	0	0	0	200	300	0	0	0	0	0	0	0	200	903	0	0	0	0	0	0	0	603	903	0
878	3	0	0	0	0	0	0	200	300	0	0	0	0	0	0	0	200	903	0	0	0	0	0	0	0	603	903	0
878	4	0	0	0	0	0	0	200	300	0	0	0	0	0	0	0	200	903	0	0	0	0	0	0	0	603	903	0
878	5	0	0	0	0	0	0	200	300	0	0	0	0	0	0	0	200	903	0	0	0	0	0	0	0	603	903	0
878	6	0	0	0	0	0	0	200	300	0	0	0	0	0	0	0	200	903	0	0	0	0	0	0	0	603	903	0
878	7	0	0	0	0	0	0	200	300	0	0	0	0	0	0	0	200	903	0	0	0	0	0	0	0	603	903	0
878	8	0	0	0	0	0	0	200	300	0	0	0	0	0	0	0	200	903	0	0	0	0	0	0	0	603	903	0
878	9	0	0	0	0	0	0	200	300	0	0	0	0	0	0	0	200	903	0	0	0	0	0	0	0	603	903	0
879	0	0	0	0	0	0	0	200	300	0	0	0	0	0	0	0	200	903	0	0	0	0	0	0	0	603	903	0
879	1	0	0	0	0	0	0	200	300	0	0	0	0	0	0	0	200	903	0	0	0	0	0	0	0	603	903	0
879	2	0	0	0	0	0	0	200	300	0	0	0	0	0	0	0	200	903	0	0	0	0	0	0	0	603	903	0
879	3	0	0	0	0	0	0	200	300	0	0	0	0	0	0	0	200	903	0	0	0	0	0	0	0	603	903	0
879	4	0	0	0	0	0	0	200	300	0	0	0	0	0	0	0	200	903	0	0	0	0	0	0	0	603	903	0
879	5	0	0	0	0	0	0	200	300	0	0	0	0	0	0	0	200	903	0	0	0	0	0	0	0	603	903	0
879	6	0	0	0	0	0	0	200	300	0	0	0	0	0	0	0	200	903	0	0	0	0	0	0	0	603	903	0
879	7	0	0	0	0	0	0	200	300	0	0	0	0	0	0	0	200	903	0	0	0	0	0	0	0	603	903	0
879	8	0	0	0	0	0	0	200	300	0	0	0	0	0	0	0	200	903	0	0	0	0	0	0	0	603	903	0
879	9	0	0	0	0	0	0	200	300	0	0	0	0	0	0	0	200	903	0	0	0	0	0	0	0	603	903	0
880	0	0	0	0	0	0	0	200	300	0	0	0	0	0	0	0	200	903	0	0	0	0	0	0	0	603	903	0
880	1	0	0	0	0	0	0	200	300	0	0	0	0	0	0	0	200	903	0	0	0	0	0	0	0	603	903	0
880	2	0	0	0	0	0	0	200	300	0	0	0	0	0	0	0	200	903	0	0	0	0	0	0	0	603	903	0
880	3	0	0	0	0	0	0	200	300	0	0	0	0	0	0	0	200	903	0	0	0	0	0	0	0	603	903	0
880	4	0	0	0	0	0	0	200	300	0	0	0	0	0	0	0	200	903	0	0	0	0	0	0	0	603	903	0
880	5	0	0	0	0	0	0	200	300	0	0	0	0	0	0	0	200	903	0	0	0	0	0	0	0	603	903	0
880	6	0	0	0	0	0	0	200	300	0	0	0	0	0	0	0	200	903	0	0	0	0	0	0	0	603	903	0
880	7	0	0	0	0	0	0	200	300	0	0	0	0	0	0	0	200	903	0	0	0	0	0	0	0	603	903	0
880	8	0	0	0	0	0	0	200	300	0	0	0	0	0	0	0	200	903	0	0	0	0	0	0	0	603	903	0
880	9	0	0	0	0	0	0	200	300	0	0	0	0	0	0	0	200	903	0	0	0	0	0	0	0	603	903	0
881	0	0	0	0	0	0	0	200	300	0	0	0	0	0	0	0	200	903	0	0	0	0	0	0	0	603	903	0
881	1	0	0	0	0	0	0	200	300	0	0	0	0	0	0	0	200	903	0	0	0	0	0	0	0	603	903	0
881	2	0	0	0	0	0	0	200	300	0	0	0	0	0	0	0	200	903	0	0	0	0	0	0	0	603	903	0
881	3	0	0	0	0	0	0	200	300	0	0	0	0	0	0	0	200	903	0	0	0	0	0	0	0	603	903	0
881	4	0	0	0	0	0	0	200	300	0	0	0	0	0	0	0	200	903	0	0	0	0	0	0	0	603	903	0
881	5	0	0	0	0	0	0	200	300	0	0	0	0	0	0	0	200	903	0	0	0	0	0	0	0	603	903	0
881	6	0	0	0	0	0	0	200	300	0	0	0	0	0	0	0	200	903	0	0	0	0	0	0	0	603	903	0
881	7	0	0	0	0	0	0	200	300	0	0	0	0	0	0	0	200	903	0	0	0	0	0	0	0	603	903	0
881	8	0	0	0	0	0	0	200	300	0	0	0	0	0	0	0	200	903	0	0	0	0	0	0	0	603	903	0
881	9	0	0	0	0	0	0	200	300	0	0	0	0	0	0	0	200	903	0	0	0	0	0	0	0	603	903	0
882	0	0	0	0	0	0	0	200	300	0	0	0	0	0	0	0	200	903	0	0	0	0	0	0	0	603	903	0
882	1	0	0	0	0	0	0	200	300	0	0	0	0	0	0	0	200	903	0	0	0	0	0	0	0	603	903	0
882	2	0	0	0	0	0	0	200	300	0	0	0	0	0	0	0	200	903	0	0	0	0	0	0	0	603	903	0
882	3	0	0	0	0	0	0	200	300	0	0	0	0	0	0	0	200	903	0	0	0	0	0	0	0	603	903	0
882	4	0	0	0	0	0	0	200	300	0	0	0	0	0	0	0	200	903	0	0	0	0	0	0	0	603	903	0
882	5	0	0	0	0	0	0	200	300	0	0	0	0	0	0	0	200	903	0	0	0	0	0	0	0	603	903	0
882	6	0	0	0	0	0	0	200	300	0	0	0	0	0	0	0	200	903	0	0	0	0	0	0	0	603	903	0
882	7	0	0	0	0	0	0	200	300	0	0	0	0	0	0	0	200	903	0	0	0	0	0	0	0	603	903	0
882	8	0	0	0	0	0	0	200	300	0	0	0	0	0	0	0	200	903	0	0	0	0	0	0	0	603	903	0
882	9	0	0	0	0	0	0	200	300	0	0	0	0	0	0	0	200	903	0	0	0	0	0	0	0	603	903	0
883	0	0	0	0	0	0	0	200	300	0	0	0	0	0	0	0	200	903	0	0	0	0	0	0	0	603	903	0
883	1	0	0	0	0	0	0	200	300	0	0	0	0	0	0	0	200	903	0	0	0	0	0	0	0	603	903	0
883	2	0	0	0	0	0	0	200	300	0	0	0	0	0	0	0	200	903	0	0	0	0	0	0	0	603	903	0
883	3	0	0	0	0	0	0	200	300	0	0	0	0	0	0	0	200	903	0	0	0	0	0	0	0	603	903	0
883	4	0	0	0	0	0	0	200	300	0	0	0	0	0	0	0	200	903	0	0	0	0	0	0	0	603	903	0
883	5	0	0	0	0	0	0	200	300	0	0	0	0	0	0	0	200	903	0	0	0	0	0	0	0	603	903	0
883	6	0	0	0	0	0	0	200	300	0	0	0	0	0	0	0	200	903	0	0	0	0	0	0	0	603	903	0
883	7	0	0	0	0	0	0	200	300	0	0	0	0	0	0	0	200	903	0	0	0	0	0	0	0	603	903	0
883	8	0	0	0	0	0	0	200	300	0	0	0	0	0	0	0	200	903	0	0	0	0	0	0	0	603	903	0
883	9	0	0	0	0	0	0	200	300	0	0	0	0	0	0	0	200	903	0	0	0	0	0	0	0	603	903	0
884	0	0	0	0	0	0	0	200	300	0	0	0	0	0	0	0	200	903	0	0	0	0	0	0	0	603	903	0
884	1	0	0	0	0	0	0	200	300	0	0	0	0	0	0	0	200	903	0	0	0	0	0	0	0	603	903	0
884	2	0	0	0	0	0	0	200	300	0	0	0	0	0	0	0	200	903	0	0	0	0	0	0	0	603	903	0
884	3	0	0	0	0	0	0	200	300	0	0	0	0	0	0	0	200	903	0	0	0	0	0	0	0	603	903	0
884	4	0	0	0	0	0	0	200	300	0	0	0	0	0	0	0	200	903	0	0	0	0	0	0	0	603	903	0
884	5	0	0	0	0	0	0	200	300	0	0	0	0	0	0	0	200	903	0	0	0	0	0	0	0	603	903	0
884	6	0	0	0	0	0	0	200	300	0	0	0	0	0	0	0	200	903	0	0	0	0	0	0	0	603	903	0
884	7	0	0	0	0	0	0	200	300	0	0	0	0	0	0	0	200	903	0	0	0	0	0	0	0	603	903	0
884	8	0	0	0	0	0	0	200	300	0	0	0	0	0	0	0	200	903	0	0	0	0	0	0	0	603	903	0
884	9	0	0	0	0	0	0	200	300	0	0	0	0	0	0	0	200	903	0	0	0	0	0	0	0	603	903	0
885	0	0	0	0	0	0	0	200	300	0	0	0	0	0	0	0	200	903	0	0	0	0	0	0	0	603	903	0
885	1	0	0	0	0	0	0	200	300	0	0	0	0	0	0	0	200	903	0	0	0	0	0	0	0	603	903	0
885	2	0	0	0	0	0	0	200	300	0	0	0	0	0	0	0	200	903	0	0	0	0	0	0	0	603	903	0
885	3	0	0	0	0	0	0	200	300	0	0	0	0	0	0	0	200	903	0	0	0	0	0	0	0	603	903	0
885	4	0	0	0	0	0	0	200	300	0	0	0	0	0	0	0	200	903	0	0	0	0	0	0	0	603	903	0
885	5	0	0	0	0	0	0	200	300	0	0	0	0	0	0	0	200	903	0	0	0	0	0	0	0	603	903	0
885	6	0	0	0	0	0	0	200	300	0	0	0	0	0	0	0	200	903	0	0	0	0	0	0	0	603	903	0
885	7	0	0	0	0	0	0	200	300	0	0	0	0	0	0	0	200	903	0	0	0	0	0	0	0	603	903	0
885	8	0	0	0	0	0	0	200	300	0	0	0	0	0	0	0	200	903	0	0	0	0	0	0	0	603	903	0
885	9	0	0	0	0	0	0	200	300	0	0	0	0	0	0	0	200	903	0	0	0	0	0	0	0	603	903	0
886	0	0	0	0	0	0	0	200	300	0	0	0	0	0	0	0	200	903	0	0	0	0	0	0	0	603	903	0
886	1	0	0	0	0	0	0	200	300	0	0	0	0	0	0	0	200	903	0	0	0	0	0	0	0	603	903	0
886	2	0	0	0	0	0	0	200	300	0	0	0	0	0	0	0	200	903	0	0	0	0	0	0	0	603	903	0
886	3	0	0	0	0	0	0	200	300	0	0	0	0	0	0	0	200	903	0	0	0	0	0	0	0	603	903	0
886	4	0	0	0	0	0	0	200	300	0	0	0	0	0	0	0	200	903	0	0	0	0	0	0	0	603	903	0
886	5	0	0	0	0	0	0	200	300	0	0	0	0	0	0	0	200	903	0	0	0	0	0	0	0	603	903	0
886	6	0	0	0	0	0	0	200	300	0	0	0	0	0	0	0	200	903	0	0	0	0	0	0	0	603	903	0
886	7	0	0	0	0	0	0	200	300	0	0	0	0	0	0	0	200	903	0	0	0	0	0	0	0	603	903	0
886	8	0	0	0	0	0	0	200	300	0	0	0	0	0	0	0	200	903	0	0	0	0	0	0	0	603	903	0
886	9	0	0	0	0	0	0	200	300	0	0	0	0	0	0	0	200	903	0	0	0	0	0	0	0	603	903	0
887	0	0	0	0	0	0	0	200	300	0	0	0	0	0	0	0	200	903	0	0	0	0	0	0	0	603	903	0
887	1	0	0	0	0	0	0	200	300	0	0	0	0	0	0	0	200	903	0	0	0	0	0	0	0	603	903	0
887	2	0	0	0	0	0	0	200	300	0	0	0	0	0	0	0	200	903	0	0	0	0	0	0	0	603	903	0
887	3	0	0	0	0	0	0	200	300	0	0	0	0	0	0	0	200	903	0	0	0	0	0	0	0	603	903	0
887	4	0	0	0	0	0	0	200	300	0	0	0	0	0	0	0	200	903	0	0	0	0	0	0	0	603	903	0
887	5	0	0	0	0	0	0	200	300	0	0	0	0	0	0	0	200	903	0	0	0	0	0	0	0	603	903	0
887	6	0	0	0	0	0	0	200	300	0	0	0	0	0	0	0	200	903	0	0	0	0	0	0	0	603	903	0
887	7	0	0	0	0	0	0	200	300	0	0	0	0	0	0	0	200	903	0	0	0	0	0	0	0	603	903	0
887	8	0	0	0	0	0	0	200	300	0	0	0	0	0	0	0	200	903	0	0	0	0	0	0	0	603	903	0
887	9	0	0	0	0	0	0	200	300	0	0	0	0	0	0	0	200	903	0	0	0	0	0	0	0	603	903	0
888	0	0	0	0	0	0	0	200	300	0	0	0	0	0	0	0	200	903	0	0	0	0	0	0	0	603	903	0
888	1	0	0	0	0	0	0	200	300	0	0	0	0	0	0	0	200	903	0	0	0	0	0	0	0	603	903	0
888	2	0	0	0	0	0	0	200	300	0	0	0	0	0	0	0	200	903	0	0	0	0	0	0	0	603	903	0
888	3	0	0	0	0	0	0	200	300	0	0	0	0	0	0	0	200	903	0	0	0	0	0	0	0	603	903	0
888	4	0	0	0	0	0	0	200	300	0	0	0	0	0	0	0	200	903	0	0	0	0	0	0	0	603	903	0
888	5	0	0	0	0	0	0	200	300	0	0	0	0	0	0	0	200	903	0	0	0	0	0	0	0	603	903	0
888	6	0	0	0	0	0	0	200	300	0	0	0	0	0	0	0	200	903	0	0	0	0	0	0	0	603	903	0
888	7	0	0	0	0	0	0	200	300	0	0	0	0	0	0	0	200	903	0	0	0	0	0	0	0	603	903	0
888	8	0	0	0	0	0	0	200	300	0	0	0	0	0	0	0	200	903	0	0	0	0	0	0	0	603	903	0
888	9	0	0	0	0	0	0	200	300	0	0	0	0	0	0	0	200	903	0	0	0	0	0	0	0	603	903	0
889	0	0	0	0	0	0	0	200	300	0	0	0	0	0	0	0	200	903	0	0	0	0	0	0	0	603	903	0
889	1	0	0	0	0	0	0	200	300	0	0	0	0	0	0	0	200	903	0	0	0	0	0	0	0	603	903	0
889	2	0	0	0	0	0	0	200	300	0	0	0	0	0	0	0	200	903	0	0	0	0	0	0	0	603	903	0
889	3	0	0	0	0	0	0	200	300	0	0	0	0	0	0	0	200	903	0	0	0	0	0	0	0	603	903	0
889	4	0	0	0	0	0	0	200	300	0	0	0	0	0	0	0	200	903	0	0	0	0	0	0	0	603	903	0
889	5	0	0	0	0	0	0	200	300	0	0	0	0	0	0	0	200	903	0	0	0	0	0	0	0	603	903	0
889	6	0	0	0	0	0	0	200	300	0	0	0	0	0	0	0	200	903	0	0	0	0	0	0	0	603	903	0
889	7	0	0	0	0	0	0	200	300	0	0	0	0	0	0	0	200	903	0	0	0	0	0	0	0	603	903	0
889	8	0	0	0	0	0	0	200	300	0	0	0	0	0	0	0	200	903	0	0	0	0	0	0	0	603	903	0
889	9	0	0	0	0	0	0	200	300	0	0	0	0	0	0	0	200	903	0	0	0	0	0	0	0	603	903	0
890	0	0	0	0	0	0	0	200	300	0	0	0	0	0	0	0	200	903	0	0	0	0	0	0	0	603	903	0
890	1	0	0	0	0	0	0	200	300	0	0	0	0	0	0	0	200	903	0	0	0	0	0	0	0	603	903	0
890	2	0	0	0	0	0	0	200	300	0	0	0	0	0	0	0	200	903	0	0	0	0	0	0	0	603	903	0
890	3	0	0	0	0	0	0	200	300	0	0	0	0	0	0	0	200	903	0	0	0	0	0	0	0	603	903	0
890	4	0	0	0	0	0	0	200	300	0	0	0	0	0	0	0	200	903	0	0	0	0	0	0	0	603	903	0
890	5	0	0	0	0	0	0	200	300	0	0	0	0	0	0	0	200	903	0	0	0	0	0	0	0	603	903	0
890	6	0	0	0	0	0	0	200	300	0	0	0	0	0	0	0	200	903	0	0	0	0	0	0	0	603	903	0
890	7	0	0	0	0	0	0	200	300	0	0	0	0	0	0	0	200	903	0	0	0	0	0	0	0	603	903	0
890	8	0	0	0	0	0	0	200	300	0	0	0	0	0	0	0	200	903	0	0	0	0	0	0	0	603	903	0
890	9	0	0	0	0	0	0	200	300	0	0	0	0	0	0	0	200	903	0	0	0	0	0	0	0	603	903	0
891	0	0	0	0	0	0	0	200	300	0	0	0	0	0	0	0	200	903	0	0	0	0	0	0	0	603	903	0
891	1	0	0	0	0	0	0	200	300	0	0	0	0	0	0	0	200	903	0	0	0	0	0	0	0	603	903	0
891	2	0	0	0	0	0	0	200	300	0	0	0	0	0	0	0	200	903	0	0	0	0	0	0	0	603	903	0
891	3	0	0	0	0	0	0	200	300	0	0	0	0	0	0	0	200	903	0	0	0	0	0	0	0	603	903	0
891	4	0	0	0	0	0	0	200	300	0	0	0	0	0	0	0	200	903	0	0	0	0	0	0	0	603	903	0
891	5	0	0	0	0	0	0	200	300	0	0	0	0	0	0	0	200	903	0	0	0	0	0	0	0	603	903	0
891	6	0	0	0	0	0	0	200	300	0	0	0	0	0	0	0	200	903	0	0	0	0	0	0	0	603	903	0
891	7	0	0	0	0	0	0	200	300	0	0	0	0	0	0	0	200	903	0	0	0	0	0	0	0	603	903	0
891	8	0	0	0	0	0	0	200	300	0	0	0	0	0	0	0	200	903	0	0	0	0	0	0	0	603	903	0
891	9	0	0	0	0	0	0	200	300	0	0	0	0	0	0	0	200	903	0	0	0	0	0	0	0	603	903	0
892	0	0	0	0	0	0	0	200	300	0	0	0	0	0	0	0	200	903	0	0	0	0	0	0	0	603	903	0
892	1	0	0	0	0	0	0	200	300	0	0	0	0	0	0	0	200	903	0	0	0	0	0	0	0	603	903	0
892	2	0	0	0	0	0	0	200	300	0	0	0	0	0	0	0	200	903	0	0	0	0	0	0	0	603	903	0
892	3	0	0	0	0	0	0	200	300	0	0	0	0	0	0	0	200	903	0	0	0	0	0	0	0	603	903	0
892	4	0	0	0	0	0	0	200	300	0	0	0	0	0	0	0	200	903	0	0	0	0	0	0	0	603	903	0
892	5	0	0	0	0	0	0	200	300	0	0	0	0	0	0	0	200	903	0	0	0	0	0	0	0	603	903	0
892	6	0	0	0	0	0	0	200	300	0	0	0	0	0	0	0	200	903	0	0	0	0	0	0	0	603	903	0
892	7	0	0	0	0	0	0	200	300	0	0	0	0	0	0	0	200	903	0	0	0	0	0	0	0	603	903	0
892	8	0	0	0	0	0	0	200	300	0	0	0	0	0	0	0	200	903	0	0	0	0	0	0	0	603	903	0
892	9	0	0	0	0	0	0	200	300	0	0	0	0	0	0	0	200	903	0	0	0	0	0	0	0	603	903	0
893	0	0	0	0	0	0	0	200	300	0	0	0	0	0	0	0	200	903	0	0	0	0	0	0	0	603	903	0
893	1	0	0	0	0	0	0	200	300	0	0	0	0	0	0	0	200	903	0	0	0	0	0	0	0	603	903	0
893	2	0	0	0	0	0	0	200	300	0	0	0	0	0	0	0	200	903	0	0	0	0	0	0	0	603	903	0
893	3	0	0	0	0	0	0	200	300	0	0	0	0	0	0	0	200	903	0	0	0	0	0	0	0	603	903	0
893	4	0	0	0	0	0	0	200	300	0	0	0	0	0	0	0	200	903	0	0	0	0	0	0	0	603	903	0
893	5	0	0	0	0	0	0	200	300	0	0	0	0	0	0	0	200	903	0	0	0	0	0	0	0	603	903	0
893	6	0	0	0	0	0	0	200	300	0	0	0	0	0	0	0	200	903	0	0	0	0	0	0	0	603	903	0
893	7	0	0	0	0	0	0	200	300	0	0	0	0	0	0	0	200	903	0	0	0	0	0	0	0	603	903	0
893	8	0	0	0	0	0	0	200	300	0	0	0	0	0	0	0	200	903	0	0	0	0	0	0	0	603	903	0
893	9	0	0	0	0	0	0	200	300	0	0	0	0	0	0	0	200	903	0	0	0	0	0	0	0	603	903	0
894	0	0	0	0	0	0	0	200	300	0	0	0	0	0	0	0	200	903	0	0	0	0	0	0	0	603	903	0
894	1	0	0	0	0	0	0	200	300	0	0	0	0	0	0	0	200	903	0	0	0	0	0	0	0	603	903	0
894	2	0	0	0	0	0	0	200	300	0	0	0	0	0	0	0	200	903	0	0	0	0	0	0	0	603	903	0
894	3	0	0	0	0	0	0	200	300	0	0	0	0	0	0	0	200	903	0	0	0	0	0	0	0	603	903	0
894	4	0	0	0	0	0	0	200	300	0	0	0	0	0	0	0	200	903	0	0	0	0	0	0	0	603	903	0
894	5	0	0	0	0	0	0	200	300	0	0	0	0	0	0	0	200	903	0	0	0	0	0	0	0	603	903	0
894	6	0	0	0	0	0	0	200	300	0	0	0	0	0	0	0	200	903	0	0	0	0	0	0	0	603	903	0
894	7	0	0	0	0	0	0	200	300	0	0	0	0	0	0	0	200	903	0	0	0	0	0	0	0	603	903	0
894	8	0	0	0	0	0	0	200	300	0	0	0	0	0	0	0	200	903	0	0	0	0	0	0	0	603	903	0
894	9	0	0	0	0	0	0	200	300	0	0	0	0	0	0	0	200	903	0	0	0	0	0	0	0	603	903	0
895	0	0	0	0	0	0	0	200	300	0	0	0	0	0	0	0	200	903	0	0	0	0	0	0	0	603	903	0
895	1	0	0	0	0	0	0	200	300	0	0	0	0	0	0	0	200	903	0	0	0	0	0	0	0	603	903	0
895	2	0	0	0	0	0	0	200	300	0	0	0	0	0	0	0	200	903	0	0	0	0	0	0	0	603	903	0
895	3	0	0	0	0	0	0	200	300	0	0	0	0	0	0	0	200	903	0	0	0	0	0	0	0	603	903	0
895	4	0	0	0	0	0	0	200	300	0	0	0	0	0	0	0	200	903	0	0	0	0	0	0	0	603	903	0
895	5	0	0	0	0	0	0	200	300	0	0	0	0	0	0	0	200	903	0	0	0	0	0	0	0	603	903	0
895	6	0	0	0	0	0	0	200	300	0	0	0	0	0	0	0	200	903	0	0	0	0	0	0	0	603	903	0
895	7	0	0	0	0	0	0	200	300	0	0	0	0	0	0	0	200	903	0	0	0	0	0	0	0	603	903	0
895	8	0	0	0	0	0	0	200	300	0	0	0	0	0	0	0	200	903	0	0	0	0	0	0	0	603	903	0
895	9	0	0	0	0	0	0	200	300	0	0	0	0	0	0	0	200	903	0	0	0	0	0	0	0	603	903	0
896	0	0	0	0	0	0	0	200	300	0	0	0	0	0	0	0	200	903	0	0	0	0	0	0	0	603	903	0
896	1	0	0	0	0	0	0	200	300	0	0	0	0	0	0	0	200	903	0	0	0	0	0	0	0	603	903	0
896	2	0	0	0	0	0	0	200	300	0	0	0	0	0	0	0	200	903	0	0	0	0	0	0	0	603	903	0
896	3	0	0	0	0	0	0	200	300	0	0	0	0	0	0	0	200	903	0	0	0	0	0	0	0	603	903	0
896	4	0	0	0	0	0	0	200	300	0	0	0	0	0	0	0	200	903	0	0	0	0	0	0	0	603	903	0
896	5	0	0	0	0	0	0	200	300	0	0	0	0	0	0	0	200	903	0	0	0	0	0	0	0	603	903	0
896	6	0	0	0	0	0	0	200	300	0	0	0	0	0	0	0	200	903	0	0	0	0	0	0	0	603	903	0
896	7	0	0	0	0	0	0	200	300	0	0	0	0	0	0	0	200	903	0	0	0	0	0	0	0	603	903	0
896	8	0	0	0	0	0	0	200	300	0	0	0	0	0	0	0	200	903	0	0	0	0	0	0	0	603	903	0
896	9	0	0	0	0	0	0	200	300	0	0	0	0	0	0	0	200	903	0	0	0	0	0	0	0	603	903	0
897	0	0	0	0	0	0	0	200	300	0	0	0	0	0	0	0	200	903	0	0	0	0	0	0	0	603	903	0
897	1	0	0	0	0	0	0	200	300	0	0	0	0	0	0	0	200	903	0	0	0	0	0	0	0	603	903	0
897	2	0	0	0	0	0	0	200	300	0	0	0	0	0	0	0	200	903	0	0	0	0	0	0	0	603	903	0
897	3	0	0	0	0	0	0	200	300	0	0	0	0	0	0	0	200	903	0	0	0	0	0	0	0	603	903	0
897	4	0	0	0	0	0	0	200	300	0	0	0	0	0	0	0	200	903	0	0	0	0	0	0	0	603	903	0
897	5	0	0	0	0	0	0	200	300	0	0	0	0	0	0	0	200	903	0	0	0	0	0	0	0	603	903	0
897	6	0	0	0	0	0	0	200	300	0	0	0	0	0	0	0	200	903	0	0	0	0	0	0	0	603	903	0
897	7	0	0	0	0	0	0	200	300	0	0	0	0	0	0	0	200	903	0	0	0	0	0	0	0	603	903	0
897	8	0	0	0	0	0	0	200	300	0	0	0	0	0	0	0	200	903	0	0	0	0	0	0	0	603	903	0
897	9	0	0	0	0	0	0	200	300	0	0	0	0	0	0	0	200	903	0	0	0	0	0	0	0	603	903	0
898	0	0	0	0	0	0	0	200	300	0	0	0	0	0	0	0	200	903	0	0	0	0	0	0	0	603	903	0
898	1	0	0	0	0	0	0	200	300	0	0	0	0	0	0	0	200	903	0	0	0	0	0	0	0	603	903	0
898	2	0	0	0	0	0	0	200	300	0	0	0	0	0	0	0	200	903	0	0	0	0	0	0	0	603	903	0
898	3	0	0	0	0	0	0	200	300	0	0	0	0	0	0	0	200	903	0	0	0	0	0	0	0	603	903	0
898	4	0	0	0	0	0	0	200	300	0	0	0	0	0	0	0	200	903	0	0	0	0	0	0	0	603	903	0
898	5	0	0	0	0	0	0	200	300	0	0	0	0	0	0	0	200	903	0	0	0	0	0	0	0	603	903	0
898	6	0	0	0	0	0	0	200	300	0	0	0	0	0	0	0	200	903	0	0	0	0	0	0	0	603	903	0
898	7	0	0	0	0	0	0	200	300	0	0	0	0	0	0	0	200	903	0	0	0	0	0	0	0	603	903	0
898	8	0	0	0	0	0	0	200	300	0	0	0	0	0	0	0	200	903	0	0	0	0	0	0	0	603	903	0
898	9	0	0	0	0	0	0	200	300	0	0	0	0	0	0	0	200	903	0	0	0	0	0	0	0	603	903	0
899	0	0	0	0	0	0	0	200	300	0	0	0	0	0	0	0	200	903	0	0	0	0	0	0	0	603	903	0
899	1	0	0	0	0	0	0	200	300	0	0	0	0	0	0	0	200	903	0	0	0	0	0	0	0	603	903	0
899	2	0	0	0	0	0	0	200	300	0	0	0	0	0	0	0	200	903	0	0	0	0	0	0	0	603	903	0
899	3	0	0	0	0	0	0	200	300	0	0	0	0	0	0	0	200	903	0	0	0	0	0	0	0	603	903	0
899	4	0	0	0	0	0	0	200	300	0	0	0	0	0	0	0	200	903	0	0	0	0	0	0	0	603	903	0
899	5	0	0	0	0	0	0	200	300	0	0	0	0	0	0	0	200	903	0	0	0	0	0	0	0	603	903	0
899	6	0	0	0	0	0	0	200	300	0	0	0	0	0	0	0	200	903	0	0	0	0	0	0	0	603	903	0
899	7	0	0	0	0	0	0	200	300	0	0	0	0	0	0	0	200	903	0	0	0	0	0	0	0	603	903	0
899	8	0	0	0	0	0	0	200	300	0	0	0	0	0	0	0	200	903	0	0	0	0	0	0	0	603	903	0
899	9	0	0	0	0	0	0	200	300	0	0	0	0	0	0	0	200	903	0	0	0	0	0	0	0	603	903	0
900	0	0	0	0	0	0	0	200	300	0	0	0	0	0	0	0	200	903	0	0	0	0	0	0	0	603	903	0
900	1	0	0	0	0	0	0	200	300	0	0	0	0	0	0	0	200	903	0	0	0	0	0	0	0	603	903	0
900	2	0	0	0	0	0	0	200	300	0	0	0	0	0	0	0	200	903	0	0	0	0	0	0	0	603	903	0
900	3	0	0	0	0	0	0	200	300	0	0	0	0	0	0	0	200	903	0	0	0	0	0	0	0	603	903	0
900	4	0	0	0	0	0	0	200	300	0	0	0	0	0	0	0	200	903	0	0	0	0	0	0	0	603	903	0
900	5	0	0	0	0	0	0	200	300	0	0	0	0	0	0	0	200	903	0	0	0	0	0	0	0	603	903	0
900	6	0	0	0	0	0	0	200	300	0	0	0	0	0	0	0	200	903	0	0	0	0	0	0	0	603	903	0
900	7	0	0	0	0	0	0	200	300	0	0	0	0	0	0	0	200	903	0	0	0	0	0	0	0	603	903	0
900	8	0	0	0	0	0	0	200	300	0	0	0	0	0	0	0	200	903	0	0	0	0	0	0	0	603	903	0
900	9	0	0	0	0	0	0	200	300	0	0	0	0	0	0	0	200	903	0	0	0	0	0	0	0	603	903	0
901	0	0	0	0	0	0	0	200	300	0	0	0	0	0	0	0	200	903	0	0	0	0	0	0	0	603	903	0
901	1	0	0	0	0	0	0	200	300	0	0	0	0	0	0	0	200	903	0	0	0	0	0	0	0	603	903	0
901	2	0	0	0	0	0	0	200	300	0	0	0	0	0	0	0	200	903	0	0	0	0	0	0	0	603	903	0
901	3	0	0	0	0	0	0	200	300	0	0	0	0	0	0	0	200	903	0	0	0	0	0	0	0	603	903	0
901	4	0	0	0	0	0	0	200	300	0	0	0	0	0	0	0	200	903	0	0	0	0	0	0	0	603	903	0
901	5	0	0	0	0	0	0	200	300	0	0	0	0	0	0	0	200	903	0	0	0	0	0	0	0	603	903	0
901	6	0	0	0	0	0	0	200	300	0	0	0	0	0	0	0	200	903	0	0	0	0	0	0	0	603	903	0
901	7	0	0	0	0	0	0	200	300	0	0	0	0	0	0	0	200	903	0	0	0	0	0	0	0	603	903	0
901	8	0	0	0	0	0	0	200	300	0	0	0	0	0	0	0	200	903	0	0	0	0	0	0	0	603	903	0
901	9	0	0	0	0	0	0	200	300	0	0	0	0	0	0	0	200	903	0	0	0	0	0	0	0	603	903	0
902	0	0	0	0	0	0	0	200	300	0	0	0	0	0	0	0	200	903	0	0	0	0	0	0	0	603	903	0
902	1	0	0	0	0	0	0	200	300	0	0	0	0	0	0	0	200	903	0	0	0	0	0	0	0	603	903	0
902	2	0	0	0	0	0	0	200	300	0	0	0	0	0	0	0	200	903	0	0	0	0	0	0	0	603	903	0
902	3	0	0	0	0	0	0	200	300	0	0	0	0	0	0	0	200	903	0	0	0	0	0	0	0	603	903	0
902	4	0	0	0	0	0	0	200	300	0	0	0	0	0	0	0	200	903	0	0	0	0	0	0	0	603	903	0
902	5	0	0	0	0	0	0	200	300	0	0	0	0	0	0	0	200	903	0	0	0	0	0	0	0	603	903	0
902	6	0	0	0	0	0	0	200	300	0	0	0	0	0	0	0	200	903	0	0	0	0	0	0	0	603	903	0
902	7	0	0	0	0	0	0	200	300	0	0	0	0	0	0	0	200	903	0	0	0	0	0	0	0	603	903	0
902	8	0	0	0	0	0	0	200	300	0	0	0	0	0	0	0	200	903	0	0	0	0	0	0	0	603	903	0
902	9	0	0	0	0	0	0	200	300	0	0	0	0	0	0	0	200	903	0	0	0	0	0	0	0	603	903	0
903	0	0	0	0	0	0	0	200	300	0	0	0	0	0	0	0	200	903	0	0	0	0	0	0	0	603	903	0
903	1	0	0	0	0	0	0	200	300	0	0	0	0	0	0	0	200	903	0	0	0	0	0	0	0	603	903	0
903	2	0	0	0	0	0	0	200	300	0	0	0	0	0	0	0	200	903	0	0	0	0	0	0	0	603	903	0
903	3	0	0	0	0	0	0	200	300	0	0	0	0	0	0	0	200	903	0	0	0	0	0	0	0	603	903	0
903	4	0	0	0	0	0	0	200	300	0	0	0	0	0	0	0	200	903	0	0	0	0	0	0	0	603	903	0
903	5	0	0	0	0	0	0	200	300	0	0	0	0	0	0	0	200	903	0	0	0	0	0	0	0	603	903	0
903	6	0	0	0	0	0	0	200	300	0	0	0	0	0	0	0	200	903	0	0	0	0	0	0	0	603	903	0
903	7	0	0	0	0	0	0	200	300	0	0	0	0	0	0	0	200	903	0	0	0	0	0	0	0	603	903	0
903	8	0	0	0	0	0	0	200	300	0	0	0	0	0	0	0	200	903	0	0	0	0	0	0	0	603	903	0
903	9	0	0	0	0	0	0	200	300	0	0	0	0	0	0	0	200	903	0	0	0	0	0	0	0	603	903	0
904	0	0	0	0	0	0	0	200	300	0	0	0	0	0	0	0	200	903	0	0	0	0	0	0	0	603	903	0
904	1	0	0	0	0	0	0	200	300	0	0	0	0	0	0	0	200	903	0	0	0	0	0	0	0	603	903	0
904	2	0	0	0	0	0	0	200	300	0	0	0	0	0	0	0	200	903	0	0	0	0	0	0	0	603	903	0
904	3	0	0	0	0	0	0	200	300	0	0	0	0	0	0	0	200	903	0	0	0	0	0	0	0	603	903	0
904	4	0	0	0	0	0	0	200	300	0	0	0	0	0	0	0	200	903	0	0	0	0	0	0	0	603	903	0
904	5	0	0	0	0	0	0	200	300	0	0	0	0	0	0	0	200	903	0	0	0	0	0	0	0	603	903	0
904	6	0	0	0	0	0	0	200	300	0	0	0	0	0	0	0	200	903	0	0	0	0	0	0	0	603	903	0
904	7	0	0	0	0	0	0	200	300	0	0	0	0	0	0	0	200	903	0	0	0	0	0	0	0	603	903	0
904	8	0	0	0	0	0	0	200	300	0	0	0	0	0	0	0	200	903	0	0	0	0	0	0	0	603	903	0
904	9	0	0	0	0	0	0	200	300	0	0	0	0	0	0	0	200	903	0	0	0	0	0	0	0	603	903	0
905	0	0	0	0	0	0	0	200	300	0	0	0	0	0	0	0	200	903	0	0	0	0	0	0	0	603	903	0
905	1	0	0	0	0	0	0	200	300	0	0	0	0	0	0	0	200	903	0	0	0	0	0	0	0	603	903	0
905	2	0	0	0	0	0	0	200	300	0	0	0	0	0	0	0	200	903	0	0	0	0	0	0	0	603	903	0
905	3	0	0	0	0	0	0	200	300	0	0	0	0	0	0	0	200	903	0	0	0	0	0	0	0	603	903	0
905	4	0	0	0	0	0	0	200	300	0	0	0	0	0	0	0	200	903	0	0	0	0	0	0	0	603	903	0
905	5	0	0	0	0	0	0	200	300	0	0	0	0	0	0	0	200	903	0	0	0	0	0	0	0	603	903	0
905	6	0	0	0	0	0	0	200	300	0	0	0	0	0	0	0	200	903	0	0	0	0	0	0	0	603	903	0
905	7	0	0	0	0	0	0	200	300	0	0	0	0	0	0	0	200	903	0	0	0	0	0	0	0	603	903	0
905	8	0	0	0	0	0	0	200	300	0	0	0	0	0	0	0	200	903	0	0	0	0	0	0	0	603	903	0
905	9	0	0	0	0	0	0	200	300	0	0	0	0	0	0	0	200	903	0	0	0	0	0	0	0	603	903	0
906	0	0	0	0	0	0	0	200	300	0	0	0	0	0	0	0	200	903	0	0	0	0	0	0	0	603	903	0
906	1	0	0	0	0	0	0	200	300	0	0	0	0	0	0	0	200	903	0	0	0	0	0	0	0	603	903	0
906	2	0	0	0	0	0	0	200	300	0	0	0	0	0	0	0	200	903	0	0	0	0	0	0	0	603	903	0
906	3	0	0	0	0	0	0	200	300	0	0	0	0	0	0	0	200	903	0	0	0	0	0	0	0	603	903	0
906	4	0	0	0	0	0	0	200	300	0	0	0	0	0	0	0	200	903	0	0	0	0	0	0	0	603	903	0
906	5	0	0	0	0	0	0	200	300	0	0	0	0	0	0	0	200	903	0	0	0	0	0	0	0	603	903	0
906	6	0	0	0	0	0	0	200	300	0	0	0	0	0	0	0	200	903	0	0	0	0	0	0	0	603	903	0
906	7	0	0	0	0	0	0	200	300	0	0	0	0	0	0	0	200	903	0	0	0	0	0	0	0	603	903	0
906	8	0	0	0	0	0	0	200	300	0	0	0	0	0	0	0	200	903	0	0	0	0	0	0	0	603	903	0
906	9	0	0	0	0	0	0	200	300	0	0	0	0	0	0	0	200	903	0	0	0	0	0	0	0	603	903	0
907	0	0	0	0	0	0	0	200	300	0	0	0	0	0	0	0	200	903	0	0	0	0	0	0	0	603	903	0
907	1	0	0	0	0	0	0	200	300	0	0	0	0	0	0	0	200	903	0	0	0	0	0	0	0	603	903	0
907	2	0	0	0	0	0	0	200	300	0	0	0	0	0	0	0	200	903	0	0	0	0	0	0	0	603	903	0
907	3	0	0	0	0	0	0	200	300	0	0	0	0	0	0	0	200	903	0	0	0	0	0	0	0	603	903	0
907	4	0	0	0	0	0	0	200	300	0	0	0	0	0	0	0	200	903	0	0	0	0	0	0	0	603	903	0
907	5	0	0	0	0	0	0	200	300	0	0	0	0	0	0	0	200	903	0	0	0	0	0	0	0	603	903	0
907	6	0	0	0	0	0	0	200	300	0	0	0	0	0	0	0	200	903	0	0	0	0	0	0	0	603	903	0
907	7	0	0	0	0	0	0	200	300	0	0	0	0	0	0	0	200	903	0	0	0	0	0	0	0	603	903	0
907	8	0	0	0	0	0	0	200	300	0	0	0	0	0	0	0	200	903	0	0	0	0	0	0	0	603	903	0
907	9	0	0	0	0	0	0	200	300	0	0	0	0	0	0	0	200	903	0	0	0	0	0	0	0	603	903	0
908	0	0	0	0	0	0	0	200	300	0	0	0	0	0	0	0	200	903	0	0	0	0	0	0	0	603	903	0
908	1	0	0	0	0	0	0	200	300	0	0	0	0	0	0	0	200	903	0	0	0	0	0	0	0	603	903	0
908	2	0	0	0	0	0	0	200	300	0	0	0	0	0	0	0	200	903	0	0	0	0	0	0	0	603	903	0
908	3	0	0	0	0	0	0	200	300	0	0	0	0	0	0	0	200	903	0	0	0	0	0	0	0	603	903	0
908	4	0	0	0	0	0	0	200	300	0	0	0	0	0	0	0	200	903	0	0	0	0	0	0	0	603	903	0
908	5	0	0	0	0	0	0	200	300	0	0	0	0	0	0	0	200	903	0	0	0	0	0	0	0	603	903	0
908	6	0	0	0	0	0	0	200	300	0	0	0	0	0	0	0	200	903	0	0	0	0	0	0	0	603	903	0
908	7	0	0	0	0	0	0	200	300	0	0	0	0	0	0	0	200	903	0	0	0	0	0	0	0	603	903	0
908	8	0	0	0	0	0	0	200	300	0	0	0	0	0	0	0	200	903	0	0	0	0	0	0	0	603	903	0
908	9	0	0	0	0	0	0	200	300	0	0	0	0	0	0	0	200	903	0	0	0	0	0	0	0	603	903	0
909	0	0	0	0	0	0	0	200	300	0	0	0	0	0	0	0	200	903	0	0	0	0	0	0	0	603	903	0
909	1	0	0	0	0	0	0	200	300	0	0	0	0	0	0	0	200	903	0	0	0	0	0	0	0	603	903	0
909	2	0	0	0	0	0	0	200	300	0	0	0	0	0	0	0	200	903	0	0	0	0	0	0	0	603	903	0
909	3	0	0	0	0	0	0	200	300	0	0	0	0	0	0	0	200	903	0	0	0	0	0	0	0	603	903	0
909	4	0	0	0	0	0	0	200	300	0	0	0	0	0	0	0	200	903	0	0	0	0	0	0	0	603	903	0
909	5	0	0	0	0	0	0	200	300	0	0	0	0	0	0	0	200	903	0	0	0	0	0	0	0	603	903	0
909	6	0	0	0	0	0	0	200	300	0	0	0	0	0	0	0	200	903	0	0	0	0	0	0	0	603	903	0
909	7	0	0	0	0	0	0	200	300	0	0	0	0	0	0	0	200	903	0	0	0	0	0	0	0	603	903	0
909	8	0	0	0	0	0	0	200	300	0	0	0	0	0	0	0	200	903	0	0	0	0	0	0	0	603	903	0
909	9	0	0	0	0	0	0	200	300	0	0	0	0	0	0	0	200	903	0	0	0	0	0	0	0	603	903	0
910	0	0	0	0	0	0	0	200	300	0	0	0	0	0	0	0	200	903	0	0	0	0	0	0	0	603	903	0
910	1	0	0	0	0	0	0	200	300	0	0	0	0	0	0	0	200	903	0	0	0	0	0	0	0	603	903	0
910	2	0	0	0	0	0	0	200	300	0	0	0	0	0	0	0	200	903	0	0	0	0	0	0	0	603	903	0
910	3	0	0	0	0	0	0	200	300	0	0	0	0	0	0	0	200	903	0	0	0	0	0	0	0	603	903	0
910	4	0	0	0	0	0	0	200	300	0	0	0	0	0	0	0	200	903	0	0	0	0	0	0	0	603	903	0
910	5	0	0	0	0	0	0	200	300	0	0	0	0	0	0	0	200	903	0	0	0	0	0	0	0	603	903	0
910	6	0	0	0	0	0	0	200	300	0	0	0	0	0	0	0	200	903	0	0	0	0	0	0	0	603	903	0
910	7	0	0	0	0	0	0	200	300	0	0	0	0	0	0	0	200	903	0	0	0	0	0	0	0	603	903	0
910	8	0	0	0	0	0	0	200	300	0	0	0	0	0	0	0	200	903	0	0	0	0	0	0	0	603	903	0
910	9	0	0	0	0	0	0	200	300	0	0	0	0	0	0	0	200	903	0	0	0	0	0	0	0	603	903	0
911	0	0	0	0	0	0	0	200	300	0	0	0	0	0	0	0	200	903	0	0	0	0	0	0	0	603	903	0
911	1	0	0	0	0	0	0	200	300	0	0	0	0	0	0	0	200	903	0	0	0	0	0	0	0	603	903	0
911	2	0	0	0	0	0	0	200	300	0	0	0	0	0	0	0	200	903	0	0	0	0	0	0	0	603	903	0
911	3	0	0	0	0	0	0	200	300	0	0	0	0	0	0	0	200	903	0	0	0	0	0	0	0	603	903	0
911	4	0	0	0	0	0	0	200	300	0	0	0	0	0	0	0	200	903	0	0	0	0	0	0	0	603	903	0
911	5	0	0	0	0	0	0	200	300	0	0	0	0	0	0	0	200	903	0	0	0	0	0	0	0	603	903	0
911	6	0	0	0	0	0	0	200	300	0	0	0	0	0	0	0	200	903	0	0	0	0	0	0	0	603	903	0
911	7	0	0	0	0	0	0	200	300	0	0	0	0	0	0	0	200	903	0	0	0	0	0	0	0	603	903	0
911	8	0	0	0	0	0	0	200	300	0	0	0	0	0	0	0	200	903	0	0	0	0	0	0	0	603	903	0
911	9	0	0	0	0	0	0	200	300	0	0	0	0	0	0	0	200	903	0	0	0	0	0	0	0	603	903	0
912	0	0	0	0	0	0	0	200	300	0	0	0	0	0	0	0	200	903	0	0	0	0	0	0	0	603	903	0
912	1	0	0	0	0	0	0	200	300	0	0	0	0	0	0	0	200	903	0	0	0	0	0	0	0	603	903	0
912	2	0	0	0	0	0	0	200	300	0	0	0	0	0	0	0	200	903	0	0	0	0	0	0	0	603	903	0
912	3	0	0	0	0	0	0	200	300	0	0	0	0	0	0	0	200	903	0	0	0	0	0	0	0	603	903	0
912	4	0	0	0	0	0	0	200	300	0	0	0	0	0	0	0	200	903	0	0	0	0	0	0	0	603	903	0
912	5	0	0	0	0	0	0	200	300	0	0	0	0	0	0	0	200	903	0	0	0	0	0	0	0	603	903	0
912	6	0	0	0	0	0	0	200	300	0	0	0	0	0	0	0	200	903	0	0	0	0	0	0	0	603	903	0
912	7	0	0	0	0	0	0	200	300	0	0	0	0	0	0	0	200	903	0	0	0	0	0	0	0	603	903	0
912	8	0	0	0	0	0	0	200	300	0	0	0	0	0	0	0	200	903	0	0	0	0	0	0	0	603	903	0
912	9	0	0	0	0	0	0	200	300	0	0	0	0	0	0	0	200	903	0	0	0	0	0	0	0	603	903	0
913	0	0	0	0	0	0	0	200	300	0	0	0	0	0	0	0	200	903	0	0	0	0	0	0	0	603	903	0
913	1	0	0	0	0	0	0	200	300	0	0	0	0	0	0	0	200	903	0	0	0	0	0	0	0	603	903	0
913	2	0	0	0	0	0	0	200	300	0	0	0	0	0	0	0	200	903	0	0	0	0	0	0	0	603	903	0
913	3	0	0	0	0	0	0	200	300	0	0	0	0	0	0	0	200	903	0	0	0	0	0	0	0	603	903	0
913	4	0	0	0	0	0	0	200	300	0	0	0	0	0	0	0	200	903	0	0	0	0	0	0	0	603	903	0
913	5	0	0	0	0	0	0	200	300	0	0	0	0	0	0	0	200	903	0	0	0	0	0	0	0	603	903	0
913	6	0	0	0	0	0	0	200	300	0	0	0	0	0	0	0	200	903	0	0	0	0	0	0	0	603	903	0
913	7	0	0	0	0	0	0	200	300	0	0	0	0	0	0	0	200	903	0	0	0	0	0	0	0	603	903	0
913	8	0	0	0	0	0	0	200	300	0	0	0	0	0	0	0	200	903	0	0	0	0	0	0	0	603	903	0
913	9	0	0	0	0	0	0	200	300	0	0	0	0	0	0	0	200	903	0	0	0	0	0	0	0	603	903	0
914	0	0	0	0	0	0	0	200	300	0	0	0	0	0	0	0	200	903	0	0	0	0	0	0	0	603	903	0
914	1	0	0	0	0	0	0	200	300	0	0	0	0	0	0	0	200	903	0	0	0	0	0	0	0	603	903	0
914	2	0	0	0	0	0	0	200	300	0	0	0	0	0	0	0	200	903	0	0	0	0	0	0	0	603	903	0
914	3	0	0	0	0	0	0	200	300	0	0	0	0	0	0	0	200	903	0	0	0	0	0	0	0	603	903	0
914	4	0	0	0	0	0	0	200	300	0	0	0	0	0	0	0	200	903	0	0	0	0	0	0	0	603	903	0
914	5	0	0	0	0	0	0	200	300	0	0	0	0	0	0	0	200	903	0	0	0	0	0	0	0	603	903	0
914	6	0	0	0	0	0	0	200	300	0	0	0	0	0	0	0	200	903	0	0	0	0	0	0	0	603	903	0
914	7	0	0	0	0	0	0	200	300	0	0	0	0	0	0	0	200	903	0	0	0	0	0	0	0	603	903	0
914	8	0	0	0	0	0	0	200	300	0	0	0	0	0	0	0	200	903	0	0	0	0	0	0	0	603	903	0
914	9	0	0	0	0	0	0	200	300	0	0	0	0	0	0	0	200	903	0	0	0	0	0	0	0	603	903	0
915	0	0	0	0	0	0	0	200	300	0	0	0	0	0	0	0	200	903	0	0	0	0	0	0	0	603	903	0
915	1	0	0	0	0	0	0	200	300	0	0	0	0	0	0	0	200	903	0	0	0	0	0	0	0	603	903	0
915	2	0	0	0	0	0	0	200	300	0	0	0	0	0	0	0	200	903	0	0	0	0	0	0	0	603	903	0
915	3	0	0	0	0	0	0	200	300	0	0	0	0	0	0	0	200	903	0	0	0	0	0	0	0	603	903	0
915	4	0	0	0	0	0	0	200	300	0	0	0	0	0	0	0	200	903	0	0	0	0	0	0	0	603	903	0
915	5	0	0	0	0	0	0	200	300	0	0	0	0	0	0	0	200	903	0	0	0	0	0	0	0	603	903	0
915	6	0	0	0	0	0	0	200	300	0	0	0	0	0	0	0	200	903	0	0	0	0	0	0	0	603	903	0
915	7	0	0	0	0	0	0	200	300	0	0	0	0	0	0	0	200	903	0	0	0	0	0	0	0	603	903	0
915	8	0	0	0	0	0	0	200	300	0	0	0	0	0	0	0	200	903	0	0	0	0	0	0	0	603	903	0
915	9	0	0	0	0	0	0	200	300	0	0	0	0	0	0	0	200	903	0	0	0	0	0	0	0	603	903	0
916	0	0	0	0	0	0	0	200	300	0	0	0	0	0	0	0	200	903	0	0	0	0	0	0	0	603	903	0
916	1	0	0	0	0	0	0	200	300	0	0	0	0	0	0	0	200	903	0	0	0	0	0	0	0	603	903	0
916	2	0	0	0	0	0	0	200	300	0	0	0	0	0	0	0	200	903	0	0	0	0	0	0	0	603	903	0
916	3	0	0	0	0	0	0	200	300	0	0	0	0	0	0	0	200	903	0	0	0	0	0	0	0	603	903	0
916	4	0	0	0	0	0	0	200	300	0	0	0	0	0	0	0	200	903	0	0	0	0	0	0	0	603	903	0
916	5	0	0	0	0	0	0	200	300	0	0	0	0	0	0	0	200	903	0	0	0	0	0	0	0	603	903	0
916	6	0	0	0	0	0	0	200	300	0	0	0	0	0	0	0	200	903	0	0	0	0	0	0	0	603	903	0
916	7	0	0	0	0	0	0	200	300	0	0	0	0	0	0	0	200	903	0	0	0	0	0	0	0	603	903	0
916	8	0	0	0	0	0	0	200	300	0	0	0	0	0	0	0	200	903	0	0	0	0	0	0	0	603	903	0
916	9	0	0	0	0	0	0	200	300	0	0	0	0	0	0	0	200	903	0	0	0	0	0	0	0	603	903	0
917	0	0	0	0	0	0	0	200	300	0	0	0	0	0	0	0	200	903	0	0	0	0	0	0	0	603	903	0
917	1	0	0	0	0	0	0	200	300	0	0	0	0	0	0	0	200	903	0	0	0	0	0	0	0	603	903	0
917	2	0	0	0	0	0	0	200	300	0	0	0	0	0	0	0	200	903	0	0	0	0	0	0	0	603	903	0
917	3	0	0	0	0	0	0	200	300	0	0	0	0	0	0	0	200	903	0	0	0	0	0	0	0	603	903	0
917	4	0	0	0	0	0	0	200	300	0	0	0	0	0	0	0	200	903	0	0	0	0	0	0	0	603	903	0
917	5	0	0	0	0	0	0	200	300	0	0	0	0	0	0	0	200	903	0	0	0	0	0	0	0	603	903	0
917	6	0	0	0	0	0	0	200	300	0	0	0	0	0	0	0	200	903	0	0	0	0	0	0	0	603	903	0
917	7	0	0	0	0	0	0	200	300	0	0	0	0	0	0	0	200	903	0	0	0	0	0	0	0	603	903	0
917	8	0	0	0	0	0	0	200	300	0	0	0	0	0	0	0	200	903	0	0	0	0	0	0	0	603	903	0
917	9	0	0	0	0	0	0	200	300	0	0	0	0	0	0	0	200	903	0	0	0	0	0	0	0	603	903	0
918	0	0	0	0	0	0	0	200	300	0	0	0	0	0	0	0	200	903	0	0	0	0	0	0	0	603	903	0
918	1	0	0	0	0	0	0	200	300	0	0	0	0	0	0	0	200	903	0	0	0	0	0	0	0	603	903	0
918	2	0	0	0	0	0	0	200	300	0	0	0	0	0	0	0	200	903	0	0	0	0	0	0	0	603	903	0
918	3	0	0	0	0	0	0	200	300	0	0	0	0	0	0	0	200	903	0	0	0	0	0	0	0	603	903	0
918	4	0	0	0	0	0	0	200	300	0	0	0	0	0	0	0	200	903	0	0	0	0	0	0	0	603	903	0
918	5	0	0	0	0	0	0	200	300	0	0	0	0	0	0	0	200	903	0	0	0	0	0	0	0	603	903	0
918	6	0	0	0	0	0	0	200	300	0	0	0	0	0	0	0	200	903	0	0	0	0	0	0	0	603	903	0
918	7	0	0	0	0	0	0	200	300	0	0	0	0	0	0	0	200	903	0	0	0	0	0	0	0	603	903	0
918	8	0	0	0	0	0	0	200	300	0	0	0	0	0	0	0	200	903	0	0	0	0	0	0	0	603	903	0
918	9	0	0	0	0	0	0	200	300	0	0	0	0	0	0	0	200	903	0	0	0	0	0	0	0	603	903	0
919	0	0	0	0	0	0	0	200	300	0	0	0	0	0	0	0	200	903	0	0	0	0	0	0	0	603	903	0
919	1	0	0	0	0	0	0	200	300	0	0	0	0	0	0	0	200	903	0	0	0	0	0	0	0	603	903	0
919	2	0	0	0	0	0	0	200	300	0	0	0	0	0	0	0	200	903	0	0	0	0	0	0	0	603	903	0
919	3	0	0	0	0	0	0	200	300	0	0	0	0	0	0	0	200	903	0	0	0	0	0	0	0	603	903	0
919	4	0	0	0	0	0	0	200	300	0	0	0	0	0	0	0	200	903	0	0	0	0	0	0	0	603	903	0
919	5	0	0	0	0	0	0	200	300	0	0	0	0	0	0	0	200	903	0	0	0	0	0	0	0	603	903	0
919	6	0	0	0	0	0	0	200	300	0	0	0	0	0	0	0	200	903	0	0	0	0	0	0	0	603	903	0
919	7	0	0	0	0	0	0	200	300	0	0	0	0	0	0	0	200	903	0	0	0	0	0	0	0	603	903	0
919	8	0	0	0	0	0	0	200	300	0	0	0	0	0	0	0	200	903	0	0	0	0	0	0	0	603	903	0
919	9	0	0	0	0	0	0	200	300	0	0	0	0	0	0	0	200	903	0	0	0	0	0	0	0	603	903	0
920	0	0	0	0	0	0	0	200	300	0	0	0	0	0	0	0	200	903	0	0	0	0	0	0	0	603	903	0
920	1	0	0	0	0	0	0	200	300	0	0	0	0	0	0	0	200	903	0	0	0	0	0	0	0	603	903	0
920	2	0	0	0	0	0	0	200	300	0	0	0	0	0	0	0	200	903	0	0	0	0	0	0	0	603	903	0
920	3	0	0	0	0	0	0	200	300	0	0	0	0	0	0	0	200	903	0	0	0	0	0	0	0	603	903	0
920	4	0	0	0	0	0	0	200	300	0	0	0	0	0	0	0	200	903	0	0	0	0	0	0	0	603	903	0
920	5	0	0	0	0	0	0	200	300	0	0	0	0	0	0	0	200	903	0	0	0	0	0	0	0	603	903	0
920	6	0	0	0	0	0	0	200	300	0	0	0	0	0	0	0	200	903	0	0	0	0	0	0	0	603	903	0
920	7	0	0	0	0	0	0	200	300	0	0	0	0	0	0	0	200	903	0	0	0	0	0	0	0	603	903	0
920	8	0	0	0	0	0	0	200	300	0	0	0	0	0	0	0	200	903	0	0	0	0	0	0	0	603	903	0
920	9	0	0	0	0	0	0	200	300	0	0	0	0	0	0	0	200	903	0	0	0	0	0	0	0	603	903	0
921	0	0	0	0	0	0	0	200	300	0	0	0	0	0	0	0	200	903	0	0	0	0	0	0	0	603	903	0
921	1	0	0	0	0	0	0	200	300	0	0	0	0	0	0	0	200	903	0	0	0	0	0	0	0	603	903	0
921	2	0	0	0	0	0	0	200	300	0	0	0	0	0	0	0	200	903	0	0	0	0	0	0	0	603	903	0
921	3	0	0	0	0	0	0	200	300	0	0	0	0	0	0	0	200	903	0	0	0	0	0	0	0	603	903	0
921	4	0	0	0	0	0	0	200	300	0	0	0	0	0	0	0	200	903	0	0	0	0	0	0	0	603	903	0
921	5	0	0	0	0	0	0	200	300	0	0	0	0	0	0	0	200	903	0	0	0	0	0	0	0	603	903	0
921	6	0	0	0	0	0	0	200	300	0	0	0	0	0	0	0	200	903	0	0	0	0	0	0	0	603	903	0
921	7	0	0	0	0	0	0	200	300	0	0	0	0	0	0	0	200	903	0	0	0	0	0	0	0	603	903	0
921	8	0	0	0	0	0	0	200	300	0	0	0	0	0	0	0	200	903	0	0	0	0	0	0	0	603	903	0
921	9	0	0	0	0	0	0	200	300	0	0	0	0	0	0	0	200	903	0	0	0	0	0	0	0	603	903	0
922	0	0	0	0	0	0	0	200	300	0	0	0	0	0	0	0	200	903	0	0	0	0	0	0	0	603	903	0
922	1	0	0	0	0	0	0	200	300	0	0	0	0	0	0	0	200	903	0	0	0	0	0	0	0	603	903	0
922	2	0	0	0	0	0	0	200	300	0	0	0	0	0	0	0	200	903	0	0	0	0	0	0	0	603	903	0
922	3	0	0	0	0	0	0	200	300	0	0	0	0	0	0	0	200	903	0	0	0	0	0	0	0	603	903	0
922	4	0	0	0	0	0	0	200	300	0	0	0	0	0	0	0	200	903	0	0	0	0	0	0	0	603	903	0
922	5	0	0	0	0	0	0	200	300	0	0	0	0	0	0	0	200	903	0	0	0	0	0	0	0	603	903	0
922	6	0	0	0	0	0	0	200	300	0	0	0	0	0	0	0	200	903	0	0	0	0	0	0	0	603	903	0
922	7	0	0	0	0	0	0	200	300	0	0	0	0	0	0	0	200	903	0	0	0	0	0	0	0	603	903	0
922	8	0	0	0	0	0	0	200	300	0	0	0	0	0	0	0	200	903	0	0	0	0	0	0	0	603	903	0
922	9	0	0	0	0	0	0	200	300	0	0	0	0	0	0	0	200	903	0	0	0	0	0	0	0	603	903	0
923	0	0	0	0	0	0	0	200	300	0	0	0	0	0	0	0	200	903	0	0	0	0	0	0	0	603	903	0
923	1	0	0	0	0	0	0	200	300	0	0	0	0	0	0	0	200	903	0	0	0	0	0	0	0	603	903	0
923	2	0	0	0	0	0	0	200	300	0	0	0	0	0	0	0	200	903	0	0	0	0	0	0	0	603	903	0
923	3	0	0	0	0	0	0	200	300	0	0	0	0	0	0	0	200	903	0	0	0	0	0	0	0	603	903	0
923	4	0	0	0	0	0	0	200	300	0	0	0	0	0	0	0	200	903	0	0	0	0	0	0	0	603	903	0
923	5	0	0	0	0	0	0	200	300	0	0	0	0	0	0	0	200	903	0	0	0	0	0	0	0	603	903	0
923	6	0	0	0	0	0	0	200	300	0	0	0	0	0	0	0	200	903	0	0	0	0	0	0	0	603	903	0
923	7	0	0	0	0	0	0	200	300	0	0	0	0	0	0	0	200	903	0	0	0	0	0	0	0	603	903	0
923	8	0	0	0	0	0	0	200	300	0	0	0	0	0	0	0	200	903	0	0	0	0	0	0	0	603	903	0
923	9	0	0	0	0	0	0	200	300	0	0	0	0	0	0	0	200	903	0	0	0	0	0	0	0	603	903	0
924	0	0	0	0	0	0	0	200	300	0	0	0	0	0	0	0	200	903	0	0	0	0	0	0	0	603	903	0
924	1	0	0	0	0	0	0	200	300	0	0	0	0	0	0	0	200	903	0	0	0	0	0	0	0	603	903	0
924	2	0	0	0	0	0	0	200	300	0	0	0	0	0	0	0	200	903	0	0	0	0	0	0	0	603	903	0
924	3	0	0	0	0	0	0	200	300	0	0	0	0	0	0	0	200	903	0	0	0	0	0	0	0	603	903	0
924	4	0	0	0	0	0	0	200	300	0	0	0	0	0	0	0	200	903	0	0	0	0	0	0	0	603	903	0
924	5	0	0	0	0	0	0	200	300	0	0	0	0	0	0	0	200	903	0	0	0	0	0	0	0	603	903	0
924	6	0	0	0	0	0	0	200	300	0	0	0	0	0	0	0	200	903	0	0	0	0	0	0	0	603	903	0
924	7	0	0	0	0	0	0	200	300	0	0	0	0	0	0	0	200	903	0	0	0	0	0	0	0	603	903	0
924	8	0	0	0	0	0	0	200	300	0	0	0	0	0	0	0	200	903	0	0	0	0	0	0	0	603	903	0
924	9	0	0	0	0	0	0	200	300	0	0	0	0	0	0	0	200	903	0	0	0	0	0	0	0	603	903	0
925	0	0	0	0	0	0	0	200	300	0	0	0	0	0	0	0	200	903	0	0	0	0	0	0	0	603	903	0
925	1	0	0	0	0	0	0	200	300	0	0	0	0	0	0	0	200	903	0	0	0	0	0	0	0	603	903	0
925	2	0	0	0	0	0	0	200	300	0	0	0	0	0	0	0	200	903	0	0	0	0	0	0	0	603	903	0
925	3	0	0	0	0	0	0	200	300	0	0	0	0	0	0	0	200	903	0	0	0	0	0	0	0	603	903	0
925	4	0	0	0	0	0	0	200	300	0	0	0	0	0	0	0	200	903	0	0	0	0	0	0	0	603	903	0
925	5	0	0	0	0	0	0	200	300	0	0	0	0	0	0	0	200	903	0	0	0	0	0	0	0	603	903	0
925	6	0	0	0	0	0	0	200	300	0	0	0	0	0	0	0	200	903	0	0	0	0	0	0	0	603	903	0
925	7	0	0	0	0	0	0	200	300	0	0	0	0	0	0	0	200	903	0	0	0	0	0	0	0	603	903	0
925	8	0	0	0	0	0	0	200	300	0	0	0	0	0	0	0	200	903	0	0	0	0	0	0	0	603	903	0
925	9	0	0	0	0	0	0	200	300	0	0	0	0	0	0	0	200	903	0	0	0	0	0	0	0	603	903	0
926	0	0	0	0	0	0	0	200	300	0	0	0	0	0	0	0	200	903	0	0	0	0	0	0	0	603	903	0
926	1	0	0	0	0	0	0	200	300	0	0	0	0	0	0	0	200	903	0	0	0	0	0	0	0	603	903	0
926	2	0	0	0	0	0	0	200	300	0	0	0	0	0	0	0	200	903	0	0	0	0	0	0	0	603	903	0
926	3	0	0	0	0	0	0	200	300	0	0	0	0	0	0	0	200	903	0	0	0	0	0	0	0	603	903	0
926	4	0	0	0	0	0	0	200	300	0	0	0	0	0	0	0	200	903	0	0	0	0	0	0	0	603	903	0
926	5	0	0	0	0	0	0	200	300	0	0	0	0	0	0	0	200	903	0	0	0	0	0	0	0	603	903	0
926	6	0	0	0	0	0	0	200	300	0	0	0	0	0	0	0	200	903	0	0	0	0	0	0	0	603	903	0
926	7	0	0	0	0	0	0	200	300	0	0	0	0	0	0	0	200	903	0	0	0	0	0	0	0	603	903	0
926	8	0	0	0	0	0	0	200	300	0	0	0	0	0	0	0	200	903	0	0	0	0	0	0	0	603	903	0
926	9	0	0	0	0	0	0	200	300	0	0	0	0	0	0	0	200	903	0	0	0	0	0	0	0	603	903	0
927	0	0	0	0	0	0	0	200	300	0	0	0	0	0	0	0	200	903	0	0	0	0	0	0	0	603	903	0
927	1	0	0	0	0	0	0	200	300	0	0	0	0	0	0	0	200	903	0	0	0	0	0	0	0	603	903	0
927	2	0	0	0	0	0	0	200	300	0	0	0	0	0	0	0	200	903	0	0	0	0	0	0	0	603	903	0
927	3	0	0	0	0	0	0	200	300	0	0	0	0	0	0	0	200	903	0	0	0	0	0	0	0	603	903	0
927	4	0	0	0	0	0	0	200	300	0	0	0	0	0	0	0	200	903	0	0	0	0	0	0	0	603	903	0
927	5	0	0	0	0	0	0	200	300	0	0	0	0	0	0	0	200	903	0	0	0	0	0	0	0	603	903	0
927	6	0	0	0	0	0	0	200	300	0	0	0	0	0	0	0	200	903	0	0	0	0	0	0	0	603	903	0
927	7	0	0	0	0	0	0	200	300	0	0	0	0	0	0	0	200	903	0	0	0	0	0	0	0	603	903	0
927	8	0	0	0	0	0	0	200	300	0	0	0	0	0	0	0	200	903	0	0	0	0	0	0	0	603	903	0
927	9	0	0	0	0	0	0	200	300	0	0	0	0	0	0	0	200	903	0	0	0	0	0	0	0	603	903	0
928	0	0	0	0	0	0	0	200	300	0	0	0	0	0	0	0	200	903	0	0	0	0	0	0	0	603	903	0
928	1	0	0	0	0	0	0	200	300	0	0	0	0	0	0	0	200	903	0	0	0	0	0	0	0	603	903	0
928	2	0	0	0	0	0	0	200	300	0	0	0	0	0	0	0	200	903	0	0	0	0	0	0	0	603	903	0
928	3	0	0	0	0	0	0	200	300	0	0	0	0	0	0	0	200	903	0	0	0	0	0	0	0	603	903	0
928	4	0	0	0	0	0	0	200	300	0	0	0	0	0	0	0	200	903	0	0	0	0	0	0	0	603	903	0
928	5	0	0	0	0	0	0	200	300	0	0	0	0	0	0	0	200	903	0	0	0	0	0	0	0	603	903	0
928	6	0	0	0	0	0	0	200	300	0	0	0	0	0	0	0	200	903	0	0	0	0	0	0	0	603	903	0
928	7	0	0	0	0	0	0	200	300	0	0	0	0	0	0	0	200	903	0	0	0	0	0	0	0	603	903	0
928	8	0	0	0	0	0	0	200	300	0	0	0	0	0	0	0	200	903	0	0	0	0	0	0	0	603	903	0
928	9	0	0	0	0	0	0	200	300	0	0	0	0	0	0	0	200	903	0	0	0	0	0	0	0	603	903	0
929	0	0	0	0	0	0	0	200	300	0	0	0	0	0	0	0	200	903	0	0	0	0	0	0	0	603	903	0
929	1	0	0	0	0	0	0	200	300	0	0	0	0	0	0	0	200	903	0	0	0	0	0	0	0	603	903	0
929	2	0	0	0	0	0	0	200	300	0	0	0	0	0	0	0	200	903	0	0	0	0	0	0	0	603	903	0
929	3	0	0	0	0	0	0	200	300	0	0	0	0	0	0	0	200	903	0	0	0	0	0	0	0	603	903	0
929	4	0	0	0	0	0	0	200	300	0	0	0	0	0	0	0	200	903	0	0	0	0	0	0	0	603	903	0
929	5	0	0	0	0	0	0	200	300	0	0	0	0	0	0	0	200	903	0	0	0	0	0	0	0	603	903	0
929	6	0	0	0	0	0	0	200	300	0	0	0	0	0	0	0	200	903	0	0	0	0	0	0	0	603	903	0
929	7	0	0	0	0	0	0	200	300	0	0	0	0	0	0	0	200	903	0	0	0	0	0	0	0	603	903	0
929	8	0	0	0	0	0	0	200	300	0	0	0	0	0	0	0	200	903	0	0	0	0	0	0	0	603	903	0
929	9	0	0	0	0	0	0	200	300	0	0	0	0	0	0	0	200	903	0	0	0	0	0	0	0	603	903	0
930	0	0	0	0	0	0	0	200	300	0	0	0	0	0	0	0	200	903	0	0	0	0	0	0	0	603	903	0
930	1	0	0	0	0	0	0	200	300	0	0	0	0	0	0	0	200	903	0	0	0	0	0	0	0	603	903	0
930	2	0	0	0	0	0	0	200	300	0	0	0	0	0	0	0	200	903	0	0	0	0	0	0	0	603	903	0
930	3	0	0	0	0	0	0	200	300	0	0	0	0	0	0	0	200	903	0	0	0	0	0	0	0	603	903	0
930	4	0	0	0	0	0	0	200	300	0	0	0	0	0	0	0	200	903	0	0	0	0	0	0	0	603	903	0
930	5	0	0	0	0	0	0	200	300	0	0	0	0	0	0	0	200	903	0	0	0	0	0	0	0	603	903	0
930	6	0	0	0	0	0	0	200	300	0	0	0	0	0	0	0	200	903	0	0	0	0	0	0	0	603	903	0
930	7	0	0	0	0	0	0	200	300	0	0	0	0	0	0	0	200	903	0	0	0	0	0	0	0	603	903	0
930	8	0	0	0	0	0	0	200	300	0	0	0	0	0	0	0	200	903	0	0	0	0	0	0	0	603	903	0
930	9	0	0	0	0	0	0	200	300	0	0	0	0	0	0	0	200	903	0	0	0	0	0	0	0	603	903	0
931	0	0	0	0	0	0	0	200	300	0	0	0	0	0	0	0	200	903	0	0	0	0	0	0	0	603	903	0
931	1	0	0	0	0	0	0	200	300	0	0	0	0	0	0	0	200	903	0	0	0	0	0	0	0	603	903	0
931	2	0	0	0	0	0	0	200	300	0	0	0	0	0	0	0	200	903	0	0	0	0	0	0	0	603	903	0
931	3	0	0	0	0	0	0	200	300	0	0	0	0	0	0	0	200	903	0	0	0	0	0	0	0	603	903	0
931	4	0	0	0	0	0	0	200	300	0	0	0	0	0	0	0	200	903	0	0	0	0	0	0	0	603	903	0
931	5	0	0	0	0	0	0	200	300	0	0	0	0	0	0	0	200	903	0	0	0	0	0	0	0	603	903	0
931	6	0	0	0	0	0	0	200	300	0	0	0	0	0	0	0	200	903	0	0	0	0	0	0	0	603	903	0
931	7	0	0	0	0	0	0	200	300	0	0	0	0	0	0	0	200	903	0	0	0	0	0	0	0	603	903	0
931	8	0	0	0	0	0	0	200	300	0	0	0	0	0	0	0	200	903	0	0	0	0	0	0	0	603	903	0
931	9	0	0	0	0	0	0	200	300	0	0	0	0	0	0	0	200	903	0	0	0	0	0	0	0	603	903	0
932	0	0	0	0	0	0	0	200	300	0	0	0	0	0	0	0	200	903	0	0	0	0	0	0	0	603	903	0
932	1	0	0	0	0	0	0	200	300	0	0	0	0	0	0	0	200	903	0	0	0	0	0	0	0	603	903	0
932	2	0	0	0	0	0	0	200	300	0	0	0	0	0	0	0	200	903	0	0	0	0	0	0	0	603	903	0
932	3	0	0	0	0	0	0	200	300	0	0	0	0	0	0	0	200	903	0	0	0	0	0	0	0	603	903	0
932	4	0	0	0	0	0	0	200	300	0	0	0	0	0	0	0	200	903	0	0	0	0	0	0	0	603	903	0
932	5	0	0	0	0	0	0	200	300	0	0	0	0	0	0	0	200	903	0	0	0	0	0	0	0	603	903	0
932	6	0	0	0	0	0	0	200	300	0	0	0	0	0	0	0	200	903	0	0	0	0	0	0	0	603	903	0
932	7	0	0	0	0	0	0	200	300	0	0	0	0	0	0	0	200	903	0	0	0	0	0	0	0	603	903	0
932	8	0	0	0	0	0	0	200	300	0	0	0	0	0	0	0	200	903	0	0	0	0	0	0	0	603	903	0
932	9	0	0	0	0	0	0	200	300	0	0	0	0	0	0	0	200	903	0	0	0	0	0	0	0	603	903	0
933	0	0	0	0	0	0	0	200	300	0	0	0	0	0	0	0	200	903	0	0	0	0	0	0	0	603	903	0
933	1	0	0	0	0	0	0	200	300	0	0	0	0	0	0	0	200	903	0	0	0	0	0	0	0	603	903	0
933	2	0	0	0	0	0	0	200	300	0	0	0	0	0	0	0	200	903	0	0	0	0	0	0	0	603	903	0
933	3	0	0	0	0	0	0	200	300	0	0	0	0	0	0	0	200	903	0	0	0	0	0	0	0	603	903	0
933	4	0	0	0	0	0	0	200	300	0	0	0	0	0	0	0	200	903	0	0	0	0	0	0	0	603	903	0
933	5	0	0	0	0	0	0	200	300	0	0	0	0	0	0	0	200	903	0	0	0	0	0	0	0	603	903	0
933	6	0	0	0	0	0	0	200	300	0	0	0	0	0	0	0	200	903	0	0	0	0	0	0	0	603	903	0
933	7	0	0	0	0	0	0	200	300	0	0	0	0	0	0	0	200	903	0	0	0	0	0	0	0	603	903	0
933	8	0	0	0	0	0	0	200	300	0	0	0	0	0	0	0	200	903	0	0	0	0	0	0	0	603	903	0
933	9	0	0	0	0	0	0	200	300	0	0	0	0	0	0	0	200	903	0	0	0	0	0	0	0	603	903	0
934	0	0	0	0	0	0	0	200	300	0	0	0	0	0	0	0	200	903	0	0	0	0	0	0	0	603	903	0
934	1	0	0	0	0	0	0	200	300	0	0	0	0	0	0	0	200	903	0	0	0	0	0	0	0	603	903	0
934	2	0	0	0	0	0	0	200	300	0	0	0	0	0	0	0	200	903	0	0	0	0	0	0	0	603	903	0
934	3	0	0	0	0	0	0	200	300	0	0	0	0	0	0	0	200	903	0	0	0	0	0	0	0	603	903	0
934	4	0	0	0	0	0	0	200	300	0	0	0	0	0	0	0	200	903	0	0	0	0	0	0	0	603	903	0
934	5	0	0	0	0	0	0	200	300	0	0	0	0	0	0	0	200	903	0	0	0	0	0	0	0	603	903	0
934	6	0	0	0	0	0	0	200	300	0	0	0	0	0	0	0	200	903	0	0	0	0	0	0	0	603	903	0
934	7	0	0	0	0	0	0	200	300	0	0	0	0	0	0	0	200	903	0	0	0	0	0	0	0	603	903	0
934	8	0	0	0	0	0	0	200	300	0	0	0	0	0	0	0	200	903	0	0	0	0	0	0	0	603	903	0
934	9	0	0	0	0	0	0	200	300	0	0	0	0	0	0	0	200	903	0	0	0	0	0	0	0	603	903	0
935	0	0	0	0	0	0	0	200	300	0	0	0	0	0	0	0	200	903	0	0	0	0	0	0	0	603	903	0
935	1	0	0	0	0	0	0	200	300	0	0	0	0	0	0	0	200	903	0	0	0	0	0	0	0	603	903	0
935	2	0	0	0	0	0	0	200	300	0	0	0	0	0	0	0	200	903	0	0	0	0	0	0	0	603	903	0
935	3	0	0	0	0	0	0	200	300	0	0	0	0	0	0	0	200	903	0	0	0	0	0	0	0	603	903	0
935	4	0	0	0	0	0	0	200	300	0	0	0	0	0	0	0	200	903	0	0	0	0	0	0	0	603	903	0
935	5	0	0	0	0	0	0	200	300	0	0	0	0	0	0	0	200	903	0	0	0	0	0	0	0	603	903	0
935	6	0	0	0	0	0	0	200	300	0	0	0	0	0	0	0	200	903	0	0	0	0	0	0	0	603	903	0
935	7	0	0	0	0	0	0	200	300	0	0	0	0	0	0	0	200	903	0	0	0	0	0	0	0	603	903	0
935	8	0	0	0	0	0	0	200	300	0	0	0	0	0	0	0	200	903	0	0	0	0	0	0	0	603	903	0
935	9	0	0	0	0	0	0	200	300	0	0	0	0	0	0	0	200	903	0	0	0	0	0	0	0	603	903	0
936	0	0	0	0	0	0	0	200	300	0	0	0	0	0	0	0	200	903	0	0	0	0	0	0	0	603	903	0
936	1	0	0	0	0	0	0	200	300	0	0	0	0	0	0	0	200	903	0	0	0	0	0	0	0	603	903	0
936	2	0	0	0	0	0	0	200	300	0	0	0	0	0	0	0	200	903	0	0	0	0	0	0	0	603	903	0
936	3	0	0	0	0	0	0	200	300	0	0	0	0	0	0	0	200	903	0	0	0	0	0	0	0	603	903	0
936	4	0	0	0	0	0	0	200	300	0	0	0	0	0	0	0	200	903	0	0	0	0	0	0	0	603	903	0
936	5	0	0	0	0	0	0	200	300	0	0	0	0	0	0	0	200	903	0	0	0	0	0	0	0	603	903	0
936	6	0	0	0	0	0	0	200	300	0	0	0	0	0	0	0	200	903	0	0	0	0	0	0	0	603	903	0
936	7	0	0	0	0	0	0	200	300	0	0	0	0	0	0	0	200	903	0	0	0	0	0	0	0	603	903	0
936	8	0	0	0	0	0	0	200	300	0	0	0	0	0	0	0	200	903	0	0	0	0	0	0	0	603	903	0
936	9	0	0	0	0	0	0	200	300	0	0	0	0	0	0	0	200	903	0	0	0	0	0	0	0	603	903	0
937	0	0	0	0	0	0	0	200	300	0	0	0	0	0	0	0	200	903	0	0	0	0	0	0	0	603	903	0
937	1	0	0	0	0	0	0	200	300	0	0	0	0	0	0	0	200	903	0	0	0	0	0	0	0	603	903	0
937	2	0	0	0	0	0	0	200	300	0	0	0	0	0	0	0	200	903	0	0	0	0	0	0	0	603	903	0
937	3	0	0	0	0	0	0	200	300	0	0	0	0	0	0	0	200	903	0	0	0	0	0	0	0	603	903	0
937	4	0	0	0	0	0	0	200	300	0	0	0	0	0	0	0	200	903	0	0	0	0	0	0	0	603	903	0
937	5	0	0	0	0	0	0	200	300	0	0	0	0	0	0	0	200	903	0	0	0	0	0	0	0	603	903	0
937	6	0	0	0	0	0	0	200	300	0	0	0	0	0	0	0	200	903	0	0	0	0	0	0	0	603	903	0
937	7	0	0	0	0	0	0	200	300	0	0	0	0	0	0	0	200	903	0	0	0	0	0	0	0	603	903	0
937	8	0	0	0	0	0	0	200	300	0	0	0	0	0	0	0	200	903	0	0	0	0	0	0	0	603	903	0
937	9	0	0	0	0	0	0	200	300	0	0	0	0	0	0	0	200	903	0	0	0	0	0	0	0	603	903	0
938	0	0	0	0	0	0	0	200	300	0	0	0	0	0	0	0	200	903	0	0	0	0	0	0	0	603	903	0
938	1	0	0	0	0	0	0	200	300	0	0	0	0	0	0	0	200	903	0	0	0	0	0	0	0	603	903	0
938	2	0	0	0	0	0	0	200	300	0	0	0	0	0	0	0	200	903	0	0	0	0	0	0	0	603	903	0
938	3	0	0	0	0	0	0	200	300	0	0	0	0	0	0	0	200	903	0	0	0	0	0	0	0	603	903	0
938	4	0	0	0	0	0	0	200	300	0	0	0	0	0	0	0	200	903	0	0	0	0	0	0	0	603	903	0
938	5	0	0	0	0	0	0	200	300	0	0	0	0	0	0	0	200	903	0	0	0	0	0	0	0	603	903	0
938	6	0	0	0	0	0	0	200	300	0	0	0	0	0	0	0	200	903	0	0	0	0	0	0	0	603	903	0
938	7	0	0	0	0	0	0	200	300	0	0	0	0	0	0	0	200	903	0	0	0	0	0	0	0	603	903	0
938	8	0	0	0	0	0	0	200	300	0	0	0	0	0	0	0	200	903	0	0	0	0	0	0	0	603	903	0
938	9	0	0	0	0	0	0	200	300	0	0	0	0	0	0	0	200	903	0	0	0	0	0	0	0	603	903	0
939	0	0	0	0	0	0	0	200	300	0	0	0	0	0	0	0	200	903	0	0	0	0	0	0	0	603	903	0
939	1	0	0	0	0	0	0	200	300	0	0	0	0	0	0	0	200	903	0	0	0	0	0	0	0	603	903	0
939	2	0	0	0	0	0	0	200	300	0	0	0	0	0	0	0	200	903	0	0	0	0	0	0	0	603	903	0
939	3	0	0	0	0	0	0	200	300	0	0	0	0	0	0	0	200	903	0	0	0	0	0	0	0	603	903	0
939	4	0	0	0	0	0	0	200	300	0	0	0	0	0	0	0	200	903	0	0	0	0	0	0	0	603	903	0
939	5	0	0	0	0	0	0	200	300	0	0	0	0	0	0	0	200	903	0	0	0	0	0	0	0	603	903	0
939	6	0	0	0	0	0	0	200	300	0	0	0	0	0	0	0	200	903	0	0	0	0	0	0	0	603	903	0
939	7	0	0	0	0	0	0	200	300	0	0	0	0	0	0	0	200	903	0	0	0	0	0	0	0	603	903	0
939	8	0	0	0	0	0	0	200	300	0	0	0	0	0	0	0	200	903	0	0	0	0	0	0	0	603	903	0
939	9	0	0	0	0	0	0	200	300	0	0	0	0	0	0	0	200	903	0	0	0	0	0	0	0	603	903	0
940	0	0	0	0	0	0	0	200	300	0	0	0	0	0	0	0	200	903	0	0	0	0	0	0	0	603	903	0
940	1	0	0	0	0	0	0	200	300	0	0	0	0	0	0	0	200	903	0	0	0	0	0	0	0	603	903	0
940	2	0	0	0	0	0	0	200	300	0	0	0	0	0	0	0	200	903	0	0	0	0	0	0	0	603	903	0
940	3	0	0	0	0	0	0	200	300	0	0	0	0	0	0	0	200	903	0	0	0	0	0	0	0	603	903	0
940	4	0	0	0	0	0	0	200	300	0	0	0	0	0	0	0	200	903	0	0	0	0	0	0	0	603	903	0
940	5	0	0	0	0	0	0	200	300	0	0	0	0	0	0	0	200	903	0	0	0	0	0	0	0	603	903	0
940	6	0	0	0	0	0	0	200	300	0	0	0	0	0	0	0	200	903	0	0	0	0	0	0	0	603	903	0
940	7	0	0	0	0	0	0	200	300	0	0	0	0	0	0	0	200	903	0	0	0	0	0	0	0	603	903	0
940	8	0	0	0	0	0	0	200	300	0	0	0	0	0	0	0	200	903	0	0	0	0	0	0	0	603	903	0
940	9	0	0	0	0	0	0	200	300	0	0	0	0	0	0	0	200	903	0	0	0	0	0	0	0	603	903	0
941	0	0	0	0	0	0	0	200	300	0	0	0	0	0	0	0	200	903	0	0	0	0	0	0	0	603	903	0
941	1	0	0	0	0	0	0	200	300	0	0	0	0	0	0	0	200	903	0	0	0	0	0	0	0	603	903	0
941	2	0	0	0	0	0	0	200	300	0	0	0	0	0	0	0	200	903	0	0	0	0	0	0	0	603	903	0
941	3	0	0	0	0	0	0	200	300	0	0	0	0	0	0	0	200	903	0	0	0	0	0	0	0	603	903	0
941	4	0	0	0	0	0	0	200	300	0	0	0	0	0	0	0	200	903	0	0	0	0	0	0	0	603	903	0
941	5	0	0	0	0	0	0	200	300	0	0	0	0	0	0	0	200	903	0	0	0	0	0	0	0	603	903	0
941	6	0	0	0	0	0	0	200	300	0	0	0	0	0	0	0	200	903	0	0	0	0	0	0	0	603	903	0
941	7	0	0	0	0	0	0	200	300	0	0	0	0	0	0	0	200	903	0	0	0	0	0	0	0	603	903	0
941	8	0	0	0	0	0	0	200	300	0	0	0	0	0	0	0	200	903	0	0	0	0	0	0	0	603	903	0
941	9	0	0	0	0	0	0	200	300	0	0	0	0	0	0	0	200	903	0	0	0	0	0	0	0	603	903	0
942	0	0	0	0	0	0	0	200	300	0	0	0	0	0	0	0	200	903	0	0	0	0	0	0	0	603	903	0
942	1	0	0	0	0	0	0	200	300	0	0	0	0	0	0	0	200	903	0	0	0	0	0	0	0	603	903	0
942	2	0	0	0	0	0	0	200	300	0	0	0	0	0	0	0	200	903	0	0	0	0	0	0	0	603	903	0
942	3	0	0	0	0	0	0	200	300	0	0	0	0	0	0	0	200	903	0	0	0	0	0	0	0	603	903	0
942	4	0	0	0	0	0	0	200	300	0	0	0	0	0	0	0	200	903	0	0	0	0	0	0	0	603	903	0
942	5	0	0	0	0	0	0	200	300	0	0	0	0	0	0	0	200	903	0	0	0	0	0	0	0	603	903	0
942	6	0	0	0	0	0	0	200	300	0	0	0	0	0	0	0	200	903	0	0	0	0	0	0	0	603	903	0
942	7	0	0	0	0	0	0	200	300	0	0	0	0	0	0	0	200	903	0	0	0	0	0	0	0	603	903	0
942	8	0	0	0	0	0	0	200	300	0	0	0	0	0	0	0	200	903	0	0	0	0	0	0	0	603	903	0
942	9	0	0	0	0	0	0	200	300	0	0	0	0	0	0	0	200	903	0	0	0	0	0	0	0	603	903	0
943	0	0	0	0	0	0	0	200	300	0	0	0	0	0	0	0	200	903	0	0	0	0	0	0	0	603	903	0
943	1	0	0	0	0	0	0	200	300	0	0	0	0	0	0	0	200	903	0	0	0	0	0	0	0	603	903	0
943	2	0	0	0	0	0	0	200	300	0	0	0	0	0	0	0	200	903	0	0	0	0	0	0	0	603	903	0
943	3	0	0	0	0	0	0	200	300	0	0	0	0	0	0	0	200	903	0	0	0	0	0	0	0	603	903	0
943	4	0	0	0	0	0	0	200	300	0	0	0	0	0	0	0	200	903	0	0	0	0	0	0	0	603	903	0
943	5	0	0	0	0	0	0	200	300	0	0	0	0	0	0	0	200	903	0	0	0	0	0	0	0	603	903	0
943	6	0	0	0	0	0	0	200	300	0	0	0	0	0	0	0	200	903	0	0	0	0	0	0	0	603	903	0
943	7	0	0	0	0	0	0	200	300	0	0	0	0	0	0	0	200	903	0	0	0	0	0	0	0	603	903	0
943	8	0	0	0	0	0	0	200	300	0	0	0	0	0	0	0	200	903	0	0	0	0	0	0	0	603	903	0
943	9	0	0	0	0	0	0	200	300	0	0	0	0	0	0	0	200	903	0	0	0	0	0	0	0	603	903	0
944	0	0	0	0	0	0	0	200	300	0	0	0	0	0	0	0	200	903	0	0	0	0	0	0	0	603	903	0
944	1	0	0	0	0	0	0	200	300	0	0	0	0	0	0	0	200	903	0	0	0	0	0	0	0	603	903	0
944	2	0	0	0	0	0	0	200	300	0	0	0	0	0	0	0	200	903	0	0	0	0	0	0	0	603	903	0
944	3	0	0	0	0	0	0	200	300	0	0	0	0	0	0	0	200	903	0	0	0	0	0	0	0	603	903	0
944	4	0	0	0	0	0	0	200	300	0	0	0	0	0	0	0	200	903	0	0	0	0	0	0	0	603	903	0
944	5	0	0	0	0	0	0	200	300	0	0	0	0	0	0	0	200	903	0	0	0	0	0	0	0	603	903	0
944	6	0	0	0	0	0	0	200	300	0	0	0	0	0	0	0	200	903	0	0	0	0	0	0	0	603	903	0
944	7	0	0	0	0	0	0	200	300	0	0	0	0	0	0	0	200	903	0	0	0	0	0	0	0	603	903	0
944	8	0	0	0	0	0	0	200	300	0	0	0	0	0	0	0	200	903	0	0	0	0	0	0	0	603	903	0
944	9	0	0	0	0	0	0	200	300	0	0	0	0	0	0	0	200	903	0	0	0	0	0	0	0	603	903	0
945	0	0	0	0	0	0	0	200	300	0	0	0	0	0	0	0	200	903	0	0	0	0	0	0	0	603	903	0
945	1	0	0	0	0	0	0	200	300	0	0	0	0	0	0	0	200	903	0	0	0	0	0	0	0	603	903	0
945	2	0	0	0	0	0	0	200	300	0	0	0	0	0	0	0	200	903	0	0	0	0	0	0	0	603	903	0
945	3	0	0	0	0	0	0	200	300	0	0	0	0	0	0	0	200	903	0	0	0	0	0	0	0	603	903	0
945	4	0	0	0	0	0	0	200	300	0	0	0	0	0	0	0	200	903	0	0	0	0	0	0	0	603	903	0
945	5	0	0	0	0	0	0	200	300	0	0	0	0	0	0	0	200	903	0	0	0	0	0	0	0	603	903	0
945	6	0	0	0	0	0	0	200	300	0	0	0	0	0	0	0	200	903	0	0	0	0	0	0	0	603	903	0
945	7	0	0	0	0	0	0	200	300	0	0	0	0	0	0	0	200	903	0	0	0	0	0	0	0	603	903	0
945	8	0	0	0	0	0	0	200	300	0	0	0	0	0	0	0	200	903	0	0	0	0	0	0	0	603	903	0
945	9	0	0	0	0	0	0	200	300	0	0	0	0	0	0	0	200	903	0	0	0	0	0	0	0	603	903	0
946	0	0	0	0	0	0	0	200	300	0	0	0	0	0	0	0	200	903	0	0	0	0	0	0	0	603	903	0
946	1	0	0	0	0	0	0	200	300	0	0	0	0	0	0	0	200	903	0	0	0	0	0	0	0	603	903	0
946	2	0	0	0	0	0	0	200	300	0	0	0	0	0	0	0	200	903	0	0	0	0	0	0	0	603	903	0
946	3	0	0	0	0	0	0	200	300	0	0	0	0	0	0	0	200	903	0	0	0	0	0	0	0	603	903	0
946	4	0	0	0	0	0	0	200	300	0	0	0	0	0	0	0	200	903	0	0	0	0	0	0	0	603	903	0
946	5	0	0	0	0	0	0	200	300	0	0	0	0	0	0	0	200	903	0	0	0	0	0	0	0	603	903	0
946	6	0	0	0	0	0	0	200	300	0	0	0	0	0	0	0	200	903	0	0	0	0	0	0	0	603	903	0
946	7	0	0	0	0	0	0	200	300	0	0	0	0	0	0	0	200	903	0	0	0	0	0	0	0	603	903	0
946	8	0	0	0	0	0	0	200	300	0	0	0	0	0	0	0	200	903	0	0	0	0	0	0	0	603	903	0
946	9	0	0	0	0	0	0	200	300	0	0	0	0	0	0	0	200	903	0	0	0	0	0	0	0	603	903	0
947	0	0	0	0	0	0	0	200	300	0	0	0	0	0	0	0	200	903	0	0	0	0	0	0	0	603	903	0
947	1	0	0	0	0	0	0	200	300	0	0	0	0	0	0	0	200	903	0	0	0	0	0	0	0	603	903	0
947	2	0	0	0	0	0	0	200	300	0	0	0	0	0	0	0	200	903	0	0	0	0	0	0	0	603	903	0
947	3	0	0	0	0	0	0	200	300	0	0	0	0	0	0	0	200	903	0	0	0	0	0	0	0	603	903	0
947	4	0	0	0	0	0	0	200	300	0	0	0	0	0	0	0	200	903	0	0	0	0	0	0	0	603	903	0
947	5	0	0	0	0	0	0	200	300	0	0	0	0	0	0	0	200	903	0	0	0	0	0	0	0	603	903	0
947	6	0	0	0	0	0	0	200	300	0	0	0	0	0	0	0	200	903	0	0	0	0	0	0	0	603	903	0
947	7	0	0	0	0	0	0	200	300	0	0	0	0	0	0	0	200	903	0	0	0	0	0	0	0	603	903	0
947	8	0	0	0	0	0	0	200	300	0	0	0	0	0	0	0	200	903	0	0	0	0	0	0	0	603	903	0
947	9	0	0	0	0	0	0	200	300	0	0	0	0	0	0	0	200	903	0	0	0	0	0	0	0	603	903	0
948	0	0	0	0	0	0	0	200	300	0	0	0	0	0	0	0	200	903	0	0	0	0	0	0	0	603	903	0
948	1	0	0	0	0	0	0	200	300	0	0	0	0	0	0	0	200	903	0	0	0	0	0	0	0	603	903	0
948	2	0	0	0	0	0	0	200	300	0	0	0	0	0	0	0	200	903	0	0	0	0	0	0	0	603	903	0
948	3	0	0	0	0	0	0	200	300	0	0	0	0	0	0	0	200	903	0	0	0	0	0	0	0	603	903	0
948	4	0	0	0	0	0	0	200	300	0	0	0	0	0	0	0	200	903	0	0	0	0	0	0	0	603	903	0
948	5	0	0	0	0	0	0	200	300	0	0	0	0	0	0	0	200	903	0	0	0	0	0	0	0	603	903	0
948	6	0	0	0	0	0	0	200	300	0	0	0	0	0	0	0	200	903	0	0	0	0	0	0	0	603	903	0
948	7	0	0	0	0	0	0	200	300	0	0	0	0	0	0	0	200	903	0	0	0	0	0	0	0	603	903	0
948	8	0	0	0	0	0	0	200	300	0	0	0	0	0	0	0	200	903	0	0	0	0	0	0	0	603	903	0
948	9	0	0	0	0	0	0	200	300	0	0	0	0	0	0	0	200	903	0	0	0	0	0	0	0	603	903	0
949	0	0	0	0	0	0	0	200	300	0	0	0	0	0	0	0	200	903	0	0	0	0	0	0	0	603	903	0
949	1	0	0	0	0	0	0	200	300	0	0	0	0	0	0	0	200	903	0	0	0	0	0	0	0	603	903	0
949	2	0	0	0	0	0	0	200	300	0	0	0	0	0	0	0	200	903	0	0	0	0	0	0	0	603	903	0
949	3	0	0	0	0	0	0	200	300	0	0	0	0	0	0	0	200	903	0	0	0	0	0	0	0	603	903	0
949	4	0	0	0	0	0	0	200	300	0	0	0	0	0	0	0	200	903	0	0	0	0	0	0	0	603	903	0
949	5	0	0	0	0	0	0	200	300	0	0	0	0	0	0	0	200	903	0	0	0	0	0	0	0	603	903	0
949	6	0	0	0	0	0	0	200	300	0	0	0	0	0	0	0	200	903	0	0	0	0	0	0	0	603	903	0
949	7	0	0	0	0	0	0	200	300	0	0	0	0	0	0	0	200	903	0	0	0	0	0	0	0	603	903	0
949	8	0	0	0	0	0	0	200	300	0	0	0	0	0	0	0	200	903	0	0	0	0	0	0	0	603	903	0
949	9	0	0	0	0	0	0	200	300	0	0	0	0	0	0	0	200	903	0	0	0	0	0	0	0	603	903	0
950	0	0	0	0	0	0	0	200	300	0	0	0	0	0	0	0	200	903	0	0	0	0	0	0	0	603	903	0
950	1	0	0	0	0	0	0	200	300	0	0	0	0	0	0	0	200	903	0	0	0	0	0	0	0	603	903	0
950	2	0	0	0	0	0	0	200	300	0	0	0	0	0	0	0	200	903	0	0	0	0	0	0	0	603	903	0
950	3	0	0	0	0	0	0	200	300	0	0	0	0	0	0	0	200	903	0	0	0	0	0	0	0	603	903	0
950	4	0	0	0	0	0	0	200	300	0	0	0	0	0	0	0	200	903	0	0	0	0	0	0	0	603	903	0
950	5	0	0	0	0	0	0	200	300	0	0	0	0	0	0	0	200	903	0	0	0	0	0	0	0	603	903	0
950	6	0	0	0	0	0	0	200	300	0	0	0	0	0	0	0	200	903	0	0	0	0	0	0	0	603	903	0
950	7	0	0	0	0	0	0	200	300	0	0	0	0	0	0	0	200	903	0	0	0	0	0	0	0	603	903	0
950	8	0	0	0	0	0	0	200	300	0	0	0	0	0	0	0	200	903	0	0	0	0	0	0	0	603	903	0
950	9	0	0	0	0	0	0	200	300	0	0	0	0	0	0	0	200	903	0	0	0	0	0	0	0	603	903	0
951	0	0	0	0	0	0	0	200	300	0	0	0	0	0	0	0	200	903	0	0	0	0	0	0	0	603	903	0
951	1	0	0	0	0	0	0	200	300	0	0	0	0	0	0	0	200	903	0	0	0	0	0	0	0	603	903	0
951	2	0	0	0	0	0	0	200	300	0	0	0	0	0	0	0	200	903	0	0	0	0	0	0	0	603	903	0
951	3	0	0	0	0	0	0	200	300	0	0	0	0	0	0	0	200	903	0	0	0	0	0	0	0	603	903	0
951	4	0	0	0	0	0	0	200	300	0	0	0	0	0	0	0	200	903	0	0	0	0	0	0	0	603	903	0
951	5	0	0	0	0	0	0	200	300	0	0	0	0	0	0	0	200	903	0	0	0	0	0	0	0	603	903	0
951	6	0	0	0	0	0	0	200	300	0	0	0	0	0	0	0	200	903	0	0	0	0	0	0	0	603	903	0
951	7	0	0	0	0	0	0	200	300	0	0	0	0	0	0	0	200	903	0	0	0	0	0	0	0	603	903	0
951	8	0	0	0	0	0	0	200	300	0	0	0	0	0	0	0	200	903	0	0	0	0	0	0	0	603	903	0
951	9	0	0	0	0	0	0	200	300	0	0	0	0	0	0	0	200	903	0	0	0	0	0	0	0	603	903	0
952	0	0	0	0	0	0	0	200	300	0	0	0	0	0	0	0	200	903	0	0	0	0	0	0	0	603	903	0
952	1	0	0	0	0	0	0	200	300	0	0	0	0	0	0	0	200	903	0	0	0	0	0	0	0	603	903	0
952	2	0	0	0	0	0	0	200	300	0	0	0	0	0	0	0	200	903	0	0	0	0	0	0	0	603	903	0
952	3	0	0	0	0	0	0	200	300	0	0	0	0	0	0	0	200	903	0	0	0	0	0	0	0	603	903	0
952	4	0	0	0	0	0	0	200	300	0	0	0	0	0	0	0	200	903	0	0	0	0	0	0	0	603	903	0
952	5	0	0	0	0	0	0	200	300	0	0	0	0	0	0	0	200	903	0	0	0	0	0	0	0	603	903	0
952	6	0	0	0	0	0	0	200	300	0	0	0	0	0	0	0	200	903	0	0	0	0	0	0	0	603	903	0
952	7	0	0	0	0	0	0	200	300	0	0	0	0	0	0	0	200	903	0	0	0	0	0	0	0	603	903	0
952	8	0	0	0	0	0	0	200	300	0	0	0	0	0	0	0	200	903	0	0	0	0	0	0	0	603	903	0
952	9	0	0	0	0	0	0	200	300	0	0	0	0	0	0	0	200	903	0	0	0	0	0	0	0	603	903	0
953	0	0	0	0	0	0	0	200	300	0	0	0	0	0	0	0	200	903	0	0	0	0	0	0	0	603	903	0
953	1	0	0	0	0	0	0	200	300	0	0	0	0	0	0	0	200	903	0	0	0	0	0	0	0	603	903	0
953	2	0	0	0	0	0	0	200	300	0	0	0	0	0	0	0	200	903	0	0	0	0	0	0	0	603	903	0
953	3	0	0	0	0	0	0	200	300	0	0	0	0	0	0	0	200	903	0	0	0	0	0	0	0	603	903	0
953	4	0	0	0	0	0	0	200	300	0	0	0	0	0	0	0	200	903	0	0	0	0	0	0	0	603	903	0
953	5	0	0	0	0	0	0	200	300	0	0	0	0	0	0	0	200	903	0	0	0	0	0	0	0	603	903	0
953	6	0	0	0	0	0	0	200	300	0	0	0	0	0	0	0	200	903	0	0	0	0	0	0	0	603	903	0
953	7	0	0	0	0	0	0	200	300	0	0	0	0	0	0	0	200	903	0	0	0	0	0	0	0	603	903	0
953	8	0	0	0	0	0	0	200	300	0	0	0	0	0	0	0	200	903	0	0	0	0	0	0	0	603	903	0
953	9	0	0	0	0	0	0	200	300	0	0	0	0	0	0	0	200	903	0	0	0	0	0	0	0	603	903	0
954	0	0	0	0	0	0	0	200	300	0	0	0	0	0	0	0	200	903	0	0	0	0	0	0	0	603	903	0
954	1	0	0	0	0	0	0	200	300	0	0	0	0	0	0	0	200	903	0	0	0	0	0	0	0	603	903	0
954	2	0	0	0	0	0	0	200	300	0	0	0	0	0	0	0	200	903	0	0	0	0	0	0	0	603	903	0
954	3	0	0	0	0	0	0	200	300	0	0	0	0	0	0	0	200	903	0	0	0	0	0	0	0	603	903	0
954	4	0	0	0	0	0	0	200	300	0	0	0	0	0	0	0	200	903	0	0	0	0	0	0	0	603	903	0
954	5	0	0	0	0	0	0	200	300	0	0	0	0	0	0	0	200	903	0	0	0	0	0	0	0	603	903	0
954	6	0	0	0	0	0	0	200	300	0	0	0	0	0	0	0	200	903	0	0	0	0	0	0	0	603	903	0
954	7	0	0	0	0	0	0	200	300	0	0	0	0	0	0	0	200	903	0	0	0	0	0	0	0	603	903	0
954	8	0	0	0	0	0	0	200	300	0	0	0	0	0	0	0	200	903	0	0	0	0	0	0	0	603	903	0
954	9	0	0	0	0	0	0	200	300	0	0	0	0	0	0	0	200	903	0	0	0	0	0	0	0	603	903	0
955	0	0	0	0	0	0	0	200	300	0	0	0	0	0	0	0	200	903	0	0	0	0	0	0	0	603	903	0
955	1	0	0	0	0	0	0	200	300	0	0	0	0	0	0	0	200	903	0	0	0	0	0	0	0	603	903	0
955	2	0	0	0	0	0	0	200	300	0	0	0	0	0	0	0	200	903	0	0	0	0	0	0	0	603	903	0
955	3	0	0	0	0	0	0	200	300	0	0	0	0	0	0	0	200	903	0	0	0	0	0	0	0	603	903	0
955	4	0	0	0	0	0	0	200	300	0	0	0	0	0	0	0	200	903	0	0	0	0	0	0	0	603	903	0
955	5	0	0	0	0	0	0	200	300	0	0	0	0	0	0	0	200	903	0	0	0	0	0	0	0	603	903	0
955	6	0	0	0	0	0	0	200	300	0	0	0	0	0	0	0	200	903	0	0	0	0	0	0	0	603	903	0
955	7	0	0	0	0	0	0	200	300	0	0	0	0	0	0	0	200	903	0	0	0	0	0	0	0	603	903	0
955	8	0	0	0	0	0	0	200	300	0	0	0	0	0	0	0	200	903	0	0	0	0	0	0	0	603	903	0
955	9	0	0	0	0	0	0	200	300	0	0	0	0	0	0	0	200	903	0	0	0	0	0	0	0	603	903	0
956	0	0	0	0	0	0	0	200	300	0	0	0	0	0	0	0	200	903	0	0	0	0	0	0	0	603	903	0
956	1	0	0	0	0	0	0	200	300	0	0	0	0	0	0	0	200	903	0	0	0	0	0	0	0	603	903	0
956	2	0	0	0	0	0	0	200	300	0	0	0	0	0	0	0	200	903	0	0	0	0	0	0	0	603	903	0
956	3	0	0	0	0	0	0	200	300	0	0	0	0	0	0	0	200	903	0	0	0	0	0	0	0	603	903	0
956	4	0	0	0	0	0	0	200	300	0	0	0	0	0	0	0	200	903	0	0	0	0	0	0	0	603	903	0
956	5	0	0	0	0	0	0	200	300	0	0	0	0	0	0	0	200	903	0	0	0	0	0	0	0	603	903	0
956	6	0	0	0	0	0	0	200	300	0	0	0	0	0	0	0	200	903	0	0	0	0	0	0	0	603	903	0
956	7	0	0	0	0	0	0	200	300	0	0	0	0	0	0	0	200	903	0	0	0	0	0	0	0	603	903	0
956	8	0	0	0	0	0	0	200	300	0	0	0	0	0	0	0	200	903	0	0	0	0	0	0	0	603	903	0
956	9	0	0	0	0	0	0	200	300	0	0	0	0	0	0	0	200	903	0	0	0	0	0	0	0	603	903	0
957	0	0	0	0	0	0	0	200	300	0	0	0	0	0	0	0	200	903	0	0	0	0	0	0	0	603	903	0
957	1	0	0	0	0	0	0	200	300	0	0	0	0	0	0	0	200	903	0	0	0	0	0	0	0	603	903	0
957	2	0	0	0	0	0	0	200	300	0	0	0	0	0	0	0	200	903	0	0	0	0	0	0	0	603	903	0
957	3	0	0	0	0	0	0	200	300	0	0	0	0	0	0	0	200	903	0	0	0	0	0	0	0	603	903	0
957	4	0	0	0	0	0	0	200	300	0	0	0	0	0	0	0	200	903	0	0	0	0	0	0	0	603	903	0
957	5	0	0	0	0	0	0	200	300	0	0	0	0	0	0	0	200	903	0	0	0	0	0	0	0	603	903	0
957	6	0	0	0	0	0	0	200	300	0	0	0	0	0	0	0	200	903	0	0	0	0	0	0	0	603	903	0
957	7	0	0	0	0	0	0	200	300	0	0	0	0	0	0	0	200	903	0	0	0	0	0	0	0	603	903	0
957	8	0	0	0	0	0	0	200	300	0	0	0	0	0	0	0	200	903	0	0	0	0	0	0	0	603	903	0
957	9	0	0	0	0	0	0	200	300	0	0	0	0	0	0	0	200	903	0	0	0	0	0	0	0	603	903	0
958	0	0	0	0	0	0	0	200	300	0	0	0	0	0	0	0	200	903	0	0	0	0	0	0	0	603	903	0
958	1	0	0	0	0	0	0	200	300	0	0	0	0	0	0	0	200	903	0	0	0	0	0	0	0	603	903	0
958	2	0	0	0	0	0	0	200	300	0	0	0	0	0	0	0	200	903	0	0	0	0	0	0	0	603	903	0
958	3	0	0	0	0	0	0	200	300	0	0	0	0	0	0	0	200	903	0	0	0	0	0	0	0	603	903	0
958	4	0	0	0	0	0	0	200	300	0	0	0	0	0	0	0	200	903	0	0	0	0	0	0	0	603	903	0
958	5	0	0	0	0	0	0	200	300	0	0	0	0	0	0	0	200	903	0	0	0	0	0	0	0	603	903	0
958	6	0	0	0	0	0	0	200	300	0	0	0	0	0	0	0	200	903	0	0	0	0	0	0	0	603	903	0
958	7	0	0	0	0	0	0	200	300	0	0	0	0	0	0	0	200	903	0	0	0	0	0	0	0	603	903	0
958	8	0	0	0	0	0	0	200	300	0	0	0	0	0	0	0	200	903	0	0	0	0	0	0	0	603	903	0
958	9	0	0	0	0	0	0	200	300	0	0	0	0	0	0	0	200	903	0	0	0	0	0	0	0	603	903	0
959	0	0	0	0	0	0	0	200	300	0	0	0	0	0	0	0	200	903	0	0	0	0	0	0	0	603	903	0
959	1	0	0	0	0	0	0	200	300	0	0	0	0	0	0	0	200	903	0	0	0	0	0	0	0	603	903	0
959	2	0	0	0	0	0	0	200	300	0	0	0	0	0	0	0	200	903	0	0	0	0	0	0	0	603	903	0
959	3	0	0	0	0	0	0	200	300	0	0	0	0	0	0	0	200	903	0	0	0	0	0	0	0	603	903	0
959	4	0	0	0	0	0	0	200	300	0	0	0	0	0	0	0	200	903	0	0	0	0	0	0	0	603	903	0
959	5	0	0	0	0	0	0	200	300	0	0	0	0	0	0	0	200	903	0	0	0	0	0	0	0	603	903	0
959	6	0	0	0	0	0	0	200	300	0	0	0	0	0	0	0	200	903	0	0	0	0	0	0	0	603	903	0
959	7	0	0	0	0	0	0	200	300	0	0	0	0	0	0	0	200	903	0	0	0	0	0	0	0	603	903	0
959	8	0	0	0	0	0	0	200	300	0	0	0	0	0	0	0	200	903	0	0	0	0	0	0	0	603	903	0
959	9	0	0	0	0	0	0	200	300	0	0	0	0	0	0	0	200	903	0	0	0	0	0	0	0	603	903	0
960	0	0	0	0	0	0	0	200	300	0	0	0	0	0	0	0	200	903	0	0	0	0	0	0	0	603	903	0
960	1	0	0	0	0	0	0	200	300	0	0	0	0	0	0	0	200	903	0	0	0	0	0	0	0	603	903	0
960	2	0	0	0	0	0	0	200	300	0	0	0	0	0	0	0	200	903	0	0	0	0	0	0	0	603	903	0
960	3	0	0	0	0	0	0	200	300	0	0	0	0	0	0	0	200	903	0	0	0	0	0	0	0	603	903	0
960	4	0	0	0	0	0	0	200	300	0	0	0	0	0	0	0	200	903	0	0	0	0	0	0	0	603	903	0
960	5	0	0	0	0	0	0	200	300	0	0	0	0	0	0	0	200	903	0	0	0	0	0	0	0	603	903	0
960	6	0	0	0	0	0	0	200	300	0	0	0	0	0	0	0	200	903	0	0	0	0	0	0	0	603	903	0
960	7	0	0	0	0	0	0	200	300	0	0	0	0	0	0	0	200	903	0	0	0	0	0	0	0	603	903	0
960	8	0	0	0	0	0	0	200	300	0	0	0	0	0	0	0	200	903	0	0	0	0	0	0	0	603	903	0
960	9	0	0	0	0	0	0	200	300	0	0	0	0	0	0	0	200	903	0	0	0	0	0	0	0	603	903	0
961	0	0	0	0	0	0	0	200	300	0	0	0	0	0	0	0	200	903	0	0	0	0	0	0	0	603	903	0
961	1	0	0	0	0	0	0	200	300	0	0	0	0	0	0	0	200	903	0	0	0	0	0	0	0	603	903	0
961	2	0	0	0	0	0	0	200	300	0	0	0	0	0	0	0	200	903	0	0	0	0	0	0	0	603	903	0
961	3	0	0	0	0	0	0	200	300	0	0	0	0	0	0	0	200	903	0	0	0	0	0	0	0	603	903	0
961	4	0	0	0	0	0	0	200	300	0	0	0	0	0	0	0	200	903	0	0	0	0	0	0	0	603	903	0
961	5	0	0	0	0	0	0	200	300	0	0	0	0	0	0	0	200	903	0	0	0	0	0	0	0	603	903	0
961	6	0	0	0	0	0	0	200	300	0	0	0	0	0	0	0	200	903	0	0	0	0	0	0	0	603	903	0
961	7	0	0	0	0	0	0	200	300	0	0	0	0	0	0	0	200	903	0	0	0	0	0	0	0	603	903	0
961	8	0	0	0	0	0	0	200	300	0	0	0	0	0	0	0	200	903	0	0	0	0	0	0	0	603	903	0
961	9	0	0	0	0	0	0	200	300	0	0	0	0	0	0	0	200	903	0	0	0	0	0	0	0	603	903	0
962	0	0	0	0	0	0	0	200	300	0	0	0	0	0	0	0	200	903	0	0	0	0	0	0	0	603	903	0
962	1	0	0	0	0	0	0	200	300	0	0	0	0	0	0	0	200	903	0	0	0	0	0	0	0	603	903	0
962	2	0	0	0	0	0	0	200	300	0	0	0	0	0	0	0	200	903	0	0	0	0	0	0	0	603	903	0
962	3	0	0	0	0	0	0	200	300	0	0	0	0	0	0	0	200	903	0	0	0	0	0	0	0	603	903	0
962	4	0	0	0	0	0	0	200	300	0	0	0	0	0	0	0	200	903	0	0	0	0	0	0	0	603	903	0
962	5	0	0	0	0	0	0	200	300	0	0	0	0	0	0	0	200	903	0	0	0	0	0	0	0	603	903	0
962	6	0	0	0	0	0	0	200	300	0	0	0	0	0	0	0	200	903	0	0	0	0	0	0	0	603	903	0
962	7	0	0	0	0	0	0	200	300	0	0	0	0	0	0	0	200	903	0	0	0	0	0	0	0	603	903	0
962	8	0	0	0	0	0	0	200	300	0	0	0	0	0	0	0	200	903	0	0	0	0	0	0	0	603	903	0
962	9	0	0	0	0	0	0	200	300	0	0	0	0	0	0	0	200	903	0	0	0	0	0	0	0	603	903	0
963	0	0	0	0	0	0	0	200	300	0	0	0	0	0	0	0	200	903	0	0	0	0	0	0	0	603	903	0
963	1	0	0	0	0	0	0	200	300	0	0	0	0	0	0	0	200	903	0	0	0	0	0	0	0	603	903	0
963	2	0	0	0	0	0	0	200	300	0	0	0	0	0	0	0	200	903	0	0	0	0	0	0	0	603	903	0
963	3	0	0	0	0	0	0	200	300	0	0	0	0	0	0	0	200	903	0	0	0	0	0	0	0	603	903	0
963	4	0	0	0	0	0	0	200	300	0	0	0	0	0	0	0	200	903	0	0	0	0	0	0	0	603	903	0
963	5	0	0	0	0	0	0	200	300	0	0	0	0	0	0	0	200	903	0	0	0	0	0	0	0	603	903	0
963	6	0	0	0	0	0	0	200	300	0	0	0	0	0	0	0	200	903	0	0	0	0	0	0	0	603	903	0
963	7	0	0	0	0	0	0	200	300	0	0	0	0	0	0	0	200	903	0	0	0	0	0	0	0	603	903	0
963	8	0	0	0	0	0	0	200	300	0	0	0	0	0	0	0	200	903	0	0	0	0	0	0	0	603	903	0
963	9	0	0	0	0	0	0	200	300	0	0	0	0	0	0	0	200	903	0	0	0	0	0	0	0	603	903	0
964	0	0	0	0	0	0	0	200	300	0	0	0	0	0	0	0	200	903	0	0	0	0	0	0	0	603	903	0
964	1	0	0	0	0	0	0	200	300	0	0	0	0	0	0	0	200	903	0	0	0	0	0	0	0	603	903	0
964	2	0	0	0	0	0	0	200	300	0	0	0	0	0	0	0	200	903	0	0	0	0	0	0	0	603	903	0
964	3	0	0	0	0	0	0	200	300	0	0	0	0	0	0	0	200	903	0	0	0	0	0	0	0	603	903	0
964	4	0	0	0	0	0	0	200	300	0	0	0	0	0	0	0	200	903	0	0	0	0	0	0	0	603	903	0
964	5	0	0	0	0	0	0	200	300	0	0	0	0	0	0	0	200	903	0	0	0	0	0	0	0	603	903	0
964	6	0	0	0	0	0	0	200	300	0	0	0	0	0	0	0	200	903	0	0	0	0	0	0	0	603	903	0
964	7	0	0	0	0	0	0	200	300	0	0	0	0	0	0	0	200	903	0	0	0	0	0	0	0	603	903	0
964	8	0	0	0	0	0	0	200	300	0	0	0	0	0	0	0	200	903	0	0	0	0	0	0	0	603	903	0
964	9	0	0	0	0	0	0	200	300	0	0	0	0	0	0	0	200	903	0	0	0	0	0	0	0	603	903	0
965	0	0	0	0	0	0	0	200	300	0	0	0	0	0	0	0	200	903	0	0	0	0	0	0	0	603	903	0
965	1	0	0	0	0	0	0	200	300	0	0	0	0	0	0	0	200	903	0	0	0	0	0	0	0	603	903	0
965	2	0	0	0	0	0	0	200	300	0	0	0	0	0	0	0	200	903	0	0	0	0	0	0	0	603	903	0
965	3	0	0	0	0	0	0	200	300	0	0	0	0	0	0	0	200	903	0	0	0	0	0	0	0	603	903	0
965	4	0	0	0	0	0	0	200	300	0	0	0	0	0	0	0	200	903	0	0	0	0	0	0	0	603	903	0
965	5	0	0	0	0	0	0	200	300	0	0	0	0	0	0	0	200	903	0	0	0	0	0	0	0	603	903	0
965	6	0	0	0	0	0	0	200	300	0	0	0	0	0	0	0	200	903	0	0	0	0	0	0	0	603	903	0
965	7	0	0	0	0	0	0	200	300	0	0	0	0	0	0	0	200	903	0	0	0	0	0	0	0	603	903	0
965	8	0	0	0	0	0	0	200	300	0	0	0	0	0	0	0	200	903	0	0	0	0	0	0	0	603	903	0
965	9	0	0	0	0	0	0	200	300	0	0	0	0	0	0	0	200	903	0	0	0	0	0	0	0	603	903	0
966	0	0	0	0	0	0	0	200	300	0	0	0	0	0	0	0	200	903	0	0	0	0	0	0	0	603	903	0
966	1	0	0	0	0	0	0	200	300	0	0	0	0	0	0	0	200	903	0	0	0	0	0	0	0	603	903	0
966	2	0	0	0	0	0	0	200	300	0	0	0	0	0	0	0	200	903	0	0	0	0	0	0	0	603	903	0
966	3	0	0	0	0	0	0	200	300	0	0	0	0	0	0	0	200	903	0	0	0	0	0	0	0	603	903	0
966	4	0	0	0	0	0	0	200	300	0	0	0	0	0	0	0	200	903	0	0	0	0	0	0	0	603	903	0
966	5	0	0	0	0	0	0	200	300	0	0	0	0	0	0	0	200	903	0	0	0	0	0	0	0	603	903	0
966	6	0	0	0	0	0	0	200	300	0	0	0	0	0	0	0	200	903	0	0	0	0	0	0	0	603	903	0
966	7	0	0	0	0	0	0	200	300	0	0	0	0	0	0	0	200	903	0	0	0	0	0	0	0	603	903	0
966	8	0	0	0	0	0	0	200	300	0	0	0	0	0	0	0	200	903	0	0	0	0	0	0	0	603	903	0
966	9	0	0	0	0	0	0	200	300	0	0	0	0	0	0	0	200	903	0	0	0	0	0	0	0	603	903	0
967	0	0	0	0	0	0	0	200	300	0	0	0	0	0	0	0	200	903	0	0	0	0	0	0	0	603	903	0
967	1	0	0	0	0	0	0	200	300	0	0	0	0	0	0	0	200	903	0	0	0	0	0	0	0	603	903	0
967	2	0	0	0	0	0	0	200	300	0	0	0	0	0	0	0	200	903	0	0	0	0	0	0	0	603	903	0
967	3	0	0	0	0	0	0	200	300	0	0	0	0	0	0	0	200	903	0	0	0	0	0	0	0	603	903	0
967	4	0	0	0	0	0	0	200	300	0	0	0	0	0	0	0	200	903	0	0	0	0	0	0	0	603	903	0
967	5	0	0	0	0	0	0	200	300	0	0	0	0	0	0	0	200	903	0	0	0	0	0	0	0	603	903	0
967	6	0	0	0	0	0	0	200	300	0	0	0	0	0	0	0	200	903	0	0	0	0	0	0	0	603	903	0
967	7	0	0	0	0	0	0	200	300	0	0	0	0	0	0	0	200	903	0	0	0	0	0	0	0	603	903	0
967	8	0	0	0	0	0	0	200	300	0	0	0	0	0	0	0	200	903	0	0	0	0	0	0	0	603	903	0
967	9	0	0	0	0	0	0	200	300	0	0	0	0	0	0	0	200	903	0	0	0	0	0	0	0	603	903	0
968	0	0	0	0	0	0	0	200	300	0	0	0	0	0	0	0	200	903	0	0	0	0	0	0	0	603	903	0
968	1	0	0	0	0	0	0	200	300	0	0	0	0	0	0	0	200	903	0	0	0	0	0	0	0	603	903	0
968	2	0	0	0	0	0	0	200	300	0	0	0	0	0	0	0	200	903	0	0	0	0	0	0	0	603	903	0
968	3	0	0	0	0	0	0	200	300	0	0	0	0	0	0	0	200	903	0	0	0	0	0	0	0	603	903	0
968	4	0	0	0	0	0	0	200	300	0	0	0	0	0	0	0	200	903	0	0	0	0	0	0	0	603	903	0
968	5	0	0	0	0	0	0	200	300	0	0	0	0	0	0	0	200	903	0	0	0	0	0	0	0	603	903	0
968	6	0	0	0	0	0	0	200	300	0	0	0	0	0	0	0	200	903	0	0	0	0	0	0	0	603	903	0
968	7	0	0	0	0	0	0	200	300	0	0	0	0	0	0	0	200	903	0	0	0	0	0	0	0	603	903	0
968	8	0	0	0	0	0	0	200	300	0	0	0	0	0	0	0	200	903	0	0	0	0	0	0	0	603	903	0
968	9	0	0	0	0	0	0	200	300	0	0	0	0	0	0	0	200	903	0	0	0	0	0	0	0	603	903	0
969	0	0	0	0	0	0	0	200	300	0	0	0	0	0	0	0	200	903	0	0	0	0	0	0	0	603	903	0
969	1	0	0	0	0	0	0	200	300	0	0	0	0	0	0	0	200	903	0	0	0	0	0	0	0	603	903	0
969	2	0	0	0	0	0	0	200	300	0	0	0	0	0	0	0	200	903	0	0	0	0	0	0	0	603	903	0
969	3	0	0	0	0	0	0	200	300	0	0	0	0	0	0	0	200	903	0	0	0	0	0	0	0	603	903	0
969	4	0	0	0	0	0	0	200	300	0	0	0	0	0	0	0	200	903	0	0	0	0	0	0	0	603	903	0
969	5	0	0	0	0	0	0	200	300	0	0	0	0	0	0	0	200	903	0	0	0	0	0	0	0	603	903	0
969	6	0	0	0	0	0	0	200	300	0	0	0	0	0	0	0	200	903	0	0	0	0	0	0	0	603	903	0
969	7	0	0	0	0	0	0	200	300	0	0	0	0	0	0	0	200	903	0	0	0	0	0	0	0	603	903	0
969	8	0	0	0	0	0	0	200	300	0	0	0	0	0	0	0	200	903	0	0	0	0	0	0	0	603	903	0
969	9	0	0	0	0	0	0	200	300	0	0	0	0	0	0	0	200	903	0	0	0	0	0	0	0	603	903	0
970	0	0	0	0	0	0	0	200	300	0	0	0	0	0	0	0	200	903	0	0	0	0	0	0	0	603	903	0
970	1	0	0	0	0	0	0	200	300	0	0	0	0	0	0	0	200	903	0	0	0	0	0	0	0	603	903	0
970	2	0	0	0	0	0	0	200	300	0	0	0	0	0	0	0	200	903	0	0	0	0	0	0	0	603	903	0
970	3	0	0	0	0	0	0	200	300	0	0	0	0	0	0	0	200	903	0	0	0	0	0	0	0	603	903	0
970	4	0	0	0	0	0	0	200	300	0	0	0	0	0	0	0	200	903	0	0	0	0	0	0	0	603	903	0
970	5	0	0	0	0	0	0	200	300	0	0	0	0	0	0	0	200	903	0	0	0	0	0	0	0	603	903	0
970	6	0	0	0	0	0	0	200	300	0	0	0	0	0	0	0	200	903	0	0	0	0	0	0	0	603	903	0
970	7	0	0	0	0	0	0	200	300	0	0	0	0	0	0	0	200	903	0	0	0	0	0	0	0	603	903	0
970	8	0	0	0	0	0	0	200	300	0	0	0	0	0	0	0	200	903	0	0	0	0	0	0	0	603	903	0
970	9	0	0	0	0	0	0	200	300	0	0	0	0	0	0	0	200	903	0	0	0	0	0	0	0	603	903	0
971	0	0	0	0	0	0	0	200	300	0	0	0	0	0	0	0	200	903	0	0	0	0	0	0	0	603	903	0
971	1	0	0	0	0	0	0	200	300	0	0	0	0	0	0	0	200	903	0	0	0	0	0	0	0	603	903	0
971	2	0	0	0	0	0	0	200	300	0	0	0	0	0	0	0	200	903	0	0	0	0	0	0	0	603	903	0
971	3	0	0	0	0	0	0	200	300	0	0	0	0	0	0	0	200	903	0	0	0	0	0	0	0	603	903	0
971	4	0	0	0	0	0	0	200	300	0	0	0	0	0	0	0	200	903	0	0	0	0	0	0	0	603	903	0
971	5	0	0	0	0	0	0	200	300	0	0	0	0	0	0	0	200	903	0	0	0	0	0	0	0	603	903	0
971	6	0	0	0	0	0	0	200	300	0	0	0	0	0	0	0	200	903	0	0	0	0	0	0	0	603	903	0
971	7	0	0	0	0	0	0	200	300	0	0	0	0	0	0	0	200	903	0	0	0	0	0	0	0	603	903	0
971	8	0	0	0	0	0	0	200	300	0	0	0	0	0	0	0	200	903	0	0	0	0	0	0	0	603	903	0
971	9	0	0	0	0	0	0	200	300	0	0	0	0	0	0	0	200	903	0	0	0	0	0	0	0	603	903	0
972	0	0	0	0	0	0	0	200	300	0	0	0	0	0	0	0	200	903	0	0	0	0	0	0	0	603	903	0
972	1	0	0	0	0	0	0	200	300	0	0	0	0	0	0	0	200	903	0	0	0	0	0	0	0	603	903	0
972	2	0	0	0	0	0	0	200	300	0	0	0	0	0	0	0	200	903	0	0	0	0	0	0	0	603	903	0
972	3	0	0	0	0	0	0	200	300	0	0	0	0	0	0	0	200	903	0	0	0	0	0	0	0	603	903	0
972	4	0	0	0	0	0	0	200	300	0	0	0	0	0	0	0	200	903	0	0	0	0	0	0	0	603	903	0
972	5	0	0	0	0	0	0	200	300	0	0	0	0	0	0	0	200	903	0	0	0	0	0	0	0	603	903	0
972	6	0	0	0	0	0	0	200	300	0	0	0	0	0	0	0	200	903	0	0	0	0	0	0	0	603	903	0
972	7	0	0	0	0	0	0	200	300	0	0	0	0	0	0	0	200	903	0	0	0	0	0	0	0	603	903	0
972	8	0	0	0	0	0	0	200	300	0	0	0	0	0	0	0	200	903	0	0	0	0	0	0	0	603	903	0
972	9	0	0	0	0	0	0	200	300	0	0	0	0	0	0	0	200	903	0	0	0	0	0	0	0	603	903	0
973	0	0	0	0	0	0	0	200	300	0	0	0	0	0	0	0	200	903	0	0	0	0	0	0	0	603	903	0
973	1	0	0	0	0	0	0	200	300	0	0	0	0	0	0	0	200	903	0	0	0	0	0	0	0	603	903	0
973	2	0	0	0	0	0	0	200	300	0	0	0	0	0	0	0	200	903	0	0	0	0	0	0	0	603	903	0
973	3	0	0	0	0	0	0	200	300	0	0	0	0	0	0	0	200	903	0	0	0	0	0	0	0	603	903	0
973	4	0	0	0	0	0	0	200	300	0	0	0	0	0	0	0	200	903	0	0	0	0	0	0	0	603	903	0
973	5	0	0	0	0	0	0	200	300	0	0	0	0	0	0	0	200	903	0	0	0	0	0	0	0	603	903	0
973	6	0	0	0	0	0	0	200	300	0	0	0	0	0	0	0	200	903	0	0	0	0	0	0	0	603	903	0
973	7	0	0	0	0	0	0	200	300	0	0	0	0	0	0	0	200	903	0	0	0	0	0	0	0	603	903	0
973	8	0	0	0	0	0	0	200	300	0	0	0	0	0	0	0	200	903	0	0	0	0	0	0	0	603	903	0
973	9	0	0	0	0	0	0	200	300	0	0	0	0	0	0	0	200	903	0	0	0	0	0	0	0	603	903	0
974	0	0	0	0	0	0	0	200	300	0	0	0	0	0	0	0	200	903	0	0	0	0	0	0	0	603	903	0
974	1	0	0	0	0	0	0	200	300	0	0	0	0	0	0	0	200	903	0	0	0	0	0	0	0	603	903	0
974	2	0	0	0	0	0	0	200	300	0	0	0	0	0	0	0	200	903	0	0	0	0	0	0	0	603	903	0
974	3	0	0	0	0	0	0	200	300	0	0	0	0	0	0	0	200	903	0	0	0	0	0	0	0	603	903	0
974	4	0	0	0	0	0	0	200	300	0	0	0	0	0	0	0	200	903	0	0	0	0	0	0	0	603	903	0
974	5	0	0	0	0	0	0	200	300	0	0	0	0	0	0	0	200	903	0	0	0	0	0	0	0	603	903	0
974	6	0	0	0	0	0	0	200	300	0	0	0	0	0	0	0	200	903	0	0	0	0	0	0	0	603	903	0
974	7	0	0	0	0	0	0	200	300	0	0	0	0	0	0	0	200	903	0	0	0	0	0	0	0	603	903	0
974	8	0	0	0	0	0	0	200	300	0	0	0	0	0	0	0	200	903	0	0	0	0	0	0	0	603	903	0
974	9	0	0	0	0	0	0	200	300	0	0	0	0	0	0	0	200	903	0	0	0	0	0	0	0	603	903	0
975	0	0	0	0	0	0	0	200	300	0	0	0	0	0	0	0	200	903	0	0	0	0	0	0	0	603	903	0
975	1	0	0	0	0	0	0	200	300	0	0	0	0	0	0	0	200	903	0	0	0	0	0	0	0	603	903	0
975	2	0	0	0	0	0	0	200	300	0	0	0	0	0	0	0	200	903	0	0	0	0	0	0	0	603	903	0
975	3	0	0	0	0	0	0	200	300	0	0	0	0	0	0	0	200	903	0	0	0	0	0	0	0	603	903	0
975	4	0	0	0	0	0	0	200	300	0	0	0	0	0	0	0	200	903	0	0	0	0	0	0	0	603	903	0
975	5	0	0	0	0	0	0	200	300	0	0	0	0	0	0	0	200	903	0	0	0	0	0	0	0	603	903	0
975	6	0	0	0	0	0	0	200	300	0	0	0	0	0	0	0	200	903	0	0	0	0	0	0	0	603	903	0
975	7	0	0	0	0	0	0	200	300	0	0	0	0	0	0	0	200	903	0	0	0	0	0	0	0	603	903	0
975	8	0	0	0	0	0	0	200	300	0	0	0	0	0	0	0	200	903	0	0	0	0	0	0	0	603	903	0
975	9	0	0	0	0	0	0	200	300	0	0	0	0	0	0	0	200	903	0	0	0	0	0	0	0	603	903	0
976	0	0	0	0	0	0	0	200	300	0	0	0	0	0	0	0	200	903	0	0	0	0	0	0	0	603	903	0
976	1	0	0	0	0	0	0	200	300	0	0	0	0	0	0	0	200	903	0	0	0	0	0	0	0	603	903	0
976	2	0	0	0	0	0	0	200	300	0	0	0	0	0	0	0	200	903	0	0	0	0	0	0	0	603	903	0
976	3	0	0	0	0	0	0	200	300	0	0	0	0	0	0	0	200	903	0	0	0	0	0	0	0	603	903	0
976	4	0	0	0	0	0	0	200	300	0	0	0	0	0	0	0	200	903	0	0	0	0	0	0	0	603	903	0
976	5	0	0	0	0	0	0	200	300	0	0	0	0	0	0	0	200	903	0	0	0	0	0	0	0	603	903	0
976	6	0	0	0	0	0	0	200	300	0	0	0	0	0	0	0	200	903	0	0	0	0	0	0	0	603	903	0
976	7	0	0	0	0	0	0	200	300	0	0	0	0	0	0	0	200	903	0	0	0	0	0	0	0	603	903	0
976	8	0	0	0	0	0	0	200	300	0	0	0	0	0	0	0	200	903	0	0	0	0	0	0	0	603	903	0
976	9	0	0	0	0	0	0	200	300	0	0	0	0	0	0	0	200	903	0	0	0	0	0	0	0	603	903	0
977	0	0	0	0	0	0	0	200	300	0	0	0	0	0	0	0	200	903	0	0	0	0	0	0	0	603	903	0
977	1	0	0	0	0	0	0	200	300	0	0	0	0	0	0	0	200	903	0	0	0	0	0	0	0	603	903	0
977	2	0	0	0	0	0	0	200	300	0	0	0	0	0	0	0	200	903	0	0	0	0	0	0	0	603	903	0
977	3	0	0	0	0	0	0	200	300	0	0	0	0	0	0	0	200	903	0	0	0	0	0	0	0	603	903	0
977	4	0	0	0	0	0	0	200	300	0	0	0	0	0	0	0	200	903	0	0	0	0	0	0	0	603	903	0
977	5	0	0	0	0	0	0	200	300	0	0	0	0	0	0	0	200	903	0	0	0	0	0	0	0	603	903	0
977	6	0	0	0	0	0	0	200	300	0	0	0	0	0	0	0	200	903	0	0	0	0	0	0	0	603	903	0
977	7	0	0	0	0	0	0	200	300	0	0	0	0	0	0	0	200	903	0	0	0	0	0	0	0	603	903	0
977	8	0	0	0	0	0	0	200	300	0	0	0	0	0	0	0	200	903	0	0	0	0	0	0	0	603	903	0
977	9	0	0	0	0	0	0	200	300	0	0	0	0	0	0	0	200	903	0	0	0	0	0	0	0	603	903	0
978	0	0	0	0	0	0	0	200	300	0	0	0	0	0	0	0	200	903	0	0	0	0	0	0	0	603	903	0
978	1	0	0	0	0	0	0	200	300	0	0	0	0	0	0	0	200	903	0	0	0	0	0	0	0	603	903	0
978	2	0	0	0	0	0	0	200	300	0	0	0	0	0	0	0	200	903	0	0	0	0	0	0	0	603	903	0
978	3	0	0	0	0	0	0	200	300	0	0	0	0	0	0	0	200	903	0	0	0	0	0	0	0	603	903	0
978	4	0	0	0	0	0	0	200	300	0	0	0	0	0	0	0	200	903	0	0	0	0	0	0	0	603	903	0
978	5	0	0	0	0	0	0	200	300	0	0	0	0	0	0	0	200	903	0	0	0	0	0	0	0	603	903	0
978	6	0	0	0	0	0	0	200	300	0	0	0	0	0	0	0	200	903	0	0	0	0	0	0	0	603	903	0
978	7	0	0	0	0	0	0	200	300	0	0	0	0	0	0	0	200	903	0	0	0	0	0	0	0	603	903	0
978	8	0	0	0	0	0	0	200	300	0	0	0	0	0	0	0	200	903	0	0	0	0	0	0	0	603	903	0
978	9	0	0	0	0	0	0	200	300	0	0	0	0	0	0	0	200	903	0	0	0	0	0	0	0	603	903	0
979	0	0	0	0	0	0	0	200	300	0	0	0	0	0	0	0	200	903	0	0	0	0	0	0	0	603	903	0
979	1	0	0	0	0	0	0	200	300	0	0	0	0	0	0	0	200	903	0	0	0	0	0	0	0	603	903	0
979	2	0	0	0	0	0	0	200	300	0	0	0	0	0	0	0	200	903	0	0	0	0	0	0	0	603	903	0
979	3	0	0	0	0	0	0	200	300	0	0	0	0	0	0	0	200	903	0	0	0	0	0	0	0	603	903	0
979	4	0	0	0	0	0	0	200	300	0	0	0	0	0	0	0	200	903	0	0	0	0	0	0	0	603	903	0
979	5	0	0	0	0	0	0	200	300	0	0	0	0	0	0	0	200	903	0	0	0	0	0	0	0	603	903	0
979	6	0	0	0	0	0	0	200	300	0	0	0	0	0	0	0	200	903	0	0	0	0	0	0	0	603	903	0
979	7	0	0	0	0	0	0	200	300	0	0	0	0	0	0	0	200	903	0	0	0	0	0	0	0	603	903	0
979	8	0	0	0	0	0	0	200	300	0	0	0	0	0	0	0	200	903	0	0	0	0	0	0	0	603	903	0
979	9	0	0	0	0	0	0	200	300	0	0	0	0	0	0	0	200	903	0	0	0	0	0	0	0	603	903	0
980	0	0	0	0	0	0	0	200	300	0	0	0	0	0	0	0	200	903	0	0	0	0	0	0	0	603	903	0
980	1	0	0	0	0	0	0	200	300	0	0	0	0	0	0	0	200	903	0	0	0	0	0	0	0	603	903	0
980	2	0	0	0	0	0	0	200	300	0	0	0	0	0	0	0	200	903	0	0	0	0	0	0	0	603	903	0
980	3	0	0	0	0	0	0	200	300	0	0	0	0	0	0	0	200	903	0	0	0	0	0	0	0	603	903	0
980	4	0	0	0	0	0	0	200	300	0	0	0	0	0	0	0	200	903	0	0	0	0	0	0	0	603	903	0
980	5	0	0	0	0	0	0	200	300	0	0	0	0	0	0	0	200	903	0	0	0	0	0	0	0	603	903	0
980	6	0	0	0	0	0	0	200	300	0	0	0	0	0	0	0	200	903	0	0	0	0	0	0	0	603	903	0
980	7	0	0	0	0	0	0	200	300	0	0	0	0	0	0	0	200	903	0	0	0	0	0	0	0	603	903	0
980	8	0	0	0	0	0	0	200	300	0	0	0	0	0	0	0	200	903	0	0	0	0	0	0	0	603	903	0
980	9	0	0	0	0	0	0	200	300	0	0	0	0	0	0	0	200	903	0	0	0	0	0	0	0	603	903	0
981	0	0	0	0	0	0	0	200	300	0	0	0	0	0	0	0	200	903	0	0	0	0	0	0	0	603	903	0
981	1	0	0	0	0	0	0	200	300	0	0	0	0	0	0	0	200	903	0	0	0	0	0	0	0	603	903	0
981	2	0	0	0	0	0	0	200	300	0	0	0	0	0	0	0	200	903	0	0	0	0	0	0	0	603	903	0
981	3	0	0	0	0	0	0	200	300	0	0	0	0	0	0	0	200	903	0	0	0	0	0	0	0	603	903	0
981	4	0	0	0	0	0	0	200	300	0	0	0	0	0	0	0	200	903	0	0	0	0	0	0	0	603	903	0
981	5	0	0	0	0	0	0	200	300	0	0	0	0	0	0	0	200	903	0	0	0	0	0	0	0	603	903	0
981	6	0	0	0	0	0	0	200	300	0	0	0	0	0	0	0	200	903	0	0	0	0	0	0	0	603	903	0
981	7	0	0	0	0	0	0	200	300	0	0	0	0	0	0	0	200	903	0	0	0	0	0	0	0	603	903	0
981	8	0	0	0	0	0	0	200	300	0	0	0	0	0	0	0	200	903	0	0	0	0	0	0	0	603	903	0
981	9	0	0	0	0	0	0	200	300	0	0	0	0	0	0	0	200	903	0	0	0	0	0	0	0	603	903	0
982	0	0	0	0	0	0	0	200	300	0	0	0	0	0	0	0	200	903	0	0	0	0	0	0	0	603	903	0
982	1	0	0	0	0	0	0	200	300	0	0	0	0	0	0	0	200	903	0	0	0	0	0	0	0	603	903	0
982	2	0	0	0	0	0	0	200	300	0	0	0	0	0	0	0	200	903	0	0	0	0	0	0	0	603	903	0
982	3	0	0	0	0	0	0	200	300	0	0	0	0	0	0	0	200	903	0	0	0	0	0	0	0	603	903	0
982	4	0	0	0	0	0	0	200	300	0	0	0	0	0	0	0	200	903	0	0	0	0	0	0	0	603	903	0
982	5	0	0	0	0	0	0	200	300	0	0	0	0	0	0	0	200	903	0	0	0	0	0	0	0	603	903	0
982	6	0	0	0	0	0	0	200	300	0	0	0	0	0	0	0	200	903	0	0	0	0	0	0	0	603	903	0
982	7	0	0	0	0	0	0	200	300	0	0	0	0	0	0	0	200	903	0	0	0	0	0	0	0	603	903	0
982	8	0	0	0	0	0	0	200	300	0	0	0	0	0	0	0	200	903	0	0	0	0	0	0	0	603	903	0
982	9	0	0	0	0	0	0	200	300	0	0	0	0	0	0	0	200	903	0	0	0	0	0	0	0	603	903	0
983	0	0	0	0	0	0	0	200	300	0	0	0	0	0	0	0	200	903	0	0	0	0	0	0	0	603	903	0
983	1	0	0	0	0	0	0	200	300	0	0	0	0	0	0	0	200	903	0	0	0	0	0	0	0	603	903	0
983	2	0	0	0	0	0	0	200	300	0	0	0	0	0	0	0	200	903	0	0	0	0	0	0	0	603	903	0
983	3	0	0	0	0	0	0	200	300	0	0	0	0	0	0	0	200	903	0	0	0	0	0	0	0	603	903	0
983	4	0	0	0	0	0	0	200	300	0	0	0	0	0	0	0	200	903	0	0	0	0	0	0	0	603	903	0
983	5	0	0	0	0	0	0	200	300	0	0	0	0	0	0	0	200	903	0	0	0	0	0	0	0	603	903	0
983	6	0	0	0	0	0	0	200	300	0	0	0	0	0	0	0	200	903	0	0	0	0	0	0	0	603	903	0
983	7	0	0	0	0	0	0	200	300	0	0	0	0	0	0	0	200	903	0	0	0	0	0	0	0	603	903	0
983	8	0	0	0	0	0	0	200	300	0	0	0	0	0	0	0	200	903	0	0	0	0	0	0	0	603	903	0
983	9	0	0	0	0	0	0	200	300	0	0	0	0	0	0	0	200	903	0	0	0	0	0	0	0	603	903	0
984	0	0	0	0	0	0	0	200	300	0	0	0	0	0	0	0	200	903	0	0	0	0	0	0	0	603	903	0
984	1	0	0	0	0	0	0	200	300	0	0	0	0	0	0	0	200	903	0	0	0	0	0	0	0	603	903	0
984	2	0	0	0	0	0	0	200	300	0	0	0	0	0	0	0	200	903	0	0	0	0	0	0	0	603	903	0
984	3	0	0	0	0	0	0	200	300	0	0	0	0	0	0	0	200	903	0	0	0	0	0	0	0	603	903	0
984	4	0	0	0	0	0	0	200	300	0	0	0	0	0	0	0	200	903	0	0	0	0	0	0	0	603	903	0
984	5	0	0	0	0	0	0	200	300	0	0	0	0	0	0	0	200	903	0	0	0	0	0	0	0	603	903	0
984	6	0	0	0	0	0	0	200	300	0	0	0	0	0	0	0	200	903	0	0	0	0	0	0	0	603	903	0
984	7	0	0	0	0	0	0	200	300	0	0	0	0	0	0	0	200	903	0	0	0	0	0	0	0	603	903	0
984	8	0	0	0	0	0	0	200	300	0	0	0	0	0	0	0	200	903	0	0	0	0	0	0	0	603	903	0
984	9	0	0	0	0	0	0	200	300	0	0	0	0	0	0	0	200	903	0	0	0	0	0	0	0	603	903	0
985	0	0	0	0	0	0	0	200	300	0	0	0	0	0	0	0	200	903	0	0	0	0	0	0	0	603	903	0
985	1	0	0	0	0	0	0	200	300	0	0	0	0	0	0	0	200	903	0	0	0	0	0	0	0	603	903	0
985	2	0	0	0	0	0	0	200	300	0	0	0	0	0	0	0	200	903	0	0	0	0	0	0	0	603	903	0
985	3	0	0	0	0	0	0	200	300	0	0	0	0	0	0	0	200	903	0	0	0	0	0	0	0	603	903	0
985	4	0	0	0	0	0	0	200	300	0	0	0	0	0	0	0	200	903	0	0	0	0	0	0	0	603	903	0
985	5	0	0	0	0	0	0	200	300	0	0	0	0	0	0	0	200	903	0	0	0	0	0	0	0	603	903	0
985	6	0	0	0	0	0	0	200	300	0	0	0	0	0	0	0	200	903	0	0	0	0	0	0	0	603	903	0
985	7	0	0	0	0	0	0	200	300	0	0	0	0	0	0	0	200	903	0	0	0	0	0	0	0	603	903	0
985	8	0	0	0	0	0	0	200	300	0	0	0	0	0	0	0	200	903	0	0	0	0	0	0	0	603	903	0
985	9	0	0	0	0	0	0	200	300	0	0	0	0	0	0	0	200	903	0	0	0	0	0	0	0	603	903	0
986	0	0	0	0	0	0	0	200	300	0	0	0	0	0	0	0	200	903	0	0	0	0	0	0	0	603	903	0
986	1	0	0	0	0	0	0	200	300	0	0	0	0	0	0	0	200	903	0	0	0	0	0	0	0	603	903	0
986	2	0	0	0	0	0	0	200	300	0	0	0	0	0	0	0	200	903	0	0	0	0	0	0	0	603	903	0
986	3	0	0	0	0	0	0	200	300	0	0	0	0	0	0	0	200	903	0	0	0	0	0	0	0	603	903	0
986	4	0	0	0	0	0	0	200	300	0	0	0	0	0	0	0	200	903	0	0	0	0	0	0	0	603	903	0
986	5	0	0	0	0	0	0	200	300	0	0	0	0	0	0	0	200	903	0	0	0	0	0	0	0	603	903	0
986	6	0	0	0	0	0	0	200	300	0	0	0	0	0	0	0	200	903	0	0	0	0	0	0	0	603	903	0
986	7	0	0	0	0	0	0	200	300	0	0	0	0	0	0	0	200	903	0	0	0	0	0	0	0	603	903	0
986	8	0	0	0	0	0	0	200	300	0	0	0	0	0	0	0	200	903	0	0	0	0	0	0	0	603	903	0
986	9	0	0	0	0	0	0	200	300	0	0	0	0	0	0	0	200	903	0	0	0	0	0	0	0	603	903	0
987	0	0	0	0	0	0	0	200	300	0	0	0	0	0	0	0	200	903	0	0	0	0	0	0	0	603	903	0
987	1	0	0	0	0	0	0	200	300	0	0	0	0	0	0	0	200	903	0	0	0	0	0	0	0	603	903	0
987	2	0	0	0	0	0	0	200	300	0	0	0	0	0	0	0	200	903	0	0	0	0	0	0	0	603	903	0
987	3	0	0	0	0	0	0	200	300	0	0	0	0	0	0	0	200	903	0	0	0	0	0	0	0	603	903	0
987	4	0	0	0	0	0	0	200	300	0	0	0	0	0	0	0	200	903	0	0	0	0	0	0	0	603	903	0
987	5	0	0	0	0	0	0	200	300	0	0	0	0	0	0	0	200	903	0	0	0	0	0	0	0	603	903	0
987	6	0	0	0	0	0	0	200	300	0	0	0	0	0	0	0	200	903	0	0	0	0	0	0	0	603	903	0
987	7	0	0	0	0	0	0	200	300	0	0	0	0	0	0	0	200	903	0	0	0	0	0	0	0	603	903	0
987	8	0	0	0	0	0	0	200	300	0	0	0	0	0	0	0	200	903	0	0	0	0	0	0	0	603	903	0
987	9	0	0	0	0	0	0	200	300	0	0	0	0	0	0	0	200	903	0	0	0	0	0	0	0	603	903	0
988	0	0	0	0	0	0	0	200	300	0	0	0	0	0	0	0	200	903	0	0	0	0	0	0	0	603	903	0
988	1	0	0	0	0	0	0	200	300	0	0	0	0	0	0	0	200	903	0	0	0	0	0	0	0	603	903	0
988	2	0	0	0	0	0	0	200	300	0	0	0	0	0	0	0	200	903	0	0	0	0	0	0	0	603	903	0
988	3	0	0	0	0	0	0	200	300	0	0	0	0	0	0	0	200	903	0	0	0	0	0	0	0	603	903	0
988	4	0	0	0	0	0	0	200	300	0	0	0	0	0	0	0	200	903	0	0	0	0	0	0	0	603	903	0
988	5	0	0	0	0	0	0	200	300	0	0	0	0	0	0	0	200	903	0	0	0	0	0	0	0	603	903	0
988	6	0	0	0	0	0	0	200	300	0	0	0	0	0	0	0	200	903	0	0	0	0	0	0	0	603	903	0
988	7	0	0	0	0	0	0	200	300	0	0	0	0	0	0	0	200	903	0	0	0	0	0	0	0	603	903	0
988	8	0	0	0	0	0	0	200	300	0	0	0	0	0	0	0	200	903	0	0	0	0	0	0	0	603	903	0
988	9	0	0	0	0	0	0	200	300	0	0	0	0	0	0	0	200	903	0	0	0	0	0	0	0	603	903	0
989	0	0	0	0	0	0	0	200	300	0	0	0	0	0	0	0	200	903	0	0	0	0	0	0	0	603	903	0
989	1	0	0	0	0	0	0	200	300	0	0	0	0	0	0	0	200	903	0	0	0	0	0	0	0	603	903	0
989	2	0	0	0	0	0	0	200	300	0	0	0	0	0	0	0	200	903	0	0	0	0	0	0	0	603	903	0
989	3	0	0	0	0	0	0	200	300	0	0	0	0	0	0	0	200	903	0	0	0	0	0	0	0	603	903	0
989	4	0	0	0	0	0	0	200	300	0	0	0	0	0	0	0	200	903	0	0	0	0	0	0	0	603	903	0
989	5	0	0	0	0	0	0	200	300	0	0	0	0	0	0	0	200	903	0	0	0	0	0	0	0	603	903	0
989	6	0	0	0	0	0	0	200	300	0	0	0	0	0	0	0	200	903	0	0	0	0	0	0	0	603	903	0
989	7	0	0	0	0	0	0	200	300	0	0	0	0	0	0	0	200	903	0	0	0	0	0	0	0	603	903	0
989	8	0	0	0	0	0	0	200	300	0	0	0	0	0	0	0	200	903	0	0	0	0	0	0	0	603	903	0
989	9	0	0	0	0	0	0	200	300	0	0	0	0	0	0	0	200	903	0	0	0	0	0	0	0	603	903	0
990	0	0	0	0	0	0	0	200	300	0	0	0	0	0	0	0	200	903	0	0	0	0	0	0	0	603	903	0
990	1	0	0	0	0	0	0	200	300	0	0	0	0	0	0	0	200	903	0	0	0	0	0	0	0	603	903	0
990	2	0	0	0	0	0	0	200	300	0	0	0	0	0	0	0	200	903	0	0	0	0	0	0	0	603	903	0
990	3	0	0	0	0	0	0	200	300	0	0	0	0	0	0	0	200	903	0	0	0	0	0	0	0	603	903	0
990	4	0	0	0	0	0	0	200	300	0	0	0	0	0	0	0	200	903	0	0	0	0	0	0	0	603	903	0
990	5	0	0	0	0	0	0	200	300	0	0	0	0	0	0	0	200	903	0	0	0	0	0	0	0	603	903	0
990	6	0	0	0	0	0	0	200	300	0	0	0	0	0	0	0	200	903	0	0	0	0	0	0	0	603	903	0
990	7	0	0	0	0	0	0	200	300	0	0	0	0	0	0	0	200	903	0	0	0	0	0	0	0	603	903	0
990	8	0	0	0	0	0	0	200	300	0	0	0	0	0	0	0	200	903	0	0	0	0	0	0	0	603	903	0
990	9	0	0	0	0	0	0	200	300	0	0	0	0	0	0	0	200	903	0	0	0	0	0	0	0	603	903	0
991	0	0	0	0	0	0	0	200	300	0	0	0	0	0	0	0	200	903	0	0	0	0	0	0	0	603	903	0
991	1	0	0	0	0	0	0	200	300	0	0	0	0	0	0	0	200	903	0	0	0	0	0	0	0	603	903	0
991	2	0	0	0	0	0	0	200	300	0	0	0	0	0	0	0	200	903	0	0	0	0	0	0	0	603	903	0
991	3	0	0	0	0	0	0	200	300	0	0	0	0	0	0	0	200	903	0	0	0	0	0	0	0	603	903	0
991	4	0	0	0	0	0	0	200	300	0	0	0	0	0	0	0	200	903	0	0	0	0	0	0	0	603	903	0
991	5	0	0	0	0	0	0	200	300	0	0	0	0	0	0	0	200	903	0	0	0	0	0	0	0	603	903	0
991	6	0	0	0	0	0	0	200	300	0	0	0	0	0	0	0	200	903	0	0	0	0	0	0	0	603	903	0
991	7	0	0	0	0	0	0	200	300	0	0	0	0	0	0	0	200	903	0	0	0	0	0	0	0	603	903	0
991	8	0	0	0	0	0	0	200	300	0	0	0	0	0	0	0	200	903	0	0	0	0	0	0	0	603	903	0
991	9	0	0	0	0	0	0	200	300	0	0	0	0	0	0	0	200	903	0	0	0	0	0	0	0	603	903	0
992	0	0	0	0	0	0	0	200	300	0	0	0	0	0	0	0	200	903	0	0	0	0	0	0	0	603	903	0
992	1	0	0	0	0	0	0	200	300	0	0	0	0	0	0	0	200	903	0	0	0	0	0	0	0	603	903	0
992	2	0	0	0	0	0	0	200	300	0	0	0	0	0	0	0	200	903	0	0	0	0	0	0	0	603	903	0
992	3	0	0	0	0	0	0	200	300	0	0	0	0	0	0	0	200	903	0	0	0	0	0	0	0	603	903	0
992	4	0	0	0	0	0	0	200	300	0	0	0	0	0	0	0	200	903	0	0	0	0	0	0	0	603	903	0
992	5	0	0	0	0	0	0	200	300	0	0	0	0	0	0	0	200	903	0	0	0	0	0	0	0	603	903	0
992	6	0	0	0	0	0	0	200	300	0	0	0	0	0	0	0	200	903	0	0	0	0	0	0	0	603	903	0
992	7	0	0	0	0	0	0	200	300	0	0	0	0	0	0	0	200	903	0	0	0	0	0	0	0	603	903	0
992	8	0	0	0	0	0	0	200	300	0	0	0	0	0	0	0	200	903	0	0	0	0	0	0	0	603	903	0
992	9	0	0	0	0	0	0	200	300	0	0	0	0	0	0	0	200	903	0	0	0	0	0	0	0	603	903	0
993	0	0	0	0	0	0	0	200	300	0	0	0	0	0	0	0	200	903	0	0	0	0	0	0	0	603	903	0
993	1	0	0	0	0	0	0	200	300	0	0	0	0	0	0	0	200	903	0	0	0	0	0	0	0	603	903	0
993	2	0	0	0	0	0	0	200	300	0	0	0	0	0	0	0	200	903	0	0	0	0	0	0	0	603	903	0
993	3	0	0	0	0	0	0	200	300	0	0	0	0	0	0	0	200	903	0	0	0	0	0	0	0	603	903	0
993	4	0	0	0	0	0	0	200	300	0	0	0	0	0	0	0	200	903	0	0	0	0	0	0	0	603	903	0
993	5	0	0	0	0	0	0	200	300	0	0	0	0	0	0	0	200	903	0	0	0	0	0	0	0	603	903	0
993	6	0	0	0	0	0	0	200	300	0	0	0	0	0	0	0	200	903	0	0	0	0	0	0	0	603	903	0
993	7	0	0	0	0	0	0	200	300	0	0	0	0	0	0	0	200	903	0	0	0	0	0	0	0	603	903	0
993	8	0	0	0	0	0	0	200	300	0	0	0	0	0	0	0	200	903	0	0	0	0	0	0	0	603	903	0
993	9	0	0	0	0	0	0	200	300	0	0	0	0	0	0	0	200	903	0	0	0	0	0	0	0	603	903	0
994	0	0	0	0	0	0	0	200	300	0	0	0	0	0	0	0	200	903	0	0	0	0	0	0	0	603	903	0
994	1	0	0	0	0	0	0	200	300	0	0	0	0	0	0	0	200	903	0	0	0	0	0	0	0	603	903	0
994	2	0	0	0	0	0	0	200	300	0	0	0	0	0	0	0	200	903	0	0	0	0	0	0	0	603	903	0
994	3	0	0	0	0	0	0	200	300	0	0	0	0	0	0	0	200	903	0	0	0	0	0	0	0	603	903	0
994	4	0	0	0	0	0	0	200	300	0	0	0	0	0	0	0	200	903	0	0	0	0	0	0	0	603	903	0
994	5	0	0	0	0	0	0	200	300	0	0	0	0	0	0	0	200	903	0	0	0	0	0	0	0	603	903	0
994	6	0	0	0	0	0	0	200	300	0	0	0	0	0	0	0	200	903	0	0	0	0	0	0	0	603	903	0
994	7	0	0	0	0	0	0	200	300	0	0	0	0	0	0	0	200	903	0	0	0	0	0	0	0	603	903	0
994	8	0	0	0	0	0	0	200	300	0	0	0	0	0	0	0	200	903	0	0	0	0	0	0	0	603	903	0
994	9	0	0	0	0	0	0	200	300	0	0	0	0	0	0	0	200	903	0	0	0	0	0	0	0	603	903	0
995	0	0	0	0	0	0	0	200	300	0	0	0	0	0	0	0	200	903	0	0	0	0	0	0	0	603	903	0
995	1	0	0	0	0	0	0	200	300	0	0	0	0	0	0	0	200	903	0	0	0	0	0	0	0	603	903	0
995	2	0	0	0	0	0	0	200	300	0	0	0	0	0	0	0	200	903	0	0	0	0	0	0	0	603	903	0
995	3	0	0	0	0	0	0	200	300	0	0	0	0	0	0	0	200	903	0	0	0	0	0	0	0	603	903	0
995	4	0	0	0	0	0	0	200	300	0	0	0	0	0	0	0	200	903	0	0	0	0	0	0	0	603	903	0
995	5	0	0	0	0	0	0	200	300	0	0	0	0	0	0	0	200	903	0	0	0	0	0	0	0	603	903	0
995	6	0	0	0	0	0	0	200	300	0	0	0	0	0	0	0	200	903	0	0	0	0	0	0	0	603	903	0
995	7	0	0	0	0	0	0	200	300	0	0	0	0	0	0	0	200	903	0	0	0	0	0	0	0	603	903	0
995	8	0	0	0	0	0	0	200	300	0	0	0	0	0	0	0	200	903	0	0	0	0	0	0	0	603	903	0
995	9	0	0	0	0	0	0	200	300	0	0	0	0	0	0	0	200	903	0	0	0	0	0	0	0	603	903	0
996	0	0	0	0	0	0	0	200	300	0	0	0	0	0	0	0	200	903	0	0	0	0	0	0	0	603	903	0
996	1	0	0	0	0	0	0	200	300	0	0	0	0	0	0	0	200	903	0	0	0	0	0	0	0	603	903	0
996	2	0	0	0	0	0	0	200	300	0	0	0	0	0	0	0	200	903	0	0	0	0	0	0	0	603	903	0
996	3	0	0	0	0	0	0	200	300	0	0	0	0	0	0	0	200	903	0	0	0	0	0	0	0	603	903	0
996	4	0	0	0	0	0	0	200	300	0	0	0	0	0	0	0	200	903	0	0	0	0	0	0	0	603	903	0
996	5	0	0	0	0	0	0	200	300	0	0	0	0	0	0	0	200	903	0	0	0	0	0	0	0	603	903	0
996	6	0	0	0	0	0	0	200	300	0	0	0	0	0	0	0	200	903	0	0	0	0	0	0	0	603	903	0
996	7	0	0	0	0	0	0	200	300	0	0	0	0	0	0	0	200	903	0	0	0	0	0	0	0	603	903	0
996	8	0	0	0	0	0	0	200	300	0	0	0	0	0	0	0	200	903	0	0	0	0	0	0	0	603	903	0
996	9	0	0	0	0	0	0	200	300	0	0	0	0	0	0	0	200	903	0	0	0	0	0	0	0	603	903	0
997	0	0	0	0	0	0	0	200	300	0	0	0	0	0	0	0	200	903	0	0	0	0	0	0	0	603	903	0
997	1	0	0	0	0	0	0	200	300	0	0	0	0	0	0	0	200	903	0	0	0	0	0	0	0	603	903	0
997	2	0	0	0	0	0	0	200	300	0	0	0	0	0	0	0	200	903	0	0	0	0	0	0	0	603	903	0
997	3	0	0	0	0	0	0	200	300	0	0	0	0	0	0	0	200	903	0	0	0	0	0	0	0	603	903	0
997	4	0	0	0	0	0	0	200	300	0	0	0	0	0	0	0	200	903	0	0	0	0	0	0	0	603	903	0
997	5	0	0	0	0	0	0	200	300	0	0	0	0	0	0	0	200	903	0	0	0	0	0	0	0	603	903	0
997	6	0	0	0	0	0	0	200	300	0	0	0	0	0	0	0	200	903	0	0	0	0	0	0	0	603	903	0
997	7	0	0	0	0	0	0	200	300	0	0	0	0	0	0	0	200	903	0	0	0	0	0	0	0	603	903	0
997	8	0	0	0	0	0	0	200	300	0	0	0	0	0	0	0	200	903	0	0	0	0	0	0	0	603	903	0
997	9	0	0	0	0	0	0	200	300	0	0	0	0	0	0	0	200	903	0	0	0	0	0	0	0	603	903	0
998	0	0	0	0	0	0	0	200	300	0	0	0	0	0	0	0	200	903	0	0	0	0	0	0	0	603	903	0
998	1	0	0	0	0	0	0	200	300	0	0	0	0	0	0	0	200	903	0	0	0	0	0	0	0	603	903	0
998	2	0	0	0	0	0	0	200	300	0	0	0	0	0	0	0	200	903	0	0	0	0	0	0	0	603	903	0
998	3	0	0	0	0	0	0	200	300	0	0	0	0	0	0	0	200	903	0	0	0	0	0	0	0	603	903	0
998	4	0	0	0	0	0	0	200	300	0	0	0	0	0	0	0	200	903	0	0	0	0	0	0	0	603	903	0
998	5	0	0	0	0	0	0	200	300	0	0	0	0	0	0	0	200	903	0	0	0	0	0	0	0	603	903	0
998	6	0	0	0	0	0	0	200	300	0	0	0	0	0	0	0	200	903	0	0	0	0	0	0	0	603	903	0
998	7	0	0	0	0	0	0	200	300	0	0	0	0	0	0	0	200	903	0	0	0	0	0	0	0	603	903	0
998	8	0	0	0	0	0	0	200	300	0	0	0	0	0	0	0	200	903	0	0	0	0	0	0	0	603	903	0
998	9	0	0	0	0	0	0	200	300	0	0	0	0	0	0	0	200	903	0	0	0	0	0	0	0	603	903	0
999	0	0	0	0	0	0	0	200	300	0	0	0	0	0	0	0	200	903	0	0	0	0	0	0	0	603	903	0
999	1	0	0	0	0	0	0	200	300	0	0	0	0	0	0	0	200	903	0	0	0	0	0	0	0	603	903	0
999	2	0	0	0	0	0	0	200	300	0	0	0	0	0	0	0	200	903	0	0	0	0	0	0	0	603	903	0
999	3	0	0	0	0	0	0	200	300	0	0	0	0	0	0	0	200	903	0	0	0	0	0	0	0	603	903	0
999	4	0	0	0	0	0	0	200	300	0	0	0	0	0	0	0	200	903	0	0	0	0	0	0	0	603	903	0
999	5	0	0	0	0	0	0	200	300	0	0	0	0	0	0	0	200	903	0	0	0	0	0	0	0	603	903	0
999	6	0	0	0	0	0	0	200	300	0	0	0	0	0	0	0	200	903	0	0	0	0	0	0	0	603	903	0
999	7	0	0	0	0	0	0	200	300	0	0	0	0	0	0	0	200	903	0	0	0	0	0	0	0	603	903	0
999	8	0	0	0	0	0	0	200	300	0	0	0	0	0	0	0	200	903	0	0	0	0	0	0	0	603	903	0
999	9	0	0	0	0	0	0	200	300	0	0	0	0	0	0	0	200	903	0	0	0	0	0	0	0	603	903	0
1000	0	0	0	0	0	0	0	200	300	0	0	0	0	0	0	0	200	903	0	0	0	0	0	0	0	603	903	0
1000	1	0	0	0	0	0	0	200	300	0	0	0	0	0	0	0	200	903	0	0	0	0	0	0	0	603	903	0
1000	2	0	0	0	0	0	0	200	300	0	0	0	0	0	0	0	200	903	0	0	0	0	0	0	0	603	903	0
1000	3	0	0	0	0	0	0	200	300	0	0	0	0	0	0	0	200	903	0	0	0	0	0	0	0	603	903	0
1000	4	0	0	0	0	0	0	200	300	0	0	0	0	0	0	0	200	903	0	0	0	0	0	0	0	603	903	0
1000	5	0	0	0	0	0	0	200	300	0	0	0	0	0	0	0	200	903	0	0	0	0	0	0	0	603	903	0
1000	6	0	0	0	0	0	0	200	300	0	0	0	0	0	0	0	200	903	0	0	0	0	0	0	0	603	903	0
1000	7	0	0	0	0	0	0	200	300	0	0	0	0	0	0	0	200	903	0	0	0	0	0	0	0	603	903	0
1000	8	0	0	0	0	0	0	200	300	0	0	0	0	0	0	0	200	903	0	0	0	0	0	0	0	603	903	0
1000	9	0	0	0	0	0	0	200	300	0	0	0	0	0	0	0	200	903	0	0	0	0	0	0	0	603	903	0
1001	0	0	0	0	0	0	0	200	300	0	0	0	0	0	0	0	200	903	0	0	0	0	0	0	0	603	903	0
1001	1	0	0	0	0	0	0	200	300	0	0	0	0	0	0	0	200	903	0	0	0	0	0	0	0	603	903	0
1001	2	0	0	0	0	0	0	200	300	0	0	0	0	0	0	0	200	903	0	0	0	0	0	0	0	603	903	0
1001	3	0	0	0	0	0	0	200	300	0	0	0	0	0	0	0	200	903	0	0	0	0	0	0	0	603	903	0
1001	4	0	0	0	0	0	0	200	300	0	0	0	0	0	0	0	200	903	0	0	0	0	0	0	0	603	903	0
1001	5	0	0	0	0	0	0	200	300	0	0	0	0	0	0	0	200	903	0	0	0	0	0	0	0	603	903	0
1001	6	0	0	0	0	0	0	200	300	0	0	0	0	0	0	0	200	903	0	0	0	0	0	0	0	603	903	0
1001	7	0	0	0	0	0	0	200	300	0	0	0	0	0	0	0	200	903	0	0	0	0	0	0	0	603	903	0
1001	8	0	0	0	0	0	0	200	300	0	0	0	0	0	0	0	200	903	0	0	0	0	0	0	0	603	903	0
1001	9	0	0	0	0	0	0	200	300	0	0	0	0	0	0	0	200	903	0	0	0	0	0	0	0	603	903	0
1002	0	0	0	0	0	0	0	200	300	0	0	0	0	0	0	0	200	903	0	0	0	0	0	0	0	603	903	0
1002	1	0	0	0	0	0	0	200	300	0	0	0	0	0	0	0	200	903	0	0	0	0	0	0	0	603	903	0
1002	2	0	0	0	0	0	0	200	300	0	0	0	0	0	0	0	200	903	0	0	0	0	0	0	0	603	903	0
1002	3	0	0	0	0	0	0	200	300	0	0	0	0	0	0	0	200	903	0	0	0	0	0	0	0	603	903	0
1002	4	0	0	0	0	0	0	200	300	0	0	0	0	0	0	0	200	903	0	0	0	0	0	0	0	603	903	0
1002	5	0	0	0	0	0	0	200	300	0	0	0	0	0	0	0	200	903	0	0	0	0	0	0	0	603	903	0
1002	6	0	0	0	0	0	0	200	300	0	0	0	0	0	0	0	200	903	0	0	0	0	0	0	0	603	903	0
1002	7	0	0	0	0	0	0	200	300	0	0	0	0	0	0	0	200	903	0	0	0	0	0	0	0	603	903	0
1002	8	0	0	0	0	0	0	200	300	0	0	0	0	0	0	0	200	903	0	0	0	0	0	0	0	603	903	0
1002	9	0	0	0	0	0	0	200	300	0	0	0	0	0	0	0	200	903	0	0	0	0	0	0	0	603	903	0
1003	0	0	0	0	0	0	0	200	300	0	0	0	0	0	0	0	200	903	0	0	0	0	0	0	0	603	903	0
1003	1	0	0	0	0	0	0	200	300	0	0	0	0	0	0	0	200	903	0	0	0	0	0	0	0	603	903	0
1003	2	0	0	0	0	0	0	200	300	0	0	0	0	0	0	0	200	903	0	0	0	0	0	0	0	603	903	0
1003	3	0	0	0	0	0	0	200	300	0	0	0	0	0	0	0	200	903	0	0	0	0	0	0	0	603	903	0
1003	4	0	0	0	0	0	0	200	300	0	0	0	0	0	0	0	200	903	0	0	0	0	0	0	0	603	903	0
1003	5	0	0	0	0	0	0	200	300	0	0	0	0	0	0	0	200	903	0	0	0	0	0	0	0	603	903	0
1003	6	0	0	0	0	0	0	200	300	0	0	0	0	0	0	0	200	903	0	0	0	0	0	0	0	603	903	0
1003	7	0	0	0	0	0	0	200	300	0	0	0	0	0	0	0	200	903	0	0	0	0	0	0	0	603	903	0
1003	8	0	0	0	0	0	0	200	300	0	0	0	0	0	0	0	200	903	0	0	0	0	0	0	0	603	903	0
1003	9	0	0	0	0	0	0	200	300	0	0	0	0	0	0	0	200	903	0	0	0	0	0	0	0	603	903	0
1004	0	0	0	0	0	0	0	200	300	0	0	0	0	0	0	0	200	903	0	0	0	0	0	0	0	603	903	0
1004	1	0	0	0	0	0	0	200	300	0	0	0	0	0	0	0	200	903	0	0	0	0	0	0	0	603	903	0
1004	2	0	0	0	0	0	0	200	300	0	0	0	0	0	0	0	200	903	0	0	0	0	0	0	0	603	903	0
1004	3	0	0	0	0	0	0	200	300	0	0	0	0	0	0	0	200	903	0	0	0	0	0	0	0	603	903	0
1004	4	0	0	0	0	0	0	200	300	0	0	0	0	0	0	0	200	903	0	0	0	0	0	0	0	603	903	0
1004	5	0	0	0	0	0	0	200	300	0	0	0	0	0	0	0	200	903	0	0	0	0	0	0	0	603	903	0
1004	6	0	0	0	0	0	0	200	300	0	0	0	0	0	0	0	200	903	0	0	0	0	0	0	0	603	903	0
1004	7	0	0	0	0	0	0	200	300	0	0	0	0	0	0	0	200	903	0	0	0	0	0	0	0	603	903	0
1004	8	0	0	0	0	0	0	200	300	0	0	0	0	0	0	0	200	903	0	0	0	0	0	0	0	603	903	0
1004	9	0	0	0	0	0	0	200	300	0	0	0	0	0	0	0	200	903	0	0	0	0	0	0	0	603	903	0
1005	0	0	0	0	0	0	0	200	300	0	0	0	0	0	0	0	200	903	0	0	0	0	0	0	0	603	903	0
1005	1	0	0	0	0	0	0	200	300	0	0	0	0	0	0	0	200	903	0	0	0	0	0	0	0	603	903	0
1005	2	0	0	0	0	0	0	200	300	0	0	0	0	0	0	0	200	903	0	0	0	0	0	0	0	603	903	0
1005	3	0	0	0	0	0	0	200	300	0	0	0	0	0	0	0	200	903	0	0	0	0	0	0	0	603	903	0
1005	4	0	0	0	0	0	0	200	300	0	0	0	0	0	0	0	200	903	0	0	0	0	0	0	0	603	903	0
1005	5	0	0	0	0	0	0	200	300	0	0	0	0	0	0	0	200	903	0	0	0	0	0	0	0	603	903	0
1005	6	0	0	0	0	0	0	200	300	0	0	0	0	0	0	0	200	903	0	0	0	0	0	0	0	603	903	0
1005	7	0	0	0	0	0	0	200	300	0	0	0	0	0	0	0	200	903	0	0	0	0	0	0	0	603	903	0
1005	8	0	0	0	0	0	0	200	300	0	0	0	0	0	0	0	200	903	0	0	0	0	0	0	0	603	903	0
1005	9	0	0	0	0	0	0	200	300	0	0	0	0	0	0	0	200	903	0	0	0	0	0	0	0	603	903	0
1006	0	0	0	0	0	0	0	200	300	0	0	0	0	0	0	0	200	903	0	0	0	0	0	0	0	603	903	0
1006	1	0	0	0	0	0	0	200	300	0	0	0	0	0	0	0	200	903	0	0	0	0	0	0	0	603	903	0
1006	2	0	0	0	0	0	0	200	300	0	0	0	0	0	0	0	200	903	0	0	0	0	0	0	0	603	903	0
1006	3	0	0	0	0	0	0	200	300	0	0	0	0	0	0	0	200	903	0	0	0	0	0	0	0	603	903	0
1006	4	0	0	0	0	0	0	200	300	0	0	0	0	0	0	0	200	903	0	0	0	0	0	0	0	603	903	0
1006	5	0	0	0	0	0	0	200	300	0	0	0	0	0	0	0	200	903	0	0	0	0	0	0	0	603	903	0
1006	6	0	0	0	0	0	0	200	300	0	0	0	0	0	0	0	200	903	0	0	0	0	0	0	0	603	903	0
1006	7	0	0	0	0	0	0	200	300	0	0	0	0	0	0	0	200	903	0	0	0	0	0	0	0	603	903	0
1006	8	0	0	0	0	0	0	200	300	0	0	0	0	0	0	0	200	903	0	0	0	0	0	0	0	603	903	0
1006	9	0	0	0	0	0	0	200	300	0	0	0	0	0	0	0	200	903	0	0	0	0	0	0	0	603	903	0
1007	0	0	0	0	0	0	0	200	300	0	0	0	0	0	0	0	200	903	0	0	0	0	0	0	0	603	903	0
1007	1	0	0	0	0	0	0	200	300	0	0	0	0	0	0	0	200	903	0	0	0	0	0	0	0	603	903	0
1007	2	0	0	0	0	0	0	200	300	0	0	0	0	0	0	0	200	903	0	0	0	0	0	0	0	603	903	0
1007	3	0	0	0	0	0	0	200	300	0	0	0	0	0	0	0	200	903	0	0	0	0	0	0	0	603	903	0
1007	4	0	0	0	0	0	0	200	300	0	0	0	0	0	0	0	200	903	0	0	0	0	0	0	0	603	903	0
1007	5	0	0	0	0	0	0	200	300	0	0	0	0	0	0	0	200	903	0	0	0	0	0	0	0	603	903	0
1007	6	0	0	0	0	0	0	200	300	0	0	0	0	0	0	0	200	903	0	0	0	0	0	0	0	603	903	0
1007	7	0	0	0	0	0	0	200	300	0	0	0	0	0	0	0	200	903	0	0	0	0	0	0	0	603	903	0
1007	8	0	0	0	0	0	0	200	300	0	0	0	0	0	0	0	200	903	0	0	0	0	0	0	0	603	903	0
1007	9	0	0	0	0	0	0	200	300	0	0	0	0	0	0	0	200	903	0	0	0	0	0	0	0	603	903	0
1008	0	0	0	0	0	0	0	200	300	0	0	0	0	0	0	0	200	903	0	0	0	0	0	0	0	603	903	0
1008	1	0	0	0	0	0	0	200	300	0	0	0	0	0	0	0	200	903	0	0	0	0	0	0	0	603	903	0
1008	2	0	0	0	0	0	0	200	300	0	0	0	0	0	0	0	200	903	0	0	0	0	0	0	0	603	903	0
1008	3	0	0	0	0	0	0	200	300	0	0	0	0	0	0	0	200	903	0	0	0	0	0	0	0	603	903	0
1008	4	0	0	0	0	0	0	200	300	0	0	0	0	0	0	0	200	903	0	0	0	0	0	0	0	603	903	0
1008	5	0	0	0	0	0	0	200	300	0	0	0	0	0	0	0	200	903	0	0	0	0	0	0	0	603	903	0
1008	6	0	0	0	0	0	0	200	300	0	0	0	0	0	0	0	200	903	0	0	0	0	0	0	0	603	903	0
1008	7	0	0	0	0	0	0	200	300	0	0	0	0	0	0	0	200	903	0	0	0	0	0	0	0	603	903	0
1008	8	0	0	0	0	0	0	200	300	0	0	0	0	0	0	0	200	903	0	0	0	0	0	0	0	603	903	0
1008	9	0	0	0	0	0	0	200	300	0	0	0	0	0	0	0	200	903	0	0	0	0	0	0	0	603	903	0
1009	0	0	0	0	0	0	0	200	300	0	0	0	0	0	0	0	200	903	0	0	0	0	0	0	0	603	903	0
1009	1	0	0	0	0	0	0	200	300	0	0	0	0	0	0	0	200	903	0	0	0	0	0	0	0	603	903	0
1009	2	0	0	0	0	0	0	200	300	0	0	0	0	0	0	0	200	903	0	0	0	0	0	0	0	603	903	0
1009	3	0	0	0	0	0	0	200	300	0	0	0	0	0	0	0	200	903	0	0	0	0	0	0	0	603	903	0
1009	4	0	0	0	0	0	0	200	300	0	0	0	0	0	0	0	200	903	0	0	0	0	0	0	0	603	903	0
1009	5	0	0	0	0	0	0	200	300	0	0	0	0	0	0	0	200	903	0	0	0	0	0	0	0	603	903	0
1009	6	0	0	0	0	0	0	200	300	0	0	0	0	0	0	0	200	903	0	0	0	0	0	0	0	603	903	0
1009	7	0	0	0	0	0	0	200	300	0	0	0	0	0	0	0	200	903	0	0	0	0	0	0	0	603	903	0
1009	8	0	0	0	0	0	0	200	300	0	0	0	0	0	0	0	200	903	0	0	0	0	0	0	0	603	903	0
1009	9	0	0	0	0	0	0	200	300	0	0	0	0	0	0	0	200	903	0	0	0	0	0	0	0	603	903	0
1010	0	0	0	0	0	0	0	200	300	0	0	0	0	0	0	0	200	903	0	0	0	0	0	0	0	603	903	0
1010	1	0	0	0	0	0	0	200	300	0	0	0	0	0	0	0	200	903	0	0	0	0	0	0	0	603	903	0
1010	2	0	0	0	0	0	0	200	300	0	0	0	0	0	0	0	200	903	0	0	0	0	0	0	0	603	903	0
1010	3	0	0	0	0	0	0	200	300	0	0	0	0	0	0	0	200	903	0	0	0	0	0	0	0	603	903	0
1010	4	0	0	0	0	0	0	200	300	0	0	0	0	0	0	0	200	903	0	0	0	0	0	0	0	603	903	0
1010	5	0	0	0	0	0	0	200	300	0	0	0	0	0	0	0	200	903	0	0	0	0	0	0	0	603	903	0
1010	6	0	0	0	0	0	0	200	300	0	0	0	0	0	0	0	200	903	0	0	0	0	0	0	0	603	903	0
1010	7	0	0	0	0	0	0	200	300	0	0	0	0	0	0	0	200	903	0	0	0	0	0	0	0	603	903	0
1010	8	0	0	0	0	0	0	200	300	0	0	0	0	0	0	0	200	903	0	0	0	0	0	0	0	603	903	0
1010	9	0	0	0	0	0	0	200	300	0	0	0	0	0	0	0	200	903	0	0	0	0	0	0	0	603	903	0
1011	0	0	0	0	0	0	0	200	300	0	0	0	0	0	0	0	200	903	0	0	0	0	0	0	0	603	903	0
1011	1	0	0	0	0	0	0	200	300	0	0	0	0	0	0	0	200	903	0	0	0	0	0	0	0	603	903	0
1011	2	0	0	0	0	0	0	200	300	0	0	0	0	0	0	0	200	903	0	0	0	0	0	0	0	603	903	0
1011	3	0	0	0	0	0	0	200	300	0	0	0	0	0	0	0	200	903	0	0	0	0	0	0	0	603	903	0
1011	4	0	0	0	0	0	0	200	300	0	0	0	0	0	0	0	200	903	0	0	0	0	0	0	0	603	903	0
1011	5	0	0	0	0	0	0	200	300	0	0	0	0	0	0	0	200	903	0	0	0	0	0	0	0	603	903	0
1011	6	0	0	0	0	0	0	200	300	0	0	0	0	0	0	0	200	903	0	0	0	0	0	0	0	603	903	0
1011	7	0	0	0	0	0	0	200	300	0	0	0	0	0	0	0	200	903	0	0	0	0	0	0	0	603	903	0
1011	8	0	0	0	0	0	0	200	300	0	0	0	0	0	0	0	200	903	0	0	0	0	0	0	0	603	903	0
1011	9	0	0	0	0	0	0	200	300	0	0	0	0	0	0	0	200	903	0	0	0	0	0	0	0	603	903	0
1012	0	0	0	0	0	0	0	200	300	0	0	0	0	0	0	0	200	903	0	0	0	0	0	0	0	603	903	0
1012	1	0	0	0	0	0	0	200	300	0	0	0	0	0	0	0	200	903	0	0	0	0	0	0	0	603	903	0
1012	2	0	0	0	0	0	0	200	300	0	0	0	0	0	0	0	200	903	0	0	0	0	0	0	0	603	903	0
1012	3	0	0	0	0	0	0	200	300	0	0	0	0	0	0	0	200	903	0	0	0	0	0	0	0	603	903	0
1012	4	0	0	0	0	0	0	200	300	0	0	0	0	0	0	0	200	903	0	0	0	0	0	0	0	603	903	0
1012	5	0	0	0	0	0	0	200	300	0	0	0	0	0	0	0	200	903	0	0	0	0	0	0	0	603	903	0
1012	6	0	0	0	0	0	0	200	300	0	0	0	0	0	0	0	200	903	0	0	0	0	0	0	0	603	903	0
1012	7	0	0	0	0	0	0	200	300	0	0	0	0	0	0	0	200	903	0	0	0	0	0	0	0	603	903	0
1012	8	0	0	0	0	0	0	200	300	0	0	0	0	0	0	0	200	903	0	0	0	0	0	0	0	603	903	0
1012	9	0	0	0	0	0	0	200	300	0	0	0	0	0	0	0	200	903	0	0	0	0	0	0	0	603	903	0
1013	0	0	0	0	0	0	0	200	300	0	0	0	0	0	0	0	200	903	0	0	0	0	0	0	0	603	903	0
1013	1	0	0	0	0	0	0	200	300	0	0	0	0	0	0	0	200	903	0	0	0	0	0	0	0	603	903	0
1013	2	0	0	0	0	0	0	200	300	0	0	0	0	0	0	0	200	903	0	0	0	0	0	0	0	603	903	0
1013	3	0	0	0	0	0	0	200	300	0	0	0	0	0	0	0	200	903	0	0	0	0	0	0	0	603	903	0
1013	4	0	0	0	0	0	0	200	300	0	0	0	0	0	0	0	200	903	0	0	0	0	0	0	0	603	903	0
1013	5	0	0	0	0	0	0	200	300	0	0	0	0	0	0	0	200	903	0	0	0	0	0	0	0	603	903	0
1013	6	0	0	0	0	0	0	200	300	0	0	0	0	0	0	0	200	903	0	0	0	0	0	0	0	603	903	0
1013	7	0	0	0	0	0	0	200	300	0	0	0	0	0	0	0	200	903	0	0	0	0	0	0	0	603	903	0
1013	8	0	0	0	0	0	0	200	300	0	0	0	0	0	0	0	200	903	0	0	0	0	0	0	0	603	903	0
1013	9	0	0	0	0	0	0	200	300	0	0	0	0	0	0	0	200	903	0	0	0	0	0	0	0	603	903	0
1014	0	0	0	0	0	0	0	200	300	0	0	0	0	0	0	0	200	903	0	0	0	0	0	0	0	603	903	0
1014	1	0	0	0	0	0	0	200	300	0	0	0	0	0	0	0	200	903	0	0	0	0	0	0	0	603	903	0
1014	2	0	0	0	0	0	0	200	300	0	0	0	0	0	0	0	200	903	0	0	0	0	0	0	0	603	903	0
1014	3	0	0	0	0	0	0	200	300	0	0	0	0	0	0	0	200	903	0	0	0	0	0	0	0	603	903	0
1014	4	0	0	0	0	0	0	200	300	0	0	0	0	0	0	0	200	903	0	0	0	0	0	0	0	603	903	0
1014	5	0	0	0	0	0	0	200	300	0	0	0	0	0	0	0	200	903	0	0	0	0	0	0	0	603	903	0
1014	6	0	0	0	0	0	0	200	300	0	0	0	0	0	0	0	200	903	0	0	0	0	0	0	0	603	903	0
1014	7	0	0	0	0	0	0	200	300	0	0	0	0	0	0	0	200	903	0	0	0	0	0	0	0	603	903	0
1014	8	0	0	0	0	0	0	200	300	0	0	0	0	0	0	0	200	903	0	0	0	0	0	0	0	603	903	0
1014	9	0	0	0	0	0	0	200	300	0	0	0	0	0	0	0	200	903	0	0	0	0	0	0	0	603	903	0
1015	0	0	0	0	0	0	0	200	300	0	0	0	0	0	0	0	200	903	0	0	0	0	0	0	0	603	903	0
1015	1	0	0	0	0	0	0	200	300	0	0	0	0	0	0	0	200	903	0	0	0	0	0	0	0	603	903	0
1015	2	0	0	0	0	0	0	200	300	0	0	0	0	0	0	0	200	903	0	0	0	0	0	0	0	603	903	0
1015	3	0	0	0	0	0	0	200	300	0	0	0	0	0	0	0	200	903	0	0	0	0	0	0	0	603	903	0
1015	4	0	0	0	0	0	0	200	300	0	0	0	0	0	0	0	200	903	0	0	0	0	0	0	0	603	903	0
1015	5	0	0	0	0	0	0	200	300	0	0	0	0	0	0	0	200	903	0	0	0	0	0	0	0	603	903	0
1015	6	0	0	0	0	0	0	200	300	0	0	0	0	0	0	0	200	903	0	0	0	0	0	0	0	603	903	0
1015	7	0	0	0	0	0	0	200	300	0	0	0	0	0	0	0	200	903	0	0	0	0	0	0	0	603	903	0
1015	8	0	0	0	0	0	0	200	300	0	0	0	0	0	0	0	200	903	0	0	0	0	0	0	0	603	903	0
1015	9	0	0	0	0	0	0	200	300	0	0	0	0	0	0	0	200	903	0	0	0	0	0	0	0	603	903	0
1016	0	0	0	0	0	0	0	200	300	0	0	0	0	0	0	0	200	903	0	0	0	0	0	0	0	603	903	0
1016	1	0	0	0	0	0	0	200	300	0	0	0	0	0	0	0	200	903	0	0	0	0	0	0	0	603	903	0
1016	2	0	0	0	0	0	0	200	300	0	0	0	0	0	0	0	200	903	0	0	0	0	0	0	0	603	903	0
1016	3	0	0	0	0	0	0	200	300	0	0	0	0	0	0	0	200	903	0	0	0	0	0	0	0	603	903	0
1016	4	0	0	0	0	0	0	200	300	0	0	0	0	0	0	0	200	903	0	0	0	0	0	0	0	603	903	0
1016	5	0	0	0	0	0	0	200	300	0	0	0	0	0	0	0	200	903	0	0	0	0	0	0	0	603	903	0
1016	6	0	0	0	0	0	0	200	300	0	0	0	0	0	0	0	200	903	0	0	0	0	0	0	0	603	903	0
1016	7	0	0	0	0	0	0	200	300	0	0	0	0	0	0	0	200	903	0	0	0	0	0	0	0	603	903	0
1016	8	0	0	0	0	0	0	200	300	0	0	0	0	0	0	0	200	903	0	0	0	0	0	0	0	603	903	0
1016	9	0	0	0	0	0	0	200	300	0	0	0	0	0	0	0	200	903	0	0	0	0	0	0	0	603	903	0
1017	0	0	0	0	0	0	0	200	300	0	0	0	0	0	0	0	200	903	0	0	0	0	0	0	0	603	903	0
1017	1	0	0	0	0	0	0	200	300	0	0	0	0	0	0	0	200	903	0	0	0	0	0	0	0	603	903	0
1017	2	0	0	0	0	0	0	200	300	0	0	0	0	0	0	0	200	903	0	0	0	0	0	0	0	603	903	0
1017	3	0	0	0	0	0	0	200	300	0	0	0	0	0	0	0	200	903	0	0	0	0	0	0	0	603	903	0
1017	4	0	0	0	0	0	0	200	300	0	0	0	0	0	0	0	200	903	0	0	0	0	0	0	0	603	903	0
1017	5	0	0	0	0	0	0	200	300	0	0	0	0	0	0	0	200	903	0	0	0	0	0	0	0	603	903	0
1017	6	0	0	0	0	0	0	200	300	0	0	0	0	0	0	0	200	903	0	0	0	0	0	0	0	603	903	0
1017	7	0	0	0	0	0	0	200	300	0	0	0	0	0	0	0	200	903	0	0	0	0	0	0	0	603	903	0
1017	8	0	0	0	0	0	0	200	300	0	0	0	0	0	0	0	200	903	0	0	0	0	0	0	0	603	903	0
1017	9	0	0	0	0	0	0	200	300	0	0	0	0	0	0	0	200	903	0	0	0	0	0	0	0	603	903	0
1018	0	0	0	0	0	0	0	200	300	0	0	0	0	0	0	0	200	903	0	0	0	0	0	0	0	603	903	0
1018	1	0	0	0	0	0	0	200	300	0	0	0	0	0	0	0	200	903	0	0	0	0	0	0	0	603	903	0
1018	2	0	0	0	0	0	0	200	300	0	0	0	0	0	0	0	200	903	0	0	0	0	0	0	0	603	903	0
1018	3	0	0	0	0	0	0	200	300	0	0	0	0	0	0	0	200	903	0	0	0	0	0	0	0	603	903	0
1018	4	0	0	0	0	0	0	200	300	0	0	0	0	0	0	0	200	903	0	0	0	0	0	0	0	603	903	0
1018	5	0	0	0	0	0	0	200	300	0	0	0	0	0	0	0	200	903	0	0	0	0	0	0	0	603	903	0
1018	6	0	0	0	0	0	0	200	300	0	0	0	0	0	0	0	200	903	0	0	0	0	0	0	0	603	903	0
1018	7	0	0	0	0	0	0	200	300	0	0	0	0	0	0	0	200	903	0	0	0	0	0	0	0	603	903	0
1018	8	0	0	0	0	0	0	200	300	0	0	0	0	0	0	0	200	903	0	0	0	0	0	0	0	603	903	0
1018	9	0	0	0	0	0	0	200	300	0	0	0	0	0	0	0	200	903	0	0	0	0	0	0	0	603	903	0
1019	0	0	0	0	0	0	0	200	300	0	0	0	0	0	0	0	200	903	0	0	0	0	0	0	0	603	903	0
1019	1	0	0	0	0	0	0	200	300	0	0	0	0	0	0	0	200	903	0	0	0	0	0	0	0	603	903	0
1019	2	0	0	0	0	0	0	200	300	0	0	0	0	0	0	0	200	903	0	0	0	0	0	0	0	603	903	0
1019	3	0	0	0	0	0	0	200	300	0	0	0	0	0	0	0	200	903	0	0	0	0	0	0	0	603	903	0
1019	4	0	0	0	0	0	0	200	300	0	0	0	0	0	0	0	200	903	0	0	0	0	0	0	0	603	903	0
1019	5	0	0	0	0	0	0	200	300	0	0	0	0	0	0	0	200	903	0	0	0	0	0	0	0	603	903	0
1019	6	0	0	0	0	0	0	200	300	0	0	0	0	0	0	0	200	903	0	0	0	0	0	0	0	603	903	0
1019	7	0	0	0	0	0	0	200	300	0	0	0	0	0	0	0	200	903	0	0	0	0	0	0	0	603	903	0
1019	8	0	0	0	0	0	0	200	300	0	0	0	0	0	0	0	200	903	0	0	0	0	0	0	0	603	903	0
1019	9	0	0	0	0	0	0	200	300	0	0	0	0	0	0	0	200	903	0	0	0	0	0	0	0	603	903	0
1020	0	0	0	0	0	0	0	200	300	0	0	0	0	0	0	0	200	903	0	0	0	0	0	0	0	603	903	0
1020	1	0	0	0	0	0	0	200	300	0	0	0	0	0	0	0	200	903	0	0	0	0	0	0	0	603	903	0
1020	2	0	0	0	0	0	0	200	300	0	0	0	0	0	0	0	200	903	0	0	0	0	0	0	0	603	903	0
1020	3	0	0	0	0	0	0	200	300	0	0	0	0	0	0	0	200	903	0	0	0	0	0	0	0	603	903	0
1020	4	0	0	0	0	0	0	200	300	0	0	0	0	0	0	0	200	903	0	0	0	0	0	0	0	603	903	0
1020	5	0	0	0	0	0	0	200	300	0	0	0	0	0	0	0	200	903	0	0	0	0	0	0	0	603	903	0
1020	6	0	0	0	0	0	0	200	300	0	0	0	0	0	0	0	200	903	0	0	0	0	0	0	0	603	903	0
1020	7	0	0	0	0	0	0	200	300	0	0	0	0	0	0	0	200	903	0	0	0	0	0	0	0	603	903	0
1020	8	0	0	0	0	0	0	200	300	0	0	0	0	0	0	0	200	903	0	0	0	0	0	0	0	603	903	0
1020	9	0	0	0	0	0	0	200	300	0	0	0	0	0	0	0	200	903	0	0	0	0	0	0	0	603	903	0
1021	0	0	0	0	0	0	0	200	300	0	0	0	0	0	0	0	200	903	0	0	0	0	0	0	0	603	903	0
1021	1	0	0	0	0	0	0	200	300	0	0	0	0	0	0	0	200	903	0	0	0	0	0	0	0	603	903	0
1021	2	0	0	0	0	0	0	200	300	0	0	0	0	0	0	0	200	903	0	0	0	0	0	0	0	603	903	0
1021	3	0	0	0	0	0	0	200	300	0	0	0	0	0	0	0	200	903	0	0	0	0	0	0	0	603	903	0
1021	4	0	0	0	0	0	0	200	300	0	0	0	0	0	0	0	200	903	0	0	0	0	0	0	0	603	903	0
1021	5	0	0	0	0	0	0	200	300	0	0	0	0	0	0	0	200	903	0	0	0	0	0	0	0	603	903	0
1021	6	0	0	0	0	0	0	200	300	0	0	0	0	0	0	0	200	903	0	0	0	0	0	0	0	603	903	0
1021	7	0	0	0	0	0	0	200	300	0	0	0	0	0	0	0	200	903	0	0	0	0	0	0	0	603	903	0
1021	8	0	0	0	0	0	0	200	300	0	0	0	0	0	0	0	200	903	0	0	0	0	0	0	0	603	903	0
1021	9	0	0	0	0	0	0	200	300	0	0	0	0	0	0	0	200	903	0	0	0	0	0	0	0	603	903	0
1022	0	0	0	0	0	0	0	200	300	0	0	0	0	0	0	0	200	903	0	0	0	0	0	0	0	603	903	0
1022	1	0	0	0	0	0	0	200	300	0	0	0	0	0	0	0	200	903	0	0	0	0	0	0	0	603	903	0
1022	2	0	0	0	0	0	0	200	300	0	0	0	0	0	0	0	200	903	0	0	0	0	0	0	0	603	903	0
1022	3	0	0	0	0	0	0	200	300	0	0	0	0	0	0	0	200	903	0	0	0	0	0	0	0	603	903	0
1022	4	0	0	0	0	0	0	200	300	0	0	0	0	0	0	0	200	903	0	0	0	0	0	0	0	603	903	0
1022	5	0	0	0	0	0	0	200	300	0	0	0	0	0	0	0	200	903	0	0	0	0	0	0	0	603	903	0
1022	6	0	0	0	0	0	0	200	300	0	0	0	0	0	0	0	200	903	0	0	0	0	0	0	0	603	903	0
1022	7	0	0	0	0	0	0	200	300	0	0	0	0	0	0	0	200	903	0	0	0	0	0	0	0	603	903	0
1022	8	0	0	0	0	0	0	200	300	0	0	0	0	0	0	0	200	903	0	0	0	0	0	0	0	603	903	0
1022	9	0	0	0	0	0	0	200	300	0	0	0	0	0	0	0	200	903	0	0	0	0	0	0	0	603	903	0
1023	0	0	0	0	0	0	0	200	300	0	0	0	0	0	0	0	200	903	0	0	0	0	0	0	0	603	903	0
1023	1	0	0	0	0	0	0	200	300	0	0	0	0	0	0	0	200	903	0	0	0	0	0	0	0	603	903	0
1023	2	0	0	0	0	0	0	200	300	0	0	0	0	0	0	0	200	903	0	0	0	0	0	0	0	603	903	0
1023	3	0	0	0	0	0	0	200	300	0	0	0	0	0	0	0	200	903	0	0	0	0	0	0	0	603	903	0
1023	4	0	0	0	0	0	0	200	300	0	0	0	0	0	0	0	200	903	0	0	0	0	0	0	0	603	903	0
1023	5	0	0	0	0	0	0	200	300	0	0	0	0	0	0	0	200	903	0	0	0	0	0	0	0	603	903	0
1023	6	0	0	0	0	0	0	200	300	0	0	0	0	0	0	0	200	903	0	0	0	0	0	0	0	603	903	0
1023	7	0	0	0	0	0	0	200	300	0	0	0	0	0	0	0	200	903	0	0	0	0	0	0	0	603	903	0
1023	8	0	0	0	0	0	0	200	300	0	0	0	0	0	0	0	200	903	0	0	0	0	0	0	0	603	903	0
1023	9	0	0	0	0	0	0	200	300	0	0	0	0	0	0	0	200	903	0	0	0	0	0	0	0	603	903	0
1024	0	0	0	0	0	0	0	200	300	0	0	0	0	0	0	0	200	903	0	0	0	0	0	0	0	603	903	0
1024	1	0	0	0	0	0	0	200	300	0	0	0	0	0	0	0	200	903	0	0	0	0	0	0	0	603	903	0
1024	2	0	0	0	0	0	0	200	300	0	0	0	0	0	0	0	200	903	0	0	0	0	0	0	0	603	903	0
1024	3	0	0	0	0	0	0	200	300	0	0	0	0	0	0	0	200	903	0	0	0	0	0	0	0	603	903	0
1024	4	0	0	0	0	0	0	200	300	0	0	0	0	0	0	0	200	903	0	0	0	0	0	0	0	603	903	0
1024	5	0	0	0	0	0	0	200	300	0	0	0	0	0	0	0	200	903	0	0	0	0	0	0	0	603	903	0
1024	6	0	0	0	0	0	0	200	300	0	0	0	0	0	0	0	200	903	0	0	0	0	0	0	0	603	903	0
1024	7	0	0	0	0	0	0	200	300	0	0	0	0	0	0	0	200	903	0	0	0	0	0	0	0	603	903	0
1024	8	0	0	0	0	0	0	200	300	0	0	0	0	0	0	0	200	903	0	0	0	0	0	0	0	603	903	0
1024	9	0	0	0	0	0	0	200	300	0	0	0	0	0	0	0	200	903	0	0	0	0	0	0	0	603	903	0
1025	0	0	0	0	0	0	0	200	300	0	0	0	0	0	0	0	200	903	0	0	0	0	0	0	0	603	903	0
1025	1	0	0	0	0	0	0	200	300	0	0	0	0	0	0	0	200	903	0	0	0	0	0	0	0	603	903	0
1025	2	0	0	0	0	0	0	200	300	0	0	0	0	0	0	0	200	903	0	0	0	0	0	0	0	603	903	0
1025	3	0	0	0	0	0	0	200	300	0	0	0	0	0	0	0	200	903	0	0	0	0	0	0	0	603	903	0
1025	4	0	0	0	0	0	0	200	300	0	0	0	0	0	0	0	200	903	0	0	0	0	0	0	0	603	903	0
1025	5	0	0	0	0	0	0	200	300	0	0	0	0	0	0	0	200	903	0	0	0	0	0	0	0	603	903	0
1025	6	0	0	0	0	0	0	200	300	0	0	0	0	0	0	0	200	903	0	0	0	0	0	0	0	603	903	0
1025	7	0	0	0	0	0	0	200	300	0	0	0	0	0	0	0	200	903	0	0	0	0	0	0	0	603	903	0
1025	8	0	0	0	0	0	0	200	300	0	0	0	0	0	0	0	200	903	0	0	0	0	0	0	0	603	903	0
1025	9	0	0	0	0	0	0	200	300	0	0	0	0	0	0	0	200	903	0	0	0	0	0	0	0	603	903	0
1026	0	0	0	0	0	0	0	200	300	0	0	0	0	0	0	0	200	903	0	0	0	0	0	0	0	603	903	0
1026	1	0	0	0	0	0	0	200	300	0	0	0	0	0	0	0	200	903	0	0	0	0	0	0	0	603	903	0
1026	2	0	0	0	0	0	0	200	300	0	0	0	0	0	0	0	200	903	0	0	0	0	0	0	0	603	903	0
1026	3	0	0	0	0	0	0	200	300	0	0	0	0	0	0	0	200	903	0	0	0	0	0	0	0	603	903	0
1026	4	0	0	0	0	0	0	200	300	0	0	0	0	0	0	0	200	903	0	0	0	0	0	0	0	603	903	0
1026	5	0	0	0	0	0	0	200	300	0	0	0	0	0	0	0	200	903	0	0	0	0	0	0	0	603	903	0
1026	6	0	0	0	0	0	0	200	300	0	0	0	0	0	0	0	200	903	0	0	0	0	0	0	0	603	903	0
1026	7	0	0	0	0	0	0	200	300	0	0	0	0	0	0	0	200	903	0	0	0	0	0	0	0	603	903	0
1026	8	0	0	0	0	0	0	200	300	0	0	0	0	0	0	0	200	903	0	0	0	0	0	0	0	603	903	0
1026	9	0	0	0	0	0	0	200	300	0	0	0	0	0	0	0	200	903	0	0	0	0	0	0	0	603	903	0
1027	0	0	0	0	0	0	0	200	300	0	0	0	0	0	0	0	200	903	0	0	0	0	0	0	0	603	903	0
1027	1	0	0	0	0	0	0	200	300	0	0	0	0	0	0	0	200	903	0	0	0	0	0	0	0	603	903	0
1027	2	0	0	0	0	0	0	200	300	0	0	0	0	0	0	0	200	903	0	0	0	0	0	0	0	603	903	0
1027	3	0	0	0	0	0	0	200	300	0	0	0	0	0	0	0	200	903	0	0	0	0	0	0	0	603	903	0
1027	4	0	0	0	0	0	0	200	300	0	0	0	0	0	0	0	200	903	0	0	0	0	0	0	0	603	903	0
1027	5	0	0	0	0	0	0	200	300	0	0	0	0	0	0	0	200	903	0	0	0	0	0	0	0	603	903	0
1027	6	0	0	0	0	0	0	200	300	0	0	0	0	0	0	0	200	903	0	0	0	0	0	0	0	603	903	0
1027	7	0	0	0	0	0	0	200	300	0	0	0	0	0	0	0	200	903	0	0	0	0	0	0	0	603	903	0
1027	8	0	0	0	0	0	0	200	300	0	0	0	0	0	0	0	200	903	0	0	0	0	0	0	0	603	903	0
1027	9	0	0	0	0	0	0	200	300	0	0	0	0	0	0	0	200	903	0	0	0	0	0	0	0	603	903	0
1028	0	0	0	0	0	0	0	200	300	0	0	0	0	0	0	0	200	903	0	0	0	0	0	0	0	603	903	0
1028	1	0	0	0	0	0	0	200	300	0	0	0	0	0	0	0	200	903	0	0	0	0	0	0	0	603	903	0
1028	2	0	0	0	0	0	0	200	300	0	0	0	0	0	0	0	200	903	0	0	0	0	0	0	0	603	903	0
1028	3	0	0	0	0	0	0	200	300	0	0	0	0	0	0	0	200	903	0	0	0	0	0	0	0	603	903	0
1028	4	0	0	0	0	0	0	200	300	0	0	0	0	0	0	0	200	903	0	0	0	0	0	0	0	603	903	0
1028	5	0	0	0	0	0	0	200	300	0	0	0	0	0	0	0	200	903	0	0	0	0	0	0	0	603	903	0
1028	6	0	0	0	0	0	0	200	300	0	0	0	0	0	0	0	200	903	0	0	0	0	0	0	0	603	903	0
1028	7	0	0	0	0	0	0	200	300	0	0	0	0	0	0	0	200	903	0	0	0	0	0	0	0	603	903	0
1028	8	0	0	0	0	0	0	200	300	0	0	0	0	0	0	0	200	903	0	0	0	0	0	0	0	603	903	0
1028	9	0	0	0	0	0	0	200	300	0	0	0	0	0	0	0	200	903	0	0	0	0	0	0	0	603	903	0
1029	0	0	0	0	0	0	0	200	300	0	0	0	0	0	0	0	200	903	0	0	0	0	0	0	0	603	903	0
1029	1	0	0	0	0	0	0	200	300	0	0	0	0	0	0	0	200	903	0	0	0	0	0	0	0	603	903	0
1029	2	0	0	0	0	0	0	200	300	0	0	0	0	0	0	0	200	903	0	0	0	0	0	0	0	603	903	0
1029	3	0	0	0	0	0	0	200	300	0	0	0	0	0	0	0	200	903	0	0	0	0	0	0	0	603	903	0
1029	4	0	0	0	0	0	0	200	300	0	0	0	0	0	0	0	200	903	0	0	0	0	0	0	0	603	903	0
1029	5	0	0	0	0	0	0	200	300	0	0	0	0	0	0	0	200	903	0	0	0	0	0	0	0	603	903	0
1029	6	0	0	0	0	0	0	200	300	0	0	0	0	0	0	0	200	903	0	0	0	0	0	0	0	603	903	0
1029	7	0	0	0	0	0	0	200	300	0	0	0	0	0	0	0	200	903	0	0	0	0	0	0	0	603	903	0
1029	8	0	0	0	0	0	0	200	300	0	0	0	0	0	0	0	200	903	0	0	0	0	0	0	0	603	903	0
1029	9	0	0	0	0	0	0	200	300	0	0	0	0	0	0	0	200	903	0	0	0	0	0	0	0	603	903	0
1030	0	0	0	0	0	0	0	200	300	0	0	0	0	0	0	0	200	903	0	0	0	0	0	0	0	603	903	0
1030	1	0	0	0	0	0	0	200	300	0	0	0	0	0	0	0	200	903	0	0	0	0	0	0	0	603	903	0
1030	2	0	0	0	0	0	0	200	300	0	0	0	0	0	0	0	200	903	0	0	0	0	0	0	0	603	903	0
1030	3	0	0	0	0	0	0	200	300	0	0	0	0	0	0	0	200	903	0	0	0	0	0	0	0	603	903	0
1030	4	0	0	0	0	0	0	200	300	0	0	0	0	0	0	0	200	903	0	0	0	0	0	0	0	603	903	0
1030	5	0	0	0	0	0	0	200	300	0	0	0	0	0	0	0	200	903	0	0	0	0	0	0	0	603	903	0
1030	6	0	0	0	0	0	0	200	300	0	0	0	0	0	0	0	200	903	0	0	0	0	0	0	0	603	903	0
1030	7	0	0	0	0	0	0	200	300	0	0	0	0	0	0	0	200	903	0	0	0	0	0	0	0	603	903	0
1030	8	0	0	0	0	0	0	200	300	0	0	0	0	0	0	0	200	903	0	0	0	0	0	0	0	603	903	0
1030	9	0	0	0	0	0	0	200	300	0	0	0	0	0	0	0	200	903	0	0	0	0	0	0	0	603	903	0
1031	0	0	0	0	0	0	0	200	300	0	0	0	0	0	0	0	200	903	0	0	0	0	0	0	0	603	903	0
1031	1	0	0	0	0	0	0	200	300	0	0	0	0	0	0	0	200	903	0	0	0	0	0	0	0	603	903	0
1031	2	0	0	0	0	0	0	200	300	0	0	0	0	0	0	0	200	903	0	0	0	0	0	0	0	603	903	0
1031	3	0	0	0	0	0	0	200	300	0	0	0	0	0	0	0	200	903	0	0	0	0	0	0	0	603	903	0
1031	4	0	0	0	0	0	0	200	300	0	0	0	0	0	0	0	200	903	0	0	0	0	0	0	0	603	903	0
1031	5	0	0	0	0	0	0	200	300	0	0	0	0	0	0	0	200	903	0	0	0	0	0	0	0	603	903	0
1031	6	0	0	0	0	0	0	200	300	0	0	0	0	0	0	0	200	903	0	0	0	0	0	0	0	603	903	0
1031	7	0	0	0	0	0	0	200	300	0	0	0	0	0	0	0	200	903	0	0	0	0	0	0	0	603	903	0
1031	8	0	0	0	0	0	0	200	300	0	0	0	0	0	0	0	200	903	0	0	0	0	0	0	0	603	903	0
1031	9	0	0	0	0	0	0	200	300	0	0	0	0	0	0	0	200	903	0	0	0	0	0	0	0	603	903	0
1032	0	0	0	0	0	0	0	200	300	0	0	0	0	0	0	0	200	903	0	0	0	0	0	0	0	603	903	0
1032	1	0	0	0	0	0	0	200	300	0	0	0	0	0	0	0	200	903	0	0	0	0	0	0	0	603	903	0
1032	2	0	0	0	0	0	0	200	300	0	0	0	0	0	0	0	200	903	0	0	0	0	0	0	0	603	903	0
1032	3	0	0	0	0	0	0	200	300	0	0	0	0	0	0	0	200	903	0	0	0	0	0	0	0	603	903	0
1032	4	0	0	0	0	0	0	200	300	0	0	0	0	0	0	0	200	903	0	0	0	0	0	0	0	603	903	0
1032	5	0	0	0	0	0	0	200	300	0	0	0	0	0	0	0	200	903	0	0	0	0	0	0	0	603	903	0
1032	6	0	0	0	0	0	0	200	300	0	0	0	0	0	0	0	200	903	0	0	0	0	0	0	0	603	903	0
1032	7	0	0	0	0	0	0	200	300	0	0	0	0	0	0	0	200	903	0	0	0	0	0	0	0	603	903	0
1032	8	0	0	0	0	0	0	200	300	0	0	0	0	0	0	0	200	903	0	0	0	0	0	0	0	603	903	0
1032	9	0	0	0	0	0	0	200	300	0	0	0	0	0	0	0	200	903	0	0	0	0	0	0	0	603	903	0
1033	0	0	0	0	0	0	0	200	300	0	0	0	0	0	0	0	200	903	0	0	0	0	0	0	0	603	903	0
1033	1	0	0	0	0	0	0	200	300	0	0	0	0	0	0	0	200	903	0	0	0	0	0	0	0	603	903	0
1033	2	0	0	0	0	0	0	200	300	0	0	0	0	0	0	0	200	903	0	0	0	0	0	0	0	603	903	0
1033	3	0	0	0	0	0	0	200	300	0	0	0	0	0	0	0	200	903	0	0	0	0	0	0	0	603	903	0
1033	4	0	0	0	0	0	0	200	300	0	0	0	0	0	0	0	200	903	0	0	0	0	0	0	0	603	903	0
1033	5	0	0	0	0	0	0	200	300	0	0	0	0	0	0	0	200	903	0	0	0	0	0	0	0	603	903	0
1033	6	0	0	0	0	0	0	200	300	0	0	0	0	0	0	0	200	903	0	0	0	0	0	0	0	603	903	0
1033	7	0	0	0	0	0	0	200	300	0	0	0	0	0	0	0	200	903	0	0	0	0	0	0	0	603	903	0
1033	8	0	0	0	0	0	0	200	300	0	0	0	0	0	0	0	200	903	0	0	0	0	0	0	0	603	903	0
1033	9	0	0	0	0	0	0	200	300	0	0	0	0	0	0	0	200	903	0	0	0	0	0	0	0	603	903	0
1034	0	0	0	0	0	0	0	200	300	0	0	0	0	0	0	0	200	903	0	0	0	0	0	0	0	603	903	0
1034	1	0	0	0	0	0	0	200	300	0	0	0	0	0	0	0	200	903	0	0	0	0	0	0	0	603	903	0
1034	2	0	0	0	0	0	0	200	300	0	0	0	0	0	0	0	200	903	0	0	0	0	0	0	0	603	903	0
1034	3	0	0	0	0	0	0	200	300	0	0	0	0	0	0	0	200	903	0	0	0	0	0	0	0	603	903	0
1034	4	0	0	0	0	0	0	200	300	0	0	0	0	0	0	0	200	903	0	0	0	0	0	0	0	603	903	0
1034	5	0	0	0	0	0	0	200	300	0	0	0	0	0	0	0	200	903	0	0	0	0	0	0	0	603	903	0
1034	6	0	0	0	0	0	0	200	300	0	0	0	0	0	0	0	200	903	0	0	0	0	0	0	0	603	903	0
1034	7	0	0	0	0	0	0	200	300	0	0	0	0	0	0	0	200	903	0	0	0	0	0	0	0	603	903	0
1034	8	0	0	0	0	0	0	200	300	0	0	0	0	0	0	0	200	903	0	0	0	0	0	0	0	603	903	0
1034	9	0	0	0	0	0	0	200	300	0	0	0	0	0	0	0	200	903	0	0	0	0	0	0	0	603	903	0
1035	0	0	0	0	0	0	0	200	300	0	0	0	0	0	0	0	200	903	0	0	0	0	0	0	0	603	903	0
1035	1	0	0	0	0	0	0	200	300	0	0	0	0	0	0	0	200	903	0	0	0	0	0	0	0	603	903	0
1035	2	0	0	0	0	0	0	200	300	0	0	0	0	0	0	0	200	903	0	0	0	0	0	0	0	603	903	0
1035	3	0	0	0	0	0	0	200	300	0	0	0	0	0	0	0	200	903	0	0	0	0	0	0	0	603	903	0
1035	4	0	0	0	0	0	0	200	300	0	0	0	0	0	0	0	200	903	0	0	0	0	0	0	0	603	903	0
1035	5	0	0	0	0	0	0	200	300	0	0	0	0	0	0	0	200	903	0	0	0	0	0	0	0	603	903	0
[truncated: 3,464 more rows]
