# Supplementary material for: The Effects of an Extemporaneous Speech Dual-task on Older Adult Gait Control
Source: Research Square preprint supplement (doi:10.21203/rs.3.rs-7674245/v1), 2025-11-18
Supplement: Supplementary file 57 [file DT4Walk5.xlsx]

## Sheet: Sheet1
Trajectories
		04:LFHD			04:RFHD			04:LBHD			04:RBHD			04:C7			04:T10			04:CLAV			04:STRN			04:RBAK			04:LSHO			04:LUPA			04:LELB			04:LFRM			04:LWRA			04:LWRB			04:LFIN
Frame	Sub Frame	X	Y	Z	X	Y	Z	X	Y	Z	X	Y	Z	X	Y	Z	X	Y	Z	X	Y	Z	X	Y	Z	X	Y	Z	X	Y	Z	X	Y	Z	X	Y	Z	X	Y	Z	X	Y	Z	X	Y	Z	X	Y	Z
		mm	mm	mm	mm	mm	mm	mm	mm	mm	mm	mm	mm	mm	mm	mm	mm	mm	mm	mm	mm	mm	mm	mm	mm	mm	mm	mm	mm	mm	mm	mm	mm	mm	mm	mm	mm	mm	mm	mm	mm	mm	mm	mm	mm	mm	mm	mm	mm
315	0	113.72	2726.75	1582.26	-3.64678	2735.84	1580.77	128.645	2890.65	1527.46	19.4523	2893.25	1522.21	81.2761	2873.68	1438.44	107.575	2947.31	1156.49	76.0319	2747.08	1348.79	80.777	2676.21	1157.03	25.0612	2960.23	1225.5	258.922	2781.93	1377.16	346.228	2794.75	1138.62	354.378	2801.2	1062.33	338.178	2700.28	914.5	281.43	2688.33	841.785	351.745	2696.44	825.291	304.826	2650.64	773.724
316	0	111.534	2718.13	1584.07	-5.96811	2727.62	1581.87	127.259	2881.46	1528.19	18.096	2884.46	1522.34	79.7022	2864.74	1439.57	105.77	2937.97	1157.01	75.3788	2738.05	1350.11	80.7462	2667.17	1158.43	23.0559	2950.41	1226.24	258.097	2774.15	1378.66	345.149	2787.06	1140.04	353.459	2794.75	1063.97	338.306	2695.53	914.968	281.673	2684.48	841.882	352.75	2692.77	825.76	305.573	2648.96	772.257
317	0	109.531	2709.47	1585.81	-8.133	2719.01	1582.94	126.148	2872.56	1529.4	17.1035	2875.84	1522.47	78.3291	2855.9	1440.4	104.054	2929.44	1158.18	75.0464	2729.33	1351.39	80.9091	2657.94	1159.81	21.197	2940.86	1226.87	257.479	2766.59	1379.91	344.274	2779.77	1141.2	352.684	2788.19	1065.21	338.797	2690.69	915.168	282.514	2680.7	841.557	354.244	2688.79	826.161	306.818	2647.09	770.657
318	0	107.869	2700.75	1587.32	-10.114	2710.72	1583.76	125.201	2863.52	1529.96	16.3739	2867.37	1522.59	74.8895	2844.75	1440.27	103.905	2924.34	1159.71	74.8443	2720.74	1352.37	81.23	2649.24	1160.84	19.3928	2931.79	1227.58	256.905	2759.34	1380.82	343.311	2772.82	1141.92	351.922	2781.93	1066.23	339.668	2685.82	915.289	283.778	2676.79	841.04	355.412	2685.08	826.387	308.409	2645.31	769.064
319	0	105.977	2692.11	1588.85	-11.4761	2702.76	1584.47	124.029	2854.56	1530.75	15.5081	2858.7	1522.83	75.4853	2838.48	1442.09	100.419	2913.81	1160.2	74.6005	2712.13	1353.4	81.6903	2640.64	1161.81	17.4257	2922.67	1228.53	256.038	2752.47	1381.78	342.5	2766.1	1142.76	351.024	2775.47	1067.21	340.542	2680.88	915.406	285.403	2672.57	840.475	357.035	2680.93	826.68	310.5	2642.91	767.803
320	0	104.565	2683.48	1590.39	-13.0657	2694.25	1585.54	123.26	2845.75	1531.64	14.6455	2850.08	1523.2	74.3042	2829.95	1443.06	98.3079	2905.24	1160.88	74.5901	2703.69	1354.57	82.6455	2631.91	1162.78	15.3964	2913.36	1229.17	255.618	2745.56	1382.7	341.823	2759.84	1143.43	350.196	2769.36	1068	341.552	2675.81	915.532	287.391	2668.2	839.862	359.221	2676.7	827.231	312.832	2640.43	766.676
321	0	103.407	2674.92	1591.71	-14.1931	2685.95	1586.39	122.819	2837.1	1532.64	13.9553	2841.47	1523.61	73.0988	2821.5	1443.74	96.3574	2896.99	1161.56	74.6504	2695.48	1355.4	83.5554	2623.39	1163.73	13.4348	2904.51	1230.04	255.542	2738.71	1383.57	341.371	2753.93	1144.1	349.476	2763.28	1068.74	342.62	2671.1	915.557	289.306	2664.03	839.464	361.276	2672.79	827.587	315.643	2637.83	765.699
322	0	102.473	2666.47	1592.91	-15.2147	2677.31	1587.28	122.1	2828.28	1533.22	13.5314	2832.87	1524.17	71.9745	2813.05	1444.66	94.6751	2889.32	1162.61	74.8576	2687.12	1356.16	84.4427	2614.97	1164.21	11.2709	2895.58	1230.85	255.254	2732.27	1384.36	341.013	2748.32	1144.57	348.76	2757.49	1069.25	344.217	2666.19	915.765	291.521	2659.45	838.924	363.581	2668.81	827.973	318.77	2634.95	764.779
323	0	101.751	2657.9	1594.01	-15.875	2668.99	1588.03	121.49	2819.59	1534.2	14.6856	2826.37	1524.73	70.9072	2804.82	1445.63	92.5656	2880.78	1163.24	75.0253	2678.99	1357.06	85.3764	2606.73	1164.94	9.15902	2887	1231.82	254.981	2725.75	1385.11	340.589	2743.03	1145.23	347.899	2751.65	1069.85	345.851	2661.31	915.913	293.909	2654.86	838.524	365.953	2664.84	828.425	322.259	2631.52	764.268
324	0	101.304	2649.49	1595.21	-16.3131	2660.4	1589.09	121.15	2811.16	1535.39	12.6584	2815.99	1525.76	69.8671	2796.61	1446.48	90.5497	2872.59	1164.15	75.1512	2671.01	1358.12	86.452	2598.54	1165.96	6.91044	2878.31	1232.94	254.627	2719.55	1386	340.276	2737.95	1145.88	347.186	2746.1	1070.67	347.521	2656.56	916.284	296.518	2650.08	838.383	368.334	2661.08	829.186	325.775	2627.87	764.121
325	0	101.105	2641.08	1596.12	-16.581	2651.76	1589.8	120.828	2802.88	1536.34	12.5665	2807.87	1526.59	68.8895	2788.54	1447.28	88.8222	2864.61	1164.81	75.561	2663.09	1359.09	87.4608	2590.38	1166.91	4.90829	2869.64	1233.59	254.47	2713.46	1386.65	339.972	2733.11	1146.49	346.502	2740.72	1071.29	349.49	2652	916.623	299.07	2644.89	838.369	370.964	2657.41	829.818	329.626	2623.92	763.986
326	0	101.214	2632.8	1596.87	-16.4698	2643.22	1590.66	120.588	2794.69	1537.56	12.4679	2799.6	1527.66	67.9971	2780.64	1448.03	87.1252	2857.43	1165.56	75.9083	2655.3	1359.92	88.5373	2582.4	1167.82	2.7984	2861.19	1234.43	254.136	2707.52	1387.18	339.212	2728.85	1147	345.774	2735.38	1071.64	351.558	2647.44	916.98	302.215	2640.37	838.005	373.651	2653.63	830.445	333.56	2619.72	764.095
327	0	101.437	2624.4	1597.68	-16.0149	2634.74	1591.4	120.276	2786.41	1538.46	12.2524	2790.92	1528.75	65.4012	2770.74	1448.08	85.1282	2848.78	1166.19	76.1716	2647.45	1361.05	89.5598	2574.68	1168.77	0.740465	2852.57	1235.22	253.915	2701.49	1387.99	338.703	2724.21	1147.63	345.088	2730.1	1072.39	353.679	2642.85	917.676	305.137	2635.56	838.023	376.374	2649.91	831.185	337.583	2615.19	764.769
328	0	101.9	2616.09	1598.36	-15.771	2625.98	1592.39	120.321	2778.47	1539.74	12.0321	2782.51	1529.98	66.3949	2765.13	1449.72	85.3928	2844.19	1167.54	76.5461	2639.8	1362.03	90.4853	2567.02	1169.73	-1.31981	2843.86	1236.07	253.804	2695.59	1388.73	338.147	2719.72	1148.23	344.684	2725.02	1073.13	356.013	2638.4	918.431	307.741	2630.01	838.637	379.26	2646.06	832.112	341.817	2610.53	765.481
329	0	102.498	2607.81	1598.89	-15.0756	2617.27	1593.01	120.212	2770.27	1540.71	11.7951	2774.26	1531.56	65.6682	2757.43	1450.38	81.707	2833	1167.41	76.933	2632	1362.93	91.2499	2559.21	1170.81	-3.13689	2835.29	1236.82	253.654	2689.58	1389.37	337.692	2715.23	1148.72	344.297	2719.95	1074.01	358.32	2633.92	919.132	310.764	2624.78	838.941	382.018	2642.26	833.169	345.911	2605.48	766.206
330	0	103.284	2599.56	1599.23	-14.3353	2608.61	1593.68	120.197	2762.45	1541.61	11.7757	2765.85	1532.59	64.8692	2749.58	1451.06	80.5167	2825.66	1167.89	77.1786	2624.31	1363.81	92.1952	2551.47	1171.8	-4.99338	2826.83	1237.42	253.335	2683.75	1389.98	337.186	2710.6	1149.32	343.937	2714.86	1074.54	360.445	2629.39	919.812	313.85	2619.42	839.331	384.5	2638.4	834.012	350.069	2600.35	767.271
331	0	104.131	2591.35	1599.49	-13.4428	2599.7	1594.41	120.203	2754.51	1542.35	11.8635	2757.39	1533.63	63.6829	2741.78	1451.22	78.8779	2817.89	1168.44	77.3877	2616.74	1364.57	93.0853	2543.87	1172.74	-6.6567	2818.36	1238.18	253.307	2677.74	1390.44	336.75	2705.84	1149.68	343.572	2709.87	1075.27	362.757	2624.88	920.679	316.878	2613.78	839.953	387.042	2634.37	835	354.221	2594.9	768.339
332	0	105.277	2583.26	1599.68	-12.3555	2591.03	1595.07	120.437	2746.72	1543.01	11.8496	2748.84	1534.7	63.12	2733.92	1451.61	77.3551	2809.83	1168.72	77.9936	2609.01	1365.15	93.8957	2536.25	1173.53	-8.19316	2809.72	1238.49	253.323	2671.76	1390.76	336.484	2701.1	1150.14	343.48	2704.94	1075.75	365.016	2620.32	921.495	319.894	2608.06	840.577	389.681	2630.31	836.035	358.446	2589.5	769.428
333	0	106.467	2575.07	1599.63	-11.2674	2582.45	1595.69	120.28	2738.78	1543.36	11.9735	2740.51	1535.53	61.1615	2724.49	1451.46	76.3668	2802.79	1169.67	78.4581	2601.37	1365.55	94.6916	2528.69	1174.01	-9.79391	2801.35	1238.78	253.212	2665.65	1390.92	336.183	2696.17	1150.41	343.334	2700.05	1076.13	367.223	2615.6	922.15	322.813	2602.18	840.906	391.704	2626.34	836.616	362.589	2583.81	770.5
334	0	107.803	2566.99	1599.66	-9.98965	2573.54	1595.92	120.484	2731.02	1543.63	11.776	2731.94	1536.35	61.1163	2717.1	1451.99	74.7307	2794.54	1169.73	78.8223	2593.66	1365.98	95.4947	2521.17	1174.16	-11.1803	2792.84	1239.17	253.124	2659.48	1390.98	335.99	2691.17	1150.53	342.77	2694.76	1076.57	369.248	2610.75	922.776	325.777	2596.24	840.968	393.661	2622.17	837.18	366.544	2578.11	771.423
335	0	109.157	2558.89	1599.58	-8.60987	2564.55	1596.38	120.816	2723.39	1544.22	12.0415	2723.53	1537.07	60.6263	2709.12	1452.13	73.332	2786.51	1169.91	79.2659	2585.83	1366.34	96.3837	2513.23	1174.36	-12.5481	2784.36	1239.47	253.075	2653.37	1390.95	335.777	2686.15	1150.74	343.111	2689.86	1076.75	371.119	2606	923.383	328.245	2590.04	841.694	395.679	2617.77	837.831	370.168	2572.27	772.438
336	0	110.873	2550.79	1599.38	-7.16849	2555.72	1596.67	120.789	2715.56	1544.12	12.0034	2714.92	1537.61	60.1548	2701.09	1452.19	71.8053	2778.53	1169.92	79.8051	2578.1	1366.37	97.2791	2505.81	1174.38	-14.0064	2775.71	1239.6	253.121	2646.95	1390.75	335.804	2680.92	1150.73	342.928	2684.74	1076.65	372.987	2601.02	923.681	330.945	2584.16	841.872	397.586	2613.24	838.2	373.815	2566.53	773.273
337	0	112.339	2542.81	1599	-5.24	2547.06	1596.52	120.794	2707.66	1543.99	11.9896	2706.14	1537.89	59.847	2693.02	1452.07	70.5178	2770.54	1169.79	80.4597	2570.19	1366.24	98.1117	2497.95	1174.17	-15.2583	2767.17	1239.55	253.164	2640.61	1390.45	335.722	2675.75	1150.66	343.464	2679.69	1076.72	374.805	2596.01	923.843	333.294	2578	842.12	399.338	2608.6	838.301	377.144	2560.62	773.89
338	0	113.845	2534.77	1598.84	-3.97865	2538.02	1596.98	120.195	2699.59	1543.94	12.2055	2697.57	1538.26	59.2952	2684.63	1452.13	64.5778	2763.47	1169.96	80.9536	2562.27	1366.16	98.9965	2490.1	1174.02	-20.621	2759.36	1240.28	253.244	2633.9	1390.22	335.832	2670.47	1150.47	343.623	2674.3	1076.7	376.385	2590.91	924.021	335.607	2572	842.366	400.869	2603.75	838.543	380.179	2554.61	774.492
339	0	115.463	2526.75	1598.52	-2.53857	2529.05	1596.94	120.847	2691.75	1543.71	12.3473	2688.85	1538.32	59.1735	2676.36	1452.01	68.5171	2754.94	1170	81.722	2554.34	1365.87	99.9617	2482.3	1173.69	-17.2958	2750.28	1239.76	253.53	2627.27	1389.81	336.02	2664.99	1150.38	343.921	2668.92	1076.47	377.95	2585.74	924.053	337.802	2565.84	842.574	402.379	2598.85	838.601	382.972	2548.7	775.042
340	0	116.933	2518.73	1597.85	-0.744304	2520.16	1596.6	121.105	2683.8	1543.19	12.5847	2680.2	1538.16	59.2463	2668.11	1451.59	62.5673	2748.09	1169.8	82.3172	2546.26	1365.24	101	2474.52	1173.08	-22.5142	2743.05	1240.37	253.798	2620.41	1389.16	336.166	2659.56	1149.97	343.838	2663.4	1075.89	379.442	2580.5	923.698	339.737	2559.69	842.435	403.652	2593.99	838.144	385.619	2542.67	775.239
341	0	118.435	2510.66	1597.12	1.25206	2512.34	1596.1	120.988	2675.61	1542.52	12.795	2671.62	1537.94	59.3266	2659.75	1451.09	61.7379	2740.23	1169.49	82.9324	2538.23	1364.6	102.035	2466.69	1172.14	-23.257	2734.77	1240.23	254.099	2613.44	1388.37	336.275	2653.95	1149.48	344.406	2657.96	1075.45	380.74	2575.09	923.173	341.473	2553.45	841.989	404.748	2588.94	837.559	388.027	2536.58	775.454
342	0	120.07	2502.27	1596.45	2.63747	2503.51	1595.68	121.843	2667.61	1542.05	13.472	2662.83	1537.56	59.304	2651.24	1450.68	61.2032	2732.35	1169.24	83.9	2530.08	1363.97	103.106	2458.77	1171.39	-23.8866	2726.32	1239.87	254.411	2606.33	1387.71	336.397	2648.21	1148.93	344.619	2652.44	1074.89	382.019	2569.64	922.686	343.052	2547.23	841.574	405.59	2583.88	836.993	390.046	2530.57	775.514
343	0	121.443	2494.12	1595.63	4.07378	2494.6	1595.19	122.425	2659.34	1541.34	14.0142	2653.97	1537.06	59.6229	2642.74	1450.01	61.0713	2724.11	1168.71	84.7232	2521.75	1363.31	104.15	2450.94	1170.62	-24.044	2717.87	1239.38	254.712	2598.95	1386.94	336.701	2642.34	1148.34	344.769	2646.48	1074.17	383.255	2564.24	922.094	344.457	2541.04	841.141	406.325	2578.84	836.227	391.871	2524.58	775.347
344	0	122.74	2485.78	1594.53	5.61264	2485.85	1594.41	122.741	2650.77	1540.27	14.7334	2645.34	1536.43	60.1793	2634.33	1449.25	61.2281	2716.34	1168.07	85.8055	2513.87	1362.23	105.395	2442.9	1169.46	-23.9144	2709.63	1238.7	255.541	2591.29	1385.9	337.016	2636.3	1147.5	345.088	2640.72	1073.3	384.168	2559.23	921.02	345.78	2534.97	840.314	407.007	2573.57	835.162	393.167	2518.88	774.52
345	0	123.88	2477.57	1593.42	6.93205	2476.92	1593.53	123.637	2642.2	1539.31	15.6682	2636.7	1535.68	60.623	2625.62	1448.43	61.7014	2708.07	1167.51	86.7236	2505.26	1361.33	106.405	2434.81	1168.34	-23.527	2701.18	1238.15	256.16	2583.48	1384.91	337.285	2630.15	1146.62	345.482	2634.5	1072.55	385.089	2553.61	920.092	346.845	2528.69	839.376	407.448	2568.2	834.047	394.5	2512.71	774.004
346	0	125.153	2468.92	1592.39	8.05533	2468.01	1592.73	124.616	2633.64	1538.36	16.6109	2627.9	1534.8	61.2307	2616.9	1447.58	61.6181	2700.12	1166.92	88.0177	2497.05	1360.18	107.521	2426.62	1167.42	-23.5639	2692.62	1237.63	256.909	2575.53	1383.95	337.625	2623.87	1145.8	345.543	2628.42	1071.68	385.803	2547.95	919.054	347.695	2522.34	838.483	407.786	2562.79	832.913	395.511	2506.8	773.18
347	0	126.7	2460.1	1591.22	9.41247	2459.2	1591.65	125.635	2625.07	1537.23	17.6562	2619.06	1533.78	62.1624	2608.21	1446.52	61.5985	2691.39	1165.89	88.9732	2488.38	1358.93	108.72	2418.53	1165.98	-23.3605	2683.76	1236.97	257.898	2567.42	1382.74	338.043	2617.36	1144.77	345.927	2622.02	1070.7	386.507	2542.13	917.717	348.474	2515.74	837.549	407.913	2557.23	831.482	396.333	2500.84	772.04
348	0	128.066	2451.38	1589.82	10.46	2449.72	1590.52	127.065	2616.46	1536.03	18.8151	2610.26	1532.73	63.0891	2599.23	1445.21	62.4654	2683.12	1164.87	90.0905	2479.87	1357.41	109.747	2410.28	1164.27	-22.5002	2675.21	1236.01	258.817	2559.02	1381.24	338.453	2610.56	1143.4	346.173	2615.48	1069.13	387.061	2536.16	916.042	349.139	2509.11	836.234	408.035	2551.65	829.664	396.848	2494.95	770.437
349	0	129.474	2442.47	1588.38	12.0829	2441.09	1589.2	128.096	2607.47	1534.58	20.034	2601.54	1531.55	64.1619	2590.34	1443.98	63.83	2674.69	1163.78	91.2882	2471.17	1356.06	110.706	2401.92	1162.7	-21.2994	2666.83	1234.8	259.592	2550.47	1379.69	338.935	2603.73	1142.09	346.495	2608.89	1067.8	387.633	2530.02	914.413	349.705	2502.78	834.456	408.007	2545.83	827.781	397.155	2488.92	768.647
350	0	131.053	2433.79	1586.89	13.5599	2432.22	1587.93	129.95	2598.77	1533.35	21.6331	2592.7	1530.24	65.4055	2581.42	1442.73	66.0872	2665.79	1162.6	92.5301	2462.31	1354.7	111.609	2393.3	1161.24	-19.1931	2657.99	1233.56	260.82	2541.7	1378.19	339.349	2596.64	1140.75	347.048	2602.11	1066.4	388.076	2523.78	912.725	350.071	2495.72	833.327	407.98	2539.97	825.903	397.274	2483.01	766.951
351	0	132.563	2425.05	1585.22	15.0124	2423.02	1586.54	131.023	2589.96	1531.66	22.9555	2583.79	1528.8	66.7356	2572.54	1441.43	67.2787	2656.76	1161.18	93.7008	2453.33	1353.17	112.47	2384.7	1159.34	-17.9789	2649.1	1232.25	262.302	2532.75	1376.47	340.19	2589.16	1139.25	347.467	2595.02	1064.67	388.379	2517.47	910.597	350.524	2488.67	831.628	407.783	2533.97	823.743	397.168	2476.95	764.721
352	0	134.2	2416.04	1583.43	16.7045	2414.14	1584.88	132.702	2580.96	1529.93	24.5138	2574.74	1527.14	68.3827	2563.42	1439.74	69.1349	2648.17	1159.73	94.9532	2444.28	1351.24	113.43	2376.24	1157.3	-16.1419	2640.74	1230.92	263.637	2523.53	1374.49	340.956	2581.51	1137.44	348.09	2587.81	1062.81	388.654	2510.97	908.171	350.039	2483.19	828.621	406.917	2528.02	821.21	396.974	2470.86	762.239
353	0	135.858	2407.03	1581.8	18.4939	2405.11	1583.28	134.228	2571.86	1528.2	26.2097	2565.68	1525.54	70.0086	2554.4	1438.24	70.5292	2639.15	1158.22	96.299	2435.24	1349.55	114.195	2366.94	1155.58	-14.6821	2631.88	1229.59	264.824	2514.34	1372.65	341.832	2573.53	1135.67	348.754	2580.4	1061.05	388.839	2504.32	905.838	350.084	2476.37	826.65	406.776	2521.66	818.767	396.434	2464.71	759.647
354	0	137.721	2398.07	1580.2	20.2194	2395.9	1581.9	135.872	2563.17	1526.3	27.8698	2556.56	1523.93	71.663	2545.17	1436.63	72.2111	2629.86	1156.62	97.7153	2426.1	1347.96	115.091	2358.34	1153.6	-13.0045	2622.8	1228.09	266.709	2504.81	1370.92	342.764	2565.35	1133.96	349.447	2572.68	1059.22	389.061	2497.63	903.506	349.903	2470.36	824.023	406.452	2515.29	816.257	395.829	2458.52	757.126
355	0	139.745	2388.8	1578.47	22.0387	2386.87	1580.29	137.916	2553.77	1524.73	29.7571	2547.53	1522.28	73.4802	2535.87	1435.05	74.3811	2621.23	1155.3	99.2699	2416.88	1346.13	115.951	2349.03	1151.66	-10.9442	2614.41	1226.76	268.381	2495.15	1368.94	344.173	2556.72	1131.94	350.283	2564.68	1057.28	389.217	2490.6	900.855	349.698	2463.1	821.902	405.983	2508.79	813.675	395.125	2452.02	754.259
356	0	141.65	2379.74	1576.81	24.2563	2377.75	1578.61	139.586	2544.43	1523	31.8539	2538.35	1520.71	75.4858	2526.76	1433.69	75.9925	2612.36	1153.93	100.77	2407.67	1344.38	116.802	2339.42	1149.8	-9.26186	2605.84	1225.56	270.195	2485.31	1366.87	345.347	2547.81	1130.01	351.136	2556.49	1055.35	389.333	2483.38	898.234	349.281	2456.49	819.065	405.566	2501.98	810.909	394.392	2445.31	751.378
357	0	143.677	2370.28	1575.29	25.9617	2368.49	1577.34	142.19	2535.37	1521.54	33.8506	2529.05	1519.2	77.6767	2517.51	1432.25	77.8156	2602.93	1152.38	102.305	2398.3	1342.75	117.724	2330.5	1147.95	-7.31976	2596.8	1224.24	271.994	2475.48	1364.98	346.703	2538.5	1128.14	352.065	2547.99	1053.36	389.367	2475.94	895.499	348.822	2449.76	816.521	405.185	2495.12	808.274	393.336	2439.19	748.378
358	0	145.863	2360.98	1573.74	28.2372	2359.33	1575.8	144.005	2525.66	1519.88	36.2171	2519.86	1517.8	79.9945	2508.22	1430.76	79.9496	2593.45	1150.81	103.992	2388.87	1341.19	118.436	2320.97	1146.26	-5.11339	2587.8	1222.87	273.826	2465.64	1363.15	348.227	2528.98	1126.29	353.119	2539.15	1051.38	389.467	2468.34	892.963	348.332	2443.18	813.641	404.944	2488.07	805.656	392.286	2432.66	745.333
359	0	148.039	2351.55	1572.14	30.2587	2349.97	1574.51	146.731	2516.47	1518.4	38.6427	2510.7	1516.39	82.2988	2498.93	1429.4	82.235	2584.17	1149.42	105.886	2379.55	1339.64	119.298	2311.43	1144.59	-2.80395	2578.8	1221.6	275.905	2455.68	1361.27	349.563	2519.1	1124.24	354.07	2530.15	1049.4	389.512	2460.51	890.11	347.882	2435.43	811.046	404.596	2480.78	803.005	391.226	2425.99	742.162
360	0	150.288	2342.08	1570.83	32.7934	2341.01	1573.15	149.287	2507.07	1516.81	41.4741	2501.55	1515.14	84.7748	2489.52	1428.13	84.2953	2574.5	1148.08	107.79	2369.96	1338.26	120.395	2301.97	1143.12	-0.588598	2569.49	1220.56	278.221	2445.59	1359.49	351.105	2508.99	1122.16	355.018	2520.85	1047.47	389.611	2452.4	887.563	347.481	2428.24	808.438	403.99	2473.26	800.302	390.235	2419.32	738.986
361	0	152.853	2332.4	1569.62	35.1001	2331.65	1572.22	152.096	2497.61	1515.65	44.0855	2492.19	1514.02	87.5775	2480.33	1427.01	86.727	2564.68	1146.78	109.873	2360.58	1337.19	121.602	2292.51	1142.07	2.02954	2560.13	1219.6	280.604	2435.58	1357.89	352.787	2498.7	1120.25	355.974	2511.31	1045.57	389.645	2443.97	885.052	347.085	2421.16	805.865	404.211	2465.43	797.996	389.22	2412.25	736.09
362	0	155.245	2322.93	1568.56	37.4103	2322.32	1571.33	155	2487.74	1514.71	47.1092	2483	1513.11	90.5013	2470.96	1425.93	89.2625	2554.66	1145.5	112.046	2350.9	1336.32	122.923	2282.81	1141.18	4.67269	2550.82	1218.56	283.216	2425.6	1356.29	354.44	2488.27	1118.23	357.157	2501.57	1043.67	389.848	2435.35	882.675	346.765	2413.55	803.627	404.397	2457.44	795.742	388.233	2405.2	733.163
363	0	157.883	2313.13	1567.61	40.1327	2313.2	1570.55	157.956	2478.13	1513.75	49.9647	2473.67	1512.25	93.4023	2461.45	1425.02	91.8353	2544.87	1144.44	114.361	2341.32	1335.35	124.124	2272.8	1140.28	7.33697	2541.46	1217.68	285.516	2415.6	1354.69	356.054	2477.59	1116.15	358.536	2491.64	1041.86	389.976	2426.28	880.164	346.285	2405.69	800.946	404.515	2448.96	793.36	387.223	2397.95	730.227
364	0	160.409	2303.66	1567.46	42.7962	2303.86	1570.4	161.03	2468.43	1513.35	53.1291	2464.23	1511.89	96.6386	2452.04	1424.52	94.0502	2534.6	1143.72	116.749	2331.44	1334.94	125.279	2262.57	1139.77	9.89637	2531.77	1217.49	288.143	2405.4	1353.48	357.687	2466.84	1114.46	359.73	2481.39	1040.37	390.133	2417.06	878.114	345.93	2398.22	798.422	404.72	2440.13	791.457	386.123	2390.48	727.469
365	0	163.23	2293.84	1567.69	45.3942	2294.36	1570.62	164.247	2458.75	1513.12	56.0536	2454.53	1511.8	99.6245	2442.29	1424.49	96.2155	2524.5	1143.51	119.208	2321.67	1334.88	126.836	2252.22	1139.89	12.2342	2522.02	1217.52	291.159	2395.06	1352.64	359.435	2456.1	1113.12	361.111	2470.75	1039.12	390.199	2407.49	876.224	345.595	2390.07	796.594	405.133	2431.1	789.907	384.974	2382.95	725.071
366	0	166.184	2284.29	1567.82	48.3535	2284.75	1571.11	167.376	2448.93	1513.19	59.0396	2445.01	1511.94	102.778	2432.58	1424.42	98.6103	2514.1	1143.34	121.77	2311.74	1335.08	128.355	2241.91	1140.05	14.8789	2512.07	1217.76	293.701	2384.81	1351.83	361.08	2445.28	1111.87	361.82	2459.94	1037.71	390.544	2397.72	874.559	345.323	2381.55	794.819	405.612	2421.78	788.46	384.558	2374.86	723.051
367	0	169.318	2274.59	1568.26	51.7495	2275.53	1571.57	170.442	2438.96	1513.31	62.3655	2435.38	1512.23	105.758	2422.78	1424.84	100.768	2504	1143.68	124.309	2301.81	1335.4	130.026	2231.32	1140.46	17.274	2502.2	1218.46	296.28	2374.53	1351.15	362.673	2434.37	1110.75	363.355	2449.09	1036.6	390.908	2387.72	873.094	344.959	2372.94	792.851	405.88	2412.32	787.146	383.567	2366.8	720.907
368	0	172.418	2264.82	1569.18	54.5799	2265.68	1572.86	173.634	2429.21	1513.76	65.5339	2425.7	1512.97	109.02	2412.96	1425.47	102.679	2493.64	1144.17	126.785	2291.57	1336.06	131.548	2220.76	1141.32	19.5214	2492.42	1219.42	298.837	2364.1	1350.95	364.233	2423.43	1110.11	364.358	2437.94	1035.94	391.212	2377.49	871.958	344.908	2363.89	791.893	406.414	2402.46	786.406	382.94	2358.34	719.448
369	0	175.579	2255.24	1570.18	57.6488	2255.99	1574.34	176.797	2419.37	1514.36	68.7027	2415.93	1513.97	112.024	2403.12	1426.35	104.597	2483.29	1144.99	129.115	2281.62	1337.05	132.858	2210.17	1142.48	21.7894	2482.42	1220.73	301.497	2353.76	1350.92	365.759	2412.45	1109.72	365.114	2426.45	1035.36	391.659	2366.97	871.208	345.094	2354.46	791.415	407.43	2392.23	785.935	382.6	2349.66	718.51
370	0	178.907	2245.39	1571.31	61.0877	2246.51	1576.03	180.094	2409.55	1515.34	71.8287	2406.2	1515.35	114.977	2393.11	1427.64	106.445	2473.13	1146.25	131.477	2271.53	1338.33	134.143	2199.82	1143.66	23.8901	2472.63	1222.34	304.005	2343.34	1351.22	367.18	2401.23	1109.47	366.109	2415.08	1035.15	392.227	2356.2	870.922	345.716	2344.48	791.276	408.066	2381.8	785.7	382.38	2340.58	717.755
371	0	182.214	2235.72	1572.63	64.5056	2236.81	1577.78	183.242	2400.22	1516.27	75.04	2396.49	1517.01	117.6	2383.1	1429.2	108.07	2462.65	1147.71	133.655	2261.38	1339.91	135.475	2189.52	1145.2	25.7934	2462.4	1224.18	306.304	2332.96	1351.88	368.49	2389.84	1109.73	367.35	2403.61	1035.56	392.779	2345.27	871.005	346.549	2334.09	791.655	408.483	2371.02	785.895	382.304	2331.07	717.553
372	0	185.505	2226.02	1574.08	67.7939	2227.1	1580.03	186.453	2390.22	1517.72	78.2452	2386.94	1519.12	120.028	2372.97	1430.93	110	2452.83	1149.57	135.814	2251.53	1341.56	136.645	2179.45	1147.06	27.8345	2452.66	1226.23	308.31	2322.76	1352.86	369.848	2378.31	1110.22	368.456	2392.02	1036.02	393.496	2333.91	871.647	346.641	2323.99	791.856	409.688	2359.86	786.744	382.659	2321.33	717.791
373	0	188.822	2216.34	1575.56	71.2298	2217.68	1582.17	189.476	2380.71	1519.34	81.2088	2377.37	1521.53	122.7	2363.45	1432.76	111.503	2442.38	1151.16	137.665	2241.62	1343.47	137.802	2169.38	1149.23	29.7436	2442.69	1228.35	310.693	2312.43	1354.23	371.175	2366.77	1111.13	369.507	2380.38	1037.01	394.183	2322.46	872.66	347.115	2313.31	792.932	410.985	2348.43	787.944	383.049	2310.96	718.403
374	0	192.031	2206.64	1576.92	74.6659	2208.02	1584.26	192.395	2370.97	1521.15	84.2199	2367.77	1523.96	125.045	2353.76	1434.75	113.224	2432.47	1153.09	139.569	2231.82	1345.35	138.954	2159.45	1151.4	31.6514	2433.05	1230.55	312.647	2302.22	1355.76	372.349	2355.02	1112.12	370.65	2368.66	1038.28	395.089	2310.48	873.852	347.881	2301.65	793.848	412.064	2336.53	789.326	383.576	2300.25	719.27
375	0	195.188	2196.91	1578.34	77.7308	2198.24	1586.56	195.185	2361.51	1523.1	86.9238	2358.3	1526.71	127.15	2344.35	1436.76	114.691	2422.47	1154.98	141.046	2222.09	1347.45	139.855	2149.56	1153.69	33.346	2423.55	1232.76	314.405	2292.03	1357.44	373.637	2343.35	1113.32	371.912	2356.99	1039.76	395.885	2298.39	875.391	347.77	2289.86	794.568	413.309	2324.24	791.046	384.41	2288.96	720.385
376	0	198.315	2187.5	1579.59	80.9456	2188.76	1588.77	198.057	2352.14	1524.98	89.5838	2349	1529.62	129.252	2334.99	1438.62	116.346	2412.34	1156.67	142.492	2212.51	1349.52	140.634	2139.68	1156.06	35.2227	2413.92	1234.76	316.151	2281.92	1359.15	375.083	2331.78	1114.7	373.371	2345.31	1041.2	397.1	2286.11	877.166	349.297	2276.9	796.853	414.597	2311.67	792.806	385.339	2277.26	721.845
377	0	201.506	2177.93	1580.6	84.1567	2179.35	1590.85	200.091	2342.91	1526.51	91.9526	2339.68	1532.15	131.242	2325.93	1440.18	117.937	2402.36	1158.03	143.899	2203.19	1351.43	141.476	2130.04	1158.48	36.9946	2404.51	1236.39	317.77	2271.85	1360.73	376.534	2320.34	1116.06	374.787	2333.66	1042.39	398.359	2273.65	878.797	350.664	2264.84	798.686	415.967	2298.87	794.348	386.678	2265.03	723.273
378	0	204.244	2168.82	1581.53	86.9478	2169.68	1592.85	202.426	2333.76	1527.94	94.262	2330.46	1534.47	132.83	2317.05	1441.74	120.182	2392.7	1159.45	144.901	2193.77	1353.35	142.143	2120.44	1160.57	39.1844	2395.71	1237.86	318.934	2261.75	1362.21	378.057	2309.03	1117.37	376.28	2322	1043.8	399.486	2261.04	880.411	352.12	2252.01	800.569	417.355	2285.8	795.854	387.778	2252.27	724.713
379	0	206.996	2159.53	1582.43	89.8497	2160.3	1594.67	204.219	2324.68	1529.47	96.4557	2321.2	1536.62	134.554	2307.95	1443.22	122.12	2383.11	1160.78	145.85	2184.5	1355.01	142.449	2110.94	1162.53	41.1661	2386.83	1239.28	320.503	2251.57	1363.79	379.561	2297.78	1118.76	377.987	2310.38	1045.12	400.895	2248.24	882.147	353.119	2239.03	802.085	418.973	2272.44	797.554	389.054	2239.06	726.438
380	0	209.524	2150.57	1583.37	92.4329	2150.93	1596.54	206.26	2315.74	1530.55	98.3234	2311.98	1538.58	136.535	2298.93	1444.39	124.202	2373.51	1161.76	146.656	2175.42	1356.45	142.817	2101.64	1164.41	43.3722	2378.15	1240.38	321.797	2241.48	1365.16	381.445	2286.53	1120.18	380.22	2298.84	1046.39	402.543	2235.22	883.924	354.416	2225.71	803.976	420.66	2258.88	799.108	390.395	2225.3	728.167
381	0	211.906	2141.52	1584.14	94.8625	2141.48	1598.15	207.888	2306.56	1531.5	99.9665	2302.63	1540.22	138.044	2289.98	1445.62	126.255	2364.01	1162.73	147.308	2166.3	1357.69	143.016	2092.55	1165.79	45.4427	2369.35	1241.37	322.848	2231.26	1366.54	383.162	2275.27	1121.54	381.799	2287.04	1047.6	404.164	2222.08	885.563	355.907	2212.16	805.683	422.278	2244.93	800.548	392.023	2211.3	729.887
382	0	213.921	2132.58	1584.97	97.1055	2132.41	1599.69	208.949	2297.59	1532.44	101.459	2293.49	1541.79	139.09	2281.18	1446.85	128.182	2354.77	1163.88	147.785	2157.26	1358.79	143.035	2083.49	1166.94	47.6649	2360.99	1242.49	323.782	2220.99	1367.78	384.906	2264.04	1122.8	383.978	2275.5	1048.91	405.665	2208.9	887.176	357.448	2198.43	807.413	423.811	2230.78	802.009	393.418	2196.38	731.791
383	0	215.883	2123.73	1585.82	99.1535	2123.18	1601.19	210.215	2288.66	1533.04	102.82	2284.35	1543.09	140.391	2272.13	1447.95	130.533	2345.79	1164.78	148.252	2148.25	1359.81	143.001	2074.59	1168.01	49.7576	2352.66	1243.47	324.749	2210.74	1368.92	386.79	2252.92	1124.09	386.085	2263.79	1049.99	407.292	2195.47	888.925	358.998	2184.43	809.278	425.596	2216.6	803.485	395.139	2181.31	733.531
384	0	217.693	2114.88	1586.56	100.874	2114.19	1602.46	211.572	2279.69	1533.75	103.976	2275.32	1544.3	141.705	2263.21	1448.88	132.855	2336.84	1165.84	148.754	2139.41	1360.58	143.031	2065.98	1168.79	52.2315	2344.52	1244.17	325.707	2200.46	1370.03	388.744	2241.77	1125.39	388.226	2252.08	1051.06	409.128	2182.31	890.604	360.637	2170.36	811.158	427.301	2202.34	804.912	397.042	2166.13	735.582
385	0	218.949	2106	1587.14	102.378	2105.28	1603.56	212.242	2270.71	1534.36	104.948	2266.2	1545.45	142.853	2254.26	1449.7	135.147	2328.34	1166.78	149.031	2130.59	1361.25	142.956	2057.39	1169.15	54.4786	2336.59	1244.94	326.432	2190.2	1370.81	390.587	2230.51	1126.36	390.517	2240.18	1051.8	410.827	2168.76	892.072	362.296	2155.9	812.859	429.019	2187.76	806.211	398.757	2150.3	737.498
386	0	220.075	2097.15	1587.67	103.48	2096.27	1604.51	213.095	2261.89	1535.05	106.043	2257.36	1546.37	144.048	2245.43	1450.55	137.467	2319.72	1167.81	149.341	2121.96	1361.75	142.824	2048.76	1169.3	56.6855	2327.82	1245.59	327.035	2179.93	1371.57	392.232	2219.19	1127.31	392.511	2228.36	1052.78	412.25	2154.92	893.526	363.827	2141.54	814.487	430.468	2173.1	807.34	400.411	2134.2	739.499
387	0	220.971	2088.32	1588.3	104.338	2087.5	1605.39	214.055	2253.06	1535.66	106.914	2248.61	1547.12	145.03	2236.56	1451.32	139.567	2311.23	1168.54	149.507	2113.26	1362.46	142.693	2040.38	1169.63	58.7797	2320.38	1246.37	327.608	2169.83	1372.41	393.99	2207.93	1128.4	394.14	2216.29	1053.56	413.9	2141.31	895.051	365.53	2127.2	816.323	432.107	2158.52	808.656	401.963	2118.04	741.68
388	0	221.62	2079.45	1588.73	104.932	2078.6	1606.12	214.782	2244.17	1536.25	107.516	2239.8	1547.93	146.259	2227.71	1451.89	141.793	2303.12	1169.06	149.879	2104.65	1362.9	142.568	2031.99	1169.73	60.9825	2312.56	1246.81	328.164	2159.76	1372.84	395.631	2196.57	1128.99	396.552	2204.42	1054.11	415.428	2127.4	896.384	366.882	2112.4	817.811	433.624	2143.59	809.574	403.953	2101.7	743.972
389	0	222.101	2070.61	1589.32	105.409	2069.86	1606.83	214.959	2235.3	1536.75	108.179	2231.19	1548.66	147.069	2219.1	1452.55	143.851	2294.73	1169.81	149.835	2095.74	1363.37	142.505	2023.5	1169.75	63.099	2304.89	1247.45	328.719	2149.75	1373.39	397.351	2185.07	1129.79	398.53	2192.16	1054.65	416.962	2113.59	897.717	368.623	2097.85	819.521	435.123	2128.56	810.556	405.864	2085.24	746.217
390	0	222.224	2061.71	1590.01	105.645	2061.24	1607.4	215.658	2226.57	1537.65	108.525	2222.52	1549.45	147.99	2210.37	1453.43	145.374	2286.08	1170.32	149.9	2087.31	1363.85	142.476	2015.27	1170.02	65.1711	2296.96	1248.14	329.303	2139.86	1374.11	398.968	2173.5	1130.77	400.419	2180.02	1055.58	418.393	2099.51	899.247	370.065	2083.27	821.331	436.177	2113.57	811.816	407.486	2068.82	748.717
391	0	222.289	2052.86	1590.7	105.471	2052.41	1607.98	215.998	2217.79	1538.43	108.663	2213.77	1550.23	148.858	2201.74	1454.15	147.822	2278.42	1171.6	150.105	2078.78	1364.35	142.333	2007.12	1170.44	67.0936	2289.14	1248.93	329.811	2130.05	1375.03	400.409	2161.84	1131.78	402.671	2167.85	1056.61	419.7	2085.49	901.017	371.643	2068.28	823.565	438.146	2098.6	813.673	409.281	2052.22	751.452
392	0	222.187	2043.85	1591.25	105.28	2043.83	1608.26	216.366	2208.9	1539.39	109.013	2205.24	1550.81	149.758	2193.14	1454.88	149.89	2270.31	1172.52	150.284	2070.36	1364.77	142.35	1999.05	1170.65	68.9532	2281.42	1249.61	330.343	2120.41	1375.71	401.828	2150.07	1132.77	404.147	2155.43	1057.54	421.119	2071.22	902.887	372.868	2054.16	824.985	439.411	2083.31	815.195	410.902	2035.58	754.048
393	0	221.857	2034.89	1591.67	104.976	2035.25	1608.37	216.456	2200.08	1540.06	109.148	2196.61	1551.32	150.618	2184.65	1455.44	151.694	2262.13	1173.1	150.57	2062.08	1365.18	142.467	1991.13	1170.98	70.8836	2273.97	1250.21	330.862	2110.8	1376.44	403.09	2138.33	1133.55	406.071	2143.16	1058.3	422.41	2057.34	904.686	374.134	2039.51	826.915	440.64	2068.08	816.745	412.566	2019.23	756.788
394	0	221.487	2026.01	1592.18	104.433	2026.49	1608.5	216.411	2191.29	1541.01	109.058	2188.05	1551.88	151.419	2176.19	1456	153.53	2254	1173.69	150.831	2053.79	1365.63	142.753	1983.35	1171.55	72.7007	2266.4	1250.86	331.432	2101.27	1377.25	404.459	2126.62	1134.6	407.771	2130.86	1059.39	423.43	2043.23	906.535	375.419	2024.73	829.124	442.1	2052.99	818.697	414.174	2002.68	759.808
395	0	221.041	2017.19	1592.61	103.879	2017.91	1608.6	216.405	2182.6	1541.76	109.208	2179.59	1552.39	152.412	2167.79	1456.38	155.216	2245.93	1174.34	150.934	2045.53	1366.02	142.818	1975.56	1172.02	74.4508	2259.04	1251.31	331.845	2091.91	1378.05	405.598	2114.89	1135.7	409.145	2118.37	1060.31	424.484	2029.19	908.53	376.641	2010.5	831.167	443.377	2037.73	820.608	415.667	1986.35	762.662
396	0	220.414	2008.29	1592.84	103.306	2009.32	1608.42	216.743	2174.02	1542.48	109.183	2171.07	1552.72	153.119	2159.45	1456.71	156.819	2237.87	1174.56	151.157	2037.34	1366.18	142.928	1967.71	1172.31	76.0402	2251.25	1251.54	332.123	2082.53	1378.61	406.538	2103.16	1136.34	410.39	2106.11	1060.93	425.381	2014.93	910.461	377.457	1995.22	833.213	444.464	2022.45	822.413	417.068	1970.15	765.628
397	0	219.846	1999.43	1592.94	102.576	2000.65	1608.14	216.708	2165.26	1543.14	109.213	2162.71	1552.93	153.519	2151.26	1456.99	158.377	2229.71	1174.87	151.165	2029.07	1366.51	142.903	1959.6	1172.44	77.5569	2243.62	1251.8	332.347	2073.26	1379.13	407.441	2091.54	1137.04	411.651	2093.94	1061.76	426.118	2000.77	912.272	378.459	1980.49	835.238	445.512	2007.12	824.209	418.206	1953.88	768.423
398	0	219.021	1990.58	1593.06	101.698	1992.06	1607.89	216.638	2156.56	1543.71	109.275	2154.39	1553.13	154.08	2143.05	1457.12	159.73	2221.72	1174.8	151.364	2021.12	1366.7	142.965	1951.83	1172.58	79.0597	2235.74	1251.74	332.551	2064.15	1379.56	408.269	2080.07	1137.74	412.956	2082.11	1062.6	426.794	1986.8	914.16	379.252	1965.74	837.538	446.334	1991.91	826.076	419.358	1938.02	771.195
399	0	218.343	1981.71	1593.12	100.998	1983.61	1607.49	216.448	2147.79	1544.27	109.201	2145.9	1553.3	154.529	2134.8	1457.09	161.016	2213.61	1174.58	151.26	2012.95	1366.73	142.959	1943.98	1172.59	80.4887	2228.23	1251.73	332.812	2055.03	1379.94	408.841	2068.23	1138.07	413.886	2069.88	1062.92	427.473	1972.81	916.065	379.872	1950.98	839.551	446.968	1976.64	827.782	420.428	1922.19	773.928
400	0	217.695	1972.72	1592.93	100.237	1974.98	1607	216.565	2139.08	1544.6	109.082	2137.5	1553.39	154.972	2126.55	1457.13	162.416	2204.9	1174.82	151.414	2004.81	1366.5	143.03	1936.05	1172.37	81.9783	2221.04	1251.84	332.965	2045.88	1380.11	409.758	2056.96	1138.77	414.981	2057.8	1063.61	427.959	1958.83	917.856	380.588	1936.41	841.439	447.887	1961.57	829.663	421.213	1906.4	776.45
401	0	216.914	1963.83	1592.9	99.3915	1966.45	1606.47	216.521	2130.42	1545.09	108.869	2129.08	1553.42	155.213	2118.24	1457.25	163.678	2196.37	1175.1	151.471	1996.7	1366.49	142.98	1928.22	1171.97	83.0444	2212.96	1251.94	333.087	2036.74	1380.66	410.549	2045.7	1139.52	415.872	2045.64	1064.24	428.444	1944.91	919.819	381.07	1921.72	843.569	448.774	1946.27	831.826	421.804	1890.81	779.081
402	0	215.698	1955.04	1592.55	98.4892	1957.97	1605.77	216.431	2121.64	1545.31	108.579	2120.59	1553.34	155.623	2109.93	1457.12	164.555	2188.12	1175.15	151.162	1988.49	1366.21	142.807	1920.24	1171.55	84.0707	2205.01	1251.8	333.276	2027.67	1380.79	411.44	2034.55	1140.11	416.865	2033.76	1064.88	428.808	1931.18	921.552	381.499	1907.3	845.56	449.414	1931.5	833.752	422.382	1875.39	781.646
403	0	215.13	1946.05	1592.03	97.5644	1949.4	1604.94	216.446	2112.86	1545.24	108.396	2112.25	1553.08	155.932	2101.38	1456.74	165.298	2180.42	1175.15	151.168	1980.47	1365.61	142.596	1912.38	1170.94	84.9954	2197.25	1251.53	333.063	2018.72	1380.56	411.977	2023.52	1140.38	417.631	2021.82	1065.11	429.115	1917.52	923.097	381.604	1892.94	847.258	449.656	1916.6	835.232	422.715	1860.14	783.909
404	0	214.28	1937.12	1591.48	96.5133	1940.81	1604.1	216.324	2104	1545.09	108.138	2103.74	1552.61	156	2092.95	1456.38	166.381	2172.76	1174.85	150.752	1972.17	1365.13	142.377	1904.34	1170.05	86.0236	2189.51	1251.19	332.996	2009.59	1380.48	412.551	2012.42	1140.58	418.297	2010.13	1065.36	429.211	1903.98	924.477	381.753	1878.67	848.74	449.889	1901.99	836.702	422.715	1844.74	786.093
405	0	213.277	1928.13	1590.86	95.837	1932.49	1603.25	216.172	2095.12	1544.69	108.09	2095.41	1551.99	156.014	2084.41	1455.82	167.343	2164.74	1174.47	150.662	1963.93	1364.57	142.202	1896.26	1169.31	86.5761	2181.31	1250.7	332.804	2000.65	1380.05	412.945	2001.58	1140.61	419.059	1998.65	1065.59	429.245	1890.66	925.81	381.75	1864.74	850.359	449.952	1887.52	838.006	422.659	1829.72	788.373
406	0	212.542	1919.25	1590.26	94.7777	1923.87	1602.34	215.854	2086.37	1544.1	107.809	2086.84	1551.22	155.915	2075.8	1455.15	168.041	2156.92	1173.96	150.273	1955.55	1363.98	142.174	1888.47	1168.51	87.221	2173.41	1250.03	332.67	1991.69	1379.58	413.393	1991.03	1140.6	419.332	1987.06	1065.36	429.269	1877.72	926.953	381.557	1850.89	851.966	449.912	1873.55	839.243	422.722	1815	790.658
407	0	211.591	1910.37	1589.32	93.9297	1915.4	1601.22	215.739	2077.68	1543.37	107.729	2078.38	1550.08	155.724	2067.22	1454.31	168.656	2149.01	1173.25	150.015	1947.47	1362.78	141.75	1880.21	1167.4	87.721	2165.41	1249.17	332.277	1982.72	1378.8	413.353	1980.84	1140.03	419.791	1975.82	1064.98	429.182	1864.97	927.845	381.397	1837.27	853.324	449.9	1859.54	840.168	422.498	1800.32	792.638
408	0	210.419	1901.35	1588.27	92.9733	1906.9	1599.94	215.36	2068.69	1542.57	107.509	2069.95	1549.06	155.542	2058.55	1453.45	169.265	2141.36	1172.46	149.577	1938.93	1361.77	141.476	1872.14	1166.21	87.8021	2157.06	1248.39	331.753	1973.71	1377.89	413.637	1970.26	1139.69	419.841	1964.48	1064.37	428.834	1852.08	928.532	380.901	1823.83	854.478	449.083	1845.86	840.651	421.958	1785.86	794.444
409	0	209.315	1892.41	1587.3	91.7247	1898.19	1598.86	215.05	2059.67	1541.85	107.256	2061.37	1548.03	155.296	2049.85	1452.63	169.423	2133.41	1171.79	149.045	1930.41	1360.8	140.908	1863.99	1165.04	88.0268	2149.04	1247.68	331.105	1964.81	1376.95	413.636	1960.05	1139.24	419.999	1953.46	1064.01	428.289	1839.63	929.249	380.227	1810.5	855.661	448.76	1832.45	841.567	421.226	1771.49	796.208
410	0	207.902	1883.5	1586.36	90.8014	1889.49	1597.5	214.676	2050.71	1541.11	106.824	2052.65	1547.19	154.835	2040.97	1451.76	169.844	2124.91	1171	148.461	1921.64	1359.83	140.515	1855.67	1163.75	87.8507	2140.46	1246.92	330.839	1955.73	1376.23	413.571	1949.75	1138.74	420.403	1942.78	1063.86	427.828	1827.42	929.81	379.547	1797.43	856.749	447.713	1819.36	841.982	420.654	1757.71	797.867
411	0	206.833	1874.39	1585.03	89.8606	1880.75	1596.02	214.121	2041.7	1540.15	106.145	2043.86	1546.15	154.334	2032.06	1450.88	169.827	2116.92	1170.54	147.887	1913.02	1358.55	140.055	1847.32	1162.39	87.7464	2132.15	1246.21	330.34	1946.59	1375.21	413.288	1939.68	1137.91	420.533	1931.72	1063.35	427.124	1815.24	930.138	378.714	1784.71	857.445	447.19	1806.38	842.845	419.875	1744.13	799.24
412	0	206.293	1865.09	1583.89	88.7877	1871.92	1594.65	213.388	2032.53	1539.24	105.298	2034.91	1545.08	153.681	2023.09	1449.89	169.656	2108.93	1169.97	147.156	1904.21	1357.22	139.496	1838.97	1160.9	87.3338	2123.61	1245.54	329.641	1937.49	1374.24	413.463	1929.46	1137.6	420.243	1920.87	1062.6	426.306	1803.39	930.546	377.628	1772.06	858.147	445.969	1793.44	842.982	418.797	1730.69	800.609
413	0	205.137	1856.01	1582.59	87.6034	1862.98	1593.21	212.95	2023.44	1538.17	104.59	2026.02	1543.83	152.994	2014.07	1448.71	169.213	2100.61	1169.12	146.345	1895.33	1355.93	138.832	1830.65	1159.48	86.7445	2114.91	1244.49	329.03	1928.53	1373.14	412.99	1919.87	1136.76	420.014	1910.2	1061.83	425.34	1791.64	930.577	376.324	1759.65	858.76	444.411	1781.23	842.931	417.814	1717.74	801.865
414	0	203.939	1846.78	1581.1	86.2696	1854	1591.64	212.078	2014.23	1536.89	103.853	2017.22	1542.4	152.259	2005.11	1447.44	168.718	2093.15	1167.96	145.635	1886.49	1354.53	138.146	1822.08	1157.96	86.3274	2106.43	1243.35	328.169	1919.56	1371.67	412.061	1910.28	1135.3	419.733	1899.99	1060.98	424.19	1780.28	930.395	375.008	1747.52	859.145	442.849	1769.21	842.712	416.495	1705.06	802.811
415	0	202.495	1837.56	1579.55	85.1031	1845.2	1589.9	211.269	2005.21	1535.35	103.075	2008.3	1540.51	151.359	1996.04	1446.09	167.94	2084.85	1166.61	144.764	1877.42	1352.77	137.296	1813.45	1156.23	85.523	2097.62	1241.96	327.122	1910.6	1370.08	411.561	1900.63	1134.17	418.809	1889.6	1059.6	423.02	1769.14	930.018	373.604	1735.79	859.263	441.651	1757.1	842.438	414.884	1692.55	803.639
416	0	200.688	1828.47	1578.03	83.6969	1836.23	1588.2	210.139	1996.02	1533.77	102.139	1999.36	1538.93	150.387	1986.98	1444.49	167.148	2076.6	1165.2	143.837	1868.33	1351.21	136.587	1804.84	1154.64	84.5309	2088.58	1240.4	325.797	1901.8	1368.26	410.659	1891.23	1132.75	417.983	1879.64	1058.18	421.611	1758.18	929.491	372.098	1724.31	859.413	439.924	1745.82	841.787	413.288	1680.39	804.277
417	0	199.596	1819.36	1576.62	82.2015	1827.2	1586.68	209.13	1986.81	1532.28	101.073	1990.34	1537.22	149.349	1977.9	1443.02	165.839	2067.75	1163.79	142.872	1859.26	1349.63	135.817	1796.07	1153.02	83.6451	2079.7	1238.91	325.141	1892.93	1366.95	410.003	1881.83	1131.71	417.313	1869.99	1057.08	420.34	1747.67	928.994	370.428	1713.15	859.396	438.487	1734.44	841.437	411.802	1668.61	804.881
418	0	198.097	1810.13	1575.12	80.6797	1818.14	1585	208.005	1977.56	1530.87	100.051	1981.33	1535.48	148.082	1968.79	1441.59	164.781	2059.16	1162.5	141.798	1850.06	1348	135.078	1787.25	1151.44	82.5663	2070.73	1237.54	323.871	1883.6	1365.48	408.9	1872.47	1130.51	416.006	1860.22	1055.64	418.83	1737.16	928.462	368.783	1702.39	859.211	436.454	1723.52	840.746	409.742	1657.11	805.186
419	0	196.365	1800.91	1573.65	78.95	1809.05	1583.34	206.719	1968.22	1529.37	98.6112	1972.33	1533.99	146.777	1959.53	1440.3	163.571	2050.24	1161.18	140.555	1840.82	1346.31	134.173	1778.18	1149.74	81.3554	2061.77	1236.14	322.635	1874.6	1364.03	407.707	1863.23	1129.18	414.929	1850.63	1054.51	417.149	1726.72	927.807	366.965	1691.78	858.87	434.857	1712.42	840.336	407.39	1645.76	805.275
420	0	194.568	1791.64	1572.39	77.2023	1800.1	1581.78	205.319	1959.07	1528.23	97.1162	1963.06	1532.58	145.263	1950.18	1438.86	162.327	2041.18	1159.98	139.268	1831.6	1344.73	133.319	1769.15	1148.06	79.9999	2052.56	1234.87	321.491	1865.69	1362.79	406.259	1854.31	1127.86	413.722	1841.16	1053.46	415.287	1716.75	927.047	364.82	1681.52	858.409	432.41	1702.11	839.428	405.251	1635.09	805.196
421	0	193.065	1782.45	1571.07	75.4724	1791.06	1580.18	203.849	1949.86	1526.89	95.4856	1953.88	1531.13	143.8	1940.86	1437.57	160.824	2031.67	1158.75	137.945	1822.18	1343.2	132.631	1759.85	1146.51	78.6365	2043.32	1233.58	320.26	1856.66	1361.73	404.661	1845.26	1126.51	412.531	1832.03	1052.44	413.494	1707.09	926.347	362.806	1671.69	857.831	430.575	1691.79	839.018	402.834	1624.89	805.042
422	0	190.992	1773.12	1569.7	73.4791	1781.95	1578.64	202.098	1940.46	1525.35	93.7481	1944.74	1529.51	142.105	1931.44	1436.19	159.333	2022.32	1157.68	136.551	1812.79	1341.54	131.849	1750.51	1144.88	77.0719	2033.92	1232.11	318.823	1847.53	1360.44	403.321	1836.34	1125.38	411.317	1823.15	1051.27	411.484	1697.68	925.315	360.489	1662.18	857.154	428.549	1682.12	838.149	400.352	1615.01	804.651
423	0	188.995	1764	1568.66	71.5655	1772.85	1577.31	200.312	1931.23	1524.06	91.9551	1935.54	1527.77	140.258	1922.01	1434.87	157.736	2013.45	1156.34	135.104	1803.32	1340.21	130.855	1741.19	1143.49	75.4355	2024.48	1230.76	317.221	1838.18	1359.28	401.832	1827.56	1124.32	409.58	1814.11	1049.83	409.413	1688.56	924.311	358.424	1653.14	856.445	426.091	1672.84	836.847	397.916	1605.59	804.266
424	0	187.183	1754.75	1567.67	69.546	1763.63	1576.09	198.13	1921.81	1522.6	90.1316	1926.36	1526.11	138.41	1912.51	1433.53	156.322	2004.13	1154.84	133.342	1793.8	1338.81	129.713	1731.82	1142.02	73.8393	2015.06	1229.28	315.553	1828.94	1358.15	400.178	1818.9	1123.18	407.947	1805.54	1048.55	407.392	1679.85	923.235	355.99	1644.26	855.676	423.757	1663.75	835.787	395.161	1596.42	803.569
425	0	184.851	1745.52	1566.52	67.2745	1754.36	1574.85	196.113	1912.48	1521.14	87.9807	1917.01	1524.63	136.521	1903	1432.18	154.768	1994.2	1153.42	131.605	1784.29	1337.55	128.391	1722.3	1140.7	72.2909	2005.73	1227.8	313.631	1819.6	1356.94	398.262	1810.34	1121.68	406.413	1797.16	1047.3	405.142	1671.23	921.855	353.44	1635.81	854.717	420.774	1655.6	834.199	392.463	1587.8	802.697
426	0	182.277	1736.3	1565.64	64.9625	1745.15	1573.82	193.836	1903.25	1520.03	85.9833	1907.94	1522.93	134.277	1893.44	1431.05	153.271	1983.9	1152.37	129.601	1774.58	1336.46	126.808	1712.59	1139.32	70.4112	1996.22	1226.58	311.515	1810.15	1356.05	396.443	1801.86	1120.83	404.622	1788.94	1046.23	402.895	1663.01	920.709	350.85	1627.7	853.657	418.364	1647.23	832.986	389.751	1579.54	801.804
427	0	179.69	1726.67	1565.14	62.6194	1735.75	1572.89	191.503	1893.86	1518.91	83.6016	1898.45	1521.69	131.944	1883.84	1430.15	151.299	1974.48	1151.66	127.667	1764.92	1335.51	125.27	1702.75	1138.47	68.5106	1986.73	1225.55	309.472	1800.64	1355.5	394.58	1793.34	1120.29	402.896	1780.81	1045.56	400.673	1655.05	919.636	348.36	1619.81	852.968	416.008	1639.04	832.124	387.071	1572.03	800.765
428	0	177.706	1717.31	1564.4	60.1308	1726.39	1572.28	189.166	1884.45	1518.01	81.0443	1888.9	1520.89	129.652	1874.19	1429.35	149.619	1964.49	1150.77	125.537	1755.16	1334.71	123.519	1692.89	1137.93	66.5773	1976.71	1224.51	307.43	1791.1	1355.27	392.772	1784.9	1119.98	401.105	1772.67	1045.12	398.481	1647.22	918.733	345.721	1612.52	851.77	413.46	1631.43	831.078	384.115	1564.62	799.752
429	0	175.663	1707.82	1563.95	57.6461	1717.03	1571.64	186.553	1874.99	1517.23	78.402	1879.38	1520	127.078	1864.48	1428.66	147.948	1954.46	1150.02	123.299	1745.27	1334.04	121.721	1682.91	1137.54	64.4912	1966.04	1223.46	305.141	1781.58	1355.04	391.007	1776.43	1119.97	399.281	1764.64	1044.78	396.144	1639.8	917.797	343.174	1605.47	850.804	410.698	1624.4	829.915	381.308	1557.74	798.466
430	0	173.048	1698.62	1563.75	55.0012	1707.68	1571.35	183.881	1865.47	1516.6	75.6586	1869.87	1519.22	124.382	1854.69	1428.12	146.05	1944.06	1149.5	121.006	1735.3	1333.62	119.796	1672.6	1137.33	62.414	1955.78	1222.61	303.028	1771.84	1355.25	388.931	1767.98	1119.93	397.466	1756.76	1044.68	393.85	1632.58	917.045	340.645	1598.73	849.797	408.658	1617.14	829.444	378.481	1551.08	797.366
431	0	169.858	1689.25	1563.95	52.3318	1698.24	1571.37	181.199	1855.86	1516.1	72.7833	1860.04	1518.88	121.646	1844.89	1427.73	143.983	1933.71	1148.87	118.444	1725.17	1333.38	117.791	1661.92	1137.48	60.2729	1945.69	1221.87	300.629	1762.11	1355.54	386.935	1759.77	1120.14	395.656	1749.37	1044.73	391.574	1625.74	916.364	338.071	1592.41	848.871	405.806	1611.02	828.411	375.583	1544.89	796.288
432	0	167.565	1679.74	1564.19	49.3823	1688.63	1571.42	178.257	1846.26	1515.82	69.9811	1850.46	1518.36	118.854	1835.02	1427.38	141.758	1923.34	1148.37	115.961	1714.98	1333.34	115.861	1651.14	1137.73	57.8366	1934.46	1220.9	298.128	1752.26	1355.93	384.842	1751.6	1120.37	393.706	1742.13	1045.03	389.255	1619.07	915.557	335.594	1586.41	847.961	403.317	1604.84	827.57	372.893	1539.04	795.254
433	0	163.949	1670.5	1564.34	46.5925	1679.2	1571.54	175.119	1836.7	1515.35	67	1840.82	1517.79	116.102	1825.02	1427.05	139.669	1912.92	1147.68	113.445	1704.78	1333.38	114.035	1640.21	1138.21	55.7718	1924.14	1219.96	295.549	1742.42	1356.18	382.401	1743.47	1120.45	391.427	1734.84	1044.85	386.877	1612.79	914.691	333.12	1580.81	846.905	401.395	1598.7	826.903	370.308	1533.61	794.164
434	0	161.333	1661.03	1565.05	43.6794	1669.71	1571.91	171.865	1827.15	1515.16	64.04	1831.25	1517.46	113.347	1815.02	1426.93	137.054	1902.36	1147.41	111.046	1694.61	1333.72	112.222	1628.94	1138.93	53.4137	1913.34	1219.27	293.064	1732.61	1356.74	380.212	1735.58	1120.81	389.343	1727.94	1045.04	384.696	1606.77	914.086	330.776	1575.5	845.995	399.072	1593.16	826.125	367.733	1528.37	793.259
435	0	158.498	1651.67	1565.92	40.6692	1660.15	1572.62	168.731	1817.61	1515.35	60.7778	1821.5	1517.45	110.584	1805.08	1427.12	134.544	1891.44	1147.25	108.514	1684.31	1334.33	110.542	1617.7	1139.9	51.4143	1902.87	1218.94	290.574	1722.58	1357.74	377.972	1727.67	1121.54	387.262	1721.01	1045.51	382.451	1601.03	913.542	328.428	1570.54	845.196	397.114	1587.97	825.716	365.293	1523.51	792.471
436	0	155.184	1642.18	1567.01	37.5075	1650.45	1573.45	165.561	1808.16	1516.14	57.3212	1811.78	1517.83	107.812	1795.05	1427.7	131.314	1880.57	1148.12	106.125	1674.11	1335.18	108.769	1606.65	1140.98	49.3008	1892.48	1219.07	288.161	1712.43	1358.94	375.924	1719.52	1122.63	385.05	1713.94	1046.47	380.256	1595.42	913.192	326.121	1565.87	844.34	394.586	1583.26	825.072	362.917	1519.03	791.518
437	0	152.016	1632.69	1568.39	34.2571	1640.65	1574.31	162.134	1798.65	1517.25	53.7308	1801.7	1518.67	104.96	1785	1428.58	129.165	1869.82	1148.39	103.72	1663.84	1336.17	106.857	1595.48	1142.17	46.9157	1881.75	1219.54	285.446	1702.33	1360.22	373.513	1711.57	1123.66	383.018	1707.17	1047.68	378.024	1589.85	912.987	323.92	1561.44	843.574	392.804	1578.54	824.96	360.718	1514.94	790.561
438	0	148.832	1623.37	1570.12	31.0048	1631.1	1575.34	158.58	1789.05	1518.54	50.2894	1792.06	1519.48	102.223	1774.99	1429.65	127.127	1858.75	1149.36	101.371	1653.62	1337.56	105.198	1584.41	1143.63	44.8708	1871.24	1220.25	283.086	1692.21	1361.93	371.181	1703.59	1125.19	380.84	1700.26	1049.14	375.913	1584.6	912.982	321.824	1557.26	842.945	390.974	1574.11	825.011	358.581	1511.09	789.729
439	0	145.09	1614.03	1571.96	27.6827	1621.55	1576.56	155.143	1779.64	1520.21	46.9464	1782.46	1520.55	99.5363	1765.04	1430.99	124.756	1847.63	1150.44	99.0603	1643.57	1339.04	103.372	1573.56	1145.37	42.5724	1860.47	1221.16	280.956	1682.31	1364	369.029	1695.74	1127.05	378.687	1693.36	1050.87	373.863	1579.5	913.214	320.004	1553.36	842.596	389.255	1569.95	825.21	356.488	1507.7	788.808
440	0	141.842	1604.68	1573.81	24.232	1611.97	1577.84	152.006	1770.19	1521.95	43.5101	1772.79	1521.69	96.88	1755.13	1432.3	122.694	1837.15	1151.73	96.8843	1633.49	1340.73	101.716	1562.87	1147.27	40.3261	1849.81	1222.11	278.557	1672.59	1365.92	366.805	1687.57	1128.89	376.487	1686.42	1052.73	371.952	1574.57	913.443	318.255	1549.48	842.303	387.678	1565.99	825.468	354.811	1504.6	787.939
441	0	138.4	1595.34	1575.86	20.8234	1602.44	1579.03	148.633	1760.94	1523.94	40.1241	1763.13	1522.96	94.3911	1745.31	1433.92	120.655	1826.39	1153.09	94.871	1623.65	1342.5	100.206	1552.32	1149.29	38.1499	1839.65	1223.34	276.33	1663.04	1367.9	364.458	1679.44	1130.85	374.311	1679.74	1054.7	370.1	1569.68	913.904	316.702	1545.84	842.129	386.344	1562.31	825.982	352.963	1501.67	786.976
442	0	134.906	1586.08	1578.02	17.3757	1593.24	1580.26	145.353	1751.7	1525.81	37.0172	1753.96	1524.07	91.828	1735.68	1435.4	118.6	1815.97	1154.6	92.8545	1613.81	1344.35	98.8101	1542	1151.43	35.7747	1828.86	1224.44	274.156	1653.86	1370	362.235	1671.5	1132.9	372.184	1673.18	1056.88	368.422	1564.8	914.583	315.123	1542.23	842.204	384.72	1558.85	826.372	351.368	1499.02	786.244
443	0	131.409	1577.09	1580.15	13.9319	1584.13	1581.44	142.428	1742.51	1528.06	34.2252	1744.79	1525.09	89.4141	1726.18	1436.79	116.438	1805.87	1155.76	91.099	1604.23	1346.12	97.3168	1531.85	1153.54	33.4775	1818.74	1225.5	272.041	1644.95	1371.97	359.899	1663.4	1134.77	369.938	1666.5	1058.91	366.784	1559.8	915.343	313.839	1538.74	842.424	383.81	1555.08	827.211	349.757	1496.46	785.303
444	0	128.108	1567.95	1582.17	10.613	1575.07	1582.35	139.53	1733.3	1529.9	31.5477	1735.76	1526.11	87.1931	1716.73	1438.07	114.431	1795.9	1157.06	89.3887	1594.62	1347.71	96.1949	1521.99	1155.67	31.3319	1808.69	1226.55	270.068	1636.32	1373.76	357.85	1655.36	1136.71	367.985	1660.3	1060.94	365.218	1555.44	916.079	312.66	1535.01	842.635	382.838	1551.46	827.823	348.561	1494.03	784.308
445	0	125.079	1558.79	1584.23	7.14547	1566.1	1583.24	136.843	1724.3	1531.83	28.9311	1726.85	1527.19	84.9853	1707.33	1439.53	112.362	1786.16	1158.34	87.8976	1585.01	1349.5	95.3109	1512.44	1157.71	28.8849	1798.3	1227.68	268.488	1627.72	1375.85	355.952	1647.56	1138.71	366.189	1653.76	1063.04	364.312	1550.82	916.991	311.594	1531.39	842.925	382.116	1547.87	828.847	347.44	1491.56	783.376
446	0	121.802	1549.91	1586.47	3.91416	1557.37	1584.17	134.383	1715.22	1534.09	26.3952	1717.99	1528.19	82.9257	1697.98	1441.07	110.564	1775.77	1159.9	86.6139	1575.83	1350.97	94.4585	1502.85	1159.7	26.6404	1788.11	1229.04	266.981	1619.28	1378	354.461	1639.85	1140.87	364.667	1647.38	1065.34	363.411	1546.08	918.009	311.038	1527.28	843.645	381.595	1544.07	830.037	346.527	1489.33	782.459
447	0	118.553	1540.97	1588.48	0.684359	1548.67	1584.95	131.926	1706.22	1536.01	24.0309	1709.1	1529.1	80.8803	1688.72	1442.52	108.192	1766.91	1161.26	85.4329	1566.57	1352.38	93.7574	1493.57	1161.38	24.4408	1778.15	1230.35	265.374	1610.97	1379.74	353.009	1632.41	1142.72	363.145	1640.92	1067.39	362.392	1541.47	918.7	310.127	1523.22	844.01	380.886	1540.36	830.873	345.901	1487.07	781.379
448	0	115.179	1532.18	1590.37	-2.41716	1540.03	1585.55	129.715	1697.21	1537.87	21.7942	1700.33	1529.8	78.6922	1679.53	1443.94	105.873	1757.54	1162.83	84.2466	1557.14	1353.8	93.151	1484.42	1162.83	22.0799	1768.59	1231.67	263.984	1603.02	1381.3	351.598	1625.16	1144.28	361.666	1634.44	1068.99	361.901	1536.48	919.505	309.545	1519.06	844.244	380.707	1536.3	831.814	345.3	1484.56	780.286
449	0	112.556	1523.45	1592.49	-5.30062	1531.45	1586.09	127.681	1688.36	1539.62	19.9516	1691.71	1530.24	77.0065	1670.43	1445.16	103.472	1748.5	1163.9	83.5242	1548.62	1354.74	92.7734	1475.27	1164.13	19.424	1758.64	1232.83	262.946	1595.21	1382.73	350.03	1618.53	1145.49	360.279	1628.29	1070.48	361.493	1531.77	920.042	309.707	1514.84	844.455	380.204	1532.56	832.268	344.98	1482.12	779.29
450	0	109.622	1514.74	1594.41	-8.09737	1522.98	1586.66	125.713	1679.55	1541.22	18.2841	1683.13	1530.53	74.9263	1661.41	1446.41	101.373	1739.39	1164.86	82.6582	1539.7	1355.92	92.562	1466.37	1165.28	16.7158	1749.04	1233.77	261.691	1587.53	1383.87	348.836	1612.23	1146.73	358.783	1622.29	1071.72	361.089	1526.94	920.537	309.315	1510.61	844.706	380.33	1528.69	833.078	344.889	1479.55	778.35
451	0	106.95	1506.11	1596.2	-10.6547	1514.62	1587.15	123.916	1670.88	1542.59	16.6679	1674.48	1530.77	73.2791	1652.47	1447.37	98.9763	1730.49	1165.68	82.1349	1530.97	1357.08	92.6078	1457.5	1166.3	14.304	1740	1234.96	260.761	1580.26	1384.91	347.663	1606.2	1147.58	357.562	1616.44	1072.62	361.02	1522.14	920.991	309.81	1506.08	844.959	380.376	1524.67	833.502	345.117	1476.48	777.512
452	0	104.458	1497.56	1597.94	-12.9842	1506.34	1587.58	122.122	1661.9	1543.89	15.1514	1665.82	1531.02	71.9879	1643.67	1448.37	96.6304	1721.74	1166.71	81.6256	1522.37	1357.99	92.4951	1448.82	1167.14	11.6706	1730.86	1235.98	259.649	1573.1	1385.72	346.698	1600.46	1148.44	356.17	1610.74	1073.35	360.99	1517.39	921.328	310.193	1501.51	845.121	380.784	1520.76	833.812	345.382	1473.98	776.498
453	0	101.965	1489.04	1599.8	-15.417	1497.93	1588.22	120.637	1653.1	1545.4	13.9416	1657.44	1531.27	70.1541	1634.88	1449.57	94.3279	1713.04	1167.94	81.0464	1513.67	1359.12	92.751	1440.12	1168.12	9.24757	1721.81	1237.25	258.717	1565.97	1386.53	345.667	1594.89	1149.24	354.529	1605.07	1073.94	361.124	1512.73	921.799	310.653	1496.74	845.394	381.217	1516.9	834.511	345.911	1471.05	775.85
454	0	99.7951	1480.43	1601.57	-17.5035	1489.58	1588.82	119.311	1644.49	1546.88	12.787	1649.02	1531.7	68.708	1626.21	1450.65	92.0621	1703.88	1168.58	80.7218	1505.25	1360.21	92.9578	1431.58	1169.06	6.74318	1712.84	1238.44	257.796	1559.09	1387.49	344.631	1589.56	1150.14	353.229	1599.69	1074.88	361.347	1508.09	922.306	311.29	1492.33	845.597	381.467	1513.09	834.881	346.658	1467.98	775.334
455	0	97.9911	1471.79	1603.13	-19.2385	1481.33	1589.32	118.253	1635.81	1548.24	11.6332	1640.45	1532.23	67.4799	1617.63	1451.62	89.4615	1696.12	1169.66	80.3525	1496.86	1361.16	93.156	1423.01	1170	4.42504	1703.92	1239.6	256.692	1552.26	1388.04	343.458	1584.24	1150.68	351.746	1594.26	1075.45	361.701	1503.55	922.554	312.045	1487.57	845.678	382.311	1509.26	835.463	347.503	1464.76	774.818
456	0	96.2975	1463.23	1604.58	-20.8845	1472.89	1589.87	117.285	1627.08	1549.63	10.8099	1631.98	1532.83	65.8565	1609.06	1452.83	87.2321	1687.63	1171	80.0393	1488.52	1362.12	93.4411	1414.67	1170.95	2.07199	1694.91	1240.89	256.109	1545.35	1389.03	342.375	1579.03	1151.53	350.393	1588.84	1076.29	362.02	1498.99	922.938	312.94	1482.87	845.854	382.701	1505.51	835.858	348.661	1461.52	774.414
457	0	94.7735	1454.74	1606.13	-22.2253	1464.55	1590.45	116.618	1618.47	1551.07	10.0194	1623.42	1533.42	64.8813	1600.59	1453.87	85.1189	1679.15	1171.86	79.6763	1480.32	1363.26	93.6922	1406.36	1172.07	-0.546371	1685.71	1242.03	255.464	1538.64	1390.05	341.399	1574.02	1152.54	349.094	1583.49	1077.3	362.663	1494.5	923.595	313.937	1478.33	846.117	383.207	1502.14	836.597	349.982	1458.22	774.343
458	0	93.2449	1446.25	1607.2	-23.3105	1456.18	1591.01	115.855	1609.68	1552.22	9.48885	1614.94	1534.04	63.3177	1592.07	1454.83	83.4859	1670.95	1172.76	79.4604	1471.95	1364.28	94.0799	1398.3	1173.29	-2.83181	1676.53	1242.9	254.757	1531.96	1390.93	340.282	1569.08	1153.41	347.829	1578.12	1078.21	363.347	1490.21	924.157	314.761	1473.52	846.503	383.901	1498.58	837.245	351.367	1454.73	774.302
459	0	92.503	1437.67	1608.13	-24.1719	1447.74	1591.46	115.448	1601.22	1553.21	8.98696	1606.39	1534.52	62.4228	1583.8	1455.4	81.7589	1662.78	1173.37	79.074	1463.76	1365.08	93.9009	1389.99	1174.35	-5.06698	1667.87	1243.86	253.904	1525.42	1391.48	338.877	1564.25	1153.83	346.2	1572.89	1078.6	363.727	1485.87	924.454	315.885	1468.88	846.58	384.163	1495.4	837.463	352.846	1451.14	774.24
460	0	91.9581	1429.16	1608.83	-24.7653	1439.2	1591.98	114.744	1592.75	1553.82	8.56026	1597.89	1534.97	60.8814	1575.4	1456.11	79.5241	1654.1	1173.69	78.6628	1455.55	1365.77	94.0512	1382.15	1175.08	-7.34291	1658.85	1244.4	252.776	1518.82	1391.86	337.42	1559.24	1154.22	344.759	1567.73	1079.14	364.184	1481.82	924.658	317.037	1464.19	846.633	384.561	1491.89	837.689	354.286	1447.38	774.271
461	0	91.5853	1420.64	1609.35	-25.1134	1430.53	1592.5	114.204	1584.11	1554.3	8.22697	1589.36	1535.42	59.8847	1567.14	1456.46	77.7677	1645.6	1174.01	78.3312	1447.39	1366.31	93.9713	1374.29	1175.85	-9.21688	1650.06	1244.84	252.215	1512.12	1392.33	336.017	1554.2	1154.55	343.232	1562.54	1079.51	364.733	1477.64	924.899	317.979	1459.25	846.899	385.085	1488.56	837.992	355.902	1443.46	774.334
462	0	91.5489	1412.18	1609.64	-25.2492	1421.93	1593.01	113.693	1575.3	1554.75	7.89889	1580.8	1535.9	59.0017	1558.83	1456.66	75.9971	1637.33	1174.04	78.0021	1439.25	1366.7	93.9645	1366.38	1176.5	-11.0386	1641.21	1245.17	251.348	1505.58	1392.55	334.777	1549.09	1154.75	341.99	1557.39	1079.84	365.253	1473.43	925.106	318.904	1454.22	846.953	385.461	1485	838.185	357.643	1439.88	774.371
463	0	91.5977	1403.59	1609.72	-25.218	1413.24	1593.41	113.608	1567.16	1554.88	7.44731	1572.18	1536.44	57.9408	1550.46	1456.96	74.1439	1629.04	1174.28	77.7749	1431.09	1366.95	94.064	1358.48	1176.91	-12.6863	1632.49	1245.46	250.788	1498.61	1392.74	333.448	1543.8	1154.91	340.563	1552.19	1080.17	365.628	1469.05	925.229	319.869	1449.36	846.818	385.95	1481.33	838.397	359.156	1435.63	774.346
464	0	91.9527	1395.03	1609.77	-25.0111	1404.27	1593.78	113.251	1558.61	1554.9	7.08136	1563.51	1536.83	56.7663	1542.02	1457.21	72.186	1620.77	1174.21	77.441	1422.84	1367.05	94.0057	1350.65	1177.05	-14.2511	1623.27	1245.61	250.299	1491.72	1392.92	332.146	1538.39	1155.1	339.473	1546.92	1080.36	365.987	1464.55	925.309	320.787	1444.47	846.625	386.115	1477.56	838.553	360.552	1431.36	774.475
465	0	92.1534	1386.43	1609.62	-24.6373	1395.55	1593.92	113.108	1550.2	1554.99	6.89235	1554.84	1537.09	55.7647	1533.64	1457.3	69.8942	1611.87	1174.54	77.226	1414.8	1366.97	93.9497	1342.84	1177	-16.1162	1614.53	1245.72	249.345	1484.77	1392.8	331.041	1533.03	1155.04	338.382	1541.46	1080.61	366.237	1460.09	925.297	321.533	1439.55	846.398	386.441	1473.59	838.649	361.848	1427.03	774.335
466	0	92.7234	1377.77	1609.17	-24.3145	1386.47	1593.97	112.963	1541.59	1554.79	6.61858	1545.9	1537.49	55.0997	1525.34	1457.16	67.8106	1603	1174.45	76.8426	1406.61	1366.71	93.9845	1334.98	1176.55	-17.325	1606.05	1245.62	248.644	1477.64	1392.5	330.005	1527.32	1154.83	337.009	1535.66	1080.46	366.362	1455.36	924.986	322.197	1434.57	845.818	386.515	1469.48	838.448	363.071	1422.55	773.992
467	0	93.1346	1369.11	1608.7	-23.6143	1377.59	1593.96	112.959	1533.07	1554.61	6.45833	1537.09	1537.75	54.2973	1516.94	1457.12	65.8191	1594.38	1174.54	76.6933	1398.56	1366.39	94.0823	1327.04	1175.98	-18.9297	1597.38	1245.6	248.325	1470.35	1392.39	329.126	1521.65	1154.77	336.051	1530.04	1080.43	366.427	1450.43	924.596	322.691	1429.41	845.256	386.554	1465.27	838.141	364.122	1418.01	773.582
468	0	94.0196	1360.37	1608.24	-23.1258	1368.64	1593.99	112.949	1524.41	1554.27	6.26211	1528.26	1537.88	53.3783	1508.5	1456.89	64.8705	1586.39	1174.55	76.4731	1390.36	1366.1	94.2038	1319.12	1175.43	-20.5248	1588.76	1245.51	247.621	1463.09	1391.99	328.169	1515.63	1154.57	334.462	1523.99	1079.98	366.436	1445.52	924.259	323.178	1424.35	844.64	386.66	1460.87	837.906	365.119	1413.32	773.357
469	0	94.7588	1351.69	1607.45	-22.5649	1359.54	1593.95	112.883	1515.73	1553.58	6.41506	1519.56	1537.65	52.5522	1500.17	1456.44	64.0063	1578.99	1173.93	76.4931	1382.24	1365.56	94.4489	1311.19	1174.7	-21.4227	1580.21	1244.93	247.422	1455.71	1391.49	327.371	1509.7	1154.04	333.834	1518.11	1079.42	366.445	1440.6	923.53	323.454	1419.23	843.888	386.609	1456.48	837.212	365.812	1408.57	772.834
470	0	95.4871	1342.99	1606.47	-21.8809	1350.7	1593.52	113.15	1507.21	1552.83	6.42107	1510.69	1537.34	51.7326	1491.55	1455.78	63.1719	1571.26	1173.27	76.3932	1374.05	1364.76	94.7268	1303.17	1173.66	-22.5533	1571.49	1244.28	246.814	1448.22	1390.51	326.654	1503.37	1153.23	332.735	1512.07	1078.71	366.229	1435.42	922.469	323.569	1414.04	842.797	385.932	1452.06	836.034	366.437	1403.72	772.05
471	0	96.0653	1334.1	1605.46	-21.4161	1341.51	1593.17	113.338	1498.44	1551.96	6.6497	1501.96	1537.01	51.4373	1483.15	1455.2	62.1461	1563.39	1172.92	76.2549	1365.84	1363.99	95.0697	1295.16	1172.65	-23.5307	1563.2	1243.89	246.433	1440.61	1389.72	325.751	1496.81	1152.44	331.999	1505.78	1078.06	365.987	1430.05	921.543	323.691	1408.86	841.778	386.049	1447.21	835.308	366.735	1398.57	771.212
472	0	96.7219	1325.22	1604.51	-20.7021	1332.73	1592.7	113.678	1489.73	1551.33	6.79794	1492.99	1536.69	50.9623	1474.53	1454.51	61.0192	1555.2	1172.29	76.3543	1357.6	1363.14	95.454	1287.13	1171.72	-24.399	1554.5	1243.35	245.986	1433.01	1388.94	325.212	1489.97	1151.88	331.487	1499.46	1077.46	365.822	1424.53	920.722	323.711	1403.53	840.802	385.804	1442.14	834.544	366.871	1393.55	770.302
473	0	97.5845	1316.34	1603.43	-20.0616	1323.63	1592.09	113.874	1480.87	1550.4	7.00814	1484.19	1536.3	50.5771	1465.98	1453.8	60.3218	1547.19	1171.84	76.4062	1349.2	1362.25	96.0742	1279.02	1170.66	-25.129	1546.19	1242.75	245.792	1425.17	1388.18	324.66	1483	1151.17	330.886	1492.89	1076.83	365.632	1419.06	919.709	323.544	1398.06	839.583	385.593	1436.89	833.686	366.962	1388.36	769.252
474	0	98.0811	1307.36	1602.25	-19.4394	1314.6	1591.44	114.203	1472.02	1549.34	7.15216	1475.08	1535.79	49.7789	1457.34	1453.01	59.8862	1539.07	1171.08	76.5636	1340.79	1361.21	96.5939	1270.88	1169.46	-25.8593	1537.53	1242.02	245.8	1417.33	1387.29	324.366	1475.88	1150.34	330.324	1486.04	1076.05	365.189	1412.73	918.565	323.333	1392.31	838.315	385.327	1431.43	832.63	366.923	1382.95	768.045
475	0	98.9281	1298.46	1601.08	-18.6896	1305.68	1590.66	114.581	1463.05	1548.29	7.4409	1466.29	1535.16	49.7252	1448.78	1452.17	59.3414	1530.61	1170.24	76.7383	1332.33	1360.19	97.1059	1262.64	1168.36	-26.4999	1528.91	1241.03	246.226	1409.33	1386.6	323.915	1468.68	1149.39	329.916	1479.23	1075.3	365.115	1406.87	917.562	323.276	1386.32	837.163	384.747	1425.86	831.486	366.631	1377.54	766.752
476	0	99.5869	1289.57	1599.88	-18.1296	1296.6	1589.83	115.053	1454.22	1547.37	7.67488	1457.21	1534.46	50.0048	1440.09	1451.02	58.9933	1523.09	1169.43	77.0894	1323.92	1359.14	97.6224	1254.43	1167.43	-26.6353	1520.27	1240.18	246.387	1401.21	1385.63	323.953	1461.33	1148.66	329.659	1472.26	1074.4	364.898	1400.67	916.367	323.151	1380.23	835.972	384.74	1420.05	830.538	366.416	1372.08	765.386
477	0	100.36	1280.66	1598.44	-17.569	1287.57	1588.83	115.506	1445.4	1546.17	8.12331	1448.35	1533.55	49.9332	1431.64	1449.84	58.8484	1514.77	1168.31	77.456	1315.39	1357.93	98.0358	1246.05	1165.95	-26.5632	1511.79	1239.07	246.467	1393.04	1384.36	323.664	1453.79	1147.41	329.446	1465.18	1073.17	364.682	1394.34	914.825	323.059	1373.93	834.609	384.077	1414.25	828.992	366.001	1366.26	763.708
478	0	101.151	1271.67	1596.9	-16.5217	1278.55	1587.51	115.766	1436.55	1544.78	8.39035	1439.49	1532.62	50.2105	1423.07	1448.49	58.7507	1505.81	1166.96	77.7845	1306.67	1356.61	98.5966	1237.53	1164.69	-26.7567	1503.02	1237.85	246.404	1384.95	1382.79	323.662	1446.28	1145.98	329.155	1457.88	1071.85	364.421	1387.82	913.121	322.994	1367.2	833.215	383.513	1408.04	827.185	365.435	1360.39	761.838
479	0	101.975	1262.72	1595.31	-16.0157	1269.27	1586.49	115.972	1427.74	1543.38	8.86553	1430.41	1531.49	50.5842	1414.38	1447	59.0645	1497.39	1165.39	78.1869	1298	1355.3	99.0772	1228.95	1163.46	-26.5871	1494.46	1236.37	246.692	1376.55	1381.25	323.615	1438.64	1144.47	328.804	1450.47	1070.22	364.202	1381.15	911.317	323.068	1360.41	831.638	383.66	1402.02	825.633	364.944	1354.4	759.959
480	0	102.878	1253.74	1593.72	-15.0462	1260.13	1585.23	116.444	1418.97	1542.01	9.37749	1421.57	1530.35	51.0388	1405.73	1445.52	59.3297	1488.81	1163.67	78.9024	1289.35	1353.99	99.4264	1220.15	1162.03	-26.2167	1485.82	1234.79	247.556	1368.04	1379.85	323.8	1430.98	1142.95	328.533	1442.96	1068.43	364.229	1374.41	909.538	322.611	1353.7	829.811	383.19	1395.48	823.674	364.499	1348.31	758.028
481	0	103.788	1244.78	1592.01	-14.0875	1250.78	1583.68	116.89	1409.98	1540.74	9.76242	1412.29	1529.22	51.4524	1396.92	1444.1	59.6161	1479.65	1162.06	79.425	1280.6	1352.45	99.8529	1211.26	1160.46	-26.0486	1476.89	1233.32	247.568	1359.3	1377.91	323.842	1422.98	1141.29	328.452	1435.25	1066.86	364.075	1367.19	907.58	322.721	1346.59	827.963	382.128	1388.45	821.439	364.017	1341.67	755.929
482	0	104.849	1235.54	1590.21	-13.2462	1241.43	1582.15	117.498	1401.1	1539.53	10.2388	1403.31	1528.22	52.1117	1388.15	1442.72	60.1973	1470.81	1160.6	79.9327	1271.59	1350.93	100.201	1202.28	1158.75	-25.4449	1468.15	1231.95	248.343	1350.49	1376.36	324.125	1414.83	1139.73	328.465	1427.2	1065.34	363.924	1359.81	905.71	321.655	1340.15	825.299	382.206	1381.75	819.782	363.526	1334.94	753.798
483	0	105.859	1226.39	1588.48	-12.1647	1232.12	1580.63	118.157	1392.15	1538.33	10.7665	1393.9	1527.23	53.0567	1379.2	1441.06	60.8832	1460.79	1159.03	80.6805	1262.66	1349.38	100.475	1193.17	1157.15	-24.8285	1459.21	1230.52	249.513	1341.45	1375.07	324.275	1406.55	1138.2	328.71	1419.08	1063.94	363.929	1352.23	903.745	321.323	1332.92	823.29	381.937	1374.68	818.026	363.009	1328.14	751.68
484	0	107.041	1217.21	1586.74	-10.9321	1222.62	1578.97	118.892	1382.99	1536.97	11.4104	1384.65	1526.18	53.728	1370.21	1439.57	61.6255	1451.94	1157.64	81.4363	1253.62	1347.77	100.879	1183.89	1155.48	-24.094	1450.23	1229.03	250.44	1332.34	1373.43	324.821	1397.96	1136.56	328.913	1410.66	1062.26	364.085	1344.59	901.782	321.213	1325.33	821.376	381.993	1367.16	816.133	362.44	1321.17	749.374
485	0	108.201	1207.88	1584.83	-9.81099	1213.1	1577.26	119.82	1373.87	1535.6	12.3117	1375.3	1524.9	54.8926	1361.24	1437.87	62.5147	1442.91	1156	82.2353	1244.42	1346.07	101.368	1174.48	1153.66	-23.1168	1441.27	1227.42	251.075	1323.07	1371.49	325.055	1389.42	1134.68	329.072	1402.11	1060.46	363.964	1337	899.489	321.043	1317.6	819.245	381.67	1359.61	813.894	361.771	1314.06	746.867
486	0	109.515	1198.83	1583.02	-8.53309	1203.66	1575.6	120.756	1364.56	1534.2	13.1646	1366.1	1523.51	55.8266	1352.01	1436.29	63.3137	1433.13	1154.07	83.1144	1235.16	1344.52	101.785	1165.03	1152.02	-22.0737	1432.25	1225.84	252.404	1313.53	1369.82	325.824	1380.47	1132.97	329.371	1393.4	1058.61	363.892	1328.69	897.429	320.915	1309.77	817.142	381.476	1351.95	811.784	361.357	1306.59	744.639
487	0	110.973	1189.2	1581.21	-7.16294	1194.05	1574.08	121.664	1355.29	1532.72	14.2321	1356.76	1522.27	56.9897	1342.83	1434.66	64.5109	1424.49	1152.3	84.0253	1225.65	1342.95	102.339	1155.34	1150.4	-20.952	1423.07	1224.1	253.547	1303.87	1368	326.384	1371.36	1131.12	329.83	1384.55	1056.65	363.974	1320.24	895.325	320.894	1301.63	815.21	381.258	1343.96	809.667	361.013	1298.72	742.507
488	0	112.417	1179.62	1579.32	-5.69521	1184.31	1572.45	122.884	1346.11	1531.25	15.3409	1347.11	1521.04	58.5018	1333.53	1432.85	65.9023	1415.2	1150.45	85.0845	1216.03	1341.27	102.865	1145.65	1148.66	-19.5102	1413.89	1222.34	254.578	1294.11	1365.96	326.943	1362.11	1128.97	330.1	1375.48	1054.47	364.042	1311.56	893.134	320.8	1293.37	813	381.16	1335.8	807.313	360.617	1290.7	740.136
489	0	113.931	1170.05	1577.5	-4.06959	1174.55	1570.81	124.09	1336.52	1529.83	16.5696	1337.66	1519.86	59.9066	1324.01	1431.32	67.1614	1405.04	1148.65	86.1693	1206.44	1339.76	103.419	1135.81	1146.96	-18.2057	1404.58	1220.74	255.302	1284.2	1363.76	327.623	1352.66	1126.89	330.52	1366.1	1052.41	364.301	1303	890.568	320.533	1284.74	810.671	381.015	1327.36	804.937	360.387	1282.34	737.928
490	0	115.557	1160.42	1575.86	-2.4247	1164.85	1569.42	125.477	1327.02	1528.79	17.9069	1328.05	1518.88	61.5651	1314.41	1429.72	68.5139	1395.41	1147.14	87.2284	1196.7	1338.41	103.892	1125.87	1145.4	-16.7555	1394.84	1219.27	256.693	1273.98	1362.12	328.466	1342.83	1125.11	331.064	1356.45	1050.65	364.445	1294	888.504	320.702	1276.01	808.762	380.737	1318.66	802.86	360.243	1273.67	735.917
491	0	117.407	1150.59	1574.28	-0.773159	1154.88	1568.17	127.004	1317.53	1527.78	19.243	1318.37	1518.02	63.0198	1304.85	1428.42	69.9006	1384.99	1145.6	88.4876	1187.03	1336.88	104.563	1115.84	1144.16	-15.1314	1385.28	1217.92	258.224	1263.74	1360.61	329.244	1332.81	1123.46	331.874	1346.54	1049.04	364.821	1284.7	886.646	320.701	1267.24	806.64	380.842	1309.42	800.95	360.278	1264.8	733.871
492	0	119.229	1140.84	1572.74	1.06874	1144.9	1566.87	128.524	1307.68	1526.77	20.7759	1308.39	1517.35	64.7719	1295.04	1427.11	71.4265	1374.17	1144.27	89.7698	1176.86	1335.7	105.185	1105.66	1142.62	-13.5816	1375.29	1216.68	259.774	1253.31	1358.97	330.748	1322.38	1122.03	332.757	1336.44	1047.44	365.114	1275.05	884.663	320.997	1257.69	804.805	381.679	1300.1	799.239	360.472	1255.71	731.792
493	0	121.09	1130.86	1571.46	3.04559	1134.88	1565.59	130.332	1297.81	1525.97	22.5204	1298.44	1516.75	66.489	1285.14	1426.04	72.9925	1364.4	1143.19	91.2751	1166.83	1334.57	105.968	1095.28	1141.47	-11.9002	1365.34	1215.62	260.975	1242.88	1357.28	331.869	1311.91	1120.37	333.78	1326.02	1046.04	365.477	1265.12	882.88	321.281	1248.14	802.841	382.054	1290.4	797.458	360.542	1246.01	729.765
494	0	122.965	1120.95	1570.19	4.87322	1124.84	1564.47	132.029	1288.05	1525.3	24.0457	1288.65	1516.08	68.53	1275.3	1424.91	74.8912	1353.91	1141.99	92.7777	1156.7	1333.55	106.673	1084.74	1140.56	-10.114	1355.15	1214.45	263.122	1232.32	1356.07	333.078	1301.23	1118.78	334.804	1315.5	1044.44	366.122	1254.95	881.057	321.592	1238.24	801.085	382.472	1280.18	795.776	360.276	1236.67	727.67
495	0	124.968	1110.89	1568.85	6.84598	1114.67	1563.28	133.779	1278.03	1524.61	26.0234	1278.64	1515.47	70.7103	1265.35	1423.7	76.4783	1343.49	1140.42	94.3952	1146.48	1332.7	107.565	1074.03	1139.69	-8.18739	1344.88	1213.26	264.997	1221.85	1354.53	334.296	1290.44	1116.93	335.851	1304.75	1042.58	366.757	1244.57	879.177	321.97	1228.08	799.277	382.758	1270.05	793.849	360.521	1226.77	725.652
496	0	127.107	1100.68	1567.58	9.00504	1104.46	1562.19	135.696	1268.18	1523.88	27.8097	1268.73	1514.79	73.0493	1255.58	1422.43	78.2966	1332.56	1138.84	96.1598	1136.11	1331.82	108.624	1063.14	1138.94	-6.10126	1334.44	1211.78	266.928	1211.29	1352.86	335.605	1279.29	1114.9	336.906	1293.8	1040.61	367.521	1233.74	877.156	322.72	1217.47	797.491	383.678	1259.28	791.849	360.985	1216.35	723.675
497	0	129.292	1090.36	1566.63	11.0321	1094.05	1561.41	137.482	1258.08	1523.33	29.7706	1258.51	1514.51	75.5607	1245.75	1421.48	80.2918	1321.08	1137.21	97.9138	1125.67	1331.24	109.822	1051.96	1138.59	-3.90421	1324.07	1210.57	268.879	1200.52	1351.37	337.213	1268.03	1113.04	338.127	1282.5	1038.74	368.479	1222.62	875.335	323.454	1206.9	795.768	384.238	1248.01	789.819	361.543	1205.62	721.954
498	0	131.381	1080.09	1566.14	13.1562	1083.73	1560.88	139.539	1248.02	1523.33	32.1935	1248.5	1514.41	78.0954	1235.91	1420.67	82.2657	1309.73	1136.05	99.7798	1115.24	1330.98	110.896	1040.53	1138.54	-1.47739	1313.5	1209.56	270.595	1189.81	1349.95	338.862	1256.53	1111.48	339.448	1270.96	1037.04	369.487	1211.39	873.667	324.296	1195.98	794.274	385.354	1237.21	788.317	362.176	1194.77	720.381
499	0	133.468	1069.93	1565.73	15.3638	1073.39	1560.57	141.916	1237.92	1523.68	33.9933	1238.32	1514.64	80.5775	1225.92	1420.25	84.3877	1299.02	1135.29	101.659	1104.77	1330.9	112.122	1028.93	1138.72	0.86068	1302.86	1208.84	273.119	1178.94	1349.16	340.434	1244.66	1110.08	340.854	1259.04	1035.6	370.499	1199.77	872.121	325.038	1184.45	792.834	385.76	1225.53	786.615	362.977	1183.47	718.894
500	0	135.747	1059.55	1565.86	17.7214	1062.95	1560.51	143.803	1227.6	1524.22	36.4018	1227.95	1515.53	82.9863	1215.77	1420.2	86.3028	1286.91	1134.69	103.551	1094.19	1331.16	113.184	1017.23	1139.14	3.07517	1291.96	1208.63	275.207	1167.78	1348.52	341.798	1232.78	1108.93	342.3	1246.81	1034.63	371.581	1187.83	870.921	326.076	1172.73	791.443	387.14	1214.04	785.604	363.81	1171.81	717.598
501	0	138.278	1049.26	1566.3	20.1078	1052.55	1561.11	146.183	1217.47	1525.37	38.5629	1217.69	1516.58	85.381	1205.71	1420.61	88.0968	1275.68	1134.89	105.345	1083.57	1331.92	114.185	1005.5	1140.05	5.35303	1281.2	1208.83	277.306	1156.75	1348.29	343.496	1220.5	1108.44	343.738	1234.23	1034.1	372.647	1175.62	870.067	327.101	1160.96	790.523	388.259	1202.01	784.981	364.789	1160.05	716.78
502	0	140.813	1038.9	1567.1	22.6179	1042.18	1562.09	148.494	1207.27	1526.6	40.6707	1207.25	1517.99	87.8888	1195.47	1421.18	89.9474	1264.87	1135.47	107.303	1072.99	1332.94	115.219	993.822	1141.35	7.45225	1270.19	1209.37	279.07	1145.8	1348.31	345.493	1208	1108.27	345.114	1221.42	1033.76	373.996	1163.52	869.575	328.045	1149.51	789.912	389.9	1189.55	784.76	366.017	1147.93	716.282
503	0	143.537	1028.62	1568.04	25.2739	1031.62	1563.27	150.93	1196.9	1528.03	42.8027	1196.78	1519.68	90.1198	1185.21	1422.24	91.8316	1253.91	1136.32	109.029	1062.34	1334.28	116.056	982.256	1142.93	9.4293	1259.43	1210.46	281.394	1134.65	1348.7	347.002	1195.2	1108.1	346.466	1208.26	1033.48	375.139	1150.71	869.404	329.217	1137.12	789.58	391.111	1176.69	784.576	367.13	1135.52	716.027
504	0	146.205	1018.23	1569.31	28.0368	1021.09	1564.73	153.329	1186.83	1529.59	45.1084	1186.48	1521.41	92.4841	1174.92	1423.52	93.4778	1242.91	1137.31	110.672	1051.72	1335.91	116.774	970.965	1144.54	11.1904	1248.75	1211.91	283.178	1123.63	1349.37	347.985	1182.06	1107.96	347.628	1194.98	1033.81	376.208	1137.43	869.668	330.273	1124.26	789.619	392.498	1163.73	784.86	368.361	1122.64	716.262
505	0	149.072	1008	1570.71	30.9249	1010.77	1566.49	155.789	1176.49	1531.23	47.5983	1176.25	1523.37	94.6032	1164.62	1425	95.0447	1232.04	1138.72	112.166	1041.32	1337.87	117.351	959.974	1146.57	12.9551	1238.09	1213.48	284.914	1112.66	1350.29	349.645	1168.89	1108.53	348.711	1181.64	1034.1	377.229	1123.9	870.34	331.546	1111.09	790.397	393.937	1150.39	785.568	369.699	1109.42	716.926
506	0	151.888	997.768	1572.15	33.7479	1000.33	1568.62	158.099	1166.47	1532.76	50.4896	1166.05	1525.36	97.0844	1154.39	1426.44	96.6405	1221.59	1140.15	113.735	1030.9	1339.67	117.834	949.167	1148.8	14.7292	1227.66	1215.17	286.178	1101.75	1351.2	350.739	1155.5	1108.88	349.722	1168.21	1034.58	378.314	1110.25	871.13	332.74	1097.37	791.208	395.521	1136.59	786.523	371.089	1095.89	717.672
507	0	154.833	987.634	1573.58	36.7015	989.911	1570.69	160.62	1156.35	1534.49	52.8989	1155.75	1527.71	99.3071	1144.35	1428.29	98.397	1210.86	1142.12	115.026	1020.63	1341.81	118.202	938.576	1151.03	16.1801	1217.28	1217.1	288.018	1090.74	1352.45	351.695	1141.97	1109.44	350.773	1154.71	1035.26	379.431	1096.19	872.303	333.898	1083.33	792.3	396.889	1122.23	787.585	372.606	1081.93	718.778
508	0	157.875	977.43	1575.08	39.6015	979.585	1573.02	163.069	1146.3	1536.29	55.001	1145.46	1530.33	101.049	1134.45	1430.24	99.704	1200.39	1143.84	116.223	1010.75	1343.68	118.624	928.328	1153.36	17.8413	1207.29	1219.26	289.446	1079.65	1353.97	352.809	1128.59	1110.37	351.878	1141.19	1036.4	380.564	1082.02	873.921	335.381	1068.93	793.898	398.574	1107.68	789.166	374.082	1067.44	720.294
509	0	160.823	967.449	1576.48	42.5352	969.296	1575.36	165.409	1136.23	1538.27	57.2754	1135.28	1532.95	103.131	1124.66	1432.21	101.005	1190.03	1145.6	117.361	1000.78	1345.83	118.7	918.158	1155.78	19.385	1197.45	1221.54	291.024	1068.75	1355.66	354.086	1115.34	1111.67	353.342	1127.59	1037.87	381.901	1067.18	875.787	336.659	1054.66	795.583	400.184	1092.57	790.98	375.664	1052.67	721.961
510	0	163.799	957.349	1577.62	45.389	959.04	1577.42	167.81	1126.43	1539.97	59.5191	1125.19	1535.55	105.161	1115	1433.92	102.792	1179.86	1147.45	118.256	990.8	1347.7	118.813	908.162	1158.07	21.1129	1187.84	1223.44	292.558	1057.81	1357.31	355.428	1102.2	1112.94	354.861	1114.04	1039.21	383.224	1052.12	877.581	338.084	1039.59	797.211	401.91	1077	792.817	377.311	1037.22	723.617
511	0	166.565	947.384	1578.48	48.3255	948.852	1579.4	170.045	1116.64	1541.58	61.6391	1115.23	1538.21	107.058	1105.44	1435.62	104.428	1169.64	1149.23	119.014	980.96	1349.42	118.645	898.252	1160.11	23.0859	1178.29	1225.33	293.719	1046.65	1358.72	356.73	1089.07	1114.09	356.605	1100.51	1040.6	384.244	1037.09	879.271	339.127	1024.13	798.768	403.281	1060.9	794.435	378.435	1021.59	725.059
512	0	169.444	937.489	1579.35	51.1248	938.668	1581.28	172.339	1106.78	1543.21	63.6568	1105.21	1540.82	108.966	1095.81	1437.12	106.034	1160.1	1150.73	119.637	971.268	1351.11	118.334	888.599	1162.06	25.2148	1169.05	1226.9	295.024	1035.64	1360.17	358.103	1076.05	1115.3	358.24	1086.96	1041.86	385.247	1021.84	881.019	340.202	1009.17	800.337	404.942	1045.08	796.146	379.678	1005.28	726.921
513	0	172.203	927.689	1580.02	53.9526	928.557	1583.07	174.188	1097.16	1544.47	65.5543	1095.23	1543.11	110.563	1086.52	1438.6	108.247	1150.46	1152.1	120.162	961.771	1352.63	117.961	878.98	1163.97	27.5944	1160.17	1228.24	296.037	1024.27	1361.57	359.764	1063.18	1116.51	360.033	1073.39	1042.83	386.585	1006.43	882.772	341.338	993.156	802.299	406.285	1028.75	797.722	380.923	988.836	728.8
514	0	174.934	917.972	1580.39	56.7207	918.486	1584.78	176.057	1087.67	1545.45	67.8237	1085.63	1545.26	112.286	1077.21	1439.78	110.005	1142.52	1153.39	120.552	952.245	1354	117.419	869.577	1165.44	29.8324	1151.32	1229.36	296.935	1013.21	1362.4	361.339	1050.47	1117.39	361.81	1059.81	1043.52	387.554	990.998	884.072	341.746	979.422	802.892	407.121	1011.89	798.741	381.96	972.082	730.394
515	0	177.523	908.201	1580.56	59.3667	908.38	1586.37	177.646	1078.23	1546.35	69.5706	1075.69	1547.25	113.954	1068.03	1441.02	112.62	1134.25	1154.46	120.781	942.952	1355.29	116.802	860.296	1166.71	32.0141	1142.74	1230.56	297.105	1001.81	1362.94	362.971	1037.52	1118.28	363.7	1046.18	1044.17	388.519	975.526	885.447	343.127	962.521	805.107	408.483	995.11	799.895	382.991	954.684	732.369
516	0	180.143	898.532	1580.7	61.9396	898.329	1587.89	179.062	1068.63	1547.25	71.3233	1065.77	1549.43	115.526	1058.72	1442.22	114.892	1122.62	1155.14	120.984	933.725	1356.43	115.991	851.112	1167.86	34.4936	1134.53	1231.79	298.581	990.936	1364.19	364.724	1024.69	1119.4	365.586	1032.41	1045.05	389.421	959.947	887.037	343.623	947.175	806.782	409.579	978.287	801.243	383.576	937.336	734.362
517	0	182.658	888.828	1580.56	64.5408	888.167	1589.22	180.492	1059.04	1547.91	72.8143	1055.95	1551.46	117.179	1049.49	1443.37	117.249	1113.73	1156.39	121.041	924.623	1357.52	115.096	842.092	1168.73	37.0717	1126.29	1232.96	299.212	979.745	1365.2	366.438	1011.73	1120.54	367.837	1018.87	1046.09	390.416	944.373	888.561	344.412	931.408	808.532	410.769	961.444	802.714	384.116	919.554	736.459
518	0	185.012	879.082	1580.29	67.1287	877.947	1590.54	181.954	1049.43	1548.85	74.3228	1045.97	1553.8	118.384	1040.4	1444.7	119.81	1104.55	1158.02	121.036	915.549	1358.48	114.271	833.258	1169.34	39.535	1118.17	1234.22	299.867	968.697	1366.16	368.125	998.688	1121.72	369.664	1004.92	1047.1	391.348	928.457	890.268	345.17	915.134	810.442	411.786	944.333	804.201	384.684	901.693	738.699
519	0	187.375	869.418	1579.99	69.6747	867.714	1591.71	183.284	1040.1	1549.79	75.5674	1036.06	1556.21	119.64	1031.23	1446.04	122.359	1096.1	1159.62	121.035	906.597	1359.44	113.366	824.525	1170.07	41.9765	1110.08	1235.46	300.321	957.555	1367.24	369.737	985.454	1123.08	371.712	991.082	1048.33	392.012	912.628	892.117	345.505	899.329	812.302	412.746	927.215	805.869	385.045	883.563	741.248
520	0	189.647	859.772	1579.72	72.1255	857.53	1592.92	184.684	1030.6	1550.99	76.7742	1026.14	1558.69	120.802	1022.28	1447.37	124.88	1087.26	1161.25	121.036	897.878	1360.57	112.596	816.177	1170.81	44.4331	1102.06	1236.78	300.878	946.819	1368.58	371.433	972.178	1124.73	373.644	977.263	1049.78	392.799	896.779	894.385	345.967	883.268	814.706	413.632	910.081	807.966	385.44	865.487	744.188
521	0	191.727	850.186	1579.19	74.4339	847.271	1593.93	185.263	1021.13	1552.11	77.8624	1016.15	1561.33	122.001	1013.46	1448.53	127.155	1078.51	1162.55	120.959	889.228	1361.55	111.866	807.874	1171.52	46.8053	1094.16	1238.11	301.331	936.136	1369.85	372.823	958.917	1126.19	375.694	963.513	1051.34	393.384	880.947	896.666	346.301	866.95	817.239	414.481	892.89	810.079	385.712	847.322	747.238
522	0	193.548	840.525	1578.34	76.4691	836.989	1594.63	186.034	1011.79	1553.28	78.7964	1006.19	1563.79	123.174	1004.79	1449.76	129.318	1070.16	1163.75	120.904	880.677	1362.44	111.359	799.777	1172.24	49.1509	1086.37	1239.08	301.695	925.769	1370.88	374.019	945.632	1127.5	377.225	949.88	1052.56	393.912	865.103	898.94	346.734	850.592	819.695	415.011	875.72	812.102	385.721	829.087	750.206
523	0	195.254	831.057	1577.53	78.5015	826.798	1595.03	186.895	1002.7	1554.59	79.6985	996.309	1566.14	124.226	996.297	1450.75	131.392	1061.49	1164.95	120.871	872.211	1363.42	110.987	791.925	1172.95	51.1997	1078.52	1240.17	302.028	915.53	1372.09	375.023	932.492	1128.86	378.67	936.32	1053.98	394.277	849.43	901.434	346.88	834.309	822.399	415.459	858.521	814.366	385.889	810.899	753.653
524	0	197.049	821.623	1576.89	80.266	816.637	1595.5	187.33	993.338	1555.85	80.4868	986.521	1568.4	125.293	987.824	1451.71	133.463	1053.33	1165.49	120.953	863.865	1364.37	110.767	783.99	1174.09	53.2194	1070.65	1241.01	302.649	905.704	1373.24	376.099	919.514	1130.25	380.061	922.968	1055.4	394.719	833.845	904.042	347.27	817.948	825.408	415.952	841.438	816.815	385.906	792.843	757.141
525	0	198.533	812.417	1576.16	82.0654	806.504	1595.63	187.529	983.998	1556.92	81.0603	976.743	1570.15	126.48	979.455	1452.3	135.206	1044.61	1166.15	121.403	855.645	1365.21	110.738	776.161	1175.07	55.3088	1062.96	1241.49	303.231	896.122	1374.25	377.115	906.673	1131.48	381.292	909.7	1056.42	395.015	818.185	906.571	347.54	801.549	828.36	416.217	824.351	819.075	385.946	774.867	760.589
526	0	199.831	803.08	1575.66	83.501	796.372	1595.54	188.076	974.954	1558.26	81.4472	967.024	1571.73	127.654	971.135	1453.07	136.578	1036.17	1166.66	121.71	847.3	1365.92	110.758	768.155	1176.13	57.258	1055.16	1242.2	303.924	886.648	1375.17	378.024	894.022	1132.65	382.654	896.591	1057.58	395.123	802.604	909.155	347.573	785.022	831.232	416.474	807.132	821.593	385.794	756.836	764.161
527	0	200.823	793.891	1575.32	84.6598	786.456	1595.29	188.6	965.83	1559.6	81.9218	957.204	1573.21	128.856	962.801	1453.7	138.322	1027.4	1167.3	122.146	838.999	1366.51	110.852	760.221	1177.1	59.1013	1047.28	1242.82	304.617	877.271	1376.26	378.971	881.554	1133.92	384.002	883.421	1058.75	395.28	787.075	911.798	347.47	768.591	834.232	416.631	790.065	824.215	385.417	738.856	767.599
528	0	201.661	784.81	1575.07	85.5864	776.668	1594.82	188.879	956.688	1560.76	82.5211	947.517	1574.18	130.077	954.564	1454.17	139.754	1018.67	1167.59	122.719	830.661	1367	111.137	752.422	1177.92	60.8375	1039.37	1243.35	305.505	868.031	1377.1	379.794	869.295	1135.01	385.426	870.767	1060.13	395.393	771.698	914.37	347.257	752.363	837.233	416.653	773.001	826.858	385.092	721.067	771.094
529	0	202.401	775.655	1574.97	86.5336	767.083	1594.17	189.154	947.504	1561.97	82.7774	937.913	1574.85	131.367	946.251	1454.62	141.29	1010.06	1168.22	123.379	822.211	1367.17	111.54	744.497	1178.47	62.4201	1031.51	1243.84	306.426	858.889	1377.64	380.743	857.251	1135.84	386.458	857.924	1060.99	395.322	756.423	916.764	346.981	736.122	839.936	416.535	756.048	829.206	384.617	703.354	774.404
530	0	202.927	766.576	1574.98	87.0842	757.546	1593.6	189.41	938.563	1562.89	82.4181	928.606	1575.43	132.665	937.831	1454.99	142.483	1001.2	1168.84	124.079	813.774	1367.3	112.048	736.444	1178.83	63.8224	1023.57	1244.3	307.27	849.603	1378.15	381.681	845.444	1136.63	387.473	845.325	1061.67	395.291	741.288	919.033	346.354	719.941	842.689	416.192	739.244	831.583	383.89	685.451	777.907
531	0	203.561	757.571	1575.03	87.5052	748.324	1593.11	189.821	929.69	1563.71	82.923	919.376	1575.61	133.676	929.407	1455.29	144.255	992.647	1169.18	124.831	805.287	1367.47	112.528	728.373	1179.08	65.1097	1015.51	1244.77	308.212	840.492	1378.6	382.705	833.94	1137.32	388.377	832.894	1062.32	395.183	726.574	921.296	345.93	704.148	845.457	415.945	722.733	834.008	383.34	668.392	781.385
532	0	203.791	748.687	1574.81	87.6379	739.264	1592.56	189.928	920.855	1563.95	83.1541	910.244	1575.44	134.884	920.822	1455.28	145.561	984.125	1169.21	125.552	796.797	1367.37	113.049	720.333	1179	66.4264	1007.4	1244.82	309.108	831.439	1378.6	383.649	822.796	1137.56	389.364	820.709	1062.56	395.077	711.981	923.22	345.529	688.564	848.053	415.367	706.764	835.872	382.547	651.279	784.739
533	0	204.01	739.802	1574.46	87.8638	730.184	1591.84	189.985	911.79	1563.91	83.0467	901.403	1575.12	135.891	912.204	1455.16	146.53	976.592	1168.92	126.271	788.204	1367.06	113.574	712.304	1178.5	67.543	999.161	1244.65	309.82	822.382	1378.33	384.435	811.841	1137.49	389.996	808.545	1062.37	394.813	697.779	924.848	344.505	672.835	850.433	414.615	690.855	837.467	381.559	634.355	787.79
534	0	204.178	730.808	1574.14	87.9933	721.296	1591.23	190.147	902.913	1563.83	83.6899	892.534	1574.64	136.78	903.568	1455.12	147.433	968.677	1168.83	126.963	779.575	1366.6	114.16	704.321	1177.9	68.4604	990.902	1244.76	310.458	813.387	1378.09	385.226	801.117	1137.53	390.601	796.622	1062.42	394.49	683.595	926.542	343.743	658.046	852.68	413.785	675.37	839.175	380.462	617.772	791.04
535	0	204.353	721.971	1573.78	88.0791	712.719	1590.69	190.46	894.062	1563.54	83.9265	883.797	1574.12	137.628	894.814	1454.89	148.457	960.915	1168.81	127.555	771.007	1366.1	114.896	696.276	1177.27	69.3206	982.621	1244.74	311.155	804.281	1377.82	385.951	790.572	1137.44	391.204	784.831	1062.34	393.967	669.845	928.103	343.01	643.159	854.996	412.682	660.302	840.645	379.281	601.398	794.397
536	0	204.555	713.171	1573.26	88.3898	703.881	1589.92	190.835	885.29	1563.03	84.0555	875.101	1573.51	138.349	885.999	1454.52	149.382	953.274	1168.69	128.254	762.316	1365.41	115.733	688.155	1176.34	69.9066	974.392	1244.53	311.698	795.287	1377.26	386.712	780.216	1137.18	391.706	773.076	1062.08	393.392	656.187	929.366	342.22	628.459	857.189	411.727	645.239	842.058	378.184	585.56	797.273
537	0	204.685	704.182	1572.67	88.4897	695.163	1589.18	191.347	876.457	1562.52	84.7086	866.344	1572.82	138.814	877.132	1454.15	150.353	945.646	1168.63	129.001	753.625	1364.75	116.552	679.934	1175.34	70.2936	966.02	1244.34	312.21	786.267	1376.82	387.345	769.968	1136.9	392.15	761.503	1061.79	392.635	642.674	930.74	341.303	613.953	859.234	410.526	630.792	843.286	376.69	569.97	800.109
538	0	204.771	695.246	1572.26	88.4482	686.516	1588.63	191.836	867.478	1561.97	85.0088	857.536	1572.21	139.247	868.074	1453.81	151.096	937.779	1168.65	129.44	744.856	1363.98	117.171	671.594	1174.26	70.5645	957.576	1244.3	312.786	777.299	1376.53	387.979	759.867	1136.81	392.562	749.964	1061.8	392.017	629.611	932.028	339.689	599.964	861.339	409.254	616.442	844.783	375.297	554.751	802.924
539	0	204.948	686.311	1571.75	88.6073	677.739	1587.92	192.318	858.493	1561.37	84.94	848.701	1571.49	139.487	859.076	1453.38	151.524	930.578	1168.72	129.706	735.97	1363.15	117.845	663.378	1173.11	70.775	949.106	1244.19	313.154	768.366	1376.13	388.383	749.938	1136.52	393.036	738.735	1061.9	391.162	616.815	933.218	338.395	586.255	863.282	408.028	602.291	846.199	373.647	540.017	805.605
540	0	204.988	677.202	1570.92	88.5293	668.942	1587.07	192.693	849.538	1560.43	85.5334	839.937	1570.43	139.727	850.095	1452.87	151.504	922.907	1168.37	130.315	727.148	1362.1	118.383	654.841	1172	70.9838	940.456	1243.78	313.574	759.531	1375.53	388.652	740.088	1135.96	393.224	727.636	1061.5	390.127	604.11	933.99	337.203	572.759	864.974	406.568	588.617	847.153	372.086	525.667	807.956
541	0	204.86	668.193	1569.93	88.4555	660.108	1586.03	192.759	840.376	1559.11	85.7677	831.038	1569.24	139.932	841.083	1452.03	151.301	914.643	1167.78	130.643	718.182	1361.03	118.984	646.366	1170.66	71.2059	931.709	1243.18	313.746	750.717	1374.63	388.908	730.478	1135.09	393.151	716.739	1060.87	389.148	591.78	934.749	335.785	559.639	866.465	404.732	575.563	847.713	370.345	511.662	810.068
542	0	204.844	659.214	1569.03	88.3521	651.245	1584.99	192.828	831.274	1557.8	85.6773	822.244	1567.83	139.955	832.11	1451.09	150.704	907.027	1166.83	130.922	709.206	1360.03	119.537	638.017	1169.55	70.4712	923.041	1242.33	314.102	742.145	1373.83	388.966	721.001	1134.28	393.012	706.268	1060.04	388.383	579.775	935.566	334.254	546.881	868.011	403.243	562.86	848.397	368.484	498.226	812.096
543	0	204.75	650.153	1567.93	88.0545	642.399	1584.04	192.914	822.171	1556.28	86.2365	813.447	1566.16	139.985	822.938	1449.88	150.293	899.029	1165.92	131.253	700.088	1358.91	120.064	629.466	1168.46	69.9943	914.216	1241.53	314.296	733.582	1372.83	389.048	711.69	1133.24	392.914	695.896	1059.08	387.114	568.218	936.053	332.807	534.594	869.202	401.552	550.301	848.747	366.53	485.113	813.799
544	0	204.33	641.127	1566.7	87.8078	633.392	1582.78	193.002	813.24	1554.91	86.1935	804.436	1564.61	139.761	813.724	1448.74	149.819	891.154	1164.97	131.415	690.922	1357.57	120.604	620.887	1166.99	69.5409	905.153	1240.84	314.289	724.951	1371.59	388.853	702.36	1131.97	392.6	685.588	1057.98	385.97	556.744	936.235	331.156	522.468	870.041	399.644	538.02	848.866	364.614	472.476	815.124
545	0	203.868	631.858	1565.63	87.3621	624.444	1581.31	193.057	804.09	1553.55	85.9839	795.488	1563.11	139.403	804.474	1447.75	149.252	883.231	1164.44	131.463	681.685	1356.2	120.978	612.175	1165.58	69.0137	896.035	1240.13	314.302	716.183	1370.72	388.584	693.026	1130.83	392.259	675.518	1056.98	384.879	545.564	936.287	329.642	510.533	870.917	397.948	526.122	849.084	362.444	460.112	816.174
546	0	203.385	622.658	1564.56	86.6802	615.542	1580.09	192.836	794.918	1552.11	85.4995	786.419	1561.47	139.249	795.212	1446.68	148.343	874.655	1163.55	131.553	672.437	1354.86	121.39	603.445	1164.21	68.2905	886.818	1239.21	314.309	707.521	1369.64	388.334	683.819	1129.77	392.011	665.655	1056.21	383.641	534.694	936.386	327.744	499.298	871.509	396.099	514.566	849.234	360.381	448.313	816.954
547	0	202.787	613.558	1563.44	86.1327	606.505	1578.68	192.319	785.573	1550.55	85.015	777.404	1559.64	138.71	785.797	1445.46	147.58	866.066	1162.77	131.659	663.059	1353.45	121.811	594.831	1162.61	67.4975	877.622	1238.21	314.226	698.829	1368.49	388	674.637	1128.6	391.549	655.997	1055.09	382.304	524.013	936.064	326.011	488.227	872.041	394.273	503.237	849.11	358.246	436.747	817.451
548	0	202.12	604.298	1562.43	85.4168	597.648	1577.04	192.444	776.475	1548.98	84.4299	768.388	1557.83	138.044	776.264	1444.25	146.718	857.327	1161.87	131.607	653.573	1351.83	122.333	585.823	1160.95	66.7223	868.297	1237.16	314.077	689.958	1367.23	387.666	665.528	1127.25	390.938	646.442	1053.76	380.914	513.693	935.469	324.455	477.449	872.132	392.443	492.382	848.66	356.16	425.688	817.655
549	0	201.308	595.129	1561.38	84.5204	588.694	1575.83	192.165	767.661	1547.33	83.8098	759.284	1556.03	137.629	766.763	1442.96	145.891	848.419	1160.9	131.457	644.072	1350.4	122.764	576.744	1159.37	65.7303	858.866	1236.06	313.986	681.195	1366.04	387.088	656.424	1125.98	390.267	637.058	1052.48	379.724	503.724	935.046	322.453	467.097	872.043	390.654	481.825	848.237	353.934	415.105	817.734
550	0	200.435	586.02	1560.32	83.4037	579.651	1574.54	191.376	758.256	1545.55	83.1084	750.25	1553.79	136.9	757.107	1441.73	145.14	839.537	1159.66	131.265	634.521	1348.85	123.077	567.449	1157.96	64.7692	849.374	1234.79	313.643	672.168	1364.97	386.448	647.539	1124.54	389.544	628.051	1051.07	378.173	494.154	934.023	320.566	457.183	871.845	388.491	471.973	847.373	351.716	404.916	817.444
551	0	199.424	576.784	1559.11	82.1999	570.679	1573.22	190.495	748.794	1543.55	82.8318	741.301	1551.53	136.118	747.442	1440.27	144.079	830.423	1158.24	130.995	624.766	1347.22	123.416	558.404	1156.04	63.9116	839.803	1233.6	313.158	662.995	1363.53	385.61	638.698	1122.71	388.579	619.146	1049.34	376.766	484.764	932.913	318.671	447.723	870.94	386.495	462.276	845.992	349.582	395.209	816.73
552	0	198.181	567.639	1557.94	81.466	561.918	1571.94	189.339	739.54	1541.53	82.0942	732.136	1549.43	135.451	737.737	1438.85	143.059	821.317	1157.14	130.614	614.961	1345.76	123.557	548.899	1154.39	63.1419	830.091	1232.62	312.657	653.673	1362.3	384.785	629.98	1121.03	387.464	610.39	1047.44	375.008	475.71	931.494	317.127	438.456	870.075	384.299	453.245	844.294	347.414	385.894	815.863
553	0	197.003	558.423	1557.18	80.1135	553.011	1570.89	188.569	730.365	1539.75	81.0161	723.052	1547.52	134.504	727.87	1437.75	142.307	812.19	1156.29	130.147	605.124	1344.42	123.678	539.323	1152.9	62.2507	820.334	1231.63	312.132	644.256	1361.33	383.981	621.351	1119.64	386.489	601.81	1045.94	373.573	467.095	930.001	315.137	429.829	868.988	382.118	444.643	842.835	345.238	377.197	814.837
554	0	195.841	549.112	1556.65	78.7521	543.888	1570.01	187.801	720.891	1538.11	80.0697	713.815	1545.62	133.718	718.116	1436.75	141.449	802.611	1155.37	129.672	595.333	1343.28	123.73	529.795	1151.59	61.1783	810.665	1230.44	311.626	634.76	1360.61	383.206	612.736	1118.57	385.534	593.292	1044.64	371.943	458.736	928.518	313.062	421.719	867.688	380.345	436.638	841.292	343.188	368.948	813.549
555	0	194.387	539.669	1556.12	77.1937	534.888	1569.2	186.818	711.522	1536.54	78.9246	704.632	1543.77	132.659	708.038	1435.64	140.52	793.157	1154.6	128.951	585.328	1342.09	123.8	520.125	1150.27	60.4745	800.967	1229.36	310.933	625.02	1359.88	382.162	604.105	1117.37	384.609	584.914	1043.45	369.953	450.733	926.737	311.003	413.818	866.045	378.194	428.83	839.413	341.03	361.182	811.769
556	0	192.871	530.272	1555.78	75.8294	525.708	1568.48	185.441	701.953	1535.16	77.6005	695.237	1542.13	131.759	698.168	1434.78	139.838	783.659	1153.92	128.275	575.312	1341.05	123.379	510.218	1149.19	59.6242	791.078	1228.48	310.188	615.094	1359.34	381.275	595.62	1116.44	383.602	576.654	1042.31	368.487	442.998	924.912	309.15	406.359	864.434	376.156	421.534	837.604	338.945	353.982	809.896
557	0	191.323	520.82	1555.62	73.9809	516.548	1567.96	184.705	692.321	1533.98	76.5482	685.958	1540.54	130.528	688.1	1434.09	138.962	773.705	1153.32	127.423	565.158	1340.31	122.814	500.382	1148.42	58.8859	781.141	1227.6	309.337	605.112	1358.96	380.211	587.157	1115.64	382.61	568.743	1041.5	366.953	435.972	923.048	307.225	399.374	862.712	374.074	414.561	835.616	336.869	347.281	807.906
558	0	189.695	511.262	1555.48	72.4011	507.399	1567.43	183.58	682.811	1532.83	75.2209	676.618	1539.02	129.679	678.048	1433.31	138.328	763.781	1152.6	126.519	555.011	1339.62	122.165	490.265	1147.8	58.0839	771.071	1226.83	308.438	594.969	1358.58	379.157	578.841	1114.82	381.503	560.914	1040.6	365.451	428.966	921.052	305.744	392.778	860.66	372.06	408.189	833.394	334.786	341.015	805.433
559	0	188.103	501.8	1555.28	70.7569	498.228	1566.91	181.752	672.884	1531.47	73.9513	667.24	1537.49	128.378	667.805	1432.6	137.607	753.743	1151.76	125.532	544.721	1339.01	121.371	479.971	1147.25	57.3294	760.767	1226.09	307.453	584.722	1358.22	378.092	570.43	1113.93	380.21	553.106	1039.42	363.783	422.236	918.91	304.154	386.58	858.379	370.15	402.223	830.883	332.81	335.251	802.679
560	0	186.352	492.246	1555.16	68.9747	488.82	1566.53	180.78	663.465	1530.4	72.5052	657.725	1536.23	127.197	657.715	1431.99	137.014	743.523	1151.24	124.424	534.399	1338.63	120.453	469.595	1146.92	56.6147	750.445	1225.34	306.278	574.347	1357.98	376.944	562.136	1113.29	378.936	545.454	1038.46	362.239	415.85	916.721	302.164	380.768	856.163	368.392	396.694	828.385	330.799	329.922	799.732
561	0	184.559	482.833	1555.21	67.1308	479.656	1566.34	178.732	653.768	1529.45	71.0258	648.17	1535	125.955	647.503	1431.31	136.268	732.899	1150.48	123.2	523.909	1338.45	119.502	458.923	1146.74	55.825	739.841	1224.49	305.023	563.965	1357.94	375.807	553.845	1112.8	377.87	537.826	1037.78	361.128	409.715	914.553	300.813	375.204	853.802	366.745	391.515	825.879	328.814	325.06	796.56
562	0	182.725	473.29	1555.18	65.2968	470.245	1566.25	177.489	644.241	1528.49	69.2581	638.645	1533.84	124.616	636.994	1430.46	135.617	722.215	1149.75	121.9	513.357	1338.16	118.274	448.036	1146.65	54.7126	729.081	1223.78	303.723	553.59	1357.79	374.504	545.494	1112.34	376.496	530.41	1037.06	359.848	403.674	912.452	299.18	370.061	851.144	365.205	386.588	823.324	327.016	320.681	793.204
563	0	180.971	463.764	1555.27	63.5202	460.797	1566.1	175.452	634.38	1527.49	67.5339	628.993	1532.64	123.11	626.866	1429.99	134.695	711.497	1149.14	120.509	502.7	1337.97	117.149	436.939	1146.65	53.6081	718.114	1223.02	302.265	542.994	1357.8	373.308	537.03	1112.06	375.092	522.859	1036.44	358.563	397.847	910.084	297.853	365.138	848.366	363.768	381.803	820.732	325.29	316.528	789.672
564	0	179.299	454.286	1555.74	61.6232	451.216	1566.41	173.723	624.78	1526.84	65.6336	619.174	1531.74	121.438	616.358	1429.66	133.52	700.402	1148.53	119.032	491.973	1338.03	116.103	425.792	1146.82	52.4067	707.007	1222.23	300.796	532.403	1358.09	372.055	528.505	1112	373.883	515.437	1036.24	357.361	392.241	907.909	296.548	360.503	845.767	362.654	377.385	818.424	323.771	312.857	786.026
565	0	177.465	444.679	1556.55	59.8059	441.461	1566.9	171.905	614.953	1526.17	63.7327	609.26	1531.04	119.78	605.682	1429.36	132.271	689.144	1148.2	117.618	481.155	1338.38	115.223	414.458	1147.19	51.0115	695.879	1221.5	299.474	521.85	1358.67	370.911	519.96	1112.21	372.519	508.1	1036.23	356.59	386.801	905.94	295.498	355.968	843.212	361.897	373.209	816.313	322.383	309.717	782.403
566	0	175.525	435.137	1557.35	57.8752	431.972	1567.49	170.078	605.109	1525.59	62.0223	599.307	1530.24	118.073	595.258	1429.42	130.874	678.04	1148.09	116.173	470.274	1338.76	114.169	402.737	1147.53	49.6822	684.669	1220.98	298	510.934	1359.35	369.684	511.165	1112.59	371.189	500.543	1036.27	355.653	381.491	903.977	294.483	351.592	840.437	361.145	369.269	814.214	321.261	306.761	778.643
567	0	173.633	425.356	1558.42	55.9755	422.388	1568.21	167.849	595.108	1525.17	59.9256	589.389	1529.72	116.342	584.568	1429.63	129.159	666.729	1148.35	114.699	459.23	1339.22	113.276	391.21	1147.88	48.2257	673.441	1220.89	296.394	499.992	1360.15	368.398	502.299	1113.09	369.854	492.955	1036.75	354.635	376.206	902.195	294.128	348.339	837.511	360.451	365.298	812.382	320.154	304.169	775.073
568	0	171.523	415.76	1559.58	53.7039	412.56	1569.44	165.936	585.009	1524.8	57.5716	579.382	1529.18	114.507	573.753	1430	127.693	655.342	1148.62	113.152	448.189	1339.96	112.468	379.758	1148.46	46.7542	662.266	1220.93	294.786	488.965	1361.18	367.132	493.279	1113.85	368.652	485.407	1037.41	353.632	371.206	900.526	293.572	344.904	835.039	360.328	361.877	810.693	319.384	302.005	771.574
569	0	169.529	406.061	1560.9	51.7461	402.953	1570.58	163.999	575.206	1524.59	55.6028	569.324	1528.87	112.727	562.912	1430.52	126.199	643.739	1148.86	111.727	437.278	1340.91	111.564	368.151	1149.27	45.3197	651.191	1221.04	293.228	477.98	1362.32	365.971	484.095	1114.78	367.579	477.672	1038.36	352.831	366.369	899.182	292.787	341.647	832.79	360.21	358.696	809.216	318.81	299.958	768.326
570	0	167.377	396.32	1562.29	49.505	393.25	1571.74	161.594	565.067	1524.64	53.6373	559.371	1528.75	110.952	552.159	1431.34	125.07	632.467	1149.85	110.347	426.311	1341.98	110.853	356.825	1150.03	43.8455	640.203	1221.59	291.544	466.822	1363.61	364.779	474.652	1116.02	366.279	469.777	1039.38	352.344	361.301	898.142	292.483	339.174	830.382	360.315	355.393	808.025	318.559	298.754	765.291
571	0	165.31	386.559	1563.89	47.4508	383.602	1573.17	159.647	555.08	1524.9	51.5146	549.37	1528.86	109.206	541.412	1432.21	123.737	621.101	1151	108.994	415.547	1343.37	110.082	345.531	1151.24	42.5337	629.338	1222.66	289.94	455.788	1365.38	363.597	465.06	1117.71	365.319	461.766	1041.01	351.779	356.39	897.673	292.466	336.547	828.598	360.857	352.174	807.529	318.463	297.483	762.664
572	0	163.092	376.875	1565.62	45.1205	373.908	1574.58	157.79	545.231	1525.6	49.4864	539.401	1529.16	107.55	530.771	1433.47	122.932	609.844	1152.58	107.584	404.86	1344.96	109.28	334.597	1152.55	41.2554	618.672	1223.86	288.434	444.852	1367.4	362.437	455.309	1119.63	364.497	453.699	1043.08	351.328	351.532	897.519	292.818	334.124	827.314	361.868	348.866	807.63	318.607	296.46	760.522
573	0	160.897	367.073	1567.16	42.9099	364.24	1575.75	155.618	535.177	1526.38	47.5513	529.484	1529.65	105.786	520.189	1434.79	122.075	599.102	1154.02	106.357	394.364	1346.56	108.552	323.71	1153.99	40.0998	608.082	1224.92	287.124	434.133	1369.44	361.426	445.445	1121.68	363.697	445.615	1045.28	351.182	346.543	897.699	292.912	331.703	826.171	362.711	345.536	807.822	318.817	295.577	758.32
574	0	158.673	357.265	1568.91	40.8249	354.62	1576.93	153.701	525.24	1527.4	45.4505	519.622	1530.28	104.181	509.894	1436.18	121.412	588.549	1155.62	105.191	383.897	1348.15	107.809	313.08	1155.39	39.0069	597.65	1226.44	285.567	423.504	1371.5	360.39	435.47	1123.91	363.05	437.458	1047.7	351.051	341.399	898.102	293.813	329.335	825.429	364.025	341.756	808.594	319.311	294.748	756.688
575	0	156.589	347.52	1570.76	38.6277	344.889	1578.26	151.722	515.624	1528.55	43.4909	509.72	1531.02	102.781	499.716	1437.79	120.599	578.389	1157.25	104.139	373.66	1349.76	107.14	302.739	1156.98	37.8021	587.197	1227.85	284.211	413.031	1373.84	359.5	425.687	1126.44	362.637	429.421	1050.53	351.104	336.145	899.052	294.721	326.594	825.432	365.622	337.699	809.906	320.216	293.882	755.464
576	0	154.633	337.907	1572.52	36.6223	335.431	1579.32	150.155	505.656	1529.71	41.7592	500.144	1531.53	101.258	489.574	1439.04	120.038	568.37	1158.88	103.138	363.661	1351.39	106.4	292.738	1158.49	36.9319	576.999	1229.2	283.174	402.999	1376.1	358.799	416.085	1128.91	362.283	421.503	1053.27	351.537	330.736	900.141	296.305	323.809	825.333	367.661	333.553	811.5	321.593	292.873	754.391
577	0	152.636	328.429	1574.02	34.5516	325.879	1580.25	148.306	496.056	1530.61	40.0891	490.37	1532.11	100.063	479.853	1440.37	119.64	558.612	1160.01	102.229	353.679	1352.89	106.099	283.442	1159.67	35.7024	566.84	1230.28	282.096	393.291	1378	358.138	406.663	1131.11	361.936	413.43	1055.6	352.251	325.187	901.249	297.921	320.55	825.686	369.826	329.077	812.893	323.285	291.907	753.355
578	0	150.862	318.87	1575.51	32.82	316.547	1581.04	146.931	486.276	1531.63	38.6718	480.805	1532.52	98.7878	469.988	1441.61	118.907	548.862	1161.71	101.497	343.909	1354.38	105.676	273.848	1161.05	34.7918	556.734	1231.62	281.085	383.961	1379.73	357.658	397.391	1133.33	361.716	405.637	1057.83	353.37	319.504	902.57	300.115	316.834	826.152	372.354	324.165	814.564	325.557	290.275	752.791
579	0	149.063	309.461	1577.04	31.0323	307.382	1582.01	145.356	476.909	1532.51	37.2077	471.452	1532.83	97.4967	460.442	1442.63	117.789	539.655	1162.83	100.828	334.156	1355.78	105.168	264.519	1162.42	33.5205	546.943	1232.55	280.157	374.97	1381.49	357.385	388.462	1135.49	361.767	397.921	1060.19	354.816	313.594	903.964	302.389	312.569	826.958	374.967	319.322	816.278	328.397	288.626	752.394
580	0	147.421	300.037	1578.4	29.2394	298.002	1582.88	144.279	467.554	1533.49	36.0435	462.017	1533.2	96.2141	451.055	1443.81	116.854	530.465	1164.19	100.198	324.731	1357.04	104.977	255.458	1163.55	32.2081	537.159	1233.82	279.374	366.192	1383	356.99	379.877	1137.41	361.832	390.515	1062.32	356.385	307.76	905.2	304.837	307.908	827.611	377.636	314.491	817.972	331.76	286.489	752.282
581	0	145.966	290.755	1579.64	27.8097	288.786	1583.64	142.994	457.99	1534.22	35.0359	452.719	1533.66	95.073	441.472	1444.9	115.654	521.158	1165.12	99.7274	315.401	1358.3	105.164	246.619	1164.41	30.6319	527.701	1234.83	278.611	357.839	1384.3	356.865	371.544	1139.1	361.975	383.081	1064	358.412	301.811	906.429	307.666	302.563	828.3	380.546	309.521	819.513	335.569	283.818	752.337
582	0	144.614	281.521	1580.83	26.5205	279.82	1584.41	141.963	448.742	1535.17	33.9148	443.585	1534.21	94.0196	432.327	1445.91	114.251	512.153	1166.42	99.4501	306.317	1359.68	105.43	237.691	1165.37	29.3909	518.207	1236.13	277.96	349.689	1385.56	356.888	363.561	1140.89	362.276	375.892	1065.82	360.947	295.85	907.812	310.964	296.44	829.398	383.776	304.495	821.323	340.081	280.727	752.543
583	0	143.536	272.439	1582.24	25.3466	270.825	1585.26	141.187	439.412	1536.28	33.0306	434.449	1534.94	92.9753	423.262	1447.17	112.855	503.412	1167.62	99.1723	297.306	1361.1	105.838	228.879	1166.41	27.7471	509.049	1237.4	277.539	341.866	1387.11	356.933	356.146	1142.69	362.815	368.965	1067.86	363.509	290.113	909.264	314.321	290.562	830.554	387.08	299.872	823.315	344.599	277.029	753.506
584	0	142.402	263.377	1583.54	24.1518	261.926	1586.16	140.398	430.443	1537.47	32.1825	425.428	1535.79	91.909	414.208	1448.35	111.428	494.51	1168.59	98.8613	288.477	1362.42	106.285	220.238	1167.32	26.0828	500.034	1238.5	277.002	334.141	1388.44	357.144	349.031	1144.46	363.37	362.28	1069.85	366.379	284.276	910.878	317.829	284.498	831.561	390.59	294.664	825.422	349.21	272.795	754.451
585	0	141.347	254.372	1584.66	23.2238	252.926	1587.04	139.659	421.453	1538.56	31.4845	416.559	1536.72	90.7559	405.355	1449.52	109.809	485.999	1169.98	98.686	279.697	1363.62	106.808	211.677	1168.15	24.3802	491.004	1239.85	276.38	326.605	1389.75	357.424	342.391	1146.05	363.797	355.78	1071.63	369.206	278.568	912.436	321.392	277.877	832.959	394.007	289.697	827.4	354.175	267.848	755.731
586	0	140.579	245.527	1585.8	22.402	244.147	1587.98	138.911	412.589	1539.77	30.834	407.719	1537.67	89.7858	396.681	1450.82	108.158	477.434	1171.08	98.6484	271.073	1364.98	107.438	203.153	1169.39	22.4687	482.194	1241.34	275.92	319.235	1391.14	357.778	336.242	1147.79	364.372	349.555	1073.5	372.29	272.782	914.341	324.938	272.026	834.128	397.412	285.079	829.495	359.073	262.299	757.32
587	0	139.97	236.803	1587.01	21.6431	235.483	1589	138.42	403.888	1540.94	30.2129	399.101	1538.66	88.7926	388.186	1451.97	106.272	469.099	1172.34	98.5259	262.656	1366.51	108.178	194.867	1170.79	20.8969	473.296	1242.38	275.57	312.141	1392.67	358.141	330.642	1149.63	365.035	343.62	1075.45	375.251	267.262	916.411	328.709	266.498	835.61	401.226	280.419	831.913	363.788	256.55	759.583
588	0	139.401	228.158	1588.04	21.2064	226.748	1590.06	137.938	395.076	1542.06	29.7513	390.439	1539.73	87.9036	379.717	1452.94	104.923	460.878	1173.45	98.5032	254.274	1367.95	108.83	186.567	1172.18	18.9836	464.551	1243.78	275.179	305.185	1393.98	358.56	325.243	1151.35	365.435	337.874	1077.07	377.981	262.187	918.226	332.174	260.555	837.076	404.65	275.523	834.006	368.543	250.245	761.772
589	0	139.022	219.641	1589.01	20.7843	218.099	1591.04	137.276	386.557	1543.02	29.2597	381.864	1540.75	87.095	371.32	1454.09	103.27	452.467	1174.59	98.4764	245.895	1369.26	109.405	178.414	1173.57	17.3324	455.724	1244.92	274.948	298.042	1395.47	358.949	320.159	1153.12	365.909	332.203	1078.88	381.185	256.664	920.395	335.728	254.077	839.038	407.946	270.577	836.202	373.154	243.489	764.01
590	0	138.506	211.23	1590.05	20.3953	209.624	1591.86	136.773	378.375	1544.06	28.755	373.347	1541.78	86.1917	363.066	1455.15	101.966	444.194	1175.57	98.3375	237.706	1370.66	109.917	170.258	1175.24	15.6962	447.065	1245.94	274.371	291.341	1396.8	359.355	315.359	1155.05	366.391	326.72	1080.88	383.858	251.36	922.721	339.295	247.682	840.843	411.107	265.407	838.571	377.592	236.335	766.74
591	0	138.244	202.854	1590.77	20.1973	201.169	1592.7	136.26	370.159	1545.16	28.2638	364.932	1542.78	85.3907	354.748	1456.04	100.764	435.842	1176.65	98.2487	229.589	1372.02	110.384	162.129	1176.81	14.3171	438.331	1246.97	273.964	284.541	1398.08	359.594	310.76	1156.79	367.137	321.429	1082.99	386.899	245.885	924.839	342.81	241.181	842.885	414.195	260.288	840.877	381.992	228.849	769.499
592	0	138.007	194.622	1591.5	20.0869	192.727	1593.49	135.759	361.863	1545.97	27.8395	356.556	1543.62	84.4259	346.596	1457.08	99.5495	427.335	1177.22	98.17	221.356	1373.16	110.724	154.095	1178.12	12.633	429.681	1247.93	273.475	277.678	1399.29	359.907	306.138	1158.5	367.664	316.161	1084.77	389.429	240.412	926.977	346.077	234.617	844.545	416.912	255.171	843.115	386.388	221.388	772.492
593	0	137.968	186.457	1592.38	19.9616	184.365	1594.2	135.327	353.652	1546.73	27.4669	348.199	1544.4	83.6713	338.356	1457.91	98.2444	418.755	1177.93	97.9674	213.307	1374.16	111.035	146.014	1179.34	11.2759	421	1248.58	273.257	270.717	1400.49	360.076	301.507	1160.23	368.167	311.007	1086.46	392.078	235.089	929.095	349.525	227.779	846.591	419.788	249.713	845.174	390.557	213.505	775.362
594	0	137.996	178.363	1593.1	19.8095	176.031	1594.97	135.177	345.586	1547.46	26.9832	339.902	1545.11	82.8725	330.186	1458.58	97.3725	410.312	1178.38	97.8951	205.13	1375.15	111.2	137.993	1180.62	9.94321	412.472	1249.28	272.757	264.017	1401.5	360.423	296.942	1162.02	368.879	305.926	1088.2	394.818	229.497	931.382	352.795	220.757	848.597	422.488	244.461	847.402	394.736	205.68	778.322
595	0	137.981	170.315	1593.7	19.7417	167.62	1595.55	134.634	337.493	1547.92	26.7068	331.494	1545.65	82.1318	321.98	1459.04	96.4743	401.501	1178.91	97.8083	197.007	1375.79	111.359	130.092	1181.43	8.91307	403.863	1249.86	272.463	257.127	1402.3	360.639	292.284	1163.38	369.525	300.824	1089.75	397.201	224.062	933.324	355.653	213.585	850.617	425.005	239.274	849.319	398.717	197.778	781.18
596	0	137.931	162.269	1593.92	19.8285	159.373	1595.95	134.449	329.216	1548.24	26.34	323.207	1545.98	81.4104	313.724	1459.43	95.8729	392.632	1179.22	97.6047	188.842	1376.1	111.397	122.068	1181.93	7.82072	395.408	1250.29	271.639	250.184	1402.5	360.795	287.521	1164.45	370.165	295.796	1090.92	399.436	218.311	934.883	358.382	206.369	852.074	427.092	233.592	850.795	402.561	189.8	783.755
597	0	137.985	154.144	1594.15	20.0048	151.165	1596.28	134.101	321.292	1548.4	25.9491	314.954	1546.26	80.8121	305.546	1459.66	94.8577	383.849	1179.23	97.5413	180.547	1376.19	111.393	114.143	1182.25	6.81059	386.959	1250.57	271.414	243.045	1402.96	360.941	282.642	1165.5	370.693	290.712	1091.92	401.571	212.538	936.456	361.039	198.822	853.761	428.808	227.907	852.048	405.996	181.722	786.256
598	0	138.207	146.178	1594.32	20.0762	142.804	1596.6	133.846	313.174	1548.61	25.7836	306.625	1546.5	80.2288	297.357	1459.84	94.3825	375.327	1179.02	97.4283	172.324	1376.09	111.414	106.293	1182.43	5.91998	378.649	1250.64	271.195	235.992	1403.17	361.194	277.585	1166.39	371.272	285.565	1092.86	403.539	206.891	937.832	363.575	191.359	855.329	430.462	222.199	853.368	409.444	173.916	788.629
599	0	138.446	138.175	1594.18	20.3457	134.438	1596.78	133.596	305.124	1548.44	25.6226	298.421	1546.58	79.7768	289.126	1459.76	93.6411	367.316	1179.06	97.3308	164.068	1375.78	111.473	98.3331	1182.24	5.36287	370.248	1250.52	270.887	228.683	1402.99	361.517	272.367	1166.94	371.874	280.29	1093.36	405.408	200.958	938.786	366.037	183.551	856.494	432.41	216.037	854.273	412.66	166.122	790.607
600	0	138.69	130.041	1594	20.7748	126.133	1596.73	133.31	297.16	1548.24	25.4979	290.058	1546.69	79.2846	280.892	1459.68	93.0057	359.409	1179.08	97.3077	155.702	1375.2	111.409	90.3471	1181.88	4.62735	361.964	1250.5	270.722	221.175	1402.85	361.829	266.97	1167.5	372.305	274.64	1093.73	407.015	194.997	939.624	367.935	175.957	857.706	433.109	210.125	854.74	415.468	158.274	792.445
601	0	139.028	121.94	1593.75	21.0484	117.809	1596.65	133.321	289.079	1548.18	25.1999	281.722	1546.75	78.8595	272.588	1459.51	92.3805	351.446	1179.07	97.2883	147.423	1374.41	111.304	82.4656	1181.45	3.96274	353.667	1250.31	270.423	213.749	1402.53	362.084	261.264	1168	373.077	269.068	1094.19	408.543	189.01	940.32	369.69	168.407	858.676	434.033	203.996	855.23	417.843	150.597	793.852
602	0	139.384	113.886	1593.32	21.3224	109.316	1596.47	133.166	281.037	1547.96	25.1875	273.469	1546.5	78.4999	264.192	1459.21	92.2899	343.123	1178.55	97.2673	139.092	1373.51	111.25	74.607	1180.63	3.58663	345.424	1249.97	270.402	206.059	1402.26	362.402	255.417	1168.36	373.846	263.469	1094.76	410.018	182.742	940.878	371.385	160.642	859.543	434.774	197.84	855.454	419.913	142.991	795.219
603	0	139.7	105.694	1592.74	21.7775	100.889	1595.97	133.005	272.843	1547.45	24.8064	264.962	1546.25	78.1159	255.754	1458.72	92.0666	335.009	1178.02	97.3881	130.72	1372.52	111.428	66.6122	1179.69	2.97636	337.213	1249.65	270.215	198.279	1401.66	362.727	249.292	1168.37	374.291	257.355	1094.63	411.127	176.682	940.937	372.933	153.063	859.992	434.929	191.649	855.219	421.862	135.396	796.158
604	0	140.078	97.4677	1592.06	22.2938	92.4232	1595.35	132.847	264.617	1546.82	25.0058	256.477	1545.66	77.9419	247.367	1458.07	91.7652	326.637	1177.56	97.4143	122.318	1371.39	111.558	58.5755	1178.71	3.19751	329.055	1249.07	270.293	190.196	1400.97	362.947	242.929	1168.32	374.638	251.109	1094.38	412.237	170.271	940.992	374.102	145.492	860.337	435.631	184.977	855.058	423.466	127.92	796.899
605	0	140.519	89.2027	1591.36	22.5479	83.8565	1594.78	133.031	256.377	1546.06	24.8059	248.049	1545.04	78.1033	238.89	1457.23	91.6936	318.594	1176.64	97.7147	113.891	1370.27	111.875	50.4859	1177.9	3.43817	320.849	1248.28	270.504	182.17	1400.41	363.229	236.554	1168.17	374.907	244.697	1094	413.105	163.918	940.915	375.307	137.859	860.728	435.506	178.677	854.496	424.727	120.61	797.435
606	0	140.91	80.9188	1590.54	22.9638	75.4163	1593.97	133.046	248.259	1545.05	24.9761	239.521	1544.26	78.1857	230.455	1456.44	92.2583	310.412	1175.85	97.9523	105.458	1369.15	112.212	42.2836	1177.06	3.48762	312.611	1247.43	270.557	174.013	1399.49	363.385	229.68	1167.73	375.178	238.504	1093.51	413.883	157.377	940.559	376.119	130.251	860.761	435.739	172.214	853.832	425.762	113.217	797.485
607	0	141.184	72.5108	1589.5	23.4094	66.853	1592.91	133.03	239.695	1544.12	25.0207	231.22	1543.11	78.2942	221.96	1455.6	92.3003	302.203	1175.31	98.1528	96.9841	1367.75	112.449	34.0201	1175.91	3.7535	304.367	1246.59	270.881	165.624	1398.6	363.689	222.574	1167.1	375.291	231.693	1092.89	414.374	150.553	940.024	376.702	122.868	860.407	435.543	165.265	853.119	426.21	105.882	797.144
608	0	141.475	64.006	1588.37	23.6817	58.1766	1591.83	133.324	231.449	1543.09	25.2721	222.454	1542.14	78.4901	213.379	1454.57	92.5522	293.928	1174.3	98.3839	88.4471	1366.5	112.816	25.805	1174.68	4.27942	296.258	1245.7	270.993	157.131	1397.48	363.716	215.358	1166.34	375.727	224.914	1092.23	414.747	143.774	939.314	377.08	115.243	859.762	435.38	158.532	852.143	426.406	98.3784	796.433
609	0	141.903	55.4818	1587.33	24.1272	49.6353	1590.8	133.766	222.884	1542.04	25.5652	213.761	1540.97	79.1062	204.865	1453.36	93.3389	285.525	1173.14	98.8197	79.9787	1365.22	113.233	17.4608	1173.52	4.80224	288.009	1244.67	271.606	148.551	1396.48	364.042	207.77	1165.55	375.899	217.818	1091.35	414.998	136.741	938.158	377.206	107.993	858.974	435.097	151.638	850.964	426.393	91.3614	795.521
610	0	142.443	46.9624	1586.2	24.6798	41.0925	1589.56	134.122	214.267	1540.81	26.2183	205.095	1539.87	79.6758	196.28	1452.14	93.6433	277.041	1172.53	99.2747	71.4453	1363.86	113.602	8.97027	1172.23	5.46472	279.682	1243.56	272.094	139.9	1395.27	364.348	200.032	1164.51	376.099	210.379	1090.33	415.143	129.593	937.073	377.331	100.352	858.115	434.654	144.598	849.514	426.06	84.3934	793.962
611	0	143.03	38.2652	1585.07	25.156	32.3125	1588.3	134.713	205.545	1539.59	26.4501	196.667	1538.64	80.1669	187.462	1450.98	94.5213	268.662	1171.32	99.7421	62.8168	1362.61	114.002	0.419498	1170.87	6.27115	271.471	1242.39	272.862	130.924	1394.16	364.815	191.859	1163.47	376.409	202.837	1089.16	415.139	122.213	935.615	377.048	93.1118	856.672	434.561	137.215	848.028	425.53	77.2848	792.464
612	0	143.625	29.4803	1583.83	25.7868	23.7456	1587.11	135.404	196.887	1538.34	27.07	187.828	1537.4	80.9376	178.794	1449.77	94.9331	260.209	1170.08	100.228	54.1124	1361.15	114.421	-8.35233	1169.45	6.94865	262.997	1241.21	273.292	121.949	1392.44	365.129	183.598	1162.14	376.546	194.853	1087.91	414.916	114.76	933.968	376.763	85.5739	855.253	433.978	129.872	846.255	424.598	70.14	790.413
613	0	144.328	20.7531	1582.48	26.4184	15.1116	1585.85	136.298	188.095	1536.93	28.0994	179.194	1535.83	81.9296	170.042	1448.44	95.6163	251.55	1168.81	100.778	45.3267	1359.67	114.735	-17.2452	1167.98	8.04812	254.624	1239.86	273.961	112.913	1391.03	365.509	174.864	1160.6	376.875	186.978	1086.44	414.576	106.981	931.956	376.096	78.4938	853.161	433.465	122.53	844.37	423.633	63.0522	788.122
614	0	145.142	11.8834	1580.88	27.2641	6.3084	1584.4	137.25	179.264	1535.28	29.2744	170.485	1534.41	82.7208	161.04	1446.81	96.3485	242.621	1167.07	101.346	36.405	1358.08	115.08	-26.2556	1166.37	9.10746	246.176	1238.41	274.965	103.591	1389.44	366.004	165.977	1158.76	376.836	178.514	1084.6	414.247	99.3836	929.794	375.354	70.8839	850.948	432.628	115.161	842.117	422.438	55.9681	785.478
615	0	146.101	3.01198	1579.3	28.3583	-2.33924	1583	138.369	170.297	1533.57	30.5905	161.643	1533.01	83.8029	152.137	1445.31	97.4729	233.955	1165.59	102.058	27.4153	1356.49	115.439	-35.3127	1164.72	10.0556	237.472	1237.09	275.983	94.0039	1387.68	366.478	156.889	1156.92	376.801	169.895	1082.73	413.857	91.3474	927.469	374.451	63.3818	848.727	431.855	107.421	839.682	421.094	48.7806	782.836
616	0	147.357	-5.93943	1577.92	29.3579	-11.1397	1581.88	139.646	161.399	1531.88	31.7028	152.884	1531.49	85.0187	143.242	1443.93	98.6546	225.051	1164.12	102.815	18.3862	1355.01	115.798	-44.4502	1163.21	11.4111	228.849	1235.78	277.127	84.423	1386.14	366.875	147.571	1155.11	377.113	161.091	1080.9	413.274	83.318	925.008	373.569	56.0212	846.391	431.28	99.9678	837.384	419.631	41.6652	780.099
617	0	148.62	-14.8797	1576.25	30.7155	-19.8418	1580.47	141.132	152.44	1530.08	33.4068	143.987	1529.65	86.1828	134.088	1442.24	99.7951	216.007	1162.41	103.525	9.28318	1353.36	116.149	-53.6285	1161.5	12.693	220.071	1234.29	278.148	74.7373	1384.19	367.483	138.102	1153	377.394	151.95	1078.82	412.646	75.2028	922.413	372.457	48.5743	843.657	430.255	92.0378	834.631	418.073	34.6468	776.911
618	0	149.964	-23.9908	1574.66	31.849	-28.8667	1579.08	142.623	143.28	1528.27	34.6973	135.151	1528.28	87.7221	125.061	1440.73	101.05	206.938	1161.13	104.376	-0.015579	1351.72	116.388	-63.0063	1159.7	14.1483	211.34	1232.88	279.144	64.8427	1382.17	368.059	128.384	1150.78	377.517	142.544	1076.49	412.004	66.5918	919.531	371.183	41.0559	840.59	429.492	83.9905	831.956	416.285	27.3627	773.475
619	0	151.342	-33.1668	1573.14	33.4917	-37.6296	1577.74	144.382	134.086	1526.61	36.2032	125.997	1527.04	89.2875	115.728	1439.21	102.62	197.739	1159.95	105.297	-9.37085	1350.05	116.573	-72.4472	1158.03	15.7051	202.423	1231.51	280.582	54.7676	1380.37	368.621	118.444	1148.56	378.083	132.916	1074.69	411.202	58.0331	916.646	369.898	33.3951	837.545	428.596	76.0962	828.995	414.501	20.0042	770.077
620	0	152.974	-42.4163	1571.76	34.8849	-46.681	1576.61	146.203	124.8	1525.05	38.102	116.974	1525.45	91.0499	106.283	1437.73	103.617	188.005	1157.94	106.306	-18.8025	1348.6	116.82	-82.0235	1156.43	17.1509	193.297	1230.23	281.809	44.7063	1378.37	369.163	108.328	1146.29	378.318	123.121	1072.17	410.388	49.3536	913.703	368.496	25.7369	834.485	427.734	67.7521	826.337	412.615	12.7368	766.498
621	0	154.655	-51.6336	1570.39	36.6238	-55.6633	1575.45	148.091	115.369	1523.45	39.9877	107.796	1524.07	92.8689	96.9631	1436.45	105.292	178.385	1156.23	107.354	-28.2514	1347.02	117.123	-91.652	1154.74	18.9721	184.235	1228.99	283.403	34.4108	1376.41	369.984	97.977	1143.79	378.706	113.074	1069.75	409.491	40.3678	910.494	367.228	17.9748	831.237	427.227	59.3009	823.342	410.606	5.37581	762.768
622	0	156.427	-61.1283	1569.09	38.369	-64.9789	1574.45	150.077	105.856	1521.92	42.041	98.5024	1522.93	94.6242	87.3723	1435.14	106.858	168.76	1154.9	108.523	-37.8346	1345.64	117.442	-101.43	1153.16	20.5199	174.819	1227.81	284.825	24.113	1374.19	370.51	87.2937	1141.26	378.732	102.674	1066.94	408.699	31.0477	907.297	365.828	10.19	827.848	426.096	50.7895	820.031	408.718	-2.29643	759.023
623	0	158.287	-70.6416	1568.08	40.251	-74.0536	1573.64	152.207	96.2768	1520.53	43.8428	89.3872	1521.75	96.6922	77.7296	1433.84	108.521	158.975	1153.59	109.762	-47.4616	1344.39	117.683	-111.137	1151.74	22.2928	165.362	1226.77	286.212	13.8481	1372.17	371.157	76.5433	1138.78	378.95	92.1181	1064.55	407.785	21.6903	904.216	364.454	2.13542	824.614	425.349	42.0187	817.124	406.763	-9.81624	755.427
624	0	160.189	-80.1533	1567.1	42.0382	-83.4469	1573.02	154.403	86.7064	1519.2	46.1458	79.9554	1520.59	98.6435	68.0854	1432.71	109.665	148.897	1152.42	111.088	-57.1678	1343.19	117.904	-121.018	1150.48	24.1032	155.893	1225.77	287.439	3.66985	1370.26	371.827	65.6311	1136.37	379.021	81.4109	1062.22	406.887	12.0656	901.169	362.887	-5.91733	821.443	424.909	32.7305	814.43	404.77	-17.5916	751.91
625	0	162.204	-89.8381	1565.99	44.1906	-92.6259	1572.27	156.752	77.0434	1517.84	48.8007	70.4574	1519.55	100.495	58.2758	1431.69	111.12	139.105	1151.29	112.45	-66.9411	1342.02	118.457	-131.022	1149.04	25.793	146.05	1224.83	289.467	-6.82066	1368.52	372.476	54.4209	1133.85	379.352	70.5659	1059.74	405.988	2.25751	897.95	361.466	-14.3711	818.19	423.895	23.7267	811.556	402.758	-25.5038	748.193
626	0	164.389	-99.4786	1565.09	46.1817	-102.228	1571.77	158.91	67.2292	1516.54	50.7905	60.9301	1518.78	102.704	48.5475	1430.69	112.803	129.128	1150.31	113.91	-76.8558	1341.02	119.119	-141.259	1147.94	27.2972	136.119	1224.07	290.962	-17.0587	1366.6	372.95	42.8154	1131.34	379.188	59.3544	1057.27	405.021	-7.74779	894.938	360.511	-23.4738	815.374	423.053	14.2139	808.609	400.701	-33.6188	744.675
627	0	166.606	-109.181	1564.29	48.6325	-111.517	1571.32	161.369	57.4486	1515.53	53.569	51.3795	1518.02	104.621	38.8021	1429.87	114.136	119.252	1149.21	115.412	-86.7348	1340.37	119.791	-151.442	1147.33	29.0453	126.161	1223.29	292.336	-27.2172	1365.19	373.595	31.3552	1129.22	379.411	48.1199	1055.22	404.062	-17.6878	892.384	359.094	-31.7253	812.678	423.005	4.27555	806.388	398.841	-41.9468	741.632
628	0	169.01	-118.937	1563.71	50.8812	-121.098	1571.23	163.913	47.6399	1514.68	55.705	41.8973	1517.6	106.743	29.0439	1429.1	115.589	108.838	1148.35	116.997	-96.6956	1339.84	120.754	-161.943	1146.94	30.7919	116.106	1222.57	294.56	-37.5159	1364.19	374.272	19.8026	1127.29	379.473	36.7222	1053.27	403.162	-27.9513	889.928	357.536	-40.09	809.845	422.048	-5.5558	804.134	396.954	-50.2749	738.645
629	0	171.498	-128.824	1563.39	53.295	-130.508	1571.33	166.638	37.6975	1514	58.7647	32.2349	1517.36	109.028	19.3466	1428.59	116.798	98.2683	1147.61	118.716	-106.844	1339.42	121.742	-172.606	1146.72	32.4608	105.836	1221.94	296.402	-47.8748	1362.98	374.82	8.08097	1125.22	379.52	25.1407	1051.25	402.417	-38.6988	887.647	356.359	-49.4357	807.417	421.46	-15.8997	801.92	395.425	-59.3097	735.97
630	0	173.89	-138.728	1563.38	55.7981	-140.039	1571.72	169.445	27.7364	1513.65	61.1131	22.4915	1517.61	110.974	9.62478	1428.39	118.175	87.5558	1147.12	120.222	-116.878	1339.41	122.694	-183.542	1146.82	34.0181	95.4419	1221.55	298.187	-58.1924	1362.17	375.362	-3.59165	1123.51	379.684	13.4843	1049.64	401.665	-49.685	885.782	355.091	-59.0368	805.437	421.316	-26.6996	800.314	393.356	-67.9708	733.297
631	0	176.099	-148.574	1563.42	58.3324	-149.54	1572.38	172.319	17.8506	1513.58	63.9682	12.9991	1518.01	113.252	-0.070197	1428.31	119.64	76.5267	1146.9	121.809	-126.906	1339.71	123.7	-194.314	1147.41	35.5476	84.9172	1221.24	300.061	-68.4699	1361.76	375.942	-15.3246	1122.21	379.846	1.77765	1048.53	400.776	-60.7854	884.221	353.881	-68.7772	803.837	420.563	-37.3516	799.119	391.781	-77.3084	731.383
632	0	178.895	-158.398	1563.59	61.1866	-159.099	1573.37	175.131	7.92988	1513.51	66.6716	3.36437	1518.6	115.277	-9.83951	1428.32	120.714	65.7237	1146.44	123.443	-137.053	1340.23	124.758	-205.359	1148.13	37.0077	74.328	1221.06	301.486	-78.6742	1361.34	376.585	-26.8673	1121.16	380.09	-10.0537	1047.43	400.13	-72.143	882.939	353	-78.9448	802.665	420.4	-48.7344	797.954	390.314	-86.9703	729.672
633	0	181.673	-168.257	1564.07	64.0162	-168.736	1574.74	177.902	-2.16907	1513.53	69.9911	-6.33041	1519.46	117.181	-19.6835	1428.6	121.782	54.4238	1146.28	125.051	-147.281	1340.98	125.692	-216.396	1149.12	38.3807	63.772	1221.36	303.414	-89.1415	1361.33	377.283	-38.5086	1120.48	380.218	-22.0946	1046.51	399.556	-83.7535	882.117	352.311	-89.7115	801.895	419.894	-60.4286	797.143	388.986	-97.1654	728.477
634	0	184.645	-178.132	1564.89	67.1118	-178.153	1576.35	180.844	-12.2217	1513.74	72.8684	-16.1165	1520.61	119.287	-29.5323	1429.22	123.25	43.5482	1146.24	126.566	-157.371	1342.04	126.596	-227.507	1150.5	39.9512	53.2141	1221.75	305.063	-99.5372	1361.58	377.927	-49.9916	1120.11	380.444	-34.0167	1046.07	398.998	-95.4444	881.577	351.522	-100.583	801.552	419.636	-72.0768	796.697	387.953	-107.587	727.718
635	0	187.507	-187.971	1565.81	70.022	-187.714	1578.26	183.886	-22.0684	1514.29	75.9493	-25.7193	1521.77	120.968	-39.3723	1430.05	124.625	32.5486	1146.93	127.866	-167.411	1343.25	127.263	-238.434	1151.97	41.3905	42.828	1222.31	306.235	-109.674	1361.87	378.673	-61.4958	1119.96	380.93	-45.8905	1045.91	398.713	-107.555	881.394	350.912	-112.161	801.657	419.173	-83.9533	796.704	386.929	-118.411	727.199
636	0	190.485	-197.821	1566.75	73.1315	-197.348	1580.24	186.788	-32.1028	1514.93	78.785	-35.5172	1523.29	122.656	-49.4126	1430.92	125.84	21.3501	1147.48	129.098	-177.448	1344.4	127.918	-249.5	1153.42	42.7799	32.3689	1223.22	307.968	-120.089	1362.5	379.303	-73.0921	1119.9	381.284	-57.8852	1045.93	398.507	-119.796	881.483	350.526	-123.529	801.37	419.22	-96.7502	796.879	386.053	-129.932	726.829
637	0	193.735	-207.719	1567.77	76.5356	-206.977	1582.4	189.694	-42.0807	1515.48	81.8605	-45.2162	1525.12	124.402	-59.2493	1432.15	127.301	10.4565	1148.37	130.209	-187.364	1345.88	128.499	-260.361	1154.95	44.0987	22.065	1224.27	309.203	-130.439	1363.07	380.043	-84.7474	1120.09	381.569	-69.8837	1045.96	398.398	-132.431	881.803	350.191	-136.089	801.76	419.311	-109.289	797.063	385.505	-141.928	726.919
638	0	196.81	-217.397	1569.04	79.7007	-216.62	1584.91	192.574	-51.9511	1516.36	84.3908	-55.0114	1527.06	125.794	-68.9564	1433.42	128.41	-0.368885	1149.39	131.266	-197.234	1347.56	129.083	-271.151	1156.71	45.4923	11.83	1225.41	310.408	-140.703	1363.95	380.82	-96.3372	1120.53	382.365	-81.7876	1046.46	398.361	-145.102	882.363	350.231	-148.707	802.573	419.094	-122.513	797.689	385.085	-154.246	727.307
639	0	200.13	-227.128	1570.36	83.2556	-226.249	1587.54	195.221	-61.9029	1517.23	87.6524	-64.8138	1529.11	127.287	-78.7514	1434.86	129.483	-11.1852	1150.98	132.267	-206.983	1349.35	129.547	-281.763	1158.58	46.889	1.87736	1226.74	311.511	-150.835	1364.94	381.612	-107.828	1121.03	383.098	-93.9588	1046.9	398.512	-157.818	883.091	349.981	-162.021	803.651	419.356	-135.559	798.297	384.946	-167.124	728.039
640	0	203.343	-236.82	1571.34	86.7347	-235.904	1589.96	197.857	-71.7578	1518.16	90.0969	-74.7056	1531.39	128.505	-88.3949	1436.24	130.934	-21.236	1152.03	133.127	-216.589	1351.23	130.068	-292.426	1160.48	47.978	-8.20115	1228.08	312.523	-161.048	1365.97	382.371	-119.618	1121.68	383.428	-106.72	1047.47	398.814	-171.063	884.003	350.119	-175.365	804.674	419.176	-149.61	799.059	384.852	-180.566	728.808
641	0	206.36	-246.447	1572.26	90.0328	-245.689	1592.35	200.23	-81.4116	1519.1	92.7544	-84.3057	1533.74	129.839	-97.7639	1437.76	131.98	-31.4112	1153.85	133.855	-225.994	1353.02	130.347	-302.813	1162.44	49.2769	-17.9268	1229.5	313.263	-171.15	1367.15	383.135	-131.36	1122.6	384.12	-118.988	1048.21	399.058	-184.473	885.201	350.329	-188.923	805.85	419.507	-163.241	800.074	384.821	-194.525	729.973
642	0	209.478	-256.049	1573.02	93.3821	-255.31	1594.61	202.488	-90.9398	1520.05	95.2112	-94.004	1536.06	131.017	-107.059	1439.01	133.35	-41.416	1154.46	134.4	-235.271	1354.82	130.517	-312.872	1164.47	50.8231	-27.4055	1230.54	314.107	-181.189	1368.6	383.941	-143.193	1123.64	385.304	-131.379	1049.33	399.341	-198.026	886.63	350.717	-203.038	807.609	419.822	-177.432	801.348	384.891	-208.882	731.421
643	0	212.191	-265.309	1573.31	96.6185	-264.979	1596.72	204.77	-100.396	1520.86	97.4509	-103.562	1538.06	132.289	-116.257	1440.11	134.799	-50.6998	1155.47	134.94	-244.543	1356.51	130.665	-322.82	1166.43	52.4115	-36.6376	1231.55	314.994	-191.392	1369.96	384.886	-155.144	1124.8	386.279	-143.857	1050.45	399.768	-211.845	888.167	350.965	-217.279	809.21	420.236	-191.926	802.699	385.137	-223.823	733.039
644	0	215.1	-275.032	1573.77	99.74	-274.78	1598.51	206.73	-109.924	1521.49	99.9329	-113.181	1540.2	133.611	-125.299	1441.05	136.414	-60.4798	1156.36	135.447	-253.75	1357.83	130.697	-332.466	1168.01	53.9664	-45.7892	1232.28	315.91	-201.772	1371.15	385.808	-167.091	1125.8	387.331	-156.296	1051.32	400.246	-225.845	889.767	351.437	-231.74	810.716	420.651	-206.865	804.053	385.382	-239.283	734.76
645	0	217.578	-284.285	1573.91	102.7	-284.324	1600.24	208.587	-119.266	1522.25	101.931	-122.683	1542.27	134.751	-134.274	1442.09	137.783	-70.2859	1157.07	135.777	-262.803	1359.18	130.543	-341.919	1169.62	55.8797	-54.5922	1233.07	316.53	-212.003	1372.35	386.76	-179.058	1126.97	388.379	-168.779	1052.41	400.831	-239.97	891.553	351.921	-246.699	812.714	421.173	-222.052	805.551	385.773	-255.274	736.824
646	0	220.077	-293.599	1574.22	105.361	-293.886	1601.83	210.419	-128.577	1523.1	103.906	-131.995	1544.17	136.079	-143.186	1443.07	139.916	-79.5681	1157.74	136.031	-271.751	1360.47	130.381	-351.23	1171.03	57.652	-63.3928	1233.81	317.036	-222.267	1373.46	387.802	-190.88	1128.13	389.589	-181.337	1053.56	401.446	-254.105	893.284	352.52	-261.74	814.964	421.678	-237.242	807.151	386.189	-271.392	738.896
647	0	222.176	-302.987	1574.35	107.777	-303.377	1603.2	212.014	-137.874	1523.85	105.649	-141.446	1545.97	137.259	-152.068	1443.9	141.829	-89.2876	1158.76	135.999	-280.541	1361.58	130.052	-360.194	1172.01	59.6673	-72.0032	1234.37	317.875	-232.816	1374.55	388.964	-202.84	1129.11	390.986	-193.658	1054.46	402.052	-268.497	894.897	352.692	-276.315	816.446	422.311	-252.447	808.489	386.583	-287.806	740.898
648	0	224.147	-312.583	1574.57	110.019	-312.817	1604.29	213.485	-147.14	1524.53	107.437	-150.62	1547.67	138.588	-160.797	1444.85	143.391	-98.2271	1159.59	136.102	-289.314	1362.47	129.547	-369.111	1172.72	61.7704	-80.2929	1235.03	318.22	-243.256	1375.33	390.067	-214.767	1129.95	392.224	-206.329	1055.2	402.567	-282.996	896.432	352.904	-291.539	818.05	422.83	-268.229	809.802	386.969	-304.825	743.031
649	0	225.736	-321.714	1574.76	111.93	-322.153	1605.46	214.881	-156.351	1525.31	108.948	-159.817	1549.09	139.759	-169.527	1445.62	145.431	-107.423	1160.34	136.216	-297.955	1363.4	129.046	-377.768	1173.39	63.8114	-88.5763	1235.54	318.753	-253.687	1376.27	391.347	-226.585	1130.95	393.796	-218.949	1056.17	403.27	-297.53	898.091	353.54	-307.542	820.295	423.281	-284.122	811.349	387.438	-321.821	745.429
650	0	227.42	-331.141	1575.15	113.621	-331.308	1606.47	216.297	-165.547	1525.99	110.659	-168.871	1550.28	141.098	-178.152	1446.25	147.974	-116.153	1160.57	136.405	-306.376	1364.11	128.59	-386.389	1173.94	66.0947	-96.6308	1236.03	319.292	-263.989	1377.01	392.64	-238.44	1131.81	395.056	-231.801	1056.88	403.929	-312.172	899.653	353.942	-322.229	821.968	423.901	-300.009	812.835	388.173	-338.953	747.686
651	0	228.575	-340.427	1575.39	114.925	-340.503	1607.33	217.353	-174.782	1526.58	112.147	-178.013	1551.62	142.336	-186.793	1447	149.688	-125.051	1161.4	136.556	-314.758	1364.66	128.109	-394.988	1174.28	68.5653	-104.551	1236.45	319.732	-274.303	1377.51	393.813	-250.509	1132.49	396.518	-244.57	1057.3	404.684	-326.81	901.006	354.445	-337.64	823.499	424.402	-315.979	814.014	388.875	-356.198	749.931
652	0	229.445	-349.691	1575.71	115.952	-349.435	1608.01	218.546	-183.774	1527.37	112.928	-186.701	1552.87	143.627	-195.356	1447.75	152.116	-133.798	1162.36	136.745	-323.171	1365.26	127.612	-403.577	1174.65	70.7717	-112.429	1237.05	319.896	-284.454	1377.85	395.104	-262.705	1133.15	397.741	-257.698	1057.84	405.134	-341.951	902.652	354.871	-353.304	825.149	424.912	-331.92	815.237	389.184	-373.723	752.285
653	0	229.866	-358.722	1576.03	116.614	-358.4	1608.74	219.691	-192.796	1528.39	114.161	-195.458	1553.92	144.926	-203.953	1448.53	154.338	-141.866	1163.21	136.997	-331.523	1365.86	127.158	-412.159	1175.23	72.9771	-120.492	1237.75	320.549	-294.571	1378.63	396.175	-274.919	1133.92	399.28	-270.599	1058.67	405.579	-356.768	904.138	355.291	-368.867	826.844	425.396	-348.07	816.734	389.568	-391.173	754.719
654	0	230.564	-368.066	1576.51	117.207	-367.177	1609.32	220.879	-201.856	1529.16	115.131	-204.266	1554.98	146.273	-212.451	1449.24	156.266	-150.546	1163.66	137.216	-339.847	1366.49	126.866	-420.579	1175.82	75.3205	-128.559	1238.19	321.083	-304.501	1379.18	397.198	-287.241	1134.58	400.359	-284.033	1059.27	406.126	-371.738	905.657	355.569	-384.518	828.596	425.757	-364.13	818.071	390.04	-408.567	757.276
655	0	230.706	-376.967	1576.84	117.545	-375.97	1609.87	221.519	-210.737	1530.03	116.478	-212.797	1555.87	147.548	-220.989	1450.06	159.101	-159.242	1164.67	137.597	-348.16	1367.08	126.767	-428.876	1176.42	77.4286	-136.529	1238.84	321.599	-314.268	1379.65	398.247	-299.78	1135.2	401.475	-297.254	1059.79	406.503	-386.641	907.183	356.101	-400.099	830.292	426.198	-380.225	819.416	390.429	-426.062	759.874
656	0	231.206	-386.093	1577.55	117.641	-384.625	1610.45	222.664	-219.715	1531.03	117.361	-221.407	1556.83	148.811	-229.44	1450.77	160.891	-167.423	1165.18	137.985	-356.368	1367.8	126.825	-436.975	1177.16	79.6975	-144.532	1239.51	322.241	-323.867	1380.35	399.199	-312.328	1136.09	402.577	-310.683	1060.53	406.926	-401.569	909.114	356.308	-415.757	832.371	426.585	-396.345	821.176	390.8	-443.337	762.829
657	0	231.265	-395.092	1578.15	117.676	-393.144	1610.83	223.485	-228.558	1532.09	118.178	-229.804	1557.74	150.029	-237.805	1451.48	162.371	-175.955	1165.87	138.508	-364.528	1368.49	126.979	-444.956	1177.93	81.7313	-152.353	1240.14	322.949	-333.372	1381.17	400.073	-324.913	1137.04	403.63	-323.936	1061.5	407.148	-416.52	911.027	356.542	-431.673	834.668	426.928	-412.337	823.08	390.989	-460.586	765.777
658	0	230.847	-404.079	1578.53	117.546	-401.682	1611.06	224.286	-237.353	1533.02	118.385	-238.18	1558.48	151.268	-246.105	1452.05	164.134	-184.36	1166.89	138.972	-372.723	1369.09	127.245	-452.793	1178.43	83.6031	-160.22	1240.72	323.513	-342.712	1381.71	400.702	-337.486	1137.69	404.62	-337.23	1062.37	407.28	-431.505	912.784	356.727	-446.719	836.399	427.138	-428.356	824.819	391.147	-477.628	768.537
659	0	230.677	-413.111	1578.9	117.299	-410.164	1611.16	224.952	-246.116	1533.91	119.567	-246.551	1559.03	152.449	-254.367	1452.52	166.119	-192.794	1167.01	139.517	-380.938	1369.55	127.657	-460.677	1178.91	85.2962	-168.264	1241.11	324.157	-351.955	1382.24	401.208	-350.152	1138.39	405.423	-350.543	1063.12	407.243	-446.434	914.679	356.844	-462.161	838.397	427.326	-444.707	826.623	391.149	-494.596	771.268
660	0	230.583	-422.033	1579.42	117.08	-418.552	1611.26	225.75	-254.794	1534.71	120.289	-254.816	1559.63	153.546	-262.616	1452.83	167.49	-201.403	1167.38	140.061	-389.053	1369.96	128.144	-468.482	1179.41	86.9116	-176.173	1241.44	324.739	-360.996	1382.75	401.738	-362.676	1139.28	406.176	-363.604	1064.1	407.19	-461.551	916.802	356.726	-477.735	840.714	427.449	-460.751	828.843	391.187	-511.436	774.241
661	0	230.511	-430.752	1579.79	116.757	-426.897	1611.24	226.451	-263.466	1535.29	120.945	-263.061	1559.93	154.661	-270.823	1453.06	169.261	-209.717	1167.51	140.647	-397.204	1370.28	128.751	-476.256	1179.77	88.5957	-184.021	1241.65	325.531	-370.059	1383.36	402.288	-375.065	1140	406.899	-376.553	1064.97	407.139	-476.33	918.874	356.867	-492.892	842.842	427.592	-476.868	831	391.124	-528.11	777.118
662	0	230.41	-439.606	1580.03	116.636	-435.215	1611.06	227.109	-272.117	1535.84	121.577	-271.372	1560.03	155.67	-279.075	1453.23	170.778	-217.818	1167.4	141.33	-405.417	1370.4	129.479	-484.135	1179.91	89.964	-192.014	1241.83	326.037	-378.961	1383.53	402.746	-387.33	1140.61	407.358	-389.57	1065.43	407.107	-491.056	920.868	356.773	-508.338	844.956	427.737	-493.077	833.027	390.808	-544.584	779.685
663	0	230.146	-448.337	1580.14	116.413	-443.528	1610.87	227.96	-280.871	1536.2	122.34	-279.628	1560.16	156.623	-287.301	1453.32	171.696	-226.142	1167.66	141.926	-413.605	1370.42	130.205	-491.988	1179.88	91.3412	-200.069	1241.87	326.723	-387.916	1383.89	403.17	-399.326	1141.06	407.879	-402.338	1065.97	406.87	-505.724	922.846	356.502	-523.561	846.98	427.597	-509.053	835.051	390.476	-561.062	782.373
664	0	230.077	-457.039	1580.19	116.188	-451.745	1610.58	228.625	-289.446	1536.55	122.884	-287.834	1560.04	157.481	-295.589	1453.34	172.883	-234.572	1167.63	142.346	-421.82	1370.35	130.889	-499.844	1179.74	92.5845	-207.879	1241.9	327.172	-396.723	1383.86	403.51	-411.097	1141.54	408.547	-414.905	1066.66	406.545	-520.23	924.834	356.063	-538.707	849.132	427.439	-524.893	837.214	389.95	-577.186	784.909
665	0	230.026	-465.621	1580.07	116.055	-460.087	1610.27	229.139	-298.022	1536.7	123.421	-296.195	1559.95	158.286	-303.967	1453.21	173.364	-242.727	1167.25	142.882	-430.09	1370.09	131.622	-507.717	1179.36	93.73	-215.916	1241.83	327.775	-405.43	1383.86	403.871	-422.633	1141.85	408.9	-427.29	1067.12	406.253	-534.626	926.627	355.66	-553.585	851.025	427.121	-540.493	839.175	389.402	-593.175	787.391
666	0	230.118	-474.326	1579.83	116.081	-468.446	1609.69	229.752	-306.626	1536.47	124.092	-304.422	1559.48	159.035	-312.421	1452.98	174.815	-250.785	1167.56	143.485	-438.458	1369.65	132.334	-515.734	1178.61	94.6797	-224.02	1241.69	328.281	-414.259	1383.46	404.132	-434.047	1141.88	409.253	-439.615	1067.25	405.813	-548.894	928.203	355.165	-568.48	852.859	426.72	-556.144	840.849	388.698	-609.018	789.755
667	0	230.137	-482.861	1579.6	116.11	-476.798	1609.12	230.229	-315.223	1536.16	124.258	-312.827	1559.01	159.714	-320.977	1452.7	175.532	-258.149	1167.53	144.006	-446.833	1369.15	132.966	-523.666	1177.88	95.8346	-231.961	1241.51	328.834	-423.014	1383.15	404.546	-445.124	1141.96	409.278	-451.832	1067.27	405.397	-562.84	929.86	354.633	-583.068	854.706	426.199	-571.35	842.629	387.959	-624.647	792.194
668	0	230.278	-491.367	1579.37	116.159	-485.089	1608.52	230.734	-323.743	1535.7	124.361	-321.141	1558.28	160.349	-329.547	1452.28	176.2	-266.345	1167.22	144.55	-455.227	1368.56	133.514	-531.592	1177.13	96.6405	-240.174	1241.23	329.398	-431.689	1382.74	404.804	-455.9	1141.94	409.551	-463.695	1067.36	404.878	-576.448	931.39	353.987	-597.393	856.556	425.686	-586.249	844.351	387.192	-639.971	794.568
669	0	230.521	-499.999	1578.93	116.19	-493.548	1607.88	231.076	-332.328	1535.03	125.005	-329.729	1557.33	160.891	-338.219	1451.73	176.991	-274.188	1166.74	144.949	-463.73	1367.74	134.005	-539.645	1175.97	97.447	-248.334	1240.81	329.809	-440.353	1382.06	405.07	-466.583	1141.64	409.671	-475.429	1067.19	404.284	-589.912	932.611	353.358	-611.404	858.058	424.979	-600.904	845.74	386.225	-655.059	796.7
670	0	230.595	-508.429	1578.27	116.394	-502.056	1607.03	231.363	-340.94	1534.17	125.363	-338.269	1556.34	161.415	-346.932	1451.11	177.694	-281.696	1166.34	145.442	-472.322	1366.85	134.448	-547.746	1174.79	98.0979	-256.5	1240.42	330.229	-449.173	1381.19	405.273	-477.119	1141.22	409.729	-486.991	1066.9	403.594	-603.139	933.743	352.492	-625.395	859.521	424.166	-615.366	846.982	385.161	-670.097	798.739
671	0	230.843	-517.041	1577.75	116.469	-510.627	1606.13	231.555	-349.506	1533.36	125.427	-346.865	1555.16	161.864	-355.785	1450.48	178.088	-289.788	1165.69	145.789	-480.938	1365.94	134.921	-555.733	1173.49	98.5161	-264.803	1240.05	330.638	-457.853	1380.36	405.444	-487.42	1140.68	409.773	-498.262	1066.64	402.994	-616.104	934.807	351.584	-639.154	861.043	423.255	-629.299	848.178	384.013	-684.676	800.864
672	0	231.046	-525.503	1577.11	116.588	-519.101	1605.24	231.862	-358.123	1532.48	125.676	-355.51	1554.01	162.243	-364.639	1449.75	178.558	-297.444	1165.2	146.173	-489.578	1364.99	135.284	-563.843	1172.33	98.9515	-273.082	1239.5	331.075	-466.573	1379.3	405.675	-497.335	1140.07	409.871	-509.24	1066.19	402.259	-628.629	935.654	350.539	-652.559	862.519	422.278	-642.918	849.156	382.897	-698.94	802.839
673	0	231.132	-534.048	1576.39	116.666	-527.816	1604.31	232.062	-366.86	1531.51	125.5	-364.1	1552.91	162.667	-373.59	1449.01	179.286	-305.274	1164.75	146.559	-498.369	1364	135.663	-572.044	1171	99.2454	-281.561	1239.06	331.485	-475.326	1378.12	405.971	-507.187	1139.28	409.804	-520.125	1065.41	401.608	-641.002	936.329	349.489	-665.743	863.705	421.339	-656.383	849.959	381.625	-712.929	804.596
674	0	231.04	-542.517	1575.37	116.737	-536.496	1603.23	232.189	-375.647	1530.45	125.862	-372.953	1551.6	162.895	-382.671	1448.24	179.562	-313.428	1164.22	146.885	-507.14	1362.82	135.983	-580.163	1169.58	99.3891	-290.038	1238.63	331.804	-484.082	1376.95	406.064	-516.867	1138.35	409.674	-530.918	1064.49	400.823	-653.115	936.93	348.344	-678.506	864.717	419.99	-669.388	850.512	380.249	-726.678	806.283
675	0	231.124	-551.417	1574.64	116.677	-545.202	1602.12	232.384	-384.36	1529.53	126.012	-381.616	1550.43	163.228	-391.744	1447.42	180.183	-320.013	1163.76	147.149	-516.086	1361.66	136.315	-588.309	1168.12	99.483	-298.688	1238.16	332.019	-492.773	1375.66	406.001	-526.388	1137.33	409.757	-541.22	1063.81	399.974	-664.801	937.4	347.162	-691.091	865.73	418.606	-682.006	850.994	378.752	-739.968	807.748
676	0	231.102	-560.266	1573.71	116.568	-553.918	1600.94	232.352	-393.315	1528.52	125.954	-390.483	1549.25	163.41	-400.801	1446.53	180.321	-328.587	1163.04	147.448	-525.098	1360.51	136.565	-596.508	1166.76	99.3628	-307.445	1237.51	332.327	-501.522	1374.41	406.071	-535.618	1136.22	409.656	-551.425	1062.94	399.082	-676.318	937.548	345.753	-703.364	866.623	417.202	-694.186	851.285	377.247	-752.899	809.143
677	0	231.056	-569.227	1572.61	116.425	-562.807	1599.58	232.449	-402.18	1527.32	126.173	-399.312	1547.82	163.531	-409.975	1445.45	180.423	-336.569	1162.13	147.749	-534.133	1359.16	136.879	-605.012	1165.25	99.2889	-316.227	1236.78	332.582	-510.273	1373.04	406.166	-544.751	1134.91	409.544	-561.568	1061.76	398.173	-687.594	937.516	344.495	-715.167	867.121	415.725	-706.252	851.243	375.47	-765.694	810.228
678	0	230.845	-578.219	1571.49	116.218	-571.652	1598.3	232.591	-411.268	1526.06	126.141	-408.289	1546.23	163.59	-419.099	1444.37	180.087	-344.524	1161.35	147.928	-543.178	1357.87	137.159	-613.425	1163.84	99.0068	-325.047	1235.98	332.803	-519.038	1371.66	406.227	-553.647	1133.51	409.194	-571.475	1060.46	397.254	-698.508	937.445	343.152	-726.818	867.643	414.121	-717.906	851.061	373.853	-777.838	811.26
679	0	230.72	-587.246	1570.46	115.936	-580.629	1596.92	232.542	-420.252	1524.88	126.025	-417.092	1544.9	163.667	-428.337	1443.2	179.888	-352.883	1160.52	148.127	-552.268	1356.51	137.414	-621.987	1162.52	98.6424	-334.1	1235.16	333.073	-527.823	1370.42	406.245	-562.321	1132.31	409.131	-581.132	1059.39	396.27	-709.103	937.192	341.634	-738.116	868.21	412.574	-729.073	850.907	372.152	-789.61	812.14
680	0	230.364	-596.304	1569.07	115.64	-589.648	1595.43	232.465	-429.345	1523.62	126.01	-426.07	1543.44	163.678	-437.698	1442.05	179.408	-361.396	1159.25	148.389	-561.558	1355.1	137.683	-630.578	1161.04	98.4347	-343.09	1234.17	333.226	-536.609	1368.97	406.2	-570.961	1130.78	408.773	-590.627	1058.01	395.275	-719.514	936.729	340.255	-749.074	868.392	410.934	-740.002	850.337	370.358	-801.018	812.672
681	0	229.995	-605.478	1567.75	115.24	-598.772	1593.83	232.269	-438.544	1522.46	125.821	-435.2	1541.98	163.719	-446.994	1440.89	178.562	-369.54	1158.03	148.506	-570.82	1353.58	137.931	-639.375	1159.41	98.0871	-352.205	1233.21	333.272	-545.534	1367.48	405.91	-579.488	1129.16	408.363	-599.889	1056.45	394.248	-729.59	936.012	338.789	-759.725	868.296	409.315	-750.597	849.6	368.519	-812.073	812.94
682	0	229.407	-614.517	1566.4	114.787	-607.922	1592.48	232.145	-447.736	1521.33	125.368	-444.23	1540.84	163.58	-456.338	1439.83	178.091	-378.552	1157.56	148.595	-580.08	1352.21	138.264	-648.323	1157.99	97.6008	-361.553	1232.33	333.294	-554.378	1366.1	405.631	-587.985	1127.64	408.006	-608.962	1055.12	393.207	-739.422	935.351	337.272	-769.967	868.259	407.551	-760.808	848.835	366.599	-822.713	813.112
683	0	229.189	-623.845	1565.38	114.341	-616.998	1591.07	231.893	-456.808	1520.24	125.226	-453.476	1539.41	163.257	-465.76	1438.71	177.606	-387.527	1156.5	148.656	-589.42	1350.77	138.577	-657.263	1156.52	97.125	-370.74	1231.36	333.426	-563.278	1364.93	405.428	-596.331	1126.13	407.563	-617.745	1053.73	392.168	-748.798	934.442	335.702	-779.825	868.076	405.912	-770.543	848.027	364.83	-832.946	813.201
684	0	228.811	-633.121	1564.16	113.933	-626.268	1589.72	231.427	-466.17	1518.97	124.717	-462.7	1537.94	162.879	-475.189	1437.55	176.609	-396.517	1155.63	148.737	-598.955	1349.29	138.898	-666.433	1155.03	96.6635	-380.023	1230.36	333.362	-572.236	1363.58	405.1	-604.652	1124.6	406.965	-626.412	1052.11	391.119	-757.954	933.405	334.257	-789.363	867.468	404.09	-780.018	846.698	362.992	-842.764	812.843
685	0	228.383	-642.275	1563.06	113.445	-635.641	1588.28	230.869	-475.48	1517.63	124.171	-472.084	1536.51	162.54	-484.631	1436.32	176.257	-405.616	1154.49	148.66	-608.41	1347.87	139.193	-675.716	1153.68	96.0502	-389.39	1229.23	333.252	-581.198	1362.36	404.769	-612.917	1123.03	406.381	-635.012	1050.41	389.997	-766.829	932.103	332.75	-798.594	866.896	402.304	-789.017	845.501	361.17	-852.243	812.428
686	0	227.688	-651.326	1561.82	112.987	-644.81	1587.05	230.285	-484.72	1516.33	123.537	-481.386	1534.94	162.039	-494.186	1435.09	175.283	-414.754	1153.24	148.454	-617.98	1346.46	139.412	-685.08	1152.29	95.2878	-398.893	1228.02	333.092	-590.177	1361.2	404.314	-621.147	1121.64	405.908	-643.338	1049.01	388.855	-775.337	930.896	331.173	-807.476	866.199	400.579	-797.649	844.144	359.408	-861.199	811.756
687	0	227.051	-660.522	1560.69	112.18	-654.248	1585.72	229.622	-493.947	1515.11	122.903	-490.895	1533.49	161.474	-503.81	1433.87	174.642	-424.448	1152.2	148.195	-627.712	1345.19	139.514	-694.535	1151.09	94.6033	-408.464	1226.88	332.827	-599.204	1360.12	403.834	-629.418	1120.16	405.368	-651.445	1047.61	387.702	-783.648	929.431	329.552	-815.929	865.206	398.749	-805.931	842.56	357.562	-869.817	810.874
688	0	226.529	-670.055	1559.74	111.518	-663.754	1584.47	228.798	-503.356	1513.98	122.078	-500.39	1532.3	160.776	-513.525	1432.72	173.767	-433.922	1150.79	147.881	-637.52	1343.82	139.605	-704.185	1149.49	93.8928	-418.16	1225.7	332.456	-608.504	1359.03	403.311	-637.737	1118.81	404.743	-659.547	1046.09	386.532	-791.77	927.746	328.118	-824.186	863.988	396.896	-813.973	840.751	355.769	-878.148	809.714
689	0	225.893	-679.534	1558.96	110.871	-673.194	1583.31	227.943	-512.85	1512.85	121.142	-509.919	1530.89	160.149	-523.221	1431.64	172.912	-443.483	1149.97	147.483	-647.366	1342.66	139.704	-713.998	1148.62	93.1915	-427.917	1224.58	332.174	-617.893	1358.18	402.86	-645.985	1117.64	404.129	-667.574	1044.64	385.469	-799.595	926.167	326.606	-831.953	862.659	395.195	-821.57	838.959	353.998	-885.9	808.312
690	0	225.143	-688.971	1558.24	109.961	-682.844	1582.4	227.096	-522.223	1511.98	120.149	-519.411	1529.75	159.554	-533.062	1430.6	172.417	-453.236	1148.91	147.056	-657.346	1341.67	139.533	-723.719	1147.75	92.538	-437.864	1223.53	331.765	-627.47	1357.44	402.376	-654.127	1116.62	403.627	-675.452	1043.38	384.457	-807.114	924.537	325.099	-839.291	861.294	393.694	-828.896	837.115	352.185	-893.182	806.739
691	0	224.04	-698.19	1557.32	108.876	-692.396	1581.33	226.17	-531.817	1511.2	119.303	-529.011	1528.64	158.837	-542.924	1429.68	171.6	-463.268	1148.1	146.549	-667.247	1340.79	139.292	-733.783	1146.92	91.9275	-447.931	1222.44	331.24	-637.072	1356.7	401.811	-662.352	1115.53	403.059	-683.3	1042.07	383.318	-814.434	922.577	323.761	-846.51	859.691	392.153	-835.93	835.064	350.383	-900.128	804.839
692	0	223.121	-708.125	1556.71	107.824	-702.078	1580.36	225.208	-541.448	1510.48	118.409	-538.771	1527.81	157.997	-552.823	1428.84	170.994	-473.451	1147.27	146.025	-677.372	1339.86	138.932	-743.927	1146.1	91.4075	-458.195	1221.48	330.621	-646.872	1355.94	401.338	-670.725	1114.47	402.442	-691.127	1040.76	382.312	-821.591	920.593	322.453	-853.321	857.825	390.627	-842.72	832.855	348.699	-906.837	802.636
693	0	221.996	-717.816	1556.12	106.697	-711.774	1579.49	224.316	-551.168	1509.96	117.052	-548.346	1526.85	157.259	-562.83	1428.08	170.547	-483.714	1146.33	145.33	-687.54	1339.1	138.434	-754.353	1145.47	90.7974	-468.618	1220.47	329.909	-656.881	1355.34	400.657	-679.043	1113.6	401.934	-698.877	1039.75	381.284	-828.638	918.699	321.222	-859.926	855.877	389.321	-849.15	830.728	346.962	-913.129	800.202
694	0	220.86	-727.439	1555.61	105.546	-721.286	1578.6	223.278	-560.89	1509.37	116.242	-558.27	1526.05	156.391	-572.842	1427.16	169.609	-494.164	1145.09	144.583	-697.669	1338.54	137.908	-764.854	1145.02	90.1265	-479.325	1219.29	329.138	-666.763	1354.84	399.973	-687.351	1112.81	401.445	-706.43	1038.8	380.431	-835.418	916.769	320.077	-866.127	853.854	388.142	-855.349	828.63	345.362	-918.943	797.621
695	0	219.683	-737.027	1554.87	104.468	-731.06	1577.8	222.163	-570.681	1508.41	115.107	-567.977	1524.93	155.404	-582.844	1426.16	169.073	-504.956	1144.21	143.921	-708.086	1337.81	137.414	-775.657	1144.51	89.4056	-490.221	1217.9	328.358	-676.752	1354.1	399.354	-695.75	1111.93	400.87	-714.018	1037.59	379.73	-842.128	914.592	319.234	-872.226	851.543	387.367	-861.534	826.204	344.308	-924.487	794.774
696	0	218.68	-746.962	1554.4	103.301	-740.936	1577.07	220.832	-580.588	1507.54	113.87	-577.93	1524.11	154.272	-592.917	1425.28	168.125	-515.587	1143.03	143.047	-718.481	1337.31	136.859	-786.676	1144.17	88.5076	-501.228	1216.5	327.371	-686.692	1353.63	398.664	-704.169	1111.17	400.129	-721.685	1036.45	378.965	-848.659	912.472	318.446	-878.121	849.155	386.626	-867.575	823.885	343.076	-929.749	791.712
697	0	217.557	-756.629	1554.2	102.099	-750.741	1576.65	219.465	-590.402	1507.03	112.599	-587.849	1523.28	153.071	-603.094	1424.42	167.317	-526.599	1141.99	142.156	-729.056	1336.89	136.268	-797.98	1144.11	87.5078	-512.466	1215.26	326.496	-696.641	1353.42	397.984	-712.553	1110.68	399.438	-729.166	1035.61	378.336	-855.09	910.582	317.798	-883.634	846.879	386.026	-873.191	821.892	341.953	-934.798	788.816
698	0	216.338	-766.145	1554.04	100.874	-760.566	1576.57	218.093	-600.199	1506.55	110.995	-597.766	1522.45	151.755	-613.346	1423.72	166.008	-537.495	1140.86	141.131	-739.582	1336.54	135.777	-809.457	1144.1	86.3169	-523.776	1213.91	325.599	-706.538	1353.24	397.253	-720.858	1110.15	398.855	-736.513	1035.04	377.827	-861.334	908.549	317.356	-888.984	844.335	385.813	-878.662	819.918	341.151	-939.387	785.596
699	0	215.321	-776.088	1554.2	99.7644	-770.651	1576.42	216.627	-610.11	1506.17	109.22	-607.909	1522.01	150.345	-623.713	1423.13	164.614	-548.58	1139.86	140.216	-750.319	1336.4	135.493	-821.207	1144.07	85.0177	-535.055	1212.78	324.589	-716.681	1353.11	396.375	-729.392	1109.68	398.028	-743.915	1034.4	377.363	-867.437	906.523	317.014	-894.098	841.796	385.818	-884.14	817.771	340.578	-943.876	782.442
700	0	214.186	-785.867	1554.46	98.5668	-780.742	1576.53	215.001	-620	1505.98	107.983	-618.196	1521.73	148.923	-634.132	1422.91	162.926	-559.648	1139.33	139.26	-761.021	1336.4	135.295	-832.924	1144.17	83.8163	-546.324	1211.94	323.661	-726.931	1353.32	395.603	-737.833	1109.52	397.287	-751.298	1033.97	377.059	-873.311	904.671	316.899	-898.874	839.284	385.754	-888.978	815.692	340.228	-947.968	779.41
701	0	213.129	-795.596	1555.25	97.4115	-790.915	1576.98	213.249	-629.822	1506.22	106.229	-628.422	1521.73	147.523	-644.65	1422.98	161.389	-570.649	1139.33	138.347	-771.832	1336.73	135.106	-844.639	1144.53	82.5679	-557.491	1211.49	322.68	-737.177	1354.03	394.911	-746.221	1109.96	396.875	-758.644	1034.14	376.862	-878.931	903.106	316.838	-903.301	837.038	385.983	-893.581	814.31	340.351	-951.59	776.454
702	0	211.782	-805.175	1556.03	96.1036	-801.137	1577.62	211.49	-639.83	1506.63	104.269	-638.693	1521.92	145.994	-655.177	1423.25	160.088	-582.029	1139.42	137.374	-782.562	1337.26	135.026	-856.302	1145.21	81.1721	-568.705	1211.35	321.748	-747.542	1354.96	394.271	-754.699	1110.52	396.467	-765.966	1034.57	376.712	-884.404	901.658	317.085	-907.3	834.758	386.499	-897.881	812.812	340.7	-954.936	773.859
703	0	210.548	-815.221	1557.05	94.7114	-811.371	1578.23	209.602	-649.826	1507.19	102.573	-649.271	1522.19	144.713	-665.763	1423.77	158.645	-593.056	1139.82	136.549	-793.386	1337.94	134.922	-867.892	1145.87	79.9544	-579.748	1211.57	320.609	-757.805	1355.93	393.618	-763.391	1111.3	395.466	-773.507	1035.14	376.789	-889.388	900.301	317.571	-911.18	832.596	387.003	-901.661	811.341	341.409	-957.948	771.087
704	0	209.08	-825.046	1558.2	93.3143	-821.829	1578.99	207.684	-659.85	1508.12	100.541	-659.636	1522.74	143.333	-676.255	1424.58	157.708	-604.111	1140.88	135.929	-803.943	1338.7	134.787	-879.325	1146.95	78.8954	-590.668	1212.17	319.687	-768.155	1357.38	392.94	-772.206	1112.56	394.925	-780.985	1036.3	376.91	-894.473	899.46	318.047	-914.811	830.738	387.862	-905.367	810.436	342.18	-960.676	768.726
705	0	207.601	-834.911	1559.6	91.7044	-832.14	1579.85	205.853	-669.825	1509.2	98.5258	-670.11	1523.4	141.996	-686.725	1425.49	157.176	-615.196	1141.71	135.182	-814.516	1339.82	134.692	-890.239	1148.33	77.7966	-601.502	1213	318.806	-778.25	1359.02	392.318	-781.046	1114.15	394.638	-788.367	1037.99	377.164	-899.502	898.869	318.973	-918.126	829.254	389.042	-908.882	809.895	343.387	-963.115	766.637
706	0	206.196	-845.029	1560.95	90.1513	-842.643	1580.52	203.944	-679.725	1510.41	96.5791	-680.632	1524.07	140.74	-697.097	1426.42	156.238	-625.835	1142.58	134.603	-824.938	1340.89	134.761	-900.882	1149.61	76.6563	-612.241	1213.81	318.016	-788.293	1360.79	391.728	-790.072	1115.74	394.206	-795.837	1039.57	377.704	-904.533	898.597	320.053	-921.741	827.788	390.456	-912.49	809.584	344.753	-965.365	764.512
707	0	204.718	-855.02	1562.19	88.6039	-853.072	1581.15	202.011	-689.743	1511.78	94.6765	-691.067	1524.85	139.606	-707.289	1427.53	155.786	-636.733	1143.55	134.145	-835.201	1341.96	134.89	-911.174	1150.94	75.7227	-622.948	1214.8	316.985	-797.917	1362.27	391.134	-799.174	1117.39	393.806	-803.319	1041.08	378.465	-909.608	898.491	321.694	-924.648	826.606	392.14	-916.272	809.441	346.38	-967.486	762.538
708	0	203.182	-864.891	1563.47	86.9374	-863.518	1581.75	200.281	-699.607	1513.36	92.6914	-701.289	1525.8	138.36	-717.339	1428.7	155.473	-647.352	1144.76	133.77	-845.299	1343.12	135.002	-921.114	1152.36	74.7006	-633.515	1215.92	316.59	-807.339	1364.18	390.566	-808.144	1119.27	393.568	-810.568	1042.9	379.453	-914.655	898.826	323.368	-928.222	826.072	394.206	-920.119	809.879	348.298	-969.601	760.876
709	0	201.788	-874.786	1564.79	85.3323	-873.872	1582.23	198.485	-709.411	1515.07	90.8145	-711.522	1526.63	137.087	-727.326	1429.74	154.79	-657.285	1146.3	133.412	-855.248	1344.16	135.228	-930.774	1153.7	73.5028	-644.029	1216.84	316.117	-816.391	1365.9	390.147	-816.921	1121.01	393.565	-817.491	1044.95	380.751	-919.783	899.337	325.384	-932.087	825.73	396.53	-924.139	810.58	350.4	-971.672	759.29
710	0	200.315	-884.839	1565.84	83.8745	-884.358	1582.52	196.741	-719.236	1516.71	89.1551	-721.951	1527.52	135.957	-737.222	1430.74	154.29	-667.295	1147.21	133.211	-865.124	1345.01	135.55	-940.37	1154.69	72.3718	-654.429	1217.69	315.537	-825.131	1367.35	389.74	-825.651	1122.59	393.515	-824.593	1046.69	382.198	-925.142	899.835	327.527	-936.283	825.377	399.024	-928.491	811.321	352.77	-973.745	757.645
711	0	198.964	-894.754	1566.85	82.4271	-894.73	1582.82	195.271	-729.001	1518.25	87.4697	-732.077	1528.52	134.766	-746.864	1431.71	153.079	-676.629	1148.02	133.219	-874.793	1345.76	136.109	-949.985	1155.62	71.0459	-664.678	1218.58	315.058	-833.561	1368.55	389.602	-834.029	1123.95	393.533	-831.651	1048.17	383.986	-930.608	900.388	330.036	-940.721	825.133	401.801	-933.036	812.017	355.59	-976.04	756.089
712	0	197.744	-904.562	1567.89	81.1007	-904.951	1583.13	193.637	-738.704	1519.64	85.551	-742.05	1529.28	133.745	-756.447	1432.58	151.992	-685.498	1149.18	133.256	-884.268	1346.6	136.879	-959.233	1156.48	69.6091	-674.764	1219.35	314.738	-841.516	1369.71	389.586	-842.098	1125.43	393.717	-838.478	1049.66	385.987	-936.064	901.015	332.696	-945.431	825.102	404.695	-937.404	812.784	358.806	-978.448	754.821
713	0	196.281	-914.672	1568.89	79.915	-915.311	1583.27	192.338	-748.347	1521.12	84.722	-752.225	1529.89	132.661	-765.87	1433.42	150.619	-694.252	1150.18	133.417	-893.607	1347.32	137.757	-968.589	1157.23	68.0551	-684.669	1220.12	314.635	-849.268	1370.73	389.783	-849.754	1126.68	394.044	-845.302	1051.04	388.261	-941.571	901.595	335.658	-950.278	825.056	407.845	-942.025	813.651	362.434	-980.974	753.638
714	0	195.488	-924.306	1569.72	78.7358	-925.474	1583.41	191.088	-758.136	1522.56	83.3789	-762.076	1530.75	131.684	-775.194	1434.3	149.064	-702.942	1151.39	133.687	-902.83	1347.98	138.873	-977.746	1157.76	66.4942	-694.435	1220.87	314.434	-856.782	1371.48	390.101	-857.175	1127.76	394.439	-851.928	1051.9	390.659	-947.161	902.104	338.905	-955.595	825.01	411.096	-946.764	814.448	366.402	-983.894	752.585
715	0	194.34	-934.141	1570.68	77.483	-935.472	1583.62	190.005	-767.85	1524.08	82.3296	-771.985	1531.66	130.706	-784.519	1435.17	147.485	-711.594	1152.02	133.969	-911.918	1348.65	140.12	-986.824	1158.36	64.8033	-704.012	1221.78	314.363	-864.087	1372.33	390.441	-864.166	1128.89	394.907	-858.42	1053.11	393.292	-952.739	902.682	342.383	-960.527	824.873	414.472	-951.542	815.434	370.641	-986.989	751.858
716	0	193.298	-943.912	1571.69	76.3285	-945.318	1583.94	189.32	-777.294	1525.77	81.4759	-781.684	1532.53	129.82	-793.58	1436.04	145.587	-720.003	1152.94	134.519	-920.519	1349.28	141.467	-995.743	1158.96	62.8791	-713.471	1222.65	314.256	-871.07	1373.18	390.896	-870.676	1129.96	395.535	-864.639	1054.32	395.973	-958.1	903.386	345.639	-966.18	825.355	418.026	-956.157	816.545	375.215	-990.452	751.668
717	0	192.384	-953.789	1572.49	75.3566	-955.225	1584.09	188.587	-786.838	1527.43	80.6948	-791.228	1533.62	128.923	-802.531	1437.01	143.624	-728.669	1153.8	134.994	-929.432	1349.99	142.899	-1004.35	1159.52	60.9476	-722.9	1223.5	313.737	-877.748	1373.85	391.421	-876.861	1130.86	396.181	-870.659	1055.3	398.92	-963.367	904.194	349.324	-971.76	825.658	421.647	-960.623	817.583	379.908	-994.338	751.604
718	0	191.569	-963.434	1573.18	74.6218	-965.085	1584.33	187.976	-796.395	1529.01	80.2552	-800.687	1534.91	127.991	-811.522	1438.05	141.727	-736.524	1154.8	135.601	-938.152	1350.7	144.429	-1012.96	1160.16	58.9211	-732.167	1224.64	314.035	-884.777	1374.65	392.033	-882.545	1131.8	396.795	-876.634	1056.2	401.921	-968.547	905.004	353.285	-976.78	825.791	425.398	-965.156	818.729	384.912	-998.421	751.909
719	0	191.07	-973.198	1574.1	73.9769	-974.734	1584.76	187.535	-805.807	1531.02	79.6642	-810.149	1536.47	127.234	-820.325	1439.16	140.12	-746.604	1156.17	136.09	-946.808	1351.67	145.901	-1021.28	1161.06	56.9682	-741.318	1225.91	314	-891.422	1375.72	392.557	-887.722	1133.02	397.414	-882.204	1057.44	405.022	-973.479	906.15	357.153	-981.881	826.472	429.114	-969.354	820.232	389.918	-1002.81	752.783
720	0	190.616	-982.726	1574.83	73.4641	-984.302	1585.22	187.159	-814.984	1532.99	79.2602	-819.529	1538.15	126.409	-829.078	1440.34	138.383	-754.96	1157.54	136.609	-955.327	1352.61	147.251	-1029.54	1162.08	55.3801	-750.114	1227.77	313.944	-897.971	1376.9	393.156	-892.455	1134.28	398.103	-887.511	1058.88	408.184	-978.239	907.495	361.021	-987.384	827.482	432.782	-973.354	821.781	394.952	-1007.47	754.016
721	0	190.252	-992.124	1575.34	73.1528	-993.862	1585.76	186.809	-824.044	1534.74	79.0752	-828.752	1539.8	125.616	-837.698	1441.51	136.774	-763.222	1158.82	137.094	-963.746	1353.58	148.546	-1037.77	1163.15	53.321	-759.293	1228.84	313.881	-904.56	1377.95	393.514	-896.95	1135.35	398.638	-892.61	1060.15	411.338	-982.904	908.729	364.961	-992.612	828.343	436.432	-977.348	823.235	399.872	-1012.53	755.348
722	0	190.3	-1001.58	1576.01	73.2609	-1003.37	1586.3	186.827	-833.388	1536.47	78.786	-838.005	1541.52	124.893	-846.137	1442.72	135.219	-771.653	1159.8	137.552	-972.148	1354.7	149.705	-1045.9	1164.41	51.4235	-768.31	1230.18	313.287	-910.988	1378.88	393.904	-901.201	1136.65	399.145	-897.62	1061.53	414.537	-987.419	910.331	368.971	-997.79	829.422	440.063	-981.307	824.919	404.916	-1017.75	757.109
723	0	190.489	-1010.74	1576.8	73.3981	-1012.82	1587.11	186.816	-842.257	1538.08	78.8991	-847.18	1543.1	124.033	-854.6	1443.85	133.707	-779.88	1160.92	137.995	-980.355	1355.91	150.765	-1053.9	1165.79	49.6676	-777.274	1231.41	313.536	-917.486	1380.2	394.217	-905.063	1138.16	399.544	-902.34	1063.15	417.695	-991.731	911.977	372.816	-1003.03	830.859	443.692	-984.982	826.874	410.124	-1023.22	759.35
724	0	190.938	-1019.82	1577.46	73.7585	-1022.14	1587.85	186.871	-851.207	1539.78	78.8871	-856.254	1544.74	123.477	-862.843	1444.9	132.161	-787.619	1161.79	138.432	-988.479	1357.09	151.663	-1061.63	1167.11	48.0324	-786.118	1232.58	313.005	-923.772	1381.12	394.511	-908.754	1139.51	399.943	-906.92	1064.65	420.898	-995.921	913.733	376.651	-1008.35	832.375	447.278	-988.412	828.589	415.13	-1028.7	761.628
725	0	191.408	-1028.98	1577.98	74.3317	-1031.49	1588.48	187.169	-860.117	1541.08	79.0675	-865.341	1546.37	122.697	-871.123	1445.93	131.306	-796.507	1162.44	138.835	-996.645	1358.1	152.52	-1069.41	1168.31	46.4997	-794.959	1233.59	313.024	-930.292	1382.15	394.578	-912.542	1140.65	400.302	-911.64	1065.96	423.962	-1000.13	915.296	380.392	-1014.06	833.843	450.554	-992.137	830.224	420.052	-1034.35	763.849
726	0	191.977	-1037.95	1578.38	74.8762	-1040.74	1589.22	187.226	-868.896	1542.41	79.4179	-874.366	1547.92	122.117	-879.254	1446.91	130.454	-804.969	1163.12	139.096	-1004.69	1359.07	153.277	-1076.94	1169.33	44.9876	-803.74	1234.54	312.719	-936.777	1383.02	394.566	-916.398	1141.89	400.659	-916.119	1067.24	426.872	-1004.29	917.004	384.084	-1019.7	835.404	453.6	-995.79	831.909	424.955	-1040.02	766.155
727	0	192.645	-1046.86	1578.8	75.5862	-1049.95	1589.89	187.642	-877.586	1543.92	79.6681	-883.258	1549.62	121.378	-887.434	1447.75	129.667	-813.582	1164.1	139.4	-1012.69	1360.09	153.791	-1084.81	1170.53	43.5811	-812.357	1235.64	312.414	-943.098	1384	394.484	-920.199	1143.1	401.057	-920.453	1068.77	429.624	-1008.5	918.595	387.76	-1024.93	836.73	456.254	-999.387	833.555	429.78	-1045.63	768.616
728	0	193.435	-1055.75	1578.89	76.3946	-1059.06	1590.37	187.933	-886.249	1545.15	80.0622	-892.212	1550.96	120.979	-895.445	1448.47	128.46	-821.55	1164.99	139.828	-1020.67	1360.84	154.421	-1092.65	1171.41	42.1888	-820.667	1236.61	312.617	-949.704	1385	394.322	-924.243	1144.03	401.454	-924.936	1070.01	432.252	-1012.74	920.082	391.19	-1030.62	838.092	458.959	-1002.96	834.938	434.455	-1051.28	770.85
729	0	194.304	-1064.56	1578.8	77.3925	-1068.33	1590.67	188.188	-894.892	1546.08	80.3618	-901.078	1552.53	120.435	-903.505	1449.25	127.439	-829.742	1165.67	140.194	-1028.65	1361.53	155.113	-1100.63	1172.14	41.4303	-829.346	1237.59	312.063	-956.349	1385.4	393.773	-928.409	1144.73	401.775	-929.589	1070.83	434.679	-1017.06	921.218	394.346	-1036.66	839.438	460.908	-1006.65	835.951	439.001	-1056.89	772.916
730	0	195.362	-1073.23	1578.69	78.3651	-1077.3	1591.05	188.561	-903.456	1547.14	80.5339	-909.834	1553.68	119.966	-911.584	1449.86	126.51	-837.85	1166.12	140.531	-1036.57	1362.22	155.764	-1108.45	1172.9	40.1599	-837.447	1238.35	312.052	-963.059	1386.03	394.027	-933.032	1145.72	402.186	-934.147	1071.73	437.064	-1021.5	922.557	397.389	-1042.59	840.826	462.839	-1010.47	836.975	443.195	-1062.29	774.956
731	0	196.355	-1081.74	1578.44	79.5094	-1086.36	1591.24	188.961	-911.8	1547.98	80.9001	-918.581	1554.83	119.547	-919.699	1450.29	125.944	-846.461	1166.49	140.836	-1044.5	1362.76	156.301	-1116.26	1173.5	39.3886	-846.029	1238.62	312.093	-969.814	1386.58	393.764	-937.504	1146.5	402.674	-938.86	1072.85	439.224	-1025.58	923.676	400.273	-1048.5	842.213	464.744	-1014.15	838.067	447.267	-1067.63	776.963
732	0	197.533	-1090.39	1577.88	80.5836	-1095.37	1591.23	189.256	-920.13	1548.66	81.2356	-927.376	1556.05	119.107	-927.905	1450.63	125.094	-854.974	1166.74	141.107	-1052.52	1362.96	156.77	-1124.18	1173.75	38.1956	-854.164	1238.86	311.719	-976.708	1386.73	393.869	-942.553	1147.24	403.181	-943.62	1073.62	441.092	-1029.98	924.438	402.804	-1054.4	843.108	466.166	-1018.14	838.679	450.886	-1073.04	778.457
733	0	198.691	-1098.94	1577.04	81.8159	-1104.49	1591.07	189.584	-928.444	1548.99	81.4926	-936.05	1556.9	118.873	-935.996	1450.72	123.926	-863.799	1166.74	141.353	-1060.62	1362.97	157.223	-1132.14	1173.76	37.6994	-862.586	1239.17	311.533	-983.85	1386.74	394.042	-947.926	1147.78	403.55	-948.713	1074.09	442.781	-1034.65	924.924	405.08	-1060.21	843.723	467.643	-1022.1	839.233	454.119	-1078.37	779.801
734	0	199.849	-1107.3	1576.26	83.0894	-1113.45	1590.92	189.984	-936.81	1549.32	81.9087	-944.87	1557.6	118.452	-944.225	1450.73	122.538	-872.516	1166.29	141.673	-1068.66	1363.01	157.679	-1139.91	1173.76	36.7413	-871.007	1239.11	311.413	-990.937	1386.9	394.272	-953.442	1148.45	403.955	-953.955	1074.66	444.421	-1039.25	925.464	407.246	-1065.93	844.406	468.788	-1026.39	839.644	456.945	-1083.52	780.892
735	0	201.148	-1115.65	1575.51	84.4856	-1122.33	1590.66	190.297	-945.1	1549.34	82.4839	-953.625	1558.17	118.191	-952.419	1450.63	121.605	-881.56	1166.55	141.985	-1076.7	1362.93	158.173	-1147.71	1173.61	36.1349	-879.318	1239.02	311.486	-998.148	1386.95	394.525	-959.156	1148.9	404.217	-959.287	1075	446.014	-1043.9	925.811	409.151	-1071.66	844.992	469.706	-1030.69	839.791	459.497	-1088.67	781.732
736	0	202.423	-1124.07	1574.49	85.9197	-1131.38	1590.19	190.754	-953.388	1549.09	82.9799	-962.594	1558.45	118.034	-960.626	1450.38	121.381	-889.177	1166.29	142.398	-1084.82	1362.57	158.724	-1155.56	1173.22	35.8716	-887.928	1238.94	311.425	-1005.62	1386.57	394.596	-965.286	1148.85	404.624	-964.858	1074.92	447.16	-1048.84	925.783	410.97	-1077.46	845.142	470.481	-1035.23	839.502	461.728	-1093.84	782.171
737	0	203.628	-1132.37	1573.55	87.1972	-1140.26	1589.64	191.115	-961.783	1548.79	83.4272	-971.33	1558.67	117.936	-968.931	1450.13	121.429	-897.25	1166.53	142.698	-1092.96	1362.08	159.308	-1163.36	1172.75	35.5235	-895.889	1238.75	311.428	-1013.15	1386.33	394.801	-971.547	1148.82	404.76	-970.412	1074.92	448.216	-1054	925.551	412.477	-1083.18	845.165	471.027	-1040.04	839.202	463.52	-1098.98	782.314
738	0	204.86	-1140.69	1572.56	88.5405	-1149.23	1588.99	191.559	-970.115	1548.47	83.9552	-980.171	1558.58	117.956	-977.175	1449.68	121.213	-905.28	1166.15	143.061	-1101.11	1361.53	159.841	-1171.18	1172.14	35.4125	-904.154	1238.35	311.753	-1020.72	1386.1	395.062	-977.847	1148.87	405.142	-976.039	1074.84	449.173	-1059.12	925.337	413.75	-1088.94	845.066	471.669	-1044.63	838.812	464.881	-1104.02	782.16
739	0	206.132	-1149.1	1571.37	89.8004	-1158.11	1588.25	191.906	-978.339	1547.85	84.5845	-989.244	1558.35	117.923	-985.425	1448.94	121.059	-913.558	1165.65	143.455	-1109.36	1360.7	160.328	-1179.09	1171.32	35.3344	-912.556	1237.71	312.034	-1028.44	1385.63	395.29	-984.335	1148.63	405.471	-981.821	1074.57	449.931	-1063.98	924.819	414.764	-1094.68	844.626	472.162	-1049.48	838.329	465.954	-1109.09	781.576
740	0	207.245	-1157.5	1569.96	91.1844	-1167.16	1587.24	192.359	-986.791	1547.02	84.9617	-998.105	1557.91	118.177	-993.907	1448.14	120.951	-921.532	1164.79	143.996	-1117.68	1359.67	160.914	-1187.24	1170.32	35.408	-920.768	1236.97	312.137	-1036.43	1384.69	395.471	-991.117	1147.95	405.555	-987.977	1073.88	450.493	-1069.45	923.931	415.619	-1100.77	843.898	472.35	-1054.72	837.383	466.682	-1114.27	780.635
741	0	208.564	-1165.91	1568.67	92.5246	-1176.14	1586.18	192.848	-995.25	1546.09	85.6907	-1007.01	1557.29	118.444	-1002.44	1447.22	120.989	-929.314	1163.59	144.419	-1126.09	1358.78	161.527	-1195.43	1169.26	35.6467	-929.038	1236.07	312.528	-1044.54	1383.59	395.608	-997.95	1147.17	405.673	-994.244	1073.17	451.027	-1075	922.998	416.343	-1106.63	842.958	472.433	-1060	836.262	467.18	-1119.36	779.531
742	0	209.835	-1174.31	1567.29	93.765	-1185.05	1585.08	193.316	-1003.65	1545.2	86.2212	-1015.9	1556.51	118.949	-1010.97	1446.06	121.543	-937.945	1162.55	145.069	-1134.4	1357.59	162.145	-1203.66	1168.19	36.0422	-937.376	1234.91	313.069	-1052.71	1382.62	395.952	-1004.76	1146.42	405.878	-1000.61	1072.38	451.286	-1080.61	921.833	416.608	-1112.33	841.879	472.532	-1065.21	835.014	467.302	-1124.39	777.992
743	0	210.957	-1182.79	1565.59	95.0567	-1194.04	1583.49	193.764	-1012.04	1544.2	86.7636	-1024.9	1555.62	119.56	-1019.39	1445.05	122.058	-946.388	1161.55	145.603	-1142.92	1356.29	162.674	-1211.92	1166.69	36.5973	-945.77	1233.83	313.693	-1061.18	1381.39	396.258	-1011.89	1145.4	406.013	-1007.21	1071.34	451.517	-1086.55	920.256	416.48	-1117.66	840.194	472.355	-1070.57	833.418	467.141	-1129.6	776.098
744	0	212.013	-1191.32	1563.92	96.2358	-1203.05	1581.96	194.363	-1020.56	1543.19	87.2997	-1033.86	1554.74	120.22	-1028.14	1443.72	122.638	-954.559	1160.22	146.245	-1151.6	1354.77	163.211	-1220.36	1165.03	37.2873	-954.105	1232.64	314.305	-1069.86	1379.93	396.464	-1019.21	1144.07	406.079	-1014.03	1069.9	451.379	-1092.56	918.422	416.378	-1123.45	838.314	472.016	-1076.15	831.656	466.691	-1134.91	774.018
745	0	213.237	-1199.91	1562.33	97.5653	-1212.18	1580.34	194.807	-1029.1	1542.12	87.8747	-1042.89	1553.61	121.034	-1036.79	1442.46	123.527	-963.03	1158.88	146.87	-1160.21	1353.34	163.829	-1228.9	1163.48	38.1354	-962.448	1231.36	315.058	-1078.58	1378.6	396.815	-1026.62	1142.69	406.458	-1020.74	1068.67	451.161	-1098.69	916.554	415.839	-1129.11	836.252	471.545	-1081.81	829.724	465.993	-1140.14	771.712
746	0	214.406	-1208.46	1560.69	98.6477	-1221.19	1578.75	195.36	-1037.67	1540.99	88.4187	-1051.83	1552.3	121.858	-1045.51	1440.9	124.475	-971.721	1157.68	147.629	-1168.88	1351.73	164.334	-1237.5	1161.82	39.2312	-970.938	1229.92	316.061	-1087.52	1377.17	397.263	-1034.23	1141.25	406.561	-1027.94	1067.11	450.964	-1104.81	914.362	415.425	-1134.97	834.206	470.922	-1087.42	827.564	465.075	-1145.36	769.119
747	0	215.513	-1217.13	1559.05	99.8412	-1230.21	1576.89	195.99	-1046.3	1539.61	89.174	-1060.98	1551.07	123.016	-1054.28	1439.54	125.648	-980.324	1156.43	148.474	-1177.73	1350.08	164.9	-1246.3	1160.04	40.4145	-979.452	1228.47	316.991	-1096.79	1375.41	397.583	-1042.21	1139.37	406.757	-1035.24	1065.36	450.63	-1111.2	911.937	414.794	-1140.89	831.688	470.289	-1093.35	825.251	463.968	-1150.69	766.303
748	0	216.703	-1226.06	1557.48	100.999	-1239.32	1575.23	196.87	-1055.36	1538.17	90.1712	-1069.89	1549.63	124.255	-1063.13	1437.9	126.774	-989.009	1154.9	149.223	-1186.66	1348.42	165.535	-1255.33	1158.26	41.6539	-987.907	1226.96	317.95	-1106.13	1373.6	397.944	-1050.41	1137.55	406.706	-1042.87	1063.47	450.13	-1117.76	909.42	413.91	-1146.87	829.12	469.32	-1099.29	822.533	462.791	-1156.47	763.473
749	0	217.779	-1234.88	1555.83	101.981	-1248.08	1573.56	197.877	-1063.91	1536.66	91.1685	-1078.87	1547.92	125.617	-1072.1	1436.29	127.987	-997.85	1153.43	150.121	-1195.68	1346.65	165.99	-1264.21	1156.48	43.1411	-996.527	1225.53	319.251	-1115.59	1372.04	398.465	-1058.64	1135.93	406.72	-1050.68	1061.68	449.437	-1124.3	906.826	412.664	-1152.72	826.452	468.545	-1105.31	820.285	461.259	-1161.78	760.504
750	0	218.778	-1243.74	1554.25	103.168	-1257.15	1571.9	199.036	-1072.81	1535.13	92.3622	-1087.81	1546.1	126.709	-1081.09	1434.68	129.464	-1007.02	1151.52	151.087	-1204.8	1344.91	166.445	-1273.41	1154.67	44.5046	-1005.08	1224	320.476	-1125.12	1370.28	398.923	-1067.09	1134.1	406.783	-1058.76	1059.99	448.783	-1131.08	904.061	411.591	-1158.49	823.596	467.312	-1111.26	817.567	459.406	-1166.99	757.104
751	0	219.985	-1252.89	1552.73	104.217	-1265.94	1570.56	200.561	-1081.97	1533.27	93.489	-1096.74	1544.48	128.512	-1090.33	1433.16	131.095	-1016.17	1149.72	152.136	-1214.1	1343.06	166.901	-1282.59	1152.88	46.2173	-1013.99	1222.43	321.667	-1135.08	1368.2	399.381	-1076.04	1131.98	406.589	-1067.23	1057.66	447.993	-1138.11	901.2	410.243	-1164.81	820.571	466.411	-1117.72	814.869	457.573	-1172.62	753.732
752	0	221.199	-1261.86	1551.4	105.454	-1274.8	1569.2	201.865	-1090.97	1531.58	94.9989	-1105.56	1542.94	130.142	-1099.69	1431.59	132.332	-1024.95	1147.94	153.119	-1223.55	1341.46	167.389	-1291.95	1151.07	47.7464	-1022.85	1221.05	322.96	-1145.04	1366.22	399.959	-1085.13	1129.97	406.818	-1075.57	1055.8	447.124	-1145.2	898.367	408.897	-1171.19	817.885	465.04	-1124.11	811.938	455.527	-1178.26	750.42
753	0	222.581	-1270.83	1550.4	106.671	-1283.46	1568.28	203.504	-1099.92	1529.93	96.5065	-1114.35	1541.23	131.8	-1109.11	1430.22	134.073	-1034.78	1146.82	154.229	-1232.98	1339.99	167.773	-1301.25	1149.55	49.4683	-1031.99	1219.77	324.503	-1155.08	1364.57	400.592	-1094.34	1128.1	407.275	-1084.16	1053.93	446.232	-1152.52	895.641	407.364	-1176.94	814.893	463.815	-1130.67	809.383	453.39	-1183.92	747.187
754	0	223.928	-1279.86	1549.39	108.061	-1292.29	1567.38	205.128	-1109	1528.2	98.1043	-1123.2	1539.77	133.585	-1118.73	1428.9	135.762	-1044.83	1145.72	155.391	-1242.55	1338.46	168.265	-1310.78	1147.94	51.1723	-1041.47	1218.53	326.039	-1165.29	1362.88	401.344	-1103.88	1126.11	407.074	-1093.34	1051.83	445.314	-1159.98	892.786	405.629	-1183.63	812.14	462.548	-1137.52	806.678	451.087	-1189.78	743.813
755	0	225.196	-1288.88	1548.56	109.492	-1301.04	1566.49	206.833	-1118.27	1526.67	99.963	-1132.13	1538.22	135.44	-1128.52	1427.82	137.72	-1054.59	1145.07	156.65	-1252.36	1337.09	168.752	-1320.25	1146.31	52.8202	-1050.73	1217.6	327.557	-1175.62	1361.16	402.036	-1113.81	1124.18	407.488	-1102.32	1050.11	444.276	-1167.85	890.058	403.911	-1190.2	809.284	461.229	-1144.66	804.074	448.677	-1195.89	740.525
756	0	226.879	-1298.1	1548.06	110.937	-1309.81	1565.98	208.594	-1127.3	1525.28	101.571	-1141.02	1536.88	137.399	-1138.35	1426.87	139.027	-1064.21	1144.01	157.983	-1262.16	1335.78	169.354	-1330.06	1144.85	54.7481	-1060.28	1216.96	329.211	-1185.94	1359.71	402.888	-1123.87	1122.54	407.694	-1111.64	1048.42	443.231	-1175.83	887.497	402.004	-1196.89	806.583	459.871	-1151.99	801.667	446.066	-1202.12	737.364
757	0	228.554	-1307.05	1547.68	112.587	-1318.65	1565.65	210.521	-1136.47	1523.95	103.448	-1149.95	1535.46	139.312	-1148.28	1425.94	140.847	-1074.2	1143.54	159.476	-1272.01	1334.8	170.097	-1339.78	1143.61	56.5794	-1070.01	1216.28	331.002	-1196.17	1358.34	403.741	-1134.09	1120.91	408.066	-1121.08	1046.86	442.257	-1184.07	885.06	400.437	-1203.79	804.269	458.836	-1159.47	799.53	443.508	-1208.48	734.364
758	0	230.375	-1316.16	1547.33	114.489	-1327.44	1565.3	212.381	-1145.71	1522.77	105.412	-1159.08	1534.31	141.297	-1158.29	1425.23	142.625	-1084.55	1142.55	161.113	-1282.04	1333.8	171.078	-1349.8	1142.39	58.2098	-1079.87	1215.69	332.737	-1206.66	1356.83	404.581	-1144.72	1118.88	408.154	-1130.87	1045.1	441.223	-1192.62	882.703	398.678	-1210.81	801.759	457.661	-1167.54	797.152	440.866	-1215.19	731.316
759	0	232.32	-1325.16	1547.36	116.467	-1336.44	1565.32	214.293	-1154.82	1521.73	107.309	-1168.19	1533.46	143.444	-1168.3	1424.66	144.059	-1094.81	1141.67	162.799	-1292.14	1333.15	172.146	-1360.03	1141.61	60.0191	-1089.92	1215.24	334.502	-1217.15	1355.44	405.362	-1155.44	1117.22	408.006	-1140.93	1043.19	440.261	-1201.36	880.599	396.988	-1218.51	799.747	456.599	-1176.07	795.128	438.347	-1222.23	728.642
760	0	234.424	-1334.1	1547.65	118.447	-1345.5	1565.66	216.15	-1163.94	1521.08	109.181	-1177.2	1532.6	145.652	-1178.4	1424.18	145.945	-1105.78	1141.46	164.57	-1302.33	1332.83	173.352	-1370.69	1141.18	61.9181	-1100.12	1214.84	336.535	-1227.44	1354.44	406.375	-1166.01	1115.88	408.488	-1150.74	1041.94	439.307	-1210.43	878.646	395.467	-1226.06	797.909	455.784	-1184.69	793.564	435.761	-1229.34	726.22
761	0	236.504	-1343.21	1548.48	120.436	-1354.48	1566.41	218.26	-1173.2	1520.63	111.272	-1186.76	1532.07	147.929	-1188.46	1423.97	147.454	-1116.51	1141.14	166.298	-1312.67	1332.73	174.521	-1381.45	1140.98	63.6544	-1110.55	1214.76	338.483	-1237.83	1353.56	407.178	-1176.58	1114.64	408.813	-1160.91	1040.74	438.524	-1219.76	876.925	393.805	-1233.33	795.936	454.856	-1193.62	791.903	433.382	-1237	723.997
762	0	238.731	-1352.36	1549.25	122.763	-1363.67	1567.04	220.313	-1182.47	1520.22	113.253	-1196.16	1531.65	150.223	-1198.69	1424.04	148.657	-1127.41	1140.98	168.101	-1323.01	1332.92	175.787	-1392.41	1141.11	65.2872	-1121.12	1214.8	340.416	-1248.49	1352.76	408.02	-1187.34	1113.4	409.097	-1171.25	1039.56	437.644	-1229.48	875.24	392.312	-1242.24	794.469	454.108	-1202.98	790.432	431.037	-1244.94	721.898
763	0	241.123	-1361.44	1550.2	125.355	-1372.83	1568.07	222.409	-1192.15	1520.02	115.364	-1205.43	1531.65	152.493	-1209.01	1424.36	149.741	-1138.18	1141.19	169.957	-1333.43	1333.44	177.015	-1403.52	1141.69	66.9568	-1131.67	1215.26	342.363	-1259.03	1352.25	408.732	-1198.03	1112.44	409.543	-1181.92	1038.7	436.804	-1239.37	873.972	390.981	-1250.5	793.189	453.233	-1212.69	789.269	428.825	-1253.16	720.253
764	0	243.66	-1370.57	1551.58	127.727	-1381.95	1569.7	224.603	-1201.39	1519.97	117.809	-1214.9	1531.75	154.658	-1219.33	1424.83	151.07	-1148.68	1141.01	171.796	-1343.87	1334.22	178.241	-1414.42	1142.63	68.4295	-1142.41	1215.92	344.318	-1269.53	1352.2	409.62	-1208.57	1111.98	409.803	-1192.59	1038.13	436.117	-1249.32	873.15	389.776	-1259.62	792.644	452.534	-1222.48	788.519	426.981	-1261.54	719.12
765	0	246.124	-1379.67	1553	130.25	-1391.05	1571.3	226.821	-1210.78	1519.98	120.034	-1224.51	1532.07	156.773	-1229.69	1425.54	152.042	-1159.35	1141.71	173.636	-1354.44	1335.13	179.272	-1425.63	1143.72	69.842	-1153.19	1216.71	346.39	-1280.28	1352.29	410.436	-1219.3	1111.59	410.29	-1203.49	1037.69	435.628	-1259.7	872.459	388.722	-1268.98	792.006	451.858	-1232.57	787.937	425.401	-1270.58	718.162
766	0	248.686	-1389.12	1554.66	132.866	-1400.4	1573.36	229.252	-1220.53	1520.24	122.502	-1233.99	1532.54	159.242	-1240.08	1426.64	153.78	-1170.29	1142.82	175.414	-1365.08	1336.19	180.283	-1436.84	1144.93	71.4432	-1163.98	1218.03	348.21	-1291.01	1352.43	411.091	-1230.21	1111.31	410.372	-1214.67	1037.41	435.094	-1270.47	871.951	387.925	-1279.04	791.575	451.399	-1243.08	787.594	423.965	-1279.96	717.399
767	0	251.212	-1398.43	1556.54	135.549	-1409.59	1575.55	231.544	-1230.2	1520.71	124.957	-1243.7	1533.48	161.414	-1250.52	1427.94	154.577	-1180.8	1144.05	177.101	-1375.67	1337.73	180.96	-1448.1	1146.48	72.8495	-1174.73	1219.55	349.972	-1301.72	1352.92	411.763	-1241.17	1111.5	410.754	-1225.75	1037.55	434.647	-1281.4	871.889	387.368	-1290.03	791.694	451.026	-1253.85	787.7	422.812	-1289.83	717.204
768	0	253.834	-1407.68	1558.54	138.162	-1418.72	1578.08	234.101	-1240.01	1521.39	127.605	-1253.05	1534.43	163.535	-1260.98	1429.46	156.038	-1191.41	1145.39	178.718	-1386.12	1339.47	181.707	-1459.02	1148.22	74.3948	-1185.36	1221.35	351.795	-1312.45	1353.71	412.648	-1252.15	1111.95	411.222	-1236.97	1037.94	434.494	-1292.39	872.216	387.681	-1301.2	792.223	450.563	-1264.71	788.083	422.06	-1300.08	717.339
769	0	256.49	-1417.2	1560.47	140.838	-1427.94	1580.69	236.579	-1249.58	1521.98	130.098	-1262.7	1535.72	165.565	-1271.34	1431.16	157.273	-1202.25	1147.09	180.264	-1396.56	1341.16	182.28	-1470.05	1150.04	75.8096	-1196.08	1223.24	353.466	-1323.33	1354.46	413.157	-1263.54	1112.33	411.358	-1248.56	1038.42	434.589	-1303.99	872.673	387.569	-1312.33	793.022	450.523	-1276.16	788.536	421.183	-1310.81	717.56
770	0	258.96	-1426.58	1562.71	143.527	-1437.14	1583.47	239.132	-1259.38	1522.85	132.739	-1272.14	1537.29	167.793	-1281.7	1432.85	158.684	-1213.08	1149.04	181.744	-1406.91	1343.21	182.532	-1480.78	1151.99	77.353	-1206.4	1225.35	355.007	-1334.26	1355.29	413.703	-1275	1112.72	411.707	-1260.25	1039.01	434.708	-1315.53	873.414	386.015	-1322.71	793.236	450.304	-1287.78	789.041	420.977	-1322.13	718.278
771	0	261.503	-1435.97	1564.89	146.18	-1446.39	1586.3	241.477	-1269.03	1523.78	135.036	-1281.74	1539.01	169.883	-1291.84	1434.76	160.364	-1223.89	1150.66	183.003	-1417.14	1345.35	182.729	-1491.51	1154.21	78.7867	-1216.56	1227.56	356.612	-1345.09	1356.51	414.38	-1286.41	1113.58	412.179	-1271.88	1039.86	434.753	-1327.36	874.404	388.318	-1337.17	795.484	450.373	-1299.7	790.14	420.847	-1333.71	719.08
772	0	263.964	-1445.41	1566.82	148.793	-1455.64	1588.99	243.861	-1278.89	1524.88	137.423	-1291.31	1540.37	171.868	-1301.93	1436.57	161.692	-1234.37	1152.42	184.2	-1427.25	1347.35	182.878	-1501.55	1156.18	80.3572	-1226.62	1229.61	358.155	-1355.92	1357.82	415.15	-1297.98	1114.57	412.788	-1283.7	1040.94	435.118	-1339.56	875.386	386.16	-1346.54	795.654	450.462	-1311.87	791.161	421.064	-1346.07	720.129
773	0	266.258	-1454.79	1568.47	151.302	-1465.04	1591.55	245.815	-1288.54	1525.76	139.48	-1301.01	1542.28	173.809	-1311.94	1438.25	163.449	-1244.79	1154.19	185.207	-1437.28	1349.36	182.792	-1512.56	1158.36	82.0787	-1236.43	1231.6	359.428	-1366.83	1358.81	415.815	-1309.83	1115.27	413.471	-1295.84	1041.7	435.479	-1352.15	876.302	386.517	-1359.47	796.616	450.436	-1324.69	791.796	421.058	-1358.58	720.735
774	0	268.529	-1464.24	1570.14	153.65	-1474.35	1593.88	247.668	-1298.08	1526.81	141.342	-1310.44	1543.99	175.698	-1321.71	1440.12	165.419	-1254.96	1156.02	186.213	-1447.19	1351.24	182.634	-1522.78	1160.39	84.0191	-1246.04	1233.6	360.771	-1377.84	1359.94	416.649	-1321.63	1116.01	414.335	-1307.95	1042.46	435.982	-1364.9	877.376	387.01	-1372.95	797.717	450.951	-1337.75	792.865	421.5	-1371.99	721.892
775	0	270.593	-1473.42	1571.66	155.889	-1483.66	1596.16	249.504	-1307.38	1527.88	143.216	-1320.01	1545.96	177.47	-1331.36	1441.52	166.971	-1264.88	1157.84	187.005	-1456.91	1353.19	182.547	-1532.43	1162.35	85.9944	-1255.45	1235.29	362.12	-1388.71	1361.26	417.695	-1333.5	1117	415.321	-1320.13	1043.42	436.727	-1377.92	878.642	389.093	-1387.95	799.571	451.414	-1351.13	793.907	422.014	-1385.61	723.147
776	0	272.625	-1482.76	1572.97	158.003	-1493.16	1598.07	250.782	-1316.84	1529	144.901	-1329.66	1547.64	179.433	-1340.99	1443.05	169.01	-1274.54	1159.42	187.658	-1466.58	1354.85	182.237	-1542.33	1164.29	87.9123	-1264.49	1236.98	363.223	-1399.66	1362.37	418.929	-1345.59	1117.88	416.339	-1332.66	1044.26	437.351	-1391.3	879.683	389.243	-1401.33	800.676	452.01	-1364.98	794.695	422.551	-1399.81	724.349
777	0	274.264	-1492.08	1574.05	159.852	-1502.62	1599.86	252.184	-1326.26	1529.96	146.305	-1339.02	1549.25	181.233	-1350.52	1444.38	170.778	-1283.58	1160.6	188.229	-1476.18	1356.24	181.788	-1552.03	1165.75	90.2261	-1273.56	1238.41	364.381	-1410.75	1363.19	420.197	-1357.75	1118.41	417.898	-1345.13	1044.66	437.871	-1404.97	880.541	389.367	-1414.9	801.499	452.658	-1379.33	795.407	423.139	-1414.54	725.349
778	0	275.76	-1501.41	1575.18	161.448	-1512.07	1601.32	253.27	-1335.84	1531.2	147.306	-1348.48	1550.56	182.914	-1360.1	1445.61	172.729	-1292.71	1161.51	188.658	-1485.58	1357.58	181.176	-1561.65	1167.18	92.4448	-1282.19	1239.84	365.405	-1421.73	1364.16	421.552	-1370.04	1119.26	419.256	-1357.96	1045.51	438.552	-1418.96	881.523	389.506	-1428.6	802.544	453.332	-1393.85	796.256	423.604	-1429.69	726.445
779	0	276.963	-1510.64	1576.17	162.759	-1521.6	1602.76	254.15	-1344.9	1532.25	148.135	-1358.15	1552.03	184.399	-1369.44	1446.69	174.885	-1302.06	1162.98	188.952	-1494.83	1358.76	180.519	-1571.06	1168.36	94.7893	-1290.78	1240.85	366.436	-1432.68	1365.07	423.098	-1382.36	1120.06	420.933	-1370.82	1046.32	439.236	-1433.19	882.468	389.742	-1442.52	803.54	454.22	-1408.75	797.21	424.104	-1445.18	727.692
780	0	278.033	-1520	1577.06	164.019	-1531.14	1603.9	254.896	-1354.37	1533.24	149.28	-1367.61	1553.2	186.112	-1378.88	1447.74	176.867	-1310.97	1163.71	189.355	-1503.96	1359.77	179.95	-1580.35	1169.22	97.172	-1299.09	1241.99	367.42	-1443.83	1365.66	424.613	-1395.09	1120.49	422.48	-1383.91	1046.44	440.022	-1447.79	883.298	390.434	-1457.11	804.5	455.113	-1424.1	797.754	424.697	-1461.11	728.743
781	0	278.976	-1529.42	1577.86	165.022	-1540.7	1604.88	255.539	-1363.86	1534.23	149.901	-1376.87	1554.44	187.62	-1388.07	1448.64	179.307	-1320.1	1164.77	189.694	-1513.07	1360.67	179.237	-1589.41	1169.86	99.5513	-1307.31	1242.86	368.06	-1454.99	1366.05	426.102	-1407.91	1120.86	424.181	-1397.23	1046.8	440.782	-1462.43	884.105	391.116	-1472.08	805.528	455.865	-1439.73	798.117	425.324	-1477.35	729.916
782	0	279.548	-1538.79	1578.62	165.486	-1550.12	1605.82	256.026	-1373	1535.21	150.288	-1386.44	1555.6	189.149	-1397.17	1449.71	181.802	-1328.91	1165.85	189.824	-1522.01	1361.5	178.512	-1598.32	1170.45	102.112	-1315.52	1243.67	368.99	-1466.09	1366.87	427.824	-1420.9	1121.58	425.98	-1410.62	1047.17	441.509	-1477.32	885.156	391.602	-1486.9	806.61	456.9	-1455.61	798.939	425.895	-1493.8	731.338
783	0	279.857	-1548.17	1579.4	165.786	-1559.65	1606.63	256.376	-1382.37	1536.35	150.685	-1395.82	1556.52	190.66	-1406.28	1450.49	184.347	-1337.68	1166.72	189.928	-1530.84	1362.15	177.703	-1607.22	1170.96	104.601	-1323.26	1244.54	369.604	-1476.92	1367.59	429.513	-1433.94	1122.28	427.837	-1424.01	1047.84	442.209	-1492.39	886.143	392.264	-1502.1	807.924	458.143	-1471.58	799.989	426.526	-1510.71	732.863
784	0	280.031	-1557.84	1580.17	165.979	-1569.17	1607.26	256.625	-1391.82	1537.28	150.944	-1405.1	1557.43	191.986	-1415.17	1451.26	186.814	-1346.35	1167.63	190.081	-1539.59	1362.68	177.077	-1616.04	1171.29	107.382	-1331.6	1245.01	370.222	-1487.97	1368.18	431.133	-1447.31	1122.84	429.504	-1437.6	1048.24	442.936	-1507.73	887.09	392.845	-1517.5	808.91	459.046	-1488.09	800.608	426.971	-1527.59	734.039
785	0	279.942	-1567.45	1580.85	165.874	-1578.54	1607.77	256.867	-1401.32	1538.17	151.121	-1414.68	1558.33	193.233	-1424.15	1452.1	189.264	-1354.93	1168.46	190.148	-1548.25	1363.23	176.478	-1624.8	1171.67	109.924	-1339.4	1245.83	370.79	-1498.8	1368.87	432.706	-1460.79	1123.48	431.096	-1451.34	1048.62	443.647	-1523.13	888.304	393.639	-1533.08	810.221	459.908	-1504.69	801.438	427.739	-1545.02	735.788
786	0	279.743	-1576.99	1581.66	165.574	-1588.02	1608.38	256.984	-1410.84	1539.19	151.188	-1423.77	1559.07	194.405	-1432.78	1452.86	191.726	-1363.44	1169.02	190.176	-1556.69	1363.92	175.817	-1633.1	1172.22	112.381	-1347.22	1246.35	371.501	-1509.5	1369.85	434.253	-1474.17	1124.31	432.983	-1465.03	1049.43	444.363	-1538.58	889.683	394.174	-1548.67	811.789	460.94	-1521.33	802.844	428.458	-1562.4	737.781
787	0	279.297	-1586.6	1582.36	165.11	-1597.21	1608.76	257.254	-1420.22	1540.2	151.512	-1433.12	1559.93	195.523	-1441.41	1453.55	194.199	-1371.94	1169.84	190.3	-1565.05	1364.57	175.262	-1641.43	1172.72	114.896	-1354.97	1246.85	371.903	-1519.79	1370.62	435.576	-1487.5	1125.13	434.613	-1478.86	1050.11	445.127	-1554.21	891.271	394.88	-1564.38	813.421	462.114	-1538.23	804.167	429.223	-1580.09	739.873
788	0	278.658	-1596.28	1582.91	164.425	-1606.54	1609.13	257.272	-1429.74	1541.08	151.347	-1442.23	1560.67	196.573	-1449.89	1454.1	196.518	-1380.44	1170.2	190.3	-1573.33	1365.14	174.789	-1649.69	1173.1	117.295	-1362.65	1247.25	372.139	-1530.02	1371.35	436.713	-1500.92	1125.92	436.129	-1492.75	1050.92	445.783	-1569.96	892.911	395.576	-1580.39	815.087	463.32	-1555.39	805.692	429.915	-1597.44	741.94
789	0	277.858	-1605.97	1583.49	163.494	-1615.72	1609.27	257.676	-1439.28	1541.98	151.498	-1451.22	1561.1	197.471	-1458.3	1454.62	198.761	-1388.83	1170.85	190.215	-1581.53	1365.69	174.363	-1657.71	1173.77	119.534	-1370.43	1247.55	372.635	-1540.18	1372.27	437.848	-1514.29	1126.84	437.69	-1506.6	1051.82	446.45	-1585.84	894.755	396.219	-1596.5	816.849	464.534	-1572.37	807.453	430.534	-1615.2	744.179
790	0	277.079	-1615.71	1584.22	162.526	-1624.74	1609.54	257.948	-1448.67	1542.87	151.798	-1459.98	1561.59	198.411	-1466.51	1455.03	200.989	-1397.3	1171.2	190.148	-1589.48	1366.3	174.096	-1665.71	1174.48	121.76	-1378.09	1247.7	372.937	-1549.88	1373.3	438.951	-1527.41	1127.89	439.158	-1520.24	1052.86	447.006	-1601.52	896.614	396.842	-1612.61	818.97	465.368	-1589.61	809.246	431.324	-1633.01	746.726
791	0	276.129	-1625.36	1584.63	161.365	-1633.73	1609.69	258.176	-1458.12	1543.55	151.919	-1468.98	1561.87	199.258	-1474.61	1455.33	202.544	-1405.68	1171.37	190.212	-1597.45	1366.79	173.929	-1673.66	1175.01	123.988	-1385.71	1247.75	373.219	-1559.66	1374.07	439.917	-1540.58	1128.82	440.464	-1534.04	1053.61	447.603	-1617.4	898.502	397.503	-1628.82	820.817	466.492	-1606.91	811.09	431.967	-1650.82	749.219
792	0	275.166	-1635.11	1585.09	160.437	-1642.67	1609.74	258.287	-1467.68	1544.04	152.019	-1477.74	1562.28	199.875	-1482.64	1455.63	204.339	-1414.13	1171.17	190.182	-1605.28	1367.27	173.779	-1681.59	1175.55	126.075	-1393.38	1247.59	373.535	-1569.34	1374.78	440.936	-1553.77	1129.74	441.808	-1547.96	1054.42	448.144	-1633.36	900.581	398.15	-1645.18	822.87	467.274	-1624.3	812.97	432.657	-1668.7	751.675
793	0	274.031	-1644.65	1585.43	159.051	-1651.44	1609.76	258.551	-1477.35	1544.64	152.126	-1486.36	1562.46	200.7	-1490.65	1455.7	206.204	-1422.64	1170.81	190.073	-1613.05	1367.67	173.591	-1689.47	1176.04	128.304	-1400.97	1247.4	373.786	-1578.85	1375.53	441.766	-1566.55	1130.6	442.976	-1561.64	1055.26	448.661	-1649.17	902.608	398.633	-1661.34	824.88	468.312	-1641.6	815.006	433.321	-1686.58	754.388
794	0	272.846	-1654.23	1585.65	157.776	-1660.23	1609.57	258.688	-1486.52	1545.09	152.197	-1495.02	1562.47	201.428	-1498.68	1455.78	208.081	-1431.13	1170.83	190.042	-1620.78	1367.95	173.353	-1697.37	1176.29	130.328	-1408.57	1247.05	373.96	-1588.18	1376.07	442.631	-1579.29	1131.42	443.969	-1574.93	1055.9	449.145	-1664.95	904.622	399.191	-1677.71	827.016	469.238	-1658.81	817.075	433.861	-1704.21	756.754
795	0	271.59	-1663.82	1585.68	156.456	-1669.03	1609.33	258.728	-1495.8	1545.45	152.061	-1503.6	1562.37	202.079	-1506.63	1455.68	209.904	-1439.72	1170.41	189.959	-1628.58	1368.03	173.072	-1705.4	1176.16	132.289	-1416.21	1246.53	374.005	-1597.52	1376.4	443.307	-1591.84	1131.93	444.996	-1588.61	1056.71	449.586	-1680.75	906.496	399.656	-1694.17	828.986	469.774	-1676.03	818.969	434.244	-1722.04	759.294
796	0	270.249	-1673.33	1585.66	154.922	-1677.66	1608.75	258.721	-1505.22	1545.71	152.042	-1512.41	1562.32	202.686	-1514.61	1455.43	211.285	-1448.19	1170.05	189.9	-1636.38	1367.94	172.805	-1713.32	1176.2	134.304	-1423.84	1246.06	374.018	-1606.92	1376.64	443.953	-1604.45	1132.6	445.876	-1602.1	1057.18	449.964	-1696.5	908.483	400.162	-1710.68	831.008	470.618	-1693.45	820.986	434.616	-1739.71	761.687
797	0	268.834	-1682.69	1585.68	153.464	-1686.23	1608.19	258.82	-1514.51	1545.95	151.812	-1520.85	1562.06	203.204	-1522.69	1455.02	213.143	-1456.91	1169.55	189.814	-1644.16	1367.96	172.448	-1721.35	1176.21	135.995	-1431.66	1245.42	374.176	-1616.14	1376.82	444.601	-1616.56	1133.08	446.946	-1615.4	1057.86	450.362	-1712	910.451	400.522	-1726.87	833.079	471.248	-1710.49	822.996	435.024	-1757.4	764.4
798	0	267.342	-1692.2	1585.59	151.756	-1694.95	1607.49	258.78	-1523.69	1545.97	151.826	-1529.37	1561.53	203.734	-1530.68	1454.66	214.89	-1465.64	1168.83	189.662	-1651.92	1367.68	172.042	-1729.48	1175.91	137.667	-1439.53	1244.63	374.293	-1625.32	1376.72	445.199	-1628.71	1133.49	447.627	-1628.54	1058.1	450.722	-1727.48	912.282	400.952	-1743.18	835.111	471.803	-1727.41	824.819	435.41	-1775.21	767.05
799	0	265.664	-1701.6	1585.32	149.98	-1703.42	1606.53	258.68	-1533.33	1545.96	151.654	-1537.83	1560.89	204.192	-1538.66	1454.16	216.056	-1473.78	1168.6	189.523	-1659.87	1367.22	171.526	-1737.62	1175.37	139.061	-1447.55	1243.78	374.067	-1634.5	1376.36	445.607	-1640.66	1133.58	448.161	-1641.64	1058.11	450.948	-1742.81	913.97	401.257	-1759.45	836.966	472.365	-1744.44	826.629	435.753	-1792.83	769.588
800	0	263.887	-1711.07	1585.02	148.085	-1711.93	1605.4	258.462	-1542.64	1545.95	151.395	-1546.19	1560.1	204.585	-1546.78	1453.52	217.1	-1481.59	1167.63	189.373	-1667.79	1366.72	170.982	-1745.76	1174.76	140.384	-1455.47	1242.94	374.023	-1643.54	1375.94	445.99	-1652.34	1133.57	448.702	-1654.49	1058.22	451.16	-1757.89	915.666	401.446	-1775.68	838.904	472.648	-1761.06	828.47	435.942	-1810.21	772.147
801	0	262.064	-1720.42	1584.66	146.053	-1720.47	1604.2	258.335	-1551.52	1545.88	150.92	-1554.65	1559.17	204.983	-1554.98	1452.79	218.215	-1489.45	1166.71	189.158	-1675.84	1366.14	170.466	-1753.97	1174.13	141.573	-1463.53	1241.95	373.819	-1652.53	1375.39	446.234	-1663.75	1133.45	449.222	-1667.16	1058.49	451.189	-1772.79	917.284	401.559	-1791.65	840.803	472.738	-1777.25	830.177	436.071	-1827.46	774.799
802	0	260.149	-1729.78	1583.94	144.218	-1728.85	1602.86	258.145	-1560.79	1545.61	150.531	-1563.09	1558.17	205.281	-1563.32	1451.85	219.087	-1497.27	1165.93	189.005	-1684.07	1365.27	170.009	-1762.24	1173.14	142.676	-1471.62	1240.94	373.602	-1661.53	1374.52	446.585	-1675.32	1133.27	449.61	-1679.81	1058.3	451.252	-1787.55	918.616	401.534	-1807.4	842.487	472.847	-1793.51	831.759	436.161	-1844.57	777.275
803	0	258.308	-1739.12	1583.17	142.119	-1737.19	1601.41	257.852	-1570.5	1545.06	150.264	-1571.31	1557.31	205.498	-1571.69	1451	220.093	-1504.95	1165	188.779	-1692.31	1364.33	169.583	-1770.44	1172.09	143.592	-1479.71	1239.96	373.436	-1670.63	1373.53	446.622	-1686.38	1132.74	449.771	-1692.34	1057.76	451.097	-1802.15	919.908	401.409	-1823.01	844.056	472.681	-1809.33	832.985	436.136	-1861.5	779.705
804	0	256.39	-1748.31	1582.53	140.243	-1745.51	1600.11	257.607	-1579.64	1544.62	149.804	-1579.6	1556.24	205.806	-1580.28	1450.2	221.031	-1512.61	1164.11	188.563	-1700.67	1363.47	169.168	-1778.69	1171.08	144.333	-1487.81	1239.16	373.335	-1679.71	1372.71	446.789	-1697.17	1132.23	449.817	-1704.56	1057.44	450.982	-1816.35	921.172	401.156	-1838.33	845.679	472.491	-1824.87	834.44	436.094	-1878.19	782.476
805	0	254.577	-1757.49	1581.76	138.348	-1753.88	1598.78	256.968	-1588.62	1544.03	149.488	-1588.12	1555.27	205.6	-1588.87	1449.23	221.607	-1520.23	1163.67	188.182	-1709.19	1362.51	168.754	-1786.97	1169.97	144.774	-1496.07	1238.31	373.04	-1688.74	1371.77	446.917	-1708.04	1131.86	450.165	-1716.64	1057.33	450.686	-1830.24	922.353	400.762	-1853.39	847.333	471.958	-1839.75	835.584	435.833	-1894.45	784.99
806	0	252.786	-1766.79	1580.85	136.425	-1762.34	1597.35	256.622	-1597.92	1543.48	148.711	-1596.56	1553.89	205.517	-1597.7	1448.43	221.683	-1527.9	1162.97	187.833	-1717.77	1361.36	168.333	-1795.4	1168.59	145.025	-1504.36	1237.46	372.63	-1697.85	1370.66	446.709	-1718.43	1131	449.947	-1728.55	1056.73	450.262	-1844.06	923.367	400.257	-1868.21	848.722	471.364	-1854.76	836.721	435.379	-1910.29	787.113
807	0	250.98	-1775.99	1579.92	134.648	-1770.69	1595.89	255.906	-1607.11	1542.54	147.823	-1605.16	1552.65	205.155	-1606.61	1447.29	221.488	-1535.56	1162.11	187.356	-1726.52	1360.13	167.962	-1803.83	1167.12	145.216	-1512.76	1236.51	372.09	-1706.92	1369.56	446.625	-1728.97	1130.34	449.743	-1740.32	1055.99	449.727	-1857.51	924.164	399.614	-1882.73	850.057	470.72	-1869.41	837.648	434.842	-1926.11	789.596
808	0	249.327	-1785.03	1579.09	132.873	-1779.24	1594.58	255.158	-1616.23	1541.47	147.169	-1613.74	1550.96	204.77	-1615.55	1446.25	221.028	-1543.44	1161.11	186.903	-1735.24	1359.08	167.624	-1812.17	1165.8	145.124	-1521.26	1235.55	371.555	-1715.89	1368.59	446.37	-1739.15	1129.67	449.741	-1751.97	1055.8	449.026	-1870.6	925.093	398.837	-1896.89	851.51	469.748	-1883.42	838.64	434.105	-1941.45	792.066
809	0	247.609	-1794.02	1578.16	131.199	-1787.86	1593.24	254.294	-1625.3	1540.28	146.356	-1622.38	1549.41	204.294	-1624.63	1445.09	220.332	-1551.52	1160.19	186.271	-1744.09	1357.91	167.383	-1820.69	1164.41	144.871	-1529.97	1234.37	371.044	-1724.95	1367.57	446.085	-1749.36	1129.03	449.353	-1763.23	1055.27	448.345	-1883.44	925.855	397.899	-1910.7	852.723	468.808	-1897.17	839.418	433.363	-1956.1	794.078
810	0	246.007	-1803.07	1577.21	129.606	-1796.41	1591.7	253.389	-1634.57	1539.02	145.705	-1631.32	1548.01	203.418	-1633.76	1444	219.313	-1559.72	1159.36	185.746	-1753.08	1356.64	167.109	-1829.32	1162.81	144.5	-1538.78	1233.31	370.422	-1734.1	1366.43	445.688	-1759.44	1128.2	448.419	-1774.08	1054.09	447.553	-1895.99	926.528	396.912	-1924.29	853.965	467.655	-1910.79	840.201	432.293	-1970.66	796.154
811	0	244.457	-1812.14	1576.31	127.901	-1805.31	1590.32	252.433	-1643.72	1537.78	144.865	-1640.06	1546.32	202.68	-1643.03	1442.88	218.822	-1568.35	1158.35	185.017	-1762.11	1355.42	166.8	-1837.95	1161.24	143.824	-1547.79	1232.24	369.752	-1743.22	1365.44	445.139	-1769.26	1127.38	448.28	-1785.4	1053.88	446.459	-1908.19	927.125	395.764	-1937.44	855.226	466.226	-1923.68	840.651	431.116	-1984.69	798.231
812	0	242.811	-1821.23	1575.52	126.299	-1814.08	1588.95	251.271	-1652.83	1536.71	143.663	-1648.98	1544.65	201.623	-1652.34	1441.6	217.946	-1577.24	1157.16	184.255	-1771.31	1354.19	166.563	-1846.84	1159.84	143.351	-1556.75	1231.15	369.086	-1752.3	1364.56	444.515	-1779.1	1126.78	447.52	-1795.71	1053.34	445.464	-1920.04	927.685	394.432	-1950.26	856.462	464.932	-1936.39	841.344	429.754	-1998.1	800.019
813	0	241.268	-1830.4	1574.47	124.687	-1823.04	1587.41	250.152	-1662.01	1535.61	142.254	-1658.09	1542.78	200.595	-1661.88	1440.47	217.045	-1586.32	1156.16	183.494	-1780.37	1352.52	166.314	-1855.81	1158.21	142.493	-1565.91	1230.06	368.228	-1761.48	1363.55	443.796	-1788.88	1125.87	447.013	-1806.36	1052.84	444.359	-1931.71	928.059	393.028	-1962.79	857.323	463.234	-1948.67	841.786	428.332	-2011.27	801.569
814	0	239.734	-1839.63	1573.44	123.023	-1832.2	1585.86	248.811	-1671.35	1534.48	141.039	-1667.1	1541.44	199.552	-1671.31	1439.47	216.119	-1595.45	1155.1	182.708	-1790.04	1351.28	166.054	-1864.89	1156.54	141.628	-1575.17	1229.03	367.385	-1770.72	1362.42	442.95	-1798.46	1124.89	445.856	-1816.39	1051.63	443.13	-1943.05	928.214	391.517	-1974.92	858.21	461.442	-1960.67	841.794	426.687	-2024.03	803.105
815	0	238.082	-1848.8	1572.65	121.389	-1841.24	1584.39	247.492	-1680.55	1533.48	139.64	-1676.39	1540.07	198.305	-1681.01	1438.18	215.209	-1604.62	1154.35	181.886	-1799.47	1349.99	165.758	-1874.07	1155.1	140.63	-1584.55	1227.88	366.514	-1779.86	1361.58	442.107	-1807.81	1124.07	445.091	-1826.36	1050.98	441.816	-1954.03	928.604	389.815	-1986.82	859.292	459.735	-1972.41	842.193	424.898	-2036.14	804.324
816	0	236.381	-1858.04	1571.78	119.51	-1850.48	1583.18	245.995	-1689.89	1532.48	138.106	-1685.63	1538.5	197.093	-1690.57	1437.13	214.278	-1613.84	1153.48	180.897	-1809.01	1348.7	165.383	-1883.49	1153.72	139.501	-1594.21	1226.77	365.579	-1789.06	1360.73	441.321	-1817.1	1123.34	444.5	-1836.18	1050.57	440.373	-1964.58	928.648	387.913	-1998.24	860.091	457.544	-1983.25	842.196	422.928	-2047.89	805.378
817	0	234.478	-1867.28	1570.69	117.746	-1859.85	1581.75	244.431	-1699.35	1531.5	136.408	-1695.04	1536.87	195.561	-1700.29	1436.17	213.008	-1623.16	1152.5	179.965	-1818.84	1347.38	165.245	-1893.08	1152.3	138.532	-1603.77	1225.66	364.556	-1798.47	1359.76	440.371	-1826.38	1122.45	443.518	-1845.61	1049.62	438.886	-1974.95	928.574	386.074	-2009.15	860.605	455.53	-1994.34	842.2	420.786	-2059.18	806.112
818	0	232.664	-1876.91	1570.03	115.776	-1869.23	1580.48	242.524	-1709.09	1530.34	134.812	-1704.63	1535.31	194.123	-1710.19	1434.93	211.688	-1632.59	1151.68	178.91	-1828.54	1345.93	164.808	-1902.83	1150.88	137.206	-1613.51	1224.61	363.367	-1807.91	1358.92	439.377	-1835.5	1121.54	442.436	-1854.71	1048.53	437.197	-1984.95	928.311	384.057	-2019.65	860.925	453.359	-2004.73	841.722	418.647	-2070.09	806.648
819	0	230.752	-1886.31	1569.33	113.861	-1878.75	1579.39	240.796	-1718.44	1529.13	133.143	-1714.13	1533.93	192.604	-1720.18	1433.92	210.627	-1641.99	1150.56	177.757	-1838.44	1344.85	164.162	-1912.51	1149.61	136.024	-1623.26	1223.41	362.267	-1817.44	1358.31	438.453	-1844.49	1120.94	441.652	-1863.72	1047.94	435.589	-1994.51	928.088	381.968	-2029.74	861.385	450.958	-2014.58	841.511	416.19	-2080.4	807.207
820	0	228.757	-1896	1568.86	111.724	-1888.28	1578.47	238.964	-1728.19	1528.21	131.222	-1723.9	1532.44	191.179	-1730.23	1432.99	209.341	-1651.46	1149.54	176.592	-1848.49	1343.59	163.573	-1922.23	1148.46	134.657	-1633.23	1222.38	361.125	-1827.26	1357.69	437.495	-1853.32	1120.2	441.003	-1872.68	1047.33	433.866	-2003.79	927.547	379.718	-2039.32	861.466	448.686	-2024.42	841.19	413.575	-2090.18	807.222
821	0	226.675	-1905.65	1568.29	109.742	-1897.89	1577.46	237.075	-1737.97	1527	129.309	-1733.72	1530.81	189.533	-1740.56	1431.97	208.392	-1661.06	1148.59	175.397	-1858.74	1342.57	163.109	-1932.35	1147.28	133.578	-1643.19	1221.35	359.882	-1837.22	1357.07	436.56	-1862.31	1119.58	439.817	-1881.24	1046.05	432.113	-2012.79	926.954	377.537	-2048.67	861.472	445.999	-2033.43	840.152	411.015	-2099.7	807.204
822	0	224.491	-1915.39	1567.89	107.472	-1907.64	1576.59	235.06	-1747.88	1525.86	127.337	-1743.57	1529.43	187.88	-1750.84	1431.29	207.403	-1671.37	1148.09	174.002	-1869.12	1341.49	162.398	-1942.47	1146.19	132.193	-1653.36	1220.53	358.455	-1847.37	1356.56	435.42	-1870.91	1118.76	438.997	-1889.73	1045.18	430.418	-2021.55	926.208	375.144	-2057.56	861.264	443.765	-2042.75	839.55	408.225	-2108.64	806.893
823	0	222.257	-1925.13	1567.6	105.221	-1917.2	1575.92	232.98	-1757.6	1525.02	125.385	-1753.44	1528.16	186.139	-1761.2	1430.44	205.854	-1681.16	1147.53	172.489	-1879.52	1340.52	161.328	-1952.67	1145.28	131.062	-1663.73	1219.73	356.952	-1857.59	1356.22	434.343	-1879.74	1118.48	438.389	-1897.97	1044.81	428.554	-2029.96	925.412	372.778	-2066.17	861.125	441.018	-2051	838.258	405.214	-2117.12	806.344
824	0	219.898	-1934.91	1567.23	102.882	-1927.03	1575.02	230.984	-1767.71	1524.34	123.363	-1763.34	1526.86	184.378	-1771.73	1429.67	204.683	-1691.34	1146.85	171.052	-1890.03	1339.55	160.284	-1963	1144.47	129.861	-1674.18	1218.85	355.387	-1867.96	1355.71	433.295	-1888.43	1117.92	437.409	-1905.87	1043.86	427.04	-2038.09	924.327	370.543	-2073.54	860.181	438.363	-2059	837.046	402.395	-2125.16	805.517
825	0	217.658	-1944.9	1566.8	100.649	-1936.97	1574.13	228.765	-1777.73	1523.25	121.071	-1773.45	1525.74	182.576	-1782.23	1429.12	203.04	-1701.79	1146.51	169.539	-1900.69	1338.78	159.285	-1973.62	1143.61	128.548	-1684.89	1218.03	353.749	-1878.48	1355.21	432.308	-1897.28	1117.39	436.618	-1914.19	1043.07	425.128	-2045.92	923.196	368.218	-2081.29	859.361	435.727	-2066.7	835.682	399.428	-2132.84	804.492
826	0	215.237	-1954.74	1566.52	98.2803	-1946.74	1573.36	226.538	-1787.78	1522.51	118.87	-1783.53	1524.61	180.704	-1792.72	1428.26	201.875	-1712.32	1145.68	167.977	-1911.21	1338.2	158.253	-1984.36	1143.11	127.305	-1695.68	1217.12	352.083	-1888.91	1354.86	431.142	-1905.9	1117.02	435.688	-1921.97	1042.16	423.323	-2053.37	921.988	365.86	-2088.56	858.622	433.532	-2074.18	834.307	396.475	-2139.83	803.107
827	0	213.027	-1964.6	1566.35	95.7275	-1956.58	1572.65	224.38	-1797.71	1522.1	116.609	-1793.45	1523.45	178.751	-1803.11	1427.54	200.408	-1723.24	1144.93	166.43	-1921.77	1337.73	157.09	-1995.3	1142.89	125.625	-1706.7	1216.1	350.359	-1899.1	1354.63	430.177	-1914.43	1116.96	434.968	-1929.61	1041.76	421.675	-2060.53	920.765	363.671	-2095.31	857.804	430.988	-2080.81	832.933	393.564	-2146.37	801.644
828	0	210.643	-1974.53	1565.98	93.4348	-1966.67	1571.71	222.046	-1807.71	1521.47	114.249	-1803.51	1522.45	176.745	-1813.49	1426.81	198.524	-1734.28	1144.05	164.725	-1932.5	1337.24	155.806	-2006.42	1142.43	123.9	-1717.8	1215	348.623	-1909.37	1354.27	428.972	-1923.14	1116.76	434.03	-1937.23	1041.19	419.994	-2067.5	919.383	361.336	-2102.07	856.752	428.796	-2087.63	831.518	390.654	-2152.7	799.928
829	0	208.176	-1984.56	1565.8	91.0531	-1976.79	1571.08	219.563	-1817.8	1520.78	111.812	-1813.64	1521.4	174.513	-1823.79	1425.96	196.794	-1745.64	1142.77	163.002	-1943.29	1336.71	154.557	-2017.94	1142.22	122.02	-1729.12	1213.68	346.685	-1919.42	1353.9	427.649	-1931.74	1116.35	432.712	-1944.71	1040.57	418.346	-2074.24	917.993	359.351	-2108.53	855.482	426.537	-2093.93	829.826	387.935	-2158.67	797.92
830	0	205.762	-1994.37	1565.9	88.5735	-1986.8	1570.61	217.127	-1827.67	1520.31	109.426	-1823.93	1520.45	172.297	-1834.22	1425.32	194.932	-1756.81	1141.85	161.248	-1954.13	1336.54	153.374	-2029.55	1142.27	119.935	-1740.42	1212.35	344.944	-1929.28	1353.84	426.346	-1940.26	1116.29	432.092	-1952.3	1040.59	416.837	-2080.67	916.673	357.574	-2114.65	854.402	423.609	-2098.56	828.158	385.5	-2163.61	795.5
831	0	203.426	-2004.24	1566.27	86.2458	-1996.87	1570.44	214.664	-1837.75	1520.21	106.874	-1834.07	1519.88	170.018	-1844.61	1424.78	192.472	-1768.12	1141.11	159.499	-1964.85	1336.51	152.427	-2041.18	1142.59	117.758	-1751.89	1211.27	343.378	-1938.98	1353.95	425.11	-1948.83	1116.48	430.781	-1959.13	1040.14	415.344	-2086.85	915.404	355.984	-2120.41	853.207	421.618	-2103.74	826.51	383.252	-2168.59	793.32
832	0	201.035	-2014.13	1566.7	83.7789	-2007.01	1570.38	211.989	-1847.77	1520.07	104.202	-1844.43	1519.21	167.604	-1855.04	1424.45	189.924	-1779.4	1140.54	157.825	-1975.75	1336.78	151.622	-2052.92	1142.85	115.445	-1763.37	1210.46	341.826	-1948.99	1354.5	423.691	-1957.31	1116.59	429.552	-1966.41	1040.08	414.081	-2092.84	914.277	354.566	-2126.1	852.004	420.464	-2109.64	825.247	381.14	-2173.25	791.133
833	0	198.674	-2024.04	1567.45	81.3496	-2017.2	1570.76	209.424	-1857.85	1520.22	101.687	-1854.7	1518.99	165.287	-1865.47	1424.51	187.524	-1790.75	1140.35	156.123	-1986.56	1337.15	151.08	-2064.7	1143.43	112.976	-1774.63	1209.86	339.961	-1958.77	1355.14	422.177	-1965.58	1116.9	428.019	-1973.04	1039.98	412.85	-2098.58	913.279	353.412	-2131.56	850.968	418.752	-2114.19	823.766	379.36	-2177.41	788.834
834	0	196.143	-2033.93	1568.52	78.9006	-2027.27	1571.12	206.865	-1867.91	1520.65	99.0612	-1865.02	1518.68	162.82	-1876.05	1424.82	185.01	-1801.94	1141.02	154.467	-1997.35	1337.6	150.63	-2076.34	1144.26	110.718	-1785.95	1209.72	338.397	-1968.7	1356.18	420.63	-1973.71	1117.63	426.44	-1979.55	1040.63	411.761	-2103.91	912.36	352.345	-2136.54	849.886	417.426	-2118.14	822.491	378.003	-2181.14	786.554
835	0	193.655	-2043.84	1569.57	76.2871	-2037.43	1571.63	204.354	-1877.9	1521.04	96.3446	-1875.37	1518.81	160.473	-1886.81	1425.23	182.828	-1813.05	1141.2	152.922	-2008.17	1338.32	150.315	-2087.91	1145.07	108.343	-1796.93	1209.92	336.802	-1978.64	1357.49	418.895	-1981.68	1118.34	424.975	-1986.32	1041.53	410.794	-2109.07	911.54	351.496	-2141.35	848.786	416.385	-2122.07	821.64	377.026	-2184.57	784.287
836	0	191.216	-2053.88	1570.91	73.6254	-2047.52	1572.39	201.568	-1888.16	1521.71	93.692	-1885.59	1518.9	158.217	-1897.34	1426.05	180.662	-1823.96	1141.81	151.487	-2018.95	1339.16	150.075	-2099.23	1145.93	106.317	-1808.05	1210.49	335.518	-1988.95	1359.03	417.346	-1989.8	1119.45	423.031	-1992.95	1042.2	409.798	-2113.93	910.745	350.801	-2145.85	847.571	416.366	-2126.45	820.926	376.339	-2187.6	782.111
837	0	188.661	-2063.69	1572.36	71.1135	-2057.54	1573.2	199.035	-1898.15	1522.53	91.1059	-1895.83	1519.24	155.813	-1907.87	1427.1	178.799	-1834.66	1143.04	150.138	-2029.42	1340.25	149.877	-2110.14	1147.15	104.28	-1818.88	1211.35	333.947	-1998.71	1360.78	415.632	-1997.62	1120.71	421.318	-1999.77	1043.53	408.999	-2118.69	910.215	350.292	-2149.89	846.47	415.491	-2129.39	820.089	375.986	-2190.08	780.158
838	0	186.008	-2073.55	1574.08	68.4448	-2067.52	1573.99	196.41	-1907.96	1523.64	88.4764	-1906.04	1519.48	153.682	-1918.3	1428.3	176.932	-1845.15	1144.53	148.905	-2039.76	1341.55	149.626	-2120.73	1148.44	102.102	-1829.62	1212.4	332.427	-2008.3	1362.77	414.196	-2005.39	1122.36	419.929	-2006.7	1045.39	408.263	-2123.08	909.941	349.841	-2153.62	845.487	414.658	-2131.98	819.431	375.953	-2192.35	778.31
839	0	183.361	-2083.43	1575.62	65.6989	-2077.65	1574.51	193.807	-1917.88	1525.03	86.1515	-1916.1	1520.1	151.63	-1928.59	1429.58	175.81	-1855.67	1145.62	147.888	-2049.98	1342.8	149.519	-2131.02	1149.75	100.252	-1840.23	1213.59	331.122	-2017.74	1364.64	412.53	-2013.26	1124.13	417.951	-2013.17	1046.83	407.591	-2127.38	909.628	349.609	-2157.18	844.441	414.416	-2134.68	819.012	376.175	-2194.37	776.616
840	0	180.694	-2093.32	1577.13	63.1399	-2087.56	1575.01	191.165	-1927.53	1526.41	83.7227	-1925.97	1520.8	149.665	-1938.6	1430.81	174.038	-1865.93	1147.36	146.97	-2060.07	1344.11	149.539	-2141.09	1151.19	98.4784	-1850.63	1214.81	329.936	-2026.84	1366.51	410.899	-2020.67	1125.65	416.925	-2020.33	1049.05	407.106	-2131.75	909.591	349.502	-2160.6	843.53	413.99	-2137.03	818.53	376.523	-2196.23	774.903
841	0	177.996	-2103	1578.67	60.5217	-2097.4	1575.34	189.164	-1937.26	1528.59	81.2915	-1935.72	1521.7	147.907	-1948.51	1432.18	172.913	-1875.76	1148.58	146.158	-2069.84	1345.36	149.597	-2150.77	1152.8	96.6177	-1861.06	1216.22	328.767	-2035.57	1368.69	409.268	-2028.1	1127.59	415.204	-2026.44	1050.91	406.72	-2135.98	909.895	349.762	-2164	842.987	414.753	-2140.05	819.19	377.241	-2197.87	773.376
842	0	175.5	-2112.66	1580.22	57.9604	-2107.16	1575.65	186.783	-1946.68	1530.31	79.274	-1945.57	1522.23	146.086	-1958	1433.46	171.746	-1885.65	1150.2	145.549	-2079.45	1346.58	149.735	-2160.23	1154.36	94.7393	-1871.39	1217.41	327.702	-2043.84	1370.62	408.052	-2035.44	1129.43	414.206	-2033.06	1053.26	406.675	-2140.38	910.292	350.47	-2167.38	842.45	415.35	-2142.89	819.741	377.919	-2199.65	772.031
843	0	173.128	-2122.29	1581.66	55.7662	-2117.03	1575.94	184.756	-1956.45	1532.12	77.0804	-1955.3	1522.83	144.342	-1967.53	1434.78	170.291	-1894.99	1151.48	145.145	-2088.91	1347.73	149.99	-2169.53	1155.75	92.8603	-1881.41	1218.45	326.839	-2051.83	1372.31	406.923	-2042.6	1131.04	412.945	-2039.37	1054.85	406.794	-2144.5	910.576	351.033	-2170.9	841.975	416.337	-2146.18	819.991	378.926	-2201.33	770.545
844	0	170.896	-2131.82	1583.19	53.5134	-2126.77	1576.14	182.786	-1965.84	1534.12	75.2757	-1964.81	1523.81	142.757	-1976.61	1436.05	169.113	-1904.25	1152.67	144.656	-2098.13	1349.05	150.35	-2178.61	1157.13	90.8129	-1891.5	1219.68	326.213	-2059.49	1373.98	405.94	-2049.69	1132.69	411.744	-2045.47	1056.44	407.216	-2149.11	911.126	352.146	-2174.45	841.485	417.165	-2149.22	820.192	380.211	-2203.22	769.43
845	0	168.763	-2141.29	1584.72	51.4509	-2136.17	1576.29	180.902	-1975.12	1536.17	73.4504	-1974.3	1524.68	141.293	-1985.71	1437.11	167.531	-1913.33	1153.85	144.303	-2107.12	1350.23	150.804	-2187.56	1158.52	88.6902	-1901.29	1220.65	325.684	-2066.76	1375.58	405.435	-2056.48	1134.08	410.939	-2051.42	1058.1	407.807	-2153.48	911.547	353.122	-2178	841.16	418.771	-2152.54	820.954	381.515	-2205.04	768.325
846	0	166.739	-2150.66	1586.08	49.5189	-2145.8	1576.52	179.251	-1984.19	1538.17	71.9173	-1983.62	1525.46	139.874	-1994.44	1438.14	165.576	-1922.14	1154.77	144.176	-2115.93	1351.34	151.439	-2196.34	1159.75	86.4349	-1910.67	1221.45	324.799	-2073.53	1376.86	405.008	-2063.17	1135.36	410.059	-2057.22	1059.36	408.71	-2158.02	911.987	354.485	-2181.72	840.787	420.316	-2155.86	821.58	383.251	-2207.06	767.113
847	0	164.861	-2160.1	1587.34	47.8833	-2155.24	1576.48	177.52	-1993.53	1540.01	70.6776	-1992.87	1526.35	138.492	-2003.3	1439.2	163.746	-1930.93	1155.67	144.049	-2124.6	1352.28	152.241	-2205.21	1160.89	84.1038	-1920.04	1222.45	324.357	-2080.43	1377.86	404.734	-2069.8	1136.43	409.342	-2063.2	1060.17	409.789	-2162.75	912.07	356.245	-2185.52	840.205	422.203	-2159.72	821.989	385.116	-2209.3	766.089
848	0	163.166	-2169.36	1588.58	46.2616	-2164.47	1576.69	176.333	-2002.54	1541.9	69.4659	-2001.97	1527.35	137.102	-2011.82	1440.24	161.641	-1939.31	1156.15	144.255	-2132.7	1353.2	153.086	-2213.93	1162.09	81.8185	-1929.08	1223.34	323.944	-2087.13	1379.08	404.494	-2075.82	1137.28	408.919	-2069.26	1061.14	410.935	-2167.09	912.306	357.877	-2189.77	840.048	424.196	-2163.44	822.572	387.238	-2211.57	765.31
849	0	161.765	-2178.48	1589.79	44.9129	-2173.67	1577.11	175.168	-2011.54	1543.99	68.486	-2010.95	1528.52	136.001	-2020.28	1441.23	159.436	-1947.95	1157.38	144.128	-2141.06	1354.42	154.047	-2222.37	1163.44	79.379	-1937.92	1224.49	322.714	-2093.23	1379.99	404.512	-2081.72	1138.59	408.652	-2074.85	1062.29	412.49	-2171.26	912.944	359.86	-2193.25	839.862	426.338	-2166.92	823.261	389.684	-2213.91	764.784
850	0	160.547	-2187.69	1590.89	43.7118	-2182.8	1577.46	174.245	-2020.64	1545.95	67.7161	-2019.9	1529.7	134.81	-2028.68	1442.38	157.058	-1956.23	1158.21	142.067	-2151.1	1356.7	155.027	-2230.85	1164.65	77.3613	-1946.88	1225.65	322.147	-2099.73	1380.92	404.295	-2087.21	1139.47	408.277	-2080.33	1063.16	414.047	-2175.7	913.572	362.027	-2197.07	839.732	428.594	-2170.42	823.9	392.547	-2216.73	764.617
851	0	159.452	-2196.98	1591.95	42.7115	-2191.8	1577.89	173.582	-2029.61	1547.97	67.0243	-2028.74	1531.35	133.632	-2036.93	1443.64	155.022	-1964.86	1159.33	143.993	-2157.83	1356.44	155.856	-2239.3	1165.77	74.9739	-1955.7	1226.83	321.689	-2106.4	1381.81	404.049	-2092.54	1140.45	407.928	-2085.78	1064.11	415.507	-2179.95	914.013	364.521	-2201.06	839.579	430.905	-2173.87	824.661	395.509	-2219.66	764.506
852	0	158.625	-2206.2	1592.96	41.9414	-2200.71	1578.54	172.969	-2038.49	1549.9	66.3821	-2037.32	1532.74	132.478	-2045.25	1444.69	152.61	-1973.12	1160.27	143.826	-2166.01	1357.55	156.541	-2247.51	1167	72.8101	-1964.64	1227.91	321.325	-2112.94	1383.18	403.727	-2097.6	1141.67	407.946	-2091.23	1065.76	417.157	-2184.12	914.758	366.705	-2204.87	839.73	433.174	-2177.36	825.777	398.709	-2222.8	764.839
853	0	158.125	-2215.21	1593.73	41.4513	-2209.68	1579.25	172.601	-2047.29	1551.93	66.1246	-2046.11	1534.59	131.484	-2053.4	1445.74	150.983	-1981.35	1161.78	143.744	-2174.16	1358.47	157.163	-2255.53	1168.26	70.4381	-1973.02	1229.32	320.71	-2119.37	1384.31	403.287	-2102.23	1142.78	407.255	-2095.81	1066.73	418.956	-2188.19	915.748	369.19	-2208.73	840.02	435.45	-2180.43	826.77	402.159	-2226.15	765.392
854	0	157.912	-2224.14	1594.28	41.2221	-2218.53	1579.95	172.178	-2055.87	1553.31	65.8572	-2054.76	1536.34	130.336	-2061.47	1446.82	149.479	-1989.57	1162.39	143.63	-2182.32	1359.35	157.695	-2263.66	1169.42	68.6251	-1981.77	1230.2	320.024	-2125.97	1385.18	402.882	-2106.76	1143.8	406.985	-2101.02	1067.89	420.625	-2192.1	916.502	371.84	-2212.66	840.28	438.076	-2183.85	827.966	405.821	-2229.72	766.095
855	0	157.899	-2233.03	1594.87	41.2515	-2227.45	1580.69	172.125	-2064.7	1554.7	65.5191	-2063.22	1538.04	129.101	-2069.39	1447.79	147.769	-1997.76	1163.07	143.455	-2190.16	1360.24	158.15	-2271.49	1170.64	66.4949	-1990.47	1231.25	319.326	-2132.53	1386.04	402.256	-2111.13	1144.93	406.619	-2106.19	1069.14	422.491	-2195.88	917.455	374.477	-2216.61	840.714	440.217	-2187.03	828.863	409.532	-2233.35	766.991
856	0	158.178	-2241.78	1595.28	41.411	-2236.34	1581.43	171.868	-2073.19	1556.09	65.4499	-2071.92	1539.64	127.988	-2077.42	1448.55	146.422	-2006.4	1163.56	143.177	-2198.15	1361.01	158.38	-2279.28	1171.84	64.8028	-1999.15	1231.99	318.711	-2138.92	1387.09	400.939	-2114.81	1145.81	406.134	-2110.63	1070.18	424.302	-2199.77	918.518	377.122	-2220.55	841.268	442.831	-2190.24	830.308	413.314	-2237.13	768.028
857	0	158.595	-2250.49	1595.43	41.8116	-2245.3	1582.08	172.006	-2081.71	1557.57	65.1862	-2080.55	1541.13	127.07	-2085.33	1449.18	145.129	-2015.18	1164.31	142.932	-2206.04	1361.65	158.575	-2287.06	1172.84	62.9342	-2007.74	1232.56	317.883	-2145.12	1387.78	400.388	-2119.06	1146.79	405.713	-2115.35	1071.49	426.099	-2203.54	919.39	379.864	-2224.6	841.671	445.429	-2193.21	831.615	417.281	-2241.6	769.253
858	0	159.287	-2259.2	1595.5	42.5027	-2254.46	1582.65	171.824	-2090.11	1558.62	65.0546	-2089.14	1542.95	126.026	-2093.26	1449.84	144.614	-2023.59	1164.01	142.619	-2213.94	1362.23	158.732	-2294.85	1173.72	61.417	-2016.35	1233.07	317.306	-2151.85	1388.57	399.538	-2123.47	1147.49	405.322	-2120.17	1072.46	427.968	-2207.56	920.269	382.574	-2228.91	841.998	447.382	-2196.22	832.3	421.152	-2245.2	770.141
859	0	160.161	-2267.73	1595.42	43.3039	-2263.51	1583.21	171.767	-2098.25	1559.62	64.7303	-2097.77	1544.21	124.922	-2100.81	1450.28	143.529	-2031.83	1164.48	142.41	-2221.78	1362.67	158.863	-2302.56	1174.61	59.7765	-2024.7	1233.43	316.495	-2158.23	1388.91	398.938	-2128.06	1148.17	404.561	-2124.92	1073.09	429.882	-2211.38	921.021	385.521	-2233.31	842.476	449.51	-2199.46	833.094	425.058	-2249.34	771.334
860	0	161.219	-2276.14	1595.31	44.1932	-2272.62	1583.68	171.495	-2106.55	1560.67	64.3431	-2106.61	1545.79	124	-2108.67	1450.64	142.315	-2039.77	1165.26	142.161	-2229.54	1363.16	158.953	-2310.24	1175.4	58.3856	-2033.15	1233.81	316.175	-2164.99	1389.66	398.413	-2132.77	1148.89	404.299	-2129.66	1074.13	431.546	-2215.11	921.728	388.212	-2237.69	842.862	451.757	-2202.61	834.141	428.873	-2253.14	772.141
861	0	162.38	-2284.55	1594.94	45.2484	-2281.87	1583.92	171.005	-2114.46	1561.4	63.6663	-2115.43	1547.2	123.179	-2116.43	1450.86	141.107	-2047.42	1164.73	142.012	-2237.29	1363.44	159.064	-2318.02	1175.83	57.1325	-2041.53	1234.04	315.597	-2171.62	1389.97	397.756	-2137.73	1149.31	403.962	-2134.51	1074.7	433.338	-2219.22	922.338	390.841	-2242.18	843.029	453.779	-2206.18	834.942	432.636	-2257.4	773.077
862	0	163.575	-2292.89	1594.42	46.3302	-2291.16	1584.12	170.564	-2122.6	1562.06	63.0214	-2124.15	1548.5	122.366	-2124.2	1451.05	140.4	-2055.06	1165.29	141.786	-2245.12	1363.56	159.19	-2325.96	1176.11	55.8161	-2049.74	1234.25	314.995	-2178.44	1390.1	397.062	-2142.92	1149.41	403.556	-2139.82	1075.15	435.073	-2223.37	922.642	393.347	-2246.9	843.015	455.689	-2209.88	835.494	436.222	-2261.43	773.511
863	0	164.766	-2301.09	1593.95	47.6458	-2300.33	1584.09	169.968	-2130.75	1562.96	62.495	-2133.15	1549.64	121.669	-2131.93	1451.23	139.542	-2062.75	1165.01	141.604	-2252.86	1363.66	159.323	-2333.75	1176.35	54.8016	-2057.92	1234.23	314.648	-2185.28	1390.4	396.747	-2148.54	1150.17	403.021	-2145.16	1075.58	436.545	-2227.69	923.116	395.704	-2251.72	843.095	456.943	-2213.12	835.891	439.77	-2265.77	774.337
864	0	166.1	-2309.28	1593.29	48.8992	-2309.7	1584.09	169.455	-2138.55	1563.25	61.852	-2142.06	1550.54	120.832	-2139.56	1451.07	139.187	-2071.04	1164.99	141.419	-2260.59	1363.62	159.493	-2341.57	1176.45	53.9101	-2066.03	1234.06	314.181	-2192.11	1390.46	396.274	-2154.02	1150.26	402.508	-2150.55	1075.72	438.01	-2232.11	923.241	397.844	-2256.61	842.962	458.786	-2216.85	836.427	442.932	-2269.79	774.529
865	0	167.469	-2317.3	1592.21	50.2626	-2319.04	1583.78	168.828	-2146.58	1563.26	61.2724	-2151.02	1551.11	120.246	-2147.3	1450.76	138.499	-2078.85	1164.46	141.328	-2268.39	1363.41	159.661	-2349.48	1176.24	53.1122	-2074.17	1233.62	313.696	-2199.12	1390.13	395.99	-2160.22	1150.22	402.353	-2156.47	1075.75	439.35	-2236.77	923.077	399.899	-2261.56	842.501	460.118	-2220.9	836.296	445.803	-2274.19	774.703
866	0	168.881	-2325.23	1591.32	51.5357	-2328.13	1583.54	168.147	-2154.6	1563.17	60.6129	-2159.88	1551.6	119.711	-2155.17	1450.4	137.588	-2086.83	1164.12	141.282	-2276.14	1363.19	159.899	-2357.32	1176.01	52.2912	-2082.09	1233.39	313.384	-2206.34	1389.79	395.549	-2166.49	1149.94	402.326	-2162.41	1075.66	440.558	-2241.45	922.892	401.745	-2266.74	842.315	461.268	-2225.11	836.048	448.379	-2278.41	774.617
867	0	170.106	-2333.1	1590.56	52.6924	-2337.28	1583.33	167.581	-2162.42	1562.94	59.904	-2168.89	1551.88	119.309	-2162.98	1449.95	137.269	-2094.67	1163.56	141.198	-2283.92	1362.88	160.102	-2365.15	1175.82	51.6416	-2090.37	1232.91	313.062	-2213.42	1389.54	395.437	-2172.85	1150.03	401.991	-2168.35	1075.52	441.686	-2246.36	922.812	403.474	-2271.74	841.975	462.351	-2229.26	835.994	450.805	-2282.82	774.761
868	0	171.21	-2341.03	1589.77	53.8839	-2346.32	1582.86	166.93	-2170.16	1562.62	59.4595	-2177.73	1551.7	119.015	-2171	1449.61	136.853	-2102.84	1163.29	141.226	-2291.85	1362.43	160.338	-2373.07	1175.49	51.1698	-2098.51	1232.37	312.898	-2220.61	1389.28	395.191	-2179.3	1149.79	402.126	-2174.71	1075.63	442.685	-2251.52	922.513	405.087	-2276.91	841.411	463.426	-2233.63	835.869	452.857	-2287.32	774.397
869	0	172.317	-2349.08	1588.91	55.1063	-2355.31	1582.18	166.364	-2178.13	1562.12	59.0245	-2186.63	1551.62	118.595	-2178.9	1448.94	136.814	-2109.6	1161.69	141.244	-2299.82	1361.68	160.653	-2380.95	1174.89	50.6925	-2106.56	1231.67	312.598	-2228.03	1388.72	394.925	-2186.12	1149.3	401.767	-2180.88	1075.1	443.381	-2256.92	921.945	406.356	-2282.46	840.685	464.687	-2238.43	835.683	454.613	-2292.06	773.835
870	0	173.478	-2357.02	1588.01	56.1781	-2364.21	1581.62	166.03	-2186.21	1561.51	58.6377	-2195.42	1551.24	118.464	-2186.93	1448.32	136.269	-2117.81	1161.29	141.383	-2307.87	1361.08	161.073	-2388.96	1174.22	50.3425	-2114.66	1231.04	312.62	-2235.65	1388.2	394.855	-2193.06	1148.8	401.955	-2187.63	1074.96	444.223	-2262.58	921.523	407.732	-2287.83	839.873	465.632	-2243.41	835.31	456.06	-2296.64	772.926
871	0	174.333	-2364.8	1587.08	57.1429	-2372.91	1580.97	165.667	-2194.06	1560.84	58.1561	-2204.39	1550.34	118.24	-2194.97	1447.55	136.154	-2126.01	1161	141.585	-2315.88	1360.4	161.589	-2396.83	1173.62	50.1515	-2122.84	1230.27	312.782	-2243.2	1387.74	395.045	-2200.12	1148.63	402.03	-2194.15	1074.49	444.98	-2268.32	921.039	408.681	-2293.49	839.224	466.134	-2248.3	834.692	457.285	-2301.46	772.135
872	0	175.278	-2372.69	1586.17	58.1735	-2381.59	1580.17	165.524	-2202.12	1560.03	58.2382	-2213.24	1549.54	118.309	-2203.1	1446.74	136.448	-2133.41	1159.86	141.907	-2324.04	1359.74	162.141	-2404.82	1172.93	50.081	-2131	1229.66	313.004	-2250.99	1387.11	395.235	-2207.41	1148.14	401.939	-2201.1	1073.99	445.559	-2274.07	920.283	409.784	-2298.97	838.167	466.963	-2253.72	834.084	458.278	-2306.51	771.197
873	0	176.042	-2380.83	1585.31	59.0345	-2390.17	1579.15	165.214	-2210.33	1559.01	58.1654	-2221.95	1548.89	118.464	-2211.29	1445.82	136.19	-2142.17	1159.22	142.293	-2332.2	1358.77	162.74	-2412.92	1172	50.1254	-2139.07	1228.63	313.129	-2259	1386.15	395.222	-2214.62	1147.1	401.964	-2208.03	1073.19	446.146	-2280.2	919.41	410.477	-2305.19	837.189	467.401	-2259.26	833.082	459.049	-2311.82	770.146
874	0	176.635	-2388.94	1584.35	59.6896	-2398.73	1578.24	165.314	-2218.21	1557.88	58.5016	-2230.22	1548.06	118.647	-2219.48	1444.75	136.201	-2150.38	1158.13	142.676	-2340.5	1357.9	163.3	-2421.11	1171.01	50.276	-2147.31	1227.73	313.449	-2267.04	1385.34	395.426	-2222.02	1146.37	401.868	-2214.95	1072.3	446.758	-2286.34	918.342	411.505	-2310.89	835.861	467.778	-2264.93	832.191	459.599	-2317.09	768.77
875	0	177.209	-2396.95	1583.18	60.3677	-2407.03	1577.16	165.557	-2226.29	1556.96	58.7125	-2238.71	1546.57	119.03	-2227.89	1443.49	136.689	-2157.89	1156.86	143.13	-2348.89	1356.77	163.883	-2429.27	1169.94	50.4539	-2155.52	1226.56	313.855	-2275.08	1384.36	395.744	-2229.36	1145.52	402.096	-2221.91	1071.42	447.147	-2292.41	916.948	411.975	-2317.4	834.844	468.238	-2270.65	831.247	460.009	-2322.55	767.349
876	0	178.005	-2405.24	1582.08	61.125	-2415.51	1576.1	166.055	-2234.56	1555.79	58.9781	-2247.2	1545.34	119.616	-2236.23	1442.37	136.769	-2166.4	1154.54	143.742	-2357.37	1355.54	164.469	-2437.64	1168.61	51.0761	-2163.87	1225.32	314.325	-2283.57	1383.08	395.939	-2236.87	1144.12	402.194	-2229.05	1070.13	447.658	-2298.71	915.337	412.541	-2324.01	833.443	468.109	-2276.53	829.581	460.302	-2328.25	765.588
877	0	178.746	-2413.52	1580.86	61.8088	-2423.79	1574.88	166.519	-2242.99	1554.45	59.4393	-2255.61	1544.38	120.292	-2244.71	1441.15	135.695	-2175.51	1152.21	144.387	-2365.93	1354.3	165.008	-2446.12	1167.19	51.6133	-2172.2	1224.25	315.001	-2292.27	1381.7	396.39	-2244.88	1142.96	402.398	-2236.64	1068.87	448.163	-2305.46	913.969	412.979	-2330.75	832.023	468.194	-2282.86	827.91	460.397	-2334.09	763.747
878	0	179.471	-2421.66	1579.58	62.5564	-2432.03	1573.71	167.197	-2251.27	1553.16	60.4161	-2263.67	1543.43	121.068	-2253.28	1439.84	138.007	-2182.6	1152.91	145.002	-2374.54	1353.02	165.574	-2454.56	1165.83	52.1293	-2180.55	1222.95	315.771	-2301.04	1380.45	396.933	-2252.78	1141.9	402.637	-2244.27	1067.73	448.52	-2312.25	912.558	413.373	-2337.55	830.512	468.081	-2289.2	826.262	460.391	-2340.23	761.989
879	0	180.233	-2430.07	1578.62	63.405	-2440.3	1572.66	167.955	-2259.53	1551.88	61.6135	-2272.02	1541.94	121.994	-2261.97	1438.56	138.991	-2191.29	1151.7	145.764	-2383.3	1351.63	166.048	-2463.18	1164.27	52.9049	-2188.92	1221.75	316.75	-2309.96	1379.3	397.462	-2260.55	1140.62	403.176	-2251.83	1066.54	448.901	-2319.13	910.996	413.554	-2344.78	829.051	467.818	-2295.7	824.731	460.328	-2346.55	760.065
880	0	181.111	-2438.55	1577.31	64.1657	-2448.61	1571.44	168.908	-2267.93	1550.34	62.1835	-2280.47	1540.54	123.008	-2270.62	1437.23	139.962	-2199.71	1150.57	146.483	-2392	1350.06	166.638	-2472.05	1162.61	53.8991	-2197.34	1220.54	317.671	-2319.24	1377.76	398.024	-2268.82	1139.27	403.638	-2259.78	1065	449.225	-2326.38	909.078	413.799	-2352.01	827.073	467.762	-2303.02	823.049	459.988	-2353.01	757.616
[truncated: 69 more columns]

## Sheet: Sheet2
Devices
		025370 - Force			025370 - Moment			025370 - CoP			027571 - Force			027571 - Moment			027571 - CoP			037720 - Force			037720 - Moment			037720 - CoP
Frame	Sub Frame	Fx	Fy	Fz	Mx	My	Mz	Cx	Cy	Cz	Fx	Fy	Fz	Mx	My	Mz	Cx	Cy	Cz	Fx	Fy	Fz	Mx	My	Mz	Cx	Cy	Cz
		N	N	N	N.mm	N.mm	N.mm	mm	mm	mm	N	N	N	N.mm	N.mm	N.mm	mm	mm	mm	N	N	N	N.mm	N.mm	N.mm	mm	mm	mm
315	0	0	0	0	0	0	0	200	300	0	0	0	0	0	0	0	200	903	0	0	0	0	0	0	0	603	903	0
315	1	0	0	0	0	0	0	200	300	0	0	0	0	0	0	0	200	903	0	0	0	0	0	0	0	603	903	0
315	2	0	0	0	0	0	0	200	300	0	0	0	0	0	0	0	200	903	0	0	0	0	0	0	0	603	903	0
315	3	0	0	0	0	0	0	200	300	0	0	0	0	0	0	0	200	903	0	0	0	0	0	0	0	603	903	0
315	4	0	0	0	0	0	0	200	300	0	0	0	0	0	0	0	200	903	0	0	0	0	0	0	0	603	903	0
315	5	0	0	0	0	0	0	200	300	0	0	0	0	0	0	0	200	903	0	0	0	0	0	0	0	603	903	0
315	6	0	0	0	0	0	0	200	300	0	0	0	0	0	0	0	200	903	0	0	0	0	0	0	0	603	903	0
315	7	0	0	0	0	0	0	200	300	0	0	0	0	0	0	0	200	903	0	0	0	0	0	0	0	603	903	0
315	8	0	0	0	0	0	0	200	300	0	0	0	0	0	0	0	200	903	0	0	0	0	0	0	0	603	903	0
315	9	0	0	0	0	0	0	200	300	0	0	0	0	0	0	0	200	903	0	0	0	0	0	0	0	603	903	0
316	0	0	0	0	0	0	0	200	300	0	0	0	0	0	0	0	200	903	0	0	0	0	0	0	0	603	903	0
316	1	0	0	0	0	0	0	200	300	0	0	0	0	0	0	0	200	903	0	0	0	0	0	0	0	603	903	0
316	2	0	0	0	0	0	0	200	300	0	0	0	0	0	0	0	200	903	0	0	0	0	0	0	0	603	903	0
316	3	0	0	0	0	0	0	200	300	0	0	0	0	0	0	0	200	903	0	0	0	0	0	0	0	603	903	0
316	4	0	0	0	0	0	0	200	300	0	0	0	0	0	0	0	200	903	0	0	0	0	0	0	0	603	903	0
316	5	0	0	0	0	0	0	200	300	0	0	0	0	0	0	0	200	903	0	0	0	0	0	0	0	603	903	0
316	6	0	0	0	0	0	0	200	300	0	0	0	0	0	0	0	200	903	0	0	0	0	0	0	0	603	903	0
316	7	0	0	0	0	0	0	200	300	0	0	0	0	0	0	0	200	903	0	0	0	0	0	0	0	603	903	0
316	8	0	0	0	0	0	0	200	300	0	0	0	0	0	0	0	200	903	0	0	0	0	0	0	0	603	903	0
316	9	0	0	0	0	0	0	200	300	0	0	0	0	0	0	0	200	903	0	0	0	0	0	0	0	603	903	0
317	0	0	0	0	0	0	0	200	300	0	0	0	0	0	0	0	200	903	0	0	0	0	0	0	0	603	903	0
317	1	0	0	0	0	0	0	200	300	0	0	0	0	0	0	0	200	903	0	0	0	0	0	0	0	603	903	0
317	2	0	0	0	0	0	0	200	300	0	0	0	0	0	0	0	200	903	0	0	0	0	0	0	0	603	903	0
317	3	0	0	0	0	0	0	200	300	0	0	0	0	0	0	0	200	903	0	0	0	0	0	0	0	603	903	0
317	4	0	0	0	0	0	0	200	300	0	0	0	0	0	0	0	200	903	0	0	0	0	0	0	0	603	903	0
317	5	0	0	0	0	0	0	200	300	0	0	0	0	0	0	0	200	903	0	0	0	0	0	0	0	603	903	0
317	6	0	0	0	0	0	0	200	300	0	0	0	0	0	0	0	200	903	0	0	0	0	0	0	0	603	903	0
317	7	0	0	0	0	0	0	200	300	0	0	0	0	0	0	0	200	903	0	0	0	0	0	0	0	603	903	0
317	8	0	0	0	0	0	0	200	300	0	0	0	0	0	0	0	200	903	0	0	0	0	0	0	0	603	903	0
317	9	0	0	0	0	0	0	200	300	0	0	0	0	0	0	0	200	903	0	0	0	0	0	0	0	603	903	0
318	0	0	0	0	0	0	0	200	300	0	0	0	0	0	0	0	200	903	0	0	0	0	0	0	0	603	903	0
318	1	0	0	0	0	0	0	200	300	0	0	0	0	0	0	0	200	903	0	0	0	0	0	0	0	603	903	0
318	2	0	0	0	0	0	0	200	300	0	0	0	0	0	0	0	200	903	0	0	0	0	0	0	0	603	903	0
318	3	0	0	0	0	0	0	200	300	0	0	0	0	0	0	0	200	903	0	0	0	0	0	0	0	603	903	0
318	4	0	0	0	0	0	0	200	300	0	0	0	0	0	0	0	200	903	0	0	0	0	0	0	0	603	903	0
318	5	0	0	0	0	0	0	200	300	0	0	0	0	0	0	0	200	903	0	0	0	0	0	0	0	603	903	0
318	6	0	0	0	0	0	0	200	300	0	0	0	0	0	0	0	200	903	0	0	0	0	0	0	0	603	903	0
318	7	0	0	0	0	0	0	200	300	0	0	0	0	0	0	0	200	903	0	0	0	0	0	0	0	603	903	0
318	8	0	0	0	0	0	0	200	300	0	0	0	0	0	0	0	200	903	0	0	0	0	0	0	0	603	903	0
318	9	0	0	0	0	0	0	200	300	0	0	0	0	0	0	0	200	903	0	0	0	0	0	0	0	603	903	0
319	0	0	0	0	0	0	0	200	300	0	0	0	0	0	0	0	200	903	0	0	0	0	0	0	0	603	903	0
319	1	0	0	0	0	0	0	200	300	0	0	0	0	0	0	0	200	903	0	0	0	0	0	0	0	603	903	0
319	2	0	0	0	0	0	0	200	300	0	0	0	0	0	0	0	200	903	0	0	0	0	0	0	0	603	903	0
319	3	0	0	0	0	0	0	200	300	0	0	0	0	0	0	0	200	903	0	0	0	0	0	0	0	603	903	0
319	4	0	0	0	0	0	0	200	300	0	0	0	0	0	0	0	200	903	0	0	0	0	0	0	0	603	903	0
319	5	0	0	0	0	0	0	200	300	0	0	0	0	0	0	0	200	903	0	0	0	0	0	0	0	603	903	0
319	6	0	0	0	0	0	0	200	300	0	0	0	0	0	0	0	200	903	0	0	0	0	0	0	0	603	903	0
319	7	0	0	0	0	0	0	200	300	0	0	0	0	0	0	0	200	903	0	0	0	0	0	0	0	603	903	0
319	8	0	0	0	0	0	0	200	300	0	0	0	0	0	0	0	200	903	0	0	0	0	0	0	0	603	903	0
319	9	0	0	0	0	0	0	200	300	0	0	0	0	0	0	0	200	903	0	0	0	0	0	0	0	603	903	0
320	0	0	0	0	0	0	0	200	300	0	0	0	0	0	0	0	200	903	0	0	0	0	0	0	0	603	903	0
320	1	0	0	0	0	0	0	200	300	0	0	0	0	0	0	0	200	903	0	0	0	0	0	0	0	603	903	0
320	2	0	0	0	0	0	0	200	300	0	0	0	0	0	0	0	200	903	0	0	0	0	0	0	0	603	903	0
320	3	0	0	0	0	0	0	200	300	0	0	0	0	0	0	0	200	903	0	0	0	0	0	0	0	603	903	0
320	4	0	0	0	0	0	0	200	300	0	0	0	0	0	0	0	200	903	0	0	0	0	0	0	0	603	903	0
320	5	0	0	0	0	0	0	200	300	0	0	0	0	0	0	0	200	903	0	0	0	0	0	0	0	603	903	0
320	6	0	0	0	0	0	0	200	300	0	0	0	0	0	0	0	200	903	0	0	0	0	0	0	0	603	903	0
320	7	0	0	0	0	0	0	200	300	0	0	0	0	0	0	0	200	903	0	0	0	0	0	0	0	603	903	0
320	8	0	0	0	0	0	0	200	300	0	0	0	0	0	0	0	200	903	0	0	0	0	0	0	0	603	903	0
320	9	0	0	0	0	0	0	200	300	0	0	0	0	0	0	0	200	903	0	0	0	0	0	0	0	603	903	0
321	0	0	0	0	0	0	0	200	300	0	0	0	0	0	0	0	200	903	0	0	0	0	0	0	0	603	903	0
321	1	0	0	0	0	0	0	200	300	0	0	0	0	0	0	0	200	903	0	0	0	0	0	0	0	603	903	0
321	2	0	0	0	0	0	0	200	300	0	0	0	0	0	0	0	200	903	0	0	0	0	0	0	0	603	903	0
321	3	0	0	0	0	0	0	200	300	0	0	0	0	0	0	0	200	903	0	0	0	0	0	0	0	603	903	0
321	4	0	0	0	0	0	0	200	300	0	0	0	0	0	0	0	200	903	0	0	0	0	0	0	0	603	903	0
321	5	0	0	0	0	0	0	200	300	0	0	0	0	0	0	0	200	903	0	0	0	0	0	0	0	603	903	0
321	6	0	0	0	0	0	0	200	300	0	0	0	0	0	0	0	200	903	0	0	0	0	0	0	0	603	903	0
321	7	0	0	0	0	0	0	200	300	0	0	0	0	0	0	0	200	903	0	0	0	0	0	0	0	603	903	0
321	8	0	0	0	0	0	0	200	300	0	0	0	0	0	0	0	200	903	0	0	0	0	0	0	0	603	903	0
321	9	0	0	0	0	0	0	200	300	0	0	0	0	0	0	0	200	903	0	0	0	0	0	0	0	603	903	0
322	0	0	0	0	0	0	0	200	300	0	0	0	0	0	0	0	200	903	0	0	0	0	0	0	0	603	903	0
322	1	0	0	0	0	0	0	200	300	0	0	0	0	0	0	0	200	903	0	0	0	0	0	0	0	603	903	0
322	2	0	0	0	0	0	0	200	300	0	0	0	0	0	0	0	200	903	0	0	0	0	0	0	0	603	903	0
322	3	0	0	0	0	0	0	200	300	0	0	0	0	0	0	0	200	903	0	0	0	0	0	0	0	603	903	0
322	4	0	0	0	0	0	0	200	300	0	0	0	0	0	0	0	200	903	0	0	0	0	0	0	0	603	903	0
322	5	0	0	0	0	0	0	200	300	0	0	0	0	0	0	0	200	903	0	0	0	0	0	0	0	603	903	0
322	6	0	0	0	0	0	0	200	300	0	0	0	0	0	0	0	200	903	0	0	0	0	0	0	0	603	903	0
322	7	0	0	0	0	0	0	200	300	0	0	0	0	0	0	0	200	903	0	0	0	0	0	0	0	603	903	0
322	8	0	0	0	0	0	0	200	300	0	0	0	0	0	0	0	200	903	0	0	0	0	0	0	0	603	903	0
322	9	0	0	0	0	0	0	200	300	0	0	0	0	0	0	0	200	903	0	0	0	0	0	0	0	603	903	0
323	0	0	0	0	0	0	0	200	300	0	0	0	0	0	0	0	200	903	0	0	0	0	0	0	0	603	903	0
323	1	0	0	0	0	0	0	200	300	0	0	0	0	0	0	0	200	903	0	0	0	0	0	0	0	603	903	0
323	2	0	0	0	0	0	0	200	300	0	0	0	0	0	0	0	200	903	0	0	0	0	0	0	0	603	903	0
323	3	0	0	0	0	0	0	200	300	0	0	0	0	0	0	0	200	903	0	0	0	0	0	0	0	603	903	0
323	4	0	0	0	0	0	0	200	300	0	0	0	0	0	0	0	200	903	0	0	0	0	0	0	0	603	903	0
323	5	0	0	0	0	0	0	200	300	0	0	0	0	0	0	0	200	903	0	0	0	0	0	0	0	603	903	0
323	6	0	0	0	0	0	0	200	300	0	0	0	0	0	0	0	200	903	0	0	0	0	0	0	0	603	903	0
323	7	0	0	0	0	0	0	200	300	0	0	0	0	0	0	0	200	903	0	0	0	0	0	0	0	603	903	0
323	8	0	0	0	0	0	0	200	300	0	0	0	0	0	0	0	200	903	0	0	0	0	0	0	0	603	903	0
323	9	0	0	0	0	0	0	200	300	0	0	0	0	0	0	0	200	903	0	0	0	0	0	0	0	603	903	0
324	0	0	0	0	0	0	0	200	300	0	0	0	0	0	0	0	200	903	0	0	0	0	0	0	0	603	903	0
324	1	0	0	0	0	0	0	200	300	0	0	0	0	0	0	0	200	903	0	0	0	0	0	0	0	603	903	0
324	2	0	0	0	0	0	0	200	300	0	0	0	0	0	0	0	200	903	0	0	0	0	0	0	0	603	903	0
324	3	0	0	0	0	0	0	200	300	0	0	0	0	0	0	0	200	903	0	0	0	0	0	0	0	603	903	0
324	4	0	0	0	0	0	0	200	300	0	0	0	0	0	0	0	200	903	0	0	0	0	0	0	0	603	903	0
324	5	0	0	0	0	0	0	200	300	0	0	0	0	0	0	0	200	903	0	0	0	0	0	0	0	603	903	0
324	6	0	0	0	0	0	0	200	300	0	0	0	0	0	0	0	200	903	0	0	0	0	0	0	0	603	903	0
324	7	0	0	0	0	0	0	200	300	0	0	0	0	0	0	0	200	903	0	0	0	0	0	0	0	603	903	0
324	8	0	0	0	0	0	0	200	300	0	0	0	0	0	0	0	200	903	0	0	0	0	0	0	0	603	903	0
324	9	0	0	0	0	0	0	200	300	0	0	0	0	0	0	0	200	903	0	0	0	0	0	0	0	603	903	0
325	0	0	0	0	0	0	0	200	300	0	0	0	0	0	0	0	200	903	0	0	0	0	0	0	0	603	903	0
325	1	0	0	0	0	0	0	200	300	0	0	0	0	0	0	0	200	903	0	0	0	0	0	0	0	603	903	0
325	2	0	0	0	0	0	0	200	300	0	0	0	0	0	0	0	200	903	0	0	0	0	0	0	0	603	903	0
325	3	0	0	0	0	0	0	200	300	0	0	0	0	0	0	0	200	903	0	0	0	0	0	0	0	603	903	0
325	4	0	0	0	0	0	0	200	300	0	0	0	0	0	0	0	200	903	0	0	0	0	0	0	0	603	903	0
325	5	0	0	0	0	0	0	200	300	0	0	0	0	0	0	0	200	903	0	0	0	0	0	0	0	603	903	0
325	6	0	0	0	0	0	0	200	300	0	0	0	0	0	0	0	200	903	0	0	0	0	0	0	0	603	903	0
325	7	0	0	0	0	0	0	200	300	0	0	0	0	0	0	0	200	903	0	0	0	0	0	0	0	603	903	0
325	8	0	0	0	0	0	0	200	300	0	0	0	0	0	0	0	200	903	0	0	0	0	0	0	0	603	903	0
325	9	0	0	0	0	0	0	200	300	0	0	0	0	0	0	0	200	903	0	0	0	0	0	0	0	603	903	0
326	0	0	0	0	0	0	0	200	300	0	0	0	0	0	0	0	200	903	0	0	0	0	0	0	0	603	903	0
326	1	0	0	0	0	0	0	200	300	0	0	0	0	0	0	0	200	903	0	0	0	0	0	0	0	603	903	0
326	2	0	0	0	0	0	0	200	300	0	0	0	0	0	0	0	200	903	0	0	0	0	0	0	0	603	903	0
326	3	0	0	0	0	0	0	200	300	0	0	0	0	0	0	0	200	903	0	0	0	0	0	0	0	603	903	0
326	4	0	0	0	0	0	0	200	300	0	0	0	0	0	0	0	200	903	0	0	0	0	0	0	0	603	903	0
326	5	0	0	0	0	0	0	200	300	0	0	0	0	0	0	0	200	903	0	0	0	0	0	0	0	603	903	0
326	6	0	0	0	0	0	0	200	300	0	0	0	0	0	0	0	200	903	0	0	0	0	0	0	0	603	903	0
326	7	0	0	0	0	0	0	200	300	0	0	0	0	0	0	0	200	903	0	0	0	0	0	0	0	603	903	0
326	8	0	0	0	0	0	0	200	300	0	0	0	0	0	0	0	200	903	0	0	0	0	0	0	0	603	903	0
326	9	0	0	0	0	0	0	200	300	0	0	0	0	0	0	0	200	903	0	0	0	0	0	0	0	603	903	0
327	0	0	0	0	0	0	0	200	300	0	0	0	0	0	0	0	200	903	0	0	0	0	0	0	0	603	903	0
327	1	0	0	0	0	0	0	200	300	0	0	0	0	0	0	0	200	903	0	0	0	0	0	0	0	603	903	0
327	2	0	0	0	0	0	0	200	300	0	0	0	0	0	0	0	200	903	0	0	0	0	0	0	0	603	903	0
327	3	0	0	0	0	0	0	200	300	0	0	0	0	0	0	0	200	903	0	0	0	0	0	0	0	603	903	0
327	4	0	0	0	0	0	0	200	300	0	0	0	0	0	0	0	200	903	0	0	0	0	0	0	0	603	903	0
327	5	0	0	0	0	0	0	200	300	0	0	0	0	0	0	0	200	903	0	0	0	0	0	0	0	603	903	0
327	6	0	0	0	0	0	0	200	300	0	0	0	0	0	0	0	200	903	0	0	0	0	0	0	0	603	903	0
327	7	0	0	0	0	0	0	200	300	0	0	0	0	0	0	0	200	903	0	0	0	0	0	0	0	603	903	0
327	8	0	0	0	0	0	0	200	300	0	0	0	0	0	0	0	200	903	0	0	0	0	0	0	0	603	903	0
327	9	0	0	0	0	0	0	200	300	0	0	0	0	0	0	0	200	903	0	0	0	0	0	0	0	603	903	0
328	0	0	0	0	0	0	0	200	300	0	0	0	0	0	0	0	200	903	0	0	0	0	0	0	0	603	903	0
328	1	0	0	0	0	0	0	200	300	0	0	0	0	0	0	0	200	903	0	0	0	0	0	0	0	603	903	0
328	2	0	0	0	0	0	0	200	300	0	0	0	0	0	0	0	200	903	0	0	0	0	0	0	0	603	903	0
328	3	0	0	0	0	0	0	200	300	0	0	0	0	0	0	0	200	903	0	0	0	0	0	0	0	603	903	0
328	4	0	0	0	0	0	0	200	300	0	0	0	0	0	0	0	200	903	0	0	0	0	0	0	0	603	903	0
328	5	0	0	0	0	0	0	200	300	0	0	0	0	0	0	0	200	903	0	0	0	0	0	0	0	603	903	0
328	6	0	0	0	0	0	0	200	300	0	0	0	0	0	0	0	200	903	0	0	0	0	0	0	0	603	903	0
328	7	0	0	0	0	0	0	200	300	0	0	0	0	0	0	0	200	903	0	0	0	0	0	0	0	603	903	0
328	8	0	0	0	0	0	0	200	300	0	0	0	0	0	0	0	200	903	0	0	0	0	0	0	0	603	903	0
328	9	0	0	0	0	0	0	200	300	0	0	0	0	0	0	0	200	903	0	0	0	0	0	0	0	603	903	0
329	0	0	0	0	0	0	0	200	300	0	0	0	0	0	0	0	200	903	0	0	0	0	0	0	0	603	903	0
329	1	0	0	0	0	0	0	200	300	0	0	0	0	0	0	0	200	903	0	0	0	0	0	0	0	603	903	0
329	2	0	0	0	0	0	0	200	300	0	0	0	0	0	0	0	200	903	0	0	0	0	0	0	0	603	903	0
329	3	0	0	0	0	0	0	200	300	0	0	0	0	0	0	0	200	903	0	0	0	0	0	0	0	603	903	0
329	4	0	0	0	0	0	0	200	300	0	0	0	0	0	0	0	200	903	0	0	0	0	0	0	0	603	903	0
329	5	0	0	0	0	0	0	200	300	0	0	0	0	0	0	0	200	903	0	0	0	0	0	0	0	603	903	0
329	6	0	0	0	0	0	0	200	300	0	0	0	0	0	0	0	200	903	0	0	0	0	0	0	0	603	903	0
329	7	0	0	0	0	0	0	200	300	0	0	0	0	0	0	0	200	903	0	0	0	0	0	0	0	603	903	0
329	8	0	0	0	0	0	0	200	300	0	0	0	0	0	0	0	200	903	0	0	0	0	0	0	0	603	903	0
329	9	0	0	0	0	0	0	200	300	0	0	0	0	0	0	0	200	903	0	0	0	0	0	0	0	603	903	0
330	0	0	0	0	0	0	0	200	300	0	0	0	0	0	0	0	200	903	0	0	0	0	0	0	0	603	903	0
330	1	0	0	0	0	0	0	200	300	0	0	0	0	0	0	0	200	903	0	0	0	0	0	0	0	603	903	0
330	2	0	0	0	0	0	0	200	300	0	0	0	0	0	0	0	200	903	0	0	0	0	0	0	0	603	903	0
330	3	0	0	0	0	0	0	200	300	0	0	0	0	0	0	0	200	903	0	0	0	0	0	0	0	603	903	0
330	4	0	0	0	0	0	0	200	300	0	0	0	0	0	0	0	200	903	0	0	0	0	0	0	0	603	903	0
330	5	0	0	0	0	0	0	200	300	0	0	0	0	0	0	0	200	903	0	0	0	0	0	0	0	603	903	0
330	6	0	0	0	0	0	0	200	300	0	0	0	0	0	0	0	200	903	0	0	0	0	0	0	0	603	903	0
330	7	0	0	0	0	0	0	200	300	0	0	0	0	0	0	0	200	903	0	0	0	0	0	0	0	603	903	0
330	8	0	0	0	0	0	0	200	300	0	0	0	0	0	0	0	200	903	0	0	0	0	0	0	0	603	903	0
330	9	0	0	0	0	0	0	200	300	0	0	0	0	0	0	0	200	903	0	0	0	0	0	0	0	603	903	0
331	0	0	0	0	0	0	0	200	300	0	0	0	0	0	0	0	200	903	0	0	0	0	0	0	0	603	903	0
331	1	0	0	0	0	0	0	200	300	0	0	0	0	0	0	0	200	903	0	0	0	0	0	0	0	603	903	0
331	2	0	0	0	0	0	0	200	300	0	0	0	0	0	0	0	200	903	0	0	0	0	0	0	0	603	903	0
331	3	0	0	0	0	0	0	200	300	0	0	0	0	0	0	0	200	903	0	0	0	0	0	0	0	603	903	0
331	4	0	0	0	0	0	0	200	300	0	0	0	0	0	0	0	200	903	0	0	0	0	0	0	0	603	903	0
331	5	0	0	0	0	0	0	200	300	0	0	0	0	0	0	0	200	903	0	0	0	0	0	0	0	603	903	0
331	6	0	0	0	0	0	0	200	300	0	0	0	0	0	0	0	200	903	0	0	0	0	0	0	0	603	903	0
331	7	0	0	0	0	0	0	200	300	0	0	0	0	0	0	0	200	903	0	0	0	0	0	0	0	603	903	0
331	8	0	0	0	0	0	0	200	300	0	0	0	0	0	0	0	200	903	0	0	0	0	0	0	0	603	903	0
331	9	0	0	0	0	0	0	200	300	0	0	0	0	0	0	0	200	903	0	0	0	0	0	0	0	603	903	0
332	0	0	0	0	0	0	0	200	300	0	0	0	0	0	0	0	200	903	0	0	0	0	0	0	0	603	903	0
332	1	0	0	0	0	0	0	200	300	0	0	0	0	0	0	0	200	903	0	0	0	0	0	0	0	603	903	0
332	2	0	0	0	0	0	0	200	300	0	0	0	0	0	0	0	200	903	0	0	0	0	0	0	0	603	903	0
332	3	0	0	0	0	0	0	200	300	0	0	0	0	0	0	0	200	903	0	0	0	0	0	0	0	603	903	0
332	4	0	0	0	0	0	0	200	300	0	0	0	0	0	0	0	200	903	0	0	0	0	0	0	0	603	903	0
332	5	0	0	0	0	0	0	200	300	0	0	0	0	0	0	0	200	903	0	0	0	0	0	0	0	603	903	0
332	6	0	0	0	0	0	0	200	300	0	0	0	0	0	0	0	200	903	0	0	0	0	0	0	0	603	903	0
332	7	0	0	0	0	0	0	200	300	0	0	0	0	0	0	0	200	903	0	0	0	0	0	0	0	603	903	0
332	8	0	0	0	0	0	0	200	300	0	0	0	0	0	0	0	200	903	0	0	0	0	0	0	0	603	903	0
332	9	0	0	0	0	0	0	200	300	0	0	0	0	0	0	0	200	903	0	0	0	0	0	0	0	603	903	0
333	0	0	0	0	0	0	0	200	300	0	0	0	0	0	0	0	200	903	0	0	0	0	0	0	0	603	903	0
333	1	0	0	0	0	0	0	200	300	0	0	0	0	0	0	0	200	903	0	0	0	0	0	0	0	603	903	0
333	2	0	0	0	0	0	0	200	300	0	0	0	0	0	0	0	200	903	0	0	0	0	0	0	0	603	903	0
333	3	0	0	0	0	0	0	200	300	0	0	0	0	0	0	0	200	903	0	0	0	0	0	0	0	603	903	0
333	4	0	0	0	0	0	0	200	300	0	0	0	0	0	0	0	200	903	0	0	0	0	0	0	0	603	903	0
333	5	0	0	0	0	0	0	200	300	0	0	0	0	0	0	0	200	903	0	0	0	0	0	0	0	603	903	0
333	6	0	0	0	0	0	0	200	300	0	0	0	0	0	0	0	200	903	0	0	0	0	0	0	0	603	903	0
333	7	0	0	0	0	0	0	200	300	0	0	0	0	0	0	0	200	903	0	0	0	0	0	0	0	603	903	0
333	8	0	0	0	0	0	0	200	300	0	0	0	0	0	0	0	200	903	0	0	0	0	0	0	0	603	903	0
333	9	0	0	0	0	0	0	200	300	0	0	0	0	0	0	0	200	903	0	0	0	0	0	0	0	603	903	0
334	0	0	0	0	0	0	0	200	300	0	0	0	0	0	0	0	200	903	0	0	0	0	0	0	0	603	903	0
334	1	0	0	0	0	0	0	200	300	0	0	0	0	0	0	0	200	903	0	0	0	0	0	0	0	603	903	0
334	2	0	0	0	0	0	0	200	300	0	0	0	0	0	0	0	200	903	0	0	0	0	0	0	0	603	903	0
334	3	0	0	0	0	0	0	200	300	0	0	0	0	0	0	0	200	903	0	0	0	0	0	0	0	603	903	0
334	4	0	0	0	0	0	0	200	300	0	0	0	0	0	0	0	200	903	0	0	0	0	0	0	0	603	903	0
334	5	0	0	0	0	0	0	200	300	0	0	0	0	0	0	0	200	903	0	0	0	0	0	0	0	603	903	0
334	6	0	0	0	0	0	0	200	300	0	0	0	0	0	0	0	200	903	0	0	0	0	0	0	0	603	903	0
334	7	0	0	0	0	0	0	200	300	0	0	0	0	0	0	0	200	903	0	0	0	0	0	0	0	603	903	0
334	8	0	0	0	0	0	0	200	300	0	0	0	0	0	0	0	200	903	0	0	0	0	0	0	0	603	903	0
334	9	0	0	0	0	0	0	200	300	0	0	0	0	0	0	0	200	903	0	0	0	0	0	0	0	603	903	0
335	0	0	0	0	0	0	0	200	300	0	0	0	0	0	0	0	200	903	0	0	0	0	0	0	0	603	903	0
335	1	0	0	0	0	0	0	200	300	0	0	0	0	0	0	0	200	903	0	0	0	0	0	0	0	603	903	0
335	2	0	0	0	0	0	0	200	300	0	0	0	0	0	0	0	200	903	0	0	0	0	0	0	0	603	903	0
335	3	0	0	0	0	0	0	200	300	0	0	0	0	0	0	0	200	903	0	0	0	0	0	0	0	603	903	0
335	4	0	0	0	0	0	0	200	300	0	0	0	0	0	0	0	200	903	0	0	0	0	0	0	0	603	903	0
335	5	0	0	0	0	0	0	200	300	0	0	0	0	0	0	0	200	903	0	0	0	0	0	0	0	603	903	0
335	6	0	0	0	0	0	0	200	300	0	0	0	0	0	0	0	200	903	0	0	0	0	0	0	0	603	903	0
335	7	0	0	0	0	0	0	200	300	0	0	0	0	0	0	0	200	903	0	0	0	0	0	0	0	603	903	0
335	8	0	0	0	0	0	0	200	300	0	0	0	0	0	0	0	200	903	0	0	0	0	0	0	0	603	903	0
335	9	0	0	0	0	0	0	200	300	0	0	0	0	0	0	0	200	903	0	0	0	0	0	0	0	603	903	0
336	0	0	0	0	0	0	0	200	300	0	0	0	0	0	0	0	200	903	0	0	0	0	0	0	0	603	903	0
336	1	0	0	0	0	0	0	200	300	0	0	0	0	0	0	0	200	903	0	0	0	0	0	0	0	603	903	0
336	2	0	0	0	0	0	0	200	300	0	0	0	0	0	0	0	200	903	0	0	0	0	0	0	0	603	903	0
336	3	0	0	0	0	0	0	200	300	0	0	0	0	0	0	0	200	903	0	0	0	0	0	0	0	603	903	0
336	4	0	0	0	0	0	0	200	300	0	0	0	0	0	0	0	200	903	0	0	0	0	0	0	0	603	903	0
336	5	0	0	0	0	0	0	200	300	0	0	0	0	0	0	0	200	903	0	0	0	0	0	0	0	603	903	0
336	6	0	0	0	0	0	0	200	300	0	0	0	0	0	0	0	200	903	0	0	0	0	0	0	0	603	903	0
336	7	0	0	0	0	0	0	200	300	0	0	0	0	0	0	0	200	903	0	0	0	0	0	0	0	603	903	0
336	8	0	0	0	0	0	0	200	300	0	0	0	0	0	0	0	200	903	0	0	0	0	0	0	0	603	903	0
336	9	0	0	0	0	0	0	200	300	0	0	0	0	0	0	0	200	903	0	0	0	0	0	0	0	603	903	0
337	0	0	0	0	0	0	0	200	300	0	0	0	0	0	0	0	200	903	0	0	0	0	0	0	0	603	903	0
337	1	0	0	0	0	0	0	200	300	0	0	0	0	0	0	0	200	903	0	0	0	0	0	0	0	603	903	0
337	2	0	0	0	0	0	0	200	300	0	0	0	0	0	0	0	200	903	0	0	0	0	0	0	0	603	903	0
337	3	0	0	0	0	0	0	200	300	0	0	0	0	0	0	0	200	903	0	0	0	0	0	0	0	603	903	0
337	4	0	0	0	0	0	0	200	300	0	0	0	0	0	0	0	200	903	0	0	0	0	0	0	0	603	903	0
337	5	0	0	0	0	0	0	200	300	0	0	0	0	0	0	0	200	903	0	0	0	0	0	0	0	603	903	0
337	6	0	0	0	0	0	0	200	300	0	0	0	0	0	0	0	200	903	0	0	0	0	0	0	0	603	903	0
337	7	0	0	0	0	0	0	200	300	0	0	0	0	0	0	0	200	903	0	0	0	0	0	0	0	603	903	0
337	8	0	0	0	0	0	0	200	300	0	0	0	0	0	0	0	200	903	0	0	0	0	0	0	0	603	903	0
337	9	0	0	0	0	0	0	200	300	0	0	0	0	0	0	0	200	903	0	0	0	0	0	0	0	603	903	0
338	0	0	0	0	0	0	0	200	300	0	0	0	0	0	0	0	200	903	0	0	0	0	0	0	0	603	903	0
338	1	0	0	0	0	0	0	200	300	0	0	0	0	0	0	0	200	903	0	0	0	0	0	0	0	603	903	0
338	2	0	0	0	0	0	0	200	300	0	0	0	0	0	0	0	200	903	0	0	0	0	0	0	0	603	903	0
338	3	0	0	0	0	0	0	200	300	0	0	0	0	0	0	0	200	903	0	0	0	0	0	0	0	603	903	0
338	4	0	0	0	0	0	0	200	300	0	0	0	0	0	0	0	200	903	0	0	0	0	0	0	0	603	903	0
338	5	0	0	0	0	0	0	200	300	0	0	0	0	0	0	0	200	903	0	0	0	0	0	0	0	603	903	0
338	6	0	0	0	0	0	0	200	300	0	0	0	0	0	0	0	200	903	0	0	0	0	0	0	0	603	903	0
338	7	0	0	0	0	0	0	200	300	0	0	0	0	0	0	0	200	903	0	0	0	0	0	0	0	603	903	0
338	8	0	0	0	0	0	0	200	300	0	0	0	0	0	0	0	200	903	0	0	0	0	0	0	0	603	903	0
338	9	0	0	0	0	0	0	200	300	0	0	0	0	0	0	0	200	903	0	0	0	0	0	0	0	603	903	0
339	0	0	0	0	0	0	0	200	300	0	0	0	0	0	0	0	200	903	0	0	0	0	0	0	0	603	903	0
339	1	0	0	0	0	0	0	200	300	0	0	0	0	0	0	0	200	903	0	0	0	0	0	0	0	603	903	0
339	2	0	0	0	0	0	0	200	300	0	0	0	0	0	0	0	200	903	0	0	0	0	0	0	0	603	903	0
339	3	0	0	0	0	0	0	200	300	0	0	0	0	0	0	0	200	903	0	0	0	0	0	0	0	603	903	0
339	4	0	0	0	0	0	0	200	300	0	0	0	0	0	0	0	200	903	0	0	0	0	0	0	0	603	903	0
339	5	0	0	0	0	0	0	200	300	0	0	0	0	0	0	0	200	903	0	0	0	0	0	0	0	603	903	0
339	6	0	0	0	0	0	0	200	300	0	0	0	0	0	0	0	200	903	0	0	0	0	0	0	0	603	903	0
339	7	0	0	0	0	0	0	200	300	0	0	0	0	0	0	0	200	903	0	0	0	0	0	0	0	603	903	0
339	8	0	0	0	0	0	0	200	300	0	0	0	0	0	0	0	200	903	0	0	0	0	0	0	0	603	903	0
339	9	0	0	0	0	0	0	200	300	0	0	0	0	0	0	0	200	903	0	0	0	0	0	0	0	603	903	0
340	0	0	0	0	0	0	0	200	300	0	0	0	0	0	0	0	200	903	0	0	0	0	0	0	0	603	903	0
340	1	0	0	0	0	0	0	200	300	0	0	0	0	0	0	0	200	903	0	0	0	0	0	0	0	603	903	0
340	2	0	0	0	0	0	0	200	300	0	0	0	0	0	0	0	200	903	0	0	0	0	0	0	0	603	903	0
340	3	0	0	0	0	0	0	200	300	0	0	0	0	0	0	0	200	903	0	0	0	0	0	0	0	603	903	0
340	4	0	0	0	0	0	0	200	300	0	0	0	0	0	0	0	200	903	0	0	0	0	0	0	0	603	903	0
340	5	0	0	0	0	0	0	200	300	0	0	0	0	0	0	0	200	903	0	0	0	0	0	0	0	603	903	0
340	6	0	0	0	0	0	0	200	300	0	0	0	0	0	0	0	200	903	0	0	0	0	0	0	0	603	903	0
340	7	0	0	0	0	0	0	200	300	0	0	0	0	0	0	0	200	903	0	0	0	0	0	0	0	603	903	0
340	8	0	0	0	0	0	0	200	300	0	0	0	0	0	0	0	200	903	0	0	0	0	0	0	0	603	903	0
340	9	0	0	0	0	0	0	200	300	0	0	0	0	0	0	0	200	903	0	0	0	0	0	0	0	603	903	0
341	0	0	0	0	0	0	0	200	300	0	0	0	0	0	0	0	200	903	0	0	0	0	0	0	0	603	903	0
341	1	0	0	0	0	0	0	200	300	0	0	0	0	0	0	0	200	903	0	0	0	0	0	0	0	603	903	0
341	2	0	0	0	0	0	0	200	300	0	0	0	0	0	0	0	200	903	0	0	0	0	0	0	0	603	903	0
341	3	0	0	0	0	0	0	200	300	0	0	0	0	0	0	0	200	903	0	0	0	0	0	0	0	603	903	0
341	4	0	0	0	0	0	0	200	300	0	0	0	0	0	0	0	200	903	0	0	0	0	0	0	0	603	903	0
341	5	0	0	0	0	0	0	200	300	0	0	0	0	0	0	0	200	903	0	0	0	0	0	0	0	603	903	0
341	6	0	0	0	0	0	0	200	300	0	0	0	0	0	0	0	200	903	0	0	0	0	0	0	0	603	903	0
341	7	0	0	0	0	0	0	200	300	0	0	0	0	0	0	0	200	903	0	0	0	0	0	0	0	603	903	0
341	8	0	0	0	0	0	0	200	300	0	0	0	0	0	0	0	200	903	0	0	0	0	0	0	0	603	903	0
341	9	0	0	0	0	0	0	200	300	0	0	0	0	0	0	0	200	903	0	0	0	0	0	0	0	603	903	0
342	0	0	0	0	0	0	0	200	300	0	0	0	0	0	0	0	200	903	0	0	0	0	0	0	0	603	903	0
342	1	0	0	0	0	0	0	200	300	0	0	0	0	0	0	0	200	903	0	0	0	0	0	0	0	603	903	0
342	2	0	0	0	0	0	0	200	300	0	0	0	0	0	0	0	200	903	0	0	0	0	0	0	0	603	903	0
342	3	0	0	0	0	0	0	200	300	0	0	0	0	0	0	0	200	903	0	0	0	0	0	0	0	603	903	0
342	4	0	0	0	0	0	0	200	300	0	0	0	0	0	0	0	200	903	0	0	0	0	0	0	0	603	903	0
342	5	0	0	0	0	0	0	200	300	0	0	0	0	0	0	0	200	903	0	0	0	0	0	0	0	603	903	0
342	6	0	0	0	0	0	0	200	300	0	0	0	0	0	0	0	200	903	0	0	0	0	0	0	0	603	903	0
342	7	0	0	0	0	0	0	200	300	0	0	0	0	0	0	0	200	903	0	0	0	0	0	0	0	603	903	0
342	8	0	0	0	0	0	0	200	300	0	0	0	0	0	0	0	200	903	0	0	0	0	0	0	0	603	903	0
342	9	0	0	0	0	0	0	200	300	0	0	0	0	0	0	0	200	903	0	0	0	0	0	0	0	603	903	0
343	0	0	0	0	0	0	0	200	300	0	0	0	0	0	0	0	200	903	0	0	0	0	0	0	0	603	903	0
343	1	0	0	0	0	0	0	200	300	0	0	0	0	0	0	0	200	903	0	0	0	0	0	0	0	603	903	0
343	2	0	0	0	0	0	0	200	300	0	0	0	0	0	0	0	200	903	0	0	0	0	0	0	0	603	903	0
343	3	0	0	0	0	0	0	200	300	0	0	0	0	0	0	0	200	903	0	0	0	0	0	0	0	603	903	0
343	4	0	0	0	0	0	0	200	300	0	0	0	0	0	0	0	200	903	0	0	0	0	0	0	0	603	903	0
343	5	0	0	0	0	0	0	200	300	0	0	0	0	0	0	0	200	903	0	0	0	0	0	0	0	603	903	0
343	6	0	0	0	0	0	0	200	300	0	0	0	0	0	0	0	200	903	0	0	0	0	0	0	0	603	903	0
343	7	0	0	0	0	0	0	200	300	0	0	0	0	0	0	0	200	903	0	0	0	0	0	0	0	603	903	0
343	8	0	0	0	0	0	0	200	300	0	0	0	0	0	0	0	200	903	0	0	0	0	0	0	0	603	903	0
343	9	0	0	0	0	0	0	200	300	0	0	0	0	0	0	0	200	903	0	0	0	0	0	0	0	603	903	0
344	0	0	0	0	0	0	0	200	300	0	0	0	0	0	0	0	200	903	0	0	0	0	0	0	0	603	903	0
344	1	0	0	0	0	0	0	200	300	0	0	0	0	0	0	0	200	903	0	0	0	0	0	0	0	603	903	0
344	2	0	0	0	0	0	0	200	300	0	0	0	0	0	0	0	200	903	0	0	0	0	0	0	0	603	903	0
344	3	0	0	0	0	0	0	200	300	0	0	0	0	0	0	0	200	903	0	0	0	0	0	0	0	603	903	0
344	4	0	0	0	0	0	0	200	300	0	0	0	0	0	0	0	200	903	0	0	0	0	0	0	0	603	903	0
344	5	0	0	0	0	0	0	200	300	0	0	0	0	0	0	0	200	903	0	0	0	0	0	0	0	603	903	0
344	6	0	0	0	0	0	0	200	300	0	0	0	0	0	0	0	200	903	0	0	0	0	0	0	0	603	903	0
344	7	0	0	0	0	0	0	200	300	0	0	0	0	0	0	0	200	903	0	0	0	0	0	0	0	603	903	0
344	8	0	0	0	0	0	0	200	300	0	0	0	0	0	0	0	200	903	0	0	0	0	0	0	0	603	903	0
344	9	0	0	0	0	0	0	200	300	0	0	0	0	0	0	0	200	903	0	0	0	0	0	0	0	603	903	0
345	0	0	0	0	0	0	0	200	300	0	0	0	0	0	0	0	200	903	0	0	0	0	0	0	0	603	903	0
345	1	0	0	0	0	0	0	200	300	0	0	0	0	0	0	0	200	903	0	0	0	0	0	0	0	603	903	0
345	2	0	0	0	0	0	0	200	300	0	0	0	0	0	0	0	200	903	0	0	0	0	0	0	0	603	903	0
345	3	0	0	0	0	0	0	200	300	0	0	0	0	0	0	0	200	903	0	0	0	0	0	0	0	603	903	0
345	4	0	0	0	0	0	0	200	300	0	0	0	0	0	0	0	200	903	0	0	0	0	0	0	0	603	903	0
345	5	0	0	0	0	0	0	200	300	0	0	0	0	0	0	0	200	903	0	0	0	0	0	0	0	603	903	0
345	6	0	0	0	0	0	0	200	300	0	0	0	0	0	0	0	200	903	0	0	0	0	0	0	0	603	903	0
345	7	0	0	0	0	0	0	200	300	0	0	0	0	0	0	0	200	903	0	0	0	0	0	0	0	603	903	0
345	8	0	0	0	0	0	0	200	300	0	0	0	0	0	0	0	200	903	0	0	0	0	0	0	0	603	903	0
345	9	0	0	0	0	0	0	200	300	0	0	0	0	0	0	0	200	903	0	0	0	0	0	0	0	603	903	0
346	0	0	0	0	0	0	0	200	300	0	0	0	0	0	0	0	200	903	0	0	0	0	0	0	0	603	903	0
346	1	0	0	0	0	0	0	200	300	0	0	0	0	0	0	0	200	903	0	0	0	0	0	0	0	603	903	0
346	2	0	0	0	0	0	0	200	300	0	0	0	0	0	0	0	200	903	0	0	0	0	0	0	0	603	903	0
346	3	0	0	0	0	0	0	200	300	0	0	0	0	0	0	0	200	903	0	0	0	0	0	0	0	603	903	0
346	4	0	0	0	0	0	0	200	300	0	0	0	0	0	0	0	200	903	0	0	0	0	0	0	0	603	903	0
346	5	0	0	0	0	0	0	200	300	0	0	0	0	0	0	0	200	903	0	0	0	0	0	0	0	603	903	0
346	6	0	0	0	0	0	0	200	300	0	0	0	0	0	0	0	200	903	0	0	0	0	0	0	0	603	903	0
346	7	0	0	0	0	0	0	200	300	0	0	0	0	0	0	0	200	903	0	0	0	0	0	0	0	603	903	0
346	8	0	0	0	0	0	0	200	300	0	0	0	0	0	0	0	200	903	0	0	0	0	0	0	0	603	903	0
346	9	0	0	0	0	0	0	200	300	0	0	0	0	0	0	0	200	903	0	0	0	0	0	0	0	603	903	0
347	0	0	0	0	0	0	0	200	300	0	0	0	0	0	0	0	200	903	0	0	0	0	0	0	0	603	903	0
347	1	0	0	0	0	0	0	200	300	0	0	0	0	0	0	0	200	903	0	0	0	0	0	0	0	603	903	0
347	2	0	0	0	0	0	0	200	300	0	0	0	0	0	0	0	200	903	0	0	0	0	0	0	0	603	903	0
347	3	0	0	0	0	0	0	200	300	0	0	0	0	0	0	0	200	903	0	0	0	0	0	0	0	603	903	0
347	4	0	0	0	0	0	0	200	300	0	0	0	0	0	0	0	200	903	0	0	0	0	0	0	0	603	903	0
347	5	0	0	0	0	0	0	200	300	0	0	0	0	0	0	0	200	903	0	0	0	0	0	0	0	603	903	0
347	6	0	0	0	0	0	0	200	300	0	0	0	0	0	0	0	200	903	0	0	0	0	0	0	0	603	903	0
347	7	0	0	0	0	0	0	200	300	0	0	0	0	0	0	0	200	903	0	0	0	0	0	0	0	603	903	0
347	8	0	0	0	0	0	0	200	300	0	0	0	0	0	0	0	200	903	0	0	0	0	0	0	0	603	903	0
347	9	0	0	0	0	0	0	200	300	0	0	0	0	0	0	0	200	903	0	0	0	0	0	0	0	603	903	0
348	0	0	0	0	0	0	0	200	300	0	0	0	0	0	0	0	200	903	0	0	0	0	0	0	0	603	903	0
348	1	0	0	0	0	0	0	200	300	0	0	0	0	0	0	0	200	903	0	0	0	0	0	0	0	603	903	0
348	2	0	0	0	0	0	0	200	300	0	0	0	0	0	0	0	200	903	0	0	0	0	0	0	0	603	903	0
348	3	0	0	0	0	0	0	200	300	0	0	0	0	0	0	0	200	903	0	0	0	0	0	0	0	603	903	0
348	4	0	0	0	0	0	0	200	300	0	0	0	0	0	0	0	200	903	0	0	0	0	0	0	0	603	903	0
348	5	0	0	0	0	0	0	200	300	0	0	0	0	0	0	0	200	903	0	0	0	0	0	0	0	603	903	0
348	6	0	0	0	0	0	0	200	300	0	0	0	0	0	0	0	200	903	0	0	0	0	0	0	0	603	903	0
348	7	0	0	0	0	0	0	200	300	0	0	0	0	0	0	0	200	903	0	0	0	0	0	0	0	603	903	0
348	8	0	0	0	0	0	0	200	300	0	0	0	0	0	0	0	200	903	0	0	0	0	0	0	0	603	903	0
348	9	0	0	0	0	0	0	200	300	0	0	0	0	0	0	0	200	903	0	0	0	0	0	0	0	603	903	0
349	0	0	0	0	0	0	0	200	300	0	0	0	0	0	0	0	200	903	0	0	0	0	0	0	0	603	903	0
349	1	0	0	0	0	0	0	200	300	0	0	0	0	0	0	0	200	903	0	0	0	0	0	0	0	603	903	0
349	2	0	0	0	0	0	0	200	300	0	0	0	0	0	0	0	200	903	0	0	0	0	0	0	0	603	903	0
349	3	0	0	0	0	0	0	200	300	0	0	0	0	0	0	0	200	903	0	0	0	0	0	0	0	603	903	0
349	4	0	0	0	0	0	0	200	300	0	0	0	0	0	0	0	200	903	0	0	0	0	0	0	0	603	903	0
349	5	0	0	0	0	0	0	200	300	0	0	0	0	0	0	0	200	903	0	0	0	0	0	0	0	603	903	0
349	6	0	0	0	0	0	0	200	300	0	0	0	0	0	0	0	200	903	0	0	0	0	0	0	0	603	903	0
349	7	0	0	0	0	0	0	200	300	0	0	0	0	0	0	0	200	903	0	0	0	0	0	0	0	603	903	0
349	8	0	0	0	0	0	0	200	300	0	0	0	0	0	0	0	200	903	0	0	0	0	0	0	0	603	903	0
349	9	0	0	0	0	0	0	200	300	0	0	0	0	0	0	0	200	903	0	0	0	0	0	0	0	603	903	0
350	0	0	0	0	0	0	0	200	300	0	0	0	0	0	0	0	200	903	0	0	0	0	0	0	0	603	903	0
350	1	0	0	0	0	0	0	200	300	0	0	0	0	0	0	0	200	903	0	0	0	0	0	0	0	603	903	0
350	2	0	0	0	0	0	0	200	300	0	0	0	0	0	0	0	200	903	0	0	0	0	0	0	0	603	903	0
350	3	0	0	0	0	0	0	200	300	0	0	0	0	0	0	0	200	903	0	0	0	0	0	0	0	603	903	0
350	4	0	0	0	0	0	0	200	300	0	0	0	0	0	0	0	200	903	0	0	0	0	0	0	0	603	903	0
350	5	0	0	0	0	0	0	200	300	0	0	0	0	0	0	0	200	903	0	0	0	0	0	0	0	603	903	0
350	6	0	0	0	0	0	0	200	300	0	0	0	0	0	0	0	200	903	0	0	0	0	0	0	0	603	903	0
350	7	0	0	0	0	0	0	200	300	0	0	0	0	0	0	0	200	903	0	0	0	0	0	0	0	603	903	0
350	8	0	0	0	0	0	0	200	300	0	0	0	0	0	0	0	200	903	0	0	0	0	0	0	0	603	903	0
350	9	0	0	0	0	0	0	200	300	0	0	0	0	0	0	0	200	903	0	0	0	0	0	0	0	603	903	0
351	0	0	0	0	0	0	0	200	300	0	0	0	0	0	0	0	200	903	0	0	0	0	0	0	0	603	903	0
351	1	0	0	0	0	0	0	200	300	0	0	0	0	0	0	0	200	903	0	0	0	0	0	0	0	603	903	0
351	2	0	0	0	0	0	0	200	300	0	0	0	0	0	0	0	200	903	0	0	0	0	0	0	0	603	903	0
351	3	0	0	0	0	0	0	200	300	0	0	0	0	0	0	0	200	903	0	0	0	0	0	0	0	603	903	0
351	4	0	0	0	0	0	0	200	300	0	0	0	0	0	0	0	200	903	0	0	0	0	0	0	0	603	903	0
351	5	0	0	0	0	0	0	200	300	0	0	0	0	0	0	0	200	903	0	0	0	0	0	0	0	603	903	0
351	6	0	0	0	0	0	0	200	300	0	0	0	0	0	0	0	200	903	0	0	0	0	0	0	0	603	903	0
351	7	0	0	0	0	0	0	200	300	0	0	0	0	0	0	0	200	903	0	0	0	0	0	0	0	603	903	0
351	8	0	0	0	0	0	0	200	300	0	0	0	0	0	0	0	200	903	0	0	0	0	0	0	0	603	903	0
351	9	0	0	0	0	0	0	200	300	0	0	0	0	0	0	0	200	903	0	0	0	0	0	0	0	603	903	0
352	0	0	0	0	0	0	0	200	300	0	0	0	0	0	0	0	200	903	0	0	0	0	0	0	0	603	903	0
352	1	0	0	0	0	0	0	200	300	0	0	0	0	0	0	0	200	903	0	0	0	0	0	0	0	603	903	0
352	2	0	0	0	0	0	0	200	300	0	0	0	0	0	0	0	200	903	0	0	0	0	0	0	0	603	903	0
352	3	0	0	0	0	0	0	200	300	0	0	0	0	0	0	0	200	903	0	0	0	0	0	0	0	603	903	0
352	4	0	0	0	0	0	0	200	300	0	0	0	0	0	0	0	200	903	0	0	0	0	0	0	0	603	903	0
352	5	0	0	0	0	0	0	200	300	0	0	0	0	0	0	0	200	903	0	0	0	0	0	0	0	603	903	0
352	6	0	0	0	0	0	0	200	300	0	0	0	0	0	0	0	200	903	0	0	0	0	0	0	0	603	903	0
352	7	0	0	0	0	0	0	200	300	0	0	0	0	0	0	0	200	903	0	0	0	0	0	0	0	603	903	0
352	8	0	0	0	0	0	0	200	300	0	0	0	0	0	0	0	200	903	0	0	0	0	0	0	0	603	903	0
352	9	0	0	0	0	0	0	200	300	0	0	0	0	0	0	0	200	903	0	0	0	0	0	0	0	603	903	0
353	0	0	0	0	0	0	0	200	300	0	0	0	0	0	0	0	200	903	0	0	0	0	0	0	0	603	903	0
353	1	0	0	0	0	0	0	200	300	0	0	0	0	0	0	0	200	903	0	0	0	0	0	0	0	603	903	0
353	2	0	0	0	0	0	0	200	300	0	0	0	0	0	0	0	200	903	0	0	0	0	0	0	0	603	903	0
353	3	0	0	0	0	0	0	200	300	0	0	0	0	0	0	0	200	903	0	0	0	0	0	0	0	603	903	0
353	4	0	0	0	0	0	0	200	300	0	0	0	0	0	0	0	200	903	0	0	0	0	0	0	0	603	903	0
353	5	0	0	0	0	0	0	200	300	0	0	0	0	0	0	0	200	903	0	0	0	0	0	0	0	603	903	0
353	6	0	0	0	0	0	0	200	300	0	0	0	0	0	0	0	200	903	0	0	0	0	0	0	0	603	903	0
353	7	0	0	0	0	0	0	200	300	0	0	0	0	0	0	0	200	903	0	0	0	0	0	0	0	603	903	0
353	8	0	0	0	0	0	0	200	300	0	0	0	0	0	0	0	200	903	0	0	0	0	0	0	0	603	903	0
353	9	0	0	0	0	0	0	200	300	0	0	0	0	0	0	0	200	903	0	0	0	0	0	0	0	603	903	0
354	0	0	0	0	0	0	0	200	300	0	0	0	0	0	0	0	200	903	0	0	0	0	0	0	0	603	903	0
354	1	0	0	0	0	0	0	200	300	0	0	0	0	0	0	0	200	903	0	0	0	0	0	0	0	603	903	0
354	2	0	0	0	0	0	0	200	300	0	0	0	0	0	0	0	200	903	0	0	0	0	0	0	0	603	903	0
354	3	0	0	0	0	0	0	200	300	0	0	0	0	0	0	0	200	903	0	0	0	0	0	0	0	603	903	0
354	4	0	0	0	0	0	0	200	300	0	0	0	0	0	0	0	200	903	0	0	0	0	0	0	0	603	903	0
354	5	0	0	0	0	0	0	200	300	0	0	0	0	0	0	0	200	903	0	0	0	0	0	0	0	603	903	0
354	6	0	0	0	0	0	0	200	300	0	0	0	0	0	0	0	200	903	0	0	0	0	0	0	0	603	903	0
354	7	0	0	0	0	0	0	200	300	0	0	0	0	0	0	0	200	903	0	0	0	0	0	0	0	603	903	0
354	8	0	0	0	0	0	0	200	300	0	0	0	0	0	0	0	200	903	0	0	0	0	0	0	0	603	903	0
354	9	0	0	0	0	0	0	200	300	0	0	0	0	0	0	0	200	903	0	0	0	0	0	0	0	603	903	0
355	0	0	0	0	0	0	0	200	300	0	0	0	0	0	0	0	200	903	0	0	0	0	0	0	0	603	903	0
355	1	0	0	0	0	0	0	200	300	0	0	0	0	0	0	0	200	903	0	0	0	0	0	0	0	603	903	0
355	2	0	0	0	0	0	0	200	300	0	0	0	0	0	0	0	200	903	0	0	0	0	0	0	0	603	903	0
355	3	0	0	0	0	0	0	200	300	0	0	0	0	0	0	0	200	903	0	0	0	0	0	0	0	603	903	0
355	4	0	0	0	0	0	0	200	300	0	0	0	0	0	0	0	200	903	0	0	0	0	0	0	0	603	903	0
355	5	0	0	0	0	0	0	200	300	0	0	0	0	0	0	0	200	903	0	0	0	0	0	0	0	603	903	0
355	6	0	0	0	0	0	0	200	300	0	0	0	0	0	0	0	200	903	0	0	0	0	0	0	0	603	903	0
355	7	0	0	0	0	0	0	200	300	0	0	0	0	0	0	0	200	903	0	0	0	0	0	0	0	603	903	0
355	8	0	0	0	0	0	0	200	300	0	0	0	0	0	0	0	200	903	0	0	0	0	0	0	0	603	903	0
355	9	0	0	0	0	0	0	200	300	0	0	0	0	0	0	0	200	903	0	0	0	0	0	0	0	603	903	0
356	0	0	0	0	0	0	0	200	300	0	0	0	0	0	0	0	200	903	0	0	0	0	0	0	0	603	903	0
356	1	0	0	0	0	0	0	200	300	0	0	0	0	0	0	0	200	903	0	0	0	0	0	0	0	603	903	0
356	2	0	0	0	0	0	0	200	300	0	0	0	0	0	0	0	200	903	0	0	0	0	0	0	0	603	903	0
356	3	0	0	0	0	0	0	200	300	0	0	0	0	0	0	0	200	903	0	0	0	0	0	0	0	603	903	0
356	4	0	0	0	0	0	0	200	300	0	0	0	0	0	0	0	200	903	0	0	0	0	0	0	0	603	903	0
356	5	0	0	0	0	0	0	200	300	0	0	0	0	0	0	0	200	903	0	0	0	0	0	0	0	603	903	0
356	6	0	0	0	0	0	0	200	300	0	0	0	0	0	0	0	200	903	0	0	0	0	0	0	0	603	903	0
356	7	0	0	0	0	0	0	200	300	0	0	0	0	0	0	0	200	903	0	0	0	0	0	0	0	603	903	0
356	8	0	0	0	0	0	0	200	300	0	0	0	0	0	0	0	200	903	0	0	0	0	0	0	0	603	903	0
356	9	0	0	0	0	0	0	200	300	0	0	0	0	0	0	0	200	903	0	0	0	0	0	0	0	603	903	0
357	0	0	0	0	0	0	0	200	300	0	0	0	0	0	0	0	200	903	0	0	0	0	0	0	0	603	903	0
357	1	0	0	0	0	0	0	200	300	0	0	0	0	0	0	0	200	903	0	0	0	0	0	0	0	603	903	0
357	2	0	0	0	0	0	0	200	300	0	0	0	0	0	0	0	200	903	0	0	0	0	0	0	0	603	903	0
357	3	0	0	0	0	0	0	200	300	0	0	0	0	0	0	0	200	903	0	0	0	0	0	0	0	603	903	0
357	4	0	0	0	0	0	0	200	300	0	0	0	0	0	0	0	200	903	0	0	0	0	0	0	0	603	903	0
357	5	0	0	0	0	0	0	200	300	0	0	0	0	0	0	0	200	903	0	0	0	0	0	0	0	603	903	0
357	6	0	0	0	0	0	0	200	300	0	0	0	0	0	0	0	200	903	0	0	0	0	0	0	0	603	903	0
357	7	0	0	0	0	0	0	200	300	0	0	0	0	0	0	0	200	903	0	0	0	0	0	0	0	603	903	0
357	8	0	0	0	0	0	0	200	300	0	0	0	0	0	0	0	200	903	0	0	0	0	0	0	0	603	903	0
357	9	0	0	0	0	0	0	200	300	0	0	0	0	0	0	0	200	903	0	0	0	0	0	0	0	603	903	0
358	0	0	0	0	0	0	0	200	300	0	0	0	0	0	0	0	200	903	0	0	0	0	0	0	0	603	903	0
358	1	0	0	0	0	0	0	200	300	0	0	0	0	0	0	0	200	903	0	0	0	0	0	0	0	603	903	0
358	2	0	0	0	0	0	0	200	300	0	0	0	0	0	0	0	200	903	0	0	0	0	0	0	0	603	903	0
358	3	0	0	0	0	0	0	200	300	0	0	0	0	0	0	0	200	903	0	0	0	0	0	0	0	603	903	0
358	4	0	0	0	0	0	0	200	300	0	0	0	0	0	0	0	200	903	0	0	0	0	0	0	0	603	903	0
358	5	0	0	0	0	0	0	200	300	0	0	0	0	0	0	0	200	903	0	0	0	0	0	0	0	603	903	0
358	6	0	0	0	0	0	0	200	300	0	0	0	0	0	0	0	200	903	0	0	0	0	0	0	0	603	903	0
358	7	0	0	0	0	0	0	200	300	0	0	0	0	0	0	0	200	903	0	0	0	0	0	0	0	603	903	0
358	8	0	0	0	0	0	0	200	300	0	0	0	0	0	0	0	200	903	0	0	0	0	0	0	0	603	903	0
358	9	0	0	0	0	0	0	200	300	0	0	0	0	0	0	0	200	903	0	0	0	0	0	0	0	603	903	0
359	0	0	0	0	0	0	0	200	300	0	0	0	0	0	0	0	200	903	0	0	0	0	0	0	0	603	903	0
359	1	0	0	0	0	0	0	200	300	0	0	0	0	0	0	0	200	903	0	0	0	0	0	0	0	603	903	0
359	2	0	0	0	0	0	0	200	300	0	0	0	0	0	0	0	200	903	0	0	0	0	0	0	0	603	903	0
359	3	0	0	0	0	0	0	200	300	0	0	0	0	0	0	0	200	903	0	0	0	0	0	0	0	603	903	0
359	4	0	0	0	0	0	0	200	300	0	0	0	0	0	0	0	200	903	0	0	0	0	0	0	0	603	903	0
359	5	0	0	0	0	0	0	200	300	0	0	0	0	0	0	0	200	903	0	0	0	0	0	0	0	603	903	0
359	6	0	0	0	0	0	0	200	300	0	0	0	0	0	0	0	200	903	0	0	0	0	0	0	0	603	903	0
359	7	0	0	0	0	0	0	200	300	0	0	0	0	0	0	0	200	903	0	0	0	0	0	0	0	603	903	0
359	8	0	0	0	0	0	0	200	300	0	0	0	0	0	0	0	200	903	0	0	0	0	0	0	0	603	903	0
359	9	0	0	0	0	0	0	200	300	0	0	0	0	0	0	0	200	903	0	0	0	0	0	0	0	603	903	0
360	0	0	0	0	0	0	0	200	300	0	0	0	0	0	0	0	200	903	0	0	0	0	0	0	0	603	903	0
360	1	0	0	0	0	0	0	200	300	0	0	0	0	0	0	0	200	903	0	0	0	0	0	0	0	603	903	0
360	2	0	0	0	0	0	0	200	300	0	0	0	0	0	0	0	200	903	0	0	0	0	0	0	0	603	903	0
360	3	0	0	0	0	0	0	200	300	0	0	0	0	0	0	0	200	903	0	0	0	0	0	0	0	603	903	0
360	4	0	0	0	0	0	0	200	300	0	0	0	0	0	0	0	200	903	0	0	0	0	0	0	0	603	903	0
360	5	0	0	0	0	0	0	200	300	0	0	0	0	0	0	0	200	903	0	0	0	0	0	0	0	603	903	0
360	6	0	0	0	0	0	0	200	300	0	0	0	0	0	0	0	200	903	0	0	0	0	0	0	0	603	903	0
360	7	0	0	0	0	0	0	200	300	0	0	0	0	0	0	0	200	903	0	0	0	0	0	0	0	603	903	0
360	8	0	0	0	0	0	0	200	300	0	0	0	0	0	0	0	200	903	0	0	0	0	0	0	0	603	903	0
360	9	0	0	0	0	0	0	200	300	0	0	0	0	0	0	0	200	903	0	0	0	0	0	0	0	603	903	0
361	0	0	0	0	0	0	0	200	300	0	0	0	0	0	0	0	200	903	0	0	0	0	0	0	0	603	903	0
361	1	0	0	0	0	0	0	200	300	0	0	0	0	0	0	0	200	903	0	0	0	0	0	0	0	603	903	0
361	2	0	0	0	0	0	0	200	300	0	0	0	0	0	0	0	200	903	0	0	0	0	0	0	0	603	903	0
361	3	0	0	0	0	0	0	200	300	0	0	0	0	0	0	0	200	903	0	0	0	0	0	0	0	603	903	0
361	4	0	0	0	0	0	0	200	300	0	0	0	0	0	0	0	200	903	0	0	0	0	0	0	0	603	903	0
361	5	0	0	0	0	0	0	200	300	0	0	0	0	0	0	0	200	903	0	0	0	0	0	0	0	603	903	0
361	6	0	0	0	0	0	0	200	300	0	0	0	0	0	0	0	200	903	0	0	0	0	0	0	0	603	903	0
361	7	0	0	0	0	0	0	200	300	0	0	0	0	0	0	0	200	903	0	0	0	0	0	0	0	603	903	0
361	8	0	0	0	0	0	0	200	300	0	0	0	0	0	0	0	200	903	0	0	0	0	0	0	0	603	903	0
361	9	0	0	0	0	0	0	200	300	0	0	0	0	0	0	0	200	903	0	0	0	0	0	0	0	603	903	0
362	0	0	0	0	0	0	0	200	300	0	0	0	0	0	0	0	200	903	0	0	0	0	0	0	0	603	903	0
362	1	0	0	0	0	0	0	200	300	0	0	0	0	0	0	0	200	903	0	0	0	0	0	0	0	603	903	0
362	2	0	0	0	0	0	0	200	300	0	0	0	0	0	0	0	200	903	0	0	0	0	0	0	0	603	903	0
362	3	0	0	0	0	0	0	200	300	0	0	0	0	0	0	0	200	903	0	0	0	0	0	0	0	603	903	0
362	4	0	0	0	0	0	0	200	300	0	0	0	0	0	0	0	200	903	0	0	0	0	0	0	0	603	903	0
362	5	0	0	0	0	0	0	200	300	0	0	0	0	0	0	0	200	903	0	0	0	0	0	0	0	603	903	0
362	6	0	0	0	0	0	0	200	300	0	0	0	0	0	0	0	200	903	0	0	0	0	0	0	0	603	903	0
362	7	0	0	0	0	0	0	200	300	0	0	0	0	0	0	0	200	903	0	0	0	0	0	0	0	603	903	0
362	8	0	0	0	0	0	0	200	300	0	0	0	0	0	0	0	200	903	0	0	0	0	0	0	0	603	903	0
362	9	0	0	0	0	0	0	200	300	0	0	0	0	0	0	0	200	903	0	0	0	0	0	0	0	603	903	0
363	0	0	0	0	0	0	0	200	300	0	0	0	0	0	0	0	200	903	0	0	0	0	0	0	0	603	903	0
363	1	0	0	0	0	0	0	200	300	0	0	0	0	0	0	0	200	903	0	0	0	0	0	0	0	603	903	0
363	2	0	0	0	0	0	0	200	300	0	0	0	0	0	0	0	200	903	0	0	0	0	0	0	0	603	903	0
363	3	0	0	0	0	0	0	200	300	0	0	0	0	0	0	0	200	903	0	0	0	0	0	0	0	603	903	0
363	4	0	0	0	0	0	0	200	300	0	0	0	0	0	0	0	200	903	0	0	0	0	0	0	0	603	903	0
363	5	0	0	0	0	0	0	200	300	0	0	0	0	0	0	0	200	903	0	0	0	0	0	0	0	603	903	0
363	6	0	0	0	0	0	0	200	300	0	0	0	0	0	0	0	200	903	0	0	0	0	0	0	0	603	903	0
363	7	0	0	0	0	0	0	200	300	0	0	0	0	0	0	0	200	903	0	0	0	0	0	0	0	603	903	0
363	8	0	0	0	0	0	0	200	300	0	0	0	0	0	0	0	200	903	0	0	0	0	0	0	0	603	903	0
363	9	0	0	0	0	0	0	200	300	0	0	0	0	0	0	0	200	903	0	0	0	0	0	0	0	603	903	0
364	0	0	0	0	0	0	0	200	300	0	0	0	0	0	0	0	200	903	0	0	0	0	0	0	0	603	903	0
364	1	0	0	0	0	0	0	200	300	0	0	0	0	0	0	0	200	903	0	0	0	0	0	0	0	603	903	0
364	2	0	0	0	0	0	0	200	300	0	0	0	0	0	0	0	200	903	0	0	0	0	0	0	0	603	903	0
364	3	0	0	0	0	0	0	200	300	0	0	0	0	0	0	0	200	903	0	0	0	0	0	0	0	603	903	0
364	4	0	0	0	0	0	0	200	300	0	0	0	0	0	0	0	200	903	0	0	0	0	0	0	0	603	903	0
364	5	0	0	0	0	0	0	200	300	0	0	0	0	0	0	0	200	903	0	0	0	0	0	0	0	603	903	0
364	6	0	0	0	0	0	0	200	300	0	0	0	0	0	0	0	200	903	0	0	0	0	0	0	0	603	903	0
364	7	0	0	0	0	0	0	200	300	0	0	0	0	0	0	0	200	903	0	0	0	0	0	0	0	603	903	0
364	8	0	0	0	0	0	0	200	300	0	0	0	0	0	0	0	200	903	0	0	0	0	0	0	0	603	903	0
364	9	0	0	0	0	0	0	200	300	0	0	0	0	0	0	0	200	903	0	0	0	0	0	0	0	603	903	0
365	0	0	0	0	0	0	0	200	300	0	0	0	0	0	0	0	200	903	0	0	0	0	0	0	0	603	903	0
365	1	0	0	0	0	0	0	200	300	0	0	0	0	0	0	0	200	903	0	0	0	0	0	0	0	603	903	0
365	2	0	0	0	0	0	0	200	300	0	0	0	0	0	0	0	200	903	0	0	0	0	0	0	0	603	903	0
365	3	0	0	0	0	0	0	200	300	0	0	0	0	0	0	0	200	903	0	0	0	0	0	0	0	603	903	0
365	4	0	0	0	0	0	0	200	300	0	0	0	0	0	0	0	200	903	0	0	0	0	0	0	0	603	903	0
365	5	0	0	0	0	0	0	200	300	0	0	0	0	0	0	0	200	903	0	0	0	0	0	0	0	603	903	0
365	6	0	0	0	0	0	0	200	300	0	0	0	0	0	0	0	200	903	0	0	0	0	0	0	0	603	903	0
365	7	0	0	0	0	0	0	200	300	0	0	0	0	0	0	0	200	903	0	0	0	0	0	0	0	603	903	0
365	8	0	0	0	0	0	0	200	300	0	0	0	0	0	0	0	200	903	0	0	0	0	0	0	0	603	903	0
365	9	0	0	0	0	0	0	200	300	0	0	0	0	0	0	0	200	903	0	0	0	0	0	0	0	603	903	0
366	0	0	0	0	0	0	0	200	300	0	0	0	0	0	0	0	200	903	0	0	0	0	0	0	0	603	903	0
366	1	0	0	0	0	0	0	200	300	0	0	0	0	0	0	0	200	903	0	0	0	0	0	0	0	603	903	0
366	2	0	0	0	0	0	0	200	300	0	0	0	0	0	0	0	200	903	0	0	0	0	0	0	0	603	903	0
366	3	0	0	0	0	0	0	200	300	0	0	0	0	0	0	0	200	903	0	0	0	0	0	0	0	603	903	0
366	4	0	0	0	0	0	0	200	300	0	0	0	0	0	0	0	200	903	0	0	0	0	0	0	0	603	903	0
366	5	0	0	0	0	0	0	200	300	0	0	0	0	0	0	0	200	903	0	0	0	0	0	0	0	603	903	0
366	6	0	0	0	0	0	0	200	300	0	0	0	0	0	0	0	200	903	0	0	0	0	0	0	0	603	903	0
366	7	0	0	0	0	0	0	200	300	0	0	0	0	0	0	0	200	903	0	0	0	0	0	0	0	603	903	0
366	8	0	0	0	0	0	0	200	300	0	0	0	0	0	0	0	200	903	0	0	0	0	0	0	0	603	903	0
366	9	0	0	0	0	0	0	200	300	0	0	0	0	0	0	0	200	903	0	0	0	0	0	0	0	603	903	0
367	0	0	0	0	0	0	0	200	300	0	0	0	0	0	0	0	200	903	0	0	0	0	0	0	0	603	903	0
367	1	0	0	0	0	0	0	200	300	0	0	0	0	0	0	0	200	903	0	0	0	0	0	0	0	603	903	0
367	2	0	0	0	0	0	0	200	300	0	0	0	0	0	0	0	200	903	0	0	0	0	0	0	0	603	903	0
367	3	0	0	0	0	0	0	200	300	0	0	0	0	0	0	0	200	903	0	0	0	0	0	0	0	603	903	0
367	4	0	0	0	0	0	0	200	300	0	0	0	0	0	0	0	200	903	0	0	0	0	0	0	0	603	903	0
367	5	0	0	0	0	0	0	200	300	0	0	0	0	0	0	0	200	903	0	0	0	0	0	0	0	603	903	0
367	6	0	0	0	0	0	0	200	300	0	0	0	0	0	0	0	200	903	0	0	0	0	0	0	0	603	903	0
367	7	0	0	0	0	0	0	200	300	0	0	0	0	0	0	0	200	903	0	0	0	0	0	0	0	603	903	0
367	8	0	0	0	0	0	0	200	300	0	0	0	0	0	0	0	200	903	0	0	0	0	0	0	0	603	903	0
367	9	0	0	0	0	0	0	200	300	0	0	0	0	0	0	0	200	903	0	0	0	0	0	0	0	603	903	0
368	0	0	0	0	0	0	0	200	300	0	0	0	0	0	0	0	200	903	0	0	0	0	0	0	0	603	903	0
368	1	0	0	0	0	0	0	200	300	0	0	0	0	0	0	0	200	903	0	0	0	0	0	0	0	603	903	0
368	2	0	0	0	0	0	0	200	300	0	0	0	0	0	0	0	200	903	0	0	0	0	0	0	0	603	903	0
368	3	0	0	0	0	0	0	200	300	0	0	0	0	0	0	0	200	903	0	0	0	0	0	0	0	603	903	0
368	4	0	0	0	0	0	0	200	300	0	0	0	0	0	0	0	200	903	0	0	0	0	0	0	0	603	903	0
368	5	0	0	0	0	0	0	200	300	0	0	0	0	0	0	0	200	903	0	0	0	0	0	0	0	603	903	0
368	6	0	0	0	0	0	0	200	300	0	0	0	0	0	0	0	200	903	0	0	0	0	0	0	0	603	903	0
368	7	0	0	0	0	0	0	200	300	0	0	0	0	0	0	0	200	903	0	0	0	0	0	0	0	603	903	0
368	8	0	0	0	0	0	0	200	300	0	0	0	0	0	0	0	200	903	0	0	0	0	0	0	0	603	903	0
368	9	0	0	0	0	0	0	200	300	0	0	0	0	0	0	0	200	903	0	0	0	0	0	0	0	603	903	0
369	0	0	0	0	0	0	0	200	300	0	0	0	0	0	0	0	200	903	0	0	0	0	0	0	0	603	903	0
369	1	0	0	0	0	0	0	200	300	0	0	0	0	0	0	0	200	903	0	0	0	0	0	0	0	603	903	0
369	2	0	0	0	0	0	0	200	300	0	0	0	0	0	0	0	200	903	0	0	0	0	0	0	0	603	903	0
369	3	0	0	0	0	0	0	200	300	0	0	0	0	0	0	0	200	903	0	0	0	0	0	0	0	603	903	0
369	4	0	0	0	0	0	0	200	300	0	0	0	0	0	0	0	200	903	0	0	0	0	0	0	0	603	903	0
369	5	0	0	0	0	0	0	200	300	0	0	0	0	0	0	0	200	903	0	0	0	0	0	0	0	603	903	0
369	6	0	0	0	0	0	0	200	300	0	0	0	0	0	0	0	200	903	0	0	0	0	0	0	0	603	903	0
369	7	0	0	0	0	0	0	200	300	0	0	0	0	0	0	0	200	903	0	0	0	0	0	0	0	603	903	0
369	8	0	0	0	0	0	0	200	300	0	0	0	0	0	0	0	200	903	0	0	0	0	0	0	0	603	903	0
369	9	0	0	0	0	0	0	200	300	0	0	0	0	0	0	0	200	903	0	0	0	0	0	0	0	603	903	0
370	0	0	0	0	0	0	0	200	300	0	0	0	0	0	0	0	200	903	0	0	0	0	0	0	0	603	903	0
370	1	0	0	0	0	0	0	200	300	0	0	0	0	0	0	0	200	903	0	0	0	0	0	0	0	603	903	0
370	2	0	0	0	0	0	0	200	300	0	0	0	0	0	0	0	200	903	0	0	0	0	0	0	0	603	903	0
370	3	0	0	0	0	0	0	200	300	0	0	0	0	0	0	0	200	903	0	0	0	0	0	0	0	603	903	0
370	4	0	0	0	0	0	0	200	300	0	0	0	0	0	0	0	200	903	0	0	0	0	0	0	0	603	903	0
370	5	0	0	0	0	0	0	200	300	0	0	0	0	0	0	0	200	903	0	0	0	0	0	0	0	603	903	0
370	6	0	0	0	0	0	0	200	300	0	0	0	0	0	0	0	200	903	0	0	0	0	0	0	0	603	903	0
370	7	0	0	0	0	0	0	200	300	0	0	0	0	0	0	0	200	903	0	0	0	0	0	0	0	603	903	0
370	8	0	0	0	0	0	0	200	300	0	0	0	0	0	0	0	200	903	0	0	0	0	0	0	0	603	903	0
370	9	0	0	0	0	0	0	200	300	0	0	0	0	0	0	0	200	903	0	0	0	0	0	0	0	603	903	0
371	0	0	0	0	0	0	0	200	300	0	0	0	0	0	0	0	200	903	0	0	0	0	0	0	0	603	903	0
371	1	0	0	0	0	0	0	200	300	0	0	0	0	0	0	0	200	903	0	0	0	0	0	0	0	603	903	0
371	2	0	0	0	0	0	0	200	300	0	0	0	0	0	0	0	200	903	0	0	0	0	0	0	0	603	903	0
371	3	0	0	0	0	0	0	200	300	0	0	0	0	0	0	0	200	903	0	0	0	0	0	0	0	603	903	0
371	4	0	0	0	0	0	0	200	300	0	0	0	0	0	0	0	200	903	0	0	0	0	0	0	0	603	903	0
371	5	0	0	0	0	0	0	200	300	0	0	0	0	0	0	0	200	903	0	0	0	0	0	0	0	603	903	0
371	6	0	0	0	0	0	0	200	300	0	0	0	0	0	0	0	200	903	0	0	0	0	0	0	0	603	903	0
371	7	0	0	0	0	0	0	200	300	0	0	0	0	0	0	0	200	903	0	0	0	0	0	0	0	603	903	0
371	8	0	0	0	0	0	0	200	300	0	0	0	0	0	0	0	200	903	0	0	0	0	0	0	0	603	903	0
371	9	0	0	0	0	0	0	200	300	0	0	0	0	0	0	0	200	903	0	0	0	0	0	0	0	603	903	0
372	0	0	0	0	0	0	0	200	300	0	0	0	0	0	0	0	200	903	0	0	0	0	0	0	0	603	903	0
372	1	0	0	0	0	0	0	200	300	0	0	0	0	0	0	0	200	903	0	0	0	0	0	0	0	603	903	0
372	2	0	0	0	0	0	0	200	300	0	0	0	0	0	0	0	200	903	0	0	0	0	0	0	0	603	903	0
372	3	0	0	0	0	0	0	200	300	0	0	0	0	0	0	0	200	903	0	0	0	0	0	0	0	603	903	0
372	4	0	0	0	0	0	0	200	300	0	0	0	0	0	0	0	200	903	0	0	0	0	0	0	0	603	903	0
372	5	0	0	0	0	0	0	200	300	0	0	0	0	0	0	0	200	903	0	0	0	0	0	0	0	603	903	0
372	6	0	0	0	0	0	0	200	300	0	0	0	0	0	0	0	200	903	0	0	0	0	0	0	0	603	903	0
372	7	0	0	0	0	0	0	200	300	0	0	0	0	0	0	0	200	903	0	0	0	0	0	0	0	603	903	0
372	8	0	0	0	0	0	0	200	300	0	0	0	0	0	0	0	200	903	0	0	0	0	0	0	0	603	903	0
372	9	0	0	0	0	0	0	200	300	0	0	0	0	0	0	0	200	903	0	0	0	0	0	0	0	603	903	0
373	0	0	0	0	0	0	0	200	300	0	0	0	0	0	0	0	200	903	0	0	0	0	0	0	0	603	903	0
373	1	0	0	0	0	0	0	200	300	0	0	0	0	0	0	0	200	903	0	0	0	0	0	0	0	603	903	0
373	2	0	0	0	0	0	0	200	300	0	0	0	0	0	0	0	200	903	0	0	0	0	0	0	0	603	903	0
373	3	0	0	0	0	0	0	200	300	0	0	0	0	0	0	0	200	903	0	0	0	0	0	0	0	603	903	0
373	4	0	0	0	0	0	0	200	300	0	0	0	0	0	0	0	200	903	0	0	0	0	0	0	0	603	903	0
373	5	0	0	0	0	0	0	200	300	0	0	0	0	0	0	0	200	903	0	0	0	0	0	0	0	603	903	0
373	6	0	0	0	0	0	0	200	300	0	0	0	0	0	0	0	200	903	0	0	0	0	0	0	0	603	903	0
373	7	0	0	0	0	0	0	200	300	0	0	0	0	0	0	0	200	903	0	0	0	0	0	0	0	603	903	0
373	8	0	0	0	0	0	0	200	300	0	0	0	0	0	0	0	200	903	0	0	0	0	0	0	0	603	903	0
373	9	0	0	0	0	0	0	200	300	0	0	0	0	0	0	0	200	903	0	0	0	0	0	0	0	603	903	0
374	0	0	0	0	0	0	0	200	300	0	0	0	0	0	0	0	200	903	0	0	0	0	0	0	0	603	903	0
374	1	0	0	0	0	0	0	200	300	0	0	0	0	0	0	0	200	903	0	0	0	0	0	0	0	603	903	0
374	2	0	0	0	0	0	0	200	300	0	0	0	0	0	0	0	200	903	0	0	0	0	0	0	0	603	903	0
374	3	0	0	0	0	0	0	200	300	0	0	0	0	0	0	0	200	903	0	0	0	0	0	0	0	603	903	0
374	4	0	0	0	0	0	0	200	300	0	0	0	0	0	0	0	200	903	0	0	0	0	0	0	0	603	903	0
374	5	0	0	0	0	0	0	200	300	0	0	0	0	0	0	0	200	903	0	0	0	0	0	0	0	603	903	0
374	6	0	0	0	0	0	0	200	300	0	0	0	0	0	0	0	200	903	0	0	0	0	0	0	0	603	903	0
374	7	0	0	0	0	0	0	200	300	0	0	0	0	0	0	0	200	903	0	0	0	0	0	0	0	603	903	0
374	8	0	0	0	0	0	0	200	300	0	0	0	0	0	0	0	200	903	0	0	0	0	0	0	0	603	903	0
374	9	0	0	0	0	0	0	200	300	0	0	0	0	0	0	0	200	903	0	0	0	0	0	0	0	603	903	0
375	0	0	0	0	0	0	0	200	300	0	0	0	0	0	0	0	200	903	0	0	0	0	0	0	0	603	903	0
375	1	0	0	0	0	0	0	200	300	0	0	0	0	0	0	0	200	903	0	0	0	0	0	0	0	603	903	0
375	2	0	0	0	0	0	0	200	300	0	0	0	0	0	0	0	200	903	0	0	0	0	0	0	0	603	903	0
375	3	0	0	0	0	0	0	200	300	0	0	0	0	0	0	0	200	903	0	0	0	0	0	0	0	603	903	0
375	4	0	0	0	0	0	0	200	300	0	0	0	0	0	0	0	200	903	0	0	0	0	0	0	0	603	903	0
375	5	0	0	0	0	0	0	200	300	0	0	0	0	0	0	0	200	903	0	0	0	0	0	0	0	603	903	0
375	6	0	0	0	0	0	0	200	300	0	0	0	0	0	0	0	200	903	0	0	0	0	0	0	0	603	903	0
375	7	0	0	0	0	0	0	200	300	0	0	0	0	0	0	0	200	903	0	0	0	0	0	0	0	603	903	0
375	8	0	0	0	0	0	0	200	300	0	0	0	0	0	0	0	200	903	0	0	0	0	0	0	0	603	903	0
375	9	0	0	0	0	0	0	200	300	0	0	0	0	0	0	0	200	903	0	0	0	0	0	0	0	603	903	0
376	0	0	0	0	0	0	0	200	300	0	0	0	0	0	0	0	200	903	0	0	0	0	0	0	0	603	903	0
376	1	0	0	0	0	0	0	200	300	0	0	0	0	0	0	0	200	903	0	0	0	0	0	0	0	603	903	0
376	2	0	0	0	0	0	0	200	300	0	0	0	0	0	0	0	200	903	0	0	0	0	0	0	0	603	903	0
376	3	0	0	0	0	0	0	200	300	0	0	0	0	0	0	0	200	903	0	0	0	0	0	0	0	603	903	0
376	4	0	0	0	0	0	0	200	300	0	0	0	0	0	0	0	200	903	0	0	0	0	0	0	0	603	903	0
376	5	0	0	0	0	0	0	200	300	0	0	0	0	0	0	0	200	903	0	0	0	0	0	0	0	603	903	0
376	6	0	0	0	0	0	0	200	300	0	0	0	0	0	0	0	200	903	0	0	0	0	0	0	0	603	903	0
376	7	0	0	0	0	0	0	200	300	0	0	0	0	0	0	0	200	903	0	0	0	0	0	0	0	603	903	0
376	8	0	0	0	0	0	0	200	300	0	0	0	0	0	0	0	200	903	0	0	0	0	0	0	0	603	903	0
376	9	0	0	0	0	0	0	200	300	0	0	0	0	0	0	0	200	903	0	0	0	0	0	0	0	603	903	0
377	0	0	0	0	0	0	0	200	300	0	0	0	0	0	0	0	200	903	0	0	0	0	0	0	0	603	903	0
377	1	0	0	0	0	0	0	200	300	0	0	0	0	0	0	0	200	903	0	0	0	0	0	0	0	603	903	0
377	2	0	0	0	0	0	0	200	300	0	0	0	0	0	0	0	200	903	0	0	0	0	0	0	0	603	903	0
377	3	0	0	0	0	0	0	200	300	0	0	0	0	0	0	0	200	903	0	0	0	0	0	0	0	603	903	0
377	4	0	0	0	0	0	0	200	300	0	0	0	0	0	0	0	200	903	0	0	0	0	0	0	0	603	903	0
377	5	0	0	0	0	0	0	200	300	0	0	0	0	0	0	0	200	903	0	0	0	0	0	0	0	603	903	0
377	6	0	0	0	0	0	0	200	300	0	0	0	0	0	0	0	200	903	0	0	0	0	0	0	0	603	903	0
377	7	0	0	0	0	0	0	200	300	0	0	0	0	0	0	0	200	903	0	0	0	0	0	0	0	603	903	0
377	8	0	0	0	0	0	0	200	300	0	0	0	0	0	0	0	200	903	0	0	0	0	0	0	0	603	903	0
377	9	0	0	0	0	0	0	200	300	0	0	0	0	0	0	0	200	903	0	0	0	0	0	0	0	603	903	0
378	0	0	0	0	0	0	0	200	300	0	0	0	0	0	0	0	200	903	0	0	0	0	0	0	0	603	903	0
378	1	0	0	0	0	0	0	200	300	0	0	0	0	0	0	0	200	903	0	0	0	0	0	0	0	603	903	0
378	2	0	0	0	0	0	0	200	300	0	0	0	0	0	0	0	200	903	0	0	0	0	0	0	0	603	903	0
378	3	0	0	0	0	0	0	200	300	0	0	0	0	0	0	0	200	903	0	0	0	0	0	0	0	603	903	0
378	4	0	0	0	0	0	0	200	300	0	0	0	0	0	0	0	200	903	0	0	0	0	0	0	0	603	903	0
378	5	0	0	0	0	0	0	200	300	0	0	0	0	0	0	0	200	903	0	0	0	0	0	0	0	603	903	0
378	6	0	0	0	0	0	0	200	300	0	0	0	0	0	0	0	200	903	0	0	0	0	0	0	0	603	903	0
378	7	0	0	0	0	0	0	200	300	0	0	0	0	0	0	0	200	903	0	0	0	0	0	0	0	603	903	0
378	8	0	0	0	0	0	0	200	300	0	0	0	0	0	0	0	200	903	0	0	0	0	0	0	0	603	903	0
378	9	0	0	0	0	0	0	200	300	0	0	0	0	0	0	0	200	903	0	0	0	0	0	0	0	603	903	0
379	0	0	0	0	0	0	0	200	300	0	0	0	0	0	0	0	200	903	0	0	0	0	0	0	0	603	903	0
379	1	0	0	0	0	0	0	200	300	0	0	0	0	0	0	0	200	903	0	0	0	0	0	0	0	603	903	0
379	2	0	0	0	0	0	0	200	300	0	0	0	0	0	0	0	200	903	0	0	0	0	0	0	0	603	903	0
379	3	0	0	0	0	0	0	200	300	0	0	0	0	0	0	0	200	903	0	0	0	0	0	0	0	603	903	0
379	4	0	0	0	0	0	0	200	300	0	0	0	0	0	0	0	200	903	0	0	0	0	0	0	0	603	903	0
379	5	0	0	0	0	0	0	200	300	0	0	0	0	0	0	0	200	903	0	0	0	0	0	0	0	603	903	0
379	6	0	0	0	0	0	0	200	300	0	0	0	0	0	0	0	200	903	0	0	0	0	0	0	0	603	903	0
379	7	0	0	0	0	0	0	200	300	0	0	0	0	0	0	0	200	903	0	0	0	0	0	0	0	603	903	0
379	8	0	0	0	0	0	0	200	300	0	0	0	0	0	0	0	200	903	0	0	0	0	0	0	0	603	903	0
379	9	0	0	0	0	0	0	200	300	0	0	0	0	0	0	0	200	903	0	0	0	0	0	0	0	603	903	0
380	0	0	0	0	0	0	0	200	300	0	0	0	0	0	0	0	200	903	0	0	0	0	0	0	0	603	903	0
380	1	0	0	0	0	0	0	200	300	0	0	0	0	0	0	0	200	903	0	0	0	0	0	0	0	603	903	0
380	2	0	0	0	0	0	0	200	300	0	0	0	0	0	0	0	200	903	0	0	0	0	0	0	0	603	903	0
380	3	0	0	0	0	0	0	200	300	0	0	0	0	0	0	0	200	903	0	0	0	0	0	0	0	603	903	0
380	4	0	0	0	0	0	0	200	300	0	0	0	0	0	0	0	200	903	0	0	0	0	0	0	0	603	903	0
380	5	0	0	0	0	0	0	200	300	0	0	0	0	0	0	0	200	903	0	0	0	0	0	0	0	603	903	0
380	6	0	0	0	0	0	0	200	300	0	0	0	0	0	0	0	200	903	0	0	0	0	0	0	0	603	903	0
380	7	0	0	0	0	0	0	200	300	0	0	0	0	0	0	0	200	903	0	0	0	0	0	0	0	603	903	0
380	8	0	0	0	0	0	0	200	300	0	0	0	0	0	0	0	200	903	0	0	0	0	0	0	0	603	903	0
380	9	0	0	0	0	0	0	200	300	0	0	0	0	0	0	0	200	903	0	0	0	0	0	0	0	603	903	0
381	0	0	0	0	0	0	0	200	300	0	0	0	0	0	0	0	200	903	0	0	0	0	0	0	0	603	903	0
381	1	0	0	0	0	0	0	200	300	0	0	0	0	0	0	0	200	903	0	0	0	0	0	0	0	603	903	0
381	2	0	0	0	0	0	0	200	300	0	0	0	0	0	0	0	200	903	0	0	0	0	0	0	0	603	903	0
381	3	0	0	0	0	0	0	200	300	0	0	0	0	0	0	0	200	903	0	0	0	0	0	0	0	603	903	0
381	4	0	0	0	0	0	0	200	300	0	0	0	0	0	0	0	200	903	0	0	0	0	0	0	0	603	903	0
381	5	0	0	0	0	0	0	200	300	0	0	0	0	0	0	0	200	903	0	0	0	0	0	0	0	603	903	0
381	6	0	0	0	0	0	0	200	300	0	0	0	0	0	0	0	200	903	0	0	0	0	0	0	0	603	903	0
381	7	0	0	0	0	0	0	200	300	0	0	0	0	0	0	0	200	903	0	0	0	0	0	0	0	603	903	0
381	8	0	0	0	0	0	0	200	300	0	0	0	0	0	0	0	200	903	0	0	0	0	0	0	0	603	903	0
381	9	0	0	0	0	0	0	200	300	0	0	0	0	0	0	0	200	903	0	0	0	0	0	0	0	603	903	0
382	0	0	0	0	0	0	0	200	300	0	0	0	0	0	0	0	200	903	0	0	0	0	0	0	0	603	903	0
382	1	0	0	0	0	0	0	200	300	0	0	0	0	0	0	0	200	903	0	0	0	0	0	0	0	603	903	0
382	2	0	0	0	0	0	0	200	300	0	0	0	0	0	0	0	200	903	0	0	0	0	0	0	0	603	903	0
382	3	0	0	0	0	0	0	200	300	0	0	0	0	0	0	0	200	903	0	0	0	0	0	0	0	603	903	0
382	4	0	0	0	0	0	0	200	300	0	0	0	0	0	0	0	200	903	0	0	0	0	0	0	0	603	903	0
382	5	0	0	0	0	0	0	200	300	0	0	0	0	0	0	0	200	903	0	0	0	0	0	0	0	603	903	0
382	6	0	0	0	0	0	0	200	300	0	0	0	0	0	0	0	200	903	0	0	0	0	0	0	0	603	903	0
382	7	0	0	0	0	0	0	200	300	0	0	0	0	0	0	0	200	903	0	0	0	0	0	0	0	603	903	0
382	8	0	0	0	0	0	0	200	300	0	0	0	0	0	0	0	200	903	0	0	0	0	0	0	0	603	903	0
382	9	0	0	0	0	0	0	200	300	0	0	0	0	0	0	0	200	903	0	0	0	0	0	0	0	603	903	0
383	0	0	0	0	0	0	0	200	300	0	0	0	0	0	0	0	200	903	0	0	0	0	0	0	0	603	903	0
383	1	0	0	0	0	0	0	200	300	0	0	0	0	0	0	0	200	903	0	0	0	0	0	0	0	603	903	0
383	2	0	0	0	0	0	0	200	300	0	0	0	0	0	0	0	200	903	0	0	0	0	0	0	0	603	903	0
383	3	0	0	0	0	0	0	200	300	0	0	0	0	0	0	0	200	903	0	0	0	0	0	0	0	603	903	0
383	4	0	0	0	0	0	0	200	300	0	0	0	0	0	0	0	200	903	0	0	0	0	0	0	0	603	903	0
383	5	0	0	0	0	0	0	200	300	0	0	0	0	0	0	0	200	903	0	0	0	0	0	0	0	603	903	0
383	6	0	0	0	0	0	0	200	300	0	0	0	0	0	0	0	200	903	0	0	0	0	0	0	0	603	903	0
383	7	0	0	0	0	0	0	200	300	0	0	0	0	0	0	0	200	903	0	0	0	0	0	0	0	603	903	0
383	8	0	0	0	0	0	0	200	300	0	0	0	0	0	0	0	200	903	0	0	0	0	0	0	0	603	903	0
383	9	0	0	0	0	0	0	200	300	0	0	0	0	0	0	0	200	903	0	0	0	0	0	0	0	603	903	0
384	0	0	0	0	0	0	0	200	300	0	0	0	0	0	0	0	200	903	0	0	0	0	0	0	0	603	903	0
384	1	0	0	0	0	0	0	200	300	0	0	0	0	0	0	0	200	903	0	0	0	0	0	0	0	603	903	0
384	2	0	0	0	0	0	0	200	300	0	0	0	0	0	0	0	200	903	0	0	0	0	0	0	0	603	903	0
384	3	0	0	0	0	0	0	200	300	0	0	0	0	0	0	0	200	903	0	0	0	0	0	0	0	603	903	0
384	4	0	0	0	0	0	0	200	300	0	0	0	0	0	0	0	200	903	0	0	0	0	0	0	0	603	903	0
384	5	0	0	0	0	0	0	200	300	0	0	0	0	0	0	0	200	903	0	0	0	0	0	0	0	603	903	0
384	6	0	0	0	0	0	0	200	300	0	0	0	0	0	0	0	200	903	0	0	0	0	0	0	0	603	903	0
384	7	0	0	0	0	0	0	200	300	0	0	0	0	0	0	0	200	903	0	0	0	0	0	0	0	603	903	0
384	8	0	0	0	0	0	0	200	300	0	0	0	0	0	0	0	200	903	0	0	0	0	0	0	0	603	903	0
384	9	0	0	0	0	0	0	200	300	0	0	0	0	0	0	0	200	903	0	0	0	0	0	0	0	603	903	0
385	0	0	0	0	0	0	0	200	300	0	0	0	0	0	0	0	200	903	0	0	0	0	0	0	0	603	903	0
385	1	0	0	0	0	0	0	200	300	0	0	0	0	0	0	0	200	903	0	0	0	0	0	0	0	603	903	0
385	2	0	0	0	0	0	0	200	300	0	0	0	0	0	0	0	200	903	0	0	0	0	0	0	0	603	903	0
385	3	0	0	0	0	0	0	200	300	0	0	0	0	0	0	0	200	903	0	0	0	0	0	0	0	603	903	0
385	4	0	0	0	0	0	0	200	300	0	0	0	0	0	0	0	200	903	0	0	0	0	0	0	0	603	903	0
385	5	0	0	0	0	0	0	200	300	0	0	0	0	0	0	0	200	903	0	0	0	0	0	0	0	603	903	0
385	6	0	0	0	0	0	0	200	300	0	0	0	0	0	0	0	200	903	0	0	0	0	0	0	0	603	903	0
385	7	0	0	0	0	0	0	200	300	0	0	0	0	0	0	0	200	903	0	0	0	0	0	0	0	603	903	0
385	8	0	0	0	0	0	0	200	300	0	0	0	0	0	0	0	200	903	0	0	0	0	0	0	0	603	903	0
385	9	0	0	0	0	0	0	200	300	0	0	0	0	0	0	0	200	903	0	0	0	0	0	0	0	603	903	0
386	0	0	0	0	0	0	0	200	300	0	0	0	0	0	0	0	200	903	0	0	0	0	0	0	0	603	903	0
386	1	0	0	0	0	0	0	200	300	0	0	0	0	0	0	0	200	903	0	0	0	0	0	0	0	603	903	0
386	2	0	0	0	0	0	0	200	300	0	0	0	0	0	0	0	200	903	0	0	0	0	0	0	0	603	903	0
386	3	0	0	0	0	0	0	200	300	0	0	0	0	0	0	0	200	903	0	0	0	0	0	0	0	603	903	0
386	4	0	0	0	0	0	0	200	300	0	0	0	0	0	0	0	200	903	0	0	0	0	0	0	0	603	903	0
386	5	0	0	0	0	0	0	200	300	0	0	0	0	0	0	0	200	903	0	0	0	0	0	0	0	603	903	0
386	6	0	0	0	0	0	0	200	300	0	0	0	0	0	0	0	200	903	0	0	0	0	0	0	0	603	903	0
386	7	0	0	0	0	0	0	200	300	0	0	0	0	0	0	0	200	903	0	0	0	0	0	0	0	603	903	0
386	8	0	0	0	0	0	0	200	300	0	0	0	0	0	0	0	200	903	0	0	0	0	0	0	0	603	903	0
386	9	0	0	0	0	0	0	200	300	0	0	0	0	0	0	0	200	903	0	0	0	0	0	0	0	603	903	0
387	0	0	0	0	0	0	0	200	300	0	0	0	0	0	0	0	200	903	0	0	0	0	0	0	0	603	903	0
387	1	0	0	0	0	0	0	200	300	0	0	0	0	0	0	0	200	903	0	0	0	0	0	0	0	603	903	0
387	2	0	0	0	0	0	0	200	300	0	0	0	0	0	0	0	200	903	0	0	0	0	0	0	0	603	903	0
387	3	0	0	0	0	0	0	200	300	0	0	0	0	0	0	0	200	903	0	0	0	0	0	0	0	603	903	0
387	4	0	0	0	0	0	0	200	300	0	0	0	0	0	0	0	200	903	0	0	0	0	0	0	0	603	903	0
387	5	0	0	0	0	0	0	200	300	0	0	0	0	0	0	0	200	903	0	0	0	0	0	0	0	603	903	0
387	6	0	0	0	0	0	0	200	300	0	0	0	0	0	0	0	200	903	0	0	0	0	0	0	0	603	903	0
387	7	0	0	0	0	0	0	200	300	0	0	0	0	0	0	0	200	903	0	0	0	0	0	0	0	603	903	0
387	8	0	0	0	0	0	0	200	300	0	0	0	0	0	0	0	200	903	0	0	0	0	0	0	0	603	903	0
387	9	0	0	0	0	0	0	200	300	0	0	0	0	0	0	0	200	903	0	0	0	0	0	0	0	603	903	0
388	0	0	0	0	0	0	0	200	300	0	0	0	0	0	0	0	200	903	0	0	0	0	0	0	0	603	903	0
388	1	0	0	0	0	0	0	200	300	0	0	0	0	0	0	0	200	903	0	0	0	0	0	0	0	603	903	0
388	2	0	0	0	0	0	0	200	300	0	0	0	0	0	0	0	200	903	0	0	0	0	0	0	0	603	903	0
388	3	0	0	0	0	0	0	200	300	0	0	0	0	0	0	0	200	903	0	0	0	0	0	0	0	603	903	0
388	4	0	0	0	0	0	0	200	300	0	0	0	0	0	0	0	200	903	0	0	0	0	0	0	0	603	903	0
388	5	0	0	0	0	0	0	200	300	0	0	0	0	0	0	0	200	903	0	0	0	0	0	0	0	603	903	0
388	6	0	0	0	0	0	0	200	300	0	0	0	0	0	0	0	200	903	0	0	0	0	0	0	0	603	903	0
388	7	0	0	0	0	0	0	200	300	0	0	0	0	0	0	0	200	903	0	0	0	0	0	0	0	603	903	0
388	8	0	0	0	0	0	0	200	300	0	0	0	0	0	0	0	200	903	0	0	0	0	0	0	0	603	903	0
388	9	0	0	0	0	0	0	200	300	0	0	0	0	0	0	0	200	903	0	0	0	0	0	0	0	603	903	0
389	0	0	0	0	0	0	0	200	300	0	0	0	0	0	0	0	200	903	0	0	0	0	0	0	0	603	903	0
389	1	0	0	0	0	0	0	200	300	0	0	0	0	0	0	0	200	903	0	0	0	0	0	0	0	603	903	0
389	2	0	0	0	0	0	0	200	300	0	0	0	0	0	0	0	200	903	0	0	0	0	0	0	0	603	903	0
389	3	0	0	0	0	0	0	200	300	0	0	0	0	0	0	0	200	903	0	0	0	0	0	0	0	603	903	0
389	4	0	0	0	0	0	0	200	300	0	0	0	0	0	0	0	200	903	0	0	0	0	0	0	0	603	903	0
389	5	0	0	0	0	0	0	200	300	0	0	0	0	0	0	0	200	903	0	0	0	0	0	0	0	603	903	0
389	6	0	0	0	0	0	0	200	300	0	0	0	0	0	0	0	200	903	0	0	0	0	0	0	0	603	903	0
389	7	0	0	0	0	0	0	200	300	0	0	0	0	0	0	0	200	903	0	0	0	0	0	0	0	603	903	0
389	8	0	0	0	0	0	0	200	300	0	0	0	0	0	0	0	200	903	0	0	0	0	0	0	0	603	903	0
389	9	0	0	0	0	0	0	200	300	0	0	0	0	0	0	0	200	903	0	0	0	0	0	0	0	603	903	0
390	0	0	0	0	0	0	0	200	300	0	0	0	0	0	0	0	200	903	0	0	0	0	0	0	0	603	903	0
390	1	0	0	0	0	0	0	200	300	0	0	0	0	0	0	0	200	903	0	0	0	0	0	0	0	603	903	0
390	2	0	0	0	0	0	0	200	300	0	0	0	0	0	0	0	200	903	0	0	0	0	0	0	0	603	903	0
390	3	0	0	0	0	0	0	200	300	0	0	0	0	0	0	0	200	903	0	0	0	0	0	0	0	603	903	0
390	4	0	0	0	0	0	0	200	300	0	0	0	0	0	0	0	200	903	0	0	0	0	0	0	0	603	903	0
390	5	0	0	0	0	0	0	200	300	0	0	0	0	0	0	0	200	903	0	0	0	0	0	0	0	603	903	0
390	6	0	0	0	0	0	0	200	300	0	0	0	0	0	0	0	200	903	0	0	0	0	0	0	0	603	903	0
390	7	0	0	0	0	0	0	200	300	0	0	0	0	0	0	0	200	903	0	0	0	0	0	0	0	603	903	0
390	8	0	0	0	0	0	0	200	300	0	0	0	0	0	0	0	200	903	0	0	0	0	0	0	0	603	903	0
390	9	0	0	0	0	0	0	200	300	0	0	0	0	0	0	0	200	903	0	0	0	0	0	0	0	603	903	0
391	0	0	0	0	0	0	0	200	300	0	0	0	0	0	0	0	200	903	0	0	0	0	0	0	0	603	903	0
391	1	0	0	0	0	0	0	200	300	0	0	0	0	0	0	0	200	903	0	0	0	0	0	0	0	603	903	0
391	2	0	0	0	0	0	0	200	300	0	0	0	0	0	0	0	200	903	0	0	0	0	0	0	0	603	903	0
391	3	0	0	0	0	0	0	200	300	0	0	0	0	0	0	0	200	903	0	0	0	0	0	0	0	603	903	0
391	4	0	0	0	0	0	0	200	300	0	0	0	0	0	0	0	200	903	0	0	0	0	0	0	0	603	903	0
391	5	0	0	0	0	0	0	200	300	0	0	0	0	0	0	0	200	903	0	0	0	0	0	0	0	603	903	0
391	6	0	0	0	0	0	0	200	300	0	0	0	0	0	0	0	200	903	0	0	0	0	0	0	0	603	903	0
391	7	0	0	0	0	0	0	200	300	0	0	0	0	0	0	0	200	903	0	0	0	0	0	0	0	603	903	0
391	8	0	0	0	0	0	0	200	300	0	0	0	0	0	0	0	200	903	0	0	0	0	0	0	0	603	903	0
391	9	0	0	0	0	0	0	200	300	0	0	0	0	0	0	0	200	903	0	0	0	0	0	0	0	603	903	0
392	0	0	0	0	0	0	0	200	300	0	0	0	0	0	0	0	200	903	0	0	0	0	0	0	0	603	903	0
392	1	0	0	0	0	0	0	200	300	0	0	0	0	0	0	0	200	903	0	0	0	0	0	0	0	603	903	0
392	2	0	0	0	0	0	0	200	300	0	0	0	0	0	0	0	200	903	0	0	0	0	0	0	0	603	903	0
392	3	0	0	0	0	0	0	200	300	0	0	0	0	0	0	0	200	903	0	0	0	0	0	0	0	603	903	0
392	4	0	0	0	0	0	0	200	300	0	0	0	0	0	0	0	200	903	0	0	0	0	0	0	0	603	903	0
392	5	0	0	0	0	0	0	200	300	0	0	0	0	0	0	0	200	903	0	0	0	0	0	0	0	603	903	0
392	6	0	0	0	0	0	0	200	300	0	0	0	0	0	0	0	200	903	0	0	0	0	0	0	0	603	903	0
392	7	0	0	0	0	0	0	200	300	0	0	0	0	0	0	0	200	903	0	0	0	0	0	0	0	603	903	0
392	8	0	0	0	0	0	0	200	300	0	0	0	0	0	0	0	200	903	0	0	0	0	0	0	0	603	903	0
392	9	0	0	0	0	0	0	200	300	0	0	0	0	0	0	0	200	903	0	0	0	0	0	0	0	603	903	0
393	0	0	0	0	0	0	0	200	300	0	0	0	0	0	0	0	200	903	0	0	0	0	0	0	0	603	903	0
393	1	0	0	0	0	0	0	200	300	0	0	0	0	0	0	0	200	903	0	0	0	0	0	0	0	603	903	0
393	2	0	0	0	0	0	0	200	300	0	0	0	0	0	0	0	200	903	0	0	0	0	0	0	0	603	903	0
393	3	0	0	0	0	0	0	200	300	0	0	0	0	0	0	0	200	903	0	0	0	0	0	0	0	603	903	0
393	4	0	0	0	0	0	0	200	300	0	0	0	0	0	0	0	200	903	0	0	0	0	0	0	0	603	903	0
393	5	0	0	0	0	0	0	200	300	0	0	0	0	0	0	0	200	903	0	0	0	0	0	0	0	603	903	0
393	6	0	0	0	0	0	0	200	300	0	0	0	0	0	0	0	200	903	0	0	0	0	0	0	0	603	903	0
393	7	0	0	0	0	0	0	200	300	0	0	0	0	0	0	0	200	903	0	0	0	0	0	0	0	603	903	0
393	8	0	0	0	0	0	0	200	300	0	0	0	0	0	0	0	200	903	0	0	0	0	0	0	0	603	903	0
393	9	0	0	0	0	0	0	200	300	0	0	0	0	0	0	0	200	903	0	0	0	0	0	0	0	603	903	0
394	0	0	0	0	0	0	0	200	300	0	0	0	0	0	0	0	200	903	0	0	0	0	0	0	0	603	903	0
394	1	0	0	0	0	0	0	200	300	0	0	0	0	0	0	0	200	903	0	0	0	0	0	0	0	603	903	0
394	2	0	0	0	0	0	0	200	300	0	0	0	0	0	0	0	200	903	0	0	0	0	0	0	0	603	903	0
394	3	0	0	0	0	0	0	200	300	0	0	0	0	0	0	0	200	903	0	0	0	0	0	0	0	603	903	0
394	4	0	0	0	0	0	0	200	300	0	0	0	0	0	0	0	200	903	0	0	0	0	0	0	0	603	903	0
394	5	0	0	0	0	0	0	200	300	0	0	0	0	0	0	0	200	903	0	0	0	0	0	0	0	603	903	0
394	6	0	0	0	0	0	0	200	300	0	0	0	0	0	0	0	200	903	0	0	0	0	0	0	0	603	903	0
394	7	0	0	0	0	0	0	200	300	0	0	0	0	0	0	0	200	903	0	0	0	0	0	0	0	603	903	0
394	8	0	0	0	0	0	0	200	300	0	0	0	0	0	0	0	200	903	0	0	0	0	0	0	0	603	903	0
394	9	0	0	0	0	0	0	200	300	0	0	0	0	0	0	0	200	903	0	0	0	0	0	0	0	603	903	0
395	0	0	0	0	0	0	0	200	300	0	0	0	0	0	0	0	200	903	0	0	0	0	0	0	0	603	903	0
395	1	0	0	0	0	0	0	200	300	0	0	0	0	0	0	0	200	903	0	0	0	0	0	0	0	603	903	0
395	2	0	0	0	0	0	0	200	300	0	0	0	0	0	0	0	200	903	0	0	0	0	0	0	0	603	903	0
395	3	0	0	0	0	0	0	200	300	0	0	0	0	0	0	0	200	903	0	0	0	0	0	0	0	603	903	0
395	4	0	0	0	0	0	0	200	300	0	0	0	0	0	0	0	200	903	0	0	0	0	0	0	0	603	903	0
395	5	0	0	0	0	0	0	200	300	0	0	0	0	0	0	0	200	903	0	0	0	0	0	0	0	603	903	0
395	6	0	0	0	0	0	0	200	300	0	0	0	0	0	0	0	200	903	0	0	0	0	0	0	0	603	903	0
395	7	0	0	0	0	0	0	200	300	0	0	0	0	0	0	0	200	903	0	0	0	0	0	0	0	603	903	0
395	8	0	0	0	0	0	0	200	300	0	0	0	0	0	0	0	200	903	0	0	0	0	0	0	0	603	903	0
395	9	0	0	0	0	0	0	200	300	0	0	0	0	0	0	0	200	903	0	0	0	0	0	0	0	603	903	0
396	0	0	0	0	0	0	0	200	300	0	0	0	0	0	0	0	200	903	0	0	0	0	0	0	0	603	903	0
396	1	0	0	0	0	0	0	200	300	0	0	0	0	0	0	0	200	903	0	0	0	0	0	0	0	603	903	0
396	2	0	0	0	0	0	0	200	300	0	0	0	0	0	0	0	200	903	0	0	0	0	0	0	0	603	903	0
396	3	0	0	0	0	0	0	200	300	0	0	0	0	0	0	0	200	903	0	0	0	0	0	0	0	603	903	0
396	4	0	0	0	0	0	0	200	300	0	0	0	0	0	0	0	200	903	0	0	0	0	0	0	0	603	903	0
396	5	0	0	0	0	0	0	200	300	0	0	0	0	0	0	0	200	903	0	0	0	0	0	0	0	603	903	0
396	6	0	0	0	0	0	0	200	300	0	0	0	0	0	0	0	200	903	0	0	0	0	0	0	0	603	903	0
396	7	0	0	0	0	0	0	200	300	0	0	0	0	0	0	0	200	903	0	0	0	0	0	0	0	603	903	0
396	8	0	0	0	0	0	0	200	300	0	0	0	0	0	0	0	200	903	0	0	0	0	0	0	0	603	903	0
396	9	0	0	0	0	0	0	200	300	0	0	0	0	0	0	0	200	903	0	0	0	0	0	0	0	603	903	0
397	0	0	0	0	0	0	0	200	300	0	0	0	0	0	0	0	200	903	0	0	0	0	0	0	0	603	903	0
397	1	0	0	0	0	0	0	200	300	0	0	0	0	0	0	0	200	903	0	0	0	0	0	0	0	603	903	0
397	2	0	0	0	0	0	0	200	300	0	0	0	0	0	0	0	200	903	0	0	0	0	0	0	0	603	903	0
397	3	0	0	0	0	0	0	200	300	0	0	0	0	0	0	0	200	903	0	0	0	0	0	0	0	603	903	0
397	4	0	0	0	0	0	0	200	300	0	0	0	0	0	0	0	200	903	0	0	0	0	0	0	0	603	903	0
397	5	0	0	0	0	0	0	200	300	0	0	0	0	0	0	0	200	903	0	0	0	0	0	0	0	603	903	0
397	6	0	0	0	0	0	0	200	300	0	0	0	0	0	0	0	200	903	0	0	0	0	0	0	0	603	903	0
397	7	0	0	0	0	0	0	200	300	0	0	0	0	0	0	0	200	903	0	0	0	0	0	0	0	603	903	0
397	8	0	0	0	0	0	0	200	300	0	0	0	0	0	0	0	200	903	0	0	0	0	0	0	0	603	903	0
397	9	0	0	0	0	0	0	200	300	0	0	0	0	0	0	0	200	903	0	0	0	0	0	0	0	603	903	0
398	0	0	0	0	0	0	0	200	300	0	0	0	0	0	0	0	200	903	0	0	0	0	0	0	0	603	903	0
398	1	0	0	0	0	0	0	200	300	0	0	0	0	0	0	0	200	903	0	0	0	0	0	0	0	603	903	0
398	2	0	0	0	0	0	0	200	300	0	0	0	0	0	0	0	200	903	0	0	0	0	0	0	0	603	903	0
398	3	0	0	0	0	0	0	200	300	0	0	0	0	0	0	0	200	903	0	0	0	0	0	0	0	603	903	0
398	4	0	0	0	0	0	0	200	300	0	0	0	0	0	0	0	200	903	0	0	0	0	0	0	0	603	903	0
398	5	0	0	0	0	0	0	200	300	0	0	0	0	0	0	0	200	903	0	0	0	0	0	0	0	603	903	0
398	6	0	0	0	0	0	0	200	300	0	0	0	0	0	0	0	200	903	0	0	0	0	0	0	0	603	903	0
398	7	0	0	0	0	0	0	200	300	0	0	0	0	0	0	0	200	903	0	0	0	0	0	0	0	603	903	0
398	8	0	0	0	0	0	0	200	300	0	0	0	0	0	0	0	200	903	0	0	0	0	0	0	0	603	903	0
398	9	0	0	0	0	0	0	200	300	0	0	0	0	0	0	0	200	903	0	0	0	0	0	0	0	603	903	0
399	0	0	0	0	0	0	0	200	300	0	0	0	0	0	0	0	200	903	0	0	0	0	0	0	0	603	903	0
399	1	0	0	0	0	0	0	200	300	0	0	0	0	0	0	0	200	903	0	0	0	0	0	0	0	603	903	0
399	2	0	0	0	0	0	0	200	300	0	0	0	0	0	0	0	200	903	0	0	0	0	0	0	0	603	903	0
399	3	0	0	0	0	0	0	200	300	0	0	0	0	0	0	0	200	903	0	0	0	0	0	0	0	603	903	0
399	4	0	0	0	0	0	0	200	300	0	0	0	0	0	0	0	200	903	0	0	0	0	0	0	0	603	903	0
399	5	0	0	0	0	0	0	200	300	0	0	0	0	0	0	0	200	903	0	0	0	0	0	0	0	603	903	0
399	6	0	0	0	0	0	0	200	300	0	0	0	0	0	0	0	200	903	0	0	0	0	0	0	0	603	903	0
399	7	0	0	0	0	0	0	200	300	0	0	0	0	0	0	0	200	903	0	0	0	0	0	0	0	603	903	0
399	8	0	0	0	0	0	0	200	300	0	0	0	0	0	0	0	200	903	0	0	0	0	0	0	0	603	903	0
399	9	0	0	0	0	0	0	200	300	0	0	0	0	0	0	0	200	903	0	0	0	0	0	0	0	603	903	0
400	0	0	0	0	0	0	0	200	300	0	0	0	0	0	0	0	200	903	0	0	0	0	0	0	0	603	903	0
400	1	0	0	0	0	0	0	200	300	0	0	0	0	0	0	0	200	903	0	0	0	0	0	0	0	603	903	0
400	2	0	0	0	0	0	0	200	300	0	0	0	0	0	0	0	200	903	0	0	0	0	0	0	0	603	903	0
400	3	0	0	0	0	0	0	200	300	0	0	0	0	0	0	0	200	903	0	0	0	0	0	0	0	603	903	0
400	4	0	0	0	0	0	0	200	300	0	0	0	0	0	0	0	200	903	0	0	0	0	0	0	0	603	903	0
400	5	0	0	0	0	0	0	200	300	0	0	0	0	0	0	0	200	903	0	0	0	0	0	0	0	603	903	0
400	6	0	0	0	0	0	0	200	300	0	0	0	0	0	0	0	200	903	0	0	0	0	0	0	0	603	903	0
400	7	0	0	0	0	0	0	200	300	0	0	0	0	0	0	0	200	903	0	0	0	0	0	0	0	603	903	0
400	8	0	0	0	0	0	0	200	300	0	0	0	0	0	0	0	200	903	0	0	0	0	0	0	0	603	903	0
400	9	0	0	0	0	0	0	200	300	0	0	0	0	0	0	0	200	903	0	0	0	0	0	0	0	603	903	0
401	0	0	0	0	0	0	0	200	300	0	0	0	0	0	0	0	200	903	0	0	0	0	0	0	0	603	903	0
401	1	0	0	0	0	0	0	200	300	0	0	0	0	0	0	0	200	903	0	0	0	0	0	0	0	603	903	0
401	2	0	0	0	0	0	0	200	300	0	0	0	0	0	0	0	200	903	0	0	0	0	0	0	0	603	903	0
401	3	0	0	0	0	0	0	200	300	0	0	0	0	0	0	0	200	903	0	0	0	0	0	0	0	603	903	0
401	4	0	0	0	0	0	0	200	300	0	0	0	0	0	0	0	200	903	0	0	0	0	0	0	0	603	903	0
401	5	0	0	0	0	0	0	200	300	0	0	0	0	0	0	0	200	903	0	0	0	0	0	0	0	603	903	0
401	6	0	0	0	0	0	0	200	300	0	0	0	0	0	0	0	200	903	0	0	0	0	0	0	0	603	903	0
401	7	0	0	0	0	0	0	200	300	0	0	0	0	0	0	0	200	903	0	0	0	0	0	0	0	603	903	0
401	8	0	0	0	0	0	0	200	300	0	0	0	0	0	0	0	200	903	0	0	0	0	0	0	0	603	903	0
401	9	0	0	0	0	0	0	200	300	0	0	0	0	0	0	0	200	903	0	0	0	0	0	0	0	603	903	0
402	0	0	0	0	0	0	0	200	300	0	0	0	0	0	0	0	200	903	0	0	0	0	0	0	0	603	903	0
402	1	0	0	0	0	0	0	200	300	0	0	0	0	0	0	0	200	903	0	0	0	0	0	0	0	603	903	0
402	2	0	0	0	0	0	0	200	300	0	0	0	0	0	0	0	200	903	0	0	0	0	0	0	0	603	903	0
402	3	0	0	0	0	0	0	200	300	0	0	0	0	0	0	0	200	903	0	0	0	0	0	0	0	603	903	0
402	4	0	0	0	0	0	0	200	300	0	0	0	0	0	0	0	200	903	0	0	0	0	0	0	0	603	903	0
402	5	0	0	0	0	0	0	200	300	0	0	0	0	0	0	0	200	903	0	0	0	0	0	0	0	603	903	0
402	6	0	0	0	0	0	0	200	300	0	0	0	0	0	0	0	200	903	0	0	0	0	0	0	0	603	903	0
402	7	0	0	0	0	0	0	200	300	0	0	0	0	0	0	0	200	903	0	0	0	0	0	0	0	603	903	0
402	8	0	0	0	0	0	0	200	300	0	0	0	0	0	0	0	200	903	0	0	0	0	0	0	0	603	903	0
402	9	0	0	0	0	0	0	200	300	0	0	0	0	0	0	0	200	903	0	0	0	0	0	0	0	603	903	0
403	0	0	0	0	0	0	0	200	300	0	0	0	0	0	0	0	200	903	0	0	0	0	0	0	0	603	903	0
403	1	0	0	0	0	0	0	200	300	0	0	0	0	0	0	0	200	903	0	0	0	0	0	0	0	603	903	0
403	2	0	0	0	0	0	0	200	300	0	0	0	0	0	0	0	200	903	0	0	0	0	0	0	0	603	903	0
403	3	0	0	0	0	0	0	200	300	0	0	0	0	0	0	0	200	903	0	0	0	0	0	0	0	603	903	0
403	4	0	0	0	0	0	0	200	300	0	0	0	0	0	0	0	200	903	0	0	0	0	0	0	0	603	903	0
403	5	0	0	0	0	0	0	200	300	0	0	0	0	0	0	0	200	903	0	0	0	0	0	0	0	603	903	0
403	6	0	0	0	0	0	0	200	300	0	0	0	0	0	0	0	200	903	0	0	0	0	0	0	0	603	903	0
403	7	0	0	0	0	0	0	200	300	0	0	0	0	0	0	0	200	903	0	0	0	0	0	0	0	603	903	0
403	8	0	0	0	0	0	0	200	300	0	0	0	0	0	0	0	200	903	0	0	0	0	0	0	0	603	903	0
403	9	0	0	0	0	0	0	200	300	0	0	0	0	0	0	0	200	903	0	0	0	0	0	0	0	603	903	0
404	0	0	0	0	0	0	0	200	300	0	0	0	0	0	0	0	200	903	0	0	0	0	0	0	0	603	903	0
404	1	0	0	0	0	0	0	200	300	0	0	0	0	0	0	0	200	903	0	0	0	0	0	0	0	603	903	0
404	2	0	0	0	0	0	0	200	300	0	0	0	0	0	0	0	200	903	0	0	0	0	0	0	0	603	903	0
404	3	0	0	0	0	0	0	200	300	0	0	0	0	0	0	0	200	903	0	0	0	0	0	0	0	603	903	0
404	4	0	0	0	0	0	0	200	300	0	0	0	0	0	0	0	200	903	0	0	0	0	0	0	0	603	903	0
404	5	0	0	0	0	0	0	200	300	0	0	0	0	0	0	0	200	903	0	0	0	0	0	0	0	603	903	0
404	6	0	0	0	0	0	0	200	300	0	0	0	0	0	0	0	200	903	0	0	0	0	0	0	0	603	903	0
404	7	0	0	0	0	0	0	200	300	0	0	0	0	0	0	0	200	903	0	0	0	0	0	0	0	603	903	0
404	8	0	0	0	0	0	0	200	300	0	0	0	0	0	0	0	200	903	0	0	0	0	0	0	0	603	903	0
404	9	0	0	0	0	0	0	200	300	0	0	0	0	0	0	0	200	903	0	0	0	0	0	0	0	603	903	0
405	0	0	0	0	0	0	0	200	300	0	0	0	0	0	0	0	200	903	0	0	0	0	0	0	0	603	903	0
405	1	0	0	0	0	0	0	200	300	0	0	0	0	0	0	0	200	903	0	0	0	0	0	0	0	603	903	0
405	2	0	0	0	0	0	0	200	300	0	0	0	0	0	0	0	200	903	0	0	0	0	0	0	0	603	903	0
405	3	0	0	0	0	0	0	200	300	0	0	0	0	0	0	0	200	903	0	0	0	0	0	0	0	603	903	0
405	4	0	0	0	0	0	0	200	300	0	0	0	0	0	0	0	200	903	0	0	0	0	0	0	0	603	903	0
405	5	0	0	0	0	0	0	200	300	0	0	0	0	0	0	0	200	903	0	0	0	0	0	0	0	603	903	0
405	6	0	0	0	0	0	0	200	300	0	0	0	0	0	0	0	200	903	0	0	0	0	0	0	0	603	903	0
405	7	0	0	0	0	0	0	200	300	0	0	0	0	0	0	0	200	903	0	0	0	0	0	0	0	603	903	0
405	8	0	0	0	0	0	0	200	300	0	0	0	0	0	0	0	200	903	0	0	0	0	0	0	0	603	903	0
405	9	0	0	0	0	0	0	200	300	0	0	0	0	0	0	0	200	903	0	0	0	0	0	0	0	603	903	0
406	0	0	0	0	0	0	0	200	300	0	0	0	0	0	0	0	200	903	0	0	0	0	0	0	0	603	903	0
406	1	0	0	0	0	0	0	200	300	0	0	0	0	0	0	0	200	903	0	0	0	0	0	0	0	603	903	0
406	2	0	0	0	0	0	0	200	300	0	0	0	0	0	0	0	200	903	0	0	0	0	0	0	0	603	903	0
406	3	0	0	0	0	0	0	200	300	0	0	0	0	0	0	0	200	903	0	0	0	0	0	0	0	603	903	0
406	4	0	0	0	0	0	0	200	300	0	0	0	0	0	0	0	200	903	0	0	0	0	0	0	0	603	903	0
406	5	0	0	0	0	0	0	200	300	0	0	0	0	0	0	0	200	903	0	0	0	0	0	0	0	603	903	0
406	6	0	0	0	0	0	0	200	300	0	0	0	0	0	0	0	200	903	0	0	0	0	0	0	0	603	903	0
406	7	0	0	0	0	0	0	200	300	0	0	0	0	0	0	0	200	903	0	0	0	0	0	0	0	603	903	0
406	8	0	0	0	0	0	0	200	300	0	0	0	0	0	0	0	200	903	0	0	0	0	0	0	0	603	903	0
406	9	0	0	0	0	0	0	200	300	0	0	0	0	0	0	0	200	903	0	0	0	0	0	0	0	603	903	0
407	0	0	0	0	0	0	0	200	300	0	0	0	0	0	0	0	200	903	0	0	0	0	0	0	0	603	903	0
407	1	0	0	0	0	0	0	200	300	0	0	0	0	0	0	0	200	903	0	0	0	0	0	0	0	603	903	0
407	2	0	0	0	0	0	0	200	300	0	0	0	0	0	0	0	200	903	0	0	0	0	0	0	0	603	903	0
407	3	0	0	0	0	0	0	200	300	0	0	0	0	0	0	0	200	903	0	0	0	0	0	0	0	603	903	0
407	4	0	0	0	0	0	0	200	300	0	0	0	0	0	0	0	200	903	0	0	0	0	0	0	0	603	903	0
407	5	0	0	0	0	0	0	200	300	0	0	0	0	0	0	0	200	903	0	0	0	0	0	0	0	603	903	0
407	6	0	0	0	0	0	0	200	300	0	0	0	0	0	0	0	200	903	0	0	0	0	0	0	0	603	903	0
407	7	0	0	0	0	0	0	200	300	0	0	0	0	0	0	0	200	903	0	0	0	0	0	0	0	603	903	0
407	8	0	0	0	0	0	0	200	300	0	0	0	0	0	0	0	200	903	0	0	0	0	0	0	0	603	903	0
407	9	0	0	0	0	0	0	200	300	0	0	0	0	0	0	0	200	903	0	0	0	0	0	0	0	603	903	0
408	0	0	0	0	0	0	0	200	300	0	0	0	0	0	0	0	200	903	0	0	0	0	0	0	0	603	903	0
408	1	0	0	0	0	0	0	200	300	0	0	0	0	0	0	0	200	903	0	0	0	0	0	0	0	603	903	0
408	2	0	0	0	0	0	0	200	300	0	0	0	0	0	0	0	200	903	0	0	0	0	0	0	0	603	903	0
408	3	0	0	0	0	0	0	200	300	0	0	0	0	0	0	0	200	903	0	0	0	0	0	0	0	603	903	0
408	4	0	0	0	0	0	0	200	300	0	0	0	0	0	0	0	200	903	0	0	0	0	0	0	0	603	903	0
408	5	0	0	0	0	0	0	200	300	0	0	0	0	0	0	0	200	903	0	0	0	0	0	0	0	603	903	0
408	6	0	0	0	0	0	0	200	300	0	0	0	0	0	0	0	200	903	0	0	0	0	0	0	0	603	903	0
408	7	0	0	0	0	0	0	200	300	0	0	0	0	0	0	0	200	903	0	0	0	0	0	0	0	603	903	0
408	8	0	0	0	0	0	0	200	300	0	0	0	0	0	0	0	200	903	0	0	0	0	0	0	0	603	903	0
408	9	0	0	0	0	0	0	200	300	0	0	0	0	0	0	0	200	903	0	0	0	0	0	0	0	603	903	0
409	0	0	0	0	0	0	0	200	300	0	0	0	0	0	0	0	200	903	0	0	0	0	0	0	0	603	903	0
409	1	0	0	0	0	0	0	200	300	0	0	0	0	0	0	0	200	903	0	0	0	0	0	0	0	603	903	0
409	2	0	0	0	0	0	0	200	300	0	0	0	0	0	0	0	200	903	0	0	0	0	0	0	0	603	903	0
409	3	0	0	0	0	0	0	200	300	0	0	0	0	0	0	0	200	903	0	0	0	0	0	0	0	603	903	0
409	4	0	0	0	0	0	0	200	300	0	0	0	0	0	0	0	200	903	0	0	0	0	0	0	0	603	903	0
409	5	0	0	0	0	0	0	200	300	0	0	0	0	0	0	0	200	903	0	0	0	0	0	0	0	603	903	0
409	6	0	0	0	0	0	0	200	300	0	0	0	0	0	0	0	200	903	0	0	0	0	0	0	0	603	903	0
409	7	0	0	0	0	0	0	200	300	0	0	0	0	0	0	0	200	903	0	0	0	0	0	0	0	603	903	0
409	8	0	0	0	0	0	0	200	300	0	0	0	0	0	0	0	200	903	0	0	0	0	0	0	0	603	903	0
409	9	0	0	0	0	0	0	200	300	0	0	0	0	0	0	0	200	903	0	0	0	0	0	0	0	603	903	0
410	0	0	0	0	0	0	0	200	300	0	0	0	0	0	0	0	200	903	0	0	0	0	0	0	0	603	903	0
410	1	0	0	0	0	0	0	200	300	0	0	0	0	0	0	0	200	903	0	0	0	0	0	0	0	603	903	0
410	2	0	0	0	0	0	0	200	300	0	0	0	0	0	0	0	200	903	0	0	0	0	0	0	0	603	903	0
410	3	0	0	0	0	0	0	200	300	0	0	0	0	0	0	0	200	903	0	0	0	0	0	0	0	603	903	0
410	4	0	0	0	0	0	0	200	300	0	0	0	0	0	0	0	200	903	0	0	0	0	0	0	0	603	903	0
410	5	0	0	0	0	0	0	200	300	0	0	0	0	0	0	0	200	903	0	0	0	0	0	0	0	603	903	0
410	6	0	0	0	0	0	0	200	300	0	0	0	0	0	0	0	200	903	0	0	0	0	0	0	0	603	903	0
410	7	0	0	0	0	0	0	200	300	0	0	0	0	0	0	0	200	903	0	0	0	0	0	0	0	603	903	0
410	8	0	0	0	0	0	0	200	300	0	0	0	0	0	0	0	200	903	0	0	0	0	0	0	0	603	903	0
410	9	0	0	0	0	0	0	200	300	0	0	0	0	0	0	0	200	903	0	0	0	0	0	0	0	603	903	0
411	0	0	0	0	0	0	0	200	300	0	0	0	0	0	0	0	200	903	0	0	0	0	0	0	0	603	903	0
411	1	0	0	0	0	0	0	200	300	0	0	0	0	0	0	0	200	903	0	0	0	0	0	0	0	603	903	0
411	2	0	0	0	0	0	0	200	300	0	0	0	0	0	0	0	200	903	0	0	0	0	0	0	0	603	903	0
411	3	0	0	0	0	0	0	200	300	0	0	0	0	0	0	0	200	903	0	0	0	0	0	0	0	603	903	0
411	4	0	0	0	0	0	0	200	300	0	0	0	0	0	0	0	200	903	0	0	0	0	0	0	0	603	903	0
411	5	0	0	0	0	0	0	200	300	0	0	0	0	0	0	0	200	903	0	0	0	0	0	0	0	603	903	0
411	6	0	0	0	0	0	0	200	300	0	0	0	0	0	0	0	200	903	0	0	0	0	0	0	0	603	903	0
411	7	0	0	0	0	0	0	200	300	0	0	0	0	0	0	0	200	903	0	0	0	0	0	0	0	603	903	0
411	8	0	0	0	0	0	0	200	300	0	0	0	0	0	0	0	200	903	0	0	0	0	0	0	0	603	903	0
411	9	0	0	0	0	0	0	200	300	0	0	0	0	0	0	0	200	903	0	0	0	0	0	0	0	603	903	0
412	0	0	0	0	0	0	0	200	300	0	0	0	0	0	0	0	200	903	0	0	0	0	0	0	0	603	903	0
412	1	0	0	0	0	0	0	200	300	0	0	0	0	0	0	0	200	903	0	0	0	0	0	0	0	603	903	0
412	2	0	0	0	0	0	0	200	300	0	0	0	0	0	0	0	200	903	0	0	0	0	0	0	0	603	903	0
412	3	0	0	0	0	0	0	200	300	0	0	0	0	0	0	0	200	903	0	0	0	0	0	0	0	603	903	0
412	4	0	0	0	0	0	0	200	300	0	0	0	0	0	0	0	200	903	0	0	0	0	0	0	0	603	903	0
412	5	0	0	0	0	0	0	200	300	0	0	0	0	0	0	0	200	903	0	0	0	0	0	0	0	603	903	0
412	6	0	0	0	0	0	0	200	300	0	0	0	0	0	0	0	200	903	0	0	0	0	0	0	0	603	903	0
412	7	0	0	0	0	0	0	200	300	0	0	0	0	0	0	0	200	903	0	0	0	0	0	0	0	603	903	0
412	8	0	0	0	0	0	0	200	300	0	0	0	0	0	0	0	200	903	0	0	0	0	0	0	0	603	903	0
412	9	0	0	0	0	0	0	200	300	0	0	0	0	0	0	0	200	903	0	0	0	0	0	0	0	603	903	0
413	0	0	0	0	0	0	0	200	300	0	0	0	0	0	0	0	200	903	0	0	0	0	0	0	0	603	903	0
413	1	0	0	0	0	0	0	200	300	0	0	0	0	0	0	0	200	903	0	0	0	0	0	0	0	603	903	0
413	2	0	0	0	0	0	0	200	300	0	0	0	0	0	0	0	200	903	0	0	0	0	0	0	0	603	903	0
413	3	0	0	0	0	0	0	200	300	0	0	0	0	0	0	0	200	903	0	0	0	0	0	0	0	603	903	0
413	4	0	0	0	0	0	0	200	300	0	0	0	0	0	0	0	200	903	0	0	0	0	0	0	0	603	903	0
413	5	0	0	0	0	0	0	200	300	0	0	0	0	0	0	0	200	903	0	0	0	0	0	0	0	603	903	0
413	6	0	0	0	0	0	0	200	300	0	0	0	0	0	0	0	200	903	0	0	0	0	0	0	0	603	903	0
413	7	0	0	0	0	0	0	200	300	0	0	0	0	0	0	0	200	903	0	0	0	0	0	0	0	603	903	0
413	8	0	0	0	0	0	0	200	300	0	0	0	0	0	0	0	200	903	0	0	0	0	0	0	0	603	903	0
413	9	0	0	0	0	0	0	200	300	0	0	0	0	0	0	0	200	903	0	0	0	0	0	0	0	603	903	0
414	0	0	0	0	0	0	0	200	300	0	0	0	0	0	0	0	200	903	0	0	0	0	0	0	0	603	903	0
414	1	0	0	0	0	0	0	200	300	0	0	0	0	0	0	0	200	903	0	0	0	0	0	0	0	603	903	0
414	2	0	0	0	0	0	0	200	300	0	0	0	0	0	0	0	200	903	0	0	0	0	0	0	0	603	903	0
414	3	0	0	0	0	0	0	200	300	0	0	0	0	0	0	0	200	903	0	0	0	0	0	0	0	603	903	0
414	4	0	0	0	0	0	0	200	300	0	0	0	0	0	0	0	200	903	0	0	0	0	0	0	0	603	903	0
414	5	0	0	0	0	0	0	200	300	0	0	0	0	0	0	0	200	903	0	0	0	0	0	0	0	603	903	0
414	6	0	0	0	0	0	0	200	300	0	0	0	0	0	0	0	200	903	0	0	0	0	0	0	0	603	903	0
414	7	0	0	0	0	0	0	200	300	0	0	0	0	0	0	0	200	903	0	0	0	0	0	0	0	603	903	0
414	8	0	0	0	0	0	0	200	300	0	0	0	0	0	0	0	200	903	0	0	0	0	0	0	0	603	903	0
414	9	0	0	0	0	0	0	200	300	0	0	0	0	0	0	0	200	903	0	0	0	0	0	0	0	603	903	0
415	0	0	0	0	0	0	0	200	300	0	0	0	0	0	0	0	200	903	0	0	0	0	0	0	0	603	903	0
415	1	0	0	0	0	0	0	200	300	0	0	0	0	0	0	0	200	903	0	0	0	0	0	0	0	603	903	0
415	2	0	0	0	0	0	0	200	300	0	0	0	0	0	0	0	200	903	0	0	0	0	0	0	0	603	903	0
415	3	0	0	0	0	0	0	200	300	0	0	0	0	0	0	0	200	903	0	0	0	0	0	0	0	603	903	0
415	4	0	0	0	0	0	0	200	300	0	0	0	0	0	0	0	200	903	0	0	0	0	0	0	0	603	903	0
415	5	0	0	0	0	0	0	200	300	0	0	0	0	0	0	0	200	903	0	0	0	0	0	0	0	603	903	0
415	6	0	0	0	0	0	0	200	300	0	0	0	0	0	0	0	200	903	0	0	0	0	0	0	0	603	903	0
415	7	0	0	0	0	0	0	200	300	0	0	0	0	0	0	0	200	903	0	0	0	0	0	0	0	603	903	0
415	8	0	0	0	0	0	0	200	300	0	0	0	0	0	0	0	200	903	0	0	0	0	0	0	0	603	903	0
415	9	0	0	0	0	0	0	200	300	0	0	0	0	0	0	0	200	903	0	0	0	0	0	0	0	603	903	0
416	0	0	0	0	0	0	0	200	300	0	0	0	0	0	0	0	200	903	0	0	0	0	0	0	0	603	903	0
416	1	0	0	0	0	0	0	200	300	0	0	0	0	0	0	0	200	903	0	0	0	0	0	0	0	603	903	0
416	2	0	0	0	0	0	0	200	300	0	0	0	0	0	0	0	200	903	0	0	0	0	0	0	0	603	903	0
416	3	0	0	0	0	0	0	200	300	0	0	0	0	0	0	0	200	903	0	0	0	0	0	0	0	603	903	0
416	4	0	0	0	0	0	0	200	300	0	0	0	0	0	0	0	200	903	0	0	0	0	0	0	0	603	903	0
416	5	0	0	0	0	0	0	200	300	0	0	0	0	0	0	0	200	903	0	0	0	0	0	0	0	603	903	0
416	6	0	0	0	0	0	0	200	300	0	0	0	0	0	0	0	200	903	0	0	0	0	0	0	0	603	903	0
416	7	0	0	0	0	0	0	200	300	0	0	0	0	0	0	0	200	903	0	0	0	0	0	0	0	603	903	0
416	8	0	0	0	0	0	0	200	300	0	0	0	0	0	0	0	200	903	0	0	0	0	0	0	0	603	903	0
416	9	0	0	0	0	0	0	200	300	0	0	0	0	0	0	0	200	903	0	0	0	0	0	0	0	603	903	0
417	0	0	0	0	0	0	0	200	300	0	0	0	0	0	0	0	200	903	0	0	0	0	0	0	0	603	903	0
417	1	0	0	0	0	0	0	200	300	0	0	0	0	0	0	0	200	903	0	0	0	0	0	0	0	603	903	0
417	2	0	0	0	0	0	0	200	300	0	0	0	0	0	0	0	200	903	0	0	0	0	0	0	0	603	903	0
417	3	0	0	0	0	0	0	200	300	0	0	0	0	0	0	0	200	903	0	0	0	0	0	0	0	603	903	0
417	4	0	0	0	0	0	0	200	300	0	0	0	0	0	0	0	200	903	0	0	0	0	0	0	0	603	903	0
417	5	0	0	0	0	0	0	200	300	0	0	0	0	0	0	0	200	903	0	0	0	0	0	0	0	603	903	0
417	6	0	0	0	0	0	0	200	300	0	0	0	0	0	0	0	200	903	0	0	0	0	0	0	0	603	903	0
417	7	0	0	0	0	0	0	200	300	0	0	0	0	0	0	0	200	903	0	0	0	0	0	0	0	603	903	0
417	8	0	0	0	0	0	0	200	300	0	0	0	0	0	0	0	200	903	0	0	0	0	0	0	0	603	903	0
417	9	0	0	0	0	0	0	200	300	0	0	0	0	0	0	0	200	903	0	0	0	0	0	0	0	603	903	0
418	0	0	0	0	0	0	0	200	300	0	0	0	0	0	0	0	200	903	0	0	0	0	0	0	0	603	903	0
418	1	0	0	0	0	0	0	200	300	0	0	0	0	0	0	0	200	903	0	0	0	0	0	0	0	603	903	0
418	2	0	0	0	0	0	0	200	300	0	0	0	0	0	0	0	200	903	0	0	0	0	0	0	0	603	903	0
418	3	0	0	0	0	0	0	200	300	0	0	0	0	0	0	0	200	903	0	0	0	0	0	0	0	603	903	0
418	4	0	0	0	0	0	0	200	300	0	0	0	0	0	0	0	200	903	0	0	0	0	0	0	0	603	903	0
418	5	0	0	0	0	0	0	200	300	0	0	0	0	0	0	0	200	903	0	0	0	0	0	0	0	603	903	0
418	6	0	0	0	0	0	0	200	300	0	0	0	0	0	0	0	200	903	0	0	0	0	0	0	0	603	903	0
418	7	0	0	0	0	0	0	200	300	0	0	0	0	0	0	0	200	903	0	0	0	0	0	0	0	603	903	0
418	8	0	0	0	0	0	0	200	300	0	0	0	0	0	0	0	200	903	0	0	0	0	0	0	0	603	903	0
418	9	0	0	0	0	0	0	200	300	0	0	0	0	0	0	0	200	903	0	0	0	0	0	0	0	603	903	0
419	0	0	0	0	0	0	0	200	300	0	0	0	0	0	0	0	200	903	0	0	0	0	0	0	0	603	903	0
419	1	0	0	0	0	0	0	200	300	0	0	0	0	0	0	0	200	903	0	0	0	0	0	0	0	603	903	0
419	2	0	0	0	0	0	0	200	300	0	0	0	0	0	0	0	200	903	0	0	0	0	0	0	0	603	903	0
419	3	0	0	0	0	0	0	200	300	0	0	0	0	0	0	0	200	903	0	0	0	0	0	0	0	603	903	0
419	4	0	0	0	0	0	0	200	300	0	0	0	0	0	0	0	200	903	0	0	0	0	0	0	0	603	903	0
419	5	0	0	0	0	0	0	200	300	0	0	0	0	0	0	0	200	903	0	0	0	0	0	0	0	603	903	0
419	6	0	0	0	0	0	0	200	300	0	0	0	0	0	0	0	200	903	0	0	0	0	0	0	0	603	903	0
419	7	0	0	0	0	0	0	200	300	0	0	0	0	0	0	0	200	903	0	0	0	0	0	0	0	603	903	0
419	8	0	0	0	0	0	0	200	300	0	0	0	0	0	0	0	200	903	0	0	0	0	0	0	0	603	903	0
419	9	0	0	0	0	0	0	200	300	0	0	0	0	0	0	0	200	903	0	0	0	0	0	0	0	603	903	0
420	0	0	0	0	0	0	0	200	300	0	0	0	0	0	0	0	200	903	0	0	0	0	0	0	0	603	903	0
420	1	0	0	0	0	0	0	200	300	0	0	0	0	0	0	0	200	903	0	0	0	0	0	0	0	603	903	0
420	2	0	0	0	0	0	0	200	300	0	0	0	0	0	0	0	200	903	0	0	0	0	0	0	0	603	903	0
420	3	0	0	0	0	0	0	200	300	0	0	0	0	0	0	0	200	903	0	0	0	0	0	0	0	603	903	0
420	4	0	0	0	0	0	0	200	300	0	0	0	0	0	0	0	200	903	0	0	0	0	0	0	0	603	903	0
420	5	0	0	0	0	0	0	200	300	0	0	0	0	0	0	0	200	903	0	0	0	0	0	0	0	603	903	0
420	6	0	0	0	0	0	0	200	300	0	0	0	0	0	0	0	200	903	0	0	0	0	0	0	0	603	903	0
420	7	0	0	0	0	0	0	200	300	0	0	0	0	0	0	0	200	903	0	0	0	0	0	0	0	603	903	0
420	8	0	0	0	0	0	0	200	300	0	0	0	0	0	0	0	200	903	0	0	0	0	0	0	0	603	903	0
420	9	0	0	0	0	0	0	200	300	0	0	0	0	0	0	0	200	903	0	0	0	0	0	0	0	603	903	0
421	0	0	0	0	0	0	0	200	300	0	0	0	0	0	0	0	200	903	0	0	0	0	0	0	0	603	903	0
421	1	0	0	0	0	0	0	200	300	0	0	0	0	0	0	0	200	903	0	0	0	0	0	0	0	603	903	0
421	2	0	0	0	0	0	0	200	300	0	0	0	0	0	0	0	200	903	0	0	0	0	0	0	0	603	903	0
421	3	0	0	0	0	0	0	200	300	0	0	0	0	0	0	0	200	903	0	0	0	0	0	0	0	603	903	0
421	4	0	0	0	0	0	0	200	300	0	0	0	0	0	0	0	200	903	0	0	0	0	0	0	0	603	903	0
421	5	0	0	0	0	0	0	200	300	0	0	0	0	0	0	0	200	903	0	0	0	0	0	0	0	603	903	0
421	6	0	0	0	0	0	0	200	300	0	0	0	0	0	0	0	200	903	0	0	0	0	0	0	0	603	903	0
421	7	0	0	0	0	0	0	200	300	0	0	0	0	0	0	0	200	903	0	0	0	0	0	0	0	603	903	0
421	8	0	0	0	0	0	0	200	300	0	0	0	0	0	0	0	200	903	0	0	0	0	0	0	0	603	903	0
421	9	0	0	0	0	0	0	200	300	0	0	0	0	0	0	0	200	903	0	0	0	0	0	0	0	603	903	0
422	0	0	0	0	0	0	0	200	300	0	0	0	0	0	0	0	200	903	0	0	0	0	0	0	0	603	903	0
422	1	0	0	0	0	0	0	200	300	0	0	0	0	0	0	0	200	903	0	0	0	0	0	0	0	603	903	0
422	2	0	0	0	0	0	0	200	300	0	0	0	0	0	0	0	200	903	0	0	0	0	0	0	0	603	903	0
422	3	0	0	0	0	0	0	200	300	0	0	0	0	0	0	0	200	903	0	0	0	0	0	0	0	603	903	0
422	4	0	0	0	0	0	0	200	300	0	0	0	0	0	0	0	200	903	0	0	0	0	0	0	0	603	903	0
422	5	0	0	0	0	0	0	200	300	0	0	0	0	0	0	0	200	903	0	0	0	0	0	0	0	603	903	0
422	6	0	0	0	0	0	0	200	300	0	0	0	0	0	0	0	200	903	0	0	0	0	0	0	0	603	903	0
422	7	0	0	0	0	0	0	200	300	0	0	0	0	0	0	0	200	903	0	0	0	0	0	0	0	603	903	0
422	8	0	0	0	0	0	0	200	300	0	0	0	0	0	0	0	200	903	0	0	0	0	0	0	0	603	903	0
422	9	0	0	0	0	0	0	200	300	0	0	0	0	0	0	0	200	903	0	0	0	0	0	0	0	603	903	0
423	0	0	0	0	0	0	0	200	300	0	0	0	0	0	0	0	200	903	0	0	0	0	0	0	0	603	903	0
423	1	0	0	0	0	0	0	200	300	0	0	0	0	0	0	0	200	903	0	0	0	0	0	0	0	603	903	0
423	2	0	0	0	0	0	0	200	300	0	0	0	0	0	0	0	200	903	0	0	0	0	0	0	0	603	903	0
423	3	0	0	0	0	0	0	200	300	0	0	0	0	0	0	0	200	903	0	0	0	0	0	0	0	603	903	0
423	4	0	0	0	0	0	0	200	300	0	0	0	0	0	0	0	200	903	0	0	0	0	0	0	0	603	903	0
423	5	0	0	0	0	0	0	200	300	0	0	0	0	0	0	0	200	903	0	0	0	0	0	0	0	603	903	0
423	6	0	0	0	0	0	0	200	300	0	0	0	0	0	0	0	200	903	0	0	0	0	0	0	0	603	903	0
423	7	0	0	0	0	0	0	200	300	0	0	0	0	0	0	0	200	903	0	0	0	0	0	0	0	603	903	0
423	8	0	0	0	0	0	0	200	300	0	0	0	0	0	0	0	200	903	0	0	0	0	0	0	0	603	903	0
423	9	0	0	0	0	0	0	200	300	0	0	0	0	0	0	0	200	903	0	0	0	0	0	0	0	603	903	0
424	0	0	0	0	0	0	0	200	300	0	0	0	0	0	0	0	200	903	0	0	0	0	0	0	0	603	903	0
424	1	0	0	0	0	0	0	200	300	0	0	0	0	0	0	0	200	903	0	0	0	0	0	0	0	603	903	0
424	2	0	0	0	0	0	0	200	300	0	0	0	0	0	0	0	200	903	0	0	0	0	0	0	0	603	903	0
424	3	0	0	0	0	0	0	200	300	0	0	0	0	0	0	0	200	903	0	0	0	0	0	0	0	603	903	0
424	4	0	0	0	0	0	0	200	300	0	0	0	0	0	0	0	200	903	0	0	0	0	0	0	0	603	903	0
424	5	0	0	0	0	0	0	200	300	0	0	0	0	0	0	0	200	903	0	0	0	0	0	0	0	603	903	0
424	6	0	0	0	0	0	0	200	300	0	0	0	0	0	0	0	200	903	0	0	0	0	0	0	0	603	903	0
424	7	0	0	0	0	0	0	200	300	0	0	0	0	0	0	0	200	903	0	0	0	0	0	0	0	603	903	0
424	8	0	0	0	0	0	0	200	300	0	0	0	0	0	0	0	200	903	0	0	0	0	0	0	0	603	903	0
424	9	0	0	0	0	0	0	200	300	0	0	0	0	0	0	0	200	903	0	0	0	0	0	0	0	603	903	0
425	0	0	0	0	0	0	0	200	300	0	0	0	0	0	0	0	200	903	0	0	0	0	0	0	0	603	903	0
425	1	0	0	0	0	0	0	200	300	0	0	0	0	0	0	0	200	903	0	0	0	0	0	0	0	603	903	0
425	2	0	0	0	0	0	0	200	300	0	0	0	0	0	0	0	200	903	0	0	0	0	0	0	0	603	903	0
425	3	0	0	0	0	0	0	200	300	0	0	0	0	0	0	0	200	903	0	0	0	0	0	0	0	603	903	0
425	4	0	0	0	0	0	0	200	300	0	0	0	0	0	0	0	200	903	0	0	0	0	0	0	0	603	903	0
425	5	0	0	0	0	0	0	200	300	0	0	0	0	0	0	0	200	903	0	0	0	0	0	0	0	603	903	0
425	6	0	0	0	0	0	0	200	300	0	0	0	0	0	0	0	200	903	0	0	0	0	0	0	0	603	903	0
425	7	0	0	0	0	0	0	200	300	0	0	0	0	0	0	0	200	903	0	0	0	0	0	0	0	603	903	0
425	8	0	0	0	0	0	0	200	300	0	0	0	0	0	0	0	200	903	0	0	0	0	0	0	0	603	903	0
425	9	0	0	0	0	0	0	200	300	0	0	0	0	0	0	0	200	903	0	0	0	0	0	0	0	603	903	0
426	0	0	0	0	0	0	0	200	300	0	0	0	0	0	0	0	200	903	0	0	0	0	0	0	0	603	903	0
426	1	0	0	0	0	0	0	200	300	0	0	0	0	0	0	0	200	903	0	0	0	0	0	0	0	603	903	0
426	2	0	0	0	0	0	0	200	300	0	0	0	0	0	0	0	200	903	0	0	0	0	0	0	0	603	903	0
426	3	0	0	0	0	0	0	200	300	0	0	0	0	0	0	0	200	903	0	0	0	0	0	0	0	603	903	0
426	4	0	0	0	0	0	0	200	300	0	0	0	0	0	0	0	200	903	0	0	0	0	0	0	0	603	903	0
426	5	0	0	0	0	0	0	200	300	0	0	0	0	0	0	0	200	903	0	0	0	0	0	0	0	603	903	0
426	6	0	0	0	0	0	0	200	300	0	0	0	0	0	0	0	200	903	0	0	0	0	0	0	0	603	903	0
426	7	0	0	0	0	0	0	200	300	0	0	0	0	0	0	0	200	903	0	0	0	0	0	0	0	603	903	0
426	8	0	0	0	0	0	0	200	300	0	0	0	0	0	0	0	200	903	0	0	0	0	0	0	0	603	903	0
426	9	0	0	0	0	0	0	200	300	0	0	0	0	0	0	0	200	903	0	0	0	0	0	0	0	603	903	0
427	0	0	0	0	0	0	0	200	300	0	0	0	0	0	0	0	200	903	0	0	0	0	0	0	0	603	903	0
427	1	0	0	0	0	0	0	200	300	0	0	0	0	0	0	0	200	903	0	0	0	0	0	0	0	603	903	0
427	2	0	0	0	0	0	0	200	300	0	0	0	0	0	0	0	200	903	0	0	0	0	0	0	0	603	903	0
427	3	0	0	0	0	0	0	200	300	0	0	0	0	0	0	0	200	903	0	0	0	0	0	0	0	603	903	0
427	4	0	0	0	0	0	0	200	300	0	0	0	0	0	0	0	200	903	0	0	0	0	0	0	0	603	903	0
427	5	0	0	0	0	0	0	200	300	0	0	0	0	0	0	0	200	903	0	0	0	0	0	0	0	603	903	0
427	6	0	0	0	0	0	0	200	300	0	0	0	0	0	0	0	200	903	0	0	0	0	0	0	0	603	903	0
427	7	0	0	0	0	0	0	200	300	0	0	0	0	0	0	0	200	903	0	0	0	0	0	0	0	603	903	0
427	8	0	0	0	0	0	0	200	300	0	0	0	0	0	0	0	200	903	0	0	0	0	0	0	0	603	903	0
427	9	0	0	0	0	0	0	200	300	0	0	0	0	0	0	0	200	903	0	0	0	0	0	0	0	603	903	0
428	0	0	0	0	0	0	0	200	300	0	0	0	0	0	0	0	200	903	0	0	0	0	0	0	0	603	903	0
428	1	0	0	0	0	0	0	200	300	0	0	0	0	0	0	0	200	903	0	0	0	0	0	0	0	603	903	0
428	2	0	0	0	0	0	0	200	300	0	0	0	0	0	0	0	200	903	0	0	0	0	0	0	0	603	903	0
428	3	0	0	0	0	0	0	200	300	0	0	0	0	0	0	0	200	903	0	0	0	0	0	0	0	603	903	0
428	4	0	0	0	0	0	0	200	300	0	0	0	0	0	0	0	200	903	0	0	0	0	0	0	0	603	903	0
428	5	0	0	0	0	0	0	200	300	0	0	0	0	0	0	0	200	903	0	0	0	0	0	0	0	603	903	0
428	6	0	0	0	0	0	0	200	300	0	0	0	0	0	0	0	200	903	0	0	0	0	0	0	0	603	903	0
428	7	0	0	0	0	0	0	200	300	0	0	0	0	0	0	0	200	903	0	0	0	0	0	0	0	603	903	0
428	8	0	0	0	0	0	0	200	300	0	0	0	0	0	0	0	200	903	0	0	0	0	0	0	0	603	903	0
428	9	0	0	0	0	0	0	200	300	0	0	0	0	0	0	0	200	903	0	0	0	0	0	0	0	603	903	0
429	0	0	0	0	0	0	0	200	300	0	0	0	0	0	0	0	200	903	0	0	0	0	0	0	0	603	903	0
429	1	0	0	0	0	0	0	200	300	0	0	0	0	0	0	0	200	903	0	0	0	0	0	0	0	603	903	0
429	2	0	0	0	0	0	0	200	300	0	0	0	0	0	0	0	200	903	0	0	0	0	0	0	0	603	903	0
429	3	0	0	0	0	0	0	200	300	0	0	0	0	0	0	0	200	903	0	0	0	0	0	0	0	603	903	0
429	4	0	0	0	0	0	0	200	300	0	0	0	0	0	0	0	200	903	0	0	0	0	0	0	0	603	903	0
429	5	0	0	0	0	0	0	200	300	0	0	0	0	0	0	0	200	903	0	0	0	0	0	0	0	603	903	0
429	6	0	0	0	0	0	0	200	300	0	0	0	0	0	0	0	200	903	0	0	0	0	0	0	0	603	903	0
429	7	0	0	0	0	0	0	200	300	0	0	0	0	0	0	0	200	903	0	0	0	0	0	0	0	603	903	0
429	8	0	0	0	0	0	0	200	300	0	0	0	0	0	0	0	200	903	0	0	0	0	0	0	0	603	903	0
429	9	0	0	0	0	0	0	200	300	0	0	0	0	0	0	0	200	903	0	0	0	0	0	0	0	603	903	0
430	0	0	0	0	0	0	0	200	300	0	0	0	0	0	0	0	200	903	0	0	0	0	0	0	0	603	903	0
430	1	0	0	0	0	0	0	200	300	0	0	0	0	0	0	0	200	903	0	0	0	0	0	0	0	603	903	0
430	2	0	0	0	0	0	0	200	300	0	0	0	0	0	0	0	200	903	0	0	0	0	0	0	0	603	903	0
430	3	0	0	0	0	0	0	200	300	0	0	0	0	0	0	0	200	903	0	0	0	0	0	0	0	603	903	0
430	4	0	0	0	0	0	0	200	300	0	0	0	0	0	0	0	200	903	0	0	0	0	0	0	0	603	903	0
430	5	0	0	0	0	0	0	200	300	0	0	0	0	0	0	0	200	903	0	0	0	0	0	0	0	603	903	0
430	6	0	0	0	0	0	0	200	300	0	0	0	0	0	0	0	200	903	0	0	0	0	0	0	0	603	903	0
430	7	0	0	0	0	0	0	200	300	0	0	0	0	0	0	0	200	903	0	0	0	0	0	0	0	603	903	0
430	8	0	0	0	0	0	0	200	300	0	0	0	0	0	0	0	200	903	0	0	0	0	0	0	0	603	903	0
430	9	0	0	0	0	0	0	200	300	0	0	0	0	0	0	0	200	903	0	0	0	0	0	0	0	603	903	0
431	0	0	0	0	0	0	0	200	300	0	0	0	0	0	0	0	200	903	0	0	0	0	0	0	0	603	903	0
431	1	0	0	0	0	0	0	200	300	0	0	0	0	0	0	0	200	903	0	0	0	0	0	0	0	603	903	0
431	2	0	0	0	0	0	0	200	300	0	0	0	0	0	0	0	200	903	0	0	0	0	0	0	0	603	903	0
431	3	0	0	0	0	0	0	200	300	0	0	0	0	0	0	0	200	903	0	0	0	0	0	0	0	603	903	0
431	4	0	0	0	0	0	0	200	300	0	0	0	0	0	0	0	200	903	0	0	0	0	0	0	0	603	903	0
431	5	0	0	0	0	0	0	200	300	0	0	0	0	0	0	0	200	903	0	0	0	0	0	0	0	603	903	0
431	6	0	0	0	0	0	0	200	300	0	0	0	0	0	0	0	200	903	0	0	0	0	0	0	0	603	903	0
431	7	0	0	0	0	0	0	200	300	0	0	0	0	0	0	0	200	903	0	0	0	0	0	0	0	603	903	0
431	8	0	0	0	0	0	0	200	300	0	0	0	0	0	0	0	200	903	0	0	0	0	0	0	0	603	903	0
431	9	0	0	0	0	0	0	200	300	0	0	0	0	0	0	0	200	903	0	0	0	0	0	0	0	603	903	0
432	0	0	0	0	0	0	0	200	300	0	0	0	0	0	0	0	200	903	0	0	0	0	0	0	0	603	903	0
432	1	0	0	0	0	0	0	200	300	0	0	0	0	0	0	0	200	903	0	0	0	0	0	0	0	603	903	0
432	2	0	0	0	0	0	0	200	300	0	0	0	0	0	0	0	200	903	0	0	0	0	0	0	0	603	903	0
432	3	0	0	0	0	0	0	200	300	0	0	0	0	0	0	0	200	903	0	0	0	0	0	0	0	603	903	0
432	4	0	0	0	0	0	0	200	300	0	0	0	0	0	0	0	200	903	0	0	0	0	0	0	0	603	903	0
432	5	0	0	0	0	0	0	200	300	0	0	0	0	0	0	0	200	903	0	0	0	0	0	0	0	603	903	0
432	6	0	0	0	0	0	0	200	300	0	0	0	0	0	0	0	200	903	0	0	0	0	0	0	0	603	903	0
432	7	0	0	0	0	0	0	200	300	0	0	0	0	0	0	0	200	903	0	0	0	0	0	0	0	603	903	0
432	8	0	0	0	0	0	0	200	300	0	0	0	0	0	0	0	200	903	0	0	0	0	0	0	0	603	903	0
432	9	0	0	0	0	0	0	200	300	0	0	0	0	0	0	0	200	903	0	0	0	0	0	0	0	603	903	0
433	0	0	0	0	0	0	0	200	300	0	0	0	0	0	0	0	200	903	0	0	0	0	0	0	0	603	903	0
433	1	0	0	0	0	0	0	200	300	0	0	0	0	0	0	0	200	903	0	0	0	0	0	0	0	603	903	0
433	2	0	0	0	0	0	0	200	300	0	0	0	0	0	0	0	200	903	0	0	0	0	0	0	0	603	903	0
433	3	0	0	0	0	0	0	200	300	0	0	0	0	0	0	0	200	903	0	0	0	0	0	0	0	603	903	0
433	4	0	0	0	0	0	0	200	300	0	0	0	0	0	0	0	200	903	0	0	0	0	0	0	0	603	903	0
433	5	0	0	0	0	0	0	200	300	0	0	0	0	0	0	0	200	903	0	0	0	0	0	0	0	603	903	0
433	6	0	0	0	0	0	0	200	300	0	0	0	0	0	0	0	200	903	0	0	0	0	0	0	0	603	903	0
433	7	0	0	0	0	0	0	200	300	0	0	0	0	0	0	0	200	903	0	0	0	0	0	0	0	603	903	0
433	8	0	0	0	0	0	0	200	300	0	0	0	0	0	0	0	200	903	0	0	0	0	0	0	0	603	903	0
433	9	0	0	0	0	0	0	200	300	0	0	0	0	0	0	0	200	903	0	0	0	0	0	0	0	603	903	0
434	0	0	0	0	0	0	0	200	300	0	0	0	0	0	0	0	200	903	0	0	0	0	0	0	0	603	903	0
434	1	0	0	0	0	0	0	200	300	0	0	0	0	0	0	0	200	903	0	0	0	0	0	0	0	603	903	0
434	2	0	0	0	0	0	0	200	300	0	0	0	0	0	0	0	200	903	0	0	0	0	0	0	0	603	903	0
434	3	0	0	0	0	0	0	200	300	0	0	0	0	0	0	0	200	903	0	0	0	0	0	0	0	603	903	0
434	4	0	0	0	0	0	0	200	300	0	0	0	0	0	0	0	200	903	0	0	0	0	0	0	0	603	903	0
434	5	0	0	0	0	0	0	200	300	0	0	0	0	0	0	0	200	903	0	0	0	0	0	0	0	603	903	0
434	6	0	0	0	0	0	0	200	300	0	0	0	0	0	0	0	200	903	0	0	0	0	0	0	0	603	903	0
434	7	0	0	0	0	0	0	200	300	0	0	0	0	0	0	0	200	903	0	0	0	0	0	0	0	603	903	0
434	8	0	0	0	0	0	0	200	300	0	0	0	0	0	0	0	200	903	0	0	0	0	0	0	0	603	903	0
434	9	0	0	0	0	0	0	200	300	0	0	0	0	0	0	0	200	903	0	0	0	0	0	0	0	603	903	0
435	0	0	0	0	0	0	0	200	300	0	0	0	0	0	0	0	200	903	0	0	0	0	0	0	0	603	903	0
435	1	0	0	0	0	0	0	200	300	0	0	0	0	0	0	0	200	903	0	0	0	0	0	0	0	603	903	0
435	2	0	0	0	0	0	0	200	300	0	0	0	0	0	0	0	200	903	0	0	0	0	0	0	0	603	903	0
435	3	0	0	0	0	0	0	200	300	0	0	0	0	0	0	0	200	903	0	0	0	0	0	0	0	603	903	0
435	4	0	0	0	0	0	0	200	300	0	0	0	0	0	0	0	200	903	0	0	0	0	0	0	0	603	903	0
435	5	0	0	0	0	0	0	200	300	0	0	0	0	0	0	0	200	903	0	0	0	0	0	0	0	603	903	0
435	6	0	0	0	0	0	0	200	300	0	0	0	0	0	0	0	200	903	0	0	0	0	0	0	0	603	903	0
435	7	0	0	0	0	0	0	200	300	0	0	0	0	0	0	0	200	903	0	0	0	0	0	0	0	603	903	0
435	8	0	0	0	0	0	0	200	300	0	0	0	0	0	0	0	200	903	0	0	0	0	0	0	0	603	903	0
435	9	0	0	0	0	0	0	200	300	0	0	0	0	0	0	0	200	903	0	0	0	0	0	0	0	603	903	0
436	0	0	0	0	0	0	0	200	300	0	0	0	0	0	0	0	200	903	0	0	0	0	0	0	0	603	903	0
436	1	0	0	0	0	0	0	200	300	0	0	0	0	0	0	0	200	903	0	0	0	0	0	0	0	603	903	0
436	2	0	0	0	0	0	0	200	300	0	0	0	0	0	0	0	200	903	0	0	0	0	0	0	0	603	903	0
436	3	0	0	0	0	0	0	200	300	0	0	0	0	0	0	0	200	903	0	0	0	0	0	0	0	603	903	0
436	4	0	0	0	0	0	0	200	300	0	0	0	0	0	0	0	200	903	0	0	0	0	0	0	0	603	903	0
436	5	0	0	0	0	0	0	200	300	0	0	0	0	0	0	0	200	903	0	0	0	0	0	0	0	603	903	0
436	6	0	0	0	0	0	0	200	300	0	0	0	0	0	0	0	200	903	0	0	0	0	0	0	0	603	903	0
436	7	0	0	0	0	0	0	200	300	0	0	0	0	0	0	0	200	903	0	0	0	0	0	0	0	603	903	0
436	8	0	0	0	0	0	0	200	300	0	0	0	0	0	0	0	200	903	0	0	0	0	0	0	0	603	903	0
436	9	0	0	0	0	0	0	200	300	0	0	0	0	0	0	0	200	903	0	0	0	0	0	0	0	603	903	0
437	0	0	0	0	0	0	0	200	300	0	0	0	0	0	0	0	200	903	0	0	0	0	0	0	0	603	903	0
437	1	0	0	0	0	0	0	200	300	0	0	0	0	0	0	0	200	903	0	0	0	0	0	0	0	603	903	0
437	2	0	0	0	0	0	0	200	300	0	0	0	0	0	0	0	200	903	0	0	0	0	0	0	0	603	903	0
437	3	0	0	0	0	0	0	200	300	0	0	0	0	0	0	0	200	903	0	0	0	0	0	0	0	603	903	0
437	4	0	0	0	0	0	0	200	300	0	0	0	0	0	0	0	200	903	0	0	0	0	0	0	0	603	903	0
437	5	0	0	0	0	0	0	200	300	0	0	0	0	0	0	0	200	903	0	0	0	0	0	0	0	603	903	0
437	6	0	0	0	0	0	0	200	300	0	0	0	0	0	0	0	200	903	0	0	0	0	0	0	0	603	903	0
437	7	0	0	0	0	0	0	200	300	0	0	0	0	0	0	0	200	903	0	0	0	0	0	0	0	603	903	0
437	8	0	0	0	0	0	0	200	300	0	0	0	0	0	0	0	200	903	0	0	0	0	0	0	0	603	903	0
437	9	0	0	0	0	0	0	200	300	0	0	0	0	0	0	0	200	903	0	0	0	0	0	0	0	603	903	0
438	0	0	0	0	0	0	0	200	300	0	0	0	0	0	0	0	200	903	0	0	0	0	0	0	0	603	903	0
438	1	0	0	0	0	0	0	200	300	0	0	0	0	0	0	0	200	903	0	0	0	0	0	0	0	603	903	0
438	2	0	0	0	0	0	0	200	300	0	0	0	0	0	0	0	200	903	0	0	0	0	0	0	0	603	903	0
438	3	0	0	0	0	0	0	200	300	0	0	0	0	0	0	0	200	903	0	0	0	0	0	0	0	603	903	0
438	4	0	0	0	0	0	0	200	300	0	0	0	0	0	0	0	200	903	0	0	0	0	0	0	0	603	903	0
438	5	0	0	0	0	0	0	200	300	0	0	0	0	0	0	0	200	903	0	0	0	0	0	0	0	603	903	0
438	6	0	0	0	0	0	0	200	300	0	0	0	0	0	0	0	200	903	0	0	0	0	0	0	0	603	903	0
438	7	0	0	0	0	0	0	200	300	0	0	0	0	0	0	0	200	903	0	0	0	0	0	0	0	603	903	0
438	8	0	0	0	0	0	0	200	300	0	0	0	0	0	0	0	200	903	0	0	0	0	0	0	0	603	903	0
438	9	0	0	0	0	0	0	200	300	0	0	0	0	0	0	0	200	903	0	0	0	0	0	0	0	603	903	0
439	0	0	0	0	0	0	0	200	300	0	0	0	0	0	0	0	200	903	0	0	0	0	0	0	0	603	903	0
439	1	0	0	0	0	0	0	200	300	0	0	0	0	0	0	0	200	903	0	0	0	0	0	0	0	603	903	0
439	2	0	0	0	0	0	0	200	300	0	0	0	0	0	0	0	200	903	0	0	0	0	0	0	0	603	903	0
439	3	0	0	0	0	0	0	200	300	0	0	0	0	0	0	0	200	903	0	0	0	0	0	0	0	603	903	0
439	4	0	0	0	0	0	0	200	300	0	0	0	0	0	0	0	200	903	0	0	0	0	0	0	0	603	903	0
439	5	0	0	0	0	0	0	200	300	0	0	0	0	0	0	0	200	903	0	0	0	0	0	0	0	603	903	0
439	6	0	0	0	0	0	0	200	300	0	0	0	0	0	0	0	200	903	0	0	0	0	0	0	0	603	903	0
439	7	0	0	0	0	0	0	200	300	0	0	0	0	0	0	0	200	903	0	0	0	0	0	0	0	603	903	0
439	8	0	0	0	0	0	0	200	300	0	0	0	0	0	0	0	200	903	0	0	0	0	0	0	0	603	903	0
439	9	0	0	0	0	0	0	200	300	0	0	0	0	0	0	0	200	903	0	0	0	0	0	0	0	603	903	0
440	0	0	0	0	0	0	0	200	300	0	0	0	0	0	0	0	200	903	0	0	0	0	0	0	0	603	903	0
440	1	0	0	0	0	0	0	200	300	0	0	0	0	0	0	0	200	903	0	0	0	0	0	0	0	603	903	0
440	2	0	0	0	0	0	0	200	300	0	0	0	0	0	0	0	200	903	0	0	0	0	0	0	0	603	903	0
440	3	0	0	0	0	0	0	200	300	0	0	0	0	0	0	0	200	903	0	0	0	0	0	0	0	603	903	0
440	4	0	0	0	0	0	0	200	300	0	0	0	0	0	0	0	200	903	0	0	0	0	0	0	0	603	903	0
440	5	0	0	0	0	0	0	200	300	0	0	0	0	0	0	0	200	903	0	0	0	0	0	0	0	603	903	0
440	6	0	0	0	0	0	0	200	300	0	0	0	0	0	0	0	200	903	0	0	0	0	0	0	0	603	903	0
440	7	0	0	0	0	0	0	200	300	0	0	0	0	0	0	0	200	903	0	0	0	0	0	0	0	603	903	0
440	8	0	0	0	0	0	0	200	300	0	0	0	0	0	0	0	200	903	0	0	0	0	0	0	0	603	903	0
440	9	0	0	0	0	0	0	200	300	0	0	0	0	0	0	0	200	903	0	0	0	0	0	0	0	603	903	0
441	0	0	0	0	0	0	0	200	300	0	0	0	0	0	0	0	200	903	0	0	0	0	0	0	0	603	903	0
441	1	0	0	0	0	0	0	200	300	0	0	0	0	0	0	0	200	903	0	0	0	0	0	0	0	603	903	0
441	2	0	0	0	0	0	0	200	300	0	0	0	0	0	0	0	200	903	0	0	0	0	0	0	0	603	903	0
441	3	0	0	0	0	0	0	200	300	0	0	0	0	0	0	0	200	903	0	0	0	0	0	0	0	603	903	0
441	4	0	0	0	0	0	0	200	300	0	0	0	0	0	0	0	200	903	0	0	0	0	0	0	0	603	903	0
441	5	0	0	0	0	0	0	200	300	0	0	0	0	0	0	0	200	903	0	0	0	0	0	0	0	603	903	0
441	6	0	0	0	0	0	0	200	300	0	0	0	0	0	0	0	200	903	0	0	0	0	0	0	0	603	903	0
441	7	0	0	0	0	0	0	200	300	0	0	0	0	0	0	0	200	903	0	0	0	0	0	0	0	603	903	0
441	8	0	0	0	0	0	0	200	300	0	0	0	0	0	0	0	200	903	0	0	0	0	0	0	0	603	903	0
441	9	0	0	0	0	0	0	200	300	0	0	0	0	0	0	0	200	903	0	0	0	0	0	0	0	603	903	0
442	0	0	0	0	0	0	0	200	300	0	0	0	0	0	0	0	200	903	0	0	0	0	0	0	0	603	903	0
442	1	0	0	0	0	0	0	200	300	0	0	0	0	0	0	0	200	903	0	0	0	0	0	0	0	603	903	0
442	2	0	0	0	0	0	0	200	300	0	0	0	0	0	0	0	200	903	0	0	0	0	0	0	0	603	903	0
442	3	0	0	0	0	0	0	200	300	0	0	0	0	0	0	0	200	903	0	0	0	0	0	0	0	603	903	0
442	4	0	0	0	0	0	0	200	300	0	0	0	0	0	0	0	200	903	0	0	0	0	0	0	0	603	903	0
442	5	0	0	0	0	0	0	200	300	0	0	0	0	0	0	0	200	903	0	0	0	0	0	0	0	603	903	0
442	6	0	0	0	0	0	0	200	300	0	0	0	0	0	0	0	200	903	0	0	0	0	0	0	0	603	903	0
442	7	0	0	0	0	0	0	200	300	0	0	0	0	0	0	0	200	903	0	0	0	0	0	0	0	603	903	0
442	8	0	0	0	0	0	0	200	300	0	0	0	0	0	0	0	200	903	0	0	0	0	0	0	0	603	903	0
442	9	0	0	0	0	0	0	200	300	0	0	0	0	0	0	0	200	903	0	0	0	0	0	0	0	603	903	0
443	0	0	0	0	0	0	0	200	300	0	0	0	0	0	0	0	200	903	0	0	0	0	0	0	0	603	903	0
443	1	0	0	0	0	0	0	200	300	0	0	0	0	0	0	0	200	903	0	0	0	0	0	0	0	603	903	0
443	2	0	0	0	0	0	0	200	300	0	0	0	0	0	0	0	200	903	0	0	0	0	0	0	0	603	903	0
443	3	0	0	0	0	0	0	200	300	0	0	0	0	0	0	0	200	903	0	0	0	0	0	0	0	603	903	0
443	4	0	0	0	0	0	0	200	300	0	0	0	0	0	0	0	200	903	0	0	0	0	0	0	0	603	903	0
443	5	0	0	0	0	0	0	200	300	0	0	0	0	0	0	0	200	903	0	0	0	0	0	0	0	603	903	0
443	6	0	0	0	0	0	0	200	300	0	0	0	0	0	0	0	200	903	0	0	0	0	0	0	0	603	903	0
443	7	0	0	0	0	0	0	200	300	0	0	0	0	0	0	0	200	903	0	0	0	0	0	0	0	603	903	0
443	8	0	0	0	0	0	0	200	300	0	0	0	0	0	0	0	200	903	0	0	0	0	0	0	0	603	903	0
443	9	0	0	0	0	0	0	200	300	0	0	0	0	0	0	0	200	903	0	0	0	0	0	0	0	603	903	0
444	0	0	0	0	0	0	0	200	300	0	0	0	0	0	0	0	200	903	0	0	0	0	0	0	0	603	903	0
444	1	0	0	0	0	0	0	200	300	0	0	0	0	0	0	0	200	903	0	0	0	0	0	0	0	603	903	0
444	2	0	0	0	0	0	0	200	300	0	0	0	0	0	0	0	200	903	0	0	0	0	0	0	0	603	903	0
444	3	0	0	0	0	0	0	200	300	0	0	0	0	0	0	0	200	903	0	0	0	0	0	0	0	603	903	0
444	4	0	0	0	0	0	0	200	300	0	0	0	0	0	0	0	200	903	0	0	0	0	0	0	0	603	903	0
444	5	0	0	0	0	0	0	200	300	0	0	0	0	0	0	0	200	903	0	0	0	0	0	0	0	603	903	0
444	6	0	0	0	0	0	0	200	300	0	0	0	0	0	0	0	200	903	0	0	0	0	0	0	0	603	903	0
444	7	0	0	0	0	0	0	200	300	0	0	0	0	0	0	0	200	903	0	0	0	0	0	0	0	603	903	0
444	8	0	0	0	0	0	0	200	300	0	0	0	0	0	0	0	200	903	0	0	0	0	0	0	0	603	903	0
444	9	0	0	0	0	0	0	200	300	0	0	0	0	0	0	0	200	903	0	0	0	0	0	0	0	603	903	0
445	0	0	0	0	0	0	0	200	300	0	0	0	0	0	0	0	200	903	0	0	0	0	0	0	0	603	903	0
445	1	0	0	0	0	0	0	200	300	0	0	0	0	0	0	0	200	903	0	0	0	0	0	0	0	603	903	0
445	2	0	0	0	0	0	0	200	300	0	0	0	0	0	0	0	200	903	0	0	0	0	0	0	0	603	903	0
445	3	0	0	0	0	0	0	200	300	0	0	0	0	0	0	0	200	903	0	0	0	0	0	0	0	603	903	0
445	4	0	0	0	0	0	0	200	300	0	0	0	0	0	0	0	200	903	0	0	0	0	0	0	0	603	903	0
445	5	0	0	0	0	0	0	200	300	0	0	0	0	0	0	0	200	903	0	0	0	0	0	0	0	603	903	0
445	6	0	0	0	0	0	0	200	300	0	0	0	0	0	0	0	200	903	0	0	0	0	0	0	0	603	903	0
445	7	0	0	0	0	0	0	200	300	0	0	0	0	0	0	0	200	903	0	0	0	0	0	0	0	603	903	0
445	8	0	0	0	0	0	0	200	300	0	0	0	0	0	0	0	200	903	0	0	0	0	0	0	0	603	903	0
445	9	0	0	0	0	0	0	200	300	0	0	0	0	0	0	0	200	903	0	0	0	0	0	0	0	603	903	0
446	0	0	0	0	0	0	0	200	300	0	0	0	0	0	0	0	200	903	0	0	0	0	0	0	0	603	903	0
446	1	0	0	0	0	0	0	200	300	0	0	0	0	0	0	0	200	903	0	0	0	0	0	0	0	603	903	0
446	2	0	0	0	0	0	0	200	300	0	0	0	0	0	0	0	200	903	0	0	0	0	0	0	0	603	903	0
446	3	0	0	0	0	0	0	200	300	0	0	0	0	0	0	0	200	903	0	0	0	0	0	0	0	603	903	0
446	4	0	0	0	0	0	0	200	300	0	0	0	0	0	0	0	200	903	0	0	0	0	0	0	0	603	903	0
446	5	0	0	0	0	0	0	200	300	0	0	0	0	0	0	0	200	903	0	0	0	0	0	0	0	603	903	0
446	6	0	0	0	0	0	0	200	300	0	0	0	0	0	0	0	200	903	0	0	0	0	0	0	0	603	903	0
446	7	0	0	0	0	0	0	200	300	0	0	0	0	0	0	0	200	903	0	0	0	0	0	0	0	603	903	0
446	8	0	0	0	0	0	0	200	300	0	0	0	0	0	0	0	200	903	0	0	0	0	0	0	0	603	903	0
446	9	0	0	0	0	0	0	200	300	0	0	0	0	0	0	0	200	903	0	0	0	0	0	0	0	603	903	0
447	0	0	0	0	0	0	0	200	300	0	0	0	0	0	0	0	200	903	0	0	0	0	0	0	0	603	903	0
447	1	0	0	0	0	0	0	200	300	0	0	0	0	0	0	0	200	903	0	0	0	0	0	0	0	603	903	0
447	2	0	0	0	0	0	0	200	300	0	0	0	0	0	0	0	200	903	0	0	0	0	0	0	0	603	903	0
447	3	0	0	0	0	0	0	200	300	0	0	0	0	0	0	0	200	903	0	0	0	0	0	0	0	603	903	0
447	4	0	0	0	0	0	0	200	300	0	0	0	0	0	0	0	200	903	0	0	0	0	0	0	0	603	903	0
447	5	0	0	0	0	0	0	200	300	0	0	0	0	0	0	0	200	903	0	0	0	0	0	0	0	603	903	0
447	6	0	0	0	0	0	0	200	300	0	0	0	0	0	0	0	200	903	0	0	0	0	0	0	0	603	903	0
447	7	0	0	0	0	0	0	200	300	0	0	0	0	0	0	0	200	903	0	0	0	0	0	0	0	603	903	0
447	8	0	0	0	0	0	0	200	300	0	0	0	0	0	0	0	200	903	0	0	0	0	0	0	0	603	903	0
447	9	0	0	0	0	0	0	200	300	0	0	0	0	0	0	0	200	903	0	0	0	0	0	0	0	603	903	0
448	0	0	0	0	0	0	0	200	300	0	0	0	0	0	0	0	200	903	0	0	0	0	0	0	0	603	903	0
448	1	0	0	0	0	0	0	200	300	0	0	0	0	0	0	0	200	903	0	0	0	0	0	0	0	603	903	0
448	2	0	0	0	0	0	0	200	300	0	0	0	0	0	0	0	200	903	0	0	0	0	0	0	0	603	903	0
448	3	0	0	0	0	0	0	200	300	0	0	0	0	0	0	0	200	903	0	0	0	0	0	0	0	603	903	0
448	4	0	0	0	0	0	0	200	300	0	0	0	0	0	0	0	200	903	0	0	0	0	0	0	0	603	903	0
448	5	0	0	0	0	0	0	200	300	0	0	0	0	0	0	0	200	903	0	0	0	0	0	0	0	603	903	0
448	6	0	0	0	0	0	0	200	300	0	0	0	0	0	0	0	200	903	0	0	0	0	0	0	0	603	903	0
448	7	0	0	0	0	0	0	200	300	0	0	0	0	0	0	0	200	903	0	0	0	0	0	0	0	603	903	0
448	8	0	0	0	0	0	0	200	300	0	0	0	0	0	0	0	200	903	0	0	0	0	0	0	0	603	903	0
448	9	0	0	0	0	0	0	200	300	0	0	0	0	0	0	0	200	903	0	0	0	0	0	0	0	603	903	0
449	0	0	0	0	0	0	0	200	300	0	0	0	0	0	0	0	200	903	0	0	0	0	0	0	0	603	903	0
449	1	0	0	0	0	0	0	200	300	0	0	0	0	0	0	0	200	903	0	0	0	0	0	0	0	603	903	0
449	2	0	0	0	0	0	0	200	300	0	0	0	0	0	0	0	200	903	0	0	0	0	0	0	0	603	903	0
449	3	0	0	0	0	0	0	200	300	0	0	0	0	0	0	0	200	903	0	0	0	0	0	0	0	603	903	0
449	4	0	0	0	0	0	0	200	300	0	0	0	0	0	0	0	200	903	0	0	0	0	0	0	0	603	903	0
449	5	0	0	0	0	0	0	200	300	0	0	0	0	0	0	0	200	903	0	0	0	0	0	0	0	603	903	0
449	6	0	0	0	0	0	0	200	300	0	0	0	0	0	0	0	200	903	0	0	0	0	0	0	0	603	903	0
449	7	0	0	0	0	0	0	200	300	0	0	0	0	0	0	0	200	903	0	0	0	0	0	0	0	603	903	0
449	8	0	0	0	0	0	0	200	300	0	0	0	0	0	0	0	200	903	0	0	0	0	0	0	0	603	903	0
449	9	0	0	0	0	0	0	200	300	0	0	0	0	0	0	0	200	903	0	0	0	0	0	0	0	603	903	0
450	0	0	0	0	0	0	0	200	300	0	0	0	0	0	0	0	200	903	0	0	0	0	0	0	0	603	903	0
450	1	0	0	0	0	0	0	200	300	0	0	0	0	0	0	0	200	903	0	0	0	0	0	0	0	603	903	0
450	2	0	0	0	0	0	0	200	300	0	0	0	0	0	0	0	200	903	0	0	0	0	0	0	0	603	903	0
450	3	0	0	0	0	0	0	200	300	0	0	0	0	0	0	0	200	903	0	0	0	0	0	0	0	603	903	0
450	4	0	0	0	0	0	0	200	300	0	0	0	0	0	0	0	200	903	0	0	0	0	0	0	0	603	903	0
450	5	0	0	0	0	0	0	200	300	0	0	0	0	0	0	0	200	903	0	0	0	0	0	0	0	603	903	0
450	6	0	0	0	0	0	0	200	300	0	0	0	0	0	0	0	200	903	0	0	0	0	0	0	0	603	903	0
450	7	0	0	0	0	0	0	200	300	0	0	0	0	0	0	0	200	903	0	0	0	0	0	0	0	603	903	0
450	8	0	0	0	0	0	0	200	300	0	0	0	0	0	0	0	200	903	0	0	0	0	0	0	0	603	903	0
450	9	0	0	0	0	0	0	200	300	0	0	0	0	0	0	0	200	903	0	0	0	0	0	0	0	603	903	0
451	0	0	0	0	0	0	0	200	300	0	0	0	0	0	0	0	200	903	0	0	0	0	0	0	0	603	903	0
451	1	0	0	0	0	0	0	200	300	0	0	0	0	0	0	0	200	903	0	0	0	0	0	0	0	603	903	0
451	2	0	0	0	0	0	0	200	300	0	0	0	0	0	0	0	200	903	0	0	0	0	0	0	0	603	903	0
451	3	0	0	0	0	0	0	200	300	0	0	0	0	0	0	0	200	903	0	0	0	0	0	0	0	603	903	0
451	4	0	0	0	0	0	0	200	300	0	0	0	0	0	0	0	200	903	0	0	0	0	0	0	0	603	903	0
451	5	0	0	0	0	0	0	200	300	0	0	0	0	0	0	0	200	903	0	0	0	0	0	0	0	603	903	0
451	6	0	0	0	0	0	0	200	300	0	0	0	0	0	0	0	200	903	0	0	0	0	0	0	0	603	903	0
451	7	0	0	0	0	0	0	200	300	0	0	0	0	0	0	0	200	903	0	0	0	0	0	0	0	603	903	0
451	8	0	0	0	0	0	0	200	300	0	0	0	0	0	0	0	200	903	0	0	0	0	0	0	0	603	903	0
451	9	0	0	0	0	0	0	200	300	0	0	0	0	0	0	0	200	903	0	0	0	0	0	0	0	603	903	0
452	0	0	0	0	0	0	0	200	300	0	0	0	0	0	0	0	200	903	0	0	0	0	0	0	0	603	903	0
452	1	0	0	0	0	0	0	200	300	0	0	0	0	0	0	0	200	903	0	0	0	0	0	0	0	603	903	0
452	2	0	0	0	0	0	0	200	300	0	0	0	0	0	0	0	200	903	0	0	0	0	0	0	0	603	903	0
452	3	0	0	0	0	0	0	200	300	0	0	0	0	0	0	0	200	903	0	0	0	0	0	0	0	603	903	0
452	4	0	0	0	0	0	0	200	300	0	0	0	0	0	0	0	200	903	0	0	0	0	0	0	0	603	903	0
452	5	0	0	0	0	0	0	200	300	0	0	0	0	0	0	0	200	903	0	0	0	0	0	0	0	603	903	0
452	6	0	0	0	0	0	0	200	300	0	0	0	0	0	0	0	200	903	0	0	0	0	0	0	0	603	903	0
452	7	0	0	0	0	0	0	200	300	0	0	0	0	0	0	0	200	903	0	0	0	0	0	0	0	603	903	0
452	8	0	0	0	0	0	0	200	300	0	0	0	0	0	0	0	200	903	0	0	0	0	0	0	0	603	903	0
452	9	0	0	0	0	0	0	200	300	0	0	0	0	0	0	0	200	903	0	0	0	0	0	0	0	603	903	0
453	0	0	0	0	0	0	0	200	300	0	0	0	0	0	0	0	200	903	0	0	0	0	0	0	0	603	903	0
453	1	0	0	0	0	0	0	200	300	0	0	0	0	0	0	0	200	903	0	0	0	0	0	0	0	603	903	0
453	2	0	0	0	0	0	0	200	300	0	0	0	0	0	0	0	200	903	0	0	0	0	0	0	0	603	903	0
453	3	0	0	0	0	0	0	200	300	0	0	0	0	0	0	0	200	903	0	0	0	0	0	0	0	603	903	0
453	4	0	0	0	0	0	0	200	300	0	0	0	0	0	0	0	200	903	0	0	0	0	0	0	0	603	903	0
453	5	0	0	0	0	0	0	200	300	0	0	0	0	0	0	0	200	903	0	0	0	0	0	0	0	603	903	0
453	6	0	0	0	0	0	0	200	300	0	0	0	0	0	0	0	200	903	0	0	0	0	0	0	0	603	903	0
453	7	0	0	0	0	0	0	200	300	0	0	0	0	0	0	0	200	903	0	0	0	0	0	0	0	603	903	0
453	8	0	0	0	0	0	0	200	300	0	0	0	0	0	0	0	200	903	0	0	0	0	0	0	0	603	903	0
453	9	0	0	0	0	0	0	200	300	0	0	0	0	0	0	0	200	903	0	0	0	0	0	0	0	603	903	0
454	0	0	0	0	0	0	0	200	300	0	0	0	0	0	0	0	200	903	0	0	0	0	0	0	0	603	903	0
454	1	0	0	0	0	0	0	200	300	0	0	0	0	0	0	0	200	903	0	0	0	0	0	0	0	603	903	0
454	2	0	0	0	0	0	0	200	300	0	0	0	0	0	0	0	200	903	0	0	0	0	0	0	0	603	903	0
454	3	0	0	0	0	0	0	200	300	0	0	0	0	0	0	0	200	903	0	0	0	0	0	0	0	603	903	0
454	4	0	0	0	0	0	0	200	300	0	0	0	0	0	0	0	200	903	0	0	0	0	0	0	0	603	903	0
454	5	0	0	0	0	0	0	200	300	0	0	0	0	0	0	0	200	903	0	0	0	0	0	0	0	603	903	0
454	6	0	0	0	0	0	0	200	300	0	0	0	0	0	0	0	200	903	0	0	0	0	0	0	0	603	903	0
454	7	0	0	0	0	0	0	200	300	0	0	0	0	0	0	0	200	903	0	0	0	0	0	0	0	603	903	0
454	8	0	0	0	0	0	0	200	300	0	0	0	0	0	0	0	200	903	0	0	0	0	0	0	0	603	903	0
454	9	0	0	0	0	0	0	200	300	0	0	0	0	0	0	0	200	903	0	0	0	0	0	0	0	603	903	0
455	0	0	0	0	0	0	0	200	300	0	0	0	0	0	0	0	200	903	0	0	0	0	0	0	0	603	903	0
455	1	0	0	0	0	0	0	200	300	0	0	0	0	0	0	0	200	903	0	0	0	0	0	0	0	603	903	0
455	2	0	0	0	0	0	0	200	300	0	0	0	0	0	0	0	200	903	0	0	0	0	0	0	0	603	903	0
455	3	0	0	0	0	0	0	200	300	0	0	0	0	0	0	0	200	903	0	0	0	0	0	0	0	603	903	0
455	4	0	0	0	0	0	0	200	300	0	0	0	0	0	0	0	200	903	0	0	0	0	0	0	0	603	903	0
455	5	0	0	0	0	0	0	200	300	0	0	0	0	0	0	0	200	903	0	0	0	0	0	0	0	603	903	0
455	6	0	0	0	0	0	0	200	300	0	0	0	0	0	0	0	200	903	0	0	0	0	0	0	0	603	903	0
455	7	0	0	0	0	0	0	200	300	0	0	0	0	0	0	0	200	903	0	0	0	0	0	0	0	603	903	0
455	8	0	0	0	0	0	0	200	300	0	0	0	0	0	0	0	200	903	0	0	0	0	0	0	0	603	903	0
455	9	0	0	0	0	0	0	200	300	0	0	0	0	0	0	0	200	903	0	0	0	0	0	0	0	603	903	0
456	0	0	0	0	0	0	0	200	300	0	0	0	0	0	0	0	200	903	0	0	0	0	0	0	0	603	903	0
456	1	0	0	0	0	0	0	200	300	0	0	0	0	0	0	0	200	903	0	0	0	0	0	0	0	603	903	0
456	2	0	0	0	0	0	0	200	300	0	0	0	0	0	0	0	200	903	0	0	0	0	0	0	0	603	903	0
456	3	0	0	0	0	0	0	200	300	0	0	0	0	0	0	0	200	903	0	0	0	0	0	0	0	603	903	0
456	4	0	0	0	0	0	0	200	300	0	0	0	0	0	0	0	200	903	0	0	0	0	0	0	0	603	903	0
456	5	0	0	0	0	0	0	200	300	0	0	0	0	0	0	0	200	903	0	0	0	0	0	0	0	603	903	0
456	6	0	0	0	0	0	0	200	300	0	0	0	0	0	0	0	200	903	0	0	0	0	0	0	0	603	903	0
456	7	0	0	0	0	0	0	200	300	0	0	0	0	0	0	0	200	903	0	0	0	0	0	0	0	603	903	0
456	8	0	0	0	0	0	0	200	300	0	0	0	0	0	0	0	200	903	0	0	0	0	0	0	0	603	903	0
456	9	0	0	0	0	0	0	200	300	0	0	0	0	0	0	0	200	903	0	0	0	0	0	0	0	603	903	0
457	0	0	0	0	0	0	0	200	300	0	0	0	0	0	0	0	200	903	0	0	0	0	0	0	0	603	903	0
457	1	0	0	0	0	0	0	200	300	0	0	0	0	0	0	0	200	903	0	0	0	0	0	0	0	603	903	0
457	2	0	0	0	0	0	0	200	300	0	0	0	0	0	0	0	200	903	0	0	0	0	0	0	0	603	903	0
457	3	0	0	0	0	0	0	200	300	0	0	0	0	0	0	0	200	903	0	0	0	0	0	0	0	603	903	0
457	4	0	0	0	0	0	0	200	300	0	0	0	0	0	0	0	200	903	0	0	0	0	0	0	0	603	903	0
457	5	0	0	0	0	0	0	200	300	0	0	0	0	0	0	0	200	903	0	0	0	0	0	0	0	603	903	0
457	6	0	0	0	0	0	0	200	300	0	0	0	0	0	0	0	200	903	0	0	0	0	0	0	0	603	903	0
457	7	0	0	0	0	0	0	200	300	0	0	0	0	0	0	0	200	903	0	0	0	0	0	0	0	603	903	0
457	8	0	0	0	0	0	0	200	300	0	0	0	0	0	0	0	200	903	0	0	0	0	0	0	0	603	903	0
457	9	0	0	0	0	0	0	200	300	0	0	0	0	0	0	0	200	903	0	0	0	0	0	0	0	603	903	0
458	0	0	0	0	0	0	0	200	300	0	0	0	0	0	0	0	200	903	0	0	0	0	0	0	0	603	903	0
458	1	0	0	0	0	0	0	200	300	0	0	0	0	0	0	0	200	903	0	0	0	0	0	0	0	603	903	0
458	2	0	0	0	0	0	0	200	300	0	0	0	0	0	0	0	200	903	0	0	0	0	0	0	0	603	903	0
458	3	0	0	0	0	0	0	200	300	0	0	0	0	0	0	0	200	903	0	0	0	0	0	0	0	603	903	0
458	4	0	0	0	0	0	0	200	300	0	0	0	0	0	0	0	200	903	0	0	0	0	0	0	0	603	903	0
458	5	0	0	0	0	0	0	200	300	0	0	0	0	0	0	0	200	903	0	0	0	0	0	0	0	603	903	0
458	6	0	0	0	0	0	0	200	300	0	0	0	0	0	0	0	200	903	0	0	0	0	0	0	0	603	903	0
458	7	0	0	0	0	0	0	200	300	0	0	0	0	0	0	0	200	903	0	0	0	0	0	0	0	603	903	0
458	8	0	0	0	0	0	0	200	300	0	0	0	0	0	0	0	200	903	0	0	0	0	0	0	0	603	903	0
458	9	0	0	0	0	0	0	200	300	0	0	0	0	0	0	0	200	903	0	0	0	0	0	0	0	603	903	0
459	0	0	0	0	0	0	0	200	300	0	0	0	0	0	0	0	200	903	0	0	0	0	0	0	0	603	903	0
459	1	0	0	0	0	0	0	200	300	0	0	0	0	0	0	0	200	903	0	0	0	0	0	0	0	603	903	0
459	2	0	0	0	0	0	0	200	300	0	0	0	0	0	0	0	200	903	0	0	0	0	0	0	0	603	903	0
459	3	0	0	0	0	0	0	200	300	0	0	0	0	0	0	0	200	903	0	0	0	0	0	0	0	603	903	0
459	4	0	0	0	0	0	0	200	300	0	0	0	0	0	0	0	200	903	0	0	0	0	0	0	0	603	903	0
459	5	0	0	0	0	0	0	200	300	0	0	0	0	0	0	0	200	903	0	0	0	0	0	0	0	603	903	0
459	6	0	0	0	0	0	0	200	300	0	0	0	0	0	0	0	200	903	0	0	0	0	0	0	0	603	903	0
459	7	0	0	0	0	0	0	200	300	0	0	0	0	0	0	0	200	903	0	0	0	0	0	0	0	603	903	0
459	8	0	0	0	0	0	0	200	300	0	0	0	0	0	0	0	200	903	0	0	0	0	0	0	0	603	903	0
459	9	0	0	0	0	0	0	200	300	0	0	0	0	0	0	0	200	903	0	0	0	0	0	0	0	603	903	0
460	0	0	0	0	0	0	0	200	300	0	0	0	0	0	0	0	200	903	0	0	0	0	0	0	0	603	903	0
460	1	0	0	0	0	0	0	200	300	0	0	0	0	0	0	0	200	903	0	0	0	0	0	0	0	603	903	0
460	2	0	0	0	0	0	0	200	300	0	0	0	0	0	0	0	200	903	0	0	0	0	0	0	0	603	903	0
460	3	0	0	0	0	0	0	200	300	0	0	0	0	0	0	0	200	903	0	0	0	0	0	0	0	603	903	0
460	4	0	0	0	0	0	0	200	300	0	0	0	0	0	0	0	200	903	0	0	0	0	0	0	0	603	903	0
460	5	0	0	0	0	0	0	200	300	0	0	0	0	0	0	0	200	903	0	0	0	0	0	0	0	603	903	0
460	6	0	0	0	0	0	0	200	300	0	0	0	0	0	0	0	200	903	0	0	0	0	0	0	0	603	903	0
460	7	0	0	0	0	0	0	200	300	0	0	0	0	0	0	0	200	903	0	0	0	0	0	0	0	603	903	0
460	8	0	0	0	0	0	0	200	300	0	0	0	0	0	0	0	200	903	0	0	0	0	0	0	0	603	903	0
460	9	0	0	0	0	0	0	200	300	0	0	0	0	0	0	0	200	903	0	0	0	0	0	0	0	603	903	0
461	0	0	0	0	0	0	0	200	300	0	0	0	0	0	0	0	200	903	0	0	0	0	0	0	0	603	903	0
461	1	0	0	0	0	0	0	200	300	0	0	0	0	0	0	0	200	903	0	0	0	0	0	0	0	603	903	0
461	2	0	0	0	0	0	0	200	300	0	0	0	0	0	0	0	200	903	0	0	0	0	0	0	0	603	903	0
461	3	0	0	0	0	0	0	200	300	0	0	0	0	0	0	0	200	903	0	0	0	0	0	0	0	603	903	0
461	4	0	0	0	0	0	0	200	300	0	0	0	0	0	0	0	200	903	0	0	0	0	0	0	0	603	903	0
461	5	0	0	0	0	0	0	200	300	0	0	0	0	0	0	0	200	903	0	0	0	0	0	0	0	603	903	0
461	6	0	0	0	0	0	0	200	300	0	0	0	0	0	0	0	200	903	0	0	0	0	0	0	0	603	903	0
461	7	0	0	0	0	0	0	200	300	0	0	0	0	0	0	0	200	903	0	0	0	0	0	0	0	603	903	0
461	8	0	0	0	0	0	0	200	300	0	0	0	0	0	0	0	200	903	0	0	0	0	0	0	0	603	903	0
461	9	0	0	0	0	0	0	200	300	0	0	0	0	0	0	0	200	903	0	0	0	0	0	0	0	603	903	0
462	0	0	0	0	0	0	0	200	300	0	0	0	0	0	0	0	200	903	0	0	0	0	0	0	0	603	903	0
462	1	0	0	0	0	0	0	200	300	0	0	0	0	0	0	0	200	903	0	0	0	0	0	0	0	603	903	0
462	2	0	0	0	0	0	0	200	300	0	0	0	0	0	0	0	200	903	0	0	0	0	0	0	0	603	903	0
462	3	0	0	0	0	0	0	200	300	0	0	0	0	0	0	0	200	903	0	0	0	0	0	0	0	603	903	0
462	4	0	0	0	0	0	0	200	300	0	0	0	0	0	0	0	200	903	0	0	0	0	0	0	0	603	903	0
462	5	0	0	0	0	0	0	200	300	0	0	0	0	0	0	0	200	903	0	0	0	0	0	0	0	603	903	0
462	6	0	0	0	0	0	0	200	300	0	0	0	0	0	0	0	200	903	0	0	0	0	0	0	0	603	903	0
462	7	0	0	0	0	0	0	200	300	0	0	0	0	0	0	0	200	903	0	0	0	0	0	0	0	603	903	0
462	8	0	0	0	0	0	0	200	300	0	0	0	0	0	0	0	200	903	0	0	0	0	0	0	0	603	903	0
462	9	0	0	0	0	0	0	200	300	0	0	0	0	0	0	0	200	903	0	0	0	0	0	0	0	603	903	0
463	0	0	0	0	0	0	0	200	300	0	0	0	0	0	0	0	200	903	0	0	0	0	0	0	0	603	903	0
463	1	0	0	0	0	0	0	200	300	0	0	0	0	0	0	0	200	903	0	0	0	0	0	0	0	603	903	0
463	2	0	0	0	0	0	0	200	300	0	0	0	0	0	0	0	200	903	0	0	0	0	0	0	0	603	903	0
463	3	0	0	0	0	0	0	200	300	0	0	0	0	0	0	0	200	903	0	0	0	0	0	0	0	603	903	0
463	4	0	0	0	0	0	0	200	300	0	0	0	0	0	0	0	200	903	0	0	0	0	0	0	0	603	903	0
463	5	0	0	0	0	0	0	200	300	0	0	0	0	0	0	0	200	903	0	0	0	0	0	0	0	603	903	0
463	6	0	0	0	0	0	0	200	300	0	0	0	0	0	0	0	200	903	0	0	0	0	0	0	0	603	903	0
463	7	0	0	0	0	0	0	200	300	0	0	0	0	0	0	0	200	903	0	0	0	0	0	0	0	603	903	0
463	8	0	0	0	0	0	0	200	300	0	0	0	0	0	0	0	200	903	0	0	0	0	0	0	0	603	903	0
463	9	0	0	0	0	0	0	200	300	0	0	0	0	0	0	0	200	903	0	0	0	0	0	0	0	603	903	0
464	0	0	0	0	0	0	0	200	300	0	0	0	0	0	0	0	200	903	0	0	0	0	0	0	0	603	903	0
464	1	0	0	0	0	0	0	200	300	0	0	0	0	0	0	0	200	903	0	0	0	0	0	0	0	603	903	0
464	2	0	0	0	0	0	0	200	300	0	0	0	0	0	0	0	200	903	0	0	0	0	0	0	0	603	903	0
464	3	0	0	0	0	0	0	200	300	0	0	0	0	0	0	0	200	903	0	0	0	0	0	0	0	603	903	0
464	4	0	0	0	0	0	0	200	300	0	0	0	0	0	0	0	200	903	0	0	0	0	0	0	0	603	903	0
464	5	0	0	0	0	0	0	200	300	0	0	0	0	0	0	0	200	903	0	0	0	0	0	0	0	603	903	0
464	6	0	0	0	0	0	0	200	300	0	0	0	0	0	0	0	200	903	0	0	0	0	0	0	0	603	903	0
464	7	0	0	0	0	0	0	200	300	0	0	0	0	0	0	0	200	903	0	0	0	0	0	0	0	603	903	0
464	8	0	0	0	0	0	0	200	300	0	0	0	0	0	0	0	200	903	0	0	0	0	0	0	0	603	903	0
464	9	0	0	0	0	0	0	200	300	0	0	0	0	0	0	0	200	903	0	0	0	0	0	0	0	603	903	0
465	0	0	0	0	0	0	0	200	300	0	0	0	0	0	0	0	200	903	0	0	0	0	0	0	0	603	903	0
465	1	0	0	0	0	0	0	200	300	0	0	0	0	0	0	0	200	903	0	0	0	0	0	0	0	603	903	0
465	2	0	0	0	0	0	0	200	300	0	0	0	0	0	0	0	200	903	0	0	0	0	0	0	0	603	903	0
465	3	0	0	0	0	0	0	200	300	0	0	0	0	0	0	0	200	903	0	0	0	0	0	0	0	603	903	0
465	4	0	0	0	0	0	0	200	300	0	0	0	0	0	0	0	200	903	0	0	0	0	0	0	0	603	903	0
465	5	0	0	0	0	0	0	200	300	0	0	0	0	0	0	0	200	903	0	0	0	0	0	0	0	603	903	0
465	6	0	0	0	0	0	0	200	300	0	0	0	0	0	0	0	200	903	0	0	0	0	0	0	0	603	903	0
465	7	0	0	0	0	0	0	200	300	0	0	0	0	0	0	0	200	903	0	0	0	0	0	0	0	603	903	0
465	8	0	0	0	0	0	0	200	300	0	0	0	0	0	0	0	200	903	0	0	0	0	0	0	0	603	903	0
465	9	0	0	0	0	0	0	200	300	0	0	0	0	0	0	0	200	903	0	0	0	0	0	0	0	603	903	0
466	0	0	0	0	0	0	0	200	300	0	0	0	0	0	0	0	200	903	0	0	0	0	0	0	0	603	903	0
466	1	0	0	0	0	0	0	200	300	0	0	0	0	0	0	0	200	903	0	0	0	0	0	0	0	603	903	0
466	2	0	0	0	0	0	0	200	300	0	0	0	0	0	0	0	200	903	0	0	0	0	0	0	0	603	903	0
466	3	0	0	0	0	0	0	200	300	0	0	0	0	0	0	0	200	903	0	0	0	0	0	0	0	603	903	0
466	4	0	0	0	0	0	0	200	300	0	0	0	0	0	0	0	200	903	0	0	0	0	0	0	0	603	903	0
466	5	0	0	0	0	0	0	200	300	0	0	0	0	0	0	0	200	903	0	0	0	0	0	0	0	603	903	0
466	6	0	0	0	0	0	0	200	300	0	0	0	0	0	0	0	200	903	0	0	0	0	0	0	0	603	903	0
466	7	0	0	0	0	0	0	200	300	0	0	0	0	0	0	0	200	903	0	0	0	0	0	0	0	603	903	0
466	8	0	0	0	0	0	0	200	300	0	0	0	0	0	0	0	200	903	0	0	0	0	0	0	0	603	903	0
466	9	0	0	0	0	0	0	200	300	0	0	0	0	0	0	0	200	903	0	0	0	0	0	0	0	603	903	0
467	0	0	0	0	0	0	0	200	300	0	0	0	0	0	0	0	200	903	0	0	0	0	0	0	0	603	903	0
467	1	0	0	0	0	0	0	200	300	0	0	0	0	0	0	0	200	903	0	0	0	0	0	0	0	603	903	0
467	2	0	0	0	0	0	0	200	300	0	0	0	0	0	0	0	200	903	0	0	0	0	0	0	0	603	903	0
467	3	0	0	0	0	0	0	200	300	0	0	0	0	0	0	0	200	903	0	0	0	0	0	0	0	603	903	0
467	4	0	0	0	0	0	0	200	300	0	0	0	0	0	0	0	200	903	0	0	0	0	0	0	0	603	903	0
467	5	0	0	0	0	0	0	200	300	0	0	0	0	0	0	0	200	903	0	0	0	0	0	0	0	603	903	0
467	6	0	0	0	0	0	0	200	300	0	0	0	0	0	0	0	200	903	0	0	0	0	0	0	0	603	903	0
467	7	0	0	0	0	0	0	200	300	0	0	0	0	0	0	0	200	903	0	0	0	0	0	0	0	603	903	0
467	8	0	0	0	0	0	0	200	300	0	0	0	0	0	0	0	200	903	0	0	0	0	0	0	0	603	903	0
467	9	0	0	0	0	0	0	200	300	0	0	0	0	0	0	0	200	903	0	0	0	0	0	0	0	603	903	0
468	0	0	0	0	0	0	0	200	300	0	0	0	0	0	0	0	200	903	0	0	0	0	0	0	0	603	903	0
468	1	0	0	0	0	0	0	200	300	0	0	0	0	0	0	0	200	903	0	0	0	0	0	0	0	603	903	0
468	2	0	0	0	0	0	0	200	300	0	0	0	0	0	0	0	200	903	0	0	0	0	0	0	0	603	903	0
468	3	0	0	0	0	0	0	200	300	0	0	0	0	0	0	0	200	903	0	0	0	0	0	0	0	603	903	0
468	4	0	0	0	0	0	0	200	300	0	0	0	0	0	0	0	200	903	0	0	0	0	0	0	0	603	903	0
468	5	0	0	0	0	0	0	200	300	0	0	0	0	0	0	0	200	903	0	0	0	0	0	0	0	603	903	0
468	6	0	0	0	0	0	0	200	300	0	0	0	0	0	0	0	200	903	0	0	0	0	0	0	0	603	903	0
468	7	0	0	0	0	0	0	200	300	0	0	0	0	0	0	0	200	903	0	0	0	0	0	0	0	603	903	0
468	8	0	0	0	0	0	0	200	300	0	0	0	0	0	0	0	200	903	0	0	0	0	0	0	0	603	903	0
468	9	0	0	0	0	0	0	200	300	0	0	0	0	0	0	0	200	903	0	0	0	0	0	0	0	603	903	0
469	0	0	0	0	0	0	0	200	300	0	0	0	0	0	0	0	200	903	0	0	0	0	0	0	0	603	903	0
469	1	0	0	0	0	0	0	200	300	0	0	0	0	0	0	0	200	903	0	0	0	0	0	0	0	603	903	0
469	2	0	0	0	0	0	0	200	300	0	0	0	0	0	0	0	200	903	0	0	0	0	0	0	0	603	903	0
469	3	0	0	0	0	0	0	200	300	0	0	0	0	0	0	0	200	903	0	0	0	0	0	0	0	603	903	0
469	4	0	0	0	0	0	0	200	300	0	0	0	0	0	0	0	200	903	0	0	0	0	0	0	0	603	903	0
469	5	0	0	0	0	0	0	200	300	0	0	0	0	0	0	0	200	903	0	0	0	0	0	0	0	603	903	0
469	6	0	0	0	0	0	0	200	300	0	0	0	0	0	0	0	200	903	0	0	0	0	0	0	0	603	903	0
469	7	0	0	0	0	0	0	200	300	0	0	0	0	0	0	0	200	903	0	0	0	0	0	0	0	603	903	0
469	8	0	0	0	0	0	0	200	300	0	0	0	0	0	0	0	200	903	0	0	0	0	0	0	0	603	903	0
469	9	0	0	0	0	0	0	200	300	0	0	0	0	0	0	0	200	903	0	0	0	0	0	0	0	603	903	0
470	0	0	0	0	0	0	0	200	300	0	0	0	0	0	0	0	200	903	0	0	0	0	0	0	0	603	903	0
470	1	0	0	0	0	0	0	200	300	0	0	0	0	0	0	0	200	903	0	0	0	0	0	0	0	603	903	0
470	2	0	0	0	0	0	0	200	300	0	0	0	0	0	0	0	200	903	0	0	0	0	0	0	0	603	903	0
470	3	0	0	0	0	0	0	200	300	0	0	0	0	0	0	0	200	903	0	0	0	0	0	0	0	603	903	0
470	4	0	0	0	0	0	0	200	300	0	0	0	0	0	0	0	200	903	0	0	0	0	0	0	0	603	903	0
470	5	0	0	0	0	0	0	200	300	0	0	0	0	0	0	0	200	903	0	0	0	0	0	0	0	603	903	0
470	6	0	0	0	0	0	0	200	300	0	0	0	0	0	0	0	200	903	0	0	0	0	0	0	0	603	903	0
470	7	0	0	0	0	0	0	200	300	0	0	0	0	0	0	0	200	903	0	0	0	0	0	0	0	603	903	0
470	8	0	0	0	0	0	0	200	300	0	0	0	0	0	0	0	200	903	0	0	0	0	0	0	0	603	903	0
470	9	0	0	0	0	0	0	200	300	0	0	0	0	0	0	0	200	903	0	0	0	0	0	0	0	603	903	0
471	0	0	0	0	0	0	0	200	300	0	0	0	0	0	0	0	200	903	0	0	0	0	0	0	0	603	903	0
471	1	0	0	0	0	0	0	200	300	0	0	0	0	0	0	0	200	903	0	0	0	0	0	0	0	603	903	0
471	2	0	0	0	0	0	0	200	300	0	0	0	0	0	0	0	200	903	0	0	0	0	0	0	0	603	903	0
471	3	0	0	0	0	0	0	200	300	0	0	0	0	0	0	0	200	903	0	0	0	0	0	0	0	603	903	0
471	4	0	0	0	0	0	0	200	300	0	0	0	0	0	0	0	200	903	0	0	0	0	0	0	0	603	903	0
471	5	0	0	0	0	0	0	200	300	0	0	0	0	0	0	0	200	903	0	0	0	0	0	0	0	603	903	0
471	6	0	0	0	0	0	0	200	300	0	0	0	0	0	0	0	200	903	0	0	0	0	0	0	0	603	903	0
471	7	0	0	0	0	0	0	200	300	0	0	0	0	0	0	0	200	903	0	0	0	0	0	0	0	603	903	0
471	8	0	0	0	0	0	0	200	300	0	0	0	0	0	0	0	200	903	0	0	0	0	0	0	0	603	903	0
471	9	0	0	0	0	0	0	200	300	0	0	0	0	0	0	0	200	903	0	0	0	0	0	0	0	603	903	0
472	0	0	0	0	0	0	0	200	300	0	0	0	0	0	0	0	200	903	0	0	0	0	0	0	0	603	903	0
472	1	0	0	0	0	0	0	200	300	0	0	0	0	0	0	0	200	903	0	0	0	0	0	0	0	603	903	0
472	2	0	0	0	0	0	0	200	300	0	0	0	0	0	0	0	200	903	0	0	0	0	0	0	0	603	903	0
472	3	0	0	0	0	0	0	200	300	0	0	0	0	0	0	0	200	903	0	0	0	0	0	0	0	603	903	0
472	4	0	0	0	0	0	0	200	300	0	0	0	0	0	0	0	200	903	0	0	0	0	0	0	0	603	903	0
472	5	0	0	0	0	0	0	200	300	0	0	0	0	0	0	0	200	903	0	0	0	0	0	0	0	603	903	0
472	6	0	0	0	0	0	0	200	300	0	0	0	0	0	0	0	200	903	0	0	0	0	0	0	0	603	903	0
472	7	0	0	0	0	0	0	200	300	0	0	0	0	0	0	0	200	903	0	0	0	0	0	0	0	603	903	0
472	8	0	0	0	0	0	0	200	300	0	0	0	0	0	0	0	200	903	0	0	0	0	0	0	0	603	903	0
472	9	0	0	0	0	0	0	200	300	0	0	0	0	0	0	0	200	903	0	0	0	0	0	0	0	603	903	0
473	0	0	0	0	0	0	0	200	300	0	0	0	0	0	0	0	200	903	0	0	0	0	0	0	0	603	903	0
473	1	0	0	0	0	0	0	200	300	0	0	0	0	0	0	0	200	903	0	0	0	0	0	0	0	603	903	0
473	2	0	0	0	0	0	0	200	300	0	0	0	0	0	0	0	200	903	0	0	0	0	0	0	0	603	903	0
473	3	0	0	0	0	0	0	200	300	0	0	0	0	0	0	0	200	903	0	0	0	0	0	0	0	603	903	0
473	4	0	0	0	0	0	0	200	300	0	0	0	0	0	0	0	200	903	0	0	0	0	0	0	0	603	903	0
473	5	0	0	0	0	0	0	200	300	0	0	0	0	0	0	0	200	903	0	0	0	0	0	0	0	603	903	0
473	6	0	0	0	0	0	0	200	300	0	0	0	0	0	0	0	200	903	0	0	0	0	0	0	0	603	903	0
473	7	0	0	0	0	0	0	200	300	0	0	0	0	0	0	0	200	903	0	0	0	0	0	0	0	603	903	0
473	8	0	0	0	0	0	0	200	300	0	0	0	0	0	0	0	200	903	0	0	0	0	0	0	0	603	903	0
473	9	0	0	0	0	0	0	200	300	0	0	0	0	0	0	0	200	903	0	0	0	0	0	0	0	603	903	0
474	0	0	0	0	0	0	0	200	300	0	0	0	0	0	0	0	200	903	0	0	0	0	0	0	0	603	903	0
474	1	0	0	0	0	0	0	200	300	0	0	0	0	0	0	0	200	903	0	0	0	0	0	0	0	603	903	0
474	2	0	0	0	0	0	0	200	300	0	0	0	0	0	0	0	200	903	0	0	0	0	0	0	0	603	903	0
474	3	0	0	0	0	0	0	200	300	0	0	0	0	0	0	0	200	903	0	0	0	0	0	0	0	603	903	0
474	4	0	0	0	0	0	0	200	300	0	0	0	0	0	0	0	200	903	0	0	0	0	0	0	0	603	903	0
474	5	0	0	0	0	0	0	200	300	0	0	0	0	0	0	0	200	903	0	0	0	0	0	0	0	603	903	0
474	6	0	0	0	0	0	0	200	300	0	0	0	0	0	0	0	200	903	0	0	0	0	0	0	0	603	903	0
474	7	0	0	0	0	0	0	200	300	0	0	0	0	0	0	0	200	903	0	0	0	0	0	0	0	603	903	0
474	8	0	0	0	0	0	0	200	300	0	0	0	0	0	0	0	200	903	0	0	0	0	0	0	0	603	903	0
474	9	0	0	0	0	0	0	200	300	0	0	0	0	0	0	0	200	903	0	0	0	0	0	0	0	603	903	0
475	0	0	0	0	0	0	0	200	300	0	0	0	0	0	0	0	200	903	0	0	0	0	0	0	0	603	903	0
475	1	0	0	0	0	0	0	200	300	0	0	0	0	0	0	0	200	903	0	0	0	0	0	0	0	603	903	0
475	2	0	0	0	0	0	0	200	300	0	0	0	0	0	0	0	200	903	0	0	0	0	0	0	0	603	903	0
475	3	0	0	0	0	0	0	200	300	0	0	0	0	0	0	0	200	903	0	0	0	0	0	0	0	603	903	0
475	4	0	0	0	0	0	0	200	300	0	0	0	0	0	0	0	200	903	0	0	0	0	0	0	0	603	903	0
475	5	0	0	0	0	0	0	200	300	0	0	0	0	0	0	0	200	903	0	0	0	0	0	0	0	603	903	0
475	6	0	0	0	0	0	0	200	300	0	0	0	0	0	0	0	200	903	0	0	0	0	0	0	0	603	903	0
475	7	0	0	0	0	0	0	200	300	0	0	0	0	0	0	0	200	903	0	0	0	0	0	0	0	603	903	0
475	8	0	0	0	0	0	0	200	300	0	0	0	0	0	0	0	200	903	0	0	0	0	0	0	0	603	903	0
475	9	0	0	0	0	0	0	200	300	0	0	0	0	0	0	0	200	903	0	0	0	0	0	0	0	603	903	0
476	0	0	0	0	0	0	0	200	300	0	0	0	0	0	0	0	200	903	0	0	0	0	0	0	0	603	903	0
476	1	0	0	0	0	0	0	200	300	0	0	0	0	0	0	0	200	903	0	0	0	0	0	0	0	603	903	0
476	2	0	0	0	0	0	0	200	300	0	0	0	0	0	0	0	200	903	0	0	0	0	0	0	0	603	903	0
476	3	0	0	0	0	0	0	200	300	0	0	0	0	0	0	0	200	903	0	0	0	0	0	0	0	603	903	0
476	4	0	0	0	0	0	0	200	300	0	0	0	0	0	0	0	200	903	0	0	0	0	0	0	0	603	903	0
476	5	0	0	0	0	0	0	200	300	0	0	0	0	0	0	0	200	903	0	0	0	0	0	0	0	603	903	0
476	6	0	0	0	0	0	0	200	300	0	0	0	0	0	0	0	200	903	0	0	0	0	0	0	0	603	903	0
476	7	0	0	0	0	0	0	200	300	0	0	0	0	0	0	0	200	903	0	0	0	0	0	0	0	603	903	0
476	8	0	0	0	0	0	0	200	300	0	0	0	0	0	0	0	200	903	0	0	0	0	0	0	0	603	903	0
476	9	0	0	0	0	0	0	200	300	0	0	0	0	0	0	0	200	903	0	0	0	0	0	0	0	603	903	0
477	0	0	0	0	0	0	0	200	300	0	0	0	0	0	0	0	200	903	0	0	0	0	0	0	0	603	903	0
477	1	0	0	0	0	0	0	200	300	0	0	0	0	0	0	0	200	903	0	0	0	0	0	0	0	603	903	0
477	2	0	0	0	0	0	0	200	300	0	0	0	0	0	0	0	200	903	0	0	0	0	0	0	0	603	903	0
477	3	0	0	0	0	0	0	200	300	0	0	0	0	0	0	0	200	903	0	0	0	0	0	0	0	603	903	0
477	4	0	0	0	0	0	0	200	300	0	0	0	0	0	0	0	200	903	0	0	0	0	0	0	0	603	903	0
477	5	0	0	0	0	0	0	200	300	0	0	0	0	0	0	0	200	903	0	0	0	0	0	0	0	603	903	0
477	6	0	0	0	0	0	0	200	300	0	0	0	0	0	0	0	200	903	0	0	0	0	0	0	0	603	903	0
477	7	0	0	0	0	0	0	200	300	0	0	0	0	0	0	0	200	903	0	0	0	0	0	0	0	603	903	0
477	8	0	0	0	0	0	0	200	300	0	0	0	0	0	0	0	200	903	0	0	0	0	0	0	0	603	903	0
477	9	0	0	0	0	0	0	200	300	0	0	0	0	0	0	0	200	903	0	0	0	0	0	0	0	603	903	0
478	0	0	0	0	0	0	0	200	300	0	0	0	0	0	0	0	200	903	0	0	0	0	0	0	0	603	903	0
478	1	0	0	0	0	0	0	200	300	0	0	0	0	0	0	0	200	903	0	0	0	0	0	0	0	603	903	0
478	2	0	0	0	0	0	0	200	300	0	0	0	0	0	0	0	200	903	0	0	0	0	0	0	0	603	903	0
478	3	0	0	0	0	0	0	200	300	0	0	0	0	0	0	0	200	903	0	0	0	0	0	0	0	603	903	0
478	4	0	0	0	0	0	0	200	300	0	0	0	0	0	0	0	200	903	0	0	0	0	0	0	0	603	903	0
478	5	0	0	0	0	0	0	200	300	0	0	0	0	0	0	0	200	903	0	0	0	0	0	0	0	603	903	0
478	6	0	0	0	0	0	0	200	300	0	0	0	0	0	0	0	200	903	0	0	0	0	0	0	0	603	903	0
478	7	0	0	0	0	0	0	200	300	0	0	0	0	0	0	0	200	903	0	0	0	0	0	0	0	603	903	0
478	8	0	0	0	0	0	0	200	300	0	0	0	0	0	0	0	200	903	0	0	0	0	0	0	0	603	903	0
478	9	0	0	0	0	0	0	200	300	0	0	0	0	0	0	0	200	903	0	0	0	0	0	0	0	603	903	0
479	0	0	0	0	0	0	0	200	300	0	0	0	0	0	0	0	200	903	0	0	0	0	0	0	0	603	903	0
479	1	0	0	0	0	0	0	200	300	0	0	0	0	0	0	0	200	903	0	0	0	0	0	0	0	603	903	0
479	2	0	0	0	0	0	0	200	300	0	0	0	0	0	0	0	200	903	0	0	0	0	0	0	0	603	903	0
479	3	0	0	0	0	0	0	200	300	0	0	0	0	0	0	0	200	903	0	0	0	0	0	0	0	603	903	0
479	4	0	0	0	0	0	0	200	300	0	0	0	0	0	0	0	200	903	0	0	0	0	0	0	0	603	903	0
479	5	0	0	0	0	0	0	200	300	0	0	0	0	0	0	0	200	903	0	0	0	0	0	0	0	603	903	0
479	6	0	0	0	0	0	0	200	300	0	0	0	0	0	0	0	200	903	0	0	0	0	0	0	0	603	903	0
479	7	0	0	0	0	0	0	200	300	0	0	0	0	0	0	0	200	903	0	0	0	0	0	0	0	603	903	0
479	8	0	0	0	0	0	0	200	300	0	0	0	0	0	0	0	200	903	0	0	0	0	0	0	0	603	903	0
479	9	0	0	0	0	0	0	200	300	0	0	0	0	0	0	0	200	903	0	0	0	0	0	0	0	603	903	0
480	0	0	0	0	0	0	0	200	300	0	0	0	0	0	0	0	200	903	0	0	0	0	0	0	0	603	903	0
480	1	0	0	0	0	0	0	200	300	0	0	0	0	0	0	0	200	903	0	0	0	0	0	0	0	603	903	0
480	2	0	0	0	0	0	0	200	300	0	0	0	0	0	0	0	200	903	0	0	0	0	0	0	0	603	903	0
480	3	0	0	0	0	0	0	200	300	0	0	0	0	0	0	0	200	903	0	0	0	0	0	0	0	603	903	0
480	4	0	0	0	0	0	0	200	300	0	0	0	0	0	0	0	200	903	0	0	0	0	0	0	0	603	903	0
480	5	0	0	0	0	0	0	200	300	0	0	0	0	0	0	0	200	903	0	0	0	0	0	0	0	603	903	0
480	6	0	0	0	0	0	0	200	300	0	0	0	0	0	0	0	200	903	0	0	0	0	0	0	0	603	903	0
480	7	0	0	0	0	0	0	200	300	0	0	0	0	0	0	0	200	903	0	0	0	0	0	0	0	603	903	0
480	8	0	0	0	0	0	0	200	300	0	0	0	0	0	0	0	200	903	0	0	0	0	0	0	0	603	903	0
480	9	0	0	0	0	0	0	200	300	0	0	0	0	0	0	0	200	903	0	0	0	0	0	0	0	603	903	0
481	0	0	0	0	0	0	0	200	300	0	0	0	0	0	0	0	200	903	0	0	0	0	0	0	0	603	903	0
481	1	0	0	0	0	0	0	200	300	0	0	0	0	0	0	0	200	903	0	0	0	0	0	0	0	603	903	0
481	2	0	0	0	0	0	0	200	300	0	0	0	0	0	0	0	200	903	0	0	0	0	0	0	0	603	903	0
481	3	0	0	0	0	0	0	200	300	0	0	0	0	0	0	0	200	903	0	0	0	0	0	0	0	603	903	0
481	4	0	0	0	0	0	0	200	300	0	0	0	0	0	0	0	200	903	0	0	0	0	0	0	0	603	903	0
481	5	0	0	0	0	0	0	200	300	0	0	0	0	0	0	0	200	903	0	0	0	0	0	0	0	603	903	0
481	6	0	0	0	0	0	0	200	300	0	0	0	0	0	0	0	200	903	0	0	0	0	0	0	0	603	903	0
481	7	0	0	0	0	0	0	200	300	0	0	0	0	0	0	0	200	903	0	0	0	0	0	0	0	603	903	0
481	8	0	0	0	0	0	0	200	300	0	0	0	0	0	0	0	200	903	0	0	0	0	0	0	0	603	903	0
481	9	0	0	0	0	0	0	200	300	0	0	0	0	0	0	0	200	903	0	0	0	0	0	0	0	603	903	0
482	0	0	0	0	0	0	0	200	300	0	0	0	0	0	0	0	200	903	0	0	0	0	0	0	0	603	903	0
482	1	0	0	0	0	0	0	200	300	0	0	0	0	0	0	0	200	903	0	0	0	0	0	0	0	603	903	0
482	2	0	0	0	0	0	0	200	300	0	0	0	0	0	0	0	200	903	0	0	0	0	0	0	0	603	903	0
482	3	0	0	0	0	0	0	200	300	0	0	0	0	0	0	0	200	903	0	0	0	0	0	0	0	603	903	0
482	4	0	0	0	0	0	0	200	300	0	0	0	0	0	0	0	200	903	0	0	0	0	0	0	0	603	903	0
482	5	0	0	0	0	0	0	200	300	0	0	0	0	0	0	0	200	903	0	0	0	0	0	0	0	603	903	0
482	6	0	0	0	0	0	0	200	300	0	0	0	0	0	0	0	200	903	0	0	0	0	0	0	0	603	903	0
482	7	0	0	0	0	0	0	200	300	0	0	0	0	0	0	0	200	903	0	0	0	0	0	0	0	603	903	0
482	8	0	0	0	0	0	0	200	300	0	0	0	0	0	0	0	200	903	0	0	0	0	0	0	0	603	903	0
482	9	0	0	0	0	0	0	200	300	0	0	0	0	0	0	0	200	903	0	0	0	0	0	0	0	603	903	0
483	0	0	0	0	0	0	0	200	300	0	0	0	0	0	0	0	200	903	0	0	0	0	0	0	0	603	903	0
483	1	0	0	0	0	0	0	200	300	0	0	0	0	0	0	0	200	903	0	0	0	0	0	0	0	603	903	0
483	2	0	0	0	0	0	0	200	300	0	0	0	0	0	0	0	200	903	0	0	0	0	0	0	0	603	903	0
483	3	0	0	0	0	0	0	200	300	0	0	0	0	0	0	0	200	903	0	0	0	0	0	0	0	603	903	0
483	4	0	0	0	0	0	0	200	300	0	0	0	0	0	0	0	200	903	0	0	0	0	0	0	0	603	903	0
483	5	0	0	0	0	0	0	200	300	0	0	0	0	0	0	0	200	903	0	0	0	0	0	0	0	603	903	0
483	6	0	0	0	0	0	0	200	300	0	0	0	0	0	0	0	200	903	0	0	0	0	0	0	0	603	903	0
483	7	0	0	0	0	0	0	200	300	0	0	0	0	0	0	0	200	903	0	0	0	0	0	0	0	603	903	0
483	8	0	0	0	0	0	0	200	300	0	0	0	0	0	0	0	200	903	0	0	0	0	0	0	0	603	903	0
483	9	0	0	0	0	0	0	200	300	0	0	0	0	0	0	0	200	903	0	0	0	0	0	0	0	603	903	0
484	0	0	0	0	0	0	0	200	300	0	0	0	0	0	0	0	200	903	0	0	0	0	0	0	0	603	903	0
484	1	0	0	0	0	0	0	200	300	0	0	0	0	0	0	0	200	903	0	0	0	0	0	0	0	603	903	0
484	2	0	0	0	0	0	0	200	300	0	0	0	0	0	0	0	200	903	0	0	0	0	0	0	0	603	903	0
484	3	0	0	0	0	0	0	200	300	0	0	0	0	0	0	0	200	903	0	0	0	0	0	0	0	603	903	0
484	4	0	0	0	0	0	0	200	300	0	0	0	0	0	0	0	200	903	0	0	0	0	0	0	0	603	903	0
484	5	0	0	0	0	0	0	200	300	0	0	0	0	0	0	0	200	903	0	0	0	0	0	0	0	603	903	0
484	6	0	0	0	0	0	0	200	300	0	0	0	0	0	0	0	200	903	0	0	0	0	0	0	0	603	903	0
484	7	0	0	0	0	0	0	200	300	0	0	0	0	0	0	0	200	903	0	0	0	0	0	0	0	603	903	0
484	8	0	0	0	0	0	0	200	300	0	0	0	0	0	0	0	200	903	0	0	0	0	0	0	0	603	903	0
484	9	0	0	0	0	0	0	200	300	0	0	0	0	0	0	0	200	903	0	0	0	0	0	0	0	603	903	0
485	0	0	0	0	0	0	0	200	300	0	0	0	0	0	0	0	200	903	0	0	0	0	0	0	0	603	903	0
485	1	0	0	0	0	0	0	200	300	0	0	0	0	0	0	0	200	903	0	0	0	0	0	0	0	603	903	0
485	2	0	0	0	0	0	0	200	300	0	0	0	0	0	0	0	200	903	0	0	0	0	0	0	0	603	903	0
485	3	0	0	0	0	0	0	200	300	0	0	0	0	0	0	0	200	903	0	0	0	0	0	0	0	603	903	0
485	4	0	0	0	0	0	0	200	300	0	0	0	0	0	0	0	200	903	0	0	0	0	0	0	0	603	903	0
485	5	0	0	0	0	0	0	200	300	0	0	0	0	0	0	0	200	903	0	0	0	0	0	0	0	603	903	0
485	6	0	0	0	0	0	0	200	300	0	0	0	0	0	0	0	200	903	0	0	0	0	0	0	0	603	903	0
485	7	0	0	0	0	0	0	200	300	0	0	0	0	0	0	0	200	903	0	0	0	0	0	0	0	603	903	0
485	8	0	0	0	0	0	0	200	300	0	0	0	0	0	0	0	200	903	0	0	0	0	0	0	0	603	903	0
485	9	0	0	0	0	0	0	200	300	0	0	0	0	0	0	0	200	903	0	0	0	0	0	0	0	603	903	0
486	0	0	0	0	0	0	0	200	300	0	0	0	0	0	0	0	200	903	0	0	0	0	0	0	0	603	903	0
486	1	0	0	0	0	0	0	200	300	0	0	0	0	0	0	0	200	903	0	0	0	0	0	0	0	603	903	0
486	2	0	0	0	0	0	0	200	300	0	0	0	0	0	0	0	200	903	0	0	0	0	0	0	0	603	903	0
486	3	0	0	0	0	0	0	200	300	0	0	0	0	0	0	0	200	903	0	0	0	0	0	0	0	603	903	0
486	4	0	0	0	0	0	0	200	300	0	0	0	0	0	0	0	200	903	0	0	0	0	0	0	0	603	903	0
486	5	0	0	0	0	0	0	200	300	0	0	0	0	0	0	0	200	903	0	0	0	0	0	0	0	603	903	0
486	6	0	0	0	0	0	0	200	300	0	0	0	0	0	0	0	200	903	0	0	0	0	0	0	0	603	903	0
486	7	0	0	0	0	0	0	200	300	0	0	0	0	0	0	0	200	903	0	0	0	0	0	0	0	603	903	0
486	8	0	0	0	0	0	0	200	300	0	0	0	0	0	0	0	200	903	0	0	0	0	0	0	0	603	903	0
486	9	0	0	0	0	0	0	200	300	0	0	0	0	0	0	0	200	903	0	0	0	0	0	0	0	603	903	0
487	0	0	0	0	0	0	0	200	300	0	0	0	0	0	0	0	200	903	0	0	0	0	0	0	0	603	903	0
487	1	0	0	0	0	0	0	200	300	0	0	0	0	0	0	0	200	903	0	0	0	0	0	0	0	603	903	0
487	2	0	0	0	0	0	0	200	300	0	0	0	0	0	0	0	200	903	0	0	0	0	0	0	0	603	903	0
487	3	0	0	0	0	0	0	200	300	0	0	0	0	0	0	0	200	903	0	0	0	0	0	0	0	603	903	0
487	4	0	0	0	0	0	0	200	300	0	0	0	0	0	0	0	200	903	0	0	0	0	0	0	0	603	903	0
487	5	0	0	0	0	0	0	200	300	0	0	0	0	0	0	0	200	903	0	0	0	0	0	0	0	603	903	0
487	6	0	0	0	0	0	0	200	300	0	0	0	0	0	0	0	200	903	0	0	0	0	0	0	0	603	903	0
487	7	0	0	0	0	0	0	200	300	0	0	0	0	0	0	0	200	903	0	0	0	0	0	0	0	603	903	0
487	8	0	0	0	0	0	0	200	300	0	0	0	0	0	0	0	200	903	0	0	0	0	0	0	0	603	903	0
487	9	0	0	0	0	0	0	200	300	0	0	0	0	0	0	0	200	903	0	0	0	0	0	0	0	603	903	0
488	0	0	0	0	0	0	0	200	300	0	0	0	0	0	0	0	200	903	0	0	0	0	0	0	0	603	903	0
488	1	0	0	0	0	0	0	200	300	0	0	0	0	0	0	0	200	903	0	0	0	0	0	0	0	603	903	0
488	2	0	0	0	0	0	0	200	300	0	0	0	0	0	0	0	200	903	0	0	0	0	0	0	0	603	903	0
488	3	0	0	0	0	0	0	200	300	0	0	0	0	0	0	0	200	903	0	0	0	0	0	0	0	603	903	0
488	4	0	0	0	0	0	0	200	300	0	0	0	0	0	0	0	200	903	0	0	0	0	0	0	0	603	903	0
488	5	0	0	0	0	0	0	200	300	0	0	0	0	0	0	0	200	903	0	0	0	0	0	0	0	603	903	0
488	6	0	0	0	0	0	0	200	300	0	0	0	0	0	0	0	200	903	0	0	0	0	0	0	0	603	903	0
488	7	0	0	0	0	0	0	200	300	0	0	0	0	0	0	0	200	903	0	0	0	0	0	0	0	603	903	0
488	8	0	0	0	0	0	0	200	300	0	0	0	0	0	0	0	200	903	0	0	0	0	0	0	0	603	903	0
488	9	0	0	0	0	0	0	200	300	0	0	0	0	0	0	0	200	903	0	0	0	0	0	0	0	603	903	0
489	0	0	0	0	0	0	0	200	300	0	0	0	0	0	0	0	200	903	0	0	0	0	0	0	0	603	903	0
489	1	0	0	0	0	0	0	200	300	0	0	0	0	0	0	0	200	903	0	0	0	0	0	0	0	603	903	0
489	2	0	0	0	0	0	0	200	300	0	0	0	0	0	0	0	200	903	0	0	0	0	0	0	0	603	903	0
489	3	0	0	0	0	0	0	200	300	0	0	0	0	0	0	0	200	903	0	0	0	0	0	0	0	603	903	0
489	4	0	0	0	0	0	0	200	300	0	0	0	0	0	0	0	200	903	0	0	0	0	0	0	0	603	903	0
489	5	0	0	0	0	0	0	200	300	0	0	0	0	0	0	0	200	903	0	0	0	0	0	0	0	603	903	0
489	6	0	0	0	0	0	0	200	300	0	0	0	0	0	0	0	200	903	0	0	0	0	0	0	0	603	903	0
489	7	0	0	0	0	0	0	200	300	0	0	0	0	0	0	0	200	903	0	0	0	0	0	0	0	603	903	0
489	8	0	0	0	0	0	0	200	300	0	0	0	0	0	0	0	200	903	0	0	0	0	0	0	0	603	903	0
489	9	0	0	0	0	0	0	200	300	0	0	0	0	0	0	0	200	903	0	0	0	0	0	0	0	603	903	0
490	0	0	0	0	0	0	0	200	300	0	0	0	0	0	0	0	200	903	0	0	0	0	0	0	0	603	903	0
490	1	0	0	0	0	0	0	200	300	0	0	0	0	0	0	0	200	903	0	0	0	0	0	0	0	603	903	0
490	2	0	0	0	0	0	0	200	300	0	0	0	0	0	0	0	200	903	0	0	0	0	0	0	0	603	903	0
490	3	0	0	0	0	0	0	200	300	0	0	0	0	0	0	0	200	903	0	0	0	0	0	0	0	603	903	0
490	4	0	0	0	0	0	0	200	300	0	0	0	0	0	0	0	200	903	0	0	0	0	0	0	0	603	903	0
490	5	0	0	0	0	0	0	200	300	0	0	0	0	0	0	0	200	903	0	0	0	0	0	0	0	603	903	0
490	6	0	0	0	0	0	0	200	300	0	0	0	0	0	0	0	200	903	0	0	0	0	0	0	0	603	903	0
490	7	0	0	0	0	0	0	200	300	0	0	0	0	0	0	0	200	903	0	0	0	0	0	0	0	603	903	0
490	8	0	0	0	0	0	0	200	300	0	0	0	0	0	0	0	200	903	0	0	0	0	0	0	0	603	903	0
490	9	0	0	0	0	0	0	200	300	0	0	0	0	0	0	0	200	903	0	0	0	0	0	0	0	603	903	0
491	0	0	0	0	0	0	0	200	300	0	0	0	0	0	0	0	200	903	0	0	0	0	0	0	0	603	903	0
491	1	0	0	0	0	0	0	200	300	0	0	0	0	0	0	0	200	903	0	0	0	0	0	0	0	603	903	0
491	2	0	0	0	0	0	0	200	300	0	0	0	0	0	0	0	200	903	0	0	0	0	0	0	0	603	903	0
491	3	0	0	0	0	0	0	200	300	0	0	0	0	0	0	0	200	903	0	0	0	0	0	0	0	603	903	0
491	4	0	0	0	0	0	0	200	300	0	0	0	0	0	0	0	200	903	0	0	0	0	0	0	0	603	903	0
491	5	0	0	0	0	0	0	200	300	0	0	0	0	0	0	0	200	903	0	0	0	0	0	0	0	603	903	0
491	6	0	0	0	0	0	0	200	300	0	0	0	0	0	0	0	200	903	0	0	0	0	0	0	0	603	903	0
491	7	0	0	0	0	0	0	200	300	0	0	0	0	0	0	0	200	903	0	0	0	0	0	0	0	603	903	0
491	8	0	0	0	0	0	0	200	300	0	0	0	0	0	0	0	200	903	0	0	0	0	0	0	0	603	903	0
491	9	0	0	0	0	0	0	200	300	0	0	0	0	0	0	0	200	903	0	0	0	0	0	0	0	603	903	0
492	0	0	0	0	0	0	0	200	300	0	0	0	0	0	0	0	200	903	0	0	0	0	0	0	0	603	903	0
492	1	0	0	0	0	0	0	200	300	0	0	0	0	0	0	0	200	903	0	0	0	0	0	0	0	603	903	0
492	2	0	0	0	0	0	0	200	300	0	0	0	0	0	0	0	200	903	0	0	0	0	0	0	0	603	903	0
492	3	0	0	0	0	0	0	200	300	0	0	0	0	0	0	0	200	903	0	0	0	0	0	0	0	603	903	0
492	4	0	0	0	0	0	0	200	300	0	0	0	0	0	0	0	200	903	0	0	0	0	0	0	0	603	903	0
492	5	0	0	0	0	0	0	200	300	0	0	0	0	0	0	0	200	903	0	0	0	0	0	0	0	603	903	0
492	6	0	0	0	0	0	0	200	300	0	0	0	0	0	0	0	200	903	0	0	0	0	0	0	0	603	903	0
492	7	0	0	0	0	0	0	200	300	0	0	0	0	0	0	0	200	903	0	0	0	0	0	0	0	603	903	0
492	8	0	0	0	0	0	0	200	300	0	0	0	0	0	0	0	200	903	0	0	0	0	0	0	0	603	903	0
492	9	0	0	0	0	0	0	200	300	0	0	0	0	0	0	0	200	903	0	0	0	0	0	0	0	603	903	0
493	0	0	0	0	0	0	0	200	300	0	0	0	0	0	0	0	200	903	0	0	0	0	0	0	0	603	903	0
493	1	0	0	0	0	0	0	200	300	0	0	0	0	0	0	0	200	903	0	0	0	0	0	0	0	603	903	0
493	2	0	0	0	0	0	0	200	300	0	0	0	0	0	0	0	200	903	0	0	0	0	0	0	0	603	903	0
493	3	0	0	0	0	0	0	200	300	0	0	0	0	0	0	0	200	903	0	0	0	0	0	0	0	603	903	0
493	4	0	0	0	0	0	0	200	300	0	0	0	0	0	0	0	200	903	0	0	0	0	0	0	0	603	903	0
493	5	0	0	0	0	0	0	200	300	0	0	0	0	0	0	0	200	903	0	0	0	0	0	0	0	603	903	0
493	6	0	0	0	0	0	0	200	300	0	0	0	0	0	0	0	200	903	0	0	0	0	0	0	0	603	903	0
493	7	0	0	0	0	0	0	200	300	0	0	0	0	0	0	0	200	903	0	0	0	0	0	0	0	603	903	0
493	8	0	0	0	0	0	0	200	300	0	0	0	0	0	0	0	200	903	0	0	0	0	0	0	0	603	903	0
493	9	0	0	0	0	0	0	200	300	0	0	0	0	0	0	0	200	903	0	0	0	0	0	0	0	603	903	0
494	0	0	0	0	0	0	0	200	300	0	0	0	0	0	0	0	200	903	0	0	0	0	0	0	0	603	903	0
494	1	0	0	0	0	0	0	200	300	0	0	0	0	0	0	0	200	903	0	0	0	0	0	0	0	603	903	0
494	2	0	0	0	0	0	0	200	300	0	0	0	0	0	0	0	200	903	0	0	0	0	0	0	0	603	903	0
494	3	0	0	0	0	0	0	200	300	0	0	0	0	0	0	0	200	903	0	0	0	0	0	0	0	603	903	0
494	4	0	0	0	0	0	0	200	300	0	0	0	0	0	0	0	200	903	0	0	0	0	0	0	0	603	903	0
494	5	0	0	0	0	0	0	200	300	0	0	0	0	0	0	0	200	903	0	0	0	0	0	0	0	603	903	0
494	6	0	0	0	0	0	0	200	300	0	0	0	0	0	0	0	200	903	0	0	0	0	0	0	0	603	903	0
494	7	0	0	0	0	0	0	200	300	0	0	0	0	0	0	0	200	903	0	0	0	0	0	0	0	603	903	0
494	8	0	0	0	0	0	0	200	300	0	0	0	0	0	0	0	200	903	0	0	0	0	0	0	0	603	903	0
494	9	0	0	0	0	0	0	200	300	0	0	0	0	0	0	0	200	903	0	0	0	0	0	0	0	603	903	0
495	0	0	0	0	0	0	0	200	300	0	0	0	0	0	0	0	200	903	0	0	0	0	0	0	0	603	903	0
495	1	0	0	0	0	0	0	200	300	0	0	0	0	0	0	0	200	903	0	0	0	0	0	0	0	603	903	0
495	2	0	0	0	0	0	0	200	300	0	0	0	0	0	0	0	200	903	0	0	0	0	0	0	0	603	903	0
495	3	0	0	0	0	0	0	200	300	0	-5.27924	9.00009	-35.625	-2203.77	-1020.32	254.149	171.359	964.86	0	0	0	0	0	0	0	603	903	0
495	4	0	0	0	0	0	0	200	300	0	-4.21112	16.7821	-32.8784	-1837.56	-1203.42	208.373	163.398	958.89	0	0	0	0	0	0	0	603	903	0
495	5	0	0	0	0	0	0	200	300	0	-0.0912476	18.6131	-25.249	-2203.77	-959.283	-295.167	162.007	990.281	0	0	0	0	0	0	0	603	903	0
495	6	0	0	0	0	0	0	200	300	0	2.35016	21.2071	-27.9956	-2661.53	-1020.32	-340.943	163.554	998.07	0	0	0	0	0	0	0	603	903	0
495	7	0	0	0	0	0	0	200	300	0	3.87604	25.4796	-43.2543	-2661.53	-1508.6	-752.931	165.123	964.532	0	0	0	0	0	0	0	603	903	0
495	8	0	0	0	0	0	0	200	300	0	2.04498	27.7684	-51.1889	-2569.98	-1508.6	-890.26	170.529	953.206	0	0	0	0	0	0	0	603	903	0
495	9	0	0	0	0	0	0	200	300	0	3.41827	29.1417	-49.3579	-3485.51	-1691.7	-707.154	165.726	973.617	0	0	0	0	0	0	0	603	903	0
496	0	0	0	0	0	0	0	200	300	0	8.45367	32.8038	-52.7148	-4034.82	-1813.78	-1302.25	165.593	979.541	0	0	0	0	0	0	0	603	903	0
496	1	0	0	0	0	0	0	200	300	0	7.08038	35.3978	-66.7529	-4034.82	-2363.09	-936.036	164.599	963.444	0	0	0	0	0	0	0	603	903	0
496	2	0	0	0	0	0	0	200	300	0	3.87604	31.5831	-74.6875	-4034.82	-2607.23	-1210.69	165.091	957.023	0	0	0	0	0	0	0	603	903	0
496	3	0	0	0	0	0	0	200	300	0	6.16486	32.1935	-75.9082	-4492.58	-2424.13	-936.036	168.065	962.185	0	0	0	0	0	0	0	603	903	0
496	4	0	0	0	0	0	0	200	300	0	6.16486	35.3978	-78.3496	-4401.03	-2973.44	-1164.92	162.049	959.172	0	0	0	0	0	0	0	603	903	0
496	5	0	0	0	0	0	0	200	300	0	6.16486	30.9727	-87.1997	-5316.56	-3522.76	-752.931	159.601	963.97	0	0	0	0	0	0	0	603	903	0
496	6	0	0	0	0	0	0	200	300	0	1.8924	29.2943	-94.8291	-4858.79	-3644.83	-1073.37	161.564	954.237	0	0	0	0	0	0	0	603	903	0
496	7	0	0	0	0	0	0	200	300	0	-0.701599	28.9891	-99.1015	-5133.45	-4255.18	-752.931	157.062	954.8	0	0	0	0	0	0	0	603	903	0
496	8	0	0	0	0	0	0	200	300	0	0.976868	28.6839	-98.7963	-5499.66	-4499.32	-524.049	154.459	958.667	0	0	0	0	0	0	0	603	903	0
496	9	0	0	0	0	0	0	200	300	0	-0.243835	24.5641	-102.458	-6506.74	-4499.32	-432.496	156.086	966.506	0	0	0	0	0	0	0	603	903	0
497	0	0	0	0	0	0	0	200	300	0	-3.60077	20.5968	-111.309	-4858.79	-5353.81	-386.72	151.901	946.652	0	0	0	0	0	0	0	603	903	0
497	1	0	0	0	0	0	0	200	300	0	-6.04218	17.2398	-110.088	-5591.22	-5353.81	-66.2851	151.368	953.789	0	0	0	0	0	0	0	603	903	0
497	2	0	0	0	0	0	0	200	300	0	-3.90594	14.7984	-115.276	-5774.32	-5170.71	71.0441	155.145	953.091	0	0	0	0	0	0	0	603	903	0
497	3	0	0	0	0	0	0	200	300	0	-3.60077	10.8311	-115.886	-5591.22	-5720.02	254.149	150.641	951.247	0	0	0	0	0	0	0	603	903	0
497	4	0	0	0	0	0	0	200	300	0	-4.97406	8.38974	-121.074	-5957.43	-6086.24	391.479	149.731	952.205	0	0	0	0	0	0	0	603	903	0
497	5	0	0	0	0	0	0	200	300	0	-9.70428	5.03281	-128.093	-5957.43	-6330.38	620.36	150.58	949.509	0	0	0	0	0	0	0	603	903	0
497	6	0	0	0	0	0	0	200	300	0	-8.48358	1.06552	-129.619	-6415.19	-6635.55	574.584	148.807	952.493	0	0	0	0	0	0	0	603	903	0
497	7	0	0	0	0	0	0	200	300	0	-7.56805	-2.29141	-132.061	-6140.53	-6330.38	620.36	152.065	949.498	0	0	0	0	0	0	0	603	903	0
497	8	0	0	0	0	0	0	200	300	0	-10.6198	-3.6647	-136.028	-6323.64	-7490.04	986.571	144.937	949.488	0	0	0	0	0	0	0	603	903	0
497	9	0	0	0	0	0	0	200	300	0	-13.9767	-8.54751	-142.131	-5957.43	-7795.22	895.019	145.155	944.915	0	0	0	0	0	0	0	603	903	0
498	0	0	0	0	0	0	0	200	300	0	-11.8405	-9.9208	-147.93	-5774.32	-7856.26	1032.35	146.892	942.034	0	0	0	0	0	0	0	603	903	0
498	1	0	0	0	0	0	0	200	300	0	-12.2983	-10.226	-150.676	-6415.19	-8039.36	1078.12	146.645	945.576	0	0	0	0	0	0	0	603	903	0
498	2	0	0	0	0	0	0	200	300	0	-15.8078	-12.5148	-157.085	-6689.85	-8771.79	1307.01	144.159	945.588	0	0	0	0	0	0	0	603	903	0
498	3	0	0	0	0	0	0	200	300	0	-15.6552	-15.5666	-161.663	-6323.64	-8649.72	1352.78	146.495	942.116	0	0	0	0	0	0	0	603	903	0
498	4	0	0	0	0	0	0	200	300	0	-14.1293	-15.1088	-170.207	-6506.74	-9199.03	1261.23	145.954	941.228	0	0	0	0	0	0	0	603	903	0
498	5	0	0	0	0	0	0	200	300	0	-15.5026	-15.5666	-175.395	-6323.64	-9870.42	986.571	143.725	939.054	0	0	0	0	0	0	0	603	903	0
498	6	0	0	0	0	0	0	200	300	0	-16.7233	-18.3131	-178.752	-7056.06	-9809.38	1215.45	145.123	942.474	0	0	0	0	0	0	0	603	903	0
498	7	0	0	0	0	0	0	200	300	0	-15.9604	-20.602	-186.382	-6781.4	-10175.6	1123.9	145.405	939.385	0	0	0	0	0	0	0	603	903	0
498	8	0	0	0	0	0	0	200	300	0	-15.5026	-20.2968	-194.011	-7330.72	-10724.9	986.571	144.72	940.785	0	0	0	0	0	0	0	603	903	0
498	9	0	0	0	0	0	0	200	300	0	-16.5707	-19.9916	-200.42	-7696.93	-10785.9	1123.9	146.183	941.404	0	0	0	0	0	0	0	603	903	0
499	0	0	0	0	0	0	0	200	300	0	-17.0285	-22.8908	-207.439	-7239.17	-11091.1	1490.11	146.533	937.898	0	0	0	0	0	0	0	603	903	0
499	1	0	0	0	0	0	0	200	300	0	-15.5026	-24.1115	-214.763	-6689.85	-11823.5	1123.9	144.946	934.15	0	0	0	0	0	0	0	603	903	0
499	2	0	0	0	0	0	0	200	300	0	-17.7914	-24.4167	-220.256	-7696.93	-12189.8	1444.34	144.656	937.945	0	0	0	0	0	0	0	603	903	0
499	3	0	0	0	0	0	0	200	300	0	-18.0966	-25.7899	-226.36	-7696.93	-12250.8	1490.11	145.879	937.003	0	0	0	0	0	0	0	603	903	0
499	4	0	0	0	0	0	0	200	300	0	-17.944	-29.6046	-234.6	-7422.27	-12861.1	1398.56	145.178	934.638	0	0	0	0	0	0	0	603	903	0
499	5	0	0	0	0	0	0	200	300	0	-17.7914	-29.2995	-242.534	-7422.27	-13166.3	711.913	145.714	933.603	0	0	0	0	0	0	0	603	903	0
499	6	0	0	0	0	0	0	200	300	0	-17.6389	-31.8935	-249.248	-7605.38	-13471.5	2039.43	145.951	933.513	0	0	0	0	0	0	0	603	903	0
499	7	0	0	0	0	0	0	200	300	0	-17.944	-34.1823	-254.436	-7422.27	-13898.7	1215.45	145.374	932.171	0	0	0	0	0	0	0	603	903	0
499	8	0	0	0	0	0	0	200	300	0	-17.944	-35.2504	-261.76	-7056.06	-14203.9	1581.66	145.737	929.956	0	0	0	0	0	0	0	603	903	0
499	9	0	0	0	0	0	0	200	300	0	-19.9277	-37.0815	-269.695	-7513.82	-14387	1673.22	146.654	930.861	0	0	0	0	0	0	0	603	903	0
500	0	0	0	0	0	0	0	200	300	0	-18.8596	-40.591	-274.272	-7239.17	-14936.3	1993.65	145.542	929.394	0	0	0	0	0	0	0	603	903	0
500	1	0	0	0	0	0	0	200	300	0	-16.113	-41.6591	-281.902	-7513.82	-15180.5	1673.22	146.15	929.654	0	0	0	0	0	0	0	603	903	0
500	2	0	0	0	0	0	0	200	300	0	-19.9277	-43.4901	-289.226	-7056.06	-15485.7	1947.88	146.458	927.396	0	0	0	0	0	0	0	603	903	0
500	3	0	0	0	0	0	0	200	300	0	-19.3173	-46.2367	-295.024	-7513.82	-15973.9	1810.55	145.856	928.469	0	0	0	0	0	0	0	603	903	0
500	4	0	0	0	0	0	0	200	300	0	-17.3337	-48.373	-301.738	-7422.27	-16096	1993.65	146.656	927.598	0	0	0	0	0	0	0	603	903	0
500	5	0	0	0	0	0	0	200	300	0	-17.4863	-49.8988	-307.231	-6872.96	-16462.2	2130.98	146.418	925.371	0	0	0	0	0	0	0	603	903	0
500	6	0	0	0	0	0	0	200	300	0	-17.1811	-51.1195	-314.25	-7056.06	-17072.6	2130.98	145.672	925.454	0	0	0	0	0	0	0	603	903	0
500	7	0	0	0	0	0	0	200	300	0	-16.2656	-53.2558	-319.438	-6781.4	-17194.6	2130.98	146.172	924.229	0	0	0	0	0	0	0	603	903	0
500	8	0	0	0	0	0	0	200	300	0	-16.7233	-55.2394	-326.457	-6689.85	-17133.6	2314.09	147.517	923.492	0	0	0	0	0	0	0	603	903	0
500	9	0	0	0	0	0	0	200	300	0	-17.1811	-55.0868	-327.373	-6506.74	-18049.1	2268.31	144.867	922.876	0	0	0	0	0	0	0	603	903	0
501	0	0	0	0	0	0	0	200	300	0	-16.4182	-56.1549	-337.749	-6140.53	-17927.1	2176.76	146.922	921.181	0	0	0	0	0	0	0	603	903	0
501	1	0	0	0	0	0	0	200	300	0	-14.8923	-59.3593	-342.937	-5774.32	-18049.1	2359.86	147.369	919.838	0	0	0	0	0	0	0	603	903	0
501	2	0	0	0	0	0	0	200	300	0	-16.2656	-59.0541	-348.43	-6323.64	-18415.3	2130.98	147.148	921.149	0	0	0	0	0	0	0	603	903	0
501	3	0	0	0	0	0	0	200	300	0	-15.1974	-58.4438	-354.228	-6140.53	-18720.5	2451.42	147.151	920.335	0	0	0	0	0	0	0	603	903	0
501	4	0	0	0	0	0	0	200	300	0	-13.8242	-61.6481	-359.722	-5774.32	-18659.5	2634.52	148.128	919.052	0	0	0	0	0	0	0	603	903	0
501	5	0	0	0	0	0	0	200	300	0	-13.519	-61.9533	-364.604	-5865.88	-19086.7	2726.07	147.651	919.088	0	0	0	0	0	0	0	603	903	0
501	6	0	0	0	0	0	0	200	300	0	-13.8242	-61.1903	-369.792	-5774.32	-19269.8	2588.74	147.89	918.615	0	0	0	0	0	0	0	603	903	0
501	7	0	0	0	0	0	0	200	300	0	-13.6716	-63.174	-376.506	-5316.56	-19391.9	2680.3	148.495	917.121	0	0	0	0	0	0	0	603	903	0
501	8	0	0	0	0	0	0	200	300	0	-11.8405	-64.0895	-374.675	-5225.01	-19941.2	2451.42	146.777	916.945	0	0	0	0	0	0	0	603	903	0
501	9	0	0	0	0	0	0	200	300	0	-11.3828	-63.7843	-387.493	-4675.69	-19880.2	2634.52	148.695	915.067	0	0	0	0	0	0	0	603	903	0
502	0	0	0	0	0	0	0	200	300	0	-9.85687	-66.2257	-390.239	-4858.79	-20063.3	2771.85	148.587	915.451	0	0	0	0	0	0	0	603	903	0
502	1	0	0	0	0	0	0	200	300	0	-9.39911	-67.2939	-394.512	-4767.24	-20246.4	2542.97	148.68	915.084	0	0	0	0	0	0	0	603	903	0
502	2	0	0	0	0	0	0	200	300	0	-8.78876	-68.5146	-399.089	-3393.95	-20307.4	2771.85	149.116	911.504	0	0	0	0	0	0	0	603	903	0
502	3	0	0	0	0	0	0	200	300	0	-9.39911	-69.2775	-405.193	-4401.03	-20734.7	3092.28	148.828	913.862	0	0	0	0	0	0	0	603	903	0
502	4	0	0	0	0	0	0	200	300	0	-8.78876	-69.4301	-408.855	-3851.72	-20917.8	2954.96	148.838	912.421	0	0	0	0	0	0	0	603	903	0
502	5	0	0	0	0	0	0	200	300	0	-6.9577	-73.0922	-413.127	-3668.61	-20490.5	2863.4	150.401	911.88	0	0	0	0	0	0	0	603	903	0
502	6	0	0	0	0	0	0	200	300	0	-7.26288	-72.787	-416.484	-3210.85	-21345	3000.73	148.75	910.709	0	0	0	0	0	0	0	603	903	0
502	7	0	0	0	0	0	0	200	300	0	-3.75336	-74.0077	-422.283	-3485.51	-21223	3000.73	149.742	911.254	0	0	0	0	0	0	0	603	903	0
502	8	0	0	0	0	0	0	200	300	0	-4.82147	-77.0595	-425.64	-2478.43	-20856.7	3000.73	150.999	908.823	0	0	0	0	0	0	0	603	903	0
502	9	0	0	0	0	0	0	200	300	0	-4.5163	-77.3647	-428.691	-2753.08	-21528.1	3000.73	149.782	909.422	0	0	0	0	0	0	0	603	903	0
503	0	0	0	0	0	0	0	200	300	0	-4.05853	-77.0595	-433.269	-2569.98	-22016.4	3092.28	149.185	908.932	0	0	0	0	0	0	0	603	903	0
503	1	0	0	0	0	0	0	200	300	0	-2.68524	-78.8905	-435.405	-1746	-21161.9	3321.17	151.397	907.01	0	0	0	0	0	0	0	603	903	0
503	2	0	0	0	0	0	0	200	300	0	-1.9223	-80.7216	-441.814	-1654.45	-21833.3	3412.72	150.583	906.745	0	0	0	0	0	0	0	603	903	0
503	3	0	0	0	0	0	0	200	300	0	-2.68524	-81.3319	-445.781	-922.028	-21955.4	3183.84	150.749	905.068	0	0	0	0	0	0	0	603	903	0
503	4	0	0	0	0	0	0	200	300	0	-2.22748	-82.5526	-448.528	-922.028	-21528.1	3504.27	152.003	905.056	0	0	0	0	0	0	0	603	903	0
503	5	0	0	0	0	0	0	200	300	0	-0.549011	-83.6208	-450.969	-555.817	-22199.5	3138.06	150.774	904.232	0	0	0	0	0	0	0	603	903	0
503	6	0	0	0	0	0	0	200	300	0	0.366516	-83.0104	-456.157	-281.159	-22504.7	3046.51	150.665	903.616	0	0	0	0	0	0	0	603	903	0
503	7	0	0	0	0	0	0	200	300	0	1.73981	-84.0785	-456.157	-372.711	-22016.4	3138.06	151.735	903.817	0	0	0	0	0	0	0	603	903	0
503	8	0	0	0	0	0	0	200	300	0	1.73981	-87.1303	-464.092	176.605	-22260.6	3321.17	152.034	902.62	0	0	0	0	0	0	0	603	903	0
503	9	0	0	0	0	0	0	200	300	0	2.80792	-87.588	-465.618	634.369	-22687.8	3412.72	151.274	901.638	0	0	0	0	0	0	0	603	903	0
504	0	0	0	0	0	0	0	200	300	0	2.35016	-87.2829	-472.637	1275.24	-22138.5	3321.17	153.16	900.302	0	0	0	0	0	0	0	603	903	0
504	1	0	0	0	0	0	0	200	300	0	5.40192	-88.351	-477.825	1641.45	-22687.8	3550.05	152.519	899.565	0	0	0	0	0	0	0	603	903	0
504	2	0	0	0	0	0	0	200	300	0	9.06403	-91.5553	-482.707	2099.21	-22077.4	3550.05	154.263	898.651	0	0	0	0	0	0	0	603	903	0
504	3	0	0	0	0	0	0	200	300	0	6.77521	-90.6398	-485.454	2923.19	-22260.6	3595.82	154.145	896.979	0	0	0	0	0	0	0	603	903	0
504	4	0	0	0	0	0	0	200	300	0	10.2847	-92.1657	-489.421	2465.42	-22931.9	3778.93	153.145	897.963	0	0	0	0	0	0	0	603	903	0
504	5	0	0	0	0	0	0	200	300	0	13.4891	-94.3019	-494.609	4296.48	-22382.6	4053.59	154.747	894.313	0	0	0	0	0	0	0	603	903	0
504	6	0	0	0	0	0	0	200	300	0	14.5572	-97.0485	-497.661	3838.72	-22260.6	3916.26	155.27	895.287	0	0	0	0	0	0	0	603	903	0
504	7	0	0	0	0	0	0	200	300	0	14.252	-97.964	-501.323	4113.37	-23237.1	3824.71	153.648	894.795	0	0	0	0	0	0	0	603	903	0
504	8	0	0	0	0	0	0	200	300	0	15.6253	-101.016	-506.206	4662.69	-22382.6	4465.58	155.784	893.789	0	0	0	0	0	0	0	603	903	0
504	9	0	0	0	0	0	0	200	300	0	16.3882	-104.678	-506.206	5212.01	-22687.8	4190.92	155.181	892.704	0	0	0	0	0	0	0	603	903	0
505	0	0	0	0	0	0	0	200	300	0	17.4564	-103.152	-508.647	5395.11	-23176.1	4190.92	154.436	892.393	0	0	0	0	0	0	0	603	903	0
505	1	0	0	0	0	0	0	200	300	0	15.7779	-103.61	-513.53	5395.11	-22748.8	4419.8	155.701	892.494	0	0	0	0	0	0	0	603	903	0
505	2	0	0	0	0	0	0	200	300	0	17.1512	-106.509	-513.835	6127.53	-22809.9	4374.02	155.609	891.075	0	0	0	0	0	0	0	603	903	0
505	3	0	0	0	0	0	0	200	300	0	17.9141	-106.051	-514.446	6402.19	-23054	4053.59	155.187	890.555	0	0	0	0	0	0	0	603	903	0
505	4	0	0	0	0	0	0	200	300	0	15.9305	-105.593	-516.277	6493.74	-23054	4190.92	155.346	890.422	0	0	0	0	0	0	0	603	903	0
505	5	0	0	0	0	0	0	200	300	0	16.0831	-104.525	-518.413	6676.85	-22809.9	4190.92	156.001	890.121	0	0	0	0	0	0	0	603	903	0
505	6	0	0	0	0	0	0	200	300	0	18.5245	-104.678	-518.413	7317.72	-23176.1	4145.14	155.294	888.884	0	0	0	0	0	0	0	603	903	0
505	7	0	0	0	0	0	0	200	300	0	16.9986	-104.22	-521.16	7683.93	-23298.2	4465.58	155.296	888.256	0	0	0	0	0	0	0	603	903	0
505	8	0	0	0	0	0	0	200	300	0	17.3038	-103.305	-520.549	7592.38	-23054	4007.81	155.712	888.415	0	0	0	0	0	0	0	603	903	0
505	9	0	0	0	0	0	0	200	300	0	19.44	-104.83	-520.549	7958.59	-23298.2	4236.69	155.243	887.711	0	0	0	0	0	0	0	603	903	0
506	0	0	0	0	0	0	0	200	300	0	19.8978	-102.236	-522.38	8416.35	-23054	3916.26	155.867	886.888	0	0	0	0	0	0	0	603	903	0
506	1	0	0	0	0	0	0	200	300	0	19.5926	-101.626	-523.296	8507.91	-23115	3870.48	155.828	886.742	0	0	0	0	0	0	0	603	903	0
506	2	0	0	0	0	0	0	200	300	0	20.0504	-102.847	-521.77	8233.25	-22931.9	4007.81	156.05	887.221	0	0	0	0	0	0	0	603	903	0
506	3	0	0	0	0	0	0	200	300	0	20.5081	-102.389	-519.939	8874.12	-23176.1	3916.26	155.425	885.932	0	0	0	0	0	0	0	603	903	0
506	4	0	0	0	0	0	0	200	300	0	22.4918	-102.999	-522.075	9148.78	-22687.8	3733.15	156.543	885.476	0	0	0	0	0	0	0	603	903	0
506	5	0	0	0	0	0	0	200	300	0	24.1702	-102.389	-522.075	9331.88	-23237.1	3916.26	155.491	885.125	0	0	0	0	0	0	0	603	903	0
506	6	0	0	0	0	0	0	200	300	0	22.7969	-103.762	-522.685	9881.2	-23054	4053.59	155.893	884.095	0	0	0	0	0	0	0	603	903	0
506	7	0	0	0	0	0	0	200	300	0	24.7806	-104.83	-523.601	10613.6	-22626.8	3870.48	156.786	882.73	0	0	0	0	0	0	0	603	903	0
506	8	0	0	0	0	0	0	200	300	0	24.1702	-102.694	-525.432	9789.65	-23176.1	4053.59	155.891	884.368	0	0	0	0	0	0	0	603	903	0
506	9	0	0	0	0	0	0	200	300	0	25.2383	-105.593	-524.211	10430.5	-22931.9	4007.81	156.254	883.103	0	0	0	0	0	0	0	603	903	0
507	0	0	0	0	0	0	0	200	300	0	26.6116	-105.288	-522.991	11071.4	-22321.6	4145.14	157.319	881.831	0	0	0	0	0	0	0	603	903	0
507	1	0	0	0	0	0	0	200	300	0	27.6797	-104.983	-526.958	10888.3	-22504.7	4053.59	157.293	882.338	0	0	0	0	0	0	0	603	903	0
507	2	0	0	0	0	0	0	200	300	0	28.1375	-106.051	-526.042	11346	-22138.5	4282.47	157.915	881.431	0	0	0	0	0	0	0	603	903	0
507	3	0	0	0	0	0	0	200	300	0	29.816	-108.187	-526.348	11712.3	-22138.5	4053.59	157.939	880.748	0	0	0	0	0	0	0	603	903	0
507	4	0	0	0	0	0	0	200	300	0	30.5789	-106.662	-526.042	12170	-22626.8	4099.36	156.987	879.865	0	0	0	0	0	0	0	603	903	0
507	5	0	0	0	0	0	0	200	300	0	30.8841	-106.204	-527.873	11803.8	-22382.6	4190.92	157.599	880.639	0	0	0	0	0	0	0	603	903	0
507	6	0	0	0	0	0	0	200	300	0	32.2574	-106.509	-529.094	12353.1	-22199.5	4374.02	158.042	879.652	0	0	0	0	0	0	0	603	903	0
507	7	0	0	0	0	0	0	200	300	0	32.5626	-106.814	-529.094	12627.8	-22077.4	4236.69	158.273	879.133	0	0	0	0	0	0	0	603	903	0
507	8	0	0	0	0	0	0	200	300	0	33.0203	-106.967	-530.925	13360.2	-22199.5	4190.92	158.187	877.836	0	0	0	0	0	0	0	603	903	0
507	9	0	0	0	0	0	0	200	300	0	35.004	-106.967	-530.62	12994	-22077.4	4007.81	158.393	878.512	0	0	0	0	0	0	0	603	903	0
508	0	0	0	0	0	0	0	200	300	0	36.0721	-107.119	-530.62	13451.8	-22138.5	4282.47	158.278	877.649	0	0	0	0	0	0	0	603	903	0
508	1	0	0	0	0	0	0	200	300	0	36.5298	-104.983	-529.094	13451.8	-22138.5	4007.81	158.158	877.576	0	0	0	0	0	0	0	603	903	0
508	2	0	0	0	0	0	0	200	300	0	38.8187	-104.83	-533.367	13360.2	-21955.4	3962.04	158.836	877.951	0	0	0	0	0	0	0	603	903	0
508	3	0	0	0	0	0	0	200	300	0	38.2083	-107.577	-533.672	13634.9	-21955.4	4648.68	158.86	877.451	0	0	0	0	0	0	0	603	903	0
508	4	0	0	0	0	0	0	200	300	0	38.6661	-106.967	-532.146	14275.7	-22199.5	4282.47	158.283	876.173	0	0	0	0	0	0	0	603	903	0
508	5	0	0	0	0	0	0	200	300	0	38.2083	-104.983	-533.367	14092.6	-22199.5	4328.25	158.379	876.578	0	0	0	0	0	0	0	603	903	0
508	6	0	0	0	0	0	0	200	300	0	38.6661	-105.441	-536.724	14367.3	-22199.5	4328.25	158.639	876.232	0	0	0	0	0	0	0	603	903	0
508	7	0	0	0	0	0	0	200	300	0	40.3445	-106.356	-533.977	14275.7	-22016.4	4465.58	158.769	876.265	0	0	0	0	0	0	0	603	903	0
508	8	0	0	0	0	0	0	200	300	0	39.8868	-105.746	-536.724	14733.5	-21772.3	3962.04	159.435	875.549	0	0	0	0	0	0	0	603	903	0
508	9	0	0	0	0	0	0	200	300	0	41.2601	-105.593	-537.029	15008.2	-22199.5	3916.26	158.662	875.053	0	0	0	0	0	0	0	603	903	0
509	0	0	0	0	0	0	0	200	300	0	41.1075	-105.288	-538.249	14916.6	-22199.5	4099.36	158.756	875.287	0	0	0	0	0	0	0	603	903	0
509	1	0	0	0	0	0	0	200	300	0	41.7178	-105.136	-539.165	14458.8	-21894.3	4099.36	159.392	876.183	0	0	0	0	0	0	0	603	903	0
509	2	0	0	0	0	0	0	200	300	0	41.1075	-105.746	-538.555	15649	-21772.3	4190.92	159.573	873.943	0	0	0	0	0	0	0	603	903	0
509	3	0	0	0	0	0	0	200	300	0	42.023	-103.915	-541.301	15557.5	-22016.4	4374.02	159.327	874.259	0	0	0	0	0	0	0	603	903	0
509	4	0	0	0	0	0	0	200	300	0	42.9385	-105.593	-540.996	15282.8	-22077.4	4282.47	159.191	874.751	0	0	0	0	0	0	0	603	903	0
509	5	0	0	0	0	0	0	200	300	0	41.4127	-105.288	-542.827	15557.5	-21711.2	4145.14	160.003	874.34	0	0	0	0	0	0	0	603	903	0
509	6	0	0	0	0	0	0	200	300	0	42.023	-104.678	-545.574	16289.9	-22931.9	4419.8	157.967	873.142	0	0	0	0	0	0	0	603	903	0
509	7	0	0	0	0	0	0	200	300	0	43.0911	-105.899	-543.743	16381.4	-22321.6	4282.47	158.948	872.873	0	0	0	0	0	0	0	603	903	0
509	8	0	0	0	0	0	0	200	300	0	44.1592	-105.441	-547.1	16198.3	-22260.6	4328.25	159.312	873.392	0	0	0	0	0	0	0	603	903	0
509	9	0	0	0	0	0	0	200	300	0	41.8704	-104.678	-548.015	16381.4	-22809.9	4007.81	158.377	873.108	0	0	0	0	0	0	0	603	903	0
510	0	0	0	0	0	0	0	200	300	0	43.3963	-104.373	-549.236	16564.6	-22931.9	4328.25	158.248	872.841	0	0	0	0	0	0	0	603	903	0
510	1	0	0	0	0	0	0	200	300	0	42.1756	-104.373	-551.982	16747.7	-22260.6	4282.47	159.672	872.659	0	0	0	0	0	0	0	603	903	0
510	2	0	0	0	0	0	0	200	300	0	42.1756	-104.373	-552.288	16839.2	-22931.9	4282.47	158.478	872.51	0	0	0	0	0	0	0	603	903	0
510	3	0	0	0	0	0	0	200	300	0	41.5652	-102.999	-553.508	16930.8	-23359.2	4099.36	157.798	872.412	0	0	0	0	0	0	0	603	903	0
510	4	0	0	0	0	0	0	200	300	0	42.1756	-104.373	-555.339	17297	-22809.9	4374.02	158.926	871.853	0	0	0	0	0	0	0	603	903	0
510	5	0	0	0	0	0	0	200	300	0	41.5652	-102.542	-555.034	16747.7	-22870.9	4007.81	158.794	872.826	0	0	0	0	0	0	0	603	903	0
510	6	0	0	0	0	0	0	200	300	0	41.4127	-102.236	-559.001	17480.1	-22931.9	4145.14	158.977	871.73	0	0	0	0	0	0	0	603	903	0
510	7	0	0	0	0	0	0	200	300	0	44.4644	-102.999	-559.001	17846.3	-22993	4099.36	158.868	871.075	0	0	0	0	0	0	0	603	903	0
510	8	0	0	0	0	0	0	200	300	0	41.4127	-100.253	-559.612	17205.4	-23054	4145.14	158.804	872.255	0	0	0	0	0	0	0	603	903	0
510	9	0	0	0	0	0	0	200	300	0	40.192	-101.779	-560.527	17571.6	-23786.4	3962.04	157.564	871.652	0	0	0	0	0	0	0	603	903	0
511	0	0	0	0	0	0	0	200	300	0	42.1756	-100.405	-563.274	17846.3	-23420.2	4145.14	158.421	871.317	0	0	0	0	0	0	0	603	903	0
511	1	0	0	0	0	0	0	200	300	0	41.4127	-99.4899	-564.189	17480.1	-23481.3	4099.36	158.381	872.017	0	0	0	0	0	0	0	603	903	0
511	2	0	0	0	0	0	0	200	300	0	41.7178	-100.253	-565.105	18029.4	-23603.3	3962.04	158.232	871.096	0	0	0	0	0	0	0	603	903	0
511	3	0	0	0	0	0	0	200	300	0	40.3445	-97.5063	-566.02	19036.5	-23969.5	3916.26	157.653	869.368	0	0	0	0	0	0	0	603	903	0
511	4	0	0	0	0	0	0	200	300	0	41.1075	-99.1847	-566.631	17846.3	-23908.5	4053.59	157.806	871.505	0	0	0	0	0	0	0	603	903	0
511	5	0	0	0	0	0	0	200	300	0	39.5816	-97.964	-567.852	18120.9	-24030.6	4053.59	157.682	871.089	0	0	0	0	0	0	0	603	903	0
511	6	0	0	0	0	0	0	200	300	0	40.6497	-96.4381	-569.683	17937.8	-24091.6	4007.81	157.71	871.513	0	0	0	0	0	0	0	603	903	0
511	7	0	0	0	0	0	0	200	300	0	40.192	-96.5907	-569.988	18304.1	-24335.7	3916.26	157.305	870.887	0	0	0	0	0	0	0	603	903	0
511	8	0	0	0	0	0	0	200	300	0	39.2764	-97.6588	-572.734	18029.4	-24640.9	4145.14	156.977	871.521	0	0	0	0	0	0	0	603	903	0
511	9	0	0	0	0	0	0	200	300	0	38.6661	-96.7433	-572.124	18761.8	-24702	3916.26	156.824	870.207	0	0	0	0	0	0	0	603	903	0
512	0	0	0	0	0	0	0	200	300	0	41.2601	-94.6071	-573.039	18853.4	-24518.9	3916.26	157.213	870.099	0	0	0	0	0	0	0	603	903	0
512	1	0	0	0	0	0	0	200	300	0	38.5135	-94.9123	-577.922	18578.7	-24763	4190.92	157.152	870.853	0	0	0	0	0	0	0	603	903	0
512	2	0	0	0	0	0	0	200	300	0	38.2083	-93.8441	-573.345	19036.5	-25068.2	3687.38	156.277	869.798	0	0	0	0	0	0	0	603	903	0
512	3	0	0	0	0	0	0	200	300	0	39.1238	-93.8441	-577.922	19311.1	-24702	3687.38	157.257	869.585	0	0	0	0	0	0	0	603	903	0
512	4	0	0	0	0	0	0	200	300	0	39.1238	-93.539	-579.143	19311.1	-24702	4007.81	157.347	869.656	0	0	0	0	0	0	0	603	903	0
512	5	0	0	0	0	0	0	200	300	0	37.7505	-92.776	-580.059	18853.4	-25007.1	3687.38	156.889	870.497	0	0	0	0	0	0	0	603	903	0
512	6	0	0	0	0	0	0	200	300	0	38.9713	-91.4027	-580.974	19402.7	-24824	3733.15	157.272	869.603	0	0	0	0	0	0	0	603	903	0
512	7	0	0	0	0	0	0	200	300	0	38.0557	-91.2502	-583.721	19585.8	-25068.2	3412.72	157.055	869.447	0	0	0	0	0	0	0	603	903	0
512	8	0	0	0	0	0	0	200	300	0	37.2928	-91.8605	-585.247	19402.7	-25495.4	3687.38	156.436	869.847	0	0	0	0	0	0	0	603	903	0
512	9	0	0	0	0	0	0	200	300	0	36.5298	-91.7079	-585.857	19677.3	-24946.1	3550.05	157.419	869.413	0	0	0	0	0	0	0	603	903	0
513	0	0	0	0	0	0	0	200	300	0	36.2247	-90.4872	-584.331	20867.5	-25190.2	3687.38	156.89	867.288	0	0	0	0	0	0	0	603	903	0
513	1	0	0	0	0	0	0	200	300	0	36.3773	-90.182	-587.993	19768.9	-25983.7	3687.38	155.81	869.379	0	0	0	0	0	0	0	603	903	0
513	2	0	0	0	0	0	0	200	300	0	35.3091	-89.7243	-589.824	20226.7	-25739.6	4007.81	156.361	868.707	0	0	0	0	0	0	0	603	903	0
513	3	0	0	0	0	0	0	200	300	0	37.1402	-90.4872	-590.74	20501.3	-25373.3	3687.38	157.048	868.296	0	0	0	0	0	0	0	603	903	0
513	4	0	0	0	0	0	0	200	300	0	35.004	-89.2665	-592.266	20501.3	-26227.8	3229.61	155.716	868.385	0	0	0	0	0	0	0	603	903	0
513	5	0	0	0	0	0	0	200	300	0	34.6988	-89.2665	-594.097	20043.6	-26044.7	3687.38	156.161	869.262	0	0	0	0	0	0	0	603	903	0
513	6	0	0	0	0	0	0	200	300	0	35.3091	-88.8087	-595.622	21508.4	-25739.6	3412.72	156.785	866.889	0	0	0	0	0	0	0	603	903	0
513	7	0	0	0	0	0	0	200	300	0	34.8514	-88.351	-597.148	20959.1	-25922.7	3275.39	156.589	867.901	0	0	0	0	0	0	0	603	903	0
513	8	0	0	0	0	0	0	200	300	0	33.3255	-88.351	-599.285	21050.6	-26288.9	3550.05	156.133	867.874	0	0	0	0	0	0	0	603	903	0
513	9	0	0	0	0	0	0	200	300	0	32.7151	-89.2665	-599.285	21233.7	-26166.8	3641.6	156.337	867.568	0	0	0	0	0	0	0	603	903	0
514	0	0	0	0	0	0	0	200	300	0	33.1729	-87.4355	-598.674	21416.8	-26410.9	3229.61	155.884	867.226	0	0	0	0	0	0	0	603	903	0
514	1	0	0	0	0	0	0	200	300	0	33.9359	-87.8932	-603.252	21600	-26899.2	3595.82	155.41	867.194	0	0	0	0	0	0	0	603	903	0
514	2	0	0	0	0	0	0	200	300	0	33.4781	-86.9777	-606.304	21508.4	-26410.9	3412.72	156.439	867.525	0	0	0	0	0	0	0	603	903	0
514	3	0	0	0	0	0	0	200	300	0	31.9522	-87.7406	-606.304	22332.4	-26410.9	3458.5	156.439	866.166	0	0	0	0	0	0	0	603	903	0
514	4	0	0	0	0	0	0	200	300	0	31.9522	-87.4355	-607.524	23156.3	-27204.4	3275.39	155.221	864.884	0	0	0	0	0	0	0	603	903	0
514	5	0	0	0	0	0	0	200	300	0	30.8841	-86.5199	-609.05	22149.3	-27448.5	3321.17	154.932	866.633	0	0	0	0	0	0	0	603	903	0
[truncated: 3,664 more rows]
