# Supplementary material for: The Effects of an Extemporaneous Speech Dual-task on Older Adult Gait Control
Source: Research Square preprint supplement (doi:10.21203/rs.3.rs-7674245/v1), 2025-11-18
Supplement: Supplementary file 59 [file DT4Walk7.xlsx]

## Sheet: Sheet1
Trajectories
		04:LFHD			04:RFHD			04:LBHD			04:RBHD			04:C7			04:T10			04:CLAV			04:STRN			04:RBAK			04:LSHO			04:LUPA			04:LELB			04:LFRM			04:LWRA			04:LWRB			04:LFIN
Frame	Sub Frame	X	Y	Z	X	Y	Z	X	Y	Z	X	Y	Z	X	Y	Z	X	Y	Z	X	Y	Z	X	Y	Z	X	Y	Z	X	Y	Z	X	Y	Z	X	Y	Z	X	Y	Z	X	Y	Z	X	Y	Z	X	Y	Z
		mm	mm	mm	mm	mm	mm	mm	mm	mm	mm	mm	mm	mm	mm	mm	mm	mm	mm	mm	mm	mm	mm	mm	mm	mm	mm	mm	mm	mm	mm	mm	mm	mm	mm	mm	mm	mm	mm	mm	mm	mm	mm	mm	mm	mm	mm	mm	mm
470	0	294.273	2366.73	1586.02	177.282	2363.28	1601.12	283.309	2527.56	1522.24	175.977	2519.9	1532.09	224.24	2499.93	1450.6	214.501	2577.97	1170.89	224.172	2372.01	1362.9	207.794	2308.1	1170.02	133.266	2588.54	1252.16	403.829	2426.2	1372.7	464.396	2464.88	1126.19	463.4	2476.44	1051.48	472.438	2402.2	891.383	419.881	2391.14	814.947	486.65	2418.6	803.87	451.55	2377.66	739.947
471	0	294.702	2357.4	1587.13	177.778	2354.28	1602.09	284.265	2518.4	1523.59	177.098	2510.99	1533.11	225.569	2490.84	1451.85	216.638	2569.46	1172.13	224.586	2363.04	1363.95	207.905	2299.46	1170.79	135.43	2580.12	1253.25	404.487	2415.89	1373.84	465.757	2452.66	1127.31	465.316	2464.19	1052.66	473.199	2388.1	893.016	420.375	2376.93	816.645	487.334	2403.63	805.262	451.9	2361.99	741.992
472	0	295	2348.11	1588.3	177.964	2345.29	1603.06	285.277	2509.08	1524.72	178.111	2502.34	1533.99	226.88	2481.88	1452.88	218.604	2560.43	1173.28	225.152	2354.14	1365	208.06	2290.87	1171.69	137.386	2571.73	1254.38	405.239	2405.84	1374.94	467.211	2440.56	1128.49	466.532	2451.63	1053.64	473.996	2374.17	894.82	420.928	2362.74	818.642	488.346	2388.42	806.882	452.439	2346.26	744.452
473	0	295.148	2338.73	1589.45	178.059	2336.46	1603.98	286.148	2499.78	1525.69	179.005	2493.37	1535.01	228.076	2473.02	1453.94	220.964	2552.3	1174.41	225.682	2345.34	1365.95	208.416	2282.32	1172.59	139.438	2563.45	1255.39	406.104	2395.94	1376.05	468.72	2428.55	1129.73	468.558	2439.23	1054.79	474.927	2360.03	896.646	421.92	2347.74	821.135	489.168	2373.48	808.52	453.193	2330.3	747.106
474	0	295.075	2329.32	1590.6	177.996	2327.56	1604.8	287.185	2490.53	1527.15	179.885	2484.49	1536.05	229.101	2464.24	1455.19	222.488	2543.43	1175.7	226.228	2336.46	1366.89	208.793	2273.97	1173.43	141.372	2555.29	1256.66	406.794	2386.07	1377.39	470.165	2416.5	1131.11	470.191	2426.79	1055.97	475.66	2346.12	898.644	422.466	2333.63	823.158	490.059	2358.3	810.533	453.844	2314.21	749.734
475	0	294.907	2319.96	1591.78	177.794	2318.76	1605.69	288.067	2481.13	1528.27	180.686	2475.81	1536.71	230.156	2455.4	1456.35	224.463	2535.17	1176.98	226.751	2327.79	1367.83	209.389	2265.65	1174.5	143.021	2546.93	1257.81	407.484	2376.4	1378.73	471.751	2404.52	1132.73	472.083	2414.56	1057.3	476.636	2331.95	900.958	423.302	2319.4	825.49	491.221	2342.88	812.679	454.576	2298.11	752.599
476	0	294.814	2310.52	1592.94	177.517	2310.12	1606.45	288.829	2471.8	1529.53	181.545	2467.08	1537.72	231.151	2446.57	1457.38	225.775	2526.35	1178.18	227.122	2319.31	1368.62	209.867	2257.41	1175.41	144.832	2538.9	1258.96	408.202	2366.85	1380.05	473.058	2392.9	1134.18	473.973	2402.33	1058.73	477.599	2317.87	903.364	424.087	2304.74	828.027	492.197	2327.59	814.999	455.483	2281.89	755.759
477	0	294.622	2301.24	1593.93	177.55	2301.61	1606.85	289.685	2462.78	1530.66	182.469	2458.68	1538.63	232.109	2437.97	1458.29	227.762	2518.16	1179.09	227.766	2310.7	1369.32	210.374	2249.19	1176.19	146.348	2530.64	1259.73	408.95	2357.52	1381.21	474.472	2381.43	1135.48	475.851	2390.31	1060.15	478.521	2303.83	905.66	424.955	2289.95	830.648	493.249	2312.32	817.106	456.296	2265.61	758.75
478	0	294.477	2292.06	1594.79	177.178	2292.63	1607.42	290.34	2453.56	1531.65	183.039	2450.04	1539.38	232.906	2429.3	1459.14	228.981	2509.43	1179.87	228.169	2302.14	1369.9	211.051	2240.99	1176.86	147.825	2522.48	1260.62	409.521	2348.12	1382.23	475.945	2369.92	1136.64	477.549	2378.3	1061.31	479.595	2289.61	908.072	425.955	2275.2	833.048	494.376	2296.73	819.331	457.212	2249.36	761.826
479	0	294.462	2282.86	1595.57	177.28	2284.3	1607.68	290.993	2444.74	1532.63	183.653	2441.32	1540.13	233.811	2420.7	1459.95	230.376	2501.21	1180.67	228.748	2293.58	1370.47	211.829	2232.92	1177.6	149.223	2514.36	1261.35	410.212	2339	1383.2	477.659	2358.45	1138.05	479.32	2366.55	1062.43	480.646	2275.65	910.436	426.998	2260.24	835.711	495.686	2281.07	821.719	458.068	2233.08	764.844
480	0	294.499	2273.79	1596.21	177.037	2275.35	1608.13	291.653	2435.78	1533.54	184.195	2432.74	1540.74	234.593	2412.04	1460.42	231.382	2492.64	1180.93	229.284	2285.2	1370.81	212.522	2224.79	1178.16	150.467	2506.03	1261.7	410.935	2330	1384	479.102	2347.43	1139.07	481.408	2355.04	1063.58	481.84	2261.65	912.77	428.072	2245.35	838.385	496.765	2265.81	824.022	459.177	2216.88	767.921
481	0	294.573	2264.88	1596.58	177.105	2266.6	1608.31	292.343	2426.43	1534.61	184.714	2424.15	1541.2	235.319	2403.48	1460.64	232.459	2484.32	1181.17	229.789	2276.75	1370.89	213.303	2216.69	1178.42	151.721	2498.02	1261.96	411.48	2321.09	1384.34	480.294	2336.84	1139.64	482.99	2343.54	1064.09	482.964	2247.85	914.767	429.13	2230.41	840.705	498.015	2250.36	826.02	460.206	2200.69	770.794
482	0	294.63	2255.96	1596.77	177.375	2258.23	1608.22	292.8	2417.81	1535.07	185.27	2415.63	1541.48	236.02	2395.09	1460.75	233.399	2476.11	1181.14	230.287	2268.47	1370.87	214.05	2208.53	1178.38	152.636	2489.78	1261.98	411.885	2312.36	1384.5	481.611	2326.19	1140.05	484.513	2332.06	1064.33	484.056	2233.94	916.6	430.042	2215.22	843.017	499.239	2234.95	827.873	461.192	2184.48	773.459
483	0	294.715	2247.12	1596.88	177.41	2249.49	1608.17	293.42	2409.16	1535.5	185.914	2407.12	1541.48	236.64	2386.64	1460.75	233.935	2467.73	1181.24	230.678	2260.19	1370.83	214.653	2200.41	1178.3	153.738	2481.86	1261.93	412.442	2303.67	1384.45	483.127	2315.69	1140.38	485.971	2320.61	1064.55	485.167	2220.22	918.383	431.075	2200.28	845.244	500.221	2219.77	829.579	462.202	2168.28	776.257
484	0	295	2238.27	1596.7	177.408	2240.6	1608.02	294.03	2400.38	1535.53	186.37	2398.47	1541.67	237.221	2378.32	1460.33	234.825	2459.87	1180.74	231.167	2251.93	1370.53	215.283	2192.17	1178.02	154.48	2473.61	1261.56	413.069	2295.09	1384.08	484.564	2305.34	1140.37	487.813	2309.48	1064.56	486.412	2206.53	919.949	431.971	2185.3	847.219	501.295	2204.64	831.113	463.291	2152.41	778.79
485	0	295.172	2229.42	1596.3	177.8	2232.25	1607.46	294.614	2391.57	1535.44	186.969	2389.88	1541.53	237.934	2369.72	1459.87	235.301	2451.51	1180.23	231.727	2243.69	1369.89	215.969	2183.93	1177.39	155.336	2465.56	1261.19	413.774	2286.5	1383.59	486.03	2295.11	1140.23	489.191	2298.15	1064.03	487.507	2192.96	921.238	433.072	2170.42	849.099	501.89	2189.9	832.352	464.275	2136.47	781.063
486	0	295.362	2220.33	1595.98	177.807	2223.45	1607.01	295.4	2382.81	1535.51	187.668	2381.44	1541.34	238.546	2361.16	1459.58	236.127	2443.42	1180.09	232.098	2235.41	1369.3	216.517	2175.72	1176.64	156.096	2457.45	1260.98	414.251	2278	1383.09	487.166	2285.15	1139.93	490.566	2286.86	1063.81	488.55	2179.38	922.608	433.929	2155.68	850.825	502.775	2175.08	833.757	465.245	2120.64	783.49
487	0	295.766	2211.22	1595.59	178.045	2214.82	1606.38	296.091	2374.23	1535.15	188.019	2372.78	1541.19	239.046	2352.6	1459.19	236.597	2435.16	1179.79	232.603	2227.22	1368.53	217.103	2167.5	1175.82	156.583	2449.17	1260.59	414.602	2269.58	1382.37	488.641	2274.93	1139.87	491.939	2275.57	1063.54	489.588	2166.05	923.887	434.932	2141.2	852.645	503.884	2160.19	835.342	466.251	2105.06	785.882
488	0	295.878	2202.41	1594.88	178.264	2206.33	1605.6	296.797	2365.15	1534.69	188.548	2364.14	1540.81	239.491	2344.07	1458.59	237.058	2427.14	1179.39	232.951	2218.84	1367.52	217.451	2159.3	1174.7	157.169	2441.04	1260.09	415.081	2261.19	1381.36	489.828	2264.99	1139.36	493.287	2264.66	1063.15	490.513	2152.94	924.809	435.67	2126.72	854.07	504.504	2145.81	836.388	467.086	2089.43	787.932
489	0	296.032	2193.29	1593.97	178.364	2197.58	1604.78	297.338	2356.33	1534.02	189.039	2355.49	1540.29	239.578	2335.74	1457.81	237.271	2418.96	1178.75	233.404	2210.53	1366.4	217.79	2151.13	1173.34	157.374	2432.71	1259.47	415.284	2252.84	1380.15	490.726	2255.24	1138.56	494.118	2253.64	1062.23	491.466	2139.91	925.533	436.481	2112.45	855.35	504.983	2131.61	837.188	467.923	2073.96	790.046
490	0	296.237	2184.4	1592.96	178.623	2189.01	1603.96	297.916	2347.56	1533.19	189.679	2346.89	1539.5	240.084	2326.95	1456.92	237.577	2410.89	1177.86	233.706	2202.1	1365.28	218.115	2143.02	1172.07	157.79	2424.46	1258.68	415.653	2244.57	1378.9	491.625	2245.6	1137.79	494.973	2242.83	1061.35	492.366	2127.16	926.341	437.317	2098.29	856.798	505.575	2117.38	837.948	468.845	2058.91	792.212
491	0	296.588	2175.51	1591.91	178.909	2180.24	1603.02	298.396	2338.6	1532.25	190.353	2338.27	1538.5	240.211	2318.49	1455.75	237.523	2402.51	1176.83	234.031	2193.76	1364.1	218.291	2134.84	1170.77	157.951	2416.12	1257.63	416.019	2236.38	1377.7	492.01	2236.37	1136.62	495.745	2232.53	1060.39	493.072	2114.63	926.94	438.082	2084.46	858.179	506.514	2103.75	838.796	469.654	2044.09	794.279
492	0	296.937	2166.54	1590.66	179.17	2171.3	1601.92	298.802	2329.84	1531.21	190.729	2329.56	1537.59	240.291	2309.87	1454.62	237.632	2394.33	1175.66	234.182	2185.21	1362.85	218.499	2126.65	1169.31	157.925	2407.65	1256.59	416.118	2228.25	1376.18	492.811	2226.8	1135.59	496.147	2221.83	1059.06	493.801	2102.42	927.365	438.66	2070.68	859.414	506.712	2090.2	839.237	470.44	2029.49	796.16
493	0	297.227	2157.55	1589.33	179.572	2162.47	1600.67	299.276	2321.13	1530.07	191.225	2320.78	1536.64	240.392	2301.32	1453.46	237.461	2386.14	1174.62	234.333	2176.82	1361.55	218.699	2118.42	1167.86	158.028	2399.35	1255.55	416.157	2220.01	1374.66	493.034	2217.67	1134.34	496.587	2211.37	1057.91	494.132	2090.15	927.667	439.004	2057.29	860.423	506.464	2077.11	839.429	470.831	2014.92	797.97
494	0	297.304	2148.63	1588.01	179.737	2153.48	1599.54	299.353	2312.07	1528.98	191.463	2312.01	1535.75	240.367	2292.32	1452.4	237.061	2377.68	1173.58	234.404	2168.15	1360.42	218.944	2110.12	1166.53	157.62	2390.59	1254.53	416.223	2211.73	1373.39	493.172	2208.51	1133.24	497.02	2200.59	1057.12	494.473	2078.25	928.079	439.352	2044.41	861.487	506.544	2064.39	839.893	471.419	2000.95	799.843
495	0	297.506	2139.6	1586.73	179.779	2144.38	1598.4	299.289	2303.12	1528	191.45	2303	1534.88	240.085	2283.92	1451.3	236.823	2369.45	1172.51	234.519	2159.49	1359.11	219.298	2101.82	1165.13	157.318	2381.92	1253.52	416.198	2203.49	1372.13	493.128	2199.61	1132.13	497.227	2190.12	1056.37	494.617	2066.35	928.378	439.557	2031.34	862.459	506.57	2051.89	840.369	471.949	1987.32	801.507
496	0	297.742	2130.5	1585.4	180.094	2135.31	1597.07	299.443	2294.21	1527.02	191.346	2293.81	1534.1	240.018	2274.88	1450.18	236.316	2360.85	1171.43	234.647	2150.98	1357.65	219.391	2093.24	1163.62	156.927	2373.31	1252.51	416.172	2195.17	1370.75	493.165	2190.55	1130.84	497.425	2179.72	1055.33	494.581	2054.64	928.534	439.668	2018.91	863.06	506.163	2039.44	840.41	472.486	1974.02	802.948
497	0	297.953	2121.41	1584.07	180.372	2126.16	1595.71	299.35	2285.33	1525.97	191.319	2284.95	1533.21	239.492	2266.43	1449.11	235.928	2352.35	1170.41	234.6	2142.3	1356.45	219.69	2084.62	1162.24	156.396	2364.36	1251.52	416.136	2186.95	1369.48	493.039	2181.44	1129.67	497.281	2169.35	1054.18	494.441	2043.2	928.627	439.606	2006.71	863.583	505.956	2027.18	840.623	472.431	1961.12	804.107
498	0	297.817	2112.39	1582.63	180.31	2116.89	1594.41	299.414	2276.23	1525.14	191.246	2275.88	1532.34	239.251	2257.24	1447.93	235.427	2343.82	1169.39	234.612	2133.77	1355.18	219.741	2075.85	1160.96	155.747	2355.25	1250.4	415.96	2178.79	1368.28	492.93	2172.4	1128.54	497.265	2159.16	1053.35	494.303	2031.92	928.776	439.455	1994.64	864.206	505.482	2015.43	840.757	472.455	1948.52	805.33
499	0	297.69	2103.27	1581.07	179.999	2107.68	1593.03	299.228	2267.3	1524.07	190.847	2266.76	1531.33	238.697	2248.8	1446.59	234.801	2334.78	1168.04	234.567	2125.17	1353.72	219.777	2067.17	1159.65	155.261	2346.32	1248.96	415.631	2170.65	1366.89	492.524	2163.65	1127.19	497.294	2149.44	1052.54	494.02	2020.86	928.629	439.156	1983.04	864.546	504.978	2003.74	840.68	472.412	1936.34	806.206
500	0	297.31	2094.15	1579.53	179.747	2098.31	1591.55	298.514	2258.36	1522.84	190.448	2257.63	1530.1	238.038	2239.89	1445.18	234.045	2326.15	1166.69	234.195	2116.16	1352.37	219.903	2058.38	1158.17	154.493	2337.31	1247.52	415.207	2162.42	1365.28	491.879	2154.75	1125.63	496.501	2139.46	1051.08	493.476	2010.05	928.333	438.703	1971.56	864.564	504.183	1992.13	840.176	471.874	1924.38	806.795
501	0	297.127	2084.95	1578.12	179.409	2088.89	1590.07	298.004	2249.24	1521.67	189.912	2248.42	1528.85	237.435	2230.82	1443.78	233.369	2317.49	1165.34	233.967	2107.28	1351.07	220.105	2049.5	1156.86	153.67	2328.28	1246.07	414.789	2154.07	1363.93	491.263	2145.92	1124.22	496.073	2129.98	1049.95	493.018	1999.43	927.904	438.026	1960.14	864.777	503.424	1981.15	839.843	471.485	1912.87	807.372
502	0	296.615	2075.73	1576.68	178.943	2079.48	1588.59	297.344	2240.13	1520.54	189.151	2239.09	1527.53	236.883	2221.93	1442.29	232.735	2308.5	1163.81	233.716	2098.12	1349.82	220.074	2040.43	1155.56	152.951	2319.09	1244.54	414.384	2145.73	1362.63	490.72	2137.21	1122.88	495.248	2120.31	1048.56	492.364	1989.17	927.483	437.427	1949.42	864.781	502.704	1970.28	839.416	470.721	1901.72	807.691
503	0	295.957	2066.54	1575.24	178.34	2070	1587.11	295.735	2231.06	1519.19	188.438	2229.78	1526.23	236.291	2212.85	1440.92	232.116	2299.5	1162.38	233.412	2089.02	1348.47	220.163	2031.29	1154.24	152.235	2309.7	1243.07	413.975	2137.18	1361.4	490.064	2128.48	1121.6	494.554	2110.85	1047.35	491.757	1979.04	926.992	436.778	1939.02	864.564	502.348	1959.65	839.264	470.082	1891	807.666
504	0	295.085	2057.32	1574.01	177.569	2060.46	1585.58	295.127	2221.75	1518.2	187.469	2220.38	1525.05	235.461	2203.62	1439.66	231.348	2290.31	1161.12	233.146	2079.89	1347.1	220.404	2021.97	1152.83	151.363	2300.24	1241.79	413.451	2128.43	1360.29	489.33	2119.65	1120.32	493.695	2101.17	1046.24	490.955	1969	926.471	435.948	1928.92	864.073	501.423	1949.35	838.761	469.115	1880.55	807.474
505	0	294.184	2047.85	1573.01	176.616	2050.94	1584.09	294.138	2212.22	1517.38	186.222	2210.79	1523.95	234.595	2194.26	1438.58	230.704	2281.1	1160.12	232.599	2070.66	1345.75	220.294	2012.53	1151.4	150.493	2290.64	1240.69	412.797	2119.61	1359.41	488.658	2110.78	1119.33	492.932	2091.71	1045.42	490.016	1959.19	925.966	434.974	1919.09	863.453	500.279	1939.35	838.209	468.161	1870.62	807.109
506	0	293.155	2038.41	1571.94	175.452	2041.36	1582.79	292.945	2202.88	1516.35	184.999	2201.13	1522.64	233.579	2184.82	1437.4	229.925	2271.73	1158.99	231.936	2061.22	1344.42	220.182	2002.77	1150.14	149.561	2281.14	1239.34	412.058	2110.59	1358.56	487.854	2101.98	1118.38	492.287	2082.7	1044.6	489.009	1949.67	925.19	433.815	1909.44	862.769	499.393	1929.67	837.59	466.952	1860.76	806.556
507	0	291.993	2028.92	1570.89	174.377	2031.71	1581.43	291.624	2193.24	1515.33	183.591	2191.4	1521.42	232.526	2175.22	1436.28	229.3	2262.28	1157.8	231.184	2051.57	1343.17	220.127	1993.2	1148.78	148.737	2271.33	1238.04	411.373	2101.34	1357.6	486.96	2093.03	1117.23	491.368	2073.36	1043.54	487.998	1940.3	924.305	432.797	1900.08	861.903	498.175	1920.22	836.664	465.804	1851.28	805.606
508	0	290.806	2019.26	1569.96	173.179	2021.97	1580.19	290.487	2183.63	1514.23	182.4	2181.79	1520.16	231.563	2165.47	1435.08	228.568	2252.59	1156.62	230.629	2041.91	1341.94	220.034	1983.5	1147.4	147.984	2261.75	1236.67	410.672	2091.93	1356.64	486.129	2084.13	1116.25	490.504	2064.16	1042.5	486.937	1931.23	923.36	431.677	1890.98	860.951	497.071	1911.08	835.603	464.625	1842.44	804.494
509	0	289.503	2009.69	1569.09	171.809	2012.24	1579.17	288.816	2174.04	1513.22	181.125	2172.03	1518.79	230.488	2155.67	1433.94	227.999	2242.83	1155.33	229.769	2031.93	1340.91	219.784	1973.69	1146.35	147.283	2251.96	1235.33	409.836	2082.29	1355.91	485.198	2075.1	1115.32	489.516	2055.18	1041.44	485.909	1922.67	922.089	430.465	1882.38	860.01	496.033	1902.53	834.503	463.25	1833.86	803.279
510	0	288.109	2000.03	1568.27	170.269	2002.49	1578.17	287.758	2164.25	1512.16	179.888	2162.27	1517.38	229.59	2145.75	1432.77	227.462	2232.96	1154.09	228.78	2022.02	1339.93	219.214	1963.68	1145.1	146.753	2242.14	1233.97	408.867	2072.35	1355.23	484.168	2066	1114.31	488.68	2046.33	1040.45	484.82	1914.03	920.777	429.187	1873.79	858.918	494.723	1894.13	832.997	461.636	1825.56	801.757
511	0	286.494	1990.19	1567.47	168.682	1992.78	1577.2	286.304	2154.44	1511.2	178.578	2152.49	1516.32	228.411	2135.71	1431.78	227.038	2223.06	1153.09	227.559	2011.75	1339.07	218.976	1953.66	1144.17	146.079	2231.92	1232.7	407.662	2062.21	1354.4	483.121	2056.71	1113.4	487.653	2037.51	1039.47	483.652	1905.7	919.32	427.971	1866.3	856.997	493.278	1885.88	831.284	460.288	1817.76	800.084
512	0	284.856	1980.36	1566.8	166.982	1982.88	1576.34	284.851	2144.52	1510.43	177.2	2142.58	1515.37	227.112	2125.56	1430.94	226.599	2212.92	1152.24	226.612	2001.62	1338.29	218.092	1943.27	1143.25	145.438	2221.47	1231.57	406.689	2051.85	1353.9	482.133	2047.59	1112.8	486.578	2028.62	1038.61	482.43	1897.39	917.837	426.763	1858.53	855.471	491.92	1878.38	829.677	458.549	1810.19	798.084
513	0	283.198	1970.45	1566.37	165.247	1972.86	1575.6	283.444	2134.45	1509.93	175.75	2132.6	1514.58	225.898	2115.31	1430.18	226.194	2202.7	1151.49	225.508	1991.11	1337.77	217.31	1932.76	1142.71	144.713	2210.95	1230.52	405.664	2041.32	1353.71	481.089	2038.24	1112.35	485.752	2019.88	1038.01	481.453	1889.51	916.578	425.351	1851.02	853.814	491.101	1870.61	828.407	457.014	1803.14	796.149
514	0	281.552	1960.47	1566	163.58	1962.86	1574.85	281.885	2124.56	1509.49	174.142	2122.68	1513.83	224.604	2105.08	1429.54	225.99	2192	1150.59	224.208	1980.66	1337.24	216.397	1921.79	1142.24	144.025	2200.37	1229.47	404.45	2030.78	1353.36	480.055	2028.64	1112.15	484.887	2011.13	1037.59	480.268	1881.64	915.063	424.279	1843.88	852.134	489.845	1863.47	826.817	455.321	1796.13	793.934
515	0	279.792	1950.39	1565.59	161.814	1952.91	1574.09	280.465	2114.43	1509.11	172.379	2112.49	1513.31	223.258	2094.57	1428.96	225.829	2181.51	1149.89	222.788	1970.11	1336.79	215.339	1910.86	1141.8	143.408	2189.8	1228.6	403.115	2020.06	1353.22	479.016	2019.09	1111.96	483.931	2002.58	1037.38	479.207	1873.79	913.615	422.965	1836.91	850.096	488.86	1856.23	825.208	453.844	1789.53	791.563
516	0	278.161	1940.26	1565.23	160.158	1942.81	1573.49	278.808	2104.46	1508.89	170.668	2102.4	1512.86	221.818	2084.37	1428.4	225.324	2170.48	1149.29	221.481	1959.52	1336.57	214.236	1899.59	1141.64	142.447	2178.34	1227.51	401.789	2009.5	1353.08	477.963	2009.54	1112.04	482.848	1993.78	1036.96	478.303	1866.48	912.184	421.89	1830.21	848.317	487.516	1849.23	823.53	452.395	1783.56	788.787
517	0	276.51	1930.2	1565.1	158.418	1932.55	1573.22	277.011	2094.24	1508.63	168.906	2092.3	1512.5	219.98	2073.68	1427.81	224.705	2159.64	1148.44	220.089	1948.74	1336.39	213.169	1888.1	1141.75	141.471	2167.37	1226.29	400.449	1998.94	1353.17	476.803	1999.93	1112	481.679	1985.23	1036.84	477.26	1859.13	910.671	420.732	1823.68	846.344	486.899	1842.61	822.094	450.724	1777.62	786.011
518	0	274.761	1920.13	1565.08	156.638	1922.22	1572.99	274.991	2084.12	1508.5	166.948	2081.96	1512.17	218.56	2063.54	1427.36	223.751	2148.76	1147.51	218.657	1937.94	1336.36	212.113	1876.55	1141.83	140.207	2155.89	1225.19	398.903	1988.41	1353.11	475.373	1990.21	1111.97	480.363	1976.83	1036.57	476.37	1851.82	909.241	419.815	1817.32	844.345	485.878	1836.28	820.365	449.208	1771.83	783.173
519	0	273.024	1910.06	1565.18	155.013	1911.83	1572.92	272.863	2074.09	1508.36	164.961	2071.55	1511.97	216.86	2052.8	1427	222.405	2137.34	1146.89	217.121	1926.99	1336.43	211.284	1864.64	1142.04	139.051	2144.6	1224.22	397.441	1977.76	1353.29	473.997	1980.57	1111.94	479.039	1968.43	1036.53	475.426	1844.75	907.63	419.021	1811.4	842.093	485.486	1830.04	818.868	447.912	1766.29	780.368
520	0	271.281	1900.05	1565.72	153.259	1901.69	1573.23	271.038	2063.96	1508.53	163.083	2061.3	1511.89	215.284	2042.35	1426.81	221.218	2126.18	1146.29	215.816	1916.24	1336.89	210.397	1852.76	1142.62	137.664	2132.9	1223.33	396.043	1967.11	1353.77	472.649	1970.62	1112.29	477.434	1959.72	1036.45	474.639	1837.93	906.401	418.173	1805.76	840.166	485.024	1824.23	817.429	446.735	1761.45	777.789
521	0	269.261	1889.96	1566.5	151.214	1891.26	1573.83	269.06	2053.72	1509	161.01	2050.79	1512.01	213.544	2031.63	1426.95	219.622	2114.46	1146.18	214.418	1905.24	1337.39	209.693	1840.86	1143.28	136.534	2122.04	1222.97	394.678	1956.39	1354.58	471.259	1960.88	1112.94	476.078	1951.34	1037.12	473.706	1831.25	905.229	417.464	1800.66	838.095	484.842	1818.37	816.332	445.454	1756.74	775.161
522	0	267.193	1879.65	1567.44	149.3	1880.85	1574.53	267.007	2043.29	1509.47	158.916	2040.17	1512.32	211.819	2020.86	1427.45	218.475	2102.67	1146.31	212.972	1894.27	1338.07	208.882	1828.95	1143.99	135.161	2110.4	1222.96	393.112	1945.43	1355.64	469.909	1951	1113.82	474.312	1942.59	1037.69	472.597	1824.81	904.074	416.782	1795.92	835.996	484.727	1813.12	815.375	444.3	1752.28	772.735
523	0	265.161	1869.49	1568.6	147.449	1870.72	1575.31	264.938	2032.94	1510.25	156.991	2029.81	1512.76	210.053	2010.06	1428.15	217.676	2092.01	1146.84	211.408	1883.23	1339.12	208.192	1817.11	1144.9	134.007	2099.25	1223.3	391.562	1934.52	1356.96	468.174	1940.85	1114.82	472.756	1933.91	1038.79	471.65	1818.6	903.27	415.782	1791.55	833.918	484.067	1808.2	814.384	443.158	1748.25	770.422
524	0	263.307	1859.35	1569.82	145.448	1860.42	1576.26	263.128	2022.74	1511.19	154.83	2019.31	1513.42	208.311	1999.45	1428.98	216.176	2079.78	1147.75	209.959	1872.21	1340.01	207.459	1805.68	1146.09	132.611	2088.22	1223.81	390.206	1923.68	1358.64	466.725	1930.85	1116.23	471.402	1925.44	1040.36	470.429	1812.31	902.678	415.021	1787.38	832.437	484.047	1803.19	813.978	442.245	1744.73	768.366
525	0	261.297	1849.09	1570.99	143.498	1850.08	1577.06	260.982	2012.31	1512.1	152.879	2008.94	1514.15	206.641	1988.78	1429.91	215.039	2068.41	1148.58	208.657	1861.31	1341.05	206.918	1794.56	1147.32	131.425	2077.34	1224.44	388.57	1912.49	1360.17	465.077	1920.65	1117.61	469.632	1916.72	1041.67	469.203	1806.27	902.138	414.001	1783.34	830.754	483.771	1798.68	813.606	441.757	1741.41	766.221
526	0	259.207	1838.91	1572.27	141.317	1839.86	1577.98	259.226	2002.2	1513.42	151.019	1998.75	1515.01	204.936	1978.33	1430.96	213.889	2057.56	1149.6	207.622	1850.83	1342.12	206.339	1783.34	1148.6	130.116	2066.61	1225.43	386.781	1902.01	1361.85	463.396	1910.45	1119.16	467.889	1907.85	1043.23	467.913	1800.18	901.871	413.736	1779.51	829.253	483.564	1793.99	813.337	441.277	1738.29	764.486
527	0	256.984	1828.7	1573.68	139.224	1829.77	1578.85	257.514	1991.8	1514.84	149.314	1988.65	1516.17	203.338	1967.95	1432.29	213.263	2047.16	1151.03	206.48	1840.35	1343.53	205.912	1772.83	1150.1	128.811	2055.56	1226.44	385.709	1891.64	1363.81	461.812	1900.49	1120.81	466.396	1899.25	1045.07	466.415	1794.29	901.715	412.73	1775.9	828.049	483.6	1789.71	813.552	441.063	1735.3	762.901
528	0	254.815	1818.37	1574.96	137.013	1819.76	1579.64	256.198	1981.84	1516.48	147.692	1978.69	1517.16	201.835	1957.84	1433.42	212.563	2036.97	1152.27	205.486	1830.1	1344.7	205.515	1762.37	1151.58	127.809	2045.23	1227.25	384.551	1881.65	1365.72	460.09	1890.43	1122.37	464.774	1890.63	1046.93	465.672	1788.63	901.861	412.822	1772.19	827.104	483.537	1785.31	813.648	440.907	1732.57	761.556
529	0	252.606	1808.07	1576.22	134.586	1809.8	1580.3	254.643	1971.76	1518.04	146.265	1968.76	1518.12	200.4	1947.95	1434.5	211.993	2026.42	1153.28	204.457	1819.78	1345.98	205.104	1752.19	1152.94	126.871	2034.82	1227.99	383.35	1871.81	1367.39	458.496	1880.78	1123.92	463.573	1882.52	1048.88	464.854	1782.8	902.057	412.68	1769.07	826.017	483.804	1781.03	814.038	440.929	1729.65	760.414
530	0	250.262	1797.61	1577.53	132.298	1799.88	1580.86	253.432	1961.58	1519.74	145.123	1959.08	1519.12	199.065	1938.1	1435.66	211.45	2017.26	1154.4	203.959	1810.23	1346.95	204.844	1742.29	1154.16	125.831	2024.56	1228.87	382.545	1862.26	1369.19	456.937	1871.28	1125.4	461.928	1874.01	1050.32	464.328	1776.75	902.573	412.437	1764.79	825.676	483.623	1776.82	814.138	440.93	1726.63	759.506
531	0	248.026	1787.28	1579	129.913	1790.27	1581.46	252.398	1951.42	1521.5	144.107	1949.49	1520.17	197.892	1928.41	1436.8	210.808	2007.86	1155.53	203.079	1800.27	1348.35	204.759	1732.57	1155.56	124.924	2014.4	1229.71	381.271	1852.9	1370.79	455.897	1862.2	1127.24	461.125	1866.16	1052.46	463.887	1771.14	902.977	412.655	1760.75	825.688	484.53	1771.87	815.26	441.192	1723.54	758.95
532	0	245.801	1776.93	1580.42	127.558	1780.87	1581.98	251.696	1941.14	1523.35	143.465	1940.06	1521.3	196.694	1918.83	1437.96	210.27	1998.19	1156.86	202.633	1790.72	1349.54	204.752	1722.97	1156.92	123.897	2004.28	1230.57	380.869	1843.93	1372.71	454.994	1853.36	1128.93	460.052	1858.26	1054.17	463.612	1765.51	903.694	413.228	1755.86	826.026	484.954	1767.38	816.15	441.609	1720.14	758.532
533	0	243.407	1766.48	1581.6	125.103	1771.46	1582.35	251.204	1930.91	1525.08	142.894	1930.8	1522.22	195.689	1909.39	1439.1	209.668	1988.88	1157.85	202.203	1781.24	1350.5	204.927	1713.63	1157.95	123.008	1994.58	1231.59	380.025	1835.12	1374.14	454.446	1844.95	1130.37	459.557	1850.71	1055.76	463.575	1759.73	904.204	413.661	1751.69	825.81	485.825	1762.37	816.978	442.187	1716.36	758.205
534	0	240.414	1756.17	1582.64	122.793	1762.26	1582.78	250.835	1920.57	1526.79	142.53	1921.62	1523.39	194.655	1899.99	1440.24	208.841	1979.55	1158.96	201.994	1771.96	1351.53	205.353	1704.36	1159.07	122.064	1985.05	1232.55	379.524	1826.56	1375.64	454.117	1836.87	1131.89	459.293	1843.29	1057.41	464.004	1753.68	905.107	414.185	1746.36	826.429	486.901	1757.08	818.166	443.122	1712.26	758.15
535	0	238.632	1745.88	1584.09	120.534	1753.17	1583.34	250.872	1910.48	1528.68	142.305	1912.52	1524.5	193.771	1890.64	1441.45	208.309	1971.13	1160.21	201.683	1762.75	1352.62	205.797	1695.26	1160.19	121.083	1975.71	1233.68	379.042	1818.13	1377.14	454.069	1828.92	1133.52	459.246	1836.15	1059.08	465.098	1747.89	906.181	415.069	1741.05	827.091	487.925	1751.98	819.266	444.302	1707.77	758.499
536	0	236.53	1735.65	1585.29	118.529	1744.31	1583.97	250.622	1900.1	1530.27	142.223	1903.53	1525.81	192.815	1881.43	1442.55	206.689	1961.3	1161.32	201.57	1753.92	1353.54	206.217	1686.18	1161.1	120.004	1966.37	1234.84	378.626	1809.85	1378.34	454.265	1821.54	1134.89	459.422	1829.33	1060.38	465.987	1741.8	907.196	416.403	1735.66	827.845	489.01	1746.42	820.371	445.832	1702.93	759.022
537	0	234.143	1725.32	1586.41	116.818	1735.47	1584.73	250.335	1890	1531.83	142.423	1894.75	1526.93	192.105	1872.28	1443.68	205.695	1952.33	1162.36	201.402	1744.89	1354.49	206.857	1677.16	1162.19	119.046	1957.16	1235.84	378.347	1801.65	1379.62	454.739	1814.62	1136.3	459.872	1822.67	1061.64	466.935	1735.87	908.218	417.724	1729.45	829.053	490.251	1740.92	821.546	447.466	1697.58	759.735
538	0	232.341	1715.41	1587.58	115.352	1726.62	1585.62	250.242	1880.26	1533.16	142.351	1885.77	1528.07	191.356	1863.24	1444.8	204.521	1943.68	1163.35	201.386	1736.06	1355.57	207.398	1668.27	1163.22	118.448	1948.47	1237.15	377.886	1793.6	1380.69	455.158	1808.55	1137.45	460.44	1816.4	1062.87	468.397	1729.73	909.321	419.022	1723.22	830.163	491.524	1735.35	822.65	449.355	1692.02	760.638
539	0	231.131	1705.75	1588.67	114.017	1717.56	1586.65	249.971	1869.98	1534.99	142.264	1876.81	1529.34	190.783	1854.33	1445.99	203.427	1934.77	1164.58	201.273	1727.25	1356.64	207.777	1659.44	1164.33	117.533	1939.47	1238.27	377.653	1785.52	1381.87	455.514	1802.04	1138.69	460.957	1810.1	1064.21	469.838	1723.88	910.562	420.492	1716.71	831.444	492.93	1729.56	823.953	451.473	1686.15	761.852
540	0	230.662	1696.56	1589.91	113.054	1708.41	1587.72	249.825	1861.11	1536.36	142.053	1867.87	1530.69	190.124	1845.42	1447.14	202.378	1925.91	1165.6	201.11	1718.52	1357.76	208.309	1650.65	1165.36	116.01	1930.05	1239.24	377.461	1777.57	1383.05	456.221	1796.29	1140.39	461.546	1803.99	1065.62	471.01	1717.75	911.903	422.526	1710.05	832.922	494.504	1724.05	825.367	453.719	1679.69	763.274
541	0	229.864	1686.85	1590.85	112.654	1699.45	1588.76	249.338	1851.53	1537.49	141.694	1858.82	1532.09	189.474	1836.6	1448.34	201.717	1917.85	1166.62	201.003	1709.86	1358.8	208.666	1641.99	1166.49	115.042	1921.26	1240.39	376.923	1769.51	1384.12	456.942	1790.65	1141.99	462.326	1798.12	1067.12	472.704	1711.64	913.479	424	1703.31	834.422	495.908	1718.18	826.791	456.009	1673.09	764.915
542	0	229.835	1678.03	1592.01	112.406	1690.33	1589.83	249.207	1842.34	1539.29	141.306	1849.7	1533.36	188.894	1827.92	1449.46	200.263	1908.39	1167.99	200.881	1701.31	1359.83	208.914	1633.51	1167.69	113.906	1912.09	1241.56	376.318	1761.69	1385.35	457.537	1785.18	1143.77	462.904	1791.99	1068.82	474.389	1705.62	914.988	426.083	1696.46	836.069	497.261	1712.85	828.225	458.608	1667.07	766.567
543	0	229.464	1668.96	1592.76	112.197	1681.1	1590.92	248.827	1833.69	1540.16	140.974	1840.81	1534.66	188.377	1819.29	1450.49	200.046	1900.36	1168.94	200.92	1692.79	1360.94	208.915	1624.88	1168.87	113.056	1903.19	1242.6	376.364	1753.87	1386.65	458.044	1779.79	1145.53	463.513	1786.13	1070.38	476.079	1699.66	916.725	427.885	1689.44	837.862	498.967	1707.13	829.903	461.257	1660.46	768.596
544	0	229.645	1660.14	1593.49	112.363	1671.91	1591.85	248.413	1825	1541.1	140.584	1831.82	1535.88	187.801	1810.76	1451.43	198.787	1890.93	1169.78	200.751	1684.27	1361.86	208.995	1616.37	1170.18	112.303	1894.38	1243.4	375.994	1746.02	1387.7	458.386	1774.48	1147.04	464.125	1780.14	1071.94	477.73	1693.76	918.134	429.572	1682.51	839.373	500.481	1701.47	831.182	463.732	1653.62	770.292
545	0	229.996	1651.42	1594.11	112.786	1662.71	1592.68	247.815	1816.54	1542.11	139.873	1822.73	1537.07	187.327	1802.21	1452.35	198.016	1882.17	1170.7	200.459	1675.74	1362.76	208.916	1608.14	1171.18	111.453	1885.5	1244.3	375.674	1738.22	1388.64	458.514	1768.95	1148.51	464.536	1774.3	1073.44	479.475	1687.65	919.542	431.721	1675.21	840.838	501.858	1695.7	832.513	466.351	1646.64	772.184
546	0	230.539	1642.87	1594.74	113.072	1653.25	1593.53	247.256	1808.15	1542.95	139.172	1813.66	1538.05	186.859	1793.76	1453.05	197.462	1873.26	1171.24	200.412	1667.37	1363.62	208.777	1599.96	1172.23	110.727	1876.6	1244.9	375.408	1730.51	1389.53	458.601	1763.12	1149.7	464.947	1768.26	1074.81	481.162	1681.76	920.89	433.568	1667.95	842.253	503.305	1690.25	833.799	469.11	1639.75	773.924
547	0	231.311	1634.32	1595.09	113.88	1644.06	1594.25	246.637	1799.87	1543.53	138.52	1804.67	1538.98	186.457	1785.28	1453.53	196.458	1864.1	1171.72	200.242	1658.91	1364.23	208.618	1591.76	1173.12	110.218	1868.02	1245.39	375.248	1722.75	1390.22	458.641	1757.14	1150.77	465.364	1761.82	1075.92	482.786	1675.5	922.074	435.643	1660.76	843.545	504.402	1684.52	834.768	471.8	1632.77	775.456
548	0	232.24	1625.88	1595.38	114.528	1634.55	1594.77	245.85	1791.72	1544.02	137.73	1795.66	1539.71	186.075	1776.88	1454.03	195.258	1854.93	1172.03	200.298	1650.61	1364.76	208.387	1583.57	1173.74	109.533	1859.19	1245.75	375.048	1715.02	1390.74	458.596	1751.1	1151.5	465.176	1755.71	1076.44	484.381	1669.41	923.038	437.563	1653.32	844.689	505.538	1678.76	835.483	474.586	1625.66	776.861
549	0	233.033	1617.53	1595.67	115.339	1625.12	1595.21	244.965	1783.51	1544.56	136.752	1786.47	1540.38	185.678	1768.43	1454.45	194.273	1845.82	1172.4	200.197	1642.1	1365.21	208.283	1575.41	1174.24	108.958	1850.57	1246.27	374.596	1707.25	1391.12	458.536	1744.58	1152.34	464.779	1749.13	1077.15	485.786	1663.12	923.847	439.314	1645.84	845.516	506.731	1672.71	836.237	477.33	1618.56	778.176
550	0	233.592	1609.33	1595.63	116.147	1615.78	1595.53	244.273	1775.44	1545.07	135.79	1776.99	1541.2	185.372	1759.91	1454.75	194.28	1838.19	1172.88	200.306	1633.75	1365.51	208.343	1567.19	1174.6	108.645	1841.94	1246.53	374.738	1699.24	1391.65	458.564	1737.94	1152.97	465.421	1742.76	1078.08	487.098	1656.61	924.585	441.074	1638.33	846.243	507.888	1666.65	836.948	479.826	1611.38	779.174
551	0	234.47	1601.06	1595.42	116.999	1606.13	1595.54	243.375	1767.34	1545.24	134.824	1767.78	1541.6	185.101	1751.41	1454.93	194.065	1829.52	1173.26	200.321	1625.4	1365.56	208.45	1558.8	1174.6	108.271	1833.4	1246.75	374.663	1691.26	1391.81	458.371	1730.83	1153.19	465.448	1735.88	1078.38	488.259	1650.04	925.044	442.702	1630.92	846.555	509.116	1660.48	837.5	482.368	1604.13	780.02
552	0	235.639	1592.86	1595.27	117.969	1596.83	1595.43	242.097	1759.17	1545.37	133.999	1758.76	1541.67	184.876	1742.88	1454.99	193.888	1821.34	1173.29	200.268	1616.91	1365.54	208.698	1550.46	1174.48	107.847	1824.96	1246.84	374.616	1683.27	1391.84	458.24	1723.61	1153.41	465.397	1728.87	1078.73	489.377	1643.51	925.197	444.25	1623.29	846.775	509.815	1654.88	837.689	484.755	1597.24	780.543
553	0	236.465	1584.63	1594.99	118.843	1587.28	1595.26	241.163	1751.08	1545.34	133.157	1749.53	1541.68	184.597	1734.23	1454.86	193.444	1812.56	1173.09	200.379	1608.34	1365.4	209.073	1542.18	1174.33	107.513	1816.3	1246.67	374.549	1675.16	1391.82	458.199	1716.2	1153.41	465.39	1721.72	1078.85	490.355	1636.65	925.353	445.595	1615.68	846.915	510.751	1648.11	837.699	487.056	1590.25	781.173
554	0	237.268	1576.39	1594.5	119.764	1577.94	1594.92	240.447	1743.06	1544.99	132.345	1740.29	1541.49	184.519	1725.68	1454.44	193.396	1804	1172.76	200.735	1599.87	1365.13	209.632	1533.76	1174.05	107.514	1807.83	1246.22	374.54	1667.04	1391.55	458.238	1708.71	1153.28	465.405	1714.43	1078.58	491.158	1629.77	925.164	446.935	1608.1	846.857	511.465	1641.64	837.464	489.159	1583.29	781.292
555	0	238.035	1568.25	1593.86	120.615	1568.6	1594.36	239.547	1734.73	1544.54	131.747	1731.08	1541.09	184.392	1716.98	1453.94	193.475	1795.9	1172.24	200.872	1591.31	1364.64	210.076	1525.36	1173.54	107.331	1799.21	1245.76	374.669	1658.89	1391.14	458.335	1701.01	1152.97	465.577	1706.91	1078.26	491.924	1622.78	924.792	448.018	1600.49	846.51	512.095	1635	837.023	490.967	1576.25	781.169
556	0	238.765	1559.73	1593.11	121.347	1559.35	1593.63	239.272	1726.45	1544.12	131.466	1722.09	1540.6	184.33	1708.29	1453.41	193.381	1787.55	1171.89	201.032	1582.64	1364.03	210.549	1516.95	1172.8	107.237	1790.6	1245.29	374.71	1650.59	1390.76	458.307	1692.89	1152.59	465.677	1699.15	1078.04	492.555	1615.59	924.382	449.059	1593.16	845.976	512.677	1628.03	836.632	492.339	1569.08	780.884
557	0	239.455	1551.23	1592.36	121.963	1550.19	1592.78	239.078	1717.88	1543.62	131.193	1713.03	1540.04	184.393	1699.51	1452.8	193.665	1778.88	1171.42	201.431	1573.96	1363.42	211.218	1508.44	1172.08	107.337	1782.01	1244.66	375.039	1642.24	1390.45	458.296	1684.65	1152.16	465.854	1691.41	1077.69	493.205	1608.16	923.932	449.947	1585.62	845.46	513.101	1621.09	836.216	493.556	1561.89	780.446
558	0	239.908	1542.53	1591.3	122.405	1540.94	1591.72	238.898	1709.4	1542.99	131.105	1704.1	1539.31	184.486	1690.75	1451.96	193.712	1770.01	1170.65	201.81	1565.31	1362.56	211.848	1499.91	1171.09	107.352	1773.23	1243.84	375.294	1633.71	1389.87	458.458	1676.36	1151.53	466.097	1683.57	1077.18	493.799	1600.59	923.225	450.714	1578.01	844.633	513.563	1613.89	835.559	494.655	1554.63	779.622
559	0	240.409	1533.7	1590.17	122.944	1531.87	1590.51	238.967	1700.47	1542.13	131.293	1694.97	1538.54	184.691	1681.93	1451.06	193.824	1761.32	1169.9	202.306	1556.57	1361.48	212.731	1491.28	1170.07	107.712	1764.63	1242.92	375.673	1625.15	1389.03	458.687	1667.93	1150.73	466.257	1675.56	1076.37	494.291	1592.85	922.336	451.334	1570.36	843.589	514.351	1606.35	834.677	495.431	1547.35	778.496
560	0	240.827	1524.63	1589.05	123.369	1523.02	1589.24	239.672	1691.5	1541.33	131.871	1686.08	1537.62	184.978	1673.05	1450.09	194.311	1752.67	1168.96	202.835	1547.72	1360.48	213.559	1482.65	1169.05	107.893	1755.72	1241.9	376.069	1616.4	1388.15	459.187	1659.44	1149.9	466.5	1667.13	1075.53	494.745	1584.93	921.382	451.776	1562.53	842.492	514.973	1598.61	833.774	495.886	1540.04	777.345
561	0	241.381	1515.43	1587.85	123.63	1514.02	1588	240.387	1682.34	1540.27	132.36	1677.17	1536.62	185.447	1664.11	1448.83	194.559	1743.52	1167.89	203.311	1538.83	1359.36	214.239	1473.85	1167.68	108.501	1747.14	1240.78	376.308	1607.64	1387.05	459.618	1650.95	1149	466.907	1658.9	1074.54	495.245	1577.01	920.288	452.298	1554.76	841.419	515.495	1590.76	832.754	496.26	1532.76	775.951
562	0	241.667	1506.28	1586.39	124.014	1505.2	1586.54	241.199	1673.27	1538.89	133.352	1668.45	1535.13	186.005	1655.06	1447.48	195.304	1734.97	1166.52	204.049	1529.92	1357.94	215.01	1464.95	1166.31	108.912	1738.17	1239.37	377.112	1598.66	1385.82	460.023	1642.28	1147.59	467.435	1650.66	1073.29	495.72	1569.07	918.851	452.531	1546.75	839.863	515.717	1582.94	831.317	496.257	1525.05	774.095
563	0	242.05	1496.98	1584.76	124.487	1496.27	1584.85	242.246	1664.14	1537.38	134.257	1659.58	1533.6	186.736	1645.96	1445.97	195.808	1725.68	1164.96	204.574	1520.82	1356.48	215.793	1455.98	1164.8	109.76	1729.5	1237.95	377.787	1589.68	1384.31	460.638	1633.6	1146.1	467.804	1642.18	1071.74	496.115	1560.89	917.097	452.854	1538.82	838.238	516.217	1574.59	829.632	496.256	1517.4	772.187
564	0	242.573	1487.66	1583.23	124.945	1487.35	1583.43	243.182	1654.62	1535.83	135.559	1650.76	1532.01	187.402	1636.72	1444.43	196.546	1716.82	1163.42	205.419	1511.59	1355.14	216.443	1446.87	1163.22	110.378	1720.46	1236.46	378.55	1580.47	1382.74	461.297	1624.74	1144.59	468.384	1633.65	1070.15	496.562	1552.64	915.449	453.134	1530.74	836.575	516.303	1566.38	827.9	496.345	1510.07	770.188
565	0	243.403	1478.28	1581.61	125.682	1478.48	1581.9	244.038	1645.32	1534.18	136.628	1641.82	1530.49	188.42	1627.53	1442.74	197.41	1707.6	1161.76	206.257	1502.46	1353.39	217.085	1437.58	1161.54	111.374	1711.5	1234.81	379.692	1571	1381.12	462.089	1615.83	1143.01	469.089	1625.02	1068.49	496.9	1544	913.606	453.327	1522.65	834.775	517.066	1557.85	826.244	496.209	1502.3	767.973
566	0	244.215	1468.86	1579.89	126.356	1469.32	1580.21	245.632	1635.86	1532.33	137.914	1632.71	1528.67	189.458	1618.05	1441.07	198.341	1698.4	1160.15	207.021	1492.99	1351.54	217.722	1428.26	1159.75	112.42	1702.4	1233.33	380.699	1561.42	1379.38	463.092	1607.1	1141.38	469.416	1616.05	1066.63	497.387	1535.41	911.703	453.473	1514.39	832.808	517.115	1549.28	824.216	495.947	1494.34	765.647
567	0	245.277	1459.51	1578.22	127.406	1460.18	1578.52	247.103	1626.54	1530.53	139.074	1623.51	1526.89	190.582	1608.59	1439.52	199.487	1689.17	1158.67	207.847	1483.39	1349.66	218.394	1418.74	1157.72	113.407	1693.08	1231.87	381.421	1551.55	1377.42	463.773	1597.93	1139.61	470.493	1607.37	1065.05	497.802	1526.78	909.708	453.631	1506.18	830.715	517.643	1540.46	822.339	495.625	1486.3	763.187
568	0	246.617	1450.13	1576.65	128.674	1450.95	1576.98	248.126	1617.02	1528.75	140.408	1614.06	1525.23	191.781	1598.98	1437.94	200.527	1679.53	1157.25	208.717	1473.99	1347.81	218.892	1409.27	1155.77	114.913	1684.41	1230.53	382.877	1541.56	1375.81	464.665	1588.77	1137.89	471.391	1598.39	1063.27	498.181	1517.85	907.588	453.779	1497.78	828.663	518.04	1531.78	820.39	495.181	1477.93	760.872
569	0	248.008	1440.85	1574.96	130.108	1441.45	1575.41	249.651	1607.54	1526.66	141.673	1604.64	1523.27	193.312	1589.32	1436.22	201.921	1669.86	1155.53	209.787	1464.2	1345.88	219.497	1399.65	1153.74	116.072	1675.2	1228.93	384.168	1531.51	1373.79	465.723	1579.58	1135.92	472.254	1589.22	1061.19	498.559	1509.17	905.301	453.744	1489.27	826.409	518.373	1523.11	818.136	495.091	1470.09	758.435
570	0	249.82	1431.41	1573.22	131.862	1431.88	1573.81	251.018	1598.26	1524.63	142.94	1594.93	1521.37	194.833	1579.62	1434.51	203.172	1660.3	1153.88	210.863	1454.33	1344.11	219.895	1389.9	1151.74	117.74	1665.94	1227.35	385.368	1521.32	1371.57	466.603	1570.3	1133.82	473.051	1580.16	1058.98	499.046	1500.33	902.864	453.935	1480.81	824.111	518.529	1514.37	815.613	495.008	1461.91	755.996
571	0	251.719	1421.95	1571.65	133.744	1422.24	1572.37	252.279	1588.71	1522.98	144.659	1585.32	1519.68	196.491	1569.76	1433.02	204.782	1650.63	1152.29	212.018	1444.74	1342.37	220.364	1380.3	1149.8	119.138	1656.3	1225.93	386.411	1510.99	1369.42	467.669	1560.86	1131.88	473.818	1570.8	1056.91	499.437	1491.5	900.593	454.125	1472.23	821.918	518.796	1505.68	813.318	494.829	1453.52	753.739
572	0	253.722	1412.52	1570.28	135.746	1412.5	1571.25	253.856	1579.21	1521.34	146.137	1575.52	1518.21	198.231	1559.85	1431.62	205.993	1640.7	1151.02	213.32	1434.73	1340.79	220.813	1370.49	1148.12	120.857	1646.78	1224.73	387.861	1500.76	1367.63	468.558	1551.21	1129.98	474.738	1561.3	1055.09	499.857	1482.53	898.455	454.256	1463.61	819.798	519.354	1497.51	811.328	494.813	1445.07	751.604
573	0	255.895	1403.04	1568.97	137.873	1402.62	1570	255.272	1569.57	1519.69	147.383	1565.51	1516.77	200.043	1549.96	1430.23	207.653	1631.09	1149.7	214.656	1424.77	1339.35	221.121	1360.8	1146.29	122.407	1636.76	1223.46	389.448	1490.27	1365.75	469.542	1541.39	1128.14	475.503	1551.65	1053.16	500.103	1473.42	896.097	454.407	1454.9	817.542	519.231	1488.37	808.972	494.895	1436.49	749.436
574	0	257.983	1393.64	1567.65	140.09	1392.62	1568.86	256.889	1559.8	1518.24	149.104	1555.49	1515.42	201.926	1539.89	1429.12	208.928	1620.87	1148.56	216.129	1414.71	1337.89	221.764	1350.99	1144.76	123.957	1627.06	1222.55	391.058	1479.89	1363.89	470.563	1531.22	1126.17	476.223	1541.9	1051.27	500.407	1464.2	893.83	454.527	1446.17	815.155	519.336	1479.39	806.664	495.045	1427.79	747.213
575	0	260.252	1383.62	1566.65	142.403	1382.71	1567.9	259.041	1550.04	1517.01	151.186	1545.51	1514.22	203.999	1529.9	1428.06	210.41	1610.64	1147.55	217.662	1404.61	1336.73	222.502	1340.92	1143.52	125.617	1616.67	1221.64	392.826	1469.54	1362.34	471.672	1520.96	1124.43	476.683	1531.87	1049.5	500.712	1455.06	891.676	454.698	1437.27	813.054	519.651	1470.68	804.627	495.23	1418.86	745.368
576	0	262.535	1373.81	1565.74	144.705	1372.74	1567.1	261.245	1540.08	1515.93	153.283	1535.24	1513.24	206.133	1519.71	1427.16	212.037	1600.53	1146.53	219.4	1394.41	1335.82	223.246	1330.73	1142.61	127.355	1606.62	1220.91	394.539	1459.2	1360.77	472.718	1510.5	1122.72	477.737	1522.08	1047.92	501.067	1445.68	889.706	454.992	1428.46	810.942	519.973	1461.75	802.749	495.441	1409.93	743.521
577	0	265.054	1363.88	1565.05	146.981	1362.83	1566.37	263.56	1530.05	1514.91	155.637	1525.38	1512.26	208.303	1509.62	1426.3	213.471	1589.65	1145.62	221.331	1384.35	1334.81	224.243	1320.34	1141.83	128.754	1596.18	1220.23	396.732	1448.72	1359.45	473.809	1499.75	1120.97	478.637	1512.06	1046.41	501.508	1436.35	887.793	455.247	1419.34	809.019	520.453	1452.7	800.914	495.794	1400.73	741.874
578	0	267.236	1354.02	1564.57	149.293	1352.97	1565.99	265.896	1519.91	1514.07	158.006	1515.28	1511.57	210.531	1499.33	1425.67	214.724	1578.85	1144.76	223.224	1373.63	1334.36	225.439	1309.7	1141.36	130.286	1585.63	1219.7	398.609	1438.35	1358.09	474.874	1489.05	1119.26	479.201	1501.73	1044.76	501.933	1426.64	886	455.335	1410.11	806.994	520.57	1443.39	798.991	496.112	1391.42	740.174
579	0	269.63	1343.67	1564.7	151.395	1343.11	1566.16	268.627	1509.65	1513.47	160.599	1505.31	1510.96	212.855	1488.92	1425.26	216.196	1568.17	1144.21	225.155	1363.05	1334.17	226.652	1298.81	1141.26	131.96	1574.79	1219.27	400.692	1427.99	1357.05	475.883	1478.39	1117.69	479.893	1491.24	1043.27	502.19	1417.01	884.195	455.636	1400.83	805.349	520.846	1433.95	797.311	496.435	1382.11	738.744
580	0	271.796	1333.64	1565.02	153.667	1333.28	1566.81	271.314	1499.08	1513.02	163.315	1495.23	1510.65	215.02	1478.38	1425.02	217.262	1557.33	1143.68	227.176	1352.39	1334.26	228.009	1287.72	1141.33	133.482	1563.79	1219.09	402.637	1417.63	1356.06	476.832	1467.63	1116.24	480.435	1480.72	1041.79	502.611	1407.14	882.532	455.916	1391.36	803.79	521.166	1424.47	795.794	496.751	1372.68	737.333
581	0	274.256	1323.29	1565.37	156.08	1323.39	1567.49	274.122	1488.76	1512.69	165.965	1485.15	1510.62	217.227	1467.89	1425.06	218.165	1546.38	1143.58	229.211	1341.63	1334.6	229.445	1276.39	1141.6	134.724	1552.61	1219.19	404.613	1407.38	1355.23	477.886	1456.96	1115.14	481.087	1469.9	1040.67	502.986	1397.11	881.051	456.233	1381.69	802.507	521.379	1414.81	794.393	497.228	1363.1	736.034
582	0	276.858	1313.13	1566.1	158.619	1313.5	1568.67	276.665	1478.24	1512.52	168.675	1475.07	1510.82	219.256	1457.05	1425.59	218.854	1535.12	1143.67	231.251	1330.81	1335.23	230.937	1264.97	1142.21	135.755	1541.2	1219.84	406.537	1396.84	1354.88	478.85	1446.26	1114.48	481.886	1458.91	1039.92	503.442	1386.95	880.067	456.714	1371.91	801.45	521.725	1405.04	793.486	497.645	1353.4	735.185
583	0	279.579	1303.02	1567.38	161.101	1303.57	1570.28	279.48	1467.8	1512.72	171.22	1464.63	1511.52	221.168	1446.2	1426.31	219.653	1523.94	1144.44	233.317	1319.85	1336.1	232.515	1253.62	1143.17	136.74	1529.66	1220.75	408.412	1386.38	1354.93	479.946	1435.36	1114.29	482.599	1447.77	1039.66	503.914	1376.37	879.593	457.138	1361.81	800.948	522.142	1394.77	793.059	498.153	1343.86	734.532
584	0	282.195	1292.86	1568.67	163.842	1293.54	1572.02	281.967	1457.3	1513.15	173.699	1454.14	1512.45	223.162	1435.51	1427.33	220.448	1512.6	1145.34	235.18	1308.95	1337.19	234.118	1242.28	1144.22	137.552	1518.23	1221.95	410.278	1376	1355.33	480.932	1424.36	1114.22	483.456	1436.67	1039.77	504.393	1365.74	879.314	457.714	1351.4	800.704	522.317	1384.52	792.767	498.364	1334.06	733.807
585	0	284.93	1283.07	1570.14	166.966	1283.71	1573.99	284.376	1447.1	1513.65	176.008	1443.77	1513.54	224.734	1424.53	1428.69	221.156	1501.24	1146.68	237.074	1298.15	1338.52	235.675	1230.85	1145.35	138.231	1506.76	1223.68	411.648	1365.66	1355.78	481.715	1413.42	1114.45	483.435	1425.07	1039.76	504.828	1354.82	879.373	458.056	1341.06	800.51	523.167	1373.67	793.119	498.659	1323.88	733.445
586	0	287.81	1273.12	1571.57	169.805	1273.4	1576.13	286.57	1436.79	1514.52	178.219	1433.25	1515.06	226.276	1413.62	1430.1	221.818	1490.25	1148.25	238.713	1287.23	1340.3	237.166	1219.47	1146.89	138.851	1495.35	1225.37	413.329	1355.18	1356.63	482.434	1402.22	1114.89	484.248	1413.84	1040.5	505.382	1343.65	879.976	458.199	1330.19	800.575	523.737	1362.84	793.641	498.959	1313.64	733.502
587	0	290.729	1263.29	1573.16	172.633	1263.06	1578.57	288.461	1426.85	1515.29	180.242	1422.9	1516.44	227.809	1402.97	1431.61	222.302	1479.31	1149.67	240.414	1276.58	1342.08	238.814	1208.22	1148.81	139.444	1484.01	1226.95	414.967	1344.94	1357.79	483.092	1391.09	1115.57	484.28	1402.52	1040.93	505.943	1332.4	880.77	458.916	1319.29	801.39	524.73	1351.62	794.641	499.578	1302.81	733.926
588	0	293.731	1253.48	1574.65	175.609	1252.88	1580.83	290.386	1416.7	1516.28	181.991	1412.32	1518.28	229.344	1392.39	1433.1	223.062	1468.26	1150.88	242.074	1265.92	1343.96	240.233	1197.03	1150.63	140.135	1472.78	1228.53	416.44	1334.64	1358.91	483.796	1380.09	1116.24	484.879	1391.19	1041.86	506.598	1321.02	881.758	459.773	1308.4	802.32	525.784	1340.28	795.622	499.766	1291.72	734.401
589	0	296.463	1243.68	1576.22	178.437	1242.43	1583.13	291.754	1406.89	1517.29	183.832	1401.95	1520.04	230.644	1381.79	1434.62	223.575	1457.22	1152.51	243.515	1255.4	1345.78	241.597	1186.08	1152.58	140.868	1461.83	1230.26	417.66	1324.36	1360.14	484.187	1368.92	1117.09	485.194	1379.87	1042.85	507.379	1309.77	882.932	460.874	1297.48	803.44	526.51	1328.9	796.579	500.077	1280.16	735.11
590	0	298.875	1234.06	1577.71	180.982	1232.08	1585.49	293.258	1396.81	1518.62	185.397	1391.56	1521.99	232.108	1371.47	1436.25	224.558	1446.57	1153.97	244.794	1244.86	1347.76	242.756	1175.11	1154.69	141.795	1451.02	1231.93	418.949	1313.89	1361.73	484.609	1357.87	1118.15	485.218	1368.56	1043.94	508.304	1298.49	884.395	461.63	1286.24	804.855	527.607	1317.32	798.046	500.433	1268.29	736.197
591	0	301.399	1224.27	1579.22	183.478	1221.8	1587.61	294.426	1387.08	1519.9	186.813	1381.06	1523.84	233.353	1361.22	1437.79	225.466	1435.76	1155.35	245.974	1234.45	1349.66	243.712	1164.17	1156.69	142.843	1440.37	1233.41	420.251	1303.5	1363.27	485.137	1346.89	1119.25	485.912	1357.13	1045.34	509.115	1287.03	885.882	462.407	1274.87	806.457	528.972	1305.72	799.642	500.819	1256.21	737.523
592	0	303.637	1214.6	1580.51	185.963	1211.49	1589.65	295.463	1377.22	1521.08	187.978	1370.7	1525.77	234.568	1350.92	1439.24	226.568	1424.96	1156.67	247.034	1223.99	1351.47	244.64	1153.5	1158.7	143.969	1429.91	1234.9	421.401	1292.98	1364.78	485.695	1335.75	1120.4	486.231	1345.61	1046.45	510.007	1275.56	887.288	463.244	1263.16	807.888	529.711	1294.1	800.753	501.306	1243.74	738.933
593	0	305.78	1204.89	1581.78	188.153	1201.05	1591.56	296.661	1367.55	1522.42	188.997	1360.46	1527.39	235.513	1340.97	1440.5	228.028	1414.89	1158.16	247.888	1213.82	1353.22	245.25	1142.93	1160.48	145.316	1419.95	1236.33	422.329	1282.31	1366.2	486.355	1324.69	1121.61	487.308	1334.27	1047.86	510.74	1263.97	888.738	464.057	1251.63	809.383	530.294	1282.27	801.987	501.802	1230.86	740.587
594	0	307.634	1195.23	1583.15	190.104	1190.72	1593.48	297.008	1357.6	1523.52	189.812	1349.98	1529.25	236.613	1330.65	1441.97	229.355	1404.46	1159.57	248.622	1203.56	1354.81	245.634	1132.7	1162.17	146.728	1409.94	1237.84	423.227	1271.54	1367.74	487.233	1313.66	1123.05	488.298	1322.85	1049.28	511.42	1252.08	890.292	464.797	1239.08	811.529	530.961	1270.28	803.504	502.375	1217.94	742.58
595	0	309.306	1185.61	1584.4	191.893	1180.43	1595.17	297.859	1347.86	1524.82	190.485	1339.51	1530.96	237.803	1320.73	1443.45	230.913	1394.62	1160.99	249.234	1193.36	1356.27	245.905	1122.68	1163.65	148.271	1400.18	1239.35	424.338	1260.65	1369.4	488.194	1302.4	1124.46	489.468	1311.3	1050.77	511.977	1240.08	891.733	465.401	1227.06	812.987	531.413	1257.93	804.913	502.724	1204.68	744.509
596	0	310.743	1175.74	1585.6	193.402	1170.23	1596.84	298.182	1337.88	1525.91	190.863	1329.27	1532.49	238.711	1310.44	1444.83	232.381	1384.62	1162.58	249.681	1183.63	1357.18	245.924	1112.81	1164.82	149.808	1390.56	1240.8	425.022	1249.63	1370.72	489.311	1291.24	1125.83	490.789	1299.75	1052.2	512.488	1227.81	893.222	465.42	1214.47	814.542	531.808	1245.19	806.265	503.024	1191.19	746.574
597	0	311.964	1166	1586.78	194.672	1160.03	1598.25	298.801	1328.11	1527.04	191.119	1318.9	1533.96	240.088	1300.53	1446.45	234.244	1374.98	1164.07	249.987	1173.64	1358.4	245.803	1103.14	1165.77	151.503	1381.16	1242.15	425.662	1238.6	1372.03	490.516	1280.08	1127.18	492.041	1288.36	1053.48	513.049	1215.59	894.673	465.974	1202.39	815.998	532.174	1232.31	807.594	503.09	1177.51	748.759
598	0	312.943	1156.19	1587.93	195.777	1150.07	1599.73	299.02	1318.14	1527.99	191.888	1308.69	1535.16	240.881	1290.39	1447.56	236.19	1365.61	1165.38	250.307	1163.57	1359.64	245.802	1093.68	1166.67	153.274	1371.98	1243.36	426.348	1227.73	1373.37	491.855	1268.86	1128.63	493.443	1276.91	1054.7	513.65	1203.1	896.192	465.951	1189.51	817.948	532.338	1219.32	808.918	503.312	1163.83	751.032
599	0	313.711	1146.38	1588.94	196.623	1139.73	1601.01	299.282	1308.29	1528.89	192.379	1298.7	1535.99	241.841	1280.61	1448.75	237.768	1355.88	1166.59	250.462	1154.11	1360.49	245.667	1084.26	1167.25	155.11	1362.88	1244.49	426.699	1216.74	1374.37	493.181	1257.6	1129.88	494.648	1265.33	1055.65	514.136	1190.51	897.631	466.157	1176.94	819.654	532.96	1205.8	810.247	503.193	1149.92	753.258
600	0	314.344	1136.44	1590.06	197.273	1129.79	1602.06	299.641	1298.38	1529.92	192.48	1288.48	1537.29	242.309	1270.64	1449.77	239.811	1346.66	1167.69	250.427	1144.41	1361.33	245.417	1074.97	1167.93	156.786	1353.86	1245.53	427.3	1205.67	1375.62	494.602	1246.17	1131.26	495.966	1253.55	1056.76	514.735	1177.66	899.212	466.549	1163.93	821.461	533.426	1192.06	811.641	502.893	1135.84	755.425
601	0	314.692	1126.41	1591.09	197.458	1119.76	1603.35	299.982	1288.27	1531.01	193.106	1278.49	1538.28	243.534	1260.96	1451.1	241.724	1337.44	1169.26	250.537	1134.88	1362.31	245.14	1065.8	1168.55	158.578	1345.02	1246.82	427.164	1194.86	1376.66	495.99	1234.64	1132.87	497.648	1241.76	1058.28	515.272	1164.49	901.052	466.677	1151.45	823.208	534.042	1178.28	813.44	502.785	1121.72	757.762
602	0	314.79	1116.34	1592.33	197.605	1109.83	1604.34	300.44	1278.39	1532.34	192.992	1268.58	1539.62	243.892	1251.16	1452.32	243.754	1328.62	1170.67	250.402	1125.35	1363.21	244.963	1056.65	1169.24	160.31	1336.2	1248.18	427.96	1183.97	1378.26	497.449	1222.96	1134.48	499.152	1229.81	1059.74	515.808	1151.27	902.925	466.694	1137.91	825.359	534.656	1164.25	815.288	502.587	1107.54	760.02
603	0	314.828	1106.29	1593.4	197.513	1099.88	1605.07	300.752	1268.33	1533.57	193.692	1258.65	1540.68	244.928	1241.61	1453.52	245.269	1319.54	1172.06	250.562	1115.99	1364.08	244.814	1047.65	1169.87	161.978	1327.52	1249.25	428.214	1173.19	1379.59	498.728	1211.11	1135.87	500.614	1217.81	1061.2	516.391	1138.11	904.73	467.204	1124.62	827.307	535.1	1150.03	816.976	502.323	1093.23	762.227
604	0	314.703	1096.17	1594.54	197.283	1090.12	1605.81	301.252	1258.28	1534.99	193.685	1249.05	1541.88	245.41	1232.05	1454.79	246.866	1310.38	1173.39	250.685	1106.7	1364.97	244.733	1038.69	1170.55	163.662	1318.95	1250.49	428.368	1162.67	1380.76	499.867	1199.03	1137.36	502.11	1205.59	1062.57	516.75	1124.65	906.569	467.708	1111.16	829.29	535.53	1135.73	818.678	502.061	1078.73	764.597
605	0	314.396	1085.88	1595.45	196.827	1080.37	1606.47	301.806	1248.27	1536.29	194.593	1239.51	1542.72	246.173	1222.66	1455.66	248.484	1301.29	1174.4	250.517	1097.59	1365.77	244.629	1029.97	1171.34	165.347	1310.37	1251.45	428.997	1152.16	1382.13	501.201	1186.99	1138.81	503.735	1193.51	1063.87	517.246	1111.24	908.433	467.605	1097.82	831.255	536.155	1121.52	820.46	501.818	1064.09	767.101
606	0	313.928	1075.58	1596.2	196.104	1070.68	1606.91	302.4	1238.1	1537.43	195.068	1230.08	1543.63	246.99	1213.42	1456.44	250.095	1292.16	1175.28	250.525	1088.35	1366.56	244.634	1021.23	1172.05	166.991	1301.88	1252.23	429.062	1141.9	1383.03	502.225	1174.76	1139.91	505.069	1181.18	1065.04	517.653	1097.64	910.132	467.984	1084.16	833.179	536.549	1107.16	821.988	501.684	1049.68	769.276
607	0	313.402	1065.35	1596.86	195.572	1061.06	1607.01	303.067	1228.19	1538.61	195.704	1220.64	1544.39	247.58	1204.14	1457.21	251.647	1283.46	1175.9	250.686	1079.38	1367.16	244.554	1012.56	1172.65	168.493	1293.45	1253.02	429.51	1131.66	1384.06	503.28	1162.45	1140.94	506.776	1169.12	1066.19	518.022	1084.19	911.68	468.031	1070.5	834.863	537.156	1092.48	823.508	501.426	1035.05	771.445
608	0	312.451	1054.74	1597.28	194.636	1051.52	1607.17	303.531	1218.1	1539.74	196.198	1211.5	1545	248.27	1195.05	1457.76	253.011	1274.93	1176.86	250.744	1070.37	1367.7	244.583	1003.84	1173.31	169.851	1285.03	1253.64	429.771	1121.48	1384.88	504.237	1150.13	1141.85	507.696	1156.57	1066.95	518.302	1070.47	913.205	468.432	1057.18	836.278	537.465	1077.86	825.029	501.279	1020.23	773.706
609	0	311.74	1044.47	1597.74	193.836	1042.03	1607.27	304.331	1208.23	1540.84	196.738	1202.29	1545.69	248.978	1186.1	1458.34	254.23	1266.37	1177.14	250.942	1061.5	1368.22	244.617	995.215	1173.92	171.274	1276.66	1254.23	430.153	1111.55	1385.6	505.137	1137.91	1142.73	509.075	1144.4	1067.84	518.706	1057	914.667	468.898	1043.72	837.828	537.648	1063.33	826.361	501.316	1005.48	775.857
610	0	311.097	1034.19	1597.91	193.032	1032.53	1607.09	304.826	1198.21	1541.73	197.34	1193.12	1546.29	249.678	1177.11	1458.63	255.505	1257.64	1177.53	250.974	1052.56	1368.5	244.727	986.663	1174.33	172.565	1268.26	1254.55	430.494	1101.76	1386.05	505.983	1125.67	1143.27	510.003	1132.02	1068.24	518.943	1043.31	915.901	469.166	1029.54	839.305	538.153	1048.83	827.717	501.36	990.692	777.688
611	0	310.378	1023.93	1598	192.219	1023.14	1606.84	305.69	1188.37	1542.61	197.923	1183.91	1546.96	250.202	1167.96	1458.86	256.758	1249.38	1178.2	251.104	1043.68	1368.68	244.595	977.958	1174.44	173.784	1259.84	1254.78	430.892	1091.93	1386.42	506.842	1113.59	1143.84	511.065	1119.65	1068.7	519.262	1029.47	917.171	469.079	1015.74	840.458	538.606	1033.98	828.898	501.61	975.829	779.434
612	0	309.519	1013.73	1598.06	191.373	1013.71	1606.43	306.409	1178.26	1543.65	198.531	1174.77	1547.4	250.776	1158.93	1459.13	257.595	1240.36	1178.38	251.203	1034.8	1368.65	244.472	969.318	1174.54	174.959	1251.29	1255.25	431.161	1082.19	1386.7	507.655	1101.49	1144.32	512.092	1107.29	1069.15	519.319	1015.75	918.262	469.284	1001.44	841.655	539.034	1019.17	830.141	501.757	961.005	780.932
613	0	308.83	1003.53	1597.96	190.564	1004.41	1606.02	307.271	1168.49	1544.31	199.036	1165.7	1547.86	251.645	1150.08	1459.36	258.578	1231.33	1178.71	251.281	1026.03	1368.52	244.273	960.747	1174.44	175.825	1242.8	1255.52	431.433	1072.63	1386.88	508.339	1089.56	1144.67	512.951	1094.93	1069.54	519.782	1002.02	919.328	469.799	986.999	842.792	539.447	1004.53	831.292	502.149	946.198	782.438
614	0	308.328	993.366	1597.57	189.857	995.03	1605.45	307.737	1158.57	1544.62	199.693	1156.48	1548	252.128	1141.01	1459.27	259.12	1222.86	1178.67	251.218	1017.08	1368.14	244.034	952.168	1174	176.62	1234.33	1255.44	431.512	1062.91	1386.5	508.753	1077.8	1144.47	513.527	1082.64	1069.38	519.85	988.103	920.049	469.866	972.507	843.59	539.658	989.985	832.001	502.447	931.239	783.606
615	0	307.547	983.407	1596.83	189.275	985.717	1604.85	308.278	1148.59	1544.61	200.121	1147.48	1547.79	252.41	1131.76	1458.89	259.634	1214.1	1178.44	251.177	1008.09	1367.64	244.062	943.862	1173.19	177.317	1225.81	1255.28	431.584	1053.46	1385.91	509.186	1066.33	1144.11	513.955	1070.48	1068.79	520.144	974.497	920.488	470.171	958.315	844.206	539.819	975.379	832.517	502.818	916.666	784.522
616	0	306.687	973.363	1596.17	188.859	976.302	1604.14	308.827	1138.87	1544.33	200.677	1138.28	1547.41	252.651	1122.62	1458.44	259.994	1205.53	1177.99	251.267	999.193	1367.09	243.742	935.324	1172.54	177.897	1217.26	1255.08	431.569	1044.02	1385.24	509.587	1054.91	1143.68	514.343	1058.29	1068.22	520.342	960.984	920.965	469.976	944.277	844.815	539.886	961.132	832.857	503.102	902.131	785.518
617	0	306.267	963.523	1595.43	188.325	966.878	1603.31	309.189	1128.98	1543.95	200.965	1128.88	1547.05	253.156	1113.6	1457.92	260.428	1196.9	1177.53	251.067	990.179	1366.41	243.493	926.883	1171.69	178.354	1208.72	1254.82	431.695	1034.57	1384.66	509.815	1043.65	1143.21	514.482	1046.06	1067.69	520.332	947.461	921.41	470.097	930.189	845.301	540.286	946.794	833.416	503.448	887.542	786.347
618	0	305.906	953.54	1594.4	188.024	957.437	1602.4	309.745	1119.2	1543.34	201.284	1119.54	1546.66	253.254	1104.27	1457.38	260.858	1188.34	1177.13	250.902	981.156	1365.49	243.087	918.252	1170.62	178.671	1200.1	1254.54	431.61	1025.07	1383.82	509.904	1032.41	1142.48	514.806	1033.85	1067.08	520.124	933.989	921.571	470.467	915.872	845.667	540.221	932.572	833.625	503.621	873.142	786.922
619	0	305.536	943.629	1593.24	187.768	947.768	1601.5	309.711	1109.4	1542.67	201.37	1110.02	1545.98	253.251	1094.94	1456.78	260.887	1179.63	1176.87	250.636	972.102	1364.44	242.641	909.808	1169.42	178.759	1191.4	1254.22	431.472	1015.54	1382.89	509.919	1021.29	1141.76	514.815	1021.65	1066.31	520.158	920.522	921.796	469.943	902.116	845.781	540.24	918.395	833.874	503.756	858.867	787.466
620	0	305.355	933.933	1592.09	187.502	938.213	1600.47	309.757	1100.03	1541.75	201.32	1100.57	1545.27	253.086	1085.68	1456.04	260.758	1170.69	1176.37	250.356	962.954	1363.43	242.23	901.268	1168.11	178.784	1182.65	1253.66	431.309	1006.17	1381.87	509.789	1010.33	1140.92	514.714	1009.69	1065.61	519.832	907.309	921.847	469.936	887.916	845.966	540.187	904.524	834.147	503.885	844.808	787.986
621	0	305.363	924.226	1590.8	187.453	928.428	1599.26	309.577	1090.46	1540.8	201.203	1090.89	1544.41	252.86	1076.2	1455.17	260.959	1162.25	1176.02	250.056	953.795	1362.21	241.65	892.451	1166.84	178.723	1173.84	1253.03	430.93	996.661	1380.7	509.49	999.463	1139.94	514.569	997.698	1064.74	519.536	894.226	921.859	469.88	874.246	846.076	539.891	890.549	834.136	503.899	830.857	788.41
622	0	305.223	914.39	1589.47	187.481	918.659	1598.01	309.256	1080.76	1539.71	201.053	1081.19	1543.47	252.64	1066.78	1454.26	260.654	1153.35	1175.18	249.682	944.567	1360.98	241.279	883.765	1165.43	178.507	1164.94	1252.42	430.766	987.194	1379.57	509.272	988.667	1139.06	514.151	985.866	1063.76	518.856	881.202	921.76	469.298	861.157	846.042	539.525	876.965	834.107	503.763	816.996	788.808
623	0	305.208	904.765	1588.19	187.345	908.769	1596.96	308.826	1071.13	1538.71	200.523	1071.42	1542.58	252.411	1057.32	1453.38	260.487	1144.67	1174.48	249.319	935.344	1359.85	240.835	875.06	1164.14	178.325	1156.05	1251.86	430.374	977.735	1378.43	508.864	977.988	1138.04	513.964	974.249	1062.88	518.367	868.443	921.726	468.862	848.026	846.019	539.387	863.351	834.321	503.534	803.377	789.185
624	0	305.118	895.216	1586.74	187.238	898.777	1595.82	308.27	1061.65	1537.53	199.956	1061.52	1541.5	251.973	1047.77	1452.31	260.007	1135.96	1173.43	248.823	926.115	1358.57	240.265	866.236	1162.71	177.958	1146.98	1250.99	429.901	968.334	1377.14	508.257	967.571	1136.91	513.399	962.665	1061.95	518.012	855.859	921.615	468.295	834.853	845.987	538.843	850.155	834.255	503.108	790.004	789.296
625	0	305.098	885.607	1585.17	187.266	888.733	1594.27	307.39	1052.29	1536.22	199.117	1051.63	1540.26	251.709	1038.45	1451.14	259.39	1126.83	1172.32	248.185	916.746	1357.05	239.87	857.437	1161.11	177.434	1137.87	1249.97	429.337	958.972	1375.65	507.599	957.131	1135.51	512.806	951.343	1060.81	517.05	843.412	921.155	467.601	821.926	845.62	538.184	837.082	833.863	502.652	776.7	789.323
626	0	305.13	876.044	1583.6	187.286	878.451	1592.79	306.126	1042.78	1534.74	198.201	1041.57	1538.92	250.861	1028.79	1449.8	258.838	1118.14	1171.24	247.611	907.373	1355.63	239.403	848.336	1159.58	176.731	1128.58	1248.93	428.694	949.667	1374.12	506.804	946.797	1134.11	512.034	940.137	1059.52	516.168	831.097	920.757	466.881	809.205	845.24	537.139	824.306	833.349	502.155	763.653	789.422
627	0	305.363	866.72	1582.08	187.29	868.238	1591.52	305.09	1033.49	1533.43	196.926	1031.49	1537.69	250.337	1019.42	1448.49	258.346	1109.31	1170.23	247.271	897.994	1354.26	238.917	839.354	1158.1	175.93	1119.18	1247.72	428.284	940.519	1372.88	506.08	936.637	1132.89	511.365	929.043	1058.42	515.578	819.039	920.449	466.314	796.929	845.043	536.226	811.954	833.011	501.562	750.941	789.433
628	0	305.341	857.208	1580.5	187.117	857.886	1589.97	303.678	1024.01	1532.09	195.545	1021.26	1536.49	249.52	1009.65	1447.29	257.803	1100.15	1169.11	246.544	888.398	1352.83	238.244	830.062	1156.77	175.076	1109.73	1246.46	427.58	931.21	1371.52	505.409	926.601	1131.72	510.585	918.047	1057.36	514.684	807.318	920.03	464.956	784.37	844.783	535.463	799.44	832.801	500.883	738.541	789.301
629	0	305.08	847.728	1578.86	186.91	847.572	1588.38	301.983	1014.57	1530.67	193.926	1010.86	1535.1	248.842	1000.21	1445.88	256.978	1091.15	1167.89	245.798	878.994	1351.2	237.712	820.74	1155.07	174.185	1100.17	1245.27	426.811	922.023	1369.93	504.561	916.702	1130.28	509.77	907.351	1055.95	513.566	795.699	919.267	463.771	772.204	844.255	534.258	787.276	832.113	500.088	726.344	788.992
630	0	304.519	838.385	1577.37	186.531	837.097	1586.94	299.602	1005.01	1529.21	192.274	1000.56	1533.67	247.583	990.369	1444.43	256.275	1082.33	1166.82	245.098	869.326	1349.71	237.216	811.198	1153.6	172.981	1090.41	1243.95	425.868	912.813	1368.49	503.496	906.844	1128.9	508.694	896.731	1054.71	512.117	784.348	918.549	462.588	760.389	843.767	533.109	775.456	831.536	499.131	714.357	788.82
631	0	304.149	828.851	1575.8	186.181	826.628	1585.3	297.946	995.553	1527.8	190.343	990.081	1532.13	246.673	980.909	1443.04	255.488	1073.76	1165.67	244.14	859.764	1348.18	236.595	801.537	1152.09	171.785	1080.8	1242.31	424.864	903.644	1367.01	502.464	897.184	1127.52	507.629	886.384	1053.48	511.188	773.17	917.952	461.032	748.605	843.238	531.702	764.009	830.774	498.055	702.641	788.551
632	0	303.672	819.409	1574.32	185.722	816.151	1583.76	295.997	986.135	1526.18	188.482	979.667	1530.69	245.254	970.959	1441.51	254.084	1064.3	1164.06	243.426	850.066	1346.67	236.085	791.848	1150.55	170.519	1070.84	1240.76	423.906	894.403	1365.5	501.305	887.537	1126.05	506.404	876.248	1052.05	509.961	762.295	917.082	460.356	737.417	842.627	530.426	752.839	829.99	496.845	691.129	788.21
633	0	302.949	810.023	1572.95	185.149	805.545	1582.34	293.686	976.387	1524.75	186.377	969.052	1529.11	244.075	961.174	1440	252.368	1054.6	1162.64	242.576	840.232	1345.24	235.579	781.911	1149	169.102	1060.9	1239.39	422.805	885.19	1364.14	500.173	878.017	1124.76	505.102	866.301	1050.63	508.732	751.764	916.25	458.874	726.159	842.078	528.862	741.883	829.129	495.578	679.88	787.966
634	0	302.036	800.42	1571.74	184.258	795.067	1580.84	291.196	966.757	1523.41	183.859	958.539	1527.75	242.618	951.296	1438.75	250.974	1044.76	1161.41	241.525	830.388	1343.91	235.032	771.969	1147.64	167.616	1050.83	1237.85	421.716	875.929	1363.04	498.971	868.541	1123.64	503.91	856.606	1049.52	507.298	741.409	915.608	457.255	715.399	841.521	527.366	731.18	828.488	493.961	668.892	787.774
635	0	301.018	791.011	1570.62	183.252	784.567	1579.69	288.765	957.144	1522.04	181.477	947.852	1526.12	241.06	941.217	1437.39	249.389	1034.62	1160.04	240.395	820.413	1342.65	234.401	761.84	1146.27	165.946	1040.65	1236.35	420.441	866.586	1361.93	497.775	859.172	1122.52	502.668	847.085	1048.46	505.977	731.266	914.842	455.677	705.097	841.082	526.086	720.511	828.032	492.316	658.139	787.591
636	0	299.747	781.41	1569.51	182.138	773.965	1578.32	286.338	947.451	1520.64	179.497	937.272	1524.5	239.09	931.389	1435.92	247.633	1024.22	1158.54	239.189	810.404	1341.34	233.623	751.487	1144.97	164.366	1030.43	1234.93	418.944	857.051	1360.79	496.267	849.858	1121.28	501.313	837.743	1047.22	504.244	721.458	914.021	454.324	695.088	840.362	524.202	710.299	827.152	490.641	647.616	787.357
637	0	298.197	771.662	1568.45	180.735	763.546	1576.94	283.856	937.461	1519.25	177.241	926.684	1522.92	237.647	921.189	1434.8	245.987	1013.8	1157.19	237.85	800.216	1340.17	232.835	741.122	1143.63	162.646	1019.98	1233.42	417.489	847.412	1359.73	494.791	840.477	1120.26	499.88	828.492	1046.13	502.912	711.675	913.313	452.783	685.254	839.705	522.598	700.262	826.384	488.695	637.461	787.101
638	0	296.576	761.927	1567.69	179.051	753.259	1576.01	281.485	927.378	1518.1	174.5	916.226	1521.45	235.55	911.075	1433.76	244.434	1003.43	1155.96	236.486	790.068	1339.12	231.988	730.586	1142.68	160.914	1009.53	1231.99	415.908	837.736	1359.03	493.448	831.321	1119.64	498.705	819.472	1045.46	501.215	702.407	912.719	450.729	675.961	839.314	521.046	690.693	825.958	486.834	627.694	787.033
639	0	294.629	751.927	1567.07	177.191	742.874	1575.18	279.301	917.272	1517.02	172.518	905.672	1520.06	233.338	901.012	1432.52	242.892	992.968	1154.93	235.169	779.86	1338.38	231.02	719.864	1141.98	159.141	998.848	1230.84	414.269	828.046	1358.53	492.079	822.274	1119.25	497.573	810.683	1044.93	499.699	693.26	912.244	448.964	666.919	838.884	519.49	681.235	825.644	484.833	618.369	787.055
640	0	292.359	741.936	1566.45	174.932	732.73	1574.21	277.059	907.036	1515.75	170.217	895.301	1518.69	231.332	890.862	1431.4	240.881	982.163	1153.7	233.589	769.444	1337.59	229.931	709.515	1140.87	157.287	988.083	1229.34	412.428	818.226	1357.91	490.593	813.354	1118.67	496.261	802.014	1044.25	498.236	684.316	911.791	447.689	658.079	838.448	517.723	672.194	824.99	482.794	609.161	786.959
641	0	290.003	731.77	1565.87	172.532	722.598	1573.43	274.855	896.659	1514.62	168.058	884.983	1517.28	229.178	880.504	1430.39	238.869	971.343	1152.4	231.788	758.928	1336.78	228.703	698.186	1140.42	155.243	977.156	1227.79	410.357	808.338	1357.37	489.015	804.41	1118.26	494.99	793.552	1043.65	496.527	675.665	911.255	445.917	649.751	837.925	516.152	663.292	824.495	480.922	600.41	786.984
642	0	287.312	721.571	1565.4	169.923	712.615	1572.91	272.603	886.189	1513.44	165.415	874.701	1515.92	226.792	870.277	1429.18	236.96	960.325	1150.98	229.945	748.46	1336.15	227.417	686.964	1140.1	153.262	965.939	1226.34	408.376	798.6	1356.96	487.518	795.669	1117.99	493.677	785.341	1043.31	495.038	667.337	910.816	444.087	641.545	837.546	514.532	654.917	824.027	478.925	591.887	787.184
643	0	284.672	711.2	1565.05	167.169	702.568	1572.35	270.288	875.685	1512.24	163.531	864.491	1514.7	224.022	860.055	1428.1	234.983	949.141	1149.6	228.08	737.786	1335.6	226.107	675.456	1139.85	151.007	954.663	1224.66	406.029	788.736	1356.51	486.003	786.999	1117.8	492.443	777.307	1042.97	493.3	659.285	910.328	442.246	633.201	837.323	512.828	646.767	823.375	476.929	583.497	787.155
644	0	281.926	700.919	1565.06	164.233	692.704	1572.13	267.921	865.137	1511.37	160.734	854.414	1513.66	221.175	849.599	1427.43	233.123	937.516	1148.55	225.973	726.911	1335.16	224.784	663.954	1139.62	148.713	943.201	1223.19	403.947	778.821	1356.43	484.475	778.408	1117.75	491.177	769.552	1042.7	492.116	651.367	910.061	441.164	625.595	836.942	511.507	638.479	823.157	475.223	575.262	787.281
645	0	278.933	690.668	1565.33	161.22	682.795	1572.13	265.594	854.635	1510.71	158.607	844.115	1512.82	218.58	838.946	1426.8	230.902	926.225	1147.56	223.941	716.079	1334.94	223.556	652.037	1139.75	146.402	931.695	1222.08	401.892	768.757	1356.52	482.928	769.947	1117.88	489.935	761.82	1042.59	490.85	643.723	909.754	439.722	618.115	836.693	510.253	630.72	823.029	473.735	567.658	787.289
646	0	275.9	680.39	1565.72	158.153	672.846	1572.32	263.067	844.14	1510.16	156.104	833.854	1512.21	215.704	828.332	1426.29	228.665	914.658	1146.83	221.809	705.072	1334.99	222.064	639.978	1140.05	144.067	920.084	1220.96	399.719	758.476	1356.82	481.492	761.716	1118.11	488.682	754.429	1042.77	489.689	636.299	909.554	438.338	610.713	836.709	508.748	623.457	822.744	472.214	560.126	787.459
647	0	272.661	670.191	1566.32	154.82	663.087	1572.58	260.644	833.589	1509.89	153.352	823.706	1511.54	213.132	817.552	1426	226.336	903.142	1146.15	219.608	693.995	1335.15	220.742	627.937	1140.41	141.79	908.493	1220.13	397.432	747.919	1357.22	479.863	753.626	1118.5	487.245	747.044	1043.02	488.529	629.11	909.377	437.031	603.439	836.822	507.339	616.5	822.461	471.05	552.982	787.417
648	0	269.494	659.873	1567.22	151.465	653.232	1573.01	258.315	823.169	1509.86	150.929	813.619	1511	210.38	806.665	1426.12	223.991	891.321	1145.97	217.436	682.906	1335.5	219.401	615.726	1140.89	139.567	897.001	1219.68	395.29	737.18	1357.94	478.306	745.645	1119.08	485.711	739.596	1043.51	487.456	622.224	909.316	435.854	596.326	836.896	505.575	610.347	822.03	469.947	546.193	787.321
649	0	266.144	649.609	1568.34	148.155	643.373	1573.66	256.181	812.84	1510.15	148.069	803.452	1510.95	207.951	795.751	1426.38	221.978	879.387	1146.06	215.277	671.79	1336.22	218.096	603.912	1141.62	137.61	885.587	1219.59	393.17	726.317	1358.95	476.742	737.758	1120.19	484.279	732.234	1044.37	486.464	615.621	909.474	434.566	589.547	837.271	504.44	604.344	822.008	469.072	539.802	787.433
650	0	262.754	639.431	1569.66	144.655	633.518	1574.43	253.719	802.445	1510.76	145.502	793.422	1510.99	205.453	784.938	1427.02	219.897	867.66	1146.54	213.221	660.763	1337.25	216.708	592.037	1142.68	135.574	874.328	1219.9	391.038	715.376	1360.19	475.156	729.923	1121.42	482.812	724.895	1045.57	485.507	609.242	909.734	433.804	582.991	837.775	502.946	598.958	821.824	468.276	533.736	787.627
651	0	259.433	629.18	1571.05	141.115	623.718	1575.22	251.016	791.941	1511.61	143.108	783.365	1511.35	203.544	773.925	1427.82	217.95	856.306	1147.15	211.175	649.795	1338.32	215.3	580.498	1143.84	133.636	863.12	1220.31	388.842	704.547	1361.51	473.494	721.836	1122.91	481.161	717.322	1046.89	484.708	603.15	909.997	432.729	577.085	838.087	501.655	593.829	821.764	467.406	527.68	787.74
652	0	255.941	618.793	1572.63	137.66	613.836	1575.9	248.725	781.643	1512.84	140.764	773.445	1511.87	200.775	763.488	1428.75	216.119	845.004	1148.29	209.267	638.967	1339.51	213.7	569.085	1145.37	131.721	852.003	1221.02	386.732	693.721	1363.19	471.578	713.582	1124.7	479.565	709.757	1048.67	483.795	597.168	910.453	431.978	571.289	838.563	500.537	588.905	822.01	466.705	522.261	788.074
653	0	252.482	608.481	1574.26	134.219	604.003	1576.59	246.161	771.342	1514.43	138.29	763.649	1512.57	199.007	752.583	1430.11	214.298	834.021	1149.59	207.319	628.257	1340.88	212.204	558.099	1147.05	129.771	840.849	1222.2	384.683	683.28	1365.06	469.81	705.204	1126.78	478.077	702.321	1050.87	482.931	591.409	911.11	431.402	565.797	839.202	499.784	583.955	822.633	466.02	516.918	788.511
654	0	249.115	598.322	1575.81	130.723	594.361	1577.17	243.759	761.206	1516.16	135.987	753.787	1513.58	197.158	742.274	1431.42	212.935	823.286	1150.72	205.545	617.661	1342.31	210.651	547.294	1148.76	127.968	829.747	1223.17	382.827	673.018	1366.95	467.916	696.571	1128.73	476.388	694.756	1052.96	482.245	585.714	911.791	430.589	560.627	839.829	498.987	579.295	823.14	465.236	511.682	788.741
655	0	245.766	588.002	1577.32	127.267	584.742	1577.7	241.988	751.225	1517.75	133.891	744.218	1514.35	195.185	732.01	1432.59	211.554	812.824	1151.97	203.913	607.263	1343.66	209.256	536.916	1150.31	125.934	818.869	1223.95	381.01	663.056	1368.7	466.061	687.772	1130.57	474.7	687.257	1054.76	481.464	579.861	912.482	430.464	555.438	840.246	498.297	574.336	823.707	464.518	506.66	788.75
656	0	242.505	577.913	1578.93	124.033	575.166	1578.23	240.191	741.107	1519.47	132.001	734.736	1515.04	192.885	721.971	1433.74	210.064	802.409	1153.02	202.503	596.921	1345.21	208.01	526.359	1152.13	124.178	807.89	1224.94	379.43	653.457	1370.55	464.355	678.998	1132.54	473.115	679.84	1056.7	480.815	574.11	913.328	429.92	550.2	840.766	497.88	569.432	824.534	463.632	501.753	788.75
657	0	239.162	567.769	1580.6	120.618	565.729	1578.8	238.463	730.93	1521.12	130.321	725.335	1515.57	191.09	712.17	1434.98	208.769	791.942	1154.19	201.057	586.777	1346.58	206.989	516.413	1153.96	122.138	797.132	1225.77	377.858	644.103	1372.29	462.758	670.065	1134.38	471.542	672.453	1058.67	480.029	568.28	914.128	429.035	545.247	841.148	497.396	564.403	825.411	462.661	497.017	788.629
658	0	235.949	557.629	1582.23	117.372	556.62	1579.2	236.858	720.835	1522.69	128.845	715.99	1516.21	189.474	702.313	1436.06	207.311	782.34	1155.12	199.848	576.76	1347.83	206.06	506.748	1155.23	120.135	786.511	1226.53	376.467	635.016	1373.88	461.201	661.075	1135.87	469.975	665.083	1060.4	479.059	562.214	914.807	428.558	540.374	841.173	496.973	559.255	826.104	461.614	492.336	788.251
659	0	232.665	547.653	1583.78	114.159	547.565	1579.71	235.465	710.719	1524.24	127.545	706.702	1516.73	187.683	692.4	1437.2	205.433	772.381	1156.06	198.859	566.838	1349.02	205.437	496.884	1156.7	118.275	776.027	1227.49	375.128	626.164	1375.27	459.885	652.004	1137.25	468.474	657.47	1061.88	478.241	556.299	915.323	428.034	535.583	841.193	496.71	553.817	826.858	460.661	487.791	787.804
660	0	229.573	537.756	1585.57	111.015	538.636	1580.31	234.238	700.621	1525.75	126.797	697.696	1517.18	186.16	683.006	1438.48	203.988	762.864	1157.17	198.005	557.12	1350.33	205.072	487.165	1158.13	116.407	765.814	1228.73	374.013	617.521	1376.77	458.778	643.117	1138.7	467.041	649.976	1063.35	477.484	550.277	915.971	427.257	530.698	841.418	496.609	548.497	827.758	459.537	483.641	787.237
661	0	226.701	527.972	1587.4	108.245	529.969	1580.8	233.26	690.764	1527.33	125.542	688.644	1517.68	184.637	673.181	1439.55	202.142	753.267	1158.33	197.337	547.527	1351.63	205.109	478.023	1159.35	114.421	755.797	1229.58	373.286	608.989	1378.4	457.717	634.329	1140.13	465.809	642.441	1064.92	476.801	544.14	916.662	427.082	525.888	841.585	496.5	543.123	828.674	458.765	479.441	786.627
662	0	223.713	518.326	1589	105.491	521.418	1581.31	232.331	680.82	1528.84	124.793	679.774	1518.2	183.233	663.982	1440.89	200.278	743.674	1159.52	196.753	537.929	1352.93	205.07	468.616	1160.53	112.643	745.886	1230.94	372.338	600.54	1379.78	456.624	625.86	1141.45	464.472	634.576	1066.17	476.092	537.919	917.223	426.471	520.655	841.558	496.44	537.683	829.512	458.472	475.117	785.933
663	0	220.573	508.79	1590.8	102.953	513.051	1581.97	231.552	671.057	1530.36	124.343	670.922	1518.85	181.98	654.321	1442.33	198.508	734.364	1161.15	196.203	528.479	1354.16	205.308	459.132	1161.75	110.865	736.2	1232.35	371.423	591.989	1381.27	455.507	617.771	1142.84	463.453	626.821	1067.66	475.08	531.686	917.856	426.393	515.341	841.566	496.343	532.372	830.363	458.243	470.956	785.145
664	0	218.005	499.364	1592.61	100.44	504.746	1583	231.006	661.358	1531.85	123.686	662.145	1519.56	180.786	645.114	1443.61	196.512	724.926	1162.83	195.701	519.155	1355.42	205.431	449.696	1163.17	108.919	726.57	1233.6	370.514	583.77	1382.75	454.34	610.07	1144.14	462.459	619.14	1069.24	474.535	525.628	918.514	425.814	510.208	841.777	496.189	527.272	831.284	458.271	466.724	784.394
665	0	215.676	490.34	1594.56	98.2451	496.443	1584.12	230.405	651.814	1533.23	122.988	653.429	1520.11	179.426	635.564	1445.2	194.797	715.683	1164.09	195.415	509.817	1356.72	205.786	440.666	1164.43	107.185	716.901	1235.25	369.586	575.575	1384.21	453.262	602.711	1145.43	461.374	611.795	1070.75	474.055	519.51	919.404	426.172	504.245	842.264	496.02	522.244	832.216	458.869	462.584	783.843
666	0	213.81	481.327	1596.36	96.4415	488.132	1585.24	229.876	642.529	1534.36	122.495	644.778	1520.78	178.35	626.264	1446.47	192.807	706.437	1165.39	195.122	500.574	1358.06	206.159	431.879	1165.57	105.198	707.379	1236.78	368.895	567.339	1385.6	452.198	595.664	1146.72	460.229	604.556	1072.01	473.706	513.484	920.27	425.893	498.751	842.725	495.782	517.446	832.993	459.756	458.466	783.214
667	0	212.105	472.5	1598.31	94.9042	480.109	1586.54	229.325	633.379	1535.52	122.013	636.178	1521.43	177.682	616.854	1448.26	191.164	697.344	1167.08	194.833	491.449	1359.54	206.761	423.184	1166.87	103.36	697.805	1238.41	368.027	559.191	1387.03	451.259	588.963	1148.14	459.097	597.642	1073.49	473.619	507.528	921.312	426.327	492.995	843.504	495.688	512.55	834.089	460.745	454.332	782.916
668	0	210.682	463.982	1600.27	93.571	472.024	1588.02	228.829	624.379	1536.65	121.757	627.552	1522.01	176.529	607.487	1449.13	189.692	688.21	1168.48	194.623	482.262	1361.03	207.044	414.574	1168.28	101.69	688.279	1239.77	367.455	550.9	1388.7	450.254	582.299	1149.76	458.207	590.917	1075.08	473.575	501.455	922.546	426.683	486.906	844.618	495.894	507.658	835.372	461.753	450.263	782.624
669	0	209.606	455.575	1602	92.579	463.766	1589.29	228.339	615.594	1537.59	121.335	619	1522.63	175.493	598.372	1450.44	188.132	679.048	1169.75	194.344	473.186	1362.37	207.332	405.908	1169.69	99.8797	678.641	1241.36	366.783	542.8	1390.07	449.458	576.016	1151.2	457.106	584.281	1076.52	473.795	495.583	923.649	426.79	481.053	845.559	496.164	502.704	836.585	462.776	446.267	782.505
670	0	208.673	447.319	1603.65	91.7333	455.621	1590.47	227.734	607.061	1538.4	120.786	610.397	1523.24	174.427	589.442	1451.81	186.712	670.183	1171.12	193.878	464.043	1363.61	207.378	397.115	1170.93	98.3289	669.13	1242.51	365.984	534.641	1391.4	448.509	569.739	1152.63	456.055	577.845	1077.88	474.073	489.798	924.88	427.536	474.967	846.547	496.155	497.65	837.669	463.299	441.889	782.524
671	0	208.134	439.096	1605.23	91.1893	447.267	1591.83	227.203	598.459	1539.16	120.443	601.767	1523.64	172.937	579.915	1452.79	185.508	660.987	1171.87	193.577	454.972	1364.87	207.464	388.317	1172.17	96.7906	659.606	1243.85	365.472	526.373	1392.71	447.843	563.686	1154.14	455.153	571.395	1079.28	474.303	484.29	925.831	428.067	468.912	847.545	496.454	492.518	838.872	463.858	437.418	782.708
672	0	207.73	431.055	1606.66	90.7061	438.953	1592.97	226.651	590.194	1539.9	119.984	593.167	1524.11	172.178	570.907	1453.83	184.082	651.687	1173.18	193.346	446.007	1366.01	207.316	379.417	1173.55	95.4176	650.187	1244.8	364.827	518.338	1393.94	447.101	557.462	1155.49	454.211	565.022	1080.64	474.675	478.587	926.851	428.64	462.748	848.591	496.742	487.259	840.07	464.632	432.869	782.964
673	0	207.56	422.923	1607.72	90.554	430.471	1593.86	226.071	581.803	1540.43	119.366	584.456	1524.61	171.786	561.724	1454.85	182.99	642.605	1173.93	193.011	436.99	1367.02	207.255	370.971	1174.32	94.0866	640.694	1245.51	364.494	509.994	1395.01	446.481	551.108	1156.69	453.32	558.496	1081.64	474.997	472.735	927.752	429.179	456.587	849.357	497.163	481.845	841.063	465.392	428.057	783.097
674	0	207.415	414.825	1608.74	90.31	421.912	1594.84	225.37	573.556	1540.78	118.548	575.754	1525.05	170.8	552.742	1455.33	181.527	633.087	1174.45	192.768	427.906	1367.87	207.021	362.359	1175.05	92.9525	631.316	1246.45	363.663	501.729	1395.71	446.079	544.648	1157.8	452.735	551.966	1082.68	475.336	466.825	928.471	429.447	451.035	849.614	497.543	476.397	841.928	466.378	423.057	783.288
675	0	207.382	406.659	1609.48	90.2368	413.229	1595.57	224.98	565.203	1541.2	117.97	566.956	1525.3	169.772	543.576	1455.84	180.421	623.462	1174.97	192.448	418.926	1368.55	206.668	353.808	1175.61	91.7909	622.044	1247.12	362.772	493.451	1396.23	445.42	538.005	1158.62	451.99	545.242	1083.7	475.658	460.729	929.126	429.955	445.031	849.997	498.056	470.943	842.649	467.335	417.853	783.419
676	0	207.431	398.388	1609.94	90.2676	404.446	1595.98	224.314	556.934	1541.42	117.356	558.208	1525.52	169.226	534.33	1456.39	178.918	613.38	1175.6	192.149	409.977	1369.05	206.386	345.099	1175.89	90.69	612.867	1247.47	362.413	485.019	1396.63	444.83	531.137	1159.23	451.439	538.631	1084.3	475.87	454.703	929.428	430.547	438.748	850.278	498.233	465.47	843.094	468.391	412.721	783.386
677	0	207.512	389.931	1610.03	90.3441	395.571	1596.08	223.572	548.7	1541.37	116.795	549.4	1525.54	168.952	525.261	1456.69	177.716	603.694	1175.96	191.919	400.915	1369.19	206.136	336.337	1175.89	89.8542	603.68	1247.77	362.227	476.562	1396.79	444.229	523.98	1159.38	450.629	531.611	1084.52	476.251	448.459	929.638	431.132	432.119	850.294	498.478	459.94	843.296	469.351	407.218	783.224
678	0	207.822	381.443	1610.01	90.5056	386.507	1596.03	222.964	540.278	1541.32	116.216	540.495	1525.58	168.517	516.342	1456.7	176.703	594.533	1176.15	191.778	391.884	1369.27	205.913	327.899	1175.73	89.1009	594.575	1247.88	361.446	468.084	1396.5	443.691	516.686	1159.52	450.262	524.712	1084.65	476.47	442.217	929.694	431.786	425.65	850.257	498.858	454.517	843.401	470.417	401.653	783.047
679	0	208.008	372.832	1609.78	90.6933	377.294	1595.82	222.299	532.009	1541.33	115.681	531.626	1525.59	167.885	507.296	1456.69	176.197	586.036	1176.02	191.537	382.883	1369.16	205.736	319.111	1175.55	88.3467	585.45	1247.89	361.535	459.394	1396.59	443.202	509.229	1159.61	449.749	517.608	1084.68	476.728	435.985	929.684	432.358	419.129	850.19	499.08	448.82	843.408	471.531	396.031	782.777
680	0	208.303	364.113	1609.18	90.9373	367.964	1595.34	221.789	523.545	1541.37	115.277	522.746	1525.6	167.462	498.182	1456.4	175.801	577.347	1175.74	191.388	373.865	1368.78	205.581	310.35	1175.1	87.781	576.311	1247.76	361.745	450.7	1396.41	442.704	501.581	1159.47	449.719	510.489	1084.77	476.979	429.604	929.382	432.88	412.309	849.97	499.232	442.987	843.169	472.569	390.224	782.2
681	0	208.886	355.114	1608.41	91.2617	358.515	1594.62	221.409	514.9	1541.48	114.675	513.724	1525.8	167.373	488.798	1456.19	175.246	568.501	1175.29	191.258	364.762	1368.15	205.416	301.688	1174.29	87.2784	567.26	1247.68	361.472	441.908	1396.07	442.364	493.688	1159.18	449.478	503.112	1084.79	477.162	423.007	928.834	433.379	405.558	849.332	499.219	437.027	842.663	473.483	384.195	781.504
682	0	209.264	346.1	1607.61	91.6072	349.022	1593.79	221.149	506.257	1541.58	114.264	504.653	1525.95	166.748	479.72	1455.7	174.759	559.438	1175.12	191.15	355.707	1367.43	205.285	292.995	1173.44	86.842	558.358	1247.39	360.917	433.07	1395.32	442.003	485.708	1158.82	449.419	495.804	1084.63	477.378	416.382	928.24	433.673	398.895	848.478	498.844	431.135	841.958	474.163	377.943	780.932
683	0	209.791	337.19	1606.74	91.9276	339.548	1592.84	220.834	497.542	1541.61	113.947	495.61	1525.91	166.471	470.573	1454.89	174.465	550.376	1174.52	191.139	346.688	1366.69	205.359	284.227	1172.66	86.5719	549.491	1246.89	361.347	424.138	1394.83	441.762	477.738	1158.36	449.469	488.284	1084.17	477.724	409.7	927.582	434.114	391.954	847.68	498.872	425.088	841.251	475.05	371.727	780.211
684	0	210.688	328.113	1605.88	92.2099	329.943	1591.71	220.738	488.486	1541.46	113.768	486.377	1525.83	166.323	461.338	1454.07	174.356	541.499	1173.95	191.118	337.628	1365.73	205.344	275.486	1171.49	86.3822	540.629	1246.19	361.169	415.179	1393.83	441.832	469.638	1157.74	449.233	480.751	1083.47	478.024	402.966	926.57	434.419	385.09	846.807	499.027	418.845	840.265	475.576	365.974	778.776
685	0	211.233	318.987	1604.99	92.5512	320.385	1590.68	220.586	479.386	1541.21	113.703	477.145	1525.62	166.084	452.286	1453.31	173.94	532.955	1173.22	191.238	328.493	1364.62	205.311	266.606	1170.36	86.3216	531.75	1245.41	360.646	406.22	1392.59	441.633	461.46	1156.92	449.155	473.034	1082.6	478.149	395.947	925.557	434.748	378.149	845.577	499.317	412.133	839.276	475.951	359.672	777.469
686	0	211.732	309.684	1603.97	92.8381	310.743	1589.81	220.485	470.37	1540.88	113.687	467.779	1525.31	166.37	443.139	1452.3	174.015	523.988	1172.37	191.26	319.378	1363.45	205.395	257.761	1169.04	86.3918	522.933	1244.44	361.318	396.983	1391.89	441.643	453.247	1155.92	449.026	465.21	1081.75	478.393	388.941	924.319	435.03	371.051	844.303	499.561	405.539	838.246	476.255	353.32	776.166
687	0	212.377	300.438	1602.78	93.1076	301.087	1588.81	220.436	461.217	1540.36	113.79	458.388	1524.73	166.615	434.072	1451.13	174.308	515.083	1171.41	191.42	310.243	1362.24	205.522	248.844	1167.74	86.6137	514.135	1243.25	361.724	387.677	1390.85	441.831	444.956	1154.76	449.172	457.323	1080.82	478.628	381.731	922.93	435.01	364.158	842.916	499.398	398.825	836.844	476.564	346.763	774.491
688	0	213.044	290.797	1601.4	93.602	291.298	1587.43	220.503	451.904	1539.59	113.946	448.794	1524.05	166.89	424.979	1449.79	174.325	506.057	1170.19	191.658	301.003	1360.77	205.592	239.761	1166.17	86.9092	505.257	1242	361.74	378.336	1389.34	441.901	436.508	1153.33	449.032	449.293	1079.51	478.647	374.501	921.266	435.199	356.659	841.195	499.04	392.083	835.132	476.708	339.938	772.762
689	0	213.794	281.132	1600	94.0979	281.502	1586.13	220.773	442.321	1538.75	114.157	439.146	1523.35	167.275	415.865	1448.39	174.485	497.105	1168.88	191.912	291.825	1359.39	205.699	230.653	1164.61	87.2273	496.323	1240.82	362.193	368.871	1387.95	442.27	427.809	1152.17	449.336	440.929	1078.31	478.922	366.812	919.693	435.435	349.423	839.623	499.074	384.917	833.488	476.656	333.256	770.78
690	0	214.632	271.518	1598.65	94.6764	271.783	1584.9	221.265	432.748	1537.8	114.492	429.416	1522.35	167.744	406.615	1447	175.135	487.983	1167.5	192.223	282.495	1357.85	205.853	221.539	1163.19	87.7054	487.353	1239.74	362.684	359.343	1386.5	442.713	419.064	1151.08	449.151	432.419	1076.95	479.21	359.369	918.142	435.572	341.917	837.89	499.624	377.624	832.032	476.74	326.365	768.99
691	0	215.469	261.804	1597.14	95.3291	262.081	1583.42	221.831	423.105	1536.57	114.944	419.677	1521.13	168.577	397.207	1445.73	175.692	478.608	1165.95	192.677	272.996	1356.29	205.949	212.324	1161.41	88.2842	478.341	1238.47	363.11	349.642	1384.8	443.375	410.104	1149.82	449.855	424.115	1075.52	479.404	351.352	916.3	435.633	334.355	836.18	499.589	369.976	830.256	476.771	319.274	766.923
692	0	216.337	252.135	1595.4	96.0603	252.41	1581.84	222.571	413.447	1534.99	115.562	410.022	1519.65	169.24	387.653	1444.14	176.206	469.216	1164.32	192.985	263.443	1354.45	206.059	202.978	1159.55	89.0408	469.273	1236.96	363.695	339.877	1382.93	443.587	401.067	1147.93	449.701	415.201	1073.72	479.562	343.437	914.193	435.915	326.353	834.128	499.243	362.415	828.089	476.567	312.019	764.513
693	0	217.309	242.438	1593.72	96.7959	242.744	1580.55	223.431	403.733	1533.16	116.48	400.331	1518.06	170.052	377.918	1442.32	177.164	459.755	1162.89	193.52	253.766	1352.66	206.149	193.372	1157.68	89.9914	460.11	1235.3	364.382	329.786	1381.2	443.967	391.922	1146.23	450.218	406.316	1072.14	479.731	335.206	912.244	436.073	318.707	832.055	499.678	354.358	826.269	476.586	304.513	762.277
694	0	218.124	232.874	1592.06	97.7725	233.188	1579.24	224.605	394.01	1531.15	117.497	390.644	1516.29	171.075	368.273	1440.64	178.07	450.313	1161.27	193.996	244.012	1350.82	206.248	183.733	1155.84	91.0221	450.868	1233.66	364.686	319.775	1379.2	444.587	382.793	1144.51	450.766	397.462	1070.48	479.997	326.877	910.144	436.464	310.317	830.164	499.607	346.574	824.351	476.411	297.098	759.931
695	0	219.651	223.188	1590.31	98.9557	223.729	1577.85	225.679	384.243	1528.87	118.864	380.993	1514.28	172.235	358.55	1438.79	179.082	440.791	1159.41	194.628	234.167	1348.95	206.465	173.76	1153.86	92.1857	441.522	1231.99	366.021	309.415	1377.29	445.148	373.348	1142.51	451.15	388.078	1068.5	480.284	318.238	907.923	436.648	301.825	827.882	499.928	337.657	822.199	476.314	289.264	757.328
696	0	221.082	213.59	1588.58	100.309	214.47	1576.49	227.215	374.417	1526.54	120.209	371.438	1512.49	173.351	348.626	1436.85	180.033	430.989	1157.5	195.323	224.255	1347.12	206.678	163.739	1151.82	93.3312	432.051	1230.42	366.771	298.955	1375.08	445.806	363.837	1140.51	451.814	378.771	1066.5	480.57	309.534	905.648	437.06	293.205	825.769	499.744	329.619	819.541	476.308	281.386	754.807
697	0	222.616	203.986	1586.89	101.63	205.14	1575.31	228.899	364.632	1524.41	121.89	361.842	1510.66	174.736	338.722	1435.24	181.102	421.099	1155.69	196.126	214.281	1345.42	206.84	153.61	1150.02	94.6374	422.446	1228.86	368.001	288.4	1373.18	446.644	354.188	1138.64	452.397	369.215	1064.44	481.299	300.742	903.36	437.333	284.305	823.722	500.424	320.857	817.53	476.261	273.312	752.323
698	0	224.118	194.315	1585.35	103.058	195.77	1574.15	230.816	354.652	1522.54	123.727	352.233	1508.97	176.284	328.703	1433.69	182.069	410.857	1154.32	196.887	204.251	1343.63	206.867	143.457	1148.19	96.038	412.767	1227.35	369.359	277.813	1371.22	447.546	344.295	1136.75	453.184	359.383	1062.57	481.751	291.588	901.104	437.691	275.116	821.635	500.734	311.987	815.421	476.304	264.885	749.801
699	0	225.904	184.465	1583.69	104.876	186.362	1572.9	232.949	344.797	1520.67	125.717	342.617	1507.48	177.881	318.635	1432.14	183.617	400.873	1152.83	197.958	194.038	1342.05	207.071	133.057	1146.41	97.633	402.99	1225.9	370.464	266.991	1369.17	448.541	334.099	1134.71	454.219	349.295	1060.7	482.151	282.21	898.654	437.148	267.265	818.489	500.622	303.253	812.951	476.112	256.403	747.126
700	0	227.621	174.604	1581.94	106.822	176.906	1571.69	235.157	334.739	1518.79	127.923	333.046	1506.18	179.869	308.585	1430.74	185.086	390.344	1151.38	199.225	183.87	1340.51	207.336	122.649	1144.81	99.4455	393.139	1224.6	372.193	256.013	1367.14	449.6	323.579	1132.65	454.718	338.81	1058.53	482.691	272.656	896.315	437.841	257.686	816.429	500.936	294.047	810.492	476.322	247.71	744.6
701	0	229.56	164.625	1580.48	108.799	167.2	1570.69	237.615	324.745	1517.24	130.303	323.382	1504.95	182.055	298.573	1429.41	186.953	379.598	1150.02	200.497	173.644	1339.17	207.594	112.171	1143.57	101.282	383.194	1223.53	373.799	245.151	1365.33	450.689	312.938	1130.8	455.77	328.333	1056.67	483.122	262.613	894.037	437.934	248.789	813.962	501.814	284.547	808.428	476.538	238.706	742.298
702	0	231.783	154.397	1579.02	111.075	157.548	1569.54	240.108	314.566	1515.9	132.754	313.6	1503.92	184.248	288.508	1428.12	188.691	368.78	1148.7	201.989	163.313	1338.05	207.969	101.647	1142.5	103.152	373.127	1222.42	375.574	234.367	1363.62	451.908	301.974	1129.02	456.626	317.374	1054.84	483.889	252.623	891.998	438.476	239.34	811.877	502.232	274.939	806.297	476.787	229.631	739.892
703	0	233.943	144.083	1577.3	113.476	147.524	1568.29	242.709	304.494	1514.48	135.373	303.897	1502.96	186.443	278.407	1427.02	190.579	357.845	1147.29	203.48	152.964	1336.95	208.324	91.0192	1141.47	105.066	362.85	1221.3	377.358	223.36	1361.78	453.202	290.474	1126.92	457.584	306.335	1052.81	484.426	242.35	889.648	438.909	229.447	809.495	502.774	265.024	804.046	477.203	219.996	737.526
704	0	236.181	133.572	1575.62	116.002	137.4	1567.11	245.502	294.262	1513.37	138.223	294.033	1502.22	188.788	268.403	1425.88	192.558	346.737	1146.01	205.098	142.641	1335.97	208.89	80.1463	1140.66	107.087	352.438	1220.19	379.388	212.456	1360.17	454.423	278.91	1124.77	458.789	295.09	1050.82	485.034	231.813	887.34	439.343	219.472	807.091	503.58	255.056	801.907	477.5	210.139	735.114
705	0	238.628	123.05	1574.27	118.732	127.265	1566.18	248.269	284.091	1512.54	140.985	284.184	1501.67	191.384	258.289	1424.8	194.465	335.413	1144.73	206.937	132.13	1335.28	209.627	69.0243	1140.3	109.138	341.861	1219.21	381.445	201.757	1358.73	455.793	267.106	1122.83	459.785	283.592	1048.99	485.854	220.975	885.342	440.014	209.193	805.077	504.43	244.605	799.959	477.763	200.899	732.505
706	0	241.139	112.381	1573.17	121.467	116.966	1565.47	251.215	273.742	1511.97	143.915	274.321	1501.39	194.027	248.148	1424.09	195.989	324.361	1143.79	208.753	121.564	1334.85	210.529	57.8023	1140.18	111.099	331.204	1218.53	383.691	190.769	1357.34	457.27	255.082	1120.86	460.964	271.659	1047.23	486.555	209.797	883.112	440.703	198.601	802.947	505.179	233.918	797.913	478.38	190.746	730.236
707	0	243.664	101.943	1572.31	124.235	106.588	1565.23	254.082	263.345	1511.76	146.88	264.302	1501.49	196.609	237.867	1423.86	197.406	313.347	1143.07	210.79	111.011	1334.64	211.559	46.294	1140.26	113.229	320.413	1218.24	386.134	179.762	1356.21	458.69	242.841	1119.02	461.82	259.504	1045.26	487.371	198.517	881.171	441.322	187.859	800.879	505.478	223.074	795.787	479.045	180.205	728.29
708	0	246.286	91.1655	1571.98	127.281	96.2548	1565.24	256.985	253.012	1511.91	149.628	254.266	1502.21	199.351	227.751	1423.9	198.926	301.909	1142.59	212.649	100.514	1334.92	212.497	34.7751	1140.7	115.256	309.657	1218.19	388.179	169.203	1355.25	460.063	230.515	1117.46	462.635	247.051	1043.74	488.097	186.803	879.483	441.932	176.85	799.066	506.657	211.57	794.375	479.703	169.513	726.534
709	0	249.047	80.446	1571.8	130.041	85.8633	1565.75	259.985	242.642	1512.48	152.664	244.023	1502.96	202.16	217.488	1424.18	200.452	290.677	1142.41	214.631	89.9209	1335.52	213.39	23.1815	1141.58	117.205	298.863	1218.43	390.372	158.163	1354.62	461.305	218.082	1116.21	464.808	234.499	1043.01	488.777	175	878.012	442.728	166.15	797.383	507.518	200.192	793.091	480.344	158.61	725.001
710	0	251.808	69.8338	1572.15	133.012	75.392	1566.58	262.89	232.139	1513.16	155.605	233.822	1504.12	204.835	207.07	1424.54	201.983	279.697	1142.82	216.598	79.3231	1336.33	214.342	11.5761	1142.63	119.037	288.204	1219.15	392.56	147.19	1354.29	462.529	205.493	1115.17	465.724	221.554	1042.02	489.453	162.82	876.757	443.302	154.514	795.957	508.046	188.499	792.073	481.018	147.329	723.686
711	0	254.705	59.1645	1572.99	136.157	64.9816	1567.93	265.909	221.626	1513.99	158.613	223.437	1505.39	207.319	196.7	1425.63	203.354	268.727	1143.4	218.638	68.7986	1337.47	215.3	0.108448	1144.03	120.699	277.52	1220.28	394.816	136.25	1354.41	463.745	192.682	1114.68	466.139	208.734	1041.06	490.149	150.307	876.207	443.958	142.52	795.216	508.962	176.26	791.735	481.776	135.678	722.972
712	0	257.752	48.659	1574	139.175	54.5635	1569.5	268.94	211.088	1515.08	161.445	213.013	1507.06	209.731	186.295	1426.72	204.792	257.661	1144.69	220.484	58.3626	1338.84	216.139	-11.1722	1145.83	122.351	266.936	1221.68	396.952	125.296	1354.89	464.867	179.876	1114.47	466.502	195.438	1040.77	490.75	137.497	876.015	444.77	130.144	795.067	510.313	163.428	791.657	482.502	123.77	722.753
713	0	260.811	38.1793	1575.11	142.201	44.1346	1571.42	271.726	200.591	1516.11	164.307	202.484	1508.81	212.26	176.024	1428.13	206.053	246.381	1145.69	222.261	48.015	1340.45	216.882	-22.2587	1147.74	123.788	256.452	1223.47	398.566	114.587	1355.26	465.796	166.97	1114.34	467.319	182.426	1040.77	491.48	124.549	876.154	445.422	117.825	795.004	511.349	150.39	791.928	483.323	111.331	722.75
714	0	263.829	27.6913	1576.28	145.384	33.8322	1573.49	274.561	190.179	1517.18	166.937	192.096	1510.79	214.385	166.08	1429.58	207.793	235.375	1147.54	224.005	37.6417	1342.13	217.534	-33.0231	1149.61	125.258	246.107	1225.3	400.45	103.844	1356.03	466.557	154.071	1114.38	467.925	169.335	1040.89	492.029	111.054	876.646	446.28	104.694	795.425	512.372	136.792	792.437	484.016	98.5214	722.849
715	0	266.832	17.2963	1577.59	148.567	23.5957	1575.62	277.323	179.849	1518.35	169.645	181.768	1512.85	216.438	155.94	1431.27	208.891	224.918	1149.35	225.48	27.5028	1343.77	218.164	-43.7005	1151.7	126.549	235.861	1227.34	402.047	93.3828	1356.82	467.257	141.106	1114.65	468.444	156.416	1041.35	492.635	97.3475	877.451	447.114	91.3529	795.956	513.437	122.766	793.36	484.86	85.1872	723.31
716	0	269.823	6.99216	1578.82	151.443	13.2219	1577.89	279.952	169.623	1519.77	171.988	171.595	1515.07	218.185	146.09	1432.89	209.68	214.497	1150.89	226.778	17.5073	1345.61	218.685	-54.1457	1153.78	127.741	225.767	1229.25	403.665	82.9452	1357.88	467.907	128.535	1115.02	469.255	143.609	1042.11	493.199	83.4942	878.423	447.604	76.8901	797.181	514.403	108.648	794.356	485.577	71.5956	723.905
717	0	272.756	-3.20599	1580.07	154.509	3.01209	1580.07	282.342	159.473	1520.91	174.375	161.363	1517.19	219.956	136.19	1434.38	210.759	204.409	1152.25	228.06	7.58992	1347.27	219.082	-64.3573	1155.82	128.894	215.883	1231.22	404.418	72.8582	1358.6	468.591	116.091	1115.54	469.838	130.812	1042.51	493.927	69.5275	879.434	448.392	62.6086	798.183	515.093	94.2144	795.418	486.447	57.393	724.714
718	0	275.61	-13.232	1581.34	157.396	-7.16653	1582.4	284.658	149.257	1522.02	176.712	151.132	1519.19	221.943	126.435	1436.11	211.85	194.245	1154.02	229.243	-2.23407	1348.96	219.552	-74.4308	1157.74	130.22	206.124	1232.81	406.206	62.3465	1359.68	469.37	103.78	1116.04	470.412	118.05	1042.93	494.672	55.2778	880.536	449.093	48.0467	799.322	516.311	78.8524	796.466	487.221	42.7689	725.686
719	0	278.22	-23.2342	1582.59	159.962	-17.1602	1584.75	286.882	139.282	1523.09	178.765	141.216	1521.4	223.364	117.002	1437.51	212.888	184.154	1155.01	230.167	-11.8753	1350.69	219.741	-84.3781	1159.72	131.344	196.457	1234.48	407.392	52.1371	1360.72	470.139	91.8722	1116.8	471.159	105.371	1043.48	495.258	40.987	881.893	449.79	33.2613	800.725	517.135	63.6752	797.634	488.193	27.5584	727.032
720	0	280.717	-33.0789	1583.81	162.511	-27.023	1586.91	288.946	129.391	1524.34	180.703	131.276	1523.33	224.991	107.23	1438.95	214.49	174.491	1156.81	230.874	-21.406	1352.24	219.807	-94.1336	1161.48	132.653	186.971	1235.93	408.284	42.1396	1361.66	470.962	79.9048	1117.56	472.092	92.9809	1044.14	495.862	26.6377	883.163	450.283	18.2886	802.098	518.043	48.3849	798.994	488.817	12.1456	728.377
721	0	282.996	-42.839	1584.89	164.755	-36.9252	1589.05	290.628	119.611	1525.18	182.44	121.404	1525.01	226.046	97.7612	1440.16	215.436	164.984	1157.59	231.552	-30.8627	1353.71	219.786	-103.919	1162.99	134.036	177.745	1237.08	409.308	31.9428	1362.61	471.83	68.1438	1118.27	472.984	80.2458	1044.83	496.403	12.0594	884.453	450.845	3.32537	803.355	518.353	32.9401	800.2	489.283	-3.67471	729.644
722	0	285.151	-52.6065	1586.03	166.973	-46.6811	1591.09	292.074	109.674	1526.02	184.058	111.449	1526.85	227.317	88.2832	1441.49	216.764	155.735	1158.96	232.057	-40.2943	1355.12	219.752	-113.502	1164.32	135.501	168.69	1238.43	409.977	21.8083	1363.33	472.626	56.5355	1118.95	473.851	67.7733	1045.33	496.82	-2.56098	885.779	451.262	-12.016	804.709	518.716	17.3538	801.153	489.749	-19.9997	731.25
723	0	287.177	-62.1732	1587.14	169.073	-56.3056	1592.99	293.694	100.262	1526.86	185.461	101.862	1528.51	228.505	78.8258	1442.6	218.304	146.02	1160.22	232.359	-49.4992	1356.47	219.654	-123.025	1165.69	136.922	159.602	1239.53	410.894	11.6686	1364.51	473.711	44.9437	1119.95	474.985	54.9818	1046.19	497.339	-16.9946	887.317	451.683	-27.5541	806.618	519.725	1.68046	802.496	490.123	-36.5132	733.201
724	0	288.902	-71.6022	1588.11	170.684	-65.9545	1594.86	294.998	90.7451	1527.73	186.826	92.3149	1529.93	229.77	69.2471	1443.94	219.476	136.749	1161.34	232.778	-58.7615	1357.82	219.592	-132.431	1166.92	138.503	150.632	1240.78	411.578	1.62207	1365.47	474.79	33.5433	1120.95	476.237	42.7222	1046.97	497.787	-31.3994	888.981	451.706	-42.4661	808.458	520.113	-14.0593	803.981	490.521	-53.4892	735.482
725	0	290.427	-81.0539	1589.08	172.384	-75.4356	1596.38	296.252	81.3113	1528.79	188.013	82.7604	1531.57	230.536	59.9979	1445.25	221.573	128.036	1162.89	233.182	-67.9586	1359.01	219.568	-141.659	1167.88	140.13	141.929	1242.02	411.857	-8.3806	1366.21	475.846	22.1312	1121.98	477.308	30.3062	1047.73	498.08	-45.8448	890.625	451.932	-57.8708	810.486	520.191	-29.9856	805.252	490.548	-70.622	737.883
726	0	291.651	-90.5019	1590.16	173.77	-84.6893	1597.68	297.229	71.8952	1530.01	189.122	73.4623	1533.13	231.73	50.4928	1446.66	222.633	118.903	1164.16	233.527	-77.1101	1360.28	219.577	-150.828	1168.81	141.526	132.979	1243.33	412.499	-18.3874	1367.28	476.869	10.8616	1123.06	478.408	18.0255	1048.79	498.516	-60.583	892.568	451.862	-73.268	812.589	520.443	-45.5748	806.771	490.393	-88.1145	740.556
727	0	292.71	-99.8512	1591.19	174.694	-94.1341	1598.93	298.231	62.6109	1531.59	189.944	64.232	1534.76	232.377	41.3501	1447.88	224.465	110.015	1165.71	233.94	-86.132	1361.47	219.68	-159.811	1169.79	143.197	124.315	1244.74	413.154	-28.2182	1368.54	477.916	-0.294017	1124.38	479.877	6.13143	1050.01	498.86	-74.9246	894.629	451.78	-88.7315	815.067	520.45	-61.6162	808.716	490.169	-105.547	743.64
728	0	293.56	-109.213	1592.17	175.55	-103.483	1600.09	299.215	53.5378	1533.09	190.841	54.987	1536.34	233.38	32.1438	1449.29	225.94	101.347	1166.82	234.441	-95.1361	1362.58	220.072	-168.698	1170.72	144.635	115.552	1245.84	413.894	-38.1219	1369.84	479.124	-11.3785	1125.71	481.346	-5.85299	1051.32	499	-89.1332	896.684	451.672	-104.052	817.693	520.095	-77.7947	810.573	489.947	-123.189	746.996
729	0	294.174	-118.646	1593.09	176.334	-112.803	1600.91	299.874	44.3697	1534.45	191.656	45.9474	1537.82	234.299	22.9375	1450.44	227.106	92.0415	1168.36	234.997	-104.106	1363.61	220.536	-177.445	1171.58	146.028	106.816	1247.2	414.254	-47.808	1370.89	480.416	-22.4628	1127	482.558	-17.7107	1052.29	499.168	-103.454	898.852	451.449	-119.525	820.422	519.897	-93.6265	812.373	489.446	-141.026	750.491
730	0	294.628	-127.959	1594.17	176.847	-122.056	1601.73	300.491	35.1893	1536.11	192.484	36.9531	1539.27	235.096	13.8526	1451.59	228.674	83.5611	1169.46	235.598	-112.987	1364.69	221.151	-186.04	1172.56	147.437	98.2473	1248.28	415.19	-57.4475	1372.19	481.641	-33.303	1128.54	483.967	-29.3625	1053.58	499.405	-117.662	901.442	451.182	-134.849	823.459	519.585	-109.263	814.397	488.9	-158.44	754.274
731	0	295.021	-137.272	1594.96	177.078	-131.342	1602.4	301.063	26.1621	1537.71	193.048	28.0195	1540.68	235.973	4.91237	1452.67	229.65	74.4075	1170.49	236.25	-121.839	1365.68	221.759	-194.544	1173.6	148.645	89.3845	1249.21	415.956	-66.7343	1373.51	482.978	-43.9816	1129.93	485.72	-40.8178	1054.94	499.535	-131.693	903.999	450.88	-150.088	826.625	519.322	-124.899	816.701	488.288	-175.804	758.318
732	0	295.163	-146.709	1595.58	177.175	-140.734	1602.79	301.519	17.2231	1539.33	193.475	19.0738	1542.02	236.807	-3.97261	1453.49	230.572	65.5021	1171.06	236.846	-130.624	1366.54	222.513	-202.998	1174.44	149.87	80.8543	1249.99	416.368	-75.8095	1374.43	484.24	-54.7144	1131.22	487.29	-52.2492	1056.15	499.575	-145.841	906.308	450.588	-165.918	829.988	518.882	-140.629	818.877	487.498	-193.255	762.093
733	0	295.299	-156.065	1596.15	177.322	-149.938	1603.08	302.045	8.13432	1540.78	193.983	10.2329	1543.22	237.601	-12.8477	1454.37	231.641	57.1841	1171.87	237.484	-139.405	1367.22	223.261	-211.559	1175.18	150.924	72.1572	1250.82	417.308	-85.0321	1375.49	485.445	-65.301	1132.28	488.712	-63.5526	1057.13	499.627	-159.805	908.751	450.028	-180.841	832.909	518.2	-156.303	820.969	486.64	-210.5	766.136
734	0	295.382	-165.335	1596.73	177.456	-159.093	1603.32	302.55	-1.0271	1542.24	194.458	1.22043	1544.33	238.373	-21.5469	1455.14	232.148	48.2049	1172.48	238.196	-148.109	1367.84	224.135	-219.952	1175.96	151.776	63.421	1251.61	417.845	-93.9272	1376.31	486.837	-75.8729	1133.47	490.203	-74.6797	1058.09	499.832	-173.718	911.301	449.551	-196.007	836.15	517.698	-171.935	823.215	485.811	-227.606	770.113
735	0	295.555	-174.545	1597.21	177.551	-168.276	1603.61	302.891	-10.1524	1543.18	194.726	-7.73651	1545.08	238.965	-30.2424	1455.67	232.684	39.7562	1173.2	238.886	-156.803	1368.39	225.039	-228.422	1176.66	152.728	54.8123	1252.03	418.673	-102.792	1377.22	488.256	-86.3333	1134.47	491.769	-85.7197	1058.94	499.887	-187.402	913.565	449.3	-211.214	839.59	517.302	-187.479	825.499	484.946	-244.427	774.049
736	0	295.584	-183.742	1597.47	177.674	-177.477	1603.72	303.15	-19.2523	1543.68	194.916	-16.9081	1545.55	239.55	-39.0847	1456.05	234.045	31.4869	1173.78	239.514	-165.6	1368.65	225.962	-236.919	1177.03	153.307	46.1512	1252.48	419.096	-111.512	1377.58	489.547	-96.7787	1135.1	493.14	-96.8446	1059.29	499.952	-201.248	915.783	448.831	-226.334	842.551	516.665	-202.861	827.484	483.974	-261.098	777.933
737	0	295.572	-192.871	1597.7	177.702	-186.47	1603.77	303.41	-28.3391	1543.94	195.139	-25.9197	1545.65	240.057	-47.9555	1456.22	234.484	22.8219	1173.96	240.088	-174.432	1368.73	226.863	-245.465	1177.23	153.928	37.4473	1252.79	419.699	-120.361	1377.9	490.782	-107.237	1135.74	494.542	-107.82	1059.8	500.123	-214.931	918.06	448.417	-241.286	845.687	515.65	-218.027	829.392	483.046	-277.667	781.623
738	0	295.627	-201.909	1597.84	177.671	-195.436	1603.74	303.72	-37.3879	1543.95	195.53	-34.8785	1545.4	240.569	-56.8588	1456.34	235.373	14.6786	1173.68	240.545	-183.299	1368.7	227.717	-253.952	1177.23	154.701	28.9349	1252.81	420.365	-129.141	1378.25	491.951	-117.517	1136.32	495.825	-118.631	1060.33	500.188	-228.162	920.152	447.983	-256.013	848.802	515.391	-233.151	831.559	482.105	-293.732	785.44
739	0	295.699	-210.835	1597.92	177.741	-204.348	1603.67	303.936	-46.4955	1543.64	195.8	-43.8526	1544.85	240.85	-65.9623	1456.27	235.974	6.19485	1173.32	241.022	-192.224	1368.48	228.534	-262.429	1176.94	155.133	20.3213	1252.73	420.653	-137.779	1378.09	493.002	-127.746	1136.58	496.961	-129.433	1060.66	500.242	-241.376	922.038	447.454	-270.575	851.687	514.71	-247.97	833.495	481.067	-309.65	788.938
740	0	295.675	-219.876	1597.89	177.803	-213.266	1603.47	303.952	-55.6656	1542.94	195.91	-52.986	1544.19	241.057	-75.1245	1456.09	236.036	-1.99642	1173.31	241.495	-201.194	1367.99	229.333	-270.917	1176.25	155.534	11.4736	1252.59	421.014	-146.701	1377.86	493.951	-137.882	1136.68	497.875	-140.274	1060.54	500.166	-254.42	923.688	446.966	-284.931	854.321	514.021	-262.607	835.175	480.138	-325.273	792.375
741	0	295.776	-228.764	1597.95	177.795	-222.054	1603.36	304.128	-64.8768	1542.16	196.149	-62.1009	1543.37	241.236	-84.3193	1455.85	236.754	-10.0284	1173.74	241.884	-210.134	1367.52	230.05	-279.344	1175.55	155.875	2.84405	1252.49	421.306	-155.48	1377.54	494.869	-147.907	1136.84	498.665	-151.09	1060.4	500.116	-267.285	925.461	446.426	-299.013	857.117	513.303	-276.926	836.884	479.348	-340.548	795.881
742	0	295.675	-237.661	1597.91	177.661	-230.842	1603.16	304.38	-74.0358	1541.45	196.403	-71.075	1542.39	241.421	-93.5774	1455.56	236.804	-18.343	1173.66	242.188	-219.075	1366.97	230.693	-287.775	1174.65	155.975	-5.85399	1252.39	421.589	-164.303	1377.27	495.71	-157.839	1136.9	499.521	-161.673	1060.43	499.944	-279.964	927.081	445.951	-312.823	859.704	512.635	-291.029	838.753	478.494	-355.534	799.098
743	0	295.448	-246.647	1597.68	177.498	-239.709	1602.79	304.469	-83.3094	1540.63	196.474	-80.1737	1541.19	241.389	-102.916	1455.16	237.172	-26.1792	1173.74	242.431	-228.042	1366.23	231.163	-296.218	1173.44	155.836	-14.7334	1252.32	421.706	-173.106	1376.74	496.241	-167.704	1136.66	500.176	-172.257	1060.21	499.574	-292.453	928.503	445.154	-326.525	861.988	511.716	-304.944	840.319	477.664	-370.28	802.143
744	0	295.198	-255.733	1597.37	177.313	-248.543	1602.41	304.584	-92.6585	1539.53	196.447	-89.4376	1540.12	241.251	-112.268	1454.76	236.986	-34.571	1173.49	242.55	-237.075	1365.43	231.56	-304.719	1172.11	155.685	-23.5361	1252.27	421.952	-182.106	1376.26	496.647	-177.422	1136.29	500.863	-182.663	1059.88	499.088	-304.949	929.88	444.5	-339.993	864.116	510.791	-318.769	841.714	476.776	-384.709	805.008
745	0	294.988	-264.782	1597	177.169	-257.386	1601.89	304.546	-102.059	1538.38	196.458	-98.7017	1539.07	241.215	-121.69	1454.21	237.025	-42.5354	1173.22	242.701	-246.128	1364.52	231.931	-313.186	1170.88	155.576	-32.4218	1252.03	421.457	-190.674	1375.39	496.981	-187.006	1135.75	501.338	-193.007	1059.47	498.592	-317.182	931.103	443.556	-353.094	866.1	509.747	-332.192	843.085	475.872	-398.823	807.767
746	0	294.823	-273.854	1596.5	176.905	-266.436	1601.35	304.465	-111.42	1537.19	196.445	-107.917	1537.67	240.981	-131.008	1453.52	236.855	-50.7737	1172.79	242.797	-255.201	1363.7	232.283	-321.667	1169.66	155.265	-41.2879	1251.52	421.806	-199.535	1374.67	497.243	-196.467	1135.2	501.451	-203.395	1058.94	498.023	-329.222	932.185	442.725	-365.84	867.949	508.622	-345.196	844.448	474.907	-412.631	810.231
747	0	294.459	-283.115	1595.89	176.519	-275.593	1600.73	304.328	-120.882	1535.91	196.311	-117.262	1536.38	240.75	-140.4	1452.77	236.265	-59.2278	1172.43	242.876	-264.318	1362.68	232.528	-330.303	1168.38	154.792	-50.3544	1250.99	421.572	-208.278	1373.69	497.277	-205.822	1134.44	501.619	-213.728	1058.2	497.326	-341.147	933.071	441.748	-378.409	869.457	507.736	-358.516	845.414	473.711	-426.191	812.584
748	0	294.139	-292.511	1595.21	176.224	-284.76	1599.97	303.974	-130.382	1534.55	196.136	-126.664	1535.15	240.362	-149.747	1451.88	235.638	-67.8196	1171.66	242.75	-273.432	1361.62	232.735	-339.014	1167.17	154.08	-59.4729	1250.35	421.044	-216.92	1372.46	497.273	-215.001	1133.66	501.931	-224.027	1057.48	496.594	-352.999	933.898	440.572	-390.629	870.712	506.495	-371.294	846.36	472.331	-439.532	814.688
749	0	293.6	-301.885	1594.26	175.85	-294.093	1599.11	303.553	-139.96	1533.26	195.771	-136.232	1533.86	239.87	-159.008	1451.03	234.843	-76.2266	1170.75	242.561	-282.55	1360.56	232.807	-347.722	1166	153.412	-68.7483	1249.49	420.987	-225.554	1371.53	497.228	-224.049	1132.8	502.111	-234.318	1056.88	495.725	-364.625	934.497	439.297	-402.574	871.801	505.635	-384.167	847.272	470.789	-452.456	816.471
750	0	293.17	-311.393	1593.25	175.356	-303.564	1598.19	303.196	-149.477	1532.14	195.361	-145.901	1532.49	239.327	-168.421	1449.92	234.578	-85.3679	1169.87	242.327	-291.693	1359.32	232.819	-356.533	1164.83	152.629	-77.922	1248.67	420.734	-234.284	1370.48	496.985	-233.039	1131.79	502.071	-244.57	1056.1	494.834	-376.249	934.948	438.037	-414.23	872.568	504.565	-396.685	847.949	469.151	-465.102	817.963
751	0	292.671	-320.971	1592.06	174.9	-313.213	1597.08	302.523	-159.106	1530.77	194.691	-155.514	1531.32	238.664	-177.738	1448.85	233.55	-94.1467	1168.85	242.08	-300.886	1358.14	232.889	-365.406	1163.53	151.797	-87.3053	1247.7	419.912	-242.915	1369.03	496.788	-242.139	1130.59	501.743	-254.974	1054.94	493.822	-387.769	935.046	436.772	-425.769	872.982	503.479	-409.292	848.323	467.382	-477.586	819.199
752	0	292.164	-330.608	1590.76	174.415	-323.005	1595.85	301.753	-168.763	1529.53	193.946	-165.256	1530.37	238.094	-187.139	1447.85	232.643	-103.526	1167.74	241.763	-310.143	1356.84	232.847	-374.289	1162.27	150.762	-96.6304	1246.75	419.742	-251.757	1367.94	496.523	-251.21	1129.37	501.546	-265.453	1053.95	492.834	-399.271	935.172	435.442	-437.03	873.142	502.459	-421.654	848.587	465.59	-489.781	820.171
753	0	291.674	-340.255	1589.48	173.749	-332.866	1594.6	300.973	-178.449	1528.51	193.158	-175.12	1529.23	237.223	-196.563	1446.55	231.713	-112.442	1166.91	241.355	-319.378	1355.54	232.752	-383.232	1161	149.823	-106.157	1245.56	419.274	-260.512	1366.86	496.141	-260.275	1128.29	501.289	-275.846	1053.11	491.855	-410.603	935.278	434.109	-448.162	873.297	501.577	-433.75	848.984	463.814	-501.539	820.757
754	0	290.83	-350.069	1587.83	173.025	-342.814	1593.02	300.091	-188.044	1527.3	192.13	-184.83	1527.92	236.327	-206.008	1445.37	230.846	-121.68	1165.78	240.833	-328.71	1354	232.537	-392.277	1159.46	148.899	-115.672	1244.3	418.617	-269.4	1365.59	495.409	-269.441	1126.9	500.738	-286.239	1052.03	490.633	-421.769	934.903	432.908	-459.137	873.013	500.571	-445.625	848.945	461.994	-513.222	821.027
755	0	290.068	-359.929	1586.24	172.251	-352.853	1591.38	298.965	-197.826	1525.93	191.094	-194.652	1526.9	235.265	-215.57	1443.9	229.919	-130.753	1164.63	240.204	-338.275	1352.47	232.394	-401.427	1157.84	147.937	-125.269	1242.98	417.802	-278.347	1364.31	494.834	-278.857	1125.65	500.072	-296.637	1050.97	489.423	-432.873	934.567	431.605	-469.862	872.462	499.635	-457.356	848.712	460.318	-524.487	821.096
756	0	289.215	-369.82	1584.51	171.318	-362.984	1589.67	297.869	-207.654	1524.65	190.044	-204.616	1525.32	234.238	-225.196	1442.54	228.743	-140.153	1162.84	239.484	-347.836	1350.77	232.146	-410.635	1156.28	146.913	-135.097	1241.44	416.993	-287.388	1363.1	494.175	-288.295	1124.51	499.501	-306.997	1050.13	488.253	-443.761	934.306	430.299	-480.394	871.984	498.698	-468.684	848.647	458.567	-535.442	820.797
757	0	288.326	-379.734	1582.79	170.347	-373.119	1587.89	296.668	-217.39	1523.21	188.901	-214.596	1523.83	232.951	-234.898	1440.84	227.931	-149.352	1161.4	238.764	-357.483	1349.15	231.982	-419.9	1154.65	145.886	-144.769	1239.75	416.157	-296.466	1361.9	493.576	-297.887	1123.47	498.766	-317.237	1049.25	487.022	-454.365	933.732	429.095	-490.656	871.217	497.722	-479.651	848.312	457.166	-546.212	820.513
758	0	287.172	-389.718	1580.93	169.238	-383.372	1586.06	295.297	-227.319	1521.45	187.499	-224.699	1522.1	231.783	-244.771	1439.22	227.105	-158.736	1159.84	237.899	-367.261	1347.33	231.8	-429.349	1152.75	144.886	-154.561	1238.04	414.681	-305.688	1360.26	492.398	-307.627	1122.1	497.973	-327.55	1048.04	485.861	-464.875	932.996	427.92	-500.856	870.232	496.744	-490.52	847.533	455.715	-556.679	819.652
759	0	285.929	-399.884	1579.24	167.965	-393.6	1584.11	293.954	-237.298	1519.95	186.272	-234.767	1520.37	230.43	-254.657	1437.67	226.098	-168.319	1158.81	237.043	-377.087	1345.47	231.522	-438.901	1150.78	143.905	-164.278	1236.31	413.954	-315.297	1358.96	491.295	-317.587	1120.71	497.44	-337.699	1046.8	484.576	-475.186	931.982	426.775	-510.794	868.997	495.793	-500.983	846.642	454.424	-566.884	818.698
760	0	284.511	-410.019	1577.63	166.528	-403.881	1582.33	292.541	-247.322	1518.61	184.67	-245.125	1518.8	229.083	-264.78	1436.16	225.077	-177.927	1156.57	236.036	-387.113	1343.83	231.134	-448.55	1148.94	142.895	-174.212	1234.72	412.964	-324.873	1357.84	490.232	-327.496	1119.49	496.194	-347.701	1045.8	483.399	-485.24	930.962	425.632	-520.632	867.713	494.824	-511.127	845.661	453.226	-576.745	817.471
761	0	282.985	-420.247	1575.98	164.972	-414.262	1580.46	290.827	-257.487	1517.32	183.06	-255.3	1517.17	227.647	-274.925	1434.7	224.023	-187.628	1155.68	235.024	-397.154	1342	230.648	-458.262	1147	141.721	-184.181	1233.24	411.817	-334.753	1356.7	489.315	-337.633	1118.43	495.401	-357.684	1044.79	482.242	-495.204	929.715	424.49	-530.245	866.295	493.844	-520.998	844.477	451.991	-586.39	816.003
762	0	281.373	-430.543	1574.39	163.377	-424.659	1578.62	289.086	-267.74	1515.94	181.369	-265.632	1515.71	226.138	-285.269	1433.26	223.028	-197.517	1154.35	233.94	-407.366	1340.27	230.045	-468.021	1145.05	140.558	-194.376	1231.68	410.205	-344.646	1355.33	488.009	-347.601	1117.13	494.277	-367.652	1043.47	481.128	-504.95	928.135	423.504	-539.644	864.514	492.906	-530.7	842.958	450.948	-595.879	814.344
763	0	279.599	-440.883	1572.85	161.611	-435.204	1577.01	287.119	-278.061	1514.5	179.492	-276.026	1514.23	224.645	-295.658	1431.82	221.685	-207.635	1153.06	232.66	-417.702	1338.78	229.43	-478.003	1143.23	139.386	-204.592	1230.18	409.135	-354.959	1354.28	486.934	-357.696	1116.02	493.193	-377.602	1042.2	480.257	-514.423	926.613	422.52	-548.817	862.669	492.072	-539.9	841.288	450.039	-604.927	812.479
764	0	277.856	-451.18	1571.59	159.726	-445.685	1575.46	285.259	-288.21	1513.4	177.412	-286.45	1512.81	222.991	-306.146	1430.49	220.782	-217.893	1151.83	231.42	-428.165	1337.36	228.74	-488.18	1141.69	138.095	-214.993	1228.72	407.867	-365.262	1353.37	485.822	-367.602	1115.17	491.867	-387.26	1041.27	479.283	-523.639	924.993	421.646	-557.648	860.836	491.232	-548.856	839.709	449.157	-613.646	810.535
765	0	275.814	-461.664	1570.29	157.75	-456.316	1574.04	283.272	-298.591	1512.03	175.389	-297.173	1511.3	221.311	-316.794	1429.14	219.45	-228.238	1150.58	229.9	-438.798	1336.07	227.897	-498.564	1140.21	136.822	-225.534	1227.32	406.305	-375.813	1352.44	484.532	-377.65	1114.23	490.794	-397.018	1040.31	478.346	-532.713	923.14	420.751	-566.418	858.889	490.415	-557.356	837.802	448.338	-622.101	808.242
766	0	273.787	-472.295	1569.23	155.694	-467.051	1572.64	281.027	-309.236	1510.69	173.314	-307.785	1509.73	219.457	-327.507	1427.84	218.444	-238.781	1149.35	228.393	-449.567	1334.77	226.879	-509.094	1138.86	135.462	-236.273	1225.76	404.731	-386.448	1351.51	483.342	-387.711	1113.38	489.571	-406.858	1039.29	477.469	-541.614	921.292	419.981	-574.891	856.616	489.668	-565.74	835.692	447.702	-630.237	805.774
767	0	271.63	-482.835	1568.18	153.534	-477.717	1571.42	278.77	-319.883	1509.52	171.08	-318.724	1508.34	217.769	-338.297	1426.7	217.549	-249.768	1148.06	226.672	-460.351	1333.62	225.813	-519.813	1137.77	134.301	-247.07	1224.3	402.691	-397.258	1350.64	481.928	-397.783	1112.69	488.196	-416.439	1038.5	476.49	-550.312	919.485	419.228	-583.111	854.365	488.887	-573.705	833.711	447.058	-638.023	803.237
768	0	269.457	-493.468	1567.48	151.333	-488.53	1570.33	276.493	-330.502	1508.28	168.756	-329.599	1506.78	215.818	-349.255	1425.49	216.329	-260.015	1146.63	225.096	-471.514	1332.77	224.602	-530.658	1136.93	133.07	-258.068	1222.8	401.397	-408.29	1350.28	480.579	-407.868	1112.21	486.98	-425.994	1037.92	475.606	-558.83	917.637	418.523	-591.003	851.996	488.358	-581.386	831.626	446.55	-645.49	800.572
769	0	267.187	-504.144	1566.6	149.071	-499.432	1569.24	273.977	-341.615	1507.22	166.544	-340.452	1505.68	213.897	-360.308	1424.51	214.778	-271.459	1145.96	223.455	-482.32	1331.71	223.327	-541.787	1136.15	131.701	-269.356	1221.48	399.267	-419.462	1349.6	479.174	-418.255	1111.79	485.522	-435.617	1037.28	474.824	-567.183	915.709	417.946	-598.719	849.648	487.786	-588.837	829.552	446.115	-652.713	797.685
770	0	264.925	-515.03	1566.01	146.685	-510.268	1568.39	271.722	-352.28	1506.4	163.974	-351.447	1504.47	211.91	-371.342	1423.7	213.712	-283.014	1145.18	221.585	-493.816	1331.06	222.003	-553.17	1135.55	130.326	-280.781	1220.35	397.414	-430.859	1349.32	477.657	-428.672	1111.57	484.115	-445.239	1036.74	474.137	-575.4	913.983	417.526	-606.335	847.322	487.405	-596.075	827.423	445.836	-659.52	794.782
771	0	262.487	-525.755	1565.55	144.242	-521.26	1567.61	269.356	-363.148	1505.67	161.63	-362.55	1503.53	209.856	-382.622	1423.05	212.012	-294.207	1144.82	219.756	-505.164	1330.53	220.596	-564.767	1135.18	128.995	-292.22	1219.36	396.017	-442.392	1349.68	476.169	-439.23	1111.64	482.835	-454.654	1036.7	473.361	-583.275	912.145	416.947	-613.584	845.097	486.941	-602.92	825.471	445.62	-665.968	791.752
772	0	259.934	-536.729	1565.35	141.715	-532.255	1566.99	266.809	-374.289	1505.13	159.093	-373.887	1502.6	207.726	-393.934	1422.45	210.528	-305.415	1144.18	217.699	-516.848	1330.15	219.13	-576.614	1135	127.443	-303.939	1218.49	393.835	-453.922	1349.87	474.534	-449.831	1111.84	481.331	-463.957	1036.78	472.588	-590.92	910.235	416.384	-620.558	842.77	486.54	-609.319	823.497	445.421	-672.006	788.705
773	0	257.345	-547.738	1565.3	139.163	-543.284	1566.73	264.251	-385.409	1504.67	156.603	-384.915	1502.04	205.65	-405.385	1422.27	209.349	-317.596	1143.76	215.753	-528.554	1330	217.81	-588.785	1134.89	126.075	-315.518	1217.84	391.951	-465.869	1350.23	472.914	-460.49	1112.07	479.765	-473.305	1036.87	472.189	-598.404	908.598	416.066	-627.212	840.397	486.221	-615.406	821.524	445.393	-677.679	785.734
774	0	254.659	-558.776	1565.68	136.389	-554.435	1566.81	261.586	-396.785	1504.53	153.865	-396.117	1501.18	203.636	-416.982	1422.24	207.967	-329.511	1143.29	213.753	-540.213	1330.11	216.456	-600.932	1134.99	124.576	-327.26	1217.55	390.342	-478.002	1351.01	471.127	-470.99	1112.62	478.048	-482.652	1037.13	471.349	-605.46	906.873	415.803	-633.474	838.081	485.8	-620.996	819.726	445.543	-683.014	782.793
775	0	251.91	-569.891	1566.57	133.667	-565.493	1567.18	259.09	-408.003	1504.58	151.485	-407.632	1500.77	201.539	-428.502	1422.46	206.018	-340.81	1143.91	211.739	-552.106	1330.72	215.049	-613.12	1135.57	123.237	-338.968	1217.49	388.472	-490.201	1352.08	469.452	-481.57	1113.43	476.222	-491.767	1037.84	470.591	-612.45	905.498	415.38	-639.279	836.054	485.463	-626.132	818.157	445.866	-687.797	780.103
776	0	249.108	-581.057	1567.55	130.802	-576.613	1567.79	256.431	-419.499	1504.77	148.77	-419.171	1500.76	199.8	-440.133	1423.29	205.045	-352.886	1143.94	209.661	-563.792	1331.37	213.611	-625.482	1136.32	122.019	-350.349	1217.92	386.516	-502.545	1353.29	467.638	-492.035	1114.5	474.37	-500.939	1038.61	470.151	-618.702	904.167	415.079	-644.839	833.957	485.062	-630.941	816.545	446.117	-692.19	777.465
777	0	246.191	-592.238	1568.76	127.932	-587.744	1568.61	253.713	-431.17	1505.14	146.274	-430.544	1500.89	197.673	-451.726	1423.98	203.377	-364.284	1145.46	207.65	-575.642	1332.38	212.048	-637.745	1137.32	120.651	-361.98	1218.64	384.196	-514.844	1354.62	465.906	-502.628	1115.85	472.576	-510.018	1039.87	469.379	-625.06	903.038	415.091	-650.185	832.243	484.722	-635.35	815.241	446.489	-696.117	774.869
778	0	243.341	-603.458	1570.26	125.003	-598.935	1569.6	251.173	-442.445	1505.89	143.448	-442.157	1501.27	195.879	-463.24	1425.3	202.638	-376.732	1146.2	205.496	-587.341	1333.59	210.259	-649.709	1138.63	119.369	-373.426	1219.62	382.172	-527.121	1356.5	463.889	-513.19	1117.57	470.591	-519.177	1041.52	468.572	-631.255	902.329	414.364	-655.497	830.789	484.5	-639.519	814.429	446.708	-699.673	772.546
779	0	240.537	-614.463	1571.97	122.256	-609.998	1570.9	248.545	-453.771	1506.87	141.063	-453.562	1501.73	193.743	-474.681	1426.49	201.548	-388.429	1147.74	203.513	-598.959	1335.11	208.534	-661.614	1140.27	118.07	-384.895	1220.87	380.674	-539.347	1358.78	461.994	-523.757	1119.55	468.808	-528.039	1043.54	467.886	-637.14	902.006	414.291	-659.987	829.641	484.178	-643.401	813.888	447.026	-702.771	770.505
780	0	237.809	-625.479	1573.75	119.454	-621.057	1572.23	245.948	-465.17	1507.7	138.274	-465.103	1502.29	191.854	-485.935	1427.96	200.902	-399.962	1148.9	201.565	-610.447	1336.7	206.866	-673.22	1141.95	116.733	-396.36	1222.17	378.668	-551.24	1360.75	459.865	-534.368	1121.47	466.651	-537.073	1045.43	467.204	-642.907	901.767	414.422	-664.452	828.509	483.956	-647.146	813.516	447.249	-705.619	768.361
781	0	235.096	-636.453	1575.7	116.812	-631.982	1573.69	243.423	-476.508	1508.74	135.914	-476.432	1502.87	189.834	-497.071	1429.46	199.82	-411.886	1150.94	199.669	-621.778	1338.49	205.193	-684.777	1143.83	115.345	-407.731	1223.51	376.693	-562.963	1362.82	457.807	-545.048	1123.53	464.605	-545.871	1047.46	466.538	-648.737	901.923	414.349	-668.826	827.865	483.828	-650.967	813.608	447.502	-708.26	766.68
782	0	232.429	-647.197	1577.58	114.202	-642.811	1575.13	241.047	-487.515	1509.96	133.415	-487.66	1503.63	187.858	-508.027	1430.97	198.652	-422.694	1152.3	197.728	-632.952	1340.46	203.452	-696.003	1145.89	113.799	-419.135	1224.9	374.824	-574.268	1365.23	455.813	-555.576	1125.85	462.714	-554.361	1049.91	465.925	-654.268	902.316	413.984	-673.234	827.68	483.853	-654.664	814.144	447.534	-710.574	765.091
783	0	229.8	-657.808	1579.56	111.658	-653.289	1576.47	238.76	-498.508	1511.06	131.22	-498.733	1504.27	185.837	-518.803	1432.4	197.794	-434.068	1154.07	196.008	-643.839	1342.15	201.855	-707.153	1147.86	112.233	-430.488	1226.19	373.089	-585.245	1367.53	453.796	-565.994	1128.02	460.95	-562.814	1052.4	465.354	-659.833	902.931	413.715	-677.721	827.635	483.7	-658.484	814.909	447.604	-713.108	763.731
784	0	227.184	-668.233	1581.33	108.969	-663.785	1577.84	236.557	-509.442	1511.99	129.002	-509.739	1504.71	183.811	-529.533	1433.74	196.711	-444.908	1155.32	194.294	-654.941	1343.89	200.393	-718.087	1149.68	110.634	-441.659	1227.3	371.29	-596.072	1369.54	451.786	-576.291	1129.9	459.059	-571.211	1054.56	464.708	-665.53	903.511	413.729	-681.874	827.371	483.614	-662.487	815.544	447.497	-715.002	762.192
785	0	224.716	-678.575	1583.25	106.471	-674.016	1579.21	234.248	-520.467	1512.54	126.941	-520.553	1505.03	181.929	-540.204	1435.04	195.583	-455.141	1156.63	192.735	-665.781	1345.47	199.157	-728.917	1151.46	108.97	-452.866	1228.44	369.084	-606.531	1371.34	449.967	-586.327	1131.77	457.225	-579.472	1056.55	464.221	-671.29	904.269	413.632	-686.159	827.382	483.517	-666.696	816.416	447.37	-717.263	760.887
786	0	222.251	-688.631	1585.2	104.11	-683.962	1580.62	232.3	-531.108	1513.09	124.966	-531.081	1505.02	180.122	-550.755	1436.32	194.338	-465.651	1158.07	191.275	-676.54	1347.26	198.105	-739.442	1153.23	107.357	-463.884	1229.52	368.043	-616.897	1373.54	448.41	-596.035	1133.68	455.631	-587.563	1058.6	463.78	-677.081	905.197	413.5	-690.411	827.746	483.589	-671.2	817.608	447.127	-719.197	759.956
787	0	219.859	-698.487	1587.18	101.678	-693.729	1581.98	230.479	-541.687	1513.63	123.296	-541.675	1505.09	178.312	-561.316	1437.54	193.07	-475.633	1159.27	190.042	-687.015	1348.74	197.303	-749.982	1154.73	105.726	-474.618	1230.72	366.523	-627.034	1375.38	447.018	-605.383	1135.6	454.134	-595.562	1060.64	463.377	-683.013	906.282	413.448	-694.832	828.18	483.706	-675.956	818.958	446.874	-721.381	759.121
788	0	217.511	-708.233	1589.11	99.3686	-703.323	1583.29	228.594	-552.202	1514.12	121.58	-552.038	1505.18	176.564	-571.83	1438.95	191.849	-485.941	1161.1	188.864	-697.675	1350.23	196.8	-760.415	1156.01	104.108	-485.323	1232.01	365.138	-637.154	1377.3	445.655	-614.558	1137.4	452.79	-603.625	1062.51	462.752	-689.086	907.28	413.223	-699.547	828.692	483.67	-680.943	820.223	446.543	-723.553	758.273
789	0	215.236	-717.915	1590.99	97.1355	-712.764	1584.69	227.019	-562.455	1514.79	119.881	-562.163	1505.44	174.977	-582.185	1440.41	190.328	-495.418	1162.47	187.734	-707.97	1351.71	196.42	-770.622	1157.27	102.323	-495.814	1233.41	363.806	-646.945	1379.14	444.445	-623.331	1139.16	451.698	-611.61	1064.59	461.889	-695.288	908.319	413.122	-704.423	829.402	483.644	-686.117	821.734	446.098	-725.882	757.798
790	0	213.039	-727.276	1592.84	94.9908	-722.042	1586.07	225.415	-572.376	1515.62	118.281	-572.136	1505.63	173.385	-592.442	1441.8	188.689	-506.098	1164.32	186.734	-718.114	1353.15	196.258	-780.682	1158.43	100.67	-506.193	1234.76	362.74	-656.717	1381.18	443.377	-631.835	1141.03	450.738	-619.401	1066.72	461.276	-701.402	909.597	412.759	-709.136	830.373	483.544	-691.32	823.362	445.628	-728.295	757.751
791	0	211.128	-736.536	1594.67	93.042	-731.296	1587.42	223.808	-582.202	1516.39	116.653	-581.905	1505.87	171.935	-602.592	1443.19	187.111	-515.631	1165.68	185.964	-728.199	1354.7	196.233	-790.335	1159.52	98.9578	-516.344	1236.31	361.551	-666.322	1382.98	442.53	-639.876	1142.87	449.974	-627.074	1068.65	460.963	-707.678	911.016	412.179	-713.976	831.579	483.435	-696.6	824.98	445.203	-730.987	758.027
792	0	209.367	-745.782	1596.57	91.5135	-740.432	1588.58	222.297	-591.96	1517.11	115.284	-591.753	1506.32	170.509	-612.554	1444.65	185.914	-525.632	1167.61	185.232	-738.174	1356.32	196.314	-799.895	1160.6	97.4548	-526.412	1237.73	360.47	-675.833	1384.82	441.763	-647.606	1144.77	449.274	-634.718	1070.65	460.311	-713.612	912.382	412.01	-718.921	832.787	483.174	-702.091	826.625	444.5	-733.72	758.464
793	0	207.603	-754.778	1598.29	89.7972	-749.557	1590.07	220.749	-601.501	1518.08	113.943	-601.411	1506.84	169.197	-622.524	1446.15	184.418	-535.465	1169.16	184.551	-747.903	1357.95	196.429	-809.269	1161.83	95.8603	-536.282	1239.46	359.467	-685.196	1386.97	441.21	-654.78	1146.98	448.659	-641.906	1072.92	459.585	-719.449	914.036	411.555	-723.312	834.176	482.982	-707.436	828.623	444.059	-737.078	759.39
794	0	206.136	-763.664	1600.03	88.1613	-758.59	1591.53	219.29	-610.794	1518.98	112.55	-610.872	1507.39	167.94	-632.19	1447.48	182.956	-545.113	1170.62	183.899	-757.544	1359.58	196.54	-818.526	1163.25	94.412	-545.988	1240.86	358.577	-694.355	1389.03	440.723	-661.656	1149.23	448.192	-648.77	1075.23	459.043	-725.534	915.831	410.933	-728.39	835.94	482.603	-712.757	830.593	443.576	-740.736	760.702
795	0	204.832	-772.634	1601.66	86.7486	-767.661	1592.81	217.998	-619.929	1519.77	111.303	-620.309	1508.1	166.641	-641.79	1448.82	182.129	-554.706	1172.33	183.3	-767.136	1361.09	196.63	-827.738	1164.64	92.914	-555.666	1242.35	357.635	-703.504	1391.02	440.289	-668.384	1151.48	447.642	-655.498	1077.48	458.65	-731.489	917.699	410.509	-733.515	837.565	482.258	-718.139	832.501	443.074	-744.777	762.062
796	0	203.6	-781.48	1603.18	85.6424	-776.721	1594.1	216.692	-629.028	1520.75	109.989	-629.651	1508.92	165.727	-651.303	1450.45	181.117	-563.871	1173.85	182.694	-776.571	1362.63	196.728	-837.013	1166.28	91.5822	-565.203	1243.87	356.245	-712.454	1392.83	439.924	-674.825	1153.86	447.141	-662.119	1079.72	458.317	-737.364	919.627	410.429	-739.23	839.657	481.955	-723.628	834.542	442.666	-749.327	763.844
797	0	202.54	-790.12	1604.62	84.4851	-785.578	1595.41	215.578	-637.943	1521.89	108.618	-638.773	1509.61	164.743	-660.542	1451.81	179.876	-572.729	1175.73	182.131	-785.832	1364.3	196.843	-846.225	1168.06	90.3547	-574.641	1245.34	355.715	-721.391	1395.14	439.854	-681.041	1156.43	446.797	-668.49	1082.21	458.358	-743.094	921.598	410.101	-745.051	841.725	481.734	-728.953	836.737	442.409	-754.031	765.689
798	0	201.66	-798.756	1606.01	83.5774	-794.534	1596.58	214.422	-646.88	1522.87	107.432	-648.035	1510.42	163.746	-669.641	1453.02	179.377	-582.267	1176.93	181.583	-795.085	1365.91	196.754	-855.349	1169.81	89.3389	-584.074	1246.62	354.64	-730.192	1396.93	439.558	-687.325	1158.93	446.669	-674.804	1084.63	458.138	-748.812	923.669	409.918	-750.203	843.682	481.448	-734.253	838.773	441.997	-759.177	767.583
799	0	200.861	-807.519	1607.25	82.7623	-803.467	1597.57	213.298	-655.868	1523.57	106.405	-657.184	1511.17	162.711	-678.703	1453.94	178.313	-591.07	1178.27	181.052	-804.275	1367.26	196.532	-864.438	1171.33	88.3426	-593.39	1247.9	354.09	-739.109	1398.72	439.448	-693.788	1161.09	446.47	-681.301	1086.73	458.263	-754.726	925.549	409.763	-755.096	845.38	481.112	-739.816	840.582	441.84	-764.942	769.458
800	0	200.075	-816.165	1608.31	82.0459	-812.309	1598.44	212.478	-664.548	1524.32	105.447	-666.158	1511.77	161.818	-687.898	1455.04	177.949	-600.784	1179.12	180.337	-813.424	1368.56	196.1	-873.571	1172.81	87.5574	-602.589	1248.79	353.11	-747.799	1400.1	439.284	-700.357	1163.17	446.382	-687.716	1088.89	458.125	-760.659	927.212	409.206	-760.917	847.206	480.816	-745.328	842.244	441.576	-770.765	771.211
801	0	199.289	-824.649	1609.19	81.2906	-821.157	1599.36	211.553	-673.127	1524.84	104.605	-675.222	1512.23	161.097	-696.829	1455.79	177.265	-610.016	1179.83	179.743	-822.426	1369.79	195.572	-882.506	1174.13	86.7027	-611.538	1249.71	352.765	-756.623	1401.75	439.252	-706.995	1165.07	446.489	-694.1	1090.9	458.22	-766.564	928.823	409.51	-767.222	848.997	480.63	-750.966	843.877	441.346	-776.96	773.021
802	0	198.695	-833.173	1609.88	80.7282	-829.862	1600.1	210.713	-682.056	1525.18	103.868	-684.182	1512.61	160.479	-705.725	1456.35	175.949	-619.578	1180.46	179.132	-831.375	1370.8	194.988	-891.541	1175.17	86.0704	-620.889	1250.31	352.147	-765.446	1402.77	439.182	-713.931	1166.74	446.564	-700.658	1092.58	458.151	-772.791	930.208	409.388	-773.628	850.514	480.457	-756.778	845.076	441.045	-783.257	774.443
803	0	198.382	-841.842	1610.6	80.1585	-838.55	1600.74	210.105	-690.784	1525.37	103.281	-693.066	1512.82	159.711	-714.737	1456.91	175.021	-629.476	1180.96	178.598	-840.27	1371.73	194.35	-900.419	1175.98	85.5966	-629.902	1250.85	351.492	-774.357	1403.48	439.166	-721.131	1168.09	446.574	-707.51	1093.79	458.382	-779.218	931.439	409.167	-780.127	851.806	480.114	-762.701	846.048	441.013	-790.045	775.777
804	0	198.003	-850.432	1611.11	79.8398	-847.086	1601.19	209.524	-699.475	1525.52	102.93	-701.941	1513.09	159.233	-723.719	1457.29	174.354	-639.016	1181.19	177.985	-849.114	1372.53	193.641	-909.134	1176.65	85.1923	-638.962	1251.23	350.865	-783.28	1404.17	439.155	-728.427	1169.3	446.696	-714.271	1094.99	458.308	-785.703	932.362	409.445	-786.833	853.089	480.02	-768.835	847.053	441.011	-796.963	777.131
805	0	197.574	-858.897	1611.3	79.3217	-855.826	1601.59	208.877	-708.086	1525.54	102.114	-710.745	1513.25	158.819	-732.679	1457.56	174.266	-647.742	1181.42	177.391	-857.952	1373.24	192.869	-917.813	1176.94	84.703	-647.678	1251.5	350.481	-792.245	1404.79	439.031	-735.861	1170.27	446.906	-721.196	1096.19	458.386	-792.029	933.08	409.098	-793.298	854.007	479.788	-774.812	847.742	440.962	-804.056	778.246
806	0	197.017	-867.276	1610.97	79.1404	-864.606	1601.58	208.486	-716.668	1525.39	101.771	-719.486	1513.15	158.332	-741.676	1457.7	174.217	-656.201	1182.08	176.82	-866.869	1373.61	192.1	-926.711	1176.94	84.4536	-656.544	1251.57	349.966	-801.425	1404.96	439.076	-743.634	1170.95	447.001	-728.232	1097.06	458.444	-798.364	933.795	409.334	-800.456	854.469	479.572	-780.904	848.188	441.059	-811.673	779.085
807	0	196.83	-875.978	1610.79	78.9482	-873.457	1601.51	207.922	-725.462	1525.22	101.085	-728.279	1513.14	158.042	-750.569	1457.7	173.909	-665.112	1182.17	176.322	-875.739	1373.81	191.467	-935.667	1176.85	84.2615	-665.399	1251.66	349.568	-810.591	1405.01	438.813	-751.468	1171.43	447.009	-735.41	1097.59	458.176	-804.961	934.004	408.961	-807.48	854.954	479.216	-787.205	848.419	441.237	-819.467	779.83
808	0	196.817	-884.606	1610.49	78.8249	-882.213	1601.29	207.592	-733.934	1524.86	100.783	-736.985	1512.7	157.735	-759.764	1457.5	174.163	-674.068	1181.98	175.869	-884.585	1373.86	190.871	-944.642	1176.62	84.1372	-674.3	1251.55	349.383	-819.8	1405.02	438.687	-759.286	1171.81	447.067	-742.697	1098.08	458.476	-811.704	934.288	409.223	-814.673	855.163	479.065	-793.631	848.555	441.295	-826.919	780.256
809	0	196.773	-893.285	1609.95	78.6873	-891.074	1600.93	207.061	-742.766	1524.32	100.46	-745.832	1512.21	157.536	-768.701	1457.02	174.21	-683.152	1181.63	175.455	-893.489	1373.69	190.363	-953.561	1176.23	84.2285	-683	1251.21	348.607	-828.97	1404.53	438.67	-767.323	1171.92	447.142	-750.162	1098.27	458.293	-818.531	934.159	409.033	-822.117	855.432	478.322	-799.755	848.328	441.762	-835.005	780.791
810	0	196.731	-902.097	1609.21	78.741	-900.165	1600.2	207.066	-751.405	1523.79	100.012	-754.84	1511.99	157.357	-777.663	1456.57	174.226	-692.1	1181.06	175.163	-902.392	1373.12	189.904	-962.58	1175.65	84.378	-691.944	1250.72	348.588	-838.377	1404.13	438.529	-775.631	1171.84	447.109	-757.943	1098.15	458.483	-825.723	933.96	409.042	-829.709	855.172	478.207	-806.664	848.049	442.139	-843.286	780.98
811	0	196.773	-911.111	1608.31	78.7534	-909.139	1599.32	206.616	-760.227	1523.17	99.866	-763.648	1511.29	157.295	-786.949	1455.94	174.455	-700.948	1180.77	174.859	-911.388	1372.48	189.425	-971.489	1174.84	84.5079	-700.426	1250.26	348.245	-847.822	1403.38	438.436	-783.906	1171.52	446.928	-765.94	1097.92	458.448	-833.114	933.462	409.197	-837.603	854.75	477.356	-813.595	847.325	442.195	-851.423	780.918
812	0	196.754	-920.029	1607.31	78.8219	-918.402	1598.29	206.594	-768.867	1522.54	99.625	-772.57	1510.58	157.335	-795.859	1455.1	174.844	-709.876	1180.07	174.574	-920.321	1371.71	189.11	-980.321	1173.99	84.8109	-709.04	1249.56	348.566	-857.206	1402.95	438.363	-792.352	1171.09	446.979	-773.943	1097.7	458.403	-840.634	932.844	408.8	-845.503	854.387	477.225	-820.804	846.709	442.443	-859.689	780.698
813	0	196.844	-929.137	1606.09	79.037	-927.668	1597.17	206.475	-777.825	1521.63	99.4733	-781.502	1509.83	157.467	-805.067	1454.22	175.111	-718.757	1179.16	174.479	-929.383	1370.58	188.893	-989.446	1172.69	85.1855	-717.846	1248.66	348.508	-866.711	1401.92	438.357	-800.95	1170.33	446.995	-782.27	1097.02	458.279	-848.474	931.88	409.17	-853.931	853.69	476.897	-828.152	845.726	442.413	-868.12	780.099
814	0	197.217	-938.571	1605	79.2612	-936.93	1595.87	206.448	-786.784	1520.53	99.6651	-790.473	1508.98	157.486	-814.284	1453.19	175.626	-727.687	1178	174.429	-938.456	1369.39	188.805	-998.701	1171.69	85.6138	-726.513	1247.65	348.492	-876.329	1400.67	438.455	-809.886	1169.37	446.922	-790.835	1095.97	458.016	-856.559	930.702	408.938	-862.062	852.734	476.202	-835.971	844.396	442.501	-876.727	779.267
815	0	197.399	-947.822	1603.62	79.4333	-946.129	1594.54	206.657	-796.08	1519.54	99.7891	-799.603	1508.1	157.936	-823.253	1452	176.111	-736.862	1176.78	174.411	-947.507	1368.08	188.689	-1007.72	1170.31	86.4275	-735.422	1246.38	348.314	-885.847	1399.21	438.48	-818.824	1168.21	446.957	-799.553	1094.84	458.08	-864.914	929.408	409.27	-870.829	851.544	475.894	-844.228	843.136	442.53	-885.35	778.223
816	0	197.788	-957.213	1602.16	79.7609	-955.345	1593.25	207.163	-805.162	1518.52	100.158	-808.555	1506.99	158.278	-832.546	1450.64	176.744	-745.987	1175.48	174.472	-956.623	1366.63	188.626	-1016.85	1168.87	86.9427	-743.949	1245.07	348.986	-895.57	1398.05	438.637	-827.942	1166.84	447.155	-808.249	1093.6	458.055	-873.467	928.052	408.702	-879.098	850.058	476.044	-852.633	841.733	442.376	-894.075	776.9
817	0	198.072	-966.803	1600.39	80.1526	-964.743	1591.65	207.684	-814.458	1517.16	100.739	-817.834	1505.7	158.749	-841.793	1449.02	177.369	-754.723	1173.75	174.559	-965.87	1364.92	188.508	-1026.39	1167.15	87.7059	-752.754	1243.49	349.297	-905.269	1396.23	438.837	-837.322	1165.16	447.324	-817.329	1091.94	457.891	-882.474	926.2	406.988	-886.137	847.477	475.422	-861.563	839.904	442.136	-903.039	775.124
818	0	198.632	-976.487	1598.6	80.6823	-974.061	1589.91	208.31	-823.985	1515.7	101.375	-826.829	1504.57	159.303	-851.063	1447.5	178.156	-764.476	1172.09	174.724	-975.201	1363.03	188.402	-1035.87	1165.28	88.5703	-761.646	1241.8	349.761	-915.143	1394.18	439.098	-846.845	1163.12	447.472	-826.641	1089.92	458.074	-891.845	924.203	408.543	-897.259	845.96	475.57	-870.667	837.86	441.954	-912.257	773.123
819	0	199.384	-986.148	1596.74	81.3431	-983.476	1588.34	209.332	-833.277	1514.33	102.302	-836.025	1503.3	160.056	-860.497	1445.82	179.213	-774.172	1170.36	175.103	-984.633	1361.12	188.466	-1045.34	1163.39	89.5543	-770.547	1240.14	349.952	-924.944	1392.15	439.544	-856.467	1161.12	447.723	-836.151	1087.88	458.307	-901.246	922.108	408.48	-906.5	844.019	475.456	-880.339	835.723	441.815	-921.58	771.096
820	0	200.172	-995.776	1594.71	82.1857	-992.769	1586.59	210.307	-842.741	1512.82	103.229	-845.175	1502.06	160.942	-869.901	1443.91	180.101	-782.783	1168.46	175.552	-994.103	1359.09	188.438	-1055.14	1161.58	90.6795	-779.683	1238.39	350.586	-934.902	1390	440.021	-866.277	1159.01	448.061	-845.91	1085.77	458.543	-911.018	919.926	408.094	-915.725	841.766	475.895	-890.038	833.481	441.607	-930.934	768.831
821	0	201.276	-1005.63	1592.62	83.2415	-1002.38	1584.53	211.335	-852.295	1511.22	104.447	-854.406	1500.74	161.989	-879.55	1442.23	181.367	-792.678	1166.62	176.128	-1003.83	1356.83	188.461	-1065.06	1159.52	91.9992	-789.048	1236.5	351.331	-945.105	1387.78	440.594	-876.379	1156.69	448.52	-856.096	1083.38	458.713	-921.028	917.506	408.291	-925.652	839.311	475.947	-900.396	831.139	441.367	-940.573	766.351
822	0	202.391	-1015.48	1590.52	84.4007	-1012.12	1582.63	212.702	-861.592	1509.78	105.528	-863.615	1499.33	162.985	-889.172	1440.34	182.417	-802.559	1164.78	176.753	-1013.62	1354.6	188.378	-1075.1	1157.6	93.1335	-798.225	1234.87	352.249	-955.407	1385.7	441.149	-886.537	1154.47	449.049	-866.423	1081.03	458.826	-931.241	915.016	408.57	-935.928	837.092	476.431	-910.493	828.828	441.374	-950.506	763.922
823	0	203.717	-1025.25	1588.47	85.6326	-1021.83	1580.73	214.012	-871.092	1508.58	106.974	-873.109	1498.21	164.481	-898.723	1438.59	183.343	-812.074	1162.63	177.513	-1023.43	1352.5	188.43	-1084.06	1155.36	94.4876	-807.596	1233.16	353.633	-965.745	1383.73	441.935	-896.862	1152.3	449.866	-876.866	1078.9	459.128	-941.619	912.677	408.689	-945.945	834.948	476.641	-921.05	826.536	441.344	-960.531	761.513
824	0	205.283	-1035.16	1586.51	87.2083	-1031.75	1578.84	215.377	-880.517	1507.33	108.302	-882.489	1496.95	165.901	-908.592	1436.81	184.793	-822.545	1160.75	178.346	-1033.37	1350.37	188.4	-1094.72	1153.58	95.9403	-817.282	1231.36	354.771	-976.235	1381.53	442.696	-907.432	1149.84	450.572	-887.516	1076.51	459.485	-952.351	910.198	409.398	-956.686	832.604	477.283	-931.413	824.285	441.423	-971.07	759.078
825	0	206.93	-1045.05	1584.6	88.9456	-1041.69	1577.12	216.991	-890.355	1506.09	109.884	-892.21	1495.9	167.297	-918.346	1435.23	185.834	-832.873	1158.71	179.319	-1043.35	1348.38	188.59	-1104.77	1151.73	97.2843	-827.004	1229.65	355.742	-986.684	1379.15	443.549	-918.183	1147.36	451.216	-898.576	1073.87	460.059	-963.293	907.77	409.16	-966.915	829.901	477.5	-942.409	821.687	441.534	-981.733	756.582
826	0	209.023	-1055.2	1582.98	90.8027	-1051.74	1575.57	218.59	-899.922	1504.65	111.644	-901.918	1494.85	169.029	-928.143	1433.62	186.991	-843.243	1156.81	180.425	-1053.37	1346.69	189.091	-1113.89	1149.66	98.7089	-837.066	1227.95	356.85	-997.102	1376.84	444.652	-929.215	1145.08	452.11	-909.721	1071.44	460.441	-974.42	905.383	409.812	-977.903	827.505	478.225	-953.833	819.234	441.859	-992.592	754.133
827	0	211.064	-1065.2	1581.22	92.7426	-1061.8	1574.23	220.337	-909.737	1503.41	113.151	-911.724	1493.63	170.554	-937.959	1431.68	188.197	-853.721	1155.16	181.572	-1063.5	1345.18	189.362	-1124.68	1148.39	100.043	-847.211	1226.41	358.693	-1007.56	1375.08	445.6	-940.312	1142.78	452.964	-920.928	1069.1	461.085	-985.629	902.941	410.361	-988.735	825.176	479.071	-965.119	816.952	442.369	-1003.68	751.754
828	0	213.098	-1075.27	1579.45	94.8642	-1071.95	1572.9	222.29	-919.91	1502.1	115.099	-921.728	1492.7	172.129	-948.086	1430.29	189.147	-864.274	1153.42	182.863	-1073.76	1343.66	189.71	-1135.18	1147.02	101.327	-857.362	1224.98	359.978	-1017.94	1372.92	446.599	-951.831	1140.29	453.748	-932.433	1066.63	461.627	-997.251	900.452	410.959	-1000.02	822.676	479.794	-976.841	814.506	442.917	-1015.22	749.294
829	0	215.38	-1085.48	1577.88	97.2342	-1082.17	1571.75	224.42	-930.028	1500.72	117.241	-931.847	1491.73	173.822	-958.248	1428.96	190.112	-874.89	1151.72	184.266	-1084.09	1342.18	190.409	-1145.2	1145.4	102.584	-867.839	1223.56	361.491	-1028.34	1370.84	447.587	-963.519	1137.82	454.499	-944.089	1064.12	462.504	-1009.12	898.167	411.439	-1011.64	820.18	480.506	-988.921	812.048	443.547	-1026.96	746.895
830	0	217.858	-1095.9	1576.59	99.6256	-1092.33	1570.66	226.71	-940.105	1499.35	119.343	-941.972	1490.56	175.988	-968.521	1427.51	191.324	-885.716	1150.07	185.806	-1094.55	1340.76	191.094	-1156.01	1144.28	103.873	-878.468	1222.2	363.308	-1038.75	1368.97	448.703	-975.343	1135.26	455.323	-955.849	1061.62	463.301	-1020.98	895.769	412.229	-1023.29	817.735	481.559	-1000.93	809.879	444.196	-1038.6	744.321
831	0	220.205	-1106.08	1575.29	102.061	-1102.58	1569.75	229.052	-950.422	1498.04	121.752	-952.172	1489.55	177.91	-978.92	1426.13	192.39	-896.647	1148.6	187.516	-1105.09	1339.57	192.005	-1166.85	1143.2	105.232	-889.161	1220.94	365.159	-1049.02	1367.07	449.615	-987.186	1132.79	456.097	-967.785	1059.1	464.24	-1033.03	893.439	413.447	-1035.47	815.458	482.518	-1013.17	807.454	445.39	-1050.94	742.182
832	0	222.857	-1116.48	1574.39	104.626	-1112.93	1569.08	231.404	-961.018	1496.85	124.254	-962.66	1488.76	180.128	-989.588	1425.29	193.313	-907.871	1147.26	189.49	-1115.73	1338.41	193.229	-1177.86	1142.3	106.592	-900.131	1219.85	367.035	-1059.4	1365.17	450.678	-999.178	1130.34	457.018	-979.899	1056.6	465.109	-1045.28	891.205	414.483	-1047.79	813.21	483.606	-1025.57	805.315	446.598	-1063.41	740.062
833	0	225.414	-1126.9	1573.85	107.188	-1123.37	1568.84	234.008	-971.604	1496.07	126.773	-973.219	1488.24	182.184	-999.837	1424.44	194.33	-918.857	1146.16	191.449	-1126.44	1337.51	194.506	-1189.15	1141.55	107.732	-910.813	1219.17	369.067	-1069.99	1363.59	451.694	-1011.17	1128.01	457.887	-992.202	1054.39	466.03	-1057.68	889.163	415.195	-1060.03	811.002	484.456	-1038.26	803.15	447.852	-1076.03	738.104
834	0	228.044	-1137.42	1573.74	109.725	-1133.82	1568.95	236.608	-982.183	1495.78	129.214	-983.834	1487.95	184.41	-1010.51	1423.96	195.059	-930.2	1145.27	193.371	-1137.2	1337.07	195.87	-1200.67	1141.18	108.995	-922.058	1218.57	371.546	-1080.55	1362.48	452.703	-1023.15	1125.95	458.747	-1004.47	1052.43	466.752	-1070.18	887.204	416.176	-1072.62	809.105	485.642	-1050.65	801.348	449.158	-1088.86	736.359
835	0	230.8	-1147.89	1573.81	112.46	-1144.41	1569.37	239.016	-992.864	1495.62	131.673	-994.466	1488.03	186.486	-1021.25	1423.8	195.725	-941.559	1144.69	195.376	-1148.02	1336.88	197.271	-1212.49	1141.13	110.388	-933.291	1218.68	373.357	-1090.92	1361.26	453.639	-1035.15	1124.07	459.497	-1016.88	1050.53	467.815	-1082.86	885.501	417.514	-1085.46	807.206	486.615	-1063.25	799.706	450.484	-1101.87	734.757
836	0	233.543	-1158.4	1574.15	115.344	-1155.05	1570.09	241.464	-1003.54	1495.71	134.264	-1005.21	1488.72	188.597	-1032.01	1423.97	196.422	-953.237	1144.59	197.453	-1158.85	1336.97	198.748	-1224.17	1141.32	111.255	-944.495	1218.85	375.158	-1101.35	1360.14	454.661	-1047.22	1122.47	460.072	-1029.57	1048.75	468.783	-1095.56	883.995	418.638	-1098.23	805.597	487.811	-1076.1	798.314	451.813	-1115.23	733.508
837	0	236.217	-1168.7	1574.76	118.204	-1165.75	1571.4	243.905	-1014.07	1496.22	136.47	-1015.86	1489.66	190.604	-1042.68	1424.3	197.012	-964.566	1144.81	199.522	-1169.67	1337.49	200.109	-1235.93	1141.89	111.977	-956.082	1219.17	377.128	-1111.87	1359.58	455.581	-1059.21	1121.29	460.691	-1042.34	1047.36	469.701	-1108.45	882.829	419.325	-1110.97	804.266	488.742	-1089.14	797.185	453.107	-1128.54	732.52
838	0	239.163	-1179.23	1575.88	121.067	-1176.35	1572.91	246.128	-1024.67	1497.12	138.694	-1026.5	1490.87	192.333	-1053.41	1425.06	197.224	-975.662	1144.88	201.438	-1180.43	1338.44	201.498	-1247.59	1142.92	112.638	-967.457	1220.08	378.891	-1122.06	1359.32	456.494	-1071.15	1120.49	461.258	-1055.11	1046.34	470.46	-1121.35	882.013	420.25	-1123.8	803.381	489.774	-1102.24	796.397	454.439	-1141.88	731.953
839	0	241.965	-1189.69	1576.83	123.868	-1187.16	1574.63	248.445	-1035.19	1498.27	140.861	-1037.22	1492.77	194.161	-1063.93	1426.07	197.523	-987.09	1145.77	203.258	-1191.06	1339.57	202.744	-1259.23	1144.2	113.155	-978.776	1221.22	380.383	-1132.12	1359.26	457.443	-1083.25	1119.94	461.609	-1068.09	1045.63	471.551	-1134.71	881.543	421.554	-1137.29	802.643	490.873	-1115.5	796.059	455.629	-1155.54	731.484
840	0	244.79	-1200.22	1577.77	126.699	-1197.93	1576.37	250.556	-1045.49	1499.56	142.941	-1047.83	1494.69	195.537	-1074.36	1427.2	197.783	-998.003	1146.55	204.852	-1201.63	1341	203.917	-1270.91	1145.81	113.517	-989.898	1222.45	381.841	-1142.16	1359.57	458.132	-1095.43	1119.64	461.881	-1081.16	1045.15	472.259	-1148.17	881.446	422.153	-1150.81	802.389	491.835	-1128.99	795.841	456.763	-1169.2	731.268
841	0	247.733	-1210.7	1578.85	129.654	-1208.76	1578.31	252.467	-1055.78	1501.21	144.538	-1058.21	1496.95	197	-1084.54	1428.56	198.038	-1009.22	1147.89	206.497	-1212.01	1342.72	204.959	-1282.16	1147.74	113.969	-1001.09	1223.95	382.755	-1151.76	1360.13	458.752	-1107.55	1119.67	462.272	-1094.14	1045.17	472.835	-1161.72	881.734	422.967	-1164.54	802.637	492.66	-1142.75	796.094	457.715	-1183.23	731.697
842	0	250.587	-1221.15	1580.05	132.513	-1219.56	1580.38	254.288	-1065.81	1502.96	146.594	-1068.77	1499.42	198.433	-1094.63	1430.06	198.442	-1020.17	1149.27	207.854	-1222.29	1344.51	205.646	-1292.73	1149.8	114.227	-1011.64	1225.39	384.441	-1161.73	1361.24	459.331	-1119.79	1119.94	462.515	-1107.18	1045.47	473.393	-1175.43	882.449	423.997	-1178.55	803.158	493.526	-1157.06	796.895	458.792	-1197.23	732.308
843	0	253.375	-1231.59	1581.13	135.299	-1230.4	1582.38	256.066	-1075.99	1504.77	148.284	-1079.09	1502.14	199.495	-1104.68	1431.48	198.95	-1031.03	1150.49	209.149	-1232.49	1346.37	206.516	-1303.59	1152.06	114.72	-1022.34	1226.86	385.254	-1171.53	1362.2	459.704	-1132.05	1120.46	462.687	-1120.27	1045.85	473.895	-1189.46	883.486	424.794	-1192.62	803.966	494.146	-1171.7	797.761	459.679	-1211.64	733.227
844	0	255.998	-1241.9	1582.23	137.939	-1241.1	1584.45	257.52	-1086.09	1506.66	149.955	-1089.32	1504.93	200.734	-1114.4	1433.16	199.4	-1041.8	1151.74	210.088	-1242.48	1348.34	207.332	-1315.29	1154.53	115.253	-1032.82	1228.18	386.271	-1181.55	1363.54	459.985	-1144.33	1121.27	462.875	-1133.32	1046.65	474.348	-1203.56	884.992	425.183	-1206.81	805.339	494.95	-1186.3	799.191	460.557	-1226.16	734.556
845	0	258.493	-1252.07	1583.24	140.419	-1251.68	1586.55	258.876	-1095.8	1508.63	150.95	-1099.53	1507.77	201.939	-1124.37	1434.33	200.08	-1052.24	1152.84	210.58	-1252.46	1350.37	207.755	-1325.02	1156.72	115.986	-1043.1	1229.53	387.204	-1191.5	1365.21	460.132	-1156.45	1122.3	463.174	-1146.11	1047.92	474.535	-1217.6	886.686	426.006	-1221.23	807.068	495.821	-1201.02	800.99	461.161	-1240.72	736.243
846	0	260.832	-1262.33	1584.12	142.872	-1262.26	1588.47	260.175	-1105.57	1510.38	152.336	-1109.47	1510.44	202.672	-1133.74	1435.88	200.921	-1062.83	1154.09	211.131	-1262.4	1352.18	207.984	-1335.82	1159	116.777	-1053.06	1230.59	387.643	-1201.63	1366.74	460.287	-1168.54	1123.34	463.501	-1158.84	1049.15	474.997	-1231.96	888.66	426.274	-1235.81	808.788	496.173	-1216.03	802.964	461.658	-1255.47	737.852
847	0	263.018	-1272.45	1584.94	145.122	-1272.85	1590.41	261.074	-1115.33	1512.06	153.254	-1119.63	1513.1	203.645	-1143.38	1437.28	202.096	-1073.25	1155.14	211.469	-1272.26	1353.82	208.172	-1345.63	1160.74	117.843	-1062.85	1231.68	388.308	-1212.1	1368.25	460.488	-1180.56	1124.47	463.797	-1171.67	1050.37	475.164	-1246.49	890.68	426.261	-1250.39	810.586	496.495	-1231.15	804.768	461.965	-1270.67	739.872
848	0	264.971	-1282.33	1585.82	147.12	-1283.37	1592.29	262.045	-1125.05	1513.75	153.945	-1129.57	1515.58	204.127	-1153.06	1438.38	203.446	-1083.49	1156.31	211.72	-1282.01	1355.5	208.081	-1355.58	1162.58	119.049	-1072.52	1232.83	388.768	-1222.64	1369.84	460.854	-1192.52	1125.89	464.282	-1184.43	1051.66	475.044	-1260.65	892.704	426.446	-1264.93	812.693	496.911	-1246.2	806.808	462.304	-1285.85	741.942
849	0	266.831	-1292.28	1586.84	148.978	-1293.67	1594.14	262.69	-1134.65	1515.42	154.756	-1139.67	1518.19	205.002	-1162.59	1440.07	204.866	-1093.45	1157.64	211.702	-1291.63	1357.04	207.745	-1365.42	1164.42	120.525	-1081.88	1233.76	389.205	-1233.23	1371.53	461.505	-1204.19	1127.45	464.961	-1196.95	1053.19	475.008	-1274.65	894.91	426.321	-1279.36	814.993	496.909	-1261.38	809	462.167	-1301.46	744.725
850	0	268.279	-1302.08	1587.7	150.541	-1303.95	1595.77	263.312	-1144.25	1517.18	155.372	-1149.49	1520.38	205.561	-1172.39	1441.05	206.457	-1103.13	1158.8	211.544	-1301.23	1358.45	207.285	-1375.08	1165.76	121.954	-1091.11	1234.93	389.179	-1243.95	1372.9	462.058	-1215.87	1128.97	465.877	-1209.62	1054.7	474.89	-1288.88	897.061	426.143	-1294.01	817.217	496.914	-1276.58	811.106	462.163	-1317.32	747.028
851	0	269.437	-1312.12	1588.64	151.653	-1314.33	1597.2	263.581	-1153.85	1518.84	155.819	-1159.6	1522.69	206.03	-1181.87	1442.8	208.089	-1112.81	1160.14	211.387	-1310.85	1359.66	206.749	-1384.73	1166.86	123.481	-1100.26	1236.09	389.636	-1254.98	1374.52	462.656	-1227.59	1130.51	466.403	-1222.29	1056.08	474.672	-1303.24	899.221	425.783	-1308.69	819.395	496.729	-1291.82	813.043	461.605	-1332.65	749.35
852	0	270.279	-1321.91	1589.62	152.739	-1324.56	1598.64	264.038	-1163.44	1520.72	156.037	-1169.28	1524.8	206.781	-1191.35	1444.15	210.025	-1122.36	1161.52	211.022	-1320.29	1360.83	206.049	-1394.05	1167.83	125.162	-1109.32	1237.26	389.672	-1265.68	1375.95	463.503	-1239.23	1132.01	467.263	-1234.89	1057.59	474.299	-1317.43	901.15	425.357	-1323.26	821.668	496.418	-1307.19	815.072	460.661	-1348.12	751.652
853	0	271.039	-1331.78	1590.82	153.447	-1334.66	1600.08	264.171	-1172.95	1522.59	156.288	-1179.13	1526.74	207.055	-1200.72	1445.24	211.695	-1131.83	1162.91	210.746	-1329.66	1361.99	205.419	-1403.54	1168.85	126.701	-1118.1	1238.38	389.754	-1276.51	1377.31	464.478	-1250.92	1133.54	468.296	-1247.5	1059.05	474.003	-1331.6	903.238	424.753	-1337.61	823.91	496.038	-1322.33	816.934	459.819	-1363.9	754.241
854	0	271.429	-1341.55	1591.94	153.963	-1344.66	1601.38	264.294	-1182.5	1524.25	156.493	-1188.77	1528.79	207.635	-1210.09	1446.62	213.392	-1141.12	1164.31	210.454	-1338.94	1363.03	204.796	-1412.8	1169.73	128.392	-1127.15	1239.4	389.346	-1287.1	1378.3	465.335	-1262.75	1134.97	469.163	-1260.39	1060.2	473.704	-1345.81	905.101	424.272	-1352.92	826.37	495.546	-1337.63	818.664	458.755	-1379.85	756.809
855	0	271.713	-1351.34	1593.33	154.248	-1354.52	1602.85	264.399	-1192.14	1526.07	156.47	-1198.48	1530.73	208.089	-1219.63	1448.09	215.128	-1150.39	1165.52	210.221	-1348.11	1364.16	204.106	-1422.27	1170.71	130.08	-1135.85	1240.59	389.642	-1297.91	1379.51	466.282	-1274.72	1136.37	470.05	-1273.24	1061.3	473.305	-1360.01	907.097	423.491	-1366.52	828.334	495.04	-1352.93	820.428	457.548	-1395.63	759.393
856	0	271.714	-1361.11	1594.69	154.285	-1364.38	1604.16	264.394	-1201.57	1527.86	156.527	-1207.99	1532.34	208.474	-1229.06	1449.27	216.801	-1159.51	1166.92	209.81	-1357.32	1365.14	203.542	-1431.65	1171.97	131.718	-1144.71	1241.46	389.364	-1308.25	1380.63	467.217	-1286.78	1137.93	470.982	-1285.98	1062.76	472.788	-1374.11	909.076	422.617	-1380.76	830.604	494.377	-1368.12	822.322	456.141	-1411.42	762.153
857	0	271.514	-1370.72	1595.71	154.288	-1374.02	1605.2	264.356	-1211.09	1529.56	156.236	-1217.68	1534.03	209.168	-1238.36	1450.5	218.461	-1168.65	1168.31	209.525	-1366.39	1366.13	203.313	-1440.98	1173.15	133.422	-1153.59	1242.5	389.71	-1318.71	1382.02	467.987	-1299.02	1139.33	471.954	-1298.76	1064.23	472.182	-1388.26	911.08	421.786	-1395.04	832.846	493.541	-1383.22	824.23	454.672	-1427.07	764.914
858	0	271.347	-1380.52	1596.71	153.943	-1383.73	1606.16	264.225	-1220.59	1530.91	156.337	-1227.06	1535.24	209.705	-1247.57	1451.69	219.783	-1177.65	1169.33	209.339	-1375.45	1366.95	203.342	-1450.33	1174.33	134.954	-1162.11	1243.52	389.746	-1329.2	1383.13	468.656	-1311.53	1140.63	472.746	-1311.62	1065.39	471.502	-1402.46	913.1	421.045	-1409.45	835.017	492.567	-1398.49	826.03	453.035	-1442.76	767.548
859	0	271.064	-1390.22	1597.8	153.828	-1393.4	1606.95	264.187	-1230.01	1532.44	156.091	-1236.53	1536.54	210.091	-1256.99	1452.69	221.372	-1186.72	1170.5	209.261	-1384.45	1367.69	202.242	-1458.74	1175.23	136.586	-1171.1	1244.22	389.696	-1339.45	1384.19	469.234	-1324.13	1142.04	473.478	-1324.24	1066.71	470.747	-1416.57	915.297	419.758	-1423.97	837.536	491.656	-1413.86	828.139	451.288	-1458.04	770.107
860	0	270.73	-1399.75	1598.95	153.287	-1402.82	1607.8	264.004	-1239.55	1533.87	156.22	-1245.66	1537.69	210.664	-1266.2	1453.66	222.483	-1195.72	1171.4	209.151	-1393.31	1368.44	202.019	-1467.31	1176.11	137.943	-1179.75	1245.24	389.955	-1349.63	1385.43	469.8	-1336.75	1143.49	474.36	-1336.72	1068.17	469.84	-1430.54	917.597	418.617	-1438.32	840.247	490.619	-1429.19	830.497	449.601	-1473.67	773.143
861	0	270.266	-1409.27	1599.74	153.029	-1412.36	1608.28	263.958	-1248.88	1535.07	155.836	-1255.1	1538.9	211.136	-1275.39	1454.55	223.891	-1204.65	1172.48	209.17	-1402.26	1368.92	201.959	-1475.88	1176.73	139.226	-1188.45	1245.98	390.114	-1359.77	1386.45	470.099	-1349.45	1144.63	475.115	-1349.11	1069.25	468.965	-1444.93	919.953	417.359	-1452.9	842.777	489.504	-1444.6	832.663	447.72	-1488.98	775.737
862	0	269.854	-1418.85	1600.26	152.524	-1421.86	1608.54	263.811	-1258.23	1536.16	155.828	-1264.36	1539.58	211.554	-1284.63	1455.35	225.002	-1213.39	1173.23	209.168	-1411.07	1369.23	201.966	-1484.34	1177.15	140.455	-1197.12	1246.68	390.162	-1369.86	1387.21	470.258	-1362.09	1145.52	475.674	-1361.49	1070.18	467.845	-1458.81	922.03	416.092	-1467.35	845.169	488.165	-1460.15	834.729	445.671	-1504.67	778.505
863	0	269.445	-1428.33	1600.8	152.075	-1431.29	1608.7	263.559	-1267.32	1537.22	155.533	-1273.64	1540.15	212.09	-1293.75	1455.93	225.949	-1222.28	1174.01	209.202	-1419.87	1369.48	201.991	-1492.79	1177.48	141.46	-1205.65	1247.31	390.393	-1379.77	1387.99	470.355	-1374.47	1146.47	476.218	-1373.51	1071.16	466.654	-1472.76	924.197	414.501	-1481.87	847.685	486.571	-1475.55	836.911	443.567	-1520.12	781.143
864	0	269.069	-1437.7	1601.16	151.595	-1440.73	1608.66	263.317	-1276.47	1538.19	155.273	-1282.74	1540.73	212.475	-1302.88	1456.31	226.735	-1231.1	1174.45	209.316	-1428.69	1369.53	202.249	-1501.3	1177.82	142.546	-1214.15	1247.83	390.484	-1389.47	1388.64	470.534	-1386.59	1147.25	476.896	-1385.41	1072.07	465.527	-1486.55	926.274	412.596	-1496.19	850.195	484.841	-1490.74	838.998	441.238	-1535.48	783.848
865	0	268.655	-1446.99	1601.32	151.195	-1450.08	1608.45	263.043	-1285.64	1538.84	155.031	-1291.94	1541.07	212.576	-1312.03	1456.63	227.782	-1240.02	1174.94	209.49	-1437.45	1369.45	202.599	-1510.04	1177.5	143.498	-1222.73	1248.06	390.528	-1399.13	1388.91	470.645	-1398.4	1147.74	477.286	-1397.3	1072.48	464.462	-1500.36	928.111	410.994	-1510.52	852.387	483.103	-1506.08	840.955	438.922	-1550.76	786.313
866	0	268.284	-1456.21	1601.48	150.853	-1459.52	1608.2	262.712	-1294.78	1539.46	154.552	-1301.07	1541.6	212.885	-1321.09	1456.78	228.532	-1248.66	1175.18	209.645	-1446.21	1369.31	202.849	-1518.67	1177.19	144.238	-1231.28	1248.27	390.609	-1408.8	1389.17	470.907	-1409.98	1148.29	477.549	-1409.07	1072.74	463.217	-1513.93	929.986	409.038	-1524.81	854.816	481.27	-1521.22	842.756	436.343	-1566.21	789.047
867	0	267.797	-1465.3	1601.52	150.265	-1468.69	1607.8	262.34	-1303.58	1539.99	154.441	-1310.02	1541.62	213.199	-1330.12	1456.8	228.775	-1257.31	1175.43	209.719	-1454.9	1369.03	203.163	-1527.44	1176.79	144.874	-1239.85	1248.33	390.751	-1418.22	1389.31	471.092	-1421.02	1148.56	478.015	-1420.52	1073.03	461.852	-1527.19	931.683	406.991	-1538.94	857.192	479.227	-1535.93	844.579	433.621	-1581.57	791.894
868	0	267.298	-1474.4	1601.4	149.776	-1477.89	1607.24	261.949	-1312.38	1540.41	153.911	-1319.16	1541.64	213.222	-1339.19	1456.76	229.256	-1266.12	1175.41	209.808	-1463.61	1368.56	203.41	-1536.01	1176.52	145.481	-1248.52	1248.34	390.789	-1427.58	1389.34	471.292	-1431.91	1148.72	478.233	-1431.78	1073.2	460.341	-1540.6	933.291	404.895	-1552.96	859.321	477.027	-1550.68	846.263	430.742	-1596.91	794.68
869	0	266.691	-1483.57	1601.07	149.273	-1486.96	1606.51	261.599	-1321.37	1540.66	153.624	-1327.97	1541.43	213.384	-1348.34	1456.51	229.735	-1274.84	1175.16	209.971	-1472.41	1367.95	203.701	-1544.92	1175.55	146.039	-1257.13	1248.14	390.813	-1436.99	1388.97	471.424	-1442.51	1148.48	478.35	-1443.05	1072.83	458.824	-1553.77	934.734	402.693	-1567.13	861.398	474.721	-1565.35	847.578	427.799	-1612.23	797.326
870	0	266.053	-1492.65	1600.69	148.573	-1496.17	1605.66	261.295	-1330.27	1540.69	153.243	-1336.79	1541.04	213.621	-1357.47	1456.08	230.083	-1283.38	1174.86	210.114	-1481.14	1367.12	203.811	-1553.63	1174.33	146.527	-1265.73	1247.94	390.886	-1446.52	1388.57	471.691	-1452.82	1148.14	478.294	-1454.07	1072.43	457.285	-1566.8	935.994	400.445	-1581.34	863.514	472.255	-1579.62	848.822	424.865	-1627.5	800.019
871	0	265.421	-1501.68	1600.29	147.83	-1504.97	1604.6	260.952	-1339.16	1540.78	152.791	-1345.58	1540.65	213.636	-1366.67	1455.75	230.402	-1291.82	1174.89	210.225	-1489.9	1366.35	203.968	-1562.06	1173.31	146.789	-1274.37	1247.64	390.99	-1455.96	1388.16	471.989	-1462.83	1147.78	478.231	-1464.87	1071.79	455.634	-1579.61	937.331	398.004	-1595.21	865.737	469.719	-1593.8	850.215	421.872	-1642.53	802.769
872	0	264.679	-1510.72	1599.65	147.176	-1513.98	1603.48	260.692	-1348.03	1540.57	152.569	-1354.33	1540.02	213.608	-1375.89	1455.18	230.757	-1300.15	1174.39	210.326	-1498.77	1365.34	204.087	-1570.66	1172.19	147.069	-1283.17	1247.07	390.987	-1465.35	1387.51	472.25	-1472.55	1147.16	478.115	-1475.56	1071.04	454.073	-1592.28	938.39	395.554	-1609.4	867.969	466.967	-1607.6	851.279	418.902	-1657.52	805.473
873	0	263.884	-1519.81	1598.82	146.284	-1522.92	1602.09	260.393	-1356.88	1540.13	152.57	-1363.24	1539.4	213.67	-1385.13	1454.51	230.883	-1308.47	1173.96	210.381	-1507.66	1364.24	204.231	-1579.39	1170.8	147.218	-1292	1246.65	390.971	-1474.89	1386.68	472.443	-1482.17	1146.38	477.747	-1486.16	1070.12	452.409	-1605.01	939.499	392.977	-1623.44	870.134	464.025	-1621.34	852.271	415.892	-1672.42	808.119
874	0	263.02	-1528.91	1598.05	145.432	-1531.82	1600.7	259.998	-1365.76	1539.71	152.079	-1371.91	1538.39	213.357	-1394.48	1453.88	230.961	-1316.85	1173.29	210.364	-1516.64	1363.07	204.209	-1587.91	1169.48	147.363	-1300.77	1246.16	390.757	-1484.16	1385.83	472.403	-1491.54	1145.56	477.365	-1496.53	1069.27	450.527	-1617.43	940.567	389.992	-1637.45	872.565	461.053	-1635.19	853.435	412.615	-1687.14	810.861
875	0	262.128	-1537.96	1597.2	144.492	-1540.76	1599.29	259.579	-1374.63	1539.07	151.673	-1380.79	1536.74	213.241	-1403.98	1452.98	230.974	-1325.24	1172.72	210.276	-1525.59	1361.9	204.155	-1596.55	1168.12	147.205	-1309.71	1245.52	390.686	-1493.46	1385.05	472.294	-1500.66	1144.66	476.953	-1506.82	1068.43	448.728	-1629.72	941.483	387.025	-1650.98	874.851	457.751	-1648.6	854.695	409.102	-1701.7	813.677
876	0	261.267	-1547.05	1596.22	143.533	-1549.67	1597.79	259.415	-1383.82	1538.21	151.381	-1389.6	1535.34	212.886	-1413.43	1451.95	230.964	-1333.4	1171.96	210.213	-1534.69	1360.45	204.185	-1605.31	1166.51	146.851	-1318.84	1244.68	390.382	-1502.77	1383.98	472.148	-1509.69	1143.63	476.308	-1517.14	1067.31	446.821	-1642.01	942.451	383.988	-1664.32	877.093	454.213	-1662.31	855.992	405.298	-1716.12	816.491
877	0	260.353	-1556.25	1595.26	142.805	-1558.73	1596.22	258.914	-1393.17	1537.06	151.115	-1398.7	1534.2	212.276	-1423.03	1450.9	230.802	-1341.4	1171.06	210.097	-1543.82	1359.09	204.105	-1613.91	1164.91	146.509	-1327.84	1243.96	390.163	-1512.1	1382.98	471.824	-1518.74	1142.51	475.398	-1527.51	1066	444.361	-1654.32	943.576	380.658	-1677.35	879.201	450.749	-1676.22	857.245	401.054	-1730.39	819.341
878	0	259.37	-1565.45	1594.32	141.682	-1567.7	1594.71	258.45	-1402.45	1536.03	150.495	-1407.85	1532.51	211.94	-1432.38	1449.98	230.565	-1349.47	1170.63	209.837	-1552.94	1357.71	204.025	-1622.6	1163.3	145.893	-1336.84	1243.19	389.803	-1521.25	1381.94	471.268	-1527.44	1141.3	474.42	-1537.59	1064.94	441.735	-1666.42	944.498	377.181	-1690.22	881.433	447.051	-1689.95	858.833	396.604	-1744.44	822.289
879	0	258.358	-1574.6	1593.17	140.755	-1576.98	1593.05	257.965	-1411.66	1534.94	150.076	-1416.93	1530.89	211.334	-1441.96	1448.94	230.004	-1357.44	1169.93	209.485	-1562.04	1356.24	203.87	-1631.37	1161.65	145.28	-1345.95	1242.4	389.336	-1530.36	1380.76	470.627	-1536.24	1140.04	473.385	-1547.69	1063.76	438.902	-1678.56	945.547	373.442	-1703.17	883.504	443.338	-1703.68	860.381	392.094	-1758.46	825.316
880	0	257.305	-1584.13	1591.99	139.755	-1586.17	1591.36	257.228	-1421.14	1533.72	148.919	-1426.42	1529.18	210.622	-1451.24	1447.75	228.79	-1365.69	1169.03	209.058	-1571.28	1354.76	203.582	-1640	1159.78	144.44	-1355.19	1241.37	388.727	-1539.55	1379.4	469.671	-1545.06	1138.43	471.991	-1557.92	1062.23	435.77	-1690.85	946.378	369.71	-1715.68	885.194	439.252	-1717.35	861.593	387.288	-1772.35	827.947
881	0	256.248	-1593.64	1590.59	138.765	-1595.66	1589.65	256.558	-1430.51	1532.42	148.867	-1435.65	1527.56	210.327	-1460.85	1446.72	227.28	-1374.03	1167.84	208.626	-1580.55	1353.19	203.211	-1648.9	1157.74	143.392	-1364.46	1240.24	388.121	-1548.58	1377.93	468.611	-1553.83	1136.59	470.359	-1568.08	1060.37	432.448	-1702.88	947.091	365.827	-1728.1	886.725	435.15	-1730.74	862.709	382.384	-1785.93	830.448
882	0	255.293	-1603.04	1589.17	137.781	-1604.97	1587.87	255.695	-1439.73	1531.26	148.208	-1444.96	1526.18	209.376	-1470.15	1445.34	225.67	-1382.7	1166.76	208.135	-1589.9	1351.79	202.916	-1657.42	1156.36	142.283	-1373.69	1239.27	387.632	-1557.51	1376.63	467.335	-1562.58	1134.84	468.977	-1578.42	1059.01	429.117	-1714.64	947.838	361.75	-1740.31	888.222	430.946	-1743.78	863.777	377.538	-1799.26	832.969
883	0	254.227	-1612.63	1587.74	136.639	-1614.51	1586.14	255.051	-1449.34	1530.17	147.26	-1454.46	1524.7	208.64	-1479.52	1444.15	224.086	-1391.54	1165.75	207.542	-1599.33	1350.34	202.575	-1665.93	1154.66	141.03	-1383.18	1238.15	386.917	-1566.51	1375.22	465.931	-1571.51	1132.98	467.273	-1588.84	1057.42	425.448	-1726.39	948.288	357.679	-1752.39	889.547	426.63	-1756.76	864.732	372.689	-1812.44	835.369
884	0	253.051	-1622.37	1586.24	135.671	-1624.12	1584.27	254.111	-1458.9	1529.06	146.614	-1463.79	1523.25	207.502	-1488.92	1442.76	222.527	-1400.52	1164.76	206.958	-1608.95	1348.81	202.269	-1674.58	1152.93	139.774	-1392.77	1237.01	386.147	-1575.52	1373.67	464.292	-1580.66	1131.05	465.384	-1599.44	1055.66	421.911	-1738.08	948.687	353.538	-1764.37	890.629	422.412	-1769.59	865.422	367.87	-1825.39	837.461
885	0	251.791	-1632.13	1584.85	134.353	-1633.66	1582.69	253.293	-1468.59	1528.02	145.669	-1473.32	1522.15	206.653	-1498.58	1441.72	220.766	-1409.58	1163.65	206.148	-1618.5	1347.38	201.964	-1683.22	1151.28	138.423	-1402.36	1235.78	385.316	-1584.41	1372.29	462.495	-1589.92	1129.17	463.366	-1609.78	1054.03	418.285	-1749.57	948.969	349.493	-1776.18	891.702	418.032	-1782.08	866.193	363.056	-1837.98	839.427
886	0	250.477	-1641.98	1583.49	133.084	-1643.43	1581.19	252.288	-1478.22	1527.11	144.571	-1482.63	1520.7	205.001	-1508.05	1440.4	218.959	-1418.85	1162.55	205.343	-1628.2	1345.99	201.572	-1691.98	1149.69	136.827	-1412.27	1234.62	384.337	-1593.27	1370.96	460.471	-1599.41	1127.45	461.224	-1620.06	1052.6	414.743	-1760.88	949.158	345.42	-1787.72	892.718	413.859	-1794.17	866.6	358.335	-1850.26	841.281
887	0	249.049	-1651.88	1582.14	131.702	-1653.12	1579.59	251.143	-1487.91	1526.09	143.322	-1492.51	1519.55	203.697	-1517.86	1439.29	216.933	-1427.79	1161.48	204.475	-1637.97	1344.66	201.238	-1701.11	1148.07	135.236	-1421.97	1233.56	383.266	-1602.23	1369.52	458.446	-1609.23	1125.81	458.853	-1630.21	1050.94	411.212	-1771.98	949.281	341.554	-1799.22	893.485	409.722	-1806.23	867.092	353.768	-1862.47	842.668
888	0	247.515	-1661.77	1580.99	130.121	-1662.92	1578.36	249.833	-1497.92	1525.02	142.232	-1502.12	1518.63	201.949	-1527.38	1438.03	214.849	-1436.72	1160.61	203.462	-1647.8	1343.47	200.833	-1710.29	1146.57	133.412	-1431.66	1232.65	382.083	-1611.21	1368.26	456.182	-1619.34	1124.27	456.409	-1640.4	1049.35	407.861	-1783.01	949.449	337.945	-1810.7	894.555	405.857	-1818.18	867.689	349.499	-1874.08	844.221
889	0	245.879	-1671.69	1579.99	128.531	-1672.83	1577.31	248.24	-1507.85	1523.94	140.635	-1512.07	1517.52	200.527	-1537.42	1437.2	212.827	-1446.03	1159.71	202.277	-1657.66	1342.37	200.363	-1719.87	1145.38	131.375	-1441.47	1231.77	380.962	-1620.29	1367.14	454.02	-1629.42	1122.98	454.058	-1650.27	1048.03	404.742	-1793.5	949.557	334.323	-1821.76	895.547	402.144	-1829.69	868.349	345.347	-1885.6	845.703
890	0	244.105	-1681.6	1579.14	126.8	-1682.68	1576.19	246.573	-1517.74	1522.93	138.514	-1521.96	1516.05	198.788	-1547.25	1436.32	210.627	-1455.39	1158.93	200.955	-1667.6	1341.42	199.776	-1729.44	1144.3	129.215	-1451.14	1230.85	379.503	-1629.34	1366.1	451.565	-1639.36	1121.76	451.595	-1659.89	1046.89	401.615	-1803.91	949.705	330.833	-1832.58	896.373	398.503	-1840.68	868.766	341.391	-1896.76	846.881
891	0	242.122	-1691.67	1578.37	124.738	-1692.71	1575.31	244.737	-1527.78	1522.04	137.387	-1532.01	1515.21	196.699	-1557.14	1435.24	208.48	-1465.13	1158.06	199.426	-1677.66	1340.52	199.016	-1739.49	1143.29	127.448	-1461.27	1229.8	377.831	-1638.65	1365.03	449.09	-1649.43	1120.55	448.966	-1669.32	1045.52	398.582	-1814.05	949.586	327.529	-1843.24	896.905	394.949	-1851.42	868.911	337.679	-1907.54	847.816
892	0	240.022	-1701.75	1577.65	122.83	-1702.84	1574.55	242.594	-1537.9	1521.09	135.227	-1542.25	1514.3	194.876	-1567.3	1434.64	206.576	-1475.14	1157.27	197.862	-1687.76	1339.7	198.12	-1749.6	1142.44	125.288	-1471.34	1229.16	376.111	-1648.19	1364.09	446.462	-1659.31	1119.36	445.972	-1678.38	1043.96	395.738	-1824.03	949.465	324.348	-1853.52	897.305	391.536	-1861.72	868.919	334.412	-1918.2	848.656
893	0	237.853	-1711.69	1577.17	120.626	-1712.86	1573.74	240.503	-1547.85	1520.5	132.757	-1552.43	1513.56	192.866	-1577.21	1433.94	204.602	-1485.35	1156.5	196.146	-1697.87	1339.19	196.947	-1759.53	1141.93	123.252	-1481.73	1228.24	374.239	-1657.55	1363.36	443.934	-1669.05	1118.69	443.669	-1687.78	1043.4	392.875	-1833.56	949.233	321.285	-1863.47	897.632	388.408	-1871.58	868.941	331.26	-1928.41	849.448
894	0	235.589	-1721.76	1576.63	118.268	-1722.92	1573.09	238.119	-1557.87	1520.01	130.735	-1562.36	1512.72	190.582	-1587.2	1433.27	202.72	-1495.91	1155.74	194.347	-1708.12	1338.71	195.576	-1769.87	1141.46	121.105	-1492.28	1227.39	372.161	-1667.01	1362.76	441.516	-1678.61	1117.99	441.216	-1696.99	1042.62	390.281	-1842.92	948.911	318.426	-1873.05	897.633	385.434	-1881.17	868.709	328.396	-1938.31	849.966
895	0	233.247	-1731.82	1576.13	115.978	-1733.05	1572.36	235.603	-1567.86	1519.73	128.338	-1572.34	1512.3	187.817	-1597.13	1432.46	200.738	-1506.71	1155.05	192.452	-1718.53	1338.36	194.089	-1780.41	1141.24	118.788	-1502.77	1226.64	369.875	-1676.5	1362.27	438.977	-1688.16	1117.54	438.793	-1706.14	1042.02	387.743	-1852.1	948.538	315.848	-1882.32	897.463	382.778	-1890.5	868.333	325.833	-1947.98	850.405
896	0	230.748	-1741.73	1575.68	113.536	-1743.24	1571.68	232.966	-1577.73	1519.44	125.407	-1582.37	1512.15	185.163	-1607.12	1431.92	198.768	-1517.59	1154.25	190.32	-1728.88	1338.06	192.34	-1791	1141.03	116.515	-1513.66	1225.66	367.541	-1685.88	1362	436.67	-1697.77	1117.53	436.476	-1715.16	1041.67	385.232	-1861.04	948.083	313.381	-1891.28	897.131	380.27	-1899.39	867.939	323.291	-1957.11	850.52
897	0	228.217	-1751.56	1575.19	110.924	-1753.29	1571.1	230.031	-1587.45	1519.21	122.519	-1592.55	1511.58	182.127	-1616.96	1431.16	196.426	-1528.53	1153.25	188.073	-1739.23	1337.98	190.535	-1801.94	1141.25	113.744	-1524.77	1224.64	365.175	-1695.14	1361.91	434.195	-1706.96	1117.43	434.246	-1723.92	1041.64	383.137	-1869.82	947.77	311.21	-1899.85	896.631	378.135	-1908.26	867.713	321.016	-1965.71	850.395
898	0	225.664	-1761.29	1574.72	108.311	-1763.42	1570.57	227.019	-1597.07	1518.8	119.481	-1602.6	1511.12	178.974	-1626.91	1430.45	194.086	-1539.58	1152.24	185.713	-1749.67	1337.85	188.797	-1813.24	1141.4	110.795	-1535.89	1223.19	362.552	-1704.31	1361.76	431.929	-1716.29	1117.52	432.4	-1732.6	1041.62	381.185	-1878.19	947.218	309.412	-1908.1	895.921	376.408	-1916.81	867.31	319.013	-1974.04	850.104
899	0	223.104	-1770.99	1574.67	105.791	-1773.59	1570.53	223.728	-1606.79	1518.35	116.519	-1612.8	1510.52	175.643	-1636.9	1429.84	191.348	-1550.87	1151.09	183.244	-1760.24	1338.09	187.088	-1824.64	1141.98	107.639	-1546.79	1222.13	359.657	-1713.38	1361.83	429.642	-1725.48	1117.62	430.494	-1741.32	1041.65	379.466	-1886.49	947.099	308.02	-1916.12	895.185	375.077	-1924.83	866.784	317.459	-1982.08	849.755
900	0	220.35	-1780.43	1574.97	103.162	-1783.55	1570.69	220.434	-1616.54	1518.16	113.229	-1622.99	1510.51	172.23	-1646.91	1429.31	188.511	-1562.13	1150.12	180.542	-1770.8	1338.44	185.412	-1836.14	1142.73	104.249	-1557.96	1220.95	356.872	-1722.4	1362.31	427.678	-1734.68	1118.32	428.961	-1749.51	1042.15	378.033	-1894.28	946.921	307.001	-1923.6	894.429	374.172	-1932.63	866.611	316.285	-1989.48	849.201
901	0	217.596	-1789.82	1575.32	100.249	-1793.43	1571.07	217.018	-1626.11	1518.05	109.447	-1633.07	1510.45	168.646	-1656.92	1428.98	185.658	-1573.48	1149.22	177.781	-1781.41	1339.07	183.845	-1847.53	1143.67	100.846	-1569.45	1219.74	353.948	-1731.41	1362.86	425.686	-1743.6	1119.2	427.565	-1757.4	1042.87	377.079	-1901.69	946.805	306.395	-1930.71	893.626	373.745	-1939.89	866.377	315.612	-1996.48	848.511
902	0	214.676	-1799.23	1575.8	97.321	-1803.48	1571.74	213.315	-1635.75	1517.72	105.821	-1643.32	1510.13	165.155	-1666.99	1428.96	182.28	-1584.7	1148.66	174.92	-1792.14	1339.69	182.322	-1858.97	1144.62	97.5104	-1581.09	1218.76	351.08	-1740.88	1363.68	423.777	-1752.26	1119.86	426.38	-1765.14	1043.76	376.291	-1908.72	946.241	306.113	-1937.61	892.53	373.524	-1946.51	865.577	315.419	-2003	847.409
903	0	211.477	-1808.59	1576.83	94.142	-1813.21	1572.66	209.533	-1645.47	1517.54	102.179	-1653.38	1509.81	161.84	-1677.33	1429.09	179.125	-1596.13	1148.53	172.16	-1802.97	1340.5	180.816	-1870.46	1145.89	94.4968	-1593.07	1218.06	348.441	-1750.53	1364.89	422.082	-1760.67	1120.8	425.277	-1772.55	1044.75	375.865	-1915.36	945.839	306.42	-1943.78	891.35	373.757	-1952.82	864.963	315.778	-2009.19	846.242
904	0	208.186	-1817.81	1578.25	90.9512	-1822.95	1573.79	205.85	-1655.28	1517.75	98.4301	-1663.63	1509.74	158.532	-1687.56	1429.57	176.001	-1607.18	1148.68	169.381	-1813.64	1341.53	179.411	-1881.8	1147.43	91.7397	-1604.87	1217.77	345.672	-1760.13	1366.37	420.526	-1768.49	1122.15	424.369	-1779.56	1046.01	375.944	-1921.7	945.476	306.838	-1949.64	890.191	374.336	-1958.19	864.104	316.666	-2014.8	844.99
905	0	204.786	-1827.07	1579.78	87.533	-1832.52	1574.88	202.269	-1665.03	1517.99	95.0906	-1673.72	1509.7	155.327	-1697.84	1430.23	172.935	-1617.9	1149.15	166.787	-1824.22	1342.81	178.016	-1893.03	1149.02	89.1691	-1616.64	1217.84	342.671	-1769.81	1367.92	419.18	-1776.02	1123.69	423.504	-1786.52	1047.51	376.234	-1927.55	944.781	307.422	-1955.07	888.883	375.331	-1963	862.903	318.113	-2019.99	843.515
906	0	201.262	-1836.42	1581.39	84.0765	-1842.08	1576.02	198.59	-1674.77	1518.4	91.3279	-1683.52	1509.72	152.16	-1708.21	1431.16	170.075	-1628.52	1149.95	164.339	-1834.68	1344.13	176.745	-1904.13	1150.59	86.4991	-1627.74	1218.4	339.961	-1779.83	1369.43	418.079	-1783.44	1125.46	422.657	-1793.51	1048.99	376.958	-1933.18	944.014	308.53	-1959.89	886.914	376.685	-1967.48	861.443	319.883	-2024.66	841.607
907	0	197.493	-1845.61	1583.08	80.3487	-1851.64	1577.15	194.972	-1684.47	1518.9	87.9779	-1693.17	1509.58	149.093	-1718.5	1432.16	167.232	-1639.21	1151.19	161.982	-1845.09	1345.52	175.343	-1915.11	1152.2	83.9602	-1638.37	1219.22	337.198	-1789.77	1371.33	417.132	-1790.57	1127.57	422.083	-1800.67	1051.11	377.856	-1938.6	943.367	310.055	-1964.72	885.253	378.308	-1971.54	860.181	322.019	-2028.84	839.458
908	0	193.853	-1855.01	1585.07	76.632	-1860.99	1578.34	191.703	-1694.12	1519.88	84.7486	-1703.06	1509.66	145.968	-1728.49	1433.28	164.812	-1649.72	1152.58	159.719	-1855.29	1347.04	173.992	-1926.04	1153.95	81.5478	-1648.38	1220.41	334.493	-1799.5	1373.15	416.105	-1797.37	1129.85	421.707	-1807.43	1053.44	378.986	-1943.71	942.611	311.804	-1969.17	883.516	380.347	-1975.12	858.853	324.519	-2032.54	837.021
909	0	190.106	-1864.17	1586.85	72.9093	-1870.45	1579.36	188.392	-1703.77	1520.79	81.6554	-1713.36	1510.19	143.379	-1738.53	1434.5	163.218	-1660.33	1153.72	157.624	-1865.41	1348.55	172.742	-1936.91	1155.62	79.2422	-1658.53	1221.54	332.607	-1808.82	1375.54	415.28	-1804.36	1132.18	421.233	-1814.22	1055.74	380.445	-1948.67	941.764	313.949	-1973.27	881.521	382.586	-1978.02	856.997	327.266	-2035.91	834.085
910	0	186.51	-1873.51	1588.85	69.4777	-1879.81	1580.35	185.26	-1713.44	1521.8	78.1297	-1723.08	1510.41	140.687	-1748.32	1435.63	161.616	-1671	1154.86	155.718	-1875.32	1350.13	171.522	-1947.47	1157.37	77.0567	-1669.01	1222.5	330.144	-1818.08	1377.27	414.667	-1811.52	1134.41	420.592	-1821.17	1057.85	382.179	-1953.59	941.09	316.453	-1977.22	879.484	385.547	-1981.6	855.823	330.727	-2038.63	830.939
911	0	183.107	-1882.74	1590.79	66.0695	-1889	1581.31	182.246	-1723	1522.8	75.211	-1732.9	1510.64	138.129	-1757.87	1436.87	160.608	-1681.73	1155.99	153.946	-1885.01	1351.78	170.347	-1957.64	1159.26	74.8463	-1679.36	1223.61	328.053	-1827.08	1379.4	414.078	-1818.94	1137.01	420.102	-1827.94	1060.23	384.21	-1958.21	940.337	319.324	-1981.13	877.556	388.784	-1984.61	854.664	334.097	-2041.08	827.626
912	0	179.752	-1891.81	1592.79	62.8266	-1898.16	1582.21	179.47	-1732.35	1523.99	72.7797	-1742.1	1510.82	135.802	-1767.37	1438.14	159.586	-1692.5	1157.14	152.283	-1894.56	1353.45	169.213	-1967.46	1161.11	72.4956	-1689.39	1224.67	326.05	-1835.79	1381.37	413.559	-1826.45	1139.52	419.508	-1834.39	1062.6	386.61	-1962.94	939.974	322.516	-1984.9	875.745	392.257	-1987.07	853.386	338.321	-2043.35	824.134
913	0	176.487	-1900.91	1594.55	59.6472	-1907.25	1583.01	176.933	-1741.84	1525.04	70.4013	-1751.7	1511.41	133.533	-1776.63	1439.48	158.877	-1703.07	1158.3	150.771	-1904.06	1354.85	168.105	-1977.21	1162.76	70.2162	-1699.32	1225.66	324.246	-1844.47	1383.21	412.535	-1833.99	1141.65	418.794	-1841.07	1064.81	389.064	-1967.52	939.369	326.274	-1988.75	873.722	396.113	-1989.8	852.322	342.751	-2045.38	820.413
914	0	173.448	-1909.98	1596.24	56.7745	-1916.31	1583.8	174.605	-1751.21	1526.01	68.1342	-1760.99	1511.75	131.376	-1785.93	1440.72	157.9	-1713.2	1159.86	149.416	-1913.35	1356.21	167.121	-1986.38	1164.18	67.9262	-1709.13	1226.67	322.53	-1852.84	1384.92	411.594	-1841.8	1143.72	417.973	-1847.73	1066.9	391.704	-1971.76	938.538	330.032	-1992.37	871.672	400.396	-1992.44	851.31	347.62	-2047.17	816.542
915	0	170.606	-1918.88	1597.93	54.0282	-1925.13	1584.66	172.35	-1760.22	1526.92	66.173	-1770.26	1511.78	129.502	-1795.05	1441.75	156.14	-1722.12	1160.9	148.151	-1922.5	1357.61	166.33	-1995.53	1165.67	65.6305	-1718.53	1227.73	321.093	-1861.05	1386.77	410.634	-1849.7	1145.78	417.171	-1854.04	1069.02	394.649	-1975.82	937.745	334.057	-1995.78	869.636	404.685	-1994.52	850.431	352.962	-2048.57	812.76
916	0	167.993	-1927.74	1599.61	51.3933	-1933.91	1585.49	170.492	-1769.51	1528.08	64.0354	-1779.35	1511.76	127.204	-1803.96	1442.9	153.943	-1730.15	1161.7	146.935	-1931.45	1358.96	165.786	-2004.16	1167.07	63.8485	-1728.12	1228.72	319.635	-1868.98	1388.46	409.717	-1857.7	1147.68	416.17	-1860.37	1070.82	397.596	-1979.78	937	338.349	-1999.13	867.633	409.293	-1996.41	849.52	358.736	-2049.74	809.012
917	0	165.593	-1936.58	1601.2	49.1401	-1942.7	1586.23	168.737	-1778.7	1528.88	62.7398	-1788.46	1512.21	125.418	-1812.94	1443.99	152.254	-1738.33	1163.06	145.969	-1940.41	1360.19	165.422	-2012.8	1168.06	61.7486	-1737.15	1230.07	318.218	-1876.85	1389.83	408.554	-1865.79	1149.3	414.936	-1866.91	1072.31	400.805	-1983.72	936.247	342.925	-2002.41	865.427	414.05	-1998.12	848.626	365.005	-2050.72	805.349
918	0	163.212	-1945.28	1602.81	46.7552	-1951.35	1587.1	167.119	-1787.82	1529.71	61.2469	-1797.49	1512.35	123.75	-1821.92	1445.28	150.77	-1746.77	1164.37	145.045	-1949.12	1361.44	165.285	-2021.03	1169.4	60.1664	-1746.75	1231.08	316.932	-1884.65	1391.27	407.442	-1873.87	1151.06	414.256	-1873.77	1074.22	404.043	-1987.46	935.602	347.574	-2005.41	863.336	418.977	-1999.58	847.874	371.58	-2051.52	801.908
919	0	161.011	-1954.09	1604.43	44.7338	-1959.97	1587.83	165.616	-1796.61	1530.77	60.059	-1806.35	1512.62	122.183	-1830.89	1446.57	148.671	-1755.26	1165.83	144.133	-1957.84	1362.67	165.082	-2029.02	1170.54	57.9452	-1755.26	1232.61	315.784	-1892.15	1392.93	406.065	-1881.51	1152.53	413	-1879.99	1075.94	407.227	-1990.73	934.972	352.387	-2008.27	861.363	423.964	-2000.62	847.462	378.473	-2051.83	798.718
920	0	158.935	-1962.77	1605.86	42.745	-1968.49	1588.68	164.316	-1805.65	1531.69	58.8964	-1815.1	1512.96	120.609	-1839.73	1447.73	146.45	-1763.99	1167.44	143.384	-1966.34	1363.79	164.931	-2036.93	1171.52	55.8531	-1763.98	1234.06	314.797	-1899.82	1394.42	404.774	-1888.98	1153.86	412.044	-1886.81	1077.8	410.502	-1994.54	934.357	357.315	-2011.2	859.464	428.988	-2001.46	847.111	385.573	-2052.11	795.908
921	0	157.066	-1971.55	1607.28	40.976	-1977	1589.43	163.086	-1814.7	1532.62	57.7418	-1823.98	1513.41	119.208	-1848.3	1448.96	144.243	-1772.59	1168.52	142.664	-1974.94	1364.95	164.592	-2044.86	1172.45	53.8885	-1772.57	1235.53	313.674	-1907.6	1395.64	403.523	-1896.42	1155.08	411.025	-1893.47	1079.26	413.744	-1997.52	933.815	362.687	-2014.37	857.777	434.159	-2002.42	846.886	392.82	-2052.15	793.435
922	0	155.383	-1980.23	1608.64	39.4274	-1985.5	1590.3	162.149	-1823.5	1533.57	56.7488	-1832.65	1514.09	118.077	-1857.12	1450.16	142.174	-1781.18	1169.86	142.003	-1983.37	1366.24	164.045	-2052.77	1173.48	52.0355	-1781.21	1236.93	312.698	-1915.21	1396.89	402.346	-1903.55	1156.42	410.132	-1899.99	1080.84	417.046	-2000.36	933.64	367.361	-2015.44	855.876	439.109	-2002.9	847.066	400.025	-2052.01	791.39
923	0	153.883	-1988.82	1609.91	37.8119	-1993.81	1591.26	161.228	-1832.38	1534.71	55.8062	-1841.28	1514.71	116.826	-1865.61	1451.29	140.435	-1789.61	1170.98	141.435	-1991.5	1367.43	163.514	-2060.63	1174.67	50.2075	-1789.82	1238.2	311.821	-1922.83	1398.3	401.187	-1910.25	1157.67	409.383	-1906.32	1082.63	420.346	-2003.18	933.698	372.453	-2017.37	854.716	443.791	-2003.01	847.488	407.265	-2051.69	789.945
924	0	152.444	-1997.54	1610.9	36.4423	-2002.26	1591.99	160.434	-1841.25	1535.52	54.9454	-1849.92	1515.05	115.698	-1873.79	1452.18	138.728	-1798.13	1171.83	140.841	-1999.75	1368.4	163.019	-2068.64	1175.69	48.5398	-1798.48	1239.25	310.959	-1930.54	1399.31	400.055	-1916.69	1158.54	408.556	-1912.47	1084.09	423.779	-2006.14	933.947	377.338	-2019.07	853.422	448.879	-2003.69	848.186	414.322	-2051.42	788.572
925	0	151.253	-2006.27	1611.81	35.2727	-2010.65	1592.74	159.653	-1849.9	1536.06	54.0829	-1858.42	1515.94	114.941	-1882.54	1453.15	137.603	-1806.52	1172.77	140.185	-2008.19	1369.46	162.587	-2076.87	1176.81	46.8709	-1807.12	1240.26	310.031	-1938.36	1400.22	399.175	-1923.01	1159.64	407.922	-1918.74	1085.52	426.91	-2008.97	934.206	382.452	-2020.96	852.457	453.451	-2004.1	848.867	421.135	-2051.15	787.535
926	0	150.178	-2014.85	1612.56	34.2413	-2018.94	1593.57	159.055	-1858.71	1536.62	53.7065	-1866.97	1516.18	113.852	-1891	1453.92	136.224	-1814.77	1173.34	139.385	-2016.55	1370.43	161.99	-2085.17	1177.93	45.4731	-1815.69	1241.08	309.251	-1946.11	1401.16	398.216	-1928.56	1160.42	406.977	-1923.99	1086.55	429.956	-2011.64	934.614	387.086	-2022.91	851.973	458.356	-2004.8	850.209	427.823	-2050.84	786.94
927	0	149.368	-2023.41	1613.2	33.3248	-2027.34	1594.37	158.543	-1867.44	1536.82	53.1791	-1875.48	1516.51	112.986	-1899.33	1454.35	134.745	-1823.14	1173.91	138.675	-2024.98	1371.33	161.364	-2093.51	1179.02	44.1081	-1824.33	1241.71	308.503	-1953.99	1401.94	397.775	-1934.3	1161.45	406.577	-1929.83	1087.95	432.998	-2014.21	934.919	391.784	-2024.74	851.5	462.571	-2005.39	851.37	434.167	-2050.49	786.403
928	0	148.664	-2031.95	1613.57	32.6641	-2035.67	1594.99	158.022	-1876.3	1536.72	52.6425	-1884.01	1517	112.28	-1907.68	1454.74	133.706	-1831.33	1174.08	138.007	-2033.4	1372.1	160.728	-2102.12	1179.97	42.8264	-1832.84	1242.17	307.651	-1962.03	1402.3	396.646	-1939.37	1161.96	405.972	-1935.17	1088.65	436.075	-2017.26	935.573	396.276	-2026.78	851.086	466.704	-2006.44	852.354	440.382	-2050.64	786.205
929	0	148.218	-2040.49	1614.01	32.0935	-2044.08	1595.68	157.659	-1885.02	1536.63	52.1446	-1892.57	1517.31	111.471	-1916.19	1455.13	133.02	-1839.6	1174.49	137.273	-2041.91	1372.8	159.983	-2110.55	1180.81	41.899	-1841.31	1242.79	306.831	-1970.26	1402.66	396.175	-1944.67	1162.65	405.632	-1940.66	1089.55	438.934	-2020.11	936.221	400.501	-2028.87	850.987	470.985	-2007.59	853.684	446.096	-2050.81	786.061
930	0	147.771	-2048.87	1614.24	31.6119	-2052.33	1596.24	157.203	-1893.63	1536.56	51.5205	-1901.29	1517.37	110.508	-1924.53	1455.53	132.282	-1847.93	1174.77	136.503	-2050.39	1373.35	159.005	-2118.78	1181.35	40.9361	-1849.82	1243.22	306.287	-1978.48	1403.29	395.686	-1949.58	1163.36	405.653	-1945.91	1090.83	441.683	-2023.02	936.913	404.325	-2030.97	850.931	474.62	-2008.73	855.069	451.47	-2050.67	786.046
931	0	147.468	-2057.32	1614.3	31.2607	-2060.8	1596.58	156.801	-1902.2	1536.34	50.991	-1909.82	1517.17	109.972	-1933.09	1455.81	131.594	-1856.52	1175.26	135.693	-2058.88	1373.64	158.019	-2127.06	1181.58	39.9673	-1858.25	1243.63	305.661	-1986.88	1403.69	395.764	-1955.2	1164.55	405.604	-1951.19	1091.79	444.211	-2025.99	937.392	407.985	-2033.26	850.961	477.739	-2009.87	856.234	456.422	-2051.07	786.22
932	0	147.275	-2065.77	1614.26	31.0639	-2069.17	1596.84	156.375	-1910.91	1535.97	50.7125	-1918.45	1517.18	109.531	-1941.69	1456.02	130.13	-1865.22	1175.22	134.937	-2067.47	1373.76	156.967	-2135.42	1181.48	39.3992	-1866.48	1243.92	305.204	-1995.78	1403.83	395.424	-1960.88	1165.04	405.915	-1956.52	1092.58	446.691	-2029.1	937.854	411.283	-2035.66	850.841	480.563	-2011.45	857.187	460.951	-2051.8	786.322
933	0	147.117	-2073.98	1613.93	30.906	-2077.74	1597.07	155.857	-1919.49	1535.51	50.072	-1927.01	1517.23	109.035	-1950.29	1456.09	129.702	-1873.94	1176.13	134.318	-2075.94	1373.9	155.88	-2143.63	1181.23	38.958	-1874.62	1244.27	304.425	-2004.24	1403.63	395.412	-1966.88	1165.84	405.934	-1961.84	1093.39	448.983	-2032.17	938.324	414.448	-2038.24	850.996	483.47	-2013.16	858.26	464.956	-2052.56	786.584
934	0	147.123	-2082.37	1613.83	30.7191	-2086.19	1597.17	155.4	-1927.87	1535.08	49.6183	-1935.68	1516.97	108.608	-1958.84	1456.19	128.644	-1883.15	1176.14	133.665	-2084.47	1373.87	154.736	-2151.65	1180.88	38.6542	-1882.82	1244.59	304.009	-2013.08	1403.81	395.574	-1973.13	1166.65	406.496	-1967.3	1094.48	451.161	-2035.27	938.863	417.152	-2040.72	851.176	486.013	-2014.97	859.302	468.596	-2053.67	786.971
935	0	147.183	-2090.96	1613.51	30.6484	-2094.86	1597	154.855	-1936.18	1534.44	49.0664	-1944.23	1516.76	108.135	-1967.26	1456.09	127.373	-1892.09	1176.41	133.069	-2093.03	1373.7	153.706	-2159.93	1180.38	38.359	-1890.81	1244.76	303.739	-2022.22	1403.85	395.322	-1978.93	1167.16	406.824	-1972.87	1095.17	453.133	-2038.55	939.292	419.757	-2043.49	851.39	487.828	-2016.75	859.98	471.717	-2055.06	787.322
936	0	147.048	-2099.46	1613.02	30.4581	-2103.49	1596.71	154.495	-1944.73	1534.08	48.7603	-1952.9	1516.38	108.037	-1976.12	1455.96	127.756	-1900.33	1176.19	132.515	-2101.62	1373.46	152.726	-2168.31	1179.81	38.0565	-1898.87	1244.82	303.183	-2031.17	1403.44	396.048	-1986.77	1167.88	407.364	-1978.88	1095.85	455.007	-2042.25	939.553	421.962	-2046.86	851.592	489.749	-2019.24	860.652	474.296	-2056.87	787.44
937	0	146.869	-2108	1612.51	30.3641	-2112.23	1596.38	154.19	-1953.04	1533.61	48.2675	-1961.47	1516.05	107.819	-1984.72	1455.65	127.962	-1907.79	1175.97	131.949	-2110.16	1373.04	151.742	-2176.55	1179.27	38.0355	-1907.03	1244.75	302.954	-2040.1	1403.3	396.079	-1993.38	1168.19	407.606	-1984.37	1096.35	456.46	-2045.89	939.711	423.783	-2049.92	851.625	490.34	-2020.92	860.635	476.477	-2058.92	787.625
938	0	146.794	-2116.61	1611.85	30.2114	-2120.89	1595.72	153.846	-1961.55	1533.29	48.0799	-1970.06	1515.7	107.981	-1993.61	1455.37	128.088	-1915.9	1176.07	131.534	-2118.71	1372.64	150.915	-2184.77	1178.66	38.0247	-1915.01	1244.66	302.554	-2048.81	1402.85	396.803	-2000.67	1168.76	408.5	-1990.34	1097.19	457.697	-2049.74	939.837	425.202	-2053.31	851.568	491.613	-2023.38	861.031	478.213	-2061.25	787.596
939	0	146.793	-2125.37	1611.11	30.1566	-2129.66	1595.09	153.52	-1970.13	1532.64	47.7211	-1978.61	1515.33	107.895	-2002.02	1454.93	128.145	-1924.46	1175.4	131.189	-2127.27	1372.1	150.184	-2193.23	1177.73	38.2011	-1923.04	1244.39	302.536	-2058.16	1402.56	397.138	-2007.91	1168.98	408.622	-1996.19	1097.3	458.715	-2053.94	939.748	426.809	-2057.28	851.583	492.609	-2026.49	861.074	479.493	-2064.02	787.414
940	0	146.725	-2134.23	1610.38	30.0531	-2138.41	1594.34	153.394	-1978.83	1532.2	47.5466	-1987.25	1514.89	108.123	-2010.72	1454.64	128.199	-1932.98	1175.25	130.885	-2135.78	1371.6	149.558	-2201.66	1177.44	38.3792	-1931.24	1244.1	302.484	-2067.34	1402.04	397.33	-2015.31	1169.04	409.273	-2002.65	1097.79	459.541	-2058.39	939.685	427.649	-2061.13	851.316	493.6	-2030.38	861.209	480.536	-2067.06	787.188
941	0	146.665	-2143.03	1609.53	29.9003	-2147.11	1593.66	153.37	-1987.49	1531.84	47.599	-1995.86	1514.61	108.207	-2019.06	1454.09	128.521	-1941.1	1174.6	130.619	-2144.34	1370.98	148.899	-2209.98	1176.87	38.6944	-1939.22	1243.8	302.265	-2076.15	1401.51	397.923	-2022.82	1169.61	409.424	-2008.86	1098.05	460.176	-2062.99	939.569	428.336	-2065.52	851.193	493.763	-2033.69	861.058	481.109	-2070.36	786.863
942	0	146.662	-2152	1608.52	29.9094	-2155.92	1592.71	153.401	-1996.24	1531.28	47.6207	-2004.49	1513.91	108.631	-2027.91	1453.39	129.022	-1949.49	1174.3	130.378	-2152.96	1370.32	148.39	-2218.45	1176.26	39.0554	-1947.34	1243.19	302.591	-2085.52	1401.22	398.195	-2030.2	1169.63	410.204	-2015.23	1098.23	460.578	-2067.88	939.166	428.887	-2070.11	850.757	493.846	-2037.65	860.882	481.39	-2074.12	786.39
943	0	146.756	-2161.07	1607.37	30.094	-2164.87	1591.74	153.345	-2005.1	1530.37	47.8173	-2013.07	1513.31	108.826	-2036.24	1452.66	129.362	-1957.91	1173.83	130.232	-2161.66	1369.45	147.868	-2227	1175.4	39.4589	-1955.61	1242.65	302.398	-2094.54	1400.15	398.221	-2037.71	1169.07	410.361	-2021.93	1098.17	460.836	-2073.06	938.558	429.04	-2075.3	850.35	493.844	-2042.39	860.38	481.321	-2078.34	785.639
944	0	146.982	-2170.13	1606.12	30.3013	-2173.61	1590.66	153.827	-2013.96	1529.41	48.0181	-2021.82	1512.7	109.321	-2045.29	1451.88	129.477	-1966.63	1172.79	130.113	-2170.37	1368.63	147.457	-2235.6	1174.56	40.0002	-1963.68	1241.78	302.656	-2104.13	1399.38	398.252	-2045.38	1168.55	410.402	-2028.65	1097.79	460.829	-2078.43	937.849	429.016	-2080.47	849.682	493.55	-2047.14	859.639	480.996	-2082.8	784.816
945	0	147.404	-2179.21	1604.93	30.6462	-2182.59	1589.68	154.296	-2022.98	1528.68	48.3773	-2030.6	1512.04	109.558	-2053.72	1450.83	130.393	-1975.21	1171.85	130.116	-2179.12	1367.75	147.071	-2244.22	1173.77	40.6646	-1971.98	1240.86	303.014	-2113.45	1398.63	398.476	-2053.07	1168.19	410.355	-2035.3	1097.51	460.715	-2083.97	937.082	428.65	-2085.94	849.157	493.092	-2052.09	858.997	480.4	-2087.54	784.045
946	0	147.885	-2188.43	1603.56	31.0155	-2191.54	1588.56	154.921	-2031.91	1527.64	48.9275	-2039.36	1511.16	110.108	-2062.64	1449.92	130.836	-1983.83	1170.74	130.125	-2187.98	1366.74	146.698	-2252.96	1172.69	41.3542	-1980.22	1240.05	303.332	-2123.02	1397.53	398.597	-2061.07	1167.45	410.31	-2042.43	1096.99	460.457	-2089.94	936.203	428.114	-2091.95	848.426	492.161	-2057.62	857.931	479.579	-2092.77	782.955
947	0	148.396	-2197.66	1602.01	31.5417	-2200.57	1587.25	155.391	-2040.93	1526.51	49.4605	-2048.2	1510.4	110.771	-2071.44	1448.84	132.042	-1992.6	1169.67	130.164	-2196.97	1365.53	146.366	-2261.92	1171.4	42.1945	-1988.62	1239.16	303.488	-2132.61	1396.25	398.874	-2069.45	1166.81	410.097	-2049.8	1096.21	459.955	-2096.13	934.753	427.375	-2098.24	847.353	491.299	-2063.76	856.764	478.491	-2098.4	781.598
948	0	149.044	-2206.92	1600.45	32.1436	-2209.69	1586.06	155.928	-2050	1525.71	50.1039	-2057.08	1509.58	111.032	-2080.14	1447.83	132.745	-2001.57	1169.03	130.201	-2205.92	1364.26	145.997	-2270.82	1170.17	42.9665	-1996.99	1238.2	303.899	-2142.28	1395.3	398.868	-2077.27	1165.94	409.986	-2057.21	1095.56	459.237	-2102.94	933.64	426.326	-2104.72	846.12	489.835	-2070.03	855.252	477.111	-2104.39	780.183
949	0	149.817	-2216.25	1598.8	32.9351	-2218.81	1584.64	156.885	-2058.95	1524.77	50.7088	-2065.95	1508.93	111.927	-2089.09	1446.64	133.459	-2010.23	1167.93	130.329	-2215.02	1363.09	145.758	-2279.83	1168.83	44.0011	-2005.42	1237.23	304.557	-2152.12	1394.28	399.187	-2085.67	1165.3	409.686	-2065.09	1094.56	458.451	-2109.95	932.235	425.066	-2111.58	844.803	488.771	-2076.37	854.022	475.528	-2110.77	778.543
950	0	150.712	-2225.73	1597.19	33.7937	-2228.06	1583.17	157.686	-2068.25	1523.56	51.3178	-2074.94	1508.14	112.758	-2098.41	1445.57	134.458	-2019.29	1166.58	130.623	-2224.18	1361.74	145.534	-2288.95	1167.38	45.0327	-2013.99	1236.08	305.125	-2162.12	1392.8	399.104	-2093.88	1163.84	409.51	-2073.1	1093.26	457.582	-2117.4	930.556	423.761	-2118.9	843.308	487.427	-2083.6	852.268	473.748	-2117.58	776.63
951	0	151.688	-2235.31	1595.47	34.6965	-2237.37	1581.84	158.676	-2077.59	1522.4	52.2478	-2083.85	1507.28	113.628	-2107.45	1444.25	135.313	-2028.47	1165.38	130.919	-2233.39	1360.23	145.25	-2298.11	1165.87	46.164	-2022.67	1234.99	305.654	-2172.22	1391.12	399.191	-2102.74	1162.47	409.33	-2081.57	1091.64	456.617	-2125.22	928.629	422.325	-2126.49	841.609	485.864	-2091.24	850.066	471.742	-2124.82	774.525
952	0	152.729	-2244.87	1593.56	35.5794	-2246.66	1580.42	159.789	-2086.93	1521.3	53.2087	-2092.99	1506.38	114.807	-2116.77	1442.86	136.355	-2037.73	1163.95	131.242	-2242.64	1358.76	144.94	-2307.34	1164.25	47.2476	-2031.35	1233.66	306.373	-2182.22	1389.51	399.281	-2111.4	1160.94	408.947	-2089.9	1089.96	455.515	-2133.27	926.526	420.624	-2134.36	839.652	484.537	-2099.22	848.076	469.511	-2132.43	772.288
953	0	153.712	-2254.56	1591.71	36.6912	-2256.13	1578.83	160.958	-2096.34	1520.22	54.5772	-2102.1	1505.33	116.155	-2126.41	1441.24	137.454	-2047.09	1162.65	131.702	-2251.97	1357.15	144.739	-2316.7	1162.61	48.5142	-2040.26	1232.4	307.166	-2192.27	1387.76	399.053	-2120	1159.01	408.824	-2098.92	1088.26	454.363	-2141.84	924.184	418.943	-2142.7	837.649	482.799	-2107.47	845.654	467.195	-2140.54	769.858
954	0	154.869	-2264.44	1589.79	37.7657	-2265.73	1577.38	162.506	-2106.08	1518.87	55.6262	-2111.45	1504.63	117.374	-2135.84	1439.83	138.599	-2056.5	1161.14	132.165	-2261.45	1355.41	144.535	-2326.21	1160.81	49.6837	-2049.1	1230.98	307.945	-2202.6	1385.74	399.045	-2129.28	1156.84	408.456	-2107.81	1085.87	453.097	-2150.81	921.633	417.118	-2151.6	835.428	480.877	-2116.29	842.758	464.647	-2149.15	767.138
955	0	156.224	-2274.49	1588.06	39.0497	-2275.41	1576.07	164.005	-2115.85	1517.6	57.0598	-2120.82	1503.74	118.535	-2145.09	1438.37	139.755	-2065.91	1159.55	132.743	-2271.02	1353.68	144.353	-2335.68	1158.98	51.1306	-2058.15	1229.77	308.896	-2212.93	1383.67	399.399	-2139.1	1154.91	408.555	-2117.53	1083.86	451.863	-2160.21	919.053	415.119	-2160.81	832.978	479.073	-2125.62	839.923	462.028	-2158.15	764.295
956	0	157.594	-2284.5	1586.49	40.3771	-2284.99	1574.78	165.496	-2125.67	1516.53	58.6281	-2130.46	1502.76	119.766	-2154.7	1437.09	140.697	-2075.63	1158.04	133.527	-2280.48	1351.98	144.257	-2345.04	1157.16	52.5618	-2067.35	1228.49	309.968	-2223.24	1381.74	399.374	-2148.5	1152.49	408.276	-2126.83	1081.45	450.622	-2169.79	916.326	413.235	-2170.34	830.724	477.372	-2135.25	837.07	459.339	-2167.54	761.437
957	0	159.258	-2294.66	1584.9	41.8701	-2294.9	1573.64	166.991	-2135.53	1515.21	59.9262	-2140.01	1501.98	121.578	-2165.03	1435.73	141.984	-2085.08	1156.96	134.264	-2290.08	1350.37	144.186	-2354.59	1155.29	53.8926	-2076.61	1227.28	311.027	-2233.64	1379.67	399.704	-2158.66	1150.09	408.216	-2136.86	1078.91	449.345	-2179.91	913.577	411.206	-2180.21	828.138	475.561	-2145.63	834.064	456.588	-2177.45	758.465
958	0	160.862	-2304.9	1583.36	43.5357	-2304.78	1572.41	168.738	-2145.68	1514.16	61.4754	-2149.81	1501.28	123.057	-2174.94	1434.58	143.066	-2094.79	1155.79	135.088	-2299.8	1348.74	144.277	-2364.17	1153.46	55.1125	-2085.81	1226.33	312.123	-2244.05	1377.52	400.124	-2169.16	1147.58	408.366	-2147.37	1076.51	448.033	-2190.47	910.648	409.276	-2190.71	825.647	473.723	-2156.16	830.838	453.766	-2187.96	755.358
959	0	162.523	-2315.17	1581.85	45.2209	-2314.94	1571.32	170.379	-2155.73	1513.17	63.1018	-2159.62	1500.65	124.702	-2184.82	1433.43	144.45	-2104.41	1154.24	135.993	-2309.5	1347.02	144.308	-2373.83	1151.63	56.3175	-2095.3	1225.25	313.407	-2254.42	1375.6	400.721	-2180.02	1145.29	408.322	-2157.94	1073.76	446.705	-2201.37	907.611	407.113	-2201.49	822.822	471.866	-2167.3	827.555	450.913	-2198.88	752.212
960	0	164.51	-2325.55	1580.46	47.0905	-2325.07	1570.24	172.303	-2165.79	1512.46	64.9422	-2169.62	1500.09	126.247	-2194.44	1432.31	145.42	-2114.57	1152.91	137.098	-2319.44	1345.53	144.462	-2383.61	1149.96	57.7005	-2104.88	1224.18	314.797	-2264.76	1373.72	401.312	-2191	1142.82	408.445	-2168.84	1071.29	445.346	-2212.71	904.61	405.026	-2212.79	820.24	470.226	-2178.73	824.547	447.985	-2210.31	749.072
961	0	166.479	-2335.88	1578.94	49.0932	-2335.49	1569.16	174.005	-2176	1511.58	66.8687	-2179.65	1499.76	128.035	-2204.21	1431.01	146.644	-2124.8	1151.7	138.333	-2329.39	1344.16	144.799	-2393.64	1148.41	59.112	-2114.68	1223.1	316.191	-2275.26	1371.7	401.722	-2202.28	1139.99	408.777	-2180.04	1068.32	443.93	-2224.46	901.511	402.727	-2224.35	817.313	468.327	-2190.88	821.129	445.117	-2222.27	745.952
962	0	168.769	-2346.28	1577.46	51.3292	-2345.81	1568.32	176.098	-2186.18	1510.93	68.3967	-2189.79	1499.01	130.107	-2214.08	1429.98	147.375	-2134.67	1150.3	139.739	-2339.25	1342.86	145.274	-2403.88	1147.18	60.6395	-2124.47	1222.13	317.694	-2285.69	1369.53	401.957	-2213.65	1136.83	408.957	-2191.56	1065.37	442.541	-2236.63	898.545	400.721	-2236.5	814.946	466.335	-2203.65	817.726	442.311	-2234.95	743.203
963	0	171.057	-2356.74	1576.52	53.4362	-2356.28	1567.5	177.878	-2196.07	1510.25	70.3138	-2199.96	1498.8	132.362	-2223.87	1428.99	148.428	-2145.32	1149.2	141.043	-2349.62	1342.1	145.802	-2414.3	1146.08	62.0758	-2134.37	1221.1	319.466	-2295.99	1367.89	402.645	-2225.33	1134.28	409.118	-2203.4	1062.91	441.181	-2249.06	895.769	398.58	-2248.9	812.415	464.655	-2216.46	814.594	439.395	-2247.68	740.261
964	0	173.392	-2367.25	1575.7	55.7756	-2366.69	1567.04	180.029	-2206.37	1510.07	72.6444	-2210.4	1498.85	134.529	-2233.65	1428.26	149.897	-2156.3	1148.03	142.932	-2359.32	1340.97	146.507	-2425.02	1145.65	63.7125	-2144.43	1220.26	321.382	-2306.42	1366.42	403.32	-2237.17	1131.83	409.422	-2215.16	1060.12	439.753	-2262	893.06	396.42	-2261.83	810.085	462.915	-2230.06	811.64	436.611	-2261.23	737.534
965	0	175.808	-2377.93	1575.15	58.1871	-2377.33	1566.89	182.182	-2216.89	1509.92	75.1015	-2220.91	1499.39	136.982	-2243.57	1427.67	151.205	-2166.54	1147.02	144.716	-2369.52	1340.35	147.187	-2435.98	1145.24	65.4785	-2154.75	1219.67	323.253	-2316.74	1364.67	404.07	-2249.33	1129.41	409.919	-2227.4	1057.72	438.415	-2275.43	890.407	394.322	-2275.42	807.988	461.13	-2243.92	808.61	433.801	-2275.44	734.94
966	0	178.219	-2388.43	1574.72	60.59	-2388.05	1566.87	184.134	-2227.4	1509.9	76.6625	-2231.47	1499.53	139.524	-2253.42	1427.42	152.511	-2177.43	1146.13	146.511	-2379.59	1339.93	147.827	-2446.97	1145.19	67.1211	-2165.04	1219.37	325.792	-2327.4	1363.69	404.903	-2261.53	1127.2	409.984	-2240.07	1055.28	437.15	-2289.15	888.07	392.206	-2289.06	805.589	459.084	-2258.89	805.849	431.215	-2290.25	732.738
967	0	180.744	-2398.94	1574.63	63.0243	-2398.68	1567.2	186.242	-2237.64	1510.27	78.7641	-2242.06	1500.04	142.098	-2263.3	1427.29	153.338	-2188.38	1145.89	148.53	-2389.73	1339.97	148.442	-2457.91	1145.52	68.8041	-2175.54	1219.15	327.767	-2337.65	1362.61	405.783	-2273.67	1125.26	410.503	-2252.5	1052.98	435.848	-2303.04	885.909	390.273	-2303.36	804.026	457.584	-2273.22	803.389	428.525	-2305.12	730.539
968	0	183.206	-2409.56	1575.05	65.4673	-2409.52	1567.78	188.451	-2248.38	1510.91	80.8056	-2252.62	1500.88	144.805	-2273.33	1427.4	154.838	-2199.6	1145.47	150.562	-2399.95	1340.24	149.031	-2469.09	1146.03	70.434	-2186	1219.29	329.751	-2347.94	1361.43	406.682	-2285.99	1123.31	411.13	-2265.3	1050.86	434.722	-2317.57	884.02	388.388	-2317.91	802.41	456.007	-2288.54	801.032	426.112	-2320.86	728.793
969	0	185.766	-2420.21	1575.76	68.0263	-2420.25	1568.75	190.565	-2258.94	1511.83	83.3924	-2263.31	1502.44	147.587	-2283.41	1427.96	156.27	-2210.31	1145.48	152.606	-2410.12	1340.88	149.635	-2480.27	1146.85	72.1879	-2196.47	1219.79	331.845	-2358.35	1360.56	407.592	-2298.47	1121.55	411.43	-2278.45	1048.82	433.525	-2331.92	881.953	386.618	-2333.01	801.161	454.414	-2304.39	798.89	423.776	-2336.94	727.238
970	0	188.179	-2431.01	1576.86	70.5044	-2431.16	1570.01	192.661	-2269.51	1513.16	85.2196	-2274.11	1503.45	150.013	-2293.55	1428.82	157.114	-2220.91	1145.86	154.628	-2420.22	1341.81	150.208	-2491.45	1147.94	73.7353	-2206.98	1220.75	334.072	-2368.75	1360.1	408.375	-2310.87	1120.15	411.737	-2291.58	1047	432.282	-2346.79	880.504	384.777	-2348.31	800.131	452.749	-2320.29	797.186	421.431	-2353.4	726.093
971	0	190.698	-2441.68	1578.03	73.0115	-2441.83	1571.21	195.124	-2280.06	1514.86	87.5077	-2284.88	1504.96	152.595	-2303.61	1429.92	158.4	-2231.71	1146.94	156.584	-2430.29	1343.1	150.862	-2502.53	1149.28	75.1965	-2217.3	1222.1	336.041	-2378.83	1360.04	409.124	-2323.2	1119.08	411.963	-2304.68	1045.67	431.328	-2362.01	879.65	382.973	-2364.01	799.431	451.183	-2336.63	795.86	419.279	-2370.34	725.488
972	0	193.27	-2452.55	1579.49	75.6109	-2452.75	1572.78	197.392	-2290.71	1516.6	89.8598	-2295.36	1507.01	154.799	-2313.76	1431.18	159.833	-2242.33	1148.23	158.551	-2440.34	1344.48	151.542	-2513.45	1150.79	76.2673	-2227.68	1223.58	337.816	-2389	1359.91	409.734	-2335.84	1118.1	411.883	-2318.35	1044.33	430.198	-2377.42	878.953	381.444	-2380.06	799.179	449.624	-2353.25	794.732	417.237	-2387.77	725.217
973	0	195.823	-2463.31	1580.83	78.257	-2463.59	1574.34	199.765	-2301.28	1518.43	92.3818	-2305.93	1509.41	157.182	-2323.77	1432.7	160.604	-2252.58	1149.53	160.432	-2450.33	1346.31	152.257	-2524.1	1152.59	77.6156	-2237.97	1225.49	339.608	-2399.1	1360.17	410.32	-2348.54	1117.46	412.009	-2332	1043.41	429.153	-2393.09	878.918	380.054	-2396.2	799.26	448.054	-2369.83	793.952	415.319	-2405.48	725.504
974	0	198.63	-2474.12	1582.28	81.0285	-2474.24	1576.07	202.3	-2311.79	1520.63	94.8387	-2316.33	1511.7	159.278	-2333.7	1434.31	161.882	-2262.94	1151.53	162.143	-2460.16	1348.11	152.943	-2534.38	1154.6	78.5998	-2248.04	1227.39	341.35	-2408.98	1360.92	410.762	-2361.2	1117.37	412.339	-2345.7	1043.22	428.191	-2408.96	879.36	378.794	-2412.83	799.905	447.072	-2387.26	794.287	413.508	-2423.56	726.289
975	0	201.256	-2484.8	1583.47	83.7041	-2484.97	1577.76	204.631	-2322.23	1522.96	97.0256	-2326.78	1514.35	161.224	-2343.39	1435.99	162.184	-2272.93	1153.02	163.669	-2469.95	1349.93	153.602	-2544.39	1156.64	79.4661	-2257.9	1229.45	342.935	-2418.77	1361.94	411.329	-2373.96	1117.73	412.764	-2359.34	1043.46	427.195	-2425.01	880.206	377.122	-2429.7	801.001	445.633	-2404.48	794.834	411.775	-2441.94	727.58
[truncated: 69 more columns]

## Sheet: Sheet2
Devices
		025370 - Force			025370 - Moment			025370 - CoP			027571 - Force			027571 - Moment			027571 - CoP			037720 - Force			037720 - Moment			037720 - CoP
Frame	Sub Frame	Fx	Fy	Fz	Mx	My	Mz	Cx	Cy	Cz	Fx	Fy	Fz	Mx	My	Mz	Cx	Cy	Cz	Fx	Fy	Fz	Mx	My	Mz	Cx	Cy	Cz
		N	N	N	N.mm	N.mm	N.mm	mm	mm	mm	N	N	N	N.mm	N.mm	N.mm	mm	mm	mm	N	N	N	N.mm	N.mm	N.mm	mm	mm	mm
470	0	0	0	0	0	0	0	200	300	0	0	0	0	0	0	0	200	903	0	0	0	0	0	0	0	603	903	0
470	1	0	0	0	0	0	0	200	300	0	0	0	0	0	0	0	200	903	0	0	0	0	0	0	0	603	903	0
470	2	0	0	0	0	0	0	200	300	0	0	0	0	0	0	0	200	903	0	0	0	0	0	0	0	603	903	0
470	3	0	0	0	0	0	0	200	300	0	0	0	0	0	0	0	200	903	0	0	0	0	0	0	0	603	903	0
470	4	0	0	0	0	0	0	200	300	0	0	0	0	0	0	0	200	903	0	0	0	0	0	0	0	603	903	0
470	5	0	0	0	0	0	0	200	300	0	0	0	0	0	0	0	200	903	0	0	0	0	0	0	0	603	903	0
470	6	0	0	0	0	0	0	200	300	0	0	0	0	0	0	0	200	903	0	0	0	0	0	0	0	603	903	0
470	7	0	0	0	0	0	0	200	300	0	0	0	0	0	0	0	200	903	0	0	0	0	0	0	0	603	903	0
470	8	0	0	0	0	0	0	200	300	0	0	0	0	0	0	0	200	903	0	0	0	0	0	0	0	603	903	0
470	9	0	0	0	0	0	0	200	300	0	0	0	0	0	0	0	200	903	0	0	0	0	0	0	0	603	903	0
471	0	0	0	0	0	0	0	200	300	0	0	0	0	0	0	0	200	903	0	0	0	0	0	0	0	603	903	0
471	1	0	0	0	0	0	0	200	300	0	0	0	0	0	0	0	200	903	0	0	0	0	0	0	0	603	903	0
471	2	0	0	0	0	0	0	200	300	0	0	0	0	0	0	0	200	903	0	0	0	0	0	0	0	603	903	0
471	3	0	0	0	0	0	0	200	300	0	0	0	0	0	0	0	200	903	0	0	0	0	0	0	0	603	903	0
471	4	0	0	0	0	0	0	200	300	0	0	0	0	0	0	0	200	903	0	0	0	0	0	0	0	603	903	0
471	5	0	0	0	0	0	0	200	300	0	0	0	0	0	0	0	200	903	0	0	0	0	0	0	0	603	903	0
471	6	0	0	0	0	0	0	200	300	0	0	0	0	0	0	0	200	903	0	0	0	0	0	0	0	603	903	0
471	7	0	0	0	0	0	0	200	300	0	0	0	0	0	0	0	200	903	0	0	0	0	0	0	0	603	903	0
471	8	0	0	0	0	0	0	200	300	0	0	0	0	0	0	0	200	903	0	0	0	0	0	0	0	603	903	0
471	9	0	0	0	0	0	0	200	300	0	0	0	0	0	0	0	200	903	0	0	0	0	0	0	0	603	903	0
472	0	0	0	0	0	0	0	200	300	0	0	0	0	0	0	0	200	903	0	0	0	0	0	0	0	603	903	0
472	1	0	0	0	0	0	0	200	300	0	0	0	0	0	0	0	200	903	0	0	0	0	0	0	0	603	903	0
472	2	0	0	0	0	0	0	200	300	0	0	0	0	0	0	0	200	903	0	0	0	0	0	0	0	603	903	0
472	3	0	0	0	0	0	0	200	300	0	0	0	0	0	0	0	200	903	0	0	0	0	0	0	0	603	903	0
472	4	0	0	0	0	0	0	200	300	0	0	0	0	0	0	0	200	903	0	0	0	0	0	0	0	603	903	0
472	5	0	0	0	0	0	0	200	300	0	0	0	0	0	0	0	200	903	0	0	0	0	0	0	0	603	903	0
472	6	0	0	0	0	0	0	200	300	0	0	0	0	0	0	0	200	903	0	0	0	0	0	0	0	603	903	0
472	7	0	0	0	0	0	0	200	300	0	0	0	0	0	0	0	200	903	0	0	0	0	0	0	0	603	903	0
472	8	0	0	0	0	0	0	200	300	0	0	0	0	0	0	0	200	903	0	0	0	0	0	0	0	603	903	0
472	9	0	0	0	0	0	0	200	300	0	0	0	0	0	0	0	200	903	0	0	0	0	0	0	0	603	903	0
473	0	0	0	0	0	0	0	200	300	0	0	0	0	0	0	0	200	903	0	0	0	0	0	0	0	603	903	0
473	1	0	0	0	0	0	0	200	300	0	0	0	0	0	0	0	200	903	0	0	0	0	0	0	0	603	903	0
473	2	0	0	0	0	0	0	200	300	0	0	0	0	0	0	0	200	903	0	0	0	0	0	0	0	603	903	0
473	3	0	0	0	0	0	0	200	300	0	0	0	0	0	0	0	200	903	0	0	0	0	0	0	0	603	903	0
473	4	0	0	0	0	0	0	200	300	0	0	0	0	0	0	0	200	903	0	0	0	0	0	0	0	603	903	0
473	5	0	0	0	0	0	0	200	300	0	0	0	0	0	0	0	200	903	0	0	0	0	0	0	0	603	903	0
473	6	0	0	0	0	0	0	200	300	0	0	0	0	0	0	0	200	903	0	0	0	0	0	0	0	603	903	0
473	7	0	0	0	0	0	0	200	300	0	0	0	0	0	0	0	200	903	0	0	0	0	0	0	0	603	903	0
473	8	0	0	0	0	0	0	200	300	0	0	0	0	0	0	0	200	903	0	0	0	0	0	0	0	603	903	0
473	9	0	0	0	0	0	0	200	300	0	0	0	0	0	0	0	200	903	0	0	0	0	0	0	0	603	903	0
474	0	0	0	0	0	0	0	200	300	0	0	0	0	0	0	0	200	903	0	0	0	0	0	0	0	603	903	0
474	1	0	0	0	0	0	0	200	300	0	0	0	0	0	0	0	200	903	0	0	0	0	0	0	0	603	903	0
474	2	0	0	0	0	0	0	200	300	0	0	0	0	0	0	0	200	903	0	0	0	0	0	0	0	603	903	0
474	3	0	0	0	0	0	0	200	300	0	0	0	0	0	0	0	200	903	0	0	0	0	0	0	0	603	903	0
474	4	0	0	0	0	0	0	200	300	0	0	0	0	0	0	0	200	903	0	0	0	0	0	0	0	603	903	0
474	5	0	0	0	0	0	0	200	300	0	0	0	0	0	0	0	200	903	0	0	0	0	0	0	0	603	903	0
474	6	0	0	0	0	0	0	200	300	0	0	0	0	0	0	0	200	903	0	0	0	0	0	0	0	603	903	0
474	7	0	0	0	0	0	0	200	300	0	0	0	0	0	0	0	200	903	0	0	0	0	0	0	0	603	903	0
474	8	0	0	0	0	0	0	200	300	0	0	0	0	0	0	0	200	903	0	0	0	0	0	0	0	603	903	0
474	9	0	0	0	0	0	0	200	300	0	0	0	0	0	0	0	200	903	0	0	0	0	0	0	0	603	903	0
475	0	0	0	0	0	0	0	200	300	0	0	0	0	0	0	0	200	903	0	0	0	0	0	0	0	603	903	0
475	1	0	0	0	0	0	0	200	300	0	0	0	0	0	0	0	200	903	0	0	0	0	0	0	0	603	903	0
475	2	0	0	0	0	0	0	200	300	0	0	0	0	0	0	0	200	903	0	0	0	0	0	0	0	603	903	0
475	3	0	0	0	0	0	0	200	300	0	0	0	0	0	0	0	200	903	0	0	0	0	0	0	0	603	903	0
475	4	0	0	0	0	0	0	200	300	0	0	0	0	0	0	0	200	903	0	0	0	0	0	0	0	603	903	0
475	5	0	0	0	0	0	0	200	300	0	0	0	0	0	0	0	200	903	0	0	0	0	0	0	0	603	903	0
475	6	0	0	0	0	0	0	200	300	0	0	0	0	0	0	0	200	903	0	0	0	0	0	0	0	603	903	0
475	7	0	0	0	0	0	0	200	300	0	0	0	0	0	0	0	200	903	0	0	0	0	0	0	0	603	903	0
475	8	0	0	0	0	0	0	200	300	0	0	0	0	0	0	0	200	903	0	0	0	0	0	0	0	603	903	0
475	9	0	0	0	0	0	0	200	300	0	0	0	0	0	0	0	200	903	0	0	0	0	0	0	0	603	903	0
476	0	0	0	0	0	0	0	200	300	0	0	0	0	0	0	0	200	903	0	0	0	0	0	0	0	603	903	0
476	1	0	0	0	0	0	0	200	300	0	0	0	0	0	0	0	200	903	0	0	0	0	0	0	0	603	903	0
476	2	0	0	0	0	0	0	200	300	0	0	0	0	0	0	0	200	903	0	0	0	0	0	0	0	603	903	0
476	3	0	0	0	0	0	0	200	300	0	0	0	0	0	0	0	200	903	0	0	0	0	0	0	0	603	903	0
476	4	0	0	0	0	0	0	200	300	0	0	0	0	0	0	0	200	903	0	0	0	0	0	0	0	603	903	0
476	5	0	0	0	0	0	0	200	300	0	0	0	0	0	0	0	200	903	0	0	0	0	0	0	0	603	903	0
476	6	0	0	0	0	0	0	200	300	0	0	0	0	0	0	0	200	903	0	0	0	0	0	0	0	603	903	0
476	7	0	0	0	0	0	0	200	300	0	0	0	0	0	0	0	200	903	0	0	0	0	0	0	0	603	903	0
476	8	0	0	0	0	0	0	200	300	0	0	0	0	0	0	0	200	903	0	0	0	0	0	0	0	603	903	0
476	9	0	0	0	0	0	0	200	300	0	0	0	0	0	0	0	200	903	0	0	0	0	0	0	0	603	903	0
477	0	0	0	0	0	0	0	200	300	0	0	0	0	0	0	0	200	903	0	0	0	0	0	0	0	603	903	0
477	1	0	0	0	0	0	0	200	300	0	0	0	0	0	0	0	200	903	0	0	0	0	0	0	0	603	903	0
477	2	0	0	0	0	0	0	200	300	0	0	0	0	0	0	0	200	903	0	0	0	0	0	0	0	603	903	0
477	3	0	0	0	0	0	0	200	300	0	0	0	0	0	0	0	200	903	0	0	0	0	0	0	0	603	903	0
477	4	0	0	0	0	0	0	200	300	0	0	0	0	0	0	0	200	903	0	0	0	0	0	0	0	603	903	0
477	5	0	0	0	0	0	0	200	300	0	0	0	0	0	0	0	200	903	0	0	0	0	0	0	0	603	903	0
477	6	0	0	0	0	0	0	200	300	0	0	0	0	0	0	0	200	903	0	0	0	0	0	0	0	603	903	0
477	7	0	0	0	0	0	0	200	300	0	0	0	0	0	0	0	200	903	0	0	0	0	0	0	0	603	903	0
477	8	0	0	0	0	0	0	200	300	0	0	0	0	0	0	0	200	903	0	0	0	0	0	0	0	603	903	0
477	9	0	0	0	0	0	0	200	300	0	0	0	0	0	0	0	200	903	0	0	0	0	0	0	0	603	903	0
478	0	0	0	0	0	0	0	200	300	0	0	0	0	0	0	0	200	903	0	0	0	0	0	0	0	603	903	0
478	1	0	0	0	0	0	0	200	300	0	0	0	0	0	0	0	200	903	0	0	0	0	0	0	0	603	903	0
478	2	0	0	0	0	0	0	200	300	0	0	0	0	0	0	0	200	903	0	0	0	0	0	0	0	603	903	0
478	3	0	0	0	0	0	0	200	300	0	0	0	0	0	0	0	200	903	0	0	0	0	0	0	0	603	903	0
478	4	0	0	0	0	0	0	200	300	0	0	0	0	0	0	0	200	903	0	0	0	0	0	0	0	603	903	0
478	5	0	0	0	0	0	0	200	300	0	0	0	0	0	0	0	200	903	0	0	0	0	0	0	0	603	903	0
478	6	0	0	0	0	0	0	200	300	0	0	0	0	0	0	0	200	903	0	0	0	0	0	0	0	603	903	0
478	7	0	0	0	0	0	0	200	300	0	0	0	0	0	0	0	200	903	0	0	0	0	0	0	0	603	903	0
478	8	0	0	0	0	0	0	200	300	0	0	0	0	0	0	0	200	903	0	0	0	0	0	0	0	603	903	0
478	9	0	0	0	0	0	0	200	300	0	0	0	0	0	0	0	200	903	0	0	0	0	0	0	0	603	903	0
479	0	0	0	0	0	0	0	200	300	0	0	0	0	0	0	0	200	903	0	0	0	0	0	0	0	603	903	0
479	1	0	0	0	0	0	0	200	300	0	0	0	0	0	0	0	200	903	0	0	0	0	0	0	0	603	903	0
479	2	0	0	0	0	0	0	200	300	0	0	0	0	0	0	0	200	903	0	0	0	0	0	0	0	603	903	0
479	3	0	0	0	0	0	0	200	300	0	0	0	0	0	0	0	200	903	0	0	0	0	0	0	0	603	903	0
479	4	0	0	0	0	0	0	200	300	0	0	0	0	0	0	0	200	903	0	0	0	0	0	0	0	603	903	0
479	5	0	0	0	0	0	0	200	300	0	0	0	0	0	0	0	200	903	0	0	0	0	0	0	0	603	903	0
479	6	0	0	0	0	0	0	200	300	0	0	0	0	0	0	0	200	903	0	0	0	0	0	0	0	603	903	0
479	7	0	0	0	0	0	0	200	300	0	0	0	0	0	0	0	200	903	0	0	0	0	0	0	0	603	903	0
479	8	0	0	0	0	0	0	200	300	0	0	0	0	0	0	0	200	903	0	0	0	0	0	0	0	603	903	0
479	9	0	0	0	0	0	0	200	300	0	0	0	0	0	0	0	200	903	0	0	0	0	0	0	0	603	903	0
480	0	0	0	0	0	0	0	200	300	0	0	0	0	0	0	0	200	903	0	0	0	0	0	0	0	603	903	0
480	1	0	0	0	0	0	0	200	300	0	0	0	0	0	0	0	200	903	0	0	0	0	0	0	0	603	903	0
480	2	0	0	0	0	0	0	200	300	0	0	0	0	0	0	0	200	903	0	0	0	0	0	0	0	603	903	0
480	3	0	0	0	0	0	0	200	300	0	0	0	0	0	0	0	200	903	0	0	0	0	0	0	0	603	903	0
480	4	0	0	0	0	0	0	200	300	0	0	0	0	0	0	0	200	903	0	0	0	0	0	0	0	603	903	0
480	5	0	0	0	0	0	0	200	300	0	0	0	0	0	0	0	200	903	0	0	0	0	0	0	0	603	903	0
480	6	0	0	0	0	0	0	200	300	0	0	0	0	0	0	0	200	903	0	0	0	0	0	0	0	603	903	0
480	7	0	0	0	0	0	0	200	300	0	0	0	0	0	0	0	200	903	0	0	0	0	0	0	0	603	903	0
480	8	0	0	0	0	0	0	200	300	0	0	0	0	0	0	0	200	903	0	0	0	0	0	0	0	603	903	0
480	9	0	0	0	0	0	0	200	300	0	0	0	0	0	0	0	200	903	0	0	0	0	0	0	0	603	903	0
481	0	0	0	0	0	0	0	200	300	0	0	0	0	0	0	0	200	903	0	0	0	0	0	0	0	603	903	0
481	1	0	0	0	0	0	0	200	300	0	0	0	0	0	0	0	200	903	0	0	0	0	0	0	0	603	903	0
481	2	0	0	0	0	0	0	200	300	0	0	0	0	0	0	0	200	903	0	0	0	0	0	0	0	603	903	0
481	3	0	0	0	0	0	0	200	300	0	0	0	0	0	0	0	200	903	0	0	0	0	0	0	0	603	903	0
481	4	0	0	0	0	0	0	200	300	0	0	0	0	0	0	0	200	903	0	0	0	0	0	0	0	603	903	0
481	5	0	0	0	0	0	0	200	300	0	0	0	0	0	0	0	200	903	0	0	0	0	0	0	0	603	903	0
481	6	0	0	0	0	0	0	200	300	0	0	0	0	0	0	0	200	903	0	0	0	0	0	0	0	603	903	0
481	7	0	0	0	0	0	0	200	300	0	0	0	0	0	0	0	200	903	0	0	0	0	0	0	0	603	903	0
481	8	0	0	0	0	0	0	200	300	0	0	0	0	0	0	0	200	903	0	0	0	0	0	0	0	603	903	0
481	9	0	0	0	0	0	0	200	300	0	0	0	0	0	0	0	200	903	0	0	0	0	0	0	0	603	903	0
482	0	0	0	0	0	0	0	200	300	0	0	0	0	0	0	0	200	903	0	0	0	0	0	0	0	603	903	0
482	1	0	0	0	0	0	0	200	300	0	0	0	0	0	0	0	200	903	0	0	0	0	0	0	0	603	903	0
482	2	0	0	0	0	0	0	200	300	0	0	0	0	0	0	0	200	903	0	0	0	0	0	0	0	603	903	0
482	3	0	0	0	0	0	0	200	300	0	0	0	0	0	0	0	200	903	0	0	0	0	0	0	0	603	903	0
482	4	0	0	0	0	0	0	200	300	0	0	0	0	0	0	0	200	903	0	0	0	0	0	0	0	603	903	0
482	5	0	0	0	0	0	0	200	300	0	0	0	0	0	0	0	200	903	0	0	0	0	0	0	0	603	903	0
482	6	0	0	0	0	0	0	200	300	0	0	0	0	0	0	0	200	903	0	0	0	0	0	0	0	603	903	0
482	7	0	0	0	0	0	0	200	300	0	0	0	0	0	0	0	200	903	0	0	0	0	0	0	0	603	903	0
482	8	0	0	0	0	0	0	200	300	0	0	0	0	0	0	0	200	903	0	0	0	0	0	0	0	603	903	0
482	9	0	0	0	0	0	0	200	300	0	0	0	0	0	0	0	200	903	0	0	0	0	0	0	0	603	903	0
483	0	0	0	0	0	0	0	200	300	0	0	0	0	0	0	0	200	903	0	0	0	0	0	0	0	603	903	0
483	1	0	0	0	0	0	0	200	300	0	0	0	0	0	0	0	200	903	0	0	0	0	0	0	0	603	903	0
483	2	0	0	0	0	0	0	200	300	0	0	0	0	0	0	0	200	903	0	0	0	0	0	0	0	603	903	0
483	3	0	0	0	0	0	0	200	300	0	0	0	0	0	0	0	200	903	0	0	0	0	0	0	0	603	903	0
483	4	0	0	0	0	0	0	200	300	0	0	0	0	0	0	0	200	903	0	0	0	0	0	0	0	603	903	0
483	5	0	0	0	0	0	0	200	300	0	0	0	0	0	0	0	200	903	0	0	0	0	0	0	0	603	903	0
483	6	0	0	0	0	0	0	200	300	0	0	0	0	0	0	0	200	903	0	0	0	0	0	0	0	603	903	0
483	7	0	0	0	0	0	0	200	300	0	0	0	0	0	0	0	200	903	0	0	0	0	0	0	0	603	903	0
483	8	0	0	0	0	0	0	200	300	0	0	0	0	0	0	0	200	903	0	0	0	0	0	0	0	603	903	0
483	9	0	0	0	0	0	0	200	300	0	0	0	0	0	0	0	200	903	0	0	0	0	0	0	0	603	903	0
484	0	0	0	0	0	0	0	200	300	0	0	0	0	0	0	0	200	903	0	0	0	0	0	0	0	603	903	0
484	1	0	0	0	0	0	0	200	300	0	0	0	0	0	0	0	200	903	0	0	0	0	0	0	0	603	903	0
484	2	0	0	0	0	0	0	200	300	0	0	0	0	0	0	0	200	903	0	0	0	0	0	0	0	603	903	0
484	3	0	0	0	0	0	0	200	300	0	0	0	0	0	0	0	200	903	0	0	0	0	0	0	0	603	903	0
484	4	0	0	0	0	0	0	200	300	0	0	0	0	0	0	0	200	903	0	0	0	0	0	0	0	603	903	0
484	5	0	0	0	0	0	0	200	300	0	0	0	0	0	0	0	200	903	0	0	0	0	0	0	0	603	903	0
484	6	0	0	0	0	0	0	200	300	0	0	0	0	0	0	0	200	903	0	0	0	0	0	0	0	603	903	0
484	7	0	0	0	0	0	0	200	300	0	0	0	0	0	0	0	200	903	0	0	0	0	0	0	0	603	903	0
484	8	0	0	0	0	0	0	200	300	0	0	0	0	0	0	0	200	903	0	0	0	0	0	0	0	603	903	0
484	9	0	0	0	0	0	0	200	300	0	0	0	0	0	0	0	200	903	0	0	0	0	0	0	0	603	903	0
485	0	0	0	0	0	0	0	200	300	0	0	0	0	0	0	0	200	903	0	0	0	0	0	0	0	603	903	0
485	1	0	0	0	0	0	0	200	300	0	0	0	0	0	0	0	200	903	0	0	0	0	0	0	0	603	903	0
485	2	0	0	0	0	0	0	200	300	0	0	0	0	0	0	0	200	903	0	0	0	0	0	0	0	603	903	0
485	3	0	0	0	0	0	0	200	300	0	0	0	0	0	0	0	200	903	0	0	0	0	0	0	0	603	903	0
485	4	0	0	0	0	0	0	200	300	0	0	0	0	0	0	0	200	903	0	0	0	0	0	0	0	603	903	0
485	5	0	0	0	0	0	0	200	300	0	0	0	0	0	0	0	200	903	0	0	0	0	0	0	0	603	903	0
485	6	0	0	0	0	0	0	200	300	0	0	0	0	0	0	0	200	903	0	0	0	0	0	0	0	603	903	0
485	7	0	0	0	0	0	0	200	300	0	0	0	0	0	0	0	200	903	0	0	0	0	0	0	0	603	903	0
485	8	0	0	0	0	0	0	200	300	0	0	0	0	0	0	0	200	903	0	0	0	0	0	0	0	603	903	0
485	9	0	0	0	0	0	0	200	300	0	0	0	0	0	0	0	200	903	0	0	0	0	0	0	0	603	903	0
486	0	0	0	0	0	0	0	200	300	0	0	0	0	0	0	0	200	903	0	0	0	0	0	0	0	603	903	0
486	1	0	0	0	0	0	0	200	300	0	0	0	0	0	0	0	200	903	0	0	0	0	0	0	0	603	903	0
486	2	0	0	0	0	0	0	200	300	0	0	0	0	0	0	0	200	903	0	0	0	0	0	0	0	603	903	0
486	3	0	0	0	0	0	0	200	300	0	0	0	0	0	0	0	200	903	0	0	0	0	0	0	0	603	903	0
486	4	0	0	0	0	0	0	200	300	0	0	0	0	0	0	0	200	903	0	0	0	0	0	0	0	603	903	0
486	5	0	0	0	0	0	0	200	300	0	0	0	0	0	0	0	200	903	0	0	0	0	0	0	0	603	903	0
486	6	0	0	0	0	0	0	200	300	0	0	0	0	0	0	0	200	903	0	0	0	0	0	0	0	603	903	0
486	7	0	0	0	0	0	0	200	300	0	0	0	0	0	0	0	200	903	0	0	0	0	0	0	0	603	903	0
486	8	0	0	0	0	0	0	200	300	0	0	0	0	0	0	0	200	903	0	0	0	0	0	0	0	603	903	0
486	9	0	0	0	0	0	0	200	300	0	0	0	0	0	0	0	200	903	0	0	0	0	0	0	0	603	903	0
487	0	0	0	0	0	0	0	200	300	0	0	0	0	0	0	0	200	903	0	0	0	0	0	0	0	603	903	0
487	1	0	0	0	0	0	0	200	300	0	0	0	0	0	0	0	200	903	0	0	0	0	0	0	0	603	903	0
487	2	0	0	0	0	0	0	200	300	0	0	0	0	0	0	0	200	903	0	0	0	0	0	0	0	603	903	0
487	3	0	0	0	0	0	0	200	300	0	0	0	0	0	0	0	200	903	0	0	0	0	0	0	0	603	903	0
487	4	0	0	0	0	0	0	200	300	0	0	0	0	0	0	0	200	903	0	0	0	0	0	0	0	603	903	0
487	5	0	0	0	0	0	0	200	300	0	0	0	0	0	0	0	200	903	0	0	0	0	0	0	0	603	903	0
487	6	0	0	0	0	0	0	200	300	0	0	0	0	0	0	0	200	903	0	0	0	0	0	0	0	603	903	0
487	7	0	0	0	0	0	0	200	300	0	0	0	0	0	0	0	200	903	0	0	0	0	0	0	0	603	903	0
487	8	0	0	0	0	0	0	200	300	0	0	0	0	0	0	0	200	903	0	0	0	0	0	0	0	603	903	0
487	9	0	0	0	0	0	0	200	300	0	0	0	0	0	0	0	200	903	0	0	0	0	0	0	0	603	903	0
488	0	0	0	0	0	0	0	200	300	0	0	0	0	0	0	0	200	903	0	0	0	0	0	0	0	603	903	0
488	1	0	0	0	0	0	0	200	300	0	0	0	0	0	0	0	200	903	0	0	0	0	0	0	0	603	903	0
488	2	0	0	0	0	0	0	200	300	0	0	0	0	0	0	0	200	903	0	0	0	0	0	0	0	603	903	0
488	3	0	0	0	0	0	0	200	300	0	0	0	0	0	0	0	200	903	0	0	0	0	0	0	0	603	903	0
488	4	0	0	0	0	0	0	200	300	0	0	0	0	0	0	0	200	903	0	0	0	0	0	0	0	603	903	0
488	5	0	0	0	0	0	0	200	300	0	0	0	0	0	0	0	200	903	0	0	0	0	0	0	0	603	903	0
488	6	0	0	0	0	0	0	200	300	0	0	0	0	0	0	0	200	903	0	0	0	0	0	0	0	603	903	0
488	7	0	0	0	0	0	0	200	300	0	0	0	0	0	0	0	200	903	0	0	0	0	0	0	0	603	903	0
488	8	0	0	0	0	0	0	200	300	0	0	0	0	0	0	0	200	903	0	0	0	0	0	0	0	603	903	0
488	9	0	0	0	0	0	0	200	300	0	0	0	0	0	0	0	200	903	0	0	0	0	0	0	0	603	903	0
489	0	0	0	0	0	0	0	200	300	0	0	0	0	0	0	0	200	903	0	0	0	0	0	0	0	603	903	0
489	1	0	0	0	0	0	0	200	300	0	0	0	0	0	0	0	200	903	0	0	0	0	0	0	0	603	903	0
489	2	0	0	0	0	0	0	200	300	0	0	0	0	0	0	0	200	903	0	0	0	0	0	0	0	603	903	0
489	3	0	0	0	0	0	0	200	300	0	0	0	0	0	0	0	200	903	0	0	0	0	0	0	0	603	903	0
489	4	0	0	0	0	0	0	200	300	0	0	0	0	0	0	0	200	903	0	0	0	0	0	0	0	603	903	0
489	5	0	0	0	0	0	0	200	300	0	0	0	0	0	0	0	200	903	0	0	0	0	0	0	0	603	903	0
489	6	0	0	0	0	0	0	200	300	0	0	0	0	0	0	0	200	903	0	0	0	0	0	0	0	603	903	0
489	7	0	0	0	0	0	0	200	300	0	0	0	0	0	0	0	200	903	0	0	0	0	0	0	0	603	903	0
489	8	0	0	0	0	0	0	200	300	0	0	0	0	0	0	0	200	903	0	0	0	0	0	0	0	603	903	0
489	9	0	0	0	0	0	0	200	300	0	0	0	0	0	0	0	200	903	0	0	0	0	0	0	0	603	903	0
490	0	0	0	0	0	0	0	200	300	0	0	0	0	0	0	0	200	903	0	0	0	0	0	0	0	603	903	0
490	1	0	0	0	0	0	0	200	300	0	0	0	0	0	0	0	200	903	0	0	0	0	0	0	0	603	903	0
490	2	0	0	0	0	0	0	200	300	0	0	0	0	0	0	0	200	903	0	0	0	0	0	0	0	603	903	0
490	3	0	0	0	0	0	0	200	300	0	0	0	0	0	0	0	200	903	0	0	0	0	0	0	0	603	903	0
490	4	0	0	0	0	0	0	200	300	0	0	0	0	0	0	0	200	903	0	0	0	0	0	0	0	603	903	0
490	5	0	0	0	0	0	0	200	300	0	0	0	0	0	0	0	200	903	0	0	0	0	0	0	0	603	903	0
490	6	0	0	0	0	0	0	200	300	0	0	0	0	0	0	0	200	903	0	0	0	0	0	0	0	603	903	0
490	7	0	0	0	0	0	0	200	300	0	0	0	0	0	0	0	200	903	0	0	0	0	0	0	0	603	903	0
490	8	0	0	0	0	0	0	200	300	0	0	0	0	0	0	0	200	903	0	0	0	0	0	0	0	603	903	0
490	9	0	0	0	0	0	0	200	300	0	0	0	0	0	0	0	200	903	0	0	0	0	0	0	0	603	903	0
491	0	0	0	0	0	0	0	200	300	0	0	0	0	0	0	0	200	903	0	0	0	0	0	0	0	603	903	0
491	1	0	0	0	0	0	0	200	300	0	0	0	0	0	0	0	200	903	0	0	0	0	0	0	0	603	903	0
491	2	0	0	0	0	0	0	200	300	0	0	0	0	0	0	0	200	903	0	0	0	0	0	0	0	603	903	0
491	3	0	0	0	0	0	0	200	300	0	0	0	0	0	0	0	200	903	0	0	0	0	0	0	0	603	903	0
491	4	0	0	0	0	0	0	200	300	0	0	0	0	0	0	0	200	903	0	0	0	0	0	0	0	603	903	0
491	5	0	0	0	0	0	0	200	300	0	0	0	0	0	0	0	200	903	0	0	0	0	0	0	0	603	903	0
491	6	0	0	0	0	0	0	200	300	0	0	0	0	0	0	0	200	903	0	0	0	0	0	0	0	603	903	0
491	7	0	0	0	0	0	0	200	300	0	0	0	0	0	0	0	200	903	0	0	0	0	0	0	0	603	903	0
491	8	0	0	0	0	0	0	200	300	0	0	0	0	0	0	0	200	903	0	0	0	0	0	0	0	603	903	0
491	9	0	0	0	0	0	0	200	300	0	0	0	0	0	0	0	200	903	0	0	0	0	0	0	0	603	903	0
492	0	0	0	0	0	0	0	200	300	0	0	0	0	0	0	0	200	903	0	0	0	0	0	0	0	603	903	0
492	1	0	0	0	0	0	0	200	300	0	0	0	0	0	0	0	200	903	0	0	0	0	0	0	0	603	903	0
492	2	0	0	0	0	0	0	200	300	0	0	0	0	0	0	0	200	903	0	0	0	0	0	0	0	603	903	0
492	3	0	0	0	0	0	0	200	300	0	0	0	0	0	0	0	200	903	0	0	0	0	0	0	0	603	903	0
492	4	0	0	0	0	0	0	200	300	0	0	0	0	0	0	0	200	903	0	0	0	0	0	0	0	603	903	0
492	5	0	0	0	0	0	0	200	300	0	0	0	0	0	0	0	200	903	0	0	0	0	0	0	0	603	903	0
492	6	0	0	0	0	0	0	200	300	0	0	0	0	0	0	0	200	903	0	0	0	0	0	0	0	603	903	0
492	7	0	0	0	0	0	0	200	300	0	0	0	0	0	0	0	200	903	0	0	0	0	0	0	0	603	903	0
492	8	0	0	0	0	0	0	200	300	0	0	0	0	0	0	0	200	903	0	0	0	0	0	0	0	603	903	0
492	9	0	0	0	0	0	0	200	300	0	0	0	0	0	0	0	200	903	0	0	0	0	0	0	0	603	903	0
493	0	0	0	0	0	0	0	200	300	0	0	0	0	0	0	0	200	903	0	0	0	0	0	0	0	603	903	0
493	1	0	0	0	0	0	0	200	300	0	0	0	0	0	0	0	200	903	0	0	0	0	0	0	0	603	903	0
493	2	0	0	0	0	0	0	200	300	0	0	0	0	0	0	0	200	903	0	0	0	0	0	0	0	603	903	0
493	3	0	0	0	0	0	0	200	300	0	0	0	0	0	0	0	200	903	0	0	0	0	0	0	0	603	903	0
493	4	0	0	0	0	0	0	200	300	0	0	0	0	0	0	0	200	903	0	0	0	0	0	0	0	603	903	0
493	5	0	0	0	0	0	0	200	300	0	0	0	0	0	0	0	200	903	0	0	0	0	0	0	0	603	903	0
493	6	0	0	0	0	0	0	200	300	0	0	0	0	0	0	0	200	903	0	0	0	0	0	0	0	603	903	0
493	7	0	0	0	0	0	0	200	300	0	0	0	0	0	0	0	200	903	0	0	0	0	0	0	0	603	903	0
493	8	0	0	0	0	0	0	200	300	0	0	0	0	0	0	0	200	903	0	0	0	0	0	0	0	603	903	0
493	9	0	0	0	0	0	0	200	300	0	0	0	0	0	0	0	200	903	0	0	0	0	0	0	0	603	903	0
494	0	0	0	0	0	0	0	200	300	0	0	0	0	0	0	0	200	903	0	0	0	0	0	0	0	603	903	0
494	1	0	0	0	0	0	0	200	300	0	0	0	0	0	0	0	200	903	0	0	0	0	0	0	0	603	903	0
494	2	0	0	0	0	0	0	200	300	0	0	0	0	0	0	0	200	903	0	0	0	0	0	0	0	603	903	0
494	3	0	0	0	0	0	0	200	300	0	0	0	0	0	0	0	200	903	0	0	0	0	0	0	0	603	903	0
494	4	0	0	0	0	0	0	200	300	0	0	0	0	0	0	0	200	903	0	0	0	0	0	0	0	603	903	0
494	5	0	0	0	0	0	0	200	300	0	0	0	0	0	0	0	200	903	0	0	0	0	0	0	0	603	903	0
494	6	0	0	0	0	0	0	200	300	0	0	0	0	0	0	0	200	903	0	0	0	0	0	0	0	603	903	0
494	7	0	0	0	0	0	0	200	300	0	0	0	0	0	0	0	200	903	0	0	0	0	0	0	0	603	903	0
494	8	0	0	0	0	0	0	200	300	0	0	0	0	0	0	0	200	903	0	0	0	0	0	0	0	603	903	0
494	9	0	0	0	0	0	0	200	300	0	0	0	0	0	0	0	200	903	0	0	0	0	0	0	0	603	903	0
495	0	0	0	0	0	0	0	200	300	0	0	0	0	0	0	0	200	903	0	0	0	0	0	0	0	603	903	0
495	1	0	0	0	0	0	0	200	300	0	0	0	0	0	0	0	200	903	0	0	0	0	0	0	0	603	903	0
495	2	0	0	0	0	0	0	200	300	0	0	0	0	0	0	0	200	903	0	0	0	0	0	0	0	603	903	0
495	3	0	0	0	0	0	0	200	300	0	0	0	0	0	0	0	200	903	0	0	0	0	0	0	0	603	903	0
495	4	0	0	0	0	0	0	200	300	0	0	0	0	0	0	0	200	903	0	0	0	0	0	0	0	603	903	0
495	5	0	0	0	0	0	0	200	300	0	0	0	0	0	0	0	200	903	0	0	0	0	0	0	0	603	903	0
495	6	0	0	0	0	0	0	200	300	0	0	0	0	0	0	0	200	903	0	0	0	0	0	0	0	603	903	0
495	7	0	0	0	0	0	0	200	300	0	0	0	0	0	0	0	200	903	0	0	0	0	0	0	0	603	903	0
495	8	0	0	0	0	0	0	200	300	0	0	0	0	0	0	0	200	903	0	0	0	0	0	0	0	603	903	0
495	9	0	0	0	0	0	0	200	300	0	0	0	0	0	0	0	200	903	0	0	0	0	0	0	0	603	903	0
496	0	0	0	0	0	0	0	200	300	0	0	0	0	0	0	0	200	903	0	0	0	0	0	0	0	603	903	0
496	1	0	0	0	0	0	0	200	300	0	0	0	0	0	0	0	200	903	0	0	0	0	0	0	0	603	903	0
496	2	0	0	0	0	0	0	200	300	0	0	0	0	0	0	0	200	903	0	0	0	0	0	0	0	603	903	0
496	3	0	0	0	0	0	0	200	300	0	0	0	0	0	0	0	200	903	0	0	0	0	0	0	0	603	903	0
496	4	0	0	0	0	0	0	200	300	0	0	0	0	0	0	0	200	903	0	0	0	0	0	0	0	603	903	0
496	5	0	0	0	0	0	0	200	300	0	0	0	0	0	0	0	200	903	0	0	0	0	0	0	0	603	903	0
496	6	0	0	0	0	0	0	200	300	0	0	0	0	0	0	0	200	903	0	0	0	0	0	0	0	603	903	0
496	7	0	0	0	0	0	0	200	300	0	0	0	0	0	0	0	200	903	0	0	0	0	0	0	0	603	903	0
496	8	0	0	0	0	0	0	200	300	0	0	0	0	0	0	0	200	903	0	0	0	0	0	0	0	603	903	0
496	9	0	0	0	0	0	0	200	300	0	0	0	0	0	0	0	200	903	0	0	0	0	0	0	0	603	903	0
497	0	0	0	0	0	0	0	200	300	0	0	0	0	0	0	0	200	903	0	0	0	0	0	0	0	603	903	0
497	1	0	0	0	0	0	0	200	300	0	0	0	0	0	0	0	200	903	0	0	0	0	0	0	0	603	903	0
497	2	0	0	0	0	0	0	200	300	0	0	0	0	0	0	0	200	903	0	0	0	0	0	0	0	603	903	0
497	3	0	0	0	0	0	0	200	300	0	0	0	0	0	0	0	200	903	0	0	0	0	0	0	0	603	903	0
497	4	0	0	0	0	0	0	200	300	0	0	0	0	0	0	0	200	903	0	0	0	0	0	0	0	603	903	0
497	5	0	0	0	0	0	0	200	300	0	0	0	0	0	0	0	200	903	0	0	0	0	0	0	0	603	903	0
497	6	0	0	0	0	0	0	200	300	0	0	0	0	0	0	0	200	903	0	0	0	0	0	0	0	603	903	0
497	7	0	0	0	0	0	0	200	300	0	0	0	0	0	0	0	200	903	0	0	0	0	0	0	0	603	903	0
497	8	0	0	0	0	0	0	200	300	0	0	0	0	0	0	0	200	903	0	0	0	0	0	0	0	603	903	0
497	9	0	0	0	0	0	0	200	300	0	0	0	0	0	0	0	200	903	0	0	0	0	0	0	0	603	903	0
498	0	0	0	0	0	0	0	200	300	0	0	0	0	0	0	0	200	903	0	0	0	0	0	0	0	603	903	0
498	1	0	0	0	0	0	0	200	300	0	0	0	0	0	0	0	200	903	0	0	0	0	0	0	0	603	903	0
498	2	0	0	0	0	0	0	200	300	0	0	0	0	0	0	0	200	903	0	0	0	0	0	0	0	603	903	0
498	3	0	0	0	0	0	0	200	300	0	0	0	0	0	0	0	200	903	0	0	0	0	0	0	0	603	903	0
498	4	0	0	0	0	0	0	200	300	0	0	0	0	0	0	0	200	903	0	0	0	0	0	0	0	603	903	0
498	5	0	0	0	0	0	0	200	300	0	0	0	0	0	0	0	200	903	0	0	0	0	0	0	0	603	903	0
498	6	0	0	0	0	0	0	200	300	0	0	0	0	0	0	0	200	903	0	0	0	0	0	0	0	603	903	0
498	7	0	0	0	0	0	0	200	300	0	0	0	0	0	0	0	200	903	0	0	0	0	0	0	0	603	903	0
498	8	0	0	0	0	0	0	200	300	0	0	0	0	0	0	0	200	903	0	0	0	0	0	0	0	603	903	0
498	9	0	0	0	0	0	0	200	300	0	0	0	0	0	0	0	200	903	0	0	0	0	0	0	0	603	903	0
499	0	0	0	0	0	0	0	200	300	0	0	0	0	0	0	0	200	903	0	0	0	0	0	0	0	603	903	0
499	1	0	0	0	0	0	0	200	300	0	0	0	0	0	0	0	200	903	0	0	0	0	0	0	0	603	903	0
499	2	0	0	0	0	0	0	200	300	0	0	0	0	0	0	0	200	903	0	0	0	0	0	0	0	603	903	0
499	3	0	0	0	0	0	0	200	300	0	0	0	0	0	0	0	200	903	0	0	0	0	0	0	0	603	903	0
499	4	0	0	0	0	0	0	200	300	0	0	0	0	0	0	0	200	903	0	0	0	0	0	0	0	603	903	0
499	5	0	0	0	0	0	0	200	300	0	0	0	0	0	0	0	200	903	0	0	0	0	0	0	0	603	903	0
499	6	0	0	0	0	0	0	200	300	0	0	0	0	0	0	0	200	903	0	0	0	0	0	0	0	603	903	0
499	7	0	0	0	0	0	0	200	300	0	0	0	0	0	0	0	200	903	0	0	0	0	0	0	0	603	903	0
499	8	0	0	0	0	0	0	200	300	0	0	0	0	0	0	0	200	903	0	0	0	0	0	0	0	603	903	0
499	9	0	0	0	0	0	0	200	300	0	0	0	0	0	0	0	200	903	0	0	0	0	0	0	0	603	903	0
500	0	0	0	0	0	0	0	200	300	0	0	0	0	0	0	0	200	903	0	0	0	0	0	0	0	603	903	0
500	1	0	0	0	0	0	0	200	300	0	0	0	0	0	0	0	200	903	0	0	0	0	0	0	0	603	903	0
500	2	0	0	0	0	0	0	200	300	0	0	0	0	0	0	0	200	903	0	0	0	0	0	0	0	603	903	0
500	3	0	0	0	0	0	0	200	300	0	0	0	0	0	0	0	200	903	0	0	0	0	0	0	0	603	903	0
500	4	0	0	0	0	0	0	200	300	0	0	0	0	0	0	0	200	903	0	0	0	0	0	0	0	603	903	0
500	5	0	0	0	0	0	0	200	300	0	0	0	0	0	0	0	200	903	0	0	0	0	0	0	0	603	903	0
500	6	0	0	0	0	0	0	200	300	0	0	0	0	0	0	0	200	903	0	0	0	0	0	0	0	603	903	0
500	7	0	0	0	0	0	0	200	300	0	0	0	0	0	0	0	200	903	0	0	0	0	0	0	0	603	903	0
500	8	0	0	0	0	0	0	200	300	0	0	0	0	0	0	0	200	903	0	0	0	0	0	0	0	603	903	0
500	9	0	0	0	0	0	0	200	300	0	0	0	0	0	0	0	200	903	0	0	0	0	0	0	0	603	903	0
501	0	0	0	0	0	0	0	200	300	0	0	0	0	0	0	0	200	903	0	0	0	0	0	0	0	603	903	0
501	1	0	0	0	0	0	0	200	300	0	0	0	0	0	0	0	200	903	0	0	0	0	0	0	0	603	903	0
501	2	0	0	0	0	0	0	200	300	0	0	0	0	0	0	0	200	903	0	0	0	0	0	0	0	603	903	0
501	3	0	0	0	0	0	0	200	300	0	0	0	0	0	0	0	200	903	0	0	0	0	0	0	0	603	903	0
501	4	0	0	0	0	0	0	200	300	0	0	0	0	0	0	0	200	903	0	0	0	0	0	0	0	603	903	0
501	5	0	0	0	0	0	0	200	300	0	0	0	0	0	0	0	200	903	0	0	0	0	0	0	0	603	903	0
501	6	0	0	0	0	0	0	200	300	0	0	0	0	0	0	0	200	903	0	0	0	0	0	0	0	603	903	0
501	7	0	0	0	0	0	0	200	300	0	0	0	0	0	0	0	200	903	0	0	0	0	0	0	0	603	903	0
501	8	0	0	0	0	0	0	200	300	0	0	0	0	0	0	0	200	903	0	0	0	0	0	0	0	603	903	0
501	9	0	0	0	0	0	0	200	300	0	0	0	0	0	0	0	200	903	0	0	0	0	0	0	0	603	903	0
502	0	0	0	0	0	0	0	200	300	0	0	0	0	0	0	0	200	903	0	0	0	0	0	0	0	603	903	0
502	1	0	0	0	0	0	0	200	300	0	0	0	0	0	0	0	200	903	0	0	0	0	0	0	0	603	903	0
502	2	0	0	0	0	0	0	200	300	0	0	0	0	0	0	0	200	903	0	0	0	0	0	0	0	603	903	0
502	3	0	0	0	0	0	0	200	300	0	0	0	0	0	0	0	200	903	0	0	0	0	0	0	0	603	903	0
502	4	0	0	0	0	0	0	200	300	0	0	0	0	0	0	0	200	903	0	0	0	0	0	0	0	603	903	0
502	5	0	0	0	0	0	0	200	300	0	0	0	0	0	0	0	200	903	0	0	0	0	0	0	0	603	903	0
502	6	0	0	0	0	0	0	200	300	0	0	0	0	0	0	0	200	903	0	0	0	0	0	0	0	603	903	0
502	7	0	0	0	0	0	0	200	300	0	0	0	0	0	0	0	200	903	0	0	0	0	0	0	0	603	903	0
502	8	0	0	0	0	0	0	200	300	0	0	0	0	0	0	0	200	903	0	0	0	0	0	0	0	603	903	0
502	9	0	0	0	0	0	0	200	300	0	0	0	0	0	0	0	200	903	0	0	0	0	0	0	0	603	903	0
503	0	0	0	0	0	0	0	200	300	0	0	0	0	0	0	0	200	903	0	0	0	0	0	0	0	603	903	0
503	1	0	0	0	0	0	0	200	300	0	0	0	0	0	0	0	200	903	0	0	0	0	0	0	0	603	903	0
503	2	0	0	0	0	0	0	200	300	0	0	0	0	0	0	0	200	903	0	0	0	0	0	0	0	603	903	0
503	3	0	0	0	0	0	0	200	300	0	0	0	0	0	0	0	200	903	0	0	0	0	0	0	0	603	903	0
503	4	0	0	0	0	0	0	200	300	0	0	0	0	0	0	0	200	903	0	0	0	0	0	0	0	603	903	0
503	5	0	0	0	0	0	0	200	300	0	0	0	0	0	0	0	200	903	0	0	0	0	0	0	0	603	903	0
503	6	0	0	0	0	0	0	200	300	0	0	0	0	0	0	0	200	903	0	0	0	0	0	0	0	603	903	0
503	7	0	0	0	0	0	0	200	300	0	0	0	0	0	0	0	200	903	0	0	0	0	0	0	0	603	903	0
503	8	0	0	0	0	0	0	200	300	0	0	0	0	0	0	0	200	903	0	0	0	0	0	0	0	603	903	0
503	9	0	0	0	0	0	0	200	300	0	0	0	0	0	0	0	200	903	0	0	0	0	0	0	0	603	903	0
504	0	0	0	0	0	0	0	200	300	0	0	0	0	0	0	0	200	903	0	0	0	0	0	0	0	603	903	0
504	1	0	0	0	0	0	0	200	300	0	0	0	0	0	0	0	200	903	0	0	0	0	0	0	0	603	903	0
504	2	0	0	0	0	0	0	200	300	0	0	0	0	0	0	0	200	903	0	0	0	0	0	0	0	603	903	0
504	3	0	0	0	0	0	0	200	300	0	0	0	0	0	0	0	200	903	0	0	0	0	0	0	0	603	903	0
504	4	0	0	0	0	0	0	200	300	0	0	0	0	0	0	0	200	903	0	0	0	0	0	0	0	603	903	0
504	5	0	0	0	0	0	0	200	300	0	0	0	0	0	0	0	200	903	0	0	0	0	0	0	0	603	903	0
504	6	0	0	0	0	0	0	200	300	0	0	0	0	0	0	0	200	903	0	0	0	0	0	0	0	603	903	0
504	7	0	0	0	0	0	0	200	300	0	0	0	0	0	0	0	200	903	0	0	0	0	0	0	0	603	903	0
504	8	0	0	0	0	0	0	200	300	0	0	0	0	0	0	0	200	903	0	0	0	0	0	0	0	603	903	0
504	9	0	0	0	0	0	0	200	300	0	0	0	0	0	0	0	200	903	0	0	0	0	0	0	0	603	903	0
505	0	0	0	0	0	0	0	200	300	0	0	0	0	0	0	0	200	903	0	0	0	0	0	0	0	603	903	0
505	1	0	0	0	0	0	0	200	300	0	0	0	0	0	0	0	200	903	0	0	0	0	0	0	0	603	903	0
505	2	0	0	0	0	0	0	200	300	0	0	0	0	0	0	0	200	903	0	0	0	0	0	0	0	603	903	0
505	3	0	0	0	0	0	0	200	300	0	0	0	0	0	0	0	200	903	0	0	0	0	0	0	0	603	903	0
505	4	0	0	0	0	0	0	200	300	0	0	0	0	0	0	0	200	903	0	0	0	0	0	0	0	603	903	0
505	5	0	0	0	0	0	0	200	300	0	0	0	0	0	0	0	200	903	0	0	0	0	0	0	0	603	903	0
505	6	0	0	0	0	0	0	200	300	0	0	0	0	0	0	0	200	903	0	0	0	0	0	0	0	603	903	0
505	7	0	0	0	0	0	0	200	300	0	0	0	0	0	0	0	200	903	0	0	0	0	0	0	0	603	903	0
505	8	0	0	0	0	0	0	200	300	0	0	0	0	0	0	0	200	903	0	0	0	0	0	0	0	603	903	0
505	9	0	0	0	0	0	0	200	300	0	0	0	0	0	0	0	200	903	0	0	0	0	0	0	0	603	903	0
506	0	0	0	0	0	0	0	200	300	0	0	0	0	0	0	0	200	903	0	0	0	0	0	0	0	603	903	0
506	1	0	0	0	0	0	0	200	300	0	0	0	0	0	0	0	200	903	0	0	0	0	0	0	0	603	903	0
506	2	0	0	0	0	0	0	200	300	0	0	0	0	0	0	0	200	903	0	0	0	0	0	0	0	603	903	0
506	3	0	0	0	0	0	0	200	300	0	0	0	0	0	0	0	200	903	0	0	0	0	0	0	0	603	903	0
506	4	0	0	0	0	0	0	200	300	0	0	0	0	0	0	0	200	903	0	0	0	0	0	0	0	603	903	0
506	5	0	0	0	0	0	0	200	300	0	0	0	0	0	0	0	200	903	0	0	0	0	0	0	0	603	903	0
506	6	0	0	0	0	0	0	200	300	0	0	0	0	0	0	0	200	903	0	0	0	0	0	0	0	603	903	0
506	7	0	0	0	0	0	0	200	300	0	0	0	0	0	0	0	200	903	0	0	0	0	0	0	0	603	903	0
506	8	0	0	0	0	0	0	200	300	0	0	0	0	0	0	0	200	903	0	0	0	0	0	0	0	603	903	0
506	9	0	0	0	0	0	0	200	300	0	0	0	0	0	0	0	200	903	0	0	0	0	0	0	0	603	903	0
507	0	0	0	0	0	0	0	200	300	0	0	0	0	0	0	0	200	903	0	0	0	0	0	0	0	603	903	0
507	1	0	0	0	0	0	0	200	300	0	0	0	0	0	0	0	200	903	0	0	0	0	0	0	0	603	903	0
507	2	0	0	0	0	0	0	200	300	0	0	0	0	0	0	0	200	903	0	0	0	0	0	0	0	603	903	0
507	3	0	0	0	0	0	0	200	300	0	0	0	0	0	0	0	200	903	0	0	0	0	0	0	0	603	903	0
507	4	0	0	0	0	0	0	200	300	0	0	0	0	0	0	0	200	903	0	0	0	0	0	0	0	603	903	0
507	5	0	0	0	0	0	0	200	300	0	0	0	0	0	0	0	200	903	0	0	0	0	0	0	0	603	903	0
507	6	0	0	0	0	0	0	200	300	0	0	0	0	0	0	0	200	903	0	0	0	0	0	0	0	603	903	0
507	7	0	0	0	0	0	0	200	300	0	0	0	0	0	0	0	200	903	0	0	0	0	0	0	0	603	903	0
507	8	0	0	0	0	0	0	200	300	0	0	0	0	0	0	0	200	903	0	0	0	0	0	0	0	603	903	0
507	9	0	0	0	0	0	0	200	300	0	0	0	0	0	0	0	200	903	0	0	0	0	0	0	0	603	903	0
508	0	0	0	0	0	0	0	200	300	0	0	0	0	0	0	0	200	903	0	0	0	0	0	0	0	603	903	0
508	1	0	0	0	0	0	0	200	300	0	0	0	0	0	0	0	200	903	0	0	0	0	0	0	0	603	903	0
508	2	0	0	0	0	0	0	200	300	0	0	0	0	0	0	0	200	903	0	0	0	0	0	0	0	603	903	0
508	3	0	0	0	0	0	0	200	300	0	0	0	0	0	0	0	200	903	0	0	0	0	0	0	0	603	903	0
508	4	0	0	0	0	0	0	200	300	0	0	0	0	0	0	0	200	903	0	0	0	0	0	0	0	603	903	0
508	5	0	0	0	0	0	0	200	300	0	0	0	0	0	0	0	200	903	0	0	0	0	0	0	0	603	903	0
508	6	0	0	0	0	0	0	200	300	0	0	0	0	0	0	0	200	903	0	0	0	0	0	0	0	603	903	0
508	7	0	0	0	0	0	0	200	300	0	0	0	0	0	0	0	200	903	0	0	0	0	0	0	0	603	903	0
508	8	0	0	0	0	0	0	200	300	0	0	0	0	0	0	0	200	903	0	0	0	0	0	0	0	603	903	0
508	9	0	0	0	0	0	0	200	300	0	0	0	0	0	0	0	200	903	0	0	0	0	0	0	0	603	903	0
509	0	0	0	0	0	0	0	200	300	0	0	0	0	0	0	0	200	903	0	0	0	0	0	0	0	603	903	0
509	1	0	0	0	0	0	0	200	300	0	0	0	0	0	0	0	200	903	0	0	0	0	0	0	0	603	903	0
509	2	0	0	0	0	0	0	200	300	0	0	0	0	0	0	0	200	903	0	0	0	0	0	0	0	603	903	0
509	3	0	0	0	0	0	0	200	300	0	0	0	0	0	0	0	200	903	0	0	0	0	0	0	0	603	903	0
509	4	0	0	0	0	0	0	200	300	0	0	0	0	0	0	0	200	903	0	0	0	0	0	0	0	603	903	0
509	5	0	0	0	0	0	0	200	300	0	0	0	0	0	0	0	200	903	0	0	0	0	0	0	0	603	903	0
509	6	0	0	0	0	0	0	200	300	0	0	0	0	0	0	0	200	903	0	0	0	0	0	0	0	603	903	0
509	7	0	0	0	0	0	0	200	300	0	0	0	0	0	0	0	200	903	0	0	0	0	0	0	0	603	903	0
509	8	0	0	0	0	0	0	200	300	0	0	0	0	0	0	0	200	903	0	0	0	0	0	0	0	603	903	0
509	9	0	0	0	0	0	0	200	300	0	0	0	0	0	0	0	200	903	0	0	0	0	0	0	0	603	903	0
510	0	0	0	0	0	0	0	200	300	0	0	0	0	0	0	0	200	903	0	0	0	0	0	0	0	603	903	0
510	1	0	0	0	0	0	0	200	300	0	0	0	0	0	0	0	200	903	0	0	0	0	0	0	0	603	903	0
510	2	0	0	0	0	0	0	200	300	0	0	0	0	0	0	0	200	903	0	0	0	0	0	0	0	603	903	0
510	3	0	0	0	0	0	0	200	300	0	0	0	0	0	0	0	200	903	0	0	0	0	0	0	0	603	903	0
510	4	0	0	0	0	0	0	200	300	0	0	0	0	0	0	0	200	903	0	0	0	0	0	0	0	603	903	0
510	5	0	0	0	0	0	0	200	300	0	0	0	0	0	0	0	200	903	0	0	0	0	0	0	0	603	903	0
510	6	0	0	0	0	0	0	200	300	0	0	0	0	0	0	0	200	903	0	0	0	0	0	0	0	603	903	0
510	7	0	0	0	0	0	0	200	300	0	0	0	0	0	0	0	200	903	0	0	0	0	0	0	0	603	903	0
510	8	0	0	0	0	0	0	200	300	0	0	0	0	0	0	0	200	903	0	0	0	0	0	0	0	603	903	0
510	9	0	0	0	0	0	0	200	300	0	0	0	0	0	0	0	200	903	0	0	0	0	0	0	0	603	903	0
511	0	0	0	0	0	0	0	200	300	0	0	0	0	0	0	0	200	903	0	0	0	0	0	0	0	603	903	0
511	1	0	0	0	0	0	0	200	300	0	0	0	0	0	0	0	200	903	0	0	0	0	0	0	0	603	903	0
511	2	0	0	0	0	0	0	200	300	0	0	0	0	0	0	0	200	903	0	0	0	0	0	0	0	603	903	0
511	3	0	0	0	0	0	0	200	300	0	0	0	0	0	0	0	200	903	0	0	0	0	0	0	0	603	903	0
511	4	0	0	0	0	0	0	200	300	0	0	0	0	0	0	0	200	903	0	0	0	0	0	0	0	603	903	0
511	5	0	0	0	0	0	0	200	300	0	0	0	0	0	0	0	200	903	0	0	0	0	0	0	0	603	903	0
511	6	0	0	0	0	0	0	200	300	0	0	0	0	0	0	0	200	903	0	0	0	0	0	0	0	603	903	0
511	7	0	0	0	0	0	0	200	300	0	0	0	0	0	0	0	200	903	0	0	0	0	0	0	0	603	903	0
511	8	0	0	0	0	0	0	200	300	0	0	0	0	0	0	0	200	903	0	0	0	0	0	0	0	603	903	0
511	9	0	0	0	0	0	0	200	300	0	0	0	0	0	0	0	200	903	0	0	0	0	0	0	0	603	903	0
512	0	0	0	0	0	0	0	200	300	0	0	0	0	0	0	0	200	903	0	0	0	0	0	0	0	603	903	0
512	1	0	0	0	0	0	0	200	300	0	0	0	0	0	0	0	200	903	0	0	0	0	0	0	0	603	903	0
512	2	0	0	0	0	0	0	200	300	0	0	0	0	0	0	0	200	903	0	0	0	0	0	0	0	603	903	0
512	3	0	0	0	0	0	0	200	300	0	0	0	0	0	0	0	200	903	0	0	0	0	0	0	0	603	903	0
512	4	0	0	0	0	0	0	200	300	0	0	0	0	0	0	0	200	903	0	0	0	0	0	0	0	603	903	0
512	5	0	0	0	0	0	0	200	300	0	0	0	0	0	0	0	200	903	0	0	0	0	0	0	0	603	903	0
512	6	0	0	0	0	0	0	200	300	0	0	0	0	0	0	0	200	903	0	0	0	0	0	0	0	603	903	0
512	7	0	0	0	0	0	0	200	300	0	0	0	0	0	0	0	200	903	0	0	0	0	0	0	0	603	903	0
512	8	0	0	0	0	0	0	200	300	0	0	0	0	0	0	0	200	903	0	0	0	0	0	0	0	603	903	0
512	9	0	0	0	0	0	0	200	300	0	0	0	0	0	0	0	200	903	0	0	0	0	0	0	0	603	903	0
513	0	0	0	0	0	0	0	200	300	0	0	0	0	0	0	0	200	903	0	0	0	0	0	0	0	603	903	0
513	1	0	0	0	0	0	0	200	300	0	0	0	0	0	0	0	200	903	0	0	0	0	0	0	0	603	903	0
513	2	0	0	0	0	0	0	200	300	0	0	0	0	0	0	0	200	903	0	0	0	0	0	0	0	603	903	0
513	3	0	0	0	0	0	0	200	300	0	0	0	0	0	0	0	200	903	0	0	0	0	0	0	0	603	903	0
513	4	0	0	0	0	0	0	200	300	0	0	0	0	0	0	0	200	903	0	0	0	0	0	0	0	603	903	0
513	5	0	0	0	0	0	0	200	300	0	0	0	0	0	0	0	200	903	0	0	0	0	0	0	0	603	903	0
513	6	0	0	0	0	0	0	200	300	0	0	0	0	0	0	0	200	903	0	0	0	0	0	0	0	603	903	0
513	7	0	0	0	0	0	0	200	300	0	0	0	0	0	0	0	200	903	0	0	0	0	0	0	0	603	903	0
513	8	0	0	0	0	0	0	200	300	0	0	0	0	0	0	0	200	903	0	0	0	0	0	0	0	603	903	0
513	9	0	0	0	0	0	0	200	300	0	0	0	0	0	0	0	200	903	0	0	0	0	0	0	0	603	903	0
514	0	0	0	0	0	0	0	200	300	0	0	0	0	0	0	0	200	903	0	0	0	0	0	0	0	603	903	0
514	1	0	0	0	0	0	0	200	300	0	0	0	0	0	0	0	200	903	0	0	0	0	0	0	0	603	903	0
514	2	0	0	0	0	0	0	200	300	0	0	0	0	0	0	0	200	903	0	0	0	0	0	0	0	603	903	0
514	3	0	0	0	0	0	0	200	300	0	0	0	0	0	0	0	200	903	0	0	0	0	0	0	0	603	903	0
514	4	0	0	0	0	0	0	200	300	0	0	0	0	0	0	0	200	903	0	0	0	0	0	0	0	603	903	0
514	5	0	0	0	0	0	0	200	300	0	0	0	0	0	0	0	200	903	0	0	0	0	0	0	0	603	903	0
514	6	0	0	0	0	0	0	200	300	0	0	0	0	0	0	0	200	903	0	0	0	0	0	0	0	603	903	0
514	7	0	0	0	0	0	0	200	300	0	0	0	0	0	0	0	200	903	0	0	0	0	0	0	0	603	903	0
514	8	0	0	0	0	0	0	200	300	0	0	0	0	0	0	0	200	903	0	0	0	0	0	0	0	603	903	0
514	9	0	0	0	0	0	0	200	300	0	0	0	0	0	0	0	200	903	0	0	0	0	0	0	0	603	903	0
515	0	0	0	0	0	0	0	200	300	0	0	0	0	0	0	0	200	903	0	0	0	0	0	0	0	603	903	0
515	1	0	0	0	0	0	0	200	300	0	0	0	0	0	0	0	200	903	0	0	0	0	0	0	0	603	903	0
515	2	0	0	0	0	0	0	200	300	0	0	0	0	0	0	0	200	903	0	0	0	0	0	0	0	603	903	0
515	3	0	0	0	0	0	0	200	300	0	0	0	0	0	0	0	200	903	0	0	0	0	0	0	0	603	903	0
515	4	0	0	0	0	0	0	200	300	0	0	0	0	0	0	0	200	903	0	0	0	0	0	0	0	603	903	0
515	5	0	0	0	0	0	0	200	300	0	0	0	0	0	0	0	200	903	0	0	0	0	0	0	0	603	903	0
515	6	0	0	0	0	0	0	200	300	0	0	0	0	0	0	0	200	903	0	0	0	0	0	0	0	603	903	0
515	7	0	0	0	0	0	0	200	300	0	0	0	0	0	0	0	200	903	0	0	0	0	0	0	0	603	903	0
515	8	0	0	0	0	0	0	200	300	0	0	0	0	0	0	0	200	903	0	0	0	0	0	0	0	603	903	0
515	9	0	0	0	0	0	0	200	300	0	0	0	0	0	0	0	200	903	0	0	0	0	0	0	0	603	903	0
516	0	0	0	0	0	0	0	200	300	0	0	0	0	0	0	0	200	903	0	0	0	0	0	0	0	603	903	0
516	1	0	0	0	0	0	0	200	300	0	0	0	0	0	0	0	200	903	0	0	0	0	0	0	0	603	903	0
516	2	0	0	0	0	0	0	200	300	0	0	0	0	0	0	0	200	903	0	0	0	0	0	0	0	603	903	0
516	3	0	0	0	0	0	0	200	300	0	0	0	0	0	0	0	200	903	0	0	0	0	0	0	0	603	903	0
516	4	0	0	0	0	0	0	200	300	0	0	0	0	0	0	0	200	903	0	0	0	0	0	0	0	603	903	0
516	5	0	0	0	0	0	0	200	300	0	0	0	0	0	0	0	200	903	0	0	0	0	0	0	0	603	903	0
516	6	0	0	0	0	0	0	200	300	0	0	0	0	0	0	0	200	903	0	0	0	0	0	0	0	603	903	0
516	7	0	0	0	0	0	0	200	300	0	0	0	0	0	0	0	200	903	0	0	0	0	0	0	0	603	903	0
516	8	0	0	0	0	0	0	200	300	0	0	0	0	0	0	0	200	903	0	0	0	0	0	0	0	603	903	0
516	9	0	0	0	0	0	0	200	300	0	0	0	0	0	0	0	200	903	0	0	0	0	0	0	0	603	903	0
517	0	0	0	0	0	0	0	200	300	0	0	0	0	0	0	0	200	903	0	0	0	0	0	0	0	603	903	0
517	1	0	0	0	0	0	0	200	300	0	0	0	0	0	0	0	200	903	0	0	0	0	0	0	0	603	903	0
517	2	0	0	0	0	0	0	200	300	0	0	0	0	0	0	0	200	903	0	0	0	0	0	0	0	603	903	0
517	3	0	0	0	0	0	0	200	300	0	0	0	0	0	0	0	200	903	0	0	0	0	0	0	0	603	903	0
517	4	0	0	0	0	0	0	200	300	0	0	0	0	0	0	0	200	903	0	0	0	0	0	0	0	603	903	0
517	5	0	0	0	0	0	0	200	300	0	0	0	0	0	0	0	200	903	0	0	0	0	0	0	0	603	903	0
517	6	0	0	0	0	0	0	200	300	0	0	0	0	0	0	0	200	903	0	0	0	0	0	0	0	603	903	0
517	7	0	0	0	0	0	0	200	300	0	0	0	0	0	0	0	200	903	0	0	0	0	0	0	0	603	903	0
517	8	0	0	0	0	0	0	200	300	0	0	0	0	0	0	0	200	903	0	0	0	0	0	0	0	603	903	0
517	9	0	0	0	0	0	0	200	300	0	0	0	0	0	0	0	200	903	0	0	0	0	0	0	0	603	903	0
518	0	0	0	0	0	0	0	200	300	0	0	0	0	0	0	0	200	903	0	0	0	0	0	0	0	603	903	0
518	1	0	0	0	0	0	0	200	300	0	0	0	0	0	0	0	200	903	0	0	0	0	0	0	0	603	903	0
518	2	0	0	0	0	0	0	200	300	0	0	0	0	0	0	0	200	903	0	0	0	0	0	0	0	603	903	0
518	3	0	0	0	0	0	0	200	300	0	0	0	0	0	0	0	200	903	0	0	0	0	0	0	0	603	903	0
518	4	0	0	0	0	0	0	200	300	0	0	0	0	0	0	0	200	903	0	0	0	0	0	0	0	603	903	0
518	5	0	0	0	0	0	0	200	300	0	0	0	0	0	0	0	200	903	0	0	0	0	0	0	0	603	903	0
518	6	0	0	0	0	0	0	200	300	0	0	0	0	0	0	0	200	903	0	0	0	0	0	0	0	603	903	0
518	7	0	0	0	0	0	0	200	300	0	0	0	0	0	0	0	200	903	0	0	0	0	0	0	0	603	903	0
518	8	0	0	0	0	0	0	200	300	0	0	0	0	0	0	0	200	903	0	0	0	0	0	0	0	603	903	0
518	9	0	0	0	0	0	0	200	300	0	0	0	0	0	0	0	200	903	0	0	0	0	0	0	0	603	903	0
519	0	0	0	0	0	0	0	200	300	0	0	0	0	0	0	0	200	903	0	0	0	0	0	0	0	603	903	0
519	1	0	0	0	0	0	0	200	300	0	0	0	0	0	0	0	200	903	0	0	0	0	0	0	0	603	903	0
519	2	0	0	0	0	0	0	200	300	0	0	0	0	0	0	0	200	903	0	0	0	0	0	0	0	603	903	0
519	3	0	0	0	0	0	0	200	300	0	0	0	0	0	0	0	200	903	0	0	0	0	0	0	0	603	903	0
519	4	0	0	0	0	0	0	200	300	0	0	0	0	0	0	0	200	903	0	0	0	0	0	0	0	603	903	0
519	5	0	0	0	0	0	0	200	300	0	0	0	0	0	0	0	200	903	0	0	0	0	0	0	0	603	903	0
519	6	0	0	0	0	0	0	200	300	0	0	0	0	0	0	0	200	903	0	0	0	0	0	0	0	603	903	0
519	7	0	0	0	0	0	0	200	300	0	0	0	0	0	0	0	200	903	0	0	0	0	0	0	0	603	903	0
519	8	0	0	0	0	0	0	200	300	0	0	0	0	0	0	0	200	903	0	0	0	0	0	0	0	603	903	0
519	9	0	0	0	0	0	0	200	300	0	0	0	0	0	0	0	200	903	0	0	0	0	0	0	0	603	903	0
520	0	0	0	0	0	0	0	200	300	0	0	0	0	0	0	0	200	903	0	0	0	0	0	0	0	603	903	0
520	1	0	0	0	0	0	0	200	300	0	0	0	0	0	0	0	200	903	0	0	0	0	0	0	0	603	903	0
520	2	0	0	0	0	0	0	200	300	0	0	0	0	0	0	0	200	903	0	0	0	0	0	0	0	603	903	0
520	3	0	0	0	0	0	0	200	300	0	0	0	0	0	0	0	200	903	0	0	0	0	0	0	0	603	903	0
520	4	0	0	0	0	0	0	200	300	0	0	0	0	0	0	0	200	903	0	0	0	0	0	0	0	603	903	0
520	5	0	0	0	0	0	0	200	300	0	0	0	0	0	0	0	200	903	0	0	0	0	0	0	0	603	903	0
520	6	0	0	0	0	0	0	200	300	0	0	0	0	0	0	0	200	903	0	0	0	0	0	0	0	603	903	0
520	7	0	0	0	0	0	0	200	300	0	0	0	0	0	0	0	200	903	0	0	0	0	0	0	0	603	903	0
520	8	0	0	0	0	0	0	200	300	0	0	0	0	0	0	0	200	903	0	0	0	0	0	0	0	603	903	0
520	9	0	0	0	0	0	0	200	300	0	0	0	0	0	0	0	200	903	0	0	0	0	0	0	0	603	903	0
521	0	0	0	0	0	0	0	200	300	0	0	0	0	0	0	0	200	903	0	0	0	0	0	0	0	603	903	0
521	1	0	0	0	0	0	0	200	300	0	0	0	0	0	0	0	200	903	0	0	0	0	0	0	0	603	903	0
521	2	0	0	0	0	0	0	200	300	0	0	0	0	0	0	0	200	903	0	0	0	0	0	0	0	603	903	0
521	3	0	0	0	0	0	0	200	300	0	0	0	0	0	0	0	200	903	0	0	0	0	0	0	0	603	903	0
521	4	0	0	0	0	0	0	200	300	0	0	0	0	0	0	0	200	903	0	0	0	0	0	0	0	603	903	0
521	5	0	0	0	0	0	0	200	300	0	0	0	0	0	0	0	200	903	0	0	0	0	0	0	0	603	903	0
521	6	0	0	0	0	0	0	200	300	0	0	0	0	0	0	0	200	903	0	0	0	0	0	0	0	603	903	0
521	7	0	0	0	0	0	0	200	300	0	0	0	0	0	0	0	200	903	0	0	0	0	0	0	0	603	903	0
521	8	0	0	0	0	0	0	200	300	0	0	0	0	0	0	0	200	903	0	0	0	0	0	0	0	603	903	0
521	9	0	0	0	0	0	0	200	300	0	0	0	0	0	0	0	200	903	0	0	0	0	0	0	0	603	903	0
522	0	0	0	0	0	0	0	200	300	0	0	0	0	0	0	0	200	903	0	0	0	0	0	0	0	603	903	0
522	1	0	0	0	0	0	0	200	300	0	0	0	0	0	0	0	200	903	0	0	0	0	0	0	0	603	903	0
522	2	0	0	0	0	0	0	200	300	0	0	0	0	0	0	0	200	903	0	0	0	0	0	0	0	603	903	0
522	3	0	0	0	0	0	0	200	300	0	0	0	0	0	0	0	200	903	0	0	0	0	0	0	0	603	903	0
522	4	0	0	0	0	0	0	200	300	0	0	0	0	0	0	0	200	903	0	0	0	0	0	0	0	603	903	0
522	5	0	0	0	0	0	0	200	300	0	0	0	0	0	0	0	200	903	0	0	0	0	0	0	0	603	903	0
522	6	0	0	0	0	0	0	200	300	0	0	0	0	0	0	0	200	903	0	0	0	0	0	0	0	603	903	0
522	7	0	0	0	0	0	0	200	300	0	0	0	0	0	0	0	200	903	0	0	0	0	0	0	0	603	903	0
522	8	0	0	0	0	0	0	200	300	0	0	0	0	0	0	0	200	903	0	0	0	0	0	0	0	603	903	0
522	9	0	0	0	0	0	0	200	300	0	0	0	0	0	0	0	200	903	0	0	0	0	0	0	0	603	903	0
523	0	0	0	0	0	0	0	200	300	0	0	0	0	0	0	0	200	903	0	0	0	0	0	0	0	603	903	0
523	1	0	0	0	0	0	0	200	300	0	0	0	0	0	0	0	200	903	0	0	0	0	0	0	0	603	903	0
523	2	0	0	0	0	0	0	200	300	0	0	0	0	0	0	0	200	903	0	0	0	0	0	0	0	603	903	0
523	3	0	0	0	0	0	0	200	300	0	0	0	0	0	0	0	200	903	0	0	0	0	0	0	0	603	903	0
523	4	0	0	0	0	0	0	200	300	0	0	0	0	0	0	0	200	903	0	0	0	0	0	0	0	603	903	0
523	5	0	0	0	0	0	0	200	300	0	0	0	0	0	0	0	200	903	0	0	0	0	0	0	0	603	903	0
523	6	0	0	0	0	0	0	200	300	0	0	0	0	0	0	0	200	903	0	0	0	0	0	0	0	603	903	0
523	7	0	0	0	0	0	0	200	300	0	0	0	0	0	0	0	200	903	0	0	0	0	0	0	0	603	903	0
523	8	0	0	0	0	0	0	200	300	0	0	0	0	0	0	0	200	903	0	0	0	0	0	0	0	603	903	0
523	9	0	0	0	0	0	0	200	300	0	0	0	0	0	0	0	200	903	0	0	0	0	0	0	0	603	903	0
524	0	0	0	0	0	0	0	200	300	0	0	0	0	0	0	0	200	903	0	0	0	0	0	0	0	603	903	0
524	1	0	0	0	0	0	0	200	300	0	0	0	0	0	0	0	200	903	0	0	0	0	0	0	0	603	903	0
524	2	0	0	0	0	0	0	200	300	0	0	0	0	0	0	0	200	903	0	0	0	0	0	0	0	603	903	0
524	3	0	0	0	0	0	0	200	300	0	0	0	0	0	0	0	200	903	0	0	0	0	0	0	0	603	903	0
524	4	0	0	0	0	0	0	200	300	0	0	0	0	0	0	0	200	903	0	0	0	0	0	0	0	603	903	0
524	5	0	0	0	0	0	0	200	300	0	0	0	0	0	0	0	200	903	0	0	0	0	0	0	0	603	903	0
524	6	0	0	0	0	0	0	200	300	0	0	0	0	0	0	0	200	903	0	0	0	0	0	0	0	603	903	0
524	7	0	0	0	0	0	0	200	300	0	0	0	0	0	0	0	200	903	0	0	0	0	0	0	0	603	903	0
524	8	0	0	0	0	0	0	200	300	0	0	0	0	0	0	0	200	903	0	0	0	0	0	0	0	603	903	0
524	9	0	0	0	0	0	0	200	300	0	0	0	0	0	0	0	200	903	0	0	0	0	0	0	0	603	903	0
525	0	0	0	0	0	0	0	200	300	0	0	0	0	0	0	0	200	903	0	0	0	0	0	0	0	603	903	0
525	1	0	0	0	0	0	0	200	300	0	0	0	0	0	0	0	200	903	0	0	0	0	0	0	0	603	903	0
525	2	0	0	0	0	0	0	200	300	0	0	0	0	0	0	0	200	903	0	0	0	0	0	0	0	603	903	0
525	3	0	0	0	0	0	0	200	300	0	0	0	0	0	0	0	200	903	0	0	0	0	0	0	0	603	903	0
525	4	0	0	0	0	0	0	200	300	0	0	0	0	0	0	0	200	903	0	0	0	0	0	0	0	603	903	0
525	5	0	0	0	0	0	0	200	300	0	0	0	0	0	0	0	200	903	0	0	0	0	0	0	0	603	903	0
525	6	0	0	0	0	0	0	200	300	0	0	0	0	0	0	0	200	903	0	0	0	0	0	0	0	603	903	0
525	7	0	0	0	0	0	0	200	300	0	0	0	0	0	0	0	200	903	0	0	0	0	0	0	0	603	903	0
525	8	0	0	0	0	0	0	200	300	0	0	0	0	0	0	0	200	903	0	0	0	0	0	0	0	603	903	0
525	9	0	0	0	0	0	0	200	300	0	0	0	0	0	0	0	200	903	0	0	0	0	0	0	0	603	903	0
526	0	0	0	0	0	0	0	200	300	0	0	0	0	0	0	0	200	903	0	0	0	0	0	0	0	603	903	0
526	1	0	0	0	0	0	0	200	300	0	0	0	0	0	0	0	200	903	0	0	0	0	0	0	0	603	903	0
526	2	0	0	0	0	0	0	200	300	0	0	0	0	0	0	0	200	903	0	0	0	0	0	0	0	603	903	0
526	3	0	0	0	0	0	0	200	300	0	0	0	0	0	0	0	200	903	0	0	0	0	0	0	0	603	903	0
526	4	0	0	0	0	0	0	200	300	0	0	0	0	0	0	0	200	903	0	0	0	0	0	0	0	603	903	0
526	5	0	0	0	0	0	0	200	300	0	0	0	0	0	0	0	200	903	0	0	0	0	0	0	0	603	903	0
526	6	0	0	0	0	0	0	200	300	0	0	0	0	0	0	0	200	903	0	0	0	0	0	0	0	603	903	0
526	7	0	0	0	0	0	0	200	300	0	0	0	0	0	0	0	200	903	0	0	0	0	0	0	0	603	903	0
526	8	0	0	0	0	0	0	200	300	0	0	0	0	0	0	0	200	903	0	0	0	0	0	0	0	603	903	0
526	9	0	0	0	0	0	0	200	300	0	0	0	0	0	0	0	200	903	0	0	0	0	0	0	0	603	903	0
527	0	0	0	0	0	0	0	200	300	0	0	0	0	0	0	0	200	903	0	0	0	0	0	0	0	603	903	0
527	1	0	0	0	0	0	0	200	300	0	0	0	0	0	0	0	200	903	0	0	0	0	0	0	0	603	903	0
527	2	0	0	0	0	0	0	200	300	0	0	0	0	0	0	0	200	903	0	0	0	0	0	0	0	603	903	0
527	3	0	0	0	0	0	0	200	300	0	0	0	0	0	0	0	200	903	0	0	0	0	0	0	0	603	903	0
527	4	0	0	0	0	0	0	200	300	0	0	0	0	0	0	0	200	903	0	0	0	0	0	0	0	603	903	0
527	5	0	0	0	0	0	0	200	300	0	0	0	0	0	0	0	200	903	0	0	0	0	0	0	0	603	903	0
527	6	0	0	0	0	0	0	200	300	0	0	0	0	0	0	0	200	903	0	0	0	0	0	0	0	603	903	0
527	7	0	0	0	0	0	0	200	300	0	0	0	0	0	0	0	200	903	0	0	0	0	0	0	0	603	903	0
527	8	0	0	0	0	0	0	200	300	0	0	0	0	0	0	0	200	903	0	0	0	0	0	0	0	603	903	0
527	9	0	0	0	0	0	0	200	300	0	0	0	0	0	0	0	200	903	0	0	0	0	0	0	0	603	903	0
528	0	0	0	0	0	0	0	200	300	0	0	0	0	0	0	0	200	903	0	0	0	0	0	0	0	603	903	0
528	1	0	0	0	0	0	0	200	300	0	0	0	0	0	0	0	200	903	0	0	0	0	0	0	0	603	903	0
528	2	0	0	0	0	0	0	200	300	0	0	0	0	0	0	0	200	903	0	0	0	0	0	0	0	603	903	0
528	3	0	0	0	0	0	0	200	300	0	0	0	0	0	0	0	200	903	0	0	0	0	0	0	0	603	903	0
528	4	0	0	0	0	0	0	200	300	0	0	0	0	0	0	0	200	903	0	0	0	0	0	0	0	603	903	0
528	5	0	0	0	0	0	0	200	300	0	0	0	0	0	0	0	200	903	0	0	0	0	0	0	0	603	903	0
528	6	0	0	0	0	0	0	200	300	0	0	0	0	0	0	0	200	903	0	0	0	0	0	0	0	603	903	0
528	7	0	0	0	0	0	0	200	300	0	0	0	0	0	0	0	200	903	0	0	0	0	0	0	0	603	903	0
528	8	0	0	0	0	0	0	200	300	0	0	0	0	0	0	0	200	903	0	0	0	0	0	0	0	603	903	0
528	9	0	0	0	0	0	0	200	300	0	0	0	0	0	0	0	200	903	0	0	0	0	0	0	0	603	903	0
529	0	0	0	0	0	0	0	200	300	0	0	0	0	0	0	0	200	903	0	0	0	0	0	0	0	603	903	0
529	1	0	0	0	0	0	0	200	300	0	0	0	0	0	0	0	200	903	0	0	0	0	0	0	0	603	903	0
529	2	0	0	0	0	0	0	200	300	0	0	0	0	0	0	0	200	903	0	0	0	0	0	0	0	603	903	0
529	3	0	0	0	0	0	0	200	300	0	0	0	0	0	0	0	200	903	0	0	0	0	0	0	0	603	903	0
529	4	0	0	0	0	0	0	200	300	0	0	0	0	0	0	0	200	903	0	0	0	0	0	0	0	603	903	0
529	5	0	0	0	0	0	0	200	300	0	0	0	0	0	0	0	200	903	0	0	0	0	0	0	0	603	903	0
529	6	0	0	0	0	0	0	200	300	0	0	0	0	0	0	0	200	903	0	0	0	0	0	0	0	603	903	0
529	7	0	0	0	0	0	0	200	300	0	0	0	0	0	0	0	200	903	0	0	0	0	0	0	0	603	903	0
529	8	0	0	0	0	0	0	200	300	0	0	0	0	0	0	0	200	903	0	0	0	0	0	0	0	603	903	0
529	9	0	0	0	0	0	0	200	300	0	0	0	0	0	0	0	200	903	0	0	0	0	0	0	0	603	903	0
530	0	0	0	0	0	0	0	200	300	0	0	0	0	0	0	0	200	903	0	0	0	0	0	0	0	603	903	0
530	1	0	0	0	0	0	0	200	300	0	0	0	0	0	0	0	200	903	0	0	0	0	0	0	0	603	903	0
530	2	0	0	0	0	0	0	200	300	0	0	0	0	0	0	0	200	903	0	0	0	0	0	0	0	603	903	0
530	3	0	0	0	0	0	0	200	300	0	0	0	0	0	0	0	200	903	0	0	0	0	0	0	0	603	903	0
530	4	0	0	0	0	0	0	200	300	0	0	0	0	0	0	0	200	903	0	0	0	0	0	0	0	603	903	0
530	5	0	0	0	0	0	0	200	300	0	0	0	0	0	0	0	200	903	0	0	0	0	0	0	0	603	903	0
530	6	0	0	0	0	0	0	200	300	0	0	0	0	0	0	0	200	903	0	0	0	0	0	0	0	603	903	0
530	7	0	0	0	0	0	0	200	300	0	0	0	0	0	0	0	200	903	0	0	0	0	0	0	0	603	903	0
530	8	0	0	0	0	0	0	200	300	0	0	0	0	0	0	0	200	903	0	0	0	0	0	0	0	603	903	0
530	9	0	0	0	0	0	0	200	300	0	0	0	0	0	0	0	200	903	0	0	0	0	0	0	0	603	903	0
531	0	0	0	0	0	0	0	200	300	0	0	0	0	0	0	0	200	903	0	0	0	0	0	0	0	603	903	0
531	1	0	0	0	0	0	0	200	300	0	0	0	0	0	0	0	200	903	0	0	0	0	0	0	0	603	903	0
531	2	0	0	0	0	0	0	200	300	0	0	0	0	0	0	0	200	903	0	0	0	0	0	0	0	603	903	0
531	3	0	0	0	0	0	0	200	300	0	0	0	0	0	0	0	200	903	0	0	0	0	0	0	0	603	903	0
531	4	0	0	0	0	0	0	200	300	0	0	0	0	0	0	0	200	903	0	0	0	0	0	0	0	603	903	0
531	5	0	0	0	0	0	0	200	300	0	0	0	0	0	0	0	200	903	0	0	0	0	0	0	0	603	903	0
531	6	0	0	0	0	0	0	200	300	0	0	0	0	0	0	0	200	903	0	0	0	0	0	0	0	603	903	0
531	7	0	0	0	0	0	0	200	300	0	0	0	0	0	0	0	200	903	0	0	0	0	0	0	0	603	903	0
531	8	0	0	0	0	0	0	200	300	0	0	0	0	0	0	0	200	903	0	0	0	0	0	0	0	603	903	0
531	9	0	0	0	0	0	0	200	300	0	0	0	0	0	0	0	200	903	0	0	0	0	0	0	0	603	903	0
532	0	0	0	0	0	0	0	200	300	0	0	0	0	0	0	0	200	903	0	0	0	0	0	0	0	603	903	0
532	1	0	0	0	0	0	0	200	300	0	0	0	0	0	0	0	200	903	0	0	0	0	0	0	0	603	903	0
532	2	0	0	0	0	0	0	200	300	0	0	0	0	0	0	0	200	903	0	0	0	0	0	0	0	603	903	0
532	3	0	0	0	0	0	0	200	300	0	0	0	0	0	0	0	200	903	0	0	0	0	0	0	0	603	903	0
532	4	0	0	0	0	0	0	200	300	0	0	0	0	0	0	0	200	903	0	0	0	0	0	0	0	603	903	0
532	5	0	0	0	0	0	0	200	300	0	0	0	0	0	0	0	200	903	0	0	0	0	0	0	0	603	903	0
532	6	0	0	0	0	0	0	200	300	0	0	0	0	0	0	0	200	903	0	0	0	0	0	0	0	603	903	0
532	7	0	0	0	0	0	0	200	300	0	0	0	0	0	0	0	200	903	0	0	0	0	0	0	0	603	903	0
532	8	0	0	0	0	0	0	200	300	0	0	0	0	0	0	0	200	903	0	0	0	0	0	0	0	603	903	0
532	9	0	0	0	0	0	0	200	300	0	0	0	0	0	0	0	200	903	0	0	0	0	0	0	0	603	903	0
533	0	0	0	0	0	0	0	200	300	0	0	0	0	0	0	0	200	903	0	0	0	0	0	0	0	603	903	0
533	1	0	0	0	0	0	0	200	300	0	0	0	0	0	0	0	200	903	0	0	0	0	0	0	0	603	903	0
533	2	0	0	0	0	0	0	200	300	0	0	0	0	0	0	0	200	903	0	0	0	0	0	0	0	603	903	0
533	3	0	0	0	0	0	0	200	300	0	0	0	0	0	0	0	200	903	0	0	0	0	0	0	0	603	903	0
533	4	0	0	0	0	0	0	200	300	0	0	0	0	0	0	0	200	903	0	0	0	0	0	0	0	603	903	0
533	5	0	0	0	0	0	0	200	300	0	0	0	0	0	0	0	200	903	0	0	0	0	0	0	0	603	903	0
533	6	0	0	0	0	0	0	200	300	0	0	0	0	0	0	0	200	903	0	0	0	0	0	0	0	603	903	0
533	7	0	0	0	0	0	0	200	300	0	0	0	0	0	0	0	200	903	0	0	0	0	0	0	0	603	903	0
533	8	0	0	0	0	0	0	200	300	0	0	0	0	0	0	0	200	903	0	0	0	0	0	0	0	603	903	0
533	9	0	0	0	0	0	0	200	300	0	0	0	0	0	0	0	200	903	0	0	0	0	0	0	0	603	903	0
534	0	0	0	0	0	0	0	200	300	0	0	0	0	0	0	0	200	903	0	0	0	0	0	0	0	603	903	0
534	1	0	0	0	0	0	0	200	300	0	0	0	0	0	0	0	200	903	0	0	0	0	0	0	0	603	903	0
534	2	0	0	0	0	0	0	200	300	0	0	0	0	0	0	0	200	903	0	0	0	0	0	0	0	603	903	0
534	3	0	0	0	0	0	0	200	300	0	0	0	0	0	0	0	200	903	0	0	0	0	0	0	0	603	903	0
534	4	0	0	0	0	0	0	200	300	0	0	0	0	0	0	0	200	903	0	0	0	0	0	0	0	603	903	0
534	5	0	0	0	0	0	0	200	300	0	0	0	0	0	0	0	200	903	0	0	0	0	0	0	0	603	903	0
534	6	0	0	0	0	0	0	200	300	0	0	0	0	0	0	0	200	903	0	0	0	0	0	0	0	603	903	0
534	7	0	0	0	0	0	0	200	300	0	0	0	0	0	0	0	200	903	0	0	0	0	0	0	0	603	903	0
534	8	0	0	0	0	0	0	200	300	0	0	0	0	0	0	0	200	903	0	0	0	0	0	0	0	603	903	0
534	9	0	0	0	0	0	0	200	300	0	0	0	0	0	0	0	200	903	0	0	0	0	0	0	0	603	903	0
535	0	0	0	0	0	0	0	200	300	0	0	0	0	0	0	0	200	903	0	0	0	0	0	0	0	603	903	0
535	1	0	0	0	0	0	0	200	300	0	0	0	0	0	0	0	200	903	0	0	0	0	0	0	0	603	903	0
535	2	0	0	0	0	0	0	200	300	0	0	0	0	0	0	0	200	903	0	0	0	0	0	0	0	603	903	0
535	3	0	0	0	0	0	0	200	300	0	0	0	0	0	0	0	200	903	0	0	0	0	0	0	0	603	903	0
535	4	0	0	0	0	0	0	200	300	0	0	0	0	0	0	0	200	903	0	0	0	0	0	0	0	603	903	0
535	5	0	0	0	0	0	0	200	300	0	0	0	0	0	0	0	200	903	0	0	0	0	0	0	0	603	903	0
535	6	0	0	0	0	0	0	200	300	0	0	0	0	0	0	0	200	903	0	0	0	0	0	0	0	603	903	0
535	7	0	0	0	0	0	0	200	300	0	0	0	0	0	0	0	200	903	0	0	0	0	0	0	0	603	903	0
535	8	0	0	0	0	0	0	200	300	0	0	0	0	0	0	0	200	903	0	0	0	0	0	0	0	603	903	0
535	9	0	0	0	0	0	0	200	300	0	0	0	0	0	0	0	200	903	0	0	0	0	0	0	0	603	903	0
536	0	0	0	0	0	0	0	200	300	0	0	0	0	0	0	0	200	903	0	0	0	0	0	0	0	603	903	0
536	1	0	0	0	0	0	0	200	300	0	0	0	0	0	0	0	200	903	0	0	0	0	0	0	0	603	903	0
536	2	0	0	0	0	0	0	200	300	0	0	0	0	0	0	0	200	903	0	0	0	0	0	0	0	603	903	0
536	3	0	0	0	0	0	0	200	300	0	0	0	0	0	0	0	200	903	0	0	0	0	0	0	0	603	903	0
536	4	0	0	0	0	0	0	200	300	0	0	0	0	0	0	0	200	903	0	0	0	0	0	0	0	603	903	0
536	5	0	0	0	0	0	0	200	300	0	0	0	0	0	0	0	200	903	0	0	0	0	0	0	0	603	903	0
536	6	0	0	0	0	0	0	200	300	0	0	0	0	0	0	0	200	903	0	0	0	0	0	0	0	603	903	0
536	7	0	0	0	0	0	0	200	300	0	0	0	0	0	0	0	200	903	0	0	0	0	0	0	0	603	903	0
536	8	0	0	0	0	0	0	200	300	0	0	0	0	0	0	0	200	903	0	0	0	0	0	0	0	603	903	0
536	9	0	0	0	0	0	0	200	300	0	0	0	0	0	0	0	200	903	0	0	0	0	0	0	0	603	903	0
537	0	0	0	0	0	0	0	200	300	0	0	0	0	0	0	0	200	903	0	0	0	0	0	0	0	603	903	0
537	1	0	0	0	0	0	0	200	300	0	0	0	0	0	0	0	200	903	0	0	0	0	0	0	0	603	903	0
537	2	0	0	0	0	0	0	200	300	0	0	0	0	0	0	0	200	903	0	0	0	0	0	0	0	603	903	0
537	3	0	0	0	0	0	0	200	300	0	0	0	0	0	0	0	200	903	0	0	0	0	0	0	0	603	903	0
537	4	0	0	0	0	0	0	200	300	0	0	0	0	0	0	0	200	903	0	0	0	0	0	0	0	603	903	0
537	5	0	0	0	0	0	0	200	300	0	0	0	0	0	0	0	200	903	0	0	0	0	0	0	0	603	903	0
537	6	0	0	0	0	0	0	200	300	0	0	0	0	0	0	0	200	903	0	0	0	0	0	0	0	603	903	0
537	7	0	0	0	0	0	0	200	300	0	0	0	0	0	0	0	200	903	0	0	0	0	0	0	0	603	903	0
537	8	0	0	0	0	0	0	200	300	0	0	0	0	0	0	0	200	903	0	0	0	0	0	0	0	603	903	0
537	9	0	0	0	0	0	0	200	300	0	0	0	0	0	0	0	200	903	0	0	0	0	0	0	0	603	903	0
538	0	0	0	0	0	0	0	200	300	0	0	0	0	0	0	0	200	903	0	0	0	0	0	0	0	603	903	0
538	1	0	0	0	0	0	0	200	300	0	0	0	0	0	0	0	200	903	0	0	0	0	0	0	0	603	903	0
538	2	0	0	0	0	0	0	200	300	0	0	0	0	0	0	0	200	903	0	0	0	0	0	0	0	603	903	0
538	3	0	0	0	0	0	0	200	300	0	0	0	0	0	0	0	200	903	0	0	0	0	0	0	0	603	903	0
538	4	0	0	0	0	0	0	200	300	0	0	0	0	0	0	0	200	903	0	0	0	0	0	0	0	603	903	0
538	5	0	0	0	0	0	0	200	300	0	0	0	0	0	0	0	200	903	0	0	0	0	0	0	0	603	903	0
538	6	0	0	0	0	0	0	200	300	0	0	0	0	0	0	0	200	903	0	0	0	0	0	0	0	603	903	0
538	7	0	0	0	0	0	0	200	300	0	0	0	0	0	0	0	200	903	0	0	0	0	0	0	0	603	903	0
538	8	0	0	0	0	0	0	200	300	0	0	0	0	0	0	0	200	903	0	0	0	0	0	0	0	603	903	0
538	9	0	0	0	0	0	0	200	300	0	0	0	0	0	0	0	200	903	0	0	0	0	0	0	0	603	903	0
539	0	0	0	0	0	0	0	200	300	0	0	0	0	0	0	0	200	903	0	0	0	0	0	0	0	603	903	0
539	1	0	0	0	0	0	0	200	300	0	0	0	0	0	0	0	200	903	0	0	0	0	0	0	0	603	903	0
539	2	0	0	0	0	0	0	200	300	0	0	0	0	0	0	0	200	903	0	0	0	0	0	0	0	603	903	0
539	3	0	0	0	0	0	0	200	300	0	0	0	0	0	0	0	200	903	0	0	0	0	0	0	0	603	903	0
539	4	0	0	0	0	0	0	200	300	0	0	0	0	0	0	0	200	903	0	0	0	0	0	0	0	603	903	0
539	5	0	0	0	0	0	0	200	300	0	0	0	0	0	0	0	200	903	0	0	0	0	0	0	0	603	903	0
539	6	0	0	0	0	0	0	200	300	0	0	0	0	0	0	0	200	903	0	0	0	0	0	0	0	603	903	0
539	7	0	0	0	0	0	0	200	300	0	0	0	0	0	0	0	200	903	0	0	0	0	0	0	0	603	903	0
539	8	0	0	0	0	0	0	200	300	0	0	0	0	0	0	0	200	903	0	0	0	0	0	0	0	603	903	0
539	9	0	0	0	0	0	0	200	300	0	0	0	0	0	0	0	200	903	0	0	0	0	0	0	0	603	903	0
540	0	0	0	0	0	0	0	200	300	0	0	0	0	0	0	0	200	903	0	0	0	0	0	0	0	603	903	0
540	1	0	0	0	0	0	0	200	300	0	0	0	0	0	0	0	200	903	0	0	0	0	0	0	0	603	903	0
540	2	0	0	0	0	0	0	200	300	0	0	0	0	0	0	0	200	903	0	0	0	0	0	0	0	603	903	0
540	3	0	0	0	0	0	0	200	300	0	0	0	0	0	0	0	200	903	0	0	0	0	0	0	0	603	903	0
540	4	0	0	0	0	0	0	200	300	0	0	0	0	0	0	0	200	903	0	0	0	0	0	0	0	603	903	0
540	5	0	0	0	0	0	0	200	300	0	0	0	0	0	0	0	200	903	0	0	0	0	0	0	0	603	903	0
540	6	0	0	0	0	0	0	200	300	0	0	0	0	0	0	0	200	903	0	0	0	0	0	0	0	603	903	0
540	7	0	0	0	0	0	0	200	300	0	0	0	0	0	0	0	200	903	0	0	0	0	0	0	0	603	903	0
540	8	0	0	0	0	0	0	200	300	0	0	0	0	0	0	0	200	903	0	0	0	0	0	0	0	603	903	0
540	9	0	0	0	0	0	0	200	300	0	0	0	0	0	0	0	200	903	0	0	0	0	0	0	0	603	903	0
541	0	0	0	0	0	0	0	200	300	0	0	0	0	0	0	0	200	903	0	0	0	0	0	0	0	603	903	0
541	1	0	0	0	0	0	0	200	300	0	0	0	0	0	0	0	200	903	0	0	0	0	0	0	0	603	903	0
541	2	0	0	0	0	0	0	200	300	0	0	0	0	0	0	0	200	903	0	0	0	0	0	0	0	603	903	0
541	3	0	0	0	0	0	0	200	300	0	0	0	0	0	0	0	200	903	0	0	0	0	0	0	0	603	903	0
541	4	0	0	0	0	0	0	200	300	0	0	0	0	0	0	0	200	903	0	0	0	0	0	0	0	603	903	0
541	5	0	0	0	0	0	0	200	300	0	0	0	0	0	0	0	200	903	0	0	0	0	0	0	0	603	903	0
541	6	0	0	0	0	0	0	200	300	0	0	0	0	0	0	0	200	903	0	0	0	0	0	0	0	603	903	0
541	7	0	0	0	0	0	0	200	300	0	0	0	0	0	0	0	200	903	0	0	0	0	0	0	0	603	903	0
541	8	0	0	0	0	0	0	200	300	0	0	0	0	0	0	0	200	903	0	0	0	0	0	0	0	603	903	0
541	9	0	0	0	0	0	0	200	300	0	0	0	0	0	0	0	200	903	0	0	0	0	0	0	0	603	903	0
542	0	0	0	0	0	0	0	200	300	0	0	0	0	0	0	0	200	903	0	0	0	0	0	0	0	603	903	0
542	1	0	0	0	0	0	0	200	300	0	0	0	0	0	0	0	200	903	0	0	0	0	0	0	0	603	903	0
542	2	0	0	0	0	0	0	200	300	0	0	0	0	0	0	0	200	903	0	0	0	0	0	0	0	603	903	0
542	3	0	0	0	0	0	0	200	300	0	0	0	0	0	0	0	200	903	0	0	0	0	0	0	0	603	903	0
542	4	0	0	0	0	0	0	200	300	0	0	0	0	0	0	0	200	903	0	0	0	0	0	0	0	603	903	0
542	5	0	0	0	0	0	0	200	300	0	0	0	0	0	0	0	200	903	0	0	0	0	0	0	0	603	903	0
542	6	0	0	0	0	0	0	200	300	0	0	0	0	0	0	0	200	903	0	0	0	0	0	0	0	603	903	0
542	7	0	0	0	0	0	0	200	300	0	0	0	0	0	0	0	200	903	0	0	0	0	0	0	0	603	903	0
542	8	0	0	0	0	0	0	200	300	0	0	0	0	0	0	0	200	903	0	0	0	0	0	0	0	603	903	0
542	9	0	0	0	0	0	0	200	300	0	0	0	0	0	0	0	200	903	0	0	0	0	0	0	0	603	903	0
543	0	0	0	0	0	0	0	200	300	0	0	0	0	0	0	0	200	903	0	0	0	0	0	0	0	603	903	0
543	1	0	0	0	0	0	0	200	300	0	0	0	0	0	0	0	200	903	0	0	0	0	0	0	0	603	903	0
543	2	0	0	0	0	0	0	200	300	0	0	0	0	0	0	0	200	903	0	0	0	0	0	0	0	603	903	0
543	3	0	0	0	0	0	0	200	300	0	0	0	0	0	0	0	200	903	0	0	0	0	0	0	0	603	903	0
543	4	0	0	0	0	0	0	200	300	0	0	0	0	0	0	0	200	903	0	0	0	0	0	0	0	603	903	0
543	5	0	0	0	0	0	0	200	300	0	0	0	0	0	0	0	200	903	0	0	0	0	0	0	0	603	903	0
543	6	0	0	0	0	0	0	200	300	0	0	0	0	0	0	0	200	903	0	0	0	0	0	0	0	603	903	0
543	7	0	0	0	0	0	0	200	300	0	0	0	0	0	0	0	200	903	0	0	0	0	0	0	0	603	903	0
543	8	0	0	0	0	0	0	200	300	0	0	0	0	0	0	0	200	903	0	0	0	0	0	0	0	603	903	0
543	9	0	0	0	0	0	0	200	300	0	0	0	0	0	0	0	200	903	0	0	0	0	0	0	0	603	903	0
544	0	0	0	0	0	0	0	200	300	0	0	0	0	0	0	0	200	903	0	0	0	0	0	0	0	603	903	0
544	1	0	0	0	0	0	0	200	300	0	0	0	0	0	0	0	200	903	0	0	0	0	0	0	0	603	903	0
544	2	0	0	0	0	0	0	200	300	0	0	0	0	0	0	0	200	903	0	0	0	0	0	0	0	603	903	0
544	3	0	0	0	0	0	0	200	300	0	0	0	0	0	0	0	200	903	0	0	0	0	0	0	0	603	903	0
544	4	0	0	0	0	0	0	200	300	0	0	0	0	0	0	0	200	903	0	0	0	0	0	0	0	603	903	0
544	5	0	0	0	0	0	0	200	300	0	0	0	0	0	0	0	200	903	0	0	0	0	0	0	0	603	903	0
544	6	0	0	0	0	0	0	200	300	0	0	0	0	0	0	0	200	903	0	0	0	0	0	0	0	603	903	0
544	7	0	0	0	0	0	0	200	300	0	0	0	0	0	0	0	200	903	0	0	0	0	0	0	0	603	903	0
544	8	0	0	0	0	0	0	200	300	0	0	0	0	0	0	0	200	903	0	0	0	0	0	0	0	603	903	0
544	9	0	0	0	0	0	0	200	300	0	0	0	0	0	0	0	200	903	0	0	0	0	0	0	0	603	903	0
545	0	0	0	0	0	0	0	200	300	0	0	0	0	0	0	0	200	903	0	0	0	0	0	0	0	603	903	0
545	1	0	0	0	0	0	0	200	300	0	0	0	0	0	0	0	200	903	0	0	0	0	0	0	0	603	903	0
545	2	0	0	0	0	0	0	200	300	0	0	0	0	0	0	0	200	903	0	0	0	0	0	0	0	603	903	0
545	3	0	0	0	0	0	0	200	300	0	0	0	0	0	0	0	200	903	0	0	0	0	0	0	0	603	903	0
545	4	0	0	0	0	0	0	200	300	0	0	0	0	0	0	0	200	903	0	0	0	0	0	0	0	603	903	0
545	5	0	0	0	0	0	0	200	300	0	0	0	0	0	0	0	200	903	0	0	0	0	0	0	0	603	903	0
545	6	0	0	0	0	0	0	200	300	0	0	0	0	0	0	0	200	903	0	0	0	0	0	0	0	603	903	0
545	7	0	0	0	0	0	0	200	300	0	0	0	0	0	0	0	200	903	0	0	0	0	0	0	0	603	903	0
545	8	0	0	0	0	0	0	200	300	0	0	0	0	0	0	0	200	903	0	0	0	0	0	0	0	603	903	0
545	9	0	0	0	0	0	0	200	300	0	0	0	0	0	0	0	200	903	0	0	0	0	0	0	0	603	903	0
546	0	0	0	0	0	0	0	200	300	0	0	0	0	0	0	0	200	903	0	0	0	0	0	0	0	603	903	0
546	1	0	0	0	0	0	0	200	300	0	0	0	0	0	0	0	200	903	0	0	0	0	0	0	0	603	903	0
546	2	0	0	0	0	0	0	200	300	0	0	0	0	0	0	0	200	903	0	0	0	0	0	0	0	603	903	0
546	3	0	0	0	0	0	0	200	300	0	0	0	0	0	0	0	200	903	0	0	0	0	0	0	0	603	903	0
546	4	0	0	0	0	0	0	200	300	0	0	0	0	0	0	0	200	903	0	0	0	0	0	0	0	603	903	0
546	5	0	0	0	0	0	0	200	300	0	0	0	0	0	0	0	200	903	0	0	0	0	0	0	0	603	903	0
546	6	0	0	0	0	0	0	200	300	0	0	0	0	0	0	0	200	903	0	0	0	0	0	0	0	603	903	0
546	7	0	0	0	0	0	0	200	300	0	0	0	0	0	0	0	200	903	0	0	0	0	0	0	0	603	903	0
546	8	0	0	0	0	0	0	200	300	0	0	0	0	0	0	0	200	903	0	0	0	0	0	0	0	603	903	0
546	9	0	0	0	0	0	0	200	300	0	0	0	0	0	0	0	200	903	0	0	0	0	0	0	0	603	903	0
547	0	0	0	0	0	0	0	200	300	0	0	0	0	0	0	0	200	903	0	0	0	0	0	0	0	603	903	0
547	1	0	0	0	0	0	0	200	300	0	0	0	0	0	0	0	200	903	0	0	0	0	0	0	0	603	903	0
547	2	0	0	0	0	0	0	200	300	0	0	0	0	0	0	0	200	903	0	0	0	0	0	0	0	603	903	0
547	3	0	0	0	0	0	0	200	300	0	0	0	0	0	0	0	200	903	0	0	0	0	0	0	0	603	903	0
547	4	0	0	0	0	0	0	200	300	0	0	0	0	0	0	0	200	903	0	0	0	0	0	0	0	603	903	0
547	5	0	0	0	0	0	0	200	300	0	0	0	0	0	0	0	200	903	0	0	0	0	0	0	0	603	903	0
547	6	0	0	0	0	0	0	200	300	0	0	0	0	0	0	0	200	903	0	0	0	0	0	0	0	603	903	0
547	7	0	0	0	0	0	0	200	300	0	0	0	0	0	0	0	200	903	0	0	0	0	0	0	0	603	903	0
547	8	0	0	0	0	0	0	200	300	0	0	0	0	0	0	0	200	903	0	0	0	0	0	0	0	603	903	0
547	9	0	0	0	0	0	0	200	300	0	0	0	0	0	0	0	200	903	0	0	0	0	0	0	0	603	903	0
548	0	0	0	0	0	0	0	200	300	0	0	0	0	0	0	0	200	903	0	0	0	0	0	0	0	603	903	0
548	1	0	0	0	0	0	0	200	300	0	0	0	0	0	0	0	200	903	0	0	0	0	0	0	0	603	903	0
548	2	0	0	0	0	0	0	200	300	0	0	0	0	0	0	0	200	903	0	0	0	0	0	0	0	603	903	0
548	3	0	0	0	0	0	0	200	300	0	0	0	0	0	0	0	200	903	0	0	0	0	0	0	0	603	903	0
548	4	0	0	0	0	0	0	200	300	0	0	0	0	0	0	0	200	903	0	0	0	0	0	0	0	603	903	0
548	5	0	0	0	0	0	0	200	300	0	0	0	0	0	0	0	200	903	0	0	0	0	0	0	0	603	903	0
548	6	0	0	0	0	0	0	200	300	0	0	0	0	0	0	0	200	903	0	0	0	0	0	0	0	603	903	0
548	7	0	0	0	0	0	0	200	300	0	0	0	0	0	0	0	200	903	0	0	0	0	0	0	0	603	903	0
548	8	0	0	0	0	0	0	200	300	0	0	0	0	0	0	0	200	903	0	0	0	0	0	0	0	603	903	0
548	9	0	0	0	0	0	0	200	300	0	0	0	0	0	0	0	200	903	0	0	0	0	0	0	0	603	903	0
549	0	0	0	0	0	0	0	200	300	0	0	0	0	0	0	0	200	903	0	0	0	0	0	0	0	603	903	0
549	1	0	0	0	0	0	0	200	300	0	0	0	0	0	0	0	200	903	0	0	0	0	0	0	0	603	903	0
549	2	0	0	0	0	0	0	200	300	0	0	0	0	0	0	0	200	903	0	0	0	0	0	0	0	603	903	0
549	3	0	0	0	0	0	0	200	300	0	0	0	0	0	0	0	200	903	0	0	0	0	0	0	0	603	903	0
549	4	0	0	0	0	0	0	200	300	0	0	0	0	0	0	0	200	903	0	0	0	0	0	0	0	603	903	0
549	5	0	0	0	0	0	0	200	300	0	0	0	0	0	0	0	200	903	0	0	0	0	0	0	0	603	903	0
549	6	0	0	0	0	0	0	200	300	0	0	0	0	0	0	0	200	903	0	0	0	0	0	0	0	603	903	0
549	7	0	0	0	0	0	0	200	300	0	0	0	0	0	0	0	200	903	0	0	0	0	0	0	0	603	903	0
549	8	0	0	0	0	0	0	200	300	0	0	0	0	0	0	0	200	903	0	0	0	0	0	0	0	603	903	0
549	9	0	0	0	0	0	0	200	300	0	0	0	0	0	0	0	200	903	0	0	0	0	0	0	0	603	903	0
550	0	0	0	0	0	0	0	200	300	0	0	0	0	0	0	0	200	903	0	0	0	0	0	0	0	603	903	0
550	1	0	0	0	0	0	0	200	300	0	0	0	0	0	0	0	200	903	0	0	0	0	0	0	0	603	903	0
550	2	0	0	0	0	0	0	200	300	0	0	0	0	0	0	0	200	903	0	0	0	0	0	0	0	603	903	0
550	3	0	0	0	0	0	0	200	300	0	0	0	0	0	0	0	200	903	0	0	0	0	0	0	0	603	903	0
550	4	0	0	0	0	0	0	200	300	0	0	0	0	0	0	0	200	903	0	0	0	0	0	0	0	603	903	0
550	5	0	0	0	0	0	0	200	300	0	0	0	0	0	0	0	200	903	0	0	0	0	0	0	0	603	903	0
550	6	0	0	0	0	0	0	200	300	0	0	0	0	0	0	0	200	903	0	0	0	0	0	0	0	603	903	0
550	7	0	0	0	0	0	0	200	300	0	0	0	0	0	0	0	200	903	0	0	0	0	0	0	0	603	903	0
550	8	0	0	0	0	0	0	200	300	0	0	0	0	0	0	0	200	903	0	0	0	0	0	0	0	603	903	0
550	9	0	0	0	0	0	0	200	300	0	0	0	0	0	0	0	200	903	0	0	0	0	0	0	0	603	903	0
551	0	0	0	0	0	0	0	200	300	0	0	0	0	0	0	0	200	903	0	0	0	0	0	0	0	603	903	0
551	1	0	0	0	0	0	0	200	300	0	0	0	0	0	0	0	200	903	0	0	0	0	0	0	0	603	903	0
551	2	0	0	0	0	0	0	200	300	0	0	0	0	0	0	0	200	903	0	0	0	0	0	0	0	603	903	0
551	3	0	0	0	0	0	0	200	300	0	0	0	0	0	0	0	200	903	0	0	0	0	0	0	0	603	903	0
551	4	0	0	0	0	0	0	200	300	0	0	0	0	0	0	0	200	903	0	0	0	0	0	0	0	603	903	0
551	5	0	0	0	0	0	0	200	300	0	0	0	0	0	0	0	200	903	0	0	0	0	0	0	0	603	903	0
551	6	0	0	0	0	0	0	200	300	0	0	0	0	0	0	0	200	903	0	0	0	0	0	0	0	603	903	0
551	7	0	0	0	0	0	0	200	300	0	0	0	0	0	0	0	200	903	0	0	0	0	0	0	0	603	903	0
551	8	0	0	0	0	0	0	200	300	0	0	0	0	0	0	0	200	903	0	0	0	0	0	0	0	603	903	0
551	9	0	0	0	0	0	0	200	300	0	0	0	0	0	0	0	200	903	0	0	0	0	0	0	0	603	903	0
552	0	0	0	0	0	0	0	200	300	0	0	0	0	0	0	0	200	903	0	0	0	0	0	0	0	603	903	0
552	1	0	0	0	0	0	0	200	300	0	0	0	0	0	0	0	200	903	0	0	0	0	0	0	0	603	903	0
552	2	0	0	0	0	0	0	200	300	0	0	0	0	0	0	0	200	903	0	0	0	0	0	0	0	603	903	0
552	3	0	0	0	0	0	0	200	300	0	0	0	0	0	0	0	200	903	0	0	0	0	0	0	0	603	903	0
552	4	0	0	0	0	0	0	200	300	0	0	0	0	0	0	0	200	903	0	0	0	0	0	0	0	603	903	0
552	5	0	0	0	0	0	0	200	300	0	0	0	0	0	0	0	200	903	0	0	0	0	0	0	0	603	903	0
552	6	0	0	0	0	0	0	200	300	0	0	0	0	0	0	0	200	903	0	0	0	0	0	0	0	603	903	0
552	7	0	0	0	0	0	0	200	300	0	0	0	0	0	0	0	200	903	0	0	0	0	0	0	0	603	903	0
552	8	0	0	0	0	0	0	200	300	0	0	0	0	0	0	0	200	903	0	0	0	0	0	0	0	603	903	0
552	9	0	0	0	0	0	0	200	300	0	0	0	0	0	0	0	200	903	0	0	0	0	0	0	0	603	903	0
553	0	0	0	0	0	0	0	200	300	0	0	0	0	0	0	0	200	903	0	0	0	0	0	0	0	603	903	0
553	1	0	0	0	0	0	0	200	300	0	0	0	0	0	0	0	200	903	0	0	0	0	0	0	0	603	903	0
553	2	0	0	0	0	0	0	200	300	0	0	0	0	0	0	0	200	903	0	0	0	0	0	0	0	603	903	0
553	3	0	0	0	0	0	0	200	300	0	0	0	0	0	0	0	200	903	0	0	0	0	0	0	0	603	903	0
553	4	0	0	0	0	0	0	200	300	0	0	0	0	0	0	0	200	903	0	0	0	0	0	0	0	603	903	0
553	5	0	0	0	0	0	0	200	300	0	0	0	0	0	0	0	200	903	0	0	0	0	0	0	0	603	903	0
553	6	0	0	0	0	0	0	200	300	0	0	0	0	0	0	0	200	903	0	0	0	0	0	0	0	603	903	0
553	7	0	0	0	0	0	0	200	300	0	0	0	0	0	0	0	200	903	0	0	0	0	0	0	0	603	903	0
553	8	0	0	0	0	0	0	200	300	0	0	0	0	0	0	0	200	903	0	0	0	0	0	0	0	603	903	0
553	9	0	0	0	0	0	0	200	300	0	0	0	0	0	0	0	200	903	0	0	0	0	0	0	0	603	903	0
554	0	0	0	0	0	0	0	200	300	0	0	0	0	0	0	0	200	903	0	0	0	0	0	0	0	603	903	0
554	1	0	0	0	0	0	0	200	300	0	0	0	0	0	0	0	200	903	0	0	0	0	0	0	0	603	903	0
554	2	0	0	0	0	0	0	200	300	0	0	0	0	0	0	0	200	903	0	0	0	0	0	0	0	603	903	0
554	3	0	0	0	0	0	0	200	300	0	0	0	0	0	0	0	200	903	0	0	0	0	0	0	0	603	903	0
554	4	0	0	0	0	0	0	200	300	0	0	0	0	0	0	0	200	903	0	0	0	0	0	0	0	603	903	0
554	5	0	0	0	0	0	0	200	300	0	0	0	0	0	0	0	200	903	0	0	0	0	0	0	0	603	903	0
554	6	0	0	0	0	0	0	200	300	0	0	0	0	0	0	0	200	903	0	0	0	0	0	0	0	603	903	0
554	7	0	0	0	0	0	0	200	300	0	0	0	0	0	0	0	200	903	0	0	0	0	0	0	0	603	903	0
554	8	0	0	0	0	0	0	200	300	0	0	0	0	0	0	0	200	903	0	0	0	0	0	0	0	603	903	0
554	9	0	0	0	0	0	0	200	300	0	0	0	0	0	0	0	200	903	0	0	0	0	0	0	0	603	903	0
555	0	0	0	0	0	0	0	200	300	0	0	0	0	0	0	0	200	903	0	0	0	0	0	0	0	603	903	0
555	1	0	0	0	0	0	0	200	300	0	0	0	0	0	0	0	200	903	0	0	0	0	0	0	0	603	903	0
555	2	0	0	0	0	0	0	200	300	0	0	0	0	0	0	0	200	903	0	0	0	0	0	0	0	603	903	0
555	3	0	0	0	0	0	0	200	300	0	0	0	0	0	0	0	200	903	0	0	0	0	0	0	0	603	903	0
555	4	0	0	0	0	0	0	200	300	0	0	0	0	0	0	0	200	903	0	0	0	0	0	0	0	603	903	0
555	5	0	0	0	0	0	0	200	300	0	0	0	0	0	0	0	200	903	0	0	0	0	0	0	0	603	903	0
555	6	0	0	0	0	0	0	200	300	0	0	0	0	0	0	0	200	903	0	0	0	0	0	0	0	603	903	0
555	7	0	0	0	0	0	0	200	300	0	0	0	0	0	0	0	200	903	0	0	0	0	0	0	0	603	903	0
555	8	0	0	0	0	0	0	200	300	0	0	0	0	0	0	0	200	903	0	0	0	0	0	0	0	603	903	0
555	9	0	0	0	0	0	0	200	300	0	0	0	0	0	0	0	200	903	0	0	0	0	0	0	0	603	903	0
556	0	0	0	0	0	0	0	200	300	0	0	0	0	0	0	0	200	903	0	0	0	0	0	0	0	603	903	0
556	1	0	0	0	0	0	0	200	300	0	0	0	0	0	0	0	200	903	0	0	0	0	0	0	0	603	903	0
556	2	0	0	0	0	0	0	200	300	0	0	0	0	0	0	0	200	903	0	0	0	0	0	0	0	603	903	0
556	3	0	0	0	0	0	0	200	300	0	0	0	0	0	0	0	200	903	0	0	0	0	0	0	0	603	903	0
556	4	0	0	0	0	0	0	200	300	0	0	0	0	0	0	0	200	903	0	0	0	0	0	0	0	603	903	0
556	5	0	0	0	0	0	0	200	300	0	0	0	0	0	0	0	200	903	0	0	0	0	0	0	0	603	903	0
556	6	0	0	0	0	0	0	200	300	0	0	0	0	0	0	0	200	903	0	0	0	0	0	0	0	603	903	0
556	7	0	0	0	0	0	0	200	300	0	0	0	0	0	0	0	200	903	0	0	0	0	0	0	0	603	903	0
556	8	0	0	0	0	0	0	200	300	0	0	0	0	0	0	0	200	903	0	0	0	0	0	0	0	603	903	0
556	9	0	0	0	0	0	0	200	300	0	0	0	0	0	0	0	200	903	0	0	0	0	0	0	0	603	903	0
557	0	0	0	0	0	0	0	200	300	0	0	0	0	0	0	0	200	903	0	0	0	0	0	0	0	603	903	0
557	1	0	0	0	0	0	0	200	300	0	0	0	0	0	0	0	200	903	0	0	0	0	0	0	0	603	903	0
557	2	0	0	0	0	0	0	200	300	0	0	0	0	0	0	0	200	903	0	0	0	0	0	0	0	603	903	0
557	3	0	0	0	0	0	0	200	300	0	0	0	0	0	0	0	200	903	0	0	0	0	0	0	0	603	903	0
557	4	0	0	0	0	0	0	200	300	0	0	0	0	0	0	0	200	903	0	0	0	0	0	0	0	603	903	0
557	5	0	0	0	0	0	0	200	300	0	0	0	0	0	0	0	200	903	0	0	0	0	0	0	0	603	903	0
557	6	0	0	0	0	0	0	200	300	0	0	0	0	0	0	0	200	903	0	0	0	0	0	0	0	603	903	0
557	7	0	0	0	0	0	0	200	300	0	0	0	0	0	0	0	200	903	0	0	0	0	0	0	0	603	903	0
557	8	0	0	0	0	0	0	200	300	0	0	0	0	0	0	0	200	903	0	0	0	0	0	0	0	603	903	0
557	9	0	0	0	0	0	0	200	300	0	0	0	0	0	0	0	200	903	0	0	0	0	0	0	0	603	903	0
558	0	0	0	0	0	0	0	200	300	0	0	0	0	0	0	0	200	903	0	0	0	0	0	0	0	603	903	0
558	1	0	0	0	0	0	0	200	300	0	0	0	0	0	0	0	200	903	0	0	0	0	0	0	0	603	903	0
558	2	0	0	0	0	0	0	200	300	0	0	0	0	0	0	0	200	903	0	0	0	0	0	0	0	603	903	0
558	3	0	0	0	0	0	0	200	300	0	0	0	0	0	0	0	200	903	0	0	0	0	0	0	0	603	903	0
558	4	0	0	0	0	0	0	200	300	0	0	0	0	0	0	0	200	903	0	0	0	0	0	0	0	603	903	0
558	5	0	0	0	0	0	0	200	300	0	0	0	0	0	0	0	200	903	0	0	0	0	0	0	0	603	903	0
558	6	0	0	0	0	0	0	200	300	0	0	0	0	0	0	0	200	903	0	0	0	0	0	0	0	603	903	0
558	7	0	0	0	0	0	0	200	300	0	0	0	0	0	0	0	200	903	0	0	0	0	0	0	0	603	903	0
558	8	0	0	0	0	0	0	200	300	0	0	0	0	0	0	0	200	903	0	0	0	0	0	0	0	603	903	0
558	9	0	0	0	0	0	0	200	300	0	0	0	0	0	0	0	200	903	0	0	0	0	0	0	0	603	903	0
559	0	0	0	0	0	0	0	200	300	0	0	0	0	0	0	0	200	903	0	0	0	0	0	0	0	603	903	0
559	1	0	0	0	0	0	0	200	300	0	0	0	0	0	0	0	200	903	0	0	0	0	0	0	0	603	903	0
559	2	0	0	0	0	0	0	200	300	0	0	0	0	0	0	0	200	903	0	0	0	0	0	0	0	603	903	0
559	3	0	0	0	0	0	0	200	300	0	0	0	0	0	0	0	200	903	0	0	0	0	0	0	0	603	903	0
559	4	0	0	0	0	0	0	200	300	0	0	0	0	0	0	0	200	903	0	0	0	0	0	0	0	603	903	0
559	5	0	0	0	0	0	0	200	300	0	0	0	0	0	0	0	200	903	0	0	0	0	0	0	0	603	903	0
559	6	0	0	0	0	0	0	200	300	0	0	0	0	0	0	0	200	903	0	0	0	0	0	0	0	603	903	0
559	7	0	0	0	0	0	0	200	300	0	0	0	0	0	0	0	200	903	0	0	0	0	0	0	0	603	903	0
559	8	0	0	0	0	0	0	200	300	0	0	0	0	0	0	0	200	903	0	0	0	0	0	0	0	603	903	0
559	9	0	0	0	0	0	0	200	300	0	0	0	0	0	0	0	200	903	0	0	0	0	0	0	0	603	903	0
560	0	0	0	0	0	0	0	200	300	0	0	0	0	0	0	0	200	903	0	0	0	0	0	0	0	603	903	0
560	1	0	0	0	0	0	0	200	300	0	0	0	0	0	0	0	200	903	0	0	0	0	0	0	0	603	903	0
560	2	0	0	0	0	0	0	200	300	0	0	0	0	0	0	0	200	903	0	0	0	0	0	0	0	603	903	0
560	3	0	0	0	0	0	0	200	300	0	0	0	0	0	0	0	200	903	0	0	0	0	0	0	0	603	903	0
560	4	0	0	0	0	0	0	200	300	0	0	0	0	0	0	0	200	903	0	0	0	0	0	0	0	603	903	0
560	5	0	0	0	0	0	0	200	300	0	0	0	0	0	0	0	200	903	0	0	0	0	0	0	0	603	903	0
560	6	0	0	0	0	0	0	200	300	0	0	0	0	0	0	0	200	903	0	0	0	0	0	0	0	603	903	0
560	7	0	0	0	0	0	0	200	300	0	0	0	0	0	0	0	200	903	0	0	0	0	0	0	0	603	903	0
560	8	0	0	0	0	0	0	200	300	0	0	0	0	0	0	0	200	903	0	0	0	0	0	0	0	603	903	0
560	9	0	0	0	0	0	0	200	300	0	0	0	0	0	0	0	200	903	0	0	0	0	0	0	0	603	903	0
561	0	0	0	0	0	0	0	200	300	0	0	0	0	0	0	0	200	903	0	0	0	0	0	0	0	603	903	0
561	1	0	0	0	0	0	0	200	300	0	0	0	0	0	0	0	200	903	0	0	0	0	0	0	0	603	903	0
561	2	0	0	0	0	0	0	200	300	0	0	0	0	0	0	0	200	903	0	0	0	0	0	0	0	603	903	0
561	3	0	0	0	0	0	0	200	300	0	0	0	0	0	0	0	200	903	0	0	0	0	0	0	0	603	903	0
561	4	0	0	0	0	0	0	200	300	0	0	0	0	0	0	0	200	903	0	0	0	0	0	0	0	603	903	0
561	5	0	0	0	0	0	0	200	300	0	0	0	0	0	0	0	200	903	0	0	0	0	0	0	0	603	903	0
561	6	0	0	0	0	0	0	200	300	0	0	0	0	0	0	0	200	903	0	0	0	0	0	0	0	603	903	0
561	7	0	0	0	0	0	0	200	300	0	0	0	0	0	0	0	200	903	0	0	0	0	0	0	0	603	903	0
561	8	0	0	0	0	0	0	200	300	0	0	0	0	0	0	0	200	903	0	0	0	0	0	0	0	603	903	0
561	9	0	0	0	0	0	0	200	300	0	0	0	0	0	0	0	200	903	0	0	0	0	0	0	0	603	903	0
562	0	0	0	0	0	0	0	200	300	0	0	0	0	0	0	0	200	903	0	0	0	0	0	0	0	603	903	0
562	1	0	0	0	0	0	0	200	300	0	0	0	0	0	0	0	200	903	0	0	0	0	0	0	0	603	903	0
562	2	0	0	0	0	0	0	200	300	0	0	0	0	0	0	0	200	903	0	0	0	0	0	0	0	603	903	0
562	3	0	0	0	0	0	0	200	300	0	0	0	0	0	0	0	200	903	0	0	0	0	0	0	0	603	903	0
562	4	0	0	0	0	0	0	200	300	0	0	0	0	0	0	0	200	903	0	0	0	0	0	0	0	603	903	0
562	5	0	0	0	0	0	0	200	300	0	0	0	0	0	0	0	200	903	0	0	0	0	0	0	0	603	903	0
562	6	0	0	0	0	0	0	200	300	0	0	0	0	0	0	0	200	903	0	0	0	0	0	0	0	603	903	0
562	7	0	0	0	0	0	0	200	300	0	0	0	0	0	0	0	200	903	0	0	0	0	0	0	0	603	903	0
562	8	0	0	0	0	0	0	200	300	0	0	0	0	0	0	0	200	903	0	0	0	0	0	0	0	603	903	0
562	9	0	0	0	0	0	0	200	300	0	0	0	0	0	0	0	200	903	0	0	0	0	0	0	0	603	903	0
563	0	0	0	0	0	0	0	200	300	0	0	0	0	0	0	0	200	903	0	0	0	0	0	0	0	603	903	0
563	1	0	0	0	0	0	0	200	300	0	0	0	0	0	0	0	200	903	0	0	0	0	0	0	0	603	903	0
563	2	0	0	0	0	0	0	200	300	0	0	0	0	0	0	0	200	903	0	0	0	0	0	0	0	603	903	0
563	3	0	0	0	0	0	0	200	300	0	0	0	0	0	0	0	200	903	0	0	0	0	0	0	0	603	903	0
563	4	0	0	0	0	0	0	200	300	0	0	0	0	0	0	0	200	903	0	0	0	0	0	0	0	603	903	0
563	5	0	0	0	0	0	0	200	300	0	0	0	0	0	0	0	200	903	0	0	0	0	0	0	0	603	903	0
563	6	0	0	0	0	0	0	200	300	0	0	0	0	0	0	0	200	903	0	0	0	0	0	0	0	603	903	0
563	7	0	0	0	0	0	0	200	300	0	0	0	0	0	0	0	200	903	0	0	0	0	0	0	0	603	903	0
563	8	0	0	0	0	0	0	200	300	0	0	0	0	0	0	0	200	903	0	0	0	0	0	0	0	603	903	0
563	9	0	0	0	0	0	0	200	300	0	0	0	0	0	0	0	200	903	0	0	0	0	0	0	0	603	903	0
564	0	0	0	0	0	0	0	200	300	0	0	0	0	0	0	0	200	903	0	0	0	0	0	0	0	603	903	0
564	1	0	0	0	0	0	0	200	300	0	0	0	0	0	0	0	200	903	0	0	0	0	0	0	0	603	903	0
564	2	0	0	0	0	0	0	200	300	0	0	0	0	0	0	0	200	903	0	0	0	0	0	0	0	603	903	0
564	3	0	0	0	0	0	0	200	300	0	0	0	0	0	0	0	200	903	0	0	0	0	0	0	0	603	903	0
564	4	0	0	0	0	0	0	200	300	0	0	0	0	0	0	0	200	903	0	0	0	0	0	0	0	603	903	0
564	5	0	0	0	0	0	0	200	300	0	0	0	0	0	0	0	200	903	0	0	0	0	0	0	0	603	903	0
564	6	0	0	0	0	0	0	200	300	0	0	0	0	0	0	0	200	903	0	0	0	0	0	0	0	603	903	0
564	7	0	0	0	0	0	0	200	300	0	0	0	0	0	0	0	200	903	0	0	0	0	0	0	0	603	903	0
564	8	0	0	0	0	0	0	200	300	0	0	0	0	0	0	0	200	903	0	0	0	0	0	0	0	603	903	0
564	9	0	0	0	0	0	0	200	300	0	0	0	0	0	0	0	200	903	0	0	0	0	0	0	0	603	903	0
565	0	0	0	0	0	0	0	200	300	0	0	0	0	0	0	0	200	903	0	0	0	0	0	0	0	603	903	0
565	1	0	0	0	0	0	0	200	300	0	0	0	0	0	0	0	200	903	0	0	0	0	0	0	0	603	903	0
565	2	0	0	0	0	0	0	200	300	0	0	0	0	0	0	0	200	903	0	0	0	0	0	0	0	603	903	0
565	3	0	0	0	0	0	0	200	300	0	0	0	0	0	0	0	200	903	0	0	0	0	0	0	0	603	903	0
565	4	0	0	0	0	0	0	200	300	0	0	0	0	0	0	0	200	903	0	0	0	0	0	0	0	603	903	0
565	5	0	0	0	0	0	0	200	300	0	0	0	0	0	0	0	200	903	0	0	0	0	0	0	0	603	903	0
565	6	0	0	0	0	0	0	200	300	0	0	0	0	0	0	0	200	903	0	0	0	0	0	0	0	603	903	0
565	7	0	0	0	0	0	0	200	300	0	0	0	0	0	0	0	200	903	0	0	0	0	0	0	0	603	903	0
565	8	0	0	0	0	0	0	200	300	0	0	0	0	0	0	0	200	903	0	0	0	0	0	0	0	603	903	0
565	9	0	0	0	0	0	0	200	300	0	0	0	0	0	0	0	200	903	0	0	0	0	0	0	0	603	903	0
566	0	0	0	0	0	0	0	200	300	0	0	0	0	0	0	0	200	903	0	0	0	0	0	0	0	603	903	0
566	1	0	0	0	0	0	0	200	300	0	0	0	0	0	0	0	200	903	0	0	0	0	0	0	0	603	903	0
566	2	0	0	0	0	0	0	200	300	0	0	0	0	0	0	0	200	903	0	0	0	0	0	0	0	603	903	0
566	3	0	0	0	0	0	0	200	300	0	0	0	0	0	0	0	200	903	0	0	0	0	0	0	0	603	903	0
566	4	0	0	0	0	0	0	200	300	0	0	0	0	0	0	0	200	903	0	0	0	0	0	0	0	603	903	0
566	5	0	0	0	0	0	0	200	300	0	0	0	0	0	0	0	200	903	0	0	0	0	0	0	0	603	903	0
566	6	0	0	0	0	0	0	200	300	0	0	0	0	0	0	0	200	903	0	0	0	0	0	0	0	603	903	0
566	7	0	0	0	0	0	0	200	300	0	0	0	0	0	0	0	200	903	0	0	0	0	0	0	0	603	903	0
566	8	0	0	0	0	0	0	200	300	0	0	0	0	0	0	0	200	903	0	0	0	0	0	0	0	603	903	0
566	9	0	0	0	0	0	0	200	300	0	0	0	0	0	0	0	200	903	0	0	0	0	0	0	0	603	903	0
567	0	0	0	0	0	0	0	200	300	0	0	0	0	0	0	0	200	903	0	0	0	0	0	0	0	603	903	0
567	1	0	0	0	0	0	0	200	300	0	0	0	0	0	0	0	200	903	0	0	0	0	0	0	0	603	903	0
567	2	0	0	0	0	0	0	200	300	0	0	0	0	0	0	0	200	903	0	0	0	0	0	0	0	603	903	0
567	3	0	0	0	0	0	0	200	300	0	0	0	0	0	0	0	200	903	0	0	0	0	0	0	0	603	903	0
567	4	0	0	0	0	0	0	200	300	0	0	0	0	0	0	0	200	903	0	0	0	0	0	0	0	603	903	0
567	5	0	0	0	0	0	0	200	300	0	0	0	0	0	0	0	200	903	0	0	0	0	0	0	0	603	903	0
567	6	0	0	0	0	0	0	200	300	0	0	0	0	0	0	0	200	903	0	0	0	0	0	0	0	603	903	0
567	7	0	0	0	0	0	0	200	300	0	0	0	0	0	0	0	200	903	0	0	0	0	0	0	0	603	903	0
567	8	0	0	0	0	0	0	200	300	0	0	0	0	0	0	0	200	903	0	0	0	0	0	0	0	603	903	0
567	9	0	0	0	0	0	0	200	300	0	0	0	0	0	0	0	200	903	0	0	0	0	0	0	0	603	903	0
568	0	0	0	0	0	0	0	200	300	0	0	0	0	0	0	0	200	903	0	0	0	0	0	0	0	603	903	0
568	1	0	0	0	0	0	0	200	300	0	0	0	0	0	0	0	200	903	0	0	0	0	0	0	0	603	903	0
568	2	0	0	0	0	0	0	200	300	0	0	0	0	0	0	0	200	903	0	0	0	0	0	0	0	603	903	0
568	3	0	0	0	0	0	0	200	300	0	0	0	0	0	0	0	200	903	0	0	0	0	0	0	0	603	903	0
568	4	0	0	0	0	0	0	200	300	0	0	0	0	0	0	0	200	903	0	0	0	0	0	0	0	603	903	0
568	5	0	0	0	0	0	0	200	300	0	0	0	0	0	0	0	200	903	0	0	0	0	0	0	0	603	903	0
568	6	0	0	0	0	0	0	200	300	0	0	0	0	0	0	0	200	903	0	0	0	0	0	0	0	603	903	0
568	7	0	0	0	0	0	0	200	300	0	0	0	0	0	0	0	200	903	0	0	0	0	0	0	0	603	903	0
568	8	0	0	0	0	0	0	200	300	0	0	0	0	0	0	0	200	903	0	0	0	0	0	0	0	603	903	0
568	9	0	0	0	0	0	0	200	300	0	0	0	0	0	0	0	200	903	0	0	0	0	0	0	0	603	903	0
569	0	0	0	0	0	0	0	200	300	0	0	0	0	0	0	0	200	903	0	0	0	0	0	0	0	603	903	0
569	1	0	0	0	0	0	0	200	300	0	0	0	0	0	0	0	200	903	0	0	0	0	0	0	0	603	903	0
569	2	0	0	0	0	0	0	200	300	0	0	0	0	0	0	0	200	903	0	0	0	0	0	0	0	603	903	0
569	3	0	0	0	0	0	0	200	300	0	0	0	0	0	0	0	200	903	0	0	0	0	0	0	0	603	903	0
569	4	0	0	0	0	0	0	200	300	0	0	0	0	0	0	0	200	903	0	0	0	0	0	0	0	603	903	0
569	5	0	0	0	0	0	0	200	300	0	0	0	0	0	0	0	200	903	0	0	0	0	0	0	0	603	903	0
569	6	0	0	0	0	0	0	200	300	0	0	0	0	0	0	0	200	903	0	0	0	0	0	0	0	603	903	0
569	7	0	0	0	0	0	0	200	300	0	0	0	0	0	0	0	200	903	0	0	0	0	0	0	0	603	903	0
569	8	0	0	0	0	0	0	200	300	0	0	0	0	0	0	0	200	903	0	0	0	0	0	0	0	603	903	0
569	9	0	0	0	0	0	0	200	300	0	0	0	0	0	0	0	200	903	0	0	0	0	0	0	0	603	903	0
570	0	0	0	0	0	0	0	200	300	0	0	0	0	0	0	0	200	903	0	0	0	0	0	0	0	603	903	0
570	1	0	0	0	0	0	0	200	300	0	0	0	0	0	0	0	200	903	0	0	0	0	0	0	0	603	903	0
570	2	0	0	0	0	0	0	200	300	0	0	0	0	0	0	0	200	903	0	0	0	0	0	0	0	603	903	0
570	3	0	0	0	0	0	0	200	300	0	0	0	0	0	0	0	200	903	0	0	0	0	0	0	0	603	903	0
570	4	0	0	0	0	0	0	200	300	0	0	0	0	0	0	0	200	903	0	0	0	0	0	0	0	603	903	0
570	5	0	0	0	0	0	0	200	300	0	0	0	0	0	0	0	200	903	0	0	0	0	0	0	0	603	903	0
570	6	0	0	0	0	0	0	200	300	0	0	0	0	0	0	0	200	903	0	0	0	0	0	0	0	603	903	0
570	7	0	0	0	0	0	0	200	300	0	0	0	0	0	0	0	200	903	0	0	0	0	0	0	0	603	903	0
570	8	0	0	0	0	0	0	200	300	0	0	0	0	0	0	0	200	903	0	0	0	0	0	0	0	603	903	0
570	9	0	0	0	0	0	0	200	300	0	0	0	0	0	0	0	200	903	0	0	0	0	0	0	0	603	903	0
571	0	0	0	0	0	0	0	200	300	0	0	0	0	0	0	0	200	903	0	0	0	0	0	0	0	603	903	0
571	1	0	0	0	0	0	0	200	300	0	0	0	0	0	0	0	200	903	0	0	0	0	0	0	0	603	903	0
571	2	0	0	0	0	0	0	200	300	0	0	0	0	0	0	0	200	903	0	0	0	0	0	0	0	603	903	0
571	3	0	0	0	0	0	0	200	300	0	0	0	0	0	0	0	200	903	0	0	0	0	0	0	0	603	903	0
571	4	0	0	0	0	0	0	200	300	0	0	0	0	0	0	0	200	903	0	0	0	0	0	0	0	603	903	0
571	5	0	0	0	0	0	0	200	300	0	0	0	0	0	0	0	200	903	0	0	0	0	0	0	0	603	903	0
571	6	0	0	0	0	0	0	200	300	0	0	0	0	0	0	0	200	903	0	0	0	0	0	0	0	603	903	0
571	7	0	0	0	0	0	0	200	300	0	0	0	0	0	0	0	200	903	0	0	0	0	0	0	0	603	903	0
571	8	0	0	0	0	0	0	200	300	0	0	0	0	0	0	0	200	903	0	0	0	0	0	0	0	603	903	0
571	9	0	0	0	0	0	0	200	300	0	0	0	0	0	0	0	200	903	0	0	0	0	0	0	0	603	903	0
572	0	0	0	0	0	0	0	200	300	0	0	0	0	0	0	0	200	903	0	0	0	0	0	0	0	603	903	0
572	1	0	0	0	0	0	0	200	300	0	0	0	0	0	0	0	200	903	0	0	0	0	0	0	0	603	903	0
572	2	0	0	0	0	0	0	200	300	0	0	0	0	0	0	0	200	903	0	0	0	0	0	0	0	603	903	0
572	3	0	0	0	0	0	0	200	300	0	0	0	0	0	0	0	200	903	0	0	0	0	0	0	0	603	903	0
572	4	0	0	0	0	0	0	200	300	0	0	0	0	0	0	0	200	903	0	0	0	0	0	0	0	603	903	0
572	5	0	0	0	0	0	0	200	300	0	0	0	0	0	0	0	200	903	0	0	0	0	0	0	0	603	903	0
572	6	0	0	0	0	0	0	200	300	0	0	0	0	0	0	0	200	903	0	0	0	0	0	0	0	603	903	0
572	7	0	0	0	0	0	0	200	300	0	0	0	0	0	0	0	200	903	0	0	0	0	0	0	0	603	903	0
572	8	0	0	0	0	0	0	200	300	0	0	0	0	0	0	0	200	903	0	0	0	0	0	0	0	603	903	0
572	9	0	0	0	0	0	0	200	300	0	0	0	0	0	0	0	200	903	0	0	0	0	0	0	0	603	903	0
573	0	0	0	0	0	0	0	200	300	0	0	0	0	0	0	0	200	903	0	0	0	0	0	0	0	603	903	0
573	1	0	0	0	0	0	0	200	300	0	0	0	0	0	0	0	200	903	0	0	0	0	0	0	0	603	903	0
573	2	0	0	0	0	0	0	200	300	0	0	0	0	0	0	0	200	903	0	0	0	0	0	0	0	603	903	0
573	3	0	0	0	0	0	0	200	300	0	0	0	0	0	0	0	200	903	0	0	0	0	0	0	0	603	903	0
573	4	0	0	0	0	0	0	200	300	0	0	0	0	0	0	0	200	903	0	0	0	0	0	0	0	603	903	0
573	5	0	0	0	0	0	0	200	300	0	0	0	0	0	0	0	200	903	0	0	0	0	0	0	0	603	903	0
573	6	0	0	0	0	0	0	200	300	0	0	0	0	0	0	0	200	903	0	0	0	0	0	0	0	603	903	0
573	7	0	0	0	0	0	0	200	300	0	0	0	0	0	0	0	200	903	0	0	0	0	0	0	0	603	903	0
573	8	0	0	0	0	0	0	200	300	0	0	0	0	0	0	0	200	903	0	0	0	0	0	0	0	603	903	0
573	9	0	0	0	0	0	0	200	300	0	0	0	0	0	0	0	200	903	0	0	0	0	0	0	0	603	903	0
574	0	0	0	0	0	0	0	200	300	0	0	0	0	0	0	0	200	903	0	0	0	0	0	0	0	603	903	0
574	1	0	0	0	0	0	0	200	300	0	0	0	0	0	0	0	200	903	0	0	0	0	0	0	0	603	903	0
574	2	0	0	0	0	0	0	200	300	0	0	0	0	0	0	0	200	903	0	0	0	0	0	0	0	603	903	0
574	3	0	0	0	0	0	0	200	300	0	0	0	0	0	0	0	200	903	0	0	0	0	0	0	0	603	903	0
574	4	0	0	0	0	0	0	200	300	0	0	0	0	0	0	0	200	903	0	0	0	0	0	0	0	603	903	0
574	5	0	0	0	0	0	0	200	300	0	0	0	0	0	0	0	200	903	0	0	0	0	0	0	0	603	903	0
574	6	0	0	0	0	0	0	200	300	0	0	0	0	0	0	0	200	903	0	0	0	0	0	0	0	603	903	0
574	7	0	0	0	0	0	0	200	300	0	0	0	0	0	0	0	200	903	0	0	0	0	0	0	0	603	903	0
574	8	0	0	0	0	0	0	200	300	0	0	0	0	0	0	0	200	903	0	0	0	0	0	0	0	603	903	0
574	9	0	0	0	0	0	0	200	300	0	0	0	0	0	0	0	200	903	0	0	0	0	0	0	0	603	903	0
575	0	0	0	0	0	0	0	200	300	0	0	0	0	0	0	0	200	903	0	0	0	0	0	0	0	603	903	0
575	1	0	0	0	0	0	0	200	300	0	0	0	0	0	0	0	200	903	0	0	0	0	0	0	0	603	903	0
575	2	0	0	0	0	0	0	200	300	0	0	0	0	0	0	0	200	903	0	0	0	0	0	0	0	603	903	0
575	3	0	0	0	0	0	0	200	300	0	0	0	0	0	0	0	200	903	0	0	0	0	0	0	0	603	903	0
575	4	0	0	0	0	0	0	200	300	0	0	0	0	0	0	0	200	903	0	0	0	0	0	0	0	603	903	0
575	5	0	0	0	0	0	0	200	300	0	0	0	0	0	0	0	200	903	0	0	0	0	0	0	0	603	903	0
575	6	0	0	0	0	0	0	200	300	0	0	0	0	0	0	0	200	903	0	0	0	0	0	0	0	603	903	0
575	7	0	0	0	0	0	0	200	300	0	0	0	0	0	0	0	200	903	0	0	0	0	0	0	0	603	903	0
575	8	0	0	0	0	0	0	200	300	0	0	0	0	0	0	0	200	903	0	0	0	0	0	0	0	603	903	0
575	9	0	0	0	0	0	0	200	300	0	0	0	0	0	0	0	200	903	0	0	0	0	0	0	0	603	903	0
576	0	0	0	0	0	0	0	200	300	0	0	0	0	0	0	0	200	903	0	0	0	0	0	0	0	603	903	0
576	1	0	0	0	0	0	0	200	300	0	0	0	0	0	0	0	200	903	0	0	0	0	0	0	0	603	903	0
576	2	0	0	0	0	0	0	200	300	0	0	0	0	0	0	0	200	903	0	0	0	0	0	0	0	603	903	0
576	3	0	0	0	0	0	0	200	300	0	0	0	0	0	0	0	200	903	0	0	0	0	0	0	0	603	903	0
576	4	0	0	0	0	0	0	200	300	0	0	0	0	0	0	0	200	903	0	0	0	0	0	0	0	603	903	0
576	5	0	0	0	0	0	0	200	300	0	0	0	0	0	0	0	200	903	0	0	0	0	0	0	0	603	903	0
576	6	0	0	0	0	0	0	200	300	0	1.43463	9.15268	-30.1318	-10077.3	3557.32	299.926	318.059	1237.44	0	0	0	0	0	0	0	603	903	0
576	7	0	0	0	0	0	0	200	300	0	6.77521	21.8175	-37.7612	-11084.4	3679.39	483.031	297.438	1196.54	0	0	0	0	0	0	0	603	903	0
576	8	0	0	0	0	0	0	200	300	0	4.18121	23.1908	-35.9301	-10809.7	3740.42	1032.35	304.103	1203.85	0	0	0	0	0	0	0	603	903	0
576	9	0	0	0	0	0	0	200	300	0	-1.9223	18.0028	-34.0991	-10992.8	3252.14	1535.89	295.373	1225.38	0	0	0	0	0	0	0	603	903	0
577	0	0	0	0	0	0	0	200	300	0	-0.701599	21.8175	-37.1508	-11633.7	3862.49	1810.55	303.968	1216.15	0	0	0	0	0	0	0	603	903	0
577	1	0	0	0	0	0	0	200	300	0	3.87604	28.8365	-47.2216	-13831	4350.78	2405.64	292.135	1195.89	0	0	0	0	0	0	0	603	903	0
577	2	0	0	0	0	0	0	200	300	0	0.671692	29.752	-53.6303	-16669.1	5388.38	2726.07	300.473	1213.81	0	0	0	0	0	0	0	603	903	0
577	3	0	0	0	0	0	0	200	300	0	1.73981	33.2616	-60.3442	-18683.3	5571.48	2954.96	292.328	1212.61	0	0	0	0	0	0	0	603	903	0
577	4	0	0	0	0	0	0	200	300	0	0.671692	39.9754	-71.6357	-21521.4	6609.08	2588.74	292.26	1203.43	0	0	0	0	0	0	0	603	903	0
577	5	0	0	0	0	0	0	200	300	0	2.96051	42.4168	-81.0961	-24176.4	7280.46	2817.63	289.776	1201.12	0	0	0	0	0	0	0	603	903	0
577	6	0	0	0	0	0	0	200	300	0	3.26569	39.9754	-85.0634	-25549.7	8073.92	3000.73	294.917	1203.36	0	0	0	0	0	0	0	603	903	0
577	7	0	0	0	0	0	0	200	300	0	0.0613403	37.9918	-92.6928	-28021.6	8684.27	2863.4	293.689	1205.31	0	0	0	0	0	0	0	603	903	0
577	8	0	0	0	0	0	0	200	300	0	-1.76971	37.3814	-98.186	-30676.7	9477.73	2863.4	296.528	1215.43	0	0	0	0	0	0	0	603	903	0
577	9	0	0	0	0	0	0	200	300	0	1.58722	34.0245	-105.815	-32416.2	9538.76	2954.96	290.145	1209.35	0	0	0	0	0	0	0	603	903	0
578	0	0	0	0	0	0	0	200	300	0	0.213928	31.1253	-109.783	-34338.8	10393.3	2909.18	294.671	1215.79	0	0	0	0	0	0	0	603	903	0
578	1	0	0	0	0	0	0	200	300	0	-3.90594	30.2098	-119.853	-36169.8	10698.4	3275.39	289.263	1204.78	0	0	0	0	0	0	0	603	903	0
578	2	0	0	0	0	0	0	200	300	0	-1.15936	27.1581	-125.652	-37451.6	10820.5	3321.17	286.115	1201.06	0	0	0	0	0	0	0	603	903	0
578	3	0	0	0	0	0	0	200	300	0	-1.31195	25.0218	-127.788	-38824.9	11491.9	3366.94	289.929	1206.82	0	0	0	0	0	0	0	603	903	0
578	4	0	0	0	0	0	0	200	300	0	-4.36371	22.2752	-132.061	-39465.7	11308.8	3046.51	285.633	1201.85	0	0	0	0	0	0	0	603	903	0
578	5	0	0	0	0	0	0	200	300	0	-5.88959	18.308	-134.197	-40564.4	11430.9	2817.63	285.18	1205.28	0	0	0	0	0	0	0	603	903	0
578	6	0	0	0	0	0	0	200	300	0	-4.82147	13.4251	-136.943	-41663	11797.1	2314.09	286.146	1207.24	0	0	0	0	0	0	0	603	903	0
578	7	0	0	0	0	0	0	200	300	0	-4.5163	10.526	-139.385	-41296.8	12285.3	2405.64	288.14	1199.28	0	0	0	0	0	0	0	603	903	0
578	8	0	0	0	0	0	0	200	300	0	-5.88959	8.54233	-140.605	-41937.7	11552.9	2130.98	282.166	1201.27	0	0	0	0	0	0	0	603	903	0
578	9	0	0	0	0	0	0	200	300	0	-7.56805	3.81211	-143.047	-42761.6	12285.3	2039.43	285.883	1201.93	0	0	0	0	0	0	0	603	903	0
579	0	0	0	0	0	0	0	200	300	0	-7.87323	0.455172	-144.268	-42761.6	12041.2	2176.76	283.464	1199.41	0	0	0	0	0	0	0	603	903	0
579	1	0	0	0	0	0	0	200	300	0	-6.9577	-0.15518	-145.793	-43036.3	12102.2	2130.98	283.01	1198.19	0	0	0	0	0	0	0	603	903	0
579	2	0	0	0	0	0	0	200	300	0	-8.02582	-2.444	-147.93	-44592.7	11919.1	1764.77	280.573	1204.45	0	0	0	0	0	0	0	603	903	0
579	3	0	0	0	0	0	0	200	300	0	-10.162	-6.41128	-148.54	-44318	12346.4	1947.88	283.118	1201.36	0	0	0	0	0	0	0	603	903	0
579	4	0	0	0	0	0	0	200	300	0	-10.0095	-7.4794	-149.456	-43951.8	11980.2	1856.32	280.159	1197.08	0	0	0	0	0	0	0	603	903	0
579	5	0	0	0	0	0	0	200	300	0	-10.4672	-7.78457	-151.897	-44592.7	12529.5	1810.55	282.487	1196.57	0	0	0	0	0	0	0	603	903	0
579	6	0	0	0	0	0	0	200	300	0	-11.2302	-10.5312	-153.423	-45599.8	12407.4	2268.31	280.871	1200.22	0	0	0	0	0	0	0	603	903	0
579	7	0	0	0	0	0	0	200	300	0	-10.162	-12.057	-152.812	-45966	12346.4	1764.77	280.794	1203.8	0	0	0	0	0	0	0	603	903	0
579	8	0	0	0	0	0	0	200	300	0	-12.1457	-12.3622	-158.306	-45782.9	12956.7	1673.22	281.846	1192.21	0	0	0	0	0	0	0	603	903	0
579	9	0	0	0	0	0	0	200	300	0	-11.8405	-12.2096	-159.221	-46240.6	13078.8	1810.55	282.142	1193.42	0	0	0	0	0	0	0	603	903	0
580	0	0	0	0	0	0	0	200	300	0	-13.3664	-14.4984	-161.357	-47797	12956.7	1581.66	280.298	1199.22	0	0	0	0	0	0	0	603	903	0
580	1	0	0	0	0	0	0	200	300	0	-13.519	-15.2614	-164.409	-47888.6	13384	1444.34	281.407	1194.28	0	0	0	0	0	0	0	603	903	0
580	2	0	0	0	0	0	0	200	300	0	-12.2983	-15.2614	-168.071	-48621	13261.9	1718.99	278.906	1192.29	0	0	0	0	0	0	0	603	903	0
580	3	0	0	0	0	0	0	200	300	0	-11.8405	-16.4821	-171.428	-49719.6	13567.1	1398.56	279.142	1193.03	0	0	0	0	0	0	0	603	903	0
580	4	0	0	0	0	0	0	200	300	0	-13.519	-17.5502	-174.785	-50269	14726.8	849.242	284.256	1190.6	0	0	0	0	0	0	0	603	903	0
580	5	0	0	0	0	0	0	200	300	0	-13.0612	-17.7028	-178.447	-50818.3	14177.4	1032.35	279.449	1187.78	0	0	0	0	0	0	0	603	903	0
580	6	0	0	0	0	0	0	200	300	0	-11.8405	-18.7709	-182.415	-52008.5	14665.7	1169.68	280.398	1188.11	0	0	0	0	0	0	0	603	903	0
580	7	0	0	0	0	0	0	200	300	0	-11.3828	-20.2968	-183.33	-54114.2	15581.2	483.031	284.99	1198.17	0	0	0	0	0	0	0	603	903	0
580	8	0	0	0	0	0	0	200	300	0	-11.9931	-20.4494	-192.485	-54663.5	15764.3	437.255	281.899	1186.99	0	0	0	0	0	0	0	603	903	0
580	9	0	0	0	0	0	0	200	300	0	-11.9931	-21.0597	-192.18	-55945.2	15764.3	299.926	282.029	1194.11	0	0	0	0	0	0	0	603	903	0
581	0	0	0	0	0	0	0	200	300	0	-10.4672	-23.9589	-201.03	-56769.2	16985.1	-112.061	284.49	1185.39	0	0	0	0	0	0	0	603	903	0
581	1	0	0	0	0	0	0	200	300	0	-10.0095	-24.8744	-204.998	-59241.1	17229.2	-340.943	284.046	1191.98	0	0	0	0	0	0	0	603	903	0
581	2	0	0	0	0	0	0	200	300	0	-11.2302	-25.027	-210.796	-60522.9	17351.3	-615.602	282.313	1190.12	0	0	0	0	0	0	0	603	903	0
581	3	0	0	0	0	0	0	200	300	0	-11.0776	-26.5529	-217.205	-61255.3	18388.9	-432.496	284.662	1185.02	0	0	0	0	0	0	0	603	903	0
581	4	0	0	0	0	0	0	200	300	0	-9.85687	-28.5365	-221.782	-62537	18694	-936.036	284.29	1184.97	0	0	0	0	0	0	0	603	903	0
581	5	0	0	0	0	0	0	200	300	0	-10.0095	-29.1469	-226.665	-64276.5	18694	-981.813	282.474	1186.58	0	0	0	0	0	0	0	603	903	0
581	6	0	0	0	0	0	0	200	300	0	-10.6198	-30.9779	-233.074	-65924.5	19609.6	-1531.13	284.135	1185.85	0	0	0	0	0	0	0	603	903	0
581	7	0	0	0	0	0	0	200	300	0	-9.24652	-31.4357	-237.651	-66748.5	20036.8	-1439.58	284.312	1183.87	0	0	0	0	0	0	0	603	903	0
581	8	0	0	0	0	0	0	200	300	0	-8.63617	-33.4193	-243.144	-67847.1	19670.6	-1622.68	280.901	1182.04	0	0	0	0	0	0	0	603	903	0
581	9	0	0	0	0	0	0	200	300	0	-10.162	-34.1823	-249.858	-69678.2	20830.3	-1897.34	283.368	1181.87	0	0	0	0	0	0	0	603	903	0
582	0	0	0	0	0	0	0	200	300	0	-10.3146	-35.403	-253.215	-70868.3	21196.5	-1714.23	283.709	1182.87	0	0	0	0	0	0	0	603	903	0
582	1	0	0	0	0	0	0	200	300	0	-9.24652	-36.9289	-257.488	-71143	21623.7	-2034.67	283.98	1179.3	0	0	0	0	0	0	0	603	903	0
582	2	0	0	0	0	0	0	200	300	0	-9.24652	-37.234	-262.676	-72790.9	22173	-2309.33	284.412	1180.11	0	0	0	0	0	0	0	603	903	0
582	3	0	0	0	0	0	0	200	300	0	-9.70428	-37.997	-267.559	-74438.9	22234.1	-2217.78	283.1	1181.22	0	0	0	0	0	0	0	603	903	0
582	4	0	0	0	0	0	0	200	300	0	-10.3146	-39.2177	-270.305	-74896.6	22417.2	-2126.22	282.933	1180.08	0	0	0	0	0	0	0	603	903	0
582	5	0	0	0	0	0	0	200	300	0	-7.56805	-39.9806	-273.967	-75903.7	22844.4	-2538.21	283.384	1180.05	0	0	0	0	0	0	0	603	903	0
582	6	0	0	0	0	0	0	200	300	0	-9.85687	-39.2177	-279.155	-77093.9	23393.8	-2675.54	283.802	1179.17	0	0	0	0	0	0	0	603	903	0
582	7	0	0	0	0	0	0	200	300	0	-9.70428	-41.2013	-280.376	-77460.1	23821	-2400.88	284.961	1179.27	0	0	0	0	0	0	0	603	903	0
582	8	0	0	0	0	0	0	200	300	0	-9.24652	-41.5065	-286.174	-77185.5	23943.1	-3087.53	283.666	1172.71	0	0	0	0	0	0	0	603	903	0
582	9	0	0	0	0	0	0	200	300	0	-7.56805	-40.8961	-287.7	-79291.2	24248.2	-2995.97	284.283	1178.6	0	0	0	0	0	0	0	603	903	0
583	0	0	0	0	0	0	0	200	300	0	-9.39911	-41.6591	-291.973	-80115.1	24309.3	-2721.32	283.259	1177.39	0	0	0	0	0	0	0	603	903	0
583	1	0	0	0	0	0	0	200	300	0	-8.78876	-42.2694	-295.33	-80298.3	24614.5	-3041.75	283.346	1174.89	0	0	0	0	0	0	0	603	903	0
583	2	0	0	0	0	0	0	200	300	0	-8.02582	-42.7272	-298.992	-80481.4	24980.7	-3224.86	283.55	1172.18	0	0	0	0	0	0	0	603	903	0
583	3	0	0	0	0	0	0	200	300	0	-7.87323	-43.0324	-301.128	-81946.2	25407.9	-3087.53	284.376	1175.13	0	0	0	0	0	0	0	603	903	0
583	4	0	0	0	0	0	0	200	300	0	-5.27924	-43.4901	-303.569	-82678.6	25102.7	-3636.84	282.692	1175.36	0	0	0	0	0	0	0	603	903	0
583	5	0	0	0	0	0	0	200	300	0	-5.27924	-44.2531	-304.79	-82587.1	26079.3	-3819.95	285.565	1173.96	0	0	0	0	0	0	0	603	903	0
583	6	0	0	0	0	0	0	200	300	0	-5.58441	-45.3212	-308.452	-82678.6	26018.3	-3728.4	284.351	1171.04	0	0	0	0	0	0	0	603	903	0
583	7	0	0	0	0	0	0	200	300	0	-5.43182	-45.1686	-311.199	-83319.5	25407.9	-3957.28	281.645	1170.74	0	0	0	0	0	0	0	603	903	0
583	8	0	0	0	0	0	0	200	300	0	-5.12665	-45.4738	-312.114	-83411	26445.5	-4140.38	284.73	1170.25	0	0	0	0	0	0	0	603	903	0
583	9	0	0	0	0	0	0	200	300	0	-4.5163	-46.0841	-314.25	-84143.5	27300	-4140.38	286.873	1170.76	0	0	0	0	0	0	0	603	903	0
584	0	0	0	0	0	0	0	200	300	0	-3.29559	-46.6945	-318.218	-84875.9	26262.4	-4460.82	282.53	1169.72	0	0	0	0	0	0	0	603	903	0
584	1	0	0	0	0	0	0	200	300	0	-1.9223	-48.0678	-319.438	-85699.9	27483.1	-4827.03	286.036	1171.28	0	0	0	0	0	0	0	603	903	0
584	2	0	0	0	0	0	0	200	300	0	-2.38007	-49.5937	-321.575	-85425.2	27666.2	-4827.03	286.034	1168.65	0	0	0	0	0	0	0	603	903	0
584	3	0	0	0	0	0	0	200	300	0	-1.31195	-48.9833	-323.101	-85516.8	27300	-5330.57	284.494	1167.68	0	0	0	0	0	0	0	603	903	0
584	4	0	0	0	0	0	0	200	300	0	-1.31195	-49.7462	-327.068	-86066.1	27666.2	-5239.02	284.589	1166.14	0	0	0	0	0	0	0	603	903	0
584	5	0	0	0	0	0	0	200	300	0	-1.46454	-51.4247	-327.983	-86523.9	28215.5	-5422.12	286.027	1166.81	0	0	0	0	0	0	0	603	903	0
584	6	0	0	0	0	0	0	200	300	0	0.82428	-52.0351	-329.814	-87073.1	27971.4	-5834.11	284.81	1167.01	0	0	0	0	0	0	0	603	903	0
584	7	0	0	0	0	0	0	200	300	0	0.213928	-51.8825	-331.34	-87530.9	28337.6	-6108.77	285.524	1167.17	0	0	0	0	0	0	0	603	903	0
584	8	0	0	0	0	0	0	200	300	0	-0.396423	-53.1032	-334.392	-88354.9	28520.7	-5834.11	285.291	1167.23	0	0	0	0	0	0	0	603	903	0
584	9	0	0	0	0	0	0	200	300	0	-0.0912476	-54.0187	-332.866	-87988.7	28642.8	-6429.2	286.049	1167.34	0	0	0	0	0	0	0	603	903	0
585	0	0	0	0	0	0	0	200	300	0	0.976868	-54.6291	-340.801	-88263.4	28886.9	-6749.64	284.762	1161.99	0	0	0	0	0	0	0	603	903	0
585	1	0	0	0	0	0	0	200	300	0	0.976868	-55.5446	-339.58	-88629.6	28947.9	-6246.1	285.246	1164	0	0	0	0	0	0	0	603	903	0
585	2	0	0	0	0	0	0	200	300	0	0.82428	-56.1549	-342.021	-89453.5	29131.1	-6841.19	285.173	1164.54	0	0	0	0	0	0	0	603	903	0
585	3	0	0	0	0	0	0	200	300	0	1.58722	-55.8498	-345.073	-89178.9	29375.2	-7024.29	285.127	1161.43	0	0	0	0	0	0	0	603	903	0
585	4	0	0	0	0	0	0	200	300	0	2.80792	-56.7653	-347.209	-90186	29558.3	-7070.07	285.131	1162.75	0	0	0	0	0	0	0	603	903	0
585	5	0	0	0	0	0	0	200	300	0	3.1131	-57.0705	-347.82	-90552.2	29863.5	-7207.4	285.859	1163.34	0	0	0	0	0	0	0	603	903	0
585	6	0	0	0	0	0	0	200	300	0	5.24933	-57.3756	-349.956	-90369	30229.7	-7665.16	286.381	1161.23	0	0	0	0	0	0	0	603	903	0
585	7	0	0	0	0	0	0	200	300	0	3.1131	-57.986	-352.397	-90369	30595.9	-7665.16	286.822	1159.44	0	0	0	0	0	0	0	603	903	0
585	8	0	0	0	0	0	0	200	300	0	3.26569	-58.7489	-354.839	-90826.8	30351.8	-7848.27	285.537	1158.97	0	0	0	0	0	0	0	603	903	0
585	9	0	0	0	0	0	0	200	300	0	2.65533	-59.9696	-359.722	-91101.5	30962.1	-8077.15	286.072	1156.26	0	0	0	0	0	0	0	603	903	0
586	0	0	0	0	0	0	0	200	300	0	4.3338	-61.0378	-360.027	-91925.5	31084.2	-8122.93	286.339	1158.33	0	0	0	0	0	0	0	603	903	0
586	1	0	0	0	0	0	0	200	300	0	4.94415	-60.1222	-360.942	-92841	31206.2	-8672.24	286.458	1160.22	0	0	0	0	0	0	0	603	903	0
586	2	0	0	0	0	0	0	200	300	0	7.23297	-61.3429	-365.215	-93115.7	31633.5	-8443.36	286.616	1157.96	0	0	0	0	0	0	0	603	903	0
586	3	0	0	0	0	0	0	200	300	0	6.01227	-62.5636	-369.487	-93207.2	32488	-8901.12	287.927	1155.26	0	0	0	0	0	0	0	603	903	0
586	4	0	0	0	0	0	0	200	300	0	8.30109	-63.0214	-371.929	-93756.5	32304.9	-8992.68	286.858	1155.08	0	0	0	0	0	0	0	603	903	0
586	5	0	0	0	0	0	0	200	300	0	7.08038	-63.6317	-375.591	-94946.7	32732.1	-9541.99	287.148	1155.79	0	0	0	0	0	0	0	603	903	0
586	6	0	0	0	0	0	0	200	300	0	7.99591	-65.4628	-381.999	-95679.1	33708.7	-9679.33	288.243	1153.47	0	0	0	0	0	0	0	603	903	0
586	7	0	0	0	0	0	0	200	300	0	9.3692	-64.6999	-385.051	-95862.2	33586.6	-10274.4	287.226	1151.96	0	0	0	0	0	0	0	603	903	0
586	8	0	0	0	0	0	0	200	300	0	11.0477	-67.599	-393.901	-96686.2	34319.1	-10137.1	287.126	1148.46	0	0	0	0	0	0	0	603	903	0
586	9	0	0	0	0	0	0	200	300	0	9.97955	-73.8551	-395.122	-97510.2	34746.3	-10961.1	287.938	1149.79	0	0	0	0	0	0	0	603	903	0
587	0	0	0	0	0	0	0	200	300	0	7.23297	-76.2965	-398.479	-98151.1	35478.7	-11235.7	289.035	1149.31	0	0	0	0	0	0	0	603	903	0
587	1	0	0	0	0	0	0	200	300	0	11.3528	-75.6862	-402.141	-98059.5	34929.4	-11327.3	286.859	1146.84	0	0	0	0	0	0	0	603	903	0
587	2	0	0	0	0	0	0	200	300	0	12.1158	-79.3483	-404.277	-99615.9	35600.8	-11144.2	288.06	1149.41	0	0	0	0	0	0	0	603	903	0
587	3	0	0	0	0	0	0	200	300	0	10.2847	-82.5526	-404.888	-99982.1	35906	-11693.5	288.681	1149.94	0	0	0	0	0	0	0	603	903	0
587	4	0	0	0	0	0	0	200	300	0	9.67438	-81.4845	-408.245	-99432.8	35722.9	-12013.9	287.504	1146.56	0	0	0	0	0	0	0	603	903	0
587	5	0	0	0	0	0	0	200	300	0	13.3365	-80.8742	-410.381	-100898	36272.2	-12151.2	288.387	1148.86	0	0	0	0	0	0	0	603	903	0
587	6	0	0	0	0	0	0	200	300	0	13.0313	-82.5526	-415.569	-102088	36760.5	-11739.3	288.458	1148.66	0	0	0	0	0	0	0	603	903	0
587	7	0	0	0	0	0	0	200	300	0	11.658	-81.7897	-418.621	-101539	35967	-12288.6	285.918	1145.56	0	0	0	0	0	0	0	603	903	0
587	8	0	0	0	0	0	0	200	300	0	15.3201	-79.1957	-421.977	-102454	37431.8	-12654.8	288.706	1145.8	0	0	0	0	0	0	0	603	903	0
587	9	0	0	0	0	0	0	200	300	0	16.0831	-79.6535	-426.25	-103644	37798.1	-12471.7	288.676	1146.15	0	0	0	0	0	0	0	603	903	0
588	0	0	0	0	0	0	0	200	300	0	16.5408	-79.5009	-428.691	-103553	38042.2	-12563.2	288.74	1144.56	0	0	0	0	0	0	0	603	903	0
588	1	0	0	0	0	0	0	200	300	0	16.5408	-77.975	-432.353	-104010	38408.4	-13066.8	288.836	1143.57	0	0	0	0	0	0	0	603	903	0
588	2	0	0	0	0	0	0	200	300	0	16.9986	-79.5009	-437.541	-105109	38957.7	-13249.9	289.038	1143.23	0	0	0	0	0	0	0	603	903	0
588	3	0	0	0	0	0	0	200	300	0	19.44	-81.6371	-439.372	-105567	38774.6	-13249.9	288.25	1143.27	0	0	0	0	0	0	0	603	903	0
588	4	0	0	0	0	0	0	200	300	0	19.5926	-80.569	-439.983	-105384	39140.8	-13982.3	288.96	1142.52	0	0	0	0	0	0	0	603	903	0
588	5	0	0	0	0	0	0	200	300	0	20.6607	-80.569	-446.392	-105841	39690.1	-13982.3	288.913	1140.1	0	0	0	0	0	0	0	603	903	0
588	6	0	0	0	0	0	0	200	300	0	19.7452	-82.8578	-444.866	-106665	39079.8	-14073.9	287.846	1142.77	0	0	0	0	0	0	0	603	903	0
588	7	0	0	0	0	0	0	200	300	0	20.8133	-84.5363	-449.748	-107581	40056.4	-14257	289.064	1142.2	0	0	0	0	0	0	0	603	903	0
588	8	0	0	0	0	0	0	200	300	0	20.6607	-83.4682	-451.58	-105567	39995.3	-14440.1	288.568	1136.77	0	0	0	0	0	0	0	603	903	0
588	9	0	0	0	0	0	0	200	300	0	20.9659	-83.7733	-454.326	-108039	40056.4	-14394.3	288.167	1140.8	0	0	0	0	0	0	0	603	903	0
589	0	0	0	0	0	0	0	200	300	0	22.1866	-86.2148	-458.293	-108771	40300.5	-14897.8	287.936	1140.34	0	0	0	0	0	0	0	603	903	0
589	1	0	0	0	0	0	0	200	300	0	21.7288	-85.757	-461.65	-108771	41277.1	-15126.7	289.412	1138.61	0	0	0	0	0	0	0	603	903	0
589	2	0	0	0	0	0	0	200	300	0	23.4073	-85.757	-462.566	-108680	40666.7	-15126.7	287.915	1137.95	0	0	0	0	0	0	0	603	903	0
589	3	0	0	0	0	0	0	200	300	0	23.5599	-86.9777	-465.312	-110053	41277.1	-14852.1	288.708	1139.51	0	0	0	0	0	0	0	603	903	0
589	4	0	0	0	0	0	0	200	300	0	25.5435	-87.8932	-470.195	-110236	42131.6	-15264	289.604	1137.45	0	0	0	0	0	0	0	603	903	0
589	5	0	0	0	0	0	0	200	300	0	24.7806	-87.7406	-473.857	-110328	42497.8	-15630.3	289.685	1135.83	0	0	0	0	0	0	0	603	903	0
589	6	0	0	0	0	0	0	200	300	0	26.3065	-87.2829	-473.247	-110785	42070.5	-15676	288.898	1137.1	0	0	0	0	0	0	0	603	903	0
589	7	0	0	0	0	0	0	200	300	0	25.5435	-91.5553	-477.214	-111243	42802.9	-15996.5	289.693	1136.11	0	0	0	0	0	0	0	603	903	0
589	8	0	0	0	0	0	0	200	300	0	26.3065	-88.6562	-480.266	-111792	43230.2	-16088	290.013	1135.77	0	0	0	0	0	0	0	603	903	0
589	9	0	0	0	0	0	0	200	300	0	27.8323	-88.5036	-484.539	-112525	43047.1	-16362.7	288.841	1135.23	0	0	0	0	0	0	0	603	903	0
590	0	0	0	0	0	0	0	200	300	0	28.2901	-90.945	-486.98	-113257	43474.3	-16316.9	289.273	1135.57	0	0	0	0	0	0	0	603	903	0
590	1	0	0	0	0	0	0	200	300	0	29.3582	-90.6398	-487.59	-113623	43962.6	-16820.4	290.163	1136.03	0	0	0	0	0	0	0	603	903	0
590	2	0	0	0	0	0	0	200	300	0	28.9005	-88.9613	-490.947	-113715	43901.6	-16957.8	289.422	1134.62	0	0	0	0	0	0	0	603	903	0
590	3	0	0	0	0	0	0	200	300	0	32.1048	-89.5717	-496.135	-114264	44145.7	-17278.2	288.979	1133.31	0	0	0	0	0	0	0	603	903	0
590	4	0	0	0	0	0	0	200	300	0	30.1212	-90.182	-497.051	-115546	44511.9	-17095.1	289.552	1135.46	0	0	0	0	0	0	0	603	903	0
590	5	0	0	0	0	0	0	200	300	0	30.8841	-90.182	-498.882	-115546	44695	-16912	289.59	1134.61	0	0	0	0	0	0	0	603	903	0
590	6	0	0	0	0	0	0	200	300	0	32.41	-89.4191	-503.459	-114905	45000.2	-17324	289.382	1131.23	0	0	0	0	0	0	0	603	903	0
590	7	0	0	0	0	0	0	200	300	0	33.0203	-90.0294	-505.901	-117011	45305.4	-17232.4	289.554	1134.29	0	0	0	0	0	0	0	603	903	0
590	8	0	0	0	0	0	0	200	300	0	32.7151	-90.3346	-506.206	-117377	45488.5	-17827.5	289.862	1134.88	0	0	0	0	0	0	0	603	903	0
590	9	0	0	0	0	0	0	200	300	0	33.4781	-88.6562	-510.784	-116645	45671.6	-17873.3	289.415	1131.36	0	0	0	0	0	0	0	603	903	0
591	0	0	0	0	0	0	0	200	300	0	34.241	-90.4872	-512.31	-117743	46037.8	-17690.2	289.863	1132.83	0	0	0	0	0	0	0	603	903	0
591	1	0	0	0	0	0	0	200	300	0	33.3255	-89.8769	-514.446	-117194	46159.9	-18239.5	289.727	1130.81	0	0	0	0	0	0	0	603	903	0
591	2	0	0	0	0	0	0	200	300	0	33.4781	-89.4191	-518.718	-118567	46587.1	-18056.4	289.812	1131.58	0	0	0	0	0	0	0	603	903	0
591	3	0	0	0	0	0	0	200	300	0	35.004	-89.7243	-520.244	-119025	46770.2	-18056.4	289.901	1131.79	0	0	0	0	0	0	0	603	903	0
591	4	0	0	0	0	0	0	200	300	0	35.9195	-91.5553	-522.685	-119849	47319.5	-17919.1	290.532	1132.29	0	0	0	0	0	0	0	603	903	0
591	5	0	0	0	0	0	0	200	300	0	35.3091	-90.0294	-525.127	-120398	46526.1	-18285.3	288.6	1132.27	0	0	0	0	0	0	0	603	903	0
591	6	0	0	0	0	0	0	200	300	0	35.3091	-89.5717	-527.568	-120581	47929.9	-18376.8	290.851	1131.56	0	0	0	0	0	0	0	603	903	0
591	7	0	0	0	0	0	0	200	300	0	35.7669	-90.6398	-531.536	-120948	47929.9	-17873.3	290.172	1130.54	0	0	0	0	0	0	0	603	903	0
591	8	0	0	0	0	0	0	200	300	0	35.4617	-90.3346	-530.925	-122596	47746.8	-18331.1	289.931	1133.91	0	0	0	0	0	0	0	603	903	0
591	9	0	0	0	0	0	0	200	300	0	35.6143	-89.8769	-533.977	-122046	48174	-18422.6	290.217	1131.56	0	0	0	0	0	0	0	603	903	0
592	0	0	0	0	0	0	0	200	300	0	37.1402	-88.9613	-538.86	-122870	48784.4	-18422.6	290.533	1131.02	0	0	0	0	0	0	0	603	903	0
592	1	0	0	0	0	0	0	200	300	0	37.1402	-90.3346	-542.522	-123877	48601.3	-18239.5	289.584	1131.34	0	0	0	0	0	0	0	603	903	0
592	2	0	0	0	0	0	0	200	300	0	37.598	-90.7924	-543.743	-123877	49028.5	-18285.3	290.169	1130.82	0	0	0	0	0	0	0	603	903	0
592	3	0	0	0	0	0	0	200	300	0	36.835	-90.6398	-545.879	-124152	49211.6	-18422.6	290.151	1130.44	0	0	0	0	0	0	0	603	903	0
592	4	0	0	0	0	0	0	200	300	0	37.598	-89.7243	-548.32	-125068	48906.5	-18559.9	289.193	1131.09	0	0	0	0	0	0	0	603	903	0
592	5	0	0	0	0	0	0	200	300	0	37.1402	-90.0294	-552.288	-125708	49455.8	-18056.4	289.547	1130.61	0	0	0	0	0	0	0	603	903	0
592	6	0	0	0	0	0	0	200	300	0	36.3773	-89.4191	-554.729	-125342	50066.1	-18559.9	290.253	1128.95	0	0	0	0	0	0	0	603	903	0
592	7	0	0	0	0	0	0	200	300	0	39.2764	-89.7243	-556.255	-126075	49455.8	-18239.5	288.908	1129.65	0	0	0	0	0	0	0	603	903	0
592	8	0	0	0	0	0	0	200	300	0	37.2928	-89.2665	-557.476	-126807	49944.1	-18239.5	289.59	1130.47	0	0	0	0	0	0	0	603	903	0
592	9	0	0	0	0	0	0	200	300	0	36.9876	-89.2665	-560.527	-127082	50615.4	-18331.1	290.3	1129.72	0	0	0	0	0	0	0	603	903	0
593	0	0	0	0	0	0	0	200	300	0	38.6661	-88.351	-564.189	-126349	50127.2	-18514.2	288.848	1126.95	0	0	0	0	0	0	0	603	903	0
593	1	0	0	0	0	0	0	200	300	0	38.8187	-89.4191	-565.105	-127723	50432.3	-18285.3	289.244	1129.02	0	0	0	0	0	0	0	603	903	0
593	2	0	0	0	0	0	0	200	300	0	37.598	-88.351	-565.41	-128363	51286.8	-18468.4	290.707	1130.03	0	0	0	0	0	0	0	603	903	0
593	3	0	0	0	0	0	0	200	300	0	38.6661	-88.0458	-569.377	-127997	51408.9	-18743	290.29	1127.8	0	0	0	0	0	0	0	603	903	0
593	4	0	0	0	0	0	0	200	300	0	39.2764	-88.1984	-573.039	-128547	50798.5	-18422.6	288.648	1127.32	0	0	0	0	0	0	0	603	903	0
593	5	0	0	0	0	0	0	200	300	0	39.429	-89.2665	-573.039	-129554	51408.9	-18147.9	289.713	1129.08	0	0	0	0	0	0	0	603	903	0
593	6	0	0	0	0	0	0	200	300	0	38.8187	-86.9777	-575.481	-129737	51775.1	-18056.4	289.968	1128.44	0	0	0	0	0	0	0	603	903	0
593	7	0	0	0	0	0	0	200	300	0	39.1238	-87.1303	-578.227	-129371	51592	-18331.1	289.224	1126.74	0	0	0	0	0	0	0	603	903	0
593	8	0	0	0	0	0	0	200	300	0	41.2601	-87.7406	-580.974	-130194	51958.2	-18376.8	289.433	1127.1	0	0	0	0	0	0	0	603	903	0
593	9	0	0	0	0	0	0	200	300	0	40.8023	-87.4355	-580.364	-130561	52263.4	-18559.9	290.053	1127.96	0	0	0	0	0	0	0	603	903	0
594	0	0	0	0	0	0	0	200	300	0	40.192	-86.5199	-580.669	-130835	51958.2	-18422.6	289.48	1128.32	0	0	0	0	0	0	0	603	903	0
594	1	0	0	0	0	0	0	200	300	0	41.1075	-85.2992	-583.11	-131202	52141.3	-18285.3	289.419	1128	0	0	0	0	0	0	0	603	903	0
594	2	0	0	0	0	0	0	200	300	0	41.5652	-85.6044	-582.805	-131476	52934.8	-18331.1	290.828	1128.59	0	0	0	0	0	0	0	603	903	0
594	3	0	0	0	0	0	0	200	300	0	38.5135	-85.1466	-588.298	-132209	52629.6	-18147.9	289.461	1127.73	0	0	0	0	0	0	0	603	903	0
594	4	0	0	0	0	0	0	200	300	0	38.9713	-85.9096	-591.045	-131751	52202.4	-18147.9	288.322	1125.91	0	0	0	0	0	0	0	603	903	0
594	5	0	0	0	0	0	0	200	300	0	39.429	-85.2992	-592.876	-132850	52873.7	-18010.6	289.182	1127.08	0	0	0	0	0	0	0	603	903	0
594	6	0	0	0	0	0	0	200	300	0	39.1238	-85.1466	-594.402	-132209	53056.8	-17919.1	289.261	1125.42	0	0	0	0	0	0	0	603	903	0
594	7	0	0	0	0	0	0	200	300	0	38.3609	-84.8415	-597.759	-132666	53056.8	-18193.7	288.76	1124.94	0	0	0	0	0	0	0	603	903	0
594	8	0	0	0	0	0	0	200	300	0	39.7342	-85.2992	-598.064	-133124	53056.8	-17873.3	288.714	1125.59	0	0	0	0	0	0	0	603	903	0
594	9	0	0	0	0	0	0	200	300	0	39.2764	-84.6889	-598.369	-133307	53545.1	-17461.3	289.485	1125.78	0	0	0	0	0	0	0	603	903	0
595	0	0	0	0	0	0	0	200	300	0	38.8187	-83.3156	-602.947	-134314	53362	-18102.2	288.502	1125.76	0	0	0	0	0	0	0	603	903	0
595	1	0	0	0	0	0	0	200	300	0	40.192	-84.0785	-603.252	-134681	53850.3	-17781.7	289.267	1126.26	0	0	0	0	0	0	0	603	903	0
595	2	0	0	0	0	0	0	200	300	0	39.1238	-83.163	-605.693	-134772	54155.5	-17598.6	289.411	1125.51	0	0	0	0	0	0	0	603	903	0
595	3	0	0	0	0	0	0	200	300	0	39.1238	-83.6208	-605.388	-134955	53606.2	-17873.3	288.548	1125.92	0	0	0	0	0	0	0	603	903	0
595	4	0	0	0	0	0	0	200	300	0	38.2083	-82.5526	-607.83	-135321	54094.4	-17736	288.996	1125.63	0	0	0	0	0	0	0	603	903	0
595	5	0	0	0	0	0	0	200	300	0	38.5135	-82.5526	-610.576	-135413	54216.5	-17736	288.796	1124.78	0	0	0	0	0	0	0	603	903	0
595	6	0	0	0	0	0	0	200	300	0	40.192	-82.7052	-611.492	-135871	53239.9	-17461.3	287.066	1125.2	0	0	0	0	0	0	0	603	903	0
595	7	0	0	0	0	0	0	200	300	0	38.2083	-81.7897	-612.712	-135962	54765.8	-17552.9	289.383	1124.9	0	0	0	0	0	0	0	603	903	0
595	8	0	0	0	0	0	0	200	300	0	38.9713	-81.0268	-613.628	-136329	54582.7	-17278.2	288.951	1125.17	0	0	0	0	0	0	0	603	903	0
595	9	0	0	0	0	0	0	200	300	0	39.429	-80.7216	-616.069	-136695	54521.7	-17278.2	288.499	1124.88	0	0	0	0	0	0	0	603	903	0
596	0	0	0	0	0	0	0	200	300	0	38.5135	-80.569	-614.849	-137244	55071	-16957.8	289.568	1126.22	0	0	0	0	0	0	0	603	903	0
596	1	0	0	0	0	0	0	200	300	0	38.8187	-79.8061	-620.647	-136969	54887.9	-17095.1	288.437	1123.69	0	0	0	0	0	0	0	603	903	0
596	2	0	0	0	0	0	0	200	300	0	39.1238	-81.3319	-620.952	-137427	54704.8	-17049.3	288.098	1124.32	0	0	0	0	0	0	0	603	903	0
596	3	0	0	0	0	0	0	200	300	0	37.9031	-77.975	-620.342	-137976	55132	-16957.8	288.874	1125.42	0	0	0	0	0	0	0	603	903	0
596	4	0	0	0	0	0	0	200	300	0	37.2928	-78.7379	-623.699	-137885	55498.2	-16866.2	288.983	1124.08	0	0	0	0	0	0	0	603	903	0
596	5	0	0	0	0	0	0	200	300	0	38.3609	-79.0431	-624.919	-137885	54704.8	-17003.5	287.539	1123.64	0	0	0	0	0	0	0	603	903	0
596	6	0	0	0	0	0	0	200	300	0	39.5816	-78.5854	-624.919	-138434	55376.2	-16820.4	288.613	1124.52	0	0	0	0	0	0	0	603	903	0
596	7	0	0	0	0	0	0	200	300	0	37.1402	-76.9069	-626.14	-138892	55803.4	-16728.9	289.123	1124.82	0	0	0	0	0	0	0	603	903	0
596	8	0	0	0	0	0	0	200	300	0	37.4454	-76.6017	-628.887	-139167	55620.3	-16820.4	288.443	1124.29	0	0	0	0	0	0	0	603	903	0
596	9	0	0	0	0	0	0	200	300	0	37.9031	-77.2121	-632.244	-138068	55437.2	-16408.4	287.683	1121.38	0	0	0	0	0	0	0	603	903	0
597	0	0	0	0	0	0	0	200	300	0	38.0557	-76.4491	-629.192	-139533	55315.1	-16683.1	287.915	1124.77	0	0	0	0	0	0	0	603	903	0
597	1	0	0	0	0	0	0	200	300	0	36.9876	-75.381	-631.328	-139624	55437.2	-16362.7	287.811	1124.16	0	0	0	0	0	0	0	603	903	0
597	2	0	0	0	0	0	0	200	300	0	36.835	-74.7707	-634.99	-139258	55559.3	-15813.4	287.496	1122.31	0	0	0	0	0	0	0	603	903	0
597	3	0	0	0	0	0	0	200	300	0	36.9876	-75.2284	-635.601	-139899	55986.5	-16454.2	288.084	1123.11	0	0	0	0	0	0	0	603	903	0
597	4	0	0	0	0	0	0	200	300	0	37.2928	-74.6181	-634.685	-140082	56291.7	-16133.8	288.692	1123.71	0	0	0	0	0	0	0	603	903	0
597	5	0	0	0	0	0	0	200	300	0	37.2928	-73.55	-637.737	-140265	56108.6	-15950.7	287.981	1122.94	0	0	0	0	0	0	0	603	903	0
597	6	0	0	0	0	0	0	200	300	0	37.4454	-73.2448	-638.042	-140265	56108.6	-15721.8	287.939	1122.84	0	0	0	0	0	0	0	603	903	0
597	7	0	0	0	0	0	0	200	300	0	38.6661	-73.2448	-641.094	-140357	56841	-15996.5	288.663	1121.93	0	0	0	0	0	0	0	603	903	0
597	8	0	0	0	0	0	0	200	300	0	35.9195	-72.3293	-640.483	-140632	56291.7	-15904.9	287.889	1122.57	0	0	0	0	0	0	0	603	903	0
597	9	0	0	0	0	0	0	200	300	0	36.2247	-71.8715	-641.094	-140448	56413.8	-15813.4	287.996	1122.08	0	0	0	0	0	0	0	603	903	0
598	0	0	0	0	0	0	0	200	300	0	36.6824	-71.2611	-642.314	-140815	56902.1	-15904.9	288.589	1122.23	0	0	0	0	0	0	0	603	903	0
598	1	0	0	0	0	0	0	200	300	0	36.5298	-71.1086	-643.84	-141272	56780	-15859.1	288.19	1122.42	0	0	0	0	0	0	0	603	903	0
598	2	0	0	0	0	0	0	200	300	0	36.0721	-70.4982	-644.145	-141730	56230.7	-15492.9	287.295	1123.03	0	0	0	0	0	0	0	603	903	0
598	3	0	0	0	0	0	0	200	300	0	38.5135	-70.3456	-645.061	-141089	56657.9	-15401.4	287.833	1121.72	0	0	0	0	0	0	0	603	903	0
598	4	0	0	0	0	0	0	200	300	0	35.3091	-69.4301	-646.587	-141089	56108.6	-15447.1	286.777	1121.21	0	0	0	0	0	0	0	603	903	0
598	5	0	0	0	0	0	0	200	300	0	35.004	-69.4301	-644.756	-141639	56657.9	-15355.6	287.875	1122.68	0	0	0	0	0	0	0	603	903	0
598	6	0	0	0	0	0	0	200	300	0	35.4617	-68.6671	-646.587	-141455	56596.9	-15355.6	287.532	1121.77	0	0	0	0	0	0	0	603	903	0
598	7	0	0	0	0	0	0	200	300	0	36.6824	-66.9887	-642.925	-141272	57146.2	-15309.8	288.885	1122.73	0	0	0	0	0	0	0	603	903	0
598	8	0	0	0	0	0	0	200	300	0	35.4617	-67.1413	-647.502	-141547	57146.2	-15264	288.256	1121.6	0	0	0	0	0	0	0	603	903	0
598	9	0	0	0	0	0	0	200	300	0	35.004	-67.9042	-645.061	-141089	56169.6	-15264	287.077	1121.72	0	0	0	0	0	0	0	603	903	0
599	0	0	0	0	0	0	0	200	300	0	35.004	-66.8361	-649.028	-141455	57268.3	-15080.9	288.237	1120.95	0	0	0	0	0	0	0	603	903	0
599	1	0	0	0	0	0	0	200	300	0	35.1566	-66.3783	-645.671	-141822	57207.2	-14989.4	288.601	1122.65	0	0	0	0	0	0	0	603	903	0
599	2	0	0	0	0	0	0	200	300	0	36.2247	-65.4628	-650.554	-141455	56841	-14852.1	287.373	1120.44	0	0	0	0	0	0	0	603	903	0
599	3	0	0	0	0	0	0	200	300	0	35.3091	-64.6999	-646.587	-141272	56535.8	-14852.1	287.437	1121.49	0	0	0	0	0	0	0	603	903	0
599	4	0	0	0	0	0	0	200	300	0	35.004	-64.0895	-647.502	-141181	57390.3	-15126.7	288.633	1121.04	0	0	0	0	0	0	0	603	903	0
599	5	0	0	0	0	0	0	200	300	0	33.7833	-64.5473	-648.113	-141181	56902.1	-14485.8	287.797	1120.83	0	0	0	0	0	0	0	603	903	0
599	6	0	0	0	0	0	0	200	300	0	35.6143	-64.2421	-649.639	-140723	56657.9	-14760.5	287.215	1119.62	0	0	0	0	0	0	0	603	903	0
599	7	0	0	0	0	0	0	200	300	0	35.1566	-63.0214	-649.028	-140998	56963.1	-14531.6	287.767	1120.24	0	0	0	0	0	0	0	603	903	0
599	8	0	0	0	0	0	0	200	300	0	34.0884	-61.9533	-649.944	-141272	57146.2	-14623.2	287.925	1120.36	0	0	0	0	0	0	0	603	903	0
599	9	0	0	0	0	0	0	200	300	0	36.0721	-62.7162	-649.639	-140998	56780	-14714.7	287.402	1120.04	0	0	0	0	0	0	0	603	903	0
600	0	0	0	0	0	0	0	200	300	0	35.004	-61.9533	-650.249	-140540	57207.2	-14348.5	287.977	1119.13	0	0	0	0	0	0	0	603	903	0
600	1	0	0	0	0	0	0	200	300	0	34.8514	-61.6481	-649.944	-140448	57085.2	-15035.2	287.831	1119.09	0	0	0	0	0	0	0	603	903	0
600	2	0	0	0	0	0	0	200	300	0	34.5462	-61.0378	-649.639	-140357	56902.1	-14714.7	287.59	1119.05	0	0	0	0	0	0	0	603	903	0
600	3	0	0	0	0	0	0	200	300	0	34.5462	-60.7326	-647.197	-141089	57146.2	-14394.3	288.298	1121	0	0	0	0	0	0	0	603	903	0
600	4	0	0	0	0	0	0	200	300	0	35.6143	-60.58	-645.366	-139075	57207.2	-14211.2	288.643	1118.5	0	0	0	0	0	0	0	603	903	0
600	5	0	0	0	0	0	0	200	300	0	35.1566	-59.9696	-647.808	-140174	56230.7	-14485.8	286.802	1119.38	0	0	0	0	0	0	0	603	903	0
600	6	0	0	0	0	0	0	200	300	0	35.004	-59.0541	-647.808	-139533	57024.1	-13982.3	288.026	1118.39	0	0	0	0	0	0	0	603	903	0
600	7	0	0	0	0	0	0	200	300	0	34.5462	-58.9015	-648.418	-139075	57085.2	-14211.2	288.038	1117.48	0	0	0	0	0	0	0	603	903	0
600	8	0	0	0	0	0	0	200	300	0	35.1566	-58.7489	-645.366	-139167	56841	-14211.2	288.076	1118.64	0	0	0	0	0	0	0	603	903	0
600	9	0	0	0	0	0	0	200	300	0	35.6143	-58.1386	-646.282	-138526	57085.2	-14211.2	288.329	1117.34	0	0	0	0	0	0	0	603	903	0
601	0	0	0	0	0	0	0	200	300	0	36.5298	-57.6808	-646.282	-138800	56780	-14348.5	287.856	1117.77	0	0	0	0	0	0	0	603	903	0
601	1	0	0	0	0	0	0	200	300	0	35.7669	-57.6808	-645.366	-138160	56535.8	-14257	287.603	1117.08	0	0	0	0	0	0	0	603	903	0
601	2	0	0	0	0	0	0	200	300	0	35.004	-57.5282	-642.925	-136969	57207.2	-14394.3	288.98	1116.04	0	0	0	0	0	0	0	603	903	0
601	3	0	0	0	0	0	0	200	300	0	35.3091	-56.1549	-642.314	-136786	56413.8	-14028.1	287.829	1115.96	0	0	0	0	0	0	0	603	903	0
601	4	0	0	0	0	0	0	200	300	0	35.4617	-55.8498	-642.925	-137061	56535.8	-13936.5	287.935	1116.18	0	0	0	0	0	0	0	603	903	0
601	5	0	0	0	0	0	0	200	300	0	35.6143	-56.4601	-639.568	-136695	56474.8	-13936.5	288.302	1116.73	0	0	0	0	0	0	0	603	903	0
601	6	0	0	0	0	0	0	200	300	0	38.0557	-56.3075	-640.483	-136786	56719	-13570.3	288.557	1116.57	0	0	0	0	0	0	0	603	903	0
601	7	0	0	0	0	0	0	200	300	0	35.7669	-54.6291	-638.347	-136420	55986.5	-13661.9	287.705	1116.71	0	0	0	0	0	0	0	603	903	0
601	8	0	0	0	0	0	0	200	300	0	35.7669	-54.4765	-636.516	-135505	56169.6	-13890.8	288.245	1115.88	0	0	0	0	0	0	0	603	903	0
601	9	0	0	0	0	0	0	200	300	0	35.7669	-53.7135	-636.821	-135688	56108.6	-13936.5	288.107	1116.07	0	0	0	0	0	0	0	603	903	0
602	0	0	0	0	0	0	0	200	300	0	35.7669	-53.2558	-636.821	-135505	55681.4	-13707.6	287.436	1115.78	0	0	0	0	0	0	0	603	903	0
602	1	0	0	0	0	0	0	200	300	0	35.9195	-53.7135	-634.99	-134589	55742.4	-13799.2	287.785	1114.95	0	0	0	0	0	0	0	603	903	0
602	2	0	0	0	0	0	0	200	300	0	35.9195	-52.1877	-633.159	-134223	56108.6	-13799.2	288.617	1114.99	0	0	0	0	0	0	0	603	903	0
602	3	0	0	0	0	0	0	200	300	0	34.6988	-51.7299	-631.938	-134498	56047.6	-13478.8	288.692	1115.83	0	0	0	0	0	0	0	603	903	0
602	4	0	0	0	0	0	0	200	300	0	35.004	-52.0351	-632.244	-133582	55742.4	-13524.5	288.166	1114.28	0	0	0	0	0	0	0	603	903	0
602	5	0	0	0	0	0	0	200	300	0	37.4454	-52.6454	-629.802	-133307	56047.6	-13341.4	288.992	1114.67	0	0	0	0	0	0	0	603	903	0
602	6	0	0	0	0	0	0	200	300	0	34.5462	-50.8144	-626.75	-132483	55681.4	-13433	288.841	1114.38	0	0	0	0	0	0	0	603	903	0
602	7	0	0	0	0	0	0	200	300	0	34.8514	-50.3566	-627.056	-133307	55071	-13616.1	287.825	1115.59	0	0	0	0	0	0	0	603	903	0
602	8	0	0	0	0	0	0	200	300	0	35.9195	-49.8988	-626.445	-132209	55559.3	-13295.7	288.69	1114.05	0	0	0	0	0	0	0	603	903	0
602	9	0	0	0	0	0	0	200	300	0	35.004	-49.8988	-624.614	-131842	55864.5	-13478.8	289.438	1114.08	0	0	0	0	0	0	0	603	903	0
603	0	0	0	0	0	0	0	200	300	0	35.4617	-49.4411	-622.173	-131202	54826.9	-13387.2	288.122	1113.88	0	0	0	0	0	0	0	603	903	0
603	1	0	0	0	0	0	0	200	300	0	35.4617	-48.8307	-620.647	-130835	55132	-13066.8	288.83	1113.8	0	0	0	0	0	0	0	603	903	0
603	2	0	0	0	0	0	0	200	300	0	35.3091	-48.8307	-620.037	-129737	55254.1	-12975.2	289.114	1112.24	0	0	0	0	0	0	0	603	903	0
603	3	0	0	0	0	0	0	200	300	0	33.9359	-48.0678	-620.037	-130011	54826.9	-13158.3	288.425	1112.68	0	0	0	0	0	0	0	603	903	0
603	4	0	0	0	0	0	0	200	300	0	34.3936	-47.4574	-619.426	-129371	54582.7	-12609	288.118	1111.86	0	0	0	0	0	0	0	603	903	0
603	5	0	0	0	0	0	0	200	300	0	34.5462	-48.0678	-616.68	-128821	54582.7	-12975.2	288.511	1111.9	0	0	0	0	0	0	0	603	903	0
603	6	0	0	0	0	0	0	200	300	0	34.8514	-46.6945	-615.764	-128913	54582.7	-12609	288.642	1112.35	0	0	0	0	0	0	0	603	903	0
603	7	0	0	0	0	0	0	200	300	0	35.6143	-45.9315	-612.407	-128363	54704.8	-12929.4	289.328	1112.6	0	0	0	0	0	0	0	603	903	0
603	8	0	0	0	0	0	0	200	300	0	34.3936	-46.2367	-615.154	-127997	54826.9	-12563.2	289.127	1111.07	0	0	0	0	0	0	0	603	903	0
603	9	0	0	0	0	0	0	200	300	0	34.6988	-46.5419	-611.186	-127814	54460.7	-12517.5	289.106	1112.12	0	0	0	0	0	0	0	603	903	0
604	0	0	0	0	0	0	0	200	300	0	33.6307	-45.9315	-609.966	-127265	54094.4	-12242.8	288.684	1111.64	0	0	0	0	0	0	0	603	903	0
604	1	0	0	0	0	0	0	200	300	0	34.5462	-45.016	-610.271	-126716	54643.8	-12288.6	289.54	1110.64	0	0	0	0	0	0	0	603	903	0
604	2	0	0	0	0	0	0	200	300	0	33.9359	-44.8634	-609.355	-126349	54460.7	-12380.1	289.374	1110.35	0	0	0	0	0	0	0	603	903	0
604	3	0	0	0	0	0	0	200	300	0	33.3255	-44.8634	-607.83	-125251	54277.5	-12517.5	289.297	1109.06	0	0	0	0	0	0	0	603	903	0
604	4	0	0	0	0	0	0	200	300	0	32.2574	-44.5583	-607.524	-125525	54216.5	-12380.1	289.242	1109.62	0	0	0	0	0	0	0	603	903	0
604	5	0	0	0	0	0	0	200	300	0	33.9359	-43.9479	-605.388	-125068	53972.4	-12151.2	289.153	1109.59	0	0	0	0	0	0	0	603	903	0
604	6	0	0	0	0	0	0	200	300	0	33.0203	-42.7272	-604.778	-125159	53789.3	-12334.4	288.941	1109.95	0	0	0	0	0	0	0	603	903	0
604	7	0	0	0	0	0	0	200	300	0	33.7833	-43.6427	-602.947	-124244	54033.4	-11876.6	289.616	1109.06	0	0	0	0	0	0	0	603	903	0
604	8	0	0	0	0	0	0	200	300	0	33.0203	-43.185	-604.473	-123694	53667.2	-11785	288.784	1107.63	0	0	0	0	0	0	0	603	903	0
604	9	0	0	0	0	0	0	200	300	0	32.8677	-43.6427	-601.116	-123877	53545.1	-11327.3	289.076	1109.08	0	0	0	0	0	0	0	603	903	0
605	0	0	0	0	0	0	0	200	300	0	31.7996	-42.5746	-600.81	-123603	53667.2	-11830.8	289.325	1108.73	0	0	0	0	0	0	0	603	903	0
605	1	0	0	0	0	0	0	200	300	0	32.1048	-41.6591	-599.59	-122687	53423.1	-12013.9	289.099	1107.62	0	0	0	0	0	0	0	603	903	0
605	2	0	0	0	0	0	0	200	300	0	34.6988	-42.1169	-599.895	-122870	53362	-11464.6	288.952	1107.82	0	0	0	0	0	0	0	603	903	0
605	3	0	0	0	0	0	0	200	300	0	31.1893	-41.6591	-597.454	-121955	53239.9	-11785	289.111	1107.12	0	0	0	0	0	0	0	603	903	0
605	4	0	0	0	0	0	0	200	300	0	31.7996	-40.7436	-595.317	-121497	53239.9	-11418.8	289.431	1107.09	0	0	0	0	0	0	0	603	903	0
605	5	0	0	0	0	0	0	200	300	0	31.9522	-39.828	-597.148	-121589	52995.8	-11327.3	288.748	1106.62	0	0	0	0	0	0	0	603	903	0
605	6	0	0	0	0	0	0	200	300	0	32.1048	-41.6591	-593.486	-121680	52812.7	-11189.9	288.987	1108.03	0	0	0	0	0	0	0	603	903	0
605	7	0	0	0	0	0	0	200	300	0	30.8841	-38.6073	-594.097	-120948	53423.1	-11510.4	289.923	1106.58	0	0	0	0	0	0	0	603	903	0
605	8	0	0	0	0	0	0	200	300	0	30.5789	-39.3703	-592.571	-120124	53239.9	-11189.9	289.846	1105.72	0	0	0	0	0	0	0	603	903	0
605	9	0	0	0	0	0	0	200	300	0	31.1893	-38.9125	-592.266	-120215	52202.4	-11235.7	288.14	1105.98	0	0	0	0	0	0	0	603	903	0
606	0	0	0	0	0	0	0	200	300	0	30.2737	-38.4547	-590.129	-120215	53239.9	-10732.2	290.217	1106.71	0	0	0	0	0	0	0	603	903	0
606	1	0	0	0	0	0	0	200	300	0	30.1212	-38.4547	-591.045	-119483	53117.9	-11052.6	289.871	1105.16	0	0	0	0	0	0	0	603	903	0
606	2	0	0	0	0	0	0	200	300	0	31.0367	-38.3022	-589.214	-119483	52690.6	-10823.7	289.425	1105.78	0	0	0	0	0	0	0	603	903	0
606	3	0	0	0	0	0	0	200	300	0	30.7315	-37.3866	-585.552	-119208	52690.6	-10732.2	289.985	1106.58	0	0	0	0	0	0	0	603	903	0
606	4	0	0	0	0	0	0	200	300	0	29.053	-36.9289	-586.162	-117377	52995.8	-10732.2	290.412	1103.25	0	0	0	0	0	0	0	603	903	0
606	5	0	0	0	0	0	0	200	300	0	29.6634	-37.0815	-587.078	-118110	52324.4	-10549.1	289.127	1104.18	0	0	0	0	0	0	0	603	903	0
606	6	0	0	0	0	0	0	200	300	0	30.2737	-36.9289	-586.772	-117835	52873.7	-10457.5	290.109	1103.82	0	0	0	0	0	0	0	603	903	0
606	7	0	0	0	0	0	0	200	300	0	29.6634	-36.7763	-585.247	-118018	52995.8	-10686.4	290.553	1104.66	0	0	0	0	0	0	0	603	903	0
606	8	0	0	0	0	0	0	200	300	0	29.5108	-35.403	-584.941	-117835	52751.7	-10594.9	290.183	1104.45	0	0	0	0	0	0	0	603	903	0
606	9	0	0	0	0	0	0	200	300	0	29.816	-35.403	-584.331	-117102	52324.4	-10274.4	289.546	1103.4	0	0	0	0	0	0	0	603	903	0
607	0	0	0	0	0	0	0	200	300	0	29.2056	-35.5556	-583.415	-116645	52751.7	-10091.3	290.419	1102.93	0	0	0	0	0	0	0	603	903	0
607	1	0	0	0	0	0	0	200	300	0	28.9005	-34.64	-581.584	-115088	52629.6	-10182.9	290.493	1100.89	0	0	0	0	0	0	0	603	903	0
607	2	0	0	0	0	0	0	200	300	0	28.7479	-34.1823	-582.5	-115912	52263.4	-10091.3	289.723	1101.99	0	0	0	0	0	0	0	603	903	0
607	3	0	0	0	0	0	0	200	300	0	28.9005	-34.4875	-582.5	-116004	52751.7	-9953.98	290.561	1102.15	0	0	0	0	0	0	0	603	903	0
607	4	0	0	0	0	0	0	200	300	0	28.4427	-33.8771	-579.143	-115821	52690.6	-10045.5	290.98	1102.99	0	0	0	0	0	0	0	603	903	0
607	5	0	0	0	0	0	0	200	300	0	29.6634	-33.4193	-577.312	-115546	52446.5	-10045.5	290.846	1103.15	0	0	0	0	0	0	0	603	903	0
607	6	0	0	0	0	0	0	200	300	0	28.5953	-33.8771	-577.617	-114631	52324.4	-9587.77	290.587	1101.45	0	0	0	0	0	0	0	603	903	0
607	7	0	0	0	0	0	0	200	300	0	28.1375	-33.2668	-577.007	-115088	52263.4	-9953.98	290.577	1102.46	0	0	0	0	0	0	0	603	903	0
607	8	0	0	0	0	0	0	200	300	0	27.6797	-32.809	-577.922	-114264	51958.2	-9816.65	289.905	1100.72	0	0	0	0	0	0	0	603	903	0
607	9	0	0	0	0	0	0	200	300	0	27.8323	-32.5038	-577.617	-114173	52141.3	-9496.22	290.27	1100.66	0	0	0	0	0	0	0	603	903	0
608	0	0	0	0	0	0	0	200	300	0	29.6634	-31.8935	-577.007	-113715	52019.2	-9633.55	290.154	1100.08	0	0	0	0	0	0	0	603	903	0
608	1	0	0	0	0	0	0	200	300	0	26.3065	-31.7409	-575.481	-113532	52263.4	-9496.22	290.817	1100.28	0	0	0	0	0	0	0	603	903	0
608	2	0	0	0	0	0	0	200	300	0	26.459	-31.2831	-575.481	-112433	51958.2	-9496.22	290.287	1098.37	0	0	0	0	0	0	0	603	903	0
608	3	0	0	0	0	0	0	200	300	0	28.1375	-31.1305	-574.871	-112983	52324.4	-9587.77	291.019	1099.54	0	0	0	0	0	0	0	603	903	0
608	4	0	0	0	0	0	0	200	300	0	27.3746	-30.6728	-573.65	-113074	52751.7	-9267.33	291.958	1100.11	0	0	0	0	0	0	0	603	903	0
608	5	0	0	0	0	0	0	200	300	0	26.6116	-29.2995	-569.988	-112983	51469.9	-9679.33	290.3	1101.22	0	0	0	0	0	0	0	603	903	0
608	6	0	0	0	0	0	0	200	300	0	27.222	-29.6046	-572.734	-112250	51897.2	-9541.99	290.613	1098.99	0	0	0	0	0	0	0	603	903	0
608	7	0	0	0	0	0	0	200	300	0	27.222	-29.9098	-572.734	-112525	52629.6	-9084.23	291.892	1099.47	0	0	0	0	0	0	0	603	903	0
608	8	0	0	0	0	0	0	200	300	0	25.8487	-28.3839	-572.429	-111426	52080.3	-9175.78	290.981	1097.66	0	0	0	0	0	0	0	603	903	0
608	9	0	0	0	0	0	0	200	300	0	26.459	-28.3839	-570.598	-111518	51958.2	-9175.78	291.059	1098.44	0	0	0	0	0	0	0	603	903	0
609	0	0	0	0	0	0	0	200	300	0	26.7642	-28.3839	-572.429	-111701	52568.6	-8809.57	291.834	1098.13	0	0	0	0	0	0	0	603	903	0
609	1	0	0	0	0	0	0	200	300	0	26.459	-27.9262	-569.072	-111518	52019.2	-8992.68	291.411	1098.96	0	0	0	0	0	0	0	603	903	0
609	2	0	0	0	0	0	0	200	300	0	26.459	-28.2314	-571.208	-111060	52141.3	-9130.01	291.282	1097.43	0	0	0	0	0	0	0	603	903	0
609	3	0	0	0	0	0	0	200	300	0	26.3065	-28.2314	-571.819	-109504	52446.5	-8809.57	291.719	1094.5	0	0	0	0	0	0	0	603	903	0
609	4	0	0	0	0	0	0	200	300	0	26.6116	-27.1632	-569.072	-111152	52690.6	-9084.23	292.59	1098.32	0	0	0	0	0	0	0	603	903	0
609	5	0	0	0	0	0	0	200	300	0	26.0013	-26.8581	-568.157	-110694	52385.5	-8763.79	292.203	1097.83	0	0	0	0	0	0	0	603	903	0
609	6	0	0	0	0	0	0	200	300	0	26.3065	-26.5529	-571.514	-109961	52568.6	-8672.24	291.981	1095.4	0	0	0	0	0	0	0	603	903	0
609	7	0	0	0	0	0	0	200	300	0	27.3746	-26.2477	-570.598	-109961	52263.4	-8580.69	291.594	1095.71	0	0	0	0	0	0	0	603	903	0
609	8	0	0	0	0	0	0	200	300	0	26.7642	-26.0951	-567.546	-110144	52263.4	-8672.24	292.087	1097.07	0	0	0	0	0	0	0	603	903	0
609	9	0	0	0	0	0	0	200	300	0	25.3909	-25.3322	-568.157	-109595	52446.5	-8855.35	292.31	1095.9	0	0	0	0	0	0	0	603	903	0
610	0	0	0	0	0	0	0	200	300	0	26.6116	-25.027	-568.767	-109412	52263.4	-8855.35	291.889	1095.37	0	0	0	0	0	0	0	603	903	0
610	1	0	0	0	0	0	0	200	300	0	28.1375	-24.8744	-568.157	-109229	52751.7	-8580.69	292.847	1095.25	0	0	0	0	0	0	0	603	903	0
610	2	0	0	0	0	0	0	200	300	0	25.0858	-24.8744	-566.631	-109320	52324.4	-8672.24	292.343	1095.93	0	0	0	0	0	0	0	603	903	0
610	3	0	0	0	0	0	0	200	300	0	27.222	-23.5011	-565.41	-109046	52507.5	-8809.57	292.866	1095.86	0	0	0	0	0	0	0	603	903	0
610	4	0	0	0	0	0	0	200	300	0	27.3746	-23.5011	-564.8	-108497	52629.6	-8031.37	293.183	1095.1	0	0	0	0	0	0	0	603	903	0
610	5	0	0	0	0	0	0	200	300	0	25.8487	-23.196	-563.884	-108680	52568.6	-8534.91	293.226	1095.73	0	0	0	0	0	0	0	603	903	0
610	6	0	0	0	0	0	0	200	300	0	25.8487	-24.5692	-566.02	-107673	52751.7	-8260.25	293.197	1093.23	0	0	0	0	0	0	0	603	903	0
610	7	0	0	0	0	0	0	200	300	0	25.3909	-22.5856	-565.105	-108039	52690.6	-8306.03	293.24	1094.18	0	0	0	0	0	0	0	603	903	0
610	8	0	0	0	0	0	0	200	300	0	26.3065	-22.7382	-564.8	-107764	52324.4	-7939.82	292.642	1093.8	0	0	0	0	0	0	0	603	903	0
610	9	0	0	0	0	0	0	200	300	0	26.7642	-21.6701	-565.105	-107947	52446.5	-8580.69	292.808	1094.02	0	0	0	0	0	0	0	603	903	0
611	0	0	0	0	0	0	0	200	300	0	26.459	-22.1278	-565.105	-107581	52873.7	-8534.91	293.564	1093.37	0	0	0	0	0	0	0	603	903	0
611	1	0	0	0	0	0	0	200	300	0	26.1539	-21.2123	-563.579	-107123	52690.6	-8534.91	293.493	1093.08	0	0	0	0	0	0	0	603	903	0
611	2	0	0	0	0	0	0	200	300	0	28.5953	-21.0597	-563.274	-107215	52263.4	-8306.03	292.785	1093.34	0	0	0	0	0	0	0	603	903	0
611	3	0	0	0	0	0	0	200	300	0	26.0013	-20.602	-564.495	-106940	52812.7	-8260.25	293.557	1092.44	0	0	0	0	0	0	0	603	903	0
611	4	0	0	0	0	0	0	200	300	0	26.1539	-20.602	-565.41	-107947	52751.7	-8168.7	293.298	1093.92	0	0	0	0	0	0	0	603	903	0
611	5	0	0	0	0	0	0	200	300	0	26.7642	-20.7545	-562.969	-105475	51958.2	-8122.93	292.293	1090.36	0	0	0	0	0	0	0	603	903	0
611	6	0	0	0	0	0	0	200	300	0	26.459	-20.602	-562.664	-106574	53362	-8122.93	294.838	1092.41	0	0	0	0	0	0	0	603	903	0
611	7	0	0	0	0	0	0	200	300	0	26.3065	-19.2287	-563.884	-106665	52751.7	-8122.93	293.551	1092.16	0	0	0	0	0	0	0	603	903	0
611	8	0	0	0	0	0	0	200	300	0	26.6116	-19.2287	-564.8	-106025	52568.6	-8214.48	293.075	1090.72	0	0	0	0	0	0	0	603	903	0
611	9	0	0	0	0	0	0	200	300	0	26.9168	-18.7709	-563.274	-105750	52873.7	-8260.25	293.869	1090.74	0	0	0	0	0	0	0	603	903	0
612	0	0	0	0	0	0	0	200	300	0	26.7642	-18.3131	-562.664	-105841	53056.8	-8351.81	294.296	1091.11	0	0	0	0	0	0	0	603	903	0
612	1	0	0	0	0	0	0	200	300	0	26.7642	-17.5502	-563.274	-105750	52568.6	-8077.15	293.327	1090.74	0	0	0	0	0	0	0	603	903	0
612	2	0	0	0	0	0	0	200	300	0	26.0013	-18.1606	-563.579	-105201	53056.8	-8122.93	294.143	1089.67	0	0	0	0	0	0	0	603	903	0
612	3	0	0	0	0	0	0	200	300	0	26.6116	-17.245	-563.274	-104926	52507.5	-8031.37	293.219	1089.28	0	0	0	0	0	0	0	603	903	0
612	4	0	0	0	0	0	0	200	300	0	27.3746	-16.9398	-562.358	-105201	52873.7	-7985.6	294.021	1090.07	0	0	0	0	0	0	0	603	903	0
612	5	0	0	0	0	0	0	200	300	0	26.459	-17.3976	-563.274	-105201	52934.8	-7802.49	293.977	1089.77	0	0	0	0	0	0	0	603	903	0
612	6	0	0	0	0	0	0	200	300	0	27.222	-17.245	-562.053	-103736	53239.9	-8168.7	294.724	1087.57	0	0	0	0	0	0	0	603	903	0
612	7	0	0	0	0	0	0	200	300	0	26.9168	-16.4821	-561.748	-104560	53178.9	-7344.73	294.667	1089.13	0	0	0	0	0	0	0	603	903	0
612	8	0	0	0	0	0	0	200	300	0	28.1375	-16.4821	-562.053	-105017	52995.8	-8031.37	294.29	1089.85	0	0	0	0	0	0	0	603	903	0
612	9	0	0	0	0	0	0	200	300	0	27.222	-17.7028	-561.443	-104285	53239.9	-8031.37	294.827	1088.74	0	0	0	0	0	0	0	603	903	0
613	0	0	0	0	0	0	0	200	300	0	29.053	-16.7873	-561.443	-103553	53545.1	-8031.37	295.371	1087.44	0	0	0	0	0	0	0	603	903	0
613	1	0	0	0	0	0	0	200	300	0	26.9168	-15.5666	-563.274	-104377	53056.8	-7802.49	294.194	1088.3	0	0	0	0	0	0	0	603	903	0
613	2	0	0	0	0	0	0	200	300	0	26.9168	-15.1088	-562.969	-104285	53606.2	-7436.28	295.22	1088.24	0	0	0	0	0	0	0	603	903	0
613	3	0	0	0	0	0	0	200	300	0	27.9849	-15.2614	-562.358	-102820	53789.3	-7710.94	295.649	1085.84	0	0	0	0	0	0	0	603	903	0
613	4	0	0	0	0	0	0	200	300	0	27.222	-14.4984	-562.358	-103736	52995.8	-7573.61	294.238	1087.47	0	0	0	0	0	0	0	603	903	0
613	5	0	0	0	0	0	0	200	300	0	27.3746	-14.3459	-562.053	-104102	53056.8	-7665.16	294.398	1088.22	0	0	0	0	0	0	0	603	903	0
613	6	0	0	0	0	0	0	200	300	0	27.0694	-14.1933	-563.274	-103186	53301	-7665.16	294.627	1086.19	0	0	0	0	0	0	0	603	903	0
613	7	0	0	0	0	0	0	200	300	0	27.3746	-13.4303	-561.443	-102912	53423.1	-7802.49	295.153	1086.3	0	0	0	0	0	0	0	603	903	0
613	8	0	0	0	0	0	0	200	300	0	27.6797	-14.651	-562.358	-103461	53178.9	-7756.72	294.564	1086.98	0	0	0	0	0	0	0	603	903	0
613	9	0	0	0	0	0	0	200	300	0	27.5272	-14.0407	-564.189	-103278	54033.4	-7298.95	295.772	1086.06	0	0	0	0	0	0	0	603	903	0
614	0	0	0	0	0	0	0	200	300	0	27.6797	-12.2096	-564.189	-102454	53850.3	-7756.72	295.447	1084.6	0	0	0	0	0	0	0	603	903	0
614	1	0	0	0	0	0	0	200	300	0	27.3746	-12.3622	-564.189	-102454	53545.1	-7802.49	294.906	1084.6	0	0	0	0	0	0	0	603	903	0
614	2	0	0	0	0	0	0	200	300	0	27.6797	-12.2096	-563.884	-102637	53911.3	-7436.28	295.607	1085.02	0	0	0	0	0	0	0	603	903	0
614	3	0	0	0	0	0	0	200	300	0	28.2901	-12.5148	-562.969	-102454	54094.4	-7573.61	296.088	1084.99	0	0	0	0	0	0	0	603	903	0
614	4	0	0	0	0	0	0	200	300	0	27.3746	-11.5993	-564.189	-101905	53728.2	-7298.95	295.231	1083.62	0	0	0	0	0	0	0	603	903	0
614	5	0	0	0	0	0	0	200	300	0	27.8323	-11.2941	-564.495	-101905	53728.2	-7390.51	295.179	1083.52	0	0	0	0	0	0	0	603	903	0
614	6	0	0	0	0	0	0	200	300	0	27.0694	-12.057	-563.884	-101996	53667.2	-7619.39	295.174	1083.88	0	0	0	0	0	0	0	603	903	0
614	7	0	0	0	0	0	0	200	300	0	26.9168	-10.6837	-562.664	-100898	53972.4	-7710.94	295.923	1082.32	0	0	0	0	0	0	0	603	903	0
614	8	0	0	0	0	0	0	200	300	0	27.9849	-10.5312	-565.715	-101722	53728.2	-7344.73	294.974	1082.81	0	0	0	0	0	0	0	603	903	0
614	9	0	0	0	0	0	0	200	300	0	28.2901	-10.5312	-561.748	-102271	54033.4	-7344.73	296.188	1085.06	0	0	0	0	0	0	0	603	903	0
615	0	0	0	0	0	0	0	200	300	0	26.9168	-10.9889	-564.495	-102088	53789.3	-7298.95	295.287	1083.85	0	0	0	0	0	0	0	603	903	0
615	1	0	0	0	0	0	0	200	300	0	26.7642	-9.76822	-564.495	-100806	53850.3	-7344.73	295.396	1081.58	0	0	0	0	0	0	0	603	903	0
615	2	0	0	0	0	0	0	200	300	0	29.3582	-9.46304	-564.189	-101447	54094.4	-6795.41	295.88	1082.81	0	0	0	0	0	0	0	603	903	0
615	3	0	0	0	0	0	0	200	300	0	27.8323	-9.76822	-565.715	-101264	54277.5	-7207.4	295.945	1082	0	0	0	0	0	0	0	603	903	0
615	4	0	0	0	0	0	0	200	300	0	26.3065	-8.85269	-565.715	-101172	54155.5	-7207.4	295.729	1081.84	0	0	0	0	0	0	0	603	903	0
615	5	0	0	0	0	0	0	200	300	0	28.1375	-7.63199	-565.105	-99707.5	54094.4	-7253.18	295.725	1079.44	0	0	0	0	0	0	0	603	903	0
615	6	0	0	0	0	0	0	200	300	0	27.8323	-9.9208	-565.105	-101264	54582.7	-7207.4	296.589	1082.19	0	0	0	0	0	0	0	603	903	0
615	7	0	0	0	0	0	0	200	300	0	26.7642	-8.39493	-565.715	-100989	54521.7	-7161.62	296.377	1081.52	0	0	0	0	0	0	0	603	903	0
615	8	0	0	0	0	0	0	200	300	0	27.3746	-7.4794	-566.02	-100257	54643.8	-7207.4	296.54	1080.13	0	0	0	0	0	0	0	603	903	0
615	9	0	0	0	0	0	0	200	300	0	29.3582	-7.63199	-568.157	-100531	54643.8	-6841.19	296.177	1079.94	0	0	0	0	0	0	0	603	903	0
616	0	0	0	0	0	0	0	200	300	0	26.9168	-7.63199	-565.715	-100348	54399.6	-6932.74	296.161	1080.38	0	0	0	0	0	0	0	603	903	0
616	1	0	0	0	0	0	0	200	300	0	26.6116	-6.56387	-567.546	-99432.8	54216.5	-6932.74	295.528	1078.2	0	0	0	0	0	0	0	603	903	0
616	2	0	0	0	0	0	0	200	300	0	27.3746	-6.41128	-569.683	-100074	54582.7	-6886.97	295.813	1078.67	0	0	0	0	0	0	0	603	903	0
616	3	0	0	0	0	0	0	200	300	0	26.7642	-7.32681	-564.495	-100440	54643.8	-7115.85	296.801	1080.93	0	0	0	0	0	0	0	603	903	0
616	4	0	0	0	0	0	0	200	300	0	27.0694	-6.71646	-568.462	-100257	54765.8	-6612.31	296.34	1079.36	0	0	0	0	0	0	0	603	903	0
616	5	0	0	0	0	0	0	200	300	0	26.7642	-5.80093	-567.852	-99615.9	55071	-6566.53	296.981	1078.43	0	0	0	0	0	0	0	603	903	0
616	6	0	0	0	0	0	0	200	300	0	27.3746	-5.64834	-569.072	-99982.1	54826.9	-6566.53	296.344	1078.69	0	0	0	0	0	0	0	603	903	0
616	7	0	0	0	0	0	0	200	300	0	26.459	-5.03799	-570.598	-99615.9	54765.8	-6658.08	295.98	1077.58	0	0	0	0	0	0	0	603	903	0
616	8	0	0	0	0	0	0	200	300	0	26.1539	-5.03799	-567.852	-99158.1	55498.2	-6566.53	297.734	1077.62	0	0	0	0	0	0	0	603	903	0
616	9	0	0	0	0	0	0	200	300	0	27.6797	-5.49576	-570.598	-99615.9	55071	-6474.98	296.515	1077.58	0	0	0	0	0	0	0	603	903	0
617	0	0	0	0	0	0	0	200	300	0	26.7642	-4.42764	-570.598	-99615.9	54521.7	-6383.43	295.552	1077.58	0	0	0	0	0	0	0	603	903	0
617	1	0	0	0	0	0	0	200	300	0	27.3746	-4.27505	-570.903	-99799	55620.3	-6429.2	297.425	1077.81	0	0	0	0	0	0	0	603	903	0
617	2	0	0	0	0	0	0	200	300	0	26.7642	-3.20694	-573.039	-99158.1	55315.1	-6703.86	296.529	1076.04	0	0	0	0	0	0	0	603	903	0
617	3	0	0	0	0	0	0	200	300	0	27.3746	-4.12247	-571.819	-99249.7	55193.1	-6200.32	296.522	1076.57	0	0	0	0	0	0	0	603	903	0
617	4	0	0	0	0	0	0	200	300	0	25.8487	-4.12247	-573.039	-99615.9	55437.2	-6474.98	296.742	1076.84	0	0	0	0	0	0	0	603	903	0
617	5	0	0	0	0	0	0	200	300	0	25.8487	-2.74917	-572.124	-99066.6	55376.2	-6291.87	296.791	1076.16	0	0	0	0	0	0	0	603	903	0
617	6	0	0	0	0	0	0	200	300	0	27.9849	-2.59659	-573.955	-98791.9	55437.2	-6246.1	296.588	1075.12	0	0	0	0	0	0	0	603	903	0
617	7	0	0	0	0	0	0	200	300	0	26.459	-3.05435	-574.565	-99615.9	55498.2	-6154.54	296.592	1076.38	0	0	0	0	0	0	0	603	903	0
617	8	0	0	0	0	0	0	200	300	0	26.0013	-1.98623	-575.481	-99249.7	55986.5	-6200.32	297.286	1075.46	0	0	0	0	0	0	0	603	903	0
617	9	0	0	0	0	0	0	200	300	0	27.3746	-2.29141	-574.871	-98059.5	55864.5	-6200.32	297.177	1073.58	0	0	0	0	0	0	0	603	903	0
618	0	0	0	0	0	0	0	200	300	0	27.222	-2.74917	-576.091	-99249.7	55925.5	-6108.77	297.078	1075.28	0	0	0	0	0	0	0	603	903	0
618	1	0	0	0	0	0	0	200	300	0	26.7642	-1.68106	-575.786	-99249.7	55498.2	-6017.21	296.387	1075.37	0	0	0	0	0	0	0	603	903	0
618	2	0	0	0	0	0	0	200	300	0	28.5953	-0.612944	-579.143	-98242.6	55986.5	-5834.11	296.671	1072.63	0	0	0	0	0	0	0	603	903	0
618	3	0	0	0	0	0	0	200	300	0	26.6116	-0.460356	-577.922	-99341.2	55803.4	-5788.33	296.559	1074.89	0	0	0	0	0	0	0	603	903	0
618	4	0	0	0	0	0	0	200	300	0	26.1539	-0.918119	-577.617	-99524.3	56047.6	-5834.11	297.032	1075.3	0	0	0	0	0	0	0	603	903	0
618	5	0	0	0	0	0	0	200	300	0	24.7806	-0.0025921	-578.533	-98425.7	56657.9	-5788.33	297.934	1073.13	0	0	0	0	0	0	0	603	903	0
618	6	0	0	0	0	0	0	200	300	0	27.8323	0.760347	-579.753	-98608.8	55803.4	-5742.56	296.254	1073.09	0	0	0	0	0	0	0	603	903	0
618	7	0	0	0	0	0	0	200	300	0	25.6961	0.760347	-578.227	-98975	56535.8	-5788.33	297.774	1074.17	0	0	0	0	0	0	0	603	903	0
618	8	0	0	0	0	0	0	200	300	0	25.5435	0.912935	-582.5	-98334.1	56963.1	-5742.56	297.791	1071.81	0	0	0	0	0	0	0	603	903	0
618	9	0	0	0	0	0	0	200	300	0	26.459	1.52329	-581.279	-98151.1	56719	-5879.89	297.576	1071.85	0	0	0	0	0	0	0	603	903	0
619	0	0	0	0	0	0	0	200	300	0	26.7642	1.82846	-581.89	-98517.3	56169.6	-5467.9	296.53	1072.31	0	0	0	0	0	0	0	603	903	0
619	1	0	0	0	0	0	0	200	300	0	26.0013	1.82846	-583.415	-98700.4	57024.1	-5605.23	297.742	1072.18	0	0	0	0	0	0	0	603	903	0
619	2	0	0	0	0	0	0	200	300	0	26.6116	2.13364	-584.636	-98059.5	56963.1	-5559.45	297.433	1070.73	0	0	0	0	0	0	0	603	903	0
619	3	0	0	0	0	0	0	200	300	0	27.0694	2.74399	-584.636	-98425.7	56841	-5284.79	297.225	1071.35	0	0	0	0	0	0	0	603	903	0
619	4	0	0	0	0	0	0	200	300	0	25.6961	2.28623	-584.331	-98425.7	57207.2	-5239.02	297.902	1071.44	0	0	0	0	0	0	0	603	903	0
619	5	0	0	0	0	0	0	200	300	0	25.6961	2.5914	-584.331	-98883.5	57207.2	-5467.9	297.902	1072.23	0	0	0	0	0	0	0	603	903	0
619	6	0	0	0	0	0	0	200	300	0	26.459	3.65952	-584.331	-98334.1	56841	-5559.45	297.275	1071.29	0	0	0	0	0	0	0	603	903	0
619	7	0	0	0	0	0	0	200	300	0	26.0013	2.74399	-589.214	-98517.3	57329.3	-5330.57	297.298	1070.2	0	0	0	0	0	0	0	603	903	0
619	8	0	0	0	0	0	0	200	300	0	26.459	4.11728	-586.467	-98700.4	57634.5	-5101.69	298.274	1071.3	0	0	0	0	0	0	0	603	903	0
619	9	0	0	0	0	0	0	200	300	0	25.8487	4.11728	-588.603	-97601.7	57146.2	-5147.46	297.088	1068.82	0	0	0	0	0	0	0	603	903	0
620	0	0	0	0	0	0	0	200	300	0	28.9005	4.88022	-589.214	-98242.6	57146.2	-5147.46	296.987	1069.74	0	0	0	0	0	0	0	603	903	0
620	1	0	0	0	0	0	0	200	300	0	25.8487	4.26987	-590.74	-98975	57878.6	-5010.13	297.977	1070.54	0	0	0	0	0	0	0	603	903	0
620	2	0	0	0	0	0	0	200	300	0	25.0858	5.33798	-590.129	-97784.8	58122.8	-4872.81	298.492	1068.7	0	0	0	0	0	0	0	603	903	0
620	3	0	0	0	0	0	0	200	300	0	27.0694	5.79575	-591.96	-97601.7	57268.3	-4598.15	296.743	1067.88	0	0	0	0	0	0	0	603	903	0
620	4	0	0	0	0	0	0	200	300	0	27.0694	6.25351	-592.266	-98151.1	57939.7	-4872.81	297.827	1068.72	0	0	0	0	0	0	0	603	903	0
620	5	0	0	0	0	0	0	200	300	0	25.0858	6.25351	-592.876	-97418.6	58000.7	-4964.36	297.829	1067.32	0	0	0	0	0	0	0	603	903	0
620	6	0	0	0	0	0	0	200	300	0	25.2383	7.16904	-592.876	-98700.4	57512.4	-5101.69	297.006	1069.48	0	0	0	0	0	0	0	603	903	0
620	7	0	0	0	0	0	0	200	300	0	26.459	7.6268	-593.486	-97693.3	58183.8	-4369.26	298.037	1067.61	0	0	0	0	0	0	0	603	903	0
620	8	0	0	0	0	0	0	200	300	0	26.1539	7.6268	-595.317	-97967.9	58305.9	-4735.48	297.941	1067.56	0	0	0	0	0	0	0	603	903	0
620	9	0	0	0	0	0	0	200	300	0	25.3909	7.93198	-595.928	-98242.6	57817.6	-4781.25	297.021	1067.86	0	0	0	0	0	0	0	603	903	0
621	0	0	0	0	0	0	0	200	300	0	25.6961	7.47421	-593.181	-97693.3	58183.8	-4643.92	298.088	1067.69	0	0	0	0	0	0	0	603	903	0
621	1	0	0	0	0	0	0	200	300	0	26.3065	8.38974	-594.097	-97784.8	58550	-4415.04	298.553	1067.59	0	0	0	0	0	0	0	603	903	0
621	2	0	0	0	0	0	0	200	300	0	25.6961	7.6268	-595.622	-97967.9	58244.8	-4918.58	297.788	1067.48	0	0	0	0	0	0	0	603	903	0
621	3	0	0	0	0	0	0	200	300	0	27.9849	9.61045	-599.285	-97784.8	58244.8	-4415.04	297.191	1066.17	0	0	0	0	0	0	0	603	903	0
621	4	0	0	0	0	0	0	200	300	0	27.0694	9.00009	-598.979	-96869.3	58733.1	-4140.38	298.055	1064.72	0	0	0	0	0	0	0	603	903	0
621	5	0	0	0	0	0	0	200	300	0	27.0694	9.15268	-598.369	-97693.3	58733.1	-4506.59	298.155	1066.27	0	0	0	0	0	0	0	603	903	0
621	6	0	0	0	0	0	0	200	300	0	25.6961	9.91562	-600.2	-96960.8	57817.6	-4186.16	296.331	1064.55	0	0	0	0	0	0	0	603	903	0
621	7	0	0	0	0	0	0	200	300	0	26.3065	10.6786	-602.031	-98242.6	58916.2	-4277.71	297.862	1066.19	0	0	0	0	0	0	0	603	903	0
621	8	0	0	0	0	0	0	200	300	0	26.9168	10.0682	-601.726	-96320	58916.2	-4506.59	297.912	1063.07	0	0	0	0	0	0	0	603	903	0
621	9	0	0	0	0	0	0	200	300	0	26.3065	10.526	-602.031	-96228.4	58733.1	-4231.93	297.558	1062.84	0	0	0	0	0	0	0	603	903	0
622	0	0	0	0	0	0	0	200	300	0	26.7642	11.4415	-601.726	-97510.2	58489	-4140.38	297.202	1065.05	0	0	0	0	0	0	0	603	903	0
622	1	0	0	0	0	0	0	200	300	0	26.1539	11.2889	-602.642	-96869.3	58916.2	-3591.07	297.763	1063.74	0	0	0	0	0	0	0	603	903	0
622	2	0	0	0	0	0	0	200	300	0	26.459	11.1363	-604.167	-96869.3	59160.4	-4094.61	297.921	1063.34	0	0	0	0	0	0	0	603	903	0
622	3	0	0	0	0	0	0	200	300	0	26.0013	12.2044	-603.862	-97052.4	59099.3	-4094.61	297.869	1063.72	0	0	0	0	0	0	0	603	903	0
622	4	0	0	0	0	0	0	200	300	0	27.6797	12.6622	-604.473	-97144	59221.4	-4003.05	297.972	1063.71	0	0	0	0	0	0	0	603	903	0
622	5	0	0	0	0	0	0	200	300	0	26.459	12.8148	-605.388	-96594.6	59404.5	-4003.05	298.126	1062.56	0	0	0	0	0	0	0	603	903	0
622	6	0	0	0	0	0	0	200	300	0	26.7642	12.8148	-605.693	-96503.1	59038.3	-4094.61	297.472	1062.33	0	0	0	0	0	0	0	603	903	0
622	7	0	0	0	0	0	0	200	300	0	25.5435	13.2726	-605.693	-96869.3	59709.7	-4003.05	298.581	1062.93	0	0	0	0	0	0	0	603	903	0
622	8	0	0	0	0	0	0	200	300	0	26.0013	12.9674	-607.219	-96777.8	59892.8	-3316.41	298.635	1062.38	0	0	0	0	0	0	0	603	903	0
622	9	0	0	0	0	0	0	200	300	0	27.0694	13.4251	-607.83	-96411.6	59343.5	-4003.05	297.632	1061.62	0	0	0	0	0	0	0	603	903	0
623	0	0	0	0	0	0	0	200	300	0	26.6116	13.7303	-605.693	-96503.1	59770.7	-3636.84	298.681	1062.33	0	0	0	0	0	0	0	603	903	0
623	1	0	0	0	0	0	0	200	300	0	26.0013	13.4251	-608.135	-96594.6	59648.6	-3636.84	298.085	1061.84	0	0	0	0	0	0	0	603	903	0
623	2	0	0	0	0	0	0	200	300	0	25.8487	13.8829	-608.135	-96045.3	59587.6	-3545.29	297.984	1060.93	0	0	0	0	0	0	0	603	903	0
623	3	0	0	0	0	0	0	200	300	0	26.6116	14.951	-608.135	-95404.5	59709.7	-3545.29	298.185	1059.88	0	0	0	0	0	0	0	603	903	0
623	4	0	0	0	0	0	0	200	300	0	27.5272	15.4088	-609.355	-96503.1	60014.9	-3591.07	298.489	1061.37	0	0	0	0	0	0	0	603	903	0
623	5	0	0	0	0	0	0	200	300	0	27.9849	15.4088	-610.271	-96136.9	59709.7	-3545.29	297.841	1060.53	0	0	0	0	0	0	0	603	903	0
623	6	0	0	0	0	0	0	200	300	0	26.3065	15.8665	-610.576	-95038.2	60075.9	-3591.07	298.392	1058.65	0	0	0	0	0	0	0	603	903	0
623	7	0	0	0	0	0	0	200	300	0	26.9168	16.7821	-610.271	-95312.9	60014.9	-3728.4	298.341	1059.18	0	0	0	0	0	0	0	603	903	0
623	8	0	0	0	0	0	0	200	300	0	26.1539	16.1717	-611.797	-94855.2	60381.1	-3362.18	298.695	1058.04	0	0	0	0	0	0	0	603	903	0
623	9	0	0	0	0	0	0	200	300	0	26.459	16.3243	-611.797	-95312.9	60014.9	-3316.41	298.096	1058.79	0	0	0	0	0	0	0	603	903	0
624	0	0	0	0	0	0	0	200	300	0	27.0694	16.7821	-611.186	-95129.8	60259	-3133.3	298.594	1058.65	0	0	0	0	0	0	0	603	903	0
624	1	0	0	0	0	0	0	200	300	0	27.9849	18.0028	-611.186	-95312.9	60381.1	-3087.53	298.793	1058.95	0	0	0	0	0	0	0	603	903	0
624	2	0	0	0	0	0	0	200	300	0	26.0013	17.3924	-613.628	-95038.2	60381.1	-2904.42	298.4	1057.88	0	0	0	0	0	0	0	603	903	0
624	3	0	0	0	0	0	0	200	300	0	26.9168	18.0028	-614.543	-94488.9	60503.1	-3453.74	298.452	1056.75	0	0	0	0	0	0	0	603	903	0
624	4	0	0	0	0	0	0	200	300	0	27.9849	18.308	-613.628	-94672	60564.2	-3041.75	298.699	1057.28	0	0	0	0	0	0	0	603	903	0
624	5	0	0	0	0	0	0	200	300	0	27.0694	18.6131	-610.576	-95038.2	60136.9	-3041.75	298.492	1058.65	0	0	0	0	0	0	0	603	903	0
624	6	0	0	0	0	0	0	200	300	0	26.9168	18.4605	-610.881	-94946.7	60503.1	-3224.86	299.042	1058.43	0	0	0	0	0	0	0	603	903	0
624	7	0	0	0	0	0	0	200	300	0	27.222	19.0709	-613.933	-94031.2	60564.2	-2995.97	298.649	1056.16	0	0	0	0	0	0	0	603	903	0
624	8	0	0	0	0	0	0	200	300	0	27.8323	19.0709	-615.154	-94488.9	60381.1	-2629.76	298.156	1056.6	0	0	0	0	0	0	0	603	903	0
624	9	0	0	0	0	0	0	200	300	0	26.9168	19.5287	-614.238	-94855.2	60747.3	-3133.3	298.899	1057.43	0	0	0	0	0	0	0	603	903	0
625	0	0	0	0	0	0	0	200	300	0	27.5272	19.9864	-613.933	-93207.2	60808.3	-3270.63	299.047	1054.82	0	0	0	0	0	0	0	603	903	0
625	1	0	0	0	0	0	0	200	300	0	28.5953	20.139	-616.069	-93481.9	60075.9	-2858.64	297.515	1054.74	0	0	0	0	0	0	0	603	903	0
625	2	0	0	0	0	0	0	200	300	0	27.8323	20.2916	-616.374	-94214.3	60625.2	-2767.09	298.358	1055.85	0	0	0	0	0	0	0	603	903	0
625	3	0	0	0	0	0	0	200	300	0	26.7642	20.7494	-615.459	-93298.7	61235.6	-2950.2	299.496	1054.59	0	0	0	0	0	0	0	603	903	0
625	4	0	0	0	0	0	0	200	300	0	27.6797	21.3597	-615.764	-92108.6	61113.5	-2904.42	299.248	1052.58	0	0	0	0	0	0	0	603	903	0
625	5	0	0	0	0	0	0	200	300	0	28.7479	21.6649	-616.68	-93756.5	60625.2	-2812.87	298.309	1055.03	0	0	0	0	0	0	0	603	903	0
625	6	0	0	0	0	0	0	200	300	0	27.9849	21.6649	-617.29	-93024.1	61235.6	-2675.54	299.201	1053.7	0	0	0	0	0	0	0	603	903	0
625	7	0	0	0	0	0	0	200	300	0	27.0694	21.5123	-616.985	-92841	61235.6	-2721.32	299.25	1053.48	0	0	0	0	0	0	0	603	903	0
625	8	0	0	0	0	0	0	200	300	0	28.5953	22.8856	-615.154	-92566.3	60869.3	-2767.09	298.95	1053.48	0	0	0	0	0	0	0	603	903	0
625	9	0	0	0	0	0	0	200	300	0	28.4427	20.139	-618.206	-92657.9	60930.4	-2538.21	298.56	1052.88	0	0	0	0	0	0	0	603	903	0
626	0	0	0	0	0	0	0	200	300	0	29.053	22.733	-618.816	-92566.3	61235.6	-2721.32	298.956	1052.59	0	0	0	0	0	0	0	603	903	0
626	1	0	0	0	0	0	0	200	300	0	28.2901	23.0382	-619.121	-92108.6	60930.4	-2675.54	298.414	1051.77	0	0	0	0	0	0	0	603	903	0
626	2	0	0	0	0	0	0	200	300	0	28.9005	22.733	-619.731	-92291.7	60991.4	-2172	298.416	1051.92	0	0	0	0	0	0	0	603	903	0
626	3	0	0	0	0	0	0	200	300	0	27.6797	23.3434	-618.511	-92291.7	60808.3	-2126.22	298.314	1052.22	0	0	0	0	0	0	0	603	903	0
626	4	0	0	0	0	0	0	200	300	0	27.8323	24.1063	-619.426	-92017	60869.3	-2400.88	298.267	1051.55	0	0	0	0	0	0	0	603	903	0
626	5	0	0	0	0	0	0	200	300	0	29.5108	23.8011	-621.868	-90369	61357.6	-2080.45	298.667	1048.32	0	0	0	0	0	0	0	603	903	0
626	6	0	0	0	0	0	0	200	300	0	29.2056	24.2589	-621.257	-91742.4	61540.7	-2309.33	299.058	1050.67	0	0	0	0	0	0	0	603	903	0
626	7	0	0	0	0	0	0	200	300	0	27.8323	24.5641	-620.342	-90369	61357.6	-2217.78	298.909	1048.68	0	0	0	0	0	0	0	603	903	0
626	8	0	0	0	0	0	0	200	300	0	28.4427	25.6322	-622.478	-91284.6	61113.5	-2263.55	298.178	1049.65	0	0	0	0	0	0	0	603	903	0
626	9	0	0	0	0	0	0	200	300	0	29.816	24.8692	-620.037	-91193	61357.6	-2172	298.958	1050.08	0	0	0	0	0	0	0	603	903	0
627	0	0	0	0	0	0	0	200	300	0	29.816	24.5641	-622.173	-91376.1	61540.7	-2126.22	298.913	1049.87	0	0	0	0	0	0	0	603	903	0
627	1	0	0	0	0	0	0	200	300	0	27.6797	25.9373	-621.868	-90826.8	61296.6	-2172	298.569	1049.05	0	0	0	0	0	0	0	603	903	0
627	2	0	0	0	0	0	0	200	300	0	29.053	26.3951	-621.868	-90735.3	61235.6	-1988.89	298.47	1048.91	0	0	0	0	0	0	0	603	903	0
627	3	0	0	0	0	0	0	200	300	0	29.816	26.7003	-623.088	-90552.2	61662.8	-1943.12	298.963	1048.33	0	0	0	0	0	0	0	603	903	0
627	4	0	0	0	0	0	0	200	300	0	29.053	26.5477	-624.004	-90643.7	61540.7	-1897.34	298.622	1048.26	0	0	0	0	0	0	0	603	903	0
627	5	0	0	0	0	0	0	200	300	0	28.7479	27.6158	-623.088	-90826.8	61235.6	-2126.22	298.277	1048.77	0	0	0	0	0	0	0	603	903	0
627	6	0	0	0	0	0	0	200	300	0	29.9686	27.6158	-623.393	-89911.3	61540.7	-1622.68	298.719	1047.23	0	0	0	0	0	0	0	603	903	0
627	7	0	0	0	0	0	0	200	300	0	30.2737	28.2262	-625.225	-90186	61418.7	-1897.34	298.235	1047.25	0	0	0	0	0	0	0	603	903	0
627	8	0	0	0	0	0	0	200	300	0	29.3582	27.3106	-621.868	-90369	61968	-1943.12	299.648	1048.32	0	0	0	0	0	0	0	603	903	0
627	9	0	0	0	0	0	0	200	300	0	30.7315	28.5313	-626.14	-89911.3	60564.2	-2034.67	296.726	1046.6	0	0	0	0	0	0	0	603	903	0
628	0	0	0	0	0	0	0	200	300	0	30.4263	28.9891	-624.309	-89545.1	61235.6	-1485.35	298.085	1046.43	0	0	0	0	0	0	0	603	903	0
628	1	0	0	0	0	0	0	200	300	0	30.1212	30.0572	-624.004	-89453.5	61418.7	-1668.46	298.427	1046.35	0	0	0	0	0	0	0	603	903	0
628	2	0	0	0	0	0	0	200	300	0	29.2056	31.1253	-625.835	-89911.3	61968	-1668.46	299.017	1046.67	0	0	0	0	0	0	0	603	903	0
628	3	0	0	0	0	0	0	200	300	0	29.5108	30.515	-626.445	-89545.1	61784.9	-1302.25	298.628	1045.94	0	0	0	0	0	0	0	603	903	0
628	4	0	0	0	0	0	0	200	300	0	30.7315	30.8202	-626.445	-89453.5	61052.4	-1576.91	297.459	1045.8	0	0	0	0	0	0	0	603	903	0
628	5	0	0	0	0	0	0	200	300	0	30.5789	31.7357	-626.445	-89178.9	61845.9	-1576.91	298.725	1045.36	0	0	0	0	0	0	0	603	903	0
628	6	0	0	0	0	0	0	200	300	0	30.2737	32.0409	-628.276	-89270.4	61845.9	-1531.13	298.437	1045.09	0	0	0	0	0	0	0	603	903	0
628	7	0	0	0	0	0	0	200	300	0	30.8841	31.7357	-628.887	-89178.9	61662.8	-1485.35	298.051	1044.8	0	0	0	0	0	0	0	603	903	0
628	8	0	0	0	0	0	0	200	300	0	32.41	32.8038	-629.192	-88721.1	62029	-1256.47	298.585	1044.01	0	0	0	0	0	0	0	603	903	0
628	9	0	0	0	0	0	0	200	300	0	29.5108	33.8719	-628.887	-88812.7	61723.8	-1302.25	298.148	1044.22	0	0	0	0	0	0	0	603	903	0
629	0	0	0	0	0	0	0	200	300	0	31.7996	33.8719	-630.107	-89453.5	61540.7	-661.378	297.667	1044.97	0	0	0	0	0	0	0	603	903	0
629	1	0	0	0	0	0	0	200	300	0	30.7315	33.7193	-630.107	-88263.4	61662.8	-981.813	297.861	1043.08	0	0	0	0	0	0	0	603	903	0
629	2	0	0	0	0	0	0	200	300	0	30.5789	34.6349	-630.413	-88538	62151.1	-1073.37	298.588	1043.44	0	0	0	0	0	0	0	603	903	0
629	3	0	0	0	0	0	0	200	300	0	29.9686	34.94	-631.328	-88904.2	61479.7	-1027.59	297.382	1043.82	0	0	0	0	0	0	0	603	903	0
629	4	0	0	0	0	0	0	200	300	0	30.2737	35.2452	-632.854	-88446.5	61723.8	-844.484	297.533	1042.76	0	0	0	0	0	0	0	603	903	0
629	5	0	0	0	0	0	0	200	300	0	30.4263	35.703	-633.159	-88354.9	61296.6	-981.813	296.811	1042.55	0	0	0	0	0	0	0	603	903	0
629	6	0	0	0	0	0	0	200	300	0	31.0367	36.4659	-632.854	-88538	61845.9	-936.036	297.725	1042.9	0	0	0	0	0	0	0	603	903	0
629	7	0	0	0	0	0	0	200	300	0	31.7996	37.0763	-630.107	-88721.1	61784.9	-386.72	298.055	1043.8	0	0	0	0	0	0	0	603	903	0
629	8	0	0	0	0	0	0	200	300	0	30.5789	35.3978	-631.023	-88263.4	62212.1	-707.154	298.589	1042.87	0	0	0	0	0	0	0	603	903	0
629	9	0	0	0	0	0	0	200	300	0	31.0367	37.534	-632.244	-88263.4	61968	-844.484	298.013	1042.6	0	0	0	0	0	0	0	603	903	0
630	0	0	0	0	0	0	0	200	300	0	30.2737	36.4659	-636.211	-88538	61906.9	-524.049	297.306	1042.16	0	0	0	0	0	0	0	603	903	0
630	1	0	0	0	0	0	0	200	300	0	30.7315	38.297	-636.516	-87988.7	62273.2	-340.943	297.834	1041.23	0	0	0	0	0	0	0	603	903	0
630	2	0	0	0	0	0	0	200	300	0	30.5789	39.0599	-636.821	-87988.7	62395.2	-295.167	297.979	1041.17	0	0	0	0	0	0	0	603	903	0
630	3	0	0	0	0	0	0	200	300	0	30.1212	39.8228	-638.957	-88263.4	61906.9	-112.061	296.887	1041.14	0	0	0	0	0	0	0	603	903	0
630	4	0	0	0	0	0	0	200	300	0	30.5789	39.9754	-638.347	-88080.2	62090	-112.061	297.267	1040.98	0	0	0	0	0	0	0	603	903	0
630	5	0	0	0	0	0	0	200	300	0	31.1893	40.2806	-638.347	-88263.4	62456.3	-157.838	297.841	1041.27	0	0	0	0	0	0	0	603	903	0
630	6	0	0	0	0	0	0	200	300	0	30.1212	41.6539	-639.568	-88263.4	61906.9	-340.943	296.795	1041	0	0	0	0	0	0	0	603	903	0
630	7	0	0	0	0	0	0	200	300	0	30.2737	42.4168	-640.178	-88538	61845.9	116.82	296.607	1041.3	0	0	0	0	0	0	0	603	903	0
630	8	0	0	0	0	0	0	200	300	0	30.1212	41.6539	-641.094	-88080.2	62456.3	254.149	297.421	1040.39	0	0	0	0	0	0	0	603	903	0
630	9	0	0	0	0	0	0	200	300	0	29.9686	42.5694	-641.704	-87897.1	62151.1	299.926	296.853	1039.97	0	0	0	0	0	0	0	603	903	0
631	0	0	0	0	0	0	0	200	300	0	29.6634	45.0108	-640.483	-87988.7	62029	116.82	296.847	1040.38	0	0	0	0	0	0	0	603	903	0
631	1	0	0	0	0	0	0	200	300	0	30.4263	42.8746	-641.094	-87897.1	61418.7	895.019	295.803	1040.1	0	0	0	0	0	0	0	603	903	0
631	2	0	0	0	0	0	0	200	300	0	30.4263	45.0108	-645.366	-87805.6	62517.3	528.808	296.871	1039.06	0	0	0	0	0	0	0	603	903	0
631	3	0	0	0	0	0	0	200	300	0	30.4263	45.316	-645.366	-88263.4	62212.1	666.137	296.398	1039.76	0	0	0	0	0	0	0	603	903	0
631	4	0	0	0	0	0	0	200	300	0	31.3419	45.9264	-646.587	-88354.9	61845.9	620.36	295.65	1039.65	0	0	0	0	0	0	0	603	903	0
631	5	0	0	0	0	0	0	200	300	0	30.8841	46.2315	-646.892	-87897.1	62151.1	1169.68	296.076	1038.88	0	0	0	0	0	0	0	603	903	0
631	6	0	0	0	0	0	0	200	300	0	30.5789	47.7574	-647.197	-88171.8	62456.3	666.137	296.503	1039.24	0	0	0	0	0	0	0	603	903	0
631	7	0	0	0	0	0	0	200	300	0	29.5108	47.7574	-649.333	-87897.1	62578.3	1032.35	296.373	1038.37	0	0	0	0	0	0	0	603	903	0
631	8	0	0	0	0	0	0	200	300	0	29.6634	48.0626	-648.418	-87988.7	62151.1	1261.23	295.85	1038.7	0	0	0	0	0	0	0	603	903	0
631	9	0	0	0	0	0	0	200	300	0	30.1212	49.7411	-649.333	-88354.9	62578.3	1215.45	296.373	1039.07	0	0	0	0	0	0	0	603	903	0
632	0	0	0	0	0	0	0	200	300	0	30.2737	49.7411	-649.944	-88354.9	62822.5	1352.78	296.658	1038.94	0	0	0	0	0	0	0	603	903	0
632	1	0	0	0	0	0	0	200	300	0	29.5108	50.0462	-652.385	-88721.1	63493.9	1398.56	297.326	1038.99	0	0	0	0	0	0	0	603	903	0
632	2	0	0	0	0	0	0	200	300	0	31.0367	50.9618	-652.08	-88080.2	62639.4	1307.01	296.061	1038.08	0	0	0	0	0	0	0	603	903	0
632	3	0	0	0	0	0	0	200	300	0	30.1212	52.3351	-652.08	-88812.7	63188.7	1398.56	296.903	1039.2	0	0	0	0	0	0	0	603	903	0
632	4	0	0	0	0	0	0	200	300	0	29.3582	50.504	-654.216	-88538	62822.5	1673.22	296.027	1038.33	0	0	0	0	0	0	0	603	903	0
632	5	0	0	0	0	0	0	200	300	0	29.5108	52.9454	-655.742	-88354.9	62578.3	1718.99	295.431	1037.74	0	0	0	0	0	0	0	603	903	0
632	6	0	0	0	0	0	0	200	300	0	31.0367	52.6402	-657.573	-88354.9	63310.8	1673.22	296.279	1037.37	0	0	0	0	0	0	0	603	903	0
632	7	0	0	0	0	0	0	200	300	0	29.2056	54.0135	-656.658	-88995.8	63066.6	1764.77	296.042	1038.53	0	0	0	0	0	0	0	603	903	0
632	8	0	0	0	0	0	0	200	300	0	29.5108	55.9972	-657.573	-88904.2	62456.3	1947.88	294.98	1038.2	0	0	0	0	0	0	0	603	903	0
632	9	0	0	0	0	0	0	200	300	0	30.2737	55.8446	-658.489	-88354.9	63188.7	2130.98	295.96	1037.18	0	0	0	0	0	0	0	603	903	0
633	0	0	0	0	0	0	0	200	300	0	29.5108	56.1497	-660.625	-88629.6	63249.7	2314.09	295.742	1037.16	0	0	0	0	0	0	0	603	903	0
633	1	0	0	0	0	0	0	200	300	0	28.9005	56.4549	-659.709	-87714	62822.5	1947.88	295.228	1035.96	0	0	0	0	0	0	0	603	903	0
633	2	0	0	0	0	0	0	200	300	0	29.053	57.523	-661.846	-88354.9	62822.5	2359.86	294.92	1036.5	0	0	0	0	0	0	0	603	903	0
633	3	0	0	0	0	0	0	200	300	0	30.4263	57.9808	-661.846	-88354.9	63554.9	2268.31	296.027	1036.5	0	0	0	0	0	0	0	603	903	0
633	4	0	0	0	0	0	0	200	300	0	29.9686	59.0489	-660.93	-88629.6	63005.6	2176.76	295.329	1037.1	0	0	0	0	0	0	0	603	903	0
633	5	0	0	0	0	0	0	200	300	0	31.1893	58.7437	-663.982	-88446.5	63066.6	2405.64	294.982	1036.21	0	0	0	0	0	0	0	603	903	0
633	6	0	0	0	0	0	0	200	300	0	30.5789	58.8963	-663.982	-88354.9	63188.7	2542.97	295.166	1036.07	0	0	0	0	0	0	0	603	903	0
633	7	0	0	0	0	0	0	200	300	0	29.6634	60.88	-664.592	-87897.1	63371.8	2497.19	295.354	1035.26	0	0	0	0	0	0	0	603	903	0
633	8	0	0	0	0	0	0	200	300	0	29.053	61.1852	-665.813	-87439.4	63188.7	2405.64	294.905	1034.33	0	0	0	0	0	0	0	603	903	0
633	9	0	0	0	0	0	0	200	300	0	29.053	61.0326	-667.644	-88812.7	63371.8	2497.19	294.919	1036.02	0	0	0	0	0	0	0	603	903	0
634	0	0	0	0	0	0	0	200	300	0	30.2737	61.6429	-666.423	-88538	63310.8	2588.74	295.001	1035.86	0	0	0	0	0	0	0	603	903	0
634	1	0	0	0	0	0	0	200	300	0	29.5108	63.1688	-664.897	-88629.6	63310.8	2588.74	295.219	1036.3	0	0	0	0	0	0	0	603	903	0
634	2	0	0	0	0	0	0	200	300	0	30.5789	62.2533	-667.034	-88904.2	63493.9	2680.3	295.188	1036.28	0	0	0	0	0	0	0	603	903	0
634	3	0	0	0	0	0	0	200	300	0	29.9686	64.8473	-668.254	-88538	63554.9	2863.4	295.106	1035.49	0	0	0	0	0	0	0	603	903	0
634	4	0	0	0	0	0	0	200	300	0	29.6634	63.9317	-670.696	-88812.7	63615.9	2909.18	294.851	1035.42	0	0	0	0	0	0	0	603	903	0
634	5	0	0	0	0	0	0	200	300	0	29.3582	65.1524	-670.085	-88538	63677	3092.28	295.028	1035.13	0	0	0	0	0	0	0	603	903	0
634	6	0	0	0	0	0	0	200	300	0	29.9686	65.4576	-671.001	-88354.9	62578.3	3000.73	293.261	1034.68	0	0	0	0	0	0	0	603	903	0
634	7	0	0	0	0	0	0	200	300	0	29.6634	66.068	-671.306	-88446.5	63615.9	3000.73	294.764	1034.75	0	0	0	0	0	0	0	603	903	0
634	8	0	0	0	0	0	0	200	300	0	30.4263	66.6783	-670.696	-88538	63615.9	2954.96	294.851	1035.01	0	0	0	0	0	0	0	603	903	0
634	9	0	0	0	0	0	0	200	300	0	29.6634	67.2887	-671.916	-88904.2	63615.9	2771.85	294.678	1035.31	0	0	0	0	0	0	0	603	903	0
635	0	0	0	0	0	0	0	200	300	0	29.9686	68.2042	-672.527	-88354.9	63432.8	3275.39	294.32	1034.38	0	0	0	0	0	0	0	603	903	0
635	1	0	0	0	0	0	0	200	300	0	30.2737	69.2723	-672.222	-87988.7	63860.1	3046.51	294.999	1033.89	0	0	0	0	0	0	0	603	903	0
635	2	0	0	0	0	0	0	200	300	0	30.7315	68.5094	-675.884	-88629.6	63738	3138.06	294.303	1034.13	0	0	0	0	0	0	0	603	903	0
635	3	0	0	0	0	0	0	200	300	0	30.1212	67.2887	-675.579	-88629.6	63432.8	3504.27	293.894	1034.19	0	0	0	0	0	0	0	603	903	0
635	4	0	0	0	0	0	0	200	300	0	30.4263	69.5775	-673.747	-88538	63860.1	3275.39	294.783	1034.41	0	0	0	0	0	0	0	603	903	0
635	5	0	0	0	0	0	0	200	300	0	31.647	71.4085	-673.747	-87714	63982.1	3138.06	294.965	1033.19	0	0	0	0	0	0	0	603	903	0
635	6	0	0	0	0	0	0	200	300	0	30.8841	71.7137	-676.494	-88538	62761.4	3275.39	292.775	1033.88	0	0	0	0	0	0	0	603	903	0
635	7	0	0	0	0	0	0	200	300	0	29.9686	71.5611	-675.884	-88721.1	63799	3000.73	294.394	1034.27	0	0	0	0	0	0	0	603	903	0
635	8	0	0	0	0	0	0	200	300	0	30.4263	72.4767	-675.273	-86981.6	64104.2	3138.06	294.931	1031.81	0	0	0	0	0	0	0	603	903	0
635	9	0	0	0	0	0	0	200	300	0	30.7315	74.1551	-675.273	-87988.7	63738	3321.17	294.388	1033.3	0	0	0	0	0	0	0	603	903	0
636	0	0	0	0	0	0	0	200	300	0	30.7315	74.1551	-675.884	-88721.1	63799	3641.6	294.394	1034.27	0	0	0	0	0	0	0	603	903	0
636	1	0	0	0	0	0	0	200	300	0	29.9686	74.3077	-676.494	-87714	63799	3550.05	294.308	1032.66	0	0	0	0	0	0	0	603	903	0
636	2	0	0	0	0	0	0	200	300	0	33.1729	74.6129	-675.579	-87714	63615.9	3824.71	294.165	1032.84	0	0	0	0	0	0	0	603	903	0
636	3	0	0	0	0	0	0	200	300	0	30.1212	76.5965	-676.189	-88263.4	63493.9	3412.72	293.9	1033.53	0	0	0	0	0	0	0	603	903	0
636	4	0	0	0	0	0	0	200	300	0	30.7315	75.2232	-676.799	-87439.4	64043.2	3550.05	294.627	1032.2	0	0	0	0	0	0	0	603	903	0
636	5	0	0	0	0	0	0	200	300	0	31.4944	76.1388	-677.104	-87347.8	63554.9	3458.5	293.863	1032	0	0	0	0	0	0	0	603	903	0
636	6	0	0	0	0	0	0	200	300	0	31.3419	76.9017	-677.104	-87347.8	63432.8	3916.26	293.682	1032	0	0	0	0	0	0	0	603	903	0
636	7	0	0	0	0	0	0	200	300	0	32.5626	77.5121	-677.104	-87714	63738	3778.93	294.133	1032.54	0	0	0	0	0	0	0	603	903	0
636	8	0	0	0	0	0	0	200	300	0	31.4944	78.4276	-676.494	-87530.9	63493.9	3962.04	293.857	1032.39	0	0	0	0	0	0	0	603	903	0
636	9	0	0	0	0	0	0	200	300	0	32.1048	79.3431	-677.41	-86981.6	63310.8	3641.6	293.46	1031.4	0	0	0	0	0	0	0	603	903	0
637	0	0	0	0	0	0	0	200	300	0	31.0367	79.6483	-678.325	-87073.1	63554.9	3687.38	293.694	1031.36	0	0	0	0	0	0	0	603	903	0
637	1	0	0	0	0	0	0	200	300	0	30.7315	79.4957	-677.41	-86981.6	63005.6	3687.38	293.01	1031.4	0	0	0	0	0	0	0	603	903	0
637	2	0	0	0	0	0	0	200	300	0	31.7996	80.869	-672.832	-86798.5	63432.8	3778.93	294.277	1032	0	0	0	0	0	0	0	603	903	0
637	3	0	0	0	0	0	0	200	300	0	31.9522	79.1905	-677.104	-86523.9	63677	3778.93	294.043	1030.79	0	0	0	0	0	0	0	603	903	0
637	4	0	0	0	0	0	0	200	300	0	32.7151	82.2423	-678.02	-86890.1	63310.8	3916.26	293.376	1031.15	0	0	0	0	0	0	0	603	903	0
637	5	0	0	0	0	0	0	200	300	0	32.5626	81.7845	-677.715	-86981.6	63066.6	4053.59	293.058	1031.35	0	0	0	0	0	0	0	603	903	0
637	6	0	0	0	0	0	0	200	300	0	31.7996	82.0897	-676.189	-86066.1	63738	3733.15	294.261	1030.28	0	0	0	0	0	0	0	603	903	0
637	7	0	0	0	0	0	0	200	300	0	31.7996	83.463	-675.884	-86890.1	63127.6	4145.14	293.4	1031.56	0	0	0	0	0	0	0	603	903	0
637	8	0	0	0	0	0	0	200	300	0	32.41	83.9207	-675.884	-86340.7	62700.4	3962.04	292.768	1030.74	0	0	0	0	0	0	0	603	903	0
637	9	0	0	0	0	0	0	200	300	0	33.7833	83.1578	-676.189	-85883	63249.7	4053.59	293.539	1030.01	0	0	0	0	0	0	0	603	903	0
638	0	0	0	0	0	0	0	200	300	0	32.2574	84.0733	-674.663	-86157.6	63310.8	3595.82	293.841	1030.7	0	0	0	0	0	0	0	603	903	0
638	1	0	0	0	0	0	0	200	300	0	33.1729	86.057	-674.663	-85883	62517.3	4145.14	292.664	1030.3	0	0	0	0	0	0	0	603	903	0
638	2	0	0	0	0	0	0	200	300	0	32.7151	83.6156	-672.222	-85242.1	62700.4	4053.59	293.273	1029.81	0	0	0	0	0	0	0	603	903	0
638	3	0	0	0	0	0	0	200	300	0	32.8677	86.9725	-672.832	-85333.6	62151.1	3733.15	292.372	1029.83	0	0	0	0	0	0	0	603	903	0
638	4	0	0	0	0	0	0	200	300	0	32.41	85.294	-673.442	-84601.2	62395.2	4145.14	292.651	1028.62	0	0	0	0	0	0	0	603	903	0
638	5	0	0	0	0	0	0	200	300	0	32.41	86.5147	-672.832	-84784.3	62517.3	4236.69	292.917	1029.01	0	0	0	0	0	0	0	603	903	0
638	6	0	0	0	0	0	0	200	300	0	32.5626	87.5829	-669.17	-84784.3	62700.4	4145.14	293.699	1029.7	0	0	0	0	0	0	0	603	903	0
638	7	0	0	0	0	0	0	200	300	0	32.7151	88.4984	-671.001	-84509.7	61845.9	4099.36	292.17	1028.95	0	0	0	0	0	0	0	603	903	0
638	8	0	0	0	0	0	0	200	300	0	32.41	88.9561	-671.306	-84784.3	62212.1	4145.14	292.673	1029.3	0	0	0	0	0	0	0	603	903	0
638	9	0	0	0	0	0	0	200	300	0	32.8677	88.8036	-670.085	-84509.7	62395.2	4328.25	293.115	1029.12	0	0	0	0	0	0	0	603	903	0
639	0	0	0	0	0	0	0	200	300	0	33.3255	89.7191	-668.865	-84051.9	62334.2	4419.8	293.194	1028.66	0	0	0	0	0	0	0	603	903	0
639	1	0	0	0	0	0	0	200	300	0	33.0203	90.7872	-669.475	-84143.5	61540.7	4374.02	291.924	1028.69	0	0	0	0	0	0	0	603	903	0
639	2	0	0	0	0	0	0	200	300	0	34.241	90.1768	-668.865	-84326.6	61906.9	4328.25	292.555	1029.07	0	0	0	0	0	0	0	603	903	0
639	3	0	0	0	0	0	0	200	300	0	33.0203	89.2613	-670.391	-83319.5	62273.2	4282.47	292.891	1027.29	0	0	0	0	0	0	0	603	903	0
639	4	0	0	0	0	0	0	200	300	0	32.8677	90.482	-666.728	-82770.2	61540.7	4328.25	292.303	1027.14	0	0	0	0	0	0	0	603	903	0
639	5	0	0	0	0	0	0	200	300	0	32.8677	92.1605	-664.592	-82312.4	61723.8	4557.13	292.875	1026.85	0	0	0	0	0	0	0	603	903	0
639	6	0	0	0	0	0	0	200	300	0	32.5626	92.7708	-664.897	-83228	61845.9	4557.13	293.016	1028.17	0	0	0	0	0	0	0	603	903	0
639	7	0	0	0	0	0	0	200	300	0	33.0203	92.3131	-663.677	-81213.8	61235.6	4740.23	292.267	1025.37	0	0	0	0	0	0	0	603	903	0
639	8	0	0	0	0	0	0	200	300	0	33.3255	93.076	-662.151	-82312.4	61235.6	4236.69	292.48	1027.31	0	0	0	0	0	0	0	603	903	0
639	9	0	0	0	0	0	0	200	300	0	33.3255	93.6864	-661.235	-82495.5	61418.7	5198	292.885	1027.76	0	0	0	0	0	0	0	603	903	0
640	0	0	0	0	0	0	0	200	300	0	32.2574	94.9071	-660.32	-81671.5	60991.4	4557.13	292.367	1026.68	0	0	0	0	0	0	0	603	903	0
640	1	0	0	0	0	0	0	200	300	0	34.3936	94.1441	-659.404	-81580	60686.2	4740.23	292.032	1026.72	0	0	0	0	0	0	0	603	903	0
640	2	0	0	0	0	0	0	200	300	0	32.7151	93.076	-660.015	-81671.5	60991.4	4602.9	292.409	1026.74	0	0	0	0	0	0	0	603	903	0
640	3	0	0	0	0	0	0	200	300	0	32.5626	94.6019	-656.352	-81213.8	60991.4	5060.67	292.925	1026.74	0	0	0	0	0	0	0	603	903	0
640	4	0	0	0	0	0	0	200	300	0	33.1729	96.433	-655.132	-80847.6	60320	4694.46	292.073	1026.41	0	0	0	0	0	0	0	603	903	0
640	5	0	0	0	0	0	0	200	300	0	33.3255	96.7381	-655.742	-80939.1	60564.2	4740.23	292.36	1026.43	0	0	0	0	0	0	0	603	903	0
640	6	0	0	0	0	0	0	200	300	0	34.241	96.2804	-653.606	-80847.6	60442.1	5014.89	292.475	1026.69	0	0	0	0	0	0	0	603	903	0
640	7	0	0	0	0	0	0	200	300	0	32.1048	97.0433	-651.775	-80481.4	59343.5	4923.34	291.049	1026.48	0	0	0	0	0	0	0	603	903	0
640	8	0	0	0	0	0	0	200	300	0	32.5626	98.1114	-649.639	-79565.9	60259	5014.89	292.758	1025.48	0	0	0	0	0	0	0	603	903	0
640	9	0	0	0	0	0	0	200	300	0	32.8677	98.4166	-650.249	-79840.5	59770.7	5106.44	291.92	1025.78	0	0	0	0	0	0	0	603	903	0
641	0	0	0	0	0	0	0	200	300	0	32.5626	99.7899	-646.282	-79291.2	59465.5	5060.67	292.012	1025.69	0	0	0	0	0	0	0	603	903	0
641	1	0	0	0	0	0	0	200	300	0	32.7151	97.9588	-647.502	-79016.5	60075.9	5152.22	292.781	1025.03	0	0	0	0	0	0	0	603	903	0
641	2	0	0	0	0	0	0	200	300	0	32.7151	99.1795	-645.366	-78833.4	59404.5	5198	292.048	1025.15	0	0	0	0	0	0	0	603	903	0
641	3	0	0	0	0	0	0	200	300	0	32.5626	100.4	-643.84	-79016.5	58977.3	5243.77	291.602	1025.73	0	0	0	0	0	0	0	603	903	0
641	4	0	0	0	0	0	0	200	300	0	31.1893	100.4	-643.535	-78009.4	58977.3	5381.1	291.646	1024.22	0	0	0	0	0	0	0	603	903	0
641	5	0	0	0	0	0	0	200	300	0	31.9522	100.248	-641.704	-78009.4	58977.3	5198	291.907	1024.57	0	0	0	0	0	0	0	603	903	0
641	6	0	0	0	0	0	0	200	300	0	32.5626	100.4	-638.957	-77917.9	58916.2	5198	292.207	1024.95	0	0	0	0	0	0	0	603	903	0
641	7	0	0	0	0	0	0	200	300	0	31.3419	101.468	-638.042	-77551.7	58427.9	5609.99	291.574	1024.55	0	0	0	0	0	0	0	603	903	0
641	8	8.80741	-5.58959	-20.5717	-5973.82	-553.973	-1933.96	173.071	590.39	0	31.3419	101.926	-637.126	-76819.2	58427.9	5472.66	291.705	1023.57	0	0	0	0	0	0	0	603	903	0
641	9	13.385	-4.06372	-26.9804	-8445.74	-1347.43	-3169.92	150.059	613.033	0	32.5626	101.621	-634.99	-76361.5	58244.8	5426.88	291.726	1023.26	0	0	0	0	0	0	0	603	903	0
642	0	5.29788	5.09156	-26.37	-6614.69	-1103.29	-2345.95	158.161	550.841	0	31.647	102.231	-634.075	-76910.8	57146.2	5564.21	290.125	1024.3	0	0	0	0	0	0	0	603	903	0
642	1	3.46683	2.80274	-23.0131	-7713.32	-615.008	-1338.87	173.276	635.171	0	30.1212	102.842	-630.718	-76178.4	57939.7	5564.21	291.863	1023.78	0	0	0	0	0	0	0	603	903	0
642	2	14.3006	1.27686	-24.2338	-8079.53	-981.219	-2574.83	159.51	633.399	0	31.4944	104.215	-630.107	-75446	57634.5	5747.31	291.468	1022.74	0	0	0	0	0	0	0	603	903	0
642	3	11.2488	10.5847	-35.2201	-8995.06	-859.149	-2391.73	175.606	555.395	0	32.5626	103.605	-627.056	-75171.3	57024.1	5701.54	290.94	1022.88	0	0	0	0	0	0	0	603	903	0
642	4	3.16165	14.2468	-44.9858	-10551.5	-920.184	-1933.96	179.545	534.551	0	31.1893	104.062	-624.004	-75537.5	57146.2	5655.76	291.58	1024.05	0	0	0	0	0	0	0	603	903	0
642	5	7.73929	9.97437	-46.2065	-14122	-2323.99	-3261.48	149.704	605.628	0	29.816	104.52	-620.952	-75079.7	57146.2	5838.87	292.03	1023.91	0	0	0	0	0	0	0	603	903	0
642	6	8.34964	15.1624	-48.6479	-16136.2	-1957.78	-3856.57	159.756	631.693	0	29.816	104.673	-624.309	-73889.6	56413.8	6021.97	290.362	1021.35	0	0	0	0	0	0	0	603	903	0
642	7	8.34964	22.334	-61.4652	-17051.7	-1957.78	-3261.48	168.148	577.42	0	31.4944	105.741	-620.647	-73981.1	56291.7	5930.42	290.698	1022.2	0	0	0	0	0	0	0	603	903	0
642	8	15.979	14.7046	-68.7895	-18699.7	-2812.27	-3490.36	159.118	571.839	0	30.5789	105.741	-618.206	-74347.3	56719	6067.75	291.748	1023.26	0	0	0	0	0	0	0	603	903	0
642	9	13.8428	9.51661	-72.7568	-21080	-2873.31	-4177	160.508	589.733	0	29.3582	105.283	-617.29	-73614.9	55925.5	6159.3	290.598	1022.25	0	0	0	0	0	0	0	603	903	0
643	0	8.04447	18.5193	-78.5551	-20347.6	-2507.1	-3902.35	168.085	559.023	0	29.6634	106.504	-615.764	-72607.8	55376.2	5930.42	289.931	1020.92	0	0	0	0	0	0	0	603	903	0
643	1	12.3169	17.9089	-86.4897	-24742.1	-3605.73	-4131.23	158.31	586.07	0	29.5108	107.572	-613.628	-72699.4	55681.4	6296.63	290.741	1021.47	0	0	0	0	0	0	0	603	903	0
643	2	15.979	12.1106	-94.4242	-26573.2	-3727.8	-4772.1	160.521	581.423	0	29.5108	105.741	-609.355	-72790.9	55437.2	6342.41	290.977	1022.46	0	0	0	0	0	0	0	603	903	0
643	3	13.0799	12.2632	-100.528	-26573.2	-3239.52	-4497.44	167.775	564.337	0	29.816	106.809	-607.524	-72150.1	54948.9	6021.97	290.447	1021.76	0	0	0	0	0	0	0	603	903	0
643	4	16.742	14.2468	-103.58	-28587.3	-3727.8	-5092.53	164.01	575.994	0	30.1212	109.25	-607.524	-71234.5	54948.9	6708.62	290.447	1020.25	0	0	0	0	0	0	0	603	903	0
643	5	20.8618	14.0942	-108.157	-30418.4	-4765.4	-5687.62	155.94	581.243	0	30.5789	107.419	-603.557	-70959.9	55193.1	6433.96	291.446	1020.57	0	0	0	0	0	0	0	603	903	0
643	6	13.9954	11.5002	-113.345	-31883.2	-4582.29	-5184.08	159.572	581.293	0	28.9005	106.504	-599.59	-71143	54033.4	6296.63	290.117	1021.65	0	0	0	0	0	0	0	603	903	0
643	7	14.148	10.2795	-118.838	-33439.6	-5131.61	-5046.76	156.819	581.388	0	27.6797	109.708	-598.979	-70502.1	53545.1	6342.41	289.394	1020.7	0	0	0	0	0	0	0	603	903	0
643	8	22.5403	9.66919	-126.163	-34629.8	-5009.54	-5138.31	160.293	574.486	0	28.5953	109.403	-597.759	-69861.2	53911.3	6617.07	290.189	1019.87	0	0	0	0	0	0	0	603	903	0
643	9	19.6411	8.90625	-129.519	-35179.1	-5070.57	-4955.2	160.851	571.613	0	30.5789	107.114	-593.486	-69586.6	53239.9	6205.08	289.707	1020.25	0	0	0	0	0	0	0	603	903	0
644	0	15.5213	4.02344	-132.876	-35820	-5192.65	-4817.87	160.921	569.574	0	29.2056	108.182	-591.35	-69128.8	53056.8	6708.62	289.722	1019.9	0	0	0	0	0	0	0	603	903	0
644	1	17.3523	-0.249019	-139.895	-37742.6	-5864.03	-5000.98	158.083	569.792	0	27.8323	110.166	-588.603	-68762.6	52446.5	6617.07	289.103	1019.82	0	0	0	0	0	0	0	603	903	0
644	2	17.3523	0.819096	-142.642	-38017.3	-5741.96	-4360.11	159.746	566.522	0	27.222	109.403	-587.078	-68213.3	52690.6	6571.29	289.751	1019.19	0	0	0	0	0	0	0	603	903	0
644	3	14.3006	0.361333	-144.778	-40306.1	-5864.03	-4039.67	159.496	578.399	0	28.2901	108.487	-582.5	-67572.4	52141.3	6571.29	289.513	1019	0	0	0	0	0	0	0	603	903	0
644	4	16.4368	-5.89477	-150.271	-41496.3	-6474.38	-4039.67	156.915	576.142	0	25.8487	109.708	-581.279	-66931.5	52385.5	6891.72	290.121	1018.15	0	0	0	0	0	0	0	603	903	0
644	5	16.5894	-7.11547	-157.596	-42869.6	-6779.56	-3398.81	156.981	572.023	0	25.6961	110.013	-577.007	-66199.1	51775.1	6388.18	289.731	1017.73	0	0	0	0	0	0	0	603	903	0
644	6	12.7747	-3.75854	-163.699	-43785.1	-7145.77	-2803.71	156.348	567.473	0	26.3065	110.013	-574.871	-66199.1	51469.9	6571.29	289.533	1018.15	0	0	0	0	0	0	0	603	903	0
644	7	12.6221	-9.09912	-169.497	-44426	-7450.95	-2757.94	156.041	562.104	0	25.8487	110.166	-572.734	-66290.7	51531	6754.4	289.974	1018.74	0	0	0	0	0	0	0	603	903	0
644	8	12.4695	-14.4397	-172.549	-46257	-8244.41	-2345.95	152.22	568.08	0	25.6961	110.471	-568.767	-66107.6	50859.6	6433.96	289.421	1019.23	0	0	0	0	0	0	0	603	903	0
644	9	9.26517	-11.6931	-181.705	-48912	-8122.33	-1659.3	155.299	569.185	0	25.6961	110.624	-564.495	-65100.5	50798.5	6800.17	289.989	1018.33	0	0	0	0	0	0	0	603	903	0
645	0	12.0118	-11.6931	-185.061	-49461.4	-8427.51	-1750.86	154.461	567.27	0	27.0694	110.624	-564.189	-64368.1	50554.4	6891.72	289.605	1017.09	0	0	0	0	0	0	0	603	903	0
645	1	11.554	-18.2544	-191.775	-51750.2	-9098.9	-1705.08	152.554	569.848	0	24.7806	110.929	-560.527	-64459.6	50005.1	6525.51	289.211	1018	0	0	0	0	0	0	0	603	903	0
645	2	6.67118	-17.3389	-196.963	-52299.5	-9465.11	-1064.21	151.945	565.529	0	24.3228	110.166	-557.476	-64185	49516.8	6754.4	288.823	1018.14	0	0	0	0	0	0	0	603	903	0
645	3	9.26517	-16.4233	-203.677	-53398.1	-10136.5	-881.105	150.233	562.171	0	23.4073	110.929	-550.762	-63452.6	49516.8	6983.28	289.906	1018.21	0	0	0	0	0	0	0	603	903	0
645	4	11.4014	-19.9329	-210.086	-55320.7	-9648.21	-1109.99	154.075	563.325	0	23.1021	110.013	-549.846	-62811.7	49394.7	6983.28	289.834	1017.24	0	0	0	0	0	0	0	603	903	0
645	5	8.65482	-20.6958	-218.02	-56877.1	-10502.7	-926.881	151.827	560.88	0	22.6443	111.234	-548.015	-62445.5	48357.1	6983.28	288.241	1016.95	0	0	0	0	0	0	0	603	903	0
645	6	8.04447	-21.1536	-223.819	-57884.2	-10563.7	-469.118	152.802	558.621	0	21.2711	110.471	-544.658	-61713.1	48540.2	7715.7	289.121	1016.31	0	0	0	0	0	0	0	603	903	0
645	7	10.6385	-21.9165	-228.702	-60173	-11113.1	-377.565	151.408	563.107	0	21.8814	110.776	-541.301	-60980.6	48174	6983.28	288.997	1015.66	0	0	0	0	0	0	0	603	903	0
645	8	6.51859	-23.4424	-235.11	-60356.2	-11540.3	-423.341	150.915	556.714	0	22.1866	111.234	-538.249	-61163.7	47563.7	6937.5	288.367	1016.63	0	0	0	0	0	0	0	603	903	0
645	9	7.89188	-27.5623	-239.993	-61454.8	-11601.3	-11.3538	151.66	556.069	0	22.4918	111.387	-535.503	-60797.5	47563.7	7212.16	288.821	1016.53	0	0	0	0	0	0	0	603	903	0
646	0	8.50223	-28.1726	-243.35	-63194.3	-12211.7	-514.894	149.818	559.685	0	20.9659	110.624	-531.23	-59790.4	47136.4	7395.26	288.731	1015.55	0	0	0	0	0	0	0	603	903	0
646	1	7.5867	-28.783	-246.097	-64384.5	-12272.7	217.528	150.13	561.623	0	22.7969	110.318	-526.348	-58508.7	46343	7166.38	288.046	1014.16	0	0	0	0	0	0	0	603	903	0
646	2	5.29788	-29.6985	-256.167	-65757.8	-12761	812.621	150.185	556.698	0	19.8978	111.539	-522.991	-59332.7	46159.9	7212.16	288.261	1016.45	0	0	0	0	0	0	0	603	903	0
646	3	5.60306	-33.0554	-260.135	-67771.9	-13127.2	217.528	149.537	560.526	0	19.2874	111.387	-520.549	-58691.8	45732.6	7532.59	287.855	1015.75	0	0	0	0	0	0	0	603	903	0
646	4	6.67118	-33.3606	-267.459	-68870.6	-13798.6	400.634	148.409	557.5	0	19.2874	110.166	-516.887	-57593.2	45610.6	7257.94	288.241	1014.42	0	0	0	0	0	0	0	603	903	0
646	5	5.45047	-33.0554	-272.342	-69145.2	-13554.5	1224.61	150.23	553.891	0	19.8978	110.471	-512.31	-56952.3	45122.3	7715.7	288.076	1014.17	0	0	0	0	0	0	0	603	903	0
646	6	5.1453	-37.6331	-279.666	-70793.1	-14409	904.174	148.478	553.135	0	19.1348	111.539	-508.037	-57318.5	44145.7	7624.15	286.895	1015.82	0	0	0	0	0	0	0	603	903	0
646	7	5.29788	-40.6848	-285.159	-72166.5	-14470	1224.61	149.256	553.074	0	17.7615	110.776	-505.29	-56311.4	44389.9	7853.03	287.85	1014.44	0	0	0	0	0	0	0	603	903	0
646	8	3.31424	-38.7012	-289.737	-73722.8	-14592.1	1728.15	149.637	554.448	0	17.6089	109.403	-497.356	-54663.5	44084.7	7624.15	288.638	1012.91	0	0	0	0	0	0	0	603	903	0
646	9	1.63577	-39.0063	-292.483	-74913	-15080.3	1728.15	148.44	556.128	0	17.6089	108.64	-497.966	-55304.4	43718.5	7944.58	287.794	1014.06	0	0	0	0	0	0	0	603	903	0
647	0	3.92459	-43.1262	-300.418	-76469.4	-15873.8	2094.36	147.161	554.544	0	17.3038	109.25	-491.863	-54571.9	43413.3	7715.7	288.263	1013.95	0	0	0	0	0	0	0	603	903	0
647	1	2.24613	-42.5159	-307.437	-76744.1	-15995.9	2323.24	147.97	549.625	0	16.2357	110.471	-486.675	-53748	42802.9	7624.15	287.95	1013.44	0	0	0	0	0	0	0	603	903	0
647	2	2.5513	-43.2788	-314.456	-77934.3	-16545.2	2460.57	147.385	547.839	0	15.7779	111.081	-484.844	-53473.3	42680.9	8081.91	288.03	1013.29	0	0	0	0	0	0	0	603	903	0
647	3	1.94095	-45.2624	-320.559	-79307.6	-17033.5	2643.68	146.863	547.404	0	16.0831	109.403	-480.571	-52924	42192.6	7853.03	287.797	1013.13	0	0	0	0	0	0	0	603	903	0
647	4	-0.0426918	-46.7883	-326.053	-80680.8	-17582.8	3238.77	146.074	547.447	0	15.3201	108.64	-474.773	-52466.2	41521.2	7532.59	287.455	1013.51	0	0	0	0	0	0	0	603	903	0
647	5	-1.56857	-47.7039	-330.63	-82420.4	-17277.6	3147.22	147.743	549.283	0	14.5572	110.318	-469.585	-51642.3	41338.1	7761.48	288.031	1012.97	0	0	0	0	0	0	0	603	903	0
647	6	-0.347868	-47.7039	-336.429	-83427.5	-18010	3192.99	146.467	547.98	0	16.2357	109.556	-468.669	-50909.8	41338.1	7898.8	288.203	1011.63	0	0	0	0	0	0	0	603	903	0
647	7	-1.56857	-49.8401	-340.396	-84526.1	-18071.1	3467.65	146.912	548.317	0	13.7943	107.877	-463.176	-51092.9	40361.5	7761.48	287.141	1013.31	0	0	0	0	0	0	0	603	903	0
647	8	-1.56857	-49.3823	-345.279	-85258.5	-18498.3	3604.98	146.425	546.927	0	12.7261	107.572	-457.683	-50269	40239.5	7990.36	287.92	1012.83	0	0	0	0	0	0	0	603	903	0
647	9	-0.958219	-50.603	-350.772	-84892.3	-18803.5	3421.87	146.394	542.016	0	13.0313	108.64	-453.716	-48895.7	39690.1	7715.7	287.478	1010.77	0	0	0	0	0	0	0	603	903	0
648	0	-2.33151	-51.2134	-358.401	-87181.1	-19413.8	3742.31	145.832	543.25	0	13.1839	107.572	-450.054	-49170.3	38896.7	7807.25	286.427	1012.25	0	0	0	0	0	0	0	603	903	0
648	1	-3.39963	-52.7393	-361.758	-88646	-19535.9	4383.18	145.997	545.042	0	12.421	106.504	-445.171	-48529.5	39079.8	7807.25	287.786	1012.01	0	0	0	0	0	0	0	603	903	0
648	2	-2.78927	-54.4177	-367.251	-89469.9	-19535.9	4062.74	146.805	543.62	0	10.8951	106.504	-439.067	-46881.5	38469.4	7715.7	287.616	1009.78	0	0	0	0	0	0	0	603	903	0
648	3	-3.85739	-53.197	-371.524	-90019.2	-20146.3	4200.07	145.774	542.297	0	12.7261	106.504	-433.879	-46973.1	37553.9	7807.25	286.554	1011.26	0	0	0	0	0	0	0	603	903	0
648	4	-5.68844	-54.2651	-371.829	-91392.5	-20451.4	5115.6	144.998	545.792	0	11.5054	105.893	-430.217	-46423.7	37737	8081.91	287.716	1010.91	0	0	0	0	0	0	0	603	903	0
648	5	-4.9255	-55.6384	-379.153	-91484.1	-20878.7	4703.61	144.933	541.285	0	12.1158	104.52	-423.809	-45874.4	37126.7	7853.03	287.602	1011.24	0	0	0	0	0	0	0	603	903	0
648	6	-5.53586	-57.3169	-383.121	-91667.2	-21000.8	4932.49	145.185	539.265	0	11.2003	103.91	-421.672	-44958.9	36272.2	7624.15	286.02	1009.62	0	0	0	0	0	0	0	603	903	0
648	7	-6.60397	-57.6221	-387.393	-92765.8	-21550.1	5298.7	144.372	539.462	0	11.5054	102.994	-415.874	-44226.5	35967	8036.13	286.485	1009.35	0	0	0	0	0	0	0	603	903	0
648	8	-5.38327	-59.3005	-391.971	-94505.3	-21367	5527.59	145.488	541.103	0	9.3692	103.452	-409.465	-43677.2	36150.1	7532.59	288.286	1009.67	0	0	0	0	0	0	0	603	903	0
648	9	-4.77292	-61.2842	-396.853	-94963.1	-21916.3	5481.81	144.775	539.29	0	9.52179	103.452	-405.193	-42670.1	34929.4	7669.92	286.204	1008.31	0	0	0	0	0	0	0	603	903	0
649	0	-8.28244	-60.0635	-400.21	-95512.4	-22343.5	5985.35	144.171	538.656	0	9.97955	102.384	-400.92	-42029.2	34563.2	7669.92	286.21	1007.83	0	0	0	0	0	0	0	603	903	0
649	1	-7.36691	-60.8264	-401.736	-95695.5	-22099.4	6122.68	144.99	538.205	0	9.52179	100.705	-394.512	-42120.8	33952.8	7853.03	286.063	1009.77	0	0	0	0	0	0	0	603	903	0
649	2	-8.12985	-62.1997	-408.45	-96427.9	-22770.8	5939.58	144.251	536.083	0	10.1321	101.774	-389.324	-41296.8	33769.7	7898.8	286.74	1009.07	0	0	0	0	0	0	0	603	903	0
649	3	-11.1816	-64.1833	-411.197	-96427.9	-22648.7	6351.56	144.92	534.506	0	8.45367	100.705	-383.831	-40015.1	33220.4	7715.7	286.55	1007.25	0	0	0	0	0	0	0	603	903	0
649	4	-8.12985	-65.0989	-415.164	-97343.5	-22892.8	6855.1	144.858	534.47	0	8.60626	98.7218	-378.643	-40106.6	32854.2	7944.58	286.768	1008.92	0	0	0	0	0	0	0	603	903	0
649	5	-9.50314	-64.7937	-416.385	-98991.4	-23198	6626.22	144.287	537.74	0	8.45367	98.1114	-372.539	-39648.8	32610.1	7624.15	287.535	1009.43	0	0	0	0	0	0	0	603	903	0
649	6	-11.3342	-65.404	-415.469	-98533.7	-23442.2	6900.88	143.577	537.162	0	7.38556	98.264	-366.13	-37543.1	31572.5	7395.26	286.233	1005.54	0	0	0	0	0	0	0	603	903	0
649	7	-10.7238	-66.3196	-423.404	-99449.2	-23320.1	7129.76	144.922	534.88	0	7.84332	97.1959	-362.468	-38000.9	31450.4	7349.49	286.767	1007.84	0	0	0	0	0	0	0	603	903	0
649	8	-9.80832	-66.6247	-425.235	-99449.2	-24052.5	7267.09	143.437	533.869	0	6.77521	94.9071	-353.923	-37176.9	31023.1	7441.04	287.655	1008.04	0	0	0	0	0	0	0	603	903	0
649	9	-10.7238	-67.8455	-429.507	-99906.9	-23808.4	7541.75	144.568	532.608	0	6.62262	93.2286	-350.872	-35986.7	30473.8	7212.16	286.852	1005.56	0	0	0	0	0	0	0	603	903	0
650	0	-11.4868	-67.8455	-432.559	-99815.4	-23625.3	7404.42	145.383	530.755	0	6.47003	94.2967	-344.158	-35437.4	29436.2	7120.61	285.531	1005.97	0	0	0	0	0	0	0	603	903	0
650	1	-12.4023	-69.6765	-435.916	-99906.9	-24846	7770.63	143.003	529.189	0	5.40192	90.9398	-338.054	-35620.5	29558.3	7349.49	287.437	1008.37	0	0	0	0	0	0	0	603	903	0
650	2	-12.7075	-69.0662	-437.747	-101738	-24540.8	7770.63	143.938	532.413	0	6.01227	90.7872	-334.392	-33697.9	28642.8	7212.16	285.656	1003.77	0	0	0	0	0	0	0	603	903	0
650	3	-11.9445	-68.4558	-438.968	-101738	-24357.7	7999.51	144.511	531.767	0	5.5545	89.8717	-328.899	-33423.3	28276.6	6662.84	285.973	1004.62	0	0	0	0	0	0	0	603	903	0
650	4	-14.386	-70.592	-440.494	-102379	-24784.9	7816.41	143.734	532.419	0	4.94415	88.8036	-321.575	-32050	27361	6983.28	285.085	1002.67	0	0	0	0	0	0	0	603	903	0
650	5	-14.5385	-71.2024	-442.019	-102196	-25578.4	8274.17	142.133	531.202	0	4.18121	87.5829	-316.387	-31775.3	27300	7029.05	286.287	1003.43	0	0	0	0	0	0	0	603	903	0
650	6	-13.3178	-70.7446	-445.682	-102196	-25090.1	8411.5	143.704	529.302	0	4.48639	87.4303	-310.893	-31042.9	26811.7	6571.29	286.241	1002.85	0	0	0	0	0	0	0	603	903	0
650	7	-13.623	-73.6438	-446.902	-102379	-25700.5	8411.5	142.492	529.086	0	4.94415	85.7518	-305.095	-30951.3	26506.5	6845.95	286.88	1004.45	0	0	0	0	0	0	0	603	903	0
650	8	-14.0808	-73.6438	-451.175	-103203	-25578.4	8365.72	143.307	528.743	0	3.57086	83.6156	-299.297	-29944.2	25835.2	6891.72	286.32	1003.05	0	0	0	0	0	0	0	603	903	0
650	9	-14.6911	-72.8809	-454.837	-102654	-25822.5	9098.14	143.227	525.693	0	4.18121	83.1578	-293.498	-28296.3	25346.9	6479.74	286.361	999.41	0	0	0	0	0	0	0	603	903	0
651	0	-14.9963	-73.7964	-455.447	-104301	-26432.9	8869.26	141.963	529.009	0	3.41827	82.2423	-288.616	-28296.3	24919.6	6571.29	286.342	1001.04	0	0	0	0	0	0	0	603	903	0
651	1	-16.8274	-74.5593	-467.654	-104027	-26921.2	9235.47	142.434	522.444	0	2.80792	79.1905	-284.038	-27563.9	24431.3	6754.4	286.014	1000.04	0	0	0	0	0	0	0	603	903	0
651	2	-21.2524	-76.0852	-472.842	-105583	-27531.5	9922.12	141.774	523.295	0	3.1131	77.6646	-274.272	-27289.2	23637.9	6571.29	286.184	1002.5	0	0	0	0	0	0	0	603	903	0
651	3	-24.9145	-78.6792	-476.504	-105766	-27836.7	10654.5	141.581	521.963	0	2.35016	77.6646	-268.779	-26831.5	23271.7	6205.08	286.583	1002.83	0	0	0	0	0	0	0	603	903	0
651	4	-24.9145	-82.4939	-479.556	-106224	-28569.1	10791.9	140.426	521.505	0	1.43463	76.9017	-265.422	-25366.6	22966.5	6296.63	286.528	998.571	0	0	0	0	0	0	0	603	903	0
651	5	-23.3886	-84.1724	-483.523	-107506	-28386	11066.5	141.293	522.338	0	4.02863	73.8499	-257.183	-25000.4	21989.9	5884.64	285.503	1000.21	0	0	0	0	0	0	0	603	903	0
651	6	-23.999	-88.1396	-490.848	-108055	-28935.3	11844.7	141.05	520.14	0	1.8924	70.9508	-251.079	-23993.3	21501.7	5930.42	285.637	998.561	0	0	0	0	0	0	0	603	903	0
651	7	-22.7783	-95.3113	-490.848	-108147	-28935.3	11615.8	141.05	520.326	0	0.213928	71.5611	-245.891	-23444	21135.4	5793.09	285.955	998.343	0	0	0	0	0	0	0	603	903	0
651	8	-22.1679	-95.1587	-494.815	-107872	-28874.3	11799	141.646	518.005	0	0.976868	68.3568	-238.262	-22436.9	19975.8	5747.31	283.84	997.169	0	0	0	0	0	0	0	603	903	0
651	9	-22.9309	-94.8535	-496.036	-108147	-29484.6	11936.3	140.559	518.022	0	1.43463	68.662	-233.074	-22162.3	19975.8	5472.66	285.706	998.087	0	0	0	0	0	0	0	603	903	0
652	0	-23.3886	-98.363	-498.477	-108971	-29057.4	11799	141.708	518.607	0	0.0613403	66.8309	-228.801	-21338.3	20036.8	5701.54	287.573	996.261	0	0	0	0	0	0	0	603	903	0
652	1	-22.0153	-100.194	-500.613	-109154	-29728.8	11524.3	140.615	518.04	0	0.213928	65.1524	-221.477	-20514.3	18877.1	5426.88	285.233	995.625	0	0	0	0	0	0	0	603	903	0
652	2	-23.5412	-96.532	-502.139	-109886	-29484.6	11524.3	141.282	518.836	0	1.8924	64.3895	-216.289	-20056.5	18205.8	5335.33	284.173	995.73	0	0	0	0	0	0	0	603	903	0
652	3	-22.3205	-96.2268	-505.191	-110252	-30156	11936.3	140.308	518.239	0	-0.549011	62.8636	-211.406	-19232.6	18388.9	5060.67	286.984	993.974	0	0	0	0	0	0	0	603	903	0
652	4	-24.1516	-95.769	-507.937	-109154	-29911.9	11890.5	141.111	514.896	0	0.0613403	60.5748	-205.608	-18774.8	17595.4	4831.79	285.578	994.314	0	0	0	0	0	0	0	603	903	0
652	5	-25.9826	-95.4639	-508.243	-108696	-30095	11799	140.786	513.866	0	0.671692	59.3541	-198.894	-18225.5	16496.8	4694.46	282.943	994.634	0	0	0	0	0	0	0	603	903	0
652	6	-25.5249	-93.0225	-510.684	-109886	-30400.2	12302.5	140.472	515.175	0	0.366516	58.1334	-194.927	-18042.4	16740.9	5198	285.883	995.56	0	0	0	0	0	0	0	603	903	0
652	7	-24.3042	-92.8699	-515.872	-110527	-30278.1	12485.6	141.307	514.253	0	2.50275	57.0653	-188.518	-16943.8	16069.5	4465.58	285.241	992.879	0	0	0	0	0	0	0	603	903	0
652	8	-27.9663	-94.2432	-516.177	-109520	-30644.3	12439.8	140.632	512.175	0	1.58722	54.0135	-184.856	-15753.6	15459.2	4374.02	283.628	988.221	0	0	0	0	0	0	0	603	903	0
652	9	-28.8818	-95.4639	-518.313	-110069	-30705.3	12668.7	140.759	512.361	0	0.519104	52.6402	-177.837	-15662	15337.1	4374.02	286.243	991.07	0	0	0	0	0	0	0	603	903	0
653	0	-28.1189	-93.4802	-518.008	-109245	-31071.6	12760.3	140.017	510.895	0	-1.15936	52.1825	-171.123	-15478.9	14909.9	4190.92	287.129	993.455	0	0	0	0	0	0	0	603	903	0
653	1	-28.1189	-95.1587	-517.398	-110252	-30705.3	12760.3	140.654	513.09	0	-0.243835	49.8936	-167.156	-14380.3	13933.3	4007.81	283.355	989.029	0	0	0	0	0	0	0	603	903	0
653	2	-30.7129	-98.8208	-519.229	-109520	-31254.7	13309.6	139.806	510.928	0	1.12946	47.4522	-163.188	-13464.8	13506	3870.48	282.764	985.51	0	0	0	0	0	0	0	603	903	0
653	3	-29.4922	-97.9053	-521.365	-110893	-31254.7	13355.3	140.052	512.698	0	0.366516	46.6893	-155.559	-13190.1	13322.9	3870.48	285.646	987.792	0	0	0	0	0	0	0	603	903	0
653	4	-29.6447	-97.1423	-523.807	-111534	-31193.6	13355.3	140.448	512.93	0	-0.854187	45.1634	-148.54	-13464.8	12895.7	3412.72	286.816	993.647	0	0	0	0	0	0	0	603	903	0
653	5	-31.4758	-99.2786	-525.638	-111076	-31376.7	13950.4	140.307	511.317	0	-0.854187	42.1117	-147.319	-12183	12224.3	3412.72	282.978	985.698	0	0	0	0	0	0	0	603	903	0
653	6	-31.018	-99.2786	-529.605	-110252	-31681.9	13492.7	140.178	508.179	0	0.519104	41.9591	-140.911	-12183	11736	3138.06	283.287	989.459	0	0	0	0	0	0	0	603	903	0
653	7	-30.8654	-99.2786	-530.826	-111076	-32048.1	13767.3	139.626	509.252	0	-0.549011	40.7384	-137.554	-11542.1	11369.8	3092.28	282.657	986.91	0	0	0	0	0	0	0	603	903	0
653	8	-32.6965	-99.4311	-533.267	-110710	-32170.2	14225.1	139.673	507.607	0	-1.00677	38.7547	-131.45	-11084.4	11125.7	2817.63	284.638	987.324	0	0	0	0	0	0	0	603	903	0
653	9	-33.0017	-101.873	-535.403	-111900	-32170.2	13904.7	139.914	509.002	0	0.366516	38.1444	-127.483	-10626.6	10515.3	2863.4	282.484	986.357	0	0	0	0	0	0	0	603	903	0
654	0	-32.5439	-103.856	-537.845	-112358	-32597.4	14682.9	139.392	508.904	0	3.1131	36.0081	-124.126	-9985.75	10637.4	2817.63	285.698	983.449	0	0	0	0	0	0	0	603	903	0
654	1	-34.375	-103.398	-541.202	-112724	-32536.4	14728.6	139.881	508.285	0	-1.00677	35.3978	-118.938	-9985.75	9782.9	2588.74	282.252	986.958	0	0	0	0	0	0	0	603	903	0
654	2	-34.2224	-104.924	-542.117	-112358	-32963.6	14545.5	139.195	507.258	0	1.12946	33.4142	-114.055	-9344.88	9843.94	2451.42	286.309	984.933	0	0	0	0	0	0	0	603	903	0
654	3	-33.9172	-105.992	-547	-112724	-32780.5	14545.5	140.072	506.077	0	0.82428	31.8883	-111.003	-8795.56	9416.69	2497.19	284.833	982.237	0	0	0	0	0	0	0	603	903	0
654	4	-34.2224	-106.755	-552.188	-113365	-33207.8	14866	139.861	505.302	0	0.519104	30.8202	-106.731	-8337.8	8623.24	2176.76	280.794	981.12	0	0	0	0	0	0	0	603	903	0
654	5	-33.4594	-106.298	-554.324	-113548	-32841.6	14408.2	140.754	504.841	0	-0.701599	30.0572	-103.069	-7788.48	8806.34	2222.53	285.441	978.566	0	0	0	0	0	0	0	603	903	0
654	6	-33.7646	-108.129	-557.071	-115013	-33451.9	14774.4	139.95	506.461	0	0.366516	28.2262	-98.186	-7605.38	8012.89	1902.1	281.609	980.459	0	0	0	0	0	0	0	603	903	0
654	7	-35.2905	-107.671	-561.343	-115105	-33513	14362.4	140.299	505.052	0	0.976868	28.2262	-94.5239	-7422.27	7890.82	1993.65	283.48	981.523	0	0	0	0	0	0	0	603	903	0
654	8	-34.9853	-106.603	-563.785	-115837	-33879.2	14545.5	139.908	505.463	0	0.519104	27.4632	-90.8618	-7239.17	8073.92	1856.32	288.859	982.672	0	0	0	0	0	0	0	603	903	0
654	9	-34.8327	-107.061	-564.09	-115196	-33696.1	14682.9	140.265	504.216	0	-0.243835	24.8692	-88.7255	-7147.61	7585.64	1718.99	285.496	983.559	0	0	0	0	0	0	0	603	903	0
655	0	-35.5957	-107.518	-568.973	-115746	-33940.2	14682.9	140.348	503.429	0	0.366516	23.1908	-83.8427	-6872.96	6914.25	1581.66	282.467	984.974	0	0	0	0	0	0	0	603	903	0
655	1	-34.2224	-108.129	-571.109	-116386	-34428.5	14682.9	139.716	503.79	0	1.73981	23.1908	-80.4858	-6415.19	6853.22	1764.77	285.148	982.706	0	0	0	0	0	0	0	603	903	0
655	2	-33.4594	-106.298	-573.245	-117668	-34001.2	14637.1	140.686	505.267	0	0.671692	23.3434	-78.9599	-5682.77	6914.25	1307.01	287.567	974.97	0	0	0	0	0	0	0	603	903	0
655	3	-33.1543	-105.687	-578.738	-117668	-34489.5	14591.3	140.406	503.318	0	1.12946	19.3761	-71.6357	-5774.32	6059.76	1352.78	284.591	983.607	0	0	0	0	0	0	0	603	903	0
655	4	-34.2224	-107.061	-580.874	-118584	-34672.6	14545.5	140.31	504.147	0	1.8924	18.6131	-71.3305	-5225.01	6792.18	1352.78	295.221	976.251	0	0	0	0	0	0	0	603	903	0
655	5	-34.0698	-106.145	-580.569	-118309	-34855.7	14454	139.963	503.781	0	0.82428	18.7657	-68.2788	-5133.45	6364.94	1032.35	293.22	978.184	0	0	0	0	0	0	0	603	903	0
655	6	-34.6801	-104.924	-586.368	-118492	-34672.6	14225.1	140.869	502.078	0	0.213928	18.6131	-66.4477	-4950.35	5693.55	849.242	285.685	977.5	0	0	0	0	0	0	0	603	903	0
655	7	-33.612	-106.45	-587.893	-119041	-35221.9	14225.1	140.088	502.488	0	1.28204	18.0028	-65.227	-4492.58	5510.45	1215.45	284.481	971.876	0	0	0	0	0	0	0	603	903	0
655	8	-34.0698	-105.992	-591.861	-120506	-35221.9	14454	140.489	503.606	0	3.26569	17.545	-62.1752	-4584.14	5449.41	849.242	287.646	976.729	0	0	0	0	0	0	0	603	903	0
655	9	-34.2224	-104.161	-594.302	-120781	-34916.8	14042	141.247	503.232	0	0.213928	17.3924	-58.208	-4584.14	4961.13	620.36	285.231	981.754	0	0	0	0	0	0	0	603	903	0
656	0	-33.3069	-105.077	-596.438	-121239	-35710.2	13950.4	140.128	503.271	0	0.0613403	16.7821	-57.2924	-5133.45	4961.13	986.571	286.593	992.601	0	0	0	0	0	0	0	603	903	0
656	1	-32.6965	-104.772	-601.626	-121056	-34977.8	14362.4	141.861	501.214	0	1.58722	15.714	-56.0717	-4126.37	5022.16	1078.12	289.567	976.591	0	0	0	0	0	0	0	603	903	0
656	2	-30.5603	-105.382	-604.373	-121696	-35221.9	13858.9	141.722	501.36	0	1.12946	16.0191	-51.7993	-4126.37	4594.92	620.36	288.706	982.661	0	0	0	0	0	0	0	603	903	0
656	3	-32.3913	-105.535	-607.12	-122063	-35710.2	13813.1	141.181	501.052	0	0.82428	14.7984	-50.5786	-3943.27	4411.81	940.795	287.227	980.963	0	0	0	0	0	0	0	603	903	0
656	4	-32.5439	-104.772	-611.087	-123253	-36076.4	13950.4	140.964	501.695	0	0.82428	13.7303	-47.5268	-3760.16	4716.99	528.808	299.249	982.117	0	0	0	0	0	0	0	603	903	0
656	5	-33.1543	-104.314	-611.697	-123894	-35771.3	13721.6	141.521	502.541	0	1.8924	13.2726	-46.3061	-3668.61	4106.64	483.031	288.685	982.225	0	0	0	0	0	0	0	603	903	0
656	6	-33.7646	-103.856	-614.444	-124260	-36198.5	13630	141.087	502.232	0	0.519104	12.5096	-44.475	-3210.85	3984.56	711.913	289.591	975.194	0	0	0	0	0	0	0	603	903	0
656	7	-31.781	-103.398	-614.139	-123711	-36686.8	13584.2	140.263	501.438	0	0.366516	11.5941	-40.8129	-3485.51	3557.32	483.031	287.162	988.402	0	0	0	0	0	0	0	603	903	0
656	8	-32.5439	-103.398	-618.716	-124260	-36381.6	13630	141.198	500.835	0	1.73981	10.9837	-37.1508	-3302.4	3618.35	986.571	297.396	991.892	0	0	0	0	0	0	0	603	903	0
656	9	-32.8491	-103.856	-616.885	-124809	-36686.8	13630	140.529	502.322	0	0.976868	11.1363	-37.1508	-2753.08	3618.35	574.584	297.396	977.106	0	0	0	0	0	0	0	603	903	0
657	0	-31.018	-102.635	-622.684	-125084	-36198.5	13492.7	141.867	500.879	0	0.82428	10.9837	-36.2353	-2936.19	3252.14	620.36	289.751	984.031	0	0	0	0	0	0	0	603	903	0
657	1	-31.3232	-102.635	-624.82	-124992	-36869.9	13584.2	140.991	500.045	0	1.12946	9.61045	-34.7094	-2569.98	2946.97	437.255	284.904	977.043	0	0	0	0	0	0	0	603	903	0
657	2	-31.018	-103.093	-627.872	-125908	-36381.6	13401.1	142.056	500.531	0	1.28204	10.0682	-31.3525	-2203.77	3008	711.913	295.941	973.29	0	0	0	0	0	0	0	603	903	0
657	3	-31.018	-101.873	-630.618	-125816	-37114	13218	141.147	499.513	0	0.976868	10.2208	-30.1318	-2478.43	2885.93	25.2677	295.777	985.253	0	0	0	0	0	0	0	603	903	0
657	4	-30.7129	-101.567	-626.956	-126366	-36808.9	13080.7	141.29	501.554	0	1.28204	9.61045	-29.8266	-2386.87	2580.76	299.926	286.525	983.025	0	0	0	0	0	0	0	603	903	0
657	5	-31.781	-102.025	-634.28	-126457	-36930.9	12897.6	141.775	499.371	0	1.12946	8.54233	-27.6904	-2112.21	2580.76	254.149	293.2	979.28	0	0	0	0	0	0	0	603	903	0
657	6	-31.781	-101.11	-636.111	-126640	-37114	13034.9	141.655	499.085	0	1.12946	8.54233	-24.9438	-1746	2519.72	208.373	301.016	972.998	0	0	0	0	0	0	0	603	903	0
657	7	-31.018	-101.11	-635.196	-127464	-37297.1	13080.7	141.282	500.669	0	1.12946	8.08457	-22.1972	-1471.34	2397.65	25.2677	308.016	969.285	0	0	0	0	0	0	0	603	903	0
657	8	-31.6284	-100.804	-638.553	-127831	-37236.1	12851.8	141.687	500.188	0	0.519104	7.47421	-23.7231	-1837.56	1604.19	391.479	267.622	980.459	0	0	0	0	0	0	0	603	903	0
657	9	-31.1706	-100.957	-639.163	-128197	-36992	13172.2	142.124	500.57	0	0.82428	7.32163	-20.6713	-1562.9	1970.4	208.373	295.321	978.607	0	0	0	0	0	0	0	603	903	0
658	0	-29.7973	-100.194	-640.994	-127556	-37541.3	12943.4	141.433	498.997	0	1.73981	6.86386	-18.5351	-1746	1665.23	25.2677	289.842	997.2	0	0	0	0	0	0	0	603	903	0
658	1	-29.6447	-100.194	-643.741	-127739	-37236.1	12622.9	142.157	498.432	0	0	0	0	0	0	0	200	903	0	0	0	0	0	0	0	603	903	0
658	2	-29.4922	-99.126	-646.487	-128288	-37724.4	12989.1	141.647	498.439	0	0	0	0	0	0	0	200	903	0	0	0	0	0	0	0	603	903	0
658	3	-29.4922	-98.9734	-647.708	-129570	-37419.2	12622.9	142.228	500.044	0	0	0	0	0	0	0	200	903	0	0	0	0	0	0	0	603	903	0
658	4	-29.3396	-98.9734	-648.929	-129021	-37480.2	12210.9	142.243	498.821	0	0	0	0	0	0	0	200	903	0	0	0	0	0	0	0	603	903	0
658	5	-30.4077	-97.6001	-651.98	-129478	-37846.5	12485.6	141.952	498.593	0	0	0	0	0	0	0	200	903	0	0	0	0	0	0	0	603	903	0
658	6	-30.2551	-97.2949	-652.286	-129845	-37724.4	12348.3	142.166	499.061	0	0	0	0	0	0	0	200	903	0	0	0	0	0	0	0	603	903	0
658	7	-30.1025	-96.2268	-652.591	-129295	-37724.4	12485.6	142.193	498.126	0	0	0	0	0	0	0	200	903	0	0	0	0	0	0	0	603	903	0
658	8	-29.7973	-96.3794	-654.422	-129112	-37663.3	12302.5	142.448	497.292	0	0	0	0	0	0	0	200	903	0	0	0	0	0	0	0	603	903	0
658	9	-28.8818	-96.8372	-655.643	-130119	-38273.7	12394	141.624	498.461	0	0	0	0	0	0	0	200	903	0	0	0	0	0	0	0	603	903	0
659	0	-28.1189	-94.8535	-657.474	-130943	-37663.3	12302.5	142.715	499.161	0	0	0	0	0	0	0	200	903	0	0	0	0	0	0	0	603	903	0
659	1	-27.9663	-94.0906	-659.305	-130394	-38151.6	11844.7	142.134	497.775	0	0	0	0	0	0	0	200	903	0	0	0	0	0	0	0	603	903	0
659	2	-28.2715	-94.8535	-662.662	-131218	-38700.9	11890.5	141.598	498.017	0	0	0	0	0	0	0	200	903	0	0	0	0	0	0	0	603	903	0
659	3	-27.6611	-93.3276	-662.967	-130669	-37785.4	12348.3	143.006	497.097	0	0	0	0	0	0	0	200	903	0	0	0	0	0	0	0	603	903	0
659	4	-29.0344	-92.1069	-666.018	-130669	-38334.7	11799	142.442	496.194	0	0	0	0	0	0	0	200	903	0	0	0	0	0	0	0	603	903	0
659	5	-29.4922	-92.8699	-666.629	-131401	-37968.5	11707.4	143.044	497.113	0	0	0	0	0	0	0	200	903	0	0	0	0	0	0	0	603	903	0
659	6	-29.0344	-92.5647	-667.544	-131218	-38395.8	11890.5	142.482	496.568	0	0	0	0	0	0	0	200	903	0	0	0	0	0	0	0	603	903	0
659	7	-28.424	-91.8018	-668.155	-132042	-38090.6	11707.4	142.991	497.622	0	0	0	0	0	0	0	200	903	0	0	0	0	0	0	0	603	903	0
659	8	-28.8818	-90.8862	-667.85	-132225	-38700.9	11478.5	142.051	497.986	0	0	0	0	0	0	0	200	903	0	0	0	0	0	0	0	603	903	0
659	9	-27.8137	-89.9707	-669.986	-132042	-38273.7	11615.8	142.874	497.082	0	0	0	0	0	0	0	200	903	0	0	0	0	0	0	0	603	903	0
660	0	-27.9663	-89.9707	-671.512	-132408	-38639.9	11432.7	142.458	497.179	0	0	0	0	0	0	0	200	903	0	0	0	0	0	0	0	603	903	0
660	1	-27.5085	-89.9707	-671.512	-131950	-38762	11615.8	142.277	496.498	0	0	0	0	0	0	0	200	903	0	0	0	0	0	0	0	603	903	0
660	2	-27.6611	-90.1233	-676.7	-131584	-38456.8	11432.7	143.17	494.45	0	0	0	0	0	0	0	200	903	0	0	0	0	0	0	0	603	903	0
660	3	-27.5085	-89.2078	-677.92	-132957	-38884.1	11295.4	142.642	496.126	0	0	0	0	0	0	0	200	903	0	0	0	0	0	0	0	603	903	0
660	4	-26.7456	-87.9871	-672.427	-133049	-38334.7	11615.8	142.991	497.864	0	0	0	0	0	0	0	200	903	0	0	0	0	0	0	0	603	903	0
660	5	-28.1189	-87.0715	-678.531	-132042	-38517.8	11249.6	143.233	494.6	0	0	0	0	0	0	0	200	903	0	0	0	0	0	0	0	603	903	0
660	6	-28.2715	-87.9871	-679.751	-132133	-38578.9	11295.4	143.246	494.385	0	0	0	0	0	0	0	200	903	0	0	0	0	0	0	0	603	903	0
660	7	-27.0507	-87.3767	-677.615	-132683	-38823	11478.5	142.706	495.808	0	0	0	0	0	0	0	200	903	0	0	0	0	0	0	0	603	903	0
660	8	-27.6611	-85.8508	-678.531	-132957	-38395.8	11066.5	143.413	495.949	0	0	0	0	0	0	0	200	903	0	0	0	0	0	0	0	603	903	0
660	9	-26.4404	-85.2405	-680.972	-133324	-39189.2	10929.2	142.451	495.784	0	0	0	0	0	0	0	200	903	0	0	0	0	0	0	0	603	903	0
661	0	-25.83	-84.9353	-680.362	-132957	-39128.2	11158.1	142.489	495.422	0	0	0	0	0	0	0	200	903	0	0	0	0	0	0	0	603	903	0
661	1	-24.9145	-83.7146	-683.414	-132317	-38639.9	10883.4	143.46	493.611	0	0	0	0	0	0	0	200	903	0	0	0	0	0	0	0	603	903	0
661	2	-26.4404	-84.0198	-681.888	-132591	-38945.1	10837.6	142.886	494.447	0	0	0	0	0	0	0	200	903	0	0	0	0	0	0	0	603	903	0
661	3	-25.83	-83.2568	-685.245	-133141	-38700.9	11112.3	143.522	494.296	0	0	0	0	0	0	0	200	903	0	0	0	0	0	0	0	603	903	0
661	4	-27.3559	-82.4939	-683.108	-133049	-38578.9	10883.4	143.525	494.77	0	0	0	0	0	0	0	200	903	0	0	0	0	0	0	0	603	903	0
661	5	-27.9663	-82.9517	-683.108	-132866	-38700.9	10700.3	143.346	494.502	0	0	0	0	0	0	0	200	903	0	0	0	0	0	0	0	603	903	0
661	6	-25.3723	-82.0361	-682.498	-132225	-39189.2	10837.6	142.58	493.737	0	0	0	0	0	0	0	200	903	0	0	0	0	0	0	0	603	903	0
661	7	-27.3559	-81.2732	-682.498	-132408	-38884.1	10700.3	143.027	494.005	0	0	0	0	0	0	0	200	903	0	0	0	0	0	0	0	603	903	0
661	8	-27.2033	-80.968	-682.193	-132774	-38762	10563	143.18	494.629	0	0	0	0	0	0	0	200	903	0	0	0	0	0	0	0	603	903	0
661	9	-25.83	-79.7473	-683.414	-131676	-39311.3	10654.5	142.478	492.674	0	0	0	0	0	0	0	200	903	0	0	0	0	0	0	0	603	903	0
662	0	-25.83	-79.137	-682.803	-132591	-38884.1	10700.3	143.052	494.187	0	0	0	0	0	0	0	200	903	0	0	0	0	0	0	0	603	903	0
662	1	-26.4404	-80.3577	-684.634	-131859	-39128.2	10791.9	142.848	492.598	0	0	0	0	0	0	0	200	903	0	0	0	0	0	0	0	603	903	0
662	2	-26.593	-78.6792	-684.024	-131493	-38456.8	10929.2	143.779	492.234	0	0	0	0	0	0	0	200	903	0	0	0	0	0	0	0	603	903	0
662	3	-26.4404	-78.6792	-678.836	-132042	-39433.4	10563	141.91	494.512	0	0	0	0	0	0	0	200	903	0	0	0	0	0	0	0	603	903	0
662	4	-27.2033	-77.4585	-684.024	-131859	-38578.9	10837.6	143.6	492.769	0	0	0	0	0	0	0	200	903	0	0	0	0	0	0	0	603	903	0
662	5	-26.8982	-76.3904	-683.719	-130943	-39067.2	10608.8	142.861	491.516	0	0	0	0	0	0	0	200	903	0	0	0	0	0	0	0	603	903	0
662	6	-27.8137	-76.543	-682.498	-130577	-39006.1	10700.3	142.848	491.322	0	0	0	0	0	0	0	200	903	0	0	0	0	0	0	0	603	903	0
662	7	-27.5085	-77.7637	-682.498	-130669	-38884.1	10700.3	143.027	491.456	0	0	0	0	0	0	0	200	903	0	0	0	0	0	0	0	603	903	0
662	8	-26.8982	-75.6274	-682.498	-131310	-38884.1	10563	143.027	492.396	0	0	0	0	0	0	0	200	903	0	0	0	0	0	0	0	603	903	0
662	9	-27.0507	-74.7119	-681.277	-130943	-38884.1	10425.7	142.925	492.203	0	0	0	0	0	0	0	200	903	0	0	0	0	0	0	0	603	903	0
663	0	-26.4404	-73.949	-684.024	-130119	-38823	10334.1	143.243	490.226	0	0	0	0	0	0	0	200	903	0	0	0	0	0	0	0	603	903	0
663	1	-26.7456	-74.2541	-681.582	-129478	-38762	10563	143.129	489.967	0	0	0	0	0	0	0	200	903	0	0	0	0	0	0	0	603	903	0
663	2	-27.5085	-75.3223	-680.057	-129662	-38945.1	10288.3	142.733	490.663	0	0	0	0	0	0	0	200	903	0	0	0	0	0	0	0	603	903	0
663	3	-27.9663	-73.7964	-681.888	-130028	-38578.9	10379.9	143.423	490.688	0	0	0	0	0	0	0	200	903	0	0	0	0	0	0	0	603	903	0
663	4	-28.5766	-72.7283	-680.972	-130028	-38884.1	10334.1	142.899	490.944	0	0	0	0	0	0	0	200	903	0	0	0	0	0	0	0	603	903	0
663	5	-27.2033	-72.1179	-678.226	-129295	-38884.1	10471.4	142.668	490.638	0	0	0	0	0	0	0	200	903	0	0	0	0	0	0	0	603	903	0
663	6	-28.5766	-72.4231	-678.226	-127464	-38639.9	10379.9	143.028	487.938	0	0	0	0	0	0	0	200	903	0	0	0	0	0	0	0	603	903	0
663	7	-26.8982	-72.1179	-677.92	-128838	-38945.1	10700.3	142.552	490.048	0	0	0	0	0	0	0	200	903	0	0	0	0	0	0	0	603	903	0
663	8	-27.5085	-72.4231	-675.784	-128838	-38578.9	10425.7	142.912	490.649	0	0	0	0	0	0	0	200	903	0	0	0	0	0	0	0	603	903	0
663	9	-27.3559	-70.2869	-677.615	-128563	-38517.8	10471.4	143.157	489.729	0	0	0	0	0	0	0	200	903	0	0	0	0	0	0	0	603	903	0
664	0	-27.6611	-70.2869	-676.394	-127190	-38578.9	10471.4	142.964	488.041	0	0	0	0	0	0	0	200	903	0	0	0	0	0	0	0	603	903	0
664	1	-27.8137	-70.8972	-674.869	-127464	-38700.9	10517.2	142.654	488.873	0	0	0	0	0	0	0	200	903	0	0	0	0	0	0	0	603	903	0
664	2	-29.3396	-69.6765	-674.869	-126915	-38090.6	10517.2	143.559	488.059	0	0	0	0	0	0	0	200	903	0	0	0	0	0	0	0	603	903	0
664	3	-29.3396	-68.761	-673.648	-127098	-38334.7	10379.9	143.094	488.671	0	0	0	0	0	0	0	200	903	0	0	0	0	0	0	0	603	903	0
664	4	-29.0344	-69.0662	-670.291	-127098	-38823	10288.3	142.08	489.616	0	0	0	0	0	0	0	200	903	0	0	0	0	0	0	0	603	903	0
664	5	-29.0344	-67.8455	-669.375	-125999	-38029.6	10608.8	143.187	488.234	0	0	0	0	0	0	0	200	903	0	0	0	0	0	0	0	603	903	0
664	6	-30.1025	-67.5403	-668.46	-125359	-38517.8	10425.7	142.378	487.533	0	0	0	0	0	0	0	200	903	0	0	0	0	0	0	0	603	903	0
664	7	-28.8818	-67.5403	-667.85	-125176	-37907.5	10242.6	143.239	487.431	0	0	0	0	0	0	0	200	903	0	0	0	0	0	0	0	603	903	0
664	8	-26.2878	-67.0825	-667.85	-125359	-38517.8	10608.8	142.326	487.705	0	0	0	0	0	0	0	200	903	0	0	0	0	0	0	0	603	903	0
664	9	-28.424	-67.2351	-666.324	-125176	-37785.4	10288.3	143.293	487.86	0	0	0	0	0	0	0	200	903	0	0	0	0	0	0	0	603	903	0
665	0	-28.5766	-65.8618	-665.408	-124535	-38334.7	10288.3	142.389	487.155	0	0	0	0	0	0	0	200	903	0	0	0	0	0	0	0	603	903	0
665	1	-29.6447	-65.404	-665.408	-123619	-37785.4	10105.2	143.215	485.779	0	0	0	0	0	0	0	200	903	0	0	0	0	0	0	0	603	903	0
665	2	-27.9663	-65.5566	-661.441	-123344	-37968.5	10151	142.597	486.478	0	0	0	0	0	0	0	200	903	0	0	0	0	0	0	0	603	903	0
665	3	-29.4922	-65.2515	-660.525	-122795	-38273.7	10242.6	142.056	485.905	0	0	0	0	0	0	0	200	903	0	0	0	0	0	0	0	603	903	0
665	4	-29.6447	-64.1833	-657.474	-123253	-37846.5	10151	142.437	487.464	0	0	0	0	0	0	0	200	903	0	0	0	0	0	0	0	603	903	0
665	5	-28.8818	-63.7256	-657.779	-122612	-37419.2	10151	143.113	486.403	0	0	0	0	0	0	0	200	903	0	0	0	0	0	0	0	603	903	0
665	6	-29.187	-62.9626	-657.474	-122429	-37419.2	10059.4	143.086	486.211	0	0	0	0	0	0	0	200	903	0	0	0	0	0	0	0	603	903	0
665	7	-28.7292	-62.3523	-656.253	-121056	-38151.6	10425.7	141.864	484.465	0	0	0	0	0	0	0	200	903	0	0	0	0	0	0	0	603	903	0
665	8	-29.4922	-62.9626	-656.253	-121330	-37602.3	10059.4	142.701	484.883	0	0	0	0	0	0	0	200	903	0	0	0	0	0	0	0	603	903	0
665	9	-27.2033	-61.8945	-653.811	-120689	-37419.2	10059.4	142.768	484.594	0	0	0	0	0	0	0	200	903	0	0	0	0	0	0	0	603	903	0
666	0	-30.2551	-61.5894	-652.896	-120964	-37602.3	10196.8	142.407	485.273	0	0	0	0	0	0	0	200	903	0	0	0	0	0	0	0	603	903	0
666	1	-30.5603	-60.8264	-653.201	-119774	-37602.3	9647.46	142.434	483.365	0	0	0	0	0	0	0	200	903	0	0	0	0	0	0	0	603	903	0
666	2	-29.7973	-61.8945	-649.539	-119957	-37602.3	10013.7	142.109	484.68	0	0	0	0	0	0	0	200	903	0	0	0	0	0	0	0	603	903	0
666	3	-30.4077	-59.7583	-647.708	-118858	-36869.9	9876.34	143.076	483.506	0	0	0	0	0	0	0	200	903	0	0	0	0	0	0	0	603	903	0
666	4	-29.9499	-60.2161	-646.792	-117851	-36686.8	9693.24	143.279	482.209	0	0	0	0	0	0	0	200	903	0	0	0	0	0	0	0	603	903	0
666	5	-29.187	-61.1316	-645.877	-118492	-37114	10059.4	142.537	483.459	0	0	0	0	0	0	0	200	903	0	0	0	0	0	0	0	603	903	0
666	6	-28.8818	-59.1479	-643.13	-118675	-37358.2	9693.24	141.912	484.528	0	0	0	0	0	0	0	200	903	0	0	0	0	0	0	0	603	903	0
666	7	-29.9499	-57.9272	-645.267	-117027	-36869.9	9693.24	142.861	481.363	0	0	0	0	0	0	0	200	903	0	0	0	0	0	0	0	603	903	0
666	8	-28.5766	-58.0798	-640.079	-117394	-37175.1	9830.57	141.921	483.405	0	0	0	0	0	0	0	200	903	0	0	0	0	0	0	0	603	903	0
666	9	-30.4077	-57.1643	-640.689	-116753	-36930.9	9784.79	142.357	482.23	0	0	0	0	0	0	0	200	903	0	0	0	0	0	0	0	603	903	0
667	0	-30.4077	-57.1643	-639.468	-116020	-36503.7	9510.13	142.916	481.432	0	0	0	0	0	0	0	200	903	0	0	0	0	0	0	0	603	903	0
667	1	-30.2551	-57.0117	-636.722	-115471	-36930.9	9693.24	141.998	481.352	0	0	0	0	0	0	0	200	903	0	0	0	0	0	0	0	603	903	0
667	2	-29.7973	-56.4014	-634.28	-115837	-36503.7	9784.79	142.449	482.628	0	0	0	0	0	0	0	200	903	0	0	0	0	0	0	0	603	903	0
667	3	-28.5766	-56.554	-633.67	-115746	-36869.9	9464.35	141.815	482.659	0	0	0	0	0	0	0	200	903	0	0	0	0	0	0	0	603	903	0
667	4	-28.8818	-53.96	-633.67	-114464	-36198.5	9739.01	142.875	480.636	0	0	0	0	0	0	0	200	903	0	0	0	0	0	0	0	603	903	0
667	5	-27.0507	-54.8755	-631.534	-115196	-36747.8	9372.8	141.812	482.407	0	0	0	0	0	0	0	200	903	0	0	0	0	0	0	0	603	903	0
667	6	-28.424	-54.7229	-631.228	-113731	-36076.4	9555.91	142.847	480.175	0	0	0	0	0	0	0	200	903	0	0	0	0	0	0	0	603	903	0
667	7	-27.8137	-53.96	-627.872	-112999	-36015.4	9281.25	142.639	479.972	0	0	0	0	0	0	0	200	903	0	0	0	0	0	0	0	603	903	0
667	8	-30.5603	-53.5022	-628.177	-113182	-36442.6	8960.81	141.987	480.176	0	0	0	0	0	0	0	200	903	0	0	0	0	0	0	0	603	903	0
667	9	-29.0344	-53.8074	-626.651	-112907	-36015.4	9418.58	142.527	480.176	0	0	0	0	0	0	0	200	903	0	0	0	0	0	0	0	603	903	0
668	0	-28.1189	-51.6711	-623.904	-112541	-36137.5	9418.58	142.079	480.382	0	0	0	0	0	0	0	200	903	0	0	0	0	0	0	0	603	903	0
668	1	-29.0344	-51.6711	-623.294	-112358	-35649.2	9189.7	142.805	480.265	0	0	0	0	0	0	0	200	903	0	0	0	0	0	0	0	603	903	0
668	2	-29.4922	-51.366	-620.547	-111259	-36076.4	8960.81	141.864	479.293	0	0	0	0	0	0	0	200	903	0	0	0	0	0	0	0	603	903	0
668	3	-27.5085	-51.9763	-619.632	-110893	-35588.2	8915.04	142.566	478.966	0	0	0	0	0	0	0	200	903	0	0	0	0	0	0	0	603	903	0
668	4	-28.2715	-51.2134	-618.411	-109978	-35832.3	8777.71	142.057	477.839	0	0	0	0	0	0	0	200	903	0	0	0	0	0	0	0	603	903	0
668	5	-26.2878	-51.366	-619.327	-110527	-35588.2	8823.49	142.537	478.463	0	0	0	0	0	0	0	200	903	0	0	0	0	0	0	0	603	903	0
668	6	-27.9663	-49.2297	-617.801	-110344	-35832.3	8731.93	142	478.608	0	0	0	0	0	0	0	200	903	0	0	0	0	0	0	0	603	903	0
668	7	-27.8137	-48.9246	-615.664	-109612	-35527.1	8777.71	142.295	478.038	0	0	0	0	0	0	0	200	903	0	0	0	0	0	0	0	603	903	0
668	8	-28.5766	-48.9246	-615.054	-108879	-35344	8640.38	142.535	477.024	0	0	0	0	0	0	0	200	903	0	0	0	0	0	0	0	603	903	0
668	9	-27.9663	-49.2297	-613.833	-108971	-35527.1	8594.6	142.123	477.525	0	0	0	0	0	0	0	200	903	0	0	0	0	0	0	0	603	903	0
669	0	-27.8137	-48.6194	-610.782	-109245	-35099.9	8365.72	142.533	478.861	0	0	0	0	0	0	0	200	903	0	0	0	0	0	0	0	603	903	0
669	1	-28.424	-46.4832	-610.782	-107140	-34977.8	8228.39	142.733	475.414	0	0	0	0	0	0	0	200	903	0	0	0	0	0	0	0	603	903	0
669	2	-26.7456	-47.5513	-610.477	-107872	-35160.9	8365.72	142.404	476.701	0	0	0	0	0	0	0	200	903	0	0	0	0	0	0	0	603	903	0
669	3	-26.593	-46.6357	-607.73	-107780	-35099.9	8594.6	142.244	477.349	0	0	0	0	0	0	0	200	903	0	0	0	0	0	0	0	603	903	0
669	4	-26.7456	-45.8728	-606.509	-105858	-34611.6	8182.62	142.933	474.536	0	0	0	0	0	0	0	200	903	0	0	0	0	0	0	0	603	903	0
669	5	-26.2878	-46.178	-606.509	-106316	-34489.5	8091.06	143.134	475.291	0	0	0	0	0	0	0	200	903	0	0	0	0	0	0	0	603	903	0
[truncated: 3,064 more rows]
