# Supplementary material for: The Effects of an Extemporaneous Speech Dual-task on Older Adult Gait Control
Source: Research Square preprint supplement (doi:10.21203/rs.3.rs-7674245/v1), 2025-11-18
Supplement: Supplementary file 61 [file DT4Walk8.xlsx]

## Sheet: Sheet1
Trajectories
		04:LFHD			04:RFHD			04:LBHD			04:RBHD			04:C7			04:T10			04:CLAV			04:STRN			04:RBAK			04:LSHO			04:LUPA			04:LELB			04:LFRM			04:LWRA			04:LWRB			04:LFIN
Frame	Sub Frame	X	Y	Z	X	Y	Z	X	Y	Z	X	Y	Z	X	Y	Z	X	Y	Z	X	Y	Z	X	Y	Z	X	Y	Z	X	Y	Z	X	Y	Z	X	Y	Z	X	Y	Z	X	Y	Z	X	Y	Z	X	Y	Z
		mm	mm	mm	mm	mm	mm	mm	mm	mm	mm	mm	mm	mm	mm	mm	mm	mm	mm	mm	mm	mm	mm	mm	mm	mm	mm	mm	mm	mm	mm	mm	mm	mm	mm	mm	mm	mm	mm	mm	mm	mm	mm	mm	mm	mm	mm	mm	mm
559	0	78.343	-2348.02	1578.34	194.966	-2349.87	1592.06	78.8146	-2516.89	1541.52	185.838	-2515.74	1549.53	141.547	-2506.69	1449.36	144.666	-2586.81	1168.74	148.828	-2385.19	1355.88	163.941	-2318.74	1162.66	223.941	-2604.28	1247.67	-32.8899	-2429.68	1366.03	-100.524	-2457.47	1122.61	-102.23	-2464.47	1048.21	-118.563	-2387.14	891.491	-71.8821	-2375.34	812.104	-139.647	-2401.86	805.107	-111.831	-2357.92	741.275
560	0	78.9608	-2338.42	1579.06	195.606	-2340.27	1592.8	79.5461	-2507.21	1542.33	186.527	-2506.12	1550.29	141.566	-2497.19	1450.29	143.599	-2577.99	1169.77	149.349	-2375.87	1356.44	164.372	-2310.25	1163.04	222.848	-2595.57	1248.46	-32.6327	-2419.35	1367.13	-101.015	-2445.04	1123.76	-103.037	-2451.28	1049.37	-117.947	-2371.81	893.294	-70.8843	-2359.52	814.303	-138.919	-2385.27	806.902	-110.439	-2340.61	743.781
561	0	79.6533	-2328.82	1579.79	196.298	-2330.58	1593.35	80.0607	-2497.92	1543.36	187.279	-2496.47	1550.83	141.596	-2487.73	1451.16	142.556	-2568.99	1170.71	149.784	-2366.93	1357.23	165.107	-2301.54	1163.35	221.815	-2586.92	1249.43	-32.1947	-2409.18	1368.1	-101.647	-2432.75	1125.04	-103.871	-2438.17	1050.49	-117.068	-2356.41	895.33	-69.7045	-2343.6	816.359	-137.979	-2368.49	808.556	-108.893	-2323.12	746.34
562	0	80.4604	-2319.36	1580.43	197.241	-2320.98	1593.72	80.8591	-2488.31	1544.19	187.952	-2486.82	1551.49	141.66	-2478.37	1451.88	141.637	-2560.03	1171.52	150.097	-2357.89	1357.72	165.556	-2292.93	1163.76	220.793	-2578.27	1250.08	-31.9765	-2399.12	1368.86	-102.132	-2420.38	1126.26	-104.589	-2425.25	1051.46	-116.237	-2340.9	897.372	-68.6414	-2327.46	818.896	-137.131	-2351.42	810.247	-107.103	-2305.49	748.966
563	0	81.534	-2309.78	1581.03	198.292	-2311.48	1593.83	81.6767	-2478.83	1545.07	188.834	-2477.46	1551.88	141.72	-2469.1	1452.48	140.732	-2551.09	1172.16	150.638	-2348.72	1358.16	165.821	-2284.35	1164.35	219.926	-2569.65	1250.82	-31.6856	-2389.11	1369.88	-102.649	-2408.2	1127.4	-105.377	-2412.53	1052.5	-115.446	-2325.57	899.611	-67.4269	-2311.11	821.723	-136.001	-2334.31	812.376	-105.235	-2287.82	751.808
564	0	82.6879	-2300.1	1581.48	199.659	-2302.08	1593.89	82.5915	-2469.24	1545.87	189.881	-2468.24	1552.28	141.921	-2459.76	1453.11	139.852	-2542.34	1172.85	150.895	-2339.7	1358.54	166.355	-2275.93	1164.87	219.07	-2560.97	1251.3	-31.4082	-2379.2	1370.9	-103.145	-2396.14	1128.68	-106.112	-2400.01	1053.57	-114.625	-2310.21	902.275	-66.0071	-2294.91	824.678	-134.842	-2317.26	814.599	-103.292	-2270.02	754.92
565	0	83.9379	-2290.54	1581.92	201.095	-2292.55	1593.84	83.5181	-2459.59	1546.5	190.987	-2458.96	1552.59	142.15	-2450.36	1453.58	139.12	-2533.24	1173.43	151.48	-2330.51	1358.72	166.555	-2267.33	1165.07	218.378	-2552.28	1251.91	-31.0293	-2369.23	1371.78	-103.581	-2384.17	1129.85	-106.863	-2387.77	1054.79	-113.767	-2295.03	904.778	-64.4897	-2278.61	827.958	-133.55	-2300.2	817.065	-101.198	-2252.22	758.344
566	0	85.2757	-2280.87	1582.08	202.357	-2283.05	1593.63	84.3854	-2450.23	1547.05	191.859	-2449.44	1552.67	142.432	-2441.12	1453.91	138.499	-2524.3	1173.76	151.756	-2321.42	1358.77	166.885	-2258.64	1165.37	217.755	-2543.58	1252.2	-30.7544	-2359.24	1372.52	-103.953	-2372.58	1130.93	-107.574	-2375.55	1055.79	-112.919	-2279.97	907.408	-62.9407	-2262.34	831.148	-132.003	-2283.29	819.443	-98.9819	-2234.42	761.739
567	0	86.8399	-2271.23	1582.26	203.811	-2273.65	1593.42	85.4531	-2440.44	1547.24	192.839	-2439.93	1552.52	142.757	-2431.85	1454.1	137.916	-2515.01	1174.06	152.365	-2312.09	1358.88	166.845	-2249.91	1165.86	217.239	-2534.85	1252.3	-30.4143	-2349.45	1373.39	-104.426	-2360.98	1132.14	-108.271	-2363.49	1056.66	-111.851	-2264.99	909.939	-61.2338	-2246.04	834.585	-130.607	-2266.34	821.835	-96.7849	-2216.61	765.56
568	0	88.1642	-2261.69	1582.29	205.37	-2264.15	1593.03	86.4722	-2430.91	1547.39	193.988	-2430.63	1552.45	143.143	-2422.57	1454.2	137.309	-2505.54	1174.35	152.876	-2302.88	1358.79	166.971	-2241.22	1165.61	216.794	-2526.12	1252.44	-29.8205	-2339.53	1374	-104.85	-2349.73	1133.21	-108.855	-2351.45	1057.53	-110.827	-2250.17	912.547	-59.4604	-2229.83	837.924	-129.312	-2249.24	824.795	-94.4934	-2198.89	769.229
569	0	89.6901	-2251.94	1582.19	206.809	-2254.66	1592.68	87.4017	-2421.32	1547.28	194.901	-2420.98	1552.01	143.654	-2413.25	1454.21	136.721	-2496.46	1174.13	153.571	-2293.67	1358.7	167.128	-2232.36	1165.45	216.493	-2517.33	1252.54	-29.3116	-2329.68	1374.53	-105.272	-2338.53	1133.94	-109.38	-2339.37	1058.33	-109.66	-2235.46	914.782	-57.6056	-2213.85	841.348	-126.934	-2233.39	826.59	-91.9671	-2181.3	773.081
570	0	91.3629	-2242.22	1581.87	208.311	-2245.27	1592.15	88.6055	-2411.46	1546.81	196.016	-2411.58	1551.43	144.185	-2404	1454.06	136.588	-2487.5	1174.24	154.269	-2284.33	1358.49	167.435	-2223.73	1165.14	216.221	-2508.57	1252.36	-28.784	-2319.83	1374.85	-105.684	-2327.54	1134.8	-109.897	-2327.57	1058.84	-108.452	-2220.95	917.258	-55.6592	-2197.95	844.514	-124.665	-2216.75	828.841	-89.4665	-2163.63	777.094
571	0	92.6448	-2232.65	1581.58	210.068	-2235.91	1591.54	89.6116	-2401.88	1546.32	197.136	-2402.21	1550.67	144.806	-2394.63	1453.81	136.442	-2478.81	1174.14	155.014	-2275.03	1358.04	167.59	-2214.82	1164.57	216.109	-2499.73	1252.23	-28.0209	-2309.97	1375.16	-106.083	-2316.76	1135.66	-110.33	-2315.59	1059.47	-107.078	-2206.62	919.582	-53.5522	-2181.99	847.991	-122.284	-2200.9	831.215	-86.8897	-2146.26	781.081
572	0	94.3076	-2222.9	1581.19	211.465	-2226.37	1590.87	90.6137	-2392.13	1545.75	198.274	-2392.64	1549.8	145.51	-2385.18	1453.48	136.18	-2469.89	1173.99	156.006	-2265.55	1357.52	168.073	-2206.21	1163.91	216.048	-2490.69	1251.98	-27.3874	-2300.1	1375.36	-106.276	-2306	1136.19	-110.771	-2303.85	1060.1	-105.621	-2192.21	921.867	-51.5381	-2166.16	851.379	-120.15	-2184.85	833.662	-84.2828	-2128.92	785.048
573	0	95.7014	-2213.27	1580.51	213.03	-2216.88	1590.16	91.6977	-2382.39	1545.02	199.354	-2383.19	1548.88	146.281	-2375.74	1453.08	136.095	-2461.24	1173.5	156.704	-2256.02	1356.76	168.675	-2197.52	1162.92	216.093	-2481.62	1251.62	-26.5132	-2290.12	1375.36	-106.481	-2295.22	1136.67	-111.031	-2291.97	1060.3	-104.193	-2178.12	923.88	-49.2588	-2150.64	854.963	-117.615	-2169.2	835.511	-81.5461	-2112.03	788.944
574	0	97.2045	-2203.61	1579.88	214.54	-2207.49	1589.21	92.7823	-2372.7	1544.12	200.439	-2373.71	1547.92	147.131	-2366.14	1452.39	136.312	-2452.14	1173.31	157.511	-2246.54	1355.99	169.554	-2188.91	1162.34	216.274	-2472.56	1251.04	-25.5392	-2280.45	1375.26	-106.532	-2284.5	1136.86	-111.091	-2280.26	1060.64	-102.592	-2164.11	926.036	-46.9131	-2135.27	858.201	-114.896	-2153.74	837.811	-78.7263	-2095.25	792.65
575	0	98.8217	-2193.9	1579.18	216.088	-2198.01	1588.24	93.8925	-2363.08	1543.29	201.533	-2364.22	1546.81	148.028	-2356.54	1451.74	136.454	-2443.34	1172.75	158.43	-2236.93	1355.05	170.213	-2180.09	1161.53	216.612	-2463.4	1250.49	-24.7378	-2270.47	1375.06	-106.396	-2273.84	1137.08	-111.198	-2268.47	1060.67	-100.986	-2150.2	928.044	-44.5909	-2119.97	861.491	-112.035	-2138.39	839.7	-75.5429	-2078.81	796.577
576	0	100.133	-2184.18	1578.39	217.61	-2188.46	1587.32	95.1068	-2353.36	1542.36	202.729	-2354.62	1545.69	149.029	-2346.89	1451	136.689	-2434.26	1172.27	159.505	-2227.15	1354.23	171.075	-2171.18	1160.41	217.035	-2454.12	1249.84	-23.7991	-2260.57	1374.7	-106.248	-2263.22	1136.98	-111.07	-2256.89	1060.62	-99.1654	-2136.4	929.739	-42.0613	-2104.78	864.71	-109.445	-2123.1	841.673	-72.5982	-2062.36	800.286
577	0	101.871	-2174.48	1577.28	219.109	-2178.92	1586.19	96.3802	-2343.54	1541.14	203.942	-2344.95	1544.41	150.077	-2337.14	1450.11	136.91	-2425.26	1171.36	160.535	-2217.46	1353.26	171.79	-2162.16	1159.31	217.527	-2444.89	1249.18	-22.7305	-2250.65	1374	-105.881	-2252.61	1136.77	-110.973	-2245.22	1060.27	-97.3852	-2122.68	931.398	-39.6203	-2089.84	867.659	-106.155	-2108.22	843.047	-69.3951	-2046.37	803.564
578	0	103.663	-2164.85	1576.2	220.737	-2169.32	1584.92	97.6923	-2333.75	1539.86	205.278	-2335.29	1543.01	151.174	-2327.38	1449.18	137.453	-2416.15	1170.88	161.722	-2207.74	1352.02	172.823	-2153.13	1157.9	218.173	-2435.51	1248.34	-21.6506	-2240.78	1373.32	-105.464	-2242.1	1136.32	-110.517	-2233.77	1059.95	-95.3207	-2109.16	932.9	-36.8868	-2075.23	870.51	-103.163	-2093.18	844.914	-65.8589	-2030.7	806.832
579	0	105.021	-2155.08	1575.26	222.122	-2159.86	1583.44	99.1271	-2323.91	1538.53	206.729	-2325.67	1541.55	152.312	-2317.56	1448.09	137.982	-2407.12	1170.1	162.92	-2197.93	1350.59	173.624	-2143.95	1156.78	218.98	-2426.11	1247.46	-20.4652	-2230.83	1372.54	-104.69	-2231.48	1135.66	-110.031	-2222.19	1059.49	-93.076	-2095.77	934.22	-33.8621	-2060.92	873.101	-99.616	-2078.71	846.002	-62.3203	-2015.26	809.808
580	0	106.68	-2145.25	1573.96	224.092	-2150.04	1582.45	100.567	-2314.04	1537.05	208.231	-2315.75	1539.92	153.543	-2307.62	1446.95	138.631	-2397.94	1169.19	164.051	-2188.08	1349.17	174.575	-2134.59	1155.2	219.793	-2416.48	1246.48	-19.1985	-2220.83	1371.67	-104.046	-2220.86	1134.92	-109.517	-2210.68	1058.87	-90.8409	-2082.51	935.475	-30.8422	-2046.73	875.472	-96.2388	-2064.14	847.422	-58.6502	-2000.09	812.746
581	0	108.398	-2135.38	1572.55	225.681	-2140.27	1580.99	102.136	-2304.2	1535.39	209.848	-2306.11	1538.29	154.868	-2297.82	1445.63	139.344	-2388.76	1168.09	165.55	-2178.07	1347.88	175.626	-2125.08	1153.65	220.859	-2406.91	1245.34	-17.9606	-2210.85	1370.54	-103.204	-2210.22	1134.22	-108.669	-2199.24	1058.17	-88.5013	-2069.25	936.482	-27.774	-2032.86	877.84	-92.6591	-2049.68	848.637	-54.7348	-1985.14	815.427
582	0	110.013	-2125.59	1571.25	227.424	-2130.58	1579.39	103.855	-2294.41	1533.81	211.558	-2296.38	1536.48	156.344	-2287.96	1444.34	140.176	-2379.7	1167.05	166.689	-2168.2	1346.74	176.649	-2115.59	1152.24	221.931	-2397.25	1244.15	-16.6347	-2200.91	1369.52	-102.217	-2199.63	1133.45	-107.825	-2187.64	1057.45	-86.0325	-2056.33	937.534	-24.7393	-2019.09	879.882	-89.2186	-2035.46	849.769	-50.9376	-1970.49	817.966
583	0	111.891	-2115.73	1569.88	229.241	-2120.74	1577.89	105.611	-2284.54	1532.2	213.363	-2286.47	1534.63	157.84	-2278.02	1442.92	141.034	-2370.26	1165.88	168.352	-2158.2	1345.11	178.151	-2106.28	1151.07	223.218	-2387.47	1242.98	-15.2654	-2191.02	1368.61	-101.177	-2189.06	1132.57	-106.679	-2176.17	1056.55	-83.3668	-2043.3	938.417	-21.4406	-2005.75	881.937	-85.7739	-2021.5	851.049	-46.7509	-1956.13	820.451
584	0	113.808	-2105.88	1568.23	231.25	-2110.81	1576.16	107.372	-2274.66	1530.47	215.04	-2276.57	1532.84	159.422	-2268.01	1441.47	142.011	-2361.04	1164.67	169.343	-2148.24	1343.4	178.869	-2096.37	1149.48	224.547	-2377.53	1241.6	-13.8416	-2181.13	1367.37	-99.8772	-2178.36	1131.6	-105.416	-2164.74	1055.56	-80.6104	-2030.58	939.04	-18.0747	-1992.61	883.716	-82.0525	-2007.75	851.981	-42.5977	-1942.12	822.395
585	0	115.772	-2095.84	1566.6	233.139	-2100.88	1574.23	109.279	-2264.8	1528.73	216.999	-2266.71	1530.86	161.141	-2258.12	1439.88	143.166	-2351.8	1163.27	170.969	-2138.28	1341.95	179.993	-2086.75	1148.09	226.068	-2367.63	1240.03	-12.2654	-2171.36	1366.09	-98.4119	-2167.66	1130.42	-104.009	-2153.18	1054.54	-77.7125	-2017.88	939.526	-14.5116	-1979.64	885.098	-78.4515	-1993.93	852.698	-38.4514	-1928.34	824.269
586	0	117.844	-2086.11	1564.96	235.391	-2091.11	1572.35	111.326	-2254.91	1527.07	218.988	-2256.83	1529.08	162.882	-2248.25	1438.27	144.461	-2342.27	1161.82	172.359	-2128.17	1340.5	181.15	-2076.9	1146.59	227.702	-2357.75	1238.51	-10.7102	-2161.65	1364.9	-96.9153	-2156.87	1129.27	-102.464	-2141.78	1053.44	-74.588	-2005.41	939.964	-10.7718	-1966.99	886.144	-74.7579	-1980.5	853.276	-33.9994	-1914.98	825.771
587	0	120.125	-2076.09	1563.21	237.691	-2081.11	1570.43	113.403	-2244.94	1525.54	221.174	-2246.78	1527.17	164.728	-2238.26	1436.75	145.812	-2332.62	1160.14	174.102	-2118.02	1338.7	182.163	-2067.01	1144.83	229.448	-2347.71	1237.03	-9.10816	-2151.79	1363.76	-95.2165	-2146.19	1127.98	-100.728	-2130.36	1052.31	-71.4689	-1992.94	940.218	-7.11117	-1954.66	886.839	-71.1686	-1967.19	853.689	-29.6711	-1901.67	827.061
588	0	122.414	-2066.15	1561.57	239.919	-2071.07	1568.42	115.477	-2234.96	1524.02	223.354	-2236.94	1525.44	166.567	-2228.26	1435.18	147.569	-2323.16	1158.91	175.621	-2108.03	1336.93	183.628	-2057.12	1143.25	231.235	-2337.55	1235.39	-7.47648	-2141.85	1362.35	-93.4249	-2135.22	1126.52	-98.9401	-2118.95	1051.11	-68.1626	-1980.69	940.21	-3.39472	-1942.49	887.333	-67.406	-1954.18	853.85	-25.3868	-1888.85	827.93
589	0	124.807	-2056.01	1559.82	242.347	-2061.03	1566.33	117.841	-2224.93	1522.49	225.632	-2226.88	1523.58	168.527	-2218.14	1433.47	149.29	-2313.04	1156.93	177.299	-2098.32	1334.8	184.783	-2046.93	1141.53	233.063	-2327.5	1233.66	-5.7406	-2131.79	1361.1	-91.4103	-2124.41	1125.15	-96.9049	-2107.53	1049.78	-64.7932	-1968.71	940.079	0.296148	-1930.57	887.696	-63.6723	-1941.37	853.932	-20.961	-1876.39	828.541
590	0	127.234	-2045.84	1558.35	244.865	-2050.93	1564.47	120.239	-2214.84	1521.04	227.927	-2216.73	1521.77	170.534	-2208.06	1431.95	151.19	-2302.94	1155.46	179.109	-2088.21	1333.34	186.151	-2036.66	1139.95	234.909	-2317.3	1232.07	-3.94807	-2121.72	1359.83	-89.3588	-2113.56	1123.89	-94.7117	-2096.43	1048.53	-61.417	-1956.91	939.83	4.10434	-1919	887.681	-59.7134	-1929.08	853.852	-16.5756	-1864.15	829.049
591	0	129.823	-2035.54	1556.78	247.191	-2040.94	1562.63	122.593	-2204.56	1519.64	230.286	-2206.53	1520.12	172.559	-2197.88	1430.54	153.191	-2292.91	1154.4	180.999	-2077.5	1332.31	187.221	-2026.16	1138.72	236.771	-2307.03	1230.63	-2.08682	-2111.56	1358.72	-87.1942	-2102.8	1122.52	-92.3369	-2085.36	1047.32	-58.0753	-1945.35	939.364	7.79858	-1907.68	887.707	-56.1761	-1917	853.785	-12.3837	-1852.25	829.412
592	0	132.511	-2025.33	1555.54	249.983	-2030.57	1561.32	125.045	-2194.27	1518.23	232.781	-2196.28	1518.4	174.816	-2187.58	1429.18	155.211	-2282.59	1153.04	182.901	-2067.07	1331.11	188.634	-2015.6	1137.73	238.716	-2296.67	1229.11	-0.046775	-2101.18	1357.88	-84.7339	-2092.03	1121.46	-89.766	-2074.33	1046.18	-54.628	-1934.06	939.042	11.6209	-1896.48	887.548	-52.55	-1905.32	853.592	-8.27508	-1840.74	829.431
593	0	135.143	-2014.95	1554.59	252.864	-2020.26	1559.9	127.6	-2183.89	1516.78	235.332	-2186.12	1516.9	177.129	-2177.25	1427.92	157.276	-2272.31	1151.79	185.034	-2056.42	1330.05	190.162	-2004.77	1137.01	240.724	-2286.2	1227.69	1.9586	-2090.87	1357.44	-82.2964	-2081.3	1120.71	-87.0287	-2063.5	1045.2	-51.2794	-1923.03	938.618	15.1779	-1885.74	887.296	-49.0099	-1893.98	853.219	-4.31845	-1829.64	829.463
594	0	138.009	-2004.49	1553.56	255.88	-2010.06	1558.71	130.167	-2173.38	1515.62	238.047	-2175.73	1515.54	179.613	-2166.73	1426.9	159.284	-2261.69	1150.62	187.262	-2046.12	1329.1	191.866	-1993.87	1135.77	242.818	-2275.64	1226.61	4.15572	-2080.36	1356.8	-79.6803	-2070.65	1119.81	-84.301	-2052.71	1044.41	-47.8607	-1912.21	937.951	18.7855	-1875.27	886.754	-45.4911	-1882.96	852.678	-0.379928	-1818.87	829.182
595	0	140.918	-1993.95	1552.45	258.611	-1999.68	1557.61	132.871	-2162.87	1514.57	240.682	-2165.29	1514.19	182.18	-2156.13	1426.05	161.369	-2251.14	1150.01	189.552	-2035.33	1328.23	193.523	-1982.98	1134.85	244.979	-2264.92	1225.62	6.60616	-2069.72	1356.26	-76.826	-2059.98	1119.16	-81.4447	-2042.14	1043.59	-44.5396	-1901.59	937.332	22.2419	-1865	885.92	-42.1631	-1872.25	852.105	3.41037	-1808.56	828.53
596	0	144.004	-1983.5	1551.58	261.566	-1989.29	1556.43	135.648	-2152.36	1513.45	243.374	-2154.81	1513.07	184.863	-2145.48	1425.04	163.443	-2240.37	1149.01	191.932	-2024.72	1327.19	195.486	-1972.07	1134.09	247.269	-2254.09	1224.57	9.07737	-2059.07	1355.92	-73.9031	-2049.37	1118.38	-78.5608	-2031.77	1043.03	-41.1386	-1891.39	936.331	25.7028	-1855.04	884.891	-38.9444	-1862.05	851.339	7.04907	-1798.42	827.677
597	0	146.946	-1972.99	1550.81	264.538	-1978.9	1555.47	138.626	-2141.83	1512.63	246.15	-2144.25	1512.01	187.668	-2134.86	1424.24	165.533	-2229.45	1147.97	194.539	-2013.84	1326.6	197.907	-1961.01	1133.3	249.657	-2243.04	1223.44	11.7664	-2048.42	1355.69	-70.8443	-2038.81	1117.97	-75.3343	-2021.57	1042.47	-37.9333	-1881.45	935.775	29.0413	-1845.55	883.889	-35.8321	-1852.09	850.673	10.6463	-1788.87	826.588
598	0	150.018	-1962.51	1550.37	267.559	-1968.22	1554.92	141.587	-2131.32	1512.09	249.225	-2133.73	1511.29	190.579	-2124.16	1423.69	167.804	-2218.29	1147.51	197.022	-2002.72	1326.06	200.217	-1949.83	1133.24	252.129	-2231.79	1222.53	14.5034	-2037.52	1355.57	-67.7815	-2028.38	1117.51	-72.3243	-2011.59	1042.09	-34.8812	-1871.65	934.863	32.1568	-1836.19	882.76	-32.8769	-1842.38	849.756	13.9272	-1779.59	825.384
599	0	153.201	-1951.92	1550.21	270.738	-1957.61	1554.59	144.715	-2120.7	1511.86	252.407	-2123.14	1510.95	193.576	-2113.35	1423.24	170.095	-2207.04	1146.97	199.885	-1991.6	1325.98	202.355	-1938.57	1133.08	254.733	-2220.41	1221.86	17.3005	-2026.7	1355.88	-64.7476	-2018.01	1117.41	-69.217	-2001.59	1041.88	-31.7414	-1862.11	934.108	35.2252	-1827.06	881.839	-29.9731	-1832.94	848.881	16.89	-1770.69	824.159
600	0	156.458	-1941.34	1550.21	274.155	-1946.92	1554.44	147.984	-2110.07	1511.8	255.717	-2112.51	1510.62	196.609	-2102.54	1423.05	172.496	-2195.68	1146.69	202.671	-1980.55	1326.35	204.659	-1926.63	1133.78	257.324	-2208.98	1221.15	20.0006	-2015.67	1356.47	-61.6147	-2007.64	1117.62	-66.0073	-1991.82	1041.84	-28.9637	-1852.92	933.304	38.0735	-1818.28	880.551	-27.3261	-1824.21	848.022	19.7875	-1762.03	822.996
601	0	159.81	-1930.56	1550.58	277.441	-1936.36	1554.49	151.275	-2099.38	1511.98	258.915	-2101.72	1510.61	199.626	-2091.63	1423.08	174.826	-2184.33	1146.35	205.507	-1969.36	1326.7	206.95	-1914.6	1134.4	259.822	-2197.52	1220.78	22.865	-2004.43	1357.32	-58.5442	-1997.37	1117.96	-62.7607	-1982.19	1042	-26.1411	-1843.87	932.594	40.7456	-1809.94	879.243	-24.8122	-1815.77	847.212	22.6127	-1753.86	821.446
602	0	163.245	-1919.79	1551.17	281.146	-1925.35	1554.92	154.627	-2088.54	1512.49	262.272	-2090.91	1510.9	202.65	-2080.73	1423.48	177.357	-2172.91	1146.75	208.34	-1958.2	1327.35	209.466	-1902.72	1135.19	262.28	-2186	1220.72	25.6707	-1993.12	1358.42	-55.4613	-1987.22	1118.51	-59.7153	-1972.5	1042.43	-23.4332	-1835.22	931.809	43.4415	-1801.73	877.877	-22.3572	-1807.82	846.229	24.9548	-1746.16	819.916
603	0	166.789	-1908.98	1551.95	284.574	-1914.55	1555.25	157.912	-2077.82	1513.46	265.744	-2080.18	1511.4	205.594	-2070.02	1424	179.791	-2161.3	1147.12	211.267	-1947.03	1328.31	211.928	-1890.68	1135.98	264.749	-2174.54	1220.81	28.6355	-1981.74	1359.64	-52.4727	-1976.98	1119.36	-56.5957	-1963.07	1043.2	-20.93	-1826.86	930.977	45.7117	-1793.87	876.53	-20.0521	-1800.16	845.101	27.1497	-1738.82	818.231
604	0	170.403	-1898.14	1552.88	288.152	-1903.99	1555.51	161.281	-2067	1514.51	269.079	-2069.51	1512.07	208.515	-2059.13	1424.6	182.243	-2149.69	1147.66	214.119	-1935.91	1329.45	214.041	-1878.67	1137.33	267.162	-2163.16	1221.04	31.5085	-1970.38	1361.25	-49.4574	-1966.63	1120.46	-53.5777	-1953.42	1044.22	-18.3778	-1818.58	930.144	48.2114	-1786.54	874.889	-17.9548	-1792.98	843.938	29.3064	-1731.96	816.235
605	0	174.145	-1887.28	1554.03	291.648	-1893.58	1555.9	164.626	-2056.17	1516.01	272.385	-2058.67	1512.99	211.277	-2048.43	1425.6	184.508	-2138.05	1148.19	216.797	-1924.92	1330.39	216.596	-1866.6	1138.74	269.328	-2151.86	1221.59	34.3854	-1959.05	1362.85	-46.5086	-1956.04	1121.67	-50.684	-1944.03	1045.42	-16.0341	-1810.57	929.355	50.2231	-1779.33	873.269	-16.0621	-1786.09	842.821	31.1524	-1725.42	814.213
606	0	177.894	-1876.25	1555.13	295.434	-1882.51	1556.64	167.99	-2045.32	1517.66	275.661	-2047.94	1514.05	213.966	-2037.72	1426.81	186.724	-2126.37	1149.41	219.643	-1913.77	1331.89	218.911	-1855.22	1140.16	271.422	-2140.59	1222.33	37.0514	-1947.82	1364.66	-43.6818	-1945.42	1123.16	-47.9235	-1934.41	1046.76	-13.8631	-1802.74	928.578	52.1808	-1772.61	871.484	-14.3047	-1779.48	841.64	32.7074	-1719.27	812.163
607	0	181.552	-1865.4	1556.55	299.105	-1871.87	1557.37	171.348	-2034.59	1519.41	278.967	-2037.36	1515.25	216.679	-2027.07	1428.06	188.915	-2114.98	1150.54	222.114	-1903.02	1333.48	221.123	-1843.66	1141.95	273.527	-2129.41	1223.22	39.7716	-1936.75	1366.64	-40.8646	-1934.75	1124.94	-45.1992	-1924.95	1048.39	-11.7913	-1795.12	928.087	53.8881	-1766.09	870.061	-12.734	-1773.35	840.762	34.1495	-1713.62	810.024
608	0	185.206	-1854.6	1558.22	302.609	-1861.38	1558.21	174.501	-2023.92	1521.21	282.264	-2026.91	1516.61	219.169	-2016.74	1429.38	190.916	-2103.73	1151.8	224.579	-1892.09	1334.95	223.529	-1832.28	1144.14	275.598	-2118.33	1224.21	42.3004	-1925.72	1368.79	-38.1936	-1923.97	1126.86	-42.7773	-1915.44	1050.17	-9.97015	-1787.76	927.698	55.3537	-1759.7	868.622	-11.6358	-1767.09	840.066	35.439	-1708.19	808.058
609	0	188.801	-1843.92	1559.75	306.183	-1850.91	1559.14	177.603	-2013.3	1523.29	285.364	-2016.34	1517.97	221.668	-2006.36	1430.91	192.832	-2092.71	1153.21	227.021	-1881.47	1337.09	225.502	-1820.97	1146.34	277.633	-2107.33	1225.34	44.802	-1915.03	1370.78	-35.6521	-1913.2	1128.87	-40.3452	-1906.06	1051.96	-8.37067	-1780.47	927.355	56.7081	-1753.69	867.16	-10.5762	-1761.25	839.329	36.6611	-1703.12	805.88
610	0	192.151	-1833.2	1561.32	309.653	-1840.43	1560.14	180.697	-2002.7	1525.31	288.332	-2005.72	1519.32	224.071	-1996.08	1432.49	194.725	-2081.96	1154.66	229.228	-1870.89	1338.65	227.574	-1810.05	1148.41	279.754	-2096.37	1226.55	46.9686	-1904.57	1372.89	-33.2169	-1902.43	1130.79	-38.3	-1896.63	1054.08	-6.82558	-1773.21	927.193	57.7734	-1747.78	865.985	-9.93437	-1755.29	838.739	37.6746	-1698.17	803.838
611	0	195.56	-1822.77	1563.12	312.838	-1829.95	1561.09	183.736	-1992.29	1527.26	291.299	-1995.48	1520.66	226.402	-1985.81	1433.88	196.642	-2071.42	1156.04	231.277	-1860.36	1340.59	229.368	-1799.15	1150.26	281.81	-2085.54	1227.6	49.2211	-1894.16	1374.72	-30.9699	-1891.78	1132.85	-36.1981	-1887.41	1056.02	-5.59422	-1766.06	927.06	58.6801	-1742.08	864.692	-9.45748	-1749.44	838.413	38.6714	-1693.68	801.566
612	0	198.799	-1812.39	1564.88	316.021	-1819.7	1562.08	186.553	-1981.97	1529.14	294.181	-1985.21	1522.02	228.627	-1975.64	1435.33	198.606	-2061.02	1157.45	233.261	-1850.19	1342.19	231.268	-1788.64	1151.93	283.959	-2074.83	1228.78	51.2422	-1884.1	1376.67	-28.8065	-1881.13	1134.92	-34.3698	-1878.21	1058.03	-4.46967	-1758.88	927.092	59.4132	-1736.57	863.58	-9.1699	-1743.5	838.307	39.3461	-1689.16	799.542
613	0	201.693	-1802.03	1566.5	319.024	-1809.38	1563.16	189.228	-1971.72	1531.14	296.894	-1974.97	1523.28	230.837	-1965.58	1436.82	200.548	-2050.85	1158.88	235.11	-1839.88	1343.6	232.782	-1778.43	1153.63	286.1	-2064.2	1230.04	53.3194	-1874.45	1378.33	-27.0027	-1870.73	1136.64	-32.6818	-1869.34	1059.82	-3.60448	-1751.78	927.104	59.6184	-1730.86	862.529	-9.49039	-1737.22	838.408	39.9032	-1684.86	797.412
614	0	204.479	-1791.88	1568.2	321.786	-1799.29	1564.17	191.849	-1961.39	1532.95	299.396	-1964.76	1524.57	233.049	-1955.49	1438.33	202.576	-2040.93	1160.36	236.748	-1829.88	1344.98	234.213	-1768.37	1154.94	288.232	-2053.67	1231.27	55.1008	-1864.83	1379.95	-25.1597	-1860.44	1138.27	-30.9322	-1860.29	1061.55	-2.9437	-1744.74	927.085	59.7778	-1725.37	861.213	-9.91295	-1731.02	838.386	39.9877	-1680.53	795.393
615	0	207.167	-1781.64	1569.89	324.353	-1789.22	1565.17	194.29	-1951.3	1534.84	301.777	-1954.73	1525.86	235.062	-1945.52	1439.78	204.697	-2031.27	1161.69	238.334	-1819.96	1346.14	235.204	-1758.43	1155.86	290.439	-2043.33	1232.51	56.9308	-1855.43	1381.46	-23.567	-1850.63	1139.86	-29.4068	-1851.71	1063.21	-2.37528	-1737.78	927.311	59.7718	-1719.9	860.191	-10.4282	-1724.91	838.388	40.0897	-1676.31	793.505
616	0	209.834	-1771.57	1571.55	326.965	-1779.09	1566.33	196.594	-1941.24	1536.73	304.039	-1944.63	1527.3	237.07	-1935.72	1441.25	206.707	-2021.96	1163	239.697	-1810.23	1347.42	236.579	-1748.71	1157.25	292.611	-2033.23	1233.89	58.4008	-1846.41	1382.91	-21.9601	-1841.12	1141.45	-28.2431	-1843.26	1064.86	-1.97214	-1730.86	927.591	59.3691	-1714.55	859.419	-11.2679	-1718.75	838.677	39.6398	-1672.16	791.836
617	0	212.203	-1761.48	1573.15	329.249	-1769.03	1567.54	198.76	-1931.14	1538.67	306.176	-1934.56	1528.78	238.998	-1925.88	1442.72	208.853	-2012.44	1164.56	241.015	-1800.86	1349.12	237.204	-1739.22	1158.26	294.857	-2023.04	1235.29	59.9413	-1837.5	1384.23	-20.6527	-1831.96	1143.03	-27.1029	-1834.75	1066.31	-1.9497	-1724	927.87	58.6102	-1708.89	858.814	-12.2808	-1712.42	839.163	38.988	-1667.93	790.206
618	0	214.401	-1751.47	1574.72	331.545	-1759.18	1568.64	200.697	-1921.15	1540.55	308.181	-1925.03	1530.44	240.82	-1916.24	1444.14	211.086	-2003.08	1166	242.008	-1791.18	1350.38	237.644	-1729.68	1159.46	297.083	-2013.34	1236.67	61.2962	-1828.79	1385.51	-19.414	-1823.44	1144.36	-25.9906	-1826.71	1067.85	-2.09556	-1717.3	928.317	57.771	-1703.4	858.052	-13.6223	-1706.31	839.638	37.7556	-1663.74	788.922
619	0	216.673	-1741.48	1576.13	333.684	-1749.3	1569.75	202.657	-1911.25	1542.42	310.013	-1915.05	1531.92	242.586	-1906.75	1445.57	213.325	-1993.56	1167.51	243.191	-1781.88	1351.59	237.982	-1720.23	1160.57	299.289	-2003.7	1238.1	62.5237	-1820.42	1386.8	-18.3396	-1815.29	1145.86	-25.0473	-1818.95	1069.34	-2.38808	-1710.73	928.743	56.6279	-1697.97	857.782	-15.2008	-1700.3	840.226	36.2479	-1659.24	787.927
620	0	218.547	-1731.58	1577.74	335.705	-1739.64	1571.06	204.287	-1901.48	1544.31	311.726	-1905.64	1533.6	244.342	-1897.23	1447.1	215.492	-1984.26	1168.98	244.051	-1772.49	1352.92	238.283	-1710.94	1161.76	301.491	-1994.28	1239.63	63.7449	-1812.06	1388.04	-17.2302	-1807.64	1147.17	-24.1407	-1811.51	1070.79	-2.98576	-1704.32	929.177	55.2849	-1692.39	857.467	-16.8987	-1694.64	840.985	34.2019	-1654.88	787.067
621	0	220.466	-1721.61	1579.19	337.526	-1729.9	1572.24	205.924	-1891.62	1546.23	313.263	-1895.91	1535.17	246.018	-1887.86	1448.66	217.725	-1975	1170.41	245.01	-1763.43	1354.24	238.499	-1701.82	1162.7	303.716	-1984.77	1241.13	64.8654	-1803.88	1389.28	-16.4181	-1800.49	1148.41	-23.4407	-1804.35	1072.16	-3.68585	-1698.12	929.772	53.7371	-1686.87	857.317	-18.6496	-1689.04	841.727	31.6453	-1650.18	786.531
622	0	222.199	-1711.89	1580.64	339.11	-1720.48	1573.48	207.349	-1882.01	1547.8	314.667	-1886.28	1536.63	247.619	-1878.58	1449.99	219.904	-1966.06	1171.8	245.785	-1754.25	1355.32	238.943	-1692.52	1164	305.995	-1975.47	1242.53	66.0743	-1795.94	1390.54	-15.55	-1793.78	1149.5	-22.9455	-1797.56	1073.6	-4.75464	-1692.25	930.466	51.9259	-1681.35	857.165	-20.6702	-1683.8	842.507	28.9418	-1645.51	786.368
623	0	223.626	-1702.43	1582.19	340.673	-1711.04	1574.76	208.666	-1872.56	1549.55	315.98	-1877.04	1538.14	249.232	-1869.42	1451.27	222.067	-1956.96	1173.03	246.701	-1745.37	1356.73	239.234	-1683.25	1165.31	308.216	-1966.09	1243.81	67.1029	-1788.02	1391.75	-15.0942	-1787.53	1150.84	-22.4389	-1791.17	1075.07	-6.09862	-1686.66	931.12	49.6711	-1675.84	857.324	-22.8791	-1679.03	843.428	25.8671	-1640.52	786.433
624	0	224.932	-1693.25	1583.6	341.939	-1701.8	1576.2	209.853	-1863.16	1550.93	317.187	-1867.59	1539.59	250.819	-1860.28	1452.58	224.028	-1948.14	1174.08	247.416	-1736.25	1358.02	239.196	-1673.98	1166.52	310.466	-1956.83	1245.09	68.0787	-1780.23	1393.04	-14.7785	-1781.7	1152.26	-21.9336	-1785.05	1076.41	-7.82583	-1681.07	931.93	47.4375	-1670.37	857.712	-25.2512	-1674.18	844.339	22.5708	-1635.57	786.727
625	0	226.133	-1684.05	1585.03	343.01	-1692.48	1577.59	210.872	-1854.01	1552.23	318.199	-1858.47	1540.88	252.387	-1851.25	1453.71	226.071	-1939.13	1175.05	248.082	-1727.42	1359.38	239.4	-1664.95	1167.78	312.683	-1947.74	1246.18	69.0806	-1772.56	1394.3	-14.3225	-1776.25	1153.41	-21.3483	-1779.27	1077.6	-9.68365	-1675.78	932.757	45.0016	-1664.69	858.117	-27.647	-1669.81	845.16	19.0174	-1630.44	787.28
626	0	226.895	-1674.97	1586.27	343.918	-1683.51	1578.98	211.823	-1844.86	1553.39	319.236	-1849.35	1541.95	253.959	-1842.33	1454.69	228.054	-1929.95	1176.05	248.931	-1718.61	1360.62	239.834	-1655.89	1169.34	314.781	-1938.1	1247.08	69.9563	-1764.77	1395.43	-13.9009	-1770.92	1154.67	-21.0552	-1773.41	1079.03	-11.7327	-1670.7	933.614	42.3549	-1659.05	858.714	-30.2568	-1665.38	846.117	15.1811	-1625.18	788.022
627	0	227.587	-1665.9	1587.57	344.553	-1674.54	1580.27	212.658	-1835.85	1554.34	319.967	-1840.41	1543.12	255.388	-1833.41	1455.71	229.927	-1920.94	1176.94	249.626	-1709.87	1361.8	240.348	-1646.76	1170.8	316.911	-1929.06	1248	71.0362	-1757.05	1396.49	-13.8084	-1765.98	1155.9	-20.5132	-1768.06	1080.13	-14.0887	-1665.73	934.419	39.4677	-1653.54	859.069	-32.9976	-1661.26	847.104	11.2518	-1619.99	788.727
628	0	228.251	-1657.09	1588.72	345.254	-1665.47	1581.73	213.341	-1826.81	1555.12	320.78	-1831.28	1544.03	256.772	-1824.49	1456.55	231.759	-1911.98	1177.55	250.427	-1701.1	1362.88	240.69	-1637.63	1171.87	318.895	-1919.54	1248.7	72.0536	-1749.29	1397.54	-13.5597	-1760.88	1157	-20.3408	-1762.57	1081.27	-16.3271	-1660.87	935.107	36.5897	-1647.81	859.44	-35.815	-1657.26	847.892	7.17534	-1614.75	789.379
629	0	228.639	-1648.31	1589.82	345.782	-1656.62	1583.03	213.971	-1817.99	1555.59	321.316	-1822.41	1544.84	258.127	-1815.69	1457.19	233.597	-1902.57	1178.03	251.081	-1692.23	1363.73	241.021	-1628.63	1172.78	320.792	-1910.37	1249.24	72.9514	-1741.56	1398.02	-13.2914	-1755.99	1157.82	-19.9549	-1757.36	1082.1	-18.7583	-1656.02	935.599	33.5043	-1642.05	859.779	-38.4718	-1653.35	848.381	3.01322	-1609.48	790.091
630	0	229.072	-1639.76	1590.65	346.038	-1647.96	1584.06	214.44	-1809.12	1555.85	321.778	-1813.79	1545.4	259.368	-1806.88	1457.66	235.461	-1893.38	1178.32	251.943	-1683.61	1364.42	241.66	-1619.75	1173.39	322.523	-1901.08	1249.57	73.9694	-1733.88	1398.58	-12.9392	-1751.13	1158.57	-19.6006	-1751.93	1082.95	-21.2732	-1651.38	936.127	30.2428	-1636.35	860.16	-41.1782	-1649.55	848.714	-1.23781	-1604.19	790.729
631	0	229.305	-1631.02	1591.36	346.308	-1639.19	1584.97	214.827	-1800.34	1556.03	322.231	-1804.62	1545.61	260.557	-1798.1	1458.11	237.418	-1883.82	1178.42	252.571	-1674.93	1364.86	242.138	-1610.74	1173.67	324.21	-1891.8	1249.85	74.7521	-1726.03	1398.81	-12.7165	-1746.02	1159.16	-19.4834	-1746.81	1083.61	-23.7217	-1646.66	936.494	27.2535	-1630.4	860.352	-43.8505	-1645.79	849.007	-5.52907	-1598.88	791.251
632	0	229.484	-1622.23	1591.98	346.671	-1630.28	1585.96	215.158	-1791.49	1556.06	322.57	-1796.04	1545.99	261.615	-1789.21	1458.26	239.415	-1874.41	1178.66	253.229	-1666.16	1365.38	242.766	-1602.08	1173.92	325.819	-1882.77	1250.09	75.531	-1718.11	1398.86	-12.3013	-1740.84	1159.53	-19.336	-1741.36	1084.27	-26.1688	-1641.93	936.719	24.1557	-1624.48	860.471	-46.5149	-1641.99	849.235	-9.91134	-1593.65	791.615
633	0	229.693	-1613.7	1592.39	346.709	-1621.64	1586.6	215.457	-1782.79	1555.91	322.921	-1787.21	1546.12	262.675	-1780.37	1458.41	241.149	-1864.97	1178.6	253.848	-1657.41	1365.64	243.419	-1593.41	1174.07	327.311	-1873.6	1250.19	76.3767	-1710.02	1398.93	-12.0649	-1735.39	1160	-19.2004	-1735.99	1084.67	-28.4775	-1637.25	936.955	20.9488	-1618.61	860.439	-49.0285	-1638.24	849.397	-14.1667	-1588.68	791.897
634	0	229.672	-1604.98	1592.58	346.827	-1612.96	1587.09	215.748	-1774.06	1555.52	323.219	-1777.81	1546.04	263.608	-1771.55	1458.42	242.38	-1856.37	1178.57	254.348	-1648.73	1365.76	244.153	-1584.87	1174.03	328.701	-1864.67	1250.17	77.021	-1701.95	1398.79	-11.6484	-1730.01	1160.15	-19.1044	-1730.38	1084.91	-30.8062	-1632.55	936.791	17.9136	-1612.83	860.449	-51.2169	-1634.55	849.239	-18.3227	-1583.72	792.117
635	0	229.592	-1596.45	1592.51	346.809	-1604.2	1587.47	215.943	-1765.26	1555.07	323.458	-1769.3	1546.01	264.448	-1762.62	1458.27	243.49	-1847.81	1178.63	254.967	-1640.01	1365.66	244.452	-1576.27	1173.86	330.057	-1855.83	1250.21	77.7301	-1693.95	1398.37	-11.4833	-1723.98	1160.15	-19.1075	-1724.82	1085.11	-32.9798	-1627.9	936.599	15.0314	-1607.09	860.056	-53.4008	-1630.93	848.881	-22.3695	-1578.78	792.05
636	0	229.613	-1587.77	1592.21	346.712	-1595.38	1587.5	216.063	-1756.58	1554.47	323.636	-1760.45	1545.74	265.126	-1753.78	1457.95	244.539	-1839.08	1178.3	255.6	-1631.33	1365.2	245.207	-1567.82	1173.2	331.207	-1846.97	1249.91	78.1588	-1685.67	1397.84	-11.0881	-1717.99	1160.06	-19.079	-1719.03	1085.06	-34.8814	-1623.13	936.054	12.252	-1601.46	859.369	-55.5328	-1627.21	848.345	-26.2592	-1573.95	791.748
637	0	229.488	-1578.99	1591.8	346.615	-1586.59	1587.39	216.18	-1747.8	1553.85	323.717	-1751.64	1545.35	265.897	-1745	1457.51	245.642	-1830.26	1177.82	256.051	-1622.55	1364.78	245.762	-1559.25	1172.37	332.313	-1838.2	1249.55	78.8088	-1677.38	1397.23	-10.673	-1711.77	1159.81	-19.0351	-1713.03	1084.9	-36.7593	-1618.43	935.558	9.60219	-1595.91	858.849	-57.4267	-1623.47	847.88	-30.1269	-1569.37	791.385
638	0	229.309	-1570.28	1591.25	346.467	-1577.7	1587.2	216.261	-1739.05	1553.08	323.782	-1742.73	1544.92	266.555	-1736.15	1456.95	246.559	-1821.54	1177.26	256.332	-1613.73	1364.48	246.205	-1550.68	1171.57	333.287	-1829.43	1249.03	79.4039	-1669.26	1396.48	-10.4263	-1705.21	1159.53	-18.9684	-1707.12	1084.59	-38.5107	-1613.66	934.874	7.31551	-1590.52	857.827	-59.2029	-1619.75	847.238	-33.3779	-1564.7	790.733
639	0	228.997	-1561.42	1590.45	346.319	-1568.82	1586.88	216.232	-1730.18	1552.2	323.903	-1733.84	1544.33	267.122	-1727.37	1456.3	247.416	-1813.24	1176.49	256.709	-1605.04	1363.72	246.353	-1542.03	1170.84	334.212	-1820.56	1248.38	79.8231	-1660.9	1395.52	-10.1826	-1698.3	1159.04	-19.1321	-1700.99	1084.25	-40.0095	-1608.61	933.913	4.9698	-1585.19	856.7	-60.633	-1616.03	845.998	-36.7367	-1560.1	790.036
640	0	228.684	-1552.65	1589.58	345.953	-1559.85	1586.35	216.218	-1721.33	1551.06	323.803	-1724.96	1543.64	267.623	-1718.59	1455.39	248.141	-1804.12	1175.6	257.068	-1596.28	1362.81	246.513	-1533.19	1170.11	334.913	-1811.76	1247.53	80.0334	-1652.53	1394.63	-9.94748	-1691.33	1158.3	-19.4078	-1694.81	1083.72	-41.5704	-1603.95	932.747	3.03787	-1580	855.265	-62.0682	-1612	844.991	-39.6213	-1555.69	788.851
641	0	228.363	-1543.73	1588.63	345.595	-1550.95	1585.61	216.109	-1712.4	1549.92	323.756	-1715.96	1542.76	268.013	-1709.82	1454.34	248.859	-1795.38	1174.58	257.221	-1587.74	1361.75	246.894	-1524.44	1168.97	335.635	-1803.13	1246.54	80.4556	-1644.26	1393.58	-9.75138	-1684.06	1157.59	-19.2456	-1688.39	1083.09	-42.7493	-1598.89	931.697	1.17166	-1574.85	853.829	-63.5991	-1607.79	843.9	-42.007	-1551.35	787.593
642	0	228.045	-1534.81	1587.53	345.134	-1541.76	1584.86	215.997	-1703.48	1548.7	323.643	-1706.9	1541.79	268.299	-1701.04	1453.27	249.371	-1786.42	1173.41	257.254	-1578.77	1360.88	246.943	-1515.78	1167.77	336.148	-1794.31	1245.39	80.6283	-1635.69	1392.39	-9.62652	-1676.76	1156.75	-19.366	-1682.11	1082.27	-43.9585	-1593.79	930.371	-0.467793	-1569.73	852.254	-64.4621	-1603.68	842.56	-44.3095	-1546.89	786.076
643	0	227.468	-1525.78	1586.26	344.681	-1532.67	1584.05	215.638	-1694.42	1547.26	323.443	-1697.73	1540.69	268.41	-1692.16	1451.95	249.889	-1777.51	1172.08	257.427	-1569.89	1359.86	247.273	-1506.84	1166.82	336.488	-1785.39	1244.13	80.7078	-1627.01	1391.09	-9.63096	-1669.26	1155.66	-19.367	-1675.62	1081.23	-44.999	-1588.66	928.734	-1.97236	-1564.56	850.549	-65.912	-1599.29	841.183	-46.2799	-1542.63	784.424
644	0	226.835	-1516.82	1584.88	344.143	-1523.71	1582.99	215.48	-1685.44	1545.62	323.17	-1688.73	1539.55	268.517	-1683.36	1450.48	250.213	-1769.08	1170.5	257.607	-1561.33	1358.31	247.496	-1497.84	1165.61	336.69	-1776.81	1242.68	80.8962	-1618.63	1389.66	-9.58724	-1661.71	1154.41	-19.0258	-1668.79	1080.07	-46.0553	-1583.27	927.173	-3.38217	-1559.27	848.818	-66.8589	-1594.69	839.615	-47.9313	-1538.26	782.416
645	0	226.255	-1507.75	1583.38	343.489	-1514.52	1581.76	215.094	-1676.33	1544.15	322.845	-1679.05	1538.04	268.504	-1674.42	1449.03	250.462	-1759.98	1168.88	257.484	-1552.43	1356.89	247.343	-1488.8	1164.14	336.769	-1767.82	1241.1	80.602	-1609.69	1388.13	-9.5727	-1653.98	1153.05	-19.2427	-1662.12	1078.83	-46.9524	-1577.9	925.362	-4.91219	-1553.9	846.952	-67.9018	-1590.08	837.919	-49.4125	-1533.93	780.195
646	0	225.647	-1498.69	1581.77	342.891	-1505.24	1580.48	214.701	-1667.21	1542.51	322.426	-1670.28	1536.89	268.292	-1665.46	1447.48	250.526	-1750.84	1167.25	257.421	-1543.48	1355.52	247.369	-1479.52	1162.76	336.739	-1758.91	1239.58	80.4738	-1600.91	1386.33	-9.76305	-1646.09	1151.38	-18.9617	-1654.99	1077.31	-47.6227	-1572.18	923.235	-5.71018	-1548.95	844.378	-68.7691	-1585.19	835.977	-50.5327	-1529.59	777.825
647	0	224.948	-1489.43	1580.03	342.396	-1496.01	1579.05	214.146	-1658.06	1540.83	321.839	-1661.07	1535.48	268.005	-1656.45	1445.72	250.517	-1741.05	1165.55	257.206	-1534.33	1353.72	247.603	-1470.3	1160.99	336.646	-1749.94	1237.92	80.1032	-1591.69	1384.48	-9.74324	-1638.32	1149.74	-19.2339	-1648.01	1075.78	-48.2219	-1566.39	921.079	-6.54494	-1543.88	841.875	-69.6373	-1580.19	833.945	-51.6447	-1525.28	775.132
648	0	224.145	-1480.25	1578.14	341.427	-1486.74	1577.47	213.589	-1648.91	1539.14	321.325	-1651.75	1534.02	267.622	-1647.34	1443.89	250.435	-1731.83	1163.7	256.807	-1524.99	1352.24	247.575	-1461.12	1159.21	336.462	-1740.83	1236.11	79.9694	-1582.61	1382.43	-9.76419	-1630.33	1147.91	-19.197	-1640.74	1073.92	-48.7266	-1560.63	918.593	-7.24013	-1538.74	839.19	-70.1277	-1575.27	831.747	-52.2387	-1520.66	772.26
649	0	223.146	-1470.98	1576.4	340.462	-1477.39	1575.74	212.93	-1639.7	1537.46	320.679	-1642.5	1532.47	267.149	-1638.15	1442.15	250.232	-1722.36	1161.84	256.537	-1515.94	1350.34	247.872	-1451.58	1157.51	336.127	-1731.8	1234.36	79.7101	-1573.35	1380.48	-10.0398	-1622.05	1146.16	-19.2331	-1633.15	1072.27	-49.1298	-1554.64	916.339	-7.6442	-1533.42	836.575	-70.5252	-1570.02	829.475	-52.9236	-1516.08	769.491
650	0	222.208	-1461.6	1574.55	339.733	-1467.93	1574.23	212.124	-1630.35	1535.76	319.918	-1633.12	1530.98	266.51	-1628.8	1440.45	249.855	-1713.19	1160	256.381	-1506.47	1348.48	247.689	-1442.12	1155.54	335.641	-1722.43	1232.72	79.107	-1563.68	1378.46	-10.0431	-1613.83	1144.13	-19.3204	-1625.47	1070.44	-49.4594	-1548.43	913.713	-7.89858	-1528.08	833.584	-71.1182	-1564.72	827.162	-53.3064	-1511.81	766.61
651	0	221.235	-1452.13	1572.57	338.584	-1458.42	1572.51	211.307	-1620.95	1533.92	319.019	-1623.7	1529.46	265.797	-1619.29	1438.64	249.291	-1703.07	1158.32	255.759	-1496.89	1346.64	247.8	-1432.42	1153.86	335.072	-1713.14	1230.95	78.536	-1554.07	1376.3	-10.2325	-1605.54	1142.28	-19.3848	-1617.61	1068.58	-49.774	-1542.24	911.143	-8.35995	-1522.67	830.995	-71.1906	-1559.38	824.821	-53.4107	-1507.06	763.523
652	0	220.193	-1442.52	1570.75	337.632	-1448.99	1570.95	210.4	-1611.51	1532.13	318.14	-1614.22	1527.89	265.029	-1609.8	1436.91	248.724	-1693.13	1156.35	255.198	-1487.34	1344.89	247.693	-1422.8	1151.82	334.42	-1703.61	1229.18	77.9472	-1544.48	1374.27	-10.4784	-1597.09	1140.42	-19.4842	-1609.63	1066.68	-49.7851	-1535.83	908.615	-8.39637	-1517.24	828.051	-71.3601	-1553.96	822.309	-53.4981	-1502.4	760.553
653	0	218.919	-1433.04	1569	336.374	-1439.36	1569.46	209.251	-1601.89	1530.34	317.073	-1604.64	1526.27	264.227	-1600.15	1435.16	248.162	-1683.61	1154.48	254.894	-1477.46	1343.06	247.66	-1412.79	1150.27	333.694	-1693.94	1227.36	77.235	-1534.4	1372.4	-10.83	-1588.67	1138.62	-19.4333	-1601.55	1064.9	-49.9642	-1529.35	906.145	-8.4352	-1511.67	825.422	-71.3592	-1548.2	820.112	-53.3482	-1497.65	757.563
654	0	217.692	-1423.33	1567.34	335.138	-1429.49	1568.1	208.056	-1592.1	1528.46	315.849	-1594.94	1524.77	263.222	-1590.27	1433.42	247.466	-1673.48	1152.7	254.07	-1467.49	1341.38	247.521	-1402.89	1148.45	332.975	-1684.17	1225.77	76.5082	-1524.35	1370.31	-10.9772	-1579.89	1136.69	-19.4279	-1593.25	1063	-49.9057	-1522.59	903.489	-8.24375	-1506.01	822.739	-71.5838	-1542.21	817.696	-52.9983	-1492.72	754.641
655	0	216.453	-1413.5	1565.78	333.855	-1419.85	1566.82	206.761	-1582.28	1526.78	314.538	-1585.17	1523.28	262.26	-1580.42	1431.75	246.844	-1662.82	1151.03	253.406	-1457.45	1339.99	247.396	-1392.66	1147.07	332.174	-1674.18	1224.06	75.4918	-1514.2	1368.59	-11.0981	-1571.08	1135	-19.5605	-1584.91	1061.3	-49.9157	-1515.73	901.298	-8.14003	-1499.93	820.32	-71.2931	-1536.28	815.387	-52.5617	-1487.52	751.719
656	0	215.129	-1403.57	1564.37	332.395	-1410.1	1565.57	205.331	-1572.37	1524.97	313.111	-1575.29	1521.76	261.252	-1570.34	1430.22	246.078	-1652.49	1149.32	252.661	-1447.03	1338.43	246.92	-1382.43	1145.51	331.396	-1663.9	1222.49	74.9047	-1504.05	1366.8	-11.454	-1562	1133.26	-19.4552	-1576.54	1059.49	-49.872	-1508.77	898.848	-7.97951	-1494.18	817.4	-71.215	-1529.99	813.263	-51.8802	-1482.18	748.974
657	0	213.606	-1393.59	1562.91	330.976	-1400.35	1564.52	203.831	-1562.2	1523.29	311.548	-1565.25	1520.25	260.119	-1560.09	1428.77	245.367	-1641.88	1147.84	251.796	-1436.65	1337.12	246.815	-1372.14	1144.2	330.566	-1653.49	1221.09	73.7318	-1493.49	1365.07	-11.8664	-1553.01	1131.68	-19.5353	-1567.72	1057.91	-49.7498	-1501.52	896.592	-7.44608	-1487.62	815.236	-71.0797	-1523.43	811.087	-50.7668	-1476.8	746.084
658	0	211.796	-1383.55	1561.51	329.361	-1390.35	1563.47	202.056	-1552.1	1521.72	309.822	-1555.27	1518.92	258.914	-1549.64	1427.5	244.55	-1631.28	1146.52	250.844	-1425.96	1335.64	246.208	-1361.6	1142.86	329.717	-1642.94	1219.85	72.6081	-1483.01	1363.42	-12.1597	-1543.47	1130.01	-19.4652	-1558.89	1056.39	-49.6563	-1494.12	894.449	-7.23408	-1480.92	813.08	-70.8831	-1516.76	809.237	-50.3442	-1471.03	743.432
659	0	210.345	-1373.41	1560.39	327.826	-1380.4	1562.56	200.238	-1541.85	1520.15	307.993	-1545.3	1517.7	257.629	-1539.04	1426.19	243.738	-1620.48	1145.31	249.827	-1415.31	1334.44	245.789	-1351.16	1141.49	328.884	-1632.17	1218.73	71.5546	-1472.36	1362.08	-12.4927	-1533.86	1128.51	-19.5829	-1549.72	1055	-49.5758	-1486.56	892.375	-6.65709	-1474.17	810.792	-70.6544	-1509.82	807.346	-49.6002	-1465.07	741.031
660	0	208.478	-1363.1	1559.34	326.001	-1370.34	1561.74	198.297	-1531.53	1518.84	306.065	-1535.17	1516.62	256.336	-1528.36	1425.2	242.883	-1610.01	1144.13	248.45	-1404.27	1333.34	245.065	-1340.44	1140.56	328.004	-1621.15	1217.73	70.2937	-1461.7	1360.75	-12.9962	-1524.16	1127.13	-19.6168	-1540.61	1053.67	-49.4085	-1478.69	890.551	-6.11555	-1467.24	808.857	-70.3654	-1502.66	805.643	-48.5541	-1459.07	738.507
661	0	206.687	-1352.94	1558.38	324.101	-1360.23	1560.95	196.236	-1521.15	1517.77	304.064	-1524.91	1515.78	254.819	-1517.51	1424.44	241.98	-1598.28	1143.33	247.261	-1393.34	1332.5	244.28	-1329.54	1139.6	327.079	-1609.94	1216.96	68.7937	-1450.97	1359.6	-13.4553	-1514.09	1125.77	-19.7211	-1530.95	1052.42	-49.3055	-1470.5	888.702	-5.53414	-1459.89	806.9	-70.1936	-1495.09	804.045	-47.6855	-1452.45	736.347
662	0	204.722	-1342.55	1557.57	322.106	-1350.16	1560.24	194.062	-1510.78	1516.87	301.919	-1514.79	1515	253.177	-1506.61	1423.58	241.111	-1586.89	1142.48	245.687	-1382.22	1331.87	243.138	-1318.37	1139.07	326.133	-1598.58	1216.2	67.4348	-1440.06	1358.39	-13.9994	-1503.93	1124.56	-20.01	-1521.27	1051.3	-49.2082	-1461.97	887.209	-5.3555	-1452.03	805.389	-69.96	-1487.17	802.613	-46.8215	-1445.69	734.383
663	0	202.635	-1332.13	1556.81	320.194	-1339.9	1559.59	191.926	-1500.37	1516.18	299.777	-1504.56	1514.34	251.521	-1495.79	1422.81	240.308	-1575.3	1141.46	244.241	-1370.95	1331.37	242.078	-1306.86	1138.61	325.133	-1587.08	1215.41	65.8452	-1429.08	1357.33	-14.7618	-1493.57	1123.35	-20.2076	-1511.5	1050.08	-49.0832	-1453.1	885.667	-5.19107	-1443.88	803.927	-69.7082	-1478.92	801.117	-46.0051	-1438.53	732.396
664	0	200.652	-1321.69	1556.19	318.187	-1329.6	1559.3	189.503	-1489.98	1515.8	297.515	-1494.38	1514.17	249.729	-1484.98	1422.21	239.51	-1563.87	1140.53	242.665	-1359.91	1330.86	240.825	-1295.17	1138.42	324.012	-1575.4	1214.76	63.8988	-1418.07	1356.64	-15.3406	-1483.1	1122.26	-20.3724	-1501.36	1048.92	-49.1055	-1444.09	884.449	-5.2766	-1435.27	802.739	-69.1919	-1470.58	799.744	-45.3907	-1431	730.704
665	0	198.522	-1311.11	1555.86	316.042	-1319.25	1559.36	187.132	-1479.32	1515.78	295.09	-1484.02	1514.41	247.748	-1474.09	1421.8	238.602	-1551.44	1139.94	240.974	-1348.57	1330.82	239.744	-1283.16	1138.61	322.911	-1563.73	1214.31	62.2638	-1406.95	1355.8	-16.0329	-1472.44	1121.07	-20.738	-1490.97	1047.97	-48.999	-1434.8	882.938	-4.68926	-1426.45	801.146	-69.2176	-1461.67	798.632	-44.9983	-1422.96	729.143
666	0	196.299	-1300.51	1555.58	313.829	-1308.97	1559.26	184.583	-1468.83	1515.96	292.532	-1473.91	1514.88	245.815	-1463.26	1421.51	237.722	-1539.57	1139.3	239.153	-1337.21	1330.97	238.36	-1270.98	1139.01	321.78	-1551.76	1213.84	60.5766	-1395.92	1355.03	-16.7305	-1461.62	1120.07	-20.9821	-1480.28	1046.9	-49.024	-1425.06	881.602	-4.44686	-1417.45	799.792	-69.0245	-1452.47	797.376	-44.3095	-1414.52	727.49
667	0	193.968	-1289.89	1555.6	311.609	-1298.78	1559.4	181.991	-1458.34	1516.45	289.82	-1463.59	1515.5	243.883	-1452.35	1421.4	236.865	-1527.6	1138.72	237.443	-1325.82	1331.3	237.392	-1258.63	1139.59	320.632	-1539.68	1213.56	58.7922	-1384.85	1354.58	-17.4146	-1450.73	1119.31	-21.3406	-1469.38	1046.09	-48.9992	-1415.19	880.429	-4.15498	-1408.03	798.586	-68.7938	-1443.12	796.357	-43.775	-1405.83	726.168
668	0	191.95	-1279.15	1555.81	309.377	-1288.48	1559.92	179.226	-1447.75	1517.24	287.1	-1453.33	1516.52	241.862	-1441.44	1421.58	235.922	-1515.45	1138.53	235.759	-1314.06	1331.97	236.313	-1246.25	1140.37	319.415	-1527.57	1213.63	57.0366	-1373.6	1354.27	-18.1797	-1439.46	1118.58	-21.5616	-1458.04	1045.34	-49.0473	-1404.89	879.309	-3.96535	-1398.12	797.516	-68.6123	-1433.38	795.53	-43.4325	-1396.82	724.807
669	0	189.688	-1268.37	1556.33	307.095	-1278.21	1560.74	176.255	-1437.05	1518.31	284.156	-1443.1	1517.82	239.843	-1430.39	1422.2	234.987	-1503.28	1138.8	233.904	-1302.84	1332.77	235.401	-1233.9	1141.52	318.306	-1515.57	1214.15	55.1208	-1362.24	1354.22	-19.0568	-1427.83	1117.98	-21.999	-1446.42	1044.77	-49.3179	-1394.22	878.55	-4.06635	-1387.78	796.854	-68.5825	-1423.05	794.85	-42.8356	-1387.19	723.972
670	0	187.324	-1257.66	1557.12	304.862	-1268.09	1561.72	173.275	-1426.33	1519.34	280.936	-1432.89	1519.03	237.861	-1419.28	1422.94	233.933	-1491.34	1139.22	231.987	-1291.31	1334.03	234.646	-1221.67	1142.93	317.13	-1503.61	1214.81	53.8616	-1351.27	1354.25	-19.8358	-1416.09	1117.68	-22.2162	-1434.56	1044.48	-49.3347	-1383.3	878.068	-3.90464	-1377.32	796.388	-68.6124	-1412.46	794.389	-42.6151	-1377.28	723.218
671	0	184.897	-1247.03	1558.15	302.519	-1257.98	1562.97	170.25	-1415.59	1520.47	277.88	-1422.63	1520.4	235.799	-1408.16	1423.86	232.836	-1479.26	1139.93	230.573	-1279.81	1335.29	233.826	-1209.41	1144.46	316.017	-1491.73	1215.83	51.8973	-1339.8	1354.65	-20.4742	-1404.19	1117.61	-22.3148	-1422.6	1044.31	-49.5047	-1371.94	877.828	-3.90374	-1366.28	796.059	-68.5752	-1401.52	794.272	-42.3394	-1366.76	722.835
672	0	182.601	-1236.3	1559.36	300.104	-1247.85	1564.62	167.232	-1404.75	1521.61	274.796	-1412.38	1521.83	233.715	-1397.07	1425.08	231.701	-1467.12	1140.96	228.861	-1268.3	1337	233.182	-1197.5	1146.15	314.969	-1480.06	1217.21	50.0942	-1328.48	1355.11	-21.1456	-1391.85	1117.57	-22.6398	-1410.34	1044.3	-49.6725	-1360.19	877.809	-4.22463	-1354.74	796.12	-68.6812	-1389.96	794.3	-42.4343	-1355.76	722.94
673	0	180.128	-1225.62	1560.68	297.686	-1237.74	1566.46	164.18	-1394	1522.64	271.866	-1402.2	1523.53	231.713	-1385.99	1426.38	230.711	-1455.35	1142.27	227.372	-1256.99	1338.66	232.486	-1185.82	1147.84	313.966	-1468.64	1218.81	48.4365	-1317.12	1355.76	-21.5992	-1379.57	1117.54	-22.8858	-1397.9	1044.56	-49.7845	-1347.89	878.133	-4.27471	-1342.57	796.489	-68.8791	-1378.08	794.734	-42.6087	-1344.15	723.042
674	0	177.745	-1214.94	1562.11	295.309	-1227.87	1568.62	161.184	-1383.24	1523.55	268.845	-1392.01	1524.99	229.82	-1375.1	1427.86	229.783	-1443.85	1143.65	225.913	-1245.77	1340.34	232.078	-1174.28	1149.75	312.934	-1457.48	1220.53	47.1192	-1305.83	1356.55	-22.1795	-1366.95	1117.86	-23.0169	-1385.4	1044.58	-49.9781	-1335.33	878.422	-4.36287	-1330.16	796.732	-69.0103	-1365.58	795.018	-42.7468	-1331.98	723.33
675	0	175.314	-1204.38	1563.47	292.731	-1217.82	1570.82	158.251	-1372.53	1524.59	265.856	-1381.85	1526.88	227.801	-1364.11	1429.41	228.78	-1432.69	1145.49	224.59	-1235.13	1341.92	231.679	-1163.06	1151.68	311.904	-1446.54	1222.52	45.9729	-1294.58	1357.21	-22.4163	-1354.38	1118.06	-23.2721	-1372.62	1045.16	-50.1003	-1322.47	879.034	-4.51454	-1317.32	797.312	-69.1016	-1352.61	795.713	-42.8717	-1319.31	723.682
676	0	172.762	-1193.96	1564.82	290.231	-1207.77	1573.37	155.372	-1361.8	1525.54	262.878	-1371.66	1528.77	226.276	-1353.38	1431.26	227.818	-1421.91	1147.42	223.86	-1224.04	1343.64	231.495	-1151.99	1153.46	310.84	-1435.88	1224.66	44.5821	-1283.02	1358.31	-22.7121	-1341.61	1118.41	-23.6293	-1359.89	1045.62	-50.3409	-1309.16	879.726	-4.54849	-1303.92	797.978	-69.4329	-1339.02	796.369	-42.9179	-1306.2	724.152
677	0	170.323	-1183.77	1566.08	287.531	-1197.93	1575.72	152.746	-1351.3	1526.32	260.239	-1361.67	1530.72	224.662	-1342.89	1432.89	226.943	-1411.37	1149.13	222.821	-1213.36	1345.39	231.385	-1141.3	1155.09	309.728	-1425.53	1226.66	43.5576	-1271.75	1359.24	-23.1432	-1329.11	1118.98	-23.9534	-1346.92	1046.35	-50.4428	-1295.53	880.437	-4.63747	-1290.16	798.678	-69.5685	-1325.23	797.003	-43.164	-1292.39	724.991
678	0	167.93	-1173.46	1567.35	285.061	-1188.1	1578.12	150.231	-1340.97	1527.19	257.598	-1351.57	1532.63	223.119	-1332.51	1434.49	226.093	-1401.04	1150.7	222.445	-1203.12	1346.85	231.481	-1130.83	1156.76	308.554	-1415.52	1228.48	42.5254	-1260.54	1360.53	-23.6897	-1316.38	1119.71	-24.3151	-1333.9	1046.85	-50.5516	-1281.65	881.449	-4.6494	-1276.25	799.478	-69.6136	-1310.96	797.779	-43.283	-1278.11	725.782
679	0	165.731	-1163.33	1568.64	282.617	-1178.26	1580.53	147.932	-1330.58	1528.13	255.185	-1341.68	1534.48	221.668	-1322.22	1436.07	224.988	-1390.69	1152.27	221.805	-1192.85	1348.59	231.658	-1120.56	1158.67	307.22	-1405.66	1230.24	41.7732	-1249.23	1361.57	-24.0554	-1303.71	1120.38	-24.6955	-1320.73	1047.59	-50.4459	-1267.52	882.389	-4.60373	-1261.9	800.546	-69.8048	-1296.16	798.817	-43.4064	-1263.26	726.872
680	0	163.544	-1153.2	1569.82	280.283	-1168.43	1582.69	145.797	-1320.43	1529	252.89	-1331.74	1536.56	220.139	-1311.97	1437.53	223.716	-1380.7	1153.87	221.544	-1182.74	1350.24	231.878	-1110.54	1160.33	305.715	-1395.88	1231.95	40.9334	-1237.86	1362.8	-24.7411	-1290.79	1121.29	-25.282	-1307.38	1048.35	-50.4631	-1252.98	883.427	-4.42692	-1247.12	801.83	-70.1079	-1280.89	799.781	-43.2022	-1248	727.924
681	0	161.73	-1143.14	1570.88	278.277	-1158.66	1584.89	143.823	-1310.36	1530	250.784	-1322.01	1538.39	218.793	-1302.28	1439.13	222.201	-1370.63	1155.37	221.316	-1172.85	1351.84	232.357	-1100.53	1161.96	304.069	-1386.56	1233.43	40.2441	-1226.59	1363.86	-25.3562	-1278.22	1122	-26.1955	-1294.21	1049.02	-50.4417	-1238.12	884.56	-4.28017	-1232.09	803.004	-70.1861	-1265.36	800.737	-43.2502	-1232.28	729.208
682	0	160.4	-1133.37	1571.82	276.339	-1149	1586.68	141.998	-1300.45	1531.12	249	-1312.37	1540.29	217.381	-1292.38	1440.48	220.478	-1360.92	1156.64	220.963	-1163.18	1353.45	233.034	-1090.72	1163.62	302.221	-1377.32	1234.84	39.5656	-1215.19	1365.17	-26.1679	-1265.26	1123.09	-26.9481	-1280.91	1049.94	-50.2681	-1223.06	885.68	-4.18575	-1216.93	804.326	-70.1257	-1249.4	801.638	-42.6847	-1216.13	730.359
683	0	158.747	-1123.48	1572.77	274.685	-1139.25	1588.46	140.275	-1290.62	1532.45	247.081	-1302.6	1542.27	215.954	-1282.78	1442.04	218.559	-1351.03	1158.16	221.051	-1153.66	1354.88	233.627	-1081.03	1165.17	300.127	-1368.19	1236.18	38.9333	-1204.04	1366.38	-26.8616	-1252.29	1123.95	-28.0632	-1267.35	1050.76	-50.1285	-1207.86	886.979	-3.77737	-1201.33	805.812	-70.0706	-1233.29	802.658	-42.4162	-1199.36	731.892
684	0	157.356	-1113.64	1573.91	273.214	-1129.5	1590.03	138.732	-1280.96	1533.87	245.465	-1292.96	1544.09	214.491	-1273.26	1443.46	216.605	-1341.74	1159.38	220.763	-1144.32	1356.29	234.273	-1071.53	1166.55	298.105	-1359.28	1237.62	38.4121	-1192.9	1367.53	-27.4857	-1239.34	1124.9	-29.1131	-1253.74	1051.61	-49.8945	-1192.42	888.225	-3.52778	-1185.5	807.352	-69.9253	-1216.78	803.629	-41.8361	-1182.13	733.429
685	0	156.347	-1103.86	1574.92	272.007	-1119.91	1591.41	137.344	-1271.29	1535.51	244.173	-1283.51	1546.1	213.279	-1264.07	1444.98	214.604	-1332.06	1160.93	220.546	-1135.09	1357.68	234.93	-1062.25	1167.94	295.838	-1350.34	1238.83	37.7515	-1182.03	1368.84	-28.5159	-1226.12	1126.01	-30.1188	-1240.06	1052.46	-49.6989	-1176.73	889.636	-3.18703	-1170.35	808.898	-69.8342	-1199.87	804.698	-41.0467	-1164.79	734.983
686	0	155.256	-1094.17	1576.02	270.73	-1110.46	1592.61	136.049	-1261.73	1537.21	242.733	-1274.09	1547.95	211.861	-1254.84	1446.32	212.544	-1322.49	1162.28	220.47	-1125.98	1359.12	235.533	-1053.01	1169.44	293.654	-1341.56	1240.06	37.2684	-1171.16	1369.97	-29.59	-1213.09	1126.98	-31.2784	-1226.53	1053.35	-49.5146	-1160.99	891.076	-2.25338	-1153.51	811.066	-69.6039	-1182.96	805.797	-40.299	-1146.9	736.921
687	0	154.221	-1084.53	1577.04	269.96	-1100.89	1593.94	134.914	-1252.13	1539.12	241.527	-1264.63	1549.95	210.461	-1245.75	1447.83	210.467	-1313.06	1163.64	220.119	-1117.01	1360.55	236.061	-1044.1	1171.08	291.431	-1332.6	1241.29	36.5168	-1160.69	1371.37	-30.4358	-1199.97	1128.17	-32.588	-1212.91	1054.46	-49.3211	-1145.08	892.697	-1.57139	-1137.46	812.893	-69.4711	-1165.58	807.11	-39.405	-1128.9	738.849
688	0	153.558	-1074.9	1578.09	269.159	-1091.3	1595.05	133.893	-1242.72	1540.92	240.533	-1255.4	1551.87	209.076	-1236.77	1449.05	208.482	-1304.03	1164.57	219.647	-1108.1	1361.99	236.387	-1035.1	1172.64	289.297	-1323.87	1242.39	36.0417	-1150.32	1372.39	-31.4393	-1186.76	1129.14	-33.5001	-1198.99	1055.18	-49.2009	-1129.01	894.459	-1.05197	-1120.8	814.975	-69.1563	-1148.22	808.404	-38.2752	-1110.53	741
689	0	152.858	-1065.31	1579.23	268.376	-1081.99	1596.13	132.903	-1233.39	1542.73	239.444	-1246.11	1553.66	207.814	-1227.9	1450.37	206.599	-1294.44	1165.86	219.214	-1099.22	1363.48	236.642	-1026.03	1174.24	287.234	-1314.97	1243.35	35.333	-1140.39	1373.72	-32.5044	-1173.8	1130.37	-34.7635	-1185.47	1056.27	-49.0206	-1112.97	896.373	-0.51398	-1104	817.201	-68.8752	-1130.64	809.91	-37.3346	-1091.95	743.499
690	0	152.158	-1055.97	1580.61	267.784	-1072.72	1597.38	131.867	-1224.07	1544.59	238.461	-1236.87	1555.44	206.546	-1219.12	1451.49	204.843	-1285.15	1166.91	218.82	-1090.62	1364.96	236.49	-1017.03	1176.1	285.354	-1306.16	1244.34	34.5291	-1130.69	1375.03	-33.7261	-1160.91	1131.76	-35.9181	-1171.96	1057.18	-48.8429	-1096.87	898.385	-0.1093	-1087.07	819.584	-68.6446	-1112.87	811.605	-36.3573	-1073.12	745.893
691	0	151.536	-1046.42	1581.87	267.148	-1063.4	1598.58	130.932	-1214.72	1546.16	237.507	-1227.66	1556.92	205.345	-1210.37	1452.57	203.261	-1275.84	1167.84	218.143	-1081.94	1366.19	236.459	-1007.91	1177.63	283.609	-1297.17	1245.21	33.8382	-1120.98	1376.21	-34.6253	-1148.12	1132.67	-37.1881	-1158.63	1058.14	-48.7464	-1080.76	900.464	0.505764	-1069.63	822.153	-68.2866	-1094.94	813.328	-35.3802	-1054.28	748.553
692	0	150.975	-1037.17	1582.89	266.645	-1054.28	1599.62	129.961	-1205.33	1547.34	236.547	-1218.45	1558.02	204.164	-1201.61	1453.39	201.885	-1266.76	1168.42	217.466	-1073.29	1367.34	236.096	-998.937	1179.24	282.047	-1288.47	1245.84	33.0827	-1111.57	1377.01	-35.6109	-1135.44	1133.65	-38.4905	-1145.27	1058.92	-48.6832	-1064.54	902.512	1.04268	-1052.49	824.662	-68.0451	-1076.87	815.069	-34.4732	-1035.1	751.347
693	0	150.244	-1027.88	1583.91	265.889	-1045.22	1600.38	129.188	-1196.02	1548.26	235.699	-1209.45	1558.85	203.064	-1192.9	1453.94	200.595	-1258.02	1168.85	216.947	-1064.56	1368.28	235.768	-990.023	1180.66	280.541	-1279.51	1246.24	32.1824	-1102.25	1377.88	-36.7083	-1123.15	1134.44	-39.6456	-1132.25	1059.65	-48.5425	-1048.36	904.509	1.54773	-1035.11	827.269	-67.5806	-1058.98	816.79	-33.538	-1015.88	754.288
694	0	149.682	-1018.62	1584.58	265.189	-1036.05	1601.07	128.206	-1186.83	1549.05	234.687	-1200.16	1559.57	202	-1183.98	1454.55	199.288	-1249.36	1169.4	216.442	-1055.74	1368.84	235.103	-981.075	1181.8	279.189	-1270.74	1246.68	31.4491	-1092.77	1378.59	-37.7844	-1110.83	1135.31	-40.6621	-1119.29	1060.12	-48.3548	-1032.25	906.551	2.28382	-1017.67	829.627	-67.1489	-1041.24	818.714	-32.5251	-996.627	757.022
695	0	148.957	-1009.45	1585.02	264.521	-1027.04	1601.67	127.131	-1177.59	1549.69	233.727	-1191.15	1560.19	201.042	-1175.05	1455.02	197.937	-1240.39	1169.47	215.655	-1046.92	1369.24	234.53	-972.377	1182.67	277.911	-1262.08	1247.11	30.8982	-1083.42	1379.01	-38.5705	-1098.84	1135.64	-41.8901	-1106.28	1060.66	-48.2696	-1016.29	908.551	2.82849	-1000.25	832.409	-66.5083	-1023.03	820.386	-31.566	-977.311	760.219
696	0	148.102	-1000.32	1585.34	263.618	-1018.15	1601.88	126.172	-1168.53	1550.12	232.732	-1182.21	1560.65	200.094	-1165.94	1455.33	197.013	-1232.05	1169.84	215.126	-1038.04	1369.48	233.768	-963.733	1183.23	276.795	-1253.27	1247.41	30.0513	-1073.81	1379.37	-39.5006	-1086.97	1136.19	-42.9651	-1093.74	1060.82	-48.0669	-1000.52	910.594	3.46819	-982.999	835.089	-65.6574	-1005.11	822.253	-30.6104	-958.084	763.514
697	0	147.503	-991.32	1585.45	263.011	-1009.18	1602	125.237	-1159.33	1550.41	231.673	-1173.32	1560.93	199.266	-1156.83	1455.45	196.171	-1223.62	1169.95	214.721	-1029.07	1369.63	233.039	-955.203	1183.39	275.828	-1244.44	1247.52	29.604	-1064.29	1379.51	-40.4017	-1075.36	1136.41	-44.266	-1081.09	1061.06	-47.8413	-984.858	912.611	4.05836	-965.709	837.766	-64.9763	-987.401	824.137	-29.5921	-938.816	766.795
698	0	146.718	-982.132	1585.4	262.34	-1000.12	1602.13	124.254	-1150.3	1550.6	230.676	-1164.26	1561.16	198.366	-1147.51	1455.59	195.443	-1215.33	1170.23	214.118	-1020.09	1369.52	232.451	-946.693	1183.3	274.972	-1235.39	1247.77	29.0976	-1054.73	1379.37	-41.2956	-1063.88	1136.48	-45.1761	-1068.61	1060.88	-47.6659	-969.292	914.44	4.90289	-948.775	840.255	-64.2777	-969.937	826.013	-28.5992	-919.62	770.29
699	0	145.926	-973.12	1585.19	261.454	-991.168	1601.97	123.268	-1141.22	1550.57	229.824	-1155.5	1561.31	197.622	-1138.26	1455.6	195.204	-1207.44	1170.57	213.634	-1011.19	1369.35	231.759	-938.233	1182.77	274.392	-1226.62	1247.97	28.4233	-1045.12	1379.09	-42.1646	-1052.65	1136.52	-46.1907	-1056.27	1060.96	-47.348	-953.783	916.219	5.54696	-931.806	842.998	-63.4698	-952.628	827.741	-27.6533	-900.669	773.789
700	0	145.427	-964.025	1584.86	260.962	-982.266	1601.64	122.456	-1132.22	1550.42	228.908	-1146.5	1561.07	196.927	-1128.84	1455.47	195.244	-1199.08	1170.54	213.23	-1002.05	1368.86	231.353	-929.821	1181.96	273.913	-1217.86	1248.01	28.218	-1035.66	1378.62	-42.7987	-1041.53	1136.46	-47.104	-1043.99	1060.63	-47.0171	-938.587	917.9	6.27759	-915.129	845.71	-62.6989	-935.524	829.583	-26.5484	-881.86	777.321
701	0	144.698	-954.849	1584.22	260.365	-973.179	1601.13	121.741	-1123.11	1550.09	228.088	-1137.5	1560.79	196.416	-1119.47	1455.34	195.736	-1191.34	1170.91	212.776	-993.159	1368.25	231.091	-921.197	1180.9	273.64	-1208.98	1248.01	27.6631	-1026.11	1377.99	-43.4672	-1030.69	1136.24	-47.8831	-1031.89	1060.32	-46.7449	-923.565	919.594	7.00856	-898.629	848.135	-61.6511	-918.557	831.097	-25.4948	-863.348	780.952
702	0	144.268	-945.912	1583.55	259.776	-964.196	1600.54	121.099	-1114.02	1549.65	227.351	-1128.51	1560.41	195.933	-1109.9	1455.13	196.258	-1183.34	1170.88	212.476	-984.142	1367.43	230.93	-912.683	1179.45	273.358	-1200.1	1248	27.6767	-1016.69	1377.05	-44.0313	-1019.94	1135.65	-48.474	-1019.92	1059.76	-46.3479	-908.749	921.083	7.96637	-882.15	850.659	-60.6523	-901.924	832.578	-24.4578	-845.073	784.448
703	0	143.685	-936.588	1582.66	259.241	-955.013	1599.65	120.575	-1105	1548.95	226.834	-1119.4	1559.7	195.535	-1100.35	1454.72	196.786	-1175.26	1170.71	212.126	-975.028	1366.33	230.574	-903.996	1178.05	273.366	-1191.32	1247.8	27.3447	-1007.25	1376.11	-44.5358	-1009.37	1135	-48.8441	-1008.07	1059.03	-45.9541	-894.156	922.442	8.71611	-866.058	853.027	-59.614	-885.456	834.017	-23.2987	-827.141	787.97
704	0	143.253	-927.739	1581.74	258.833	-945.877	1598.8	120.343	-1095.94	1548.05	226.586	-1110.36	1558.81	195.246	-1090.73	1454.17	197.19	-1167.28	1170.48	211.844	-965.892	1365.29	230.29	-895.28	1176.58	273.337	-1182.45	1247.49	27.3529	-997.894	1375.07	-44.9338	-999.077	1134.29	-49.4239	-996.381	1058.34	-45.5548	-879.764	923.934	9.51573	-850.263	855.405	-58.572	-869.322	835.564	-22.2632	-809.53	791.506
705	0	142.777	-918.529	1580.86	258.419	-936.685	1597.92	120.113	-1086.94	1547.03	226.342	-1101.09	1557.91	195.131	-1081.06	1453.57	197.6	-1159.03	1170.32	211.791	-956.656	1364.07	229.943	-886.514	1175.02	273.474	-1173.53	1247.22	27.1129	-988.439	1374.09	-45.2596	-988.64	1133.53	-49.7811	-984.922	1057.66	-45.0073	-865.725	925.388	10.5442	-834.571	857.946	-57.4563	-853.386	837.202	-21.16	-792.257	795.145
706	0	142.43	-909.607	1579.73	258.057	-927.297	1596.8	119.96	-1077.96	1546.04	226.289	-1091.84	1556.69	194.988	-1071.3	1452.88	198.048	-1150.74	1169.99	211.512	-947.289	1362.94	229.783	-877.586	1173.64	273.708	-1164.63	1246.82	27.2766	-978.923	1372.83	-45.4669	-978.671	1132.65	-49.8999	-973.613	1056.7	-44.4318	-851.766	926.827	11.3727	-819.209	860.55	-56.1802	-837.822	838.743	-20.1167	-775.339	798.698
707	0	142.224	-900.568	1578.7	257.709	-918.125	1595.44	120.186	-1068.94	1544.77	226.616	-1082.66	1555.3	195.093	-1061.56	1452	198.421	-1142.42	1169.43	211.629	-937.91	1361.62	229.678	-868.797	1172.12	273.939	-1155.59	1246.23	27.2191	-969.499	1371.87	-45.6381	-968.793	1131.86	-50.0497	-962.477	1055.82	-43.7707	-838.24	928.241	12.4188	-804.049	863.034	-54.68	-822.75	840.27	-18.9654	-758.899	802.228
708	0	141.835	-891.47	1577.56	257.587	-908.761	1594.1	120.253	-1059.94	1543.36	226.696	-1073.3	1553.68	195.229	-1051.71	1451.12	198.876	-1133.85	1168.87	211.768	-928.381	1360.25	229.771	-859.895	1170.61	274.32	-1146.41	1245.65	27.3629	-959.875	1370.78	-45.6764	-958.913	1130.87	-50.0592	-951.433	1054.92	-43.0143	-824.829	929.549	13.5087	-789.273	865.484	-53.3817	-807.766	841.878	-17.8366	-742.789	805.647
709	0	141.697	-882.484	1576.13	257.406	-899.315	1592.69	120.639	-1050.87	1541.76	227.059	-1063.88	1552.01	195.54	-1041.83	1450.21	199.338	-1125.05	1168.3	211.916	-918.736	1358.8	229.786	-851.271	1168.92	274.847	-1137.16	1245.2	27.6451	-950.296	1369.6	-45.6338	-949.37	1129.94	-50.0995	-940.482	1053.98	-42.2745	-811.638	930.697	14.6431	-774.79	867.88	-51.724	-793.27	843.135	-16.4907	-727.086	808.961
710	0	141.603	-873.378	1574.83	257.357	-889.852	1591.12	121.174	-1041.85	1540.12	227.671	-1054.54	1550.39	195.914	-1031.91	1449.25	199.947	-1116.35	1167.62	212.227	-908.98	1357.25	229.957	-842.515	1167.12	275.562	-1127.99	1244.57	27.9604	-940.638	1368.4	-45.3995	-939.751	1128.88	-49.9455	-929.623	1053.03	-41.4688	-798.717	931.72	15.7886	-760.654	870.034	-50.3951	-778.946	844.456	-15.2299	-711.845	812.034
711	0	141.574	-864.247	1573.39	257.577	-880.294	1589.59	121.798	-1032.75	1538.34	228.371	-1044.98	1548.53	196.37	-1022.04	1448.17	200.697	-1107.49	1166.96	212.505	-899.145	1355.64	230.126	-833.963	1165.34	276.326	-1118.63	1243.84	28.5517	-930.995	1367.22	-45.1505	-930.207	1127.79	-49.6875	-918.951	1052.07	-40.6182	-786.065	932.673	17.0161	-746.852	871.992	-48.6829	-764.949	845.53	-13.7324	-697.044	814.971
712	0	141.911	-855.221	1571.91	257.832	-870.743	1588.03	122.685	-1023.49	1536.65	229.179	-1035.42	1546.69	197.024	-1012.09	1447.12	201.517	-1098.41	1166.27	212.991	-889.366	1354.01	230.229	-825.12	1163.35	277.199	-1109.03	1243.14	29.038	-921.297	1366.25	-44.7083	-920.797	1126.8	-49.1116	-908.224	1051.28	-39.6943	-773.713	933.58	18.2783	-733.43	873.97	-47.2026	-751.288	846.878	-12.1935	-682.644	817.686
713	0	142.398	-845.782	1570.64	258.243	-861.087	1586.56	123.536	-1014.24	1535.08	230.244	-1025.87	1544.94	197.828	-1002.08	1446.19	202.346	-1089.16	1165.65	213.457	-879.475	1352.44	230.149	-816.413	1161.49	278.085	-1099.58	1242.48	29.6517	-911.746	1365.28	-44.1177	-911.213	1125.91	-48.6977	-897.676	1050.5	-38.8153	-761.524	934.383	19.5761	-720.303	875.87	-45.5738	-737.998	847.884	-10.6488	-668.673	820.356
714	0	142.928	-836.59	1569.42	259.081	-851.459	1585.21	124.574	-1004.89	1533.41	231.3	-1016.19	1543.11	198.543	-991.905	1444.95	203.168	-1079.73	1164.85	213.997	-869.587	1350.86	230.209	-807.436	1159.66	279	-1089.91	1241.57	30.3711	-902.028	1364.29	-43.4904	-901.827	1124.91	-48.0274	-887.281	1049.61	-37.821	-749.664	935.168	20.8135	-707.576	877.681	-44.133	-724.995	848.84	-9.34128	-655.18	822.955
715	0	143.737	-827.343	1568.33	259.968	-841.844	1583.71	125.878	-995.465	1531.91	232.486	-1006.5	1541.32	199.641	-982.065	1443.9	204.057	-1070.29	1164.01	214.618	-859.602	1349.43	230.191	-798.42	1157.92	280.086	-1080.25	1240.65	31.1851	-892.454	1363.52	-42.7447	-892.329	1124.12	-47.2889	-876.962	1048.9	-36.7527	-738.023	935.915	22.0559	-695.171	879.324	-42.5644	-712.306	849.862	-7.44449	-642.063	825.016
716	0	144.738	-817.798	1567.29	260.933	-832.078	1582.34	127.237	-986.098	1530.46	233.978	-996.736	1539.44	200.768	-972.248	1442.81	204.836	-1060.8	1163.13	215.224	-849.629	1348.14	230.391	-789.187	1156.15	281.105	-1070.35	1239.58	31.9125	-883.011	1362.76	-41.9366	-882.713	1123.35	-46.5358	-866.914	1048.15	-35.7319	-726.69	936.554	23.4703	-683.129	880.789	-40.9584	-700.14	850.711	-5.86856	-629.336	827.012
717	0	145.711	-808.273	1566.3	262.146	-822.317	1581.05	128.779	-976.661	1529	235.687	-986.999	1537.74	201.864	-962.25	1441.65	205.729	-1051.15	1162.15	215.807	-839.604	1346.66	230.22	-779.702	1154.56	282.166	-1060.2	1238.46	32.7067	-873.524	1361.86	-41.0312	-873.264	1122.52	-45.7527	-856.799	1047.42	-34.5688	-715.51	937.023	24.8426	-671.407	882.021	-39.4372	-688.179	851.354	-4.29885	-617.09	828.66
718	0	147.032	-798.911	1565.33	263.528	-812.461	1579.69	130.526	-967.191	1527.59	237.567	-977.069	1536	203.269	-952.368	1440.55	206.658	-1041.84	1161.16	216.468	-829.507	1345.32	230.231	-770.165	1152.93	283.361	-1050.3	1237.34	33.645	-864.055	1361.18	-40.0307	-863.839	1121.79	-44.7958	-846.892	1046.79	-33.2528	-704.676	937.436	26.2386	-660.056	883.011	-37.8087	-676.699	852.031	-2.72691	-605.266	830.119
719	0	148.273	-789.419	1564.56	264.953	-802.536	1578.4	132.575	-957.791	1526.2	239.521	-967.135	1534.25	204.662	-942.277	1439.41	207.741	-1032.45	1160.24	217.407	-819.426	1344.12	230.104	-760.249	1151.66	284.642	-1040.32	1236.15	34.5888	-854.781	1360.42	-39.0647	-854.197	1121.02	-44.0532	-837.044	1046.25	-31.919	-693.996	937.74	27.7148	-649.092	883.728	-36.2177	-665.454	852.429	-0.987486	-593.89	831.224
720	0	149.654	-779.784	1563.83	266.528	-792.574	1577.15	134.578	-948.092	1525.01	241.58	-956.872	1532.5	205.985	-932.081	1438.35	208.917	-1022.7	1159.35	218.115	-809.294	1342.76	230.081	-750.257	1150.27	285.861	-1030.17	1235.08	35.4197	-845.449	1359.63	-38.0474	-844.494	1120.2	-43.2206	-827.279	1045.67	-30.5139	-683.555	937.711	29.2599	-638.473	884.083	-34.6021	-654.525	852.554	0.380511	-582.801	832.017
721	0	151.559	-770.274	1563.3	268.148	-782.492	1576.09	136.788	-938.317	1523.7	243.827	-946.769	1530.87	207.464	-921.871	1437.26	210.161	-1013.03	1158.38	218.963	-799.155	1341.59	230.035	-740.071	1149.14	287.216	-1020.02	1233.91	36.4025	-835.985	1358.81	-37.0316	-835.001	1119.31	-42.2476	-817.796	1044.82	-29.0564	-673.46	937.592	30.7167	-628.158	884.233	-33.0197	-644.011	852.522	2.32082	-572.199	832.441
722	0	153.176	-760.57	1562.83	269.933	-772.424	1575.2	138.988	-928.581	1522.45	246.203	-936.69	1529.26	209.013	-911.73	1436.23	211.467	-1003.22	1157.39	219.784	-789.055	1340.65	230.137	-729.81	1148.22	288.547	-1009.86	1232.78	37.4661	-826.446	1358.11	-35.916	-825.365	1118.55	-41.221	-808.273	1043.92	-27.6786	-663.596	937.328	32.276	-618.228	884.192	-31.5896	-633.709	852.486	4.01354	-561.992	832.662
723	0	154.891	-750.758	1562.55	271.78	-762.255	1574.51	141.357	-918.776	1521.34	248.636	-926.358	1527.86	210.763	-901.696	1435.24	212.641	-992.86	1156.39	221.045	-778.783	1339.88	230.393	-719.367	1147.38	290.007	-999.536	1231.64	38.7412	-817.184	1357.38	-34.9114	-815.758	1117.88	-40.1801	-798.892	1043.13	-26.3105	-653.971	936.966	33.8385	-608.689	883.975	-30.0908	-623.821	852.185	5.68457	-552.115	832.652
724	0	156.715	-740.977	1562.26	273.71	-751.962	1573.99	143.714	-908.81	1520.42	250.925	-915.953	1526.63	212.465	-891.436	1434.3	213.782	-982.57	1155.38	221.975	-768.604	1339	230.786	-708.703	1146.81	291.379	-989.161	1230.5	39.71	-807.517	1356.81	-33.7837	-806.176	1117.22	-38.9709	-789.49	1042.21	-24.9806	-644.625	936.46	35.3363	-599.385	883.507	-28.6499	-614.338	851.638	7.35961	-542.722	832.336
725	0	158.626	-731.122	1562.04	275.685	-741.739	1573.42	146.141	-898.823	1519.53	253.427	-905.544	1525.4	214.226	-881.169	1433.36	214.908	-971.996	1154.2	223.181	-758.331	1338.33	231.469	-698.01	1146.2	292.775	-978.663	1229.34	40.8817	-797.848	1356.16	-32.7147	-796.671	1116.54	-38.2753	-780.497	1041.34	-23.6752	-635.576	935.536	36.8375	-590.492	882.668	-27.1704	-605.27	850.79	9.031	-533.588	831.551
726	0	160.208	-721.114	1561.88	277.713	-731.513	1572.89	148.674	-888.841	1518.75	255.968	-894.919	1524.39	216.115	-870.964	1432.28	216.096	-961.499	1152.97	224.444	-747.96	1337.68	232.253	-687.12	1145.65	294.298	-968.064	1228.05	42.265	-788.031	1355.44	-31.6655	-787.199	1115.74	-37.2287	-771.429	1040.46	-22.2991	-626.685	934.435	38.3702	-581.957	881.368	-25.7976	-596.509	849.746	10.6716	-524.894	830.398
727	0	162.104	-711.061	1561.63	279.729	-721.203	1572.45	151.128	-878.672	1517.94	258.429	-884.475	1523.42	217.963	-860.674	1431.4	217.19	-950.579	1151.61	225.835	-737.433	1337.14	233.178	-676.097	1145.3	295.8	-957.228	1226.76	43.7437	-778.231	1354.63	-30.6159	-777.816	1114.89	-36.4208	-762.416	1039.68	-20.8985	-618.05	933.031	39.8145	-573.711	879.858	-24.2578	-588.027	848.065	12.2974	-516.657	828.802
728	0	164.276	-701.147	1561.36	281.819	-710.808	1571.93	153.513	-868.429	1517.31	260.821	-874.015	1522.61	219.876	-850.465	1430.44	218.491	-939.746	1150.56	227.421	-727.022	1336.68	234.26	-664.915	1145.12	297.301	-946.3	1225.45	45.424	-768.237	1353.78	-29.5674	-768.456	1113.98	-35.5367	-753.509	1038.77	-19.5666	-609.635	931.361	41.2529	-565.653	877.941	-22.9945	-579.927	846.292	13.8066	-508.712	826.917
729	0	166.329	-691.096	1561.12	283.981	-700.532	1571.41	156.089	-858.352	1516.63	263.334	-863.65	1521.59	221.835	-840.222	1429.49	219.768	-928.566	1149.02	228.993	-716.474	1336.25	235.575	-653.606	1144.97	298.914	-935.289	1224	46.965	-758.171	1353.08	-28.2347	-759.242	1113.14	-34.2966	-744.566	1037.8	-18.2814	-601.488	929.625	42.6344	-558.018	875.809	-21.6414	-572.201	844.286	15.4218	-501.32	824.578
730	0	168.252	-680.905	1561.29	286.123	-690.213	1571.17	158.544	-848.176	1516.14	265.866	-853.2	1520.89	223.732	-829.855	1428.66	221.143	-917.567	1148.12	230.799	-705.796	1336.03	237.056	-642.117	1144.97	300.57	-923.946	1222.6	48.5479	-748.107	1352.65	-26.9376	-750.015	1112.58	-33.1293	-735.808	1037.15	-17.0038	-593.494	927.74	43.8444	-550.79	873.492	-20.6153	-564.947	842.292	16.8764	-494.263	822.017
731	0	170.389	-670.764	1561.42	288.257	-679.818	1571.34	160.926	-837.864	1515.81	268.338	-842.712	1520.43	225.663	-819.427	1428.03	222.49	-906.077	1147	232.087	-695.18	1336.03	238.399	-630.246	1145.15	302.035	-912.802	1221.51	50.1322	-737.836	1352.23	-25.6584	-740.795	1112.28	-31.9386	-727.265	1036.49	-15.8331	-586.038	925.848	44.9641	-543.809	871.114	-19.7216	-558.114	840.232	18.0058	-487.773	819.239
732	0	172.587	-660.578	1561.77	290.347	-669.439	1571.57	163.364	-827.538	1515.56	270.777	-832.11	1520.12	227.666	-808.982	1427.64	224.007	-894.672	1146.29	233.686	-684.445	1336.09	239.619	-618.512	1145.35	303.48	-901.452	1220.39	51.7454	-727.486	1352.02	-24.2836	-731.622	1112.02	-30.4791	-718.826	1036	-14.8156	-578.798	923.78	45.943	-537.244	868.475	-18.7544	-551.814	837.888	19.0145	-481.726	816.15
733	0	174.79	-650.255	1562.3	292.598	-659.071	1572.1	165.816	-817.156	1515.38	273.25	-821.525	1519.82	229.76	-798.482	1427.29	225.342	-883.353	1145.42	235.434	-673.769	1336.29	240.935	-606.76	1145.66	304.969	-890.104	1219.36	53.4008	-717.167	1352.03	-22.6706	-722.447	1111.81	-28.8753	-710.455	1035.72	-13.6332	-571.982	921.671	46.9105	-531.076	865.727	-17.8917	-546.038	835.457	19.9575	-476.209	812.771
734	0	177.138	-639.958	1563.17	294.935	-648.666	1572.93	168.374	-806.595	1515.31	275.826	-811.113	1519.78	231.78	-788.026	1427.22	226.569	-871.923	1144.8	237.038	-663.089	1336.69	242.293	-594.799	1146.05	306.35	-878.688	1218.63	55.1267	-706.88	1352.16	-21.0861	-713.241	1111.7	-27.3057	-702.264	1035.52	-12.5446	-565.407	919.561	47.9005	-525.254	862.788	-17.0777	-540.723	832.889	20.7022	-471.2	809.153
735	0	179.477	-629.673	1564.29	297.337	-638.169	1574.06	170.958	-795.914	1515.49	278.471	-800.367	1519.99	233.801	-777.496	1427.39	227.588	-860.297	1144.49	238.669	-652.559	1337.17	243.483	-582.735	1146.73	307.626	-867.428	1218.27	56.6586	-696.51	1352.5	-19.4658	-704.017	1111.83	-25.5699	-694.002	1035.36	-11.5568	-559.111	917.306	48.6638	-519.742	859.683	-16.3353	-535.829	830.259	21.1875	-466.605	805.238
736	0	181.871	-619.301	1565.47	299.782	-627.776	1575.12	173.601	-785.256	1515.71	281.043	-789.651	1520.28	235.776	-766.917	1427.64	228.567	-849.086	1144.63	240.172	-642.038	1337.87	244.72	-571.056	1147.45	308.885	-856.326	1218.08	58.3889	-686.189	1352.97	-17.6672	-694.821	1111.93	-23.705	-685.925	1035.46	-10.3533	-553	915.06	49.3307	-514.565	856.429	-15.5833	-531.484	827.561	21.4872	-462.517	801.099
737	0	184.431	-608.875	1566.72	302.358	-617.389	1575.98	176.126	-774.736	1516.17	283.643	-778.977	1520.46	237.66	-756.495	1427.98	229.344	-837.966	1144.68	241.634	-631.685	1338.7	245.855	-559.467	1148.3	310.052	-845.355	1217.98	59.8693	-675.893	1353.61	-15.7589	-685.509	1112.22	-21.6387	-677.763	1035.59	-9.38335	-547.219	912.697	49.9366	-509.678	853.013	-14.8842	-527.5	824.56	21.758	-458.971	796.757
738	0	187.112	-598.439	1568.05	304.9	-606.996	1576.93	178.487	-764.118	1516.74	286.119	-768.368	1520.6	239.399	-746.064	1428.45	230.01	-826.593	1144.82	243.104	-621.378	1339.57	246.719	-547.987	1149.13	311.19	-834.425	1218.13	61.3525	-665.633	1354.39	-13.859	-676.134	1112.58	-19.1033	-669.549	1035.86	-8.60872	-541.586	910.321	50.3818	-505.099	849.563	-14.4051	-523.807	821.795	21.7764	-455.847	792.325
739	0	189.729	-588.027	1569.38	307.53	-596.666	1577.82	180.779	-753.383	1517.46	288.395	-757.701	1520.86	241.268	-735.641	1429.21	230.782	-815.817	1145.51	244.396	-611.152	1340.45	247.686	-536.864	1150.01	312.347	-823.483	1218.45	62.8515	-655.586	1355.18	-11.8679	-666.718	1113.09	-16.9617	-661.658	1036.4	-7.84332	-536.517	907.983	50.6728	-500.787	846.167	-14.1278	-520.634	819.078	21.5868	-453.178	787.739
740	0	192.311	-577.625	1570.94	310.256	-586.441	1578.68	183.12	-742.717	1518.19	290.521	-747.209	1521.11	242.925	-725.367	1429.88	231.555	-804.97	1145.97	245.616	-601.008	1341.28	248.449	-525.887	1151.01	313.568	-812.742	1218.76	64.177	-645.643	1356.17	-9.81108	-657.379	1113.68	-14.6195	-653.556	1037.03	-7.10335	-531.544	905.736	50.9368	-496.846	842.771	-13.8833	-517.741	816.491	21.3354	-451.05	783.287
741	0	194.939	-567.227	1572.47	312.93	-576.224	1579.62	185.147	-732.048	1518.96	292.663	-736.828	1521.24	244.643	-715.249	1430.66	232.323	-794.125	1146.54	246.695	-591	1342.25	249.041	-515.291	1151.88	314.851	-802.099	1219.21	65.45	-636.096	1357.38	-7.95624	-647.962	1114.69	-12.2753	-645.417	1037.75	-6.45278	-526.658	903.698	51.1313	-493.26	839.563	-13.9443	-515.203	814.115	20.8968	-449.254	778.898
742	0	197.596	-556.799	1573.98	315.377	-566.169	1580.48	187.058	-721.35	1519.84	294.599	-726.292	1521.55	246.211	-705.27	1431.43	233.163	-783.292	1147.17	247.685	-581.222	1343.38	249.534	-505.028	1152.88	316.147	-791.561	1219.69	66.5944	-626.712	1358.7	-6.07635	-638.536	1115.45	-9.98561	-637.414	1038.79	-5.95091	-522.099	901.772	51.1318	-489.789	836.511	-13.8822	-512.944	812.113	20.3595	-447.964	774.542
743	0	199.914	-546.348	1575.56	317.933	-556.139	1581.51	188.726	-710.732	1520.65	296.374	-716.006	1522.01	247.871	-695.574	1432.31	234.051	-772.441	1147.82	248.55	-571.552	1344.38	249.671	-494.886	1153.79	317.555	-781.147	1220.13	67.6616	-617.652	1359.91	-4.32075	-629.045	1116.35	-8.02154	-629.225	1039.83	-5.42644	-517.606	900.163	51.023	-486.28	833.718	-14.1637	-510.613	810.307	19.8108	-446.957	770.3
744	0	202.339	-536.057	1576.92	320.269	-546.205	1582.42	190.421	-700.114	1521.33	298.125	-705.756	1522.19	249.368	-685.976	1433.13	234.772	-761.941	1148.43	249.258	-562.047	1345.36	249.785	-485.025	1154.59	318.985	-770.838	1220.58	68.7814	-608.97	1361.12	-2.67422	-619.946	1117.35	-6.17704	-621.272	1040.96	-4.92042	-513.119	898.751	50.9067	-483.815	830.765	-14.5071	-508.387	808.914	19.1848	-446.152	766.264
745	0	204.565	-525.779	1578.47	322.417	-536.287	1583.31	191.938	-689.576	1522.14	299.576	-695.551	1522.56	250.895	-676.274	1433.94	235.965	-752.058	1149.07	249.9	-552.712	1346.23	249.604	-475.18	1155.52	320.36	-760.702	1221.13	69.5573	-600.374	1362.42	-1.27626	-610.877	1118.19	-4.28626	-613.27	1042.12	-4.54191	-508.495	897.729	50.7739	-481.158	828.271	-15.1937	-505.908	807.965	18.6464	-445.551	762.64
746	0	206.63	-515.531	1579.89	324.603	-526.338	1584.44	193.423	-679.05	1523.09	301.151	-685.312	1523.07	252.201	-666.933	1434.89	237.363	-742.302	1149.53	250.526	-543.404	1347.28	249.206	-465.608	1156.3	321.888	-750.695	1221.87	70.3281	-592.106	1363.73	-0.093034	-602.208	1119.32	-3.23129	-605.754	1043.26	-4.2854	-503.914	896.954	50.5031	-478.553	826.149	-16.0403	-503.125	807.249	18.217	-444.758	759.366
747	0	208.609	-505.483	1581.29	326.639	-516.535	1585.4	194.902	-668.68	1523.99	302.332	-675.182	1523.54	253.563	-657.648	1435.82	238.661	-734.448	1150.96	250.88	-534.372	1348.35	248.764	-456.146	1157.12	323.345	-740.888	1222.57	71.1808	-583.943	1364.79	0.951116	-593.87	1120.2	-2.0061	-598.056	1044.5	-3.93244	-499.237	896.436	50.2531	-476.078	824.36	-17.0476	-500.097	807.005	17.7496	-444.638	756.375
748	0	210.438	-495.372	1582.84	328.452	-506.805	1586.21	195.948	-658.393	1524.81	303.619	-665.188	1523.97	254.769	-648.426	1436.69	240.306	-724.822	1151.5	251.289	-525.396	1349.55	247.976	-446.773	1157.91	324.754	-731.276	1223.46	71.699	-575.949	1366.04	1.66796	-585.983	1121.25	-1.454	-591.073	1045.69	-3.97419	-494.399	896.24	49.6327	-473.744	822.972	-18.3428	-496.83	807.106	17.3379	-444.223	753.766
749	0	212.064	-485.283	1584.18	329.979	-497.055	1587.23	196.981	-648.117	1525.88	304.64	-655.201	1524.63	255.924	-639.253	1437.69	241.488	-716.453	1152.76	251.581	-516.446	1350.64	247.405	-437.606	1158.64	326.174	-721.719	1224.32	72.3342	-568.159	1367.27	2.15642	-578.549	1122.24	-1.08994	-584.158	1046.88	-4.22309	-489.734	896.33	49.1667	-471.361	821.822	-19.7495	-493.36	807.443	16.8945	-443.63	751.624
750	0	213.693	-475.326	1585.76	331.534	-487.476	1588.38	197.818	-637.908	1527.05	305.401	-645.265	1525.33	257.025	-630.202	1438.82	242.757	-707.813	1153.99	251.618	-507.756	1351.71	246.464	-428.526	1159.66	327.626	-712.333	1225.43	72.9063	-560.413	1368.57	2.33248	-571.674	1123.54	-0.980246	-577.359	1048.15	-4.52348	-484.991	896.658	48.2058	-469.496	820.753	-21.2354	-489.412	808.255	16.4226	-442.94	749.864
751	0	215.012	-465.434	1587.19	332.902	-477.879	1589.4	198.505	-627.771	1528.16	306.097	-635.528	1526.04	258.054	-621.212	1439.86	244.257	-698.637	1154.95	251.954	-498.94	1353.03	245.734	-419.595	1160.57	329.217	-703.081	1226.68	73.4784	-552.898	1369.79	2.17463	-565.228	1124.73	-0.631614	-570.952	1049.34	-4.90865	-480.294	897.175	47.2808	-467.053	820.514	-22.7632	-485.499	809.179	15.8205	-442.168	748.76
752	0	216.296	-455.589	1588.72	334.113	-468.446	1590.41	198.962	-617.808	1529.37	306.649	-625.838	1527	259.099	-612.344	1441.01	245.802	-689.548	1155.96	252.099	-490.393	1354.44	244.775	-410.789	1161.68	330.423	-693.965	1227.57	73.8664	-545.15	1371.31	2.01472	-559.345	1126.17	-1.05418	-565.06	1050.85	-5.48298	-475.472	897.909	46.8224	-464.587	820.559	-24.4264	-481.475	810.241	15.0161	-441.298	747.879
753	0	217.446	-445.689	1590.16	335.223	-458.999	1591.54	199.517	-607.765	1530.68	306.946	-616.174	1527.88	259.873	-603.456	1442.19	247.063	-680.769	1157.2	252.379	-481.768	1355.79	244.057	-402.002	1162.8	331.784	-684.828	1228.8	74.3428	-537.473	1372.64	1.55166	-553.528	1127.61	-1.34278	-559.379	1052.3	-6.32327	-470.864	898.831	45.2783	-461.367	820.976	-26.0648	-477.48	811.492	13.9416	-439.857	747.45
754	0	218.796	-435.984	1591.45	335.961	-449.669	1592.56	199.533	-597.731	1531.94	307.067	-606.521	1528.83	260.67	-594.645	1443.35	248.361	-671.874	1158.33	252.327	-473.343	1357.07	243.334	-393.414	1163.89	333.271	-675.766	1229.97	74.7279	-529.768	1373.86	1.17724	-548.08	1129.19	-1.74082	-553.852	1053.83	-7.29992	-466.415	899.81	43.6158	-458.326	821.539	-27.9164	-473.598	812.811	12.4713	-438.337	747.306
755	0	219.267	-426.114	1592.87	336.764	-440.464	1593.48	199.544	-587.83	1533.06	307.081	-597.23	1529.8	261.352	-586.001	1444.45	249.507	-663.224	1159.35	252.582	-464.866	1358.52	242.77	-384.811	1165.19	334.474	-666.757	1231.06	75.1382	-522.041	1375	0.733625	-542.86	1130.62	-2.00608	-548.621	1055.2	-8.51012	-462.042	900.849	42.578	-455.049	822.181	-29.7005	-469.898	814.098	10.621	-436.374	747.503
756	0	220.169	-416.409	1594.15	337.533	-431.292	1594.65	199.239	-577.886	1534.07	306.762	-587.689	1530.53	261.905	-577.242	1445.51	250.517	-654.551	1160.44	252.648	-456.468	1359.88	242.327	-376.352	1166.51	335.639	-657.822	1232.14	75.3417	-514.373	1376.34	0.490237	-537.742	1132.22	-2.19808	-543.628	1056.75	-10.0211	-458.041	901.961	40.5791	-451.203	823.02	-31.7014	-466.427	815.392	8.21984	-434.008	748.046
757	0	220.82	-406.66	1595.23	338.1	-422.299	1595.71	199.057	-567.927	1535.01	306.408	-578.364	1531.38	262.409	-568.462	1446.56	251.419	-645.907	1161.47	252.848	-447.957	1361.08	242.116	-367.903	1167.61	336.532	-648.774	1233.24	75.6567	-506.664	1377.46	0.32793	-532.656	1133.57	-2.42472	-538.688	1058.25	-11.7911	-453.987	903.103	38.3616	-447.345	823.876	-33.8095	-463.215	816.655	5.62657	-431.183	748.738
758	0	221.622	-397.034	1596.21	338.5	-413.481	1596.58	198.732	-558.064	1535.81	305.887	-569.161	1532.2	262.945	-559.739	1447.47	252.139	-637.139	1162.31	252.91	-439.575	1362.23	241.736	-359.448	1168.6	337.43	-639.848	1234.26	75.9308	-498.881	1378.43	0.153406	-527.635	1135.02	-2.78402	-533.802	1059.67	-13.6529	-450.008	904.067	36.0284	-443.082	824.768	-35.9206	-460.159	817.841	2.70314	-428.112	749.457
759	0	222.188	-387.383	1596.97	339.024	-404.655	1597.42	198.011	-548.171	1536.29	305.172	-560.177	1532.85	263.243	-550.993	1448.24	252.882	-628.603	1163.17	252.96	-431.087	1363.31	241.726	-351.08	1169.56	338.294	-630.827	1235.09	76.1864	-490.992	1379.2	0.125246	-522.506	1136.27	-3.01617	-528.916	1060.98	-15.9026	-446.325	905.065	33.3109	-438.38	825.617	-38.0867	-457.298	818.83	-0.456061	-424.579	750.373
760	0	222.658	-377.857	1597.64	339.233	-396.003	1598.22	197.408	-538.324	1536.7	304.426	-550.956	1533.24	263.591	-542.159	1448.87	253.545	-620.017	1163.77	253.237	-422.68	1364.27	241.459	-342.62	1170.2	338.975	-621.9	1235.77	76.6356	-483.227	1379.83	0.068841	-517.339	1137.28	-3.13705	-524.128	1062.11	-18.2784	-442.702	906.024	30.2655	-433.672	826.402	-40.1895	-454.621	819.713	-3.85835	-420.499	751.381
761	0	222.849	-368.354	1598.17	339.375	-387.244	1598.95	196.663	-528.434	1536.95	303.606	-541.863	1533.65	263.996	-533.334	1449.44	254.216	-611.448	1164.47	253.404	-414.144	1364.99	241.355	-334.192	1170.72	339.721	-612.86	1236.33	76.7606	-475.397	1380.36	0.153003	-512.08	1138.2	-3.33552	-519.285	1063.22	-20.4498	-439.027	906.607	27.116	-429.08	826.817	-42.4165	-451.967	820.422	-7.64631	-416.744	752.035
762	0	223.086	-358.961	1598.44	339.494	-378.48	1599.42	196.004	-518.795	1536.93	302.982	-532.73	1533.76	264.279	-524.448	1449.77	254.839	-602.972	1164.73	253.477	-405.472	1365.46	241.175	-325.751	1170.89	340.333	-603.892	1236.78	77.081	-467.471	1380.57	0.011579	-506.875	1138.84	-3.41096	-514.355	1063.98	-22.5239	-435.42	906.981	24.1279	-424.455	826.963	-44.384	-449.374	820.844	-11.3862	-412.413	752.746
763	0	223.088	-349.592	1598.64	339.298	-369.838	1599.8	195.445	-509.227	1536.79	302.294	-523.849	1533.9	264.602	-515.53	1450.03	255.429	-594.52	1164.98	253.597	-396.902	1365.73	241.131	-317.246	1170.91	340.946	-594.913	1237.1	77.2403	-459.462	1380.71	0.320759	-501.175	1139.33	-3.45127	-509.325	1064.67	-24.8972	-431.756	907.407	21.7743	-418.948	827.61	-46.284	-446.741	821.206	-15.1695	-407.925	753.463
764	0	222.86	-340.434	1598.74	339.092	-360.922	1600.13	194.835	-499.777	1536.46	301.68	-514.728	1533.91	264.762	-506.653	1450.17	256.081	-585.986	1165.28	253.705	-388.128	1365.8	240.907	-308.879	1170.85	341.506	-585.913	1237.35	77.412	-451.32	1380.6	0.510574	-495.561	1139.79	-3.54989	-504.148	1065.24	-27.2953	-427.897	907.761	18.8277	-413.824	827.722	-47.9255	-444.058	821.335	-19.0058	-403.207	754.168
765	0	222.483	-331.274	1598.55	338.69	-351.995	1600.29	194.355	-490.454	1535.91	300.951	-505.549	1533.71	265.026	-497.455	1450.08	256.551	-577.389	1165.36	253.637	-379.417	1365.55	240.727	-300.184	1170.48	342.028	-576.962	1237.39	77.6116	-443.093	1380.35	0.650125	-489.706	1139.99	-3.53817	-498.815	1065.55	-29.1872	-424.028	907.605	16.1175	-408.564	827.688	-49.6083	-441.172	821.347	-22.7509	-398.423	754.624
766	0	221.908	-322.064	1598.33	338.17	-342.994	1600.32	193.867	-481.316	1535.39	300.475	-496.501	1533.36	265.206	-488.427	1449.89	256.906	-568.8	1165.29	253.686	-370.621	1365.06	240.409	-291.686	1169.91	342.476	-568.066	1237.42	77.3975	-434.754	1380.04	0.454612	-483.815	1140.15	-3.55973	-493.227	1065.65	-31.1741	-420.135	907.451	13.4727	-403.35	827.454	-51.0436	-438.191	821.161	-26.1614	-393.665	754.954
767	0	221.352	-313.264	1597.89	337.599	-333.878	1600.1	193.352	-472.227	1534.79	300.027	-487.37	1532.94	265.221	-479.223	1449.6	257.192	-560.146	1165.13	253.482	-361.638	1364.54	240.062	-283.136	1169.11	342.809	-559.134	1237.32	77.6286	-426.369	1379.48	0.799766	-477.507	1140.02	-3.58693	-487.426	1065.69	-32.8698	-415.939	907.185	10.8687	-397.816	827.185	-52.0673	-434.993	820.755	-29.6731	-388.791	755.341
768	0	220.573	-304.093	1597.41	336.825	-324.859	1599.7	192.874	-463.062	1534.06	299.665	-478.282	1532.49	265.363	-469.966	1449.22	257.5	-551.4	1164.95	253.268	-352.678	1363.94	239.651	-274.505	1168.25	343	-550.244	1237.11	77.2746	-417.727	1378.93	0.563234	-471.217	1139.95	-3.46543	-481.489	1065.65	-34.638	-411.5	906.893	8.28504	-392.119	826.944	-53.1669	-431.533	820.451	-32.9401	-383.841	755.421
769	0	219.953	-295.012	1596.49	336.154	-315.596	1599.01	192.428	-454.065	1533.27	299.281	-469.113	1531.81	265.265	-460.67	1448.66	257.601	-542.59	1164.57	253.043	-343.673	1362.99	239.041	-265.84	1167.18	343.161	-541.302	1236.77	77.0149	-409.183	1378.16	0.629674	-464.576	1139.73	-3.32687	-475.246	1065.45	-35.8277	-406.826	906.333	6.26158	-386.339	826.371	-54.0633	-427.696	819.89	-35.767	-378.797	755.449
770	0	219.3	-285.985	1595.55	335.503	-306.309	1598.14	191.984	-445.071	1532.48	298.908	-459.987	1531.08	265.224	-451.445	1448.01	257.47	-533.507	1163.93	252.68	-334.477	1361.8	238.664	-257.061	1166.11	343.285	-532.393	1236.29	76.7479	-400.494	1377.45	0.69982	-457.705	1139.39	-3.44852	-468.898	1065.23	-37.1146	-401.944	905.736	4.22113	-380.566	825.768	-54.8062	-423.609	819.322	-38.8616	-373.634	755.335
771	0	218.555	-276.814	1594.62	334.716	-297.137	1597.1	191.576	-436.183	1531.87	298.297	-450.892	1530.49	265.115	-442.045	1447.18	257.422	-524.593	1163.27	252.224	-325.367	1360.77	237.993	-248.416	1164.86	343.28	-523.405	1235.63	76.3741	-391.818	1376.72	0.545365	-450.587	1138.87	-3.54492	-462.188	1064.86	-38.318	-396.622	905.22	2.50436	-374.677	825.007	-55.4895	-419.133	818.698	-40.8962	-368.455	754.974
772	0	217.785	-267.758	1593.36	334.113	-287.634	1595.96	191.055	-427.235	1531.16	298.001	-441.628	1529.74	264.856	-432.626	1446.3	257.256	-515.669	1162.6	251.57	-316.056	1359.38	237.324	-239.556	1163.5	343.167	-514.336	1234.96	76.0793	-382.981	1375.48	0.524887	-443.266	1138.22	-3.53096	-455.298	1064.32	-39.3628	-390.843	904.412	1.38452	-368.984	823.783	-55.881	-414.221	817.923	-43.285	-362.948	754.512
773	0	217.086	-258.398	1591.96	333.359	-278.176	1594.55	190.582	-418.228	1530.25	297.559	-432.484	1528.86	264.503	-423.324	1445.24	257.159	-507.057	1161.76	250.973	-306.785	1357.92	236.673	-231.145	1161.86	343.021	-505.201	1234	75.5764	-374.153	1374.39	0.394933	-435.824	1137.38	-3.65921	-448.205	1063.56	-40.1266	-384.851	903.423	0.077478	-362.788	822.754	-56.7157	-408.792	817.063	-45.1281	-357.434	753.555
774	0	216.326	-249.265	1590.67	332.57	-268.715	1593.19	190.119	-409.197	1529.22	297.078	-423.215	1527.74	264.107	-413.946	1444	256.894	-498.166	1160.62	250.196	-297.598	1356.52	235.757	-222.102	1160.69	342.826	-496.189	1232.98	75.0155	-365.357	1373.21	0.16824	-428.191	1136.4	-3.9006	-440.927	1062.57	-41.0171	-378.397	902.428	-1.03457	-356.556	821.386	-57.4105	-402.97	816.077	-46.6521	-351.695	752.446
775	0	215.503	-239.851	1589.14	331.815	-259.14	1591.75	189.707	-400.026	1528	296.78	-413.879	1526.56	263.683	-404.515	1442.77	256.562	-489.217	1159.52	249.4	-288.279	1355.06	235.061	-213.37	1158.94	342.405	-486.971	1231.87	74.6816	-356.392	1371.73	-0.183444	-420.195	1135.34	-4.1029	-433.381	1061.57	-41.7549	-371.696	901.254	-2.16471	-349.845	820.094	-58.2331	-396.735	815.063	-47.8758	-345.625	751.217
776	0	214.469	-230.829	1587.64	331.041	-249.398	1590.38	189.295	-390.905	1526.46	296.473	-404.345	1525.13	262.997	-395.175	1441.31	255.976	-480.185	1158.25	248.633	-278.912	1353.56	234.225	-204.478	1157.63	341.942	-477.858	1230.54	73.495	-347.44	1370.5	-0.588479	-412.057	1134.12	-4.37547	-425.751	1060.45	-42.3557	-364.677	899.842	-2.94308	-342.985	818.696	-59.0349	-390.04	813.917	-48.9145	-339.468	749.625
777	0	213.394	-221.527	1586.02	329.721	-239.765	1588.59	188.918	-381.941	1524.81	296.098	-394.712	1523.36	262.247	-385.631	1439.68	255.244	-471.113	1156.72	247.776	-269.569	1351.94	233.46	-195.351	1155.81	341.334	-468.654	1229.05	72.748	-338.288	1368.8	-1.05265	-403.691	1132.75	-4.86698	-417.904	1059.14	-43.1696	-357.22	898.316	-3.59014	-336.173	816.896	-59.885	-383.119	812.46	-49.6189	-333.048	747.874
778	0	211.89	-212.609	1584.29	328.46	-230.032	1586.82	188.639	-372.934	1522.96	295.881	-385.086	1521.56	261.408	-376.177	1438.07	254.453	-462.047	1155.15	246.875	-260.118	1350.13	232.584	-186.19	1154.28	340.567	-459.509	1227.56	71.9134	-329.089	1367.16	-1.68095	-395.175	1131.17	-5.37563	-409.707	1057.74	-43.9264	-349.756	896.704	-4.29446	-329.032	815.168	-60.5723	-375.828	810.946	-50.2364	-326.228	745.82
779	0	210.204	-203.476	1582.52	327.062	-219.935	1585.13	188.249	-364.079	1521.27	295.657	-375.418	1519.82	260.479	-366.606	1436.36	253.593	-452.786	1153.54	245.901	-250.484	1348.34	231.608	-177.047	1152.35	339.75	-450.176	1226.11	71.235	-319.788	1365.17	-2.18188	-386.489	1129.52	-6.12753	-401.403	1056.19	-44.4302	-341.865	894.835	-4.76393	-321.621	813.264	-61.3665	-368.09	809.328	-50.1697	-319.276	743.518
780	0	208.458	-194.431	1580.85	325.476	-209.892	1583.43	187.932	-355.234	1519.4	295.403	-365.594	1518.01	259.452	-356.987	1434.66	252.716	-443.6	1152.04	244.759	-240.914	1346.35	230.772	-167.552	1150.39	338.705	-440.669	1224.4	70.2397	-310.242	1363.2	-3.22088	-377.563	1127.93	-6.91408	-392.799	1054.53	-45.1649	-333.777	892.894	-5.18786	-313.979	811.223	-62.2684	-360.083	807.635	-50.0576	-312.21	741.464
781	0	206.444	-185.474	1579.24	323.581	-199.808	1581.66	187.824	-346.5	1517.74	295.102	-355.639	1516.1	258.43	-347.213	1432.9	251.622	-434.124	1150.27	243.722	-231.286	1344.61	230.06	-158.002	1148.51	337.791	-431.38	1222.83	68.8351	-300.674	1361.49	-4.08704	-368.575	1126.15	-7.82402	-384.116	1052.75	-45.8722	-325.386	890.859	-5.45779	-306.339	809.198	-63.0989	-351.826	805.724	-50.1596	-304.394	739.444
782	0	204.221	-176.423	1577.88	321.729	-189.58	1580.17	187.215	-337.581	1515.96	294.82	-345.608	1514.4	257.346	-337.471	1431.23	250.531	-424.678	1148.52	242.537	-221.566	1342.77	229.174	-148.347	1146.7	336.598	-421.68	1221.16	67.9944	-291.016	1359.34	-5.09045	-359.479	1124.26	-8.79081	-375.126	1050.87	-46.6208	-316.826	888.862	-5.81149	-298.39	807.121	-63.9505	-343.273	803.738	-50.5508	-296.477	737.218
783	0	202.217	-167.429	1576.27	319.731	-179.295	1578.75	186.626	-328.631	1514.29	294.313	-335.533	1512.68	255.994	-327.686	1429.67	249.357	-415.062	1147.05	241.167	-211.847	1341.11	228.311	-138.616	1144.68	335.487	-412.09	1219.69	66.3819	-281.073	1357.3	-6.21932	-350.17	1122.43	-9.8445	-365.928	1048.93	-47.2238	-307.855	886.785	-6.24457	-290.086	805.09	-64.7201	-334.422	801.763	-49.4275	-288.816	734.196
784	0	199.937	-158.319	1575.17	317.587	-169.012	1577.5	186.029	-319.502	1512.57	293.711	-325.389	1510.96	254.618	-317.8	1428.08	248.135	-405.474	1145.49	239.81	-202.044	1339.52	227.483	-128.685	1142.9	334.135	-402.298	1218.26	65.0181	-271.203	1355.43	-7.29392	-340.658	1120.62	-10.9034	-356.615	1047.06	-48.0164	-298.813	884.536	-6.56675	-281.601	802.945	-65.3806	-325.467	799.602	-49.6814	-280.271	731.985
785	0	197.284	-149.152	1573.89	315.306	-158.727	1576.17	185.127	-310.366	1510.84	292.884	-314.99	1509.11	253.028	-307.974	1426.6	246.543	-395.293	1143.68	238.22	-192.143	1337.87	226.705	-118.691	1141	332.753	-392.397	1216.77	63.4887	-261.366	1353.4	-8.55408	-331.096	1118.69	-11.8608	-347.046	1044.92	-48.6798	-289.432	882.376	-6.82827	-273.1	800.825	-65.9902	-316.222	797.362	-49.7615	-271.701	729.969
786	0	194.805	-139.762	1572.95	312.862	-148.428	1574.99	184.138	-300.993	1509.37	291.875	-304.829	1507.51	251.398	-297.922	1425.26	245.375	-385.711	1142.5	236.717	-182.148	1336.64	225.672	-108.519	1139.34	331.34	-382.351	1215.54	62.0828	-251.402	1351.56	-9.8136	-321.104	1116.87	-12.9788	-337.139	1043.06	-49.2772	-279.802	880.241	-7.28038	-264.196	798.889	-66.8965	-306.687	795.455	-49.1855	-262.926	727.093
787	0	192.35	-130.385	1571.99	310.538	-138.018	1573.94	182.852	-291.595	1508.11	290.684	-294.454	1506.2	249.65	-287.847	1424.17	244.077	-375.814	1141.55	234.84	-172.129	1335.27	224.567	-98.262	1137.85	329.871	-372.199	1214.5	60.4091	-241.61	1350.08	-11.0439	-310.903	1115.07	-14.0131	-327.062	1041.36	-50.0326	-270.119	878.383	-7.58896	-254.822	796.838	-67.6556	-296.944	793.548	-49.1518	-253.621	725.067
788	0	189.877	-120.864	1571.01	308.028	-127.721	1572.84	181.546	-282.088	1507.01	289.196	-284.183	1504.92	247.743	-277.801	1423.09	242.765	-365.696	1140.54	232.966	-161.982	1334.23	223.088	-87.8983	1136.65	328.372	-361.925	1213.53	58.5221	-231.735	1348.48	-12.3752	-300.592	1113.37	-15.0033	-316.781	1039.64	-50.7205	-260.046	876.397	-7.88039	-245.084	794.837	-68.2419	-287.052	791.683	-49.1671	-244.101	722.784
789	0	187.292	-111.178	1570.31	305.484	-117.434	1571.84	179.511	-272.366	1506.09	287.271	-273.863	1503.81	245.634	-267.77	1422.13	241.47	-355.549	1139.51	230.932	-151.873	1333.24	221.556	-77.4531	1135.58	326.84	-351.634	1212.63	56.6102	-221.751	1347.17	-13.7363	-290.072	1111.61	-16.1844	-306.387	1037.99	-51.406	-249.792	874.602	-8.3901	-235.127	792.977	-68.6856	-276.949	789.91	-49.1236	-234.373	721.111
790	0	184.64	-101.404	1569.65	302.957	-107.077	1571.11	177.417	-262.651	1505.49	285.27	-263.689	1503.04	243.343	-257.751	1421.28	240.007	-344.89	1138.59	228.722	-141.709	1332.61	219.731	-66.8727	1134.91	325.152	-341.142	1211.92	54.3631	-211.839	1345.93	-15.1004	-279.421	1109.97	-17.19	-295.875	1036.48	-52.0009	-239.394	873.031	-8.96639	-224.81	791.535	-69.4631	-266.443	788.38	-49.4677	-224.333	719.486
791	0	181.898	-91.46	1569.28	300.149	-96.9882	1570.68	175.157	-252.6	1505.09	282.806	-253.464	1502.59	240.894	-247.835	1420.63	238.35	-334.138	1137.59	226.419	-131.499	1332.28	217.94	-56.1274	1134.85	323.361	-330.53	1211.23	52.0992	-201.85	1344.94	-16.3894	-268.699	1108.48	-18.2589	-285.212	1035.08	-52.6843	-228.76	871.643	-9.57428	-214.194	790.209	-69.9981	-255.77	786.89	-49.9036	-213.82	717.787
792	0	179.046	-81.3474	1569.33	297.471	-86.6787	1570.62	172.619	-242.598	1504.77	280.256	-243.33	1502.28	238.214	-238.034	1420.2	236.919	-323.422	1136.88	223.956	-121.304	1332.21	215.992	-44.9356	1135.09	321.545	-320.227	1210.86	50.0402	-191.92	1343.92	-17.7266	-257.948	1107.03	-19.2684	-274.434	1033.57	-53.4289	-217.94	870.289	-10.1421	-203.488	788.809	-70.4386	-245.002	785.419	-50.4661	-203.056	716.554
793	0	176.267	-71.2374	1569.59	294.488	-76.6435	1570.79	169.688	-232.319	1504.75	277.431	-233.124	1502.25	235.595	-227.988	1419.98	235.28	-312.091	1136.27	221.479	-111.036	1332.43	214.016	-33.6371	1135.6	319.559	-309.597	1210.66	47.2139	-181.774	1343.37	-19.0991	-247.191	1105.8	-20.3176	-263.431	1032.21	-54.3075	-206.859	869.061	-10.6499	-192.276	787.682	-71.0845	-233.886	784.157	-50.9743	-191.877	715.537
794	0	173.127	-60.9527	1569.97	291.63	-66.4455	1571.44	166.388	-221.931	1504.95	274.267	-222.848	1502.68	232.758	-217.932	1419.97	233.569	-300.564	1135.92	219.005	-100.601	1332.93	212.157	-22.2828	1136.29	317.7	-298.815	1210.71	45.0531	-171.481	1342.48	-20.5628	-236.421	1104.75	-21.4339	-252.182	1031.08	-55.0874	-195.594	867.967	-11.3597	-180.696	786.77	-71.7088	-222.523	783.003	-51.6489	-180.376	714.253
795	0	170.091	-50.6794	1570.53	288.435	-56.4678	1572.24	163.203	-211.559	1505.48	271.098	-212.739	1503.49	229.954	-207.88	1420.35	231.59	-288.489	1135.62	216.327	-90.1502	1333.69	210.47	-10.795	1137.19	315.715	-287.847	1210.96	42.4124	-161.216	1342.19	-22.1006	-225.524	1103.91	-22.447	-240.654	1030.02	-56.0415	-184.043	866.949	-11.9322	-169.056	785.904	-71.922	-211.084	781.917	-52.19	-168.496	713.469
796	0	166.923	-40.3344	1571.47	285.289	-46.2495	1573.24	160.006	-201.217	1506.18	267.647	-202.592	1504.27	227.159	-197.726	1420.92	229.783	-276.979	1135.68	213.797	-79.7614	1334.62	208.893	0.696158	1138.29	313.681	-276.915	1211.43	39.7225	-150.64	1341.97	-23.252	-214.533	1103.04	-23.4458	-229.005	1029.14	-56.8238	-172.256	866.11	-12.5327	-157.26	784.976	-72.5835	-199.254	780.99	-52.7656	-156.549	712.794
797	0	163.69	-29.871	1572.58	281.894	-36.2151	1574.57	156.588	-190.663	1507.18	264.202	-192.233	1505.45	224.181	-187.409	1421.86	228.204	-266.005	1136.63	211.346	-69.2121	1335.81	207.492	12.0918	1139.62	311.743	-265.892	1212.4	37.2037	-140.172	1341.94	-24.8516	-203.178	1102.62	-24.6235	-217.055	1028.56	-57.5659	-160.223	865.469	-13.0508	-144.729	784.605	-72.708	-187.212	780.305	-53.2499	-144.176	712.213
798	0	160.303	-19.326	1573.89	278.734	-25.937	1576.25	153.003	-180.127	1508.48	260.707	-181.961	1507.06	221.383	-177.018	1423.11	226.494	-254.839	1137.77	208.836	-58.7402	1337.25	206.23	23.4263	1141.28	309.815	-254.869	1213.87	34.7018	-129.532	1342.28	-26.3282	-191.532	1102.48	-25.5447	-204.788	1028.31	-58.2628	-147.88	865.231	-13.6772	-132.293	784.403	-73.3371	-174.688	779.999	-53.7348	-131.369	712.11
799	0	156.935	-8.94641	1575.27	275.315	-15.7608	1577.87	149.44	-169.686	1509.87	257.142	-171.801	1508.84	218.6	-166.641	1424.56	224.557	-243.178	1138.88	206.404	-48.2278	1338.83	205.025	34.6261	1143.11	307.794	-243.998	1215.48	32.4227	-118.796	1342.82	-27.736	-179.606	1102.58	-26.6082	-192.433	1028.32	-58.9151	-135.565	865.086	-14.1091	-119.678	784.521	-73.8476	-162.056	780.031	-54.4726	-118.35	712.497
800	0	153.39	1.47705	1576.77	271.724	-5.5017	1579.69	145.902	-159.209	1511.55	253.576	-161.648	1510.75	215.703	-156.259	1426.18	223.112	-232.349	1140.53	204.117	-37.709	1340.76	203.836	45.6746	1145.09	305.959	-233.316	1217.4	30.0128	-108.103	1343.67	-29.2236	-167.34	1102.84	-27.6996	-179.988	1028.5	-59.7196	-122.459	865.648	-14.7107	-106.231	784.975	-74.2672	-148.855	780.228	-54.5706	-104.917	712.632
801	0	150.117	11.8929	1578.14	268.262	4.75133	1581.7	142.304	-148.861	1513.34	249.969	-151.411	1512.98	212.913	-145.872	1427.91	221.397	-220.936	1141.95	202.014	-27.2694	1342.72	202.821	56.5059	1147.05	304.008	-222.728	1219.49	27.6685	-97.3463	1344.62	-30.6475	-154.87	1103.3	-28.4048	-167.427	1028.92	-60.4032	-109.288	866.427	-15.3947	-92.8884	786.078	-74.9165	-135.479	780.905	-55.1559	-91.3817	713.643
802	0	146.463	22.3778	1579.81	264.808	14.972	1583.85	138.788	-138.493	1515.19	246.496	-141.278	1515.3	210.275	-135.637	1429.8	220.148	-209.788	1143.8	199.986	-16.8971	1344.63	201.979	67.2075	1149.33	302.12	-212.433	1221.76	25.6586	-86.3732	1345.66	-31.7723	-142.281	1103.86	-29.7045	-154.747	1029.76	-61.1655	-95.8635	867.502	-15.8659	-79.0176	787.212	-75.2394	-121.622	781.657	-55.4687	-77.2899	714.702
803	0	143.043	32.81	1581.2	261.29	25.2768	1585.81	135.278	-128.273	1517.01	243.071	-131.251	1517.71	207.618	-125.442	1431.68	218.75	-198.518	1145.69	198.111	-6.6338	1346.52	201.125	77.7492	1151.6	300.156	-202.337	1224.08	24.0063	-75.4514	1346.75	-33.1423	-129.701	1104.57	-30.8838	-141.966	1030.56	-61.7478	-82.053	868.561	-16.4652	-65.0561	788.499	-76.0024	-107.389	782.701	-55.8683	-62.9244	715.897
804	0	140.048	43.0235	1582.42	257.731	35.3486	1587.75	132.165	-118.046	1518.72	239.839	-121.392	1520.17	205.181	-115.327	1433.57	217.558	-187.34	1147.91	196.4	3.53292	1348.43	200.451	88.0452	1153.8	298.136	-192.477	1226.24	21.6826	-64.5574	1348.24	-34.4636	-117.172	1105.49	-32.1778	-129.209	1031.51	-62.2855	-68.0969	869.832	-16.7975	-50.7989	789.889	-76.5905	-92.8434	783.814	-55.8328	-48.3742	717.067
805	0	136.861	53.4101	1583.63	254.702	45.5439	1589.94	128.845	-107.834	1520.35	236.657	-111.337	1522.59	202.741	-105.272	1435.37	216.062	-175.964	1149.89	194.797	13.7176	1350.27	199.784	98.1847	1155.92	296.015	-182.662	1228.42	19.7651	-53.6596	1349.57	-35.8663	-104.57	1106.56	-33.6086	-116.32	1032.62	-62.9701	-53.9248	871.198	-17.1498	-36.1941	791.555	-77.0985	-77.8494	784.94	-56.0601	-33.4008	718.423
806	0	133.586	63.7449	1584.72	251.404	55.4235	1591.7	125.834	-97.6318	1521.83	233.501	-101.597	1524.72	200.345	-95.3042	1437.1	214.326	-164.463	1151.8	193.339	23.8566	1351.73	199.291	108.155	1157.93	293.768	-173.065	1230.3	17.983	-42.7127	1350.96	-37.6102	-91.9142	1107.71	-35.1442	-103.384	1033.54	-63.3594	-39.3742	872.354	-17.3717	-21.3678	793.214	-77.4926	-62.6845	786.127	-56.221	-17.9419	719.967
807	0	131.035	73.8399	1585.44	248.553	65.4061	1593.47	123.12	-87.6579	1522.95	230.535	-91.794	1526.67	198.138	-85.416	1438.65	212.636	-153.819	1153.38	192.049	33.8553	1353.17	198.813	117.871	1159.71	291.521	-163.641	1232.1	16.6514	-31.7951	1352.12	-39.1667	-79.4231	1108.71	-36.8617	-90.5346	1034.54	-63.8122	-24.724	873.71	-17.4327	-6.80473	794.757	-78.0021	-47.2926	787.234	-56.0531	-2.15558	721.253
808	0	128.164	84.1663	1586.33	245.688	75.0104	1595.22	120.155	-77.5037	1524.06	227.72	-82.1624	1528.74	195.96	-75.5614	1440.21	210.036	-143.868	1154.83	190.861	43.7611	1354.59	198.562	127.51	1161.44	289.22	-154.394	1233.8	15.1152	-20.8038	1353.38	-40.7034	-66.967	1109.69	-38.6238	-77.7157	1035.41	-64.4613	-10.1353	875.208	-17.4043	7.807	796.314	-78.5626	-31.6186	788.471	-55.7153	13.9009	722.815
809	0	126.226	94.0291	1586.9	243.274	84.6155	1597.02	117.522	-67.3821	1525.06	224.84	-72.5399	1530.52	193.966	-65.7516	1441.74	207.473	-134.435	1156.51	189.788	53.6273	1355.89	198.345	136.943	1162.92	286.865	-145.305	1235.45	13.3676	-9.77069	1354.65	-42.3366	-54.2961	1110.7	-40.5797	-64.7197	1036.36	-64.9659	4.68322	876.503	-17.3504	22.5853	797.876	-79.2355	-15.5715	789.748	-55.5846	30.3257	724.746
810	0	123.684	104.325	1587.9	240.888	93.9949	1598.74	114.843	-57.314	1525.88	222.181	-63.0096	1532.19	191.947	-56.0886	1443.17	205.261	-125.37	1157.98	188.769	63.3191	1357.15	198.218	146.316	1164.17	284.413	-136.299	1237.07	12.1797	1.13116	1355.64	-44.4434	-42.035	1111.73	-42.4623	-51.796	1037.23	-65.4982	19.6373	877.99	-17.5068	37.7218	799.718	-79.7589	0.606933	790.831	-55.2787	46.7599	726.618
811	0	121.987	114.235	1588.67	238.931	103.416	1600.31	112.35	-47.2046	1526.66	219.689	-53.7235	1533.66	189.984	-46.41	1444.48	202.988	-116.141	1159.01	187.909	72.8368	1358.29	198.169	155.472	1165.25	281.941	-127.464	1238.53	10.4749	12.0556	1356.77	-46.2588	-29.4635	1112.82	-44.4706	-38.9084	1037.93	-66.0197	34.6404	879.53	-17.4195	52.7875	801.62	-80.2745	16.7462	791.987	-54.8529	63.6829	728.573
812	0	120.222	124.121	1589.6	236.97	112.492	1601.95	110.283	-37.3171	1527.45	217.333	-44.3744	1535.06	188.095	-36.8841	1445.87	201.062	-107.671	1160.88	186.962	82.2976	1359.41	198.106	164.491	1166.26	279.487	-118.56	1239.93	8.95693	22.8211	1357.84	-48.4686	-17.1741	1113.84	-46.6427	-26.0999	1038.85	-66.5058	49.6664	881.015	-17.8841	68.5532	803.895	-80.859	33.0198	793.312	-54.5497	80.5531	730.782
813	0	118.555	133.892	1590.57	235.367	121.763	1603.58	108.025	-27.1505	1528.32	215.087	-34.9004	1536.58	186.135	-27.4442	1447.24	198.68	-98.8759	1162.41	185.903	91.631	1360.52	197.982	173.436	1167.13	277.136	-110.047	1241.55	7.60872	33.4327	1358.78	-50.4048	-4.66255	1114.81	-48.8789	-13.2282	1039.68	-67.1122	64.7203	882.602	-17.9676	83.4057	805.807	-81.4368	49.3378	794.716	-54.2095	97.833	733.059
814	0	117.24	143.648	1591.38	233.901	130.914	1604.75	106.127	-17.3867	1529.16	213.155	-25.8151	1537.9	184.223	-18.066	1448.46	196.292	-90.0145	1163.73	184.8	100.779	1361.51	197.911	182.288	1167.93	274.627	-101.328	1242.8	6.57123	43.8285	1359.44	-52.3001	7.83718	1115.78	-51.0074	-0.41222	1040.44	-67.729	79.7327	884.224	-18.0531	99.1108	807.992	-81.8636	65.7258	796.039	-53.9856	115.045	735.458
815	0	116.253	153.409	1592.28	232.565	139.943	1605.82	104.32	-7.92183	1530.21	211.207	-16.669	1539.16	182.415	-8.75881	1449.68	194.063	-81.0927	1165.02	183.856	109.931	1362.52	197.517	190.732	1168.33	272.278	-92.7561	1244.1	4.87394	54.0946	1360.44	-54.1399	20.1968	1116.76	-53.0664	12.218	1041.3	-68.2482	94.6981	885.895	-18.1433	114.661	810.047	-82.2631	82.2239	797.449	-53.5338	132.391	738.021
816	0	115.421	163.046	1593.1	231.548	149.132	1606.89	102.516	1.80184	1531.5	209.414	-7.47406	1540.49	180.61	0.47641	1450.92	191.909	-72.1872	1166.46	182.79	118.972	1363.47	197.206	199.469	1169.09	270.007	-84.2949	1245.56	3.61976	64.2225	1361.24	-55.7747	32.6606	1117.65	-55.2007	24.9337	1042.08	-68.9093	109.678	887.653	-18.2222	130.236	812.316	-82.677	98.7103	799.004	-53.4528	149.799	740.8
817	0	114.389	172.798	1594.02	230.633	158.315	1607.78	100.986	11.3439	1532.71	207.747	1.68001	1541.74	178.78	9.63815	1452.06	189.807	-63.3978	1167.81	181.566	127.926	1364.42	196.905	207.919	1169.86	267.709	-75.7318	1246.93	2.62375	74.1954	1361.95	-57.6418	44.7887	1118.47	-57.4823	37.4816	1042.96	-69.5886	124.547	889.467	-18.4303	145.772	814.669	-83.2385	115.072	800.695	-53.081	167.177	743.614
818	0	113.685	182.385	1594.77	229.881	167.382	1608.46	99.2832	20.8527	1533.88	206.11	10.6545	1542.81	176.97	18.6658	1453.05	187.747	-54.7416	1168.73	180.43	136.815	1365.29	196.325	216.329	1170.77	265.674	-67.3241	1248.01	0.987387	83.8978	1362.82	-59.5176	56.7079	1119.37	-59.544	49.8285	1043.67	-70.1128	139.282	891.433	-18.7703	161.353	817.267	-83.6617	131.422	802.461	-53.1778	184.564	746.617
819	0	113.159	191.981	1595.51	229.316	176.435	1609.02	97.8136	30.4384	1535.11	204.66	19.6646	1543.78	175.292	27.5689	1454.01	185.938	-46.2933	1169.9	179.144	145.577	1366.14	195.523	224.615	1171.6	263.588	-58.9193	1249.14	-0.562508	93.1992	1363.66	-61.3066	68.4429	1120.31	-61.6522	62.0891	1044.65	-71.0422	154.302	893.737	-19.0089	176.785	820.008	-84.1062	147.837	804.411	-53.1131	201.916	749.749
820	0	112.619	201.547	1596.18	228.91	185.55	1609.53	96.6031	39.8943	1536.25	203.293	28.6567	1544.67	173.56	36.3883	1454.83	184.233	-37.6658	1170.71	177.912	154.287	1366.88	194.685	232.929	1172.48	261.783	-50.5534	1250.18	-1.90538	102.577	1364.33	-63.0925	80.1011	1121.11	-63.7235	74.2605	1045.5	-71.7446	168.798	895.755	-19.3519	192.34	822.658	-84.6033	164.2	806.453	-53.2637	219.01	753.101
821	0	112.29	211.13	1596.65	228.537	194.605	1609.74	95.2718	49.313	1537.23	201.945	37.7438	1545.43	171.754	45.1679	1455.54	182.387	-29.2558	1171.44	176.577	162.929	1367.51	193.682	241.035	1173.24	259.926	-42.2181	1250.97	-3.24652	111.702	1365.07	-64.7248	91.4772	1121.86	-65.6493	86.3215	1046.1	-72.4456	183.323	897.889	-19.8923	207.88	825.451	-85.2241	180.285	808.551	-53.2274	236.299	756.358
822	0	112.02	220.786	1597.03	228.089	203.709	1609.73	93.8079	58.8949	1538.07	200.658	46.7224	1546.03	170.149	53.8307	1456.03	180.749	-20.7073	1171.76	175.242	171.518	1367.93	192.628	249.171	1174.01	258.184	-33.8466	1251.54	-4.8254	120.571	1365.72	-66.3888	102.728	1122.61	-67.3678	98.3058	1046.55	-73.0527	197.864	900.13	-20.1958	223.533	828.518	-85.8147	196.211	810.761	-53.4561	253.24	759.703
823	0	111.773	230.437	1597.23	227.867	212.776	1609.56	92.6608	68.4946	1538.85	199.246	55.7563	1546.59	168.568	62.4985	1456.39	179.15	-12.343	1172.2	174.047	180.083	1368.16	191.49	257.381	1174.41	256.59	-25.5494	1251.98	-6.11378	129.58	1366.11	-67.9302	113.652	1123.22	-69.3355	110.101	1047.15	-73.9111	212.248	902.451	-20.5321	238.977	831.406	-86.2293	212.411	812.784	-53.6526	270.217	763.202
824	0	111.486	240.183	1597.1	227.601	221.939	1609.34	91.1596	78.0167	1539.58	197.883	64.8384	1547.06	167.12	71.1675	1456.68	177.856	-4.19518	1172.64	172.755	188.676	1368.21	190.432	265.42	1174.61	255.048	-17.2136	1252.48	-7.66871	138.27	1366.41	-69.6136	124.52	1123.61	-70.6686	121.612	1047.43	-74.8842	226.528	904.513	-21.0351	254.383	834	-86.6281	228.385	814.84	-53.9472	286.91	766.484
825	0	111.351	249.921	1596.63	227.343	231.039	1608.67	89.9516	87.522	1540.08	196.529	73.8195	1547.32	165.769	79.8027	1456.77	176.62	3.94193	1172.87	171.605	197.36	1368.15	189.304	273.361	1174.61	253.716	-8.90414	1252.76	-8.83874	147.069	1366.45	-71.0784	135.077	1123.69	-72.3238	133.1	1047.56	-75.3168	240.476	906.314	-21.4988	269.639	836.556	-86.9427	244.088	816.917	-54.266	303.556	769.69
826	0	111.1	259.716	1595.95	226.991	240.35	1607.72	88.697	97.115	1540.4	195.286	82.8641	1547.46	164.546	88.453	1456.79	175.446	12.0223	1172.94	170.534	205.999	1367.87	188.293	281.168	1174.13	252.614	-0.582043	1252.95	-9.97458	155.819	1366.51	-72.3496	145.495	1123.82	-73.7629	144.428	1047.69	-76.077	254.318	908.265	-21.8389	284.711	839.319	-87.2814	259.4	818.923	-54.4271	320.094	773.116
827	0	110.802	269.574	1595	226.496	249.761	1606.85	87.4302	106.816	1540.62	193.946	91.9542	1547.7	163.422	97.129	1456.76	174.226	19.9002	1173.08	169.472	214.586	1367.34	187.201	288.937	1173.63	251.548	7.64476	1253.2	-11.182	164.43	1366.53	-73.7569	155.716	1124.02	-75.3001	155.695	1047.92	-76.7524	268.155	910.039	-22.2623	299.602	842.025	-87.6682	274.438	821.015	-54.8173	336.172	776.523
828	0	110.368	279.445	1593.85	226.086	259.113	1606.02	86.2178	116.453	1540.57	192.68	101.103	1547.81	162.453	105.799	1456.53	173.188	27.5832	1173.12	168.491	223.231	1366.8	186.367	296.727	1173.2	250.737	15.9576	1253.32	-12.0966	173.233	1366.4	-74.9911	165.685	1124.03	-76.3308	166.997	1047.93	-77.4529	281.563	911.805	-22.7184	314.195	844.581	-88.0316	289.494	823.13	-55.1139	352.19	779.849
829	0	109.917	289.419	1592.51	225.546	268.57	1604.95	85.1665	126.035	1540.25	191.411	110.23	1547.8	161.656	114.435	1456.24	172.336	35.1592	1173.02	167.77	231.911	1366.31	185.411	304.429	1172.54	250.076	24.2707	1253.18	-12.6328	181.77	1366.26	-76.2402	175.427	1124	-77.7266	178.1	1047.91	-78.0055	294.621	913.601	-23.105	328.562	847.035	-88.2763	304.163	824.904	-55.4199	367.969	783.299
830	0	109.316	299.272	1590.97	224.957	277.893	1603.97	83.8963	135.821	1539.63	190.085	119.488	1547.75	160.964	123.102	1455.85	171.38	42.7439	1172.94	167.005	240.48	1365.59	184.543	312.196	1171.83	249.531	32.5336	1253.03	-13.6782	190.25	1366.05	-77.4293	185.014	1124.06	-78.6842	189.039	1047.78	-78.5246	307.745	915.381	-23.3683	342.675	849.657	-88.5207	318.571	826.644	-55.8105	383.332	786.535
831	0	108.867	309.332	1589.35	224.389	287.336	1603.09	82.5945	145.786	1538.89	188.575	128.832	1547.61	160.228	131.725	1455.38	170.521	50.3145	1172.83	166.359	249.155	1364.65	183.645	319.547	1170.84	249.052	40.7084	1252.88	-14.1515	198.811	1365.57	-78.546	194.52	1124.01	-79.8495	200.164	1047.52	-79.1766	320.616	916.849	-23.6021	356.464	852.169	-88.6713	332.711	828.379	-56.1471	398.35	789.682
832	0	108.495	319.447	1587.39	223.749	296.756	1602.01	81.1916	155.839	1537.99	186.966	138.164	1547.24	159.837	140.495	1454.79	169.896	57.6718	1172.63	165.939	257.99	1363.76	182.986	327.325	1169.72	248.644	48.9028	1252.64	-14.6483	207.424	1365.18	-79.5281	203.984	1123.72	-80.8367	210.885	1047.46	-79.6502	333.266	918.286	-24.1152	370.215	854.371	-88.8597	346.684	829.959	-56.3272	413.241	792.812
833	0	108.274	329.652	1585.42	223.047	305.99	1600.78	79.7713	165.895	1536.75	185.418	147.481	1546.8	159.504	149.341	1454.13	169.423	65.1577	1172.25	165.582	266.824	1362.59	182.465	335.153	1168.67	248.356	57.1817	1252.17	-14.7489	215.851	1364.57	-80.2505	213.45	1123.42	-81.6922	221.584	1047.15	-80.0365	345.734	919.553	-24.2906	383.527	856.425	-88.9554	360.312	831.241	-56.5045	427.619	795.6
834	0	107.977	339.773	1583.27	222.488	315.308	1599.74	78.5768	176.018	1535.26	183.807	156.668	1546.36	159.388	158.175	1453.41	169.357	72.7601	1171.87	165.343	275.753	1361.44	182.033	343.063	1167.37	248.252	65.4822	1251.72	-15.3941	224.377	1364.08	-80.8383	222.871	1122.89	-82.6343	232.138	1046.8	-80.4899	357.959	920.744	-24.6209	396.866	858.282	-88.8275	373.755	832.493	-56.6634	441.736	798.159
835	0	107.639	349.736	1581.08	221.968	324.477	1598.85	77.0436	186.287	1533.73	182.205	165.855	1545.77	159.268	167.048	1452.65	169.453	80.5426	1171.35	165.172	284.676	1360.28	181.909	351.066	1166.13	248.238	73.8505	1251.3	-15.4721	232.902	1363.29	-81.3116	232.258	1122.14	-83.5365	242.694	1046.63	-80.6619	370.094	921.768	-24.7552	409.996	860.031	-88.6781	387.017	833.545	-56.6917	455.491	800.537
836	0	107.682	359.799	1578.97	221.355	333.417	1597.78	75.8501	196.485	1531.74	180.748	175.047	1544.95	159.135	175.995	1451.79	169.628	88.6574	1170.71	165.201	293.746	1358.93	181.737	359.306	1164.88	248.345	82.3944	1250.7	-15.785	241.658	1362.52	-81.704	241.497	1121.59	-83.9861	253.076	1046.1	-81.0775	381.984	922.666	-24.7932	422.524	861.609	-88.6254	399.825	834.475	-56.772	469.022	802.896
837	0	107.699	369.727	1576.98	220.842	342.396	1596.87	75.0744	206.543	1529.7	179.536	184.141	1543.9	159.288	185.026	1450.84	169.912	96.8116	1170.07	165.281	302.924	1357.82	181.634	367.567	1163.83	248.459	91.0543	1249.94	-15.4988	250.416	1361.57	-81.9915	250.694	1121	-84.5716	263.428	1045.67	-81.4396	393.622	923.522	-25.0271	434.776	863.088	-88.8434	412.362	835.763	-56.6756	482.01	804.952
838	0	107.688	379.507	1574.93	220.593	351.274	1596.19	74.1213	216.488	1527.51	178.315	193.306	1542.83	159.6	194.249	1449.93	170.114	105.225	1169.43	165.396	312.117	1356.51	181.491	375.963	1162.74	248.75	99.7718	1249.3	-15.2481	259.215	1360.78	-82.5385	259.716	1120.41	-85.0549	273.713	1045.14	-81.7207	405.115	924.397	-25.204	446.814	864.309	-88.829	424.561	836.563	-56.7763	494.798	806.765
839	0	107.694	389.078	1573.14	220.388	360.045	1595.44	73.6881	226.412	1525.43	177.349	202.435	1541.69	159.873	203.37	1448.96	170.352	113.898	1168.63	165.685	321.377	1355.45	181.485	384.52	1161.63	249.12	108.609	1248.46	-15.3062	268.053	1360.04	-82.9206	268.801	1119.96	-85.4052	284.005	1044.5	-81.8143	416.316	924.79	-25.3521	458.427	865.409	-88.7341	436.679	837.47	-56.7697	507.006	808.245
840	0	107.858	398.565	1571.12	219.822	368.669	1594.55	73.238	236.13	1523.17	176.583	211.59	1540.52	160.381	212.512	1447.86	170.786	122.521	1167.73	166.003	330.607	1354.24	181.422	393.064	1160.4	249.527	117.551	1247.45	-14.8577	276.86	1359.11	-82.7779	278.156	1119.14	-85.7626	294.167	1044.14	-81.9382	427.397	925.343	-25.1001	469.931	866.29	-89.0115	448.26	838.021	-56.7287	518.912	809.522
841	0	108.275	407.968	1569.27	219.879	377.66	1593.79	72.9668	245.769	1521.13	176.059	220.593	1539.38	160.843	221.682	1446.8	171.365	131.204	1166.89	166.382	339.962	1353.17	181.438	401.892	1159.3	250.028	126.572	1246.52	-14.3582	285.899	1358.27	-82.9971	287.251	1118.54	-86.0988	304.251	1043.61	-81.7921	438.385	925.682	-25.122	481.002	866.835	-88.7669	459.813	838.092	-56.5513	530.555	810.332
842	0	108.651	417.461	1567.38	219.884	386.521	1593.03	72.9715	255.333	1519.06	175.721	229.681	1538.42	161.445	231.033	1445.76	171.929	140.148	1166.06	166.792	349.321	1352.2	181.421	410.756	1157.96	250.678	135.676	1245.58	-13.9539	294.893	1357.49	-82.8531	296.562	1117.86	-86.3234	314.355	1043.21	-81.8411	449.018	925.707	-24.9391	491.983	866.943	-88.8317	470.739	838.428	-56.4953	541.677	810.912
843	0	108.924	426.892	1565.53	220.004	395.549	1592.18	73.1629	264.806	1517.4	175.63	238.658	1537.43	162.153	240.394	1444.77	172.597	148.99	1165.21	167.308	358.748	1350.97	181.423	419.762	1156.73	251.458	144.744	1244.61	-13.24	303.893	1356.71	-82.6525	306.034	1117.2	-86.3574	324.472	1042.88	-81.8381	459.46	925.549	-25.0216	502.362	866.861	-88.689	481.657	838.476	-56.2179	552.535	811.141
844	0	109.412	436	1563.75	219.9	404.558	1590.82	73.7344	274.059	1515.76	175.961	247.578	1536.6	163.004	249.638	1443.66	173.416	157.737	1164.25	167.958	368.249	1349.92	181.432	428.827	1155.42	252.205	153.917	1243.57	-13.1952	313.239	1356.23	-82.3733	315.468	1116.69	-86.1445	334.481	1042.23	-81.5722	469.801	925.432	-24.7843	512.59	866.731	-88.8492	492.025	838.224	-56.128	562.824	811.131
845	0	109.911	445.2	1561.94	220.412	414.067	1589.78	74.4894	283.017	1514.44	176.535	256.683	1535.9	163.84	259.02	1442.62	174.111	166.733	1163.37	168.551	377.765	1348.91	181.427	438.076	1154.35	252.96	163.166	1242.53	-12.4157	322.502	1355.51	-82.1128	325.031	1116.23	-85.8488	344.311	1041.91	-81.4898	479.808	925.291	-24.6257	522.63	866.242	-88.9125	502.159	837.992	-55.8711	572.891	810.737
846	0	110.486	454.326	1560.14	220.946	423.614	1588.76	75.3351	291.963	1513.47	177.52	265.959	1535.42	164.621	268.439	1441.64	174.869	175.862	1162.48	169.132	387.285	1347.78	181.537	447.329	1153.29	253.84	172.443	1241.66	-11.8939	331.94	1354.99	-81.9589	334.826	1115.7	-85.8937	354.118	1041.62	-81.455	489.63	924.793	-24.673	532.24	865.62	-88.9674	512.148	837.626	-55.636	582.68	810.124
847	0	111.214	463.672	1558.46	221.623	433.271	1587.27	76.6357	300.671	1512.52	178.782	275.132	1534.86	165.514	277.807	1440.51	175.75	184.857	1161.5	169.735	396.829	1346.78	181.623	456.712	1152.2	254.642	181.811	1240.48	-11.1277	341.312	1354.29	-81.2647	344.784	1115.23	-85.773	363.867	1041.02	-81.1956	499.28	924.314	-24.7642	541.437	864.765	-89.1321	521.834	837	-55.5943	592.109	809.209
848	0	111.807	472.842	1556.98	222.569	443.096	1585.93	77.903	309.491	1511.91	180.354	284.496	1534.28	166.574	287.223	1439.37	176.616	194.028	1160.54	170.5	406.534	1345.87	181.796	466.117	1151.43	255.368	191.467	1239.24	-10.4805	350.733	1353.74	-80.7904	354.509	1114.73	-85.3245	373.524	1040.53	-81.0631	508.788	923.67	-24.6313	550.475	863.794	-89.2101	531.015	836.405	-55.5549	601.039	808.138
849	0	112.649	482.118	1555.72	223.752	453.007	1584.45	79.4943	318.36	1511.45	182.013	294.039	1533.66	167.492	296.726	1438.38	177.382	203.282	1159.59	171.21	416.165	1344.97	181.932	475.658	1150.52	256.141	200.907	1238.18	-9.7795	360.085	1353.22	-80.3538	364.251	1114.32	-84.8809	383.209	1040.12	-80.723	517.984	922.919	-24.7107	559.119	862.423	-89.4017	539.861	835.444	-55.5153	609.628	806.687
850	0	113.862	491.468	1554.45	225.116	462.95	1583	81.1081	327.462	1510.99	183.849	303.502	1532.9	168.499	306.35	1437.43	178.079	212.966	1158.56	171.828	425.968	1344.14	182.157	485.324	1149.83	256.9	210.837	1237.07	-9.2252	369.63	1352.91	-79.6771	374.085	1114.1	-84.3678	392.817	1039.59	-80.8425	526.97	921.87	-24.7161	567.718	861.162	-89.8262	548.617	834.582	-55.5813	617.964	805.187
851	0	115.199	500.964	1553.41	226.693	472.825	1581.49	82.6663	336.694	1510.35	185.715	313.138	1531.81	169.531	315.949	1436.45	179.04	222.308	1157.69	172.559	435.926	1343.15	182.312	495.11	1149	257.712	220.288	1235.96	-8.28893	379.323	1352.35	-78.9612	384.089	1113.81	-83.8783	402.101	1039.23	-80.7807	535.82	920.712	-24.5915	575.93	859.352	-89.9967	556.847	833.309	-55.6434	625.939	803.398
852	0	116.927	510.468	1552.51	228.474	482.457	1579.86	84.3952	346.071	1509.71	187.409	322.784	1530.65	170.741	325.742	1435.43	179.939	231.977	1156.72	173.541	445.989	1342.06	182.622	505.06	1148.05	258.54	230.189	1234.77	-7.49024	389.017	1351.99	-78.4471	393.788	1113.49	-83.2952	411.315	1039.05	-80.7403	544.269	919.256	-24.6321	583.886	857.281	-90.4213	564.893	831.867	-55.6662	633.534	801.116
853	0	118.766	520.182	1551.77	230.477	492.051	1578.79	85.8793	355.92	1509.11	189.051	332.372	1529.54	171.835	335.711	1434.65	180.715	242.019	1155.88	174.398	456.173	1341.32	183.111	515.203	1147.36	259.39	240.304	1233.78	-6.59173	398.963	1351.74	-77.9319	403.585	1113.28	-82.8888	420.654	1038.74	-80.6566	552.492	918.032	-24.6367	591.552	855.344	-90.5809	572.414	830.441	-56.074	640.7	798.838
854	0	121.059	529.77	1551.14	232.689	501.579	1577.92	87.44	365.754	1508.51	190.566	341.937	1528.58	173.15	345.885	1433.8	181.346	252.249	1155.04	175.473	466.527	1340.6	183.385	525.433	1146.79	260.212	250.63	1232.76	-5.56886	409.163	1351.45	-77.2471	413.382	1113.13	-82.4595	429.764	1038.46	-80.5438	560.556	916.642	-24.9341	598.812	853.355	-91.058	580.046	829.018	-56.2184	647.812	796.587
855	0	122.977	539.682	1550.8	234.877	510.917	1577.02	89.2369	375.645	1507.84	192.21	351.433	1527.6	174.501	355.994	1433.05	182.305	262.687	1154.12	176.491	477	1340.1	184.033	535.917	1146.18	261.221	261.111	1231.63	-4.35736	419.194	1351.26	-76.2961	423.279	1112.99	-81.9094	438.812	1038.26	-80.5819	568.328	915.322	-25.1347	605.893	851.32	-91.6123	587.023	827.594	-56.506	654.248	794.095
856	0	125.436	549.518	1550.34	237.196	520.339	1576.29	90.6875	385.635	1507.44	193.846	360.989	1526.78	176.066	366.348	1432.23	183.058	273.242	1153.29	177.7	487.604	1339.54	184.646	546.753	1145.94	262.207	271.761	1230.58	-3.19654	429.804	1351.23	-75.9835	432.661	1113.14	-81.4738	447.745	1038.22	-80.5937	576.021	914.036	-25.4963	612.77	849.056	-92.205	593.926	826.208	-56.8861	660.533	791.571
857	0	127.681	559.433	1550.12	239.302	529.657	1575.38	92.4014	395.764	1507.2	195.433	370.767	1526.16	177.614	376.757	1431.55	184.051	284.135	1152.54	178.955	498.363	1339.24	185.172	557.615	1145.64	263.318	282.684	1229.64	-2.1774	440.231	1351.4	-75.4736	442.28	1113.37	-80.9396	456.502	1038.07	-80.7388	583.412	912.635	-26.0853	619.278	846.917	-93.1043	600.545	824.751	-57.4927	666.417	788.858
858	0	130.072	569.29	1549.82	241.922	539.48	1574.85	94.0444	405.671	1507.08	197.281	380.391	1525.58	179.185	387.27	1430.96	185.137	295.079	1151.84	180.065	509.128	1339.06	185.719	568.855	1145.46	264.479	293.965	1228.58	-0.91608	450.959	1351.55	-74.548	452.12	1113.41	-80.4084	465.316	1038.02	-80.9988	590.801	911.441	-26.493	625.775	844.841	-93.7547	607.033	823.25	-58.0559	672.218	786.245
859	0	132.392	579.432	1549.86	244.369	549.324	1574.06	96.1476	415.811	1507.23	199.175	390.316	1525.11	180.714	397.846	1430.39	186.253	306.247	1151.02	181.545	520.12	1338.89	186.379	580.301	1145.38	265.782	304.807	1227.65	0.609748	461.855	1351.55	-73.9453	461.466	1113.46	-79.6886	473.944	1037.89	-81.2123	597.838	909.925	-27.0579	631.936	842.575	-94.6561	613.013	821.902	-59.0126	677.406	783.426
860	0	134.809	589.629	1550.02	246.82	559.388	1573.46	97.8519	426.072	1507.74	201.063	400.489	1524.84	182.248	408.517	1430.04	187.534	317.432	1150.43	182.911	531.209	1338.87	187.045	592.028	1145.43	267.066	316.044	1226.84	1.70376	472.634	1351.87	-73.1802	470.781	1113.72	-79.0117	482.421	1038.02	-81.5202	604.758	908.451	-27.9317	637.851	840.396	-95.6614	618.707	820.271	-59.9433	682.435	780.639
861	0	137.199	599.71	1550.12	249.239	569.756	1572.79	99.9366	436.27	1508.37	203.31	410.708	1524.75	183.907	419.285	1429.84	188.977	328.754	1150.13	184.11	542.266	1338.95	187.813	603.847	1145.55	268.35	327.338	1226.27	3.01342	483.786	1352.36	-72.2995	480.189	1114.06	-78.277	490.92	1038.4	-81.8454	611.424	907.04	-28.5072	643.714	838.068	-96.542	624.223	818.814	-61.0868	687.176	777.787
862	0	139.276	610.275	1550.58	251.683	580.364	1572.31	102.306	446.599	1509.24	205.74	421.171	1524.83	185.475	430.029	1429.73	190.425	340.207	1149.87	185.463	553.428	1339.09	188.482	615.738	1145.85	269.705	338.442	1225.88	4.89401	495.08	1352.8	-71.2725	489.618	1114.48	-77.4597	499.275	1038.84	-82.2572	617.783	905.636	-29.2671	649.079	835.646	-97.4087	629.261	817.589	-62.4124	691.578	775.146
863	0	141.572	620.761	1551.15	253.832	590.891	1571.79	104.291	456.931	1510.35	208.197	431.936	1525.14	186.945	440.812	1429.87	191.731	351.516	1149.87	186.797	564.616	1339.52	189.169	627.715	1146.43	270.826	349.547	1225.75	5.86888	506.384	1353.57	-69.9986	499.003	1114.93	-76.676	507.546	1039.29	-82.5513	623.91	904.619	-30.176	654.233	833.635	-98.2724	633.82	816.217	-63.9366	695.611	772.766
864	0	143.774	631.532	1551.94	256.66	602.139	1571.97	106.644	467.329	1511.66	210.751	442.755	1525.64	188.371	451.671	1430.32	192.876	362.986	1150.28	188.078	575.805	1340.16	189.932	639.656	1147.17	271.874	360.711	1225.92	6.98185	517.731	1354.63	-69.3651	507.991	1115.98	-75.8019	515.812	1040.16	-82.9896	629.702	903.496	-31.0461	659.216	832.1	-99.325	637.878	815.225	-65.6514	699.306	770.553
865	0	145.874	642.4	1552.92	259.018	613.227	1572.09	109.377	477.959	1513.23	213.435	453.746	1526.24	189.757	462.676	1430.99	193.915	374.44	1150.8	189.189	586.866	1341.05	190.785	651.43	1148.13	272.89	371.919	1226.32	8.43139	528.995	1355.69	-68.1927	517.134	1117.04	-74.7941	523.934	1041.15	-83.2956	635.331	902.767	-31.8269	663.83	830.457	-100.109	641.896	814.236	-67.1616	702.755	768.468
866	0	148.099	653.052	1553.83	261.279	624.516	1572.01	111.534	488.651	1514.68	216	464.784	1527.08	191.127	473.636	1431.8	194.707	385.824	1151.5	190.467	597.944	1341.97	191.656	663.015	1149.25	273.8	382.928	1226.85	9.54641	540.34	1357.11	-67.0487	526.432	1118.32	-73.6793	532.018	1042.48	-83.5371	640.741	902.116	-32.6691	668.372	829.107	-100.726	645.691	813.769	-68.9072	705.588	766.327
867	0	150.115	664.207	1554.82	263.502	635.846	1572.27	113.866	499.459	1516.33	218.314	476.009	1528.01	192.506	484.478	1432.79	195.291	396.939	1152.53	191.751	608.962	1343.06	192.545	674.47	1150.48	274.802	393.845	1227.83	11.1771	551.361	1358.42	-65.9911	535.655	1119.6	-72.586	539.888	1043.87	-83.8568	645.993	901.793	-33.5959	672.736	828.153	-101.43	649.043	813.433	-70.2939	708.436	764.453
868	0	151.997	675.359	1555.84	265.661	647.115	1572.7	115.867	510.357	1517.8	220.46	487.23	1529.07	193.921	495.359	1433.94	195.753	408.229	1153.55	192.907	619.837	1344.2	193.509	685.656	1151.83	275.718	404.815	1228.8	12.2629	562.185	1359.94	-64.6028	544.871	1121.12	-71.4675	547.72	1045.39	-84.0776	651.158	901.689	-34.2708	676.686	827.01	-102.161	652.422	813.381	-71.5602	710.798	762.555
869	0	153.944	686.464	1556.73	267.772	658.489	1573.32	117.571	521.391	1519.32	222.388	498.245	1530.25	195.369	506.16	1435.06	196.571	418.944	1154.85	194.063	630.606	1345.43	194.46	696.555	1153.3	276.884	415.659	1230.04	13.3927	572.794	1361.58	-63.4257	554.095	1122.79	-70.4061	555.312	1047.14	-84.2881	656.425	901.803	-35.0997	680.457	826.359	-102.911	655.991	813.653	-72.5325	712.896	760.983
870	0	155.727	697.459	1557.45	269.628	669.533	1573.8	119.206	532.288	1520.76	224.064	509.175	1531.43	196.859	516.755	1436.28	197.119	429.899	1155.93	195.288	641.409	1346.45	195.372	707.275	1154.7	278.041	426.542	1231.04	14.9428	583.206	1363.2	-62.1808	563.056	1124.41	-69.1041	562.644	1048.96	-84.3522	661.223	902.221	-35.9417	684.258	826.014	-103.789	659.411	814.226	-73.3439	714.797	759.319
871	0	157.393	708.399	1558.22	271.184	680.593	1574.37	120.632	543.12	1522.35	225.595	520.044	1532.88	198.372	527.292	1437.46	197.996	440.323	1157.27	196.285	651.95	1347.66	196.212	717.762	1156	279.342	437.293	1232.17	16.0614	593.242	1364.87	-61.0317	572.154	1126.22	-67.7994	569.944	1050.69	-84.5198	666.15	902.71	-36.4467	687.904	825.591	-104.49	662.84	814.994	-73.9483	716.448	757.937
872	0	158.819	719.412	1558.91	272.418	691.322	1575	121.96	553.805	1523.75	226.862	530.765	1534.22	199.799	537.661	1438.76	198.734	450.862	1158.43	197.276	662.409	1348.79	196.903	728.047	1157.42	280.69	448.142	1233.27	17.1106	603.298	1366.67	-59.8562	580.881	1127.85	-66.5758	577.188	1052.62	-84.475	671.239	903.303	-37.004	691.609	825.555	-105.047	666.347	815.885	-74.1337	717.969	756.65
873	0	160	730.129	1559.69	273.65	702.092	1575.57	123.419	564.523	1525.19	228.137	541.451	1535.53	201.127	548.006	1439.89	199.65	461.212	1159.68	198.135	672.768	1349.95	197.366	738.061	1158.77	281.957	458.755	1234.21	18.0117	612.92	1368.29	-58.4021	589.681	1129.32	-65.382	584.35	1054.28	-84.2757	676.143	903.959	-37.1145	695.171	825.614	-105.677	669.822	816.925	-74.4545	719.426	755.592
874	0	160.949	740.73	1560.48	274.747	712.761	1576.17	124.069	574.777	1526.62	229.317	552.031	1536.87	202.422	558.194	1441	200.71	471.279	1160.78	198.896	683.013	1351.03	197.723	748.035	1160.05	283.378	469.476	1235.29	19.0198	622.191	1370.02	-57.2971	598.083	1130.92	-64.1049	591.343	1056.08	-83.9907	680.938	904.733	-37.3353	698.441	825.671	-105.67	673.175	817.973	-74.8592	720.722	754.858
875	0	162.085	751.204	1561.2	275.851	723.437	1576.96	125.269	585.149	1528.03	230.356	562.486	1538.16	203.708	568.244	1442.35	201.736	481.171	1162.18	199.417	692.891	1352.16	197.7	757.951	1161.28	284.705	479.582	1236.36	19.5955	631.647	1371.66	-56.3727	606.307	1132.47	-63.0574	598.088	1057.85	-83.373	685.62	905.343	-36.7572	702.056	825.786	-106.093	676.727	819.202	-75.3099	722.384	754.238
876	0	162.922	761.344	1561.86	276.818	734.017	1577.48	126.238	595.161	1529.54	231.421	572.798	1539.52	204.813	578.235	1443.51	202.833	490.646	1163.5	199.863	702.907	1353.25	197.646	767.416	1162.2	286.117	489.783	1237.68	20.3467	640.658	1373.29	-55.3424	614.121	1133.93	-61.9697	604.933	1059.44	-82.9725	690.41	905.974	-37.2458	705.403	826	-106.055	680.346	820.214	-75.695	724.049	753.771
877	0	163.626	771.562	1562.42	277.651	744.506	1577.66	127.316	605.237	1531.12	232.44	582.97	1540.74	205.891	588.065	1444.65	203.867	499.983	1164.76	200.088	712.609	1354.17	197.337	776.931	1163.04	287.316	499.907	1238.66	21.2832	649.557	1374.44	-54.3997	621.755	1135.19	-60.9033	611.633	1060.89	-82.3917	695.126	906.56	-36.7949	708.499	825.934	-106.016	683.979	821.246	-76.0268	725.766	753.427
878	0	164.579	781.805	1562.93	278.545	754.971	1577.68	128.028	615.097	1532.87	233.454	593.114	1542.06	206.951	597.702	1445.84	204.914	509.312	1165.98	200.23	722.173	1355.1	197.084	786.166	1163.78	288.741	509.764	1239.91	21.4551	658.212	1376.06	-53.5351	629.152	1136.51	-59.9179	618.131	1062.44	-81.5799	699.781	907.206	-35.8164	711.723	826.051	-105.816	687.585	822.499	-76.2531	728.146	753.555
879	0	165.309	791.793	1563.33	279.24	765.192	1577.62	128.838	624.962	1534.79	234.353	603.21	1543.54	207.789	607.189	1447	206.111	518.549	1167.33	200.277	731.651	1356.03	196.457	795.182	1164.53	290.082	519.502	1241.22	22.0705	666.564	1377.38	-52.6204	636.226	1137.75	-59.0762	624.526	1063.79	-80.8225	704.467	907.913	-35.6282	715.246	826.467	-105.556	691.41	823.767	-76.411	730.503	753.8
880	0	166.154	802.045	1563.66	280.097	775.438	1577.48	129.663	634.74	1536.67	235.107	613.216	1545.02	208.525	616.691	1448.23	207.258	527.689	1168.61	200.209	740.98	1356.91	195.603	803.979	1165.21	291.296	529.213	1242.52	22.3792	674.814	1378.65	-51.9065	642.803	1138.92	-58.412	630.529	1065.41	-80.0936	708.927	908.822	-35.0447	718.638	826.948	-105.328	695.301	824.919	-76.1538	733.204	753.963
881	0	166.873	812.081	1563.98	281.019	785.619	1577.19	130.254	644.4	1538.81	235.789	623.013	1546.62	209.136	625.78	1449.32	208.258	537.018	1169.68	200.082	750.187	1357.77	194.757	812.611	1166.01	292.636	538.638	1243.72	22.9416	682.746	1379.96	-51.2846	649.108	1140.16	-57.6677	636.326	1066.73	-79.1787	713.373	909.643	-33.9718	722.166	827.403	-104.683	699.259	825.993	-75.814	735.916	754.355
882	0	167.763	822.15	1564.15	282.015	795.902	1576.91	130.728	654.354	1540.96	236.355	632.888	1548.4	209.753	634.9	1450.39	209.458	545.76	1170.9	199.78	759.238	1358.72	193.787	821.213	1166.83	293.987	548.012	1244.93	23.2803	690.464	1381	-50.7597	655.016	1141.29	-57.1691	641.74	1068.03	-78.4579	718.026	910.446	-33.2051	725.667	828.045	-104.03	703.254	826.944	-75.2753	738.85	755.005
883	0	168.432	832.307	1564.19	282.603	805.838	1576.65	131.101	664.319	1543.38	236.816	642.775	1550.34	210.376	643.895	1451.57	210.59	554.687	1172.08	199.42	768.063	1359.66	192.859	829.725	1167.75	295.166	557.31	1246.29	23.0106	698.142	1382.33	-50.3588	660.681	1142.64	-56.5014	647.032	1069.35	-77.8578	722.487	911.299	-32.7732	730.096	829.062	-103.423	707.437	828.075	-74.644	742.158	755.557
884	0	169.005	842.399	1563.93	283.353	816.008	1576.32	131.321	674.139	1545.33	237.077	652.69	1552.24	211.115	652.714	1452.62	211.791	563.36	1173.15	198.895	776.682	1360.66	191.986	838.174	1168.67	296.489	566.442	1247.28	23.2714	705.464	1383.43	-50.2909	665.924	1143.87	-56.0191	652.073	1070.64	-77.2195	727.028	912.098	-31.5579	734.103	829.915	-102.472	711.404	828.91	-73.6138	745.526	756.142
885	0	169.642	852.357	1563.7	283.738	826.032	1575.93	131.578	684.096	1547.31	237.238	662.605	1554.18	211.498	661.389	1453.55	212.978	572.044	1173.92	198.687	785.162	1361.52	191.115	846.544	1169.63	297.734	575.606	1248.38	23.5179	712.916	1384.42	-50.3324	670.924	1145.16	-55.4816	656.948	1071.84	-76.809	731.46	912.813	-30.6506	738.826	830.862	-101.476	715.339	829.497	-72.7942	749.123	756.672
886	0	169.913	862.409	1563.3	284.132	836.107	1575.75	131.652	694.251	1548.71	237.124	672.501	1555.97	212.039	669.816	1454.4	213.98	580.685	1174.69	198.544	793.552	1362.22	190.408	854.895	1170.6	298.95	584.472	1249.14	23.8436	720.291	1385.22	-49.9925	675.997	1146.37	-55.0682	661.716	1072.96	-76.3441	735.742	913.51	-30.6048	744.148	831.904	-100.475	719.319	830.071	-71.5813	752.908	757.314
887	0	170.378	872.798	1562.47	284.41	846.128	1575.65	131.272	704.258	1549.79	236.924	682.411	1557.43	212.585	678.327	1455.13	214.941	589.371	1175.37	198.374	801.915	1362.7	189.705	863.183	1171.37	299.911	593.242	1249.91	24.3972	727.436	1385.81	-49.8904	680.815	1147.44	-54.5696	666.531	1074.15	-76.0355	740.013	914.01	-30.1498	749.403	832.792	-99.4139	723.149	830.478	-70.1737	756.949	757.395
888	0	170.484	882.799	1561.72	284.311	855.991	1575.37	131.094	714.479	1550.54	236.521	692.268	1558.71	213.229	686.769	1455.66	215.911	597.908	1175.82	198.306	810.268	1362.96	189.158	871.454	1172.04	301.043	601.833	1250.5	23.9432	734.71	1386.81	-49.8805	685.522	1148.47	-53.9005	671.396	1075.13	-75.7744	744.34	914.484	-29.2972	753.819	833.363	-98.4645	727.027	830.72	-69.5083	761.587	758.141
889	0	170.686	892.875	1560.9	284.067	865.747	1575.26	130.672	724.408	1550.99	236.006	702.034	1559.88	213.804	695.255	1456.05	216.832	606.533	1176.06	198.29	818.56	1363.19	188.669	879.635	1172.66	301.885	610.643	1250.81	24.2891	742.079	1387.3	-49.6811	690.168	1149.49	-53.0193	676.313	1075.94	-75.7064	748.674	914.931	-28.2165	759.265	833.869	-97.2215	730.622	830.793	-68.5219	765.946	758.597
890	0	170.221	902.61	1560.15	283.853	875.471	1575.45	130.071	734.191	1551.27	235.537	711.799	1560.9	214.437	703.64	1456.38	217.674	615.066	1176.3	198.368	826.867	1363.17	188.346	887.77	1173.14	302.671	619.316	1250.94	25.0311	749.451	1387.4	-49.3869	694.923	1150.34	-52.2921	681.276	1076.6	-75.4759	752.933	915.233	-28.5784	764.672	834.547	-95.9204	734.063	830.815	-67.8311	770.371	758.862
891	0	169.965	912.258	1559.38	283.422	885.183	1575.64	129.6	743.879	1551.28	234.988	721.383	1561.76	214.886	712.152	1456.49	218.177	623.929	1176.33	198.342	835.091	1363.13	188.194	895.93	1173.38	303.347	628.027	1250.99	25.1266	756.924	1387.6	-48.9755	699.931	1150.94	-51.4822	686.682	1076.97	-75.4289	757.431	915.333	-28.3861	769.518	834.947	-94.935	737.578	830.666	-67.5792	774.841	759.251
892	0	169.657	921.791	1558.56	282.846	894.823	1575.67	129.393	753.389	1551.09	234.562	730.959	1562.41	215.366	720.636	1456.5	218.81	632.445	1176.31	198.383	843.358	1363.1	188.138	903.948	1173.32	303.902	636.425	1250.88	25.3304	764.623	1387.73	-48.4032	705.229	1151.42	-50.6231	692.221	1077.18	-75.3279	761.878	915.373	-28.8813	775.351	835.327	-93.9321	741.026	830.333	-67.4137	779.384	759.322
893	0	168.846	930.959	1557.89	282.203	904.322	1575.6	129.121	762.513	1550.9	234.154	740.316	1562.83	215.86	729.163	1456.43	219.431	641.057	1176.19	198.34	851.58	1362.93	187.948	912.063	1173.11	304.299	645.15	1250.66	26.0608	772.276	1387.38	-47.6141	710.791	1151.65	-49.6207	697.924	1077.25	-75.2934	766.219	915.287	-29.1033	781.164	835.403	-92.6434	744.367	829.824	-67.3946	783.933	759.105
894	0	168.385	940.118	1557.16	281.711	913.682	1575.46	128.623	771.673	1550.69	233.844	749.553	1563.1	216.193	737.697	1456.37	219.913	649.798	1176.1	198.252	859.769	1362.48	187.844	920.319	1172.72	304.738	653.73	1250.48	26.1952	780.046	1387.05	-46.9166	716.793	1151.7	-48.7039	703.863	1077.32	-75.2022	770.683	914.902	-29.5446	786.847	835.125	-91.6277	747.89	829.255	-67.5324	788.458	758.825
895	0	167.96	949.249	1556.3	281.096	922.966	1575.04	128.377	780.663	1550.24	233.511	758.751	1563.09	216.464	746.28	1456.11	220.317	658.589	1175.79	198.234	868.152	1361.86	187.604	928.819	1172.03	304.901	662.427	1250.08	26.0849	787.953	1386.74	-46.1212	723.091	1151.39	-47.6618	710.06	1077.14	-75.1394	775.456	914.26	-29.9702	792.516	834.571	-90.7608	751.784	828.52	-67.6075	793.142	758.293
896	0	167.536	958.227	1555.62	280.627	932.008	1574.51	128.058	789.374	1549.68	233.245	767.757	1562.8	216.638	754.875	1455.59	220.846	667.508	1175.3	198.002	876.436	1361.25	187.215	937.228	1171.3	305.292	670.927	1249.58	26.0154	795.743	1386.39	-45.1704	729.802	1150.89	-46.6538	716.279	1076.87	-74.9256	780.315	913.522	-30.1226	798.303	833.995	-89.7444	755.659	827.747	-67.6007	797.957	757.569
897	0	167.208	967.015	1554.81	280.178	940.951	1573.98	127.698	798.314	1549.11	232.985	776.673	1562.37	216.737	763.448	1455.08	221.267	676.509	1174.87	197.808	884.777	1360.5	186.849	945.825	1170.62	305.382	679.555	1249.07	26.0831	803.762	1385.79	-44.3552	736.82	1150.21	-45.7485	722.732	1076.36	-74.8292	785.372	912.799	-30.3658	804.069	833.038	-88.8093	759.945	827.065	-67.6343	802.882	756.742
898	0	166.87	975.857	1554.05	280.025	949.869	1573.37	127.458	807.141	1548.49	232.631	785.513	1561.81	216.879	772.112	1454.55	221.573	685.108	1174.35	197.583	893.209	1359.66	186.464	954.443	1169.64	305.577	688.045	1248.5	25.7486	811.755	1385.14	-43.5982	744.137	1149.37	-44.9016	729.379	1075.89	-74.6676	790.704	911.891	-30.3796	809.757	832.331	-88.0315	764.815	826.178	-67.7432	807.883	755.677
899	0	166.737	984.667	1553.24	279.693	958.495	1572.59	127.192	816.033	1547.56	232.245	794.211	1560.94	216.934	780.731	1453.75	221.535	693.587	1173.54	197.388	901.718	1358.83	185.869	963.149	1168.77	305.593	696.738	1247.71	25.647	819.9	1384.44	-42.8523	751.462	1148.49	-44.1144	736.162	1075.25	-74.4243	796.454	910.928	-30.2848	815.362	831.127	-87.3545	769.819	825.119	-67.9007	813.159	754.758
900	0	166.68	993.541	1552.4	279.563	967.148	1571.78	126.928	824.905	1546.46	231.872	802.964	1560	216.917	789.443	1452.87	221.602	701.761	1172.84	197.005	910.218	1357.84	185.311	971.814	1167.91	305.719	705.206	1246.89	25.3491	828.137	1383.67	-42.4204	758.905	1147.56	-43.5101	743.239	1074.43	-74.1508	802.405	909.95	-30.1518	821.061	829.953	-86.9027	775.132	824.213	-67.8198	818.592	753.805
901	0	166.681	1002.41	1551.4	279.441	975.756	1570.94	126.552	833.816	1545.44	231.406	811.619	1559.09	216.738	798.164	1452.01	221.501	710.643	1171.87	196.599	918.788	1356.88	184.746	980.386	1166.94	305.604	713.835	1246.12	25.7142	836.442	1382.35	-41.9254	766.606	1146.59	-43.0301	750.529	1073.58	-73.7703	808.84	908.774	-29.7542	826.978	828.555	-86.5531	780.997	823.073	-67.706	824.233	752.575
902	0	166.413	1011.17	1550.44	279.252	984.376	1570.08	126.248	842.717	1544.39	231.066	820.35	1558.04	216.581	806.934	1451	221.416	719.365	1170.9	196.197	927.491	1355.75	184.088	988.963	1165.74	305.514	722.368	1245.18	25.1204	844.987	1381.55	-41.9268	774.659	1145.58	-42.8466	758.401	1072.72	-73.5323	815.574	907.487	-29.533	832.902	827.307	-86.4866	787.04	822.074	-67.3422	829.791	751.421
903	0	166.231	1019.89	1549.33	279.009	992.911	1568.96	125.74	851.314	1543.13	230.552	828.996	1556.81	216.14	815.652	1449.83	221.074	728.079	1169.74	195.755	936.095	1354.62	183.557	997.487	1164.66	305.036	731.119	1243.98	24.8579	853.512	1380.32	-41.6261	782.746	1144.32	-42.7579	766.347	1071.43	-73.2619	822.543	906.092	-29.214	838.987	825.514	-86.555	793.646	820.712	-66.8955	835.827	749.884
904	0	165.918	1028.69	1548.31	278.672	1001.62	1567.95	125.264	860.154	1541.77	230.233	837.632	1555.49	215.855	824.327	1448.66	220.648	736.725	1168.47	195.416	944.867	1353.49	182.962	1006.15	1163.39	304.717	739.668	1242.72	24.8748	862.305	1379.05	-42.2398	791.235	1143.19	-42.8294	774.572	1070.32	-73.2553	829.776	904.529	-28.8703	845.028	824.027	-86.9453	800.47	819.675	-66.7124	841.919	748.413
905	0	165.573	1037.46	1547.11	278.263	1010.34	1566.76	125.024	869.09	1540.54	229.842	846.443	1554.23	215.235	833.159	1447.35	220.213	745.519	1167.28	194.847	953.741	1352.25	182.261	1014.78	1162.12	304.129	748.312	1241.5	24.163	871.043	1377.74	-42.608	799.961	1141.98	-43.209	783.132	1069.19	-73.2537	837.471	903.115	-28.6125	851.456	822.311	-87.5658	807.555	818.561	-66.6329	848.389	746.859
906	0	164.824	1046.15	1545.89	277.715	1019.17	1565.48	124.558	877.578	1539.22	229.494	855.14	1552.83	214.906	841.972	1445.98	219.485	754.623	1165.84	194.389	962.662	1350.85	181.657	1023.65	1160.78	303.494	757.071	1240.18	23.6622	879.986	1376.36	-43.2156	808.959	1140.64	-43.617	791.787	1067.86	-73.1936	845.384	901.482	-29.0296	857.994	820.599	-88.1563	815.065	817.187	-66.592	855.22	745.237
907	0	164.236	1054.77	1544.44	276.931	1028.04	1563.82	124.182	886.111	1537.78	229.048	863.993	1551.25	214.204	850.746	1444.42	218.821	763.543	1164.25	193.789	971.624	1349.43	181.024	1032.64	1159.26	302.869	765.724	1238.54	23.0223	889.114	1375.01	-43.813	817.926	1139.08	-44.179	800.561	1066.59	-73.3607	853.453	899.852	-29.4449	864.939	819.019	-89.2105	822.911	815.848	-66.8085	862.188	743.585
908	0	163.148	1063.43	1543.13	276.052	1036.99	1562.32	123.629	894.677	1536.32	228.594	872.783	1549.66	213.416	859.6	1442.85	217.747	772.484	1162.65	193.096	980.539	1347.85	180.529	1041.82	1157.78	301.805	774.534	1236.96	21.9285	898.042	1373.56	-44.5579	827.261	1137.54	-45.036	809.594	1065.05	-73.7865	861.789	898.156	-28.6085	871.626	816.828	-90.1932	830.868	814.412	-67.2656	869.55	741.96
909	0	162.209	1072.03	1541.57	275.093	1045.93	1560.63	123.16	903.281	1534.98	228.054	881.595	1548.09	212.561	868.393	1441.23	216.77	781.882	1160.94	192.236	989.589	1346.32	179.998	1051.23	1156.28	300.926	783.35	1235.38	21.4503	907.348	1371.81	-45.5307	836.584	1136.05	-45.8664	818.66	1063.53	-74.436	870.244	896.357	-28.9989	878.712	814.737	-91.7303	839.395	813.049	-67.9567	877.421	740.133
910	0	161.043	1080.8	1540.16	274.101	1054.84	1558.94	122.365	911.88	1533.29	227.383	890.562	1546.29	211.516	877.289	1439.48	215.672	791.204	1159.05	191.468	998.699	1344.69	179.374	1060.64	1154.65	299.853	792.164	1233.44	20.0284	916.687	1370.36	-46.354	845.925	1134.28	-46.685	827.865	1061.93	-75.2145	878.977	894.56	-29.6774	885.881	812.635	-93.0966	847.921	811.504	-69.0546	885.456	738.291
911	0	159.898	1089.51	1538.8	273.045	1063.74	1557.27	121.289	920.6	1531.89	226.441	899.271	1544.62	210.387	886.166	1437.75	214.467	800.448	1157.13	190.593	1007.88	1343.23	178.798	1070.25	1153.3	298.578	801.169	1231.63	19.5397	926.077	1368.25	-47.2525	855.4	1132.46	-47.8011	837.251	1060.34	-76.4495	887.872	892.951	-30.7379	893.627	810.532	-94.8351	856.684	809.888	-70.6451	893.664	736.713
912	0	158.688	1098.37	1537.49	271.948	1072.61	1555.81	120.475	929.403	1530.48	225.427	908.231	1542.99	209.112	895.154	1436.11	213.177	810.052	1155.45	189.927	1017.03	1341.63	178.272	1079.95	1151.85	297.246	810.344	1230	18.0162	935.418	1366.64	-48.3971	864.951	1130.8	-48.8858	846.792	1058.54	-77.7413	896.871	891.094	-32.8278	902.597	808.777	-96.7893	865.531	808.398	-72.8075	902.075	735.163
913	0	157.439	1107.31	1536.31	270.775	1081.43	1554.51	119.133	938.334	1529.05	224.106	917.07	1541.47	207.55	904.205	1434.45	211.893	819.728	1153.61	188.496	1026.52	1340.22	177.569	1089.67	1150.43	295.792	819.534	1228.23	16.9748	945.037	1364.74	-49.2878	874.665	1128.79	-50.1055	856.398	1056.81	-79.4503	906.122	889.299	-35.0681	911.756	807.006	-98.9291	874.552	806.902	-75.1654	911.096	733.422
914	0	156.182	1116.25	1535.31	269.337	1090.23	1553.19	117.399	947.358	1527.8	222.646	925.936	1539.78	205.881	913.412	1432.83	210.547	829.552	1151.76	187.208	1035.8	1338.73	177.001	1099.57	1149	294.436	828.904	1226.68	15.3509	954.778	1362.95	-50.9721	884.304	1127.05	-51.3638	866.209	1054.83	-81.4701	915.472	887.565	-37.5035	921.21	805.127	-101.135	883.662	805.266	-77.7878	920.372	731.713
915	0	154.726	1125.32	1534.45	267.868	1099.12	1552.14	115.747	956.377	1526.35	220.906	934.865	1538.38	204.131	922.744	1431.46	209.111	839.471	1150.06	186.115	1045.36	1337.42	176.391	1109.56	1147.68	292.977	838.407	1225.21	13.849	964.627	1361.05	-52.172	894.309	1125.13	-52.7288	876.259	1053	-83.63	925.006	885.774	-39.9188	930.664	803.123	-103.526	892.933	803.635	-80.7124	930.006	730.098
916	0	153.08	1134.33	1533.72	266.242	1108.07	1551.31	113.95	965.474	1525.24	219.164	943.801	1536.96	202.3	932.321	1430.01	207.715	849.559	1148.72	184.721	1055.25	1336.17	175.962	1119.48	1146.3	291.37	848.217	1224	12.6845	974.548	1358.93	-53.6047	904.446	1123.21	-54.3418	886.373	1051.35	-85.9315	934.763	884.082	-42.0723	940.194	801.231	-105.713	902.421	802.179	-83.7936	939.753	728.531
917	0	151.322	1143.45	1533.18	264.467	1116.98	1550.6	112.111	974.565	1523.98	217.244	952.873	1535.58	200.468	942.046	1428.87	206.322	859.677	1147.42	183.118	1064.99	1334.9	175.129	1129.44	1145	289.747	858.163	1222.8	10.8465	984.643	1357.35	-55.1466	914.642	1121.58	-55.8598	896.734	1049.7	-88.4508	944.756	882.589	-45.2531	950.832	799.679	-108.287	912.187	800.713	-87.1028	949.942	726.954
918	0	149.428	1152.64	1532.82	262.482	1125.93	1549.87	110.051	983.742	1522.84	215.271	962.022	1534.25	198.458	951.837	1427.68	205.059	869.823	1146.08	181.313	1074.95	1333.84	174.316	1139.56	1143.79	288.238	868.319	1221.82	8.77121	994.578	1355.81	-56.6684	925.122	1119.77	-57.455	907.245	1048.01	-90.984	954.937	881.079	-48.3318	961.147	797.999	-110.951	922.307	799.263	-90.486	960.382	725.712
919	0	147.446	1161.76	1532.59	260.426	1134.91	1549.47	107.834	993.047	1521.75	213.107	971.155	1533.02	196.4	961.697	1426.67	203.619	880.349	1145.01	179.575	1085.08	1333.01	173.293	1149.98	1142.79	286.681	878.528	1220.92	7.10076	1004.71	1354.23	-58.3914	935.612	1118.16	-59.2132	917.791	1046.59	-93.4753	965.376	879.705	-51.2985	972.097	796.426	-113.605	932.677	798.009	-93.9044	971.325	724.603
920	0	145.216	1170.95	1532.46	258.287	1144.06	1549.39	105.471	1002.31	1520.92	210.809	980.289	1532.07	194.013	971.567	1425.74	202.435	891.562	1143.8	177.73	1095.32	1332.26	172.187	1160.5	1142.16	285.048	889.078	1220	4.80589	1014.95	1352.82	-60.1959	946.283	1116.81	-61.005	928.573	1045.12	-96.1687	976.097	878.591	-54.1627	983.709	795.224	-116.115	943.388	796.891	-97.2919	982.668	723.471
921	0	142.844	1180.34	1532.61	256.032	1153.13	1549.44	103.117	1011.69	1520.09	208.309	989.519	1531.1	191.741	981.466	1424.95	200.835	902.388	1142.82	175.519	1105.49	1331.74	170.739	1171.29	1141.65	283.439	899.643	1219.2	3.23361	1025.13	1351.26	-61.9774	957.09	1115.33	-62.7898	939.504	1043.6	-98.8263	987.177	877.473	-57.2469	994.901	794.102	-118.885	954.629	795.722	-100.645	994.203	722.612
922	0	140.502	1189.75	1533.07	253.537	1162.32	1549.66	100.596	1021.18	1519.67	205.797	998.989	1530.47	189.356	991.361	1424.44	199.494	913.319	1141.94	173.54	1115.89	1331.55	169.426	1182.39	1141.54	281.733	910.39	1218.53	0.993638	1035.4	1350.41	-63.6705	967.841	1113.97	-64.6454	950.64	1042.25	-101.462	998.609	876.505	-60.0061	1006.96	792.907	-121.415	966.156	794.613	-103.73	1006.11	721.812
923	0	138.035	1199.35	1533.73	250.949	1171.72	1550.31	97.9336	1030.89	1519.52	203.223	1008.44	1530.34	187.005	1001.49	1424.16	198.105	924.539	1141.32	171.39	1126.44	1331.57	167.856	1193.66	1141.57	280.134	921.131	1218.26	-1.37878	1045.92	1349.43	-65.8333	978.983	1112.95	-66.5758	962.049	1041.15	-103.868	1010.27	875.635	-62.7734	1018.87	792.036	-124.144	978.023	793.77	-106.647	1018.33	721.146
924	0	135.428	1208.93	1534.39	248.404	1181.18	1551.05	95.1827	1040.59	1519.66	200.392	1018.07	1530.55	184.774	1011.75	1424.05	196.805	935.555	1141.08	169.314	1136.77	1331.88	166.387	1205.06	1141.86	278.562	932.2	1218.27	-3.58085	1056.39	1348.77	-67.7859	990.177	1112.16	-68.4816	973.677	1040.32	-106.45	1022.16	874.883	-65.4239	1031.22	791.335	-126.704	990.153	793.064	-109.421	1030.97	720.507
925	0	132.761	1218.66	1535.15	245.623	1190.68	1551.99	92.4263	1050.32	1519.91	197.542	1027.62	1530.96	182.486	1021.99	1424.13	195.723	946.653	1140.93	167.349	1147.46	1332.37	165.033	1216.7	1142.48	277.017	943.336	1218.42	-5.24989	1066.85	1348.04	-69.6131	1001.61	1111.51	-70.3565	985.467	1039.49	-108.728	1034.64	874.409	-67.8337	1044.1	790.668	-129.043	1002.76	792.453	-112.062	1043.81	720.162
926	0	130.022	1228.49	1536.29	242.837	1200.36	1553.34	89.6198	1060.23	1520.48	194.573	1037.35	1531.77	180.261	1032.14	1424.77	194.609	957.757	1141.19	165.141	1157.91	1333.19	163.621	1228.28	1143.52	275.589	954.572	1218.86	-7.14849	1077.28	1347.96	-71.5549	1013.2	1111.14	-72.3253	997.669	1038.97	-110.828	1047.18	874.126	-70.2052	1056.91	790.301	-131.493	1015.57	792.156	-114.53	1057.08	720.109
927	0	127.286	1238.39	1537.55	239.928	1210.08	1555.02	86.6392	1070.33	1521.32	191.581	1047.3	1533.03	178.091	1042.47	1425.61	193.208	969.112	1141.74	163.216	1168.51	1334.39	162.274	1239.72	1144.65	274.197	965.723	1219.87	-8.92054	1087.68	1347.85	-73.435	1025.13	1111.08	-74.1066	1009.93	1038.91	-112.922	1060.14	874.128	-72.5169	1069.86	790.385	-133.778	1028.78	792.293	-116.749	1070.6	720.212
928	0	124.553	1248.5	1538.64	237.056	1219.88	1556.77	83.6505	1080.5	1522.17	188.507	1057.19	1534.45	176.293	1052.91	1426.6	192.107	979.775	1142.82	161.45	1179.08	1335.7	161.013	1251.12	1146.07	273.061	976.949	1220.96	-10.8335	1097.91	1348.22	-75.0219	1037.19	1111.07	-75.5625	1022.41	1038.77	-114.825	1073.14	874.462	-74.4902	1083.21	790.6	-135.818	1042.3	792.517	-119.03	1084.68	720.636
929	0	121.881	1258.52	1539.84	234.143	1229.82	1558.6	80.7417	1090.61	1523.15	185.366	1067.07	1536.05	174.528	1063.25	1427.77	190.928	990.875	1143.92	159.72	1189.51	1337.35	159.863	1262.67	1147.77	271.93	987.951	1222.22	-12.3953	1108.11	1348.91	-76.2017	1049.23	1111.27	-77.1691	1034.99	1039.23	-116.726	1086.64	875.21	-76.4409	1096.91	791.112	-138.038	1056.17	793.113	-121.301	1098.9	721.51
930	0	119.06	1268.48	1541.13	231.203	1239.69	1560.79	78.0563	1100.73	1524.19	182.447	1076.98	1537.91	172.776	1073.51	1429.15	189.779	1002.15	1145.12	158.175	1200.03	1339.06	158.728	1273.97	1149.72	270.818	998.855	1223.72	-13.4333	1118.3	1349.64	-77.8557	1061.6	1111.87	-78.5762	1047.58	1039.58	-118.319	1100.09	876.221	-78.3116	1110.47	792.047	-140.056	1070.36	793.989	-123.316	1113.45	722.676
931	0	116.162	1278.48	1542.37	228.212	1249.65	1563.09	75.0424	1110.81	1525.15	179.504	1086.86	1539.84	171.307	1083.76	1430.54	188.485	1013.18	1146.67	156.629	1210.4	1340.93	157.503	1284.9	1151.85	269.751	1009.6	1225.27	-14.7619	1128.39	1350.68	-79.1119	1073.92	1112.61	-79.7837	1060.33	1040.33	-119.872	1114.02	877.472	-80.0087	1124.72	793.349	-141.801	1084.76	795.11	-125.459	1128.35	724.114
932	0	113.494	1288.52	1543.65	225.257	1259.64	1565.43	72.6495	1120.81	1526.02	176.779	1097.03	1541.7	169.844	1093.91	1431.96	187.25	1023.85	1147.96	155.467	1220.84	1342.89	156.488	1295.87	1153.94	268.599	1020.28	1226.61	-15.8974	1138.63	1351.8	-80.198	1086.18	1113.51	-81.0228	1073.08	1041.27	-120.996	1128.1	878.703	-81.5071	1139.47	794.565	-143.426	1099.37	796.326	-127.344	1143.64	725.789
933	0	110.738	1298.41	1544.79	222.129	1269.69	1567.7	70.3311	1130.65	1526.8	174.319	1106.81	1543.57	168.565	1103.95	1433.41	186.152	1035.22	1149.06	154.308	1230.98	1344.89	155.659	1306.94	1156.15	267.408	1030.67	1227.9	-16.9737	1148.85	1353.03	-81.1103	1098.32	1114.41	-82.2025	1085.76	1042.35	-122.388	1142.13	880.304	-82.8757	1153.38	795.832	-145.023	1114.32	797.719	-129.153	1159.29	727.498
934	0	107.903	1308.2	1545.93	219.258	1279.85	1570.11	68.5332	1140.33	1527.55	172.171	1116.71	1545.46	167.348	1113.92	1434.78	185.008	1045.37	1150.47	153.597	1241.27	1346.73	154.865	1317.82	1158.28	266.204	1041.06	1229.15	-18.2085	1159.23	1354.61	-82.1509	1110.52	1115.47	-83.2143	1098.58	1043.3	-123.136	1156.52	881.836	-83.9741	1168.69	797.6	-146.302	1129.34	799.166	-131.047	1175.26	729.392
935	0	105.045	1317.76	1547.15	216.46	1290.07	1572.62	66.7547	1149.75	1528.12	170.306	1126.73	1547.12	166.157	1123.8	1436.11	183.771	1055.93	1151.57	152.734	1251.32	1348.58	154.055	1328.57	1160.45	264.774	1051.19	1230.3	-19.1681	1169.73	1356.26	-83.1347	1122.71	1116.66	-84.3819	1111.59	1044.46	-124.379	1170.75	883.64	-84.9719	1183.78	799.34	-147.54	1144.4	800.631	-132.086	1191.08	731.414
936	0	102.312	1327.3	1548.44	213.669	1300.33	1574.8	65.2987	1159.03	1528.63	168.932	1136.77	1548.5	165.001	1133.66	1437.32	182.325	1066.3	1152.57	152.197	1261.55	1350.3	153.681	1339.07	1162.39	263.233	1061.06	1231.24	-20.3228	1180.36	1357.89	-84.175	1134.89	1117.9	-85.6076	1124.47	1045.68	-125.017	1185.26	885.237	-85.889	1198.93	801.109	-148.284	1159.65	801.943	-133.108	1207.1	733.398
937	0	99.6659	1336.74	1549.78	211.099	1310.55	1577.07	64.2031	1168.33	1528.97	167.757	1146.71	1549.71	163.938	1143.54	1438.4	180.292	1076.38	1153.55	151.689	1271.72	1351.9	153.346	1349.66	1164.18	261.341	1070.8	1232.05	-21.1543	1191.19	1359.32	-85.3483	1147.09	1119.02	-86.6876	1137.35	1046.64	-125.821	1199.99	886.811	-86.6055	1214.22	802.787	-148.946	1175.01	803.21	-133.844	1223.5	735.394
938	0	97.3103	1346.19	1551.09	208.643	1320.72	1579.22	63.2868	1177.8	1529.33	166.761	1156.69	1550.8	162.726	1153.47	1439.59	178.346	1086.37	1154.64	151.373	1281.62	1353.13	153.258	1359.73	1165.6	259.384	1080.37	1232.96	-21.8442	1202.25	1360.64	-86.4587	1159.3	1120.26	-88.0523	1150.49	1047.83	-126.477	1214.48	888.328	-87.2119	1229.34	804.51	-149.549	1190.37	804.459	-134.343	1239.93	737.323
939	0	95.1729	1355.55	1552.45	206.584	1330.81	1581.13	62.6664	1186.77	1529.78	166.047	1166.48	1551.88	161.672	1163.38	1440.81	176.367	1096.67	1155.59	151.152	1291.75	1354.32	153.251	1369.8	1166.73	257.302	1089.71	1233.96	-22.6464	1213.4	1361.89	-87.7608	1171.59	1121.4	-89.4545	1163.52	1049.1	-127.067	1229.32	889.803	-87.5003	1244.84	806.209	-150.058	1206.13	805.733	-134.431	1256.44	739.121
940	0	93.5656	1364.98	1553.78	204.882	1340.72	1582.87	61.8402	1196.39	1530.29	165.462	1176.33	1552.78	160.568	1173.28	1441.97	173.923	1106.37	1156.63	150.748	1301.5	1355.38	153.35	1379.78	1167.76	255.087	1098.77	1234.95	-23.4842	1224.67	1363.09	-89.0457	1183.96	1122.48	-90.6489	1176.56	1049.93	-127.304	1244.18	891.16	-87.6347	1260.26	807.956	-150.084	1221.71	806.69	-134.35	1272.95	741.02
941	0	92.4608	1374.59	1555.22	203.837	1350.44	1584.56	61.2828	1205.8	1530.89	164.618	1186.12	1553.49	159.45	1183.31	1443.13	171.6	1116.09	1157.65	150.635	1311.35	1356.39	153.397	1389.46	1168.7	252.871	1108.02	1235.89	-24.6507	1235.97	1364.56	-90.5397	1196.35	1123.77	-92.0822	1189.71	1050.93	-127.743	1259.2	892.796	-87.6114	1275.94	809.994	-150.348	1237.8	807.831	-134.003	1289.63	742.979
942	0	91.7372	1384.27	1556.66	203.213	1359.95	1586.1	60.5047	1215.62	1531.67	163.891	1195.76	1554.29	158.304	1193.13	1444.25	169.198	1125.9	1158.81	150.184	1320.89	1357.36	153.626	1399.12	1169.34	250.672	1117.04	1236.96	-25.4222	1247.2	1365.76	-91.8933	1208.89	1125.04	-93.5215	1202.78	1052.06	-128.122	1273.95	894.364	-87.5386	1291.46	812.082	-150.36	1253.84	808.828	-133.443	1306.26	745.049
943	0	91.6092	1394.13	1558.07	202.844	1369.28	1587.47	59.836	1225.77	1532.28	163.056	1205.37	1554.98	157.052	1202.99	1445.34	167.279	1135.7	1160.15	149.997	1330.74	1358.29	153.71	1408.67	1169.9	248.567	1125.95	1237.94	-26.2508	1258.47	1366.88	-93.4109	1221.47	1126.06	-94.8821	1215.73	1052.9	-128.483	1288.9	895.875	-87.2048	1307.32	813.996	-150.37	1270.05	810.055	-132.648	1323.41	746.932
944	0	91.7872	1404.1	1559.41	202.931	1378.44	1588.74	58.9308	1236.17	1532.77	162.107	1214.82	1555.59	155.829	1212.71	1446.34	165.047	1145.12	1161.11	149.412	1340.13	1359.23	153.809	1418.07	1170.43	246.426	1134.78	1238.85	-26.6087	1269.54	1367.79	-94.7309	1234.1	1127.02	-96.3483	1228.68	1053.53	-128.746	1304.09	897.304	-86.5158	1322.85	815.744	-150.35	1286.32	811.124	-131.593	1340.17	748.802
945	0	92.2479	1414.13	1560.51	203.133	1387.53	1589.9	58.1959	1246.53	1533.39	161.161	1224.36	1556.19	154.702	1222.46	1447.32	162.449	1154.08	1162.24	149.227	1349.88	1360.08	153.912	1427.33	1170.85	244.435	1143.63	1239.88	-27.7215	1280.46	1369.11	-96.1546	1246.78	1128.18	-97.7175	1241.79	1054.53	-128.669	1319.1	898.701	-86.3202	1338.49	817.79	-150.091	1302.83	812.362	-130.356	1357.34	750.93
946	0	92.9792	1424.32	1561.42	203.57	1396.72	1591.04	57.5106	1256.93	1534.01	160.33	1233.93	1556.98	153.662	1232.14	1448.38	160.259	1162.8	1163.54	148.795	1359.01	1360.9	153.827	1436.55	1171.37	242.454	1152.52	1240.89	-28.0326	1291.3	1370.1	-97.4263	1259.48	1129.09	-99.0695	1254.69	1055.35	-128.609	1334.32	900.227	-85.8313	1354.19	819.888	-149.954	1319.56	813.802	-128.893	1374.59	752.925
947	0	93.5454	1434.4	1562.24	203.843	1405.97	1592.01	57.2899	1267.26	1534.62	159.613	1243.52	1557.79	152.692	1241.82	1449.31	158.47	1172.19	1164.53	148.628	1368.44	1361.82	153.706	1445.6	1171.84	240.56	1161.33	1241.79	-28.958	1302.11	1371.31	-98.7176	1272.08	1129.92	-100.557	1267.56	1056.05	-128.422	1349.51	901.796	-83.8853	1369.57	821.632	-149.363	1336.2	815.031	-127.39	1392	755.254
948	0	94.0488	1444.38	1563.02	204.171	1415.28	1592.84	56.5996	1277.45	1535.23	159.032	1253.13	1558.55	151.739	1251.37	1450.17	156.535	1180.52	1165.39	148.196	1377.57	1362.8	153.603	1454.68	1172.43	238.911	1169.89	1242.71	-28.97	1312.76	1372.26	-99.9831	1284.78	1130.96	-101.995	1280.47	1056.8	-128.109	1364.78	903.527	-83.2311	1384.72	823.636	-149.273	1353.18	816.601	-125.779	1409.25	757.673
949	0	94.4973	1454.36	1563.57	204.435	1424.84	1593.59	56.4027	1287.51	1535.85	158.818	1262.77	1559.2	150.857	1260.89	1451	154.849	1189.35	1166.39	148.142	1386.8	1363.71	153.4	1463.53	1172.91	237.076	1178.82	1243.36	-29.676	1323.33	1373.35	-100.961	1297.6	1132.02	-103.337	1293.42	1057.59	-127.78	1380.03	905.4	-81.9945	1400.41	826.133	-148.673	1370.28	818.234	-124.094	1426.7	760.341
950	0	94.6726	1464.2	1564.06	204.637	1434.58	1594.08	56.791	1297.4	1536.49	158.84	1272.62	1559.77	150.128	1270.36	1451.69	153.176	1198.28	1167.06	147.967	1395.9	1364.43	153.336	1472.32	1173.33	235.393	1187.34	1244.04	-30.1515	1333.7	1374.39	-102.262	1310.05	1133.06	-104.671	1306.31	1058.49	-127.19	1395.34	907.362	-81.0302	1416.43	828.761	-147.895	1387.18	820.032	-122.056	1444.15	763.088
951	0	94.6129	1473.84	1564.49	204.784	1444.44	1594.23	56.9887	1307.04	1537.16	159.167	1282.43	1560.19	149.404	1279.66	1452.27	151.806	1207.12	1167.86	147.87	1405.06	1365.19	153.181	1481.1	1173.75	234.01	1195.93	1244.65	-30.0746	1344.04	1375.18	-103.207	1322.56	1134.08	-106.182	1318.99	1059.21	-126.349	1410.69	909.44	-79.7787	1431.53	830.956	-147.476	1404.15	821.903	-120.2	1461.72	766.019
952	0	94.6001	1483.51	1564.81	205.024	1454.35	1594.27	57.2296	1316.51	1537.81	159.584	1292.18	1560.61	148.735	1289.1	1452.84	150.113	1215.95	1168.36	147.635	1414.16	1365.67	152.917	1489.82	1174.08	232.556	1204.54	1245.14	-30.3725	1354.25	1375.92	-104.337	1334.84	1134.96	-107.444	1331.82	1059.97	-125.764	1426.16	911.494	-79.1499	1446.66	833.495	-146.528	1421.25	823.723	-118.233	1479.11	768.999
953	0	94.4704	1493.11	1564.99	205.081	1464.35	1593.95	56.9863	1325.9	1538.49	159.99	1301.95	1560.89	148.046	1298.54	1453.17	148.826	1224.86	1168.88	147.435	1423.19	1365.81	152.867	1498.62	1174.1	231.133	1213.12	1245.53	-31.1605	1364.41	1376.82	-105.045	1347.41	1135.64	-108.691	1344.52	1060.74	-125.151	1441.16	913.496	-77.5864	1462.93	836.139	-145.663	1438.21	825.545	-116.111	1496.7	771.982
954	0	94.7024	1502.75	1565.06	205.366	1474.23	1593.29	57.6215	1335.47	1539.27	160.394	1311.75	1560.95	147.497	1307.93	1453.47	147.367	1233.35	1169.38	147.306	1432.59	1365.67	152.925	1507.39	1173.85	229.75	1221.73	1245.91	-31.633	1374.38	1377.27	-105.793	1359.64	1136.18	-109.622	1357.2	1061.23	-124.354	1456.09	915.251	-76.418	1478.43	838.48	-144.737	1454.8	827.395	-114.159	1514.28	775
955	0	94.8512	1512.3	1565.18	205.761	1483.96	1592.73	57.8143	1345.06	1539.82	160.563	1321.29	1560.83	146.881	1317.44	1453.61	146.258	1242.19	1169.57	146.879	1441.68	1365.53	152.784	1516.03	1173.59	228.463	1230.42	1246.05	-31.6567	1384.31	1377.45	-106.573	1371.65	1136.79	-110.625	1369.5	1061.65	-123.54	1471.02	917.091	-75.0717	1494.46	840.981	-143.519	1471.52	829.058	-112.103	1531.61	778.275
956	0	95.2238	1521.89	1565.3	206.315	1493.55	1592.15	57.8951	1354.56	1540.41	160.923	1331	1560.79	146.352	1326.86	1453.7	145.205	1251.31	1169.71	146.76	1450.97	1365.32	152.892	1524.76	1173.23	227.434	1239.17	1246.28	-32.3633	1394.23	1377.55	-107.271	1383.41	1137.19	-111.668	1381.67	1061.86	-122.823	1485.76	918.945	-73.5262	1509.74	843.615	-142.373	1488.01	830.798	-110.392	1549.03	781.629
957	0	95.5632	1531.41	1565.3	207.041	1503.11	1591.57	58.0612	1364.27	1540.93	161.104	1340.42	1560.72	145.886	1336.39	1453.75	144.219	1259.77	1170.23	146.36	1460.05	1364.98	152.767	1533.52	1172.74	226.476	1248.08	1246.44	-32.7931	1403.94	1377.45	-108.139	1394.88	1137.5	-112.489	1393.74	1062	-122.346	1500.31	920.739	-72.2294	1525.77	846.428	-141.185	1504.26	832.576	-108.574	1566.37	785.136
958	0	96.2461	1541.07	1565	207.655	1512.4	1590.61	58.1539	1373.92	1541.15	161.254	1349.87	1560.35	145.446	1345.88	1453.54	143.369	1268.55	1170.11	146.244	1469.43	1364.38	152.65	1542.15	1171.99	225.784	1256.82	1246.45	-33.0849	1413.66	1377.27	-108.728	1406.1	1137.69	-113.153	1405.74	1061.83	-121.544	1514.71	922.318	-70.9965	1541.43	848.965	-139.791	1520.48	834.169	-106.73	1583.28	788.279
959	0	96.9517	1550.77	1564.64	208.386	1521.69	1589.7	58.0639	1383.68	1541.14	161.312	1359.42	1559.92	145.179	1355.4	1453.24	143.076	1277.24	1170.12	145.889	1478.69	1363.76	152.613	1551.02	1171.14	225.091	1265.61	1246.36	-33.2778	1423.27	1376.86	-109.145	1417.13	1137.31	-113.679	1417.66	1061.52	-121.138	1528.98	923.857	-70.1372	1557.16	851.374	-138.475	1536.56	835.666	-105.047	1600.24	791.516
960	0	98.194	1560.62	1564.15	209.244	1530.98	1588.91	57.5844	1393.42	1540.83	161.097	1368.79	1559.44	144.905	1364.8	1452.98	142.408	1285.8	1170.04	145.903	1488.12	1362.87	152.365	1559.66	1170.12	224.699	1274.49	1246.26	-33.2047	1432.75	1376.18	-109.571	1427.84	1137.08	-114.186	1429.35	1061.18	-120.445	1543.13	925.312	-68.4216	1572.6	853.805	-137.085	1552.31	837.191	-103.173	1617.11	794.707
961	0	99.0455	1570.35	1563.44	209.746	1540.1	1588.18	57.6101	1403.38	1540.32	161.024	1378.3	1558.71	144.717	1374.37	1452.51	141.937	1293.9	1170.02	145.784	1497.34	1361.91	152.273	1568.54	1169.16	224.388	1283.36	1246.08	-33.5176	1442.32	1375.75	-109.917	1438.34	1136.67	-114.444	1440.9	1060.79	-119.729	1557.19	926.728	-67.3192	1587.56	856.068	-135.649	1568.15	838.785	-101.349	1633.57	797.919
962	0	99.6445	1580.09	1562.71	210.423	1549.4	1587.41	57.9222	1413.41	1539.39	160.934	1387.63	1557.81	144.703	1383.93	1451.91	142.031	1302.81	1169.61	145.779	1506.74	1360.95	152.113	1577.31	1168.08	224.127	1292.29	1245.71	-33.2613	1451.83	1374.94	-110.2	1448.55	1136.26	-114.674	1452.42	1060.25	-118.703	1571.13	928.169	-65.464	1603.62	858.73	-134.022	1583.61	840.312	-99.4569	1649.82	801.151
963	0	100.043	1589.64	1561.98	210.711	1558.72	1586.61	57.8238	1422.96	1538.29	161.095	1397.16	1556.78	144.776	1393.57	1451.29	141.941	1311.88	1168.99	145.99	1516.31	1359.98	151.962	1586.11	1167.11	224.003	1301.43	1245.23	-33.6765	1461.24	1374.43	-110.561	1458.41	1135.97	-114.91	1463.99	1059.88	-117.993	1584.86	929.668	-64.1939	1618.08	861.219	-132.399	1598.85	841.746	-97.4656	1665.91	804.412
964	0	100.065	1599.08	1561.08	210.786	1568.26	1585.82	58.2082	1432.48	1537.23	161.49	1406.7	1555.8	144.924	1403.28	1450.61	142.362	1320.92	1168.68	146.131	1525.71	1358.82	152.054	1595.16	1166.02	224.263	1310.19	1244.8	-33.4871	1470.78	1373.72	-110.946	1468.22	1135.38	-115.05	1475.51	1059.37	-116.997	1598.52	931.018	-62.6451	1632.64	863.63	-130.863	1613.92	843.261	-95.3973	1681.71	807.554
965	0	100.164	1608.48	1560.19	211.051	1577.98	1585	58.7271	1441.8	1535.95	162.103	1416.22	1554.43	145.11	1412.88	1449.79	142.318	1329.65	1168.11	146.358	1535.39	1357.56	151.808	1603.8	1164.84	224.488	1319.35	1244.19	-33.2832	1480.31	1372.72	-110.798	1478.2	1134.81	-115.17	1486.95	1058.86	-115.838	1611.99	932.188	-60.9647	1647.09	865.751	-129.054	1628.93	844.568	-93.2844	1697.35	810.822
966	0	100.13	1617.73	1559.35	211.168	1587.8	1583.88	59.371	1450.95	1534.79	162.81	1425.9	1553.07	145.488	1422.57	1448.85	142.594	1338.64	1167.29	146.862	1545.13	1356.36	152.004	1612.65	1163.69	224.751	1328.52	1243.42	-33.0172	1489.68	1372	-110.824	1488.02	1134.02	-115.365	1498.27	1058.25	-114.734	1625.46	933.476	-59.1843	1661.17	867.871	-127.265	1643.51	845.89	-91.1116	1712.6	814.035
967	0	100.143	1627.06	1558.33	211.345	1597.63	1582.76	60.3672	1460.18	1533.53	163.682	1435.57	1551.67	145.981	1432.26	1447.89	143.102	1347.62	1166.55	147.302	1554.78	1355.32	152.081	1621.38	1162.38	225.157	1337.82	1242.66	-32.3027	1499.14	1370.74	-110.825	1497.74	1133.4	-115.518	1509.71	1057.78	-113.469	1638.78	934.609	-57.499	1674.96	869.842	-125.375	1658.25	847.197	-88.7788	1727.76	817.252
968	0	100.157	1636.44	1557.22	211.482	1607.49	1581.38	60.9874	1469.23	1532.55	164.694	1445.19	1550.3	146.421	1441.9	1446.94	143.44	1356.67	1165.8	147.647	1564.25	1353.96	152.332	1630.49	1161.13	225.725	1347.2	1241.9	-32.0842	1508.63	1369.96	-110.641	1507.65	1132.48	-115.376	1521.25	1057.15	-112.1	1651.91	935.613	-55.9637	1688.78	871.878	-123.582	1672.72	848.331	-86.6289	1742.58	820.207
969	0	100.267	1645.88	1556.05	211.881	1617.38	1579.83	61.8546	1478.44	1531.28	165.751	1454.96	1548.88	146.933	1451.65	1445.79	144.168	1365.81	1164.9	148.098	1573.88	1352.53	152.571	1639.63	1159.66	226.278	1356.57	1240.94	-31.5686	1518.08	1368.54	-110.328	1517.71	1131.43	-115.308	1532.72	1056.45	-110.737	1665.02	936.504	-53.85	1702.37	873.327	-121.665	1687.07	849.517	-84.182	1757.47	822.996
970	0	100.819	1655.25	1554.86	212.436	1627.19	1578.18	62.8268	1487.8	1530.26	166.804	1464.56	1547.47	147.619	1461.39	1444.68	144.626	1374.51	1163.98	148.761	1583.64	1351.16	152.757	1648.53	1157.93	226.895	1366.09	1239.93	-31.0956	1527.28	1367.6	-109.934	1527.84	1130.45	-115.213	1544.01	1055.67	-109.307	1677.96	937.412	-52.1318	1715.61	874.752	-119.873	1701.47	850.621	-81.918	1771.78	825.518
971	0	101.624	1664.77	1553.71	213.322	1636.97	1576.53	63.7707	1497.16	1529.39	167.86	1474.13	1546.08	148.343	1471.15	1443.43	145.277	1383.61	1162.97	149.263	1593.42	1349.95	152.971	1657.63	1156.62	227.625	1375.7	1238.91	-30.4698	1536.65	1366.17	-109.499	1538.13	1129.18	-115.006	1555.34	1054.78	-107.95	1690.86	938.311	-50.4161	1728.63	876.19	-118.35	1715.55	851.69	-79.5993	1786.04	828.068
972	0	102.396	1674.32	1552.41	214.558	1646.74	1574.79	64.7559	1506.8	1528.71	168.948	1483.88	1544.97	149.02	1480.84	1442.36	146.125	1392.91	1161.98	149.707	1602.96	1348.59	153.354	1667.05	1155.25	228.309	1385.37	1237.81	-29.7539	1546.07	1364.9	-109.057	1548.34	1128.29	-114.696	1566.68	1054.02	-106.874	1703.5	939.144	-48.7522	1741.57	877.455	-116.988	1729.48	853.096	-77.5862	1800.19	830.584
973	0	103.556	1684.06	1551	215.843	1656.58	1572.85	65.8699	1516.35	1528.11	170.127	1493.63	1543.84	149.904	1490.6	1441.12	146.798	1401.71	1161.13	150.322	1612.53	1347.33	153.871	1676.77	1154	229.195	1395.11	1236.65	-29.0008	1555.45	1363.75	-108.364	1558.74	1127.18	-114.084	1577.92	1052.99	-105	1716.16	939.746	-47.0277	1754.52	878.6	-115.411	1743.18	854.029	-75.4497	1813.56	832.767
974	0	104.781	1693.99	1549.57	217.324	1666.56	1570.99	67.1008	1526.13	1527.61	171.428	1503.47	1542.91	150.958	1500.34	1439.91	147.77	1410.77	1160.2	151.027	1622.21	1346.06	154.074	1685.66	1152.4	230.182	1404.98	1235.48	-28.3249	1564.8	1362.68	-107.547	1569.12	1126.28	-113.62	1589.01	1052.36	-103.476	1728.74	940.346	-45.3113	1766.98	879.6	-113.873	1756.5	855.178	-73.5459	1826.92	834.909
975	0	106.243	1703.77	1548.31	218.78	1676.61	1569.36	68.5066	1535.78	1527.09	172.917	1513.28	1542.04	151.928	1510.25	1438.85	148.664	1419.88	1159.29	151.789	1632.02	1344.8	154.255	1695.16	1151.16	231.093	1414.85	1234.41	-27.4525	1574.18	1361.69	-106.867	1579.5	1125.48	-112.959	1600.06	1051.76	-102.458	1740.81	941.136	-43.8155	1779.17	880.469	-112.639	1769.56	856.157	-71.9764	1839.89	836.885
976	0	107.61	1713.53	1546.95	220.272	1686.65	1567.71	70.0293	1545.47	1526.49	174.797	1523.24	1541.15	153.05	1520.04	1437.79	149.789	1429.26	1158.4	152.561	1641.87	1343.61	154.662	1704.94	1149.93	232.26	1424.71	1233.37	-26.6681	1583.54	1361.02	-105.989	1590.06	1124.88	-112.129	1611.13	1051.29	-101.048	1752.58	941.726	-42.5203	1791.16	881.438	-111.344	1782.16	857.232	-70.2225	1852.53	838.799
977	0	109.233	1723.19	1545.74	221.715	1696.87	1566.01	71.9674	1555.14	1525.79	176.697	1533.18	1540.01	154.41	1529.91	1436.66	150.99	1438.85	1157.25	153.447	1651.8	1342.59	154.874	1715.11	1148.95	233.428	1434.68	1232.21	-25.4706	1593.08	1360.04	-104.864	1600.75	1124.22	-111.323	1621.98	1050.75	-99.6254	1764.31	942.188	-41.0634	1803.02	881.931	-110.018	1794.66	857.756	-69.0575	1864.87	840.426
978	0	110.57	1733.06	1544.81	223.293	1707.06	1564.64	73.9713	1564.8	1525.09	178.72	1543.17	1538.95	155.771	1539.82	1435.67	152.362	1448.69	1156.26	154.601	1661.64	1341.62	155.389	1724.95	1148.09	234.601	1444.73	1231.09	-24.1111	1602.64	1359.53	-103.82	1611.3	1123.89	-110.498	1632.57	1050.57	-98.3861	1775.49	942.758	-39.6087	1814.35	882.471	-108.825	1806.39	858.568	-67.6731	1876.65	841.978
979	0	112.089	1742.82	1544.01	225.093	1717.19	1563.65	76.0334	1574.27	1524.36	181.268	1553.38	1537.91	157.575	1549.69	1434.74	153.744	1458.76	1155.4	155.722	1671.7	1340.87	155.367	1735.66	1147.57	235.926	1454.83	1230.06	-22.7143	1612.34	1359.2	-102.903	1621.79	1123.63	-109.68	1642.96	1050.32	-97.148	1786.44	943.357	-38.6803	1825.28	882.896	-107.807	1818.08	859.459	-66.5481	1888.31	843.486
980	0	113.706	1752.48	1543.58	226.811	1727.27	1562.74	78.5805	1583.94	1523.64	183.562	1563.35	1536.88	159.418	1559.88	1433.75	155.447	1469.26	1154.54	157.156	1681.96	1340.27	156.11	1744.07	1146.31	237.348	1465.14	1228.88	-21.1442	1622.2	1358.86	-101.809	1632.25	1123.57	-108.708	1653.11	1050.13	-96.0279	1797.32	943.758	-37.592	1836.33	883.743	-106.903	1828.96	860.218	-65.7333	1899.48	844.966
981	0	115.383	1761.96	1543.38	228.669	1737.15	1562.12	80.9228	1593.51	1522.96	185.974	1573.29	1535.81	161.35	1570.03	1432.93	156.769	1479.58	1153.49	158.646	1692.2	1339.88	156.811	1754.36	1145.81	238.774	1475.54	1227.69	-19.5347	1632.1	1358.74	-100.559	1642.68	1123.71	-107.863	1662.94	1050.16	-94.9563	1807.49	944.231	-36.8792	1846.65	884.073	-106.173	1839.65	861.038	-64.9123	1910.04	846.282
982	0	117.123	1771.5	1543.33	230.528	1747.03	1561.69	83.293	1602.95	1522.32	188.415	1583.13	1534.76	163.535	1580.26	1432.08	158.12	1490.06	1152.71	160.304	1702.52	1339.5	157.674	1764.79	1145.47	240.266	1486.2	1226.63	-17.7418	1642.28	1358.75	-99.3888	1652.85	1124.03	-107.059	1672.68	1050.37	-94.571	1817.31	944.766	-35.8521	1856.96	884.794	-105.418	1849.96	861.523	-64.7201	1920.49	847.426
983	0	119.008	1780.96	1543.34	232.542	1757.11	1561.44	85.6667	1612.28	1521.73	190.927	1592.78	1533.84	165.72	1590.38	1431.31	159.593	1500.85	1151.84	162.093	1712.92	1339.11	158.754	1775.74	1145.07	241.886	1497.02	1225.45	-15.6641	1652.61	1358.7	-98.3063	1662.86	1124.38	-106.309	1682.25	1050.66	-93.7886	1826.92	945.073	-35.0059	1866.96	885.321	-104.646	1859.64	861.811	-64.2769	1930.34	848.149
984	0	121.087	1790.37	1543.55	234.695	1766.72	1561.27	88.2483	1621.66	1521.06	193.557	1602.49	1532.97	168.237	1600.74	1430.6	161.167	1511.67	1150.95	163.807	1723.67	1339.2	159.983	1786.69	1144.78	243.537	1508.04	1224.13	-13.4422	1663.01	1358.81	-97.1002	1672.8	1124.63	-105.519	1691.56	1050.77	-93.1864	1836.28	945.439	-34.5459	1876.63	885.779	-104.135	1868.97	862.161	-64.0303	1939.94	848.808
985	0	123.397	1799.78	1544.1	237.142	1776.33	1561.2	90.9125	1631.13	1520.63	196.291	1612.15	1532.23	170.639	1611.03	1430	162.72	1522.56	1150.01	165.986	1734.26	1339.2	161.184	1797.84	1144.68	245.397	1519.21	1222.94	-11.478	1673.36	1359.11	-95.9611	1682.52	1124.96	-104.768	1700.76	1051.04	-92.765	1845.27	945.647	-34.343	1885.92	886.085	-103.489	1878.09	862.354	-63.829	1949.24	849.117
986	0	125.783	1809.15	1544.83	239.673	1785.88	1561.36	93.6399	1640.64	1520.38	199.208	1621.62	1531.2	173.128	1621.53	1429.49	164.421	1533.66	1149.25	168.255	1744.93	1339.35	162.634	1809.31	1144.6	247.221	1530.42	1221.88	-9.21339	1684.08	1359.46	-94.8929	1692.03	1125.37	-104.074	1709.7	1051.39	-92.0351	1854.49	945.58	-33.8271	1895.03	885.9	-103.153	1887.26	862.43	-63.9231	1958.2	849.339
987	0	128.435	1818.68	1545.64	242.39	1795.31	1561.59	96.2437	1650.25	1520.17	201.931	1631.26	1530.47	175.504	1632.01	1429.06	166.385	1545.09	1148.75	170.351	1755.55	1339.64	163.99	1821.16	1144.81	249.095	1541.78	1220.89	-7.1158	1694.71	1359.96	-93.7403	1701.39	1125.87	-103.168	1718.68	1051.77	-91.6524	1863.15	945.604	-33.2028	1903.97	886.001	-103.119	1895.54	862.358	-64.0563	1966.77	849.035
988	0	131.31	1828.26	1546.71	245.369	1804.81	1561.86	98.9842	1660.03	1520.12	204.623	1640.84	1529.66	177.915	1642.53	1428.79	168.059	1556.52	1148.05	172.555	1766.34	1340.1	165.47	1833.02	1145.13	250.838	1553.03	1219.98	-4.75544	1705.51	1360.42	-92.4944	1710.67	1126.39	-102.319	1727.26	1052.23	-91.2909	1871.47	945.649	-33.3677	1912.3	885.681	-102.831	1903.59	862.214	-64.3767	1974.73	848.591
989	0	134.318	1837.93	1547.77	248.488	1814.22	1562.38	101.623	1669.87	1520.38	207.277	1650.64	1529.39	180.095	1653.03	1428.67	169.833	1567.96	1147.72	174.601	1777.28	1340.69	166.783	1844.76	1145.63	252.501	1564.25	1219.33	-2.79152	1716.6	1361.15	-91.2287	1719.93	1127.03	-101.322	1735.7	1052.68	-90.8425	1879.55	945.361	-33.228	1920.36	885.21	-102.704	1911.24	861.831	-64.7707	1982.45	847.812
990	0	137.555	1847.68	1549	251.665	1823.73	1562.71	104.374	1679.99	1521.01	210.025	1660.32	1529.2	182.254	1663.63	1428.84	171.254	1579.62	1147.59	176.327	1787.86	1341.42	168.54	1856.72	1146.25	254.077	1575.36	1219.03	-0.834877	1727.55	1362.16	-89.7838	1729.13	1127.75	-100.167	1744.1	1053.2	-90.2259	1887.3	945.098	-33.5843	1927.82	884.402	-102.567	1918.24	861.403	-65.3678	1989.6	846.774
991	0	140.898	1857.72	1550.24	255.091	1833.32	1563.16	107.047	1690.06	1521.97	212.641	1670.3	1529.41	184.476	1674.09	1429.08	172.747	1591.33	1147.76	178.458	1798.7	1342.34	169.892	1868.55	1147.05	255.694	1586.45	1218.92	1.50741	1738.79	1363.04	-88.5454	1738.2	1128.7	-99.2327	1752.07	1054.01	-90.2156	1894.52	944.673	-33.2968	1935.35	883.855	-102.434	1924.65	860.725	-66.1403	1996.16	845.256
992	0	144.32	1867.88	1551.51	258.35	1842.94	1563.61	109.75	1700.36	1523.26	215.35	1680.17	1529.94	186.387	1684.64	1429.63	174.066	1603.01	1148.22	180.682	1809.45	1343.31	171.761	1880.4	1148.17	256.952	1597.32	1219.08	3.40089	1749.79	1364.23	-87.0295	1747.1	1129.69	-97.9676	1760.16	1054.81	-90.0302	1901.44	944.13	-33.5409	1942.24	883.013	-102.343	1930.46	859.844	-67.1011	2002.16	843.468
993	0	147.547	1878.1	1552.87	261.832	1852.9	1564.18	112.324	1710.67	1524.8	217.851	1690.14	1530.8	188.29	1694.91	1430.51	175.017	1614.45	1148.57	182.218	1819.95	1344.55	173.28	1891.63	1149.46	258.264	1608.25	1219.42	5.43953	1760.76	1365.38	-85.6206	1756.04	1130.79	-96.655	1768.08	1055.73	-89.857	1908.08	943.67	-33.5198	1949.09	882.175	-102.498	1935.76	858.931	-67.6507	2007.95	841.521
994	0	150.898	1888.56	1554.2	265.113	1862.92	1564.82	114.899	1721.14	1526.62	220.374	1700.07	1531.8	190.215	1705.24	1431.42	175.959	1625.76	1149.38	184.249	1830.53	1345.69	175.031	1903.06	1150.94	259.49	1619.21	1219.95	7.14895	1771.27	1367	-84.16	1764.85	1131.92	-95.2982	1775.83	1056.99	-89.2942	1914.42	942.784	-33.9083	1954.9	880.828	-102.397	1940.64	857.639	-68.81	2012.74	839.082
995	0	154.222	1898.72	1555.26	268.504	1873.11	1565.26	117.363	1731.68	1528.39	223.026	1710.49	1533.09	191.912	1715.32	1432.36	176.772	1636.91	1150.14	185.976	1840.83	1347.15	176.639	1914.06	1152.45	260.744	1629.79	1220.57	9.04232	1781.89	1368.55	-82.3045	1773.82	1133.25	-93.594	1783.6	1058.22	-89.3043	1920.47	941.891	-34.4851	1960.96	879.722	-102.253	1945.03	856.017	-69.6815	2017.19	836.392
996	0	157.526	1909.65	1556.32	271.621	1883.18	1565.62	119.729	1742.29	1530.24	225.345	1720.81	1534.38	193.669	1725.48	1433.43	177.675	1647.76	1151.04	187.786	1851.15	1348.57	178.284	1925.08	1154.33	261.892	1640.54	1221.28	10.7854	1792.27	1370.07	-80.6469	1782.57	1134.88	-91.7464	1791.34	1059.46	-89.0561	1926.18	940.839	-34.5204	1966.18	877.913	-102.273	1948.74	854.594	-70.3948	2021.05	833.262
997	0	160.572	1920.18	1557.35	274.626	1893.21	1566.07	121.994	1753.02	1532	227.457	1730.89	1535.63	195.328	1735.32	1434.61	178.776	1658.16	1152.1	189.06	1861.21	1350.13	179.87	1935.66	1156.31	263.123	1650.94	1222.2	12.3228	1802.25	1372.05	-79.0764	1791.15	1136.32	-89.8682	1799.07	1060.89	-88.6652	1931.4	940.07	-34.5052	1970.76	876.046	-102.029	1952.6	852.984	-71.031	2024.57	830.142
998	0	163.698	1930.86	1558.13	277.613	1903.31	1566.58	123.963	1763.74	1533.61	229.432	1741.04	1536.78	196.815	1745.29	1435.71	179.786	1668.37	1153.24	190.537	1871.2	1351.56	181.269	1945.9	1158.06	264.533	1661.66	1223.07	13.6551	1812.02	1373.54	-77.2894	1799.82	1137.99	-87.9969	1806.66	1062.46	-88.2398	1936.86	938.86	-34.7075	1974.58	873.604	-102.186	1956.07	851.904	-71.4445	2027.52	826.673
999	0	166.368	1941.39	1559	280.158	1913.18	1567.12	125.644	1774.54	1534.86	231.156	1751.27	1537.86	198.417	1755.22	1436.8	180.528	1678.24	1154.18	191.901	1881.25	1352.73	182.373	1956	1159.8	265.853	1671.63	1223.96	15.2361	1821.6	1375.36	-75.5679	1808.58	1139.39	-85.9967	1814.2	1063.68	-88.0636	1941.68	937.849	-34.4255	1978.98	871.646	-102.381	1959.25	850.539	-71.7285	2030.31	823.094
1000	0	169.014	1951.67	1559.94	282.568	1923	1567.67	127.333	1784.9	1536.17	232.665	1761.21	1538.78	199.847	1765.11	1437.9	181.555	1688.02	1155.32	193.231	1891.21	1353.83	183.35	1965.85	1161.37	267.195	1681.77	1224.9	16.5235	1831.02	1376.82	-73.7318	1817.52	1140.54	-84.1366	1821.43	1064.98	-87.3753	1946.79	936.691	-34.8486	1982.78	869.53	-102.391	1962.48	849.074	-72.2408	2032.51	819.55
1001	0	171.309	1961.84	1560.89	284.876	1932.9	1568.48	129.11	1795.25	1537.53	234.26	1771.37	1540.07	201.35	1775.1	1439.08	182.887	1697.57	1156.6	194.456	1901.09	1354.71	184.278	1975.49	1162.62	268.621	1692.08	1226.06	17.6601	1840.44	1378.24	-71.8719	1826.41	1141.73	-82.1268	1828.9	1066.22	-86.8621	1951.36	935.53	-34.646	1985.59	866.684	-102.91	1965.22	847.897	-72.4716	2034.35	815.716
1002	0	173.346	1971.79	1561.87	286.756	1942.51	1569.27	130.601	1805.26	1538.68	235.856	1781.27	1541.07	202.896	1784.92	1440.31	184.268	1707.17	1157.86	195.504	1910.91	1355.58	185.014	1985.2	1163.81	270.104	1701.68	1227.26	18.7181	1849.71	1379.84	-70.4695	1834.87	1142.91	-80.2297	1835.99	1067.34	-86.2236	1956.15	934.263	-34.5448	1988.74	864.384	-103.031	1968.11	846.628	-72.6077	2035.94	811.837
1003	0	175.135	1981.44	1563.08	288.503	1951.9	1570.01	132.061	1815.08	1539.91	237.247	1790.79	1542.01	204.1	1794.6	1441.45	185.665	1716.61	1159	196.415	1920.66	1356.43	184.817	1993.61	1164.46	271.687	1711.26	1228.53	19.5307	1858.8	1381.2	-68.7331	1843.47	1143.87	-78.3504	1843.35	1068.39	-85.8866	1960.27	933.243	-35.0477	1991.37	862.084	-103.35	1970.42	845.483	-72.7083	2037.29	808.076
1004	0	176.814	1990.94	1564.23	290.337	1961.36	1570.79	133.235	1824.61	1541.22	238.327	1800.16	1542.72	205.308	1804.29	1442.56	187.295	1726.06	1160.31	197.241	1930.24	1357.05	185.03	2002.73	1165.22	273.113	1720.95	1229.77	20.0354	1867.84	1382.43	-67.2904	1852.02	1144.78	-76.4653	1850.65	1069.54	-85.3817	1964.59	932.161	-34.7357	1993.72	859.518	-103.719	1972.77	843.958	-72.8423	2038.22	804.456
1005	0	178.516	2000.28	1565.38	292	1970.52	1571.6	134.148	1834.06	1542.49	239.354	1809.37	1543.54	206.388	1814.09	1443.77	188.239	1735.22	1161.68	197.987	1939.7	1357.51	185.011	2011.59	1165.75	274.264	1730.33	1231.02	20.9721	1876.94	1383.56	-65.9538	1860.05	1145.75	-74.9965	1857.69	1070.69	-85.1189	1968.74	930.755	-34.9081	1996.17	857.278	-104.236	1974.85	842.83	-72.9178	2039.01	800.647
1006	0	179.916	2009.51	1566.79	293.527	1979.42	1572.51	135.248	1843.42	1543.69	240.126	1818.29	1544.29	207.44	1823.56	1444.92	189.783	1744.29	1162.81	198.465	1949.08	1358.01	185.184	2020.65	1166.39	275.611	1739.66	1232.31	22.1997	1885.87	1384.5	-64.3948	1868.08	1146.42	-73.2222	1864.92	1071.55	-84.8678	1972.53	929.654	-35.4409	1998.03	855.212	-104.578	1976.68	841.637	-72.9598	2039.61	797.211
1007	0	181.337	2018.52	1568.22	294.938	1988.12	1573.49	136.173	1852.58	1545.1	241.193	1827.15	1545.25	208.288	1832.86	1446.06	191.018	1753.22	1164.12	198.985	1958.54	1358.66	184.873	2029.28	1167.21	276.887	1748.86	1233.61	22.0581	1894.47	1385.91	-63.4236	1875.78	1147.54	-71.789	1871.95	1072.48	-84.5869	1975.96	928.539	-35.6379	2000.21	853.504	-104.792	1978.42	840.662	-73.0609	2039.9	794.11
1008	0	182.724	2027.42	1569.68	296.285	1996.59	1574.46	136.884	1861.63	1546.54	241.709	1835.85	1546.27	209.091	1842.09	1447.38	192.497	1762.06	1165.47	199.442	1967.83	1359.28	184.891	2038.11	1168	278.196	1758.04	1235.06	22.5432	1903.23	1386.95	-62.1646	1883.27	1148.45	-70.424	1878.72	1073.27	-84.51	1979.77	927.645	-35.7758	2002.06	851.714	-105.025	1980.22	839.806	-73.1686	2040.17	791.126
1009	0	183.954	2036.27	1571.01	297.552	2005.01	1575.23	137.437	1870.67	1547.99	242.124	1844.38	1547.22	209.767	1851.16	1448.46	193.633	1770.85	1166.69	199.766	1976.85	1359.88	184.665	2046.85	1168.8	279.475	1767.06	1236.47	22.8616	1911.75	1387.92	-61.317	1890.31	1149.3	-69.345	1885.28	1074.25	-84.2898	1982.88	926.825	-35.645	2004.35	850.19	-105.208	1981.88	838.901	-73.1937	2040.38	788.308
1010	0	185.256	2045.01	1572.33	298.637	2013.18	1575.92	137.899	1879.53	1549.5	242.557	1852.99	1548.23	210.392	1860.1	1449.56	194.821	1779.56	1167.87	200.035	1985.76	1360.57	184.591	2055.53	1169.56	280.695	1776.09	1237.71	23.0261	1920.11	1388.82	-60.4485	1897.06	1149.98	-68.1679	1891.56	1075.16	-83.9939	1986.31	926.008	-35.7523	2006.33	848.644	-105.257	1983.42	838.222	-73.2933	2040.48	785.518
1011	0	186.461	2053.62	1573.67	299.626	2021.31	1576.7	138.196	1888.36	1550.93	242.616	1861.32	1549.21	211.044	1869.03	1450.7	195.985	1788.26	1168.83	200.231	1994.71	1361.45	184.526	2064.17	1170.55	281.885	1784.86	1238.95	23.4136	1928.55	1389.61	-59.478	1903.81	1150.72	-67.0768	1897.62	1075.95	-83.9527	1989.67	925.418	-36.1538	2007.56	847.109	-105.378	1984.88	837.648	-73.4172	2040.58	783.06
1012	0	187.419	2062.22	1574.84	300.48	2029.41	1577.65	138.337	1897.16	1552.23	242.46	1869.47	1550.25	211.464	1877.72	1451.8	196.722	1796.9	1170.01	200.326	2003.35	1362.41	184.464	2072.71	1171.59	282.967	1793.67	1240.21	23.6152	1936.72	1390.52	-59.0767	1910.13	1151.54	-66.1009	1903.61	1076.7	-83.9896	1992.96	924.851	-36.5343	2010.4	846.557	-105.648	1986.71	837.225	-73.5033	2040.73	781.092
1013	0	188.198	2070.8	1575.8	301.232	2037.47	1578.44	138.376	1906.03	1553.46	242.422	1877.76	1551.19	212.028	1886.38	1452.7	197.85	1805.55	1170.91	200.665	2012.02	1363.26	184.55	2081.17	1172.53	283.956	1802.46	1241.18	24.227	1945.07	1391.2	-58.4534	1916.42	1152.27	-65.1336	1909.43	1077.45	-84.034	1996.34	924.429	-36.7696	2012.34	845.808	-106.032	1988.47	836.976	-73.4531	2041.05	779.257
1014	0	188.882	2079.31	1576.55	301.765	2045.51	1579.11	138.599	1914.64	1554.18	242.459	1886.19	1552.04	212.506	1894.93	1453.44	198.706	1814.02	1171.66	200.81	2020.41	1364.11	184.737	2089.54	1173.39	285.058	1811.16	1242.09	25.1863	1952.8	1391.66	-57.8896	1922.63	1153.04	-64.2172	1915	1078.21	-84.1636	1999.66	924.272	-36.6957	2014.14	845.157	-106.249	1990.55	836.811	-73.3372	2041.44	777.591
1015	0	189.319	2087.76	1577.26	302.123	2053.67	1579.76	138.516	1923.34	1554.96	242.309	1894.51	1552.86	213.033	1903.44	1454.23	199.422	1822.51	1172.3	201.1	2028.94	1364.84	184.793	2097.75	1174.29	285.881	1819.66	1242.91	24.9866	1960.74	1392.47	-57.4367	1928.68	1153.65	-63.4718	1920.46	1078.92	-84.2589	2003.04	924.104	-37.4006	2016.81	844.776	-106.526	1992.6	836.779	-73.3381	2042.01	776.219
1016	0	189.533	2096.43	1577.68	302.205	2061.98	1580.38	138.321	1931.97	1555.61	242.069	1902.84	1553.57	213.372	1911.81	1454.8	200.187	1831.03	1172.88	201.267	2037.31	1365.4	185.199	2106.11	1174.99	286.666	1828.26	1243.65	25.301	1968.82	1392.96	-56.9394	1934.78	1154.27	-62.7509	1925.92	1079.67	-84.4262	2006.49	923.953	-37.4464	2019.18	844.311	-106.955	1994.76	836.931	-73.4654	2043.35	775.169
1017	0	189.422	2104.92	1578	302.184	2070.4	1580.83	138.133	1940.41	1555.99	241.847	1911.35	1554.12	213.858	1920.17	1455.18	200.818	1839.53	1173.2	201.596	2045.67	1365.83	185.348	2114.08	1175.51	287.506	1836.8	1244.05	25.962	1976.64	1393.17	-56.4775	1940.84	1154.89	-62.0646	1931.1	1080.27	-84.5876	2010.08	923.873	-38.0269	2022.45	844.401	-107.108	1997.3	836.896	-73.4036	2044.32	773.944
1018	0	189.053	2113.44	1578.08	301.86	2078.95	1581.27	138.063	1948.84	1556.14	241.545	1919.76	1554.65	214.241	1928.46	1455.45	201.301	1847.81	1173.5	201.736	2053.78	1366.19	185.652	2122.34	1175.94	288.204	1845.21	1244.3	26.3212	1984.65	1393.36	-56.0986	1946.55	1155.05	-61.3694	1936.27	1080.72	-84.7528	2013.73	923.785	-38.523	2025.24	844.172	-107.466	1999.86	836.874	-73.6958	2045.73	773.092
1019	0	188.522	2121.91	1577.87	301.409	2087.74	1581.69	137.963	1957.22	1556.29	241.621	1928.23	1555.25	214.716	1936.7	1455.75	202.49	1856.45	1173.83	202.063	2062.15	1366.31	185.932	2130.29	1176.08	288.85	1853.57	1244.6	26.1494	1992.45	1393.8	-55.6122	1952.49	1155.52	-60.7828	1941.74	1081.26	-84.9222	2017.39	923.68	-38.4936	2028.35	843.847	-107.805	2002.31	836.866	-73.8191	2047.69	772.167
1020	0	187.875	2130.49	1577.45	300.792	2096.78	1581.68	137.969	1965.49	1556.3	241.953	1936.9	1555.73	215.063	1944.98	1455.8	202.675	1864.76	1173.72	202.176	2070.28	1366.21	186.2	2138.47	1176.06	289.436	1861.95	1244.72	26.8618	2000.48	1393.75	-54.8876	1958.47	1155.66	-60.3324	1946.99	1081.71	-85.0156	2021.27	923.468	-38.9115	2031.99	843.513	-108.037	2005.12	836.837	-74.0748	2049.89	771.354
1021	0	187.191	2138.99	1576.83	300.15	2105.84	1581.33	137.99	1973.73	1556.3	241.938	1945.49	1556	215.385	1953.16	1455.74	203.071	1873.05	1173.65	202.401	2078.53	1366	186.385	2146.61	1175.79	289.832	1870.18	1244.58	26.698	2008.3	1393.88	-54.3252	1964.3	1155.6	-59.8392	1952.21	1081.89	-84.927	2025.35	923.052	-39.157	2035.64	843.038	-108.076	2008.18	836.62	-74.4255	2052.87	770.646
1022	0	186.392	2147.63	1576.12	299.498	2114.83	1580.99	138.017	1982.01	1556.22	241.891	1954.24	1556.09	215.539	1961.4	1455.52	203.421	1881.34	1173.49	202.46	2086.58	1365.66	186.614	2154.53	1175.45	290.311	1878.45	1244.44	27.1695	2016.33	1393.53	-53.7935	1970.24	1155.61	-59.4276	1957.66	1081.95	-85.2598	2029.36	922.652	-39.8326	2039.67	842.748	-107.446	2011.25	836.326	-74.3786	2055.2	769.621
1023	0	185.62	2156.1	1575.46	298.941	2123.95	1580.57	137.853	1990.4	1556.14	242.048	1963.27	1556.33	215.696	1969.64	1455.24	203.567	1889.63	1173.31	202.529	2094.82	1365.46	186.702	2162.65	1175.17	290.516	1886.72	1244.21	27.3238	2024.34	1393.1	-53.3882	1976.2	1155.68	-59.2408	1963.04	1082.08	-85.5135	2033.32	922.452	-39.7585	2043.56	842.358	-107.711	2014.86	836.104	-74.4756	2058.29	769.103
1024	0	184.904	2164.79	1574.71	298.461	2132.91	1580.12	137.717	1998.72	1555.93	242.081	1971.96	1556.32	215.825	1977.96	1454.94	203.585	1897.86	1172.99	202.46	2103.01	1365.02	186.637	2170.5	1174.78	290.704	1894.85	1243.87	27.171	2032.2	1392.89	-53.4596	1981.8	1155.55	-59.0291	1968.49	1082.08	-85.732	2037.79	922.128	-40.2269	2048.24	842.224	-107.747	2018.52	835.681	-74.474	2061.66	768.523
1025	0	184.261	2173.35	1573.82	297.976	2141.87	1579.14	137.604	2007.02	1555.55	241.994	1980.65	1555.94	215.824	1986.27	1454.43	204.057	1906.26	1172.45	202.159	2111.2	1364.51	186.618	2178.5	1174.27	290.865	1903.13	1243.42	27.3011	2040.5	1392.28	-53.293	1987.65	1155.33	-58.5872	1974.29	1081.87	-85.8261	2042.55	921.521	-40.437	2052.63	841.836	-107.328	2022.49	835.1	-74.5167	2065.32	767.709
1026	0	183.871	2181.88	1572.75	297.456	2150.73	1578.25	137.589	2015.52	1555.12	241.952	1989.14	1555.47	215.806	1994.74	1453.76	204.046	1914.69	1171.78	201.98	2119.6	1363.72	186.516	2186.68	1173.5	290.882	1911.37	1242.79	26.9695	2048.36	1391.63	-53.1199	1993.68	1155.05	-58.4667	1979.99	1081.53	-86.1191	2047.22	920.967	-40.1259	2057.19	840.933	-107.1	2026.86	834.413	-74.2702	2069.37	766.832
1027	0	183.567	2190.1	1571.72	297.032	2159.57	1577.18	137.393	2024.08	1554.43	241.558	1997.63	1554.92	215.65	2003.24	1453.08	203.99	1922.93	1171.17	201.592	2127.81	1362.84	186.187	2194.59	1172.51	290.841	1919.7	1242.3	26.8933	2056.65	1390.99	-52.9805	1999.99	1154.48	-58.5103	1985.78	1081.09	-85.9579	2052.58	919.959	-39.984	2062.6	840.322	-107.01	2031.46	833.661	-73.7782	2073.76	765.704
1028	0	182.974	2198.9	1570.64	296.471	2168.28	1576.2	137.006	2032.55	1553.48	241.523	2006.58	1554.03	215.449	2011.85	1452.22	204.134	1931.67	1170.56	201.324	2136.39	1361.78	185.819	2202.88	1171.47	290.69	1927.97	1241.52	26.3952	2064.8	1390.05	-53.1111	2006.39	1153.79	-58.4571	1991.74	1080.61	-86.1034	2057.94	919.051	-39.8733	2068.04	839.338	-106.561	2036.55	832.797	-73.3638	2078.32	764.538
1029	0	182.429	2207.55	1569.64	295.987	2176.87	1575.16	136.576	2040.95	1552.23	241.058	2015.08	1552.83	215.066	2020.37	1451.23	204.084	1940.47	1169.47	200.823	2144.7	1360.76	185.299	2211.09	1170.3	290.5	1936.24	1240.71	26.2196	2073.36	1389.12	-53.1979	2012.94	1153.3	-58.3814	1998.03	1079.82	-86.1107	2063.47	917.889	-40.0866	2073.63	838.453	-106.144	2041.78	831.772	-72.7667	2083.41	763.247
1030	0	181.88	2215.82	1568.71	295.392	2185.41	1574.28	136.251	2049.3	1551.06	240.489	2023.52	1551.77	214.857	2028.96	1450.23	203.926	1948.93	1168.52	200.564	2153.25	1359.68	184.808	2219.5	1169.25	290.219	1944.65	1239.79	25.7086	2081.52	1388.15	-53.2822	2019.65	1152.45	-58.4133	2004.5	1079.26	-85.94	2069.5	916.99	-39.8962	2079.45	837.501	-105.743	2047.42	830.911	-72.3389	2088.5	762.166
1031	0	181.158	2224.31	1567.43	294.655	2193.93	1573.4	135.672	2057.72	1549.68	240.22	2032.1	1550.59	214.534	2037.61	1449.18	204.004	1957.67	1167.56	200.047	2161.82	1358.45	184.334	2227.95	1167.91	290.066	1953.01	1238.76	25.547	2090.15	1386.97	-53.5286	2026.49	1151.92	-58.5208	2011.17	1078.44	-85.9257	2075.76	915.843	-39.6459	2085.78	836.641	-105.537	2053.53	829.778	-71.7544	2094.23	760.9
1032	0	180.113	2232.69	1566.32	293.768	2202.4	1572.46	134.953	2065.99	1548.02	239.857	2040.59	1549.19	214.055	2046.28	1447.89	203.95	1967.06	1166.25	199.65	2170.44	1357.37	183.588	2236.54	1166.68	289.608	1961.41	1237.5	24.8242	2098.66	1386.02	-53.8594	2033.59	1150.83	-58.7449	2018.02	1077.64	-85.8916	2082.28	914.821	-38.9559	2092.01	835.463	-104.869	2059.7	828.603	-71.2851	2100.15	759.759
1033	0	179.132	2240.95	1565.16	292.783	2210.8	1571.58	134.354	2074.41	1546.53	238.963	2048.99	1547.74	213.572	2054.84	1446.48	203.291	1975.28	1164.78	199.075	2178.92	1356.32	182.912	2245.21	1165.4	289.426	1970.27	1236.18	24.4276	2107.32	1384.47	-54.2453	2040.95	1149.99	-59.1595	2024.94	1076.42	-85.9886	2088.95	913.726	-39.1963	2098.71	834.505	-104.622	2066.39	827.24	-70.9246	2106.34	758.505
1034	0	177.896	2249	1563.88	291.701	2219.35	1570.55	133.517	2082.69	1544.92	238.13	2057.37	1546.27	213.085	2063.55	1445.14	202.837	1983.65	1163.53	198.56	2187.72	1355.15	182.344	2254.04	1164.06	289.014	1978.82	1234.91	24.0835	2116.13	1382.9	-54.3213	2048.62	1148.77	-59.4765	2032.18	1075.4	-86.0308	2095.91	912.345	-38.8421	2105.75	833.36	-104.714	2073.39	825.966	-70.5104	2112.88	757.14
1035	0	176.639	2257.5	1562.24	290.389	2227.99	1569.33	132.383	2090.92	1543.14	237.283	2066.02	1544.89	212.249	2072.2	1443.65	202.402	1992.85	1162.06	197.973	2196.3	1353.76	181.81	2262.93	1162.6	288.408	1987.54	1233.41	23.2496	2124.71	1381.55	-55.0131	2056.57	1147.41	-59.8237	2039.84	1074.01	-86.1541	2103.14	910.823	-38.342	2112.63	831.836	-104.735	2080.49	824.566	-70.1296	2119.84	755.577
1036	0	175.09	2266.08	1560.58	289.025	2236.79	1567.66	131.468	2099.35	1541.35	236.314	2074.82	1543.41	211.521	2080.8	1442.02	201.766	2001.88	1160.33	197.186	2204.98	1352.22	181.411	2272.07	1160.9	287.61	1996.15	1231.72	22.6309	2133.66	1379.93	-55.4474	2064.49	1145.84	-60.3125	2047.55	1072.42	-86.2011	2110.91	909.159	-38.7002	2120.42	830.195	-104.211	2088.11	822.733	-69.8119	2127.11	753.734
1037	0	173.676	2274.85	1558.74	287.437	2245.64	1566.08	130.313	2107.9	1539.76	235.416	2083.54	1542.09	210.459	2089.44	1440.41	200.806	2010.89	1158.86	196.36	2213.7	1350.62	180.822	2281.13	1159.17	286.829	2004.82	1230.16	21.7217	2142.59	1378.3	-55.8254	2072.99	1144.16	-60.9406	2055.3	1070.89	-86.138	2118.9	907.217	-38.4988	2128.65	828.396	-104.158	2096.09	820.958	-69.669	2134.78	751.712
1038	0	172.059	2283.39	1557	285.797	2254.55	1564.74	128.849	2116.5	1538.36	234.135	2092.08	1540.77	209.283	2098.2	1438.96	199.876	2019.86	1157.19	195.506	2222.59	1349.04	180.316	2290.17	1157.52	285.849	2013.54	1228.63	20.4781	2151.43	1376.55	-56.829	2081.37	1142.56	-61.4079	2063.58	1069.19	-86.511	2126.91	905.322	-38.1716	2136.53	826.471	-104.133	2104.01	819.119	-69.464	2142.84	749.724
1039	0	170.431	2292.17	1555.39	284.162	2263.49	1563.33	127.417	2125.31	1536.86	232.495	2101.09	1539.41	207.991	2106.96	1437.38	198.862	2028.89	1155.56	194.495	2231.54	1347.65	179.87	2299.46	1156.09	284.674	2022.42	1227.1	19.3701	2160.56	1374.7	-57.5201	2090.16	1140.68	-62.1638	2072.11	1067.36	-86.7294	2135.43	903.333	-38.7459	2145.4	824.682	-104.343	2112.68	817.151	-69.7722	2150.92	747.892
1040	0	168.553	2301.11	1554.09	282.433	2272.44	1562.19	125.822	2134.07	1535.34	231.078	2110.14	1538.22	206.607	2115.95	1435.92	197.731	2038.14	1153.8	193.246	2240.57	1346.48	179.413	2308.57	1154.69	283.492	2031.5	1225.74	18.2338	2169.74	1372.8	-58.3571	2099.11	1138.9	-62.833	2080.82	1065.36	-87.3161	2143.9	901.449	-39.0169	2153.99	822.904	-104.499	2121.21	815.182	-69.99	2159.62	746.006
1041	0	166.705	2309.95	1552.9	280.576	2281.44	1561.14	124.125	2143.09	1533.99	229.313	2118.92	1536.99	205.071	2124.97	1434.59	196.495	2047.49	1152.61	192.027	2249.7	1345.25	178.827	2317.65	1153.38	282.401	2040.65	1224.48	16.8571	2178.91	1371.05	-59.3303	2108.13	1137.02	-63.6919	2089.7	1063.5	-87.7659	2152.88	899.517	-39.2948	2162.97	821.093	-104.456	2129.98	813.155	-70.4721	2168.18	744.212
1042	0	164.655	2319.16	1551.95	278.677	2290.56	1560.48	122.286	2152.11	1532.81	227.453	2128.14	1535.8	203.526	2134.15	1433.45	195.634	2056.99	1151.31	190.644	2258.97	1344.22	178.152	2326.85	1152.22	281.157	2049.93	1223.44	15.3331	2188.13	1369.4	-60.3738	2117.53	1135.32	-64.3986	2099.08	1061.67	-88.3358	2162.11	897.737	-39.586	2172.48	819.454	-105.114	2139.32	811.404	-71.021	2177.43	742.483
1043	0	162.486	2328.13	1551.19	276.589	2299.7	1559.75	120.437	2161.23	1531.47	225.652	2137.29	1534.8	201.773	2143.49	1432.45	194.32	2066.4	1150.01	189.105	2268.33	1343.23	177.483	2336.3	1151.14	279.89	2059.53	1222.48	14.0541	2197.61	1367.75	-61.4931	2127.15	1133.59	-65.1357	2108.67	1059.82	-88.9204	2171.5	895.963	-39.666	2181.65	817.431	-105.615	2148.7	809.627	-71.7916	2186.9	740.774
1044	0	160.384	2337.29	1550.43	274.406	2309	1559.27	118.275	2170.34	1530.18	223.55	2146.54	1533.69	200.071	2152.88	1431.5	193.403	2075.94	1148.97	187.49	2277.77	1342.41	176.687	2345.69	1150.13	278.828	2069.14	1221.67	12.4838	2207.05	1366.32	-62.3407	2136.96	1131.86	-65.8457	2118.48	1058.03	-89.5876	2181.23	894.162	-40.5489	2191.6	815.715	-105.794	2158.61	807.85	-72.5417	2196.51	739.009
1045	0	158.023	2346.7	1549.89	272.052	2318.39	1558.67	116.121	2179.62	1529.26	221.462	2155.89	1532.73	198.12	2162.51	1430.76	192.455	2085.75	1148.15	185.888	2287.59	1341.52	175.717	2355.23	1149.07	277.47	2079.03	1221.08	10.6764	2216.33	1365.08	-63.3212	2146.85	1130.14	-66.6224	2128.65	1056.33	-90.2886	2191.39	892.301	-41.3267	2201.69	813.956	-106.309	2168.62	806.112	-73.3327	2206.55	737.116
1046	0	155.656	2355.82	1549.25	269.607	2327.99	1558.21	114.246	2189.13	1528.48	219.204	2165.27	1531.95	196.177	2172.08	1430.09	191.21	2095.54	1147.55	183.99	2297.13	1340.79	174.533	2364.89	1148.12	276.428	2088.86	1220.68	8.74227	2225.64	1363.87	-64.3806	2156.95	1128.43	-67.5758	2138.87	1054.74	-90.8525	2201.91	890.507	-41.9263	2212.23	812.116	-107.071	2179.01	804.605	-74.1773	2216.88	735.298
1047	0	153.241	2365.45	1548.9	267.057	2337.45	1557.98	111.831	2198.41	1527.61	217.092	2174.86	1531.31	194.075	2181.6	1429.52	190.406	2105.58	1146.67	181.96	2306.89	1340.16	173.322	2374.86	1147.46	275.053	2099.01	1220.21	7.07662	2235.22	1362.61	-65.5291	2167.26	1126.82	-68.5094	2149.28	1053.04	-91.5212	2212.68	888.912	-42.0484	2223.16	810.456	-107.96	2189.81	803.094	-75.1021	2227.46	733.612
1048	0	150.758	2374.65	1548.64	264.614	2346.84	1557.98	109.462	2207.86	1527.03	214.587	2184.57	1530.99	192.02	2191.18	1429.17	189.388	2115.78	1145.85	180.011	2316.52	1340.02	171.718	2385.01	1147.28	273.882	2108.9	1219.82	5.06566	2244.7	1361.5	-66.0638	2177.52	1125.12	-69.3389	2159.74	1051.43	-92.3822	2223.45	887.6	-43.2401	2233.97	809.087	-108.624	2200.8	801.734	-76.1042	2238.21	732.227
1049	0	148.223	2384.28	1548.8	262.223	2356.22	1558.4	106.785	2217.49	1526.72	211.977	2193.97	1530.81	189.737	2200.58	1428.77	188.342	2126.23	1145.33	177.845	2326.38	1340.12	170.008	2395.36	1147.53	272.417	2119.28	1219.47	2.84711	2254.14	1360.61	-67.5653	2187.95	1123.75	-70.3452	2170.48	1050.01	-93.3577	2234.48	886.543	-44.0814	2245	808	-109.691	2212.1	800.546	-77.1642	2249.27	731.007
1050	0	145.707	2393.8	1549	259.71	2365.68	1558.85	104.039	2227.49	1526.87	208.984	2203.5	1530.99	187.339	2209.88	1428.5	186.928	2136.72	1144.99	175.802	2336.01	1340.43	168.12	2405.91	1147.96	270.949	2129.59	1219.18	0.581789	2263.55	1360.05	-68.6613	2198.42	1122.34	-71.2148	2181.72	1048.57	-94.2269	2246.01	885.453	-44.5115	2256.32	806.772	-110.849	2223.88	799.462	-78.5396	2260.51	729.964
1051	0	143.358	2403.88	1549.31	257.203	2375.06	1559.43	101.05	2237.58	1527.03	205.935	2213.15	1531.66	185.037	2219.35	1428.52	185.96	2147.26	1144.32	173.551	2345.83	1340.81	166.329	2416.82	1148.68	269.518	2140.05	1219.05	-1.43456	2273.2	1359.37	-70.2749	2209.24	1121.24	-72.2684	2192.85	1047.42	-95.3189	2257.43	884.477	-45.8397	2268.13	805.932	-111.93	2235.53	798.474	-79.5589	2271.96	728.975
1052	0	140.984	2413.79	1549.53	254.679	2384.65	1560.21	97.8799	2247.65	1527.51	202.851	2222.8	1532.62	182.728	2228.72	1428.64	184.966	2157.98	1144.18	171.36	2355.51	1341.5	164.594	2427.87	1149.67	267.882	2150.61	1219.03	-3.4385	2282.91	1358.93	-71.528	2220.2	1120.19	-73.3199	2204.39	1046.4	-96.1181	2269.41	883.619	-46.795	2279.95	804.955	-112.642	2247.67	797.492	-80.7077	2283.84	728.122
1053	0	138.97	2424.02	1550.02	252.132	2394.21	1561.04	94.8131	2257.9	1528.32	199.634	2232.44	1533.81	180.396	2238.19	1428.91	183.621	2168.71	1144.04	169.264	2365.45	1342.24	163.042	2438.76	1150.57	266.352	2161.3	1219.23	-5.76678	2292.38	1358.9	-72.7405	2231.38	1119.53	-74.4265	2216.08	1045.53	-97.2209	2281.38	882.908	-47.3797	2291.88	804.195	-114.067	2259.82	796.981	-81.8315	2295.75	727.25
1054	0	136.687	2434.62	1550.26	249.488	2403.95	1561.93	91.8521	2268.16	1529.07	196.386	2242.23	1535.06	177.997	2247.83	1429.29	182.323	2179.41	1144.07	167.155	2375.43	1343.01	161.548	2449.79	1151.8	264.768	2171.97	1219.49	-7.90344	2302.03	1358.69	-73.9675	2242.37	1119.01	-75.5394	2227.81	1044.78	-98.1347	2293.71	882.281	-48.7466	2304.5	803.644	-115.237	2272.22	796.508	-83.0328	2308.22	726.732
1055	0	134.008	2444.33	1550.93	246.731	2413.76	1563.03	89.0555	2278.29	1529.74	193.559	2252.18	1536.4	175.626	2257.6	1429.89	181.001	2190.01	1144.36	165.121	2385.4	1344.08	160.124	2460.84	1153.14	263.234	2182.57	1219.99	-10.1458	2311.77	1358.91	-75.3774	2253.95	1118.41	-76.6185	2239.79	1044.15	-99.1588	2306.38	882.008	-49.3945	2317.01	803.315	-115.908	2284.96	796.161	-84.1921	2320.79	726.224
1056	0	131.474	2454.47	1552.2	243.884	2423.72	1564.71	86.3891	2288.14	1530.43	191.047	2261.9	1537.49	173.248	2267.39	1430.69	179.588	2200.75	1144.85	162.988	2395.59	1345.26	158.74	2471.94	1154.72	261.529	2193.3	1220.87	-12.3577	2321.5	1359.04	-76.9485	2265.43	1118.05	-77.679	2251.98	1043.93	-100.325	2318.86	882.048	-50.6581	2329.75	803.18	-117.45	2297.91	796.257	-85.4663	2333.51	726.111
1057	0	128.093	2463.76	1553.63	241.006	2433.57	1566.56	84.0336	2297.5	1531.09	188.742	2271.81	1538.49	170.876	2277.39	1431.61	178.122	2211.87	1145.75	160.871	2405.61	1346.51	157.403	2482.69	1156.3	259.987	2203.79	1221.83	-14.3258	2331.54	1359.26	-78.1939	2277.05	1118.03	-79.0435	2263.9	1043.76	-101.71	2331.55	882.095	-51.8593	2342.92	803.365	-118.488	2310.98	796.231	-86.8686	2346.49	726.338
1058	0	125.07	2472.63	1555.52	238.162	2443.3	1568.49	82.0037	2306.65	1531.66	186.988	2281.31	1539.04	168.802	2287.4	1432.57	176.531	2222.29	1146.5	158.957	2415.93	1347.79	156.247	2493.46	1157.95	258.54	2214.23	1222.9	-16.3283	2341.64	1359.75	-79.468	2288.65	1117.85	-80.1358	2276.09	1043.53	-102.961	2344.36	882.633	-52.9548	2356	803.914	-119.926	2324.55	796.659	-88.3093	2359.75	726.73
1059	0	122.195	2481.56	1557.58	235.407	2452.77	1570.49	80.144	2315.68	1532.17	184.979	2291.09	1539.54	166.706	2297.61	1433.65	174.651	2232.82	1147.45	157.083	2426.37	1349.14	155.046	2504.15	1159.52	256.96	2224.68	1224.08	-18.2335	2351.88	1360.23	-80.6902	2300.48	1117.89	-81.3134	2288.38	1043.64	-104.172	2357.44	883.164	-54.488	2369.63	804.608	-121	2337.96	797.056	-89.4007	2373.25	727.26
1060	0	119.109	2490.32	1559.83	232.755	2462.06	1572.85	78.2187	2324.49	1532.76	183.158	2300.14	1540.17	164.625	2307.75	1434.98	173.121	2243.48	1148.97	155.348	2436.57	1350.44	154.017	2514.81	1161.09	255.393	2235.1	1225.63	-19.9229	2362.33	1360.67	-82.2042	2312.02	1118.29	-82.8809	2300.56	1043.92	-105.39	2370.75	883.872	-55.2089	2383.04	805.285	-122.637	2351.9	797.727	-90.8088	2387.33	728.183
1061	0	116.57	2499.11	1561.98	230.163	2471.14	1575.14	76.0562	2333.44	1533.47	181.228	2309.65	1540.91	162.679	2317.86	1436.34	171.625	2254.01	1150.34	153.676	2446.85	1351.68	153.008	2525.32	1162.43	253.79	2245.21	1227.24	-21.5918	2372.92	1361.45	-83.3126	2323.9	1118.69	-84.251	2312.98	1044.39	-106.481	2384.18	884.508	-56.2823	2396.81	805.984	-124.028	2365.69	798.538	-91.8026	2401.59	728.761
1062	0	114.111	2507.85	1564.04	227.735	2480.12	1577.1	74.1803	2342.26	1534.02	179.215	2318.54	1541.62	160.71	2328.05	1437.65	169.918	2264.44	1151.66	152.211	2457.02	1353.02	152.194	2535.76	1163.68	252.35	2255.28	1228.75	-23.1387	2383.45	1362.19	-84.9505	2335.61	1119.07	-85.5416	2325.68	1044.62	-107.531	2397.84	885.312	-58.1361	2410.76	806.995	-124.625	2379.63	798.947	-92.9434	2416.01	729.795
1063	0	112.004	2516.61	1565.92	225.491	2488.79	1579.26	72.1234	2351.1	1534.72	177.383	2327.28	1542.39	159.006	2337.82	1438.99	168.663	2275	1153.03	150.928	2466.83	1354.54	151.347	2546	1165.03	250.715	2265.1	1230.15	-24.6628	2394.05	1363.02	-86.2557	2347.65	1119.94	-87.0162	2338.23	1045.32	-108.489	2411.49	886.265	-58.8618	2424.68	808.007	-126.104	2394.05	800.065	-93.9853	2430.89	731.075
1064	0	110.056	2525.44	1567.61	223.459	2497.54	1581.4	70.1976	2360.11	1535.58	175.269	2336.33	1543.62	157.187	2347.62	1440.35	166.979	2284.87	1154.57	149.617	2476.39	1356.01	150.691	2555.98	1166.28	249.265	2274.67	1231.68	-26.2501	2404.36	1364.01	-88.0989	2359.57	1120.82	-88.6956	2350.66	1046.1	-109.505	2425.2	887.607	-59.8454	2438.6	809.395	-127.518	2408.5	801.18	-95.0588	2445.81	732.566
1065	0	108.04	2534.38	1569.13	221.567	2506.21	1583.18	68.1506	2369.21	1536.52	173.225	2345.07	1544.88	155.649	2356.99	1441.59	165.286	2294.64	1155.9	148.771	2486.03	1357.48	150.126	2565.83	1167.52	247.625	2284.06	1233.12	-27.3806	2414.89	1364.89	-89.8849	2371.55	1121.6	-90.4554	2363.04	1047	-110.559	2438.98	888.941	-60.5012	2452.79	810.9	-127.914	2422.85	802.316	-95.921	2461.21	734.145
1066	0	106.483	2543.55	1570.23	219.83	2514.93	1584.67	66.1613	2378.54	1537.48	171.06	2354.07	1546.18	154	2366.43	1442.74	163.882	2304.2	1156.96	147.844	2495.29	1358.75	149.723	2575.52	1168.75	246.012	2293.26	1234.35	-28.5002	2425.48	1365.84	-91.1865	2383.85	1122.61	-92.0539	2375.64	1047.73	-111.497	2452.99	890.228	-61.1681	2466.88	812.191	-129.596	2437.79	803.586	-96.8436	2476.66	735.925
1067	0	104.925	2552.87	1571.25	218.249	2523.77	1586.02	64.2091	2387.86	1538.6	168.934	2363.02	1547.67	152.516	2375.47	1443.85	162.084	2313.5	1157.96	147.052	2504.52	1360	149.534	2584.85	1169.85	244.29	2302.14	1235.36	-29.553	2435.69	1366.82	-92.8587	2395.96	1123.43	-93.6916	2388.21	1048.49	-112.386	2466.97	891.705	-62.4569	2481.38	813.885	-130.604	2452.69	804.901	-97.7242	2492.2	737.855
1068	0	103.507	2562.2	1572.01	216.862	2532.8	1587.25	62.2396	2397.24	1540	166.903	2372.12	1549.39	151.047	2384.45	1444.87	160.271	2322.67	1159.05	146.383	2513.47	1361.25	149.457	2594.13	1171	242.356	2311.01	1236.35	-30.7569	2445.68	1367.73	-94.6519	2407.97	1124.29	-95.4776	2400.48	1049.4	-113.34	2480.79	893.296	-62.9477	2495.75	815.608	-131.727	2467.61	806.354	-98.6266	2507.97	739.878
1069	0	102.181	2571.63	1572.55	215.445	2541.95	1588.19	60.5853	2406.69	1541.24	165.104	2381.24	1551.07	149.564	2393.38	1445.8	158.646	2331.85	1159.81	145.656	2522.22	1362.39	149.312	2603.14	1172.08	240.606	2319.59	1237.16	-31.7751	2455.52	1368.6	-96.0857	2420.09	1125.28	-97.272	2412.72	1050	-114.411	2494.96	894.863	-63.7993	2509.84	817.467	-132.75	2482.79	807.592	-99.4194	2523.91	741.982
1070	0	100.876	2581.16	1572.83	214.038	2551.35	1588.92	59.0619	2416.07	1542.5	163.476	2390.51	1552.85	148.083	2402	1446.74	156.852	2340.71	1160.59	144.944	2530.91	1363.33	149.303	2611.97	1173.18	238.788	2328.02	1237.94	-32.8055	2465.3	1369.44	-97.7285	2432.34	1125.97	-98.7944	2425.2	1050.77	-115.479	2509.28	896.468	-63.9894	2524.34	819.079	-133.773	2497.79	808.993	-100.143	2540.02	744.145
1071	0	99.4947	2590.64	1572.89	212.775	2560.86	1589.47	57.6114	2425.48	1543.87	162.129	2399.96	1554.42	146.858	2410.58	1447.58	155.275	2349.65	1161.35	144.369	2539.63	1364.18	149.407	2620.74	1174.1	236.854	2336.45	1238.75	-34.3692	2474.86	1370.41	-99.3371	2444.07	1126.69	-100.505	2437.65	1051.36	-116.228	2522.98	897.731	-65.1797	2538.74	820.877	-134.825	2512.67	810.192	-100.959	2556.24	746.473
1072	0	98.2565	2600.06	1573.21	211.624	2570.58	1589.74	56.4179	2434.74	1544.85	160.954	2409.37	1555.64	145.504	2419.22	1448.23	153.395	2358.15	1162.27	143.793	2548.48	1364.81	149.414	2629.33	1174.85	235.12	2344.68	1239.38	-34.9328	2484.36	1370.75	-100.873	2455.92	1127.56	-102.213	2449.9	1052	-116.869	2537.21	899.23	-66.0008	2553.24	822.383	-135.844	2528.15	811.741	-101.673	2572.47	748.855
1073	0	97.2033	2609.31	1573.61	210.543	2579.92	1590.29	55.7512	2444.58	1545.51	159.946	2418.61	1556.4	144.04	2428.17	1448.99	151.528	2366.71	1163.02	142.907	2557.16	1365.35	149.348	2637.91	1175.8	233.337	2352.81	1240.26	-35.8607	2493.83	1371.24	-102.269	2467.88	1128.05	-103.88	2462.25	1052.61	-117.504	2551.16	900.704	-66.416	2567.38	823.939	-136.747	2543.02	812.989	-102.301	2588.81	751.312
1074	0	96.169	2618.46	1574.29	209.556	2589.1	1590.93	54.7137	2453.91	1546.05	158.861	2427.69	1556.85	142.64	2437.14	1449.88	149.862	2375.04	1163.83	142.216	2565.98	1366.04	149.026	2646.45	1176.62	231.343	2361.2	1241.18	-37.5359	2503.32	1372.11	-103.866	2479.42	1128.76	-105.518	2474.46	1053.32	-118.255	2565.15	902.103	-67.4526	2581.77	825.726	-137.698	2557.9	814.365	-102.895	2605.25	753.918
1075	0	95.5519	2627.44	1575.11	208.936	2597.92	1591.65	53.7906	2463.03	1546.43	157.967	2436.9	1557.01	141.416	2446.14	1450.68	148.195	2383.39	1164.98	141.378	2575	1366.58	148.905	2654.78	1177.23	229.623	2369.42	1242.07	-37.9987	2512.83	1372.74	-105.34	2490.83	1129.46	-107.034	2486.76	1053.98	-118.901	2579.04	903.699	-67.9649	2596.13	827.447	-138.459	2572.89	815.941	-103.383	2621.56	756.729
1076	0	95.2237	2636.22	1576.14	208.331	2606.33	1592.36	52.9125	2472.13	1546.84	157.061	2445.64	1557.11	140.148	2455.31	1451.5	146.423	2391.94	1165.71	140.559	2584.01	1367	148.547	2663.16	1177.88	227.858	2377.86	1243.04	-39.7222	2522.38	1373.85	-106.577	2502.42	1130.16	-108.422	2498.8	1054.59	-119.795	2592.58	905.508	-68.7924	2610.31	829.522	-139.245	2587.62	817.509	-103.897	2637.58	759.594
1077	0	94.5898	2644.97	1577.46	207.869	2614.5	1593.13	52.109	2481.02	1546.95	156.025	2454.17	1557.08	138.85	2464.38	1452.22	144.826	2400.42	1166.42	139.795	2593.06	1367.47	147.963	2671.39	1178.39	226.186	2386.24	1244	-40.2777	2531.99	1374.45	-107.71	2513.58	1131.08	-109.931	2510.68	1055.58	-120.396	2606.28	907.402	-69.6759	2624.7	831.677	-140.157	2602.21	819.316	-104.403	2653.63	762.519
1078	0	94.379	2653.52	1578.69	207.544	2622.44	1593.86	50.8915	2490.11	1547.22	154.862	2462.68	1556.87	137.766	2473.39	1452.79	143.281	2409	1167.39	138.963	2602.04	1367.91	147.452	2679.58	1178.74	224.617	2394.56	1244.98	-42.0117	2541.65	1375.26	-109.058	2524.66	1131.82	-111.314	2522.56	1056.17	-120.973	2619.9	909.369	-70.7683	2638.67	834.001	-140.788	2616.93	820.885	-104.955	2669.36	765.521
1079	0	93.7158	2661.95	1579.86	207.276	2630.29	1594.56	49.8735	2498.81	1547.54	153.871	2470.88	1556.62	136.391	2482.52	1453.51	141.759	2417.78	1168.22	138.132	2611.22	1368.29	146.768	2687.58	1178.91	223.158	2403	1245.78	-43.0741	2551.38	1375.82	-110.412	2535.57	1132.43	-112.61	2534.27	1057.02	-121.996	2633.23	911.29	-70.8671	2653.58	836.556	-141.357	2631.45	822.757	-105.29	2684.83	768.408
1080	0	93.9301	2670.3	1580.68	207.025	2638.09	1595.02	48.6717	2507.13	1547.61	152.615	2479.26	1556.32	135.229	2491.61	1454.01	140.138	2426.3	1168.99	137.412	2620.17	1368.39	146.146	2695.85	1178.96	221.8	2411.39	1246.35	-43.2453	2561.14	1376.08	-111.773	2546.07	1133.14	-114.121	2545.63	1057.73	-122.543	2646.64	913.234	-71.4167	2667.87	838.956	-141.841	2645.87	824.531	-105.546	2700.24	771.152
1081	0	93.5613	2678.79	1581.5	206.719	2645.89	1595.31	47.7431	2515.91	1547.56	151.555	2487.5	1555.87	134.132	2500.54	1454.29	138.844	2434.68	1169.25	136.748	2629.21	1368.55	145.484	2704.12	1178.89	220.494	2419.96	1246.77	-44.1937	2570.75	1376.65	-112.835	2556.88	1133.89	-115.519	2556.9	1057.99	-123.371	2659.97	915.037	-71.9416	2682.21	841.27	-142.194	2660.32	826.216	-105.669	2715.21	773.807
1082	0	94.0457	2686.87	1581.62	206.438	2653.77	1595.38	46.8058	2524.6	1547.67	150.516	2495.7	1555.65	133.164	2509.51	1454.56	137.366	2443.62	1169.58	135.971	2638.07	1368.59	144.887	2712.13	1178.7	219.168	2428.19	1247.32	-45.6548	2580.37	1377.14	-114.227	2567.19	1134.3	-117.011	2568.03	1058.73	-124.023	2673.22	916.776	-72.1852	2696.48	843.702	-142.404	2674.69	827.854	-105.638	2730.4	776.446
1083	0	93.8496	2695.44	1581.83	206.149	2661.95	1595.24	46.03	2533.32	1547.76	149.687	2504.15	1555.35	132.274	2518.46	1454.72	136.767	2451.68	1169.93	135.393	2646.55	1368.07	144.255	2720.39	1178.41	218.081	2436.53	1247.69	-46.4185	2589.94	1377.18	-115.565	2577.34	1134.79	-118.288	2579.34	1058.87	-124.479	2686.2	918.316	-72.8269	2710.85	846.177	-142.447	2689.01	829.22	-105.396	2745.47	779.021
1084	0	93.619	2704.01	1581.82	205.761	2670.3	1594.85	45.1992	2542.06	1547.66	148.85	2512.55	1554.91	131.318	2527.32	1454.69	135.992	2460.32	1170.09	134.9	2655.8	1368.08	143.777	2728.47	1177.87	217.06	2444.75	1247.84	-46.9809	2599.34	1377.31	-116.883	2587.28	1135	-119.651	2590.16	1059.22	-125.408	2698.93	919.649	-72.805	2724.39	848.165	-142.443	2702.98	830.512	-105.007	2760.43	781.536
1085	0	93.1322	2712.65	1581.53	205.251	2678.93	1594.28	44.5193	2550.64	1547.52	148.193	2521.18	1554.59	130.445	2536.1	1454.54	135.248	2467.86	1169.97	134.197	2664.39	1367.59	143.131	2736.61	1177.4	216.105	2453.07	1247.94	-47.082	2608.86	1377.06	-118.099	2597.28	1135.12	-120.778	2601.24	1059.05	-126.066	2711.82	920.921	-72.8903	2738.34	850.297	-142.372	2716.98	831.723	-104.596	2775.38	784.207
1086	0	92.4982	2721.16	1580.99	204.779	2687.67	1593.6	44.1849	2559.1	1547.14	147.666	2529.96	1554.18	129.827	2545.13	1454.38	134.402	2475.89	1170.02	133.781	2673.22	1367.08	142.714	2744.72	1176.84	215.366	2461.23	1248.03	-48.516	2618.18	1376.94	-119.319	2607.22	1135.12	-121.806	2612.21	1059.05	-126.56	2724.64	922.256	-72.9452	2752.24	852.4	-142.124	2730.9	833.038	-104.181	2790.25	786.837
1087	0	91.7623	2729.79	1580.42	204.328	2696.45	1592.6	43.5616	2567.84	1546.8	147.388	2538.69	1553.38	129.091	2554.25	1454	133.716	2484	1169.96	133.233	2681.77	1366.21	142.293	2752.77	1176.21	214.723	2469.63	1248.06	-49.1658	2627.61	1376.93	-120.622	2617.08	1135.26	-122.727	2623.15	1058.89	-126.791	2737.55	923.649	-73.1542	2766.3	854.692	-141.698	2744.83	834.111	-103.672	2805.13	789.314
1088	0	91.1978	2738.43	1579.69	203.804	2705.24	1591.43	43.1569	2576.29	1545.97	147.13	2547.45	1552.08	128.506	2563.45	1453.69	133.151	2491.52	1169.91	133.07	2690.86	1365.41	142.121	2760.71	1175.29	214.226	2477.82	1248.11	-49.7797	2637.01	1376.42	-121.466	2626.89	1134.8	-123.467	2634.04	1058.48	-127.161	2750.39	924.73	-73.0596	2780.33	856.819	-141.322	2758.74	835.146	-103.272	2819.87	791.81
1089	0	90.6241	2747.11	1579.06	203.272	2714.22	1590.39	42.7817	2584.91	1544.86	146.866	2556.41	1550.74	128.016	2572.8	1453.25	132.543	2499.19	1169.92	132.455	2699.6	1364.11	141.764	2768.64	1174.29	213.744	2486.3	1248.13	-50.2068	2646.56	1376	-122.306	2636.75	1134.55	-123.925	2644.95	1058.11	-127.338	2763.24	926.078	-72.7379	2794.32	858.777	-140.184	2772.58	836.224	-102.779	2834.94	794.284
1090	0	89.9828	2755.64	1578.45	202.868	2723.01	1589.24	42.4071	2593.64	1543.69	146.653	2565.37	1548.97	127.606	2582.44	1452.85	131.981	2506.71	1169.79	132.197	2708.42	1362.59	141.657	2776.57	1172.98	213.359	2494.63	1248.22	-50.2552	2656.01	1375.17	-122.995	2646.64	1133.9	-124.603	2655.84	1057.61	-127.278	2776.17	927.174	-72.3133	2808.61	860.763	-140.012	2787.14	837.675	-101.851	2849.89	796.481
1091	0	89.4441	2764.2	1577.58	202.46	2731.78	1588.07	42.0228	2602.32	1542.29	146.371	2574.25	1547.15	127.12	2591.9	1452.24	131.484	2514.46	1169.87	131.262	2717.14	1360.95	141.426	2784.36	1171.56	213.001	2503.44	1248.09	-51.1768	2665.54	1374.27	-124.111	2656.72	1133.42	-124.74	2666.88	1056.67	-127.006	2789.13	928.253	-71.6605	2822.73	862.524	-139.14	2801.34	838.669	-100.898	2865.02	798.774
1092	0	89.0592	2772.93	1576.81	202.065	2740.58	1586.81	41.8225	2610.97	1540.96	146.044	2582.91	1545.57	126.761	2601.35	1451.6	131.238	2522.05	1169.49	131.543	2727.1	1359.97	141.397	2792.59	1170.12	212.78	2512.11	1247.79	-51.4193	2675	1373.47	-123.783	2667.41	1132.61	-125.051	2677.88	1055.9	-126.357	2802.31	929.175	-70.8791	2836.58	864.346	-137.658	2815.5	839.638	-99.7312	2880.2	801.288
1093	0	88.5611	2781.46	1575.67	201.654	2749.42	1585.56	41.611	2619.52	1539.74	146.064	2591.84	1544.03	126.527	2610.9	1450.97	131.111	2529.75	1169.09	131.222	2735.82	1358.39	141.268	2800.48	1168.53	212.671	2520.73	1247.66	-51.5288	2684.48	1372.46	-124.086	2677.57	1131.62	-125.078	2689.17	1055.17	-125.652	2815.28	929.881	-69.8154	2850.7	866.284	-136.77	2829.72	840.529	-98.51	2895.14	803.779
1094	0	87.497	2790.33	1574.85	201.394	2758.56	1584.2	41.5364	2627.94	1538.57	145.998	2600.72	1542.65	126.328	2620.23	1450.21	131.21	2538.19	1168.68	132.227	2746.83	1357.91	141.159	2808.69	1166.98	212.745	2529.51	1247.31	-51.7825	2694.01	1371.44	-123.809	2688.28	1130.56	-125.208	2700.38	1054.38	-124.905	2828.03	930.529	-68.1614	2864.49	867.887	-135.264	2844.16	841.736	-96.6216	2910.3	806.279
1095	0	87.1525	2798.87	1573.75	201.041	2767.55	1582.74	41.73	2636.55	1537.43	146.213	2609.8	1541.44	126.405	2629.51	1449.3	131.835	2546.53	1168.06	132.13	2755.9	1356.75	141.163	2817.04	1165.44	212.99	2538.28	1246.77	-51.1944	2703.2	1370.3	-122.841	2698.72	1129.42	-125.313	2711.74	1053.32	-123.653	2841.31	931.401	-66.5531	2878.37	869.698	-133.305	2858.55	842.645	-94.4419	2925.12	808.72
1096	0	86.3869	2807.79	1572.54	200.824	2776.89	1581.25	41.8163	2645.26	1536.65	146.405	2618.77	1540.25	126.488	2638.88	1448.41	132.576	2555.13	1167.42	130.706	2762.9	1354.58	140.941	2825.41	1164	213.386	2547.26	1246.08	-51.8603	2712.26	1369.35	-122.944	2709.46	1128.7	-125.044	2723.25	1052.62	-122.148	2854.34	932.462	-64.73	2891.98	871.511	-131.783	2872.5	843.717	-92.3247	2939.79	811.323
1097	0	86.1965	2816.55	1570.81	200.63	2786.54	1579.78	42.2384	2653.76	1535.9	146.955	2627.98	1539.61	126.703	2648.05	1447.56	133.177	2563.83	1166.95	131.476	2772.87	1353.89	140.863	2834.2	1162.63	213.786	2556.28	1245.42	-51.6729	2721.07	1368.04	-122.812	2720.17	1127.79	-124.715	2734.6	1051.85	-120.946	2867.46	933.449	-62.8897	2905.52	873.418	-129.999	2886.66	845.09	-89.6945	2954.34	813.756
1098	0	85.9719	2825.69	1569.2	200.517	2796.26	1577.95	42.7281	2662.1	1535.31	147.696	2637.07	1538.8	127.174	2657.24	1446.45	133.173	2572.14	1165.95	132.107	2782.8	1352.93	140.506	2842.74	1161.14	214.277	2565.28	1244.62	-51.0951	2729.68	1366.84	-122.177	2730.86	1126.46	-124.704	2745.48	1050.82	-119.115	2880.57	934.475	-60.6672	2918.98	875.257	-127.916	2901.28	846.549	-86.6245	2968.78	816.051
1099	0	85.696	2834.77	1567.37	200.614	2806.36	1575.9	43.6191	2671.03	1534.82	148.723	2646.57	1538.06	127.734	2666.28	1445.17	134.367	2580.85	1165.49	132.25	2792.04	1351.65	140.348	2851.52	1159.73	215.05	2574.43	1243.48	-51.2032	2738.4	1365.73	-121.707	2741.31	1125.64	-124.249	2756.96	1049.79	-117.213	2893.48	935.542	-58.2915	2932.3	877.218	-125.648	2915.84	848.108	-83.502	2982.54	818.306
[truncated: 69 more columns]

## Sheet: Sheet2
Devices
		025370 - Force			025370 - Moment			025370 - CoP			027571 - Force			027571 - Moment			027571 - CoP			037720 - Force			037720 - Moment			037720 - CoP
Frame	Sub Frame	Fx	Fy	Fz	Mx	My	Mz	Cx	Cy	Cz	Fx	Fy	Fz	Mx	My	Mz	Cx	Cy	Cz	Fx	Fy	Fz	Mx	My	Mz	Cx	Cy	Cz
		N	N	N	N.mm	N.mm	N.mm	mm	mm	mm	N	N	N	N.mm	N.mm	N.mm	mm	mm	mm	N	N	N	N.mm	N.mm	N.mm	mm	mm	mm
559	0	0	0	0	0	0	0	200	300	0	0	0	0	0	0	0	200	903	0	0	0	0	0	0	0	603	903	0
559	1	0	0	0	0	0	0	200	300	0	0	0	0	0	0	0	200	903	0	0	0	0	0	0	0	603	903	0
559	2	0	0	0	0	0	0	200	300	0	0	0	0	0	0	0	200	903	0	0	0	0	0	0	0	603	903	0
559	3	0	0	0	0	0	0	200	300	0	0	0	0	0	0	0	200	903	0	0	0	0	0	0	0	603	903	0
559	4	0	0	0	0	0	0	200	300	0	0	0	0	0	0	0	200	903	0	0	0	0	0	0	0	603	903	0
559	5	0	0	0	0	0	0	200	300	0	0	0	0	0	0	0	200	903	0	0	0	0	0	0	0	603	903	0
559	6	0	0	0	0	0	0	200	300	0	0	0	0	0	0	0	200	903	0	0	0	0	0	0	0	603	903	0
559	7	0	0	0	0	0	0	200	300	0	0	0	0	0	0	0	200	903	0	0	0	0	0	0	0	603	903	0
559	8	0	0	0	0	0	0	200	300	0	0	0	0	0	0	0	200	903	0	0	0	0	0	0	0	603	903	0
559	9	0	0	0	0	0	0	200	300	0	0	0	0	0	0	0	200	903	0	0	0	0	0	0	0	603	903	0
560	0	0	0	0	0	0	0	200	300	0	0	0	0	0	0	0	200	903	0	0	0	0	0	0	0	603	903	0
560	1	0	0	0	0	0	0	200	300	0	0	0	0	0	0	0	200	903	0	0	0	0	0	0	0	603	903	0
560	2	0	0	0	0	0	0	200	300	0	0	0	0	0	0	0	200	903	0	0	0	0	0	0	0	603	903	0
560	3	0	0	0	0	0	0	200	300	0	0	0	0	0	0	0	200	903	0	0	0	0	0	0	0	603	903	0
560	4	0	0	0	0	0	0	200	300	0	0	0	0	0	0	0	200	903	0	0	0	0	0	0	0	603	903	0
560	5	0	0	0	0	0	0	200	300	0	0	0	0	0	0	0	200	903	0	0	0	0	0	0	0	603	903	0
560	6	0	0	0	0	0	0	200	300	0	0	0	0	0	0	0	200	903	0	0	0	0	0	0	0	603	903	0
560	7	0	0	0	0	0	0	200	300	0	0	0	0	0	0	0	200	903	0	0	0	0	0	0	0	603	903	0
560	8	0	0	0	0	0	0	200	300	0	0	0	0	0	0	0	200	903	0	0	0	0	0	0	0	603	903	0
560	9	0	0	0	0	0	0	200	300	0	0	0	0	0	0	0	200	903	0	0	0	0	0	0	0	603	903	0
561	0	0	0	0	0	0	0	200	300	0	0	0	0	0	0	0	200	903	0	0	0	0	0	0	0	603	903	0
561	1	0	0	0	0	0	0	200	300	0	0	0	0	0	0	0	200	903	0	0	0	0	0	0	0	603	903	0
561	2	0	0	0	0	0	0	200	300	0	0	0	0	0	0	0	200	903	0	0	0	0	0	0	0	603	903	0
561	3	0	0	0	0	0	0	200	300	0	0	0	0	0	0	0	200	903	0	0	0	0	0	0	0	603	903	0
561	4	0	0	0	0	0	0	200	300	0	0	0	0	0	0	0	200	903	0	0	0	0	0	0	0	603	903	0
561	5	0	0	0	0	0	0	200	300	0	0	0	0	0	0	0	200	903	0	0	0	0	0	0	0	603	903	0
561	6	0	0	0	0	0	0	200	300	0	0	0	0	0	0	0	200	903	0	0	0	0	0	0	0	603	903	0
561	7	0	0	0	0	0	0	200	300	0	0	0	0	0	0	0	200	903	0	0	0	0	0	0	0	603	903	0
561	8	0	0	0	0	0	0	200	300	0	0	0	0	0	0	0	200	903	0	0	0	0	0	0	0	603	903	0
561	9	0	0	0	0	0	0	200	300	0	0	0	0	0	0	0	200	903	0	0	0	0	0	0	0	603	903	0
562	0	0	0	0	0	0	0	200	300	0	0	0	0	0	0	0	200	903	0	0	0	0	0	0	0	603	903	0
562	1	0	0	0	0	0	0	200	300	0	0	0	0	0	0	0	200	903	0	0	0	0	0	0	0	603	903	0
562	2	0	0	0	0	0	0	200	300	0	0	0	0	0	0	0	200	903	0	0	0	0	0	0	0	603	903	0
562	3	0	0	0	0	0	0	200	300	0	0	0	0	0	0	0	200	903	0	0	0	0	0	0	0	603	903	0
562	4	0	0	0	0	0	0	200	300	0	0	0	0	0	0	0	200	903	0	0	0	0	0	0	0	603	903	0
562	5	0	0	0	0	0	0	200	300	0	0	0	0	0	0	0	200	903	0	0	0	0	0	0	0	603	903	0
562	6	0	0	0	0	0	0	200	300	0	0	0	0	0	0	0	200	903	0	0	0	0	0	0	0	603	903	0
562	7	0	0	0	0	0	0	200	300	0	0	0	0	0	0	0	200	903	0	0	0	0	0	0	0	603	903	0
562	8	0	0	0	0	0	0	200	300	0	0	0	0	0	0	0	200	903	0	0	0	0	0	0	0	603	903	0
562	9	0	0	0	0	0	0	200	300	0	0	0	0	0	0	0	200	903	0	0	0	0	0	0	0	603	903	0
563	0	0	0	0	0	0	0	200	300	0	0	0	0	0	0	0	200	903	0	0	0	0	0	0	0	603	903	0
563	1	0	0	0	0	0	0	200	300	0	0	0	0	0	0	0	200	903	0	0	0	0	0	0	0	603	903	0
563	2	0	0	0	0	0	0	200	300	0	0	0	0	0	0	0	200	903	0	0	0	0	0	0	0	603	903	0
563	3	0	0	0	0	0	0	200	300	0	0	0	0	0	0	0	200	903	0	0	0	0	0	0	0	603	903	0
563	4	0	0	0	0	0	0	200	300	0	0	0	0	0	0	0	200	903	0	0	0	0	0	0	0	603	903	0
563	5	0	0	0	0	0	0	200	300	0	0	0	0	0	0	0	200	903	0	0	0	0	0	0	0	603	903	0
563	6	0	0	0	0	0	0	200	300	0	0	0	0	0	0	0	200	903	0	0	0	0	0	0	0	603	903	0
563	7	0	0	0	0	0	0	200	300	0	0	0	0	0	0	0	200	903	0	0	0	0	0	0	0	603	903	0
563	8	0	0	0	0	0	0	200	300	0	0	0	0	0	0	0	200	903	0	0	0	0	0	0	0	603	903	0
563	9	0	0	0	0	0	0	200	300	0	0	0	0	0	0	0	200	903	0	0	0	0	0	0	0	603	903	0
564	0	0	0	0	0	0	0	200	300	0	0	0	0	0	0	0	200	903	0	0	0	0	0	0	0	603	903	0
564	1	0	0	0	0	0	0	200	300	0	0	0	0	0	0	0	200	903	0	0	0	0	0	0	0	603	903	0
564	2	0	0	0	0	0	0	200	300	0	0	0	0	0	0	0	200	903	0	0	0	0	0	0	0	603	903	0
564	3	0	0	0	0	0	0	200	300	0	0	0	0	0	0	0	200	903	0	0	0	0	0	0	0	603	903	0
564	4	0	0	0	0	0	0	200	300	0	0	0	0	0	0	0	200	903	0	0	0	0	0	0	0	603	903	0
564	5	0	0	0	0	0	0	200	300	0	0	0	0	0	0	0	200	903	0	0	0	0	0	0	0	603	903	0
564	6	0	0	0	0	0	0	200	300	0	0	0	0	0	0	0	200	903	0	0	0	0	0	0	0	603	903	0
564	7	0	0	0	0	0	0	200	300	0	0	0	0	0	0	0	200	903	0	0	0	0	0	0	0	603	903	0
564	8	0	0	0	0	0	0	200	300	0	0	0	0	0	0	0	200	903	0	0	0	0	0	0	0	603	903	0
564	9	0	0	0	0	0	0	200	300	0	0	0	0	0	0	0	200	903	0	0	0	0	0	0	0	603	903	0
565	0	0	0	0	0	0	0	200	300	0	0	0	0	0	0	0	200	903	0	0	0	0	0	0	0	603	903	0
565	1	0	0	0	0	0	0	200	300	0	0	0	0	0	0	0	200	903	0	0	0	0	0	0	0	603	903	0
565	2	0	0	0	0	0	0	200	300	0	0	0	0	0	0	0	200	903	0	0	0	0	0	0	0	603	903	0
565	3	0	0	0	0	0	0	200	300	0	0	0	0	0	0	0	200	903	0	0	0	0	0	0	0	603	903	0
565	4	0	0	0	0	0	0	200	300	0	0	0	0	0	0	0	200	903	0	0	0	0	0	0	0	603	903	0
565	5	0	0	0	0	0	0	200	300	0	0	0	0	0	0	0	200	903	0	0	0	0	0	0	0	603	903	0
565	6	0	0	0	0	0	0	200	300	0	0	0	0	0	0	0	200	903	0	0	0	0	0	0	0	603	903	0
565	7	0	0	0	0	0	0	200	300	0	0	0	0	0	0	0	200	903	0	0	0	0	0	0	0	603	903	0
565	8	0	0	0	0	0	0	200	300	0	0	0	0	0	0	0	200	903	0	0	0	0	0	0	0	603	903	0
565	9	0	0	0	0	0	0	200	300	0	0	0	0	0	0	0	200	903	0	0	0	0	0	0	0	603	903	0
566	0	0	0	0	0	0	0	200	300	0	0	0	0	0	0	0	200	903	0	0	0	0	0	0	0	603	903	0
566	1	0	0	0	0	0	0	200	300	0	0	0	0	0	0	0	200	903	0	0	0	0	0	0	0	603	903	0
566	2	0	0	0	0	0	0	200	300	0	0	0	0	0	0	0	200	903	0	0	0	0	0	0	0	603	903	0
566	3	0	0	0	0	0	0	200	300	0	0	0	0	0	0	0	200	903	0	0	0	0	0	0	0	603	903	0
566	4	0	0	0	0	0	0	200	300	0	0	0	0	0	0	0	200	903	0	0	0	0	0	0	0	603	903	0
566	5	0	0	0	0	0	0	200	300	0	0	0	0	0	0	0	200	903	0	0	0	0	0	0	0	603	903	0
566	6	0	0	0	0	0	0	200	300	0	0	0	0	0	0	0	200	903	0	0	0	0	0	0	0	603	903	0
566	7	0	0	0	0	0	0	200	300	0	0	0	0	0	0	0	200	903	0	0	0	0	0	0	0	603	903	0
566	8	0	0	0	0	0	0	200	300	0	0	0	0	0	0	0	200	903	0	0	0	0	0	0	0	603	903	0
566	9	0	0	0	0	0	0	200	300	0	0	0	0	0	0	0	200	903	0	0	0	0	0	0	0	603	903	0
567	0	0	0	0	0	0	0	200	300	0	0	0	0	0	0	0	200	903	0	0	0	0	0	0	0	603	903	0
567	1	0	0	0	0	0	0	200	300	0	0	0	0	0	0	0	200	903	0	0	0	0	0	0	0	603	903	0
567	2	0	0	0	0	0	0	200	300	0	0	0	0	0	0	0	200	903	0	0	0	0	0	0	0	603	903	0
567	3	0	0	0	0	0	0	200	300	0	0	0	0	0	0	0	200	903	0	0	0	0	0	0	0	603	903	0
567	4	0	0	0	0	0	0	200	300	0	0	0	0	0	0	0	200	903	0	0	0	0	0	0	0	603	903	0
567	5	0	0	0	0	0	0	200	300	0	0	0	0	0	0	0	200	903	0	0	0	0	0	0	0	603	903	0
567	6	0	0	0	0	0	0	200	300	0	0	0	0	0	0	0	200	903	0	0	0	0	0	0	0	603	903	0
567	7	0	0	0	0	0	0	200	300	0	0	0	0	0	0	0	200	903	0	0	0	0	0	0	0	603	903	0
567	8	0	0	0	0	0	0	200	300	0	0	0	0	0	0	0	200	903	0	0	0	0	0	0	0	603	903	0
567	9	0	0	0	0	0	0	200	300	0	0	0	0	0	0	0	200	903	0	0	0	0	0	0	0	603	903	0
568	0	0	0	0	0	0	0	200	300	0	0	0	0	0	0	0	200	903	0	0	0	0	0	0	0	603	903	0
568	1	0	0	0	0	0	0	200	300	0	0	0	0	0	0	0	200	903	0	0	0	0	0	0	0	603	903	0
568	2	0	0	0	0	0	0	200	300	0	0	0	0	0	0	0	200	903	0	0	0	0	0	0	0	603	903	0
568	3	0	0	0	0	0	0	200	300	0	0	0	0	0	0	0	200	903	0	0	0	0	0	0	0	603	903	0
568	4	0	0	0	0	0	0	200	300	0	0	0	0	0	0	0	200	903	0	0	0	0	0	0	0	603	903	0
568	5	0	0	0	0	0	0	200	300	0	0	0	0	0	0	0	200	903	0	0	0	0	0	0	0	603	903	0
568	6	0	0	0	0	0	0	200	300	0	0	0	0	0	0	0	200	903	0	0	0	0	0	0	0	603	903	0
568	7	0	0	0	0	0	0	200	300	0	0	0	0	0	0	0	200	903	0	0	0	0	0	0	0	603	903	0
568	8	0	0	0	0	0	0	200	300	0	0	0	0	0	0	0	200	903	0	0	0	0	0	0	0	603	903	0
568	9	0	0	0	0	0	0	200	300	0	0	0	0	0	0	0	200	903	0	0	0	0	0	0	0	603	903	0
569	0	0	0	0	0	0	0	200	300	0	0	0	0	0	0	0	200	903	0	0	0	0	0	0	0	603	903	0
569	1	0	0	0	0	0	0	200	300	0	0	0	0	0	0	0	200	903	0	0	0	0	0	0	0	603	903	0
569	2	0	0	0	0	0	0	200	300	0	0	0	0	0	0	0	200	903	0	0	0	0	0	0	0	603	903	0
569	3	0	0	0	0	0	0	200	300	0	0	0	0	0	0	0	200	903	0	0	0	0	0	0	0	603	903	0
569	4	0	0	0	0	0	0	200	300	0	0	0	0	0	0	0	200	903	0	0	0	0	0	0	0	603	903	0
569	5	0	0	0	0	0	0	200	300	0	0	0	0	0	0	0	200	903	0	0	0	0	0	0	0	603	903	0
569	6	0	0	0	0	0	0	200	300	0	0	0	0	0	0	0	200	903	0	0	0	0	0	0	0	603	903	0
569	7	0	0	0	0	0	0	200	300	0	0	0	0	0	0	0	200	903	0	0	0	0	0	0	0	603	903	0
569	8	0	0	0	0	0	0	200	300	0	0	0	0	0	0	0	200	903	0	0	0	0	0	0	0	603	903	0
569	9	0	0	0	0	0	0	200	300	0	0	0	0	0	0	0	200	903	0	0	0	0	0	0	0	603	903	0
570	0	0	0	0	0	0	0	200	300	0	0	0	0	0	0	0	200	903	0	0	0	0	0	0	0	603	903	0
570	1	0	0	0	0	0	0	200	300	0	0	0	0	0	0	0	200	903	0	0	0	0	0	0	0	603	903	0
570	2	0	0	0	0	0	0	200	300	0	0	0	0	0	0	0	200	903	0	0	0	0	0	0	0	603	903	0
570	3	0	0	0	0	0	0	200	300	0	0	0	0	0	0	0	200	903	0	0	0	0	0	0	0	603	903	0
570	4	0	0	0	0	0	0	200	300	0	0	0	0	0	0	0	200	903	0	0	0	0	0	0	0	603	903	0
570	5	0	0	0	0	0	0	200	300	0	0	0	0	0	0	0	200	903	0	0	0	0	0	0	0	603	903	0
570	6	0	0	0	0	0	0	200	300	0	0	0	0	0	0	0	200	903	0	0	0	0	0	0	0	603	903	0
570	7	0	0	0	0	0	0	200	300	0	0	0	0	0	0	0	200	903	0	0	0	0	0	0	0	603	903	0
570	8	0	0	0	0	0	0	200	300	0	0	0	0	0	0	0	200	903	0	0	0	0	0	0	0	603	903	0
570	9	0	0	0	0	0	0	200	300	0	0	0	0	0	0	0	200	903	0	0	0	0	0	0	0	603	903	0
571	0	0	0	0	0	0	0	200	300	0	0	0	0	0	0	0	200	903	0	0	0	0	0	0	0	603	903	0
571	1	0	0	0	0	0	0	200	300	0	0	0	0	0	0	0	200	903	0	0	0	0	0	0	0	603	903	0
571	2	0	0	0	0	0	0	200	300	0	0	0	0	0	0	0	200	903	0	0	0	0	0	0	0	603	903	0
571	3	0	0	0	0	0	0	200	300	0	0	0	0	0	0	0	200	903	0	0	0	0	0	0	0	603	903	0
571	4	0	0	0	0	0	0	200	300	0	0	0	0	0	0	0	200	903	0	0	0	0	0	0	0	603	903	0
571	5	0	0	0	0	0	0	200	300	0	0	0	0	0	0	0	200	903	0	0	0	0	0	0	0	603	903	0
571	6	0	0	0	0	0	0	200	300	0	0	0	0	0	0	0	200	903	0	0	0	0	0	0	0	603	903	0
571	7	0	0	0	0	0	0	200	300	0	0	0	0	0	0	0	200	903	0	0	0	0	0	0	0	603	903	0
571	8	0	0	0	0	0	0	200	300	0	0	0	0	0	0	0	200	903	0	0	0	0	0	0	0	603	903	0
571	9	0	0	0	0	0	0	200	300	0	0	0	0	0	0	0	200	903	0	0	0	0	0	0	0	603	903	0
572	0	0	0	0	0	0	0	200	300	0	0	0	0	0	0	0	200	903	0	0	0	0	0	0	0	603	903	0
572	1	0	0	0	0	0	0	200	300	0	0	0	0	0	0	0	200	903	0	0	0	0	0	0	0	603	903	0
572	2	0	0	0	0	0	0	200	300	0	0	0	0	0	0	0	200	903	0	0	0	0	0	0	0	603	903	0
572	3	0	0	0	0	0	0	200	300	0	0	0	0	0	0	0	200	903	0	0	0	0	0	0	0	603	903	0
572	4	0	0	0	0	0	0	200	300	0	0	0	0	0	0	0	200	903	0	0	0	0	0	0	0	603	903	0
572	5	0	0	0	0	0	0	200	300	0	0	0	0	0	0	0	200	903	0	0	0	0	0	0	0	603	903	0
572	6	0	0	0	0	0	0	200	300	0	0	0	0	0	0	0	200	903	0	0	0	0	0	0	0	603	903	0
572	7	0	0	0	0	0	0	200	300	0	0	0	0	0	0	0	200	903	0	0	0	0	0	0	0	603	903	0
572	8	0	0	0	0	0	0	200	300	0	0	0	0	0	0	0	200	903	0	0	0	0	0	0	0	603	903	0
572	9	0	0	0	0	0	0	200	300	0	0	0	0	0	0	0	200	903	0	0	0	0	0	0	0	603	903	0
573	0	0	0	0	0	0	0	200	300	0	0	0	0	0	0	0	200	903	0	0	0	0	0	0	0	603	903	0
573	1	0	0	0	0	0	0	200	300	0	0	0	0	0	0	0	200	903	0	0	0	0	0	0	0	603	903	0
573	2	0	0	0	0	0	0	200	300	0	0	0	0	0	0	0	200	903	0	0	0	0	0	0	0	603	903	0
573	3	0	0	0	0	0	0	200	300	0	0	0	0	0	0	0	200	903	0	0	0	0	0	0	0	603	903	0
573	4	0	0	0	0	0	0	200	300	0	0	0	0	0	0	0	200	903	0	0	0	0	0	0	0	603	903	0
573	5	0	0	0	0	0	0	200	300	0	0	0	0	0	0	0	200	903	0	0	0	0	0	0	0	603	903	0
573	6	0	0	0	0	0	0	200	300	0	0	0	0	0	0	0	200	903	0	0	0	0	0	0	0	603	903	0
573	7	0	0	0	0	0	0	200	300	0	0	0	0	0	0	0	200	903	0	0	0	0	0	0	0	603	903	0
573	8	0	0	0	0	0	0	200	300	0	0	0	0	0	0	0	200	903	0	0	0	0	0	0	0	603	903	0
573	9	0	0	0	0	0	0	200	300	0	0	0	0	0	0	0	200	903	0	0	0	0	0	0	0	603	903	0
574	0	0	0	0	0	0	0	200	300	0	0	0	0	0	0	0	200	903	0	0	0	0	0	0	0	603	903	0
574	1	0	0	0	0	0	0	200	300	0	0	0	0	0	0	0	200	903	0	0	0	0	0	0	0	603	903	0
574	2	0	0	0	0	0	0	200	300	0	0	0	0	0	0	0	200	903	0	0	0	0	0	0	0	603	903	0
574	3	0	0	0	0	0	0	200	300	0	0	0	0	0	0	0	200	903	0	0	0	0	0	0	0	603	903	0
574	4	0	0	0	0	0	0	200	300	0	0	0	0	0	0	0	200	903	0	0	0	0	0	0	0	603	903	0
574	5	0	0	0	0	0	0	200	300	0	0	0	0	0	0	0	200	903	0	0	0	0	0	0	0	603	903	0
574	6	0	0	0	0	0	0	200	300	0	0	0	0	0	0	0	200	903	0	0	0	0	0	0	0	603	903	0
574	7	0	0	0	0	0	0	200	300	0	0	0	0	0	0	0	200	903	0	0	0	0	0	0	0	603	903	0
574	8	0	0	0	0	0	0	200	300	0	0	0	0	0	0	0	200	903	0	0	0	0	0	0	0	603	903	0
574	9	0	0	0	0	0	0	200	300	0	0	0	0	0	0	0	200	903	0	0	0	0	0	0	0	603	903	0
575	0	0	0	0	0	0	0	200	300	0	0	0	0	0	0	0	200	903	0	0	0	0	0	0	0	603	903	0
575	1	0	0	0	0	0	0	200	300	0	0	0	0	0	0	0	200	903	0	0	0	0	0	0	0	603	903	0
575	2	0	0	0	0	0	0	200	300	0	0	0	0	0	0	0	200	903	0	0	0	0	0	0	0	603	903	0
575	3	0	0	0	0	0	0	200	300	0	0	0	0	0	0	0	200	903	0	0	0	0	0	0	0	603	903	0
575	4	0	0	0	0	0	0	200	300	0	0	0	0	0	0	0	200	903	0	0	0	0	0	0	0	603	903	0
575	5	0	0	0	0	0	0	200	300	0	0	0	0	0	0	0	200	903	0	0	0	0	0	0	0	603	903	0
575	6	0	0	0	0	0	0	200	300	0	0	0	0	0	0	0	200	903	0	0	0	0	0	0	0	603	903	0
575	7	0	0	0	0	0	0	200	300	0	0	0	0	0	0	0	200	903	0	0	0	0	0	0	0	603	903	0
575	8	0	0	0	0	0	0	200	300	0	0	0	0	0	0	0	200	903	0	0	0	0	0	0	0	603	903	0
575	9	0	0	0	0	0	0	200	300	0	0	0	0	0	0	0	200	903	0	0	0	0	0	0	0	603	903	0
576	0	0	0	0	0	0	0	200	300	0	0	0	0	0	0	0	200	903	0	0	0	0	0	0	0	603	903	0
576	1	0	0	0	0	0	0	200	300	0	0	0	0	0	0	0	200	903	0	0	0	0	0	0	0	603	903	0
576	2	0	0	0	0	0	0	200	300	0	0	0	0	0	0	0	200	903	0	0	0	0	0	0	0	603	903	0
576	3	0	0	0	0	0	0	200	300	0	0	0	0	0	0	0	200	903	0	0	0	0	0	0	0	603	903	0
576	4	0	0	0	0	0	0	200	300	0	0	0	0	0	0	0	200	903	0	0	0	0	0	0	0	603	903	0
576	5	0	0	0	0	0	0	200	300	0	0	0	0	0	0	0	200	903	0	0	0	0	0	0	0	603	903	0
576	6	0	0	0	0	0	0	200	300	0	0	0	0	0	0	0	200	903	0	0	0	0	0	0	0	603	903	0
576	7	0	0	0	0	0	0	200	300	0	0	0	0	0	0	0	200	903	0	0	0	0	0	0	0	603	903	0
576	8	0	0	0	0	0	0	200	300	0	0	0	0	0	0	0	200	903	0	0	0	0	0	0	0	603	903	0
576	9	0	0	0	0	0	0	200	300	0	0	0	0	0	0	0	200	903	0	0	0	0	0	0	0	603	903	0
577	0	0	0	0	0	0	0	200	300	0	0	0	0	0	0	0	200	903	0	0	0	0	0	0	0	603	903	0
577	1	0	0	0	0	0	0	200	300	0	0	0	0	0	0	0	200	903	0	0	0	0	0	0	0	603	903	0
577	2	0	0	0	0	0	0	200	300	0	0	0	0	0	0	0	200	903	0	0	0	0	0	0	0	603	903	0
577	3	0	0	0	0	0	0	200	300	0	0	0	0	0	0	0	200	903	0	0	0	0	0	0	0	603	903	0
577	4	0	0	0	0	0	0	200	300	0	0	0	0	0	0	0	200	903	0	0	0	0	0	0	0	603	903	0
577	5	0	0	0	0	0	0	200	300	0	0	0	0	0	0	0	200	903	0	0	0	0	0	0	0	603	903	0
577	6	0	0	0	0	0	0	200	300	0	0	0	0	0	0	0	200	903	0	0	0	0	0	0	0	603	903	0
577	7	0	0	0	0	0	0	200	300	0	0	0	0	0	0	0	200	903	0	0	0	0	0	0	0	603	903	0
577	8	0	0	0	0	0	0	200	300	0	0	0	0	0	0	0	200	903	0	0	0	0	0	0	0	603	903	0
577	9	0	0	0	0	0	0	200	300	0	0	0	0	0	0	0	200	903	0	0	0	0	0	0	0	603	903	0
578	0	0	0	0	0	0	0	200	300	0	0	0	0	0	0	0	200	903	0	0	0	0	0	0	0	603	903	0
578	1	0	0	0	0	0	0	200	300	0	0	0	0	0	0	0	200	903	0	0	0	0	0	0	0	603	903	0
578	2	0	0	0	0	0	0	200	300	0	0	0	0	0	0	0	200	903	0	0	0	0	0	0	0	603	903	0
578	3	0	0	0	0	0	0	200	300	0	0	0	0	0	0	0	200	903	0	0	0	0	0	0	0	603	903	0
578	4	0	0	0	0	0	0	200	300	0	0	0	0	0	0	0	200	903	0	0	0	0	0	0	0	603	903	0
578	5	0	0	0	0	0	0	200	300	0	0	0	0	0	0	0	200	903	0	0	0	0	0	0	0	603	903	0
578	6	0	0	0	0	0	0	200	300	0	0	0	0	0	0	0	200	903	0	0	0	0	0	0	0	603	903	0
578	7	0	0	0	0	0	0	200	300	0	0	0	0	0	0	0	200	903	0	0	0	0	0	0	0	603	903	0
578	8	0	0	0	0	0	0	200	300	0	0	0	0	0	0	0	200	903	0	0	0	0	0	0	0	603	903	0
578	9	0	0	0	0	0	0	200	300	0	0	0	0	0	0	0	200	903	0	0	0	0	0	0	0	603	903	0
579	0	0	0	0	0	0	0	200	300	0	0	0	0	0	0	0	200	903	0	0	0	0	0	0	0	603	903	0
579	1	0	0	0	0	0	0	200	300	0	0	0	0	0	0	0	200	903	0	0	0	0	0	0	0	603	903	0
579	2	0	0	0	0	0	0	200	300	0	0	0	0	0	0	0	200	903	0	0	0	0	0	0	0	603	903	0
579	3	0	0	0	0	0	0	200	300	0	0	0	0	0	0	0	200	903	0	0	0	0	0	0	0	603	903	0
579	4	0	0	0	0	0	0	200	300	0	0	0	0	0	0	0	200	903	0	0	0	0	0	0	0	603	903	0
579	5	0	0	0	0	0	0	200	300	0	0	0	0	0	0	0	200	903	0	0	0	0	0	0	0	603	903	0
579	6	0	0	0	0	0	0	200	300	0	0	0	0	0	0	0	200	903	0	0	0	0	0	0	0	603	903	0
579	7	0	0	0	0	0	0	200	300	0	0	0	0	0	0	0	200	903	0	0	0	0	0	0	0	603	903	0
579	8	0	0	0	0	0	0	200	300	0	0	0	0	0	0	0	200	903	0	0	0	0	0	0	0	603	903	0
579	9	0	0	0	0	0	0	200	300	0	0	0	0	0	0	0	200	903	0	0	0	0	0	0	0	603	903	0
580	0	0	0	0	0	0	0	200	300	0	0	0	0	0	0	0	200	903	0	0	0	0	0	0	0	603	903	0
580	1	0	0	0	0	0	0	200	300	0	0	0	0	0	0	0	200	903	0	0	0	0	0	0	0	603	903	0
580	2	0	0	0	0	0	0	200	300	0	0	0	0	0	0	0	200	903	0	0	0	0	0	0	0	603	903	0
580	3	0	0	0	0	0	0	200	300	0	0	0	0	0	0	0	200	903	0	0	0	0	0	0	0	603	903	0
580	4	0	0	0	0	0	0	200	300	0	0	0	0	0	0	0	200	903	0	0	0	0	0	0	0	603	903	0
580	5	0	0	0	0	0	0	200	300	0	0	0	0	0	0	0	200	903	0	0	0	0	0	0	0	603	903	0
580	6	0	0	0	0	0	0	200	300	0	0	0	0	0	0	0	200	903	0	0	0	0	0	0	0	603	903	0
580	7	0	0	0	0	0	0	200	300	0	0	0	0	0	0	0	200	903	0	0	0	0	0	0	0	603	903	0
580	8	0	0	0	0	0	0	200	300	0	0	0	0	0	0	0	200	903	0	0	0	0	0	0	0	603	903	0
580	9	0	0	0	0	0	0	200	300	0	0	0	0	0	0	0	200	903	0	0	0	0	0	0	0	603	903	0
581	0	0	0	0	0	0	0	200	300	0	0	0	0	0	0	0	200	903	0	0	0	0	0	0	0	603	903	0
581	1	0	0	0	0	0	0	200	300	0	0	0	0	0	0	0	200	903	0	0	0	0	0	0	0	603	903	0
581	2	0	0	0	0	0	0	200	300	0	0	0	0	0	0	0	200	903	0	0	0	0	0	0	0	603	903	0
581	3	0	0	0	0	0	0	200	300	0	0	0	0	0	0	0	200	903	0	0	0	0	0	0	0	603	903	0
581	4	0	0	0	0	0	0	200	300	0	0	0	0	0	0	0	200	903	0	0	0	0	0	0	0	603	903	0
581	5	0	0	0	0	0	0	200	300	0	0	0	0	0	0	0	200	903	0	0	0	0	0	0	0	603	903	0
581	6	0	0	0	0	0	0	200	300	0	0	0	0	0	0	0	200	903	0	0	0	0	0	0	0	603	903	0
581	7	0	0	0	0	0	0	200	300	0	0	0	0	0	0	0	200	903	0	0	0	0	0	0	0	603	903	0
581	8	0	0	0	0	0	0	200	300	0	0	0	0	0	0	0	200	903	0	0	0	0	0	0	0	603	903	0
581	9	0	0	0	0	0	0	200	300	0	0	0	0	0	0	0	200	903	0	0	0	0	0	0	0	603	903	0
582	0	0	0	0	0	0	0	200	300	0	0	0	0	0	0	0	200	903	0	0	0	0	0	0	0	603	903	0
582	1	0	0	0	0	0	0	200	300	0	0	0	0	0	0	0	200	903	0	0	0	0	0	0	0	603	903	0
582	2	0	0	0	0	0	0	200	300	0	0	0	0	0	0	0	200	903	0	0	0	0	0	0	0	603	903	0
582	3	0	0	0	0	0	0	200	300	0	0	0	0	0	0	0	200	903	0	0	0	0	0	0	0	603	903	0
582	4	0	0	0	0	0	0	200	300	0	0	0	0	0	0	0	200	903	0	0	0	0	0	0	0	603	903	0
582	5	0	0	0	0	0	0	200	300	0	0	0	0	0	0	0	200	903	0	0	0	0	0	0	0	603	903	0
582	6	0	0	0	0	0	0	200	300	0	0	0	0	0	0	0	200	903	0	0	0	0	0	0	0	603	903	0
582	7	0	0	0	0	0	0	200	300	0	0	0	0	0	0	0	200	903	0	0	0	0	0	0	0	603	903	0
582	8	0	0	0	0	0	0	200	300	0	0	0	0	0	0	0	200	903	0	0	0	0	0	0	0	603	903	0
582	9	0	0	0	0	0	0	200	300	0	0	0	0	0	0	0	200	903	0	0	0	0	0	0	0	603	903	0
583	0	0	0	0	0	0	0	200	300	0	0	0	0	0	0	0	200	903	0	0	0	0	0	0	0	603	903	0
583	1	0	0	0	0	0	0	200	300	0	0	0	0	0	0	0	200	903	0	0	0	0	0	0	0	603	903	0
583	2	0	0	0	0	0	0	200	300	0	0	0	0	0	0	0	200	903	0	0	0	0	0	0	0	603	903	0
583	3	0	0	0	0	0	0	200	300	0	0	0	0	0	0	0	200	903	0	0	0	0	0	0	0	603	903	0
583	4	0	0	0	0	0	0	200	300	0	0	0	0	0	0	0	200	903	0	0	0	0	0	0	0	603	903	0
583	5	0	0	0	0	0	0	200	300	0	0	0	0	0	0	0	200	903	0	0	0	0	0	0	0	603	903	0
583	6	0	0	0	0	0	0	200	300	0	0	0	0	0	0	0	200	903	0	0	0	0	0	0	0	603	903	0
583	7	0	0	0	0	0	0	200	300	0	0	0	0	0	0	0	200	903	0	0	0	0	0	0	0	603	903	0
583	8	0	0	0	0	0	0	200	300	0	0	0	0	0	0	0	200	903	0	0	0	0	0	0	0	603	903	0
583	9	0	0	0	0	0	0	200	300	0	0	0	0	0	0	0	200	903	0	0	0	0	0	0	0	603	903	0
584	0	0	0	0	0	0	0	200	300	0	0	0	0	0	0	0	200	903	0	0	0	0	0	0	0	603	903	0
584	1	0	0	0	0	0	0	200	300	0	0	0	0	0	0	0	200	903	0	0	0	0	0	0	0	603	903	0
584	2	0	0	0	0	0	0	200	300	0	0	0	0	0	0	0	200	903	0	0	0	0	0	0	0	603	903	0
584	3	0	0	0	0	0	0	200	300	0	0	0	0	0	0	0	200	903	0	0	0	0	0	0	0	603	903	0
584	4	0	0	0	0	0	0	200	300	0	0	0	0	0	0	0	200	903	0	0	0	0	0	0	0	603	903	0
584	5	0	0	0	0	0	0	200	300	0	0	0	0	0	0	0	200	903	0	0	0	0	0	0	0	603	903	0
584	6	0	0	0	0	0	0	200	300	0	0	0	0	0	0	0	200	903	0	0	0	0	0	0	0	603	903	0
584	7	0	0	0	0	0	0	200	300	0	0	0	0	0	0	0	200	903	0	0	0	0	0	0	0	603	903	0
584	8	0	0	0	0	0	0	200	300	0	0	0	0	0	0	0	200	903	0	0	0	0	0	0	0	603	903	0
584	9	0	0	0	0	0	0	200	300	0	0	0	0	0	0	0	200	903	0	0	0	0	0	0	0	603	903	0
585	0	0	0	0	0	0	0	200	300	0	0	0	0	0	0	0	200	903	0	0	0	0	0	0	0	603	903	0
585	1	0	0	0	0	0	0	200	300	0	0	0	0	0	0	0	200	903	0	0	0	0	0	0	0	603	903	0
585	2	0	0	0	0	0	0	200	300	0	0	0	0	0	0	0	200	903	0	0	0	0	0	0	0	603	903	0
585	3	0	0	0	0	0	0	200	300	0	0	0	0	0	0	0	200	903	0	0	0	0	0	0	0	603	903	0
585	4	0	0	0	0	0	0	200	300	0	0	0	0	0	0	0	200	903	0	0	0	0	0	0	0	603	903	0
585	5	0	0	0	0	0	0	200	300	0	0	0	0	0	0	0	200	903	0	0	0	0	0	0	0	603	903	0
585	6	0	0	0	0	0	0	200	300	0	0	0	0	0	0	0	200	903	0	0	0	0	0	0	0	603	903	0
585	7	0	0	0	0	0	0	200	300	0	0	0	0	0	0	0	200	903	0	0	0	0	0	0	0	603	903	0
585	8	0	0	0	0	0	0	200	300	0	0	0	0	0	0	0	200	903	0	0	0	0	0	0	0	603	903	0
585	9	0	0	0	0	0	0	200	300	0	0	0	0	0	0	0	200	903	0	0	0	0	0	0	0	603	903	0
586	0	0	0	0	0	0	0	200	300	0	0	0	0	0	0	0	200	903	0	0	0	0	0	0	0	603	903	0
586	1	0	0	0	0	0	0	200	300	0	0	0	0	0	0	0	200	903	0	0	0	0	0	0	0	603	903	0
586	2	0	0	0	0	0	0	200	300	0	0	0	0	0	0	0	200	903	0	0	0	0	0	0	0	603	903	0
586	3	0	0	0	0	0	0	200	300	0	0	0	0	0	0	0	200	903	0	0	0	0	0	0	0	603	903	0
586	4	0	0	0	0	0	0	200	300	0	0	0	0	0	0	0	200	903	0	0	0	0	0	0	0	603	903	0
586	5	0	0	0	0	0	0	200	300	0	0	0	0	0	0	0	200	903	0	0	0	0	0	0	0	603	903	0
586	6	0	0	0	0	0	0	200	300	0	0	0	0	0	0	0	200	903	0	0	0	0	0	0	0	603	903	0
586	7	0	0	0	0	0	0	200	300	0	0	0	0	0	0	0	200	903	0	0	0	0	0	0	0	603	903	0
586	8	0	0	0	0	0	0	200	300	0	0	0	0	0	0	0	200	903	0	0	0	0	0	0	0	603	903	0
586	9	0	0	0	0	0	0	200	300	0	0	0	0	0	0	0	200	903	0	0	0	0	0	0	0	603	903	0
587	0	0	0	0	0	0	0	200	300	0	0	0	0	0	0	0	200	903	0	0	0	0	0	0	0	603	903	0
587	1	0	0	0	0	0	0	200	300	0	0	0	0	0	0	0	200	903	0	0	0	0	0	0	0	603	903	0
587	2	0	0	0	0	0	0	200	300	0	0	0	0	0	0	0	200	903	0	0	0	0	0	0	0	603	903	0
587	3	0	0	0	0	0	0	200	300	0	0	0	0	0	0	0	200	903	0	0	0	0	0	0	0	603	903	0
587	4	0	0	0	0	0	0	200	300	0	0	0	0	0	0	0	200	903	0	0	0	0	0	0	0	603	903	0
587	5	0	0	0	0	0	0	200	300	0	0	0	0	0	0	0	200	903	0	0	0	0	0	0	0	603	903	0
587	6	0	0	0	0	0	0	200	300	0	0	0	0	0	0	0	200	903	0	0	0	0	0	0	0	603	903	0
587	7	0	0	0	0	0	0	200	300	0	0	0	0	0	0	0	200	903	0	0	0	0	0	0	0	603	903	0
587	8	0	0	0	0	0	0	200	300	0	0	0	0	0	0	0	200	903	0	0	0	0	0	0	0	603	903	0
587	9	0	0	0	0	0	0	200	300	0	0	0	0	0	0	0	200	903	0	0	0	0	0	0	0	603	903	0
588	0	0	0	0	0	0	0	200	300	0	0	0	0	0	0	0	200	903	0	0	0	0	0	0	0	603	903	0
588	1	0	0	0	0	0	0	200	300	0	0	0	0	0	0	0	200	903	0	0	0	0	0	0	0	603	903	0
588	2	0	0	0	0	0	0	200	300	0	0	0	0	0	0	0	200	903	0	0	0	0	0	0	0	603	903	0
588	3	0	0	0	0	0	0	200	300	0	0	0	0	0	0	0	200	903	0	0	0	0	0	0	0	603	903	0
588	4	0	0	0	0	0	0	200	300	0	0	0	0	0	0	0	200	903	0	0	0	0	0	0	0	603	903	0
588	5	0	0	0	0	0	0	200	300	0	0	0	0	0	0	0	200	903	0	0	0	0	0	0	0	603	903	0
588	6	0	0	0	0	0	0	200	300	0	0	0	0	0	0	0	200	903	0	0	0	0	0	0	0	603	903	0
588	7	0	0	0	0	0	0	200	300	0	0	0	0	0	0	0	200	903	0	0	0	0	0	0	0	603	903	0
588	8	0	0	0	0	0	0	200	300	0	0	0	0	0	0	0	200	903	0	0	0	0	0	0	0	603	903	0
588	9	0	0	0	0	0	0	200	300	0	0	0	0	0	0	0	200	903	0	0	0	0	0	0	0	603	903	0
589	0	0	0	0	0	0	0	200	300	0	0	0	0	0	0	0	200	903	0	0	0	0	0	0	0	603	903	0
589	1	0	0	0	0	0	0	200	300	0	0	0	0	0	0	0	200	903	0	0	0	0	0	0	0	603	903	0
589	2	0	0	0	0	0	0	200	300	0	0	0	0	0	0	0	200	903	0	0	0	0	0	0	0	603	903	0
589	3	0	0	0	0	0	0	200	300	0	0	0	0	0	0	0	200	903	0	0	0	0	0	0	0	603	903	0
589	4	0	0	0	0	0	0	200	300	0	0	0	0	0	0	0	200	903	0	0	0	0	0	0	0	603	903	0
589	5	0	0	0	0	0	0	200	300	0	0	0	0	0	0	0	200	903	0	0	0	0	0	0	0	603	903	0
589	6	0	0	0	0	0	0	200	300	0	0	0	0	0	0	0	200	903	0	0	0	0	0	0	0	603	903	0
589	7	0	0	0	0	0	0	200	300	0	0	0	0	0	0	0	200	903	0	0	0	0	0	0	0	603	903	0
589	8	0	0	0	0	0	0	200	300	0	0	0	0	0	0	0	200	903	0	0	0	0	0	0	0	603	903	0
589	9	0	0	0	0	0	0	200	300	0	0	0	0	0	0	0	200	903	0	0	0	0	0	0	0	603	903	0
590	0	0	0	0	0	0	0	200	300	0	0	0	0	0	0	0	200	903	0	0	0	0	0	0	0	603	903	0
590	1	0	0	0	0	0	0	200	300	0	0	0	0	0	0	0	200	903	0	0	0	0	0	0	0	603	903	0
590	2	0	0	0	0	0	0	200	300	0	0	0	0	0	0	0	200	903	0	0	0	0	0	0	0	603	903	0
590	3	0	0	0	0	0	0	200	300	0	0	0	0	0	0	0	200	903	0	0	0	0	0	0	0	603	903	0
590	4	0	0	0	0	0	0	200	300	0	0	0	0	0	0	0	200	903	0	0	0	0	0	0	0	603	903	0
590	5	0	0	0	0	0	0	200	300	0	0	0	0	0	0	0	200	903	0	0	0	0	0	0	0	603	903	0
590	6	0	0	0	0	0	0	200	300	0	0	0	0	0	0	0	200	903	0	0	0	0	0	0	0	603	903	0
590	7	0	0	0	0	0	0	200	300	0	0	0	0	0	0	0	200	903	0	0	0	0	0	0	0	603	903	0
590	8	0	0	0	0	0	0	200	300	0	0	0	0	0	0	0	200	903	0	0	0	0	0	0	0	603	903	0
590	9	0	0	0	0	0	0	200	300	0	0	0	0	0	0	0	200	903	0	0	0	0	0	0	0	603	903	0
591	0	0	0	0	0	0	0	200	300	0	0	0	0	0	0	0	200	903	0	0	0	0	0	0	0	603	903	0
591	1	0	0	0	0	0	0	200	300	0	0	0	0	0	0	0	200	903	0	0	0	0	0	0	0	603	903	0
591	2	0	0	0	0	0	0	200	300	0	0	0	0	0	0	0	200	903	0	0	0	0	0	0	0	603	903	0
591	3	0	0	0	0	0	0	200	300	0	0	0	0	0	0	0	200	903	0	0	0	0	0	0	0	603	903	0
591	4	0	0	0	0	0	0	200	300	0	0	0	0	0	0	0	200	903	0	0	0	0	0	0	0	603	903	0
591	5	0	0	0	0	0	0	200	300	0	0	0	0	0	0	0	200	903	0	0	0	0	0	0	0	603	903	0
591	6	0	0	0	0	0	0	200	300	0	0	0	0	0	0	0	200	903	0	0	0	0	0	0	0	603	903	0
591	7	0	0	0	0	0	0	200	300	0	0	0	0	0	0	0	200	903	0	0	0	0	0	0	0	603	903	0
591	8	0	0	0	0	0	0	200	300	0	0	0	0	0	0	0	200	903	0	0	0	0	0	0	0	603	903	0
591	9	0	0	0	0	0	0	200	300	0	0	0	0	0	0	0	200	903	0	0	0	0	0	0	0	603	903	0
592	0	0	0	0	0	0	0	200	300	0	0	0	0	0	0	0	200	903	0	0	0	0	0	0	0	603	903	0
592	1	0	0	0	0	0	0	200	300	0	0	0	0	0	0	0	200	903	0	0	0	0	0	0	0	603	903	0
592	2	0	0	0	0	0	0	200	300	0	0	0	0	0	0	0	200	903	0	0	0	0	0	0	0	603	903	0
592	3	0	0	0	0	0	0	200	300	0	0	0	0	0	0	0	200	903	0	0	0	0	0	0	0	603	903	0
592	4	0	0	0	0	0	0	200	300	0	0	0	0	0	0	0	200	903	0	0	0	0	0	0	0	603	903	0
592	5	0	0	0	0	0	0	200	300	0	0	0	0	0	0	0	200	903	0	0	0	0	0	0	0	603	903	0
592	6	0	0	0	0	0	0	200	300	0	0	0	0	0	0	0	200	903	0	0	0	0	0	0	0	603	903	0
592	7	0	0	0	0	0	0	200	300	0	0	0	0	0	0	0	200	903	0	0	0	0	0	0	0	603	903	0
592	8	0	0	0	0	0	0	200	300	0	0	0	0	0	0	0	200	903	0	0	0	0	0	0	0	603	903	0
592	9	0	0	0	0	0	0	200	300	0	0	0	0	0	0	0	200	903	0	0	0	0	0	0	0	603	903	0
593	0	0	0	0	0	0	0	200	300	0	0	0	0	0	0	0	200	903	0	0	0	0	0	0	0	603	903	0
593	1	0	0	0	0	0	0	200	300	0	0	0	0	0	0	0	200	903	0	0	0	0	0	0	0	603	903	0
593	2	0	0	0	0	0	0	200	300	0	0	0	0	0	0	0	200	903	0	0	0	0	0	0	0	603	903	0
593	3	0	0	0	0	0	0	200	300	0	0	0	0	0	0	0	200	903	0	0	0	0	0	0	0	603	903	0
593	4	0	0	0	0	0	0	200	300	0	0	0	0	0	0	0	200	903	0	0	0	0	0	0	0	603	903	0
593	5	0	0	0	0	0	0	200	300	0	0	0	0	0	0	0	200	903	0	0	0	0	0	0	0	603	903	0
593	6	0	0	0	0	0	0	200	300	0	0	0	0	0	0	0	200	903	0	0	0	0	0	0	0	603	903	0
593	7	0	0	0	0	0	0	200	300	0	0	0	0	0	0	0	200	903	0	0	0	0	0	0	0	603	903	0
593	8	0	0	0	0	0	0	200	300	0	0	0	0	0	0	0	200	903	0	0	0	0	0	0	0	603	903	0
593	9	0	0	0	0	0	0	200	300	0	0	0	0	0	0	0	200	903	0	0	0	0	0	0	0	603	903	0
594	0	0	0	0	0	0	0	200	300	0	0	0	0	0	0	0	200	903	0	0	0	0	0	0	0	603	903	0
594	1	0	0	0	0	0	0	200	300	0	0	0	0	0	0	0	200	903	0	0	0	0	0	0	0	603	903	0
594	2	0	0	0	0	0	0	200	300	0	0	0	0	0	0	0	200	903	0	0	0	0	0	0	0	603	903	0
594	3	0	0	0	0	0	0	200	300	0	0	0	0	0	0	0	200	903	0	0	0	0	0	0	0	603	903	0
594	4	0	0	0	0	0	0	200	300	0	0	0	0	0	0	0	200	903	0	0	0	0	0	0	0	603	903	0
594	5	0	0	0	0	0	0	200	300	0	0	0	0	0	0	0	200	903	0	0	0	0	0	0	0	603	903	0
594	6	0	0	0	0	0	0	200	300	0	0	0	0	0	0	0	200	903	0	0	0	0	0	0	0	603	903	0
594	7	0	0	0	0	0	0	200	300	0	0	0	0	0	0	0	200	903	0	0	0	0	0	0	0	603	903	0
594	8	0	0	0	0	0	0	200	300	0	0	0	0	0	0	0	200	903	0	0	0	0	0	0	0	603	903	0
594	9	0	0	0	0	0	0	200	300	0	0	0	0	0	0	0	200	903	0	0	0	0	0	0	0	603	903	0
595	0	0	0	0	0	0	0	200	300	0	0	0	0	0	0	0	200	903	0	0	0	0	0	0	0	603	903	0
595	1	0	0	0	0	0	0	200	300	0	0	0	0	0	0	0	200	903	0	0	0	0	0	0	0	603	903	0
595	2	0	0	0	0	0	0	200	300	0	0	0	0	0	0	0	200	903	0	0	0	0	0	0	0	603	903	0
595	3	0	0	0	0	0	0	200	300	0	0	0	0	0	0	0	200	903	0	0	0	0	0	0	0	603	903	0
595	4	0	0	0	0	0	0	200	300	0	0	0	0	0	0	0	200	903	0	0	0	0	0	0	0	603	903	0
595	5	0	0	0	0	0	0	200	300	0	0	0	0	0	0	0	200	903	0	0	0	0	0	0	0	603	903	0
595	6	0	0	0	0	0	0	200	300	0	0	0	0	0	0	0	200	903	0	0	0	0	0	0	0	603	903	0
595	7	0	0	0	0	0	0	200	300	0	0	0	0	0	0	0	200	903	0	0	0	0	0	0	0	603	903	0
595	8	0	0	0	0	0	0	200	300	0	0	0	0	0	0	0	200	903	0	0	0	0	0	0	0	603	903	0
595	9	0	0	0	0	0	0	200	300	0	0	0	0	0	0	0	200	903	0	0	0	0	0	0	0	603	903	0
596	0	0	0	0	0	0	0	200	300	0	0	0	0	0	0	0	200	903	0	0	0	0	0	0	0	603	903	0
596	1	0	0	0	0	0	0	200	300	0	0	0	0	0	0	0	200	903	0	0	0	0	0	0	0	603	903	0
596	2	0	0	0	0	0	0	200	300	0	0	0	0	0	0	0	200	903	0	0	0	0	0	0	0	603	903	0
596	3	0	0	0	0	0	0	200	300	0	0	0	0	0	0	0	200	903	0	0	0	0	0	0	0	603	903	0
596	4	0	0	0	0	0	0	200	300	0	0	0	0	0	0	0	200	903	0	0	0	0	0	0	0	603	903	0
596	5	0	0	0	0	0	0	200	300	0	0	0	0	0	0	0	200	903	0	0	0	0	0	0	0	603	903	0
596	6	0	0	0	0	0	0	200	300	0	0	0	0	0	0	0	200	903	0	0	0	0	0	0	0	603	903	0
596	7	0	0	0	0	0	0	200	300	0	0	0	0	0	0	0	200	903	0	0	0	0	0	0	0	603	903	0
596	8	0	0	0	0	0	0	200	300	0	0	0	0	0	0	0	200	903	0	0	0	0	0	0	0	603	903	0
596	9	0	0	0	0	0	0	200	300	0	0	0	0	0	0	0	200	903	0	0	0	0	0	0	0	603	903	0
597	0	0	0	0	0	0	0	200	300	0	0	0	0	0	0	0	200	903	0	0	0	0	0	0	0	603	903	0
597	1	0	0	0	0	0	0	200	300	0	0	0	0	0	0	0	200	903	0	0	0	0	0	0	0	603	903	0
597	2	0	0	0	0	0	0	200	300	0	0	0	0	0	0	0	200	903	0	0	0	0	0	0	0	603	903	0
597	3	0	0	0	0	0	0	200	300	0	0	0	0	0	0	0	200	903	0	0	0	0	0	0	0	603	903	0
597	4	0	0	0	0	0	0	200	300	0	0	0	0	0	0	0	200	903	0	0	0	0	0	0	0	603	903	0
597	5	0	0	0	0	0	0	200	300	0	0	0	0	0	0	0	200	903	0	0	0	0	0	0	0	603	903	0
597	6	0	0	0	0	0	0	200	300	0	0	0	0	0	0	0	200	903	0	0	0	0	0	0	0	603	903	0
597	7	0	0	0	0	0	0	200	300	0	0	0	0	0	0	0	200	903	0	0	0	0	0	0	0	603	903	0
597	8	0	0	0	0	0	0	200	300	0	0	0	0	0	0	0	200	903	0	0	0	0	0	0	0	603	903	0
597	9	0	0	0	0	0	0	200	300	0	0	0	0	0	0	0	200	903	0	0	0	0	0	0	0	603	903	0
598	0	0	0	0	0	0	0	200	300	0	0	0	0	0	0	0	200	903	0	0	0	0	0	0	0	603	903	0
598	1	0	0	0	0	0	0	200	300	0	0	0	0	0	0	0	200	903	0	0	0	0	0	0	0	603	903	0
598	2	0	0	0	0	0	0	200	300	0	0	0	0	0	0	0	200	903	0	0	0	0	0	0	0	603	903	0
598	3	0	0	0	0	0	0	200	300	0	0	0	0	0	0	0	200	903	0	0	0	0	0	0	0	603	903	0
598	4	0	0	0	0	0	0	200	300	0	0	0	0	0	0	0	200	903	0	0	0	0	0	0	0	603	903	0
598	5	0	0	0	0	0	0	200	300	0	0	0	0	0	0	0	200	903	0	0	0	0	0	0	0	603	903	0
598	6	0	0	0	0	0	0	200	300	0	0	0	0	0	0	0	200	903	0	0	0	0	0	0	0	603	903	0
598	7	0	0	0	0	0	0	200	300	0	0	0	0	0	0	0	200	903	0	0	0	0	0	0	0	603	903	0
598	8	0	0	0	0	0	0	200	300	0	0	0	0	0	0	0	200	903	0	0	0	0	0	0	0	603	903	0
598	9	0	0	0	0	0	0	200	300	0	0	0	0	0	0	0	200	903	0	0	0	0	0	0	0	603	903	0
599	0	0	0	0	0	0	0	200	300	0	0	0	0	0	0	0	200	903	0	0	0	0	0	0	0	603	903	0
599	1	0	0	0	0	0	0	200	300	0	0	0	0	0	0	0	200	903	0	0	0	0	0	0	0	603	903	0
599	2	0	0	0	0	0	0	200	300	0	0	0	0	0	0	0	200	903	0	0	0	0	0	0	0	603	903	0
599	3	0	0	0	0	0	0	200	300	0	0	0	0	0	0	0	200	903	0	0	0	0	0	0	0	603	903	0
599	4	0	0	0	0	0	0	200	300	0	0	0	0	0	0	0	200	903	0	0	0	0	0	0	0	603	903	0
599	5	0	0	0	0	0	0	200	300	0	0	0	0	0	0	0	200	903	0	0	0	0	0	0	0	603	903	0
599	6	0	0	0	0	0	0	200	300	0	0	0	0	0	0	0	200	903	0	0	0	0	0	0	0	603	903	0
599	7	0	0	0	0	0	0	200	300	0	0	0	0	0	0	0	200	903	0	0	0	0	0	0	0	603	903	0
599	8	0	0	0	0	0	0	200	300	0	0	0	0	0	0	0	200	903	0	0	0	0	0	0	0	603	903	0
599	9	0	0	0	0	0	0	200	300	0	0	0	0	0	0	0	200	903	0	0	0	0	0	0	0	603	903	0
600	0	0	0	0	0	0	0	200	300	0	0	0	0	0	0	0	200	903	0	0	0	0	0	0	0	603	903	0
600	1	0	0	0	0	0	0	200	300	0	0	0	0	0	0	0	200	903	0	0	0	0	0	0	0	603	903	0
600	2	0	0	0	0	0	0	200	300	0	0	0	0	0	0	0	200	903	0	0	0	0	0	0	0	603	903	0
600	3	0	0	0	0	0	0	200	300	0	0	0	0	0	0	0	200	903	0	0	0	0	0	0	0	603	903	0
600	4	0	0	0	0	0	0	200	300	0	0	0	0	0	0	0	200	903	0	0	0	0	0	0	0	603	903	0
600	5	0	0	0	0	0	0	200	300	0	0	0	0	0	0	0	200	903	0	0	0	0	0	0	0	603	903	0
600	6	0	0	0	0	0	0	200	300	0	0	0	0	0	0	0	200	903	0	0	0	0	0	0	0	603	903	0
600	7	0	0	0	0	0	0	200	300	0	0	0	0	0	0	0	200	903	0	0	0	0	0	0	0	603	903	0
600	8	0	0	0	0	0	0	200	300	0	0	0	0	0	0	0	200	903	0	0	0	0	0	0	0	603	903	0
600	9	0	0	0	0	0	0	200	300	0	0	0	0	0	0	0	200	903	0	0	0	0	0	0	0	603	903	0
601	0	0	0	0	0	0	0	200	300	0	0	0	0	0	0	0	200	903	0	0	0	0	0	0	0	603	903	0
601	1	0	0	0	0	0	0	200	300	0	0	0	0	0	0	0	200	903	0	0	0	0	0	0	0	603	903	0
601	2	0	0	0	0	0	0	200	300	0	0	0	0	0	0	0	200	903	0	0	0	0	0	0	0	603	903	0
601	3	0	0	0	0	0	0	200	300	0	0	0	0	0	0	0	200	903	0	0	0	0	0	0	0	603	903	0
601	4	0	0	0	0	0	0	200	300	0	0	0	0	0	0	0	200	903	0	0	0	0	0	0	0	603	903	0
601	5	0	0	0	0	0	0	200	300	0	0	0	0	0	0	0	200	903	0	0	0	0	0	0	0	603	903	0
601	6	0	0	0	0	0	0	200	300	0	0	0	0	0	0	0	200	903	0	0	0	0	0	0	0	603	903	0
601	7	0	0	0	0	0	0	200	300	0	0	0	0	0	0	0	200	903	0	0	0	0	0	0	0	603	903	0
601	8	0	0	0	0	0	0	200	300	0	0	0	0	0	0	0	200	903	0	0	0	0	0	0	0	603	903	0
601	9	0	0	0	0	0	0	200	300	0	0	0	0	0	0	0	200	903	0	0	0	0	0	0	0	603	903	0
602	0	0	0	0	0	0	0	200	300	0	0	0	0	0	0	0	200	903	0	0	0	0	0	0	0	603	903	0
602	1	0	0	0	0	0	0	200	300	0	0	0	0	0	0	0	200	903	0	0	0	0	0	0	0	603	903	0
602	2	0	0	0	0	0	0	200	300	0	0	0	0	0	0	0	200	903	0	0	0	0	0	0	0	603	903	0
602	3	0	0	0	0	0	0	200	300	0	0	0	0	0	0	0	200	903	0	0	0	0	0	0	0	603	903	0
602	4	0	0	0	0	0	0	200	300	0	0	0	0	0	0	0	200	903	0	0	0	0	0	0	0	603	903	0
602	5	0	0	0	0	0	0	200	300	0	0	0	0	0	0	0	200	903	0	0	0	0	0	0	0	603	903	0
602	6	0	0	0	0	0	0	200	300	0	0	0	0	0	0	0	200	903	0	0	0	0	0	0	0	603	903	0
602	7	0	0	0	0	0	0	200	300	0	0	0	0	0	0	0	200	903	0	0	0	0	0	0	0	603	903	0
602	8	0	0	0	0	0	0	200	300	0	0	0	0	0	0	0	200	903	0	0	0	0	0	0	0	603	903	0
602	9	0	0	0	0	0	0	200	300	0	0	0	0	0	0	0	200	903	0	0	0	0	0	0	0	603	903	0
603	0	0	0	0	0	0	0	200	300	0	0	0	0	0	0	0	200	903	0	0	0	0	0	0	0	603	903	0
603	1	0	0	0	0	0	0	200	300	0	0	0	0	0	0	0	200	903	0	0	0	0	0	0	0	603	903	0
603	2	0	0	0	0	0	0	200	300	0	0	0	0	0	0	0	200	903	0	0	0	0	0	0	0	603	903	0
603	3	0	0	0	0	0	0	200	300	0	0	0	0	0	0	0	200	903	0	0	0	0	0	0	0	603	903	0
603	4	0	0	0	0	0	0	200	300	0	0	0	0	0	0	0	200	903	0	0	0	0	0	0	0	603	903	0
603	5	0	0	0	0	0	0	200	300	0	0	0	0	0	0	0	200	903	0	0	0	0	0	0	0	603	903	0
603	6	0	0	0	0	0	0	200	300	0	0	0	0	0	0	0	200	903	0	0	0	0	0	0	0	603	903	0
603	7	0	0	0	0	0	0	200	300	0	0	0	0	0	0	0	200	903	0	0	0	0	0	0	0	603	903	0
603	8	0	0	0	0	0	0	200	300	0	0	0	0	0	0	0	200	903	0	0	0	0	0	0	0	603	903	0
603	9	0	0	0	0	0	0	200	300	0	0	0	0	0	0	0	200	903	0	0	0	0	0	0	0	603	903	0
604	0	0	0	0	0	0	0	200	300	0	0	0	0	0	0	0	200	903	0	0	0	0	0	0	0	603	903	0
604	1	0	0	0	0	0	0	200	300	0	0	0	0	0	0	0	200	903	0	0	0	0	0	0	0	603	903	0
604	2	0	0	0	0	0	0	200	300	0	0	0	0	0	0	0	200	903	0	0	0	0	0	0	0	603	903	0
604	3	0	0	0	0	0	0	200	300	0	0	0	0	0	0	0	200	903	0	0	0	0	0	0	0	603	903	0
604	4	0	0	0	0	0	0	200	300	0	0	0	0	0	0	0	200	903	0	0	0	0	0	0	0	603	903	0
604	5	0	0	0	0	0	0	200	300	0	0	0	0	0	0	0	200	903	0	0	0	0	0	0	0	603	903	0
604	6	0	0	0	0	0	0	200	300	0	0	0	0	0	0	0	200	903	0	0	0	0	0	0	0	603	903	0
604	7	0	0	0	0	0	0	200	300	0	0	0	0	0	0	0	200	903	0	0	0	0	0	0	0	603	903	0
604	8	0	0	0	0	0	0	200	300	0	0	0	0	0	0	0	200	903	0	0	0	0	0	0	0	603	903	0
604	9	0	0	0	0	0	0	200	300	0	0	0	0	0	0	0	200	903	0	0	0	0	0	0	0	603	903	0
605	0	0	0	0	0	0	0	200	300	0	0	0	0	0	0	0	200	903	0	0	0	0	0	0	0	603	903	0
605	1	0	0	0	0	0	0	200	300	0	0	0	0	0	0	0	200	903	0	0	0	0	0	0	0	603	903	0
605	2	0	0	0	0	0	0	200	300	0	0	0	0	0	0	0	200	903	0	0	0	0	0	0	0	603	903	0
605	3	0	0	0	0	0	0	200	300	0	0	0	0	0	0	0	200	903	0	0	0	0	0	0	0	603	903	0
605	4	0	0	0	0	0	0	200	300	0	0	0	0	0	0	0	200	903	0	0	0	0	0	0	0	603	903	0
605	5	0	0	0	0	0	0	200	300	0	0	0	0	0	0	0	200	903	0	0	0	0	0	0	0	603	903	0
605	6	0	0	0	0	0	0	200	300	0	0	0	0	0	0	0	200	903	0	0	0	0	0	0	0	603	903	0
605	7	0	0	0	0	0	0	200	300	0	0	0	0	0	0	0	200	903	0	0	0	0	0	0	0	603	903	0
605	8	0	0	0	0	0	0	200	300	0	0	0	0	0	0	0	200	903	0	0	0	0	0	0	0	603	903	0
605	9	0	0	0	0	0	0	200	300	0	0	0	0	0	0	0	200	903	0	0	0	0	0	0	0	603	903	0
606	0	0	0	0	0	0	0	200	300	0	0	0	0	0	0	0	200	903	0	0	0	0	0	0	0	603	903	0
606	1	0	0	0	0	0	0	200	300	0	0	0	0	0	0	0	200	903	0	0	0	0	0	0	0	603	903	0
606	2	0	0	0	0	0	0	200	300	0	0	0	0	0	0	0	200	903	0	0	0	0	0	0	0	603	903	0
606	3	0	0	0	0	0	0	200	300	0	0	0	0	0	0	0	200	903	0	0	0	0	0	0	0	603	903	0
606	4	0	0	0	0	0	0	200	300	0	0	0	0	0	0	0	200	903	0	0	0	0	0	0	0	603	903	0
606	5	0	0	0	0	0	0	200	300	0	0	0	0	0	0	0	200	903	0	0	0	0	0	0	0	603	903	0
606	6	0	0	0	0	0	0	200	300	0	0	0	0	0	0	0	200	903	0	0	0	0	0	0	0	603	903	0
606	7	0	0	0	0	0	0	200	300	0	0	0	0	0	0	0	200	903	0	0	0	0	0	0	0	603	903	0
606	8	0	0	0	0	0	0	200	300	0	0	0	0	0	0	0	200	903	0	0	0	0	0	0	0	603	903	0
606	9	0	0	0	0	0	0	200	300	0	0	0	0	0	0	0	200	903	0	0	0	0	0	0	0	603	903	0
607	0	0	0	0	0	0	0	200	300	0	0	0	0	0	0	0	200	903	0	0	0	0	0	0	0	603	903	0
607	1	0	0	0	0	0	0	200	300	0	0	0	0	0	0	0	200	903	0	0	0	0	0	0	0	603	903	0
607	2	0	0	0	0	0	0	200	300	0	0	0	0	0	0	0	200	903	0	0	0	0	0	0	0	603	903	0
607	3	0	0	0	0	0	0	200	300	0	0	0	0	0	0	0	200	903	0	0	0	0	0	0	0	603	903	0
607	4	0	0	0	0	0	0	200	300	0	0	0	0	0	0	0	200	903	0	0	0	0	0	0	0	603	903	0
607	5	0	0	0	0	0	0	200	300	0	0	0	0	0	0	0	200	903	0	0	0	0	0	0	0	603	903	0
607	6	0	0	0	0	0	0	200	300	0	0	0	0	0	0	0	200	903	0	0	0	0	0	0	0	603	903	0
607	7	0	0	0	0	0	0	200	300	0	0	0	0	0	0	0	200	903	0	0	0	0	0	0	0	603	903	0
607	8	0	0	0	0	0	0	200	300	0	0	0	0	0	0	0	200	903	0	0	0	0	0	0	0	603	903	0
607	9	0	0	0	0	0	0	200	300	0	0	0	0	0	0	0	200	903	0	0	0	0	0	0	0	603	903	0
608	0	0	0	0	0	0	0	200	300	0	0	0	0	0	0	0	200	903	0	0	0	0	0	0	0	603	903	0
608	1	0	0	0	0	0	0	200	300	0	0	0	0	0	0	0	200	903	0	0	0	0	0	0	0	603	903	0
608	2	0	0	0	0	0	0	200	300	0	0	0	0	0	0	0	200	903	0	0	0	0	0	0	0	603	903	0
608	3	0	0	0	0	0	0	200	300	0	0	0	0	0	0	0	200	903	0	0	0	0	0	0	0	603	903	0
608	4	0	0	0	0	0	0	200	300	0	0	0	0	0	0	0	200	903	0	0	0	0	0	0	0	603	903	0
608	5	0	0	0	0	0	0	200	300	0	0	0	0	0	0	0	200	903	0	0	0	0	0	0	0	603	903	0
608	6	0	0	0	0	0	0	200	300	0	0	0	0	0	0	0	200	903	0	0	0	0	0	0	0	603	903	0
608	7	0	0	0	0	0	0	200	300	0	0	0	0	0	0	0	200	903	0	0	0	0	0	0	0	603	903	0
608	8	0	0	0	0	0	0	200	300	0	0	0	0	0	0	0	200	903	0	0	0	0	0	0	0	603	903	0
608	9	0	0	0	0	0	0	200	300	0	0	0	0	0	0	0	200	903	0	0	0	0	0	0	0	603	903	0
609	0	0	0	0	0	0	0	200	300	0	0	0	0	0	0	0	200	903	0	0	0	0	0	0	0	603	903	0
609	1	0	0	0	0	0	0	200	300	0	0	0	0	0	0	0	200	903	0	0	0	0	0	0	0	603	903	0
609	2	0	0	0	0	0	0	200	300	0	0	0	0	0	0	0	200	903	0	0	0	0	0	0	0	603	903	0
609	3	0	0	0	0	0	0	200	300	0	0	0	0	0	0	0	200	903	0	0	0	0	0	0	0	603	903	0
609	4	0	0	0	0	0	0	200	300	0	0	0	0	0	0	0	200	903	0	0	0	0	0	0	0	603	903	0
609	5	0	0	0	0	0	0	200	300	0	0	0	0	0	0	0	200	903	0	0	0	0	0	0	0	603	903	0
609	6	0	0	0	0	0	0	200	300	0	0	0	0	0	0	0	200	903	0	0	0	0	0	0	0	603	903	0
609	7	0	0	0	0	0	0	200	300	0	0	0	0	0	0	0	200	903	0	0	0	0	0	0	0	603	903	0
609	8	0	0	0	0	0	0	200	300	0	0	0	0	0	0	0	200	903	0	0	0	0	0	0	0	603	903	0
609	9	0	0	0	0	0	0	200	300	0	0	0	0	0	0	0	200	903	0	0	0	0	0	0	0	603	903	0
610	0	0	0	0	0	0	0	200	300	0	0	0	0	0	0	0	200	903	0	0	0	0	0	0	0	603	903	0
610	1	0	0	0	0	0	0	200	300	0	0	0	0	0	0	0	200	903	0	0	0	0	0	0	0	603	903	0
610	2	0	0	0	0	0	0	200	300	0	0	0	0	0	0	0	200	903	0	0	0	0	0	0	0	603	903	0
610	3	0	0	0	0	0	0	200	300	0	0	0	0	0	0	0	200	903	0	0	0	0	0	0	0	603	903	0
610	4	0	0	0	0	0	0	200	300	0	0	0	0	0	0	0	200	903	0	0	0	0	0	0	0	603	903	0
610	5	0	0	0	0	0	0	200	300	0	0	0	0	0	0	0	200	903	0	0	0	0	0	0	0	603	903	0
610	6	0	0	0	0	0	0	200	300	0	0	0	0	0	0	0	200	903	0	0	0	0	0	0	0	603	903	0
610	7	0	0	0	0	0	0	200	300	0	0	0	0	0	0	0	200	903	0	0	0	0	0	0	0	603	903	0
610	8	0	0	0	0	0	0	200	300	0	0	0	0	0	0	0	200	903	0	0	0	0	0	0	0	603	903	0
610	9	0	0	0	0	0	0	200	300	0	0	0	0	0	0	0	200	903	0	0	0	0	0	0	0	603	903	0
611	0	0	0	0	0	0	0	200	300	0	0	0	0	0	0	0	200	903	0	0	0	0	0	0	0	603	903	0
611	1	0	0	0	0	0	0	200	300	0	0	0	0	0	0	0	200	903	0	0	0	0	0	0	0	603	903	0
611	2	0	0	0	0	0	0	200	300	0	0	0	0	0	0	0	200	903	0	0	0	0	0	0	0	603	903	0
611	3	0	0	0	0	0	0	200	300	0	0	0	0	0	0	0	200	903	0	0	0	0	0	0	0	603	903	0
611	4	0	0	0	0	0	0	200	300	0	0	0	0	0	0	0	200	903	0	0	0	0	0	0	0	603	903	0
611	5	0	0	0	0	0	0	200	300	0	0	0	0	0	0	0	200	903	0	0	0	0	0	0	0	603	903	0
611	6	0	0	0	0	0	0	200	300	0	0	0	0	0	0	0	200	903	0	0	0	0	0	0	0	603	903	0
611	7	0	0	0	0	0	0	200	300	0	0	0	0	0	0	0	200	903	0	0	0	0	0	0	0	603	903	0
611	8	0	0	0	0	0	0	200	300	0	0	0	0	0	0	0	200	903	0	0	0	0	0	0	0	603	903	0
611	9	0	0	0	0	0	0	200	300	0	0	0	0	0	0	0	200	903	0	0	0	0	0	0	0	603	903	0
612	0	0	0	0	0	0	0	200	300	0	0	0	0	0	0	0	200	903	0	0	0	0	0	0	0	603	903	0
612	1	0	0	0	0	0	0	200	300	0	0	0	0	0	0	0	200	903	0	0	0	0	0	0	0	603	903	0
612	2	0	0	0	0	0	0	200	300	0	0	0	0	0	0	0	200	903	0	0	0	0	0	0	0	603	903	0
612	3	0	0	0	0	0	0	200	300	0	0	0	0	0	0	0	200	903	0	0	0	0	0	0	0	603	903	0
612	4	0	0	0	0	0	0	200	300	0	0	0	0	0	0	0	200	903	0	0	0	0	0	0	0	603	903	0
612	5	0	0	0	0	0	0	200	300	0	0	0	0	0	0	0	200	903	0	0	0	0	0	0	0	603	903	0
612	6	0	0	0	0	0	0	200	300	0	0	0	0	0	0	0	200	903	0	0	0	0	0	0	0	603	903	0
612	7	0	0	0	0	0	0	200	300	0	0	0	0	0	0	0	200	903	0	0	0	0	0	0	0	603	903	0
612	8	0	0	0	0	0	0	200	300	0	0	0	0	0	0	0	200	903	0	0	0	0	0	0	0	603	903	0
612	9	0	0	0	0	0	0	200	300	0	0	0	0	0	0	0	200	903	0	0	0	0	0	0	0	603	903	0
613	0	0	0	0	0	0	0	200	300	0	0	0	0	0	0	0	200	903	0	0	0	0	0	0	0	603	903	0
613	1	0	0	0	0	0	0	200	300	0	0	0	0	0	0	0	200	903	0	0	0	0	0	0	0	603	903	0
613	2	0	0	0	0	0	0	200	300	0	0	0	0	0	0	0	200	903	0	0	0	0	0	0	0	603	903	0
613	3	0	0	0	0	0	0	200	300	0	0	0	0	0	0	0	200	903	0	0	0	0	0	0	0	603	903	0
613	4	0	0	0	0	0	0	200	300	0	0	0	0	0	0	0	200	903	0	0	0	0	0	0	0	603	903	0
613	5	0	0	0	0	0	0	200	300	0	0	0	0	0	0	0	200	903	0	0	0	0	0	0	0	603	903	0
613	6	0	0	0	0	0	0	200	300	0	0	0	0	0	0	0	200	903	0	0	0	0	0	0	0	603	903	0
613	7	0	0	0	0	0	0	200	300	0	0	0	0	0	0	0	200	903	0	0	0	0	0	0	0	603	903	0
613	8	0	0	0	0	0	0	200	300	0	0	0	0	0	0	0	200	903	0	0	0	0	0	0	0	603	903	0
613	9	0	0	0	0	0	0	200	300	0	0	0	0	0	0	0	200	903	0	0	0	0	0	0	0	603	903	0
614	0	0	0	0	0	0	0	200	300	0	0	0	0	0	0	0	200	903	0	0	0	0	0	0	0	603	903	0
614	1	0	0	0	0	0	0	200	300	0	0	0	0	0	0	0	200	903	0	0	0	0	0	0	0	603	903	0
614	2	0	0	0	0	0	0	200	300	0	0	0	0	0	0	0	200	903	0	0	0	0	0	0	0	603	903	0
614	3	0	0	0	0	0	0	200	300	0	0	0	0	0	0	0	200	903	0	0	0	0	0	0	0	603	903	0
614	4	0	0	0	0	0	0	200	300	0	0	0	0	0	0	0	200	903	0	0	0	0	0	0	0	603	903	0
614	5	0	0	0	0	0	0	200	300	0	0	0	0	0	0	0	200	903	0	0	0	0	0	0	0	603	903	0
614	6	0	0	0	0	0	0	200	300	0	0	0	0	0	0	0	200	903	0	0	0	0	0	0	0	603	903	0
614	7	0	0	0	0	0	0	200	300	0	0	0	0	0	0	0	200	903	0	0	0	0	0	0	0	603	903	0
614	8	0	0	0	0	0	0	200	300	0	0	0	0	0	0	0	200	903	0	0	0	0	0	0	0	603	903	0
614	9	0	0	0	0	0	0	200	300	0	0	0	0	0	0	0	200	903	0	0	0	0	0	0	0	603	903	0
615	0	0	0	0	0	0	0	200	300	0	0	0	0	0	0	0	200	903	0	0	0	0	0	0	0	603	903	0
615	1	0	0	0	0	0	0	200	300	0	0	0	0	0	0	0	200	903	0	0	0	0	0	0	0	603	903	0
615	2	0	0	0	0	0	0	200	300	0	0	0	0	0	0	0	200	903	0	0	0	0	0	0	0	603	903	0
615	3	0	0	0	0	0	0	200	300	0	0	0	0	0	0	0	200	903	0	0	0	0	0	0	0	603	903	0
615	4	0	0	0	0	0	0	200	300	0	0	0	0	0	0	0	200	903	0	0	0	0	0	0	0	603	903	0
615	5	0	0	0	0	0	0	200	300	0	0	0	0	0	0	0	200	903	0	0	0	0	0	0	0	603	903	0
615	6	0	0	0	0	0	0	200	300	0	0	0	0	0	0	0	200	903	0	0	0	0	0	0	0	603	903	0
615	7	0	0	0	0	0	0	200	300	0	0	0	0	0	0	0	200	903	0	0	0	0	0	0	0	603	903	0
615	8	0	0	0	0	0	0	200	300	0	0	0	0	0	0	0	200	903	0	0	0	0	0	0	0	603	903	0
615	9	0	0	0	0	0	0	200	300	0	0	0	0	0	0	0	200	903	0	0	0	0	0	0	0	603	903	0
616	0	0	0	0	0	0	0	200	300	0	0	0	0	0	0	0	200	903	0	0	0	0	0	0	0	603	903	0
616	1	0	0	0	0	0	0	200	300	0	0	0	0	0	0	0	200	903	0	0	0	0	0	0	0	603	903	0
616	2	0	0	0	0	0	0	200	300	0	0	0	0	0	0	0	200	903	0	0	0	0	0	0	0	603	903	0
616	3	0	0	0	0	0	0	200	300	0	0	0	0	0	0	0	200	903	0	0	0	0	0	0	0	603	903	0
616	4	0	0	0	0	0	0	200	300	0	0	0	0	0	0	0	200	903	0	0	0	0	0	0	0	603	903	0
616	5	0	0	0	0	0	0	200	300	0	0	0	0	0	0	0	200	903	0	0	0	0	0	0	0	603	903	0
616	6	0	0	0	0	0	0	200	300	0	0	0	0	0	0	0	200	903	0	0	0	0	0	0	0	603	903	0
616	7	0	0	0	0	0	0	200	300	0	0	0	0	0	0	0	200	903	0	0	0	0	0	0	0	603	903	0
616	8	0	0	0	0	0	0	200	300	0	0	0	0	0	0	0	200	903	0	0	0	0	0	0	0	603	903	0
616	9	0	0	0	0	0	0	200	300	0	0	0	0	0	0	0	200	903	0	0	0	0	0	0	0	603	903	0
617	0	0	0	0	0	0	0	200	300	0	0	0	0	0	0	0	200	903	0	0	0	0	0	0	0	603	903	0
617	1	0	0	0	0	0	0	200	300	0	0	0	0	0	0	0	200	903	0	0	0	0	0	0	0	603	903	0
617	2	0	0	0	0	0	0	200	300	0	0	0	0	0	0	0	200	903	0	0	0	0	0	0	0	603	903	0
617	3	0	0	0	0	0	0	200	300	0	0	0	0	0	0	0	200	903	0	0	0	0	0	0	0	603	903	0
617	4	0	0	0	0	0	0	200	300	0	0	0	0	0	0	0	200	903	0	0	0	0	0	0	0	603	903	0
617	5	0	0	0	0	0	0	200	300	0	0	0	0	0	0	0	200	903	0	0	0	0	0	0	0	603	903	0
617	6	0	0	0	0	0	0	200	300	0	0	0	0	0	0	0	200	903	0	0	0	0	0	0	0	603	903	0
617	7	0	0	0	0	0	0	200	300	0	0	0	0	0	0	0	200	903	0	0	0	0	0	0	0	603	903	0
617	8	0	0	0	0	0	0	200	300	0	0	0	0	0	0	0	200	903	0	0	0	0	0	0	0	603	903	0
617	9	0	0	0	0	0	0	200	300	0	0	0	0	0	0	0	200	903	0	0	0	0	0	0	0	603	903	0
618	0	0	0	0	0	0	0	200	300	0	0	0	0	0	0	0	200	903	0	0	0	0	0	0	0	603	903	0
618	1	0	0	0	0	0	0	200	300	0	0	0	0	0	0	0	200	903	0	0	0	0	0	0	0	603	903	0
618	2	0	0	0	0	0	0	200	300	0	0	0	0	0	0	0	200	903	0	0	0	0	0	0	0	603	903	0
618	3	0	0	0	0	0	0	200	300	0	0	0	0	0	0	0	200	903	0	0	0	0	0	0	0	603	903	0
618	4	0	0	0	0	0	0	200	300	0	0	0	0	0	0	0	200	903	0	0	0	0	0	0	0	603	903	0
618	5	0	0	0	0	0	0	200	300	0	0	0	0	0	0	0	200	903	0	0	0	0	0	0	0	603	903	0
618	6	0	0	0	0	0	0	200	300	0	0	0	0	0	0	0	200	903	0	0	0	0	0	0	0	603	903	0
618	7	0	0	0	0	0	0	200	300	0	0	0	0	0	0	0	200	903	0	0	0	0	0	0	0	603	903	0
618	8	0	0	0	0	0	0	200	300	0	0	0	0	0	0	0	200	903	0	0	0	0	0	0	0	603	903	0
618	9	0	0	0	0	0	0	200	300	0	0	0	0	0	0	0	200	903	0	0	0	0	0	0	0	603	903	0
619	0	0	0	0	0	0	0	200	300	0	0	0	0	0	0	0	200	903	0	0	0	0	0	0	0	603	903	0
619	1	0	0	0	0	0	0	200	300	0	0	0	0	0	0	0	200	903	0	0	0	0	0	0	0	603	903	0
619	2	0	0	0	0	0	0	200	300	0	0	0	0	0	0	0	200	903	0	0	0	0	0	0	0	603	903	0
619	3	0	0	0	0	0	0	200	300	0	0	0	0	0	0	0	200	903	0	0	0	0	0	0	0	603	903	0
619	4	0	0	0	0	0	0	200	300	0	0	0	0	0	0	0	200	903	0	0	0	0	0	0	0	603	903	0
619	5	0	0	0	0	0	0	200	300	0	0	0	0	0	0	0	200	903	0	0	0	0	0	0	0	603	903	0
619	6	0	0	0	0	0	0	200	300	0	0	0	0	0	0	0	200	903	0	0	0	0	0	0	0	603	903	0
619	7	0	0	0	0	0	0	200	300	0	0	0	0	0	0	0	200	903	0	0	0	0	0	0	0	603	903	0
619	8	0	0	0	0	0	0	200	300	0	0	0	0	0	0	0	200	903	0	0	0	0	0	0	0	603	903	0
619	9	0	0	0	0	0	0	200	300	0	0	0	0	0	0	0	200	903	0	0	0	0	0	0	0	603	903	0
620	0	0	0	0	0	0	0	200	300	0	0	0	0	0	0	0	200	903	0	0	0	0	0	0	0	603	903	0
620	1	0	0	0	0	0	0	200	300	0	0	0	0	0	0	0	200	903	0	0	0	0	0	0	0	603	903	0
620	2	0	0	0	0	0	0	200	300	0	0	0	0	0	0	0	200	903	0	0	0	0	0	0	0	603	903	0
620	3	0	0	0	0	0	0	200	300	0	0	0	0	0	0	0	200	903	0	0	0	0	0	0	0	603	903	0
620	4	0	0	0	0	0	0	200	300	0	0	0	0	0	0	0	200	903	0	0	0	0	0	0	0	603	903	0
620	5	0	0	0	0	0	0	200	300	0	0	0	0	0	0	0	200	903	0	0	0	0	0	0	0	603	903	0
620	6	0	0	0	0	0	0	200	300	0	0	0	0	0	0	0	200	903	0	0	0	0	0	0	0	603	903	0
620	7	0	0	0	0	0	0	200	300	0	0	0	0	0	0	0	200	903	0	0	0	0	0	0	0	603	903	0
620	8	0	0	0	0	0	0	200	300	0	0	0	0	0	0	0	200	903	0	0	0	0	0	0	0	603	903	0
620	9	0	0	0	0	0	0	200	300	0	0	0	0	0	0	0	200	903	0	0	0	0	0	0	0	603	903	0
621	0	0	0	0	0	0	0	200	300	0	0	0	0	0	0	0	200	903	0	0	0	0	0	0	0	603	903	0
621	1	0	0	0	0	0	0	200	300	0	0	0	0	0	0	0	200	903	0	0	0	0	0	0	0	603	903	0
621	2	0	0	0	0	0	0	200	300	0	0	0	0	0	0	0	200	903	0	0	0	0	0	0	0	603	903	0
621	3	0	0	0	0	0	0	200	300	0	0	0	0	0	0	0	200	903	0	0	0	0	0	0	0	603	903	0
621	4	0	0	0	0	0	0	200	300	0	0	0	0	0	0	0	200	903	0	0	0	0	0	0	0	603	903	0
621	5	0	0	0	0	0	0	200	300	0	0	0	0	0	0	0	200	903	0	0	0	0	0	0	0	603	903	0
621	6	0	0	0	0	0	0	200	300	0	0	0	0	0	0	0	200	903	0	0	0	0	0	0	0	603	903	0
621	7	0	0	0	0	0	0	200	300	0	0	0	0	0	0	0	200	903	0	0	0	0	0	0	0	603	903	0
621	8	0	0	0	0	0	0	200	300	0	0	0	0	0	0	0	200	903	0	0	0	0	0	0	0	603	903	0
621	9	0	0	0	0	0	0	200	300	0	0	0	0	0	0	0	200	903	0	0	0	0	0	0	0	603	903	0
622	0	0	0	0	0	0	0	200	300	0	0	0	0	0	0	0	200	903	0	0	0	0	0	0	0	603	903	0
622	1	0	0	0	0	0	0	200	300	0	0	0	0	0	0	0	200	903	0	0	0	0	0	0	0	603	903	0
622	2	0	0	0	0	0	0	200	300	0	0	0	0	0	0	0	200	903	0	0	0	0	0	0	0	603	903	0
622	3	0	0	0	0	0	0	200	300	0	0	0	0	0	0	0	200	903	0	0	0	0	0	0	0	603	903	0
622	4	0	0	0	0	0	0	200	300	0	0	0	0	0	0	0	200	903	0	0	0	0	0	0	0	603	903	0
622	5	0	0	0	0	0	0	200	300	0	0	0	0	0	0	0	200	903	0	0	0	0	0	0	0	603	903	0
622	6	0	0	0	0	0	0	200	300	0	0	0	0	0	0	0	200	903	0	0	0	0	0	0	0	603	903	0
622	7	0	0	0	0	0	0	200	300	0	0	0	0	0	0	0	200	903	0	0	0	0	0	0	0	603	903	0
622	8	0	0	0	0	0	0	200	300	0	0	0	0	0	0	0	200	903	0	0	0	0	0	0	0	603	903	0
622	9	0	0	0	0	0	0	200	300	0	0	0	0	0	0	0	200	903	0	0	0	0	0	0	0	603	903	0
623	0	0	0	0	0	0	0	200	300	0	0	0	0	0	0	0	200	903	0	0	0	0	0	0	0	603	903	0
623	1	0	0	0	0	0	0	200	300	0	0	0	0	0	0	0	200	903	0	0	0	0	0	0	0	603	903	0
623	2	0	0	0	0	0	0	200	300	0	0	0	0	0	0	0	200	903	0	0	0	0	0	0	0	603	903	0
623	3	0	0	0	0	0	0	200	300	0	0	0	0	0	0	0	200	903	0	0	0	0	0	0	0	603	903	0
623	4	0	0	0	0	0	0	200	300	0	0	0	0	0	0	0	200	903	0	0	0	0	0	0	0	603	903	0
623	5	0	0	0	0	0	0	200	300	0	0	0	0	0	0	0	200	903	0	0	0	0	0	0	0	603	903	0
623	6	0	0	0	0	0	0	200	300	0	0	0	0	0	0	0	200	903	0	0	0	0	0	0	0	603	903	0
623	7	0	0	0	0	0	0	200	300	0	0	0	0	0	0	0	200	903	0	0	0	0	0	0	0	603	903	0
623	8	0	0	0	0	0	0	200	300	0	0	0	0	0	0	0	200	903	0	0	0	0	0	0	0	603	903	0
623	9	0	0	0	0	0	0	200	300	0	0	0	0	0	0	0	200	903	0	0	0	0	0	0	0	603	903	0
624	0	0	0	0	0	0	0	200	300	0	0	0	0	0	0	0	200	903	0	0	0	0	0	0	0	603	903	0
624	1	0	0	0	0	0	0	200	300	0	0	0	0	0	0	0	200	903	0	0	0	0	0	0	0	603	903	0
624	2	0	0	0	0	0	0	200	300	0	0	0	0	0	0	0	200	903	0	0	0	0	0	0	0	603	903	0
624	3	0	0	0	0	0	0	200	300	0	0	0	0	0	0	0	200	903	0	0	0	0	0	0	0	603	903	0
624	4	0	0	0	0	0	0	200	300	0	0	0	0	0	0	0	200	903	0	0	0	0	0	0	0	603	903	0
624	5	0	0	0	0	0	0	200	300	0	0	0	0	0	0	0	200	903	0	0	0	0	0	0	0	603	903	0
624	6	0	0	0	0	0	0	200	300	0	0	0	0	0	0	0	200	903	0	0	0	0	0	0	0	603	903	0
624	7	0	0	0	0	0	0	200	300	0	0	0	0	0	0	0	200	903	0	0	0	0	0	0	0	603	903	0
624	8	0	0	0	0	0	0	200	300	0	0	0	0	0	0	0	200	903	0	0	0	0	0	0	0	603	903	0
624	9	0	0	0	0	0	0	200	300	0	0	0	0	0	0	0	200	903	0	0	0	0	0	0	0	603	903	0
625	0	0	0	0	0	0	0	200	300	0	0	0	0	0	0	0	200	903	0	0	0	0	0	0	0	603	903	0
625	1	0	0	0	0	0	0	200	300	0	0	0	0	0	0	0	200	903	0	0	0	0	0	0	0	603	903	0
625	2	0	0	0	0	0	0	200	300	0	0	0	0	0	0	0	200	903	0	0	0	0	0	0	0	603	903	0
625	3	0	0	0	0	0	0	200	300	0	0	0	0	0	0	0	200	903	0	0	0	0	0	0	0	603	903	0
625	4	0	0	0	0	0	0	200	300	0	0	0	0	0	0	0	200	903	0	0	0	0	0	0	0	603	903	0
625	5	0	0	0	0	0	0	200	300	0	0	0	0	0	0	0	200	903	0	0	0	0	0	0	0	603	903	0
625	6	0	0	0	0	0	0	200	300	0	0	0	0	0	0	0	200	903	0	0	0	0	0	0	0	603	903	0
625	7	0	0	0	0	0	0	200	300	0	0	0	0	0	0	0	200	903	0	0	0	0	0	0	0	603	903	0
625	8	0	0	0	0	0	0	200	300	0	0	0	0	0	0	0	200	903	0	0	0	0	0	0	0	603	903	0
625	9	0	0	0	0	0	0	200	300	0	0	0	0	0	0	0	200	903	0	0	0	0	0	0	0	603	903	0
626	0	0	0	0	0	0	0	200	300	0	0	0	0	0	0	0	200	903	0	0	0	0	0	0	0	603	903	0
626	1	0	0	0	0	0	0	200	300	0	0	0	0	0	0	0	200	903	0	0	0	0	0	0	0	603	903	0
626	2	0	0	0	0	0	0	200	300	0	0	0	0	0	0	0	200	903	0	0	0	0	0	0	0	603	903	0
626	3	0	0	0	0	0	0	200	300	0	0	0	0	0	0	0	200	903	0	0	0	0	0	0	0	603	903	0
626	4	0	0	0	0	0	0	200	300	0	0	0	0	0	0	0	200	903	0	0	0	0	0	0	0	603	903	0
626	5	0	0	0	0	0	0	200	300	0	0	0	0	0	0	0	200	903	0	0	0	0	0	0	0	603	903	0
626	6	0	0	0	0	0	0	200	300	0	0	0	0	0	0	0	200	903	0	0	0	0	0	0	0	603	903	0
626	7	0	0	0	0	0	0	200	300	0	0	0	0	0	0	0	200	903	0	0	0	0	0	0	0	603	903	0
626	8	0	0	0	0	0	0	200	300	0	0	0	0	0	0	0	200	903	0	0	0	0	0	0	0	603	903	0
626	9	0	0	0	0	0	0	200	300	0	0	0	0	0	0	0	200	903	0	0	0	0	0	0	0	603	903	0
627	0	0	0	0	0	0	0	200	300	0	0	0	0	0	0	0	200	903	0	0	0	0	0	0	0	603	903	0
627	1	0	0	0	0	0	0	200	300	0	0	0	0	0	0	0	200	903	0	0	0	0	0	0	0	603	903	0
627	2	0	0	0	0	0	0	200	300	0	0	0	0	0	0	0	200	903	0	0	0	0	0	0	0	603	903	0
627	3	0	0	0	0	0	0	200	300	0	0	0	0	0	0	0	200	903	0	0	0	0	0	0	0	603	903	0
627	4	0	0	0	0	0	0	200	300	0	0	0	0	0	0	0	200	903	0	0	0	0	0	0	0	603	903	0
627	5	0	0	0	0	0	0	200	300	0	0	0	0	0	0	0	200	903	0	0	0	0	0	0	0	603	903	0
627	6	0	0	0	0	0	0	200	300	0	0	0	0	0	0	0	200	903	0	0	0	0	0	0	0	603	903	0
627	7	0	0	0	0	0	0	200	300	0	0	0	0	0	0	0	200	903	0	0	0	0	0	0	0	603	903	0
627	8	0	0	0	0	0	0	200	300	0	0	0	0	0	0	0	200	903	0	0	0	0	0	0	0	603	903	0
627	9	0	0	0	0	0	0	200	300	0	0	0	0	0	0	0	200	903	0	0	0	0	0	0	0	603	903	0
628	0	0	0	0	0	0	0	200	300	0	0	0	0	0	0	0	200	903	0	0	0	0	0	0	0	603	903	0
628	1	0	0	0	0	0	0	200	300	0	0	0	0	0	0	0	200	903	0	0	0	0	0	0	0	603	903	0
628	2	0	0	0	0	0	0	200	300	0	0	0	0	0	0	0	200	903	0	0	0	0	0	0	0	603	903	0
628	3	0	0	0	0	0	0	200	300	0	0	0	0	0	0	0	200	903	0	0	0	0	0	0	0	603	903	0
628	4	0	0	0	0	0	0	200	300	0	0	0	0	0	0	0	200	903	0	0	0	0	0	0	0	603	903	0
628	5	0	0	0	0	0	0	200	300	0	0	0	0	0	0	0	200	903	0	0	0	0	0	0	0	603	903	0
628	6	0	0	0	0	0	0	200	300	0	0	0	0	0	0	0	200	903	0	0	0	0	0	0	0	603	903	0
628	7	0	0	0	0	0	0	200	300	0	0	0	0	0	0	0	200	903	0	0	0	0	0	0	0	603	903	0
628	8	0	0	0	0	0	0	200	300	0	0	0	0	0	0	0	200	903	0	0	0	0	0	0	0	603	903	0
628	9	0	0	0	0	0	0	200	300	0	0	0	0	0	0	0	200	903	0	0	0	0	0	0	0	603	903	0
629	0	0	0	0	0	0	0	200	300	0	0	0	0	0	0	0	200	903	0	0	0	0	0	0	0	603	903	0
629	1	0	0	0	0	0	0	200	300	0	0	0	0	0	0	0	200	903	0	0	0	0	0	0	0	603	903	0
629	2	0	0	0	0	0	0	200	300	0	0	0	0	0	0	0	200	903	0	0	0	0	0	0	0	603	903	0
629	3	0	0	0	0	0	0	200	300	0	0	0	0	0	0	0	200	903	0	0	0	0	0	0	0	603	903	0
629	4	0	0	0	0	0	0	200	300	0	0	0	0	0	0	0	200	903	0	0	0	0	0	0	0	603	903	0
629	5	0	0	0	0	0	0	200	300	0	0	0	0	0	0	0	200	903	0	0	0	0	0	0	0	603	903	0
629	6	0	0	0	0	0	0	200	300	0	0	0	0	0	0	0	200	903	0	0	0	0	0	0	0	603	903	0
629	7	0	0	0	0	0	0	200	300	0	0	0	0	0	0	0	200	903	0	0	0	0	0	0	0	603	903	0
629	8	0	0	0	0	0	0	200	300	0	0	0	0	0	0	0	200	903	0	0	0	0	0	0	0	603	903	0
629	9	0	0	0	0	0	0	200	300	0	0	0	0	0	0	0	200	903	0	0	0	0	0	0	0	603	903	0
630	0	0	0	0	0	0	0	200	300	0	0	0	0	0	0	0	200	903	0	0	0	0	0	0	0	603	903	0
630	1	0	0	0	0	0	0	200	300	0	0	0	0	0	0	0	200	903	0	0	0	0	0	0	0	603	903	0
630	2	0	0	0	0	0	0	200	300	0	0	0	0	0	0	0	200	903	0	0	0	0	0	0	0	603	903	0
630	3	0	0	0	0	0	0	200	300	0	0	0	0	0	0	0	200	903	0	0	0	0	0	0	0	603	903	0
630	4	0	0	0	0	0	0	200	300	0	0	0	0	0	0	0	200	903	0	0	0	0	0	0	0	603	903	0
630	5	0	0	0	0	0	0	200	300	0	0	0	0	0	0	0	200	903	0	0	0	0	0	0	0	603	903	0
630	6	0	0	0	0	0	0	200	300	0	0	0	0	0	0	0	200	903	0	0	0	0	0	0	0	603	903	0
630	7	0	0	0	0	0	0	200	300	0	0	0	0	0	0	0	200	903	0	0	0	0	0	0	0	603	903	0
630	8	0	0	0	0	0	0	200	300	0	0	0	0	0	0	0	200	903	0	0	0	0	0	0	0	603	903	0
630	9	0	0	0	0	0	0	200	300	0	0	0	0	0	0	0	200	903	0	0	0	0	0	0	0	603	903	0
631	0	0	0	0	0	0	0	200	300	0	0	0	0	0	0	0	200	903	0	0	0	0	0	0	0	603	903	0
631	1	0	0	0	0	0	0	200	300	0	0	0	0	0	0	0	200	903	0	0	0	0	0	0	0	603	903	0
631	2	0	0	0	0	0	0	200	300	0	0	0	0	0	0	0	200	903	0	0	0	0	0	0	0	603	903	0
631	3	0	0	0	0	0	0	200	300	0	0	0	0	0	0	0	200	903	0	0	0	0	0	0	0	603	903	0
631	4	0	0	0	0	0	0	200	300	0	0	0	0	0	0	0	200	903	0	0	0	0	0	0	0	603	903	0
631	5	0	0	0	0	0	0	200	300	0	0	0	0	0	0	0	200	903	0	0	0	0	0	0	0	603	903	0
631	6	0	0	0	0	0	0	200	300	0	0	0	0	0	0	0	200	903	0	0	0	0	0	0	0	603	903	0
631	7	0	0	0	0	0	0	200	300	0	0	0	0	0	0	0	200	903	0	0	0	0	0	0	0	603	903	0
631	8	0	0	0	0	0	0	200	300	0	0	0	0	0	0	0	200	903	0	0	0	0	0	0	0	603	903	0
631	9	0	0	0	0	0	0	200	300	0	0	0	0	0	0	0	200	903	0	0	0	0	0	0	0	603	903	0
632	0	0	0	0	0	0	0	200	300	0	0	0	0	0	0	0	200	903	0	0	0	0	0	0	0	603	903	0
632	1	0	0	0	0	0	0	200	300	0	0	0	0	0	0	0	200	903	0	0	0	0	0	0	0	603	903	0
632	2	0	0	0	0	0	0	200	300	0	0	0	0	0	0	0	200	903	0	0	0	0	0	0	0	603	903	0
632	3	0	0	0	0	0	0	200	300	0	0	0	0	0	0	0	200	903	0	0	0	0	0	0	0	603	903	0
632	4	0	0	0	0	0	0	200	300	0	0	0	0	0	0	0	200	903	0	0	0	0	0	0	0	603	903	0
632	5	0	0	0	0	0	0	200	300	0	0	0	0	0	0	0	200	903	0	0	0	0	0	0	0	603	903	0
632	6	0	0	0	0	0	0	200	300	0	0	0	0	0	0	0	200	903	0	0	0	0	0	0	0	603	903	0
632	7	0	0	0	0	0	0	200	300	0	0	0	0	0	0	0	200	903	0	0	0	0	0	0	0	603	903	0
632	8	0	0	0	0	0	0	200	300	0	0	0	0	0	0	0	200	903	0	0	0	0	0	0	0	603	903	0
632	9	0	0	0	0	0	0	200	300	0	0	0	0	0	0	0	200	903	0	0	0	0	0	0	0	603	903	0
633	0	0	0	0	0	0	0	200	300	0	0	0	0	0	0	0	200	903	0	0	0	0	0	0	0	603	903	0
633	1	0	0	0	0	0	0	200	300	0	0	0	0	0	0	0	200	903	0	0	0	0	0	0	0	603	903	0
633	2	0	0	0	0	0	0	200	300	0	0	0	0	0	0	0	200	903	0	0	0	0	0	0	0	603	903	0
633	3	0	0	0	0	0	0	200	300	0	0	0	0	0	0	0	200	903	0	0	0	0	0	0	0	603	903	0
633	4	0	0	0	0	0	0	200	300	0	0	0	0	0	0	0	200	903	0	0	0	0	0	0	0	603	903	0
633	5	0	0	0	0	0	0	200	300	0	0	0	0	0	0	0	200	903	0	0	0	0	0	0	0	603	903	0
633	6	0	0	0	0	0	0	200	300	0	0	0	0	0	0	0	200	903	0	0	0	0	0	0	0	603	903	0
633	7	0	0	0	0	0	0	200	300	0	0	0	0	0	0	0	200	903	0	0	0	0	0	0	0	603	903	0
633	8	0	0	0	0	0	0	200	300	0	0	0	0	0	0	0	200	903	0	0	0	0	0	0	0	603	903	0
633	9	0	0	0	0	0	0	200	300	0	0	0	0	0	0	0	200	903	0	0	0	0	0	0	0	603	903	0
634	0	0	0	0	0	0	0	200	300	0	0	0	0	0	0	0	200	903	0	0	0	0	0	0	0	603	903	0
634	1	0	0	0	0	0	0	200	300	0	0	0	0	0	0	0	200	903	0	0	0	0	0	0	0	603	903	0
634	2	0	0	0	0	0	0	200	300	0	0	0	0	0	0	0	200	903	0	0	0	0	0	0	0	603	903	0
634	3	0	0	0	0	0	0	200	300	0	0	0	0	0	0	0	200	903	0	0	0	0	0	0	0	603	903	0
634	4	0	0	0	0	0	0	200	300	0	0	0	0	0	0	0	200	903	0	0	0	0	0	0	0	603	903	0
634	5	0	0	0	0	0	0	200	300	0	0	0	0	0	0	0	200	903	0	0	0	0	0	0	0	603	903	0
634	6	0	0	0	0	0	0	200	300	0	0	0	0	0	0	0	200	903	0	0	0	0	0	0	0	603	903	0
634	7	0	0	0	0	0	0	200	300	0	0	0	0	0	0	0	200	903	0	0	0	0	0	0	0	603	903	0
634	8	0	0	0	0	0	0	200	300	0	0	0	0	0	0	0	200	903	0	0	0	0	0	0	0	603	903	0
634	9	0	0	0	0	0	0	200	300	0	0	0	0	0	0	0	200	903	0	0	0	0	0	0	0	603	903	0
635	0	0	0	0	0	0	0	200	300	0	0	0	0	0	0	0	200	903	0	0	0	0	0	0	0	603	903	0
635	1	0	0	0	0	0	0	200	300	0	0	0	0	0	0	0	200	903	0	0	0	0	0	0	0	603	903	0
635	2	0	0	0	0	0	0	200	300	0	0	0	0	0	0	0	200	903	0	0	0	0	0	0	0	603	903	0
635	3	0	0	0	0	0	0	200	300	0	0	0	0	0	0	0	200	903	0	0	0	0	0	0	0	603	903	0
635	4	0	0	0	0	0	0	200	300	0	0	0	0	0	0	0	200	903	0	0	0	0	0	0	0	603	903	0
635	5	0	0	0	0	0	0	200	300	0	0	0	0	0	0	0	200	903	0	0	0	0	0	0	0	603	903	0
635	6	0	0	0	0	0	0	200	300	0	0	0	0	0	0	0	200	903	0	0	0	0	0	0	0	603	903	0
635	7	0	0	0	0	0	0	200	300	0	0	0	0	0	0	0	200	903	0	0	0	0	0	0	0	603	903	0
635	8	0	0	0	0	0	0	200	300	0	0	0	0	0	0	0	200	903	0	0	0	0	0	0	0	603	903	0
635	9	0	0	0	0	0	0	200	300	0	0	0	0	0	0	0	200	903	0	0	0	0	0	0	0	603	903	0
636	0	0	0	0	0	0	0	200	300	0	0	0	0	0	0	0	200	903	0	0	0	0	0	0	0	603	903	0
636	1	0	0	0	0	0	0	200	300	0	0	0	0	0	0	0	200	903	0	0	0	0	0	0	0	603	903	0
636	2	0	0	0	0	0	0	200	300	0	0	0	0	0	0	0	200	903	0	0	0	0	0	0	0	603	903	0
636	3	0	0	0	0	0	0	200	300	0	0	0	0	0	0	0	200	903	0	0	0	0	0	0	0	603	903	0
636	4	0	0	0	0	0	0	200	300	0	0	0	0	0	0	0	200	903	0	0	0	0	0	0	0	603	903	0
636	5	0	0	0	0	0	0	200	300	0	0	0	0	0	0	0	200	903	0	0	0	0	0	0	0	603	903	0
636	6	0	0	0	0	0	0	200	300	0	0	0	0	0	0	0	200	903	0	0	0	0	0	0	0	603	903	0
636	7	0	0	0	0	0	0	200	300	0	0	0	0	0	0	0	200	903	0	0	0	0	0	0	0	603	903	0
636	8	0	0	0	0	0	0	200	300	0	0	0	0	0	0	0	200	903	0	0	0	0	0	0	0	603	903	0
636	9	0	0	0	0	0	0	200	300	0	0	0	0	0	0	0	200	903	0	0	0	0	0	0	0	603	903	0
637	0	0	0	0	0	0	0	200	300	0	0	0	0	0	0	0	200	903	0	0	0	0	0	0	0	603	903	0
637	1	0	0	0	0	0	0	200	300	0	0	0	0	0	0	0	200	903	0	0	0	0	0	0	0	603	903	0
637	2	0	0	0	0	0	0	200	300	0	0	0	0	0	0	0	200	903	0	0	0	0	0	0	0	603	903	0
637	3	0	0	0	0	0	0	200	300	0	0	0	0	0	0	0	200	903	0	0	0	0	0	0	0	603	903	0
637	4	0	0	0	0	0	0	200	300	0	0	0	0	0	0	0	200	903	0	0	0	0	0	0	0	603	903	0
637	5	0	0	0	0	0	0	200	300	0	0	0	0	0	0	0	200	903	0	0	0	0	0	0	0	603	903	0
637	6	0	0	0	0	0	0	200	300	0	0	0	0	0	0	0	200	903	0	0	0	0	0	0	0	603	903	0
637	7	0	0	0	0	0	0	200	300	0	0	0	0	0	0	0	200	903	0	0	0	0	0	0	0	603	903	0
637	8	0	0	0	0	0	0	200	300	0	0	0	0	0	0	0	200	903	0	0	0	0	0	0	0	603	903	0
637	9	0	0	0	0	0	0	200	300	0	0	0	0	0	0	0	200	903	0	0	0	0	0	0	0	603	903	0
638	0	0	0	0	0	0	0	200	300	0	0	0	0	0	0	0	200	903	0	0	0	0	0	0	0	603	903	0
638	1	0	0	0	0	0	0	200	300	0	0	0	0	0	0	0	200	903	0	0	0	0	0	0	0	603	903	0
638	2	0	0	0	0	0	0	200	300	0	0	0	0	0	0	0	200	903	0	0	0	0	0	0	0	603	903	0
638	3	0	0	0	0	0	0	200	300	0	0	0	0	0	0	0	200	903	0	0	0	0	0	0	0	603	903	0
638	4	0	0	0	0	0	0	200	300	0	0	0	0	0	0	0	200	903	0	0	0	0	0	0	0	603	903	0
638	5	0	0	0	0	0	0	200	300	0	0	0	0	0	0	0	200	903	0	0	0	0	0	0	0	603	903	0
638	6	0	0	0	0	0	0	200	300	0	0	0	0	0	0	0	200	903	0	0	0	0	0	0	0	603	903	0
638	7	0	0	0	0	0	0	200	300	0	0	0	0	0	0	0	200	903	0	0	0	0	0	0	0	603	903	0
638	8	0	0	0	0	0	0	200	300	0	0	0	0	0	0	0	200	903	0	0	0	0	0	0	0	603	903	0
638	9	0	0	0	0	0	0	200	300	0	0	0	0	0	0	0	200	903	0	0	0	0	0	0	0	603	903	0
639	0	0	0	0	0	0	0	200	300	0	0	0	0	0	0	0	200	903	0	0	0	0	0	0	0	603	903	0
639	1	0	0	0	0	0	0	200	300	0	0	0	0	0	0	0	200	903	0	0	0	0	0	0	0	603	903	0
639	2	0	0	0	0	0	0	200	300	0	0	0	0	0	0	0	200	903	0	0	0	0	0	0	0	603	903	0
639	3	0	0	0	0	0	0	200	300	0	0	0	0	0	0	0	200	903	0	0	0	0	0	0	0	603	903	0
639	4	0	0	0	0	0	0	200	300	0	0	0	0	0	0	0	200	903	0	0	0	0	0	0	0	603	903	0
639	5	0	0	0	0	0	0	200	300	0	0	0	0	0	0	0	200	903	0	0	0	0	0	0	0	603	903	0
639	6	0	0	0	0	0	0	200	300	0	0	0	0	0	0	0	200	903	0	0	0	0	0	0	0	603	903	0
639	7	0	0	0	0	0	0	200	300	0	0	0	0	0	0	0	200	903	0	0	0	0	0	0	0	603	903	0
639	8	0	0	0	0	0	0	200	300	0	0	0	0	0	0	0	200	903	0	0	0	0	0	0	0	603	903	0
639	9	0	0	0	0	0	0	200	300	0	0	0	0	0	0	0	200	903	0	0	0	0	0	0	0	603	903	0
640	0	0	0	0	0	0	0	200	300	0	0	0	0	0	0	0	200	903	0	0	0	0	0	0	0	603	903	0
640	1	0	0	0	0	0	0	200	300	0	0	0	0	0	0	0	200	903	0	0	0	0	0	0	0	603	903	0
640	2	0	0	0	0	0	0	200	300	0	0	0	0	0	0	0	200	903	0	0	0	0	0	0	0	603	903	0
640	3	0	0	0	0	0	0	200	300	0	0	0	0	0	0	0	200	903	0	0	0	0	0	0	0	603	903	0
640	4	0	0	0	0	0	0	200	300	0	0	0	0	0	0	0	200	903	0	0	0	0	0	0	0	603	903	0
640	5	0	0	0	0	0	0	200	300	0	0	0	0	0	0	0	200	903	0	0	0	0	0	0	0	603	903	0
640	6	0	0	0	0	0	0	200	300	0	0	0	0	0	0	0	200	903	0	0	0	0	0	0	0	603	903	0
640	7	0	0	0	0	0	0	200	300	0	0	0	0	0	0	0	200	903	0	0	0	0	0	0	0	603	903	0
640	8	0	0	0	0	0	0	200	300	0	0	0	0	0	0	0	200	903	0	0	0	0	0	0	0	603	903	0
640	9	0	0	0	0	0	0	200	300	0	0	0	0	0	0	0	200	903	0	0	0	0	0	0	0	603	903	0
641	0	0	0	0	0	0	0	200	300	0	0	0	0	0	0	0	200	903	0	0	0	0	0	0	0	603	903	0
641	1	0	0	0	0	0	0	200	300	0	0	0	0	0	0	0	200	903	0	0	0	0	0	0	0	603	903	0
641	2	0	0	0	0	0	0	200	300	0	0	0	0	0	0	0	200	903	0	0	0	0	0	0	0	603	903	0
641	3	0	0	0	0	0	0	200	300	0	0	0	0	0	0	0	200	903	0	0	0	0	0	0	0	603	903	0
641	4	0	0	0	0	0	0	200	300	0	0	0	0	0	0	0	200	903	0	0	0	0	0	0	0	603	903	0
641	5	0	0	0	0	0	0	200	300	0	0	0	0	0	0	0	200	903	0	0	0	0	0	0	0	603	903	0
641	6	0	0	0	0	0	0	200	300	0	0	0	0	0	0	0	200	903	0	0	0	0	0	0	0	603	903	0
641	7	0	0	0	0	0	0	200	300	0	0	0	0	0	0	0	200	903	0	0	0	0	0	0	0	603	903	0
641	8	0	0	0	0	0	0	200	300	0	0	0	0	0	0	0	200	903	0	0	0	0	0	0	0	603	903	0
641	9	0	0	0	0	0	0	200	300	0	0	0	0	0	0	0	200	903	0	0	0	0	0	0	0	603	903	0
642	0	0	0	0	0	0	0	200	300	0	0	0	0	0	0	0	200	903	0	0	0	0	0	0	0	603	903	0
642	1	0	0	0	0	0	0	200	300	0	0	0	0	0	0	0	200	903	0	0	0	0	0	0	0	603	903	0
642	2	0	0	0	0	0	0	200	300	0	0	0	0	0	0	0	200	903	0	0	0	0	0	0	0	603	903	0
642	3	0	0	0	0	0	0	200	300	0	0	0	0	0	0	0	200	903	0	0	0	0	0	0	0	603	903	0
642	4	0	0	0	0	0	0	200	300	0	0	0	0	0	0	0	200	903	0	0	0	0	0	0	0	603	903	0
642	5	0	0	0	0	0	0	200	300	0	0	0	0	0	0	0	200	903	0	0	0	0	0	0	0	603	903	0
642	6	0	0	0	0	0	0	200	300	0	0	0	0	0	0	0	200	903	0	0	0	0	0	0	0	603	903	0
642	7	0	0	0	0	0	0	200	300	0	0	0	0	0	0	0	200	903	0	0	0	0	0	0	0	603	903	0
642	8	0	0	0	0	0	0	200	300	0	0	0	0	0	0	0	200	903	0	0	0	0	0	0	0	603	903	0
642	9	0	0	0	0	0	0	200	300	0	0	0	0	0	0	0	200	903	0	0	0	0	0	0	0	603	903	0
643	0	0	0	0	0	0	0	200	300	0	0	0	0	0	0	0	200	903	0	0	0	0	0	0	0	603	903	0
643	1	0	0	0	0	0	0	200	300	0	0	0	0	0	0	0	200	903	0	0	0	0	0	0	0	603	903	0
643	2	0	0	0	0	0	0	200	300	0	0	0	0	0	0	0	200	903	0	0	0	0	0	0	0	603	903	0
643	3	0	0	0	0	0	0	200	300	0	0	0	0	0	0	0	200	903	0	0	0	0	0	0	0	603	903	0
643	4	0	0	0	0	0	0	200	300	0	0	0	0	0	0	0	200	903	0	0	0	0	0	0	0	603	903	0
643	5	0	0	0	0	0	0	200	300	0	0	0	0	0	0	0	200	903	0	0	0	0	0	0	0	603	903	0
643	6	0	0	0	0	0	0	200	300	0	0	0	0	0	0	0	200	903	0	0	0	0	0	0	0	603	903	0
643	7	0	0	0	0	0	0	200	300	0	0	0	0	0	0	0	200	903	0	0	0	0	0	0	0	603	903	0
643	8	0	0	0	0	0	0	200	300	0	0	0	0	0	0	0	200	903	0	0	0	0	0	0	0	603	903	0
643	9	0	0	0	0	0	0	200	300	0	0	0	0	0	0	0	200	903	0	0	0	0	0	0	0	603	903	0
644	0	0	0	0	0	0	0	200	300	0	0	0	0	0	0	0	200	903	0	0	0	0	0	0	0	603	903	0
644	1	0	0	0	0	0	0	200	300	0	0	0	0	0	0	0	200	903	0	0	0	0	0	0	0	603	903	0
644	2	0	0	0	0	0	0	200	300	0	0	0	0	0	0	0	200	903	0	0	0	0	0	0	0	603	903	0
644	3	0	0	0	0	0	0	200	300	0	0	0	0	0	0	0	200	903	0	0	0	0	0	0	0	603	903	0
644	4	0	0	0	0	0	0	200	300	0	0	0	0	0	0	0	200	903	0	0	0	0	0	0	0	603	903	0
644	5	0	0	0	0	0	0	200	300	0	0	0	0	0	0	0	200	903	0	0	0	0	0	0	0	603	903	0
644	6	0	0	0	0	0	0	200	300	0	0	0	0	0	0	0	200	903	0	0	0	0	0	0	0	603	903	0
644	7	0	0	0	0	0	0	200	300	0	0	0	0	0	0	0	200	903	0	0	0	0	0	0	0	603	903	0
644	8	0	0	0	0	0	0	200	300	0	0	0	0	0	0	0	200	903	0	0	0	0	0	0	0	603	903	0
644	9	0	0	0	0	0	0	200	300	0	0	0	0	0	0	0	200	903	0	0	0	0	0	0	0	603	903	0
645	0	0	0	0	0	0	0	200	300	0	0	0	0	0	0	0	200	903	0	0	0	0	0	0	0	603	903	0
645	1	0	0	0	0	0	0	200	300	0	0	0	0	0	0	0	200	903	0	0	0	0	0	0	0	603	903	0
645	2	0	0	0	0	0	0	200	300	0	0	0	0	0	0	0	200	903	0	0	0	0	0	0	0	603	903	0
645	3	0	0	0	0	0	0	200	300	0	0	0	0	0	0	0	200	903	0	0	0	0	0	0	0	603	903	0
645	4	0	0	0	0	0	0	200	300	0	0	0	0	0	0	0	200	903	0	0	0	0	0	0	0	603	903	0
645	5	0	0	0	0	0	0	200	300	0	0	0	0	0	0	0	200	903	0	0	0	0	0	0	0	603	903	0
645	6	0	0	0	0	0	0	200	300	0	0	0	0	0	0	0	200	903	0	0	0	0	0	0	0	603	903	0
645	7	0	0	0	0	0	0	200	300	0	0	0	0	0	0	0	200	903	0	0	0	0	0	0	0	603	903	0
645	8	0	0	0	0	0	0	200	300	0	0	0	0	0	0	0	200	903	0	0	0	0	0	0	0	603	903	0
645	9	0	0	0	0	0	0	200	300	0	0	0	0	0	0	0	200	903	0	0	0	0	0	0	0	603	903	0
646	0	0	0	0	0	0	0	200	300	0	0	0	0	0	0	0	200	903	0	0	0	0	0	0	0	603	903	0
646	1	0	0	0	0	0	0	200	300	0	0	0	0	0	0	0	200	903	0	0	0	0	0	0	0	603	903	0
646	2	0	0	0	0	0	0	200	300	0	0	0	0	0	0	0	200	903	0	0	0	0	0	0	0	603	903	0
646	3	0	0	0	0	0	0	200	300	0	0	0	0	0	0	0	200	903	0	0	0	0	0	0	0	603	903	0
646	4	0	0	0	0	0	0	200	300	0	0	0	0	0	0	0	200	903	0	0	0	0	0	0	0	603	903	0
646	5	0	0	0	0	0	0	200	300	0	0	0	0	0	0	0	200	903	0	0	0	0	0	0	0	603	903	0
646	6	0	0	0	0	0	0	200	300	0	0	0	0	0	0	0	200	903	0	0	0	0	0	0	0	603	903	0
646	7	0	0	0	0	0	0	200	300	0	0	0	0	0	0	0	200	903	0	0	0	0	0	0	0	603	903	0
646	8	0	0	0	0	0	0	200	300	0	0	0	0	0	0	0	200	903	0	0	0	0	0	0	0	603	903	0
646	9	0	0	0	0	0	0	200	300	0	0	0	0	0	0	0	200	903	0	0	0	0	0	0	0	603	903	0
647	0	0	0	0	0	0	0	200	300	0	0	0	0	0	0	0	200	903	0	0	0	0	0	0	0	603	903	0
647	1	0	0	0	0	0	0	200	300	0	0	0	0	0	0	0	200	903	0	0	0	0	0	0	0	603	903	0
647	2	0	0	0	0	0	0	200	300	0	0	0	0	0	0	0	200	903	0	0	0	0	0	0	0	603	903	0
647	3	0	0	0	0	0	0	200	300	0	0	0	0	0	0	0	200	903	0	0	0	0	0	0	0	603	903	0
647	4	0	0	0	0	0	0	200	300	0	0	0	0	0	0	0	200	903	0	0	0	0	0	0	0	603	903	0
647	5	0	0	0	0	0	0	200	300	0	0	0	0	0	0	0	200	903	0	0	0	0	0	0	0	603	903	0
647	6	0	0	0	0	0	0	200	300	0	0	0	0	0	0	0	200	903	0	0	0	0	0	0	0	603	903	0
647	7	0	0	0	0	0	0	200	300	0	0	0	0	0	0	0	200	903	0	0	0	0	0	0	0	603	903	0
647	8	0	0	0	0	0	0	200	300	0	0	0	0	0	0	0	200	903	0	0	0	0	0	0	0	603	903	0
647	9	0	0	0	0	0	0	200	300	0	0	0	0	0	0	0	200	903	0	0	0	0	0	0	0	603	903	0
648	0	0	0	0	0	0	0	200	300	0	0	0	0	0	0	0	200	903	0	0	0	0	0	0	0	603	903	0
648	1	0	0	0	0	0	0	200	300	0	0	0	0	0	0	0	200	903	0	0	0	0	0	0	0	603	903	0
648	2	0	0	0	0	0	0	200	300	0	0	0	0	0	0	0	200	903	0	0	0	0	0	0	0	603	903	0
648	3	0	0	0	0	0	0	200	300	0	0	0	0	0	0	0	200	903	0	0	0	0	0	0	0	603	903	0
648	4	0	0	0	0	0	0	200	300	0	0	0	0	0	0	0	200	903	0	0	0	0	0	0	0	603	903	0
648	5	0	0	0	0	0	0	200	300	0	0	0	0	0	0	0	200	903	0	0	0	0	0	0	0	603	903	0
648	6	0	0	0	0	0	0	200	300	0	0	0	0	0	0	0	200	903	0	0	0	0	0	0	0	603	903	0
648	7	0	0	0	0	0	0	200	300	0	0	0	0	0	0	0	200	903	0	0	0	0	0	0	0	603	903	0
648	8	0	0	0	0	0	0	200	300	0	0	0	0	0	0	0	200	903	0	0	0	0	0	0	0	603	903	0
648	9	0	0	0	0	0	0	200	300	0	0	0	0	0	0	0	200	903	0	0	0	0	0	0	0	603	903	0
649	0	0	0	0	0	0	0	200	300	0	0	0	0	0	0	0	200	903	0	0	0	0	0	0	0	603	903	0
649	1	0	0	0	0	0	0	200	300	0	0	0	0	0	0	0	200	903	0	0	0	0	0	0	0	603	903	0
649	2	0	0	0	0	0	0	200	300	0	0	0	0	0	0	0	200	903	0	0	0	0	0	0	0	603	903	0
649	3	0	0	0	0	0	0	200	300	0	0	0	0	0	0	0	200	903	0	0	0	0	0	0	0	603	903	0
649	4	0	0	0	0	0	0	200	300	0	0	0	0	0	0	0	200	903	0	0	0	0	0	0	0	603	903	0
649	5	0	0	0	0	0	0	200	300	0	0	0	0	0	0	0	200	903	0	0	0	0	0	0	0	603	903	0
649	6	0	0	0	0	0	0	200	300	0	0	0	0	0	0	0	200	903	0	0	0	0	0	0	0	603	903	0
649	7	0	0	0	0	0	0	200	300	0	0	0	0	0	0	0	200	903	0	0	0	0	0	0	0	603	903	0
649	8	0	0	0	0	0	0	200	300	0	0	0	0	0	0	0	200	903	0	0	0	0	0	0	0	603	903	0
649	9	0	0	0	0	0	0	200	300	0	0	0	0	0	0	0	200	903	0	0	0	0	0	0	0	603	903	0
650	0	0	0	0	0	0	0	200	300	0	0	0	0	0	0	0	200	903	0	0	0	0	0	0	0	603	903	0
650	1	0	0	0	0	0	0	200	300	0	0	0	0	0	0	0	200	903	0	0	0	0	0	0	0	603	903	0
650	2	0	0	0	0	0	0	200	300	0	0	0	0	0	0	0	200	903	0	0	0	0	0	0	0	603	903	0
650	3	0	0	0	0	0	0	200	300	0	0	0	0	0	0	0	200	903	0	0	0	0	0	0	0	603	903	0
650	4	0	0	0	0	0	0	200	300	0	0	0	0	0	0	0	200	903	0	0	0	0	0	0	0	603	903	0
650	5	0	0	0	0	0	0	200	300	0	0	0	0	0	0	0	200	903	0	0	0	0	0	0	0	603	903	0
650	6	0	0	0	0	0	0	200	300	0	0	0	0	0	0	0	200	903	0	0	0	0	0	0	0	603	903	0
650	7	0	0	0	0	0	0	200	300	0	0	0	0	0	0	0	200	903	0	0	0	0	0	0	0	603	903	0
650	8	0	0	0	0	0	0	200	300	0	0	0	0	0	0	0	200	903	0	0	0	0	0	0	0	603	903	0
650	9	0	0	0	0	0	0	200	300	0	0	0	0	0	0	0	200	903	0	0	0	0	0	0	0	603	903	0
651	0	0	0	0	0	0	0	200	300	0	0	0	0	0	0	0	200	903	0	0	0	0	0	0	0	603	903	0
651	1	0	0	0	0	0	0	200	300	0	0	0	0	0	0	0	200	903	0	0	0	0	0	0	0	603	903	0
651	2	0	0	0	0	0	0	200	300	0	0	0	0	0	0	0	200	903	0	0	0	0	0	0	0	603	903	0
651	3	0	0	0	0	0	0	200	300	0	0	0	0	0	0	0	200	903	0	0	0	0	0	0	0	603	903	0
651	4	0	0	0	0	0	0	200	300	0	0	0	0	0	0	0	200	903	0	0	0	0	0	0	0	603	903	0
651	5	0	0	0	0	0	0	200	300	0	0	0	0	0	0	0	200	903	0	0	0	0	0	0	0	603	903	0
651	6	0	0	0	0	0	0	200	300	0	0	0	0	0	0	0	200	903	0	0	0	0	0	0	0	603	903	0
651	7	0	0	0	0	0	0	200	300	0	0	0	0	0	0	0	200	903	0	0	0	0	0	0	0	603	903	0
651	8	0	0	0	0	0	0	200	300	0	0	0	0	0	0	0	200	903	0	0	0	0	0	0	0	603	903	0
651	9	0	0	0	0	0	0	200	300	0	0	0	0	0	0	0	200	903	0	0	0	0	0	0	0	603	903	0
652	0	0	0	0	0	0	0	200	300	0	0	0	0	0	0	0	200	903	0	0	0	0	0	0	0	603	903	0
652	1	0	0	0	0	0	0	200	300	0	0	0	0	0	0	0	200	903	0	0	0	0	0	0	0	603	903	0
652	2	0	0	0	0	0	0	200	300	0	0	0	0	0	0	0	200	903	0	0	0	0	0	0	0	603	903	0
652	3	0	0	0	0	0	0	200	300	0	0	0	0	0	0	0	200	903	0	0	0	0	0	0	0	603	903	0
652	4	0	0	0	0	0	0	200	300	0	0	0	0	0	0	0	200	903	0	0	0	0	0	0	0	603	903	0
652	5	0	0	0	0	0	0	200	300	0	0	0	0	0	0	0	200	903	0	0	0	0	0	0	0	603	903	0
652	6	0	0	0	0	0	0	200	300	0	0	0	0	0	0	0	200	903	0	0	0	0	0	0	0	603	903	0
652	7	0	0	0	0	0	0	200	300	0	0	0	0	0	0	0	200	903	0	0	0	0	0	0	0	603	903	0
652	8	0	0	0	0	0	0	200	300	0	0	0	0	0	0	0	200	903	0	0	0	0	0	0	0	603	903	0
652	9	0	0	0	0	0	0	200	300	0	0	0	0	0	0	0	200	903	0	0	0	0	0	0	0	603	903	0
653	0	0	0	0	0	0	0	200	300	0	0	0	0	0	0	0	200	903	0	0	0	0	0	0	0	603	903	0
653	1	0	0	0	0	0	0	200	300	0	0	0	0	0	0	0	200	903	0	0	0	0	0	0	0	603	903	0
653	2	0	0	0	0	0	0	200	300	0	0	0	0	0	0	0	200	903	0	0	0	0	0	0	0	603	903	0
653	3	0	0	0	0	0	0	200	300	0	0	0	0	0	0	0	200	903	0	0	0	0	0	0	0	603	903	0
653	4	0	0	0	0	0	0	200	300	0	0	0	0	0	0	0	200	903	0	0	0	0	0	0	0	603	903	0
653	5	0	0	0	0	0	0	200	300	0	0	0	0	0	0	0	200	903	0	0	0	0	0	0	0	603	903	0
653	6	0	0	0	0	0	0	200	300	0	0	0	0	0	0	0	200	903	0	0	0	0	0	0	0	603	903	0
653	7	0	0	0	0	0	0	200	300	0	0	0	0	0	0	0	200	903	0	0	0	0	0	0	0	603	903	0
653	8	0	0	0	0	0	0	200	300	0	0	0	0	0	0	0	200	903	0	0	0	0	0	0	0	603	903	0
653	9	0	0	0	0	0	0	200	300	0	0	0	0	0	0	0	200	903	0	0	0	0	0	0	0	603	903	0
654	0	0	0	0	0	0	0	200	300	0	0	0	0	0	0	0	200	903	0	0	0	0	0	0	0	603	903	0
654	1	0	0	0	0	0	0	200	300	0	0	0	0	0	0	0	200	903	0	0	0	0	0	0	0	603	903	0
654	2	0	0	0	0	0	0	200	300	0	0	0	0	0	0	0	200	903	0	0	0	0	0	0	0	603	903	0
654	3	0	0	0	0	0	0	200	300	0	0	0	0	0	0	0	200	903	0	0	0	0	0	0	0	603	903	0
654	4	0	0	0	0	0	0	200	300	0	0	0	0	0	0	0	200	903	0	0	0	0	0	0	0	603	903	0
654	5	0	0	0	0	0	0	200	300	0	0	0	0	0	0	0	200	903	0	0	0	0	0	0	0	603	903	0
654	6	0	0	0	0	0	0	200	300	0	0	0	0	0	0	0	200	903	0	0	0	0	0	0	0	603	903	0
654	7	0	0	0	0	0	0	200	300	0	0	0	0	0	0	0	200	903	0	0	0	0	0	0	0	603	903	0
654	8	0	0	0	0	0	0	200	300	0	0	0	0	0	0	0	200	903	0	0	0	0	0	0	0	603	903	0
654	9	0	0	0	0	0	0	200	300	0	0	0	0	0	0	0	200	903	0	0	0	0	0	0	0	603	903	0
655	0	0	0	0	0	0	0	200	300	0	0	0	0	0	0	0	200	903	0	0	0	0	0	0	0	603	903	0
655	1	0	0	0	0	0	0	200	300	0	0	0	0	0	0	0	200	903	0	0	0	0	0	0	0	603	903	0
655	2	0	0	0	0	0	0	200	300	0	0	0	0	0	0	0	200	903	0	0	0	0	0	0	0	603	903	0
655	3	0	0	0	0	0	0	200	300	0	0	0	0	0	0	0	200	903	0	0	0	0	0	0	0	603	903	0
655	4	0	0	0	0	0	0	200	300	0	0	0	0	0	0	0	200	903	0	0	0	0	0	0	0	603	903	0
655	5	0	0	0	0	0	0	200	300	0	0	0	0	0	0	0	200	903	0	0	0	0	0	0	0	603	903	0
655	6	0	0	0	0	0	0	200	300	0	0	0	0	0	0	0	200	903	0	0	0	0	0	0	0	603	903	0
655	7	0	0	0	0	0	0	200	300	0	0	0	0	0	0	0	200	903	0	0	0	0	0	0	0	603	903	0
655	8	0	0	0	0	0	0	200	300	0	0	0	0	0	0	0	200	903	0	0	0	0	0	0	0	603	903	0
655	9	0	0	0	0	0	0	200	300	0	0	0	0	0	0	0	200	903	0	0	0	0	0	0	0	603	903	0
656	0	0	0	0	0	0	0	200	300	0	0	0	0	0	0	0	200	903	0	0	0	0	0	0	0	603	903	0
656	1	0	0	0	0	0	0	200	300	0	0	0	0	0	0	0	200	903	0	0	0	0	0	0	0	603	903	0
656	2	0	0	0	0	0	0	200	300	0	0	0	0	0	0	0	200	903	0	0	0	0	0	0	0	603	903	0
656	3	0	0	0	0	0	0	200	300	0	0	0	0	0	0	0	200	903	0	0	0	0	0	0	0	603	903	0
656	4	0	0	0	0	0	0	200	300	0	0	0	0	0	0	0	200	903	0	0	0	0	0	0	0	603	903	0
656	5	0	0	0	0	0	0	200	300	0	0	0	0	0	0	0	200	903	0	0	0	0	0	0	0	603	903	0
656	6	0	0	0	0	0	0	200	300	0	0	0	0	0	0	0	200	903	0	0	0	0	0	0	0	603	903	0
656	7	0	0	0	0	0	0	200	300	0	0	0	0	0	0	0	200	903	0	0	0	0	0	0	0	603	903	0
656	8	0	0	0	0	0	0	200	300	0	0	0	0	0	0	0	200	903	0	0	0	0	0	0	0	603	903	0
656	9	0	0	0	0	0	0	200	300	0	0	0	0	0	0	0	200	903	0	0	0	0	0	0	0	603	903	0
657	0	0	0	0	0	0	0	200	300	0	0	0	0	0	0	0	200	903	0	0	0	0	0	0	0	603	903	0
657	1	0	0	0	0	0	0	200	300	0	0	0	0	0	0	0	200	903	0	0	0	0	0	0	0	603	903	0
657	2	0	0	0	0	0	0	200	300	0	0	0	0	0	0	0	200	903	0	0	0	0	0	0	0	603	903	0
657	3	0	0	0	0	0	0	200	300	0	0	0	0	0	0	0	200	903	0	0	0	0	0	0	0	603	903	0
657	4	0	0	0	0	0	0	200	300	0	0	0	0	0	0	0	200	903	0	0	0	0	0	0	0	603	903	0
657	5	0	0	0	0	0	0	200	300	0	0	0	0	0	0	0	200	903	0	0	0	0	0	0	0	603	903	0
657	6	0	0	0	0	0	0	200	300	0	0	0	0	0	0	0	200	903	0	0	0	0	0	0	0	603	903	0
657	7	0	0	0	0	0	0	200	300	0	0	0	0	0	0	0	200	903	0	0	0	0	0	0	0	603	903	0
657	8	0	0	0	0	0	0	200	300	0	0	0	0	0	0	0	200	903	0	0	0	0	0	0	0	603	903	0
657	9	0	0	0	0	0	0	200	300	0	0	0	0	0	0	0	200	903	0	0	0	0	0	0	0	603	903	0
658	0	0	0	0	0	0	0	200	300	0	0	0	0	0	0	0	200	903	0	0	0	0	0	0	0	603	903	0
658	1	0	0	0	0	0	0	200	300	0	0	0	0	0	0	0	200	903	0	0	0	0	0	0	0	603	903	0
658	2	0	0	0	0	0	0	200	300	0	0	0	0	0	0	0	200	903	0	0	0	0	0	0	0	603	903	0
658	3	0	0	0	0	0	0	200	300	0	0	0	0	0	0	0	200	903	0	0	0	0	0	0	0	603	903	0
658	4	0	0	0	0	0	0	200	300	0	0	0	0	0	0	0	200	903	0	0	0	0	0	0	0	603	903	0
658	5	0	0	0	0	0	0	200	300	0	0	0	0	0	0	0	200	903	0	0	0	0	0	0	0	603	903	0
658	6	0	0	0	0	0	0	200	300	0	0	0	0	0	0	0	200	903	0	0	0	0	0	0	0	603	903	0
658	7	0	0	0	0	0	0	200	300	0	0	0	0	0	0	0	200	903	0	0	0	0	0	0	0	603	903	0
658	8	0	0	0	0	0	0	200	300	0	0	0	0	0	0	0	200	903	0	0	0	0	0	0	0	603	903	0
658	9	0	0	0	0	0	0	200	300	0	0	0	0	0	0	0	200	903	0	0	0	0	0	0	0	603	903	0
659	0	0	0	0	0	0	0	200	300	0	0	0	0	0	0	0	200	903	0	0	0	0	0	0	0	603	903	0
659	1	0	0	0	0	0	0	200	300	0	0	0	0	0	0	0	200	903	0	0	0	0	0	0	0	603	903	0
659	2	0	0	0	0	0	0	200	300	0	0	0	0	0	0	0	200	903	0	0	0	0	0	0	0	603	903	0
659	3	0	0	0	0	0	0	200	300	0	0	0	0	0	0	0	200	903	0	0	0	0	0	0	0	603	903	0
659	4	0	0	0	0	0	0	200	300	0	0	0	0	0	0	0	200	903	0	0	0	0	0	0	0	603	903	0
659	5	0	0	0	0	0	0	200	300	0	0	0	0	0	0	0	200	903	0	0	0	0	0	0	0	603	903	0
659	6	0	0	0	0	0	0	200	300	0	0	0	0	0	0	0	200	903	0	0	0	0	0	0	0	603	903	0
659	7	0	0	0	0	0	0	200	300	0	0	0	0	0	0	0	200	903	0	0	0	0	0	0	0	603	903	0
659	8	0	0	0	0	0	0	200	300	0	0	0	0	0	0	0	200	903	0	0	0	0	0	0	0	603	903	0
659	9	0	0	0	0	0	0	200	300	0	0	0	0	0	0	0	200	903	0	0	0	0	0	0	0	603	903	0
660	0	0	0	0	0	0	0	200	300	0	0	0	0	0	0	0	200	903	0	0	0	0	0	0	0	603	903	0
660	1	0	0	0	0	0	0	200	300	0	0	0	0	0	0	0	200	903	0	0	0	0	0	0	0	603	903	0
660	2	0	0	0	0	0	0	200	300	0	0	0	0	0	0	0	200	903	0	0	0	0	0	0	0	603	903	0
660	3	0	0	0	0	0	0	200	300	0	0	0	0	0	0	0	200	903	0	0	0	0	0	0	0	603	903	0
660	4	0	0	0	0	0	0	200	300	0	0	0	0	0	0	0	200	903	0	0	0	0	0	0	0	603	903	0
660	5	0	0	0	0	0	0	200	300	0	0	0	0	0	0	0	200	903	0	0	0	0	0	0	0	603	903	0
660	6	0	0	0	0	0	0	200	300	0	0	0	0	0	0	0	200	903	0	0	0	0	0	0	0	603	903	0
660	7	0	0	0	0	0	0	200	300	0	0	0	0	0	0	0	200	903	0	0	0	0	0	0	0	603	903	0
660	8	0	0	0	0	0	0	200	300	0	0	0	0	0	0	0	200	903	0	0	0	0	0	0	0	603	903	0
660	9	0	0	0	0	0	0	200	300	0	0	0	0	0	0	0	200	903	0	0	0	0	0	0	0	603	903	0
661	0	0	0	0	0	0	0	200	300	0	0	0	0	0	0	0	200	903	0	0	0	0	0	0	0	603	903	0
661	1	0	0	0	0	0	0	200	300	0	0	0	0	0	0	0	200	903	0	0	0	0	0	0	0	603	903	0
661	2	0	0	0	0	0	0	200	300	0	0	0	0	0	0	0	200	903	0	0	0	0	0	0	0	603	903	0
661	3	0	0	0	0	0	0	200	300	0	0	0	0	0	0	0	200	903	0	0	0	0	0	0	0	603	903	0
661	4	0	0	0	0	0	0	200	300	0	0	0	0	0	0	0	200	903	0	0	0	0	0	0	0	603	903	0
661	5	0	0	0	0	0	0	200	300	0	0	0	0	0	0	0	200	903	0	0	0	0	0	0	0	603	903	0
661	6	0	0	0	0	0	0	200	300	0	0	0	0	0	0	0	200	903	0	0	0	0	0	0	0	603	903	0
661	7	0	0	0	0	0	0	200	300	0	0	0	0	0	0	0	200	903	0	0	0	0	0	0	0	603	903	0
661	8	0	0	0	0	0	0	200	300	0	0	0	0	0	0	0	200	903	0	0	0	0	0	0	0	603	903	0
661	9	0	0	0	0	0	0	200	300	0	0	0	0	0	0	0	200	903	0	0	0	0	0	0	0	603	903	0
662	0	0	0	0	0	0	0	200	300	0	0	0	0	0	0	0	200	903	0	0	0	0	0	0	0	603	903	0
662	1	0	0	0	0	0	0	200	300	0	0	0	0	0	0	0	200	903	0	0	0	0	0	0	0	603	903	0
662	2	0	0	0	0	0	0	200	300	0	0	0	0	0	0	0	200	903	0	0	0	0	0	0	0	603	903	0
662	3	0	0	0	0	0	0	200	300	0	0	0	0	0	0	0	200	903	0	0	0	0	0	0	0	603	903	0
662	4	0	0	0	0	0	0	200	300	0	0	0	0	0	0	0	200	903	0	0	0	0	0	0	0	603	903	0
662	5	0	0	0	0	0	0	200	300	0	0	0	0	0	0	0	200	903	0	0	0	0	0	0	0	603	903	0
662	6	0	0	0	0	0	0	200	300	0	0	0	0	0	0	0	200	903	0	0	0	0	0	0	0	603	903	0
662	7	0	0	0	0	0	0	200	300	0	0	0	0	0	0	0	200	903	0	0	0	0	0	0	0	603	903	0
662	8	0	0	0	0	0	0	200	300	0	0	0	0	0	0	0	200	903	0	0	0	0	0	0	0	603	903	0
662	9	0	0	0	0	0	0	200	300	0	0	0	0	0	0	0	200	903	0	0	0	0	0	0	0	603	903	0
663	0	0	0	0	0	0	0	200	300	0	0	0	0	0	0	0	200	903	0	0	0	0	0	0	0	603	903	0
663	1	0	0	0	0	0	0	200	300	0	0	0	0	0	0	0	200	903	0	0	0	0	0	0	0	603	903	0
663	2	0	0	0	0	0	0	200	300	0	0	0	0	0	0	0	200	903	0	0	0	0	0	0	0	603	903	0
663	3	0	0	0	0	0	0	200	300	0	0	0	0	0	0	0	200	903	0	0	0	0	0	0	0	603	903	0
663	4	0	0	0	0	0	0	200	300	0	0	0	0	0	0	0	200	903	0	0	0	0	0	0	0	603	903	0
663	5	0	0	0	0	0	0	200	300	0	0	0	0	0	0	0	200	903	0	0	0	0	0	0	0	603	903	0
663	6	0	0	0	0	0	0	200	300	0	0	0	0	0	0	0	200	903	0	0	0	0	0	0	0	603	903	0
663	7	0	0	0	0	0	0	200	300	0	0	0	0	0	0	0	200	903	0	0	0	0	0	0	0	603	903	0
663	8	0	0	0	0	0	0	200	300	0	0	0	0	0	0	0	200	903	0	0	0	0	0	0	0	603	903	0
663	9	0	0	0	0	0	0	200	300	0	0	0	0	0	0	0	200	903	0	0	0	0	0	0	0	603	903	0
664	0	0	0	0	0	0	0	200	300	0	0	0	0	0	0	0	200	903	0	0	0	0	0	0	0	603	903	0
664	1	0	0	0	0	0	0	200	300	0	0	0	0	0	0	0	200	903	0	0	0	0	0	0	0	603	903	0
664	2	0	0	0	0	0	0	200	300	0	0	0	0	0	0	0	200	903	0	0	0	0	0	0	0	603	903	0
664	3	0	0	0	0	0	0	200	300	0	0	0	0	0	0	0	200	903	0	0	0	0	0	0	0	603	903	0
664	4	0	0	0	0	0	0	200	300	0	0	0	0	0	0	0	200	903	0	0	0	0	0	0	0	603	903	0
664	5	0	0	0	0	0	0	200	300	0	0	0	0	0	0	0	200	903	0	0	0	0	0	0	0	603	903	0
664	6	0	0	0	0	0	0	200	300	0	0	0	0	0	0	0	200	903	0	0	0	0	0	0	0	603	903	0
664	7	0	0	0	0	0	0	200	300	0	0	0	0	0	0	0	200	903	0	0	0	0	0	0	0	603	903	0
664	8	0	0	0	0	0	0	200	300	0	0	0	0	0	0	0	200	903	0	0	0	0	0	0	0	603	903	0
664	9	0	0	0	0	0	0	200	300	0	0	0	0	0	0	0	200	903	0	0	0	0	0	0	0	603	903	0
665	0	0	0	0	0	0	0	200	300	0	0	0	0	0	0	0	200	903	0	0	0	0	0	0	0	603	903	0
665	1	0	0	0	0	0	0	200	300	0	0	0	0	0	0	0	200	903	0	0	0	0	0	0	0	603	903	0
665	2	0	0	0	0	0	0	200	300	0	0	0	0	0	0	0	200	903	0	0	0	0	0	0	0	603	903	0
665	3	0	0	0	0	0	0	200	300	0	0	0	0	0	0	0	200	903	0	0	0	0	0	0	0	603	903	0
665	4	0	0	0	0	0	0	200	300	0	0	0	0	0	0	0	200	903	0	0	0	0	0	0	0	603	903	0
665	5	0	0	0	0	0	0	200	300	0	0	0	0	0	0	0	200	903	0	0	0	0	0	0	0	603	903	0
665	6	0	0	0	0	0	0	200	300	0	0	0	0	0	0	0	200	903	0	0	0	0	0	0	0	603	903	0
665	7	0	0	0	0	0	0	200	300	0	0	0	0	0	0	0	200	903	0	0	0	0	0	0	0	603	903	0
665	8	0	0	0	0	0	0	200	300	0	0	0	0	0	0	0	200	903	0	0	0	0	0	0	0	603	903	0
665	9	0	0	0	0	0	0	200	300	0	0	0	0	0	0	0	200	903	0	0	0	0	0	0	0	603	903	0
666	0	0	0	0	0	0	0	200	300	0	0	0	0	0	0	0	200	903	0	0	0	0	0	0	0	603	903	0
666	1	0	0	0	0	0	0	200	300	0	0	0	0	0	0	0	200	903	0	0	0	0	0	0	0	603	903	0
666	2	0	0	0	0	0	0	200	300	0	0	0	0	0	0	0	200	903	0	0	0	0	0	0	0	603	903	0
666	3	0	0	0	0	0	0	200	300	0	0	0	0	0	0	0	200	903	0	0	0	0	0	0	0	603	903	0
666	4	0	0	0	0	0	0	200	300	0	0	0	0	0	0	0	200	903	0	0	0	0	0	0	0	603	903	0
666	5	0	0	0	0	0	0	200	300	0	0	0	0	0	0	0	200	903	0	0	0	0	0	0	0	603	903	0
666	6	0	0	0	0	0	0	200	300	0	0	0	0	0	0	0	200	903	0	0	0	0	0	0	0	603	903	0
666	7	0	0	0	0	0	0	200	300	0	0	0	0	0	0	0	200	903	0	0	0	0	0	0	0	603	903	0
666	8	0	0	0	0	0	0	200	300	0	0	0	0	0	0	0	200	903	0	0	0	0	0	0	0	603	903	0
666	9	0	0	0	0	0	0	200	300	0	0	0	0	0	0	0	200	903	0	0	0	0	0	0	0	603	903	0
667	0	0	0	0	0	0	0	200	300	0	0	0	0	0	0	0	200	903	0	0	0	0	0	0	0	603	903	0
667	1	0	0	0	0	0	0	200	300	0	0	0	0	0	0	0	200	903	0	0	0	0	0	0	0	603	903	0
667	2	0	0	0	0	0	0	200	300	0	0	0	0	0	0	0	200	903	0	0	0	0	0	0	0	603	903	0
667	3	0	0	0	0	0	0	200	300	0	0	0	0	0	0	0	200	903	0	0	0	0	0	0	0	603	903	0
667	4	0	0	0	0	0	0	200	300	0	0	0	0	0	0	0	200	903	0	0	0	0	0	0	0	603	903	0
667	5	0	0	0	0	0	0	200	300	0	0	0	0	0	0	0	200	903	0	0	0	0	0	0	0	603	903	0
667	6	0	0	0	0	0	0	200	300	0	0	0	0	0	0	0	200	903	0	0	0	0	0	0	0	603	903	0
667	7	0	0	0	0	0	0	200	300	0	0	0	0	0	0	0	200	903	0	0	0	0	0	0	0	603	903	0
667	8	0	0	0	0	0	0	200	300	0	0	0	0	0	0	0	200	903	0	0	0	0	0	0	0	603	903	0
667	9	0	0	0	0	0	0	200	300	0	0	0	0	0	0	0	200	903	0	0	0	0	0	0	0	603	903	0
668	0	0	0	0	0	0	0	200	300	0	0	0	0	0	0	0	200	903	0	0	0	0	0	0	0	603	903	0
668	1	0	0	0	0	0	0	200	300	0	0	0	0	0	0	0	200	903	0	0	0	0	0	0	0	603	903	0
668	2	0	0	0	0	0	0	200	300	0	0	0	0	0	0	0	200	903	0	0	0	0	0	0	0	603	903	0
668	3	0	0	0	0	0	0	200	300	0	0	0	0	0	0	0	200	903	0	0	0	0	0	0	0	603	903	0
668	4	0	0	0	0	0	0	200	300	0	0	0	0	0	0	0	200	903	0	0	0	0	0	0	0	603	903	0
668	5	0	0	0	0	0	0	200	300	0	0	0	0	0	0	0	200	903	0	0	0	0	0	0	0	603	903	0
668	6	0	0	0	0	0	0	200	300	0	0	0	0	0	0	0	200	903	0	0	0	0	0	0	0	603	903	0
668	7	0	0	0	0	0	0	200	300	0	0	0	0	0	0	0	200	903	0	0	0	0	0	0	0	603	903	0
668	8	0	0	0	0	0	0	200	300	0	0	0	0	0	0	0	200	903	0	0	0	0	0	0	0	603	903	0
668	9	0	0	0	0	0	0	200	300	0	0	0	0	0	0	0	200	903	0	0	0	0	0	0	0	603	903	0
669	0	0	0	0	0	0	0	200	300	0	0	0	0	0	0	0	200	903	0	0	0	0	0	0	0	603	903	0
669	1	0	0	0	0	0	0	200	300	0	0	0	0	0	0	0	200	903	0	0	0	0	0	0	0	603	903	0
669	2	0	0	0	0	0	0	200	300	0	0	0	0	0	0	0	200	903	0	0	0	0	0	0	0	603	903	0
669	3	0	0	0	0	0	0	200	300	0	0	0	0	0	0	0	200	903	0	0	0	0	0	0	0	603	903	0
669	4	0	0	0	0	0	0	200	300	0	0	0	0	0	0	0	200	903	0	0	0	0	0	0	0	603	903	0
669	5	0	0	0	0	0	0	200	300	0	0	0	0	0	0	0	200	903	0	0	0	0	0	0	0	603	903	0
669	6	0	0	0	0	0	0	200	300	0	0	0	0	0	0	0	200	903	0	0	0	0	0	0	0	603	903	0
669	7	0	0	0	0	0	0	200	300	0	0	0	0	0	0	0	200	903	0	0	0	0	0	0	0	603	903	0
669	8	0	0	0	0	0	0	200	300	0	0	0	0	0	0	0	200	903	0	0	0	0	0	0	0	603	903	0
669	9	0	0	0	0	0	0	200	300	0	0	0	0	0	0	0	200	903	0	0	0	0	0	0	0	603	903	0
670	0	0	0	0	0	0	0	200	300	0	0	0	0	0	0	0	200	903	0	0	0	0	0	0	0	603	903	0
670	1	0	0	0	0	0	0	200	300	0	0	0	0	0	0	0	200	903	0	0	0	0	0	0	0	603	903	0
670	2	0	0	0	0	0	0	200	300	0	0	0	0	0	0	0	200	903	0	0	0	0	0	0	0	603	903	0
670	3	0	0	0	0	0	0	200	300	0	0	0	0	0	0	0	200	903	0	0	0	0	0	0	0	603	903	0
670	4	0	0	0	0	0	0	200	300	0	0	0	0	0	0	0	200	903	0	0	0	0	0	0	0	603	903	0
670	5	0	0	0	0	0	0	200	300	0	0	0	0	0	0	0	200	903	0	0	0	0	0	0	0	603	903	0
670	6	0	0	0	0	0	0	200	300	0	0	0	0	0	0	0	200	903	0	0	0	0	0	0	0	603	903	0
670	7	0	0	0	0	0	0	200	300	0	0	0	0	0	0	0	200	903	0	0	0	0	0	0	0	603	903	0
670	8	0	0	0	0	0	0	200	300	0	0	0	0	0	0	0	200	903	0	0	0	0	0	0	0	603	903	0
670	9	0	0	0	0	0	0	200	300	0	0	0	0	0	0	0	200	903	0	0	0	0	0	0	0	603	903	0
671	0	0	0	0	0	0	0	200	300	0	0	0	0	0	0	0	200	903	0	0	0	0	0	0	0	603	903	0
671	1	0	0	0	0	0	0	200	300	0	0	0	0	0	0	0	200	903	0	0	0	0	0	0	0	603	903	0
671	2	0	0	0	0	0	0	200	300	0	0	0	0	0	0	0	200	903	0	0	0	0	0	0	0	603	903	0
671	3	0	0	0	0	0	0	200	300	0	0	0	0	0	0	0	200	903	0	0	0	0	0	0	0	603	903	0
671	4	0	0	0	0	0	0	200	300	0	0	0	0	0	0	0	200	903	0	0	0	0	0	0	0	603	903	0
671	5	0	0	0	0	0	0	200	300	0	0	0	0	0	0	0	200	903	0	0	0	0	0	0	0	603	903	0
671	6	0	0	0	0	0	0	200	300	0	0	0	0	0	0	0	200	903	0	0	0	0	0	0	0	603	903	0
671	7	0	0	0	0	0	0	200	300	0	0	0	0	0	0	0	200	903	0	0	0	0	0	0	0	603	903	0
671	8	0	0	0	0	0	0	200	300	0	0	0	0	0	0	0	200	903	0	0	0	0	0	0	0	603	903	0
671	9	0	0	0	0	0	0	200	300	0	0	0	0	0	0	0	200	903	0	0	0	0	0	0	0	603	903	0
672	0	0	0	0	0	0	0	200	300	0	0	0	0	0	0	0	200	903	0	0	0	0	0	0	0	603	903	0
672	1	0	0	0	0	0	0	200	300	0	0	0	0	0	0	0	200	903	0	0	0	0	0	0	0	603	903	0
672	2	0	0	0	0	0	0	200	300	0	0	0	0	0	0	0	200	903	0	0	0	0	0	0	0	603	903	0
672	3	0	0	0	0	0	0	200	300	0	0	0	0	0	0	0	200	903	0	0	0	0	0	0	0	603	903	0
672	4	0	0	0	0	0	0	200	300	0	0	0	0	0	0	0	200	903	0	0	0	0	0	0	0	603	903	0
672	5	0	0	0	0	0	0	200	300	0	0	0	0	0	0	0	200	903	0	0	0	0	0	0	0	603	903	0
672	6	0	0	0	0	0	0	200	300	0	0	0	0	0	0	0	200	903	0	0	0	0	0	0	0	603	903	0
672	7	0	0	0	0	0	0	200	300	0	0	0	0	0	0	0	200	903	0	0	0	0	0	0	0	603	903	0
672	8	0	0	0	0	0	0	200	300	0	0	0	0	0	0	0	200	903	0	0	0	0	0	0	0	603	903	0
672	9	0	0	0	0	0	0	200	300	0	0	0	0	0	0	0	200	903	0	0	0	0	0	0	0	603	903	0
673	0	0	0	0	0	0	0	200	300	0	0	0	0	0	0	0	200	903	0	0	0	0	0	0	0	603	903	0
673	1	0	0	0	0	0	0	200	300	0	0	0	0	0	0	0	200	903	0	0	0	0	0	0	0	603	903	0
673	2	0	0	0	0	0	0	200	300	0	0	0	0	0	0	0	200	903	0	0	0	0	0	0	0	603	903	0
673	3	0	0	0	0	0	0	200	300	0	0	0	0	0	0	0	200	903	0	0	0	0	0	0	0	603	903	0
673	4	0	0	0	0	0	0	200	300	0	0	0	0	0	0	0	200	903	0	0	0	0	0	0	0	603	903	0
673	5	0	0	0	0	0	0	200	300	0	0	0	0	0	0	0	200	903	0	0	0	0	0	0	0	603	903	0
673	6	0	0	0	0	0	0	200	300	0	0	0	0	0	0	0	200	903	0	0	0	0	0	0	0	603	903	0
673	7	0	0	0	0	0	0	200	300	0	0	0	0	0	0	0	200	903	0	0	0	0	0	0	0	603	903	0
673	8	0	0	0	0	0	0	200	300	0	0	0	0	0	0	0	200	903	0	0	0	0	0	0	0	603	903	0
673	9	0	0	0	0	0	0	200	300	0	0	0	0	0	0	0	200	903	0	0	0	0	0	0	0	603	903	0
674	0	0	0	0	0	0	0	200	300	0	0	0	0	0	0	0	200	903	0	0	0	0	0	0	0	603	903	0
674	1	0	0	0	0	0	0	200	300	0	0	0	0	0	0	0	200	903	0	0	0	0	0	0	0	603	903	0
674	2	0	0	0	0	0	0	200	300	0	0	0	0	0	0	0	200	903	0	0	0	0	0	0	0	603	903	0
674	3	0	0	0	0	0	0	200	300	0	0	0	0	0	0	0	200	903	0	0	0	0	0	0	0	603	903	0
674	4	0	0	0	0	0	0	200	300	0	0	0	0	0	0	0	200	903	0	0	0	0	0	0	0	603	903	0
674	5	0	0	0	0	0	0	200	300	0	0	0	0	0	0	0	200	903	0	0	0	0	0	0	0	603	903	0
674	6	0	0	0	0	0	0	200	300	0	0	0	0	0	0	0	200	903	0	0	0	0	0	0	0	603	903	0
674	7	0	0	0	0	0	0	200	300	0	0	0	0	0	0	0	200	903	0	0	0	0	0	0	0	603	903	0
674	8	0	0	0	0	0	0	200	300	0	0	0	0	0	0	0	200	903	0	0	0	0	0	0	0	603	903	0
674	9	0	0	0	0	0	0	200	300	0	0	0	0	0	0	0	200	903	0	0	0	0	0	0	0	603	903	0
675	0	0	0	0	0	0	0	200	300	0	0	0	0	0	0	0	200	903	0	0	0	0	0	0	0	603	903	0
675	1	0	0	0	0	0	0	200	300	0	0	0	0	0	0	0	200	903	0	0	0	0	0	0	0	603	903	0
675	2	0	0	0	0	0	0	200	300	0	0	0	0	0	0	0	200	903	0	0	0	0	0	0	0	603	903	0
675	3	0	0	0	0	0	0	200	300	0	0	0	0	0	0	0	200	903	0	0	0	0	0	0	0	603	903	0
675	4	0	0	0	0	0	0	200	300	0	0	0	0	0	0	0	200	903	0	0	0	0	0	0	0	603	903	0
675	5	0	0	0	0	0	0	200	300	0	0	0	0	0	0	0	200	903	0	0	0	0	0	0	0	603	903	0
675	6	0	0	0	0	0	0	200	300	0	0	0	0	0	0	0	200	903	0	0	0	0	0	0	0	603	903	0
675	7	0	0	0	0	0	0	200	300	0	0	0	0	0	0	0	200	903	0	0	0	0	0	0	0	603	903	0
675	8	0	0	0	0	0	0	200	300	0	0	0	0	0	0	0	200	903	0	0	0	0	0	0	0	603	903	0
675	9	0	0	0	0	0	0	200	300	0	0	0	0	0	0	0	200	903	0	0	0	0	0	0	0	603	903	0
676	0	0	0	0	0	0	0	200	300	0	0	0	0	0	0	0	200	903	0	0	0	0	0	0	0	603	903	0
676	1	0	0	0	0	0	0	200	300	0	0	0	0	0	0	0	200	903	0	0	0	0	0	0	0	603	903	0
676	2	0	0	0	0	0	0	200	300	0	0	0	0	0	0	0	200	903	0	0	0	0	0	0	0	603	903	0
676	3	0	0	0	0	0	0	200	300	0	0	0	0	0	0	0	200	903	0	0	0	0	0	0	0	603	903	0
676	4	0	0	0	0	0	0	200	300	0	0	0	0	0	0	0	200	903	0	0	0	0	0	0	0	603	903	0
676	5	0	0	0	0	0	0	200	300	0	0	0	0	0	0	0	200	903	0	0	0	0	0	0	0	603	903	0
676	6	0	0	0	0	0	0	200	300	0	0	0	0	0	0	0	200	903	0	0	0	0	0	0	0	603	903	0
676	7	0	0	0	0	0	0	200	300	0	0	0	0	0	0	0	200	903	0	0	0	0	0	0	0	603	903	0
676	8	0	0	0	0	0	0	200	300	0	0	0	0	0	0	0	200	903	0	0	0	0	0	0	0	603	903	0
676	9	0	0	0	0	0	0	200	300	0	0	0	0	0	0	0	200	903	0	0	0	0	0	0	0	603	903	0
677	0	0	0	0	0	0	0	200	300	0	0	0	0	0	0	0	200	903	0	0	0	0	0	0	0	603	903	0
677	1	0	0	0	0	0	0	200	300	0	0	0	0	0	0	0	200	903	0	0	0	0	0	0	0	603	903	0
677	2	0	0	0	0	0	0	200	300	0	0	0	0	0	0	0	200	903	0	0	0	0	0	0	0	603	903	0
677	3	0	0	0	0	0	0	200	300	0	0	0	0	0	0	0	200	903	0	0	0	0	0	0	0	603	903	0
677	4	0	0	0	0	0	0	200	300	0	0	0	0	0	0	0	200	903	0	0	0	0	0	0	0	603	903	0
677	5	0	0	0	0	0	0	200	300	0	0	0	0	0	0	0	200	903	0	0	0	0	0	0	0	603	903	0
677	6	0	0	0	0	0	0	200	300	0	0	0	0	0	0	0	200	903	0	0	0	0	0	0	0	603	903	0
677	7	0	0	0	0	0	0	200	300	0	0	0	0	0	0	0	200	903	0	0	0	0	0	0	0	603	903	0
677	8	0	0	0	0	0	0	200	300	0	0	0	0	0	0	0	200	903	0	0	0	0	0	0	0	603	903	0
677	9	0	0	0	0	0	0	200	300	0	0	0	0	0	0	0	200	903	0	0	0	0	0	0	0	603	903	0
678	0	0	0	0	0	0	0	200	300	0	0	0	0	0	0	0	200	903	0	0	0	0	0	0	0	603	903	0
678	1	0	0	0	0	0	0	200	300	0	0	0	0	0	0	0	200	903	0	0	0	0	0	0	0	603	903	0
678	2	0	0	0	0	0	0	200	300	0	0	0	0	0	0	0	200	903	0	0	0	0	0	0	0	603	903	0
678	3	0	0	0	0	0	0	200	300	0	0	0	0	0	0	0	200	903	0	0	0	0	0	0	0	603	903	0
678	4	0	0	0	0	0	0	200	300	0	0	0	0	0	0	0	200	903	0	0	0	0	0	0	0	603	903	0
678	5	0	0	0	0	0	0	200	300	0	0	0	0	0	0	0	200	903	0	0	0	0	0	0	0	603	903	0
678	6	0	0	0	0	0	0	200	300	0	0	0	0	0	0	0	200	903	0	0	0	0	0	0	0	603	903	0
678	7	0	0	0	0	0	0	200	300	0	0	0	0	0	0	0	200	903	0	0	0	0	0	0	0	603	903	0
678	8	0	0	0	0	0	0	200	300	0	0	0	0	0	0	0	200	903	0	0	0	0	0	0	0	603	903	0
678	9	0	0	0	0	0	0	200	300	0	0	0	0	0	0	0	200	903	0	0	0	0	0	0	0	603	903	0
679	0	0	0	0	0	0	0	200	300	0	0	0	0	0	0	0	200	903	0	0	0	0	0	0	0	603	903	0
679	1	0	0	0	0	0	0	200	300	0	0	0	0	0	0	0	200	903	0	0	0	0	0	0	0	603	903	0
679	2	0	0	0	0	0	0	200	300	0	0	0	0	0	0	0	200	903	0	0	0	0	0	0	0	603	903	0
679	3	0	0	0	0	0	0	200	300	0	0	0	0	0	0	0	200	903	0	0	0	0	0	0	0	603	903	0
679	4	0	0	0	0	0	0	200	300	0	0	0	0	0	0	0	200	903	0	0	0	0	0	0	0	603	903	0
679	5	0	0	0	0	0	0	200	300	0	0	0	0	0	0	0	200	903	0	0	0	0	0	0	0	603	903	0
679	6	0	0	0	0	0	0	200	300	0	0	0	0	0	0	0	200	903	0	0	0	0	0	0	0	603	903	0
679	7	0	0	0	0	0	0	200	300	0	0	0	0	0	0	0	200	903	0	0	0	0	0	0	0	603	903	0
679	8	0	0	0	0	0	0	200	300	0	0	0	0	0	0	0	200	903	0	0	0	0	0	0	0	603	903	0
679	9	0	0	0	0	0	0	200	300	0	0	0	0	0	0	0	200	903	0	0	0	0	0	0	0	603	903	0
680	0	0	0	0	0	0	0	200	300	0	0	0	0	0	0	0	200	903	0	0	0	0	0	0	0	603	903	0
680	1	0	0	0	0	0	0	200	300	0	0	0	0	0	0	0	200	903	0	0	0	0	0	0	0	603	903	0
680	2	0	0	0	0	0	0	200	300	0	0	0	0	0	0	0	200	903	0	0	0	0	0	0	0	603	903	0
680	3	0	0	0	0	0	0	200	300	0	0	0	0	0	0	0	200	903	0	0	0	0	0	0	0	603	903	0
680	4	0	0	0	0	0	0	200	300	0	0	0	0	0	0	0	200	903	0	0	0	0	0	0	0	603	903	0
680	5	0	0	0	0	0	0	200	300	0	0	0	0	0	0	0	200	903	0	0	0	0	0	0	0	603	903	0
680	6	0	0	0	0	0	0	200	300	0	0	0	0	0	0	0	200	903	0	0	0	0	0	0	0	603	903	0
680	7	0	0	0	0	0	0	200	300	0	0	0	0	0	0	0	200	903	0	0	0	0	0	0	0	603	903	0
680	8	0	0	0	0	0	0	200	300	0	0	0	0	0	0	0	200	903	0	0	0	0	0	0	0	603	903	0
680	9	0	0	0	0	0	0	200	300	0	0	0	0	0	0	0	200	903	0	0	0	0	0	0	0	603	903	0
681	0	0	0	0	0	0	0	200	300	0	0	0	0	0	0	0	200	903	0	0	0	0	0	0	0	603	903	0
681	1	0	0	0	0	0	0	200	300	0	0	0	0	0	0	0	200	903	0	0	0	0	0	0	0	603	903	0
681	2	0	0	0	0	0	0	200	300	0	0	0	0	0	0	0	200	903	0	0	0	0	0	0	0	603	903	0
681	3	0	0	0	0	0	0	200	300	0	0	0	0	0	0	0	200	903	0	0	0	0	0	0	0	603	903	0
681	4	0	0	0	0	0	0	200	300	0	0	0	0	0	0	0	200	903	0	0	0	0	0	0	0	603	903	0
681	5	0	0	0	0	0	0	200	300	0	0	0	0	0	0	0	200	903	0	0	0	0	0	0	0	603	903	0
681	6	0	0	0	0	0	0	200	300	0	0	0	0	0	0	0	200	903	0	0	0	0	0	0	0	603	903	0
681	7	0	0	0	0	0	0	200	300	0	0	0	0	0	0	0	200	903	0	0	0	0	0	0	0	603	903	0
681	8	0	0	0	0	0	0	200	300	0	0	0	0	0	0	0	200	903	0	0	0	0	0	0	0	603	903	0
681	9	0	0	0	0	0	0	200	300	0	0	0	0	0	0	0	200	903	0	0	0	0	0	0	0	603	903	0
682	0	0	0	0	0	0	0	200	300	0	0	0	0	0	0	0	200	903	0	0	0	0	0	0	0	603	903	0
682	1	0	0	0	0	0	0	200	300	0	0	0	0	0	0	0	200	903	0	0	0	0	0	0	0	603	903	0
682	2	0	0	0	0	0	0	200	300	0	0	0	0	0	0	0	200	903	0	0	0	0	0	0	0	603	903	0
682	3	0	0	0	0	0	0	200	300	0	0	0	0	0	0	0	200	903	0	0	0	0	0	0	0	603	903	0
682	4	0	0	0	0	0	0	200	300	0	0	0	0	0	0	0	200	903	0	0	0	0	0	0	0	603	903	0
682	5	0	0	0	0	0	0	200	300	0	0	0	0	0	0	0	200	903	0	0	0	0	0	0	0	603	903	0
682	6	0	0	0	0	0	0	200	300	0	0	0	0	0	0	0	200	903	0	0	0	0	0	0	0	603	903	0
682	7	0	0	0	0	0	0	200	300	0	0	0	0	0	0	0	200	903	0	0	0	0	0	0	0	603	903	0
682	8	0	0	0	0	0	0	200	300	0	0	0	0	0	0	0	200	903	0	0	0	0	0	0	0	603	903	0
682	9	0	0	0	0	0	0	200	300	0	0	0	0	0	0	0	200	903	0	0	0	0	0	0	0	603	903	0
683	0	0	0	0	0	0	0	200	300	0	0	0	0	0	0	0	200	903	0	0	0	0	0	0	0	603	903	0
683	1	0	0	0	0	0	0	200	300	0	0	0	0	0	0	0	200	903	0	0	0	0	0	0	0	603	903	0
683	2	0	0	0	0	0	0	200	300	0	0	0	0	0	0	0	200	903	0	0	0	0	0	0	0	603	903	0
683	3	0	0	0	0	0	0	200	300	0	0	0	0	0	0	0	200	903	0	0	0	0	0	0	0	603	903	0
683	4	0	0	0	0	0	0	200	300	0	0	0	0	0	0	0	200	903	0	0	0	0	0	0	0	603	903	0
683	5	0	0	0	0	0	0	200	300	0	0	0	0	0	0	0	200	903	0	0	0	0	0	0	0	603	903	0
683	6	0	0	0	0	0	0	200	300	0	0	0	0	0	0	0	200	903	0	0	0	0	0	0	0	603	903	0
683	7	0	0	0	0	0	0	200	300	0	0	0	0	0	0	0	200	903	0	0	0	0	0	0	0	603	903	0
683	8	0	0	0	0	0	0	200	300	0	0	0	0	0	0	0	200	903	0	0	0	0	0	0	0	603	903	0
683	9	0	0	0	0	0	0	200	300	0	0	0	0	0	0	0	200	903	0	0	0	0	0	0	0	603	903	0
684	0	0	0	0	0	0	0	200	300	0	0	0	0	0	0	0	200	903	0	0	0	0	0	0	0	603	903	0
684	1	0	0	0	0	0	0	200	300	0	0	0	0	0	0	0	200	903	0	0	0	0	0	0	0	603	903	0
684	2	0	0	0	0	0	0	200	300	0	0	0	0	0	0	0	200	903	0	0	0	0	0	0	0	603	903	0
684	3	0	0	0	0	0	0	200	300	0	0	0	0	0	0	0	200	903	0	0	0	0	0	0	0	603	903	0
684	4	0	0	0	0	0	0	200	300	0	0	0	0	0	0	0	200	903	0	0	0	0	0	0	0	603	903	0
684	5	0	0	0	0	0	0	200	300	0	0	0	0	0	0	0	200	903	0	0	0	0	0	0	0	603	903	0
684	6	0	0	0	0	0	0	200	300	0	0	0	0	0	0	0	200	903	0	0	0	0	0	0	0	603	903	0
684	7	0	0	0	0	0	0	200	300	0	0	0	0	0	0	0	200	903	0	0	0	0	0	0	0	603	903	0
684	8	0	0	0	0	0	0	200	300	0	0	0	0	0	0	0	200	903	0	0	0	0	0	0	0	603	903	0
684	9	0	0	0	0	0	0	200	300	0	0	0	0	0	0	0	200	903	0	0	0	0	0	0	0	603	903	0
685	0	0	0	0	0	0	0	200	300	0	0	0	0	0	0	0	200	903	0	0	0	0	0	0	0	603	903	0
685	1	0	0	0	0	0	0	200	300	0	0	0	0	0	0	0	200	903	0	0	0	0	0	0	0	603	903	0
685	2	0	0	0	0	0	0	200	300	0	0	0	0	0	0	0	200	903	0	0	0	0	0	0	0	603	903	0
685	3	0	0	0	0	0	0	200	300	0	0	0	0	0	0	0	200	903	0	0	0	0	0	0	0	603	903	0
685	4	0	0	0	0	0	0	200	300	0	0	0	0	0	0	0	200	903	0	0	0	0	0	0	0	603	903	0
685	5	0	0	0	0	0	0	200	300	0	0	0	0	0	0	0	200	903	0	0	0	0	0	0	0	603	903	0
685	6	0	0	0	0	0	0	200	300	0	0	0	0	0	0	0	200	903	0	0	0	0	0	0	0	603	903	0
685	7	0	0	0	0	0	0	200	300	0	0	0	0	0	0	0	200	903	0	0	0	0	0	0	0	603	903	0
685	8	0	0	0	0	0	0	200	300	0	0	0	0	0	0	0	200	903	0	0	0	0	0	0	0	603	903	0
685	9	0	0	0	0	0	0	200	300	0	0	0	0	0	0	0	200	903	0	0	0	0	0	0	0	603	903	0
686	0	0	0	0	0	0	0	200	300	0	0	0	0	0	0	0	200	903	0	0	0	0	0	0	0	603	903	0
686	1	0	0	0	0	0	0	200	300	0	0	0	0	0	0	0	200	903	0	0	0	0	0	0	0	603	903	0
686	2	0	0	0	0	0	0	200	300	0	0	0	0	0	0	0	200	903	0	0	0	0	0	0	0	603	903	0
686	3	0	0	0	0	0	0	200	300	0	0	0	0	0	0	0	200	903	0	0	0	0	0	0	0	603	903	0
686	4	0	0	0	0	0	0	200	300	0	0	0	0	0	0	0	200	903	0	0	0	0	0	0	0	603	903	0
686	5	0	0	0	0	0	0	200	300	0	0	0	0	0	0	0	200	903	0	0	0	0	0	0	0	603	903	0
686	6	0	0	0	0	0	0	200	300	0	0	0	0	0	0	0	200	903	0	0	0	0	0	0	0	603	903	0
686	7	0	0	0	0	0	0	200	300	0	0	0	0	0	0	0	200	903	0	0	0	0	0	0	0	603	903	0
686	8	0	0	0	0	0	0	200	300	0	0	0	0	0	0	0	200	903	0	0	0	0	0	0	0	603	903	0
686	9	0	0	0	0	0	0	200	300	0	0	0	0	0	0	0	200	903	0	0	0	0	0	0	0	603	903	0
687	0	0	0	0	0	0	0	200	300	0	0	0	0	0	0	0	200	903	0	0	0	0	0	0	0	603	903	0
687	1	0	0	0	0	0	0	200	300	0	0	0	0	0	0	0	200	903	0	0	0	0	0	0	0	603	903	0
687	2	0	0	0	0	0	0	200	300	0	0	0	0	0	0	0	200	903	0	0	0	0	0	0	0	603	903	0
687	3	0	0	0	0	0	0	200	300	0	0	0	0	0	0	0	200	903	0	0	0	0	0	0	0	603	903	0
687	4	0	0	0	0	0	0	200	300	0	0	0	0	0	0	0	200	903	0	0	0	0	0	0	0	603	903	0
687	5	0	0	0	0	0	0	200	300	0	0	0	0	0	0	0	200	903	0	0	0	0	0	0	0	603	903	0
687	6	0	0	0	0	0	0	200	300	0	0	0	0	0	0	0	200	903	0	0	0	0	0	0	0	603	903	0
687	7	0	0	0	0	0	0	200	300	0	0	0	0	0	0	0	200	903	0	0	0	0	0	0	0	603	903	0
687	8	0	0	0	0	0	0	200	300	0	0	0	0	0	0	0	200	903	0	0	0	0	0	0	0	603	903	0
687	9	0	0	0	0	0	0	200	300	0	0	0	0	0	0	0	200	903	0	0	0	0	0	0	0	603	903	0
688	0	0	0	0	0	0	0	200	300	0	0	0	0	0	0	0	200	903	0	0	0	0	0	0	0	603	903	0
688	1	0	0	0	0	0	0	200	300	0	0	0	0	0	0	0	200	903	0	0	0	0	0	0	0	603	903	0
688	2	0	0	0	0	0	0	200	300	0	0	0	0	0	0	0	200	903	0	0	0	0	0	0	0	603	903	0
688	3	0	0	0	0	0	0	200	300	0	0	0	0	0	0	0	200	903	0	0	0	0	0	0	0	603	903	0
688	4	0	0	0	0	0	0	200	300	0	0	0	0	0	0	0	200	903	0	0	0	0	0	0	0	603	903	0
688	5	0	0	0	0	0	0	200	300	0	0	0	0	0	0	0	200	903	0	0	0	0	0	0	0	603	903	0
688	6	0	0	0	0	0	0	200	300	0	0	0	0	0	0	0	200	903	0	0	0	0	0	0	0	603	903	0
688	7	0	0	0	0	0	0	200	300	0	0	0	0	0	0	0	200	903	0	0	0	0	0	0	0	603	903	0
688	8	0	0	0	0	0	0	200	300	0	0	0	0	0	0	0	200	903	0	0	0	0	0	0	0	603	903	0
688	9	0	0	0	0	0	0	200	300	0	0	0	0	0	0	0	200	903	0	0	0	0	0	0	0	603	903	0
689	0	0	0	0	0	0	0	200	300	0	0	0	0	0	0	0	200	903	0	0	0	0	0	0	0	603	903	0
689	1	0	0	0	0	0	0	200	300	0	0	0	0	0	0	0	200	903	0	0	0	0	0	0	0	603	903	0
689	2	0	0	0	0	0	0	200	300	0	0	0	0	0	0	0	200	903	0	0	0	0	0	0	0	603	903	0
689	3	0	0	0	0	0	0	200	300	0	0	0	0	0	0	0	200	903	0	0	0	0	0	0	0	603	903	0
689	4	0	0	0	0	0	0	200	300	0	0	0	0	0	0	0	200	903	0	0	0	0	0	0	0	603	903	0
689	5	0	0	0	0	0	0	200	300	0	0	0	0	0	0	0	200	903	0	0	0	0	0	0	0	603	903	0
689	6	0	0	0	0	0	0	200	300	0	0	0	0	0	0	0	200	903	0	0	0	0	0	0	0	603	903	0
689	7	0	0	0	0	0	0	200	300	0	0	0	0	0	0	0	200	903	0	0	0	0	0	0	0	603	903	0
689	8	0	0	0	0	0	0	200	300	0	0	0	0	0	0	0	200	903	0	0	0	0	0	0	0	603	903	0
689	9	0	0	0	0	0	0	200	300	0	0	0	0	0	0	0	200	903	0	0	0	0	0	0	0	603	903	0
690	0	0	0	0	0	0	0	200	300	0	0	0	0	0	0	0	200	903	0	0	0	0	0	0	0	603	903	0
690	1	0	0	0	0	0	0	200	300	0	0	0	0	0	0	0	200	903	0	0	0	0	0	0	0	603	903	0
690	2	0	0	0	0	0	0	200	300	0	0	0	0	0	0	0	200	903	0	0	0	0	0	0	0	603	903	0
690	3	0	0	0	0	0	0	200	300	0	0	0	0	0	0	0	200	903	0	0	0	0	0	0	0	603	903	0
690	4	0	0	0	0	0	0	200	300	0	0	0	0	0	0	0	200	903	0	0	0	0	0	0	0	603	903	0
690	5	0	0	0	0	0	0	200	300	0	0	0	0	0	0	0	200	903	0	0	0	0	0	0	0	603	903	0
690	6	0	0	0	0	0	0	200	300	0	0	0	0	0	0	0	200	903	0	0	0	0	0	0	0	603	903	0
690	7	0	0	0	0	0	0	200	300	0	0	0	0	0	0	0	200	903	0	0	0	0	0	0	0	603	903	0
690	8	0	0	0	0	0	0	200	300	0	0	0	0	0	0	0	200	903	0	0	0	0	0	0	0	603	903	0
690	9	0	0	0	0	0	0	200	300	0	0	0	0	0	0	0	200	903	0	0	0	0	0	0	0	603	903	0
691	0	0	0	0	0	0	0	200	300	0	0	0	0	0	0	0	200	903	0	0	0	0	0	0	0	603	903	0
691	1	0	0	0	0	0	0	200	300	0	0	0	0	0	0	0	200	903	0	0	0	0	0	0	0	603	903	0
691	2	0	0	0	0	0	0	200	300	0	0	0	0	0	0	0	200	903	0	0	0	0	0	0	0	603	903	0
691	3	0	0	0	0	0	0	200	300	0	0	0	0	0	0	0	200	903	0	0	0	0	0	0	0	603	903	0
691	4	0	0	0	0	0	0	200	300	0	0	0	0	0	0	0	200	903	0	0	0	0	0	0	0	603	903	0
691	5	0	0	0	0	0	0	200	300	0	0	0	0	0	0	0	200	903	0	0	0	0	0	0	0	603	903	0
691	6	0	0	0	0	0	0	200	300	0	0	0	0	0	0	0	200	903	0	0	0	0	0	0	0	603	903	0
691	7	0	0	0	0	0	0	200	300	0	0	0	0	0	0	0	200	903	0	0	0	0	0	0	0	603	903	0
691	8	0	0	0	0	0	0	200	300	0	0	0	0	0	0	0	200	903	0	0	0	0	0	0	0	603	903	0
691	9	0	0	0	0	0	0	200	300	0	0	0	0	0	0	0	200	903	0	0	0	0	0	0	0	603	903	0
692	0	0	0	0	0	0	0	200	300	0	0	0	0	0	0	0	200	903	0	0	0	0	0	0	0	603	903	0
692	1	0	0	0	0	0	0	200	300	0	0	0	0	0	0	0	200	903	0	0	0	0	0	0	0	603	903	0
692	2	0	0	0	0	0	0	200	300	0	0	0	0	0	0	0	200	903	0	0	0	0	0	0	0	603	903	0
692	3	0	0	0	0	0	0	200	300	0	0	0	0	0	0	0	200	903	0	0	0	0	0	0	0	603	903	0
692	4	0	0	0	0	0	0	200	300	0	0	0	0	0	0	0	200	903	0	0	0	0	0	0	0	603	903	0
692	5	0	0	0	0	0	0	200	300	0	0	0	0	0	0	0	200	903	0	0	0	0	0	0	0	603	903	0
692	6	0	0	0	0	0	0	200	300	0	0	0	0	0	0	0	200	903	0	0	0	0	0	0	0	603	903	0
692	7	0	0	0	0	0	0	200	300	0	0	0	0	0	0	0	200	903	0	0	0	0	0	0	0	603	903	0
692	8	0	0	0	0	0	0	200	300	0	0	0	0	0	0	0	200	903	0	0	0	0	0	0	0	603	903	0
692	9	0	0	0	0	0	0	200	300	0	0	0	0	0	0	0	200	903	0	0	0	0	0	0	0	603	903	0
693	0	0	0	0	0	0	0	200	300	0	0	0	0	0	0	0	200	903	0	0	0	0	0	0	0	603	903	0
693	1	0	0	0	0	0	0	200	300	0	0	0	0	0	0	0	200	903	0	0	0	0	0	0	0	603	903	0
693	2	0	0	0	0	0	0	200	300	0	0	0	0	0	0	0	200	903	0	0	0	0	0	0	0	603	903	0
693	3	0	0	0	0	0	0	200	300	0	0	0	0	0	0	0	200	903	0	0	0	0	0	0	0	603	903	0
693	4	0	0	0	0	0	0	200	300	0	0	0	0	0	0	0	200	903	0	0	0	0	0	0	0	603	903	0
693	5	0	0	0	0	0	0	200	300	0	0	0	0	0	0	0	200	903	0	0	0	0	0	0	0	603	903	0
693	6	0	0	0	0	0	0	200	300	0	0	0	0	0	0	0	200	903	0	0	0	0	0	0	0	603	903	0
693	7	0	0	0	0	0	0	200	300	0	0	0	0	0	0	0	200	903	0	0	0	0	0	0	0	603	903	0
693	8	0	0	0	0	0	0	200	300	0	0	0	0	0	0	0	200	903	0	0	0	0	0	0	0	603	903	0
693	9	0	0	0	0	0	0	200	300	0	0	0	0	0	0	0	200	903	0	0	0	0	0	0	0	603	903	0
694	0	0	0	0	0	0	0	200	300	0	0	0	0	0	0	0	200	903	0	0	0	0	0	0	0	603	903	0
694	1	0	0	0	0	0	0	200	300	0	0	0	0	0	0	0	200	903	0	0	0	0	0	0	0	603	903	0
694	2	0	0	0	0	0	0	200	300	0	0	0	0	0	0	0	200	903	0	0	0	0	0	0	0	603	903	0
694	3	0	0	0	0	0	0	200	300	0	0	0	0	0	0	0	200	903	0	0	0	0	0	0	0	603	903	0
694	4	0	0	0	0	0	0	200	300	0	0	0	0	0	0	0	200	903	0	0	0	0	0	0	0	603	903	0
694	5	0	0	0	0	0	0	200	300	0	0	0	0	0	0	0	200	903	0	0	0	0	0	0	0	603	903	0
694	6	0	0	0	0	0	0	200	300	0	0	0	0	0	0	0	200	903	0	0	0	0	0	0	0	603	903	0
694	7	0	0	0	0	0	0	200	300	0	0	0	0	0	0	0	200	903	0	0	0	0	0	0	0	603	903	0
694	8	0	0	0	0	0	0	200	300	0	0	0	0	0	0	0	200	903	0	0	0	0	0	0	0	603	903	0
694	9	0	0	0	0	0	0	200	300	0	0	0	0	0	0	0	200	903	0	0	0	0	0	0	0	603	903	0
695	0	0	0	0	0	0	0	200	300	0	0	0	0	0	0	0	200	903	0	0	0	0	0	0	0	603	903	0
695	1	0	0	0	0	0	0	200	300	0	0	0	0	0	0	0	200	903	0	0	0	0	0	0	0	603	903	0
695	2	0	0	0	0	0	0	200	300	0	0	0	0	0	0	0	200	903	0	0	0	0	0	0	0	603	903	0
695	3	0	0	0	0	0	0	200	300	0	0	0	0	0	0	0	200	903	0	0	0	0	0	0	0	603	903	0
695	4	0	0	0	0	0	0	200	300	0	0	0	0	0	0	0	200	903	0	0	0	0	0	0	0	603	903	0
695	5	0	0	0	0	0	0	200	300	0	0	0	0	0	0	0	200	903	0	0	0	0	0	0	0	603	903	0
695	6	0	0	0	0	0	0	200	300	0	0	0	0	0	0	0	200	903	0	0	0	0	0	0	0	603	903	0
695	7	0	0	0	0	0	0	200	300	0	0	0	0	0	0	0	200	903	0	0	0	0	0	0	0	603	903	0
695	8	0	0	0	0	0	0	200	300	0	0	0	0	0	0	0	200	903	0	0	0	0	0	0	0	603	903	0
695	9	0	0	0	0	0	0	200	300	0	0	0	0	0	0	0	200	903	0	0	0	0	0	0	0	603	903	0
696	0	0	0	0	0	0	0	200	300	0	0	0	0	0	0	0	200	903	0	0	0	0	0	0	0	603	903	0
696	1	0	0	0	0	0	0	200	300	0	0	0	0	0	0	0	200	903	0	0	0	0	0	0	0	603	903	0
696	2	0	0	0	0	0	0	200	300	0	0	0	0	0	0	0	200	903	0	0	0	0	0	0	0	603	903	0
696	3	0	0	0	0	0	0	200	300	0	0	0	0	0	0	0	200	903	0	0	0	0	0	0	0	603	903	0
696	4	0	0	0	0	0	0	200	300	0	0	0	0	0	0	0	200	903	0	0	0	0	0	0	0	603	903	0
696	5	0	0	0	0	0	0	200	300	0	0	0	0	0	0	0	200	903	0	0	0	0	0	0	0	603	903	0
696	6	0	0	0	0	0	0	200	300	0	0	0	0	0	0	0	200	903	0	0	0	0	0	0	0	603	903	0
696	7	0	0	0	0	0	0	200	300	0	0	0	0	0	0	0	200	903	0	0	0	0	0	0	0	603	903	0
696	8	0	0	0	0	0	0	200	300	0	0	0	0	0	0	0	200	903	0	0	0	0	0	0	0	603	903	0
696	9	0	0	0	0	0	0	200	300	0	0	0	0	0	0	0	200	903	0	0	0	0	0	0	0	603	903	0
697	0	0	0	0	0	0	0	200	300	0	0	0	0	0	0	0	200	903	0	0	0	0	0	0	0	603	903	0
697	1	0	0	0	0	0	0	200	300	0	0	0	0	0	0	0	200	903	0	0	0	0	0	0	0	603	903	0
697	2	0	0	0	0	0	0	200	300	0	0	0	0	0	0	0	200	903	0	0	0	0	0	0	0	603	903	0
697	3	0	0	0	0	0	0	200	300	0	0	0	0	0	0	0	200	903	0	0	0	0	0	0	0	603	903	0
697	4	0	0	0	0	0	0	200	300	0	0	0	0	0	0	0	200	903	0	0	0	0	0	0	0	603	903	0
697	5	0	0	0	0	0	0	200	300	0	0	0	0	0	0	0	200	903	0	0	0	0	0	0	0	603	903	0
697	6	0	0	0	0	0	0	200	300	0	0	0	0	0	0	0	200	903	0	0	0	0	0	0	0	603	903	0
697	7	0	0	0	0	0	0	200	300	0	0	0	0	0	0	0	200	903	0	0	0	0	0	0	0	603	903	0
697	8	0	0	0	0	0	0	200	300	0	0	0	0	0	0	0	200	903	0	0	0	0	0	0	0	603	903	0
697	9	0	0	0	0	0	0	200	300	0	0	0	0	0	0	0	200	903	0	0	0	0	0	0	0	603	903	0
698	0	0	0	0	0	0	0	200	300	0	0	0	0	0	0	0	200	903	0	0	0	0	0	0	0	603	903	0
698	1	0	0	0	0	0	0	200	300	0	0	0	0	0	0	0	200	903	0	0	0	0	0	0	0	603	903	0
698	2	0	0	0	0	0	0	200	300	0	0	0	0	0	0	0	200	903	0	0	0	0	0	0	0	603	903	0
698	3	0	0	0	0	0	0	200	300	0	0	0	0	0	0	0	200	903	0	0	0	0	0	0	0	603	903	0
698	4	0	0	0	0	0	0	200	300	0	0	0	0	0	0	0	200	903	0	0	0	0	0	0	0	603	903	0
698	5	0	0	0	0	0	0	200	300	0	0	0	0	0	0	0	200	903	0	0	0	0	0	0	0	603	903	0
698	6	0	0	0	0	0	0	200	300	0	0	0	0	0	0	0	200	903	0	0	0	0	0	0	0	603	903	0
698	7	0	0	0	0	0	0	200	300	0	0	0	0	0	0	0	200	903	0	0	0	0	0	0	0	603	903	0
698	8	0	0	0	0	0	0	200	300	0	0	0	0	0	0	0	200	903	0	0	0	0	0	0	0	603	903	0
698	9	0	0	0	0	0	0	200	300	0	0	0	0	0	0	0	200	903	0	0	0	0	0	0	0	603	903	0
699	0	0	0	0	0	0	0	200	300	0	0	0	0	0	0	0	200	903	0	0	0	0	0	0	0	603	903	0
699	1	0	0	0	0	0	0	200	300	0	0	0	0	0	0	0	200	903	0	0	0	0	0	0	0	603	903	0
699	2	0	0	0	0	0	0	200	300	0	0	0	0	0	0	0	200	903	0	0	0	0	0	0	0	603	903	0
699	3	0	0	0	0	0	0	200	300	0	0	0	0	0	0	0	200	903	0	0	0	0	0	0	0	603	903	0
699	4	0	0	0	0	0	0	200	300	0	0	0	0	0	0	0	200	903	0	0	0	0	0	0	0	603	903	0
699	5	0	0	0	0	0	0	200	300	0	0	0	0	0	0	0	200	903	0	0	0	0	0	0	0	603	903	0
699	6	0	0	0	0	0	0	200	300	0	0	0	0	0	0	0	200	903	0	0	0	0	0	0	0	603	903	0
699	7	0	0	0	0	0	0	200	300	0	0	0	0	0	0	0	200	903	0	0	0	0	0	0	0	603	903	0
699	8	0	0	0	0	0	0	200	300	0	0	0	0	0	0	0	200	903	0	0	0	0	0	0	0	603	903	0
699	9	0	0	0	0	0	0	200	300	0	0	0	0	0	0	0	200	903	0	0	0	0	0	0	0	603	903	0
700	0	0	0	0	0	0	0	200	300	0	0	0	0	0	0	0	200	903	0	0	0	0	0	0	0	603	903	0
700	1	0	0	0	0	0	0	200	300	0	0	0	0	0	0	0	200	903	0	0	0	0	0	0	0	603	903	0
700	2	0	0	0	0	0	0	200	300	0	0	0	0	0	0	0	200	903	0	0	0	0	0	0	0	603	903	0
700	3	0	0	0	0	0	0	200	300	0	0	0	0	0	0	0	200	903	0	0	0	0	0	0	0	603	903	0
700	4	0	0	0	0	0	0	200	300	0	0	0	0	0	0	0	200	903	0	0	0	0	0	0	0	603	903	0
700	5	0	0	0	0	0	0	200	300	0	0	0	0	0	0	0	200	903	0	0	0	0	0	0	0	603	903	0
700	6	0	0	0	0	0	0	200	300	0	0	0	0	0	0	0	200	903	0	0	0	0	0	0	0	603	903	0
700	7	0	0	0	0	0	0	200	300	0	0	0	0	0	0	0	200	903	0	0	0	0	0	0	0	603	903	0
700	8	0	0	0	0	0	0	200	300	0	0	0	0	0	0	0	200	903	0	0	0	0	0	0	0	603	903	0
700	9	0	0	0	0	0	0	200	300	0	0	0	0	0	0	0	200	903	0	0	0	0	0	0	0	603	903	0
701	0	0	0	0	0	0	0	200	300	0	0	0	0	0	0	0	200	903	0	0	0	0	0	0	0	603	903	0
701	1	0	0	0	0	0	0	200	300	0	0	0	0	0	0	0	200	903	0	0	0	0	0	0	0	603	903	0
701	2	0	0	0	0	0	0	200	300	0	0	0	0	0	0	0	200	903	0	0	0	0	0	0	0	603	903	0
701	3	0	0	0	0	0	0	200	300	0	0	0	0	0	0	0	200	903	0	0	0	0	0	0	0	603	903	0
701	4	0	0	0	0	0	0	200	300	0	0	0	0	0	0	0	200	903	0	0	0	0	0	0	0	603	903	0
701	5	0	0	0	0	0	0	200	300	0	0	0	0	0	0	0	200	903	0	0	0	0	0	0	0	603	903	0
701	6	0	0	0	0	0	0	200	300	0	0	0	0	0	0	0	200	903	0	0	0	0	0	0	0	603	903	0
701	7	0	0	0	0	0	0	200	300	0	0	0	0	0	0	0	200	903	0	0	0	0	0	0	0	603	903	0
701	8	0	0	0	0	0	0	200	300	0	0	0	0	0	0	0	200	903	0	0	0	0	0	0	0	603	903	0
701	9	0	0	0	0	0	0	200	300	0	0	0	0	0	0	0	200	903	0	0	0	0	0	0	0	603	903	0
702	0	0	0	0	0	0	0	200	300	0	0	0	0	0	0	0	200	903	0	0	0	0	0	0	0	603	903	0
702	1	0	0	0	0	0	0	200	300	0	0	0	0	0	0	0	200	903	0	0	0	0	0	0	0	603	903	0
702	2	0	0	0	0	0	0	200	300	0	0	0	0	0	0	0	200	903	0	0	0	0	0	0	0	603	903	0
702	3	0	0	0	0	0	0	200	300	0	0	0	0	0	0	0	200	903	0	0	0	0	0	0	0	603	903	0
702	4	0	0	0	0	0	0	200	300	0	0	0	0	0	0	0	200	903	0	0	0	0	0	0	0	603	903	0
702	5	0	0	0	0	0	0	200	300	0	0	0	0	0	0	0	200	903	0	0	0	0	0	0	0	603	903	0
702	6	0	0	0	0	0	0	200	300	0	0	0	0	0	0	0	200	903	0	0	0	0	0	0	0	603	903	0
702	7	0	0	0	0	0	0	200	300	0	0	0	0	0	0	0	200	903	0	0	0	0	0	0	0	603	903	0
702	8	0	0	0	0	0	0	200	300	0	0	0	0	0	0	0	200	903	0	0	0	0	0	0	0	603	903	0
702	9	0	0	0	0	0	0	200	300	0	0	0	0	0	0	0	200	903	0	0	0	0	0	0	0	603	903	0
703	0	0	0	0	0	0	0	200	300	0	0	0	0	0	0	0	200	903	0	0	0	0	0	0	0	603	903	0
703	1	0	0	0	0	0	0	200	300	0	0	0	0	0	0	0	200	903	0	0	0	0	0	0	0	603	903	0
703	2	0	0	0	0	0	0	200	300	0	0	0	0	0	0	0	200	903	0	0	0	0	0	0	0	603	903	0
703	3	0	0	0	0	0	0	200	300	0	0	0	0	0	0	0	200	903	0	0	0	0	0	0	0	603	903	0
703	4	0	0	0	0	0	0	200	300	0	0	0	0	0	0	0	200	903	0	0	0	0	0	0	0	603	903	0
703	5	0	0	0	0	0	0	200	300	0	0	0	0	0	0	0	200	903	0	0	0	0	0	0	0	603	903	0
703	6	0	0	0	0	0	0	200	300	0	0	0	0	0	0	0	200	903	0	0	0	0	0	0	0	603	903	0
703	7	0	0	0	0	0	0	200	300	0	0	0	0	0	0	0	200	903	0	0	0	0	0	0	0	603	903	0
703	8	0	0	0	0	0	0	200	300	0	0	0	0	0	0	0	200	903	0	0	0	0	0	0	0	603	903	0
703	9	0	0	0	0	0	0	200	300	0	0	0	0	0	0	0	200	903	0	0	0	0	0	0	0	603	903	0
704	0	0	0	0	0	0	0	200	300	0	0	0	0	0	0	0	200	903	0	0	0	0	0	0	0	603	903	0
704	1	0	0	0	0	0	0	200	300	0	0	0	0	0	0	0	200	903	0	0	0	0	0	0	0	603	903	0
704	2	0	0	0	0	0	0	200	300	0	0	0	0	0	0	0	200	903	0	0	0	0	0	0	0	603	903	0
704	3	0	0	0	0	0	0	200	300	0	0	0	0	0	0	0	200	903	0	0	0	0	0	0	0	603	903	0
704	4	0	0	0	0	0	0	200	300	0	0	0	0	0	0	0	200	903	0	0	0	0	0	0	0	603	903	0
704	5	0	0	0	0	0	0	200	300	0	0	0	0	0	0	0	200	903	0	0	0	0	0	0	0	603	903	0
704	6	0	0	0	0	0	0	200	300	0	0	0	0	0	0	0	200	903	0	0	0	0	0	0	0	603	903	0
704	7	0	0	0	0	0	0	200	300	0	0	0	0	0	0	0	200	903	0	0	0	0	0	0	0	603	903	0
704	8	0	0	0	0	0	0	200	300	0	0	0	0	0	0	0	200	903	0	0	0	0	0	0	0	603	903	0
704	9	0	0	0	0	0	0	200	300	0	0	0	0	0	0	0	200	903	0	0	0	0	0	0	0	603	903	0
705	0	0	0	0	0	0	0	200	300	0	0	0	0	0	0	0	200	903	0	0	0	0	0	0	0	603	903	0
705	1	0	0	0	0	0	0	200	300	0	0	0	0	0	0	0	200	903	0	0	0	0	0	0	0	603	903	0
705	2	0	0	0	0	0	0	200	300	0	0	0	0	0	0	0	200	903	0	0	0	0	0	0	0	603	903	0
705	3	0	0	0	0	0	0	200	300	0	0	0	0	0	0	0	200	903	0	0	0	0	0	0	0	603	903	0
705	4	0	0	0	0	0	0	200	300	0	0	0	0	0	0	0	200	903	0	0	0	0	0	0	0	603	903	0
705	5	0	0	0	0	0	0	200	300	0	0	0	0	0	0	0	200	903	0	0	0	0	0	0	0	603	903	0
705	6	0	0	0	0	0	0	200	300	0	0	0	0	0	0	0	200	903	0	0	0	0	0	0	0	603	903	0
705	7	0	0	0	0	0	0	200	300	0	0	0	0	0	0	0	200	903	0	0	0	0	0	0	0	603	903	0
705	8	0	0	0	0	0	0	200	300	0	0	0	0	0	0	0	200	903	0	0	0	0	0	0	0	603	903	0
705	9	0	0	0	0	0	0	200	300	0	0	0	0	0	0	0	200	903	0	0	0	0	0	0	0	603	903	0
706	0	0	0	0	0	0	0	200	300	0	0	0	0	0	0	0	200	903	0	0	0	0	0	0	0	603	903	0
706	1	0	0	0	0	0	0	200	300	0	0	0	0	0	0	0	200	903	0	0	0	0	0	0	0	603	903	0
706	2	0	0	0	0	0	0	200	300	0	0	0	0	0	0	0	200	903	0	0	0	0	0	0	0	603	903	0
706	3	0	0	0	0	0	0	200	300	0	0	0	0	0	0	0	200	903	0	0	0	0	0	0	0	603	903	0
706	4	0	0	0	0	0	0	200	300	0	0	0	0	0	0	0	200	903	0	0	0	0	0	0	0	603	903	0
706	5	0	0	0	0	0	0	200	300	0	0	0	0	0	0	0	200	903	0	0	0	0	0	0	0	603	903	0
706	6	0	0	0	0	0	0	200	300	0	0	0	0	0	0	0	200	903	0	0	0	0	0	0	0	603	903	0
706	7	0	0	0	0	0	0	200	300	0	0	0	0	0	0	0	200	903	0	0	0	0	0	0	0	603	903	0
706	8	0	0	0	0	0	0	200	300	0	0	0	0	0	0	0	200	903	0	0	0	0	0	0	0	603	903	0
706	9	0	0	0	0	0	0	200	300	0	0	0	0	0	0	0	200	903	0	0	0	0	0	0	0	603	903	0
707	0	0	0	0	0	0	0	200	300	0	0	0	0	0	0	0	200	903	0	0	0	0	0	0	0	603	903	0
707	1	0	0	0	0	0	0	200	300	0	0	0	0	0	0	0	200	903	0	0	0	0	0	0	0	603	903	0
707	2	0	0	0	0	0	0	200	300	0	0	0	0	0	0	0	200	903	0	0	0	0	0	0	0	603	903	0
707	3	0	0	0	0	0	0	200	300	0	0	0	0	0	0	0	200	903	0	0	0	0	0	0	0	603	903	0
707	4	0	0	0	0	0	0	200	300	0	0	0	0	0	0	0	200	903	0	0	0	0	0	0	0	603	903	0
707	5	0	0	0	0	0	0	200	300	0	0	0	0	0	0	0	200	903	0	0	0	0	0	0	0	603	903	0
707	6	0	0	0	0	0	0	200	300	0	0	0	0	0	0	0	200	903	0	0	0	0	0	0	0	603	903	0
707	7	0	0	0	0	0	0	200	300	0	0	0	0	0	0	0	200	903	0	0	0	0	0	0	0	603	903	0
707	8	0	0	0	0	0	0	200	300	0	0	0	0	0	0	0	200	903	0	0	0	0	0	0	0	603	903	0
707	9	0	0	0	0	0	0	200	300	0	0	0	0	0	0	0	200	903	0	0	0	0	0	0	0	603	903	0
708	0	0	0	0	0	0	0	200	300	0	0	0	0	0	0	0	200	903	0	0	0	0	0	0	0	603	903	0
708	1	0	0	0	0	0	0	200	300	0	0	0	0	0	0	0	200	903	0	0	0	0	0	0	0	603	903	0
708	2	0	0	0	0	0	0	200	300	0	0	0	0	0	0	0	200	903	0	0	0	0	0	0	0	603	903	0
708	3	0	0	0	0	0	0	200	300	0	0	0	0	0	0	0	200	903	0	0	0	0	0	0	0	603	903	0
708	4	0	0	0	0	0	0	200	300	0	0	0	0	0	0	0	200	903	0	0	0	0	0	0	0	603	903	0
708	5	0	0	0	0	0	0	200	300	0	0	0	0	0	0	0	200	903	0	0	0	0	0	0	0	603	903	0
708	6	0	0	0	0	0	0	200	300	0	0	0	0	0	0	0	200	903	0	0	0	0	0	0	0	603	903	0
708	7	0	0	0	0	0	0	200	300	0	0	0	0	0	0	0	200	903	0	0	0	0	0	0	0	603	903	0
708	8	0	0	0	0	0	0	200	300	0	0	0	0	0	0	0	200	903	0	0	0	0	0	0	0	603	903	0
708	9	0	0	0	0	0	0	200	300	0	0	0	0	0	0	0	200	903	0	0	0	0	0	0	0	603	903	0
709	0	0	0	0	0	0	0	200	300	0	0	0	0	0	0	0	200	903	0	0	0	0	0	0	0	603	903	0
709	1	0	0	0	0	0	0	200	300	0	0	0	0	0	0	0	200	903	0	0	0	0	0	0	0	603	903	0
709	2	0	0	0	0	0	0	200	300	0	0	0	0	0	0	0	200	903	0	0	0	0	0	0	0	603	903	0
709	3	0	0	0	0	0	0	200	300	0	0	0	0	0	0	0	200	903	0	0	0	0	0	0	0	603	903	0
709	4	0	0	0	0	0	0	200	300	0	0	0	0	0	0	0	200	903	0	0	0	0	0	0	0	603	903	0
709	5	0	0	0	0	0	0	200	300	0	0	0	0	0	0	0	200	903	0	0	0	0	0	0	0	603	903	0
709	6	0	0	0	0	0	0	200	300	0	0	0	0	0	0	0	200	903	0	0	0	0	0	0	0	603	903	0
709	7	0	0	0	0	0	0	200	300	0	0	0	0	0	0	0	200	903	0	0	0	0	0	0	0	603	903	0
709	8	0	0	0	0	0	0	200	300	0	0	0	0	0	0	0	200	903	0	0	0	0	0	0	0	603	903	0
709	9	0	0	0	0	0	0	200	300	0	0	0	0	0	0	0	200	903	0	0	0	0	0	0	0	603	903	0
710	0	0	0	0	0	0	0	200	300	0	0	0	0	0	0	0	200	903	0	0	0	0	0	0	0	603	903	0
710	1	0	0	0	0	0	0	200	300	0	0	0	0	0	0	0	200	903	0	0	0	0	0	0	0	603	903	0
710	2	0	0	0	0	0	0	200	300	0	0	0	0	0	0	0	200	903	0	0	0	0	0	0	0	603	903	0
710	3	0	0	0	0	0	0	200	300	0	0	0	0	0	0	0	200	903	0	0	0	0	0	0	0	603	903	0
710	4	0	0	0	0	0	0	200	300	0	0	0	0	0	0	0	200	903	0	0	0	0	0	0	0	603	903	0
710	5	0	0	0	0	0	0	200	300	0	0	0	0	0	0	0	200	903	0	0	0	0	0	0	0	603	903	0
710	6	0	0	0	0	0	0	200	300	0	0	0	0	0	0	0	200	903	0	0	0	0	0	0	0	603	903	0
710	7	0	0	0	0	0	0	200	300	0	0	0	0	0	0	0	200	903	0	0	0	0	0	0	0	603	903	0
710	8	0	0	0	0	0	0	200	300	0	0	0	0	0	0	0	200	903	0	0	0	0	0	0	0	603	903	0
710	9	0	0	0	0	0	0	200	300	0	0	0	0	0	0	0	200	903	0	0	0	0	0	0	0	603	903	0
711	0	0	0	0	0	0	0	200	300	0	0	0	0	0	0	0	200	903	0	0	0	0	0	0	0	603	903	0
711	1	0	0	0	0	0	0	200	300	0	0	0	0	0	0	0	200	903	0	0	0	0	0	0	0	603	903	0
711	2	0	0	0	0	0	0	200	300	0	0	0	0	0	0	0	200	903	0	0	0	0	0	0	0	603	903	0
711	3	0	0	0	0	0	0	200	300	0	0	0	0	0	0	0	200	903	0	0	0	0	0	0	0	603	903	0
711	4	0	0	0	0	0	0	200	300	0	0	0	0	0	0	0	200	903	0	0	0	0	0	0	0	603	903	0
711	5	0	0	0	0	0	0	200	300	0	0	0	0	0	0	0	200	903	0	0	0	0	0	0	0	603	903	0
711	6	0	0	0	0	0	0	200	300	0	0	0	0	0	0	0	200	903	0	0	0	0	0	0	0	603	903	0
711	7	0	0	0	0	0	0	200	300	0	0	0	0	0	0	0	200	903	0	0	0	0	0	0	0	603	903	0
711	8	0	0	0	0	0	0	200	300	0	0	0	0	0	0	0	200	903	0	0	0	0	0	0	0	603	903	0
711	9	0	0	0	0	0	0	200	300	0	0	0	0	0	0	0	200	903	0	0	0	0	0	0	0	603	903	0
712	0	0	0	0	0	0	0	200	300	0	0	0	0	0	0	0	200	903	0	0	0	0	0	0	0	603	903	0
712	1	0	0	0	0	0	0	200	300	0	0	0	0	0	0	0	200	903	0	0	0	0	0	0	0	603	903	0
712	2	0	0	0	0	0	0	200	300	0	0	0	0	0	0	0	200	903	0	0	0	0	0	0	0	603	903	0
712	3	0	0	0	0	0	0	200	300	0	0	0	0	0	0	0	200	903	0	0	0	0	0	0	0	603	903	0
712	4	0	0	0	0	0	0	200	300	0	0	0	0	0	0	0	200	903	0	0	0	0	0	0	0	603	903	0
712	5	0	0	0	0	0	0	200	300	0	0	0	0	0	0	0	200	903	0	0	0	0	0	0	0	603	903	0
712	6	0	0	0	0	0	0	200	300	0	0	0	0	0	0	0	200	903	0	0	0	0	0	0	0	603	903	0
712	7	0	0	0	0	0	0	200	300	0	0	0	0	0	0	0	200	903	0	0	0	0	0	0	0	603	903	0
712	8	0	0	0	0	0	0	200	300	0	0	0	0	0	0	0	200	903	0	0	0	0	0	0	0	603	903	0
712	9	0	0	0	0	0	0	200	300	0	0	0	0	0	0	0	200	903	0	0	0	0	0	0	0	603	903	0
713	0	0	0	0	0	0	0	200	300	0	0	0	0	0	0	0	200	903	0	0	0	0	0	0	0	603	903	0
713	1	0	0	0	0	0	0	200	300	0	0	0	0	0	0	0	200	903	0	0	0	0	0	0	0	603	903	0
713	2	0	0	0	0	0	0	200	300	0	0	0	0	0	0	0	200	903	0	0	0	0	0	0	0	603	903	0
713	3	0	0	0	0	0	0	200	300	0	0	0	0	0	0	0	200	903	0	0	0	0	0	0	0	603	903	0
713	4	0	0	0	0	0	0	200	300	0	0	0	0	0	0	0	200	903	0	0	0	0	0	0	0	603	903	0
713	5	0	0	0	0	0	0	200	300	0	0	0	0	0	0	0	200	903	0	0	0	0	0	0	0	603	903	0
713	6	0	0	0	0	0	0	200	300	0	0	0	0	0	0	0	200	903	0	0	0	0	0	0	0	603	903	0
713	7	0	0	0	0	0	0	200	300	0	0	0	0	0	0	0	200	903	0	0	0	0	0	0	0	603	903	0
713	8	0	0	0	0	0	0	200	300	0	0	0	0	0	0	0	200	903	0	0	0	0	0	0	0	603	903	0
713	9	0	0	0	0	0	0	200	300	0	0	0	0	0	0	0	200	903	0	0	0	0	0	0	0	603	903	0
714	0	0	0	0	0	0	0	200	300	0	0	0	0	0	0	0	200	903	0	0	0	0	0	0	0	603	903	0
714	1	0	0	0	0	0	0	200	300	0	0	0	0	0	0	0	200	903	0	0	0	0	0	0	0	603	903	0
714	2	0	0	0	0	0	0	200	300	0	0	0	0	0	0	0	200	903	0	0	0	0	0	0	0	603	903	0
714	3	0	0	0	0	0	0	200	300	0	0	0	0	0	0	0	200	903	0	0	0	0	0	0	0	603	903	0
714	4	0	0	0	0	0	0	200	300	0	0	0	0	0	0	0	200	903	0	0	0	0	0	0	0	603	903	0
714	5	0	0	0	0	0	0	200	300	0	0	0	0	0	0	0	200	903	0	0	0	0	0	0	0	603	903	0
714	6	0	0	0	0	0	0	200	300	0	0	0	0	0	0	0	200	903	0	0	0	0	0	0	0	603	903	0
714	7	0	0	0	0	0	0	200	300	0	0	0	0	0	0	0	200	903	0	0	0	0	0	0	0	603	903	0
714	8	0	0	0	0	0	0	200	300	0	0	0	0	0	0	0	200	903	0	0	0	0	0	0	0	603	903	0
714	9	0	0	0	0	0	0	200	300	0	0	0	0	0	0	0	200	903	0	0	0	0	0	0	0	603	903	0
715	0	0	0	0	0	0	0	200	300	0	0	0	0	0	0	0	200	903	0	0	0	0	0	0	0	603	903	0
715	1	0	0	0	0	0	0	200	300	0	0	0	0	0	0	0	200	903	0	0	0	0	0	0	0	603	903	0
715	2	0	0	0	0	0	0	200	300	0	0	0	0	0	0	0	200	903	0	0	0	0	0	0	0	603	903	0
715	3	0	0	0	0	0	0	200	300	0	0	0	0	0	0	0	200	903	0	0	0	0	0	0	0	603	903	0
715	4	0	0	0	0	0	0	200	300	0	0	0	0	0	0	0	200	903	0	0	0	0	0	0	0	603	903	0
715	5	0	0	0	0	0	0	200	300	0	0	0	0	0	0	0	200	903	0	0	0	0	0	0	0	603	903	0
715	6	0	0	0	0	0	0	200	300	0	0	0	0	0	0	0	200	903	0	0	0	0	0	0	0	603	903	0
715	7	0	0	0	0	0	0	200	300	0	0	0	0	0	0	0	200	903	0	0	0	0	0	0	0	603	903	0
715	8	0	0	0	0	0	0	200	300	0	0	0	0	0	0	0	200	903	0	0	0	0	0	0	0	603	903	0
715	9	0	0	0	0	0	0	200	300	0	0	0	0	0	0	0	200	903	0	0	0	0	0	0	0	603	903	0
716	0	0	0	0	0	0	0	200	300	0	0	0	0	0	0	0	200	903	0	0	0	0	0	0	0	603	903	0
716	1	0	0	0	0	0	0	200	300	0	0	0	0	0	0	0	200	903	0	0	0	0	0	0	0	603	903	0
716	2	0	0	0	0	0	0	200	300	0	0	0	0	0	0	0	200	903	0	0	0	0	0	0	0	603	903	0
716	3	0	0	0	0	0	0	200	300	0	0	0	0	0	0	0	200	903	0	0	0	0	0	0	0	603	903	0
716	4	0	0	0	0	0	0	200	300	0	0	0	0	0	0	0	200	903	0	0	0	0	0	0	0	603	903	0
716	5	0	0	0	0	0	0	200	300	0	0	0	0	0	0	0	200	903	0	0	0	0	0	0	0	603	903	0
716	6	0	0	0	0	0	0	200	300	0	0	0	0	0	0	0	200	903	0	0	0	0	0	0	0	603	903	0
716	7	0	0	0	0	0	0	200	300	0	0	0	0	0	0	0	200	903	0	0	0	0	0	0	0	603	903	0
716	8	0	0	0	0	0	0	200	300	0	0	0	0	0	0	0	200	903	0	0	0	0	0	0	0	603	903	0
716	9	0	0	0	0	0	0	200	300	0	0	0	0	0	0	0	200	903	0	0	0	0	0	0	0	603	903	0
717	0	0	0	0	0	0	0	200	300	0	0	0	0	0	0	0	200	903	0	0	0	0	0	0	0	603	903	0
717	1	0	0	0	0	0	0	200	300	0	0	0	0	0	0	0	200	903	0	0	0	0	0	0	0	603	903	0
717	2	0	0	0	0	0	0	200	300	0	0	0	0	0	0	0	200	903	0	0	0	0	0	0	0	603	903	0
717	3	0	0	0	0	0	0	200	300	0	0	0	0	0	0	0	200	903	0	0	0	0	0	0	0	603	903	0
717	4	0	0	0	0	0	0	200	300	0	0	0	0	0	0	0	200	903	0	0	0	0	0	0	0	603	903	0
717	5	0	0	0	0	0	0	200	300	0	0	0	0	0	0	0	200	903	0	0	0	0	0	0	0	603	903	0
717	6	0	0	0	0	0	0	200	300	0	0	0	0	0	0	0	200	903	0	0	0	0	0	0	0	603	903	0
717	7	0	0	0	0	0	0	200	300	0	0	0	0	0	0	0	200	903	0	0	0	0	0	0	0	603	903	0
717	8	0	0	0	0	0	0	200	300	0	0	0	0	0	0	0	200	903	0	0	0	0	0	0	0	603	903	0
717	9	0	0	0	0	0	0	200	300	0	0	0	0	0	0	0	200	903	0	0	0	0	0	0	0	603	903	0
718	0	0	0	0	0	0	0	200	300	0	0	0	0	0	0	0	200	903	0	0	0	0	0	0	0	603	903	0
718	1	0	0	0	0	0	0	200	300	0	0	0	0	0	0	0	200	903	0	0	0	0	0	0	0	603	903	0
718	2	0	0	0	0	0	0	200	300	0	0	0	0	0	0	0	200	903	0	0	0	0	0	0	0	603	903	0
718	3	0	0	0	0	0	0	200	300	0	0	0	0	0	0	0	200	903	0	0	0	0	0	0	0	603	903	0
718	4	0	0	0	0	0	0	200	300	0	0	0	0	0	0	0	200	903	0	0	0	0	0	0	0	603	903	0
718	5	0	0	0	0	0	0	200	300	0	0	0	0	0	0	0	200	903	0	0	0	0	0	0	0	603	903	0
718	6	0	0	0	0	0	0	200	300	0	0	0	0	0	0	0	200	903	0	0	0	0	0	0	0	603	903	0
718	7	0	0	0	0	0	0	200	300	0	0	0	0	0	0	0	200	903	0	0	0	0	0	0	0	603	903	0
718	8	0	0	0	0	0	0	200	300	0	0	0	0	0	0	0	200	903	0	0	0	0	0	0	0	603	903	0
718	9	0	0	0	0	0	0	200	300	0	0	0	0	0	0	0	200	903	0	0	0	0	0	0	0	603	903	0
719	0	0	0	0	0	0	0	200	300	0	0	0	0	0	0	0	200	903	0	0	0	0	0	0	0	603	903	0
719	1	0	0	0	0	0	0	200	300	0	0	0	0	0	0	0	200	903	0	0	0	0	0	0	0	603	903	0
719	2	0	0	0	0	0	0	200	300	0	0	0	0	0	0	0	200	903	0	0	0	0	0	0	0	603	903	0
719	3	0	0	0	0	0	0	200	300	0	0	0	0	0	0	0	200	903	0	0	0	0	0	0	0	603	903	0
719	4	0	0	0	0	0	0	200	300	0	0	0	0	0	0	0	200	903	0	0	0	0	0	0	0	603	903	0
719	5	0	0	0	0	0	0	200	300	0	0	0	0	0	0	0	200	903	0	0	0	0	0	0	0	603	903	0
719	6	0	0	0	0	0	0	200	300	0	0	0	0	0	0	0	200	903	0	0	0	0	0	0	0	603	903	0
719	7	0	0	0	0	0	0	200	300	0	0	0	0	0	0	0	200	903	0	0	0	0	0	0	0	603	903	0
719	8	0	0	0	0	0	0	200	300	0	0	0	0	0	0	0	200	903	0	0	0	0	0	0	0	603	903	0
719	9	0	0	0	0	0	0	200	300	0	0	0	0	0	0	0	200	903	0	0	0	0	0	0	0	603	903	0
720	0	0	0	0	0	0	0	200	300	0	0	0	0	0	0	0	200	903	0	0	0	0	0	0	0	603	903	0
720	1	0	0	0	0	0	0	200	300	0	0	0	0	0	0	0	200	903	0	0	0	0	0	0	0	603	903	0
720	2	0	0	0	0	0	0	200	300	0	0	0	0	0	0	0	200	903	0	0	0	0	0	0	0	603	903	0
720	3	0	0	0	0	0	0	200	300	0	0	0	0	0	0	0	200	903	0	0	0	0	0	0	0	603	903	0
720	4	0	0	0	0	0	0	200	300	0	0	0	0	0	0	0	200	903	0	0	0	0	0	0	0	603	903	0
720	5	0	0	0	0	0	0	200	300	0	0	0	0	0	0	0	200	903	0	0	0	0	0	0	0	603	903	0
720	6	0	0	0	0	0	0	200	300	0	0	0	0	0	0	0	200	903	0	0	0	0	0	0	0	603	903	0
720	7	0	0	0	0	0	0	200	300	0	0	0	0	0	0	0	200	903	0	0	0	0	0	0	0	603	903	0
720	8	0	0	0	0	0	0	200	300	0	0	0	0	0	0	0	200	903	0	0	0	0	0	0	0	603	903	0
720	9	0	0	0	0	0	0	200	300	0	0	0	0	0	0	0	200	903	0	0	0	0	0	0	0	603	903	0
721	0	0	0	0	0	0	0	200	300	0	0	0	0	0	0	0	200	903	0	0	0	0	0	0	0	603	903	0
721	1	0	0	0	0	0	0	200	300	0	0	0	0	0	0	0	200	903	0	0	0	0	0	0	0	603	903	0
721	2	0	0	0	0	0	0	200	300	0	0	0	0	0	0	0	200	903	0	0	0	0	0	0	0	603	903	0
721	3	0	0	0	0	0	0	200	300	0	0	0	0	0	0	0	200	903	0	0	0	0	0	0	0	603	903	0
721	4	0	0	0	0	0	0	200	300	0	0	0	0	0	0	0	200	903	0	0	0	0	0	0	0	603	903	0
721	5	0	0	0	0	0	0	200	300	0	0	0	0	0	0	0	200	903	0	0	0	0	0	0	0	603	903	0
721	6	0	0	0	0	0	0	200	300	0	0	0	0	0	0	0	200	903	0	0	0	0	0	0	0	603	903	0
721	7	0	0	0	0	0	0	200	300	0	0	0	0	0	0	0	200	903	0	0	0	0	0	0	0	603	903	0
721	8	0	0	0	0	0	0	200	300	0	0	0	0	0	0	0	200	903	0	0	0	0	0	0	0	603	903	0
721	9	0	0	0	0	0	0	200	300	0	0	0	0	0	0	0	200	903	0	0	0	0	0	0	0	603	903	0
722	0	0	0	0	0	0	0	200	300	0	0	0	0	0	0	0	200	903	0	0	0	0	0	0	0	603	903	0
722	1	0	0	0	0	0	0	200	300	0	0	0	0	0	0	0	200	903	0	0	0	0	0	0	0	603	903	0
722	2	0	0	0	0	0	0	200	300	0	0	0	0	0	0	0	200	903	0	0	0	0	0	0	0	603	903	0
722	3	0	0	0	0	0	0	200	300	0	0	0	0	0	0	0	200	903	0	0	0	0	0	0	0	603	903	0
722	4	0	0	0	0	0	0	200	300	0	0	0	0	0	0	0	200	903	0	0	0	0	0	0	0	603	903	0
722	5	0	0	0	0	0	0	200	300	0	0	0	0	0	0	0	200	903	0	0	0	0	0	0	0	603	903	0
722	6	0	0	0	0	0	0	200	300	0	0	0	0	0	0	0	200	903	0	0	0	0	0	0	0	603	903	0
722	7	0	0	0	0	0	0	200	300	0	0	0	0	0	0	0	200	903	0	0	0	0	0	0	0	603	903	0
722	8	0	0	0	0	0	0	200	300	0	0	0	0	0	0	0	200	903	0	0	0	0	0	0	0	603	903	0
722	9	0	0	0	0	0	0	200	300	0	0	0	0	0	0	0	200	903	0	0	0	0	0	0	0	603	903	0
723	0	0	0	0	0	0	0	200	300	0	0	0	0	0	0	0	200	903	0	0	0	0	0	0	0	603	903	0
723	1	0	0	0	0	0	0	200	300	0	0	0	0	0	0	0	200	903	0	0	0	0	0	0	0	603	903	0
723	2	0	0	0	0	0	0	200	300	0	0	0	0	0	0	0	200	903	0	0	0	0	0	0	0	603	903	0
723	3	0	0	0	0	0	0	200	300	0	0	0	0	0	0	0	200	903	0	0	0	0	0	0	0	603	903	0
723	4	0	0	0	0	0	0	200	300	0	0	0	0	0	0	0	200	903	0	0	0	0	0	0	0	603	903	0
723	5	0	0	0	0	0	0	200	300	0	0	0	0	0	0	0	200	903	0	0	0	0	0	0	0	603	903	0
723	6	0	0	0	0	0	0	200	300	0	0	0	0	0	0	0	200	903	0	0	0	0	0	0	0	603	903	0
723	7	0	0	0	0	0	0	200	300	0	0	0	0	0	0	0	200	903	0	0	0	0	0	0	0	603	903	0
723	8	0	0	0	0	0	0	200	300	0	0	0	0	0	0	0	200	903	0	0	0	0	0	0	0	603	903	0
723	9	0	0	0	0	0	0	200	300	0	0	0	0	0	0	0	200	903	0	0	0	0	0	0	0	603	903	0
724	0	0	0	0	0	0	0	200	300	0	0	0	0	0	0	0	200	903	0	0	0	0	0	0	0	603	903	0
724	1	0	0	0	0	0	0	200	300	0	0	0	0	0	0	0	200	903	0	0	0	0	0	0	0	603	903	0
724	2	0	0	0	0	0	0	200	300	0	0	0	0	0	0	0	200	903	0	0	0	0	0	0	0	603	903	0
724	3	0	0	0	0	0	0	200	300	0	0	0	0	0	0	0	200	903	0	0	0	0	0	0	0	603	903	0
724	4	0	0	0	0	0	0	200	300	0	0	0	0	0	0	0	200	903	0	0	0	0	0	0	0	603	903	0
724	5	0	0	0	0	0	0	200	300	0	0	0	0	0	0	0	200	903	0	0	0	0	0	0	0	603	903	0
724	6	0	0	0	0	0	0	200	300	0	0	0	0	0	0	0	200	903	0	0	0	0	0	0	0	603	903	0
724	7	0	0	0	0	0	0	200	300	0	0	0	0	0	0	0	200	903	0	0	0	0	0	0	0	603	903	0
724	8	0	0	0	0	0	0	200	300	0	0	0	0	0	0	0	200	903	0	0	0	0	0	0	0	603	903	0
724	9	0	0	0	0	0	0	200	300	0	0	0	0	0	0	0	200	903	0	0	0	0	0	0	0	603	903	0
725	0	0	0	0	0	0	0	200	300	0	0	0	0	0	0	0	200	903	0	0	0	0	0	0	0	603	903	0
725	1	0	0	0	0	0	0	200	300	0	0	0	0	0	0	0	200	903	0	0	0	0	0	0	0	603	903	0
725	2	0	0	0	0	0	0	200	300	0	0	0	0	0	0	0	200	903	0	0	0	0	0	0	0	603	903	0
725	3	0	0	0	0	0	0	200	300	0	0	0	0	0	0	0	200	903	0	0	0	0	0	0	0	603	903	0
725	4	0	0	0	0	0	0	200	300	0	0	0	0	0	0	0	200	903	0	0	0	0	0	0	0	603	903	0
725	5	0	0	0	0	0	0	200	300	0	0	0	0	0	0	0	200	903	0	0	0	0	0	0	0	603	903	0
725	6	0	0	0	0	0	0	200	300	0	0	0	0	0	0	0	200	903	0	0	0	0	0	0	0	603	903	0
725	7	0	0	0	0	0	0	200	300	0	0	0	0	0	0	0	200	903	0	0	0	0	0	0	0	603	903	0
725	8	0	0	0	0	0	0	200	300	0	0	0	0	0	0	0	200	903	0	0	0	0	0	0	0	603	903	0
725	9	0	0	0	0	0	0	200	300	0	0	0	0	0	0	0	200	903	0	0	0	0	0	0	0	603	903	0
726	0	0	0	0	0	0	0	200	300	0	0	0	0	0	0	0	200	903	0	0	0	0	0	0	0	603	903	0
726	1	0	0	0	0	0	0	200	300	0	0	0	0	0	0	0	200	903	0	0	0	0	0	0	0	603	903	0
726	2	0	0	0	0	0	0	200	300	0	0	0	0	0	0	0	200	903	0	0	0	0	0	0	0	603	903	0
726	3	0	0	0	0	0	0	200	300	0	0	0	0	0	0	0	200	903	0	0	0	0	0	0	0	603	903	0
726	4	0	0	0	0	0	0	200	300	0	0	0	0	0	0	0	200	903	0	0	0	0	0	0	0	603	903	0
726	5	0	0	0	0	0	0	200	300	0	0	0	0	0	0	0	200	903	0	0	0	0	0	0	0	603	903	0
726	6	0	0	0	0	0	0	200	300	0	0	0	0	0	0	0	200	903	0	0	0	0	0	0	0	603	903	0
726	7	0	0	0	0	0	0	200	300	0	0	0	0	0	0	0	200	903	0	0	0	0	0	0	0	603	903	0
726	8	0	0	0	0	0	0	200	300	0	0	0	0	0	0	0	200	903	0	0	0	0	0	0	0	603	903	0
726	9	0	0	0	0	0	0	200	300	0	0	0	0	0	0	0	200	903	0	0	0	0	0	0	0	603	903	0
727	0	0	0	0	0	0	0	200	300	0	0	0	0	0	0	0	200	903	0	0	0	0	0	0	0	603	903	0
727	1	0	0	0	0	0	0	200	300	0	0	0	0	0	0	0	200	903	0	0	0	0	0	0	0	603	903	0
727	2	0	0	0	0	0	0	200	300	0	0	0	0	0	0	0	200	903	0	0	0	0	0	0	0	603	903	0
727	3	0	0	0	0	0	0	200	300	0	0	0	0	0	0	0	200	903	0	0	0	0	0	0	0	603	903	0
727	4	0	0	0	0	0	0	200	300	0	0	0	0	0	0	0	200	903	0	0	0	0	0	0	0	603	903	0
727	5	0	0	0	0	0	0	200	300	0	0	0	0	0	0	0	200	903	0	0	0	0	0	0	0	603	903	0
727	6	0	0	0	0	0	0	200	300	0	0	0	0	0	0	0	200	903	0	0	0	0	0	0	0	603	903	0
727	7	0	0	0	0	0	0	200	300	0	0	0	0	0	0	0	200	903	0	0	0	0	0	0	0	603	903	0
727	8	0	0	0	0	0	0	200	300	0	0	0	0	0	0	0	200	903	0	0	0	0	0	0	0	603	903	0
727	9	0	0	0	0	0	0	200	300	0	0	0	0	0	0	0	200	903	0	0	0	0	0	0	0	603	903	0
728	0	0	0	0	0	0	0	200	300	0	0	0	0	0	0	0	200	903	0	0	0	0	0	0	0	603	903	0
728	1	0	0	0	0	0	0	200	300	0	0	0	0	0	0	0	200	903	0	0	0	0	0	0	0	603	903	0
728	2	0	0	0	0	0	0	200	300	0	0	0	0	0	0	0	200	903	0	0	0	0	0	0	0	603	903	0
728	3	0	0	0	0	0	0	200	300	0	0	0	0	0	0	0	200	903	0	0	0	0	0	0	0	603	903	0
728	4	0	0	0	0	0	0	200	300	0	0	0	0	0	0	0	200	903	0	0	0	0	0	0	0	603	903	0
728	5	0	0	0	0	0	0	200	300	0	0	0	0	0	0	0	200	903	0	0	0	0	0	0	0	603	903	0
728	6	0	0	0	0	0	0	200	300	0	0	0	0	0	0	0	200	903	0	0	0	0	0	0	0	603	903	0
728	7	0	0	0	0	0	0	200	300	0	0	0	0	0	0	0	200	903	0	0	0	0	0	0	0	603	903	0
728	8	0	0	0	0	0	0	200	300	0	0	0	0	0	0	0	200	903	0	0	0	0	0	0	0	603	903	0
728	9	0	0	0	0	0	0	200	300	0	0	0	0	0	0	0	200	903	0	0	0	0	0	0	0	603	903	0
729	0	0	0	0	0	0	0	200	300	0	0	0	0	0	0	0	200	903	0	0	0	0	0	0	0	603	903	0
729	1	0	0	0	0	0	0	200	300	0	0	0	0	0	0	0	200	903	0	0	0	0	0	0	0	603	903	0
729	2	0	0	0	0	0	0	200	300	0	0	0	0	0	0	0	200	903	0	0	0	0	0	0	0	603	903	0
729	3	0	0	0	0	0	0	200	300	0	0	0	0	0	0	0	200	903	0	0	0	0	0	0	0	603	903	0
729	4	0	0	0	0	0	0	200	300	0	0	0	0	0	0	0	200	903	0	0	0	0	0	0	0	603	903	0
729	5	0	0	0	0	0	0	200	300	0	0	0	0	0	0	0	200	903	0	0	0	0	0	0	0	603	903	0
729	6	0	0	0	0	0	0	200	300	0	0	0	0	0	0	0	200	903	0	0	0	0	0	0	0	603	903	0
729	7	0	0	0	0	0	0	200	300	0	0	0	0	0	0	0	200	903	0	0	0	0	0	0	0	603	903	0
729	8	0	0	0	0	0	0	200	300	0	0	0	0	0	0	0	200	903	0	0	0	0	0	0	0	603	903	0
729	9	0	0	0	0	0	0	200	300	0	0	0	0	0	0	0	200	903	0	0	0	0	0	0	0	603	903	0
730	0	0	0	0	0	0	0	200	300	0	0	0	0	0	0	0	200	903	0	0	0	0	0	0	0	603	903	0
730	1	0	0	0	0	0	0	200	300	0	0	0	0	0	0	0	200	903	0	0	0	0	0	0	0	603	903	0
730	2	0	0	0	0	0	0	200	300	0	0	0	0	0	0	0	200	903	0	0	0	0	0	0	0	603	903	0
730	3	0	0	0	0	0	0	200	300	0	0	0	0	0	0	0	200	903	0	0	0	0	0	0	0	603	903	0
730	4	0	0	0	0	0	0	200	300	0	0	0	0	0	0	0	200	903	0	0	0	0	0	0	0	603	903	0
730	5	0	0	0	0	0	0	200	300	0	0	0	0	0	0	0	200	903	0	0	0	0	0	0	0	603	903	0
730	6	0	0	0	0	0	0	200	300	0	0	0	0	0	0	0	200	903	0	0	0	0	0	0	0	603	903	0
730	7	0	0	0	0	0	0	200	300	0	0	0	0	0	0	0	200	903	0	0	0	0	0	0	0	603	903	0
730	8	0	0	0	0	0	0	200	300	0	0	0	0	0	0	0	200	903	0	0	0	0	0	0	0	603	903	0
730	9	0	0	0	0	0	0	200	300	0	0	0	0	0	0	0	200	903	0	0	0	0	0	0	0	603	903	0
731	0	0	0	0	0	0	0	200	300	0	0	0	0	0	0	0	200	903	0	0	0	0	0	0	0	603	903	0
731	1	0	0	0	0	0	0	200	300	0	0	0	0	0	0	0	200	903	0	0	0	0	0	0	0	603	903	0
731	2	0	0	0	0	0	0	200	300	0	0	0	0	0	0	0	200	903	0	0	0	0	0	0	0	603	903	0
731	3	0	0	0	0	0	0	200	300	0	0	0	0	0	0	0	200	903	0	0	0	0	0	0	0	603	903	0
731	4	0	0	0	0	0	0	200	300	0	0	0	0	0	0	0	200	903	0	0	0	0	0	0	0	603	903	0
731	5	0	0	0	0	0	0	200	300	0	0	0	0	0	0	0	200	903	0	0	0	0	0	0	0	603	903	0
731	6	0	0	0	0	0	0	200	300	0	0	0	0	0	0	0	200	903	0	0	0	0	0	0	0	603	903	0
731	7	0	0	0	0	0	0	200	300	0	0	0	0	0	0	0	200	903	0	0	0	0	0	0	0	603	903	0
731	8	0	0	0	0	0	0	200	300	0	0	0	0	0	0	0	200	903	0	0	0	0	0	0	0	603	903	0
731	9	0	0	0	0	0	0	200	300	0	0	0	0	0	0	0	200	903	0	0	0	0	0	0	0	603	903	0
732	0	0	0	0	0	0	0	200	300	0	0	0	0	0	0	0	200	903	0	0	0	0	0	0	0	603	903	0
732	1	0	0	0	0	0	0	200	300	0	0	0	0	0	0	0	200	903	0	0	0	0	0	0	0	603	903	0
732	2	0	0	0	0	0	0	200	300	0	0	0	0	0	0	0	200	903	0	0	0	0	0	0	0	603	903	0
732	3	0	0	0	0	0	0	200	300	0	0	0	0	0	0	0	200	903	0	0	0	0	0	0	0	603	903	0
732	4	0	0	0	0	0	0	200	300	0	0	0	0	0	0	0	200	903	0	0	0	0	0	0	0	603	903	0
732	5	0	0	0	0	0	0	200	300	0	0	0	0	0	0	0	200	903	0	0	0	0	0	0	0	603	903	0
732	6	0	0	0	0	0	0	200	300	0	0	0	0	0	0	0	200	903	0	0	0	0	0	0	0	603	903	0
732	7	0	0	0	0	0	0	200	300	0	0	0	0	0	0	0	200	903	0	0	0	0	0	0	0	603	903	0
732	8	0	0	0	0	0	0	200	300	0	0	0	0	0	0	0	200	903	0	0	0	0	0	0	0	603	903	0
732	9	0	0	0	0	0	0	200	300	0	0	0	0	0	0	0	200	903	0	0	0	0	0	0	0	603	903	0
733	0	0	0	0	0	0	0	200	300	0	0	0	0	0	0	0	200	903	0	0	0	0	0	0	0	603	903	0
733	1	0	0	0	0	0	0	200	300	0	0	0	0	0	0	0	200	903	0	0	0	0	0	0	0	603	903	0
733	2	0	0	0	0	0	0	200	300	0	0	0	0	0	0	0	200	903	0	0	0	0	0	0	0	603	903	0
733	3	0	0	0	0	0	0	200	300	0	0	0	0	0	0	0	200	903	0	0	0	0	0	0	0	603	903	0
733	4	0	0	0	0	0	0	200	300	0	0	0	0	0	0	0	200	903	0	0	0	0	0	0	0	603	903	0
733	5	0	0	0	0	0	0	200	300	0	0	0	0	0	0	0	200	903	0	0	0	0	0	0	0	603	903	0
733	6	0	0	0	0	0	0	200	300	0	0	0	0	0	0	0	200	903	0	0	0	0	0	0	0	603	903	0
733	7	0	0	0	0	0	0	200	300	0	0	0	0	0	0	0	200	903	0	0	0	0	0	0	0	603	903	0
733	8	0	0	0	0	0	0	200	300	0	0	0	0	0	0	0	200	903	0	0	0	0	0	0	0	603	903	0
733	9	0	0	0	0	0	0	200	300	0	0	0	0	0	0	0	200	903	0	0	0	0	0	0	0	603	903	0
734	0	0	0	0	0	0	0	200	300	0	0	0	0	0	0	0	200	903	0	0	0	0	0	0	0	603	903	0
734	1	0	0	0	0	0	0	200	300	0	0	0	0	0	0	0	200	903	0	0	0	0	0	0	0	603	903	0
734	2	0	0	0	0	0	0	200	300	0	0	0	0	0	0	0	200	903	0	0	0	0	0	0	0	603	903	0
734	3	0	0	0	0	0	0	200	300	0	0	0	0	0	0	0	200	903	0	0	0	0	0	0	0	603	903	0
734	4	0	0	0	0	0	0	200	300	0	0	0	0	0	0	0	200	903	0	0	0	0	0	0	0	603	903	0
734	5	0	0	0	0	0	0	200	300	0	0	0	0	0	0	0	200	903	0	0	0	0	0	0	0	603	903	0
734	6	0	0	0	0	0	0	200	300	0	0	0	0	0	0	0	200	903	0	0	0	0	0	0	0	603	903	0
734	7	0	0	0	0	0	0	200	300	0	0	0	0	0	0	0	200	903	0	0	0	0	0	0	0	603	903	0
734	8	0	0	0	0	0	0	200	300	0	0	0	0	0	0	0	200	903	0	0	0	0	0	0	0	603	903	0
734	9	0	0	0	0	0	0	200	300	0	0	0	0	0	0	0	200	903	0	0	0	0	0	0	0	603	903	0
735	0	0	0	0	0	0	0	200	300	0	0	0	0	0	0	0	200	903	0	0	0	0	0	0	0	603	903	0
735	1	0	0	0	0	0	0	200	300	0	0	0	0	0	0	0	200	903	0	0	0	0	0	0	0	603	903	0
735	2	0	0	0	0	0	0	200	300	0	0	0	0	0	0	0	200	903	0	0	0	0	0	0	0	603	903	0
735	3	0	0	0	0	0	0	200	300	0	0	0	0	0	0	0	200	903	0	0	0	0	0	0	0	603	903	0
735	4	0	0	0	0	0	0	200	300	0	0	0	0	0	0	0	200	903	0	0	0	0	0	0	0	603	903	0
735	5	0	0	0	0	0	0	200	300	0	0	0	0	0	0	0	200	903	0	0	0	0	0	0	0	603	903	0
735	6	0	0	0	0	0	0	200	300	0	0	0	0	0	0	0	200	903	0	0	0	0	0	0	0	603	903	0
735	7	0	0	0	0	0	0	200	300	0	0	0	0	0	0	0	200	903	0	0	0	0	0	0	0	603	903	0
735	8	0	0	0	0	0	0	200	300	0	0	0	0	0	0	0	200	903	0	0	0	0	0	0	0	603	903	0
735	9	0	0	0	0	0	0	200	300	0	0	0	0	0	0	0	200	903	0	0	0	0	0	0	0	603	903	0
736	0	0	0	0	0	0	0	200	300	0	0	0	0	0	0	0	200	903	0	0	0	0	0	0	0	603	903	0
736	1	0	0	0	0	0	0	200	300	0	0	0	0	0	0	0	200	903	0	0	0	0	0	0	0	603	903	0
736	2	0	0	0	0	0	0	200	300	0	0	0	0	0	0	0	200	903	0	0	0	0	0	0	0	603	903	0
736	3	0	0	0	0	0	0	200	300	0	0	0	0	0	0	0	200	903	0	0	0	0	0	0	0	603	903	0
736	4	0	0	0	0	0	0	200	300	0	0	0	0	0	0	0	200	903	0	0	0	0	0	0	0	603	903	0
736	5	0	0	0	0	0	0	200	300	0	0	0	0	0	0	0	200	903	0	0	0	0	0	0	0	603	903	0
736	6	0	0	0	0	0	0	200	300	0	0	0	0	0	0	0	200	903	0	0	0	0	0	0	0	603	903	0
736	7	0	0	0	0	0	0	200	300	0	0	0	0	0	0	0	200	903	0	0	0	0	0	0	0	603	903	0
736	8	0	0	0	0	0	0	200	300	0	0	0	0	0	0	0	200	903	0	0	0	0	0	0	0	603	903	0
736	9	0	0	0	0	0	0	200	300	0	0	0	0	0	0	0	200	903	0	0	0	0	0	0	0	603	903	0
737	0	0	0	0	0	0	0	200	300	0	0	0	0	0	0	0	200	903	0	0	0	0	0	0	0	603	903	0
737	1	0	0	0	0	0	0	200	300	0	0	0	0	0	0	0	200	903	0	0	0	0	0	0	0	603	903	0
737	2	0	0	0	0	0	0	200	300	0	0	0	0	0	0	0	200	903	0	0	0	0	0	0	0	603	903	0
737	3	0	0	0	0	0	0	200	300	0	0	0	0	0	0	0	200	903	0	0	0	0	0	0	0	603	903	0
737	4	0	0	0	0	0	0	200	300	0	0	0	0	0	0	0	200	903	0	0	0	0	0	0	0	603	903	0
737	5	0	0	0	0	0	0	200	300	0	0	0	0	0	0	0	200	903	0	0	0	0	0	0	0	603	903	0
737	6	0	0	0	0	0	0	200	300	0	0	0	0	0	0	0	200	903	0	0	0	0	0	0	0	603	903	0
737	7	0	0	0	0	0	0	200	300	0	0	0	0	0	0	0	200	903	0	0	0	0	0	0	0	603	903	0
737	8	0	0	0	0	0	0	200	300	0	0	0	0	0	0	0	200	903	0	0	0	0	0	0	0	603	903	0
737	9	0	0	0	0	0	0	200	300	0	0	0	0	0	0	0	200	903	0	0	0	0	0	0	0	603	903	0
738	0	0	0	0	0	0	0	200	300	0	0	0	0	0	0	0	200	903	0	0	0	0	0	0	0	603	903	0
738	1	0	0	0	0	0	0	200	300	0	0	0	0	0	0	0	200	903	0	0	0	0	0	0	0	603	903	0
738	2	0	0	0	0	0	0	200	300	0	0	0	0	0	0	0	200	903	0	0	0	0	0	0	0	603	903	0
738	3	0	0	0	0	0	0	200	300	0	0	0	0	0	0	0	200	903	0	0	0	0	0	0	0	603	903	0
738	4	0	0	0	0	0	0	200	300	0	0	0	0	0	0	0	200	903	0	0	0	0	0	0	0	603	903	0
738	5	0	0	0	0	0	0	200	300	0	0	0	0	0	0	0	200	903	0	0	0	0	0	0	0	603	903	0
738	6	0	0	0	0	0	0	200	300	0	0	0	0	0	0	0	200	903	0	0	0	0	0	0	0	603	903	0
738	7	0	0	0	0	0	0	200	300	0	0	0	0	0	0	0	200	903	0	0	0	0	0	0	0	603	903	0
738	8	0	0	0	0	0	0	200	300	0	0	0	0	0	0	0	200	903	0	0	0	0	0	0	0	603	903	0
738	9	0	0	0	0	0	0	200	300	0	0	0	0	0	0	0	200	903	0	0	0	0	0	0	0	603	903	0
739	0	0	0	0	0	0	0	200	300	0	0	0	0	0	0	0	200	903	0	0	0	0	0	0	0	603	903	0
739	1	0	0	0	0	0	0	200	300	0	0	0	0	0	0	0	200	903	0	0	0	0	0	0	0	603	903	0
739	2	0	0	0	0	0	0	200	300	0	0	0	0	0	0	0	200	903	0	0	0	0	0	0	0	603	903	0
739	3	0	0	0	0	0	0	200	300	0	0	0	0	0	0	0	200	903	0	0	0	0	0	0	0	603	903	0
739	4	0	0	0	0	0	0	200	300	0	0	0	0	0	0	0	200	903	0	0	0	0	0	0	0	603	903	0
739	5	0	0	0	0	0	0	200	300	0	0	0	0	0	0	0	200	903	0	0	0	0	0	0	0	603	903	0
739	6	0	0	0	0	0	0	200	300	0	0	0	0	0	0	0	200	903	0	0	0	0	0	0	0	603	903	0
739	7	0	0	0	0	0	0	200	300	0	0	0	0	0	0	0	200	903	0	0	0	0	0	0	0	603	903	0
739	8	0	0	0	0	0	0	200	300	0	0	0	0	0	0	0	200	903	0	0	0	0	0	0	0	603	903	0
739	9	0	0	0	0	0	0	200	300	0	0	0	0	0	0	0	200	903	0	0	0	0	0	0	0	603	903	0
740	0	0	0	0	0	0	0	200	300	0	0	0	0	0	0	0	200	903	0	0	0	0	0	0	0	603	903	0
740	1	0	0	0	0	0	0	200	300	0	0	0	0	0	0	0	200	903	0	0	0	0	0	0	0	603	903	0
740	2	0	0	0	0	0	0	200	300	0	0	0	0	0	0	0	200	903	0	0	0	0	0	0	0	603	903	0
740	3	0	0	0	0	0	0	200	300	0	0	0	0	0	0	0	200	903	0	0	0	0	0	0	0	603	903	0
740	4	0	0	0	0	0	0	200	300	0	0	0	0	0	0	0	200	903	0	0	0	0	0	0	0	603	903	0
740	5	0	0	0	0	0	0	200	300	0	0	0	0	0	0	0	200	903	0	0	0	0	0	0	0	603	903	0
740	6	0	0	0	0	0	0	200	300	0	0	0	0	0	0	0	200	903	0	0	0	0	0	0	0	603	903	0
740	7	0	0	0	0	0	0	200	300	0	0	0	0	0	0	0	200	903	0	0	0	0	0	0	0	603	903	0
740	8	0	0	0	0	0	0	200	300	0	0	0	0	0	0	0	200	903	0	0	0	0	0	0	0	603	903	0
740	9	0	0	0	0	0	0	200	300	0	0	0	0	0	0	0	200	903	0	0	0	0	0	0	0	603	903	0
741	0	0	0	0	0	0	0	200	300	0	0	0	0	0	0	0	200	903	0	0	0	0	0	0	0	603	903	0
741	1	0	0	0	0	0	0	200	300	0	0	0	0	0	0	0	200	903	0	0	0	0	0	0	0	603	903	0
741	2	0	0	0	0	0	0	200	300	0	0	0	0	0	0	0	200	903	0	0	0	0	0	0	0	603	903	0
741	3	0	0	0	0	0	0	200	300	0	0	0	0	0	0	0	200	903	0	0	0	0	0	0	0	603	903	0
741	4	0	0	0	0	0	0	200	300	0	0	0	0	0	0	0	200	903	0	0	0	0	0	0	0	603	903	0
741	5	0	0	0	0	0	0	200	300	0	0	0	0	0	0	0	200	903	0	0	0	0	0	0	0	603	903	0
741	6	0	0	0	0	0	0	200	300	0	0	0	0	0	0	0	200	903	0	0	0	0	0	0	0	603	903	0
741	7	0	0	0	0	0	0	200	300	0	0	0	0	0	0	0	200	903	0	0	0	0	0	0	0	603	903	0
741	8	0	0	0	0	0	0	200	300	0	0	0	0	0	0	0	200	903	0	0	0	0	0	0	0	603	903	0
741	9	0	0	0	0	0	0	200	300	0	0	0	0	0	0	0	200	903	0	0	0	0	0	0	0	603	903	0
742	0	0	0	0	0	0	0	200	300	0	0	0	0	0	0	0	200	903	0	0	0	0	0	0	0	603	903	0
742	1	0	0	0	0	0	0	200	300	0	0	0	0	0	0	0	200	903	0	0	0	0	0	0	0	603	903	0
742	2	0	0	0	0	0	0	200	300	0	0	0	0	0	0	0	200	903	0	0	0	0	0	0	0	603	903	0
742	3	0	0	0	0	0	0	200	300	0	0	0	0	0	0	0	200	903	0	0	0	0	0	0	0	603	903	0
742	4	0	0	0	0	0	0	200	300	0	0	0	0	0	0	0	200	903	0	0	0	0	0	0	0	603	903	0
742	5	0	0	0	0	0	0	200	300	0	0	0	0	0	0	0	200	903	0	0	0	0	0	0	0	603	903	0
742	6	0	0	0	0	0	0	200	300	0	0	0	0	0	0	0	200	903	0	0	0	0	0	0	0	603	903	0
742	7	0	0	0	0	0	0	200	300	0	0	0	0	0	0	0	200	903	0	0	0	0	0	0	0	603	903	0
742	8	0	0	0	0	0	0	200	300	0	0	0	0	0	0	0	200	903	0	0	0	0	0	0	0	603	903	0
742	9	0	0	0	0	0	0	200	300	0	0	0	0	0	0	0	200	903	0	0	0	0	0	0	0	603	903	0
743	0	0	0	0	0	0	0	200	300	0	0	0	0	0	0	0	200	903	0	0	0	0	0	0	0	603	903	0
743	1	0	0	0	0	0	0	200	300	0	0	0	0	0	0	0	200	903	0	0	0	0	0	0	0	603	903	0
743	2	0	0	0	0	0	0	200	300	0	0	0	0	0	0	0	200	903	0	0	0	0	0	0	0	603	903	0
743	3	0	0	0	0	0	0	200	300	0	0	0	0	0	0	0	200	903	0	0	0	0	0	0	0	603	903	0
743	4	0	0	0	0	0	0	200	300	0	0	0	0	0	0	0	200	903	0	0	0	0	0	0	0	603	903	0
743	5	0	0	0	0	0	0	200	300	0	0	0	0	0	0	0	200	903	0	0	0	0	0	0	0	603	903	0
743	6	0	0	0	0	0	0	200	300	0	0	0	0	0	0	0	200	903	0	0	0	0	0	0	0	603	903	0
743	7	0	0	0	0	0	0	200	300	0	0	0	0	0	0	0	200	903	0	0	0	0	0	0	0	603	903	0
743	8	0	0	0	0	0	0	200	300	0	0	0	0	0	0	0	200	903	0	0	0	0	0	0	0	603	903	0
743	9	0	0	0	0	0	0	200	300	0	0	0	0	0	0	0	200	903	0	0	0	0	0	0	0	603	903	0
744	0	0	0	0	0	0	0	200	300	0	0	0	0	0	0	0	200	903	0	0	0	0	0	0	0	603	903	0
744	1	0	0	0	0	0	0	200	300	0	0	0	0	0	0	0	200	903	0	0	0	0	0	0	0	603	903	0
744	2	0	0	0	0	0	0	200	300	0	0	0	0	0	0	0	200	903	0	0	0	0	0	0	0	603	903	0
744	3	0	0	0	0	0	0	200	300	0	0	0	0	0	0	0	200	903	0	0	0	0	0	0	0	603	903	0
744	4	0	0	0	0	0	0	200	300	0	0	0	0	0	0	0	200	903	0	0	0	0	0	0	0	603	903	0
744	5	0	0	0	0	0	0	200	300	0	0	0	0	0	0	0	200	903	0	0	0	0	0	0	0	603	903	0
744	6	0	0	0	0	0	0	200	300	0	0	0	0	0	0	0	200	903	0	0	0	0	0	0	0	603	903	0
744	7	0	0	0	0	0	0	200	300	0	0	0	0	0	0	0	200	903	0	0	0	0	0	0	0	603	903	0
744	8	0	0	0	0	0	0	200	300	0	0	0	0	0	0	0	200	903	0	0	0	0	0	0	0	603	903	0
744	9	0	0	0	0	0	0	200	300	0	0	0	0	0	0	0	200	903	0	0	0	0	0	0	0	603	903	0
745	0	0	0	0	0	0	0	200	300	0	0	0	0	0	0	0	200	903	0	0	0	0	0	0	0	603	903	0
745	1	0	0	0	0	0	0	200	300	0	0	0	0	0	0	0	200	903	0	0	0	0	0	0	0	603	903	0
745	2	0	0	0	0	0	0	200	300	0	0	0	0	0	0	0	200	903	0	0	0	0	0	0	0	603	903	0
745	3	0	0	0	0	0	0	200	300	0	0	0	0	0	0	0	200	903	0	0	0	0	0	0	0	603	903	0
745	4	0	0	0	0	0	0	200	300	0	0	0	0	0	0	0	200	903	0	0	0	0	0	0	0	603	903	0
745	5	0	0	0	0	0	0	200	300	0	0	0	0	0	0	0	200	903	0	0	0	0	0	0	0	603	903	0
745	6	0	0	0	0	0	0	200	300	0	0	0	0	0	0	0	200	903	0	0	0	0	0	0	0	603	903	0
745	7	0	0	0	0	0	0	200	300	0	0	0	0	0	0	0	200	903	0	0	0	0	0	0	0	603	903	0
745	8	0	0	0	0	0	0	200	300	0	0	0	0	0	0	0	200	903	0	0	0	0	0	0	0	603	903	0
745	9	0	0	0	0	0	0	200	300	0	0	0	0	0	0	0	200	903	0	0	0	0	0	0	0	603	903	0
746	0	0	0	0	0	0	0	200	300	0	0	0	0	0	0	0	200	903	0	0	0	0	0	0	0	603	903	0
746	1	0	0	0	0	0	0	200	300	0	0	0	0	0	0	0	200	903	0	0	0	0	0	0	0	603	903	0
746	2	0	0	0	0	0	0	200	300	0	0	0	0	0	0	0	200	903	0	0	0	0	0	0	0	603	903	0
746	3	0	0	0	0	0	0	200	300	0	0	0	0	0	0	0	200	903	0	0	0	0	0	0	0	603	903	0
746	4	0	0	0	0	0	0	200	300	0	0	0	0	0	0	0	200	903	0	0	0	0	0	0	0	603	903	0
746	5	0	0	0	0	0	0	200	300	0	0	0	0	0	0	0	200	903	0	0	0	0	0	0	0	603	903	0
746	6	0	0	0	0	0	0	200	300	0	0	0	0	0	0	0	200	903	0	0	0	0	0	0	0	603	903	0
746	7	0	0	0	0	0	0	200	300	0	0	0	0	0	0	0	200	903	0	0	0	0	0	0	0	603	903	0
746	8	0	0	0	0	0	0	200	300	0	0	0	0	0	0	0	200	903	0	0	0	0	0	0	0	603	903	0
746	9	0	0	0	0	0	0	200	300	0	0	0	0	0	0	0	200	903	0	0	0	0	0	0	0	603	903	0
747	0	0	0	0	0	0	0	200	300	0	0	0	0	0	0	0	200	903	0	0	0	0	0	0	0	603	903	0
747	1	0	0	0	0	0	0	200	300	0	0	0	0	0	0	0	200	903	0	0	0	0	0	0	0	603	903	0
747	2	0	0	0	0	0	0	200	300	0	0	0	0	0	0	0	200	903	0	0	0	0	0	0	0	603	903	0
747	3	0	0	0	0	0	0	200	300	0	0	0	0	0	0	0	200	903	0	0	0	0	0	0	0	603	903	0
747	4	0	0	0	0	0	0	200	300	0	0	0	0	0	0	0	200	903	0	0	0	0	0	0	0	603	903	0
747	5	0	0	0	0	0	0	200	300	0	0	0	0	0	0	0	200	903	0	0	0	0	0	0	0	603	903	0
747	6	0	0	0	0	0	0	200	300	0	0	0	0	0	0	0	200	903	0	0	0	0	0	0	0	603	903	0
747	7	0	0	0	0	0	0	200	300	0	0	0	0	0	0	0	200	903	0	0	0	0	0	0	0	603	903	0
747	8	0	0	0	0	0	0	200	300	0	0	0	0	0	0	0	200	903	0	0	0	0	0	0	0	603	903	0
747	9	0	0	0	0	0	0	200	300	0	0	0	0	0	0	0	200	903	0	0	0	0	0	0	0	603	903	0
748	0	0	0	0	0	0	0	200	300	0	0	0	0	0	0	0	200	903	0	0	0	0	0	0	0	603	903	0
748	1	0	0	0	0	0	0	200	300	0	0	0	0	0	0	0	200	903	0	0	0	0	0	0	0	603	903	0
748	2	0	0	0	0	0	0	200	300	0	0	0	0	0	0	0	200	903	0	0	0	0	0	0	0	603	903	0
748	3	0	0	0	0	0	0	200	300	0	0	0	0	0	0	0	200	903	0	0	0	0	0	0	0	603	903	0
748	4	0	0	0	0	0	0	200	300	0	0	0	0	0	0	0	200	903	0	0	0	0	0	0	0	603	903	0
748	5	0	0	0	0	0	0	200	300	0	0	0	0	0	0	0	200	903	0	0	0	0	0	0	0	603	903	0
748	6	0	0	0	0	0	0	200	300	0	0	0	0	0	0	0	200	903	0	0	0	0	0	0	0	603	903	0
748	7	0	0	0	0	0	0	200	300	0	0	0	0	0	0	0	200	903	0	0	0	0	0	0	0	603	903	0
748	8	0	0	0	0	0	0	200	300	0	0	0	0	0	0	0	200	903	0	0	0	0	0	0	0	603	903	0
748	9	0	0	0	0	0	0	200	300	0	0	0	0	0	0	0	200	903	0	0	0	0	0	0	0	603	903	0
749	0	0	0	0	0	0	0	200	300	0	0	0	0	0	0	0	200	903	0	0	0	0	0	0	0	603	903	0
749	1	0	0	0	0	0	0	200	300	0	0	0	0	0	0	0	200	903	0	0	0	0	0	0	0	603	903	0
749	2	0	0	0	0	0	0	200	300	0	0	0	0	0	0	0	200	903	0	0	0	0	0	0	0	603	903	0
749	3	0	0	0	0	0	0	200	300	0	0	0	0	0	0	0	200	903	0	0	0	0	0	0	0	603	903	0
749	4	0	0	0	0	0	0	200	300	0	0	0	0	0	0	0	200	903	0	0	0	0	0	0	0	603	903	0
749	5	0	0	0	0	0	0	200	300	0	0	0	0	0	0	0	200	903	0	0	0	0	0	0	0	603	903	0
749	6	0	0	0	0	0	0	200	300	0	0	0	0	0	0	0	200	903	0	0	0	0	0	0	0	603	903	0
749	7	0	0	0	0	0	0	200	300	0	0	0	0	0	0	0	200	903	0	0	0	0	0	0	0	603	903	0
749	8	0	0	0	0	0	0	200	300	0	0	0	0	0	0	0	200	903	0	0	0	0	0	0	0	603	903	0
749	9	0	0	0	0	0	0	200	300	0	0	0	0	0	0	0	200	903	0	0	0	0	0	0	0	603	903	0
750	0	0	0	0	0	0	0	200	300	0	0	0	0	0	0	0	200	903	0	0	0	0	0	0	0	603	903	0
750	1	0	0	0	0	0	0	200	300	0	0	0	0	0	0	0	200	903	0	0	0	0	0	0	0	603	903	0
750	2	0	0	0	0	0	0	200	300	0	0	0	0	0	0	0	200	903	0	0	0	0	0	0	0	603	903	0
750	3	0	0	0	0	0	0	200	300	0	0	0	0	0	0	0	200	903	0	0	0	0	0	0	0	603	903	0
750	4	0	0	0	0	0	0	200	300	0	0	0	0	0	0	0	200	903	0	0	0	0	0	0	0	603	903	0
750	5	0	0	0	0	0	0	200	300	0	0	0	0	0	0	0	200	903	0	0	0	0	0	0	0	603	903	0
750	6	0	0	0	0	0	0	200	300	0	0	0	0	0	0	0	200	903	0	0	0	0	0	0	0	603	903	0
750	7	0	0	0	0	0	0	200	300	0	0	0	0	0	0	0	200	903	0	0	0	0	0	0	0	603	903	0
750	8	0	0	0	0	0	0	200	300	0	0	0	0	0	0	0	200	903	0	0	0	0	0	0	0	603	903	0
750	9	0	0	0	0	0	0	200	300	0	0	0	0	0	0	0	200	903	0	0	0	0	0	0	0	603	903	0
751	0	0	0	0	0	0	0	200	300	0	0	0	0	0	0	0	200	903	0	0	0	0	0	0	0	603	903	0
751	1	0	0	0	0	0	0	200	300	0	0	0	0	0	0	0	200	903	0	0	0	0	0	0	0	603	903	0
751	2	0	0	0	0	0	0	200	300	0	0	0	0	0	0	0	200	903	0	0	0	0	0	0	0	603	903	0
751	3	0	0	0	0	0	0	200	300	0	0	0	0	0	0	0	200	903	0	0	0	0	0	0	0	603	903	0
751	4	0	0	0	0	0	0	200	300	0	0	0	0	0	0	0	200	903	0	0	0	0	0	0	0	603	903	0
751	5	0	0	0	0	0	0	200	300	0	0	0	0	0	0	0	200	903	0	0	0	0	0	0	0	603	903	0
751	6	0	0	0	0	0	0	200	300	0	0	0	0	0	0	0	200	903	0	0	0	0	0	0	0	603	903	0
751	7	0	0	0	0	0	0	200	300	0	0	0	0	0	0	0	200	903	0	0	0	0	0	0	0	603	903	0
751	8	0	0	0	0	0	0	200	300	0	0	0	0	0	0	0	200	903	0	0	0	0	0	0	0	603	903	0
751	9	0	0	0	0	0	0	200	300	0	0	0	0	0	0	0	200	903	0	0	0	0	0	0	0	603	903	0
752	0	0	0	0	0	0	0	200	300	0	0	0	0	0	0	0	200	903	0	0	0	0	0	0	0	603	903	0
752	1	0	0	0	0	0	0	200	300	0	0	0	0	0	0	0	200	903	0	0	0	0	0	0	0	603	903	0
752	2	0	0	0	0	0	0	200	300	0	0	0	0	0	0	0	200	903	0	0	0	0	0	0	0	603	903	0
752	3	0	0	0	0	0	0	200	300	0	0	0	0	0	0	0	200	903	0	0	0	0	0	0	0	603	903	0
752	4	0	0	0	0	0	0	200	300	0	0	0	0	0	0	0	200	903	0	0	0	0	0	0	0	603	903	0
752	5	0	0	0	0	0	0	200	300	0	0	0	0	0	0	0	200	903	0	0	0	0	0	0	0	603	903	0
752	6	0	0	0	0	0	0	200	300	0	0	0	0	0	0	0	200	903	0	0	0	0	0	0	0	603	903	0
752	7	0	0	0	0	0	0	200	300	0	0	0	0	0	0	0	200	903	0	0	0	0	0	0	0	603	903	0
752	8	0	0	0	0	0	0	200	300	0	0	0	0	0	0	0	200	903	0	0	0	0	0	0	0	603	903	0
752	9	0	0	0	0	0	0	200	300	0	0	0	0	0	0	0	200	903	0	0	0	0	0	0	0	603	903	0
753	0	0	0	0	0	0	0	200	300	0	0	0	0	0	0	0	200	903	0	0	0	0	0	0	0	603	903	0
753	1	0	0	0	0	0	0	200	300	0	0	0	0	0	0	0	200	903	0	0	0	0	0	0	0	603	903	0
753	2	0	0	0	0	0	0	200	300	0	0	0	0	0	0	0	200	903	0	0	0	0	0	0	0	603	903	0
753	3	0	0	0	0	0	0	200	300	0	0	0	0	0	0	0	200	903	0	0	0	0	0	0	0	603	903	0
753	4	0	0	0	0	0	0	200	300	0	0	0	0	0	0	0	200	903	0	0	0	0	0	0	0	603	903	0
753	5	0	0	0	0	0	0	200	300	0	0	0	0	0	0	0	200	903	0	0	0	0	0	0	0	603	903	0
753	6	0	0	0	0	0	0	200	300	0	0	0	0	0	0	0	200	903	0	0	0	0	0	0	0	603	903	0
753	7	0	0	0	0	0	0	200	300	0	0	0	0	0	0	0	200	903	0	0	0	0	0	0	0	603	903	0
753	8	0	0	0	0	0	0	200	300	0	0	0	0	0	0	0	200	903	0	0	0	0	0	0	0	603	903	0
753	9	0	0	0	0	0	0	200	300	0	0	0	0	0	0	0	200	903	0	0	0	0	0	0	0	603	903	0
754	0	0	0	0	0	0	0	200	300	0	0	0	0	0	0	0	200	903	0	0	0	0	0	0	0	603	903	0
754	1	0	0	0	0	0	0	200	300	0	0	0	0	0	0	0	200	903	0	0	0	0	0	0	0	603	903	0
754	2	0	0	0	0	0	0	200	300	0	0	0	0	0	0	0	200	903	0	0	0	0	0	0	0	603	903	0
754	3	0	0	0	0	0	0	200	300	0	0	0	0	0	0	0	200	903	0	0	0	0	0	0	0	603	903	0
754	4	0	0	0	0	0	0	200	300	0	0	0	0	0	0	0	200	903	0	0	0	0	0	0	0	603	903	0
754	5	0	0	0	0	0	0	200	300	0	0	0	0	0	0	0	200	903	0	0	0	0	0	0	0	603	903	0
754	6	0	0	0	0	0	0	200	300	0	0	0	0	0	0	0	200	903	0	0	0	0	0	0	0	603	903	0
754	7	0	0	0	0	0	0	200	300	0	0	0	0	0	0	0	200	903	0	0	0	0	0	0	0	603	903	0
754	8	0	0	0	0	0	0	200	300	0	0	0	0	0	0	0	200	903	0	0	0	0	0	0	0	603	903	0
754	9	0	0	0	0	0	0	200	300	0	0	0	0	0	0	0	200	903	0	0	0	0	0	0	0	603	903	0
755	0	0	0	0	0	0	0	200	300	0	0	0	0	0	0	0	200	903	0	0	0	0	0	0	0	603	903	0
755	1	0	0	0	0	0	0	200	300	0	0	0	0	0	0	0	200	903	0	0	0	0	0	0	0	603	903	0
755	2	0	0	0	0	0	0	200	300	0	0	0	0	0	0	0	200	903	0	0	0	0	0	0	0	603	903	0
755	3	0	0	0	0	0	0	200	300	0	0	0	0	0	0	0	200	903	0	0	0	0	0	0	0	603	903	0
755	4	0	0	0	0	0	0	200	300	0	0	0	0	0	0	0	200	903	0	0	0	0	0	0	0	603	903	0
755	5	0	0	0	0	0	0	200	300	0	0	0	0	0	0	0	200	903	0	0	0	0	0	0	0	603	903	0
755	6	0	0	0	0	0	0	200	300	0	0	0	0	0	0	0	200	903	0	0	0	0	0	0	0	603	903	0
755	7	0	0	0	0	0	0	200	300	0	0	0	0	0	0	0	200	903	0	0	0	0	0	0	0	603	903	0
755	8	0	0	0	0	0	0	200	300	0	0	0	0	0	0	0	200	903	0	0	0	0	0	0	0	603	903	0
755	9	0	0	0	0	0	0	200	300	0	0	0	0	0	0	0	200	903	0	0	0	0	0	0	0	603	903	0
756	0	0	0	0	0	0	0	200	300	0	0	0	0	0	0	0	200	903	0	0	0	0	0	0	0	603	903	0
756	1	0	0	0	0	0	0	200	300	0	0	0	0	0	0	0	200	903	0	0	0	0	0	0	0	603	903	0
756	2	0	0	0	0	0	0	200	300	0	0	0	0	0	0	0	200	903	0	0	0	0	0	0	0	603	903	0
756	3	0	0	0	0	0	0	200	300	0	0	0	0	0	0	0	200	903	0	0	0	0	0	0	0	603	903	0
756	4	0	0	0	0	0	0	200	300	0	0	0	0	0	0	0	200	903	0	0	0	0	0	0	0	603	903	0
756	5	0	0	0	0	0	0	200	300	0	0	0	0	0	0	0	200	903	0	0	0	0	0	0	0	603	903	0
756	6	0	0	0	0	0	0	200	300	0	0	0	0	0	0	0	200	903	0	0	0	0	0	0	0	603	903	0
756	7	0	0	0	0	0	0	200	300	0	0	0	0	0	0	0	200	903	0	0	0	0	0	0	0	603	903	0
756	8	0	0	0	0	0	0	200	300	0	0	0	0	0	0	0	200	903	0	0	0	0	0	0	0	603	903	0
756	9	0	0	0	0	0	0	200	300	0	0	0	0	0	0	0	200	903	0	0	0	0	0	0	0	603	903	0
757	0	0	0	0	0	0	0	200	300	0	0	0	0	0	0	0	200	903	0	0	0	0	0	0	0	603	903	0
757	1	0	0	0	0	0	0	200	300	0	0	0	0	0	0	0	200	903	0	0	0	0	0	0	0	603	903	0
757	2	0	0	0	0	0	0	200	300	0	0	0	0	0	0	0	200	903	0	0	0	0	0	0	0	603	903	0
757	3	0	0	0	0	0	0	200	300	0	0	0	0	0	0	0	200	903	0	0	0	0	0	0	0	603	903	0
757	4	0	0	0	0	0	0	200	300	0	0	0	0	0	0	0	200	903	0	0	0	0	0	0	0	603	903	0
757	5	0	0	0	0	0	0	200	300	0	0	0	0	0	0	0	200	903	0	0	0	0	0	0	0	603	903	0
757	6	0	0	0	0	0	0	200	300	0	0	0	0	0	0	0	200	903	0	0	0	0	0	0	0	603	903	0
757	7	0	0	0	0	0	0	200	300	0	0	0	0	0	0	0	200	903	0	0	0	0	0	0	0	603	903	0
757	8	0	0	0	0	0	0	200	300	0	0	0	0	0	0	0	200	903	0	0	0	0	0	0	0	603	903	0
757	9	0	0	0	0	0	0	200	300	0	0	0	0	0	0	0	200	903	0	0	0	0	0	0	0	603	903	0
758	0	0	0	0	0	0	0	200	300	0	0	0	0	0	0	0	200	903	0	0	0	0	0	0	0	603	903	0
758	1	0	0	0	0	0	0	200	300	0	0	0	0	0	0	0	200	903	0	0	0	0	0	0	0	603	903	0
758	2	0	0	0	0	0	0	200	300	0	0	0	0	0	0	0	200	903	0	0	0	0	0	0	0	603	903	0
758	3	0	0	0	0	0	0	200	300	0	0	0	0	0	0	0	200	903	0	0	0	0	0	0	0	603	903	0
758	4	0	0	0	0	0	0	200	300	0	0	0	0	0	0	0	200	903	0	0	0	0	0	0	0	603	903	0
758	5	0	0	0	0	0	0	200	300	0	0	0	0	0	0	0	200	903	0	0	0	0	0	0	0	603	903	0
[truncated: 3,414 more rows]
