# Supplementary material for: The Effects of an Extemporaneous Speech Dual-task on Older Adult Gait Control
Source: Research Square preprint supplement (doi:10.21203/rs.3.rs-7674245/v1), 2025-11-18
Supplement: Supplementary file 63 [file DT4Walk9.xlsx]

## Sheet: Sheet1
Trajectories
		04:LFHD			04:RFHD			04:LBHD			04:RBHD			04:C7			04:T10			04:CLAV			04:STRN			04:RBAK			04:LSHO			04:LUPA			04:LELB			04:LFRM			04:LWRA			04:LWRB			04:LFIN
Frame	Sub Frame	X	Y	Z	X	Y	Z	X	Y	Z	X	Y	Z	X	Y	Z	X	Y	Z	X	Y	Z	X	Y	Z	X	Y	Z	X	Y	Z	X	Y	Z	X	Y	Z	X	Y	Z	X	Y	Z	X	Y	Z	X	Y	Z
		mm	mm	mm	mm	mm	mm	mm	mm	mm	mm	mm	mm	mm	mm	mm	mm	mm	mm	mm	mm	mm	mm	mm	mm	mm	mm	mm	mm	mm	mm	mm	mm	mm	mm	mm	mm	mm	mm	mm	mm	mm	mm	mm	mm	mm	mm	mm	mm
483	0	306.504	2055.22	1572.62	189.313	2050.86	1578.74	300.164	2226.05	1543.98	192.592	2218.65	1545.14	237.668	2213.7	1445.31	229.218	2292.17	1164.45	249.984	2087.98	1354.06	244.817	2021.98	1162.59	147.055	2296.89	1243.4	425.661	2157.36	1369.93	489.96	2201.78	1125.84	490.425	2210.83	1051.46	511.282	2137.2	892.853	464.648	2121.55	816.392	530.166	2154.21	804.979	497.424	2095.14	750.09
484	0	308.595	2046.29	1573.29	191.529	2041.64	1580.13	301.544	2217.11	1544.76	193.952	2209.43	1546.59	238.851	2204.72	1446.37	231.803	2283.24	1165.58	250.364	2079.07	1355.01	244.826	2013.2	1163.28	149.237	2288.54	1244.29	425.972	2147.05	1370.81	491.89	2190.29	1127.1	493.839	2198.44	1053.09	513.248	2123.28	894.747	466.409	2107.1	818.438	532.04	2139.31	806.613	499.103	2079.81	752.529
485	0	310.298	2037.38	1573.93	193.106	2032.32	1581.43	302.513	2208.15	1545.44	194.99	2200.22	1548.05	240.159	2195.76	1447.48	234.242	2274.25	1166.78	250.767	2070.26	1355.7	244.691	2004.39	1163.74	151.707	2280.54	1245.21	426.669	2136.71	1371.8	493.781	2178.64	1128.33	495.928	2186.19	1053.97	514.99	2109.18	896.452	467.927	2092.46	820.258	533.826	2124.25	808.089	500.635	2064.24	754.93
486	0	311.802	2028.55	1574.46	194.823	2023.11	1582.51	303.415	2199.29	1546.48	195.751	2190.98	1549.55	241.253	2186.96	1448.56	236.686	2265.68	1167.94	250.986	2061.52	1356.53	244.393	1995.6	1164.26	153.991	2272.65	1246.21	427.393	2126.5	1372.95	495.588	2166.9	1129.6	497.356	2173.96	1054.69	516.476	2095.08	898.26	469.678	2077.72	822.571	535.647	2109.13	809.871	502.11	2048.43	757.408
487	0	313.199	2019.63	1575.03	196.274	2013.95	1583.62	304.088	2190.46	1547.52	196.568	2181.86	1551.11	242.342	2178.45	1449.65	238.122	2256.18	1168.73	251.322	2053.14	1357.32	244.331	1987.06	1164.97	156.082	2264.69	1247.02	428.021	2116.35	1374.08	497.337	2154.98	1130.97	500.068	2161.53	1056.56	518.233	2080.82	900.473	471.24	2063.02	824.843	537.44	2093.84	811.84	503.58	2033.03	760.079
488	0	314.388	2010.77	1575.46	197.478	2004.61	1584.5	304.861	2181.64	1548.87	197.376	2172.85	1552.77	243.508	2170.02	1450.67	240.862	2248.19	1169.91	251.599	2044.74	1358.12	244.353	1978.61	1165.65	158.287	2256.9	1247.82	428.663	2106.52	1375.16	499.133	2142.88	1132.28	501.564	2148.96	1057.39	519.743	2066.57	902.485	472.782	2048.4	826.982	539.349	2078.13	813.761	504.829	2017.12	762.766
489	0	315.485	2001.93	1575.94	198.746	1995.49	1585.17	305.44	2172.97	1550.33	197.921	2163.74	1554.34	244.593	2161.76	1451.56	243.266	2239.9	1170.81	251.852	2036.55	1358.96	244.456	1970.39	1166.47	160.495	2249.23	1248.56	429.336	2096.74	1376.34	500.694	2130.8	1133.61	503.674	2136.57	1058.51	521.225	2052.33	904.573	474.66	2034.62	829.394	540.827	2062.91	815.75	506.121	2001.4	765.487
490	0	316.497	1993.14	1576.43	199.383	1986.28	1585.8	305.755	2164.28	1551.73	198.43	2154.87	1555.96	245.911	2153.64	1452.38	245.268	2231.21	1171.58	252.123	2028.45	1359.99	244.636	1962.27	1167.68	162.63	2241.56	1249.06	430.019	2087.39	1377.5	502.313	2118.82	1134.95	505.582	2124.25	1059.89	522.786	2037.95	907.019	475.693	2019.01	831.944	542.874	2047.54	818.225	507.37	1985.8	768.523
491	0	317.073	1984.47	1576.94	200.087	1977.24	1586.21	306.249	2155.71	1553.25	198.888	2146.12	1557.28	246.935	2145.69	1453.21	247.419	2222.84	1172.11	252.401	2020.36	1360.9	244.849	1954.52	1168.76	164.805	2233.79	1249.51	430.669	2078.02	1378.68	503.789	2106.71	1136.24	507.605	2111.61	1061.38	523.951	2023.69	909.295	477.362	2004.06	834.591	544.277	2031.87	820.402	508.199	1969.86	771.373
492	0	317.352	1975.69	1577.48	200.523	1968.42	1586.53	306.567	2146.98	1554.68	199.21	2137.33	1558.42	248.018	2137.79	1453.89	249.438	2214.29	1172.57	252.76	2012.37	1361.71	245.13	1946.32	1169.9	166.763	2226.33	1250.04	431.123	2069.02	1379.74	505.128	2094.65	1137.45	509.313	2099.13	1062.61	525.082	2009.27	911.499	478.521	1989.76	836.743	545.574	2016.46	822.626	509.278	1954.13	774.357
493	0	317.647	1967.08	1578.05	200.762	1959.72	1586.83	306.919	2138.54	1555.9	199.552	2128.81	1559.43	249.05	2129.77	1454.58	251.303	2205.64	1173.14	253.02	2004.33	1362.41	245.473	1938.5	1171.02	168.82	2218.76	1250.43	432.003	2059.87	1380.73	506.462	2082.67	1138.62	510.686	2086.84	1063.63	526.373	1994.72	913.92	479.668	1975.78	838.971	547.282	2000.89	824.806	510.247	1938.45	777.253
494	0	317.762	1958.53	1578.77	200.861	1951.39	1587.17	307.335	2129.96	1557.24	199.814	2120.36	1560.45	250.229	2121.91	1455.14	253.097	2196.78	1173.42	253.239	1996.11	1363.11	245.83	1930.44	1172.06	170.79	2211.11	1250.76	432.736	2050.8	1381.82	507.609	2070.67	1139.51	512.184	2074.54	1064.65	527.374	1980.85	915.901	480.917	1961.18	841.268	549.307	1985.21	827.293	511.279	1922.78	780.163
495	0	317.865	1949.91	1579.59	200.69	1942.99	1587.43	307.721	2121.6	1558.22	200.161	2112.24	1561.12	251.245	2113.81	1455.66	254.883	2188.6	1173.94	253.983	1988.17	1363.57	246.323	1922.56	1173.02	172.554	2203.58	1251.19	433.514	2041.89	1382.68	509.098	2059.03	1140.61	514.51	2062.36	1066.08	528.465	1966.71	918.117	482.145	1946.64	843.64	549.994	1969.98	829.105	512.246	1907.3	783.181
496	0	317.707	1941.49	1580.35	200.471	1934.87	1587.7	308.063	2113.08	1559.04	200.466	2104.03	1561.42	252.399	2105.7	1456.01	256.46	2180.36	1174.16	254.199	1979.81	1364.26	246.735	1914.3	1173.7	174.267	2195.46	1251.4	434.198	2032.78	1383.53	510.253	2047.33	1141.45	515.377	2049.91	1066.35	529.51	1952.7	920.192	483.149	1932.2	845.739	551.957	1954.01	831.565	512.891	1891.68	785.88
497	0	317.433	1933.12	1580.83	200.218	1926.96	1587.88	308.46	2104.85	1559.48	200.909	2096.06	1561.53	253.389	2097.72	1456.18	257.975	2171.95	1174.23	254.73	1971.71	1364.45	247.108	1906.26	1174.2	176.099	2187.78	1251.4	434.836	2023.76	1383.88	511.3	2035.91	1141.97	517.057	2037.82	1067.27	530.381	1938.74	922.019	484.112	1917.89	847.658	552.557	1939.25	833.087	513.617	1876.32	788.618
498	0	317.022	1924.9	1581.25	199.76	1919.04	1587.9	308.762	2096.6	1559.65	201.232	2088.27	1561.33	254.342	2089.63	1456.13	259.558	2163.8	1174	255.167	1963.57	1364.56	247.512	1898.1	1174.42	177.787	2179.78	1251.11	435.453	2014.84	1384.07	512.524	2024.82	1142.52	518.493	2025.95	1067.82	531.263	1925.12	923.559	484.919	1903.57	849.601	554.29	1924.15	835.228	514.294	1861.13	791.268
499	0	316.772	1916.71	1581.49	199.408	1911.29	1587.86	309.156	2088.34	1559.68	201.431	2080.26	1561.07	255.306	2081.43	1456.08	261.039	2155.42	1173.87	255.53	1955.43	1364.5	247.957	1890.14	1174.11	179.518	2171.94	1250.79	435.992	2005.65	1384	513.571	2013.58	1142.64	519.78	2014.01	1068.01	532.167	1911.47	924.972	485.854	1889.35	851.425	555.164	1909.57	836.634	514.921	1846.04	793.534
500	0	316.374	1908.49	1581.69	199.052	1903.56	1587.69	309.508	2080.21	1559.67	201.907	2072.66	1560.62	256.143	2073.16	1455.85	262.163	2147.05	1173.69	255.755	1947.18	1364.33	248.373	1882.06	1173.82	181.083	2164.45	1250.66	436.596	1996.5	1383.81	514.594	2002.63	1142.91	520.878	2002.3	1068.12	533.083	1898.04	926.434	486.57	1875.2	853.106	555.878	1894.72	837.962	515.43	1830.89	795.904
501	0	315.955	1900.31	1581.92	198.611	1895.58	1587.57	309.729	2071.94	1559.42	202.255	2064.82	1560.09	256.895	2064.87	1455.65	263.296	2138.93	1173.41	256.015	1938.89	1363.93	248.643	1874.1	1173.29	182.532	2156.63	1250.38	437.067	1987.37	1383.6	515.61	1992.04	1142.98	522.071	1990.62	1068.24	533.925	1884.81	927.808	487.226	1861.29	854.709	556.199	1880.71	838.998	515.887	1816.15	798.226
502	0	315.711	1892.2	1581.91	198.368	1887.93	1587.28	309.961	2063.77	1558.91	202.144	2056.73	1559.42	257.519	2056.48	1455.17	264.531	2130.9	1173.14	256.293	1930.61	1363.3	248.694	1866.21	1172.5	183.732	2148.57	1249.93	437.394	1978.19	1383.09	516.628	1981.51	1142.88	522.927	1979.18	1067.9	534.559	1871.72	928.742	487.738	1847.47	856.093	557.28	1866.25	840.254	516.242	1801.56	800.146
503	0	315.369	1883.99	1581.68	198.083	1880.14	1586.76	310.242	2055.62	1558.29	202.394	2048.97	1558.57	258.195	2048.08	1454.7	265.714	2122.78	1172.79	256.615	1922.32	1362.59	248.647	1858.03	1171.41	184.742	2140.26	1249.29	437.686	1969.06	1382.46	517.349	1971.08	1142.45	523.915	1967.75	1067.65	535.208	1858.82	929.464	488.073	1833.63	857.292	557.046	1852.67	840.698	516.405	1787.14	801.823
504	0	315.119	1875.82	1581.41	197.642	1872.04	1586.2	310.307	2047.37	1557.55	202.538	2040.94	1557.56	258.605	2039.48	1454.13	266.664	2114.96	1172.47	256.573	1913.92	1361.84	248.441	1849.91	1170.17	185.763	2132.3	1248.78	437.882	1960.03	1381.64	518.061	1960.92	1141.97	524.778	1956.4	1067.32	535.661	1846.05	930.229	488.317	1820.09	858.385	557.524	1838.5	841.696	516.353	1772.88	803.404
505	0	314.812	1867.58	1581.06	197.423	1864.17	1585.61	310.383	2039.18	1556.65	202.656	2032.85	1556.43	258.95	2030.98	1453.41	267.684	2107.22	1171.82	256.676	1905.67	1360.91	248.431	1842.03	1169.07	186.513	2124.5	1248.26	438.199	1950.89	1381.01	518.777	1950.67	1141.64	525.511	1944.92	1066.98	535.827	1833.29	930.945	488.549	1806.93	859.492	557.889	1825.01	842.621	516.203	1758.87	804.96
506	0	314.62	1859.24	1580.48	197.226	1856.15	1584.8	310.374	2030.84	1555.52	202.744	2024.76	1555.2	259.233	2022.36	1452.55	268.673	2099.49	1171.11	256.62	1897.15	1359.85	248.442	1833.86	1167.76	187.07	2116.14	1247.5	438.308	1941.89	1379.96	519.318	1940.55	1140.94	526.183	1933.92	1066.43	536.119	1820.76	931.333	488.543	1793.79	860.26	557.949	1811.34	843.042	515.957	1745.25	806.188
507	0	314.376	1850.89	1579.68	196.945	1847.99	1583.91	310.544	2022.43	1554.28	202.815	2016.43	1553.97	259.576	2013.77	1451.56	269.531	2091.85	1170.24	256.724	1888.76	1358.57	248.27	1825.77	1166.34	187.676	2108.17	1246.68	438.316	1932.97	1378.7	519.642	1930.78	1140.03	526.292	1922.98	1065.38	536.198	1808.59	931.573	488.504	1780.99	860.78	557.807	1798.19	843.25	515.698	1731.84	807.212
508	0	314.057	1842.42	1578.98	196.682	1839.86	1583.09	310.7	2013.91	1553.16	202.877	2008.08	1552.77	259.604	2004.98	1450.62	270.178	2084.38	1169.61	256.667	1880.24	1357.36	247.876	1817.65	1164.89	188.132	2100.02	1245.96	438.261	1924.01	1377.64	519.889	1920.85	1139.14	526.517	1912.11	1064.57	535.94	1796.45	931.827	488.144	1768.58	861.184	557.72	1785.33	843.641	515.223	1718.74	808.166
509	0	313.662	1833.94	1578.14	196.141	1831.4	1582.13	310.637	2005.26	1551.93	202.73	1999.77	1551.31	259.58	1996.28	1449.59	270.559	2076.82	1168.72	256.265	1871.46	1356.1	247.594	1809.5	1163.57	188.103	2091.54	1245.09	437.927	1914.66	1376.41	519.932	1911.18	1138.18	527.218	1901.34	1064.31	535.515	1784.37	931.823	487.605	1756.27	861.431	557.282	1772.52	843.738	514.34	1705.88	808.878
510	0	313.144	1825.35	1577.01	195.797	1823.2	1580.98	310.571	1996.67	1550.45	202.697	1991.38	1549.8	259.416	1987.48	1448.41	270.559	2069.08	1167.67	255.962	1862.95	1354.7	247.211	1801.3	1161.92	188.273	2083.69	1244.09	437.6	1905.81	1374.93	519.525	1901.22	1136.94	526.934	1890.34	1063.11	534.996	1772.68	931.639	487.03	1744.19	861.45	557.004	1760.21	843.716	513.613	1693.72	809.256
511	0	312.589	1816.66	1575.83	195.3	1814.77	1579.91	310.428	1987.92	1548.88	202.618	1983.02	1548.39	259.289	1978.68	1447.14	270.381	2061.07	1166.58	255.422	1854.21	1353.36	246.856	1793.23	1160.33	188.15	2074.92	1242.88	437.373	1897.09	1373.42	519.263	1891.46	1135.68	526.68	1879.97	1061.9	534.437	1761.07	931.207	486.326	1732.52	861.342	556.226	1747.92	843.418	512.581	1681.2	809.536
512	0	312.229	1807.92	1574.73	194.767	1806.38	1578.91	310.454	1979.09	1547.43	202.633	1974.44	1546.98	258.873	1969.81	1445.9	270.042	2053.02	1165.35	255.23	1845.62	1351.94	246.473	1784.96	1158.88	188.19	2066.68	1241.77	436.809	1888.18	1371.84	519.135	1881.69	1134.58	526.41	1869.24	1060.76	533.54	1749.79	930.835	485.477	1721.05	861.133	555.696	1735.93	843.073	511.401	1669.41	809.645
513	0	311.653	1798.99	1573.59	194.025	1797.71	1577.88	310.419	1970.17	1546.01	202.489	1965.81	1545.46	258.484	1960.88	1444.81	269.557	2044.67	1164.16	254.595	1836.83	1350.39	246.005	1776.62	1157.28	187.688	2057.94	1240.66	436.309	1879.24	1370.51	518.51	1871.7	1133.34	526.379	1859.01	1060	532.865	1738.91	930.374	484.447	1710.04	860.639	554.581	1724.46	842.73	510.124	1657.91	809.43
514	0	310.997	1790.02	1572.32	193.536	1789.21	1576.73	310.076	1961.13	1544.52	202.245	1957.02	1544.15	258.026	1951.98	1443.61	269.006	2036.11	1163.23	253.997	1827.91	1348.91	245.596	1768.27	1155.71	187.573	2049.61	1239.66	435.897	1870.29	1369.19	517.828	1862.14	1131.99	525.316	1848.7	1058.55	531.544	1727.99	929.582	483.35	1699.25	860.014	553.555	1713.04	841.983	508.648	1646.86	809.057
515	0	310.2	1780.93	1571.01	192.693	1780.3	1575.56	309.54	1952.18	1543.12	201.673	1948.13	1542.88	257.335	1942.9	1442.41	268.249	2027.28	1162.13	253.509	1819.1	1347.48	244.919	1759.78	1154.08	186.977	2040.61	1238.5	435.044	1861.25	1367.67	516.994	1852.25	1130.59	524.586	1838.57	1057.3	530.367	1717.54	928.567	481.983	1688.76	859.23	552.405	1702.27	841.31	506.939	1636	808.387
516	0	309.457	1771.92	1569.77	191.925	1771.54	1574.45	309.263	1943.08	1541.68	201.167	1939.36	1541.7	256.604	1933.84	1441.15	267.596	2018.46	1161.01	252.621	1810.14	1346.03	244.227	1751.19	1152.6	186.477	2031.97	1237.37	434.39	1852.28	1366.35	516.067	1842.7	1129.34	523.77	1828.71	1056.15	528.98	1707.17	927.692	480.531	1678.73	858.288	550.919	1691.92	840.194	505.319	1625.7	807.645
517	0	308.557	1762.47	1568.35	191.048	1762.7	1573.26	308.6	1933.91	1540.16	200.539	1930.49	1540.4	255.972	1924.79	1439.97	266.893	2009.37	1159.95	251.576	1801.18	1344.64	243.613	1742.55	1151.22	185.974	2023.14	1236.17	433.752	1843.1	1365.2	515.066	1833.33	1128.21	522.474	1818.99	1054.78	527.383	1697.27	926.628	478.974	1668.84	857.331	549.075	1681.81	839.063	503.775	1615.93	806.836
518	0	307.553	1753.35	1567.03	190.133	1753.71	1572.08	307.98	1924.85	1538.75	199.721	1921.48	1539.11	255.064	1915.61	1438.73	266.1	2000.51	1158.79	250.785	1792.35	1343.31	242.982	1733.71	1149.62	185.142	2013.95	1234.9	432.996	1833.87	1363.95	513.908	1823.69	1127.03	521.387	1809.4	1053.53	525.777	1687.61	925.429	477.322	1659.37	856.172	547.786	1672.01	838.062	501.692	1606.18	805.721
519	0	306.542	1744.24	1565.73	188.998	1744.74	1570.98	307.124	1915.67	1537.43	198.921	1912.52	1537.8	253.991	1906.42	1437.43	265.467	1991.73	1157.53	249.865	1783.31	1341.72	242.369	1724.73	1148.28	184.562	2004.78	1233.53	431.754	1824.77	1362.49	512.586	1814.17	1125.66	519.973	1800.07	1052.21	524.127	1678.35	924.111	475.427	1650.17	854.945	545.952	1662.55	836.756	499.661	1596.91	804.437
520	0	305.395	1735.15	1564.6	187.92	1735.79	1569.99	305.96	1906.48	1535.97	197.917	1903.51	1536.53	253.011	1897.13	1436.18	264.404	1982.82	1156.28	248.881	1774.14	1340.37	241.598	1715.64	1147.05	183.954	1995.84	1232.22	430.656	1815.63	1361.14	511.135	1805	1124.28	518.573	1791.03	1050.94	522.27	1669.36	922.696	473.43	1641.4	853.602	543.876	1653.53	835.245	497.457	1588.02	803.15
521	0	304.057	1725.91	1563.57	186.448	1726.51	1569.04	304.883	1897.28	1534.65	196.723	1894.38	1535.23	252.002	1887.75	1435.03	263.304	1973.88	1155.1	247.703	1764.69	1339.2	240.625	1706.37	1145.68	183.195	1986.57	1230.92	429.587	1806.24	1360.02	509.775	1796.12	1123.03	517.146	1782.2	1049.63	520.332	1660.56	921.301	471.397	1632.98	852.162	541.97	1644.78	833.887	495.22	1579.47	801.645
522	0	302.57	1716.79	1562.64	185.066	1717.39	1568.14	303.557	1888.09	1533.52	195.359	1885.22	1534.01	250.762	1878.34	1433.88	262.239	1965.15	1154.2	246.525	1755.44	1338.01	239.952	1697.18	1144.49	182.277	1977.11	1229.71	428.534	1796.73	1359.11	508.156	1787.19	1121.8	515.539	1773.51	1048.25	518.46	1652.08	919.755	469.19	1624.78	850.599	539.797	1636.41	832.295	492.832	1571.19	800.037
523	0	301.071	1707.68	1561.97	183.684	1708.28	1567.34	301.917	1878.9	1532.38	193.862	1876	1532.82	249.477	1868.84	1432.89	261.06	1955.63	1153.14	245.221	1745.92	1337.13	238.795	1687.6	1143.18	181.392	1967.28	1228.46	427.115	1787.25	1358.08	506.884	1778.43	1120.81	513.972	1765.1	1047.11	516.261	1643.87	918.159	466.971	1616.9	849.086	537.684	1628.33	830.772	490.374	1563.49	798.38
524	0	299.438	1698.51	1561.35	181.983	1698.99	1566.69	300.086	1869.62	1531.21	192.115	1866.63	1531.62	248.224	1859.08	1431.95	260.098	1946.11	1152.12	243.958	1736.3	1336.18	237.98	1678.02	1142.29	180.65	1957.72	1227.32	426.018	1777.63	1357.3	505.524	1769.94	1119.46	512.297	1756.76	1045.73	514.226	1636.02	916.384	464.69	1609.42	847.522	535.542	1620.67	828.957	487.801	1555.95	796.447
525	0	297.679	1689.26	1560.86	180.27	1689.73	1566	297.912	1860.31	1530.21	190.144	1856.99	1530.61	246.789	1849.32	1431.08	258.866	1936.58	1151.41	242.561	1726.6	1335.18	236.82	1668.14	1141.31	179.782	1948.15	1226.4	424.661	1767.67	1356.51	503.896	1761.42	1118.18	511.099	1748.73	1044.9	512.055	1628.37	914.653	462.24	1602.16	845.744	532.575	1613.54	826.824	485.236	1548.85	794.495
526	0	295.767	1679.96	1560.58	178.326	1680.49	1565.36	296.176	1851.07	1529.49	188.144	1847.77	1529.48	245.337	1839.52	1430.3	257.525	1927.23	1150.81	241.04	1716.73	1334.34	235.538	1658.27	1140.32	179.004	1938.82	1225.67	423.562	1757.8	1356.13	502.335	1752.97	1117.21	508.812	1740.61	1043.47	509.74	1620.84	912.97	459.73	1595.23	843.887	530.444	1606.15	825.237	482.342	1542.03	792.409
527	0	293.719	1670.82	1560.33	176.281	1671.2	1564.85	294.203	1841.7	1528.69	186.092	1838.3	1528.41	243.707	1829.61	1429.55	256.32	1917.42	1150.03	239.445	1706.83	1333.71	234.219	1648.06	1139.69	178.097	1928.84	1224.73	421.814	1747.71	1355.4	500.711	1744.63	1116.39	507.179	1732.81	1042.43	507.248	1613.58	911.1	457.261	1588.6	842.189	527.783	1599.38	823.313	479.547	1535.63	790.166
528	0	291.531	1661.54	1560.18	174.038	1661.88	1564.32	291.997	1832.33	1527.91	183.964	1828.9	1527.4	242.085	1819.63	1428.83	255.075	1907.17	1149.33	237.78	1696.86	1333.06	232.853	1637.71	1139.18	177.117	1918.37	1223.62	420.11	1737.46	1354.62	499.067	1736.2	1115.58	505.516	1724.95	1041.41	505.038	1606.56	909.272	454.552	1582.27	840.228	525.36	1592.88	821.429	476.805	1529.53	787.915
529	0	289.24	1652.21	1560.06	171.792	1652.63	1563.83	289.827	1822.93	1527.05	181.773	1819.6	1526.21	240.613	1809.61	1428.16	253.666	1896.95	1148.62	236.124	1686.71	1332.61	231.282	1627.3	1138.78	175.933	1908.08	1222.65	418.539	1727.27	1354.14	497.278	1727.65	1114.75	503.651	1717.23	1040.41	502.6	1599.73	907.407	452.145	1576.22	838.338	522.778	1586.57	819.459	473.933	1523.81	785.583
530	0	286.861	1642.89	1559.98	169.354	1643.35	1563.45	287.629	1813.55	1526.23	179.595	1810.21	1525.08	238.883	1799.71	1427.42	252.448	1886.32	1147.61	234.426	1676.51	1332.1	229.607	1616.6	1138.36	174.84	1897.52	1221.53	416.832	1716.91	1353.68	495.751	1719.27	1114.34	501.736	1709.86	1039.53	500.311	1593.19	905.709	449.424	1570.43	836.526	520.437	1580.56	817.754	471.138	1518.27	783.323
531	0	284.211	1633.49	1559.98	166.775	1634.14	1563.11	285.409	1804.09	1525.51	177.436	1800.84	1523.9	237.015	1789.72	1426.7	251.194	1875.86	1146.66	232.621	1666.21	1331.77	227.843	1605.73	1138.21	173.643	1887.11	1220.27	415.201	1706.6	1353.39	493.689	1710.7	1113.8	499.775	1702.36	1038.74	497.982	1586.76	903.918	446.953	1564.91	834.617	517.912	1574.8	816.007	468.257	1512.95	781.064
532	0	281.745	1624.18	1560.11	164.157	1624.97	1562.92	283.261	1794.56	1524.88	175.17	1791.41	1522.98	235.265	1779.48	1426.01	249.694	1865.24	1145.85	230.741	1655.95	1331.45	226.057	1594.68	1138.1	172.369	1876.19	1219	413.057	1696.31	1352.9	491.523	1702.08	1113.14	497.944	1694.83	1038.19	495.693	1580.67	902.173	444.51	1559.53	832.784	515.257	1569.47	814.11	465.646	1508	778.767
533	0	278.932	1614.74	1560.59	161.459	1615.79	1562.94	280.996	1784.9	1524.26	172.861	1781.99	1522.11	233.667	1769.33	1425.48	248.249	1855.02	1144.78	228.902	1645.52	1331.26	224.483	1583.38	1138.12	170.767	1865.12	1217.82	411.18	1686.08	1352.75	489.822	1693.61	1112.86	495.751	1687.89	1037.54	493.521	1574.74	900.499	442.074	1554.35	830.943	513.121	1564.06	812.522	463.037	1503.22	776.502
534	0	276.198	1605.45	1561.26	158.658	1606.69	1563.28	278.587	1774.94	1523.85	170.461	1772.52	1521.42	231.637	1759.14	1425.21	246.267	1844.14	1144.27	226.996	1635.12	1331.45	222.949	1571.98	1138.53	169.404	1854.24	1216.99	409.523	1675.76	1353.14	487.691	1685.14	1112.78	494.093	1680.61	1037.48	491.413	1568.99	899.122	439.885	1549.49	829.437	510.892	1559.17	811.107	460.772	1498.89	774.489
535	0	273.399	1595.97	1562.16	155.806	1597.51	1563.86	276.087	1765.34	1523.71	168.048	1763.05	1521.05	229.277	1748.98	1425.08	244.032	1832.79	1143.96	225.205	1624.7	1331.73	221.621	1560.33	1139.08	167.994	1843.36	1216.15	407.604	1665.46	1353.49	486.079	1676.9	1113.14	491.771	1673.51	1037.45	489.302	1563.43	897.867	437.846	1544.9	827.993	508.87	1554.72	809.808	458.647	1494.59	772.598
536	0	270.5	1586.52	1563.31	152.969	1588.37	1564.62	273.746	1755.68	1523.75	165.632	1753.49	1520.83	227.464	1738.68	1425.19	241.969	1822.01	1144.04	223.139	1614.19	1332.28	220.197	1548.59	1139.79	166.383	1832.22	1215.75	405.787	1655.08	1354.27	484.071	1668.68	1113.39	489.857	1666.31	1037.66	487.436	1557.95	896.891	435.756	1540.11	826.827	506.865	1550.33	808.64	456.615	1490.78	770.587
537	0	267.538	1577.06	1564.71	149.947	1579.17	1565.57	270.772	1745.97	1524.09	163.127	1743.98	1520.8	225.105	1728.42	1425.74	239.881	1810.87	1144.34	221.212	1603.77	1333.02	218.894	1536.97	1140.68	164.737	1821.3	1215.64	403.767	1644.74	1355.24	481.993	1660.3	1114.12	487.751	1659.25	1038.37	485.341	1552.55	896.029	433.828	1535.71	825.701	504.695	1546.26	807.595	454.819	1487.14	768.893
538	0	264.574	1567.71	1566.22	146.931	1570.03	1566.69	268.611	1736.42	1524.61	160.598	1734.67	1520.78	223.265	1718.32	1426.22	237.723	1799.63	1144.72	219.273	1593.42	1334.07	217.693	1525.72	1141.91	163.167	1810.4	1215.67	401.752	1634.49	1356.41	480.069	1651.97	1115.16	485.583	1651.89	1039.33	483.429	1547.33	895.406	432.002	1531.42	825.018	503.196	1542.47	807.072	453.237	1483.91	767.37
539	0	261.59	1558.46	1567.93	143.926	1560.83	1567.73	265.894	1726.9	1525.22	158.084	1725.27	1520.96	221.1	1708.27	1427.03	236.134	1788.41	1145.26	217.402	1583.04	1335.24	216.617	1514.36	1143.24	161.433	1799.78	1216.01	400	1624.36	1357.87	478.178	1643.51	1116.39	483.574	1644.65	1040.59	481.781	1542.34	895.159	430.605	1526.98	824.68	501.546	1538.59	806.798	451.736	1480.68	766.039
540	0	258.615	1549.3	1569.77	140.958	1551.72	1568.91	262.948	1717.27	1526.13	155.503	1715.86	1521.31	218.92	1698.25	1427.97	234.47	1776.99	1145.87	216.026	1572.96	1336.65	215.501	1503.21	1144.77	159.632	1788.85	1216.61	398.264	1614.32	1359.62	476.199	1635.06	1117.92	481.431	1637.38	1041.98	480.242	1537.24	895.2	428.985	1522.83	824.199	500.189	1535.02	806.817	450.418	1477.68	764.789
541	0	255.543	1540.06	1571.79	137.67	1542.55	1570.1	260.853	1707.76	1527.39	152.95	1706.55	1521.76	216.839	1688.35	1429.17	233.264	1766.48	1146.61	214.398	1562.96	1338.15	214.603	1492.45	1146.59	158.016	1778.57	1217.45	396.386	1604.68	1361.5	474.484	1626.68	1119.88	479.339	1629.98	1043.75	478.755	1532.19	895.559	427.647	1518.83	824.07	498.561	1531.77	806.9	449.305	1474.87	763.941
542	0	252.448	1530.55	1573.86	134.606	1533.54	1571.16	258.31	1698.39	1528.7	150.394	1697.24	1522.34	214.763	1678.56	1430.42	231.446	1755.59	1148.07	212.857	1553.1	1339.73	213.752	1481.77	1148.63	156.413	1768.29	1218.43	394.753	1595.16	1363.71	472.565	1618.06	1121.83	477.438	1622.7	1045.95	477.569	1527.11	896.285	426.364	1514.89	824.366	497.922	1527.71	807.945	448.333	1472.01	763.211
543	0	249.273	1521.42	1576.02	131.445	1524.47	1572.21	256.091	1689.02	1530.39	148.069	1688.05	1522.92	212.751	1668.81	1431.75	229.967	1745.17	1149.44	211.404	1543.25	1341.39	212.947	1471.58	1150.56	154.669	1757.85	1219.44	393.12	1585.92	1365.77	470.616	1609.35	1123.65	475.716	1615.19	1048.22	476.285	1521.82	897.073	425.627	1510.89	824.567	497.05	1523.84	808.786	447.509	1469.14	762.584
544	0	246.155	1512.25	1578.08	128.437	1515.58	1573	253.799	1679.7	1531.93	145.891	1678.94	1523.49	210.875	1659.31	1433.02	228.349	1734.97	1150.72	210.572	1534.03	1342.8	212.234	1461.38	1152.35	153.57	1747.98	1220.68	391.728	1577.02	1367.87	468.942	1601.23	1125.55	473.823	1607.61	1050.18	475.218	1516.51	897.988	425.127	1506.81	824.883	496.416	1519.41	809.839	446.795	1465.51	762.18
545	0	243.049	1502.99	1580.2	125.326	1506.7	1573.79	251.735	1670.31	1533.77	143.777	1669.89	1524.02	208.742	1649.92	1434.54	227.068	1725.75	1152.03	209.359	1524.31	1344.52	211.747	1451.66	1154.24	151.879	1737.82	1221.76	390.53	1568.18	1370.12	467.335	1592.53	1127.57	472.366	1600.18	1052.43	474.406	1510.87	899.187	424.375	1501.99	825.465	496.196	1515.03	811.1	446.589	1462.49	761.879
546	0	239.96	1493.78	1582.38	122.18	1497.81	1574.5	249.597	1660.96	1535.37	141.892	1660.91	1524.46	206.999	1640.47	1435.76	225.174	1715.66	1153.29	208.45	1515.03	1346.08	211.321	1442.11	1156.16	150.053	1727.85	1222.88	389.317	1559.74	1372.17	465.857	1583.91	1129.62	471.261	1592.57	1054.64	473.943	1505.05	900.403	424.624	1498.06	825.729	496.243	1510.11	812.616	446.558	1458.7	761.911
547	0	236.92	1484.73	1584.4	119.267	1489.04	1575.1	247.645	1651.65	1537.04	140.075	1651.94	1524.85	205.305	1631.27	1437	223.556	1706.66	1154.61	207.573	1505.87	1347.51	211.043	1432.79	1157.51	147.446	1717.2	1223.57	388.245	1551.65	1373.82	465.208	1575.98	1131.63	469.552	1585.22	1056.08	473.636	1499.1	901.481	424.654	1492.99	826.292	496.327	1505.28	813.713	447.055	1454.73	761.776
548	0	233.801	1475.51	1586.28	116.33	1480.36	1575.62	245.849	1642.29	1538.47	138.4	1642.96	1525.17	203.739	1622.25	1438.21	221.859	1697.7	1155.93	206.97	1496.88	1348.85	210.99	1423.66	1158.89	145.506	1707.4	1224.51	387.105	1543.92	1375.25	464.017	1568.12	1133.1	468.729	1577.9	1057.88	473.527	1493.35	902.567	425.007	1487.54	826.893	496.805	1499.91	814.993	447.862	1450.23	761.904
549	0	230.778	1466.48	1588.17	113.418	1471.69	1576.1	244.199	1633.12	1540.08	137.043	1634.26	1525.43	202.089	1613.27	1439.38	220.025	1688.5	1156.93	206.459	1487.95	1350.2	211.089	1414.74	1160.21	143.501	1697.94	1225.5	385.926	1536.57	1376.55	463.115	1560.53	1134.56	467.839	1570.62	1059.48	473.704	1487.09	903.745	425.945	1481.81	827.703	497.562	1494.65	816.325	449.248	1445.31	762.104
550	0	227.999	1457.45	1589.96	110.794	1463.09	1576.48	242.592	1623.93	1541.67	135.664	1625.42	1525.7	200.42	1604.41	1440.44	218.068	1679.51	1157.75	206.229	1479.47	1351.34	211.271	1405.88	1161.29	141.287	1688.61	1226.5	385.08	1529.22	1377.7	462.254	1553.13	1135.76	467.175	1563.79	1060.97	474.334	1480.82	904.974	426.891	1475.36	828.56	498.602	1489.22	817.664	451.059	1440.04	762.451
551	0	225.335	1448.32	1591.5	108.393	1454.47	1576.71	241.004	1614.75	1543.21	134.358	1616.51	1526.14	198.973	1595.69	1441.47	216.107	1670.88	1158.76	205.917	1470.9	1352.46	211.85	1397.09	1162.36	139.152	1679.43	1227.46	384.168	1522.4	1378.61	461.525	1546.16	1136.79	466.317	1556.79	1061.96	475.2	1474.37	906.065	428.16	1468.54	829.203	499.5	1483.21	818.829	453.335	1434.21	762.842
552	0	222.883	1439.19	1593.07	105.942	1445.57	1576.96	239.484	1605.61	1544.8	133.298	1607.84	1526.51	197.405	1587.11	1442.5	214.094	1662.1	1159.66	205.706	1462.32	1353.72	212.463	1388.45	1163.36	137.098	1670.65	1228.48	383.442	1515.64	1379.62	460.846	1539.6	1137.7	465.547	1550.22	1062.77	476.342	1467.95	907.198	429.621	1461.4	830.13	501.042	1477.28	820.375	456.083	1428.26	763.514
553	0	220.482	1429.97	1594.72	103.932	1436.82	1577.21	238.264	1596.51	1546.77	132.254	1598.96	1527.23	195.939	1578.59	1443.68	211.878	1653.32	1160.61	205.758	1454.34	1354.87	213.202	1379.99	1164.43	134.693	1661.54	1229.7	382.529	1509.17	1380.7	460.224	1533.14	1138.87	465.437	1543.58	1064.28	477.574	1461.48	908.564	431.382	1454.26	831.103	502.878	1470.98	822.047	458.81	1421.79	764.52
554	0	218.414	1420.93	1596.14	102.029	1428.07	1577.33	237.134	1587.55	1548.59	131.236	1590.15	1527.96	194.47	1570.2	1444.85	209.932	1644.92	1161.7	205.505	1445.87	1356.15	213.888	1371.61	1165.4	132.267	1652.67	1231.01	381.848	1502.64	1381.77	459.69	1527.26	1139.8	464.592	1537.19	1065.04	479.04	1454.86	909.872	432.831	1446.33	832.322	504.244	1464.75	823.345	461.59	1414.91	765.593
555	0	216.605	1411.78	1597.45	100.415	1419.14	1577.43	235.969	1578.37	1550.58	130.265	1581.35	1528.82	192.988	1561.83	1446.01	207.657	1636.32	1163.03	205.423	1437.8	1357.2	214.568	1363.44	1166.33	129.587	1643.83	1232.45	381.025	1496.4	1382.84	459.153	1521.54	1140.96	464.242	1530.66	1066.22	480.536	1448.25	911.212	434.941	1438.88	833.413	505.992	1458.3	824.888	464.581	1407.65	766.883
556	0	215.04	1402.61	1598.78	99.0117	1410.28	1577.74	234.943	1569.41	1552.47	129.354	1572.56	1529.84	191.69	1553.6	1447.2	205.501	1627.53	1163.92	205.151	1429.69	1358.43	215.355	1355.42	1167.71	126.901	1634.99	1233.78	380.337	1490.21	1384.05	458.75	1515.97	1142.2	463.89	1524.37	1067.42	482.067	1441.73	912.693	436.89	1431.23	834.739	507.523	1451.74	826.44	468.034	1400.56	768.509
557	0	213.66	1393.67	1599.85	97.9862	1401.35	1578.1	234.147	1560.57	1554.17	128.571	1563.75	1530.9	190.319	1545.52	1448.26	203.567	1619.08	1164.84	205.097	1421.78	1359.61	216.039	1347.49	1169.05	124.501	1626.33	1234.89	379.446	1484.2	1385.03	458.431	1510.57	1143.56	463.619	1518	1068.62	483.839	1435.16	914.434	439.029	1423.66	836.039	508.915	1445.58	828.038	471.233	1393	770.409
558	0	212.926	1384.59	1600.86	97.038	1392.22	1578.61	233.267	1551.52	1555.56	127.92	1554.92	1531.83	189.108	1537.51	1449.21	201.814	1610.61	1165.62	204.912	1414.04	1360.68	216.666	1339.64	1170.24	122.075	1617.88	1235.94	378.617	1478.11	1386.05	457.983	1505.41	1144.72	463.252	1511.81	1069.73	485.441	1428.46	916.085	440.891	1415.41	837.632	510.85	1439.36	829.786	474.488	1384.97	772.419
559	0	212.066	1375.69	1601.51	96.5034	1383.26	1579.07	232.556	1542.89	1556.92	127.106	1545.96	1532.88	187.798	1529.58	1450.14	200.206	1602.45	1166.25	204.769	1406.35	1361.59	217.114	1331.85	1171.43	119.795	1609.11	1236.91	378.13	1472.09	1387.12	457.405	1500.16	1145.86	463.154	1505.59	1070.96	487.059	1421.76	917.825	443.288	1407.49	839.128	512.975	1432.28	831.728	477.79	1376.88	774.558
560	0	211.928	1366.78	1602.12	96.1091	1374.08	1579.63	231.735	1533.92	1557.82	126.647	1537.03	1533.85	186.704	1521.58	1450.81	198.662	1594.25	1166.66	204.591	1398.72	1362.42	217.635	1324.07	1172.81	117.654	1600.48	1237.63	377.421	1466.04	1388.08	456.923	1494.98	1146.82	463.327	1499.52	1072.36	488.723	1414.93	919.688	445.43	1399.28	840.686	514.079	1425.16	833.409	481.055	1368.69	776.699
561	0	211.759	1357.79	1602.42	95.9596	1364.97	1580.23	231.189	1525.2	1558.74	125.857	1528.07	1534.86	185.331	1513.67	1451.5	197.507	1586.22	1167.16	204.392	1391.07	1363.1	217.983	1316.34	1173.92	116.03	1591.83	1238.2	376.55	1459.88	1388.78	456.246	1489.64	1147.73	463.132	1493.59	1073.37	490.347	1408.1	921.433	447.455	1390.9	842.449	515.601	1418.17	835.062	484.444	1360.59	778.906
562	0	211.97	1349.01	1602.65	96.246	1355.77	1580.76	230.667	1516.55	1559.36	125.293	1519.06	1535.91	184.107	1505.86	1452.02	196.34	1578.15	1167.68	204.24	1383.38	1363.72	218.265	1308.62	1174.89	114.096	1583.12	1238.6	375.739	1453.72	1389.42	455.745	1484.22	1148.41	463.015	1487.42	1074.33	491.865	1401.3	923.064	449.759	1382.64	844.004	517.185	1411.13	836.73	487.611	1352.15	781.014
563	0	212.463	1340.1	1602.8	96.451	1346.39	1581.44	230.361	1507.87	1559.99	124.932	1510.28	1536.82	182.844	1497.98	1452.45	195.52	1570.15	1167.82	203.963	1375.68	1364.19	218.595	1300.81	1175.68	112.403	1574.94	1239.1	374.622	1447.45	1389.84	455.274	1478.83	1149.29	462.575	1481.4	1074.92	493.442	1394.43	924.692	451.758	1374.11	845.556	518.798	1403.85	838.254	490.801	1343.79	783.154
564	0	213.042	1331.3	1602.92	96.9809	1337.19	1581.93	229.959	1499.14	1560.43	124.474	1501.12	1537.78	181.668	1490.07	1452.71	194.656	1562.19	1167.97	203.588	1367.95	1364.63	218.881	1293.1	1176.36	110.883	1566.41	1239.29	374.234	1440.97	1390.53	454.836	1473.42	1149.96	462.63	1475.2	1075.86	494.878	1387.46	926.263	453.77	1365.75	847.176	520.207	1396.68	839.784	493.734	1335.56	785.281
565	0	213.753	1322.56	1602.7	97.4361	1327.95	1582.35	229.831	1490.56	1560.71	124.112	1492.25	1538.5	180.398	1482.23	1452.88	193.596	1553.97	1167.83	203.285	1360.27	1364.77	218.971	1285.27	1176.71	109.433	1557.95	1239.4	373.543	1434.39	1390.79	454.281	1467.59	1150.41	462.805	1469.2	1076.65	496.194	1380.46	927.378	455.796	1357.55	848.606	521.737	1389.47	840.989	496.589	1327.19	787.249
566	0	214.51	1313.77	1602.33	98.2012	1318.69	1582.64	229.656	1481.88	1560.89	123.757	1483.08	1539.12	179.535	1474.44	1452.92	192.359	1546.3	1167.62	202.941	1352.43	1364.77	218.976	1277.46	1176.83	108.206	1549.72	1239.36	372.256	1427.95	1390.6	453.907	1461.81	1150.77	461.983	1462.8	1076.48	497.569	1373.44	928.506	457.666	1349.17	849.775	523.007	1382.35	841.906	499.203	1318.8	788.872
567	0	215.396	1304.93	1601.85	98.8819	1309.45	1582.83	229.62	1473.25	1560.85	123.627	1474.07	1539.75	178.716	1466.48	1452.83	191.205	1538.63	1167.57	202.758	1344.68	1364.59	219.056	1269.7	1176.76	106.9	1541.36	1239.17	372.05	1420.91	1390.76	453.352	1455.85	1150.89	461.186	1456.54	1076.44	498.659	1366.58	929.371	459.332	1340.79	850.885	524.071	1375.18	842.571	501.464	1310.44	790.473
568	0	216.241	1296.27	1601.32	99.6589	1300.22	1582.93	229.612	1464.61	1560.64	123.42	1465.16	1539.97	177.819	1458.4	1452.56	190.102	1530.85	1167.2	202.461	1336.87	1364.35	219.108	1261.9	1176.56	105.7	1533.2	1238.97	371.025	1414.06	1390.38	452.652	1449.78	1150.91	462.111	1450.02	1077.12	499.763	1359.44	930.081	461.02	1332.58	851.866	524.46	1367.94	842.948	503.591	1302.15	791.85
569	0	217.232	1287.49	1600.54	100.519	1291.13	1582.82	229.471	1455.91	1560.08	123.237	1456.14	1540.09	177.266	1450.23	1452	188.897	1523.31	1166.72	202.266	1329.03	1364	219.086	1254.06	1176.12	104.71	1525	1238.49	370.469	1406.85	1389.86	452.669	1443.46	1150.85	461.888	1443.62	1076.73	500.867	1352.31	930.52	462.555	1324.24	852.704	525.609	1360.42	843.268	505.539	1293.89	792.895
570	0	218.057	1278.73	1599.63	101.317	1281.89	1582.49	229.638	1447.38	1559.43	123.226	1447.05	1540.09	176.666	1442.25	1451.55	187.959	1515.87	1166.01	202.134	1321.1	1363.35	219.062	1246.32	1175.37	103.784	1516.71	1238	369.878	1399.46	1389.17	452.4	1437.09	1150.44	461.759	1436.92	1076.23	501.736	1345.26	930.618	463.845	1315.99	853.097	526.235	1353.24	843.037	507.218	1285.76	793.609
571	0	218.935	1269.96	1598.66	101.972	1272.79	1582.18	229.74	1438.66	1558.77	123.19	1438.16	1539.86	176.127	1434.02	1450.93	187.24	1507.88	1165.56	201.904	1313.07	1362.6	218.93	1238.35	1174.53	103.072	1508.64	1237.44	369.976	1392.07	1388.76	452.247	1430.5	1150.02	461.715	1430.28	1075.72	502.418	1338.16	930.492	464.921	1307.85	853.471	526.786	1345.95	842.75	508.673	1277.91	794.086
572	0	219.616	1261.37	1597.54	102.706	1263.62	1581.71	229.682	1429.96	1557.95	123.161	1429.19	1539.56	175.71	1425.64	1450.24	186.707	1500.91	1165.09	201.746	1304.96	1361.75	219.015	1230.31	1173.62	102.372	1500.71	1236.84	369.69	1384.39	1388	452.154	1423.61	1149.48	462.255	1423.26	1075.46	503.127	1330.93	930.255	465.796	1299.7	853.515	526.553	1338.6	842.153	509.808	1270.08	794.35
573	0	220.55	1252.48	1596.38	103.55	1254.54	1581.03	229.984	1421.63	1557.2	123.313	1420.21	1539.11	175.527	1417.24	1449.44	186.387	1493.52	1164.38	201.669	1296.85	1360.68	219.111	1222.2	1172.56	101.713	1492.61	1236.25	369.429	1376.35	1386.9	452.199	1416.28	1148.64	462.447	1416.24	1074.66	503.605	1323.69	929.558	466.63	1291.68	853.161	527.293	1331.16	841.498	510.494	1261.72	794.249
574	0	221.251	1243.9	1595.1	104.251	1245.38	1580.29	229.878	1412.74	1556.12	122.998	1411.2	1538.6	175.475	1408.86	1448.52	186.189	1485.83	1163.63	201.772	1288.68	1359.58	219.21	1214.06	1171.16	101.351	1484.59	1235.52	369.452	1368.39	1385.86	452.292	1409.14	1147.77	462.442	1409.15	1073.69	503.917	1316.36	928.722	467.123	1283.73	852.717	527.36	1323.95	840.402	511.166	1253.92	793.83
575	0	222.183	1235.12	1593.99	104.999	1236.17	1579.49	229.957	1404.08	1555.21	123.191	1402.27	1537.95	175.375	1400.38	1447.59	186.061	1477.79	1162.75	201.862	1280.42	1358.53	219.449	1205.79	1170.06	101.186	1476.51	1234.76	369.583	1360.26	1384.87	452.054	1401.92	1146.72	461.154	1401.79	1072.05	504.065	1308.99	927.831	467.568	1275.91	852.227	527.376	1316.58	839.363	511.489	1246.25	793.283
576	0	222.878	1226.39	1592.62	105.787	1227.08	1578.49	230.111	1395.47	1554.22	123.222	1393.03	1537.41	175.55	1391.89	1446.57	186.124	1469.8	1161.98	201.927	1272.11	1357.29	219.654	1197.48	1168.87	101.265	1468.37	1233.87	369.363	1351.84	1383.61	452.47	1394.15	1146.03	462.424	1394.34	1071.44	504.267	1301.7	926.642	467.706	1268.21	851.282	526.316	1309.37	837.587	511.521	1238.52	792.377
577	0	223.653	1217.4	1591.27	106.385	1217.84	1577.38	230.197	1386.62	1553.05	123.013	1384	1536.55	175.785	1383.39	1445.53	186.167	1461.76	1161.04	202.164	1263.75	1356.07	219.936	1189.03	1167.41	101.419	1460.04	1232.93	369.452	1343.26	1382.34	452.321	1386.55	1144.67	462.383	1386.62	1070.24	504.098	1294.19	925.099	467.646	1260.6	849.875	525.665	1302.01	835.947	511.259	1230.77	791.135
578	0	224.282	1208.57	1589.83	107.21	1208.66	1576.13	230.255	1377.88	1551.85	123.108	1374.86	1535.47	176.062	1374.83	1444.33	186.472	1453.79	1159.96	202.339	1255.22	1354.87	220.233	1180.46	1166.12	101.699	1451.66	1231.77	370.137	1334.67	1381.26	452.352	1378.4	1143.4	461.795	1378.77	1068.74	503.788	1286.58	923.613	467.289	1253.01	848.444	525.66	1294.68	834.549	510.819	1223.18	789.824
579	0	224.981	1199.87	1588.32	107.869	1199.49	1574.99	230.417	1369.26	1550.57	123.562	1365.98	1534.25	176.445	1366.24	1442.97	186.816	1445.64	1158.54	202.563	1246.78	1353.62	220.643	1171.88	1164.91	102.13	1443.25	1230.36	370.051	1325.96	1379.62	452.573	1370.2	1141.97	461.609	1370.82	1067.21	503.445	1278.91	921.897	466.823	1245.58	846.932	525.004	1287.33	832.715	510.122	1215.62	788.197
580	0	225.943	1190.84	1586.83	108.829	1190.29	1573.66	230.685	1360.46	1549.34	123.779	1356.85	1533.08	177.024	1357.71	1441.54	187.305	1437.38	1157.16	203.077	1238.23	1352.29	220.994	1163.16	1163.61	102.807	1434.78	1228.78	371.013	1317.24	1378.28	452.728	1361.73	1140.35	461.855	1362.71	1065.76	503.074	1271.28	920.049	466.286	1238.18	845.148	524.994	1279.8	830.901	509.35	1208.27	786.303
581	0	226.766	1181.86	1585.34	109.621	1181.03	1572.26	231.043	1351.51	1547.95	124.18	1347.83	1531.97	177.68	1349.04	1440.1	188.154	1428.9	1155.88	203.495	1229.59	1351.01	221.287	1154.4	1162.22	103.579	1426.44	1227.44	371.364	1308.31	1376.66	452.837	1352.84	1138.71	462.104	1354.47	1064.3	502.503	1263.49	918.055	465.537	1230.82	843.022	524.714	1272.58	828.986	508.248	1200.81	784.263
582	0	227.496	1172.94	1583.82	110.35	1171.84	1570.84	231.381	1342.66	1546.68	124.386	1338.65	1530.7	178.452	1340.33	1438.7	188.836	1420.32	1154.44	203.893	1220.72	1349.67	221.441	1145.5	1160.91	104.448	1417.93	1226.06	371.757	1299.21	1375.01	453.17	1343.77	1137.18	461.611	1346.03	1062.5	501.8	1255.6	915.953	464.657	1223.52	840.882	523.172	1265.16	826.5	507.034	1193.31	781.995
583	0	228.461	1163.88	1582.32	111.266	1162.57	1569.37	231.956	1333.67	1545.48	125.137	1329.37	1529.69	179.285	1331.48	1437.28	189.775	1411.35	1153.05	204.326	1211.93	1348.23	221.611	1136.45	1159.41	105.255	1409.25	1224.73	373.038	1289.88	1373.83	453.274	1334.64	1135.47	461.001	1337.51	1060.38	501.135	1247.61	913.667	463.607	1216.15	838.534	522.545	1257.58	824.407	505.577	1185.84	779.495
584	0	229.432	1154.9	1580.73	112.383	1153.29	1567.93	232.702	1324.53	1544.29	125.749	1320.13	1528.57	180.235	1322.54	1435.83	190.663	1402.03	1151.67	205.075	1203.02	1346.8	221.763	1127.21	1157.88	106.317	1400.53	1223.39	373.944	1280.44	1372.25	453.626	1325.26	1133.69	461.548	1328.88	1058.68	500.406	1239.49	911.188	462.585	1208.79	835.996	522.176	1249.39	822.147	504.329	1178.49	776.735
585	0	230.621	1145.74	1579.18	113.474	1144.04	1566.45	233.515	1315.5	1543	126.349	1310.92	1527.42	181.217	1313.57	1434.29	191.457	1392.86	1150.1	205.728	1193.93	1345.28	221.988	1117.93	1156.31	107.282	1391.79	1222.03	374.605	1271.07	1370.42	454.186	1315.84	1131.87	461.292	1320.08	1056.69	499.613	1231.41	908.625	461.445	1201.33	833.405	521.351	1241.66	819.676	502.738	1171.08	773.883
586	0	231.769	1136.62	1577.62	114.477	1134.66	1565.02	234.288	1306.47	1541.56	127.045	1301.63	1526.17	182.414	1304.52	1432.81	192.688	1383.8	1148.52	206.415	1184.81	1343.69	222.203	1108.49	1154.69	108.505	1383.02	1220.51	376.009	1261.31	1368.9	454.351	1306.33	1129.77	461.951	1311.21	1055.12	498.902	1223.19	906.058	460.363	1193.91	830.733	520.766	1233.9	817.229	501.335	1163.72	770.999
587	0	233.032	1127.35	1576.03	115.711	1125.24	1563.62	234.927	1297.2	1540.06	128.133	1292.31	1524.77	183.689	1295.23	1431.24	194.116	1374.46	1146.92	207.287	1175.35	1342.24	222.403	1098.88	1153.17	109.862	1374.2	1218.95	377.166	1251.49	1366.97	455.153	1296.68	1127.78	461.843	1302.13	1052.94	498.293	1214.98	903.307	459.319	1186.44	827.954	519.942	1226.09	814.502	499.792	1156.35	767.954
588	0	234.229	1118.05	1574.31	117.107	1115.78	1562.2	235.999	1287.94	1538.61	129.162	1282.98	1523.46	185.063	1285.88	1429.62	195.31	1364.95	1145.17	208.112	1165.91	1340.73	222.577	1089.19	1151.39	111.169	1365.06	1217.42	378.119	1241.45	1364.87	455.182	1287.05	1125.4	461.13	1292.9	1050.37	497.501	1206.52	900.502	458.301	1178.94	825.031	519.014	1218.16	811.759	498.341	1148.91	764.818
589	0	235.609	1108.71	1572.81	118.415	1106.36	1560.89	237.271	1278.64	1537.26	130.323	1273.52	1522.3	186.42	1276.48	1428.16	196.927	1355.58	1143.57	208.835	1156.34	1339.24	222.758	1079.33	1149.82	112.337	1355.75	1216.03	379.183	1231.32	1362.93	455.847	1277.29	1123.43	462.015	1283.54	1048.71	496.769	1198.04	897.687	457.012	1171.47	822.088	518.162	1210.23	809.149	496.832	1141.52	761.607
590	0	237.049	1099.22	1571.51	119.804	1096.84	1559.75	238.545	1269.18	1536	131.777	1264.07	1521.17	187.894	1266.89	1426.78	198.111	1345.87	1142.12	209.813	1146.57	1338	222.921	1069.47	1148.21	113.631	1346.4	1214.78	380.368	1221.11	1361.1	456.328	1267.4	1121.38	461.985	1273.88	1046.7	496.054	1189.54	894.95	455.936	1163.93	819.34	517.62	1202.12	806.674	495.555	1134.06	758.561
591	0	238.681	1089.59	1570.25	121.348	1087.27	1558.74	239.916	1259.51	1534.66	132.903	1254.51	1520.08	189.426	1257.21	1425.47	199.329	1336.04	1140.92	210.914	1136.73	1336.74	223.247	1059.47	1146.76	115.007	1336.83	1213.38	381.287	1210.85	1359.01	456.809	1257.81	1119.25	460.761	1264.25	1043.95	495.482	1180.93	892.211	455.119	1156.06	816.527	517.012	1194.07	803.976	494.217	1126.48	755.465
592	0	240.339	1079.89	1569.08	122.995	1077.55	1557.84	241.671	1249.87	1533.54	134.358	1244.73	1519.28	190.84	1247.29	1424.28	200.654	1326.06	1139.64	211.971	1126.78	1335.58	223.524	1049.35	1145.45	116.241	1326.85	1212.43	382.951	1200.48	1357.43	457.258	1247.37	1117.31	461.057	1254.4	1042.07	494.905	1172.18	889.577	454.221	1148.32	813.711	516.315	1185.91	801.31	493.093	1118.85	752.427
593	0	242.107	1070.12	1568.07	124.638	1067.72	1557.05	243.262	1240.13	1532.54	135.916	1234.99	1518.56	192.502	1237.44	1423.27	201.879	1315.87	1138.76	213.113	1116.78	1334.49	223.838	1039.23	1144.19	117.496	1316.79	1211.6	384.281	1190.07	1355.96	457.895	1237.05	1115.64	461.585	1244.44	1040.58	494.327	1163.22	887.112	453.374	1140.47	811.014	515.128	1177.79	798.696	491.933	1110.97	749.566
594	0	243.882	1060.26	1567.13	126.426	1057.94	1556.38	245.055	1230.21	1531.74	137.525	1225.24	1517.89	194.004	1227.37	1422.34	203.119	1305.85	1137.87	214.358	1106.65	1333.6	224.159	1028.94	1143.3	118.598	1306.52	1210.79	385.792	1179.75	1354.63	458.399	1226.71	1113.9	461.689	1234.27	1038.9	493.947	1154.23	884.806	452.735	1132.26	808.475	514.721	1169.36	796.63	491.037	1103.38	746.725
595	0	245.773	1050.34	1566.26	128.338	1047.95	1555.79	246.97	1220.29	1530.99	139.665	1215.23	1517.48	195.629	1217.35	1421.55	204.434	1295.43	1137.05	215.54	1096.34	1332.8	224.804	1018.44	1142.43	119.843	1296.06	1209.99	387.285	1169.34	1353.28	458.634	1216.21	1112.06	461.836	1224.01	1037.2	493.59	1145.11	882.454	452.202	1123.86	806.007	514.97	1160.65	794.718	490.217	1095.51	743.897
596	0	247.762	1040.23	1565.71	130.335	1037.96	1555.54	248.448	1210.25	1530.44	141.284	1205.24	1517.18	197.495	1207.27	1420.93	205.599	1285.2	1136.34	216.954	1086.03	1332.25	225.539	1007.74	1141.74	121.025	1285.41	1209.36	388.726	1158.94	1352.04	459.405	1205.52	1110.43	462.031	1213.68	1035.74	493.331	1135.72	880.347	451.951	1115.21	803.94	514.698	1151.95	792.767	489.65	1087.59	741.249
597	0	249.931	1030.14	1565.5	132.393	1027.85	1555.63	250.694	1200.05	1530.3	143.653	1195.12	1517.2	199.16	1197.05	1420.52	206.885	1274.44	1135.78	218.482	1075.63	1332.16	226.255	996.892	1141.58	122.137	1274.61	1208.95	390.221	1148.43	1351.06	460.114	1194.94	1109.12	462.13	1203.11	1034.28	493.402	1126.44	878.623	451.693	1106.81	801.99	514.596	1143.22	791.223	489.229	1079.46	739.067
598	0	252.071	1019.83	1565.52	134.439	1017.61	1555.94	252.861	1189.88	1530.38	145.537	1184.9	1517.53	201.046	1186.82	1420.42	208.098	1263.85	1135.4	219.954	1065.21	1332.28	227.117	985.967	1141.76	123.229	1263.84	1208.67	391.896	1138.03	1350.38	460.692	1184.19	1107.95	462.229	1192.49	1033.11	493.422	1116.78	877.181	451.747	1097.73	800.507	515.031	1134.77	789.991	489.042	1071.29	737.162
599	0	254.258	1009.45	1565.59	136.688	1007.26	1556.53	255.07	1179.59	1530.64	147.611	1174.49	1518.26	202.776	1176.46	1420.62	209.194	1252.55	1135.49	221.244	1054.57	1332.63	227.933	974.938	1142.1	124.4	1253.01	1209.01	393.283	1127.44	1349.81	460.986	1173.36	1106.95	462.453	1181.6	1032.35	493.775	1107.23	875.883	452.175	1088.05	799.447	514.794	1125.62	788.714	488.82	1062.8	735.307
600	0	256.671	999.013	1565.83	139.026	996.822	1557.33	257.189	1169.04	1531.21	149.795	1164.12	1519.24	204.556	1166.09	1421.08	210.096	1241.68	1135.65	222.716	1044.12	1333.04	228.756	963.839	1142.64	125.49	1242.1	1209.44	394.378	1116.85	1349.37	461.716	1162.4	1106.47	462.587	1170.67	1031.83	493.944	1097.37	874.879	451.583	1079.72	797.597	514.65	1116.34	787.768	488.796	1054.22	733.771
601	0	259.137	988.537	1566.46	141.481	986.308	1558.66	259.477	1158.8	1532.01	151.998	1153.66	1520.65	206.309	1155.82	1421.87	211.012	1230.42	1136.47	224.09	1033.63	1333.99	229.604	952.783	1143.84	126.459	1231.12	1210.34	395.83	1106.26	1349.59	462.44	1151.55	1106.42	462.991	1159.59	1031.71	493.897	1087.64	874.266	451.783	1070.27	797.02	515.075	1107.15	787.542	489.112	1045.46	732.918
602	0	261.817	977.929	1567.19	144.104	975.66	1559.99	261.56	1148.32	1533.22	154.281	1143.17	1522.33	207.884	1145.34	1422.94	211.871	1219.57	1137.2	225.461	1023.12	1335.12	230.326	941.749	1145.12	127.438	1220.37	1211.4	397.489	1095.54	1350.16	462.997	1140.5	1106.5	462.931	1148.39	1031.83	494.224	1077.56	874.095	452.255	1060.69	796.844	515.545	1097.78	787.598	489.553	1036.34	732.429
603	0	264.472	967.345	1567.92	146.747	964.869	1561.55	263.862	1137.84	1534.47	156.613	1132.61	1524.6	209.589	1135.07	1424.21	212.524	1208.29	1138.51	226.635	1012.57	1336.51	230.998	930.894	1146.59	128.4	1209.55	1212.99	398.458	1084.92	1350.69	463.615	1129.17	1106.97	463.452	1137.1	1032.43	494.65	1067.21	874.301	452.664	1050.68	796.957	515.365	1088.05	787.633	490.021	1026.9	732.165
604	0	267.27	956.722	1568.77	149.588	954.157	1563.36	266.375	1127.34	1536.15	158.9	1122.05	1526.99	211.032	1124.65	1425.77	213.316	1197.46	1139.96	227.776	1002.25	1337.99	231.612	920.023	1148.37	129.33	1198.82	1214.68	400.223	1074.2	1351.95	464.061	1118.04	1107.57	463.768	1125.83	1033.31	494.97	1056.54	874.914	453.073	1040.61	797.382	516.249	1077.88	788.517	490.313	1017.34	732.299
605	0	270.048	946.081	1569.52	152.111	943.516	1565.24	268.489	1116.77	1537.82	161.264	1111.57	1529.57	212.625	1114.56	1427.19	214.44	1186.74	1141.2	228.765	992.069	1339.76	232.077	909.242	1150.47	130.404	1188.27	1216.17	401.53	1063.49	1353.2	464.796	1106.67	1108.6	464.394	1114.5	1034.27	495.578	1045.94	875.853	453.746	1030.22	798.28	517.007	1067.59	789.571	490.785	1007.35	732.918
606	0	272.738	935.53	1570.25	154.793	932.806	1566.99	270.747	1106.56	1539.53	163.242	1101.09	1532.32	214.113	1104.46	1428.77	215.147	1175.89	1142.84	229.635	981.768	1341.37	232.35	898.591	1152.46	131.515	1177.95	1217.8	402.28	1052.73	1354.36	465.427	1095.15	1109.59	465.017	1103.11	1035.53	496.008	1034.76	876.957	454.325	1019.66	799.089	517.515	1056.88	790.666	491.417	997.082	733.597
607	0	275.41	925.062	1570.96	157.529	922.147	1568.71	273.043	1096.19	1541.22	165.271	1090.69	1535.01	215.668	1094.45	1430.38	216.308	1165.15	1144.19	230.318	971.964	1342.88	232.696	887.873	1154.63	132.916	1167.82	1219.27	403.746	1041.94	1355.81	466.302	1083.6	1110.69	465.564	1091.66	1036.67	496.648	1023.61	878.159	455.008	1008.66	800.103	518.344	1045.9	791.931	492.059	986.37	734.508
608	0	278.075	914.698	1571.71	160.209	911.469	1570.75	275.106	1085.88	1542.89	167.014	1080.07	1537.67	217.267	1084.86	1431.91	217.779	1154.45	1145.77	231.154	962.059	1344.64	232.875	877.422	1156.81	134.486	1157.92	1220.82	404.776	1030.97	1357.28	467.34	1072.11	1112.06	466.501	1080.21	1038.03	497.409	1012.2	879.627	455.65	997.383	801.607	519.15	1034.56	793.369	492.693	975.17	735.811
609	0	280.639	904.483	1572.4	162.812	900.847	1572.66	277.085	1075.82	1544.43	168.819	1069.74	1540.34	218.711	1075.01	1433.33	219.273	1143.62	1146.88	231.669	952.073	1346.4	232.772	867.045	1158.98	136.266	1148.18	1222.15	405.938	1019.96	1358.91	468.168	1060.58	1113.41	467.709	1068.68	1039.65	498.203	1000.65	881.204	456.398	985.954	803.126	520.04	1023.03	794.85	493.375	963.749	737.293
610	0	283.122	894.397	1573.1	165.26	890.372	1574.59	278.377	1065.77	1545.81	170.294	1059.36	1542.84	220.027	1065.12	1434.83	220.89	1133.12	1148.17	232.046	942.116	1347.97	232.542	856.862	1161.06	138.181	1138.71	1223.46	406.942	1008.76	1360.41	469.266	1049.03	1114.92	468.756	1056.96	1041.05	499.056	988.909	882.703	457.2	974.1	804.687	520.501	1011.11	796.267	493.951	952.165	738.633
611	0	285.523	884.435	1573.64	167.629	879.993	1576.24	279.282	1055.81	1547.03	171.771	1049.12	1545.11	221.475	1055.4	1436	222.728	1122.62	1149.52	232.313	932.066	1349.49	232.208	846.806	1162.82	140.326	1129.42	1224.7	407.802	997.382	1361.86	470.529	1037.48	1116.37	470.244	1045.31	1042.54	499.884	976.77	884.152	457.88	961.97	806.186	521.493	998.976	797.518	494.52	939.852	740.168
612	0	287.813	874.721	1574.31	169.986	869.679	1578.02	280.829	1046.16	1548.33	172.891	1038.88	1547.29	222.837	1045.67	1437.39	224.602	1112.65	1150.73	232.6	922.232	1350.87	231.722	837.034	1164.42	142.644	1120.41	1225.98	408.18	985.913	1363.17	471.901	1025.85	1117.96	471.812	1033.49	1044.17	500.843	964.484	885.789	458.7	950.208	807.724	522.783	986.115	799.21	495.348	927.161	742.003
613	0	289.928	865.025	1574.97	172.228	859.361	1579.66	281.643	1036.53	1549.35	174.003	1028.65	1549.24	224.086	1035.78	1438.69	226.411	1102.63	1151.9	232.601	912.426	1352.08	231.115	827.457	1165.83	144.737	1111.35	1227.09	409.474	974.388	1364.85	473.4	1014.2	1119.6	473.415	1021.52	1045.65	501.815	951.94	887.351	460.011	937.047	809.811	523.897	973.27	800.755	495.969	914.353	743.717
614	0	292.06	855.451	1575.48	174.433	849.036	1581.05	282.105	1026.81	1550.18	174.821	1018.4	1551.1	225.322	1025.97	1439.82	228.291	1093.1	1153.09	232.771	902.676	1353.13	230.435	817.952	1166.8	146.837	1102.4	1228.29	409.695	962.81	1365.86	474.959	1002.39	1120.99	475.193	1009.48	1046.99	502.917	939.183	888.823	460.897	924.206	811.349	524.367	959.899	801.838	496.529	901.102	745.317
615	0	293.763	846.056	1575.84	176.394	838.821	1582.34	282.802	1017.39	1551.1	175.539	1008.31	1552.63	226.661	1016.33	1441.01	230.415	1083.41	1154.31	232.619	893.005	1354.06	229.647	808.709	1167.63	149.278	1094.01	1229.59	410.387	951.415	1366.99	476.582	990.47	1122.42	476.985	997.273	1048.3	504.053	926.065	890.497	461.887	910.954	813.25	526.034	946.342	803.377	497.111	887.529	747.046
616	0	295.393	836.573	1576.27	178.134	828.662	1583.54	283.344	1008.01	1552	175.713	998.153	1554.23	227.671	1006.6	1442.14	232.185	1074.5	1155.49	232.496	883.529	1354.9	228.675	799.534	1168.2	151.544	1085.53	1230.66	411.232	939.776	1368.33	478.169	978.287	1123.93	478.819	985.075	1049.62	505.01	912.832	892.037	462.334	898.794	814.483	527.005	932.158	804.897	497.711	873.717	748.934
617	0	296.867	827.212	1576.6	179.76	818.494	1584.59	283.558	998.415	1552.88	176.134	988.044	1555.75	228.782	996.956	1443.28	234.662	1064.53	1156.62	232.595	874.1	1355.7	227.715	790.498	1168.64	153.819	1077.14	1231.73	411.698	928.221	1369.34	479.911	965.906	1125.34	480.749	972.659	1050.93	505.935	899.492	893.524	462.994	885.444	816.032	528.234	917.975	806.36	498.274	859.516	750.722
618	0	298.09	817.853	1576.88	180.999	808.403	1585.22	283.784	989.135	1553.75	176.806	977.965	1557.08	229.871	987.477	1444.25	236.512	1055.32	1158.02	232.402	864.784	1356.29	226.749	781.586	1168.87	155.895	1068.81	1233.03	411.921	916.778	1370.32	481.303	953.273	1126.52	482.12	960.044	1051.96	506.9	885.868	895.042	463.954	872.996	817.185	529.086	903.668	807.701	498.786	845.119	752.646
619	0	299.088	808.528	1577.19	182.162	798.427	1585.94	283.817	979.791	1554.82	176.877	968.108	1558.24	230.991	978.142	1445.39	238.681	1045.93	1158.97	232.367	855.588	1356.95	225.766	772.802	1169.27	158.028	1060.54	1233.99	412.33	905.651	1371.18	482.866	940.523	1127.84	484.243	947.584	1053.2	507.932	872.01	896.758	465.208	858.707	819.206	530.932	888.978	809.395	499.567	830.487	754.619
620	0	299.875	799.105	1577.56	182.983	788.466	1586.49	283.716	970.332	1555.9	176.837	958.246	1559.64	232	968.863	1446.42	240.498	1036.62	1160.03	232.41	846.555	1357.58	224.87	764.24	1169.69	160.031	1052.28	1235.13	412.681	894.754	1372.21	484.267	927.639	1129.05	485.93	934.85	1054.41	508.983	858.204	898.386	465.797	845.337	820.758	532.25	874.17	810.991	500.202	815.68	756.631
621	0	300.25	789.808	1577.89	183.528	778.509	1586.78	283.815	960.989	1557.29	176.487	948.428	1560.93	232.888	959.671	1447.53	242.233	1027.55	1161.21	232.405	837.622	1358.26	224.123	755.892	1170.11	162.001	1044.2	1236.39	412.933	884.028	1373.03	485.67	914.718	1130.3	487.665	922.031	1055.52	509.839	844.092	899.978	466.889	831.211	822.521	533.629	859.132	812.576	500.869	800.573	758.671
622	0	300.402	780.318	1578.19	183.842	768.647	1586.76	283.551	951.619	1558.6	176.583	938.717	1562.09	233.792	950.619	1448.41	243.884	1018.69	1162.53	232.459	828.859	1358.84	223.447	747.594	1170.61	163.824	1036.1	1237.38	413.323	873.62	1373.94	486.691	901.754	1131.3	489.261	909.224	1056.69	510.729	829.927	901.51	467.694	817.151	823.942	534.417	844.055	813.872	501.584	785.428	760.679
623	0	300.487	770.791	1578.45	183.85	758.957	1586.69	283.279	942.146	1560.19	176.34	929.183	1563.28	234.754	941.752	1449.46	245.343	1009.88	1163.55	232.553	820.219	1359.47	222.982	739.635	1171.09	165.571	1028.04	1238.58	413.651	863.549	1374.79	487.716	888.852	1132.32	490.776	896.264	1057.76	511.482	815.699	903.162	468.53	802.911	825.586	536.047	828.84	815.715	502.244	770.093	762.803
624	0	300.21	761.359	1578.62	183.519	749.35	1586.46	283.235	932.95	1561.67	176.251	919.805	1564.33	235.622	933.027	1450.29	246.774	1000.96	1164.3	232.93	811.751	1360.1	222.619	731.502	1171.77	167.346	1020.09	1239.31	414.023	853.808	1375.6	488.738	876.047	1133.24	492.146	883.423	1058.78	512.277	801.457	904.815	469.359	788.438	827.281	537.196	813.521	817.362	503.038	754.589	765.036
625	0	299.952	751.832	1578.74	183.164	739.877	1586.05	282.919	923.528	1563.05	176.084	910.525	1565.3	236.516	924.426	1450.9	248.149	992.928	1165.03	233.157	803.202	1360.65	222.381	723.446	1172.48	168.931	1012.15	1240.07	414.466	844.145	1376.26	489.492	863.441	1133.98	493.322	870.534	1059.4	513.06	787.179	906.406	470.258	773.701	828.911	538.376	798.19	818.851	503.755	738.891	767.224
626	0	299.414	742.256	1578.91	182.686	730.623	1585.61	282.805	914.182	1564.54	175.95	901.332	1566.2	237.381	915.904	1451.59	249.507	984.005	1165.82	233.246	794.778	1361.14	222.291	715.406	1173.17	170.291	1004.25	1240.77	414.936	834.833	1376.94	490.222	850.941	1134.87	494.51	857.737	1060.25	513.797	772.831	908.186	470.921	759.143	830.653	539.084	782.858	820.449	504.352	723.235	769.487
627	0	298.671	732.875	1579	181.905	721.631	1585.27	282.882	905.007	1565.98	175.857	892.46	1566.94	238.1	907.429	1452.13	250.633	975.555	1166.34	233.704	786.476	1361.65	222.214	707.404	1173.95	171.68	996.292	1241.49	415.36	825.63	1377.72	491.014	838.679	1135.78	495.719	845.029	1061.21	514.367	758.568	909.956	471.751	744.227	832.547	540.318	767.316	822.386	505.006	707.529	771.9
628	0	297.895	723.356	1578.92	181.056	712.546	1584.7	282.756	895.608	1567.2	175.732	883.511	1567.65	238.836	899.03	1452.55	251.437	966.828	1166.61	233.931	778.03	1361.96	222.337	699.387	1174.45	172.904	988.326	1241.81	415.746	816.613	1378.22	491.607	826.591	1136.51	496.698	832.44	1061.96	514.871	744.223	911.571	472.234	729.47	834.282	541.098	751.724	824.036	505.482	691.707	774.254
629	0	296.989	713.933	1578.9	180.056	703.72	1584.02	282.742	886.257	1568.39	175.64	874.853	1568.33	239.542	890.587	1453.05	252.563	958.389	1167.26	234.093	769.691	1362.09	222.533	691.237	1174.84	174.065	980.38	1242.38	416.103	807.582	1378.75	492.285	814.84	1137.21	497.836	819.815	1062.87	515.315	729.977	913.286	472.678	714.706	835.866	541.534	736.358	825.615	505.853	675.788	776.638
630	0	296.076	704.565	1578.86	179.144	694.93	1583.27	283.089	877.203	1569.42	175.605	866.129	1568.81	240.002	882.142	1453.39	253.336	950.003	1167.36	234.49	761.254	1362.32	222.733	683.21	1175.1	174.977	972.447	1242.77	416.436	798.737	1379.22	492.867	803.305	1137.9	498.673	807.547	1063.49	515.785	715.737	915.076	472.941	699.761	837.664	542.326	720.784	827.587	506.08	659.789	779.171
631	0	295.247	695.281	1578.68	178.055	686.338	1582.6	283.212	868.073	1570.21	175.541	857.568	1569.2	240.435	873.7	1453.55	253.955	941.534	1167.37	234.763	752.925	1362.39	222.892	675.12	1175.24	175.766	964.449	1242.82	416.684	789.973	1379.5	493.421	792.119	1138.48	499.241	795.608	1063.97	516.063	701.756	916.787	473.194	685.087	839.475	542.531	705.493	829.21	506.276	643.983	781.75
632	0	294.302	686.179	1578.55	177.059	677.759	1581.96	283.236	858.932	1570.71	175.227	849.059	1569.35	240.824	865.222	1453.57	254.864	933.402	1167.62	234.913	744.488	1362.35	223.104	667.05	1175.04	176.397	956.374	1242.98	416.906	781.246	1379.72	494.006	781.143	1138.99	500.016	783.721	1064.45	516.377	687.805	918.431	473.253	670.258	841.314	542.86	690.119	830.873	506.318	628.066	784.488
633	0	293.317	676.941	1578.28	176.018	669.177	1581.33	283.347	849.747	1571.12	175.221	840.648	1569.27	241	856.735	1453.47	255.527	925.122	1167.76	235.075	736.088	1362.1	223.239	658.933	1174.71	176.994	948.289	1243.13	417.043	772.547	1379.76	494.522	770.531	1139.38	500.513	771.87	1064.73	516.497	674.079	919.945	473.266	655.692	843.04	542.867	674.968	832.398	506.112	612.255	787.052
634	0	292.305	667.895	1578.04	174.798	660.747	1580.76	282.958	840.791	1571.28	175.462	832.194	1569.04	241.049	848.207	1453.3	255.83	916.91	1167.57	235.128	727.701	1361.81	223.451	650.861	1174.2	177.391	940.203	1243.12	417.021	763.86	1379.77	494.929	760.236	1139.62	501.157	760.417	1065.12	516.552	660.386	921.566	473.071	641.141	844.947	542.956	659.937	834.223	505.942	596.532	789.867
635	0	291.347	658.834	1577.7	173.902	652.289	1580.04	283.627	832.15	1571.24	175.325	823.795	1568.6	241.013	839.605	1453.03	256.074	908.979	1167.06	235.15	719.215	1361.38	223.603	642.729	1173.5	177.587	932.09	1242.82	417.046	755.294	1379.54	495.233	750.108	1139.72	501.364	749.03	1065.15	516.574	646.838	923.124	472.709	626.55	846.824	542.408	645.239	835.624	505.549	580.996	792.715
636	0	290.438	649.942	1577.24	172.811	643.952	1579.3	283.197	823.182	1570.75	175.303	815.363	1567.82	240.949	830.966	1452.62	256.479	900.686	1166.61	235.152	710.745	1360.75	223.81	634.55	1172.58	177.76	923.91	1242.36	416.887	746.624	1379.03	495.623	740.215	1139.62	501.77	737.866	1065.02	516.335	633.542	924.439	472.241	612.24	848.498	542.203	630.297	837.106	505.049	565.655	795.312
637	0	289.517	641.014	1576.83	171.91	635.439	1578.62	283.272	814.385	1570.23	175.077	807.019	1567.12	240.838	822.307	1452.18	256.84	892.644	1166.36	234.991	702.162	1360.13	223.949	626.314	1171.75	177.705	915.687	1242.02	416.832	737.969	1378.6	495.874	730.56	1139.5	502.114	726.77	1064.98	516.223	620.429	925.787	471.709	598.045	850.238	541.367	615.999	838.215	504.45	550.389	797.943
638	0	288.703	632.156	1576.63	170.834	626.964	1578.09	282.753	805.359	1569.68	174.684	798.471	1566.29	240.649	813.568	1451.76	257.259	884.575	1166.2	234.871	693.61	1359.42	224.081	618.144	1170.75	177.58	907.34	1241.7	416.686	729.272	1378.28	496.231	721.103	1139.52	502.364	715.923	1064.94	515.915	607.398	927.204	471.009	584.025	852.06	540.991	601.505	839.878	503.593	535.456	800.669
639	0	287.803	623.195	1576.15	169.914	618.508	1577.43	282.624	796.451	1568.86	174.278	789.95	1565.4	240.251	804.765	1451.17	257.577	876.783	1165.98	234.637	685.035	1358.59	223.972	609.944	1169.57	177.37	898.885	1241.35	416.357	720.613	1377.69	496.282	711.737	1139.22	502.678	705.292	1064.79	515.426	594.713	928.303	470.084	570.284	853.677	540.023	587.391	840.995	502.659	520.588	803.276
640	0	286.756	614.415	1575.44	168.98	609.923	1576.6	281.895	787.539	1567.81	173.932	781.434	1564.34	239.825	795.869	1450.51	257.531	868.74	1165.75	234.35	676.337	1357.57	223.942	601.666	1168.24	176.954	890.53	1240.89	415.946	711.95	1376.87	496.364	702.55	1138.65	502.647	694.684	1064.37	514.812	582.119	929.353	469.346	556.782	855.131	538.731	573.642	841.876	501.571	506.113	805.748
641	0	285.873	605.528	1574.71	167.944	601.472	1575.8	281.666	778.667	1566.69	173.492	772.866	1563.08	239.188	786.895	1449.74	257.129	860.775	1165.11	233.921	667.615	1356.5	223.707	593.344	1166.86	176.511	881.95	1240.29	415.518	703.327	1375.96	496.222	693.589	1138.03	502.65	684.401	1063.89	514.203	569.892	930.188	467.664	543.077	856.728	537.747	559.902	842.916	500.376	491.755	808.129
642	0	284.988	596.632	1573.98	167.024	592.801	1574.94	281.288	769.831	1565.54	173.016	764.267	1561.71	238.507	777.852	1448.86	256.388	852.806	1164.35	233.567	658.9	1355.49	223.498	585.005	1165.61	175.874	873.309	1239.6	414.997	694.721	1375.06	496.236	684.723	1137.42	502.642	674.334	1063.32	513.384	557.795	931.101	466.392	530.136	858.2	536.454	546.544	843.879	498.917	477.838	810.482
643	0	284.071	587.669	1573.15	166.13	584.326	1574.1	280.788	760.811	1564.23	172.445	755.559	1560.46	237.893	768.936	1447.86	255.601	844.31	1163.44	233.014	650.071	1354.33	223.17	576.659	1164.25	175.163	864.594	1238.86	414.385	686.195	1373.97	496.052	675.899	1136.67	502.4	664.272	1062.5	512.616	545.99	931.763	464.991	516.969	859.603	534.839	533.619	844.531	497.457	464.223	812.649
644	0	283.103	578.76	1572.15	165.282	575.573	1573.11	279.924	751.74	1562.8	171.999	746.772	1559.01	237.076	759.871	1446.77	254.565	836.358	1162.63	232.469	641.151	1353.03	222.808	568.258	1162.73	174.304	855.828	1238.05	413.727	677.617	1372.78	495.622	666.992	1135.65	502.057	654.401	1061.58	511.676	534.489	932.209	463.444	504.507	860.77	533.217	520.813	845.051	495.833	450.77	814.678
645	0	282.118	569.664	1571.13	164.132	566.832	1572.06	279.511	742.735	1561.35	171.276	737.896	1557.56	236.011	750.702	1445.72	253.614	827.957	1161.67	231.665	632.249	1351.76	222.271	559.73	1161.25	173.231	847.045	1237.1	412.937	668.933	1371.59	495.207	658.234	1134.7	501.722	644.695	1060.79	510.491	523.081	932.672	462.271	492.313	861.837	531.361	508.38	845.463	494.107	437.785	816.615
646	0	281.125	560.562	1569.98	163.191	558.146	1570.85	278.891	733.756	1559.83	170.672	728.944	1555.96	235.069	741.578	1444.68	252.55	819.629	1160.74	230.858	623.27	1350.38	221.667	551.25	1159.64	172.07	838.163	1235.97	411.971	660.364	1370.25	494.622	649.464	1133.6	501.149	635.073	1059.84	509.203	512.123	932.85	460.321	480.473	862.681	529.505	496.286	845.793	492.188	425.072	818.257
647	0	279.944	551.436	1568.65	162.084	549.017	1569.7	278.079	724.714	1558.13	169.718	719.915	1554.43	234.049	732.428	1443.31	251.118	811.345	1159.57	230.098	614.279	1348.9	221.096	542.684	1158.03	170.833	829.177	1234.81	411.096	651.791	1368.75	493.909	640.672	1132.35	500.572	625.616	1058.66	507.807	501.13	932.841	458.433	468.733	863.309	527.491	484.364	845.779	490.367	412.829	819.643
648	0	278.913	542.256	1567.34	160.944	539.977	1568.4	277.082	715.378	1556.46	168.719	710.694	1552.87	232.729	723.158	1442.06	249.991	803.058	1158.86	229.171	605.309	1347.37	220.336	533.99	1156.32	169.518	820.256	1233.84	410.068	643.096	1367.32	493.15	631.863	1131.17	499.768	616.23	1057.39	506.431	490.518	932.632	456.865	457.302	863.822	525.558	472.776	845.764	488.373	400.944	820.837
649	0	277.684	532.962	1566.03	159.865	530.838	1567	275.937	706.09	1554.9	167.581	701.605	1551.28	231.435	713.935	1440.91	248.644	795.038	1157.94	228.194	596.215	1345.89	219.63	525.169	1154.7	168.014	811.166	1232.8	409.078	634.467	1366.04	492.162	623.021	1130.01	498.946	606.963	1056.24	504.786	480.091	932.501	454.616	446.294	864.174	523.447	461.658	845.679	486.246	389.415	821.882
650	0	276.528	523.67	1564.64	158.509	521.667	1565.77	274.833	696.825	1553.36	166.412	692.309	1549.78	230.079	704.759	1439.48	247.091	786.232	1156.84	227.018	587.094	1344.41	218.855	516.359	1153.04	166.449	802.07	1231.54	407.823	625.794	1364.66	491.171	614.285	1128.74	497.995	597.946	1055.04	503.074	470.095	932.138	452.493	435.554	864.542	521.279	450.879	845.266	484.027	378.442	822.651
651	0	275.125	514.367	1563.14	157.148	512.16	1564.31	273.49	687.436	1551.86	164.974	682.955	1548.28	228.492	695.4	1438.25	245.627	777.327	1155.66	225.918	577.887	1342.83	218.112	507.456	1151.31	164.803	792.933	1230.24	406.55	617.025	1363.18	489.927	605.445	1127.41	496.811	588.907	1053.74	501.275	460.159	931.409	450.503	425.248	864.446	518.964	440.391	844.704	481.597	367.708	822.953
652	0	273.586	505.003	1561.71	155.698	502.8	1562.86	271.904	678.119	1550.37	163.442	673.565	1546.87	227.015	686.18	1436.92	243.77	768.778	1154.39	224.528	568.664	1341.41	217.285	498.482	1149.66	163.147	783.796	1229.09	405.157	608.321	1361.86	488.548	596.778	1126.07	495.474	580	1052.36	499.181	450.622	930.731	448.207	415.331	864.029	516.625	430.335	844.085	479.228	357.378	823.059
653	0	272.036	495.63	1560.39	154.124	493.442	1561.59	270.281	668.786	1549.17	161.784	664.102	1545.51	225.254	676.904	1435.7	242.393	760.04	1153.21	223.104	559.378	1340.03	216.382	489.514	1148.22	161.474	774.578	1227.75	403.611	599.496	1360.69	487.065	588.063	1124.94	494.04	571.377	1051.14	497.057	441.273	930.061	445.687	405.929	863.776	514.1	420.681	843.364	476.639	347.681	823.178
654	0	270.324	486.249	1559.12	152.406	483.813	1560.16	268.415	659.237	1547.97	160.061	654.653	1544.32	223.483	667.521	1434.49	240.739	751.103	1151.99	221.643	549.979	1338.79	215.523	480.449	1146.84	159.761	765.302	1226.4	402.388	590.485	1359.73	485.482	579.393	1123.81	492.436	562.697	1049.88	494.933	432.519	929.06	443.26	396.717	863.11	511.566	411.391	842.543	474.064	338.273	822.749
655	0	268.455	476.829	1558.01	150.551	474.44	1559.01	266.522	649.927	1546.87	158.045	645.196	1543.11	221.78	658.113	1433.47	238.906	741.911	1151.07	220.038	540.643	1337.52	214.51	471.281	1145.57	158.23	756.068	1225.26	400.76	581.382	1358.74	483.759	570.786	1122.78	490.797	554.183	1048.76	492.734	423.833	927.91	440.799	388.016	862.403	509.005	402.563	841.495	471.507	329.39	822.256
656	0	266.351	467.348	1557.03	148.51	464.719	1557.79	264.212	640.338	1546.05	155.806	635.72	1542.22	219.772	648.598	1432.62	237.266	732.787	1150.35	218.372	531.134	1336.48	213.313	461.985	1144.55	156.625	746.683	1224.38	399.068	572.131	1358.15	481.904	562.259	1121.98	489.026	545.871	1047.89	490.518	415.447	926.953	437.948	379.925	861.32	506.458	394.282	840.423	468.711	321.048	821.434
657	0	264.153	457.832	1556.21	146.182	455.343	1556.72	261.946	630.891	1545.34	153.524	626.156	1541.29	217.834	639.185	1431.65	235.382	723.085	1149.7	216.541	521.635	1335.57	212.35	452.978	1143.51	154.937	737.108	1223.45	397.259	562.674	1357.65	479.991	553.675	1121.21	487.168	537.704	1047.23	487.902	407.484	925.793	435.206	372.07	860.308	503.692	386.393	839.202	466.303	313.237	820.478
658	0	261.798	448.389	1555.46	143.875	445.63	1555.75	259.39	621.381	1544.72	151.075	616.533	1540.42	215.694	629.569	1430.87	233.79	713.846	1148.93	214.671	511.995	1334.71	210.767	443.374	1142.7	153.266	727.578	1222.42	395.255	553.241	1357.16	477.929	545.145	1120.57	485.14	529.574	1046.48	485.294	399.688	924.648	432.526	364.675	858.936	500.8	378.846	837.838	463.511	305.653	819.059
659	0	259.297	438.847	1554.8	141.522	436.201	1554.69	256.766	611.946	1544.17	148.421	606.991	1539.69	213.763	620.032	1430.24	231.768	703.809	1148.21	212.724	502.247	1334.09	209.34	433.768	1142.09	151.637	717.848	1221.33	393.274	543.643	1356.72	475.852	536.665	1119.96	483.103	521.578	1045.67	482.841	392.276	923.273	429.883	357.649	857.486	498.117	371.759	836.356	460.793	298.635	817.505
660	0	256.714	429.526	1554.4	138.797	426.542	1553.91	254.121	602.425	1543.77	145.758	597.5	1538.88	211.463	610.421	1429.46	229.954	694.027	1147.41	210.755	492.483	1333.62	207.588	423.805	1141.86	150.055	708	1220.44	391.282	533.932	1356.61	473.727	528.284	1119.6	481.003	513.751	1045.1	480.234	385.106	921.995	426.936	350.531	856.347	495.533	365.038	835.014	458.01	292.096	815.819
661	0	253.967	420.001	1554.04	136.065	417.155	1553.32	251.191	593.021	1543.39	143.075	588.033	1538.12	209.24	600.79	1428.69	227.891	683.708	1146.85	208.563	482.611	1333.25	205.698	413.772	1141.69	148.46	697.907	1219.37	389.151	524.223	1356.47	471.511	519.911	1119.2	478.787	505.979	1044.5	477.754	378.232	920.584	424.054	343.993	854.579	492.79	358.662	833.456	454.965	285.841	813.648
662	0	251.016	410.638	1553.7	133.17	407.643	1552.49	248.327	583.628	1542.96	140.135	578.656	1537.31	206.869	591.161	1427.95	225.852	673.287	1146.11	206.267	472.566	1332.86	203.771	403.497	1141.53	146.727	687.575	1218.1	386.805	514.466	1356.15	469.24	511.556	1118.68	476.496	498.373	1043.92	475.189	371.495	918.816	421.531	338.656	852.306	490.12	352.487	831.63	451.976	280.009	811.159
663	0	247.97	401.127	1553.68	130.084	398.208	1552.08	245.231	574.118	1542.78	137.143	569.065	1536.74	204.343	581.244	1427.42	223.904	663.037	1145.51	204.06	462.38	1332.62	201.927	392.804	1141.56	144.883	677.178	1217	384.419	504.595	1356.09	466.864	503.13	1118.39	474.04	490.809	1043.38	472.767	364.992	917.222	419.273	332.483	850.609	487.439	346.555	829.874	449.087	274.487	808.563
664	0	244.855	391.743	1554.13	127.127	388.644	1551.85	242.028	564.693	1542.8	134.018	559.497	1536.37	201.809	571.504	1427.08	221.652	652.504	1144.84	201.649	452.219	1332.62	199.802	382.041	1141.77	143.029	666.597	1215.94	382.214	494.514	1356.41	464.531	494.813	1118.22	471.591	483.306	1043.05	470.266	358.625	915.677	416.777	326.986	848.686	485.175	340.88	828.429	446.323	269.354	805.826
665	0	241.684	382.369	1554.52	123.863	379.145	1551.81	238.821	555.302	1542.92	130.755	550.072	1535.92	199.322	561.443	1426.82	219.348	641.924	1144.41	199.323	441.907	1332.81	197.794	371.02	1142.06	141.014	655.873	1215.24	379.962	484.461	1356.7	462.142	486.406	1118.23	468.996	475.775	1042.82	467.868	352.488	914.058	413.806	321.961	846.481	482.754	335.524	826.697	443.456	264.667	802.945
666	0	238.433	372.916	1555.16	120.631	369.744	1551.84	235.239	545.823	1543.19	127.492	540.364	1535.63	196.57	551.306	1426.8	216.904	631.045	1144.22	196.968	431.505	1333.06	196.006	359.887	1142.47	138.909	645.108	1214.87	377.483	474.23	1357.16	459.853	478.111	1118.44	466.491	468.354	1042.8	465.539	346.488	912.557	411.379	316.996	844.44	480.305	330.684	824.934	440.816	260.218	800.056
667	0	235.089	363.546	1556.1	117.346	360.208	1552.1	231.774	536.306	1543.61	124.041	530.813	1535.49	194.08	541.224	1426.92	214.594	620.24	1144.27	194.507	421.01	1333.52	194.061	348.595	1143.02	136.849	634.363	1214.54	375.045	463.896	1357.82	457.414	469.62	1118.93	463.984	460.889	1043.13	463.157	340.766	911.09	409.37	312.315	842.503	478.074	326.025	823.515	438.173	256.312	797.148
668	0	231.475	354.21	1557.35	113.673	350.757	1552.56	228.374	527.07	1544.28	120.541	521.26	1535.38	191.483	531.197	1427.16	212.317	609.71	1144.44	192.006	410.563	1334.16	192.271	337.352	1143.76	134.759	623.613	1214.4	372.67	453.338	1358.72	454.922	461.172	1119.52	461.399	453.607	1043.62	460.716	335.292	909.796	406.517	308.201	840.495	475.675	321.795	822.084	435.794	252.588	794.274
669	0	227.928	344.868	1558.73	110.258	341.33	1553.17	224.558	517.598	1544.89	116.978	511.744	1535.4	188.861	520.86	1427.58	209.862	598.929	1144.78	189.582	400.037	1334.98	190.354	326.02	1144.58	132.61	613.033	1214.45	370.321	442.815	1359.78	452.467	452.516	1120.22	458.675	446.154	1044.2	457.999	330.081	908.423	404.766	304.273	838.346	473.493	317.811	820.696	433.329	249.136	791.379
670	0	224.405	335.466	1560.24	106.8	331.865	1553.85	220.924	508.238	1545.7	113.408	502.189	1535.47	186.068	510.653	1428.16	207.208	588.023	1145.11	187.165	389.606	1335.98	188.585	314.822	1145.59	130.479	602.426	1214.61	367.662	432.488	1360.8	449.884	443.918	1121.07	455.943	438.611	1044.9	455.779	324.756	907.49	402.599	300.544	836.668	471.608	314.021	819.515	431.435	246.408	788.433
671	0	220.682	326.211	1562.01	103.079	322.474	1554.77	217.262	498.929	1546.7	109.777	492.731	1535.71	183.417	500.465	1428.98	204.94	577.248	1145.96	184.918	379.24	1337.25	186.85	303.892	1146.86	128.247	591.797	1215.19	365.162	422.1	1362.28	447.413	435.031	1122.32	453.312	431.16	1046.1	453.688	319.719	906.719	400.296	296.909	835.038	470.096	310.724	818.705	429.529	243.88	785.748
672	0	216.983	316.982	1563.94	99.4774	313.27	1555.69	213.759	489.636	1547.87	106.368	483.425	1536.02	180.798	490.457	1429.96	202.634	566.402	1146.84	182.593	368.862	1338.62	185.016	293.07	1148.39	126.026	581.158	1215.96	362.997	411.804	1364.1	444.876	426.092	1123.85	450.673	423.469	1047.47	451.604	314.802	906.359	398.448	293.574	833.874	468.362	307.434	818.113	427.724	241.59	783.165
673	0	213.155	307.605	1565.83	95.8723	304.13	1556.67	210.255	480.248	1548.96	103.151	474.075	1536.24	178.134	480.21	1431.18	200.636	555.9	1148.03	180.299	358.662	1340.02	183.402	282.599	1149.83	123.809	570.531	1216.96	360.42	401.816	1365.65	442.335	416.919	1125.37	448.197	415.947	1049.08	449.624	309.823	906.062	397.112	290.026	832.778	467.088	303.992	817.811	426.231	239.42	780.776
674	0	209.391	298.373	1567.84	91.9728	294.93	1557.74	206.984	470.836	1550.22	99.8084	464.914	1536.69	175.402	470.184	1432.42	198.54	545.518	1149.22	178.18	348.53	1341.38	181.514	272.143	1151.4	121.432	559.945	1217.85	357.978	391.991	1367.49	439.733	407.815	1127.01	445.616	408.312	1050.92	447.591	304.79	905.966	395.541	286.743	831.942	465.699	300.798	817.691	424.55	237.337	778.459
675	0	205.493	289.078	1569.98	88.2795	286.121	1558.8	203.922	461.638	1551.57	96.8978	455.88	1536.99	172.861	460.289	1433.64	196.508	535.206	1150.57	176.078	338.561	1342.91	179.8	262.099	1152.93	119.014	549.499	1218.93	355.873	382.224	1369.6	437.316	398.666	1128.95	443.195	400.77	1053.02	445.871	299.925	906.205	394.008	283.727	831.376	464.858	297.294	818.186	423.128	235.395	776.672
676	0	201.643	279.856	1572.09	84.5186	277.404	1559.83	200.977	452.318	1552.77	93.9962	446.842	1537.22	170.23	450.495	1435.02	194.748	525.102	1151.81	174.057	328.714	1344.39	178.282	251.954	1154.52	116.492	539.197	1220.15	353.648	372.932	1371.41	434.962	389.624	1130.82	440.917	393.268	1055.07	444.607	295.22	906.488	392.981	280.557	830.896	464.231	293.643	818.694	421.902	233.474	774.963
677	0	197.89	270.742	1574.18	80.8264	268.676	1560.89	198.074	443.001	1553.78	91.3463	438.041	1537.37	167.785	440.673	1436.29	193.073	515.171	1153.26	172.293	318.875	1345.77	176.897	242.204	1156.04	114.147	528.921	1221.08	351.624	363.717	1373.22	432.855	380.5	1132.63	438.775	385.7	1056.91	443.439	290.163	907.057	392.275	277.439	830.562	463.54	289.927	819.325	421.105	231.345	773.596
678	0	194.195	261.529	1576.27	77.2695	260.069	1561.89	195.428	433.771	1554.78	88.7342	429.194	1537.47	165.37	431.107	1437.41	190.89	505.409	1154.37	170.482	309.3	1347.11	175.585	232.594	1157.46	111.808	518.649	1222.04	349.513	354.792	1374.96	430.757	371.829	1134.31	436.694	378.299	1058.74	442.565	284.976	907.759	391.753	274.092	830.484	463.431	285.887	820.365	420.479	228.974	772.398
679	0	190.626	252.567	1578.27	73.7281	251.482	1562.89	192.803	424.714	1555.75	86.266	420.574	1537.46	162.835	421.349	1438.54	188.933	496.003	1155.68	168.835	299.806	1348.37	174.687	223.418	1158.71	109.469	508.737	1223.2	347.561	346.1	1376.56	428.848	363.35	1136	434.933	371.087	1060.73	441.609	279.85	908.525	391.347	270.544	830.574	463.384	281.722	821.499	420.197	226.402	771.695
680	0	187.199	243.573	1580.12	70.4688	242.92	1563.81	190.253	415.597	1556.65	83.8525	411.93	1537.55	160.569	412.009	1439.81	186.91	486.537	1157.08	167.186	290.399	1349.48	173.432	213.952	1159.78	106.896	498.906	1224.24	345.77	337.435	1378.18	427.081	355.322	1137.65	433.269	363.957	1062.59	440.724	274.577	909.318	391.335	266.316	830.881	463.319	277.667	822.487	420.517	223.423	771.204
681	0	183.984	234.718	1581.82	67.5227	234.428	1564.66	187.75	406.633	1557.49	81.5524	403.157	1537.75	158.177	402.476	1440.89	184.734	477.365	1158.15	165.589	281.14	1350.49	172.812	205.277	1160.57	104.5	489.219	1225.25	343.762	329.118	1379.47	425.469	347.641	1139.17	431.875	356.96	1064.22	440.62	269.035	910.326	391.703	261.551	831.404	463.593	273.392	823.654	421.354	219.989	770.963
682	0	181.189	225.941	1583.56	64.5845	225.715	1565.63	185.354	397.717	1558.42	79.3774	394.382	1537.86	155.845	393.3	1441.9	182.757	468.332	1159.35	164.131	271.899	1351.52	172.214	196.343	1161.54	101.87	479.803	1226.32	341.99	321.04	1380.95	424.156	340.422	1140.82	430.625	350.194	1065.92	440.37	263.68	911.473	392.052	257.47	831.806	464.263	268.939	825.152	422.679	216.281	771.178
683	0	178.571	217.274	1585.15	62.1173	217.176	1566.5	183.094	389.053	1559.34	77.0514	385.39	1538.2	153.422	383.966	1442.97	180.432	458.962	1160.5	162.671	263.001	1352.53	171.816	187.558	1162.46	99.2599	470.409	1227.5	340.308	312.999	1382.4	422.954	333.567	1142.48	429.438	343.599	1067.63	440.819	258.6	912.859	392.885	252.407	832.77	465.165	264.443	826.76	424.401	212.152	771.646
684	0	176.115	208.656	1586.48	59.8098	208.559	1567.34	180.902	380.231	1560.26	75.052	376.856	1538.66	151.365	375.045	1444.15	178.591	449.668	1161.66	161.285	254.055	1353.45	171.461	178.952	1163.14	96.7246	461.272	1228.64	338.587	305.174	1383.7	421.776	327.073	1143.99	428.436	337.252	1069.26	441.194	253.151	914.258	394.504	246.639	833.928	466.144	259.647	828.375	426.488	207.632	772.321
685	0	173.909	199.864	1587.87	57.6407	199.735	1568.19	178.696	371.539	1561.2	73.0793	367.893	1539.25	149.039	366.008	1445.33	176.195	439.906	1162.96	159.943	245.31	1354.38	171.117	170.414	1163.86	94.0937	452.394	1229.89	336.803	297.365	1385.02	420.712	320.906	1145.58	427.682	331.185	1071.03	441.779	247.667	915.74	395.765	240.611	835.316	467.195	254.876	830.065	428.784	202.747	773.514
686	0	171.914	191.315	1589.09	55.6622	191.006	1569.01	176.833	362.894	1562.32	71.1067	359.094	1539.96	146.841	357.103	1446.31	174.398	431.171	1164.03	158.594	236.672	1355.39	170.983	162.213	1164.6	91.2894	443.544	1231.21	335.222	289.833	1386.34	419.847	315.198	1147.23	426.926	325.415	1072.75	442.805	242.3	917.444	397.088	234.89	836.709	468.441	250.069	831.896	431.339	197.668	774.885
687	0	170.181	182.588	1590.15	53.9919	182.192	1569.8	174.954	354.299	1563.42	69.4112	350.384	1540.76	144.779	348.525	1447.45	171.914	422.888	1165.16	157.312	228.155	1356.36	170.72	153.997	1165.48	88.7631	434.822	1232.33	333.819	282.394	1387.74	418.969	309.65	1148.89	426.309	319.719	1074.41	443.865	236.784	919.318	398.598	228.366	838.486	469.651	245.119	833.701	434.108	192.27	776.398
688	0	168.683	173.972	1591.07	52.5544	173.469	1570.6	173.058	345.539	1564.48	67.6542	341.672	1541.8	142.687	339.886	1448.56	169.274	414.691	1166.33	156.17	219.691	1357.37	170.47	145.726	1166.41	86.0115	426.236	1233.39	331.99	275.171	1388.91	418.283	304.316	1150.64	425.658	314.066	1076.08	445.233	231.155	921.187	400.185	221.754	840.369	471.007	240.066	835.663	436.959	186.724	778.23
689	0	167.369	165.289	1591.94	51.3104	164.606	1571.43	171.405	336.993	1565.72	66.0633	333.045	1543.03	140.622	331.305	1449.67	167.033	406.693	1167.64	154.898	211.382	1358.44	170.168	137.61	1167.48	83.5587	417.715	1234.6	330.004	268.01	1390.13	417.569	299.086	1152.56	425.084	308.516	1077.95	446.524	225.528	923.407	401.914	215.205	842.284	472.383	234.854	837.83	439.773	181	780.096
690	0	166.198	156.672	1592.75	50.0799	155.689	1572.29	169.901	328.319	1567.1	64.3787	324.197	1544.31	138.508	322.979	1450.68	164.99	398.425	1168.78	153.712	203.164	1359.49	169.771	129.679	1168.66	81.2331	409.221	1235.74	328.953	260.695	1391.88	416.912	293.883	1154.65	424.671	302.986	1080.07	447.93	219.858	925.567	403.35	208.41	844.609	473.682	229.545	840.156	442.629	175.185	782.285
691	0	165.191	147.896	1593.26	49.0021	146.793	1573	168.423	319.768	1568.22	63.0573	315.304	1545.6	136.678	314.751	1451.59	163.485	390.232	1169.61	152.463	194.985	1360.36	169.351	121.7	1169.83	78.8907	400.687	1236.65	327.348	253.597	1393.23	416.221	288.766	1156.51	424.32	297.489	1081.96	449.212	214.198	927.845	405.364	201.29	846.636	475.029	224.024	842.347	445.315	169.188	784.364
692	0	164.344	139.321	1593.54	48.1357	137.739	1573.59	166.942	311.176	1569.11	61.3767	306.745	1546.74	134.881	306.623	1452.41	161.967	381.957	1170.34	151.293	186.819	1361.16	168.854	113.84	1170.94	76.8124	392.19	1237.28	325.849	246.518	1394.4	415.46	283.508	1158.27	423.797	291.806	1083.72	450.365	208.371	929.803	407.077	194.322	848.823	476.188	218.445	844.396	448.022	162.992	786.433
693	0	163.628	130.738	1593.92	47.5064	128.729	1574.26	165.545	302.726	1570.03	60.0752	297.659	1547.96	132.966	298.589	1453.17	160.549	373.849	1171.12	150.066	178.734	1361.99	168.269	105.974	1172.09	74.8416	383.869	1238.03	324.401	239.504	1395.65	414.802	278.195	1160.11	423.462	286.246	1085.54	451.671	202.386	932.152	408.661	187.397	850.794	477.627	213.004	846.549	450.613	156.738	788.676
694	0	163.197	122.259	1594.29	46.8795	119.785	1575.03	164.198	294.288	1570.81	58.4981	289.067	1549.01	131.17	290.518	1453.81	159.042	365.854	1171.62	148.971	170.548	1362.73	167.53	98.2456	1173.15	72.9192	375.444	1238.71	323.27	232.352	1396.96	414.062	272.69	1161.86	423.346	280.691	1087.4	452.789	196.473	934.263	410.36	180.535	852.982	478.964	207.164	848.923	453.301	150.416	790.873
695	0	162.723	113.857	1594.46	46.3649	110.869	1575.63	162.743	285.887	1571.21	56.9942	279.838	1549.87	129.434	282.45	1454.28	157.519	357.928	1172.09	147.852	162.442	1363.29	166.768	90.4145	1173.86	71.0218	366.913	1239.12	321.912	225.214	1397.87	413.291	266.936	1163.36	422.969	274.795	1089.11	453.848	190.487	936.223	412.117	173.443	854.9	479.809	201.279	850.603	455.638	143.852	792.945
696	0	162.153	105.67	1594.58	45.8797	101.999	1576.13	161.425	277.856	1571.36	55.4671	271.372	1550.41	127.743	274.39	1454.62	156.319	349.942	1172.37	146.806	154.212	1363.63	165.961	82.5991	1174.41	69.0796	358.565	1239.57	320.385	217.984	1398.5	412.515	261.003	1164.59	422.637	268.942	1090.48	454.843	184.376	937.948	413.65	166.429	856.434	481.142	195.096	852.425	457.805	137.251	794.893
697	0	161.698	97.5366	1594.76	45.4483	93.2849	1576.66	160.091	269.729	1571.39	54.1808	262.404	1550.58	126.2	266.199	1454.87	155.133	342.094	1172.53	145.679	145.996	1364	165.182	74.812	1174.97	67.3552	350.144	1239.76	319.174	210.766	1399.2	411.818	255.014	1165.75	422.374	262.986	1091.71	455.668	178.205	939.458	415.002	159.31	858.093	481.961	188.892	853.968	459.89	130.455	796.883
698	0	161.34	89.5352	1594.92	45.0641	84.5885	1577.09	158.748	261.735	1571.15	52.8121	253.928	1550.54	124.712	257.997	1454.94	153.951	333.96	1172.65	144.694	137.64	1364.21	164.545	66.9591	1175.45	65.7448	341.871	1239.84	317.574	203.498	1399.49	411.048	248.792	1166.59	421.743	256.987	1092.5	456.366	172.113	940.702	416.322	152.43	859.456	482.945	182.99	855.279	461.876	123.709	798.672
699	0	160.854	81.6187	1595.03	44.5713	76.069	1577.44	157.477	253.709	1570.71	51.4846	245.368	1550.41	123.382	249.677	1454.93	152.818	325.937	1172.74	143.784	129.319	1364.22	163.895	59.1095	1175.51	64.3052	333.489	1239.91	316.585	195.776	1399.75	410.418	242.487	1167.23	421.251	250.823	1093.1	457.02	165.832	941.706	417.417	145.307	860.429	483.631	176.694	856.173	463.666	116.808	800.106
700	0	160.385	73.6858	1595.17	44.0429	67.614	1577.75	156.281	245.691	1570.14	50.4383	236.853	1550.14	122.066	241.34	1454.88	151.611	317.603	1172.77	142.916	120.968	1364.23	163.229	51.2537	1175.45	62.9923	325.131	1239.95	315.867	187.902	1400	409.715	235.982	1167.81	420.924	244.43	1093.76	457.722	159.464	942.719	418.761	138.43	861.237	483.898	170.595	856.836	465.268	109.982	801.483
701	0	159.928	65.918	1595.32	43.4727	59.3625	1577.93	155.183	237.788	1569.66	49.3689	228.422	1549.58	121.001	232.922	1454.77	150.588	309.621	1172.72	142.131	112.521	1364.12	162.666	43.2291	1175.27	61.6644	316.937	1239.9	314.372	180.181	1399.83	409.124	229.373	1168.4	420.634	237.989	1094.37	458.185	153.087	943.419	419.416	131.243	862.13	484.668	164.301	857.589	466.664	103.205	802.512
702	0	159.267	58.0455	1595.19	42.9044	51.3014	1577.9	154.279	229.79	1569	48.489	220.092	1548.96	119.896	224.579	1454.65	149.634	301.681	1172.72	141.281	104.053	1363.79	162.065	35.2457	1174.79	60.4533	308.599	1239.82	313.883	172.056	1399.9	408.434	222.589	1168.6	420.333	231.329	1094.7	458.518	146.709	943.757	420.157	124.116	862.514	484.938	158.067	857.871	467.88	96.4197	803.251
703	0	158.598	50.133	1594.97	42.4202	43.213	1577.64	153.41	221.874	1568.14	47.6674	211.982	1548.24	119.098	216.089	1454.33	148.844	293.932	1172.54	140.517	95.5299	1363.41	161.47	27.0966	1174.12	59.2732	300.43	1239.75	312.993	163.9	1399.59	407.896	215.553	1168.7	419.816	224.338	1094.84	458.8	139.926	943.872	420.795	116.918	862.695	485.049	151.678	857.902	468.806	89.5396	803.699
704	0	157.944	42.2771	1594.71	41.6797	35.1188	1577.42	152.757	213.897	1567.3	47.0375	203.882	1547.38	118.143	207.663	1453.99	147.996	285.849	1172.27	139.906	86.9084	1362.91	161.027	18.928	1173.4	58.342	292.203	1239.53	312.437	155.515	1399.35	407.348	208.389	1168.74	419.483	217.403	1094.94	459	133.309	943.794	421.321	109.746	862.748	484.833	145.474	857.718	469.618	82.7304	803.896
705	0	157.307	34.2906	1594.4	40.9424	27.15	1577.15	152.298	205.833	1566.26	46.4116	195.703	1546.39	117.45	199.109	1453.42	147.246	277.762	1171.84	139.264	78.3903	1362.32	160.49	10.828	1172.67	57.5038	283.98	1239.23	311.828	147.128	1398.95	406.985	201.164	1168.7	419.104	210.249	1094.88	459.203	126.671	943.654	421.809	102.553	862.756	484.622	138.839	857.397	470.263	75.8219	803.841
706	0	156.662	26.2672	1593.99	40.3998	19.3272	1576.75	151.756	197.736	1565.1	46.0132	187.727	1545.27	116.837	190.539	1452.72	146.594	269.592	1171.28	138.783	69.7947	1361.69	160.014	2.55639	1171.87	56.7969	275.781	1238.78	311.105	138.563	1398.2	406.519	193.519	1168.41	418.644	202.752	1094.5	459.336	119.762	943.182	422.002	95.3345	862.433	484.468	132.488	856.727	470.605	69.1857	803.321
707	0	156.047	18.2549	1593.38	39.7681	11.4373	1576.22	151.575	189.502	1563.75	45.7367	179.6	1543.96	116.256	181.898	1452.01	146.191	261.668	1170.71	138.234	61.1236	1360.9	159.584	-5.78336	1170.83	56.2912	267.542	1238.27	310.54	129.945	1397.53	405.89	185.594	1167.9	418.279	195.307	1093.98	459.244	112.835	942.536	422.015	88.1581	861.678	484.502	125.805	856.027	470.739	62.7743	802.6
708	0	155.417	10.09	1592.73	39.0062	3.40648	1575.66	151.275	181.34	1562.28	45.4324	171.586	1542.59	115.767	173.215	1451.14	146.004	253.73	1169.96	137.773	52.3584	1359.98	159.011	-14.0409	1169.82	55.8456	259.413	1237.68	310.135	121.133	1396.82	405.576	177.605	1167.31	417.627	187.523	1093.42	458.993	105.677	941.634	421.855	81.0027	860.793	483.641	119.144	855.101	470.633	56.0496	801.68
709	0	154.813	1.98144	1591.86	38.4647	-4.4449	1574.99	151.179	173.116	1560.65	45.293	163.545	1541.12	115.507	164.52	1450.14	145.833	245.649	1169.1	137.393	43.5682	1359.02	158.434	-22.3535	1168.67	55.5308	251.066	1236.86	309.572	112.365	1395.89	405.1	169.268	1166.57	417.098	179.606	1092.6	458.74	98.4856	940.534	421.698	73.7855	859.869	483.468	112.221	854.068	470.176	49.3521	800.366
710	0	154.451	-6.23866	1590.96	38.0787	-12.3547	1574.04	151.128	164.788	1558.78	45.256	155.312	1539.34	115.434	155.796	1449.14	145.734	237.228	1167.99	137.091	34.736	1357.89	158.043	-30.7853	1167.46	55.2256	242.648	1235.99	309.615	103.217	1394.83	404.741	160.667	1165.51	416.706	171.572	1091.63	458.352	91.0539	939.273	421.127	66.7184	858.362	482.881	105.085	852.705	469.81	42.4333	798.953
711	0	154.078	-14.5501	1590.04	37.5813	-20.5143	1573.21	151.164	156.246	1557	45.3308	147.274	1537.67	115.409	147.008	1448.04	145.76	229.017	1167.05	136.841	25.8106	1356.7	157.622	-39.3549	1166.13	55.0625	234.051	1235.06	309.568	94.0163	1393.8	404.476	151.913	1164.52	416.337	163.263	1090.58	457.876	83.3783	937.912	420.652	59.2541	856.97	482.341	97.8947	851.391	469.15	35.4711	797.273
712	0	153.743	-22.915	1589.12	37.3019	-28.5097	1572.36	151.529	147.701	1555.14	45.4426	139.001	1535.86	115.316	138.103	1446.79	145.956	220.643	1166.15	136.593	16.842	1355.57	157.052	-47.9053	1164.9	55.0795	225.53	1234.05	309.302	84.8799	1392.59	404.382	143.034	1163.45	415.938	154.869	1089.53	457.282	75.6682	936.446	419.843	52.0349	855.284	481.427	90.5564	849.903	468.247	28.4259	795.597
713	0	153.5	-31.284	1587.97	37.0918	-36.5979	1571.32	151.704	139.178	1553.12	45.6066	130.289	1534	115.344	129.105	1445.49	146.046	212.057	1165.13	136.41	7.74696	1354.17	156.555	-56.57	1163.28	55.1483	217.007	1232.82	309.337	75.518	1391.27	404.054	133.814	1161.97	415.58	146.229	1088.17	456.563	67.6538	934.587	418.984	44.6678	853.348	480.973	83.1423	848.19	467.342	21.1527	793.583
714	0	153.451	-39.6783	1586.78	36.8495	-45.0443	1570.25	152.03	130.477	1550.94	45.9768	122.018	1531.86	115.506	120.033	1444.11	146.18	203.065	1163.99	136.343	-1.43646	1352.78	156.085	-65.4462	1161.72	55.426	208.307	1231.6	309.444	66.0183	1389.76	403.728	124.526	1160.31	415.077	137.372	1086.59	455.772	59.4575	932.494	418.094	37.1438	851.306	480.259	75.3013	846.329	466.263	13.8191	791.283
715	0	153.597	-48.1384	1585.66	36.9707	-53.2317	1569.19	152.565	122.024	1548.76	46.3918	113.603	1529.81	115.861	110.891	1442.8	146.704	194.35	1162.85	136.324	-10.7331	1351.31	155.643	-74.3784	1160.09	55.5071	199.527	1230.54	309.437	56.4605	1388.18	403.68	115.175	1158.68	414.789	128.469	1085.04	454.99	51.2136	930.515	417.074	29.7314	849.003	479.461	67.2039	844.437	465.092	6.23793	788.98
716	0	153.879	-56.5763	1584.53	37.2922	-61.5448	1568.28	152.978	113.299	1546.47	46.8322	104.697	1527.8	116.274	101.727	1441.27	147.006	185.585	1161.35	136.396	-20.0677	1349.95	155.344	-83.4493	1158.51	55.789	190.661	1229.37	309.667	46.8201	1386.62	403.576	105.545	1156.99	414.551	119.364	1083.37	454.251	42.6992	928.419	416.039	22.057	846.703	479.196	59.0737	842.578	463.995	-1.43909	786.837
717	0	154.313	-65.1307	1583.35	37.5671	-70.0087	1567.41	153.57	104.367	1544	47.4935	95.9998	1525.53	116.73	92.4313	1439.72	147.257	176.36	1159.69	136.502	-29.5589	1348.42	154.924	-92.6649	1156.84	56.3468	181.731	1228.05	309.71	37.0959	1384.74	403.52	95.8901	1155.1	414.281	110.101	1081.49	453.416	34.0511	926.092	414.989	14.3259	844.418	478.554	50.6972	840.488	462.856	-9.25259	784.482
718	0	154.858	-73.6443	1582.16	38.2822	-78.404	1566.48	154.296	95.2677	1541.39	48.1897	87.1442	1523.29	117.31	83.0068	1438.26	147.574	167.203	1158.16	136.67	-39.1641	1346.87	154.557	-102.113	1155.09	56.896	172.692	1226.62	310.15	27.1463	1382.91	403.537	86.2695	1153.18	414.174	100.661	1079.56	452.62	25.3335	923.735	413.993	6.2508	842.028	477.441	42.1724	838.052	461.612	-17.27	781.86
719	0	155.507	-82.1856	1580.99	38.7663	-87.0235	1565.65	155.07	86.3779	1539.02	48.9267	78.2771	1521.09	117.912	73.4155	1436.72	147.765	157.835	1157.04	136.917	-48.8177	1345.39	154.203	-111.622	1153.44	57.3102	163.421	1225.28	311.198	17.0165	1381.57	403.586	76.3897	1151.36	414.158	91.0185	1077.78	451.923	16.376	921.526	413.063	-1.56538	839.511	477.07	33.6109	835.977	460.32	-25.4518	779.337
720	0	156.408	-90.7463	1579.85	39.7514	-95.3472	1564.7	156.147	77.5476	1536.63	49.9741	69.645	1518.98	118.735	63.9149	1435.24	148.289	148.203	1155.69	137.201	-58.5367	1343.97	153.931	-121.24	1151.79	57.7077	153.985	1224.05	311.2	7.11314	1379.67	403.648	66.3126	1149.43	414.132	81.377	1075.99	451.203	7.1928	919.19	412.093	-9.83905	837.003	476.763	24.7008	833.999	459.057	-33.7877	776.739
721	0	157.532	-99.3307	1578.73	40.6339	-103.995	1563.89	157.403	68.5799	1534.28	51.0672	60.4165	1516.98	119.741	54.366	1433.75	148.289	138.462	1153.94	137.661	-68.3394	1342.61	153.715	-131.022	1150.13	58.3149	144.488	1222.77	312.212	-3.24686	1377.82	403.979	56.3368	1147.43	414.054	71.4458	1073.89	450.608	-2.15646	916.619	411.308	-18.1643	834.339	476.246	15.6253	831.585	457.928	-42.4531	774.032
722	0	158.631	-108.048	1577.78	41.8163	-112.443	1563.23	158.797	59.5338	1531.78	52.6287	51.558	1514.93	120.723	44.7419	1432.44	148.388	128.722	1152.2	138.205	-78.2299	1341.23	153.487	-140.868	1148.6	58.9359	135.006	1221.67	312.94	-13.4874	1375.91	404.251	46.1612	1145.34	414.019	61.3093	1071.8	450.135	-11.5713	914.242	410.286	-26.8105	831.744	475.701	6.45203	829.149	456.934	-51.0594	771.398
723	0	159.939	-116.777	1576.97	42.8722	-120.988	1562.78	160.49	50.4008	1529.64	54.1436	42.579	1512.96	121.908	34.8559	1431.13	148.409	118.914	1151.12	138.949	-88.2534	1340.19	153.236	-150.796	1147.34	59.4749	125.236	1220.66	313.863	-23.7938	1374.23	404.49	35.8483	1143.43	414.186	51.138	1069.88	449.849	-21.144	912.075	409.972	-35.7236	829.593	475.108	-2.85365	826.911	456.127	-59.9198	769.011
724	0	161.237	-125.635	1576.1	44.2025	-129.425	1562.29	162.2	41.2014	1527.33	55.8897	33.6526	1511.02	123.115	24.9345	1429.79	148.457	108.984	1150.01	139.644	-98.3282	1339.01	153.017	-160.758	1145.99	60.0904	115.346	1219.67	314.843	-34.1647	1372.43	404.971	25.5509	1141.44	414.292	40.7381	1067.78	449.564	-30.9532	909.683	409.385	-44.9843	827.201	474.731	-12.3015	824.6	455.363	-69.0542	766.382
725	0	162.716	-134.579	1575.26	45.5554	-138.022	1561.9	164.317	31.8173	1525.06	57.77	24.6952	1509.21	124.51	15.0436	1428.62	148.772	98.8345	1148.91	140.467	-108.513	1337.79	152.787	-170.786	1144.55	60.7313	105.275	1218.78	315.892	-44.5897	1370.54	405.31	14.9646	1139.24	414.552	30.4507	1065.63	449.277	-40.9518	907.138	408.837	-54.4088	824.669	474.666	-22.1063	822.265	454.723	-78.4774	763.693
726	0	164.37	-143.585	1574.63	47.2003	-146.644	1561.63	166.39	22.4417	1522.89	60.051	15.4168	1507.4	125.925	4.88476	1427.56	149.094	88.5147	1147.92	141.541	-118.897	1336.86	152.724	-180.94	1143.34	61.332	94.994	1217.99	316.889	-55.0076	1368.72	405.574	4.18324	1137.11	414.546	19.8691	1063.48	449.134	-50.9673	904.749	408.377	-64.0716	822.25	474.402	-31.9845	819.993	454.2	-88.0061	761.196
727	0	166.166	-152.56	1574.12	48.8351	-155.276	1561.46	168.658	12.91	1520.87	62.1693	6.45102	1505.71	127.284	-5.29969	1426.61	149.277	77.9146	1146.95	142.594	-129.099	1336.01	152.847	-191.287	1142.41	61.9227	84.5821	1217.28	318.364	-65.5347	1367.24	406.129	-6.45848	1135.1	414.52	9.17973	1061.5	449.083	-61.0605	902.625	408.229	-74.1771	820.253	473.883	-41.7818	817.818	453.92	-97.8042	758.912
728	0	168.075	-161.603	1573.59	50.6316	-164.012	1561.41	171.037	3.34109	1519.01	64.4301	-2.68158	1504.16	128.823	-15.4256	1425.69	149.908	67.1284	1145.91	143.772	-139.545	1335.27	153.151	-201.809	1141.53	62.5724	74.0119	1216.61	319.516	-75.9521	1365.52	406.556	-17.2971	1133.11	414.6	-1.6398	1059.47	449.053	-71.4964	900.558	408.428	-84.6689	818.444	473.938	-51.8898	815.721	453.823	-107.756	756.819
729	0	170.127	-170.763	1573.1	52.6723	-172.637	1561.39	173.527	-6.21593	1517.3	67.0153	-12.0236	1502.88	130.562	-25.58	1424.79	150.396	56.3156	1144.78	144.989	-150.017	1334.73	153.588	-212.655	1140.89	63.1928	63.2143	1216.01	321.095	-86.5537	1364.11	406.988	-28.2471	1131.11	414.701	-12.5909	1057.47	449.011	-81.9853	898.388	408.331	-95.5045	816.389	473.798	-62.2699	813.687	453.793	-117.944	754.702
730	0	172.196	-179.874	1573.02	54.5797	-181.514	1561.65	176.027	-15.8123	1515.97	69.1886	-21.2701	1502.08	132.391	-35.7273	1424.16	150.873	45.0763	1144.09	146.328	-160.577	1334.39	154.026	-223.746	1140.54	63.8892	52.3924	1215.49	322.63	-97.0391	1362.95	407.395	-39.4312	1129.39	414.846	-23.636	1055.72	449.022	-92.6573	896.514	408.442	-106.586	814.661	473.613	-72.8525	811.874	453.781	-128.458	752.686
731	0	174.291	-189.1	1573.07	56.5356	-190.39	1562.06	178.467	-25.3846	1515.1	71.794	-30.5802	1501.35	134.035	-45.8732	1423.69	151.066	33.4432	1143.54	147.634	-171.177	1334.32	154.457	-234.981	1140.55	64.6082	41.3545	1215.04	324.032	-107.555	1361.88	407.781	-50.5522	1127.68	415.093	-34.8095	1054.2	448.828	-103.514	894.665	408.296	-117.3	812.901	473.302	-83.4688	810.138	453.827	-139.241	751.037
732	0	176.61	-198.39	1573.24	58.8638	-199.336	1562.61	180.995	-34.9257	1514.32	73.9204	-40.149	1501.11	135.907	-56.1237	1423.45	151.121	21.9139	1142.91	149.102	-181.895	1334.48	154.994	-246.399	1140.67	65.3898	30.2863	1214.77	325.499	-118.22	1360.85	408.19	-61.7231	1126.11	415.233	-46.2957	1052.59	448.694	-114.484	892.85	408.161	-128.325	811.207	473.068	-94.2123	808.372	453.879	-150.158	749.447
733	0	178.956	-207.617	1573.55	61.1312	-208.515	1563.45	183.323	-44.5402	1513.74	76.4724	-49.281	1500.98	137.856	-66.2853	1423.39	151.36	10.7066	1142.42	150.473	-192.604	1334.91	155.522	-258.109	1141.15	66.1757	19.0661	1214.66	327.027	-128.965	1359.99	408.739	-72.9668	1124.7	415.116	-58.0884	1051.04	448.871	-125.805	891.43	407.659	-138.991	809.071	472.806	-105.163	806.76	453.814	-161.138	747.848
734	0	181.28	-216.839	1574.11	63.4299	-217.617	1564.55	185.717	-54.0667	1513.61	78.8013	-58.8405	1501.1	139.745	-76.5995	1423.61	152.101	-0.609068	1142.29	151.935	-203.335	1335.65	155.845	-269.584	1142.04	67.0359	7.93328	1214.78	328.35	-139.584	1359.57	409.191	-84.4407	1123.7	415.305	-69.8986	1049.94	448.836	-137.27	890.231	407.592	-150.507	808.125	472.522	-116.195	805.495	453.886	-172.316	746.842
735	0	183.753	-226.091	1575.15	65.7238	-226.845	1565.91	187.987	-63.6691	1513.72	81.0741	-68.2359	1501.57	141.485	-86.9892	1423.99	152.85	-11.4565	1142.19	153.341	-214.119	1336.63	156.195	-281.2	1143.21	67.8411	-3.21257	1215.27	330.229	-150.379	1359.55	409.686	-96.0113	1122.96	415.241	-81.9966	1048.96	448.804	-148.912	889.308	407.446	-162.135	807.217	472.12	-127.629	804.564	453.661	-183.604	745.828
736	0	186.13	-235.423	1576.39	68.0002	-236.171	1567.48	190.247	-73.2709	1513.88	83.2106	-78.1652	1502.32	143.262	-97.3343	1424.75	153.481	-22.2145	1142.81	154.594	-224.812	1337.88	156.554	-292.7	1144.43	68.6929	-14.2117	1216.36	331.595	-161.158	1359.51	410.216	-107.725	1122.46	415.326	-94.2442	1048.43	448.559	-160.849	888.58	407.259	-174.035	806.627	471.441	-139.145	803.734	453.392	-195.232	745.189
737	0	188.493	-244.814	1577.57	70.3747	-245.519	1569.15	192.418	-82.9852	1514.43	85.4936	-87.6804	1503.31	145.121	-107.774	1425.84	153.89	-33.324	1143.85	156.011	-235.635	1339.28	156.769	-304.02	1145.88	69.3114	-25.1947	1217.68	333.033	-172.019	1359.77	410.676	-119.775	1122.16	415.077	-106.658	1048.09	448.496	-172.995	888.262	406.908	-186.169	806.214	471.121	-151.094	803.34	452.887	-207.198	744.598
738	0	190.523	-254.166	1579.29	72.6426	-254.946	1571.21	194.625	-92.7148	1515.27	87.6122	-97.3845	1504.29	146.862	-118.127	1427.16	154.519	-44.3393	1145.09	157.233	-246.183	1340.86	156.907	-315.178	1147.52	69.974	-35.9058	1219.52	334.078	-182.736	1360.32	410.967	-131.877	1122.24	415.429	-118.749	1048.24	448.31	-185.269	888.408	406.601	-198.402	806.418	471.044	-163.478	803.541	452.51	-219.148	744.589
739	0	192.919	-263.542	1580.84	75.112	-264.335	1573.32	196.791	-102.421	1516.04	89.7568	-107.21	1505.73	148.52	-128.545	1428.8	155.058	-55.341	1146.93	158.452	-256.781	1342.64	156.931	-326.094	1149.34	70.5772	-46.4367	1221.51	335.673	-193.73	1361.22	411.225	-144.157	1122.46	415.14	-131.458	1048.46	448.1	-197.909	888.738	406.35	-210.958	806.85	470.878	-176.007	803.93	452.032	-231.763	744.834
740	0	195.331	-273.067	1582.56	77.4046	-273.82	1575.55	198.942	-112.242	1516.95	91.8154	-116.947	1507.19	150.182	-138.853	1430.56	155.658	-66.0983	1148.52	159.572	-267.172	1344.44	156.861	-336.754	1151.2	71.1179	-56.7226	1223.75	336.809	-204.571	1362.08	411.378	-156.692	1122.81	415.368	-143.854	1048.89	447.833	-210.572	889.217	406.039	-223.617	807.341	470.357	-188.794	804.169	451.526	-244.496	745.178
741	0	197.522	-282.453	1584.13	79.6982	-283.246	1577.87	200.981	-122.018	1518.01	93.5825	-126.745	1508.92	151.75	-149.01	1432.36	155.92	-76.5363	1150.78	160.29	-277.334	1346.21	156.716	-347.228	1153.08	71.7002	-66.772	1226.12	337.35	-215.182	1362.84	411.657	-169.17	1123.37	415.344	-156.407	1049.6	447.551	-223.495	890.077	405.292	-236.361	808.041	470.279	-202.081	805.068	450.848	-257.552	745.842
742	0	199.601	-291.97	1585.57	81.6821	-292.777	1580.19	202.888	-131.72	1519.08	95.3318	-136.435	1510.66	153.031	-158.828	1434.13	156.476	-87.0346	1152.47	161.044	-287.508	1348.14	156.388	-357.338	1154.99	72.3525	-76.6008	1228.47	338.831	-226.024	1364.27	411.797	-181.41	1124.09	415.499	-168.751	1050.46	447.201	-236.585	891.034	404.937	-249.663	809.132	469.993	-215.52	806.096	450.277	-271.073	746.841
743	0	201.636	-301.478	1586.89	83.7765	-302.066	1582.2	204.649	-141.416	1520.13	97.0921	-145.871	1512.45	154.629	-168.896	1435.78	157.028	-97.328	1154.27	161.665	-297.467	1349.74	156.08	-367.213	1156.71	73.0584	-86.2766	1230.46	339.583	-236.603	1365.24	411.973	-193.704	1124.66	415.619	-181.067	1051.03	446.871	-249.741	891.978	404.804	-263.622	810.49	469.588	-229.185	806.885	449.629	-284.975	747.979
744	0	203.549	-311.168	1588.05	85.5564	-311.663	1584.17	206.317	-151.113	1520.97	98.797	-155.762	1514.24	155.74	-178.496	1437.15	157.791	-107.558	1155.61	162.076	-307.358	1351.26	155.669	-377.017	1158.37	73.7649	-95.7176	1232.32	340.377	-247.301	1366.12	412.175	-205.808	1125.23	415.753	-193.426	1051.62	446.455	-263.022	892.993	404.34	-277.328	811.585	469.296	-243.094	807.612	448.978	-299.213	749.075
745	0	205.405	-320.715	1589.25	87.4019	-320.958	1586.07	207.838	-160.791	1522.02	100.352	-165.071	1515.81	157.072	-188.15	1438.51	158.399	-117.087	1157.39	162.425	-317.102	1352.84	155.192	-386.531	1160.03	74.6331	-105.108	1234.09	340.843	-257.775	1367.06	412.432	-217.806	1125.95	416.103	-205.686	1052.24	446.06	-276.444	894.078	403.569	-290.728	812.819	468.86	-257.234	808.58	448.198	-313.774	750.559
746	0	207.13	-330.131	1590.24	88.9746	-330.363	1587.84	209.442	-169.967	1523.08	101.581	-174.298	1517.66	158.025	-197.62	1439.79	159.636	-126.211	1158.54	162.605	-326.744	1354.3	154.506	-395.893	1161.54	75.5684	-114.225	1235.6	341.542	-268.363	1368.18	412.926	-229.693	1126.72	416.49	-217.9	1052.93	445.572	-289.971	895.261	402.937	-304.437	814.127	468.17	-271.516	809.529	447.319	-328.522	752.111
747	0	208.467	-339.801	1590.93	90.4268	-339.81	1589.3	210.588	-179.518	1524.1	102.656	-183.797	1519.2	159.031	-207.163	1441.06	159.94	-135.74	1160.21	162.648	-336.297	1355.44	153.721	-405.038	1162.69	76.7137	-123.122	1237.16	342.014	-278.97	1369.04	413.292	-241.678	1127.39	417.14	-230.089	1053.64	445.158	-303.882	896.335	402.005	-318.387	815.328	467.926	-286.409	810.503	446.3	-343.708	753.645
748	0	209.627	-349.337	1591.69	91.6031	-349.222	1590.66	211.696	-188.971	1525.26	103.778	-192.943	1520.97	159.858	-216.465	1442.44	161.296	-145.349	1161.32	162.586	-345.719	1356.53	152.934	-414.123	1163.71	77.6676	-132.086	1238.59	342.091	-289.356	1369.81	413.672	-253.376	1128.11	417.657	-242.242	1054.32	444.742	-317.836	897.571	401.085	-332.842	816.771	467.275	-301.031	811.462	445.249	-359.011	755.404
749	0	210.734	-358.802	1592.5	92.6601	-358.651	1592.07	212.544	-198.251	1526.35	104.831	-202.307	1522.39	160.779	-225.917	1443.64	162.448	-154.209	1162.25	162.453	-354.962	1357.55	152.038	-423.017	1164.67	79.1009	-140.632	1239.77	342.552	-299.855	1370.75	414.249	-265.014	1128.92	418.341	-254.211	1055.02	444.217	-331.703	898.82	400.164	-347.153	818.421	466.608	-315.778	812.444	444.03	-374.336	757.236
750	0	211.676	-368.28	1593.23	93.6088	-368.014	1593.25	213.285	-207.602	1527.4	105.234	-211.615	1523.99	161.551	-235.184	1444.74	163.686	-162.914	1164.11	162.268	-364.125	1358.54	151.255	-431.804	1165.49	80.2359	-149.196	1240.97	342.897	-310.133	1371.5	414.797	-276.616	1129.69	419.072	-266.225	1055.69	443.646	-345.303	899.906	399.375	-361.578	820.077	465.809	-330.662	813.427	442.679	-389.961	759.187
751	0	212.371	-377.742	1594.03	94.3018	-377.497	1594.33	213.868	-217.011	1528.56	105.783	-220.757	1525.49	162.312	-244.374	1445.91	164.974	-171.722	1164.49	162.223	-373.156	1359.46	150.621	-440.506	1166.15	81.6473	-157.427	1242.22	342.917	-320.287	1372.11	415.5	-288.179	1130.51	419.746	-278.437	1056.17	443.086	-359.223	901.261	398.368	-376.204	821.901	464.95	-345.707	814.277	441.325	-405.634	761.2
752	0	212.863	-387.114	1594.86	94.8175	-386.897	1595.44	214.308	-226.285	1529.76	106.213	-229.926	1526.86	163.102	-253.554	1447.06	165.934	-180.27	1166.21	162.16	-382.069	1360.37	150.004	-449.107	1166.82	82.8698	-165.987	1243.46	343.117	-330.435	1373.05	416.111	-299.598	1131.52	420.553	-290.381	1057.07	442.553	-373.124	902.762	397.347	-390.674	823.866	463.923	-360.66	815.626	439.757	-421.337	763.482
753	0	213.144	-396.704	1595.79	95.1399	-396.284	1596.39	214.763	-235.644	1531.22	106.535	-239.215	1528.3	163.512	-262.507	1448.12	166.977	-188.587	1167.28	162.057	-390.869	1361.27	149.36	-457.635	1167.54	84.3215	-174.209	1244.69	343.306	-340.334	1374	416.72	-310.948	1132.61	421.464	-302.289	1058.11	441.931	-386.984	904.497	396.33	-405.283	826.022	463.063	-376.255	817.219	437.998	-437.212	765.897
754	0	213.296	-406.137	1596.53	95.3052	-405.756	1597.11	215.08	-244.721	1532.68	106.927	-248.419	1529.46	164.299	-271.638	1449.37	168.226	-197.289	1168.58	161.965	-399.452	1361.89	148.946	-466.135	1168.18	85.4026	-182.471	1245.89	343.45	-350.085	1374.83	417.314	-322.209	1133.5	422.104	-313.994	1058.95	441.31	-400.84	906.152	395.007	-419.854	828.19	462.073	-391.56	818.686	436.159	-452.728	768.245
755	0	213.317	-415.627	1597.2	95.2485	-415.217	1597.76	215.183	-253.943	1533.83	107.325	-257.582	1530.92	164.765	-280.529	1450.28	169.349	-205.392	1169.51	162.054	-408.113	1362.57	148.785	-474.638	1168.85	86.6461	-190.848	1246.95	343.626	-359.783	1375.7	417.861	-333.363	1134.45	422.852	-325.713	1059.8	440.68	-414.702	907.978	393.675	-434.41	830.56	461.042	-406.962	820.263	434.197	-468.522	770.82
756	0	213.217	-425.039	1598.02	95.2066	-424.421	1598.33	215.39	-263.146	1535.39	107.497	-266.609	1532.05	165.325	-289.264	1451.37	170.077	-214.162	1170.95	162.237	-416.7	1363.37	148.721	-483.047	1169.72	87.7079	-199.066	1248.03	343.91	-369.121	1376.69	418.492	-344.347	1135.62	423.643	-337.149	1060.74	439.995	-428.459	910.01	392.81	-448.866	833.148	459.719	-421.872	822.04	432.315	-484.228	773.692
757	0	213.018	-434.486	1598.89	94.9387	-433.675	1598.74	215.621	-272.298	1536.8	107.427	-275.665	1533.02	165.924	-298.096	1452.31	171.32	-222.491	1171.48	162.334	-425.224	1364.14	148.713	-491.316	1170.63	88.6104	-207.34	1248.99	344.223	-378.33	1377.7	419.175	-355.141	1136.68	424.304	-348.561	1061.73	439.392	-442.093	912.082	391.4	-463.184	835.811	458.988	-437.192	823.977	430.311	-499.847	776.715
758	0	212.635	-443.936	1599.42	94.6156	-442.957	1598.9	215.611	-281.626	1538.03	107.554	-284.54	1533.94	166.428	-306.738	1453.02	171.417	-231.109	1171.93	162.447	-433.722	1364.69	148.858	-499.587	1171.28	89.5403	-215.509	1249.69	344.471	-387.398	1378.4	419.565	-365.879	1137.43	424.953	-359.963	1062.35	438.602	-455.69	913.881	390.023	-477.424	838.25	457.749	-452.363	825.59	428.353	-515.543	779.634
759	0	212.122	-453.423	1599.81	94.1469	-452.206	1598.94	215.694	-290.683	1539.39	107.986	-293.433	1534.79	166.813	-315.239	1453.49	172.815	-239.583	1173.2	162.617	-442.169	1365.06	148.996	-507.85	1171.86	90.2297	-223.808	1250.27	344.777	-396.322	1379.06	420.103	-376.506	1138.06	425.57	-371.149	1062.86	437.802	-469.169	915.636	388.666	-491.626	840.612	456.514	-467.333	827.201	426.317	-531.113	782.596
760	0	211.681	-462.781	1600.27	93.7134	-461.283	1598.93	215.77	-299.739	1540.57	107.954	-302.206	1535.46	167.187	-323.811	1454.01	172.602	-248.397	1173.48	162.814	-450.533	1365.48	149.332	-515.975	1172.48	90.9579	-231.882	1250.78	345.063	-405.029	1379.72	420.617	-386.886	1138.78	426.076	-382.25	1063.54	436.901	-482.448	917.472	387.237	-505.9	843.18	455.29	-482.116	828.999	424.396	-546.569	785.779
761	0	211.125	-472.132	1600.52	93.1954	-470.417	1598.82	215.853	-308.992	1541.66	107.996	-311.114	1536.09	167.48	-332.324	1454.42	173.233	-257.105	1173.34	163.043	-458.841	1365.69	149.712	-524.195	1172.86	91.4407	-240.11	1251.2	345.32	-413.691	1380.17	421.184	-397.34	1139.34	426.836	-393.139	1064.01	436.013	-495.579	919.167	386.115	-520.234	845.599	453.996	-496.785	830.64	422.33	-561.994	788.876
762	0	210.615	-481.486	1600.54	92.7042	-479.44	1598.51	215.995	-317.934	1542.51	108.135	-319.951	1536.8	167.875	-340.938	1454.62	173.351	-265.15	1173.52	163.351	-467.215	1365.69	150.198	-532.472	1172.95	91.9784	-248.194	1251.41	345.612	-422.366	1380.31	421.618	-407.62	1139.53	427.308	-404.178	1063.99	435.245	-508.662	920.638	384.793	-533.813	847.711	452.62	-511.392	831.907	420.533	-577.255	791.819
763	0	210.172	-490.8	1600.53	92.1989	-488.453	1598.18	215.985	-327.169	1543.06	108.179	-328.7	1537.2	168.09	-349.41	1454.74	173.713	-273.625	1173.6	163.468	-475.551	1365.57	150.643	-540.741	1172.88	92.3952	-256.415	1251.54	345.857	-430.925	1380.45	422.095	-417.664	1139.71	427.603	-415.081	1064.02	434.462	-521.631	922.157	383.449	-547.519	849.915	451.284	-525.771	833.335	418.581	-592.4	794.852
764	0	209.561	-500.097	1600.37	91.6988	-497.352	1597.8	216.005	-336.24	1543.6	108.195	-337.531	1537.47	168.183	-358.007	1454.77	174.08	-281.286	1174.01	163.533	-483.836	1365.29	150.922	-548.973	1172.65	92.8471	-264.5	1251.55	345.99	-439.406	1380.46	422.523	-427.61	1139.84	428.106	-425.63	1064.18	433.468	-534.454	923.578	381.843	-561.232	852.117	449.779	-539.986	834.838	416.799	-607.308	797.846
765	0	209.088	-509.373	1599.93	91.1265	-506.33	1597.26	216.078	-345.236	1543.86	108.332	-346.286	1537.53	168.549	-366.751	1454.69	173.896	-289.416	1174.1	163.596	-492.228	1364.85	151.215	-557.207	1172.15	93.0607	-272.743	1251.52	346.083	-447.999	1380.22	422.794	-437.479	1139.65	428.493	-436.22	1064.07	432.527	-547.135	924.848	380.317	-574.952	854.242	448.309	-554.168	836.119	414.853	-622.067	800.617
766	0	208.579	-518.628	1599.38	90.733	-515.302	1596.52	215.953	-354.421	1543.81	108.287	-355.114	1537.49	168.356	-375.272	1454.4	174.188	-297.704	1173.76	163.784	-500.599	1364.2	151.536	-565.455	1171.41	93.3357	-280.86	1251.31	346.027	-456.468	1379.79	423.003	-447.205	1139.29	428.736	-446.798	1063.68	431.592	-559.895	926.081	378.865	-588.568	856.245	446.635	-568.037	837.2	413.091	-636.585	803.277
767	0	208.274	-527.807	1598.68	90.4021	-524.188	1595.79	215.913	-363.412	1543.63	108.286	-363.958	1537.16	168.221	-383.936	1454	174.763	-305.707	1173.75	163.802	-508.946	1363.59	151.751	-573.572	1170.58	93.2906	-289.099	1251.09	346.073	-464.881	1379.31	423.239	-456.748	1138.97	428.624	-457.232	1063.1	430.664	-572.102	927.269	377.736	-601.932	858.27	445.025	-581.665	838.347	411.253	-650.814	805.921
768	0	207.927	-536.962	1598	90.0474	-533.199	1595.11	215.895	-372.339	1543.36	108.343	-372.675	1536.76	168.223	-392.719	1453.55	174.181	-313.295	1173.28	163.708	-517.289	1362.85	151.976	-581.576	1169.69	93.2696	-297.227	1250.75	345.958	-473.197	1378.81	423.338	-466.06	1138.59	428.68	-467.375	1062.6	429.59	-584.337	928.357	375.997	-615.054	860.302	443.408	-595.042	839.43	409.482	-664.773	808.458
769	0	207.682	-546.156	1597.2	89.7763	-542.154	1594.19	215.759	-381.455	1542.99	108.204	-381.655	1536.44	167.818	-401.294	1452.98	174.552	-320.81	1172.78	163.633	-525.725	1362.01	152.084	-589.622	1168.53	93.0909	-305.525	1250.38	345.705	-481.572	1378.02	423.378	-475.345	1138.03	428.663	-477.603	1061.95	428.424	-596.381	929.334	374.47	-628.081	862.138	441.792	-608.325	840.408	407.729	-678.543	810.785
770	0	207.269	-555.272	1596.19	89.415	-551.25	1593.23	215.714	-390.428	1542.57	108.066	-390.411	1535.96	167.615	-409.978	1452.4	174.455	-329.116	1172.41	163.517	-534.175	1360.99	152.073	-597.685	1167.25	92.9818	-313.803	1249.98	345.627	-490.053	1377.25	423.222	-484.496	1137.34	428.506	-487.704	1061.31	427.377	-608.245	930.103	372.917	-640.875	863.828	439.737	-621.27	841.244	405.851	-692.122	812.997
771	0	206.86	-564.378	1595.13	89.1128	-560.321	1592.32	215.592	-399.4	1542.17	107.921	-399.37	1535.47	167.254	-418.73	1451.8	174.291	-336.342	1172.09	163.329	-542.61	1359.95	152.014	-605.805	1166.06	92.6532	-322.102	1249.49	345.448	-498.38	1376.47	423.127	-493.587	1136.7	428.416	-497.65	1060.77	426.212	-619.774	930.847	371.503	-653.621	865.597	437.926	-634.015	842.072	403.992	-705.331	815.142
772	0	206.655	-573.533	1594.14	88.9569	-569.185	1591.14	215.338	-408.342	1541.5	107.592	-408.318	1534.79	166.803	-427.457	1451.03	173.944	-344.092	1171.37	163.066	-551.039	1358.96	151.889	-613.967	1164.85	92.1778	-330.445	1248.91	345.102	-506.581	1375.56	422.836	-502.46	1135.91	428.172	-507.472	1060.02	424.972	-631.19	931.474	369.655	-665.873	867.18	435.815	-646.314	842.788	402.195	-718.193	817.099
773	0	206.24	-582.485	1592.72	88.6162	-578.312	1590.09	215.076	-417.378	1540.6	107.374	-417.212	1534.04	166.491	-436.173	1450.06	173.686	-352.239	1170.6	162.878	-559.574	1357.74	151.817	-622.234	1163.64	91.8219	-338.841	1248.09	344.79	-514.91	1374.45	422.599	-511.293	1134.93	427.756	-517.409	1058.95	423.817	-642.474	931.941	367.976	-678.118	868.633	433.769	-658.568	843.11	400.409	-730.883	818.899
774	0	206.021	-591.74	1591.59	88.3701	-587.464	1588.89	214.659	-426.4	1539.65	107.115	-426.158	1533.31	165.949	-444.911	1449.16	173.22	-360.171	1169.86	162.52	-568.104	1356.69	151.643	-630.616	1162.38	91.2006	-347.416	1247.29	344.39	-523.279	1373.32	422.318	-520.022	1133.87	427.348	-527.156	1057.83	422.377	-653.579	932.151	366.25	-690.112	869.875	431.679	-670.602	843.373	398.539	-743.397	820.586
775	0	205.688	-600.853	1590.37	87.9054	-596.59	1587.77	214.242	-435.465	1538.77	106.511	-435.303	1532.52	165.332	-453.666	1448.09	173.034	-367.723	1169	162.058	-576.63	1355.45	151.382	-638.972	1161.22	90.5532	-355.918	1246.38	343.933	-531.513	1372.17	421.798	-528.576	1132.76	426.911	-536.736	1056.94	421.04	-664.645	932.429	364.377	-701.875	871.064	429.465	-682.359	843.666	396.498	-755.511	822.046
776	0	205.212	-609.893	1588.88	87.608	-605.768	1586.47	213.732	-444.422	1537.76	106.176	-444.323	1531.48	164.786	-462.374	1446.91	172.178	-376.285	1167.82	161.702	-585.235	1354.24	151.115	-647.387	1159.91	89.8265	-364.568	1245.32	343.491	-539.736	1370.89	421.291	-537.243	1131.49	426.339	-546.319	1055.77	419.543	-675.433	932.505	362.531	-713.452	871.969	427.359	-694.063	843.777	394.423	-767.509	823.26
777	0	204.684	-619.156	1587.45	87.0726	-614.963	1585.04	213.189	-453.468	1536.56	105.617	-453.332	1530.38	164.033	-471.221	1445.68	171.319	-384.44	1166.49	161.157	-593.934	1352.79	150.706	-655.876	1158.56	88.9795	-373.322	1244.21	342.915	-548.125	1369.41	420.646	-545.857	1129.99	425.748	-555.958	1054.42	417.931	-686.229	932.211	360.903	-724.847	872.524	425.048	-705.542	843.489	392.28	-779.258	824.126
778	0	204.182	-628.349	1586.01	86.4403	-624.222	1583.78	212.413	-462.603	1535.4	104.818	-462.539	1529.26	163.53	-480.193	1444.48	170.437	-393.134	1165.51	160.63	-602.693	1351.47	150.346	-664.397	1157.16	87.9605	-382.145	1243.02	342.276	-556.496	1368.02	419.953	-554.43	1128.53	424.953	-565.481	1053.04	416.299	-696.918	932.02	358.897	-735.962	873.073	422.559	-716.567	843.434	390.05	-790.86	824.98
779	0	203.583	-637.56	1584.66	85.862	-633.538	1582.34	211.65	-471.689	1534.31	104.102	-471.776	1528.27	162.616	-488.911	1443.18	169.423	-401.585	1164.6	160.234	-611.109	1349.89	149.886	-672.933	1155.81	87.1443	-390.921	1241.82	341.843	-564.956	1366.8	419.368	-562.998	1127.12	424.227	-575.042	1051.69	414.559	-707.449	931.775	356.756	-746.769	873.346	420.592	-727.936	843.132	387.694	-802.027	825.544
780	0	202.955	-646.793	1583.12	85.1803	-642.923	1580.93	210.893	-480.813	1533.13	103.326	-480.975	1527	161.798	-497.945	1441.79	168.34	-410.388	1163.12	159.496	-620.145	1348.73	149.472	-681.521	1154.36	86.16	-399.84	1240.59	341.161	-573.333	1365.27	418.617	-571.649	1125.6	423.421	-584.57	1050.25	412.952	-717.854	931.256	354.746	-757.377	873.354	418.493	-738.999	842.714	385.332	-813.12	825.745
781	0	202.072	-656.062	1581.56	84.3306	-652.172	1579.31	210.007	-490.004	1531.95	102.384	-490.104	1525.87	160.878	-506.967	1440.66	167.321	-419.118	1162.22	158.84	-629.064	1347.1	148.922	-690.355	1152.78	85.103	-408.875	1239.36	340.292	-581.987	1363.73	417.745	-580.402	1124.12	422.446	-594.187	1048.86	411.162	-728.176	930.633	352.83	-767.867	873.166	416.54	-749.925	842.371	382.841	-823.906	825.805
782	0	201.144	-665.369	1580.04	83.3273	-661.569	1577.83	209.034	-499.198	1530.87	101.347	-499.311	1524.77	159.935	-516.07	1439.36	166.075	-427.787	1160.97	158.064	-638.059	1345.65	148.379	-699.188	1151.26	83.9427	-417.988	1238.21	339.479	-590.589	1362.38	416.843	-589.119	1122.77	421.44	-603.615	1047.69	409.341	-738.389	930.036	350.574	-777.96	872.817	414.482	-760.582	841.949	380.212	-834.386	825.576
783	0	199.977	-674.55	1578.39	82.292	-670.97	1576.39	207.941	-508.507	1529.65	100.124	-508.659	1523.45	158.831	-525.209	1438	164.919	-436.913	1159.72	157.348	-647.024	1344.2	147.932	-708.191	1149.79	82.8195	-427.074	1236.89	338.635	-599.302	1361.07	415.745	-597.898	1121.33	420.336	-613.069	1046.37	407.558	-748.317	929.218	348.575	-787.787	872.217	412.521	-770.773	841.208	377.781	-844.545	825.1
784	0	198.948	-684.138	1576.97	81.2206	-680.447	1574.71	206.682	-517.824	1528.2	98.9927	-518.067	1522.12	157.56	-534.425	1436.64	163.777	-445.88	1158.47	156.485	-656.214	1342.64	147.5	-717.347	1148.12	81.6479	-436.301	1235.47	337.627	-608.025	1359.66	414.657	-606.821	1119.87	419.041	-622.467	1044.85	405.722	-758.151	928.229	346.55	-797.49	871.36	410.59	-780.978	840.143	375.259	-854.453	824.285
785	0	197.74	-693.561	1575.46	79.9615	-689.853	1573.35	205.471	-527.253	1526.9	97.6917	-527.448	1520.88	156.354	-543.673	1435.24	162.865	-454.795	1156.82	155.563	-665.408	1341.28	146.994	-726.556	1146.68	80.5155	-445.538	1234.05	336.589	-617.017	1358.41	413.336	-615.904	1118.49	417.622	-631.932	1043.45	404.03	-767.716	927.214	344.796	-806.885	870.414	408.911	-790.854	839.283	372.776	-864.035	823.319
786	0	196.386	-703.013	1574.16	78.5518	-699.296	1571.83	204.179	-536.637	1525.78	96.497	-536.824	1519.58	154.994	-552.966	1433.99	161.373	-464.16	1155.89	154.687	-674.468	1339.8	146.43	-735.67	1145.26	79.3161	-454.898	1232.7	335.496	-625.915	1357.38	412.082	-624.941	1117.36	416.322	-641.212	1042.37	401.975	-777.011	926.102	342.815	-816.03	869.36	406.969	-800.26	838.175	370.373	-873.287	822.187
787	0	194.857	-712.583	1572.76	77.1542	-708.821	1570.49	202.735	-546.075	1524.62	95.054	-546.378	1518.34	153.554	-562.34	1432.77	160.063	-473.45	1154.61	153.357	-683.988	1338.57	145.786	-744.985	1143.86	77.9658	-464.322	1231.35	334.222	-634.978	1356.39	410.553	-634.19	1116.22	414.748	-650.39	1041.24	400.364	-786.165	924.955	340.718	-824.811	868.087	405.254	-809.497	837.052	367.968	-882.257	820.844
788	0	193.262	-722.143	1571.48	75.6432	-718.493	1569.2	201.104	-555.696	1523.57	93.4745	-555.869	1517.37	151.963	-571.806	1431.62	159.071	-482.882	1153.37	152.173	-693.381	1337.27	145.083	-754.444	1142.55	76.6965	-473.864	1230.06	332.969	-644.155	1355.47	408.96	-643.452	1115.13	413.053	-659.518	1040.13	398.626	-795.205	923.704	338.801	-833.406	866.645	403.519	-818.477	835.853	365.663	-890.952	819.294
789	0	191.576	-731.775	1570.33	74.0079	-728.195	1568	199.526	-565.283	1522.68	91.7426	-565.54	1516.39	150.337	-581.343	1430.57	157.589	-492.4	1152.84	150.876	-702.823	1336.09	144.366	-764.036	1141.45	75.3349	-483.525	1228.81	331.545	-653.517	1354.82	407.363	-652.796	1114.28	411.412	-668.612	1039.23	396.859	-803.979	922.352	336.959	-841.715	865.088	401.879	-827.114	834.615	363.419	-899.252	817.661
790	0	189.918	-741.444	1569.39	72.2018	-737.793	1567	197.594	-574.904	1521.68	89.887	-575.165	1515.42	148.6	-590.94	1429.57	156.342	-502.15	1151.47	149.383	-712.589	1335.31	143.52	-773.689	1140.63	73.9593	-493.264	1227.62	330.063	-662.998	1354.34	405.69	-662.034	1113.59	409.634	-677.591	1038.52	395.087	-812.466	921.179	335.153	-849.738	863.561	400.353	-835.434	833.382	361.318	-907.185	815.915
791	0	188.157	-751.108	1568.45	70.3475	-747.559	1566.14	195.64	-584.537	1520.83	87.9331	-584.843	1514.65	146.778	-600.589	1428.65	155.101	-511.989	1150.48	147.898	-722.328	1334.43	142.653	-783.511	1139.81	72.5859	-503.162	1226.42	328.436	-672.634	1353.89	403.951	-671.323	1112.9	407.951	-686.529	1037.83	393.239	-820.895	919.843	333.385	-857.472	861.832	398.92	-843.504	831.982	359.358	-914.878	813.933
792	0	186.182	-760.816	1567.54	68.4562	-757.467	1565.19	193.596	-594.242	1520.18	85.6563	-594.663	1514.07	144.907	-610.302	1427.85	153.928	-521.579	1149.63	146.184	-732.216	1333.71	141.562	-793.585	1139.19	71.2335	-513.158	1225.32	326.839	-682.488	1353.59	402.214	-680.564	1112.45	406.18	-695.527	1037.22	391.394	-829.133	918.49	331.656	-864.958	859.874	397.461	-851.311	830.555	357.472	-922.32	811.881
793	0	184.036	-770.481	1566.77	66.3974	-767.455	1564.34	191.348	-603.704	1519.68	83.4139	-604.511	1513.35	142.966	-620.147	1427.06	152.681	-531.727	1148.94	144.404	-742.171	1333.07	140.357	-803.731	1138.71	69.8506	-523.379	1224.26	325.109	-692.452	1353.48	400.429	-689.901	1112.17	404.361	-704.383	1036.93	389.584	-837.176	917.181	330.155	-872.311	857.958	396.156	-858.894	829.166	355.656	-929.452	809.754
794	0	182.01	-780.354	1566.18	64.2362	-777.273	1563.6	188.993	-613.556	1519.14	81.0199	-614.447	1512.68	140.96	-630.018	1426.38	151.32	-542.225	1147.71	142.583	-752.26	1332.59	139.02	-814.039	1138.45	68.4936	-533.694	1223.06	323.16	-702.429	1353.29	398.52	-699.177	1111.83	402.574	-713.071	1036.57	387.905	-845	915.81	328.45	-879.218	855.879	394.931	-866.064	827.772	353.932	-936.283	807.478
795	0	179.797	-790.122	1565.49	62.138	-787.318	1562.89	186.45	-623.285	1518.66	78.5939	-624.324	1512.11	138.913	-639.882	1425.55	149.962	-552.532	1146.79	140.742	-762.353	1332.21	137.67	-824.704	1138.21	67.0554	-544.203	1221.74	321.297	-712.53	1353.13	396.725	-708.671	1111.55	400.739	-721.807	1036.18	386.114	-852.794	914.421	327.181	-886.194	853.759	393.854	-873.192	826.274	352.419	-942.895	805.003
796	0	177.637	-799.938	1565.14	59.8734	-797.409	1562.24	183.843	-632.871	1518.38	76.1306	-634.281	1511.69	136.873	-649.792	1424.94	148.809	-563.583	1145.86	138.817	-772.689	1331.93	136.388	-835.507	1138.24	65.6374	-554.944	1220.5	319.339	-722.767	1353.19	394.873	-718.051	1111.46	398.923	-730.493	1035.85	384.801	-860.368	913.125	325.745	-892.685	851.644	392.997	-880.174	824.867	350.959	-949.216	802.454
797	0	175.307	-809.769	1565.12	57.4639	-807.501	1561.98	181.229	-642.728	1518.43	73.6507	-644.32	1511.63	134.652	-659.823	1424.47	147.136	-574.009	1145.43	136.882	-783.11	1332	134.963	-846.563	1138.44	64.1291	-565.763	1219.4	317.519	-733.037	1353.61	393.036	-727.604	1111.63	397.179	-739.043	1035.87	383.31	-867.866	911.882	324.578	-899.037	849.536	392.227	-886.826	823.612	349.629	-955.229	799.983
798	0	172.757	-819.716	1565.29	54.9123	-817.485	1561.86	178.619	-652.594	1518.69	70.9367	-654.363	1511.41	132.41	-669.871	1424.31	145.649	-585.066	1145.25	134.875	-793.54	1332.15	133.682	-857.951	1138.56	62.7021	-576.688	1218.5	315.496	-743.369	1354.04	391.321	-737.088	1111.93	395.42	-747.556	1036.13	382.093	-874.787	910.585	323.504	-905.247	847.563	391.601	-893.299	822.403	348.554	-960.997	797.455
799	0	170.2	-829.656	1565.51	52.3729	-827.564	1561.78	176.054	-662.487	1518.99	68.265	-664.38	1511.54	130.308	-680.153	1424.24	144.115	-596.105	1144.49	132.893	-804.066	1332.37	132.363	-869.362	1139.01	61.3199	-587.67	1217.74	313.555	-754.031	1354.59	389.466	-746.718	1112.39	393.729	-756.161	1036.56	380.813	-881.85	909.381	322.592	-911.187	845.52	391.067	-899.537	821.199	347.661	-966.348	794.722
800	0	167.482	-839.593	1566.03	49.755	-837.74	1562.05	173.367	-672.426	1519.5	65.5357	-674.548	1511.75	128.177	-690.573	1424.33	142.839	-607.138	1144.28	130.974	-814.689	1332.82	131.186	-881.064	1139.63	59.9556	-598.725	1217.21	311.434	-764.693	1355.53	387.715	-756.325	1113.15	392.083	-764.622	1037.18	379.74	-888.713	908.3	322.079	-917.019	843.712	390.572	-905.323	820.085	346.986	-971.537	792.181
801	0	164.788	-849.64	1567.05	47.071	-847.838	1562.6	170.626	-682.494	1520.13	62.9082	-684.69	1511.96	125.974	-700.899	1424.73	140.834	-618.052	1144.55	129.011	-825.369	1333.68	130.008	-892.775	1140.58	58.5422	-609.777	1217.08	309.549	-775.358	1356.72	386.098	-765.905	1114.23	390.53	-773.18	1038.24	378.913	-895.288	907.632	321.247	-922.85	842.201	390.185	-910.476	819.272	346.579	-976.242	789.871
802	0	162.037	-859.74	1568.1	44.2921	-857.869	1563.32	167.906	-692.838	1520.93	60.3921	-694.853	1512.28	123.763	-711.329	1425.41	139.717	-629.338	1144.99	127.119	-836.109	1334.67	128.86	-904.368	1141.63	57.2457	-620.712	1217.28	307.637	-786.163	1358.15	384.615	-775.64	1115.61	388.998	-781.692	1039.38	378.157	-901.732	906.962	321.106	-927.427	840.51	390.075	-915.55	818.525	346.389	-980.524	787.471
803	0	159.211	-869.724	1569.36	41.5017	-867.96	1564.12	165.332	-702.999	1521.93	57.8358	-705.084	1512.95	121.722	-721.961	1426.25	138.358	-640.414	1145.57	125.335	-846.791	1335.85	127.652	-915.922	1142.86	55.9969	-631.626	1217.75	305.556	-796.989	1359.74	383.141	-785.367	1117.25	387.611	-790.283	1040.96	377.577	-907.999	906.483	321.102	-932.504	839.342	390.099	-920.439	817.842	346.373	-984.568	785.191
804	0	156.151	-879.545	1570.78	38.6504	-878.092	1565.11	162.741	-712.999	1523.18	55.1471	-715.273	1513.82	119.398	-732.502	1427.46	137.343	-651.704	1146.93	123.447	-857.424	1337.19	126.48	-927.235	1144.34	54.6879	-642.473	1218.49	303.742	-807.765	1361.69	381.759	-795.149	1119.27	386.562	-798.799	1042.91	377.315	-914.157	906.498	320.919	-937.281	838.311	390.208	-924.908	817.582	346.416	-988.284	783.217
805	0	153.244	-889.596	1572.31	35.8294	-888.172	1566.14	160.115	-723.159	1524.74	52.5051	-725.451	1514.75	117.276	-742.897	1428.69	136.29	-662.722	1147.99	121.748	-868.01	1338.68	125.322	-938.375	1145.93	53.3597	-653.354	1219.45	301.794	-818.328	1363.72	380.313	-804.971	1121.38	385.346	-807.147	1045.13	376.757	-920.197	906.509	321.302	-942.074	837.6	390.539	-929.381	817.528	346.785	-991.747	781.278
806	0	150.504	-899.721	1573.95	33.0966	-898.236	1567.17	157.534	-733.286	1526.21	50.0313	-735.648	1515.8	115.297	-753.363	1430.05	135.446	-673.83	1149.22	120.081	-878.424	1340.06	124.294	-949.128	1147.57	51.9831	-664.065	1220.49	299.983	-828.731	1365.76	379.028	-814.822	1123.54	383.995	-815.711	1047.31	376.77	-926.259	906.808	321.535	-946.55	836.874	391.051	-933.788	817.687	347.165	-995.017	779.489
807	0	147.825	-909.812	1575.69	30.3831	-908.326	1568.21	154.883	-743.457	1527.79	47.5981	-745.721	1516.75	113.268	-763.567	1431.36	134.529	-684.665	1150.64	118.627	-888.818	1341.69	123.356	-959.923	1149.32	50.5125	-674.789	1221.69	298.347	-839.002	1367.98	377.75	-824.661	1125.91	382.923	-824.246	1049.66	376.616	-932.16	907.289	322.076	-950.83	836.398	391.753	-938.216	818.332	347.767	-998.264	778.104
808	0	145.18	-919.804	1577.45	27.7791	-918.396	1569.23	152.512	-753.33	1529.42	45.1461	-755.835	1517.82	111.366	-773.65	1432.81	133.342	-694.968	1152.12	117.244	-898.965	1343.33	122.46	-970.279	1151.13	48.9472	-685.478	1222.78	296.673	-848.874	1370.16	376.608	-834.342	1128.29	381.984	-832.599	1052.2	376.872	-938.044	908.142	322.806	-955.225	836.338	392.719	-942.647	819.206	348.562	-1001.56	777.03
809	0	142.542	-929.703	1578.92	25.157	-928.326	1570.12	150.189	-763.206	1531.23	42.8731	-765.765	1518.75	109.58	-783.615	1434.23	132.474	-705.239	1153.78	115.951	-908.998	1344.89	121.632	-980.461	1152.81	47.3661	-696.053	1223.86	295.15	-858.478	1372.19	375.684	-843.848	1130.55	381.117	-840.708	1054.61	376.911	-943.914	908.959	323.543	-959.715	836.339	394.091	-947.461	820.329	349.758	-1004.59	775.927
810	0	139.918	-939.683	1580.39	22.7405	-938.391	1570.65	147.992	-773.158	1532.73	40.7053	-775.699	1519.72	107.832	-793.568	1435.45	131.066	-714.742	1155.19	114.778	-918.933	1346.13	120.92	-990.493	1154.32	45.823	-706.547	1224.86	293.883	-868.067	1374.05	374.503	-853.236	1132.64	380.156	-848.754	1056.79	377.144	-949.977	909.83	324.876	-964.4	836.215	395.452	-952.398	821.326	351.153	-1008.12	775.118
811	0	137.337	-949.573	1581.77	20.3227	-948.321	1571.28	145.893	-783.051	1534.23	38.685	-785.564	1520.61	106.093	-803.421	1436.63	130.206	-724.479	1156.29	113.686	-928.826	1347.39	120.351	-1000.22	1155.76	44.1863	-716.936	1225.65	292.441	-877.208	1375.76	373.521	-862.306	1134.62	379.347	-856.662	1058.88	377.518	-956.074	910.87	325.922	-969.204	836.341	397.052	-957.351	822.571	352.813	-1011.79	774.493
812	0	135.216	-959.618	1583.33	18.0692	-958.092	1571.89	143.88	-792.864	1535.68	36.7998	-795.379	1521.33	104.409	-813.095	1437.77	128.805	-733.777	1157.63	112.754	-938.482	1348.54	120.003	-1009.86	1157.07	42.5073	-727.108	1226.49	291.18	-886.027	1377.37	372.757	-871.095	1136.41	378.61	-864.373	1060.79	378.072	-962.103	911.815	327.426	-974.006	836.467	398.795	-962.406	823.85	354.89	-1015.67	774.049
813	0	133.052	-969.548	1584.65	15.9648	-967.777	1572.45	142.105	-802.645	1537.07	35.2738	-805.132	1522.04	102.799	-822.718	1438.97	127.359	-742.878	1158.64	112.022	-948.008	1349.64	119.771	-1019.24	1158.16	40.8779	-737.105	1227.35	290.161	-894.76	1378.82	372.054	-879.664	1138.13	377.973	-872.052	1062.58	379.099	-968.161	912.719	329.197	-979.152	836.708	400.678	-967.393	825.035	357.345	-1019.7	773.801
814	0	130.988	-979.323	1585.83	14.0079	-977.437	1572.93	140.507	-812.496	1538.36	33.6274	-814.717	1522.81	101.255	-832.295	1440.03	125.666	-751.907	1160.04	111.408	-957.368	1350.65	119.902	-1028.56	1159.13	39.3272	-746.901	1228.42	288.641	-903.168	1380.02	371.283	-887.791	1139.65	377.434	-879.639	1064.15	380.119	-974.168	913.73	331.139	-984.72	837.15	402.78	-972.497	826.421	360.185	-1024.06	773.789
815	0	129.065	-989.057	1586.93	12.027	-987.019	1573.45	138.919	-822.092	1539.75	31.9568	-824.243	1523.68	99.9036	-841.744	1441.08	124.352	-760.757	1161.13	110.773	-966.679	1351.66	120.034	-1037.58	1159.92	37.8214	-756.524	1229.39	288.147	-911.566	1381.57	370.639	-895.591	1141.19	377.039	-887.018	1066.01	381.099	-980.202	914.782	333.415	-989.729	837.348	404.959	-977.573	827.794	363.126	-1028.49	773.91
816	0	127.187	-998.65	1587.94	10.2842	-996.619	1573.9	137.741	-831.754	1541.28	30.7336	-833.899	1524.45	98.5949	-850.996	1442.14	122.931	-770.164	1162.31	110.226	-975.808	1352.54	120.236	-1046.51	1160.64	36.2661	-765.892	1230.38	287.293	-919.64	1382.89	370.042	-902.98	1142.56	376.778	-894.06	1067.58	382.734	-986.149	915.967	335.481	-995.775	838.12	407.186	-982.525	829.147	366.34	-1033.13	774.242
817	0	125.604	-1008.3	1588.92	8.75121	-1006.12	1574.3	136.179	-841.293	1542.54	29.4346	-843.29	1525.24	97.2441	-860.193	1443.22	121.138	-778.82	1163.34	109.907	-984.853	1353.37	120.784	-1055.31	1161.35	34.6516	-775.181	1231.49	286.099	-927.429	1383.98	369.508	-910.052	1143.86	376.648	-901.069	1069.21	384.364	-992.043	917.105	338.246	-1001.66	838.774	409.454	-987.466	830.586	369.737	-1037.88	774.789
818	0	124.233	-1017.82	1589.88	7.56281	-1015.6	1574.74	134.94	-850.692	1543.75	28.2951	-852.676	1526.13	95.9652	-869.2	1444.25	119.688	-787.987	1164.56	109.561	-993.787	1354.21	121.301	-1064.06	1162.11	33.0653	-784.4	1232.53	285.726	-935.377	1385.29	369.163	-916.777	1145.15	376.443	-907.76	1070.6	386.153	-997.906	918.299	340.749	-1007.35	839.6	411.816	-992.515	832.008	373.119	-1042.92	775.507
819	0	123.107	-1027.29	1590.92	6.2822	-1024.98	1575.42	133.887	-860.029	1545.07	27.2474	-861.958	1527.1	94.6119	-878.219	1445.31	118.008	-796.563	1165.83	109.361	-1002.52	1355.17	121.874	-1072.69	1163.02	31.2606	-793.465	1233.56	285.02	-942.957	1386.5	368.969	-922.987	1146.59	376.434	-914.253	1072.19	388.087	-1003.74	919.807	343.052	-1013.26	840.714	414.061	-997.494	833.601	376.567	-1047.87	776.48
820	0	122.093	-1036.62	1591.88	5.31971	-1034.26	1576.03	132.926	-869.19	1546.43	26.3995	-871.32	1527.97	93.582	-887.021	1446.29	116.43	-805.262	1166.54	109.134	-1011.2	1356.22	122.487	-1081.23	1164.03	29.5465	-802.423	1234.58	284.395	-950.453	1387.77	368.875	-928.971	1148.14	376.474	-920.552	1073.84	390.13	-1009.68	921.344	345.537	-1019.51	842.117	416.464	-1002.35	835.275	379.935	-1053.1	777.678
821	0	121.187	-1045.95	1592.73	4.54078	-1043.67	1576.57	131.946	-878.575	1547.66	25.6288	-880.57	1529.05	92.5871	-895.781	1447.33	114.915	-814.75	1167.78	108.899	-1019.8	1357.14	123.054	-1089.71	1165.03	27.9591	-811.4	1235.65	283.831	-957.902	1389.04	368.832	-934.734	1149.6	376.614	-926.717	1075.32	391.997	-1015.37	922.838	347.896	-1025.8	843.347	418.573	-1007.73	836.951	383.166	-1058.46	778.747
822	0	120.268	-1054.92	1593.43	3.75726	-1052.91	1577.33	131.344	-887.684	1548.92	24.8125	-889.621	1530.11	91.4461	-904.418	1448.35	113.506	-822.569	1168.81	108.761	-1028.32	1358.15	123.561	-1098.02	1166.13	26.5524	-820.394	1236.69	283.195	-965.237	1390.21	368.882	-940.121	1151.15	376.772	-932.61	1076.94	393.916	-1021.02	924.455	350.568	-1032.1	844.755	420.672	-1013.1	838.707	386.336	-1063.93	780.222
823	0	119.73	-1064.19	1594.4	3.41128	-1062.1	1578.02	130.596	-896.642	1550.16	24.3428	-898.711	1531.2	90.6225	-912.882	1449.28	112.209	-831.263	1169.49	108.606	-1036.68	1359.23	124.1	-1106.27	1167.28	24.7859	-829.02	1237.45	282.677	-972.486	1391.48	369.081	-945.401	1152.78	376.956	-938.402	1078.46	395.738	-1026.73	926.035	352.91	-1038.26	846.193	422.914	-1018.33	840.464	389.325	-1069.35	781.574
824	0	119.437	-1073.49	1595.27	2.89006	-1071.24	1578.67	130.247	-905.778	1551.4	24.0227	-907.806	1532.25	89.5348	-921.431	1450.05	111.107	-840.001	1169.94	108.456	-1045.1	1360.22	124.478	-1114.58	1168.46	23.3362	-837.741	1238.24	282.168	-979.786	1392.54	369.222	-950.604	1154.19	377.143	-944.164	1079.82	397.68	-1032.35	927.531	354.949	-1044.7	847.695	424.939	-1023.81	842.133	392.319	-1074.93	782.899
825	0	119.057	-1082.54	1595.84	2.58265	-1080.26	1579.28	130.055	-914.803	1552.37	23.6702	-916.686	1533.31	88.9093	-929.798	1450.87	109.887	-848.749	1170.58	108.355	-1053.47	1361.11	124.883	-1122.61	1169.41	22.0381	-846.567	1238.97	281.3	-987.051	1393.23	369.357	-955.831	1155.49	377.359	-950.007	1081.07	399.507	-1038.12	929.034	357.163	-1051.05	849.019	426.971	-1029.21	843.635	395.252	-1080.79	784.292
826	0	118.915	-1091.68	1596.48	2.34116	-1089.37	1579.87	129.685	-923.827	1553.28	23.4079	-925.576	1534.23	88.1261	-938.235	1451.57	109.095	-857.552	1171.41	108.235	-1061.73	1361.95	125.088	-1130.52	1170.41	20.9512	-855.296	1239.65	280.813	-994.389	1394.04	369.375	-961.089	1156.81	377.61	-955.808	1082.35	401.27	-1043.89	930.417	359.332	-1057.45	850.291	428.793	-1034.84	845.123	398.037	-1086.58	785.656
827	0	118.848	-1100.78	1596.86	2.15591	-1098.2	1580.36	129.702	-932.741	1554.27	23.4205	-934.541	1535.09	87.5791	-946.503	1452.1	108.23	-865.894	1171.81	108.017	-1070	1362.74	125.175	-1138.7	1171.32	19.8296	-864.016	1240.25	280.541	-1001.76	1395.03	369.557	-966.511	1158.02	377.907	-961.532	1083.67	403.021	-1049.82	931.856	361.357	-1063.82	851.642	430.528	-1040.26	846.609	400.766	-1092.36	786.994
828	0	118.784	-1109.89	1597.03	2.13881	-1107.29	1580.64	129.648	-941.685	1554.93	23.2261	-943.296	1535.67	86.886	-954.958	1452.59	107.698	-874.187	1172.23	107.862	-1078.29	1363.32	125.167	-1146.91	1171.94	18.7916	-872.506	1240.8	280.484	-1009.31	1395.68	369.47	-972.111	1158.91	378.157	-967.442	1084.64	404.522	-1055.75	932.983	363.523	-1070.37	852.528	431.775	-1045.49	847.648	403.298	-1098.3	787.964
829	0	118.85	-1118.89	1597.1	2.23084	-1116.3	1580.9	129.69	-950.639	1555.42	23.1647	-952.18	1536.28	86.5396	-963.234	1452.88	107.121	-882.487	1172.29	107.772	-1086.62	1363.84	125.12	-1155.05	1172.36	17.8932	-881.396	1240.95	280.157	-1016.85	1395.96	369.337	-977.938	1159.66	378.539	-973.257	1085.41	405.984	-1061.72	933.903	365.241	-1076.97	853.403	433.515	-1051.34	848.606	405.679	-1104.25	788.805
830	0	119.176	-1128.02	1597.27	2.41085	-1125.25	1581.16	129.623	-959.623	1555.76	23.2467	-961.151	1536.82	86.1217	-971.601	1453.11	106.654	-891.016	1172.34	107.701	-1094.8	1364.38	125.003	-1163.06	1172.78	16.9635	-889.867	1241.17	279.713	-1024.39	1396.07	369.454	-983.946	1160.39	378.796	-979.326	1086.12	407.379	-1067.64	934.733	366.915	-1083.36	854.107	434.853	-1056.9	849.328	407.885	-1110	789.573
831	0	119.384	-1136.95	1597.28	2.56895	-1134.22	1581.36	129.831	-968.532	1556.02	23.3552	-970.136	1537.19	85.7268	-979.996	1453.3	106.076	-899.377	1172.53	107.609	-1103.05	1364.87	124.904	-1171.18	1173.04	16.0607	-898.472	1241.36	279.301	-1032.01	1396.12	369.3	-990.115	1160.89	378.858	-985.662	1086.63	408.616	-1073.53	935.36	368.52	-1089.81	854.731	435.823	-1062.38	849.849	409.967	-1115.91	790.286
832	0	119.751	-1145.93	1597.07	2.81991	-1143.26	1581.4	130.044	-977.349	1556.05	23.3625	-978.972	1537.55	85.4543	-988.392	1453.32	105.577	-907.735	1172.58	107.605	-1111.35	1365	124.799	-1179.36	1173.02	15.392	-907.054	1241.47	279.403	-1039.8	1396.21	369.255	-996.649	1161.11	379.161	-991.955	1086.98	409.791	-1079.69	935.683	369.946	-1096.34	855.061	436.959	-1068.03	850.269	411.725	-1121.81	790.533
833	0	120.121	-1154.87	1596.75	3.33243	-1152.3	1581.31	130.112	-986.32	1556.05	23.6959	-988.027	1537.65	85.1698	-996.926	1453.24	105.042	-916.161	1172.63	107.53	-1119.64	1364.99	124.793	-1187.6	1172.77	14.8698	-915.62	1241.47	279.26	-1047.71	1395.99	369.308	-1003.4	1161.23	379.563	-998.175	1087.24	410.795	-1085.92	935.771	371.109	-1102.91	855.087	438.302	-1073.89	850.574	413.203	-1127.64	790.529
834	0	120.675	-1163.9	1596.41	3.67634	-1161.33	1581.18	130.485	-995.169	1555.95	23.8783	-996.946	1537.61	85.2558	-1005.43	1453.05	104.49	-924.929	1172.17	107.576	-1128.01	1364.99	124.834	-1195.87	1172.49	14.4488	-924.09	1241.37	279.057	-1055.65	1395.69	369.292	-1010.3	1161.25	379.806	-1004.57	1087.38	411.695	-1092.21	935.764	372.499	-1109.74	855.245	438.92	-1079.57	850.487	414.427	-1133.49	790.397
835	0	121.199	-1172.68	1595.88	4.20698	-1170.41	1580.88	130.704	-1004.01	1555.52	24.0496	-1005.82	1537.41	85.1709	-1014.06	1452.71	104.132	-933.814	1171.62	107.656	-1136.45	1364.79	125.053	-1204.16	1172.12	14.0488	-932.67	1241.09	279.082	-1063.73	1395.22	369.366	-1017.32	1161	380.052	-1011.15	1087.19	412.335	-1098.06	935.337	373.36	-1117.19	855.305	439.363	-1085.26	850.107	415.502	-1139.26	790.027
836	0	121.88	-1181.62	1595.11	4.97142	-1179.46	1580.29	130.993	-1012.82	1555.01	24.5801	-1014.83	1537.34	85.1264	-1022.69	1452.29	103.797	-942.222	1171.08	107.814	-1145	1364.47	125.351	-1212.51	1171.53	13.8548	-941.109	1240.74	279.308	-1072.12	1394.57	369.228	-1024.53	1160.5	380.162	-1017.87	1086.74	412.959	-1103.97	934.751	373.933	-1123.54	854.84	439.711	-1091.27	849.531	416.317	-1145.1	789.445
837	0	122.522	-1190.19	1594.11	5.52632	-1188.44	1579.84	131.389	-1021.62	1554.51	24.8003	-1023.75	1537.04	85.4479	-1031.37	1451.71	103.526	-951.419	1170.82	108.039	-1153.6	1363.96	125.699	-1220.95	1170.93	13.831	-949.587	1240.45	279.398	-1080.52	1393.97	369.394	-1031.9	1160.18	380.159	-1024.91	1086.36	413.413	-1110.26	934.206	374.402	-1127.59	853.536	440.215	-1097.18	848.915	416.984	-1150.91	788.714
838	0	123.299	-1199.12	1593.27	6.28512	-1197.54	1579.16	131.863	-1030.36	1553.91	25.1363	-1032.72	1536.69	85.663	-1040.27	1451.18	103.197	-960.462	1170.48	108.321	-1162.24	1363.39	126.154	-1229.45	1170.22	14.125	-958.589	1239.75	279.865	-1089.05	1393.44	369.594	-1039.38	1159.82	380.442	-1031.7	1086.02	413.702	-1116.6	933.505	374.568	-1133.81	852.8	440.57	-1103.32	848.31	417.401	-1156.69	787.681
839	0	124.15	-1208.2	1592.33	7.17375	-1206.51	1578.25	132.192	-1039.23	1553.17	25.6804	-1041.6	1536.08	85.9915	-1049.02	1450.48	102.863	-969.855	1169.9	108.617	-1171.07	1362.65	126.541	-1237.93	1169.28	14.1731	-966.91	1239.19	280.124	-1097.71	1392.73	369.671	-1046.97	1159.11	380.361	-1038.86	1085.38	413.89	-1123.12	932.496	375.086	-1140.26	851.75	440.575	-1109.1	847.395	417.684	-1162.56	786.551
840	0	124.996	-1217.19	1591.11	8.01658	-1215.69	1577.3	132.959	-1048.14	1552.13	26.3571	-1050.64	1535.27	86.59	-1057.98	1449.44	102.793	-978.895	1168.79	109.027	-1179.91	1361.68	127.033	-1246.52	1168.26	14.6451	-975.521	1238.52	280.574	-1106.61	1391.69	369.76	-1054.73	1158.13	380.436	-1046.16	1084.45	414.019	-1129.71	931.155	374.913	-1146.39	850.282	440.58	-1115.24	846.101	417.755	-1168.5	784.948
841	0	125.92	-1226.16	1589.9	9.04153	-1224.64	1576.26	133.823	-1057.15	1551.02	27.0666	-1059.6	1534.37	87.214	-1066.96	1448.61	103.022	-987.86	1167.89	109.523	-1188.79	1360.71	127.557	-1255.23	1167.12	15.0325	-984.041	1237.67	281.092	-1115.48	1390.65	369.861	-1062.62	1157.12	380.549	-1053.64	1083.53	414.118	-1136.3	929.768	374.978	-1152.8	848.883	440.479	-1121.34	844.651	417.835	-1174.42	783.384
842	0	126.939	-1235.28	1588.86	9.94529	-1233.56	1575.19	134.666	-1066.28	1549.9	28.222	-1068.71	1533.35	87.7454	-1075.93	1447.54	103.706	-996.834	1166.96	110.159	-1197.75	1359.67	128.109	-1263.96	1166.14	15.6161	-992.734	1236.84	282.002	-1124.62	1389.68	370.216	-1070.76	1156.11	380.525	-1061.24	1082.41	414.144	-1142.93	928.311	374.984	-1159.02	847.386	440.316	-1127.52	843.139	417.684	-1179.7	781.469
843	0	127.771	-1244.25	1587.39	10.8074	-1242.79	1574.11	135.706	-1075.49	1548.52	29.0404	-1077.68	1532.09	88.642	-1085.15	1446.49	104.59	-1004.98	1166.08	110.827	-1206.83	1358.48	128.665	-1272.78	1164.73	16.459	-1001.36	1235.96	282.616	-1133.81	1388.34	370.412	-1079.08	1154.86	380.578	-1069	1081.17	414.092	-1149.8	926.541	374.896	-1165.34	845.462	440.166	-1133.88	841.451	417.353	-1185.59	779.382
844	0	128.742	-1253.62	1586.01	11.8646	-1251.75	1572.79	136.944	-1084.68	1546.99	30.3406	-1086.89	1530.89	89.6909	-1094.29	1445.22	105.489	-1014.04	1165.2	111.5	-1215.97	1357.03	129.235	-1281.82	1163.25	17.288	-1010.13	1234.94	283.417	-1143.13	1386.81	370.738	-1087.66	1153.39	380.636	-1076.94	1079.75	413.989	-1156.79	924.505	374.583	-1171.89	843.426	439.995	-1140.37	839.593	417.09	-1191.87	777.263
845	0	129.857	-1263	1584.54	12.8781	-1260.92	1571.51	138.405	-1094.05	1545.41	31.6371	-1096.05	1529.32	90.6919	-1103.59	1443.8	106.396	-1023.03	1163.87	112.332	-1225.27	1355.64	129.821	-1290.74	1161.64	18.2538	-1018.93	1233.79	284.623	-1152.65	1385.4	371.041	-1096.25	1151.77	380.74	-1084.89	1078.23	413.928	-1163.83	922.412	374.404	-1178.37	841.29	439.779	-1146.8	837.551	416.829	-1198.22	775.01
846	0	130.919	-1272.26	1582.83	14.0602	-1270.01	1569.96	139.852	-1103.4	1543.75	33.0388	-1105.2	1527.77	91.9833	-1113.05	1442.26	107.461	-1032.22	1162.27	113.226	-1234.59	1354.01	130.391	-1300.04	1159.95	19.2294	-1027.79	1232.43	285.623	-1162.19	1383.66	371.145	-1104.93	1149.9	380.991	-1092.72	1076.56	413.818	-1170.92	920.16	374.079	-1185.07	839.052	439.64	-1153.42	835.362	416.325	-1204.16	772.406
847	0	132.301	-1281.95	1581.33	15.2011	-1279.13	1568.54	141.563	-1113.04	1541.88	34.8008	-1114.43	1526.17	93.2009	-1122.52	1440.88	108.517	-1041.53	1160.75	114.286	-1244.15	1352.33	131.074	-1309.24	1158.12	20.4977	-1036.78	1231.11	286.733	-1172	1381.57	371.648	-1113.99	1147.78	381.047	-1101.07	1074.59	413.819	-1178.23	917.724	374.027	-1192.12	836.684	439.438	-1160.32	832.959	416.16	-1210.63	769.726
848	0	133.658	-1291.49	1579.63	16.5424	-1288.29	1566.96	143.4	-1122.68	1540.09	36.6425	-1123.71	1524.66	94.7374	-1132.08	1439.29	109.765	-1050.87	1159.09	115.38	-1253.61	1350.63	131.858	-1318.25	1156.06	21.8002	-1045.84	1229.63	287.997	-1181.96	1379.53	372.405	-1123.13	1145.67	381.305	-1109.46	1072.51	414.002	-1185.68	915.268	373.887	-1198.74	834.105	439.572	-1167.36	830.486	415.698	-1217	766.943
849	0	135.061	-1301.01	1577.8	18.0544	-1297.48	1565.37	145.432	-1132.39	1538.37	38.595	-1132.95	1522.79	96.4949	-1141.75	1437.64	110.936	-1060.12	1157.39	116.542	-1263.29	1348.79	132.425	-1327.93	1154.18	23.2936	-1055.04	1228.2	289.42	-1191.99	1377.46	372.993	-1132.14	1143.52	381.555	-1117.89	1070.36	414.206	-1193.16	912.715	374.179	-1206.26	831.711	439.467	-1174.24	827.94	415.596	-1223.83	764.286
850	0	136.611	-1310.8	1576.04	19.6359	-1306.71	1563.63	147.573	-1142.05	1536.52	40.8329	-1142.32	1521.24	98.2524	-1151.53	1435.8	112.368	-1069.41	1155.81	117.787	-1273.11	1346.86	132.967	-1337.71	1152.11	24.9393	-1064.33	1227.05	290.891	-1202.02	1375.27	373.756	-1141.34	1141.27	382.023	-1126.49	1068.18	414.428	-1200.95	910.034	374.096	-1213.47	829.002	439.574	-1181.57	825.349	415.472	-1230.8	761.384
851	0	138.356	-1320.53	1574.01	21.3922	-1316.14	1561.97	149.766	-1151.9	1534.52	42.9811	-1151.79	1519.55	100.15	-1161.3	1434.28	113.935	-1078.74	1154.52	119.168	-1282.99	1344.81	133.624	-1347.34	1149.93	26.5364	-1073.71	1225.75	292.718	-1212.44	1373.15	374.606	-1150.73	1138.99	382.545	-1135.47	1065.95	414.974	-1209.05	907.218	374.645	-1221.3	826.284	439.734	-1188.99	822.722	415.492	-1238.02	758.451
852	0	140.372	-1330.51	1572.19	23.3262	-1325.63	1560.49	152.307	-1161.86	1532.68	45.463	-1161.43	1517.96	102.111	-1171.26	1432.6	115.501	-1088.45	1153.12	120.586	-1292.95	1342.91	134.337	-1356.85	1147.7	27.9812	-1082.91	1224.26	294.349	-1222.78	1370.84	375.648	-1160.12	1136.8	383.256	-1144.6	1063.67	415.407	-1217.25	904.571	374.902	-1229.04	823.642	440.101	-1196.62	820.105	415.716	-1245.24	755.613
853	0	142.522	-1340.43	1570.5	25.4283	-1335.12	1559.1	154.843	-1171.86	1530.84	47.8409	-1171.07	1516.39	104.062	-1181.15	1431.11	116.899	-1098.23	1151.61	122.168	-1302.91	1341.13	134.949	-1367.1	1145.96	29.746	-1092.33	1223.3	295.952	-1233.09	1368.59	376.628	-1169.72	1134.63	384.123	-1153.89	1061.54	416.155	-1225.71	902.094	375.528	-1237.11	821.207	440.565	-1204.53	817.502	416.108	-1252.73	752.95
854	0	144.916	-1350.53	1568.87	27.8037	-1344.82	1557.78	157.578	-1181.97	1529.07	50.6601	-1180.82	1515.03	106.206	-1191.23	1429.55	118.267	-1108.46	1150.27	123.797	-1313.03	1339.39	135.76	-1377	1144.04	31.4901	-1102.1	1222.11	297.802	-1243.61	1366.47	377.754	-1179.44	1132.42	385.193	-1163.42	1059.48	416.986	-1234.34	899.675	376.17	-1245.42	818.76	441.266	-1212.66	815.175	416.705	-1260.47	750.309
855	0	147.38	-1360.56	1567.25	30.273	-1354.63	1556.78	160.497	-1192.23	1527.3	53.47	-1190.83	1513.63	108.366	-1201.38	1428.21	119.781	-1118.63	1148.7	125.503	-1323.18	1337.75	136.654	-1386.19	1141.98	33.3211	-1111.81	1220.94	299.641	-1254.04	1364.33	379.003	-1189.55	1130.41	386.128	-1173.08	1057.34	417.945	-1243.21	897.225	377.105	-1254.16	816.348	442.14	-1221.03	812.808	417.528	-1268.59	747.809
856	0	150.113	-1370.97	1565.92	32.8663	-1364.56	1555.85	163.431	-1202.57	1525.64	56.358	-1200.74	1512.55	110.631	-1211.56	1426.83	121.287	-1128.63	1147.03	127.243	-1333.57	1336.36	137.494	-1396.22	1140.5	35.2264	-1121.79	1219.79	301.739	-1264.54	1362.44	380.364	-1199.64	1128.45	387.195	-1182.94	1055.35	419.073	-1252.21	894.876	378.461	-1263.26	814.121	442.981	-1229.56	810.565	418.684	-1276.99	745.572
857	0	152.898	-1381.13	1564.46	35.7042	-1374.55	1555.06	166.545	-1212.86	1524.03	59.4367	-1210.77	1511.56	112.952	-1221.74	1425.68	122.918	-1139.1	1145.87	129.113	-1343.73	1334.97	138.378	-1406.28	1139.11	36.9903	-1131.91	1218.74	303.827	-1274.88	1360.53	381.843	-1210	1126.54	388.406	-1192.87	1053.49	420.379	-1261.39	892.724	379.671	-1272.25	811.758	444.098	-1238.35	808.569	420.19	-1285.63	743.417
858	0	155.879	-1391.43	1563.11	38.6762	-1384.55	1554.44	169.683	-1223.31	1522.51	62.5734	-1220.88	1510.56	115.407	-1231.97	1424.52	124.441	-1149.41	1144.78	131.076	-1354.17	1333.89	139.491	-1416.49	1138	38.8505	-1142.76	1217.5	305.619	-1285.18	1358.55	383.305	-1220.56	1124.59	389.732	-1203.01	1051.58	421.997	-1270.86	890.641	380.897	-1281.29	809.529	445.566	-1247.54	806.618	422.254	-1294.92	741.594
859	0	159.103	-1401.92	1562	41.8471	-1394.73	1553.91	172.995	-1233.81	1521.17	65.7856	-1231.05	1509.85	117.86	-1242.13	1423.5	126.201	-1159.84	1143.62	133.179	-1364.5	1332.88	140.731	-1426.88	1136.98	40.5368	-1152.87	1216.77	307.739	-1295.64	1356.82	384.843	-1231.35	1122.76	391.061	-1213.44	1049.83	423.593	-1280.46	888.757	382.649	-1290.71	807.503	447.25	-1257	804.749	424.22	-1304.31	739.958
860	0	162.327	-1412.33	1560.88	44.9655	-1404.9	1553.5	176.269	-1244.08	1520.23	69.0411	-1241.25	1509.46	120.32	-1252.33	1422.66	127.83	-1170.68	1142.65	135.308	-1374.97	1332.15	142.034	-1437.41	1136.36	42.4218	-1163.41	1215.91	310.095	-1305.87	1355.35	386.633	-1242.03	1121.22	392.687	-1223.86	1048.29	425.58	-1290.33	887.142	384.851	-1300.48	805.785	449.241	-1266.73	803.217	426.526	-1313.92	738.458
861	0	165.375	-1422.59	1559.9	48.1585	-1415.11	1553.24	179.557	-1254.55	1519.55	72.2332	-1251.49	1509.27	122.997	-1262.49	1421.94	129.342	-1181.52	1141.97	137.593	-1385.48	1331.51	143.442	-1448.31	1135.74	44.2622	-1174.08	1215.19	312.251	-1316.06	1353.84	388.385	-1252.8	1119.79	394.162	-1234.7	1046.71	427.695	-1300.64	885.629	387.064	-1310.83	804.212	451.355	-1276.52	801.841	429.102	-1323.93	737.073
862	0	168.5	-1433.12	1559.4	51.34	-1425.33	1553.39	182.996	-1265.13	1519.25	75.6046	-1261.67	1509.56	125.683	-1272.69	1421.5	131.089	-1192.88	1141.27	139.829	-1396.06	1331.25	145.05	-1459.38	1135.49	46.1572	-1185.13	1214.8	314.734	-1326.46	1352.63	390.318	-1263.78	1118.62	396.368	-1245.51	1045.63	430.102	-1311.22	884.376	389.91	-1321.63	802.775	453.763	-1286.78	800.645	431.935	-1334.2	735.94
863	0	171.839	-1443.81	1559.21	54.5956	-1435.69	1553.71	186.465	-1275.66	1519.19	78.9729	-1271.9	1510.25	128.393	-1282.95	1421.32	132.69	-1203.86	1140.96	142.233	-1406.62	1331.29	146.698	-1470.7	1135.65	48.0554	-1195.92	1214.6	317.036	-1336.65	1351.58	392.366	-1274.72	1117.71	398.554	-1256.59	1044.84	432.795	-1321.92	883.578	392.799	-1333.05	801.965	456.24	-1297.18	799.699	435.084	-1344.83	735.195
864	0	175.174	-1454.46	1559.33	57.8752	-1446.1	1554.35	189.85	-1286.17	1519.45	82.3137	-1282.24	1510.95	131.128	-1293.2	1421.42	134.253	-1215.04	1140.73	144.652	-1417.16	1331.68	148.498	-1482.3	1136.35	49.8104	-1206.82	1214.55	319.427	-1346.83	1350.9	394.605	-1285.58	1117.31	401.171	-1267.63	1044.47	435.942	-1332.85	883.263	395.893	-1344.59	801.542	458.904	-1307.85	799.117	438.546	-1355.71	734.864
865	0	178.519	-1465.11	1559.66	61.2251	-1456.52	1555.33	193.302	-1296.85	1520	85.8661	-1292.64	1511.99	133.729	-1303.45	1421.9	135.894	-1226.27	1140.65	147.12	-1427.72	1332.38	150.34	-1493.75	1137.27	51.5028	-1217.75	1214.98	321.819	-1357.15	1350.57	396.832	-1296.5	1117.18	403.723	-1278.79	1044.27	439.17	-1343.98	883.294	399.598	-1356.63	801.556	461.873	-1319.03	799.011	442.456	-1367.11	735.122
866	0	181.781	-1475.69	1560.12	64.5564	-1466.95	1556.51	196.659	-1307.52	1520.61	89.2057	-1303.04	1513.31	136.425	-1313.73	1422.69	137.169	-1237.3	1141.36	149.585	-1438.2	1333.4	152.016	-1505.1	1138.42	53.4078	-1228.56	1215.78	324.126	-1367.47	1350.51	399.29	-1307.43	1117.37	406.311	-1290.09	1044.38	442.719	-1355.44	883.712	403.438	-1369.31	801.883	465.039	-1330.59	799.285	446.904	-1378.98	735.681
867	0	185.046	-1486.27	1560.92	67.8347	-1477.5	1557.98	199.932	-1318.04	1521.72	92.3948	-1313.56	1515.07	138.915	-1323.99	1423.73	139.12	-1248.54	1142.33	151.869	-1448.66	1334.68	153.704	-1516.42	1139.96	55.0127	-1239.51	1216.77	326.287	-1377.59	1350.9	401.907	-1318.19	1118.27	409.212	-1301.13	1045.17	446.573	-1367.06	884.757	407.625	-1382.7	802.888	468.507	-1342.32	800.192	451.926	-1391.23	736.905
868	0	188.296	-1496.95	1561.93	71.1858	-1488.12	1559.62	203.192	-1328.59	1523.11	95.5933	-1324.03	1516.83	141.479	-1334.21	1425.13	140.677	-1259.49	1143.31	154.323	-1459.01	1336.22	155.351	-1527.6	1141.81	56.73	-1250.28	1218.31	328.706	-1387.71	1351.81	404.503	-1328.76	1119.47	412.018	-1312.14	1046.06	450.727	-1378.99	886.425	412.413	-1396.55	804.472	472.174	-1354.46	801.639	457.736	-1403.88	738.55
869	0	191.644	-1507.63	1562.92	74.4815	-1498.78	1561.44	206.412	-1339.2	1524.56	98.7031	-1334.38	1519.28	143.974	-1344.35	1426.6	142.313	-1270.46	1144.81	156.588	-1469.27	1337.87	156.867	-1538.63	1143.71	58.4714	-1260.82	1219.86	330.858	-1397.95	1352.74	407.17	-1339.38	1120.85	414.927	-1323.32	1047.31	455.168	-1391.23	888.447	417.776	-1411.12	806.5	476.29	-1367.25	803.48	464.196	-1417.27	740.935
870	0	194.949	-1518.33	1563.98	77.6946	-1509.26	1563.2	209.488	-1349.73	1526.27	101.542	-1344.74	1521.59	146.348	-1354.33	1428.43	144.277	-1281.42	1146.62	158.628	-1479.35	1339.7	158.436	-1549.32	1145.77	60.1129	-1271.25	1221.87	332.879	-1407.99	1353.83	409.677	-1349.92	1122.46	417.75	-1334.57	1048.74	459.849	-1403.73	891.035	423.366	-1426.26	809.131	480.705	-1380.23	805.809	471.238	-1431.01	743.889
871	0	198.119	-1528.82	1565.17	80.8282	-1519.85	1565.31	212.453	-1360.2	1528.16	104.364	-1355.17	1524.08	148.634	-1364.29	1430.07	146.094	-1292.26	1148.56	160.665	-1489.31	1341.67	159.844	-1559.81	1148.18	61.731	-1281.5	1223.82	335.065	-1418.08	1355.33	412.449	-1360.37	1124.32	420.619	-1345.78	1050.41	464.84	-1416.37	894.038	429.599	-1441.27	812.18	485.389	-1393.27	808.44	478.915	-1444.96	747.447
872	0	201.044	-1539.28	1566.32	83.9172	-1530.49	1567	215.315	-1370.5	1530.21	107.378	-1365.45	1526.81	150.784	-1373.99	1432.05	147.783	-1302.58	1150.2	162.456	-1499.22	1343.62	161.151	-1570	1150.38	63.3985	-1291.48	1225.76	336.777	-1427.91	1356.77	415.166	-1370.83	1126.31	423.936	-1356.86	1052.31	470.055	-1429.3	897.223	436.298	-1456.77	815.632	490.042	-1406.73	811.279	487.111	-1459.37	751.39
873	0	203.944	-1549.8	1567.3	86.8275	-1541	1568.94	217.823	-1380.71	1532.26	109.886	-1375.67	1529.65	152.842	-1383.71	1433.69	149.291	-1312.66	1151.62	164.186	-1509.01	1345.55	162.419	-1580.15	1152.63	65.1959	-1301.24	1227.73	338.623	-1437.87	1358.27	417.884	-1381.34	1128.21	427.199	-1368.16	1054.1	475.464	-1442.31	900.524	443.333	-1472.82	819.482	494.955	-1420.2	814.253	495.769	-1474.08	755.847
874	0	206.736	-1560.24	1568.34	89.5059	-1551.39	1570.56	220.234	-1390.85	1534.3	112.433	-1385.73	1532.25	154.79	-1393.29	1435.51	150.904	-1322.98	1153.5	165.798	-1518.62	1347.49	163.442	-1589.99	1154.81	66.7929	-1310.91	1229.46	340.186	-1447.67	1359.65	420.621	-1391.87	1130.13	430.501	-1379.67	1056.03	481.111	-1455.48	904.087	450.848	-1488.89	823.557	499.993	-1434.02	817.381	504.551	-1489	760.534
875	0	209.401	-1570.48	1569.33	92.191	-1561.79	1572.33	222.665	-1400.91	1536.4	114.687	-1395.9	1534.91	156.506	-1402.61	1437.18	152.321	-1332.61	1154.72	167.187	-1528.02	1349.37	164.381	-1599.72	1157.01	68.3252	-1320.28	1231.28	341.76	-1457.43	1361.23	423.408	-1402.43	1132.31	434.036	-1391.25	1058.09	487.209	-1468.65	907.889	458.785	-1505.28	828.25	504.973	-1448.01	820.605	513.9	-1504.1	765.849
876	0	211.839	-1580.67	1570.26	94.7495	-1572.18	1573.83	224.765	-1410.86	1538.36	116.979	-1406.03	1537.71	158.141	-1411.77	1438.88	153.819	-1342.14	1156.51	168.548	-1537.35	1351.22	165.127	-1609.19	1158.94	69.9708	-1329.39	1233.01	342.985	-1467.11	1362.63	426.229	-1413.19	1134.36	437.663	-1402.94	1060.12	493.29	-1482.07	911.91	467.241	-1521.96	833.291	510.182	-1462.36	823.972	523.4	-1519.32	771.388
877	0	214.22	-1590.82	1571.03	97.0664	-1582.5	1575.28	226.77	-1420.75	1540.31	118.597	-1416.12	1540.2	159.875	-1420.91	1440.43	155.35	-1351.56	1158.05	169.665	-1546.48	1352.93	165.676	-1618.29	1160.68	71.4883	-1338.41	1234.64	344.287	-1476.93	1364.15	429.165	-1424.09	1136.48	441.376	-1414.72	1062.18	499.67	-1495.6	916.045	476.049	-1538.96	838.704	515.156	-1477.18	827.426	532.836	-1534.56	777.161
878	0	216.293	-1600.75	1571.75	99.1853	-1592.78	1576.8	228.547	-1430.57	1542.19	120.686	-1426.04	1542.7	161.313	-1429.74	1441.99	157.016	-1360.81	1159.64	170.586	-1555.46	1354.55	166.035	-1627.33	1162.37	73.1243	-1347.28	1236.23	345.42	-1486.43	1365.78	432.143	-1434.86	1138.75	445.19	-1426.56	1064.53	506.015	-1509.06	920.384	484.655	-1555.52	844.301	520.429	-1492.16	831.298	542.226	-1549.66	783.172
879	0	218.357	-1610.74	1572.43	101.154	-1602.97	1578.06	230.14	-1440.2	1544.14	122.164	-1435.83	1545.02	162.691	-1438.65	1443.38	158.508	-1369.86	1161	171.502	-1564.33	1356.13	166.339	-1636.21	1163.99	74.7277	-1356.05	1237.68	346.645	-1495.9	1367.48	435.349	-1445.63	1141.29	448.747	-1438.6	1066.9	512.184	-1522.68	924.876	493.593	-1572.43	850.681	525.624	-1507.65	835.25	551.385	-1564.89	789.397
880	0	220.174	-1620.57	1572.89	103.003	-1613.09	1579.11	231.52	-1449.95	1545.83	123.698	-1445.79	1547.09	164.023	-1447.25	1444.97	160.178	-1378.66	1162.36	172.335	-1573.11	1357.53	166.592	-1644.94	1165.34	76.3191	-1364.57	1239.08	347.654	-1505.45	1368.96	438.277	-1456.82	1143.49	452.664	-1450.65	1069.15	518.497	-1536.57	929.492	502.38	-1588.97	856.718	530.826	-1523.35	839.259	560.482	-1580.51	795.811
881	0	221.913	-1630.46	1573.32	104.722	-1623.23	1579.97	232.825	-1459.56	1547.41	124.794	-1455.47	1549.39	165.323	-1455.97	1446.43	161.958	-1387.47	1163.94	173.122	-1581.76	1358.88	166.924	-1653.73	1166.69	78.0649	-1373.13	1240.37	348.536	-1514.78	1370.22	441.173	-1468.05	1145.68	456.225	-1463.01	1071.37	524.567	-1550.44	934.085	510.857	-1605.82	863.098	535.821	-1539.04	843.37	569.115	-1596.26	802.299
882	0	223.41	-1640.1	1573.83	106.264	-1633.13	1580.83	233.934	-1469.02	1549.14	125.987	-1465.28	1551.35	166.479	-1464.42	1447.6	163.435	-1395.93	1165.06	173.865	-1590.24	1360.24	167.192	-1662.03	1168.05	79.5931	-1381.4	1241.61	349.536	-1524.09	1371.68	444.075	-1479.21	1147.91	460.039	-1475.17	1073.74	530.509	-1564.35	939.001	519.186	-1622.25	869.939	541.002	-1555.73	847.571	577.337	-1612.04	809.078
883	0	224.829	-1649.85	1574.28	107.655	-1642.99	1581.46	235.072	-1478.52	1551.11	126.947	-1474.8	1553.47	167.656	-1472.86	1448.92	164.883	-1404.36	1166.31	174.632	-1598.66	1361.47	167.575	-1670.54	1169.33	81.1511	-1389.8	1242.91	350.361	-1533.06	1373.16	447.14	-1490.4	1150.26	463.753	-1487.43	1076.14	536.22	-1578.47	943.831	526.835	-1638.73	876.94	545.982	-1572.36	852.143	585.094	-1628.21	815.969
884	0	225.843	-1659.49	1574.54	108.795	-1652.91	1581.95	235.845	-1487.86	1552.76	128.06	-1484.53	1555.17	168.87	-1481.17	1450.21	166.457	-1412.76	1167.41	175.41	-1607.1	1362.62	168.053	-1679.02	1170.49	82.7283	-1398.12	1243.87	351.257	-1541.95	1374.47	449.958	-1501.83	1152.37	467.355	-1499.69	1078.46	541.424	-1592.73	948.634	534.091	-1655.06	883.695	551.155	-1589.29	856.807	592.279	-1644.7	822.855
885	0	226.794	-1669.11	1574.77	109.791	-1662.71	1582.24	236.748	-1497.32	1554.58	128.81	-1494.09	1557.05	169.895	-1489.47	1451.29	168.075	-1421.34	1168.7	176.214	-1615.42	1363.72	168.615	-1687.42	1171.67	84.2172	-1406.21	1244.99	352.135	-1550.86	1375.72	452.68	-1513.1	1154.53	471.118	-1511.58	1080.73	546.469	-1607.22	953.726	540.417	-1671.54	890.702	555.932	-1606.39	861.713	598.896	-1661.61	829.91
886	0	227.885	-1678.73	1575.06	110.594	-1672.41	1582.45	237.599	-1506.68	1556.48	129.566	-1503.49	1558.8	171.064	-1497.75	1452.26	169.22	-1429.68	1169.55	177.1	-1623.57	1364.9	169.446	-1695.73	1173.04	85.6919	-1414.61	1245.88	353.127	-1559.45	1377.11	455.521	-1524.05	1156.7	474.611	-1523.39	1083.06	550.996	-1621.7	958.904	546.133	-1687.92	897.94	560.367	-1623.67	866.763	604.925	-1678.74	837.306
887	0	228.675	-1688.25	1575.21	111.436	-1682.13	1582.51	238.173	-1516.02	1557.98	130.475	-1513.08	1560.23	172.107	-1505.8	1453.19	170.612	-1438.05	1170.45	178.028	-1631.79	1365.88	170.394	-1704.06	1174.45	86.9985	-1422.67	1246.65	353.979	-1567.91	1378.32	458.192	-1534.79	1158.67	477.864	-1535.01	1085.36	555.258	-1636.51	964.306	551.162	-1704.39	905.427	564.72	-1641.04	872.055	610.296	-1696.22	844.88
888	0	229.321	-1697.77	1575.18	112.187	-1691.88	1582.37	238.916	-1525.55	1559.5	131.034	-1522.56	1561.58	173.085	-1513.95	1454.07	171.915	-1446.52	1171.3	179.036	-1639.98	1366.76	171.418	-1712.32	1175.55	88.3614	-1430.76	1247.51	354.895	-1576.28	1379.38	460.914	-1545.37	1160.72	481.187	-1546.31	1087.59	559.004	-1651.4	969.644	555.599	-1720.75	912.978	568.707	-1658.57	877.578	615.02	-1714.21	852.657
889	0	229.933	-1707.28	1575.05	112.781	-1701.43	1582.03	239.595	-1534.99	1560.93	131.428	-1531.97	1562.68	174.263	-1522.05	1454.71	173.226	-1454.72	1171.98	179.987	-1648.11	1367.49	172.571	-1720.59	1176.72	89.5479	-1438.8	1248.12	355.914	-1584.45	1380.49	463.586	-1555.69	1162.72	484.5	-1557.2	1089.89	562.366	-1666.34	975.141	559.295	-1737.14	920.781	572.151	-1676.06	883.09	619.013	-1732.36	860.647
890	0	230.403	-1716.93	1575.1	113.173	-1710.86	1581.66	240.176	-1544.33	1562.03	132.162	-1541.35	1563.55	175.167	-1530.04	1455.24	174.093	-1462.84	1172.08	180.952	-1656.26	1368.11	173.712	-1728.62	1177.73	90.7511	-1446.94	1248.48	357.007	-1592.5	1381.7	465.937	-1565.27	1164.75	487.82	-1567.72	1091.93	565.412	-1680.94	980.582	562.254	-1753.18	928.626	574.994	-1693.99	888.967	622.29	-1750.76	869.037
891	0	230.79	-1726.5	1574.76	113.603	-1720.29	1581.22	240.972	-1553.62	1563	132.894	-1550.7	1564.21	176.139	-1538.03	1455.55	175.088	-1471.02	1172.3	181.934	-1664.44	1368.5	175.056	-1736.69	1178.45	91.7835	-1455.11	1248.66	357.993	-1600.55	1382.5	467.993	-1574.84	1166.18	491.006	-1578.22	1093.85	567.894	-1695.54	985.833	564.572	-1769.34	936.717	577.736	-1711.27	894.559	624.723	-1769.38	877.19
892	0	231.167	-1736.07	1574.32	113.98	-1729.8	1580.56	241.648	-1563.16	1563.5	133.706	-1559.91	1564.75	177.09	-1546.13	1455.69	176.109	-1479.23	1172.48	182.973	-1672.68	1368.77	176.454	-1744.81	1178.99	92.8974	-1463.18	1248.67	358.906	-1608.59	1383.04	470.508	-1583.87	1167.73	494.114	-1588.33	1095.44	570.098	-1709.83	990.831	566.296	-1785.09	944.762	578.2	-1730.48	900.007	626.525	-1788.21	885.58
893	0	231.426	-1745.51	1573.91	114.314	-1739.03	1579.94	242.32	-1572.82	1563.98	134.459	-1569.31	1565.09	177.925	-1554.28	1455.7	176.884	-1487.44	1172.23	183.989	-1680.96	1368.89	177.859	-1752.78	1179.42	93.9664	-1471.45	1248.55	359.768	-1616.57	1383.5	472.592	-1592.58	1168.85	496.886	-1598.2	1096.84	571.916	-1723.71	995.762	567.336	-1800.69	953.131	580.323	-1747.3	905.389	627.469	-1806.94	894.293
894	0	231.854	-1754.97	1573.42	114.616	-1748.06	1579.35	243.209	-1581.88	1564.33	135.074	-1578.54	1565.07	178.631	-1562.49	1455.76	177.493	-1495.52	1172.01	184.986	-1689.25	1368.82	179.279	-1760.78	1179.62	94.7323	-1479.45	1248.62	360.531	-1624.33	1383.76	474.576	-1601.01	1170.03	499.909	-1607.91	1098.3	573.373	-1737.62	1000.92	567.495	-1815.92	961.113	580.661	-1765.15	911.033	627.754	-1825.72	903.08
895	0	232.172	-1764.34	1572.78	114.947	-1757.25	1578.62	244.033	-1591.36	1564.32	135.709	-1587.57	1565.09	179.329	-1570.91	1455.67	178.3	-1503.58	1172.1	185.904	-1697.67	1368.44	180.763	-1769	1179.45	95.6265	-1487.83	1248.4	361.485	-1632.57	1384.12	476.648	-1609.62	1171.05	502.501	-1617.55	1099.4	574.329	-1751.39	1005.8	567.509	-1830.91	969.343	581.258	-1782.46	917.238	627.171	-1844.27	911.721
896	0	232.308	-1773.75	1572.25	115.271	-1766.21	1578	244.753	-1600.7	1564.04	136.652	-1596.51	1564.77	179.802	-1579.4	1455.47	178.977	-1511.45	1171.97	186.792	-1706.16	1367.93	182.099	-1777.09	1178.92	96.1915	-1496.05	1248.25	362.279	-1640.69	1384.08	478.587	-1617.96	1171.86	505.072	-1627.1	1100.48	574.885	-1764.87	1010.42	566.638	-1845.72	977.222	581.174	-1799.28	923.043	625.77	-1862.98	920.398
897	0	232.519	-1782.94	1571.68	115.552	-1775.1	1577.41	245.434	-1609.9	1563.58	137.472	-1605.49	1564.25	180.244	-1588.03	1455.13	179.653	-1519.17	1171.57	187.679	-1714.64	1367.42	183.409	-1785.21	1178.17	96.7301	-1504.43	1248.1	363.004	-1648.69	1384.06	480.042	-1625.99	1172.37	507.337	-1636.51	1101.35	575.238	-1778.32	1015.23	565.235	-1859.86	984.869	581.046	-1815.94	929.19	623.574	-1881.3	928.763
898	0	232.955	-1792.09	1571.11	115.906	-1783.95	1576.82	246.295	-1619.13	1562.97	138.039	-1614.33	1563.51	180.674	-1596.68	1454.83	180.192	-1526.81	1171.78	188.506	-1723.1	1366.74	184.82	-1793.51	1177.41	97.1395	-1512.86	1247.77	363.77	-1656.84	1383.88	481.647	-1634.36	1172.79	509.447	-1646.12	1102.02	575.151	-1791.67	1020.01	563.455	-1873.87	992.213	580.495	-1831.93	935.082	620.77	-1899.65	937.07
899	0	233.317	-1801.12	1570.47	116.291	-1792.7	1576.38	247.074	-1628.27	1562.3	139.088	-1623.21	1562.84	181.072	-1605.32	1454.49	180.76	-1534.36	1171.53	189.337	-1731.62	1366.03	186.05	-1801.65	1176.4	97.4238	-1521.14	1247.48	364.373	-1664.98	1383.48	482.965	-1642.64	1172.94	511.207	-1655.57	1102.37	574.776	-1804.78	1024.6	561.125	-1887.34	999.085	580.051	-1848.1	941.335	617.581	-1918.11	945.281
900	0	233.586	-1810.12	1569.9	116.63	-1801.6	1575.7	247.705	-1637.28	1561.59	139.479	-1631.94	1562.15	181.427	-1614.09	1453.96	181.399	-1541.93	1171.23	190.098	-1740.15	1365.45	187.202	-1809.94	1175.51	97.5365	-1529.61	1247.18	364.853	-1672.99	1383.08	483.974	-1650.78	1172.85	512.854	-1665.18	1102.74	574.032	-1817.67	1028.98	558.453	-1900.59	1005.63	579.215	-1863.56	946.921	613.261	-1935.91	952.907
901	0	234.012	-1819.1	1569.34	116.947	-1810.3	1575.12	248.132	-1646.11	1560.71	140.156	-1640.8	1561.4	181.776	-1622.65	1453.43	181.544	-1549.61	1170.8	190.795	-1748.57	1364.81	188.238	-1818.24	1174.54	97.6523	-1538.35	1246.61	365.324	-1680.89	1382.48	484.883	-1659.19	1172.87	514.121	-1674.75	1102.89	572.906	-1830.23	1033.08	555.324	-1913.59	1012.06	578.057	-1878.3	952.41	608.293	-1953.06	960.115
902	0	234.351	-1828.01	1568.57	117.399	-1819.13	1574.44	248.675	-1654.86	1559.76	140.818	-1649.55	1560.29	182.048	-1631.39	1452.67	181.453	-1557.32	1170.23	191.418	-1757.16	1364.24	189.171	-1826.64	1173.57	97.5087	-1546.87	1246.16	365.606	-1688.85	1381.73	485.483	-1667.53	1172.41	515.272	-1684.21	1102.71	571.614	-1842.91	1037.06	552.041	-1926.43	1017.83	576.491	-1893.05	957.719	602.688	-1969.89	966.772
903	0	234.745	-1836.92	1567.85	117.758	-1827.9	1573.67	249.304	-1663.99	1558.85	141.582	-1658.41	1559.56	182.275	-1640	1451.96	181.595	-1565.2	1169.48	192.031	-1765.85	1363.65	190.053	-1835.16	1172.67	97.4566	-1555.73	1245.52	366.026	-1696.87	1380.97	485.844	-1675.93	1171.84	516.448	-1694.32	1102.72	569.964	-1855.49	1040.92	548.319	-1938.78	1023.21	574.897	-1907.44	962.789	596.477	-1986.18	972.92
904	0	235.224	-1845.74	1567.16	118.202	-1836.68	1573.05	249.788	-1672.85	1557.88	141.924	-1667.11	1558.63	182.415	-1648.67	1451.41	181.155	-1573.32	1169.04	192.531	-1774.44	1363.08	190.854	-1843.5	1171.89	97.2763	-1564.46	1244.95	366.342	-1704.79	1380.23	486.17	-1684.73	1171.31	517.079	-1703.91	1102.4	567.893	-1867.57	1044.37	544.225	-1950.72	1028.38	572.546	-1921.44	967.61	589.83	-2001.7	978.661
905	0	235.656	-1854.51	1566.44	118.569	-1845.49	1572.16	249.962	-1682.07	1556.66	142.242	-1676.08	1557.37	182.436	-1657.38	1450.65	180.89	-1581.56	1168.21	193.014	-1783.1	1362.53	191.566	-1851.93	1171.15	96.9081	-1573.21	1244.34	366.698	-1712.73	1379.59	486.42	-1693.49	1170.64	517.666	-1713.54	1102.09	565.484	-1879.56	1047.71	539.871	-1962.35	1032.94	570.444	-1935.5	972.493	582.68	-2016.56	983.88
906	0	235.928	-1863.26	1565.5	118.929	-1854.29	1571.39	250.316	-1690.82	1555.44	142.487	-1684.76	1556.17	182.47	-1666.07	1449.97	180.711	-1590.06	1167.59	193.382	-1791.84	1361.77	192.2	-1860.46	1170.39	96.4955	-1582.18	1243.69	366.97	-1720.78	1378.88	486.578	-1702.35	1169.85	518.391	-1723.65	1101.83	562.804	-1891.57	1050.76	535.31	-1973.9	1037.13	567.421	-1949.04	976.8	575.298	-2030.7	988.343
907	0	236.229	-1872.1	1564.49	119.311	-1863.24	1570.4	250.664	-1699.36	1554.23	142.676	-1693.82	1555.08	182.521	-1674.83	1448.97	180.545	-1598.69	1166.81	193.705	-1800.71	1360.98	192.791	-1868.86	1169.56	96.2345	-1591.18	1242.84	367.124	-1728.86	1378.04	486.709	-1711.56	1169.03	518.608	-1733.38	1101.19	560.202	-1903.47	1053.48	530.447	-1985.06	1040.66	563.966	-1961.83	980.173	567.745	-2044.53	992.308
908	0	236.563	-1880.82	1563.34	119.566	-1872.01	1569.48	250.735	-1708.06	1552.82	142.701	-1702.74	1553.75	182.539	-1683.55	1448	180.452	-1607.61	1165.85	194.031	-1809.47	1360	193.327	-1877.41	1168.67	96.1461	-1600.23	1241.89	367.244	-1736.94	1377.23	486.869	-1720.96	1168.14	518.665	-1743.13	1100.55	557.13	-1914.79	1055.68	525.596	-1995.82	1043.72	560.501	-1974.34	983.394	559.86	-2057.44	995.515
909	0	236.839	-1889.73	1562.31	119.815	-1881.04	1568.25	250.783	-1716.82	1551.27	142.817	-1711.62	1552.25	182.377	-1692.44	1446.81	179.813	-1616.47	1164.61	194.315	-1818.39	1359.01	193.867	-1885.98	1167.76	95.7395	-1609.27	1240.78	367.325	-1745.17	1376.24	486.69	-1730.36	1167.09	518.702	-1753.1	1099.68	553.929	-1926.16	1057.63	520.635	-2006.47	1046.17	556.808	-1986.65	986.103	552.081	-2070.17	998.259
910	0	237.073	-1898.53	1561.04	120.104	-1890.17	1567.1	250.494	-1725.99	1549.79	142.823	-1720.65	1550.77	182.15	-1701.28	1445.73	179.943	-1625.46	1163.59	194.533	-1827.47	1357.84	194.386	-1894.64	1166.61	95.4237	-1618.52	1239.64	367.223	-1753.59	1375.03	486.438	-1739.73	1165.7	518.339	-1762.98	1098.36	550.711	-1937.24	1059.05	515.635	-2016.95	1048.21	553.054	-1998.85	988.411	544.109	-2082.26	1000.23
911	0	237.259	-1907.34	1559.76	120.237	-1899.21	1565.71	250.377	-1734.59	1548.61	142.536	-1729.75	1549.43	181.884	-1710.37	1444.37	179.49	-1634.25	1162.27	194.793	-1836.33	1356.68	194.876	-1903.46	1165.51	95.2197	-1627.8	1238.18	367.121	-1762.01	1373.79	486.294	-1749.32	1164.47	517.996	-1773.05	1097.24	547.462	-1948.14	1060.23	510.53	-2027.25	1049.76	549.13	-2010.61	990.149	536.266	-2093.93	1001.69
912	0	237.397	-1916.21	1558.41	120.33	-1908.51	1564.18	249.897	-1743.45	1547.24	141.878	-1739.05	1547.87	181.404	-1719.24	1443.18	179.06	-1643.21	1160.93	194.888	-1845.19	1355.35	195.336	-1912.36	1164.23	94.9151	-1637.01	1236.77	367.001	-1770.51	1372.74	485.927	-1759.12	1163.31	517.758	-1782.98	1096.25	544.017	-1958.88	1061.11	505.38	-2037.28	1050.97	545.364	-2021.95	991.805	528.45	-2105.09	1002.59
913	0	237.391	-1925.08	1556.85	120.299	-1917.88	1562.58	249.394	-1752.14	1546.01	141.482	-1748.08	1546.54	181.241	-1728.49	1441.79	178.537	-1652.05	1159.73	194.901	-1854.32	1353.86	195.856	-1921.48	1162.85	94.3708	-1646.35	1235.36	366.852	-1779.15	1371.58	485.524	-1768.88	1161.92	517.282	-1792.77	1094.81	540.542	-1969.68	1061.63	500.21	-2047.35	1051.69	541.573	-2033.31	993.141	520.547	-2115.99	1002.86
914	0	237.501	-1934.08	1555.25	120.192	-1927.33	1560.81	248.648	-1761.15	1544.82	140.684	-1757.43	1545.26	180.689	-1737.62	1440.38	178.104	-1660.94	1158.44	194.893	-1863.37	1352.26	196.36	-1930.7	1161.22	93.8412	-1655.63	1234.01	366.556	-1788.01	1370.3	484.948	-1778.5	1160.36	516.563	-1803.11	1093.45	537.116	-1980.53	1062.08	494.938	-2057.45	1052.09	537.808	-2044.61	994.095	513.009	-2126.38	1002.31
915	0	237.335	-1942.97	1553.75	120.076	-1936.79	1559.06	247.7	-1770.05	1543.62	139.531	-1766.97	1543.86	180.187	-1746.91	1438.99	177.621	-1669.88	1157.28	194.84	-1872.43	1350.78	196.709	-1939.89	1159.77	93.4475	-1665.11	1232.39	366.317	-1796.97	1369.06	484.331	-1788.29	1158.83	516.03	-1813	1091.98	533.688	-1991.1	1062.23	489.788	-2067.31	1052.11	534.527	-2055.86	995.26	505.808	-2136.65	1001.75
916	0	237.23	-1951.85	1552.22	119.881	-1946.5	1557.31	246.518	-1779.01	1542.42	138.582	-1776.33	1542.4	179.552	-1756.23	1437.58	176.98	-1678.97	1155.69	194.607	-1881.7	1349.31	197.115	-1949.28	1158.32	92.9968	-1674.5	1230.88	365.932	-1805.98	1367.89	483.667	-1798.02	1157.28	515.376	-1823.03	1090.58	530.267	-2001.64	1062.33	484.808	-2076.94	1051.71	531.14	-2066.9	995.943	499.154	-2146.58	1000.87
917	0	236.908	-1960.85	1550.8	119.576	-1956.25	1555.63	245.296	-1788.03	1541.31	137.175	-1786	1540.77	179.065	-1765.67	1436.02	176.691	-1688.24	1154.31	194.339	-1891.08	1347.83	197.357	-1958.72	1156.79	92.4299	-1683.99	1229.41	365.512	-1815.17	1366.51	483.064	-1807.87	1155.71	514.564	-1833.03	1088.93	526.882	-2012.3	1062.31	479.933	-2086.56	1050.75	527.946	-2077.74	996.282	492.959	-2156.34	999.354
918	0	236.468	-1970.1	1549.63	119.047	-1966.13	1553.96	243.888	-1797.19	1540.19	135.863	-1795.75	1539.32	178.399	-1775.29	1434.61	176.077	-1697.52	1152.77	193.946	-1900.65	1346.44	197.49	-1968.25	1155.33	92.1224	-1693.57	1227.74	365.051	-1824.63	1365.28	482.38	-1817.76	1154.24	513.586	-1843.27	1087.38	523.479	-2022.78	1061.86	475.332	-2096.4	1049.76	524.797	-2088.37	996.31	487.195	-2165.87	997.346
919	0	235.833	-1979.35	1548.62	118.359	-1976.01	1552.38	242.366	-1806.38	1539.1	134.275	-1805.58	1537.87	177.691	-1784.8	1433.34	175.921	-1707.16	1151.51	193.458	-1910.24	1345.13	197.482	-1977.85	1153.96	91.8425	-1703.06	1226.28	364.597	-1834.09	1364.15	481.615	-1827.48	1152.79	513.024	-1853.49	1086.22	520.214	-2033.29	1061.51	470.913	-2105.94	1048.38	522.177	-2098.99	996.375	481.891	-2175.12	995.079
920	0	235.091	-1988.64	1547.62	117.593	-1985.9	1550.8	240.643	-1815.65	1538.08	132.584	-1815.48	1536.31	177.23	-1794.59	1431.95	175.171	-1716.68	1150.24	192.911	-1920.03	1343.83	197.376	-1987.56	1152.63	91.358	-1712.84	1224.89	364.054	-1843.81	1363.05	480.732	-1837.11	1151.35	512.398	-1863.62	1085	517.114	-2043.56	1060.86	466.746	-2115.44	1046.63	519.845	-2109.49	996.352	477.301	-2184.32	992.675
921	0	234.221	-1998.08	1546.75	116.624	-1995.98	1549.44	238.959	-1825.16	1537.19	130.897	-1825.47	1534.68	176.504	-1804.65	1430.76	174.913	-1726.62	1148.9	192.417	-1929.99	1342.65	197.24	-1997.41	1151.52	91.2619	-1722.72	1223.51	363.563	-1853.9	1362	479.824	-1847.15	1150.02	511.321	-1874	1083.65	514.273	-2053.96	1060.2	462.891	-2125.08	1044.69	517.426	-2119.79	995.696	473.393	-2193.56	990.088
922	0	233.09	-2007.6	1546.29	115.564	-2006.07	1548.18	237.159	-1834.69	1536.2	129.087	-1835.46	1533.31	175.944	-1814.7	1429.74	174.424	-1736.47	1147.88	191.803	-1940.05	1341.61	196.888	-2007.49	1150.54	90.9944	-1732.71	1222.32	362.917	-1864.17	1361.05	479.081	-1857.09	1148.84	510.784	-1883.93	1082.6	511.655	-2064.25	1059.46	459.329	-2134.6	1042.55	515.785	-2130.37	995.499	470.083	-2202.66	987.433
923	0	232.051	-2017.35	1545.94	114.241	-2016.13	1547.21	235.336	-1844.32	1535.49	127.256	-1845.56	1531.95	175.107	-1824.87	1428.76	173.898	-1746.62	1147.01	191.069	-1950.23	1340.7	196.314	-2017.61	1149.65	90.678	-1742.88	1221.08	362.225	-1874.38	1360.46	478.222	-1867.08	1148.12	510.168	-1894.01	1081.89	509.215	-2074.41	1058.57	455.941	-2143.93	1039.99	514.332	-2140.54	995.264	467.49	-2211.82	984.821
924	0	230.54	-2027.14	1545.69	112.779	-2026.19	1546.12	233.406	-1854	1534.83	125.033	-1855.58	1530.34	174.191	-1835.08	1427.73	173.826	-1756.94	1146.15	190.214	-1960.63	1339.93	195.712	-2028.04	1148.94	90.3779	-1753.31	1219.76	361.443	-1884.8	1359.91	477.491	-1877.2	1147.5	509.391	-1904.26	1081.34	506.942	-2084.49	1057.5	452.988	-2153.39	1037.33	512.942	-2150.44	994.57	465.552	-2221.1	982.135
925	0	229.033	-2036.92	1545.45	111.28	-2036.31	1545.23	231.541	-1863.9	1534.1	123.328	-1865.85	1529.31	173.313	-1845.37	1426.96	173.141	-1767.34	1145.37	189.364	-1971.07	1339.12	194.959	-2038.71	1148.16	90.2021	-1763.86	1218.65	360.596	-1895.48	1359.24	476.57	-1887.32	1146.74	508.594	-1914.22	1080.49	504.995	-2094.62	1056.29	450.469	-2163.08	1034.66	511.927	-2160.54	993.807	464.371	-2230.45	979.426
926	0	227.362	-2046.82	1545.43	109.495	-2046.41	1544.58	229.399	-1873.8	1533.25	121.486	-1875.94	1527.98	172.186	-1855.92	1425.92	172.675	-1777.95	1144.23	188.438	-1981.61	1338.54	194.144	-2049.6	1147.66	89.6916	-1774.66	1217.44	359.489	-1905.93	1358.45	475.668	-1897.49	1146.2	507.724	-1924.53	1080.15	503.291	-2104.77	1055.32	448.299	-2172.39	1031.38	511.523	-2170.5	993.031	463.832	-2240.03	977.111
927	0	225.558	-2056.68	1545.58	107.741	-2056.47	1544.06	227.353	-1883.72	1532.45	119.446	-1886.1	1526.59	171	-1866.33	1425.08	171.995	-1788.85	1142.93	187.402	-1992.3	1338.12	193.333	-2060.71	1147.4	89.246	-1785.67	1216.1	358.494	-1916.76	1358.19	474.804	-1907.77	1145.77	507.026	-1934.6	1079.75	501.827	-2114.77	1054.17	446.493	-2181.79	1028.23	511.192	-2180.24	992.179	463.957	-2249.68	975.038
928	0	223.721	-2066.69	1545.97	105.913	-2066.75	1543.92	225.311	-1893.83	1532.09	117.355	-1896.41	1525.51	169.734	-1877.04	1424.53	171.357	-1799.74	1142.07	186.334	-2003.04	1337.85	192.49	-2072.08	1147.06	88.575	-1796.79	1214.83	357.437	-1927.61	1357.94	473.962	-1918.31	1145.55	506.53	-1945.07	1079.53	500.574	-2124.62	1052.68	445.181	-2191.2	1024.81	511.374	-2190.03	991.302	464.515	-2259.25	972.953
929	0	221.642	-2076.89	1546.44	103.845	-2077.07	1543.7	223.057	-1904.01	1531.8	115.28	-1906.81	1524.76	168.397	-1887.79	1423.97	170.624	-1810.54	1141.41	185.113	-2013.92	1337.71	191.766	-2083.77	1146.96	88.0341	-1808	1213.97	355.892	-1938.33	1357.53	472.958	-1928.64	1145.24	505.638	-1955.24	1079.32	499.54	-2134.59	1051.24	444.065	-2200.48	1021.05	511.533	-2199.46	990.026	465.528	-2269.13	971.134
930	0	219.447	-2087.05	1547.12	101.784	-2087.45	1543.83	220.901	-1914.23	1531.85	113.105	-1917.19	1524.03	166.984	-1898.44	1423.76	169.25	-1821.52	1141.22	183.83	-2024.77	1337.81	190.958	-2095.4	1147.03	87.22	-1819.18	1213.26	354.714	-1949.26	1357.74	472.336	-1939.5	1145.73	504.668	-1965.13	1079.44	498.627	-2144.25	1049.72	443.241	-2209.6	1017.17	512.604	-2209.45	989.302	466.772	-2279.1	969.793
931	0	217.335	-2097.15	1547.92	99.5828	-2097.8	1544.1	218.567	-1924.43	1531.96	110.78	-1927.68	1523.62	165.467	-1909.15	1423.58	168.403	-1832.75	1140.71	182.538	-2035.67	1338.11	190.22	-2107.14	1147.37	86.5023	-1830.34	1212.74	353.508	-1960.26	1358.31	471.083	-1949.82	1146.12	503.748	-1975.08	1079.93	497.871	-2153.86	1048.07	442.77	-2218.53	1012.96	512.88	-2218.11	987.735	468.449	-2288.37	968.315
932	0	215.071	-2107.5	1549.09	97.4518	-2108.17	1544.53	216.198	-1934.83	1532.25	108.433	-1938.13	1523.43	164.172	-1920	1423.87	167.032	-1844.07	1141.16	181.265	-2046.65	1338.68	189.562	-2119.05	1147.94	85.7632	-1841.52	1212.6	352.549	-1971.71	1359.02	470.01	-1960.41	1146.71	502.703	-1985.02	1080.39	497.352	-2163.34	1046.28	442.553	-2227.34	1008.52	514.079	-2227.81	986.187	470.099	-2298.03	967.186
933	0	212.848	-2117.83	1550.3	95.2081	-2118.58	1545.22	213.955	-1945.16	1532.83	106.218	-1948.65	1523.52	162.66	-1930.81	1424.38	166.317	-1855.51	1141.45	179.952	-2057.59	1339.44	188.861	-2130.87	1148.77	84.9052	-1852.67	1212.71	351.031	-1982.67	1359.64	468.946	-1971.1	1147.66	501.427	-1994.98	1081.04	496.839	-2172.72	1044.36	442.662	-2235.93	1003.85	514.988	-2236.66	984.231	471.761	-2307.29	965.964
934	0	210.529	-2128.12	1551.76	92.9052	-2128.93	1546.02	211.762	-1955.54	1533.66	103.846	-1959.06	1523.87	161.455	-1941.67	1425.03	165.79	-1867.18	1141.83	178.586	-2068.43	1340.37	188.12	-2142.46	1149.94	84.3344	-1863.56	1213.03	350.081	-1994.07	1361.14	467.658	-1981.56	1148.76	500.304	-2004.64	1081.99	496.456	-2181.91	1042.33	442.928	-2244.34	999.295	515.805	-2245.11	982.095	473.372	-2316.14	964.77
935	0	208.173	-2138.4	1553.22	90.6169	-2139.32	1546.91	209.391	-1965.86	1534.57	101.679	-1969.51	1524.31	160.098	-1952.35	1425.8	164.928	-1878.7	1142.68	177.231	-2079.33	1341.46	187.391	-2154.04	1151.22	83.5969	-1874.6	1213.53	348.801	-2005.15	1362.51	466.473	-1992.31	1150.04	498.761	-2014.17	1082.78	496.163	-2190.96	1040.2	443.863	-2252.73	994.615	516.821	-2253.18	979.638	475.047	-2324.73	963.502
936	0	205.878	-2148.69	1554.67	88.387	-2149.6	1547.72	207.155	-1976.22	1535.53	99.5713	-1979.96	1524.63	158.779	-1963.07	1426.6	164.452	-1889.95	1143.41	175.963	-2090.09	1342.54	186.676	-2165.47	1152.55	83.1755	-1885.43	1214.05	347.536	-2016.22	1363.84	464.92	-2002.81	1150.99	497.191	-2023.74	1083.53	495.941	-2199.94	1038.09	444.806	-2260.93	990.208	518.047	-2261.39	977.236	476.713	-2332.95	961.902
937	0	203.621	-2158.96	1556.28	86.1924	-2159.8	1548.64	205.076	-1986.53	1536.43	97.5573	-1990.26	1525.01	157.525	-1973.66	1427.6	164.774	-1901.24	1144.27	174.746	-2100.79	1343.75	185.927	-2176.51	1153.94	82.5928	-1896.46	1214.65	346.322	-2027.11	1365.08	463.579	-2013.48	1152.08	495.705	-2033.46	1084.48	495.906	-2208.57	1035.96	445.851	-2268.97	986.03	519.185	-2268.9	974.292	478.365	-2340.85	960.31
938	0	201.424	-2169.07	1557.94	84.1108	-2169.91	1549.69	202.976	-1996.67	1537.49	95.5125	-2000.57	1525.45	156.326	-1984.11	1428.58	164.272	-1912.19	1145.23	173.644	-2111.3	1345.1	185.169	-2187.3	1155.45	82.2012	-1907.19	1215.28	345.177	-2037.73	1366.56	462.342	-2024.01	1153.24	494.034	-2042.81	1085.4	496.162	-2217	1033.81	447.128	-2276.82	982.234	520.49	-2276.26	971.485	479.974	-2348.42	958.57
939	0	199.404	-2179.14	1559.59	82.0553	-2180.03	1550.74	201.076	-2006.81	1538.43	93.7761	-2010.72	1525.89	155.298	-1994.46	1429.64	163.881	-1923.03	1146.23	172.667	-2121.62	1346.43	184.479	-2197.83	1156.91	81.7668	-1917.92	1216.13	344.208	-2048.3	1368.01	460.836	-2034.42	1154.33	492.365	-2052.24	1086.24	496.468	-2225.22	1031.64	448.429	-2284.54	978.543	521.919	-2283.35	968.565	481.749	-2355.77	956.741
940	0	197.344	-2189.24	1561.25	80.1878	-2190.03	1551.59	199.352	-2017.02	1539.53	91.9585	-2020.78	1526.39	154.215	-2004.64	1430.76	163.921	-1933.51	1147.36	171.756	-2131.92	1347.71	183.732	-2208.19	1158.15	81.3727	-1928.5	1216.98	343.14	-2058.57	1369.35	459.436	-2044.81	1155.42	490.752	-2061.69	1087.14	496.966	-2233.38	1029.49	449.711	-2292.11	974.866	523.121	-2290.29	965.549	483.442	-2362.89	954.632
941	0	195.452	-2199.18	1562.8	78.2345	-2199.93	1552.46	197.539	-2026.93	1540.76	90.286	-2030.68	1526.78	153.399	-2014.85	1431.85	163.348	-1943.74	1148.01	170.936	-2141.99	1348.91	183.112	-2218.34	1159.32	80.715	-1938.79	1217.85	342.098	-2068.31	1370.56	458.168	-2055.01	1156.57	489.014	-2070.74	1088.05	497.355	-2241.18	1026.96	450.872	-2299.49	971.137	524.245	-2296.99	962.535	485.062	-2369.62	952.092
942	0	193.824	-2209	1564.38	76.6673	-2209.67	1553.24	196.177	-2036.7	1541.99	88.8674	-2040.65	1527.58	152.281	-2024.91	1432.93	163.046	-1953.37	1149.44	170.269	-2151.96	1350.13	182.645	-2228.33	1160.4	80.083	-1949.21	1218.7	341.534	-2078.35	1372.31	456.954	-2064.78	1157.69	487.037	-2079.44	1088.68	497.765	-2249	1024.6	451.967	-2306.57	967.426	525.235	-2303.34	959.287	486.527	-2376.33	949.705
943	0	192.276	-2218.67	1565.79	75.2272	-2219.43	1554.21	194.708	-2046.56	1543.08	87.5264	-2050.4	1528.19	151.296	-2034.75	1434.07	162.691	-1963.02	1150.71	169.749	-2161.76	1351.31	182.349	-2238.05	1161.3	79.6157	-1959.57	1219.62	340.808	-2087.98	1373.56	455.234	-2074.66	1158.34	485.375	-2088.45	1089.3	498.044	-2256.63	1022.06	452.927	-2313.45	963.537	526.135	-2309.6	956.082	487.969	-2382.7	946.87
944	0	191.04	-2228.3	1567.18	74.0549	-2229.16	1555.1	193.374	-2056.23	1544.12	86.2863	-2060.26	1528.85	150.336	-2044.42	1435.21	162.475	-1972.61	1151.77	169.298	-2171.34	1352.41	182.188	-2247.63	1162.1	78.8227	-1969.71	1220.53	340.116	-2097.38	1374.63	454.444	-2084.2	1159.24	483.727	-2097.39	1089.77	498.228	-2264.03	1019.52	453.812	-2320.13	959.755	526.968	-2315.64	952.829	489.236	-2388.84	943.763
945	0	190.046	-2237.8	1568.66	72.9992	-2238.92	1556.17	192.312	-2065.9	1545.23	85.0894	-2069.91	1529.53	149.495	-2054.01	1436.28	162.049	-1982.18	1152.63	168.923	-2180.85	1353.56	182.224	-2256.99	1163.02	78.0972	-1979.52	1221.53	339.397	-2106.37	1375.81	453.316	-2093.46	1159.98	482.019	-2106.06	1090.21	498.326	-2271.22	1017.05	454.59	-2326.47	956.101	527.782	-2321.32	949.688	490.383	-2394.7	940.439
946	0	189.134	-2247.16	1570.12	72.2235	-2248.5	1557.18	191.22	-2075.25	1546.31	83.9895	-2079.55	1530.15	148.856	-2063.61	1437.25	161.442	-1991.93	1153.7	168.574	-2190.21	1354.75	182.427	-2266.25	1163.89	77.1713	-1989.26	1222.58	339.002	-2115.26	1377.07	452.019	-2102.61	1160.49	480.294	-2114.68	1090.7	498.375	-2278.26	1014.75	455.373	-2332.62	952.489	528.435	-2326.84	946.69	491.444	-2400.35	936.835
947	0	188.378	-2256.46	1571.22	71.5187	-2258.07	1558.1	190.319	-2084.61	1547.31	83.178	-2089.15	1530.92	148.134	-2072.98	1438.29	160.767	-2001.64	1154.95	168.325	-2199.47	1355.79	182.866	-2275.48	1164.79	76.3528	-1998.87	1223.62	338.296	-2123.88	1378.03	450.962	-2111.54	1160.97	478.485	-2123.02	1090.77	498.299	-2285.03	1012.38	456.034	-2338.61	948.973	528.996	-2332.15	943.571	492.421	-2405.72	932.768
948	0	187.8	-2265.64	1572.48	71.0203	-2267.46	1559.13	189.425	-2093.88	1548.54	82.3282	-2098.59	1531.85	147.451	-2082.28	1439.5	160.255	-2011.52	1156.19	168.167	-2208.61	1356.81	183.44	-2284.64	1165.81	75.5802	-2008.27	1224.73	337.957	-2132.38	1379.2	449.465	-2120.27	1161.2	476.462	-2130.97	1090.88	498.207	-2291.57	1010.06	456.596	-2344.33	945.6	529.509	-2337.17	940.59	493.331	-2410.83	928.653
949	0	187.317	-2274.79	1573.86	70.6303	-2276.8	1560.27	188.753	-2103.16	1549.78	81.8298	-2108.03	1532.94	146.891	-2091.47	1440.6	159.318	-2021.2	1156.79	168.125	-2217.65	1358.01	184.164	-2293.56	1166.94	74.5903	-2017.6	1226.02	337.681	-2140.7	1380.5	448.241	-2128.26	1161.56	474.863	-2138.99	1091.32	498.184	-2297.78	1007.93	457.047	-2349.74	942.393	529.959	-2341.67	937.543	494.264	-2415.61	924.42
950	0	187.038	-2283.94	1575.24	70.2298	-2286.14	1561.49	188.328	-2112.22	1550.91	81.2251	-2117.14	1533.96	146.344	-2100.42	1441.77	158.647	-2030.66	1158.11	168.112	-2226.63	1359.11	184.945	-2302.49	1168.21	73.7823	-2026.79	1227.22	337.388	-2148.84	1381.68	447.284	-2136.71	1162.42	473.032	-2146.92	1091.67	497.871	-2303.88	1005.8	457.444	-2354.92	939.199	530.156	-2346.28	934.835	495.067	-2420.1	919.886
951	0	186.807	-2293.05	1576.51	70.0099	-2295.24	1562.71	188.02	-2121.38	1552.13	81.0364	-2126.48	1535.18	145.876	-2109.64	1443.1	157.598	-2039.65	1159.35	168.165	-2235.51	1360.33	185.671	-2311.38	1169.42	73.1777	-2036.06	1228.58	337.335	-2157.25	1383.21	446.117	-2144.81	1162.86	471.399	-2154.5	1092.06	497.632	-2309.64	1003.54	457.703	-2359.83	936.024	530.391	-2350.49	931.956	495.853	-2424.28	915.274
952	0	186.673	-2302.06	1577.83	69.8221	-2304.26	1563.97	187.978	-2130.46	1553.4	80.8324	-2135.63	1536.41	145.227	-2118.62	1444.49	156.94	-2048.24	1160.69	168.285	-2244.33	1361.46	186.33	-2320.13	1170.8	72.2795	-2045.26	1229.92	337.19	-2165.32	1384.64	444.794	-2152.23	1163.38	469.664	-2161.89	1092.51	497.337	-2315.11	1001.37	457.853	-2364.45	932.901	530.399	-2354.32	929.112	496.52	-2427.98	910.495
953	0	186.589	-2310.98	1579.12	69.8008	-2313.27	1565.17	187.796	-2139.42	1554.69	80.9573	-2144.57	1537.3	145.019	-2127.66	1445.65	156.529	-2057.14	1162.01	168.389	-2253.21	1362.65	186.959	-2329	1172.19	71.4976	-2054.42	1231.08	337.19	-2173.39	1386.15	443.828	-2159.75	1164.19	467.881	-2168.73	1092.75	497.069	-2320.46	999.311	457.803	-2368.75	929.759	530.227	-2357.87	926.164	497.056	-2431.62	905.894
954	0	186.703	-2319.97	1580.38	69.953	-2322.21	1566.33	187.91	-2148.38	1555.61	80.9032	-2153.59	1538.53	144.666	-2136.58	1446.61	156.223	-2065.79	1163.09	168.539	-2262.12	1363.73	187.536	-2337.6	1173.41	70.867	-2063.6	1232.12	336.954	-2181.44	1387.19	442.604	-2166.95	1164.56	466.429	-2175.98	1093.15	496.589	-2325.51	996.937	457.486	-2372.81	926.454	529.815	-2361.22	923.138	497.395	-2434.78	900.857
955	0	186.899	-2328.76	1581.43	70.1674	-2331.12	1567.68	188.017	-2157.38	1556.42	80.9348	-2162.5	1539.34	144.55	-2145.68	1447.73	155.451	-2074.69	1163.74	168.738	-2270.89	1364.71	187.986	-2346.39	1174.56	70.3053	-2072.81	1233.1	336.862	-2189.62	1388.11	441.513	-2174.21	1164.9	464.787	-2182.61	1093.04	496.066	-2330.33	994.486	457.38	-2376.63	923.196	529.459	-2364.34	919.857	497.693	-2437.71	895.889
956	0	187.334	-2337.5	1582.44	70.4141	-2339.93	1568.96	188.157	-2166.11	1557.1	81.2263	-2171.3	1540.26	144.315	-2154.71	1448.58	155.008	-2084.04	1164.52	168.96	-2279.73	1365.79	188.347	-2354.99	1175.71	69.7272	-2081.92	1233.96	336.87	-2197.72	1389.01	440.372	-2181.16	1164.96	463.208	-2189.28	1093.05	495.541	-2334.99	992.088	457.098	-2380.14	919.947	529.195	-2367.39	916.856	497.724	-2440.28	890.661
957	0	187.665	-2346.22	1583.53	70.7449	-2348.68	1569.99	188.476	-2174.9	1557.85	81.3054	-2179.97	1540.76	144.108	-2163.62	1449.4	155.073	-2092.57	1165.3	169.113	-2288.48	1366.65	188.662	-2363.66	1176.69	69.3852	-2091.22	1234.81	336.698	-2205.87	1389.88	439.35	-2187.95	1165.32	461.724	-2195.65	1093.02	495.006	-2339.36	989.595	456.653	-2383.44	916.688	528.852	-2370.13	913.909	497.674	-2442.52	885.536
958	0	188.1	-2354.93	1584.31	71.3452	-2357.52	1571.01	188.64	-2183.68	1558.31	81.968	-2189.36	1541.76	143.971	-2172.76	1450.1	154.708	-2101.25	1165.78	169.318	-2297.41	1367.31	188.956	-2372.32	1177.31	69.028	-2100.29	1235.52	336.721	-2214.19	1390.42	437.927	-2194.66	1164.94	460.245	-2202.06	1092.78	494.422	-2344.16	987.136	456.386	-2386.7	913.309	528.542	-2372.91	910.708	497.557	-2444.79	880.236
959	0	188.647	-2363.66	1584.91	71.9317	-2366.39	1571.78	188.989	-2192.41	1558.64	82.2419	-2198.2	1542.41	143.89	-2181.75	1450.54	155.253	-2110.61	1166.52	169.53	-2306.21	1367.74	189.149	-2380.99	1177.72	68.9056	-2109.31	1236.09	336.807	-2222.68	1390.9	436.842	-2200.99	1164.54	458.848	-2208.53	1092.5	493.954	-2348.09	984.339	456.212	-2389.81	909.887	528.024	-2375.35	907.399	497.402	-2446.66	874.874
[truncated: 69 more columns]

## Sheet: Sheet2
Devices
		025370 - Force			025370 - Moment			025370 - CoP			027571 - Force			027571 - Moment			027571 - CoP			037720 - Force			037720 - Moment			037720 - CoP
Frame	Sub Frame	Fx	Fy	Fz	Mx	My	Mz	Cx	Cy	Cz	Fx	Fy	Fz	Mx	My	Mz	Cx	Cy	Cz	Fx	Fy	Fz	Mx	My	Mz	Cx	Cy	Cz
		N	N	N	N.mm	N.mm	N.mm	mm	mm	mm	N	N	N	N.mm	N.mm	N.mm	mm	mm	mm	N	N	N	N.mm	N.mm	N.mm	mm	mm	mm
483	0	0	0	0	0	0	0	200	300	0	0	0	0	0	0	0	200	903	0	0	0	0	0	0	0	603	903	0
483	1	0	0	0	0	0	0	200	300	0	0	0	0	0	0	0	200	903	0	0	0	0	0	0	0	603	903	0
483	2	0	0	0	0	0	0	200	300	0	0	0	0	0	0	0	200	903	0	0	0	0	0	0	0	603	903	0
483	3	0	0	0	0	0	0	200	300	0	0	0	0	0	0	0	200	903	0	0	0	0	0	0	0	603	903	0
483	4	0	0	0	0	0	0	200	300	0	0	0	0	0	0	0	200	903	0	0	0	0	0	0	0	603	903	0
483	5	0	0	0	0	0	0	200	300	0	0	0	0	0	0	0	200	903	0	0	0	0	0	0	0	603	903	0
483	6	0	0	0	0	0	0	200	300	0	0	0	0	0	0	0	200	903	0	0	0	0	0	0	0	603	903	0
483	7	0	0	0	0	0	0	200	300	0	0	0	0	0	0	0	200	903	0	0	0	0	0	0	0	603	903	0
483	8	0	0	0	0	0	0	200	300	0	0	0	0	0	0	0	200	903	0	0	0	0	0	0	0	603	903	0
483	9	0	0	0	0	0	0	200	300	0	0	0	0	0	0	0	200	903	0	0	0	0	0	0	0	603	903	0
484	0	0	0	0	0	0	0	200	300	0	0	0	0	0	0	0	200	903	0	0	0	0	0	0	0	603	903	0
484	1	0	0	0	0	0	0	200	300	0	0	0	0	0	0	0	200	903	0	0	0	0	0	0	0	603	903	0
484	2	0	0	0	0	0	0	200	300	0	0	0	0	0	0	0	200	903	0	0	0	0	0	0	0	603	903	0
484	3	0	0	0	0	0	0	200	300	0	0	0	0	0	0	0	200	903	0	0	0	0	0	0	0	603	903	0
484	4	0	0	0	0	0	0	200	300	0	0	0	0	0	0	0	200	903	0	0	0	0	0	0	0	603	903	0
484	5	0	0	0	0	0	0	200	300	0	0	0	0	0	0	0	200	903	0	0	0	0	0	0	0	603	903	0
484	6	0	0	0	0	0	0	200	300	0	0	0	0	0	0	0	200	903	0	0	0	0	0	0	0	603	903	0
484	7	0	0	0	0	0	0	200	300	0	0	0	0	0	0	0	200	903	0	0	0	0	0	0	0	603	903	0
484	8	0	0	0	0	0	0	200	300	0	0	0	0	0	0	0	200	903	0	0	0	0	0	0	0	603	903	0
484	9	0	0	0	0	0	0	200	300	0	0	0	0	0	0	0	200	903	0	0	0	0	0	0	0	603	903	0
485	0	0	0	0	0	0	0	200	300	0	0	0	0	0	0	0	200	903	0	0	0	0	0	0	0	603	903	0
485	1	0	0	0	0	0	0	200	300	0	0	0	0	0	0	0	200	903	0	0	0	0	0	0	0	603	903	0
485	2	0	0	0	0	0	0	200	300	0	0	0	0	0	0	0	200	903	0	0	0	0	0	0	0	603	903	0
485	3	0	0	0	0	0	0	200	300	0	0	0	0	0	0	0	200	903	0	0	0	0	0	0	0	603	903	0
485	4	0	0	0	0	0	0	200	300	0	0	0	0	0	0	0	200	903	0	0	0	0	0	0	0	603	903	0
485	5	0	0	0	0	0	0	200	300	0	0	0	0	0	0	0	200	903	0	0	0	0	0	0	0	603	903	0
485	6	0	0	0	0	0	0	200	300	0	0	0	0	0	0	0	200	903	0	0	0	0	0	0	0	603	903	0
485	7	0	0	0	0	0	0	200	300	0	0	0	0	0	0	0	200	903	0	0	0	0	0	0	0	603	903	0
485	8	0	0	0	0	0	0	200	300	0	0	0	0	0	0	0	200	903	0	0	0	0	0	0	0	603	903	0
485	9	0	0	0	0	0	0	200	300	0	0	0	0	0	0	0	200	903	0	0	0	0	0	0	0	603	903	0
486	0	0	0	0	0	0	0	200	300	0	0	0	0	0	0	0	200	903	0	0	0	0	0	0	0	603	903	0
486	1	0	0	0	0	0	0	200	300	0	0	0	0	0	0	0	200	903	0	0	0	0	0	0	0	603	903	0
486	2	0	0	0	0	0	0	200	300	0	0	0	0	0	0	0	200	903	0	0	0	0	0	0	0	603	903	0
486	3	0	0	0	0	0	0	200	300	0	0	0	0	0	0	0	200	903	0	0	0	0	0	0	0	603	903	0
486	4	0	0	0	0	0	0	200	300	0	0	0	0	0	0	0	200	903	0	0	0	0	0	0	0	603	903	0
486	5	0	0	0	0	0	0	200	300	0	0	0	0	0	0	0	200	903	0	0	0	0	0	0	0	603	903	0
486	6	0	0	0	0	0	0	200	300	0	0	0	0	0	0	0	200	903	0	0	0	0	0	0	0	603	903	0
486	7	0	0	0	0	0	0	200	300	0	0	0	0	0	0	0	200	903	0	0	0	0	0	0	0	603	903	0
486	8	0	0	0	0	0	0	200	300	0	0	0	0	0	0	0	200	903	0	0	0	0	0	0	0	603	903	0
486	9	0	0	0	0	0	0	200	300	0	0	0	0	0	0	0	200	903	0	0	0	0	0	0	0	603	903	0
487	0	0	0	0	0	0	0	200	300	0	0	0	0	0	0	0	200	903	0	0	0	0	0	0	0	603	903	0
487	1	0	0	0	0	0	0	200	300	0	0	0	0	0	0	0	200	903	0	0	0	0	0	0	0	603	903	0
487	2	0	0	0	0	0	0	200	300	0	0	0	0	0	0	0	200	903	0	0	0	0	0	0	0	603	903	0
487	3	0	0	0	0	0	0	200	300	0	0	0	0	0	0	0	200	903	0	0	0	0	0	0	0	603	903	0
487	4	0	0	0	0	0	0	200	300	0	0	0	0	0	0	0	200	903	0	0	0	0	0	0	0	603	903	0
487	5	0	0	0	0	0	0	200	300	0	0	0	0	0	0	0	200	903	0	0	0	0	0	0	0	603	903	0
487	6	0	0	0	0	0	0	200	300	0	0	0	0	0	0	0	200	903	0	0	0	0	0	0	0	603	903	0
487	7	0	0	0	0	0	0	200	300	0	0	0	0	0	0	0	200	903	0	0	0	0	0	0	0	603	903	0
487	8	0	0	0	0	0	0	200	300	0	0	0	0	0	0	0	200	903	0	0	0	0	0	0	0	603	903	0
487	9	0	0	0	0	0	0	200	300	0	0	0	0	0	0	0	200	903	0	0	0	0	0	0	0	603	903	0
488	0	0	0	0	0	0	0	200	300	0	0	0	0	0	0	0	200	903	0	0	0	0	0	0	0	603	903	0
488	1	0	0	0	0	0	0	200	300	0	0	0	0	0	0	0	200	903	0	0	0	0	0	0	0	603	903	0
488	2	0	0	0	0	0	0	200	300	0	0	0	0	0	0	0	200	903	0	0	0	0	0	0	0	603	903	0
488	3	0	0	0	0	0	0	200	300	0	0	0	0	0	0	0	200	903	0	0	0	0	0	0	0	603	903	0
488	4	0	0	0	0	0	0	200	300	0	0	0	0	0	0	0	200	903	0	0	0	0	0	0	0	603	903	0
488	5	0	0	0	0	0	0	200	300	0	0	0	0	0	0	0	200	903	0	0	0	0	0	0	0	603	903	0
488	6	0	0	0	0	0	0	200	300	0	0	0	0	0	0	0	200	903	0	0	0	0	0	0	0	603	903	0
488	7	0	0	0	0	0	0	200	300	0	0	0	0	0	0	0	200	903	0	0	0	0	0	0	0	603	903	0
488	8	0	0	0	0	0	0	200	300	0	0	0	0	0	0	0	200	903	0	0	0	0	0	0	0	603	903	0
488	9	0	0	0	0	0	0	200	300	0	0	0	0	0	0	0	200	903	0	0	0	0	0	0	0	603	903	0
489	0	0	0	0	0	0	0	200	300	0	0	0	0	0	0	0	200	903	0	0	0	0	0	0	0	603	903	0
489	1	0	0	0	0	0	0	200	300	0	0	0	0	0	0	0	200	903	0	0	0	0	0	0	0	603	903	0
489	2	0	0	0	0	0	0	200	300	0	0	0	0	0	0	0	200	903	0	0	0	0	0	0	0	603	903	0
489	3	0	0	0	0	0	0	200	300	0	0	0	0	0	0	0	200	903	0	0	0	0	0	0	0	603	903	0
489	4	0	0	0	0	0	0	200	300	0	0	0	0	0	0	0	200	903	0	0	0	0	0	0	0	603	903	0
489	5	0	0	0	0	0	0	200	300	0	0	0	0	0	0	0	200	903	0	0	0	0	0	0	0	603	903	0
489	6	0	0	0	0	0	0	200	300	0	0	0	0	0	0	0	200	903	0	0	0	0	0	0	0	603	903	0
489	7	0	0	0	0	0	0	200	300	0	0	0	0	0	0	0	200	903	0	0	0	0	0	0	0	603	903	0
489	8	0	0	0	0	0	0	200	300	0	0	0	0	0	0	0	200	903	0	0	0	0	0	0	0	603	903	0
489	9	0	0	0	0	0	0	200	300	0	0	0	0	0	0	0	200	903	0	0	0	0	0	0	0	603	903	0
490	0	0	0	0	0	0	0	200	300	0	0	0	0	0	0	0	200	903	0	0	0	0	0	0	0	603	903	0
490	1	0	0	0	0	0	0	200	300	0	0	0	0	0	0	0	200	903	0	0	0	0	0	0	0	603	903	0
490	2	0	0	0	0	0	0	200	300	0	0	0	0	0	0	0	200	903	0	0	0	0	0	0	0	603	903	0
490	3	0	0	0	0	0	0	200	300	0	0	0	0	0	0	0	200	903	0	0	0	0	0	0	0	603	903	0
490	4	0	0	0	0	0	0	200	300	0	0	0	0	0	0	0	200	903	0	0	0	0	0	0	0	603	903	0
490	5	0	0	0	0	0	0	200	300	0	0	0	0	0	0	0	200	903	0	0	0	0	0	0	0	603	903	0
490	6	0	0	0	0	0	0	200	300	0	0	0	0	0	0	0	200	903	0	0	0	0	0	0	0	603	903	0
490	7	0	0	0	0	0	0	200	300	0	0	0	0	0	0	0	200	903	0	0	0	0	0	0	0	603	903	0
490	8	0	0	0	0	0	0	200	300	0	0	0	0	0	0	0	200	903	0	0	0	0	0	0	0	603	903	0
490	9	0	0	0	0	0	0	200	300	0	0	0	0	0	0	0	200	903	0	0	0	0	0	0	0	603	903	0
491	0	0	0	0	0	0	0	200	300	0	0	0	0	0	0	0	200	903	0	0	0	0	0	0	0	603	903	0
491	1	0	0	0	0	0	0	200	300	0	0	0	0	0	0	0	200	903	0	0	0	0	0	0	0	603	903	0
491	2	0	0	0	0	0	0	200	300	0	0	0	0	0	0	0	200	903	0	0	0	0	0	0	0	603	903	0
491	3	0	0	0	0	0	0	200	300	0	0	0	0	0	0	0	200	903	0	0	0	0	0	0	0	603	903	0
491	4	0	0	0	0	0	0	200	300	0	0	0	0	0	0	0	200	903	0	0	0	0	0	0	0	603	903	0
491	5	0	0	0	0	0	0	200	300	0	0	0	0	0	0	0	200	903	0	0	0	0	0	0	0	603	903	0
491	6	0	0	0	0	0	0	200	300	0	0	0	0	0	0	0	200	903	0	0	0	0	0	0	0	603	903	0
491	7	0	0	0	0	0	0	200	300	0	0	0	0	0	0	0	200	903	0	0	0	0	0	0	0	603	903	0
491	8	0	0	0	0	0	0	200	300	0	0	0	0	0	0	0	200	903	0	0	0	0	0	0	0	603	903	0
491	9	0	0	0	0	0	0	200	300	0	0	0	0	0	0	0	200	903	0	0	0	0	0	0	0	603	903	0
492	0	0	0	0	0	0	0	200	300	0	0	0	0	0	0	0	200	903	0	0	0	0	0	0	0	603	903	0
492	1	0	0	0	0	0	0	200	300	0	0	0	0	0	0	0	200	903	0	0	0	0	0	0	0	603	903	0
492	2	0	0	0	0	0	0	200	300	0	0	0	0	0	0	0	200	903	0	0	0	0	0	0	0	603	903	0
492	3	0	0	0	0	0	0	200	300	0	0	0	0	0	0	0	200	903	0	0	0	0	0	0	0	603	903	0
492	4	0	0	0	0	0	0	200	300	0	0	0	0	0	0	0	200	903	0	0	0	0	0	0	0	603	903	0
492	5	0	0	0	0	0	0	200	300	0	0	0	0	0	0	0	200	903	0	0	0	0	0	0	0	603	903	0
492	6	0	0	0	0	0	0	200	300	0	0	0	0	0	0	0	200	903	0	0	0	0	0	0	0	603	903	0
492	7	0	0	0	0	0	0	200	300	0	0	0	0	0	0	0	200	903	0	0	0	0	0	0	0	603	903	0
492	8	0	0	0	0	0	0	200	300	0	0	0	0	0	0	0	200	903	0	0	0	0	0	0	0	603	903	0
492	9	0	0	0	0	0	0	200	300	0	0	0	0	0	0	0	200	903	0	0	0	0	0	0	0	603	903	0
493	0	0	0	0	0	0	0	200	300	0	0	0	0	0	0	0	200	903	0	0	0	0	0	0	0	603	903	0
493	1	0	0	0	0	0	0	200	300	0	0	0	0	0	0	0	200	903	0	0	0	0	0	0	0	603	903	0
493	2	0	0	0	0	0	0	200	300	0	0	0	0	0	0	0	200	903	0	0	0	0	0	0	0	603	903	0
493	3	0	0	0	0	0	0	200	300	0	0	0	0	0	0	0	200	903	0	0	0	0	0	0	0	603	903	0
493	4	0	0	0	0	0	0	200	300	0	0	0	0	0	0	0	200	903	0	0	0	0	0	0	0	603	903	0
493	5	0	0	0	0	0	0	200	300	0	0	0	0	0	0	0	200	903	0	0	0	0	0	0	0	603	903	0
493	6	0	0	0	0	0	0	200	300	0	0	0	0	0	0	0	200	903	0	0	0	0	0	0	0	603	903	0
493	7	0	0	0	0	0	0	200	300	0	0	0	0	0	0	0	200	903	0	0	0	0	0	0	0	603	903	0
493	8	0	0	0	0	0	0	200	300	0	0	0	0	0	0	0	200	903	0	0	0	0	0	0	0	603	903	0
493	9	0	0	0	0	0	0	200	300	0	0	0	0	0	0	0	200	903	0	0	0	0	0	0	0	603	903	0
494	0	0	0	0	0	0	0	200	300	0	0	0	0	0	0	0	200	903	0	0	0	0	0	0	0	603	903	0
494	1	0	0	0	0	0	0	200	300	0	0	0	0	0	0	0	200	903	0	0	0	0	0	0	0	603	903	0
494	2	0	0	0	0	0	0	200	300	0	0	0	0	0	0	0	200	903	0	0	0	0	0	0	0	603	903	0
494	3	0	0	0	0	0	0	200	300	0	0	0	0	0	0	0	200	903	0	0	0	0	0	0	0	603	903	0
494	4	0	0	0	0	0	0	200	300	0	0	0	0	0	0	0	200	903	0	0	0	0	0	0	0	603	903	0
494	5	0	0	0	0	0	0	200	300	0	0	0	0	0	0	0	200	903	0	0	0	0	0	0	0	603	903	0
494	6	0	0	0	0	0	0	200	300	0	0	0	0	0	0	0	200	903	0	0	0	0	0	0	0	603	903	0
494	7	0	0	0	0	0	0	200	300	0	0	0	0	0	0	0	200	903	0	0	0	0	0	0	0	603	903	0
494	8	0	0	0	0	0	0	200	300	0	0	0	0	0	0	0	200	903	0	0	0	0	0	0	0	603	903	0
494	9	0	0	0	0	0	0	200	300	0	0	0	0	0	0	0	200	903	0	0	0	0	0	0	0	603	903	0
495	0	0	0	0	0	0	0	200	300	0	0	0	0	0	0	0	200	903	0	0	0	0	0	0	0	603	903	0
495	1	0	0	0	0	0	0	200	300	0	0	0	0	0	0	0	200	903	0	0	0	0	0	0	0	603	903	0
495	2	0	0	0	0	0	0	200	300	0	0	0	0	0	0	0	200	903	0	0	0	0	0	0	0	603	903	0
495	3	0	0	0	0	0	0	200	300	0	0	0	0	0	0	0	200	903	0	0	0	0	0	0	0	603	903	0
495	4	0	0	0	0	0	0	200	300	0	0	0	0	0	0	0	200	903	0	0	0	0	0	0	0	603	903	0
495	5	0	0	0	0	0	0	200	300	0	0	0	0	0	0	0	200	903	0	0	0	0	0	0	0	603	903	0
495	6	0	0	0	0	0	0	200	300	0	0	0	0	0	0	0	200	903	0	0	0	0	0	0	0	603	903	0
495	7	0	0	0	0	0	0	200	300	0	0	0	0	0	0	0	200	903	0	0	0	0	0	0	0	603	903	0
495	8	0	0	0	0	0	0	200	300	0	0	0	0	0	0	0	200	903	0	0	0	0	0	0	0	603	903	0
495	9	0	0	0	0	0	0	200	300	0	0	0	0	0	0	0	200	903	0	0	0	0	0	0	0	603	903	0
496	0	0	0	0	0	0	0	200	300	0	0	0	0	0	0	0	200	903	0	0	0	0	0	0	0	603	903	0
496	1	0	0	0	0	0	0	200	300	0	0	0	0	0	0	0	200	903	0	0	0	0	0	0	0	603	903	0
496	2	0	0	0	0	0	0	200	300	0	0	0	0	0	0	0	200	903	0	0	0	0	0	0	0	603	903	0
496	3	0	0	0	0	0	0	200	300	0	0	0	0	0	0	0	200	903	0	0	0	0	0	0	0	603	903	0
496	4	0	0	0	0	0	0	200	300	0	0	0	0	0	0	0	200	903	0	0	0	0	0	0	0	603	903	0
496	5	0	0	0	0	0	0	200	300	0	0	0	0	0	0	0	200	903	0	0	0	0	0	0	0	603	903	0
496	6	0	0	0	0	0	0	200	300	0	0	0	0	0	0	0	200	903	0	0	0	0	0	0	0	603	903	0
496	7	0	0	0	0	0	0	200	300	0	0	0	0	0	0	0	200	903	0	0	0	0	0	0	0	603	903	0
496	8	0	0	0	0	0	0	200	300	0	0	0	0	0	0	0	200	903	0	0	0	0	0	0	0	603	903	0
496	9	0	0	0	0	0	0	200	300	0	0	0	0	0	0	0	200	903	0	0	0	0	0	0	0	603	903	0
497	0	0	0	0	0	0	0	200	300	0	0	0	0	0	0	0	200	903	0	0	0	0	0	0	0	603	903	0
497	1	0	0	0	0	0	0	200	300	0	0	0	0	0	0	0	200	903	0	0	0	0	0	0	0	603	903	0
497	2	0	0	0	0	0	0	200	300	0	0	0	0	0	0	0	200	903	0	0	0	0	0	0	0	603	903	0
497	3	0	0	0	0	0	0	200	300	0	0	0	0	0	0	0	200	903	0	0	0	0	0	0	0	603	903	0
497	4	0	0	0	0	0	0	200	300	0	0	0	0	0	0	0	200	903	0	0	0	0	0	0	0	603	903	0
497	5	0	0	0	0	0	0	200	300	0	0	0	0	0	0	0	200	903	0	0	0	0	0	0	0	603	903	0
497	6	0	0	0	0	0	0	200	300	0	0	0	0	0	0	0	200	903	0	0	0	0	0	0	0	603	903	0
497	7	0	0	0	0	0	0	200	300	0	0	0	0	0	0	0	200	903	0	0	0	0	0	0	0	603	903	0
497	8	0	0	0	0	0	0	200	300	0	0	0	0	0	0	0	200	903	0	0	0	0	0	0	0	603	903	0
497	9	0	0	0	0	0	0	200	300	0	0	0	0	0	0	0	200	903	0	0	0	0	0	0	0	603	903	0
498	0	0	0	0	0	0	0	200	300	0	0	0	0	0	0	0	200	903	0	0	0	0	0	0	0	603	903	0
498	1	0	0	0	0	0	0	200	300	0	0	0	0	0	0	0	200	903	0	0	0	0	0	0	0	603	903	0
498	2	0	0	0	0	0	0	200	300	0	0	0	0	0	0	0	200	903	0	0	0	0	0	0	0	603	903	0
498	3	0	0	0	0	0	0	200	300	0	0	0	0	0	0	0	200	903	0	0	0	0	0	0	0	603	903	0
498	4	0	0	0	0	0	0	200	300	0	0	0	0	0	0	0	200	903	0	0	0	0	0	0	0	603	903	0
498	5	0	0	0	0	0	0	200	300	0	0	0	0	0	0	0	200	903	0	0	0	0	0	0	0	603	903	0
498	6	0	0	0	0	0	0	200	300	0	0	0	0	0	0	0	200	903	0	0	0	0	0	0	0	603	903	0
498	7	0	0	0	0	0	0	200	300	0	0	0	0	0	0	0	200	903	0	0	0	0	0	0	0	603	903	0
498	8	0	0	0	0	0	0	200	300	0	0	0	0	0	0	0	200	903	0	0	0	0	0	0	0	603	903	0
498	9	0	0	0	0	0	0	200	300	0	0	0	0	0	0	0	200	903	0	0	0	0	0	0	0	603	903	0
499	0	0	0	0	0	0	0	200	300	0	0	0	0	0	0	0	200	903	0	0	0	0	0	0	0	603	903	0
499	1	0	0	0	0	0	0	200	300	0	0	0	0	0	0	0	200	903	0	0	0	0	0	0	0	603	903	0
499	2	0	0	0	0	0	0	200	300	0	0	0	0	0	0	0	200	903	0	0	0	0	0	0	0	603	903	0
499	3	0	0	0	0	0	0	200	300	0	0	0	0	0	0	0	200	903	0	0	0	0	0	0	0	603	903	0
499	4	0	0	0	0	0	0	200	300	0	0	0	0	0	0	0	200	903	0	0	0	0	0	0	0	603	903	0
499	5	0	0	0	0	0	0	200	300	0	0	0	0	0	0	0	200	903	0	0	0	0	0	0	0	603	903	0
499	6	0	0	0	0	0	0	200	300	0	0	0	0	0	0	0	200	903	0	0	0	0	0	0	0	603	903	0
499	7	0	0	0	0	0	0	200	300	0	0	0	0	0	0	0	200	903	0	0	0	0	0	0	0	603	903	0
499	8	0	0	0	0	0	0	200	300	0	0	0	0	0	0	0	200	903	0	0	0	0	0	0	0	603	903	0
499	9	0	0	0	0	0	0	200	300	0	0	0	0	0	0	0	200	903	0	0	0	0	0	0	0	603	903	0
500	0	0	0	0	0	0	0	200	300	0	0	0	0	0	0	0	200	903	0	0	0	0	0	0	0	603	903	0
500	1	0	0	0	0	0	0	200	300	0	0	0	0	0	0	0	200	903	0	0	0	0	0	0	0	603	903	0
500	2	0	0	0	0	0	0	200	300	0	0	0	0	0	0	0	200	903	0	0	0	0	0	0	0	603	903	0
500	3	0	0	0	0	0	0	200	300	0	0	0	0	0	0	0	200	903	0	0	0	0	0	0	0	603	903	0
500	4	0	0	0	0	0	0	200	300	0	0	0	0	0	0	0	200	903	0	0	0	0	0	0	0	603	903	0
500	5	0	0	0	0	0	0	200	300	0	0	0	0	0	0	0	200	903	0	0	0	0	0	0	0	603	903	0
500	6	0	0	0	0	0	0	200	300	0	0	0	0	0	0	0	200	903	0	0	0	0	0	0	0	603	903	0
500	7	0	0	0	0	0	0	200	300	0	0	0	0	0	0	0	200	903	0	0	0	0	0	0	0	603	903	0
500	8	0	0	0	0	0	0	200	300	0	0	0	0	0	0	0	200	903	0	0	0	0	0	0	0	603	903	0
500	9	0	0	0	0	0	0	200	300	0	0	0	0	0	0	0	200	903	0	0	0	0	0	0	0	603	903	0
501	0	0	0	0	0	0	0	200	300	0	0	0	0	0	0	0	200	903	0	0	0	0	0	0	0	603	903	0
501	1	0	0	0	0	0	0	200	300	0	0	0	0	0	0	0	200	903	0	0	0	0	0	0	0	603	903	0
501	2	0	0	0	0	0	0	200	300	0	0	0	0	0	0	0	200	903	0	0	0	0	0	0	0	603	903	0
501	3	0	0	0	0	0	0	200	300	0	0	0	0	0	0	0	200	903	0	0	0	0	0	0	0	603	903	0
501	4	0	0	0	0	0	0	200	300	0	0	0	0	0	0	0	200	903	0	0	0	0	0	0	0	603	903	0
501	5	0	0	0	0	0	0	200	300	0	0	0	0	0	0	0	200	903	0	0	0	0	0	0	0	603	903	0
501	6	0	0	0	0	0	0	200	300	0	0	0	0	0	0	0	200	903	0	0	0	0	0	0	0	603	903	0
501	7	0	0	0	0	0	0	200	300	0	0	0	0	0	0	0	200	903	0	0	0	0	0	0	0	603	903	0
501	8	0	0	0	0	0	0	200	300	0	0	0	0	0	0	0	200	903	0	0	0	0	0	0	0	603	903	0
501	9	0	0	0	0	0	0	200	300	0	0	0	0	0	0	0	200	903	0	0	0	0	0	0	0	603	903	0
502	0	0	0	0	0	0	0	200	300	0	0	0	0	0	0	0	200	903	0	0	0	0	0	0	0	603	903	0
502	1	0	0	0	0	0	0	200	300	0	0	0	0	0	0	0	200	903	0	0	0	0	0	0	0	603	903	0
502	2	0	0	0	0	0	0	200	300	0	0	0	0	0	0	0	200	903	0	0	0	0	0	0	0	603	903	0
502	3	0	0	0	0	0	0	200	300	0	0	0	0	0	0	0	200	903	0	0	0	0	0	0	0	603	903	0
502	4	0	0	0	0	0	0	200	300	0	0	0	0	0	0	0	200	903	0	0	0	0	0	0	0	603	903	0
502	5	0	0	0	0	0	0	200	300	0	0	0	0	0	0	0	200	903	0	0	0	0	0	0	0	603	903	0
502	6	0	0	0	0	0	0	200	300	0	0	0	0	0	0	0	200	903	0	0	0	0	0	0	0	603	903	0
502	7	0	0	0	0	0	0	200	300	0	0	0	0	0	0	0	200	903	0	0	0	0	0	0	0	603	903	0
502	8	0	0	0	0	0	0	200	300	0	0	0	0	0	0	0	200	903	0	0	0	0	0	0	0	603	903	0
502	9	0	0	0	0	0	0	200	300	0	0	0	0	0	0	0	200	903	0	0	0	0	0	0	0	603	903	0
503	0	0	0	0	0	0	0	200	300	0	0	0	0	0	0	0	200	903	0	0	0	0	0	0	0	603	903	0
503	1	0	0	0	0	0	0	200	300	0	0	0	0	0	0	0	200	903	0	0	0	0	0	0	0	603	903	0
503	2	0	0	0	0	0	0	200	300	0	0	0	0	0	0	0	200	903	0	0	0	0	0	0	0	603	903	0
503	3	0	0	0	0	0	0	200	300	0	0	0	0	0	0	0	200	903	0	0	0	0	0	0	0	603	903	0
503	4	0	0	0	0	0	0	200	300	0	0	0	0	0	0	0	200	903	0	0	0	0	0	0	0	603	903	0
503	5	0	0	0	0	0	0	200	300	0	0	0	0	0	0	0	200	903	0	0	0	0	0	0	0	603	903	0
503	6	0	0	0	0	0	0	200	300	0	0	0	0	0	0	0	200	903	0	0	0	0	0	0	0	603	903	0
503	7	0	0	0	0	0	0	200	300	0	0	0	0	0	0	0	200	903	0	0	0	0	0	0	0	603	903	0
503	8	0	0	0	0	0	0	200	300	0	0	0	0	0	0	0	200	903	0	0	0	0	0	0	0	603	903	0
503	9	0	0	0	0	0	0	200	300	0	0	0	0	0	0	0	200	903	0	0	0	0	0	0	0	603	903	0
504	0	0	0	0	0	0	0	200	300	0	0	0	0	0	0	0	200	903	0	0	0	0	0	0	0	603	903	0
504	1	0	0	0	0	0	0	200	300	0	0	0	0	0	0	0	200	903	0	0	0	0	0	0	0	603	903	0
504	2	0	0	0	0	0	0	200	300	0	0	0	0	0	0	0	200	903	0	0	0	0	0	0	0	603	903	0
504	3	0	0	0	0	0	0	200	300	0	0	0	0	0	0	0	200	903	0	0	0	0	0	0	0	603	903	0
504	4	0	0	0	0	0	0	200	300	0	0	0	0	0	0	0	200	903	0	0	0	0	0	0	0	603	903	0
504	5	0	0	0	0	0	0	200	300	0	0	0	0	0	0	0	200	903	0	0	0	0	0	0	0	603	903	0
504	6	0	0	0	0	0	0	200	300	0	0	0	0	0	0	0	200	903	0	0	0	0	0	0	0	603	903	0
504	7	0	0	0	0	0	0	200	300	0	0	0	0	0	0	0	200	903	0	0	0	0	0	0	0	603	903	0
504	8	0	0	0	0	0	0	200	300	0	0	0	0	0	0	0	200	903	0	0	0	0	0	0	0	603	903	0
504	9	0	0	0	0	0	0	200	300	0	0	0	0	0	0	0	200	903	0	0	0	0	0	0	0	603	903	0
505	0	0	0	0	0	0	0	200	300	0	0	0	0	0	0	0	200	903	0	0	0	0	0	0	0	603	903	0
505	1	0	0	0	0	0	0	200	300	0	0	0	0	0	0	0	200	903	0	0	0	0	0	0	0	603	903	0
505	2	0	0	0	0	0	0	200	300	0	0	0	0	0	0	0	200	903	0	0	0	0	0	0	0	603	903	0
505	3	0	0	0	0	0	0	200	300	0	0	0	0	0	0	0	200	903	0	0	0	0	0	0	0	603	903	0
505	4	0	0	0	0	0	0	200	300	0	0	0	0	0	0	0	200	903	0	0	0	0	0	0	0	603	903	0
505	5	0	0	0	0	0	0	200	300	0	0	0	0	0	0	0	200	903	0	0	0	0	0	0	0	603	903	0
505	6	0	0	0	0	0	0	200	300	0	0	0	0	0	0	0	200	903	0	0	0	0	0	0	0	603	903	0
505	7	0	0	0	0	0	0	200	300	0	0	0	0	0	0	0	200	903	0	0	0	0	0	0	0	603	903	0
505	8	0	0	0	0	0	0	200	300	0	0	0	0	0	0	0	200	903	0	0	0	0	0	0	0	603	903	0
505	9	0	0	0	0	0	0	200	300	0	0	0	0	0	0	0	200	903	0	0	0	0	0	0	0	603	903	0
506	0	0	0	0	0	0	0	200	300	0	0	0	0	0	0	0	200	903	0	0	0	0	0	0	0	603	903	0
506	1	0	0	0	0	0	0	200	300	0	0	0	0	0	0	0	200	903	0	0	0	0	0	0	0	603	903	0
506	2	0	0	0	0	0	0	200	300	0	0	0	0	0	0	0	200	903	0	0	0	0	0	0	0	603	903	0
506	3	0	0	0	0	0	0	200	300	0	0	0	0	0	0	0	200	903	0	0	0	0	0	0	0	603	903	0
506	4	0	0	0	0	0	0	200	300	0	0	0	0	0	0	0	200	903	0	0	0	0	0	0	0	603	903	0
506	5	0	0	0	0	0	0	200	300	0	0	0	0	0	0	0	200	903	0	0	0	0	0	0	0	603	903	0
506	6	0	0	0	0	0	0	200	300	0	0	0	0	0	0	0	200	903	0	0	0	0	0	0	0	603	903	0
506	7	0	0	0	0	0	0	200	300	0	0	0	0	0	0	0	200	903	0	0	0	0	0	0	0	603	903	0
506	8	0	0	0	0	0	0	200	300	0	0	0	0	0	0	0	200	903	0	0	0	0	0	0	0	603	903	0
506	9	0	0	0	0	0	0	200	300	0	0	0	0	0	0	0	200	903	0	0	0	0	0	0	0	603	903	0
507	0	0	0	0	0	0	0	200	300	0	0	0	0	0	0	0	200	903	0	0	0	0	0	0	0	603	903	0
507	1	0	0	0	0	0	0	200	300	0	0	0	0	0	0	0	200	903	0	0	0	0	0	0	0	603	903	0
507	2	0	0	0	0	0	0	200	300	0	0	0	0	0	0	0	200	903	0	0	0	0	0	0	0	603	903	0
507	3	0	0	0	0	0	0	200	300	0	0	0	0	0	0	0	200	903	0	0	0	0	0	0	0	603	903	0
507	4	0	0	0	0	0	0	200	300	0	0	0	0	0	0	0	200	903	0	0	0	0	0	0	0	603	903	0
507	5	0	0	0	0	0	0	200	300	0	0	0	0	0	0	0	200	903	0	0	0	0	0	0	0	603	903	0
507	6	0	0	0	0	0	0	200	300	0	0	0	0	0	0	0	200	903	0	0	0	0	0	0	0	603	903	0
507	7	0	0	0	0	0	0	200	300	0	0	0	0	0	0	0	200	903	0	0	0	0	0	0	0	603	903	0
507	8	0	0	0	0	0	0	200	300	0	0	0	0	0	0	0	200	903	0	0	0	0	0	0	0	603	903	0
507	9	0	0	0	0	0	0	200	300	0	0	0	0	0	0	0	200	903	0	0	0	0	0	0	0	603	903	0
508	0	0	0	0	0	0	0	200	300	0	0	0	0	0	0	0	200	903	0	0	0	0	0	0	0	603	903	0
508	1	0	0	0	0	0	0	200	300	0	0	0	0	0	0	0	200	903	0	0	0	0	0	0	0	603	903	0
508	2	0	0	0	0	0	0	200	300	0	0	0	0	0	0	0	200	903	0	0	0	0	0	0	0	603	903	0
508	3	0	0	0	0	0	0	200	300	0	0	0	0	0	0	0	200	903	0	0	0	0	0	0	0	603	903	0
508	4	0	0	0	0	0	0	200	300	0	0	0	0	0	0	0	200	903	0	0	0	0	0	0	0	603	903	0
508	5	0	0	0	0	0	0	200	300	0	0	0	0	0	0	0	200	903	0	0	0	0	0	0	0	603	903	0
508	6	0	0	0	0	0	0	200	300	0	0	0	0	0	0	0	200	903	0	0	0	0	0	0	0	603	903	0
508	7	0	0	0	0	0	0	200	300	0	0	0	0	0	0	0	200	903	0	0	0	0	0	0	0	603	903	0
508	8	0	0	0	0	0	0	200	300	0	0	0	0	0	0	0	200	903	0	0	0	0	0	0	0	603	903	0
508	9	0	0	0	0	0	0	200	300	0	0	0	0	0	0	0	200	903	0	0	0	0	0	0	0	603	903	0
509	0	0	0	0	0	0	0	200	300	0	0	0	0	0	0	0	200	903	0	0	0	0	0	0	0	603	903	0
509	1	0	0	0	0	0	0	200	300	0	0	0	0	0	0	0	200	903	0	0	0	0	0	0	0	603	903	0
509	2	0	0	0	0	0	0	200	300	0	0	0	0	0	0	0	200	903	0	0	0	0	0	0	0	603	903	0
509	3	0	0	0	0	0	0	200	300	0	0	0	0	0	0	0	200	903	0	0	0	0	0	0	0	603	903	0
509	4	0	0	0	0	0	0	200	300	0	0	0	0	0	0	0	200	903	0	0	0	0	0	0	0	603	903	0
509	5	0	0	0	0	0	0	200	300	0	0	0	0	0	0	0	200	903	0	0	0	0	0	0	0	603	903	0
509	6	0	0	0	0	0	0	200	300	0	0	0	0	0	0	0	200	903	0	0	0	0	0	0	0	603	903	0
509	7	0	0	0	0	0	0	200	300	0	0	0	0	0	0	0	200	903	0	0	0	0	0	0	0	603	903	0
509	8	0	0	0	0	0	0	200	300	0	0	0	0	0	0	0	200	903	0	0	0	0	0	0	0	603	903	0
509	9	0	0	0	0	0	0	200	300	0	0	0	0	0	0	0	200	903	0	0	0	0	0	0	0	603	903	0
510	0	0	0	0	0	0	0	200	300	0	0	0	0	0	0	0	200	903	0	0	0	0	0	0	0	603	903	0
510	1	0	0	0	0	0	0	200	300	0	0	0	0	0	0	0	200	903	0	0	0	0	0	0	0	603	903	0
510	2	0	0	0	0	0	0	200	300	0	0	0	0	0	0	0	200	903	0	0	0	0	0	0	0	603	903	0
510	3	0	0	0	0	0	0	200	300	0	0	0	0	0	0	0	200	903	0	0	0	0	0	0	0	603	903	0
510	4	0	0	0	0	0	0	200	300	0	0	0	0	0	0	0	200	903	0	0	0	0	0	0	0	603	903	0
510	5	0	0	0	0	0	0	200	300	0	0	0	0	0	0	0	200	903	0	0	0	0	0	0	0	603	903	0
510	6	0	0	0	0	0	0	200	300	0	0	0	0	0	0	0	200	903	0	0	0	0	0	0	0	603	903	0
510	7	0	0	0	0	0	0	200	300	0	0	0	0	0	0	0	200	903	0	0	0	0	0	0	0	603	903	0
510	8	0	0	0	0	0	0	200	300	0	0	0	0	0	0	0	200	903	0	0	0	0	0	0	0	603	903	0
510	9	0	0	0	0	0	0	200	300	0	0	0	0	0	0	0	200	903	0	0	0	0	0	0	0	603	903	0
511	0	0	0	0	0	0	0	200	300	0	0	0	0	0	0	0	200	903	0	0	0	0	0	0	0	603	903	0
511	1	0	0	0	0	0	0	200	300	0	0	0	0	0	0	0	200	903	0	0	0	0	0	0	0	603	903	0
511	2	0	0	0	0	0	0	200	300	0	0	0	0	0	0	0	200	903	0	0	0	0	0	0	0	603	903	0
511	3	0	0	0	0	0	0	200	300	0	0	0	0	0	0	0	200	903	0	0	0	0	0	0	0	603	903	0
511	4	0	0	0	0	0	0	200	300	0	0	0	0	0	0	0	200	903	0	0	0	0	0	0	0	603	903	0
511	5	0	0	0	0	0	0	200	300	0	0	0	0	0	0	0	200	903	0	0	0	0	0	0	0	603	903	0
511	6	0	0	0	0	0	0	200	300	0	0	0	0	0	0	0	200	903	0	0	0	0	0	0	0	603	903	0
511	7	0	0	0	0	0	0	200	300	0	0	0	0	0	0	0	200	903	0	0	0	0	0	0	0	603	903	0
511	8	0	0	0	0	0	0	200	300	0	0	0	0	0	0	0	200	903	0	0	0	0	0	0	0	603	903	0
511	9	0	0	0	0	0	0	200	300	0	0	0	0	0	0	0	200	903	0	0	0	0	0	0	0	603	903	0
512	0	0	0	0	0	0	0	200	300	0	0	0	0	0	0	0	200	903	0	0	0	0	0	0	0	603	903	0
512	1	0	0	0	0	0	0	200	300	0	0	0	0	0	0	0	200	903	0	0	0	0	0	0	0	603	903	0
512	2	0	0	0	0	0	0	200	300	0	0	0	0	0	0	0	200	903	0	0	0	0	0	0	0	603	903	0
512	3	0	0	0	0	0	0	200	300	0	0	0	0	0	0	0	200	903	0	0	0	0	0	0	0	603	903	0
512	4	0	0	0	0	0	0	200	300	0	0	0	0	0	0	0	200	903	0	0	0	0	0	0	0	603	903	0
512	5	0	0	0	0	0	0	200	300	0	0	0	0	0	0	0	200	903	0	0	0	0	0	0	0	603	903	0
512	6	0	0	0	0	0	0	200	300	0	0	0	0	0	0	0	200	903	0	0	0	0	0	0	0	603	903	0
512	7	0	0	0	0	0	0	200	300	0	0	0	0	0	0	0	200	903	0	0	0	0	0	0	0	603	903	0
512	8	0	0	0	0	0	0	200	300	0	0	0	0	0	0	0	200	903	0	0	0	0	0	0	0	603	903	0
512	9	0	0	0	0	0	0	200	300	0	0	0	0	0	0	0	200	903	0	0	0	0	0	0	0	603	903	0
513	0	0	0	0	0	0	0	200	300	0	0	0	0	0	0	0	200	903	0	0	0	0	0	0	0	603	903	0
513	1	0	0	0	0	0	0	200	300	0	0	0	0	0	0	0	200	903	0	0	0	0	0	0	0	603	903	0
513	2	0	0	0	0	0	0	200	300	0	0	0	0	0	0	0	200	903	0	0	0	0	0	0	0	603	903	0
513	3	0	0	0	0	0	0	200	300	0	0	0	0	0	0	0	200	903	0	0	0	0	0	0	0	603	903	0
513	4	0	0	0	0	0	0	200	300	0	0	0	0	0	0	0	200	903	0	0	0	0	0	0	0	603	903	0
513	5	0	0	0	0	0	0	200	300	0	0	0	0	0	0	0	200	903	0	0	0	0	0	0	0	603	903	0
513	6	0	0	0	0	0	0	200	300	0	0	0	0	0	0	0	200	903	0	0	0	0	0	0	0	603	903	0
513	7	0	0	0	0	0	0	200	300	0	0	0	0	0	0	0	200	903	0	0	0	0	0	0	0	603	903	0
513	8	0	0	0	0	0	0	200	300	0	0	0	0	0	0	0	200	903	0	0	0	0	0	0	0	603	903	0
513	9	0	0	0	0	0	0	200	300	0	0	0	0	0	0	0	200	903	0	0	0	0	0	0	0	603	903	0
514	0	0	0	0	0	0	0	200	300	0	0	0	0	0	0	0	200	903	0	0	0	0	0	0	0	603	903	0
514	1	0	0	0	0	0	0	200	300	0	0	0	0	0	0	0	200	903	0	0	0	0	0	0	0	603	903	0
514	2	0	0	0	0	0	0	200	300	0	0	0	0	0	0	0	200	903	0	0	0	0	0	0	0	603	903	0
514	3	0	0	0	0	0	0	200	300	0	0	0	0	0	0	0	200	903	0	0	0	0	0	0	0	603	903	0
514	4	0	0	0	0	0	0	200	300	0	0	0	0	0	0	0	200	903	0	0	0	0	0	0	0	603	903	0
514	5	0	0	0	0	0	0	200	300	0	0	0	0	0	0	0	200	903	0	0	0	0	0	0	0	603	903	0
514	6	0	0	0	0	0	0	200	300	0	0	0	0	0	0	0	200	903	0	0	0	0	0	0	0	603	903	0
514	7	0	0	0	0	0	0	200	300	0	0	0	0	0	0	0	200	903	0	0	0	0	0	0	0	603	903	0
514	8	0	0	0	0	0	0	200	300	0	0	0	0	0	0	0	200	903	0	0	0	0	0	0	0	603	903	0
514	9	0	0	0	0	0	0	200	300	0	0	0	0	0	0	0	200	903	0	0	0	0	0	0	0	603	903	0
515	0	0	0	0	0	0	0	200	300	0	0	0	0	0	0	0	200	903	0	0	0	0	0	0	0	603	903	0
515	1	0	0	0	0	0	0	200	300	0	0	0	0	0	0	0	200	903	0	0	0	0	0	0	0	603	903	0
515	2	0	0	0	0	0	0	200	300	0	0	0	0	0	0	0	200	903	0	0	0	0	0	0	0	603	903	0
515	3	0	0	0	0	0	0	200	300	0	0	0	0	0	0	0	200	903	0	0	0	0	0	0	0	603	903	0
515	4	0	0	0	0	0	0	200	300	0	0	0	0	0	0	0	200	903	0	0	0	0	0	0	0	603	903	0
515	5	0	0	0	0	0	0	200	300	0	0	0	0	0	0	0	200	903	0	0	0	0	0	0	0	603	903	0
515	6	0	0	0	0	0	0	200	300	0	0	0	0	0	0	0	200	903	0	0	0	0	0	0	0	603	903	0
515	7	0	0	0	0	0	0	200	300	0	0	0	0	0	0	0	200	903	0	0	0	0	0	0	0	603	903	0
515	8	0	0	0	0	0	0	200	300	0	0	0	0	0	0	0	200	903	0	0	0	0	0	0	0	603	903	0
515	9	0	0	0	0	0	0	200	300	0	0	0	0	0	0	0	200	903	0	0	0	0	0	0	0	603	903	0
516	0	0	0	0	0	0	0	200	300	0	0	0	0	0	0	0	200	903	0	0	0	0	0	0	0	603	903	0
516	1	0	0	0	0	0	0	200	300	0	0	0	0	0	0	0	200	903	0	0	0	0	0	0	0	603	903	0
516	2	0	0	0	0	0	0	200	300	0	0	0	0	0	0	0	200	903	0	0	0	0	0	0	0	603	903	0
516	3	0	0	0	0	0	0	200	300	0	0	0	0	0	0	0	200	903	0	0	0	0	0	0	0	603	903	0
516	4	0	0	0	0	0	0	200	300	0	0	0	0	0	0	0	200	903	0	0	0	0	0	0	0	603	903	0
516	5	0	0	0	0	0	0	200	300	0	0	0	0	0	0	0	200	903	0	0	0	0	0	0	0	603	903	0
516	6	0	0	0	0	0	0	200	300	0	0	0	0	0	0	0	200	903	0	0	0	0	0	0	0	603	903	0
516	7	0	0	0	0	0	0	200	300	0	0	0	0	0	0	0	200	903	0	0	0	0	0	0	0	603	903	0
516	8	0	0	0	0	0	0	200	300	0	0	0	0	0	0	0	200	903	0	0	0	0	0	0	0	603	903	0
516	9	0	0	0	0	0	0	200	300	0	0	0	0	0	0	0	200	903	0	0	0	0	0	0	0	603	903	0
517	0	0	0	0	0	0	0	200	300	0	0	0	0	0	0	0	200	903	0	0	0	0	0	0	0	603	903	0
517	1	0	0	0	0	0	0	200	300	0	0	0	0	0	0	0	200	903	0	0	0	0	0	0	0	603	903	0
517	2	0	0	0	0	0	0	200	300	0	0	0	0	0	0	0	200	903	0	0	0	0	0	0	0	603	903	0
517	3	0	0	0	0	0	0	200	300	0	0	0	0	0	0	0	200	903	0	0	0	0	0	0	0	603	903	0
517	4	0	0	0	0	0	0	200	300	0	0	0	0	0	0	0	200	903	0	0	0	0	0	0	0	603	903	0
517	5	0	0	0	0	0	0	200	300	0	0	0	0	0	0	0	200	903	0	0	0	0	0	0	0	603	903	0
517	6	0	0	0	0	0	0	200	300	0	0	0	0	0	0	0	200	903	0	0	0	0	0	0	0	603	903	0
517	7	0	0	0	0	0	0	200	300	0	0	0	0	0	0	0	200	903	0	0	0	0	0	0	0	603	903	0
517	8	0	0	0	0	0	0	200	300	0	0	0	0	0	0	0	200	903	0	0	0	0	0	0	0	603	903	0
517	9	0	0	0	0	0	0	200	300	0	0	0	0	0	0	0	200	903	0	0	0	0	0	0	0	603	903	0
518	0	0	0	0	0	0	0	200	300	0	0	0	0	0	0	0	200	903	0	0	0	0	0	0	0	603	903	0
518	1	0	0	0	0	0	0	200	300	0	0	0	0	0	0	0	200	903	0	0	0	0	0	0	0	603	903	0
518	2	0	0	0	0	0	0	200	300	0	0	0	0	0	0	0	200	903	0	0	0	0	0	0	0	603	903	0
518	3	0	0	0	0	0	0	200	300	0	0	0	0	0	0	0	200	903	0	0	0	0	0	0	0	603	903	0
518	4	0	0	0	0	0	0	200	300	0	0	0	0	0	0	0	200	903	0	0	0	0	0	0	0	603	903	0
518	5	0	0	0	0	0	0	200	300	0	0	0	0	0	0	0	200	903	0	0	0	0	0	0	0	603	903	0
518	6	0	0	0	0	0	0	200	300	0	0	0	0	0	0	0	200	903	0	0	0	0	0	0	0	603	903	0
518	7	0	0	0	0	0	0	200	300	0	0	0	0	0	0	0	200	903	0	0	0	0	0	0	0	603	903	0
518	8	0	0	0	0	0	0	200	300	0	0	0	0	0	0	0	200	903	0	0	0	0	0	0	0	603	903	0
518	9	0	0	0	0	0	0	200	300	0	0	0	0	0	0	0	200	903	0	0	0	0	0	0	0	603	903	0
519	0	0	0	0	0	0	0	200	300	0	0	0	0	0	0	0	200	903	0	0	0	0	0	0	0	603	903	0
519	1	0	0	0	0	0	0	200	300	0	0	0	0	0	0	0	200	903	0	0	0	0	0	0	0	603	903	0
519	2	0	0	0	0	0	0	200	300	0	0	0	0	0	0	0	200	903	0	0	0	0	0	0	0	603	903	0
519	3	0	0	0	0	0	0	200	300	0	0	0	0	0	0	0	200	903	0	0	0	0	0	0	0	603	903	0
519	4	0	0	0	0	0	0	200	300	0	0	0	0	0	0	0	200	903	0	0	0	0	0	0	0	603	903	0
519	5	0	0	0	0	0	0	200	300	0	0	0	0	0	0	0	200	903	0	0	0	0	0	0	0	603	903	0
519	6	0	0	0	0	0	0	200	300	0	0	0	0	0	0	0	200	903	0	0	0	0	0	0	0	603	903	0
519	7	0	0	0	0	0	0	200	300	0	0	0	0	0	0	0	200	903	0	0	0	0	0	0	0	603	903	0
519	8	0	0	0	0	0	0	200	300	0	0	0	0	0	0	0	200	903	0	0	0	0	0	0	0	603	903	0
519	9	0	0	0	0	0	0	200	300	0	0	0	0	0	0	0	200	903	0	0	0	0	0	0	0	603	903	0
520	0	0	0	0	0	0	0	200	300	0	0	0	0	0	0	0	200	903	0	0	0	0	0	0	0	603	903	0
520	1	0	0	0	0	0	0	200	300	0	0	0	0	0	0	0	200	903	0	0	0	0	0	0	0	603	903	0
520	2	0	0	0	0	0	0	200	300	0	0	0	0	0	0	0	200	903	0	0	0	0	0	0	0	603	903	0
520	3	0	0	0	0	0	0	200	300	0	0	0	0	0	0	0	200	903	0	0	0	0	0	0	0	603	903	0
520	4	0	0	0	0	0	0	200	300	0	0	0	0	0	0	0	200	903	0	0	0	0	0	0	0	603	903	0
520	5	0	0	0	0	0	0	200	300	0	0	0	0	0	0	0	200	903	0	0	0	0	0	0	0	603	903	0
520	6	0	0	0	0	0	0	200	300	0	0	0	0	0	0	0	200	903	0	0	0	0	0	0	0	603	903	0
520	7	0	0	0	0	0	0	200	300	0	0	0	0	0	0	0	200	903	0	0	0	0	0	0	0	603	903	0
520	8	0	0	0	0	0	0	200	300	0	0	0	0	0	0	0	200	903	0	0	0	0	0	0	0	603	903	0
520	9	0	0	0	0	0	0	200	300	0	0	0	0	0	0	0	200	903	0	0	0	0	0	0	0	603	903	0
521	0	0	0	0	0	0	0	200	300	0	0	0	0	0	0	0	200	903	0	0	0	0	0	0	0	603	903	0
521	1	0	0	0	0	0	0	200	300	0	0	0	0	0	0	0	200	903	0	0	0	0	0	0	0	603	903	0
521	2	0	0	0	0	0	0	200	300	0	0	0	0	0	0	0	200	903	0	0	0	0	0	0	0	603	903	0
521	3	0	0	0	0	0	0	200	300	0	0	0	0	0	0	0	200	903	0	0	0	0	0	0	0	603	903	0
521	4	0	0	0	0	0	0	200	300	0	0	0	0	0	0	0	200	903	0	0	0	0	0	0	0	603	903	0
521	5	0	0	0	0	0	0	200	300	0	0	0	0	0	0	0	200	903	0	0	0	0	0	0	0	603	903	0
521	6	0	0	0	0	0	0	200	300	0	0	0	0	0	0	0	200	903	0	0	0	0	0	0	0	603	903	0
521	7	0	0	0	0	0	0	200	300	0	0	0	0	0	0	0	200	903	0	0	0	0	0	0	0	603	903	0
521	8	0	0	0	0	0	0	200	300	0	0	0	0	0	0	0	200	903	0	0	0	0	0	0	0	603	903	0
521	9	0	0	0	0	0	0	200	300	0	0	0	0	0	0	0	200	903	0	0	0	0	0	0	0	603	903	0
522	0	0	0	0	0	0	0	200	300	0	0	0	0	0	0	0	200	903	0	0	0	0	0	0	0	603	903	0
522	1	0	0	0	0	0	0	200	300	0	0	0	0	0	0	0	200	903	0	0	0	0	0	0	0	603	903	0
522	2	0	0	0	0	0	0	200	300	0	0	0	0	0	0	0	200	903	0	0	0	0	0	0	0	603	903	0
522	3	0	0	0	0	0	0	200	300	0	0	0	0	0	0	0	200	903	0	0	0	0	0	0	0	603	903	0
522	4	0	0	0	0	0	0	200	300	0	0	0	0	0	0	0	200	903	0	0	0	0	0	0	0	603	903	0
522	5	0	0	0	0	0	0	200	300	0	0	0	0	0	0	0	200	903	0	0	0	0	0	0	0	603	903	0
522	6	0	0	0	0	0	0	200	300	0	0	0	0	0	0	0	200	903	0	0	0	0	0	0	0	603	903	0
522	7	0	0	0	0	0	0	200	300	0	0	0	0	0	0	0	200	903	0	0	0	0	0	0	0	603	903	0
522	8	0	0	0	0	0	0	200	300	0	0	0	0	0	0	0	200	903	0	0	0	0	0	0	0	603	903	0
522	9	0	0	0	0	0	0	200	300	0	0	0	0	0	0	0	200	903	0	0	0	0	0	0	0	603	903	0
523	0	0	0	0	0	0	0	200	300	0	0	0	0	0	0	0	200	903	0	0	0	0	0	0	0	603	903	0
523	1	0	0	0	0	0	0	200	300	0	0	0	0	0	0	0	200	903	0	0	0	0	0	0	0	603	903	0
523	2	0	0	0	0	0	0	200	300	0	0	0	0	0	0	0	200	903	0	0	0	0	0	0	0	603	903	0
523	3	0	0	0	0	0	0	200	300	0	0	0	0	0	0	0	200	903	0	0	0	0	0	0	0	603	903	0
523	4	0	0	0	0	0	0	200	300	0	0	0	0	0	0	0	200	903	0	0	0	0	0	0	0	603	903	0
523	5	0	0	0	0	0	0	200	300	0	0	0	0	0	0	0	200	903	0	0	0	0	0	0	0	603	903	0
523	6	0	0	0	0	0	0	200	300	0	0	0	0	0	0	0	200	903	0	0	0	0	0	0	0	603	903	0
523	7	0	0	0	0	0	0	200	300	0	0	0	0	0	0	0	200	903	0	0	0	0	0	0	0	603	903	0
523	8	0	0	0	0	0	0	200	300	0	0	0	0	0	0	0	200	903	0	0	0	0	0	0	0	603	903	0
523	9	0	0	0	0	0	0	200	300	0	0	0	0	0	0	0	200	903	0	0	0	0	0	0	0	603	903	0
524	0	0	0	0	0	0	0	200	300	0	0	0	0	0	0	0	200	903	0	0	0	0	0	0	0	603	903	0
524	1	0	0	0	0	0	0	200	300	0	0	0	0	0	0	0	200	903	0	0	0	0	0	0	0	603	903	0
524	2	0	0	0	0	0	0	200	300	0	0	0	0	0	0	0	200	903	0	0	0	0	0	0	0	603	903	0
524	3	0	0	0	0	0	0	200	300	0	0	0	0	0	0	0	200	903	0	0	0	0	0	0	0	603	903	0
524	4	0	0	0	0	0	0	200	300	0	0	0	0	0	0	0	200	903	0	0	0	0	0	0	0	603	903	0
524	5	0	0	0	0	0	0	200	300	0	0	0	0	0	0	0	200	903	0	0	0	0	0	0	0	603	903	0
524	6	0	0	0	0	0	0	200	300	0	0	0	0	0	0	0	200	903	0	0	0	0	0	0	0	603	903	0
524	7	0	0	0	0	0	0	200	300	0	0	0	0	0	0	0	200	903	0	0	0	0	0	0	0	603	903	0
524	8	0	0	0	0	0	0	200	300	0	0	0	0	0	0	0	200	903	0	0	0	0	0	0	0	603	903	0
524	9	0	0	0	0	0	0	200	300	0	0	0	0	0	0	0	200	903	0	0	0	0	0	0	0	603	903	0
525	0	0	0	0	0	0	0	200	300	0	0	0	0	0	0	0	200	903	0	0	0	0	0	0	0	603	903	0
525	1	0	0	0	0	0	0	200	300	0	0	0	0	0	0	0	200	903	0	0	0	0	0	0	0	603	903	0
525	2	0	0	0	0	0	0	200	300	0	0	0	0	0	0	0	200	903	0	0	0	0	0	0	0	603	903	0
525	3	0	0	0	0	0	0	200	300	0	0	0	0	0	0	0	200	903	0	0	0	0	0	0	0	603	903	0
525	4	0	0	0	0	0	0	200	300	0	0	0	0	0	0	0	200	903	0	0	0	0	0	0	0	603	903	0
525	5	0	0	0	0	0	0	200	300	0	0	0	0	0	0	0	200	903	0	0	0	0	0	0	0	603	903	0
525	6	0	0	0	0	0	0	200	300	0	0	0	0	0	0	0	200	903	0	0	0	0	0	0	0	603	903	0
525	7	0	0	0	0	0	0	200	300	0	0	0	0	0	0	0	200	903	0	0	0	0	0	0	0	603	903	0
525	8	0	0	0	0	0	0	200	300	0	0	0	0	0	0	0	200	903	0	0	0	0	0	0	0	603	903	0
525	9	0	0	0	0	0	0	200	300	0	0	0	0	0	0	0	200	903	0	0	0	0	0	0	0	603	903	0
526	0	0	0	0	0	0	0	200	300	0	0	0	0	0	0	0	200	903	0	0	0	0	0	0	0	603	903	0
526	1	0	0	0	0	0	0	200	300	0	0	0	0	0	0	0	200	903	0	0	0	0	0	0	0	603	903	0
526	2	0	0	0	0	0	0	200	300	0	0	0	0	0	0	0	200	903	0	0	0	0	0	0	0	603	903	0
526	3	0	0	0	0	0	0	200	300	0	0	0	0	0	0	0	200	903	0	0	0	0	0	0	0	603	903	0
526	4	0	0	0	0	0	0	200	300	0	0	0	0	0	0	0	200	903	0	0	0	0	0	0	0	603	903	0
526	5	0	0	0	0	0	0	200	300	0	0	0	0	0	0	0	200	903	0	0	0	0	0	0	0	603	903	0
526	6	0	0	0	0	0	0	200	300	0	0	0	0	0	0	0	200	903	0	0	0	0	0	0	0	603	903	0
526	7	0	0	0	0	0	0	200	300	0	0	0	0	0	0	0	200	903	0	0	0	0	0	0	0	603	903	0
526	8	0	0	0	0	0	0	200	300	0	0	0	0	0	0	0	200	903	0	0	0	0	0	0	0	603	903	0
526	9	0	0	0	0	0	0	200	300	0	0	0	0	0	0	0	200	903	0	0	0	0	0	0	0	603	903	0
527	0	0	0	0	0	0	0	200	300	0	0	0	0	0	0	0	200	903	0	0	0	0	0	0	0	603	903	0
527	1	0	0	0	0	0	0	200	300	0	0	0	0	0	0	0	200	903	0	0	0	0	0	0	0	603	903	0
527	2	0	0	0	0	0	0	200	300	0	0	0	0	0	0	0	200	903	0	0	0	0	0	0	0	603	903	0
527	3	0	0	0	0	0	0	200	300	0	0	0	0	0	0	0	200	903	0	0	0	0	0	0	0	603	903	0
527	4	0	0	0	0	0	0	200	300	0	0	0	0	0	0	0	200	903	0	0	0	0	0	0	0	603	903	0
527	5	0	0	0	0	0	0	200	300	0	0	0	0	0	0	0	200	903	0	0	0	0	0	0	0	603	903	0
527	6	0	0	0	0	0	0	200	300	0	0	0	0	0	0	0	200	903	0	0	0	0	0	0	0	603	903	0
527	7	0	0	0	0	0	0	200	300	0	0	0	0	0	0	0	200	903	0	0	0	0	0	0	0	603	903	0
527	8	0	0	0	0	0	0	200	300	0	0	0	0	0	0	0	200	903	0	0	0	0	0	0	0	603	903	0
527	9	0	0	0	0	0	0	200	300	0	0	0	0	0	0	0	200	903	0	0	0	0	0	0	0	603	903	0
528	0	0	0	0	0	0	0	200	300	0	0	0	0	0	0	0	200	903	0	0	0	0	0	0	0	603	903	0
528	1	0	0	0	0	0	0	200	300	0	0	0	0	0	0	0	200	903	0	0	0	0	0	0	0	603	903	0
528	2	0	0	0	0	0	0	200	300	0	0	0	0	0	0	0	200	903	0	0	0	0	0	0	0	603	903	0
528	3	0	0	0	0	0	0	200	300	0	0	0	0	0	0	0	200	903	0	0	0	0	0	0	0	603	903	0
528	4	0	0	0	0	0	0	200	300	0	0	0	0	0	0	0	200	903	0	0	0	0	0	0	0	603	903	0
528	5	0	0	0	0	0	0	200	300	0	0	0	0	0	0	0	200	903	0	0	0	0	0	0	0	603	903	0
528	6	0	0	0	0	0	0	200	300	0	0	0	0	0	0	0	200	903	0	0	0	0	0	0	0	603	903	0
528	7	0	0	0	0	0	0	200	300	0	0	0	0	0	0	0	200	903	0	0	0	0	0	0	0	603	903	0
528	8	0	0	0	0	0	0	200	300	0	0	0	0	0	0	0	200	903	0	0	0	0	0	0	0	603	903	0
528	9	0	0	0	0	0	0	200	300	0	0	0	0	0	0	0	200	903	0	0	0	0	0	0	0	603	903	0
529	0	0	0	0	0	0	0	200	300	0	0	0	0	0	0	0	200	903	0	0	0	0	0	0	0	603	903	0
529	1	0	0	0	0	0	0	200	300	0	0	0	0	0	0	0	200	903	0	0	0	0	0	0	0	603	903	0
529	2	0	0	0	0	0	0	200	300	0	0	0	0	0	0	0	200	903	0	0	0	0	0	0	0	603	903	0
529	3	0	0	0	0	0	0	200	300	0	0	0	0	0	0	0	200	903	0	0	0	0	0	0	0	603	903	0
529	4	0	0	0	0	0	0	200	300	0	0	0	0	0	0	0	200	903	0	0	0	0	0	0	0	603	903	0
529	5	0	0	0	0	0	0	200	300	0	0	0	0	0	0	0	200	903	0	0	0	0	0	0	0	603	903	0
529	6	0	0	0	0	0	0	200	300	0	0	0	0	0	0	0	200	903	0	0	0	0	0	0	0	603	903	0
529	7	0	0	0	0	0	0	200	300	0	0	0	0	0	0	0	200	903	0	0	0	0	0	0	0	603	903	0
529	8	0	0	0	0	0	0	200	300	0	0	0	0	0	0	0	200	903	0	0	0	0	0	0	0	603	903	0
529	9	0	0	0	0	0	0	200	300	0	0	0	0	0	0	0	200	903	0	0	0	0	0	0	0	603	903	0
530	0	0	0	0	0	0	0	200	300	0	0	0	0	0	0	0	200	903	0	0	0	0	0	0	0	603	903	0
530	1	0	0	0	0	0	0	200	300	0	0	0	0	0	0	0	200	903	0	0	0	0	0	0	0	603	903	0
530	2	0	0	0	0	0	0	200	300	0	0	0	0	0	0	0	200	903	0	0	0	0	0	0	0	603	903	0
530	3	0	0	0	0	0	0	200	300	0	0	0	0	0	0	0	200	903	0	0	0	0	0	0	0	603	903	0
530	4	0	0	0	0	0	0	200	300	0	0	0	0	0	0	0	200	903	0	0	0	0	0	0	0	603	903	0
530	5	0	0	0	0	0	0	200	300	0	0	0	0	0	0	0	200	903	0	0	0	0	0	0	0	603	903	0
530	6	0	0	0	0	0	0	200	300	0	0	0	0	0	0	0	200	903	0	0	0	0	0	0	0	603	903	0
530	7	0	0	0	0	0	0	200	300	0	0	0	0	0	0	0	200	903	0	0	0	0	0	0	0	603	903	0
530	8	0	0	0	0	0	0	200	300	0	0	0	0	0	0	0	200	903	0	0	0	0	0	0	0	603	903	0
530	9	0	0	0	0	0	0	200	300	0	0	0	0	0	0	0	200	903	0	0	0	0	0	0	0	603	903	0
531	0	0	0	0	0	0	0	200	300	0	0	0	0	0	0	0	200	903	0	0	0	0	0	0	0	603	903	0
531	1	0	0	0	0	0	0	200	300	0	0	0	0	0	0	0	200	903	0	0	0	0	0	0	0	603	903	0
531	2	0	0	0	0	0	0	200	300	0	0	0	0	0	0	0	200	903	0	0	0	0	0	0	0	603	903	0
531	3	0	0	0	0	0	0	200	300	0	0	0	0	0	0	0	200	903	0	0	0	0	0	0	0	603	903	0
531	4	0	0	0	0	0	0	200	300	0	0	0	0	0	0	0	200	903	0	0	0	0	0	0	0	603	903	0
531	5	0	0	0	0	0	0	200	300	0	0	0	0	0	0	0	200	903	0	0	0	0	0	0	0	603	903	0
531	6	0	0	0	0	0	0	200	300	0	0	0	0	0	0	0	200	903	0	0	0	0	0	0	0	603	903	0
531	7	0	0	0	0	0	0	200	300	0	0	0	0	0	0	0	200	903	0	0	0	0	0	0	0	603	903	0
531	8	0	0	0	0	0	0	200	300	0	0	0	0	0	0	0	200	903	0	0	0	0	0	0	0	603	903	0
531	9	0	0	0	0	0	0	200	300	0	0	0	0	0	0	0	200	903	0	0	0	0	0	0	0	603	903	0
532	0	0	0	0	0	0	0	200	300	0	0	0	0	0	0	0	200	903	0	0	0	0	0	0	0	603	903	0
532	1	0	0	0	0	0	0	200	300	0	0	0	0	0	0	0	200	903	0	0	0	0	0	0	0	603	903	0
532	2	0	0	0	0	0	0	200	300	0	0	0	0	0	0	0	200	903	0	0	0	0	0	0	0	603	903	0
532	3	0	0	0	0	0	0	200	300	0	0	0	0	0	0	0	200	903	0	0	0	0	0	0	0	603	903	0
532	4	0	0	0	0	0	0	200	300	0	0	0	0	0	0	0	200	903	0	0	0	0	0	0	0	603	903	0
532	5	0	0	0	0	0	0	200	300	0	0	0	0	0	0	0	200	903	0	0	0	0	0	0	0	603	903	0
532	6	0	0	0	0	0	0	200	300	0	0	0	0	0	0	0	200	903	0	0	0	0	0	0	0	603	903	0
532	7	0	0	0	0	0	0	200	300	0	0	0	0	0	0	0	200	903	0	0	0	0	0	0	0	603	903	0
532	8	0	0	0	0	0	0	200	300	0	0	0	0	0	0	0	200	903	0	0	0	0	0	0	0	603	903	0
532	9	0	0	0	0	0	0	200	300	0	0	0	0	0	0	0	200	903	0	0	0	0	0	0	0	603	903	0
533	0	0	0	0	0	0	0	200	300	0	0	0	0	0	0	0	200	903	0	0	0	0	0	0	0	603	903	0
533	1	0	0	0	0	0	0	200	300	0	0	0	0	0	0	0	200	903	0	0	0	0	0	0	0	603	903	0
533	2	0	0	0	0	0	0	200	300	0	0	0	0	0	0	0	200	903	0	0	0	0	0	0	0	603	903	0
533	3	0	0	0	0	0	0	200	300	0	0	0	0	0	0	0	200	903	0	0	0	0	0	0	0	603	903	0
533	4	0	0	0	0	0	0	200	300	0	0	0	0	0	0	0	200	903	0	0	0	0	0	0	0	603	903	0
533	5	0	0	0	0	0	0	200	300	0	0	0	0	0	0	0	200	903	0	0	0	0	0	0	0	603	903	0
533	6	0	0	0	0	0	0	200	300	0	0	0	0	0	0	0	200	903	0	0	0	0	0	0	0	603	903	0
533	7	0	0	0	0	0	0	200	300	0	0	0	0	0	0	0	200	903	0	0	0	0	0	0	0	603	903	0
533	8	0	0	0	0	0	0	200	300	0	0	0	0	0	0	0	200	903	0	0	0	0	0	0	0	603	903	0
533	9	0	0	0	0	0	0	200	300	0	0	0	0	0	0	0	200	903	0	0	0	0	0	0	0	603	903	0
534	0	0	0	0	0	0	0	200	300	0	0	0	0	0	0	0	200	903	0	0	0	0	0	0	0	603	903	0
534	1	0	0	0	0	0	0	200	300	0	0	0	0	0	0	0	200	903	0	0	0	0	0	0	0	603	903	0
534	2	0	0	0	0	0	0	200	300	0	0	0	0	0	0	0	200	903	0	0	0	0	0	0	0	603	903	0
534	3	0	0	0	0	0	0	200	300	0	0	0	0	0	0	0	200	903	0	0	0	0	0	0	0	603	903	0
534	4	0	0	0	0	0	0	200	300	0	0	0	0	0	0	0	200	903	0	0	0	0	0	0	0	603	903	0
534	5	0	0	0	0	0	0	200	300	0	0	0	0	0	0	0	200	903	0	0	0	0	0	0	0	603	903	0
534	6	0	0	0	0	0	0	200	300	0	0	0	0	0	0	0	200	903	0	0	0	0	0	0	0	603	903	0
534	7	0	0	0	0	0	0	200	300	0	0	0	0	0	0	0	200	903	0	0	0	0	0	0	0	603	903	0
534	8	0	0	0	0	0	0	200	300	0	0	0	0	0	0	0	200	903	0	0	0	0	0	0	0	603	903	0
534	9	0	0	0	0	0	0	200	300	0	0	0	0	0	0	0	200	903	0	0	0	0	0	0	0	603	903	0
535	0	0	0	0	0	0	0	200	300	0	0	0	0	0	0	0	200	903	0	0	0	0	0	0	0	603	903	0
535	1	0	0	0	0	0	0	200	300	0	0	0	0	0	0	0	200	903	0	0	0	0	0	0	0	603	903	0
535	2	0	0	0	0	0	0	200	300	0	0	0	0	0	0	0	200	903	0	0	0	0	0	0	0	603	903	0
535	3	0	0	0	0	0	0	200	300	0	0	0	0	0	0	0	200	903	0	0	0	0	0	0	0	603	903	0
535	4	0	0	0	0	0	0	200	300	0	0	0	0	0	0	0	200	903	0	0	0	0	0	0	0	603	903	0
535	5	0	0	0	0	0	0	200	300	0	0	0	0	0	0	0	200	903	0	0	0	0	0	0	0	603	903	0
535	6	0	0	0	0	0	0	200	300	0	0	0	0	0	0	0	200	903	0	0	0	0	0	0	0	603	903	0
535	7	0	0	0	0	0	0	200	300	0	0	0	0	0	0	0	200	903	0	0	0	0	0	0	0	603	903	0
535	8	0	0	0	0	0	0	200	300	0	0	0	0	0	0	0	200	903	0	0	0	0	0	0	0	603	903	0
535	9	0	0	0	0	0	0	200	300	0	0	0	0	0	0	0	200	903	0	0	0	0	0	0	0	603	903	0
536	0	0	0	0	0	0	0	200	300	0	0	0	0	0	0	0	200	903	0	0	0	0	0	0	0	603	903	0
536	1	0	0	0	0	0	0	200	300	0	0	0	0	0	0	0	200	903	0	0	0	0	0	0	0	603	903	0
536	2	0	0	0	0	0	0	200	300	0	0	0	0	0	0	0	200	903	0	0	0	0	0	0	0	603	903	0
536	3	0	0	0	0	0	0	200	300	0	0	0	0	0	0	0	200	903	0	0	0	0	0	0	0	603	903	0
536	4	0	0	0	0	0	0	200	300	0	0	0	0	0	0	0	200	903	0	0	0	0	0	0	0	603	903	0
536	5	0	0	0	0	0	0	200	300	0	0	0	0	0	0	0	200	903	0	0	0	0	0	0	0	603	903	0
536	6	0	0	0	0	0	0	200	300	0	0	0	0	0	0	0	200	903	0	0	0	0	0	0	0	603	903	0
536	7	0	0	0	0	0	0	200	300	0	0	0	0	0	0	0	200	903	0	0	0	0	0	0	0	603	903	0
536	8	0	0	0	0	0	0	200	300	0	0	0	0	0	0	0	200	903	0	0	0	0	0	0	0	603	903	0
536	9	0	0	0	0	0	0	200	300	0	0	0	0	0	0	0	200	903	0	0	0	0	0	0	0	603	903	0
537	0	0	0	0	0	0	0	200	300	0	0	0	0	0	0	0	200	903	0	0	0	0	0	0	0	603	903	0
537	1	0	0	0	0	0	0	200	300	0	0	0	0	0	0	0	200	903	0	0	0	0	0	0	0	603	903	0
537	2	0	0	0	0	0	0	200	300	0	0	0	0	0	0	0	200	903	0	0	0	0	0	0	0	603	903	0
537	3	0	0	0	0	0	0	200	300	0	0	0	0	0	0	0	200	903	0	0	0	0	0	0	0	603	903	0
537	4	0	0	0	0	0	0	200	300	0	0	0	0	0	0	0	200	903	0	0	0	0	0	0	0	603	903	0
537	5	0	0	0	0	0	0	200	300	0	0	0	0	0	0	0	200	903	0	0	0	0	0	0	0	603	903	0
537	6	0	0	0	0	0	0	200	300	0	0	0	0	0	0	0	200	903	0	0	0	0	0	0	0	603	903	0
537	7	0	0	0	0	0	0	200	300	0	0	0	0	0	0	0	200	903	0	0	0	0	0	0	0	603	903	0
537	8	0	0	0	0	0	0	200	300	0	0	0	0	0	0	0	200	903	0	0	0	0	0	0	0	603	903	0
537	9	0	0	0	0	0	0	200	300	0	0	0	0	0	0	0	200	903	0	0	0	0	0	0	0	603	903	0
538	0	0	0	0	0	0	0	200	300	0	0	0	0	0	0	0	200	903	0	0	0	0	0	0	0	603	903	0
538	1	0	0	0	0	0	0	200	300	0	0	0	0	0	0	0	200	903	0	0	0	0	0	0	0	603	903	0
538	2	0	0	0	0	0	0	200	300	0	0	0	0	0	0	0	200	903	0	0	0	0	0	0	0	603	903	0
538	3	0	0	0	0	0	0	200	300	0	0	0	0	0	0	0	200	903	0	0	0	0	0	0	0	603	903	0
538	4	0	0	0	0	0	0	200	300	0	0	0	0	0	0	0	200	903	0	0	0	0	0	0	0	603	903	0
538	5	0	0	0	0	0	0	200	300	0	0	0	0	0	0	0	200	903	0	0	0	0	0	0	0	603	903	0
538	6	0	0	0	0	0	0	200	300	0	0	0	0	0	0	0	200	903	0	0	0	0	0	0	0	603	903	0
538	7	0	0	0	0	0	0	200	300	0	0	0	0	0	0	0	200	903	0	0	0	0	0	0	0	603	903	0
538	8	0	0	0	0	0	0	200	300	0	0	0	0	0	0	0	200	903	0	0	0	0	0	0	0	603	903	0
538	9	0	0	0	0	0	0	200	300	0	0	0	0	0	0	0	200	903	0	0	0	0	0	0	0	603	903	0
539	0	0	0	0	0	0	0	200	300	0	0	0	0	0	0	0	200	903	0	0	0	0	0	0	0	603	903	0
539	1	0	0	0	0	0	0	200	300	0	0	0	0	0	0	0	200	903	0	0	0	0	0	0	0	603	903	0
539	2	0	0	0	0	0	0	200	300	0	0	0	0	0	0	0	200	903	0	0	0	0	0	0	0	603	903	0
539	3	0	0	0	0	0	0	200	300	0	0	0	0	0	0	0	200	903	0	0	0	0	0	0	0	603	903	0
539	4	0	0	0	0	0	0	200	300	0	0	0	0	0	0	0	200	903	0	0	0	0	0	0	0	603	903	0
539	5	0	0	0	0	0	0	200	300	0	0	0	0	0	0	0	200	903	0	0	0	0	0	0	0	603	903	0
539	6	0	0	0	0	0	0	200	300	0	0	0	0	0	0	0	200	903	0	0	0	0	0	0	0	603	903	0
539	7	0	0	0	0	0	0	200	300	0	0	0	0	0	0	0	200	903	0	0	0	0	0	0	0	603	903	0
539	8	0	0	0	0	0	0	200	300	0	0	0	0	0	0	0	200	903	0	0	0	0	0	0	0	603	903	0
539	9	0	0	0	0	0	0	200	300	0	0	0	0	0	0	0	200	903	0	0	0	0	0	0	0	603	903	0
540	0	0	0	0	0	0	0	200	300	0	0	0	0	0	0	0	200	903	0	0	0	0	0	0	0	603	903	0
540	1	0	0	0	0	0	0	200	300	0	0	0	0	0	0	0	200	903	0	0	0	0	0	0	0	603	903	0
540	2	0	0	0	0	0	0	200	300	0	0	0	0	0	0	0	200	903	0	0	0	0	0	0	0	603	903	0
540	3	0	0	0	0	0	0	200	300	0	0	0	0	0	0	0	200	903	0	0	0	0	0	0	0	603	903	0
540	4	0	0	0	0	0	0	200	300	0	0	0	0	0	0	0	200	903	0	0	0	0	0	0	0	603	903	0
540	5	0	0	0	0	0	0	200	300	0	0	0	0	0	0	0	200	903	0	0	0	0	0	0	0	603	903	0
540	6	0	0	0	0	0	0	200	300	0	0	0	0	0	0	0	200	903	0	0	0	0	0	0	0	603	903	0
540	7	0	0	0	0	0	0	200	300	0	0	0	0	0	0	0	200	903	0	0	0	0	0	0	0	603	903	0
540	8	0	0	0	0	0	0	200	300	0	0	0	0	0	0	0	200	903	0	0	0	0	0	0	0	603	903	0
540	9	0	0	0	0	0	0	200	300	0	0	0	0	0	0	0	200	903	0	0	0	0	0	0	0	603	903	0
541	0	0	0	0	0	0	0	200	300	0	0	0	0	0	0	0	200	903	0	0	0	0	0	0	0	603	903	0
541	1	0	0	0	0	0	0	200	300	0	0	0	0	0	0	0	200	903	0	0	0	0	0	0	0	603	903	0
541	2	0	0	0	0	0	0	200	300	0	0	0	0	0	0	0	200	903	0	0	0	0	0	0	0	603	903	0
541	3	0	0	0	0	0	0	200	300	0	0	0	0	0	0	0	200	903	0	0	0	0	0	0	0	603	903	0
541	4	0	0	0	0	0	0	200	300	0	0	0	0	0	0	0	200	903	0	0	0	0	0	0	0	603	903	0
541	5	0	0	0	0	0	0	200	300	0	0	0	0	0	0	0	200	903	0	0	0	0	0	0	0	603	903	0
541	6	0	0	0	0	0	0	200	300	0	0	0	0	0	0	0	200	903	0	0	0	0	0	0	0	603	903	0
541	7	0	0	0	0	0	0	200	300	0	0	0	0	0	0	0	200	903	0	0	0	0	0	0	0	603	903	0
541	8	0	0	0	0	0	0	200	300	0	0	0	0	0	0	0	200	903	0	0	0	0	0	0	0	603	903	0
541	9	0	0	0	0	0	0	200	300	0	0	0	0	0	0	0	200	903	0	0	0	0	0	0	0	603	903	0
542	0	0	0	0	0	0	0	200	300	0	0	0	0	0	0	0	200	903	0	0	0	0	0	0	0	603	903	0
542	1	0	0	0	0	0	0	200	300	0	0	0	0	0	0	0	200	903	0	0	0	0	0	0	0	603	903	0
542	2	0	0	0	0	0	0	200	300	0	0	0	0	0	0	0	200	903	0	0	0	0	0	0	0	603	903	0
542	3	0	0	0	0	0	0	200	300	0	0	0	0	0	0	0	200	903	0	0	0	0	0	0	0	603	903	0
542	4	0	0	0	0	0	0	200	300	0	0	0	0	0	0	0	200	903	0	0	0	0	0	0	0	603	903	0
542	5	0	0	0	0	0	0	200	300	0	0	0	0	0	0	0	200	903	0	0	0	0	0	0	0	603	903	0
542	6	0	0	0	0	0	0	200	300	0	0	0	0	0	0	0	200	903	0	0	0	0	0	0	0	603	903	0
542	7	0	0	0	0	0	0	200	300	0	0	0	0	0	0	0	200	903	0	0	0	0	0	0	0	603	903	0
542	8	0	0	0	0	0	0	200	300	0	0	0	0	0	0	0	200	903	0	0	0	0	0	0	0	603	903	0
542	9	0	0	0	0	0	0	200	300	0	0	0	0	0	0	0	200	903	0	0	0	0	0	0	0	603	903	0
543	0	0	0	0	0	0	0	200	300	0	0	0	0	0	0	0	200	903	0	0	0	0	0	0	0	603	903	0
543	1	0	0	0	0	0	0	200	300	0	0	0	0	0	0	0	200	903	0	0	0	0	0	0	0	603	903	0
543	2	0	0	0	0	0	0	200	300	0	0	0	0	0	0	0	200	903	0	0	0	0	0	0	0	603	903	0
543	3	0	0	0	0	0	0	200	300	0	0	0	0	0	0	0	200	903	0	0	0	0	0	0	0	603	903	0
543	4	0	0	0	0	0	0	200	300	0	0	0	0	0	0	0	200	903	0	0	0	0	0	0	0	603	903	0
543	5	0	0	0	0	0	0	200	300	0	0	0	0	0	0	0	200	903	0	0	0	0	0	0	0	603	903	0
543	6	0	0	0	0	0	0	200	300	0	0	0	0	0	0	0	200	903	0	0	0	0	0	0	0	603	903	0
543	7	0	0	0	0	0	0	200	300	0	0	0	0	0	0	0	200	903	0	0	0	0	0	0	0	603	903	0
543	8	0	0	0	0	0	0	200	300	0	0	0	0	0	0	0	200	903	0	0	0	0	0	0	0	603	903	0
543	9	0	0	0	0	0	0	200	300	0	0	0	0	0	0	0	200	903	0	0	0	0	0	0	0	603	903	0
544	0	0	0	0	0	0	0	200	300	0	0	0	0	0	0	0	200	903	0	0	0	0	0	0	0	603	903	0
544	1	0	0	0	0	0	0	200	300	0	0	0	0	0	0	0	200	903	0	0	0	0	0	0	0	603	903	0
544	2	0	0	0	0	0	0	200	300	0	0	0	0	0	0	0	200	903	0	0	0	0	0	0	0	603	903	0
544	3	0	0	0	0	0	0	200	300	0	0	0	0	0	0	0	200	903	0	0	0	0	0	0	0	603	903	0
544	4	0	0	0	0	0	0	200	300	0	0	0	0	0	0	0	200	903	0	0	0	0	0	0	0	603	903	0
544	5	0	0	0	0	0	0	200	300	0	0	0	0	0	0	0	200	903	0	0	0	0	0	0	0	603	903	0
544	6	0	0	0	0	0	0	200	300	0	0	0	0	0	0	0	200	903	0	0	0	0	0	0	0	603	903	0
544	7	0	0	0	0	0	0	200	300	0	0	0	0	0	0	0	200	903	0	0	0	0	0	0	0	603	903	0
544	8	0	0	0	0	0	0	200	300	0	0	0	0	0	0	0	200	903	0	0	0	0	0	0	0	603	903	0
544	9	0	0	0	0	0	0	200	300	0	0	0	0	0	0	0	200	903	0	0	0	0	0	0	0	603	903	0
545	0	0	0	0	0	0	0	200	300	0	0	0	0	0	0	0	200	903	0	0	0	0	0	0	0	603	903	0
545	1	0	0	0	0	0	0	200	300	0	0	0	0	0	0	0	200	903	0	0	0	0	0	0	0	603	903	0
545	2	0	0	0	0	0	0	200	300	0	0	0	0	0	0	0	200	903	0	0	0	0	0	0	0	603	903	0
545	3	0	0	0	0	0	0	200	300	0	0	0	0	0	0	0	200	903	0	0	0	0	0	0	0	603	903	0
545	4	0	0	0	0	0	0	200	300	0	0	0	0	0	0	0	200	903	0	0	0	0	0	0	0	603	903	0
545	5	0	0	0	0	0	0	200	300	0	0	0	0	0	0	0	200	903	0	0	0	0	0	0	0	603	903	0
545	6	0	0	0	0	0	0	200	300	0	0	0	0	0	0	0	200	903	0	0	0	0	0	0	0	603	903	0
545	7	0	0	0	0	0	0	200	300	0	0	0	0	0	0	0	200	903	0	0	0	0	0	0	0	603	903	0
545	8	0	0	0	0	0	0	200	300	0	0	0	0	0	0	0	200	903	0	0	0	0	0	0	0	603	903	0
545	9	0	0	0	0	0	0	200	300	0	0	0	0	0	0	0	200	903	0	0	0	0	0	0	0	603	903	0
546	0	0	0	0	0	0	0	200	300	0	0	0	0	0	0	0	200	903	0	0	0	0	0	0	0	603	903	0
546	1	0	0	0	0	0	0	200	300	0	0	0	0	0	0	0	200	903	0	0	0	0	0	0	0	603	903	0
546	2	0	0	0	0	0	0	200	300	0	0	0	0	0	0	0	200	903	0	0	0	0	0	0	0	603	903	0
546	3	0	0	0	0	0	0	200	300	0	0	0	0	0	0	0	200	903	0	0	0	0	0	0	0	603	903	0
546	4	0	0	0	0	0	0	200	300	0	0	0	0	0	0	0	200	903	0	0	0	0	0	0	0	603	903	0
546	5	0	0	0	0	0	0	200	300	0	0	0	0	0	0	0	200	903	0	0	0	0	0	0	0	603	903	0
546	6	0	0	0	0	0	0	200	300	0	0	0	0	0	0	0	200	903	0	0	0	0	0	0	0	603	903	0
546	7	0	0	0	0	0	0	200	300	0	0	0	0	0	0	0	200	903	0	0	0	0	0	0	0	603	903	0
546	8	0	0	0	0	0	0	200	300	0	0	0	0	0	0	0	200	903	0	0	0	0	0	0	0	603	903	0
546	9	0	0	0	0	0	0	200	300	0	0	0	0	0	0	0	200	903	0	0	0	0	0	0	0	603	903	0
547	0	0	0	0	0	0	0	200	300	0	0	0	0	0	0	0	200	903	0	0	0	0	0	0	0	603	903	0
547	1	0	0	0	0	0	0	200	300	0	0	0	0	0	0	0	200	903	0	0	0	0	0	0	0	603	903	0
547	2	0	0	0	0	0	0	200	300	0	0	0	0	0	0	0	200	903	0	0	0	0	0	0	0	603	903	0
547	3	0	0	0	0	0	0	200	300	0	0	0	0	0	0	0	200	903	0	0	0	0	0	0	0	603	903	0
547	4	0	0	0	0	0	0	200	300	0	0	0	0	0	0	0	200	903	0	0	0	0	0	0	0	603	903	0
547	5	0	0	0	0	0	0	200	300	0	0	0	0	0	0	0	200	903	0	0	0	0	0	0	0	603	903	0
547	6	0	0	0	0	0	0	200	300	0	0	0	0	0	0	0	200	903	0	0	0	0	0	0	0	603	903	0
547	7	0	0	0	0	0	0	200	300	0	0	0	0	0	0	0	200	903	0	0	0	0	0	0	0	603	903	0
547	8	0	0	0	0	0	0	200	300	0	0	0	0	0	0	0	200	903	0	0	0	0	0	0	0	603	903	0
547	9	0	0	0	0	0	0	200	300	0	0	0	0	0	0	0	200	903	0	0	0	0	0	0	0	603	903	0
548	0	0	0	0	0	0	0	200	300	0	0	0	0	0	0	0	200	903	0	0	0	0	0	0	0	603	903	0
548	1	0	0	0	0	0	0	200	300	0	0	0	0	0	0	0	200	903	0	0	0	0	0	0	0	603	903	0
548	2	0	0	0	0	0	0	200	300	0	0	0	0	0	0	0	200	903	0	0	0	0	0	0	0	603	903	0
548	3	0	0	0	0	0	0	200	300	0	0	0	0	0	0	0	200	903	0	0	0	0	0	0	0	603	903	0
548	4	0	0	0	0	0	0	200	300	0	0	0	0	0	0	0	200	903	0	0	0	0	0	0	0	603	903	0
548	5	0	0	0	0	0	0	200	300	0	0	0	0	0	0	0	200	903	0	0	0	0	0	0	0	603	903	0
548	6	0	0	0	0	0	0	200	300	0	0	0	0	0	0	0	200	903	0	0	0	0	0	0	0	603	903	0
548	7	0	0	0	0	0	0	200	300	0	0	0	0	0	0	0	200	903	0	0	0	0	0	0	0	603	903	0
548	8	0	0	0	0	0	0	200	300	0	0	0	0	0	0	0	200	903	0	0	0	0	0	0	0	603	903	0
548	9	0	0	0	0	0	0	200	300	0	0	0	0	0	0	0	200	903	0	0	0	0	0	0	0	603	903	0
549	0	0	0	0	0	0	0	200	300	0	0	0	0	0	0	0	200	903	0	0	0	0	0	0	0	603	903	0
549	1	0	0	0	0	0	0	200	300	0	0	0	0	0	0	0	200	903	0	0	0	0	0	0	0	603	903	0
549	2	0	0	0	0	0	0	200	300	0	0	0	0	0	0	0	200	903	0	0	0	0	0	0	0	603	903	0
549	3	0	0	0	0	0	0	200	300	0	0	0	0	0	0	0	200	903	0	0	0	0	0	0	0	603	903	0
549	4	0	0	0	0	0	0	200	300	0	0	0	0	0	0	0	200	903	0	0	0	0	0	0	0	603	903	0
549	5	0	0	0	0	0	0	200	300	0	0	0	0	0	0	0	200	903	0	0	0	0	0	0	0	603	903	0
549	6	0	0	0	0	0	0	200	300	0	0	0	0	0	0	0	200	903	0	0	0	0	0	0	0	603	903	0
549	7	0	0	0	0	0	0	200	300	0	0	0	0	0	0	0	200	903	0	0	0	0	0	0	0	603	903	0
549	8	0	0	0	0	0	0	200	300	0	0	0	0	0	0	0	200	903	0	0	0	0	0	0	0	603	903	0
549	9	0	0	0	0	0	0	200	300	0	0	0	0	0	0	0	200	903	0	0	0	0	0	0	0	603	903	0
550	0	0	0	0	0	0	0	200	300	0	0	0	0	0	0	0	200	903	0	0	0	0	0	0	0	603	903	0
550	1	0	0	0	0	0	0	200	300	0	0	0	0	0	0	0	200	903	0	0	0	0	0	0	0	603	903	0
550	2	0	0	0	0	0	0	200	300	0	0	0	0	0	0	0	200	903	0	0	0	0	0	0	0	603	903	0
550	3	0	0	0	0	0	0	200	300	0	0	0	0	0	0	0	200	903	0	0	0	0	0	0	0	603	903	0
550	4	0	0	0	0	0	0	200	300	0	0	0	0	0	0	0	200	903	0	0	0	0	0	0	0	603	903	0
550	5	0	0	0	0	0	0	200	300	0	0	0	0	0	0	0	200	903	0	0	0	0	0	0	0	603	903	0
550	6	0	0	0	0	0	0	200	300	0	0	0	0	0	0	0	200	903	0	0	0	0	0	0	0	603	903	0
550	7	0	0	0	0	0	0	200	300	0	0	0	0	0	0	0	200	903	0	0	0	0	0	0	0	603	903	0
550	8	0	0	0	0	0	0	200	300	0	0	0	0	0	0	0	200	903	0	0	0	0	0	0	0	603	903	0
550	9	0	0	0	0	0	0	200	300	0	0	0	0	0	0	0	200	903	0	0	0	0	0	0	0	603	903	0
551	0	0	0	0	0	0	0	200	300	0	0	0	0	0	0	0	200	903	0	0	0	0	0	0	0	603	903	0
551	1	0	0	0	0	0	0	200	300	0	0	0	0	0	0	0	200	903	0	0	0	0	0	0	0	603	903	0
551	2	0	0	0	0	0	0	200	300	0	0	0	0	0	0	0	200	903	0	0	0	0	0	0	0	603	903	0
551	3	0	0	0	0	0	0	200	300	0	0	0	0	0	0	0	200	903	0	0	0	0	0	0	0	603	903	0
551	4	0	0	0	0	0	0	200	300	0	0	0	0	0	0	0	200	903	0	0	0	0	0	0	0	603	903	0
551	5	0	0	0	0	0	0	200	300	0	0	0	0	0	0	0	200	903	0	0	0	0	0	0	0	603	903	0
551	6	0	0	0	0	0	0	200	300	0	0	0	0	0	0	0	200	903	0	0	0	0	0	0	0	603	903	0
551	7	0	0	0	0	0	0	200	300	0	0	0	0	0	0	0	200	903	0	0	0	0	0	0	0	603	903	0
551	8	0	0	0	0	0	0	200	300	0	0	0	0	0	0	0	200	903	0	0	0	0	0	0	0	603	903	0
551	9	0	0	0	0	0	0	200	300	0	0	0	0	0	0	0	200	903	0	0	0	0	0	0	0	603	903	0
552	0	0	0	0	0	0	0	200	300	0	0	0	0	0	0	0	200	903	0	0	0	0	0	0	0	603	903	0
552	1	0	0	0	0	0	0	200	300	0	0	0	0	0	0	0	200	903	0	0	0	0	0	0	0	603	903	0
552	2	0	0	0	0	0	0	200	300	0	0	0	0	0	0	0	200	903	0	0	0	0	0	0	0	603	903	0
552	3	0	0	0	0	0	0	200	300	0	0	0	0	0	0	0	200	903	0	0	0	0	0	0	0	603	903	0
552	4	0	0	0	0	0	0	200	300	0	0	0	0	0	0	0	200	903	0	0	0	0	0	0	0	603	903	0
552	5	0	0	0	0	0	0	200	300	0	0	0	0	0	0	0	200	903	0	0	0	0	0	0	0	603	903	0
552	6	0	0	0	0	0	0	200	300	0	0	0	0	0	0	0	200	903	0	0	0	0	0	0	0	603	903	0
552	7	0	0	0	0	0	0	200	300	0	0	0	0	0	0	0	200	903	0	0	0	0	0	0	0	603	903	0
552	8	0	0	0	0	0	0	200	300	0	0	0	0	0	0	0	200	903	0	0	0	0	0	0	0	603	903	0
552	9	0	0	0	0	0	0	200	300	0	0	0	0	0	0	0	200	903	0	0	0	0	0	0	0	603	903	0
553	0	0	0	0	0	0	0	200	300	0	0	0	0	0	0	0	200	903	0	0	0	0	0	0	0	603	903	0
553	1	0	0	0	0	0	0	200	300	0	0	0	0	0	0	0	200	903	0	0	0	0	0	0	0	603	903	0
553	2	0	0	0	0	0	0	200	300	0	0	0	0	0	0	0	200	903	0	0	0	0	0	0	0	603	903	0
553	3	0	0	0	0	0	0	200	300	0	0	0	0	0	0	0	200	903	0	0	0	0	0	0	0	603	903	0
553	4	0	0	0	0	0	0	200	300	0	0	0	0	0	0	0	200	903	0	0	0	0	0	0	0	603	903	0
553	5	0	0	0	0	0	0	200	300	0	0	0	0	0	0	0	200	903	0	0	0	0	0	0	0	603	903	0
553	6	0	0	0	0	0	0	200	300	0	0	0	0	0	0	0	200	903	0	0	0	0	0	0	0	603	903	0
553	7	0	0	0	0	0	0	200	300	0	0	0	0	0	0	0	200	903	0	0	0	0	0	0	0	603	903	0
553	8	0	0	0	0	0	0	200	300	0	0	0	0	0	0	0	200	903	0	0	0	0	0	0	0	603	903	0
553	9	0	0	0	0	0	0	200	300	0	0	0	0	0	0	0	200	903	0	0	0	0	0	0	0	603	903	0
554	0	0	0	0	0	0	0	200	300	0	0	0	0	0	0	0	200	903	0	0	0	0	0	0	0	603	903	0
554	1	0	0	0	0	0	0	200	300	0	0	0	0	0	0	0	200	903	0	0	0	0	0	0	0	603	903	0
554	2	0	0	0	0	0	0	200	300	0	0	0	0	0	0	0	200	903	0	0	0	0	0	0	0	603	903	0
554	3	0	0	0	0	0	0	200	300	0	0	0	0	0	0	0	200	903	0	0	0	0	0	0	0	603	903	0
554	4	0	0	0	0	0	0	200	300	0	0	0	0	0	0	0	200	903	0	0	0	0	0	0	0	603	903	0
554	5	0	0	0	0	0	0	200	300	0	0	0	0	0	0	0	200	903	0	0	0	0	0	0	0	603	903	0
554	6	0	0	0	0	0	0	200	300	0	0	0	0	0	0	0	200	903	0	0	0	0	0	0	0	603	903	0
554	7	0	0	0	0	0	0	200	300	0	0	0	0	0	0	0	200	903	0	0	0	0	0	0	0	603	903	0
554	8	0	0	0	0	0	0	200	300	0	0	0	0	0	0	0	200	903	0	0	0	0	0	0	0	603	903	0
554	9	0	0	0	0	0	0	200	300	0	0	0	0	0	0	0	200	903	0	0	0	0	0	0	0	603	903	0
555	0	0	0	0	0	0	0	200	300	0	0	0	0	0	0	0	200	903	0	0	0	0	0	0	0	603	903	0
555	1	0	0	0	0	0	0	200	300	0	0	0	0	0	0	0	200	903	0	0	0	0	0	0	0	603	903	0
555	2	0	0	0	0	0	0	200	300	0	0	0	0	0	0	0	200	903	0	0	0	0	0	0	0	603	903	0
555	3	0	0	0	0	0	0	200	300	0	0	0	0	0	0	0	200	903	0	0	0	0	0	0	0	603	903	0
555	4	0	0	0	0	0	0	200	300	0	0	0	0	0	0	0	200	903	0	0	0	0	0	0	0	603	903	0
555	5	0	0	0	0	0	0	200	300	0	0	0	0	0	0	0	200	903	0	0	0	0	0	0	0	603	903	0
555	6	0	0	0	0	0	0	200	300	0	0	0	0	0	0	0	200	903	0	0	0	0	0	0	0	603	903	0
555	7	0	0	0	0	0	0	200	300	0	0	0	0	0	0	0	200	903	0	0	0	0	0	0	0	603	903	0
555	8	0	0	0	0	0	0	200	300	0	0	0	0	0	0	0	200	903	0	0	0	0	0	0	0	603	903	0
555	9	0	0	0	0	0	0	200	300	0	0	0	0	0	0	0	200	903	0	0	0	0	0	0	0	603	903	0
556	0	0	0	0	0	0	0	200	300	0	0	0	0	0	0	0	200	903	0	0	0	0	0	0	0	603	903	0
556	1	0	0	0	0	0	0	200	300	0	0	0	0	0	0	0	200	903	0	0	0	0	0	0	0	603	903	0
556	2	0	0	0	0	0	0	200	300	0	0	0	0	0	0	0	200	903	0	0	0	0	0	0	0	603	903	0
556	3	0	0	0	0	0	0	200	300	0	0	0	0	0	0	0	200	903	0	0	0	0	0	0	0	603	903	0
556	4	0	0	0	0	0	0	200	300	0	0	0	0	0	0	0	200	903	0	0	0	0	0	0	0	603	903	0
556	5	0	0	0	0	0	0	200	300	0	0	0	0	0	0	0	200	903	0	0	0	0	0	0	0	603	903	0
556	6	0	0	0	0	0	0	200	300	0	0	0	0	0	0	0	200	903	0	0	0	0	0	0	0	603	903	0
556	7	0	0	0	0	0	0	200	300	0	0	0	0	0	0	0	200	903	0	0	0	0	0	0	0	603	903	0
556	8	0	0	0	0	0	0	200	300	0	0	0	0	0	0	0	200	903	0	0	0	0	0	0	0	603	903	0
556	9	0	0	0	0	0	0	200	300	0	0	0	0	0	0	0	200	903	0	0	0	0	0	0	0	603	903	0
557	0	0	0	0	0	0	0	200	300	0	0	0	0	0	0	0	200	903	0	0	0	0	0	0	0	603	903	0
557	1	0	0	0	0	0	0	200	300	0	0	0	0	0	0	0	200	903	0	0	0	0	0	0	0	603	903	0
557	2	0	0	0	0	0	0	200	300	0	0	0	0	0	0	0	200	903	0	0	0	0	0	0	0	603	903	0
557	3	0	0	0	0	0	0	200	300	0	0	0	0	0	0	0	200	903	0	0	0	0	0	0	0	603	903	0
557	4	0	0	0	0	0	0	200	300	0	0	0	0	0	0	0	200	903	0	0	0	0	0	0	0	603	903	0
557	5	0	0	0	0	0	0	200	300	0	0	0	0	0	0	0	200	903	0	0	0	0	0	0	0	603	903	0
557	6	0	0	0	0	0	0	200	300	0	0	0	0	0	0	0	200	903	0	0	0	0	0	0	0	603	903	0
557	7	0	0	0	0	0	0	200	300	0	0	0	0	0	0	0	200	903	0	0	0	0	0	0	0	603	903	0
557	8	0	0	0	0	0	0	200	300	0	0	0	0	0	0	0	200	903	0	0	0	0	0	0	0	603	903	0
557	9	0	0	0	0	0	0	200	300	0	0	0	0	0	0	0	200	903	0	0	0	0	0	0	0	603	903	0
558	0	0	0	0	0	0	0	200	300	0	0	0	0	0	0	0	200	903	0	0	0	0	0	0	0	603	903	0
558	1	0	0	0	0	0	0	200	300	0	0	0	0	0	0	0	200	903	0	0	0	0	0	0	0	603	903	0
558	2	0	0	0	0	0	0	200	300	0	0	0	0	0	0	0	200	903	0	0	0	0	0	0	0	603	903	0
558	3	0	0	0	0	0	0	200	300	0	0	0	0	0	0	0	200	903	0	0	0	0	0	0	0	603	903	0
558	4	0	0	0	0	0	0	200	300	0	0	0	0	0	0	0	200	903	0	0	0	0	0	0	0	603	903	0
558	5	0	0	0	0	0	0	200	300	0	0	0	0	0	0	0	200	903	0	0	0	0	0	0	0	603	903	0
558	6	0	0	0	0	0	0	200	300	0	0	0	0	0	0	0	200	903	0	0	0	0	0	0	0	603	903	0
558	7	0	0	0	0	0	0	200	300	0	0	0	0	0	0	0	200	903	0	0	0	0	0	0	0	603	903	0
558	8	0	0	0	0	0	0	200	300	0	0	0	0	0	0	0	200	903	0	0	0	0	0	0	0	603	903	0
558	9	0	0	0	0	0	0	200	300	0	0	0	0	0	0	0	200	903	0	0	0	0	0	0	0	603	903	0
559	0	0	0	0	0	0	0	200	300	0	0	0	0	0	0	0	200	903	0	0	0	0	0	0	0	603	903	0
559	1	0	0	0	0	0	0	200	300	0	0	0	0	0	0	0	200	903	0	0	0	0	0	0	0	603	903	0
559	2	0	0	0	0	0	0	200	300	0	0	0	0	0	0	0	200	903	0	0	0	0	0	0	0	603	903	0
559	3	0	0	0	0	0	0	200	300	0	0	0	0	0	0	0	200	903	0	0	0	0	0	0	0	603	903	0
559	4	0	0	0	0	0	0	200	300	0	0	0	0	0	0	0	200	903	0	0	0	0	0	0	0	603	903	0
559	5	0	0	0	0	0	0	200	300	0	0	0	0	0	0	0	200	903	0	0	0	0	0	0	0	603	903	0
559	6	0	0	0	0	0	0	200	300	0	0	0	0	0	0	0	200	903	0	0	0	0	0	0	0	603	903	0
559	7	0	0	0	0	0	0	200	300	0	0	0	0	0	0	0	200	903	0	0	0	0	0	0	0	603	903	0
559	8	0	0	0	0	0	0	200	300	0	0	0	0	0	0	0	200	903	0	0	0	0	0	0	0	603	903	0
559	9	0	0	0	0	0	0	200	300	0	0	0	0	0	0	0	200	903	0	0	0	0	0	0	0	603	903	0
560	0	0	0	0	0	0	0	200	300	0	0	0	0	0	0	0	200	903	0	0	0	0	0	0	0	603	903	0
560	1	0	0	0	0	0	0	200	300	0	0	0	0	0	0	0	200	903	0	0	0	0	0	0	0	603	903	0
560	2	0	0	0	0	0	0	200	300	0	0	0	0	0	0	0	200	903	0	0	0	0	0	0	0	603	903	0
560	3	0	0	0	0	0	0	200	300	0	0	0	0	0	0	0	200	903	0	0	0	0	0	0	0	603	903	0
560	4	0	0	0	0	0	0	200	300	0	0	0	0	0	0	0	200	903	0	0	0	0	0	0	0	603	903	0
560	5	0	0	0	0	0	0	200	300	0	0	0	0	0	0	0	200	903	0	0	0	0	0	0	0	603	903	0
560	6	0	0	0	0	0	0	200	300	0	0	0	0	0	0	0	200	903	0	0	0	0	0	0	0	603	903	0
560	7	0	0	0	0	0	0	200	300	0	0	0	0	0	0	0	200	903	0	0	0	0	0	0	0	603	903	0
560	8	0	0	0	0	0	0	200	300	0	0	0	0	0	0	0	200	903	0	0	0	0	0	0	0	603	903	0
560	9	0	0	0	0	0	0	200	300	0	0	0	0	0	0	0	200	903	0	0	0	0	0	0	0	603	903	0
561	0	0	0	0	0	0	0	200	300	0	0	0	0	0	0	0	200	903	0	0	0	0	0	0	0	603	903	0
561	1	0	0	0	0	0	0	200	300	0	0	0	0	0	0	0	200	903	0	0	0	0	0	0	0	603	903	0
561	2	0	0	0	0	0	0	200	300	0	0	0	0	0	0	0	200	903	0	0	0	0	0	0	0	603	903	0
561	3	0	0	0	0	0	0	200	300	0	0	0	0	0	0	0	200	903	0	0	0	0	0	0	0	603	903	0
561	4	0	0	0	0	0	0	200	300	0	0	0	0	0	0	0	200	903	0	0	0	0	0	0	0	603	903	0
561	5	0	0	0	0	0	0	200	300	0	0	0	0	0	0	0	200	903	0	0	0	0	0	0	0	603	903	0
561	6	0	0	0	0	0	0	200	300	0	0	0	0	0	0	0	200	903	0	0	0	0	0	0	0	603	903	0
561	7	0	0	0	0	0	0	200	300	0	0	0	0	0	0	0	200	903	0	0	0	0	0	0	0	603	903	0
561	8	0	0	0	0	0	0	200	300	0	0	0	0	0	0	0	200	903	0	0	0	0	0	0	0	603	903	0
561	9	0	0	0	0	0	0	200	300	0	0	0	0	0	0	0	200	903	0	0	0	0	0	0	0	603	903	0
562	0	0	0	0	0	0	0	200	300	0	0	0	0	0	0	0	200	903	0	0	0	0	0	0	0	603	903	0
562	1	0	0	0	0	0	0	200	300	0	0	0	0	0	0	0	200	903	0	0	0	0	0	0	0	603	903	0
562	2	0	0	0	0	0	0	200	300	0	0	0	0	0	0	0	200	903	0	0	0	0	0	0	0	603	903	0
562	3	0	0	0	0	0	0	200	300	0	0	0	0	0	0	0	200	903	0	0	0	0	0	0	0	603	903	0
562	4	0	0	0	0	0	0	200	300	0	0	0	0	0	0	0	200	903	0	0	0	0	0	0	0	603	903	0
562	5	0	0	0	0	0	0	200	300	0	0	0	0	0	0	0	200	903	0	0	0	0	0	0	0	603	903	0
562	6	0	0	0	0	0	0	200	300	0	0	0	0	0	0	0	200	903	0	0	0	0	0	0	0	603	903	0
562	7	0	0	0	0	0	0	200	300	0	0	0	0	0	0	0	200	903	0	0	0	0	0	0	0	603	903	0
562	8	0	0	0	0	0	0	200	300	0	0	0	0	0	0	0	200	903	0	0	0	0	0	0	0	603	903	0
562	9	0	0	0	0	0	0	200	300	0	0	0	0	0	0	0	200	903	0	0	0	0	0	0	0	603	903	0
563	0	0	0	0	0	0	0	200	300	0	0	0	0	0	0	0	200	903	0	0	0	0	0	0	0	603	903	0
563	1	0	0	0	0	0	0	200	300	0	0	0	0	0	0	0	200	903	0	0	0	0	0	0	0	603	903	0
563	2	0	0	0	0	0	0	200	300	0	0	0	0	0	0	0	200	903	0	0	0	0	0	0	0	603	903	0
563	3	0	0	0	0	0	0	200	300	0	0	0	0	0	0	0	200	903	0	0	0	0	0	0	0	603	903	0
563	4	0	0	0	0	0	0	200	300	0	0	0	0	0	0	0	200	903	0	0	0	0	0	0	0	603	903	0
563	5	0	0	0	0	0	0	200	300	0	0	0	0	0	0	0	200	903	0	0	0	0	0	0	0	603	903	0
563	6	0	0	0	0	0	0	200	300	0	0	0	0	0	0	0	200	903	0	0	0	0	0	0	0	603	903	0
563	7	0	0	0	0	0	0	200	300	0	0	0	0	0	0	0	200	903	0	0	0	0	0	0	0	603	903	0
563	8	0	0	0	0	0	0	200	300	0	0	0	0	0	0	0	200	903	0	0	0	0	0	0	0	603	903	0
563	9	0	0	0	0	0	0	200	300	0	0	0	0	0	0	0	200	903	0	0	0	0	0	0	0	603	903	0
564	0	0	0	0	0	0	0	200	300	0	0	0	0	0	0	0	200	903	0	0	0	0	0	0	0	603	903	0
564	1	0	0	0	0	0	0	200	300	0	0	0	0	0	0	0	200	903	0	0	0	0	0	0	0	603	903	0
564	2	0	0	0	0	0	0	200	300	0	0	0	0	0	0	0	200	903	0	0	0	0	0	0	0	603	903	0
564	3	0	0	0	0	0	0	200	300	0	0	0	0	0	0	0	200	903	0	0	0	0	0	0	0	603	903	0
564	4	0	0	0	0	0	0	200	300	0	0	0	0	0	0	0	200	903	0	0	0	0	0	0	0	603	903	0
564	5	0	0	0	0	0	0	200	300	0	0	0	0	0	0	0	200	903	0	0	0	0	0	0	0	603	903	0
564	6	0	0	0	0	0	0	200	300	0	0	0	0	0	0	0	200	903	0	0	0	0	0	0	0	603	903	0
564	7	0	0	0	0	0	0	200	300	0	0	0	0	0	0	0	200	903	0	0	0	0	0	0	0	603	903	0
564	8	0	0	0	0	0	0	200	300	0	0	0	0	0	0	0	200	903	0	0	0	0	0	0	0	603	903	0
564	9	0	0	0	0	0	0	200	300	0	0	0	0	0	0	0	200	903	0	0	0	0	0	0	0	603	903	0
565	0	0	0	0	0	0	0	200	300	0	0	0	0	0	0	0	200	903	0	0	0	0	0	0	0	603	903	0
565	1	0	0	0	0	0	0	200	300	0	0	0	0	0	0	0	200	903	0	0	0	0	0	0	0	603	903	0
565	2	0	0	0	0	0	0	200	300	0	0	0	0	0	0	0	200	903	0	0	0	0	0	0	0	603	903	0
565	3	0	0	0	0	0	0	200	300	0	0	0	0	0	0	0	200	903	0	0	0	0	0	0	0	603	903	0
565	4	0	0	0	0	0	0	200	300	0	0	0	0	0	0	0	200	903	0	0	0	0	0	0	0	603	903	0
565	5	0	0	0	0	0	0	200	300	0	0	0	0	0	0	0	200	903	0	0	0	0	0	0	0	603	903	0
565	6	0	0	0	0	0	0	200	300	0	0	0	0	0	0	0	200	903	0	0	0	0	0	0	0	603	903	0
565	7	0	0	0	0	0	0	200	300	0	0	0	0	0	0	0	200	903	0	0	0	0	0	0	0	603	903	0
565	8	0	0	0	0	0	0	200	300	0	0	0	0	0	0	0	200	903	0	0	0	0	0	0	0	603	903	0
565	9	0	0	0	0	0	0	200	300	0	0	0	0	0	0	0	200	903	0	0	0	0	0	0	0	603	903	0
566	0	0	0	0	0	0	0	200	300	0	0	0	0	0	0	0	200	903	0	0	0	0	0	0	0	603	903	0
566	1	0	0	0	0	0	0	200	300	0	0	0	0	0	0	0	200	903	0	0	0	0	0	0	0	603	903	0
566	2	0	0	0	0	0	0	200	300	0	0	0	0	0	0	0	200	903	0	0	0	0	0	0	0	603	903	0
566	3	0	0	0	0	0	0	200	300	0	0	0	0	0	0	0	200	903	0	0	0	0	0	0	0	603	903	0
566	4	0	0	0	0	0	0	200	300	0	0	0	0	0	0	0	200	903	0	0	0	0	0	0	0	603	903	0
566	5	0	0	0	0	0	0	200	300	0	0	0	0	0	0	0	200	903	0	0	0	0	0	0	0	603	903	0
566	6	0	0	0	0	0	0	200	300	0	0	0	0	0	0	0	200	903	0	0	0	0	0	0	0	603	903	0
566	7	0	0	0	0	0	0	200	300	0	0	0	0	0	0	0	200	903	0	0	0	0	0	0	0	603	903	0
566	8	0	0	0	0	0	0	200	300	0	0	0	0	0	0	0	200	903	0	0	0	0	0	0	0	603	903	0
566	9	0	0	0	0	0	0	200	300	0	0	0	0	0	0	0	200	903	0	0	0	0	0	0	0	603	903	0
567	0	0	0	0	0	0	0	200	300	0	0	0	0	0	0	0	200	903	0	0	0	0	0	0	0	603	903	0
567	1	0	0	0	0	0	0	200	300	0	0	0	0	0	0	0	200	903	0	0	0	0	0	0	0	603	903	0
567	2	0	0	0	0	0	0	200	300	0	0	0	0	0	0	0	200	903	0	0	0	0	0	0	0	603	903	0
567	3	0	0	0	0	0	0	200	300	0	0	0	0	0	0	0	200	903	0	0	0	0	0	0	0	603	903	0
567	4	0	0	0	0	0	0	200	300	0	0	0	0	0	0	0	200	903	0	0	0	0	0	0	0	603	903	0
567	5	0	0	0	0	0	0	200	300	0	0	0	0	0	0	0	200	903	0	0	0	0	0	0	0	603	903	0
567	6	0	0	0	0	0	0	200	300	0	0	0	0	0	0	0	200	903	0	0	0	0	0	0	0	603	903	0
567	7	0	0	0	0	0	0	200	300	0	0	0	0	0	0	0	200	903	0	0	0	0	0	0	0	603	903	0
567	8	0	0	0	0	0	0	200	300	0	0	0	0	0	0	0	200	903	0	0	0	0	0	0	0	603	903	0
567	9	0	0	0	0	0	0	200	300	0	0	0	0	0	0	0	200	903	0	0	0	0	0	0	0	603	903	0
568	0	0	0	0	0	0	0	200	300	0	0	0	0	0	0	0	200	903	0	0	0	0	0	0	0	603	903	0
568	1	0	0	0	0	0	0	200	300	0	0	0	0	0	0	0	200	903	0	0	0	0	0	0	0	603	903	0
568	2	0	0	0	0	0	0	200	300	0	0	0	0	0	0	0	200	903	0	0	0	0	0	0	0	603	903	0
568	3	0	0	0	0	0	0	200	300	0	0	0	0	0	0	0	200	903	0	0	0	0	0	0	0	603	903	0
568	4	0	0	0	0	0	0	200	300	0	0	0	0	0	0	0	200	903	0	0	0	0	0	0	0	603	903	0
568	5	0	0	0	0	0	0	200	300	0	0	0	0	0	0	0	200	903	0	0	0	0	0	0	0	603	903	0
568	6	0	0	0	0	0	0	200	300	0	0	0	0	0	0	0	200	903	0	0	0	0	0	0	0	603	903	0
568	7	0	0	0	0	0	0	200	300	0	0	0	0	0	0	0	200	903	0	0	0	0	0	0	0	603	903	0
568	8	0	0	0	0	0	0	200	300	0	0	0	0	0	0	0	200	903	0	0	0	0	0	0	0	603	903	0
568	9	0	0	0	0	0	0	200	300	0	0	0	0	0	0	0	200	903	0	0	0	0	0	0	0	603	903	0
569	0	0	0	0	0	0	0	200	300	0	0	0	0	0	0	0	200	903	0	0	0	0	0	0	0	603	903	0
569	1	0	0	0	0	0	0	200	300	0	0	0	0	0	0	0	200	903	0	0	0	0	0	0	0	603	903	0
569	2	0	0	0	0	0	0	200	300	0	0	0	0	0	0	0	200	903	0	0	0	0	0	0	0	603	903	0
569	3	0	0	0	0	0	0	200	300	0	0	0	0	0	0	0	200	903	0	0	0	0	0	0	0	603	903	0
569	4	0	0	0	0	0	0	200	300	0	0	0	0	0	0	0	200	903	0	0	0	0	0	0	0	603	903	0
569	5	0	0	0	0	0	0	200	300	0	0	0	0	0	0	0	200	903	0	0	0	0	0	0	0	603	903	0
569	6	0	0	0	0	0	0	200	300	0	0	0	0	0	0	0	200	903	0	0	0	0	0	0	0	603	903	0
569	7	0	0	0	0	0	0	200	300	0	0	0	0	0	0	0	200	903	0	0	0	0	0	0	0	603	903	0
569	8	0	0	0	0	0	0	200	300	0	0	0	0	0	0	0	200	903	0	0	0	0	0	0	0	603	903	0
569	9	0	0	0	0	0	0	200	300	0	0	0	0	0	0	0	200	903	0	0	0	0	0	0	0	603	903	0
570	0	0	0	0	0	0	0	200	300	0	0	0	0	0	0	0	200	903	0	0	0	0	0	0	0	603	903	0
570	1	0	0	0	0	0	0	200	300	0	0	0	0	0	0	0	200	903	0	0	0	0	0	0	0	603	903	0
570	2	0	0	0	0	0	0	200	300	0	0	0	0	0	0	0	200	903	0	0	0	0	0	0	0	603	903	0
570	3	0	0	0	0	0	0	200	300	0	0	0	0	0	0	0	200	903	0	0	0	0	0	0	0	603	903	0
570	4	0	0	0	0	0	0	200	300	0	0	0	0	0	0	0	200	903	0	0	0	0	0	0	0	603	903	0
570	5	0	0	0	0	0	0	200	300	0	0	0	0	0	0	0	200	903	0	0	0	0	0	0	0	603	903	0
570	6	0	0	0	0	0	0	200	300	0	0	0	0	0	0	0	200	903	0	0	0	0	0	0	0	603	903	0
570	7	0	0	0	0	0	0	200	300	0	0	0	0	0	0	0	200	903	0	0	0	0	0	0	0	603	903	0
570	8	0	0	0	0	0	0	200	300	0	0	0	0	0	0	0	200	903	0	0	0	0	0	0	0	603	903	0
570	9	0	0	0	0	0	0	200	300	0	0	0	0	0	0	0	200	903	0	0	0	0	0	0	0	603	903	0
571	0	0	0	0	0	0	0	200	300	0	0	0	0	0	0	0	200	903	0	0	0	0	0	0	0	603	903	0
571	1	0	0	0	0	0	0	200	300	0	0	0	0	0	0	0	200	903	0	0	0	0	0	0	0	603	903	0
571	2	0	0	0	0	0	0	200	300	0	0	0	0	0	0	0	200	903	0	0	0	0	0	0	0	603	903	0
571	3	0	0	0	0	0	0	200	300	0	0	0	0	0	0	0	200	903	0	0	0	0	0	0	0	603	903	0
571	4	0	0	0	0	0	0	200	300	0	0	0	0	0	0	0	200	903	0	0	0	0	0	0	0	603	903	0
571	5	0	0	0	0	0	0	200	300	0	0	0	0	0	0	0	200	903	0	0	0	0	0	0	0	603	903	0
571	6	0	0	0	0	0	0	200	300	0	0	0	0	0	0	0	200	903	0	0	0	0	0	0	0	603	903	0
571	7	0	0	0	0	0	0	200	300	0	0	0	0	0	0	0	200	903	0	0	0	0	0	0	0	603	903	0
571	8	0	0	0	0	0	0	200	300	0	0	0	0	0	0	0	200	903	0	0	0	0	0	0	0	603	903	0
571	9	0	0	0	0	0	0	200	300	0	0	0	0	0	0	0	200	903	0	0	0	0	0	0	0	603	903	0
572	0	0	0	0	0	0	0	200	300	0	0	0	0	0	0	0	200	903	0	0	0	0	0	0	0	603	903	0
572	1	0	0	0	0	0	0	200	300	0	0	0	0	0	0	0	200	903	0	0	0	0	0	0	0	603	903	0
572	2	0	0	0	0	0	0	200	300	0	0	0	0	0	0	0	200	903	0	0	0	0	0	0	0	603	903	0
572	3	0	0	0	0	0	0	200	300	0	0	0	0	0	0	0	200	903	0	0	0	0	0	0	0	603	903	0
572	4	0	0	0	0	0	0	200	300	0	0	0	0	0	0	0	200	903	0	0	0	0	0	0	0	603	903	0
572	5	0	0	0	0	0	0	200	300	0	0	0	0	0	0	0	200	903	0	0	0	0	0	0	0	603	903	0
572	6	0	0	0	0	0	0	200	300	0	0	0	0	0	0	0	200	903	0	0	0	0	0	0	0	603	903	0
572	7	0	0	0	0	0	0	200	300	0	0	0	0	0	0	0	200	903	0	0	0	0	0	0	0	603	903	0
572	8	0	0	0	0	0	0	200	300	0	0	0	0	0	0	0	200	903	0	0	0	0	0	0	0	603	903	0
572	9	0	0	0	0	0	0	200	300	0	0	0	0	0	0	0	200	903	0	0	0	0	0	0	0	603	903	0
573	0	0	0	0	0	0	0	200	300	0	0	0	0	0	0	0	200	903	0	0	0	0	0	0	0	603	903	0
573	1	0	0	0	0	0	0	200	300	0	0	0	0	0	0	0	200	903	0	0	0	0	0	0	0	603	903	0
573	2	0	0	0	0	0	0	200	300	0	0	0	0	0	0	0	200	903	0	0	0	0	0	0	0	603	903	0
573	3	0	0	0	0	0	0	200	300	0	0	0	0	0	0	0	200	903	0	0	0	0	0	0	0	603	903	0
573	4	0	0	0	0	0	0	200	300	0	0	0	0	0	0	0	200	903	0	0	0	0	0	0	0	603	903	0
573	5	0	0	0	0	0	0	200	300	0	0	0	0	0	0	0	200	903	0	0	0	0	0	0	0	603	903	0
573	6	0	0	0	0	0	0	200	300	0	0	0	0	0	0	0	200	903	0	0	0	0	0	0	0	603	903	0
573	7	0	0	0	0	0	0	200	300	0	0	0	0	0	0	0	200	903	0	0	0	0	0	0	0	603	903	0
573	8	0	0	0	0	0	0	200	300	0	0	0	0	0	0	0	200	903	0	0	0	0	0	0	0	603	903	0
573	9	0	0	0	0	0	0	200	300	0	0	0	0	0	0	0	200	903	0	0	0	0	0	0	0	603	903	0
574	0	0	0	0	0	0	0	200	300	0	0	0	0	0	0	0	200	903	0	0	0	0	0	0	0	603	903	0
574	1	0	0	0	0	0	0	200	300	0	0	0	0	0	0	0	200	903	0	0	0	0	0	0	0	603	903	0
574	2	0	0	0	0	0	0	200	300	0	0	0	0	0	0	0	200	903	0	0	0	0	0	0	0	603	903	0
574	3	0	0	0	0	0	0	200	300	0	0	0	0	0	0	0	200	903	0	0	0	0	0	0	0	603	903	0
574	4	0	0	0	0	0	0	200	300	0	0	0	0	0	0	0	200	903	0	0	0	0	0	0	0	603	903	0
574	5	0	0	0	0	0	0	200	300	0	0	0	0	0	0	0	200	903	0	0	0	0	0	0	0	603	903	0
574	6	0	0	0	0	0	0	200	300	0	0	0	0	0	0	0	200	903	0	0	0	0	0	0	0	603	903	0
574	7	0	0	0	0	0	0	200	300	0	0	0	0	0	0	0	200	903	0	0	0	0	0	0	0	603	903	0
574	8	0	0	0	0	0	0	200	300	0	0	0	0	0	0	0	200	903	0	0	0	0	0	0	0	603	903	0
574	9	0	0	0	0	0	0	200	300	0	0	0	0	0	0	0	200	903	0	0	0	0	0	0	0	603	903	0
575	0	0	0	0	0	0	0	200	300	0	0	0	0	0	0	0	200	903	0	0	0	0	0	0	0	603	903	0
575	1	0	0	0	0	0	0	200	300	0	0	0	0	0	0	0	200	903	0	0	0	0	0	0	0	603	903	0
575	2	0	0	0	0	0	0	200	300	0	0	0	0	0	0	0	200	903	0	0	0	0	0	0	0	603	903	0
575	3	0	0	0	0	0	0	200	300	0	0	0	0	0	0	0	200	903	0	0	0	0	0	0	0	603	903	0
575	4	0	0	0	0	0	0	200	300	0	0	0	0	0	0	0	200	903	0	0	0	0	0	0	0	603	903	0
575	5	0	0	0	0	0	0	200	300	0	0	0	0	0	0	0	200	903	0	0	0	0	0	0	0	603	903	0
575	6	0	0	0	0	0	0	200	300	0	0	0	0	0	0	0	200	903	0	0	0	0	0	0	0	603	903	0
575	7	0	0	0	0	0	0	200	300	0	0	0	0	0	0	0	200	903	0	0	0	0	0	0	0	603	903	0
575	8	0	0	0	0	0	0	200	300	0	0	0	0	0	0	0	200	903	0	0	0	0	0	0	0	603	903	0
575	9	0	0	0	0	0	0	200	300	0	0	0	0	0	0	0	200	903	0	0	0	0	0	0	0	603	903	0
576	0	0	0	0	0	0	0	200	300	0	0	0	0	0	0	0	200	903	0	0	0	0	0	0	0	603	903	0
576	1	0	0	0	0	0	0	200	300	0	0	0	0	0	0	0	200	903	0	0	0	0	0	0	0	603	903	0
576	2	0	0	0	0	0	0	200	300	0	0	0	0	0	0	0	200	903	0	0	0	0	0	0	0	603	903	0
576	3	0	0	0	0	0	0	200	300	0	0	0	0	0	0	0	200	903	0	0	0	0	0	0	0	603	903	0
576	4	0	0	0	0	0	0	200	300	0	0	0	0	0	0	0	200	903	0	0	0	0	0	0	0	603	903	0
576	5	0	0	0	0	0	0	200	300	0	0	0	0	0	0	0	200	903	0	0	0	0	0	0	0	603	903	0
576	6	0	0	0	0	0	0	200	300	0	0	0	0	0	0	0	200	903	0	0	0	0	0	0	0	603	903	0
576	7	0	0	0	0	0	0	200	300	0	0	0	0	0	0	0	200	903	0	0	0	0	0	0	0	603	903	0
576	8	0	0	0	0	0	0	200	300	0	0	0	0	0	0	0	200	903	0	0	0	0	0	0	0	603	903	0
576	9	0	0	0	0	0	0	200	300	0	0	0	0	0	0	0	200	903	0	0	0	0	0	0	0	603	903	0
577	0	0	0	0	0	0	0	200	300	0	0	0	0	0	0	0	200	903	0	0	0	0	0	0	0	603	903	0
577	1	0	0	0	0	0	0	200	300	0	0	0	0	0	0	0	200	903	0	0	0	0	0	0	0	603	903	0
577	2	0	0	0	0	0	0	200	300	0	0	0	0	0	0	0	200	903	0	0	0	0	0	0	0	603	903	0
577	3	0	0	0	0	0	0	200	300	0	0	0	0	0	0	0	200	903	0	0	0	0	0	0	0	603	903	0
577	4	0	0	0	0	0	0	200	300	0	0	0	0	0	0	0	200	903	0	0	0	0	0	0	0	603	903	0
577	5	0	0	0	0	0	0	200	300	0	0	0	0	0	0	0	200	903	0	0	0	0	0	0	0	603	903	0
577	6	0	0	0	0	0	0	200	300	0	0	0	0	0	0	0	200	903	0	0	0	0	0	0	0	603	903	0
577	7	0	0	0	0	0	0	200	300	0	0	0	0	0	0	0	200	903	0	0	0	0	0	0	0	603	903	0
577	8	0	0	0	0	0	0	200	300	0	0	0	0	0	0	0	200	903	0	0	0	0	0	0	0	603	903	0
577	9	0	0	0	0	0	0	200	300	0	0	0	0	0	0	0	200	903	0	0	0	0	0	0	0	603	903	0
578	0	0	0	0	0	0	0	200	300	0	0	0	0	0	0	0	200	903	0	0	0	0	0	0	0	603	903	0
578	1	0	0	0	0	0	0	200	300	0	0	0	0	0	0	0	200	903	0	0	0	0	0	0	0	603	903	0
578	2	0	0	0	0	0	0	200	300	0	0	0	0	0	0	0	200	903	0	0	0	0	0	0	0	603	903	0
578	3	0	0	0	0	0	0	200	300	0	0	0	0	0	0	0	200	903	0	0	0	0	0	0	0	603	903	0
578	4	0	0	0	0	0	0	200	300	0	0	0	0	0	0	0	200	903	0	0	0	0	0	0	0	603	903	0
578	5	0	0	0	0	0	0	200	300	0	0	0	0	0	0	0	200	903	0	0	0	0	0	0	0	603	903	0
578	6	0	0	0	0	0	0	200	300	0	0	0	0	0	0	0	200	903	0	0	0	0	0	0	0	603	903	0
578	7	0	0	0	0	0	0	200	300	0	0	0	0	0	0	0	200	903	0	0	0	0	0	0	0	603	903	0
578	8	0	0	0	0	0	0	200	300	0	0	0	0	0	0	0	200	903	0	0	0	0	0	0	0	603	903	0
578	9	0	0	0	0	0	0	200	300	0	0	0	0	0	0	0	200	903	0	0	0	0	0	0	0	603	903	0
579	0	0	0	0	0	0	0	200	300	0	0	0	0	0	0	0	200	903	0	0	0	0	0	0	0	603	903	0
579	1	0	0	0	0	0	0	200	300	0	0	0	0	0	0	0	200	903	0	0	0	0	0	0	0	603	903	0
579	2	0	0	0	0	0	0	200	300	0	0	0	0	0	0	0	200	903	0	0	0	0	0	0	0	603	903	0
579	3	0	0	0	0	0	0	200	300	0	0	0	0	0	0	0	200	903	0	0	0	0	0	0	0	603	903	0
579	4	0	0	0	0	0	0	200	300	0	0	0	0	0	0	0	200	903	0	0	0	0	0	0	0	603	903	0
579	5	0	0	0	0	0	0	200	300	0	0	0	0	0	0	0	200	903	0	0	0	0	0	0	0	603	903	0
579	6	0	0	0	0	0	0	200	300	0	0	0	0	0	0	0	200	903	0	0	0	0	0	0	0	603	903	0
579	7	0	0	0	0	0	0	200	300	0	0	0	0	0	0	0	200	903	0	0	0	0	0	0	0	603	903	0
579	8	0	0	0	0	0	0	200	300	0	0	0	0	0	0	0	200	903	0	0	0	0	0	0	0	603	903	0
579	9	0	0	0	0	0	0	200	300	0	0	0	0	0	0	0	200	903	0	0	0	0	0	0	0	603	903	0
580	0	0	0	0	0	0	0	200	300	0	0	0	0	0	0	0	200	903	0	0	0	0	0	0	0	603	903	0
580	1	0	0	0	0	0	0	200	300	0	0	0	0	0	0	0	200	903	0	0	0	0	0	0	0	603	903	0
580	2	0	0	0	0	0	0	200	300	0	0	0	0	0	0	0	200	903	0	0	0	0	0	0	0	603	903	0
580	3	0	0	0	0	0	0	200	300	0	0	0	0	0	0	0	200	903	0	0	0	0	0	0	0	603	903	0
580	4	0	0	0	0	0	0	200	300	0	0	0	0	0	0	0	200	903	0	0	0	0	0	0	0	603	903	0
580	5	0	0	0	0	0	0	200	300	0	0	0	0	0	0	0	200	903	0	0	0	0	0	0	0	603	903	0
580	6	0	0	0	0	0	0	200	300	0	0	0	0	0	0	0	200	903	0	0	0	0	0	0	0	603	903	0
580	7	0	0	0	0	0	0	200	300	0	0	0	0	0	0	0	200	903	0	0	0	0	0	0	0	603	903	0
580	8	0	0	0	0	0	0	200	300	0	0	0	0	0	0	0	200	903	0	0	0	0	0	0	0	603	903	0
580	9	0	0	0	0	0	0	200	300	0	0	0	0	0	0	0	200	903	0	0	0	0	0	0	0	603	903	0
581	0	0	0	0	0	0	0	200	300	0	0	0	0	0	0	0	200	903	0	0	0	0	0	0	0	603	903	0
581	1	0	0	0	0	0	0	200	300	0	0	0	0	0	0	0	200	903	0	0	0	0	0	0	0	603	903	0
581	2	0	0	0	0	0	0	200	300	0	0	0	0	0	0	0	200	903	0	0	0	0	0	0	0	603	903	0
581	3	0	0	0	0	0	0	200	300	0	0	0	0	0	0	0	200	903	0	0	0	0	0	0	0	603	903	0
581	4	0	0	0	0	0	0	200	300	0	0	0	0	0	0	0	200	903	0	0	0	0	0	0	0	603	903	0
581	5	0	0	0	0	0	0	200	300	0	0	0	0	0	0	0	200	903	0	0	0	0	0	0	0	603	903	0
581	6	0	0	0	0	0	0	200	300	0	0	0	0	0	0	0	200	903	0	0	0	0	0	0	0	603	903	0
581	7	0	0	0	0	0	0	200	300	0	0	0	0	0	0	0	200	903	0	0	0	0	0	0	0	603	903	0
581	8	0	0	0	0	0	0	200	300	0	0	0	0	0	0	0	200	903	0	0	0	0	0	0	0	603	903	0
581	9	0	0	0	0	0	0	200	300	0	0	0	0	0	0	0	200	903	0	0	0	0	0	0	0	603	903	0
582	0	0	0	0	0	0	0	200	300	0	0	0	0	0	0	0	200	903	0	0	0	0	0	0	0	603	903	0
582	1	0	0	0	0	0	0	200	300	0	0	0	0	0	0	0	200	903	0	0	0	0	0	0	0	603	903	0
582	2	0	0	0	0	0	0	200	300	0	0	0	0	0	0	0	200	903	0	0	0	0	0	0	0	603	903	0
582	3	0	0	0	0	0	0	200	300	0	0	0	0	0	0	0	200	903	0	0	0	0	0	0	0	603	903	0
582	4	0	0	0	0	0	0	200	300	0	0	0	0	0	0	0	200	903	0	0	0	0	0	0	0	603	903	0
582	5	0	0	0	0	0	0	200	300	0	0	0	0	0	0	0	200	903	0	0	0	0	0	0	0	603	903	0
582	6	0	0	0	0	0	0	200	300	0	0	0	0	0	0	0	200	903	0	0	0	0	0	0	0	603	903	0
582	7	0	0	0	0	0	0	200	300	0	0	0	0	0	0	0	200	903	0	0	0	0	0	0	0	603	903	0
582	8	0	0	0	0	0	0	200	300	0	0	0	0	0	0	0	200	903	0	0	0	0	0	0	0	603	903	0
582	9	0	0	0	0	0	0	200	300	0	0	0	0	0	0	0	200	903	0	0	0	0	0	0	0	603	903	0
583	0	0	0	0	0	0	0	200	300	0	0	0	0	0	0	0	200	903	0	0	0	0	0	0	0	603	903	0
583	1	0	0	0	0	0	0	200	300	0	0	0	0	0	0	0	200	903	0	0	0	0	0	0	0	603	903	0
583	2	0	0	0	0	0	0	200	300	0	0	0	0	0	0	0	200	903	0	0	0	0	0	0	0	603	903	0
583	3	0	0	0	0	0	0	200	300	0	0	0	0	0	0	0	200	903	0	0	0	0	0	0	0	603	903	0
583	4	0	0	0	0	0	0	200	300	0	0	0	0	0	0	0	200	903	0	0	0	0	0	0	0	603	903	0
583	5	0	0	0	0	0	0	200	300	0	0	0	0	0	0	0	200	903	0	0	0	0	0	0	0	603	903	0
583	6	0	0	0	0	0	0	200	300	0	0	0	0	0	0	0	200	903	0	0	0	0	0	0	0	603	903	0
583	7	0	0	0	0	0	0	200	300	0	0	0	0	0	0	0	200	903	0	0	0	0	0	0	0	603	903	0
583	8	0	0	0	0	0	0	200	300	0	0	0	0	0	0	0	200	903	0	0	0	0	0	0	0	603	903	0
583	9	0	0	0	0	0	0	200	300	0	0	0	0	0	0	0	200	903	0	0	0	0	0	0	0	603	903	0
584	0	0	0	0	0	0	0	200	300	0	0	0	0	0	0	0	200	903	0	0	0	0	0	0	0	603	903	0
584	1	0	0	0	0	0	0	200	300	0	0	0	0	0	0	0	200	903	0	0	0	0	0	0	0	603	903	0
584	2	0	0	0	0	0	0	200	300	0	0	0	0	0	0	0	200	903	0	0	0	0	0	0	0	603	903	0
584	3	0	0	0	0	0	0	200	300	0	0	0	0	0	0	0	200	903	0	0	0	0	0	0	0	603	903	0
584	4	0	0	0	0	0	0	200	300	0	0	0	0	0	0	0	200	903	0	0	0	0	0	0	0	603	903	0
584	5	0	0	0	0	0	0	200	300	0	0	0	0	0	0	0	200	903	0	0	0	0	0	0	0	603	903	0
584	6	0	0	0	0	0	0	200	300	0	0	0	0	0	0	0	200	903	0	0	0	0	0	0	0	603	903	0
584	7	0	0	0	0	0	0	200	300	0	0	0	0	0	0	0	200	903	0	0	0	0	0	0	0	603	903	0
584	8	0	0	0	0	0	0	200	300	0	0	0	0	0	0	0	200	903	0	0	0	0	0	0	0	603	903	0
584	9	0	0	0	0	0	0	200	300	0	0	0	0	0	0	0	200	903	0	0	0	0	0	0	0	603	903	0
585	0	0	0	0	0	0	0	200	300	0	0	0	0	0	0	0	200	903	0	0	0	0	0	0	0	603	903	0
585	1	0	0	0	0	0	0	200	300	0	0	0	0	0	0	0	200	903	0	0	0	0	0	0	0	603	903	0
585	2	0	0	0	0	0	0	200	300	0	0	0	0	0	0	0	200	903	0	0	0	0	0	0	0	603	903	0
585	3	0	0	0	0	0	0	200	300	0	0	0	0	0	0	0	200	903	0	0	0	0	0	0	0	603	903	0
585	4	0	0	0	0	0	0	200	300	0	0	0	0	0	0	0	200	903	0	0	0	0	0	0	0	603	903	0
585	5	0	0	0	0	0	0	200	300	0	0	0	0	0	0	0	200	903	0	0	0	0	0	0	0	603	903	0
585	6	0	0	0	0	0	0	200	300	0	0	0	0	0	0	0	200	903	0	0	0	0	0	0	0	603	903	0
585	7	0	0	0	0	0	0	200	300	0	0	0	0	0	0	0	200	903	0	0	0	0	0	0	0	603	903	0
585	8	0	0	0	0	0	0	200	300	0	0	0	0	0	0	0	200	903	0	0	0	0	0	0	0	603	903	0
585	9	0	0	0	0	0	0	200	300	0	0	0	0	0	0	0	200	903	0	0	0	0	0	0	0	603	903	0
586	0	0	0	0	0	0	0	200	300	0	0	0	0	0	0	0	200	903	0	0	0	0	0	0	0	603	903	0
586	1	0	0	0	0	0	0	200	300	0	0	0	0	0	0	0	200	903	0	0	0	0	0	0	0	603	903	0
586	2	0	0	0	0	0	0	200	300	0	0	0	0	0	0	0	200	903	0	0	0	0	0	0	0	603	903	0
586	3	0	0	0	0	0	0	200	300	0	0	0	0	0	0	0	200	903	0	0	0	0	0	0	0	603	903	0
586	4	0	0	0	0	0	0	200	300	0	0	0	0	0	0	0	200	903	0	0	0	0	0	0	0	603	903	0
586	5	0	0	0	0	0	0	200	300	0	0	0	0	0	0	0	200	903	0	0	0	0	0	0	0	603	903	0
586	6	0	0	0	0	0	0	200	300	0	0	0	0	0	0	0	200	903	0	0	0	0	0	0	0	603	903	0
586	7	0	0	0	0	0	0	200	300	0	0	0	0	0	0	0	200	903	0	0	0	0	0	0	0	603	903	0
586	8	0	0	0	0	0	0	200	300	0	0	0	0	0	0	0	200	903	0	0	0	0	0	0	0	603	903	0
586	9	0	0	0	0	0	0	200	300	0	0	0	0	0	0	0	200	903	0	0	0	0	0	0	0	603	903	0
587	0	0	0	0	0	0	0	200	300	0	0	0	0	0	0	0	200	903	0	0	0	0	0	0	0	603	903	0
587	1	0	0	0	0	0	0	200	300	0	0	0	0	0	0	0	200	903	0	0	0	0	0	0	0	603	903	0
587	2	0	0	0	0	0	0	200	300	0	0	0	0	0	0	0	200	903	0	0	0	0	0	0	0	603	903	0
587	3	0	0	0	0	0	0	200	300	0	0	0	0	0	0	0	200	903	0	0	0	0	0	0	0	603	903	0
587	4	0	0	0	0	0	0	200	300	0	0	0	0	0	0	0	200	903	0	0	0	0	0	0	0	603	903	0
587	5	0	0	0	0	0	0	200	300	0	0	0	0	0	0	0	200	903	0	0	0	0	0	0	0	603	903	0
587	6	0	0	0	0	0	0	200	300	0	0	0	0	0	0	0	200	903	0	0	0	0	0	0	0	603	903	0
587	7	0	0	0	0	0	0	200	300	0	0	0	0	0	0	0	200	903	0	0	0	0	0	0	0	603	903	0
587	8	0	0	0	0	0	0	200	300	0	0	0	0	0	0	0	200	903	0	0	0	0	0	0	0	603	903	0
587	9	0	0	0	0	0	0	200	300	0	0	0	0	0	0	0	200	903	0	0	0	0	0	0	0	603	903	0
588	0	0	0	0	0	0	0	200	300	0	0	0	0	0	0	0	200	903	0	0	0	0	0	0	0	603	903	0
588	1	0	0	0	0	0	0	200	300	0	0	0	0	0	0	0	200	903	0	0	0	0	0	0	0	603	903	0
588	2	0	0	0	0	0	0	200	300	0	0	0	0	0	0	0	200	903	0	0	0	0	0	0	0	603	903	0
588	3	0	0	0	0	0	0	200	300	0	0	0	0	0	0	0	200	903	0	0	0	0	0	0	0	603	903	0
588	4	0	0	0	0	0	0	200	300	0	0	0	0	0	0	0	200	903	0	0	0	0	0	0	0	603	903	0
588	5	0	0	0	0	0	0	200	300	0	0	0	0	0	0	0	200	903	0	0	0	0	0	0	0	603	903	0
588	6	0	0	0	0	0	0	200	300	0	0	0	0	0	0	0	200	903	0	0	0	0	0	0	0	603	903	0
588	7	0	0	0	0	0	0	200	300	0	0	0	0	0	0	0	200	903	0	0	0	0	0	0	0	603	903	0
588	8	0	0	0	0	0	0	200	300	0	0	0	0	0	0	0	200	903	0	0	0	0	0	0	0	603	903	0
588	9	0	0	0	0	0	0	200	300	0	0	0	0	0	0	0	200	903	0	0	0	0	0	0	0	603	903	0
589	0	0	0	0	0	0	0	200	300	0	0	0	0	0	0	0	200	903	0	0	0	0	0	0	0	603	903	0
589	1	0	0	0	0	0	0	200	300	0	0	0	0	0	0	0	200	903	0	0	0	0	0	0	0	603	903	0
589	2	0	0	0	0	0	0	200	300	0	0	0	0	0	0	0	200	903	0	0	0	0	0	0	0	603	903	0
589	3	0	0	0	0	0	0	200	300	0	0	0	0	0	0	0	200	903	0	0	0	0	0	0	0	603	903	0
589	4	0	0	0	0	0	0	200	300	0	0	0	0	0	0	0	200	903	0	0	0	0	0	0	0	603	903	0
589	5	0	0	0	0	0	0	200	300	0	0	0	0	0	0	0	200	903	0	0	0	0	0	0	0	603	903	0
589	6	0	0	0	0	0	0	200	300	0	0	0	0	0	0	0	200	903	0	0	0	0	0	0	0	603	903	0
589	7	0	0	0	0	0	0	200	300	0	0	0	0	0	0	0	200	903	0	0	0	0	0	0	0	603	903	0
589	8	0	0	0	0	0	0	200	300	0	0	0	0	0	0	0	200	903	0	0	0	0	0	0	0	603	903	0
589	9	0	0	0	0	0	0	200	300	0	0	0	0	0	0	0	200	903	0	0	0	0	0	0	0	603	903	0
590	0	0	0	0	0	0	0	200	300	0	0	0	0	0	0	0	200	903	0	0	0	0	0	0	0	603	903	0
590	1	0	0	0	0	0	0	200	300	0	0	0	0	0	0	0	200	903	0	0	0	0	0	0	0	603	903	0
590	2	0	0	0	0	0	0	200	300	0	0	0	0	0	0	0	200	903	0	0	0	0	0	0	0	603	903	0
590	3	0	0	0	0	0	0	200	300	0	0	0	0	0	0	0	200	903	0	0	0	0	0	0	0	603	903	0
590	4	0	0	0	0	0	0	200	300	0	0	0	0	0	0	0	200	903	0	0	0	0	0	0	0	603	903	0
590	5	0	0	0	0	0	0	200	300	0	0	0	0	0	0	0	200	903	0	0	0	0	0	0	0	603	903	0
590	6	0	0	0	0	0	0	200	300	0	0	0	0	0	0	0	200	903	0	0	0	0	0	0	0	603	903	0
590	7	0	0	0	0	0	0	200	300	0	0	0	0	0	0	0	200	903	0	0	0	0	0	0	0	603	903	0
590	8	0	0	0	0	0	0	200	300	0	0	0	0	0	0	0	200	903	0	0	0	0	0	0	0	603	903	0
590	9	0	0	0	0	0	0	200	300	0	0	0	0	0	0	0	200	903	0	0	0	0	0	0	0	603	903	0
591	0	0	0	0	0	0	0	200	300	0	0	0	0	0	0	0	200	903	0	0	0	0	0	0	0	603	903	0
591	1	0	0	0	0	0	0	200	300	0	0	0	0	0	0	0	200	903	0	0	0	0	0	0	0	603	903	0
591	2	0	0	0	0	0	0	200	300	0	0	0	0	0	0	0	200	903	0	0	0	0	0	0	0	603	903	0
591	3	0	0	0	0	0	0	200	300	0	0	0	0	0	0	0	200	903	0	0	0	0	0	0	0	603	903	0
591	4	0	0	0	0	0	0	200	300	0	0	0	0	0	0	0	200	903	0	0	0	0	0	0	0	603	903	0
591	5	0	0	0	0	0	0	200	300	0	0	0	0	0	0	0	200	903	0	0	0	0	0	0	0	603	903	0
591	6	0	0	0	0	0	0	200	300	0	0	0	0	0	0	0	200	903	0	0	0	0	0	0	0	603	903	0
591	7	0	0	0	0	0	0	200	300	0	0	0	0	0	0	0	200	903	0	0	0	0	0	0	0	603	903	0
591	8	0	0	0	0	0	0	200	300	0	0	0	0	0	0	0	200	903	0	0	0	0	0	0	0	603	903	0
591	9	0	0	0	0	0	0	200	300	0	0	0	0	0	0	0	200	903	0	0	0	0	0	0	0	603	903	0
592	0	0	0	0	0	0	0	200	300	0	0	0	0	0	0	0	200	903	0	0	0	0	0	0	0	603	903	0
592	1	0	0	0	0	0	0	200	300	0	0	0	0	0	0	0	200	903	0	0	0	0	0	0	0	603	903	0
592	2	0	0	0	0	0	0	200	300	0	0	0	0	0	0	0	200	903	0	0	0	0	0	0	0	603	903	0
592	3	0	0	0	0	0	0	200	300	0	0	0	0	0	0	0	200	903	0	0	0	0	0	0	0	603	903	0
592	4	0	0	0	0	0	0	200	300	0	0	0	0	0	0	0	200	903	0	0	0	0	0	0	0	603	903	0
592	5	0	0	0	0	0	0	200	300	0	0	0	0	0	0	0	200	903	0	0	0	0	0	0	0	603	903	0
592	6	0	0	0	0	0	0	200	300	0	0	0	0	0	0	0	200	903	0	0	0	0	0	0	0	603	903	0
592	7	0	0	0	0	0	0	200	300	0	0	0	0	0	0	0	200	903	0	0	0	0	0	0	0	603	903	0
592	8	0	0	0	0	0	0	200	300	0	0	0	0	0	0	0	200	903	0	0	0	0	0	0	0	603	903	0
592	9	0	0	0	0	0	0	200	300	0	0	0	0	0	0	0	200	903	0	0	0	0	0	0	0	603	903	0
593	0	0	0	0	0	0	0	200	300	0	0	0	0	0	0	0	200	903	0	0	0	0	0	0	0	603	903	0
593	1	0	0	0	0	0	0	200	300	0	0	0	0	0	0	0	200	903	0	0	0	0	0	0	0	603	903	0
593	2	0	0	0	0	0	0	200	300	0	0	0	0	0	0	0	200	903	0	0	0	0	0	0	0	603	903	0
593	3	0	0	0	0	0	0	200	300	0	0	0	0	0	0	0	200	903	0	0	0	0	0	0	0	603	903	0
593	4	0	0	0	0	0	0	200	300	0	0	0	0	0	0	0	200	903	0	0	0	0	0	0	0	603	903	0
593	5	0	0	0	0	0	0	200	300	0	0	0	0	0	0	0	200	903	0	0	0	0	0	0	0	603	903	0
593	6	0	0	0	0	0	0	200	300	0	0	0	0	0	0	0	200	903	0	0	0	0	0	0	0	603	903	0
593	7	0	0	0	0	0	0	200	300	0	0	0	0	0	0	0	200	903	0	0	0	0	0	0	0	603	903	0
593	8	0	0	0	0	0	0	200	300	0	0	0	0	0	0	0	200	903	0	0	0	0	0	0	0	603	903	0
593	9	0	0	0	0	0	0	200	300	0	3.1131	-5.19058	-23.4179	-555.817	2092.47	-432.496	289.354	926.735	0	0	0	0	0	0	0	603	903	0
594	0	0	0	0	0	0	0	200	300	0	2.65533	-2.29141	-24.6386	-98.0532	2214.54	-112.061	289.881	906.98	0	0	0	0	0	0	0	603	903	0
594	1	0	0	0	0	0	0	200	300	0	4.48639	0.302584	-27.9956	-738.922	2885.93	208.373	303.085	929.394	0	0	0	0	0	0	0	603	903	0
594	2	0	0	0	0	0	0	200	300	0	4.63898	3.04917	-31.9628	-1013.58	3130.07	254.149	297.928	934.711	0	0	0	0	0	0	0	603	903	0
594	3	0	0	0	0	0	0	200	300	0	4.63898	6.25351	-38.6767	-464.264	3557.32	1032.35	291.976	915.004	0	0	0	0	0	0	0	603	903	0
594	4	0	0	0	0	0	0	200	300	0	4.3338	6.86386	-42.0336	-738.922	3923.53	1123.9	293.343	920.579	0	0	0	0	0	0	0	603	903	0
594	5	0	0	0	0	0	0	200	300	0	4.3338	6.55869	-43.8647	-1196.69	4411.81	757.69	300.578	930.281	0	0	0	0	0	0	0	603	903	0
594	6	0	0	0	0	0	0	200	300	0	6.01227	9.76303	-49.3579	-464.264	4411.81	1169.68	289.384	912.406	0	0	0	0	0	0	0	603	903	0
594	7	0	0	0	0	0	0	200	300	0	5.40192	12.8148	-55.4614	-464.264	4839.06	986.571	287.251	911.371	0	0	0	0	0	0	0	603	903	0
594	8	0	0	0	0	0	0	200	300	0	3.72345	10.526	-60.3442	-1013.58	5693.55	940.795	294.351	919.797	0	0	0	0	0	0	0	603	903	0
594	9	0	0	0	0	0	0	200	300	0	4.63898	13.2726	-64.3115	-1013.58	5876.66	1444.34	291.378	918.761	0	0	0	0	0	0	0	603	903	0
595	0	0	0	0	0	0	0	200	300	0	4.3338	18.0028	-69.1943	-1013.58	6120.8	1902.1	288.458	917.648	0	0	0	0	0	0	0	603	903	0
595	1	0	0	0	0	0	0	200	300	0	2.80792	18.1554	-72.8564	-647.37	6914.25	1856.32	294.902	911.886	0	0	0	0	0	0	0	603	903	0
595	2	0	0	0	0	0	0	200	300	0	-0.701599	18.0028	-81.7065	-1013.58	6548.04	1902.1	280.141	915.405	0	0	0	0	0	0	0	603	903	0
595	3	0	0	0	0	0	0	200	300	0	1.43463	19.8338	-86.8945	-1105.13	7280.46	1902.1	283.785	915.718	0	0	0	0	0	0	0	603	903	0
595	4	0	0	0	0	0	0	200	300	0	-1.00677	20.9019	-90.2514	-555.817	7707.71	1718.99	285.403	909.159	0	0	0	0	0	0	0	603	903	0
595	5	0	0	0	0	0	0	200	300	0	-0.549011	19.3761	-94.8291	-830.475	7341.5	1856.32	277.418	911.758	0	0	0	0	0	0	0	603	903	0
595	6	0	0	0	0	0	0	200	300	0	-5.27924	17.6976	-100.017	-647.37	7951.85	2039.43	279.505	909.473	0	0	0	0	0	0	0	603	903	0
595	7	0	0	0	0	0	0	200	300	0	-6.34735	17.3924	-103.984	-830.475	8195.99	1673.22	278.819	910.987	0	0	0	0	0	0	0	603	903	0
595	8	0	0	0	0	0	0	200	300	0	-2.83783	16.3243	-103.374	-189.606	8257.03	1627.44	279.875	904.834	0	0	0	0	0	0	0	603	903	0
595	9	0	0	0	0	0	0	200	300	0	-5.58441	12.357	-109.477	-555.817	8562.2	1490.11	278.21	908.077	0	0	0	0	0	0	0	603	903	0
596	0	0	0	0	0	0	0	200	300	0	-8.94135	11.8993	-115.276	-372.711	8257.03	1078.12	271.628	906.233	0	0	0	0	0	0	0	603	903	0
596	1	0	0	0	0	0	0	200	300	0	-9.09393	10.2208	-119.853	-189.606	8867.38	803.466	273.985	904.582	0	0	0	0	0	0	0	603	903	0
596	2	0	0	0	0	0	0	200	300	0	-9.24652	6.10092	-121.99	268.158	9111.52	757.69	274.691	900.802	0	0	0	0	0	0	0	603	903	0
596	3	0	0	0	0	0	0	200	300	0	-11.3828	3.96469	-122.6	-738.922	8867.38	299.926	272.328	909.027	0	0	0	0	0	0	0	603	903	0
596	4	0	0	0	0	0	0	200	300	0	-13.3664	0.455172	-127.178	725.922	8867.38	162.597	269.724	897.292	0	0	0	0	0	0	0	603	903	0
596	5	0	0	0	0	0	0	200	300	0	-13.9767	-2.13882	-130.84	359.71	9172.55	25.2677	270.105	900.251	0	0	0	0	0	0	0	603	903	0
596	6	0	0	0	0	0	0	200	300	0	-13.8242	-3.81729	-133.586	-6.50045	9416.69	-340.943	270.491	903.049	0	0	0	0	0	0	0	603	903	0
596	7	0	0	0	0	0	0	200	300	0	-14.4345	-4.27505	-138.164	359.71	9477.73	-524.049	268.598	900.397	0	0	0	0	0	0	0	603	903	0
596	8	0	0	0	0	0	0	200	300	0	-16.8759	-7.17422	-140.911	359.71	9966.01	-798.707	270.726	900.447	0	0	0	0	0	0	0	603	903	0
596	9	0	0	0	0	0	0	200	300	0	-16.2656	-9.76822	-144.573	725.922	10149.1	-1073.37	270.201	897.979	0	0	0	0	0	0	0	603	903	0
597	0	0	0	0	0	0	0	200	300	0	-15.8078	-10.226	-148.54	1275.24	10210.2	-1073.37	268.737	894.415	0	0	0	0	0	0	0	603	903	0
597	1	0	0	0	0	0	0	200	300	0	-16.2656	-11.4467	-153.423	634.369	10393.3	-1164.92	267.743	898.865	0	0	0	0	0	0	0	603	903	0
597	2	0	0	0	0	0	0	200	300	0	-18.707	-14.8036	-156.475	1092.13	11186.7	-1210.69	271.492	896.02	0	0	0	0	0	0	0	603	903	0
597	3	0	0	0	0	0	0	200	300	0	-18.5544	-16.0243	-159.221	1275.24	11064.6	-1576.91	269.492	894.991	0	0	0	0	0	0	0	603	903	0
597	4	0	0	0	0	0	0	200	300	0	-15.8078	-15.2614	-163.799	1549.9	10942.6	-1805.79	266.805	893.538	0	0	0	0	0	0	0	603	903	0
597	5	0	0	0	0	0	0	200	300	0	-19.6225	-17.7028	-167.766	1275.24	12163.3	-1943.12	272.501	895.399	0	0	0	0	0	0	0	603	903	0
597	6	0	0	0	0	0	0	200	300	0	-19.4699	-19.2287	-171.123	1641.45	11736	-2217.78	268.582	893.408	0	0	0	0	0	0	0	603	903	0
597	7	0	0	0	0	0	0	200	300	0	-19.6225	-20.2968	-176.921	1916.11	12224.3	-2355.1	269.095	892.17	0	0	0	0	0	0	0	603	903	0
597	8	0	0	0	0	0	0	200	300	0	-19.3173	-20.2968	-180.278	1549.9	12651.6	-2126.22	270.178	894.403	0	0	0	0	0	0	0	603	903	0
597	9	0	0	0	0	0	0	200	300	0	-20.2328	-20.2968	-179.668	2190.77	12956.7	-2217.78	272.115	890.807	0	0	0	0	0	0	0	603	903	0
598	0	0	0	0	0	0	0	200	300	0	-20.538	-21.9752	-187.908	2465.42	12956.7	-2126.22	268.953	889.88	0	0	0	0	0	0	0	603	903	0
598	1	0	0	0	0	0	0	200	300	0	-19.6225	-21.6701	-193.706	2648.53	13384	-2400.88	269.094	889.327	0	0	0	0	0	0	0	603	903	0
598	2	0	0	0	0	0	0	200	300	0	-19.7751	-22.2804	-195.842	2556.98	13872.3	-2538.21	270.834	889.944	0	0	0	0	0	0	0	603	903	0
598	3	0	0	0	0	0	0	200	300	0	-19.0121	-24.5692	-200.42	3014.74	13628.1	-2721.32	267.998	887.958	0	0	0	0	0	0	0	603	903	0
598	4	0	0	0	0	0	0	200	300	0	-21.301	-24.7218	-204.387	2831.64	14299.5	-2904.42	269.963	889.146	0	0	0	0	0	0	0	603	903	0
598	5	0	0	0	0	0	0	200	300	0	-18.8596	-24.4167	-207.744	3289.4	14970.9	-2858.64	272.064	887.166	0	0	0	0	0	0	0	603	903	0
598	6	0	0	0	0	0	0	200	300	0	-21.7587	-26.5529	-214.153	3655.61	14665.7	-3087.53	268.483	885.93	0	0	0	0	0	0	0	603	903	0
598	7	0	0	0	0	0	0	200	300	0	-18.8596	-27.0106	-215.679	3655.61	14726.8	-2767.09	268.281	886.051	0	0	0	0	0	0	0	603	903	0
598	8	0	0	0	0	0	0	200	300	0	-20.0803	-28.0788	-220.561	4296.48	15581.2	-2995.97	270.644	883.52	0	0	0	0	0	0	0	603	903	0
598	9	0	0	0	0	0	0	200	300	0	-20.2328	-29.7572	-223.918	4845.79	15703.3	-3316.41	270.13	881.359	0	0	0	0	0	0	0	603	903	0
599	0	0	0	0	0	0	0	200	300	0	-20.0803	-30.3676	-226.665	4754.24	15520.2	-3133.3	268.472	882.025	0	0	0	0	0	0	0	603	903	0
599	1	0	0	0	0	0	0	200	300	0	-20.538	-31.8935	-232.158	4937.35	16679.9	-3453.74	271.847	881.733	0	0	0	0	0	0	0	603	903	0
599	2	0	0	0	0	0	0	200	300	0	-19.1647	-32.0461	-235.21	5212.01	16496.8	-3774.17	270.136	880.841	0	0	0	0	0	0	0	603	903	0
599	3	0	0	0	0	0	0	200	300	0	-18.0966	-34.0297	-240.093	5120.45	16679.9	-3774.17	269.473	881.673	0	0	0	0	0	0	0	603	903	0
599	4	0	0	0	0	0	0	200	300	0	-19.6225	-35.8607	-241.619	5486.66	17412.3	-3591.07	272.065	880.292	0	0	0	0	0	0	0	603	903	0
599	5	0	0	0	0	0	0	200	300	0	-19.4699	-35.403	-245.281	5944.43	17656.4	-4186.16	271.985	878.765	0	0	0	0	0	0	0	603	903	0
599	6	0	0	0	0	0	0	200	300	0	-16.8759	-37.234	-248.638	6310.64	17412.3	-3819.95	270.031	877.619	0	0	0	0	0	0	0	603	903	0
599	7	0	0	0	0	0	0	200	300	0	-17.944	-38.9125	-252.3	5944.43	17961.6	-4048.83	271.192	879.439	0	0	0	0	0	0	0	603	903	0
599	8	0	0	0	0	0	0	200	300	0	-17.944	-39.0651	-255.657	6493.74	18022.7	-4048.83	270.496	877.6	0	0	0	0	0	0	0	603	903	0
599	9	0	0	0	0	0	0	200	300	0	-16.113	-39.3703	-257.488	7043.06	18205.8	-4094.61	270.705	875.647	0	0	0	0	0	0	0	603	903	0
600	0	0	0	0	0	0	0	200	300	0	-15.35	-41.8117	-262.676	6585.3	18510.9	-4003.05	270.471	877.93	0	0	0	0	0	0	0	603	903	0
600	1	0	0	0	0	0	0	200	300	0	-15.5026	-41.6591	-266.033	6951.51	19487.5	-4415.04	273.252	876.87	0	0	0	0	0	0	0	603	903	0
600	2	0	0	0	0	0	0	200	300	0	-15.9604	-42.7272	-270.915	8050.14	19304.4	-4369.26	271.256	873.285	0	0	0	0	0	0	0	603	903	0
600	3	0	0	0	0	0	0	200	300	0	-12.6035	-44.4057	-272.441	7592.38	19426.5	-4323.49	271.305	875.132	0	0	0	0	0	0	0	603	903	0
600	4	0	0	0	0	0	0	200	300	0	-13.0612	-46.2367	-277.935	7958.59	20281	-4460.82	272.97	874.365	0	0	0	0	0	0	0	603	903	0
600	5	0	0	0	0	0	0	200	300	0	-13.519	-45.3212	-280.071	8141.69	20342	-4552.37	272.632	873.93	0	0	0	0	0	0	0	603	903	0
600	6	0	0	0	0	0	0	200	300	0	-11.9931	-45.6264	-282.817	8874.12	20342	-4460.82	271.926	871.622	0	0	0	0	0	0	0	603	903	0
600	7	0	0	0	0	0	0	200	300	0	-10.162	-47.7626	-287.7	9148.78	21196.5	-4506.59	273.676	871.2	0	0	0	0	0	0	0	603	903	0
600	8	0	0	0	0	0	0	200	300	0	-10.6198	-47.4574	-290.142	8965.67	21562.7	-4506.59	274.318	872.099	0	0	0	0	0	0	0	603	903	0
600	9	0	0	0	0	0	0	200	300	0	-9.5517	-47.9152	-295.33	9148.78	21562.7	-4277.71	273.012	872.022	0	0	0	0	0	0	0	603	903	0
601	0	0	0	0	0	0	0	200	300	0	-9.09393	-49.2885	-295.94	9514.99	21806.8	-4369.26	273.687	870.848	0	0	0	0	0	0	0	603	903	0
601	1	0	0	0	0	0	0	200	300	0	-7.56805	-48.8307	-297.161	10155.9	22173	-4460.82	274.616	868.824	0	0	0	0	0	0	0	603	903	0
601	2	0	0	0	0	0	0	200	300	0	-6.65253	-49.7462	-301.738	10155.9	22417.2	-4506.59	274.294	869.342	0	0	0	0	0	0	0	603	903	0
601	3	0	0	0	0	0	0	200	300	0	-4.5163	-50.0514	-305.706	10339	21867.9	-4506.59	271.532	869.18	0	0	0	0	0	0	0	603	903	0
601	4	0	0	0	0	0	0	200	300	0	-4.21112	-50.9669	-308.452	11071.4	23027.5	-4552.37	274.655	867.107	0	0	0	0	0	0	0	603	903	0
601	5	0	0	0	0	0	0	200	300	0	-2.83783	-51.4247	-311.809	11346	23271.7	-4598.15	274.634	866.612	0	0	0	0	0	0	0	603	903	0
601	6	0	0	0	0	0	0	200	300	0	-4.36371	-51.7299	-314.556	11254.5	23027.5	-4552.37	273.207	867.221	0	0	0	0	0	0	0	603	903	0
601	7	0	0	0	0	0	0	200	300	0	-3.75336	-52.798	-316.081	11529.1	23943.1	-4643.92	275.75	866.525	0	0	0	0	0	0	0	603	903	0
601	8	0	0	0	0	0	0	200	300	0	-1.61713	-53.1032	-319.133	12627.8	24126.2	-4506.59	275.599	863.431	0	0	0	0	0	0	0	603	903	0
601	9	0	0	0	0	0	0	200	300	0	-0.0912476	-54.1713	-320.659	11986.9	23943.1	-4689.7	274.668	865.618	0	0	0	0	0	0	0	603	903	0
602	0	0	0	0	0	0	0	200	300	0	-0.701599	-55.8498	-323.711	12444.7	24309.3	-4781.25	275.096	864.556	0	0	0	0	0	0	0	603	903	0
602	1	0	0	0	0	0	0	200	300	0	-0.396423	-55.8498	-325.542	13085.5	24553.4	-4689.7	275.423	862.804	0	0	0	0	0	0	0	603	903	0
602	2	0	0	0	0	0	0	200	300	0	2.80792	-56.3075	-328.899	13451.8	24675.5	-4643.92	275.025	862.101	0	0	0	0	0	0	0	603	903	0
602	3	0	0	0	0	0	0	200	300	0	2.35016	-56.6127	-331.035	13451.8	24980.7	-4735.48	275.462	862.365	0	0	0	0	0	0	0	603	903	0
602	4	0	0	0	0	0	0	200	300	0	2.65533	-58.4438	-331.645	13543.3	25591	-5055.91	277.164	862.163	0	0	0	0	0	0	0	603	903	0
602	5	0	0	0	0	0	0	200	300	0	3.87604	-58.4438	-337.139	14001.1	25713.1	-4827.03	276.269	861.471	0	0	0	0	0	0	0	603	903	0
602	6	0	0	0	0	0	0	200	300	0	6.77521	-59.9696	-336.528	14367.3	25285.8	-4918.58	275.137	860.307	0	0	0	0	0	0	0	603	903	0
602	7	0	0	0	0	0	0	200	300	0	6.16486	-59.817	-338.359	14550.4	26384.5	-5010.13	277.978	859.997	0	0	0	0	0	0	0	603	903	0
602	8	0	0	0	0	0	0	200	300	0	7.23297	-59.9696	-340.496	14641.9	26445.5	-4964.36	277.668	859.998	0	0	0	0	0	0	0	603	903	0
602	9	0	0	0	0	0	0	200	300	0	6.77521	-61.3429	-344.768	15008.2	26384.5	-4964.36	276.528	859.469	0	0	0	0	0	0	0	603	903	0
603	0	0	0	0	0	0	0	200	300	0	7.69073	-62.411	-346.599	15740.6	26506.5	-4918.58	276.476	857.586	0	0	0	0	0	0	0	603	903	0
603	1	0	0	0	0	0	0	200	300	0	7.84332	-63.0214	-348.125	15649	26750.7	-5055.91	276.842	858.048	0	0	0	0	0	0	0	603	903	0
603	2	0	0	0	0	0	0	200	300	0	8.45367	-63.174	-349.651	15465.9	26872.8	-5147.46	276.856	858.768	0	0	0	0	0	0	0	603	903	0
603	3	0	0	0	0	0	0	200	300	0	9.06403	-62.5636	-349.651	16198.3	27544.1	-5147.46	278.776	856.673	0	0	0	0	0	0	0	603	903	0
603	4	0	0	0	0	0	0	200	300	0	10.5899	-64.0895	-355.144	16930.8	27666.2	-5101.69	277.901	855.327	0	0	0	0	0	0	0	603	903	0
603	5	0	0	0	0	0	0	200	300	0	9.97955	-65.005	-356.06	16564.6	27605.2	-4964.36	277.53	856.478	0	0	0	0	0	0	0	603	903	0
603	6	0	0	0	0	0	0	200	300	0	12.2684	-65.1576	-357.891	17205.4	27971.4	-5147.46	278.156	854.926	0	0	0	0	0	0	0	603	903	0
603	7	0	0	0	0	0	0	200	300	0	11.9632	-65.4628	-359.416	17571.6	28459.7	-5605.23	279.183	854.111	0	0	0	0	0	0	0	603	903	0
603	8	0	0	0	0	0	0	200	300	0	13.1839	-67.1413	-363.079	18304.1	28703.8	-5101.69	279.057	852.587	0	0	0	0	0	0	0	603	903	0
603	9	0	0	0	0	0	0	200	300	0	11.0477	-67.1413	-367.046	18029.4	28825.9	-5513.67	278.535	853.88	0	0	0	0	0	0	0	603	903	0
604	0	0	0	0	0	0	0	200	300	0	15.9305	-67.9042	-369.487	18853.4	29558.3	-5376.35	279.998	851.974	0	0	0	0	0	0	0	603	903	0
604	1	0	0	0	0	0	0	200	300	0	15.3201	-69.1249	-372.234	19219.6	29680.4	-5193.24	279.736	851.367	0	0	0	0	0	0	0	603	903	0
604	2	0	0	0	0	0	0	200	300	0	17.7615	-70.0404	-375.286	19768.9	29619.3	-5376.35	278.925	850.323	0	0	0	0	0	0	0	603	903	0
604	3	0	0	0	0	0	0	200	300	0	17.1512	-69.4301	-376.811	19677.3	29985.5	-5376.35	279.577	850.779	0	0	0	0	0	0	0	603	903	0
604	4	0	0	0	0	0	0	200	300	0	19.7452	-70.956	-380.779	20501.3	30412.8	-5055.91	279.87	849.16	0	0	0	0	0	0	0	603	903	0
604	5	0	0	0	0	0	0	200	300	0	18.9822	-72.787	-383.831	20776	30412.8	-5193.24	279.235	848.872	0	0	0	0	0	0	0	603	903	0
604	6	0	0	0	0	0	0	200	300	0	20.5081	-73.0922	-387.187	21966.2	30962.1	-5193.24	279.967	846.267	0	0	0	0	0	0	0	603	903	0
604	7	0	0	0	0	0	0	200	300	0	22.4918	-75.0758	-390.239	21966.2	30718	-5284.79	278.716	846.711	0	0	0	0	0	0	0	603	903	0
604	8	0	0	0	0	0	0	200	300	0	23.2547	-76.4491	-392.681	21966.2	31206.2	-5422.12	279.47	847.061	0	0	0	0	0	0	0	603	903	0
604	9	0	0	0	0	0	0	200	300	0	22.3392	-77.2121	-395.732	23156.3	32060.8	-5651	281.016	844.485	0	0	0	0	0	0	0	603	903	0
605	0	0	0	0	0	0	0	200	300	0	24.0176	-77.8224	-399.394	23522.6	31999.7	-5467.9	280.121	844.104	0	0	0	0	0	0	0	603	903	0
605	1	0	0	0	0	0	0	200	300	0	24.9332	-81.0268	-403.667	23339.5	31816.6	-5376.35	278.819	845.181	0	0	0	0	0	0	0	603	903	0
605	2	0	0	0	0	0	0	200	300	0	24.1702	-81.9423	-402.446	23705.7	32427	-5834.11	280.575	844.096	0	0	0	0	0	0	0	603	903	0
605	3	0	0	0	0	0	0	200	300	0	23.8651	-81.0268	-405.803	24529.6	32793.2	-5925.66	280.811	842.553	0	0	0	0	0	0	0	603	903	0
605	4	0	0	0	0	0	0	200	300	0	25.3909	-81.9423	-408.245	24804.3	32732.1	-5788.33	280.178	842.242	0	0	0	0	0	0	0	603	903	0
605	5	0	0	0	0	0	0	200	300	0	24.628	-83.0104	-411.602	24621.2	33037.3	-6017.21	280.265	843.182	0	0	0	0	0	0	0	603	903	0
605	6	0	0	0	0	0	0	200	300	0	25.8487	-82.5526	-413.433	25170.5	33525.6	-6062.99	281.091	842.118	0	0	0	0	0	0	0	603	903	0
605	7	0	0	0	0	0	0	200	300	0	25.2383	-82.5526	-416.179	25445.2	33525.6	-6017.21	280.556	841.86	0	0	0	0	0	0	0	603	903	0
605	8	0	0	0	0	0	0	200	300	0	26.0013	-83.3156	-417.4	25994.5	33586.6	-5925.66	280.466	840.723	0	0	0	0	0	0	0	603	903	0
605	9	0	0	0	0	0	0	200	300	0	25.6961	-81.1794	-419.536	26452.2	33952.8	-5696.78	280.93	839.949	0	0	0	0	0	0	0	603	903	0
606	0	0	0	0	0	0	0	200	300	0	25.8487	-80.2638	-423.809	26726.9	34013.9	-5696.78	280.258	839.936	0	0	0	0	0	0	0	603	903	0
606	1	0	0	0	0	0	0	200	300	0	26.9168	-80.8742	-426.555	27276.2	33891.8	-5742.56	279.455	839.055	0	0	0	0	0	0	0	603	903	0
606	2	0	0	0	0	0	0	200	300	0	27.222	-82.5526	-429.302	27825.5	34380.1	-5788.33	280.084	838.184	0	0	0	0	0	0	0	603	903	0
606	3	0	0	0	0	0	0	200	300	0	26.6116	-82.7052	-431.743	27642.4	34807.3	-5925.66	280.62	838.975	0	0	0	0	0	0	0	603	903	0
606	4	0	0	0	0	0	0	200	300	0	27.222	-83.163	-433.879	28374.9	34868.4	-6062.99	280.364	837.602	0	0	0	0	0	0	0	603	903	0
606	5	0	0	0	0	0	0	200	300	0	27.8323	-83.3156	-436.321	28741.1	34258	-6017.21	278.516	837.129	0	0	0	0	0	0	0	603	903	0
606	6	0	0	0	0	0	0	200	300	0	28.4427	-83.4682	-438.762	28832.6	35051.5	-6108.77	279.887	837.286	0	0	0	0	0	0	0	603	903	0
606	7	0	0	0	0	0	0	200	300	0	29.2056	-84.8415	-440.898	28649.5	35356.6	-6108.77	280.192	838.02	0	0	0	0	0	0	0	603	903	0
606	8	0	0	0	0	0	0	200	300	0	30.5789	-83.6208	-441.814	29473.5	35478.7	-5834.11	280.302	836.29	0	0	0	0	0	0	0	603	903	0
606	9	0	0	0	0	0	0	200	300	0	29.6634	-85.2992	-445.171	29931.2	35539.8	-5971.44	279.834	835.765	0	0	0	0	0	0	0	603	903	0
607	0	0	0	0	0	0	0	200	300	0	31.0367	-85.1466	-447.307	30114.4	35844.9	-5879.89	280.135	835.676	0	0	0	0	0	0	0	603	903	0
607	1	0	0	0	0	0	0	200	300	0	30.1212	-85.4518	-449.138	29748.1	35906	-5834.11	279.944	836.766	0	0	0	0	0	0	0	603	903	0
607	2	0	0	0	0	0	0	200	300	0	31.7996	-85.9096	-450.664	31213	35967	-5971.44	279.809	833.74	0	0	0	0	0	0	0	603	903	0
607	3	0	0	0	0	0	0	200	300	0	32.7151	-85.2992	-455.547	31396.1	36272.2	-5559.45	279.623	834.08	0	0	0	0	0	0	0	603	903	0
607	4	0	0	0	0	0	0	200	300	0	32.1048	-86.8251	-455.547	30755.2	36516.3	-5696.78	280.159	835.487	0	0	0	0	0	0	0	603	903	0
607	5	0	0	0	0	0	0	200	300	0	32.5626	-85.757	-458.599	32037	36455.3	-5559.45	279.493	833.142	0	0	0	0	0	0	0	603	903	0
607	6	0	0	0	0	0	0	200	300	0	34.3936	-86.6725	-462.261	32403.2	37248.7	-5559.45	280.579	832.903	0	0	0	0	0	0	0	603	903	0
607	7	0	0	0	0	0	0	200	300	0	34.0884	-86.8251	-461.04	31029.9	37065.6	-5147.46	280.396	835.696	0	0	0	0	0	0	0	603	903	0
607	8	0	0	0	0	0	0	200	300	0	33.9359	-85.2992	-463.176	32403.2	37187.7	-5513.67	280.288	833.041	0	0	0	0	0	0	0	603	903	0
607	9	0	0	0	0	0	0	200	300	0	34.5462	-87.1303	-468.059	32860.9	37431.8	-5696.78	279.973	832.793	0	0	0	0	0	0	0	603	903	0
608	0	0	0	0	0	0	0	200	300	0	37.1402	-86.9777	-470.195	33044	37676	-5467.9	280.128	832.723	0	0	0	0	0	0	0	603	903	0
608	1	0	0	0	0	0	0	200	300	0	34.8514	-86.9777	-473.552	33501.8	37920.1	-5788.33	280.076	832.254	0	0	0	0	0	0	0	603	903	0
608	2	0	0	0	0	0	0	200	300	0	37.2928	-86.5199	-471.721	33868	37553.9	-5742.56	279.61	831.203	0	0	0	0	0	0	0	603	903	0
608	3	0	0	0	0	0	0	200	300	0	37.598	-87.8932	-478.74	34234.2	37553.9	-5467.9	278.443	831.491	0	0	0	0	0	0	0	603	903	0
608	4	0	0	0	0	0	0	200	300	0	37.7505	-88.0458	-479.961	34508.9	38164.3	-5467.9	279.515	831.101	0	0	0	0	0	0	0	603	903	0
608	5	0	0	0	0	0	0	200	300	0	35.4617	-86.0622	-481.792	34875.1	38164.3	-5467.9	279.213	830.614	0	0	0	0	0	0	0	603	903	0
608	6	0	0	0	0	0	0	200	300	0	36.2247	-87.2829	-486.064	34600.4	38469.4	-5193.24	279.145	831.815	0	0	0	0	0	0	0	603	903	0
608	7	0	0	0	0	0	0	200	300	0	35.3091	-87.7406	-486.675	34783.5	39079.8	-5742.56	280.3	831.528	0	0	0	0	0	0	0	603	903	0
608	8	0	0	0	0	0	0	200	300	0	36.6824	-86.2148	-490.947	35516	38835.7	-5651	279.104	830.658	0	0	0	0	0	0	0	603	903	0
608	9	0	0	0	0	0	0	200	300	0	35.9195	-87.588	-492.473	35516	39323.9	-5559.45	279.85	830.882	0	0	0	0	0	0	0	603	903	0
609	0	0	0	0	0	0	0	200	300	0	35.6143	-87.588	-493.694	36248.4	39385	-5559.45	279.776	829.577	0	0	0	0	0	0	0	603	903	0
609	1	0	0	0	0	0	0	200	300	0	36.2247	-86.2148	-497.966	36339.9	38591.5	-5559.45	277.498	830.023	0	0	0	0	0	0	0	603	903	0
609	2	0	0	0	0	0	0	200	300	0	36.0721	-87.1303	-502.239	36523	39873.2	-5513.67	279.391	830.28	0	0	0	0	0	0	0	603	903	0
609	3	0	0	0	0	0	0	200	300	0	37.4454	-86.2148	-503.459	36431.5	39751.2	-5559.45	278.956	830.638	0	0	0	0	0	0	0	603	903	0
609	4	0	0	0	0	0	0	200	300	0	35.4617	-87.2829	-502.544	37530.1	39690.1	-5376.35	278.978	828.32	0	0	0	0	0	0	0	603	903	0
609	5	0	0	0	0	0	0	200	300	0	36.6824	-85.6044	-507.732	37621.7	39507	-5467.9	277.811	828.902	0	0	0	0	0	0	0	603	903	0
609	6	0	0	0	0	0	0	200	300	0	35.9195	-86.0622	-509.563	37438.6	40300.5	-5422.12	279.088	829.528	0	0	0	0	0	0	0	603	903	0
609	7	0	0	0	0	0	0	200	300	0	35.7669	-86.2148	-513.225	37804.8	40300.5	-5467.9	278.524	829.339	0	0	0	0	0	0	0	603	903	0
609	8	0	0	0	0	0	0	200	300	0	36.6824	-85.9096	-515.056	38903.4	40117.4	-5422.12	277.889	827.468	0	0	0	0	0	0	0	603	903	0
609	9	0	0	0	0	0	0	200	300	0	37.1402	-86.9777	-517.803	38811.9	40849.8	-5376.35	278.891	828.045	0	0	0	0	0	0	0	603	903	0
610	0	0	0	0	0	0	0	200	300	0	35.4617	-86.2148	-519.023	38354.1	40666.7	-5284.79	278.352	829.103	0	0	0	0	0	0	0	603	903	0
610	1	0	0	0	0	0	0	200	300	0	35.4617	-84.8415	-522.685	38903.4	40849.8	-5742.56	278.154	828.57	0	0	0	0	0	0	0	603	903	0
610	2	0	0	0	0	0	0	200	300	0	36.835	-85.2992	-524.517	39635.8	40971.9	-5101.69	278.114	827.434	0	0	0	0	0	0	0	603	903	0
610	3	0	0	0	0	0	0	200	300	0	36.2247	-85.6044	-526.042	39544.3	41277.1	-5513.67	278.467	827.827	0	0	0	0	0	0	0	603	903	0
610	4	0	0	0	0	0	0	200	300	0	36.2247	-84.2311	-528.179	39452.7	41032.9	-5193.24	277.688	828.304	0	0	0	0	0	0	0	603	903	0
610	5	0	0	0	0	0	0	200	300	0	37.2928	-83.9259	-533.061	39452.7	41643.3	-5147.46	278.121	828.988	0	0	0	0	0	0	0	603	903	0
610	6	0	0	0	0	0	0	200	300	0	36.0721	-84.6889	-533.367	40093.6	41948.4	-5101.69	278.648	827.829	0	0	0	0	0	0	0	603	903	0
610	7	0	0	0	0	0	0	200	300	0	35.4617	-84.6889	-537.334	40642.9	41521.2	-5101.69	277.273	827.362	0	0	0	0	0	0	0	603	903	0
610	8	0	0	0	0	0	0	200	300	0	35.3091	-84.5363	-539.165	40551.4	42436.7	-5239.02	278.708	827.789	0	0	0	0	0	0	0	603	903	0
610	9	0	0	0	0	0	0	200	300	0	36.6824	-83.7733	-541.301	40459.8	42375.7	-5239.02	278.285	828.255	0	0	0	0	0	0	0	603	903	0
611	0	0	0	0	0	0	0	200	300	0	36.0721	-83.0104	-542.217	41375.3	42192.6	-5239.02	277.815	826.692	0	0	0	0	0	0	0	603	903	0
611	1	0	0	0	0	0	0	200	300	0	35.9195	-83.0104	-545.574	41558.5	42314.7	-5284.79	277.56	826.826	0	0	0	0	0	0	0	603	903	0
611	2	0	0	0	0	0	0	200	300	0	34.6988	-84.2311	-547.71	41466.9	42314.7	-5376.35	277.257	827.29	0	0	0	0	0	0	0	603	903	0
611	3	0	0	0	0	0	0	200	300	0	34.241	-82.8578	-549.541	42199.3	42619.8	-5467.9	277.555	826.21	0	0	0	0	0	0	0	603	903	0
611	4	0	0	0	0	0	0	200	300	0	35.1566	-82.0949	-551.982	42840.2	42680.9	-5010.13	277.323	825.389	0	0	0	0	0	0	0	603	903	0
611	5	0	0	0	0	0	0	200	300	0	37.4454	-82.0949	-555.034	42199.3	43108.1	-4918.58	277.667	826.97	0	0	0	0	0	0	0	603	903	0
611	6	0	0	0	0	0	0	200	300	0	33.9359	-82.4001	-553.813	42565.5	43047.1	-5055.91	277.728	826.141	0	0	0	0	0	0	0	603	903	0
611	7	0	0	0	0	0	0	200	300	0	35.9195	-82.7052	-559.612	42657.1	42986	-5193.24	276.814	826.774	0	0	0	0	0	0	0	603	903	0
611	8	0	0	0	0	0	0	200	300	0	36.3773	-82.0949	-560.832	43481	43413.3	-5010.13	277.409	825.471	0	0	0	0	0	0	0	603	903	0
611	9	0	0	0	0	0	0	200	300	0	35.3091	-81.0268	-559.917	43206.4	43718.5	-5422.12	278.08	825.834	0	0	0	0	0	0	0	603	903	0
612	0	0	0	0	0	0	0	200	300	0	35.4617	-80.8742	-564.495	43481	42741.9	-5147.46	275.717	825.974	0	0	0	0	0	0	0	603	903	0
612	1	0	0	0	0	0	0	200	300	0	34.5462	-81.0268	-568.157	43847.3	44023.6	-5239.02	277.485	825.825	0	0	0	0	0	0	0	603	903	0
612	2	0	0	0	0	0	0	200	300	0	34.5462	-80.7216	-569.377	44121.9	44145.7	-4872.81	277.533	825.509	0	0	0	0	0	0	0	603	903	0
612	3	0	0	0	0	0	0	200	300	0	33.6307	-80.7216	-570.903	45037.5	43840.5	-5239.02	276.792	824.112	0	0	0	0	0	0	0	603	903	0
612	4	0	0	0	0	0	0	200	300	0	32.7151	-80.2638	-572.734	44762.8	43901.6	-5055.91	276.653	824.844	0	0	0	0	0	0	0	603	903	0
612	5	0	0	0	0	0	0	200	300	0	32.7151	-79.6535	-576.702	44671.2	44511.9	-5010.13	277.184	825.54	0	0	0	0	0	0	0	603	903	0
612	6	0	0	0	0	0	0	200	300	0	33.1729	-79.9586	-577.007	45129	44267.8	-4827.03	276.72	824.788	0	0	0	0	0	0	0	603	903	0
612	7	0	0	0	0	0	0	200	300	0	33.1729	-79.8061	-578.838	45403.7	44450.9	-4552.37	276.793	824.561	0	0	0	0	0	0	0	603	903	0
612	8	0	0	0	0	0	0	200	300	0	32.5626	-79.0431	-579.753	45312.1	44573	-5010.13	276.883	824.843	0	0	0	0	0	0	0	603	903	0
612	9	0	0	0	0	0	0	200	300	0	31.4944	-77.975	-578.227	45861.4	44695	-4918.58	277.297	823.686	0	0	0	0	0	0	0	603	903	0
613	0	0	0	0	0	0	0	200	300	0	31.7996	-78.1276	-584.331	46776.9	44695	-4872.81	276.489	822.948	0	0	0	0	0	0	0	603	903	0
613	1	0	0	0	0	0	0	200	300	0	32.5626	-79.0431	-587.688	45861.4	45061.2	-5010.13	276.675	824.963	0	0	0	0	0	0	0	603	903	0
613	2	0	0	0	0	0	0	200	300	0	32.1048	-79.0431	-587.688	46410.7	45427.4	-5055.91	277.299	824.028	0	0	0	0	0	0	0	603	903	0
613	3	0	0	0	0	0	0	200	300	0	31.0367	-78.2802	-589.519	47051.6	45122.3	-5010.13	276.541	823.186	0	0	0	0	0	0	0	603	903	0
613	4	0	0	0	0	0	0	200	300	0	31.7996	-77.6698	-592.876	47692.5	45244.3	-4918.58	276.313	822.557	0	0	0	0	0	0	0	603	903	0
613	5	0	0	0	0	0	0	200	300	0	29.9686	-78.7379	-594.707	47143.2	45976.8	-5193.24	277.31	823.729	0	0	0	0	0	0	0	603	903	0
613	6	0	0	0	0	0	0	200	300	0	29.816	-78.4328	-594.707	47784	45244.3	-4964.36	276.078	822.651	0	0	0	0	0	0	0	603	903	0
613	7	0	0	0	0	0	0	200	300	0	29.9686	-78.1276	-594.402	48516.5	45854.7	-5055.91	277.144	821.378	0	0	0	0	0	0	0	603	903	0
613	8	0	0	0	0	0	0	200	300	0	29.9686	-77.8224	-598.674	48608	45976.8	-4827.03	276.798	821.807	0	0	0	0	0	0	0	603	903	0
613	9	0	0	0	0	0	0	200	300	0	28.7479	-77.2121	-600.505	48516.5	45854.7	-4918.58	276.36	822.207	0	0	0	0	0	0	0	603	903	0
614	0	0	0	0	0	0	0	200	300	0	28.9005	-77.8224	-603.252	48974.2	45793.7	-4964.36	275.911	821.816	0	0	0	0	0	0	0	603	903	0
614	1	0	0	0	0	0	0	200	300	0	29.5108	-77.3647	-603.862	49523.5	46526.1	-4964.36	277.048	820.989	0	0	0	0	0	0	0	603	903	0
614	2	0	0	0	0	0	0	200	300	0	29.3582	-76.7543	-604.778	49432	46281.9	-4964.36	276.527	821.264	0	0	0	0	0	0	0	603	903	0
614	3	0	0	0	0	0	0	200	300	0	28.7479	-76.2965	-608.44	49798.2	46281.9	-5147.46	276.067	821.154	0	0	0	0	0	0	0	603	903	0
614	4	0	0	0	0	0	0	200	300	0	28.4427	-76.144	-606.304	49432	46404	-5147.46	276.536	821.47	0	0	0	0	0	0	0	603	903	0
614	5	0	0	0	0	0	0	200	300	0	29.2056	-75.6862	-611.186	50164.4	46465	-5193.24	276.024	820.923	0	0	0	0	0	0	0	603	903	0
614	6	0	0	0	0	0	0	200	300	0	27.9849	-76.4491	-612.712	51537.7	46709.2	-5101.69	276.233	818.886	0	0	0	0	0	0	0	603	903	0
614	7	0	0	0	0	0	0	200	300	0	28.2901	-75.0758	-613.933	49706.6	46892.3	-5010.13	276.38	822.036	0	0	0	0	0	0	0	603	903	0
614	8	0	0	0	0	0	0	200	300	0	27.9849	-75.381	-616.68	50896.8	47014.4	-4918.58	276.238	820.466	0	0	0	0	0	0	0	603	903	0
614	9	0	0	0	0	0	0	200	300	0	28.2901	-75.6862	-617.9	51354.6	47075.4	-5010.13	276.186	819.889	0	0	0	0	0	0	0	603	903	0
615	0	0	0	0	0	0	0	200	300	0	28.9005	-74.9232	-618.511	51537.7	47197.5	-4689.7	276.308	819.675	0	0	0	0	0	0	0	603	903	0
615	1	0	0	0	0	0	0	200	300	0	28.1375	-74.9232	-618.511	51446.1	47807.8	-4689.7	277.295	819.823	0	0	0	0	0	0	0	603	903	0
615	2	0	0	0	0	0	0	200	300	0	28.1375	-73.7025	-621.562	52453.2	46526.1	-4827.03	274.853	818.611	0	0	0	0	0	0	0	603	903	0
615	3	0	0	0	0	0	0	200	300	0	28.5953	-73.7025	-624.919	52453.2	47746.8	-4872.81	276.405	819.064	0	0	0	0	0	0	0	603	903	0
615	4	0	0	0	0	0	0	200	300	0	28.4427	-74.6181	-627.361	52453.2	47868.9	-4552.37	276.302	819.391	0	0	0	0	0	0	0	603	903	0
615	5	0	0	0	0	0	0	200	300	0	29.6634	-73.8551	-626.14	52453.2	47807.8	-4964.36	276.353	819.228	0	0	0	0	0	0	0	603	903	0
615	6	0	0	0	0	0	0	200	300	0	29.053	-73.0922	-628.276	53368.7	48174	-4827.03	276.677	818.055	0	0	0	0	0	0	0	603	903	0
615	7	0	0	0	0	0	0	200	300	0	28.7479	-72.9396	-630.107	53368.7	48296.1	-4735.48	276.647	818.302	0	0	0	0	0	0	0	603	903	0
615	8	0	0	0	0	0	0	200	300	0	28.1375	-73.55	-630.718	53368.7	48113	-4689.7	276.283	818.384	0	0	0	0	0	0	0	603	903	0
615	9	0	0	0	0	0	0	200	300	0	27.9849	-72.9396	-631.328	54558.9	48052	-4643.92	276.112	816.581	0	0	0	0	0	0	0	603	903	0
616	0	0	0	0	0	0	0	200	300	0	28.9005	-72.1767	-632.854	54009.6	48052	-4552.37	275.929	817.657	0	0	0	0	0	0	0	603	903	0
616	1	0	0	0	0	0	0	200	300	0	28.7479	-71.8715	-634.99	54192.7	48296.1	-4552.37	276.058	817.656	0	0	0	0	0	0	0	603	903	0
616	2	0	0	0	0	0	0	200	300	0	27.0694	-72.3293	-633.464	54742	48723.3	-4872.81	276.916	816.583	0	0	0	0	0	0	0	603	903	0
616	3	0	0	0	0	0	0	200	300	0	28.7479	-71.1086	-635.601	54925.2	48784.4	-4735.48	276.753	816.586	0	0	0	0	0	0	0	603	903	0
616	4	0	0	0	0	0	0	200	300	0	28.7479	-72.787	-635.601	55108.3	48357.1	-4735.48	276.081	816.297	0	0	0	0	0	0	0	603	903	0
616	5	0	0	0	0	0	0	200	300	0	27.9849	-71.1086	-636.821	55199.8	48845.4	-4827.03	276.702	816.32	0	0	0	0	0	0	0	603	903	0
616	6	0	0	0	0	0	0	200	300	0	29.053	-70.4982	-639.873	55291.4	49028.5	-4781.25	276.622	816.59	0	0	0	0	0	0	0	603	903	0
616	7	0	0	0	0	0	0	200	300	0	28.4427	-72.0241	-640.789	55749.1	49394.7	-4598.15	277.084	815.999	0	0	0	0	0	0	0	603	903	0
616	8	0	0	0	0	0	0	200	300	0	28.4427	-71.1086	-640.483	56115.3	49089.6	-4964.36	276.645	815.386	0	0	0	0	0	0	0	603	903	0
616	9	0	0	0	0	0	0	200	300	0	27.9849	-69.7353	-639.873	56481.5	49394.7	-4689.7	277.195	814.73	0	0	0	0	0	0	0	603	903	0
617	0	0	0	0	0	0	0	200	300	0	28.2901	-69.1249	-639.568	56390	49516.8	-4460.82	277.422	814.831	0	0	0	0	0	0	0	603	903	0
617	1	0	0	0	0	0	0	200	300	0	29.3582	-69.1249	-641.399	56115.3	48845.4	-4827.03	276.155	815.511	0	0	0	0	0	0	0	603	903	0
617	2	0	0	0	0	0	0	200	300	0	28.5953	-70.193	-644.145	56664.6	49638.9	-4643.92	277.062	815.031	0	0	0	0	0	0	0	603	903	0
617	3	0	0	0	0	0	0	200	300	0	28.4427	-69.8878	-644.145	57488.6	49638.9	-4552.37	277.062	813.752	0	0	0	0	0	0	0	603	903	0
617	4	0	0	0	0	0	0	200	300	0	28.2901	-69.4301	-644.145	56939.3	49577.8	-4689.7	276.967	814.605	0	0	0	0	0	0	0	603	903	0
617	5	0	0	0	0	0	0	200	300	0	29.053	-68.6671	-644.451	58587.3	49822	-4598.15	277.309	812.09	0	0	0	0	0	0	0	603	903	0
617	6	0	0	0	0	0	0	200	300	0	30.4263	-69.1249	-646.282	57763.3	49883	-4323.49	277.185	813.622	0	0	0	0	0	0	0	603	903	0
617	7	0	0	0	0	0	0	200	300	0	29.5108	-68.0568	-645.366	57854.8	49760.9	-4506.59	277.105	813.353	0	0	0	0	0	0	0	603	903	0
617	8	0	0	0	0	0	0	200	300	0	30.2737	-67.599	-645.061	58404.2	50188.2	-4735.48	277.804	812.46	0	0	0	0	0	0	0	603	903	0
617	9	0	0	0	0	0	0	200	300	0	29.5108	-66.9887	-646.892	58770.4	50066.1	-4369.26	277.395	812.15	0	0	0	0	0	0	0	603	903	0
618	0	0	0	0	0	0	0	200	300	0	32.5626	-66.3783	-646.587	58770.4	49944.1	-4277.71	277.243	812.107	0	0	0	0	0	0	0	603	903	0
618	1	0	0	0	0	0	0	200	300	0	29.9686	-67.9042	-647.808	58861.9	50066.1	-4094.61	277.286	812.137	0	0	0	0	0	0	0	603	903	0
618	2	0	0	0	0	0	0	200	300	0	31.4944	-66.2257	-646.587	58495.7	50188.2	-4781.25	277.62	812.532	0	0	0	0	0	0	0	603	903	0
618	3	0	0	0	0	0	0	200	300	0	31.4944	-66.0732	-647.197	59411.2	50066.1	-4186.16	277.358	811.202	0	0	0	0	0	0	0	603	903	0
618	4	0	0	0	0	0	0	200	300	0	30.7315	-65.9206	-647.197	59869	50310.3	-4369.26	277.736	810.495	0	0	0	0	0	0	0	603	903	0
618	5	0	0	0	0	0	0	200	300	0	30.1212	-65.4628	-646.587	59777.4	50615.4	-4598.15	278.281	810.549	0	0	0	0	0	0	0	603	903	0
618	6	0	0	0	0	0	0	200	300	0	30.5789	-65.1576	-647.808	59594.3	50188.2	-4231.93	277.474	811.006	0	0	0	0	0	0	0	603	903	0
618	7	0	0	0	0	0	0	200	300	0	31.9522	-65.005	-646.282	59869	50310.3	-4003.05	277.846	810.364	0	0	0	0	0	0	0	603	903	0
618	8	0	0	0	0	0	0	200	300	0	32.41	-64.2421	-647.808	60052.1	50859.6	-4186.16	278.51	810.299	0	0	0	0	0	0	0	603	903	0
618	9	0	0	0	0	0	0	200	300	0	31.647	-65.005	-647.502	60326.8	50859.6	-4094.61	278.547	809.832	0	0	0	0	0	0	0	603	903	0
619	0	0	0	0	0	0	0	200	300	0	31.9522	-63.174	-647.197	60601.4	50066.1	-4048.83	277.358	809.363	0	0	0	0	0	0	0	603	903	0
619	1	0	0	0	0	0	0	200	300	0	33.0203	-64.5473	-645.061	61242.3	50859.6	-4094.61	278.845	808.06	0	0	0	0	0	0	0	603	903	0
619	2	0	0	0	0	0	0	200	300	0	33.6307	-63.174	-645.977	60967.6	50798.5	-4094.61	278.638	808.62	0	0	0	0	0	0	0	603	903	0
619	3	0	0	0	0	0	0	200	300	0	33.4781	-63.4792	-643.535	60326.8	50432.3	-4094.61	278.368	809.257	0	0	0	0	0	0	0	603	903	0
619	4	0	0	0	0	0	0	200	300	0	33.0203	-63.174	-645.061	61425.4	51042.7	-3865.72	279.128	807.776	0	0	0	0	0	0	0	603	903	0
619	5	0	0	0	0	0	0	200	300	0	34.3936	-63.0214	-643.84	61883.2	50554.4	-4048.83	278.52	806.884	0	0	0	0	0	0	0	603	903	0
619	6	0	0	0	0	0	0	200	300	0	34.6988	-62.2585	-643.84	61059.2	50493.4	-3957.28	278.425	808.164	0	0	0	0	0	0	0	603	903	0
619	7	0	0	0	0	0	0	200	300	0	35.1566	-61.9533	-643.535	61608.5	50737.5	-3911.5	278.842	807.266	0	0	0	0	0	0	0	603	903	0
619	8	0	0	0	0	0	0	200	300	0	35.004	-61.8007	-642.62	61974.7	50920.6	-4048.83	279.239	806.559	0	0	0	0	0	0	0	603	903	0
619	9	0	0	0	0	0	0	200	300	0	37.7505	-62.1059	-641.094	62157.8	50310.3	-3636.84	278.476	806.044	0	0	0	0	0	0	0	603	903	0
620	0	0	0	0	0	0	0	200	300	0	34.6988	-61.4955	-640.178	61883.2	50920.6	-3911.5	279.541	806.334	0	0	0	0	0	0	0	603	903	0
620	1	0	0	0	0	0	0	200	300	0	35.004	-60.8852	-639.568	61791.6	50981.6	-4003.05	279.713	806.385	0	0	0	0	0	0	0	603	903	0
620	2	0	0	0	0	0	0	200	300	0	35.6143	-60.8852	-640.178	62340.9	50249.2	-3682.62	278.493	805.62	0	0	0	0	0	0	0	603	903	0
620	3	0	0	0	0	0	0	200	300	0	36.3773	-61.4955	-638.347	62066.3	50554.4	-3499.51	279.196	805.77	0	0	0	0	0	0	0	603	903	0
620	4	0	0	0	0	0	0	200	300	0	35.4617	-60.4274	-635.601	62432.5	50798.5	-3636.84	279.922	804.774	0	0	0	0	0	0	0	603	903	0
620	5	0	0	0	0	0	0	200	300	0	35.7669	-59.0541	-636.211	63073.3	50615.4	-3591.07	279.558	803.861	0	0	0	0	0	0	0	603	903	0
620	6	0	0	0	0	0	0	200	300	0	37.2928	-59.9696	-634.38	62524	50066.1	-3407.96	278.921	804.441	0	0	0	0	0	0	0	603	903	0
620	7	0	0	0	0	0	0	200	300	0	37.9031	-60.8852	-633.769	62707.1	50676.5	-3591.07	279.96	804.057	0	0	0	0	0	0	0	603	903	0
620	8	0	0	0	0	0	0	200	300	0	35.3091	-59.3593	-634.38	62615.6	50615.4	-3270.63	279.787	804.296	0	0	0	0	0	0	0	603	903	0
620	9	0	0	0	0	0	0	200	300	0	36.0721	-58.5963	-633.464	62981.8	50066.1	-3407.96	279.035	803.576	0	0	0	0	0	0	0	603	903	0
621	0	0	0	0	0	0	0	200	300	0	36.2247	-58.5963	-632.244	62615.6	50615.4	-3453.74	280.057	803.963	0	0	0	0	0	0	0	603	903	0
621	1	0	0	0	0	0	0	200	300	0	35.004	-58.2912	-631.328	63164.9	50371.3	-3682.62	279.786	802.949	0	0	0	0	0	0	0	603	903	0
621	2	0	0	0	0	0	0	200	300	0	36.3773	-58.5963	-630.107	63256.4	50310.3	-3545.29	279.844	802.61	0	0	0	0	0	0	0	603	903	0
621	3	0	0	0	0	0	0	200	300	0	37.2928	-57.6808	-628.581	63805.8	50188.2	-3362.18	279.844	801.492	0	0	0	0	0	0	0	603	903	0
621	4	0	0	0	0	0	0	200	300	0	34.8514	-57.0705	-628.887	63439.5	50859.6	-3316.41	280.872	802.124	0	0	0	0	0	0	0	603	903	0
621	5	0	0	0	0	0	0	200	300	0	36.2247	-57.0705	-628.276	64080.4	50310.3	-3179.08	280.077	801.006	0	0	0	0	0	0	0	603	903	0
621	6	0	0	0	0	0	0	200	300	0	35.7669	-57.2231	-625.835	63988.9	49455.8	-3270.63	279.024	800.754	0	0	0	0	0	0	0	603	903	0
621	7	0	0	0	0	0	0	200	300	0	35.1566	-56.3075	-623.699	63805.8	50127.2	-3499.51	280.371	800.698	0	0	0	0	0	0	0	603	903	0
621	8	0	0	0	0	0	0	200	300	0	35.004	-54.9342	-625.835	63897.3	50493.4	-3224.86	280.682	800.901	0	0	0	0	0	0	0	603	903	0
621	9	0	0	0	0	0	0	200	300	0	33.9359	-55.392	-625.835	64263.5	50005.1	-2995.97	279.901	800.316	0	0	0	0	0	0	0	603	903	0
622	0	0	0	0	0	0	0	200	300	0	34.241	-55.0868	-624.004	64629.7	50066.1	-3224.86	280.234	799.427	0	0	0	0	0	0	0	603	903	0
622	1	0	0	0	0	0	0	200	300	0	34.0884	-54.9342	-622.783	64538.2	50127.2	-3087.53	280.489	799.371	0	0	0	0	0	0	0	603	903	0
622	2	0	0	0	0	0	0	200	300	0	34.0884	-53.5609	-622.478	64812.8	50005.1	-3179.08	280.332	798.879	0	0	0	0	0	0	0	603	903	0
622	3	0	0	0	0	0	0	200	300	0	34.6988	-53.4084	-621.562	64629.7	50066.1	-2995.97	280.549	799.021	0	0	0	0	0	0	0	603	903	0
622	4	0	0	0	0	0	0	200	300	0	34.5462	-53.5609	-622.173	65087.5	50371.3	-3041.75	280.96	798.387	0	0	0	0	0	0	0	603	903	0
622	5	0	0	0	0	0	0	200	300	0	33.3255	-53.5609	-620.647	64629.7	50371.3	-3270.63	281.159	798.867	0	0	0	0	0	0	0	603	903	0
622	6	0	0	0	0	0	0	200	300	0	33.7833	-52.6454	-619.121	65087.5	50066.1	-3636.84	280.866	797.871	0	0	0	0	0	0	0	603	903	0
622	7	0	0	0	0	0	0	200	300	0	34.5462	-53.1032	-619.426	65636.8	50432.3	-3087.53	281.418	797.036	0	0	0	0	0	0	0	603	903	0
622	8	0	0	0	0	0	0	200	300	0	33.7833	-51.5773	-619.426	65087.5	49944.1	-3179.08	280.63	797.923	0	0	0	0	0	0	0	603	903	0
622	9	0	0	0	0	0	0	200	300	0	35.004	-52.0351	-618.816	64904.4	49516.8	-3133.3	280.019	798.115	0	0	0	0	0	0	0	603	903	0
623	0	0	0	0	0	0	0	200	300	0	33.0203	-51.2721	-617.595	65728.4	50493.4	-3087.53	281.758	796.574	0	0	0	0	0	0	0	603	903	0
623	1	0	0	0	0	0	0	200	300	0	34.0884	-50.5092	-616.069	65728.4	49822	-3041.75	280.871	796.31	0	0	0	0	0	0	0	603	903	0
623	2	0	0	0	0	0	0	200	300	0	33.0203	-50.8144	-616.985	65636.8	50188.2	-2675.54	281.344	796.617	0	0	0	0	0	0	0	603	903	0
623	3	0	0	0	0	0	0	200	300	0	34.5462	-50.204	-613.933	65911.5	50188.2	-3041.75	281.749	795.641	0	0	0	0	0	0	0	603	903	0
623	4	0	0	0	0	0	0	200	300	0	32.7151	-48.8307	-616.069	66003	50188.2	-3133.3	281.465	795.864	0	0	0	0	0	0	0	603	903	0
623	5	0	0	0	0	0	0	200	300	0	32.5626	-49.8988	-615.154	66735.5	49760.9	-2904.42	280.892	794.514	0	0	0	0	0	0	0	603	903	0
623	6	0	0	0	0	0	0	200	300	0	31.4944	-48.8307	-612.407	65545.3	50127.2	-3270.63	281.853	795.971	0	0	0	0	0	0	0	603	903	0
623	7	0	0	0	0	0	0	200	300	0	31.3419	-49.1359	-614.238	66460.8	50005.1	-2858.64	281.41	794.8	0	0	0	0	0	0	0	603	903	0
623	8	0	0	0	0	0	0	200	300	0	32.1048	-48.9833	-614.238	66735.5	49638.9	-2995.97	280.814	794.353	0	0	0	0	0	0	0	603	903	0
623	9	0	0	0	0	0	0	200	300	0	31.7996	-48.373	-611.186	66003	50005.1	-3087.53	281.816	795.008	0	0	0	0	0	0	0	603	903	0
624	0	0	0	0	0	0	0	200	300	0	32.7151	-47.4574	-609.355	66643.9	49944.1	-2858.64	281.962	793.632	0	0	0	0	0	0	0	603	903	0
624	1	0	0	0	0	0	0	200	300	0	30.4263	-46.9997	-610.271	67010.1	49577.8	-2904.42	281.239	793.196	0	0	0	0	0	0	0	603	903	0
624	2	0	0	0	0	0	0	200	300	0	31.4944	-47.4574	-610.881	67101.7	49822	-2904.42	281.558	793.156	0	0	0	0	0	0	0	603	903	0
624	3	0	0	0	0	0	0	200	300	0	29.9686	-46.9997	-609.661	67467.9	49638.9	-2858.64	281.421	792.335	0	0	0	0	0	0	0	603	903	0
624	4	0	0	0	0	0	0	200	300	0	30.7315	-46.5419	-608.44	66918.5	49516.8	-2995.97	281.383	793.016	0	0	0	0	0	0	0	603	903	0
624	5	0	0	0	0	0	0	200	300	0	30.8841	-46.2367	-608.135	67376.3	49699.9	-2629.76	281.725	792.208	0	0	0	0	0	0	0	603	903	0
624	6	0	0	0	0	0	0	200	300	0	30.8841	-45.9315	-608.44	67284.8	50127.2	-2904.42	282.386	792.414	0	0	0	0	0	0	0	603	903	0
624	7	0	0	0	0	0	0	200	300	0	30.5789	-45.4738	-607.83	67284.8	49699.9	-2950.2	281.766	792.303	0	0	0	0	0	0	0	603	903	0
624	8	0	0	0	0	0	0	200	300	0	30.2737	-45.9315	-606.304	67925.6	49638.9	-2675.54	281.871	790.968	0	0	0	0	0	0	0	603	903	0
624	9	0	0	0	0	0	0	200	300	0	30.8841	-46.0841	-604.778	68108.7	50005.1	-2904.42	282.683	790.382	0	0	0	0	0	0	0	603	903	0
625	0	0	0	0	0	0	0	200	300	0	31.3419	-44.7108	-604.778	67559.4	49822	-2309.33	282.381	791.291	0	0	0	0	0	0	0	603	903	0
625	1	0	0	0	0	0	0	200	300	0	30.1212	-44.8634	-605.083	67467.9	49577.8	-2309.33	281.936	791.498	0	0	0	0	0	0	0	603	903	0
625	2	0	0	0	0	0	0	200	300	0	30.1212	-44.2531	-603.252	68108.7	49455.8	-2904.42	281.982	790.097	0	0	0	0	0	0	0	603	903	0
625	3	0	0	0	0	0	0	200	300	0	30.4263	-43.9479	-602.947	68749.6	49699.9	-2538.21	282.428	788.977	0	0	0	0	0	0	0	603	903	0
625	4	0	0	0	0	0	0	200	300	0	29.9686	-43.3376	-602.336	68108.7	49333.7	-2629.76	281.904	789.926	0	0	0	0	0	0	0	603	903	0
625	5	0	0	0	0	0	0	200	300	0	29.6634	-43.3376	-601.726	68108.7	49516.8	-2492.43	282.291	789.811	0	0	0	0	0	0	0	603	903	0
625	6	0	0	0	0	0	0	200	300	0	30.5789	-43.185	-601.726	68932.7	49883	-2721.32	282.9	788.442	0	0	0	0	0	0	0	603	903	0
625	7	0	0	0	0	0	0	200	300	0	32.1048	-42.7272	-599.895	68841.2	49211.6	-2675.54	282.034	788.245	0	0	0	0	0	0	0	603	903	0
625	8	0	0	0	0	0	0	200	300	0	29.5108	-42.5746	-596.233	68749.6	49455.8	-2355.1	282.947	787.693	0	0	0	0	0	0	0	603	903	0
625	9	0	0	0	0	0	0	200	300	0	28.4427	-41.2013	-598.064	69115.8	50005.1	-2721.32	283.612	787.434	0	0	0	0	0	0	0	603	903	0
626	0	0	0	0	0	0	0	200	300	0	30.8841	-41.9643	-598.979	68749.6	49394.7	-2400.88	282.465	788.222	0	0	0	0	0	0	0	603	903	0
626	1	0	0	0	0	0	0	200	300	0	29.6634	-42.8798	-597.759	68749.6	49394.7	-2492.43	282.633	787.988	0	0	0	0	0	0	0	603	903	0
626	2	0	0	0	0	0	0	200	300	0	29.053	-42.1169	-595.622	68932.7	49760.9	-2446.66	283.544	787.268	0	0	0	0	0	0	0	603	903	0
626	3	0	0	0	0	0	0	200	300	0	29.5108	-41.2013	-595.622	69573.6	49333.7	-2446.66	282.827	786.192	0	0	0	0	0	0	0	603	903	0
626	4	0	0	0	0	0	0	200	300	0	32.7151	-41.0487	-595.928	69848.2	49211.6	-1897.34	282.58	785.791	0	0	0	0	0	0	0	603	903	0
626	5	0	0	0	0	0	0	200	300	0	29.2056	-40.7436	-595.622	69298.9	49577.8	-2309.33	283.237	786.653	0	0	0	0	0	0	0	603	903	0
626	6	0	0	0	0	0	0	200	300	0	29.053	-39.9806	-592.876	69482	49516.8	-2400.88	283.52	785.805	0	0	0	0	0	0	0	603	903	0
626	7	0	0	0	0	0	0	200	300	0	29.816	-40.1332	-593.181	69298.9	49211.6	-2217.78	282.962	786.174	0	0	0	0	0	0	0	603	903	0
626	8	0	0	0	0	0	0	200	300	0	29.816	-39.9806	-592.571	69482	49699.9	-2263.55	283.872	785.745	0	0	0	0	0	0	0	603	903	0
626	9	0	0	0	0	0	0	200	300	0	29.053	-39.5229	-593.181	69298.9	49455.8	-2263.55	283.374	786.174	0	0	0	0	0	0	0	603	903	0
627	0	0	0	0	0	0	0	200	300	0	28.9005	-39.0651	-591.045	70397.6	49211.6	-2263.55	283.262	783.893	0	0	0	0	0	0	0	603	903	0
627	1	0	0	0	0	0	0	200	300	0	29.6634	-38.4547	-589.519	70122.9	49211.6	-2172	283.478	784.051	0	0	0	0	0	0	0	603	903	0
627	2	0	0	0	0	0	0	200	300	0	29.053	-38.4547	-590.435	70580.7	48845.4	-2080.45	282.728	783.46	0	0	0	0	0	0	0	603	903	0
627	3	0	0	0	0	0	0	200	300	0	29.3582	-38.9125	-589.519	69756.7	49028.5	-2172	283.167	784.672	0	0	0	0	0	0	0	603	903	0
627	4	0	0	0	0	0	0	200	300	0	29.2056	-38.3022	-588.298	70672.2	49211.6	-2080.45	283.651	782.87	0	0	0	0	0	0	0	603	903	0
627	5	0	0	0	0	0	0	200	300	0	29.6634	-37.3866	-587.993	71038.4	49638.9	-2080.45	284.421	782.185	0	0	0	0	0	0	0	603	903	0
627	6	0	0	0	0	0	0	200	300	0	30.1212	-37.5392	-587.383	70672.2	49211.6	-2172	283.781	782.683	0	0	0	0	0	0	0	603	903	0
627	7	0	0	0	0	0	0	200	300	0	29.2056	-37.6918	-587.383	70855.3	49333.7	-1805.79	283.989	782.371	0	0	0	0	0	0	0	603	903	0
627	8	0	0	0	0	0	0	200	300	0	28.9005	-37.234	-584.941	71587.7	49516.8	-1897.34	284.653	780.616	0	0	0	0	0	0	0	603	903	0
627	9	0	0	0	0	0	0	200	300	0	29.3582	-36.4711	-583.721	71404.6	49089.6	-2126.22	284.098	780.673	0	0	0	0	0	0	0	603	903	0
628	0	0	0	0	0	0	0	200	300	0	29.9686	-36.6237	-582.5	70946.9	48296.1	-1668.46	282.912	781.203	0	0	0	0	0	0	0	603	903	0
628	1	0	0	0	0	0	0	200	300	0	29.2056	-36.0133	-584.026	71221.5	49516.8	-1943.12	284.785	781.051	0	0	0	0	0	0	0	603	903	0
628	2	0	0	0	0	0	0	200	300	0	29.816	-37.5392	-583.721	71770.8	49272.7	-1897.34	284.411	780.046	0	0	0	0	0	0	0	603	903	0
628	3	0	0	0	0	0	0	200	300	0	31.0367	-36.1659	-583.415	71404.6	49150.6	-1393.8	284.246	780.609	0	0	0	0	0	0	0	603	903	0
628	4	0	0	0	0	0	0	200	300	0	29.2056	-36.3185	-581.584	71130	49272.7	-1622.68	284.721	780.696	0	0	0	0	0	0	0	603	903	0
628	5	0	0	0	0	0	0	200	300	0	31.1893	-35.0978	-582.195	71679.3	49089.6	-1576.91	284.318	779.881	0	0	0	0	0	0	0	603	903	0
628	6	0	0	0	0	0	0	200	300	0	29.816	-35.5556	-581.89	72411.7	48845.4	-1668.46	283.943	778.558	0	0	0	0	0	0	0	603	903	0
628	7	0	0	0	0	0	0	200	300	0	29.2056	-34.7926	-579.448	71587.7	48784.4	-1714.23	284.191	779.455	0	0	0	0	0	0	0	603	903	0
628	8	0	0	0	0	0	0	200	300	0	28.7479	-34.4875	-578.838	72594.8	48967.5	-1622.68	284.596	777.585	0	0	0	0	0	0	0	603	903	0
628	9	0	0	0	0	0	0	200	300	0	28.4427	-34.3349	-580.364	71953.9	48540.2	-1622.68	283.638	779.019	0	0	0	0	0	0	0	603	903	0
629	0	0	0	0	0	0	0	200	300	0	30.2737	-34.64	-578.533	71587.7	48601.3	-1576.91	284.008	779.26	0	0	0	0	0	0	0	603	903	0
629	1	0	0	0	0	0	0	200	300	0	29.5108	-34.9452	-577.922	73235.7	48967.5	-1622.68	284.73	776.278	0	0	0	0	0	0	0	603	903	0
629	2	0	0	0	0	0	0	200	300	0	28.9005	-33.5719	-577.007	72045.5	48113	-1393.8	283.384	778.139	0	0	0	0	0	0	0	603	903	0
629	3	0	0	0	0	0	0	200	300	0	29.3582	-33.2668	-576.091	72869.5	48540.2	-1393.8	284.258	776.511	0	0	0	0	0	0	0	603	903	0
629	4	0	0	0	0	0	0	200	300	0	29.6634	-33.1142	-576.702	73144.1	48967.5	-1302.25	284.91	776.168	0	0	0	0	0	0	0	603	903	0
629	5	0	0	0	0	0	0	200	300	0	29.053	-34.3349	-577.312	72777.9	48723.3	-1531.13	284.397	776.937	0	0	0	0	0	0	0	603	903	0
629	6	0	0	0	0	0	0	200	300	0	28.7479	-33.2668	-574.565	72869.5	47624.7	-1119.14	282.888	776.175	0	0	0	0	0	0	0	603	903	0
629	7	0	0	0	0	0	0	200	300	0	28.2901	-33.1142	-574.871	73601.9	49089.6	-1210.69	285.392	774.968	0	0	0	0	0	0	0	603	903	0
629	8	0	0	0	0	0	0	200	300	0	29.053	-32.809	-575.176	73785	48662.3	-1439.58	284.604	774.718	0	0	0	0	0	0	0	603	903	0
629	9	0	0	0	0	0	0	200	300	0	28.5953	-33.1142	-574.871	73601.9	48479.2	-1302.25	284.331	774.968	0	0	0	0	0	0	0	603	903	0
630	0	0	0	0	0	0	0	200	300	0	30.2737	-33.2668	-572.734	73601.9	48479.2	-844.484	284.645	774.49	0	0	0	0	0	0	0	603	903	0
630	1	0	0	0	0	0	0	200	300	0	29.6634	-31.7409	-570.293	74609	48662.3	-1210.69	285.329	772.174	0	0	0	0	0	0	0	603	903	0
630	2	0	0	0	0	0	0	200	300	0	29.5108	-31.5883	-571.514	74883.6	48113	-1073.37	284.185	771.973	0	0	0	0	0	0	0	603	903	0
630	3	0	0	0	0	0	0	200	300	0	28.4427	-31.7409	-573.65	73144.1	48418.2	-981.813	284.404	775.493	0	0	0	0	0	0	0	603	903	0
630	4	0	0	0	0	0	0	200	300	0	28.4427	-31.8935	-572.429	74883.6	48479.2	-890.26	284.69	772.183	0	0	0	0	0	0	0	603	903	0
630	5	0	0	0	0	0	0	200	300	0	29.6634	-31.5883	-572.429	74975.2	48174	-890.26	284.157	772.023	0	0	0	0	0	0	0	603	903	0
630	6	0	0	0	0	0	0	200	300	0	29.9686	-30.9779	-569.683	74425.9	48174	-844.484	284.563	772.355	0	0	0	0	0	0	0	603	903	0
630	7	0	0	0	0	0	0	200	300	0	28.1375	-30.8253	-570.903	74883.6	48662.3	-981.813	285.237	771.833	0	0	0	0	0	0	0	603	903	0
630	8	0	0	0	0	0	0	200	300	0	28.1375	-30.3676	-571.514	75890.7	48418.2	-844.484	284.719	770.211	0	0	0	0	0	0	0	603	903	0
630	9	0	0	0	0	0	0	200	300	0	29.9686	-30.5202	-570.598	75158.3	48418.2	-890.26	284.855	771.282	0	0	0	0	0	0	0	603	903	0
631	0	0	0	0	0	0	0	200	300	0	29.053	-29.7572	-567.852	75341.4	48540.2	-707.154	285.481	770.322	0	0	0	0	0	0	0	603	903	0
631	1	0	0	0	0	0	0	200	300	0	28.1375	-31.1305	-570.903	75433	48662.3	-1073.37	285.237	770.871	0	0	0	0	0	0	0	603	903	0
631	2	0	0	0	0	0	0	200	300	0	29.053	-29.4521	-571.208	75982.3	48052	-844.484	284.123	769.98	0	0	0	0	0	0	0	603	903	0
631	3	0	0	0	0	0	0	200	300	0	29.2056	-30.3676	-570.598	75982.3	48479.2	-752.931	284.962	769.838	0	0	0	0	0	0	0	603	903	0
631	4	0	0	0	0	0	0	200	300	0	29.3582	-29.9098	-569.377	76165.4	48296.1	-890.26	284.823	769.23	0	0	0	0	0	0	0	603	903	0
631	5	0	0	0	0	0	0	200	300	0	28.1375	-28.8417	-570.598	76348.5	47990.9	-524.049	284.106	769.196	0	0	0	0	0	0	0	603	903	0
631	6	0	0	0	0	0	0	200	300	0	28.9005	-29.7572	-570.293	76623.2	48052	-295.167	284.258	768.642	0	0	0	0	0	0	0	603	903	0
631	7	0	0	0	0	0	0	200	300	0	29.053	-28.5365	-564.8	76989.4	48540.2	-798.707	285.942	766.687	0	0	0	0	0	0	0	603	903	0
631	8	0	0	0	0	0	0	200	300	0	28.9005	-29.7572	-570.293	76806.2	48662.3	-752.931	285.329	768.321	0	0	0	0	0	0	0	603	903	0
631	9	0	0	0	0	0	0	200	300	0	28.4427	-28.5365	-569.377	76714.7	47990.9	-478.272	284.287	768.266	0	0	0	0	0	0	0	603	903	0
632	0	0	0	0	0	0	0	200	300	0	28.5953	-28.3839	-567.241	77172.5	48357.1	-432.496	285.25	766.951	0	0	0	0	0	0	0	603	903	0
632	1	0	0	0	0	0	0	200	300	0	29.5108	-27.7736	-569.377	77630.2	48113	-524.049	284.501	766.658	0	0	0	0	0	0	0	603	903	0
632	2	0	0	0	0	0	0	200	300	0	30.5789	-28.3839	-569.072	76897.8	47807.8	-478.272	284.01	767.872	0	0	0	0	0	0	0	603	903	0
632	3	0	0	0	0	0	0	200	300	0	28.4427	-27.9262	-569.072	77355.6	48296.1	-478.272	284.868	767.067	0	0	0	0	0	0	0	603	903	0
632	4	0	0	0	0	0	0	200	300	0	28.2901	-28.0788	-568.462	77996.5	48235.1	-478.272	284.852	765.794	0	0	0	0	0	0	0	603	903	0
632	5	0	0	0	0	0	0	200	300	0	29.5108	-27.4684	-567.852	77447.1	47502.6	-432.496	283.653	766.614	0	0	0	0	0	0	0	603	903	0
632	6	0	0	0	0	0	0	200	300	0	27.0694	-26.4003	-568.767	77721.8	48052	-249.391	284.484	766.35	0	0	0	0	0	0	0	603	903	0
632	7	0	0	0	0	0	0	200	300	0	27.6797	-27.1632	-569.377	78362.7	47868.9	-432.496	284.072	765.371	0	0	0	0	0	0	0	603	903	0
632	8	0	0	0	0	0	0	200	300	0	28.9005	-26.5529	-569.072	78454.2	47563.7	-295.167	283.581	765.137	0	0	0	0	0	0	0	603	903	0
632	9	0	0	0	0	0	0	200	300	0	28.2901	-26.7055	-568.462	77996.5	47929.9	71.0441	284.315	765.794	0	0	0	0	0	0	0	603	903	0
633	0	0	0	0	0	0	0	200	300	0	26.9168	-25.6374	-569.683	78454.2	47990.9	-203.614	284.242	765.284	0	0	0	0	0	0	0	603	903	0
633	1	0	0	0	0	0	0	200	300	0	26.9168	-25.7899	-566.631	78912	47929.9	-66.2851	284.588	763.735	0	0	0	0	0	0	0	603	903	0
633	2	0	0	0	0	0	0	200	300	0	28.7479	-26.2477	-570.598	79186.6	47685.8	208.373	283.572	764.222	0	0	0	0	0	0	0	603	903	0
633	3	0	0	0	0	0	0	200	300	0	28.2901	-25.4848	-568.462	79278.2	48052	-157.838	284.53	763.539	0	0	0	0	0	0	0	603	903	0
633	4	0	0	0	0	0	0	200	300	0	29.3582	-25.4848	-569.683	79369.7	47990.9	-66.2851	284.242	763.677	0	0	0	0	0	0	0	603	903	0
633	5	0	0	0	0	0	0	200	300	0	26.0013	-24.7218	-570.903	79735.9	47685.8	162.597	283.527	763.334	0	0	0	0	0	0	0	603	903	0
633	6	0	0	0	0	0	0	200	300	0	28.9005	-25.027	-569.683	79827.5	47929.9	25.2677	284.134	762.874	0	0	0	0	0	0	0	603	903	0
633	7	0	0	0	0	0	0	200	300	0	26.1539	-24.4167	-571.208	79827.5	47929.9	254.149	283.91	763.248	0	0	0	0	0	0	0	603	903	0
633	8	0	0	0	0	0	0	200	300	0	26.6116	-24.8744	-568.462	80010.6	47624.7	162.597	283.778	762.251	0	0	0	0	0	0	0	603	903	0
633	9	0	0	0	0	0	0	200	300	0	26.7642	-23.8063	-569.377	79552.9	47685.8	208.373	283.751	763.281	0	0	0	0	0	0	0	603	903	0
634	0	0	0	0	0	0	0	200	300	0	26.1539	-23.3485	-570.598	81383.9	48052	299.926	284.213	760.371	0	0	0	0	0	0	0	603	903	0
634	1	0	0	0	0	0	0	200	300	0	26.6116	-23.8063	-570.598	79461.3	47502.6	299.926	283.251	763.74	0	0	0	0	0	0	0	603	903	0
634	2	0	0	0	0	0	0	200	300	0	25.2383	-23.3485	-569.377	80559.9	47685.8	437.255	283.751	761.512	0	0	0	0	0	0	0	603	903	0
634	3	0	0	0	0	0	0	200	300	0	26.3065	-24.2641	-570.598	80285.3	48174	299.926	284.427	762.296	0	0	0	0	0	0	0	603	903	0
634	4	0	0	0	0	0	0	200	300	0	26.459	-22.2804	-569.988	80926.1	47258.5	299.926	282.911	761.021	0	0	0	0	0	0	0	603	903	0
634	5	0	0	0	0	0	0	200	300	0	25.5435	-22.8908	-571.514	80468.4	47929.9	483.031	283.865	762.201	0	0	0	0	0	0	0	603	903	0
634	6	0	0	0	0	0	0	200	300	0	25.0858	-21.9752	-571.208	81017.7	48235.1	437.255	284.444	761.164	0	0	0	0	0	0	0	603	903	0
634	7	0	0	0	0	0	0	200	300	0	25.5435	-21.0597	-570.598	82024.8	47929.9	299.926	283.999	759.248	0	0	0	0	0	0	0	603	903	0
634	8	0	0	0	0	0	0	200	300	0	25.6961	-22.2804	-572.734	81200.8	47807.8	757.69	283.473	761.223	0	0	0	0	0	0	0	603	903	0
634	9	0	0	0	0	0	0	200	300	0	25.0858	-21.3649	-572.124	81750.1	48052	391.479	283.989	760.111	0	0	0	0	0	0	0	603	903	0
635	0	0	0	0	0	0	0	200	300	0	24.7806	-20.4494	-573.955	82391	47990.9	757.69	283.614	759.451	0	0	0	0	0	0	0	603	903	0
635	1	0	0	0	0	0	0	200	300	0	25.3909	-20.9071	-571.208	82207.9	47624.7	574.584	283.375	759.081	0	0	0	0	0	0	0	603	903	0
635	2	0	0	0	0	0	0	200	300	0	25.2383	-20.1442	-573.345	82024.8	48174	711.913	284.023	759.936	0	0	0	0	0	0	0	603	903	0
635	3	0	0	0	0	0	0	200	300	0	27.222	-19.9916	-573.955	82848.8	48174	757.69	283.934	758.653	0	0	0	0	0	0	0	603	903	0
635	4	0	0	0	0	0	0	200	300	0	25.3909	-19.5338	-575.481	82757.2	47746.8	940.795	282.969	759.195	0	0	0	0	0	0	0	603	903	0
635	5	0	0	0	0	0	0	200	300	0	25.6961	-19.6864	-574.871	83123.4	47929.9	666.137	283.375	758.405	0	0	0	0	0	0	0	603	903	0
635	6	0	0	0	0	0	0	200	300	0	23.2547	-19.0761	-575.481	83489.6	47929.9	757.69	283.287	757.922	0	0	0	0	0	0	0	603	903	0
635	7	0	0	0	0	0	0	200	300	0	25.0858	-18.9235	-575.176	83398	47380.6	940.795	282.376	758.004	0	0	0	0	0	0	0	603	903	0
635	8	0	0	0	0	0	0	200	300	0	24.4754	-18.7709	-571.819	83764.2	47929.9	1032.35	283.82	756.513	0	0	0	0	0	0	0	603	903	0
635	9	0	0	0	0	0	0	200	300	0	24.628	-19.2287	-575.481	83398	47929.9	849.242	283.287	758.081	0	0	0	0	0	0	0	603	903	0
636	0	0	0	0	0	0	0	200	300	0	24.1702	-17.7028	-576.702	83489.6	47441.6	1032.35	282.264	758.229	0	0	0	0	0	0	0	603	903	0
636	1	0	0	0	0	0	0	200	300	0	24.0176	-18.3131	-575.786	84313.6	47990.9	1307.01	283.349	756.568	0	0	0	0	0	0	0	603	903	0
636	2	0	0	0	0	0	0	200	300	0	24.7806	-17.245	-575.481	84313.6	48052	1261.23	283.499	756.49	0	0	0	0	0	0	0	603	903	0
636	3	0	0	0	0	0	0	200	300	0	24.628	-16.9398	-576.702	84222	47807.8	1169.68	282.899	756.959	0	0	0	0	0	0	0	603	903	0
636	4	0	0	0	0	0	0	200	300	0	23.5599	-17.245	-579.143	84130.5	47929.9	1490.11	282.76	757.733	0	0	0	0	0	0	0	603	903	0
636	5	0	0	0	0	0	0	200	300	0	23.7125	-17.3976	-574.565	84679.8	47807.8	1123.9	283.207	755.619	0	0	0	0	0	0	0	603	903	0
636	6	0	0	0	0	0	0	200	300	0	25.3909	-16.9398	-578.533	85229.1	48113	1490.11	283.164	755.681	0	0	0	0	0	0	0	603	903	0
636	7	0	0	0	0	0	0	200	300	0	23.2547	-16.3295	-577.922	84862.9	47746.8	1307.01	282.618	756.159	0	0	0	0	0	0	0	603	903	0
636	8	0	0	0	0	0	0	200	300	0	24.9332	-15.414	-577.312	85137.5	48113	1444.34	283.34	755.528	0	0	0	0	0	0	0	603	903	0
636	9	0	0	0	0	0	0	200	300	0	24.4754	-15.1088	-578.533	86327.7	48113	1673.22	283.164	753.782	0	0	0	0	0	0	0	603	903	0
637	0	0	0	0	0	0	0	200	300	0	24.4754	-15.1088	-580.669	85961.5	47746.8	1718.99	282.227	754.961	0	0	0	0	0	0	0	603	903	0
637	1	0	0	0	0	0	0	200	300	0	23.8651	-15.1088	-579.753	84954.5	48052	1627.44	282.883	756.465	0	0	0	0	0	0	0	603	903	0
637	2	0	0	0	0	0	0	200	300	0	22.7969	-13.7355	-577.922	86785.5	47624.7	1764.77	282.407	752.832	0	0	0	0	0	0	0	603	903	0
637	3	0	0	0	0	0	0	200	300	0	24.7806	-14.8036	-580.669	86236.2	47685.8	1856.32	282.122	754.488	0	0	0	0	0	0	0	603	903	0
637	4	0	0	0	0	0	0	200	300	0	24.4754	-13.5829	-580.974	85778.4	48052	1902.1	282.709	755.354	0	0	0	0	0	0	0	603	903	0
637	5	0	0	0	0	0	0	200	300	0	23.2547	-13.8881	-581.584	86327.7	48296.1	1856.32	283.042	754.565	0	0	0	0	0	0	0	603	903	0
637	6	0	0	0	0	0	0	200	300	0	24.1702	-13.1252	-581.584	86785.5	47685.8	1810.55	281.993	753.778	0	0	0	0	0	0	0	603	903	0
637	7	0	0	0	0	0	0	200	300	0	25.6961	-13.5829	-580.974	87060.1	48357.1	1993.65	283.235	753.148	0	0	0	0	0	0	0	603	903	0
637	8	0	0	0	0	0	0	200	300	0	24.1702	-12.5148	-581.89	86968.6	48418.2	1810.55	283.209	753.541	0	0	0	0	0	0	0	603	903	0
637	9	0	0	0	0	0	0	200	300	0	25.5435	-11.9044	-581.279	87151.7	48418.2	1947.88	283.296	753.069	0	0	0	0	0	0	0	603	903	0
638	0	0	0	0	0	0	0	200	300	0	24.7806	-12.2096	-584.941	87609.5	47380.6	2314.09	281.001	753.225	0	0	0	0	0	0	0	603	903	0
638	1	0	0	0	0	0	0	200	300	0	26.1539	-12.057	-581.584	87792.6	48296.1	2085.2	283.042	752.046	0	0	0	0	0	0	0	603	903	0
638	2	0	0	0	0	0	0	200	300	0	23.8651	-11.5993	-583.415	87609.5	48418.2	2130.98	282.991	752.833	0	0	0	0	0	0	0	603	903	0
638	3	0	0	0	0	0	0	200	300	0	24.0176	-10.0734	-585.552	87517.9	48052	2359.86	282.063	753.538	0	0	0	0	0	0	0	603	903	0
638	4	0	0	0	0	0	0	200	300	0	24.4754	-10.0734	-584.636	87975.7	47990.9	2497.19	282.087	752.521	0	0	0	0	0	0	0	603	903	0
638	5	0	0	0	0	0	0	200	300	0	24.4754	-9.61563	-584.941	89257.4	48357.1	2405.64	282.67	750.408	0	0	0	0	0	0	0	603	903	0
638	6	0	0	0	0	0	0	200	300	0	24.1702	-9.31045	-585.247	88891.2	48052	2405.64	282.105	751.113	0	0	0	0	0	0	0	603	903	0
638	7	0	0	0	0	0	0	200	300	0	24.1702	-8.39493	-585.857	88433.4	48113	2359.86	282.124	752.053	0	0	0	0	0	0	0	603	903	0
638	8	0	0	0	0	0	0	200	300	0	24.1702	-8.85269	-586.467	89715.2	48479.2	2405.64	282.663	750.024	0	0	0	0	0	0	0	603	903	0
638	9	0	0	0	0	0	0	200	300	0	24.628	-8.7001	-586.467	89349	47929.9	2588.74	281.726	750.649	0	0	0	0	0	0	0	603	903	0
639	0	0	0	0	0	0	0	200	300	0	24.0176	-8.08975	-583.415	88891.2	48357.1	2817.63	282.886	750.637	0	0	0	0	0	0	0	603	903	0
639	1	0	0	0	0	0	0	200	300	0	24.0176	-8.54751	-586.467	89165.9	48601.3	2680.3	282.871	750.961	0	0	0	0	0	0	0	603	903	0
639	2	0	0	0	0	0	0	200	300	0	24.628	-6.71646	-589.214	89257.4	48357.1	2817.63	282.071	751.514	0	0	0	0	0	0	0	603	903	0
639	3	0	0	0	0	0	0	200	300	0	25.6961	-6.41128	-587.993	90539.2	48113	3229.61	281.826	749.02	0	0	0	0	0	0	0	603	903	0
639	4	0	0	0	0	0	0	200	300	0	23.8651	-5.95352	-586.467	89898.3	48784.4	2954.96	283.183	749.712	0	0	0	0	0	0	0	603	903	0
639	5	0	0	0	0	0	0	200	300	0	24.7806	-5.34317	-587.688	90264.5	48723.3	2863.4	282.907	749.407	0	0	0	0	0	0	0	603	903	0
639	6	0	0	0	0	0	0	200	300	0	24.4754	-5.19058	-590.129	89806.8	48540.2	3183.84	282.254	750.819	0	0	0	0	0	0	0	603	903	0
639	7	0	0	0	0	0	0	200	300	0	24.7806	-5.64834	-589.214	90447.6	48357.1	3183.84	282.071	749.494	0	0	0	0	0	0	0	603	903	0
639	8	0	0	0	0	0	0	200	300	0	24.4754	-4.27505	-587.078	90813.8	48845.4	3092.28	283.201	748.312	0	0	0	0	0	0	0	603	903	0
639	9	0	0	0	0	0	0	200	300	0	24.4754	-5.34317	-587.993	91454.7	48357.1	3046.51	282.241	747.463	0	0	0	0	0	0	0	603	903	0
640	0	0	0	0	0	0	0	200	300	0	25.0858	-4.73282	-589.214	90905.4	48601.3	3412.72	282.485	748.717	0	0	0	0	0	0	0	603	903	0
640	1	0	0	0	0	0	0	200	300	0	24.9332	-3.51211	-589.214	91271.6	48906.5	3595.82	283.003	748.096	0	0	0	0	0	0	0	603	903	0
640	2	0	0	0	0	0	0	200	300	0	25.8487	-3.51211	-591.655	91180	48723.3	3504.27	282.351	748.89	0	0	0	0	0	0	0	603	903	0
640	3	0	0	0	0	0	0	200	300	0	24.7806	-2.90176	-590.435	91912.5	48357.1	3595.82	281.901	747.331	0	0	0	0	0	0	0	603	903	0
640	4	0	0	0	0	0	0	200	300	0	25.6961	-2.74917	-590.74	92370.2	49211.6	3458.5	283.305	746.636	0	0	0	0	0	0	0	603	903	0
640	5	0	0	0	0	0	0	200	300	0	25.6961	-1.37588	-592.266	91912.5	48418.2	3733.15	281.751	747.812	0	0	0	0	0	0	0	603	903	0
640	6	0	0	0	0	0	0	200	300	0	26.3065	-2.29141	-591.045	92004	48967.5	4007.81	282.849	747.337	0	0	0	0	0	0	0	603	903	0
640	7	0	0	0	0	0	0	200	300	0	25.0858	-2.59659	-592.876	92644.9	49150.6	3870.48	282.902	746.736	0	0	0	0	0	0	0	603	903	0
640	8	0	0	0	0	0	0	200	300	0	27.222	-0.612944	-593.791	92736.4	48784.4	3733.15	282.157	746.823	0	0	0	0	0	0	0	603	903	0
640	9	0	0	0	0	0	0	200	300	0	25.6961	-0.765532	-593.791	92644.9	48662.3	4374.02	281.952	746.977	0	0	0	0	0	0	0	603	903	0
641	0	0	0	0	0	0	0	200	300	0	24.3228	-0.15518	-595.012	93011.1	48906.5	4145.14	282.194	746.682	0	0	0	0	0	0	0	603	903	0
641	1	0	0	0	0	0	0	200	300	0	26.6116	0.302584	-595.317	93651.9	48723.3	4465.58	281.844	745.686	0	0	0	0	0	0	0	603	903	0
641	2	0	0	0	0	0	0	200	300	0	26.1539	0.912935	-595.317	93651.9	48784.4	4465.58	281.947	745.686	0	0	0	0	0	0	0	603	903	0
641	3	0	0	0	0	0	0	200	300	0	25.0858	0.760347	-593.486	93285.7	48906.5	4374.02	282.405	745.817	0	0	0	0	0	0	0	603	903	0
641	4	0	0	0	0	0	0	200	300	0	27.0694	0.760347	-595.622	93926.6	49211.6	4145.14	282.622	745.305	0	0	0	0	0	0	0	603	903	0
641	5	0	0	0	0	0	0	200	300	0	24.7806	1.21811	-597.148	94475.9	48601.3	4419.8	281.389	744.788	0	0	0	0	0	0	0	603	903	0
641	6	0	0	0	0	0	0	200	300	0	26.7642	1.21811	-597.454	93743.5	48906.5	4511.35	281.858	746.095	0	0	0	0	0	0	0	603	903	0
641	7	0	0	0	0	0	0	200	300	0	25.5435	2.13364	-596.233	94475.9	49333.7	4557.13	282.742	744.545	0	0	0	0	0	0	0	603	903	0
641	8	0	0	0	0	0	0	200	300	0	27.0694	3.35434	-598.979	94475.9	49394.7	4602.9	282.465	745.272	0	0	0	0	0	0	0	603	903	0
641	9	0	0	0	0	0	0	200	300	0	27.0694	3.20175	-598.979	94933.7	48845.4	4740.23	281.548	744.508	0	0	0	0	0	0	0	603	903	0
642	0	0	0	0	0	0	0	200	300	0	27.3746	3.65952	-599.895	95116.8	49638.9	4877.56	282.746	744.444	0	0	0	0	0	0	0	603	903	0
642	1	0	0	0	0	0	0	200	300	0	26.3065	3.81211	-599.895	95574.6	49150.6	4923.34	281.932	743.681	0	0	0	0	0	0	0	603	903	0
642	2	0	0	0	0	0	0	200	300	0	28.5953	4.57504	-599.285	95208.4	49150.6	4969.12	282.015	744.13	0	0	0	0	0	0	0	603	903	0
642	3	0	0	0	0	0	0	200	300	0	28.1375	3.96469	-601.116	95940.8	49394.7	4923.34	282.172	743.396	0	0	0	0	0	0	0	603	903	0
642	4	0	0	0	0	0	0	200	300	0	26.459	6.25351	-601.726	96032.3	49577.8	4694.46	282.393	743.405	0	0	0	0	0	0	0	603	903	0
642	5	0	0	0	0	0	0	200	300	0	26.459	4.72763	-602.947	96307	48906.5	4969.12	281.112	743.273	0	0	0	0	0	0	0	603	903	0
642	6	0	0	0	0	0	0	200	300	0	26.1539	5.64316	-602.336	96032.3	49638.9	5106.44	282.411	743.567	0	0	0	0	0	0	0	603	903	0
642	7	0	0	0	0	0	0	200	300	0	27.3746	5.94834	-602.947	95940.8	49883	5152.22	282.732	743.88	0	0	0	0	0	0	0	603	903	0
642	8	0	0	0	0	0	0	200	300	0	27.3746	7.01645	-605.083	97497.2	49699.9	5426.88	282.137	741.87	0	0	0	0	0	0	0	603	903	0
642	9	0	0	0	0	0	0	200	300	0	26.3065	5.94834	-605.388	97039.4	49028.5	5518.43	280.987	742.707	0	0	0	0	0	0	0	603	903	0
643	0	0	0	0	0	0	0	200	300	0	26.459	7.32163	-605.693	97131	50066.1	5335.33	282.659	742.637	0	0	0	0	0	0	0	603	903	0
643	1	0	0	0	0	0	0	200	300	0	27.5272	8.23715	-606.609	98321.1	50005.1	5518.43	282.434	740.917	0	0	0	0	0	0	0	603	903	0
643	2	0	0	0	0	0	0	200	300	0	27.6797	8.08457	-608.135	98046.5	49822	5426.88	281.926	741.775	0	0	0	0	0	0	0	603	903	0
643	3	0	0	0	0	0	0	200	300	0	26.3065	7.93198	-608.745	97771.8	50127.2	5564.21	282.345	742.388	0	0	0	0	0	0	0	603	903	0
643	4	0	0	0	0	0	0	200	300	0	28.7479	8.54233	-609.05	98229.6	50249.2	5655.76	282.504	741.717	0	0	0	0	0	0	0	603	903	0
643	5	0	0	0	0	0	0	200	300	0	26.7642	8.84751	-609.661	98778.9	49883	5564.21	281.821	740.977	0	0	0	0	0	0	0	603	903	0
643	6	0	0	0	0	0	0	200	300	0	29.816	9.91562	-609.661	98870.5	50249.2	5564.21	282.422	740.827	0	0	0	0	0	0	0	603	903	0
643	7	0	0	0	0	0	0	200	300	0	27.9849	10.2208	-611.186	99145.1	50371.3	5838.87	282.416	740.783	0	0	0	0	0	0	0	603	903	0
643	8	0	0	0	0	0	0	200	300	0	29.2056	10.2208	-612.102	98687.3	49638.9	6067.75	281.096	741.773	0	0	0	0	0	0	0	603	903	0
643	9	0	0	0	0	0	0	200	300	0	26.6116	10.3734	-612.102	99694.5	50432.3	5747.31	282.392	740.128	0	0	0	0	0	0	0	603	903	0
644	0	0	0	0	0	0	0	200	300	0	27.8323	10.8311	-612.102	99877.5	50737.5	6021.97	282.891	739.829	0	0	0	0	0	0	0	603	903	0
644	1	0	0	0	0	0	0	200	300	0	28.2901	11.5941	-613.933	99694.5	50371.3	6525.51	282.047	740.614	0	0	0	0	0	0	0	603	903	0
644	2	0	0	0	0	0	0	200	300	0	26.9168	10.8311	-614.849	100335	50737.5	5976.2	282.52	739.813	0	0	0	0	0	0	0	603	903	0
644	3	0	0	0	0	0	0	200	300	0	27.5272	11.7467	-613.933	100610	50676.5	5976.2	282.544	739.122	0	0	0	0	0	0	0	603	903	0
644	4	0	0	0	0	0	0	200	300	0	27.9849	11.8993	-615.459	101251	50737.5	5747.31	282.438	738.487	0	0	0	0	0	0	0	603	903	0
644	5	0	0	0	0	0	0	200	300	0	27.9849	11.7467	-617.29	100610	50554.4	6250.85	281.897	740.014	0	0	0	0	0	0	0	603	903	0
644	6	0	0	0	0	0	0	200	300	0	27.5272	13.2726	-617.29	101342	50676.5	6250.85	282.095	738.827	0	0	0	0	0	0	0	603	903	0
644	7	0	0	0	0	0	0	200	300	0	28.1375	13.5777	-618.511	101709	51164.8	6479.74	282.723	738.559	0	0	0	0	0	0	0	603	903	0
644	8	0	0	0	0	0	0	200	300	0	31.0367	13.8829	-618.206	102166	51347.9	6479.74	283.06	737.737	0	0	0	0	0	0	0	603	903	0
644	9	0	0	0	0	0	0	200	300	0	29.3582	14.3407	-618.816	101526	50249.2	6525.51	281.202	738.936	0	0	0	0	0	0	0	603	903	0
645	0	0	0	0	0	0	0	200	300	0	28.7479	14.951	-620.647	102716	51469.9	6662.84	282.929	737.502	0	0	0	0	0	0	0	603	903	0
645	1	0	0	0	0	0	0	200	300	0	28.1375	14.1881	-618.816	102624	51347.9	6433.96	282.978	737.161	0	0	0	0	0	0	0	603	903	0
645	2	0	0	0	0	0	0	200	300	0	31.1893	14.6458	-622.478	102899	50981.6	6479.74	281.901	737.695	0	0	0	0	0	0	0	603	903	0
645	3	0	0	0	0	0	0	200	300	0	27.8323	15.5614	-621.257	103265	51286.8	6388.18	282.553	736.781	0	0	0	0	0	0	0	603	903	0
645	4	0	0	0	0	0	0	200	300	0	30.8841	16.4769	-620.952	102990	51286.8	6571.29	282.594	737.141	0	0	0	0	0	0	0	603	903	0
645	5	0	0	0	0	0	0	200	300	0	29.6634	16.3243	-622.478	103814	51592	6433.96	282.882	736.224	0	0	0	0	0	0	0	603	903	0
645	6	0	0	0	0	0	0	200	300	0	29.2056	16.3243	-624.614	103723	51164.8	6754.4	281.914	736.941	0	0	0	0	0	0	0	603	903	0
645	7	0	0	0	0	0	0	200	300	0	29.053	17.2398	-624.614	103723	51408.9	6891.72	282.305	736.941	0	0	0	0	0	0	0	603	903	0
645	8	0	0	0	0	0	0	200	300	0	28.4427	17.0873	-624.309	104089	51775.1	7029.05	282.932	736.273	0	0	0	0	0	0	0	603	903	0
645	9	0	0	0	0	0	0	200	300	0	27.8323	18.0028	-625.53	104455	51286.8	6937.5	281.989	736.013	0	0	0	0	0	0	0	603	903	0
646	0	0	0	0	0	0	0	200	300	0	29.5108	18.0028	-624.004	104638	51286.8	6617.07	282.19	735.312	0	0	0	0	0	0	0	603	903	0
646	1	0	0	0	0	0	0	200	300	0	29.3582	17.545	-627.666	104455	51714.1	6891.72	282.391	736.582	0	0	0	0	0	0	0	603	903	0
646	2	0	0	0	0	0	0	200	300	0	28.4427	17.6976	-625.53	105004	51592	6845.95	282.477	735.135	0	0	0	0	0	0	0	603	903	0
646	3	0	0	0	0	0	0	200	300	0	29.2056	18.7657	-627.361	105737	51469.9	6845.95	282.042	734.458	0	0	0	0	0	0	0	603	903	0
646	4	0	0	0	0	0	0	200	300	0	30.4263	19.3761	-627.971	106195	52019.2	7029.05	282.837	733.892	0	0	0	0	0	0	0	603	903	0
646	5	0	0	0	0	0	0	200	300	0	29.2056	19.2235	-627.971	105371	51775.1	6983.28	282.448	735.205	0	0	0	0	0	0	0	603	903	0
646	6	0	0	0	0	0	0	200	300	0	30.5789	19.6812	-627.971	106378	51531	7303.71	282.059	733.601	0	0	0	0	0	0	0	603	903	0
646	7	0	0	0	0	0	0	200	300	0	29.053	20.5968	-629.192	106286	51958.2	7303.71	282.579	734.075	0	0	0	0	0	0	0	603	903	0
646	8	0	0	0	0	0	0	200	300	0	30.7315	21.2071	-630.413	106378	52202.4	7395.26	282.807	734.257	0	0	0	0	0	0	0	603	903	0
646	9	0	0	0	0	0	0	200	300	0	30.2737	21.3597	-630.718	106927	51958.2	7441.04	282.38	733.468	0	0	0	0	0	0	0	603	903	0
647	0	0	0	0	0	0	0	200	300	0	30.7315	21.2071	-629.802	107293	51653	7395.26	282.015	732.64	0	0	0	0	0	0	0	603	903	0
647	1	0	0	0	0	0	0	200	300	0	29.816	21.8175	-629.802	107293	52019.2	7395.26	282.596	732.64	0	0	0	0	0	0	0	603	903	0
647	2	0	0	0	0	0	0	200	300	0	30.7315	22.4278	-631.328	107843	52141.3	7349.49	282.59	732.181	0	0	0	0	0	0	0	603	903	0
647	3	0	0	0	0	0	0	200	300	0	30.7315	22.2752	-630.107	107476	51836.1	7257.94	282.266	732.432	0	0	0	0	0	0	0	603	903	0
647	4	0	0	0	0	0	0	200	300	0	31.9522	20.9019	-634.075	107843	52080.3	7624.15	282.136	732.921	0	0	0	0	0	0	0	603	903	0
647	5	0	0	0	0	0	0	200	300	0	29.2056	22.8856	-632.854	108209	52507.5	7486.82	282.969	732.015	0	0	0	0	0	0	0	603	903	0
647	6	0	0	0	0	0	0	200	300	0	30.1212	23.9537	-633.159	108850	51958.2	7486.82	282.062	731.085	0	0	0	0	0	0	0	603	903	0
647	7	0	0	0	0	0	0	200	300	0	30.5789	23.6485	-636.211	108484	52019.2	7715.7	281.764	732.485	0	0	0	0	0	0	0	603	903	0
647	8	0	0	0	0	0	0	200	300	0	29.6634	23.6485	-635.295	108484	52202.4	7578.37	282.17	732.239	0	0	0	0	0	0	0	603	903	0
647	9	0	0	0	0	0	0	200	300	0	30.1212	25.1744	-634.99	109216	52263.4	7578.37	282.306	731.004	0	0	0	0	0	0	0	603	903	0
648	0	0	0	0	0	0	0	200	300	0	32.1048	24.8692	-635.295	109491	52202.4	8219.24	282.17	730.654	0	0	0	0	0	0	0	603	903	0
648	1	0	0	0	0	0	0	200	300	0	30.1212	26.2425	-636.516	108850	52812.7	7761.48	282.971	731.991	0	0	0	0	0	0	0	603	903	0
648	2	0	0	0	0	0	0	200	300	0	29.5108	25.7848	-638.042	109674	52873.7	7807.25	282.869	731.109	0	0	0	0	0	0	0	603	903	0
648	3	0	0	0	0	0	0	200	300	0	30.8841	25.0218	-639.873	109857	52385.5	7624.15	281.869	731.315	0	0	0	0	0	0	0	603	903	0
648	4	0	0	0	0	0	0	200	300	0	30.7315	25.9373	-637.126	110406	52751.7	7990.36	282.796	729.712	0	0	0	0	0	0	0	603	903	0
648	5	0	0	0	0	0	0	200	300	0	29.3582	27.4632	-638.347	110589	53301	8036.13	283.498	729.757	0	0	0	0	0	0	0	603	903	0
648	6	0	0	0	0	0	0	200	300	0	29.9686	28.5313	-640.483	110864	52263.4	8081.91	281.6	729.906	0	0	0	0	0	0	0	603	903	0
648	7	0	0	0	0	0	0	200	300	0	30.8841	28.3788	-641.399	111230	52568.6	8265.01	281.959	729.582	0	0	0	0	0	0	0	603	903	0
648	8	0	0	0	0	0	0	200	300	0	30.4263	28.0736	-640.483	111596	52446.5	8310.79	281.886	728.762	0	0	0	0	0	0	0	603	903	0
648	9	0	0	0	0	0	0	200	300	0	29.6634	29.9046	-641.399	111230	52507.5	8219.24	281.864	729.582	0	0	0	0	0	0	0	603	903	0
649	0	0	0	0	0	0	0	200	300	0	30.5789	29.752	-644.451	111047	52507.5	8493.9	281.476	730.687	0	0	0	0	0	0	0	603	903	0
649	1	0	0	0	0	0	0	200	300	0	30.2737	29.752	-640.483	111779	52873.7	8493.9	282.553	728.476	0	0	0	0	0	0	0	603	903	0
649	2	0	0	0	0	0	0	200	300	0	30.2737	28.5313	-643.84	111962	52995.8	8173.46	282.312	729.102	0	0	0	0	0	0	0	603	903	0
649	3	0	0	0	0	0	0	200	300	0	30.2737	31.4305	-644.756	112054	52751.7	8448.12	281.817	729.207	0	0	0	0	0	0	0	603	903	0
649	4	0	0	0	0	0	0	200	300	0	29.9686	31.1253	-645.366	112512	53178.9	8265.01	282.401	728.662	0	0	0	0	0	0	0	603	903	0
649	5	0	0	0	0	0	0	200	300	0	31.3419	32.1935	-645.671	112786	53301	8402.34	282.551	728.319	0	0	0	0	0	0	0	603	903	0
649	6	0	0	0	0	0	0	200	300	0	30.7315	32.1935	-648.113	112878	52995.8	8402.34	281.769	728.836	0	0	0	0	0	0	0	603	903	0
649	7	0	0	0	0	0	0	200	300	0	32.41	33.109	-647.808	112695	53178.9	8585.45	282.091	729.036	0	0	0	0	0	0	0	603	903	0
649	8	0	0	0	0	0	0	200	300	0	32.2574	33.7193	-645.671	113519	53484.1	8677	282.835	727.185	0	0	0	0	0	0	0	603	903	0
649	9	0	0	0	0	0	0	200	300	0	32.7151	32.8038	-649.639	113702	53239.9	8860.11	281.953	727.977	0	0	0	0	0	0	0	603	903	0
650	0	0	0	0	0	0	0	200	300	0	30.4263	34.7874	-651.47	113244	52995.8	8677	281.348	729.171	0	0	0	0	0	0	0	603	903	0
650	1	0	0	0	0	0	0	200	300	0	30.4263	34.3297	-651.47	113702	53667.2	8905.88	282.379	728.469	0	0	0	0	0	0	0	603	903	0
650	2	0	0	0	0	0	0	200	300	0	30.5789	35.0926	-652.69	114984	53362	8814.33	281.757	726.831	0	0	0	0	0	0	0	603	903	0
650	3	0	0	0	0	0	0	200	300	0	31.1893	36.9237	-652.69	114618	53056.8	8951.66	281.289	727.392	0	0	0	0	0	0	0	603	903	0
650	4	0	0	0	0	0	0	200	300	0	29.9686	37.2289	-654.216	114892	53301	8860.11	281.473	727.382	0	0	0	0	0	0	0	603	903	0
650	5	0	0	0	0	0	0	200	300	0	29.816	37.0763	-652.69	115167	53789.3	8860.11	282.412	726.551	0	0	0	0	0	0	0	603	903	0
650	6	0	0	0	0	0	0	200	300	0	31.1893	35.703	-658.184	115625	53301	9180.54	280.982	727.328	0	0	0	0	0	0	0	603	903	0
650	7	0	0	0	0	0	0	200	300	0	30.5789	37.534	-654.216	116082	52873.7	9180.54	280.82	725.563	0	0	0	0	0	0	0	603	903	0
650	8	0	0	0	0	0	0	200	300	0	30.4263	37.3814	-657.878	114618	53850.3	9043.21	281.855	728.777	0	0	0	0	0	0	0	603	903	0
650	9	0	0	0	0	0	0	200	300	0	30.2737	39.3651	-659.099	115075	53850.3	9409.42	281.703	728.405	0	0	0	0	0	0	0	603	903	0
651	0	0	0	0	0	0	0	200	300	0	30.8841	38.7547	-660.625	115350	53606.2	9729.86	281.145	728.393	0	0	0	0	0	0	0	603	903	0
651	1	0	0	0	0	0	0	200	300	0	31.0367	40.2806	-659.404	116998	53728.2	9134.76	281.48	725.57	0	0	0	0	0	0	0	603	903	0
651	2	0	0	0	0	0	0	200	300	0	30.1212	40.891	-660.93	115716	53911.3	9775.63	281.569	727.919	0	0	0	0	0	0	0	603	903	0
651	3	0	0	0	0	0	0	200	300	0	30.5789	41.1961	-662.761	116357	53178.9	9409.42	280.238	727.436	0	0	0	0	0	0	0	603	903	0
651	4	0	0	0	0	0	0	200	300	0	30.7315	41.5013	-662.456	116815	53667.2	9455.2	281.012	726.664	0	0	0	0	0	0	0	603	903	0
651	5	0	0	0	0	0	0	200	300	0	30.5789	41.3487	-663.677	116815	54033.4	9455.2	281.415	726.988	0	0	0	0	0	0	0	603	903	0
651	6	0	0	0	0	0	0	200	300	0	30.2737	42.1117	-663.372	116815	54155.5	9546.75	281.637	726.907	0	0	0	0	0	0	0	603	903	0
651	7	0	0	0	0	0	0	200	300	0	30.8841	43.1798	-665.813	117181	54033.4	9638.3	281.154	727.003	0	0	0	0	0	0	0	603	903	0
651	8	0	0	0	0	0	0	200	300	0	30.7315	43.0272	-666.118	118188	54399.6	9638.3	281.667	725.572	0	0	0	0	0	0	0	603	903	0
651	9	0	0	0	0	0	0	200	300	0	31.7996	43.3324	-665.508	117456	54094.4	9638.3	281.283	726.51	0	0	0	0	0	0	0	603	903	0
652	0	0	0	0	0	0	0	200	300	0	31.3419	44.2479	-663.677	117730	54277.5	9775.63	281.783	725.609	0	0	0	0	0	0	0	603	903	0
652	1	0	0	0	0	0	0	200	300	0	29.816	43.6375	-666.423	118280	54277.5	9729.86	281.446	725.516	0	0	0	0	0	0	0	603	903	0
652	2	0	0	0	0	0	0	200	300	0	32.5626	46.0789	-668.254	118646	54216.5	9363.65	281.132	725.454	0	0	0	0	0	0	0	603	903	0
652	3	0	0	0	0	0	0	200	300	0	30.8841	44.0953	-669.78	118554	55254.1	9958.74	282.496	725.995	0	0	0	0	0	0	0	603	903	0
652	4	0	0	0	0	0	0	200	300	0	31.1893	46.2315	-669.78	118737	54094.4	10004.5	280.764	725.722	0	0	0	0	0	0	0	603	903	0
652	5	0	0	0	0	0	0	200	300	0	31.9522	47.1471	-669.78	119287	54704.8	9912.96	281.676	724.902	0	0	0	0	0	0	0	603	903	0
652	6	0	0	0	0	0	0	200	300	0	32.1048	47.1471	-673.137	119104	54765.8	10141.8	281.359	726.062	0	0	0	0	0	0	0	603	903	0
652	7	0	0	0	0	0	0	200	300	0	30.7315	47.4522	-672.222	118921	54277.5	9958.74	280.744	726.093	0	0	0	0	0	0	0	603	903	0
652	8	0	0	0	0	0	0	200	300	0	33.0203	47.7574	-673.137	119744	54643.8	10141.8	281.178	725.11	0	0	0	0	0	0	0	603	903	0
652	9	0	0	0	0	0	0	200	300	0	34.0884	49.2833	-673.747	120111	54826.9	10141.8	281.376	724.727	0	0	0	0	0	0	0	603	903	0
653	0	0	0	0	0	0	0	200	300	0	33.4781	49.7411	-674.663	120019	54460.7	10187.6	280.723	725.105	0	0	0	0	0	0	0	603	903	0
653	1	0	0	0	0	0	0	200	300	0	30.7315	49.2833	-676.494	120294	54582.7	10370.7	280.685	725.181	0	0	0	0	0	0	0	603	903	0
653	2	0	0	0	0	0	0	200	300	0	33.6307	49.7411	-676.189	120385	54704.8	10279.2	280.902	724.965	0	0	0	0	0	0	0	603	903	0
653	3	0	0	0	0	0	0	200	300	0	31.9522	50.9618	-676.494	120752	55132	10462.3	281.497	724.504	0	0	0	0	0	0	0	603	903	0
653	4	0	0	0	0	0	0	200	300	0	34.241	51.1143	-677.41	121301	54948.9	10187.6	281.116	723.934	0	0	0	0	0	0	0	603	903	0
653	5	0	0	0	0	0	0	200	300	0	33.3255	50.8092	-678.02	120660	54887.9	10462.3	280.953	725.041	0	0	0	0	0	0	0	603	903	0
653	6	0	0	0	0	0	0	200	300	0	34.8514	51.1143	-678.325	121026	55132	10508.1	281.277	724.581	0	0	0	0	0	0	0	603	903	0
653	7	0	0	0	0	0	0	200	300	0	32.2574	52.7928	-679.546	121576	54826.9	10508.1	280.682	724.093	0	0	0	0	0	0	0	603	903	0
653	8	0	0	0	0	0	0	200	300	0	35.4617	53.4032	-681.072	121759	54582.7	10325	280.142	724.225	0	0	0	0	0	0	0	603	903	0
653	9	0	0	0	0	0	0	200	300	0	33.0203	52.7928	-681.377	121942	55071	10691.2	280.823	724.036	0	0	0	0	0	0	0	603	903	0
654	0	0	0	0	0	0	0	200	300	0	32.7151	53.098	-680.461	121759	54826.9	10416.5	280.573	724.065	0	0	0	0	0	0	0	603	903	0
654	1	0	0	0	0	0	0	200	300	0	33.9359	54.6239	-681.377	122125	54765.8	10553.8	280.375	723.768	0	0	0	0	0	0	0	603	903	0
654	2	0	0	0	0	0	0	200	300	0	33.6307	54.929	-683.818	121484	55254.1	10736.9	280.802	725.345	0	0	0	0	0	0	0	603	903	0
654	3	0	0	0	0	0	0	200	300	0	33.0203	54.6239	-681.072	122308	55315.1	10920	281.218	723.418	0	0	0	0	0	0	0	603	903	0
654	4	0	0	0	0	0	0	200	300	0	33.3255	54.0135	-679.851	122857	54948.9	10736.9	280.825	722.288	0	0	0	0	0	0	0	603	903	0
654	5	0	0	0	0	0	0	200	300	0	34.3936	56.3023	-684.429	123223	55376.2	10645.4	280.909	722.962	0	0	0	0	0	0	0	603	903	0
654	6	0	0	0	0	0	0	200	300	0	34.0884	56.3023	-683.818	122583	55437.2	10874.3	281.07	723.738	0	0	0	0	0	0	0	603	903	0
654	7	0	0	0	0	0	0	200	300	0	35.6143	57.8282	-685.649	123407	55132	10874.3	280.409	723.015	0	0	0	0	0	0	0	603	903	0
654	8	0	0	0	0	0	0	200	300	0	35.1566	57.6756	-686.87	124047	55254.1	10920	280.443	722.402	0	0	0	0	0	0	0	603	903	0
654	9	0	0	0	0	0	0	200	300	0	35.004	57.6756	-685.344	123773	55498.2	11240.5	280.979	722.401	0	0	0	0	0	0	0	603	903	0
655	0	0	0	0	0	0	0	200	300	0	34.3936	59.2015	-686.565	123681	55437.2	11057.4	280.746	722.855	0	0	0	0	0	0	0	603	903	0
655	1	0	0	0	0	0	0	200	300	0	35.1566	59.6593	-687.48	124047	55010	10920	280.017	722.562	0	0	0	0	0	0	0	603	903	0
655	2	0	0	0	0	0	0	200	300	0	36.0721	59.5067	-689.617	123590	55376.2	11332	280.3	723.785	0	0	0	0	0	0	0	603	903	0
655	3	0	0	0	0	0	0	200	300	0	36.0721	59.9644	-687.786	124047	55620.3	11148.9	280.869	722.642	0	0	0	0	0	0	0	603	903	0
655	4	0	0	0	0	0	0	200	300	0	35.7669	61.1852	-687.48	124231	55437.2	10920	280.638	722.296	0	0	0	0	0	0	0	603	903	0
655	5	0	0	0	0	0	0	200	300	0	36.835	60.7274	-689.617	124505	55437.2	11332	280.388	722.457	0	0	0	0	0	0	0	603	903	0
655	6	0	0	0	0	0	0	200	300	0	36.5298	61.1852	-688.701	124780	55681.4	11194.7	280.85	721.818	0	0	0	0	0	0	0	603	903	0
655	7	0	0	0	0	0	0	200	300	0	36.5298	61.6429	-688.091	124505	54765.8	11469.4	279.591	722.057	0	0	0	0	0	0	0	603	903	0
655	8	0	0	0	0	0	0	200	300	0	39.1238	63.3214	-689.617	124597	55620.3	11652.5	280.654	722.325	0	0	0	0	0	0	0	603	903	0
655	9	0	0	0	0	0	0	200	300	0	38.0557	63.0162	-689.006	124963	55742.4	11423.6	280.903	721.633	0	0	0	0	0	0	0	603	903	0
656	0	0	0	0	0	0	0	200	300	0	39.8868	64.2369	-690.227	125238	55681.4	11515.1	280.671	721.556	0	0	0	0	0	0	0	603	903	0
656	1	0	0	0	0	0	0	200	300	0	38.9713	64.3895	-689.922	125146	55620.3	11835.6	280.618	721.608	0	0	0	0	0	0	0	603	903	0
656	2	0	0	0	0	0	0	200	300	0	39.1238	65.1524	-688.701	124871	55864.5	11469.4	281.116	721.686	0	0	0	0	0	0	0	603	903	0
656	3	0	0	0	0	0	0	200	300	0	37.9031	65.7628	-689.311	125512	55193.1	11744	280.07	720.916	0	0	0	0	0	0	0	603	903	0
656	4	0	0	0	0	0	0	200	300	0	38.5135	65.1524	-688.396	125787	55620.3	11652.5	280.797	720.275	0	0	0	0	0	0	0	603	903	0
656	5	0	0	0	0	0	0	200	300	0	39.2764	64.3895	-691.753	125329	55498.2	11560.9	280.228	721.824	0	0	0	0	0	0	0	603	903	0
656	6	0	0	0	0	0	0	200	300	0	40.0394	66.5257	-691.448	125695	55803.4	11789.8	280.705	721.214	0	0	0	0	0	0	0	603	903	0
656	7	0	0	0	0	0	0	200	300	0	39.2764	64.8473	-689.311	126245	55254.1	11972.9	280.158	719.854	0	0	0	0	0	0	0	603	903	0
656	8	0	0	0	0	0	0	200	300	0	40.6497	66.9835	-688.091	125604	55559.3	12018.7	280.744	720.46	0	0	0	0	0	0	0	603	903	0
656	9	0	0	0	0	0	0	200	300	0	38.6661	66.2206	-689.922	125695	55864.5	12156	280.972	720.812	0	0	0	0	0	0	0	603	903	0
657	0	0	0	0	0	0	0	200	300	0	40.9549	68.3568	-688.396	126153	55498.2	11789.8	280.62	719.743	0	0	0	0	0	0	0	603	903	0
657	1	0	0	0	0	0	0	200	300	0	39.8868	68.8145	-689.006	126245	55132	12156	280.017	719.773	0	0	0	0	0	0	0	603	903	0
657	2	0	0	0	0	0	0	200	300	0	39.429	68.9671	-689.922	126062	55986.5	12064.5	281.149	720.281	0	0	0	0	0	0	0	603	903	0
657	3	0	0	0	0	0	0	200	300	0	39.1238	69.5775	-688.701	126245	55010	12247.6	279.875	719.692	0	0	0	0	0	0	0	603	903	0
657	4	0	0	0	0	0	0	200	300	0	40.9549	71.256	-689.311	126062	55193.1	12430.7	280.07	720.12	0	0	0	0	0	0	0	603	903	0
657	5	0	0	0	0	0	0	200	300	0	39.8868	71.1034	-689.006	126245	55620.3	12568	280.725	719.773	0	0	0	0	0	0	0	603	903	0
657	6	0	0	0	0	0	0	200	300	0	41.1075	72.1715	-688.396	126245	55437.2	12384.9	280.531	719.61	0	0	0	0	0	0	0	603	903	0
657	7	0	0	0	0	0	0	200	300	0	40.9549	71.7137	-688.396	126336	54399.6	12705.3	279.024	719.477	0	0	0	0	0	0	0	603	903	0
657	8	0	0	0	0	0	0	200	300	0	41.2601	72.4767	-685.649	125970	55376.2	12430.7	280.765	719.276	0	0	0	0	0	0	0	603	903	0
657	9	0	0	0	0	0	0	200	300	0	40.6497	74.0025	-684.429	126153	55498.2	12476.4	281.087	718.681	0	0	0	0	0	0	0	603	903	0
658	0	0	0	0	0	0	0	200	300	0	40.9549	74.1551	-687.175	126428	54765.8	12430.7	279.697	719.018	0	0	0	0	0	0	0	603	903	0
658	1	0	0	0	0	0	0	200	300	0	40.3445	73.8499	-685.039	126153	54643.8	12476.4	279.767	718.845	0	0	0	0	0	0	0	603	903	0
658	2	0	0	0	0	0	0	200	300	0	40.6497	74.3077	-684.429	125421	55193.1	12476.4	280.641	719.751	0	0	0	0	0	0	0	603	903	0
658	3	0	0	0	0	0	0	200	300	0	40.192	75.9862	-682.292	125146	54887.9	12842.7	280.446	719.58	0	0	0	0	0	0	0	603	903	0
658	4	0	0	0	0	0	0	200	300	0	41.7178	74.9181	-682.598	125329	53606.2	12980	278.533	719.394	0	0	0	0	0	0	0	603	903	0
658	5	0	0	0	0	0	0	200	300	0	39.429	75.8336	-683.513	125879	55010	13071.5	280.481	718.836	0	0	0	0	0	0	0	603	903	0
658	6	0	0	0	0	0	0	200	300	0	39.8868	76.5965	-681.377	126336	54887.9	12842.7	280.554	717.587	0	0	0	0	0	0	0	603	903	0
658	7	0	0	0	0	0	0	200	300	0	40.9549	77.5121	-680.461	125970	53972.4	12796.9	279.317	717.876	0	0	0	0	0	0	0	603	903	0
658	8	0	0	0	0	0	0	200	300	0	40.6497	77.6646	-679.241	125512	54460.7	12888.4	280.179	718.217	0	0	0	0	0	0	0	603	903	0
658	9	0	0	0	0	0	0	200	300	0	40.6497	78.4276	-678.63	125695	54399.6	12888.4	280.161	717.781	0	0	0	0	0	0	0	603	903	0
659	0	0	0	0	0	0	0	200	300	0	41.2601	78.5802	-678.63	125879	54155.5	12934.2	279.801	717.511	0	0	0	0	0	0	0	603	903	0
659	1	0	0	0	0	0	0	200	300	0	41.2601	77.9698	-677.104	125695	54155.5	12980	279.981	717.363	0	0	0	0	0	0	0	603	903	0
659	2	0	0	0	0	0	0	200	300	0	41.1075	79.8009	-672.222	125146	54216.5	12888.4	280.653	716.832	0	0	0	0	0	0	0	603	903	0
659	3	0	0	0	0	0	0	200	300	0	41.5652	78.5802	-672.832	125421	54155.5	13208.9	280.489	716.593	0	0	0	0	0	0	0	603	903	0
659	4	0	0	0	0	0	0	200	300	0	40.3445	80.7164	-674.663	125329	53117.9	13208.9	278.732	717.234	0	0	0	0	0	0	0	603	903	0
659	5	0	0	0	0	0	0	200	300	0	41.7178	81.1742	-672.832	125329	54033.4	13254.6	280.307	716.729	0	0	0	0	0	0	0	603	903	0
659	6	0	0	0	0	0	0	200	300	0	39.2764	81.3268	-671.306	125604	53728.2	13025.8	280.035	715.896	0	0	0	0	0	0	0	603	903	0
659	7	0	0	0	0	0	0	200	300	0	41.4127	81.7845	-669.475	124688	53117.9	13208.9	279.343	716.752	0	0	0	0	0	0	0	603	903	0
659	8	0	0	0	0	0	0	200	300	0	39.429	82.3949	-668.865	124963	53117.9	13025.8	279.415	716.172	0	0	0	0	0	0	0	603	903	0
659	9	0	0	0	0	0	0	200	300	0	40.3445	82.7	-668.865	125238	52812.7	12796.9	278.959	715.761	0	0	0	0	0	0	0	603	903	0
660	0	0	0	0	0	0	0	200	300	0	40.192	82.5475	-666.423	124231	52629.6	13163.1	278.973	716.586	0	0	0	0	0	0	0	603	903	0
660	1	0	0	0	0	0	0	200	300	0	40.9549	83.6156	-665.508	124231	52812.7	13163.1	279.357	716.33	0	0	0	0	0	0	0	603	903	0
660	2	0	0	0	0	0	0	200	300	0	39.429	82.5475	-664.592	124688	53178.9	13254.6	280.017	715.384	0	0	0	0	0	0	0	603	903	0
660	3	0	0	0	0	0	0	200	300	0	39.7342	85.1414	-663.677	124414	52568.6	13300.4	279.208	715.539	0	0	0	0	0	0	0	603	903	0
660	4	0	0	0	0	0	0	200	300	0	39.1238	83.463	-661.846	123864	52141.3	13392	278.782	715.85	0	0	0	0	0	0	0	603	903	0
660	5	0	0	0	0	0	0	200	300	0	39.5816	84.9889	-659.099	124047	52568.6	13071.5	279.758	714.792	0	0	0	0	0	0	0	603	903	0
660	6	0	0	0	0	0	0	200	300	0	39.8868	86.2096	-659.709	124139	52629.6	13666.6	279.777	714.828	0	0	0	0	0	0	0	603	903	0
660	7	0	0	0	0	0	0	200	300	0	39.7342	84.3785	-658.794	123864	52019.2	13346.2	278.961	714.983	0	0	0	0	0	0	0	603	903	0
660	8	0	0	0	0	0	0	200	300	0	39.1238	86.3622	-655.742	123498	52019.2	13117.3	279.329	714.667	0	0	0	0	0	0	0	603	903	0
660	9	0	0	0	0	0	0	200	300	0	39.5816	86.8199	-655.742	123590	51286.8	13025.8	278.212	714.527	0	0	0	0	0	0	0	603	903	0
661	0	0	0	0	0	0	0	200	300	0	38.5135	87.1251	-653.301	123773	51469.9	13208.9	278.784	713.542	0	0	0	0	0	0	0	603	903	0
661	1	0	0	0	0	0	0	200	300	0	38.0557	88.0406	-651.164	122491	51408.9	13346.2	278.949	714.889	0	0	0	0	0	0	0	603	903	0
661	2	8.04447	5.24415	-29.4218	-572.205	-1225.36	-560.67	158.352	319.448	0	37.2928	88.9561	-650.859	123407	51408.9	13392	278.986	713.394	0	0	0	0	0	0	0	603	903	0
661	3	10.4859	14.8572	-39.7978	-480.652	-1469.5	-1018.43	163.076	312.077	0	37.7505	86.9725	-646.587	122125	51286.8	13575.1	279.319	714.124	0	0	0	0	0	0	0	603	903	0
661	4	4.68753	19.74	-36.1357	-846.863	-1652.61	-972.658	154.267	323.436	0	37.9031	88.8036	-647.197	121759	50981.6	13804	278.773	714.868	0	0	0	0	0	0	0	603	903	0
661	5	4.68753	16.5356	-26.9804	-846.863	-1652.61	-1338.87	138.748	331.388	0	36.6824	89.1087	-644.756	122308	51164.8	13529.3	279.355	713.303	0	0	0	0	0	0	0	603	903	0
661	6	10.3333	18.5193	-31.2528	-480.652	-1713.64	-1567.75	145.169	315.379	0	36.835	90.482	-642.314	121484	50554.4	13529.3	278.707	713.865	0	0	0	0	0	0	0	603	903	0
661	7	10.0281	25.9961	-46.5116	-205.994	-2079.85	-1155.76	155.283	304.429	0	37.2928	90.7872	-641.094	121301	50432.3	13895.5	278.666	713.791	0	0	0	0	0	0	0	603	903	0
661	8	9.57034	28.1323	-49.2582	-205.994	-2140.89	-1521.97	156.537	304.182	0	36.6824	91.7027	-639.263	121118	50249.2	13437.7	278.605	713.535	0	0	0	0	0	0	0	603	903	0
661	9	9.87552	23.7073	-50.7841	-663.758	-2934.34	-1979.74	142.219	313.07	0	36.0721	91.245	-640.483	121484	49333.7	13025.8	277.026	713.324	0	0	0	0	0	0	0	603	903	0
662	0	7.5867	31.6418	-53.8359	-1396.18	-3239.52	-2162.84	139.826	325.934	0	36.0721	91.3976	-635.295	120843	49822	13620.9	278.423	712.784	0	0	0	0	0	0	0	603	903	0
662	1	12.0118	35.6091	-69.705	-389.099	-3239.52	-1659.3	153.525	305.582	0	35.7669	92.7708	-632.244	121026	49760.9	13392	278.705	711.577	0	0	0	0	0	0	0	603	903	0
662	2	14.4532	28.2849	-75.8085	-755.311	-3788.84	-1888.19	150.021	309.963	0	36.5298	92.3131	-632.854	120752	49822	13300.4	278.726	712.195	0	0	0	0	0	0	0	603	903	0
662	3	10.1807	23.5547	-73.9775	-297.547	-3910.91	-1705.08	147.134	304.022	0	35.4617	91.5501	-632.244	120111	49333.7	13483.5	278.03	713.025	0	0	0	0	0	0	0	603	903	0
662	4	8.04447	25.9961	-77.6396	-297.547	-4094.01	-1430.42	147.269	303.832	0	34.241	92.3131	-628.887	119836	48418.2	13758.2	276.99	712.447	0	0	0	0	0	0	0	603	903	0
662	5	13.8428	24.928	-80.3861	-938.416	-4521.26	-1659.3	143.756	311.674	0	35.4617	94.4493	-621.868	120202	49394.7	13575.1	279.43	709.708	0	0	0	0	0	0	0	603	903	0
662	6	11.2488	17.2986	-86.7948	-938.416	-4277.12	-1384.65	150.722	310.812	0	37.2928	92.3131	-624.309	119928	49089.6	13575.1	278.63	710.904	0	0	0	0	0	0	0	603	903	0
662	7	11.0962	13.6365	-87.4052	-389.099	-4216.08	-1201.54	151.764	304.452	0	33.7833	93.839	-623.699	118829	48479.2	13346.2	277.729	712.477	0	0	0	0	0	0	0	603	903	0
662	8	14.9109	15.3149	-87.1	-1396.18	-4521.26	-743.776	148.091	316.03	0	32.7151	93.9915	-620.952	119012	48540.2	13208.9	278.171	711.339	0	0	0	0	0	0	0	603	903	0
662	9	15.3687	15.0098	-91.0673	-480.652	-4704.36	-1018.43	148.342	305.278	0	35.4617	93.839	-616.985	119378	48357.1	13437.7	278.377	709.513	0	0	0	0	0	0	0	603	903	0
663	0	10.0281	6.92261	-99.6122	68.6643	-5131.61	-469.118	148.484	299.311	0	35.7669	94.6019	-615.459	118188	47807.8	13163.1	277.678	710.968	0	0	0	0	0	0	0	603	903	0
663	1	11.0962	2.65015	-101.138	-389.099	-5253.68	-423.341	148.054	303.847	0	33.1729	94.9071	-614.849	117089	47746.8	13346.2	277.656	712.564	0	0	0	0	0	0	0	603	903	0
663	2	14.6057	4.48121	-101.443	-297.547	-5192.65	-514.894	148.812	302.933	0	32.1048	94.2967	-611.797	118554	47746.8	13300.4	278.044	709.22	0	0	0	0	0	0	0	603	903	0
663	3	12.6221	4.17603	-103.274	1075.74	-5497.82	-102.907	146.765	289.584	0	35.4617	94.9071	-608.44	116723	47685.8	13437.7	278.374	711.16	0	0	0	0	0	0	0	603	903	0
663	4	11.4014	-4.82666	-106.326	-480.652	-5741.96	171.752	145.997	304.521	0	35.004	93.2286	-603.862	116540	46709.2	13575.1	277.351	710.009	0	0	0	0	0	0	0	603	903	0
663	5	10.4859	-5.43701	-109.378	251.77	-6169.21	309.081	143.597	297.698	0	32.1048	94.4493	-603.862	116357	47197.5	13437.7	278.159	710.312	0	0	0	0	0	0	0	603	903	0
663	6	9.72293	-2.69043	-110.904	160.217	-6230.24	125.975	143.823	298.555	0	33.0203	96.1278	-602.947	116723	46526.1	13437.7	277.164	709.412	0	0	0	0	0	0	0	603	903	0
663	7	10.791	-5.43701	-113.345	434.875	-6352.31	309.081	143.956	296.163	0	34.3936	95.2122	-599.285	116174	46404	13300.4	277.432	709.146	0	0	0	0	0	0	0	603	903	0
663	8	12.6221	-9.86206	-117.007	251.77	-6779.56	217.528	142.059	297.848	0	33.6307	96.1278	-595.622	115442	46465	13300.4	278.011	709.183	0	0	0	0	0	0	0	603	903	0
663	9	9.57034	-7.87841	-123.416	801.086	-6474.38	583.739	147.54	293.509	0	31.9522	96.433	-592.571	114984	46281.9	13071.5	278.104	708.958	0	0	0	0	0	0	0	603	903	0
664	0	9.41776	-4.82666	-124.331	343.322	-6962.67	400.634	143.999	297.239	0	31.9522	96.2804	-592.571	114709	45610.6	13437.7	276.971	709.421	0	0	0	0	0	0	0	603	903	0
664	1	9.41776	-7.57324	-127.383	617.981	-7450.95	309.081	141.508	295.149	0	32.8677	95.5174	-584.331	114343	45427.4	13254.6	277.743	707.318	0	0	0	0	0	0	0	603	903	0
664	2	6.97635	-11.2353	-131.045	1716.61	-7389.91	492.186	143.608	286.901	0	33.3255	95.5174	-586.467	113885	45244.3	13346.2	277.147	708.812	0	0	0	0	0	0	0	603	903	0
664	3	7.12894	-8.94653	-135.623	1350.4	-7573.02	446.41	144.161	290.043	0	31.0367	96.7381	-581.89	113336	44695	13208.9	276.81	708.228	0	0	0	0	0	0	0	603	903	0
664	4	8.95999	-8.18359	-139.285	160.217	-7939.23	263.304	143	298.85	0	30.5789	97.5011	-579.448	112970	44634	13071.5	277.028	708.039	0	0	0	0	0	0	0	603	903	0
664	5	8.34964	-9.09912	-139.895	1167.3	-8183.37	400.634	141.504	291.656	0	32.41	97.8062	-578.838	113061	44573	13254.6	277.004	707.676	0	0	0	0	0	0	0	603	903	0
664	6	6.06082	-12.456	-145.389	1167.3	-8610.62	583.739	140.775	291.971	0	32.41	97.1959	-575.176	111871	44328.8	12980	277.07	708.501	0	0	0	0	0	0	0	603	903	0
664	7	8.04447	-8.94653	-153.323	1808.17	-8610.62	537.963	143.84	288.207	0	29.9686	96.1278	-567.546	111322	44023.6	12934.2	277.568	706.854	0	0	0	0	0	0	0	603	903	0
664	8	9.26517	-9.40429	-156.68	1441.96	-8854.76	537.963	143.485	290.797	0	29.816	97.5011	-568.462	111962	44206.7	12842.7	277.766	706.043	0	0	0	0	0	0	0	603	903	0
664	9	7.43411	-12.9138	-156.985	2449.04	-9648.21	1041.5	138.541	284.4	0	33.6307	98.264	-565.41	110681	43474.3	12842.7	276.89	707.247	0	0	0	0	0	0	0	603	903	0
665	0	6.06082	-14.1345	-162.173	1533.51	-9526.14	766.844	141.259	290.544	0	32.41	98.5692	-562.969	110315	42925	12659.5	276.248	707.048	0	0	0	0	0	0	0	603	903	0
665	1	7.12894	-11.5405	-166.751	1716.61	-9526.14	721.068	142.872	289.706	0	29.816	97.8062	-559.307	109674	42802.9	12934.2	276.529	706.911	0	0	0	0	0	0	0	603	903	0
665	2	5.90824	-12.456	-168.887	2082.82	-10197.5	766.844	139.619	287.667	0	30.1212	98.4166	-557.17	110040	41765.3	12796.9	274.96	705.502	0	0	0	0	0	0	0	603	903	0
665	3	4.53495	-16.5759	-172.549	2540.59	-10563.7	995.726	138.778	285.276	0	30.1212	97.8062	-552.898	109307	42253.6	13071.5	276.422	705.301	0	0	0	0	0	0	0	603	903	0
665	4	8.34964	-18.8647	-176.211	2632.14	-10624.8	1041.5	139.704	285.063	0	28.1375	99.1795	-550.151	107751	42009.5	12659.5	276.36	707.143	0	0	0	0	0	0	0	603	903	0
665	5	6.21341	-19.3225	-180.484	2906.8	-10807.9	1270.38	140.117	283.894	0	27.6797	99.1795	-548.32	108209	42131.6	12568	276.837	705.654	0	0	0	0	0	0	0	603	903	0
665	6	6.67118	-19.7803	-186.587	2815.25	-11052	1224.61	140.768	284.912	0	28.7479	97.9588	-546.489	107385	41948.4	12842.7	276.76	706.501	0	0	0	0	0	0	0	603	903	0
665	7	5.1453	-22.3743	-191.47	3547.67	-11784.4	1819.7	138.453	281.471	0	28.5953	98.4166	-540.691	106744	40666.7	12522.2	275.212	705.578	0	0	0	0	0	0	0	603	903	0
665	8	4.68753	-23.2898	-193.606	3456.12	-11540.3	1407.71	140.393	282.149	0	27.222	97.9588	-536.418	105920	41277.1	12476.4	276.949	705.542	0	0	0	0	0	0	0	603	903	0
665	9	4.38236	-23.595	-200.931	4280.09	-12211.7	1636.6	139.224	278.699	0	26.6116	99.3321	-534.587	106103	40971.9	12339.1	276.642	704.523	0	0	0	0	0	0	0	603	903	0
666	0	4.84012	-27.2571	-203.067	3913.88	-12761	1590.82	137.159	280.726	0	27.8323	98.8744	-531.23	104821	40300.5	12384.9	275.863	705.682	0	0	0	0	0	0	0	603	903	0
666	1	1.94095	-28.4778	-207.339	3913.88	-12883.1	2002.81	137.865	281.123	0	26.9168	98.4166	-528.179	105096	40056.4	12476.4	275.839	704.022	0	0	0	0	0	0	0	603	903	0
666	2	2.39871	-27.7148	-214.053	4096.98	-13249.3	2002.81	138.103	280.86	0	26.1539	98.8744	-524.211	103723	39873.2	12293.3	276.063	705.136	0	0	0	0	0	0	0	603	903	0
666	3	3.00907	-28.6304	-218.02	3913.88	-13981.7	2048.58	135.87	282.048	0	26.1539	99.1795	-520.244	103448	39262.9	12339.1	275.47	704.155	0	0	0	0	0	0	0	603	903	0
666	4	4.07718	-30.3088	-224.734	4188.54	-13798.6	2094.36	138.6	281.362	0	26.459	99.3321	-517.192	103540	39201.9	12613.8	275.797	702.804	0	0	0	0	0	0	0	603	903	0
666	5	1.63577	-31.5295	-229.922	5195.62	-14103.8	2552.12	138.658	277.403	0	26.3065	98.7218	-512.004	102533	38835.7	12018.7	275.85	702.743	0	0	0	0	0	0	0	603	903	0
666	6	1.17801	-30.4614	-236.026	5287.17	-15202.4	2140.14	135.59	277.599	0	25.2383	96.433	-510.478	101526	38896.7	12156	276.197	704.117	0	0	0	0	0	0	0	603	903	0
666	7	1.3306	-31.5295	-240.603	5195.62	-14836.2	2231.69	138.338	278.406	0	24.3228	98.5692	-506.511	101434	38042.2	12018.7	275.106	702.74	0	0	0	0	0	0	0	603	903	0
666	8	-0.19528	-34.1235	-243.35	5928.04	-15446.6	2414.79	136.525	275.64	0	25.2383	99.3321	-502.544	100244	38042.2	11789.8	275.699	703.527	0	0	0	0	0	0	0	603	903	0
666	9	-0.653043	-34.4287	-249.148	5653.38	-16240	2231.69	134.818	277.309	0	24.7806	98.7218	-500.102	99877.5	37859.1	12293.3	275.703	703.286	0	0	0	0	0	0	0	603	903	0
667	0	1.78836	-32.5977	-255.252	5928.04	-15995.9	2597.9	137.333	276.776	0	23.7125	98.1114	-496.135	98870.5	37248.7	11698.2	275.078	703.719	0	0	0	0	0	0	0	603	903	0
667	1	0.720248	-34.2761	-258.609	6294.25	-16789.3	2506.35	135.078	275.661	0	23.8651	98.4166	-491.558	98687.3	36943.6	12110.2	275.156	702.235	0	0	0	0	0	0	0	603	903	0
667	2	0.262484	-35.3442	-265.933	6935.12	-16728.3	2643.68	137.096	273.922	0	24.0176	99.3321	-488.811	98321.1	37065.6	12018.7	275.828	701.857	0	0	0	0	0	0	0	603	903	0
667	3	1.3306	-35.6494	-271.426	7667.54	-16972.4	2781	137.469	271.751	0	24.0176	98.264	-484.233	97314.1	36272.2	11789.8	274.906	702.035	0	0	0	0	0	0	0	603	903	0
667	4	0.415072	-34.5813	-276.309	7484.44	-17949	2460.57	135.04	272.913	0	22.034	97.6537	-479.045	97039.4	35967	11698.2	275.081	700.432	0	0	0	0	0	0	0	603	903	0
667	5	1.02542	-36.4123	-281.497	7484.44	-17765.9	2643.68	136.888	273.412	0	22.034	96.433	-476.909	95849.2	35844.9	11332	275.161	702.02	0	0	0	0	0	0	0	603	903	0
667	6	-0.19528	-37.7856	-283.633	7759.1	-18254.2	2643.68	135.642	272.644	0	22.3392	98.1114	-471.416	94292.8	35295.6	11515.1	274.871	702.98	0	0	0	0	0	0	0	603	903	0
667	7	0.109896	-36.8701	-288.821	7575.99	-18803.5	2643.68	134.896	273.769	0	21.5762	98.1114	-466.838	94567.5	35051.5	11148.9	275.083	700.43	0	0	0	0	0	0	0	603	903	0
667	8	0.56766	-38.5486	-293.399	8857.73	-18803.5	2781	135.912	269.81	0	20.8133	97.5011	-464.702	93651.9	34929.4	11286.3	275.165	701.469	0	0	0	0	0	0	0	603	903	0
667	9	0.56766	-39.3115	-299.502	9132.38	-19535.9	2826.78	134.772	269.508	0	20.5081	96.7381	-459.514	93011.1	34441.1	11148.9	274.951	700.588	0	0	0	0	0	0	0	603	903	0
668	0	-0.0426918	-40.8374	-303.775	9040.83	-19841.1	3101.44	134.685	270.238	0	20.8133	95.0597	-452.8	92553.3	34258	11194.7	275.658	698.598	0	0	0	0	0	0	0	603	903	0
668	1	-0.653043	-40.3796	-308.963	9864.81	-19658	3147.22	136.374	268.071	0	20.0504	95.3648	-450.359	91729.3	33830.8	11332	275.12	699.319	0	0	0	0	0	0	0	603	903	0
668	2	-1.26339	-42.2107	-314.151	9407.04	-20512.5	3101.44	134.705	270.056	0	20.2029	96.5855	-446.697	90447.6	33586.6	11011.6	275.189	700.519	0	0	0	0	0	0	0	603	903	0
668	3	-1.87375	-43.8892	-315.677	9773.25	-20695.6	3284.55	134.441	269.04	0	19.5926	95.3648	-443.34	90447.6	32976.3	11148.9	274.382	698.986	0	0	0	0	0	0	0	603	903	0
668	4	-1.56857	-43.7366	-317.508	10139.5	-20512.5	3376.1	135.395	268.065	0	21.5762	95.3648	-439.067	89532.1	32793.2	10691.2	274.688	699.086	0	0	0	0	0	0	0	603	903	0
668	5	-1.87375	-43.584	-324.832	10597.2	-21428	3192.99	134.034	267.376	0	18.6771	95.0597	-433.879	88433.4	32488	10965.8	274.878	699.18	0	0	0	0	0	0	0	603	903	0
668	6	-0.805631	-46.178	-329.104	11238.1	-21367	3696.53	135.075	265.852	0	19.7452	94.2967	-428.691	87517.9	32121.8	10645.4	274.93	698.849	0	0	0	0	0	0	0	603	903	0
668	7	-1.26339	-47.2461	-334.903	11695.9	-21672.1	3696.53	135.288	265.077	0	18.3719	94.9071	-425.64	87151.7	31694.5	10325	274.463	698.245	0	0	0	0	0	0	0	603	903	0
668	8	-1.56857	-48.9246	-334.598	11879	-22404.6	3742.31	133.04	264.498	0	20.3555	94.9071	-421.367	86236.2	30840	10325	273.19	698.342	0	0	0	0	0	0	0	603	903	0
668	9	-2.4841	-49.2297	-344.363	12062.1	-22343.5	3879.64	135.116	264.973	0	16.3882	93.076	-416.789	84862.9	30901.1	10599.6	274.141	699.389	0	0	0	0	0	0	0	603	903	0
669	0	-1.56857	-49.8401	-345.584	12245.2	-22404.6	4108.52	135.169	264.567	0	18.6771	93.076	-410.076	84130.5	30229.7	10050.3	273.717	697.842	0	0	0	0	0	0	0	603	903	0
669	1	-3.7048	-51.5186	-350.772	13069.2	-23137	4200.07	134.04	262.742	0	17.4564	93.076	-407.634	84588.2	30412.8	10233.4	274.608	695.49	0	0	0	0	0	0	0	603	903	0
669	2	-1.56857	-51.6711	-355.35	13160.7	-23198	4337.4	134.718	262.964	0	16.6934	91.245	-402.141	82757.2	30046.6	10141.8	274.717	697.209	0	0	0	0	0	0	0	603	903	0
669	3	-2.63669	-51.8237	-358.706	13343.8	-23686.3	4200.07	133.967	262.8	0	14.8624	91.245	-397.563	81475.4	29497.3	10004.5	274.195	698.063	0	0	0	0	0	0	0	603	903	0
669	4	-3.55221	-53.6548	-363.894	14259.3	-24296.7	4520.51	133.232	260.815	0	15.1675	90.7872	-393.901	81292.4	29314.2	9867.19	274.42	696.623	0	0	0	0	0	0	0	603	903	0
669	5	-3.39963	-55.6384	-367.862	14442.4	-24174.6	4428.95	134.284	260.739	0	14.8624	90.1768	-387.798	80102.1	28764.8	9775.63	274.175	696.444	0	0	0	0	0	0	0	603	903	0
669	6	-4.46774	-57.4695	-372.745	14350.9	-25090.1	4520.51	132.688	261.499	0	15.015	90.3294	-382.305	78820.4	28276.6	9729.86	273.963	696.828	0	0	0	0	0	0	0	603	903	0
669	7	-2.94186	-56.4014	-376.101	14717.1	-25029.1	4612.06	133.451	260.869	0	13.1839	90.0243	-378.948	78454.2	27177.9	9409.42	271.719	695.968	0	0	0	0	0	0	0	603	903	0
669	8	-5.53586	-57.6221	-378.543	16181.9	-25395.3	4383.18	132.913	257.252	0	13.3365	88.4984	-373.76	77264	27788.3	9500.98	274.348	696.279	0	0	0	0	0	0	0	603	903	0
669	9	-5.38327	-58.2324	-384.341	15266.4	-26066.7	4612.06	132.178	260.279	0	13.1839	86.057	-370.098	76257	27055.9	9409.42	273.105	696.954	0	0	0	0	0	0	0	603	903	0
670	0	-4.46774	-57.3169	-387.393	15907.3	-26493.9	4978.27	131.61	258.938	0	13.1839	87.2777	-362.468	75707.6	26628.6	9134.76	273.465	694.133	0	0	0	0	0	0	0	603	903	0
670	1	-6.14621	-58.5376	-393.496	16639.7	-26371.8	4428.95	132.981	257.713	0	12.8787	88.1932	-357.585	74517.4	26018.3	9409.42	272.761	694.609	0	0	0	0	0	0	0	603	903	0
670	2	-5.99362	-62.0471	-395.022	17005.9	-27287.4	4703.61	130.922	256.949	0	11.2003	86.8199	-353.923	73876.6	26079.3	9134.76	273.686	694.264	0	0	0	0	0	0	0	603	903	0
670	3	-7.97726	-60.5212	-400.21	17555.2	-26677	4795.16	133.342	256.135	0	12.1158	85.294	-347.82	72961.1	25102.7	8951.66	272.172	693.233	0	0	0	0	0	0	0	603	903	0
670	4	-6.75656	-60.8264	-402.347	17463.7	-27104.3	4749.39	132.635	256.595	0	12.2684	84.6837	-343.852	71587.7	25285.8	8814.33	273.537	694.807	0	0	0	0	0	0	0	603	903	0
670	5	-8.7402	-61.2842	-406.924	17829.9	-28019.8	5024.05	131.142	256.184	0	10.4373	84.2259	-336.833	70489.1	24736.5	8905.88	273.438	693.73	0	0	0	0	0	0	0	603	903	0
670	6	-9.04538	-63.2678	-410.892	18379.2	-27775.7	5069.82	132.401	255.27	0	10.1321	83.463	-331.645	69939.8	24431.3	8402.34	273.667	692.113	0	0	0	0	0	0	0	603	903	0
670	7	-9.04538	-62.6575	-412.723	18745.4	-28569.1	4932.49	130.779	254.581	0	10.2847	81.9371	-327.678	68841.2	24248.2	8448.12	274	692.912	0	0	0	0	0	0	0	603	903	0
670	8	-8.58761	-63.573	-418.826	19203.2	-28813.3	4840.94	131.205	254.15	0	9.82697	81.3268	-322.185	67559.4	23821	7761.48	273.936	693.309	0	0	0	0	0	0	0	603	903	0
670	9	-10.2661	-66.7773	-422.183	19569.4	-28752.2	5436.03	131.896	253.647	0	9.06403	80.5638	-315.166	66643.9	22417.2	8173.46	271.128	691.544	0	0	0	0	0	0	0	603	903	0
671	0	-11.9445	-66.6247	-424.93	19569.4	-29728.8	5024.05	130.038	253.947	0	9.3692	80.106	-312.114	66186.1	22844.4	8310.79	273.193	690.943	0	0	0	0	0	0	0	603	903	0
671	1	-12.5549	-65.5566	-428.592	20027.2	-29545.7	5024.05	131.063	253.272	0	9.3692	76.9017	-301.433	64812.8	22661.3	7990.36	275.179	687.984	0	0	0	0	0	0	0	603	903	0
671	2	-12.8601	-66.167	-430.118	19844.1	-29850.9	4932.49	130.598	253.864	0	9.3692	77.2069	-301.433	63348	21928.9	7853.03	272.749	692.844	0	0	0	0	0	0	0	603	903	0
671	3	-14.386	-67.2351	-433.169	20576.5	-30217.1	5069.82	130.242	252.498	0	8.45367	76.2914	-295.94	62890.2	21501.7	7257.94	272.656	690.49	0	0	0	0	0	0	0	603	903	0
671	4	-13.9282	-68.1506	-436.526	21766.7	-30339.1	4932.49	130.499	250.137	0	11.2003	75.5284	-289.531	61883.2	20708.2	7486.82	271.523	689.264	0	0	0	0	0	0	0	603	903	0
671	5	-14.2334	-69.0662	-440.188	22132.9	-31071.6	5024.05	129.413	249.72	0	8.1485	74.6129	-287.09	60693	20830.3	7486.82	272.557	691.592	0	0	0	0	0	0	0	603	903	0
671	6	-14.9963	-68.3032	-446.292	22499.1	-31498.8	5069.82	129.421	249.587	0	6.9278	72.9344	-279.766	59869	20586.1	7120.61	273.583	689.003	0	0	0	0	0	0	0	603	903	0
671	7	-17.2851	-70.8972	-445.682	22590.6	-31437.8	4840.94	129.461	249.312	0	6.77521	71.4085	-273.357	58495.7	20036.8	7029.05	273.299	689.01	0	0	0	0	0	0	0	603	903	0
671	8	-20.6421	-72.5757	-455.142	23140	-32658.5	5069.82	128.246	249.159	0	6.9278	70.1878	-266.338	57214	19853.7	7120.61	274.543	688.183	0	0	0	0	0	0	0	603	903	0
671	9	-19.2688	-71.2024	-456.668	23872.4	-32536.4	4795.16	128.753	247.725	0	6.77521	68.0516	-262.981	56481.5	18877.1	6845.95	271.781	688.226	0	0	0	0	0	0	0	603	903	0
672	0	-23.3886	-72.5757	-462.771	24879.5	-33085.7	4520.51	128.505	246.238	0	5.5545	68.662	-259.624	56023.8	18999.2	6479.74	273.18	687.212	0	0	0	0	0	0	0	603	903	0
672	1	-24.7619	-75.78	-468.875	25978.1	-33696.1	4474.73	128.134	244.595	0	5.40192	66.3731	-254.436	53826.5	18694	6754.4	273.472	691.448	0	0	0	0	0	0	0	603	903	0
672	2	-25.83	-78.8318	-471.927	26344.3	-33696.1	5024.05	128.599	244.177	0	5.5545	64.9998	-246.501	53643.4	17717.5	6296.63	271.876	685.381	0	0	0	0	0	0	0	603	903	0
672	3	-26.2878	-80.2051	-475.284	26619	-34672.6	4840.94	127.049	243.994	0	5.85968	64.8473	-241.924	52361.7	17351.3	6250.85	271.722	686.561	0	0	0	0	0	0	0	603	903	0
672	4	-26.7456	-82.1887	-480.166	27534.5	-34794.7	5252.93	127.536	242.656	0	5.24933	62.1007	-235.515	50988.4	16740.9	5884.64	271.082	686.503	0	0	0	0	0	0	0	603	903	0
672	5	-27.5085	-84.0198	-484.134	27259.8	-34855.7	5298.7	128.004	243.694	0	4.3338	61.4903	-230.327	50622.2	16618.8	5930.42	272.153	683.216	0	0	0	0	0	0	0	603	903	0
672	6	-27.8137	-85.8508	-485.965	26985.2	-35466.1	5527.59	127.019	244.471	0	4.48639	60.88	-226.36	49248.9	16496.8	5701.54	272.879	685.431	0	0	0	0	0	0	0	603	903	0
672	7	-27.8137	-86.9189	-487.491	28266.9	-35221.9	5619.14	127.748	242.016	0	4.94415	59.5067	-219.951	47051.6	16008.5	5701.54	272.782	689.081	0	0	0	0	0	0	0	603	903	0
672	8	-27.2033	-86.0034	-485.354	28266.9	-35405	5619.14	127.053	241.76	0	3.72345	58.8963	-214.458	46502.3	15642.3	5701.54	272.939	686.164	0	0	0	0	0	0	0	603	903	0
672	9	-25.3723	-87.8345	-491.458	28541.6	-35832.3	5802.25	127.09	241.925	0	2.96051	57.6756	-209.88	46227.6	14665.7	5335.33	269.877	682.743	0	0	0	0	0	0	0	603	903	0
673	0	-23.5412	-86.7663	-493.899	29548.6	-35466.1	5848.02	128.192	240.173	0	3.72345	55.2342	-204.692	44945.9	14482.6	5335.33	270.753	683.422	0	0	0	0	0	0	0	603	903	0
673	1	-24.9145	-86.3086	-496.036	28724.7	-36076.4	5710.69	127.27	242.092	0	4.02863	53.2506	-198.894	43755.7	14787.8	5243.77	274.35	683.005	0	0	0	0	0	0	0	603	903	0
673	2	-25.83	-84.9353	-499.087	29274	-36198.5	6031.13	127.471	241.345	0	2.65533	52.1825	-193.401	42840.2	14116.4	4877.56	272.99	681.49	0	0	0	0	0	0	0	603	903	0
673	3	-26.4404	-84.3249	-500.918	29457.1	-36076.4	5573.36	127.979	241.194	0	3.1131	51.7247	-189.739	42199.3	13384	4465.58	270.539	680.593	0	0	0	0	0	0	0	603	903	0
673	4	-27.9663	-83.2568	-501.834	30830.4	-36442.6	5527.59	127.381	238.565	0	3.87604	48.9781	-184.551	40826	13078.8	4831.79	270.868	681.782	0	0	0	0	0	0	0	603	903	0
673	5	-26.593	-82.6465	-504.275	30738.8	-36747.8	5710.69	127.127	239.044	0	1.58722	48.2152	-179.058	39544.3	12834.7	4282.47	271.679	682.153	0	0	0	0	0	0	0	603	903	0
673	6	-27.0507	-82.7991	-505.496	31105	-36930.9	5527.59	126.941	238.466	0	2.35016	47.6048	-173.564	38628.8	12468.5	4190.92	271.838	680.439	0	0	0	0	0	0	0	603	903	0
673	7	-28.1189	-83.8672	-508.243	31288.2	-37358.2	5481.81	126.495	238.439	0	2.65533	45.7738	-171.123	37255.5	12163.3	4419.8	271.079	685.288	0	0	0	0	0	0	0	603	903	0
673	8	-27.5085	-83.1042	-513.125	31379.7	-37602.3	5573.36	126.719	238.846	0	2.65533	43.0272	-164.409	36614.6	11797.1	4190.92	271.754	680.296	0	0	0	0	0	0	0	603	903	0
673	9	-27.8137	-82.7991	-513.431	31837.5	-37175.1	5207.15	127.595	237.991	0	1.58722	42.4168	-159.221	35607.5	11247.7	3962.04	270.642	679.364	0	0	0	0	0	0	0	603	903	0
674	0	-29.187	-84.4775	-518.619	32112.1	-37907.5	5527.59	126.907	238.081	0	1.28204	41.0435	-152.202	35149.8	11247.7	3916.26	273.9	672.059	0	0	0	0	0	0	0	603	903	0
674	1	-29.0344	-85.3931	-519.229	32844.5	-38273.7	5619.14	126.287	236.744	0	2.35016	38.9073	-148.235	33776.5	10942.6	3504.27	273.819	675.142	0	0	0	0	0	0	0	603	903	0
674	2	-29.9499	-84.6301	-519.229	32936.1	-37846.5	5619.14	127.11	236.567	0	1.8924	38.9073	-143.657	33135.6	10393.3	3504.27	272.348	672.343	0	0	0	0	0	0	0	603	903	0
674	3	-30.4077	-86.6138	-522.281	33577	-38762	5527.59	125.783	235.711	0	1.12946	36.1607	-142.131	31945.4	10271.2	3412.72	272.266	678.24	0	0	0	0	0	0	0	603	903	0
674	4	-29.6447	-87.6819	-525.027	34034.7	-38395.8	5573.36	126.869	235.175	0	1.73981	35.2452	-136.028	31121.4	9721.87	3229.61	271.47	674.213	0	0	0	0	0	0	0	603	903	0
674	5	-27.9663	-87.9871	-529.91	33393.9	-38456.8	5664.92	127.428	236.982	0	2.04498	34.4823	-132.671	30480.6	9416.69	2954.96	270.978	673.254	0	0	0	0	0	0	0	603	903	0
674	6	-30.2551	-87.5293	-532.046	34309.4	-38945.1	5573.36	126.801	235.514	0	2.04498	33.2616	-128.398	29565	8989.45	3229.61	270.012	672.74	0	0	0	0	0	0	0	603	903	0
674	7	-31.9336	-88.9026	-534.488	34309.4	-39372.3	5710.69	126.336	235.809	0	3.41827	31.4305	-125.347	27917.1	8806.34	3183.84	270.256	680.281	0	0	0	0	0	0	0	603	903	0
674	8	-32.5439	-88.75	-536.929	34950.3	-39189.2	5802.25	127.012	234.907	0	3.26569	30.3624	-119.243	27917.1	8379.1	3138.06	270.269	668.881	0	0	0	0	0	0	0	603	903	0
674	9	-31.781	-89.2078	-539.065	35682.7	-39921.6	5756.47	125.943	233.806	0	1.8924	29.752	-114.665	27093.1	8195.99	2863.4	271.477	666.72	0	0	0	0	0	0	0	603	903	0
675	0	-32.8491	-89.6655	-543.033	35865.8	-39982.7	5344.48	126.372	233.953	0	1.43463	28.5313	-111.919	25994.5	7890.82	2909.18	270.505	670.738	0	0	0	0	0	0	0	603	903	0
675	1	-31.4758	-90.2759	-545.474	35774.2	-40593	5848.02	125.582	234.416	0	0.519104	27.0055	-108.562	25811.4	7768.75	2359.86	271.56	665.243	0	0	0	0	0	0	0	603	903	0
675	2	-32.2387	-89.5129	-545.779	36781.3	-40532	5527.59	125.736	232.608	0	2.19757	25.327	-102.764	23980.3	7463.57	2359.86	272.629	669.646	0	0	0	0	0	0	0	603	903	0
675	3	-31.9336	-89.8181	-552.493	36140.4	-40348.9	5756.47	126.969	234.587	0	2.80792	25.0218	-98.4912	23522.6	7158.39	2588.74	272.681	664.171	0	0	0	0	0	0	0	603	903	0
675	4	-32.3913	-89.8181	-556.46	37239.1	-41081.3	5893.8	126.174	233.079	0	1.12946	23.4959	-96.6601	22423.9	6853.22	2726.07	270.9	671.013	0	0	0	0	0	0	0	603	903	0
675	5	-32.6965	-90.1233	-557.071	37422.2	-40837.2	5893.8	126.693	232.823	0	1.28204	21.3597	-90.5566	22240.8	6425.97	2359.86	270.961	657.399	0	0	0	0	0	0	0	603	903	0
675	6	-33.0017	-90.1233	-558.597	37880	-41081.3	5848.02	126.456	232.187	0	2.50275	21.0545	-90.8618	21508.4	6303.9	2634.52	269.379	666.284	0	0	0	0	0	0	0	603	903	0
675	7	-32.3913	-89.6655	-561.954	37605.3	-41447.5	5664.92	126.244	233.081	0	2.50275	20.7494	-86.2841	20409.8	6120.8	2222.53	270.938	666.459	0	0	0	0	0	0	0	603	903	0
675	8	-31.9336	-89.8181	-563.174	37239.1	-41386.5	5802.25	126.512	233.876	0	1.73981	20.2916	-82.9272	19768.9	5876.66	2176.76	270.865	664.611	0	0	0	0	0	0	0	603	903	0
675	9	-31.6284	-88.75	-566.836	37971.5	-41752.7	6168.46	126.341	233.012	0	1.43463	18.9183	-82.3168	19219.6	5876.66	2085.2	271.391	669.517	0	0	0	0	0	0	0	603	903	0
676	0	-31.3232	-89.0552	-571.109	38429.3	-42485.1	5802.25	125.609	232.711	0	3.1131	18.0028	-80.1806	18578.7	5571.48	2268.31	269.487	671.289	0	0	0	0	0	0	0	603	903	0
676	1	-31.6284	-87.9871	-567.447	38795.5	-42057.9	5802.25	125.882	231.632	0	2.65533	17.0873	-74.6875	17754.7	5205.27	1993.65	269.694	665.28	0	0	0	0	0	0	0	603	903	0
676	2	-33.3069	-88.5974	-575.686	39344.8	-42485.1	5619.14	126.201	231.656	0	1.43463	16.0191	-70.7202	16930.8	5327.34	1947.88	275.33	663.595	0	0	0	0	0	0	0	603	903	0
676	3	-30.7129	-88.1396	-576.602	39619.4	-42973.4	5619.14	125.471	231.288	0	2.19757	15.8665	-69.1943	16473	5144.23	2039.43	274.345	664.931	0	0	0	0	0	0	0	603	903	0
676	4	-33.4594	-88.2922	-578.128	38978.6	-42363.1	6076.9	126.724	232.578	0	2.65533	15.1036	-67.6684	15832.1	4655.95	1856.32	268.805	669.034	0	0	0	0	0	0	0	603	903	0
676	5	-31.9336	-88.4448	-581.18	39253.2	-43034.4	5756.47	125.953	232.459	0	3.1131	14.0355	-64.9218	15282.8	4961.13	1627.44	276.417	667.597	0	0	0	0	0	0	0	603	903	0
676	6	-32.6965	-87.0715	-583.621	39436.3	-43583.8	5344.48	125.322	232.428	0	2.35016	14.0355	-62.1752	14825	4655.95	1627.44	274.884	664.56	0	0	0	0	0	0	0	603	903	0
676	7	-32.5439	-87.5293	-588.199	39802.6	-43217.5	5710.69	126.526	232.331	0	1.73981	13.12	-56.6821	14275.7	4839.06	1535.89	285.372	651.144	0	0	0	0	0	0	0	603	903	0
676	8	-32.0861	-86.156	-587.283	40901.2	-43644.8	5481.81	125.684	230.355	0	3.26569	11.2889	-57.5976	14092.6	4167.67	1490.11	272.358	658.326	0	0	0	0	0	0	0	603	903	0
676	9	-33.9172	-86.7663	-590.945	40260.3	-43278.6	5252.93	126.764	231.871	0	3.57086	13.12	-55.7666	13451.8	4228.71	1444.34	275.829	661.785	0	0	0	0	0	0	0	603	903	0
677	0	-32.3913	-86.7663	-593.692	40901.2	-43522.7	5619.14	126.691	231.107	0	5.09674	11.4415	-55.7666	12536.2	3923.53	1856.32	270.356	678.202	0	0	0	0	0	0	0	603	903	0
677	1	-32.6965	-86.156	-593.387	40351.9	-43766.9	5573.36	126.242	231.997	0	4.18121	11.5941	-49.3579	12353.1	3679.39	1581.66	274.545	652.723	0	0	0	0	0	0	0	603	903	0
677	2	-33.612	-84.9353	-592.776	40809.6	-43950	5527.59	125.857	231.155	0	2.19757	11.2889	-48.1372	12170	3862.49	1627.44	280.239	650.18	0	0	0	0	0	0	0	603	903	0
677	3	-31.781	-84.6301	-598.269	40992.8	-44133.1	5573.36	126.232	231.481	0	3.26569	9.91562	-47.2216	11437.6	3557.32	1444.34	275.332	660.789	0	0	0	0	0	0	0	603	903	0
677	4	-31.781	-85.0879	-600.406	41267.4	-44499.3	5802.25	125.885	231.268	0	2.96051	9.61045	-42.9492	10339	3618.35	1535.89	284.247	662.274	0	0	0	0	0	0	0	603	903	0
677	5	-31.3232	-84.9353	-603.152	41725.2	-44316.2	5573.36	126.526	230.822	0	1.73981	7.6268	-42.3388	10613.6	3557.32	1398.56	284.02	652.317	0	0	0	0	0	0	0	603	903	0
677	6	-31.1706	-84.7827	-604.678	41816.7	-44682.4	5619.14	126.105	230.845	0	1.58722	8.69492	-39.5922	9881.2	3069.04	1490.11	277.516	653.426	0	0	0	0	0	0	0	603	903	0
677	7	-32.0861	-84.4775	-607.73	41999.8	-45231.7	5619.14	125.573	230.891	0	2.80792	8.38974	-38.3715	9698.09	3191.11	1764.77	283.163	650.258	0	0	0	0	0	0	0	603	903	0
677	8	-30.7129	-84.0198	-608.645	41999.8	-44682.4	5481.81	126.587	230.995	0	2.50275	8.08457	-37.7612	9514.99	3069.04	1352.78	281.275	651.022	0	0	0	0	0	0	0	603	903	0
677	9	-32.2387	-82.7991	-610.477	42457.6	-45353.8	5802.25	125.708	230.452	0	2.19757	7.32163	-35.3198	8416.35	2702.83	1581.66	276.524	664.71	0	0	0	0	0	0	0	603	903	0
678	0	-32.6965	-84.0198	-609.561	41816.7	-45659	5573.36	125.095	231.399	0	0.82428	7.01645	-32.8784	8141.69	2458.69	1444.34	274.781	655.369	0	0	0	0	0	0	0	603	903	0
678	1	-30.5603	-82.4939	-613.223	43373.1	-45353.8	5848.02	126.04	229.27	0	2.65533	7.47421	-30.437	7775.48	2641.79	1307.01	286.796	647.538	0	0	0	0	0	0	0	603	903	0
678	2	-30.7129	-82.6465	-616.885	43190	-45781	5344.48	125.787	229.987	0	3.1131	7.6268	-31.3525	7226.17	2214.54	1810.55	270.634	672.519	0	0	0	0	0	0	0	603	903	0
678	3	-31.1706	-82.4939	-618.716	43373.1	-46147.2	5527.59	125.415	229.898	0	1.58722	5.79575	-25.8593	6859.96	2336.62	1215.45	290.359	637.72	0	0	0	0	0	0	0	603	903	0
678	4	-31.018	-82.4939	-618.411	43098.4	-45475.8	5527.59	126.463	230.308	0	2.50275	6.25351	-25.5541	6402.19	1909.37	1032.35	274.719	652.466	0	0	0	0	0	0	0	603	903	0
678	5	-31.781	-81.8835	-620.547	43098.4	-46208.3	5390.26	125.536	230.548	0	2.96051	5.49057	-24.0283	6127.53	2214.54	1123.9	292.164	647.987	0	0	0	0	0	0	0	603	903	0
678	6	-31.4758	-82.0361	-621.768	43373.1	-46330.3	5115.6	125.486	230.242	0	3.1131	5.03281	-23.1127	5486.66	1726.26	1947.88	274.689	665.613	0	0	0	0	0	0	0	603	903	0
678	7	-30.8654	-80.968	-621.463	44288.6	-46025.2	5664.92	125.941	228.735	0	1.73981	4.72763	-21.892	5303.56	1848.33	1261.23	284.43	660.74	0	0	0	0	0	0	0	603	903	0
678	8	-31.4758	-81.2732	-622.684	44563.3	-46452.4	5252.93	125.4	228.433	0	1.73981	4.42246	-22.5024	5395.11	1604.19	1261.23	271.29	663.243	0	0	0	0	0	0	0	603	903	0
678	9	-30.8654	-80.968	-624.515	44654.9	-46757.6	5527.59	125.13	228.497	0	2.96051	4.11728	-19.1455	5212.01	1360.05	1215.45	271.038	630.768	0	0	0	0	0	0	0	603	903	0
679	0	-30.8654	-80.6628	-627.566	44014	-46269.3	5436.03	126.272	229.866	0	0	0	0	0	0	0	200	903	0	0	0	0	0	0	0	603	903	0
679	1	-30.1025	-79.5947	-627.566	44288.6	-46757.6	5436.03	125.494	229.428	0	0	0	0	0	0	0	200	903	0	0	0	0	0	0	0	603	903	0
679	2	-31.9336	-79.137	-630.008	44563.3	-46574.5	5298.7	126.073	229.266	0	0	0	0	0	0	0	200	903	0	0	0	0	0	0	0	603	903	0
679	3	-31.4758	-78.2214	-631.228	44014	-46818.6	5344.48	125.829	230.273	0	0	0	0	0	0	0	200	903	0	0	0	0	0	0	0	603	903	0
679	4	-31.4758	-78.5266	-630.923	45295.7	-47306.9	5161.38	125.02	228.207	0	0	0	0	0	0	0	200	903	0	0	0	0	0	0	0	603	903	0
679	5	-32.2387	-77.9163	-629.092	45570.4	-47062.8	5298.7	125.189	227.562	0	0	0	0	0	0	0	200	903	0	0	0	0	0	0	0	603	903	0
679	6	-30.5603	-79.137	-632.754	45570.4	-47367.9	5252.93	125.14	227.981	0	0	0	0	0	0	0	200	903	0	0	0	0	0	0	0	603	903	0
679	7	-29.6447	-77.4585	-635.806	45570.4	-47734.1	5252.93	124.923	228.327	0	0	0	0	0	0	0	200	903	0	0	0	0	0	0	0	603	903	0
679	8	-30.1025	-76.543	-636.722	46119.7	-47306.9	5252.93	125.702	227.567	0	0	0	0	0	0	0	200	903	0	0	0	0	0	0	0	603	903	0
679	9	-32.3913	-77.0007	-638.247	45753.5	-47795.2	5207.15	125.115	228.314	0	0	0	0	0	0	0	200	903	0	0	0	0	0	0	0	603	903	0
680	0	-31.018	-76.2378	-639.468	46577.5	-47245.9	5390.26	126.117	227.162	0	0	0	0	0	0	0	200	903	0	0	0	0	0	0	0	603	903	0
680	1	-30.8654	-77.7637	-638.553	46485.9	-47673.1	5115.6	125.342	227.201	0	0	0	0	0	0	0	200	903	0	0	0	0	0	0	0	603	903	0
680	2	-31.781	-75.78	-640.079	46485.9	-47917.3	5069.82	125.138	227.375	0	0	0	0	0	0	0	200	903	0	0	0	0	0	0	0	603	903	0
680	3	-29.6447	-75.6274	-643.435	46485.9	-48161.4	5481.81	125.15	227.754	0	0	0	0	0	0	0	200	903	0	0	0	0	0	0	0	603	903	0
680	4	-30.1025	-74.4067	-641.299	47126.8	-48039.3	5298.7	125.091	226.514	0	0	0	0	0	0	0	200	903	0	0	0	0	0	0	0	603	903	0
680	5	-30.5603	-75.3223	-646.182	46852.1	-48466.6	5161.38	124.995	227.494	0	0	0	0	0	0	0	200	903	0	0	0	0	0	0	0	603	903	0
680	6	-30.5603	-73.7964	-648.013	47767.7	-48771.7	5115.6	124.736	226.286	0	0	0	0	0	0	0	200	903	0	0	0	0	0	0	0	603	903	0
680	7	-31.018	-74.1016	-647.098	47401.4	-48405.5	5069.82	125.196	226.748	0	0	0	0	0	0	0	200	903	0	0	0	0	0	0	0	603	903	0
680	8	-31.4758	-73.3386	-648.318	48408.5	-48832.8	5115.6	124.678	225.332	0	0	0	0	0	0	0	200	903	0	0	0	0	0	0	0	603	903	0
680	9	-30.4077	-73.3386	-647.708	47401.4	-48954.9	5344.48	124.418	226.817	0	0	0	0	0	0	0	200	903	0	0	0	0	0	0	0	603	903	0
681	0	-31.3232	-73.186	-648.929	47584.5	-49382.1	5024.05	123.902	226.672	0	0	0	0	0	0	0	200	903	0	0	0	0	0	0	0	603	903	0
681	1	-30.7129	-72.5757	-649.539	48133.9	-48649.7	5024.05	125.101	225.895	0	0	0	0	0	0	0	200	903	0	0	0	0	0	0	0	603	903	0
681	2	-30.7129	-72.5757	-651.675	48866.3	-49504.2	4932.49	124.036	225.014	0	0	0	0	0	0	0	200	903	0	0	0	0	0	0	0	603	903	0
681	3	-28.7292	-71.8127	-655.337	48317	-49199	4932.49	124.926	226.272	0	0	0	0	0	0	0	200	903	0	0	0	0	0	0	0	603	903	0
681	4	-29.9499	-71.6601	-655.337	49140.9	-49199	4840.94	124.926	225.014	0	0	0	0	0	0	0	200	903	0	0	0	0	0	0	0	603	903	0
681	5	-30.8654	-70.7446	-653.201	48866.3	-49504.2	4840.94	124.213	225.19	0	0	0	0	0	0	0	200	903	0	0	0	0	0	0	0	603	903	0
681	6	-30.8654	-70.592	-657.474	49415.6	-49382.1	4978.27	124.891	224.84	0	0	0	0	0	0	0	200	903	0	0	0	0	0	0	0	603	903	0
681	7	-31.6284	-70.2869	-658.084	49415.6	-49687.3	4886.72	124.497	224.91	0	0	0	0	0	0	0	200	903	0	0	0	0	0	0	0	603	903	0
681	8	-31.9336	-70.592	-656.863	50148	-49443.1	4840.94	124.728	223.655	0	0	0	0	0	0	0	200	903	0	0	0	0	0	0	0	603	903	0
681	9	-31.4758	-70.2869	-656.863	50331.1	-49565.2	4978.27	124.543	223.377	0	0	0	0	0	0	0	200	903	0	0	0	0	0	0	0	603	903	0
682	0	-30.4077	-69.5239	-659.305	50697.3	-50053.5	4840.94	124.081	223.105	0	0	0	0	0	0	0	200	903	0	0	0	0	0	0	0	603	903	0
682	1	-30.5603	-69.8291	-659.305	50422.7	-49809.3	4795.16	124.452	223.521	0	0	0	0	0	0	0	200	903	0	0	0	0	0	0	0	603	903	0
682	2	-29.9499	-69.2187	-662.967	50880.4	-50785.9	4795.16	123.396	223.253	0	0	0	0	0	0	0	200	903	0	0	0	0	0	0	0	603	903	0
682	3	-30.2551	-68.4558	-662.356	50056.5	-50175.6	4749.39	124.247	224.427	0	0	0	0	0	0	0	200	903	0	0	0	0	0	0	0	603	903	0
682	4	-31.1706	-67.8455	-662.662	51796	-50419.7	4840.94	123.913	221.836	0	0	0	0	0	0	0	200	903	0	0	0	0	0	0	0	603	903	0
682	5	-31.3232	-68.1506	-663.882	51521.3	-50480.7	4749.39	123.961	222.394	0	0	0	0	0	0	0	200	903	0	0	0	0	0	0	0	603	903	0
[truncated: 2,774 more rows]
