# Supplementary material for: The Effects of an Extemporaneous Speech Dual-task on Older Adult Gait Control
Source: Research Square preprint supplement (doi:10.21203/rs.3.rs-7674245/v1), 2025-11-18
Supplement: Supplementary file 65 [file DT5Walk09.xlsx]

## Sheet: Sheet1
Trajectories
		05:LFHD			05:RFHD			05:LBHD			05:RBHD			05:C7			05:T10			05:CLAV			05:STRN			05:RBAK			05:LSHO			05:LUPA			05:LELB			05:LFRM			05:LWRA			05:LWRB			05:LFIN
Frame	Sub Frame	X	Y	Z	X	Y	Z	X	Y	Z	X	Y	Z	X	Y	Z	X	Y	Z	X	Y	Z	X	Y	Z	X	Y	Z	X	Y	Z	X	Y	Z	X	Y	Z	X	Y	Z	X	Y	Z	X	Y	Z	X	Y	Z
		mm	mm	mm	mm	mm	mm	mm	mm	mm	mm	mm	mm	mm	mm	mm	mm	mm	mm	mm	mm	mm	mm	mm	mm	mm	mm	mm	mm	mm	mm	mm	mm	mm	mm	mm	mm	mm	mm	mm	mm	mm	mm	mm	mm	mm	mm	mm	mm
452	0	199.232	-2344.91	1592.03	314.769	-2342.41	1602.85	200.456	-2518.14	1597.49	318.559	-2524.36	1609.28	271.115	-2567.89	1467.12	278.912	-2646.96	1232.25	280.325	-2409.88	1398.96	284.569	-2346.53	1218.38	401.424	-2659.93	1290.42	101.059	-2524.91	1430.4	20.2291	-2578.45	1203.33	14.6972	-2592.49	1106.74	-3.76593	-2535.33	922.971	48.6711	-2523.11	848.852	-17.2382	-2561.67	845.917	7.26545	-2524.54	754.069
453	0	196.326	-2334.78	1593.01	311.853	-2332.25	1604.31	198.164	-2508.25	1598.71	316.591	-2514.65	1611.38	269.45	-2557.94	1468.41	277.464	-2636.78	1233.58	278.742	-2399.85	1400.52	283.292	-2336.17	1220.43	400.376	-2649.36	1292.65	98.8923	-2514.52	1431.26	18.2362	-2564.43	1202.97	13.0284	-2577.6	1106.71	-6.77559	-2518.89	923.442	44.8922	-2505.57	849.498	-20.3026	-2544.3	846.481	2.74322	-2505.64	755.501
454	0	193.695	-2324.83	1593.94	309.107	-2321.99	1605.79	195.697	-2498.51	1599.93	314.462	-2504.51	1613.28	265.706	-2546.68	1467.91	275.927	-2626.46	1235.02	277.433	-2389.82	1402.2	282.426	-2325.89	1222.08	398.941	-2638.59	1294.33	97.4242	-2504.14	1432.29	16.2747	-2550.45	1203	11.2104	-2562.87	1106.91	-9.46077	-2502.03	924.618	42.3911	-2488.03	850.288	-23.5668	-2526.34	847.568	-1.34697	-2486.41	756.778
455	0	191.262	-2314.89	1594.78	306.423	-2311.63	1607.04	195.388	-2489.97	1602.16	312.187	-2494.06	1614.78	265.209	-2537.46	1470.28	274.658	-2616.42	1236.45	276.265	-2379.89	1403.71	281.805	-2315.96	1223.45	397.824	-2628.55	1295.64	96.0092	-2493.61	1433.26	14.6285	-2537.15	1203.08	8.66591	-2548.01	1107.38	-11.851	-2484.95	925.898	39.4825	-2470.12	851.491	-27.119	-2507.96	848.81	-5.37186	-2466.89	758.588
456	0	188.9	-2304.75	1595.36	303.955	-2301.68	1608.1	192.277	-2479.1	1602.12	310.314	-2483.87	1616.24	263.56	-2527.78	1471.15	272.903	-2606.22	1237.46	275.15	-2370.2	1404.88	281.743	-2306.15	1224.75	396.371	-2618.84	1296.97	95.3852	-2483.47	1435.06	13.1778	-2523.34	1203.27	7.07634	-2533.44	1107.83	-14.416	-2467.6	927.417	36.0264	-2451.48	853.058	-30.0047	-2489.74	850.117	-9.30003	-2447.09	760.665
457	0	186.875	-2297.41	1595.19	301.801	-2291.36	1609.29	190.472	-2469.06	1603.24	308.602	-2473.53	1617.83	261.954	-2517.86	1472.51	271.38	-2596.26	1238.71	274.389	-2360.7	1406.15	281.399	-2296.37	1226.07	394.731	-2609.3	1298.18	93.9722	-2472.82	1435.98	11.3758	-2510.01	1204.17	5.02603	-2518.78	1108.54	-16.8231	-2450.14	929.46	33.3769	-2433.62	854.484	-32.8739	-2471.17	851.748	-13.0089	-2427.01	762.976
458	0	184.969	-2287.88	1595.94	299.727	-2281.11	1610.37	189.888	-2460.07	1604.97	307.276	-2463.3	1619.86	261.003	-2508.25	1474.31	269.549	-2586.36	1240.24	273.974	-2351.06	1407.67	281.499	-2286.92	1227.59	392.884	-2599.92	1299.42	92.5647	-2462.18	1437.51	9.88599	-2496.6	1205.2	3.31387	-2504.08	1109.37	-19.3193	-2432.74	931.389	30.8225	-2414.72	856.734	-35.3897	-2452.67	853.638	-16.2307	-2406.8	765.333
459	0	183.216	-2278.07	1596.59	298.16	-2271.06	1611.29	188.898	-2450.54	1606.4	306.221	-2453.21	1621.69	260.08	-2498.84	1475.84	267.393	-2576.67	1241.7	273.646	-2341.65	1409.12	281.265	-2277.5	1228.9	391.098	-2591	1300.88	91.9284	-2451.77	1438.84	8.38225	-2483.44	1206.11	0.847474	-2489.63	1110.43	-21.8682	-2415.12	933.678	28.5355	-2396.75	859.267	-38.0747	-2433.84	855.679	-19.698	-2386.35	768.48
460	0	182.197	-2268.14	1597.44	296.739	-2260.9	1612.23	187.924	-2440.78	1607.95	305.119	-2443.02	1623.55	258.919	-2489.28	1477.39	265.49	-2567.1	1243.38	273.203	-2332.26	1410.43	281.189	-2268.31	1230.14	389.165	-2582.21	1301.98	91.0167	-2441.16	1440.45	6.44594	-2470.1	1207.55	-0.93045	-2475.09	1111.7	-24.2141	-2397.64	936.103	25.7656	-2377.81	862.065	-41.2869	-2414.81	858.017	-22.8305	-2365.69	772.053
461	0	181.278	-2258.54	1598.25	295.791	-2250.99	1613.23	186.892	-2430.74	1609.73	304.184	-2432.75	1625.58	257.84	-2479.68	1479.15	263.812	-2557.69	1245.08	272.848	-2322.99	1411.96	280.838	-2259.02	1231.36	387.433	-2573.4	1303.24	89.9886	-2430.82	1442.3	4.75924	-2457	1209.24	-3.20069	-2460.52	1113.41	-26.3586	-2380.17	939.038	23.703	-2359.6	865.269	-43.3373	-2396.05	860.712	-25.8394	-2344.9	775.948
462	0	180.648	-2248.71	1598.84	294.899	-2240.92	1613.91	186.411	-2421.02	1611.79	303.756	-2422.87	1627.75	257.029	-2470.39	1480.99	262.079	-2548.3	1246.43	272.614	-2313.79	1413.52	280.572	-2249.88	1232.84	385.828	-2564.98	1304.69	89.013	-2420.47	1444.37	3.32944	-2444.02	1211.27	-5.73292	-2446.14	1115.55	-28.3827	-2362.86	942.263	21.3669	-2340.91	868.642	-45.7159	-2377.36	863.894	-28.4405	-2324.04	780.344
463	0	179.754	-2239.51	1599.54	294.558	-2231.1	1614.67	186.081	-2411.44	1613.8	303.153	-2412.86	1629.62	254.901	-2461.16	1481.31	260.824	-2539.09	1247.81	272.36	-2304.73	1414.94	280.319	-2240.83	1234.72	384.024	-2556.36	1306.07	88.5844	-2410.55	1446.69	1.60621	-2430.93	1213.49	-7.77051	-2432.02	1117.87	-30.4347	-2345.49	945.915	19.6134	-2322.75	872.335	-48.294	-2358.46	867.048	-30.6961	-2303.25	784.99
464	0	179.719	-2229.3	1600.63	294.203	-2221.26	1615.27	185.732	-2401.56	1615.96	302.732	-2402.92	1631.62	254.643	-2452.36	1483.71	259.513	-2530	1249.21	272.052	-2295.74	1416.56	279.857	-2231.85	1236.46	382.422	-2548.04	1307.26	87.8101	-2400.51	1448.83	0.205583	-2418.16	1215.89	-9.41243	-2418.09	1120.22	-32.2124	-2328.37	949.84	17.5065	-2304.49	876.92	-50.28	-2339.9	870.939	-32.9299	-2282.49	790.339
465	0	179.533	-2219.91	1601.39	294.258	-2211.4	1616.15	185.385	-2391.62	1618.36	302.553	-2393.03	1633.9	253.792	-2443.19	1485.49	258.279	-2520.72	1250.79	271.619	-2286.72	1418.28	279.235	-2222.76	1237.99	380.856	-2539.39	1308.96	87.4233	-2390.55	1451.4	-1.24034	-2405.45	1218.05	-11.3549	-2404.34	1122.63	-33.9961	-2311.42	953.645	15.588	-2285.56	881.591	-52.278	-2321.35	874.937	-34.9167	-2261.7	795.959
466	0	180.686	-2210.08	1604.57	294.367	-2201.64	1616.9	185.249	-2381.74	1620.63	302.615	-2383.36	1635.88	253.032	-2434.21	1487.24	257.143	-2511.66	1252.38	271.398	-2277.85	1420.08	278.713	-2213.76	1240.01	379.413	-2531.05	1310.46	86.5775	-2380.81	1454	-3.36397	-2392.85	1221.68	-13.4848	-2390.74	1125.39	-35.2893	-2294.53	958.117	13.922	-2267.61	886.524	-54.7201	-2302.48	879.91	-36.5715	-2241.07	801.787
467	0	180.271	-2199.8	1604.19	294.868	-2192.05	1617.74	185.329	-2371.99	1622.94	302.551	-2373.73	1637.58	252.238	-2425.23	1488.69	256.178	-2502.76	1253.78	270.885	-2269.02	1421.51	278.112	-2204.95	1241.83	377.915	-2522.77	1311.57	85.8532	-2371.1	1456.31	-4.85844	-2380.63	1224.05	-15.2785	-2377.41	1128.34	-36.8913	-2277.68	962.652	12.5009	-2249.71	891.212	-56.023	-2284.25	884.249	-38.1318	-2220.63	807.701
468	0	180.649	-2189.93	1605.48	295.344	-2182.47	1618.4	185.223	-2362.03	1625.26	302.585	-2364.1	1639.46	251.234	-2416.38	1490.31	254.841	-2493.48	1255.19	270.976	-2260.23	1423.62	277.582	-2196.03	1243.38	376.484	-2514.06	1313.09	85.4666	-2361.37	1458.55	-6.61235	-2368.53	1226.76	-17.5926	-2364.25	1130.92	-38.1785	-2261.07	966.918	11.1618	-2231.67	896.917	-57.8443	-2265.51	888.904	-39.1731	-2200.33	813.754
469	0	181.633	-2180.29	1607.55	295.992	-2172.99	1619.18	184.945	-2352.04	1627.34	302.561	-2354.51	1641.07	250.664	-2407.41	1492.01	253.829	-2484.2	1256.75	270.409	-2251.22	1424.92	276.951	-2187.17	1244.8	375.195	-2505.58	1314.36	84.7751	-2351.83	1460.27	-7.84475	-2356.53	1228.8	-19.7693	-2351.24	1133.5	-39.4241	-2244.4	971.636	10.3982	-2213.74	902.062	-59.0467	-2247.07	893.164	-40.103	-2180.01	820.116
470	0	182.478	-2170.16	1608.73	296.783	-2163.58	1619.77	185.088	-2342.06	1629.51	302.662	-2345.19	1642.58	249.869	-2398.41	1493.27	252.653	-2474.93	1258	269.845	-2242.41	1426.1	277.092	-2178.12	1246.74	373.915	-2496.84	1315.58	83.8732	-2342.14	1462.64	-9.67804	-2344.99	1231.41	-21.7767	-2338.52	1135.79	-40.4231	-2228.02	975.918	9.50586	-2196.1	907.413	-59.6377	-2229.04	897.619	-40.5484	-2159.85	826.346
471	0	183.525	-2161.04	1609.99	297.632	-2154.14	1620.27	184.787	-2332.27	1631	302.522	-2335.56	1643.58	249.159	-2389.39	1494.6	251.562	-2465.63	1258.99	269.607	-2233.39	1427.33	276.501	-2169.32	1247.89	372.704	-2488.17	1316.57	83.5512	-2332.65	1464.14	-11.1106	-2333.5	1233.38	-23.6246	-2326.05	1137.75	-41.3094	-2211.73	980.184	9.0979	-2178.69	912.789	-60.7398	-2210.71	901.992	-40.8151	-2140.16	832.543
472	0	183.754	-2150.58	1611.27	298.443	-2144.66	1620.7	184.809	-2322.19	1632.72	302.343	-2325.94	1644.6	248.637	-2380.31	1495.74	250.77	-2456.21	1260.24	269.278	-2224.45	1428.39	276.015	-2160.47	1248.77	371.685	-2479.34	1317.61	83.1929	-2323.24	1465.35	-12.6225	-2322.09	1235.33	-25.7489	-2313.52	1139.72	-42.2459	-2195.57	984.496	8.38415	-2161.18	917.927	-61.5081	-2192.66	906.111	-40.7561	-2120.44	838.641
473	0	184.94	-2141.24	1612	299.255	-2135.37	1620.92	184.929	-2312.46	1633.64	302.528	-2316.65	1645.53	247.974	-2371.22	1496.5	249.919	-2446.85	1260.98	268.895	-2215.43	1429.28	275.782	-2151.51	1249.63	370.91	-2470.58	1318.48	82.7315	-2313.93	1466.29	-13.9373	-2310.98	1236.74	-27.7041	-2301.03	1141.49	-42.7787	-2179.61	988.378	8.21291	-2144.1	922.758	-61.7794	-2174.84	910.364	-40.3992	-2100.84	844.982
474	0	184.979	-2130.62	1611.63	299.925	-2126.15	1621.01	185.167	-2302.87	1634.75	302.637	-2307.38	1646.05	247.543	-2362.05	1497.36	249.545	-2437.67	1261.66	268.621	-2206.41	1429.89	275.66	-2142.65	1250.23	370.057	-2461.63	1318.95	82.3464	-2304.52	1467.34	-15.4277	-2300.06	1238.12	-29.8347	-2288.75	1143.05	-43.3771	-2163.95	992.13	7.98384	-2127.26	927.991	-62.0215	-2157.21	914.239	-39.8684	-2081.58	851.229
475	0	185.477	-2121.07	1611.98	300.764	-2116.69	1621.12	185.289	-2292.95	1635.79	302.627	-2297.87	1646.53	247.089	-2352.83	1497.89	249.069	-2428.38	1262.17	268.15	-2197.33	1430.28	275.377	-2133.7	1250.52	369.528	-2452.74	1319.56	81.711	-2295.26	1468.05	-16.7035	-2288.96	1239.38	-31.494	-2276.57	1144.28	-43.7663	-2148.37	995.806	8.18242	-2110.74	932.511	-62.2421	-2139.85	917.9	-39.1101	-2062.93	856.973
476	0	186.433	-2111.15	1612.92	301.487	-2106.89	1621.06	185.187	-2282.8	1636.67	302.811	-2288.32	1647.02	246.625	-2343.39	1498.43	248.833	-2419.25	1262.85	267.902	-2188.06	1430.65	275.079	-2124.63	1250.7	369.098	-2443.48	1320.33	81.3346	-2285.81	1468.26	-17.7899	-2278.05	1239.96	-31.9913	-2265.66	1143.44	-43.8698	-2132.95	999.328	8.44602	-2094.65	937.341	-62.1596	-2122.53	921.491	-38.2911	-2044.27	862.516
477	0	187.223	-2101.19	1613.16	302.112	-2097.5	1620.6	185.316	-2272.98	1637.19	302.997	-2278.77	1647.1	246.437	-2334.01	1498.64	248.578	-2410.11	1263.05	267.636	-2178.91	1430.72	275.017	-2115.44	1250.69	368.723	-2434.41	1320.48	80.9796	-2276.59	1468.31	-18.8943	-2267.24	1240.68	-34.8028	-2252.33	1145.98	-43.992	-2117.85	1002.62	8.74469	-2078.44	941.542	-61.8875	-2105.71	924.944	-37.2461	-2025.88	868.068
478	0	187.753	-2091.4	1613.23	302.848	-2087.95	1620.11	185.863	-2263.25	1637.44	303.143	-2269.22	1646.85	246.349	-2324.71	1498.55	248.617	-2401.13	1263.1	267.463	-2169.72	1430.4	274.814	-2106.37	1250.37	368.697	-2425.14	1320.77	80.5414	-2267.17	1468.13	-19.6886	-2256.51	1240.84	-36.1175	-2240.48	1146.46	-43.9975	-2103.05	1005.46	9.19061	-2062.81	945.591	-61.6414	-2089.06	928.326	-36.1595	-2007.94	873.447
479	0	188.588	-2081.6	1613.23	303.499	-2078.25	1619.4	185.677	-2253.23	1637.49	303.35	-2259.7	1646.05	246.191	-2315.09	1498.44	248.892	-2392.04	1263.22	267.235	-2160.16	1429.99	274.761	-2097.28	1249.78	368.687	-2415.77	1320.89	80.6447	-2258.08	1467.48	-20.4939	-2245.8	1241.01	-37.4323	-2228.46	1146.78	-43.8647	-2088.23	1008.36	9.80869	-2047.3	949.564	-61.2239	-2072.59	931.348	-34.8952	-1990.45	878.504
480	0	189.48	-2071.93	1612.97	304.149	-2068.55	1618.61	185.598	-2242.9	1637.71	303.595	-2250.05	1645.66	246.193	-2305.44	1498.17	249.119	-2382.82	1262.99	267.021	-2150.81	1429.16	274.686	-2088.3	1248.99	369.014	-2406.24	1321.02	80.7619	-2249.05	1466.48	-20.8757	-2235.16	1240.55	-37.9924	-2216.84	1146.59	-43.3277	-2073.88	1010.82	10.6926	-2032.34	952.788	-60.5368	-2056.42	934.28	-33.5323	-1973.24	883.423
481	0	189.63	-2061.73	1611.9	304.797	-2058.99	1617.56	186.121	-2233.08	1637.39	304.183	-2240.13	1645.04	246.363	-2295.84	1497.53	249.677	-2373.73	1262.7	266.949	-2141.35	1428.5	274.472	-2079.16	1247.82	369.508	-2396.75	1320.79	80.6746	-2239.81	1465.57	-21.06	-2224.54	1240.15	-39.0943	-2205.12	1146.58	-42.791	-2059.67	1013.17	11.8906	-2017.88	955.788	-59.8306	-2040.68	937	-31.9443	-1956.64	887.978
482	0	190.502	-2051.98	1611.47	305.372	-2049.2	1616.45	186.621	-2223.11	1636.82	304.387	-2230.23	1643.96	246.476	-2286.12	1496.81	250.229	-2364.58	1262.2	267.1	-2131.73	1427.71	274.347	-2069.96	1246.7	370.101	-2386.76	1320.98	80.7133	-2230.49	1464.95	-21.2842	-2213.98	1239.57	-39.504	-2193.66	1146.29	-42.1642	-2045.82	1015.16	12.6733	-2003.31	958.516	-58.7416	-2025.43	939.408	-30.4151	-1940.31	892.198
483	0	191.001	-2042.01	1610.4	305.553	-2039.57	1614.75	186.977	-2213	1636.17	304.996	-2220.43	1642.96	246.862	-2276.27	1496.15	251.1	-2355.4	1261.81	266.683	-2122.03	1426.29	274.34	-2060.85	1245.29	370.827	-2377.08	1320.56	80.983	-2221.35	1463.98	-21.2511	-2203.49	1238.56	-39.7018	-2182.28	1145.42	-41.1666	-2032.18	1016.81	14.0487	-1989.49	960.876	-58.125	-2010.13	941.618	-28.7851	-1924.57	896.068
484	0	191.678	-2032.21	1609.32	306.207	-2029.55	1613.44	187.334	-2203.01	1635.29	305.348	-2210.48	1641.61	247.281	-2266.43	1495.18	251.867	-2346.07	1260.96	266.759	-2112.31	1425.03	274.313	-2051.51	1243.63	371.756	-2367.27	1320.16	81.0949	-2212.03	1462.61	-21.0058	-2193.08	1237.69	-39.7866	-2170.9	1144.62	-40.1423	-2018.97	1018.09	15.3706	-1975.86	963.034	-56.9488	-1995.47	943.456	-26.9306	-1909.31	899.425
485	0	192.427	-2022.12	1608.3	306.674	-2019.67	1611.61	187.713	-2193.09	1634.03	305.803	-2200.63	1639.89	247.815	-2256.56	1493.94	252.889	-2336.84	1260.01	266.529	-2102.54	1423.4	274.269	-2042.29	1241.91	372.765	-2357.36	1319.53	81.7046	-2202.7	1461.01	-20.5879	-2182.81	1236.47	-39.6477	-2159.79	1143.84	-38.9242	-2005.99	1019.3	16.9363	-1962.53	964.409	-55.421	-1981.42	945.083	-25.1806	-1894.57	902.309
486	0	193.127	-2012.05	1607.32	307.375	-2009.71	1609.83	188.079	-2182.97	1632.71	306.375	-2190.72	1638.25	248.329	-2246.6	1492.82	254	-2327.47	1259.18	266.721	-2092.69	1421.94	274.118	-2032.95	1239.89	374.109	-2347.74	1318.48	81.9805	-2193.28	1459.44	-19.9982	-2172.49	1234.96	-39.2732	-2148.72	1142.58	-37.881	-1993.15	1020.13	18.4062	-1949.51	965.832	-54.1224	-1967.29	946.153	-23.3194	-1880.26	904.854
487	0	193.493	-2001.9	1605.81	307.994	-1999.71	1608.19	188.528	-2172.75	1631.39	307.079	-2180.76	1636.48	248.871	-2236.52	1491.58	255.036	-2317.97	1257.99	266.828	-2082.77	1419.92	274.125	-2023.14	1237.8	375.254	-2337.73	1317.59	82.385	-2184.09	1458.08	-19.3949	-2162.31	1233.47	-38.7827	-2137.77	1141.31	-36.3217	-1980.84	1020.37	20.257	-1936.91	966.902	-52.6235	-1953.87	947.157	-21.1754	-1866.49	907.068
488	0	194.394	-1991.59	1604.77	308.607	-1989.74	1606.21	189.352	-2162.73	1629.8	307.694	-2170.72	1634.45	249.606	-2226.55	1489.96	256.394	-2308.56	1256.74	267.274	-2072.88	1418.02	274.484	-2013.73	1235.76	376.486	-2327.84	1316.51	82.9009	-2174.55	1456	-18.5023	-2152.29	1231.5	-38.0566	-2127.03	1139.7	-34.8794	-1968.69	1020.65	21.964	-1924.49	967.19	-51.0116	-1940.85	947.401	-18.8927	-1853.12	908.615
489	0	194.849	-1981.79	1602.23	309.416	-1979.66	1604.19	190.034	-2152.74	1627.9	308.314	-2160.68	1632.31	250.392	-2216.55	1488.29	257.608	-2298.94	1255.24	267.354	-2062.79	1416	274.821	-2004.14	1234.02	377.75	-2317.84	1315.25	83.5186	-2165.01	1454.28	-17.6951	-2142.29	1229.71	-37.4774	-2116.49	1137.91	-33.3267	-1956.78	1020.49	23.989	-1912.76	967.535	-49.5671	-1928.02	947.875	-16.557	-1840.28	909.553
490	0	195.611	-1971.47	1601.07	310.137	-1969.67	1602.11	190.912	-2142.48	1626.42	309.209	-2150.66	1630.48	251.181	-2206.37	1486.83	259.071	-2289.36	1253.86	267.887	-2052.72	1414.09	275.16	-1994.38	1231.9	379.047	-2307.48	1314.16	83.9532	-2155.52	1452.06	-16.4818	-2132.4	1227.41	-36.5784	-2106.03	1135.98	-31.6278	-1945.26	1019.97	25.8542	-1901.04	967.101	-47.4213	-1915.7	947.436	-14.0858	-1827.87	910.113
491	0	196.682	-1961.3	1599.32	311.296	-1959.5	1600.42	191.802	-2132.35	1624.67	310.174	-2140.54	1628.46	252.154	-2196.21	1485.21	260.572	-2279.72	1252.39	268.343	-2042.52	1412.13	275.839	-1984.48	1230.03	380.535	-2297.18	1312.94	85.1137	-2146.24	1450.07	-15.5009	-2122.63	1225.35	-35.5944	-2095.71	1134	-29.8117	-1934.11	1018.98	28.0087	-1889.9	966.605	-45.4613	-1903.83	946.847	-11.6159	-1816	910.183
492	0	198.11	-1950.85	1598.12	312.323	-1949.15	1598.45	192.864	-2122.19	1623.02	311.1	-2130.33	1626.44	253.314	-2186.01	1483.54	261.911	-2269.84	1250.81	269.105	-2032.27	1410.42	276.392	-1974.51	1227.99	381.829	-2286.84	1311.66	86.063	-2136.6	1448.07	-14.1699	-2112.91	1223.15	-34.3734	-2085.59	1131.87	-27.87	-1923.2	1017.73	30.3136	-1879.21	965.689	-43.4758	-1892.48	945.711	-8.99734	-1804.59	909.8
493	0	199.192	-1940.65	1596.38	313.459	-1939.13	1596.79	193.861	-2111.9	1621.35	312.217	-2120.19	1624.54	254.417	-2175.66	1482	263.43	-2260.13	1249.36	269.817	-2022.05	1408.47	277.35	-1964.47	1226.15	383.235	-2276.66	1310.4	86.8127	-2126.8	1446.21	-12.7477	-2103.31	1220.93	-33.1587	-2075.65	1129.85	-26.0334	-1912.72	1016.22	32.6048	-1868.81	964.355	-41.1517	-1881.61	944.238	-6.49338	-1793.86	908.942
494	0	200.666	-1930.18	1595.36	314.945	-1928.81	1595.36	195.244	-2101.5	1619.91	313.675	-2109.96	1622.9	255.563	-2165.17	1480.47	264.843	-2250.18	1248.09	270.704	-2011.87	1406.62	278.317	-1954.27	1224.31	384.518	-2266.27	1309.26	88.0406	-2116.76	1444	-11.4236	-2093.66	1218.85	-31.6115	-2065.83	1127.65	-23.8027	-1902.48	1014.45	34.811	-1858.85	962.793	-39.2681	-1871.21	942.728	-4.14194	-1783.47	907.606
495	0	202.178	-1919.83	1593.85	316.417	-1918.58	1593.75	196.562	-2091.2	1618.39	315.005	-2099.79	1621.05	256.92	-2154.64	1478.99	266.086	-2240.05	1246.67	272.063	-2001.46	1404.91	279.644	-1944.14	1222.53	385.709	-2255.95	1307.94	89.2533	-2106.51	1442.38	-9.79468	-2084.21	1216.63	-30.4189	-2055.98	1125.76	-21.8213	-1892.7	1012.25	37.1349	-1849.32	960.603	-36.6982	-1861.25	940.638	-1.46833	-1773.74	905.953
496	0	204.07	-1909.34	1592.71	318.553	-1908.44	1592.44	198.293	-2080.84	1616.6	316.571	-2089.55	1619.11	258.299	-2144.1	1477.52	267.357	-2229.97	1245.25	273.529	-1990.96	1403.38	281.074	-1933.96	1220.9	386.888	-2245.7	1306.59	90.6671	-2096.09	1440.75	-8.03578	-2074.58	1214.8	-28.7278	-2046.44	1123.8	-19.378	-1883.34	1010.11	39.6011	-1840.3	958.21	-34.2157	-1852.23	938.373	1.07444	-1764.44	903.735
497	0	206.032	-1898.76	1591.63	320.522	-1897.9	1591.26	199.747	-2070.31	1614.96	318.192	-2079.2	1617.5	259.631	-2133.43	1476.25	268.548	-2219.75	1243.96	275.029	-1980.51	1401.82	282.56	-1923.6	1219.16	387.961	-2235.4	1305.37	92.0066	-2085.34	1439.16	-6.53093	-2064.96	1213.18	-26.6858	-2037.25	1121.68	-17.2061	-1874.23	1007.42	41.8962	-1831.47	955.473	-32.2413	-1843.22	935.768	3.37374	-1755.79	901.261
498	0	208.1	-1888.21	1590.44	322.793	-1887.65	1590.42	201.414	-2059.62	1613.57	320.347	-2069.1	1616.22	261.003	-2122.75	1475.04	269.695	-2209.29	1242.88	276.542	-1969.95	1400.32	284.101	-1913.1	1217.83	389.015	-2225.05	1304.12	93.3442	-2074.48	1437.84	-4.58657	-2055.29	1211.45	-24.761	-2028.05	1119.75	-15.0086	-1865.48	1004.85	44.4367	-1823.29	952.686	-29.7051	-1834.75	933.121	5.82457	-1747.59	898.24
499	0	210.581	-1877.56	1589.75	324.785	-1877.54	1588.77	203.432	-2049.09	1612.17	322.381	-2058.89	1614.68	262.439	-2112.13	1473.73	270.659	-2198.73	1241.63	278.342	-1959.31	1399.11	285.698	-1902.6	1216.27	390.035	-2214.72	1302.61	94.3874	-2063.11	1436.67	-2.56941	-2045.56	1209.92	-22.7436	-2019.14	1118.07	-12.71	-1857.25	1001.92	46.7959	-1815.32	949.778	-27.4689	-1826.94	930.227	8.44777	-1739.96	894.892
500	0	213.044	-1867.01	1588.64	327.324	-1867.3	1587.59	205.679	-2038.58	1610.66	324.082	-2048.31	1612.7	264.019	-2101.58	1472.43	271.532	-2188.04	1240.32	280.04	-1948.83	1397.75	287.411	-1891.89	1215.19	391.124	-2204.33	1300.89	96.5222	-2052.25	1435.66	-0.670182	-2035.75	1208.46	-20.7698	-2010.33	1116.36	-10.1995	-1849.27	999.148	49.1504	-1807.86	946.557	-25.1311	-1819.55	927.138	10.6819	-1732.77	891.041
501	0	215.75	-1856.26	1587.95	330.154	-1856.69	1587.01	207.949	-2027.92	1609.48	327.046	-2038.63	1611.86	265.665	-2091.05	1471.26	272.527	-2177.06	1239.1	281.938	-1938.22	1396.62	289.033	-1881.16	1214.28	392.201	-2193.72	1299.29	97.8186	-2040.85	1434.51	1.23226	-2025.78	1207.24	-18.4435	-2001.63	1114.61	-7.94243	-1841.55	995.949	51.7336	-1800.84	942.928	-22.8938	-1812.4	923.943	12.8079	-1726.3	886.743
502	0	218.556	-1845.7	1587.18	332.978	-1846.63	1585.89	210.338	-2017.44	1608.19	329.517	-2028.48	1610.42	267.434	-2080.58	1469.85	273.578	-2165.93	1237.46	283.924	-1927.6	1395.6	290.83	-1870.34	1213.25	393.45	-2183.19	1297.39	99.578	-2029.83	1433.52	3.13265	-2015.84	1205.96	-17.3064	-1992.77	1113.34	-5.54625	-1834.07	992.769	54.1191	-1794.07	939.065	-20.292	-1805.8	920.343	15.1441	-1720.18	882.149
503	0	221.489	-1835.32	1586.32	335.751	-1836.64	1584.53	213.138	-2007.1	1606.99	331.888	-2018.26	1608.84	269.321	-2070.33	1468.39	274.766	-2154.66	1235.55	285.998	-1917.04	1394.44	292.512	-1859.3	1212.3	394.854	-2172.73	1295.26	101.547	-2018.93	1432.59	5.28707	-2005.86	1204.81	-14.6701	-1984.19	1111.71	-3.01197	-1826.86	989.557	56.5546	-1787.73	934.694	-18.2808	-1799.46	917.197	17.3504	-1714.6	877.097
504	0	224.506	-1824.87	1585.74	338.835	-1826.47	1583.95	215.608	-1996.69	1605.96	333.83	-2007.61	1607.11	271.182	-2059.95	1467.06	276.274	-2143.33	1233.85	287.975	-1906.51	1393.48	294.24	-1848.09	1211.89	396.222	-2162.02	1293.19	103.481	-2008.18	1431.78	7.27148	-1995.88	1203.71	-11.8217	-1975.89	1110.17	-0.811064	-1819.85	986.158	59.0074	-1781.86	930.425	-15.9191	-1793.27	913.721	19.4491	-1709.41	871.939
505	0	227.612	-1814.44	1585.34	341.929	-1816.26	1583.22	218.178	-1986.11	1605.19	336.735	-1997.58	1606.43	273.251	-2049.58	1465.96	278.085	-2132.07	1232.38	290.217	-1895.71	1392.86	295.737	-1836.6	1211.4	397.789	-2151.31	1291.17	105.511	-1997.61	1430.84	9.24693	-1985.94	1202.83	-10.2671	-1966.92	1109.16	1.69351	-1812.94	982.661	61.295	-1776.43	925.868	-14.0152	-1787.61	910.021	21.5107	-1704.58	866.539
506	0	230.545	-1804.1	1584.91	345.067	-1806.09	1582.78	221.033	-1975.69	1604.57	340.099	-1987.74	1605.95	275.421	-2039.25	1464.96	279.99	-2120.9	1230.95	292.288	-1885.16	1392.22	297.591	-1825.15	1211.09	399.475	-2140.53	1289.01	107.656	-1987.14	1430.24	11.3014	-1976.1	1202.12	-6.9018	-1958.47	1107.98	4.0171	-1806.53	979.109	63.3702	-1771.33	920.986	-12.1071	-1782.14	906.366	23.5472	-1700.27	860.898
507	0	233.964	-1793.79	1584.86	348.167	-1795.86	1582.52	224.15	-1965.57	1604.17	342.54	-1977.26	1604.85	277.757	-2028.9	1464.2	281.926	-2109.83	1229.76	294.544	-1874.67	1391.79	299.152	-1813.54	1211.03	401.087	-2129.77	1287.05	109.916	-1976.89	1429.9	13.3748	-1966.55	1201.52	-4.80875	-1949.94	1107.08	6.13964	-1800.25	975.597	65.3805	-1766.64	916.102	-10.8977	-1777	902.738	25.3576	-1696.36	855.377
508	0	237	-1783.51	1584.91	351.349	-1785.73	1582.5	227.18	-1955.3	1604.05	345.814	-1967.24	1604.79	280.08	-2018.48	1463.8	283.826	-2098.88	1229.16	296.754	-1864.13	1391.7	300.881	-1802.15	1211.23	402.909	-2118.89	1285.65	112.167	-1966.76	1429.9	15.5071	-1957.05	1201.05	-1.67318	-1941.43	1106.27	8.32727	-1794.35	972.016	67.3151	-1762.3	911.132	-8.93318	-1772.55	898.996	26.6011	-1693	849.684
509	0	240.177	-1773.14	1585.32	354.512	-1775.36	1582.75	230.153	-1944.92	1604.19	348.914	-1956.94	1604.9	282.49	-2008.12	1463.7	285.925	-2088.04	1228.95	298.923	-1853.62	1391.99	302.54	-1790.76	1211.5	404.73	-2107.99	1284.53	114.255	-1956.57	1430.02	18.0361	-1947.68	1200.99	1.22098	-1932.79	1106.13	10.4636	-1788.65	968.646	69.0193	-1758.47	906.146	-7.69264	-1768.54	895.799	27.6253	-1690.28	843.925
510	0	243.249	-1762.89	1585.93	357.517	-1765.29	1583.11	233.242	-1934.65	1604.5	352.035	-1946.76	1604.91	284.916	-1997.84	1463.74	287.772	-2077.33	1228.7	301.203	-1843.18	1392.26	304.273	-1779.53	1212.13	406.578	-2097.21	1283.63	116.832	-1946.57	1430.61	20.574	-1938.42	1201.29	5.15651	-1924.2	1105.9	12.389	-1783.51	965.332	70.477	-1754.88	901.485	-6.46995	-1764.97	892.08	28.2549	-1687.97	838.545
511	0	246.434	-1752.68	1586.89	360.609	-1754.97	1583.56	236.506	-1924.66	1605.02	355.233	-1936.56	1605.28	287.54	-1987.53	1464.04	289.538	-2066.51	1228.85	303.332	-1832.78	1392.82	306.078	-1768.85	1212.74	408.359	-2086.46	1283.06	119.145	-1936.54	1431.43	23.3284	-1929.38	1201.61	7.82061	-1915.99	1106.3	14.3308	-1778.59	962.394	71.8233	-1751.85	896.984	-5.16956	-1762.05	889.115	28.1799	-1686.26	833.194
512	0	249.346	-1742.61	1587.63	363.804	-1744.75	1584.45	239.695	-1914.43	1606	358.894	-1926.62	1606.34	289.994	-1977.4	1464.78	291.339	-2055.78	1229.14	305.47	-1822.42	1393.79	307.743	-1758.1	1213.83	410.48	-2075.98	1283.17	121.182	-1926.59	1432.48	26.2333	-1920.13	1202.61	11.2679	-1907.64	1106.9	15.9021	-1774.05	959.809	72.6501	-1748.83	892.945	-4.34353	-1759.81	886.052	27.9944	-1685.09	828.341
513	0	252.443	-1732.48	1588.68	366.731	-1734.45	1585.27	242.687	-1904.21	1607.02	361.775	-1916.14	1606.9	292.376	-1967.33	1465.62	293.341	-2045.25	1229.77	307.325	-1812.38	1394.87	309.287	-1747.57	1214.87	412.35	-2065.42	1283.23	123.414	-1916.76	1433.78	29.0862	-1911.19	1203.29	14.731	-1899.44	1107.94	17.2805	-1769.97	957.553	73.4427	-1746.31	889.445	-3.79435	-1757.7	884.111	27.3625	-1684.38	823.786
514	0	255.402	-1722.4	1589.65	369.664	-1724.3	1586.34	246.065	-1894.3	1608.19	365.037	-1906	1607.86	294.691	-1957.46	1466.5	295.404	-2034.89	1230.45	309.03	-1802.42	1396.05	311.012	-1737.29	1216.29	414.491	-2054.97	1283.65	125.59	-1906.93	1435.29	32.3056	-1902.3	1204.24	17.9955	-1891.68	1108.88	18.4351	-1766.16	955.623	74.0997	-1743.94	886.252	-3.56097	-1756.18	881.81	26.4168	-1684.08	819.474
515	0	258.299	-1712.31	1590.81	372.687	-1713.99	1587.43	249.031	-1884.26	1609.75	368.025	-1895.82	1608.95	297.007	-1947.61	1467.59	297.42	-2024.52	1231.43	310.866	-1792.47	1397.41	312.405	-1727.17	1217.77	416.704	-2044.74	1284.18	127.834	-1897.33	1436.92	35.0392	-1893.58	1205.45	21.4902	-1884.02	1110.48	19.5011	-1762.83	954.237	74.0677	-1741.52	883.64	-2.95241	-1755.11	880.279	25.098	-1684.17	815.582
516	0	260.997	-1702.26	1592.2	375.402	-1704.03	1588.12	251.977	-1874.16	1611.15	371.001	-1885.77	1610.3	299.26	-1937.78	1468.81	299.396	-2014.1	1232.57	312.673	-1782.71	1398.62	313.891	-1717.17	1219.09	418.786	-2034.05	1285	129.821	-1887.78	1438.69	37.8214	-1885.02	1206.78	25.2538	-1876.58	1111.49	20.2853	-1759.57	953.104	74.4758	-1739.41	881.359	-2.42578	-1754.15	878.665	23.7288	-1684.44	812.084
517	0	263.52	-1692.53	1593.07	377.961	-1694.24	1588.79	254.773	-1864.43	1612.43	373.879	-1875.81	1611.4	301.474	-1928.18	1469.79	301.889	-2004.22	1233.6	314.389	-1772.97	1399.75	315.054	-1707.22	1220.29	421.234	-2023.76	1285.72	131.902	-1878.48	1440.29	40.0878	-1876.84	1208	28.93	-1870.09	1111.7	21.0309	-1756.49	952.136	74.5227	-1737.27	879.707	-2.18908	-1753.24	877.954	22.3296	-1684.97	808.784
518	0	266.298	-1682.62	1594.25	380.41	-1684.4	1589.36	257.19	-1854.49	1613.8	376.42	-1865.92	1612.16	303.568	-1918.5	1470.76	304.174	-1994.3	1234.6	315.975	-1763.3	1400.79	316.271	-1697.59	1221.63	423.721	-2013.54	1286.34	133.7	-1869.2	1441.87	42.3293	-1869.05	1209.14	29.9814	-1862.66	1113.98	21.5204	-1753.36	951.524	74.5301	-1735	878.336	-2.10398	-1752.52	877.225	20.9447	-1685.44	806.045
519	0	268.717	-1672.81	1595.32	382.926	-1674.55	1590.17	259.877	-1844.72	1615.15	379.022	-1856.21	1613.37	305.743	-1908.93	1471.96	306.655	-1984.56	1235.8	317.587	-1753.65	1401.98	317.077	-1687.86	1222.53	426.155	-2003.14	1287.21	135.49	-1860.12	1443.33	44.3048	-1861.4	1210.59	33.5022	-1856.03	1115.35	21.9663	-1750.67	951.034	74.6122	-1732.93	876.832	-1.63485	-1751.62	876.357	19.6342	-1685.9	803.524
520	0	270.779	-1663.15	1596.34	385.163	-1664.81	1591.08	262.052	-1834.91	1616.5	381.495	-1846.48	1614.58	307.829	-1899.3	1473.19	309.057	-1974.69	1236.98	318.807	-1744.09	1402.91	317.9	-1678.23	1223.65	428.917	-1992.9	1288.26	137.58	-1851.33	1444.58	45.9104	-1854.22	1211.73	35.5176	-1849.49	1116.67	22.523	-1747.69	950.559	74.3713	-1730.53	875.981	-1.62223	-1750.77	875.678	18.4144	-1686.2	801.432
521	0	272.902	-1653.35	1597.34	387.05	-1655.12	1591.65	264.298	-1825.15	1617.67	383.678	-1836.77	1615.5	309.948	-1889.94	1474.24	311.583	-1965.18	1237.99	319.996	-1734.46	1403.94	318.696	-1668.62	1224.66	431.711	-1982.78	1289.27	139.149	-1842.71	1445.83	47.4896	-1847.3	1213.06	36.8355	-1843.2	1118.19	22.723	-1744.89	950.403	74.3934	-1728.92	875.345	-1.20634	-1749.31	875.683	17.3464	-1686.26	799.678
522	0	274.646	-1643.79	1598.46	388.801	-1645.39	1592.29	266.325	-1815.66	1618.91	385.757	-1827.1	1616.57	311.938	-1880.56	1475.33	313.916	-1955.57	1238.96	321.158	-1725.05	1405.06	319.284	-1659.19	1225.79	434.393	-1972.78	1290.27	140.771	-1834.42	1447.15	49.2637	-1840.56	1214.29	38.6337	-1837.46	1119.36	23.1387	-1741.95	950.387	74.2288	-1726.42	875.061	-1.15913	-1748.02	875.654	16.4282	-1686.2	798.495
523	0	276.005	-1634.23	1599.27	390.407	-1635.62	1593.18	267.888	-1805.9	1620.35	387.58	-1817.26	1617.66	313.93	-1871.24	1476.49	316.349	-1946.27	1240.03	322.222	-1715.7	1406.15	319.767	-1649.9	1226.69	437.07	-1962.77	1291.51	142.334	-1826.24	1448.31	50.5308	-1834.27	1215.47	39.9628	-1831.66	1120.55	23.3024	-1738.98	950.525	74.3339	-1724.58	874.584	-1.09139	-1746.27	876.228	15.7519	-1685.71	797.534
524	0	277.399	-1624.76	1600.26	391.557	-1626.01	1593.83	269.874	-1796.6	1621.49	389.148	-1807.5	1618.58	315.754	-1862.01	1477.54	318.385	-1936.84	1240.77	323.211	-1706.39	1407.11	320.437	-1640.65	1227.81	439.571	-1952.88	1292.71	143.652	-1818.21	1449.43	52.1828	-1828.06	1216.88	41.4961	-1826.45	1121.77	23.6816	-1735.89	950.772	74.6127	-1722.18	874.344	-0.887083	-1744.34	876.825	15.2548	-1685	796.912
525	0	278.569	-1615.26	1601.22	392.558	-1616.35	1594.74	271.174	-1787.07	1622.64	390.747	-1797.82	1619.7	317.592	-1852.94	1478.5	320.486	-1927.9	1241.54	324.134	-1697.18	1408.18	320.85	-1631.57	1228.82	441.917	-1943.12	1293.87	145.84	-1810.6	1450.67	53.2813	-1822.34	1218.05	42.8623	-1821.43	1123.2	24.185	-1732.91	951.276	74.5385	-1719.58	874.88	-0.319603	-1742.08	877.487	14.7536	-1683.77	796.779
526	0	279.304	-1606.03	1602.08	393.498	-1606.6	1595.74	272.65	-1777.75	1623.96	392.32	-1788.1	1621.23	319.529	-1843.57	1479.67	322.275	-1918.72	1242.52	325.08	-1688.08	1409.43	321.405	-1622.35	1230.04	444.166	-1933.46	1295.27	147.212	-1802.7	1451.66	54.8001	-1816.78	1219.48	43.6978	-1816.66	1124.46	24.6962	-1729.85	952.029	74.5778	-1717.16	875.12	-0.036107	-1739.82	878.365	14.2315	-1682.39	797.008
527	0	280.08	-1596.6	1603.09	394.231	-1596.84	1596.79	273.859	-1768.27	1625.16	393.482	-1778.27	1622.33	321.12	-1834.5	1480.9	323.855	-1909.49	1243.47	326.061	-1678.95	1410.61	321.91	-1613.3	1231.18	446.122	-1923.75	1296.6	148.771	-1794.74	1452.85	55.9525	-1811.41	1220.85	44.9765	-1812.06	1125.9	25.0712	-1726.72	952.623	75.2962	-1714.41	875.754	0.143124	-1737.39	879.306	13.769	-1680.65	797.484
528	0	280.532	-1587.42	1603.8	394.532	-1587.34	1597.59	275.062	-1759.13	1626.26	394.66	-1768.45	1623.72	322.777	-1825.46	1481.89	325.794	-1900.56	1244.38	326.922	-1669.94	1411.66	322.736	-1604.26	1232.43	448.082	-1914.16	1297.72	150.269	-1786.84	1454.01	57.1892	-1806.25	1222.17	46.1305	-1807.79	1127.33	25.6003	-1723.65	953.406	75.4511	-1711.42	876.469	0.698646	-1734.9	880.254	13.5859	-1678.89	798.252
529	0	280.885	-1578.1	1604.81	395.033	-1577.59	1598.67	276.151	-1749.92	1627.31	395.658	-1758.73	1624.78	324.451	-1816.39	1482.92	327.474	-1891.33	1245.14	327.813	-1660.86	1412.82	323.472	-1595.2	1233.61	449.933	-1904.56	1298.88	151.974	-1778.88	1454.98	58.3149	-1801.33	1223.68	47.302	-1803.66	1128.73	26.2423	-1720.48	954.375	75.8562	-1708.21	876.963	1.3804	-1732.48	881.259	13.4934	-1676.83	798.996
530	0	281.086	-1569.06	1605.48	395.237	-1567.84	1599.81	277.294	-1740.79	1628.28	396.764	-1749.06	1626.15	326.003	-1807.23	1483.96	329.156	-1882.06	1246.15	328.819	-1651.78	1413.95	324.275	-1586.21	1234.81	451.87	-1895.01	1300.32	153.306	-1770.79	1456.12	59.5272	-1796.48	1225.16	48.4954	-1799.41	1130.28	26.6281	-1717.41	955.272	76.3722	-1705.14	877.83	2.00964	-1729.86	882.517	13.581	-1674.56	799.937
531	0	280.967	-1559.84	1606.29	395.227	-1558.1	1600.77	278.022	-1731.53	1629.21	397.597	-1739.26	1627.4	327.494	-1798.07	1484.86	330.833	-1873.22	1247.23	329.711	-1642.67	1414.86	324.897	-1577.37	1235.69	453.438	-1885.38	1301.3	154.518	-1762.52	1457.35	60.5494	-1791.44	1226.85	49.6568	-1795.16	1131.78	27.3336	-1714.23	956.173	76.9037	-1701.67	878.751	2.90735	-1727.04	883.53	13.7696	-1671.98	800.8
532	0	281.135	-1550.91	1606.96	395.394	-1548.57	1601.86	278.962	-1722.63	1629.73	398.448	-1729.73	1628.26	328.797	-1788.93	1485.61	332.02	-1864.21	1247.99	330.564	-1633.58	1415.88	325.622	-1568.3	1236.58	455.051	-1875.8	1302.16	155.817	-1754.19	1458.16	61.3108	-1786.45	1228.72	50.7859	-1790.89	1133.13	27.7419	-1711	957.068	77.3987	-1698.22	880.004	3.64287	-1724.34	884.466	14.0586	-1669.55	801.634
533	0	281.101	-1541.74	1607.63	395.389	-1539.01	1602.77	279.574	-1713.47	1630.33	399.217	-1720	1629.42	330.082	-1779.68	1486.3	333.066	-1855.28	1248.83	331.558	-1624.43	1416.66	326.335	-1559.37	1237.24	456.561	-1866.32	1303.12	157.093	-1745.64	1459.1	63.2122	-1781.44	1229.85	51.902	-1786.33	1134.61	28.446	-1707.5	957.939	77.966	-1694.57	880.936	4.58412	-1721.45	885.387	14.4709	-1666.93	802.44
534	0	281.206	-1532.61	1608.05	395.513	-1529.26	1603.79	280.294	-1704.44	1630.78	399.55	-1710.08	1629.64	331.258	-1770.37	1487	334.303	-1846.58	1249.76	332.396	-1615.25	1417.22	327.046	-1550.22	1237.84	457.839	-1856.76	1303.83	158.191	-1736.87	1459.83	64.6075	-1776.44	1231.05	53.031	-1781.75	1135.91	29.1002	-1704.04	958.688	78.1301	-1690.83	882.031	5.84755	-1718.32	886.442	14.6936	-1664.06	803.108
535	0	281.34	-1523.4	1608.37	395.496	-1519.73	1604.31	280.818	-1695.18	1631.03	400.469	-1700.59	1630.53	332.407	-1761.03	1487.42	335.165	-1837.66	1250.29	333.281	-1605.86	1417.76	327.887	-1540.89	1238.16	459.211	-1847.4	1304.51	159.115	-1727.92	1460.48	66.0372	-1770.91	1232.11	54.3589	-1776.97	1136.97	29.8134	-1700.29	959.221	79.1196	-1686.62	882.708	6.80645	-1715.36	886.919	15.1347	-1661.09	803.839
536	0	281.296	-1514.22	1608.65	395.602	-1510.01	1604.99	281.706	-1686.13	1631.02	400.975	-1691.1	1630.89	333.342	-1751.62	1487.67	335.963	-1828.8	1250.72	334.107	-1596.66	1417.85	328.679	-1531.71	1238.48	460.091	-1837.89	1304.76	160.232	-1718.9	1460.86	67.5873	-1765.09	1232.93	55.5303	-1771.81	1138.07	30.761	-1696.31	959.763	80.3963	-1682.32	883.266	8.11811	-1712.13	887.256	16.0919	-1658.23	803.841
537	0	281.288	-1504.86	1608.76	395.673	-1500.43	1605.41	281.965	-1676.69	1631.05	401.378	-1681.35	1631.44	334.25	-1742.12	1487.99	336.832	-1819.92	1251.3	335.27	-1587.04	1418.23	329.42	-1522.63	1238.26	461.171	-1828.59	1305.36	161.138	-1709.63	1461.14	68.8723	-1758.71	1233.77	56.598	-1766.27	1138.94	31.7663	-1692.31	960.004	81.2337	-1677.86	883.619	9.52845	-1708.72	887.56	16.9664	-1655.24	803.948
538	0	281.464	-1495.6	1608.66	395.762	-1490.74	1605.8	282.559	-1667.35	1630.94	401.767	-1671.54	1631.5	334.979	-1732.48	1488.11	337.247	-1810.65	1251.74	335.858	-1577.54	1417.93	330.141	-1513.44	1238.05	461.862	-1819.2	1305.61	162.166	-1700.18	1461.24	70.1243	-1751.96	1234.54	57.6476	-1760.25	1139.78	32.6872	-1687.79	960.004	81.9592	-1673.19	884.016	11.0475	-1704.96	887.668	17.9161	-1652.02	803.805
539	0	281.571	-1486.1	1608.57	395.873	-1481.09	1605.98	282.92	-1657.82	1630.4	402.262	-1662	1631.39	335.674	-1722.84	1487.95	337.855	-1801.69	1251.86	336.493	-1568.06	1417.63	330.811	-1504.31	1237.5	462.481	-1810.04	1305.67	162.816	-1690.61	1461.18	71.2335	-1744.82	1235.1	58.9272	-1754.04	1140.19	33.7553	-1683.09	959.825	82.5901	-1668.57	883.862	12.52	-1701.16	887.43	19.1334	-1648.67	803.393
540	0	281.668	-1476.6	1608.31	395.93	-1471.24	1606.03	283.29	-1648.49	1629.8	402.579	-1652.26	1631.11	336.348	-1713.13	1487.87	338.031	-1792.52	1251.89	337.18	-1558.32	1417.24	331.6	-1495.07	1236.86	462.982	-1800.85	1305.83	163.507	-1680.83	1461.11	72.1835	-1737.14	1235.48	60.0108	-1747.27	1140.75	34.835	-1677.99	959.781	84.6744	-1664.58	883.641	14.0229	-1697.12	887.079	20.4568	-1645.33	802.717
541	0	281.671	-1467.03	1607.74	395.986	-1461.37	1605.98	283.548	-1638.92	1629.17	402.978	-1642.49	1630.93	336.828	-1703.15	1487.7	338.355	-1783.36	1252.06	337.877	-1548.68	1416.61	332.27	-1485.93	1236.08	463.22	-1791.57	1305.8	164.076	-1670.83	1460.95	72.8438	-1729.08	1236.03	61.3171	-1740.08	1141.03	36.0564	-1672.75	959.313	85.9777	-1659.62	883.272	15.3286	-1692.68	886.763	21.8513	-1641.71	801.846
542	0	281.743	-1457.28	1607.24	396.118	-1451.7	1605.77	283.827	-1629.16	1628.33	403.243	-1632.66	1630.28	337.263	-1693.23	1487.25	338.401	-1774.01	1251.94	338.741	-1538.95	1415.72	333.055	-1476.6	1235.08	463.354	-1782.41	1305.51	164.556	-1660.76	1460.57	73.5981	-1720.72	1236.29	62.4837	-1732.63	1141.27	37.2807	-1667.09	958.767	87.6121	-1654.4	882.699	16.7881	-1687.88	886.379	23.5567	-1637.92	800.793
543	0	281.84	-1447.61	1606.47	396.057	-1441.69	1605.44	284.274	-1619.62	1627.29	403.336	-1622.78	1629.53	337.757	-1683.24	1486.68	338.399	-1764.77	1251.65	339.292	-1529.12	1414.89	333.61	-1467.34	1233.91	463.298	-1773.16	1305.14	165.042	-1650.46	1460.09	74.4516	-1712	1236.25	63.5606	-1724.9	1141.2	38.6375	-1661.27	958.23	89.0074	-1649.22	882.28	18.5464	-1682.84	885.872	25.2971	-1633.88	799.691
544	0	281.451	-1437.8	1605.87	395.952	-1431.69	1605.02	284.241	-1609.84	1626.12	403.545	-1612.9	1628.86	337.881	-1673.11	1486.11	338.086	-1755.25	1251.28	339.695	-1519.07	1413.95	334.138	-1457.89	1232.79	463.194	-1763.98	1304.82	165.359	-1639.91	1459.49	75.1591	-1702.84	1236.12	64.6227	-1716.76	1141.07	39.7908	-1654.85	957.559	90.1005	-1643.55	881.631	19.758	-1677.44	885.259	27.0416	-1629.6	798.418
545	0	281.478	-1427.93	1604.98	395.924	-1421.8	1604.47	284.247	-1599.84	1624.88	403.583	-1602.88	1627.98	337.954	-1662.88	1485.39	337.88	-1745.9	1250.93	340.373	-1509.06	1412.71	334.6	-1448.5	1231.4	462.974	-1754.69	1304.34	165.631	-1629.2	1458.94	75.7653	-1693.57	1235.95	65.4607	-1708.23	1141.15	41.0702	-1648.28	956.892	91.9966	-1637.92	881.052	21.2329	-1671.51	884.601	29.0204	-1625.03	796.898
546	0	281.324	-1417.97	1603.96	395.791	-1411.7	1603.76	284.389	-1590.09	1623.49	403.642	-1592.92	1626.76	338.048	-1652.68	1484.48	337.313	-1736.1	1250.3	340.957	-1499.04	1411.4	335.084	-1438.92	1229.93	462.553	-1745.46	1303.62	165.797	-1618.45	1458.22	76.4271	-1683.97	1235.45	66.4756	-1699.54	1140.72	42.118	-1641.42	956.142	93.4674	-1631.93	880.13	22.6718	-1665.54	884.026	30.8159	-1620.17	795.282
547	0	281.2	-1407.97	1602.75	395.568	-1401.67	1602.91	284.205	-1580.28	1621.76	403.365	-1582.86	1625.43	337.993	-1642.43	1483.48	336.718	-1726.54	1249.56	341.486	-1488.96	1410.12	335.7	-1429.18	1228.45	461.837	-1736.13	1302.7	165.957	-1607.58	1457.19	76.8854	-1674.18	1235	67.1479	-1690.69	1140.12	43.1175	-1634.24	955.108	94.7745	-1625.61	879.027	24.1945	-1659.27	882.892	32.757	-1614.99	793.669
548	0	280.977	-1397.9	1601.51	395.299	-1391.65	1602.41	283.914	-1570.05	1620.4	403.324	-1572.87	1624.57	337.661	-1631.93	1482.53	336.031	-1716.74	1248.95	341.649	-1478.69	1408.73	336.123	-1419.37	1226.93	461.099	-1726.76	1302.03	165.741	-1596.48	1456.26	76.9831	-1664.25	1234.42	67.6769	-1681.31	1139.77	44.6779	-1626.92	953.801	95.8788	-1618.64	878.213	25.3599	-1652.52	882.084	34.7856	-1609.62	791.866
549	0	280.758	-1387.82	1600.69	394.972	-1381.36	1601.75	283.524	-1559.98	1618.71	403.017	-1562.78	1623.21	337.241	-1621.38	1481.45	335.012	-1706.47	1248.1	341.92	-1468.29	1407.23	336.349	-1409.39	1225.34	460.094	-1717.3	1301.15	165.486	-1585.27	1455.22	77.2092	-1654.21	1233.94	68.0873	-1671.8	1139.07	45.7387	-1619.02	952.791	97.1426	-1611.3	877.358	26.5522	-1645.21	881.028	36.3648	-1603.5	790.102
550	0	280.318	-1377.57	1599.65	394.771	-1371.22	1600.98	283.124	-1549.99	1616.82	402.287	-1552.59	1621.43	336.731	-1610.85	1480.23	333.944	-1696.34	1246.97	342.005	-1457.94	1405.77	336.797	-1399.19	1223.78	458.958	-1707.86	1299.95	165.296	-1573.92	1454.12	76.9995	-1643.98	1233.03	68.4576	-1662.36	1138.35	46.4352	-1610.7	951.634	98.3886	-1603.93	876.229	27.6504	-1637.6	879.869	37.9564	-1597.11	788.549
551	0	279.991	-1367.24	1598.54	394.144	-1361.02	1600.29	282.562	-1539.84	1614.95	401.697	-1542.59	1620.08	335.998	-1600.4	1478.7	332.796	-1686.08	1245.95	341.972	-1447.37	1404.24	337.058	-1389.08	1222.16	457.613	-1698.24	1298.85	164.574	-1562.39	1452.8	76.8506	-1633.51	1232.08	68.2798	-1652.5	1137.55	46.8387	-1602.04	950.386	99.0128	-1595.88	875.049	28.2703	-1629.51	878.771	39.8463	-1590.45	786.641
552	0	279.213	-1356.98	1597.44	393.61	-1350.86	1599.64	281.693	-1529.57	1613.04	400.996	-1532.5	1618.57	335.008	-1589.59	1477.49	331.554	-1675.63	1244.94	341.918	-1436.8	1402.72	337.189	-1378.73	1220.5	456.255	-1688.64	1297.87	163.985	-1550.78	1451.52	76.5359	-1622.89	1231.34	68.1617	-1642.33	1136.64	47.5648	-1593.18	949.152	99.8899	-1587.24	874.036	29.018	-1620.9	877.488	41.2783	-1583.06	784.807
553	0	278.487	-1346.75	1596.4	393.057	-1340.66	1599.09	280.703	-1519.17	1611.16	399.946	-1522.38	1616.9	334.089	-1578.78	1476.13	330.34	-1665.14	1243.83	341.655	-1426.06	1401.17	337.572	-1368.36	1218.85	454.817	-1678.81	1296.76	163.252	-1539.07	1450.13	75.6473	-1612.12	1230.29	67.7437	-1632.1	1135.59	47.6636	-1583.77	947.9	100.49	-1578.44	872.941	29.7613	-1611.83	876.347	42.5742	-1575.14	783.077
554	0	277.838	-1336.15	1595.57	392.107	-1330.49	1598.31	279.659	-1508.87	1609.24	398.696	-1512.25	1615.22	332.921	-1567.68	1474.93	329.011	-1654.58	1242.64	341.49	-1415.2	1399.65	337.638	-1357.87	1217.1	453.292	-1668.88	1295.65	162.442	-1527.33	1448.52	75.0019	-1601.22	1228.97	67.4742	-1621.67	1134.53	47.8169	-1574.21	946.487	100.834	-1569.12	871.411	29.8497	-1602.63	874.865	43.5695	-1566.69	781.39
555	0	277.152	-1325.78	1594.75	391.133	-1320.3	1597.91	278.205	-1498.48	1607.32	397.321	-1502.1	1613.87	331.504	-1556.68	1473.67	327.67	-1643.82	1241.66	340.777	-1404.46	1397.94	337.641	-1347.35	1215.45	451.748	-1658.86	1294.79	161.379	-1515.62	1446.95	73.9156	-1590	1227.86	66.4911	-1610.94	1133.33	47.8522	-1564.17	945.035	100.778	-1559.42	870.198	30.0709	-1592.81	873.327	44.3057	-1557.79	779.493
556	0	275.845	-1315.21	1593.72	390.191	-1310.01	1597.47	276.466	-1488.02	1605.43	395.722	-1491.9	1612.3	330.203	-1545.45	1472.45	326.369	-1632.95	1240.6	340.353	-1393.44	1396.39	337.483	-1336.8	1213.44	450.263	-1648.68	1293.95	160.437	-1503.85	1445.32	72.9038	-1578.64	1226.41	65.5171	-1600.01	1132.12	47.4917	-1553.82	943.568	101.019	-1549.12	869.078	29.8539	-1582.49	871.901	44.8762	-1548.05	777.623
557	0	274.624	-1304.68	1592.92	388.874	-1299.78	1597	274.958	-1477.51	1603.48	394.021	-1481.84	1610.51	328.741	-1534.3	1471.02	325.2	-1622.16	1239.43	339.578	-1382.37	1394.71	337.36	-1326.09	1211.66	448.656	-1638.35	1292.97	159.094	-1492.09	1443.56	71.9392	-1567.29	1225.04	64.5153	-1588.97	1130.49	47.2575	-1542.93	941.87	100.504	-1538.61	867.447	29.6703	-1571.72	870.251	45.3157	-1537.94	775.708
558	0	273.3	-1294.08	1592.18	387.367	-1289.68	1596.54	273.135	-1466.99	1601.4	392.061	-1471.59	1608.91	327.181	-1523.09	1469.7	323.987	-1611.31	1238.34	338.865	-1371.22	1393.25	337.04	-1315.42	1210.01	447.124	-1627.85	1292.19	158.085	-1480.31	1441.77	70.5385	-1555.86	1223.38	63.446	-1577.93	1128.9	46.4114	-1531.87	940.157	100.392	-1527.7	865.938	28.9891	-1560.8	868.529	45.0346	-1527.31	774.032
559	0	271.587	-1283.36	1591.47	385.81	-1279.16	1596.34	271.052	-1456.37	1599.53	389.949	-1461.38	1607.39	325.519	-1511.59	1468.53	322.939	-1600.3	1237.47	337.685	-1360.01	1391.77	336.469	-1304.6	1208.32	445.727	-1617.2	1291.73	156.458	-1468.51	1440.07	69.5024	-1544.2	1222.03	62.1022	-1566.51	1127.36	45.6982	-1520.36	938.574	99.1624	-1516.14	864.332	28.42	-1549.23	867.028	44.3637	-1515.93	772.205
560	0	269.802	-1272.73	1590.79	384.137	-1268.71	1596.36	268.773	-1445.63	1597.6	387.759	-1451.08	1605.86	323.724	-1500.17	1467.31	321.886	-1589.21	1236.43	336.561	-1348.81	1390.32	335.987	-1293.61	1206.68	444.389	-1606.37	1291.22	155.185	-1456.69	1438.36	67.9285	-1532.58	1220.3	60.567	-1554.82	1125.73	44.302	-1508.52	936.943	98.0447	-1504.18	862.894	26.9057	-1537.35	865.242	43.6117	-1503.83	770.521
561	0	267.796	-1262.12	1590.01	382.054	-1258.57	1595.76	266.546	-1435.1	1595.7	385.229	-1440.7	1604.21	322.117	-1488.82	1466.13	320.83	-1578.07	1235.12	335.505	-1337.52	1389.08	335.619	-1282.58	1205.4	443.071	-1595.42	1290.64	153.402	-1445.14	1436.66	66.6257	-1520.87	1218.31	59.1802	-1543.28	1123.89	43.173	-1496.47	935.009	97.1305	-1492.05	861.101	25.8942	-1525.1	863.368	42.4129	-1491.67	768.704
562	0	265.8	-1251.37	1589.48	379.915	-1248.02	1595.65	264.18	-1424.47	1593.85	382.788	-1430.37	1602.77	320.326	-1477.53	1464.95	319.67	-1566.76	1233.88	334.173	-1326.27	1387.83	334.96	-1271.43	1204.09	441.703	-1584.36	1290.16	152.085	-1433.64	1434.83	64.8962	-1509.07	1216.08	57.5699	-1531.37	1121.84	41.7183	-1484.06	933.288	95.6648	-1479.33	859.438	24.6328	-1512.47	861.577	40.8245	-1478.64	766.887
563	0	263.483	-1240.65	1588.89	377.762	-1237.46	1595.64	261.64	-1413.85	1592.24	380.278	-1419.93	1601.64	318.381	-1466.31	1463.82	318.334	-1555.35	1232.68	332.466	-1315.02	1386.89	334.279	-1260.32	1203.17	440.293	-1573.29	1289.66	150.095	-1422.17	1433.12	63.379	-1497.15	1214.23	55.863	-1519.22	1120.06	40.0715	-1471.34	931.465	93.9587	-1465.96	857.76	22.7949	-1499.49	859.624	39.3505	-1465.18	765.098
564	0	261.031	-1229.99	1588.3	375.252	-1226.99	1595.45	258.89	-1403.21	1590.79	377.589	-1409.44	1600.81	316.48	-1455.3	1462.65	316.782	-1543.87	1231.35	331.372	-1303.7	1386.03	333.552	-1248.9	1202.34	438.71	-1562.13	1288.91	148.633	-1410.77	1431.35	62.1454	-1485.27	1212.63	54.2629	-1506.99	1118	38.3825	-1458.27	929.589	92.0392	-1452.37	855.943	21.151	-1486.17	857.614	37.4525	-1451.34	763.378
565	0	258.34	-1219.42	1587.93	372.72	-1216.43	1595.37	256.242	-1392.52	1589.69	374.818	-1398.89	1599.93	314.413	-1444.3	1461.64	315.194	-1532.55	1230.24	329.866	-1292.52	1385.55	332.809	-1236.83	1201.8	436.984	-1551.05	1288.23	146.77	-1399.64	1429.63	60.5117	-1473.24	1210.53	52.6097	-1494.52	1115.95	36.4608	-1444.99	927.782	90.0172	-1438.54	854.11	19.1634	-1472.81	855.67	35.2026	-1437.04	761.755
566	0	255.725	-1208.8	1587.67	369.803	-1205.89	1595.47	253.423	-1381.83	1589.03	371.962	-1388.29	1599.68	312.386	-1433.24	1461	313.532	-1521.08	1229.42	328.223	-1281.27	1385.2	331.797	-1225.24	1201.57	435.211	-1539.78	1287.72	145.118	-1388.46	1428.31	58.8037	-1460.86	1208.8	50.7602	-1481.47	1114.08	34.5037	-1431.34	926.075	87.5561	-1424.12	852.594	17.2488	-1458.79	853.863	32.9205	-1422.22	760.064
567	0	252.877	-1198.11	1587.59	366.881	-1195.27	1595.85	250.429	-1371.13	1588.55	369.203	-1377.7	1599.62	310.334	-1422.2	1460.45	311.741	-1509.47	1228.7	326.506	-1269.97	1385.14	330.946	-1213.27	1201.78	433.366	-1528.34	1287.19	143.414	-1377.39	1427.05	57.1755	-1448.3	1206.99	49.0072	-1468.29	1112.3	32.443	-1417.3	924.524	85.2114	-1409.18	850.909	15.2139	-1444.43	852.219	30.5698	-1407.08	758.713
568	0	249.924	-1187.5	1587.65	364.009	-1184.68	1596.33	247.669	-1360.6	1588.24	366.338	-1367.18	1599.63	308.439	-1411.25	1460.04	310.055	-1497.9	1227.83	325.11	-1258.67	1385.43	329.933	-1201.5	1202.49	431.472	-1516.92	1286.53	141.331	-1366.45	1426.32	55.5942	-1435.65	1205.42	47.3496	-1454.87	1110.49	30.2005	-1402.99	923.329	83.1743	-1394.5	849.653	13.0094	-1429.91	850.677	28.135	-1391.67	757.641
569	0	246.985	-1177.06	1588.07	361.048	-1174.08	1596.98	244.861	-1350.11	1588.32	363.351	-1356.61	1599.96	306.31	-1400.36	1459.85	308.415	-1486.18	1227.24	323.413	-1247.42	1385.86	328.649	-1189.53	1203.2	429.527	-1505.45	1286.14	139.514	-1355.43	1425.7	53.8696	-1422.68	1203.87	45.5827	-1441.21	1108.94	27.8304	-1388.43	922.479	80.5147	-1379.23	848.25	10.5149	-1415.13	849.438	25.5529	-1375.68	756.874
570	0	243.98	-1166.61	1588.66	358.096	-1163.47	1598.06	242.018	-1339.62	1588.72	360.461	-1346.06	1600.71	304.157	-1389.41	1460.03	306.885	-1474.41	1227.19	321.448	-1236.21	1386.67	327.412	-1177.48	1204.15	427.604	-1493.95	1286.14	137.625	-1344.36	1425.3	52.1574	-1409.58	1202.94	43.7734	-1427.18	1107.69	25.6883	-1373.36	921.506	77.9616	-1363.5	847.528	8.27763	-1399.73	848.461	22.9487	-1359.63	756.284
571	0	240.926	-1156.24	1589.43	355.032	-1153.05	1599.14	239.262	-1329.33	1589.37	357.803	-1335.61	1601.69	302.188	-1378.47	1460.53	305.459	-1462.89	1227.31	319.803	-1224.95	1387.73	326.003	-1165.65	1205.4	425.925	-1482.5	1286.52	135.639	-1333.44	1425.2	50.3931	-1396.06	1201.89	42.0288	-1412.97	1106.79	23.3668	-1358.12	921.141	75.505	-1347.59	847.132	5.81571	-1384.22	847.801	20.1759	-1342.92	756.24
572	0	237.91	-1146.06	1590.49	352.146	-1142.58	1600.49	236.718	-1319.14	1590.11	355.072	-1325.21	1602.63	300.26	-1367.65	1461.12	304.064	-1451.27	1227.61	317.851	-1213.93	1388.75	324.607	-1153.7	1206.78	424.293	-1471.02	1287.01	133.721	-1322.55	1425.35	48.6548	-1382.66	1201.16	40.444	-1398.63	1106.03	21.2727	-1342.63	921.045	72.9722	-1331.6	846.723	3.46707	-1368.25	847.213	17.666	-1325.87	756.238
573	0	235.136	-1135.9	1591.61	349.19	-1132.24	1601.97	234.176	-1308.89	1591.16	352.492	-1314.87	1603.82	298.245	-1356.8	1461.92	302.747	-1439.73	1228.22	316.086	-1202.98	1390.13	322.971	-1142.15	1208.28	422.825	-1459.59	1287.83	131.996	-1311.63	1425.71	46.9708	-1369.04	1200.65	38.5091	-1384.1	1105.53	19.0055	-1326.87	921.075	70.5199	-1315.08	846.833	1.23745	-1352.04	847.198	14.97	-1308.62	756.592
574	0	232.294	-1125.83	1592.79	346.187	-1121.95	1603.35	231.755	-1298.82	1592.07	349.992	-1304.54	1605.09	296.381	-1346.05	1462.93	301.586	-1428.33	1229.14	314.189	-1192.1	1391.6	321.302	-1130.9	1209.73	421.535	-1448.05	1289.03	130.281	-1300.71	1426.22	45.1649	-1355.24	1200.46	36.8634	-1369.5	1105.37	16.7092	-1310.82	921.44	67.6923	-1298.27	847.189	-1.22038	-1335.4	847.269	12.4748	-1290.99	757.062
575	0	229.572	-1115.95	1594.04	343.411	-1111.86	1604.74	229.465	-1288.96	1592.82	347.757	-1294.43	1606.04	294.676	-1335.55	1463.84	300.451	-1417.34	1229.84	312.431	-1181.36	1393.02	319.678	-1119.94	1211.16	420.387	-1436.78	1289.99	128.279	-1289.89	1427.09	43.3626	-1341.59	1200.42	35.1157	-1355.11	1105.15	14.4114	-1294.75	922.342	65.3283	-1281.27	847.897	-3.76829	-1318.58	847.575	9.99694	-1273.08	757.819
576	0	227.36	-1106.1	1595.62	340.819	-1101.72	1606.4	227.348	-1279.18	1593.53	345.569	-1284.39	1606.96	292.919	-1325.12	1464.73	299.315	-1406.58	1230.8	310.537	-1171	1394.27	318.235	-1109.18	1212.58	419.697	-1426.01	1291.44	126.827	-1279.27	1427.75	41.4871	-1328.05	1200.58	33.3457	-1340.74	1105.32	12.2274	-1278.18	923.094	62.897	-1263.97	848.614	-6.02765	-1301.45	848.204	7.2686	-1254.81	759.198
577	0	224.718	-1096.35	1596.76	338.434	-1091.75	1608	225.325	-1269.36	1594.36	343.536	-1274.28	1608.15	291.394	-1314.72	1465.86	298.086	-1395.99	1231.94	308.863	-1160.52	1395.59	316.813	-1098.58	1214.04	418.586	-1415.11	1292.74	125.385	-1268.58	1428.68	39.6311	-1314.54	1200.9	31.4774	-1326.45	1105.6	10.1651	-1261.69	924.099	60.6567	-1246.13	849.997	-7.70791	-1283.93	849.135	5.05138	-1236.21	760.385
578	0	222.18	-1086.66	1597.97	336.086	-1081.79	1609.51	223.462	-1259.72	1595.16	341.637	-1264.32	1609.21	289.848	-1304.5	1466.83	296.62	-1385.71	1233.13	307.574	-1150.13	1396.8	315.854	-1088.09	1215.35	417.684	-1404.51	1294.16	123.886	-1258.04	1429.39	37.9936	-1301.38	1200.88	29.7674	-1312.17	1105.71	7.79781	-1244.84	925.389	58.084	-1228.11	851.679	-10.3972	-1266.21	849.958	2.80905	-1217.38	761.712
579	0	219.998	-1076.95	1599.12	333.875	-1071.76	1610.88	221.74	-1250.03	1595.88	339.783	-1254.45	1609.97	288.655	-1294.41	1467.86	295.061	-1375.64	1234.18	306.444	-1139.98	1397.99	315.234	-1077.76	1216.51	416.491	-1394.21	1294.99	122.491	-1247.56	1430.32	36.1556	-1288.1	1201.45	28.0016	-1298.01	1105.95	5.74783	-1227.89	926.596	55.8183	-1210.12	852.88	-12.3813	-1248	850.913	0.652239	-1198.47	763.357
580	0	218.099	-1067.35	1600.12	331.894	-1061.91	1612.36	219.973	-1240.3	1596.65	338.195	-1244.55	1611.07	287.248	-1284.41	1468.91	293.081	-1365.56	1235.51	305.447	-1129.93	1399.29	314.579	-1067.82	1217.55	415.207	-1384.09	1296.21	121.429	-1236.96	1431.32	34.3151	-1275.11	1201.82	26.0641	-1283.85	1106.24	3.75382	-1211.04	927.907	53.2151	-1192.07	854.661	-14.7802	-1229.95	851.975	-1.43402	-1179.29	765.55
581	0	216.137	-1057.63	1601.29	329.838	-1051.99	1613.72	218.555	-1230.66	1597.45	336.734	-1234.61	1612.35	285.888	-1274.39	1470.1	291.288	-1355.8	1237.13	304.698	-1120.13	1400.38	314.182	-1057.98	1218.69	413.735	-1374.24	1297.22	120.284	-1226.44	1432.17	32.6429	-1262.18	1202.7	24.1064	-1269.69	1106.69	1.71759	-1193.99	929.727	51.1666	-1173.73	856.64	-16.4745	-1211.67	853.218	-3.24503	-1159.94	767.61
582	0	214.615	-1047.97	1602.18	327.96	-1042.26	1614.82	217.346	-1221.12	1598.3	335.449	-1224.76	1613.67	284.659	-1264.62	1471.31	289.495	-1346.18	1238.48	303.875	-1110.48	1401.44	314.032	-1048.47	1219.6	412.343	-1364.87	1298.29	119.287	-1216.06	1433.24	31.5041	-1249.28	1203.04	22.3428	-1255.53	1107.34	-0.048466	-1176.81	931.44	49.5248	-1155.65	858.477	-18.213	-1193.33	854.655	-4.95835	-1140.32	770.081
583	0	213.005	-1038.28	1603.06	326.72	-1032.3	1616.22	216.149	-1211.36	1599.24	334.129	-1214.95	1614.88	283.542	-1255.02	1472.44	287.931	-1336.54	1239.55	303.418	-1100.91	1402.41	313.738	-1039.02	1220.36	410.705	-1355.5	1299.21	118.35	-1205.65	1434.25	29.9405	-1236.5	1203.86	20.8057	-1241.48	1107.92	-1.53279	-1159.99	933.177	48.2971	-1137.14	860.583	-19.8322	-1174.98	856.243	-6.51941	-1120.64	772.855
584	0	211.843	-1028.68	1604.05	325.417	-1022.49	1617.48	214.951	-1201.66	1600.49	333.015	-1205.16	1616.39	282.51	-1245.41	1473.99	286.543	-1326.85	1240.66	302.801	-1091.4	1403.55	313.327	-1029.7	1221.51	409.134	-1346.51	1300.29	117.512	-1195.48	1435.47	28.8584	-1223.7	1204.71	19.2812	-1227.38	1109.02	-2.82055	-1143.09	935.533	46.6437	-1119.43	863.029	-21.4823	-1156.74	858.184	-7.82906	-1101.01	775.933
585	0	210.79	-1018.98	1604.93	324.387	-1012.78	1618.58	214.067	-1192.08	1601.87	332.042	-1195.36	1618.19	281.479	-1235.9	1475.39	285.448	-1317.42	1241.98	302.342	-1082.04	1405.06	312.941	-1020.49	1222.86	407.681	-1337.47	1301.63	116.891	-1185.31	1436.93	27.0483	-1210.91	1206.51	17.6989	-1213.31	1110.19	-4.12706	-1126.31	937.935	45.6386	-1101.55	865.842	-22.5972	-1138.55	860.38	-8.9712	-1081.26	779.534
586	0	209.92	-1009.33	1605.83	323.36	-1003.11	1619.58	213.322	-1182.44	1603.34	331.216	-1185.7	1619.85	280.711	-1226.69	1476.88	284.198	-1307.8	1243.1	301.945	-1072.87	1406.45	312.527	-1011.13	1224.36	406.225	-1328.79	1302.61	116.217	-1175.33	1438.73	25.9585	-1198.29	1207.72	16.5614	-1199.46	1111.56	-5.22938	-1109.67	940.576	44.4604	-1083.76	869.088	-23.8692	-1120.62	862.932	-10.0248	-1061.69	783.595
587	0	209.26	-999.654	1607.06	322.904	-993.418	1620.92	212.507	-1172.82	1605.08	330.444	-1176.06	1621.7	279.835	-1217.43	1478.5	283.121	-1298.57	1244.58	301.426	-1063.67	1408.12	311.929	-1002.03	1226.17	404.624	-1319.63	1303.79	115.307	-1165.58	1440.64	25.0325	-1185.73	1209.33	15.3745	-1185.79	1113.21	-6.08861	-1093.09	943.764	43.6063	-1066.2	872.744	-24.8857	-1102.77	865.881	-10.9646	-1042.17	787.838
588	0	208.873	-989.944	1608.29	322.41	-983.763	1622.13	211.904	-1163.26	1607.21	330.022	-1166.39	1623.9	278.875	-1208.42	1480.28	281.842	-1289.23	1246.12	300.905	-1054.6	1409.94	311.104	-993.016	1228.01	403.348	-1311.17	1305.33	114.477	-1155.92	1442.74	24.5726	-1173.14	1211.04	14.4297	-1172.1	1115.13	-6.93443	-1076.63	947.176	42.9105	-1048.72	876.525	-25.735	-1084.86	869.142	-11.5948	-1022.86	792.612
589	0	208.58	-980.329	1609.56	322.407	-974.182	1623.51	211.489	-1153.44	1609.41	329.583	-1156.82	1625.92	278.105	-1199.35	1482.14	280.911	-1280.12	1247.8	300.415	-1045.67	1411.85	310.443	-983.948	1229.98	402.135	-1302.53	1306.92	113.835	-1146.35	1444.96	23.5912	-1160.7	1212.9	13.3462	-1158.43	1117.18	-7.60656	-1060.36	950.645	42.3238	-1031.53	880.649	-26.3489	-1067.21	872.532	-11.8412	-1003.42	797.404
590	0	208.486	-970.607	1610.87	322.148	-964.801	1624.37	211.121	-1143.95	1611.47	329.157	-1147.32	1627.81	277.308	-1190.45	1483.72	279.914	-1271.2	1249.05	299.892	-1036.67	1413.68	309.72	-974.981	1232.02	400.597	-1293.86	1308.04	113.021	-1136.94	1447.12	22.665	-1148.63	1214.93	12.251	-1145.08	1119.29	-7.99726	-1044.07	954.514	42.065	-1014.24	885.292	-26.8551	-1049.75	876.08	-11.9422	-984.416	802.433
591	0	208.63	-961.073	1612.43	322.461	-955.249	1625.45	211.059	-1134.41	1613.83	329.043	-1137.97	1629.85	276.518	-1181.61	1485.46	278.511	-1262.83	1250.43	299.336	-1027.8	1415.49	308.891	-966.179	1233.91	399.347	-1285.29	1309.49	112.306	-1127.57	1449.31	21.7663	-1136.44	1216.9	11.3906	-1132.12	1121.4	-8.16819	-1027.93	958.189	41.9751	-997.33	889.451	-26.8867	-1032.12	879.724	-11.705	-965.599	807.48
592	0	208.796	-951.432	1613.79	322.739	-945.959	1626.49	210.656	-1124.65	1616.15	328.857	-1128.52	1631.7	275.604	-1172.76	1487.1	277.353	-1253.42	1251.98	298.619	-1019.01	1417.27	308.031	-957.23	1235.75	398.095	-1276.6	1310.9	111.099	-1118.33	1451.46	20.9552	-1124.54	1219.04	10.1623	-1119.04	1123.59	-8.53546	-1012.03	962.12	41.9789	-980.386	894.05	-26.775	-1014.72	883.643	-11.1358	-946.979	812.63
593	0	209.236	-942.059	1615.23	323.011	-936.706	1627.39	210.511	-1115.27	1618.33	328.651	-1119.3	1633.4	274.84	-1163.9	1488.67	276.487	-1244.24	1253.26	298.009	-1010.12	1418.86	307.475	-948.287	1237.56	396.945	-1267.79	1312.21	110.671	-1108.98	1453.49	19.9283	-1112.94	1221.01	9.26856	-1106.28	1125.57	-8.3724	-996.074	965.815	42.3215	-963.657	898.644	-27.0776	-997.201	887.342	-10.2176	-928.33	817.711
594	0	209.465	-932.432	1616.6	323.329	-927.424	1628.12	210.323	-1105.64	1620.44	328.566	-1110.02	1634.88	274.028	-1155.05	1489.98	275.502	-1234.89	1254.53	297.435	-1001.22	1420.31	306.841	-939.388	1239.24	395.745	-1259.15	1313.23	109.875	-1099.82	1455.38	19.0908	-1101.48	1222.77	8.12729	-1093.72	1127.6	-8.32548	-980.385	969.673	42.7271	-947.2	903.309	-26.3908	-980.191	891.155	-8.90118	-910.112	822.831
595	0	209.856	-922.938	1617.84	323.826	-918.162	1629.06	210.162	-1096.23	1622.29	328.459	-1100.74	1636.3	273.291	-1146.22	1491.33	274.535	-1225.65	1255.77	296.83	-992.301	1421.76	306.075	-930.542	1240.74	394.665	-1250.44	1314.29	109.066	-1090.62	1456.94	18.0432	-1090.21	1224.53	6.88133	-1081.34	1129.44	-8.1926	-964.841	973.533	43.175	-930.926	908.14	-26.5604	-962.833	894.939	-7.40863	-891.884	827.766
596	0	209.988	-913.514	1618.91	324.071	-908.966	1629.63	209.968	-1086.68	1624.03	328.372	-1091.46	1637.58	272.499	-1137.31	1492.44	273.625	-1216.16	1256.94	296.034	-983.517	1422.93	305.418	-921.647	1241.95	393.715	-1241.47	1315.4	108.336	-1081.38	1458.37	16.818	-1079.01	1226.16	5.46234	-1068.92	1131.04	-7.88684	-949.409	977.013	43.9053	-914.5	912.619	-26.531	-946.047	898.474	-5.56659	-873.931	832.636
597	0	210.27	-903.966	1620	324.318	-899.689	1630.06	210.007	-1077.19	1625.31	328.207	-1082.17	1638.4	271.838	-1128.36	1493.4	273.033	-1207.05	1257.78	295.56	-974.509	1423.92	304.958	-912.623	1243.04	392.759	-1232.65	1315.94	107.799	-1072.22	1459.56	15.7761	-1068.07	1227.51	4.43817	-1056.84	1132.41	-7.66518	-934.216	980.455	44.977	-898.668	916.984	-25.253	-929.338	901.74	-3.16942	-856.107	837.544
598	0	210.388	-894.636	1620.87	324.617	-890.443	1630.6	209.758	-1067.8	1626.51	328.129	-1072.94	1639.13	271.232	-1119.41	1494.12	272.505	-1197.95	1258.53	295.024	-965.549	1424.72	304.374	-903.715	1243.88	391.975	-1223.77	1316.56	107.272	-1063.09	1460.51	14.8815	-1057.22	1228.61	3.23859	-1044.93	1133.59	-7.2216	-919.192	983.865	45.9401	-883.028	921.408	-24.5901	-912.655	905.11	-0.776049	-838.651	842.345
599	0	210.317	-885.145	1621.5	324.684	-881.031	1630.85	209.572	-1058.31	1627.57	327.991	-1063.55	1639.84	270.586	-1110.31	1494.82	272.225	-1188.94	1259.31	294.339	-956.532	1425.31	303.738	-894.779	1244.58	391.439	-1214.7	1317.4	106.624	-1054.03	1461.25	13.6695	-1046.45	1229.71	1.96459	-1032.85	1134.74	-6.6172	-904.398	986.952	47.208	-867.741	925.656	-23.7474	-896.269	908.168	1.98978	-821.348	847.061
600	0	210.28	-875.751	1621.92	324.73	-871.626	1630.99	209.4	-1048.75	1628.15	327.979	-1054.22	1640.11	270.155	-1101.18	1495.31	272.044	-1179.91	1259.85	294.017	-947.421	1425.74	303.278	-885.835	1244.89	390.859	-1205.63	1317.77	106.265	-1044.91	1461.62	12.9277	-1035.65	1230.34	0.802136	-1021.07	1135.59	-5.86526	-889.943	989.813	48.5324	-852.617	929.66	-22.3755	-880.019	911.258	4.66674	-804.271	851.515
601	0	210.343	-866.402	1622.17	324.524	-862.296	1630.7	209.538	-1039.45	1628.54	327.833	-1044.77	1640.01	269.857	-1092.04	1495.49	272.03	-1170.87	1260.15	293.491	-938.33	1425.79	302.622	-877.068	1244.87	390.527	-1196.52	1318.02	105.9	-1035.88	1461.82	11.9462	-1025.17	1230.97	-0.013758	-1009.54	1136.12	-5.10777	-875.605	992.552	49.8518	-837.809	933.341	-21.0735	-864.162	913.968	7.63988	-787.559	855.9
602	0	210.06	-856.835	1622.24	324.535	-852.779	1630.56	209.226	-1029.95	1628.64	327.705	-1035.34	1639.87	269.63	-1082.65	1495.6	272.281	-1161.93	1260.44	292.986	-929.144	1425.71	302.146	-868.06	1244.72	390.484	-1187.35	1318.42	105.616	-1026.84	1461.82	11.5202	-1014.47	1231.21	-0.804036	-998.062	1136.43	-4.01234	-861.464	994.982	51.4862	-823.324	936.86	-19.707	-848.481	916.59	10.4267	-771.106	860.228
603	0	209.954	-847.448	1622.18	324.283	-843.306	1630.06	209.074	-1020.45	1628.59	327.676	-1025.81	1639.43	269.517	-1073.26	1495.51	272.496	-1152.78	1260.55	292.563	-919.788	1425.28	301.699	-859.08	1244.26	390.549	-1178.02	1318.69	105.447	-1017.73	1461.44	10.8929	-1003.91	1231.34	-1.57174	-986.707	1136.68	-3.06572	-847.638	997.266	53.0213	-808.836	940.245	-18.0266	-833.257	918.887	13.1295	-754.988	864.229
604	0	209.606	-837.825	1621.96	324.072	-833.602	1629.56	208.997	-1010.95	1628.11	327.617	-1016.17	1638.65	269.399	-1063.72	1495.17	272.862	-1143.7	1260.43	292.219	-910.362	1424.66	301.217	-850.092	1243.49	390.734	-1168.52	1318.59	105.277	-1008.75	1460.97	10.3829	-993.41	1231.08	-2.15305	-975.495	1136.54	-1.78825	-834.093	999.233	54.6868	-794.86	943.52	-16.5719	-818.073	921.161	16.0372	-739.257	868.133
605	0	209.347	-828.345	1621.59	323.81	-824.038	1628.99	209.095	-1001.53	1627.41	327.566	-1006.64	1637.45	269.525	-1054.2	1494.64	273.356	-1134.78	1260.1	291.887	-900.88	1423.75	300.757	-841.229	1242.42	391.232	-1158.99	1318.46	105.25	-999.705	1460.26	10.096	-983.092	1230.7	-2.53863	-964.423	1136.13	-0.565401	-820.78	1000.96	56.4579	-781.098	946.236	-14.8977	-803.533	923.034	18.8892	-723.925	871.79
606	0	208.908	-818.795	1621.17	323.451	-814.156	1628.26	208.95	-991.869	1626.46	327.531	-996.799	1636.32	269.566	-1044.45	1494.07	274.08	-1125.85	1259.79	291.103	-891.511	1422.69	300.17	-832.254	1241.17	391.831	-1149.31	1318.38	105.202	-990.721	1459.26	10.0385	-972.817	1229.9	-2.89923	-953.427	1135.59	0.707765	-807.679	1002.49	58.082	-767.534	948.596	-13.2075	-789.025	924.829	21.4984	-708.847	875.118
607	0	208.696	-809.113	1620.34	323.643	-804.401	1627.61	209.006	-982.336	1625.26	327.535	-987.104	1634.78	269.847	-1034.69	1493.29	274.908	-1116.72	1259.32	290.992	-881.755	1421.43	299.73	-823.093	1239.68	392.632	-1139.48	1318.09	105.179	-981.634	1458.07	10.0947	-962.584	1229.05	-3.03322	-942.653	1134.76	2.13412	-794.873	1003.81	60.058	-754.454	950.852	-11.2641	-775.081	926.145	24.2623	-694.223	878.096
608	0	208.235	-799.525	1619.48	322.807	-794.723	1625.89	208.994	-972.756	1623.84	327.652	-977.327	1633.08	270.172	-1024.9	1492.29	275.718	-1107.73	1258.56	290.569	-872.042	1419.86	299.28	-814.056	1237.95	393.554	-1129.69	1317.58	105.36	-972.719	1456.66	10.1521	-952.597	1227.77	-2.90291	-932.193	1133.53	3.67594	-782.357	1004.71	61.7554	-741.7	952.513	-9.0151	-761.538	927.014	26.8063	-679.908	880.657
609	0	208.068	-789.867	1618.38	322.762	-784.767	1624.66	209.229	-963.093	1622.33	327.71	-967.474	1631.19	270.501	-1015.03	1491.13	276.615	-1098.59	1257.62	290.205	-862.334	1418.15	299.013	-804.765	1236.04	394.544	-1119.68	1316.97	105.354	-963.601	1455.11	10.4572	-942.706	1226.39	-2.72323	-921.656	1132.2	4.99958	-770.149	1005.22	63.5972	-728.957	953.979	-7.49174	-748.041	927.944	29.473	-666.025	882.99
610	0	207.953	-780.165	1616.94	322.729	-774.857	1623.2	209.131	-953.382	1620.55	327.876	-957.635	1629.16	270.754	-1005.09	1489.89	277.643	-1089.43	1256.54	289.913	-852.462	1416	298.58	-795.673	1233.91	395.596	-1109.61	1316.21	105.566	-954.618	1453.16	10.954	-932.938	1224.51	-2.52998	-911.256	1130.66	6.53725	-758.106	1005.49	65.557	-716.747	955.072	-5.63307	-734.874	928.423	32.0995	-652.531	884.846
611	0	207.88	-770.415	1615.5	322.313	-765.166	1621.03	209.297	-943.566	1618.72	328.058	-947.777	1626.93	271.21	-995.178	1488.31	278.909	-1080.17	1255.28	289.521	-842.662	1414.03	298.167	-786.253	1231.58	396.754	-1099.5	1315.19	105.837	-945.493	1451.07	11.7228	-923.25	1222.47	-2.00344	-901.182	1128.85	8.20679	-746.37	1005.37	67.2307	-704.789	955.586	-3.76294	-722.079	928.625	34.8309	-639.41	886.341
612	0	207.743	-760.603	1613.91	322.625	-755.243	1619.25	209.67	-933.914	1616.61	328.244	-938.02	1624.34	271.623	-985.272	1486.44	280.108	-1070.82	1253.58	289.195	-832.8	1411.65	297.863	-776.851	1229.24	397.917	-1089.28	1313.92	105.894	-936.457	1448.83	12.311	-913.879	1220.33	-1.58979	-891.162	1126.48	9.73019	-734.928	1005.03	69.0592	-693.026	955.915	-1.97878	-709.644	928.367	37.2991	-626.554	887.459
613	0	208.026	-750.848	1612.22	322.584	-745.382	1617.12	209.563	-924.124	1614.53	328.504	-928.055	1621.95	272.098	-975.412	1484.74	281.436	-1061.24	1251.98	289.019	-822.894	1409.57	297.506	-767.334	1226.89	399.21	-1079.12	1312.69	106.208	-927.393	1446.53	12.7694	-904.649	1217.83	-1.05103	-881.265	1124.3	11.1145	-723.772	1004.25	70.7812	-681.794	955.834	-0.286969	-697.603	928.067	39.7091	-614.264	888.041
614	0	208.145	-741.012	1610.42	322.859	-735.468	1615.05	210.173	-914.289	1612.48	328.894	-918.189	1619.44	272.679	-965.331	1482.9	282.697	-1051.74	1250.3	288.702	-813.051	1407.22	297.266	-757.641	1224.42	400.456	-1068.86	1311.41	106.137	-918.295	1444.25	13.7476	-895.459	1215.18	-0.329524	-871.522	1121.93	12.4986	-712.872	1003.12	72.3107	-670.593	955.346	1.46004	-685.949	927.152	41.9393	-602.342	888.233
615	0	208.586	-731.177	1608.64	323.075	-725.546	1612.65	210.499	-904.395	1610.36	329.345	-908.326	1616.89	273.148	-955.297	1480.82	284.078	-1042.24	1248.42	288.694	-803.051	1404.94	297.086	-747.849	1222.07	401.687	-1058.67	1309.88	106.708	-909.08	1441.65	14.3575	-886.453	1212.5	0.247947	-861.889	1119.2	14.0392	-702.297	1001.68	74.2579	-659.837	954.401	3.25355	-674.727	925.813	44.2337	-590.823	887.932
616	0	209.098	-721.245	1606.85	323.641	-715.665	1610.47	211.157	-894.568	1608.42	329.797	-898.346	1614.47	274.09	-945.101	1478.8	285.444	-1032.41	1246.67	288.658	-793.017	1402.68	296.953	-737.96	1219.67	402.878	-1048.43	1308.34	106.981	-899.843	1439.18	15.3298	-877.546	1209.63	1.14931	-852.371	1116.58	15.3815	-691.959	999.93	75.6201	-649.419	953.081	4.85094	-663.981	924.134	46.2928	-579.81	887.286
617	0	209.631	-711.255	1605.19	324.291	-705.635	1608.41	211.472	-884.492	1606.6	330.475	-888.377	1612.22	274.42	-934.875	1477	286.442	-1022.68	1244.97	288.743	-782.89	1400.48	297.006	-727.893	1217.31	404.114	-1037.89	1306.97	107.454	-890.531	1436.67	16.3547	-868.732	1206.96	1.9953	-842.94	1114.11	16.7454	-682.056	997.906	77.2028	-639.427	951.55	6.50258	-653.656	922.092	48.1501	-569.286	886.18
618	0	210.56	-701.213	1603.51	325.272	-695.533	1606.6	212.327	-874.466	1604.69	331.231	-878.331	1609.92	275.236	-924.676	1475.04	287.706	-1012.94	1243.24	289.053	-772.738	1398.26	297.221	-717.744	1215.15	405.284	-1027.59	1305.35	107.997	-880.987	1434.34	17.2232	-859.998	1204.17	2.93251	-833.594	1111.48	18.0416	-672.469	995.597	78.6321	-629.694	949.454	7.97754	-643.736	919.88	49.9542	-559.223	884.723
619	0	211.512	-691.204	1601.99	326.154	-685.434	1604.42	213.456	-864.363	1602.77	332.186	-868.365	1607.66	276.055	-914.294	1473.06	288.778	-1003.16	1241.33	289.442	-762.513	1396.02	297.772	-707.55	1212.99	406.352	-1016.96	1303.58	108.818	-871.158	1432.02	18.4544	-851.189	1201.76	3.93579	-824.362	1109.02	19.3483	-663.212	992.933	79.9774	-620.418	947.157	9.89379	-634.663	917.094	51.4955	-549.689	882.709
620	0	212.448	-681.045	1600.66	327.324	-675.354	1602.95	214.254	-854.149	1600.97	333.159	-858.265	1605.49	276.785	-903.902	1471.34	289.817	-993.041	1239.66	290.049	-752.14	1394.3	298.206	-697.231	1211.08	407.348	-1006.5	1302	109.401	-861.301	1430.09	19.554	-842.265	1199.21	4.88791	-815.22	1106.6	20.4836	-654.296	990.329	81.256	-611.575	944.478	11.0497	-625.754	914.303	52.8247	-540.717	880.434
621	0	213.83	-670.775	1599.62	328.528	-665.135	1601.47	215.632	-843.916	1599.48	334.41	-848.009	1603.61	277.641	-893.348	1469.76	290.781	-982.901	1238.18	290.695	-741.685	1392.51	298.872	-686.809	1209.15	408.373	-995.728	1300.57	110.03	-851.024	1428.3	20.8309	-833.329	1197.24	5.98919	-806.281	1104.4	21.6076	-645.754	987.52	82.3721	-603.037	941.763	12.1151	-617.573	911.491	53.9183	-532.177	877.813
622	0	214.964	-660.379	1598.69	330.055	-654.948	1600.09	216.889	-833.589	1597.83	335.785	-837.838	1601.64	278.566	-882.933	1468.11	291.727	-972.561	1236.54	291.637	-731.107	1390.91	299.615	-676.236	1207.51	409.378	-985.211	1298.91	110.83	-840.75	1426.58	21.9702	-824.134	1195.27	7.2025	-797.401	1102.38	22.6861	-637.534	984.477	83.4677	-594.952	938.551	13.3606	-609.728	908.168	54.8625	-524.348	874.69
623	0	216.616	-650.06	1597.59	331.455	-644.774	1598.66	218.299	-823.376	1596.27	337.102	-827.658	1599.69	279.554	-872.265	1466.56	292.622	-962.148	1234.93	292.609	-720.504	1389.43	300.379	-665.713	1205.95	410.171	-974.496	1297.08	111.861	-830.079	1425.12	23.0615	-814.88	1193.67	8.51384	-788.73	1100.39	23.6838	-629.663	981.252	84.6558	-587.134	935.077	14.5141	-602.371	904.976	55.5735	-516.908	871.088
624	0	218.394	-639.744	1596.75	333.176	-634.57	1597.51	219.817	-812.959	1594.99	338.733	-817.393	1598.14	280.605	-861.726	1465.24	293.167	-951.456	1233.6	293.467	-709.832	1387.88	301.182	-655.003	1204.66	411.009	-963.879	1295.42	112.727	-819.305	1423.87	24.2248	-805.368	1191.94	9.83693	-780.034	1098.65	24.7671	-622.11	978.085	85.3876	-579.849	931.431	15.4015	-595.559	901.494	56.0767	-510.147	867.071
625	0	220.17	-629.388	1595.97	335.112	-624.38	1596.54	221.246	-802.519	1593.72	340.439	-807.151	1596.62	281.682	-851.045	1463.89	293.832	-940.602	1232.27	294.503	-699.209	1386.67	301.972	-644.153	1203.39	411.681	-953.015	1293.6	113.757	-808.457	1422.68	25.3542	-795.779	1190.52	11.2066	-771.422	1097.04	25.6257	-614.837	974.578	86.2709	-572.773	927.582	16.2669	-589.153	897.774	56.5425	-503.782	862.845
626	0	222.12	-619.103	1595.19	337.141	-614.095	1595.6	223.084	-792.246	1592.43	342.107	-796.969	1594.99	282.972	-840.535	1462.48	294.375	-929.526	1230.65	295.803	-688.458	1385.59	302.734	-633.247	1202.41	412.497	-942.3	1291.67	114.976	-797.525	1421.71	26.7499	-785.997	1189.33	12.7014	-762.945	1095.48	26.65	-607.803	971.248	87.0352	-566.161	923.686	16.9213	-583.051	894.368	56.7502	-497.974	858.144
627	0	224.248	-608.634	1594.62	339.385	-603.824	1594.84	224.901	-781.91	1591.29	343.933	-786.79	1593.52	284.212	-829.875	1461.22	294.907	-918.153	1228.93	297.153	-677.74	1384.67	303.643	-622.174	1201.77	413.379	-931.335	1289.82	116.109	-786.472	1420.97	27.7755	-775.973	1188.37	14.1465	-754.388	1094.2	27.031	-601.199	967.862	87.6319	-560.044	919.131	17.2861	-577.394	890.612	56.835	-492.574	853.159
628	0	226.332	-598.313	1594.13	341.384	-593.659	1594.1	226.571	-771.529	1590.39	345.871	-776.534	1592.48	285.505	-819.367	1460.05	295.522	-906.564	1227.35	298.333	-667.076	1384.02	304.425	-610.898	1201.12	414.199	-920.395	1287.83	117.209	-775.537	1420.21	28.888	-765.937	1187.46	15.4914	-745.694	1093.1	27.664	-594.868	964.249	88.3838	-554.164	914.625	17.5886	-572.061	886.892	56.8088	-487.639	847.86
629	0	228.678	-588.067	1593.59	343.616	-583.407	1593.54	228.588	-761.182	1589.58	347.768	-766.316	1591.5	286.872	-808.845	1458.92	296.532	-895.08	1225.9	299.706	-656.266	1383.23	305.4	-599.367	1200.74	415.058	-909.372	1285.8	118.661	-764.634	1419.65	30.0741	-755.807	1186.69	17.0171	-736.951	1092.23	28.095	-588.522	960.639	88.5499	-548.753	909.704	17.6172	-566.991	882.993	56.6337	-483.186	842.289
630	0	230.809	-577.603	1593.42	345.72	-573.251	1592.88	230.793	-750.758	1589.03	349.801	-756.125	1590.58	288.419	-798.371	1457.87	297.622	-883.68	1224.44	300.86	-645.534	1382.98	306.213	-587.639	1200.6	415.972	-898.416	1283.78	119.905	-753.788	1419.28	31.0617	-745.656	1186.25	18.6586	-728.159	1091.44	28.6492	-582.423	957.095	88.8806	-543.729	904.823	17.7642	-562.311	879.191	56.3312	-479.305	836.363
631	0	233	-567.268	1593.3	348.071	-563.042	1592.77	232.878	-740.358	1588.74	351.843	-745.9	1590.21	289.944	-787.934	1457.14	298.744	-872.369	1223.33	302.108	-634.81	1382.84	307.195	-575.801	1200.71	417.006	-887.427	1282.16	121.369	-743.16	1419.1	32.2047	-735.538	1185.92	20.3299	-719.173	1090.89	28.8994	-576.587	953.42	89.0624	-539.003	899.797	17.687	-558.11	875.245	55.8194	-475.841	830.463
632	0	235.491	-556.901	1593.29	350.398	-552.616	1592.71	234.846	-729.897	1588.75	353.839	-735.561	1590	291.271	-777.289	1456.71	299.769	-861.037	1222.61	303.585	-624.01	1382.84	308.144	-563.913	1201.04	417.968	-876.321	1280.73	122.654	-732.465	1419.1	33.3298	-725.289	1185.89	21.9217	-710.01	1090.58	29.2434	-570.872	949.858	89.134	-535.085	894.419	17.4645	-554.145	871.545	55.102	-472.988	824.374
633	0	237.472	-546.454	1593.6	352.753	-542.492	1592.65	236.976	-719.593	1588.76	355.965	-725.358	1590.04	292.871	-766.893	1456.32	300.801	-849.772	1222.07	304.981	-613.396	1383.05	309.199	-552.228	1201.48	419.003	-865.416	1279.34	124.547	-721.997	1419.35	34.5771	-715.11	1185.94	23.6986	-700.915	1090.56	29.5025	-565.451	946.495	89.0587	-531.551	889.197	16.6755	-550.619	867.981	54.2182	-470.677	818.463
634	0	239.874	-536.061	1593.95	354.917	-532.322	1592.75	239.029	-709.218	1589.25	357.988	-715.234	1590.23	294.445	-756.535	1456.13	301.967	-838.738	1221.64	306.399	-602.622	1383.56	310.262	-540.702	1202.23	419.843	-854.375	1278.22	125.697	-711.394	1419.75	35.9506	-705.089	1186.32	25.6517	-691.863	1090.69	29.8357	-560.427	943.374	88.7156	-528.279	884.078	15.9656	-547.559	864.496	52.9044	-468.942	812.685
635	0	242.041	-525.725	1594.33	357.184	-522.064	1593.04	241.017	-698.782	1590.05	359.994	-704.949	1590.86	295.793	-746.132	1456.26	302.83	-827.465	1221.45	307.718	-591.961	1384.22	311.326	-529.51	1203.12	420.876	-843.477	1277.59	127.011	-700.923	1420.52	37.4094	-694.97	1186.88	27.4289	-682.629	1091.26	30.0156	-555.605	940.552	88.2055	-525.488	879.314	15.1035	-545.131	861.258	51.3685	-467.744	807.254
636	0	244.208	-515.388	1594.97	359.31	-511.98	1593.41	242.937	-688.548	1590.82	362.022	-694.674	1591.72	297.382	-735.827	1456.69	303.853	-816.155	1221.36	309.073	-581.301	1384.94	312.327	-518.492	1204.11	421.803	-832.468	1277.15	128.476	-690.535	1421.34	38.8993	-684.826	1187.61	29.3329	-673.561	1092.04	30.0609	-551.231	938.104	87.5743	-522.655	874.892	14.2512	-542.709	858.667	49.466	-467.064	801.984
637	0	246.485	-505.094	1595.71	361.614	-501.674	1594.11	244.988	-678.196	1591.87	363.932	-684.538	1592.59	298.955	-725.648	1457.13	304.98	-805.051	1221.63	310.346	-570.858	1385.92	313.313	-507.591	1205.16	422.943	-821.761	1276.81	129.778	-680.188	1422.49	40.6462	-674.966	1188.47	31.367	-664.708	1092.94	30.1085	-547.028	935.907	86.9334	-520.592	870.944	13.277	-541.04	856.481	47.3584	-466.73	797.115
638	0	248.757	-494.827	1596.47	363.525	-491.637	1594.9	246.71	-667.94	1593.1	365.786	-674.464	1593.76	300.16	-715.419	1457.79	306.123	-794.165	1222	311.402	-560.513	1386.96	314.369	-496.783	1206.51	423.921	-810.919	1276.89	131.106	-670.039	1423.65	42.3803	-665.204	1189.77	33.3882	-655.967	1094.01	29.9895	-543.111	934.375	86.2184	-518.491	867.505	12.0495	-539.455	854.809	45.0471	-466.883	792.756
639	0	250.503	-484.529	1597.53	365.494	-481.563	1595.9	248.468	-657.734	1594.49	367.426	-664.257	1595.12	301.626	-705.251	1458.76	307.179	-783.405	1222.87	312.616	-550.067	1388.24	315.294	-486.155	1208.01	425.241	-800.133	1277.36	132.263	-659.925	1425.05	43.9863	-655.633	1190.79	35.3957	-647.479	1095.39	29.8528	-539.274	933.352	85.0515	-516.855	864.964	10.7703	-538.052	854.075	42.4832	-467.203	788.93
640	0	252.353	-474.249	1598.6	367.073	-471.745	1596.59	250.085	-647.397	1595.78	369.033	-654.291	1596.39	303.04	-695.113	1459.49	308.518	-772.761	1223.63	313.589	-539.756	1389.48	315.954	-475.624	1209.27	426.367	-789.256	1277.57	133.34	-649.877	1426.55	45.4674	-646.427	1192.09	37.2514	-639.318	1096.85	29.5075	-535.625	932.583	83.6842	-515.012	862.275	9.69195	-536.513	853.635	39.6993	-467.783	785.618
641	0	254.11	-464.088	1599.75	369.202	-461.635	1597.92	251.513	-637.293	1596.94	370.32	-644.301	1597.46	304.379	-684.863	1460.44	310.17	-762.26	1224.47	314.423	-529.611	1390.43	316.472	-465.371	1210.43	427.773	-778.507	1278.18	134.489	-640.082	1428	46.7837	-637.54	1193.36	39.2659	-631.73	1098.01	29.2428	-532.086	932.214	82.1036	-514.041	860.088	8.66687	-535.247	853.377	37.0686	-468.33	782.567
642	0	255.779	-453.884	1600.77	370.808	-451.673	1599.07	252.794	-627.1	1598.06	371.703	-634.403	1598.78	305.694	-674.715	1461.46	312.093	-751.668	1225.38	315.168	-519.389	1391.46	316.966	-455.198	1211.39	429.169	-767.784	1278.83	135.597	-630.633	1429.31	48.263	-629.141	1194.51	41.0009	-624.341	1099.38	28.6302	-528.7	931.937	80.7431	-511.84	858.887	7.32125	-533.805	853.478	34.2771	-468.821	780.036
643	0	257.328	-443.631	1602	372.432	-441.772	1600.29	254.094	-616.854	1599.36	372.922	-624.472	1599.98	307.145	-664.607	1462.68	313.515	-741.666	1226.84	315.853	-509.171	1392.43	317.08	-445.149	1212.32	430.838	-756.914	1279.88	136.858	-621.117	1430.51	49.2197	-621.202	1195.74	42.4375	-617.216	1100.84	28.0707	-525.257	931.868	79.7606	-509.759	857.748	6.27118	-532.432	853.758	31.8063	-469.145	777.923
644	0	258.711	-433.437	1603.17	373.836	-431.805	1601.44	255.001	-606.601	1600.5	373.83	-614.451	1601.15	308.467	-654.451	1463.74	315.416	-731.418	1227.97	316.368	-499.04	1393.46	317.05	-435.111	1213.27	432.798	-746.345	1280.78	137.936	-611.819	1431.88	50.4856	-613.55	1196.84	43.7321	-610.488	1102.2	27.5717	-521.954	932.081	78.4763	-507.391	857.129	5.18856	-530.756	854.231	29.4266	-469.286	776.414
645	0	259.946	-423.288	1604.33	375.113	-421.807	1602.63	256.028	-596.469	1601.7	374.767	-604.551	1602.43	309.878	-644.394	1465.09	317.28	-721.406	1229.29	316.76	-488.953	1394.51	316.82	-425.107	1214.31	434.871	-735.723	1282.03	138.916	-602.839	1433.15	51.498	-606.608	1198.17	44.8971	-604.181	1103.53	26.9042	-518.748	932.33	77.5264	-504.922	857.223	4.37388	-529.13	854.799	27.0755	-469.105	775.364
646	0	260.98	-413.138	1605.37	376.15	-411.796	1603.72	256.888	-586.215	1603.17	375.529	-594.528	1603.88	311.21	-634.468	1466.37	319.063	-711.454	1230.67	316.966	-478.99	1395.5	316.487	-415.182	1215.28	436.98	-724.895	1283.41	140.066	-594.021	1434.35	52.3173	-599.87	1199.53	45.5963	-598.124	1105.05	26.2001	-515.429	932.855	76.0391	-502.645	856.585	3.41229	-527.059	855.737	24.9935	-468.347	774.809
647	0	261.933	-402.972	1606.46	376.963	-401.795	1604.7	257.542	-576.109	1604.52	376.297	-584.5	1605.23	312.691	-624.596	1467.79	320.889	-701.573	1231.74	317.117	-469.074	1396.58	315.997	-405.569	1216.28	439.213	-714.357	1284.75	141.088	-585.575	1435.68	53.3882	-593.725	1200.88	46.2994	-592.853	1106.38	25.4061	-512.054	933.676	75.2465	-499.826	857.087	2.65537	-524.89	856.843	23.2425	-467.359	774.696
648	0	262.478	-392.872	1607.48	377.547	-391.77	1605.62	258.292	-566.084	1605.8	376.844	-574.37	1606.58	313.958	-614.919	1468.96	322.514	-691.804	1232.94	317.307	-459.242	1397.76	315.34	-396.204	1217.32	441.306	-703.98	1286.17	142.091	-577.372	1437.04	53.8816	-587.924	1202.54	47.0686	-587.81	1107.95	24.9257	-508.9	934.549	74.6303	-496.334	858.284	2.22598	-522.822	858.132	21.4953	-465.824	775.091
649	0	263.089	-382.865	1608.36	378.05	-381.686	1606.69	258.858	-555.94	1607.32	377.552	-564.386	1608.13	315.064	-605.29	1470.38	324.063	-682.025	1234.1	317.157	-449.635	1399.01	314.665	-386.89	1218.44	443.276	-693.583	1287.69	142.982	-569.29	1438.47	54.501	-582.653	1204.12	47.2941	-583.194	1109.55	24.1563	-505.706	935.696	73.233	-493.353	858.803	1.22713	-520.166	859.389	20.0063	-463.941	775.873
650	0	263.567	-372.864	1609.26	378.503	-371.352	1607.92	259.11	-546.018	1608.85	377.915	-554.17	1609.85	316.184	-595.69	1471.84	325.647	-672.409	1235.35	317.102	-440.038	1400.2	313.884	-377.629	1219.59	445.042	-683.203	1289.29	143.769	-561.44	1439.96	54.7742	-577.692	1206.07	47.6655	-578.788	1111.35	23.6188	-502.337	936.959	72.6144	-489.027	860.632	0.715645	-517.229	860.926	18.6626	-461.731	776.936
651	0	263.642	-362.893	1610.35	378.477	-361.36	1608.87	259.661	-535.956	1610.37	378.363	-544.079	1611.48	317.46	-586.256	1473.2	327.127	-662.74	1236.64	317.11	-430.501	1401.49	313.281	-368.261	1220.81	446.928	-672.942	1290.88	144.684	-553.512	1441.34	55.4654	-572.966	1207.98	48.084	-574.704	1113.01	23.117	-498.903	938.233	72.0753	-485.538	861.868	0.360069	-514.456	862.341	17.3126	-459.02	778.231
652	0	263.471	-353.032	1611.28	378.238	-351.273	1609.79	259.977	-526.202	1611.86	378.739	-533.913	1613.04	318.723	-576.732	1474.5	328.499	-653.166	1237.67	317.075	-421.119	1402.84	312.617	-358.978	1222.3	448.589	-662.649	1292.23	145.638	-545.875	1442.72	56.5154	-568.699	1209.47	48.4853	-571.036	1114.73	22.556	-495.663	939.753	71.5564	-481.484	863.405	0.131345	-511.47	864.006	15.9307	-456.015	779.892
653	0	263.172	-343.251	1612.1	378.308	-340.986	1611.18	260.116	-516.451	1613.31	378.927	-523.808	1614.78	319.806	-567.47	1475.88	329.98	-643.509	1238.91	317.024	-411.75	1404.26	312.014	-349.716	1223.77	450.093	-652.194	1293.76	146.582	-538.14	1444.2	57.2275	-564.275	1211.38	48.8058	-567.227	1116.55	21.9659	-492.227	941.517	70.7285	-477.46	865.229	-0.064776	-508.273	865.676	15.0956	-452.825	781.482
654	0	262.973	-333.454	1613.02	377.862	-330.926	1612.21	260.373	-506.691	1614.65	379.271	-513.734	1616.43	320.912	-558.055	1477.15	331.339	-633.709	1240.05	317.023	-402.353	1405.65	311.504	-340.568	1225.21	451.527	-641.792	1295.24	147.38	-530.385	1445.59	58.1507	-560.03	1213.33	49.3169	-563.48	1118.43	21.5114	-488.712	943.034	70.391	-472.69	867.194	-0.199987	-504.843	867.506	14.1319	-449.464	783.127
655	0	262.487	-323.842	1613.79	377.437	-320.904	1613.21	260.559	-497.076	1615.93	379.36	-503.762	1617.85	321.94	-548.697	1478.18	332.623	-624.04	1241.08	316.908	-392.996	1406.78	310.919	-331.469	1226.47	452.831	-631.556	1296.28	148.291	-522.407	1446.96	59.187	-555.806	1215.15	49.8817	-559.949	1120.23	21.2747	-485.156	944.718	69.6855	-468.436	868.702	-0.228489	-501.534	869.166	13.2575	-445.862	784.981
656	0	261.83	-314.336	1614.46	376.702	-311.043	1614.11	260.496	-487.61	1616.87	379.435	-493.77	1619.31	322.765	-539.235	1479.08	333.844	-614.077	1241.93	316.852	-383.6	1407.96	310.472	-322.294	1227.55	454.064	-621.325	1297.47	149.06	-514.514	1448.13	60.1026	-551.489	1216.96	50.4833	-556.393	1121.9	20.8333	-481.47	946.264	68.993	-463.668	870.899	-0.156864	-497.988	870.776	12.3621	-442.133	786.785
657	0	261.229	-304.777	1615.09	376.292	-300.997	1615.35	260.446	-478.129	1617.75	379.405	-483.721	1620.51	323.583	-529.767	1480.13	335.102	-604.108	1242.96	316.729	-374.161	1409.02	309.871	-313.087	1228.58	455.009	-610.976	1298.37	149.746	-506.301	1449.24	60.9306	-547.154	1218.69	51.0791	-552.737	1123.57	20.3142	-477.493	947.913	68.5982	-458.59	872.481	0.124896	-494.285	872.225	11.5117	-438.07	788.596
658	0	260.597	-295.267	1615.77	375.692	-291.06	1616.35	260.414	-468.504	1618.46	379.346	-473.904	1621.55	324.132	-520.177	1480.69	336.069	-594.075	1243.71	316.635	-364.6	1409.93	309.358	-303.792	1229.32	456.024	-600.751	1299.23	150.145	-497.908	1450.37	62.0903	-542.508	1220.35	51.9333	-548.781	1125.04	20.4136	-473.729	949.227	68.1576	-452.894	874.475	0.795261	-490.624	873.769	10.6024	-434.056	790.115
659	0	259.755	-285.72	1616.3	374.896	-281.23	1617.01	260.289	-459.025	1618.86	379.185	-464.023	1622.18	324.729	-510.572	1481.14	336.923	-584.16	1244.28	316.56	-355.092	1410.49	308.928	-294.365	1229.96	456.812	-590.724	1299.76	150.884	-489.336	1451.02	63.001	-537.802	1221.69	52.892	-544.615	1126.36	20.1009	-469.642	950.384	67.9937	-448.241	875.551	0.924956	-486.652	874.775	9.96474	-429.83	791.68
660	0	258.991	-276.126	1616.73	374.028	-271.303	1617.79	260.01	-449.5	1619.14	378.923	-454.071	1622.87	325.14	-500.8	1481.69	337.754	-573.87	1244.81	316.297	-345.402	1410.93	308.393	-284.877	1230.28	457.421	-580.681	1300.27	151.386	-480.533	1451.44	64.1056	-532.595	1222.99	53.4295	-540.062	1127.63	20.1523	-465.31	951.463	67.7929	-442.81	876.781	0.754876	-482.665	875.859	9.08087	-425.48	792.969
661	0	258.241	-266.599	1617.07	373.229	-261.377	1618.5	259.625	-439.942	1619.29	378.749	-444.209	1623.41	325.499	-490.853	1482.08	338.237	-563.484	1245.46	316.241	-335.67	1411.18	307.994	-275.349	1230.46	458.039	-570.381	1301.01	151.765	-471.402	1451.88	65.0326	-526.983	1223.93	54.1605	-535.114	1128.69	20.1509	-460.741	952.128	67.5567	-437.476	877.784	1.50724	-478.43	876.687	8.51572	-420.993	794.024
662	0	257.326	-257.019	1617.19	372.381	-251.522	1618.89	259.237	-430.328	1618.97	378.296	-434.298	1623.39	325.682	-480.808	1482.12	338.645	-553.837	1245.61	316.137	-325.825	1411.19	307.747	-265.734	1230.41	458.34	-560.534	1301.14	152.012	-461.954	1452.06	65.7778	-520.926	1224.75	54.8974	-529.766	1129.39	20.2559	-455.971	952.584	67.521	-432.104	878.211	1.8879	-473.884	877.056	8.06705	-416.276	794.906
663	0	256.543	-247.265	1617.15	371.472	-241.622	1619.13	258.928	-420.634	1618.53	377.902	-424.273	1623.23	325.884	-470.776	1482.05	338.734	-544.224	1245.68	316.022	-315.898	1410.88	307.469	-256.087	1229.97	458.652	-550.639	1301.23	152.422	-452.536	1451.84	67.0153	-514.341	1225.29	55.7605	-523.885	1130.03	20.4691	-450.964	952.792	67.4888	-426.989	878.232	2.34917	-469.199	877.32	7.4453	-411.634	795.457
664	0	255.875	-237.654	1616.83	370.432	-231.542	1619.1	258.345	-410.88	1618	377.437	-414.222	1623.07	325.919	-460.623	1481.9	338.767	-534.56	1245.77	315.909	-305.817	1410.4	307.257	-246.409	1229.22	458.914	-540.733	1301.28	152.537	-442.808	1451.47	68.6597	-507.189	1225.5	56.7281	-517.696	1130.53	20.6364	-445.547	952.737	67.3622	-421.308	878.092	2.75317	-464.257	877.558	6.74632	-406.822	795.655
665	0	254.655	-227.71	1616.43	369.683	-221.318	1619.13	257.967	-400.966	1617.31	377.05	-404.086	1622.73	325.751	-450.303	1481.58	338.653	-524.949	1245.61	315.815	-295.734	1409.8	307.127	-236.709	1228.45	458.9	-530.732	1301.24	152.504	-432.742	1451.13	69.3282	-499.561	1225.8	57.321	-510.824	1130.74	20.9426	-439.886	952.501	67.5893	-415.45	877.857	3.18324	-459.12	877.495	6.32821	-401.777	795.598
666	0	253.674	-217.742	1615.89	368.801	-211.041	1618.92	257.506	-391.073	1616.35	376.634	-393.864	1622.12	325.745	-440.047	1481.2	338.319	-515.298	1245.26	315.668	-285.525	1409.08	306.935	-227.011	1227.54	458.843	-520.821	1300.88	152.372	-422.552	1450.59	70.101	-491.345	1225.87	58.2188	-503.694	1130.77	21.0752	-433.911	952.009	67.5824	-409.814	877.085	3.57497	-453.837	877.19	5.82313	-396.891	795.248
667	0	252.749	-207.743	1614.97	367.648	-200.789	1618.46	257.271	-381.17	1615.3	375.968	-383.516	1621.41	325.456	-429.584	1480.57	337.864	-505.699	1244.94	315.514	-275.286	1408.26	306.803	-217.222	1226.31	458.614	-511.125	1300.5	152.286	-412.047	1450.01	70.5043	-482.702	1225.71	58.6945	-495.986	1130.68	21.1057	-427.629	951.516	67.6364	-403.763	876.742	3.98195	-448.223	876.832	5.52729	-391.814	794.543
668	0	251.539	-197.702	1613.9	366.252	-190.463	1617.62	256.196	-371.068	1613.92	375.334	-373.027	1620.42	325.088	-418.956	1479.85	337.158	-496.192	1244.55	315.372	-264.872	1407.2	306.742	-207.38	1225.04	458.056	-501.247	1300.19	151.992	-401.348	1449.24	70.5283	-473.713	1225.35	59.2493	-487.616	1130.61	21.493	-421.155	950.755	67.7633	-397.345	875.526	4.13285	-442.467	876.227	5.05924	-386.721	793.781
669	0	250.549	-187.664	1612.84	365.263	-179.924	1617.04	255.88	-360.833	1612.58	374.701	-362.548	1619.28	324.615	-408.301	1479.04	336.182	-486.65	1244.04	315.257	-254.387	1406.01	306.675	-197.435	1223.63	457.337	-491.384	1299.53	151.485	-390.386	1448.31	70.9578	-464.062	1224.93	59.6157	-478.91	1130.29	21.6124	-414.237	949.72	67.5902	-391.045	874.28	4.244	-436.467	875.529	4.80193	-381.463	792.685
670	0	249.278	-177.591	1611.48	363.88	-169.447	1616.07	254.982	-350.708	1610.65	373.925	-352.036	1617.98	323.93	-397.587	1477.97	334.986	-476.957	1243.22	315.005	-243.724	1404.7	306.419	-187.4	1222.25	456.525	-481.697	1298.64	150.884	-379.098	1447.64	70.7513	-454.09	1224.42	60.0555	-469.844	1129.68	21.7461	-407.098	948.74	67.6255	-384.49	872.891	4.80949	-430.036	874.746	4.46554	-376.141	791.283
671	0	248.061	-167.29	1610.11	362.807	-158.771	1615.33	254.461	-340.388	1608.94	373.203	-341.49	1616.63	323.158	-386.853	1477.03	333.634	-467.175	1242.42	314.843	-233.023	1403.46	306.229	-177.219	1220.52	455.475	-471.88	1297.73	150.083	-367.663	1446.37	70.8001	-443.803	1223.69	60.2694	-460.36	1129.1	21.7551	-399.6	947.606	67.4748	-377.519	871.576	5.05626	-423.461	873.724	4.35774	-370.692	789.64
672	0	246.736	-156.92	1608.75	361.13	-148.289	1614.08	253.385	-330.106	1607.05	372.252	-330.784	1615.09	322.116	-376.03	1475.83	332	-457.134	1241.65	314.656	-222.311	1402.05	306.037	-166.94	1219.11	454.16	-461.94	1296.99	149.072	-355.961	1445.35	70.0936	-432.973	1223.05	59.9003	-450.308	1128.49	21.5606	-391.747	946.315	67.6869	-370.537	870.372	4.67282	-416.698	872.758	4.19271	-365.122	787.862
673	0	245.26	-146.651	1607.06	359.888	-137.55	1613.07	252.486	-319.685	1605.08	371.346	-320.214	1613.49	321.034	-365.013	1474.42	330.175	-447.065	1240.6	314.266	-211.508	1400.49	305.723	-156.557	1217.29	452.843	-452.216	1295.99	148.095	-344.11	1444.18	69.3394	-422.102	1222.05	59.5684	-439.955	1127.82	21.4489	-383.68	944.948	67.1404	-363.292	868.615	5.50065	-409.719	871.578	4.51297	-359.27	785.899
674	0	243.794	-136.211	1605.51	358.079	-127.084	1611.61	251.532	-309.555	1602.93	370.203	-309.43	1611.77	319.881	-354.272	1473.19	328.211	-436.913	1239.33	313.811	-200.635	1399.01	305.521	-145.963	1215.66	451.027	-442.492	1294.79	146.769	-332.038	1443.03	68.2567	-410.778	1221.05	58.9529	-429.261	1126.86	21.2544	-375.285	943.302	67.2674	-355.648	866.904	5.53781	-402.226	870.297	4.46541	-353.173	783.861
675	0	241.933	-125.809	1604.01	356.729	-116.298	1610.55	250.098	-298.916	1600.96	368.988	-298.894	1610.19	318.193	-343.208	1471.72	326.148	-426.731	1238.22	313.158	-189.69	1397.45	305.169	-135.257	1213.97	449.194	-432.544	1293.66	145.417	-319.948	1441.53	66.4445	-399.006	1220.21	58.1108	-418.279	1125.93	20.9229	-366.519	941.808	67.2352	-348.161	865.423	4.87719	-394.333	869.124	4.53036	-346.686	781.635
676	0	240.523	-115.382	1602.2	354.982	-105.766	1609.08	249.091	-288.512	1599.1	367.684	-288.165	1608.62	316.619	-332.321	1470.32	324.003	-416.537	1237.21	312.541	-178.744	1395.99	304.927	-124.37	1212.47	447.433	-422.662	1292.5	143.881	-307.715	1440.14	65.1592	-386.995	1219.01	56.878	-406.791	1125	20.5008	-357.284	940.375	67.3079	-340.082	863.767	4.52938	-386.072	867.732	4.93554	-339.697	779.535
677	0	238.761	-104.757	1600.66	353.365	-95.0146	1607.79	247.258	-277.945	1597.11	366.145	-277.501	1606.92	314.886	-321.455	1468.88	321.803	-406.334	1235.96	311.571	-167.719	1394.4	304.486	-113.449	1210.86	445.257	-412.599	1291.34	142.202	-295.504	1438.76	63.1941	-375.02	1217.7	55.5056	-395.115	1123.8	19.8345	-347.727	938.638	67.2568	-332.641	861.713	4.29068	-377.509	866.238	4.76286	-332.452	777.243
678	0	236.964	-94.15	1598.93	351.558	-84.3176	1606.53	245.656	-267.457	1595.31	364.478	-266.842	1605.51	312.725	-310.453	1467.42	319.363	-396.087	1234.66	310.63	-156.764	1393.1	303.86	-102.363	1209.39	443.045	-402.633	1290.07	140.389	-283.295	1437.21	60.9457	-362.686	1216.4	53.713	-383.255	1122.46	18.982	-337.714	936.973	66.8876	-322.768	860.25	3.74993	-368.261	864.781	4.62457	-324.624	774.923
679	0	235.278	-83.6383	1597.39	349.606	-73.7161	1605.26	243.761	-256.772	1593.53	362.793	-256.2	1604.04	310.679	-299.473	1466.05	317.027	-385.616	1233.57	309.264	-145.623	1391.68	303.143	-91.2714	1207.97	440.577	-392.368	1288.88	138.364	-271.112	1435.86	58.4564	-350.214	1215.21	51.9351	-371.189	1121.13	17.8695	-327.167	935.317	66.4917	-313.844	858.747	2.39721	-358.342	863.453	4.21875	-316.372	772.863
680	0	233.281	-72.9428	1595.8	347.686	-63.0278	1603.96	242.183	-246.072	1591.91	360.722	-245.576	1602.42	308.569	-288.529	1464.62	314.732	-375.109	1232.36	307.908	-134.488	1390.3	302.428	-80.1537	1206.64	438.476	-382.147	1287.73	136.322	-258.917	1434.36	55.8948	-337.627	1213.56	49.9299	-358.999	1119.63	16.8336	-316.256	933.687	65.6263	-303.97	856.923	1.45784	-347.964	861.982	4.14185	-307.523	770.443
681	0	231.089	-62.3333	1594.4	345.309	-52.5469	1602.41	239.639	-235.492	1589.86	358.469	-235.012	1600.81	306.185	-277.485	1463.08	312.209	-364.416	1231.08	306.665	-123.374	1388.98	301.464	-69.0568	1205.11	436.044	-371.707	1286.71	134.162	-246.81	1432.63	53.5762	-325.012	1211.9	47.8627	-346.831	1118.02	15.4793	-304.841	931.922	64.5069	-293.544	855.083	-0.438615	-337.036	860.353	3.63159	-298.289	767.981
682	0	228.964	-51.6023	1592.76	343.476	-41.7983	1601.39	237.722	-224.565	1588.09	356.147	-224.455	1599.21	303.55	-266.376	1461.78	309.877	-353.603	1229.75	304.997	-112.321	1387.57	300.476	-58.0031	1203.7	433.732	-361.145	1285.73	131.816	-234.757	1431.06	51.0251	-312.495	1210.34	45.605	-334.584	1116.41	13.9838	-293.082	930.151	63.2049	-282.423	853.475	-1.63013	-325.538	858.564	2.9247	-288.518	765.709
683	0	226.711	-40.7309	1591.42	341.06	-31.3213	1600.03	234.656	-213.863	1586.42	353.528	-213.808	1597.71	300.883	-255.431	1460.38	307.447	-342.779	1228.64	303.326	-101.159	1386.31	299.194	-46.8946	1202.33	431.311	-350.719	1284.76	129.471	-222.78	1429.25	48.372	-300.139	1208.6	43.1534	-322.357	1114.74	12.2177	-280.977	928.248	61.6024	-270.849	852.004	-3.73422	-313.33	857.019	2.28484	-278.122	763.158
684	0	224.528	-29.8772	1590.13	338.897	-20.6137	1599.06	232.37	-203.097	1584.81	350.722	-203.226	1596.16	298.253	-244.578	1458.92	305.033	-331.827	1227.28	301.35	-90.0232	1385.05	298.134	-35.5582	1201.35	428.783	-339.976	1283.74	126.994	-210.946	1427.51	46.0929	-287.734	1206.63	40.6564	-310.091	1112.95	10.2899	-268.609	926.464	59.7582	-258.894	850.059	-5.70467	-300.848	855.23	1.30969	-267.221	760.655
685	0	221.794	-19.0652	1588.94	336.08	-10.0678	1597.79	229.392	-192.21	1583.43	347.964	-192.653	1594.97	295.374	-233.477	1457.77	302.551	-320.757	1225.84	299.373	-78.8499	1384.16	296.782	-24.4062	1200.43	426.36	-329.424	1283	124.493	-199.362	1425.75	44.0033	-275.305	1204.73	38.036	-297.683	1110.99	8.31478	-256.005	924.527	57.8691	-246.709	848.263	-7.95727	-288.166	853.356	-0.082555	-255.665	758.395
686	0	219.006	-8.13923	1587.95	333.51	0.603161	1597.1	225.957	-181.335	1582.36	344.911	-182	1594.09	292.7	-222.616	1456.73	299.947	-309.771	1224.81	297.264	-67.7482	1383.43	295.553	-13.1342	1199.71	423.814	-318.662	1282.38	121.964	-187.792	1424.12	41.0018	-263.249	1203	35.2494	-285.057	1109.19	6.1501	-243.112	922.622	55.8964	-233.954	846.712	-10.4135	-275.208	851.458	-1.7091	-243.396	756.228
687	0	216.307	2.75986	1587.28	330.79	11.4376	1596.54	223.146	-170.41	1581.6	341.633	-171.22	1593.37	290.125	-211.799	1455.86	297.572	-298.702	1223.88	295.277	-56.6786	1383.11	294.039	-1.67075	1199.52	421.122	-307.745	1281.78	119.413	-176.341	1422.88	38.728	-250.931	1201.5	32.5453	-272.29	1107.35	3.93782	-230.028	920.966	53.7754	-220.992	845.048	-12.2502	-261.914	849.791	-3.76314	-230.533	754.329
688	0	213.387	13.6168	1586.52	327.866	22.2148	1596.05	219.838	-159.528	1580.92	338.557	-160.601	1592.93	287.691	-201.067	1455.26	295.251	-287.561	1223.05	293.175	-45.6084	1383.05	292.561	10.0921	1199.78	418.719	-296.8	1281.22	116.841	-165.191	1421.71	35.8653	-238.461	1199.82	30.0839	-259.242	1105.57	1.50373	-216.658	919.442	51.3548	-207.802	843.322	-14.5853	-248.488	848.099	-6.10982	-216.941	752.68
689	0	210.262	24.3756	1586.11	324.622	32.826	1595.7	216.96	-148.847	1580.68	335.508	-150.025	1593.09	285.08	-190.344	1454.98	292.985	-276.354	1222.62	290.883	-34.5748	1383.34	290.875	21.7587	1200.35	416.425	-285.788	1281.03	114.311	-154.196	1420.99	33.2908	-225.911	1198.47	27.384	-246.245	1104.18	-0.843304	-203.018	918.204	49.0665	-193.79	842.219	-17.6076	-234.603	846.762	-8.65694	-202.725	751.576
690	0	207.145	34.976	1585.8	321.627	43.5838	1595.79	213.46	-138.223	1580.68	332.337	-139.288	1593.43	282.522	-179.658	1454.99	290.915	-265.199	1222.46	288.568	-23.655	1383.83	288.925	32.7519	1200.71	414.145	-274.527	1281.05	111.873	-143.492	1420.36	30.9434	-213.209	1197.4	24.6936	-232.9	1103.01	-3.41346	-189.214	917.161	46.3817	-179.685	841.221	-20.1742	-220.459	845.597	-11.5188	-187.973	750.573
691	0	204.183	45.6	1585.72	318.442	54.1288	1595.83	210.496	-127.699	1581	329.215	-128.692	1593.74	279.903	-169.362	1455.03	289.027	-253.935	1222.37	286.159	-12.9295	1384.58	286.828	44.2304	1201.64	411.933	-263.372	1281.3	109.406	-132.777	1420.25	29.0312	-200.402	1196.32	22.3631	-219.467	1101.98	-5.86822	-174.871	916.494	43.7811	-165.143	840.492	-22.2731	-205.935	844.71	-14.2793	-172.38	749.808
692	0	200.815	55.8876	1586	315.232	64.6583	1596.3	207.155	-117.275	1581.5	326.2	-118.301	1594.65	277.652	-158.779	1455.49	287.112	-242.867	1222.6	283.714	-2.23945	1385.62	284.714	55.6969	1203.02	410.142	-252.237	1281.76	106.888	-122.31	1420.29	26.6857	-187.73	1195.5	19.9369	-206.225	1101.18	-8.14543	-160.262	916.076	41.3821	-150.071	840.1	-24.984	-190.865	844.247	-17.3823	-156.582	749.8
693	0	197.848	66.2022	1586.45	312.137	75.0643	1597.18	204.168	-107.118	1582.36	323.274	-107.908	1595.9	275.202	-148.506	1456.2	285.061	-231.831	1223.11	281.349	8.45119	1387.05	282.308	67.1676	1204.66	408.275	-241.038	1282.46	104.531	-112.006	1420.7	24.2704	-175.006	1195.2	17.5673	-192.619	1100.83	-10.782	-145.375	916.269	37.814	-134.145	840.117	-28.0605	-175.379	844.269	-20.3283	-139.985	749.772
694	0	194.827	76.2732	1587.2	309.086	85.3226	1598.14	201.518	-97.0456	1583.38	320.311	-97.6361	1597.19	272.907	-138.34	1457.06	283.161	-220.904	1223.74	278.843	18.9042	1388.69	280.084	78.6833	1206.67	406.421	-229.817	1283.23	102.174	-101.733	1421.44	21.9179	-162.295	1195.15	14.9779	-179.162	1100.79	-13.0883	-129.953	916.403	35.4934	-118.169	840.375	-30.526	-159.304	844.383	-23.1815	-122.8	750.25
695	0	191.797	86.2016	1588.09	305.992	95.2133	1599.17	198.714	-87.0453	1584.66	317.47	-87.6685	1598.5	270.59	-128.321	1458.04	281.324	-210.063	1224.51	276.625	29.2993	1390.49	277.986	90.4056	1209.02	404.768	-218.972	1284.26	99.7681	-91.6242	1422.31	19.4203	-149.693	1195.29	12.79	-165.583	1100.76	-15.6298	-114.669	917.173	33.0945	-101.837	841.082	-32.7229	-142.958	844.722	-26.1364	-105.334	751.097
696	0	188.97	95.8101	1589.36	303.11	105.069	1600.6	196.066	-77.328	1585.87	314.598	-77.7788	1599.97	268.427	-118.393	1459.26	279.401	-199.481	1225.59	274.375	39.5242	1392.48	275.832	101.392	1211.33	403.137	-207.957	1285.33	97.6023	-81.4617	1423.51	17.0333	-137.162	1195.75	10.256	-152.161	1101.1	-18.173	-98.7747	918.237	30.654	-85.1405	842.061	-35.756	-126.177	845.462	-28.7205	-87.252	752.341
697	0	186.188	105.433	1590.72	300.576	114.863	1602.3	193.155	-67.6827	1587.21	312.006	-68.1555	1601.5	266.173	-108.547	1460.44	277.425	-189.025	1226.72	272.168	49.6147	1394.7	274.011	112.405	1213.8	401.278	-197.197	1286.49	95.2327	-71.2197	1424.74	14.4874	-124.659	1196.44	7.6796	-138.517	1101.72	-20.567	-82.6983	919.29	28.0806	-68.0324	843.627	-38.5719	-109.324	846.416	-31.5181	-68.765	753.77
698	0	183.656	114.872	1592.23	298.059	124.298	1603.98	191.079	-58.2546	1588.46	309.452	-58.7343	1603.05	264.026	-98.7369	1461.55	275.352	-178.477	1227.67	270.304	59.6527	1396.62	272.132	122.724	1215.81	399.273	-186.904	1287.64	93.2278	-61.0591	1426.04	12.0923	-112.226	1197.21	5.18556	-125.151	1102.2	-23.2196	-66.498	920.849	25.4194	-50.9514	845.088	-40.6086	-91.7157	847.444	-34.1513	-49.9805	755.665
699	0	181.464	124.152	1593.7	295.641	133.547	1605.54	188.524	-48.9781	1589.62	307.252	-49.4122	1604.3	261.972	-89.0258	1462.72	273.479	-168.171	1228.89	268.583	69.6519	1398.44	270.926	133.607	1217.97	397.315	-176.587	1288.89	91.1676	-50.6735	1427.36	9.8808	-99.7574	1198.13	2.57041	-111.537	1102.9	-25.5717	-50.057	922.349	23.2024	-33.4346	846.909	-43.2165	-74.2282	848.428	-36.1248	-30.6873	757.635
700	0	179.287	133.402	1595.22	293.363	142.751	1607.17	186.507	-39.7306	1590.66	305.078	-40.1481	1605.56	259.599	-79.414	1464.03	271.117	-157.915	1230.08	266.973	79.5325	1400.11	269.92	144.023	1219.9	395.06	-166.78	1290.07	89.4755	-40.1806	1428.68	7.4542	-87.2491	1199.06	-0.219046	-98.0413	1103.75	-27.9793	-33.4938	923.917	21.0907	-15.3116	849.009	-45.6613	-56.2539	849.913	-38.3209	-11.0412	759.579
701	0	177.249	142.689	1596.78	291.815	152.15	1609.3	184.694	-30.4471	1591.82	303.049	-30.9181	1606.91	257.756	-69.7516	1465.31	268.999	-147.741	1231.38	265.665	89.2393	1401.81	268.962	154.186	1221.51	392.865	-157.275	1291.43	87.6314	-29.5682	1429.96	4.9663	-74.7289	1199.89	-2.94027	-84.3543	1104.67	-30.052	-16.6236	925.542	18.8505	2.70081	851.189	-47.8114	-38.0116	851.206	-40.6123	8.71916	761.923
702	0	175.753	151.893	1598.28	289.84	161.235	1610.93	182.693	-21.2148	1592.82	301.551	-21.7529	1608.22	255.753	-60.1142	1466.67	266.623	-137.845	1232.95	264.688	99.0475	1403.33	268.267	164.101	1223.04	390.693	-147.858	1292.76	85.823	-18.9553	1431.32	2.59063	-62.0113	1200.84	-5.5258	-70.5319	1105.54	-32.1592	0.185218	927.296	16.8181	20.7709	853.274	-49.9216	-19.8589	852.612	-42.3158	28.6577	764.44
703	0	174.137	161.001	1599.77	288.216	170.26	1612.46	181.224	-11.8812	1594.03	299.688	-12.6172	1609.51	253.989	-50.5298	1468.17	264.599	-128.208	1234.34	263.668	108.66	1404.77	267.82	173.913	1224.52	388.666	-138.815	1293.98	84.3987	-8.32591	1432.88	0.314356	-49.1715	1202.03	-7.82735	-56.6186	1106.48	-34.3075	17.1811	929.307	14.6895	38.5998	855.556	-51.9134	-1.66443	854.225	-43.9496	48.7555	767.241
704	0	172.972	170.37	1601.28	287.166	179.659	1614.38	180.008	-2.56777	1595.41	298.457	-3.60948	1611.01	252.37	-41.1435	1469.7	262.403	-118.746	1235.87	262.792	118.182	1406.34	267.371	183.461	1225.95	386.552	-130.011	1295.4	82.9109	2.3636	1434.37	-1.83207	-36.1894	1203.43	-10.3718	-42.5445	1107.76	-36.449	34.328	931.702	12.7534	57.0237	858.449	-54.4261	16.7219	856.104	-45.7753	68.888	770.347
705	0	171.805	179.786	1602.7	285.705	188.481	1615.81	178.683	6.73393	1596.83	296.942	5.57649	1612.6	250.855	-31.7199	1471.34	260.707	-109.412	1237.54	261.918	127.511	1407.95	266.963	192.813	1227.55	384.797	-121.268	1296.97	81.6206	12.8196	1436.18	-3.78584	-22.883	1204.98	-12.5469	-28.2604	1109.13	-38.2117	51.1855	934.155	11.0286	75.0819	861.45	-56.2629	35.1246	858.203	-47.2663	89.1452	773.639
706	0	170.891	189.158	1604.17	284.784	197.773	1617.23	177.632	16.1528	1598.29	295.73	14.7258	1614.29	249.53	-22.4307	1472.99	258.957	-100.31	1238.91	261.3	136.811	1409.6	266.446	201.874	1229.25	382.788	-112.766	1298.36	80.3103	23.2166	1438.15	-5.7127	-9.54893	1206.39	-14.6794	-14.0643	1110.48	-40.0423	68.167	936.842	9.06961	93.2498	864.499	-58.018	53.4476	860.387	-48.738	109.629	777.388
707	0	170.012	198.501	1605.75	284.228	207.171	1618.85	176.532	25.6106	1600.17	294.718	23.9632	1616.17	248.099	-13.282	1474.62	257.382	-91.1013	1240.66	260.854	145.955	1411.32	265.665	210.308	1230.74	380.975	-104.118	1299.82	79.1871	33.4057	1440.03	-7.63244	3.84867	1208.16	-16.6723	0.310414	1112.25	-41.7698	85.1615	939.81	7.13768	110.814	867.741	-59.3325	71.7623	862.849	-49.6267	129.722	781.243
708	0	169.579	208.062	1607.11	283.819	216.351	1620.36	175.432	35.0849	1602.15	293.947	32.9764	1618.25	246.934	-4.29807	1476.58	255.764	-81.8928	1242.45	260.283	154.8	1413.23	265.504	219.681	1232.7	379.344	-95.6072	1301.58	78.3236	43.4043	1442.14	-9.40739	17.3068	1210.07	-18.5616	14.6861	1114.12	-43.3357	102.237	942.85	5.77317	128.893	871.222	-61.0794	90.1847	865.735	-50.6845	149.973	785.307
709	0	169.224	217.602	1608.51	283.611	225.636	1621.75	174.846	44.6051	1604.39	292.89	42.2047	1620.17	246.051	4.70915	1478.31	254.418	-72.7502	1244.05	259.726	163.673	1415.03	265.179	228.55	1234.46	377.742	-87.127	1303.15	77.415	53.3239	1444.32	-10.9819	30.6521	1211.93	-20.3103	29.0063	1116.06	-44.6914	119.362	946.217	4.3829	146.901	874.872	-62.8319	108.485	868.566	-51.2818	170.167	789.709
710	0	169.117	227.126	1610.16	283.207	234.599	1622.93	173.986	54.0929	1606.4	292.292	51.3761	1622.19	245.203	13.6397	1480.25	253.092	-63.7869	1245.66	259.333	172.508	1416.94	264.567	237.162	1236.34	376.209	-78.759	1304.76	76.5741	63.0002	1446.28	-12.6475	43.8001	1213.81	-21.9452	43.2611	1117.94	-45.8819	136.606	949.716	3.33036	165.109	878.766	-63.1194	127.061	871.617	-51.8362	190.059	794.001
711	0	169.025	236.678	1611.63	283.502	244.135	1624.59	173.546	63.6036	1608.87	291.812	60.6332	1624.35	243.987	22.4789	1482.1	251.9	-54.7557	1247.46	259.091	181.352	1419.02	264.326	246.425	1238.5	374.624	-70.3814	1306.58	75.8815	72.5872	1448.57	-14.3168	56.8172	1215.86	-23.5019	57.3191	1120.08	-46.7297	153.708	953.324	2.51239	183.076	883.127	-64.8656	145.848	875.13	-51.8598	210.221	798.774
712	0	169.069	246.246	1613.39	283.266	253.269	1625.66	172.99	73.112	1611.23	291.377	69.8354	1626.72	243.245	31.4556	1484.13	250.822	-45.7357	1249.44	258.654	190.108	1420.99	264.067	255.226	1240.35	373.335	-61.8765	1308.44	75.1703	82.1521	1450.51	-15.5298	69.7491	1218.09	-24.9887	71.3142	1122.26	-47.6554	170.732	957.254	1.85912	201.149	887.683	-65.3313	164.598	878.997	-51.8033	230.452	803.591
713	0	169.239	255.835	1614.98	283.007	262.251	1626.65	172.579	82.6932	1613.43	290.994	79.0454	1628.57	242.185	40.3715	1485.79	249.564	-36.6807	1250.99	258.178	198.756	1422.73	263.968	264.185	1242.08	372.032	-53.4357	1310.14	74.3082	91.7111	1452.5	-16.7709	82.2244	1220.09	-26.4001	85.0243	1124.22	-48.2044	187.976	961.029	1.43047	219.055	892.025	-66.4707	183.41	882.583	-51.4464	250.51	808.534
714	0	169.312	265.373	1616.56	283.657	271.716	1628.09	172.222	92.2429	1615.66	290.74	88.3671	1630.27	241.354	49.4325	1487.56	248.509	-27.6568	1252.7	257.958	207.621	1424.37	263.618	272.763	1243.64	370.815	-44.8878	1311.71	73.6366	101.31	1454.38	-17.911	94.4315	1222.01	-27.9728	98.3674	1126.1	-48.6964	205.068	965.102	1.43293	237.095	896.876	-66.6828	202.443	886.505	-50.7596	270.544	813.807
715	0	169.539	274.881	1618.29	283.638	280.86	1629.14	171.958	101.86	1617.79	290.508	97.6416	1632.02	240.393	58.4107	1489.28	247.416	-18.6062	1254.3	257.615	216.502	1425.93	263.541	281.402	1245.19	369.586	-36.3914	1313.5	73.0014	110.879	1456.04	-19.0379	106.326	1223.51	-29.2252	111.671	1128.16	-49.0196	221.974	969.093	1.57351	254.782	901.619	-66.8597	221.265	890.571	-49.6472	290.605	819.208
716	0	169.854	284.511	1619.6	283.314	289.783	1629.79	171.759	111.428	1619.8	290.247	106.9	1633.61	239.562	67.4769	1490.74	246.512	-9.48404	1256.02	257.348	225.386	1427.35	263.297	289.832	1246.36	368.395	-27.8246	1315.04	72.4464	120.465	1457.61	-20.147	118.054	1225.29	-30.7496	124.752	1129.87	-48.896	238.818	973.015	2.09157	272.599	906.68	-66.2872	239.972	894.574	-48.2783	310.69	824.732
717	0	170.028	294.047	1621.01	284.041	299.419	1630.95	171.684	121.013	1621.45	290.076	116.229	1634.81	238.915	76.6415	1492.06	245.707	-0.348098	1257.08	256.85	234.157	1428.36	263.34	298.619	1247.36	367.532	-19.1214	1316.36	71.9135	129.944	1458.93	-21.1466	129.441	1226.81	-32.0494	137.512	1131.4	-48.642	255.278	977.083	2.95473	289.962	911.36	-65.9555	258.589	898.554	-46.7612	330.487	830.322
718	0	170.227	303.566	1622.34	284.154	308.734	1631.69	171.605	130.623	1623.06	290.09	125.591	1635.98	238.312	85.8201	1493.3	244.83	8.67195	1258.31	256.588	243.118	1429.28	263.415	307.431	1248.3	366.537	-10.5225	1317.66	71.4952	139.355	1459.91	-21.9477	140.891	1228.38	-33.2528	150.343	1132.78	-48.2546	271.828	980.766	3.54943	307.027	916.242	-65.625	277.061	902.662	-44.8886	350.128	836.094
719	0	170.489	313.122	1623.25	284.526	318.161	1632.44	171.587	140.187	1624.53	290.01	135.042	1636.96	237.554	94.8967	1494.29	244.173	17.7354	1259.47	256.367	252.194	1429.93	263.565	316.277	1248.92	365.698	-1.83348	1318.66	71.1107	148.727	1460.61	-22.8327	152.036	1229.49	-34.5481	162.924	1134.12	-47.8667	288.04	984.534	4.68953	323.968	920.804	-64.8399	295.448	906.577	-42.7765	369.748	841.843
720	0	170.775	322.774	1624.11	284.673	327.56	1632.84	171.607	149.689	1625.51	290.053	144.415	1637.66	237.137	104.036	1495.12	243.533	26.6943	1259.98	256.196	261.257	1430.3	263.604	325.111	1249.29	365.091	6.95884	1319.45	70.8716	158.124	1461.22	-23.5277	163.129	1230.22	-35.5332	175.389	1135.03	-47.0705	304.132	988.106	6.19902	341.084	925.836	-64.028	313.404	910.271	-40.6794	388.86	847.609
721	0	170.977	332.351	1624.88	284.803	337.077	1633.03	171.783	159.27	1626.37	290.137	153.907	1638.08	236.808	113.313	1495.62	243.152	35.733	1260.3	256.06	270.284	1430.58	263.595	333.77	1249.36	364.596	15.7887	1320.01	70.605	167.485	1461.52	-24.1354	174.153	1230.87	-36.5383	187.68	1135.66	-46.3049	319.942	991.494	7.16018	357.409	930.267	-63.0461	331.19	913.708	-38.1068	407.88	853.169
722	0	171.137	342.021	1625.44	284.992	346.495	1633.19	171.728	168.761	1627.14	290.293	163.463	1638.37	236.492	122.609	1496.05	242.907	44.7339	1260.85	255.895	279.422	1430.64	263.592	342.53	1249.28	364.157	24.5769	1320.61	70.3767	176.833	1461.58	-24.8383	185.072	1231.31	-37.4854	199.901	1136.4	-45.4421	335.515	994.813	8.77802	373.852	934.97	-61.9107	348.625	917.194	-35.7386	426.466	858.58
723	0	171.313	351.618	1625.67	285.434	356.049	1633.23	171.994	178.556	1627.38	290.558	173.059	1638.34	236.311	131.946	1496.17	242.829	53.7627	1261.14	255.923	288.684	1430.51	263.666	351.593	1249.13	363.894	33.4594	1320.91	70.2609	186.179	1461.52	-25.5496	195.905	1231.53	-38.29	212.095	1136.58	-44.5894	350.915	997.834	10.2054	389.978	939.17	-60.5019	365.907	920.501	-33.0464	444.885	863.997
724	0	171.509	361.232	1625.71	285.563	365.509	1632.69	172.111	188.04	1627.45	290.674	182.631	1637.92	236.123	141.324	1495.95	242.824	62.6474	1261.1	255.894	298.03	1430.06	263.801	360.558	1248.6	363.652	42.4081	1320.88	70.1193	195.525	1461.01	-25.7308	206.853	1231.41	-39.0161	224.049	1136.64	-43.7244	365.965	1000.71	11.736	405.785	943.335	-59.4246	382.487	923.365	-30.1387	462.816	869.005
725	0	171.868	370.882	1625.43	285.988	375.17	1632.23	172.502	197.884	1627.1	290.882	192.184	1637.38	236.06	150.741	1495.52	242.928	71.6898	1260.88	255.94	307.323	1429.39	264.04	369.526	1247.92	363.714	51.5564	1320.82	70.1952	204.861	1460.38	-25.9774	217.759	1231.15	-39.4095	236.076	1136.5	-42.6161	380.889	1003.39	13.2622	421.356	947.318	-57.8687	398.981	926.178	-27.2028	480.3	874.09
726	0	172.353	380.618	1624.82	286.447	384.815	1631.43	172.567	207.443	1626.72	291.307	201.877	1636.61	236.336	160.294	1495.08	243.23	80.6465	1260.59	256.269	316.687	1428.61	264.41	378.651	1247.05	363.863	60.7567	1320.65	70.4353	214.213	1459.58	-26.1675	228.568	1230.61	-39.8715	247.939	1136.2	-41.2999	395.518	1005.67	14.9725	436.815	951.234	-55.9923	415.168	928.747	-24.3073	497.346	878.7
727	0	172.904	390.348	1623.93	286.683	394.427	1630.08	173.046	217.351	1625.84	291.649	211.627	1635.56	236.706	169.936	1494.34	243.585	89.7528	1259.95	256.457	326.227	1427.44	264.55	387.654	1245.62	364.302	69.9516	1320.24	70.7591	223.575	1458.46	-26.1098	239.338	1229.92	-39.9274	259.823	1135.72	-39.764	409.518	1007.68	16.9974	451.879	954.563	-53.9012	430.983	930.887	-21.1221	513.96	882.836
728	0	173.449	400.173	1622.99	287.455	404.337	1628.94	173.398	227.062	1624.95	292.044	221.368	1634.3	237.143	179.633	1493.41	244.397	98.9033	1259.16	256.634	335.733	1426.14	265.004	396.841	1244.18	364.907	79.4878	1319.6	71.1793	232.952	1457.29	-25.6972	250.27	1229.01	-39.8926	271.471	1134.94	-38.2395	423.626	1009.33	18.7838	466.588	957.659	-51.7067	446.396	932.671	-17.9058	530.084	886.896
729	0	173.933	410.149	1621.88	287.939	414.089	1627.49	173.855	236.958	1623.84	292.522	231.216	1632.94	237.583	189.359	1492.35	245.273	108.011	1258.46	256.827	345.291	1424.78	265.332	405.895	1242.63	365.776	88.8331	1319.06	71.6851	242.436	1455.96	-25.3723	260.829	1227.77	-39.6773	283.195	1134.12	-36.4999	437.292	1010.8	20.9645	480.958	960.607	-49.3056	461.423	934.41	-14.7548	545.827	890.595
730	0	174.684	420.183	1620.66	288.579	423.889	1625.93	174.465	246.903	1622.56	293.175	241.028	1631.51	238.236	199.207	1491.31	246.11	117.128	1257.64	257.271	355.069	1423.11	265.754	415.229	1240.91	366.8	98.5008	1318.3	72.3795	252.009	1454.62	-24.8185	271.626	1226.84	-39.3085	294.636	1133.21	-34.7497	450.693	1012.09	22.9484	495.029	963.095	-46.6854	475.939	935.848	-11.6086	561.018	893.661
731	0	175.372	430.137	1619.06	289.402	433.967	1624.14	175.11	256.832	1621.08	293.903	250.951	1629.69	239.062	209.167	1489.98	247.411	126.624	1256.48	257.891	364.86	1421.41	266.028	424.545	1239.07	368.056	108.58	1317.27	72.9624	261.575	1452.98	-24.0333	282.232	1225.24	-38.7971	306.131	1131.9	-33.0072	463.847	1013	25.4124	508.809	965.391	-44.3631	490.239	936.836	-8.54009	575.868	896.456
732	0	176.46	440.126	1617.39	290.322	443.773	1622.31	175.931	266.899	1619.39	294.67	260.882	1627.67	239.974	219.095	1488.46	248.554	135.909	1255.3	258.313	374.66	1419.48	266.465	433.961	1237.16	369.211	118.401	1316.2	73.7776	271.089	1451.34	-23.1505	292.838	1223.99	-37.9998	317.407	1130.59	-30.874	476.635	1013.69	27.7357	522.329	967.612	-41.717	504.07	937.903	-5.21871	590.16	898.949
733	0	177.31	450.156	1615.93	291.502	453.751	1620.35	176.904	277.005	1617.72	295.5	270.785	1625.71	241.04	229.027	1486.96	250.132	145.384	1253.97	258.826	384.428	1417.57	267.051	443.475	1235.11	370.76	128.546	1315.05	74.711	280.608	1449.51	-22.1967	303.337	1222.34	-37.1847	328.474	1129.08	-28.5881	489.206	1014.04	30.3534	535.592	969.224	-38.7392	517.457	938.542	-2.12018	603.94	900.958
734	0	178.618	460.391	1613.96	292.781	463.568	1618.26	177.805	287.098	1615.96	296.659	280.743	1623.56	242.363	239.009	1485.18	251.504	154.9	1252.43	259.627	394.417	1415.42	267.71	453.232	1232.98	372.245	138.313	1313.8	75.8377	290.293	1447.49	-20.9454	313.666	1220.29	-36.0436	339.546	1127.3	-26.5333	501.544	1014.01	32.9872	548.149	970.1	-36.29	530.656	938.783	1.16089	617.487	902.403
735	0	180.235	470.341	1612.3	294.396	473.677	1616.19	178.994	297.232	1614.04	297.93	290.661	1621.41	243.623	248.99	1483.5	253.197	164.624	1250.8	260.447	404.401	1413.31	268.277	462.883	1230.8	374.126	148.498	1312.22	76.8408	299.89	1445.42	-19.6524	324.008	1218.4	-34.8438	350.274	1125.48	-24.089	513.517	1013.73	35.6495	560.419	970.538	-33.4478	543.521	938.75	4.40165	630.477	903.467
736	0	181.935	480.564	1610.57	295.997	483.593	1614.11	180.426	307.357	1612.39	299.225	300.629	1619.33	245.036	259.047	1481.67	255.136	174.144	1249.19	261.467	414.422	1411.26	268.922	472.634	1228.56	375.931	158.574	1310.62	78.1795	309.369	1443.37	-18.0938	334.294	1216.34	-33.3161	361.023	1123.6	-21.8377	525.287	1013.24	38.3032	572.179	970.531	-30.5339	555.828	938.377	7.67146	643.166	904.189
737	0	183.681	490.826	1609.02	297.928	493.659	1612.19	181.968	317.564	1610.69	300.742	310.591	1617.33	246.489	269.051	1479.92	256.802	183.875	1247.74	262.62	424.563	1409.19	269.947	482.795	1226.61	377.641	168.934	1308.97	79.6829	318.98	1441.24	-16.483	344.359	1214.4	-31.696	371.814	1121.72	-19.3427	536.655	1012.23	40.9692	583.613	970.158	-27.4966	567.766	937.724	10.8407	655.244	904.345
738	0	185.887	500.976	1607.56	300.187	503.552	1610.52	183.547	327.797	1608.98	302.386	320.515	1615.31	248.26	279.185	1478.11	258.569	193.802	1246.02	263.927	434.595	1407.4	270.869	492.712	1224.64	379.433	179.062	1307.31	80.9905	328.749	1439.38	-14.6569	354.436	1212.23	-30.0474	382.124	1119.76	-16.6065	547.71	1011.3	43.8746	594.775	969.543	-24.8922	579.455	937.043	14.063	666.865	904.321
739	0	188.21	511.42	1606.11	302.556	513.567	1608.86	185.514	338.183	1607.35	304.326	330.501	1613.31	250.02	289.367	1476.43	260.389	203.583	1244.14	265.451	444.78	1405.4	272.41	503.011	1222.87	381.085	189.137	1305.51	82.6805	338.551	1437.59	-12.7761	364.338	1210.41	-28.1479	392.386	1117.69	-14.0407	558.537	1010.19	46.8808	605.679	968.51	-22.1031	590.557	936.015	17.0072	678.002	903.579
740	0	190.907	521.648	1604.82	305.119	523.551	1607.23	187.672	348.462	1605.77	306.322	340.495	1611.32	251.76	299.747	1474.77	262.104	213.9	1242.17	267.167	454.925	1403.77	273.673	513.003	1220.96	382.702	199.294	1303.78	84.2873	348.604	1435.8	-10.7602	374.188	1208.46	-26.0738	402.438	1115.89	-11.4601	568.902	1008.55	49.704	615.859	967.054	-19.4413	601.163	934.746	19.9518	688.508	902.629
741	0	193.623	532.014	1603.68	308.163	533.492	1605.8	189.756	358.729	1604.15	308.599	350.345	1609.41	253.321	309.921	1473.01	263.411	223.859	1240.83	268.785	465.159	1401.89	275.523	523.415	1219.27	384.091	209.59	1301.97	85.9801	358.966	1434.32	-8.71307	383.846	1206.88	-24.1885	412.289	1114.08	-9.05434	578.929	1006.88	52.7748	625.871	965.38	-17.0084	611.327	933.206	22.5523	698.662	901.218
742	0	196.809	542.315	1602.4	311.326	543.336	1604.26	192.148	369.19	1602.56	310.991	360.31	1607.54	255.363	320.191	1471.4	264.868	234.274	1239.05	270.853	475.528	1400.33	277.036	533.618	1217.65	385.756	220.084	1299.83	87.8938	369.499	1432.96	-6.47648	393.58	1204.98	-21.7941	421.834	1112.22	-6.41895	588.41	1004.96	55.2637	634.662	962.612	-14.4906	620.944	931.317	25.2682	708.24	899.448
743	0	199.91	552.725	1601.26	314.503	553.274	1602.72	194.787	379.458	1601.16	313.434	370.177	1605.7	257.274	330.446	1469.79	266.09	244.576	1237.54	272.659	485.79	1398.65	278.621	543.94	1216.14	387.068	230.271	1297.78	89.7949	380.025	1431.57	-3.97453	403.417	1203.47	-19.6941	431.289	1110.42	-3.89685	597.769	1002.67	57.9375	643.836	960.088	-12.0304	630.004	929.202	27.6338	717.139	897.209
744	0	203.485	562.977	1600	317.773	563.094	1601.15	197.394	389.893	1599.9	316.127	380.036	1604.08	259.257	340.747	1468.31	267.165	254.94	1236.03	274.787	496.078	1397.25	280.513	554.663	1214.81	388.53	240.602	1295.58	91.8243	390.788	1430.37	-1.85051	413.044	1201.84	-17.3542	440.65	1108.85	-1.41729	606.658	1000.29	60.3679	651.883	956.804	-9.67877	638.632	926.698	29.8598	725.634	894.516
745	0	206.939	573.417	1599.08	321.498	572.971	1599.92	200.203	400.215	1598.64	318.971	389.948	1602.53	261.487	350.925	1466.76	268.59	265.712	1234.22	277.164	506.477	1395.93	282.07	565.329	1213.66	390.109	251.016	1293.27	93.8626	401.546	1429.51	0.570844	422.925	1200.56	-14.9713	449.874	1107.4	1.13857	615.273	997.594	63.0597	660.117	953.462	-7.51724	646.591	923.758	31.8869	733.456	891.304
746	0	210.555	583.7	1598.34	325.146	582.884	1598.84	203.242	410.515	1597.51	321.784	399.795	1601.08	263.572	361.089	1465.29	270.126	276.655	1232.17	279.313	516.761	1394.86	283.573	576.124	1212.72	391.608	261.451	1290.86	95.8988	412.126	1428.49	2.96017	432.903	1199.42	-12.6182	459.014	1105.99	3.41708	623.328	994.642	65.4667	667.711	949.892	-5.41254	654.013	920.729	33.5451	740.793	887.827
747	0	214.258	593.863	1597.81	328.773	592.604	1598	206.112	420.898	1596.61	324.657	409.621	1599.95	265.69	371.232	1464.07	271.417	287.835	1230.59	281.395	527.075	1394.03	285.308	587.41	1212.25	393.174	272.101	1288.59	98.1022	422.605	1427.86	5.15966	442.89	1198.54	-10.2784	468.043	1104.92	5.52355	631.128	991.652	67.6647	674.933	946.013	-3.46843	660.939	917.575	34.8522	747.562	883.832
748	0	217.786	604.136	1597.45	332.318	602.549	1597.3	209.334	431.098	1596.09	327.789	419.601	1598.93	267.86	381.267	1463.07	272.886	299.249	1229.4	283.712	537.467	1393.41	287.133	598.66	1211.94	394.668	282.564	1286.5	100.126	433.307	1427.52	7.35173	452.96	1198	-7.94463	477.204	1104.02	7.52679	638.689	988.577	69.6133	681.79	942.072	-1.80524	667.5	914.279	36.1437	753.801	879.655
749	0	221.365	614.345	1597.25	336.014	612.494	1596.83	212.24	441.308	1595.54	330.88	429.46	1597.96	270.123	391.594	1462.11	274.344	310.248	1228.26	285.933	547.762	1392.96	288.686	609.822	1211.74	396.236	293.026	1284.43	102.142	443.913	1427.33	9.18015	462.924	1197.65	-5.62176	486.119	1103.34	9.5278	645.886	985.291	71.3791	688.148	937.655	-0.085628	673.513	910.976	37.0338	759.307	874.817
750	0	224.92	624.437	1597.18	339.582	622.326	1596.45	215.497	451.454	1595.17	334.024	439.476	1597.18	272.461	401.835	1461.46	275.986	320.935	1227.4	288.071	558.068	1392.68	290.215	620.846	1211.7	397.656	303.423	1282.79	104.185	454.363	1427.41	11.2674	472.98	1197.4	-2.95542	495.016	1102.68	11.5079	652.728	982.263	73.2273	694.337	933.498	1.22841	679.026	907.455	38.0213	764.302	869.822
751	0	228.366	634.677	1597.51	343.051	632.283	1596.4	218.591	461.661	1595.17	337.036	449.323	1596.82	274.656	411.918	1461.17	277.828	331.54	1227.02	290.453	568.44	1392.62	291.954	631.931	1211.92	399.25	313.754	1281.62	106.39	464.865	1427.66	13.0405	482.938	1197.67	-0.541471	503.881	1102.56	13.3314	659.294	979.242	74.7765	700.113	929.251	2.34916	684.141	904.19	37.9826	768.379	864.55
752	0	231.872	644.792	1597.96	346.614	642.222	1596.58	221.822	471.764	1595.3	340.261	459.338	1596.68	276.846	422.136	1461.19	279.859	342.399	1226.78	292.637	578.712	1392.81	293.97	642.973	1212.34	400.707	324.022	1280.85	108.554	475.33	1428.33	15.229	492.939	1198	2.0042	512.816	1102.87	14.9313	665.408	976.21	76.1151	705.506	924.744	3.38266	688.788	900.831	38.299	771.969	858.893
753	0	235.237	654.878	1598.63	349.998	652.201	1596.82	225.027	481.88	1595.82	343.423	469.249	1596.73	279.211	432.051	1461.47	281.876	353.407	1226.71	294.785	588.842	1393.13	295.919	653.654	1212.8	402.387	334.209	1280.24	110.75	485.464	1428.99	17.6008	502.733	1198.38	4.88247	521.508	1102.97	16.5248	671.361	973.183	76.8099	710.109	919.825	4.1707	692.919	897.559	38.305	775.15	853.238
754	0	238.435	664.889	1599.34	353.002	662.057	1597.23	228.031	491.782	1596.65	346.497	479.204	1597.29	281.447	441.899	1462.07	283.929	364.21	1226.94	296.925	598.952	1393.75	297.884	663.938	1213.6	404.03	344.257	1280.26	113.016	495.491	1430.01	19.7632	512.354	1199.15	7.61763	530.115	1103.64	17.7962	676.87	970.42	77.8671	714.673	915.632	4.73483	696.575	894.502	37.7443	777.584	847.588
755	0	241.582	674.902	1600.5	356.292	672.041	1598.2	230.981	501.912	1597.72	349.542	489.128	1598.19	283.482	451.718	1462.8	285.796	374.857	1227.32	299.111	608.842	1395.04	300.083	674.215	1214.94	405.947	354.384	1280.74	115.169	505.452	1431.29	22.1069	522.023	1200.42	10.4232	538.897	1104.71	18.949	681.991	968.02	78.5191	718.621	911.482	5.17929	699.741	891.857	37.253	779.337	842.023
756	0	244.489	684.885	1601.8	359.481	681.953	1599.27	234.157	511.824	1599.17	352.381	499.024	1599.28	285.947	461.269	1463.91	287.957	385.397	1228.16	301.316	618.57	1396.43	302.122	684.347	1216.56	407.789	364.472	1281.31	117.338	515.04	1432.86	24.3658	531.416	1201.79	13.1032	547.322	1106.05	19.9012	686.772	965.907	78.9485	722.218	907.543	5.19918	702.486	889.346	36.1971	780.448	836.636
757	0	247.578	694.695	1603.03	362.341	691.843	1600.5	236.825	521.688	1600.49	355.277	508.859	1600.44	288.166	470.974	1465	290.022	395.636	1228.92	303.411	628.258	1397.95	304.033	694.323	1218.19	410.006	374.662	1282.09	119.576	524.583	1434.36	26.6903	540.658	1203.18	15.9357	555.565	1107.1	20.8187	691.382	963.848	79.2752	725.388	903.738	5.21062	704.87	887.134	34.7937	780.952	831.181
758	0	250.318	704.567	1604.56	364.974	701.512	1601.64	239.588	531.438	1602.08	357.986	518.638	1601.85	290.381	480.425	1466.22	292.255	405.701	1229.96	305.535	637.931	1399.69	306.248	704.326	1220.06	412.216	384.794	1283.12	121.834	533.956	1436.16	29.0879	549.726	1204.67	18.8927	563.768	1108.75	21.7262	695.554	962.224	79.1441	728.079	900.283	5.34763	706.707	885.592	33.3813	781.08	826.359
759	0	252.861	714.297	1606.17	367.322	711.416	1603.1	242.063	541.113	1603.59	360.539	528.296	1603.2	292.819	490.25	1467.59	294.593	415.81	1231.16	307.301	647.36	1401.2	307.913	714.028	1221.69	414.478	395.099	1284.15	123.946	543.312	1437.79	31.4489	558.66	1206.24	21.4385	571.511	1110.22	22.1791	699.663	960.825	78.8063	730.487	897.043	5.03389	708.723	883.91	31.8508	780.726	821.632
760	0	255.366	723.804	1607.64	370.006	720.797	1604.47	244.604	550.653	1604.93	362.984	537.845	1604.43	294.934	499.59	1468.71	297.035	425.77	1232.18	309.393	657.018	1402.84	309.791	723.815	1223.33	416.933	405.365	1285.06	126.133	552.497	1439.53	33.7736	567.276	1207.72	24.3361	579.103	1111.52	22.7997	703.205	959.541	78.7822	732.979	894.368	4.69855	710.227	882.575	30.0787	780.013	817.199
761	0	257.527	733.351	1609.27	372.244	730.357	1605.9	246.894	560.226	1606.32	365.2	547.383	1605.63	297.155	509.227	1470.02	299.563	435.525	1233.41	310.91	666.456	1404.34	310.958	733.305	1224.86	419.521	415.57	1286.17	127.958	561.517	1440.89	36.0498	575.481	1209.07	26.8991	586.309	1112.95	23.0889	706.672	958.69	77.7708	734.651	891.664	4.14751	711.594	881.548	28.2951	778.963	813.152
762	0	259.826	742.771	1610.8	374.497	739.815	1607.46	248.969	569.661	1607.72	367.295	556.85	1606.98	299.135	518.509	1471.34	301.988	445.353	1234.94	312.549	676.15	1405.72	312.2	743.077	1226.29	421.963	425.762	1287.32	130.062	570.476	1442.54	38.0909	583.375	1210.19	29.3598	593.314	1114.2	23.1068	709.922	957.676	77.4112	736.966	889.502	3.52049	712.914	880.904	26.4337	777.802	809.264
763	0	261.68	752.379	1612.23	376.329	749.216	1608.63	250.925	579.146	1609.24	369.254	566.271	1608.19	301.068	527.928	1472.68	304.47	454.748	1236.07	313.823	685.652	1406.99	313.183	752.827	1227.53	424.875	436.06	1288.54	131.78	579.207	1443.72	40.1436	590.874	1211.29	31.78	600.055	1115.45	23.1992	713.064	957.053	76.6102	738.598	887.24	2.58789	714.034	880.191	24.6554	776.384	805.727
764	0	263.534	761.634	1613.75	378.193	758.526	1610	252.756	588.517	1610.41	371.035	575.642	1609.38	303.355	537.36	1473.89	306.8	464.2	1237.19	315.036	695.131	1408.24	313.805	762.38	1228.82	427.345	446.011	1289.69	133.549	587.684	1445.03	42.0227	598.002	1212.27	34.0593	606.398	1116.41	23.1646	716.065	956.515	75.3784	740.007	885.377	2.02097	715.258	879.713	22.7461	774.935	802.697
765	0	265.046	771.091	1615.12	380.003	768.029	1611.4	254.275	597.923	1611.78	372.598	585.003	1610.52	305.227	546.696	1475.13	309.217	473.512	1238.2	316.298	704.703	1409.37	314.756	772.191	1230.14	430.196	456.132	1290.97	135.262	595.963	1446.04	43.8895	604.67	1213.16	36.1632	612.482	1117.4	23.0112	718.814	956.018	74.8394	742.358	884.38	1.29106	716.227	879.395	20.8406	773.29	799.851
766	0	266.586	780.438	1616.36	381.144	777.301	1612.45	255.849	607.301	1612.96	374.134	594.487	1611.68	307.103	556.026	1476.29	311.435	482.973	1239.31	317.212	714.089	1410.38	315.281	781.564	1230.96	432.726	466.149	1292.28	136.727	604.315	1447.25	45.7532	611.102	1213.97	38.0825	618.22	1118.51	22.867	721.409	955.536	73.986	744.013	882.786	1.00805	717.17	879.252	19.14	771.943	797.531
767	0	267.684	789.887	1617.58	382.79	786.96	1613.72	257.145	616.766	1614.02	375.51	603.94	1612.69	308.974	565.474	1477.25	313.679	492.179	1240.17	318.262	723.661	1411.31	315.86	790.807	1231.83	435.235	476.21	1293.42	138.351	612.501	1448.2	47.3949	617.109	1214.78	40.0405	623.63	1119.53	22.6972	724.055	955.144	73.1126	745.517	881.703	0.180699	718.212	879.046	17.7581	770.669	795.453
768	0	268.909	799.347	1618.65	383.781	796.466	1614.75	258.527	626.134	1615.18	376.676	613.43	1613.67	311.042	574.897	1478.3	315.776	501.557	1240.93	319.148	733.269	1412.23	316.323	800.015	1232.6	437.532	486.061	1294.61	139.824	620.683	1449.34	48.9705	622.784	1215.94	41.3063	628.574	1120.23	22.369	726.216	954.903	72.1234	746.631	880.36	0.041328	718.899	878.804	16.4561	769.539	793.926
769	0	269.599	808.817	1619.83	384.634	805.969	1615.96	259.57	635.633	1616.21	377.821	623.06	1614.85	312.313	584.096	1479.35	317.844	510.803	1242.02	319.775	742.647	1413.15	316.789	809.474	1233.45	439.86	496.296	1295.83	141.283	628.854	1450.22	50.563	628.378	1216.53	42.5068	633.431	1121.3	22.1438	728.417	954.71	71.7994	748.91	880.336	-0.521899	719.551	878.828	15.1594	768.525	792.642
770	0	270.415	818.265	1620.77	384.975	815.854	1616.91	260.569	645.148	1617.19	378.928	632.737	1615.95	314.159	593.635	1480.36	319.839	520.161	1242.91	320.65	752.233	1414.02	317.276	818.85	1234.28	442.107	506.111	1297.11	142.695	637.047	1451.12	51.9648	633.549	1217.41	43.7078	638.005	1122.37	21.8051	730.243	954.621	70.954	750.062	879.655	-0.745661	720.393	878.956	14.1609	767.955	791.801
771	0	271.059	827.948	1621.58	385.874	825.463	1617.76	261.716	654.608	1618.09	379.886	642.492	1616.93	315.986	603.211	1481.28	321.925	529.428	1243.83	321.542	761.877	1414.78	317.734	828.065	1235.02	444.208	516.099	1298.23	144.288	645.167	1451.74	52.7978	638.344	1218.27	44.7689	642.187	1123.17	21.7348	732.253	954.586	70.3591	751.387	879.189	-0.98489	721.076	878.989	13.313	767.398	791.072
772	0	271.524	837.539	1622.23	386.497	835.378	1618.67	262.522	664.377	1618.93	380.849	652.362	1617.97	317.665	612.966	1482.16	323.752	538.867	1244.53	322.226	771.328	1415.62	318.297	837.474	1235.75	446.484	526.188	1299.32	145.589	653.569	1452.53	54.4831	643.328	1219.11	45.6095	646.347	1124.11	21.4775	734.036	954.53	69.8904	753.828	879.366	-1.02178	721.832	879.066	12.6886	767.2	790.649
773	0	272.074	847.25	1622.67	387.129	845.299	1619.62	263.289	673.938	1619.68	381.634	662.273	1618.99	319.019	622.503	1482.92	325.682	548.23	1245.4	323.152	780.962	1416.31	318.741	846.858	1236.24	448.467	536.109	1300.37	146.868	661.964	1453.36	55.5941	648.083	1220.21	46.5778	650.119	1125.11	21.3027	735.77	954.574	70.054	754.991	879.026	-1.0923	722.526	879.257	12.3364	767.128	790.354
774	0	272.237	856.991	1623.13	387.569	855.343	1620.3	264.144	683.658	1620.2	382.447	672.329	1619.82	320.372	632.187	1483.6	327.481	557.685	1246.27	323.901	790.605	1416.86	319.104	856.061	1236.7	450.303	546.338	1301.19	148.177	670.549	1454.13	56.7181	652.816	1221.01	47.4063	653.865	1126.14	21.3512	737.384	954.671	69.6211	756.297	878.833	-0.99496	723.175	879.427	11.8962	767.479	790.29
775	0	272.487	866.832	1623.41	387.527	865.46	1620.53	264.796	693.578	1620.47	383.142	682.423	1620.45	322.03	642.171	1484.09	329.116	567.024	1246.66	324.384	800.155	1417.37	319.358	865.372	1237.03	452.165	556.493	1301.86	149.317	679.321	1454.76	57.5952	657.439	1222	48.4037	657.472	1127.06	21.121	739.034	954.786	69.4062	758.115	879.053	-0.636172	723.942	879.457	11.4836	768.07	790.308
776	0	272.74	876.762	1623.32	387.779	875.729	1620.93	265.37	703.478	1620.77	383.8	692.625	1621.03	323.12	651.926	1484.5	330.455	576.499	1247.29	325.197	810.056	1417.52	319.814	874.898	1237.1	453.932	566.62	1302.48	150.412	688.183	1455.07	59.3359	662.422	1223.01	49.2176	661.112	1127.94	21.2271	740.702	954.759	69.4026	760.101	879.119	-0.641583	724.443	879.617	11.367	768.93	790.382
777	0	272.868	886.829	1623.2	387.778	886.076	1621.03	266.03	713.438	1620.83	384.348	702.966	1621.52	324.541	662.07	1484.93	332.024	585.611	1248.04	325.741	819.838	1417.63	320.182	884.499	1237.09	455.319	576.794	1302.96	151.345	697.221	1455.55	60.3037	667.398	1223.84	50.0965	664.938	1128.74	21.3195	742.529	954.725	69.2311	761.838	879.086	-0.089677	725.283	879.669	11.3452	769.852	790.463
778	0	272.668	897.033	1623.02	388.019	896.514	1621.21	266.709	723.552	1620.83	384.953	713.427	1621.78	325.502	672.022	1485.03	333.052	595.065	1248.38	326.471	829.841	1417.63	320.406	893.895	1236.92	456.779	586.957	1303.35	152.376	706.463	1455.94	61.4452	672.581	1224.56	51.1581	668.74	1129.62	21.447	744.379	954.701	69.2559	764.001	879.206	0.526878	726.191	879.559	11.4557	770.958	790.516
779	0	272.843	906.994	1622.49	387.842	907.012	1621.07	266.989	733.785	1620.49	385.376	723.87	1621.95	326.482	682.12	1485.13	334.108	604.237	1248.53	326.904	839.789	1417.38	320.949	903.636	1236.62	457.921	596.874	1303.54	153.29	715.895	1455.92	62.469	677.833	1225.27	51.9662	672.805	1130.35	21.8534	746.387	954.471	69.0131	765.444	878.747	1.61669	727.302	879.397	11.7073	772.089	790.405
780	0	272.891	917.319	1621.82	387.822	917.675	1620.91	267.321	744.034	1620.23	385.794	734.447	1622.05	327.308	692.263	1485.12	334.883	613.752	1248.94	327.528	849.837	1416.94	321.156	913.134	1235.96	459.206	607.43	1303.72	154.253	725.263	1455.71	63.458	683.406	1225.9	52.8294	676.978	1131.09	22.0825	748.534	954.374	69.4995	768.459	878.797	2.34197	728.413	879.336	11.942	773.461	790.168
781	0	272.76	927.603	1621.1	387.839	928.27	1620.76	267.835	754.434	1619.69	386.139	745.159	1621.95	328.068	702.621	1485.02	335.611	623.211	1249.12	328.084	859.925	1416.49	321.415	922.657	1235.23	459.879	617.218	1303.76	155.183	735.199	1455.52	64.6888	689.363	1226.59	53.8242	681.428	1131.59	22.4224	750.904	954.088	69.7544	771.079	878.684	3.90394	729.768	879.066	12.0771	774.928	789.938
782	0	272.374	938.062	1620.35	387.335	939.13	1620.24	268.074	764.751	1618.95	386.487	755.959	1621.71	328.869	713.059	1484.7	336.43	632.617	1249.09	328.652	870.134	1415.9	321.968	932.492	1234.46	460.719	627.255	1303.69	155.722	745.081	1455.13	65.6912	695.556	1226.99	55.051	686.354	1132.17	23.0019	753.51	953.762	70.0101	773.989	878.14	4.64346	731.389	878.75	12.3978	776.566	789.743
783	0	271.947	948.539	1619.46	386.931	949.698	1619.81	268.291	775.132	1618.01	386.714	766.722	1621.33	329.483	723.551	1484.35	336.713	642.366	1248.99	329.043	880.435	1415.14	322.216	942.087	1233.47	461.155	637.234	1303.51	156.508	755.391	1454.91	66.5368	702.092	1227.52	55.9941	691.515	1132.6	23.2638	756.348	953.588	70.3007	777.032	877.919	5.66442	733.094	878.412	12.7928	778.21	789.508
784	0	271.55	959.007	1618.48	386.665	960.676	1619.5	268.334	785.699	1617.12	386.767	777.559	1620.92	330.031	734.198	1484	336.983	652.24	1248.97	329.603	890.893	1414.27	322.663	951.934	1232.51	461.27	647.233	1303.28	156.997	765.693	1454.41	67.5222	708.917	1228.07	56.9943	696.999	1133.09	23.8063	759.381	953.32	70.6355	780.266	877.752	6.62402	735.106	878.169	13.4855	779.974	789.021
785	0	271.106	969.573	1617.5	385.897	971.52	1618.9	268.325	796.233	1615.82	386.839	788.504	1620.24	330.562	745.09	1483.28	337.061	662.053	1248.73	330.099	901.447	1413.38	322.898	961.776	1231.11	461.431	657.272	1302.91	157.406	776.336	1453.75	68.4062	716.303	1228.51	58.1531	702.942	1133.37	24.3304	762.939	953.05	70.7463	783.3	877.121	7.9187	737.447	877.801	14.0588	781.971	788.525
786	0	270.468	980.076	1616.2	385.242	982.401	1618.21	268.289	806.74	1614.56	386.705	799.285	1619.4	330.712	755.842	1482.53	336.869	671.844	1248.29	330.399	912.042	1412.04	323.346	971.997	1229.8	461.465	667.283	1302.43	157.84	787.146	1453.05	69.2257	724.003	1228.75	59.1948	709.234	1133.87	24.9584	766.651	952.605	71.1074	786.808	876.46	8.98426	740.128	877.462	14.8501	784.205	787.867
787	0	269.771	990.676	1615.04	384.136	993.455	1617.58	268.031	817.279	1612.89	386.723	810.29	1618.41	330.851	766.752	1481.88	336.55	682.001	1247.86	330.861	922.825	1410.96	323.564	982.019	1228.29	461.4	677.394	1302.04	158.057	798.251	1452.57	70.3677	731.998	1228.98	60.1065	715.986	1134.39	25.6222	770.932	952.142	71.974	791.208	876.015	10.3847	743.163	877.221	15.8049	786.594	787.039
788	0	269.001	1001.36	1613.71	383.409	1004.42	1617.05	267.817	827.89	1611.36	386.509	821.26	1617.41	330.828	777.892	1481	335.808	692.086	1247.41	331.125	933.681	1409.58	323.99	992.434	1226.74	460.784	687.503	1301.38	158.106	809.446	1451.68	71.0504	740.352	1229.31	61.0089	723.295	1134.62	26.3882	775.599	951.645	72.2179	794.93	875.178	11.3381	746.615	877.146	16.9399	789.124	786.232
789	0	268.037	1011.97	1612.48	382.79	1015.3	1616.1	267.427	838.543	1609.66	386.149	832.325	1616.12	330.524	788.938	1480	335.008	702.437	1246.69	331.255	944.458	1408.39	324.133	1002.64	1225.28	460.055	697.665	1300.52	158.008	821.064	1451	71.4666	749.096	1229.41	61.8133	730.925	1134.77	27.0393	780.602	951.297	72.8625	799.567	874.683	12.6672	750.435	876.759	17.9178	791.956	785.469
790	0	267.004	1022.78	1611.19	381.841	1026.34	1615.56	267.001	849.273	1607.74	385.484	843.281	1614.78	330.046	800.11	1478.96	333.933	713.001	1245.8	331.345	955.547	1406.9	324.192	1013.28	1223.66	459.16	707.959	1299.63	157.76	832.855	1450.16	71.6494	758.218	1229.39	62.4385	739.042	1134.86	27.6403	786.059	950.982	73.1826	804.168	874.012	13.6598	754.735	876.495	19.1812	795.189	784.654
791	0	265.924	1033.43	1610.1	380.658	1037.29	1614.94	266.289	860.046	1605.96	385.024	854.254	1613.6	329.348	811.294	1477.85	332.499	723.398	1245.17	331.319	966.693	1405.62	324.413	1024.05	1222.2	457.973	718.132	1298.75	157.246	844.741	1449.37	71.7495	767.81	1229.29	62.7522	747.725	1135.1	28.2878	792.138	950.455	74.7724	809.372	873.983	14.5869	759.664	876.241	20.5582	798.657	783.402
792	0	264.707	1044.37	1608.73	379.481	1048.37	1614.18	265.522	870.865	1603.98	383.974	865.35	1612.17	328.638	822.733	1476.87	331.001	734.393	1244.26	331.116	977.864	1404.23	324.3	1034.73	1220.66	456.533	728.376	1297.77	156.602	856.84	1448.46	72.0537	777.767	1229.18	63.0174	756.898	1135.19	28.7416	798.667	949.877	75.2533	814.742	873.044	15.625	765.186	875.958	21.8838	802.617	782.427
793	0	263.366	1055.09	1607.49	377.83	1059.28	1613.21	264.723	881.706	1602.25	383.152	876.372	1610.94	327.586	834.081	1475.61	329.572	745.522	1243.39	330.815	989.091	1402.87	324.031	1045.72	1219.05	455.086	738.862	1296.66	155.777	869.009	1447.61	71.7268	788.215	1228.78	63.2109	766.49	1134.91	28.9826	805.689	949.212	74.9978	819.872	871.707	16.121	771.098	875.435	23.4222	806.852	781.198
794	0	261.994	1066.03	1606.1	376.629	1070.48	1612.55	263.645	892.557	1600.45	382.229	887.562	1609.78	326.633	845.563	1474.51	327.863	756.771	1242.43	330.352	1000.45	1401.44	324.135	1056.79	1217.68	453.604	749.315	1295.78	154.845	881.24	1446.34	71.2023	799.21	1228.26	62.8262	776.618	1134.51	29.2334	813.31	948.353	76.4623	826.864	871.118	16.7179	777.674	875.023	24.8916	811.655	779.825
795	0	260.489	1076.77	1604.71	374.973	1081.51	1611.61	262.5	903.451	1598.99	380.955	898.637	1608.77	325.123	856.909	1473.34	326.425	768.255	1241.42	329.959	1011.92	1400.16	323.745	1067.9	1216.21	451.832	759.914	1294.83	153.742	893.506	1445.14	70.3138	810.552	1227.67	62.163	787.151	1134.19	29.3879	821.435	947.509	76.9018	833.708	870.163	17.0993	784.875	874.465	26.5372	816.889	778.43
796	0	258.885	1087.66	1603.2	373.328	1092.64	1610.65	261.098	914.347	1597.43	379.523	909.697	1607.7	323.951	868.468	1472.16	324.852	779.484	1240.33	329.166	1023.21	1398.8	323.344	1078.98	1214.63	450.124	770.62	1293.78	152.569	905.879	1443.85	69.0732	822.126	1226.85	61.4044	798.15	1133.4	29.4597	830.291	946.346	77.4462	841.356	869.383	16.9116	792.754	873.695	28.2304	822.706	776.853
797	0	257.07	1098.66	1601.72	371.458	1103.75	1609.63	259.56	925.25	1595.79	377.708	920.853	1606.47	322.214	879.902	1470.96	323.309	791.007	1239.14	328.291	1034.68	1397.38	322.861	1090.19	1213.13	448.363	781.495	1292.8	151.346	918.178	1442.23	67.7457	834.078	1225.98	60.4215	809.344	1132.53	29.4127	839.64	945.092	77.3023	848.568	867.627	16.8892	801.341	872.779	29.4902	829.055	775.207
798	0	255.08	1109.65	1600.38	369.58	1114.73	1608.87	257.859	936.317	1594.2	375.867	931.898	1605.26	320.423	891.526	1469.71	321.341	802.511	1238.28	327.42	1046.28	1396.04	322.422	1101.51	1211.59	446.363	792.314	1291.96	149.938	930.489	1440.88	66.0954	846.21	1224.75	59.1558	820.995	1131.44	29.0518	849.723	943.681	77.8135	857.897	866.957	16.1461	810.557	871.88	30.9418	836.113	773.477
799	0	253.176	1120.61	1599.1	367.4	1125.87	1607.94	255.787	947.397	1592.46	374.021	943.027	1603.97	318.456	903.108	1468.54	319.293	813.884	1237.23	326.306	1057.95	1394.68	321.767	1112.94	1210.15	444.403	803.257	1291.13	148.227	943.015	1439.55	64.2037	858.519	1223.48	57.6603	832.954	1130.38	28.5011	860.285	942.45	77.5099	866.742	865.518	15.6215	820.751	870.721	32.3982	843.437	772.142
800	0	250.942	1131.77	1597.76	364.88	1136.88	1606.94	253.606	958.537	1590.57	371.57	954.092	1602.63	316.336	914.651	1467.17	317.647	825.239	1236.05	324.869	1069.43	1393.27	321.01	1124.24	1208.73	442.34	814.197	1290.25	146.28	955.266	1437.97	62.3824	870.884	1222.11	55.9823	844.84	1129.06	27.7538	871.327	941.021	77.1369	876.725	863.933	14.6345	831.419	869.342	33.643	851.716	770.054
801	0	248.399	1142.84	1596.5	362.629	1148.16	1606.26	251.254	969.775	1588.72	369.199	965.239	1601.09	314.057	926.212	1466	315.504	836.647	1234.92	323.376	1081.04	1392.16	320.082	1135.67	1207.56	440.111	825.208	1289.36	144.063	967.54	1436.66	60.3588	883.283	1220.46	54.2687	856.908	1127.49	26.894	882.989	939.328	76.7111	887.444	862.539	13.4339	842.76	867.766	34.2374	860.817	768.344
802	0	245.7	1154.18	1595.29	359.783	1159.09	1605.24	248.567	981.003	1587.04	366.561	976.41	1599.75	311.325	937.659	1464.69	313.106	848.138	1233.82	321.632	1092.63	1390.9	319.078	1147.23	1206.32	437.62	836.258	1288.67	141.797	979.862	1434.89	58.5444	895.714	1218.84	52.0118	869.276	1125.84	25.7841	894.952	937.549	74.7995	896.631	860.056	12.1213	854.695	866.112	34.6918	870.494	766.534
803	0	243.084	1165.4	1594.22	357.361	1170.31	1604.36	245.634	992.264	1585.4	363.681	987.549	1598.26	308.467	949.182	1463.32	310.703	859.774	1232.39	319.75	1104.16	1389.84	318.217	1158.77	1205.38	435.066	847.243	1287.85	139.284	992.262	1433.04	55.9496	908.19	1217.05	50.0162	881.776	1124.09	24.448	907.492	935.611	74.7231	910.043	859.032	10.6721	867.181	864.116	34.6773	881.197	764.536
804	0	240.348	1176.73	1593.16	354.315	1181.36	1603.37	242.563	1003.8	1583.98	360.567	998.71	1597.11	305.602	960.491	1462.07	308.142	871.489	1230.85	317.772	1115.65	1388.81	317.167	1170.38	1204.43	432.306	858.233	1286.89	136.768	1004.53	1431.26	53.5497	920.835	1214.93	47.4139	894.459	1121.92	22.908	920.353	933.351	73.6827	922.6	857.066	9.11099	880.247	861.821	34.3132	892.409	762.459
805	0	237.553	1188.22	1592.28	351.558	1192.75	1602.84	239.326	1015.22	1582.95	357.231	1009.94	1596.29	302.471	971.82	1461.06	305.146	883.399	1229.57	315.938	1127.28	1388.18	316.236	1182.16	1203.98	429.052	869.188	1286.09	134.022	1016.63	1429.37	51.0319	933.523	1212.93	45.1667	907.452	1119.83	21.5198	933.64	930.9	72.0911	934.277	854.621	7.30778	893.652	859.519	33.7092	904.497	760.171
806	0	234.592	1199.64	1591.49	348.26	1203.95	1602.28	235.798	1026.77	1582.33	353.873	1021.24	1595.86	299.482	983.147	1460.26	302.424	895.347	1228.32	313.729	1138.72	1387.68	315.267	1194.11	1203.56	425.983	880.37	1285.49	131.359	1028.81	1427.62	48.37	946.52	1210.83	42.3531	920.893	1117.7	19.7467	947.414	928.721	70.6372	947.056	852.386	5.35623	907.503	857.277	32.8074	917.45	757.992
807	0	231.493	1211.13	1591.05	345.252	1215.38	1601.97	232.471	1038.32	1581.9	350.317	1032.56	1595.64	296.446	994.578	1459.73	299.512	907.533	1227.36	311.717	1150.19	1387.6	314.245	1206.28	1203.65	422.97	891.572	1284.93	128.717	1040.79	1426.2	45.3387	959.618	1208.82	40.0596	934.805	1115.48	18.0435	961.468	926.433	69.2825	960.325	850.199	3.52398	921.89	854.869	31.2424	931.4	755.748
808	0	228.247	1222.82	1590.57	341.788	1226.56	1601.73	228.929	1049.8	1581.66	346.699	1043.83	1595.72	293.532	1006.02	1459.36	296.904	919.447	1226.78	309.405	1161.66	1387.65	313.154	1218.4	1204.12	419.968	902.853	1284.6	125.954	1052.53	1424.97	42.9895	973.31	1206.72	37.3853	948.811	1113.04	15.8114	975.946	924.443	67.2784	974.295	848.155	1.48132	936.725	852.664	29.7036	946.141	753.449
809	0	224.782	1234.13	1590.46	338.536	1237.99	1602.16	225.364	1061.25	1581.83	343.073	1055.05	1596.36	290.543	1017.29	1459.31	294.37	931.294	1226.74	307.072	1172.93	1388.12	311.809	1230.44	1204.78	417.132	914.222	1284.8	123.361	1064.3	1424.07	40.5682	987.177	1204.99	35.0063	963.434	1111.17	13.9646	991.062	922.768	65.5741	989.21	846.742	-1.01538	951.864	850.921	27.3427	961.66	752.03
810	0	221.428	1245.48	1590.49	334.926	1249.12	1602.45	221.717	1072.51	1582.28	339.494	1066.3	1597.29	287.82	1028.58	1459.76	292.175	942.922	1226.99	304.951	1184.32	1388.87	310.296	1242.41	1205.58	414.684	925.667	1285.37	120.791	1075.63	1423.51	37.9993	1001.24	1203.37	32.5022	978.145	1109.59	11.6805	1006.46	921.486	62.6798	1004.61	844.89	-3.30347	967.787	849.27	24.4968	978.369	750.545
811	0	218.066	1256.68	1590.68	331.626	1260.32	1603.29	218.364	1083.76	1582.95	335.977	1077.43	1598.73	285.227	1039.71	1460.36	290.357	954.268	1227.38	302.588	1195.31	1389.82	308.531	1254.13	1206.73	412.604	937.071	1286.23	118.211	1086.95	1423.49	35.8322	1015.42	1201.92	30.3122	993.029	1107.99	9.41851	1022.42	920.445	61.0573	1021.04	844.119	-5.92182	984.207	847.963	21.7043	996.144	749.173
812	0	214.709	1267.71	1591	328.177	1271.39	1604.08	215.053	1094.82	1583.88	332.557	1088.5	1600.08	282.704	1050.62	1461.38	288.901	965.474	1228.08	300.442	1206.42	1391.07	306.547	1265.52	1208.12	410.853	948.439	1287.45	115.633	1097.86	1423.73	33.5094	1029.58	1201.02	28.3565	1007.78	1106.83	7.19955	1038.9	919.722	58.5657	1037.52	843.36	-8.48149	1001.21	847.161	18.6704	1014.47	748.091
813	0	211.262	1278.53	1591.43	324.48	1282.33	1604.78	211.626	1105.65	1585.03	329.206	1099.43	1601.73	280.328	1061.35	1462.51	287.395	976.542	1229.15	297.953	1217.07	1392.26	304.662	1276.81	1209.6	409.384	959.738	1288.95	113.496	1108.82	1423.87	31.4854	1043.7	1200.24	26.4911	1022.5	1106.26	4.76319	1055.64	919.478	55.6767	1055.01	842.837	-11.4632	1018.84	846.744	15.2012	1033.77	747.85
814	0	208.095	1289.28	1591.9	321.179	1293.34	1605.7	208.555	1116.28	1586.31	326.028	1110.21	1603.42	278.066	1071.8	1463.73	285.922	987.473	1230.35	295.716	1227.77	1393.72	302.705	1287.74	1211.33	408.092	970.896	1290.54	111.225	1119.34	1424.58	29.4681	1057.66	1199.86	24.3717	1037.05	1105.86	2.40886	1072.8	919.533	52.9112	1073.3	842.704	-13.939	1037.19	846.448	11.7286	1054.11	747.664
815	0	205.02	1299.64	1592.54	317.934	1303.94	1606.59	205.672	1126.81	1587.57	322.772	1120.74	1605.18	275.903	1082.01	1464.75	284.294	998.124	1231.52	293.689	1238.3	1395.44	300.96	1298.59	1213.15	406.819	981.8	1292.02	109.335	1129.89	1425.31	27.6818	1071.34	1199.49	22.4891	1051.52	1105.46	-0.008498	1090.25	919.823	50.4732	1092.11	842.848	-16.4847	1055.98	846.304	8.06957	1075.03	748.02
816	0	201.94	1309.79	1593.28	314.839	1314.29	1607.78	202.923	1137.03	1588.91	320.124	1131.4	1606.82	273.921	1092.1	1465.9	282.769	1008.66	1232.73	291.84	1248.57	1397.18	299.52	1309.02	1214.94	405.458	992.513	1293.56	107.48	1140.24	1426.14	25.7382	1084.67	1199.6	20.4539	1065.59	1105.41	-2.40876	1108.12	920.382	47.6879	1111.42	843.617	-19.2786	1075.17	846.723	4.40814	1096.7	748.553
817	0	199.057	1320	1594.05	311.812	1324.78	1608.93	200.356	1147.03	1590.22	317.671	1141.69	1608.68	272.086	1102.08	1467.19	281.224	1019.12	1233.98	290.16	1258.68	1398.71	298.431	1319.49	1216.58	403.835	1002.94	1295.08	105.675	1150.42	1427.03	23.6392	1097.76	1199.75	18.3553	1079.9	1105.48	-4.83006	1126.14	921.242	44.7608	1131.81	844.065	-21.9305	1094.96	846.875	0.964715	1119.13	749.409
818	0	196.454	1329.73	1594.87	309.183	1335.02	1610.2	198.195	1156.96	1591.58	315.29	1151.94	1610.36	270.301	1112.08	1468.4	279.617	1029.48	1235.23	288.79	1268.66	1400.27	297.748	1329.6	1218.36	402.17	1013.14	1296.43	104.187	1160.77	1428	21.9893	1110.6	1200.2	16.0095	1093.95	1105.64	-7.31696	1144.33	922.139	42.6459	1151.16	845.045	-24.6043	1114.88	847.293	-2.48724	1142.15	750.845
819	0	193.854	1339.58	1595.96	306.514	1344.85	1611.48	196.211	1166.64	1592.93	313.194	1161.89	1612.17	268.682	1121.93	1469.8	277.73	1039.68	1236.53	287.543	1278.48	1401.9	297.283	1339.68	1220.06	400.196	1022.97	1297.81	102.652	1170.96	1429.07	20.0293	1123.28	1200.63	13.9953	1108.09	1105.7	-9.6566	1162.73	923.317	40.4796	1171.35	846.678	-26.7971	1135.17	847.976	-5.78193	1165.53	752.729
820	0	191.79	1348.94	1596.93	304.27	1354.88	1613.05	194.342	1176.22	1594.46	311.445	1171.92	1614.18	267.032	1131.65	1471.49	275.62	1049.74	1238.12	286.61	1288.18	1403.52	296.839	1349.35	1221.76	398.301	1032.63	1299.29	101.412	1181.31	1430.29	18.1931	1136.01	1201.43	11.5491	1122.28	1106.27	-11.9352	1181.29	924.847	37.9366	1191.26	848.161	-29.206	1155.72	848.945	-8.95707	1189.38	754.832
821	0	189.909	1358.6	1597.99	302.527	1364.76	1614.39	192.831	1185.79	1595.94	309.965	1181.6	1616.14	265.658	1141.25	1473.11	273.566	1059.7	1239.91	285.853	1297.74	1405.26	296.604	1358.99	1223.26	396.301	1042.09	1300.71	100.085	1191.46	1431.67	16.5259	1148.59	1202.33	9.22693	1136.83	1106.83	-14.2747	1199.86	926.562	35.8843	1211.98	850.358	-31.6447	1176.47	850.216	-12.069	1213.52	757.781
822	0	188.563	1368.09	1599.11	300.847	1374.37	1615.69	191.672	1195.43	1597.6	308.459	1191.36	1617.93	264.515	1150.92	1474.61	271.757	1069.46	1241.59	284.983	1307.16	1406.81	296.274	1368.51	1224.92	394.46	1051.3	1302.08	99.081	1201.77	1433.19	14.6743	1161.39	1203.41	6.96182	1151.18	1107.59	-16.3707	1218.56	928.654	33.9095	1232.31	852.83	-33.8923	1197.01	851.703	-14.672	1237.89	761.095
823	0	187.336	1377.52	1600.25	299.859	1384	1617.33	190.46	1204.83	1599.52	307.315	1200.85	1619.98	263.131	1160.33	1476.3	270.007	1078.96	1243.12	284.256	1316.58	1408.43	295.978	1378.12	1226.86	392.677	1060.36	1303.62	97.9828	1211.82	1434.91	13.2007	1174.29	1204.7	4.89668	1165.78	1108.77	-18.2925	1237.24	931.044	31.9626	1252.93	855.616	-35.5538	1217.7	853.682	-17.3962	1262.31	764.964
824	0	186.588	1387.19	1601.67	298.852	1393.56	1618.55	189.511	1214.42	1601.63	306.392	1210.48	1622.08	261.916	1169.57	1478.11	268.572	1088.42	1244.66	283.441	1325.74	1410.13	295.353	1387.5	1228.65	391.021	1069.38	1305.17	96.9263	1221.84	1436.81	11.4632	1187.25	1206.08	2.62802	1180.44	1110.24	-20.1777	1255.87	933.711	30.0716	1273.33	858.886	-37.5982	1238.11	856.08	-19.7782	1286.68	769.728
825	0	186.094	1396.59	1603.1	298.363	1402.94	1619.76	188.626	1223.89	1603.72	305.616	1219.8	1624.09	260.737	1178.71	1479.87	267.293	1097.9	1246.09	282.852	1334.88	1411.88	294.526	1396.77	1230.21	389.625	1078.3	1306.55	95.9065	1231.71	1438.78	10.1054	1200.53	1207.93	0.595261	1195.09	1111.89	-21.8044	1274.67	936.917	28.0251	1293.68	862.385	-39.3661	1258.67	858.921	-22.2195	1310.83	774.901
826	0	185.94	1406.27	1604.52	298.259	1412.31	1620.93	187.963	1233.45	1605.94	304.993	1228.97	1626.35	259.692	1187.78	1481.61	266.106	1107.29	1247.42	281.985	1343.98	1413.54	293.301	1405.7	1231.83	388.155	1087.15	1307.83	94.9785	1241.47	1441.07	8.10313	1213.42	1209.74	-0.936165	1209.7	1113.58	-23.4486	1293.14	940.372	27.0363	1315.26	866.935	-41.0108	1279.01	861.972	-24.4495	1334.94	780.358
827	0	185.888	1415.77	1606.14	298.321	1421.44	1622.18	187.291	1243	1608.48	304.254	1238.21	1628.28	258.622	1196.73	1483.29	264.758	1116.43	1248.86	281.254	1352.98	1415.49	292.067	1414.59	1233.55	386.582	1095.94	1309.23	94.1212	1251.16	1443.31	6.73285	1226.71	1211.71	-3.03907	1224.06	1115.74	-25.0325	1311.7	944.171	25.4162	1335.77	871.714	-42.613	1299.55	865.527	-26.6794	1358.88	786.61
828	0	186.151	1425.41	1607.79	298.688	1430.62	1623.35	186.752	1252.65	1611.13	303.928	1247.42	1630.54	257.57	1205.69	1485.04	263.597	1125.47	1250.38	280.503	1361.93	1417.52	290.962	1423.7	1235.7	385.115	1104.66	1310.62	93.0679	1260.65	1445.83	5.053	1239.75	1214	-4.75269	1238.56	1117.89	-26.5706	1330.18	948.314	23.0689	1356.12	876.849	-43.8121	1319.87	869.222	-28.6438	1382.28	792.984
829	0	186.422	1435.03	1609.42	299.381	1439.79	1624.4	186.464	1262.38	1613.7	303.529	1256.71	1632.48	256.667	1214.59	1486.73	262.485	1134.67	1251.91	279.628	1370.79	1419.18	289.813	1432.63	1237.6	383.743	1113.42	1311.9	92.0203	1270.1	1448.08	3.24951	1252.49	1216.14	-6.28018	1252.7	1119.98	-27.9144	1348.81	952.66	21.5308	1376.55	881.545	-44.737	1340.41	873.277	-30.3886	1405.53	799.587
830	0	186.924	1444.59	1610.94	299.91	1448.93	1625.16	185.974	1271.92	1616.21	303.233	1265.77	1634.39	255.523	1223.38	1488.19	261.246	1143.81	1253.17	278.996	1379.73	1421.02	288.844	1441.84	1239.51	382.287	1122.11	1313.04	91.1488	1279.52	1450.29	2.02006	1265.53	1218.22	-8.00202	1266.85	1121.99	-28.8842	1367.09	957.095	20.4665	1397.22	887.151	-45.6333	1360.66	877.325	-31.8066	1428.45	806.171
831	0	187.444	1454.21	1612.41	300.696	1458.08	1625.96	185.619	1281.65	1618.68	302.993	1274.85	1636.2	254.431	1232.16	1489.69	259.936	1152.94	1254.3	278.326	1388.56	1422.66	288.001	1451	1241.3	380.702	1130.75	1314.13	90.2125	1288.82	1452.37	0.649093	1278.19	1220.17	-9.50752	1280.79	1124.05	-29.989	1385.37	961.522	19.446	1417.69	892.707	-47.0519	1380.96	881.719	-33.0729	1451.1	812.879
832	0	188.054	1463.92	1613.8	301.416	1467.24	1626.65	185.39	1291.32	1620.99	302.77	1284.14	1637.74	253.363	1241.07	1490.96	258.822	1162.25	1255.45	277.563	1397.35	1424.12	287.18	1459.91	1242.8	379.263	1139.44	1315.2	89.3748	1298.28	1454.24	-0.531711	1290.67	1222.13	-11.2334	1294.64	1125.99	-30.8403	1403.69	965.809	18.5486	1437.93	898.402	-46.5513	1401.67	886.221	-33.9482	1473.47	819.512
833	0	188.669	1473.58	1615.01	302.024	1476.37	1627	185.237	1301.08	1623	302.66	1293.26	1638.85	252.304	1249.97	1492.11	257.54	1171.7	1256.42	276.783	1406.14	1425.24	286.273	1468.82	1244.08	377.918	1148.2	1316.09	88.6499	1307.7	1455.74	-1.95515	1302.9	1223.65	-12.4475	1308.41	1127.63	-31.5106	1421.69	970.277	18.2524	1458.21	904.285	-46.8812	1421.87	890.299	-34.2902	1495.53	826.165
834	0	189.21	1483.32	1616.22	302.773	1485.86	1627.44	185.014	1310.68	1624.78	302.455	1302.47	1639.83	251.567	1258.95	1493.21	256.233	1180.97	1257.4	276.129	1415.08	1426.15	285.457	1477.67	1244.95	376.696	1156.94	1316.89	87.839	1316.91	1457.07	-3.28795	1315.01	1225.13	-14.1919	1322.06	1129.3	-32.0785	1439.66	974.569	18.0076	1477.94	909.818	-47.2972	1441.83	894.741	-34.3498	1517.38	832.611
835	0	189.838	1493.01	1617.28	303.235	1495.08	1627.71	184.982	1320.49	1626.38	302.628	1311.87	1640.77	250.73	1267.96	1494.13	255.003	1190.3	1258.34	275.511	1424.08	1427	284.899	1486.73	1245.78	375.377	1165.73	1317.64	87.0066	1326.23	1458.18	-4.43575	1327.11	1226.55	-15.6481	1335.72	1130.81	-32.5034	1457.5	978.706	17.8634	1497.2	915.477	-47.0024	1462.1	899.4	-33.9789	1539.04	839.102
836	0	190.153	1502.63	1618.26	303.72	1504.34	1627.97	184.764	1330.19	1627.69	302.49	1321.27	1641.36	249.961	1277.07	1494.84	253.978	1199.81	1259.06	274.696	1433.02	1427.56	284.135	1495.48	1246.36	374.167	1174.54	1318.24	86.5244	1335.54	1459.13	-5.69791	1338.82	1227.55	-17.1693	1349.21	1132.11	-32.7848	1475.01	983.12	17.8745	1516.11	921.078	-47.0478	1481.73	903.825	-33.2703	1560.25	845.727
837	0	190.466	1512.35	1618.9	304.301	1513.95	1628.07	184.777	1339.92	1628.7	302.503	1330.68	1641.71	249.145	1286.15	1495.37	253.117	1209.01	1259.49	274.222	1442.21	1428.12	283.683	1504.55	1246.98	373.152	1183.38	1318.61	85.8218	1344.67	1460	-7.32004	1350.38	1228.78	-18.4611	1362.86	1133.24	-33.0889	1492.34	987.208	18.2193	1534.78	926.778	-47.3113	1501.15	908.063	-32.365	1581.04	852.195
838	0	190.381	1522.26	1619.45	304.665	1523.64	1628.02	184.656	1349.66	1629.6	302.622	1340.27	1642.13	248.629	1295.43	1496	252.689	1218.04	1260.04	273.68	1451.31	1428.46	283.176	1513.63	1247.29	372.241	1192.29	1319.06	85.3257	1353.93	1460.53	-8.17591	1362.18	1229.77	-19.8784	1376.24	1134.21	-33.1895	1509.48	991.26	18.8906	1553.06	932.467	-46.4798	1520.51	912.217	-31.0883	1601.4	858.593
839	0	190.74	1531.81	1619.87	304.722	1532.87	1627.7	184.73	1359.44	1630.22	302.587	1349.61	1642.34	248.232	1304.74	1496.22	252.422	1227.15	1260.45	273.297	1460.36	1428.72	282.464	1522.3	1247.02	371.589	1201.33	1319.34	84.9524	1363.31	1461.01	-9.30533	1373.78	1230.4	-21.2969	1389.64	1135.09	-32.9939	1526.49	995.14	19.6126	1570.82	937.727	-46.0924	1539.4	916.37	-29.5989	1621.4	864.946
840	0	190.841	1541.63	1619.93	305.252	1542.79	1627.32	184.806	1369.24	1630.52	302.736	1359.39	1641.98	247.915	1314.18	1496.18	252.18	1235.97	1260.64	272.952	1469.64	1428.53	282.084	1531.33	1246.92	371.248	1210.63	1319.57	84.5802	1372.38	1460.9	-10.0466	1385.53	1230.93	-22.4258	1403.12	1135.96	-32.6632	1543.13	998.795	20.8853	1588.84	942.968	-45.3843	1558.08	920.288	-27.9042	1641.17	870.848
841	0	191.133	1551.53	1619.71	305.533	1552.49	1626.78	184.974	1379.2	1630.56	302.82	1369.03	1641.55	247.792	1323.66	1496.12	252.281	1245.28	1260.62	272.4	1478.96	1428.1	281.676	1540.42	1246.44	370.998	1219.87	1319.73	84.3081	1381.64	1460.63	-10.737	1397.1	1230.76	-23.5645	1416.36	1136.51	-32.1622	1559.51	1002.34	21.9407	1605.56	947.446	-45.0692	1576.38	924.276	-26.0027	1660.46	876.651
842	0	191.455	1561.34	1619.4	305.61	1562.17	1625.81	184.997	1389.01	1630.48	302.884	1378.87	1641.14	247.525	1333.15	1496	252.334	1254.31	1260.68	272.13	1488.39	1427.49	281.086	1549.31	1245.48	370.866	1229.46	1319.8	84.3398	1390.91	1460.16	-11.5861	1408.66	1230.97	-24.5668	1429.56	1136.95	-31.3053	1575.71	1005.51	23.2889	1622.19	951.82	-43.8243	1594.47	928.266	-23.8865	1679.17	882.214
843	0	191.815	1571.35	1618.87	305.745	1572.1	1624.63	185.345	1399.07	1630.13	303.153	1388.7	1640.12	247.653	1342.81	1495.59	252.722	1263.41	1260.59	271.866	1497.94	1426.69	280.925	1558.47	1244.59	371.222	1238.77	1319.8	84.1894	1400.11	1459.56	-11.8496	1420.3	1230.73	-25.364	1442.59	1137.33	-30.3628	1591.53	1008.74	24.7312	1638.29	955.674	-42.7886	1612.06	931.811	-21.8504	1697.4	887.411
844	0	192.012	1581.45	1618.2	306.225	1582.24	1623.67	185.254	1408.96	1629.49	303.172	1398.76	1639.35	247.755	1352.52	1495.13	253.119	1272.53	1260.24	271.499	1507.49	1425.61	280.548	1567.37	1243.22	371.536	1248.31	1319.66	84.33	1409.47	1458.86	-12.0592	1432.01	1230.61	-26.1174	1455.47	1137.6	-29.2357	1607.02	1011.47	26.3638	1653.71	959.058	-42.2027	1629.15	934.927	-19.472	1715.07	892.615
845	0	192.307	1591.49	1617.29	306.629	1592.17	1622.65	185.498	1419	1628.8	303.581	1408.93	1638.09	248.007	1362.32	1494.4	253.794	1281.68	1259.8	271.328	1517.14	1424.65	280.257	1576.58	1242.33	372.09	1257.98	1319.38	84.1876	1418.68	1458	-12.3435	1443.5	1230.36	-26.4828	1468.35	1137.47	-28.0854	1622.33	1014.39	27.7858	1669.1	962.882	-41.4987	1645.2	938.399	-17.3696	1732.19	897.464
846	0	192.392	1601.48	1616.32	306.768	1601.68	1621.66	185.703	1429.22	1627.98	303.703	1418.71	1636.96	248.202	1372.18	1493.69	254.299	1290.92	1259.38	270.998	1526.83	1423.4	279.851	1585.73	1241.18	372.813	1267.78	1319.16	84.163	1428.06	1457.24	-12.314	1455.06	1230.1	-26.7198	1481.1	1137.37	-27.0739	1636.9	1016.77	29.7895	1684.2	966.293	-40.2333	1661.56	941.08	-15.2206	1748.8	901.859
847	0	192.575	1611.79	1615.29	307.093	1611.71	1620.15	185.974	1439.31	1626.97	303.926	1428.82	1635.69	248.581	1382.2	1492.87	255.085	1300.26	1258.67	270.915	1536.72	1422.1	279.494	1594.98	1239.49	373.548	1277.52	1318.65	84.3501	1437.52	1456.13	-12.2136	1466.46	1229.42	-26.964	1493.38	1137.06	-25.4745	1651.37	1018.85	31.4513	1698.57	968.98	-38.4654	1677.09	943.843	-12.622	1765.01	906.164
848	0	193.02	1621.72	1614.03	307.397	1621.87	1618.41	186.174	1449.55	1625.83	304.155	1438.93	1634.06	248.792	1392.14	1491.84	255.924	1309.59	1257.88	270.615	1546.45	1420.47	278.771	1604.06	1237.45	374.311	1287.51	1318.04	84.4697	1446.96	1454.7	-11.9871	1477.69	1228.53	-27.0634	1505.68	1136.41	-23.9528	1665.34	1020.56	33.441	1712.71	971.49	-37.0498	1692.37	945.792	-10.4128	1780.43	909.559
849	0	193.38	1632.17	1612.49	307.581	1631.92	1616.48	186.405	1459.76	1624.61	304.569	1449.15	1632.49	249.17	1402.24	1490.7	256.838	1319.12	1257.04	270.475	1556.4	1418.57	279.046	1613.68	1235.84	375.165	1297.38	1317.51	84.7452	1456.63	1453.13	-11.5139	1488.97	1227.42	-26.8343	1517.68	1135.69	-22.6553	1678.95	1021.56	35.5205	1726.51	973.407	-35.2602	1707.21	947.758	-7.90923	1795.49	912.654
850	0	193.949	1642.25	1610.85	308.331	1642.25	1614.85	186.639	1469.93	1623.27	304.627	1459.53	1630.74	249.691	1412.33	1489.51	257.65	1328.61	1256.11	270.459	1566.35	1416.88	278.916	1623.08	1233.91	376	1307.4	1316.68	85.2181	1466.31	1451.43	-11.2575	1499.92	1226.21	-26.5643	1529.47	1134.78	-20.8437	1692.21	1022.64	37.4606	1739.88	974.84	-33.4588	1721.65	949.017	-5.37365	1810.03	915.3
851	0	194.562	1652.57	1609.38	308.721	1652.35	1612.73	187.122	1480.23	1621.66	305.122	1469.39	1628.97	250.262	1422.57	1488.19	258.962	1338.18	1254.96	270.663	1576.25	1415.04	278.859	1632.57	1231.78	377.123	1317.6	1315.8	85.5488	1475.91	1449.66	-10.4304	1510.82	1224.4	-26.1256	1541.08	1133.53	-19.1202	1705.04	1023.26	39.479	1752.92	976.12	-31.5936	1735.53	950.09	-2.69135	1824.03	917.433
852	0	195.127	1662.78	1607.59	309.349	1662.47	1610.74	187.543	1490.61	1620.1	305.626	1479.64	1627.07	250.833	1432.58	1486.7	260.061	1347.73	1253.74	270.714	1586.21	1413.13	278.972	1642.38	1229.75	378.368	1327.74	1314.85	86.0312	1485.55	1447.88	-9.80802	1521.58	1223	-25.743	1552.28	1132.17	-17.4953	1717.46	1023.58	41.3926	1765.32	976.663	-29.6543	1748.84	950.698	-0.171065	1837.56	919.189
853	0	195.822	1673.21	1605.87	310.214	1672.87	1609.03	188.019	1500.83	1618.65	305.966	1489.83	1625.57	251.519	1442.73	1485.28	261.097	1357.48	1252.54	270.808	1596.23	1411.13	279.225	1652.01	1227.92	379.509	1338.08	1313.74	86.6019	1495.16	1445.97	-8.93098	1532.07	1221.44	-25.0339	1563.55	1130.82	-15.8417	1729.61	1023.59	43.4715	1777.43	977.133	-27.9239	1761.65	951.151	2.29826	1850.55	920.306
854	0	196.665	1683.57	1604.38	311.072	1682.85	1607.2	188.728	1511.27	1617.11	306.871	1499.98	1623.72	252.354	1452.82	1483.83	262.424	1367.2	1251.22	271.364	1606.33	1409.6	279.793	1661.88	1226.43	380.843	1348.34	1312.56	87.2405	1504.8	1444.14	-8.39574	1542.35	1219.85	-24.2232	1574.46	1129.17	-14.0022	1741.28	1023.21	45.8083	1789.21	977.476	-25.4821	1773.89	951.319	4.89012	1862.91	921.047
855	0	197.629	1693.81	1602.64	312.023	1692.97	1605.36	189.423	1521.69	1615.64	307.879	1510.34	1622.13	253.247	1462.94	1482.29	263.803	1377.01	1249.79	271.873	1616.44	1408.05	280.204	1671.94	1224.72	382.185	1358.64	1311.32	87.944	1514.27	1442.47	-7.16377	1552.64	1218.07	-23.2573	1585.11	1127.52	-12.2581	1752.53	1022.55	48.3173	1800.77	977.216	-23.8421	1785.85	950.728	7.48735	1874.84	921.306
856	0	198.886	1704.23	1601.08	313.318	1703.33	1603.72	190.337	1532.04	1614.31	308.891	1520.53	1620.79	254.186	1473.15	1480.87	264.911	1386.88	1248.48	272.427	1626.49	1406.2	280.834	1682.2	1223.05	383.411	1369.05	1309.98	88.8033	1524	1440.62	-6.06274	1562.62	1216.12	-22.1391	1595.63	1125.73	-10.4355	1763.5	1021.74	50.4139	1811.62	976.573	-21.836	1797.16	949.841	9.99084	1886	921.016
857	0	200.18	1714.63	1599.73	314.684	1713.48	1602.18	191.382	1542.48	1612.95	310.011	1530.77	1619.3	255.249	1483.43	1479.31	266.166	1396.91	1247.1	273.433	1636.68	1404.73	281.839	1692.47	1221.49	384.755	1379.47	1308.69	89.6848	1533.76	1438.82	-5.06392	1572.29	1214.41	-20.999	1605.74	1124.02	-8.54756	1774	1020.27	52.6113	1822.03	975.383	-19.8605	1807.94	948.77	12.6723	1896.83	920.169
858	0	201.643	1724.88	1598.36	316.059	1723.65	1600.55	192.601	1552.92	1611.45	311.091	1540.93	1617.63	256.374	1493.75	1477.92	267.384	1406.96	1245.72	274.326	1647	1403.11	282.754	1702.91	1219.86	385.728	1389.82	1307.31	90.6559	1543.83	1437.18	-3.75984	1582.04	1212.57	-19.6651	1615.59	1122.1	-6.70383	1784.15	1018.65	54.1044	1831.71	973.579	-17.7577	1818.34	947.252	15.0342	1906.99	918.884
859	0	203.319	1735.28	1596.95	317.542	1733.73	1598.98	193.904	1563.11	1610.06	312.297	1550.97	1616.08	257.459	1504.2	1476.54	268.274	1417.04	1244.34	275.248	1657.23	1401.48	283.602	1713.32	1218.18	386.793	1400.1	1306.01	91.8114	1554.09	1435.68	-2.05017	1591.81	1210.66	-18.188	1625.15	1120.25	-4.98482	1793.76	1016.93	56.2493	1841.45	971.942	-16.1013	1828.04	945.418	17.1201	1916.63	917.057
860	0	205.416	1745.72	1595.77	319.408	1743.8	1597.59	195.47	1573.6	1608.69	314.001	1561.12	1614.63	258.735	1514.56	1475.16	269.204	1427.21	1243.05	276.53	1667.6	1400.04	284.84	1723.75	1216.82	387.795	1410.5	1304.53	93.0264	1564.58	1434.05	-0.517318	1601.3	1208.67	-16.7408	1634.43	1118.45	-3.25306	1803.02	1014.62	58.3084	1850.6	969.937	-14.2944	1837.25	943.416	19.2966	1925.69	914.72
861	0	207.486	1756.1	1594.78	321.589	1754.45	1596.4	197.171	1583.97	1607.54	315.738	1571.39	1613.05	259.892	1524.98	1473.8	270.121	1437.63	1241.71	277.74	1677.98	1398.37	285.96	1734.3	1215.29	388.627	1420.85	1302.93	94.2512	1575.29	1432.78	0.998134	1610.58	1207.19	-15.3699	1643.23	1116.67	-1.50609	1811.86	1012.31	59.5868	1858.81	967.237	-12.6566	1845.66	940.87	21.2052	1934.22	911.937
862	0	209.634	1766.37	1593.74	323.971	1764.52	1595.25	199.17	1594.44	1606.23	317.341	1581.28	1611.81	261.267	1535.34	1472.57	270.818	1448.06	1240.27	279.393	1688.4	1397.43	287.339	1744.68	1214.21	389.515	1431.16	1301.09	95.4909	1585.89	1431.82	2.52969	1619.71	1205.5	-13.8019	1652.04	1114.64	0.163405	1820.32	1009.8	61.4732	1867.09	964.686	-10.7858	1853.83	937.879	23.0234	1942.08	908.92
863	0	211.978	1776.75	1592.75	326.417	1774.5	1594.1	200.957	1604.63	1604.98	319.497	1591.41	1610.25	262.591	1545.68	1471.21	271.534	1458.69	1238.81	280.807	1698.81	1396.18	288.579	1755.23	1213.05	390.447	1441.67	1299.34	96.8625	1596.6	1430.84	4.18454	1628.99	1204.07	-12.1001	1660.4	1112.73	1.77008	1828.43	1006.96	63.076	1874.8	961.706	-9.07145	1861.17	935.137	24.6692	1949.38	905.442
864	0	214.468	1786.87	1591.82	329.101	1784.55	1593.14	203.129	1614.86	1604.12	321.697	1601.44	1609.09	264.18	1555.9	1469.91	272.384	1469.71	1237.34	282.356	1709.12	1395.27	289.967	1765.95	1212.4	391.513	1452.11	1297.42	98.084	1607.41	1429.84	5.75742	1638.22	1202.85	-10.6329	1668.74	1111.23	3.36738	1835.77	1004.03	64.8664	1882.29	958.519	-7.73066	1868.03	931.771	25.9936	1956.15	901.453
865	0	217.131	1797.13	1590.77	331.695	1794.64	1591.77	205.606	1625.18	1603.08	324.161	1611.38	1607.84	265.817	1566.05	1468.44	273.434	1480.86	1235.6	283.997	1719.44	1394.22	291.034	1776.83	1211.51	392.574	1462.58	1295.14	99.6217	1617.96	1429.19	7.30329	1647.61	1201.65	-8.85831	1677.24	1109.69	4.8918	1843.16	1000.84	66.2249	1889.09	954.664	-6.2129	1874.36	928.143	27.3877	1962.29	897.118
866	0	219.761	1807.25	1589.77	334.34	1804.43	1590.37	207.706	1635.12	1602.13	326.344	1621.37	1606.42	267.48	1576.02	1466.96	274.705	1492.04	1233.6	285.834	1729.8	1393.38	292.315	1787.68	1211.03	393.889	1473.25	1292.81	101.283	1628.4	1428.21	9.03379	1657.09	1200.37	-6.86628	1685.52	1108.16	6.42539	1850.06	997.28	67.3913	1895.24	950.39	-4.97594	1880.14	924.346	28.4076	1967.84	892.076
867	0	222.561	1817.27	1588.86	337.1	1814.29	1589.34	210.091	1645.07	1601.47	328.729	1631.13	1605.51	269.179	1585.99	1465.63	276.163	1503.19	1231.81	287.604	1740.08	1392.68	293.56	1799.01	1210.66	395.342	1483.97	1290.47	103.044	1638.75	1427.45	10.6839	1666.52	1199.36	-5.19915	1693.53	1106.86	7.93971	1856.75	993.685	69.0083	1901.54	946.297	-3.52357	1885.83	920.495	29.2943	1972.98	886.673
868	0	225.36	1827.34	1588.25	339.835	1824.26	1588.43	212.879	1655.39	1601.03	331.496	1641.11	1604.75	271.341	1596.02	1464.53	278.064	1514.45	1230.14	289.371	1750.39	1392.02	294.707	1810.23	1210.23	396.865	1494.78	1288.16	104.842	1648.83	1426.91	12.2411	1675.78	1198.52	-3.19568	1701.64	1105.67	9.46185	1862.87	989.816	70.3626	1907.46	941.723	-2.23574	1891.08	916.241	30.3295	1977.63	881.228
869	0	228.297	1837.45	1587.92	342.701	1834.43	1587.77	215.54	1665.08	1600.77	334.308	1651.24	1604.2	273.566	1606.06	1463.56	279.898	1525.67	1228.69	291.211	1760.7	1391.62	295.925	1821.78	1210.33	398.548	1505.63	1286.01	106.692	1658.79	1426.54	14.1314	1685.29	1198.09	-1.09217	1709.62	1104.63	10.5812	1868.86	985.841	71.4939	1912.51	936.787	-1.12318	1895.59	912.221	30.8985	1981.7	875.203
870	0	230.924	1847.45	1587.62	345.285	1844.33	1587.17	218.297	1675.22	1600.56	337.406	1661.44	1603.8	275.687	1616.1	1462.65	281.759	1536.75	1227.51	293.047	1770.98	1391.46	297.246	1833.48	1210.68	400.178	1516.52	1283.94	108.577	1668.64	1426.43	15.5399	1694.09	1197.55	1.16032	1717.51	1103.77	12.0763	1874.54	982.395	72.597	1917.62	931.96	-0.189177	1899.99	908.187	31.1337	1985.06	869.119
871	0	233.635	1857.26	1587.77	348.122	1854.16	1586.98	221.397	1685.09	1600.74	340.303	1671.34	1603.61	277.928	1626.32	1462.02	283.66	1547.86	1226.76	294.96	1781.34	1391.58	298.492	1844.84	1211.1	401.845	1527.4	1282.27	110.668	1678.52	1426.64	17.4267	1703.01	1197.37	3.50913	1725.28	1103.27	13.1878	1879.73	978.961	73.8409	1922.47	927.381	0.199895	1903.71	904.389	31.0446	1987.88	862.819
872	0	236.365	1867.16	1588.15	350.885	1864.25	1587.06	224.29	1694.94	1600.92	343.515	1681.39	1603.62	280.303	1636.47	1461.74	285.354	1558.55	1226.22	296.932	1791.75	1391.75	299.86	1856.23	1211.56	403.333	1538.27	1280.93	112.687	1688.44	1427.05	19.4535	1711.74	1197.5	6.13465	1732.95	1102.98	14.3445	1884.62	975.531	73.4818	1925.26	921.494	0.657787	1906.88	900.7	30.9362	1990.2	856.657
873	0	239.208	1877.06	1588.59	354.15	1874.71	1587.62	227.174	1704.83	1601.14	346.669	1691.44	1603.72	282.615	1646.68	1461.59	287.152	1569.58	1225.78	298.946	1802.09	1392.11	301.275	1867.39	1212.15	405.232	1549.03	1279.86	114.857	1698.27	1427.71	21.5968	1720.47	1197.68	8.85774	1740.7	1102.8	15.4572	1889.15	972.079	74.6092	1929.18	916.772	1.13018	1909.61	896.983	30.4075	1991.75	850.135
874	0	242.101	1887.01	1589.21	356.884	1884.54	1588.14	230.016	1714.59	1601.68	349.503	1701.41	1604.01	284.862	1656.76	1461.76	288.542	1580.32	1225.55	300.831	1812.51	1392.46	302.719	1878.18	1212.68	406.825	1559.84	1279.22	117.051	1708.29	1428.55	23.8432	1729.02	1198.24	11.5255	1748.15	1103	16.5716	1893.41	968.742	74.7949	1931.69	911.457	1.35796	1911.48	893.385	29.8002	1992.57	843.846
875	0	244.843	1896.91	1590.08	359.866	1894.47	1588.75	233.139	1724.53	1602.47	352.68	1711.3	1604.3	287.21	1666.95	1462.06	290.17	1591.15	1225.65	302.648	1822.84	1392.89	304.002	1888.93	1213.31	408.51	1570.49	1278.88	119.018	1718.12	1429.43	26.05	1737.39	1198.87	14.4272	1755.76	1103.54	17.5834	1897.15	965.517	74.9796	1934	906.305	2.02813	1913.5	889.732	28.9703	1992.81	837.506
876	0	247.729	1906.71	1591.23	362.381	1904.31	1589.19	236.309	1734.68	1603.13	355.354	1721.26	1604.66	289.552	1677.12	1462.62	291.79	1601.92	1225.88	304.464	1833.05	1393.48	305.066	1899.02	1213.9	410.195	1580.91	1278.65	121.014	1728.01	1430.52	28.4468	1745.72	1199.47	17.1365	1763.08	1104.09	18.5692	1900.46	962.434	75.3108	1936.09	901.372	2.69082	1914.4	886.729	27.6694	1992.03	831.285
877	0	250.568	1916.54	1592.31	365.287	1914.16	1590.06	239.22	1744.44	1604.1	358.174	1731	1605.13	291.493	1686.98	1463.15	293.35	1612.44	1226.27	306.035	1843.2	1394.2	306.46	1909.84	1214.81	411.802	1591.53	1278.68	122.796	1737.83	1431.71	30.8285	1754.16	1199.76	19.8341	1770.4	1104.71	19.399	1903.48	959.607	75.4365	1937.46	896.693	2.42411	1915.08	883.317	26.6736	1990.88	825.356
878	0	253.343	1926.46	1593.63	368.028	1923.73	1590.89	241.783	1754.16	1605.11	361.055	1740.71	1605.68	293.494	1696.87	1463.89	294.914	1622.8	1226.81	307.671	1853.3	1395.15	307.566	1920.12	1215.83	413.589	1602.03	1278.92	124.708	1747.53	1433.16	33.6587	1762.84	1201.03	22.571	1777.48	1105.71	19.9401	1906.1	957.233	75.4391	1938.78	892.493	2.34745	1915.47	880.517	25.5184	1989.28	819.744
879	0	255.964	1936.1	1595.13	370.754	1933.44	1591.77	244.407	1763.81	1606.24	363.906	1750.74	1606.27	295.527	1706.86	1464.57	296.662	1632.96	1227.55	309.241	1863.37	1396.01	308.533	1930.11	1216.67	415.854	1612.5	1279.31	126.339	1757.09	1434.49	35.5527	1770.83	1201.8	25.2472	1784.53	1106.63	20.6328	1908.74	955.017	75.1729	1939.49	888.786	2.30516	1915.54	878.09	24.2444	1987.31	814.356
880	0	258.531	1945.86	1596.43	373.404	1943.27	1592.81	247.102	1773.69	1607.23	366.626	1760.34	1606.72	297.353	1716.77	1465.38	298.614	1643.03	1228.3	310.158	1873.15	1396.88	309.418	1940.1	1217.5	417.497	1622.95	1279.53	128.043	1766.56	1435.88	37.5273	1779.01	1202.74	27.8474	1791.44	1107.38	21.2291	1910.97	952.971	75.0356	1939.95	885.228	2.28382	1915.34	875.915	22.9429	1984.8	809.073
881	0	261.021	1955.57	1597.91	375.865	1952.81	1593.79	249.372	1783.26	1608.33	368.781	1769.92	1607.26	298.912	1726.49	1466.21	300.702	1653.14	1229.09	311.236	1882.97	1397.65	310.062	1949.73	1218.27	419.299	1633.26	1280.07	129.647	1775.94	1436.94	39.1608	1786.84	1203.57	30.2081	1798	1108.13	21.7007	1913.18	951.23	74.9243	1940.5	882	1.53452	1914.55	873.879	21.9023	1982	804.186
882	0	263.454	1965.26	1599.58	378.171	1962.1	1594.58	251.985	1793.16	1609.61	371.103	1779.37	1607.95	300.732	1736.21	1467.25	302.86	1663.08	1230.12	312.301	1892.79	1398.46	310.69	1959.63	1219.11	421.22	1643.55	1280.96	131.076	1785.05	1438.06	40.7677	1794.6	1204.44	32.3172	1804.46	1109.04	22.0599	1915.44	949.538	74.7932	1941.25	879.286	1.72946	1914.52	872.33	20.941	1979.29	799.665
883	0	265.615	1974.91	1600.92	380.505	1971.88	1595.76	254.112	1802.87	1610.79	373.127	1789.01	1608.46	302.576	1746.05	1468.23	304.866	1672.88	1231.13	313.317	1902.59	1399.32	311.228	1969.58	1220.11	423.61	1653.79	1281.89	132.531	1794.04	1439.21	42.198	1802.08	1205.04	34.4034	1810.85	1110.06	22.4191	1917.13	948.108	74.634	1941.58	876.6	1.53096	1914.25	870.948	19.9818	1976.02	795.17
884	0	267.674	1984.58	1602.35	382.314	1981.62	1596.61	256.436	1812.98	1612.11	374.872	1798.65	1609.18	304.085	1755.76	1469.29	307.016	1682.56	1232.16	314.016	1912.29	1400.2	311.639	1979.11	1220.9	425.765	1664.03	1282.77	133.855	1802.89	1440.1	42.9473	1808.83	1206.17	36.2846	1817.03	1110.61	22.6185	1919.03	947.035	74.2904	1941.94	874.349	1.53999	1914.31	869.93	19.2789	1972.78	791.346
885	0	269.437	1994.16	1603.7	384.147	1991.06	1597.63	258.161	1822.63	1613.5	376.814	1808.15	1610.15	305.585	1765.3	1470.5	308.823	1692.26	1233.09	314.7	1921.92	1401.09	311.896	1988.84	1221.84	428.077	1674.26	1284.07	135.136	1811.49	1441.14	44.8632	1816.2	1206.91	38.1608	1823.05	1111.67	22.9488	1921.03	946.135	74.2189	1942.33	872.502	1.4255	1914.09	869.072	18.4854	1969.62	787.947
886	0	271	2003.86	1604.96	385.587	2000.66	1598.55	259.672	1832.04	1614.95	378.251	1817.85	1611.28	306.958	1774.63	1471.6	310.811	1701.92	1234.18	315.542	1931.53	1402.22	312.15	1998	1222.79	430.194	1684.31	1285.41	136.346	1819.94	1442.3	45.9544	1822.83	1208.12	39.5168	1828.77	1112.67	23.2347	1922.92	945.633	73.6546	1943.2	871.204	1.22856	1914.2	868.735	18.0233	1966.54	785.233
887	0	272.284	2013.51	1606.12	386.863	2010.34	1599.49	261.215	1841.76	1616.23	379.736	1827.5	1612.23	308.237	1783.95	1472.69	312.535	1711.39	1235.05	316.152	1941	1403.42	312.308	2007.08	1223.91	432.231	1694.22	1286.65	137.367	1828.21	1443.15	47.3595	1829.15	1208.89	40.9048	1834	1113.74	23.4723	1924.61	945.155	73.9621	1942.53	869.678	1.0118	1914.35	868.589	17.5528	1963.55	782.844
888	0	273.356	2023.14	1607.4	388.12	2020.03	1600.56	262.395	1851.37	1617.77	380.827	1837.21	1613.54	309.806	1793.43	1473.88	314.253	1721.01	1235.87	316.711	1950.4	1404.58	312.491	2016.09	1224.89	434.02	1704.27	1287.97	138.591	1836.39	1444.38	48.5596	1835.16	1209.77	42.1025	1838.9	1114.57	23.701	1926.58	944.9	73.6912	1943.13	869.231	1.00686	1914.61	868.724	17.2751	1960.73	781.108
889	0	274.266	2032.76	1608.75	388.901	2029.83	1601.69	263.439	1860.97	1619.29	382.084	1846.82	1615.02	311.276	1802.73	1475.23	316.144	1730.59	1237.09	317.229	1959.64	1405.74	312.693	2025.43	1226.38	435.718	1714.07	1289.26	139.647	1844.5	1445.47	49.789	1840.86	1211.04	43.3171	1843.33	1115.96	23.7482	1928.16	944.953	73.6139	1943.38	868.593	1.80573	1915.15	869.334	17.2845	1958.48	780.006
890	0	274.943	2042.43	1609.95	389.593	2039.53	1602.85	264.704	1870.69	1620.88	382.982	1856.75	1616.52	312.683	1812.04	1476.38	317.807	1740.05	1238.11	317.808	1968.95	1406.99	312.956	2034.71	1227.71	437.723	1724.07	1290.72	140.765	1852.63	1446.95	50.944	1846.15	1212.27	44.3829	1847.59	1117.1	24.0619	1929.89	945.409	73.5462	1944.2	868.501	1.2581	1915.49	869.922	16.963	1956.38	779.412
891	0	275.319	2051.93	1610.9	389.972	2049.5	1603.89	265.38	1880.07	1622.31	383.823	1866.7	1617.86	313.943	1821.3	1477.58	319.385	1749.6	1238.88	318.422	1978.18	1408.49	313.116	2043.79	1228.96	439.114	1733.78	1291.98	141.891	1860.72	1447.92	52.011	1850.97	1213.61	45.3136	1851.22	1118.51	24.1655	1931.34	945.78	73.5704	1945.21	868.623	1.10857	1915.8	870.495	17.0339	1954.94	778.872
892	0	275.448	2061.5	1611.58	390.298	2059.21	1605.06	266.097	1889.48	1623.51	384.831	1876.46	1619.45	315.273	1830.62	1478.87	320.628	1759.14	1240.1	319.099	1987.51	1409.95	313.428	2053.13	1230.33	440.835	1743.79	1293.42	143.061	1869.01	1449.34	53.2531	1855.66	1215	46.0669	1854.76	1119.96	24.4419	1932.84	946.152	73.5757	1945.99	868.938	1.48037	1916.39	871.242	16.9988	1953.66	778.663
893	0	275.666	2070.9	1612.74	390.512	2069.21	1606.14	267.172	1899.22	1624.84	385.587	1886.38	1620.95	316.539	1839.92	1479.96	322.273	1768.76	1241.05	319.716	1996.66	1411.03	313.948	2062.27	1231.64	443.347	1753.84	1294.66	144.022	1877.12	1450.27	54.1255	1859.75	1216.38	47.0656	1858.32	1121.41	24.555	1934.33	946.615	73.6679	1946.97	869.435	2.31017	1916.81	872.148	17.2745	1952.91	779.052
894	0	275.719	2080.41	1613.5	390.555	2079.1	1607.07	267.066	1908.31	1626.07	386.243	1896.3	1622.37	318.098	1849.5	1481.04	323.66	1778.31	1242.04	320.285	2005.95	1412.13	314.397	2071.32	1232.78	444.687	1763.47	1295.84	145.002	1885.5	1451.63	55.3541	1864.29	1217.9	48.0742	1862.08	1122.92	24.7826	1935.87	947.32	74.0111	1948.44	869.852	2.40592	1917.27	872.946	17.6243	1952.65	779.38
895	0	275.679	2089.82	1613.99	390.46	2089.12	1607.99	268.156	1917.82	1626.88	386.891	1906.37	1623.52	318.811	1858.64	1481.81	324.876	1787.93	1242.88	320.902	2015.24	1413.16	314.818	2080.32	1233.83	445.94	1773.4	1296.76	146.113	1894.13	1452.66	56.5661	1868.63	1219.31	48.9766	1865.55	1124.33	25.0142	1937.37	947.859	74.2269	1949.45	870.423	3.04806	1917.82	873.488	17.9975	1952.78	779.818
896	0	275.583	2099.32	1614.63	390.428	2099.11	1608.97	268.924	1927.25	1627.78	387.649	1916.24	1624.72	320.591	1868.25	1482.82	326.115	1797.54	1243.76	321.622	2024.6	1414.08	315.268	2089.67	1234.81	446.889	1782.95	1297.71	146.996	1902.87	1453.58	57.728	1873.11	1220.81	49.5075	1869.07	1125.74	25.3522	1938.87	948.739	74.3534	1951.14	871.094	3.76371	1918.47	874.102	18.4806	1953.24	780.486
897	0	275.248	2108.8	1615.09	390.124	2109.17	1609.68	269.381	1936.55	1628.39	388.141	1926.12	1626.01	321.745	1877.8	1483.5	326.926	1807.01	1244.48	322.253	2033.9	1414.83	315.564	2098.83	1235.58	448.372	1792.82	1298.55	147.847	1911.8	1454.41	58.3672	1877.75	1222.27	50.2249	1873	1127.36	25.7874	1940.61	949.39	73.8501	1953.1	871.787	4.478	1919.27	874.85	19.1027	1954.2	781.185
898	0	274.906	2118.21	1615.43	389.885	2119.31	1610.24	269.939	1946.1	1628.7	388.784	1936.4	1626.46	322.471	1887.4	1483.96	327.464	1816.38	1244.92	322.981	2043.37	1415.38	316.213	2108.15	1235.99	449.28	1802.37	1299.04	148.581	1920.73	1455.04	59.4886	1882.82	1223.43	51.0323	1877.05	1128.67	26.0212	1942.47	949.794	75.0854	1954.54	872.434	5.63062	1920.26	875.539	19.6287	1955.19	781.86
899	0	274.761	2127.77	1615.59	389.668	2129.38	1610.68	270.301	1955.64	1629.03	389.287	1946.56	1627.05	323.085	1896.92	1484.29	328.419	1826.03	1245.33	323.604	2052.87	1415.74	316.657	2117.43	1236.18	449.719	1811.79	1299.36	149.313	1930.01	1455.47	60.3358	1888.1	1224.76	51.8616	1881.52	1129.75	26.1977	1944.53	950.182	76.2685	1956.02	872.94	6.45339	1921.16	875.888	20.1708	1956.48	782.317
900	0	274.394	2137.46	1615.61	389.414	2139.48	1611.22	270.829	1965.39	1629.16	389.929	1956.56	1627.57	323.793	1906.6	1484.61	328.287	1834.81	1245.86	324.3	2062.39	1415.98	317.168	2126.67	1236.22	450.334	1821.35	1299.83	150.116	1939.43	1455.68	61.2078	1894.07	1226.09	52.6242	1886.12	1131.01	26.6656	1947.03	950.475	76.4394	1958.58	873.271	7.76734	1922.39	876.238	20.7913	1958.12	782.745
901	0	274.062	2147.22	1615.62	389.091	2149.76	1611.28	271.519	1975.14	1629.12	390.185	1966.81	1627.72	324.489	1916.35	1484.8	328.786	1844.14	1246.29	324.902	2072.03	1416	317.66	2135.93	1236.04	450.795	1830.76	1300.02	150.741	1949.04	1455.92	62.7743	1900.39	1226.92	53.3874	1891.4	1132	26.8827	1949.7	950.435	76.6949	1961.25	873.56	8.85056	1924	876.439	21.2332	1960.08	783.131
902	0	273.874	2157.04	1615.37	388.952	2159.97	1611.23	271.588	1984.64	1628.95	390.628	1977.11	1627.61	324.852	1926.1	1484.69	328.732	1853.35	1246.45	325.5	2081.77	1415.91	318.176	2145.3	1235.77	451.041	1840.1	1300.09	151.402	1959.05	1456.16	62.4836	1907.03	1228.02	54.3593	1896.93	1132.92	27.5824	1952.75	950.942	77.0945	1964.37	873.844	10.0385	1926	876.574	21.5722	1961.96	783.665
903	0	273.586	2166.94	1614.99	388.53	2170.21	1611.18	272.067	1994.82	1628.4	390.913	1987.29	1627.48	324.95	1936.1	1484.67	328.794	1862.6	1246.75	325.954	2091.65	1415.53	318.402	2154.83	1234.93	451.203	1849.4	1300.25	151.642	1968.95	1456.07	63.3786	1914.2	1228.77	54.8951	1902.64	1133.71	28.0424	1956.21	951.083	77.6884	1967.62	873.79	10.9233	1928.31	877.024	22.1017	1964.26	783.98
904	0	273.312	2177	1614.58	388.259	2180.78	1610.89	271.946	2004.36	1627.93	391.099	1997.68	1627.25	325.524	1946.22	1484.63	328.608	1871.89	1246.88	326.21	2101.62	1414.86	318.788	2164.19	1234.32	451.015	1858.72	1300.22	152.107	1978.89	1455.97	63.9287	1921.96	1228.99	55.6599	1908.86	1134.54	28.5374	1960.09	951.106	77.7148	1971.68	873.855	11.9926	1931.16	877.354	22.5447	1966.88	784.015
905	0	273.149	2187.03	1613.92	387.929	2191.03	1610.43	272.356	2014.5	1627.14	391.418	2007.93	1626.7	325.855	1956.58	1484.31	328.479	1881.52	1246.84	326.626	2111.66	1414.34	318.883	2173.52	1233.13	450.825	1868.08	1300.04	152.455	1989.16	1455.6	63.8653	1929.61	1229.61	56.1363	1915.39	1135.24	29.2124	1964.58	951.29	78.2535	1975.6	873.655	12.9285	1934.32	877.601	23.4281	1969.71	783.97
906	0	272.884	2196.98	1613.31	387.774	2201.45	1609.98	272.378	2024.55	1626.2	391.551	2018.34	1625.88	325.811	1966.69	1483.91	328.192	1891.08	1246.71	326.855	2121.78	1413.2	319.41	2183.08	1232.18	450.501	1877.5	1299.73	152.418	1999.47	1455.18	64.3329	1937.85	1230.13	57.1227	1922.37	1135.57	29.7735	1969.48	951.223	78.8939	1980.35	873.668	14.553	1938.65	877.628	24.4108	1972.89	783.963
907	0	272.505	2207.17	1612.54	387.375	2211.79	1609.54	272.354	2034.73	1625.34	391.409	2028.75	1625.05	326.065	1977.09	1483.46	327.534	1900.71	1246.43	327.179	2132	1412.52	319.45	2192.44	1231.01	449.836	1886.98	1299.38	152.704	2010.04	1455.25	65.1287	1946.26	1230.53	57.7919	1929.76	1136	30.4093	1974.92	951.349	78.4103	1985.79	873.437	15.106	1943.03	877.627	26.2293	1976.5	783.487
908	0	272.025	2217.3	1611.65	386.876	2222.12	1608.89	272.526	2044.8	1624.13	391.424	2039.05	1624.19	325.996	1987.52	1482.87	327.046	1910.51	1246.06	327.23	2142.23	1411.38	319.574	2202.11	1229.88	449.411	1896.39	1298.89	152.564	2020.52	1454.45	65.2337	1954.99	1230.92	58.3813	1937.47	1136.35	30.8422	1980.96	951.307	79.4269	1991.58	873.571	16.1489	1948.41	877.835	26.853	1980.58	783.125
909	0	271.698	2227.5	1610.51	386.67	2232.47	1608.2	272.372	2054.95	1622.68	391.333	2049.41	1623.05	325.469	1997.78	1481.99	326.174	1920.33	1245.33	327.405	2152.59	1410.32	319.549	2211.94	1228.66	448.41	1905.91	1298.16	152.573	2031.42	1454.29	66.4389	1963.88	1230.72	59.2173	1945.88	1136.46	31.2334	1987.49	951.016	80.1202	1997.44	873.312	16.8023	1954.22	877.728	28.3433	1985.28	782.3
910	0	271.311	2237.77	1609.46	386.195	2242.76	1607.39	272.076	2065.21	1621.25	390.991	2059.83	1621.75	325.32	2008.26	1480.92	325.236	1930.38	1244.52	327.349	2162.86	1409.03	319.421	2221.7	1227.19	447.564	1915.43	1297.37	151.982	2042.07	1453.27	65.7239	1972.81	1230.61	59.2406	1953.98	1136.26	31.619	1994.53	950.665	79.5211	2003.64	872.717	16.7708	1960.08	877.575	29.2322	1990.31	781.67
911	0	270.778	2248.04	1608.27	385.575	2253.23	1606.31	271.809	2075.29	1619.73	390.698	2070.06	1620.49	324.631	2018.65	1480.04	324.18	1940.46	1243.75	327.141	2173.18	1407.5	319.225	2231.78	1225.57	446.48	1925.02	1296.36	151.733	2053.09	1452.46	66.0795	1982.21	1230.43	59.3549	1962.94	1136.15	31.9378	2002.08	950.136	80.031	2010.64	872.244	17.4335	1967.35	877.325	30.3946	1995.84	781.06
912	0	270.197	2258.27	1606.56	385.118	2263.57	1605.2	271.142	2085.47	1618.07	390.135	2080.44	1619.1	324.045	2029.06	1478.87	322.927	1950.72	1242.93	326.985	2183.63	1406.09	319.279	2241.85	1224.03	445.092	1934.66	1295.16	151.418	2064.15	1451.61	66.2375	1991.93	1229.87	59.1961	1971.97	1135.97	32.1115	2010.12	949.437	81.0604	2018.18	871.577	18.6096	1975.84	876.975	31.382	2002.11	779.966
913	0	269.721	2268.56	1605.48	384.704	2273.71	1604.26	270.267	2095.74	1616.53	389.461	2090.65	1617.66	323.041	2039.57	1477.58	321.707	1960.94	1241.82	326.702	2193.99	1404.78	319.097	2252.03	1222.58	443.787	1944.13	1294.04	150.345	2074.98	1450.16	65.6799	2001.58	1229.28	58.7946	1981.39	1135.19	32.1418	2018.68	948.566	81.2233	2026.12	870.802	17.8012	1983.02	876.229	32.6587	2008.84	778.805
914	0	268.862	2278.84	1604.05	383.923	2284.08	1603.15	269.547	2106.02	1614.89	388.6	2100.9	1616.22	321.996	2049.89	1476.31	320.517	1971.5	1240.62	326.114	2204.25	1403.21	318.788	2262.2	1221.09	442.195	1953.78	1292.96	149.734	2086.23	1449.29	64.7277	2011.45	1228.4	58.0851	1991.27	1134.37	31.9422	2027.74	947.664	81.3888	2034.39	869.86	17.6995	1992.04	875.288	33.8487	2016.32	777.538
915	0	267.894	2289.2	1602.34	382.973	2294.28	1601.92	268.561	2116.41	1613.36	387.583	2111.23	1614.99	320.785	2060.45	1475.16	319.153	1981.53	1239.53	325.528	2214.72	1401.58	318.497	2272.49	1219.3	440.512	1963.46	1291.66	148.593	2097.31	1447.9	63.9526	2022.23	1227.55	57.0277	2001.42	1133.42	31.6243	2037.36	946.51	81.4789	2043.47	868.919	17.428	2001.51	874.179	34.4839	2024.28	776.148
916	0	266.983	2299.66	1601.08	381.934	2304.56	1600.47	267.655	2126.79	1611.69	386.513	2121.57	1613.45	319.774	2071.06	1473.68	317.687	1991.69	1238.34	324.973	2225.22	1400.07	318.206	2282.63	1217.48	438.847	1973.22	1290.4	147.498	2108.3	1446.3	63.1183	2032.96	1226.26	56.0671	2011.77	1132.17	31.1574	2047.4	944.851	80.8762	2053.21	867.433	17.114	2011.65	872.632	35.0413	2032.79	774.67
917	0	265.956	2310.07	1599.7	380.778	2314.89	1599.31	266.038	2137.04	1610.07	385.036	2131.82	1612.03	317.996	2081.57	1472.33	316.155	2001.81	1237.05	324.076	2235.66	1398.6	317.778	2293.01	1216	437.517	1983.35	1289.29	146.331	2119.53	1444.8	61.5737	2043.81	1224.9	54.6243	2022.41	1130.91	30.4503	2057.83	943.249	81.7368	2063.31	866.403	16.1158	2022.22	871.191	35.4146	2042.05	772.695
918	0	264.534	2320.46	1598.25	379.293	2325.14	1598.21	264.621	2147.43	1608.67	383.585	2141.95	1610.8	316.45	2092.03	1471	314.715	2012.11	1235.86	323.033	2246.13	1397.12	317.346	2303.3	1214.59	435.59	1993.21	1288.28	144.892	2130.57	1443.15	59.9149	2054.88	1223.42	53.0345	2033.25	1129.29	29.7195	2068.78	941.689	80.5663	2073.76	864.848	15.2694	2032.96	869.637	35.466	2051.94	770.911
919	0	263.017	2330.81	1597	377.933	2335.36	1597.08	262.804	2157.77	1607.07	381.787	2152.35	1609.26	314.736	2102.72	1469.71	313.305	2022.46	1234.73	321.847	2256.67	1395.52	316.81	2313.63	1212.97	433.681	2003.27	1287.24	143.112	2141.52	1441.59	57.139	2066.05	1221.97	51.5757	2044.39	1127.66	28.7223	2080.17	940.161	79.6928	2084.84	863.087	12.9816	2043.99	867.84	35.0868	2062.55	769.101
920	0	261.292	2341.23	1595.57	376.027	2345.52	1595.82	260.809	2167.98	1605.27	379.887	2162.59	1607.81	312.714	2113.33	1468.32	311.958	2032.79	1233.53	320.465	2267.24	1393.94	316.051	2324.02	1211.24	431.939	2013.2	1286.35	141.421	2152.58	1439.48	55.4379	2077.48	1220.3	49.7495	2055.63	1125.95	27.5966	2091.89	938.086	78.6856	2096.02	861.371	12.2918	2055.92	865.873	34.8093	2073.7	767.291
921	0	259.296	2351.61	1594.16	374.124	2355.87	1594.57	258.599	2178.42	1603.52	377.738	2172.81	1606.22	310.785	2123.99	1466.99	310.295	2043.28	1232.12	319.185	2277.82	1392.52	315.334	2334.43	1209.56	430.017	2023.19	1285.42	139.577	2163.76	1437.66	54.804	2089.44	1218.42	47.7629	2067.08	1124.02	26.2567	2103.89	935.981	77.7553	2108.15	859.716	10.7894	2068.01	864.017	33.7117	2085.77	765.332
922	0	257.2	2362.03	1592.85	372.182	2366.2	1593.47	256.872	2189.22	1601.91	375.267	2183.03	1604.86	308.088	2134.27	1465.61	308.679	2053.86	1230.74	317.646	2288.32	1391.06	314.518	2345.01	1208.04	428.081	2033.16	1284.76	138.005	2175.22	1436	51.8045	2100.77	1216.21	46.1174	2078.73	1121.88	24.8928	2116.38	933.875	76.2931	2120.44	857.431	9.43564	2080.89	861.386	32.6339	2098.27	763.137
923	0	254.986	2372.4	1591.5	369.682	2376.38	1592.3	254.031	2199.3	1600.68	372.728	2193.18	1603.6	305.719	2144.55	1464.24	306.756	2064.55	1229.28	316.053	2298.83	1389.94	313.746	2355.76	1206.99	426.028	2043.2	1283.88	135.681	2186.13	1433.81	49.5105	2112.2	1214.03	44.0922	2090.6	1119.47	23.3186	2128.97	931.605	74.677	2133.15	855.233	8.30413	2094.59	859.145	31.3827	2111.52	760.69
924	0	252.447	2382.77	1590.43	367.267	2386.5	1591.18	251.16	2209.87	1599.34	369.919	2203.47	1602.27	303.268	2154.93	1462.82	305.021	2075.37	1227.5	314.398	2309.32	1388.82	313.262	2366.34	1206.05	424.129	2053.22	1282.9	133.689	2197.04	1431.73	47.8195	2123.99	1211.43	41.8031	2102.52	1117.09	21.7031	2141.95	929.269	73.2826	2146.17	853.105	6.21167	2107.56	856.493	29.6348	2125.5	758.372
925	0	249.819	2393.16	1589.56	364.521	2396.66	1590.48	248.135	2220.01	1598.26	366.89	2213.65	1601.48	300.672	2165.32	1461.68	303.313	2086.32	1225.72	312.839	2319.94	1388.11	312.609	2377.19	1205.37	422.314	2063.65	1281.97	131.47	2208.02	1429.96	45.963	2135.86	1208.8	39.9973	2114.89	1114.44	19.8626	2155.18	926.844	71.673	2160.29	850.874	4.35176	2120.99	853.866	27.7555	2140.02	755.988
926	0	246.957	2403.58	1588.91	361.654	2406.95	1590.09	245.308	2230.64	1597.44	364.004	2223.92	1600.89	298.275	2175.48	1460.68	301.233	2097.29	1224.63	311.216	2330.38	1387.66	312.09	2388.18	1205.19	420.028	2073.7	1281.36	129.23	2218.73	1427.51	43.5515	2147.82	1206.39	37.8684	2127.47	1111.83	17.9004	2168.66	924.435	69.6633	2174.09	848.264	2.29875	2135.17	851.224	25.622	2155.05	753.766
927	0	244.068	2413.86	1588.44	358.707	2417.37	1589.86	242.179	2241.05	1596.72	360.816	2234.13	1600.5	295.797	2185.67	1459.87	299.382	2107.95	1223.39	309.607	2340.83	1387.32	311.459	2399.05	1204.84	417.908	2084.32	1280.72	127.174	2229.44	1425.89	41.7885	2160.11	1203.91	35.9487	2140.35	1109.03	16.1707	2182.67	922.196	68.8318	2188.78	846.469	0.944676	2149.92	848.609	23.2109	2170.89	751.687
928	0	241.082	2424.09	1588.12	355.671	2427.57	1589.93	238.733	2251.03	1596.16	357.576	2244.29	1600.38	293.351	2196.07	1459.21	297.488	2118.65	1222.43	307.921	2351.27	1387.25	310.914	2410.09	1205.1	415.342	2094.52	1280.15	124.761	2239.58	1423.74	40.0728	2172.68	1201.27	34.2697	2153.61	1106.53	14.0527	2196.74	919.799	66.1773	2203	843.758	-1.28174	2164.59	846.192	20.4989	2187.22	749.061
929	0	237.849	2434.43	1588.2	352.497	2437.57	1590.49	235.584	2261.33	1595.96	354.299	2254.4	1600.54	291.126	2206.35	1459	295.67	2129.49	1222.06	306.3	2361.85	1387.51	310.227	2421.2	1205.48	413.417	2105.17	1280.15	123.273	2250.19	1422.47	38.4009	2185.34	1199.03	32.4183	2167.09	1103.93	12.2827	2211.41	917.852	64.4508	2218.31	842.083	-2.96492	2179.82	844.088	18.2605	2204.08	747.134
930	0	234.618	2444.51	1588.17	349.33	2447.73	1591.12	232.27	2271.24	1595.87	351.219	2264.72	1600.82	288.788	2216.56	1458.97	294.269	2140.13	1221.98	304.631	2372.38	1387.84	309.486	2432.39	1205.93	411.715	2115.83	1280.17	120.941	2260.51	1421.49	37.6476	2198.3	1196.91	31.044	2181	1101.73	10.1436	2226.08	916.123	61.9115	2234.07	840.311	-5.62837	2194.69	841.884	15.4299	2221.32	745.976
931	0	231.365	2454.41	1588.75	345.743	2457.87	1591.98	229.479	2281.86	1595.8	347.904	2274.74	1601.53	286.684	2226.88	1459.27	292.978	2150.76	1222.05	302.964	2382.71	1388.54	308.283	2443.41	1206.88	410.048	2126.56	1280.64	119.153	2270.88	1420.68	36.2899	2211.48	1195.3	29.5823	2194.96	1100.16	8.31202	2241.39	914.992	58.8608	2249.26	838.525	-7.16724	2210.8	840.533	12.5727	2239.03	744.974
932	0	227.932	2464.29	1589.42	342.335	2467.9	1593.33	226.187	2291.46	1596.26	344.7	2284.66	1602.59	284.65	2236.99	1459.79	291.997	2161.68	1222.34	301.261	2392.87	1389.6	307.13	2454.25	1208.06	408.409	2136.97	1281.46	117.266	2281.08	1420.4	34.3421	2224.63	1193.93	28.5712	2209.1	1098.55	6.35207	2256.95	914.154	57.428	2265.72	837.737	-8.68227	2227.49	839.773	9.71774	2257.35	744.471
933	0	224.571	2473.93	1590.13	339.211	2478.15	1594.69	223.018	2300.88	1596.73	341.67	2294.58	1603.7	282.674	2246.95	1460.52	290.818	2171.98	1223.12	299.468	2403.13	1390.68	305.866	2464.89	1209.3	407.517	2147.48	1282.38	115.603	2291.39	1420.42	33.3859	2237.98	1192.93	27.2028	2223.08	1097.65	4.55385	2272.79	913.92	55.348	2281.7	836.915	-11.1501	2243.62	839.344	6.50508	2275.93	744.694
934	0	221.458	2483.59	1591.06	335.687	2487.71	1596.12	220.45	2310.83	1597.17	338.796	2304.46	1604.97	281.184	2256.9	1461.32	289.973	2182.58	1223.55	297.766	2413.25	1391.87	304.417	2475.41	1210.82	406.524	2158.15	1283.5	113.992	2301.63	1421.13	32.2596	2251.18	1192.34	25.9389	2237.22	1097.33	2.67556	2288.79	914.161	53.0714	2298.86	837.051	-12.8302	2260.41	839.082	3.50447	2294.86	745.228
935	0	218.096	2492.86	1591.89	332.578	2497.48	1597.79	217.533	2320	1597.89	335.973	2314.25	1606.42	279.104	2266.77	1462.33	288.347	2192.67	1224.67	295.986	2423.16	1393.39	302.988	2485.79	1212.48	405.522	2168.5	1284.73	111.969	2311.55	1421.67	31.4347	2264.49	1192.07	24.7169	2251.31	1097.04	1.30997	2305.28	914.869	51.0764	2316.51	837.594	-15.1007	2277.38	839.203	0.845847	2314.26	746.3
936	0	215.195	2502.04	1592.95	329.443	2507.18	1599.58	214.715	2329.2	1598.93	333.466	2323.81	1608.07	277.366	2276.19	1463.44	286.748	2202.76	1225.72	294.359	2433	1395.02	301.551	2495.89	1214.24	404.238	2178.62	1286.15	110.23	2321.53	1422.84	30.349	2277.14	1192.17	23.9657	2265.49	1096.94	-0.391154	2321.92	915.651	48.3031	2334.61	838.68	-16.741	2295.25	840.181	-2.11172	2333.95	747.707
937	0	212.273	2511.38	1594.05	326.578	2516.68	1601.33	212.603	2338.64	1599.78	330.99	2333.32	1609.55	275.639	2285.89	1464.66	285.135	2212.71	1226.84	292.938	2442.6	1396.58	300.506	2505.82	1215.97	403.181	2188.58	1287.38	108.702	2331.47	1423.8	28.8082	2290.05	1192.66	22.2849	2279.38	1097.59	-1.82384	2338.99	917.017	47.2902	2352.36	840.187	-17.503	2314.22	841.286	-4.23801	2354.03	749.387
938	0	209.551	2520.3	1595.24	324.156	2526.18	1602.9	210.957	2348.32	1600.55	328.685	2342.75	1610.87	274.263	2295.33	1465.65	283.272	2222.25	1227.86	291.713	2452.23	1398.04	299.599	2515.88	1217.66	401.893	2198.43	1288.34	107.14	2341.61	1425.14	26.3911	2302.48	1193.06	20.6384	2293.1	1097.99	-3.31922	2355.96	918.422	45.8795	2370.99	841.576	-19.5174	2332.18	842.085	-5.95721	2374.6	751.777
939	0	207.118	2529.38	1596.46	321.389	2535.5	1604.51	208.211	2356.53	1601.45	326.596	2352.03	1612.3	272.514	2304.83	1466.88	281.365	2231.61	1229.05	290.686	2461.54	1399.47	299.036	2525.47	1219.17	400.33	2207.87	1289.54	106.078	2351.68	1426.34	24.9556	2315.31	1193.64	19.2715	2307.03	1098.52	-4.74267	2373.3	919.851	44.2398	2389.45	843.54	-20.5748	2351.35	842.845	-7.45597	2395.4	753.866
940	0	204.945	2538.32	1597.59	318.972	2544.4	1606.22	206.666	2366.01	1602.31	324.728	2361.2	1613.69	270.958	2313.91	1468.13	279.122	2240.61	1230.57	289.725	2470.88	1400.85	298.478	2535.04	1220.53	398.651	2217.18	1290.74	104.907	2361.88	1427.43	25.0198	2328.81	1194.85	17.407	2320.9	1099.15	-6.14273	2390.9	921.42	43.5422	2408.75	845.806	-21.8121	2370.4	844.592	-8.80224	2416.1	756.031
941	0	202.766	2547.2	1598.45	317.169	2553.92	1607.72	204.93	2374.54	1603.33	323.044	2370.32	1615.02	269.648	2323.37	1469.42	277.047	2249.48	1232.1	288.983	2480.05	1402.07	298.135	2544.28	1221.74	396.937	2226.16	1291.91	103.779	2372.14	1428.63	22.4971	2340.77	1195.5	16.1582	2335.24	1100.03	-7.21278	2408.37	923.371	41.9994	2427.03	847.92	-22.6198	2390.07	846.221	-9.61327	2437.04	758.978
942	0	201.033	2556.1	1599.82	315.096	2562.7	1609.12	203.887	2383.65	1604.03	321.555	2379.46	1616.27	268.149	2332.45	1470.66	274.985	2258.18	1233.46	288.279	2489.14	1403.19	298.057	2553.34	1222.84	395.287	2234.93	1292.87	102.629	2382.26	1429.71	20.3582	2353.21	1196.4	13.8674	2348.84	1100.73	-8.23305	2426.17	925.523	41.6141	2446.24	850.818	-23.6731	2409.34	847.999	-10.1894	2458.57	761.869
943	0	199.499	2564.89	1600.83	313.824	2572.28	1610.58	202.103	2392.12	1605.24	320.052	2388.45	1617.66	266.917	2341.4	1471.85	272.808	2266.87	1234.9	287.672	2498.16	1404.45	297.829	2562.24	1223.85	393.411	2243.39	1293.98	101.809	2392.39	1431.36	18.892	2365.96	1197.64	12.0734	2362.89	1101.71	-9.2461	2443.8	927.888	40.7962	2465.09	853.731	-25.6121	2428.11	849.776	-10.6453	2479.56	765.216
944	0	197.918	2573.62	1602.02	311.89	2580.69	1611.91	200.777	2400.78	1606.41	318.971	2397.45	1619.11	265.85	2350.47	1473.33	271.213	2275.52	1236.22	287.087	2507.01	1405.68	297.457	2570.84	1225.03	391.737	2251.83	1295.19	101.032	2402.37	1432.63	17.0265	2378.75	1199.13	10.261	2376.7	1102.8	-10.3027	2461.25	930.556	40.3883	2484.18	857.224	-26.5457	2447.34	852.113	-10.8204	2500.96	768.88
945	0	196.793	2582.56	1603.14	310.456	2589.55	1613.12	200	2409.76	1607.63	317.997	2406.5	1620.6	264.711	2359.1	1474.81	269.575	2284.08	1237.47	286.574	2515.64	1406.86	297.055	2579.26	1226.27	390.055	2259.91	1296.4	99.9999	2412.24	1434.48	15.8848	2391.7	1200.73	8.04344	2390.31	1104.36	-11.2229	2478.77	933.404	39.6901	2502.61	860.857	-27.3066	2466.61	854.693	-11.0283	2522.19	773.193
946	0	195.764	2591.25	1604.25	310.179	2599.22	1614.44	198.802	2418.33	1608.87	317.067	2415.31	1621.93	263.747	2367.88	1476.16	268.183	2292.44	1238.82	286.122	2524.39	1408.36	296.475	2587.64	1227.61	388.375	2268.1	1297.4	99.1421	2421.73	1436.17	14.1592	2404.42	1202.59	6.73684	2404.27	1106.02	-12.3203	2495.94	936.171	39.2727	2521.21	864.889	-27.8227	2485.76	857.451	-10.8981	2543.42	777.886
947	0	194.981	2599.96	1605.32	309.277	2607.67	1615.52	198.256	2427.24	1610.32	316.325	2424.29	1623.29	262.837	2376.39	1477.57	266.9	2300.93	1240.32	285.552	2532.88	1409.64	295.793	2596.1	1228.89	386.862	2276.22	1298.53	98.4858	2431.09	1438.08	13.3607	2417.43	1204.42	4.72331	2417.62	1107.67	-12.6113	2513.28	940.092	38.4615	2539.62	868.89	-28.7926	2504.51	860.643	-10.6148	2564.59	782.938
948	0	194.337	2608.71	1606.25	309.139	2617.35	1616.54	197.65	2436	1611.9	315.839	2433	1624.89	261.964	2384.75	1479.05	265.67	2309.7	1241.55	284.915	2541.2	1410.95	295.15	2604.42	1230.22	385.503	2284.29	1299.61	97.7801	2440.2	1439.81	11.2934	2429.62	1206.42	3.27796	2431.38	1109.93	-13.0757	2530.36	943.581	38.0137	2557.29	873.08	-29.2731	2523.34	864.331	-10.5726	2585.28	787.898
949	0	193.87	2617.51	1607.46	308.392	2625.99	1617.5	197.117	2444.61	1613.42	315.392	2441.68	1626.33	260.953	2392.88	1480.4	264.46	2318.28	1242.67	284.119	2549.42	1412.43	294.331	2612.74	1231.91	383.812	2292.16	1300.65	97.0462	2449.1	1441.83	9.98126	2441.88	1208.15	2.2817	2445.16	1111.8	-13.3095	2547.33	947.295	38.9528	2576.46	878.381	-28.6178	2542.6	868.066	-10.1844	2606.09	793.528
950	0	193.583	2626.22	1608.72	308.088	2634.6	1618.41	196.717	2453.34	1615.06	314.988	2450.5	1627.76	260.047	2401.02	1481.94	263.339	2326.97	1243.86	283.377	2557.56	1413.82	293.606	2621.03	1233.63	382.346	2300.23	1301.7	96.1792	2457.63	1443.95	8.64014	2454.06	1210.31	0.350667	2457.89	1113.68	-13.724	2563.99	951.383	39.0824	2594.51	883.197	-28.9869	2560.8	871.843	-10.0604	2626.56	799.294
951	0	193.402	2634.81	1609.85	307.898	2643.17	1619.23	196.715	2462.13	1616.93	314.762	2459.18	1629.29	259.205	2409.19	1483.38	262.199	2335.69	1245.19	282.454	2565.29	1414.89	292.574	2629.17	1235.31	380.798	2308.17	1302.79	95.4332	2466.08	1445.86	7.39796	2465.85	1212.37	0.082815	2471.65	1116.01	-13.6355	2580.71	955.571	38.8924	2612.48	888.546	-29.9394	2578.97	876.051	-9.36659	2646.78	805.343
952	0	193.422	2643.61	1611.15	308.216	2651.97	1619.96	196.626	2470.96	1618.63	314.531	2467.87	1630.54	258.383	2417.26	1484.63	261.251	2344.42	1246.42	281.691	2573.66	1416.62	291.686	2637.33	1236.84	379.676	2316.31	1303.79	94.695	2474.38	1447.56	6.13978	2477.41	1214.28	-2.1929	2483.84	1117.9	-13.6794	2597.16	959.707	39.3372	2630.17	893.78	-29.1419	2597.48	880.298	-8.66582	2666.75	811.4
953	0	193.474	2652.36	1612.15	308.07	2660.43	1620.43	196.073	2479.59	1620.45	314.268	2476.31	1631.81	257.56	2425.25	1485.81	260.284	2353.03	1247.52	280.879	2581.66	1418.11	290.714	2645.48	1238.28	378.408	2324.31	1304.85	93.6644	2482.42	1449.43	5.16995	2488.54	1215.9	-2.38752	2497.14	1119.92	-13.4366	2613.3	964.077	39.652	2647.18	899.005	-28.5282	2615.63	884.591	-7.99692	2686.34	817.572
954	0	193.589	2660.98	1613.17	308.224	2668.65	1621.2	196.015	2488.56	1622.16	313.937	2484.77	1633.14	256.66	2433.15	1487.01	259.397	2361.51	1248.56	279.966	2589.63	1419.46	289.658	2653.65	1239.72	377.103	2332.26	1305.97	92.8931	2490.47	1451.03	4.56451	2499.8	1217.76	-4.03808	2509.16	1121.64	-13.1919	2629.24	968.282	40.3606	2664.5	904.341	-29.1913	2632.95	888.706	-6.97961	2705.66	823.969
955	0	193.581	2669.66	1613.93	308.643	2676.96	1621.7	195.203	2496.87	1624.01	313.689	2493.34	1634.21	255.946	2441.17	1488.15	258.855	2369.6	1249.66	279.144	2597.59	1420.64	288.929	2661.76	1240.86	376.207	2340.34	1306.87	92.0649	2498.35	1452.28	3.80203	2510.67	1219.41	-4.63658	2521.75	1123.35	-12.9977	2644.97	972.348	41.0166	2681.12	909.464	-28.2889	2650.66	893.093	-5.93974	2724.81	830.084
956	0	193.803	2678.32	1614.83	308.552	2685.41	1621.75	195.102	2505.66	1625.38	313.481	2501.69	1635.11	255.134	2449.1	1488.92	258.482	2378.01	1250.53	278.239	2605.55	1421.65	287.991	2669.87	1242.01	375.416	2348.52	1307.55	91.3042	2506.16	1453.5	3.02897	2521.15	1220.89	-5.59749	2533.71	1124.96	-12.6864	2660.42	976.551	41.8371	2697.46	914.613	-28.0708	2668.01	897.371	-4.4842	2743.43	836.318
957	0	193.962	2687.05	1615.82	308.77	2693.76	1622.04	194.788	2514.37	1626.59	313.123	2510.07	1635.9	254.288	2457.02	1489.64	258.245	2386.15	1251.17	277.534	2613.31	1422.36	287.089	2677.88	1243.05	374.603	2356.54	1308.23	90.6968	2514	1454.51	2.15111	2531.23	1221.82	-6.38473	2545.49	1126.3	-12.0368	2675.89	980.802	42.8071	2713.57	919.708	-26.7794	2685.13	901.671	-3.14729	2761.76	842.543
958	0	194.14	2695.7	1616.42	309.062	2702.29	1622.36	194.041	2522.77	1627.85	312.715	2518.46	1636.65	253.742	2465.05	1490.34	257.921	2394.49	1251.88	276.68	2621.59	1423.29	286.256	2685.93	1243.85	374.123	2364.88	1308.92	89.9777	2521.8	1455.18	0.575435	2540.63	1222.82	-7.10076	2557.14	1127.27	-11.9961	2690.64	984.563	43.7178	2729.47	924.762	-24.1868	2703.45	906.438	-1.60928	2779.73	848.695
959	0	194.181	2704.39	1616.85	308.973	2710.51	1622.34	194.33	2531.91	1628.71	312.473	2527.04	1637.13	253.246	2473.21	1490.8	257.806	2402.62	1252.53	276.051	2629.46	1423.68	285.586	2693.99	1244.48	373.739	2373.1	1309.48	89.4251	2529.57	1455.25	0.39833	2550.72	1223.37	-7.63773	2568.81	1128.46	-11.3173	2705.17	988.3	44.772	2744.95	929.595	-23.0974	2719.87	910.326	-0.167557	2797.09	854.572
960	0	194.312	2713.07	1617.06	308.931	2718.77	1622.18	193.398	2540.39	1629.56	312.116	2535.34	1637.51	252.784	2481.21	1491.08	257.866	2410.98	1252.83	275.134	2637.86	1424.21	284.957	2702.08	1244.75	373.524	2381.55	1309.85	88.9993	2537.31	1455.46	0.02082	2560.45	1224.02	-8.55261	2579.63	1129.02	-10.6048	2719.4	991.884	45.8778	2759.96	934.132	-22.0132	2735.88	913.934	1.20208	2814.21	859.913
961	0	194.322	2721.91	1617.06	309.056	2727.21	1621.86	193.017	2549.01	1629.94	311.695	2543.85	1637.67	252.332	2489.39	1491.33	258.168	2419.16	1253	274.53	2646.03	1424.18	284.228	2710.33	1244.92	373.317	2389.83	1310.22	88.5269	2545.12	1455.48	-0.448672	2569.97	1224.23	-9.00912	2590.85	1129.72	-9.87732	2733.36	994.989	47.0999	2774.72	938.508	-21.0176	2751.43	917.662	3.16656	2830.82	865.599
962	0	194.387	2730.61	1617.05	309.042	2735.72	1621.56	192.623	2557.81	1630.28	311.464	2552.4	1637.8	252.093	2497.66	1491.42	258.453	2427.12	1253.31	274.005	2654.06	1424.15	283.5	2718.19	1244.8	373.504	2398.4	1310.48	88.2824	2552.98	1455.48	-0.749656	2579.57	1224.48	-9.50568	2601.68	1130.27	-9.06762	2746.96	998.31	48.4062	2789.28	942.909	-20.0301	2766.62	921.383	4.95139	2847.06	871.121
963	0	194.133	2739.25	1616.81	309.251	2744.62	1621.24	192.219	2566.61	1630.32	311.217	2560.96	1637.84	252.057	2505.99	1491.35	258.767	2435.2	1253.35	273.449	2662.68	1424.18	282.889	2726.4	1244.74	373.873	2406.95	1310.75	87.8473	2560.6	1455.22	-1.10864	2588.9	1224.46	-9.84919	2612.45	1130.46	-8.32991	2760.1	1001.26	49.5322	2803.13	947.15	-18.6166	2781.34	924.399	6.81112	2862.73	876.335
964	0	194.07	2747.86	1616.31	308.795	2752.74	1620.51	192.266	2575.28	1629.95	310.902	2569.69	1637.59	251.935	2514.4	1491.23	259.125	2443.25	1253.22	272.707	2670.9	1423.73	282.022	2734.44	1244.25	374.279	2415.55	1310.92	87.5279	2568.38	1455	-1.69517	2597.89	1224.4	-10.3573	2622.89	1130.33	-7.5537	2772.84	1003.78	50.9447	2816.88	950.818	-17.7232	2795.24	927.388	8.64685	2877.72	881.144
965	0	193.991	2756.68	1615.75	308.803	2761.32	1619.7	191.754	2584.04	1629.71	310.564	2578.19	1637.11	252.114	2522.96	1490.82	259.666	2451.27	1253.12	272.358	2679.17	1423.1	281.49	2742.47	1243.56	374.975	2424.44	1310.86	87.4217	2576.1	1454.54	-1.24719	2607.41	1224.05	-10.5113	2633.39	1130.62	-6.59495	2785.55	1006.2	52.0167	2829.81	954.158	-16.1351	2809.32	930.505	10.0472	2892.45	885.621
966	0	193.966	2765.52	1615	308.84	2770.27	1618.69	191.356	2592.88	1629.56	310.309	2587.08	1636.59	252.121	2531.48	1490.28	260.542	2459.43	1252.85	271.603	2687.88	1422.35	280.724	2750.53	1242.56	375.851	2433.18	1310.91	87.3991	2583.95	1453.77	-0.927591	2616.74	1223.78	-10.5899	2643.61	1130.6	-5.40051	2797.77	1008.34	53.4818	2842.38	957.284	-15.9672	2821.65	933.237	12.4259	2906.51	890.077
967	0	193.86	2774.37	1613.99	308.63	2778.89	1617.48	191.149	2601.77	1628.99	310.144	2595.73	1635.72	252.647	2540.09	1489.7	261.389	2467.54	1252.47	271.234	2696.64	1421.53	280.199	2758.67	1241.35	376.8	2442.11	1310.72	87.4823	2591.7	1452.9	-0.830418	2625.82	1223.03	-10.478	2653.62	1130.07	-4.66996	2809.49	1009.97	54.9455	2854.79	960.027	-15.1389	2834.26	935.621	14.0989	2920.19	893.856
968	0	193.707	2783.08	1613.06	308.723	2787.9	1616.3	191.016	2610.61	1628.23	309.971	2604.77	1634.77	252.718	2548.62	1489.01	262.288	2475.72	1251.97	270.916	2705.16	1420.42	279.635	2766.85	1240.32	377.732	2450.93	1310.47	87.6149	2599.51	1451.83	-0.658109	2634.88	1222.29	-10.722	2663.32	1129.49	-3.23285	2820.86	1011.58	56.4581	2866.73	962.665	-14.1712	2846.19	938.465	15.875	2933.32	897.415
969	0	193.598	2791.88	1611.93	308.363	2796.17	1615.11	190.749	2619.42	1627.38	309.699	2613.14	1634	253.322	2557.49	1488.16	263.379	2483.96	1251.34	270.36	2713.84	1419.21	278.979	2775.11	1239.02	378.834	2460.07	1310.07	87.6738	2607.37	1450.75	-0.652208	2643.64	1221.22	-10.3971	2673.05	1128.86	-2.17527	2832.06	1012.88	58.9687	2879.58	965.673	-12.4091	2859.05	938.688	17.7265	2945.89	900.65
970	0	193.547	2800.75	1610.84	308.624	2805.27	1613.71	190.832	2628.31	1626.25	309.828	2622.28	1632.67	253.769	2566.35	1487.12	264.319	2492.3	1250.65	270.237	2722.63	1417.83	278.508	2783.73	1237.46	379.988	2469.22	1309.44	87.8332	2615.31	1449.6	-0.293941	2652.52	1220.39	-10.5258	2682.19	1127.96	-0.735885	2842.95	1014.02	59.5934	2889.42	966.713	-10.972	2870.84	939.975	19.751	2958.05	903.214
971	0	193.557	2809.65	1609.38	308.447	2814.12	1612.11	190.974	2637.25	1624.99	309.985	2631.38	1631.05	254.486	2575.35	1486.04	265.289	2500.79	1249.66	269.929	2731.35	1416.46	278.177	2792.15	1235.81	381.197	2478.28	1308.73	88.2342	2623.25	1447.9	0.224297	2661.28	1219.16	-10.4939	2691.28	1126.69	0.28314	2853.42	1014.73	60.9709	2900.22	968.137	-9.20573	2882.01	941.412	21.8669	2969.92	905.735
972	0	193.718	2818.56	1607.8	308.922	2823.35	1610.6	191.02	2645.99	1623.59	310.111	2640.06	1629.72	254.751	2584.07	1484.9	266.544	2509.28	1248.58	269.755	2740.16	1414.71	277.936	2800.62	1234.1	382.237	2487.43	1307.92	88.53	2631.33	1446.19	0.533799	2669.6	1217.62	-10.2618	2700.19	1125.52	1.38024	2863.41	1015.05	62.2651	2910.43	969.16	-8.53091	2892.24	943.323	23.7223	2981.05	907.404
973	0	193.975	2827.42	1606.35	308.78	2831.78	1608.83	190.908	2654.67	1621.94	310.564	2649.28	1627.98	255.283	2593.01	1483.46	267.768	2517.69	1247.5	269.76	2748.88	1412.62	277.736	2809.21	1232.27	383.587	2496.73	1307	88.9112	2639.52	1444.35	0.984865	2677.85	1215.86	-10.0755	2708.87	1124.02	2.60963	2873.35	1015.22	63.7762	2920.48	969.814	-6.45284	2903.6	942.468	25.7961	2991.84	908.924
974	0	194.423	2836.37	1604.88	309.24	2840.93	1606.97	191.789	2663.74	1620.5	311.012	2658.2	1626.15	256.083	2602.1	1481.97	269.058	2526.26	1246.12	269.886	2757.94	1410.78	277.92	2817.89	1230.34	385.091	2506.02	1305.82	89.4424	2647.88	1442.62	1.81887	2686.05	1214.22	-10.0655	2717.09	1122.41	3.79873	2882.75	1014.7	65.2304	2930.18	970.133	-5.80405	2912.68	943.919	27.1558	3002.21	909.256
975	0	194.75	2845.25	1603.15	309.853	2850.05	1605.37	192.093	2672.6	1619.04	311.311	2667.09	1624.61	256.713	2611.14	1480.58	270.198	2534.83	1244.73	270.091	2767.11	1409.28	277.879	2826.53	1228.59	386.344	2515.2	1304.69	89.9663	2656.18	1440.88	2.25092	2693.93	1212.36	-9.56292	2725.32	1120.46	4.60409	2891.59	1013.98	66.6434	2939.15	969.897	-4.44318	2922.51	943.359	29.3907	3011.82	910.142
976	0	195.394	2854.09	1601.81	310.227	2858.73	1603.95	192.587	2681.6	1617.75	311.917	2676.01	1623.11	257.516	2620.21	1479.33	271.226	2543.56	1243.54	270.261	2776.09	1407.73	278.016	2835.39	1226.86	387.575	2524.46	1303.77	90.6868	2664.72	1439.18	2.56478	2701.68	1210.7	-9.22297	2733.13	1118.19	5.27406	2900.2	1012.89	67.3798	2947.71	969.63	-3.36933	2931.39	942.728	30.4875	3021.15	909.943
977	0	196.12	2863.05	1600.65	311	2867.37	1602.65	193.271	2690.57	1616.32	312.554	2684.9	1621.57	258.533	2629.38	1477.93	272.32	2552.21	1242.38	270.84	2784.8	1405.89	278.307	2844.47	1225.1	388.835	2533.68	1302.6	91.3616	2673.3	1437.5	3.1247	2709.26	1208.94	-8.82184	2741	1116.76	6.51768	2908.54	1011.91	68.6627	2956.02	968.82	-1.74949	2940.39	941.456	31.7479	3029.79	909.501
978	0	197.04	2872.05	1599.29	311.651	2876.27	1600.85	193.949	2699.42	1614.82	313.582	2693.81	1619.88	259.359	2638.53	1476.31	273.602	2560.96	1241	271.438	2793.93	1404.15	278.93	2853.57	1223.3	390.141	2543.02	1301.23	92.1042	2682.07	1436.01	3.56511	2716.62	1207.14	-8.71724	2748.46	1114.74	7.36093	2916.33	1010.36	69.7832	2964.07	967.505	-1.30695	2947.93	940.442	33.0998	3037.96	908.415
979	0	198.154	2881.05	1597.64	313.315	2885.71	1599.56	195.139	2708.54	1613.37	314.591	2702.83	1618.34	260.451	2647.88	1474.97	274.646	2569.82	1239.71	272.152	2803.29	1402.77	279.573	2862.7	1221.7	391.166	2552.2	1299.93	92.6684	2691.12	1434.28	4.47683	2724.23	1205.17	-7.67661	2756.01	1112.88	8.30582	2924.04	1008.57	70.6423	2971.51	965.784	0.238123	2956.08	938.013	34.1454	3045.87	906.948
980	0	199.478	2890.01	1596.59	314.178	2894.22	1598.3	196.424	2717.46	1612.04	315.82	2711.72	1616.93	261.546	2657.14	1473.73	275.631	2578.73	1238.5	273.076	2812.44	1401.32	280.461	2871.62	1219.98	392.107	2561.43	1298.8	93.7645	2700.21	1432.86	5.30504	2731.64	1203.45	-7.3485	2763.27	1111.11	9.13126	2931.07	1006.5	71.4367	2978.31	963.755	1.01864	2962.88	936.054	35.5083	3052.84	904.952
981	0	201.009	2899.14	1595.39	316.049	2903.37	1596.86	197.818	2726.35	1610.61	317.385	2720.7	1615.24	262.478	2666.32	1472.4	276.544	2587.68	1237.25	274.046	2821.58	1399.71	281.361	2880.63	1218.34	393.051	2570.57	1297.58	94.754	2709.47	1431.51	5.58935	2738.93	1202.1	-6.83538	2770.32	1109.6	9.95703	2938.07	1004.25	72.3268	2984.92	961.116	1.42771	2969.24	933.934	35.8118	3059.31	902.271
982	0	202.797	2908.02	1594.42	317.858	2912.73	1595.41	199.157	2735.22	1609.17	319.127	2729.59	1613.5	263.673	2675.72	1470.97	277.31	2596.8	1235.75	275.104	2830.76	1398.18	282.346	2889.69	1216.54	393.985	2579.64	1295.99	96.0379	2718.91	1430.42	6.14899	2746.58	1200.35	-5.75256	2777.46	1107.7	10.7491	2944.59	1001.53	72.9681	2991.25	958.202	2.57328	2976.58	928.733	36.3974	3065.44	899.059
983	0	204.71	2917.08	1593.38	319.146	2921.24	1594.07	201.074	2744.3	1607.97	320.841	2738.4	1611.97	264.773	2684.94	1469.75	277.799	2605.85	1234.65	276.302	2839.98	1396.77	283.432	2899	1215.18	394.839	2588.86	1294.43	96.9251	2728.3	1429.04	7.84781	2754.43	1198.94	-5.20979	2784.32	1106.15	11.3956	2950.67	998.642	73.747	2997.34	954.989	3.41278	2982.17	925.977	36.803	3070.88	895.47
984	0	206.626	2926.04	1592.49	321.384	2930.12	1593.1	202.814	2753.06	1606.7	322.819	2747.2	1610.5	265.884	2693.99	1468.5	278.252	2614.98	1233.47	277.572	2849.03	1395.55	284.244	2908.02	1214.07	395.573	2597.89	1292.92	98.12	2737.77	1428.25	8.85146	2762.28	1198.04	-4.35262	2791.24	1104.92	11.8198	2956.6	995.668	74.2406	3002.86	951.533	3.8407	2987.36	922.495	36.7147	3075.75	891.285
985	0	208.691	2935.04	1591.6	323.323	2938.61	1591.87	204.897	2762	1605.61	324.897	2756	1608.95	267.342	2703.07	1467.13	278.643	2624.25	1232.02	278.9	2858.13	1394.51	285.119	2917.17	1212.99	396.527	2607.03	1290.98	99.1984	2747.13	1427.5	9.43451	2770.08	1196.87	-3.25601	2798.17	1103.53	12.5034	2962.28	992.459	74.3398	3007.63	947.559	4.35957	2991.78	919.416	36.9188	3080.05	886.696
986	0	211.075	2943.7	1590.73	325.828	2947.43	1590.67	207.032	2770.81	1604.29	327.092	2764.74	1607.34	268.733	2711.98	1465.58	279.133	2633.76	1230.17	280.207	2867.12	1393.59	286.098	2926.45	1212.28	397.337	2616.17	1288.89	100.362	2756.39	1426.76	10.8759	2778	1195.85	-2.10625	2805.13	1102.15	12.7951	2967.53	988.925	74.9433	3012.83	943.444	4.01619	2996.01	915.265	36.4738	3084.01	881.705
987	0	213.468	2952.45	1589.87	328.09	2955.95	1589.31	209.563	2779.56	1603.46	329.427	2773.5	1605.92	269.983	2720.8	1464.13	279.548	2643.4	1228.51	281.574	2876.1	1392.64	286.865	2935.88	1211.39	398.304	2625.56	1286.75	101.614	2765.6	1426.03	11.2568	2785.8	1195.02	-1.04286	2811.93	1101.01	13.3285	2972.62	985.397	75.1338	3017.34	938.854	4.05483	3000.04	911.447	36.0798	3087.4	876.086
988	0	216.171	2961.21	1588.89	330.672	2964.81	1587.86	212.052	2788.31	1602.59	332.031	2782.23	1604.54	271.553	2729.43	1462.8	280.553	2653.04	1226.83	282.977	2885.16	1391.72	287.52	2945.29	1210.73	399.351	2634.78	1284.48	102.938	2774.67	1425.15	12.756	2794.31	1194.01	-0.179732	2818.71	1100.15	13.9082	2977.56	981.427	75.0031	3021.41	933.603	3.09066	3003.66	906.564	35.601	3090.38	869.917
989	0	218.91	2969.94	1588.14	333.579	2973.71	1586.55	215.497	2797.24	1601.36	334.742	2790.84	1603.28	273.285	2738.05	1461.49	281.779	2662.65	1224.92	284.362	2894.06	1390.9	288.132	2954.96	1210.13	400.437	2644.06	1282.13	104.14	2783.63	1424.39	14.4562	2802.61	1193.09	1.48207	2825.84	1099.14	13.9813	2982.2	977.313	74.8136	3025.53	928.473	3.13341	3006.39	902.012	34.001	3092.69	863.074
990	0	221.686	2978.56	1587.35	336.366	2982.01	1584.92	217.352	2805.63	1601.37	337.153	2799.42	1602.36	274.782	2746.65	1460.4	283.171	2672.36	1223.28	285.652	2902.81	1390.29	288.794	2964.79	1209.86	401.498	2653.43	1279.96	105.96	2792.45	1424.25	15.1956	2810.7	1192.72	2.81166	2833.04	1098.42	14.2662	2986.66	973.259	74.9256	3028.83	922.706	3.12997	3009.3	897.584	33.5073	3094.6	856.303
991	0	224.159	2987.15	1587.07	339.233	2990.76	1584.35	220.712	2814.35	1600.9	340.059	2807.81	1601.53	276.485	2755.21	1459.33	284.55	2681.99	1221.97	287.045	2911.7	1390.22	289.296	2974.7	1209.98	402.732	2662.84	1277.89	107.313	2800.99	1424.14	16.5428	2819.11	1192.32	4.56023	2840.16	1097.73	14.6432	2990.45	968.781	74.6097	3032.06	917.076	3.99034	3011.53	893.403	32.1002	3095.67	849.265
992	0	226.77	2995.56	1586.9	341.345	2998.6	1583.38	222.659	2822.51	1601.12	342.652	2816.38	1600.79	278.258	2763.7	1458.16	285.762	2691.43	1220.9	288.568	2920.52	1390.15	289.759	2984.84	1210.14	403.977	2672.04	1276.07	108.622	2809.31	1423.82	17.8551	2827.41	1192.18	6.21349	2847.5	1097.44	14.7841	2994.25	964.8	74.4589	3034.63	910.999	3.67444	3013.56	889.41	30.7783	3096.25	842.224
993	0	229.312	3003.96	1586.9	343.014	3006.39	1582.72	225.631	2830.99	1601.02	345.414	2824.72	1600.2	280.197	2772.3	1457.77	287.095	2700.72	1220.1	289.898	2929.25	1390.27	290.05	2994.65	1210.61	405.269	2681.35	1274.61	110.192	2817.58	1424.31	19.5932	2835.63	1192.31	8.19388	2854.82	1097.27	14.7882	2997.7	960.791	73.8438	3037.03	905.287	3.26777	3015.01	884.671	28.9963	3095.97	834.964
994	0	232.006	3012.29	1587.2	346.879	3015.65	1582.74	228.757	2839.6	1601.67	348.047	2833.21	1600.01	281.849	2780.64	1457.47	288.267	2709.76	1219.72	291.068	2938.12	1390.69	290.419	3004.51	1211.33	406.439	2690.6	1273.62	111.677	2825.75	1424.88	20.7427	2843.79	1192.77	10.1029	2862.23	1097.53	14.9201	3000.85	957.243	73.2435	3038.63	899.667	2.95002	3015.82	880.752	27.0748	3095.2	828.062
995	0	234.323	3020.51	1587.8	348.25	3023.22	1582.31	231.196	2847.73	1602.29	350.893	2841.42	1600.15	283.664	2789.02	1457.32	289.468	2718.9	1219.6	292.451	2946.97	1391.33	290.949	3014.03	1212.19	407.962	2699.86	1272.89	112.922	2833.97	1425.67	22.5884	2851.98	1193.53	12.364	2869.56	1098.14	15.0038	3003.58	953.996	72.5414	3039.62	894.062	1.42739	3016.29	877.464	24.5602	3093.76	821.394
996	0	236.705	3028.55	1588.57	350.632	3031.5	1582.3	234.628	2856.33	1603.14	353.598	2849.86	1600.32	285.798	2797.85	1457.74	290.917	2727.91	1219.59	293.806	2955.61	1392.13	291.524	3023.49	1213.22	409.58	2709.17	1272.34	114.481	2842.02	1426.74	24.2379	2860.03	1193.97	14.3528	2876.87	1098.86	14.8018	3006.04	950.947	72.0427	3040.61	889.092	0.457309	3016.37	874.008	22.7236	3091.59	814.748
997	0	239.014	3036.82	1589.33	353.199	3040.02	1582.44	237.243	2864.24	1604.14	356.141	2858.13	1600.8	287.384	2806.1	1458.11	292.177	2736.75	1219.8	294.775	2964.12	1393.05	292.17	3032.63	1214.35	411.125	2718.26	1272.24	115.937	2850.18	1427.96	25.8902	2868.19	1195.01	16.6231	2883.69	1099.48	14.9539	3008.22	948.512	71.1514	3041.24	884.326	-0.931368	3015.74	871.008	20.3512	3088.93	808.588
[truncated: 69 more columns]

## Sheet: Sheet2
Devices
		025370 - Force			025370 - Moment			025370 - CoP			027571 - Force			027571 - Moment			027571 - CoP			037720 - Force			037720 - Moment			037720 - CoP
Frame	Sub Frame	Fx	Fy	Fz	Mx	My	Mz	Cx	Cy	Cz	Fx	Fy	Fz	Mx	My	Mz	Cx	Cy	Cz	Fx	Fy	Fz	Mx	My	Mz	Cx	Cy	Cz
		N	N	N	N.mm	N.mm	N.mm	mm	mm	mm	N	N	N	N.mm	N.mm	N.mm	mm	mm	mm	N	N	N	N.mm	N.mm	N.mm	mm	mm	mm
452	0	0	0	0	0	0	0	200	300	0	0	0	0	0	0	0	200	903	0	0	0	0	0	0	0	603	903	0
452	1	0	0	0	0	0	0	200	300	0	0	0	0	0	0	0	200	903	0	0	0	0	0	0	0	603	903	0
452	2	0	0	0	0	0	0	200	300	0	0	0	0	0	0	0	200	903	0	0	0	0	0	0	0	603	903	0
452	3	0	0	0	0	0	0	200	300	0	0	0	0	0	0	0	200	903	0	0	0	0	0	0	0	603	903	0
452	4	0	0	0	0	0	0	200	300	0	0	0	0	0	0	0	200	903	0	0	0	0	0	0	0	603	903	0
452	5	0	0	0	0	0	0	200	300	0	0	0	0	0	0	0	200	903	0	0	0	0	0	0	0	603	903	0
452	6	0	0	0	0	0	0	200	300	0	0	0	0	0	0	0	200	903	0	0	0	0	0	0	0	603	903	0
452	7	0	0	0	0	0	0	200	300	0	0	0	0	0	0	0	200	903	0	0	0	0	0	0	0	603	903	0
452	8	0	0	0	0	0	0	200	300	0	0	0	0	0	0	0	200	903	0	0	0	0	0	0	0	603	903	0
452	9	0	0	0	0	0	0	200	300	0	0	0	0	0	0	0	200	903	0	0	0	0	0	0	0	603	903	0
453	0	0	0	0	0	0	0	200	300	0	0	0	0	0	0	0	200	903	0	0	0	0	0	0	0	603	903	0
453	1	0	0	0	0	0	0	200	300	0	0	0	0	0	0	0	200	903	0	0	0	0	0	0	0	603	903	0
453	2	0	0	0	0	0	0	200	300	0	0	0	0	0	0	0	200	903	0	0	0	0	0	0	0	603	903	0
453	3	0	0	0	0	0	0	200	300	0	0	0	0	0	0	0	200	903	0	0	0	0	0	0	0	603	903	0
453	4	0	0	0	0	0	0	200	300	0	0	0	0	0	0	0	200	903	0	0	0	0	0	0	0	603	903	0
453	5	0	0	0	0	0	0	200	300	0	0	0	0	0	0	0	200	903	0	0	0	0	0	0	0	603	903	0
453	6	0	0	0	0	0	0	200	300	0	0	0	0	0	0	0	200	903	0	0	0	0	0	0	0	603	903	0
453	7	0	0	0	0	0	0	200	300	0	0	0	0	0	0	0	200	903	0	0	0	0	0	0	0	603	903	0
453	8	0	0	0	0	0	0	200	300	0	0	0	0	0	0	0	200	903	0	0	0	0	0	0	0	603	903	0
453	9	0	0	0	0	0	0	200	300	0	0	0	0	0	0	0	200	903	0	0	0	0	0	0	0	603	903	0
454	0	0	0	0	0	0	0	200	300	0	0	0	0	0	0	0	200	903	0	0	0	0	0	0	0	603	903	0
454	1	0	0	0	0	0	0	200	300	0	0	0	0	0	0	0	200	903	0	0	0	0	0	0	0	603	903	0
454	2	0	0	0	0	0	0	200	300	0	0	0	0	0	0	0	200	903	0	0	0	0	0	0	0	603	903	0
454	3	0	0	0	0	0	0	200	300	0	0	0	0	0	0	0	200	903	0	0	0	0	0	0	0	603	903	0
454	4	0	0	0	0	0	0	200	300	0	0	0	0	0	0	0	200	903	0	0	0	0	0	0	0	603	903	0
454	5	0	0	0	0	0	0	200	300	0	0	0	0	0	0	0	200	903	0	0	0	0	0	0	0	603	903	0
454	6	0	0	0	0	0	0	200	300	0	0	0	0	0	0	0	200	903	0	0	0	0	0	0	0	603	903	0
454	7	0	0	0	0	0	0	200	300	0	0	0	0	0	0	0	200	903	0	0	0	0	0	0	0	603	903	0
454	8	0	0	0	0	0	0	200	300	0	0	0	0	0	0	0	200	903	0	0	0	0	0	0	0	603	903	0
454	9	0	0	0	0	0	0	200	300	0	0	0	0	0	0	0	200	903	0	0	0	0	0	0	0	603	903	0
455	0	0	0	0	0	0	0	200	300	0	0	0	0	0	0	0	200	903	0	0	0	0	0	0	0	603	903	0
455	1	0	0	0	0	0	0	200	300	0	0	0	0	0	0	0	200	903	0	0	0	0	0	0	0	603	903	0
455	2	0	0	0	0	0	0	200	300	0	0	0	0	0	0	0	200	903	0	0	0	0	0	0	0	603	903	0
455	3	0	0	0	0	0	0	200	300	0	0	0	0	0	0	0	200	903	0	0	0	0	0	0	0	603	903	0
455	4	0	0	0	0	0	0	200	300	0	0	0	0	0	0	0	200	903	0	0	0	0	0	0	0	603	903	0
455	5	0	0	0	0	0	0	200	300	0	0	0	0	0	0	0	200	903	0	0	0	0	0	0	0	603	903	0
455	6	0	0	0	0	0	0	200	300	0	0	0	0	0	0	0	200	903	0	0	0	0	0	0	0	603	903	0
455	7	0	0	0	0	0	0	200	300	0	0	0	0	0	0	0	200	903	0	0	0	0	0	0	0	603	903	0
455	8	0	0	0	0	0	0	200	300	0	0	0	0	0	0	0	200	903	0	0	0	0	0	0	0	603	903	0
455	9	0	0	0	0	0	0	200	300	0	0	0	0	0	0	0	200	903	0	0	0	0	0	0	0	603	903	0
456	0	0	0	0	0	0	0	200	300	0	0	0	0	0	0	0	200	903	0	0	0	0	0	0	0	603	903	0
456	1	0	0	0	0	0	0	200	300	0	0	0	0	0	0	0	200	903	0	0	0	0	0	0	0	603	903	0
456	2	0	0	0	0	0	0	200	300	0	0	0	0	0	0	0	200	903	0	0	0	0	0	0	0	603	903	0
456	3	0	0	0	0	0	0	200	300	0	0	0	0	0	0	0	200	903	0	0	0	0	0	0	0	603	903	0
456	4	0	0	0	0	0	0	200	300	0	0	0	0	0	0	0	200	903	0	0	0	0	0	0	0	603	903	0
456	5	0	0	0	0	0	0	200	300	0	0	0	0	0	0	0	200	903	0	0	0	0	0	0	0	603	903	0
456	6	0	0	0	0	0	0	200	300	0	0	0	0	0	0	0	200	903	0	0	0	0	0	0	0	603	903	0
456	7	0	0	0	0	0	0	200	300	0	0	0	0	0	0	0	200	903	0	0	0	0	0	0	0	603	903	0
456	8	0	0	0	0	0	0	200	300	0	0	0	0	0	0	0	200	903	0	0	0	0	0	0	0	603	903	0
456	9	0	0	0	0	0	0	200	300	0	0	0	0	0	0	0	200	903	0	0	0	0	0	0	0	603	903	0
457	0	0	0	0	0	0	0	200	300	0	0	0	0	0	0	0	200	903	0	0	0	0	0	0	0	603	903	0
457	1	0	0	0	0	0	0	200	300	0	0	0	0	0	0	0	200	903	0	0	0	0	0	0	0	603	903	0
457	2	0	0	0	0	0	0	200	300	0	0	0	0	0	0	0	200	903	0	0	0	0	0	0	0	603	903	0
457	3	0	0	0	0	0	0	200	300	0	0	0	0	0	0	0	200	903	0	0	0	0	0	0	0	603	903	0
457	4	0	0	0	0	0	0	200	300	0	0	0	0	0	0	0	200	903	0	0	0	0	0	0	0	603	903	0
457	5	0	0	0	0	0	0	200	300	0	0	0	0	0	0	0	200	903	0	0	0	0	0	0	0	603	903	0
457	6	0	0	0	0	0	0	200	300	0	0	0	0	0	0	0	200	903	0	0	0	0	0	0	0	603	903	0
457	7	0	0	0	0	0	0	200	300	0	0	0	0	0	0	0	200	903	0	0	0	0	0	0	0	603	903	0
457	8	0	0	0	0	0	0	200	300	0	0	0	0	0	0	0	200	903	0	0	0	0	0	0	0	603	903	0
457	9	0	0	0	0	0	0	200	300	0	0	0	0	0	0	0	200	903	0	0	0	0	0	0	0	603	903	0
458	0	0	0	0	0	0	0	200	300	0	0	0	0	0	0	0	200	903	0	0	0	0	0	0	0	603	903	0
458	1	0	0	0	0	0	0	200	300	0	0	0	0	0	0	0	200	903	0	0	0	0	0	0	0	603	903	0
458	2	0	0	0	0	0	0	200	300	0	0	0	0	0	0	0	200	903	0	0	0	0	0	0	0	603	903	0
458	3	0	0	0	0	0	0	200	300	0	0	0	0	0	0	0	200	903	0	0	0	0	0	0	0	603	903	0
458	4	0	0	0	0	0	0	200	300	0	0	0	0	0	0	0	200	903	0	0	0	0	0	0	0	603	903	0
458	5	0	0	0	0	0	0	200	300	0	0	0	0	0	0	0	200	903	0	0	0	0	0	0	0	603	903	0
458	6	0	0	0	0	0	0	200	300	0	0	0	0	0	0	0	200	903	0	0	0	0	0	0	0	603	903	0
458	7	0	0	0	0	0	0	200	300	0	0	0	0	0	0	0	200	903	0	0	0	0	0	0	0	603	903	0
458	8	0	0	0	0	0	0	200	300	0	0	0	0	0	0	0	200	903	0	0	0	0	0	0	0	603	903	0
458	9	0	0	0	0	0	0	200	300	0	0	0	0	0	0	0	200	903	0	0	0	0	0	0	0	603	903	0
459	0	0	0	0	0	0	0	200	300	0	0	0	0	0	0	0	200	903	0	0	0	0	0	0	0	603	903	0
459	1	0	0	0	0	0	0	200	300	0	0	0	0	0	0	0	200	903	0	0	0	0	0	0	0	603	903	0
459	2	0	0	0	0	0	0	200	300	0	0	0	0	0	0	0	200	903	0	0	0	0	0	0	0	603	903	0
459	3	0	0	0	0	0	0	200	300	0	0	0	0	0	0	0	200	903	0	0	0	0	0	0	0	603	903	0
459	4	0	0	0	0	0	0	200	300	0	0	0	0	0	0	0	200	903	0	0	0	0	0	0	0	603	903	0
459	5	0	0	0	0	0	0	200	300	0	0	0	0	0	0	0	200	903	0	0	0	0	0	0	0	603	903	0
459	6	0	0	0	0	0	0	200	300	0	0	0	0	0	0	0	200	903	0	0	0	0	0	0	0	603	903	0
459	7	0	0	0	0	0	0	200	300	0	0	0	0	0	0	0	200	903	0	0	0	0	0	0	0	603	903	0
459	8	0	0	0	0	0	0	200	300	0	0	0	0	0	0	0	200	903	0	0	0	0	0	0	0	603	903	0
459	9	0	0	0	0	0	0	200	300	0	0	0	0	0	0	0	200	903	0	0	0	0	0	0	0	603	903	0
460	0	0	0	0	0	0	0	200	300	0	0	0	0	0	0	0	200	903	0	0	0	0	0	0	0	603	903	0
460	1	0	0	0	0	0	0	200	300	0	0	0	0	0	0	0	200	903	0	0	0	0	0	0	0	603	903	0
460	2	0	0	0	0	0	0	200	300	0	0	0	0	0	0	0	200	903	0	0	0	0	0	0	0	603	903	0
460	3	0	0	0	0	0	0	200	300	0	0	0	0	0	0	0	200	903	0	0	0	0	0	0	0	603	903	0
460	4	0	0	0	0	0	0	200	300	0	0	0	0	0	0	0	200	903	0	0	0	0	0	0	0	603	903	0
460	5	0	0	0	0	0	0	200	300	0	0	0	0	0	0	0	200	903	0	0	0	0	0	0	0	603	903	0
460	6	0	0	0	0	0	0	200	300	0	0	0	0	0	0	0	200	903	0	0	0	0	0	0	0	603	903	0
460	7	0	0	0	0	0	0	200	300	0	0	0	0	0	0	0	200	903	0	0	0	0	0	0	0	603	903	0
460	8	0	0	0	0	0	0	200	300	0	0	0	0	0	0	0	200	903	0	0	0	0	0	0	0	603	903	0
460	9	0	0	0	0	0	0	200	300	0	0	0	0	0	0	0	200	903	0	0	0	0	0	0	0	603	903	0
461	0	0	0	0	0	0	0	200	300	0	0	0	0	0	0	0	200	903	0	0	0	0	0	0	0	603	903	0
461	1	0	0	0	0	0	0	200	300	0	0	0	0	0	0	0	200	903	0	0	0	0	0	0	0	603	903	0
461	2	0	0	0	0	0	0	200	300	0	0	0	0	0	0	0	200	903	0	0	0	0	0	0	0	603	903	0
461	3	0	0	0	0	0	0	200	300	0	0	0	0	0	0	0	200	903	0	0	0	0	0	0	0	603	903	0
461	4	0	0	0	0	0	0	200	300	0	0	0	0	0	0	0	200	903	0	0	0	0	0	0	0	603	903	0
461	5	0	0	0	0	0	0	200	300	0	0	0	0	0	0	0	200	903	0	0	0	0	0	0	0	603	903	0
461	6	0	0	0	0	0	0	200	300	0	0	0	0	0	0	0	200	903	0	0	0	0	0	0	0	603	903	0
461	7	0	0	0	0	0	0	200	300	0	0	0	0	0	0	0	200	903	0	0	0	0	0	0	0	603	903	0
461	8	0	0	0	0	0	0	200	300	0	0	0	0	0	0	0	200	903	0	0	0	0	0	0	0	603	903	0
461	9	0	0	0	0	0	0	200	300	0	0	0	0	0	0	0	200	903	0	0	0	0	0	0	0	603	903	0
462	0	0	0	0	0	0	0	200	300	0	0	0	0	0	0	0	200	903	0	0	0	0	0	0	0	603	903	0
462	1	0	0	0	0	0	0	200	300	0	0	0	0	0	0	0	200	903	0	0	0	0	0	0	0	603	903	0
462	2	0	0	0	0	0	0	200	300	0	0	0	0	0	0	0	200	903	0	0	0	0	0	0	0	603	903	0
462	3	0	0	0	0	0	0	200	300	0	0	0	0	0	0	0	200	903	0	0	0	0	0	0	0	603	903	0
462	4	0	0	0	0	0	0	200	300	0	0	0	0	0	0	0	200	903	0	0	0	0	0	0	0	603	903	0
462	5	0	0	0	0	0	0	200	300	0	0	0	0	0	0	0	200	903	0	0	0	0	0	0	0	603	903	0
462	6	0	0	0	0	0	0	200	300	0	0	0	0	0	0	0	200	903	0	0	0	0	0	0	0	603	903	0
462	7	0	0	0	0	0	0	200	300	0	0	0	0	0	0	0	200	903	0	0	0	0	0	0	0	603	903	0
462	8	0	0	0	0	0	0	200	300	0	0	0	0	0	0	0	200	903	0	0	0	0	0	0	0	603	903	0
462	9	0	0	0	0	0	0	200	300	0	0	0	0	0	0	0	200	903	0	0	0	0	0	0	0	603	903	0
463	0	0	0	0	0	0	0	200	300	0	0	0	0	0	0	0	200	903	0	0	0	0	0	0	0	603	903	0
463	1	0	0	0	0	0	0	200	300	0	0	0	0	0	0	0	200	903	0	0	0	0	0	0	0	603	903	0
463	2	0	0	0	0	0	0	200	300	0	0	0	0	0	0	0	200	903	0	0	0	0	0	0	0	603	903	0
463	3	0	0	0	0	0	0	200	300	0	0	0	0	0	0	0	200	903	0	0	0	0	0	0	0	603	903	0
463	4	0	0	0	0	0	0	200	300	0	0	0	0	0	0	0	200	903	0	0	0	0	0	0	0	603	903	0
463	5	0	0	0	0	0	0	200	300	0	0	0	0	0	0	0	200	903	0	0	0	0	0	0	0	603	903	0
463	6	0	0	0	0	0	0	200	300	0	0	0	0	0	0	0	200	903	0	0	0	0	0	0	0	603	903	0
463	7	0	0	0	0	0	0	200	300	0	0	0	0	0	0	0	200	903	0	0	0	0	0	0	0	603	903	0
463	8	0	0	0	0	0	0	200	300	0	0	0	0	0	0	0	200	903	0	0	0	0	0	0	0	603	903	0
463	9	0	0	0	0	0	0	200	300	0	0	0	0	0	0	0	200	903	0	0	0	0	0	0	0	603	903	0
464	0	0	0	0	0	0	0	200	300	0	0	0	0	0	0	0	200	903	0	0	0	0	0	0	0	603	903	0
464	1	0	0	0	0	0	0	200	300	0	0	0	0	0	0	0	200	903	0	0	0	0	0	0	0	603	903	0
464	2	0	0	0	0	0	0	200	300	0	0	0	0	0	0	0	200	903	0	0	0	0	0	0	0	603	903	0
464	3	0	0	0	0	0	0	200	300	0	0	0	0	0	0	0	200	903	0	0	0	0	0	0	0	603	903	0
464	4	0	0	0	0	0	0	200	300	0	0	0	0	0	0	0	200	903	0	0	0	0	0	0	0	603	903	0
464	5	0	0	0	0	0	0	200	300	0	0	0	0	0	0	0	200	903	0	0	0	0	0	0	0	603	903	0
464	6	0	0	0	0	0	0	200	300	0	0	0	0	0	0	0	200	903	0	0	0	0	0	0	0	603	903	0
464	7	0	0	0	0	0	0	200	300	0	0	0	0	0	0	0	200	903	0	0	0	0	0	0	0	603	903	0
464	8	0	0	0	0	0	0	200	300	0	0	0	0	0	0	0	200	903	0	0	0	0	0	0	0	603	903	0
464	9	0	0	0	0	0	0	200	300	0	0	0	0	0	0	0	200	903	0	0	0	0	0	0	0	603	903	0
465	0	0	0	0	0	0	0	200	300	0	0	0	0	0	0	0	200	903	0	0	0	0	0	0	0	603	903	0
465	1	0	0	0	0	0	0	200	300	0	0	0	0	0	0	0	200	903	0	0	0	0	0	0	0	603	903	0
465	2	0	0	0	0	0	0	200	300	0	0	0	0	0	0	0	200	903	0	0	0	0	0	0	0	603	903	0
465	3	0	0	0	0	0	0	200	300	0	0	0	0	0	0	0	200	903	0	0	0	0	0	0	0	603	903	0
465	4	0	0	0	0	0	0	200	300	0	0	0	0	0	0	0	200	903	0	0	0	0	0	0	0	603	903	0
465	5	0	0	0	0	0	0	200	300	0	0	0	0	0	0	0	200	903	0	0	0	0	0	0	0	603	903	0
465	6	0	0	0	0	0	0	200	300	0	0	0	0	0	0	0	200	903	0	0	0	0	0	0	0	603	903	0
465	7	0	0	0	0	0	0	200	300	0	0	0	0	0	0	0	200	903	0	0	0	0	0	0	0	603	903	0
465	8	0	0	0	0	0	0	200	300	0	0	0	0	0	0	0	200	903	0	0	0	0	0	0	0	603	903	0
465	9	0	0	0	0	0	0	200	300	0	0	0	0	0	0	0	200	903	0	0	0	0	0	0	0	603	903	0
466	0	0	0	0	0	0	0	200	300	0	0	0	0	0	0	0	200	903	0	0	0	0	0	0	0	603	903	0
466	1	0	0	0	0	0	0	200	300	0	0	0	0	0	0	0	200	903	0	0	0	0	0	0	0	603	903	0
466	2	0	0	0	0	0	0	200	300	0	0	0	0	0	0	0	200	903	0	0	0	0	0	0	0	603	903	0
466	3	0	0	0	0	0	0	200	300	0	0	0	0	0	0	0	200	903	0	0	0	0	0	0	0	603	903	0
466	4	0	0	0	0	0	0	200	300	0	0	0	0	0	0	0	200	903	0	0	0	0	0	0	0	603	903	0
466	5	0	0	0	0	0	0	200	300	0	0	0	0	0	0	0	200	903	0	0	0	0	0	0	0	603	903	0
466	6	0	0	0	0	0	0	200	300	0	0	0	0	0	0	0	200	903	0	0	0	0	0	0	0	603	903	0
466	7	0	0	0	0	0	0	200	300	0	0	0	0	0	0	0	200	903	0	0	0	0	0	0	0	603	903	0
466	8	0	0	0	0	0	0	200	300	0	0	0	0	0	0	0	200	903	0	0	0	0	0	0	0	603	903	0
466	9	0	0	0	0	0	0	200	300	0	0	0	0	0	0	0	200	903	0	0	0	0	0	0	0	603	903	0
467	0	0	0	0	0	0	0	200	300	0	0	0	0	0	0	0	200	903	0	0	0	0	0	0	0	603	903	0
467	1	0	0	0	0	0	0	200	300	0	0	0	0	0	0	0	200	903	0	0	0	0	0	0	0	603	903	0
467	2	0	0	0	0	0	0	200	300	0	0	0	0	0	0	0	200	903	0	0	0	0	0	0	0	603	903	0
467	3	0	0	0	0	0	0	200	300	0	0	0	0	0	0	0	200	903	0	0	0	0	0	0	0	603	903	0
467	4	0	0	0	0	0	0	200	300	0	0	0	0	0	0	0	200	903	0	0	0	0	0	0	0	603	903	0
467	5	0	0	0	0	0	0	200	300	0	0	0	0	0	0	0	200	903	0	0	0	0	0	0	0	603	903	0
467	6	0	0	0	0	0	0	200	300	0	0	0	0	0	0	0	200	903	0	0	0	0	0	0	0	603	903	0
467	7	0	0	0	0	0	0	200	300	0	0	0	0	0	0	0	200	903	0	0	0	0	0	0	0	603	903	0
467	8	0	0	0	0	0	0	200	300	0	0	0	0	0	0	0	200	903	0	0	0	0	0	0	0	603	903	0
467	9	0	0	0	0	0	0	200	300	0	0	0	0	0	0	0	200	903	0	0	0	0	0	0	0	603	903	0
468	0	0	0	0	0	0	0	200	300	0	0	0	0	0	0	0	200	903	0	0	0	0	0	0	0	603	903	0
468	1	0	0	0	0	0	0	200	300	0	0	0	0	0	0	0	200	903	0	0	0	0	0	0	0	603	903	0
468	2	0	0	0	0	0	0	200	300	0	0	0	0	0	0	0	200	903	0	0	0	0	0	0	0	603	903	0
468	3	0	0	0	0	0	0	200	300	0	0	0	0	0	0	0	200	903	0	0	0	0	0	0	0	603	903	0
468	4	0	0	0	0	0	0	200	300	0	0	0	0	0	0	0	200	903	0	0	0	0	0	0	0	603	903	0
468	5	0	0	0	0	0	0	200	300	0	0	0	0	0	0	0	200	903	0	0	0	0	0	0	0	603	903	0
468	6	0	0	0	0	0	0	200	300	0	0	0	0	0	0	0	200	903	0	0	0	0	0	0	0	603	903	0
468	7	0	0	0	0	0	0	200	300	0	0	0	0	0	0	0	200	903	0	0	0	0	0	0	0	603	903	0
468	8	0	0	0	0	0	0	200	300	0	0	0	0	0	0	0	200	903	0	0	0	0	0	0	0	603	903	0
468	9	0	0	0	0	0	0	200	300	0	0	0	0	0	0	0	200	903	0	0	0	0	0	0	0	603	903	0
469	0	0	0	0	0	0	0	200	300	0	0	0	0	0	0	0	200	903	0	0	0	0	0	0	0	603	903	0
469	1	0	0	0	0	0	0	200	300	0	0	0	0	0	0	0	200	903	0	0	0	0	0	0	0	603	903	0
469	2	0	0	0	0	0	0	200	300	0	0	0	0	0	0	0	200	903	0	0	0	0	0	0	0	603	903	0
469	3	0	0	0	0	0	0	200	300	0	0	0	0	0	0	0	200	903	0	0	0	0	0	0	0	603	903	0
469	4	0	0	0	0	0	0	200	300	0	0	0	0	0	0	0	200	903	0	0	0	0	0	0	0	603	903	0
469	5	0	0	0	0	0	0	200	300	0	0	0	0	0	0	0	200	903	0	0	0	0	0	0	0	603	903	0
469	6	0	0	0	0	0	0	200	300	0	0	0	0	0	0	0	200	903	0	0	0	0	0	0	0	603	903	0
469	7	0	0	0	0	0	0	200	300	0	0	0	0	0	0	0	200	903	0	0	0	0	0	0	0	603	903	0
469	8	0	0	0	0	0	0	200	300	0	0	0	0	0	0	0	200	903	0	0	0	0	0	0	0	603	903	0
469	9	0	0	0	0	0	0	200	300	0	0	0	0	0	0	0	200	903	0	0	0	0	0	0	0	603	903	0
470	0	0	0	0	0	0	0	200	300	0	0	0	0	0	0	0	200	903	0	0	0	0	0	0	0	603	903	0
470	1	0	0	0	0	0	0	200	300	0	0	0	0	0	0	0	200	903	0	0	0	0	0	0	0	603	903	0
470	2	0	0	0	0	0	0	200	300	0	0	0	0	0	0	0	200	903	0	0	0	0	0	0	0	603	903	0
470	3	0	0	0	0	0	0	200	300	0	0	0	0	0	0	0	200	903	0	0	0	0	0	0	0	603	903	0
470	4	0	0	0	0	0	0	200	300	0	0	0	0	0	0	0	200	903	0	0	0	0	0	0	0	603	903	0
470	5	0	0	0	0	0	0	200	300	0	0	0	0	0	0	0	200	903	0	0	0	0	0	0	0	603	903	0
470	6	0	0	0	0	0	0	200	300	0	0	0	0	0	0	0	200	903	0	0	0	0	0	0	0	603	903	0
470	7	0	0	0	0	0	0	200	300	0	0	0	0	0	0	0	200	903	0	0	0	0	0	0	0	603	903	0
470	8	0	0	0	0	0	0	200	300	0	0	0	0	0	0	0	200	903	0	0	0	0	0	0	0	603	903	0
470	9	0	0	0	0	0	0	200	300	0	0	0	0	0	0	0	200	903	0	0	0	0	0	0	0	603	903	0
471	0	0	0	0	0	0	0	200	300	0	0	0	0	0	0	0	200	903	0	0	0	0	0	0	0	603	903	0
471	1	0	0	0	0	0	0	200	300	0	0	0	0	0	0	0	200	903	0	0	0	0	0	0	0	603	903	0
471	2	0	0	0	0	0	0	200	300	0	0	0	0	0	0	0	200	903	0	0	0	0	0	0	0	603	903	0
471	3	0	0	0	0	0	0	200	300	0	0	0	0	0	0	0	200	903	0	0	0	0	0	0	0	603	903	0
471	4	0	0	0	0	0	0	200	300	0	0	0	0	0	0	0	200	903	0	0	0	0	0	0	0	603	903	0
471	5	0	0	0	0	0	0	200	300	0	0	0	0	0	0	0	200	903	0	0	0	0	0	0	0	603	903	0
471	6	0	0	0	0	0	0	200	300	0	0	0	0	0	0	0	200	903	0	0	0	0	0	0	0	603	903	0
471	7	0	0	0	0	0	0	200	300	0	0	0	0	0	0	0	200	903	0	0	0	0	0	0	0	603	903	0
471	8	0	0	0	0	0	0	200	300	0	0	0	0	0	0	0	200	903	0	0	0	0	0	0	0	603	903	0
471	9	0	0	0	0	0	0	200	300	0	0	0	0	0	0	0	200	903	0	0	0	0	0	0	0	603	903	0
472	0	0	0	0	0	0	0	200	300	0	0	0	0	0	0	0	200	903	0	0	0	0	0	0	0	603	903	0
472	1	0	0	0	0	0	0	200	300	0	0	0	0	0	0	0	200	903	0	0	0	0	0	0	0	603	903	0
472	2	0	0	0	0	0	0	200	300	0	0	0	0	0	0	0	200	903	0	0	0	0	0	0	0	603	903	0
472	3	0	0	0	0	0	0	200	300	0	0	0	0	0	0	0	200	903	0	0	0	0	0	0	0	603	903	0
472	4	0	0	0	0	0	0	200	300	0	0	0	0	0	0	0	200	903	0	0	0	0	0	0	0	603	903	0
472	5	0	0	0	0	0	0	200	300	0	0	0	0	0	0	0	200	903	0	0	0	0	0	0	0	603	903	0
472	6	0	0	0	0	0	0	200	300	0	0	0	0	0	0	0	200	903	0	0	0	0	0	0	0	603	903	0
472	7	0	0	0	0	0	0	200	300	0	0	0	0	0	0	0	200	903	0	0	0	0	0	0	0	603	903	0
472	8	0	0	0	0	0	0	200	300	0	0	0	0	0	0	0	200	903	0	0	0	0	0	0	0	603	903	0
472	9	0	0	0	0	0	0	200	300	0	0	0	0	0	0	0	200	903	0	0	0	0	0	0	0	603	903	0
473	0	0	0	0	0	0	0	200	300	0	0	0	0	0	0	0	200	903	0	0	0	0	0	0	0	603	903	0
473	1	0	0	0	0	0	0	200	300	0	0	0	0	0	0	0	200	903	0	0	0	0	0	0	0	603	903	0
473	2	0	0	0	0	0	0	200	300	0	0	0	0	0	0	0	200	903	0	0	0	0	0	0	0	603	903	0
473	3	0	0	0	0	0	0	200	300	0	0	0	0	0	0	0	200	903	0	0	0	0	0	0	0	603	903	0
473	4	0	0	0	0	0	0	200	300	0	0	0	0	0	0	0	200	903	0	0	0	0	0	0	0	603	903	0
473	5	0	0	0	0	0	0	200	300	0	0	0	0	0	0	0	200	903	0	0	0	0	0	0	0	603	903	0
473	6	0	0	0	0	0	0	200	300	0	0	0	0	0	0	0	200	903	0	0	0	0	0	0	0	603	903	0
473	7	0	0	0	0	0	0	200	300	0	0	0	0	0	0	0	200	903	0	0	0	0	0	0	0	603	903	0
473	8	0	0	0	0	0	0	200	300	0	0	0	0	0	0	0	200	903	0	0	0	0	0	0	0	603	903	0
473	9	0	0	0	0	0	0	200	300	0	0	0	0	0	0	0	200	903	0	0	0	0	0	0	0	603	903	0
474	0	0	0	0	0	0	0	200	300	0	0	0	0	0	0	0	200	903	0	0	0	0	0	0	0	603	903	0
474	1	0	0	0	0	0	0	200	300	0	0	0	0	0	0	0	200	903	0	0	0	0	0	0	0	603	903	0
474	2	0	0	0	0	0	0	200	300	0	0	0	0	0	0	0	200	903	0	0	0	0	0	0	0	603	903	0
474	3	0	0	0	0	0	0	200	300	0	0	0	0	0	0	0	200	903	0	0	0	0	0	0	0	603	903	0
474	4	0	0	0	0	0	0	200	300	0	0	0	0	0	0	0	200	903	0	0	0	0	0	0	0	603	903	0
474	5	0	0	0	0	0	0	200	300	0	0	0	0	0	0	0	200	903	0	0	0	0	0	0	0	603	903	0
474	6	0	0	0	0	0	0	200	300	0	0	0	0	0	0	0	200	903	0	0	0	0	0	0	0	603	903	0
474	7	0	0	0	0	0	0	200	300	0	0	0	0	0	0	0	200	903	0	0	0	0	0	0	0	603	903	0
474	8	0	0	0	0	0	0	200	300	0	0	0	0	0	0	0	200	903	0	0	0	0	0	0	0	603	903	0
474	9	0	0	0	0	0	0	200	300	0	0	0	0	0	0	0	200	903	0	0	0	0	0	0	0	603	903	0
475	0	0	0	0	0	0	0	200	300	0	0	0	0	0	0	0	200	903	0	0	0	0	0	0	0	603	903	0
475	1	0	0	0	0	0	0	200	300	0	0	0	0	0	0	0	200	903	0	0	0	0	0	0	0	603	903	0
475	2	0	0	0	0	0	0	200	300	0	0	0	0	0	0	0	200	903	0	0	0	0	0	0	0	603	903	0
475	3	0	0	0	0	0	0	200	300	0	0	0	0	0	0	0	200	903	0	0	0	0	0	0	0	603	903	0
475	4	0	0	0	0	0	0	200	300	0	0	0	0	0	0	0	200	903	0	0	0	0	0	0	0	603	903	0
475	5	0	0	0	0	0	0	200	300	0	0	0	0	0	0	0	200	903	0	0	0	0	0	0	0	603	903	0
475	6	0	0	0	0	0	0	200	300	0	0	0	0	0	0	0	200	903	0	0	0	0	0	0	0	603	903	0
475	7	0	0	0	0	0	0	200	300	0	0	0	0	0	0	0	200	903	0	0	0	0	0	0	0	603	903	0
475	8	0	0	0	0	0	0	200	300	0	0	0	0	0	0	0	200	903	0	0	0	0	0	0	0	603	903	0
475	9	0	0	0	0	0	0	200	300	0	0	0	0	0	0	0	200	903	0	0	0	0	0	0	0	603	903	0
476	0	0	0	0	0	0	0	200	300	0	0	0	0	0	0	0	200	903	0	0	0	0	0	0	0	603	903	0
476	1	0	0	0	0	0	0	200	300	0	0	0	0	0	0	0	200	903	0	0	0	0	0	0	0	603	903	0
476	2	0	0	0	0	0	0	200	300	0	0	0	0	0	0	0	200	903	0	0	0	0	0	0	0	603	903	0
476	3	0	0	0	0	0	0	200	300	0	0	0	0	0	0	0	200	903	0	0	0	0	0	0	0	603	903	0
476	4	0	0	0	0	0	0	200	300	0	0	0	0	0	0	0	200	903	0	0	0	0	0	0	0	603	903	0
476	5	0	0	0	0	0	0	200	300	0	0	0	0	0	0	0	200	903	0	0	0	0	0	0	0	603	903	0
476	6	0	0	0	0	0	0	200	300	0	0	0	0	0	0	0	200	903	0	0	0	0	0	0	0	603	903	0
476	7	0	0	0	0	0	0	200	300	0	0	0	0	0	0	0	200	903	0	0	0	0	0	0	0	603	903	0
476	8	0	0	0	0	0	0	200	300	0	0	0	0	0	0	0	200	903	0	0	0	0	0	0	0	603	903	0
476	9	0	0	0	0	0	0	200	300	0	0	0	0	0	0	0	200	903	0	0	0	0	0	0	0	603	903	0
477	0	0	0	0	0	0	0	200	300	0	0	0	0	0	0	0	200	903	0	0	0	0	0	0	0	603	903	0
477	1	0	0	0	0	0	0	200	300	0	0	0	0	0	0	0	200	903	0	0	0	0	0	0	0	603	903	0
477	2	0	0	0	0	0	0	200	300	0	0	0	0	0	0	0	200	903	0	0	0	0	0	0	0	603	903	0
477	3	0	0	0	0	0	0	200	300	0	0	0	0	0	0	0	200	903	0	0	0	0	0	0	0	603	903	0
477	4	0	0	0	0	0	0	200	300	0	0	0	0	0	0	0	200	903	0	0	0	0	0	0	0	603	903	0
477	5	0	0	0	0	0	0	200	300	0	0	0	0	0	0	0	200	903	0	0	0	0	0	0	0	603	903	0
477	6	0	0	0	0	0	0	200	300	0	0	0	0	0	0	0	200	903	0	0	0	0	0	0	0	603	903	0
477	7	0	0	0	0	0	0	200	300	0	0	0	0	0	0	0	200	903	0	0	0	0	0	0	0	603	903	0
477	8	0	0	0	0	0	0	200	300	0	0	0	0	0	0	0	200	903	0	0	0	0	0	0	0	603	903	0
477	9	0	0	0	0	0	0	200	300	0	0	0	0	0	0	0	200	903	0	0	0	0	0	0	0	603	903	0
478	0	0	0	0	0	0	0	200	300	0	0	0	0	0	0	0	200	903	0	0	0	0	0	0	0	603	903	0
478	1	0	0	0	0	0	0	200	300	0	0	0	0	0	0	0	200	903	0	0	0	0	0	0	0	603	903	0
478	2	0	0	0	0	0	0	200	300	0	0	0	0	0	0	0	200	903	0	0	0	0	0	0	0	603	903	0
478	3	0	0	0	0	0	0	200	300	0	0	0	0	0	0	0	200	903	0	0	0	0	0	0	0	603	903	0
478	4	0	0	0	0	0	0	200	300	0	0	0	0	0	0	0	200	903	0	0	0	0	0	0	0	603	903	0
478	5	0	0	0	0	0	0	200	300	0	0	0	0	0	0	0	200	903	0	0	0	0	0	0	0	603	903	0
478	6	0	0	0	0	0	0	200	300	0	0	0	0	0	0	0	200	903	0	0	0	0	0	0	0	603	903	0
478	7	0	0	0	0	0	0	200	300	0	0	0	0	0	0	0	200	903	0	0	0	0	0	0	0	603	903	0
478	8	0	0	0	0	0	0	200	300	0	0	0	0	0	0	0	200	903	0	0	0	0	0	0	0	603	903	0
478	9	0	0	0	0	0	0	200	300	0	0	0	0	0	0	0	200	903	0	0	0	0	0	0	0	603	903	0
479	0	0	0	0	0	0	0	200	300	0	0	0	0	0	0	0	200	903	0	0	0	0	0	0	0	603	903	0
479	1	0	0	0	0	0	0	200	300	0	0	0	0	0	0	0	200	903	0	0	0	0	0	0	0	603	903	0
479	2	0	0	0	0	0	0	200	300	0	0	0	0	0	0	0	200	903	0	0	0	0	0	0	0	603	903	0
479	3	0	0	0	0	0	0	200	300	0	0	0	0	0	0	0	200	903	0	0	0	0	0	0	0	603	903	0
479	4	0	0	0	0	0	0	200	300	0	0	0	0	0	0	0	200	903	0	0	0	0	0	0	0	603	903	0
479	5	0	0	0	0	0	0	200	300	0	0	0	0	0	0	0	200	903	0	0	0	0	0	0	0	603	903	0
479	6	0	0	0	0	0	0	200	300	0	0	0	0	0	0	0	200	903	0	0	0	0	0	0	0	603	903	0
479	7	0	0	0	0	0	0	200	300	0	0	0	0	0	0	0	200	903	0	0	0	0	0	0	0	603	903	0
479	8	0	0	0	0	0	0	200	300	0	0	0	0	0	0	0	200	903	0	0	0	0	0	0	0	603	903	0
479	9	0	0	0	0	0	0	200	300	0	0	0	0	0	0	0	200	903	0	0	0	0	0	0	0	603	903	0
480	0	0	0	0	0	0	0	200	300	0	0	0	0	0	0	0	200	903	0	0	0	0	0	0	0	603	903	0
480	1	0	0	0	0	0	0	200	300	0	0	0	0	0	0	0	200	903	0	0	0	0	0	0	0	603	903	0
480	2	0	0	0	0	0	0	200	300	0	0	0	0	0	0	0	200	903	0	0	0	0	0	0	0	603	903	0
480	3	0	0	0	0	0	0	200	300	0	0	0	0	0	0	0	200	903	0	0	0	0	0	0	0	603	903	0
480	4	0	0	0	0	0	0	200	300	0	0	0	0	0	0	0	200	903	0	0	0	0	0	0	0	603	903	0
480	5	0	0	0	0	0	0	200	300	0	0	0	0	0	0	0	200	903	0	0	0	0	0	0	0	603	903	0
480	6	0	0	0	0	0	0	200	300	0	0	0	0	0	0	0	200	903	0	0	0	0	0	0	0	603	903	0
480	7	0	0	0	0	0	0	200	300	0	0	0	0	0	0	0	200	903	0	0	0	0	0	0	0	603	903	0
480	8	0	0	0	0	0	0	200	300	0	0	0	0	0	0	0	200	903	0	0	0	0	0	0	0	603	903	0
480	9	0	0	0	0	0	0	200	300	0	0	0	0	0	0	0	200	903	0	0	0	0	0	0	0	603	903	0
481	0	0	0	0	0	0	0	200	300	0	0	0	0	0	0	0	200	903	0	0	0	0	0	0	0	603	903	0
481	1	0	0	0	0	0	0	200	300	0	0	0	0	0	0	0	200	903	0	0	0	0	0	0	0	603	903	0
481	2	0	0	0	0	0	0	200	300	0	0	0	0	0	0	0	200	903	0	0	0	0	0	0	0	603	903	0
481	3	0	0	0	0	0	0	200	300	0	0	0	0	0	0	0	200	903	0	0	0	0	0	0	0	603	903	0
481	4	0	0	0	0	0	0	200	300	0	0	0	0	0	0	0	200	903	0	0	0	0	0	0	0	603	903	0
481	5	0	0	0	0	0	0	200	300	0	0	0	0	0	0	0	200	903	0	0	0	0	0	0	0	603	903	0
481	6	0	0	0	0	0	0	200	300	0	0	0	0	0	0	0	200	903	0	0	0	0	0	0	0	603	903	0
481	7	0	0	0	0	0	0	200	300	0	0	0	0	0	0	0	200	903	0	0	0	0	0	0	0	603	903	0
481	8	0	0	0	0	0	0	200	300	0	0	0	0	0	0	0	200	903	0	0	0	0	0	0	0	603	903	0
481	9	0	0	0	0	0	0	200	300	0	0	0	0	0	0	0	200	903	0	0	0	0	0	0	0	603	903	0
482	0	0	0	0	0	0	0	200	300	0	0	0	0	0	0	0	200	903	0	0	0	0	0	0	0	603	903	0
482	1	0	0	0	0	0	0	200	300	0	0	0	0	0	0	0	200	903	0	0	0	0	0	0	0	603	903	0
482	2	0	0	0	0	0	0	200	300	0	0	0	0	0	0	0	200	903	0	0	0	0	0	0	0	603	903	0
482	3	0	0	0	0	0	0	200	300	0	0	0	0	0	0	0	200	903	0	0	0	0	0	0	0	603	903	0
482	4	0	0	0	0	0	0	200	300	0	0	0	0	0	0	0	200	903	0	0	0	0	0	0	0	603	903	0
482	5	0	0	0	0	0	0	200	300	0	0	0	0	0	0	0	200	903	0	0	0	0	0	0	0	603	903	0
482	6	0	0	0	0	0	0	200	300	0	0	0	0	0	0	0	200	903	0	0	0	0	0	0	0	603	903	0
482	7	0	0	0	0	0	0	200	300	0	0	0	0	0	0	0	200	903	0	0	0	0	0	0	0	603	903	0
482	8	0	0	0	0	0	0	200	300	0	0	0	0	0	0	0	200	903	0	0	0	0	0	0	0	603	903	0
482	9	0	0	0	0	0	0	200	300	0	0	0	0	0	0	0	200	903	0	0	0	0	0	0	0	603	903	0
483	0	0	0	0	0	0	0	200	300	0	0	0	0	0	0	0	200	903	0	0	0	0	0	0	0	603	903	0
483	1	0	0	0	0	0	0	200	300	0	0	0	0	0	0	0	200	903	0	0	0	0	0	0	0	603	903	0
483	2	0	0	0	0	0	0	200	300	0	0	0	0	0	0	0	200	903	0	0	0	0	0	0	0	603	903	0
483	3	0	0	0	0	0	0	200	300	0	0	0	0	0	0	0	200	903	0	0	0	0	0	0	0	603	903	0
483	4	0	0	0	0	0	0	200	300	0	0	0	0	0	0	0	200	903	0	0	0	0	0	0	0	603	903	0
483	5	0	0	0	0	0	0	200	300	0	0	0	0	0	0	0	200	903	0	0	0	0	0	0	0	603	903	0
483	6	0	0	0	0	0	0	200	300	0	0	0	0	0	0	0	200	903	0	0	0	0	0	0	0	603	903	0
483	7	0	0	0	0	0	0	200	300	0	0	0	0	0	0	0	200	903	0	0	0	0	0	0	0	603	903	0
483	8	0	0	0	0	0	0	200	300	0	0	0	0	0	0	0	200	903	0	0	0	0	0	0	0	603	903	0
483	9	0	0	0	0	0	0	200	300	0	0	0	0	0	0	0	200	903	0	0	0	0	0	0	0	603	903	0
484	0	0	0	0	0	0	0	200	300	0	0	0	0	0	0	0	200	903	0	0	0	0	0	0	0	603	903	0
484	1	0	0	0	0	0	0	200	300	0	0	0	0	0	0	0	200	903	0	0	0	0	0	0	0	603	903	0
484	2	0	0	0	0	0	0	200	300	0	0	0	0	0	0	0	200	903	0	0	0	0	0	0	0	603	903	0
484	3	0	0	0	0	0	0	200	300	0	0	0	0	0	0	0	200	903	0	0	0	0	0	0	0	603	903	0
484	4	0	0	0	0	0	0	200	300	0	0	0	0	0	0	0	200	903	0	0	0	0	0	0	0	603	903	0
484	5	0	0	0	0	0	0	200	300	0	0	0	0	0	0	0	200	903	0	0	0	0	0	0	0	603	903	0
484	6	0	0	0	0	0	0	200	300	0	0	0	0	0	0	0	200	903	0	0	0	0	0	0	0	603	903	0
484	7	0	0	0	0	0	0	200	300	0	0	0	0	0	0	0	200	903	0	0	0	0	0	0	0	603	903	0
484	8	0	0	0	0	0	0	200	300	0	0	0	0	0	0	0	200	903	0	0	0	0	0	0	0	603	903	0
484	9	0	0	0	0	0	0	200	300	0	0	0	0	0	0	0	200	903	0	0	0	0	0	0	0	603	903	0
485	0	0	0	0	0	0	0	200	300	0	0	0	0	0	0	0	200	903	0	0	0	0	0	0	0	603	903	0
485	1	0	0	0	0	0	0	200	300	0	0	0	0	0	0	0	200	903	0	0	0	0	0	0	0	603	903	0
485	2	0	0	0	0	0	0	200	300	0	0	0	0	0	0	0	200	903	0	0	0	0	0	0	0	603	903	0
485	3	0	0	0	0	0	0	200	300	0	0	0	0	0	0	0	200	903	0	0	0	0	0	0	0	603	903	0
485	4	0	0	0	0	0	0	200	300	0	0	0	0	0	0	0	200	903	0	0	0	0	0	0	0	603	903	0
485	5	0	0	0	0	0	0	200	300	0	0	0	0	0	0	0	200	903	0	0	0	0	0	0	0	603	903	0
485	6	0	0	0	0	0	0	200	300	0	0	0	0	0	0	0	200	903	0	0	0	0	0	0	0	603	903	0
485	7	0	0	0	0	0	0	200	300	0	0	0	0	0	0	0	200	903	0	0	0	0	0	0	0	603	903	0
485	8	0	0	0	0	0	0	200	300	0	0	0	0	0	0	0	200	903	0	0	0	0	0	0	0	603	903	0
485	9	0	0	0	0	0	0	200	300	0	0	0	0	0	0	0	200	903	0	0	0	0	0	0	0	603	903	0
486	0	0	0	0	0	0	0	200	300	0	0	0	0	0	0	0	200	903	0	0	0	0	0	0	0	603	903	0
486	1	0	0	0	0	0	0	200	300	0	0	0	0	0	0	0	200	903	0	0	0	0	0	0	0	603	903	0
486	2	0	0	0	0	0	0	200	300	0	0	0	0	0	0	0	200	903	0	0	0	0	0	0	0	603	903	0
486	3	0	0	0	0	0	0	200	300	0	0	0	0	0	0	0	200	903	0	0	0	0	0	0	0	603	903	0
486	4	0	0	0	0	0	0	200	300	0	0	0	0	0	0	0	200	903	0	0	0	0	0	0	0	603	903	0
486	5	0	0	0	0	0	0	200	300	0	0	0	0	0	0	0	200	903	0	0	0	0	0	0	0	603	903	0
486	6	0	0	0	0	0	0	200	300	0	0	0	0	0	0	0	200	903	0	0	0	0	0	0	0	603	903	0
486	7	0	0	0	0	0	0	200	300	0	0	0	0	0	0	0	200	903	0	0	0	0	0	0	0	603	903	0
486	8	0	0	0	0	0	0	200	300	0	0	0	0	0	0	0	200	903	0	0	0	0	0	0	0	603	903	0
486	9	0	0	0	0	0	0	200	300	0	0	0	0	0	0	0	200	903	0	0	0	0	0	0	0	603	903	0
487	0	0	0	0	0	0	0	200	300	0	0	0	0	0	0	0	200	903	0	0	0	0	0	0	0	603	903	0
487	1	0	0	0	0	0	0	200	300	0	0	0	0	0	0	0	200	903	0	0	0	0	0	0	0	603	903	0
487	2	0	0	0	0	0	0	200	300	0	0	0	0	0	0	0	200	903	0	0	0	0	0	0	0	603	903	0
487	3	0	0	0	0	0	0	200	300	0	0	0	0	0	0	0	200	903	0	0	0	0	0	0	0	603	903	0
487	4	0	0	0	0	0	0	200	300	0	0	0	0	0	0	0	200	903	0	0	0	0	0	0	0	603	903	0
487	5	0	0	0	0	0	0	200	300	0	0	0	0	0	0	0	200	903	0	0	0	0	0	0	0	603	903	0
487	6	0	0	0	0	0	0	200	300	0	0	0	0	0	0	0	200	903	0	0	0	0	0	0	0	603	903	0
487	7	0	0	0	0	0	0	200	300	0	0	0	0	0	0	0	200	903	0	0	0	0	0	0	0	603	903	0
487	8	0	0	0	0	0	0	200	300	0	0	0	0	0	0	0	200	903	0	0	0	0	0	0	0	603	903	0
487	9	0	0	0	0	0	0	200	300	0	0	0	0	0	0	0	200	903	0	0	0	0	0	0	0	603	903	0
488	0	0	0	0	0	0	0	200	300	0	0	0	0	0	0	0	200	903	0	0	0	0	0	0	0	603	903	0
488	1	0	0	0	0	0	0	200	300	0	0	0	0	0	0	0	200	903	0	0	0	0	0	0	0	603	903	0
488	2	0	0	0	0	0	0	200	300	0	0	0	0	0	0	0	200	903	0	0	0	0	0	0	0	603	903	0
488	3	0	0	0	0	0	0	200	300	0	0	0	0	0	0	0	200	903	0	0	0	0	0	0	0	603	903	0
488	4	0	0	0	0	0	0	200	300	0	0	0	0	0	0	0	200	903	0	0	0	0	0	0	0	603	903	0
488	5	0	0	0	0	0	0	200	300	0	0	0	0	0	0	0	200	903	0	0	0	0	0	0	0	603	903	0
488	6	0	0	0	0	0	0	200	300	0	0	0	0	0	0	0	200	903	0	0	0	0	0	0	0	603	903	0
488	7	0	0	0	0	0	0	200	300	0	0	0	0	0	0	0	200	903	0	0	0	0	0	0	0	603	903	0
488	8	0	0	0	0	0	0	200	300	0	0	0	0	0	0	0	200	903	0	0	0	0	0	0	0	603	903	0
488	9	0	0	0	0	0	0	200	300	0	0	0	0	0	0	0	200	903	0	0	0	0	0	0	0	603	903	0
489	0	0	0	0	0	0	0	200	300	0	0	0	0	0	0	0	200	903	0	0	0	0	0	0	0	603	903	0
489	1	0	0	0	0	0	0	200	300	0	0	0	0	0	0	0	200	903	0	0	0	0	0	0	0	603	903	0
489	2	0	0	0	0	0	0	200	300	0	0	0	0	0	0	0	200	903	0	0	0	0	0	0	0	603	903	0
489	3	0	0	0	0	0	0	200	300	0	0	0	0	0	0	0	200	903	0	0	0	0	0	0	0	603	903	0
489	4	0	0	0	0	0	0	200	300	0	0	0	0	0	0	0	200	903	0	0	0	0	0	0	0	603	903	0
489	5	0	0	0	0	0	0	200	300	0	0	0	0	0	0	0	200	903	0	0	0	0	0	0	0	603	903	0
489	6	0	0	0	0	0	0	200	300	0	0	0	0	0	0	0	200	903	0	0	0	0	0	0	0	603	903	0
489	7	0	0	0	0	0	0	200	300	0	0	0	0	0	0	0	200	903	0	0	0	0	0	0	0	603	903	0
489	8	0	0	0	0	0	0	200	300	0	0	0	0	0	0	0	200	903	0	0	0	0	0	0	0	603	903	0
489	9	0	0	0	0	0	0	200	300	0	0	0	0	0	0	0	200	903	0	0	0	0	0	0	0	603	903	0
490	0	0	0	0	0	0	0	200	300	0	0	0	0	0	0	0	200	903	0	0	0	0	0	0	0	603	903	0
490	1	0	0	0	0	0	0	200	300	0	0	0	0	0	0	0	200	903	0	0	0	0	0	0	0	603	903	0
490	2	0	0	0	0	0	0	200	300	0	0	0	0	0	0	0	200	903	0	0	0	0	0	0	0	603	903	0
490	3	0	0	0	0	0	0	200	300	0	0	0	0	0	0	0	200	903	0	0	0	0	0	0	0	603	903	0
490	4	0	0	0	0	0	0	200	300	0	0	0	0	0	0	0	200	903	0	0	0	0	0	0	0	603	903	0
490	5	0	0	0	0	0	0	200	300	0	0	0	0	0	0	0	200	903	0	0	0	0	0	0	0	603	903	0
490	6	0	0	0	0	0	0	200	300	0	0	0	0	0	0	0	200	903	0	0	0	0	0	0	0	603	903	0
490	7	0	0	0	0	0	0	200	300	0	0	0	0	0	0	0	200	903	0	0	0	0	0	0	0	603	903	0
490	8	0	0	0	0	0	0	200	300	0	0	0	0	0	0	0	200	903	0	0	0	0	0	0	0	603	903	0
490	9	0	0	0	0	0	0	200	300	0	0	0	0	0	0	0	200	903	0	0	0	0	0	0	0	603	903	0
491	0	0	0	0	0	0	0	200	300	0	0	0	0	0	0	0	200	903	0	0	0	0	0	0	0	603	903	0
491	1	0	0	0	0	0	0	200	300	0	0	0	0	0	0	0	200	903	0	0	0	0	0	0	0	603	903	0
491	2	0	0	0	0	0	0	200	300	0	0	0	0	0	0	0	200	903	0	0	0	0	0	0	0	603	903	0
491	3	0	0	0	0	0	0	200	300	0	0	0	0	0	0	0	200	903	0	0	0	0	0	0	0	603	903	0
491	4	0	0	0	0	0	0	200	300	0	0	0	0	0	0	0	200	903	0	0	0	0	0	0	0	603	903	0
491	5	0	0	0	0	0	0	200	300	0	0	0	0	0	0	0	200	903	0	0	0	0	0	0	0	603	903	0
491	6	0	0	0	0	0	0	200	300	0	0	0	0	0	0	0	200	903	0	0	0	0	0	0	0	603	903	0
491	7	0	0	0	0	0	0	200	300	0	0	0	0	0	0	0	200	903	0	0	0	0	0	0	0	603	903	0
491	8	0	0	0	0	0	0	200	300	0	0	0	0	0	0	0	200	903	0	0	0	0	0	0	0	603	903	0
491	9	0	0	0	0	0	0	200	300	0	0	0	0	0	0	0	200	903	0	0	0	0	0	0	0	603	903	0
492	0	0	0	0	0	0	0	200	300	0	0	0	0	0	0	0	200	903	0	0	0	0	0	0	0	603	903	0
492	1	0	0	0	0	0	0	200	300	0	0	0	0	0	0	0	200	903	0	0	0	0	0	0	0	603	903	0
492	2	0	0	0	0	0	0	200	300	0	0	0	0	0	0	0	200	903	0	0	0	0	0	0	0	603	903	0
492	3	0	0	0	0	0	0	200	300	0	0	0	0	0	0	0	200	903	0	0	0	0	0	0	0	603	903	0
492	4	0	0	0	0	0	0	200	300	0	0	0	0	0	0	0	200	903	0	0	0	0	0	0	0	603	903	0
492	5	0	0	0	0	0	0	200	300	0	0	0	0	0	0	0	200	903	0	0	0	0	0	0	0	603	903	0
492	6	0	0	0	0	0	0	200	300	0	0	0	0	0	0	0	200	903	0	0	0	0	0	0	0	603	903	0
492	7	0	0	0	0	0	0	200	300	0	0	0	0	0	0	0	200	903	0	0	0	0	0	0	0	603	903	0
492	8	0	0	0	0	0	0	200	300	0	0	0	0	0	0	0	200	903	0	0	0	0	0	0	0	603	903	0
492	9	0	0	0	0	0	0	200	300	0	0	0	0	0	0	0	200	903	0	0	0	0	0	0	0	603	903	0
493	0	0	0	0	0	0	0	200	300	0	0	0	0	0	0	0	200	903	0	0	0	0	0	0	0	603	903	0
493	1	0	0	0	0	0	0	200	300	0	0	0	0	0	0	0	200	903	0	0	0	0	0	0	0	603	903	0
493	2	0	0	0	0	0	0	200	300	0	0	0	0	0	0	0	200	903	0	0	0	0	0	0	0	603	903	0
493	3	0	0	0	0	0	0	200	300	0	0	0	0	0	0	0	200	903	0	0	0	0	0	0	0	603	903	0
493	4	0	0	0	0	0	0	200	300	0	0	0	0	0	0	0	200	903	0	0	0	0	0	0	0	603	903	0
493	5	0	0	0	0	0	0	200	300	0	0	0	0	0	0	0	200	903	0	0	0	0	0	0	0	603	903	0
493	6	0	0	0	0	0	0	200	300	0	0	0	0	0	0	0	200	903	0	0	0	0	0	0	0	603	903	0
493	7	0	0	0	0	0	0	200	300	0	0	0	0	0	0	0	200	903	0	0	0	0	0	0	0	603	903	0
493	8	0	0	0	0	0	0	200	300	0	0	0	0	0	0	0	200	903	0	0	0	0	0	0	0	603	903	0
493	9	0	0	0	0	0	0	200	300	0	0	0	0	0	0	0	200	903	0	0	0	0	0	0	0	603	903	0
494	0	0	0	0	0	0	0	200	300	0	0	0	0	0	0	0	200	903	0	0	0	0	0	0	0	603	903	0
494	1	0	0	0	0	0	0	200	300	0	0	0	0	0	0	0	200	903	0	0	0	0	0	0	0	603	903	0
494	2	0	0	0	0	0	0	200	300	0	0	0	0	0	0	0	200	903	0	0	0	0	0	0	0	603	903	0
494	3	0	0	0	0	0	0	200	300	0	0	0	0	0	0	0	200	903	0	0	0	0	0	0	0	603	903	0
494	4	0	0	0	0	0	0	200	300	0	0	0	0	0	0	0	200	903	0	0	0	0	0	0	0	603	903	0
494	5	0	0	0	0	0	0	200	300	0	0	0	0	0	0	0	200	903	0	0	0	0	0	0	0	603	903	0
494	6	0	0	0	0	0	0	200	300	0	0	0	0	0	0	0	200	903	0	0	0	0	0	0	0	603	903	0
494	7	0	0	0	0	0	0	200	300	0	0	0	0	0	0	0	200	903	0	0	0	0	0	0	0	603	903	0
494	8	0	0	0	0	0	0	200	300	0	0	0	0	0	0	0	200	903	0	0	0	0	0	0	0	603	903	0
494	9	0	0	0	0	0	0	200	300	0	0	0	0	0	0	0	200	903	0	0	0	0	0	0	0	603	903	0
495	0	0	0	0	0	0	0	200	300	0	0	0	0	0	0	0	200	903	0	0	0	0	0	0	0	603	903	0
495	1	0	0	0	0	0	0	200	300	0	0	0	0	0	0	0	200	903	0	0	0	0	0	0	0	603	903	0
495	2	0	0	0	0	0	0	200	300	0	0	0	0	0	0	0	200	903	0	0	0	0	0	0	0	603	903	0
495	3	0	0	0	0	0	0	200	300	0	0	0	0	0	0	0	200	903	0	0	0	0	0	0	0	603	903	0
495	4	0	0	0	0	0	0	200	300	0	0	0	0	0	0	0	200	903	0	0	0	0	0	0	0	603	903	0
495	5	0	0	0	0	0	0	200	300	0	0	0	0	0	0	0	200	903	0	0	0	0	0	0	0	603	903	0
495	6	0	0	0	0	0	0	200	300	0	0	0	0	0	0	0	200	903	0	0	0	0	0	0	0	603	903	0
495	7	0	0	0	0	0	0	200	300	0	0	0	0	0	0	0	200	903	0	0	0	0	0	0	0	603	903	0
495	8	0	0	0	0	0	0	200	300	0	0	0	0	0	0	0	200	903	0	0	0	0	0	0	0	603	903	0
495	9	0	0	0	0	0	0	200	300	0	0	0	0	0	0	0	200	903	0	0	0	0	0	0	0	603	903	0
496	0	0	0	0	0	0	0	200	300	0	0	0	0	0	0	0	200	903	0	0	0	0	0	0	0	603	903	0
496	1	0	0	0	0	0	0	200	300	0	0	0	0	0	0	0	200	903	0	0	0	0	0	0	0	603	903	0
496	2	0	0	0	0	0	0	200	300	0	0	0	0	0	0	0	200	903	0	0	0	0	0	0	0	603	903	0
496	3	0	0	0	0	0	0	200	300	0	0	0	0	0	0	0	200	903	0	0	0	0	0	0	0	603	903	0
496	4	0	0	0	0	0	0	200	300	0	0	0	0	0	0	0	200	903	0	0	0	0	0	0	0	603	903	0
496	5	0	0	0	0	0	0	200	300	0	0	0	0	0	0	0	200	903	0	0	0	0	0	0	0	603	903	0
496	6	0	0	0	0	0	0	200	300	0	0	0	0	0	0	0	200	903	0	0	0	0	0	0	0	603	903	0
496	7	0	0	0	0	0	0	200	300	0	0	0	0	0	0	0	200	903	0	0	0	0	0	0	0	603	903	0
496	8	0	0	0	0	0	0	200	300	0	0	0	0	0	0	0	200	903	0	0	0	0	0	0	0	603	903	0
496	9	0	0	0	0	0	0	200	300	0	0	0	0	0	0	0	200	903	0	0	0	0	0	0	0	603	903	0
497	0	0	0	0	0	0	0	200	300	0	0	0	0	0	0	0	200	903	0	0	0	0	0	0	0	603	903	0
497	1	0	0	0	0	0	0	200	300	0	0	0	0	0	0	0	200	903	0	0	0	0	0	0	0	603	903	0
497	2	0	0	0	0	0	0	200	300	0	0	0	0	0	0	0	200	903	0	0	0	0	0	0	0	603	903	0
497	3	0	0	0	0	0	0	200	300	0	0	0	0	0	0	0	200	903	0	0	0	0	0	0	0	603	903	0
497	4	0	0	0	0	0	0	200	300	0	0	0	0	0	0	0	200	903	0	0	0	0	0	0	0	603	903	0
497	5	0	0	0	0	0	0	200	300	0	0	0	0	0	0	0	200	903	0	0	0	0	0	0	0	603	903	0
497	6	0	0	0	0	0	0	200	300	0	0	0	0	0	0	0	200	903	0	0	0	0	0	0	0	603	903	0
497	7	0	0	0	0	0	0	200	300	0	0	0	0	0	0	0	200	903	0	0	0	0	0	0	0	603	903	0
497	8	0	0	0	0	0	0	200	300	0	0	0	0	0	0	0	200	903	0	0	0	0	0	0	0	603	903	0
497	9	0	0	0	0	0	0	200	300	0	0	0	0	0	0	0	200	903	0	0	0	0	0	0	0	603	903	0
498	0	0	0	0	0	0	0	200	300	0	0	0	0	0	0	0	200	903	0	0	0	0	0	0	0	603	903	0
498	1	0	0	0	0	0	0	200	300	0	0	0	0	0	0	0	200	903	0	0	0	0	0	0	0	603	903	0
498	2	0	0	0	0	0	0	200	300	0	0	0	0	0	0	0	200	903	0	0	0	0	0	0	0	603	903	0
498	3	0	0	0	0	0	0	200	300	0	0	0	0	0	0	0	200	903	0	0	0	0	0	0	0	603	903	0
498	4	0	0	0	0	0	0	200	300	0	0	0	0	0	0	0	200	903	0	0	0	0	0	0	0	603	903	0
498	5	0	0	0	0	0	0	200	300	0	0	0	0	0	0	0	200	903	0	0	0	0	0	0	0	603	903	0
498	6	0	0	0	0	0	0	200	300	0	0	0	0	0	0	0	200	903	0	0	0	0	0	0	0	603	903	0
498	7	0	0	0	0	0	0	200	300	0	0	0	0	0	0	0	200	903	0	0	0	0	0	0	0	603	903	0
498	8	0	0	0	0	0	0	200	300	0	0	0	0	0	0	0	200	903	0	0	0	0	0	0	0	603	903	0
498	9	0	0	0	0	0	0	200	300	0	0	0	0	0	0	0	200	903	0	0	0	0	0	0	0	603	903	0
499	0	0	0	0	0	0	0	200	300	0	0	0	0	0	0	0	200	903	0	0	0	0	0	0	0	603	903	0
499	1	0	0	0	0	0	0	200	300	0	0	0	0	0	0	0	200	903	0	0	0	0	0	0	0	603	903	0
499	2	0	0	0	0	0	0	200	300	0	0	0	0	0	0	0	200	903	0	0	0	0	0	0	0	603	903	0
499	3	0	0	0	0	0	0	200	300	0	0	0	0	0	0	0	200	903	0	0	0	0	0	0	0	603	903	0
499	4	0	0	0	0	0	0	200	300	0	0	0	0	0	0	0	200	903	0	0	0	0	0	0	0	603	903	0
499	5	0	0	0	0	0	0	200	300	0	0	0	0	0	0	0	200	903	0	0	0	0	0	0	0	603	903	0
499	6	0	0	0	0	0	0	200	300	0	0	0	0	0	0	0	200	903	0	0	0	0	0	0	0	603	903	0
499	7	0	0	0	0	0	0	200	300	0	0	0	0	0	0	0	200	903	0	0	0	0	0	0	0	603	903	0
499	8	0	0	0	0	0	0	200	300	0	0	0	0	0	0	0	200	903	0	0	0	0	0	0	0	603	903	0
499	9	0	0	0	0	0	0	200	300	0	0	0	0	0	0	0	200	903	0	0	0	0	0	0	0	603	903	0
500	0	0	0	0	0	0	0	200	300	0	0	0	0	0	0	0	200	903	0	0	0	0	0	0	0	603	903	0
500	1	0	0	0	0	0	0	200	300	0	0	0	0	0	0	0	200	903	0	0	0	0	0	0	0	603	903	0
500	2	0	0	0	0	0	0	200	300	0	0	0	0	0	0	0	200	903	0	0	0	0	0	0	0	603	903	0
500	3	0	0	0	0	0	0	200	300	0	0	0	0	0	0	0	200	903	0	0	0	0	0	0	0	603	903	0
500	4	0	0	0	0	0	0	200	300	0	0	0	0	0	0	0	200	903	0	0	0	0	0	0	0	603	903	0
500	5	0	0	0	0	0	0	200	300	0	0	0	0	0	0	0	200	903	0	0	0	0	0	0	0	603	903	0
500	6	0	0	0	0	0	0	200	300	0	0	0	0	0	0	0	200	903	0	0	0	0	0	0	0	603	903	0
500	7	0	0	0	0	0	0	200	300	0	0	0	0	0	0	0	200	903	0	0	0	0	0	0	0	603	903	0
500	8	0	0	0	0	0	0	200	300	0	0	0	0	0	0	0	200	903	0	0	0	0	0	0	0	603	903	0
500	9	0	0	0	0	0	0	200	300	0	0	0	0	0	0	0	200	903	0	0	0	0	0	0	0	603	903	0
501	0	0	0	0	0	0	0	200	300	0	0	0	0	0	0	0	200	903	0	0	0	0	0	0	0	603	903	0
501	1	0	0	0	0	0	0	200	300	0	0	0	0	0	0	0	200	903	0	0	0	0	0	0	0	603	903	0
501	2	0	0	0	0	0	0	200	300	0	0	0	0	0	0	0	200	903	0	0	0	0	0	0	0	603	903	0
501	3	0	0	0	0	0	0	200	300	0	0	0	0	0	0	0	200	903	0	0	0	0	0	0	0	603	903	0
501	4	0	0	0	0	0	0	200	300	0	0	0	0	0	0	0	200	903	0	0	0	0	0	0	0	603	903	0
501	5	0	0	0	0	0	0	200	300	0	0	0	0	0	0	0	200	903	0	0	0	0	0	0	0	603	903	0
501	6	0	0	0	0	0	0	200	300	0	0	0	0	0	0	0	200	903	0	0	0	0	0	0	0	603	903	0
501	7	0	0	0	0	0	0	200	300	0	0	0	0	0	0	0	200	903	0	0	0	0	0	0	0	603	903	0
501	8	0	0	0	0	0	0	200	300	0	0	0	0	0	0	0	200	903	0	0	0	0	0	0	0	603	903	0
501	9	0	0	0	0	0	0	200	300	0	0	0	0	0	0	0	200	903	0	0	0	0	0	0	0	603	903	0
502	0	0	0	0	0	0	0	200	300	0	0	0	0	0	0	0	200	903	0	0	0	0	0	0	0	603	903	0
502	1	0	0	0	0	0	0	200	300	0	0	0	0	0	0	0	200	903	0	0	0	0	0	0	0	603	903	0
502	2	0	0	0	0	0	0	200	300	0	0	0	0	0	0	0	200	903	0	0	0	0	0	0	0	603	903	0
502	3	0	0	0	0	0	0	200	300	0	0	0	0	0	0	0	200	903	0	0	0	0	0	0	0	603	903	0
502	4	0	0	0	0	0	0	200	300	0	0	0	0	0	0	0	200	903	0	0	0	0	0	0	0	603	903	0
502	5	0	0	0	0	0	0	200	300	0	0	0	0	0	0	0	200	903	0	0	0	0	0	0	0	603	903	0
502	6	0	0	0	0	0	0	200	300	0	0	0	0	0	0	0	200	903	0	0	0	0	0	0	0	603	903	0
502	7	0	0	0	0	0	0	200	300	0	0	0	0	0	0	0	200	903	0	0	0	0	0	0	0	603	903	0
502	8	0	0	0	0	0	0	200	300	0	0	0	0	0	0	0	200	903	0	0	0	0	0	0	0	603	903	0
502	9	0	0	0	0	0	0	200	300	0	0	0	0	0	0	0	200	903	0	0	0	0	0	0	0	603	903	0
503	0	0	0	0	0	0	0	200	300	0	0	0	0	0	0	0	200	903	0	0	0	0	0	0	0	603	903	0
503	1	0	0	0	0	0	0	200	300	0	0	0	0	0	0	0	200	903	0	0	0	0	0	0	0	603	903	0
503	2	0	0	0	0	0	0	200	300	0	0	0	0	0	0	0	200	903	0	0	0	0	0	0	0	603	903	0
503	3	0	0	0	0	0	0	200	300	0	0	0	0	0	0	0	200	903	0	0	0	0	0	0	0	603	903	0
503	4	0	0	0	0	0	0	200	300	0	0	0	0	0	0	0	200	903	0	0	0	0	0	0	0	603	903	0
503	5	0	0	0	0	0	0	200	300	0	0	0	0	0	0	0	200	903	0	0	0	0	0	0	0	603	903	0
503	6	0	0	0	0	0	0	200	300	0	0	0	0	0	0	0	200	903	0	0	0	0	0	0	0	603	903	0
503	7	0	0	0	0	0	0	200	300	0	0	0	0	0	0	0	200	903	0	0	0	0	0	0	0	603	903	0
503	8	0	0	0	0	0	0	200	300	0	0	0	0	0	0	0	200	903	0	0	0	0	0	0	0	603	903	0
503	9	0	0	0	0	0	0	200	300	0	0	0	0	0	0	0	200	903	0	0	0	0	0	0	0	603	903	0
504	0	0	0	0	0	0	0	200	300	0	0	0	0	0	0	0	200	903	0	0	0	0	0	0	0	603	903	0
504	1	0	0	0	0	0	0	200	300	0	0	0	0	0	0	0	200	903	0	0	0	0	0	0	0	603	903	0
504	2	0	0	0	0	0	0	200	300	0	0	0	0	0	0	0	200	903	0	0	0	0	0	0	0	603	903	0
504	3	0	0	0	0	0	0	200	300	0	0	0	0	0	0	0	200	903	0	0	0	0	0	0	0	603	903	0
504	4	0	0	0	0	0	0	200	300	0	0	0	0	0	0	0	200	903	0	0	0	0	0	0	0	603	903	0
504	5	0	0	0	0	0	0	200	300	0	0	0	0	0	0	0	200	903	0	0	0	0	0	0	0	603	903	0
504	6	0	0	0	0	0	0	200	300	0	0	0	0	0	0	0	200	903	0	0	0	0	0	0	0	603	903	0
504	7	0	0	0	0	0	0	200	300	0	0	0	0	0	0	0	200	903	0	0	0	0	0	0	0	603	903	0
504	8	0	0	0	0	0	0	200	300	0	0	0	0	0	0	0	200	903	0	0	0	0	0	0	0	603	903	0
504	9	0	0	0	0	0	0	200	300	0	0	0	0	0	0	0	200	903	0	0	0	0	0	0	0	603	903	0
505	0	0	0	0	0	0	0	200	300	0	0	0	0	0	0	0	200	903	0	0	0	0	0	0	0	603	903	0
505	1	0	0	0	0	0	0	200	300	0	0	0	0	0	0	0	200	903	0	0	0	0	0	0	0	603	903	0
505	2	0	0	0	0	0	0	200	300	0	0	0	0	0	0	0	200	903	0	0	0	0	0	0	0	603	903	0
505	3	0	0	0	0	0	0	200	300	0	0	0	0	0	0	0	200	903	0	0	0	0	0	0	0	603	903	0
505	4	0	0	0	0	0	0	200	300	0	0	0	0	0	0	0	200	903	0	0	0	0	0	0	0	603	903	0
505	5	0	0	0	0	0	0	200	300	0	0	0	0	0	0	0	200	903	0	0	0	0	0	0	0	603	903	0
505	6	0	0	0	0	0	0	200	300	0	0	0	0	0	0	0	200	903	0	0	0	0	0	0	0	603	903	0
505	7	0	0	0	0	0	0	200	300	0	0	0	0	0	0	0	200	903	0	0	0	0	0	0	0	603	903	0
505	8	0	0	0	0	0	0	200	300	0	0	0	0	0	0	0	200	903	0	0	0	0	0	0	0	603	903	0
505	9	0	0	0	0	0	0	200	300	0	0	0	0	0	0	0	200	903	0	0	0	0	0	0	0	603	903	0
506	0	0	0	0	0	0	0	200	300	0	0	0	0	0	0	0	200	903	0	0	0	0	0	0	0	603	903	0
506	1	0	0	0	0	0	0	200	300	0	0	0	0	0	0	0	200	903	0	0	0	0	0	0	0	603	903	0
506	2	0	0	0	0	0	0	200	300	0	0	0	0	0	0	0	200	903	0	0	0	0	0	0	0	603	903	0
506	3	0	0	0	0	0	0	200	300	0	0	0	0	0	0	0	200	903	0	0	0	0	0	0	0	603	903	0
506	4	0	0	0	0	0	0	200	300	0	0	0	0	0	0	0	200	903	0	0	0	0	0	0	0	603	903	0
506	5	0	0	0	0	0	0	200	300	0	0	0	0	0	0	0	200	903	0	0	0	0	0	0	0	603	903	0
506	6	0	0	0	0	0	0	200	300	0	0	0	0	0	0	0	200	903	0	0	0	0	0	0	0	603	903	0
506	7	0	0	0	0	0	0	200	300	0	0	0	0	0	0	0	200	903	0	0	0	0	0	0	0	603	903	0
506	8	0	0	0	0	0	0	200	300	0	0	0	0	0	0	0	200	903	0	0	0	0	0	0	0	603	903	0
506	9	0	0	0	0	0	0	200	300	0	0	0	0	0	0	0	200	903	0	0	0	0	0	0	0	603	903	0
507	0	0	0	0	0	0	0	200	300	0	0	0	0	0	0	0	200	903	0	0	0	0	0	0	0	603	903	0
507	1	0	0	0	0	0	0	200	300	0	0	0	0	0	0	0	200	903	0	0	0	0	0	0	0	603	903	0
507	2	0	0	0	0	0	0	200	300	0	0	0	0	0	0	0	200	903	0	0	0	0	0	0	0	603	903	0
507	3	0	0	0	0	0	0	200	300	0	0	0	0	0	0	0	200	903	0	0	0	0	0	0	0	603	903	0
507	4	0	0	0	0	0	0	200	300	0	0	0	0	0	0	0	200	903	0	0	0	0	0	0	0	603	903	0
507	5	0	0	0	0	0	0	200	300	0	0	0	0	0	0	0	200	903	0	0	0	0	0	0	0	603	903	0
507	6	0	0	0	0	0	0	200	300	0	0	0	0	0	0	0	200	903	0	0	0	0	0	0	0	603	903	0
507	7	0	0	0	0	0	0	200	300	0	0	0	0	0	0	0	200	903	0	0	0	0	0	0	0	603	903	0
507	8	0	0	0	0	0	0	200	300	0	0	0	0	0	0	0	200	903	0	0	0	0	0	0	0	603	903	0
507	9	0	0	0	0	0	0	200	300	0	0	0	0	0	0	0	200	903	0	0	0	0	0	0	0	603	903	0
508	0	0	0	0	0	0	0	200	300	0	0	0	0	0	0	0	200	903	0	0	0	0	0	0	0	603	903	0
508	1	0	0	0	0	0	0	200	300	0	0	0	0	0	0	0	200	903	0	0	0	0	0	0	0	603	903	0
508	2	0	0	0	0	0	0	200	300	0	0	0	0	0	0	0	200	903	0	0	0	0	0	0	0	603	903	0
508	3	0	0	0	0	0	0	200	300	0	0	0	0	0	0	0	200	903	0	0	0	0	0	0	0	603	903	0
508	4	0	0	0	0	0	0	200	300	0	0	0	0	0	0	0	200	903	0	0	0	0	0	0	0	603	903	0
508	5	0	0	0	0	0	0	200	300	0	0	0	0	0	0	0	200	903	0	0	0	0	0	0	0	603	903	0
508	6	0	0	0	0	0	0	200	300	0	0	0	0	0	0	0	200	903	0	0	0	0	0	0	0	603	903	0
508	7	0	0	0	0	0	0	200	300	0	0	0	0	0	0	0	200	903	0	0	0	0	0	0	0	603	903	0
508	8	0	0	0	0	0	0	200	300	0	0	0	0	0	0	0	200	903	0	0	0	0	0	0	0	603	903	0
508	9	0	0	0	0	0	0	200	300	0	0	0	0	0	0	0	200	903	0	0	0	0	0	0	0	603	903	0
509	0	0	0	0	0	0	0	200	300	0	0	0	0	0	0	0	200	903	0	0	0	0	0	0	0	603	903	0
509	1	0	0	0	0	0	0	200	300	0	0	0	0	0	0	0	200	903	0	0	0	0	0	0	0	603	903	0
509	2	0	0	0	0	0	0	200	300	0	0	0	0	0	0	0	200	903	0	0	0	0	0	0	0	603	903	0
509	3	0	0	0	0	0	0	200	300	0	0	0	0	0	0	0	200	903	0	0	0	0	0	0	0	603	903	0
509	4	0	0	0	0	0	0	200	300	0	0	0	0	0	0	0	200	903	0	0	0	0	0	0	0	603	903	0
509	5	0	0	0	0	0	0	200	300	0	0	0	0	0	0	0	200	903	0	0	0	0	0	0	0	603	903	0
509	6	0	0	0	0	0	0	200	300	0	0	0	0	0	0	0	200	903	0	0	0	0	0	0	0	603	903	0
509	7	0	0	0	0	0	0	200	300	0	0	0	0	0	0	0	200	903	0	0	0	0	0	0	0	603	903	0
509	8	0	0	0	0	0	0	200	300	0	0	0	0	0	0	0	200	903	0	0	0	0	0	0	0	603	903	0
509	9	0	0	0	0	0	0	200	300	0	0	0	0	0	0	0	200	903	0	0	0	0	0	0	0	603	903	0
510	0	0	0	0	0	0	0	200	300	0	0	0	0	0	0	0	200	903	0	0	0	0	0	0	0	603	903	0
510	1	0	0	0	0	0	0	200	300	0	0	0	0	0	0	0	200	903	0	0	0	0	0	0	0	603	903	0
510	2	0	0	0	0	0	0	200	300	0	0	0	0	0	0	0	200	903	0	0	0	0	0	0	0	603	903	0
510	3	0	0	0	0	0	0	200	300	0	0	0	0	0	0	0	200	903	0	0	0	0	0	0	0	603	903	0
510	4	0	0	0	0	0	0	200	300	0	0	0	0	0	0	0	200	903	0	0	0	0	0	0	0	603	903	0
510	5	0	0	0	0	0	0	200	300	0	0	0	0	0	0	0	200	903	0	0	0	0	0	0	0	603	903	0
510	6	0	0	0	0	0	0	200	300	0	0	0	0	0	0	0	200	903	0	0	0	0	0	0	0	603	903	0
510	7	0	0	0	0	0	0	200	300	0	0	0	0	0	0	0	200	903	0	0	0	0	0	0	0	603	903	0
510	8	0	0	0	0	0	0	200	300	0	0	0	0	0	0	0	200	903	0	0	0	0	0	0	0	603	903	0
510	9	0	0	0	0	0	0	200	300	0	0	0	0	0	0	0	200	903	0	0	0	0	0	0	0	603	903	0
511	0	0	0	0	0	0	0	200	300	0	0	0	0	0	0	0	200	903	0	0	0	0	0	0	0	603	903	0
511	1	0	0	0	0	0	0	200	300	0	0	0	0	0	0	0	200	903	0	0	0	0	0	0	0	603	903	0
511	2	0	0	0	0	0	0	200	300	0	0	0	0	0	0	0	200	903	0	0	0	0	0	0	0	603	903	0
511	3	0	0	0	0	0	0	200	300	0	0	0	0	0	0	0	200	903	0	0	0	0	0	0	0	603	903	0
511	4	0	0	0	0	0	0	200	300	0	0	0	0	0	0	0	200	903	0	0	0	0	0	0	0	603	903	0
511	5	0	0	0	0	0	0	200	300	0	0	0	0	0	0	0	200	903	0	0	0	0	0	0	0	603	903	0
511	6	0	0	0	0	0	0	200	300	0	0	0	0	0	0	0	200	903	0	0	0	0	0	0	0	603	903	0
511	7	0	0	0	0	0	0	200	300	0	0	0	0	0	0	0	200	903	0	0	0	0	0	0	0	603	903	0
511	8	0	0	0	0	0	0	200	300	0	0	0	0	0	0	0	200	903	0	0	0	0	0	0	0	603	903	0
511	9	0	0	0	0	0	0	200	300	0	0	0	0	0	0	0	200	903	0	0	0	0	0	0	0	603	903	0
512	0	0	0	0	0	0	0	200	300	0	0	0	0	0	0	0	200	903	0	0	0	0	0	0	0	603	903	0
512	1	0	0	0	0	0	0	200	300	0	0	0	0	0	0	0	200	903	0	0	0	0	0	0	0	603	903	0
512	2	0	0	0	0	0	0	200	300	0	0	0	0	0	0	0	200	903	0	0	0	0	0	0	0	603	903	0
512	3	0	0	0	0	0	0	200	300	0	0	0	0	0	0	0	200	903	0	0	0	0	0	0	0	603	903	0
512	4	0	0	0	0	0	0	200	300	0	0	0	0	0	0	0	200	903	0	0	0	0	0	0	0	603	903	0
512	5	0	0	0	0	0	0	200	300	0	0	0	0	0	0	0	200	903	0	0	0	0	0	0	0	603	903	0
512	6	0	0	0	0	0	0	200	300	0	0	0	0	0	0	0	200	903	0	0	0	0	0	0	0	603	903	0
512	7	0	0	0	0	0	0	200	300	0	0	0	0	0	0	0	200	903	0	0	0	0	0	0	0	603	903	0
512	8	0	0	0	0	0	0	200	300	0	0	0	0	0	0	0	200	903	0	0	0	0	0	0	0	603	903	0
512	9	0	0	0	0	0	0	200	300	0	0	0	0	0	0	0	200	903	0	0	0	0	0	0	0	603	903	0
513	0	0	0	0	0	0	0	200	300	0	0	0	0	0	0	0	200	903	0	0	0	0	0	0	0	603	903	0
513	1	0	0	0	0	0	0	200	300	0	0	0	0	0	0	0	200	903	0	0	0	0	0	0	0	603	903	0
513	2	0	0	0	0	0	0	200	300	0	0	0	0	0	0	0	200	903	0	0	0	0	0	0	0	603	903	0
513	3	0	0	0	0	0	0	200	300	0	0	0	0	0	0	0	200	903	0	0	0	0	0	0	0	603	903	0
513	4	0	0	0	0	0	0	200	300	0	0	0	0	0	0	0	200	903	0	0	0	0	0	0	0	603	903	0
513	5	0	0	0	0	0	0	200	300	0	0	0	0	0	0	0	200	903	0	0	0	0	0	0	0	603	903	0
513	6	0	0	0	0	0	0	200	300	0	0	0	0	0	0	0	200	903	0	0	0	0	0	0	0	603	903	0
513	7	0	0	0	0	0	0	200	300	0	0	0	0	0	0	0	200	903	0	0	0	0	0	0	0	603	903	0
513	8	0	0	0	0	0	0	200	300	0	0	0	0	0	0	0	200	903	0	0	0	0	0	0	0	603	903	0
513	9	0	0	0	0	0	0	200	300	0	0	0	0	0	0	0	200	903	0	0	0	0	0	0	0	603	903	0
514	0	0	0	0	0	0	0	200	300	0	0	0	0	0	0	0	200	903	0	0	0	0	0	0	0	603	903	0
514	1	0	0	0	0	0	0	200	300	0	0	0	0	0	0	0	200	903	0	0	0	0	0	0	0	603	903	0
514	2	0	0	0	0	0	0	200	300	0	0	0	0	0	0	0	200	903	0	0	0	0	0	0	0	603	903	0
514	3	0	0	0	0	0	0	200	300	0	0	0	0	0	0	0	200	903	0	0	0	0	0	0	0	603	903	0
514	4	0	0	0	0	0	0	200	300	0	0	0	0	0	0	0	200	903	0	0	0	0	0	0	0	603	903	0
514	5	0	0	0	0	0	0	200	300	0	0	0	0	0	0	0	200	903	0	0	0	0	0	0	0	603	903	0
514	6	0	0	0	0	0	0	200	300	0	0	0	0	0	0	0	200	903	0	0	0	0	0	0	0	603	903	0
514	7	0	0	0	0	0	0	200	300	0	0	0	0	0	0	0	200	903	0	0	0	0	0	0	0	603	903	0
514	8	0	0	0	0	0	0	200	300	0	0	0	0	0	0	0	200	903	0	0	0	0	0	0	0	603	903	0
514	9	0	0	0	0	0	0	200	300	0	0	0	0	0	0	0	200	903	0	0	0	0	0	0	0	603	903	0
515	0	0	0	0	0	0	0	200	300	0	0	0	0	0	0	0	200	903	0	0	0	0	0	0	0	603	903	0
515	1	0	0	0	0	0	0	200	300	0	0	0	0	0	0	0	200	903	0	0	0	0	0	0	0	603	903	0
515	2	0	0	0	0	0	0	200	300	0	0	0	0	0	0	0	200	903	0	0	0	0	0	0	0	603	903	0
515	3	0	0	0	0	0	0	200	300	0	0	0	0	0	0	0	200	903	0	0	0	0	0	0	0	603	903	0
515	4	0	0	0	0	0	0	200	300	0	0	0	0	0	0	0	200	903	0	0	0	0	0	0	0	603	903	0
515	5	0	0	0	0	0	0	200	300	0	0	0	0	0	0	0	200	903	0	0	0	0	0	0	0	603	903	0
515	6	0	0	0	0	0	0	200	300	0	0	0	0	0	0	0	200	903	0	0	0	0	0	0	0	603	903	0
515	7	0	0	0	0	0	0	200	300	0	0	0	0	0	0	0	200	903	0	0	0	0	0	0	0	603	903	0
515	8	0	0	0	0	0	0	200	300	0	0	0	0	0	0	0	200	903	0	0	0	0	0	0	0	603	903	0
515	9	0	0	0	0	0	0	200	300	0	0	0	0	0	0	0	200	903	0	0	0	0	0	0	0	603	903	0
516	0	0	0	0	0	0	0	200	300	0	0	0	0	0	0	0	200	903	0	0	0	0	0	0	0	603	903	0
516	1	0	0	0	0	0	0	200	300	0	0	0	0	0	0	0	200	903	0	0	0	0	0	0	0	603	903	0
516	2	0	0	0	0	0	0	200	300	0	0	0	0	0	0	0	200	903	0	0	0	0	0	0	0	603	903	0
516	3	0	0	0	0	0	0	200	300	0	0	0	0	0	0	0	200	903	0	0	0	0	0	0	0	603	903	0
516	4	0	0	0	0	0	0	200	300	0	0	0	0	0	0	0	200	903	0	0	0	0	0	0	0	603	903	0
516	5	0	0	0	0	0	0	200	300	0	0	0	0	0	0	0	200	903	0	0	0	0	0	0	0	603	903	0
516	6	0	0	0	0	0	0	200	300	0	0	0	0	0	0	0	200	903	0	0	0	0	0	0	0	603	903	0
516	7	0	0	0	0	0	0	200	300	0	0	0	0	0	0	0	200	903	0	0	0	0	0	0	0	603	903	0
516	8	0	0	0	0	0	0	200	300	0	0	0	0	0	0	0	200	903	0	0	0	0	0	0	0	603	903	0
516	9	0	0	0	0	0	0	200	300	0	0	0	0	0	0	0	200	903	0	0	0	0	0	0	0	603	903	0
517	0	0	0	0	0	0	0	200	300	0	0	0	0	0	0	0	200	903	0	0	0	0	0	0	0	603	903	0
517	1	0	0	0	0	0	0	200	300	0	0	0	0	0	0	0	200	903	0	0	0	0	0	0	0	603	903	0
517	2	0	0	0	0	0	0	200	300	0	0	0	0	0	0	0	200	903	0	0	0	0	0	0	0	603	903	0
517	3	0	0	0	0	0	0	200	300	0	0	0	0	0	0	0	200	903	0	0	0	0	0	0	0	603	903	0
517	4	0	0	0	0	0	0	200	300	0	0	0	0	0	0	0	200	903	0	0	0	0	0	0	0	603	903	0
517	5	0	0	0	0	0	0	200	300	0	0	0	0	0	0	0	200	903	0	0	0	0	0	0	0	603	903	0
517	6	0	0	0	0	0	0	200	300	0	0	0	0	0	0	0	200	903	0	0	0	0	0	0	0	603	903	0
517	7	0	0	0	0	0	0	200	300	0	0	0	0	0	0	0	200	903	0	0	0	0	0	0	0	603	903	0
517	8	0	0	0	0	0	0	200	300	0	0	0	0	0	0	0	200	903	0	0	0	0	0	0	0	603	903	0
517	9	0	0	0	0	0	0	200	300	0	0	0	0	0	0	0	200	903	0	0	0	0	0	0	0	603	903	0
518	0	0	0	0	0	0	0	200	300	0	0	0	0	0	0	0	200	903	0	0	0	0	0	0	0	603	903	0
518	1	0	0	0	0	0	0	200	300	0	0	0	0	0	0	0	200	903	0	0	0	0	0	0	0	603	903	0
518	2	0	0	0	0	0	0	200	300	0	0	0	0	0	0	0	200	903	0	0	0	0	0	0	0	603	903	0
518	3	0	0	0	0	0	0	200	300	0	0	0	0	0	0	0	200	903	0	0	0	0	0	0	0	603	903	0
518	4	0	0	0	0	0	0	200	300	0	0	0	0	0	0	0	200	903	0	0	0	0	0	0	0	603	903	0
518	5	0	0	0	0	0	0	200	300	0	0	0	0	0	0	0	200	903	0	0	0	0	0	0	0	603	903	0
518	6	0	0	0	0	0	0	200	300	0	0	0	0	0	0	0	200	903	0	0	0	0	0	0	0	603	903	0
518	7	0	0	0	0	0	0	200	300	0	0	0	0	0	0	0	200	903	0	0	0	0	0	0	0	603	903	0
518	8	0	0	0	0	0	0	200	300	0	0	0	0	0	0	0	200	903	0	0	0	0	0	0	0	603	903	0
518	9	0	0	0	0	0	0	200	300	0	0	0	0	0	0	0	200	903	0	0	0	0	0	0	0	603	903	0
519	0	0	0	0	0	0	0	200	300	0	0	0	0	0	0	0	200	903	0	0	0	0	0	0	0	603	903	0
519	1	0	0	0	0	0	0	200	300	0	0	0	0	0	0	0	200	903	0	0	0	0	0	0	0	603	903	0
519	2	0	0	0	0	0	0	200	300	0	0	0	0	0	0	0	200	903	0	0	0	0	0	0	0	603	903	0
519	3	0	0	0	0	0	0	200	300	0	0	0	0	0	0	0	200	903	0	0	0	0	0	0	0	603	903	0
519	4	0	0	0	0	0	0	200	300	0	0	0	0	0	0	0	200	903	0	0	0	0	0	0	0	603	903	0
519	5	0	0	0	0	0	0	200	300	0	0	0	0	0	0	0	200	903	0	0	0	0	0	0	0	603	903	0
519	6	0	0	0	0	0	0	200	300	0	0	0	0	0	0	0	200	903	0	0	0	0	0	0	0	603	903	0
519	7	0	0	0	0	0	0	200	300	0	0	0	0	0	0	0	200	903	0	0	0	0	0	0	0	603	903	0
519	8	0	0	0	0	0	0	200	300	0	0	0	0	0	0	0	200	903	0	0	0	0	0	0	0	603	903	0
519	9	0	0	0	0	0	0	200	300	0	0	0	0	0	0	0	200	903	0	0	0	0	0	0	0	603	903	0
520	0	0	0	0	0	0	0	200	300	0	0	0	0	0	0	0	200	903	0	0	0	0	0	0	0	603	903	0
520	1	0	0	0	0	0	0	200	300	0	0	0	0	0	0	0	200	903	0	0	0	0	0	0	0	603	903	0
520	2	0	0	0	0	0	0	200	300	0	0	0	0	0	0	0	200	903	0	0	0	0	0	0	0	603	903	0
520	3	0	0	0	0	0	0	200	300	0	0	0	0	0	0	0	200	903	0	0	0	0	0	0	0	603	903	0
520	4	0	0	0	0	0	0	200	300	0	0	0	0	0	0	0	200	903	0	0	0	0	0	0	0	603	903	0
520	5	0	0	0	0	0	0	200	300	0	0	0	0	0	0	0	200	903	0	0	0	0	0	0	0	603	903	0
520	6	0	0	0	0	0	0	200	300	0	0	0	0	0	0	0	200	903	0	0	0	0	0	0	0	603	903	0
520	7	0	0	0	0	0	0	200	300	0	0	0	0	0	0	0	200	903	0	0	0	0	0	0	0	603	903	0
520	8	0	0	0	0	0	0	200	300	0	0	0	0	0	0	0	200	903	0	0	0	0	0	0	0	603	903	0
520	9	0	0	0	0	0	0	200	300	0	0	0	0	0	0	0	200	903	0	0	0	0	0	0	0	603	903	0
521	0	0	0	0	0	0	0	200	300	0	0	0	0	0	0	0	200	903	0	0	0	0	0	0	0	603	903	0
521	1	0	0	0	0	0	0	200	300	0	0	0	0	0	0	0	200	903	0	0	0	0	0	0	0	603	903	0
521	2	0	0	0	0	0	0	200	300	0	0	0	0	0	0	0	200	903	0	0	0	0	0	0	0	603	903	0
521	3	0	0	0	0	0	0	200	300	0	0	0	0	0	0	0	200	903	0	0	0	0	0	0	0	603	903	0
521	4	0	0	0	0	0	0	200	300	0	0	0	0	0	0	0	200	903	0	0	0	0	0	0	0	603	903	0
521	5	0	0	0	0	0	0	200	300	0	0	0	0	0	0	0	200	903	0	0	0	0	0	0	0	603	903	0
521	6	0	0	0	0	0	0	200	300	0	0	0	0	0	0	0	200	903	0	0	0	0	0	0	0	603	903	0
521	7	0	0	0	0	0	0	200	300	0	0	0	0	0	0	0	200	903	0	0	0	0	0	0	0	603	903	0
521	8	0	0	0	0	0	0	200	300	0	0	0	0	0	0	0	200	903	0	0	0	0	0	0	0	603	903	0
521	9	0	0	0	0	0	0	200	300	0	0	0	0	0	0	0	200	903	0	0	0	0	0	0	0	603	903	0
522	0	0	0	0	0	0	0	200	300	0	0	0	0	0	0	0	200	903	0	0	0	0	0	0	0	603	903	0
522	1	0	0	0	0	0	0	200	300	0	0	0	0	0	0	0	200	903	0	0	0	0	0	0	0	603	903	0
522	2	0	0	0	0	0	0	200	300	0	0	0	0	0	0	0	200	903	0	0	0	0	0	0	0	603	903	0
522	3	0	0	0	0	0	0	200	300	0	0	0	0	0	0	0	200	903	0	0	0	0	0	0	0	603	903	0
522	4	0	0	0	0	0	0	200	300	0	0	0	0	0	0	0	200	903	0	0	0	0	0	0	0	603	903	0
522	5	0	0	0	0	0	0	200	300	0	0	0	0	0	0	0	200	903	0	0	0	0	0	0	0	603	903	0
522	6	0	0	0	0	0	0	200	300	0	0	0	0	0	0	0	200	903	0	0	0	0	0	0	0	603	903	0
522	7	0	0	0	0	0	0	200	300	0	0	0	0	0	0	0	200	903	0	0	0	0	0	0	0	603	903	0
522	8	0	0	0	0	0	0	200	300	0	0	0	0	0	0	0	200	903	0	0	0	0	0	0	0	603	903	0
522	9	0	0	0	0	0	0	200	300	0	0	0	0	0	0	0	200	903	0	0	0	0	0	0	0	603	903	0
523	0	0	0	0	0	0	0	200	300	0	0	0	0	0	0	0	200	903	0	0	0	0	0	0	0	603	903	0
523	1	0	0	0	0	0	0	200	300	0	0	0	0	0	0	0	200	903	0	0	0	0	0	0	0	603	903	0
523	2	0	0	0	0	0	0	200	300	0	0	0	0	0	0	0	200	903	0	0	0	0	0	0	0	603	903	0
523	3	0	0	0	0	0	0	200	300	0	0	0	0	0	0	0	200	903	0	0	0	0	0	0	0	603	903	0
523	4	0	0	0	0	0	0	200	300	0	0	0	0	0	0	0	200	903	0	0	0	0	0	0	0	603	903	0
523	5	0	0	0	0	0	0	200	300	0	0	0	0	0	0	0	200	903	0	0	0	0	0	0	0	603	903	0
523	6	0	0	0	0	0	0	200	300	0	0	0	0	0	0	0	200	903	0	0	0	0	0	0	0	603	903	0
523	7	0	0	0	0	0	0	200	300	0	0	0	0	0	0	0	200	903	0	0	0	0	0	0	0	603	903	0
523	8	0	0	0	0	0	0	200	300	0	0	0	0	0	0	0	200	903	0	0	0	0	0	0	0	603	903	0
523	9	0	0	0	0	0	0	200	300	0	0	0	0	0	0	0	200	903	0	0	0	0	0	0	0	603	903	0
524	0	0	0	0	0	0	0	200	300	0	0	0	0	0	0	0	200	903	0	0	0	0	0	0	0	603	903	0
524	1	0	0	0	0	0	0	200	300	0	0	0	0	0	0	0	200	903	0	0	0	0	0	0	0	603	903	0
524	2	0	0	0	0	0	0	200	300	0	0	0	0	0	0	0	200	903	0	0	0	0	0	0	0	603	903	0
524	3	0	0	0	0	0	0	200	300	0	0	0	0	0	0	0	200	903	0	0	0	0	0	0	0	603	903	0
524	4	0	0	0	0	0	0	200	300	0	0	0	0	0	0	0	200	903	0	0	0	0	0	0	0	603	903	0
524	5	0	0	0	0	0	0	200	300	0	0	0	0	0	0	0	200	903	0	0	0	0	0	0	0	603	903	0
524	6	0	0	0	0	0	0	200	300	0	0	0	0	0	0	0	200	903	0	0	0	0	0	0	0	603	903	0
524	7	0	0	0	0	0	0	200	300	0	0	0	0	0	0	0	200	903	0	0	0	0	0	0	0	603	903	0
524	8	0	0	0	0	0	0	200	300	0	0	0	0	0	0	0	200	903	0	0	0	0	0	0	0	603	903	0
524	9	0	0	0	0	0	0	200	300	0	0	0	0	0	0	0	200	903	0	0	0	0	0	0	0	603	903	0
525	0	0	0	0	0	0	0	200	300	0	0	0	0	0	0	0	200	903	0	0	0	0	0	0	0	603	903	0
525	1	0	0	0	0	0	0	200	300	0	0	0	0	0	0	0	200	903	0	0	0	0	0	0	0	603	903	0
525	2	0	0	0	0	0	0	200	300	0	0	0	0	0	0	0	200	903	0	0	0	0	0	0	0	603	903	0
525	3	0	0	0	0	0	0	200	300	0	0	0	0	0	0	0	200	903	0	0	0	0	0	0	0	603	903	0
525	4	0	0	0	0	0	0	200	300	0	0	0	0	0	0	0	200	903	0	0	0	0	0	0	0	603	903	0
525	5	0	0	0	0	0	0	200	300	0	0	0	0	0	0	0	200	903	0	0	0	0	0	0	0	603	903	0
525	6	0	0	0	0	0	0	200	300	0	0	0	0	0	0	0	200	903	0	0	0	0	0	0	0	603	903	0
525	7	0	0	0	0	0	0	200	300	0	0	0	0	0	0	0	200	903	0	0	0	0	0	0	0	603	903	0
525	8	0	0	0	0	0	0	200	300	0	0	0	0	0	0	0	200	903	0	0	0	0	0	0	0	603	903	0
525	9	0	0	0	0	0	0	200	300	0	0	0	0	0	0	0	200	903	0	0	0	0	0	0	0	603	903	0
526	0	0	0	0	0	0	0	200	300	0	0	0	0	0	0	0	200	903	0	0	0	0	0	0	0	603	903	0
526	1	0	0	0	0	0	0	200	300	0	0	0	0	0	0	0	200	903	0	0	0	0	0	0	0	603	903	0
526	2	0	0	0	0	0	0	200	300	0	0	0	0	0	0	0	200	903	0	0	0	0	0	0	0	603	903	0
526	3	0	0	0	0	0	0	200	300	0	0	0	0	0	0	0	200	903	0	0	0	0	0	0	0	603	903	0
526	4	0	0	0	0	0	0	200	300	0	0	0	0	0	0	0	200	903	0	0	0	0	0	0	0	603	903	0
526	5	0	0	0	0	0	0	200	300	0	0	0	0	0	0	0	200	903	0	0	0	0	0	0	0	603	903	0
526	6	0	0	0	0	0	0	200	300	0	0	0	0	0	0	0	200	903	0	0	0	0	0	0	0	603	903	0
526	7	0	0	0	0	0	0	200	300	0	0	0	0	0	0	0	200	903	0	0	0	0	0	0	0	603	903	0
526	8	0	0	0	0	0	0	200	300	0	0	0	0	0	0	0	200	903	0	0	0	0	0	0	0	603	903	0
526	9	0	0	0	0	0	0	200	300	0	0	0	0	0	0	0	200	903	0	0	0	0	0	0	0	603	903	0
527	0	0	0	0	0	0	0	200	300	0	0	0	0	0	0	0	200	903	0	0	0	0	0	0	0	603	903	0
527	1	0	0	0	0	0	0	200	300	0	0	0	0	0	0	0	200	903	0	0	0	0	0	0	0	603	903	0
527	2	0	0	0	0	0	0	200	300	0	0	0	0	0	0	0	200	903	0	0	0	0	0	0	0	603	903	0
527	3	0	0	0	0	0	0	200	300	0	0	0	0	0	0	0	200	903	0	0	0	0	0	0	0	603	903	0
527	4	0	0	0	0	0	0	200	300	0	0	0	0	0	0	0	200	903	0	0	0	0	0	0	0	603	903	0
527	5	0	0	0	0	0	0	200	300	0	0	0	0	0	0	0	200	903	0	0	0	0	0	0	0	603	903	0
527	6	0	0	0	0	0	0	200	300	0	0	0	0	0	0	0	200	903	0	0	0	0	0	0	0	603	903	0
527	7	0	0	0	0	0	0	200	300	0	0	0	0	0	0	0	200	903	0	0	0	0	0	0	0	603	903	0
527	8	0	0	0	0	0	0	200	300	0	0	0	0	0	0	0	200	903	0	0	0	0	0	0	0	603	903	0
527	9	0	0	0	0	0	0	200	300	0	0	0	0	0	0	0	200	903	0	0	0	0	0	0	0	603	903	0
528	0	0	0	0	0	0	0	200	300	0	0	0	0	0	0	0	200	903	0	0	0	0	0	0	0	603	903	0
528	1	0	0	0	0	0	0	200	300	0	0	0	0	0	0	0	200	903	0	0	0	0	0	0	0	603	903	0
528	2	0	0	0	0	0	0	200	300	0	0	0	0	0	0	0	200	903	0	0	0	0	0	0	0	603	903	0
528	3	0	0	0	0	0	0	200	300	0	0	0	0	0	0	0	200	903	0	0	0	0	0	0	0	603	903	0
528	4	0	0	0	0	0	0	200	300	0	0	0	0	0	0	0	200	903	0	0	0	0	0	0	0	603	903	0
528	5	0	0	0	0	0	0	200	300	0	0	0	0	0	0	0	200	903	0	0	0	0	0	0	0	603	903	0
528	6	0	0	0	0	0	0	200	300	0	0	0	0	0	0	0	200	903	0	0	0	0	0	0	0	603	903	0
528	7	0	0	0	0	0	0	200	300	0	0	0	0	0	0	0	200	903	0	0	0	0	0	0	0	603	903	0
528	8	0	0	0	0	0	0	200	300	0	0	0	0	0	0	0	200	903	0	0	0	0	0	0	0	603	903	0
528	9	0	0	0	0	0	0	200	300	0	0	0	0	0	0	0	200	903	0	0	0	0	0	0	0	603	903	0
529	0	0	0	0	0	0	0	200	300	0	0	0	0	0	0	0	200	903	0	0	0	0	0	0	0	603	903	0
529	1	0	0	0	0	0	0	200	300	0	0	0	0	0	0	0	200	903	0	0	0	0	0	0	0	603	903	0
529	2	0	0	0	0	0	0	200	300	0	0	0	0	0	0	0	200	903	0	0	0	0	0	0	0	603	903	0
529	3	0	0	0	0	0	0	200	300	0	0	0	0	0	0	0	200	903	0	0	0	0	0	0	0	603	903	0
529	4	0	0	0	0	0	0	200	300	0	0	0	0	0	0	0	200	903	0	0	0	0	0	0	0	603	903	0
529	5	0	0	0	0	0	0	200	300	0	0	0	0	0	0	0	200	903	0	0	0	0	0	0	0	603	903	0
529	6	0	0	0	0	0	0	200	300	0	0	0	0	0	0	0	200	903	0	0	0	0	0	0	0	603	903	0
529	7	0	0	0	0	0	0	200	300	0	0	0	0	0	0	0	200	903	0	0	0	0	0	0	0	603	903	0
529	8	0	0	0	0	0	0	200	300	0	0	0	0	0	0	0	200	903	0	0	0	0	0	0	0	603	903	0
529	9	0	0	0	0	0	0	200	300	0	0	0	0	0	0	0	200	903	0	0	0	0	0	0	0	603	903	0
530	0	0	0	0	0	0	0	200	300	0	0	0	0	0	0	0	200	903	0	0	0	0	0	0	0	603	903	0
530	1	0	0	0	0	0	0	200	300	0	0	0	0	0	0	0	200	903	0	0	0	0	0	0	0	603	903	0
530	2	0	0	0	0	0	0	200	300	0	0	0	0	0	0	0	200	903	0	0	0	0	0	0	0	603	903	0
530	3	0	0	0	0	0	0	200	300	0	0	0	0	0	0	0	200	903	0	0	0	0	0	0	0	603	903	0
530	4	0	0	0	0	0	0	200	300	0	0	0	0	0	0	0	200	903	0	0	0	0	0	0	0	603	903	0
530	5	0	0	0	0	0	0	200	300	0	0	0	0	0	0	0	200	903	0	0	0	0	0	0	0	603	903	0
530	6	0	0	0	0	0	0	200	300	0	0	0	0	0	0	0	200	903	0	0	0	0	0	0	0	603	903	0
530	7	0	0	0	0	0	0	200	300	0	0	0	0	0	0	0	200	903	0	0	0	0	0	0	0	603	903	0
530	8	0	0	0	0	0	0	200	300	0	0	0	0	0	0	0	200	903	0	0	0	0	0	0	0	603	903	0
530	9	0	0	0	0	0	0	200	300	0	0	0	0	0	0	0	200	903	0	0	0	0	0	0	0	603	903	0
531	0	0	0	0	0	0	0	200	300	0	0	0	0	0	0	0	200	903	0	0	0	0	0	0	0	603	903	0
531	1	0	0	0	0	0	0	200	300	0	0	0	0	0	0	0	200	903	0	0	0	0	0	0	0	603	903	0
531	2	0	0	0	0	0	0	200	300	0	0	0	0	0	0	0	200	903	0	0	0	0	0	0	0	603	903	0
531	3	0	0	0	0	0	0	200	300	0	0	0	0	0	0	0	200	903	0	0	0	0	0	0	0	603	903	0
531	4	0	0	0	0	0	0	200	300	0	0	0	0	0	0	0	200	903	0	0	0	0	0	0	0	603	903	0
531	5	0	0	0	0	0	0	200	300	0	0	0	0	0	0	0	200	903	0	0	0	0	0	0	0	603	903	0
531	6	0	0	0	0	0	0	200	300	0	0	0	0	0	0	0	200	903	0	0	0	0	0	0	0	603	903	0
531	7	0	0	0	0	0	0	200	300	0	0	0	0	0	0	0	200	903	0	0	0	0	0	0	0	603	903	0
531	8	0	0	0	0	0	0	200	300	0	0	0	0	0	0	0	200	903	0	0	0	0	0	0	0	603	903	0
531	9	0	0	0	0	0	0	200	300	0	0	0	0	0	0	0	200	903	0	0	0	0	0	0	0	603	903	0
532	0	0	0	0	0	0	0	200	300	0	0	0	0	0	0	0	200	903	0	0	0	0	0	0	0	603	903	0
532	1	0	0	0	0	0	0	200	300	0	0	0	0	0	0	0	200	903	0	0	0	0	0	0	0	603	903	0
532	2	0	0	0	0	0	0	200	300	0	0	0	0	0	0	0	200	903	0	0	0	0	0	0	0	603	903	0
532	3	0	0	0	0	0	0	200	300	0	0	0	0	0	0	0	200	903	0	0	0	0	0	0	0	603	903	0
532	4	0	0	0	0	0	0	200	300	0	0	0	0	0	0	0	200	903	0	0	0	0	0	0	0	603	903	0
532	5	0	0	0	0	0	0	200	300	0	0	0	0	0	0	0	200	903	0	0	0	0	0	0	0	603	903	0
532	6	0	0	0	0	0	0	200	300	0	0	0	0	0	0	0	200	903	0	0	0	0	0	0	0	603	903	0
532	7	0	0	0	0	0	0	200	300	0	0	0	0	0	0	0	200	903	0	0	0	0	0	0	0	603	903	0
532	8	0	0	0	0	0	0	200	300	0	0	0	0	0	0	0	200	903	0	0	0	0	0	0	0	603	903	0
532	9	0	0	0	0	0	0	200	300	0	0	0	0	0	0	0	200	903	0	0	0	0	0	0	0	603	903	0
533	0	0	0	0	0	0	0	200	300	0	0	0	0	0	0	0	200	903	0	0	0	0	0	0	0	603	903	0
533	1	0	0	0	0	0	0	200	300	0	0	0	0	0	0	0	200	903	0	0	0	0	0	0	0	603	903	0
533	2	0	0	0	0	0	0	200	300	0	0	0	0	0	0	0	200	903	0	0	0	0	0	0	0	603	903	0
533	3	0	0	0	0	0	0	200	300	0	0	0	0	0	0	0	200	903	0	0	0	0	0	0	0	603	903	0
533	4	0	0	0	0	0	0	200	300	0	0	0	0	0	0	0	200	903	0	0	0	0	0	0	0	603	903	0
533	5	0	0	0	0	0	0	200	300	0	0	0	0	0	0	0	200	903	0	0	0	0	0	0	0	603	903	0
533	6	0	0	0	0	0	0	200	300	0	0	0	0	0	0	0	200	903	0	0	0	0	0	0	0	603	903	0
533	7	0	0	0	0	0	0	200	300	0	0	0	0	0	0	0	200	903	0	0	0	0	0	0	0	603	903	0
533	8	0	0	0	0	0	0	200	300	0	0	0	0	0	0	0	200	903	0	0	0	0	0	0	0	603	903	0
533	9	0	0	0	0	0	0	200	300	0	0	0	0	0	0	0	200	903	0	0	0	0	0	0	0	603	903	0
534	0	0	0	0	0	0	0	200	300	0	0	0	0	0	0	0	200	903	0	0	0	0	0	0	0	603	903	0
534	1	0	0	0	0	0	0	200	300	0	0	0	0	0	0	0	200	903	0	0	0	0	0	0	0	603	903	0
534	2	0	0	0	0	0	0	200	300	0	0	0	0	0	0	0	200	903	0	0	0	0	0	0	0	603	903	0
534	3	0	0	0	0	0	0	200	300	0	0	0	0	0	0	0	200	903	0	0	0	0	0	0	0	603	903	0
534	4	0	0	0	0	0	0	200	300	0	0	0	0	0	0	0	200	903	0	0	0	0	0	0	0	603	903	0
534	5	0	0	0	0	0	0	200	300	0	0	0	0	0	0	0	200	903	0	0	0	0	0	0	0	603	903	0
534	6	0	0	0	0	0	0	200	300	0	0	0	0	0	0	0	200	903	0	0	0	0	0	0	0	603	903	0
534	7	0	0	0	0	0	0	200	300	0	0	0	0	0	0	0	200	903	0	0	0	0	0	0	0	603	903	0
534	8	0	0	0	0	0	0	200	300	0	0	0	0	0	0	0	200	903	0	0	0	0	0	0	0	603	903	0
534	9	0	0	0	0	0	0	200	300	0	0	0	0	0	0	0	200	903	0	0	0	0	0	0	0	603	903	0
535	0	0	0	0	0	0	0	200	300	0	0	0	0	0	0	0	200	903	0	0	0	0	0	0	0	603	903	0
535	1	0	0	0	0	0	0	200	300	0	0	0	0	0	0	0	200	903	0	0	0	0	0	0	0	603	903	0
535	2	0	0	0	0	0	0	200	300	0	0	0	0	0	0	0	200	903	0	0	0	0	0	0	0	603	903	0
535	3	0	0	0	0	0	0	200	300	0	0	0	0	0	0	0	200	903	0	0	0	0	0	0	0	603	903	0
535	4	0	0	0	0	0	0	200	300	0	0	0	0	0	0	0	200	903	0	0	0	0	0	0	0	603	903	0
535	5	0	0	0	0	0	0	200	300	0	0	0	0	0	0	0	200	903	0	0	0	0	0	0	0	603	903	0
535	6	0	0	0	0	0	0	200	300	0	0	0	0	0	0	0	200	903	0	0	0	0	0	0	0	603	903	0
535	7	0	0	0	0	0	0	200	300	0	0	0	0	0	0	0	200	903	0	0	0	0	0	0	0	603	903	0
535	8	0	0	0	0	0	0	200	300	0	0	0	0	0	0	0	200	903	0	0	0	0	0	0	0	603	903	0
535	9	0	0	0	0	0	0	200	300	0	0	0	0	0	0	0	200	903	0	0	0	0	0	0	0	603	903	0
536	0	0	0	0	0	0	0	200	300	0	0	0	0	0	0	0	200	903	0	0	0	0	0	0	0	603	903	0
536	1	0	0	0	0	0	0	200	300	0	0	0	0	0	0	0	200	903	0	0	0	0	0	0	0	603	903	0
536	2	0	0	0	0	0	0	200	300	0	0	0	0	0	0	0	200	903	0	0	0	0	0	0	0	603	903	0
536	3	0	0	0	0	0	0	200	300	0	0	0	0	0	0	0	200	903	0	0	0	0	0	0	0	603	903	0
536	4	0	0	0	0	0	0	200	300	0	0	0	0	0	0	0	200	903	0	0	0	0	0	0	0	603	903	0
536	5	0	0	0	0	0	0	200	300	0	0	0	0	0	0	0	200	903	0	0	0	0	0	0	0	603	903	0
536	6	0	0	0	0	0	0	200	300	0	0	0	0	0	0	0	200	903	0	0	0	0	0	0	0	603	903	0
536	7	0	0	0	0	0	0	200	300	0	0	0	0	0	0	0	200	903	0	0	0	0	0	0	0	603	903	0
536	8	0	0	0	0	0	0	200	300	0	0	0	0	0	0	0	200	903	0	0	0	0	0	0	0	603	903	0
536	9	0	0	0	0	0	0	200	300	0	0	0	0	0	0	0	200	903	0	0	0	0	0	0	0	603	903	0
537	0	0	0	0	0	0	0	200	300	0	0	0	0	0	0	0	200	903	0	0	0	0	0	0	0	603	903	0
537	1	0	0	0	0	0	0	200	300	0	0	0	0	0	0	0	200	903	0	0	0	0	0	0	0	603	903	0
537	2	0	0	0	0	0	0	200	300	0	0	0	0	0	0	0	200	903	0	0	0	0	0	0	0	603	903	0
537	3	0	0	0	0	0	0	200	300	0	0	0	0	0	0	0	200	903	0	0	0	0	0	0	0	603	903	0
537	4	0	0	0	0	0	0	200	300	0	0	0	0	0	0	0	200	903	0	0	0	0	0	0	0	603	903	0
537	5	0	0	0	0	0	0	200	300	0	0	0	0	0	0	0	200	903	0	0	0	0	0	0	0	603	903	0
537	6	0	0	0	0	0	0	200	300	0	0	0	0	0	0	0	200	903	0	0	0	0	0	0	0	603	903	0
537	7	0	0	0	0	0	0	200	300	0	0	0	0	0	0	0	200	903	0	0	0	0	0	0	0	603	903	0
537	8	0	0	0	0	0	0	200	300	0	0	0	0	0	0	0	200	903	0	0	0	0	0	0	0	603	903	0
537	9	0	0	0	0	0	0	200	300	0	0	0	0	0	0	0	200	903	0	0	0	0	0	0	0	603	903	0
538	0	0	0	0	0	0	0	200	300	0	0	0	0	0	0	0	200	903	0	0	0	0	0	0	0	603	903	0
538	1	0	0	0	0	0	0	200	300	0	0	0	0	0	0	0	200	903	0	0	0	0	0	0	0	603	903	0
538	2	0	0	0	0	0	0	200	300	0	0	0	0	0	0	0	200	903	0	0	0	0	0	0	0	603	903	0
538	3	0	0	0	0	0	0	200	300	0	0	0	0	0	0	0	200	903	0	0	0	0	0	0	0	603	903	0
538	4	0	0	0	0	0	0	200	300	0	0	0	0	0	0	0	200	903	0	0	0	0	0	0	0	603	903	0
538	5	0	0	0	0	0	0	200	300	0	0	0	0	0	0	0	200	903	0	0	0	0	0	0	0	603	903	0
538	6	0	0	0	0	0	0	200	300	0	0	0	0	0	0	0	200	903	0	0	0	0	0	0	0	603	903	0
538	7	0	0	0	0	0	0	200	300	0	0	0	0	0	0	0	200	903	0	0	0	0	0	0	0	603	903	0
538	8	0	0	0	0	0	0	200	300	0	0	0	0	0	0	0	200	903	0	0	0	0	0	0	0	603	903	0
538	9	0	0	0	0	0	0	200	300	0	0	0	0	0	0	0	200	903	0	0	0	0	0	0	0	603	903	0
539	0	0	0	0	0	0	0	200	300	0	0	0	0	0	0	0	200	903	0	0	0	0	0	0	0	603	903	0
539	1	0	0	0	0	0	0	200	300	0	0	0	0	0	0	0	200	903	0	0	0	0	0	0	0	603	903	0
539	2	0	0	0	0	0	0	200	300	0	0	0	0	0	0	0	200	903	0	0	0	0	0	0	0	603	903	0
539	3	0	0	0	0	0	0	200	300	0	0	0	0	0	0	0	200	903	0	0	0	0	0	0	0	603	903	0
539	4	0	0	0	0	0	0	200	300	0	0	0	0	0	0	0	200	903	0	0	0	0	0	0	0	603	903	0
539	5	0	0	0	0	0	0	200	300	0	0	0	0	0	0	0	200	903	0	0	0	0	0	0	0	603	903	0
539	6	0	0	0	0	0	0	200	300	0	0	0	0	0	0	0	200	903	0	0	0	0	0	0	0	603	903	0
539	7	0	0	0	0	0	0	200	300	0	0	0	0	0	0	0	200	903	0	0	0	0	0	0	0	603	903	0
539	8	0	0	0	0	0	0	200	300	0	0	0	0	0	0	0	200	903	0	0	0	0	0	0	0	603	903	0
539	9	0	0	0	0	0	0	200	300	0	0	0	0	0	0	0	200	903	0	0	0	0	0	0	0	603	903	0
540	0	0	0	0	0	0	0	200	300	0	0	0	0	0	0	0	200	903	0	0	0	0	0	0	0	603	903	0
540	1	0	0	0	0	0	0	200	300	0	0	0	0	0	0	0	200	903	0	0	0	0	0	0	0	603	903	0
540	2	0	0	0	0	0	0	200	300	0	0	0	0	0	0	0	200	903	0	0	0	0	0	0	0	603	903	0
540	3	0	0	0	0	0	0	200	300	0	0	0	0	0	0	0	200	903	0	0	0	0	0	0	0	603	903	0
540	4	0	0	0	0	0	0	200	300	0	0	0	0	0	0	0	200	903	0	0	0	0	0	0	0	603	903	0
540	5	0	0	0	0	0	0	200	300	0	0	0	0	0	0	0	200	903	0	0	0	0	0	0	0	603	903	0
540	6	0	0	0	0	0	0	200	300	0	0	0	0	0	0	0	200	903	0	0	0	0	0	0	0	603	903	0
540	7	0	0	0	0	0	0	200	300	0	0	0	0	0	0	0	200	903	0	0	0	0	0	0	0	603	903	0
540	8	0	0	0	0	0	0	200	300	0	0	0	0	0	0	0	200	903	0	0	0	0	0	0	0	603	903	0
540	9	0	0	0	0	0	0	200	300	0	0	0	0	0	0	0	200	903	0	0	0	0	0	0	0	603	903	0
541	0	0	0	0	0	0	0	200	300	0	0	0	0	0	0	0	200	903	0	0	0	0	0	0	0	603	903	0
541	1	0	0	0	0	0	0	200	300	0	0	0	0	0	0	0	200	903	0	0	0	0	0	0	0	603	903	0
541	2	0	0	0	0	0	0	200	300	0	0	0	0	0	0	0	200	903	0	0	0	0	0	0	0	603	903	0
541	3	0	0	0	0	0	0	200	300	0	0	0	0	0	0	0	200	903	0	0	0	0	0	0	0	603	903	0
541	4	0	0	0	0	0	0	200	300	0	0	0	0	0	0	0	200	903	0	0	0	0	0	0	0	603	903	0
541	5	0	0	0	0	0	0	200	300	0	0	0	0	0	0	0	200	903	0	0	0	0	0	0	0	603	903	0
541	6	0	0	0	0	0	0	200	300	0	0	0	0	0	0	0	200	903	0	0	0	0	0	0	0	603	903	0
541	7	0	0	0	0	0	0	200	300	0	0	0	0	0	0	0	200	903	0	0	0	0	0	0	0	603	903	0
541	8	0	0	0	0	0	0	200	300	0	0	0	0	0	0	0	200	903	0	0	0	0	0	0	0	603	903	0
541	9	0	0	0	0	0	0	200	300	0	0	0	0	0	0	0	200	903	0	0	0	0	0	0	0	603	903	0
542	0	0	0	0	0	0	0	200	300	0	0	0	0	0	0	0	200	903	0	0	0	0	0	0	0	603	903	0
542	1	0	0	0	0	0	0	200	300	0	0	0	0	0	0	0	200	903	0	0	0	0	0	0	0	603	903	0
542	2	0	0	0	0	0	0	200	300	0	0	0	0	0	0	0	200	903	0	0	0	0	0	0	0	603	903	0
542	3	0	0	0	0	0	0	200	300	0	0	0	0	0	0	0	200	903	0	0	0	0	0	0	0	603	903	0
542	4	0	0	0	0	0	0	200	300	0	0	0	0	0	0	0	200	903	0	0	0	0	0	0	0	603	903	0
542	5	0	0	0	0	0	0	200	300	0	0	0	0	0	0	0	200	903	0	0	0	0	0	0	0	603	903	0
542	6	0	0	0	0	0	0	200	300	0	0	0	0	0	0	0	200	903	0	0	0	0	0	0	0	603	903	0
542	7	0	0	0	0	0	0	200	300	0	0	0	0	0	0	0	200	903	0	0	0	0	0	0	0	603	903	0
542	8	0	0	0	0	0	0	200	300	0	0	0	0	0	0	0	200	903	0	0	0	0	0	0	0	603	903	0
542	9	0	0	0	0	0	0	200	300	0	0	0	0	0	0	0	200	903	0	0	0	0	0	0	0	603	903	0
543	0	0	0	0	0	0	0	200	300	0	0	0	0	0	0	0	200	903	0	0	0	0	0	0	0	603	903	0
543	1	0	0	0	0	0	0	200	300	0	0	0	0	0	0	0	200	903	0	0	0	0	0	0	0	603	903	0
543	2	0	0	0	0	0	0	200	300	0	0	0	0	0	0	0	200	903	0	0	0	0	0	0	0	603	903	0
543	3	0	0	0	0	0	0	200	300	0	0	0	0	0	0	0	200	903	0	0	0	0	0	0	0	603	903	0
543	4	0	0	0	0	0	0	200	300	0	0	0	0	0	0	0	200	903	0	0	0	0	0	0	0	603	903	0
543	5	0	0	0	0	0	0	200	300	0	0	0	0	0	0	0	200	903	0	0	0	0	0	0	0	603	903	0
543	6	0	0	0	0	0	0	200	300	0	0	0	0	0	0	0	200	903	0	0	0	0	0	0	0	603	903	0
543	7	0	0	0	0	0	0	200	300	0	0	0	0	0	0	0	200	903	0	0	0	0	0	0	0	603	903	0
543	8	0	0	0	0	0	0	200	300	0	0	0	0	0	0	0	200	903	0	0	0	0	0	0	0	603	903	0
543	9	0	0	0	0	0	0	200	300	0	0	0	0	0	0	0	200	903	0	0	0	0	0	0	0	603	903	0
544	0	0	0	0	0	0	0	200	300	0	0	0	0	0	0	0	200	903	0	0	0	0	0	0	0	603	903	0
544	1	0	0	0	0	0	0	200	300	0	0	0	0	0	0	0	200	903	0	0	0	0	0	0	0	603	903	0
544	2	0	0	0	0	0	0	200	300	0	0	0	0	0	0	0	200	903	0	0	0	0	0	0	0	603	903	0
544	3	0	0	0	0	0	0	200	300	0	0	0	0	0	0	0	200	903	0	0	0	0	0	0	0	603	903	0
544	4	0	0	0	0	0	0	200	300	0	0	0	0	0	0	0	200	903	0	0	0	0	0	0	0	603	903	0
544	5	0	0	0	0	0	0	200	300	0	0	0	0	0	0	0	200	903	0	0	0	0	0	0	0	603	903	0
544	6	0	0	0	0	0	0	200	300	0	0	0	0	0	0	0	200	903	0	0	0	0	0	0	0	603	903	0
544	7	0	0	0	0	0	0	200	300	0	0	0	0	0	0	0	200	903	0	0	0	0	0	0	0	603	903	0
544	8	0	0	0	0	0	0	200	300	0	0	0	0	0	0	0	200	903	0	0	0	0	0	0	0	603	903	0
544	9	0	0	0	0	0	0	200	300	0	0	0	0	0	0	0	200	903	0	0	0	0	0	0	0	603	903	0
545	0	0	0	0	0	0	0	200	300	0	0	0	0	0	0	0	200	903	0	0	0	0	0	0	0	603	903	0
545	1	0	0	0	0	0	0	200	300	0	0	0	0	0	0	0	200	903	0	0	0	0	0	0	0	603	903	0
545	2	0	0	0	0	0	0	200	300	0	0	0	0	0	0	0	200	903	0	0	0	0	0	0	0	603	903	0
545	3	0	0	0	0	0	0	200	300	0	0	0	0	0	0	0	200	903	0	0	0	0	0	0	0	603	903	0
545	4	0	0	0	0	0	0	200	300	0	0	0	0	0	0	0	200	903	0	0	0	0	0	0	0	603	903	0
545	5	0	0	0	0	0	0	200	300	0	0	0	0	0	0	0	200	903	0	0	0	0	0	0	0	603	903	0
545	6	0	0	0	0	0	0	200	300	0	0	0	0	0	0	0	200	903	0	0	0	0	0	0	0	603	903	0
545	7	0	0	0	0	0	0	200	300	0	0	0	0	0	0	0	200	903	0	0	0	0	0	0	0	603	903	0
545	8	0	0	0	0	0	0	200	300	0	0	0	0	0	0	0	200	903	0	0	0	0	0	0	0	603	903	0
545	9	0	0	0	0	0	0	200	300	0	0	0	0	0	0	0	200	903	0	0	0	0	0	0	0	603	903	0
546	0	0	0	0	0	0	0	200	300	0	0	0	0	0	0	0	200	903	0	0	0	0	0	0	0	603	903	0
546	1	0	0	0	0	0	0	200	300	0	0	0	0	0	0	0	200	903	0	0	0	0	0	0	0	603	903	0
546	2	0	0	0	0	0	0	200	300	0	0	0	0	0	0	0	200	903	0	0	0	0	0	0	0	603	903	0
546	3	0	0	0	0	0	0	200	300	0	0	0	0	0	0	0	200	903	0	0	0	0	0	0	0	603	903	0
546	4	0	0	0	0	0	0	200	300	0	0	0	0	0	0	0	200	903	0	0	0	0	0	0	0	603	903	0
546	5	0	0	0	0	0	0	200	300	0	0	0	0	0	0	0	200	903	0	0	0	0	0	0	0	603	903	0
546	6	0	0	0	0	0	0	200	300	0	0	0	0	0	0	0	200	903	0	0	0	0	0	0	0	603	903	0
546	7	0	0	0	0	0	0	200	300	0	0	0	0	0	0	0	200	903	0	0	0	0	0	0	0	603	903	0
546	8	0	0	0	0	0	0	200	300	0	0	0	0	0	0	0	200	903	0	0	0	0	0	0	0	603	903	0
546	9	0	0	0	0	0	0	200	300	0	0	0	0	0	0	0	200	903	0	0	0	0	0	0	0	603	903	0
547	0	0	0	0	0	0	0	200	300	0	0	0	0	0	0	0	200	903	0	0	0	0	0	0	0	603	903	0
547	1	0	0	0	0	0	0	200	300	0	0	0	0	0	0	0	200	903	0	0	0	0	0	0	0	603	903	0
547	2	0	0	0	0	0	0	200	300	0	0	0	0	0	0	0	200	903	0	0	0	0	0	0	0	603	903	0
547	3	0	0	0	0	0	0	200	300	0	0	0	0	0	0	0	200	903	0	0	0	0	0	0	0	603	903	0
547	4	0	0	0	0	0	0	200	300	0	0	0	0	0	0	0	200	903	0	0	0	0	0	0	0	603	903	0
547	5	0	0	0	0	0	0	200	300	0	0	0	0	0	0	0	200	903	0	0	0	0	0	0	0	603	903	0
547	6	0	0	0	0	0	0	200	300	0	0	0	0	0	0	0	200	903	0	0	0	0	0	0	0	603	903	0
547	7	0	0	0	0	0	0	200	300	0	0	0	0	0	0	0	200	903	0	0	0	0	0	0	0	603	903	0
547	8	0	0	0	0	0	0	200	300	0	0	0	0	0	0	0	200	903	0	0	0	0	0	0	0	603	903	0
547	9	0	0	0	0	0	0	200	300	0	0	0	0	0	0	0	200	903	0	0	0	0	0	0	0	603	903	0
548	0	0	0	0	0	0	0	200	300	0	0	0	0	0	0	0	200	903	0	0	0	0	0	0	0	603	903	0
548	1	0	0	0	0	0	0	200	300	0	0	0	0	0	0	0	200	903	0	0	0	0	0	0	0	603	903	0
548	2	0	0	0	0	0	0	200	300	0	0	0	0	0	0	0	200	903	0	0	0	0	0	0	0	603	903	0
548	3	0	0	0	0	0	0	200	300	0	0	0	0	0	0	0	200	903	0	0	0	0	0	0	0	603	903	0
548	4	0	0	0	0	0	0	200	300	0	0	0	0	0	0	0	200	903	0	0	0	0	0	0	0	603	903	0
548	5	0	0	0	0	0	0	200	300	0	0	0	0	0	0	0	200	903	0	0	0	0	0	0	0	603	903	0
548	6	0	0	0	0	0	0	200	300	0	0	0	0	0	0	0	200	903	0	0	0	0	0	0	0	603	903	0
548	7	0	0	0	0	0	0	200	300	0	0	0	0	0	0	0	200	903	0	0	0	0	0	0	0	603	903	0
548	8	0	0	0	0	0	0	200	300	0	0	0	0	0	0	0	200	903	0	0	0	0	0	0	0	603	903	0
548	9	0	0	0	0	0	0	200	300	0	0	0	0	0	0	0	200	903	0	0	0	0	0	0	0	603	903	0
549	0	0	0	0	0	0	0	200	300	0	0	0	0	0	0	0	200	903	0	0	0	0	0	0	0	603	903	0
549	1	0	0	0	0	0	0	200	300	0	0	0	0	0	0	0	200	903	0	0	0	0	0	0	0	603	903	0
549	2	0	0	0	0	0	0	200	300	0	0	0	0	0	0	0	200	903	0	0	0	0	0	0	0	603	903	0
549	3	0	0	0	0	0	0	200	300	0	0	0	0	0	0	0	200	903	0	0	0	0	0	0	0	603	903	0
549	4	0	0	0	0	0	0	200	300	0	0	0	0	0	0	0	200	903	0	0	0	0	0	0	0	603	903	0
549	5	0	0	0	0	0	0	200	300	0	0	0	0	0	0	0	200	903	0	0	0	0	0	0	0	603	903	0
549	6	0	0	0	0	0	0	200	300	0	0	0	0	0	0	0	200	903	0	0	0	0	0	0	0	603	903	0
549	7	0	0	0	0	0	0	200	300	0	0	0	0	0	0	0	200	903	0	0	0	0	0	0	0	603	903	0
549	8	0	0	0	0	0	0	200	300	0	0	0	0	0	0	0	200	903	0	0	0	0	0	0	0	603	903	0
549	9	0	0	0	0	0	0	200	300	0	0	0	0	0	0	0	200	903	0	0	0	0	0	0	0	603	903	0
550	0	0	0	0	0	0	0	200	300	0	0	0	0	0	0	0	200	903	0	0	0	0	0	0	0	603	903	0
550	1	0	0	0	0	0	0	200	300	0	0	0	0	0	0	0	200	903	0	0	0	0	0	0	0	603	903	0
550	2	0	0	0	0	0	0	200	300	0	0	0	0	0	0	0	200	903	0	0	0	0	0	0	0	603	903	0
550	3	0	0	0	0	0	0	200	300	0	0	0	0	0	0	0	200	903	0	0	0	0	0	0	0	603	903	0
550	4	0	0	0	0	0	0	200	300	0	0	0	0	0	0	0	200	903	0	0	0	0	0	0	0	603	903	0
550	5	0	0	0	0	0	0	200	300	0	0	0	0	0	0	0	200	903	0	0	0	0	0	0	0	603	903	0
550	6	0	0	0	0	0	0	200	300	0	0	0	0	0	0	0	200	903	0	0	0	0	0	0	0	603	903	0
550	7	0	0	0	0	0	0	200	300	0	0	0	0	0	0	0	200	903	0	0	0	0	0	0	0	603	903	0
550	8	0	0	0	0	0	0	200	300	0	0	0	0	0	0	0	200	903	0	0	0	0	0	0	0	603	903	0
550	9	0	0	0	0	0	0	200	300	0	0	0	0	0	0	0	200	903	0	0	0	0	0	0	0	603	903	0
551	0	0	0	0	0	0	0	200	300	0	0	0	0	0	0	0	200	903	0	0	0	0	0	0	0	603	903	0
551	1	0	0	0	0	0	0	200	300	0	0	0	0	0	0	0	200	903	0	0	0	0	0	0	0	603	903	0
551	2	0	0	0	0	0	0	200	300	0	0	0	0	0	0	0	200	903	0	0	0	0	0	0	0	603	903	0
551	3	0	0	0	0	0	0	200	300	0	0	0	0	0	0	0	200	903	0	0	0	0	0	0	0	603	903	0
551	4	0	0	0	0	0	0	200	300	0	0	0	0	0	0	0	200	903	0	0	0	0	0	0	0	603	903	0
551	5	0	0	0	0	0	0	200	300	0	0	0	0	0	0	0	200	903	0	0	0	0	0	0	0	603	903	0
551	6	0	0	0	0	0	0	200	300	0	0	0	0	0	0	0	200	903	0	0	0	0	0	0	0	603	903	0
551	7	0	0	0	0	0	0	200	300	0	0	0	0	0	0	0	200	903	0	0	0	0	0	0	0	603	903	0
551	8	0	0	0	0	0	0	200	300	0	0	0	0	0	0	0	200	903	0	0	0	0	0	0	0	603	903	0
551	9	0	0	0	0	0	0	200	300	0	0	0	0	0	0	0	200	903	0	0	0	0	0	0	0	603	903	0
552	0	0	0	0	0	0	0	200	300	0	0	0	0	0	0	0	200	903	0	0	0	0	0	0	0	603	903	0
552	1	0	0	0	0	0	0	200	300	0	0	0	0	0	0	0	200	903	0	0	0	0	0	0	0	603	903	0
552	2	0	0	0	0	0	0	200	300	0	0	0	0	0	0	0	200	903	0	0	0	0	0	0	0	603	903	0
552	3	0	0	0	0	0	0	200	300	0	0	0	0	0	0	0	200	903	0	0	0	0	0	0	0	603	903	0
552	4	0	0	0	0	0	0	200	300	0	0	0	0	0	0	0	200	903	0	0	0	0	0	0	0	603	903	0
552	5	0	0	0	0	0	0	200	300	0	0	0	0	0	0	0	200	903	0	0	0	0	0	0	0	603	903	0
552	6	0	0	0	0	0	0	200	300	0	0	0	0	0	0	0	200	903	0	0	0	0	0	0	0	603	903	0
552	7	0	0	0	0	0	0	200	300	0	0	0	0	0	0	0	200	903	0	0	0	0	0	0	0	603	903	0
552	8	0	0	0	0	0	0	200	300	0	0	0	0	0	0	0	200	903	0	0	0	0	0	0	0	603	903	0
552	9	0	0	0	0	0	0	200	300	0	0	0	0	0	0	0	200	903	0	0	0	0	0	0	0	603	903	0
553	0	0	0	0	0	0	0	200	300	0	0	0	0	0	0	0	200	903	0	0	0	0	0	0	0	603	903	0
553	1	0	0	0	0	0	0	200	300	0	0	0	0	0	0	0	200	903	0	0	0	0	0	0	0	603	903	0
553	2	0	0	0	0	0	0	200	300	0	0	0	0	0	0	0	200	903	0	0	0	0	0	0	0	603	903	0
553	3	0	0	0	0	0	0	200	300	0	0	0	0	0	0	0	200	903	0	0	0	0	0	0	0	603	903	0
553	4	0	0	0	0	0	0	200	300	0	0	0	0	0	0	0	200	903	0	0	0	0	0	0	0	603	903	0
553	5	0	0	0	0	0	0	200	300	0	0	0	0	0	0	0	200	903	0	0	0	0	0	0	0	603	903	0
553	6	0	0	0	0	0	0	200	300	0	0	0	0	0	0	0	200	903	0	0	0	0	0	0	0	603	903	0
553	7	0	0	0	0	0	0	200	300	0	0	0	0	0	0	0	200	903	0	0	0	0	0	0	0	603	903	0
553	8	0	0	0	0	0	0	200	300	0	0	0	0	0	0	0	200	903	0	0	0	0	0	0	0	603	903	0
553	9	0	0	0	0	0	0	200	300	0	0	0	0	0	0	0	200	903	0	0	0	0	0	0	0	603	903	0
554	0	0	0	0	0	0	0	200	300	0	0	0	0	0	0	0	200	903	0	0	0	0	0	0	0	603	903	0
554	1	0	0	0	0	0	0	200	300	0	0	0	0	0	0	0	200	903	0	0	0	0	0	0	0	603	903	0
554	2	0	0	0	0	0	0	200	300	0	0	0	0	0	0	0	200	903	0	0	0	0	0	0	0	603	903	0
554	3	0	0	0	0	0	0	200	300	0	0	0	0	0	0	0	200	903	0	0	0	0	0	0	0	603	903	0
554	4	0	0	0	0	0	0	200	300	0	0	0	0	0	0	0	200	903	0	0	0	0	0	0	0	603	903	0
554	5	0	0	0	0	0	0	200	300	0	0	0	0	0	0	0	200	903	0	0	0	0	0	0	0	603	903	0
554	6	0	0	0	0	0	0	200	300	0	0	0	0	0	0	0	200	903	0	0	0	0	0	0	0	603	903	0
554	7	0	0	0	0	0	0	200	300	0	0	0	0	0	0	0	200	903	0	0	0	0	0	0	0	603	903	0
554	8	0	0	0	0	0	0	200	300	0	0	0	0	0	0	0	200	903	0	0	0	0	0	0	0	603	903	0
554	9	0	0	0	0	0	0	200	300	0	0	0	0	0	0	0	200	903	0	0	0	0	0	0	0	603	903	0
555	0	0	0	0	0	0	0	200	300	0	0	0	0	0	0	0	200	903	0	0	0	0	0	0	0	603	903	0
555	1	0	0	0	0	0	0	200	300	0	0	0	0	0	0	0	200	903	0	0	0	0	0	0	0	603	903	0
555	2	0	0	0	0	0	0	200	300	0	0	0	0	0	0	0	200	903	0	0	0	0	0	0	0	603	903	0
555	3	0	0	0	0	0	0	200	300	0	0	0	0	0	0	0	200	903	0	0	0	0	0	0	0	603	903	0
555	4	0	0	0	0	0	0	200	300	0	0	0	0	0	0	0	200	903	0	0	0	0	0	0	0	603	903	0
555	5	0	0	0	0	0	0	200	300	0	0	0	0	0	0	0	200	903	0	0	0	0	0	0	0	603	903	0
555	6	0	0	0	0	0	0	200	300	0	0	0	0	0	0	0	200	903	0	0	0	0	0	0	0	603	903	0
555	7	0	0	0	0	0	0	200	300	0	0	0	0	0	0	0	200	903	0	0	0	0	0	0	0	603	903	0
555	8	0	0	0	0	0	0	200	300	0	0	0	0	0	0	0	200	903	0	0	0	0	0	0	0	603	903	0
555	9	0	0	0	0	0	0	200	300	0	0	0	0	0	0	0	200	903	0	0	0	0	0	0	0	603	903	0
556	0	0	0	0	0	0	0	200	300	0	0	0	0	0	0	0	200	903	0	0	0	0	0	0	0	603	903	0
556	1	0	0	0	0	0	0	200	300	0	0	0	0	0	0	0	200	903	0	0	0	0	0	0	0	603	903	0
556	2	0	0	0	0	0	0	200	300	0	0	0	0	0	0	0	200	903	0	0	0	0	0	0	0	603	903	0
556	3	0	0	0	0	0	0	200	300	0	0	0	0	0	0	0	200	903	0	0	0	0	0	0	0	603	903	0
556	4	0	0	0	0	0	0	200	300	0	0	0	0	0	0	0	200	903	0	0	0	0	0	0	0	603	903	0
556	5	0	0	0	0	0	0	200	300	0	0	0	0	0	0	0	200	903	0	0	0	0	0	0	0	603	903	0
556	6	0	0	0	0	0	0	200	300	0	0	0	0	0	0	0	200	903	0	0	0	0	0	0	0	603	903	0
556	7	0	0	0	0	0	0	200	300	0	0	0	0	0	0	0	200	903	0	0	0	0	0	0	0	603	903	0
556	8	0	0	0	0	0	0	200	300	0	0	0	0	0	0	0	200	903	0	0	0	0	0	0	0	603	903	0
556	9	0	0	0	0	0	0	200	300	0	0	0	0	0	0	0	200	903	0	0	0	0	0	0	0	603	903	0
557	0	0	0	0	0	0	0	200	300	0	0	0	0	0	0	0	200	903	0	0	0	0	0	0	0	603	903	0
557	1	0	0	0	0	0	0	200	300	0	0	0	0	0	0	0	200	903	0	0	0	0	0	0	0	603	903	0
557	2	0	0	0	0	0	0	200	300	0	0	0	0	0	0	0	200	903	0	0	0	0	0	0	0	603	903	0
557	3	0	0	0	0	0	0	200	300	0	0	0	0	0	0	0	200	903	0	0	0	0	0	0	0	603	903	0
557	4	0	0	0	0	0	0	200	300	0	0	0	0	0	0	0	200	903	0	0	0	0	0	0	0	603	903	0
557	5	0	0	0	0	0	0	200	300	0	0	0	0	0	0	0	200	903	0	0	0	0	0	0	0	603	903	0
557	6	0	0	0	0	0	0	200	300	0	0	0	0	0	0	0	200	903	0	0	0	0	0	0	0	603	903	0
557	7	0	0	0	0	0	0	200	300	0	0	0	0	0	0	0	200	903	0	0	0	0	0	0	0	603	903	0
557	8	0	0	0	0	0	0	200	300	0	0	0	0	0	0	0	200	903	0	0	0	0	0	0	0	603	903	0
557	9	0	0	0	0	0	0	200	300	0	0	0	0	0	0	0	200	903	0	0	0	0	0	0	0	603	903	0
558	0	0	0	0	0	0	0	200	300	0	0	0	0	0	0	0	200	903	0	0	0	0	0	0	0	603	903	0
558	1	0	0	0	0	0	0	200	300	0	0	0	0	0	0	0	200	903	0	0	0	0	0	0	0	603	903	0
558	2	0	0	0	0	0	0	200	300	0	0	0	0	0	0	0	200	903	0	0	0	0	0	0	0	603	903	0
558	3	0	0	0	0	0	0	200	300	0	0	0	0	0	0	0	200	903	0	0	0	0	0	0	0	603	903	0
558	4	0	0	0	0	0	0	200	300	0	0	0	0	0	0	0	200	903	0	0	0	0	0	0	0	603	903	0
558	5	0	0	0	0	0	0	200	300	0	0	0	0	0	0	0	200	903	0	0	0	0	0	0	0	603	903	0
558	6	0	0	0	0	0	0	200	300	0	0	0	0	0	0	0	200	903	0	0	0	0	0	0	0	603	903	0
558	7	0	0	0	0	0	0	200	300	0	0	0	0	0	0	0	200	903	0	0	0	0	0	0	0	603	903	0
558	8	0	0	0	0	0	0	200	300	0	0	0	0	0	0	0	200	903	0	0	0	0	0	0	0	603	903	0
558	9	0	0	0	0	0	0	200	300	0	0	0	0	0	0	0	200	903	0	0	0	0	0	0	0	603	903	0
559	0	0	0	0	0	0	0	200	300	0	0	0	0	0	0	0	200	903	0	0	0	0	0	0	0	603	903	0
559	1	0	0	0	0	0	0	200	300	0	0	0	0	0	0	0	200	903	0	0	0	0	0	0	0	603	903	0
559	2	0	0	0	0	0	0	200	300	0	0	0	0	0	0	0	200	903	0	0	0	0	0	0	0	603	903	0
559	3	0	0	0	0	0	0	200	300	0	0	0	0	0	0	0	200	903	0	0	0	0	0	0	0	603	903	0
559	4	0	0	0	0	0	0	200	300	0	0	0	0	0	0	0	200	903	0	0	0	0	0	0	0	603	903	0
559	5	0	0	0	0	0	0	200	300	0	0	0	0	0	0	0	200	903	0	0	0	0	0	0	0	603	903	0
559	6	0	0	0	0	0	0	200	300	0	0	0	0	0	0	0	200	903	0	0	0	0	0	0	0	603	903	0
559	7	0	0	0	0	0	0	200	300	0	0	0	0	0	0	0	200	903	0	0	0	0	0	0	0	603	903	0
559	8	0	0	0	0	0	0	200	300	0	0	0	0	0	0	0	200	903	0	0	0	0	0	0	0	603	903	0
559	9	0	0	0	0	0	0	200	300	0	0	0	0	0	0	0	200	903	0	0	0	0	0	0	0	603	903	0
560	0	0	0	0	0	0	0	200	300	0	0	0	0	0	0	0	200	903	0	0	0	0	0	0	0	603	903	0
560	1	0	0	0	0	0	0	200	300	0	0	0	0	0	0	0	200	903	0	0	0	0	0	0	0	603	903	0
560	2	0	0	0	0	0	0	200	300	0	0	0	0	0	0	0	200	903	0	0	0	0	0	0	0	603	903	0
560	3	0	0	0	0	0	0	200	300	0	0	0	0	0	0	0	200	903	0	0	0	0	0	0	0	603	903	0
560	4	0	0	0	0	0	0	200	300	0	0	0	0	0	0	0	200	903	0	0	0	0	0	0	0	603	903	0
560	5	0	0	0	0	0	0	200	300	0	0	0	0	0	0	0	200	903	0	0	0	0	0	0	0	603	903	0
560	6	0	0	0	0	0	0	200	300	0	0	0	0	0	0	0	200	903	0	0	0	0	0	0	0	603	903	0
560	7	0	0	0	0	0	0	200	300	0	0	0	0	0	0	0	200	903	0	0	0	0	0	0	0	603	903	0
560	8	0	0	0	0	0	0	200	300	0	0	0	0	0	0	0	200	903	0	0	0	0	0	0	0	603	903	0
560	9	0	0	0	0	0	0	200	300	0	0	0	0	0	0	0	200	903	0	0	0	0	0	0	0	603	903	0
561	0	0	0	0	0	0	0	200	300	0	0	0	0	0	0	0	200	903	0	0	0	0	0	0	0	603	903	0
561	1	0	0	0	0	0	0	200	300	0	0	0	0	0	0	0	200	903	0	0	0	0	0	0	0	603	903	0
561	2	0	0	0	0	0	0	200	300	0	0	0	0	0	0	0	200	903	0	0	0	0	0	0	0	603	903	0
561	3	0	0	0	0	0	0	200	300	0	0	0	0	0	0	0	200	903	0	0	0	0	0	0	0	603	903	0
561	4	0	0	0	0	0	0	200	300	0	0	0	0	0	0	0	200	903	0	0	0	0	0	0	0	603	903	0
561	5	0	0	0	0	0	0	200	300	0	0	0	0	0	0	0	200	903	0	0	0	0	0	0	0	603	903	0
561	6	0	0	0	0	0	0	200	300	0	0	0	0	0	0	0	200	903	0	0	0	0	0	0	0	603	903	0
561	7	0	0	0	0	0	0	200	300	0	0	0	0	0	0	0	200	903	0	0	0	0	0	0	0	603	903	0
561	8	0	0	0	0	0	0	200	300	0	0	0	0	0	0	0	200	903	0	0	0	0	0	0	0	603	903	0
561	9	0	0	0	0	0	0	200	300	0	0	0	0	0	0	0	200	903	0	0	0	0	0	0	0	603	903	0
562	0	0	0	0	0	0	0	200	300	0	0	0	0	0	0	0	200	903	0	0	0	0	0	0	0	603	903	0
562	1	0	0	0	0	0	0	200	300	0	0	0	0	0	0	0	200	903	0	0	0	0	0	0	0	603	903	0
562	2	0	0	0	0	0	0	200	300	0	0	0	0	0	0	0	200	903	0	0	0	0	0	0	0	603	903	0
562	3	0	0	0	0	0	0	200	300	0	0	0	0	0	0	0	200	903	0	0	0	0	0	0	0	603	903	0
562	4	0	0	0	0	0	0	200	300	0	0	0	0	0	0	0	200	903	0	0	0	0	0	0	0	603	903	0
562	5	0	0	0	0	0	0	200	300	0	0	0	0	0	0	0	200	903	0	0	0	0	0	0	0	603	903	0
562	6	0	0	0	0	0	0	200	300	0	0	0	0	0	0	0	200	903	0	0	0	0	0	0	0	603	903	0
562	7	0	0	0	0	0	0	200	300	0	0	0	0	0	0	0	200	903	0	0	0	0	0	0	0	603	903	0
562	8	0	0	0	0	0	0	200	300	0	0	0	0	0	0	0	200	903	0	0	0	0	0	0	0	603	903	0
562	9	0	0	0	0	0	0	200	300	0	0	0	0	0	0	0	200	903	0	0	0	0	0	0	0	603	903	0
563	0	0	0	0	0	0	0	200	300	0	0	0	0	0	0	0	200	903	0	0	0	0	0	0	0	603	903	0
563	1	0	0	0	0	0	0	200	300	0	0	0	0	0	0	0	200	903	0	0	0	0	0	0	0	603	903	0
563	2	0	0	0	0	0	0	200	300	0	0	0	0	0	0	0	200	903	0	0	0	0	0	0	0	603	903	0
563	3	0	0	0	0	0	0	200	300	0	0	0	0	0	0	0	200	903	0	0	0	0	0	0	0	603	903	0
563	4	0	0	0	0	0	0	200	300	0	0	0	0	0	0	0	200	903	0	0	0	0	0	0	0	603	903	0
563	5	0	0	0	0	0	0	200	300	0	0	0	0	0	0	0	200	903	0	0	0	0	0	0	0	603	903	0
563	6	0	0	0	0	0	0	200	300	0	0	0	0	0	0	0	200	903	0	0	0	0	0	0	0	603	903	0
563	7	0	0	0	0	0	0	200	300	0	0	0	0	0	0	0	200	903	0	0	0	0	0	0	0	603	903	0
563	8	0	0	0	0	0	0	200	300	0	0	0	0	0	0	0	200	903	0	0	0	0	0	0	0	603	903	0
563	9	0	0	0	0	0	0	200	300	0	0	0	0	0	0	0	200	903	0	0	0	0	0	0	0	603	903	0
564	0	0	0	0	0	0	0	200	300	0	0	0	0	0	0	0	200	903	0	0	0	0	0	0	0	603	903	0
564	1	0	0	0	0	0	0	200	300	0	0	0	0	0	0	0	200	903	0	0	0	0	0	0	0	603	903	0
564	2	0	0	0	0	0	0	200	300	0	0	0	0	0	0	0	200	903	0	0	0	0	0	0	0	603	903	0
564	3	0	0	0	0	0	0	200	300	0	0	0	0	0	0	0	200	903	0	0	0	0	0	0	0	603	903	0
564	4	0	0	0	0	0	0	200	300	0	0	0	0	0	0	0	200	903	0	0	0	0	0	0	0	603	903	0
564	5	0	0	0	0	0	0	200	300	0	0	0	0	0	0	0	200	903	0	0	0	0	0	0	0	603	903	0
564	6	0	0	0	0	0	0	200	300	0	0	0	0	0	0	0	200	903	0	0	0	0	0	0	0	603	903	0
564	7	0	0	0	0	0	0	200	300	0	0	0	0	0	0	0	200	903	0	0	0	0	0	0	0	603	903	0
564	8	0	0	0	0	0	0	200	300	0	0	0	0	0	0	0	200	903	0	0	0	0	0	0	0	603	903	0
564	9	0	0	0	0	0	0	200	300	0	0	0	0	0	0	0	200	903	0	0	0	0	0	0	0	603	903	0
565	0	0	0	0	0	0	0	200	300	0	0	0	0	0	0	0	200	903	0	0	0	0	0	0	0	603	903	0
565	1	0	0	0	0	0	0	200	300	0	0	0	0	0	0	0	200	903	0	0	0	0	0	0	0	603	903	0
565	2	0	0	0	0	0	0	200	300	0	0	0	0	0	0	0	200	903	0	0	0	0	0	0	0	603	903	0
565	3	0	0	0	0	0	0	200	300	0	0	0	0	0	0	0	200	903	0	0	0	0	0	0	0	603	903	0
565	4	0	0	0	0	0	0	200	300	0	0	0	0	0	0	0	200	903	0	0	0	0	0	0	0	603	903	0
565	5	0	0	0	0	0	0	200	300	0	0	0	0	0	0	0	200	903	0	0	0	0	0	0	0	603	903	0
565	6	0	0	0	0	0	0	200	300	0	0	0	0	0	0	0	200	903	0	0	0	0	0	0	0	603	903	0
565	7	0	0	0	0	0	0	200	300	0	0	0	0	0	0	0	200	903	0	0	0	0	0	0	0	603	903	0
565	8	0	0	0	0	0	0	200	300	0	0	0	0	0	0	0	200	903	0	0	0	0	0	0	0	603	903	0
565	9	0	0	0	0	0	0	200	300	0	0	0	0	0	0	0	200	903	0	0	0	0	0	0	0	603	903	0
566	0	0	0	0	0	0	0	200	300	0	0	0	0	0	0	0	200	903	0	0	0	0	0	0	0	603	903	0
566	1	0	0	0	0	0	0	200	300	0	0	0	0	0	0	0	200	903	0	0	0	0	0	0	0	603	903	0
566	2	0	0	0	0	0	0	200	300	0	0	0	0	0	0	0	200	903	0	0	0	0	0	0	0	603	903	0
566	3	0	0	0	0	0	0	200	300	0	0	0	0	0	0	0	200	903	0	0	0	0	0	0	0	603	903	0
566	4	0	0	0	0	0	0	200	300	0	0	0	0	0	0	0	200	903	0	0	0	0	0	0	0	603	903	0
566	5	0	0	0	0	0	0	200	300	0	0	0	0	0	0	0	200	903	0	0	0	0	0	0	0	603	903	0
566	6	0	0	0	0	0	0	200	300	0	0	0	0	0	0	0	200	903	0	0	0	0	0	0	0	603	903	0
566	7	0	0	0	0	0	0	200	300	0	0	0	0	0	0	0	200	903	0	0	0	0	0	0	0	603	903	0
566	8	0	0	0	0	0	0	200	300	0	0	0	0	0	0	0	200	903	0	0	0	0	0	0	0	603	903	0
566	9	0	0	0	0	0	0	200	300	0	0	0	0	0	0	0	200	903	0	0	0	0	0	0	0	603	903	0
567	0	0	0	0	0	0	0	200	300	0	0	0	0	0	0	0	200	903	0	0	0	0	0	0	0	603	903	0
567	1	0	0	0	0	0	0	200	300	0	0	0	0	0	0	0	200	903	0	0	0	0	0	0	0	603	903	0
567	2	0	0	0	0	0	0	200	300	0	0	0	0	0	0	0	200	903	0	0	0	0	0	0	0	603	903	0
567	3	0	0	0	0	0	0	200	300	0	0	0	0	0	0	0	200	903	0	0	0	0	0	0	0	603	903	0
567	4	0	0	0	0	0	0	200	300	0	0	0	0	0	0	0	200	903	0	0	0	0	0	0	0	603	903	0
567	5	0	0	0	0	0	0	200	300	0	0	0	0	0	0	0	200	903	0	0	0	0	0	0	0	603	903	0
567	6	0	0	0	0	0	0	200	300	0	0	0	0	0	0	0	200	903	0	0	0	0	0	0	0	603	903	0
567	7	0	0	0	0	0	0	200	300	0	0	0	0	0	0	0	200	903	0	0	0	0	0	0	0	603	903	0
567	8	0	0	0	0	0	0	200	300	0	0	0	0	0	0	0	200	903	0	0	0	0	0	0	0	603	903	0
567	9	0	0	0	0	0	0	200	300	0	0	0	0	0	0	0	200	903	0	0	0	0	0	0	0	603	903	0
568	0	0	0	0	0	0	0	200	300	0	0	0	0	0	0	0	200	903	0	0	0	0	0	0	0	603	903	0
568	1	0	0	0	0	0	0	200	300	0	0	0	0	0	0	0	200	903	0	0	0	0	0	0	0	603	903	0
568	2	0	0	0	0	0	0	200	300	0	0	0	0	0	0	0	200	903	0	0	0	0	0	0	0	603	903	0
568	3	0	0	0	0	0	0	200	300	0	0	0	0	0	0	0	200	903	0	0	0	0	0	0	0	603	903	0
568	4	0	0	0	0	0	0	200	300	0	0	0	0	0	0	0	200	903	0	0	0	0	0	0	0	603	903	0
568	5	0	0	0	0	0	0	200	300	0	0	0	0	0	0	0	200	903	0	0	0	0	0	0	0	603	903	0
568	6	0	0	0	0	0	0	200	300	0	0	0	0	0	0	0	200	903	0	0	0	0	0	0	0	603	903	0
568	7	0	0	0	0	0	0	200	300	0	0	0	0	0	0	0	200	903	0	0	0	0	0	0	0	603	903	0
568	8	0	0	0	0	0	0	200	300	0	0	0	0	0	0	0	200	903	0	0	0	0	0	0	0	603	903	0
568	9	0	0	0	0	0	0	200	300	0	0	0	0	0	0	0	200	903	0	0	0	0	0	0	0	603	903	0
569	0	0	0	0	0	0	0	200	300	0	0	0	0	0	0	0	200	903	0	0	0	0	0	0	0	603	903	0
569	1	0	0	0	0	0	0	200	300	0	0	0	0	0	0	0	200	903	0	0	0	0	0	0	0	603	903	0
569	2	0	0	0	0	0	0	200	300	0	0	0	0	0	0	0	200	903	0	0	0	0	0	0	0	603	903	0
569	3	0	0	0	0	0	0	200	300	0	0	0	0	0	0	0	200	903	0	0	0	0	0	0	0	603	903	0
569	4	0	0	0	0	0	0	200	300	0	0	0	0	0	0	0	200	903	0	0	0	0	0	0	0	603	903	0
569	5	0	0	0	0	0	0	200	300	0	0	0	0	0	0	0	200	903	0	0	0	0	0	0	0	603	903	0
569	6	0	0	0	0	0	0	200	300	0	0	0	0	0	0	0	200	903	0	0	0	0	0	0	0	603	903	0
569	7	0	0	0	0	0	0	200	300	0	0	0	0	0	0	0	200	903	0	0	0	0	0	0	0	603	903	0
569	8	0	0	0	0	0	0	200	300	0	0	0	0	0	0	0	200	903	0	0	0	0	0	0	0	603	903	0
569	9	0	0	0	0	0	0	200	300	0	0	0	0	0	0	0	200	903	0	0	0	0	0	0	0	603	903	0
570	0	0	0	0	0	0	0	200	300	0	0	0	0	0	0	0	200	903	0	0	0	0	0	0	0	603	903	0
570	1	0	0	0	0	0	0	200	300	0	0	0	0	0	0	0	200	903	0	0	0	0	0	0	0	603	903	0
570	2	0	0	0	0	0	0	200	300	0	0	0	0	0	0	0	200	903	0	0	0	0	0	0	0	603	903	0
570	3	0	0	0	0	0	0	200	300	0	0	0	0	0	0	0	200	903	0	0	0	0	0	0	0	603	903	0
570	4	0	0	0	0	0	0	200	300	0	0	0	0	0	0	0	200	903	0	0	0	0	0	0	0	603	903	0
570	5	0	0	0	0	0	0	200	300	0	0	0	0	0	0	0	200	903	0	0	0	0	0	0	0	603	903	0
570	6	0	0	0	0	0	0	200	300	0	0	0	0	0	0	0	200	903	0	0	0	0	0	0	0	603	903	0
570	7	0	0	0	0	0	0	200	300	0	0	0	0	0	0	0	200	903	0	0	0	0	0	0	0	603	903	0
570	8	0	0	0	0	0	0	200	300	0	0	0	0	0	0	0	200	903	0	0	0	0	0	0	0	603	903	0
570	9	0	0	0	0	0	0	200	300	0	0	0	0	0	0	0	200	903	0	0	0	0	0	0	0	603	903	0
571	0	0	0	0	0	0	0	200	300	0	0	0	0	0	0	0	200	903	0	0	0	0	0	0	0	603	903	0
571	1	0	0	0	0	0	0	200	300	0	0	0	0	0	0	0	200	903	0	0	0	0	0	0	0	603	903	0
571	2	0	0	0	0	0	0	200	300	0	0	0	0	0	0	0	200	903	0	0	0	0	0	0	0	603	903	0
571	3	0	0	0	0	0	0	200	300	0	0	0	0	0	0	0	200	903	0	0	0	0	0	0	0	603	903	0
571	4	0	0	0	0	0	0	200	300	0	0	0	0	0	0	0	200	903	0	0	0	0	0	0	0	603	903	0
571	5	0	0	0	0	0	0	200	300	0	0	0	0	0	0	0	200	903	0	0	0	0	0	0	0	603	903	0
571	6	0	0	0	0	0	0	200	300	0	0	0	0	0	0	0	200	903	0	0	0	0	0	0	0	603	903	0
571	7	0	0	0	0	0	0	200	300	0	0	0	0	0	0	0	200	903	0	0	0	0	0	0	0	603	903	0
571	8	0	0	0	0	0	0	200	300	0	0	0	0	0	0	0	200	903	0	0	0	0	0	0	0	603	903	0
571	9	0	0	0	0	0	0	200	300	0	0	0	0	0	0	0	200	903	0	0	0	0	0	0	0	603	903	0
572	0	0	0	0	0	0	0	200	300	0	0	0	0	0	0	0	200	903	0	0	0	0	0	0	0	603	903	0
572	1	0	0	0	0	0	0	200	300	0	0	0	0	0	0	0	200	903	0	0	0	0	0	0	0	603	903	0
572	2	0	0	0	0	0	0	200	300	0	0	0	0	0	0	0	200	903	0	0	0	0	0	0	0	603	903	0
572	3	0	0	0	0	0	0	200	300	0	0	0	0	0	0	0	200	903	0	0	0	0	0	0	0	603	903	0
572	4	0	0	0	0	0	0	200	300	0	0	0	0	0	0	0	200	903	0	0	0	0	0	0	0	603	903	0
572	5	0	0	0	0	0	0	200	300	0	0	0	0	0	0	0	200	903	0	0	0	0	0	0	0	603	903	0
572	6	0	0	0	0	0	0	200	300	0	0	0	0	0	0	0	200	903	0	0	0	0	0	0	0	603	903	0
572	7	0	0	0	0	0	0	200	300	0	0	0	0	0	0	0	200	903	0	0	0	0	0	0	0	603	903	0
572	8	0	0	0	0	0	0	200	300	0	0	0	0	0	0	0	200	903	0	0	0	0	0	0	0	603	903	0
572	9	0	0	0	0	0	0	200	300	0	0	0	0	0	0	0	200	903	0	0	0	0	0	0	0	603	903	0
573	0	0	0	0	0	0	0	200	300	0	0	0	0	0	0	0	200	903	0	0	0	0	0	0	0	603	903	0
573	1	0	0	0	0	0	0	200	300	0	0	0	0	0	0	0	200	903	0	0	0	0	0	0	0	603	903	0
573	2	0	0	0	0	0	0	200	300	0	0	0	0	0	0	0	200	903	0	0	0	0	0	0	0	603	903	0
573	3	0	0	0	0	0	0	200	300	0	0	0	0	0	0	0	200	903	0	0	0	0	0	0	0	603	903	0
573	4	0	0	0	0	0	0	200	300	0	0	0	0	0	0	0	200	903	0	0	0	0	0	0	0	603	903	0
573	5	0	0	0	0	0	0	200	300	0	0	0	0	0	0	0	200	903	0	0	0	0	0	0	0	603	903	0
573	6	0	0	0	0	0	0	200	300	0	0	0	0	0	0	0	200	903	0	0	0	0	0	0	0	603	903	0
573	7	0	0	0	0	0	0	200	300	0	0	0	0	0	0	0	200	903	0	0	0	0	0	0	0	603	903	0
573	8	0	0	0	0	0	0	200	300	0	0	0	0	0	0	0	200	903	0	0	0	0	0	0	0	603	903	0
573	9	0	0	0	0	0	0	200	300	0	0	0	0	0	0	0	200	903	0	0	0	0	0	0	0	603	903	0
574	0	0	0	0	0	0	0	200	300	0	0	0	0	0	0	0	200	903	0	0	0	0	0	0	0	603	903	0
574	1	0	0	0	0	0	0	200	300	0	0	0	0	0	0	0	200	903	0	0	0	0	0	0	0	603	903	0
574	2	0	0	0	0	0	0	200	300	0	0	0	0	0	0	0	200	903	0	0	0	0	0	0	0	603	903	0
574	3	0	0	0	0	0	0	200	300	0	0	0	0	0	0	0	200	903	0	0	0	0	0	0	0	603	903	0
574	4	0	0	0	0	0	0	200	300	0	0	0	0	0	0	0	200	903	0	0	0	0	0	0	0	603	903	0
574	5	0	0	0	0	0	0	200	300	0	0	0	0	0	0	0	200	903	0	0	0	0	0	0	0	603	903	0
574	6	0	0	0	0	0	0	200	300	0	0	0	0	0	0	0	200	903	0	0	0	0	0	0	0	603	903	0
574	7	0	0	0	0	0	0	200	300	0	0	0	0	0	0	0	200	903	0	0	0	0	0	0	0	603	903	0
574	8	0	0	0	0	0	0	200	300	0	0	0	0	0	0	0	200	903	0	0	0	0	0	0	0	603	903	0
574	9	0	0	0	0	0	0	200	300	0	0	0	0	0	0	0	200	903	0	0	0	0	0	0	0	603	903	0
575	0	0	0	0	0	0	0	200	300	0	0	0	0	0	0	0	200	903	0	0	0	0	0	0	0	603	903	0
575	1	0	0	0	0	0	0	200	300	0	0	0	0	0	0	0	200	903	0	0	0	0	0	0	0	603	903	0
575	2	0	0	0	0	0	0	200	300	0	0	0	0	0	0	0	200	903	0	0	0	0	0	0	0	603	903	0
575	3	0	0	0	0	0	0	200	300	0	0	0	0	0	0	0	200	903	0	0	0	0	0	0	0	603	903	0
575	4	0	0	0	0	0	0	200	300	0	0	0	0	0	0	0	200	903	0	0	0	0	0	0	0	603	903	0
575	5	0	0	0	0	0	0	200	300	0	0	0	0	0	0	0	200	903	0	0	0	0	0	0	0	603	903	0
575	6	0	0	0	0	0	0	200	300	0	0	0	0	0	0	0	200	903	0	0	0	0	0	0	0	603	903	0
575	7	0	0	0	0	0	0	200	300	0	0	0	0	0	0	0	200	903	0	0	0	0	0	0	0	603	903	0
575	8	0	0	0	0	0	0	200	300	0	0	0	0	0	0	0	200	903	0	0	0	0	0	0	0	603	903	0
575	9	0	0	0	0	0	0	200	300	0	0	0	0	0	0	0	200	903	0	0	0	0	0	0	0	603	903	0
576	0	0	0	0	0	0	0	200	300	0	0	0	0	0	0	0	200	903	0	0	0	0	0	0	0	603	903	0
576	1	0	0	0	0	0	0	200	300	0	0	0	0	0	0	0	200	903	0	0	0	0	0	0	0	603	903	0
576	2	0	0	0	0	0	0	200	300	0	0	0	0	0	0	0	200	903	0	0	0	0	0	0	0	603	903	0
576	3	0	0	0	0	0	0	200	300	0	0	0	0	0	0	0	200	903	0	0	0	0	0	0	0	603	903	0
576	4	0	0	0	0	0	0	200	300	0	0	0	0	0	0	0	200	903	0	0	0	0	0	0	0	603	903	0
576	5	0	0	0	0	0	0	200	300	0	0	0	0	0	0	0	200	903	0	0	0	0	0	0	0	603	903	0
576	6	0	0	0	0	0	0	200	300	0	0	0	0	0	0	0	200	903	0	0	0	0	0	0	0	603	903	0
576	7	0	0	0	0	0	0	200	300	0	0	0	0	0	0	0	200	903	0	0	0	0	0	0	0	603	903	0
576	8	0	0	0	0	0	0	200	300	0	0	0	0	0	0	0	200	903	0	0	0	0	0	0	0	603	903	0
576	9	0	0	0	0	0	0	200	300	0	0	0	0	0	0	0	200	903	0	0	0	0	0	0	0	603	903	0
577	0	0	0	0	0	0	0	200	300	0	0	0	0	0	0	0	200	903	0	0	0	0	0	0	0	603	903	0
577	1	0	0	0	0	0	0	200	300	0	0	0	0	0	0	0	200	903	0	0	0	0	0	0	0	603	903	0
577	2	0	0	0	0	0	0	200	300	0	0	0	0	0	0	0	200	903	0	0	0	0	0	0	0	603	903	0
577	3	0	0	0	0	0	0	200	300	0	0	0	0	0	0	0	200	903	0	0	0	0	0	0	0	603	903	0
577	4	0	0	0	0	0	0	200	300	0	0	0	0	0	0	0	200	903	0	0	0	0	0	0	0	603	903	0
577	5	0	0	0	0	0	0	200	300	0	0	0	0	0	0	0	200	903	0	0	0	0	0	0	0	603	903	0
577	6	0	0	0	0	0	0	200	300	0	0	0	0	0	0	0	200	903	0	0	0	0	0	0	0	603	903	0
577	7	0	0	0	0	0	0	200	300	0	0	0	0	0	0	0	200	903	0	0	0	0	0	0	0	603	903	0
577	8	0	0	0	0	0	0	200	300	0	0	0	0	0	0	0	200	903	0	0	0	0	0	0	0	603	903	0
577	9	0	0	0	0	0	0	200	300	0	0	0	0	0	0	0	200	903	0	0	0	0	0	0	0	603	903	0
578	0	0	0	0	0	0	0	200	300	0	0	0	0	0	0	0	200	903	0	0	0	0	0	0	0	603	903	0
578	1	0	0	0	0	0	0	200	300	0	0	0	0	0	0	0	200	903	0	0	0	0	0	0	0	603	903	0
578	2	0	0	0	0	0	0	200	300	0	0	0	0	0	0	0	200	903	0	0	0	0	0	0	0	603	903	0
578	3	0	0	0	0	0	0	200	300	0	0	0	0	0	0	0	200	903	0	0	0	0	0	0	0	603	903	0
578	4	0	0	0	0	0	0	200	300	0	0	0	0	0	0	0	200	903	0	0	0	0	0	0	0	603	903	0
578	5	0	0	0	0	0	0	200	300	0	0	0	0	0	0	0	200	903	0	0	0	0	0	0	0	603	903	0
578	6	0	0	0	0	0	0	200	300	0	0	0	0	0	0	0	200	903	0	0	0	0	0	0	0	603	903	0
578	7	0	0	0	0	0	0	200	300	0	0	0	0	0	0	0	200	903	0	0	0	0	0	0	0	603	903	0
578	8	0	0	0	0	0	0	200	300	0	0	0	0	0	0	0	200	903	0	0	0	0	0	0	0	603	903	0
578	9	0	0	0	0	0	0	200	300	0	0	0	0	0	0	0	200	903	0	0	0	0	0	0	0	603	903	0
579	0	0	0	0	0	0	0	200	300	0	0	0	0	0	0	0	200	903	0	0	0	0	0	0	0	603	903	0
579	1	0	0	0	0	0	0	200	300	0	0	0	0	0	0	0	200	903	0	0	0	0	0	0	0	603	903	0
579	2	0	0	0	0	0	0	200	300	0	0	0	0	0	0	0	200	903	0	0	0	0	0	0	0	603	903	0
579	3	0	0	0	0	0	0	200	300	0	0	0	0	0	0	0	200	903	0	0	0	0	0	0	0	603	903	0
579	4	0	0	0	0	0	0	200	300	0	0	0	0	0	0	0	200	903	0	0	0	0	0	0	0	603	903	0
579	5	0	0	0	0	0	0	200	300	0	0	0	0	0	0	0	200	903	0	0	0	0	0	0	0	603	903	0
579	6	0	0	0	0	0	0	200	300	0	0	0	0	0	0	0	200	903	0	0	0	0	0	0	0	603	903	0
579	7	0	0	0	0	0	0	200	300	0	0	0	0	0	0	0	200	903	0	0	0	0	0	0	0	603	903	0
579	8	0	0	0	0	0	0	200	300	0	0	0	0	0	0	0	200	903	0	0	0	0	0	0	0	603	903	0
579	9	0	0	0	0	0	0	200	300	0	0	0	0	0	0	0	200	903	0	0	0	0	0	0	0	603	903	0
580	0	0	0	0	0	0	0	200	300	0	0	0	0	0	0	0	200	903	0	0	0	0	0	0	0	603	903	0
580	1	0	0	0	0	0	0	200	300	0	0	0	0	0	0	0	200	903	0	0	0	0	0	0	0	603	903	0
580	2	0	0	0	0	0	0	200	300	0	0	0	0	0	0	0	200	903	0	0	0	0	0	0	0	603	903	0
580	3	0	0	0	0	0	0	200	300	0	0	0	0	0	0	0	200	903	0	0	0	0	0	0	0	603	903	0
580	4	0	0	0	0	0	0	200	300	0	0	0	0	0	0	0	200	903	0	0	0	0	0	0	0	603	903	0
580	5	0	0	0	0	0	0	200	300	0	0	0	0	0	0	0	200	903	0	0	0	0	0	0	0	603	903	0
580	6	0	0	0	0	0	0	200	300	0	0	0	0	0	0	0	200	903	0	0	0	0	0	0	0	603	903	0
580	7	0	0	0	0	0	0	200	300	0	0	0	0	0	0	0	200	903	0	0	0	0	0	0	0	603	903	0
580	8	0	0	0	0	0	0	200	300	0	0	0	0	0	0	0	200	903	0	0	0	0	0	0	0	603	903	0
580	9	0	0	0	0	0	0	200	300	0	0	0	0	0	0	0	200	903	0	0	0	0	0	0	0	603	903	0
581	0	0	0	0	0	0	0	200	300	0	0	0	0	0	0	0	200	903	0	0	0	0	0	0	0	603	903	0
581	1	0	0	0	0	0	0	200	300	0	0	0	0	0	0	0	200	903	0	0	0	0	0	0	0	603	903	0
581	2	0	0	0	0	0	0	200	300	0	0	0	0	0	0	0	200	903	0	0	0	0	0	0	0	603	903	0
581	3	0	0	0	0	0	0	200	300	0	0	0	0	0	0	0	200	903	0	0	0	0	0	0	0	603	903	0
581	4	0	0	0	0	0	0	200	300	0	0	0	0	0	0	0	200	903	0	0	0	0	0	0	0	603	903	0
581	5	0	0	0	0	0	0	200	300	0	0	0	0	0	0	0	200	903	0	0	0	0	0	0	0	603	903	0
581	6	0	0	0	0	0	0	200	300	0	0	0	0	0	0	0	200	903	0	0	0	0	0	0	0	603	903	0
581	7	0	0	0	0	0	0	200	300	0	0	0	0	0	0	0	200	903	0	0	0	0	0	0	0	603	903	0
581	8	0	0	0	0	0	0	200	300	0	0	0	0	0	0	0	200	903	0	0	0	0	0	0	0	603	903	0
581	9	0	0	0	0	0	0	200	300	0	0	0	0	0	0	0	200	903	0	0	0	0	0	0	0	603	903	0
582	0	0	0	0	0	0	0	200	300	0	0	0	0	0	0	0	200	903	0	0	0	0	0	0	0	603	903	0
582	1	0	0	0	0	0	0	200	300	0	0	0	0	0	0	0	200	903	0	0	0	0	0	0	0	603	903	0
582	2	0	0	0	0	0	0	200	300	0	0	0	0	0	0	0	200	903	0	0	0	0	0	0	0	603	903	0
582	3	0	0	0	0	0	0	200	300	0	0	0	0	0	0	0	200	903	0	0	0	0	0	0	0	603	903	0
582	4	0	0	0	0	0	0	200	300	0	0	0	0	0	0	0	200	903	0	0	0	0	0	0	0	603	903	0
582	5	0	0	0	0	0	0	200	300	0	0	0	0	0	0	0	200	903	0	0	0	0	0	0	0	603	903	0
582	6	0	0	0	0	0	0	200	300	0	0	0	0	0	0	0	200	903	0	0	0	0	0	0	0	603	903	0
582	7	0	0	0	0	0	0	200	300	0	0	0	0	0	0	0	200	903	0	0	0	0	0	0	0	603	903	0
582	8	0	0	0	0	0	0	200	300	0	0	0	0	0	0	0	200	903	0	0	0	0	0	0	0	603	903	0
582	9	0	0	0	0	0	0	200	300	0	0	0	0	0	0	0	200	903	0	0	0	0	0	0	0	603	903	0
583	0	0	0	0	0	0	0	200	300	0	0	0	0	0	0	0	200	903	0	0	0	0	0	0	0	603	903	0
583	1	0	0	0	0	0	0	200	300	0	0	0	0	0	0	0	200	903	0	0	0	0	0	0	0	603	903	0
583	2	0	0	0	0	0	0	200	300	0	0	0	0	0	0	0	200	903	0	0	0	0	0	0	0	603	903	0
583	3	0	0	0	0	0	0	200	300	0	0	0	0	0	0	0	200	903	0	0	0	0	0	0	0	603	903	0
583	4	0	0	0	0	0	0	200	300	0	0	0	0	0	0	0	200	903	0	0	0	0	0	0	0	603	903	0
583	5	0	0	0	0	0	0	200	300	0	0	0	0	0	0	0	200	903	0	0	0	0	0	0	0	603	903	0
583	6	0	0	0	0	0	0	200	300	0	0	0	0	0	0	0	200	903	0	0	0	0	0	0	0	603	903	0
583	7	0	0	0	0	0	0	200	300	0	0	0	0	0	0	0	200	903	0	0	0	0	0	0	0	603	903	0
583	8	0	0	0	0	0	0	200	300	0	0	0	0	0	0	0	200	903	0	0	0	0	0	0	0	603	903	0
583	9	0	0	0	0	0	0	200	300	0	0	0	0	0	0	0	200	903	0	0	0	0	0	0	0	603	903	0
584	0	0	0	0	0	0	0	200	300	0	0	0	0	0	0	0	200	903	0	0	0	0	0	0	0	603	903	0
584	1	0	0	0	0	0	0	200	300	0	0	0	0	0	0	0	200	903	0	0	0	0	0	0	0	603	903	0
584	2	0	0	0	0	0	0	200	300	0	0	0	0	0	0	0	200	903	0	0	0	0	0	0	0	603	903	0
584	3	0	0	0	0	0	0	200	300	0	0	0	0	0	0	0	200	903	0	0	0	0	0	0	0	603	903	0
584	4	0	0	0	0	0	0	200	300	0	0	0	0	0	0	0	200	903	0	0	0	0	0	0	0	603	903	0
584	5	0	0	0	0	0	0	200	300	0	0	0	0	0	0	0	200	903	0	0	0	0	0	0	0	603	903	0
584	6	0	0	0	0	0	0	200	300	0	0	0	0	0	0	0	200	903	0	0	0	0	0	0	0	603	903	0
584	7	0	0	0	0	0	0	200	300	0	0	0	0	0	0	0	200	903	0	0	0	0	0	0	0	603	903	0
584	8	0	0	0	0	0	0	200	300	0	0	0	0	0	0	0	200	903	0	0	0	0	0	0	0	603	903	0
584	9	0	0	0	0	0	0	200	300	0	0	0	0	0	0	0	200	903	0	0	0	0	0	0	0	603	903	0
585	0	0	0	0	0	0	0	200	300	0	0	0	0	0	0	0	200	903	0	0	0	0	0	0	0	603	903	0
585	1	0	0	0	0	0	0	200	300	0	0	0	0	0	0	0	200	903	0	0	0	0	0	0	0	603	903	0
585	2	0	0	0	0	0	0	200	300	0	0	0	0	0	0	0	200	903	0	0	0	0	0	0	0	603	903	0
585	3	0	0	0	0	0	0	200	300	0	0	0	0	0	0	0	200	903	0	0	0	0	0	0	0	603	903	0
585	4	0	0	0	0	0	0	200	300	0	0	0	0	0	0	0	200	903	0	0	0	0	0	0	0	603	903	0
585	5	0	0	0	0	0	0	200	300	0	0	0	0	0	0	0	200	903	0	0	0	0	0	0	0	603	903	0
585	6	0	0	0	0	0	0	200	300	0	0	0	0	0	0	0	200	903	0	0	0	0	0	0	0	603	903	0
585	7	0	0	0	0	0	0	200	300	0	0	0	0	0	0	0	200	903	0	0	0	0	0	0	0	603	903	0
585	8	0	0	0	0	0	0	200	300	0	0	0	0	0	0	0	200	903	0	0	0	0	0	0	0	603	903	0
585	9	0	0	0	0	0	0	200	300	0	0	0	0	0	0	0	200	903	0	0	0	0	0	0	0	603	903	0
586	0	0	0	0	0	0	0	200	300	0	0	0	0	0	0	0	200	903	0	0	0	0	0	0	0	603	903	0
586	1	0	0	0	0	0	0	200	300	0	0	0	0	0	0	0	200	903	0	0	0	0	0	0	0	603	903	0
586	2	0	0	0	0	0	0	200	300	0	0	0	0	0	0	0	200	903	0	0	0	0	0	0	0	603	903	0
586	3	0	0	0	0	0	0	200	300	0	0	0	0	0	0	0	200	903	0	0	0	0	0	0	0	603	903	0
586	4	0	0	0	0	0	0	200	300	0	0	0	0	0	0	0	200	903	0	0	0	0	0	0	0	603	903	0
586	5	0	0	0	0	0	0	200	300	0	0	0	0	0	0	0	200	903	0	0	0	0	0	0	0	603	903	0
586	6	0	0	0	0	0	0	200	300	0	0	0	0	0	0	0	200	903	0	0	0	0	0	0	0	603	903	0
586	7	0	0	0	0	0	0	200	300	0	0	0	0	0	0	0	200	903	0	0	0	0	0	0	0	603	903	0
586	8	0	0	0	0	0	0	200	300	0	0	0	0	0	0	0	200	903	0	0	0	0	0	0	0	603	903	0
586	9	0	0	0	0	0	0	200	300	0	0	0	0	0	0	0	200	903	0	0	0	0	0	0	0	603	903	0
587	0	0	0	0	0	0	0	200	300	0	0	0	0	0	0	0	200	903	0	0	0	0	0	0	0	603	903	0
587	1	0	0	0	0	0	0	200	300	0	0	0	0	0	0	0	200	903	0	0	0	0	0	0	0	603	903	0
587	2	0	0	0	0	0	0	200	300	0	0	0	0	0	0	0	200	903	0	0	0	0	0	0	0	603	903	0
587	3	0	0	0	0	0	0	200	300	0	0	0	0	0	0	0	200	903	0	0	0	0	0	0	0	603	903	0
587	4	0	0	0	0	0	0	200	300	0	0	0	0	0	0	0	200	903	0	0	0	0	0	0	0	603	903	0
587	5	0	0	0	0	0	0	200	300	0	0	0	0	0	0	0	200	903	0	0	0	0	0	0	0	603	903	0
587	6	0	0	0	0	0	0	200	300	0	0	0	0	0	0	0	200	903	0	0	0	0	0	0	0	603	903	0
587	7	0	0	0	0	0	0	200	300	0	0	0	0	0	0	0	200	903	0	0	0	0	0	0	0	603	903	0
587	8	0	0	0	0	0	0	200	300	0	0	0	0	0	0	0	200	903	0	0	0	0	0	0	0	603	903	0
587	9	0	0	0	0	0	0	200	300	0	0	0	0	0	0	0	200	903	0	0	0	0	0	0	0	603	903	0
588	0	0	0	0	0	0	0	200	300	0	0	0	0	0	0	0	200	903	0	0	0	0	0	0	0	603	903	0
588	1	0	0	0	0	0	0	200	300	0	0	0	0	0	0	0	200	903	0	0	0	0	0	0	0	603	903	0
588	2	0	0	0	0	0	0	200	300	0	0	0	0	0	0	0	200	903	0	0	0	0	0	0	0	603	903	0
588	3	0	0	0	0	0	0	200	300	0	0	0	0	0	0	0	200	903	0	0	0	0	0	0	0	603	903	0
588	4	0	0	0	0	0	0	200	300	0	0	0	0	0	0	0	200	903	0	0	0	0	0	0	0	603	903	0
588	5	0	0	0	0	0	0	200	300	0	0	0	0	0	0	0	200	903	0	0	0	0	0	0	0	603	903	0
588	6	0	0	0	0	0	0	200	300	0	0	0	0	0	0	0	200	903	0	0	0	0	0	0	0	603	903	0
588	7	0	0	0	0	0	0	200	300	0	0	0	0	0	0	0	200	903	0	0	0	0	0	0	0	603	903	0
588	8	0	0	0	0	0	0	200	300	0	0	0	0	0	0	0	200	903	0	0	0	0	0	0	0	603	903	0
588	9	0	0	0	0	0	0	200	300	0	0	0	0	0	0	0	200	903	0	0	0	0	0	0	0	603	903	0
589	0	0	0	0	0	0	0	200	300	0	0	0	0	0	0	0	200	903	0	0	0	0	0	0	0	603	903	0
589	1	0	0	0	0	0	0	200	300	0	0	0	0	0	0	0	200	903	0	0	0	0	0	0	0	603	903	0
589	2	0	0	0	0	0	0	200	300	0	0	0	0	0	0	0	200	903	0	0	0	0	0	0	0	603	903	0
589	3	0	0	0	0	0	0	200	300	0	0	0	0	0	0	0	200	903	0	0	0	0	0	0	0	603	903	0
589	4	0	0	0	0	0	0	200	300	0	0	0	0	0	0	0	200	903	0	0	0	0	0	0	0	603	903	0
589	5	0	0	0	0	0	0	200	300	0	0	0	0	0	0	0	200	903	0	0	0	0	0	0	0	603	903	0
589	6	0	0	0	0	0	0	200	300	0	0	0	0	0	0	0	200	903	0	0	0	0	0	0	0	603	903	0
589	7	0	0	0	0	0	0	200	300	0	0	0	0	0	0	0	200	903	0	0	0	0	0	0	0	603	903	0
589	8	0	0	0	0	0	0	200	300	0	0	0	0	0	0	0	200	903	0	0	0	0	0	0	0	603	903	0
589	9	0	0	0	0	0	0	200	300	0	0	0	0	0	0	0	200	903	0	0	0	0	0	0	0	603	903	0
590	0	-0.306047	3.17918	9.88614	303.682	-98.3797	250.853	200	300	0	0	0	0	0	0	0	200	903	0	0	0	0	0	0	0	603	903	0
590	1	0.151716	2.874	10.4965	395.235	-342.52	-344.24	200	300	0	0	0	0	0	0	0	200	903	0	0	0	0	0	0	0	603	903	0
590	2	-0.306047	2.26365	11.1068	761.445	-281.485	-206.911	200	300	0	0	0	0	0	0	0	200	903	0	0	0	0	0	0	0	603	903	0
590	3	0.304304	2.41624	11.412	944.551	-37.3445	-206.911	200	300	0	0	0	0	0	0	0	200	903	0	0	0	0	0	0	0	603	903	0
590	4	0.60948	1.80589	12.9379	1219.21	-37.3445	-115.358	200	300	0	0	0	0	0	0	0	200	903	0	0	0	0	0	0	0	603	903	0
590	5	0	0	0	0	0	0	200	300	0	0	0	0	0	0	0	200	903	0	0	0	0	0	0	0	603	903	0
590	6	-1.22157	2.72141	12.9379	303.682	-464.591	-481.569	200	300	0	0	0	0	0	0	0	200	903	0	0	0	0	0	0	0	603	903	0
590	7	0	0	0	0	0	0	200	300	0	0	0	0	0	0	0	200	903	0	0	0	0	0	0	0	603	903	0
590	8	1.06724	1.34812	11.1068	852.998	-37.3445	-161.134	200	300	0	0	0	0	0	0	0	200	903	0	0	0	0	0	0	0	603	903	0
590	9	-0.458635	2.56883	10.1913	761.445	84.7258	-69.5817	200	300	0	0	0	0	0	0	0	200	903	0	0	0	0	0	0	0	603	903	0
591	0	1.21983	1.95848	10.8017	120.576	-159.415	-115.358	200	300	0	0	0	0	0	0	0	200	903	0	0	0	0	0	0	0	603	903	0
591	1	1.37242	2.56883	10.8017	761.445	-37.3445	-23.8053	200	300	0	0	0	0	0	0	0	200	903	0	0	0	0	0	0	0	603	903	0
591	2	0	0	0	0	0	0	200	300	0	0	0	0	0	0	0	200	903	0	0	0	0	0	0	0	603	903	0
591	3	0.60948	3.48435	9.88614	669.893	-220.45	-115.358	200	300	0	0	0	0	0	0	0	200	903	0	0	0	0	0	0	0	603	903	0
591	4	0.304304	1.80589	9.88614	669.893	-647.696	-206.911	200	300	0	0	0	0	0	0	0	200	903	0	0	0	0	0	0	0	603	903	0
591	5	-0.15346	1.80589	11.1068	578.34	145.761	-298.464	200	300	0	0	0	0	0	0	0	200	903	0	0	0	0	0	0	0	603	903	0
591	6	-0.763811	1.95848	11.1068	395.235	23.6906	-390.016	200	300	0	0	0	0	0	0	0	200	903	0	0	0	0	0	0	0	603	903	0
591	7	0.151716	2.56883	12.9379	761.445	-281.485	-252.687	200	300	0	0	0	0	0	0	0	200	903	0	0	0	0	0	0	0	603	903	0
591	8	1.06724	2.56883	10.1913	761.445	-342.52	-115.358	200	300	0	0	0	0	0	0	0	200	903	0	0	0	0	0	0	0	603	903	0
591	9	0	0	0	0	0	0	200	300	0	0	0	0	0	0	0	200	903	0	0	0	0	0	0	0	603	903	0
592	0	0	0	0	0	0	0	200	300	0	0	0	0	0	0	0	200	903	0	0	0	0	0	0	0	603	903	0
592	1	0.914656	1.95848	12.9379	212.129	-159.415	-161.134	200	300	0	0	0	0	0	0	0	200	903	0	0	0	0	0	0	0	603	903	0
592	2	0	0	0	0	0	0	200	300	0	0	0	0	0	0	0	200	903	0	0	0	0	0	0	0	603	903	0
592	3	1.83018	1.04295	11.412	395.235	-830.802	-161.134	200	300	0	0	0	0	0	0	0	200	903	0	0	0	0	0	0	0	603	903	0
592	4	0.304304	2.56883	10.4965	578.34	-708.731	-206.911	200	300	0	0	0	0	0	0	0	200	903	0	0	0	0	0	0	0	603	903	0
592	5	1.6776	1.50071	10.8017	486.787	-586.661	-23.8053	200	300	0	0	0	0	0	0	0	200	903	0	0	0	0	0	0	0	603	903	0
592	6	1.6776	2.26365	10.8017	944.551	23.6906	-115.358	200	300	0	0	0	0	0	0	0	200	903	0	0	0	0	0	0	0	603	903	0
592	7	0	0	0	0	0	0	200	300	0	0	0	0	0	0	0	200	903	0	0	0	0	0	0	0	603	903	0
592	8	0	0	0	0	0	0	200	300	0	0	0	0	0	0	0	200	903	0	0	0	0	0	0	0	603	903	0
592	9	-0.15346	3.17918	10.4965	578.34	-220.45	-206.911	200	300	0	0	0	0	0	0	0	200	903	0	0	0	0	0	0	0	603	903	0
593	0	-0.000871718	1.6533	9.88614	761.445	-37.3445	-161.134	200	300	0	0	0	0	0	0	0	200	903	0	0	0	0	0	0	0	603	903	0
593	1	-1.22157	2.11106	10.8017	852.998	-98.3797	-252.687	200	300	0	0	0	0	0	0	0	200	903	0	0	0	0	0	0	0	603	903	0
593	2	-0.611223	2.11106	11.7172	578.34	84.7258	-161.134	200	300	0	0	0	0	0	0	0	200	903	0	0	0	0	0	0	0	603	903	0
593	3	0.456892	3.02659	12.3275	212.129	-98.3797	-115.358	200	300	0	0	0	0	0	0	0	200	903	0	0	0	0	0	0	0	603	903	0
593	4	2.59312	2.72141	9.88614	578.34	-159.415	-481.569	200	300	0	0	0	0	0	0	0	200	903	0	0	0	0	0	0	0	603	903	0
593	5	0.151716	1.80589	10.1913	852.998	-98.3797	-390.016	200	300	0	0	0	0	0	0	0	200	903	0	0	0	0	0	0	0	603	903	0
593	6	0	0	0	0	0	0	200	300	0	0	0	0	0	0	0	200	903	0	0	0	0	0	0	0	603	903	0
593	7	0	0	0	0	0	0	200	300	0	0	0	0	0	0	0	200	903	0	0	0	0	0	0	0	603	903	0
593	8	0	0	0	0	0	0	200	300	0	0	0	0	0	0	0	200	903	0	0	0	0	0	0	0	603	903	0
593	9	-0.000871718	2.874	10.8017	395.235	-342.52	-115.358	200	300	0	0	0	0	0	0	0	200	903	0	0	0	0	0	0	0	603	903	0
594	0	0.914656	2.11106	11.7172	669.893	-159.415	-115.358	200	300	0	0	0	0	0	0	0	200	903	0	0	0	0	0	0	0	603	903	0
594	1	0.762068	1.50071	11.7172	578.34	-98.3797	-161.134	200	300	0	0	0	0	0	0	0	200	903	0	0	0	0	0	0	0	603	903	0
594	2	0	0	0	0	0	0	200	300	0	0	0	0	0	0	0	200	903	0	0	0	0	0	0	0	603	903	0
594	3	1.37242	1.6533	13.2431	120.576	-464.591	-344.24	200	300	0	0	0	0	0	0	0	200	903	0	0	0	0	0	0	0	603	903	0
594	4	0	0	0	0	0	0	200	300	0	0	0	0	0	0	0	200	903	0	0	0	0	0	0	0	603	903	0
594	5	1.83018	2.56883	11.412	29.0235	-281.485	67.7474	200	300	0	0	0	0	0	0	0	200	903	0	0	0	0	0	0	0	603	903	0
594	6	0.151716	2.26365	11.412	852.998	23.6906	67.7474	200	300	0	0	0	0	0	0	0	200	903	0	0	0	0	0	0	0	603	903	0
594	7	0.60948	2.41624	10.1913	761.445	-159.415	-252.687	200	300	0	0	0	0	0	0	0	200	903	0	0	0	0	0	0	0	603	903	0
594	8	0.456892	1.50071	10.4965	852.998	145.761	-206.911	200	300	0	0	0	0	0	0	0	200	903	0	0	0	0	0	0	0	603	903	0
594	9	0	0	0	0	0	0	200	300	0	0	0	0	0	0	0	200	903	0	0	0	0	0	0	0	603	903	0
595	0	-0.000871718	2.26365	10.1913	120.576	23.6906	-298.464	200	300	0	0	0	0	0	0	0	200	903	0	0	0	0	0	0	0	603	903	0
595	1	-0.000871718	2.874	9.58096	303.682	-281.485	21.9711	200	300	0	0	0	0	0	0	0	200	903	0	0	0	0	0	0	0	603	903	0
595	2	1.06724	2.11106	11.1068	761.445	-342.52	21.9711	200	300	0	0	0	0	0	0	0	200	903	0	0	0	0	0	0	0	603	903	0
595	3	-0.000871718	1.6533	10.4965	944.551	-37.3445	-115.358	200	300	0	0	0	0	0	0	0	200	903	0	0	0	0	0	0	0	603	903	0
595	4	0.914656	1.50071	11.7172	395.235	-159.415	-115.358	200	300	0	0	0	0	0	0	0	200	903	0	0	0	0	0	0	0	603	903	0
595	5	3.05089	2.72141	9.58096	852.998	-342.52	21.9711	200	300	0	0	0	0	0	0	0	200	903	0	0	0	0	0	0	0	603	903	0
595	6	1.06724	0.89036	10.1913	486.787	-220.45	-23.8053	200	300	0	0	0	0	0	0	0	200	903	0	0	0	0	0	0	0	603	903	0
595	7	0	0	0	0	0	0	200	300	0	0	0	0	0	0	0	200	903	0	0	0	0	0	0	0	603	903	0
595	8	0	0	0	0	0	0	200	300	0	0	0	0	0	0	0	200	903	0	0	0	0	0	0	0	603	903	0
595	9	-0.000871718	1.04295	11.1068	578.34	145.761	-115.358	200	300	0	0	0	0	0	0	0	200	903	0	0	0	0	0	0	0	603	903	0
596	0	-0.763811	1.95848	13.8534	212.129	23.6906	-298.464	200	300	0	0	0	0	0	0	0	200	903	0	0	0	0	0	0	0	603	903	0
596	1	0.914656	3.02659	11.412	578.34	-159.415	205.077	200	300	0	0	0	0	0	0	0	200	903	0	0	0	0	0	0	0	603	903	0
596	2	1.37242	2.26365	10.1913	852.998	-159.415	-344.24	200	300	0	0	0	0	0	0	0	200	903	0	0	0	0	0	0	0	603	903	0
596	3	0.456892	2.11106	9.88614	1127.66	23.6906	205.077	200	300	0	0	0	0	0	0	0	200	903	0	0	0	0	0	0	0	603	903	0
596	4	0	0	0	0	0	0	200	300	0	0	0	0	0	0	0	200	903	0	0	0	0	0	0	0	603	903	0
596	5	0	0	0	0	0	0	200	300	0	0	0	0	0	0	0	200	903	0	0	0	0	0	0	0	603	903	0
596	6	0.151716	1.95848	10.4965	852.998	-281.485	-23.8053	200	300	0	0	0	0	0	0	0	200	903	0	0	0	0	0	0	0	603	903	0
596	7	-0.306047	1.04295	13.5482	761.445	-37.3445	-115.358	200	300	0	0	0	0	0	0	0	200	903	0	0	0	0	0	0	0	603	903	0
596	8	1.06724	2.56883	10.4965	303.682	-220.45	-115.358	200	300	0	0	0	0	0	0	0	200	903	0	0	0	0	0	0	0	603	903	0
596	9	2.59312	1.6533	10.4965	852.998	-281.485	21.9711	200	300	0	0	0	0	0	0	0	200	903	0	0	0	0	0	0	0	603	903	0
597	0	0	0	0	0	0	0	200	300	0	0	0	0	0	0	0	200	903	0	0	0	0	0	0	0	603	903	0
597	1	0.762068	2.72141	10.1913	486.787	23.6906	-23.8053	200	300	0	0	0	0	0	0	0	200	903	0	0	0	0	0	0	0	603	903	0
597	2	0.304304	2.26365	10.4965	395.235	23.6906	-115.358	200	300	0	0	0	0	0	0	0	200	903	0	0	0	0	0	0	0	603	903	0
597	3	1.21983	2.56883	10.8017	761.445	-98.3797	-161.134	200	300	0	0	0	0	0	0	0	200	903	0	0	0	0	0	0	0	603	903	0
597	4	0.304304	1.6533	11.1068	852.998	-37.3445	-69.5817	200	300	0	0	0	0	0	0	0	200	903	0	0	0	0	0	0	0	603	903	0
597	5	1.06724	2.11106	11.1068	852.998	-159.415	-252.687	200	300	0	0	0	0	0	0	0	200	903	0	0	0	0	0	0	0	603	903	0
597	6	1.21983	2.56883	10.4965	395.235	-342.52	-344.24	200	300	0	0	0	0	0	0	0	200	903	0	0	0	0	0	0	0	603	903	0
597	7	0	0	0	0	0	0	200	300	0	0	0	0	0	0	0	200	903	0	0	0	0	0	0	0	603	903	0
597	8	0	0	0	0	0	0	200	300	0	0	0	0	0	0	0	200	903	0	0	0	0	0	0	0	603	903	0
597	9	0	0	0	0	0	0	200	300	0	0	0	0	0	0	0	200	903	0	0	0	0	0	0	0	603	903	0
598	0	0	0	0	0	0	0	200	300	0	0	0	0	0	0	0	200	903	0	0	0	0	0	0	0	603	903	0
598	1	-0.763811	1.80589	10.4965	395.235	-281.485	-23.8053	200	300	0	0	0	0	0	0	0	200	903	0	0	0	0	0	0	0	603	903	0
598	2	0	0	0	0	0	0	200	300	0	0	0	0	0	0	0	200	903	0	0	0	0	0	0	0	603	903	0
598	3	1.06724	2.26365	11.7172	29.0235	-281.485	-23.8053	200	300	0	0	0	0	0	0	0	200	903	0	0	0	0	0	0	0	603	903	0
598	4	0.762068	1.50071	9.88614	486.787	-159.415	388.182	200	300	0	0	0	0	0	0	0	200	903	0	0	0	0	0	0	0	603	903	0
598	5	0.304304	1.6533	10.8017	669.893	-98.3797	-206.911	200	300	0	0	0	0	0	0	0	200	903	0	0	0	0	0	0	0	603	903	0
598	6	0	0	0	0	0	0	200	300	0	0	0	0	0	0	0	200	903	0	0	0	0	0	0	0	603	903	0
598	7	-0.000871718	2.72141	11.412	944.551	-464.591	-252.687	200	300	0	0	0	0	0	0	0	200	903	0	0	0	0	0	0	0	603	903	0
598	8	-0.000871718	1.50071	13.2431	578.34	84.7258	-206.911	200	300	0	0	0	0	0	0	0	200	903	0	0	0	0	0	0	0	603	903	0
598	9	0.456892	1.95848	12.0224	669.893	-281.485	-161.134	200	300	0	0	0	0	0	0	0	200	903	0	0	0	0	0	0	0	603	903	0
599	0	2.28795	2.11106	10.1913	1036.1	-98.3797	-69.5817	200	300	0	0	0	0	0	0	0	200	903	0	0	0	0	0	0	0	603	903	0
599	1	0.762068	2.11106	10.4965	1036.1	-342.52	-252.687	200	300	0	0	0	0	0	0	0	200	903	0	0	0	0	0	0	0	603	903	0
599	2	0	0	0	0	0	0	200	300	0	0	0	0	0	0	0	200	903	0	0	0	0	0	0	0	603	903	0
599	3	0	0	0	0	0	0	200	300	0	0	0	0	0	0	0	200	903	0	0	0	0	0	0	0	603	903	0
599	4	-0.15346	2.26365	10.8017	761.445	-281.485	-161.134	200	300	0	0	0	0	0	0	0	200	903	0	0	0	0	0	0	0	603	903	0
599	5	0.456892	1.80589	11.412	761.445	-525.626	-206.911	200	300	0	0	0	0	0	0	0	200	903	0	0	0	0	0	0	0	603	903	0
599	6	0.60948	1.80589	10.1913	669.893	-98.3797	113.524	200	300	0	0	0	0	0	0	0	200	903	0	0	0	0	0	0	0	603	903	0
599	7	0	0	0	0	0	0	200	300	0	0	0	0	0	0	0	200	903	0	0	0	0	0	0	0	603	903	0
599	8	0	0	0	0	0	0	200	300	0	0	0	0	0	0	0	200	903	0	0	0	0	0	0	0	603	903	0
599	9	-0.15346	2.56883	10.4965	303.682	-220.45	-161.134	200	300	0	0	0	0	0	0	0	200	903	0	0	0	0	0	0	0	603	903	0
600	0	0	0	0	0	0	0	200	300	0	0	0	0	0	0	0	200	903	0	0	0	0	0	0	0	603	903	0
600	1	0.151716	1.6533	11.412	669.893	-98.3797	-252.687	200	300	0	0	0	0	0	0	0	200	903	0	0	0	0	0	0	0	603	903	0
600	2	0.762068	2.26365	10.8017	395.235	-220.45	-344.24	200	300	0	0	0	0	0	0	0	200	903	0	0	0	0	0	0	0	603	903	0
600	3	0.914656	2.26365	10.8017	486.787	-98.3797	-206.911	200	300	0	0	0	0	0	0	0	200	903	0	0	0	0	0	0	0	603	903	0
600	4	0.762068	2.41624	10.4965	1036.1	-159.415	-69.5817	200	300	0	0	0	0	0	0	0	200	903	0	0	0	0	0	0	0	603	903	0
600	5	1.06724	1.80589	10.8017	852.998	-281.485	-161.134	200	300	0	0	0	0	0	0	0	200	903	0	0	0	0	0	0	0	603	903	0
600	6	0	0	0	0	0	0	200	300	0	0	0	0	0	0	0	200	903	0	0	0	0	0	0	0	603	903	0
600	7	0.151716	2.56883	10.8017	852.998	-159.415	-115.358	200	300	0	0	0	0	0	0	0	200	903	0	0	0	0	0	0	0	603	903	0
600	8	-0.916399	1.50071	12.6327	486.787	23.6906	-252.687	200	300	0	0	0	0	0	0	0	200	903	0	0	0	0	0	0	0	603	903	0
600	9	1.06724	2.41624	10.4965	944.551	-159.415	-161.134	200	300	0	0	0	0	0	0	0	200	903	0	0	0	0	0	0	0	603	903	0
601	0	0	0	0	0	0	0	200	300	0	0	0	0	0	0	0	200	903	0	0	0	0	0	0	0	603	903	0
601	1	0	0	0	0	0	0	200	300	0	0	0	0	0	0	0	200	903	0	0	0	0	0	0	0	603	903	0
601	2	0.304304	2.56883	9.88614	852.998	-159.415	-69.5817	200	300	0	0	0	0	0	0	0	200	903	0	0	0	0	0	0	0	603	903	0
601	3	0	0	0	0	0	0	200	300	0	0	0	0	0	0	0	200	903	0	0	0	0	0	0	0	603	903	0
601	4	-0.000871718	2.41624	11.1068	669.893	-342.52	-23.8053	200	300	0	0	0	0	0	0	0	200	903	0	0	0	0	0	0	0	603	903	0
601	5	0.151716	1.80589	13.2431	761.445	145.761	-252.687	200	300	0	0	0	0	0	0	0	200	903	0	0	0	0	0	0	0	603	903	0
601	6	0.456892	2.11106	11.1068	120.576	328.867	67.7474	200	300	0	0	0	0	0	0	0	200	903	0	0	0	0	0	0	0	603	903	0
601	7	1.6776	3.17918	9.88614	761.445	-220.45	-69.5817	200	300	0	0	0	0	0	0	0	200	903	0	0	0	0	0	0	0	603	903	0
601	8	1.06724	1.50071	10.1913	669.893	-98.3797	-344.24	200	300	0	0	0	0	0	0	0	200	903	0	0	0	0	0	0	0	603	903	0
601	9	0	0	0	0	0	0	200	300	0	0	0	0	0	0	0	200	903	0	0	0	0	0	0	0	603	903	0
602	0	1.37242	2.26365	10.1913	852.998	-220.45	-206.911	200	300	0	0	0	0	0	0	0	200	903	0	0	0	0	0	0	0	603	903	0
602	1	-0.458635	1.80589	10.8017	578.34	-342.52	205.077	200	300	0	0	0	0	0	0	0	200	903	0	0	0	0	0	0	0	603	903	0
602	2	-0.000871718	3.02659	10.8017	669.893	23.6906	-252.687	200	300	0	0	0	0	0	0	0	200	903	0	0	0	0	0	0	0	603	903	0
602	3	0.762068	2.41624	10.8017	578.34	-37.3445	-206.911	200	300	0	0	0	0	0	0	0	200	903	0	0	0	0	0	0	0	603	903	0
602	4	0	0	0	0	0	0	200	300	0	0	0	0	0	0	0	200	903	0	0	0	0	0	0	0	603	903	0
602	5	0	0	0	0	0	0	200	300	0	0	0	0	0	0	0	200	903	0	0	0	0	0	0	0	603	903	0
602	6	0	0	0	0	0	0	200	300	0	0	0	0	0	0	0	200	903	0	0	0	0	0	0	0	603	903	0
602	7	0	0	0	0	0	0	200	300	0	0	0	0	0	0	0	200	903	0	0	0	0	0	0	0	603	903	0
602	8	-0.15346	2.72141	11.1068	212.129	-98.3797	159.3	200	300	0	0	0	0	0	0	0	200	903	0	0	0	0	0	0	0	603	903	0
602	9	0.60948	2.41624	11.412	761.445	-37.3445	-206.911	200	300	0	0	0	0	0	0	0	200	903	0	0	0	0	0	0	0	603	903	0
603	0	1.37242	2.11106	11.412	578.34	-220.45	-298.464	200	300	0	0	0	0	0	0	0	200	903	0	0	0	0	0	0	0	603	903	0
603	1	0	0	0	0	0	0	200	300	0	0	0	0	0	0	0	200	903	0	0	0	0	0	0	0	603	903	0
603	2	0	0	0	0	0	0	200	300	0	0	0	0	0	0	0	200	903	0	0	0	0	0	0	0	603	903	0
603	3	-0.15346	2.56883	10.1913	486.787	-281.485	-252.687	200	300	0	0	0	0	0	0	0	200	903	0	0	0	0	0	0	0	603	903	0
603	4	2.74571	2.72141	11.412	1036.1	84.7258	-252.687	200	300	0	0	0	0	0	0	0	200	903	0	0	0	0	0	0	0	603	903	0
603	5	-0.611223	0.89036	10.8017	944.551	-37.3445	67.7474	200	300	0	0	0	0	0	0	0	200	903	0	0	0	0	0	0	0	603	903	0
603	6	0.914656	2.72141	11.412	1036.1	-37.3445	-161.134	200	300	0	0	0	0	0	0	0	200	903	0	0	0	0	0	0	0	603	903	0
603	7	0.60948	1.80589	11.1068	303.682	-525.626	-344.24	200	300	0	0	0	0	0	0	0	200	903	0	0	0	0	0	0	0	603	903	0
603	8	0	0	0	0	0	0	200	300	0	0	0	0	0	0	0	200	903	0	0	0	0	0	0	0	603	903	0
603	9	-0.458635	3.02659	11.1068	212.129	-220.45	-161.134	200	300	0	0	0	0	0	0	0	200	903	0	0	0	0	0	0	0	603	903	0
604	0	0	0	0	0	0	0	200	300	0	0	0	0	0	0	0	200	903	0	0	0	0	0	0	0	603	903	0
604	1	-0.15346	1.34812	11.412	120.576	-342.52	-161.134	200	300	0	0	0	0	0	0	0	200	903	0	0	0	0	0	0	0	603	903	0
604	2	0	0	0	0	0	0	200	300	0	0	0	0	0	0	0	200	903	0	0	0	0	0	0	0	603	903	0
604	3	0.914656	2.874	12.0224	212.129	-220.45	-115.358	200	300	0	0	0	0	0	0	0	200	903	0	0	0	0	0	0	0	603	903	0
604	4	2.59312	2.41624	10.1913	486.787	-37.3445	-161.134	200	300	0	0	0	0	0	0	0	200	903	0	0	0	0	0	0	0	603	903	0
604	5	0	0	0	0	0	0	200	300	0	0	0	0	0	0	0	200	903	0	0	0	0	0	0	0	603	903	0
604	6	0	0	0	0	0	0	200	300	0	0	0	0	0	0	0	200	903	0	0	0	0	0	0	0	603	903	0
604	7	-0.611223	2.11106	11.1068	852.998	-220.45	-344.24	200	300	0	0	0	0	0	0	0	200	903	0	0	0	0	0	0	0	603	903	0
604	8	-0.306047	1.95848	11.1068	303.682	145.761	-69.5817	200	300	0	0	0	0	0	0	0	200	903	0	0	0	0	0	0	0	603	903	0
604	9	-0.611223	2.56883	13.5482	852.998	-281.485	159.3	200	300	0	0	0	0	0	0	0	200	903	0	0	0	0	0	0	0	603	903	0
605	0	0.914656	1.19554	10.8017	852.998	-220.45	113.524	200	300	0	0	0	0	0	0	0	200	903	0	0	0	0	0	0	0	603	903	0
605	1	2.28795	2.41624	9.88614	578.34	-342.52	-573.122	200	300	0	0	0	0	0	0	0	200	903	0	0	0	0	0	0	0	603	903	0
605	2	0	0	0	0	0	0	200	300	0	0	0	0	0	0	0	200	903	0	0	0	0	0	0	0	603	903	0
605	3	0	0	0	0	0	0	200	300	0	0	0	0	0	0	0	200	903	0	0	0	0	0	0	0	603	903	0
605	4	0	0	0	0	0	0	200	300	0	0	0	0	0	0	0	200	903	0	0	0	0	0	0	0	603	903	0
605	5	-0.611223	2.41624	10.8017	-245.635	-464.591	-252.687	200	300	0	0	0	0	0	0	0	200	903	0	0	0	0	0	0	0	603	903	0
605	6	0.304304	2.11106	9.88614	761.445	-342.52	-161.134	200	300	0	0	0	0	0	0	0	200	903	0	0	0	0	0	0	0	603	903	0
605	7	0.762068	1.95848	10.1913	669.893	-220.45	-161.134	200	300	0	0	0	0	0	0	0	200	903	0	0	0	0	0	0	0	603	903	0
605	8	0	0	0	0	0	0	200	300	0	0	0	0	0	0	0	200	903	0	0	0	0	0	0	0	603	903	0
605	9	2.59312	2.26365	12.0224	486.787	-159.415	-161.134	200	300	0	0	0	0	0	0	0	200	903	0	0	0	0	0	0	0	603	903	0
606	0	0	0	0	0	0	0	200	300	0	0	0	0	0	0	0	200	903	0	0	0	0	0	0	0	603	903	0
606	1	-0.15346	3.02659	11.1068	669.893	-98.3797	-298.464	200	300	0	0	0	0	0	0	0	200	903	0	0	0	0	0	0	0	603	903	0
606	2	-0.458635	1.95848	13.5482	395.235	-159.415	-206.911	200	300	0	0	0	0	0	0	0	200	903	0	0	0	0	0	0	0	603	903	0
606	3	0.914656	2.11106	11.412	578.34	84.7258	-161.134	200	300	0	0	0	0	0	0	0	200	903	0	0	0	0	0	0	0	603	903	0
606	4	2.59312	0.89036	10.8017	303.682	-37.3445	-344.24	200	300	0	0	0	0	0	0	0	200	903	0	0	0	0	0	0	0	603	903	0
606	5	0	0	0	0	0	0	200	300	0	0	0	0	0	0	0	200	903	0	0	0	0	0	0	0	603	903	0
606	6	-0.611223	2.26365	9.88614	578.34	-37.3445	-390.016	200	300	0	0	0	0	0	0	0	200	903	0	0	0	0	0	0	0	603	903	0
606	7	0	0	0	0	0	0	200	300	0	0	0	0	0	0	0	200	903	0	0	0	0	0	0	0	603	903	0
606	8	-0.916399	1.6533	11.1068	578.34	-342.52	-298.464	200	300	0	0	0	0	0	0	0	200	903	0	0	0	0	0	0	0	603	903	0
606	9	1.21983	1.34812	11.1068	120.576	-159.415	-161.134	200	300	0	0	0	0	0	0	0	200	903	0	0	0	0	0	0	0	603	903	0
607	0	0.914656	2.11106	11.1068	212.129	-525.626	-161.134	200	300	0	0	0	0	0	0	0	200	903	0	0	0	0	0	0	0	603	903	0
607	1	0	0	0	0	0	0	200	300	0	0	0	0	0	0	0	200	903	0	0	0	0	0	0	0	603	903	0
607	2	0	0	0	0	0	0	200	300	0	0	0	0	0	0	0	200	903	0	0	0	0	0	0	0	603	903	0
607	3	0	0	0	0	0	0	200	300	0	0	0	0	0	0	0	200	903	0	0	0	0	0	0	0	603	903	0
607	4	0	0	0	0	0	0	200	300	0	0	0	0	0	0	0	200	903	0	0	0	0	0	0	0	603	903	0
607	5	-0.458635	3.33177	11.1068	120.576	-98.3797	-252.687	200	300	0	0	0	0	0	0	0	200	903	0	0	0	0	0	0	0	603	903	0
607	6	1.06724	2.874	12.6327	669.893	-37.3445	-161.134	200	300	0	0	0	0	0	0	0	200	903	0	0	0	0	0	0	0	603	903	0
607	7	1.06724	1.80589	11.1068	578.34	-403.556	-206.911	200	300	0	0	0	0	0	0	0	200	903	0	0	0	0	0	0	0	603	903	0
607	8	0.60948	1.6533	10.1913	1219.21	-281.485	-206.911	200	300	0	0	0	0	0	0	0	200	903	0	0	0	0	0	0	0	603	903	0
607	9	1.06724	1.34812	13.2431	578.34	-281.485	-115.358	200	300	0	0	0	0	0	0	0	200	903	0	0	0	0	0	0	0	603	903	0
608	0	0	0	0	0	0	0	200	300	0	0	0	0	0	0	0	200	903	0	0	0	0	0	0	0	603	903	0
608	1	0.456892	2.11106	9.88614	852.998	-98.3797	-206.911	200	300	0	0	0	0	0	0	0	200	903	0	0	0	0	0	0	0	603	903	0
608	2	-0.916399	1.95848	10.1913	1402.32	-464.591	67.7474	200	300	0	0	0	0	0	0	0	200	903	0	0	0	0	0	0	0	603	903	0
608	3	0.456892	0.127421	11.1068	761.445	-220.45	-206.911	200	300	0	0	0	0	0	0	0	200	903	0	0	0	0	0	0	0	603	903	0
608	4	2.8983	2.11106	10.1913	-62.5292	-464.591	-161.134	200	300	0	0	0	0	0	0	0	200	903	0	0	0	0	0	0	0	603	903	0
608	5	1.06724	2.26365	9.88614	303.682	-342.52	67.7474	200	300	0	0	0	0	0	0	0	200	903	0	0	0	0	0	0	0	603	903	0
608	6	0	0	0	0	0	0	200	300	0	0	0	0	0	0	0	200	903	0	0	0	0	0	0	0	603	903	0
608	7	0	0	0	0	0	0	200	300	0	0	0	0	0	0	0	200	903	0	0	0	0	0	0	0	603	903	0
608	8	0.304304	1.80589	10.4965	852.998	-37.3445	21.9711	200	300	0	0	0	0	0	0	0	200	903	0	0	0	0	0	0	0	603	903	0
608	9	1.52501	1.6533	10.1913	212.129	-220.45	21.9711	200	300	0	0	0	0	0	0	0	200	903	0	0	0	0	0	0	0	603	903	0
609	0	0.60948	2.72141	10.8017	1127.66	-220.45	-206.911	200	300	0	0	0	0	0	0	0	200	903	0	0	0	0	0	0	0	603	903	0
609	1	0	0	0	0	0	0	200	300	0	0	0	0	0	0	0	200	903	0	0	0	0	0	0	0	603	903	0
609	2	1.37242	2.26365	13.5482	852.998	-281.485	21.9711	200	300	0	0	0	0	0	0	0	200	903	0	0	0	0	0	0	0	603	903	0
609	3	0	0	0	0	0	0	200	300	0	0	0	0	0	0	0	200	903	0	0	0	0	0	0	0	603	903	0
609	4	0.914656	2.41624	10.8017	1585.42	84.7258	21.9711	200	300	0	0	0	0	0	0	0	200	903	0	0	0	0	0	0	0	603	903	0
609	5	-0.306047	1.50071	11.412	486.787	-98.3797	-69.5817	200	300	0	0	0	0	0	0	0	200	903	0	0	0	0	0	0	0	603	903	0
609	6	0	0	0	0	0	0	200	300	0	0	0	0	0	0	0	200	903	0	0	0	0	0	0	0	603	903	0
609	7	0.456892	2.26365	10.1913	761.445	-464.591	-69.5817	200	300	0	0	0	0	0	0	0	200	903	0	0	0	0	0	0	0	603	903	0
609	8	0	0	0	0	0	0	200	300	0	0	0	0	0	0	0	200	903	0	0	0	0	0	0	0	603	903	0
609	9	0.762068	-0.330343	11.1068	395.235	-342.52	159.3	200	300	0	0	0	0	0	0	0	200	903	0	0	0	0	0	0	0	603	903	0
610	0	0	0	0	0	0	0	200	300	0	0	0	0	0	0	0	200	903	0	0	0	0	0	0	0	603	903	0
610	1	1.21983	2.11106	12.0224	212.129	-98.3797	-23.8053	200	300	0	0	0	0	0	0	0	200	903	0	0	0	0	0	0	0	603	903	0
610	2	0.456892	1.95848	11.1068	944.551	84.7258	21.9711	200	300	0	0	0	0	0	0	0	200	903	0	0	0	0	0	0	0	603	903	0
610	3	0.304304	1.95848	10.8017	303.682	-159.415	-298.464	200	300	0	0	0	0	0	0	0	200	903	0	0	0	0	0	0	0	603	903	0
610	4	1.06724	2.26365	11.1068	1219.21	84.7258	-252.687	200	300	0	0	0	0	0	0	0	200	903	0	0	0	0	0	0	0	603	903	0
610	5	0.60948	1.95848	11.1068	395.235	-37.3445	-298.464	200	300	0	0	0	0	0	0	0	200	903	0	0	0	0	0	0	0	603	903	0
610	6	0	0	0	0	0	0	200	300	0	0	0	0	0	0	0	200	903	0	0	0	0	0	0	0	603	903	0
610	7	0	0	0	0	0	0	200	300	0	0	0	0	0	0	0	200	903	0	0	0	0	0	0	0	603	903	0
610	8	1.06724	0.585184	11.412	1310.76	-37.3445	67.7474	200	300	0	0	0	0	0	0	0	200	903	0	0	0	0	0	0	0	603	903	0
610	9	-0.458635	2.26365	10.4965	852.998	-159.415	21.9711	200	300	0	0	0	0	0	0	0	200	903	0	0	0	0	0	0	0	603	903	0
611	0	-0.458635	2.11106	12.9379	852.998	-708.731	-69.5817	200	300	0	0	0	0	0	0	0	200	903	0	0	0	0	0	0	0	603	903	0
611	1	0.914656	2.41624	11.1068	486.787	-281.485	-115.358	200	300	0	0	0	0	0	0	0	200	903	0	0	0	0	0	0	0	603	903	0
611	2	0	0	0	0	0	0	200	300	0	0	0	0	0	0	0	200	903	0	0	0	0	0	0	0	603	903	0
611	3	0	0	0	0	0	0	200	300	0	0	0	0	0	0	0	200	903	0	0	0	0	0	0	0	603	903	0
611	4	0	0	0	0	0	0	200	300	0	0	0	0	0	0	0	200	903	0	0	0	0	0	0	0	603	903	0
611	5	0	0	0	0	0	0	200	300	0	0	0	0	0	0	0	200	903	0	0	0	0	0	0	0	603	903	0
611	6	0.151716	2.56883	11.1068	303.682	23.6906	67.7474	200	300	0	0	0	0	0	0	0	200	903	0	0	0	0	0	0	0	603	903	0
611	7	0.456892	2.41624	10.4965	1310.76	-98.3797	67.7474	200	300	0	0	0	0	0	0	0	200	903	0	0	0	0	0	0	0	603	903	0
611	8	1.21983	0.127421	11.1068	852.998	145.761	159.3	200	300	0	0	0	0	0	0	0	200	903	0	0	0	0	0	0	0	603	903	0
611	9	0.914656	1.95848	12.0224	852.998	-281.485	-298.464	200	300	0	0	0	0	0	0	0	200	903	0	0	0	0	0	0	0	603	903	0
612	0	0.456892	1.80589	10.4965	29.0235	-220.45	-206.911	200	300	0	0	0	0	0	0	0	200	903	0	0	0	0	0	0	0	603	903	0
612	1	1.37242	2.72141	10.4965	578.34	23.6906	-252.687	200	300	0	0	0	0	0	0	0	200	903	0	0	0	0	0	0	0	603	903	0
612	2	0	0	0	0	0	0	200	300	0	0	0	0	0	0	0	200	903	0	0	0	0	0	0	0	603	903	0
612	3	-0.15346	3.17918	10.8017	1127.66	23.6906	-69.5817	200	300	0	0	0	0	0	0	0	200	903	0	0	0	0	0	0	0	603	903	0
612	4	-0.611223	1.95848	9.88614	1127.66	-98.3797	-206.911	200	300	0	0	0	0	0	0	0	200	903	0	0	0	0	0	0	0	603	903	0
612	5	0.304304	1.80589	10.1913	852.998	84.7258	-252.687	200	300	0	0	0	0	0	0	0	200	903	0	0	0	0	0	0	0	603	903	0
612	6	0	0	0	0	0	0	200	300	0	0	0	0	0	0	0	200	903	0	0	0	0	0	0	0	603	903	0
612	7	0	0	0	0	0	0	200	300	0	0	0	0	0	0	0	200	903	0	0	0	0	0	0	0	603	903	0
612	8	-0.611223	2.11106	10.4965	120.576	-220.45	-115.358	200	300	0	0	0	0	0	0	0	200	903	0	0	0	0	0	0	0	603	903	0
612	9	0	0	0	0	0	0	200	300	0	0	0	0	0	0	0	200	903	0	0	0	0	0	0	0	603	903	0
613	0	0.304304	1.80589	10.1913	852.998	-403.556	-161.134	200	300	0	0	0	0	0	0	0	200	903	0	0	0	0	0	0	0	603	903	0
613	1	-0.306047	1.6533	11.1068	29.0235	206.796	-115.358	200	300	0	0	0	0	0	0	0	200	903	0	0	0	0	0	0	0	603	903	0
613	2	0.762068	2.26365	10.4965	669.893	-37.3445	-344.24	200	300	0	0	0	0	0	0	0	200	903	0	0	0	0	0	0	0	603	903	0
613	3	0.762068	1.80589	10.8017	578.34	-220.45	-298.464	200	300	0	0	0	0	0	0	0	200	903	0	0	0	0	0	0	0	603	903	0
613	4	1.21983	2.72141	9.58096	1127.66	-98.3797	-161.134	200	300	0	0	0	0	0	0	0	200	903	0	0	0	0	0	0	0	603	903	0
613	5	0.60948	1.95848	12.0224	761.445	206.796	-69.5817	200	300	0	0	0	0	0	0	0	200	903	0	0	0	0	0	0	0	603	903	0
613	6	0	0	0	0	0	0	200	300	0	0	0	0	0	0	0	200	903	0	0	0	0	0	0	0	603	903	0
613	7	1.98277	2.874	11.1068	1036.1	-220.45	-23.8053	200	300	0	0	0	0	0	0	0	200	903	0	0	0	0	0	0	0	603	903	0
613	8	-0.611223	2.56883	11.1068	486.787	23.6906	-344.24	200	300	0	0	0	0	0	0	0	200	903	0	0	0	0	0	0	0	603	903	0
613	9	0.304304	2.72141	11.1068	1036.1	-37.3445	-69.5817	200	300	0	0	0	0	0	0	0	200	903	0	0	0	0	0	0	0	603	903	0
614	0	0.762068	2.41624	11.1068	944.551	-159.415	-161.134	200	300	0	0	0	0	0	0	0	200	903	0	0	0	0	0	0	0	603	903	0
614	1	0	0	0	0	0	0	200	300	0	0	0	0	0	0	0	200	903	0	0	0	0	0	0	0	603	903	0
614	2	0.914656	1.80589	10.1913	669.893	145.761	-115.358	200	300	0	0	0	0	0	0	0	200	903	0	0	0	0	0	0	0	603	903	0
614	3	0	0	0	0	0	0	200	300	0	0	0	0	0	0	0	200	903	0	0	0	0	0	0	0	603	903	0
614	4	1.21983	3.17918	11.1068	761.445	-98.3797	21.9711	200	300	0	0	0	0	0	0	0	200	903	0	0	0	0	0	0	0	603	903	0
614	5	0.304304	1.34812	11.7172	578.34	-159.415	-161.134	200	300	0	0	0	0	0	0	0	200	903	0	0	0	0	0	0	0	603	903	0
614	6	1.21983	1.95848	10.4965	944.551	84.7258	67.7474	200	300	0	0	0	0	0	0	0	200	903	0	0	0	0	0	0	0	603	903	0
614	7	0.914656	1.04295	12.0224	120.576	-281.485	-252.687	200	300	0	0	0	0	0	0	0	200	903	0	0	0	0	0	0	0	603	903	0
614	8	0	0	0	0	0	0	200	300	0	0	0	0	0	0	0	200	903	0	0	0	0	0	0	0	603	903	0
614	9	-0.15346	2.56883	12.6327	486.787	145.761	-23.8053	200	300	0	0	0	0	0	0	0	200	903	0	0	0	0	0	0	0	603	903	0
615	0	0	0	0	0	0	0	200	300	0	0	0	0	0	0	0	200	903	0	0	0	0	0	0	0	603	903	0
615	1	0.151716	2.11106	10.8017	1219.21	-464.591	205.077	200	300	0	0	0	0	0	0	0	200	903	0	0	0	0	0	0	0	603	903	0
615	2	-0.000871718	2.11106	12.6327	395.235	206.796	-435.793	200	300	0	0	0	0	0	0	0	200	903	0	0	0	0	0	0	0	603	903	0
615	3	0.304304	2.41624	11.1068	669.893	23.6906	-69.5817	200	300	0	0	0	0	0	0	0	200	903	0	0	0	0	0	0	0	603	903	0
615	4	0.60948	2.72141	10.1913	1036.1	-281.485	-298.464	200	300	0	0	0	0	0	0	0	200	903	0	0	0	0	0	0	0	603	903	0
615	5	0	0	0	0	0	0	200	300	0	0	0	0	0	0	0	200	903	0	0	0	0	0	0	0	603	903	0
615	6	0	0	0	0	0	0	200	300	0	0	0	0	0	0	0	200	903	0	0	0	0	0	0	0	603	903	0
615	7	1.83018	2.56883	11.7172	578.34	-159.415	-115.358	200	300	0	0	0	0	0	0	0	200	903	0	0	0	0	0	0	0	603	903	0
615	8	-0.611223	2.11106	10.8017	395.235	-342.52	-298.464	200	300	0	0	0	0	0	0	0	200	903	0	0	0	0	0	0	0	603	903	0
615	9	0.914656	2.26365	11.1068	669.893	-220.45	-161.134	200	300	0	0	0	0	0	0	0	200	903	0	0	0	0	0	0	0	603	903	0
616	0	2.59312	1.19554	10.8017	578.34	-220.45	205.077	200	300	0	0	0	0	0	0	0	200	903	0	0	0	0	0	0	0	603	903	0
616	1	0	0	0	0	0	0	200	300	0	0	0	0	0	0	0	200	903	0	0	0	0	0	0	0	603	903	0
616	2	-0.000871718	2.11106	10.4965	212.129	-159.415	67.7474	200	300	0	0	0	0	0	0	0	200	903	0	0	0	0	0	0	0	603	903	0
616	3	0	0	0	0	0	0	200	300	0	0	0	0	0	0	0	200	903	0	0	0	0	0	0	0	603	903	0
616	4	-0.000871718	2.41624	11.1068	669.893	-159.415	205.077	200	300	0	0	0	0	0	0	0	200	903	0	0	0	0	0	0	0	603	903	0
616	5	-0.458635	2.41624	12.9379	761.445	-37.3445	-298.464	200	300	0	0	0	0	0	0	0	200	903	0	0	0	0	0	0	0	603	903	0
616	6	0.762068	1.80589	12.0224	669.893	-342.52	-23.8053	200	300	0	0	0	0	0	0	0	200	903	0	0	0	0	0	0	0	603	903	0
616	7	1.6776	3.33177	9.58096	395.235	23.6906	205.077	200	300	0	0	0	0	0	0	0	200	903	0	0	0	0	0	0	0	603	903	0
616	8	0	0	0	0	0	0	200	300	0	0	0	0	0	0	0	200	903	0	0	0	0	0	0	0	603	903	0
616	9	0	0	0	0	0	0	200	300	0	0	0	0	0	0	0	200	903	0	0	0	0	0	0	0	603	903	0
617	0	-0.916399	1.80589	9.88614	944.551	23.6906	-298.464	200	300	0	0	0	0	0	0	0	200	903	0	0	0	0	0	0	0	603	903	0
617	1	-0.15346	2.11106	10.1913	395.235	-220.45	-115.358	200	300	0	0	0	0	0	0	0	200	903	0	0	0	0	0	0	0	603	903	0
617	2	-0.15346	1.50071	12.0224	120.576	-342.52	-161.134	200	300	0	0	0	0	0	0	0	200	903	0	0	0	0	0	0	0	603	903	0
617	3	0.456892	2.41624	10.1913	303.682	-159.415	-298.464	200	300	0	0	0	0	0	0	0	200	903	0	0	0	0	0	0	0	603	903	0
617	4	0	0	0	0	0	0	200	300	0	0	0	0	0	0	0	200	903	0	0	0	0	0	0	0	603	903	0
617	5	0	0	0	0	0	0	200	300	0	0	0	0	0	0	0	200	903	0	0	0	0	0	0	0	603	903	0
617	6	-0.000871718	1.6533	10.1913	120.576	-159.415	-161.134	200	300	0	0	0	0	0	0	0	200	903	0	0	0	0	0	0	0	603	903	0
617	7	1.6776	2.26365	10.4965	1127.66	-220.45	-115.358	200	300	0	0	0	0	0	0	0	200	903	0	0	0	0	0	0	0	603	903	0
617	8	-0.458635	1.50071	10.8017	-337.188	145.761	-390.016	200	300	0	0	0	0	0	0	0	200	903	0	0	0	0	0	0	0	603	903	0
617	9	0.456892	2.72141	10.4965	1127.66	23.6906	-115.358	200	300	0	0	0	0	0	0	0	200	903	0	0	0	0	0	0	0	603	903	0
618	0	2.44053	1.80589	11.7172	761.445	-342.52	-206.911	200	300	0	0	0	0	0	0	0	200	903	0	0	0	0	0	0	0	603	903	0
618	1	0.304304	2.11106	11.1068	29.0235	145.761	-344.24	200	300	0	0	0	0	0	0	0	200	903	0	0	0	0	0	0	0	603	903	0
618	2	0	0	0	0	0	0	200	300	0	0	0	0	0	0	0	200	903	0	0	0	0	0	0	0	603	903	0
618	3	0	0	0	0	0	0	200	300	0	0	0	0	0	0	0	200	903	0	0	0	0	0	0	0	603	903	0
618	4	-0.611223	2.56883	11.1068	669.893	-281.485	-161.134	200	300	0	0	0	0	0	0	0	200	903	0	0	0	0	0	0	0	603	903	0
618	5	0.762068	1.6533	11.412	1036.1	-464.591	-23.8053	200	300	0	0	0	0	0	0	0	200	903	0	0	0	0	0	0	0	603	903	0
618	6	0.762068	1.6533	11.1068	395.235	-525.626	-23.8053	200	300	0	0	0	0	0	0	0	200	903	0	0	0	0	0	0	0	603	903	0
618	7	0	0	0	0	0	0	200	300	0	0	0	0	0	0	0	200	903	0	0	0	0	0	0	0	603	903	0
618	8	1.06724	1.80589	11.1068	212.129	-708.731	-161.134	200	300	0	0	0	0	0	0	0	200	903	0	0	0	0	0	0	0	603	903	0
618	9	0	0	0	0	0	0	200	300	0	0	0	0	0	0	0	200	903	0	0	0	0	0	0	0	603	903	0
619	0	1.21983	1.80589	10.1913	578.34	-159.415	-206.911	200	300	0	0	0	0	0	0	0	200	903	0	0	0	0	0	0	0	603	903	0
619	1	0.151716	1.50071	10.8017	120.576	84.7258	-23.8053	200	300	0	0	0	0	0	0	0	200	903	0	0	0	0	0	0	0	603	903	0
619	2	0.914656	2.41624	10.4965	212.129	-220.45	-69.5817	200	300	0	0	0	0	0	0	0	200	903	0	0	0	0	0	0	0	603	903	0
619	3	0.914656	2.11106	10.8017	1310.76	-37.3445	-298.464	200	300	0	0	0	0	0	0	0	200	903	0	0	0	0	0	0	0	603	903	0
619	4	0	0	0	0	0	0	200	300	0	0	0	0	0	0	0	200	903	0	0	0	0	0	0	0	603	903	0
619	5	0.304304	1.34812	10.4965	395.235	-220.45	21.9711	200	300	0	0	0	0	0	0	0	200	903	0	0	0	0	0	0	0	603	903	0
619	6	0	0	0	0	0	0	200	300	0	0	0	0	0	0	0	200	903	0	0	0	0	0	0	0	603	903	0
619	7	-0.458635	2.56883	10.4965	395.235	-220.45	-161.134	200	300	0	0	0	0	0	0	0	200	903	0	0	0	0	0	0	0	603	903	0
619	8	-0.15346	3.02659	11.7172	944.551	-37.3445	-23.8053	200	300	0	0	0	0	0	0	0	200	903	0	0	0	0	0	0	0	603	903	0
619	9	0.456892	1.50071	11.1068	1310.76	-159.415	-390.016	200	300	0	0	0	0	0	0	0	200	903	0	0	0	0	0	0	0	603	903	0
620	0	0	0	0	0	0	0	200	300	0	0	0	0	0	0	0	200	903	0	0	0	0	0	0	0	603	903	0
620	1	0	0	0	0	0	0	200	300	0	0	0	0	0	0	0	200	903	0	0	0	0	0	0	0	603	903	0
620	2	0	0	0	0	0	0	200	300	0	0	0	0	0	0	0	200	903	0	0	0	0	0	0	0	603	903	0
620	3	0	0	0	0	0	0	200	300	0	0	0	0	0	0	0	200	903	0	0	0	0	0	0	0	603	903	0
620	4	0.151716	2.11106	10.1913	852.998	145.761	-23.8053	200	300	0	0	0	0	0	0	0	200	903	0	0	0	0	0	0	0	603	903	0
620	5	0.151716	-0.0251671	14.1586	486.787	-98.3797	-115.358	200	300	0	0	0	0	0	0	0	200	903	0	0	0	0	0	0	0	603	903	0
620	6	1.6776	1.80589	11.1068	120.576	-220.45	-161.134	200	300	0	0	0	0	0	0	0	200	903	0	0	0	0	0	0	0	603	903	0
620	7	1.06724	2.56883	10.1913	-154.082	-159.415	-344.24	200	300	0	0	0	0	0	0	0	200	903	0	0	0	0	0	0	0	603	903	0
620	8	1.52501	3.02659	9.58096	1310.76	-98.3797	-23.8053	200	300	0	0	0	0	0	0	0	200	903	0	0	0	0	0	0	0	603	903	0
620	9	-0.306047	1.80589	10.4965	761.445	-281.485	-206.911	200	300	0	0	0	0	0	0	0	200	903	0	0	0	0	0	0	0	603	903	0
621	0	-0.611223	2.72141	9.88614	669.893	84.7258	-298.464	200	300	0	0	0	0	0	0	0	200	903	0	0	0	0	0	0	0	603	903	0
621	1	-0.306047	1.80589	10.8017	212.129	-37.3445	-252.687	200	300	0	0	0	0	0	0	0	200	903	0	0	0	0	0	0	0	603	903	0
621	2	1.6776	2.56883	10.4965	669.893	-37.3445	-69.5817	200	300	0	0	0	0	0	0	0	200	903	0	0	0	0	0	0	0	603	903	0
621	3	0.914656	1.19554	11.1068	486.787	-159.415	67.7474	200	300	0	0	0	0	0	0	0	200	903	0	0	0	0	0	0	0	603	903	0
621	4	0	0	0	0	0	0	200	300	0	0	0	0	0	0	0	200	903	0	0	0	0	0	0	0	603	903	0
621	5	0	0	0	0	0	0	200	300	0	0	0	0	0	0	0	200	903	0	0	0	0	0	0	0	603	903	0
621	6	0	0	0	0	0	0	200	300	0	0	0	0	0	0	0	200	903	0	0	0	0	0	0	0	603	903	0
621	7	0	0	0	0	0	0	200	300	0	0	0	0	0	0	0	200	903	0	0	0	0	0	0	0	603	903	0
621	8	-0.763811	2.26365	10.8017	120.576	-403.556	21.9711	200	300	0	0	0	0	0	0	0	200	903	0	0	0	0	0	0	0	603	903	0
621	9	0.456892	2.56883	9.88614	761.445	-220.45	-252.687	200	300	0	0	0	0	0	0	0	200	903	0	0	0	0	0	0	0	603	903	0
622	0	0.914656	1.50071	11.1068	1402.32	-159.415	67.7474	200	300	0	0	0	0	0	0	0	200	903	0	0	0	0	0	0	0	603	903	0
622	1	0	0	0	0	0	0	200	300	0	0	0	0	0	0	0	200	903	0	0	0	0	0	0	0	603	903	0
622	2	1.52501	1.95848	12.0224	303.682	84.7258	-206.911	200	300	0	0	0	0	0	0	0	200	903	0	0	0	0	0	0	0	603	903	0
622	3	-0.15346	3.48435	9.88614	303.682	-37.3445	-252.687	200	300	0	0	0	0	0	0	0	200	903	0	0	0	0	0	0	0	603	903	0
622	4	-0.000871718	2.72141	11.412	852.998	-281.485	-115.358	200	300	0	0	0	0	0	0	0	200	903	0	0	0	0	0	0	0	603	903	0
622	5	-0.000871718	3.33177	12.0224	669.893	-220.45	113.524	200	300	0	0	0	0	0	0	0	200	903	0	0	0	0	0	0	0	603	903	0
622	6	0.456892	1.80589	11.412	761.445	-403.556	-115.358	200	300	0	0	0	0	0	0	0	200	903	0	0	0	0	0	0	0	603	903	0
622	7	1.52501	2.56883	9.88614	669.893	-159.415	-69.5817	200	300	0	0	0	0	0	0	0	200	903	0	0	0	0	0	0	0	603	903	0
622	8	0.60948	2.56883	9.88614	1493.87	-403.556	-298.464	200	300	0	0	0	0	0	0	0	200	903	0	0	0	0	0	0	0	603	903	0
622	9	0	0	0	0	0	0	200	300	0	0	0	0	0	0	0	200	903	0	0	0	0	0	0	0	603	903	0
623	0	0	0	0	0	0	0	200	300	0	0	0	0	0	0	0	200	903	0	0	0	0	0	0	0	603	903	0
623	1	-0.458635	1.50071	10.1913	852.998	-403.556	-252.687	200	300	0	0	0	0	0	0	0	200	903	0	0	0	0	0	0	0	603	903	0
623	2	0.151716	1.95848	10.8017	395.235	-220.45	-206.911	200	300	0	0	0	0	0	0	0	200	903	0	0	0	0	0	0	0	603	903	0
623	3	0.60948	2.72141	11.7172	1402.32	-586.661	-23.8053	200	300	0	0	0	0	0	0	0	200	903	0	0	0	0	0	0	0	603	903	0
623	4	0	0	0	0	0	0	200	300	0	0	0	0	0	0	0	200	903	0	0	0	0	0	0	0	603	903	0
623	5	0	0	0	0	0	0	200	300	0	0	0	0	0	0	0	200	903	0	0	0	0	0	0	0	603	903	0
623	6	0	0	0	0	0	0	200	300	0	0	0	0	0	0	0	200	903	0	0	0	0	0	0	0	603	903	0
623	7	-0.15346	1.95848	11.1068	395.235	-98.3797	-69.5817	200	300	0	0	0	0	0	0	0	200	903	0	0	0	0	0	0	0	603	903	0
623	8	0.60948	2.56883	11.1068	1310.76	-281.485	-69.5817	200	300	0	0	0	0	0	0	0	200	903	0	0	0	0	0	0	0	603	903	0
623	9	0.456892	1.6533	11.1068	395.235	-37.3445	-161.134	200	300	0	0	0	0	0	0	0	200	903	0	0	0	0	0	0	0	603	903	0
624	0	0.914656	2.56883	10.8017	852.998	23.6906	-206.911	200	300	0	0	0	0	0	0	0	200	903	0	0	0	0	0	0	0	603	903	0
624	1	0.304304	1.95848	10.4965	1036.1	-37.3445	-206.911	200	300	0	0	0	0	0	0	0	200	903	0	0	0	0	0	0	0	603	903	0
624	2	0	0	0	0	0	0	200	300	0	0	0	0	0	0	0	200	903	0	0	0	0	0	0	0	603	903	0
624	3	-0.458635	3.02659	10.8017	1127.66	-98.3797	-115.358	200	300	0	0	0	0	0	0	0	200	903	0	0	0	0	0	0	0	603	903	0
624	4	0.60948	1.19554	11.1068	852.998	-98.3797	-206.911	200	300	0	0	0	0	0	0	0	200	903	0	0	0	0	0	0	0	603	903	0
624	5	0.151716	2.874	11.412	395.235	-159.415	-161.134	200	300	0	0	0	0	0	0	0	200	903	0	0	0	0	0	0	0	603	903	0
624	6	0	0	0	0	0	0	200	300	0	0	0	0	0	0	0	200	903	0	0	0	0	0	0	0	603	903	0
624	7	0.456892	1.6533	12.9379	120.576	-403.556	-23.8053	200	300	0	0	0	0	0	0	0	200	903	0	0	0	0	0	0	0	603	903	0
624	8	0	0	0	0	0	0	200	300	0	0	0	0	0	0	0	200	903	0	0	0	0	0	0	0	603	903	0
624	9	-0.000871718	2.72141	11.1068	486.787	-220.45	-69.5817	200	300	0	0	0	0	0	0	0	200	903	0	0	0	0	0	0	0	603	903	0
625	0	0.304304	2.56883	12.9379	761.445	-220.45	205.077	200	300	0	0	0	0	0	0	0	200	903	0	0	0	0	0	0	0	603	903	0
625	1	0.60948	1.95848	10.4965	669.893	23.6906	-206.911	200	300	0	0	0	0	0	0	0	200	903	0	0	0	0	0	0	0	603	903	0
625	2	0	0	0	0	0	0	200	300	0	0	0	0	0	0	0	200	903	0	0	0	0	0	0	0	603	903	0
625	3	0.60948	3.33177	12.3275	29.0235	-403.556	-298.464	200	300	0	0	0	0	0	0	0	200	903	0	0	0	0	0	0	0	603	903	0
625	4	-0.15346	3.17918	9.58096	395.235	23.6906	-206.911	200	300	0	0	0	0	0	0	0	200	903	0	0	0	0	0	0	0	603	903	0
625	5	1.83018	2.41624	11.1068	1036.1	-159.415	-344.24	200	300	0	0	0	0	0	0	0	200	903	0	0	0	0	0	0	0	603	903	0
625	6	-0.458635	2.11106	10.8017	1219.21	-37.3445	-344.24	200	300	0	0	0	0	0	0	0	200	903	0	0	0	0	0	0	0	603	903	0
625	7	0.456892	2.11106	11.1068	486.787	-159.415	-115.358	200	300	0	0	0	0	0	0	0	200	903	0	0	0	0	0	0	0	603	903	0
625	8	0	0	0	0	0	0	200	300	0	0	0	0	0	0	0	200	903	0	0	0	0	0	0	0	603	903	0
625	9	0	0	0	0	0	0	200	300	0	0	0	0	0	0	0	200	903	0	0	0	0	0	0	0	603	903	0
626	0	0	0	0	0	0	0	200	300	0	0	0	0	0	0	0	200	903	0	0	0	0	0	0	0	603	903	0
626	1	-0.306047	1.95848	10.8017	669.893	-342.52	-115.358	200	300	0	0	0	0	0	0	0	200	903	0	0	0	0	0	0	0	603	903	0
626	2	0.151716	1.95848	10.8017	303.682	-37.3445	-252.687	200	300	0	0	0	0	0	0	0	200	903	0	0	0	0	0	0	0	603	903	0
626	3	0.456892	2.26365	11.412	944.551	-281.485	-161.134	200	300	0	0	0	0	0	0	0	200	903	0	0	0	0	0	0	0	603	903	0
626	4	0.60948	0.127421	10.8017	303.682	-342.52	-23.8053	200	300	0	0	0	0	0	0	0	200	903	0	0	0	0	0	0	0	603	903	0
626	5	0	0	0	0	0	0	200	300	0	0	0	0	0	0	0	200	903	0	0	0	0	0	0	0	603	903	0
626	6	1.21983	1.80589	9.88614	669.893	145.761	-69.5817	200	300	0	0	0	0	0	0	0	200	903	0	0	0	0	0	0	0	603	903	0
626	7	0	0	0	0	0	0	200	300	0	0	0	0	0	0	0	200	903	0	0	0	0	0	0	0	603	903	0
626	8	0	0	0	0	0	0	200	300	0	0	0	0	0	0	0	200	903	0	0	0	0	0	0	0	603	903	0
626	9	0.151716	2.72141	11.1068	212.129	-98.3797	-115.358	200	300	0	0	0	0	0	0	0	200	903	0	0	0	0	0	0	0	603	903	0
627	0	0.304304	2.41624	13.5482	669.893	-37.3445	-344.24	200	300	0	0	0	0	0	0	0	200	903	0	0	0	0	0	0	0	603	903	0
627	1	0.762068	1.6533	11.412	1127.66	23.6906	-161.134	200	300	0	0	0	0	0	0	0	200	903	0	0	0	0	0	0	0	603	903	0
627	2	0.60948	0.432597	10.1913	669.893	-159.415	21.9711	200	300	0	0	0	0	0	0	0	200	903	0	0	0	0	0	0	0	603	903	0
627	3	0	0	0	0	0	0	200	300	0	0	0	0	0	0	0	200	903	0	0	0	0	0	0	0	603	903	0
627	4	-0.763811	1.95848	9.88614	303.682	-98.3797	-206.911	200	300	0	0	0	0	0	0	0	200	903	0	0	0	0	0	0	0	603	903	0
627	5	0.762068	1.95848	10.1913	395.235	-220.45	21.9711	200	300	0	0	0	0	0	0	0	200	903	0	0	0	0	0	0	0	603	903	0
627	6	-1.06899	1.34812	10.8017	669.893	-159.415	-23.8053	200	300	0	0	0	0	0	0	0	200	903	0	0	0	0	0	0	0	603	903	0
627	7	0.304304	1.50071	11.412	852.998	23.6906	-23.8053	200	300	0	0	0	0	0	0	0	200	903	0	0	0	0	0	0	0	603	903	0
627	8	0.914656	1.50071	11.1068	-62.5292	-159.415	-252.687	200	300	0	0	0	0	0	0	0	200	903	0	0	0	0	0	0	0	603	903	0
627	9	0	0	0	0	0	0	200	300	0	0	0	0	0	0	0	200	903	0	0	0	0	0	0	0	603	903	0
628	0	0	0	0	0	0	0	200	300	0	0	0	0	0	0	0	200	903	0	0	0	0	0	0	0	603	903	0
628	1	0	0	0	0	0	0	200	300	0	0	0	0	0	0	0	200	903	0	0	0	0	0	0	0	603	903	0
628	2	0	0	0	0	0	0	200	300	0	0	0	0	0	0	0	200	903	0	0	0	0	0	0	0	603	903	0
628	3	-0.15346	1.6533	11.1068	303.682	206.796	-298.464	200	300	0	0	0	0	0	0	0	200	903	0	0	0	0	0	0	0	603	903	0
628	4	-0.611223	2.26365	14.1586	944.551	23.6906	-390.016	200	300	0	0	0	0	0	0	0	200	903	0	0	0	0	0	0	0	603	903	0
628	5	0.60948	1.04295	10.4965	303.682	-98.3797	-344.24	200	300	0	0	0	0	0	0	0	200	903	0	0	0	0	0	0	0	603	903	0
628	6	2.59312	1.95848	9.88614	761.445	-220.45	113.524	200	300	0	0	0	0	0	0	0	200	903	0	0	0	0	0	0	0	603	903	0
628	7	0	0	0	0	0	0	200	300	0	0	0	0	0	0	0	200	903	0	0	0	0	0	0	0	603	903	0
628	8	0	0	0	0	0	0	200	300	0	0	0	0	0	0	0	200	903	0	0	0	0	0	0	0	603	903	0
628	9	0	0	0	0	0	0	200	300	0	0	0	0	0	0	0	200	903	0	0	0	0	0	0	0	603	903	0
629	0	-0.15346	1.6533	11.7172	486.787	-403.556	-161.134	200	300	0	0	0	0	0	0	0	200	903	0	0	0	0	0	0	0	603	903	0
629	1	-0.458635	2.11106	9.88614	578.34	-37.3445	-69.5817	200	300	0	0	0	0	0	0	0	200	903	0	0	0	0	0	0	0	603	903	0
629	2	0.456892	1.50071	10.1913	212.129	-342.52	-115.358	200	300	0	0	0	0	0	0	0	200	903	0	0	0	0	0	0	0	603	903	0
629	3	1.6776	0.89036	10.1913	669.893	-281.485	205.077	200	300	0	0	0	0	0	0	0	200	903	0	0	0	0	0	0	0	603	903	0
629	4	0	0	0	0	0	0	200	300	0	0	0	0	0	0	0	200	903	0	0	0	0	0	0	0	603	903	0
629	5	0	0	0	0	0	0	200	300	0	0	0	0	0	0	0	200	903	0	0	0	0	0	0	0	603	903	0
629	6	0	0	0	0	0	0	200	300	0	0	0	0	0	0	0	200	903	0	0	0	0	0	0	0	603	903	0
629	7	-0.306047	1.80589	11.1068	303.682	-220.45	-115.358	200	300	0	0	0	0	0	0	0	200	903	0	0	0	0	0	0	0	603	903	0
629	8	-0.763811	1.6533	10.8017	578.34	-220.45	-298.464	200	300	0	0	0	0	0	0	0	200	903	0	0	0	0	0	0	0	603	903	0
629	9	0.60948	1.95848	11.412	-62.5292	-98.3797	-206.911	200	300	0	0	0	0	0	0	0	200	903	0	0	0	0	0	0	0	603	903	0
630	0	0	0	0	0	0	0	200	300	0	0	0	0	0	0	0	200	903	0	0	0	0	0	0	0	603	903	0
630	1	0.304304	0.89036	10.8017	669.893	23.6906	-298.464	200	300	0	0	0	0	0	0	0	200	903	0	0	0	0	0	0	0	603	903	0
630	2	-0.611223	2.26365	12.3275	1036.1	23.6906	-69.5817	200	300	0	0	0	0	0	0	0	200	903	0	0	0	0	0	0	0	603	903	0
630	3	0	0	0	0	0	0	200	300	0	0	0	0	0	0	0	200	903	0	0	0	0	0	0	0	603	903	0
630	4	0.456892	1.34812	10.8017	486.787	-220.45	-298.464	200	300	0	0	0	0	0	0	0	200	903	0	0	0	0	0	0	0	603	903	0
630	5	-1.06899	1.04295	11.1068	120.576	-98.3797	-206.911	200	300	0	0	0	0	0	0	0	200	903	0	0	0	0	0	0	0	603	903	0
630	6	-0.000871718	1.95848	10.8017	395.235	-98.3797	-298.464	200	300	0	0	0	0	0	0	0	200	903	0	0	0	0	0	0	0	603	903	0
630	7	0.60948	1.80589	10.4965	395.235	-220.45	-161.134	200	300	0	0	0	0	0	0	0	200	903	0	0	0	0	0	0	0	603	903	0
630	8	0	0	0	0	0	0	200	300	0	0	0	0	0	0	0	200	903	0	0	0	0	0	0	0	603	903	0
630	9	0.60948	1.34812	10.1913	852.998	23.6906	-252.687	200	300	0	0	0	0	0	0	0	200	903	0	0	0	0	0	0	0	603	903	0
631	0	0	0	0	0	0	0	200	300	0	0	0	0	0	0	0	200	903	0	0	0	0	0	0	0	603	903	0
631	1	-0.15346	2.11106	10.1913	-245.635	-37.3445	-161.134	200	300	0	0	0	0	0	0	0	200	903	0	0	0	0	0	0	0	603	903	0
631	2	0.151716	2.41624	11.412	669.893	-98.3797	-206.911	200	300	0	0	0	0	0	0	0	200	903	0	0	0	0	0	0	0	603	903	0
631	3	1.83018	1.34812	11.412	1219.21	-403.556	-390.016	200	300	0	0	0	0	0	0	0	200	903	0	0	0	0	0	0	0	603	903	0
631	4	0.762068	1.80589	10.8017	669.893	-98.3797	-252.687	200	300	0	0	0	0	0	0	0	200	903	0	0	0	0	0	0	0	603	903	0
631	5	2.28795	2.56883	11.1068	120.576	-98.3797	21.9711	200	300	0	0	0	0	0	0	0	200	903	0	0	0	0	0	0	0	603	903	0
631	6	0	0	0	0	0	0	200	300	0	0	0	0	0	0	0	200	903	0	0	0	0	0	0	0	603	903	0
631	7	0.304304	2.41624	10.4965	578.34	-586.661	-390.016	200	300	0	0	0	0	0	0	0	200	903	0	0	0	0	0	0	0	603	903	0
631	8	0	0	0	0	0	0	200	300	0	0	0	0	0	0	0	200	903	0	0	0	0	0	0	0	603	903	0
631	9	0	0	0	0	0	0	200	300	0	0	0	0	0	0	0	200	903	0	0	0	0	0	0	0	603	903	0
632	0	-0.611223	1.34812	10.4965	212.129	-98.3797	-69.5817	200	300	0	0	0	0	0	0	0	200	903	0	0	0	0	0	0	0	603	903	0
632	1	0.60948	1.80589	11.412	29.0235	-403.556	-206.911	200	300	0	0	0	0	0	0	0	200	903	0	0	0	0	0	0	0	603	903	0
632	2	1.37242	1.95848	10.4965	944.551	-37.3445	-23.8053	200	300	0	0	0	0	0	0	0	200	903	0	0	0	0	0	0	0	603	903	0
632	3	0	0	0	0	0	0	200	300	0	0	0	0	0	0	0	200	903	0	0	0	0	0	0	0	603	903	0
632	4	0	0	0	0	0	0	200	300	0	0	0	0	0	0	0	200	903	0	0	0	0	0	0	0	603	903	0
632	5	0	0	0	0	0	0	200	300	0	0	0	0	0	0	0	200	903	0	0	0	0	0	0	0	603	903	0
632	6	0	0	0	0	0	0	200	300	0	0	0	0	0	0	0	200	903	0	0	0	0	0	0	0	603	903	0
632	7	-0.306047	2.41624	10.8017	1036.1	-159.415	-390.016	200	300	0	0	0	0	0	0	0	200	903	0	0	0	0	0	0	0	603	903	0
632	8	-0.15346	1.80589	12.3275	1036.1	-220.45	-161.134	200	300	0	0	0	0	0	0	0	200	903	0	0	0	0	0	0	0	603	903	0
632	9	1.06724	1.80589	11.1068	852.998	-37.3445	-298.464	200	300	0	0	0	0	0	0	0	200	903	0	0	0	0	0	0	0	603	903	0
633	0	0.456892	1.50071	12.0224	303.682	84.7258	-161.134	200	300	0	0	0	0	0	0	0	200	903	0	0	0	0	0	0	0	603	903	0
633	1	0	0	0	0	0	0	200	300	0	0	0	0	0	0	0	200	903	0	0	0	0	0	0	0	603	903	0
633	2	-0.15346	1.04295	11.412	669.893	-98.3797	-252.687	200	300	0	0	0	0	0	0	0	200	903	0	0	0	0	0	0	0	603	903	0
633	3	0	0	0	0	0	0	200	300	0	0	0	0	0	0	0	200	903	0	0	0	0	0	0	0	603	903	0
633	4	-0.15346	1.95848	11.412	669.893	-403.556	-206.911	200	300	0	0	0	0	0	0	0	200	903	0	0	0	0	0	0	0	603	903	0
633	5	-0.15346	1.80589	9.88614	944.551	-342.52	-298.464	200	300	0	0	0	0	0	0	0	200	903	0	0	0	0	0	0	0	603	903	0
633	6	0	0	0	0	0	0	200	300	0	0	0	0	0	0	0	200	903	0	0	0	0	0	0	0	603	903	0
633	7	0.914656	3.02659	10.1913	303.682	-220.45	21.9711	200	300	0	0	0	0	0	0	0	200	903	0	0	0	0	0	0	0	603	903	0
633	8	0	0	0	0	0	0	200	300	0	0	0	0	0	0	0	200	903	0	0	0	0	0	0	0	603	903	0
633	9	1.21983	1.6533	13.5482	1493.87	145.761	-69.5817	200	300	0	0	0	0	0	0	0	200	903	0	0	0	0	0	0	0	603	903	0
634	0	0	0	0	0	0	0	200	300	0	0	0	0	0	0	0	200	903	0	0	0	0	0	0	0	603	903	0
634	1	1.21983	2.72141	11.1068	395.235	-281.485	-206.911	200	300	0	0	0	0	0	0	0	200	903	0	0	0	0	0	0	0	603	903	0
634	2	-0.458635	2.56883	10.8017	486.787	-464.591	-390.016	200	300	0	0	0	0	0	0	0	200	903	0	0	0	0	0	0	0	603	903	0
634	3	0.60948	3.48435	10.1913	1127.66	145.761	-161.134	200	300	0	0	0	0	0	0	0	200	903	0	0	0	0	0	0	0	603	903	0
634	4	0.60948	2.41624	10.8017	1219.21	-98.3797	-161.134	200	300	0	0	0	0	0	0	0	200	903	0	0	0	0	0	0	0	603	903	0
634	5	0	0	0	0	0	0	200	300	0	0	0	0	0	0	0	200	903	0	0	0	0	0	0	0	603	903	0
634	6	0	0	0	0	0	0	200	300	0	0	0	0	0	0	0	200	903	0	0	0	0	0	0	0	603	903	0
634	7	0	0	0	0	0	0	200	300	0	0	0	0	0	0	0	200	903	0	0	0	0	0	0	0	603	903	0
634	8	0	0	0	0	0	0	200	300	0	0	0	0	0	0	0	200	903	0	0	0	0	0	0	0	603	903	0
634	9	-0.306047	5.01023	9.27579	852.998	-525.626	-115.358	200	300	0	0	0	0	0	0	0	200	903	0	0	0	0	0	0	0	603	903	0
635	0	0.60948	4.24729	9.27579	761.445	-281.485	-618.898	200	300	0	0	0	0	0	0	0	200	903	0	0	0	0	0	0	0	603	903	0
635	1	1.83018	5.01023	9.88614	761.445	-220.45	-390.016	200	300	0	0	0	0	0	0	0	200	903	0	0	0	0	0	0	0	603	903	0
635	2	2.13536	6.38352	8.66543	120.576	-891.837	-756.227	200	300	0	0	0	0	0	0	0	200	903	0	0	0	0	0	0	0	603	903	0
635	3	1.6776	7.29905	7.74991	852.998	-342.52	-985.109	200	300	0	0	0	0	0	0	0	200	903	0	0	0	0	0	0	0	603	903	0
635	4	2.28795	7.75682	8.05508	1493.87	-220.45	-802.004	200	300	0	0	0	0	0	0	0	200	903	0	0	0	0	0	0	0	603	903	0
635	5	1.21983	8.36717	6.83438	1127.66	-464.591	-1122.44	200	300	0	0	0	0	0	0	0	200	903	0	0	0	0	0	0	0	603	903	0
635	6	0.762068	9.43528	7.13956	1036.1	-769.766	-1351.32	200	300	0	0	0	0	0	0	0	200	903	0	0	0	0	0	0	0	603	903	0
635	7	1.37242	11.7241	8.97061	1219.21	-464.591	-1625.98	200	300	0	0	0	0	0	0	0	200	903	0	0	0	0	0	0	0	603	903	0
635	8	2.13536	13.0974	8.36026	1310.76	-281.485	-1900.64	200	300	0	0	0	0	0	0	0	200	903	0	0	0	0	0	0	0	603	903	0
635	9	1.98277	13.8603	7.74991	1127.66	-647.696	-2037.97	200	300	0	0	0	0	0	0	0	200	903	0	0	0	0	0	0	0	603	903	0
636	0	2.44053	13.5552	5.91885	1768.53	-830.802	-2266.85	200	300	0	0	0	0	0	0	0	200	903	0	0	0	0	0	0	0	603	903	0
636	1	2.13536	14.1655	7.13956	944.551	-769.766	-2312.62	200	300	0	0	0	0	0	0	0	200	903	0	0	0	0	0	0	0	603	903	0
636	2	1.6776	15.844	6.83438	1219.21	-708.731	-2175.3	200	300	0	0	0	0	0	0	0	200	903	0	0	0	0	0	0	0	603	903	0
636	3	1.37242	16.9121	6.5292	1036.1	-586.661	-2678.84	200	300	0	0	0	0	0	0	0	200	903	0	0	0	0	0	0	0	603	903	0
636	4	1.83018	18.2854	8.66543	1310.76	-464.591	-2861.94	200	300	0	0	0	0	0	0	0	200	903	0	0	0	0	0	0	0	603	903	0
636	5	2.74571	18.438	9.58096	1127.66	-464.591	-2861.94	200	300	0	0	0	0	0	0	0	200	903	0	0	0	0	0	0	0	603	903	0
636	6	3.50865	20.4216	8.36026	852.998	-708.731	-2770.39	200	300	0	0	0	0	0	0	0	200	903	0	0	0	0	0	0	0	603	903	0
636	7	3.96641	20.8794	6.83438	1493.87	-708.731	-3136.6	200	300	0	0	0	0	0	0	0	200	903	0	0	0	0	0	0	0	603	903	0
636	8	3.96641	19.3535	7.44473	1036.1	-586.661	-2953.49	200	300	0	0	0	0	0	0	0	200	903	0	0	0	0	0	0	0	603	903	0
636	9	3.20347	21.032	6.5292	1310.76	-586.661	-2907.72	200	300	0	0	0	0	0	0	0	200	903	0	0	0	0	0	0	0	603	903	0
637	0	3.50865	21.3371	6.22403	1768.53	-647.696	-2907.72	200	300	0	0	0	0	0	0	0	200	903	0	0	0	0	0	0	0	603	903	0
637	1	3.50865	21.1845	8.05508	1676.97	-525.626	-2953.49	200	300	0	0	0	0	0	0	0	200	903	0	0	0	0	0	0	0	603	903	0
637	2	3.96641	22.4053	10.8017	1676.97	-525.626	-3045.05	200	300	0	0	0	0	0	0	0	200	903	0	0	0	0	0	0	0	603	903	0
637	3	4.72935	22.4053	8.36026	1310.76	-769.766	-2816.16	200	300	0	0	0	0	0	0	0	200	903	0	0	0	0	0	0	0	603	903	0
637	4	6.713	22.863	6.5292	1951.63	-891.837	-2953.49	200	300	0	0	0	0	0	0	0	200	903	0	0	0	0	0	0	0	603	903	0
637	5	4.72935	22.2527	5.61368	1585.42	-1074.94	-2816.16	200	300	0	0	0	0	0	0	0	200	903	0	0	0	0	0	0	0	603	903	0
637	6	4.72935	22.863	5.00333	1676.97	-830.802	-2861.94	200	300	0	0	0	0	0	0	0	200	903	0	0	0	0	0	0	0	603	903	0
637	7	3.96641	23.1682	5.00333	1402.32	-1074.94	-2907.72	200	300	0	0	0	0	0	0	0	200	903	0	0	0	0	0	0	0	603	903	0
637	8	4.27159	24.3889	5.3085	1585.42	-769.766	-3090.82	200	300	0	0	0	0	0	0	0	200	903	0	0	0	0	0	0	0	603	903	0
637	9	4.42418	24.8467	8.36026	1676.97	-708.731	-3045.05	200	300	0	0	0	0	0	0	0	200	903	0	0	0	0	0	0	0	603	903	0
638	0	6.10264	24.6941	7.44473	2317.84	-830.802	-2999.27	200	300	0	0	0	0	0	0	0	200	903	0	0	0	0	0	0	0	603	903	0
638	1	7.17076	24.0837	6.5292	1585.42	-891.837	-3365.48	200	300	0	0	0	0	0	0	0	200	903	0	0	0	0	0	0	0	603	903	0
638	2	5.64488	25.3044	3.78262	1768.53	-830.802	-3411.26	200	300	0	0	0	0	0	0	0	200	903	0	0	0	0	0	0	0	603	903	0
638	3	5.18712	27.2881	7.13956	1310.76	-952.872	-3136.6	200	300	0	0	0	0	0	0	0	200	903	0	0	0	0	0	0	0	603	903	0
638	4	5.03453	27.1355	5.3085	2043.18	-1013.91	-3685.92	200	300	0	0	0	0	0	0	0	200	903	0	0	0	0	0	0	0	603	903	0
638	5	5.03453	26.9829	6.5292	2500.95	-830.802	-3777.47	200	300	0	0	0	0	0	0	0	200	903	0	0	0	0	0	0	0	603	903	0
638	6	4.88194	26.0674	6.22403	2226.29	-769.766	-3777.47	200	300	0	0	0	0	0	0	0	200	903	0	0	0	0	0	0	0	603	903	0
638	7	5.64488	27.4407	6.22403	1676.97	-1258.05	-3731.69	200	300	0	0	0	0	0	0	0	200	903	0	0	0	0	0	0	0	603	903	0
638	8	5.18712	27.8984	5.91885	1768.53	-1258.05	-3823.24	200	300	0	0	0	0	0	0	0	200	903	0	0	0	0	0	0	0	603	903	0
638	9	5.64488	28.8139	4.39297	2592.5	-952.872	-4006.35	200	300	0	0	0	0	0	0	0	200	903	0	0	0	0	0	0	0	603	903	0
639	0	5.95006	27.7458	7.74991	2409.4	-1013.91	-3869.02	200	300	0	0	0	0	0	0	0	200	903	0	0	0	0	0	0	0	603	903	0
639	1	4.88194	28.8139	2.8671	2409.4	-1746.33	-3685.92	200	300	0	0	0	0	0	0	0	200	903	0	0	0	0	0	0	0	603	903	0
639	2	5.64488	28.6614	5.61368	1860.08	-1258.05	-4006.35	200	300	0	0	0	0	0	0	0	200	903	0	0	0	0	0	0	0	603	903	0
639	3	5.03453	29.5769	5.00333	2317.84	-1197.01	-4097.9	200	300	0	0	0	0	0	0	0	200	903	0	0	0	0	0	0	0	603	903	0
639	4	5.49229	28.5088	4.69815	1860.08	-1380.12	-3960.57	200	300	0	0	0	0	0	0	0	200	903	0	0	0	0	0	0	0	603	903	0
639	5	6.25523	30.0346	3.78262	2409.4	-1258.05	-3869.02	200	300	0	0	0	0	0	0	0	200	903	0	0	0	0	0	0	0	603	903	0
639	6	6.25523	29.2717	3.78262	2409.4	-1074.94	-4235.23	200	300	0	0	0	0	0	0	0	200	903	0	0	0	0	0	0	0	603	903	0
639	7	6.10264	29.5769	3.78262	2867.16	-708.731	-4189.45	200	300	0	0	0	0	0	0	0	200	903	0	0	0	0	0	0	0	603	903	0
639	8	4.72935	30.645	3.47745	1768.53	-1258.05	-4281.01	200	300	0	0	0	0	0	0	0	200	903	0	0	0	0	0	0	0	603	903	0
639	9	5.03453	30.9502	3.47745	2226.29	-1197.01	-4326.79	200	300	0	0	0	0	0	0	0	200	903	0	0	0	0	0	0	0	603	903	0
640	0	4.27159	31.5605	6.22403	2684.05	-1135.98	-4738.77	200	300	0	0	0	0	0	0	0	200	903	0	0	0	0	0	0	0	603	903	0
640	1	4.42418	31.5605	6.5292	2958.71	-1258.05	-4647.22	200	300	0	0	0	0	0	0	0	200	903	0	0	0	0	0	0	0	603	903	0
640	2	5.64488	31.2554	4.39297	2775.61	-1624.26	-4281.01	200	300	0	0	0	0	0	0	0	200	903	0	0	0	0	0	0	0	603	903	0
640	3	6.713	32.0183	3.47745	2775.61	-1135.98	-4647.22	200	300	0	0	0	0	0	0	0	200	903	0	0	0	0	0	0	0	603	903	0
640	4	5.03453	32.6286	2.25674	2317.84	-1319.08	-4738.77	200	300	0	0	0	0	0	0	0	200	903	0	0	0	0	0	0	0	603	903	0
640	5	4.27159	33.5442	1.34122	2317.84	-1624.26	-4738.77	200	300	0	0	0	0	0	0	0	200	903	0	0	0	0	0	0	0	603	903	0
640	6	4.27159	33.239	1.95157	2867.16	-1807.36	-4967.65	200	300	0	0	0	0	0	0	0	200	903	0	0	0	0	0	0	0	603	903	0
640	7	3.50865	33.239	2.8671	2775.61	-1319.08	-5242.31	200	300	0	0	0	0	0	0	0	200	903	0	0	0	0	0	0	0	603	903	0
640	8	3.81383	33.8493	3.78262	2317.84	-1563.22	-5196.54	200	300	0	0	0	0	0	0	0	200	903	0	0	0	0	0	0	0	603	903	0
640	9	4.42418	34.0019	4.0878	3141.82	-1990.47	-5059.21	200	300	0	0	0	0	0	0	0	200	903	0	0	0	0	0	0	0	603	903	0
641	0	4.72935	33.6968	2.8671	2409.4	-1685.29	-5242.31	200	300	0	0	0	0	0	0	0	200	903	0	0	0	0	0	0	0	603	903	0
641	1	4.88194	34.9175	1.34122	3141.82	-1807.36	-5516.97	200	300	0	0	0	0	0	0	0	200	903	0	0	0	0	0	0	0	603	903	0
641	2	4.88194	34.4597	3.47745	3050.26	-1624.26	-5379.64	200	300	0	0	0	0	0	0	0	200	903	0	0	0	0	0	0	0	603	903	0
641	3	3.20347	34.4597	0.425689	2317.84	-1441.15	-5471.19	200	300	0	0	0	0	0	0	0	200	903	0	0	0	0	0	0	0	603	903	0
641	4	5.64488	35.3752	2.8671	3416.48	-1502.19	-5425.42	200	300	0	0	0	0	0	0	0	200	903	0	0	0	0	0	0	0	603	903	0
641	5	4.119	34.0019	3.17227	2867.16	-1441.15	-5379.64	200	300	0	0	0	0	0	0	0	200	903	0	0	0	0	0	0	0	603	903	0
641	6	3.81383	35.2226	4.39297	3324.92	-1685.29	-5379.64	200	300	0	0	0	0	0	0	0	200	903	0	0	0	0	0	0	0	603	903	0
641	7	3.50865	35.07	1.34122	3508.03	-1685.29	-5608.52	200	300	0	0	0	0	0	0	0	200	903	0	0	0	0	0	0	0	603	903	0
641	8	5.18712	35.5278	1.03604	3141.82	-1502.19	-5928.96	200	300	0	0	0	0	0	0	0	200	903	0	0	0	0	0	0	0	603	903	0
641	9	3.81383	36.2908	0.120513	3782.69	-1563.22	-5928.96	200	300	0	0	0	0	0	0	0	200	903	0	0	0	0	0	0	0	603	903	0
642	0	5.49229	34.7649	1.95157	3141.82	-1807.36	-5791.63	200	300	0	0	0	0	0	0	0	200	903	0	0	0	0	0	0	0	603	903	0
642	1	2.74571	36.2908	-0.795014	3324.92	-1990.47	-5974.73	200	300	0	0	0	0	0	0	0	200	903	0	0	0	0	0	0	0	603	903	0
642	2	4.27159	35.9856	1.03604	3691.13	-1929.43	-6066.29	200	300	0	0	0	0	0	0	0	200	903	0	0	0	0	0	0	0	603	903	0
642	3	2.8983	35.9856	1.95157	2867.16	-2051.51	-6112.06	200	300	0	0	0	0	0	0	0	200	903	0	0	0	0	0	0	0	603	903	0
642	4	5.3397	37.2063	0.120513	3050.26	-1868.4	-5471.19	200	300	0	0	0	0	0	0	0	200	903	0	0	0	0	0	0	0	603	903	0
642	5	3.66124	36.9011	0.730865	3050.26	-1746.33	-6203.62	200	300	0	0	0	0	0	0	0	200	903	0	0	0	0	0	0	0	603	903	0
642	6	4.57677	36.7485	-0.795014	3508.03	-1563.22	-6157.84	200	300	0	0	0	0	0	0	0	200	903	0	0	0	0	0	0	0	603	903	0
642	7	3.35606	36.9011	-0.795014	3324.92	-1868.4	-6203.62	200	300	0	0	0	0	0	0	0	200	903	0	0	0	0	0	0	0	603	903	0
642	8	2.28795	35.9856	-0.184663	3782.69	-1990.47	-6112.06	200	300	0	0	0	0	0	0	0	200	903	0	0	0	0	0	0	0	603	903	0
642	9	2.59312	36.4433	-0.184663	3233.37	-1807.36	-6432.5	200	300	0	0	0	0	0	0	0	200	903	0	0	0	0	0	0	0	603	903	0
643	0	2.28795	36.9011	0.425689	3233.37	-1502.19	-6295.17	200	300	0	0	0	0	0	0	0	200	903	0	0	0	0	0	0	0	603	903	0
643	1	2.13536	37.2063	-0.184663	3782.69	-2051.51	-6386.72	200	300	0	0	0	0	0	0	0	200	903	0	0	0	0	0	0	0	603	903	0
643	2	2.8983	36.4433	1.34122	4332	-2173.58	-6340.95	200	300	0	0	0	0	0	0	0	200	903	0	0	0	0	0	0	0	603	903	0
643	3	3.05089	34.4597	0.120513	3782.69	-1746.33	-6203.62	200	300	0	0	0	0	0	0	0	200	903	0	0	0	0	0	0	0	603	903	0
643	4	3.05089	36.7485	-0.795014	3324.92	-2051.51	-6203.62	200	300	0	0	0	0	0	0	0	200	903	0	0	0	0	0	0	0	603	903	0
643	5	2.8983	37.5115	1.34122	3508.03	-2051.51	-6157.84	200	300	0	0	0	0	0	0	0	200	903	0	0	0	0	0	0	0	603	903	0
643	6	1.52501	37.0537	-0.795014	3874.24	-1807.36	-6386.72	200	300	0	0	0	0	0	0	0	200	903	0	0	0	0	0	0	0	603	903	0
643	7	3.96641	36.1382	-1.40537	4148.9	-1990.47	-6386.72	-1216.34	-2652.18	0	0	0	0	0	0	0	200	903	0	0	0	0	0	0	0	603	903	0
643	8	1.6776	34.4597	0.730865	3782.69	-2417.72	-6020.51	200	300	0	0	0	0	0	0	0	200	903	0	0	0	0	0	0	0	603	903	0
643	9	2.28795	36.1382	-0.184663	3508.03	-2417.72	-6157.84	200	300	0	0	0	0	0	0	0	200	903	0	0	0	0	0	0	0	603	903	0
644	0	3.05089	36.5959	1.34122	3233.37	-1929.43	-5700.08	200	300	0	0	0	0	0	0	0	200	903	0	0	0	0	0	0	0	603	903	0
644	1	3.81383	36.7485	-1.40537	3782.69	-2051.51	-5928.96	-1259.77	-2391.6	0	0	0	0	0	0	0	200	903	0	0	0	0	0	0	0	603	903	0
644	2	2.8983	35.833	-1.40537	3965.79	-2173.58	-6112.06	-1346.63	-2521.89	0	0	0	0	0	0	0	200	903	0	0	0	0	0	0	0	603	903	0
644	3	2.44053	35.833	-0.184663	3874.24	-1990.47	-6340.95	200	300	0	0	0	0	0	0	0	200	903	0	0	0	0	0	0	0	603	903	0
644	4	2.28795	35.6804	0.120513	3233.37	-1868.4	-6157.84	200	300	0	0	0	0	0	0	0	200	903	0	0	0	0	0	0	0	603	903	0
644	5	2.13536	35.9856	0.730865	4148.9	-1990.47	-5974.73	200	300	0	0	0	0	0	0	0	200	903	0	0	0	0	0	0	0	603	903	0
644	6	1.83018	34.0019	1.34122	3416.48	-2173.58	-6066.29	200	300	0	0	0	0	0	0	0	200	903	0	0	0	0	0	0	0	603	903	0
644	7	2.59312	36.1382	0.730865	4057.34	-1563.22	-6203.62	200	300	0	0	0	0	0	0	0	200	903	0	0	0	0	0	0	0	603	903	0
644	8	4.27159	34.9175	0.120513	3599.58	-2234.61	-6020.51	200	300	0	0	0	0	0	0	0	200	903	0	0	0	0	0	0	0	603	903	0
644	9	3.35606	33.5442	-1.40537	3965.79	-2295.65	-5745.85	-1433.49	-2521.89	0	0	0	0	0	0	0	200	903	0	0	0	0	0	0	0	603	903	0
645	0	1.83018	34.6123	-1.10019	3508.03	-2173.58	-5974.73	-1775.64	-2888.57	0	0	0	0	0	0	0	200	903	0	0	0	0	0	0	0	603	903	0
645	1	2.28795	35.2226	-1.10019	3508.03	-2173.58	-5745.85	-1775.64	-2888.57	0	0	0	0	0	0	0	200	903	0	0	0	0	0	0	0	603	903	0
645	2	4.27159	33.6968	0.425689	3416.48	-2417.72	-5837.41	200	300	0	0	0	0	0	0	0	200	903	0	0	0	0	0	0	0	603	903	0
645	3	2.13536	34.7649	0.730865	3782.69	-2234.61	-5745.85	200	300	0	0	0	0	0	0	0	200	903	0	0	0	0	0	0	0	603	903	0
645	4	3.66124	34.4597	-0.795014	3782.69	-2051.51	-5974.73	200	300	0	0	0	0	0	0	0	200	903	0	0	0	0	0	0	0	603	903	0
645	5	3.66124	32.4761	-0.489838	3691.13	-1929.43	-5654.3	200	300	0	0	0	0	0	0	0	200	903	0	0	0	0	0	0	0	603	903	0
645	6	3.35606	34.1545	-2.32089	3233.37	-2356.68	-5654.3	-815.42	-1093.16	0	0	0	0	0	0	0	200	903	0	0	0	0	0	0	0	603	903	0
645	7	3.50865	34.6123	-2.32089	3782.69	-2173.58	-5791.63	-736.526	-1329.84	0	0	0	0	0	0	0	200	903	0	0	0	0	0	0	0	603	903	0
645	8	2.59312	33.5442	-1.10019	3416.48	-2051.51	-5745.85	-1664.68	-2805.35	0	0	0	0	0	0	0	200	903	0	0	0	0	0	0	0	603	903	0
645	9	3.50865	34.1545	-1.71054	3691.13	-2112.54	-5837.41	-1035.01	-1857.87	0	0	0	0	0	0	0	200	903	0	0	0	0	0	0	0	603	903	0
646	0	2.59312	33.3916	0.120513	3874.24	-2112.54	-5059.21	200	300	0	0	0	0	0	0	0	200	903	0	0	0	0	0	0	0	603	903	0
646	1	3.35606	31.2554	0.730865	3874.24	-1990.47	-5562.75	200	300	0	0	0	0	0	0	0	200	903	0	0	0	0	0	0	0	603	903	0
646	2	3.35606	33.239	1.03604	3508.03	-1990.47	-5425.42	200	300	0	0	0	0	0	0	0	200	903	0	0	0	0	0	0	0	603	903	0
646	3	3.05089	33.0864	-0.489838	3691.13	-2234.61	-5425.42	200	300	0	0	0	0	0	0	0	200	903	0	0	0	0	0	0	0	603	903	0
646	4	3.81383	32.9338	-0.795014	4423.55	-2356.68	-5379.64	200	300	0	0	0	0	0	0	0	200	903	0	0	0	0	0	0	0	603	903	0
646	5	2.74571	32.0183	-0.489838	3782.69	-2112.54	-5562.75	200	300	0	0	0	0	0	0	0	200	903	0	0	0	0	0	0	0	603	903	0
646	6	4.72935	32.0183	-0.795014	3874.24	-2295.65	-5333.87	200	300	0	0	0	0	0	0	0	200	903	0	0	0	0	0	0	0	603	903	0
646	7	2.44053	31.4079	-0.184663	3416.48	-2356.68	-5196.54	200	300	0	0	0	0	0	0	0	200	903	0	0	0	0	0	0	0	603	903	0
646	8	3.96641	32.0183	0.120513	3599.58	-2051.51	-4555.67	200	300	0	0	0	0	0	0	0	200	903	0	0	0	0	0	0	0	603	903	0
646	9	4.119	31.7131	0.120513	3141.82	-1990.47	-4830.33	200	300	0	0	0	0	0	0	0	200	903	0	0	0	0	0	0	0	603	903	0
647	0	4.27159	31.4079	-2.32089	3599.58	-2173.58	-4601.44	-736.526	-1250.95	0	0	0	0	0	0	0	200	903	0	0	0	0	0	0	0	603	903	0
647	1	5.79747	30.3398	1.34122	3782.69	-2112.54	-4921.88	200	300	0	0	0	0	0	0	0	200	903	0	0	0	0	0	0	0	603	903	0
647	2	3.81383	30.9502	-2.01572	3141.82	-2051.51	-5013.43	-817.755	-1258.66	0	0	0	0	0	0	0	200	903	0	0	0	0	0	0	0	603	903	0
647	3	3.20347	30.645	1.34122	3233.37	-2295.65	-5013.43	200	300	0	0	0	0	0	0	0	200	903	0	0	0	0	0	0	0	603	903	0
647	4	3.05089	31.4079	1.34122	3874.24	-2051.51	-4647.22	200	300	0	0	0	0	0	0	0	200	903	0	0	0	0	0	0	0	603	903	0
647	5	4.119	31.2554	0.425689	4057.34	-2234.61	-4876.1	200	300	0	0	0	0	0	0	0	200	903	0	0	0	0	0	0	0	603	903	0
647	6	5.95006	30.1872	-0.489838	3782.69	-1685.29	-4876.1	200	300	0	0	0	0	0	0	0	200	903	0	0	0	0	0	0	0	603	903	0
647	7	3.81383	30.3398	-1.40537	3965.79	-2356.68	-4830.33	-1476.92	-2521.89	0	0	0	0	0	0	0	200	903	0	0	0	0	0	0	0	603	903	0
647	8	3.96641	30.1872	-1.40537	3782.69	-2295.65	-4509.89	-1433.49	-2391.6	0	0	0	0	0	0	0	200	903	0	0	0	0	0	0	0	603	903	0
647	9	3.66124	30.3398	-1.10019	3508.03	-1929.43	-4738.77	-1553.73	-2888.57	0	0	0	0	0	0	0	200	903	0	0	0	0	0	0	0	603	903	0
648	0	3.81383	30.1872	-1.71054	4057.34	-2234.61	-4601.44	-1106.38	-2071.96	0	0	0	0	0	0	0	200	903	0	0	0	0	0	0	0	603	903	0
648	1	3.50865	29.5769	-0.184663	4881.32	-2295.65	-4464.11	200	300	0	0	0	0	0	0	0	200	903	0	0	0	0	0	0	0	603	903	0
648	2	4.88194	29.1191	0.120513	3599.58	-1990.47	-3960.57	200	300	0	0	0	0	0	0	0	200	903	0	0	0	0	0	0	0	603	903	0
648	3	5.64488	29.2717	-1.10019	3416.48	-2234.61	-4418.34	-1831.11	-2805.35	0	0	0	0	0	0	0	200	903	0	0	0	0	0	0	0	603	903	0
648	4	5.03453	29.8821	-3.23642	3508.03	-2478.75	-4235.23	-565.893	-783.922	0	0	0	0	0	0	0	200	903	0	0	0	0	0	0	0	603	903	0
648	5	4.57677	29.5769	-0.489838	4240.45	-1807.36	-4189.45	200	300	0	0	0	0	0	0	0	200	903	0	0	0	0	0	0	0	603	903	0
648	6	4.72935	28.3562	-1.71054	4332	-1929.43	-4097.9	-927.967	-2232.53	0	0	0	0	0	0	0	200	903	0	0	0	0	0	0	0	603	903	0
648	7	6.10264	26.3725	0.730865	3691.13	-2051.51	-4052.13	200	300	0	0	0	0	0	0	0	200	903	0	0	0	0	0	0	0	603	903	0
648	8	4.57677	28.051	0.425689	3416.48	-2234.61	-4143.68	200	300	0	0	0	0	0	0	0	200	903	0	0	0	0	0	0	0	603	903	0
648	9	5.79747	28.3562	0.120513	3508.03	-1929.43	-4006.35	200	300	0	0	0	0	0	0	0	200	903	0	0	0	0	0	0	0	603	903	0
649	0	5.18712	28.3562	0.120513	3874.24	-2112.54	-3960.57	200	300	0	0	0	0	0	0	0	200	903	0	0	0	0	0	0	0	603	903	0
649	1	5.3397	27.7458	-1.10019	4240.45	-2173.58	-3685.92	-1775.64	-3554.29	0	0	0	0	0	0	0	200	903	0	0	0	0	0	0	0	603	903	0
649	2	5.3397	27.8984	0.730865	3874.24	-1990.47	-4006.35	200	300	0	0	0	0	0	0	0	200	903	0	0	0	0	0	0	0	603	903	0
649	3	4.57677	27.5932	-1.71054	3782.69	-1807.36	-3365.48	-856.604	-1911.4	0	0	0	0	0	0	0	200	903	0	0	0	0	0	0	0	603	903	0
649	4	5.03453	27.1355	0.120513	3508.03	-2417.72	-4052.13	200	300	0	0	0	0	0	0	0	200	903	0	0	0	0	0	0	0	603	903	0
649	5	4.27159	27.2881	-0.489838	3599.58	-1990.47	-3777.47	200	300	0	0	0	0	0	0	0	200	903	0	0	0	0	0	0	0	603	903	0
649	6	4.88194	27.1355	-0.184663	4057.34	-2234.61	-3594.36	200	300	0	0	0	0	0	0	0	200	903	0	0	0	0	0	0	0	603	903	0
649	7	6.40782	26.3725	-0.795014	3691.13	-2295.65	-3594.36	200	300	0	0	0	0	0	0	0	200	903	0	0	0	0	0	0	0	603	903	0
649	8	5.49229	25.9148	-1.71054	3324.92	-2173.58	-3365.48	-1070.69	-1643.78	0	0	0	0	0	0	0	200	903	0	0	0	0	0	0	0	603	903	0
649	9	4.72935	26.5251	-1.10019	3691.13	-2051.51	-3228.15	-1664.68	-3055	0	0	0	0	0	0	0	200	903	0	0	0	0	0	0	0	603	903	0
650	0	5.49229	25.457	-1.40537	3324.92	-2112.54	-2816.16	-1303.2	-2065.88	0	0	0	0	0	0	0	200	903	0	0	0	0	0	0	0	603	903	0
650	1	4.88194	25.7622	-0.489838	3965.79	-2295.65	-3136.6	200	300	0	0	0	0	0	0	0	200	903	0	0	0	0	0	0	0	603	903	0
650	2	4.72935	25.1518	0.425689	3782.69	-1868.4	-3411.26	200	300	0	0	0	0	0	0	0	200	903	0	0	0	0	0	0	0	603	903	0
650	3	5.79747	24.9992	0.120513	3599.58	-1868.4	-2861.94	200	300	0	0	0	0	0	0	0	200	903	0	0	0	0	0	0	0	603	903	0
650	4	6.25523	24.3889	1.64639	3508.03	-2234.61	-3273.93	200	300	0	0	0	0	0	0	0	200	903	0	0	0	0	0	0	0	603	903	0
650	5	5.64488	25.1518	-0.489838	3233.37	-1990.47	-3136.6	200	300	0	0	0	0	0	0	0	200	903	0	0	0	0	0	0	0	603	903	0
650	6	7.17076	25.1518	0.425689	4057.34	-2112.54	-3090.82	200	300	0	0	0	0	0	0	0	200	903	0	0	0	0	0	0	0	603	903	0
650	7	5.3397	23.9311	-0.795014	3782.69	-2051.51	-2953.49	200	300	0	0	0	0	0	0	0	200	903	0	0	0	0	0	0	0	603	903	0
650	8	6.25523	23.9311	-0.489838	3416.48	-1929.43	-2816.16	200	300	0	0	0	0	0	0	0	200	903	0	0	0	0	0	0	0	603	903	0
650	9	4.88194	23.3208	0.120513	3508.03	-2051.51	-2770.39	200	300	0	0	0	0	0	0	0	200	903	0	0	0	0	0	0	0	603	903	0
651	0	5.49229	23.9311	1.03604	3691.13	-1807.36	-2449.95	200	300	0	0	0	0	0	0	0	200	903	0	0	0	0	0	0	0	603	903	0
651	1	5.49229	23.7785	0.730865	3599.58	-2112.54	-2861.94	200	300	0	0	0	0	0	0	0	200	903	0	0	0	0	0	0	0	603	903	0
651	2	5.95006	22.4053	-1.10019	3965.79	-2173.58	-2724.61	-1775.64	-3304.64	0	0	0	0	0	0	0	200	903	0	0	0	0	0	0	0	603	903	0
651	3	5.3397	22.2527	2.25674	3691.13	-2234.61	-2724.61	200	300	0	0	0	0	0	0	0	200	903	0	0	0	0	0	0	0	603	903	0
651	4	5.64488	22.2527	-1.40537	3599.58	-2234.61	-2266.85	-1390.06	-2261.31	0	0	0	0	0	0	0	200	903	0	0	0	0	0	0	0	603	903	0
651	5	4.88194	22.4053	0.120513	3782.69	-2112.54	-2541.51	200	300	0	0	0	0	0	0	0	200	903	0	0	0	0	0	0	0	603	903	0
[truncated: 3,464 more rows]
