# Supplementary material for: The Effects of an Extemporaneous Speech Dual-task on Older Adult Gait Control
Source: Research Square preprint supplement (doi:10.21203/rs.3.rs-7674245/v1), 2025-11-18
Supplement: Supplementary file 67 [file DT5Walk10.xlsx]

## Sheet: Sheet1
Trajectories
		05:LFHD			05:RFHD			05:LBHD			05:RBHD			05:C7			05:T10			05:CLAV			05:STRN			05:RBAK			05:LSHO			05:LUPA			05:LELB			05:LFRM			05:LWRA			05:LWRB			05:LFIN
Frame	Sub Frame	X	Y	Z	X	Y	Z	X	Y	Z	X	Y	Z	X	Y	Z	X	Y	Z	X	Y	Z	X	Y	Z	X	Y	Z	X	Y	Z	X	Y	Z	X	Y	Z	X	Y	Z	X	Y	Z	X	Y	Z	X	Y	Z
		mm	mm	mm	mm	mm	mm	mm	mm	mm	mm	mm	mm	mm	mm	mm	mm	mm	mm	mm	mm	mm	mm	mm	mm	mm	mm	mm	mm	mm	mm	mm	mm	mm	mm	mm	mm	mm	mm	mm	mm	mm	mm	mm	mm	mm	mm	mm	mm
172	0	333.583	2848.88	1600.41	219.75	2854.05	1605.65	348.272	3020.94	1591.24	230.027	3036.46	1598.32	280.01	3067.9	1469.14	270.192	3166.93	1241.23	262.601	2918.76	1389.9	252.97	2870.51	1204.18	150.832	3180.09	1303.82	447.474	3020.19	1426.8	531.148	3016.01	1191.77	542.467	2994.83	1095.95	500.795	2821.45	1003.69	433.431	2771.45	983.404	488.704	2784.51	930.666	450.773	2694.37	918.824
173	0	331.113	2840.39	1599.83	217.391	2845.5	1604.83	346.026	3012.59	1590.34	228.345	3027.41	1597.09	278.369	3059.27	1467.98	269.134	3157.8	1240.06	260.542	2909.77	1389.09	251.74	2861.78	1202.89	149.632	3171.24	1302.08	445.836	3010.72	1426.11	529.883	3006.35	1191.09	541.426	2985.53	1095.39	498.998	2812.86	1001.86	430.001	2765.1	977.998	489.497	2776.17	929.171	448.858	2687.08	915.63
174	0	328.562	2831.69	1599.32	214.92	2837	1603.81	343.534	3004.21	1589.32	225.432	3019.01	1596.11	276.557	3050.53	1466.86	268.179	3148.6	1238.92	258.82	2900.88	1388.07	250.054	2852.38	1202.32	148.399	3162.35	1300.42	444.118	3001.72	1425.31	528.345	2996.47	1190.43	540.053	2976.03	1094.68	497.331	2804.66	999.352	427.474	2758.92	972.34	490.025	2768.2	926.831	447.504	2680.43	911.039
175	0	325.884	2823.09	1598.85	212.112	2828.45	1603.03	340.829	2995.66	1588.74	222.842	3010.45	1594.78	274.745	3041.87	1465.92	267.188	3139.19	1237.57	256.841	2891.72	1387.13	248.428	2842.94	1201.68	147.03	3153.4	1298.62	442.031	2992.28	1424.64	527.128	2986.61	1190.21	538.737	2966.46	1094.4	495.785	2796.75	996.766	425.288	2753.27	966.155	490.087	2760.4	923.984	445.145	2674.17	905.955
176	0	323.056	2814.42	1598.61	209.184	2819.96	1602.36	337.88	2986.94	1588.3	219.891	3002	1593.82	272.883	3033.08	1464.85	265.813	3129.47	1236.01	254.829	2882.8	1386.78	246.749	2833.56	1201.24	145.76	3144.47	1296.77	440.341	2982.7	1424.37	526.281	2976.72	1190.48	537.705	2957.09	1094.41	494.462	2789.1	993.669	423.563	2747.86	959.567	490.767	2753.63	920.976	443.913	2669.05	899.593
177	0	320.281	2805.99	1598.39	206.428	2811.46	1601.73	335.058	2978.5	1588.07	217.099	2993.51	1593.11	270.939	3024.56	1463.93	264.681	3119.9	1234.52	252.7	2873.81	1386.35	245.189	2823.96	1201.28	144.536	3135.49	1294.75	438.533	2973.75	1424.12	525.033	2966.75	1190.49	536.311	2947.56	1094.24	493.282	2781.71	990.013	422.643	2743.17	953.041	491.676	2747.45	917.115	443.135	2664.29	892.642
178	0	317.23	2797.56	1598.03	202.846	2802.57	1600.99	331.828	2970.07	1587.65	213.979	2984.99	1592.55	268.996	3016.19	1463.14	263.623	3110.08	1233.12	250.662	2864.98	1386	243.627	2814.27	1201.04	143.313	3126.56	1292.73	436.478	2964.57	1423.73	523.401	2956.31	1190.23	534.735	2937.9	1094.12	491.736	2774.78	985.832	421.061	2737.82	945.463	492.077	2742.03	912.558	442.897	2660.09	884.716
179	0	314.367	2789.07	1598.07	200.64	2794.27	1600.57	328.277	2961.53	1587.83	210.881	2976.29	1592.06	266.992	3007.83	1462.39	262.245	3100.26	1231.95	248.67	2856.22	1385.81	242.1	2804.46	1201.31	141.818	3117.46	1291	434.319	2955.54	1423.85	521.553	2945.36	1190.45	533.101	2928.07	1094.28	490.849	2768.17	981.475	421.369	2734.34	937.303	492.812	2737.12	907.947	443.404	2656.72	876.27
180	0	311.243	2780.65	1598.35	196.858	2785.5	1600.3	325.553	2953.4	1588.42	207.929	2967.74	1592.01	264.828	2999.38	1462.01	260.436	3090.68	1231.16	246.56	2847.31	1386.06	240.62	2794.72	1202.13	140.378	3108.55	1289.28	432.619	2946.99	1424.43	520.206	2935	1191.24	531.253	2918.37	1094.86	490.891	2761.79	976.973	421.554	2730.37	930.001	493.786	2732.82	902.945	444.703	2653.9	867.716
181	0	308.396	2772.32	1598.61	194.183	2777.36	1600.19	322.543	2945.31	1589.09	204.526	2959.31	1592.36	262.703	2991.3	1461.87	258.724	3081.28	1230.46	244.754	2838.66	1386.5	239.129	2784.79	1202.79	138.833	3099.61	1287.87	430.372	2938.46	1424.73	518.838	2925.01	1192.14	529.016	2908.51	1095.33	490.197	2755.78	972.289	421.852	2726.4	922.105	495.559	2728.79	897.885	446.594	2651.91	858.351
182	0	305.102	2764	1599.06	191.039	2768.88	1600.15	319.27	2936.91	1590.13	201.4	2950.83	1593.03	260.507	2983.21	1462.04	256.976	3071.9	1230.03	242.654	2830.01	1387.24	237.832	2775.09	1203.82	137.305	3090.55	1286.6	428.298	2930.05	1425.4	516.691	2914.64	1192.67	526.273	2898.48	1095.93	490.25	2750.44	967.56	422.547	2722.32	915.256	497.054	2725.38	892.842	449.359	2650.67	849.063
183	0	302.342	2755.59	1599.82	188.093	2760.41	1600.54	316.077	2928.75	1591.44	198.111	2942.35	1594.09	258.085	2975.1	1462.35	255.04	3062.63	1229.76	240.751	2821.5	1388.5	236.467	2765.4	1205.27	135.502	3081.47	1285.57	426.383	2922.04	1426.41	514.52	2904.83	1193.94	523.625	2889.2	1096.83	490.608	2745.43	963.236	424.401	2719.13	908.138	499.313	2723.42	887.92	452.996	2650.09	839.935
184	0	299.334	2747.44	1600.67	185.062	2752.02	1601.12	313.109	2920.68	1593.1	195.082	2934.08	1595.11	255.816	2967.09	1462.75	252.836	3053.18	1229.74	238.821	2812.98	1389.75	235.208	2755.77	1207.22	133.597	3072.4	1284.9	424.353	2914.17	1427.59	512.524	2895.1	1195.25	520.833	2879.96	1097.99	491.546	2740.95	959.29	426.659	2716.19	901.855	501.742	2721.78	883.249	457.507	2650.39	831.119
185	0	296.769	2738.91	1601.66	182.499	2743.63	1601.68	309.86	2912.35	1595.05	191.907	2925.64	1597.06	253.332	2959.15	1463.57	250.618	3043.86	1229.98	236.773	2804.63	1391.5	233.885	2746.23	1209.09	131.644	3063.36	1284.79	422.161	2906.73	1428.81	509.627	2885.85	1196.31	517.552	2870.67	1099.13	492.681	2737.02	955.709	428.293	2713.47	895.206	504.715	2720.79	879.254	462.658	2651.33	822.744
186	0	293.833	2730.75	1602.57	179.724	2735.06	1602.35	306.691	2904.06	1597.42	188.604	2917.2	1599.08	250.736	2950.94	1464.69	248.313	3034.59	1230.71	234.815	2796.27	1393.31	232.366	2736.81	1211.2	129.62	3054.21	1284.92	419.743	2899.29	1430.54	507.07	2876.39	1198.02	513.79	2861.47	1100.46	494.017	2733.63	952.986	431.791	2711.93	889.627	508.225	2720.27	876.06	468.356	2653.29	815.262
187	0	291.354	2722.39	1603.73	176.939	2726.39	1603.28	303.88	2896.06	1599.92	185.886	2908.52	1601.26	248.27	2942.86	1465.82	245.729	3025.19	1231.5	232.773	2788.09	1395.36	230.985	2727.42	1213.6	127.28	3044.89	1285.22	417.591	2891.36	1432.45	504.043	2867.6	1199.67	511.312	2853.97	1102.61	496.07	2730.67	950.97	435.636	2710.45	885.438	511.879	2720.54	873.761	474.307	2655.71	808.558
188	0	288.706	2714.15	1604.74	174.687	2718.06	1604.18	300.784	2887.81	1602.24	182.481	2900.03	1603.64	245.781	2934.72	1466.89	243.083	3015.81	1232.28	230.99	2779.93	1397.26	229.636	2718.38	1215.64	125	3035.51	1285.62	415.571	2883.67	1434.14	501.763	2858.93	1201.19	508.538	2846.74	1104.39	498.036	2728.19	949.719	439.806	2710.19	881.715	515.452	2721.03	871.958	481.271	2658.82	802.974
189	0	286.221	2705.57	1605.76	172.17	2709.39	1604.98	297.514	2879.48	1604.57	179.496	2891.46	1605.93	240.152	2926.93	1468.69	240.458	3006.56	1233.34	229.055	2771.54	1398.89	228.039	2709.28	1217.73	122.507	3026.36	1286.51	413.193	2875.95	1435.78	498.958	2851.48	1202.75	505.569	2839.84	1106.12	499.933	2725.99	949.03	441.355	2707.35	880.251	519.437	2722.01	871.271	487.846	2662.15	798.183
190	0	283.709	2697.03	1606.68	170.147	2700.64	1605.36	294.879	2871.31	1606.58	176.673	2882.72	1607.97	240.864	2918.35	1469.18	237.808	2997.27	1234.17	226.975	2763.15	1400.8	226.43	2700.33	1219.7	119.9	3017.12	1287.32	411.36	2867.95	1437.71	496.764	2843.94	1204.28	503.14	2833.62	1107.93	502.216	2724.12	948.81	446.772	2707.09	877.718	522.882	2723.06	870.794	494.327	2665.69	794.448
191	0	281.52	2688.71	1607.47	167.937	2692.2	1606.24	292.25	2862.98	1608.44	173.895	2874.02	1609.5	235.31	2910.57	1471	235.428	2988.09	1234.99	225.385	2754.83	1402.26	224.943	2691.55	1221.39	117.146	3007.82	1287.98	409.271	2860.2	1439.47	495.196	2838.09	1205.73	501.122	2828.12	1109.72	504.668	2722.39	948.877	451.896	2707.13	875.928	526.687	2723.89	871.185	500.945	2669.27	791.425
192	0	279.683	2680.23	1608.2	165.765	2683.24	1606.73	289.712	2854.6	1610.04	171.18	2865.16	1611.13	235.669	2901.85	1471.45	233.13	2979.07	1235.77	223.675	2746.49	1403.65	223.992	2683.1	1222.77	114.4	2998.43	1288.65	407.303	2852.34	1440.75	493.323	2832.18	1206.69	499.483	2823.2	1111.14	507.356	2720.89	949.027	454.419	2705.35	875.628	530.254	2724.27	871.571	507.154	2673.08	788.947
193	0	277.593	2672.96	1608.4	163.753	2674.32	1606.99	287.261	2846.04	1611.59	168.784	2856.3	1612.4	233.419	2893.47	1472.59	230.748	2970.28	1236.52	222.128	2738.02	1404.67	222.982	2674.57	1224.02	111.739	2989.1	1289.21	405.075	2844.57	1441.89	491.715	2827	1207.45	498.319	2818.68	1112.67	509.772	2719.42	949.253	459.184	2704.94	874.536	533.752	2725	872.446	512.805	2676.52	787.021
194	0	275.458	2663.13	1609.27	162.092	2665.41	1607.23	284.975	2837.26	1613.15	166.427	2847.3	1613.74	231.042	2884.96	1473.38	228.63	2961.64	1237.33	220.607	2729.57	1405.78	221.95	2666.09	1225.13	108.978	2979.93	1289.84	403.064	2837.08	1443.42	490.481	2822.37	1208.86	497.691	2814.57	1114.4	512.298	2718.11	949.635	462.648	2703.87	874.172	537.006	2725.52	873.418	518.093	2679.69	785.867
195	0	274.019	2654.51	1609.79	160.15	2656.34	1607.69	282.882	2828.35	1614.59	164.361	2838.24	1614.96	226.258	2877.07	1474.59	226.463	2952.98	1238.21	219.16	2721.08	1406.76	220.834	2657.48	1226.1	106.701	2971.18	1290.96	400.615	2829.95	1444.16	489.686	2818.15	1210.39	497.481	2810.53	1115.91	514.883	2716.92	950.068	466.508	2703.87	872.959	539.9	2725.79	874.173	522.577	2682.74	785.042
196	0	272.491	2645.69	1609.92	158.796	2647.29	1607.77	280.869	2819.52	1615.6	162.215	2829.09	1616.09	227.029	2868.36	1475.16	224.451	2944.55	1238.74	217.973	2712.67	1407.32	220.096	2649.13	1226.65	104.28	2962.21	1291.63	399.07	2822.45	1445.31	488.465	2814.37	1210.98	497.634	2806.77	1117.29	517.512	2715.8	950.414	469.637	2703.44	873.029	542.85	2726	874.887	526.782	2685.21	784.294
197	0	270.839	2636.4	1610.16	157.304	2637.88	1607.81	278.959	2810.56	1616.83	160.271	2819.84	1617.24	224.728	2859.79	1475.76	222.421	2936.19	1239.36	216.606	2704.33	1408.15	219.243	2640.66	1227.39	101.996	2953.35	1292.19	397.13	2815.17	1446.15	488.691	2811.11	1212.53	498.176	2803.35	1118.71	519.844	2714.77	950.891	471.666	2701.88	873.44	545.406	2726.11	875.661	530.273	2687.26	784.077
198	0	269.65	2627.77	1610.17	155.82	2628.54	1607.83	277.242	2801.63	1617.73	158.34	2810.39	1617.85	220.259	2852.05	1476.68	220.546	2927.77	1239.77	215.447	2695.85	1408.76	218.432	2632.26	1228	99.9303	2944.77	1293	395.604	2807.64	1447.3	487.992	2806.8	1213.88	498.962	2800.28	1120.29	522.118	2713.72	951.496	474.952	2702.55	873.328	548.619	2725.95	876.73	533.427	2688.95	784.245
199	0	268.303	2618.71	1610.12	154.759	2618.89	1607.44	275.597	2792.47	1618.51	156.76	2800.84	1619.03	221.709	2843.39	1476.98	218.636	2919.52	1240.07	214.507	2687.47	1409.21	217.787	2624	1228.51	97.9786	2936.1	1293.43	394.253	2800.47	1447.99	487.568	2802.84	1215.16	499.807	2797.45	1121.69	524.362	2712.8	952.022	478.187	2702.11	873.779	550.981	2725.98	877.445	536.138	2690.29	784.504
200	0	267.323	2609.66	1609.87	153.859	2609.59	1607.27	274.053	2783.33	1619.39	155.123	2791.27	1619.82	216.487	2835.45	1477.94	216.721	2911.25	1240.44	213.181	2679.12	1410.11	217.06	2615.69	1229.01	96.068	2927.42	1293.88	392.644	2793.15	1448.68	487.431	2799.2	1216.55	500.598	2794.8	1123.19	526.08	2712.18	952.481	479.591	2700.04	874.782	553.058	2725.83	877.975	538.529	2690.99	784.928
201	0	266.296	2600.35	1609.69	152.903	2599.98	1607.07	272.735	2774.22	1620.31	153.699	2781.73	1620.63	218.16	2826.52	1478.19	215.243	2902.99	1240.87	212.219	2670.72	1410.44	216.2	2607.45	1229.43	94.5334	2918.94	1294.65	391.18	2785.95	1449.37	487.195	2795.37	1218.1	501.417	2792.08	1124.55	527.891	2711.47	953.098	481.877	2700.71	875.049	555.459	2726.11	878.847	540.83	2691.31	785.455
202	0	265.783	2591.28	1609.53	152.144	2590.49	1606.95	271.452	2764.73	1621.28	152.256	2772.1	1622.04	216.594	2818.16	1478.86	213.661	2894.66	1241.4	211.387	2662.31	1410.89	215.6	2599.15	1230.04	92.9657	2910.33	1295.21	389.854	2778.56	1450.12	487.13	2791.49	1219.7	502.12	2789.68	1126.21	529.979	2710.81	954	485.028	2701.89	874.938	557.566	2726.44	879.732	542.96	2691.25	786.399
203	0	265.045	2581.88	1609.08	151.635	2580.81	1606.63	270.228	2755.55	1622.11	151.006	2762.39	1622.84	214.945	2809.68	1479.42	212.115	2886.43	1241.91	210.375	2653.98	1411.42	214.985	2590.88	1230.54	91.3076	2901.67	1295.86	388.165	2771.32	1450.4	487.236	2788.08	1221.33	502.692	2787.3	1127.65	531.595	2710.3	954.699	487.435	2701.44	876.263	559.132	2726.77	880.433	545.343	2690.46	787.752
204	0	264.279	2572.43	1608.62	151.06	2571.29	1606.46	269.016	2746.2	1622.88	149.806	2752.53	1623.78	213.393	2801	1480.01	210.778	2878.1	1242.47	209.528	2645.74	1411.88	214.337	2582.6	1231.03	89.8213	2893.09	1296.67	387.119	2763.47	1451.27	486.291	2783.71	1222.67	502.964	2784.98	1129.18	533.148	2709.93	955.506	489.128	2700.86	877.021	560.65	2727.15	881.239	546.519	2690.25	788.524
205	0	263.943	2563.25	1608.18	150.534	2561.69	1606.3	268.091	2736.68	1623.66	148.612	2742.83	1625.01	212.365	2792.82	1480.73	209.449	2869.68	1243.03	208.491	2637.4	1412.4	213.699	2574.42	1231.47	88.3659	2884.48	1297.16	386.05	2755.85	1452.1	486.423	2780.13	1224.35	502.869	2782.53	1130.71	534.672	2709.6	956.373	490.756	2699.84	877.834	561.863	2727.81	882.14	548.384	2689.38	789.895
206	0	263.55	2553.96	1607.48	150.183	2552.02	1605.94	267.351	2727.51	1624.25	147.944	2732.94	1625.74	211.314	2784.3	1480.99	208.368	2861.5	1243.37	207.695	2628.94	1412.93	213.092	2566.32	1231.92	87.2572	2876.06	1297.78	385.051	2748.32	1452.71	486.097	2776.49	1225.78	502.782	2780.06	1132.17	536.064	2709.29	957.167	491.999	2699.54	878.119	562.631	2728.65	882.8	550.145	2688.47	791.224
207	0	263.163	2544.67	1606.64	149.781	2542.3	1605.47	266.465	2718.01	1624.71	147.035	2723.34	1626.86	209.737	2775.86	1481.53	207.465	2853.29	1243.87	207.105	2620.51	1413.04	212.572	2558.2	1232.08	86.0206	2867.4	1298.28	383.782	2740.32	1452.98	485.426	2772.4	1227.21	502.418	2777.6	1133.52	537.169	2708.75	957.956	486.218	2689.28	881.625	563.224	2729.2	883.442	552.167	2687.43	792.498
208	0	262.855	2535.22	1605.95	149.648	2532.69	1605.25	265.842	2708.47	1625.31	146.469	2713.43	1627.65	208.944	2767.55	1482.28	206.515	2845.13	1244.41	206.151	2611.86	1413.51	211.866	2549.96	1232.47	85.1824	2858.91	1298.85	382.56	2732.42	1453.55	484.574	2768.05	1228.49	501.873	2774.62	1135.15	537.927	2708.12	958.769	494.914	2695.14	880.446	563.271	2729.53	884.128	553.273	2686.47	793.745
209	0	262.711	2525.94	1605.23	149.368	2523.24	1604.85	265.498	2699.36	1625.68	145.916	2703.82	1628.6	207.855	2758.75	1482.39	205.841	2836.94	1244.76	205.568	2603.28	1413.73	211.47	2541.76	1232.51	84.1534	2850.28	1299.38	381.865	2724.46	1454.13	483.363	2763.47	1229.75	501.079	2771.49	1136.36	538.781	2707.3	959.728	496.222	2694.3	881.092	563.494	2730.08	884.864	554.427	2685.64	794.886
210	0	262.627	2516.73	1604.28	149.232	2513.74	1604.44	265.064	2689.53	1625.91	145.522	2694.05	1629.49	207.623	2750.18	1482.73	205.364	2829.04	1245.37	205.138	2594.7	1413.8	211.125	2533.45	1232.5	83.4857	2841.76	1299.6	380.974	2716.13	1454.29	482.829	2759.27	1230.91	500.232	2768.27	1137.57	539.335	2706.23	960.334	497.32	2692.45	881.673	563.542	2730.38	885.475	555.673	2684.79	795.864
211	0	262.403	2507.26	1603.39	149.037	2504.23	1604.03	264.886	2680.33	1625.99	145.311	2684.36	1630.24	206.691	2741.18	1482.93	204.916	2820.53	1245.71	204.501	2585.99	1413.62	210.589	2525.08	1232.41	82.9372	2833.39	1300.16	380.187	2707.81	1454.63	481.402	2754.19	1231.79	499.149	2764.6	1138.7	539.783	2704.72	961.037	498.408	2689.65	882.123	563.047	2730.16	886.008	556.599	2683.83	796.739
212	0	262.402	2497.89	1602.72	148.946	2494.89	1603.76	264.861	2670.8	1626.08	145.207	2674.78	1630.51	206.065	2732.25	1483.16	204.672	2812.46	1246.32	203.889	2577.19	1413.54	210.198	2516.71	1232.3	82.3239	2824.71	1300.38	379.421	2698.88	1454.99	480.586	2749.51	1233.03	497.516	2760.07	1139.59	539.782	2702.86	961.762	498.684	2686.7	882.839	562.287	2729.45	886.578	557.432	2682.85	797.677
213	0	262.574	2488.5	1601.97	148.969	2485.47	1603.46	264.806	2661.27	1625.83	145.236	2665.37	1630.83	205.64	2723.32	1483.18	204.517	2803.98	1246.53	203.528	2568.29	1413.36	209.923	2508.27	1232.01	81.86	2816.21	1300.57	379.194	2690.02	1455.27	479.15	2743.83	1233.53	496.595	2755.89	1140.6	539.852	2700.66	962.303	499.251	2680.7	884.625	561.295	2728.28	886.901	558.026	2681.59	797.985
214	0	262.512	2479.13	1600.97	149.015	2476.01	1602.89	264.532	2651.33	1625.46	145.489	2655.88	1631.04	205.276	2714.31	1483.24	204.367	2795.46	1246.57	203.2	2559.48	1412.73	209.687	2499.73	1231.34	82.0037	2807.69	1300.73	378.551	2681.25	1454.97	477.627	2737.84	1234.02	495.368	2751.15	1141.13	539.671	2698.05	962.537	500.642	2677.99	885.216	560.507	2727.01	887.172	558.269	2680.35	797.891
215	0	262.459	2469.77	1599.93	149.092	2466.6	1602.35	264.877	2641.95	1624.99	145.669	2646.39	1631.14	205.375	2705.35	1483.2	204.461	2787.06	1246.91	202.679	2550.45	1412.28	209.388	2491.19	1230.58	81.982	2799.12	1301.02	378.085	2672.16	1454.94	477.207	2732.43	1234.72	494.043	2745.84	1141.89	539.449	2694.57	962.92	500.307	2674.17	885.198	559.183	2724.41	887.307	558.178	2678.72	797.889
216	0	262.598	2460.38	1599.23	148.974	2457.08	1602.07	265.17	2632.59	1624.67	145.81	2636.98	1631.18	205.246	2695.96	1483.06	204.565	2778.21	1246.98	202.58	2541.5	1412.07	208.99	2482.44	1230.1	81.8927	2790.51	1301.02	377.886	2662.77	1455.09	475.863	2725.66	1235.34	492.758	2740.25	1142.54	538.896	2690.89	963.451	500.357	2670.04	885.523	558.256	2721.85	888.03	557.9	2676.7	797.907
217	0	262.638	2451.02	1598.15	149.356	2447.88	1601.67	265.393	2622.81	1624.09	146.11	2627.45	1631.07	205.107	2686.7	1482.77	204.761	2769.59	1247.16	202.232	2532.32	1411.43	208.758	2473.92	1229.18	81.9984	2781.79	1301.12	377.725	2653.7	1454.78	474.661	2718.57	1235.76	491.416	2733.94	1142.97	538.41	2686.57	963.439	500.647	2665.84	885.616	557.207	2718.54	888.306	556.617	2674.56	797.121
218	0	262.973	2441.45	1597.31	149.523	2438.36	1600.99	265.697	2613.27	1623.38	146.586	2617.86	1630.62	205.339	2677.33	1482.47	205.396	2761	1247.22	202.12	2523.03	1410.46	208.678	2465.28	1228.09	82.4591	2773.06	1301.17	377.588	2643.61	1454.39	473.7	2711.22	1235.79	490.465	2727.53	1143.13	537.62	2681.71	963.254	499.588	2661.11	884.857	556.08	2714.5	888.224	555.597	2671.65	796.446
219	0	263.188	2432.01	1596.43	149.768	2428.74	1600.28	265.998	2603.54	1622.48	146.897	2608.4	1629.89	205.609	2667.74	1482.1	205.918	2752.21	1247.19	201.918	2513.67	1409.59	208.535	2456.91	1226.81	82.8816	2764.36	1300.88	377.76	2634.02	1453.99	473.132	2703.65	1235.88	489.302	2720.53	1143.3	536.664	2676.44	962.913	498.878	2655.89	884.562	554.973	2709.76	888.316	554.367	2668.18	795.76
220	0	263.7	2422.41	1595.62	150.257	2419.24	1599.62	266.539	2594.23	1621.47	147.307	2598.95	1629.12	206.007	2658.22	1481.57	206.481	2743.07	1246.73	202.094	2504.41	1408.59	208.303	2447.74	1225.73	83.7161	2755.72	1300.64	378.294	2624.21	1453.56	472.62	2695.52	1235.77	488.683	2713.25	1143.19	535.863	2670.63	962.568	498.038	2650.85	884.113	553.675	2704.36	887.967	552.98	2664.32	794.859
221	0	264.161	2412.94	1594.54	150.746	2409.64	1598.79	266.914	2584.46	1620.23	147.803	2589.4	1628.08	206.743	2648.48	1480.81	207.672	2734.5	1246.4	202.207	2494.98	1407.54	208.286	2438.85	1224.34	84.5703	2746.99	1300.25	378.889	2614.14	1452.6	472.247	2687.07	1235.2	487.993	2705.53	1142.68	535.028	2664.18	961.708	496.472	2645.41	882.957	552.79	2698.99	887.407	550.858	2660.28	793.39
222	0	264.726	2403.23	1593.48	151.077	2400	1597.91	267.459	2575.07	1618.79	148.43	2579.89	1627.07	207.664	2638.76	1480.06	208.928	2725.42	1245.84	202.234	2485.36	1406.36	208.176	2429.88	1222.91	85.7065	2738.12	1299.82	379.432	2603.34	1451.75	472.132	2678.21	1234.62	487.5	2697.34	1142.16	533.909	2657.48	960.603	495.729	2639.35	881.958	551.679	2692.53	886.669	548.907	2655.44	791.926
223	0	265.305	2393.63	1592.38	151.688	2390.29	1596.94	268.266	2565.35	1617.67	149.322	2570.25	1625.75	208.74	2628.87	1479.15	210.16	2716.22	1245.26	202.708	2475.88	1404.82	208.131	2420.68	1221.35	87.0082	2729.36	1299.13	380.402	2592.66	1450.9	472.472	2668.83	1234	487.434	2688.89	1141.43	533.11	2650.25	959.589	494.365	2633.09	881.416	550.667	2685.91	885.808	546.897	2650.12	790.506
224	0	266.034	2383.94	1591.25	152.549	2380.78	1595.87	269.031	2555.7	1616.31	150.083	2560.69	1624.57	209.891	2618.97	1478.17	211.713	2707.05	1244.56	202.994	2466.03	1403.63	208.235	2411.85	1219.68	88.7551	2720.74	1298.72	381.336	2581.86	1449.66	472.869	2659.19	1233.04	487.496	2680	1140.65	532.297	2642.39	958.275	492.994	2626.44	880.183	549.785	2678.56	884.738	544.926	2644.28	788.83
225	0	266.719	2374.14	1589.95	153.308	2371.15	1594.75	269.869	2545.88	1614.97	150.807	2551.03	1623.39	211.26	2609.11	1477.24	213.558	2698.03	1244.08	203.443	2456.35	1402.06	208.31	2402.59	1217.97	90.2779	2711.92	1298.18	382.419	2570.89	1448.36	473.647	2649.12	1232.01	487.752	2670.75	1139.69	531.4	2633.98	956.796	491.768	2618.86	878.516	548.845	2670.56	883.432	542.644	2637.82	786.959
226	0	267.625	2364.2	1588.76	154.024	2361.37	1593.5	270.959	2535.87	1613.71	151.99	2541.26	1622.18	212.8	2599.14	1476.29	215.309	2688.64	1243.64	204.11	2446.78	1400.53	208.317	2393.4	1216.3	92.0134	2703.04	1297.69	383.646	2559.82	1447.06	474.788	2638.71	1231.16	488.269	2660.92	1138.76	530.618	2625.23	955.251	490.213	2610.54	876.778	548.079	2661.86	882.165	540.4	2630.82	785.154
227	0	268.608	2354.34	1587.54	155.369	2351.82	1592.3	272.171	2526.15	1612.49	153.013	2531.51	1620.78	214.447	2589.25	1475.32	216.936	2679.25	1242.89	204.895	2437.04	1399.13	208.377	2384.14	1214.73	93.996	2694.17	1297.09	385.046	2548.88	1445.8	476.184	2628.13	1230.1	489.071	2651.05	1137.58	530.012	2616.01	953.564	488.534	2602.7	875.454	547.437	2652.88	880.693	538.234	2623.34	783.284
228	0	269.911	2344.51	1586.14	156.555	2342.1	1591.01	273.7	2516.16	1611.01	154.554	2521.74	1619.66	216.337	2579.25	1474.19	218.815	2669.63	1241.85	205.802	2427.17	1397.64	208.654	2374.85	1213.18	95.8876	2685.15	1296.4	386.657	2537.83	1444.18	477.708	2617.42	1228.6	490.019	2640.9	1136.09	529.463	2606.34	951.576	487.789	2594.05	874.188	547.079	2643.55	878.964	536.031	2615.37	780.997
229	0	271.314	2334.59	1584.69	158.022	2332.09	1589.31	275.301	2506.33	1609.36	156.137	2511.92	1618.15	218.198	2569.26	1472.94	220.775	2660.39	1240.96	206.691	2417.4	1396.18	209.165	2365.42	1211.5	97.9477	2676.31	1295.77	388.388	2526.98	1442.66	479.319	2606.55	1226.94	491.197	2630.43	1134.4	529.034	2596.15	949.55	486.759	2584.55	872.41	546.436	2633.36	876.724	533.985	2606.79	778.683
230	0	272.664	2324.54	1583.14	159.333	2322.29	1588.23	276.917	2496.34	1607.88	157.974	2502.08	1616.64	220.103	2559.32	1471.87	222.465	2650.88	1239.99	207.878	2407.54	1394.89	209.664	2355.91	1210.11	99.9143	2667.18	1295.08	390.394	2516.12	1441.28	480.941	2595.52	1225.33	492.424	2619.61	1132.62	528.661	2585.57	947.271	486.174	2574.64	870.893	546.239	2622.77	874.744	531.884	2597.66	776.379
231	0	274.479	2314.58	1581.71	160.914	2312.3	1586.99	279.085	2486.33	1606.49	160.143	2492.22	1615.31	222.383	2549.35	1470.76	224.171	2640.95	1238.91	209.281	2397.87	1393.87	210.326	2346.42	1208.92	101.887	2657.98	1294.51	392.36	2505.26	1439.84	482.816	2584.39	1223.7	493.952	2608.77	1130.86	528.561	2574.64	945.275	485.739	2564.31	869.122	546.191	2611.75	872.51	530.3	2587.88	774.195
232	0	276.474	2304.46	1580.12	162.89	2302.5	1585.5	281.178	2476.22	1604.95	162.144	2482.38	1614.07	224.819	2539.61	1469.66	225.825	2631.17	1237.92	210.812	2388.07	1392.61	211.171	2336.9	1207.72	103.986	2648.8	1294.21	394.126	2494.75	1437.85	484.754	2573.32	1221.73	495.637	2597.79	1128.94	528.448	2563.29	942.718	485.349	2553.36	867.26	546.188	2600.12	870.186	528.646	2577.49	771.642
233	0	278.319	2294.48	1578.5	165.1	2292.7	1584.05	283.583	2466.22	1603.61	164.564	2472.32	1612.77	227.192	2529.8	1468.69	227.677	2621.17	1236.95	212.424	2378.1	1391.62	211.92	2327.23	1206.65	105.853	2639.32	1293.76	396.604	2484	1436.35	486.544	2561.92	1219.9	497.249	2586.59	1127.02	528.526	2551.38	940.642	485.117	2541.89	865.469	546.344	2587.96	867.933	527.424	2566.25	769.365
234	0	280.645	2284.34	1577.26	167.261	2282.83	1582.76	286.057	2455.95	1602.81	167.014	2462.37	1611.88	229.924	2519.98	1467.82	229.458	2611.12	1236.04	213.961	2368.23	1391.04	212.64	2317.53	1206	107.854	2630.01	1293.7	398.901	2473.58	1435	488.522	2550.77	1218.18	499.035	2575.34	1125.2	528.754	2539.37	938.537	485.029	2530.12	863.758	546.642	2575.51	865.759	526.503	2554.39	767.391
235	0	283.032	2274.26	1575.81	169.859	2273.07	1581.38	288.867	2445.77	1601.83	169.909	2452.57	1611.23	232.548	2510.37	1466.82	231.416	2601.29	1235.06	216.012	2358.44	1390.37	213.508	2307.63	1205.51	110.167	2620.77	1293.41	401.452	2463.18	1433.41	490.498	2539.59	1216.2	501.035	2564.03	1123.04	529.378	2526.81	936.38	485.125	2517.83	861.719	547.126	2562.53	863.258	526.096	2541.75	765.552
236	0	285.61	2264.32	1574.23	172.385	2263.17	1580.04	291.917	2435.67	1600.8	172.885	2442.5	1610.48	235.55	2500.66	1465.79	233.741	2591.3	1233.86	217.734	2348.54	1389.92	214.401	2297.59	1205.15	112.706	2611.32	1292.8	403.811	2453	1431.35	491.757	2528.19	1213.75	502.981	2552.51	1120.52	529.861	2514.12	933.788	484.872	2505.14	859.261	547.26	2549.16	860.337	525.387	2528.85	762.502
237	0	288.418	2254.22	1573.02	175.2	2253.36	1578.98	294.885	2425.52	1600.2	175.871	2432.73	1610.34	238.511	2491.23	1464.92	236.261	2581.45	1232.84	219.846	2338.81	1389.66	214.995	2287.47	1205.2	115.311	2601.85	1292.53	406.289	2442.56	1429.81	494.65	2517.37	1211.82	504.86	2540.7	1118.2	530.606	2501.16	931.441	485.177	2492.39	857.158	547.952	2535.72	857.772	524.894	2515.04	760.462
238	0	291.419	2244.31	1571.96	178.107	2243.33	1578.31	298.237	2415.51	1599.83	179.442	2422.69	1610.25	241.59	2481.59	1464.22	238.887	2571.45	1231.81	221.638	2328.92	1390.06	215.692	2277.29	1205.58	118.188	2592.25	1292.08	409.215	2432.2	1428.54	496.837	2506	1209.75	507.069	2528.51	1116.02	531.43	2487.94	929.275	485.342	2479.38	855.126	548.504	2522.02	855.277	525.127	2500.62	758.473
239	0	294.595	2234.5	1571.05	180.856	2233.18	1577.7	301.68	2405.43	1599.56	182.653	2412.74	1610.5	244.67	2472.05	1463.69	241.548	2561.44	1230.91	223.969	2319.14	1390.48	216.547	2267	1206.22	121.11	2582.71	1291.87	411.709	2421.96	1427.02	498.956	2494.39	1207.58	509.042	2516.41	1113.74	532.113	2474.47	926.958	485.63	2465.95	853.058	549.18	2507.91	852.747	525.601	2485.65	756.151
240	0	297.844	2224.47	1570.55	184.512	2224	1577.5	305.062	2395.54	1599.32	186.181	2402.82	1610.62	247.555	2462.32	1463.52	244.096	2551.37	1230.63	225.609	2309.1	1390.77	217.267	2256.58	1206.83	123.696	2572.87	1291.78	413.895	2411.88	1425.55	501.065	2482.26	1205.83	510.967	2503.75	1111.59	532.987	2460.64	924.995	485.82	2452.14	851.159	549.757	2493.41	850.386	525.613	2470.02	754.58
241	0	301.328	2214.67	1570.33	187.736	2213.96	1577.54	308.669	2385.56	1599.57	189.991	2393.05	1611.34	250.779	2452.72	1463.59	246.307	2541.04	1230.42	227.883	2299.25	1391.51	218.326	2245.96	1207.78	126.335	2562.95	1292.1	416.734	2401.3	1425.08	503.181	2470.12	1204.21	512.845	2490.77	1109.77	533.87	2446.41	923.396	486.17	2438.08	849.78	550.494	2478.67	848.544	526.251	2453.71	753.199
242	0	304.609	2205.05	1570.09	191.328	2204.24	1577.81	312.397	2375.84	1599.94	193.41	2383.37	1612.33	253.474	2442.94	1463.85	248.482	2530.85	1230.82	230.114	2289.33	1392.43	219.412	2235.53	1208.82	128.896	2553.02	1292.72	419.128	2391.2	1424.44	505.387	2457.67	1202.84	514.952	2477.46	1108.31	534.726	2432.06	921.939	486.744	2423.71	848.719	551.455	2463.61	847.02	527.604	2436.93	751.891
243	0	307.85	2195.48	1570.22	194.61	2194.52	1578.39	315.728	2366.04	1600.38	196.961	2373.46	1613.02	256.269	2433.15	1464.5	250.279	2520.72	1231.32	232.341	2279.26	1393.41	220.983	2225.06	1209.93	130.834	2542.97	1293.63	421.424	2380.99	1424.18	507.411	2444.87	1201.73	516.708	2464.08	1107	535.819	2417.22	921.019	487.268	2408.82	847.862	552.367	2448.04	845.7	527.947	2419.86	751.106
244	0	311.449	2185.93	1570.75	197.97	2184.9	1579.22	319.197	2356.34	1601.12	200.363	2363.77	1614.28	258.728	2423.48	1465.46	251.774	2510.5	1232.24	234.281	2269.27	1394.54	222.374	2214.84	1211.34	132.299	2532.61	1294.96	424.005	2370.64	1424.62	509.33	2432.08	1200.98	518.363	2450.43	1105.97	536.598	2401.95	920.443	487.783	2393.48	847.487	553.269	2432.01	844.864	529.642	2401.69	751.079
245	0	314.968	2176.45	1571.5	201.781	2175.32	1580.18	322.516	2346.96	1601.89	203.684	2354.36	1615.43	261.1	2413.85	1466.28	253.459	2500.56	1233.13	236.519	2259.4	1395.98	224.11	2204.63	1212.94	133.934	2522.6	1296.15	426.721	2360.67	1425.1	511.325	2419.13	1200.34	520.076	2436.86	1105.18	537.62	2386.54	920.078	488.342	2377.9	847.364	554.215	2415.75	844.277	530.371	2383.64	751.285
246	0	318.303	2167.37	1572.02	204.939	2165.76	1581.31	325.671	2337.77	1602.6	206.826	2344.93	1616.72	263.618	2404.5	1467.3	255.241	2490.88	1234.14	238.987	2249.87	1397.5	225.889	2194.63	1214.68	135.445	2512.56	1297.49	429.021	2350.97	1425.48	513.254	2406.53	1199.76	521.761	2423.41	1104.54	538.64	2370.84	919.892	488.966	2362.04	847.281	555.226	2399.2	843.732	531.492	2365.17	751.557
247	0	321.592	2158.2	1572.78	208.073	2156.43	1582.44	328.601	2328.6	1603.53	209.924	2335.54	1618.12	266.029	2395.38	1468.41	257.054	2481.54	1235.26	241.27	2240.35	1399.08	227.818	2184.67	1216.51	136.881	2502.75	1299.03	430.749	2341.49	1425.85	515.054	2393.58	1199.49	523.444	2409.7	1104.03	539.591	2354.71	920.066	489.747	2345.41	847.73	556.394	2381.89	843.718	533.129	2346.15	752.082
248	0	324.58	2149.17	1573.84	211.311	2147.25	1583.66	331.452	2319.53	1604.77	212.883	2326.24	1619.38	268.006	2386.13	1469.61	258.636	2471.96	1236.53	243.068	2230.86	1400.98	229.451	2174.84	1218.52	138.465	2492.88	1300.56	433.189	2331.67	1427.31	516.875	2381.04	1199.55	525.13	2396.15	1104.11	540.611	2338.24	920.84	490.35	2328.61	848.584	557.385	2364.41	844.11	534.341	2326.72	753.422
249	0	327.37	2140.3	1574.87	214.22	2138.3	1585.07	334.163	2310.57	1606.15	215.336	2316.98	1621.13	270.04	2377.01	1470.79	260.064	2462.32	1237.66	245.19	2221.6	1402.7	230.935	2165.16	1220.75	139.906	2483.21	1301.95	435.351	2322.16	1428.5	518.961	2368.29	1200.1	526.844	2382.58	1104.33	541.698	2321.79	921.959	490.701	2311.12	849.607	558.123	2346.23	844.67	535.553	2306.91	755.293
250	0	330.1	2131.51	1576.09	217.008	2129.19	1586.26	336.567	2301.72	1607.3	217.998	2308.08	1622.54	272.235	2368.16	1472.11	261.98	2452.85	1238.82	246.785	2212.57	1404.55	232.284	2155.6	1222.64	141.893	2473.97	1303.3	437.138	2312.66	1429.59	520.63	2355.94	1200.32	528.65	2369.02	1104.59	542.775	2305.1	923.019	493.263	2291.74	852.542	559.591	2328.25	845.674	536.221	2287.37	756.617
251	0	332.447	2122.78	1577.09	219.217	2120.19	1587.76	338.881	2293.04	1608.48	220.066	2298.99	1624	274.148	2359.18	1473.27	263.985	2443.53	1240.2	248.102	2203.35	1406.08	233.157	2146.42	1224.29	143.806	2464.67	1304.54	438.52	2303.32	1430.6	521.855	2343.48	1200.83	530.22	2355.69	1104.87	543.806	2288.25	924.349	494.265	2273.84	854.339	560.575	2310	846.808	537.473	2267.28	758.559
252	0	334.613	2114.02	1578.43	221.664	2111.29	1589.19	340.686	2284.37	1609.61	222.033	2290.22	1625.39	275.897	2350.25	1474.54	265.921	2434.02	1241.66	249.665	2194.36	1407.67	234.039	2137.33	1226.2	145.485	2455.58	1305.79	440.641	2293.5	1432.37	524.069	2331.18	1201.8	532.02	2342.03	1105.55	544.825	2271.44	926.02	493.466	2256.35	854.823	561.579	2291.38	848.245	538.393	2247.05	761.055
253	0	336.825	2105.52	1579.62	223.829	2102.73	1590.71	342.66	2275.83	1610.75	223.786	2281.5	1626.69	277.547	2341.44	1475.92	268.067	2424.74	1243.14	250.776	2185.49	1409.33	234.92	2128.2	1227.78	147.597	2446.91	1306.94	442.023	2284.02	1433.76	525.721	2319	1202.59	533.785	2328.62	1106.27	546.067	2254.52	927.887	493.421	2238.99	856.306	562.575	2272.82	849.759	539.127	2226.94	763.561
254	0	338.439	2096.95	1580.69	225.547	2093.86	1591.93	344.227	2267.33	1611.69	225.586	2272.96	1628.05	279.216	2332.72	1477.29	270.037	2415.75	1244.48	251.802	2176.78	1410.68	235.84	2119.2	1229.11	149.562	2438.49	1308.23	443.256	2274.55	1435.11	527.314	2307.03	1203.55	535.454	2315.25	1106.93	547.048	2237.68	929.797	493.27	2220.89	858.656	563.416	2254.53	851.347	539.927	2206.37	766.612
255	0	340.142	2088.46	1581.83	227.091	2085.09	1593.33	345.676	2258.81	1612.73	226.923	2264.14	1629.08	280.561	2323.94	1478.67	271.848	2407.37	1245.72	252.925	2168.08	1411.96	236.716	2110.51	1230.61	151.438	2430	1309.4	444.672	2264.98	1436.8	528.807	2294.85	1204.78	536.818	2302.53	1107.66	548.017	2220.93	932.103	494.318	2203.24	861.432	564.144	2236.11	853.382	539.949	2186.01	769.947
256	0	341.617	2079.9	1583.29	228.491	2076.87	1594.91	346.843	2250.39	1613.87	228.382	2255.65	1630.55	282.04	2315.49	1480.12	273.315	2398.88	1246.91	254.069	2159.61	1413.57	237.772	2101.94	1232.14	152.89	2421.61	1310.43	446.252	2255.4	1439.02	530.376	2282.78	1206.3	538.545	2288.61	1109.3	549.027	2204.21	934.967	494.944	2185.3	864.782	564.979	2217.59	855.926	541.115	2165.55	774.088
257	0	342.766	2071.56	1584.37	229.54	2068.32	1596.02	348.086	2241.85	1615.37	229.52	2247.19	1631.9	283.104	2307.02	1481.53	274.974	2390.79	1248.49	254.827	2151	1414.93	239.193	2093.56	1233.53	154.561	2413.53	1311.63	447.226	2246.24	1441	531.815	2270.7	1208.04	540.184	2275.23	1111.01	550.006	2187.51	938.065	495.445	2167	868.524	565.767	2199.45	858.818	542.036	2144.87	778.537
258	0	343.378	2063.13	1585.51	230.39	2059.63	1597.2	348.989	2233.33	1616.76	230.402	2238.73	1633.32	284.335	2298.76	1483.18	276.435	2382.39	1250.19	255.735	2142.6	1416.27	240.541	2085.34	1234.9	156.133	2405.52	1313.03	447.952	2237.12	1443.05	534.443	2258.2	1210.72	541.586	2262.08	1112.82	550.85	2170.77	941.407	496.38	2149.14	872.205	566.434	2181.25	861.991	542.259	2124.92	782.912
259	0	344.267	2054.63	1587.07	231.302	2051.29	1598.44	349.858	2224.82	1618.45	231.008	2230.13	1634.82	285.399	2290.46	1484.79	277.795	2374	1251.67	256.736	2134.49	1418.04	241.925	2076.97	1236.46	157.184	2397.11	1314.21	448.951	2228.14	1445.44	534.838	2246.76	1212.25	543.051	2248.94	1114.93	551.565	2154.33	945.055	497.147	2130.73	876.639	567.049	2163.33	865.567	542.523	2104.76	788.092
260	0	344.99	2046.14	1588.42	231.927	2043.04	1599.65	350.559	2216.37	1620.15	231.787	2221.85	1636.44	286.299	2282.3	1486.23	279.141	2366.03	1253.09	257.529	2126.13	1419.51	243.248	2068.93	1238.08	158.652	2389.16	1315.35	450	2219.42	1447.83	536.39	2234.98	1214.46	544.605	2235.98	1117.12	552.397	2138.11	948.983	497.594	2113.57	881.182	567.495	2145.39	869.206	543.375	2084.93	793.456
261	0	345.531	2037.83	1589.68	232.431	2034.76	1600.78	351.179	2208.06	1621.71	232.311	2213.26	1637.6	287.174	2274.15	1487.71	280.341	2357.73	1254.37	258.382	2118.05	1421.08	244.764	2060.56	1239.73	160.11	2381.35	1316.57	450.853	2210.92	1450.03	537.688	2223.37	1216.56	545.908	2223.37	1119.2	553.115	2122.11	952.85	498.201	2096.03	885.879	567.941	2127.82	872.911	543.861	2065.24	798.837
262	0	346.009	2029.45	1591.24	232.794	2026.37	1601.87	351.643	2199.58	1623.49	232.796	2205.15	1639.31	287.969	2266.03	1489.43	281.557	2349.36	1255.81	259.446	2110.02	1422.83	246.341	2052.42	1241.26	161.469	2373.36	1317.78	451.724	2202.51	1452.44	538.997	2211.84	1218.83	547.179	2210.72	1121.39	553.541	2106.11	956.855	498.597	2078.63	890.764	568.242	2110.05	876.906	543.965	2045.78	804.632
263	0	346.42	2021.07	1592.79	232.991	2018.3	1603.14	352.196	2191.22	1625.4	233.2	2196.75	1640.58	288.837	2258.04	1490.94	282.858	2341.33	1257.37	260.345	2101.98	1424.41	247.871	2044.14	1242.97	162.635	2365.34	1318.99	452.588	2194.28	1454.87	540.455	2200.49	1221.34	548.564	2198.26	1123.82	554.18	2090.04	961.354	498.599	2061.42	895.998	568.56	2092.73	881.248	543.951	2026.36	810.923
264	0	346.785	2012.93	1594.19	233.257	2010.01	1604.06	352.569	2182.94	1627.09	233.556	2188.61	1641.91	289.79	2249.99	1492.38	283.972	2333.13	1258.64	261.543	2094.11	1425.95	249.339	2035.99	1244.72	163.572	2356.94	1319.85	453.651	2186.15	1457.06	541.867	2189.52	1223.56	550.031	2186.27	1126.04	554.753	2074.68	965.774	499.212	2044.64	901.499	568.753	2075.41	885.464	544.065	2007.37	817.124
265	0	347.186	2004.57	1595.82	233.937	2002.07	1605.13	352.895	2174.68	1628.66	234.083	2180.42	1643.17	290.458	2241.99	1493.72	284.955	2324.92	1259.95	262.487	2086.19	1427.49	250.849	2027.79	1245.94	164.994	2349.24	1321.19	454.469	2178.15	1459.05	543.026	2178.84	1225.5	551.422	2174.5	1128.12	555.161	2059.23	970.124	499.475	2027.95	906.877	568.906	2057.97	889.973	543.872	1988.57	823.376
266	0	347.307	1996.46	1597.18	234.192	1993.9	1606.26	353.162	2166.42	1630.47	234.295	2172.29	1644.38	291.32	2233.93	1495.06	285.989	2316.51	1261.27	263.53	2078.31	1428.86	252.347	2019.51	1247.29	165.644	2340.62	1322.26	455.329	2170	1461.21	544.268	2168.2	1227.8	552.752	2163.01	1130.36	555.454	2043.98	974.787	499.415	2011.34	912.569	569.032	2040.73	894.927	543.682	1969.95	829.738
267	0	347.878	1988.14	1599.02	234.447	1985.69	1607.4	353.693	2158.23	1632.1	234.526	2164.22	1645.41	292.068	2225.91	1496.36	286.828	2308.15	1262.72	264.336	2070.37	1430.18	253.72	2011.36	1248.7	166.87	2332.89	1323.36	456.168	2162	1463.01	545.719	2157.94	1229.99	554.322	2151.77	1132.54	555.934	2028.92	979.653	499.358	1995.3	918.253	569.084	2023.79	899.874	543.064	1951.45	836.584
268	0	348.318	1980.06	1600.41	235	1977.64	1608.38	354.136	2150.05	1633.45	235.054	2156.06	1646.21	292.886	2217.78	1497.36	287.691	2299.93	1263.6	265.512	2062.26	1431.16	254.905	2003.12	1249.68	167.712	2324.51	1324.28	457.255	2153.97	1464.56	546.855	2148.3	1231.54	555.867	2140.86	1134.3	556.121	2014.3	984.149	499.105	1979.3	923.856	569.059	2007.09	904.672	542.305	1933.31	843.168
269	0	348.837	1971.78	1601.64	235.379	1969.45	1609.32	354.505	2142	1634.23	235.476	2148.07	1646.85	293.654	2209.66	1498.29	288.447	2291.68	1264.52	266.785	2054.39	1431.88	256.207	1995.08	1250.12	168.52	2316.32	1325.02	457.6	2146.18	1465.44	548.154	2138.64	1232.87	557.298	2129.88	1135.68	556.285	1999.79	988.4	498.632	1963.71	929.389	568.995	1990.58	909.293	541.331	1915.62	849.649
270	0	349.418	1963.48	1602.97	235.837	1961.25	1610.34	355.002	2133.96	1635.09	235.749	2139.9	1647.2	294.23	2201.35	1498.94	289.031	2283.45	1265.22	267.714	2046.13	1432.49	257.448	1986.96	1250.71	168.995	2307.69	1325.6	458.329	2138.22	1466.37	549.355	2129.61	1234.02	559.024	2119.46	1136.93	556.394	1985.69	992.662	498.202	1948.73	934.801	568.586	1974.3	913.863	540.226	1898.07	856.315
271	0	350.118	1955.27	1604.3	236.425	1953.22	1611.4	355.594	2125.75	1635.8	236.411	2131.9	1647.54	294.958	2193.14	1499.66	289.631	2275.48	1265.94	268.579	2037.92	1432.98	258.643	1978.9	1251.05	169.442	2299.36	1326.16	459.63	2130.13	1467.48	550.737	2120.45	1235.12	560.529	2109.35	1138.04	556.425	1971.93	996.887	498.042	1934.05	940.195	568.123	1958.36	918.403	539.075	1880.97	863.052
272	0	350.717	1947.04	1605.16	237.059	1944.68	1611.95	356.071	2117.6	1635.99	236.771	2123.64	1647.56	295.591	2184.66	1499.99	289.95	2267.26	1266.19	269.592	2029.78	1433.06	259.687	1970.93	1251.04	170.139	2290.84	1326.58	459.927	2122.44	1467.39	551.759	2111.77	1235.49	561.948	2099.38	1138.57	556.447	1958.41	1000.58	497.549	1919.62	945.441	567.766	1942.69	922.628	537.99	1864.23	869.555
273	0	351.369	1938.78	1605.82	237.916	1936.37	1612.56	356.194	2109.12	1635.96	237.297	2115.4	1647.46	295.936	2176.14	1500.29	290.21	2259.01	1266.61	270.486	2021.21	1433	260.816	1962.81	1250.79	170.455	2282.61	1326.89	459.93	2114.73	1467.05	552.852	2103.09	1235.88	563.456	2089.28	1139.06	556.393	1945.35	1004.19	496.504	1905.48	950.456	567.288	1927.52	926.807	536.648	1847.65	876.015
274	0	352.196	1930.39	1606.63	238.33	1927.74	1613.08	356.98	2101.2	1636.16	237.669	2107.13	1647.35	296.429	2167.67	1500.55	290.327	2250.93	1266.69	271.534	2012.67	1432.83	261.838	1954.69	1250.48	171.027	2274.12	1327.21	461.242	2106.58	1467.57	554.305	2094.42	1236.32	564.961	2079.73	1139.52	556.341	1932.52	1007.84	496.149	1891.95	955.269	566.943	1912.66	931.049	535.405	1831.9	882.32
275	0	353.057	1922.03	1606.95	239	1919.31	1613.26	357.284	2092.74	1636.01	238.303	2098.93	1646.98	296.901	2159.04	1500.42	290.404	2242.63	1266.65	272.459	2004.34	1432.31	262.891	1946.3	1249.9	170.847	2265.03	1327.14	461.207	2098.95	1466.7	555.296	2086.04	1236.15	566.43	2069.97	1139.68	556.258	1919.93	1011.01	495.015	1878.58	959.732	566.097	1898.14	934.563	534.073	1816.56	888.122
276	0	353.721	1913.67	1607.03	239.787	1910.87	1613.02	357.97	2084.6	1635.86	238.806	2090.43	1646.45	297.206	2150.59	1500.22	290.387	2234.58	1266.87	273.307	1995.77	1431.49	263.866	1938.18	1249	170.638	2256.3	1327.21	462.194	2090.9	1466.39	556.116	2077.71	1235.75	567.622	2060.36	1139.43	555.993	1907.67	1013.98	494.219	1865.46	964.014	565.197	1884.14	937.901	532.567	1801.6	893.957
277	0	354.091	1905.19	1606.96	240.439	1902.29	1612.65	358.328	2076.2	1635.32	238.992	2081.85	1645.68	297.381	2141.79	1500.02	290.031	2226.4	1266.87	274.122	1987.12	1430.68	265.006	1930.09	1247.95	170.503	2247.49	1327.2	462.621	2083.11	1465.65	556.994	2069.29	1235.3	568.859	2050.84	1139.19	555.682	1895.64	1016.71	493.872	1853.3	967.757	565.039	1870.6	941.45	530.983	1787.05	899.254
278	0	354.979	1896.68	1606.81	241.081	1893.7	1612.27	358.563	2067.45	1634.66	239.388	2073.24	1644.7	297.725	2133.04	1499.49	289.764	2218.29	1266.57	275.383	1978.74	1429.83	266.208	1921.91	1246.9	170.182	2238.67	1327.11	463.202	2075.24	1464.8	557.586	2060.57	1234.54	570.114	2041.5	1138.82	555.358	1884.13	1019.08	492.651	1840.81	971.414	563.878	1857.5	944.177	530.061	1773.21	904.501
279	0	355.625	1888.1	1606.27	241.675	1885.17	1611.58	359.105	2059.24	1633.6	239.837	2064.73	1643.43	297.807	2124.29	1498.76	289.42	2210.17	1266.1	275.848	1969.81	1428.68	267.288	1913.73	1245.53	169.569	2229.77	1326.81	463.748	2067.51	1463.64	558.28	2052.37	1233.5	571.102	2032.28	1138.09	555.023	1872.84	1021.04	492.583	1829.39	974.51	563.756	1844.58	946.865	528.816	1759.79	909.152
280	0	356.083	1879.42	1605.42	242.293	1876.37	1610.54	359.192	2050.39	1632.42	240.232	2056.15	1642.07	297.806	2115.5	1497.95	288.757	2202.17	1265.56	276.964	1961.22	1427.36	268.374	1905.61	1243.94	169.294	2221.08	1326.47	463.553	2059.94	1462.05	558.531	2044.18	1232.27	571.709	2023.12	1136.95	554.628	1861.88	1022.6	491.826	1817.93	977.201	561.518	1832.38	948.174	527.366	1746.79	912.972
281	0	356.67	1870.64	1604.75	242.765	1867.4	1609.52	359.825	2041.93	1631.2	240.791	2047.43	1640.49	297.947	2106.75	1497.12	288.249	2194.2	1264.91	277.907	1952.53	1425.83	269.586	1897.47	1242.51	168.64	2211.95	1326.05	464.026	2052.13	1460.79	559.047	2035.94	1231.11	572.5	2013.91	1136.03	554.267	1851.11	1023.96	491.034	1806.71	979.543	561.491	1820.99	950.345	526.26	1734.6	916.809
282	0	357.274	1861.78	1603.73	243.322	1858.86	1608.37	360.167	2032.87	1629.88	240.938	2038.48	1638.82	297.837	2097.75	1496.05	287.524	2185.96	1264.14	279.02	1944.13	1424.38	270.548	1889.34	1240.82	168.01	2202.87	1325.48	464.305	2044.24	1459.42	559.217	2027.67	1229.72	572.983	2005.13	1134.83	553.991	1840.76	1024.98	490.229	1795.94	981.428	561.158	1809.35	951.915	525.233	1722.42	920.167
283	0	357.579	1852.91	1602.43	243.815	1849.86	1606.86	360.498	2024.07	1628.3	241.46	2029.76	1636.98	297.853	2088.87	1494.86	287.03	2177.88	1263.24	279.822	1935.29	1422.72	271.573	1881.14	1238.86	167.259	2193.81	1324.81	464.693	2036.44	1457.86	559.35	2019.4	1228.18	573.405	1996.21	1133.43	553.425	1830.7	1025.78	489.785	1785.51	983.058	561.204	1798.02	953.296	524.351	1711.1	922.79
284	0	357.895	1843.83	1601.22	243.777	1840.53	1605.13	360.627	2014.96	1626.8	241.521	2020.69	1635.16	297.593	2079.87	1493.77	286.031	2169.56	1262.46	280.57	1926.39	1421.01	272.682	1872.73	1237.12	166.33	2184.66	1324.26	464.838	2028.47	1456.42	559.406	2011.06	1226.77	573.908	1987.38	1132.35	552.893	1820.92	1025.97	489.392	1775.48	984.159	560.524	1787.43	954.036	523.491	1700.01	924.935
285	0	358.262	1834.76	1599.95	243.804	1831.52	1603.6	361.006	2005.95	1625.46	241.851	2011.84	1633.57	297.436	2070.74	1492.56	285.428	2161.35	1261.48	281.353	1917.55	1419.26	273.532	1864.42	1235.28	165.526	2175.43	1323.63	464.987	2020.5	1455.01	559.459	2002.81	1225.46	574.183	1978.86	1131.05	552.793	1811.29	1026.31	488.684	1765.81	984.966	559.98	1777.04	954.64	522.314	1689.25	926.492
286	0	358.515	1825.82	1598.26	244.354	1822.61	1601.67	361.192	1996.93	1623.77	242.113	2002.75	1631.63	297.401	2061.73	1491.19	284.516	2152.79	1260.2	282.175	1908.57	1417.45	274.442	1855.87	1233.25	164.868	2166.12	1322.67	465.168	2012.49	1453.31	559.366	1994.66	1223.7	574.354	1970.43	1129.51	552.54	1802.01	1026.07	488.467	1756.3	985.292	559.856	1767.04	954.672	521.206	1679.18	927.189
287	0	358.594	1816.63	1596.53	244.482	1813.39	1599.71	361.368	1987.71	1622.23	241.965	1993.57	1629.7	297.141	2052.71	1489.72	283.736	2144.23	1258.99	282.676	1899.55	1415.46	275.308	1846.99	1231.38	164.038	2156.54	1321.49	465.162	2004.39	1451.46	559.183	1986.6	1221.88	574.481	1961.99	1127.84	552.213	1792.86	1025.39	488.048	1747.06	985.01	559.184	1757.43	954.177	520.857	1669.6	927.419
288	0	358.77	1807.37	1595.06	244.3	1804.33	1597.94	361.555	1978.5	1620.67	242.355	1984.48	1627.97	296.787	2043.57	1488.21	283.079	2135.41	1257.79	283.257	1890.5	1413.63	275.873	1838.21	1229.52	163.208	2147.23	1320.3	465.187	1996.22	1449.77	559.09	1978.49	1220.13	574.441	1953.6	1126.12	551.996	1784.08	1024.5	487.727	1738.09	984.489	556.675	1748.41	952.403	519.983	1660.25	927.139
289	0	358.751	1798.21	1593.55	244.251	1795	1596.09	361.542	1969.3	1619.11	242.256	1975.31	1626.24	296.467	2034.34	1486.64	282.288	2126.51	1256.44	283.852	1881.37	1412.03	276.557	1829.16	1227.72	162.44	2137.75	1318.92	465.247	1987.89	1448.05	558.858	1970.53	1218.35	574.136	1945.21	1124.3	551.861	1775.52	1023.31	487.562	1729.35	983.554	555.808	1739.86	950.932	519.236	1651.32	926.319
290	0	358.711	1788.91	1591.91	244.036	1785.55	1594.42	361.354	1959.9	1617.34	242.053	1965.99	1624.29	296.336	2025.11	1485.07	281.632	2117.75	1254.85	284.16	1872.19	1410.02	277.248	1820.3	1225.88	161.831	2128.19	1317.57	465.203	1979.55	1446.18	558.65	1962.52	1216.34	574.073	1937.12	1122.35	551.741	1767.3	1021.65	487.369	1721.07	982.112	557.679	1731.42	950.386	519.055	1642.98	924.792
291	0	358.484	1779.58	1590.44	243.707	1776.35	1592.83	361.08	1950.6	1615.7	241.989	1956.91	1622.54	295.773	2015.72	1483.49	280.74	2108.51	1253.36	284.188	1862.99	1408.21	277.416	1811.18	1223.83	161.067	2118.64	1316.28	464.81	1970.93	1444.25	558.19	1954.58	1214.31	573.245	1928.7	1119.93	551.529	1759.25	1019.59	486.175	1712.57	980.005	556.733	1723.24	947.95	518.551	1634.89	922.604
292	0	358.182	1770.17	1589.34	243.419	1766.97	1591.38	360.853	1941.37	1614.11	241.709	1947.6	1620.71	295.364	2006.12	1481.99	280.11	2099.27	1252.08	284.29	1853.58	1406.64	277.601	1801.68	1222.21	160.611	2109.43	1315.17	464.467	1962.2	1442.64	557.111	1946.3	1212.17	573.342	1920.91	1118.41	551.446	1751.43	1017.41	486.288	1704.96	977.679	556.117	1715.77	945.371	518.67	1627.42	920.042
293	0	357.621	1760.8	1588.12	242.87	1757.46	1590.18	360.41	1931.95	1612.62	241.122	1938.24	1618.98	294.857	1996.59	1480.63	279.535	2090.03	1250.95	284.048	1844.24	1404.96	277.424	1792.38	1220.46	160	2099.76	1313.81	464.209	1953.09	1441.13	557.304	1938.36	1210.74	573.511	1913.19	1117	551.556	1743.92	1014.88	486.612	1697.65	974.696	556.856	1708.48	943.04	518.71	1620.34	916.824
294	0	356.822	1751	1586.92	242.321	1748.19	1588.82	359.779	1922.42	1611.1	240.434	1928.85	1617.42	294.469	1987.16	1479.25	279.122	2080.74	1249.58	283.802	1834.64	1403.21	277.397	1783.04	1218.68	159.313	2089.98	1312.34	463.925	1943.91	1439.59	556.832	1930.25	1209.04	572.856	1905.14	1115.05	551.566	1736.6	1011.97	487.192	1690.89	971.397	556.412	1701.91	939.575	519.235	1613.88	913.055
295	0	355.877	1741.44	1585.92	241.195	1738.62	1587.7	358.886	1912.91	1609.68	239.706	1919.49	1616.03	293.789	1977.4	1477.88	278.723	2071.18	1248.27	283.39	1825.04	1401.82	277.035	1773.27	1217.28	158.963	2080.49	1311.03	463.287	1934.44	1438.21	556.237	1921.88	1207.56	572.047	1897.08	1113.25	551.578	1729.55	1009.04	486.963	1683.9	967.732	556.807	1695.42	936.324	519.553	1607.52	908.864
296	0	354.802	1731.9	1585.07	240.102	1729.12	1586.65	357.855	1903.28	1608.41	238.928	1909.97	1614.41	293.117	1967.7	1476.6	278.361	2061.53	1246.91	282.805	1815.51	1400.56	276.549	1763.77	1215.91	158.8	2070.92	1309.73	463.001	1924.66	1437.08	555.677	1913.55	1206.13	571.439	1889.32	1111.66	551.667	1722.75	1005.69	487.276	1677.54	963.68	557.687	1689.61	932.933	520.226	1601.84	904.184
297	0	353.644	1722.39	1584.17	238.878	1719.64	1585.63	356.995	1893.86	1607.28	237.975	1900.7	1613.14	292.662	1957.94	1475.34	278.329	2051.86	1245.5	282.159	1805.88	1399.22	275.971	1753.96	1214.54	158.849	2061.44	1308.21	462.304	1914.86	1435.71	555.207	1905.23	1204.77	570.879	1881.66	1110.12	551.988	1716.4	1001.94	487.73	1671.47	959.201	556.277	1683.89	927.506	521.386	1596.81	898.922
298	0	352.205	1712.74	1583.32	237.476	1710.11	1584.42	355.815	1884.44	1606.29	236.58	1891.33	1611.87	292.025	1948.31	1474.2	278.26	2042.1	1244.3	281.355	1796.27	1398.04	275.73	1744.26	1213.53	158.709	2052.06	1306.66	461.685	1904.83	1434.68	554.593	1896.67	1203.68	570.189	1873.89	1108.77	552.303	1710.23	998.168	488.338	1665.79	954.412	558.647	1679.11	924.49	522.274	1592.13	892.986
299	0	350.531	1702.98	1582.68	235.813	1700.67	1583.49	354.287	1874.69	1605.31	235.048	1881.82	1610.62	291.311	1938.73	1472.9	278.277	2032.19	1243.07	280.472	1786.6	1397.11	274.808	1734.24	1212.54	158.525	2042.48	1304.94	461.004	1894.73	1433.87	553.811	1887.92	1202.67	569.696	1866.36	1107.8	552.599	1704.22	994.263	488.868	1660.42	949.316	559.219	1674.6	920.038	523.647	1588.06	886.886
300	0	348.652	1693.31	1581.94	233.777	1691.26	1582.66	352.625	1865.06	1604.23	233.533	1872.44	1609.21	290.612	1929.11	1471.53	278.453	2022.26	1241.47	279.482	1776.98	1396.31	274.276	1724.23	1211.84	158.487	2032.79	1303.12	460.218	1884.2	1432.97	553.279	1879.09	1201.68	569.476	1859.11	1106.92	552.991	1698.56	990.056	489.64	1655.45	944.031	559.739	1670.11	915.074	525.121	1584.35	880.437
301	0	346.566	1683.62	1581.17	232.028	1682.01	1581.68	350.925	1855.45	1603.31	231.922	1863.08	1607.94	290.028	1919.65	1470.36	278.419	2012	1239.78	278.801	1767.16	1395.26	273.687	1714.01	1211.18	158.364	2023.16	1301.12	459.27	1874.28	1431.96	552.614	1869.89	1200.65	568.742	1851.33	1105.83	553.27	1692.96	985.582	490.934	1651.05	938.489	563.371	1665.99	911.837	526.745	1581.07	873.501
302	0	344.48	1673.92	1580.69	230.152	1672.77	1580.76	349.387	1845.87	1602.66	230.2	1853.77	1606.82	289.079	1910.2	1469.21	278.102	2001.66	1238.21	277.561	1757.48	1394.64	272.992	1703.81	1210.7	158.025	2013.17	1299.06	458.571	1864.08	1431.44	552.005	1860.63	1200.02	567.71	1843.3	1104.88	553.615	1687.52	981.286	491.482	1646.28	932.584	562.129	1662.34	905.67	528.207	1578.3	866.527
303	0	342.455	1664.33	1580.49	227.77	1663.38	1579.81	347.602	1836.33	1602.13	228.45	1844.53	1605.77	287.953	1900.64	1468.07	277.839	1990.93	1236.6	276.487	1747.78	1394.06	272.426	1693.28	1210.41	157.782	2003.39	1297.19	457.641	1854.19	1430.97	551.406	1851.36	1199.6	566.913	1835.17	1104.28	554.217	1682.34	977.026	492.231	1642.08	926.639	563.516	1659.56	901.092	529.882	1576.12	859.134
304	0	340.134	1654.63	1580.16	225.609	1654.02	1579.22	345.692	1826.59	1601.48	226.516	1835.23	1604.75	286.867	1891.06	1466.93	277.441	1980.39	1235.19	275.32	1737.96	1393.62	271.812	1682.74	1210.18	157.376	1993.41	1294.96	456.694	1844.22	1430.54	550.839	1841.78	1199.16	565.688	1826.88	1103.52	554.86	1677.54	972.703	493.48	1638.53	920.491	565.37	1656.41	896.623	531.997	1574.51	851.602
305	0	337.845	1645	1579.93	223.486	1644.68	1578.74	343.993	1817.15	1601.23	224.612	1825.95	1604.1	285.802	1881.56	1466.1	276.893	1969.75	1233.77	274.185	1728.09	1393.25	271.177	1671.75	1210.09	156.938	1983.1	1293.04	455.671	1834.48	1430.22	550.024	1832.23	1198.78	564.671	1818.62	1103.11	555.388	1672.8	968.339	494.421	1634.99	914.226	566.949	1653.9	891.911	533.972	1573.34	843.735
306	0	335.406	1635.18	1580.09	221.121	1635.2	1578.39	341.891	1807.48	1601.19	222.541	1816.51	1603.55	284.471	1872.07	1465.42	276.154	1959.02	1232.52	272.969	1718.18	1393.22	270.587	1661.09	1210.34	156.386	1973.21	1291.24	454.526	1824.73	1430.27	549.203	1822.99	1198.92	563.164	1810.09	1102.73	555.921	1668.25	964.189	496.06	1632.36	908.196	568.712	1651.59	887.568	536.279	1572.77	836.236
307	0	333.209	1625.61	1580.32	218.914	1625.78	1578.23	339.714	1797.88	1601.32	220.519	1807.09	1603.18	283.26	1862.53	1465.02	275.263	1948.35	1231.56	271.796	1708.41	1393.45	269.764	1649.85	1210.79	155.711	1963	1289.46	453.192	1814.99	1430.42	548.344	1813.42	1199.18	561.931	1801.75	1102.99	556.389	1664.02	960.351	497.298	1629.62	902.209	571.05	1649.57	883.857	538.735	1572.69	828.995
308	0	331.097	1615.98	1580.77	216.775	1616.3	1578.28	337.746	1788.45	1601.64	218.525	1797.68	1602.94	281.997	1852.95	1464.76	275.014	1937.26	1230.56	270.807	1698.7	1393.73	269.453	1639.4	1211.37	155.132	1952.67	1288.1	452.128	1805.44	1430.82	547.275	1803.93	1199.48	559.933	1792.86	1102.74	556.835	1659.82	956.195	498.544	1627.53	896.335	571.679	1648.53	879.002	541.153	1573.4	821.613
309	0	328.961	1606.46	1581.3	214.66	1606.77	1578.42	335.353	1778.63	1601.87	216.381	1788.16	1603.08	280.468	1843.42	1464.69	274.19	1926.95	1230.32	269.843	1688.69	1393.87	268.916	1628.7	1212	154.444	1942.52	1287.07	450.493	1795.85	1431.2	547.159	1794.01	1200.76	558.298	1784.37	1103.26	557.631	1656.49	952.809	500.127	1625.77	890.762	572.77	1647.43	874.808	543.83	1574.53	814.701
310	0	326.702	1596.85	1582.21	212.491	1597.3	1578.9	333.159	1769.13	1602.77	214.248	1778.78	1603.53	278.958	1833.91	1465.06	273.123	1917.18	1230.58	268.696	1678.8	1394.69	268.398	1618.26	1213	153.652	1932.15	1286.37	449.36	1786.48	1432.4	545.013	1784.82	1201.24	556.575	1775.73	1104.33	558.293	1653.35	950.131	501.384	1624.32	885.899	574.661	1646.98	871.892	546.692	1576.41	808.494
311	0	324.673	1587.32	1583.45	210.445	1587.82	1579.57	331.22	1759.82	1603.91	212.102	1769.28	1604.16	277.47	1824.35	1465.56	272.22	1906.97	1230.67	267.887	1669.02	1395.61	268.061	1608.12	1214.19	152.644	1922	1286.01	448.21	1777.23	1433.7	543.862	1775.4	1202.5	555.104	1767.33	1105.68	558.997	1650.3	947.987	503.293	1623.48	881.789	576.785	1646.73	869.751	549.444	1578.77	802.878
312	0	322.506	1577.93	1584.53	208.542	1578.44	1580.49	328.989	1750.42	1604.99	209.954	1759.9	1604.85	276.008	1814.92	1466.48	271.265	1896.81	1231.02	267.096	1659.36	1396.54	267.903	1597.87	1215.41	151.72	1911.9	1285.98	446.905	1767.94	1434.98	542.438	1766.11	1203.82	552.76	1758.63	1106.65	559.641	1647.56	946.372	504.758	1622.98	878.112	578.26	1646.95	867.688	552.458	1581.55	797.759
313	0	320.472	1568.53	1585.84	206.487	1568.99	1581.36	326.627	1740.73	1606.09	207.827	1750.48	1605.47	274.552	1805.56	1467.2	270.355	1886.68	1231.65	266.355	1649.76	1397.55	267.46	1587.92	1216.66	150.572	1901.59	1286.09	445.491	1758.85	1436.37	540.819	1757.05	1205.09	551.1	1750.78	1108.21	560.11	1644.75	945.354	506.363	1622.26	875.32	579.723	1646.83	866.443	555.066	1584.42	793.357
314	0	318.521	1559.29	1587.31	204.587	1559.75	1582.36	324.648	1731.44	1607.48	205.863	1741.3	1606.41	273.374	1796.34	1468.15	269.196	1876.48	1232.05	265.574	1640.38	1398.97	267.293	1577.92	1218.15	149.378	1891.44	1286.5	444.325	1749.87	1437.92	540.706	1748.07	1207.32	548.91	1742.82	1109.55	560.955	1642.27	944.81	508.029	1621.97	873.368	581.631	1646.99	866.18	557.87	1587.69	789.787
315	0	316.744	1550.1	1588.88	202.849	1550.59	1583.49	322.538	1722.35	1608.76	203.924	1732.13	1607.21	272.09	1787.11	1468.98	267.95	1866.26	1232.73	264.996	1630.91	1400.09	267.251	1568.13	1219.52	147.872	1881.05	1286.83	442.973	1740.97	1439.37	537.391	1739.96	1207.49	547.5	1735.86	1111.33	561.749	1639.74	944.714	509.087	1620.97	871.952	583.004	1646.55	866.196	560.38	1590.76	786.555
316	0	315.139	1541.02	1590.43	201.041	1541.45	1584.51	321.081	1713.45	1610.09	201.956	1722.94	1607.86	270.762	1777.9	1469.74	266.38	1856.34	1233.67	264.449	1621.52	1401.08	267.19	1558.43	1220.68	146.389	1870.84	1287.12	441.986	1732.26	1440.82	536.212	1732.16	1208.68	546.372	1729.28	1113.13	562.346	1637.07	944.837	511.224	1620.53	870.901	584.646	1646.1	866.835	562.529	1593.89	783.82
317	0	313.428	1531.92	1592	199.177	1532.26	1585.59	319.19	1704.16	1611.02	200.38	1713.93	1608.43	269.295	1768.24	1470.6	264.738	1846.52	1234.35	264.009	1611.92	1402.05	267.004	1548.62	1221.79	144.767	1860.65	1287.81	440.628	1723.39	1441.95	537.367	1725.15	1211.32	545.052	1723.09	1114.54	563.088	1634.24	945.179	512.617	1619.38	870.34	586.264	1645.5	867.794	564.785	1596.87	781.876
318	0	311.832	1522.79	1593.62	197.695	1523.28	1586.96	317.673	1695.14	1611.94	199.024	1704.99	1609.07	268.148	1759.15	1471.44	263.191	1836.89	1235.28	263.631	1602.57	1403.07	267.027	1539.14	1222.74	143.248	1850.5	1288.32	439.574	1714.88	1443.19	534.729	1718.48	1211.3	544.061	1717.41	1115.82	564.156	1631.72	945.745	514.11	1617.89	870.016	587.797	1644.19	868.772	566.72	1599.57	780.217
319	0	310.643	1513.76	1595.12	196.429	1514.34	1588.01	316.317	1686.08	1612.94	197.886	1696.09	1609.52	266.914	1749.79	1472.14	261.749	1827.55	1235.92	263.306	1593.22	1403.83	267.385	1529.81	1223.58	141.371	1840.34	1288.81	438.36	1706.42	1443.92	535.957	1712.35	1213.6	543.156	1711.77	1116.75	564.996	1629.06	946.005	515.514	1616.47	869.755	589.137	1643.38	869.534	568.592	1602.12	778.776
320	0	309.561	1504.59	1596.45	195.202	1505.2	1589.02	315.365	1677.2	1613.91	196.756	1686.94	1610.02	265.73	1740.64	1473.15	260.31	1818.53	1236.51	262.815	1583.94	1404.6	267.537	1520.37	1224.28	139.413	1830.22	1289.46	437.457	1698.33	1444.74	533.322	1706.57	1213.26	542.686	1706.74	1117.77	565.711	1626.42	946.216	516.013	1614.55	869.531	590.059	1641.61	870.039	570.063	1604.04	777.672
321	0	308.266	1495.44	1597.79	194.16	1496.1	1590.08	314.181	1667.99	1614.65	195.712	1677.96	1610.59	264.327	1731.36	1473.98	258.911	1809.41	1237.27	262.717	1574.55	1405.4	267.656	1511.05	1225.12	137.412	1820.11	1290.39	436.528	1690.33	1445.71	532.697	1701.21	1214.46	542.14	1701.71	1118.86	566.616	1623.68	946.783	517.069	1612.53	869.62	590.435	1639.41	870.477	570.912	1605.15	777.277
322	0	307.492	1486.44	1598.95	193.203	1486.99	1591	313.168	1658.75	1615.48	194.996	1668.96	1611.26	263.155	1722.28	1474.79	257.456	1800.45	1237.87	262.677	1565.39	1406.28	268.151	1501.88	1225.99	135.521	1810.15	1291.07	435.486	1682.36	1446.33	534.32	1696.17	1216.86	542.365	1697.59	1120.12	567.227	1621.15	947.232	518.392	1611.02	869.917	591.246	1637.61	871.123	572.158	1606.15	777.243
323	0	306.529	1477	1599.87	192.471	1477.83	1591.97	312.356	1649.5	1616.28	194.138	1659.9	1611.81	262.169	1713.23	1475.66	256.277	1791.62	1238.28	262.629	1556.27	1406.97	268.565	1492.93	1226.69	133.609	1799.92	1292.1	434.82	1674.69	1447.25	531.668	1691.35	1216.51	542.493	1693.49	1121.53	567.794	1618.51	947.615	519.398	1609	870.392	592.47	1636.13	872.276	572.929	1606.46	777.193
324	0	305.844	1467.8	1601.11	191.708	1468.78	1592.81	311.805	1640.39	1617.47	193.226	1650.63	1612.9	261.086	1704.19	1476.65	255	1782.73	1239.41	262.608	1547.18	1407.79	268.723	1483.92	1227.38	131.926	1790.33	1293.28	434.362	1667.14	1448.49	533.087	1686.63	1219.16	542.458	1689.46	1123.03	568.076	1615.9	948.309	519.991	1606.94	870.965	593.081	1634.38	873.442	573.636	1606.15	777.817
325	0	305.331	1458.76	1602.09	191.14	1459.59	1593.53	311.216	1630.92	1618.63	192.9	1641.58	1613.8	260.173	1695.09	1477.73	253.716	1773.81	1240.3	262.634	1538.23	1408.78	269.314	1475.08	1228.38	130.481	1780.65	1294.51	434.025	1659.76	1449.79	532.628	1682.19	1220.5	542.326	1685.57	1124.58	568.684	1613.59	949.229	520.339	1604.25	871.945	594.037	1632.96	874.71	574.595	1605.31	778.719
326	0	304.618	1449.36	1602.88	190.688	1450.25	1594.35	310.616	1621.56	1619.64	192.543	1632.21	1614.8	259.314	1686.15	1478.67	252.606	1765.19	1241.16	262.694	1529.33	1409.79	269.498	1466.31	1229.27	128.898	1771.09	1295.65	432.995	1652.05	1450.43	531.291	1678.22	1221.35	541.852	1681.69	1125.75	569.242	1611.42	950.08	521.252	1601.54	872.747	594.393	1631.52	875.637	575.539	1603.61	779.782
327	0	304.345	1440.11	1603.5	190.242	1441.09	1594.93	310.407	1612.36	1620.77	192.004	1622.82	1615.81	258.449	1677.18	1479.63	251.566	1756.4	1242.2	262.62	1520.45	1410.73	269.869	1457.62	1230.2	127.956	1761.77	1296.87	432.495	1644.52	1451.39	529.809	1673.61	1222.14	541.3	1677.91	1127.01	569.688	1609.32	950.948	523.33	1599.37	874.346	594.519	1630.16	876.42	575.068	1601.87	780.312
328	0	304.044	1430.74	1604.2	189.877	1431.8	1595.46	309.813	1602.78	1621.73	191.743	1613.61	1617.01	257.883	1668.25	1480.76	250.811	1747.88	1242.92	262.743	1511.63	1411.91	270.187	1448.96	1231.45	126.827	1752.33	1297.89	431.761	1636.75	1452.28	529.716	1669.48	1223.96	541.109	1674.64	1128.52	570.468	1607.09	952.006	523.684	1596.92	875.396	594.081	1628.64	877.067	575.356	1599.39	781.516
329	0	303.912	1421.65	1604.82	189.744	1422.47	1596.12	309.702	1593.6	1623.04	191.324	1604.45	1618.09	257.186	1659.39	1481.58	249.957	1739.23	1244.17	262.698	1502.89	1413.13	270.285	1440.33	1232.69	125.816	1743.01	1299.14	431.162	1628.9	1453.25	529.459	1665.27	1225.83	540.176	1670.89	1129.88	570.504	1605.07	952.967	522.919	1594.1	875.837	594.054	1627.52	878.256	576.806	1596.75	783.745
330	0	303.844	1412.4	1605.27	189.655	1413.25	1596.71	309.415	1584.36	1623.97	191.23	1594.88	1619.3	256.615	1650.45	1482.77	249.19	1730.7	1245.21	262.606	1494.12	1414.11	270.432	1431.83	1233.62	125.019	1733.71	1300.1	430.691	1620.92	1454.28	527.815	1660.54	1226.76	539.552	1667.1	1131.49	570.762	1603.19	954.087	522.296	1591.53	876.327	593.435	1625.92	879.087	577.3	1593.55	785.179
331	0	303.923	1403.24	1605.71	189.747	1403.83	1597.23	309.425	1575.11	1625.17	190.907	1585.53	1620.58	256.181	1641.7	1483.54	248.547	1721.86	1246.49	262.631	1485.39	1414.99	270.428	1423.19	1234.46	124.21	1724.38	1301.31	430.469	1612.87	1455.36	526.931	1655.81	1228.25	538.837	1663.27	1133.03	570.478	1600.58	954.935	526.203	1588.35	879.94	592.724	1624.34	880.01	576.64	1589.83	786.043
332	0	304.039	1394.11	1606.15	189.948	1394.64	1597.83	309.197	1565.97	1626.16	190.57	1576.24	1621.6	255.637	1632.72	1484.48	248.043	1713.36	1247.5	262.466	1476.61	1415.95	270.356	1414.51	1235.35	123.347	1715.15	1302.36	430.039	1604.48	1456.47	526.229	1650.99	1229.97	538.28	1659.23	1135.01	570.887	1598.34	956.397	525.45	1584.86	880.701	591.962	1622.7	881.216	577.394	1586.3	787.992
333	0	304.294	1385.06	1606.58	190.182	1385.26	1598.35	308.94	1556.78	1626.85	190.497	1566.73	1622.7	255.411	1623.91	1485.25	247.669	1704.64	1248.55	262.28	1467.8	1416.75	270.479	1406.04	1236.06	123.042	1706.3	1303.21	429.737	1596.08	1457.34	525.533	1645.92	1231.53	537.586	1655.19	1136.55	570.755	1595.74	957.487	525.001	1581.18	881.52	591.1	1620.96	882.245	579.045	1582.52	790.217
334	0	304.748	1376.12	1606.9	190.575	1375.95	1598.83	308.979	1547.87	1627.52	190.335	1557.4	1623.42	254.987	1614.87	1485.76	247.367	1695.93	1249.07	262.148	1459	1417.24	270.373	1397.22	1236.5	122.528	1697.17	1303.96	429.617	1587.55	1458.04	524.593	1640.59	1232.7	536.423	1650.48	1137.64	570.172	1592.68	958.021	525.608	1577.26	882.844	589.93	1618.92	882.877	578.268	1578.42	791.056
335	0	305.044	1367.14	1607.18	190.892	1366.53	1599.29	308.885	1538.76	1627.96	190.21	1548.06	1624.2	254.923	1605.91	1486.37	247.158	1687.12	1249.75	261.948	1450.12	1417.76	270.408	1388.55	1236.92	122.311	1688.27	1304.39	429.297	1578.8	1458.55	523.451	1634.87	1233.73	535.42	1645.9	1138.87	569.426	1589.15	958.737	525.708	1572.78	884.031	588.665	1616.4	883.615	578.109	1574.73	792.281
336	0	305.65	1358.1	1607.5	191.429	1357.25	1599.79	308.864	1529.9	1628.26	190.222	1538.64	1624.45	254.725	1596.74	1486.67	247.118	1678.35	1250.13	261.695	1441.15	1418.15	269.982	1379.6	1237.15	122.295	1679.51	1305.03	428.927	1569.71	1458.69	522.632	1628.82	1234.68	534.045	1640.8	1139.48	568.427	1585.69	959.095	525.433	1568.08	884.968	587.265	1613.47	884.064	577.918	1570.68	793.214
337	0	306.13	1349.12	1607.55	191.883	1347.79	1600.23	308.633	1520.78	1628.1	190.078	1529.24	1624.67	254.555	1587.46	1486.84	247.202	1669.45	1250.18	261.544	1432.1	1418.2	269.837	1370.65	1237.1	122.389	1670.72	1305.1	428.699	1560.61	1458.67	521.652	1622.56	1235.28	532.989	1635.55	1140.13	568.224	1581.57	959.72	524.545	1562.88	885.184	584.798	1609.45	883.518	577.514	1566.42	793.757
338	0	306.681	1340.01	1607.62	192.373	1338.42	1600.44	308.943	1511.9	1628.13	190.436	1519.92	1624.99	254.632	1578.13	1486.99	247.379	1660.59	1250.78	261.335	1422.96	1418.05	269.622	1361.73	1236.82	122.503	1662.14	1305.47	428.909	1551.28	1458.88	520.99	1615.76	1236.03	532.193	1629.91	1141.1	567.779	1576.83	960.228	523.154	1557.26	884.986	583.803	1605.83	884.214	576.585	1561.74	794.098
339	0	306.904	1330.81	1607.48	192.808	1328.91	1600.55	308.753	1502.63	1628.11	190.148	1510.35	1625.13	254.407	1568.62	1487.18	247.765	1651.56	1251.29	261.108	1413.72	1417.92	269.29	1352.82	1236.51	122.775	1653.32	1306.02	428.915	1541.57	1459.18	520.051	1608.49	1236.73	531.243	1623.67	1142.02	566.104	1571.57	960.043	523.106	1551.48	885.893	582.16	1601.21	884.621	575.813	1556.95	794.62
340	0	307.587	1321.74	1607.38	193.175	1319.43	1600.55	309.075	1493.53	1627.9	190.361	1500.93	1625.09	254.835	1559.26	1487.36	248.089	1642.64	1251.57	260.816	1404.34	1417.66	269.141	1343.98	1236.01	123.168	1644.36	1306.12	428.908	1531.83	1459.1	519.527	1601.09	1237.46	530.464	1617.24	1142.72	564.969	1565.72	960.195	522.631	1545.35	886.362	580.623	1595.87	884.857	575.124	1551.83	794.973
341	0	307.972	1312.42	1606.91	193.844	1309.92	1600.39	309.258	1484.16	1627.38	190.466	1491.39	1624.86	254.892	1549.51	1487.1	248.868	1633.74	1251.96	260.689	1394.96	1416.99	268.717	1334.97	1235.12	123.837	1635.74	1306.24	429.171	1521.98	1459.03	519.083	1593.24	1237.91	529.89	1610.42	1143.27	564.539	1559.76	960.503	521.153	1538.93	885.875	579.062	1589.82	884.863	573.86	1546.46	794.791
342	0	308.423	1302.99	1606.36	194.224	1300.27	1600.08	309.524	1474.98	1626.89	190.447	1481.66	1624.66	255.133	1539.83	1486.89	249.62	1624.69	1251.95	260.503	1385.48	1416.22	268.425	1326.08	1234.16	124.318	1626.94	1306.27	429.26	1511.95	1458.77	518.294	1584.76	1237.97	529.164	1602.86	1143.58	563.658	1553.04	960.373	520.233	1532.49	885.631	577.731	1583.65	884.826	572.041	1540.53	794.195
343	0	308.984	1293.7	1605.76	194.744	1290.7	1599.77	309.428	1465.67	1626.25	190.78	1472.15	1624.12	255.365	1530.11	1486.51	250.285	1615.68	1251.74	260.276	1375.86	1415.49	268.177	1316.97	1233.24	124.98	1618.21	1306.09	429.28	1501.62	1458.33	518.488	1576.55	1238.38	527.96	1594.69	1143.35	562.46	1545.94	960.025	519.042	1525.34	885.56	576.449	1576.81	884.662	570.487	1534.56	793.771
344	0	309.459	1284.13	1604.86	195.208	1280.96	1599.19	309.898	1456.26	1625.16	190.883	1462.46	1623.38	255.606	1520.23	1485.83	251.189	1606.7	1251.24	260.158	1366.27	1414.55	267.754	1307.89	1232.06	125.951	1609.42	1305.58	429.554	1491.49	1457.71	517.706	1567.49	1237.71	527.295	1586.3	1143.08	561.236	1538.28	959.227	518.677	1518.28	885.59	575.064	1569.49	883.997	568.637	1527.99	792.669
345	0	309.99	1274.74	1603.85	195.661	1271.29	1598.62	310.321	1446.73	1623.95	191.515	1452.82	1622.55	256.169	1510.43	1485.1	252.437	1598	1250.91	260.001	1356.53	1413.47	267.686	1298.79	1230.71	127.034	1600.75	1304.99	429.938	1481	1456.97	517.855	1558.18	1237.63	526.861	1577.42	1142.55	560.601	1530.46	958.506	516.421	1510.72	884.16	574.34	1561.88	883.522	567.186	1521.39	791.683
346	0	310.511	1264.98	1603.01	196.209	1261.56	1598.03	310.848	1437.29	1622.83	191.712	1443.16	1621.54	256.633	1500.54	1484.36	253.619	1588.96	1250.58	259.83	1346.72	1412.33	267.259	1289.44	1229.4	127.989	1591.88	1304.31	430.047	1470.38	1456.12	517.259	1548.08	1236.9	526.321	1568.17	1141.91	559.22	1521.67	957.411	515.361	1502.79	883.654	573.283	1553.5	882.814	564.88	1513.91	790.226
347	0	311.092	1255.35	1602.1	196.738	1251.82	1597.35	310.6	1427.54	1621.5	192.142	1433.45	1620.78	257.224	1490.36	1483.59	254.889	1579.56	1250.23	259.814	1336.88	1411.2	267.231	1280.19	1228.14	129.299	1583.06	1303.86	430.45	1459.44	1455.49	517.463	1537.92	1236.44	526.649	1558.76	1141.83	558.828	1512.8	956.979	514.486	1494.52	883.194	572.814	1545.04	882.454	563.223	1506.43	789.281
348	0	311.614	1245.7	1601.04	197.263	1242.07	1596.68	311.684	1417.9	1620.19	192.691	1423.67	1619.63	258.119	1480.49	1482.61	256.344	1570.42	1249.68	259.737	1326.97	1409.92	266.933	1270.56	1226.62	130.537	1574.14	1303.2	431.213	1448.41	1454.71	518.183	1527.41	1236.02	526.638	1548.51	1141.21	558.113	1503.21	956.02	510.057	1485.76	879.548	572.246	1535.78	881.663	562.068	1498.62	788.341
349	0	312.218	1235.9	1600.01	198.042	1232.32	1595.98	312.513	1408.26	1618.72	193.215	1413.97	1618.52	259.015	1470.27	1481.69	257.804	1560.66	1248.97	259.649	1316.94	1408.46	266.819	1260.96	1225.09	132.147	1565.27	1302.52	432.194	1437.34	1453.94	518.738	1516.45	1235.22	527.239	1538.38	1140.69	557.947	1493.55	955.228	511.364	1477.11	880.24	572.035	1526.15	880.93	560.317	1490.12	786.886
350	0	312.854	1226.11	1599.01	198.558	1222.53	1595.39	313.27	1398.55	1617.13	194.173	1404.3	1617.31	260.169	1460.26	1480.7	259.422	1550.86	1248.2	259.666	1306.82	1407.19	266.493	1251.22	1223.62	133.694	1556.27	1301.71	432.876	1426.03	1452.96	518.901	1504.96	1234.12	527.738	1527.52	1139.78	557.536	1483.26	954.105	510.758	1467.84	879.408	571.495	1515.94	879.825	559.053	1481.53	785.656
351	0	313.804	1216.35	1598.08	199.362	1212.84	1594.77	314.207	1388.77	1615.57	195.103	1394.58	1616.02	261.295	1450.05	1479.47	261.054	1540.95	1247.23	259.878	1296.67	1405.86	266.272	1241.26	1222.11	135.393	1547.09	1300.65	433.738	1414.79	1451.86	520.536	1494.03	1233.41	528.135	1516.5	1138.59	557.544	1472.9	953.029	510.359	1458.16	878.622	571.205	1505.36	878.551	557.897	1472.48	784.244
352	0	314.757	1206.53	1596.93	200.369	1203.1	1594.24	315.475	1379.13	1613.78	196.339	1385.08	1614.82	262.517	1439.74	1478.22	262.766	1530.93	1246.12	260.191	1286.5	1404.33	266.273	1231.54	1220.49	137.287	1537.99	1299.62	434.647	1403.34	1450.46	521.586	1482.36	1232.07	529.403	1505.54	1137.53	557.143	1461.68	951.288	509.522	1447.81	877.146	571.294	1494.35	877.144	556.855	1462.87	782.351
353	0	315.868	1196.75	1595.86	201.503	1193.42	1593.63	316.827	1369.39	1611.97	197.731	1375.4	1613.33	263.829	1429.46	1476.96	264.407	1520.92	1245.1	260.49	1276.19	1402.84	266.088	1221.49	1218.82	139.034	1528.74	1298.59	435.57	1391.93	1449.09	522.933	1470.59	1230.88	530.502	1494.09	1136.25	557.13	1450.27	949.661	510.477	1437.31	876.693	571.665	1483.2	875.702	556.075	1452.86	780.915
354	0	317.157	1186.85	1594.9	202.776	1183.79	1593.17	318.201	1359.53	1610.16	199.468	1365.82	1612.03	265.256	1419.11	1475.81	266.085	1510.71	1243.99	261.008	1265.98	1401.28	266.144	1211.61	1217.3	140.939	1519.46	1297.49	436.667	1380.49	1447.75	524.348	1458.7	1229.6	531.635	1482.3	1134.81	557.424	1438.46	948.18	512.081	1425.92	877.067	572.015	1471.41	874.133	554.721	1442.01	779.494
355	0	318.682	1177.03	1593.91	204.129	1174.02	1592.72	320.026	1350	1608.48	201.367	1356.27	1610.54	266.851	1408.76	1474.5	267.847	1500.55	1242.86	261.535	1255.64	1400.05	266.141	1201.61	1215.69	142.859	1509.95	1296.5	437.611	1369.01	1446.21	525.765	1446.63	1228.06	533.108	1470.53	1133.39	557.631	1426.34	946.466	509.98	1414.65	873.951	572.951	1459.4	872.674	554.385	1431.13	777.842
356	0	320.298	1167.12	1593.01	205.908	1164.34	1592.36	322.222	1340.32	1606.71	203.373	1346.69	1609.29	268.415	1398.33	1473.32	269.593	1490.22	1241.92	262.364	1245.21	1398.45	266.379	1191.57	1214.03	144.65	1500.39	1295.75	438.919	1357.58	1444.94	527.109	1434.31	1226.59	535.077	1458.64	1132.26	558.904	1414.23	945.367	509.94	1402.96	872.145	574.006	1446.77	871.233	554.32	1419.33	775.989
357	0	322.304	1157.19	1592.36	207.846	1154.67	1592.13	324.665	1330.36	1604.94	205.503	1337	1608.18	270.162	1387.96	1472.33	271.334	1479.9	1241.09	263.052	1234.92	1397.03	266.601	1181.41	1212.55	146.551	1490.8	1294.98	440.463	1346.17	1443.87	529.44	1422.5	1225.74	537.1	1446.6	1131.17	559.721	1401.25	944.043	510.781	1390.5	871.016	575.52	1433.6	870.341	553.487	1407	774.284
358	0	324.642	1147.41	1591.63	210.18	1145.01	1592.03	327.19	1320.46	1603.19	208.035	1327.34	1606.98	272.109	1377.48	1471.13	273.069	1469.49	1240.11	264.106	1224.43	1395.82	266.738	1171.15	1211.14	148.316	1480.97	1294.21	442.016	1334.9	1442.5	531.261	1410.48	1224.31	539.003	1434.33	1129.67	561.328	1388.36	942.824	509.019	1377.37	867.896	576.884	1420.15	868.776	554.731	1394.48	773.185
359	0	327.193	1137.54	1590.83	212.749	1135.36	1591.89	330.098	1310.84	1601.32	210.89	1317.82	1605.77	274.162	1367.24	1469.92	274.746	1459.07	1238.92	265.258	1214.1	1394.49	267.301	1160.95	1209.8	150.301	1471.23	1293.31	443.882	1323.78	1441.07	533.245	1398.51	1222.67	541.311	1422.22	1128.04	562.653	1375.22	941.085	509.953	1364.1	866.261	578.515	1406.64	866.958	554.552	1380.91	770.788
360	0	329.836	1127.72	1589.91	215.448	1125.65	1591.62	332.926	1300.94	1599.3	213.967	1308.24	1604.44	276.119	1356.78	1468.67	276.589	1448.82	1237.64	266.467	1203.81	1393.17	267.643	1150.47	1208.59	152.415	1461.34	1292.61	445.544	1312.62	1439.35	535.042	1386.43	1220.72	543.152	1409.81	1125.97	564.051	1361.79	939.222	511.692	1350.72	865.094	580.053	1392.6	864.941	555.332	1367.02	768.9
361	0	332.903	1117.95	1589.2	218.285	1115.92	1591.64	335.991	1291.19	1597.48	217.202	1298.58	1603.24	278.535	1346.63	1467.39	278.28	1438.12	1236.11	267.801	1193.48	1392.18	268.075	1139.85	1207.8	154.308	1451.42	1291.74	447.41	1301.86	1437.58	536.92	1374.51	1218.72	545.759	1397.83	1124.22	565.73	1348.17	937.405	515.325	1336.94	864.897	581.381	1378.26	862.611	557.133	1352.71	767.643
362	0	335.911	1108.03	1588.55	221.573	1106.22	1591.79	339.556	1281.54	1595.94	220.733	1289.03	1602.32	280.884	1336.51	1466.13	280.098	1427.42	1234.42	269.272	1183.18	1391.3	268.513	1129.18	1207.23	156.662	1441.49	1290.98	449.225	1290.95	1435.54	538.801	1362.61	1216.5	547.502	1385.35	1121.74	567.268	1334.41	935.214	517.357	1322.94	863.496	583.269	1363.93	860.413	559.015	1337.97	765.979
363	0	339.542	1098.44	1588.01	224.863	1096.48	1592.03	343.192	1271.87	1594.51	224.291	1279.35	1601.57	283.262	1326.15	1464.93	281.984	1416.49	1232.94	270.791	1172.78	1390.63	268.744	1118.35	1206.66	158.946	1431.36	1290.21	451.235	1280.05	1433.67	540.739	1350.62	1214.24	549.87	1372.73	1119.37	569.444	1320.59	933.361	519.077	1308.62	861.354	586.364	1350.6	858.726	560.789	1322.45	763.95
364	0	342.905	1088.6	1587.53	228.409	1086.75	1592.4	346.663	1262.06	1593.22	227.959	1269.72	1601.21	285.789	1316.08	1464.01	283.881	1405.47	1231.68	272.353	1162.35	1390.21	268.998	1107.35	1206.41	161.299	1421.09	1289.57	453.205	1269.27	1431.88	543.019	1338.72	1212.29	552.086	1359.89	1117.09	571.543	1306.57	931.409	518.84	1293.92	857.924	587.148	1334.66	855.806	562.792	1306.54	762.042
365	0	346.501	1078.91	1587.49	232.149	1077.07	1593.05	350.412	1252.37	1592.47	231.486	1259.99	1601.04	288.141	1305.81	1463.43	285.842	1394.39	1230.81	273.499	1151.99	1390.04	269.39	1096.17	1206.53	163.565	1410.66	1289.16	455.231	1258.68	1430.45	545.399	1326.69	1210.56	554.44	1346.95	1115.06	573.682	1292.33	929.724	523.092	1279.42	857.601	589.637	1319.95	854.134	565.308	1290.26	760.597
366	0	350.12	1069.17	1587.46	235.784	1067.38	1593.74	354.016	1242.68	1591.47	235.277	1250.33	1600.93	290.443	1295.42	1462.83	287.74	1383.27	1230.11	275.211	1141.55	1390	269.875	1084.98	1206.77	165.785	1400.2	1289.04	457.247	1248.13	1428.97	547.187	1314.35	1208.39	556.385	1333.61	1112.67	575.874	1277.85	927.85	528.487	1264.63	858.246	591.882	1305.04	852.006	567.408	1273.48	758.612
367	0	353.771	1059.59	1587.58	239.419	1057.65	1594.78	357.582	1233.07	1590.75	238.845	1240.73	1601.06	292.771	1285.33	1462.49	289.503	1372.39	1229.51	276.966	1131.12	1390.21	270.57	1073.71	1207.27	167.887	1389.4	1288.89	459.345	1237.81	1427.63	548.805	1301.61	1206.16	558.636	1320.26	1110.73	578.121	1263.35	926.155	527.161	1249.5	853.588	593.782	1289.74	849.867	570.412	1256.58	757.308
368	0	357.265	1049.91	1588.05	243.099	1048.15	1596.07	360.806	1223.38	1590.4	242.563	1231.15	1601.59	295.055	1274.93	1462.39	291.196	1361.57	1229.3	278.777	1120.75	1390.86	271.497	1062.57	1208.06	169.803	1378.7	1288.86	461.539	1227.68	1426.76	550.839	1289.11	1204.57	560.291	1306.59	1108.74	580.04	1248.47	924.64	530.417	1234.26	852.813	596.297	1274.64	848.423	573.318	1239.23	756.487
369	0	360.813	1040.33	1588.76	246.618	1038.49	1597.67	363.979	1213.77	1590.03	246.219	1221.63	1602.13	297.261	1264.81	1462.43	292.722	1350.76	1229.33	280.757	1110.27	1391.8	272.425	1051.3	1209.13	171.433	1367.72	1289.28	463.416	1217.41	1425.94	552.171	1276.07	1202.64	561.554	1292.51	1106.62	582.161	1233.65	923.348	533.059	1218.76	851.819	598.295	1259.13	846.78	576.329	1221.59	755.883
370	0	364.494	1030.94	1589.67	250.216	1028.98	1599.42	367.7	1204.41	1590.11	249.6	1212.16	1602.82	299.513	1254.71	1462.82	293.871	1340.04	1229.28	282.686	1099.91	1392.7	273.894	1040.12	1210.34	172.605	1356.84	1289.61	465.27	1207.38	1425.25	553.264	1262.92	1200.83	562.906	1278.56	1104.93	584.488	1218.64	922.544	535.1	1202.89	850.472	600.606	1243.65	845.648	580.481	1203.93	755.712
371	0	367.691	1021.36	1590.83	253.587	1019.51	1601.28	370.995	1194.95	1590.32	252.963	1202.72	1603.92	301.517	1244.63	1463.41	294.911	1329.44	1229.58	284.745	1089.55	1393.76	275.303	1029.02	1211.67	173.879	1346.03	1290.49	467.21	1197.4	1425.03	555.094	1250.29	1199.84	563.952	1264.54	1103.46	586.456	1203.35	921.957	537.103	1186.79	849.569	602.491	1227.8	844.647	583.2	1185.89	755.459
372	0	370.742	1011.98	1592.05	256.753	1010.09	1603.29	373.345	1185.31	1590.35	256.151	1193.3	1604.84	303.647	1234.71	1464.25	295.423	1318.55	1229.99	286.416	1079.33	1395.46	276.866	1018.12	1213.37	175.017	1335.2	1291.5	468.973	1187.48	1425.14	557.157	1237.08	1199.71	565.115	1250.47	1102.61	588.295	1187.76	921.722	539.871	1170.4	849.744	604.829	1211.94	844.49	586.528	1167.83	756.062
373	0	373.765	1002.74	1593.46	259.769	1000.77	1605.27	376.916	1176.3	1591.27	259.065	1184.07	1605.87	305.466	1225.01	1464.91	296.939	1308.44	1230.82	288.397	1069.24	1396.83	278.509	1007.39	1215.11	175.875	1324.46	1292.44	470.809	1177.71	1425.37	556.861	1223.98	1197.8	565.857	1236.53	1101.62	590.312	1172.16	922.043	542.135	1153.59	849.964	606.602	1195.35	844.404	589.708	1149.49	757.243
374	0	376.716	993.612	1594.9	262.678	991.595	1607.23	379.253	1166.85	1591.75	261.869	1174.86	1607.1	307.244	1215.15	1465.92	298.124	1297.93	1231.89	290.195	1059.25	1398.35	280.009	996.906	1216.83	176.871	1313.83	1293.88	472.814	1168.02	1426.08	558.264	1211.39	1197.59	567.036	1222.56	1101.55	591.924	1156.19	922.608	541.565	1135.97	848.804	608.355	1178.61	844.804	592.714	1131.06	758.012
375	0	379.176	984.386	1596.43	265.294	982.499	1609.11	382.169	1157.83	1592.72	264.277	1165.73	1608.31	308.994	1205.59	1466.96	299.611	1287.69	1233.09	291.873	1049.4	1399.92	281.158	986.394	1218.68	177.943	1303.53	1294.97	474.613	1158.27	1427.05	559.888	1198.94	1197.8	568.077	1208.63	1101.65	593.483	1139.91	923.659	545.5	1119.25	850.869	610.539	1161.74	845.951	595.376	1112.44	759.804
376	0	381.617	975.414	1597.98	267.728	973.527	1611.13	384.516	1148.8	1593.49	266.472	1156.83	1609.39	310.874	1196.15	1467.89	300.641	1277.03	1233.78	293.507	1039.66	1401.32	282.273	976.315	1220.45	179.158	1293.21	1296.11	476.179	1148.54	1427.74	560.517	1186.17	1197.39	569.337	1195.14	1101.75	595.257	1123.69	924.809	545.251	1101.24	850.661	612.138	1144.28	846.854	598.337	1093.43	761.643
377	0	383.929	966.497	1599.32	270.103	964.594	1612.93	386.006	1139.6	1593.66	268.731	1147.89	1610.35	312.575	1186.68	1468.5	302.376	1266.92	1234.83	294.803	1030.06	1402.62	282.887	966.206	1221.92	180.85	1283.48	1296.8	477.566	1138.67	1428.25	562.12	1174.18	1197.51	570.117	1181.48	1101.49	596.686	1107.29	925.797	548.898	1084	853.451	613.707	1126.91	847.782	600.334	1074.66	762.984
378	0	385.876	957.477	1600.59	272.117	955.634	1614.68	388.584	1130.97	1594.5	270.717	1138.86	1611.29	314.139	1177.25	1469.45	304.099	1256.91	1235.59	295.736	1020.41	1403.86	283.413	956.381	1223.15	182.244	1273.81	1297.64	478.89	1128.82	1428.92	561.671	1161.15	1196.71	570.931	1167.79	1101.27	597.995	1090.88	926.96	549.784	1066.18	854.67	614.665	1108.98	848.518	602.488	1055.98	764.962
379	0	387.705	948.646	1602.06	273.896	946.655	1616.49	390.074	1121.95	1595.28	272.44	1129.85	1612.36	315.602	1167.74	1470.48	305.557	1246.78	1236.5	296.489	1011.06	1405.01	283.715	946.758	1224.37	184.043	1264.42	1298.51	480.084	1118.6	1429.75	563.384	1149.2	1197.42	571.951	1154.14	1101.54	599.15	1074.41	928.495	551.209	1048.37	856.857	615.748	1091.11	849.821	603.987	1036.07	767.689
380	0	389.206	939.749	1603.39	275.587	937.778	1618.29	391.291	1113.03	1595.9	273.976	1120.99	1613.48	317	1158.21	1471.62	307.6	1237.47	1237.64	297.294	1001.71	1406.17	283.929	937.295	1225.46	185.748	1255.32	1299.22	481.199	1108.45	1430.65	564.669	1137.18	1197.87	573.09	1140.56	1101.73	600	1057.49	929.935	551.892	1030.73	858.618	616.489	1073.11	850.971	604.638	1017.04	769.674
381	0	390.606	930.762	1604.54	276.966	928.735	1619.74	392.857	1104.17	1596.75	275.275	1111.95	1614.54	318.347	1149.01	1472.78	308.991	1227.89	1238.57	297.816	992.446	1407.36	284.322	928.157	1226.37	187.51	1246.43	1300.23	482.242	1098.15	1431.55	565.726	1124.77	1198.32	574.692	1127.18	1102.51	601.178	1041.32	931.767	551.618	1012.63	860.502	617.654	1055.31	852.698	605.59	997.719	772.363
382	0	391.936	921.872	1606	278.294	919.88	1621.4	393.595	1095.15	1597.68	276.291	1103.02	1615.71	319.358	1139.65	1474.19	310.648	1218.8	1239.96	298.483	983.28	1408.46	284.687	919.101	1227.44	189.084	1237.81	1301.23	483.154	1088	1432.92	566.889	1112.43	1199.35	576.018	1113.48	1103.46	601.954	1024.76	933.956	552.527	995.113	863.492	618.396	1037.41	854.676	605.919	978.253	775.573
383	0	392.723	912.94	1607.43	278.984	910.752	1622.88	394.438	1086.18	1599.03	277.197	1094.02	1617.16	320.408	1130.46	1475.83	312.056	1209.91	1241.43	298.901	974.192	1409.89	285.102	910.19	1228.77	190.598	1229.2	1302.7	484.166	1077.95	1434.72	568.19	1099.99	1200.88	577.359	1099.73	1105	602.426	1008.38	936.52	553.128	978.575	866.335	618.956	1019.56	857.273	606.127	958.85	779.618
384	0	393.467	903.839	1608.83	279.773	901.744	1624.38	394.988	1077.13	1600.29	277.858	1085.05	1618.52	321.056	1121.29	1477.29	313.602	1201.16	1242.74	299.36	965.184	1411.42	285.64	901.362	1230.2	192.115	1220.76	1303.88	484.821	1067.92	1436.5	569.625	1087.42	1202.6	578.251	1085.83	1106.32	602.897	992.073	939.386	553.276	961.59	869.843	619.483	1002	860.06	606.06	939.647	783.533
385	0	394.182	894.988	1610.35	280.505	892.839	1625.78	395.317	1068.13	1601.75	278.252	1076	1620.18	321.998	1112.41	1478.94	314.687	1192.09	1244.3	299.845	956.424	1412.74	286.241	892.541	1231.66	193.442	1212.38	1305.14	485.643	1058.31	1438.55	570.835	1074.73	1204.37	579.975	1072.49	1108.38	603.175	975.741	942.542	553.032	944.773	873.39	619.88	984.439	863.048	605.458	920.305	787.886
386	0	394.37	885.88	1611.81	280.802	883.787	1627.16	395.808	1059.21	1603.52	278.55	1066.85	1621.63	322.744	1103.64	1480.6	316.162	1183.47	1245.8	300.128	947.532	1414.5	286.937	883.92	1233.39	194.85	1204.01	1306.47	486.351	1048.73	1440.72	572.228	1062.22	1206.54	581.486	1059.07	1110.6	603.114	959.528	945.9	552.764	927.92	877.667	619.788	966.641	866.303	604.7	901.246	792.65
387	0	394.542	876.822	1613.39	280.776	874.652	1628.63	396.212	1050.28	1605.52	278.789	1057.87	1623.24	323.594	1094.97	1482.22	317.154	1174.61	1247.11	300.679	939.1	1416.12	287.608	875.183	1235.29	196.11	1195.68	1307.76	486.801	1039.26	1442.76	573.332	1049.55	1208.63	582.1	1045.31	1112.3	603.155	943.523	949.641	552.112	911.47	881.956	619.137	948.651	869.588	603.746	882.24	797.728
388	0	394.603	867.823	1615.08	280.751	865.489	1629.9	396.247	1041.19	1607.55	278.856	1048.77	1625.21	324.214	1086.28	1484.08	317.91	1165.53	1248.63	300.947	930.5	1417.89	288.382	866.635	1237	197.453	1187.34	1309.06	487.694	1030.16	1445.3	574.844	1037.24	1211.2	583.843	1032.44	1114.95	602.83	927.353	953.5	551.411	894.911	886.489	619.009	931.115	873.478	602.455	863.374	802.914
389	0	394.518	858.495	1616.64	280.679	856.415	1631.03	396.025	1031.97	1609.71	278.865	1039.63	1626.87	325.048	1077.69	1485.91	319.197	1156.83	1250.33	301.418	921.919	1419.56	289.003	857.905	1238.87	198.776	1179.05	1310.81	488.298	1020.88	1447.53	577.189	1024.88	1214.54	585.208	1019.52	1117.43	602.179	911.162	957.522	550.499	878.36	891.226	618.508	913.508	877.567	600.448	844.426	808.329
390	0	394.269	849.448	1618.43	280.398	847.423	1632.21	396.434	1023.05	1612.34	278.746	1030.64	1628.79	325.689	1069.01	1487.67	319.924	1147.75	1251.79	301.789	913.432	1421.57	289.636	849.288	1240.84	200.013	1170.7	1312.22	488.856	1011.77	1449.89	578.633	1012.99	1217.22	586.204	1006.68	1119.79	601.78	895.389	961.926	549.226	862.074	896.232	617.812	895.991	881.925	599.01	825.767	814.1
391	0	394.166	840.265	1620.05	280.027	838.321	1633.44	396.332	1013.98	1614.53	278.664	1021.48	1630.47	326.429	1060.42	1489.43	320.979	1138.85	1253.42	302.206	904.875	1423.25	290.191	840.835	1242.52	201.116	1162.3	1313.62	489.319	1002.69	1451.94	577.9	1000.99	1218.26	587.571	994.289	1122.27	600.953	879.669	966.155	547.183	845.49	901.082	616.809	878.316	886.153	596.821	807.292	819.86
392	0	393.831	831.189	1621.54	279.702	829.165	1634.28	395.894	1004.65	1616.46	278.344	1012.35	1632.19	326.825	1051.52	1490.85	321.935	1129.87	1255.02	302.691	896.333	1424.83	290.771	832.164	1244.24	202.384	1153.87	1315.13	490.078	993.554	1454.08	579.497	989.705	1220.85	588.586	981.978	1124.49	600.231	864.088	970.439	546.484	829.9	906.347	616.071	860.974	890.759	594.668	788.942	825.663
393	0	393.694	821.814	1623.26	279.35	820.091	1635.15	396.17	995.66	1618.72	278.235	1003.38	1633.65	327.734	1043.05	1492.61	322.874	1120.92	1256.29	303.074	887.628	1426.37	291.17	823.643	1245.68	203.344	1145.44	1316.4	490.773	984.583	1456.11	581.109	978.458	1223.45	589.919	970.109	1126.71	599.186	848.669	974.628	544.933	814.048	911.462	614.924	843.854	895.221	591.675	770.734	831.385
394	0	393.41	812.771	1624.59	278.965	811.031	1635.97	396.026	986.519	1620.53	278.025	994.178	1634.88	328.236	1034.3	1493.78	323.906	1111.92	1257.8	303.337	879.031	1427.76	291.529	815.163	1247.07	204.322	1136.94	1317.59	490.998	975.436	1457.6	581.235	967.754	1224.79	590.666	958.341	1128.44	598.265	833.686	978.753	542.554	798.032	916.411	613.508	826.886	899.537	588.965	752.666	837.307
395	0	393.06	803.457	1625.5	278.642	801.79	1636.77	395.585	977.16	1621.88	277.773	984.927	1635.9	328.82	1025.48	1495.01	324.589	1102.98	1258.74	303.661	870.283	1428.82	291.852	806.565	1248.2	205.229	1128.39	1318.61	491.394	966.316	1459	583.234	957.187	1227.16	591.342	946.635	1129.85	597.252	818.874	982.662	540.672	782.652	921.318	612.169	810.382	903.741	586.29	735.103	843.11
396	0	392.85	794.264	1626.36	278.493	792.579	1637.29	395.725	968.112	1623.28	277.789	975.868	1636.95	329.206	1016.57	1496	325.045	1093.87	1259.85	303.965	861.558	1429.77	292.246	797.955	1249.06	206.002	1119.68	1319.58	491.703	957.252	1460.09	584.032	946.901	1228.49	592.185	935.292	1131.31	596.115	804.289	986.435	539.605	767.722	926.421	610.482	793.874	907.679	583.67	717.842	848.884
397	0	392.657	784.87	1627.43	278.167	783.384	1637.76	395.692	958.811	1624.55	277.61	966.543	1637.82	329.541	1007.6	1497.06	325.244	1084.84	1260.58	304.22	852.715	1430.59	292.397	789.377	1249.82	206.448	1110.99	1320.45	492.018	948.265	1461.24	584.443	936.442	1229.93	592.732	924.042	1132.53	594.922	790.034	990.046	537.64	752.697	931.223	608.551	777.752	911.564	580.842	700.806	854.627
398	0	392.637	775.61	1627.91	277.925	774.041	1638.07	395.023	949.214	1625.16	277.405	957.218	1638.34	329.662	998.453	1497.62	325.59	1075.99	1261.62	304.395	843.938	1431.25	292.613	780.674	1250.33	206.875	1102.03	1321.3	491.976	939.075	1461.91	583.539	926.15	1229.92	593.362	912.767	1133.68	593.693	776.031	993.608	535.196	737.641	935.641	606.693	762.034	915.234	578.127	684.07	860.206
399	0	392.362	766.223	1628.08	277.809	764.657	1638.09	395.359	940.089	1625.85	277.416	948.005	1638.67	329.67	989.241	1498.04	325.734	1067.12	1262.08	304.727	834.958	1431.46	293.035	772.128	1250.48	207.071	1093.23	1321.66	492.39	930.199	1462.48	583.688	916.147	1230.37	593.915	902.015	1134.41	592.561	762.293	996.716	534.086	723.577	940.266	604.573	746.562	918.394	575.604	667.8	865.409
400	0	392.139	756.779	1628.17	277.512	755.258	1637.93	395.577	930.748	1626.41	277.255	938.556	1638.89	329.952	980.296	1498.5	325.576	1058.27	1262.61	304.85	825.99	1431.43	293.194	763.308	1250.37	207.187	1084.32	1322.16	492.494	921.241	1462.82	584.271	906.381	1231.1	594.22	891.02	1134.95	591.147	748.76	999.568	532.034	709.288	944.257	603.285	731.828	922.031	572.848	651.775	870.473
401	0	392.124	747.236	1628.36	277.246	745.829	1637.71	395.489	921.164	1626.63	277.189	929.201	1638.82	329.876	970.965	1498.69	325.172	1049.37	1263.02	304.903	817.005	1431.34	293.502	754.7	1250.08	207.024	1075.15	1322.68	492.434	912.171	1462.93	585.114	896.377	1232.03	594.12	880.14	1135.22	589.767	735.543	1002.36	530.064	695.162	948.329	600.949	717.03	924.874	570.199	636.101	875.504
402	0	391.909	737.791	1628.11	277.115	736.318	1637.22	395.418	911.746	1626.59	277.192	919.621	1638.38	329.679	961.563	1498.44	324.791	1040.45	1263.1	305.287	807.859	1430.92	293.643	745.842	1249.54	206.703	1065.96	1322.79	492.523	903.364	1462.7	585.274	886.534	1232.07	593.977	869.363	1135.1	588.396	722.505	1004.72	528.164	681.283	951.989	598.616	702.421	927.248	568	621.027	880.087
403	0	391.634	728.219	1627.46	276.788	726.693	1636.42	395.573	902.14	1626.07	277.003	910.165	1637.74	329.435	952.113	1498.12	324.213	1031.7	1262.92	305.389	798.709	1430.09	294.211	737.228	1248.52	206.322	1056.81	1322.77	492.754	894.685	1462.22	584.312	877.003	1230.88	594.127	858.945	1134.7	587.008	709.815	1006.61	526.557	668.049	955.156	596.919	688.61	929.617	565.148	605.902	884.149
404	0	391.534	718.487	1626.82	276.599	717.092	1635.55	395.36	892.33	1625.36	276.801	900.548	1636.87	329.201	942.846	1497.83	323.435	1022.65	1262.79	305.399	789.331	1429.11	294.376	728.486	1247.41	205.348	1047.36	1322.59	492.688	885.811	1461.5	583.976	867.204	1230.16	594.187	848.602	1134.33	585.647	697.34	1008.34	524.708	654.863	958.015	594.976	674.903	931.706	562.659	591.265	887.947
405	0	391.354	708.867	1626.03	276.465	707.413	1634.57	395.287	882.749	1624.69	276.461	890.919	1635.84	328.779	932.981	1497.2	322.509	1013.75	1262.52	305.624	779.902	1428.09	294.646	719.676	1246.07	204.626	1038.03	1322.47	492.488	876.779	1460.63	582.996	857.184	1229.04	593.803	838.212	1133.58	584.006	684.905	1009.81	522.676	641.83	960.715	592.748	661.261	933.445	560.04	577.094	891.471
406	0	391.122	699.207	1624.98	276.297	697.733	1633.41	395.169	872.99	1623.69	276.203	881.254	1634.76	328.383	923.448	1496.46	321.505	1004.92	1262.04	305.763	770.47	1426.74	294.978	710.709	1244.53	203.461	1028.39	1322.18	492.256	867.817	1459.49	583.121	847.933	1228.3	593.44	827.883	1132.61	582.604	672.822	1011.03	520.961	629.256	962.884	590.406	647.877	934.64	557.77	563.278	894.565
407	0	390.794	689.416	1623.6	275.81	687.831	1631.81	394.926	863.161	1622.44	275.938	871.466	1633.4	327.72	913.59	1495.56	320.488	996.015	1261.54	305.668	760.964	1425.11	295.213	701.881	1242.68	202.404	1018.83	1321.76	491.75	858.74	1457.92	583.547	838.405	1227.52	593.12	817.632	1131.42	581.064	660.941	1011.73	519.126	616.923	964.702	588.735	635.299	935.918	555.326	549.839	897.12
408	0	390.596	679.539	1622.15	275.492	678.049	1630.07	394.542	853.459	1621.06	275.489	861.598	1631.76	327.081	903.807	1494.42	319.13	986.96	1260.78	305.727	751.407	1423.5	295.286	692.949	1240.85	201.018	1009.11	1321.24	491.444	849.78	1456.48	581.44	828.777	1225.17	592.671	807.47	1130.17	579.435	649.356	1012.26	517.205	604.913	966.168	586.872	622.684	936.837	552.877	536.779	899.422
409	0	390.248	669.801	1620.47	275.032	668.112	1628.18	394.119	843.677	1619.51	275.187	851.732	1629.96	326.413	894.07	1493.03	317.913	978.147	1259.64	305.79	741.759	1421.55	295.56	683.885	1238.8	199.634	999.183	1320.44	490.774	840.694	1454.61	582.514	819.761	1224.58	592.402	797.66	1128.76	578.073	637.989	1012.47	515.395	593.157	967.236	584.868	610.42	937.306	550.646	524.115	901.258
410	0	389.877	660.049	1618.53	274.783	658.252	1625.98	393.667	833.812	1617.59	274.762	841.743	1627.82	325.756	884.35	1491.32	316.472	969.091	1258.16	305.853	732.078	1419.46	295.607	674.759	1236.46	198.376	989.402	1319.27	490.262	831.79	1452.58	581.448	810.479	1222.35	591.737	787.641	1126.73	576.18	626.812	1012.18	513.703	581.86	967.718	582.942	598.458	937.239	548.452	511.921	902.49
411	0	389.408	650.246	1616.47	274.368	648.369	1623.6	393.193	824.057	1615.72	274.117	831.994	1625.71	324.871	874.598	1489.6	315.139	960.084	1256.85	305.632	722.473	1417.09	295.689	665.661	1234	196.796	979.313	1318.02	489.889	822.919	1450.51	579.22	801.138	1219.38	591.328	777.945	1124.89	574.664	615.861	1011.79	511.603	570.408	967.872	581.288	586.966	937.038	546.068	500.039	903.324
412	0	388.96	640.442	1614.46	273.808	638.503	1621.4	392.038	814.239	1613.88	273.6	822.142	1623.53	323.988	864.797	1487.67	313.734	951.092	1255.2	305.464	712.842	1414.96	295.662	656.342	1231.79	195.227	969.303	1316.69	489.071	813.904	1448.21	578.594	792.046	1217.4	590.541	768.13	1122.7	573.386	605.233	1010.99	510.081	559.931	967.677	579.1	575.519	936.245	543.914	488.63	903.823
413	0	388.341	630.469	1612.3	272.814	628.464	1618.89	391.604	804.274	1611.74	272.863	812.168	1621.26	323.081	855.019	1485.78	312.022	941.745	1253.44	305.28	703.002	1412.7	295.46	646.691	1229.42	193.788	959.397	1315.47	488.566	805	1445.98	577.649	783.055	1214.99	589.639	758.426	1120.25	571.709	594.845	1009.92	508.573	549.622	967.048	577.821	564.719	935.585	541.84	477.579	903.606
414	0	387.528	620.663	1610.21	272.378	618.712	1616.67	391.37	794.541	1610.03	272.073	802.292	1619.14	322.011	845.187	1483.93	310.614	932.671	1252.07	305.034	693.18	1410.31	295.076	636.941	1227.05	192.099	949.424	1314.24	487.779	796.004	1443.65	577.062	774.153	1212.9	589.201	748.998	1118.3	570.7	584.707	1008.48	507.002	539.433	965.88	576.316	554.024	934.396	539.969	466.801	903.045
415	0	386.586	610.741	1608.26	271.463	608.71	1614.34	390.099	784.313	1607.9	271.098	792.388	1616.99	320.871	835.296	1482.17	308.962	923.316	1250.32	304.368	683.308	1408.18	294.685	627.371	1224.67	190.502	939.486	1312.94	486.861	786.88	1441.36	575.971	765.053	1210.6	588.581	739.619	1116.31	569.432	574.999	1006.87	505.594	529.665	964.404	574.87	543.826	932.981	538.226	456.706	901.962
416	0	385.477	600.734	1606.41	270.101	598.767	1612.31	389.435	774.512	1606.25	270.15	782.519	1614.93	319.718	825.337	1480.27	307.49	913.936	1248.73	303.662	673.465	1406.06	294.109	617.576	1222.49	189.187	929.549	1311.64	485.72	777.743	1439.05	575.623	756.028	1208.86	587.843	730.244	1114.22	568.343	565.433	1004.99	504.126	520.26	962.639	573.641	534.172	931.247	536.637	447.027	900.505
417	0	384.299	590.662	1604.52	268.803	588.892	1610.4	387.851	764.332	1604.03	269.007	772.636	1612.82	318.507	815.431	1478.39	305.997	904.448	1246.81	302.926	663.591	1404.05	293.39	607.643	1220.4	187.751	919.388	1310.06	484.509	768.469	1436.84	573.918	747.322	1206.18	587.008	721.232	1112.03	567.293	556.297	1002.88	503.114	511.215	960.384	572.516	524.918	929.1	535.367	437.826	898.459
418	0	382.749	580.631	1602.93	267.266	578.923	1608.62	386.823	754.396	1602.21	267.456	762.779	1610.59	317.237	805.399	1476.51	304.458	894.834	1244.95	301.932	653.446	1401.96	292.437	597.563	1218.44	186.519	909.317	1308.3	483.511	759.009	1434.89	572.627	738.318	1204.04	585.98	712.3	1109.91	565.818	547.41	1000.53	501.887	502.545	957.85	571.533	516.066	926.709	534.218	429.199	896.049
419	0	380.829	570.685	1601.44	265.63	569.125	1606.91	385.068	744.183	1600.33	266.222	752.832	1608.74	315.927	795.361	1474.89	303.011	885.199	1243.19	300.692	643.486	1400.34	291.317	587.697	1216.57	185.306	899.339	1306.78	482.168	749.109	1433.07	571.192	729.242	1202.14	584.823	703.358	1107.98	565.061	538.899	998	501.117	494.306	955.146	571.026	507.972	924.406	533.435	421.066	893.286
420	0	378.992	560.363	1600.23	263.232	559.078	1605.49	383.504	734.289	1598.93	264.503	742.978	1606.8	314.62	785.338	1473.25	301.673	875.499	1241.35	299.346	633.52	1398.58	290.053	577.522	1215	183.914	888.986	1304.72	480.859	739.16	1431.42	569.853	720.208	1200.3	583.455	694.757	1105.91	564.298	530.905	995.336	499.734	486.268	952.039	569.942	500.201	921.156	532.915	413.571	890.051
421	0	376.744	550.345	1598.87	261.472	549.322	1603.92	381.683	723.913	1597.08	263.012	733.086	1605.11	313.268	775.319	1471.63	300.942	865.697	1239.76	298.17	623.417	1397.05	288.986	567.326	1213.38	182.999	879.137	1302.85	479.663	729.134	1429.84	568.582	711.346	1198.64	582.408	686.374	1104.25	563.576	523.155	992.402	499.673	478.887	948.626	569.589	493.01	918.027	532.676	406.556	886.172
422	0	374.237	540.173	1597.77	258.662	539.473	1602.62	379.729	713.552	1596.03	261.033	723.312	1603.62	311.891	765.419	1470.31	299.949	855.502	1238.3	296.569	613.335	1395.67	287.796	557.089	1212.28	181.794	868.914	1301.11	478.12	718.858	1428.61	567.881	702.117	1197.9	581.204	678.002	1102.81	562.94	515.744	989.346	499.26	471.784	945.017	569.347	486.633	914.726	532.779	400.113	882.024
423	0	371.618	529.866	1596.96	255.882	529.683	1601.18	377.732	703.637	1595.42	258.809	713.478	1602.43	310.269	755.456	1469.02	299.208	845.408	1236.88	294.976	603.415	1394.75	286.403	546.732	1211.33	180.778	858.932	1299.13	476.774	708.589	1427.86	566.269	693.087	1196.61	580.095	669.745	1101.92	562.302	508.714	986.233	498.407	464.826	941.188	569.076	480.493	911.367	532.873	394.322	877.553
424	0	368.634	519.834	1595.95	252.774	520.163	1599.89	375.518	693.325	1594.5	256.839	703.938	1601.27	308.796	745.802	1467.59	298.459	834.899	1235.4	293.877	593.51	1393.79	285.311	536.494	1210.58	179.713	848.808	1297.24	475.332	698.435	1426.97	564.886	683.815	1195.59	578.706	661.376	1100.74	561.672	501.971	982.831	499.064	458.812	936.993	569.263	474.928	907.74	533.342	389.009	872.494
425	0	365.53	509.73	1595.09	249.635	510.572	1598.35	373.337	683.224	1594	254.548	694.281	1600.12	306.989	736.037	1466.2	297.664	824.25	1234.01	292.138	583.551	1392.81	284.034	525.659	1210.09	178.551	838.461	1294.95	473.776	688.313	1426.15	563.263	674.296	1194.54	577.29	653.133	1099.64	561.813	495.651	979.287	499.04	452.403	932.647	569.086	469.58	903.572	534.025	384.184	866.958
426	0	362.295	499.662	1594.59	247.563	501.751	1596.93	370.952	673.317	1593.73	252.039	684.934	1599.28	305.384	726.395	1464.8	296.716	813.366	1232.11	290.304	573.547	1392.24	282.85	514.943	1209.62	177.573	828.197	1292.63	472.095	678.15	1425.38	562.036	664.923	1193.85	575.949	644.87	1098.79	561.572	489.408	975.658	498.728	446.908	927.717	569.572	464.996	899.631	534.943	379.937	861.292
427	0	358.798	489.861	1594.27	243.311	492.084	1596.22	368.267	663.294	1593.39	249.58	675.545	1598.27	303.579	716.677	1463.46	295.42	802.133	1229.9	288.743	563.434	1391.82	281.681	503.806	1209.57	176.177	817.471	1289.99	470.341	668.181	1424.67	561.598	655.54	1193.83	574.426	636.651	1097.91	561.463	483.505	971.94	499.59	441.9	922.871	570.052	460.674	895.489	535.995	376.247	855.256
428	0	355.399	479.976	1594.4	240.164	482.925	1595.59	365.01	653.264	1593.04	246.839	666.084	1597.56	301.926	706.975	1462.34	294.055	790.763	1228.04	286.831	553.435	1391.35	280.397	492.408	1209.62	175.142	806.981	1287.7	468.845	658.315	1424.16	559.388	646.172	1192.5	572.784	628.326	1096.95	561.46	477.931	968.041	499.969	436.926	917.713	570.576	456.562	891.077	537.346	373.04	848.857
429	0	351.843	470.32	1594.69	237.472	473.93	1595.2	362.214	643.49	1593.23	244.182	656.821	1597.1	299.979	697.179	1461.55	292.417	779.665	1226.63	284.978	543.333	1391.15	279.164	480.95	1209.82	173.909	796.521	1285.53	467.069	648.315	1423.9	558.215	636.823	1192.23	571.104	620.031	1096.38	561.53	472.563	964.186	500.605	432.412	912.411	571.105	452.988	886.649	538.804	370.406	842.454
430	0	348.392	460.737	1595.33	234.136	464.874	1595.34	359.635	634.055	1593.77	241.213	647.435	1596.82	298.177	687.41	1460.99	290.817	768.967	1225.68	283.227	533.188	1391.35	277.852	469.605	1210.33	172.56	785.721	1283.83	465.377	638.46	1423.88	556.904	627.539	1192.35	569.436	611.734	1096.21	561.567	467.509	960.582	501.385	428.392	907.197	571.827	449.892	882.614	540.457	368.289	835.977
431	0	345.254	451.212	1596.12	230.724	455.591	1595.54	356.215	624.267	1594.06	238.416	638.289	1596.8	296.149	677.523	1460.61	289.325	758.33	1224.96	281.287	523.097	1391.67	276.515	458.356	1210.9	171.24	775.224	1282.18	463.379	628.53	1423.87	555.281	618.312	1192.31	567.392	603.252	1096.04	561.794	462.839	957.031	502.087	424.535	902.082	572.865	447.27	878.669	542.124	367.029	829.255
432	0	342.143	441.9	1596.9	227.755	446.323	1595.81	353.687	615.076	1594.83	235.508	628.952	1596.88	294.308	667.666	1460.48	287.939	747.481	1224.42	279.721	512.912	1392	275.17	447.436	1211.44	170.011	764.828	1281.06	461.694	618.725	1424.35	554.378	608.99	1193.05	565.422	594.851	1096.16	562.166	458.481	953.58	503.234	421.41	896.813	574.05	445.149	875.011	544.286	366.34	822.728
433	0	338.806	432.429	1598.12	224.56	437.003	1596.45	350.589	605.49	1595.7	232.499	619.603	1597.32	292.251	657.862	1460.68	286.624	736.859	1224.25	277.97	502.828	1392.69	273.534	436.496	1212.32	168.382	754.301	1280.36	459.78	608.839	1425.12	552.977	599.866	1193.95	563.344	586.31	1096.89	562.226	454.361	950.643	504.249	418.565	891.861	575.297	443.48	871.902	546.523	366.18	816.647
434	0	335.908	422.988	1599.51	221.313	427.817	1597.37	347.602	596.127	1596.88	229.576	610.366	1598.03	290.149	648.045	1461.21	285.412	726.313	1224.36	275.933	492.903	1393.65	271.901	425.927	1213.55	166.664	743.928	1280.02	458.089	598.998	1426.43	550.382	590.742	1194.52	561.403	577.872	1098.06	562.529	450.622	948.256	505.242	416.611	887.2	576.437	442.239	869.092	548.909	366.684	810.922
435	0	332.849	413.705	1600.76	218.389	418.488	1598.3	345.028	586.84	1598.24	226.79	601.073	1598.88	288.257	638.528	1461.72	283.851	715.629	1224.59	274.308	483.014	1394.68	270.398	415.61	1214.69	164.992	734.018	1280	456.23	589.238	1427.49	548.511	581.602	1195.52	559.336	569.633	1099.13	562.684	447.218	945.977	506.599	415.191	882.762	577.581	441.369	866.47	551.375	367.909	805.381
436	0	330.242	404.334	1601.93	215.66	409.16	1599.17	342.23	577.461	1599.47	224.08	591.672	1599.83	286.254	628.883	1462.55	282.536	705.266	1225.46	272.439	473.265	1395.81	268.915	405.268	1216.06	163.451	723.632	1279.93	454.333	579.503	1428.69	546.323	572.4	1196.51	557.112	561.507	1100.29	562.904	444.047	944.183	507.811	413.898	878.873	579.318	440.967	864.604	553.902	369.544	800.248
437	0	327.526	395.009	1603.27	212.838	399.89	1600.21	339.568	568.159	1601	221.554	582.452	1600.94	284.448	619.375	1463.32	280.82	695.116	1225.72	270.778	463.541	1397.27	267.301	395.225	1217.54	161.504	713.631	1280.26	452.494	569.822	1430.23	545.113	563.282	1198.45	554.689	553.374	1101.64	563.146	440.941	943.086	508.341	412.557	875.607	580.215	440.425	863.005	556.231	371.505	795.771
438	0	324.815	385.695	1604.45	210.45	390.635	1601.16	336.985	558.711	1602.61	218.954	573.066	1602.26	282.512	609.87	1464.33	278.919	684.678	1226.28	269.164	453.964	1398.78	265.763	385.123	1219.14	159.511	703.793	1280.69	450.83	560.331	1431.83	542.717	554.53	1199.49	552.487	545.544	1103.2	563.294	438.207	942.114	510.033	411.945	873.225	581.576	440.222	862.244	558.524	373.94	791.842
439	0	322.471	376.287	1605.44	207.955	381.456	1601.92	334.623	549.444	1604.15	216.659	563.832	1603.51	280.796	600.554	1465.21	277.1	674.555	1226.84	267.548	444.45	1400.13	264.59	375.126	1220.5	157.791	693.576	1281.33	449.37	550.838	1433.36	540.582	545.847	1200.57	550.355	538.07	1104.64	563.667	435.425	941.523	510.995	411.343	870.661	583.022	440.067	861.836	560.715	376.471	788.133
440	0	320.048	367.046	1606.55	205.814	372.104	1602.66	332.245	539.974	1605.61	214.356	554.45	1604.84	278.997	591.129	1466.28	275.491	664.682	1228.22	266.28	434.851	1401.41	263.436	365.366	1221.9	155.964	683.492	1282.09	447.511	541.466	1434.7	539.707	537.468	1202.49	548.407	530.906	1106.24	563.888	432.111	941.476	512.562	410.796	869.052	584.167	439.529	861.846	562.779	379.061	784.874
441	0	318.059	357.424	1607.91	203.195	362.725	1603.6	330.24	530.552	1607.56	212.369	545.156	1606.28	277.384	581.698	1467.42	273.421	654.738	1229.41	264.742	425.404	1402.71	262.231	355.666	1223.39	154.012	673.713	1283.04	445.894	532.246	1436.26	538.307	529.476	1204.09	546.441	524.014	1107.94	564.27	430.029	941.525	513.544	409.939	867.945	585.23	438.924	862.436	564.484	381.796	782.293
442	0	315.825	348.052	1609.18	201.234	353.362	1604.32	328.171	520.984	1609.1	210.271	535.658	1607.62	275.692	572.282	1468.7	271.706	645.524	1230.67	263.703	415.874	1403.91	261.572	346.19	1224.52	151.929	663.791	1284.06	444.447	523.208	1437.73	536.918	521.818	1205.49	544.734	517.32	1109.53	564.389	427.183	941.628	514.214	408.831	867.11	585.965	437.966	862.916	565.926	384.395	779.888
443	0	313.95	338.377	1610.28	199.066	343.915	1605.09	326.387	511.468	1610.58	208.54	526.289	1608.72	274.022	562.867	1469.8	269.73	636.068	1232.1	262.642	406.391	1404.87	260.97	336.73	1225.49	149.708	653.948	1285.4	443.049	514.318	1438.8	535.378	514.583	1206.3	543.255	511.095	1110.8	564.541	424.458	941.615	514.891	407.88	866.285	586.921	436.991	863.547	567.257	386.768	777.745
444	0	311.909	328.814	1611.3	197.454	334.451	1605.8	324.813	501.766	1612.03	206.779	516.74	1609.8	272.432	553.415	1471.04	268.017	626.875	1233.1	261.623	396.856	1405.96	260.273	327.125	1226.69	147.745	644.165	1286.52	441.713	505.767	1440.01	533.438	507.805	1207.05	541.962	505.098	1112.04	564.472	421.597	941.789	516.229	407.036	865.888	587.653	435.893	864.298	568.264	389.035	776.098
445	0	309.996	319.31	1612.48	195.516	325.094	1606.65	323.293	492.201	1613.48	205.393	507.391	1610.86	270.906	544.113	1472.2	266.042	617.614	1234.15	260.936	387.336	1407.18	259.828	318.116	1227.69	145.499	634.286	1287.75	440.48	497.278	1441.22	532.904	501.248	1208.74	540.833	499.462	1113.44	564.533	418.912	942.289	516.641	405.505	865.817	587.961	434.396	865.111	569.067	390.933	775.082
446	0	308.539	309.571	1613.32	193.881	315.505	1607.44	321.676	482.44	1614.6	203.965	497.78	1611.98	269.437	534.782	1473.27	264.255	608.291	1235.21	260.281	377.858	1408.1	259.54	308.904	1228.56	143.41	624.425	1289.17	439.382	489.034	1442.28	531.184	495.245	1209.42	539.79	494.203	1114.44	564.405	416.028	942.531	516.831	404.019	865.728	588.033	432.619	865.771	569.482	392.343	774.313
447	0	307.116	299.97	1614.46	192.718	305.996	1608.29	320.506	472.87	1616	202.784	488.194	1613.04	267.953	525.443	1474.45	262.613	599.043	1236.14	259.448	368.547	1409.03	259.217	299.851	1229.36	141.407	614.852	1290.47	438.252	480.765	1443.38	530.576	489.314	1210.9	538.694	489.156	1115.5	564.129	413.232	942.876	516.675	402.444	865.619	588.213	431.043	866.647	569.858	393.478	774.12
448	0	305.788	290.306	1615.59	191.187	296.373	1609.21	319.057	463.045	1617.26	201.56	478.654	1614.23	266.494	516.252	1475.56	260.737	589.468	1237.14	258.789	359.182	1410.07	258.731	290.634	1230.6	139.428	604.942	1292.01	437.051	472.659	1444.38	529.035	484.084	1211.77	537.993	484.566	1116.89	563.905	410.531	943.496	517.207	399.931	866.638	588.124	429.109	867.651	570.099	393.901	774.193
449	0	304.817	280.603	1616.71	189.96	286.799	1610.3	318.07	453.479	1618.41	200.461	468.947	1615.33	265.091	506.997	1476.68	259.383	580.427	1238.28	258.322	349.817	1411.11	258.553	282.223	1231.37	137.799	595.368	1293.34	435.913	464.501	1445.43	528.051	479.007	1212.97	537.454	480.231	1118.27	563.652	407.869	944.099	517.248	398.321	867.721	587.715	427.167	868.411	569.493	394.339	774.332
450	0	304.025	270.994	1617.59	189.374	277.073	1611.18	317.159	443.85	1619.65	199.435	459.325	1616.47	263.571	497.638	1477.89	257.65	570.907	1239.34	257.681	340.561	1412.02	258.228	273.082	1232.33	136.004	585.597	1294.79	434.697	456.323	1446.48	526.844	473.978	1214.21	536.724	476	1119.61	563.224	405.243	944.648	516.94	396.172	868.037	587.381	425.332	869.357	568.896	393.689	774.628
451	0	303.175	261.5	1618.52	188.864	267.357	1612.13	316.151	434.288	1620.79	198.282	449.566	1617.73	262.24	488.297	1479.23	256.099	561.411	1240.43	256.842	331.359	1413.11	257.729	264.133	1233.29	134.333	575.95	1296.27	433.544	448.119	1447.7	525.964	469.248	1215.84	536.041	471.937	1121.21	562.818	402.593	945.575	516.086	394.183	868.653	586.76	423.377	870.427	568.211	392.591	775.332
452	0	302.715	252.154	1619.42	187.954	257.466	1613.17	315.021	424.817	1621.66	197.337	439.788	1618.83	260.935	478.975	1480.18	254.64	552.249	1241.55	256.325	321.931	1414.19	257.214	255.155	1234.45	132.676	566.232	1297.58	432.4	439.851	1448.89	524.961	464.541	1217.48	535.066	467.892	1122.67	562.307	400.204	946.516	515.702	391.594	869.949	585.975	421.535	871.509	567.305	391.055	776.29
453	0	302.381	242.855	1620.02	187.581	247.751	1614.18	314.17	415.571	1622.4	196.55	430.064	1619.88	259.672	469.633	1481.12	253.117	542.797	1242.24	255.552	312.602	1415.13	256.969	246.029	1235.34	131.433	556.653	1298.66	431.375	431.568	1449.89	523.829	459.83	1218.7	534.331	464.142	1124.02	561.798	397.701	947.304	515.14	389.083	870.903	585.268	419.813	872.438	566.815	389.184	777.307
454	0	302.28	233.461	1620.5	187.676	238.011	1615.02	313.666	406.316	1623.21	195.637	420.296	1620.84	258.474	460.302	1482.03	251.858	533.677	1243.01	254.995	303.271	1415.77	256.46	237.172	1235.88	129.939	546.957	1299.5	430.421	423.056	1450.87	522.719	455.069	1220.13	533.151	460.146	1125.22	561.176	394.923	947.866	514.153	386.387	871.391	583.843	417.948	872.912	565.76	386.643	778.077
455	0	302.268	224.084	1621.14	187.707	228.279	1615.88	312.87	396.97	1623.87	194.775	410.515	1621.78	257.375	450.952	1482.74	251.31	525.153	1244.27	254.334	293.963	1416.47	255.852	228.181	1236.58	129.005	537.637	1300.49	429.64	414.449	1452	521.534	450.155	1221.7	532.254	456.213	1126.89	560.282	392.843	948.866	513.37	383.475	872.409	582.419	416.059	873.609	564.762	383.939	779.283
456	0	302.382	214.92	1621.58	187.433	218.355	1616.55	311.992	387.725	1624.2	194.074	400.797	1622.56	256.456	441.506	1483.31	250.597	516.46	1245.16	253.619	284.566	1417.15	255.425	219.027	1237.19	127.803	528.099	1301.28	428.69	405.587	1452.84	520.251	445.139	1223.05	531.234	452.185	1128.26	559.644	390.298	949.657	512.657	380.056	873.666	580.906	414.097	874.281	564.023	380.847	780.639
457	0	302.447	205.769	1621.72	187.671	208.557	1617.17	311.328	378.463	1624.35	193.437	390.944	1623.16	255.528	432.013	1483.8	250.012	507.534	1245.55	252.957	275.141	1417.53	255.049	209.708	1237.56	126.925	518.651	1301.71	427.713	396.623	1453.27	518.987	439.984	1224.06	530.089	447.987	1129.42	558.947	387.584	950.252	512.001	376.617	874.439	579.389	412.265	874.632	562.892	377.617	781.345
458	0	302.635	196.556	1621.83	187.923	198.702	1617.66	310.926	369.217	1624.41	192.794	381.101	1623.53	254.675	422.449	1484.02	249.393	498.531	1246.19	252.072	265.732	1417.83	254.414	200.605	1237.57	126.265	509.278	1302.11	426.808	387.392	1453.7	518.145	434.629	1225.43	528.962	443.595	1130.64	557.915	384.59	950.693	508.954	373.311	873.511	577.715	410.021	875.15	561.721	373.945	782.256
459	0	302.857	187.188	1621.9	188.178	188.834	1618.17	310.46	359.879	1624.36	192.265	371.323	1623.85	253.879	412.853	1484.36	248.833	489.333	1246.83	251.252	256.325	1418.02	253.64	191.372	1237.57	125.416	499.913	1302.41	426.17	377.876	1454.35	516.957	428.756	1226.65	527.723	438.852	1131.88	557.069	381.481	951.393	507.769	369.169	873.777	576.048	407.873	875.855	560.556	370.158	783.213
460	0	303.197	177.766	1621.75	188.474	178.886	1618.53	310.046	350.558	1624.01	191.717	361.408	1623.96	253.2	403.026	1484.43	248.393	479.997	1247.11	250.649	246.701	1417.97	253.008	182.117	1237.31	124.905	490.611	1302.66	425.396	368.293	1454.43	515.79	422.605	1227.57	526.305	433.701	1132.76	556.11	378.099	951.683	506.787	364.936	874.081	573.825	405.087	875.721	559.368	366.349	783.782
461	0	303.46	168.223	1621.21	189.048	168.885	1618.66	309.748	341.161	1623.46	191.279	351.402	1623.91	252.551	393.128	1484.34	248.206	470.742	1247.33	249.966	236.964	1417.54	252.5	172.79	1236.84	124.522	481.217	1302.73	424.681	358.483	1454.19	514.286	415.902	1228	524.656	428.167	1133.17	555.018	374.281	951.7	505.648	360.472	874.062	571.649	402.03	875.549	558.338	362.319	783.913
462	0	303.809	158.599	1620.79	189.323	158.777	1618.68	309.482	331.685	1622.88	190.917	341.335	1623.82	252.064	383.169	1484.23	247.994	461.302	1247.52	249.233	227.141	1417.04	251.929	163.407	1236.21	124.252	471.91	1302.69	424.06	348.448	1454.14	513.157	408.945	1228.8	523.169	422.301	1133.92	553.809	370.059	951.898	505.356	355.041	874.906	569.683	398.842	875.681	556.655	358.167	784.087
463	0	304.271	148.943	1620.38	189.412	148.707	1618.77	309.173	322.004	1622.08	190.733	331.306	1623.54	251.534	373.069	1483.97	247.916	451.923	1247.52	248.607	217.282	1416.57	251.192	154.212	1235.38	124.207	462.684	1302.73	423.704	338.247	1454.31	512.026	401.615	1229.45	521.555	415.969	1134.49	552.595	365.437	952.143	504.905	349.639	875.696	567.334	395.003	875.578	555.256	353.727	784.571
464	0	304.823	139.28	1619.64	189.927	138.505	1618.63	308.973	312.269	1621.02	190.405	321.097	1623.01	251.118	362.771	1483.61	248.073	442.515	1247.49	248.051	207.255	1415.77	250.657	144.827	1234.41	124.261	453.367	1302.61	423.191	327.862	1453.98	510.985	393.755	1229.95	519.962	409.269	1134.8	551.419	360.445	952.124	503.192	343.744	875.016	565.046	390.757	875.349	553.761	349.318	784.276
465	0	305.344	129.47	1618.74	190.674	128.229	1618.27	308.938	302.506	1619.75	190.272	310.873	1622.42	250.781	352.375	1483.13	248.317	432.943	1247.46	247.382	197.038	1414.54	250.043	135.411	1232.88	124.364	443.973	1302.41	422.745	317.318	1453.49	509.832	385.542	1230.17	518.509	402.014	1135.07	550.063	354.751	951.757	502.724	337.6	875.466	563.189	386.092	875.251	551.998	344.417	783.766
466	0	305.895	119.582	1617.94	191.279	117.885	1617.99	308.785	292.612	1618.43	190.153	300.582	1621.69	250.454	341.84	1482.58	248.655	423.395	1247.48	246.816	186.762	1413.6	249.605	125.847	1231.58	124.63	434.48	1302.12	422.368	306.526	1453.13	508.604	376.827	1230.21	517.091	394.335	1135.25	548.719	348.612	951.602	501.106	330.957	874.875	561.165	380.61	875.115	550.303	339.238	783.4
467	0	306.415	109.772	1616.94	191.696	107.552	1617.73	308.584	282.559	1616.81	190.271	290.297	1620.76	250.265	331.187	1481.98	249.07	413.727	1247.19	246.222	176.421	1412.35	249.132	116.286	1230.11	125.049	424.968	1301.72	422.003	295.626	1452.61	507.653	367.919	1230.38	515.726	386.291	1135.34	547.68	341.78	951.563	499.818	323.902	874.531	559.11	374.213	874.929	548.423	333.533	782.899
468	0	306.964	99.7043	1615.74	192.386	97.2531	1617.27	308.741	272.572	1615.19	190.404	279.901	1619.65	250.201	320.471	1481.14	249.598	403.963	1246.82	245.709	166.027	1410.98	248.889	106.472	1228.53	125.579	415.341	1301.2	421.785	284.664	1451.93	506.741	358.625	1230.24	514.858	378.114	1135.41	546.145	334.417	950.97	498.325	316.683	873.988	557.416	367.436	874.589	546.491	327.479	782.202
469	0	307.651	89.4479	1614.63	193.334	86.7659	1616.75	308.951	262.508	1613.38	190.467	269.352	1618.59	250.171	309.658	1480.36	250.141	394.015	1246.35	245.292	155.421	1409.5	248.473	96.6031	1226.59	126.112	405.612	1300.66	421.422	273.452	1451.16	506.195	348.967	1230.22	513.795	369.242	1135.28	544.861	326.378	950.575	497.5	309.34	874.16	555.845	359.891	874.289	544.422	320.797	781.469
470	0	308.715	79.0611	1613.95	194.05	76.2948	1616.3	309.398	252.432	1611.79	190.743	258.884	1617.34	250.313	298.804	1479.48	250.897	383.983	1245.86	244.874	144.864	1408.06	248.41	86.6476	1225.2	126.8	395.879	1300.02	421.399	262.034	1450.65	505.81	338.897	1230.18	512.868	359.701	1135.27	543.494	317.887	950.052	495.981	301.393	873.704	554.483	351.753	873.984	542.472	313.718	780.922
471	0	309.285	68.8973	1612.43	194.725	65.833	1615.65	309.728	242.101	1609.68	191.1	248.306	1615.77	250.549	287.951	1478.43	251.762	373.808	1245.03	244.478	134.258	1406.49	248.245	76.5485	1223.2	127.752	386.08	1299.13	421.628	250.527	1449.85	505.617	328.652	1229.73	512.501	350.304	1134.86	542.753	309.016	949.539	494.621	293.059	873.119	553.153	342.81	873.165	540.246	306.12	779.721
472	0	309.918	58.529	1610.75	195.792	55.0849	1614.64	310.376	231.807	1607.71	191.644	237.674	1614.31	251.047	276.94	1477.12	252.75	363.345	1244.18	244.441	123.418	1404.67	248.16	66.3231	1221.33	128.723	376.214	1298.15	421.667	238.88	1448.72	505.517	317.957	1229.02	512.279	340.259	1134.45	541.605	299.441	948.514	493.008	284.319	872.07	552.558	333.613	872.724	538.232	297.997	778.536
473	0	311.067	47.8784	1609.8	196.644	44.4827	1613.76	310.993	221.283	1605.84	192.378	226.99	1612.97	251.648	265.938	1476.08	253.913	352.751	1243.48	244.367	112.598	1403.15	248.052	55.9428	1219.5	129.779	366.259	1297.32	421.921	227.112	1447.88	505.884	306.962	1228.67	512.161	329.797	1134.02	540.944	289.372	947.906	491.08	275.155	870.801	551.644	323.48	871.939	536.651	289.151	778.055
474	0	311.735	37.4877	1608.15	197.238	33.7345	1612.87	311.704	210.707	1604.14	193.079	216.398	1611.57	252.269	254.9	1474.92	254.983	342.147	1242.64	244.276	101.85	1401.63	248.066	45.6593	1217.95	131.007	356.279	1296.39	422.506	215.323	1447.13	506.517	295.742	1228.23	512.553	319.172	1133.48	540.299	278.889	947.049	490.061	265.605	870.114	551.357	312.988	871.408	534.793	280.147	776.897
475	0	312.854	26.7324	1606.64	198.313	22.9692	1611.94	313.046	200.361	1602.55	193.99	205.685	1610.14	253.036	243.877	1473.72	256.153	331.541	1241.71	244.612	90.9044	1400.08	248.094	35.2738	1216.25	132.243	346.202	1295.4	423.085	203.499	1445.99	507.428	284.336	1227.45	513.273	308.228	1132.7	539.978	267.865	945.952	489.194	255.532	869.332	550.956	301.77	870.236	533.164	270.518	775.569
476	0	313.902	16.0665	1605.2	199.604	12.3888	1610.99	313.754	189.479	1600.33	195.141	194.892	1608.82	254.002	232.81	1472.47	257.476	320.945	1240.72	244.867	79.9768	1398.35	248.242	24.7302	1214.4	133.614	336.017	1294.32	423.677	191.785	1444.64	508.18	272.513	1226.23	514.146	296.615	1131.79	539.755	256.502	944.514	488.999	245.039	868.976	551.297	290.422	869.164	531.743	260.205	774.211
477	0	315.049	5.30235	1603.87	201.115	1.68543	1610.05	315.093	178.809	1598.7	196.462	184.307	1607.49	255.053	221.824	1471.21	258.757	310.154	1239.65	245.204	69.0548	1396.96	248.516	14.0681	1212.98	134.93	325.694	1293.24	424.633	179.95	1443.65	509.44	260.571	1225.29	515.367	285.098	1130.79	539.795	244.582	943.272	488.646	234.052	867.957	551.724	278.45	867.982	530.626	249.537	772.897
478	0	316.345	-5.53671	1602.63	202.254	-8.95987	1609.24	316.785	168.138	1597.26	197.885	173.538	1606.06	256.239	210.692	1469.97	260.024	299.372	1238.59	245.908	57.9865	1395.47	248.674	3.45251	1211.35	136.281	315.225	1292.3	425.679	168.194	1442.63	510.989	248.6	1224.33	516.714	273.188	1129.64	540.404	232.308	942.235	488.673	222.68	866.836	552.336	265.809	866.691	530.207	238.405	771.491
479	0	317.887	-16.3552	1601.5	203.794	-19.6846	1608.46	318.102	157.038	1595.22	199.42	162.871	1604.76	257.604	199.542	1468.71	261.307	288.432	1237.61	246.533	46.9488	1394.05	249.197	-7.48611	1209.94	137.758	304.644	1291.35	426.621	156.566	1441.2	512.388	236.39	1222.98	518.433	261.197	1128.41	540.969	219.652	940.76	488.99	210.617	865.653	553.35	252.9	865.291	529.796	226.711	769.857
480	0	319.39	-27.1476	1600.44	205.403	-30.3608	1607.81	319.904	146.252	1593.63	201.25	152.059	1603.48	259.027	188.321	1467.56	262.356	277.405	1236.56	247.522	35.7669	1392.74	249.605	-18.4847	1208.39	139.204	293.956	1290.5	427.712	144.853	1439.75	513.995	224.149	1221.75	520.122	248.859	1127.16	541.978	206.717	939.401	489.09	198.006	863.962	554.731	239.603	863.951	529.602	214.38	768.514
481	0	321.024	-38.1487	1599.48	206.962	-41.0582	1607.2	321.787	135.214	1591.98	203.124	141.365	1602.11	260.555	177.063	1466.37	263.547	266.216	1235.46	248.309	24.6597	1391.5	250.077	-29.5739	1207.24	140.622	283.125	1289.76	428.903	133.151	1438.26	515.658	211.888	1220.4	522.123	236.761	1125.81	543.221	193.554	938.119	490.043	185.299	862.476	556.019	225.963	862.37	530.384	201.587	767.292
482	0	322.706	-49.0457	1598.45	208.734	-51.8128	1606.53	324.087	124.342	1590.41	205.362	130.681	1600.69	262.368	165.797	1465.13	264.882	254.967	1234.26	249.582	13.36	1390.27	250.802	-40.7917	1205.88	142.13	272.292	1288.96	430.401	121.478	1436.69	517.202	199.742	1218.67	523.951	224.145	1124.19	544.686	180.152	936.581	491.772	171.911	861.495	557.877	212.149	860.812	531.487	188.248	765.675
483	0	324.818	-60.1442	1597.48	210.694	-62.4921	1605.81	326.188	113.206	1588.59	207.588	119.947	1599.33	264.279	154.556	1463.96	266.196	243.582	1232.99	250.796	2.15627	1388.96	251.097	-52.3581	1204.52	143.764	261.305	1288.26	432.071	109.741	1435.02	519.203	187.572	1217.02	526.323	212.091	1122.48	546.201	166.469	934.702	492.982	158.362	859.43	559.825	198.179	859.045	533.006	174.26	763.866
484	0	326.801	-71.3045	1596.76	212.645	-73.4233	1605.07	328.572	102.081	1587.2	210.125	109.17	1598.02	266.223	143.344	1462.93	267.812	232.287	1231.82	252.129	-9.23604	1387.87	251.877	-63.9167	1203.52	145.419	250.221	1287.56	433.771	98.0273	1433.48	520.734	175.217	1215.12	528.529	199.445	1120.77	548	152.683	933.074	495.179	144.263	858.223	561.646	183.765	857.233	534.643	159.722	762.234
485	0	328.934	-82.2732	1596.39	214.8	-84.0637	1604.72	331.211	90.9566	1586.06	212.818	98.3369	1596.88	268.365	132.1	1461.74	269.537	220.669	1230.41	253.593	-20.5695	1387.15	252.348	-75.1288	1202.62	147.347	239.278	1286.79	435.57	86.3544	1431.74	522.643	162.807	1213.33	530.756	186.706	1118.96	550.1	138.782	931.415	497.171	130.13	856.457	563.945	169.336	855.6	536.965	144.596	760.842
486	0	331.353	-93.4522	1595.76	217.101	-94.8406	1604.38	333.704	79.7722	1584.81	215.483	87.5576	1596.09	270.649	120.914	1460.75	271.508	209.319	1229.25	254.98	-31.8543	1386.43	252.983	-86.6968	1202.03	149.405	228.246	1286.06	437.637	74.7033	1430.09	524.638	150.245	1211.33	532.627	173.308	1116.61	552.375	124.698	929.622	498.691	115.422	854.068	566.087	154.803	853.447	539.349	129.158	758.948
487	0	333.589	-104.736	1595.04	219.748	-105.825	1604.02	336.491	68.4702	1584.06	218.19	76.5555	1595.5	272.847	109.741	1460.02	273.575	197.742	1228.31	256.553	-43.3135	1385.91	253.537	-98.2962	1201.79	151.45	216.915	1285.52	439.351	63.0292	1428.33	526.537	137.447	1209.28	534.849	159.851	1114.49	554.493	110.319	927.672	501.539	100.758	852.841	568.522	140.116	851.57	542.115	113.188	757.171
488	0	336.03	-115.839	1594.96	222.212	-116.76	1604.01	339.282	57.2623	1583.71	221.107	65.6429	1595.28	275.042	98.4935	1459.42	275.769	186.322	1227.61	258.015	-54.625	1385.77	254.126	-109.961	1201.9	153.485	205.691	1284.98	441.62	51.4184	1427.17	528.758	124.383	1207.59	537.178	146.149	1112.54	557.023	95.782	926.132	504.072	85.9825	851.163	570.727	125.129	849.592	545.167	96.6096	755.836
489	0	338.495	-126.932	1594.63	224.611	-127.62	1604.25	342.041	46.0194	1583.36	223.962	54.776	1595.35	277.438	87.3728	1459.05	277.797	174.846	1226.9	259.622	-65.8578	1385.92	254.962	-121.916	1202.25	155.706	194.447	1284.62	443.6	39.9924	1425.88	531.077	111.157	1205.86	539.317	132.026	1110.46	559.284	81.1386	924.312	506.091	70.6155	849.038	572.692	109.783	847.325	548.372	79.8729	754.411
490	0	341.054	-138.15	1594.68	227.182	-138.634	1604.52	344.89	34.8564	1583.33	226.904	43.7962	1595.75	279.78	76.2278	1458.85	279.86	163.333	1226.46	261.417	-77.2055	1386.18	255.722	-133.953	1202.67	157.884	183.029	1284.21	445.465	28.6596	1424.64	533.268	97.8003	1204	541.469	117.502	1108.56	561.647	66.0528	922.728	508.275	55.0645	847.242	575.512	94.6649	845.875	551.61	62.613	753.208
491	0	343.689	-149.354	1594.89	229.842	-149.634	1605.02	347.656	23.699	1583.66	229.69	32.841	1596.44	282.019	65.1202	1458.98	281.58	151.935	1226.29	263.075	-88.4271	1386.82	256.807	-145.804	1203.57	159.899	171.578	1284.44	447.612	17.2381	1424.16	534.881	83.5394	1202.36	543.59	102.709	1107.03	564.062	50.7305	921.68	511.616	39.3983	846.886	578.21	79.166	844.691	555.231	45.0381	752.602
492	0	346.31	-160.307	1595.49	232.481	-160.513	1605.99	350.642	12.6277	1584.41	232.614	21.9458	1597.4	284.282	54.0895	1459.47	283.289	140.505	1226.57	264.854	-99.5405	1387.83	258.101	-157.829	1204.73	161.647	160.275	1284.7	449.882	5.92423	1424.17	536.993	69.3256	1201.3	545.653	87.7244	1105.9	566.455	35.0721	920.943	514.169	23.3108	845.927	580.708	63.058	843.786	559.003	27.1097	752.525
493	0	348.658	-171.206	1596.16	234.963	-171.26	1607.13	353.501	1.80638	1585.15	235.41	11.1702	1598.59	286.551	43.1271	1460.1	284.8	128.968	1226.91	266.818	-110.718	1388.9	259.409	-169.765	1205.97	163.516	148.894	1285.29	451.843	-5.31355	1423.95	538.807	54.9812	1200.03	547.451	72.4779	1104.6	568.752	19.1374	920.295	516.328	7.19765	844.113	583.163	46.536	842.983	562.72	8.86379	752.376
494	0	351.381	-182.161	1596.91	237.742	-181.985	1608.27	356.306	-9.1291	1586.07	238.308	0.469624	1599.88	288.621	32.196	1460.85	286.107	117.543	1227.42	268.659	-121.703	1390.22	260.723	-181.459	1207.41	165.017	137.552	1286.16	453.592	-16.416	1423.77	540.749	40.5417	1199.25	549.304	57.2133	1103.7	570.956	2.66441	919.875	520.474	-9.65844	845.757	586.115	29.9416	842.789	566.243	-9.617	752.454
495	0	353.8	-193.044	1598.1	240.053	-192.829	1609.62	358.821	-20.1278	1587.25	241.066	-10.2395	1601.38	290.663	21.4755	1462.12	287.418	106.342	1228.31	270.46	-132.698	1391.81	262.26	-192.864	1209.33	166.227	126.387	1287.42	455.624	-27.539	1424.59	542.411	26.2059	1198.79	551.006	41.9256	1103.39	573.37	-14.0237	920.333	523.223	-26.8498	846.097	588.548	12.4697	842.941	569.799	-28.3232	753.323
496	0	356.248	-203.538	1599.44	242.415	-203.15	1611.36	361.579	-30.7261	1588.65	243.884	-20.6632	1603.08	292.528	10.8916	1463.3	288.833	95.3457	1229.66	272.164	-143.389	1393.59	263.78	-204.119	1211.27	167.499	115.339	1288.93	457.713	-38.4551	1425.74	544.44	11.7479	1199.14	552.785	26.6371	1103.46	575.702	-30.7634	921.166	526.035	-44.9091	847.273	591.449	-5.04117	843.805	573.769	-47.3709	754.719
497	0	358.538	-214.159	1600.68	244.76	-213.626	1612.84	364.249	-41.229	1589.92	246.57	-31.0993	1604.57	294.426	0.496947	1464.53	290.281	84.4463	1230.87	273.996	-154.066	1395.35	265.156	-214.99	1213.17	168.721	104.288	1290.38	459.322	-49.3612	1426.45	546.223	-2.43154	1199.21	554.389	11.3947	1103.37	577.872	-48.1759	922.052	528.662	-62.8644	848.047	593.904	-23.2347	844.221	576.966	-66.6035	755.925
498	0	360.679	-224.559	1601.84	247.386	-223.813	1614.47	366.619	-51.7713	1591.07	248.918	-41.3145	1606.26	296.018	-9.93009	1465.7	291.601	73.6558	1232.24	275.38	-164.506	1396.9	266.26	-225.938	1215.04	169.932	93.3732	1291.86	460.899	-60.07	1427.42	548.179	-16.6846	1199.7	555.957	-3.81654	1103.58	579.95	-65.794	923.162	531.052	-80.9042	849.269	596.554	-41.7175	845.307	579.809	-86.2576	757.339
499	0	362.826	-234.833	1603.17	249.234	-234.016	1616.05	369.006	-61.9928	1592.46	251.309	-51.5353	1607.7	297.603	-20.1665	1467.14	292.97	62.9566	1233.59	276.749	-174.845	1398.71	266.925	-236.42	1216.83	171.048	82.7428	1293.31	462.395	-70.8433	1428.72	549.894	-30.5897	1200.39	557.611	-18.9592	1104.08	582.076	-83.5004	924.76	533.23	-99.6342	850.926	598.991	-60.8906	846.827	582.777	-106.08	759.37
500	0	365.046	-244.98	1604.52	251.463	-244.101	1617.71	370.893	-72.3026	1593.47	253.405	-61.5498	1609.38	299.159	-30.3329	1468.33	294.331	52.3209	1234.95	277.829	-184.977	1400.24	267.7	-246.792	1218.49	172.532	72.4156	1294.74	463.751	-81.4454	1429.79	551.468	-44.2569	1200.88	559.247	-33.9329	1104.61	584.154	-101.328	926.457	535.54	-118.309	852.501	601.563	-79.994	848.353	585.645	-126.057	761.388
501	0	366.744	-255.097	1605.4	253.311	-254.147	1619.12	372.651	-82.4751	1594.48	255.415	-71.5959	1610.83	300.6	-40.425	1469.72	295.912	41.7314	1236.52	278.85	-195.068	1401.56	268.159	-257.047	1219.86	174.069	62.3444	1296.08	464.977	-92.1319	1430.81	552.491	-57.7747	1200.88	560.889	-48.9116	1105.08	586.263	-119.737	928.005	537.771	-137.11	854.262	604.057	-99.2239	850.066	587.875	-146.332	763.229
502	0	368.487	-265.023	1606.57	255.096	-264.127	1620.63	374.555	-92.2912	1595.87	257.271	-81.5829	1612.52	301.954	-50.4723	1471.12	297.767	31.3453	1237.97	279.752	-205.121	1403.03	268.458	-267.037	1221.22	175.617	52.4107	1297.43	466.069	-102.849	1431.99	553.968	-71.2352	1201.71	562.572	-63.8595	1105.75	587.854	-137.747	929.898	539.846	-156.526	856.38	606.395	-119.069	852.136	589.941	-166.803	765.609
503	0	369.979	-275.051	1608	256.371	-274.148	1622.14	376.159	-102.2	1597.24	258.822	-91.4585	1614.01	303.307	-60.361	1472.42	299.49	21.3784	1239.34	280.422	-214.931	1404.48	268.727	-276.798	1222.51	177.361	42.7771	1298.59	467.271	-113.481	1433.35	555.772	-84.7414	1203.03	564.278	-78.7515	1106.65	589.739	-155.653	932.066	541.83	-175.619	858.971	608.134	-138.318	853.676	592.061	-187.421	768.486
504	0	371.229	-284.844	1609.02	257.929	-283.903	1623.52	377.442	-112.129	1598.37	260.244	-101.418	1615.6	304.588	-70.288	1473.91	301.268	11.7417	1240.72	281.098	-224.674	1405.76	269.053	-286.506	1223.66	178.988	33.2857	1299.81	468.356	-124.103	1434.62	557.084	-98.0732	1203.78	565.823	-93.7033	1107.3	591.306	-173.736	934.147	541.662	-194.461	860.045	609.931	-157.788	855.703	593.96	-208.39	771.215
505	0	372.341	-294.757	1609.96	259.213	-293.869	1624.8	378.655	-122.024	1599.79	261.462	-111.233	1617.16	305.799	-79.9773	1475.48	302.544	2.08627	1241.9	281.748	-234.367	1406.97	269.558	-296.138	1224.83	180.617	23.9784	1301.07	469.235	-134.588	1435.82	558.376	-111.41	1204.85	567.478	-108.608	1108.43	592.52	-191.759	936.433	544.387	-213.26	863.611	611.721	-177.127	858	595.018	-229.269	774.143
506	0	373.272	-304.626	1611.25	259.936	-303.635	1626.12	379.671	-131.929	1601.37	262.447	-120.958	1618.95	306.856	-89.6658	1476.99	303.992	-7.34426	1243.37	282.428	-243.958	1408.51	270.076	-305.686	1226.45	182.125	14.5247	1302.35	470.311	-145.098	1437.58	559.313	-124.58	1205.87	569.061	-123.492	1109.85	593.741	-209.515	939.131	545.318	-232.129	866.225	613.404	-196.039	860.637	596.375	-250.097	777.861
507	0	373.831	-314.474	1612.85	260.603	-313.27	1627.48	380.567	-141.664	1603.17	263.231	-130.685	1620.49	307.957	-99.2929	1478.5	305.418	-16.6939	1244.62	283.096	-253.514	1410.06	270.811	-315.101	1228.02	183.606	5.58331	1303.61	471.265	-155.329	1439.39	560.975	-137.91	1207.78	570.565	-138.128	1111.46	594.992	-227.105	942.228	546.218	-250.792	869.575	614.652	-215.291	863.733	597.44	-270.974	781.98
508	0	374.172	-324.29	1614.03	260.915	-323.111	1628.68	381.16	-151.632	1604.71	264.105	-140.44	1622.16	308.93	-108.81	1479.97	306.775	-26.2105	1245.99	283.711	-262.879	1411.55	271.413	-324.502	1229.43	185.289	-3.42868	1304.92	471.96	-165.445	1440.85	561.7	-151	1208.82	572.003	-152.751	1113.04	596.228	-244.713	945.491	546.974	-269.426	873.128	615.637	-234.211	866.503	598.192	-291.87	786.198
509	0	374.446	-334.215	1615.43	261.357	-332.871	1629.79	381.658	-161.522	1606.58	264.647	-150.296	1623.74	310.021	-118.05	1481.7	308.009	-35.7135	1247.39	284.405	-272.232	1413.16	272.177	-333.811	1231.16	186.721	-12.4436	1306.24	472.943	-175.513	1442.8	562.791	-164.128	1210.6	573.234	-167.119	1114.85	596.581	-262.151	948.582	546.531	-288.177	876.381	616.268	-253.143	869.657	598.678	-312.969	790.658
510	0	374.583	-344.16	1617.15	261.22	-342.5	1631.04	382.163	-171.393	1608.74	265.037	-159.97	1625.51	311.084	-127.423	1483.36	309.161	-45.1209	1248.85	284.935	-281.538	1414.84	272.898	-343.128	1233.03	188.197	-21.457	1307.72	474.014	-185.404	1445.08	564.155	-177.063	1212.78	574.487	-181.27	1116.93	597.106	-279.41	952.307	547.93	-306.565	881.193	616.789	-272.062	873.28	598.879	-333.726	795.865
511	0	374.437	-354.104	1618.46	261.074	-352.145	1632.16	382.546	-181.335	1610.76	265.41	-169.567	1627.18	312.035	-136.746	1484.88	310.502	-54.3306	1250.32	285.642	-290.816	1416.45	273.759	-352.391	1234.64	189.6	-30.4352	1308.98	474.807	-195.128	1446.97	565.602	-190.03	1215.03	575.731	-195.29	1118.86	597.418	-296.716	955.863	547.888	-324.715	885.534	616.875	-290.895	876.709	598.858	-354.361	801.079
512	0	374.039	-363.977	1619.81	260.602	-361.895	1633.06	382.76	-191.269	1612.69	265.544	-179.231	1628.8	312.83	-146.089	1486.47	311.406	-63.6767	1251.71	286.392	-300.077	1418.05	274.6	-361.612	1236.31	190.966	-39.4587	1310.4	475.387	-204.807	1448.63	566.277	-202.563	1216.5	576.966	-208.896	1120.86	597.492	-313.81	959.611	547.586	-342.866	889.841	616.872	-309.667	880.374	598.419	-374.918	806.401
513	0	373.722	-373.914	1621.41	260.129	-371.548	1634.01	382.989	-201.225	1614.91	265.649	-188.968	1630.39	313.709	-155.343	1487.96	312.328	-73.1488	1253.25	286.729	-309.059	1419.54	275.345	-370.89	1238.07	192.276	-48.5337	1311.87	476.204	-214.498	1450.69	567.498	-214.984	1218.75	577.928	-222.537	1123	597.434	-330.69	963.76	547.156	-360.946	894.931	617.14	-328.558	885.075	597.651	-395.417	812.247
514	0	373.518	-383.854	1622.91	259.824	-381.206	1635	383.15	-211.179	1616.86	265.789	-198.625	1631.77	314.613	-164.648	1489.4	313.322	-82.582	1254.55	287.425	-318.5	1421.06	275.956	-380.069	1239.68	193.42	-57.6079	1313.03	476.879	-224.057	1452.51	568.523	-227.111	1220.9	579.401	-235.52	1125.24	597.266	-347.576	968.054	546.497	-378.704	899.994	616.366	-347.069	888.996	596.56	-415.734	818.307
515	0	373.089	-393.892	1624.04	259.571	-390.865	1635.79	383.194	-221.225	1618.53	265.826	-208.325	1633.12	315.359	-174.001	1490.48	314.383	-92.1651	1255.89	287.986	-327.679	1422.25	276.529	-389.307	1240.92	194.619	-66.7524	1314.07	477.753	-233.73	1454.28	569.539	-239.074	1222.52	580.492	-248.647	1126.97	596.791	-364.118	971.89	545.192	-396.713	904.387	615.561	-365.603	892.864	595.289	-435.877	824.221
516	0	372.809	-403.83	1624.95	259.109	-400.644	1636.34	383.27	-231.206	1620	265.881	-218.114	1634.2	316.195	-183.331	1491.72	315.139	-101.89	1256.98	288.559	-337.077	1423.3	277.123	-398.567	1242.02	195.728	-75.9609	1315.1	478.229	-243.388	1455.45	570.493	-250.831	1224.06	581.536	-261.374	1128.49	596.126	-380.525	975.656	543.994	-414.102	909.337	614.577	-384.1	896.782	593.331	-455.945	830.061
517	0	372.282	-413.852	1626.06	258.666	-410.275	1636.94	383.545	-241.189	1621.49	266.173	-227.947	1635.07	316.798	-192.854	1492.71	315.851	-111.696	1257.85	289.083	-346.323	1424.38	277.57	-407.769	1243.08	196.631	-85.3073	1315.78	478.989	-253.064	1456.96	571.904	-262.353	1225.99	582.924	-274.019	1130.23	595.539	-396.832	979.732	542.768	-431.279	914.486	613.443	-402.265	900.919	591.194	-475.582	836.141
518	0	371.932	-423.856	1626.98	258.106	-420.021	1637.39	383.512	-251.226	1622.64	266.133	-237.694	1635.76	317.383	-202.375	1493.4	316.49	-121.451	1258.74	289.47	-355.744	1425.2	278.167	-417.017	1244.03	197.431	-94.6413	1316.62	479.426	-262.715	1458.03	572.533	-273.607	1227.29	583.976	-286.58	1131.67	594.66	-412.741	983.526	541.541	-448.107	919.443	612.234	-420.208	905.02	588.772	-494.956	842.16
519	0	371.604	-433.983	1627.46	257.793	-430.01	1637.49	383.613	-261.427	1623.47	266.205	-247.509	1636.38	317.982	-212.005	1494.11	316.97	-131.402	1259.35	289.964	-365.306	1425.7	278.602	-426.316	1244.42	198.174	-104.07	1317.26	479.945	-272.339	1458.85	573.314	-284.851	1228.18	584.961	-298.911	1132.78	593.496	-428.718	987.044	540.022	-464.802	924.24	610.744	-437.882	908.779	586.355	-513.985	848.157
520	0	371.381	-444.209	1627.77	257.521	-440.009	1637.51	383.52	-271.602	1624.02	266.194	-257.528	1636.66	318.28	-221.653	1494.57	317.33	-141.234	1259.85	290.375	-374.966	1426.06	279.057	-435.591	1244.67	198.676	-113.666	1317.74	480.182	-282.017	1459.31	574.16	-295.893	1229.19	586.076	-311.033	1133.77	592.39	-444.209	990.492	537.898	-481.146	929.057	609.017	-455.427	912.426	583.587	-532.714	854.154
521	0	371.078	-454.271	1627.92	257.049	-449.978	1637.4	383.625	-281.729	1624.57	266.3	-267.648	1636.8	318.415	-231.48	1494.94	317.415	-150.974	1260.25	290.731	-384.576	1426.29	279.408	-444.866	1244.77	199.048	-123.256	1318.07	480.505	-291.696	1459.92	574.851	-306.831	1230.04	586.877	-323.044	1134.67	591.232	-459.436	993.987	535.873	-497.107	933.769	607.345	-472.499	916.231	580.716	-551.036	859.975
522	0	370.885	-464.507	1627.75	256.937	-460.045	1637.02	383.898	-292.032	1625.03	266.192	-277.715	1636.77	318.632	-241.291	1495.12	317.175	-160.809	1260.48	291.033	-394.208	1426.16	279.745	-454.278	1244.55	199.115	-132.927	1318.46	480.651	-301.285	1460	575.304	-317.722	1230.39	587.645	-334.969	1135.21	590.035	-474.347	997.142	533.939	-512.818	938.236	605.343	-489.303	919.757	577.652	-568.848	865.566
523	0	370.626	-474.863	1627.17	257.098	-470.318	1636.26	383.628	-302.304	1624.79	266.067	-287.898	1636.64	318.731	-251.16	1495.06	316.848	-170.419	1260.66	291.47	-404.018	1425.77	280.219	-463.692	1244.01	199.092	-142.71	1318.7	480.687	-310.986	1459.81	576.112	-328.61	1230.77	588.246	-346.708	1135.38	588.536	-489.138	1000.01	531.954	-528.223	942.392	603.219	-505.825	922.893	574.713	-586.53	871.034
524	0	370.43	-485.127	1626.76	256.626	-480.534	1635.49	383.514	-312.664	1624.65	265.961	-298.313	1636.14	318.645	-261.157	1494.82	316.437	-180.133	1260.61	291.716	-413.918	1425.26	280.762	-473.185	1243.5	198.835	-152.588	1318.74	480.79	-320.538	1459.62	576.506	-339.355	1231.01	588.585	-358.277	1135.57	587.18	-503.426	1002.98	529.711	-543.372	946.573	601.041	-521.93	926.043	571.525	-603.505	876.182
525	0	370.388	-495.539	1626.13	256.445	-491.031	1634.42	383.413	-322.986	1624.33	265.906	-308.667	1635.47	318.58	-271.252	1494.33	315.799	-189.784	1260.35	291.973	-423.84	1424.63	281.112	-482.585	1242.58	198.347	-162.634	1318.57	480.845	-330.076	1459.13	576.85	-350.016	1230.98	589.27	-369.759	1135.72	585.703	-517.485	1005.58	527.313	-558.16	950.477	598.84	-537.562	928.967	568.508	-620.088	881.308
526	0	370.147	-505.931	1624.95	256.277	-501.412	1633.13	383.266	-333.497	1623.67	265.639	-319.078	1634.62	318.398	-281.346	1493.71	315.24	-199.383	1259.83	292.404	-433.865	1423.63	281.718	-492.02	1241.38	197.792	-172.711	1318.34	480.929	-339.63	1458.38	576.543	-360.537	1230	589.308	-381.135	1135.04	584.042	-531.29	1007.69	525.112	-572.664	954.007	596.473	-552.879	931.353	565.401	-636.295	885.768
527	0	369.958	-516.542	1623.73	256.357	-512.094	1631.57	383.111	-343.994	1622.93	265.337	-329.759	1633.59	318.082	-291.635	1492.96	314.406	-209.046	1259.33	292.776	-444.031	1422.27	282.258	-501.649	1239.87	197.088	-182.952	1318.08	480.821	-349.215	1457.24	576.461	-371.037	1229.18	589.491	-392.389	1134.43	581.904	-544.906	1009.55	523.041	-586.777	957.067	593.921	-567.932	933.412	562.231	-652.119	890.04
528	0	369.792	-527.065	1622.54	255.795	-522.773	1629.87	382.697	-354.635	1621.99	264.95	-340.431	1632.39	317.57	-302.027	1491.99	313.602	-218.698	1258.83	292.893	-454.211	1421	282.715	-511.253	1238.31	196.067	-193.254	1317.75	480.56	-358.852	1456.15	576.655	-381.54	1228.7	589.448	-403.448	1133.72	580.096	-558.199	1011.22	520.358	-600.689	959.962	591.462	-582.632	935.613	558.893	-667.411	893.913
529	0	369.635	-537.716	1621.1	255.749	-533.483	1628.22	382.417	-365.238	1620.9	264.756	-351.186	1630.82	317.071	-312.572	1490.98	312.678	-228.458	1257.99	293.167	-464.55	1419.45	283.117	-520.781	1236.56	195.116	-203.719	1317.26	480.644	-368.45	1454.98	576.121	-391.849	1227.21	589.293	-414.386	1132.55	578.297	-571.236	1012.6	517.985	-614.215	962.649	589.21	-596.945	937.493	555.771	-682.23	897.376
530	0	369.358	-548.392	1619.48	255.323	-544.297	1626.26	382.034	-375.905	1619.43	264.255	-361.924	1629.19	316.63	-323.162	1489.83	311.581	-238.225	1257.09	293.383	-475.044	1417.61	283.622	-530.667	1234.55	193.978	-214.253	1316.63	480.293	-378.163	1453.13	575.691	-402.008	1225.53	589.106	-425.284	1131.15	576.341	-583.844	1013.47	515.644	-627.329	964.675	586.583	-610.864	938.579	552.531	-696.623	900.381
531	0	369.047	-559.127	1617.85	255.205	-555.186	1624.22	381.54	-386.63	1617.95	263.577	-372.806	1627.25	316.129	-333.912	1488.6	310.562	-248.129	1256.25	293.514	-485.612	1415.69	283.866	-540.501	1232.32	192.726	-224.911	1316.02	479.952	-388.068	1451.41	575.078	-412.17	1223.85	588.773	-436.069	1129.62	574.418	-596.437	1014.09	513.025	-640.181	966.416	584.098	-624.5	939.738	549.316	-710.563	903.077
532	0	368.805	-569.852	1616.31	254.586	-566.082	1622.13	381.035	-397.363	1616.25	263.085	-383.708	1625.11	315.435	-344.758	1486.99	309.264	-258.024	1255.14	293.604	-496.176	1413.74	284.008	-550.308	1230.07	191.398	-235.675	1315.13	479.809	-397.89	1449.58	574.665	-422.122	1222.1	588.442	-446.574	1128.01	572.373	-608.511	1014.41	510.762	-652.595	967.84	581.731	-637.818	940.678	546.124	-724.142	905.294
533	0	368.427	-580.677	1614.36	254.347	-576.894	1619.9	380.281	-408.268	1614.08	262.636	-394.632	1622.6	314.922	-355.691	1485.29	308.029	-268.079	1253.74	293.805	-506.999	1411.52	284.284	-560.52	1227.64	190.148	-246.545	1314.15	479.503	-407.928	1447.36	573.91	-431.987	1219.7	587.924	-457.053	1125.78	570.645	-620.448	1014.39	508.427	-664.776	968.689	579.056	-650.731	940.683	543.097	-737.356	906.847
534	0	367.642	-591.484	1612.18	253.838	-587.945	1617.41	379.766	-419.023	1611.95	261.925	-405.446	1620.17	314.126	-366.673	1483.38	306.608	-278.013	1252.28	293.675	-517.858	1409.07	284.263	-570.693	1225.04	188.767	-257.494	1313.11	479.134	-418.076	1445.07	573.446	-441.822	1217.53	587.542	-467.028	1123.4	568.578	-631.982	1013.7	506.129	-676.565	969.102	576.483	-663.214	940.468	539.825	-750.106	907.927
535	0	367.155	-602.473	1610.53	252.926	-598.765	1615.06	378.997	-429.931	1609.92	260.998	-416.393	1617.52	313.368	-377.654	1481.68	305.137	-288.204	1250.86	293.6	-528.718	1406.91	284.244	-581.056	1222.63	187.193	-268.52	1312.05	478.608	-428.381	1442.9	572.367	-451.41	1214.96	586.601	-477.619	1121.13	566.674	-643.382	1013.19	503.619	-688.089	969.144	574.291	-675.401	940.329	537.011	-762.365	908.826
536	0	366.227	-613.236	1608.54	252.032	-609.701	1612.72	378.262	-440.811	1607.89	260.29	-427.362	1615.01	312.562	-388.636	1479.77	303.689	-298.339	1249.35	293.476	-539.789	1404.86	284.166	-591.475	1220.28	185.666	-279.522	1310.76	478.119	-438.678	1440.68	571.445	-460.949	1212.62	586.028	-487.706	1118.94	564.783	-654.411	1012.06	501.416	-699.077	968.887	571.987	-686.961	939.641	534.063	-774.041	908.962
537	0	365.227	-624.225	1606.39	251.14	-620.499	1610.28	377.297	-451.821	1605.61	259.284	-438.113	1612.52	311.551	-399.656	1477.82	302.245	-308.683	1247.66	293.172	-550.737	1402.54	283.991	-602.185	1217.69	184.102	-290.743	1309.38	477.528	-449.141	1438.36	570.808	-470.711	1210.21	585.103	-497.825	1116.27	562.906	-665.088	1010.46	499.27	-709.845	967.828	569.783	-698.247	938.262	531.418	-785.374	908.56
538	0	363.949	-635.169	1604.45	249.894	-631.424	1607.86	376.248	-462.868	1603.51	258.305	-449.012	1609.98	310.681	-410.64	1475.92	300.715	-319.024	1246.06	292.713	-561.88	1400.3	283.475	-612.968	1215.3	182.544	-301.916	1308	476.553	-459.771	1435.82	569.106	-480.28	1207.18	584.156	-507.649	1113.63	561.125	-675.481	1008.67	497.231	-720.285	966.439	567.51	-708.977	936.402	528.817	-796.328	907.559
539	0	362.698	-646.122	1602.73	248.376	-642.106	1605.71	375.261	-473.719	1601.72	257.046	-459.782	1607.63	309.64	-421.729	1473.96	299.543	-329.507	1244.5	292.055	-572.884	1398.32	283.092	-623.867	1213.28	181	-313.088	1306.52	475.828	-470.377	1433.82	567.992	-489.966	1205	583.121	-517.409	1111.26	559.427	-685.542	1006.75	495.258	-730.261	964.842	565.379	-719.187	934.53	526.393	-806.539	906.133
540	0	361.045	-656.972	1601.02	246.93	-652.902	1603.59	373.811	-484.722	1599.7	255.813	-470.541	1605.24	308.654	-432.652	1472.3	298.184	-340.035	1242.83	291.311	-584.015	1396.46	282.404	-634.816	1211.35	179.572	-324.312	1304.98	475.03	-481.249	1431.98	566.845	-499.801	1202.84	581.95	-526.886	1108.95	557.776	-695.225	1004.45	493.487	-739.873	962.816	563.525	-728.972	932.251	524.37	-816.223	904.245
541	0	359.381	-667.88	1599.35	245.173	-663.513	1601.59	372.494	-495.53	1597.81	254.406	-481.234	1603	307.446	-443.781	1470.41	297.022	-350.669	1241.32	290.342	-595.126	1394.44	281.622	-646.046	1209.25	178.262	-335.51	1303.35	473.862	-492.289	1429.95	565.365	-509.67	1200.59	580.67	-536.339	1106.57	556.201	-704.512	1001.82	491.785	-749.126	960.297	561.812	-738.215	929.51	522.57	-825.474	901.721
542	0	357.352	-678.714	1597.74	242.97	-674.354	1599.62	370.721	-506.492	1596.01	252.632	-491.816	1600.88	306.216	-454.833	1468.67	296.161	-361.453	1239.78	289.289	-606.263	1392.77	280.468	-657.141	1207.46	176.97	-346.713	1301.38	472.676	-503.433	1428.28	564.12	-519.727	1198.82	579.438	-545.625	1104.55	554.606	-713.549	999.069	490.28	-757.962	957.584	560.286	-746.823	926.815	521.002	-834.112	898.748
543	0	355.314	-689.411	1596.56	240.979	-684.7	1598.01	369.03	-517.249	1594.43	251.137	-502.443	1598.77	304.975	-465.732	1467.06	295.108	-372.502	1238.03	288.066	-617.277	1391.31	279.545	-668.354	1206.15	175.851	-357.777	1299.51	471.631	-514.704	1426.98	562.738	-529.711	1197.12	578.035	-554.718	1102.69	553.193	-722.056	996.161	488.862	-766.367	954.686	559.003	-754.788	923.833	519.812	-842.199	895.319
544	0	353.092	-700.218	1595.06	238.564	-695.333	1596.14	367.089	-528.021	1592.69	249.231	-512.932	1596.78	303.559	-476.701	1465.22	294.32	-383.623	1236.29	286.788	-628.298	1389.81	278.505	-679.586	1204.67	174.713	-368.866	1297.25	470.413	-525.967	1425.62	561.451	-539.896	1195.58	576.446	-563.681	1100.72	551.924	-730.384	992.915	487.447	-774.425	951.154	557.629	-762.337	920.221	518.965	-849.567	891.318
545	0	350.643	-710.933	1593.71	236.499	-705.77	1594.57	365.036	-538.74	1591.14	247.185	-523.388	1595.01	302.172	-487.379	1463.65	293.619	-394.859	1234.64	285.295	-639.303	1388.47	277.507	-690.97	1203.44	173.528	-380.013	1295.16	469.049	-537.319	1424.42	559.874	-550.332	1194.02	574.801	-572.828	1099	550.735	-738.381	989.552	486.394	-782.156	947.18	556.309	-769.496	916.335	518.261	-856.615	886.747
546	0	348.089	-721.425	1592.71	233.913	-716.127	1593.14	363.017	-549.212	1590.09	244.914	-533.881	1593.37	300.548	-497.898	1462.24	292.533	-406.268	1232.69	283.795	-650.191	1387.58	276.546	-702.402	1202.88	172.26	-391.114	1292.78	467.56	-548.319	1423.72	558.608	-560.549	1193.22	573.119	-581.864	1097.87	549.49	-745.891	986.158	485.361	-789.448	943.175	555.312	-775.985	912.594	517.664	-862.974	881.82
547	0	345.569	-731.908	1591.81	231.07	-726.379	1591.92	360.655	-559.753	1589.21	242.53	-544.158	1592.08	298.867	-508.307	1460.77	291.368	-417.728	1230.75	282.106	-661.032	1386.85	275.466	-713.976	1202.5	170.964	-402.302	1290.39	466.087	-559.18	1423.23	557.779	-570.913	1192.97	571.531	-590.998	1096.97	548.419	-753.258	982.581	484.537	-796.226	938.758	554.748	-782.189	908.867	517.674	-868.719	876.571
548	0	342.818	-742.389	1590.91	228.599	-736.561	1590.77	357.923	-570.333	1588.27	240.239	-554.557	1590.98	297.041	-518.618	1459.38	289.947	-429.161	1228.74	280.502	-671.884	1386.31	274.46	-725.873	1202.25	169.502	-413.501	1287.87	464.286	-569.847	1422.6	555.778	-581.052	1191.79	569.726	-600.117	1095.95	547.447	-760.442	978.763	483.799	-802.816	933.861	554.323	-787.879	904.65	517.697	-873.95	870.531
549	0	340.055	-752.811	1590.56	225.71	-747.023	1589.93	355.422	-580.665	1588.02	237.747	-564.757	1590.39	294.995	-528.866	1458.53	288.359	-440.663	1227.22	278.812	-682.729	1386.06	273.517	-738.02	1202.47	167.95	-424.749	1285.85	462.498	-580.302	1422.51	554.623	-591.508	1191.8	567.711	-609.42	1095.49	546.535	-767.349	975.077	483.208	-808.952	928.749	553.71	-793.298	900.29	517.932	-878.618	864.416
550	0	337.292	-763.031	1590.64	222.92	-757.213	1589.64	352.702	-591.054	1588.07	234.865	-574.998	1589.95	292.885	-539.199	1457.92	286.732	-452.197	1225.98	276.93	-693.49	1386.3	272.508	-750.233	1203.14	166.308	-435.979	1283.94	460.937	-590.651	1423.03	552.781	-601.443	1191.83	565.626	-618.64	1095.43	545.997	-773.983	971.66	482.791	-814.578	923.63	553.849	-797.975	896.48	518.603	-882.567	858.077
551	0	334.565	-773.233	1590.95	220.146	-767.435	1589.63	349.943	-601.246	1588.25	232.122	-585.257	1589.83	290.83	-549.549	1457.54	285.252	-463.551	1225.22	274.945	-704.093	1386.68	271.567	-762.413	1204.08	164.649	-447.243	1282.38	458.863	-600.967	1423.47	551.027	-611.522	1192.2	563.249	-627.899	1095.49	545.482	-779.712	968.212	482.655	-819.863	918.31	554.06	-802.205	892.452	519.555	-885.812	851.363
552	0	331.766	-783.525	1591.43	217.406	-777.661	1589.82	347.178	-611.385	1588.77	229.24	-595.531	1590.01	288.709	-559.964	1457.54	283.673	-474.851	1224.93	273.323	-715.149	1387.33	270.405	-774.439	1205.01	163.236	-458.512	1281.34	456.918	-611.315	1424.35	549.497	-621.676	1192.89	560.848	-637.369	1095.96	544.761	-785.642	964.561	482.668	-824.69	912.908	554.287	-806.126	888.339	520.893	-888.574	844.704
553	0	329.023	-793.674	1592.43	214.605	-787.914	1590.36	344.376	-621.479	1589.75	226.414	-605.663	1590.47	286.455	-570.266	1458.06	282.188	-486.067	1225.09	271.471	-725.897	1388.33	269.331	-786.159	1206.29	161.344	-469.767	1280.59	454.974	-621.706	1425.76	547.086	-631.573	1193.88	558.305	-646.627	1096.99	544.456	-791.197	961.547	482.865	-828.895	907.653	554.772	-809.232	884.885	522.375	-890.394	838
554	0	326.424	-803.673	1593.67	211.746	-798.115	1591.07	341.357	-631.554	1590.73	223.479	-615.831	1590.95	284.239	-580.642	1458.57	280.811	-497.367	1225.14	269.643	-736.467	1389.51	268.327	-797.495	1207.8	159.677	-480.987	1280.27	453.068	-632.005	1427.38	545.148	-641.631	1195.32	555.779	-655.858	1098.32	544.265	-796.265	958.736	483.81	-832.067	903.031	555.655	-811.94	881.74	524.45	-891.306	831.693
555	0	323.806	-813.684	1594.83	209.352	-808.13	1591.88	338.659	-641.419	1591.89	220.54	-626.072	1591.61	282.189	-591.238	1458.99	279.359	-508.605	1225.56	268.132	-747.092	1390.68	267.223	-808.715	1209.12	157.975	-492.026	1280.24	451.186	-642.466	1428.97	543.083	-651.84	1196.67	553.083	-665.159	1099.5	544.13	-800.975	956.068	484.527	-835.263	898.234	556.409	-814.019	878.437	526.588	-891.816	825.205
556	0	321.087	-823.65	1596.15	206.923	-818.205	1592.73	335.823	-651.407	1593.03	218.013	-636.073	1592.33	280.167	-601.555	1459.96	277.973	-519.491	1226.29	266.611	-757.659	1391.93	266.317	-819.789	1210.55	156.25	-503.002	1280.59	449.338	-652.861	1430.72	541.095	-661.925	1198.35	550.461	-674.34	1100.92	544.001	-805.371	953.642	485.303	-838.027	893.582	557.579	-815.85	875.779	528.949	-891.677	819.026
557	0	318.569	-833.469	1597.79	204.071	-828.099	1593.71	333.217	-661.201	1594.66	215.236	-645.927	1593.03	278.207	-611.639	1461.06	276.63	-530.238	1227.12	265.079	-767.968	1393.52	265.151	-830.478	1212.22	154.34	-514.017	1281.11	447.845	-663.161	1432.92	539.176	-671.887	1200.19	548.062	-683.234	1102.86	544.109	-809.443	951.889	486.374	-840.298	889.808	558.746	-817.294	873.785	531.414	-890.785	813.492
558	0	316.186	-843.234	1599.42	201.528	-837.866	1594.7	330.7	-671.012	1596.2	212.727	-655.787	1594.17	276.453	-621.68	1462.05	275.106	-540.953	1227.94	263.728	-778.254	1395.02	264.26	-841.1	1213.88	152.444	-524.88	1281.61	446.221	-673.262	1434.72	537.235	-681.751	1201.71	545.753	-691.88	1104.6	544.401	-813.236	950.541	487.462	-842.377	886.25	560.187	-818.378	872.242	534.008	-889.509	808.269
559	0	313.74	-853.057	1600.7	199.49	-847.625	1595.57	328.473	-680.735	1597.7	210.503	-665.605	1595.08	274.904	-631.683	1463.15	273.361	-551.543	1228.64	262.501	-788.535	1396.33	263.406	-851.623	1215.21	150.647	-535.706	1282.29	444.842	-683.379	1436.44	535.387	-691.482	1202.86	543.422	-700.586	1106	544.944	-817.001	949.05	488.803	-844.328	882.88	561.668	-819.534	870.651	536.979	-887.548	803.314
560	0	311.479	-862.962	1602.25	197.264	-857.508	1596.47	326.154	-690.563	1599.11	208.244	-675.464	1595.9	273.241	-641.642	1464.19	271.488	-561.984	1229.63	261.358	-798.707	1397.71	262.628	-862.092	1216.57	148.692	-546.317	1283.12	443.226	-693.236	1437.79	533.881	-700.949	1204.3	541.372	-708.964	1107.47	545.319	-820.697	947.758	490.298	-845.976	880.075	563.042	-820.684	869.444	539.476	-885.618	798.55
561	0	309.352	-872.791	1603.86	194.933	-867.224	1597.43	324.096	-700.435	1600.79	206.194	-685.177	1596.97	271.732	-651.779	1465.13	269.638	-572.194	1230.5	260.337	-808.794	1399.13	261.96	-872.528	1218.08	146.68	-557.048	1283.98	441.994	-702.872	1439.49	532.701	-710.185	1205.67	539.57	-717.101	1108.96	545.889	-824.247	947.184	491.722	-847.831	877.903	564.545	-821.722	868.767	541.904	-883.409	794.257
562	0	307.435	-882.599	1605.37	193.515	-876.979	1598.6	322.33	-710.253	1602.3	204.42	-694.893	1597.96	270.219	-661.653	1466.28	268.054	-582.131	1231.77	259.431	-818.901	1400.57	261.562	-883.081	1219.64	144.609	-567.41	1285.18	440.585	-712.286	1440.54	531.781	-719.097	1207.05	537.954	-725.006	1110.23	546.777	-827.712	946.437	493.461	-849.276	875.748	566.232	-822.998	868.31	544.346	-881.125	790.45
563	0	305.561	-892.539	1606.92	191.835	-886.773	1599.67	320.762	-720.144	1604	202.899	-704.741	1599.1	268.873	-671.307	1467.93	266.517	-591.918	1233.14	258.572	-828.914	1401.95	261.094	-893.494	1221.11	142.665	-578.104	1286.28	439.455	-721.582	1441.75	530.904	-727.652	1208.21	536.522	-732.771	1111.43	547.486	-831.173	945.869	494.868	-851.152	873.867	567.738	-824.262	867.895	546.56	-879.061	786.932
564	0	304.003	-902.454	1608.58	190.027	-896.646	1600.79	319.304	-730.091	1605.9	201.391	-714.56	1600.4	267.383	-681.153	1469.4	264.728	-601.676	1234.42	257.747	-838.764	1403.52	260.565	-903.546	1222.75	140.537	-588.295	1287.77	438.383	-730.576	1443.22	529.649	-735.743	1209.48	535.366	-740.133	1112.99	548.313	-834.488	945.865	496.687	-852.259	872.553	569.246	-825.687	868.217	548.715	-876.763	784.48
565	0	302.7	-912.442	1610.14	188.479	-906.451	1601.95	318.005	-739.973	1607.63	200.151	-724.436	1601.73	266.069	-690.91	1470.69	263.091	-611.337	1235.73	257.078	-848.453	1405.15	260.232	-913.344	1224.36	138.603	-598.614	1289.32	437.521	-739.473	1444.66	528.865	-743.469	1210.88	534.411	-747.103	1114.39	549.092	-837.824	945.991	498.276	-854.028	871.836	570.839	-827.373	868.763	550.721	-874.703	782.44
566	0	301.408	-922.298	1611.3	187.356	-916.406	1602.99	316.856	-749.867	1609.28	199.061	-734.28	1603.28	265.065	-700.517	1472.26	261.485	-621.024	1237.09	256.598	-858.251	1406.6	259.751	-923.032	1225.71	136.949	-608.915	1290.86	436.664	-748.324	1445.74	527.686	-750.732	1211.8	533.567	-753.492	1115.51	549.996	-841.17	946.168	499.53	-855.887	871.428	572.174	-829.16	869.27	552.618	-873.04	780.705
567	0	300.404	-932.388	1612.76	186.564	-926.42	1604.13	315.757	-759.889	1611.2	197.933	-744.174	1604.96	264.055	-710.173	1473.78	259.99	-630.606	1238.52	256.093	-867.955	1408.06	259.305	-932.71	1227.11	135.348	-619.18	1292.34	435.786	-757.144	1447.01	526.707	-757.538	1212.92	532.991	-759.519	1117.08	550.744	-844.392	946.646	500.952	-858.029	870.98	573.566	-831.086	870.204	554.242	-871.881	779.864
568	0	299.613	-942.457	1614.38	185.739	-936.346	1605.55	314.82	-769.905	1613.06	197.293	-754.315	1606.68	263.118	-719.706	1475.48	258.855	-640.117	1240.18	255.53	-877.466	1409.72	258.967	-942.314	1228.84	134.024	-629.081	1294.3	435.107	-765.935	1448.8	526.119	-763.801	1214.52	532.63	-764.957	1118.83	551.577	-847.457	947.449	502.317	-860.242	871.534	574.484	-832.898	871.151	556.125	-871.016	779.755
569	0	298.918	-952.267	1615.72	184.996	-946.473	1606.87	314.005	-779.899	1614.97	196.262	-764.266	1608.46	262.291	-729.289	1477.06	257.696	-649.589	1241.61	255.129	-887.04	1411.51	258.527	-951.861	1230.62	132.777	-639.118	1295.87	434.335	-774.628	1450.15	525.876	-769.661	1216.35	532.324	-769.994	1120.49	552.251	-849.882	948.421	504.493	-861.886	872.795	575.716	-834.453	872.436	558.277	-870.53	780.395
570	0	298.523	-962.471	1616.9	184.508	-956.662	1608.11	313.313	-789.909	1616.71	195.651	-774.581	1610.29	261.339	-738.878	1478.63	256.629	-659.04	1242.97	254.506	-896.688	1412.99	258.039	-961.519	1232.13	131.792	-648.953	1297.56	433.592	-783.613	1451.36	524.968	-775.132	1217.25	532.058	-774.714	1121.88	553.144	-852.573	949.104	505.579	-864.55	873.595	576.249	-836.018	873.149	559.724	-871.048	780.755
571	0	298.127	-972.413	1618.08	184.092	-967.005	1609.42	312.663	-799.857	1618.55	194.706	-784.721	1612.25	260.379	-748.566	1480.09	255.947	-668.339	1244.68	254.045	-906.192	1414.55	257.442	-971.035	1233.65	130.742	-658.911	1299.19	432.877	-792.594	1452.75	524.424	-780.302	1218.91	531.917	-779.163	1123.68	553.958	-855.217	950.058	506.952	-867.368	874.94	577.069	-837.738	874.406	560.839	-872.105	781.636
572	0	298.122	-982.5	1619.34	183.976	-977.082	1610.79	311.927	-809.94	1620.3	193.894	-795.047	1614.13	259.781	-758.099	1481.75	255.114	-677.742	1246.06	253.496	-915.707	1416.12	256.893	-980.361	1235.2	129.939	-668.73	1300.7	432.352	-801.573	1454.27	524.089	-785.267	1220.84	531.961	-783.404	1125.55	554.756	-857.675	951.176	508.07	-870.411	876.414	577.634	-839.683	875.794	561.563	-873.488	782.868
573	0	298.016	-992.361	1620.03	183.954	-987.564	1611.82	311.249	-819.729	1621.56	193.152	-805.278	1615.94	259.082	-767.608	1483.09	254.415	-687.279	1247.45	253.077	-925.209	1417.34	256.389	-989.739	1236.38	129.117	-678.449	1302.16	431.755	-810.754	1455.54	523.425	-790.177	1222.22	532.013	-787.536	1127.29	555.571	-860.287	952.481	508.89	-873.488	877.615	577.901	-841.661	876.907	561.867	-875.309	783.745
574	0	298.166	-1002.47	1620.76	184.152	-998.024	1612.86	310.694	-829.66	1622.65	192.582	-815.698	1617.45	258.425	-777.348	1484.12	253.677	-696.902	1248.65	252.457	-934.822	1418.39	255.639	-999.194	1237.42	128.315	-688.23	1303.32	431.006	-820.011	1456.4	523.366	-795.352	1224.08	531.961	-791.663	1128.84	555.985	-862.974	953.083	509.496	-876.618	878.444	577.954	-843.692	877.65	561.898	-877.506	784.695
575	0	298.379	-1012.4	1621.41	184.282	-1008.36	1613.88	310.027	-839.615	1623.78	192.052	-826.082	1618.82	257.74	-787.035	1485	252.945	-706.54	1249.7	251.81	-944.421	1419.43	255.099	-1008.69	1238.35	127.902	-698.005	1304.52	430.307	-829.222	1457.42	522.419	-800.186	1225.51	532.126	-795.867	1130.63	556.435	-865.611	954.125	510.35	-879.695	879.826	578.255	-845.671	878.945	562.136	-879.97	786.032
576	0	298.707	-1022.33	1621.83	184.303	-1018.81	1614.67	309.636	-849.528	1624.62	191.452	-836.505	1619.95	257.197	-796.876	1485.51	252.65	-715.761	1250.57	251.215	-954.119	1420.15	254.495	-1018.18	1239.06	127.303	-707.588	1305.36	429.869	-838.579	1458.4	522.231	-805.493	1227.21	532.207	-800.178	1132.22	556.858	-868.394	955.017	510.722	-883.039	880.668	578.074	-847.916	879.7	562.193	-882.56	787.116
577	0	298.976	-1032.43	1621.88	184.667	-1029.43	1615.22	309.231	-859.501	1624.91	190.952	-846.863	1620.9	256.867	-806.51	1486.3	252.328	-725.44	1251.18	250.743	-963.737	1420.39	253.942	-1027.82	1239.33	126.95	-717.138	1305.97	429.236	-848.149	1458.75	521.82	-811.062	1228.39	532.078	-804.63	1133.43	557.228	-871.402	955.56	511.295	-886.285	881.244	578.094	-850.064	880.189	562.397	-885.527	787.828
578	0	298.993	-1042.1	1621.62	185.253	-1039.85	1615.52	308.85	-869.491	1625.08	190.576	-857.399	1621.46	256.406	-816.34	1486.69	252.054	-734.982	1251.62	250.211	-973.485	1420.48	253.338	-1037.3	1239.33	126.579	-726.763	1306.31	428.511	-857.79	1458.91	521.48	-816.968	1229.58	531.928	-809.346	1134.54	557.375	-874.565	955.964	511.556	-889.934	881.84	577.802	-852.614	880.698	562.59	-888.762	788.448
579	0	299.542	-1052.36	1621.66	185.276	-1050.37	1615.84	308.669	-879.488	1625.25	190.09	-867.832	1622.03	255.91	-826.355	1486.79	251.785	-744.575	1252	249.459	-983.425	1420.55	252.66	-1046.76	1239.22	126.298	-736.319	1306.51	428.119	-867.589	1459.23	521.219	-823.092	1230.88	531.859	-814.167	1135.88	557.679	-877.828	956.621	511.655	-893.368	882.195	577.348	-854.95	880.966	563.056	-892.091	789.464
580	0	299.966	-1062.4	1621.25	185.672	-1060.79	1616.1	308.464	-889.58	1625.02	189.923	-878.35	1622.28	255.516	-836.361	1486.69	251.77	-754.155	1252.02	248.99	-993.294	1420.18	252.194	-1056.31	1238.8	126.376	-745.666	1306.59	427.624	-877.431	1459.34	520.875	-829.533	1231.76	531.487	-819.298	1136.76	558.186	-881.405	957.269	512.071	-897.601	882.788	576.873	-857.831	881.229	563.33	-895.448	790.049
581	0	300.434	-1072.6	1620.63	186.101	-1071.33	1615.89	308.403	-899.659	1624.3	189.831	-888.762	1622.34	255.287	-846.5	1486.59	251.79	-763.711	1252	248.543	-1003.3	1419.43	251.655	-1065.97	1238	126.407	-755.195	1306.52	427.12	-887.535	1459	520.46	-836.347	1232.31	531.059	-824.737	1137.38	557.962	-885.232	956.994	509.149	-897.151	880.805	576.472	-860.518	881.369	563.54	-899.154	790.229
582	0	300.737	-1082.58	1619.79	186.385	-1081.93	1615.62	308.462	-909.821	1623.77	189.746	-899.267	1622.21	254.961	-856.792	1486.42	252.107	-773.126	1251.96	248.019	-1013.29	1418.58	251.134	-1075.6	1237.04	126.786	-764.559	1306.45	426.78	-897.78	1458.72	520.057	-843.564	1233.05	530.547	-830.597	1138.06	557.913	-889.352	957.046	508.645	-901.533	880.266	576.013	-863.697	881.663	563.886	-902.985	790.584
583	0	301.297	-1092.98	1618.77	187.003	-1092.35	1615.22	308.382	-920.106	1622.72	189.931	-909.872	1621.9	254.826	-867.255	1485.94	252.419	-782.63	1251.63	247.694	-1023.18	1417.56	250.633	-1085.19	1235.91	126.834	-774.031	1306.02	426.585	-908.299	1458.33	519.783	-850.931	1233.6	529.989	-836.712	1138.58	557.985	-893.83	957.088	508.963	-907.082	880.649	575.406	-867.352	881.582	564.129	-906.906	790.636
584	0	301.921	-1103.4	1617.54	187.346	-1102.98	1614.59	308.582	-930.435	1621.63	190.08	-920.288	1621.44	254.671	-877.64	1485.31	253.021	-792.034	1251.39	247.229	-1033.58	1416.45	250.369	-1094.9	1234.51	127.479	-783.536	1305.54	426.128	-918.819	1457.33	519.137	-858.827	1233.55	529.262	-843.265	1138.5	557.767	-898.673	956.666	510.578	-915.603	880.815	574.52	-871.279	881.176	564.32	-911.059	790.389
585	0	302.289	-1113.8	1615.95	188.124	-1113.52	1613.81	308.977	-940.776	1620.46	190.369	-930.918	1620.93	254.635	-888.251	1484.67	253.528	-801.679	1251.03	246.766	-1043.85	1415.08	249.988	-1104.69	1232.88	127.842	-793.082	1305.06	425.937	-929.735	1456.59	518.678	-866.951	1233.67	528.513	-850.335	1138.71	557.382	-903.962	956.231	510.293	-921.178	880.204	573.813	-875.739	880.93	564.209	-915.49	790.012
586	0	302.872	-1124.03	1614.62	188.463	-1124.16	1613.02	309.318	-951.157	1619.23	190.607	-941.623	1620.29	254.371	-898.971	1483.9	254.271	-811.285	1250.76	246.336	-1054.25	1413.89	249.741	-1114.45	1231.52	128.531	-802.644	1304.55	425.908	-940.551	1456.14	518.214	-875.375	1234.09	528.108	-857.468	1139.18	557.475	-909.527	956.255	510.129	-927.026	880.006	572.826	-880.689	880.62	564.12	-920.022	789.883
587	0	303.514	-1134.31	1612.95	189.269	-1134.77	1612.16	309.578	-961.585	1617.73	191.116	-952.296	1619.45	254.555	-909.623	1483.02	255.056	-821.072	1250.26	245.999	-1064.59	1412.49	249.608	-1124.33	1229.97	129.086	-812.301	1303.82	425.992	-951.624	1455.46	517.84	-884.18	1234.13	527.556	-865.513	1139.42	557.098	-915.732	955.893	511.605	-933.98	880.825	572.291	-885.977	880.544	564.11	-924.896	789.41
588	0	304.187	-1144.87	1611.14	189.856	-1145.6	1610.98	310.062	-972.103	1616.05	191.506	-963.097	1618.47	254.866	-920.284	1482.22	256.132	-830.972	1249.64	245.928	-1075.05	1410.88	249.505	-1134.41	1228.19	130.119	-821.946	1303.1	425.865	-962.756	1454.46	517.326	-893.426	1233.82	527.03	-873.814	1139.12	556.749	-922.505	955.219	509.838	-939.71	878.794	571.815	-892.016	880.23	563.574	-930.224	788.479
589	0	304.763	-1155.4	1609.21	190.723	-1156.26	1609.83	310.713	-982.517	1614.59	191.912	-973.794	1617.57	255.124	-931.096	1481.05	257.193	-841.053	1249.01	245.782	-1085.61	1409.29	249.458	-1144.52	1226.42	130.806	-831.707	1302.18	426.09	-974.1	1453.54	516.85	-902.794	1233.27	526.573	-882.723	1138.9	556.341	-929.803	954.502	509.421	-946.361	877.715	571.275	-898.66	879.756	562.795	-935.919	787.53
590	0	305.682	-1166.01	1607.52	191.255	-1166.99	1608.58	311.165	-993.309	1612.92	192.682	-984.551	1616.49	255.733	-941.81	1480.01	258.393	-851.251	1248.07	245.859	-1095.96	1407.83	249.467	-1154.68	1224.92	132.066	-841.434	1301.16	426.648	-985.5	1452.94	517.008	-912.73	1233.19	526.523	-891.826	1138.76	556.243	-937.542	954.05	507.678	-950.038	876.788	570.983	-905.9	879.509	562.347	-941.88	786.685
591	0	306.53	-1176.69	1605.72	192.251	-1177.65	1607.33	311.927	-1003.97	1611.3	193.36	-995.403	1615.39	256.523	-952.531	1478.85	259.859	-861.567	1247.24	245.92	-1106.6	1406.3	249.641	-1164.98	1223.24	133.607	-851.172	1300.22	427.095	-996.96	1451.75	517.277	-922.823	1232.7	526.412	-901.621	1138.17	556.207	-945.802	953.174	506.931	-956.9	875.524	570.98	-913.555	878.881	561.523	-948.295	785.368
592	0	307.309	-1187.45	1603.73	193.242	-1188.5	1605.92	312.718	-1014.66	1609.57	194.254	-1006.16	1614.27	257.376	-963.361	1477.57	261.345	-872.048	1246.18	246.058	-1117.23	1404.75	249.787	-1175.34	1221.55	134.966	-860.95	1299.11	427.704	-1008.47	1450.5	517.587	-933.547	1231.8	526.74	-911.615	1137.49	556.069	-954.721	952.036	506.94	-965.722	874.523	570.807	-921.977	877.888	560.672	-955.311	783.985
593	0	308.283	-1198.23	1602.12	194.272	-1199.18	1604.67	313.977	-1025.39	1608.3	195.204	-1017.02	1613.13	258.54	-974.093	1476.43	262.894	-882.612	1245.22	246.451	-1127.85	1403.31	249.858	-1185.76	1220.14	136.636	-870.839	1297.99	428.576	-1020.01	1449.45	518.28	-944.373	1231.04	527.245	-922.118	1136.79	556.201	-964.113	951.074	507.616	-973.835	874.004	570.953	-930.999	877.14	559.818	-962.575	782.559
594	0	309.321	-1208.98	1600.52	195.19	-1209.85	1603.44	315.001	-1036.25	1606.85	196.546	-1027.57	1612.24	259.641	-984.935	1475.21	264.471	-893.39	1244.17	246.915	-1138.46	1402.07	250.268	-1196.21	1218.81	138.33	-880.824	1296.92	429.604	-1031.59	1448.36	519.217	-955.55	1230.19	528.057	-932.918	1136.01	556.458	-973.963	950.022	507.21	-982.741	872.871	571.479	-940.606	876.251	559.19	-970.417	781.22
595	0	310.541	-1219.83	1598.87	196.504	-1220.6	1602.27	316.299	-1047.09	1605.26	197.872	-1038.39	1611.23	261.033	-995.68	1473.92	266.249	-904.095	1243.08	247.586	-1149.18	1400.59	250.726	-1206.9	1217.39	140.076	-890.828	1295.88	430.557	-1043.11	1446.93	520.839	-967.276	1229.3	529.097	-944.032	1134.83	556.805	-984.415	948.47	507.466	-992.055	871.597	572.344	-950.599	875.114	559.129	-978.938	779.521
596	0	311.825	-1230.66	1597.4	197.714	-1231.37	1600.98	317.776	-1057.94	1603.88	199.472	-1049.03	1610.15	262.507	-1006.48	1472.77	267.629	-914.991	1241.91	248.412	-1159.93	1399.4	251.105	-1217.45	1215.97	141.917	-901.056	1294.92	431.674	-1054.48	1445.61	521.953	-979.076	1227.8	529.936	-955.673	1133.36	557.302	-995.316	946.994	507.621	-1002.13	870.174	573.109	-961.352	873.828	558.584	-987.9	777.73
597	0	313.253	-1241.39	1596.24	198.957	-1241.97	1600.09	319.623	-1068.83	1602.84	201.304	-1059.63	1609.26	264.097	-1017.42	1471.62	269.197	-925.901	1240.83	249.291	-1170.7	1398.31	251.674	-1228.04	1214.83	143.585	-911.504	1294	433.026	-1065.89	1444.64	523.815	-990.984	1226.9	531.661	-967.228	1132.61	558.195	-1006.62	945.984	508.38	-1013.02	869.126	574.478	-972.919	872.917	558.502	-997.32	776.371
598	0	314.956	-1252.25	1595.25	200.682	-1252.53	1599.34	321.495	-1079.63	1601.61	203.087	-1070.37	1608.12	266.011	-1028.24	1470.58	270.622	-936.848	1239.76	250.524	-1181.51	1397.26	252.478	-1238.35	1213.62	145.381	-921.984	1293.15	434.521	-1077.2	1443.3	525.397	-1002.93	1225.49	533.068	-979.051	1131.08	559.3	-1018.36	944.727	508.856	-1022.96	867.728	575.774	-984.546	871.636	558.573	-1007.38	774.757
599	0	316.628	-1263.13	1593.93	202.474	-1263.24	1598.27	323.536	-1090.44	1600.1	205.237	-1080.98	1607.11	267.592	-1039.33	1469.36	272.184	-947.797	1238.66	251.805	-1192.49	1396	253.298	-1249.12	1212.21	147.074	-932.663	1292.38	436.101	-1088.61	1441.81	527.191	-1014.92	1224.02	534.903	-990.971	1129.63	560.516	-1030.7	943.136	509.789	-1034.77	865.922	577.082	-997.017	869.964	558.804	-1018.24	772.854
600	0	318.486	-1273.95	1592.85	204.848	-1273.77	1597.68	325.727	-1101.3	1598.8	207.563	-1091.47	1606.14	269.605	-1050.17	1468.47	273.748	-958.866	1237.72	253.193	-1203.53	1394.9	254.321	-1260.06	1211.11	148.55	-943.397	1291.79	437.608	-1099.92	1440.34	528.852	-1026.9	1222.54	536.697	-1002.96	1128.02	561.684	-1043.2	941.499	512.107	-1047.02	864.921	578.723	-1009.6	868.431	559.382	-1029.74	771.105
601	0	320.71	-1284.77	1592.01	206.661	-1284.43	1597.07	328.417	-1112.04	1597.65	210.067	-1102.1	1605.17	271.527	-1061.21	1467.37	275.332	-969.854	1236.65	254.748	-1214.41	1393.99	255.295	-1271.01	1210.2	150.405	-954.271	1291.1	439.371	-1111.01	1439.01	530.75	-1038.64	1221.08	538.819	-1014.88	1126.85	563.529	-1055.97	940.258	512.526	-1058.48	862.894	580.699	-1022.76	866.97	560.395	-1041.67	769.618
602	0	323.063	-1295.56	1591.2	209.053	-1295.11	1596.44	331.043	-1122.85	1596.42	212.585	-1112.75	1603.93	273.597	-1072.3	1465.98	277.014	-980.968	1235.36	256.429	-1225.42	1393.05	256.398	-1282.15	1209.43	152.179	-965.277	1290.34	441.325	-1122.22	1437.57	532.583	-1050.33	1219.44	540.977	-1026.82	1125.07	565.192	-1068.86	938.488	515.31	-1072.04	862.187	582.703	-1036.13	865.243	561.767	-1054.45	767.953
603	0	325.447	-1306.39	1590.28	211.535	-1305.7	1595.75	333.54	-1133.76	1594.99	215.324	-1123.35	1602.91	275.863	-1083.18	1464.93	278.837	-992.24	1234.06	258.166	-1236.59	1392.16	257.495	-1293.49	1208.67	154.103	-976.262	1289.6	443.387	-1133.42	1436.07	534.391	-1062.09	1217.67	542.933	-1039.15	1123.34	567.289	-1082.15	936.989	517.018	-1085.27	860.397	584.69	-1049.82	863.538	563.343	-1067.96	766.19
604	0	328.024	-1317.12	1589.65	214.113	-1316.32	1595.3	336.342	-1144.59	1594.02	218.17	-1133.96	1602.15	278.256	-1093.99	1464.05	280.74	-1003.55	1232.77	259.977	-1247.6	1391.5	258.507	-1304.77	1208.13	156.15	-987.259	1288.77	445.462	-1144.52	1434.61	536.361	-1073.8	1216.12	545.361	-1051.18	1121.63	569.272	-1095.47	935.501	518.863	-1098.23	858.982	586.847	-1063.65	861.925	565.328	-1082.05	764.734
605	0	330.842	-1327.88	1589.06	216.785	-1327.07	1595.01	339.282	-1155.29	1593.2	221.027	-1144.63	1601.33	280.721	-1104.83	1462.97	282.815	-1015.05	1231.26	262.015	-1258.64	1391.01	259.669	-1316.18	1207.84	158.459	-998.223	1287.92	447.733	-1155.65	1433.23	538.609	-1085.52	1214.53	547.541	-1063.66	1119.94	571.541	-1108.97	933.897	521.043	-1112.01	857.385	588.978	-1077.65	859.974	567.522	-1096.71	763.115
606	0	333.65	-1338.79	1588.36	219.739	-1337.81	1594.73	342.128	-1166.2	1592.26	224.061	-1155.43	1600.84	282.998	-1115.75	1461.89	285.053	-1026.6	1230.12	263.899	-1269.82	1390.6	260.875	-1327.93	1207.55	160.85	-1009.36	1287.03	449.829	-1166.73	1431.54	540.627	-1097.59	1212.49	549.868	-1076.36	1117.83	573.844	-1122.78	932.107	523.35	-1126.26	855.618	591.325	-1091.72	857.892	569.725	-1112	761.223
607	0	336.571	-1349.64	1587.95	222.776	-1348.61	1594.57	344.997	-1177.1	1591.62	227.109	-1166.14	1600.7	285.457	-1126.61	1461.3	287.219	-1038.43	1229.02	265.845	-1281	1390.5	262.13	-1339.86	1207.55	163.307	-1020.58	1286.26	451.995	-1177.83	1430.23	542.926	-1109.91	1211.06	552.276	-1089.33	1116.11	576.038	-1136.82	930.471	525.751	-1141.35	853.898	593.397	-1106.3	855.898	572.277	-1127.94	759.613
608	0	339.606	-1360.25	1587.95	225.661	-1359.32	1594.68	348.121	-1187.79	1591.56	230.141	-1176.94	1600.81	287.799	-1137.61	1460.77	289.518	-1050.24	1228.41	267.81	-1291.99	1390.72	263.451	-1351.69	1208.1	165.607	-1032	1285.66	454.353	-1188.67	1429.37	545.188	-1122.38	1209.66	554.463	-1102.67	1114.52	578.526	-1150.88	929.294	528.465	-1156.53	852.838	595.898	-1120.74	854.651	574.997	-1144.21	758.581
609	0	342.722	-1370.95	1587.88	228.645	-1370.04	1594.87	351.249	-1198.47	1591.48	233.233	-1187.63	1601.09	290.31	-1148.54	1460.46	291.554	-1062.04	1227.72	269.999	-1303.07	1391.09	265.019	-1363.58	1208.77	168.046	-1043.41	1285.08	456.801	-1199.67	1428.57	547.008	-1135.09	1207.74	556.753	-1116.19	1112.96	580.874	-1165.27	927.978	531.252	-1172.72	851.512	598.002	-1135.63	853.003	577.961	-1161.09	757.543
610	0	345.644	-1381.73	1587.74	231.757	-1380.78	1595.21	354.293	-1209.31	1591.49	236.354	-1198.37	1601.53	292.752	-1159.56	1460.09	293.532	-1073.87	1227.2	272.289	-1314.21	1391.48	266.796	-1375.56	1209.4	170.402	-1054.89	1284.92	459.007	-1210.68	1427.66	549.19	-1148.29	1206.2	558.808	-1130.07	1111.1	583.234	-1180.07	926.768	534.057	-1189.35	850.355	600.211	-1150.91	851.516	580.863	-1178.68	756.513
611	0	348.605	-1392.56	1588.12	234.826	-1391.53	1595.89	357.319	-1220.18	1591.79	239.618	-1208.96	1602.32	295.094	-1170.36	1460.4	295.251	-1085.67	1227.02	274.466	-1325.4	1392.25	268.714	-1387.49	1210.31	172.366	-1066.38	1284.98	461.376	-1221.55	1427.37	551.3	-1161.72	1205.02	560.874	-1144.27	1109.87	585.504	-1195.11	925.861	536.927	-1206.4	849.509	602.308	-1166.47	850.187	583.973	-1196.52	756.092
612	0	351.681	-1403.16	1588.85	237.759	-1402.19	1596.89	360.56	-1230.86	1592.55	242.625	-1219.69	1603.26	297.347	-1181.19	1460.88	297.12	-1097.15	1227.32	276.646	-1336.47	1393.32	270.64	-1399.24	1211.68	174.324	-1077.85	1285.34	463.649	-1232.21	1427.51	553.45	-1175.21	1204.22	562.496	-1158.74	1108.64	587.704	-1210.35	925.497	539.692	-1222.82	849.359	605.083	-1182.14	849.894	587.112	-1214.72	756.244
613	0	354.651	-1413.9	1589.58	240.677	-1412.81	1598.12	363.433	-1241.67	1593.17	245.765	-1230.34	1604.27	299.455	-1192.04	1461.37	298.626	-1108.74	1227.64	279.082	-1347.37	1394.42	272.749	-1410.92	1213.15	175.86	-1089.37	1285.9	465.832	-1242.91	1427.67	555.499	-1188.89	1203.53	564.506	-1173.1	1108	589.647	-1225.8	925.063	542.314	-1239.66	849.184	607.559	-1198.04	849.521	590.199	-1233.24	756.571
614	0	357.42	-1424.51	1590.39	243.617	-1423.49	1599.35	366.631	-1252.09	1594.2	248.709	-1240.97	1605.74	301.746	-1202.6	1462.58	300.429	-1119.78	1228.81	281.361	-1358.22	1395.66	274.885	-1422.46	1214.56	177.478	-1100.72	1287.04	468.026	-1253.74	1428.19	557.279	-1202.63	1203.01	566.416	-1187.49	1107.64	592.048	-1242.19	925.354	545.225	-1258.05	849.612	609.555	-1214.72	849.165	593.125	-1252.22	757.287
615	0	360.082	-1435.02	1591.55	246.22	-1433.93	1600.82	369.488	-1262.65	1595.34	251.484	-1251.48	1607.09	303.541	-1213.45	1463.49	301.7	-1130.76	1229.48	283.743	-1368.8	1397.16	276.931	-1433.63	1216.29	178.826	-1111.76	1288.08	470.156	-1264.2	1429.11	559.458	-1216.18	1203.27	568.01	-1202.01	1107.55	594.485	-1258.54	926.531	548.105	-1276.25	850.811	611.712	-1231.81	849.683	596.183	-1271.4	758.585
616	0	362.714	-1445.47	1592.59	248.95	-1444.37	1602.35	372.139	-1273.14	1596.38	254.292	-1261.87	1608.61	305.641	-1223.83	1464.7	303.35	-1141.68	1230.64	285.785	-1379.5	1398.83	278.961	-1444.61	1218.17	180.083	-1123.02	1289.4	472.104	-1274.61	1430.11	560.994	-1229.54	1203.16	569.507	-1216.5	1107.48	596.228	-1275.04	927.234	550.402	-1294.14	851.814	613.772	-1249.38	850.371	599.13	-1290.87	760.227
617	0	365.344	-1456	1593.55	251.661	-1454.72	1603.8	374.574	-1283.65	1597.31	256.911	-1272.29	1610.16	307.494	-1234.14	1465.85	304.928	-1152.6	1231.95	287.703	-1390.04	1400.2	280.635	-1455.32	1219.69	181.665	-1133.96	1290.84	473.857	-1285.19	1430.98	562.692	-1242.96	1203.29	571.447	-1230.72	1107.88	598.089	-1292.04	928.154	552.279	-1312.11	853.025	615.699	-1267.51	851.07	601.213	-1310.61	761.577
618	0	367.64	-1466.46	1594.67	254.043	-1465.02	1605.23	377.149	-1294.01	1598.49	259.345	-1282.5	1611.68	309.116	-1244.64	1467.04	306.401	-1163.36	1233.24	289.41	-1400.36	1401.69	281.989	-1466.05	1221.21	182.912	-1144.7	1292.26	475.685	-1295.78	1432.16	564.335	-1256.17	1203.79	572.906	-1244.97	1108.06	599.79	-1309.28	929.573	554.194	-1330.51	854.677	617.56	-1286.07	852.291	603.585	-1330.71	763.589
619	0	369.817	-1476.49	1596.01	256.14	-1475.27	1606.87	379.478	-1304.18	1599.87	261.626	-1292.76	1613.3	310.845	-1254.73	1468.38	308.062	-1174.13	1234.6	290.841	-1410.56	1403.36	283.121	-1476.18	1222.92	184.604	-1155.08	1293.79	477.19	-1306.09	1433.56	566.398	-1269.11	1204.92	574.861	-1259.16	1109.07	601.929	-1326.65	931.62	556.21	-1348.87	857.063	619.614	-1304.59	853.913	605.625	-1350.81	766.108
620	0	371.993	-1486.66	1597.13	258.201	-1485.39	1608.43	381.457	-1314.25	1601.04	263.774	-1302.84	1614.77	312.568	-1264.85	1469.81	309.743	-1184.64	1235.78	292.229	-1420.48	1404.74	283.995	-1486.39	1224.45	186.351	-1165.31	1294.98	478.695	-1316.56	1434.76	567.837	-1281.89	1205.52	576.501	-1273.2	1109.51	603.369	-1343.96	933.229	557.698	-1367.35	859.046	621.115	-1323.62	855.344	607.539	-1371.16	768.574
621	0	373.783	-1496.88	1598.02	260.129	-1495.68	1609.76	383.177	-1324.47	1602.04	265.663	-1313.07	1616.37	314.21	-1275.1	1471.21	311.472	-1194.95	1237.39	293.187	-1430.66	1406.04	284.74	-1496.41	1225.65	188.092	-1175.23	1296.53	480.053	-1327.34	1435.99	569.261	-1294.88	1206.15	578.212	-1287.51	1110.26	604.76	-1361.67	934.849	558.954	-1385.78	861.124	622.792	-1342.78	856.953	609.041	-1391.92	771.055
622	0	375.473	-1506.98	1599.11	261.836	-1505.79	1611.18	384.713	-1334.68	1603.34	267.193	-1323.25	1617.96	315.551	-1285.14	1472.73	313.558	-1205.01	1239.03	294.211	-1440.5	1407.38	285.275	-1506.1	1226.89	189.907	-1184.96	1298	481.197	-1338.01	1437.4	570.807	-1307.75	1207.21	579.958	-1301.76	1111.1	606.167	-1379.25	937.075	560.088	-1404.24	863.753	624.231	-1362	858.727	610.225	-1412.63	774.025
623	0	377.007	-1516.91	1600.39	263.315	-1515.79	1612.69	386.226	-1344.47	1604.72	268.61	-1333.26	1619.64	316.926	-1295.08	1474.24	315.518	-1214.72	1240.81	294.986	-1450.21	1408.78	285.834	-1515.56	1228.14	191.833	-1194.46	1299.5	482.508	-1348.71	1439.11	572.391	-1320.61	1208.63	581.855	-1316	1112.43	607.786	-1396.88	939.918	561.257	-1422.36	867.037	626.011	-1381.03	861.345	611.244	-1433.36	777.475
624	0	378.255	-1527.01	1601.28	264.451	-1525.94	1613.85	387.391	-1354.58	1606.1	269.944	-1343.34	1621.35	318.04	-1304.98	1476.03	317.227	-1224.11	1242.34	295.64	-1459.92	1410.13	286.423	-1525.05	1229.31	193.531	-1203.59	1300.85	483.473	-1359.38	1440.67	573.767	-1333.64	1209.8	583.467	-1330.42	1113.5	608.63	-1414.47	942.037	561.96	-1440.83	869.819	627.059	-1399.95	863.433	611.992	-1454.2	780.888
625	0	379.183	-1537.01	1602.41	265.559	-1535.94	1615.1	388.129	-1364.62	1607.55	270.885	-1353.42	1623.04	319.275	-1314.77	1477.76	318.89	-1233.64	1244.13	296.284	-1469.5	1411.48	287.083	-1534.42	1230.56	195.301	-1212.68	1302.58	484.375	-1369.99	1442.41	575.139	-1346.74	1211.32	585.132	-1344.82	1115.12	609.556	-1432.05	944.787	562.532	-1459.68	873.265	627.64	-1419.49	865.804	612.479	-1475.12	784.88
626	0	380.067	-1546.94	1603.86	266.153	-1545.79	1616.52	389.226	-1374.4	1609.58	271.679	-1363.18	1624.96	320.188	-1324.36	1479.67	320.339	-1243	1245.92	296.839	-1478.85	1413.23	287.67	-1543.59	1232.25	196.951	-1221.63	1304.28	485.283	-1380.39	1444.61	576.509	-1359.78	1213.42	586.652	-1359.08	1117.16	610.223	-1449.33	948.151	563.027	-1477.91	877.238	628.523	-1438.36	869.017	613.019	-1495.92	789.557
627	0	380.581	-1556.89	1605.29	266.659	-1555.52	1617.81	389.656	-1384.36	1611.14	272.286	-1373.12	1626.86	321.281	-1333.91	1481.42	321.755	-1252.52	1247.74	297.367	-1488.2	1414.88	288.34	-1552.64	1233.97	198.742	-1230.5	1306.01	486.099	-1390.63	1446.82	577.778	-1372.87	1215.44	588.314	-1373.28	1119.3	611.056	-1466.81	951.76	563.421	-1496.37	881.558	629.148	-1457.23	872.446	613.063	-1516.7	794.18
628	0	380.768	-1566.85	1606.48	266.953	-1565.35	1619	390.268	-1394.37	1613.3	272.772	-1382.93	1628.62	322.23	-1343.26	1483.32	323.083	-1261.72	1249.32	297.921	-1497.44	1416.4	289.088	-1561.85	1235.47	200.06	-1239.45	1307.44	486.891	-1400.9	1448.78	579.119	-1386.11	1217.36	589.642	-1387.54	1121.13	611.295	-1484.07	955.089	563.325	-1514.21	885.513	629.681	-1476.21	875.784	612.911	-1537.36	799.005
629	0	380.883	-1576.82	1608.06	266.9	-1575.07	1620.19	390.705	-1404.31	1615.36	273.119	-1392.69	1630.51	323.253	-1352.7	1485.09	324.472	-1270.96	1251.18	298.498	-1506.67	1418.14	289.79	-1571.14	1237.13	201.572	-1248.22	1308.99	487.617	-1410.93	1451.01	580.228	-1399.14	1219.37	590.955	-1401.66	1123.32	611.517	-1501.26	958.924	563.224	-1532.84	890.199	629.454	-1494.96	879.238	612.526	-1557.91	804.242
630	0	380.762	-1586.52	1609.8	266.591	-1584.49	1621.56	390.831	-1414.19	1617.65	273.358	-1402.24	1632.44	324.144	-1361.95	1486.89	325.657	-1280.12	1252.86	298.923	-1515.72	1420.18	290.629	-1580.08	1239.2	203.041	-1257.14	1310.55	488.571	-1420.82	1453.55	581.615	-1411.99	1222	592.44	-1415.51	1125.83	611.745	-1518.66	962.968	563.014	-1550.33	894.973	630.076	-1513.48	883.581	611.992	-1578.23	809.918
631	0	380.519	-1596.37	1611.4	266.006	-1593.94	1622.73	391.244	-1423.97	1620.01	273.644	-1411.76	1634.12	324.983	-1371.17	1488.74	326.674	-1289.49	1254.37	299.523	-1524.88	1421.93	291.444	-1589.05	1241.05	204.457	-1265.81	1312.3	489.293	-1430.52	1455.82	582.952	-1424.77	1224.32	593.799	-1429.22	1128.31	611.595	-1535.36	967.101	562.416	-1567.8	899.809	629.922	-1532.17	887.616	611.173	-1598.37	815.728
632	0	380.056	-1606.29	1612.86	265.795	-1603.37	1623.68	391.191	-1433.99	1621.85	273.819	-1421.23	1635.9	325.979	-1380.38	1490.49	328.117	-1298.45	1256.19	300.133	-1533.87	1423.45	292.203	-1598.29	1242.56	205.853	-1274.67	1313.68	489.871	-1440.34	1457.71	584.013	-1437.64	1226.51	594.991	-1442.97	1130.35	611.189	-1552.31	970.997	561.477	-1584.98	904.315	629.727	-1550.98	891.915	609.948	-1618.55	821.206
633	0	379.494	-1615.93	1614.46	265.182	-1612.6	1624.86	391.506	-1443.63	1624.22	273.969	-1430.6	1637.5	326.63	-1389.49	1491.99	329.176	-1307.62	1257.88	300.609	-1543	1425.25	292.971	-1607.33	1244.22	207.094	-1283.36	1315.33	490.565	-1449.94	1459.92	585.418	-1450.02	1228.94	596.167	-1456.28	1132.6	610.756	-1569.03	975.247	560.479	-1602.53	909.346	628.974	-1569.48	895.965	608.479	-1638.41	827.075
634	0	379.03	-1625.55	1616.14	264.584	-1621.74	1626.02	391.493	-1453.39	1626.12	273.954	-1439.83	1639.01	327.518	-1398.55	1493.55	330.126	-1317.02	1259.22	301.215	-1551.84	1426.72	293.643	-1616.34	1245.93	208.182	-1292.19	1316.64	491.098	-1459.18	1461.82	586.194	-1462.2	1230.98	597.481	-1469.48	1134.94	610.27	-1585.5	979.523	559.391	-1619.59	914.455	628.296	-1587.75	900.44	606.892	-1658.05	833.145
635	0	378.628	-1635.31	1617.48	264.056	-1630.96	1626.84	391.592	-1462.87	1627.9	274.003	-1449.13	1640.31	328.232	-1407.68	1494.88	331.03	-1326.27	1260.69	301.712	-1561.04	1428.03	294.349	-1625.25	1247.22	209.147	-1301.2	1317.76	491.777	-1468.83	1463.6	587.113	-1474.14	1232.82	598.468	-1482.57	1136.74	609.602	-1601.95	983.569	558.072	-1636.51	919.287	627.397	-1606.14	904.667	605.042	-1677.54	839.059
636	0	377.896	-1644.76	1618.61	263.447	-1640.12	1627.75	391.628	-1472.58	1629.42	274.065	-1458.36	1641.27	328.781	-1416.68	1496.2	331.805	-1335.78	1261.71	302.147	-1570.02	1429.17	294.94	-1634.36	1248.4	209.962	-1309.95	1318.84	492.305	-1478.27	1465.11	588.065	-1485.99	1234.61	599.403	-1495.4	1138.51	608.805	-1618.11	987.62	556.533	-1653.16	924.077	626.221	-1624.24	908.833	602.836	-1696.71	844.769
637	0	377.336	-1654.08	1619.91	262.927	-1649.13	1628.59	391.764	-1482.08	1630.95	274.169	-1467.52	1642.27	329.403	-1425.83	1497.17	332.551	-1345.06	1262.77	302.588	-1578.99	1430.29	295.504	-1643.03	1249.5	210.98	-1319.02	1319.65	492.821	-1487.45	1466.58	588.964	-1497.45	1236.43	600.548	-1508.02	1140.35	607.874	-1633.98	991.919	554.953	-1669.43	929.051	625.112	-1642	913.224	600.595	-1715.66	850.896
638	0	376.932	-1663.49	1620.97	262.418	-1658.32	1629.21	391.876	-1491.68	1631.97	274.226	-1476.74	1642.93	329.996	-1435.07	1497.74	333.049	-1354.51	1263.47	303.019	-1587.96	1431.08	296.108	-1651.92	1250.33	211.818	-1327.86	1320.35	493.158	-1496.8	1467.48	589.759	-1508.68	1237.7	601.376	-1520.45	1141.77	607.045	-1649.7	995.792	553.345	-1685.52	933.754	623.847	-1659.6	917.339	598.199	-1734.22	856.7
639	0	376.501	-1673.06	1621.44	262.025	-1667.67	1629.37	391.613	-1501.29	1632.42	274.169	-1485.96	1643.33	330.442	-1444.17	1498.36	333.314	-1363.88	1264.04	303.474	-1597.13	1431.48	296.698	-1660.94	1250.64	212.317	-1336.94	1320.74	493.605	-1506.21	1468.19	590.427	-1520.05	1238.55	602.057	-1532.78	1142.6	605.971	-1665.31	999.296	550.735	-1701.22	938.015	622.201	-1677.02	920.948	595.496	-1752.73	862.144
640	0	376.348	-1682.7	1622.06	261.819	-1676.93	1629.55	391.748	-1510.63	1633.28	274.214	-1495.21	1643.57	330.781	-1453.36	1498.98	333.628	-1372.94	1264.58	303.913	-1606.19	1431.74	297.245	-1669.74	1250.89	212.697	-1346.1	1321.34	493.876	-1515.42	1468.79	591.083	-1530.9	1239.56	602.877	-1544.99	1143.59	604.793	-1680.63	1002.77	548.94	-1717.02	942.661	620.562	-1694.2	924.828	592.905	-1770.73	867.724
641	0	376.059	-1692.04	1622.54	261.324	-1686.08	1629.65	391.727	-1520.11	1633.73	274.238	-1504.54	1643.62	331.03	-1462.63	1499.23	333.387	-1382.42	1264.79	304.133	-1615.37	1432	297.35	-1678.82	1251.18	213.139	-1355.18	1321.68	494.165	-1524.48	1469.2	591.602	-1541.73	1240.31	603.522	-1556.85	1144.55	603.644	-1695.49	1006.38	546.843	-1732.34	947.023	618.699	-1710.59	928.458	590.088	-1788.23	873.284
642	0	375.792	-1701.47	1622.52	261.038	-1695.45	1629.49	391.609	-1529.64	1633.68	274.176	-1513.8	1643.33	331.16	-1472.01	1499.16	333.412	-1391.59	1264.78	304.495	-1624.55	1431.88	297.971	-1687.69	1250.9	213.383	-1364.34	1321.98	494.339	-1533.59	1469.28	591.913	-1552.35	1240.41	604.047	-1568.63	1144.91	602.31	-1710.02	1009.41	545.08	-1747.64	951.351	617.08	-1727.2	932.02	587.294	-1805.61	878.465
643	0	375.373	-1710.97	1622.31	260.904	-1704.86	1629.01	391.596	-1539.13	1633.52	274.027	-1523.27	1642.8	331.188	-1481.4	1499.01	333.291	-1400.64	1264.88	304.758	-1633.85	1431.41	298.524	-1696.38	1250.27	213.126	-1373.76	1321.81	494.249	-1542.72	1468.95	592.143	-1563	1240.34	604.338	-1580.4	1145	600.983	-1724.54	1012.24	543.05	-1762.82	955.234	615.323	-1743.39	935.335	584.523	-1822.61	883.538
644	0	374.857	-1720.23	1621.93	260.541	-1714.31	1628.3	391.391	-1548.65	1633.24	273.707	-1532.74	1642.12	330.984	-1490.77	1498.74	332.934	-1409.74	1264.71	304.975	-1643.13	1430.88	298.723	-1705.23	1249.47	213.014	-1383.19	1321.83	494.419	-1551.86	1468.61	592.495	-1573.35	1240.52	604.608	-1591.83	1145.03	599.407	-1738.63	1014.83	540.553	-1776.79	958.707	613.386	-1759.26	938.415	581.597	-1839.26	888.486
645	0	374.616	-1729.73	1621.49	260.578	-1723.75	1627.54	391.191	-1558.16	1632.69	273.495	-1542.3	1641.11	330.874	-1500.26	1498.33	332.721	-1418.66	1264.43	305.261	-1652.57	1430.03	299.348	-1714.2	1248.53	212.599	-1392.6	1321.65	494.447	-1560.9	1468.04	592.343	-1583.66	1240	604.802	-1603.21	1144.91	597.942	-1752.44	1017.2	538.603	-1791.3	962.355	610.844	-1774.47	940.87	578.871	-1855.42	893.215
646	0	374.47	-1739.56	1620.63	260.199	-1733.51	1626.33	390.89	-1567.89	1631.62	273.394	-1551.8	1639.98	330.673	-1509.92	1497.48	332.194	-1427.65	1263.84	305.346	-1662.07	1428.72	299.554	-1723.19	1247.11	212.01	-1402.25	1321.19	494.162	-1570.02	1466.67	592.197	-1594	1238.93	604.959	-1614.59	1144.13	596.258	-1766.1	1019.08	536.368	-1805.58	965.2	608.696	-1789.56	943.231	575.766	-1871.45	897.31
647	0	373.831	-1749.06	1619.65	259.839	-1743.26	1625.16	390.67	-1577.64	1630.59	273.085	-1561.56	1638.48	330.335	-1519.77	1496.38	331.399	-1436.74	1263.15	305.45	-1671.77	1427.34	299.795	-1732.35	1245.55	211.336	-1411.8	1320.66	494.075	-1579.26	1465.45	591.954	-1604.11	1237.82	604.851	-1625.64	1143.31	594.671	-1779.37	1020.82	534.126	-1819.42	967.955	606.255	-1803.99	945.152	572.8	-1886.9	901.197
648	0	373.821	-1759.03	1619.01	259.701	-1752.88	1623.87	390.422	-1587.4	1629.38	272.713	-1571.35	1636.85	329.868	-1529.59	1495.37	330.878	-1445.7	1262.47	305.576	-1681.43	1425.93	300.005	-1741.46	1243.97	210.507	-1421.5	1320.19	493.985	-1588.4	1464.26	591.831	-1614.26	1236.96	604.806	-1636.6	1142.37	592.891	-1792.32	1022.47	531.919	-1832.73	970.716	604.172	-1818.42	947.309	569.78	-1901.75	904.896
649	0	373.353	-1768.76	1617.76	259.273	-1762.75	1622.47	390.084	-1597.28	1628.08	272.698	-1581.01	1635.27	329.532	-1539.49	1494.35	329.962	-1455.05	1261.5	305.686	-1691.18	1424.21	300.153	-1750.66	1242.01	209.707	-1431.4	1319.22	493.855	-1597.72	1462.62	591.425	-1624.1	1235.29	604.79	-1647.42	1141.15	591.236	-1804.96	1023.52	529.947	-1846.26	973.356	601.841	-1831.84	948.808	566.882	-1916.23	908.248
650	0	372.776	-1778.74	1616.28	258.845	-1772.88	1620.78	389.636	-1607.25	1626.38	272.097	-1591.08	1633.26	329.115	-1549.52	1493.22	329.183	-1464.38	1260.65	305.742	-1701.11	1422.22	300.258	-1759.99	1239.69	209.038	-1441.24	1318.68	493.611	-1607.22	1460.58	590.985	-1634.17	1233.46	604.361	-1658.07	1139.27	589.365	-1817.58	1024.07	527.809	-1859.61	975.129	599.394	-1845.68	949.606	563.911	-1930.5	910.971
651	0	372.277	-1788.78	1615.09	258.501	-1782.83	1619.09	389.198	-1617.28	1624.86	271.549	-1601.03	1631.19	328.727	-1559.62	1491.86	328.147	-1473.73	1259.6	305.664	-1711.12	1420.23	300.244	-1769.34	1237.56	207.986	-1451.27	1317.83	493.382	-1616.75	1458.72	590.31	-1643.93	1231.58	604.099	-1668.78	1137.71	587.575	-1829.77	1024.63	525.732	-1872.08	976.442	597.22	-1859.33	950.424	560.913	-1944.1	913.455
652	0	371.786	-1798.79	1613.95	257.723	-1792.77	1617.47	388.735	-1627.36	1623.33	270.887	-1611.05	1629.02	328.151	-1569.85	1490.46	326.955	-1483.13	1258.43	305.555	-1721.06	1418.38	300.224	-1778.71	1235.61	207.019	-1461.31	1317.03	493.111	-1626.26	1456.93	589.654	-1653.45	1229.76	603.827	-1679.11	1136.17	585.684	-1841.45	1024.73	523.403	-1884.07	977.503	594.777	-1871.96	951.084	557.982	-1957.1	915.507
653	0	371.044	-1808.9	1612.29	257.058	-1802.9	1615.51	388.166	-1637.58	1621.41	270.477	-1621.18	1626.74	327.596	-1580.03	1488.94	325.883	-1492.41	1257.44	305.577	-1731.18	1416.22	300.048	-1788.28	1233.26	206.001	-1471.29	1316.14	492.658	-1635.84	1454.77	588.901	-1663.04	1227.47	603.52	-1689.65	1134.24	583.886	-1853.06	1024.63	521.151	-1895.71	978.034	592.596	-1884.5	951.299	555.55	-1969.91	917.019
654	0	370.102	-1819.21	1610.66	256.312	-1813.16	1613.44	387.703	-1647.74	1619.75	269.884	-1631.2	1624.54	326.891	-1590.21	1487.51	324.594	-1501.87	1256.13	305.33	-1741.38	1413.99	299.744	-1797.99	1230.88	204.646	-1481.41	1315.02	492.076	-1645.55	1452.44	588.026	-1672.64	1225.21	602.911	-1700.01	1132.22	582.002	-1864.45	1023.92	518.874	-1907.01	978.054	590.294	-1896.55	950.803	552.712	-1982.27	918.2
655	0	369.38	-1829.55	1609.25	255.307	-1823.24	1611.59	386.958	-1657.92	1618	269.128	-1641.41	1622.39	326.07	-1600.52	1485.93	323.369	-1511.45	1254.89	305.117	-1751.5	1412.03	299.458	-1807.74	1228.82	203.367	-1491.57	1314.02	491.77	-1655.17	1450.62	587.142	-1682	1223.08	602.078	-1709.97	1130.16	580.239	-1875.3	1023.28	516.823	-1917.97	977.919	588.019	-1908.06	950.374	549.933	-1993.89	918.601
656	0	368.359	-1839.88	1607.77	254.481	-1833.37	1609.69	386.179	-1668.32	1616.39	268.417	-1651.61	1620.16	325.374	-1610.76	1484.34	322.109	-1521.15	1253.36	304.745	-1761.64	1410.03	299.058	-1817.56	1226.78	202.162	-1501.88	1312.94	491.033	-1664.85	1448.5	586.383	-1691.56	1220.98	601.436	-1719.97	1128.16	578.455	-1885.84	1022.19	514.633	-1928.41	977.188	585.91	-1919.03	949.355	547.48	-2005.14	918.82
657	0	366.996	-1850.35	1606.33	253.298	-1843.7	1607.7	385.246	-1678.77	1614.66	267.439	-1661.77	1618.13	324.584	-1621.05	1482.73	320.662	-1530.98	1251.98	304.213	-1771.86	1407.99	298.461	-1827.49	1224.58	200.894	-1512.24	1311.67	490.219	-1674.67	1446.13	585.098	-1701.13	1218.43	600.532	-1729.97	1125.77	576.714	-1896.22	1020.58	512.603	-1938.67	976.002	584.151	-1929.88	947.817	545.022	-2015.88	918.129
658	0	365.624	-1860.78	1604.76	251.916	-1853.84	1605.83	384.15	-1689.3	1613.35	266.122	-1671.98	1616.19	323.607	-1631.48	1480.97	319.503	-1540.75	1250.57	303.52	-1782.13	1406.19	297.805	-1837.54	1222.69	199.454	-1522.67	1310.43	489.432	-1684.55	1444.12	584.06	-1710.68	1216.42	599.554	-1739.59	1123.78	575.323	-1906.2	1018.96	510.746	-1948.48	974.604	582.154	-1939.98	946.173	542.636	-2026.09	917.141
659	0	364.025	-1871.15	1603.73	250.167	-1863.85	1604.3	382.84	-1699.73	1612.01	265.033	-1682.18	1614.35	322.469	-1641.83	1479.45	317.967	-1550.92	1249.14	302.859	-1792.33	1404.77	296.955	-1847.57	1221.15	198.142	-1533.07	1309.44	488.686	-1694.43	1442.6	583.062	-1720.2	1214.8	598.443	-1748.88	1121.98	573.724	-1915.63	1017.29	509.051	-1957.88	973.168	580.703	-1949.61	944.771	540.507	-2035.59	915.688
660	0	362.126	-1881.59	1602.59	248.366	-1874.12	1602.61	381.489	-1710.21	1610.74	263.618	-1692.49	1612.54	321.529	-1652.03	1478.29	316.854	-1560.93	1247.77	302.015	-1802.62	1403.14	295.98	-1857.75	1219.47	197.045	-1543.49	1308.07	487.642	-1704.51	1440.9	581.861	-1729.79	1212.91	597.257	-1758	1119.93	572.252	-1924.75	1015.05	507.392	-1966.96	971.214	578.839	-1958.41	942.363	538.797	-2044.67	913.661
661	0	360.02	-1892.07	1601.24	246.656	-1884.3	1601.06	379.867	-1720.73	1609.39	261.995	-1702.61	1610.84	320.36	-1662.43	1477.1	315.491	-1571.23	1246.43	300.98	-1813.02	1401.35	294.995	-1868.15	1217.7	195.548	-1554.04	1306.65	486.465	-1714.86	1438.98	580.491	-1739.36	1210.98	595.825	-1767.03	1117.62	570.708	-1933.63	1012.4	505.812	-1975.74	968.57	577.837	-1967.49	940.089	537.182	-2053.34	910.91
662	0	357.62	-1902.48	1600.37	244.36	-1894.45	1599.54	377.959	-1731.24	1608.33	260.121	-1712.67	1609.18	319.157	-1672.91	1475.53	314.413	-1581.46	1245.25	299.751	-1823.31	1399.93	293.943	-1878.69	1216.37	194.589	-1564.42	1305.45	485.254	-1725.3	1437.82	579.129	-1748.98	1209.38	594.273	-1775.81	1115.78	569.443	-1942.05	1009.84	504.483	-1984	965.945	576.073	-1975.38	937.116	536.008	-2061.37	907.944
663	0	355.227	-1912.74	1599.71	241.763	-1904.45	1598.23	375.985	-1741.53	1607.45	258.095	-1722.8	1607.52	317.843	-1683.14	1474.68	313.267	-1591.85	1243.97	298.535	-1833.73	1398.72	292.732	-1888.98	1215.31	193.316	-1574.98	1303.9	484.094	-1735.78	1436.55	577.868	-1758.42	1208.03	592.828	-1784.32	1114.21	568.279	-1949.98	1007.18	503.972	-1992.41	963.405	574.796	-1982.66	934.214	534.944	-2068.69	904.621
664	0	352.541	-1923.13	1598.85	239.269	-1914.59	1596.87	373.777	-1751.98	1606.48	255.937	-1733.01	1605.77	316.476	-1693.49	1473.57	312.334	-1602.41	1242.67	297.213	-1844.05	1397.48	291.419	-1899.48	1214	192.334	-1585.37	1302.39	482.72	-1746.37	1435.24	576.255	-1767.91	1206.5	591.309	-1792.89	1112.4	567.076	-1957.63	1004.13	502.873	-1999.96	960.039	573.922	-1989.9	930.911	534.197	-2075.62	900.387
665	0	349.753	-1933.52	1598.06	236.554	-1924.61	1595.46	371.343	-1762.4	1605.53	253.702	-1742.9	1604.49	314.99	-1704.01	1471.82	311.418	-1613.18	1241.28	295.672	-1854.36	1396.28	290.049	-1910.16	1212.92	191.224	-1595.85	1300.55	481.261	-1757.07	1434.08	574.734	-1777.5	1205.15	589.6	-1801.44	1110.82	565.915	-1965.04	1000.8	501.813	-2007.12	956.332	572.6	-1996.31	927.143	533.48	-2082.14	896.093
666	0	346.957	-1943.64	1597.61	233.74	-1934.41	1594.35	368.88	-1772.43	1604.93	251.326	-1752.89	1603.08	313.556	-1714.15	1470.51	310.354	-1624.17	1239.76	293.984	-1864.58	1395.4	288.823	-1920.86	1212.41	189.895	-1606.39	1298.69	479.794	-1767.48	1433.27	573.144	-1786.75	1204.08	587.932	-1809.63	1109.55	564.851	-1972.13	997.499	500.937	-2013.99	952.47	572.01	-2002.61	923.807	533.005	-2087.85	891.293
667	0	344.066	-1953.59	1596.93	230.667	-1944.31	1593.15	366.152	-1782.57	1604.33	248.54	-1762.79	1601.7	311.896	-1724.03	1469.54	309.041	-1635.44	1237.91	292.489	-1874.86	1394.61	287.46	-1931.66	1211.77	188.86	-1616.98	1296.52	478.227	-1777.72	1432.39	571.637	-1796.03	1203.01	586.088	-1817.87	1108.15	563.727	-1978.82	993.824	500.138	-2020.3	948.179	570.962	-2007.98	919.714	533.061	-2093.07	886.104
668	0	340.836	-1963.52	1596.14	227.82	-1954.12	1592.02	363.427	-1792.53	1603.65	245.887	-1772.58	1600.61	310.041	-1734.07	1468.12	307.74	-1646.7	1236.01	290.743	-1885.12	1393.71	286.114	-1942.78	1211.17	187.471	-1627.68	1294.26	476.256	-1787.89	1431.28	569.903	-1805.55	1201.96	584.32	-1826.53	1106.95	562.729	-1985.46	990.096	499.427	-2026.46	943.369	570.233	-2013.32	915.261	533.176	-2097.76	880.18
669	0	337.894	-1973.4	1595.98	224.918	-1963.91	1591.09	360.148	-1802.53	1602.82	242.888	-1782.38	1599.64	308.003	-1744	1466.93	305.832	-1658.09	1234.05	288.835	-1895.38	1393.16	284.727	-1953.91	1211.02	185.971	-1638.46	1291.98	474.38	-1797.83	1430.71	568.239	-1814.83	1201.27	582.359	-1834.85	1105.95	561.897	-1991.76	986.408	498.81	-2032.06	938.508	570.01	-2018.16	911.459	533.521	-2102.1	874.149
670	0	335.116	-1983.1	1596.1	221.804	-1973.58	1590.76	357.334	-1812.1	1603.22	239.698	-1792.12	1598.95	305.729	-1753.76	1466.04	303.822	-1669.31	1232.42	286.943	-1905.56	1392.99	283.308	-1965.21	1211.18	184.35	-1649.32	1289.71	472.412	-1807.39	1430.46	566.496	-1823.92	1200.98	580.082	-1842.94	1105.23	561.099	-1997.67	982.699	498.32	-2037.09	933.403	569.989	-2022.78	907.4	534.079	-2105.78	868.18
671	0	332.017	-1992.71	1596.48	218.88	-1983.32	1590.57	354.073	-1821.65	1603.05	236.828	-1801.82	1598.61	303.507	-1763.64	1465.08	301.857	-1680.5	1230.95	285.015	-1915.76	1392.86	281.896	-1976.76	1211.42	182.731	-1660.19	1287.52	470.388	-1817.04	1430.24	565.075	-1833.25	1200.8	578.035	-1851.36	1104.68	560.255	-2003.42	978.775	497.924	-2041.58	927.458	570.205	-2027.53	903.394	534.99	-2108.97	861.499
672	0	328.97	-2002.38	1596.43	216.124	-1993.25	1590.41	350.934	-1831.39	1603.06	233.515	-1811.59	1598.37	301.323	-1773.38	1464.88	299.927	-1691.75	1229.76	282.988	-1926.1	1392.73	280.545	-1988.43	1211.75	180.97	-1671.11	1285.52	468.337	-1826.61	1430.05	563.145	-1842.38	1200.08	575.409	-1859.7	1104.03	559.512	-2008.94	974.994	497.564	-2046.7	922.316	569.872	-2031.18	898.807	536.009	-2111.73	854.566
673	0	326.112	-2012.01	1597.14	213.333	-2002.98	1590.74	347.732	-1840.9	1603.38	230.198	-1821.28	1598.34	298.566	-1783.56	1464.12	298.02	-1702.75	1228.9	280.959	-1936.34	1393.06	278.922	-1999.83	1212.28	179.262	-1681.97	1283.82	466.122	-1836.11	1430.38	560.785	-1851.22	1200.29	572.829	-1868	1104.03	559.001	-2014.04	971.51	497.657	-2050.71	917.175	570.395	-2033.85	894.989	537.484	-2113.61	847.98
674	0	323.31	-2021.43	1597.97	210.157	-2012.65	1591.3	344.421	-1850.28	1603.79	226.823	-1830.99	1598.42	296.279	-1793.48	1464.03	296.231	-1713.58	1228.31	278.918	-1946.56	1393.56	277.475	-2011.03	1213.13	177.442	-1692.77	1282.35	463.931	-1845.59	1430.92	558.673	-1860.14	1200.67	570.493	-1876.16	1104.22	558.553	-2018.74	968.17	498.031	-2053.38	911.309	571.636	-2036.94	891.988	539.42	-2114.95	841.498
675	0	320.328	-2030.85	1598.64	207.38	-2022.48	1591.96	341.147	-1859.74	1604.35	223.687	-1840.69	1598.79	293.588	-1803.46	1464.08	294.301	-1724.35	1227.9	276.853	-1956.79	1394.11	275.888	-2022.24	1214.05	175.771	-1703.48	1281.37	461.573	-1855.13	1431.47	556.083	-1868.94	1201	567.524	-1884.31	1104.41	558.215	-2023.19	964.83	498.318	-2057.7	906.78	571.597	-2038.63	887.716	541.519	-2115.61	834.886
676	0	317.374	-2040.35	1599.56	204.719	-2032.18	1592.73	337.851	-1869.25	1605.12	220.332	-1850.52	1599.27	291.117	-1813.28	1464.67	292.463	-1734.77	1228	274.815	-1966.84	1394.87	274.345	-2033.16	1215.09	173.924	-1714.04	1280.74	459.324	-1864.76	1432.59	553.528	-1877.78	1201.61	564.683	-1892.47	1105.16	557.937	-2027.16	961.853	498.949	-2060.11	901.632	572.632	-2040.38	884.752	543.99	-2115.57	828.682
677	0	314.725	-2049.86	1600.8	201.585	-2041.8	1593.66	334.691	-1878.63	1606.16	217.006	-1860.19	1599.88	288.677	-1823.17	1464.75	290.712	-1745.41	1228.07	272.794	-1976.84	1395.92	272.67	-2043.69	1216.24	172.007	-1724.53	1280.16	457.066	-1874.3	1433.9	550.731	-1886.34	1202.46	561.802	-1900.4	1106.19	557.605	-2030.7	959.294	499.624	-2062.37	897.109	573.497	-2041.51	882.094	546.668	-2114.91	823.147
678	0	311.972	-2059.34	1601.79	198.846	-2051.57	1594.36	331.557	-1888.04	1606.97	213.88	-1869.83	1600.81	286.305	-1832.98	1465.21	289.036	-1755.95	1228.26	270.95	-1986.71	1396.85	271.237	-2054.14	1217.32	170.172	-1734.92	1280	454.936	-1883.9	1435.14	548.529	-1895.26	1203.5	558.912	-1908.25	1107.09	557.532	-2033.98	956.976	501.139	-2064.29	893.032	574.507	-2042.29	879.486	549.3	-2113.65	817.638
679	0	309.092	-2068.77	1602.38	196.502	-2061.35	1595.08	328.431	-1897.41	1607.73	210.97	-1879.51	1601.45	284.122	-1842.56	1466.04	287.39	-1766.46	1228.63	269.078	-1996.66	1397.64	269.792	-2064.42	1218.25	168.2	-1745.37	1279.88	452.789	-1893.54	1436.37	546.152	-1904.11	1204.47	556.082	-1916.07	1108.06	557.683	-2037.84	954.873	502.139	-2065.78	888.954	575.728	-2042.94	877.379	552.026	-2111.98	812.384
680	0	306.327	-2078.37	1603.34	193.594	-2070.99	1595.72	325.578	-1907.04	1608.9	208.058	-1889.13	1602.48	281.992	-1852.1	1466.89	285.425	-1776.82	1229.1	267.33	-2006.47	1398.64	268.432	-2074.63	1219.5	166.248	-1755.58	1279.97	450.793	-1903.06	1437.77	543.902	-1912.61	1205.64	553.2	-1923.44	1109.3	557.356	-2039.91	953.111	503.325	-2066.86	885.739	576.64	-2043.08	875.685	554.799	-2110.02	807.804
681	0	303.828	-2087.76	1604.46	190.92	-2080.43	1596.42	322.726	-1916.42	1610.19	205.244	-1898.79	1603.14	279.833	-1861.83	1467.21	283.173	-1787.22	1229.62	265.644	-2016.03	1399.77	267.186	-2084.61	1220.86	164.121	-1765.96	1279.95	448.816	-1912.35	1439.34	541.591	-1920.75	1206.69	550.752	-1930.7	1110.85	557.861	-2042.54	952.089	504.42	-2067.62	883.04	577.765	-2042.9	874.577	557.486	-2107.49	803.533
[truncated: 69 more columns]

## Sheet: Sheet2
Devices
		025370 - Force			025370 - Moment			025370 - CoP			027571 - Force			027571 - Moment			027571 - CoP			037720 - Force			037720 - Moment			037720 - CoP
Frame	Sub Frame	Fx	Fy	Fz	Mx	My	Mz	Cx	Cy	Cz	Fx	Fy	Fz	Mx	My	Mz	Cx	Cy	Cz	Fx	Fy	Fz	Mx	My	Mz	Cx	Cy	Cz
		N	N	N	N.mm	N.mm	N.mm	mm	mm	mm	N	N	N	N.mm	N.mm	N.mm	mm	mm	mm	N	N	N	N.mm	N.mm	N.mm	mm	mm	mm
172	0	0.60948	2.11106	12.9379	212.129	-159.415	-252.687	200	300	0	0	0	0	0	0	0	200	903	0	0	0	0	0	0	0	603	903	0
172	1	1.52501	1.80589	10.4965	212.129	23.6906	479.735	200	300	0	0	0	0	0	0	0	200	903	0	0	0	0	0	0	0	603	903	0
172	2	2.28795	1.95848	11.1068	669.893	-98.3797	113.524	200	300	0	0	0	0	0	0	0	200	903	0	0	0	0	0	0	0	603	903	0
172	3	0	0	0	0	0	0	200	300	0	0	0	0	0	0	0	200	903	0	0	0	0	0	0	0	603	903	0
172	4	0.304304	1.50071	12.0224	669.893	-159.415	-115.358	200	300	0	0	0	0	0	0	0	200	903	0	0	0	0	0	0	0	603	903	0
172	5	0	0	0	0	0	0	200	300	0	0	0	0	0	0	0	200	903	0	0	0	0	0	0	0	603	903	0
172	6	1.52501	1.19554	11.412	1402.31	23.6906	-161.134	200	300	0	0	0	0	0	0	0	200	903	0	0	0	0	0	0	0	603	903	0
172	7	-0.306047	1.80589	10.8017	486.787	-37.3445	-161.134	200	300	0	0	0	0	0	0	0	200	903	0	0	0	0	0	0	0	603	903	0
172	8	0.151716	2.26365	10.1913	578.34	-37.3445	-344.24	200	300	0	0	0	0	0	0	0	200	903	0	0	0	0	0	0	0	603	903	0
172	9	1.06724	1.95848	10.8017	-154.082	-342.52	-161.134	200	300	0	0	0	0	0	0	0	200	903	0	0	0	0	0	0	0	603	903	0
173	0	1.6776	1.95848	9.88614	578.34	-159.415	113.524	200	300	0	0	0	0	0	0	0	200	903	0	0	0	0	0	0	0	603	903	0
173	1	0	0	0	0	0	0	200	300	0	0	0	0	0	0	0	200	903	0	0	0	0	0	0	0	603	903	0
173	2	0.151716	1.34812	10.1913	1402.31	-37.3445	-115.358	200	300	0	0	0	0	0	0	0	200	903	0	0	0	0	0	0	0	603	903	0
173	3	0.304304	1.50071	10.1913	395.235	-525.626	-23.8053	200	300	0	0	0	0	0	0	0	200	903	0	0	0	0	0	0	0	603	903	0
173	4	0.304304	1.34812	11.1068	669.893	-281.485	-298.464	200	300	0	0	0	0	0	0	0	200	903	0	0	0	0	0	0	0	603	903	0
173	5	0.151716	1.80589	12.3275	395.235	-37.3445	-344.24	200	300	0	0	0	0	0	0	0	200	903	0	0	0	0	0	0	0	603	903	0
173	6	0.60948	2.26365	12.6327	761.445	84.7258	-23.8053	200	300	0	0	0	0	0	0	0	200	903	0	0	0	0	0	0	0	603	903	0
173	7	1.06724	2.26365	10.4965	120.576	-220.45	-252.687	200	300	0	0	0	0	0	0	0	200	903	0	0	0	0	0	0	0	603	903	0
173	8	0	0	0	0	0	0	200	300	0	0	0	0	0	0	0	200	903	0	0	0	0	0	0	0	603	903	0
173	9	0	0	0	0	0	0	200	300	0	0	0	0	0	0	0	200	903	0	0	0	0	0	0	0	603	903	0
174	0	0	0	0	0	0	0	200	300	0	0	0	0	0	0	0	200	903	0	0	0	0	0	0	0	603	903	0
174	1	0.304304	1.80589	9.88614	303.682	-220.45	-206.911	200	300	0	0	0	0	0	0	0	200	903	0	0	0	0	0	0	0	603	903	0
174	2	0.151716	1.34812	11.1068	578.34	-342.52	-115.358	200	300	0	0	0	0	0	0	0	200	903	0	0	0	0	0	0	0	603	903	0
174	3	-0.15346	1.34812	11.1068	120.576	145.761	-161.134	200	300	0	0	0	0	0	0	0	200	903	0	0	0	0	0	0	0	603	903	0
174	4	1.52501	1.6533	11.1068	486.787	267.831	-23.8053	200	300	0	0	0	0	0	0	0	200	903	0	0	0	0	0	0	0	603	903	0
174	5	1.6776	2.11106	11.1068	-245.635	-159.415	-206.911	200	300	0	0	0	0	0	0	0	200	903	0	0	0	0	0	0	0	603	903	0
174	6	0.60948	1.80589	9.88614	29.0235	-98.3797	-344.24	200	300	0	0	0	0	0	0	0	200	903	0	0	0	0	0	0	0	603	903	0
174	7	0.914656	2.11106	9.88614	761.445	-98.3797	-298.464	200	300	0	0	0	0	0	0	0	200	903	0	0	0	0	0	0	0	603	903	0
174	8	0.151716	2.11106	11.1068	944.551	-37.3445	-69.5817	200	300	0	0	0	0	0	0	0	200	903	0	0	0	0	0	0	0	603	903	0
174	9	0	0	0	0	0	0	200	300	0	0	0	0	0	0	0	200	903	0	0	0	0	0	0	0	603	903	0
175	0	-0.000871718	1.50071	11.7172	852.998	-464.591	-298.464	200	300	0	0	0	0	0	0	0	200	903	0	0	0	0	0	0	0	603	903	0
175	1	-0.611223	1.80589	11.7172	578.34	-159.415	-206.911	200	300	0	0	0	0	0	0	0	200	903	0	0	0	0	0	0	0	603	903	0
175	2	0.60948	1.34812	10.8017	578.34	-37.3445	-161.134	200	300	0	0	0	0	0	0	0	200	903	0	0	0	0	0	0	0	603	903	0
175	3	2.44053	2.11106	9.58096	1036.1	-220.45	-161.134	200	300	0	0	0	0	0	0	0	200	903	0	0	0	0	0	0	0	603	903	0
175	4	0	0	0	0	0	0	200	300	0	0	0	0	0	0	0	200	903	0	0	0	0	0	0	0	603	903	0
175	5	0	0	0	0	0	0	200	300	0	0	0	0	0	0	0	200	903	0	0	0	0	0	0	0	603	903	0
175	6	0	0	0	0	0	0	200	300	0	0	0	0	0	0	0	200	903	0	0	0	0	0	0	0	603	903	0
175	7	0.456892	1.50071	9.88614	1310.76	206.796	67.7474	200	300	0	0	0	0	0	0	0	200	903	0	0	0	0	0	0	0	603	903	0
175	8	1.21983	1.34812	10.1913	303.682	-98.3797	-161.134	200	300	0	0	0	0	0	0	0	200	903	0	0	0	0	0	0	0	603	903	0
175	9	0.60948	1.95848	11.7172	761.445	-220.45	-298.464	200	300	0	0	0	0	0	0	0	200	903	0	0	0	0	0	0	0	603	903	0
176	0	0.60948	1.6533	11.1068	395.235	-403.556	-252.687	200	300	0	0	0	0	0	0	0	200	903	0	0	0	0	0	0	0	603	903	0
176	1	1.21983	1.34812	11.7172	120.576	84.7258	-161.134	200	300	0	0	0	0	0	0	0	200	903	0	0	0	0	0	0	0	603	903	0
176	2	0	0	0	0	0	0	200	300	0	0	0	0	0	0	0	200	903	0	0	0	0	0	0	0	603	903	0
176	3	-0.15346	2.874	10.8017	761.445	-220.45	250.853	200	300	0	0	0	0	0	0	0	200	903	0	0	0	0	0	0	0	603	903	0
176	4	-0.458635	1.95848	12.3275	395.235	-403.556	67.7474	200	300	0	0	0	0	0	0	0	200	903	0	0	0	0	0	0	0	603	903	0
176	5	1.21983	2.26365	11.7172	1036.1	-159.415	250.853	200	300	0	0	0	0	0	0	0	200	903	0	0	0	0	0	0	0	603	903	0
176	6	0	0	0	0	0	0	200	300	0	0	0	0	0	0	0	200	903	0	0	0	0	0	0	0	603	903	0
176	7	0	0	0	0	0	0	200	300	0	0	0	0	0	0	0	200	903	0	0	0	0	0	0	0	603	903	0
176	8	-0.000871718	1.34812	10.1913	761.445	-220.45	-115.358	200	300	0	0	0	0	0	0	0	200	903	0	0	0	0	0	0	0	603	903	0
176	9	0	0	0	0	0	0	200	300	0	0	0	0	0	0	0	200	903	0	0	0	0	0	0	0	603	903	0
177	0	-0.000871718	1.50071	11.7172	395.235	-98.3797	-69.5817	200	300	0	0	0	0	0	0	0	200	903	0	0	0	0	0	0	0	603	903	0
177	1	0.914656	1.80589	10.8017	486.787	23.6906	-298.464	200	300	0	0	0	0	0	0	0	200	903	0	0	0	0	0	0	0	603	903	0
177	2	0.762068	1.95848	11.7172	852.998	-159.415	-252.687	200	300	0	0	0	0	0	0	0	200	903	0	0	0	0	0	0	0	603	903	0
177	3	0	0	0	0	0	0	200	300	0	0	0	0	0	0	0	200	903	0	0	0	0	0	0	0	603	903	0
177	4	0.151716	1.50071	10.8017	395.235	23.6906	-69.5817	200	300	0	0	0	0	0	0	0	200	903	0	0	0	0	0	0	0	603	903	0
177	5	-0.458635	2.72141	10.4965	1219.21	-98.3797	-161.134	200	300	0	0	0	0	0	0	0	200	903	0	0	0	0	0	0	0	603	903	0
177	6	1.52501	2.11106	12.0224	578.34	-220.45	-435.793	200	300	0	0	0	0	0	0	0	200	903	0	0	0	0	0	0	0	603	903	0
177	7	0.151716	-0.0251671	11.1068	669.893	-647.696	-69.5817	200	300	0	0	0	0	0	0	0	200	903	0	0	0	0	0	0	0	603	903	0
177	8	0.304304	0.89036	11.1068	852.998	-403.556	-23.8053	200	300	0	0	0	0	0	0	0	200	903	0	0	0	0	0	0	0	603	903	0
177	9	0.60948	1.19554	11.7172	944.551	-37.3445	-252.687	200	300	0	0	0	0	0	0	0	200	903	0	0	0	0	0	0	0	603	903	0
178	0	0	0	0	0	0	0	200	300	0	0	0	0	0	0	0	200	903	0	0	0	0	0	0	0	603	903	0
178	1	0	0	0	0	0	0	200	300	0	0	0	0	0	0	0	200	903	0	0	0	0	0	0	0	603	903	0
178	2	-0.611223	2.26365	9.88614	-245.635	-220.45	-298.464	200	300	0	0	0	0	0	0	0	200	903	0	0	0	0	0	0	0	603	903	0
178	3	1.21983	2.11106	10.8017	303.682	206.796	-161.134	200	300	0	0	0	0	0	0	0	200	903	0	0	0	0	0	0	0	603	903	0
178	4	-0.15346	2.41624	12.3275	578.34	206.796	-298.464	200	300	0	0	0	0	0	0	0	200	903	0	0	0	0	0	0	0	603	903	0
178	5	-0.15346	2.56883	12.0224	944.551	145.761	-206.911	200	300	0	0	0	0	0	0	0	200	903	0	0	0	0	0	0	0	603	903	0
178	6	0.456892	1.34812	11.412	1493.87	-464.591	-161.134	200	300	0	0	0	0	0	0	0	200	903	0	0	0	0	0	0	0	603	903	0
178	7	0.914656	2.26365	9.88614	852.998	23.6906	-344.24	200	300	0	0	0	0	0	0	0	200	903	0	0	0	0	0	0	0	603	903	0
178	8	-0.000871718	1.04295	10.4965	852.998	23.6906	-115.358	200	300	0	0	0	0	0	0	0	200	903	0	0	0	0	0	0	0	603	903	0
178	9	0	0	0	0	0	0	200	300	0	0	0	0	0	0	0	200	903	0	0	0	0	0	0	0	603	903	0
179	0	-0.763811	1.95848	9.88614	395.235	-464.591	-344.24	200	300	0	0	0	0	0	0	0	200	903	0	0	0	0	0	0	0	603	903	0
179	1	-0.15346	2.11106	10.1913	-154.082	-220.45	-252.687	200	300	0	0	0	0	0	0	0	200	903	0	0	0	0	0	0	0	603	903	0
179	2	0.762068	0.737772	12.6327	-62.5292	-98.3797	-23.8053	200	300	0	0	0	0	0	0	0	200	903	0	0	0	0	0	0	0	603	903	0
179	3	1.37242	2.41624	10.1913	486.787	-281.485	67.7474	200	300	0	0	0	0	0	0	0	200	903	0	0	0	0	0	0	0	603	903	0
179	4	0	0	0	0	0	0	200	300	0	0	0	0	0	0	0	200	903	0	0	0	0	0	0	0	603	903	0
179	5	0.914656	1.80589	9.88614	669.893	-220.45	-344.24	200	300	0	0	0	0	0	0	0	200	903	0	0	0	0	0	0	0	603	903	0
179	6	0.304304	-0.0251671	10.1913	303.682	-281.485	-23.8053	200	300	0	0	0	0	0	0	0	200	903	0	0	0	0	0	0	0	603	903	0
179	7	-0.306047	1.34812	10.1913	29.0235	84.7258	-161.134	200	300	0	0	0	0	0	0	0	200	903	0	0	0	0	0	0	0	603	903	0
179	8	-0.458635	2.11106	11.7172	120.576	206.796	-344.24	200	300	0	0	0	0	0	0	0	200	903	0	0	0	0	0	0	0	603	903	0
179	9	-0.306047	2.56883	11.7172	578.34	-403.556	-390.016	200	300	0	0	0	0	0	0	0	200	903	0	0	0	0	0	0	0	603	903	0
180	0	0.456892	1.34812	10.8017	120.576	-220.45	67.7474	200	300	0	0	0	0	0	0	0	200	903	0	0	0	0	0	0	0	603	903	0
180	1	2.59312	1.6533	9.88614	486.787	-159.415	-115.358	200	300	0	0	0	0	0	0	0	200	903	0	0	0	0	0	0	0	603	903	0
180	2	0	0	0	0	0	0	200	300	0	0	0	0	0	0	0	200	903	0	0	0	0	0	0	0	603	903	0
180	3	0	0	0	0	0	0	200	300	0	0	0	0	0	0	0	200	903	0	0	0	0	0	0	0	603	903	0
180	4	-0.15346	-0.330343	10.4965	578.34	-464.591	113.524	200	300	0	0	0	0	0	0	0	200	903	0	0	0	0	0	0	0	603	903	0
180	5	0	0	0	0	0	0	200	300	0	0	0	0	0	0	0	200	903	0	0	0	0	0	0	0	603	903	0
180	6	-0.306047	1.19554	13.5482	-154.082	-220.45	159.3	200	300	0	0	0	0	0	0	0	200	903	0	0	0	0	0	0	0	603	903	0
180	7	1.06724	1.95848	10.8017	395.235	23.6906	-161.134	200	300	0	0	0	0	0	0	0	200	903	0	0	0	0	0	0	0	603	903	0
180	8	0.151716	1.50071	9.88614	29.0235	-220.45	159.3	200	300	0	0	0	0	0	0	0	200	903	0	0	0	0	0	0	0	603	903	0
180	9	0	0	0	0	0	0	200	300	0	0	0	0	0	0	0	200	903	0	0	0	0	0	0	0	603	903	0
181	0	0	0	0	0	0	0	200	300	0	0	0	0	0	0	0	200	903	0	0	0	0	0	0	0	603	903	0
181	1	1.37242	1.95848	10.4965	944.551	145.761	-206.911	200	300	0	0	0	0	0	0	0	200	903	0	0	0	0	0	0	0	603	903	0
181	2	-0.000871718	1.50071	11.412	486.787	-281.485	-115.358	200	300	0	0	0	0	0	0	0	200	903	0	0	0	0	0	0	0	603	903	0
181	3	0.762068	1.19554	10.4965	578.34	-281.485	-161.134	200	300	0	0	0	0	0	0	0	200	903	0	0	0	0	0	0	0	603	903	0
181	4	0.304304	1.80589	11.7172	852.998	23.6906	-69.5817	200	300	0	0	0	0	0	0	0	200	903	0	0	0	0	0	0	0	603	903	0
181	5	0	0	0	0	0	0	200	300	0	0	0	0	0	0	0	200	903	0	0	0	0	0	0	0	603	903	0
181	6	1.98277	1.80589	11.7172	120.576	-281.485	-23.8053	200	300	0	0	0	0	0	0	0	200	903	0	0	0	0	0	0	0	603	903	0
181	7	0	0	0	0	0	0	200	300	0	0	0	0	0	0	0	200	903	0	0	0	0	0	0	0	603	903	0
181	8	-0.306047	1.04295	10.4965	303.682	-37.3445	-298.464	200	300	0	0	0	0	0	0	0	200	903	0	0	0	0	0	0	0	603	903	0
181	9	0.762068	1.34812	12.6327	761.445	145.761	-206.911	200	300	0	0	0	0	0	0	0	200	903	0	0	0	0	0	0	0	603	903	0
182	0	0.914656	1.50071	12.0224	212.129	84.7258	-206.911	200	300	0	0	0	0	0	0	0	200	903	0	0	0	0	0	0	0	603	903	0
182	1	0	0	0	0	0	0	200	300	0	0	0	0	0	0	0	200	903	0	0	0	0	0	0	0	603	903	0
182	2	0.60948	1.95848	10.4965	303.682	-98.3797	-206.911	200	300	0	0	0	0	0	0	0	200	903	0	0	0	0	0	0	0	603	903	0
182	3	-1.06899	1.50071	9.88614	669.893	84.7258	-252.687	200	300	0	0	0	0	0	0	0	200	903	0	0	0	0	0	0	0	603	903	0
182	4	-0.611223	1.6533	10.1913	761.445	-37.3445	-298.464	200	300	0	0	0	0	0	0	0	200	903	0	0	0	0	0	0	0	603	903	0
182	5	-0.000871718	1.34812	10.8017	852.998	267.831	-115.358	200	300	0	0	0	0	0	0	0	200	903	0	0	0	0	0	0	0	603	903	0
182	6	0.151716	1.34812	11.1068	669.893	-281.485	-252.687	200	300	0	0	0	0	0	0	0	200	903	0	0	0	0	0	0	0	603	903	0
182	7	0.762068	1.04295	11.1068	761.445	84.7258	-252.687	200	300	0	0	0	0	0	0	0	200	903	0	0	0	0	0	0	0	603	903	0
182	8	0	0	0	0	0	0	200	300	0	0	0	0	0	0	0	200	903	0	0	0	0	0	0	0	603	903	0
182	9	1.52501	2.11106	10.8017	303.682	-37.3445	296.629	200	300	0	0	0	0	0	0	0	200	903	0	0	0	0	0	0	0	603	903	0
183	0	0	0	0	0	0	0	200	300	0	0	0	0	0	0	0	200	903	0	0	0	0	0	0	0	603	903	0
183	1	1.06724	2.56883	11.1068	395.235	-98.3797	159.3	200	300	0	0	0	0	0	0	0	200	903	0	0	0	0	0	0	0	603	903	0
183	2	-0.15346	1.6533	10.8017	303.682	145.761	-69.5817	200	300	0	0	0	0	0	0	0	200	903	0	0	0	0	0	0	0	603	903	0
183	3	0.762068	1.95848	11.412	761.445	-220.45	-161.134	200	300	0	0	0	0	0	0	0	200	903	0	0	0	0	0	0	0	603	903	0
183	4	-0.000871718	1.34812	14.1586	669.893	-98.3797	-298.464	200	300	0	0	0	0	0	0	0	200	903	0	0	0	0	0	0	0	603	903	0
183	5	0.456892	1.80589	10.4965	486.787	-98.3797	-252.687	200	300	0	0	0	0	0	0	0	200	903	0	0	0	0	0	0	0	603	903	0
183	6	0.151716	1.50071	10.4965	303.682	-281.485	-435.793	200	300	0	0	0	0	0	0	0	200	903	0	0	0	0	0	0	0	603	903	0
183	7	-0.611223	2.26365	9.88614	303.682	23.6906	-252.687	200	300	0	0	0	0	0	0	0	200	903	0	0	0	0	0	0	0	603	903	0
183	8	1.21983	1.19554	12.3275	395.235	-159.415	-161.134	200	300	0	0	0	0	0	0	0	200	903	0	0	0	0	0	0	0	603	903	0
183	9	-0.15346	1.6533	10.8017	944.551	-37.3445	-23.8053	200	300	0	0	0	0	0	0	0	200	903	0	0	0	0	0	0	0	603	903	0
184	0	2.28795	-0.788107	10.4965	578.34	-37.3445	-115.358	200	300	0	0	0	0	0	0	0	200	903	0	0	0	0	0	0	0	603	903	0
184	1	1.37242	1.34812	10.1913	669.893	-220.45	-115.358	200	300	0	0	0	0	0	0	0	200	903	0	0	0	0	0	0	0	603	903	0
184	2	0.762068	1.95848	10.1913	486.787	-159.415	-344.24	200	300	0	0	0	0	0	0	0	200	903	0	0	0	0	0	0	0	603	903	0
184	3	0	0	0	0	0	0	200	300	0	0	0	0	0	0	0	200	903	0	0	0	0	0	0	0	603	903	0
184	4	0	0	0	0	0	0	200	300	0	0	0	0	0	0	0	200	903	0	0	0	0	0	0	0	603	903	0
184	5	0.151716	2.41624	10.1913	395.235	23.6906	-161.134	200	300	0	0	0	0	0	0	0	200	903	0	0	0	0	0	0	0	603	903	0
184	6	0.151716	2.41624	11.7172	395.235	-37.3445	-69.5817	200	300	0	0	0	0	0	0	0	200	903	0	0	0	0	0	0	0	603	903	0
184	7	-0.306047	2.11106	10.1913	578.34	389.902	205.077	200	300	0	0	0	0	0	0	0	200	903	0	0	0	0	0	0	0	603	903	0
184	8	-0.611223	1.34812	11.412	761.445	328.866	-298.464	200	300	0	0	0	0	0	0	0	200	903	0	0	0	0	0	0	0	603	903	0
184	9	0	0	0	0	0	0	200	300	0	0	0	0	0	0	0	200	903	0	0	0	0	0	0	0	603	903	0
185	0	0	0	0	0	0	0	200	300	0	0	0	0	0	0	0	200	903	0	0	0	0	0	0	0	603	903	0
185	1	0	0	0	0	0	0	200	300	0	0	0	0	0	0	0	200	903	0	0	0	0	0	0	0	603	903	0
185	2	0	0	0	0	0	0	200	300	0	0	0	0	0	0	0	200	903	0	0	0	0	0	0	0	603	903	0
185	3	-0.458635	2.11106	10.1913	486.787	-159.415	67.7474	200	300	0	0	0	0	0	0	0	200	903	0	0	0	0	0	0	0	603	903	0
185	4	0.60948	0.89036	11.7172	303.682	-98.3797	21.9711	200	300	0	0	0	0	0	0	0	200	903	0	0	0	0	0	0	0	603	903	0
185	5	0.762068	1.80589	11.412	578.34	206.796	-161.134	200	300	0	0	0	0	0	0	0	200	903	0	0	0	0	0	0	0	603	903	0
185	6	0	0	0	0	0	0	200	300	0	0	0	0	0	0	0	200	903	0	0	0	0	0	0	0	603	903	0
185	7	2.59312	1.95848	12.3275	1402.31	-220.45	-115.358	200	300	0	0	0	0	0	0	0	200	903	0	0	0	0	0	0	0	603	903	0
185	8	-0.15346	1.34812	10.1913	761.445	-403.556	-298.464	200	300	0	0	0	0	0	0	0	200	903	0	0	0	0	0	0	0	603	903	0
185	9	-0.763811	1.95848	10.8017	669.893	389.902	-344.24	200	300	0	0	0	0	0	0	0	200	903	0	0	0	0	0	0	0	603	903	0
186	0	-0.763811	1.95848	13.2431	486.787	84.7258	-298.464	200	300	0	0	0	0	0	0	0	200	903	0	0	0	0	0	0	0	603	903	0
186	1	0.762068	2.41624	10.1913	578.34	-281.485	-115.358	200	300	0	0	0	0	0	0	0	200	903	0	0	0	0	0	0	0	603	903	0
186	2	0	0	0	0	0	0	200	300	0	0	0	0	0	0	0	200	903	0	0	0	0	0	0	0	603	903	0
186	3	1.21983	2.72141	10.8017	120.576	-464.591	-115.358	200	300	0	0	0	0	0	0	0	200	903	0	0	0	0	0	0	0	603	903	0
186	4	0	0	0	0	0	0	200	300	0	0	0	0	0	0	0	200	903	0	0	0	0	0	0	0	603	903	0
186	5	0	0	0	0	0	0	200	300	0	0	0	0	0	0	0	200	903	0	0	0	0	0	0	0	603	903	0
186	6	0.304304	1.04295	10.1913	669.893	-281.485	-115.358	200	300	0	0	0	0	0	0	0	200	903	0	0	0	0	0	0	0	603	903	0
186	7	1.6776	1.19554	10.4965	852.998	-37.3445	21.9711	200	300	0	0	0	0	0	0	0	200	903	0	0	0	0	0	0	0	603	903	0
186	8	0.60948	1.6533	10.1913	29.0235	23.6906	67.7474	200	300	0	0	0	0	0	0	0	200	903	0	0	0	0	0	0	0	603	903	0
186	9	0	0	0	0	0	0	200	300	0	0	0	0	0	0	0	200	903	0	0	0	0	0	0	0	603	903	0
187	0	-0.000871718	2.26365	10.8017	212.129	-159.415	-344.24	200	300	0	0	0	0	0	0	0	200	903	0	0	0	0	0	0	0	603	903	0
187	1	1.37242	1.19554	10.4965	395.235	-159.415	21.9711	200	300	0	0	0	0	0	0	0	200	903	0	0	0	0	0	0	0	603	903	0
187	2	-0.15346	2.41624	11.7172	578.34	-220.45	-69.5817	200	300	0	0	0	0	0	0	0	200	903	0	0	0	0	0	0	0	603	903	0
187	3	0.762068	0.737772	10.8017	1127.66	-464.591	-115.358	200	300	0	0	0	0	0	0	0	200	903	0	0	0	0	0	0	0	603	903	0
187	4	0	0	0	0	0	0	200	300	0	0	0	0	0	0	0	200	903	0	0	0	0	0	0	0	603	903	0
187	5	0	0	0	0	0	0	200	300	0	0	0	0	0	0	0	200	903	0	0	0	0	0	0	0	603	903	0
187	6	-0.458635	1.50071	9.88614	486.787	-220.45	-23.8053	200	300	0	0	0	0	0	0	0	200	903	0	0	0	0	0	0	0	603	903	0
187	7	0.762068	1.50071	10.1913	212.129	-159.415	-23.8053	200	300	0	0	0	0	0	0	0	200	903	0	0	0	0	0	0	0	603	903	0
187	8	-0.15346	2.26365	10.1913	395.235	-98.3797	-23.8053	200	300	0	0	0	0	0	0	0	200	903	0	0	0	0	0	0	0	603	903	0
187	9	1.6776	0.280009	11.1068	486.787	-98.3797	-69.5817	200	300	0	0	0	0	0	0	0	200	903	0	0	0	0	0	0	0	603	903	0
188	0	0.456892	2.11106	11.7172	395.235	-98.3797	-252.687	200	300	0	0	0	0	0	0	0	200	903	0	0	0	0	0	0	0	603	903	0
188	1	0	0	0	0	0	0	200	300	0	0	0	0	0	0	0	200	903	0	0	0	0	0	0	0	603	903	0
188	2	0.304304	1.50071	12.0224	852.998	-37.3445	-298.464	200	300	0	0	0	0	0	0	0	200	903	0	0	0	0	0	0	0	603	903	0
188	3	-0.000871718	1.6533	9.88614	852.998	84.7258	113.524	200	300	0	0	0	0	0	0	0	200	903	0	0	0	0	0	0	0	603	903	0
188	4	-0.000871718	1.34812	12.3275	578.34	-220.45	-206.911	200	300	0	0	0	0	0	0	0	200	903	0	0	0	0	0	0	0	603	903	0
188	5	-0.000871718	1.80589	12.3275	761.445	-342.52	159.3	200	300	0	0	0	0	0	0	0	200	903	0	0	0	0	0	0	0	603	903	0
188	6	0.762068	2.11106	10.1913	303.682	-98.3797	296.629	200	300	0	0	0	0	0	0	0	200	903	0	0	0	0	0	0	0	603	903	0
188	7	0	0	0	0	0	0	200	300	0	0	0	0	0	0	0	200	903	0	0	0	0	0	0	0	603	903	0
188	8	0.762068	1.80589	9.88614	852.998	-403.556	-161.134	200	300	0	0	0	0	0	0	0	200	903	0	0	0	0	0	0	0	603	903	0
188	9	0	0	0	0	0	0	200	300	0	0	0	0	0	0	0	200	903	0	0	0	0	0	0	0	603	903	0
189	0	0.304304	1.50071	10.4965	395.235	-220.45	-161.134	200	300	0	0	0	0	0	0	0	200	903	0	0	0	0	0	0	0	603	903	0
189	1	0.304304	1.6533	10.4965	852.998	-464.591	-298.464	200	300	0	0	0	0	0	0	0	200	903	0	0	0	0	0	0	0	603	903	0
189	2	0.60948	1.6533	10.8017	-154.082	-220.45	-298.464	200	300	0	0	0	0	0	0	0	200	903	0	0	0	0	0	0	0	603	903	0
189	3	0.456892	2.41624	12.0224	669.893	-159.415	-161.134	200	300	0	0	0	0	0	0	0	200	903	0	0	0	0	0	0	0	603	903	0
189	4	0.914656	2.26365	11.412	303.682	-220.45	-206.911	200	300	0	0	0	0	0	0	0	200	903	0	0	0	0	0	0	0	603	903	0
189	5	0.914656	2.56883	13.5482	761.445	84.7258	-161.134	200	300	0	0	0	0	0	0	0	200	903	0	0	0	0	0	0	0	603	903	0
189	6	0	0	0	0	0	0	200	300	0	0	0	0	0	0	0	200	903	0	0	0	0	0	0	0	603	903	0
189	7	0.456892	1.6533	10.8017	1402.31	-525.626	-115.358	200	300	0	0	0	0	0	0	0	200	903	0	0	0	0	0	0	0	603	903	0
189	8	-0.000871718	2.11106	10.1913	395.235	-403.556	-69.5817	200	300	0	0	0	0	0	0	0	200	903	0	0	0	0	0	0	0	603	903	0
189	9	0.151716	1.6533	11.1068	395.235	267.831	113.524	200	300	0	0	0	0	0	0	0	200	903	0	0	0	0	0	0	0	603	903	0
190	0	2.8983	1.19554	9.58096	-62.5292	-891.837	-161.134	200	300	0	0	0	0	0	0	0	200	903	0	0	0	0	0	0	0	603	903	0
190	1	0	0	0	0	0	0	200	300	0	0	0	0	0	0	0	200	903	0	0	0	0	0	0	0	603	903	0
190	2	0	0	0	0	0	0	200	300	0	0	0	0	0	0	0	200	903	0	0	0	0	0	0	0	603	903	0
190	3	1.06724	2.11106	9.88614	761.445	-281.485	-69.5817	200	300	0	0	0	0	0	0	0	200	903	0	0	0	0	0	0	0	603	903	0
190	4	-0.000871718	2.26365	10.4965	120.576	-159.415	-115.358	200	300	0	0	0	0	0	0	0	200	903	0	0	0	0	0	0	0	603	903	0
190	5	1.06724	2.26365	11.412	486.787	-98.3797	21.9711	200	300	0	0	0	0	0	0	0	200	903	0	0	0	0	0	0	0	603	903	0
190	6	2.44053	1.80589	9.58096	852.998	-220.45	-252.687	200	300	0	0	0	0	0	0	0	200	903	0	0	0	0	0	0	0	603	903	0
190	7	0	0	0	0	0	0	200	300	0	0	0	0	0	0	0	200	903	0	0	0	0	0	0	0	603	903	0
190	8	0	0	0	0	0	0	200	300	0	0	0	0	0	0	0	200	903	0	0	0	0	0	0	0	603	903	0
190	9	-0.611223	2.26365	11.1068	120.576	-159.415	-161.134	200	300	0	0	0	0	0	0	0	200	903	0	0	0	0	0	0	0	603	903	0
191	0	-0.611223	2.41624	11.412	395.235	-98.3797	-161.134	200	300	0	0	0	0	0	0	0	200	903	0	0	0	0	0	0	0	603	903	0
191	1	0.151716	2.72141	11.1068	395.235	-220.45	-23.8053	200	300	0	0	0	0	0	0	0	200	903	0	0	0	0	0	0	0	603	903	0
191	2	0.304304	1.95848	10.4965	486.787	-708.731	-206.911	200	300	0	0	0	0	0	0	0	200	903	0	0	0	0	0	0	0	603	903	0
191	3	0	0	0	0	0	0	200	300	0	0	0	0	0	0	0	200	903	0	0	0	0	0	0	0	603	903	0
191	4	-0.611223	1.04295	12.9379	669.893	-98.3797	-252.687	200	300	0	0	0	0	0	0	0	200	903	0	0	0	0	0	0	0	603	903	0
191	5	0	0	0	0	0	0	200	300	0	0	0	0	0	0	0	200	903	0	0	0	0	0	0	0	603	903	0
191	6	-0.306047	1.19554	10.8017	212.129	-37.3445	-298.464	200	300	0	0	0	0	0	0	0	200	903	0	0	0	0	0	0	0	603	903	0
191	7	0.762068	1.6533	12.0224	29.0235	-220.45	-115.358	200	300	0	0	0	0	0	0	0	200	903	0	0	0	0	0	0	0	603	903	0
191	8	1.21983	1.80589	11.7172	852.998	-98.3797	-206.911	200	300	0	0	0	0	0	0	0	200	903	0	0	0	0	0	0	0	603	903	0
191	9	0.60948	2.41624	10.1913	212.129	-220.45	-344.24	200	300	0	0	0	0	0	0	0	200	903	0	0	0	0	0	0	0	603	903	0
192	0	0.304304	1.95848	11.1068	852.998	-37.3445	-252.687	200	300	0	0	0	0	0	0	0	200	903	0	0	0	0	0	0	0	603	903	0
192	1	0	0	0	0	0	0	200	300	0	0	0	0	0	0	0	200	903	0	0	0	0	0	0	0	603	903	0
192	2	-0.000871718	1.6533	11.412	1402.31	-281.485	-344.24	200	300	0	0	0	0	0	0	0	200	903	0	0	0	0	0	0	0	603	903	0
192	3	0.151716	1.50071	10.8017	578.34	23.6906	67.7474	200	300	0	0	0	0	0	0	0	200	903	0	0	0	0	0	0	0	603	903	0
192	4	-0.611223	1.34812	11.412	669.893	-159.415	-115.358	200	300	0	0	0	0	0	0	0	200	903	0	0	0	0	0	0	0	603	903	0
192	5	0	0	0	0	0	0	200	300	0	0	0	0	0	0	0	200	903	0	0	0	0	0	0	0	603	903	0
192	6	0.60948	2.41624	9.88614	578.34	-708.731	479.735	200	300	0	0	0	0	0	0	0	200	903	0	0	0	0	0	0	0	603	903	0
192	7	0	0	0	0	0	0	200	300	0	0	0	0	0	0	0	200	903	0	0	0	0	0	0	0	603	903	0
192	8	-0.000871718	1.04295	10.8017	-62.5292	-98.3797	-69.5817	200	300	0	0	0	0	0	0	0	200	903	0	0	0	0	0	0	0	603	903	0
192	9	2.59312	2.26365	11.1068	761.445	-37.3445	-23.8053	200	300	0	0	0	0	0	0	0	200	903	0	0	0	0	0	0	0	603	903	0
193	0	0.914656	1.50071	11.7172	669.893	-281.485	-298.464	200	300	0	0	0	0	0	0	0	200	903	0	0	0	0	0	0	0	603	903	0
193	1	0	0	0	0	0	0	200	300	0	0	0	0	0	0	0	200	903	0	0	0	0	0	0	0	603	903	0
193	2	1.06724	1.50071	12.6327	212.129	-220.45	-206.911	200	300	0	0	0	0	0	0	0	200	903	0	0	0	0	0	0	0	603	903	0
193	3	-0.763811	1.6533	10.4965	212.129	-37.3445	-161.134	200	300	0	0	0	0	0	0	0	200	903	0	0	0	0	0	0	0	603	903	0
193	4	-0.611223	2.41624	10.8017	852.998	-37.3445	-390.016	200	300	0	0	0	0	0	0	0	200	903	0	0	0	0	0	0	0	603	903	0
193	5	0	0	0	0	0	0	200	300	0	0	0	0	0	0	0	200	903	0	0	0	0	0	0	0	603	903	0
193	6	0.60948	2.41624	10.1913	29.0235	-525.626	-69.5817	200	300	0	0	0	0	0	0	0	200	903	0	0	0	0	0	0	0	603	903	0
193	7	1.52501	1.6533	10.4965	669.893	-98.3797	-69.5817	200	300	0	0	0	0	0	0	0	200	903	0	0	0	0	0	0	0	603	903	0
193	8	0	0	0	0	0	0	200	300	0	0	0	0	0	0	0	200	903	0	0	0	0	0	0	0	603	903	0
193	9	0	0	0	0	0	0	200	300	0	0	0	0	0	0	0	200	903	0	0	0	0	0	0	0	603	903	0
194	0	-0.611223	1.50071	11.7172	395.235	-159.415	-115.358	200	300	0	0	0	0	0	0	0	200	903	0	0	0	0	0	0	0	603	903	0
194	1	-0.306047	1.50071	11.1068	303.682	-159.415	-206.911	200	300	0	0	0	0	0	0	0	200	903	0	0	0	0	0	0	0	603	903	0
194	2	1.06724	1.95848	12.0224	29.0235	-37.3445	-252.687	200	300	0	0	0	0	0	0	0	200	903	0	0	0	0	0	0	0	603	903	0
194	3	0.456892	1.95848	10.8017	303.682	267.831	-298.464	200	300	0	0	0	0	0	0	0	200	903	0	0	0	0	0	0	0	603	903	0
194	4	0.151716	2.26365	10.1913	761.445	23.6906	-298.464	200	300	0	0	0	0	0	0	0	200	903	0	0	0	0	0	0	0	603	903	0
194	5	0.914656	1.80589	13.2431	852.998	-586.661	-115.358	200	300	0	0	0	0	0	0	0	200	903	0	0	0	0	0	0	0	603	903	0
194	6	-0.15346	1.6533	9.88614	1219.21	84.7258	-435.793	200	300	0	0	0	0	0	0	0	200	903	0	0	0	0	0	0	0	603	903	0
194	7	1.21983	1.19554	10.1913	578.34	84.7258	-298.464	200	300	0	0	0	0	0	0	0	200	903	0	0	0	0	0	0	0	603	903	0
194	8	-0.306047	1.50071	10.4965	-62.5292	-281.485	21.9711	200	300	0	0	0	0	0	0	0	200	903	0	0	0	0	0	0	0	603	903	0
194	9	0.914656	1.34812	10.1913	120.576	-281.485	-115.358	200	300	0	0	0	0	0	0	0	200	903	0	0	0	0	0	0	0	603	903	0
195	0	0.60948	1.95848	11.412	-245.635	-220.45	-23.8053	200	300	0	0	0	0	0	0	0	200	903	0	0	0	0	0	0	0	603	903	0
195	1	0	0	0	0	0	0	200	300	0	0	0	0	0	0	0	200	903	0	0	0	0	0	0	0	603	903	0
195	2	0.60948	1.80589	11.1068	395.235	-37.3445	-298.464	200	300	0	0	0	0	0	0	0	200	903	0	0	0	0	0	0	0	603	903	0
195	3	0	0	0	0	0	0	200	300	0	0	0	0	0	0	0	200	903	0	0	0	0	0	0	0	603	903	0
195	4	0.151716	1.34812	12.3275	669.893	-37.3445	-252.687	200	300	0	0	0	0	0	0	0	200	903	0	0	0	0	0	0	0	603	903	0
195	5	-1.06899	1.19554	12.9379	669.893	145.761	-115.358	200	300	0	0	0	0	0	0	0	200	903	0	0	0	0	0	0	0	603	903	0
195	6	-0.15346	1.34812	10.8017	212.129	84.7258	-390.016	200	300	0	0	0	0	0	0	0	200	903	0	0	0	0	0	0	0	603	903	0
195	7	1.83018	1.6533	10.8017	486.787	23.6906	-206.911	200	300	0	0	0	0	0	0	0	200	903	0	0	0	0	0	0	0	603	903	0
195	8	0	0	0	0	0	0	200	300	0	0	0	0	0	0	0	200	903	0	0	0	0	0	0	0	603	903	0
195	9	0	0	0	0	0	0	200	300	0	0	0	0	0	0	0	200	903	0	0	0	0	0	0	0	603	903	0
196	0	-0.611223	1.95848	10.1913	1219.21	-220.45	-206.911	200	300	0	0	0	0	0	0	0	200	903	0	0	0	0	0	0	0	603	903	0
196	1	-0.763811	1.95848	11.412	578.34	23.6906	-252.687	200	300	0	0	0	0	0	0	0	200	903	0	0	0	0	0	0	0	603	903	0
196	2	0.60948	1.04295	11.412	761.445	23.6906	-161.134	200	300	0	0	0	0	0	0	0	200	903	0	0	0	0	0	0	0	603	903	0
196	3	0.914656	1.34812	11.7172	669.893	-98.3797	-23.8053	200	300	0	0	0	0	0	0	0	200	903	0	0	0	0	0	0	0	603	903	0
196	4	0	0	0	0	0	0	200	300	0	0	0	0	0	0	0	200	903	0	0	0	0	0	0	0	603	903	0
196	5	0.914656	1.95848	11.1068	29.0235	145.761	-161.134	200	300	0	0	0	0	0	0	0	200	903	0	0	0	0	0	0	0	603	903	0
196	6	-0.15346	1.95848	11.1068	29.0235	23.6906	-206.911	200	300	0	0	0	0	0	0	0	200	903	0	0	0	0	0	0	0	603	903	0
196	7	0.762068	1.04295	11.7172	29.0235	267.831	-252.687	200	300	0	0	0	0	0	0	0	200	903	0	0	0	0	0	0	0	603	903	0
196	8	-0.916399	1.95848	11.7172	944.551	-98.3797	-252.687	200	300	0	0	0	0	0	0	0	200	903	0	0	0	0	0	0	0	603	903	0
196	9	0.762068	1.6533	12.0224	761.445	-98.3797	-206.911	200	300	0	0	0	0	0	0	0	200	903	0	0	0	0	0	0	0	603	903	0
197	0	0.914656	1.50071	9.88614	486.787	145.761	-298.464	200	300	0	0	0	0	0	0	0	200	903	0	0	0	0	0	0	0	603	903	0
197	1	0	0	0	0	0	0	200	300	0	0	0	0	0	0	0	200	903	0	0	0	0	0	0	0	603	903	0
197	2	0	0	0	0	0	0	200	300	0	0	0	0	0	0	0	200	903	0	0	0	0	0	0	0	603	903	0
197	3	0	0	0	0	0	0	200	300	0	0	0	0	0	0	0	200	903	0	0	0	0	0	0	0	603	903	0
197	4	-0.15346	1.80589	10.1913	303.682	-281.485	-206.911	200	300	0	0	0	0	0	0	0	200	903	0	0	0	0	0	0	0	603	903	0
197	5	0.304304	0.280009	10.8017	303.682	-220.45	67.7474	200	300	0	0	0	0	0	0	0	200	903	0	0	0	0	0	0	0	603	903	0
197	6	0.914656	2.11106	11.7172	486.787	23.6906	-115.358	200	300	0	0	0	0	0	0	0	200	903	0	0	0	0	0	0	0	603	903	0
197	7	2.28795	0.280009	11.1068	578.34	-220.45	-115.358	200	300	0	0	0	0	0	0	0	200	903	0	0	0	0	0	0	0	603	903	0
197	8	0.914656	1.50071	10.8017	669.893	-220.45	-69.5817	200	300	0	0	0	0	0	0	0	200	903	0	0	0	0	0	0	0	603	903	0
197	9	0	0	0	0	0	0	200	300	0	0	0	0	0	0	0	200	903	0	0	0	0	0	0	0	603	903	0
198	0	-0.916399	1.50071	12.0224	212.129	84.7258	-298.464	200	300	0	0	0	0	0	0	0	200	903	0	0	0	0	0	0	0	603	903	0
198	1	-0.306047	0.89036	12.0224	761.445	145.761	-298.464	200	300	0	0	0	0	0	0	0	200	903	0	0	0	0	0	0	0	603	903	0
198	2	0.151716	2.41624	11.412	486.787	-220.45	-252.687	200	300	0	0	0	0	0	0	0	200	903	0	0	0	0	0	0	0	603	903	0
198	3	0.60948	1.95848	11.412	761.445	-220.45	-69.5817	200	300	0	0	0	0	0	0	0	200	903	0	0	0	0	0	0	0	603	903	0
198	4	1.21983	2.11106	10.4965	1036.1	23.6906	-252.687	200	300	0	0	0	0	0	0	0	200	903	0	0	0	0	0	0	0	603	903	0
198	5	1.83018	1.34812	12.6327	669.893	84.7258	-344.24	200	300	0	0	0	0	0	0	0	200	903	0	0	0	0	0	0	0	603	903	0
198	6	0	0	0	0	0	0	200	300	0	0	0	0	0	0	0	200	903	0	0	0	0	0	0	0	603	903	0
198	7	-0.000871718	1.50071	11.412	395.235	-342.52	21.9711	200	300	0	0	0	0	0	0	0	200	903	0	0	0	0	0	0	0	603	903	0
198	8	0.304304	2.11106	10.8017	212.129	206.796	-23.8053	200	300	0	0	0	0	0	0	0	200	903	0	0	0	0	0	0	0	603	903	0
198	9	1.06724	1.04295	11.412	-62.5292	267.831	67.7474	200	300	0	0	0	0	0	0	0	200	903	0	0	0	0	0	0	0	603	903	0
199	0	0	0	0	0	0	0	200	300	0	0	0	0	0	0	0	200	903	0	0	0	0	0	0	0	603	903	0
199	1	0	0	0	0	0	0	200	300	0	0	0	0	0	0	0	200	903	0	0	0	0	0	0	0	603	903	0
199	2	0	0	0	0	0	0	200	300	0	0	0	0	0	0	0	200	903	0	0	0	0	0	0	0	603	903	0
199	3	-0.458635	1.50071	10.8017	120.576	-37.3445	-115.358	200	300	0	0	0	0	0	0	0	200	903	0	0	0	0	0	0	0	603	903	0
199	4	-0.000871718	2.56883	10.8017	669.893	23.6906	-252.687	200	300	0	0	0	0	0	0	0	200	903	0	0	0	0	0	0	0	603	903	0
199	5	-0.611223	2.11106	14.1586	669.893	84.7258	-206.911	200	300	0	0	0	0	0	0	0	200	903	0	0	0	0	0	0	0	603	903	0
199	6	0.914656	2.56883	10.8017	852.998	-220.45	-252.687	200	300	0	0	0	0	0	0	0	200	903	0	0	0	0	0	0	0	603	903	0
199	7	1.37242	2.41624	9.88614	852.998	-281.485	-161.134	200	300	0	0	0	0	0	0	0	200	903	0	0	0	0	0	0	0	603	903	0
199	8	0	0	0	0	0	0	200	300	0	0	0	0	0	0	0	200	903	0	0	0	0	0	0	0	603	903	0
199	9	0	0	0	0	0	0	200	300	0	0	0	0	0	0	0	200	903	0	0	0	0	0	0	0	603	903	0
200	0	0.304304	-0.0251671	10.8017	852.998	-37.3445	-206.911	200	300	0	0	0	0	0	0	0	200	903	0	0	0	0	0	0	0	603	903	0
200	1	-0.15346	1.19554	10.8017	486.787	-159.415	159.3	200	300	0	0	0	0	0	0	0	200	903	0	0	0	0	0	0	0	603	903	0
200	2	0.151716	1.6533	9.88614	212.129	84.7258	-69.5817	200	300	0	0	0	0	0	0	0	200	903	0	0	0	0	0	0	0	603	903	0
200	3	0.60948	2.11106	11.1068	212.129	-159.415	113.524	200	300	0	0	0	0	0	0	0	200	903	0	0	0	0	0	0	0	603	903	0
200	4	0	0	0	0	0	0	200	300	0	0	0	0	0	0	0	200	903	0	0	0	0	0	0	0	603	903	0
200	5	0	0	0	0	0	0	200	300	0	0	0	0	0	0	0	200	903	0	0	0	0	0	0	0	603	903	0
200	6	0.456892	3.02659	9.88614	761.445	-220.45	-206.911	200	300	0	0	0	0	0	0	0	200	903	0	0	0	0	0	0	0	603	903	0
200	7	1.06724	1.34812	11.7172	761.445	-98.3797	-344.24	200	300	0	0	0	0	0	0	0	200	903	0	0	0	0	0	0	0	603	903	0
200	8	-0.15346	2.26365	11.1068	1127.66	267.831	-481.569	200	300	0	0	0	0	0	0	0	200	903	0	0	0	0	0	0	0	603	903	0
200	9	0.762068	1.19554	11.412	303.682	-342.52	-161.134	200	300	0	0	0	0	0	0	0	200	903	0	0	0	0	0	0	0	603	903	0
201	0	1.06724	1.6533	10.4965	303.682	-464.591	159.3	200	300	0	0	0	0	0	0	0	200	903	0	0	0	0	0	0	0	603	903	0
201	1	0.151716	1.80589	9.88614	395.235	-220.45	-115.358	200	300	0	0	0	0	0	0	0	200	903	0	0	0	0	0	0	0	603	903	0
201	2	0.762068	2.26365	11.1068	395.235	23.6906	21.9711	200	300	0	0	0	0	0	0	0	200	903	0	0	0	0	0	0	0	603	903	0
201	3	0	0	0	0	0	0	200	300	0	0	0	0	0	0	0	200	903	0	0	0	0	0	0	0	603	903	0
201	4	-0.000871718	2.26365	10.4965	761.445	-525.626	67.7474	200	300	0	0	0	0	0	0	0	200	903	0	0	0	0	0	0	0	603	903	0
201	5	0.151716	1.19554	12.6327	852.998	-281.485	-161.134	200	300	0	0	0	0	0	0	0	200	903	0	0	0	0	0	0	0	603	903	0
201	6	1.21983	1.50071	10.8017	852.998	23.6906	-115.358	200	300	0	0	0	0	0	0	0	200	903	0	0	0	0	0	0	0	603	903	0
201	7	-0.000871718	1.50071	10.8017	486.787	145.761	-69.5817	200	300	0	0	0	0	0	0	0	200	903	0	0	0	0	0	0	0	603	903	0
201	8	0	0	0	0	0	0	200	300	0	0	0	0	0	0	0	200	903	0	0	0	0	0	0	0	603	903	0
201	9	-0.306047	2.41624	10.1913	212.129	-159.415	525.511	200	300	0	0	0	0	0	0	0	200	903	0	0	0	0	0	0	0	603	903	0
202	0	1.21983	3.17918	10.1913	303.682	267.831	-206.911	200	300	0	0	0	0	0	0	0	200	903	0	0	0	0	0	0	0	603	903	0
202	1	-0.458635	1.80589	10.8017	669.893	206.796	-344.24	200	300	0	0	0	0	0	0	0	200	903	0	0	0	0	0	0	0	603	903	0
202	2	0.456892	2.56883	9.88614	669.893	-281.485	-252.687	200	300	0	0	0	0	0	0	0	200	903	0	0	0	0	0	0	0	603	903	0
202	3	0	0	0	0	0	0	200	300	0	0	0	0	0	0	0	200	903	0	0	0	0	0	0	0	603	903	0
202	4	0	0	0	0	0	0	200	300	0	0	0	0	0	0	0	200	903	0	0	0	0	0	0	0	603	903	0
202	5	0	0	0	0	0	0	200	300	0	0	0	0	0	0	0	200	903	0	0	0	0	0	0	0	603	903	0
202	6	0	0	0	0	0	0	200	300	0	0	0	0	0	0	0	200	903	0	0	0	0	0	0	0	603	903	0
202	7	0.151716	2.11106	11.7172	120.576	-220.45	-69.5817	200	300	0	0	0	0	0	0	0	200	903	0	0	0	0	0	0	0	603	903	0
202	8	1.37242	0.127421	12.0224	395.235	-98.3797	-252.687	200	300	0	0	0	0	0	0	0	200	903	0	0	0	0	0	0	0	603	903	0
202	9	0.456892	2.56883	11.412	395.235	145.761	-161.134	200	300	0	0	0	0	0	0	0	200	903	0	0	0	0	0	0	0	603	903	0
203	0	1.21983	2.56883	10.4965	1036.1	-281.485	-23.8053	200	300	0	0	0	0	0	0	0	200	903	0	0	0	0	0	0	0	603	903	0
203	1	0.151716	1.50071	12.6327	761.445	-98.3797	-115.358	200	300	0	0	0	0	0	0	0	200	903	0	0	0	0	0	0	0	603	903	0
203	2	0	0	0	0	0	0	200	300	0	0	0	0	0	0	0	200	903	0	0	0	0	0	0	0	603	903	0
203	3	-0.306047	1.50071	11.412	578.34	-342.52	67.7474	200	300	0	0	0	0	0	0	0	200	903	0	0	0	0	0	0	0	603	903	0
203	4	-0.000871718	2.41624	12.6327	761.445	-281.485	-161.134	200	300	0	0	0	0	0	0	0	200	903	0	0	0	0	0	0	0	603	903	0
203	5	0.151716	2.11106	10.1913	303.682	-159.415	250.853	200	300	0	0	0	0	0	0	0	200	903	0	0	0	0	0	0	0	603	903	0
203	6	0	0	0	0	0	0	200	300	0	0	0	0	0	0	0	200	903	0	0	0	0	0	0	0	603	903	0
203	7	1.06724	1.80589	10.4965	486.787	-403.556	21.9711	200	300	0	0	0	0	0	0	0	200	903	0	0	0	0	0	0	0	603	903	0
203	8	0	0	0	0	0	0	200	300	0	0	0	0	0	0	0	200	903	0	0	0	0	0	0	0	603	903	0
203	9	1.06724	1.50071	11.412	303.682	-159.415	-161.134	200	300	0	0	0	0	0	0	0	200	903	0	0	0	0	0	0	0	603	903	0
204	0	0.456892	1.19554	10.8017	-520.293	-98.3797	-161.134	200	300	0	0	0	0	0	0	0	200	903	0	0	0	0	0	0	0	603	903	0
204	1	0.304304	1.95848	10.4965	-62.5292	-159.415	-161.134	200	300	0	0	0	0	0	0	0	200	903	0	0	0	0	0	0	0	603	903	0
204	2	0.60948	2.26365	11.1068	669.893	23.6906	-161.134	200	300	0	0	0	0	0	0	0	200	903	0	0	0	0	0	0	0	603	903	0
204	3	0.914656	1.95848	10.1913	395.235	-98.3797	-161.134	200	300	0	0	0	0	0	0	0	200	903	0	0	0	0	0	0	0	603	903	0
204	4	0.151716	2.41624	10.1913	669.893	267.831	-344.24	200	300	0	0	0	0	0	0	0	200	903	0	0	0	0	0	0	0	603	903	0
204	5	-0.763811	2.11106	9.88614	578.34	-281.485	-252.687	200	300	0	0	0	0	0	0	0	200	903	0	0	0	0	0	0	0	603	903	0
204	6	-0.306047	1.6533	10.8017	1402.31	-98.3797	-115.358	200	300	0	0	0	0	0	0	0	200	903	0	0	0	0	0	0	0	603	903	0
204	7	-0.306047	1.6533	10.1913	578.34	-281.485	-115.358	200	300	0	0	0	0	0	0	0	200	903	0	0	0	0	0	0	0	603	903	0
204	8	0.60948	1.34812	11.1068	1310.76	-220.45	-69.5817	200	300	0	0	0	0	0	0	0	200	903	0	0	0	0	0	0	0	603	903	0
204	9	0	0	0	0	0	0	200	300	0	0	0	0	0	0	0	200	903	0	0	0	0	0	0	0	603	903	0
205	0	-0.000871718	2.56883	11.1068	852.998	-159.415	-69.5817	200	300	0	0	0	0	0	0	0	200	903	0	0	0	0	0	0	0	603	903	0
205	1	0	0	0	0	0	0	200	300	0	0	0	0	0	0	0	200	903	0	0	0	0	0	0	0	603	903	0
205	2	0.151716	0.432597	11.412	120.576	84.7258	-161.134	200	300	0	0	0	0	0	0	0	200	903	0	0	0	0	0	0	0	603	903	0
205	3	-0.15346	2.26365	13.2431	212.129	-98.3797	-115.358	200	300	0	0	0	0	0	0	0	200	903	0	0	0	0	0	0	0	603	903	0
205	4	0.60948	2.26365	10.8017	303.682	-37.3445	-206.911	200	300	0	0	0	0	0	0	0	200	903	0	0	0	0	0	0	0	603	903	0
205	5	1.06724	1.19554	10.4965	761.445	-159.415	-69.5817	200	300	0	0	0	0	0	0	0	200	903	0	0	0	0	0	0	0	603	903	0
205	6	1.06724	1.80589	11.1068	578.34	-37.3445	67.7474	200	300	0	0	0	0	0	0	0	200	903	0	0	0	0	0	0	0	603	903	0
205	7	-0.916399	1.50071	9.88614	303.682	-281.485	-206.911	200	300	0	0	0	0	0	0	0	200	903	0	0	0	0	0	0	0	603	903	0
205	8	-0.000871718	1.6533	12.6327	578.34	-281.485	-298.464	200	300	0	0	0	0	0	0	0	200	903	0	0	0	0	0	0	0	603	903	0
205	9	-0.458635	2.72141	11.1068	761.445	-220.45	-435.793	200	300	0	0	0	0	0	0	0	200	903	0	0	0	0	0	0	0	603	903	0
206	0	0.762068	2.11106	10.4965	395.235	-525.626	67.7474	200	300	0	0	0	0	0	0	0	200	903	0	0	0	0	0	0	0	603	903	0
206	1	2.44053	2.11106	10.1913	303.682	-220.45	113.524	200	300	0	0	0	0	0	0	0	200	903	0	0	0	0	0	0	0	603	903	0
206	2	0.60948	2.11106	9.88614	761.445	-98.3797	-161.134	200	300	0	0	0	0	0	0	0	200	903	0	0	0	0	0	0	0	603	903	0
206	3	-0.306047	1.19554	10.4965	1036.1	-98.3797	-206.911	200	300	0	0	0	0	0	0	0	200	903	0	0	0	0	0	0	0	603	903	0
206	4	-0.15346	0.89036	12.6327	669.893	-525.626	-23.8053	200	300	0	0	0	0	0	0	0	200	903	0	0	0	0	0	0	0	603	903	0
206	5	-0.458635	1.6533	10.8017	303.682	-159.415	-161.134	200	300	0	0	0	0	0	0	0	200	903	0	0	0	0	0	0	0	603	903	0
206	6	0.456892	1.6533	11.7172	120.576	84.7258	-206.911	200	300	0	0	0	0	0	0	0	200	903	0	0	0	0	0	0	0	603	903	0
206	7	0.914656	1.95848	10.4965	761.445	-98.3797	-161.134	200	300	0	0	0	0	0	0	0	200	903	0	0	0	0	0	0	0	603	903	0
206	8	0	0	0	0	0	0	200	300	0	0	0	0	0	0	0	200	903	0	0	0	0	0	0	0	603	903	0
206	9	0.60948	2.41624	12.0224	29.0235	-37.3445	-344.24	200	300	0	0	0	0	0	0	0	200	903	0	0	0	0	0	0	0	603	903	0
207	0	-0.15346	2.26365	10.4965	852.998	-159.415	159.3	200	300	0	0	0	0	0	0	0	200	903	0	0	0	0	0	0	0	603	903	0
207	1	0.762068	2.26365	12.0224	669.893	23.6906	-252.687	200	300	0	0	0	0	0	0	0	200	903	0	0	0	0	0	0	0	603	903	0
207	2	-0.763811	1.50071	9.88614	761.445	-37.3445	-115.358	200	300	0	0	0	0	0	0	0	200	903	0	0	0	0	0	0	0	603	903	0
207	3	0.304304	0.127421	11.1068	669.893	-342.52	-344.24	200	300	0	0	0	0	0	0	0	200	903	0	0	0	0	0	0	0	603	903	0
207	4	0	0	0	0	0	0	200	300	0	0	0	0	0	0	0	200	903	0	0	0	0	0	0	0	603	903	0
207	5	0	0	0	0	0	0	200	300	0	0	0	0	0	0	0	200	903	0	0	0	0	0	0	0	603	903	0
207	6	0	0	0	0	0	0	200	300	0	0	0	0	0	0	0	200	903	0	0	0	0	0	0	0	603	903	0
207	7	0	0	0	0	0	0	200	300	0	0	0	0	0	0	0	200	903	0	0	0	0	0	0	0	603	903	0
207	8	-0.15346	2.11106	11.1068	761.445	-159.415	-252.687	200	300	0	0	0	0	0	0	0	200	903	0	0	0	0	0	0	0	603	903	0
207	9	-0.15346	1.50071	13.5482	486.787	-37.3445	-115.358	200	300	0	0	0	0	0	0	0	200	903	0	0	0	0	0	0	0	603	903	0
208	0	0.304304	1.6533	11.412	669.893	206.796	21.9711	200	300	0	0	0	0	0	0	0	200	903	0	0	0	0	0	0	0	603	903	0
208	1	1.21983	1.80589	9.88614	486.787	145.761	-115.358	200	300	0	0	0	0	0	0	0	200	903	0	0	0	0	0	0	0	603	903	0
208	2	0.456892	1.6533	11.412	29.0235	-98.3797	-69.5817	200	300	0	0	0	0	0	0	0	200	903	0	0	0	0	0	0	0	603	903	0
208	3	0	0	0	0	0	0	200	300	0	0	0	0	0	0	0	200	903	0	0	0	0	0	0	0	603	903	0
208	4	0.914656	2.11106	10.1913	303.682	-220.45	-69.5817	200	300	0	0	0	0	0	0	0	200	903	0	0	0	0	0	0	0	603	903	0
208	5	-0.458635	1.34812	11.1068	486.787	-159.415	-252.687	200	300	0	0	0	0	0	0	0	200	903	0	0	0	0	0	0	0	603	903	0
208	6	0.456892	1.95848	11.412	761.445	84.7258	-161.134	200	300	0	0	0	0	0	0	0	200	903	0	0	0	0	0	0	0	603	903	0
208	7	0.456892	2.41624	10.1913	486.787	-220.45	-206.911	200	300	0	0	0	0	0	0	0	200	903	0	0	0	0	0	0	0	603	903	0
208	8	0	0	0	0	0	0	200	300	0	0	0	0	0	0	0	200	903	0	0	0	0	0	0	0	603	903	0
208	9	0.304304	1.04295	12.9379	669.893	84.7258	-252.687	200	300	0	0	0	0	0	0	0	200	903	0	0	0	0	0	0	0	603	903	0
209	0	-0.916399	1.19554	9.88614	120.576	206.796	67.7474	200	300	0	0	0	0	0	0	0	200	903	0	0	0	0	0	0	0	603	903	0
209	1	1.83018	0.585184	11.412	29.0235	23.6906	113.524	200	300	0	0	0	0	0	0	0	200	903	0	0	0	0	0	0	0	603	903	0
209	2	-0.611223	1.50071	12.3275	-62.5292	-159.415	-390.016	200	300	0	0	0	0	0	0	0	200	903	0	0	0	0	0	0	0	603	903	0
209	3	0.914656	1.6533	12.0224	395.235	23.6906	-161.134	200	300	0	0	0	0	0	0	0	200	903	0	0	0	0	0	0	0	603	903	0
209	4	2.74571	2.56883	11.7172	761.445	23.6906	-69.5817	200	300	0	0	0	0	0	0	0	200	903	0	0	0	0	0	0	0	603	903	0
209	5	0	0	0	0	0	0	200	300	0	0	0	0	0	0	0	200	903	0	0	0	0	0	0	0	603	903	0
209	6	0	0	0	0	0	0	200	300	0	0	0	0	0	0	0	200	903	0	0	0	0	0	0	0	603	903	0
209	7	0	0	0	0	0	0	200	300	0	0	0	0	0	0	0	200	903	0	0	0	0	0	0	0	603	903	0
209	8	-0.611223	1.50071	12.0224	761.445	23.6906	-206.911	200	300	0	0	0	0	0	0	0	200	903	0	0	0	0	0	0	0	603	903	0
209	9	0.304304	1.04295	11.1068	29.0235	-37.3445	-115.358	200	300	0	0	0	0	0	0	0	200	903	0	0	0	0	0	0	0	603	903	0
210	0	-0.000871718	1.34812	10.8017	395.235	-403.556	-298.464	200	300	0	0	0	0	0	0	0	200	903	0	0	0	0	0	0	0	603	903	0
210	1	0	0	0	0	0	0	200	300	0	0	0	0	0	0	0	200	903	0	0	0	0	0	0	0	603	903	0
210	2	0.456892	1.95848	10.1913	-245.635	-159.415	21.9711	200	300	0	0	0	0	0	0	0	200	903	0	0	0	0	0	0	0	603	903	0
210	3	0	0	0	0	0	0	200	300	0	0	0	0	0	0	0	200	903	0	0	0	0	0	0	0	603	903	0
210	4	1.06724	2.11106	11.7172	578.34	-159.415	-206.911	200	300	0	0	0	0	0	0	0	200	903	0	0	0	0	0	0	0	603	903	0
210	5	-0.306047	1.80589	11.412	944.551	-220.45	-252.687	200	300	0	0	0	0	0	0	0	200	903	0	0	0	0	0	0	0	603	903	0
210	6	0.456892	2.11106	11.412	395.235	23.6906	-23.8053	200	300	0	0	0	0	0	0	0	200	903	0	0	0	0	0	0	0	603	903	0
210	7	1.06724	2.11106	11.1068	761.445	206.796	-206.911	200	300	0	0	0	0	0	0	0	200	903	0	0	0	0	0	0	0	603	903	0
210	8	0.151716	1.6533	10.1913	852.998	267.831	21.9711	200	300	0	0	0	0	0	0	0	200	903	0	0	0	0	0	0	0	603	903	0
210	9	-0.458635	1.95848	10.1913	395.235	-37.3445	-435.793	200	300	0	0	0	0	0	0	0	200	903	0	0	0	0	0	0	0	603	903	0
211	0	-0.763811	1.80589	9.88614	120.576	-220.45	21.9711	200	300	0	0	0	0	0	0	0	200	903	0	0	0	0	0	0	0	603	903	0
211	1	-0.15346	2.11106	9.88614	395.235	-403.556	-69.5817	200	300	0	0	0	0	0	0	0	200	903	0	0	0	0	0	0	0	603	903	0
211	2	-1.52675	1.95848	10.8017	395.235	-342.52	-252.687	200	300	0	0	0	0	0	0	0	200	903	0	0	0	0	0	0	0	603	903	0
211	3	0.762068	1.80589	9.88614	29.0235	-98.3797	-390.016	200	300	0	0	0	0	0	0	0	200	903	0	0	0	0	0	0	0	603	903	0
211	4	1.98277	1.50071	10.1913	486.787	-220.45	21.9711	200	300	0	0	0	0	0	0	0	200	903	0	0	0	0	0	0	0	603	903	0
211	5	0	0	0	0	0	0	200	300	0	0	0	0	0	0	0	200	903	0	0	0	0	0	0	0	603	903	0
211	6	0	0	0	0	0	0	200	300	0	0	0	0	0	0	0	200	903	0	0	0	0	0	0	0	603	903	0
211	7	0	0	0	0	0	0	200	300	0	0	0	0	0	0	0	200	903	0	0	0	0	0	0	0	603	903	0
211	8	-0.15346	1.50071	12.0224	-62.5292	-464.591	-252.687	200	300	0	0	0	0	0	0	0	200	903	0	0	0	0	0	0	0	603	903	0
211	9	-0.15346	1.6533	13.5482	303.682	-403.556	-252.687	200	300	0	0	0	0	0	0	0	200	903	0	0	0	0	0	0	0	603	903	0
212	0	0.304304	2.26365	10.8017	486.787	-281.485	-344.24	200	300	0	0	0	0	0	0	0	200	903	0	0	0	0	0	0	0	603	903	0
212	1	1.37242	2.72141	10.1913	578.34	-281.485	-115.358	200	300	0	0	0	0	0	0	0	200	903	0	0	0	0	0	0	0	603	903	0
212	2	1.06724	2.26365	10.1913	669.893	145.761	-206.911	200	300	0	0	0	0	0	0	0	200	903	0	0	0	0	0	0	0	603	903	0
212	3	0.151716	2.11106	10.4965	761.445	-464.591	-206.911	200	300	0	0	0	0	0	0	0	200	903	0	0	0	0	0	0	0	603	903	0
212	4	1.06724	2.11106	11.1068	761.445	-342.52	-390.016	200	300	0	0	0	0	0	0	0	200	903	0	0	0	0	0	0	0	603	903	0
212	5	0.304304	1.50071	10.8017	944.551	328.866	-115.358	200	300	0	0	0	0	0	0	0	200	903	0	0	0	0	0	0	0	603	903	0
212	6	0.60948	1.50071	10.8017	1219.21	-37.3445	-206.911	200	300	0	0	0	0	0	0	0	200	903	0	0	0	0	0	0	0	603	903	0
212	7	0	0	0	0	0	0	200	300	0	0	0	0	0	0	0	200	903	0	0	0	0	0	0	0	603	903	0
212	8	0.914656	-0.330343	10.8017	669.893	-342.52	-69.5817	200	300	0	0	0	0	0	0	0	200	903	0	0	0	0	0	0	0	603	903	0
212	9	1.98277	1.80589	11.7172	486.787	206.796	-23.8053	200	300	0	0	0	0	0	0	0	200	903	0	0	0	0	0	0	0	603	903	0
213	0	-0.611223	1.80589	10.1913	-62.5292	-281.485	-161.134	200	300	0	0	0	0	0	0	0	200	903	0	0	0	0	0	0	0	603	903	0
213	1	-0.000871718	2.72141	11.412	852.998	206.796	-115.358	200	300	0	0	0	0	0	0	0	200	903	0	0	0	0	0	0	0	603	903	0
213	2	-0.15346	2.26365	13.2431	395.235	-342.52	-161.134	200	300	0	0	0	0	0	0	0	200	903	0	0	0	0	0	0	0	603	903	0
213	3	0.456892	1.34812	10.4965	395.235	84.7258	-69.5817	200	300	0	0	0	0	0	0	0	200	903	0	0	0	0	0	0	0	603	903	0
213	4	1.21983	2.26365	10.4965	852.998	84.7258	-115.358	200	300	0	0	0	0	0	0	0	200	903	0	0	0	0	0	0	0	603	903	0
213	5	1.21983	2.26365	9.88614	1219.21	-98.3797	-206.911	200	300	0	0	0	0	0	0	0	200	903	0	0	0	0	0	0	0	603	903	0
213	6	0	0	0	0	0	0	200	300	0	0	0	0	0	0	0	200	903	0	0	0	0	0	0	0	603	903	0
213	7	0	0	0	0	0	0	200	300	0	0	0	0	0	0	0	200	903	0	0	0	0	0	0	0	603	903	0
213	8	-0.000871718	1.19554	11.1068	761.445	-403.556	-115.358	200	300	0	0	0	0	0	0	0	200	903	0	0	0	0	0	0	0	603	903	0
213	9	0	0	0	0	0	0	200	300	0	0	0	0	0	0	0	200	903	0	0	0	0	0	0	0	603	903	0
214	0	1.06724	1.50071	10.8017	29.0235	-281.485	-23.8053	200	300	0	0	0	0	0	0	0	200	903	0	0	0	0	0	0	0	603	903	0
214	1	0	0	0	0	0	0	200	300	0	0	0	0	0	0	0	200	903	0	0	0	0	0	0	0	603	903	0
214	2	0.762068	2.41624	11.412	-520.293	-98.3797	-115.358	200	300	0	0	0	0	0	0	0	200	903	0	0	0	0	0	0	0	603	903	0
214	3	0	0	0	0	0	0	200	300	0	0	0	0	0	0	0	200	903	0	0	0	0	0	0	0	603	903	0
214	4	1.52501	2.26365	11.7172	303.682	23.6906	-390.016	200	300	0	0	0	0	0	0	0	200	903	0	0	0	0	0	0	0	603	903	0
214	5	-0.15346	2.56883	11.1068	761.445	267.831	113.524	200	300	0	0	0	0	0	0	0	200	903	0	0	0	0	0	0	0	603	903	0
214	6	0.151716	1.50071	11.7172	1036.1	-220.45	-69.5817	200	300	0	0	0	0	0	0	0	200	903	0	0	0	0	0	0	0	603	903	0
214	7	0.914656	1.50071	11.1068	1127.66	-342.52	67.7474	200	300	0	0	0	0	0	0	0	200	903	0	0	0	0	0	0	0	603	903	0
214	8	0	0	0	0	0	0	200	300	0	0	0	0	0	0	0	200	903	0	0	0	0	0	0	0	603	903	0
214	9	0	0	0	0	0	0	200	300	0	0	0	0	0	0	0	200	903	0	0	0	0	0	0	0	603	903	0
215	0	0	0	0	0	0	0	200	300	0	0	0	0	0	0	0	200	903	0	0	0	0	0	0	0	603	903	0
215	1	-0.306047	2.11106	11.412	944.551	-98.3797	21.9711	200	300	0	0	0	0	0	0	0	200	903	0	0	0	0	0	0	0	603	903	0
215	2	0.304304	1.95848	12.6327	29.0235	-403.556	-115.358	200	300	0	0	0	0	0	0	0	200	903	0	0	0	0	0	0	0	603	903	0
215	3	1.06724	1.95848	10.8017	-245.635	84.7258	388.182	200	300	0	0	0	0	0	0	0	200	903	0	0	0	0	0	0	0	603	903	0
215	4	2.13536	2.26365	10.4965	303.682	-98.3797	113.524	200	300	0	0	0	0	0	0	0	200	903	0	0	0	0	0	0	0	603	903	0
215	5	1.06724	1.6533	9.88614	578.34	23.6906	67.7474	200	300	0	0	0	0	0	0	0	200	903	0	0	0	0	0	0	0	603	903	0
215	6	0	0	0	0	0	0	200	300	0	0	0	0	0	0	0	200	903	0	0	0	0	0	0	0	603	903	0
215	7	0	0	0	0	0	0	200	300	0	0	0	0	0	0	0	200	903	0	0	0	0	0	0	0	603	903	0
215	8	-0.611223	1.95848	11.412	212.129	145.761	-298.464	200	300	0	0	0	0	0	0	0	200	903	0	0	0	0	0	0	0	603	903	0
215	9	-0.458635	1.6533	10.8017	395.235	84.7258	-527.345	200	300	0	0	0	0	0	0	0	200	903	0	0	0	0	0	0	0	603	903	0
216	0	1.06724	2.72141	10.1913	29.0235	-281.485	-115.358	200	300	0	0	0	0	0	0	0	200	903	0	0	0	0	0	0	0	603	903	0
216	1	0.456892	2.11106	10.1913	303.682	-281.485	250.853	200	300	0	0	0	0	0	0	0	200	903	0	0	0	0	0	0	0	603	903	0
216	2	0.914656	2.26365	12.9379	303.682	-525.626	-298.464	200	300	0	0	0	0	0	0	0	200	903	0	0	0	0	0	0	0	603	903	0
216	3	-0.763811	2.41624	10.4965	761.445	84.7258	-390.016	200	300	0	0	0	0	0	0	0	200	903	0	0	0	0	0	0	0	603	903	0
216	4	0.60948	1.34812	11.1068	852.998	-281.485	-161.134	200	300	0	0	0	0	0	0	0	200	903	0	0	0	0	0	0	0	603	903	0
216	5	0.151716	1.34812	11.1068	578.34	-342.52	67.7474	200	300	0	0	0	0	0	0	0	200	903	0	0	0	0	0	0	0	603	903	0
216	6	0	0	0	0	0	0	200	300	0	0	0	0	0	0	0	200	903	0	0	0	0	0	0	0	603	903	0
216	7	2.28795	1.6533	11.1068	29.0235	206.796	-161.134	200	300	0	0	0	0	0	0	0	200	903	0	0	0	0	0	0	0	603	903	0
216	8	1.06724	2.11106	9.88614	761.445	-159.415	159.3	200	300	0	0	0	0	0	0	0	200	903	0	0	0	0	0	0	0	603	903	0
216	9	0	0	0	0	0	0	200	300	0	0	0	0	0	0	0	200	903	0	0	0	0	0	0	0	603	903	0
217	0	-0.000871718	2.72141	10.4965	303.682	-220.45	-435.793	200	300	0	0	0	0	0	0	0	200	903	0	0	0	0	0	0	0	603	903	0
217	1	-0.15346	2.41624	12.6327	761.445	-525.626	-206.911	200	300	0	0	0	0	0	0	0	200	903	0	0	0	0	0	0	0	603	903	0
217	2	1.98277	1.19554	10.4965	761.445	-403.556	-252.687	200	300	0	0	0	0	0	0	0	200	903	0	0	0	0	0	0	0	603	903	0
217	3	0.304304	1.50071	11.1068	669.893	-37.3445	-161.134	200	300	0	0	0	0	0	0	0	200	903	0	0	0	0	0	0	0	603	903	0
217	4	0.60948	1.6533	10.1913	852.998	23.6906	-344.24	200	300	0	0	0	0	0	0	0	200	903	0	0	0	0	0	0	0	603	903	0
217	5	0.762068	1.80589	12.9379	303.682	-281.485	-252.687	200	300	0	0	0	0	0	0	0	200	903	0	0	0	0	0	0	0	603	903	0
217	6	0	0	0	0	0	0	200	300	0	0	0	0	0	0	0	200	903	0	0	0	0	0	0	0	603	903	0
217	7	0.60948	1.95848	10.4965	120.576	-98.3797	-23.8053	200	300	0	0	0	0	0	0	0	200	903	0	0	0	0	0	0	0	603	903	0
217	8	-0.458635	2.11106	10.8017	395.235	-281.485	-115.358	200	300	0	0	0	0	0	0	0	200	903	0	0	0	0	0	0	0	603	903	0
217	9	0.304304	1.80589	11.1068	669.893	84.7258	-298.464	200	300	0	0	0	0	0	0	0	200	903	0	0	0	0	0	0	0	603	903	0
218	0	1.06724	1.6533	11.1068	1402.31	-586.661	67.7474	200	300	0	0	0	0	0	0	0	200	903	0	0	0	0	0	0	0	603	903	0
218	1	0	0	0	0	0	0	200	300	0	0	0	0	0	0	0	200	903	0	0	0	0	0	0	0	603	903	0
218	2	1.52501	1.50071	13.5482	1768.53	145.761	-252.687	200	300	0	0	0	0	0	0	0	200	903	0	0	0	0	0	0	0	603	903	0
218	3	-0.15346	1.50071	10.1913	120.576	84.7258	-206.911	200	300	0	0	0	0	0	0	0	200	903	0	0	0	0	0	0	0	603	903	0
218	4	2.59312	1.95848	11.1068	578.34	-159.415	-69.5817	200	300	0	0	0	0	0	0	0	200	903	0	0	0	0	0	0	0	603	903	0
218	5	-0.458635	1.95848	10.4965	212.129	-159.415	-344.24	200	300	0	0	0	0	0	0	0	200	903	0	0	0	0	0	0	0	603	903	0
218	6	0.456892	2.56883	11.1068	1493.87	84.7258	-390.016	200	300	0	0	0	0	0	0	0	200	903	0	0	0	0	0	0	0	603	903	0
218	7	1.37242	1.6533	10.1913	395.235	23.6906	-298.464	200	300	0	0	0	0	0	0	0	200	903	0	0	0	0	0	0	0	603	903	0
218	8	0	0	0	0	0	0	200	300	0	0	0	0	0	0	0	200	903	0	0	0	0	0	0	0	603	903	0
218	9	-1.06899	1.50071	9.88614	852.998	-281.485	-344.24	200	300	0	0	0	0	0	0	0	200	903	0	0	0	0	0	0	0	603	903	0
219	0	0	0	0	0	0	0	200	300	0	0	0	0	0	0	0	200	903	0	0	0	0	0	0	0	603	903	0
219	1	-0.458635	1.04295	10.8017	-245.635	-98.3797	-23.8053	200	300	0	0	0	0	0	0	0	200	903	0	0	0	0	0	0	0	603	903	0
219	2	0.762068	2.11106	10.1913	120.576	-98.3797	67.7474	200	300	0	0	0	0	0	0	0	200	903	0	0	0	0	0	0	0	603	903	0
219	3	1.06724	1.95848	10.1913	-245.635	-281.485	-161.134	200	300	0	0	0	0	0	0	0	200	903	0	0	0	0	0	0	0	603	903	0
219	4	0	0	0	0	0	0	200	300	0	0	0	0	0	0	0	200	903	0	0	0	0	0	0	0	603	903	0
219	5	-1.22157	2.26365	13.5482	578.34	23.6906	-206.911	200	300	0	0	0	0	0	0	0	200	903	0	0	0	0	0	0	0	603	903	0
219	6	0	0	0	0	0	0	200	300	0	0	0	0	0	0	0	200	903	0	0	0	0	0	0	0	603	903	0
219	7	-0.15346	1.34812	10.8017	761.445	-647.696	-252.687	200	300	0	0	0	0	0	0	0	200	903	0	0	0	0	0	0	0	603	903	0
219	8	-0.458635	1.80589	13.5482	578.34	-159.415	-161.134	200	300	0	0	0	0	0	0	0	200	903	0	0	0	0	0	0	0	603	903	0
219	9	0.60948	-0.635519	11.1068	395.235	-98.3797	-69.5817	200	300	0	0	0	0	0	0	0	200	903	0	0	0	0	0	0	0	603	903	0
220	0	1.37242	1.6533	9.88614	303.682	-159.415	-115.358	200	300	0	0	0	0	0	0	0	200	903	0	0	0	0	0	0	0	603	903	0
220	1	0.151716	0.89036	10.8017	120.576	-342.52	-206.911	200	300	0	0	0	0	0	0	0	200	903	0	0	0	0	0	0	0	603	903	0
220	2	0.151716	1.95848	9.88614	212.129	-220.45	-23.8053	200	300	0	0	0	0	0	0	0	200	903	0	0	0	0	0	0	0	603	903	0
220	3	-0.15346	1.50071	11.1068	212.129	-647.696	-115.358	200	300	0	0	0	0	0	0	0	200	903	0	0	0	0	0	0	0	603	903	0
220	4	-0.15346	2.11106	12.0224	578.34	-281.485	-23.8053	200	300	0	0	0	0	0	0	0	200	903	0	0	0	0	0	0	0	603	903	0
220	5	0.60948	1.6533	11.412	303.682	-220.45	-252.687	200	300	0	0	0	0	0	0	0	200	903	0	0	0	0	0	0	0	603	903	0
220	6	1.37242	1.34812	9.88614	1036.1	84.7258	-23.8053	200	300	0	0	0	0	0	0	0	200	903	0	0	0	0	0	0	0	603	903	0
220	7	0.60948	1.34812	11.412	669.893	-159.415	-115.358	200	300	0	0	0	0	0	0	0	200	903	0	0	0	0	0	0	0	603	903	0
220	8	0	0	0	0	0	0	200	300	0	0	0	0	0	0	0	200	903	0	0	0	0	0	0	0	603	903	0
220	9	-0.000871718	1.50071	11.7172	-62.5292	-159.415	-344.24	200	300	0	0	0	0	0	0	0	200	903	0	0	0	0	0	0	0	603	903	0
221	0	-0.458635	1.95848	13.8534	578.34	84.7258	-298.464	200	300	0	0	0	0	0	0	0	200	903	0	0	0	0	0	0	0	603	903	0
221	1	1.06724	2.26365	11.412	669.893	145.761	-206.911	200	300	0	0	0	0	0	0	0	200	903	0	0	0	0	0	0	0	603	903	0
221	2	1.6776	-0.482931	9.88614	486.787	-37.3445	-115.358	200	300	0	0	0	0	0	0	0	200	903	0	0	0	0	0	0	0	603	903	0
221	3	0	0	0	0	0	0	200	300	0	0	0	0	0	0	0	200	903	0	0	0	0	0	0	0	603	903	0
221	4	-0.000871718	1.34812	10.1913	669.893	23.6906	113.524	200	300	0	0	0	0	0	0	0	200	903	0	0	0	0	0	0	0	603	903	0
221	5	0.456892	0.89036	11.412	486.787	-281.485	250.853	200	300	0	0	0	0	0	0	0	200	903	0	0	0	0	0	0	0	603	903	0
221	6	0	0	0	0	0	0	200	300	0	0	0	0	0	0	0	200	903	0	0	0	0	0	0	0	603	903	0
221	7	1.21983	1.6533	11.1068	29.0235	-464.591	-69.5817	200	300	0	0	0	0	0	0	0	200	903	0	0	0	0	0	0	0	603	903	0
221	8	1.21983	1.34812	11.7172	212.129	-159.415	-69.5817	200	300	0	0	0	0	0	0	0	200	903	0	0	0	0	0	0	0	603	903	0
221	9	0	0	0	0	0	0	200	300	0	0	0	0	0	0	0	200	903	0	0	0	0	0	0	0	603	903	0
222	0	0.60948	1.50071	9.88614	29.0235	-98.3797	-23.8053	200	300	0	0	0	0	0	0	0	200	903	0	0	0	0	0	0	0	603	903	0
222	1	0.456892	2.11106	10.1913	578.34	-159.415	-161.134	200	300	0	0	0	0	0	0	0	200	903	0	0	0	0	0	0	0	603	903	0
222	2	-0.458635	1.6533	11.7172	486.787	23.6906	-161.134	200	300	0	0	0	0	0	0	0	200	903	0	0	0	0	0	0	0	603	903	0
222	3	-0.306047	1.6533	12.3275	1402.31	-159.415	113.524	200	300	0	0	0	0	0	0	0	200	903	0	0	0	0	0	0	0	603	903	0
222	4	0.60948	1.50071	12.0224	1036.1	23.6906	-69.5817	200	300	0	0	0	0	0	0	0	200	903	0	0	0	0	0	0	0	603	903	0
222	5	0	0	0	0	0	0	200	300	0	0	0	0	0	0	0	200	903	0	0	0	0	0	0	0	603	903	0
222	6	0.914656	1.04295	10.1913	212.129	-220.45	-206.911	200	300	0	0	0	0	0	0	0	200	903	0	0	0	0	0	0	0	603	903	0
222	7	0	0	0	0	0	0	200	300	0	0	0	0	0	0	0	200	903	0	0	0	0	0	0	0	603	903	0
222	8	0.456892	2.26365	10.4965	29.0235	-37.3445	-206.911	200	300	0	0	0	0	0	0	0	200	903	0	0	0	0	0	0	0	603	903	0
222	9	-0.306047	1.80589	10.8017	395.235	23.6906	-206.911	200	300	0	0	0	0	0	0	0	200	903	0	0	0	0	0	0	0	603	903	0
223	0	0.304304	1.80589	11.1068	761.445	23.6906	-252.687	200	300	0	0	0	0	0	0	0	200	903	0	0	0	0	0	0	0	603	903	0
223	1	2.13536	1.6533	10.4965	1310.76	-159.415	-115.358	200	300	0	0	0	0	0	0	0	200	903	0	0	0	0	0	0	0	603	903	0
223	2	0	0	0	0	0	0	200	300	0	0	0	0	0	0	0	200	903	0	0	0	0	0	0	0	603	903	0
223	3	0.151716	1.6533	10.4965	395.235	-37.3445	-69.5817	200	300	0	0	0	0	0	0	0	200	903	0	0	0	0	0	0	0	603	903	0
223	4	0	0	0	0	0	0	200	300	0	0	0	0	0	0	0	200	903	0	0	0	0	0	0	0	603	903	0
223	5	-0.458635	2.11106	11.412	669.893	23.6906	-252.687	200	300	0	0	0	0	0	0	0	200	903	0	0	0	0	0	0	0	603	903	0
223	6	1.21983	2.26365	12.0224	669.893	-281.485	-115.358	200	300	0	0	0	0	0	0	0	200	903	0	0	0	0	0	0	0	603	903	0
223	7	0.60948	2.56883	11.1068	486.787	-159.415	-435.793	200	300	0	0	0	0	0	0	0	200	903	0	0	0	0	0	0	0	603	903	0
223	8	0	0	0	0	0	0	200	300	0	0	0	0	0	0	0	200	903	0	0	0	0	0	0	0	603	903	0
223	9	0.151716	1.50071	11.412	944.551	-342.52	-69.5817	200	300	0	0	0	0	0	0	0	200	903	0	0	0	0	0	0	0	603	903	0
224	0	0	0	0	0	0	0	200	300	0	0	0	0	0	0	0	200	903	0	0	0	0	0	0	0	603	903	0
224	1	-0.611223	1.04295	10.8017	-154.082	-159.415	-69.5817	200	300	0	0	0	0	0	0	0	200	903	0	0	0	0	0	0	0	603	903	0
224	2	-0.15346	1.34812	12.9379	303.682	-281.485	-161.134	200	300	0	0	0	0	0	0	0	200	903	0	0	0	0	0	0	0	603	903	0
224	3	1.21983	2.11106	10.8017	120.576	23.6906	205.077	200	300	0	0	0	0	0	0	0	200	903	0	0	0	0	0	0	0	603	903	0
224	4	0.304304	1.95848	10.4965	212.129	-37.3445	-161.134	200	300	0	0	0	0	0	0	0	200	903	0	0	0	0	0	0	0	603	903	0
224	5	0.60948	2.41624	10.1913	578.34	-159.415	159.3	200	300	0	0	0	0	0	0	0	200	903	0	0	0	0	0	0	0	603	903	0
224	6	0	0	0	0	0	0	200	300	0	0	0	0	0	0	0	200	903	0	0	0	0	0	0	0	603	903	0
224	7	1.21983	1.80589	12.0224	761.445	-98.3797	-115.358	200	300	0	0	0	0	0	0	0	200	903	0	0	0	0	0	0	0	603	903	0
224	8	-0.306047	-0.177755	11.412	669.893	-159.415	113.524	200	300	0	0	0	0	0	0	0	200	903	0	0	0	0	0	0	0	603	903	0
224	9	1.06724	1.95848	11.1068	212.129	-281.485	-69.5817	200	300	0	0	0	0	0	0	0	200	903	0	0	0	0	0	0	0	603	903	0
225	0	0.456892	1.04295	10.8017	303.682	23.6906	-206.911	200	300	0	0	0	0	0	0	0	200	903	0	0	0	0	0	0	0	603	903	0
225	1	0.60948	2.72141	10.1913	669.893	84.7258	159.3	200	300	0	0	0	0	0	0	0	200	903	0	0	0	0	0	0	0	603	903	0
225	2	-0.000871718	1.19554	10.8017	303.682	23.6906	67.7474	200	300	0	0	0	0	0	0	0	200	903	0	0	0	0	0	0	0	603	903	0
225	3	0	0	0	0	0	0	200	300	0	0	0	0	0	0	0	200	903	0	0	0	0	0	0	0	603	903	0
225	4	-0.306047	2.11106	10.4965	578.34	-281.485	-161.134	200	300	0	0	0	0	0	0	0	200	903	0	0	0	0	0	0	0	603	903	0
225	5	1.52501	1.80589	9.88614	486.787	23.6906	21.9711	200	300	0	0	0	0	0	0	0	200	903	0	0	0	0	0	0	0	603	903	0
225	6	0.914656	0.280009	11.1068	486.787	23.6906	296.629	200	300	0	0	0	0	0	0	0	200	903	0	0	0	0	0	0	0	603	903	0
225	7	0	0	0	0	0	0	200	300	0	0	0	0	0	0	0	200	903	0	0	0	0	0	0	0	603	903	0
225	8	-1.22157	2.26365	12.9379	120.576	23.6906	-252.687	200	300	0	0	0	0	0	0	0	200	903	0	0	0	0	0	0	0	603	903	0
225	9	-0.15346	2.874	10.1913	212.129	-37.3445	21.9711	200	300	0	0	0	0	0	0	0	200	903	0	0	0	0	0	0	0	603	903	0
226	0	-0.15346	1.6533	12.0224	852.998	23.6906	-390.016	200	300	0	0	0	0	0	0	0	200	903	0	0	0	0	0	0	0	603	903	0
226	1	-0.15346	2.26365	13.5482	761.445	-98.3797	-69.5817	200	300	0	0	0	0	0	0	0	200	903	0	0	0	0	0	0	0	603	903	0
226	2	-0.15346	3.33177	11.1068	669.893	-98.3797	-206.911	200	300	0	0	0	0	0	0	0	200	903	0	0	0	0	0	0	0	603	903	0
226	3	0	0	0	0	0	0	200	300	0	0	0	0	0	0	0	200	903	0	0	0	0	0	0	0	603	903	0
226	4	0	0	0	0	0	0	200	300	0	0	0	0	0	0	0	200	903	0	0	0	0	0	0	0	603	903	0
226	5	0	0	0	0	0	0	200	300	0	0	0	0	0	0	0	200	903	0	0	0	0	0	0	0	603	903	0
226	6	0.914656	1.19554	12.0224	578.34	-403.556	-115.358	200	300	0	0	0	0	0	0	0	200	903	0	0	0	0	0	0	0	603	903	0
226	7	-0.306047	2.26365	10.4965	120.576	-220.45	-206.911	200	300	0	0	0	0	0	0	0	200	903	0	0	0	0	0	0	0	603	903	0
226	8	0.762068	2.26365	10.8017	212.129	-37.3445	159.3	200	300	0	0	0	0	0	0	0	200	903	0	0	0	0	0	0	0	603	903	0
226	9	0	0	0	0	0	0	200	300	0	0	0	0	0	0	0	200	903	0	0	0	0	0	0	0	603	903	0
227	0	1.06724	2.11106	9.88614	486.787	-37.3445	-206.911	200	300	0	0	0	0	0	0	0	200	903	0	0	0	0	0	0	0	603	903	0
227	1	-0.15346	1.6533	9.88614	1219.21	-281.485	-390.016	200	300	0	0	0	0	0	0	0	200	903	0	0	0	0	0	0	0	603	903	0
227	2	1.6776	1.6533	11.7172	486.787	-281.485	-161.134	200	300	0	0	0	0	0	0	0	200	903	0	0	0	0	0	0	0	603	903	0
227	3	0.304304	-0.0251671	11.1068	761.445	84.7258	-69.5817	200	300	0	0	0	0	0	0	0	200	903	0	0	0	0	0	0	0	603	903	0
227	4	-0.306047	1.50071	11.1068	120.576	-37.3445	-115.358	200	300	0	0	0	0	0	0	0	200	903	0	0	0	0	0	0	0	603	903	0
227	5	0.304304	1.95848	11.1068	669.893	-159.415	159.3	200	300	0	0	0	0	0	0	0	200	903	0	0	0	0	0	0	0	603	903	0
227	6	0	0	0	0	0	0	200	300	0	0	0	0	0	0	0	200	903	0	0	0	0	0	0	0	603	903	0
227	7	0	0	0	0	0	0	200	300	0	0	0	0	0	0	0	200	903	0	0	0	0	0	0	0	603	903	0
227	8	0	0	0	0	0	0	200	300	0	0	0	0	0	0	0	200	903	0	0	0	0	0	0	0	603	903	0
227	9	-0.458635	1.95848	12.3275	761.445	-37.3445	-252.687	200	300	0	0	0	0	0	0	0	200	903	0	0	0	0	0	0	0	603	903	0
228	0	-0.15346	1.04295	10.8017	303.682	-220.45	67.7474	200	300	0	0	0	0	0	0	0	200	903	0	0	0	0	0	0	0	603	903	0
228	1	0	0	0	0	0	0	200	300	0	0	0	0	0	0	0	200	903	0	0	0	0	0	0	0	603	903	0
228	2	0.456892	1.19554	11.1068	303.682	-159.415	-115.358	200	300	0	0	0	0	0	0	0	200	903	0	0	0	0	0	0	0	603	903	0
228	3	0.914656	0.737772	10.8017	395.235	328.866	-435.793	200	300	0	0	0	0	0	0	0	200	903	0	0	0	0	0	0	0	603	903	0
228	4	0.60948	2.41624	12.3275	486.787	145.761	-115.358	200	300	0	0	0	0	0	0	0	200	903	0	0	0	0	0	0	0	603	903	0
228	5	0	0	0	0	0	0	200	300	0	0	0	0	0	0	0	200	903	0	0	0	0	0	0	0	603	903	0
228	6	1.21983	2.11106	10.8017	944.551	-37.3445	-252.687	200	300	0	0	0	0	0	0	0	200	903	0	0	0	0	0	0	0	603	903	0
228	7	-0.458635	2.11106	11.1068	852.998	23.6906	-206.911	200	300	0	0	0	0	0	0	0	200	903	0	0	0	0	0	0	0	603	903	0
228	8	0.762068	0.89036	10.8017	486.787	-403.556	-161.134	200	300	0	0	0	0	0	0	0	200	903	0	0	0	0	0	0	0	603	903	0
228	9	0.456892	-0.0251671	10.8017	578.34	-281.485	21.9711	200	300	0	0	0	0	0	0	0	200	903	0	0	0	0	0	0	0	603	903	0
229	0	0	0	0	0	0	0	200	300	0	0	0	0	0	0	0	200	903	0	0	0	0	0	0	0	603	903	0
229	1	1.98277	1.95848	12.6327	852.998	-159.415	-298.464	200	300	0	0	0	0	0	0	0	200	903	0	0	0	0	0	0	0	603	903	0
229	2	-0.15346	1.80589	9.88614	212.129	84.7258	-161.134	200	300	0	0	0	0	0	0	0	200	903	0	0	0	0	0	0	0	603	903	0
229	3	-0.15346	2.11106	10.1913	212.129	-159.415	159.3	200	300	0	0	0	0	0	0	0	200	903	0	0	0	0	0	0	0	603	903	0
229	4	-0.458635	2.11106	12.9379	395.235	-37.3445	-298.464	200	300	0	0	0	0	0	0	0	200	903	0	0	0	0	0	0	0	603	903	0
229	5	1.06724	1.95848	10.8017	852.998	23.6906	-69.5817	200	300	0	0	0	0	0	0	0	200	903	0	0	0	0	0	0	0	603	903	0
229	6	0.762068	1.6533	10.8017	669.893	-98.3797	-527.345	200	300	0	0	0	0	0	0	0	200	903	0	0	0	0	0	0	0	603	903	0
229	7	1.21983	1.34812	11.7172	761.445	-37.3445	113.524	200	300	0	0	0	0	0	0	0	200	903	0	0	0	0	0	0	0	603	903	0
229	8	0	0	0	0	0	0	200	300	0	0	0	0	0	0	0	200	903	0	0	0	0	0	0	0	603	903	0
229	9	-0.15346	1.80589	11.412	303.682	267.831	-69.5817	200	300	0	0	0	0	0	0	0	200	903	0	0	0	0	0	0	0	603	903	0
230	0	-0.916399	1.95848	14.1586	944.551	-281.485	-344.24	200	300	0	0	0	0	0	0	0	200	903	0	0	0	0	0	0	0	603	903	0
230	1	0.762068	2.26365	11.1068	395.235	-281.485	296.629	200	300	0	0	0	0	0	0	0	200	903	0	0	0	0	0	0	0	603	903	0
230	2	0	0	0	0	0	0	200	300	0	0	0	0	0	0	0	200	903	0	0	0	0	0	0	0	603	903	0
230	3	0	0	0	0	0	0	200	300	0	0	0	0	0	0	0	200	903	0	0	0	0	0	0	0	603	903	0
230	4	0	0	0	0	0	0	200	300	0	0	0	0	0	0	0	200	903	0	0	0	0	0	0	0	603	903	0
230	5	0.762068	1.50071	10.4965	578.34	-159.415	-115.358	200	300	0	0	0	0	0	0	0	200	903	0	0	0	0	0	0	0	603	903	0
230	6	-0.15346	1.6533	10.8017	486.787	-220.45	-252.687	200	300	0	0	0	0	0	0	0	200	903	0	0	0	0	0	0	0	603	903	0
230	7	1.21983	1.34812	11.412	395.235	-37.3445	-115.358	200	300	0	0	0	0	0	0	0	200	903	0	0	0	0	0	0	0	603	903	0
230	8	0	0	0	0	0	0	200	300	0	0	0	0	0	0	0	200	903	0	0	0	0	0	0	0	603	903	0
230	9	0.60948	2.26365	11.412	212.129	-159.415	-298.464	200	300	0	0	0	0	0	0	0	200	903	0	0	0	0	0	0	0	603	903	0
231	0	-0.916399	1.95848	10.1913	669.893	-159.415	-390.016	200	300	0	0	0	0	0	0	0	200	903	0	0	0	0	0	0	0	603	903	0
231	1	0.151716	2.56883	10.8017	486.787	-98.3797	-161.134	200	300	0	0	0	0	0	0	0	200	903	0	0	0	0	0	0	0	603	903	0
231	2	-0.15346	2.26365	12.9379	669.893	-37.3445	-206.911	200	300	0	0	0	0	0	0	0	200	903	0	0	0	0	0	0	0	603	903	0
231	3	0.60948	1.50071	10.4965	852.998	145.761	-23.8053	200	300	0	0	0	0	0	0	0	200	903	0	0	0	0	0	0	0	603	903	0
231	4	0	0	0	0	0	0	200	300	0	0	0	0	0	0	0	200	903	0	0	0	0	0	0	0	603	903	0
231	5	1.06724	1.19554	12.6327	120.576	-403.556	-161.134	200	300	0	0	0	0	0	0	0	200	903	0	0	0	0	0	0	0	603	903	0
231	6	0	0	0	0	0	0	200	300	0	0	0	0	0	0	0	200	903	0	0	0	0	0	0	0	603	903	0
231	7	-0.458635	2.11106	10.1913	212.129	84.7258	-161.134	200	300	0	0	0	0	0	0	0	200	903	0	0	0	0	0	0	0	603	903	0
231	8	1.21983	2.26365	11.412	120.576	-98.3797	21.9711	200	300	0	0	0	0	0	0	0	200	903	0	0	0	0	0	0	0	603	903	0
231	9	1.21983	1.80589	11.1068	669.893	-281.485	21.9711	200	300	0	0	0	0	0	0	0	200	903	0	0	0	0	0	0	0	603	903	0
232	0	0	0	0	0	0	0	200	300	0	0	0	0	0	0	0	200	903	0	0	0	0	0	0	0	603	903	0
232	1	-0.15346	2.11106	10.8017	486.787	-98.3797	-115.358	200	300	0	0	0	0	0	0	0	200	903	0	0	0	0	0	0	0	603	903	0
232	2	-0.458635	1.34812	10.1913	303.682	-98.3797	-344.24	200	300	0	0	0	0	0	0	0	200	903	0	0	0	0	0	0	0	603	903	0
232	3	-0.000871718	1.50071	12.0224	120.576	389.902	-435.793	200	300	0	0	0	0	0	0	0	200	903	0	0	0	0	0	0	0	603	903	0
232	4	-0.15346	1.6533	10.1913	120.576	-281.485	-344.24	200	300	0	0	0	0	0	0	0	200	903	0	0	0	0	0	0	0	603	903	0
232	5	0.60948	2.11106	11.1068	212.129	-281.485	-344.24	200	300	0	0	0	0	0	0	0	200	903	0	0	0	0	0	0	0	603	903	0
232	6	0	0	0	0	0	0	200	300	0	0	0	0	0	0	0	200	903	0	0	0	0	0	0	0	603	903	0
232	7	0	0	0	0	0	0	200	300	0	0	0	0	0	0	0	200	903	0	0	0	0	0	0	0	603	903	0
232	8	0	0	0	0	0	0	200	300	0	0	0	0	0	0	0	200	903	0	0	0	0	0	0	0	603	903	0
232	9	-1.06899	1.04295	10.4965	578.34	-220.45	-252.687	200	300	0	0	0	0	0	0	0	200	903	0	0	0	0	0	0	0	603	903	0
233	0	1.21983	-0.177755	10.4965	486.787	-403.556	-206.911	200	300	0	0	0	0	0	0	0	200	903	0	0	0	0	0	0	0	603	903	0
233	1	0.914656	1.19554	11.1068	395.235	-464.591	21.9711	200	300	0	0	0	0	0	0	0	200	903	0	0	0	0	0	0	0	603	903	0
233	2	0	0	0	0	0	0	200	300	0	0	0	0	0	0	0	200	903	0	0	0	0	0	0	0	603	903	0
233	3	-0.15346	1.50071	11.1068	303.682	84.7258	-206.911	200	300	0	0	0	0	0	0	0	200	903	0	0	0	0	0	0	0	603	903	0
233	4	-0.000871718	0.89036	12.0224	120.576	-403.556	-206.911	200	300	0	0	0	0	0	0	0	200	903	0	0	0	0	0	0	0	603	903	0
233	5	0.456892	2.11106	11.1068	395.235	-220.45	-23.8053	200	300	0	0	0	0	0	0	0	200	903	0	0	0	0	0	0	0	603	903	0
233	6	0.456892	2.26365	11.412	852.998	-159.415	-252.687	200	300	0	0	0	0	0	0	0	200	903	0	0	0	0	0	0	0	603	903	0
233	7	1.52501	1.50071	10.8017	1493.87	-159.415	-23.8053	200	300	0	0	0	0	0	0	0	200	903	0	0	0	0	0	0	0	603	903	0
233	8	0.762068	1.80589	9.88614	578.34	-37.3445	-344.24	200	300	0	0	0	0	0	0	0	200	903	0	0	0	0	0	0	0	603	903	0
233	9	0	0	0	0	0	0	200	300	0	0	0	0	0	0	0	200	903	0	0	0	0	0	0	0	603	903	0
234	0	1.06724	1.80589	9.88614	303.682	-220.45	-161.134	200	300	0	0	0	0	0	0	0	200	903	0	0	0	0	0	0	0	603	903	0
234	1	-0.611223	2.11106	10.4965	395.235	23.6906	-115.358	200	300	0	0	0	0	0	0	0	200	903	0	0	0	0	0	0	0	603	903	0
234	2	0.60948	1.80589	10.1913	29.0235	-98.3797	-69.5817	200	300	0	0	0	0	0	0	0	200	903	0	0	0	0	0	0	0	603	903	0
234	3	2.59312	2.26365	10.8017	29.0235	-525.626	-23.8053	200	300	0	0	0	0	0	0	0	200	903	0	0	0	0	0	0	0	603	903	0
234	4	0	0	0	0	0	0	200	300	0	0	0	0	0	0	0	200	903	0	0	0	0	0	0	0	603	903	0
234	5	-0.15346	2.26365	10.1913	944.551	23.6906	-161.134	200	300	0	0	0	0	0	0	0	200	903	0	0	0	0	0	0	0	603	903	0
234	6	0.304304	1.50071	10.1913	669.893	23.6906	21.9711	200	300	0	0	0	0	0	0	0	200	903	0	0	0	0	0	0	0	603	903	0
234	7	-0.15346	1.19554	10.8017	395.235	-37.3445	-161.134	200	300	0	0	0	0	0	0	0	200	903	0	0	0	0	0	0	0	603	903	0
234	8	0.456892	1.34812	12.0224	120.576	23.6906	-298.464	200	300	0	0	0	0	0	0	0	200	903	0	0	0	0	0	0	0	603	903	0
234	9	0.60948	1.80589	11.7172	212.129	-281.485	-23.8053	200	300	0	0	0	0	0	0	0	200	903	0	0	0	0	0	0	0	603	903	0
235	0	0	0	0	0	0	0	200	300	0	0	0	0	0	0	0	200	903	0	0	0	0	0	0	0	603	903	0
235	1	0	0	0	0	0	0	200	300	0	0	0	0	0	0	0	200	903	0	0	0	0	0	0	0	603	903	0
235	2	0	0	0	0	0	0	200	300	0	0	0	0	0	0	0	200	903	0	0	0	0	0	0	0	603	903	0
235	3	-0.611223	2.26365	10.1913	852.998	-159.415	159.3	200	300	0	0	0	0	0	0	0	200	903	0	0	0	0	0	0	0	603	903	0
235	4	-0.611223	1.80589	11.1068	669.893	-159.415	-23.8053	200	300	0	0	0	0	0	0	0	200	903	0	0	0	0	0	0	0	603	903	0
235	5	-0.916399	1.04295	12.3275	578.34	23.6906	-252.687	200	300	0	0	0	0	0	0	0	200	903	0	0	0	0	0	0	0	603	903	0
235	6	0.304304	1.6533	10.4965	669.893	-159.415	-344.24	200	300	0	0	0	0	0	0	0	200	903	0	0	0	0	0	0	0	603	903	0
235	7	1.06724	1.34812	10.1913	486.787	-281.485	-161.134	200	300	0	0	0	0	0	0	0	200	903	0	0	0	0	0	0	0	603	903	0
235	8	0	0	0	0	0	0	200	300	0	0	0	0	0	0	0	200	903	0	0	0	0	0	0	0	603	903	0
235	9	0	0	0	0	0	0	200	300	0	0	0	0	0	0	0	200	903	0	0	0	0	0	0	0	603	903	0
236	0	0.456892	2.26365	11.7172	303.682	-98.3797	-390.016	200	300	0	0	0	0	0	0	0	200	903	0	0	0	0	0	0	0	603	903	0
236	1	-0.15346	2.11106	12.0224	-62.5292	-98.3797	-23.8053	200	300	0	0	0	0	0	0	0	200	903	0	0	0	0	0	0	0	603	903	0
236	2	0.60948	2.41624	10.8017	944.551	-586.661	-69.5817	200	300	0	0	0	0	0	0	0	200	903	0	0	0	0	0	0	0	603	903	0
236	3	0.151716	1.34812	10.8017	1127.66	-159.415	-115.358	200	300	0	0	0	0	0	0	0	200	903	0	0	0	0	0	0	0	603	903	0
236	4	0	0	0	0	0	0	200	300	0	0	0	0	0	0	0	200	903	0	0	0	0	0	0	0	603	903	0
236	5	0.456892	-0.482931	11.412	486.787	23.6906	-206.911	200	300	0	0	0	0	0	0	0	200	903	0	0	0	0	0	0	0	603	903	0
236	6	0	0	0	0	0	0	200	300	0	0	0	0	0	0	0	200	903	0	0	0	0	0	0	0	603	903	0
236	7	0	0	0	0	0	0	200	300	0	0	0	0	0	0	0	200	903	0	0	0	0	0	0	0	603	903	0
236	8	-0.306047	2.11106	10.4965	120.576	-37.3445	-161.134	200	300	0	0	0	0	0	0	0	200	903	0	0	0	0	0	0	0	603	903	0
236	9	0.456892	2.11106	11.412	-62.5292	206.796	-23.8053	200	300	0	0	0	0	0	0	0	200	903	0	0	0	0	0	0	0	603	903	0
237	0	1.06724	2.11106	10.8017	486.787	-37.3445	113.524	200	300	0	0	0	0	0	0	0	200	903	0	0	0	0	0	0	0	603	903	0
237	1	0	0	0	0	0	0	200	300	0	0	0	0	0	0	0	200	903	0	0	0	0	0	0	0	603	903	0
237	2	0.762068	1.50071	10.1913	669.893	-159.415	-252.687	200	300	0	0	0	0	0	0	0	200	903	0	0	0	0	0	0	0	603	903	0
237	3	0	0	0	0	0	0	200	300	0	0	0	0	0	0	0	200	903	0	0	0	0	0	0	0	603	903	0
237	4	0.304304	-0.177755	10.4965	669.893	23.6906	21.9711	200	300	0	0	0	0	0	0	0	200	903	0	0	0	0	0	0	0	603	903	0
237	5	-0.15346	1.6533	12.3275	303.682	-159.415	-344.24	200	300	0	0	0	0	0	0	0	200	903	0	0	0	0	0	0	0	603	903	0
237	6	0.60948	2.72141	11.1068	761.445	-647.696	-115.358	200	300	0	0	0	0	0	0	0	200	903	0	0	0	0	0	0	0	603	903	0
237	7	0.914656	2.26365	9.88614	303.682	-98.3797	-206.911	200	300	0	0	0	0	0	0	0	200	903	0	0	0	0	0	0	0	603	903	0
237	8	0	0	0	0	0	0	200	300	0	0	0	0	0	0	0	200	903	0	0	0	0	0	0	0	603	903	0
237	9	0	0	0	0	0	0	200	300	0	0	0	0	0	0	0	200	903	0	0	0	0	0	0	0	603	903	0
238	0	1.52501	1.6533	10.8017	1127.66	-281.485	-23.8053	200	300	0	0	0	0	0	0	0	200	903	0	0	0	0	0	0	0	603	903	0
238	1	0.151716	0.737772	10.8017	486.787	-220.45	-69.5817	200	300	0	0	0	0	0	0	0	200	903	0	0	0	0	0	0	0	603	903	0
238	2	0	0	0	0	0	0	200	300	0	0	0	0	0	0	0	200	903	0	0	0	0	0	0	0	603	903	0
238	3	0.60948	1.34812	10.1913	-154.082	145.761	-298.464	200	300	0	0	0	0	0	0	0	200	903	0	0	0	0	0	0	0	603	903	0
238	4	0	0	0	0	0	0	200	300	0	0	0	0	0	0	0	200	903	0	0	0	0	0	0	0	603	903	0
238	5	0.762068	2.11106	11.7172	-245.635	-37.3445	-115.358	200	300	0	0	0	0	0	0	0	200	903	0	0	0	0	0	0	0	603	903	0
238	6	0	0	0	0	0	0	200	300	0	0	0	0	0	0	0	200	903	0	0	0	0	0	0	0	603	903	0
238	7	1.37242	1.95848	12.6327	578.34	-37.3445	-298.464	200	300	0	0	0	0	0	0	0	200	903	0	0	0	0	0	0	0	603	903	0
238	8	-0.611223	2.26365	11.7172	1127.66	206.796	-161.134	200	300	0	0	0	0	0	0	0	200	903	0	0	0	0	0	0	0	603	903	0
238	9	0.304304	1.6533	11.7172	761.445	-464.591	-161.134	200	300	0	0	0	0	0	0	0	200	903	0	0	0	0	0	0	0	603	903	0
239	0	2.74571	1.19554	10.1913	669.893	-403.556	-161.134	200	300	0	0	0	0	0	0	0	200	903	0	0	0	0	0	0	0	603	903	0
239	1	0	0	0	0	0	0	200	300	0	0	0	0	0	0	0	200	903	0	0	0	0	0	0	0	603	903	0
239	2	0	0	0	0	0	0	200	300	0	0	0	0	0	0	0	200	903	0	0	0	0	0	0	0	603	903	0
239	3	0	0	0	0	0	0	200	300	0	0	0	0	0	0	0	200	903	0	0	0	0	0	0	0	603	903	0
239	4	-0.000871718	1.6533	10.4965	29.0235	-220.45	-23.8053	200	300	0	0	0	0	0	0	0	200	903	0	0	0	0	0	0	0	603	903	0
239	5	-0.306047	1.80589	14.4638	669.893	-586.661	-252.687	200	300	0	0	0	0	0	0	0	200	903	0	0	0	0	0	0	0	603	903	0
239	6	1.21983	1.19554	11.1068	669.893	-37.3445	21.9711	200	300	0	0	0	0	0	0	0	200	903	0	0	0	0	0	0	0	603	903	0
239	7	0	0	0	0	0	0	200	300	0	0	0	0	0	0	0	200	903	0	0	0	0	0	0	0	603	903	0
239	8	1.37242	1.04295	9.88614	761.445	23.6906	-115.358	200	300	0	0	0	0	0	0	0	200	903	0	0	0	0	0	0	0	603	903	0
239	9	0.60948	1.6533	10.8017	578.34	-220.45	-298.464	200	300	0	0	0	0	0	0	0	200	903	0	0	0	0	0	0	0	603	903	0
240	0	-0.15346	1.6533	10.1913	303.682	-37.3445	-115.358	200	300	0	0	0	0	0	0	0	200	903	0	0	0	0	0	0	0	603	903	0
240	1	-0.611223	2.26365	11.1068	212.129	-281.485	-69.5817	200	300	0	0	0	0	0	0	0	200	903	0	0	0	0	0	0	0	603	903	0
240	2	0.151716	0.89036	11.7172	944.551	-98.3797	-206.911	200	300	0	0	0	0	0	0	0	200	903	0	0	0	0	0	0	0	603	903	0
240	3	0.304304	2.11106	11.7172	761.445	-159.415	-344.24	200	300	0	0	0	0	0	0	0	200	903	0	0	0	0	0	0	0	603	903	0
240	4	0	0	0	0	0	0	200	300	0	0	0	0	0	0	0	200	903	0	0	0	0	0	0	0	603	903	0
240	5	1.21983	1.19554	13.5482	852.998	-525.626	-206.911	200	300	0	0	0	0	0	0	0	200	903	0	0	0	0	0	0	0	603	903	0
240	6	0	0	0	0	0	0	200	300	0	0	0	0	0	0	0	200	903	0	0	0	0	0	0	0	603	903	0
240	7	1.21983	1.34812	11.1068	-154.082	-98.3797	-69.5817	200	300	0	0	0	0	0	0	0	200	903	0	0	0	0	0	0	0	603	903	0
240	8	0.151716	1.50071	9.88614	303.682	-525.626	205.077	200	300	0	0	0	0	0	0	0	200	903	0	0	0	0	0	0	0	603	903	0
240	9	0.456892	1.50071	10.1913	120.576	-281.485	-298.464	200	300	0	0	0	0	0	0	0	200	903	0	0	0	0	0	0	0	603	903	0
241	0	1.37242	2.26365	11.1068	669.893	-98.3797	388.182	200	300	0	0	0	0	0	0	0	200	903	0	0	0	0	0	0	0	603	903	0
241	1	1.06724	1.34812	10.8017	944.551	23.6906	-161.134	200	300	0	0	0	0	0	0	0	200	903	0	0	0	0	0	0	0	603	903	0
241	2	-0.611223	1.6533	12.6327	578.34	84.7258	159.3	200	300	0	0	0	0	0	0	0	200	903	0	0	0	0	0	0	0	603	903	0
241	3	-0.15346	1.80589	10.1913	1219.21	-159.415	113.524	200	300	0	0	0	0	0	0	0	200	903	0	0	0	0	0	0	0	603	903	0
241	4	-0.000871718	2.11106	11.1068	395.235	-98.3797	-206.911	200	300	0	0	0	0	0	0	0	200	903	0	0	0	0	0	0	0	603	903	0
241	5	-0.306047	2.72141	10.1913	212.129	23.6906	-115.358	200	300	0	0	0	0	0	0	0	200	903	0	0	0	0	0	0	0	603	903	0
241	6	0.456892	0.737772	10.8017	303.682	-159.415	159.3	200	300	0	0	0	0	0	0	0	200	903	0	0	0	0	0	0	0	603	903	0
241	7	0	0	0	0	0	0	200	300	0	0	0	0	0	0	0	200	903	0	0	0	0	0	0	0	603	903	0
241	8	0.914656	1.6533	9.88614	578.34	-220.45	113.524	200	300	0	0	0	0	0	0	0	200	903	0	0	0	0	0	0	0	603	903	0
241	9	0	0	0	0	0	0	200	300	0	0	0	0	0	0	0	200	903	0	0	0	0	0	0	0	603	903	0
242	0	0	0	0	0	0	0	200	300	0	0	0	0	0	0	0	200	903	0	0	0	0	0	0	0	603	903	0
242	1	-0.15346	1.50071	10.4965	120.576	-37.3445	-298.464	200	300	0	0	0	0	0	0	0	200	903	0	0	0	0	0	0	0	603	903	0
242	2	1.06724	2.11106	10.4965	-154.082	-281.485	-298.464	200	300	0	0	0	0	0	0	0	200	903	0	0	0	0	0	0	0	603	903	0
242	3	1.21983	1.19554	11.412	29.0235	-586.661	-23.8053	200	300	0	0	0	0	0	0	0	200	903	0	0	0	0	0	0	0	603	903	0
242	4	0	0	0	0	0	0	200	300	0	0	0	0	0	0	0	200	903	0	0	0	0	0	0	0	603	903	0
242	5	0.304304	3.02659	9.88614	761.445	23.6906	-527.345	200	300	0	0	0	0	0	0	0	200	903	0	0	0	0	0	0	0	603	903	0
242	6	-0.611223	1.6533	10.4965	669.893	23.6906	-252.687	200	300	0	0	0	0	0	0	0	200	903	0	0	0	0	0	0	0	603	903	0
242	7	1.06724	0.280009	10.4965	852.998	84.7258	-206.911	200	300	0	0	0	0	0	0	0	200	903	0	0	0	0	0	0	0	603	903	0
242	8	-0.611223	1.34812	11.1068	303.682	-281.485	-298.464	200	300	0	0	0	0	0	0	0	200	903	0	0	0	0	0	0	0	603	903	0
242	9	-0.15346	2.26365	10.4965	1219.21	-98.3797	-161.134	200	300	0	0	0	0	0	0	0	200	903	0	0	0	0	0	0	0	603	903	0
243	0	0.762068	1.80589	10.8017	212.129	-220.45	-206.911	200	300	0	0	0	0	0	0	0	200	903	0	0	0	0	0	0	0	603	903	0
243	1	0	0	0	0	0	0	200	300	0	0	0	0	0	0	0	200	903	0	0	0	0	0	0	0	603	903	0
243	2	0	0	0	0	0	0	200	300	0	0	0	0	0	0	0	200	903	0	0	0	0	0	0	0	603	903	0
243	3	0	0	0	0	0	0	200	300	0	0	0	0	0	0	0	200	903	0	0	0	0	0	0	0	603	903	0
243	4	1.21983	1.19554	12.6327	395.235	23.6906	-69.5817	200	300	0	0	0	0	0	0	0	200	903	0	0	0	0	0	0	0	603	903	0
243	5	0.304304	1.50071	10.1913	-62.5292	-98.3797	-23.8053	200	300	0	0	0	0	0	0	0	200	903	0	0	0	0	0	0	0	603	903	0
243	6	0.456892	0.432597	10.4965	-245.635	-37.3445	-252.687	200	300	0	0	0	0	0	0	0	200	903	0	0	0	0	0	0	0	603	903	0
243	7	0.60948	2.41624	11.7172	395.235	-37.3445	-206.911	200	300	0	0	0	0	0	0	0	200	903	0	0	0	0	0	0	0	603	903	0
243	8	0.914656	0.89036	10.4965	120.576	23.6906	-161.134	200	300	0	0	0	0	0	0	0	200	903	0	0	0	0	0	0	0	603	903	0
243	9	0.151716	2.26365	11.7172	852.998	-403.556	-23.8053	200	300	0	0	0	0	0	0	0	200	903	0	0	0	0	0	0	0	603	903	0
244	0	-0.763811	2.11106	9.88614	486.787	-98.3797	-298.464	200	300	0	0	0	0	0	0	0	200	903	0	0	0	0	0	0	0	603	903	0
244	1	-0.000871718	1.80589	11.412	1127.66	-403.556	-115.358	200	300	0	0	0	0	0	0	0	200	903	0	0	0	0	0	0	0	603	903	0
244	2	0.151716	1.04295	11.1068	852.998	-342.52	-161.134	200	300	0	0	0	0	0	0	0	200	903	0	0	0	0	0	0	0	603	903	0
244	3	0.762068	1.50071	10.8017	29.0235	-220.45	-23.8053	200	300	0	0	0	0	0	0	0	200	903	0	0	0	0	0	0	0	603	903	0
244	4	2.13536	1.34812	10.1913	212.129	-403.556	-206.911	200	300	0	0	0	0	0	0	0	200	903	0	0	0	0	0	0	0	603	903	0
244	5	0	0	0	0	0	0	200	300	0	0	0	0	0	0	0	200	903	0	0	0	0	0	0	0	603	903	0
244	6	0.914656	1.95848	11.412	212.129	-281.485	67.7474	200	300	0	0	0	0	0	0	0	200	903	0	0	0	0	0	0	0	603	903	0
244	7	0	0	0	0	0	0	200	300	0	0	0	0	0	0	0	200	903	0	0	0	0	0	0	0	603	903	0
244	8	-0.15346	1.50071	12.0224	761.445	-98.3797	21.9711	200	300	0	0	0	0	0	0	0	200	903	0	0	0	0	0	0	0	603	903	0
244	9	0.151716	0.89036	11.412	669.893	84.7258	-23.8053	200	300	0	0	0	0	0	0	0	200	903	0	0	0	0	0	0	0	603	903	0
245	0	0.60948	0.89036	11.412	761.445	-159.415	-115.358	200	300	0	0	0	0	0	0	0	200	903	0	0	0	0	0	0	0	603	903	0
245	1	0	0	0	0	0	0	200	300	0	0	0	0	0	0	0	200	903	0	0	0	0	0	0	0	603	903	0
245	2	0	0	0	0	0	0	200	300	0	0	0	0	0	0	0	200	903	0	0	0	0	0	0	0	603	903	0
245	3	0	0	0	0	0	0	200	300	0	0	0	0	0	0	0	200	903	0	0	0	0	0	0	0	603	903	0
245	4	0	0	0	0	0	0	200	300	0	0	0	0	0	0	0	200	903	0	0	0	0	0	0	0	603	903	0
245	5	-0.15346	2.26365	10.4965	761.445	-342.52	-115.358	200	300	0	0	0	0	0	0	0	200	903	0	0	0	0	0	0	0	603	903	0
245	6	-0.000871718	1.50071	10.4965	486.787	-464.591	-161.134	200	300	0	0	0	0	0	0	0	200	903	0	0	0	0	0	0	0	603	903	0
245	7	1.21983	1.50071	10.8017	944.551	-98.3797	-161.134	200	300	0	0	0	0	0	0	0	200	903	0	0	0	0	0	0	0	603	903	0
245	8	0	0	0	0	0	0	200	300	0	0	0	0	0	0	0	200	903	0	0	0	0	0	0	0	603	903	0
245	9	1.21983	1.50071	11.412	-62.5292	-281.485	21.9711	200	300	0	0	0	0	0	0	0	200	903	0	0	0	0	0	0	0	603	903	0
246	0	-0.000871718	1.80589	10.4965	29.0235	-281.485	-435.793	200	300	0	0	0	0	0	0	0	200	903	0	0	0	0	0	0	0	603	903	0
246	1	2.74571	2.11106	10.8017	395.235	145.761	205.077	200	300	0	0	0	0	0	0	0	200	903	0	0	0	0	0	0	0	603	903	0
246	2	-0.306047	1.19554	11.1068	120.576	84.7258	113.524	200	300	0	0	0	0	0	0	0	200	903	0	0	0	0	0	0	0	603	903	0
246	3	1.06724	1.95848	11.7172	944.551	-98.3797	-69.5817	200	300	0	0	0	0	0	0	0	200	903	0	0	0	0	0	0	0	603	903	0
246	4	1.06724	1.95848	11.7172	578.34	-647.696	-252.687	200	300	0	0	0	0	0	0	0	200	903	0	0	0	0	0	0	0	603	903	0
246	5	0.60948	1.6533	9.88614	669.893	-98.3797	-115.358	200	300	0	0	0	0	0	0	0	200	903	0	0	0	0	0	0	0	603	903	0
246	6	0.456892	1.19554	12.6327	669.893	-98.3797	-344.24	200	300	0	0	0	0	0	0	0	200	903	0	0	0	0	0	0	0	603	903	0
246	7	0	0	0	0	0	0	200	300	0	0	0	0	0	0	0	200	903	0	0	0	0	0	0	0	603	903	0
246	8	-0.458635	0.89036	11.1068	578.34	-220.45	-252.687	200	300	0	0	0	0	0	0	0	200	903	0	0	0	0	0	0	0	603	903	0
246	9	-0.306047	2.11106	10.4965	578.34	-220.45	-298.464	200	300	0	0	0	0	0	0	0	200	903	0	0	0	0	0	0	0	603	903	0
247	0	0.762068	1.6533	10.8017	29.0235	-220.45	-115.358	200	300	0	0	0	0	0	0	0	200	903	0	0	0	0	0	0	0	603	903	0
247	1	0	0	0	0	0	0	200	300	0	0	0	0	0	0	0	200	903	0	0	0	0	0	0	0	603	903	0
247	2	0	0	0	0	0	0	200	300	0	0	0	0	0	0	0	200	903	0	0	0	0	0	0	0	603	903	0
247	3	0.304304	1.04295	10.4965	1310.76	-98.3797	-161.134	200	300	0	0	0	0	0	0	0	200	903	0	0	0	0	0	0	0	603	903	0
247	4	-0.611223	1.34812	10.8017	578.34	-220.45	-344.24	200	300	0	0	0	0	0	0	0	200	903	0	0	0	0	0	0	0	603	903	0
247	5	-0.15346	2.26365	10.4965	395.235	84.7258	-115.358	200	300	0	0	0	0	0	0	0	200	903	0	0	0	0	0	0	0	603	903	0
247	6	0.762068	1.80589	13.2431	120.576	-159.415	-435.793	200	300	0	0	0	0	0	0	0	200	903	0	0	0	0	0	0	0	603	903	0
247	7	0.762068	2.26365	11.1068	944.551	389.902	-298.464	200	300	0	0	0	0	0	0	0	200	903	0	0	0	0	0	0	0	603	903	0
247	8	0.60948	2.11106	10.1913	486.787	-220.45	-206.911	200	300	0	0	0	0	0	0	0	200	903	0	0	0	0	0	0	0	603	903	0
247	9	1.21983	2.26365	12.0224	578.34	-98.3797	-69.5817	200	300	0	0	0	0	0	0	0	200	903	0	0	0	0	0	0	0	603	903	0
248	0	-1.06899	2.41624	9.88614	120.576	84.7258	-435.793	200	300	0	0	0	0	0	0	0	200	903	0	0	0	0	0	0	0	603	903	0
248	1	-0.15346	1.6533	10.4965	852.998	-159.415	-161.134	200	300	0	0	0	0	0	0	0	200	903	0	0	0	0	0	0	0	603	903	0
248	2	-0.916399	1.34812	12.6327	944.551	-403.556	-390.016	200	300	0	0	0	0	0	0	0	200	903	0	0	0	0	0	0	0	603	903	0
248	3	-0.15346	1.6533	11.412	1127.66	-586.661	-161.134	200	300	0	0	0	0	0	0	0	200	903	0	0	0	0	0	0	0	603	903	0
248	4	2.28795	1.80589	10.4965	212.129	-525.626	-115.358	200	300	0	0	0	0	0	0	0	200	903	0	0	0	0	0	0	0	603	903	0
248	5	0	0	0	0	0	0	200	300	0	0	0	0	0	0	0	200	903	0	0	0	0	0	0	0	603	903	0
248	6	0	0	0	0	0	0	200	300	0	0	0	0	0	0	0	200	903	0	0	0	0	0	0	0	603	903	0
248	7	-0.306047	0.737772	11.1068	120.576	-220.45	250.853	200	300	0	0	0	0	0	0	0	200	903	0	0	0	0	0	0	0	603	903	0
248	8	0.60948	2.11106	12.0224	669.893	-159.415	-252.687	200	300	0	0	0	0	0	0	0	200	903	0	0	0	0	0	0	0	603	903	0
248	9	0.762068	0.432597	10.8017	669.893	84.7258	-298.464	200	300	0	0	0	0	0	0	0	200	903	0	0	0	0	0	0	0	603	903	0
249	0	0.762068	1.80589	11.412	944.551	206.796	-344.24	200	300	0	0	0	0	0	0	0	200	903	0	0	0	0	0	0	0	603	903	0
249	1	0.60948	0.737772	10.1913	1036.1	-342.52	67.7474	200	300	0	0	0	0	0	0	0	200	903	0	0	0	0	0	0	0	603	903	0
249	2	0.456892	1.34812	11.7172	212.129	23.6906	-390.016	200	300	0	0	0	0	0	0	0	200	903	0	0	0	0	0	0	0	603	903	0
249	3	0	0	0	0	0	0	200	300	0	0	0	0	0	0	0	200	903	0	0	0	0	0	0	0	603	903	0
249	4	1.06724	2.41624	11.1068	944.551	-37.3445	-69.5817	200	300	0	0	0	0	0	0	0	200	903	0	0	0	0	0	0	0	603	903	0
249	5	-0.916399	1.95848	10.8017	120.576	-37.3445	-206.911	200	300	0	0	0	0	0	0	0	200	903	0	0	0	0	0	0	0	603	903	0
249	6	1.06724	1.19554	11.1068	578.34	-220.45	-161.134	200	300	0	0	0	0	0	0	0	200	903	0	0	0	0	0	0	0	603	903	0
249	7	0.60948	1.50071	12.3275	578.34	-769.766	-115.358	200	300	0	0	0	0	0	0	0	200	903	0	0	0	0	0	0	0	603	903	0
249	8	0	0	0	0	0	0	200	300	0	0	0	0	0	0	0	200	903	0	0	0	0	0	0	0	603	903	0
249	9	1.98277	0.89036	12.3275	486.787	23.6906	-161.134	200	300	0	0	0	0	0	0	0	200	903	0	0	0	0	0	0	0	603	903	0
250	0	0	0	0	0	0	0	200	300	0	0	0	0	0	0	0	200	903	0	0	0	0	0	0	0	603	903	0
250	1	2.13536	1.6533	10.1913	303.682	-281.485	-206.911	200	300	0	0	0	0	0	0	0	200	903	0	0	0	0	0	0	0	603	903	0
250	2	0.304304	1.6533	11.1068	212.129	-342.52	-69.5817	200	300	0	0	0	0	0	0	0	200	903	0	0	0	0	0	0	0	603	903	0
250	3	0.60948	2.72141	11.412	1219.21	84.7258	-161.134	200	300	0	0	0	0	0	0	0	200	903	0	0	0	0	0	0	0	603	903	0
250	4	0.60948	2.26365	12.6327	303.682	-220.45	-252.687	200	300	0	0	0	0	0	0	0	200	903	0	0	0	0	0	0	0	603	903	0
250	5	0	0	0	0	0	0	200	300	0	0	0	0	0	0	0	200	903	0	0	0	0	0	0	0	603	903	0
250	6	0	0	0	0	0	0	200	300	0	0	0	0	0	0	0	200	903	0	0	0	0	0	0	0	603	903	0
250	7	-0.611223	3.48435	10.8017	669.893	-98.3797	-161.134	200	300	0	0	0	0	0	0	0	200	903	0	0	0	0	0	0	0	603	903	0
250	8	-0.306047	1.50071	10.1913	669.893	23.6906	-298.464	200	300	0	0	0	0	0	0	0	200	903	0	0	0	0	0	0	0	603	903	0
250	9	0.304304	0.89036	10.8017	852.998	-586.661	205.077	200	300	0	0	0	0	0	0	0	200	903	0	0	0	0	0	0	0	603	903	0
251	0	0.914656	1.50071	10.1913	120.576	-281.485	-115.358	200	300	0	0	0	0	0	0	0	200	903	0	0	0	0	0	0	0	603	903	0
251	1	0	0	0	0	0	0	200	300	0	0	0	0	0	0	0	200	903	0	0	0	0	0	0	0	603	903	0
251	2	0	0	0	0	0	0	200	300	0	0	0	0	0	0	0	200	903	0	0	0	0	0	0	0	603	903	0
251	3	0	0	0	0	0	0	200	300	0	0	0	0	0	0	0	200	903	0	0	0	0	0	0	0	603	903	0
251	4	-0.000871718	2.41624	11.412	486.787	145.761	-298.464	200	300	0	0	0	0	0	0	0	200	903	0	0	0	0	0	0	0	603	903	0
251	5	1.52501	2.11106	12.6327	669.893	-159.415	-298.464	200	300	0	0	0	0	0	0	0	200	903	0	0	0	0	0	0	0	603	903	0
251	6	1.06724	1.95848	10.1913	761.445	-403.556	113.524	200	300	0	0	0	0	0	0	0	200	903	0	0	0	0	0	0	0	603	903	0
251	7	0	0	0	0	0	0	200	300	0	0	0	0	0	0	0	200	903	0	0	0	0	0	0	0	603	903	0
251	8	0.762068	0.127421	11.412	1493.87	84.7258	-206.911	200	300	0	0	0	0	0	0	0	200	903	0	0	0	0	0	0	0	603	903	0
251	9	-0.458635	1.34812	10.4965	486.787	145.761	-298.464	200	300	0	0	0	0	0	0	0	200	903	0	0	0	0	0	0	0	603	903	0
252	0	0.456892	1.95848	9.88614	212.129	-220.45	-23.8053	200	300	0	0	0	0	0	0	0	200	903	0	0	0	0	0	0	0	603	903	0
252	1	-0.763811	2.26365	10.8017	852.998	-830.802	-69.5817	200	300	0	0	0	0	0	0	0	200	903	0	0	0	0	0	0	0	603	903	0
252	2	0.60948	2.41624	10.4965	486.787	-342.52	205.077	200	300	0	0	0	0	0	0	0	200	903	0	0	0	0	0	0	0	603	903	0
252	3	1.98277	1.95848	10.1913	1493.87	23.6906	-115.358	200	300	0	0	0	0	0	0	0	200	903	0	0	0	0	0	0	0	603	903	0
252	4	0	0	0	0	0	0	200	300	0	0	0	0	0	0	0	200	903	0	0	0	0	0	0	0	603	903	0
252	5	-0.15346	1.50071	10.8017	1036.1	-98.3797	-206.911	200	300	0	0	0	0	0	0	0	200	903	0	0	0	0	0	0	0	603	903	0
252	6	-0.15346	1.6533	10.1913	761.445	-98.3797	-344.24	200	300	0	0	0	0	0	0	0	200	903	0	0	0	0	0	0	0	603	903	0
252	7	-0.306047	0.127421	12.6327	578.34	-98.3797	-115.358	200	300	0	0	0	0	0	0	0	200	903	0	0	0	0	0	0	0	603	903	0
252	8	0.60948	1.50071	11.412	395.235	-37.3445	-69.5817	200	300	0	0	0	0	0	0	0	200	903	0	0	0	0	0	0	0	603	903	0
252	9	0.60948	2.41624	11.412	486.787	-98.3797	-206.911	200	300	0	0	0	0	0	0	0	200	903	0	0	0	0	0	0	0	603	903	0
253	0	0	0	0	0	0	0	200	300	0	0	0	0	0	0	0	200	903	0	0	0	0	0	0	0	603	903	0
253	1	0.60948	1.19554	12.6327	486.787	84.7258	-23.8053	200	300	0	0	0	0	0	0	0	200	903	0	0	0	0	0	0	0	603	903	0
253	2	0	0	0	0	0	0	200	300	0	0	0	0	0	0	0	200	903	0	0	0	0	0	0	0	603	903	0
253	3	0.304304	1.6533	11.412	852.998	-98.3797	-664.674	200	300	0	0	0	0	0	0	0	200	903	0	0	0	0	0	0	0	603	903	0
253	4	0	0	0	0	0	0	200	300	0	0	0	0	0	0	0	200	903	0	0	0	0	0	0	0	603	903	0
253	5	0.914656	0.89036	11.1068	212.129	-281.485	-115.358	200	300	0	0	0	0	0	0	0	200	903	0	0	0	0	0	0	0	603	903	0
253	6	1.21983	1.50071	10.4965	120.576	-464.591	-115.358	200	300	0	0	0	0	0	0	0	200	903	0	0	0	0	0	0	0	603	903	0
253	7	1.06724	1.19554	10.8017	395.235	-98.3797	-161.134	200	300	0	0	0	0	0	0	0	200	903	0	0	0	0	0	0	0	603	903	0
253	8	-0.000871718	2.11106	11.412	669.893	84.7258	-161.134	200	300	0	0	0	0	0	0	0	200	903	0	0	0	0	0	0	0	603	903	0
253	9	0.304304	2.56883	10.1913	-154.082	23.6906	-115.358	200	300	0	0	0	0	0	0	0	200	903	0	0	0	0	0	0	0	603	903	0
254	0	-0.000871718	2.26365	11.412	761.445	-220.45	-115.358	200	300	0	0	0	0	0	0	0	200	903	0	0	0	0	0	0	0	603	903	0
254	1	-1.06899	2.26365	12.9379	852.998	-342.52	-344.24	200	300	0	0	0	0	0	0	0	200	903	0	0	0	0	0	0	0	603	903	0
254	2	0.304304	1.95848	11.1068	1127.66	84.7258	-252.687	200	300	0	0	0	0	0	0	0	200	903	0	0	0	0	0	0	0	603	903	0
254	3	0.60948	1.6533	10.1913	761.445	-98.3797	-435.793	200	300	0	0	0	0	0	0	0	200	903	0	0	0	0	0	0	0	603	903	0
254	4	0	0	0	0	0	0	200	300	0	0	0	0	0	0	0	200	903	0	0	0	0	0	0	0	603	903	0
254	5	-0.916399	1.50071	9.88614	303.682	-403.556	-390.016	200	300	0	0	0	0	0	0	0	200	903	0	0	0	0	0	0	0	603	903	0
254	6	0	0	0	0	0	0	200	300	0	0	0	0	0	0	0	200	903	0	0	0	0	0	0	0	603	903	0
254	7	-0.306047	1.95848	11.1068	212.129	-525.626	-161.134	200	300	0	0	0	0	0	0	0	200	903	0	0	0	0	0	0	0	603	903	0
254	8	0.914656	1.19554	9.88614	212.129	206.796	-69.5817	200	300	0	0	0	0	0	0	0	200	903	0	0	0	0	0	0	0	603	903	0
254	9	0.762068	1.6533	10.8017	578.34	-159.415	250.853	200	300	0	0	0	0	0	0	0	200	903	0	0	0	0	0	0	0	603	903	0
255	0	0	0	0	0	0	0	200	300	0	0	0	0	0	0	0	200	903	0	0	0	0	0	0	0	603	903	0
255	1	2.44053	1.34812	11.7172	578.34	-98.3797	113.524	200	300	0	0	0	0	0	0	0	200	903	0	0	0	0	0	0	0	603	903	0
255	2	0	0	0	0	0	0	200	300	0	0	0	0	0	0	0	200	903	0	0	0	0	0	0	0	603	903	0
255	3	-0.15346	1.19554	12.6327	395.235	-98.3797	113.524	200	300	0	0	0	0	0	0	0	200	903	0	0	0	0	0	0	0	603	903	0
255	4	-0.916399	1.04295	11.412	395.235	206.796	205.077	200	300	0	0	0	0	0	0	0	200	903	0	0	0	0	0	0	0	603	903	0
255	5	0.151716	1.95848	11.1068	212.129	84.7258	-435.793	200	300	0	0	0	0	0	0	0	200	903	0	0	0	0	0	0	0	603	903	0
255	6	0	0	0	0	0	0	200	300	0	0	0	0	0	0	0	200	903	0	0	0	0	0	0	0	603	903	0
255	7	0	0	0	0	0	0	200	300	0	0	0	0	0	0	0	200	903	0	0	0	0	0	0	0	603	903	0
255	8	0	0	0	0	0	0	200	300	0	0	0	0	0	0	0	200	903	0	0	0	0	0	0	0	603	903	0
255	9	1.06724	0.89036	11.412	486.787	-98.3797	-115.358	200	300	0	0	0	0	0	0	0	200	903	0	0	0	0	0	0	0	603	903	0
256	0	0.151716	1.34812	10.1913	944.551	-342.52	-23.8053	200	300	0	0	0	0	0	0	0	200	903	0	0	0	0	0	0	0	603	903	0
256	1	0.762068	1.19554	11.7172	29.0235	-464.591	-161.134	200	300	0	0	0	0	0	0	0	200	903	0	0	0	0	0	0	0	603	903	0
256	2	1.06724	1.04295	11.7172	212.129	84.7258	-23.8053	200	300	0	0	0	0	0	0	0	200	903	0	0	0	0	0	0	0	603	903	0
256	3	0.762068	1.95848	9.88614	578.34	84.7258	-252.687	200	300	0	0	0	0	0	0	0	200	903	0	0	0	0	0	0	0	603	903	0
256	4	0	0	0	0	0	0	200	300	0	0	0	0	0	0	0	200	903	0	0	0	0	0	0	0	603	903	0
256	5	0.456892	1.6533	10.4965	669.893	-220.45	-115.358	200	300	0	0	0	0	0	0	0	200	903	0	0	0	0	0	0	0	603	903	0
256	6	-0.611223	2.56883	12.0224	761.445	84.7258	-344.24	200	300	0	0	0	0	0	0	0	200	903	0	0	0	0	0	0	0	603	903	0
256	7	-0.000871718	1.6533	11.412	852.998	-342.52	-206.911	200	300	0	0	0	0	0	0	0	200	903	0	0	0	0	0	0	0	603	903	0
256	8	0.762068	1.34812	11.7172	852.998	-159.415	-161.134	200	300	0	0	0	0	0	0	0	200	903	0	0	0	0	0	0	0	603	903	0
256	9	0.304304	0.89036	11.7172	669.893	-37.3445	-298.464	200	300	0	0	0	0	0	0	0	200	903	0	0	0	0	0	0	0	603	903	0
257	0	0.456892	1.50071	10.1913	212.129	-281.485	-23.8053	200	300	0	0	0	0	0	0	0	200	903	0	0	0	0	0	0	0	603	903	0
257	1	0	0	0	0	0	0	200	300	0	0	0	0	0	0	0	200	903	0	0	0	0	0	0	0	603	903	0
257	2	-0.611223	2.11106	9.88614	1402.31	-37.3445	-115.358	200	300	0	0	0	0	0	0	0	200	903	0	0	0	0	0	0	0	603	903	0
257	3	-0.000871718	2.11106	10.4965	120.576	23.6906	-115.358	200	300	0	0	0	0	0	0	0	200	903	0	0	0	0	0	0	0	603	903	0
257	4	0.304304	1.80589	10.8017	303.682	-403.556	-161.134	200	300	0	0	0	0	0	0	0	200	903	0	0	0	0	0	0	0	603	903	0
257	5	0.60948	1.80589	10.4965	669.893	-159.415	67.7474	200	300	0	0	0	0	0	0	0	200	903	0	0	0	0	0	0	0	603	903	0
257	6	1.06724	1.6533	9.88614	669.893	145.761	-161.134	200	300	0	0	0	0	0	0	0	200	903	0	0	0	0	0	0	0	603	903	0
257	7	0.762068	1.50071	9.88614	486.787	23.6906	-115.358	200	300	0	0	0	0	0	0	0	200	903	0	0	0	0	0	0	0	603	903	0
257	8	0	0	0	0	0	0	200	300	0	0	0	0	0	0	0	200	903	0	0	0	0	0	0	0	603	903	0
257	9	-0.15346	1.50071	10.8017	29.0235	-98.3797	-573.122	200	300	0	0	0	0	0	0	0	200	903	0	0	0	0	0	0	0	603	903	0
258	0	0.304304	1.95848	12.0224	29.0235	-159.415	-252.687	200	300	0	0	0	0	0	0	0	200	903	0	0	0	0	0	0	0	603	903	0
258	1	1.06724	2.56883	11.1068	303.682	-37.3445	-206.911	200	300	0	0	0	0	0	0	0	200	903	0	0	0	0	0	0	0	603	903	0
258	2	0	0	0	0	0	0	200	300	0	0	0	0	0	0	0	200	903	0	0	0	0	0	0	0	603	903	0
258	3	-0.000871718	2.56883	9.88614	1036.1	206.796	-161.134	200	300	0	0	0	0	0	0	0	200	903	0	0	0	0	0	0	0	603	903	0
258	4	1.06724	1.04295	13.2431	761.445	-159.415	-298.464	200	300	0	0	0	0	0	0	0	200	903	0	0	0	0	0	0	0	603	903	0
258	5	-0.15346	1.50071	13.2431	761.445	-220.45	-298.464	200	300	0	0	0	0	0	0	0	200	903	0	0	0	0	0	0	0	603	903	0
258	6	0.60948	-0.635519	10.4965	395.235	-342.52	-252.687	200	300	0	0	0	0	0	0	0	200	903	0	0	0	0	0	0	0	603	903	0
258	7	0	0	0	0	0	0	200	300	0	0	0	0	0	0	0	200	903	0	0	0	0	0	0	0	603	903	0
258	8	0.456892	0.89036	10.8017	29.0235	-159.415	-69.5817	200	300	0	0	0	0	0	0	0	200	903	0	0	0	0	0	0	0	603	903	0
258	9	0	0	0	0	0	0	200	300	0	0	0	0	0	0	0	200	903	0	0	0	0	0	0	0	603	903	0
259	0	-0.306047	2.11106	10.4965	120.576	-159.415	-252.687	200	300	0	0	0	0	0	0	0	200	903	0	0	0	0	0	0	0	603	903	0
259	1	1.21983	1.34812	11.412	669.893	84.7258	-298.464	200	300	0	0	0	0	0	0	0	200	903	0	0	0	0	0	0	0	603	903	0
259	2	1.52501	2.11106	12.0224	669.893	-281.485	-206.911	200	300	0	0	0	0	0	0	0	200	903	0	0	0	0	0	0	0	603	903	0
259	3	0.762068	2.41624	10.8017	669.893	84.7258	159.3	200	300	0	0	0	0	0	0	0	200	903	0	0	0	0	0	0	0	603	903	0
259	4	-0.458635	1.50071	9.88614	669.893	-159.415	-206.911	200	300	0	0	0	0	0	0	0	200	903	0	0	0	0	0	0	0	603	903	0
259	5	-0.000871718	1.50071	11.1068	1127.66	23.6906	-390.016	200	300	0	0	0	0	0	0	0	200	903	0	0	0	0	0	0	0	603	903	0
259	6	0.304304	1.34812	11.1068	395.235	-37.3445	-115.358	200	300	0	0	0	0	0	0	0	200	903	0	0	0	0	0	0	0	603	903	0
259	7	0	0	0	0	0	0	200	300	0	0	0	0	0	0	0	200	903	0	0	0	0	0	0	0	603	903	0
259	8	0	0	0	0	0	0	200	300	0	0	0	0	0	0	0	200	903	0	0	0	0	0	0	0	603	903	0
259	9	0	0	0	0	0	0	200	300	0	0	0	0	0	0	0	200	903	0	0	0	0	0	0	0	603	903	0
260	0	0.456892	1.6533	11.1068	-62.5292	-403.556	-69.5817	200	300	0	0	0	0	0	0	0	200	903	0	0	0	0	0	0	0	603	903	0
260	1	0	0	0	0	0	0	200	300	0	0	0	0	0	0	0	200	903	0	0	0	0	0	0	0	603	903	0
260	2	0.762068	1.34812	10.8017	395.235	84.7258	-206.911	200	300	0	0	0	0	0	0	0	200	903	0	0	0	0	0	0	0	603	903	0
260	3	0.762068	1.6533	9.88614	761.445	206.796	-344.24	200	300	0	0	0	0	0	0	0	200	903	0	0	0	0	0	0	0	603	903	0
260	4	-0.763811	1.50071	10.4965	120.576	-159.415	-161.134	200	300	0	0	0	0	0	0	0	200	903	0	0	0	0	0	0	0	603	903	0
260	5	0.456892	1.50071	10.4965	303.682	-281.485	-69.5817	200	300	0	0	0	0	0	0	0	200	903	0	0	0	0	0	0	0	603	903	0
260	6	-0.458635	2.41624	12.3275	212.129	23.6906	-390.016	200	300	0	0	0	0	0	0	0	200	903	0	0	0	0	0	0	0	603	903	0
260	7	0.304304	2.41624	11.1068	852.998	389.902	-390.016	200	300	0	0	0	0	0	0	0	200	903	0	0	0	0	0	0	0	603	903	0
260	8	0	0	0	0	0	0	200	300	0	0	0	0	0	0	0	200	903	0	0	0	0	0	0	0	603	903	0
260	9	0	0	0	0	0	0	200	300	0	0	0	0	0	0	0	200	903	0	0	0	0	0	0	0	603	903	0
261	0	0.151716	2.41624	10.4965	486.787	-220.45	-298.464	200	300	0	0	0	0	0	0	0	200	903	0	0	0	0	0	0	0	603	903	0
261	1	-0.306047	1.19554	11.1068	1310.76	84.7258	-206.911	200	300	0	0	0	0	0	0	0	200	903	0	0	0	0	0	0	0	603	903	0
261	2	0.60948	0.737772	10.8017	578.34	-98.3797	-69.5817	200	300	0	0	0	0	0	0	0	200	903	0	0	0	0	0	0	0	603	903	0
261	3	0	0	0	0	0	0	200	300	0	0	0	0	0	0	0	200	903	0	0	0	0	0	0	0	603	903	0
261	4	-0.15346	1.19554	10.4965	-245.635	-281.485	-252.687	200	300	0	0	0	0	0	0	0	200	903	0	0	0	0	0	0	0	603	903	0
261	5	0	0	0	0	0	0	200	300	0	0	0	0	0	0	0	200	903	0	0	0	0	0	0	0	603	903	0
261	6	-0.15346	2.26365	9.88614	486.787	23.6906	-23.8053	200	300	0	0	0	0	0	0	0	200	903	0	0	0	0	0	0	0	603	903	0
261	7	1.06724	2.56883	10.8017	120.576	-37.3445	-23.8053	200	300	0	0	0	0	0	0	0	200	903	0	0	0	0	0	0	0	603	903	0
261	8	1.06724	0.89036	14.1586	212.129	-159.415	-435.793	200	300	0	0	0	0	0	0	0	200	903	0	0	0	0	0	0	0	603	903	0
261	9	0	0	0	0	0	0	200	300	0	0	0	0	0	0	0	200	903	0	0	0	0	0	0	0	603	903	0
262	0	0	0	0	0	0	0	200	300	0	0	0	0	0	0	0	200	903	0	0	0	0	0	0	0	603	903	0
262	1	0.151716	1.6533	11.412	944.551	-37.3445	-115.358	200	300	0	0	0	0	0	0	0	200	903	0	0	0	0	0	0	0	603	903	0
262	2	0.304304	1.6533	11.1068	669.893	-98.3797	-23.8053	200	300	0	0	0	0	0	0	0	200	903	0	0	0	0	0	0	0	603	903	0
262	3	0.456892	0.585184	11.1068	669.893	-37.3445	67.7474	200	300	0	0	0	0	0	0	0	200	903	0	0	0	0	0	0	0	603	903	0
262	4	0	0	0	0	0	0	200	300	0	0	0	0	0	0	0	200	903	0	0	0	0	0	0	0	603	903	0
262	5	0.762068	1.80589	9.88614	212.129	-98.3797	-298.464	200	300	0	0	0	0	0	0	0	200	903	0	0	0	0	0	0	0	603	903	0
262	6	-0.611223	2.11106	10.1913	212.129	-37.3445	-161.134	200	300	0	0	0	0	0	0	0	200	903	0	0	0	0	0	0	0	603	903	0
262	7	1.52501	0.280009	10.8017	486.787	-342.52	-115.358	200	300	0	0	0	0	0	0	0	200	903	0	0	0	0	0	0	0	603	903	0
262	8	0	0	0	0	0	0	200	300	0	0	0	0	0	0	0	200	903	0	0	0	0	0	0	0	603	903	0
262	9	1.06724	2.41624	11.1068	669.893	-220.45	-115.358	200	300	0	0	0	0	0	0	0	200	903	0	0	0	0	0	0	0	603	903	0
263	0	2.44053	1.6533	11.1068	852.998	-37.3445	-206.911	200	300	0	0	0	0	0	0	0	200	903	0	0	0	0	0	0	0	603	903	0
263	1	0.304304	1.34812	10.1913	486.787	206.796	-115.358	200	300	0	0	0	0	0	0	0	200	903	0	0	0	0	0	0	0	603	903	0
263	2	-0.000871718	1.80589	9.88614	-62.5292	-281.485	-161.134	200	300	0	0	0	0	0	0	0	200	903	0	0	0	0	0	0	0	603	903	0
263	3	-0.306047	1.50071	9.88614	395.235	-220.45	21.9711	200	300	0	0	0	0	0	0	0	200	903	0	0	0	0	0	0	0	603	903	0
263	4	-0.15346	2.11106	10.8017	1036.1	-37.3445	-206.911	200	300	0	0	0	0	0	0	0	200	903	0	0	0	0	0	0	0	603	903	0
263	5	0.914656	2.26365	10.4965	486.787	-37.3445	159.3	200	300	0	0	0	0	0	0	0	200	903	0	0	0	0	0	0	0	603	903	0
263	6	0.456892	1.34812	10.1913	486.787	-98.3797	205.077	200	300	0	0	0	0	0	0	0	200	903	0	0	0	0	0	0	0	603	903	0
263	7	0	0	0	0	0	0	200	300	0	0	0	0	0	0	0	200	903	0	0	0	0	0	0	0	603	903	0
263	8	0	0	0	0	0	0	200	300	0	0	0	0	0	0	0	200	903	0	0	0	0	0	0	0	603	903	0
263	9	0	0	0	0	0	0	200	300	0	0	0	0	0	0	0	200	903	0	0	0	0	0	0	0	603	903	0
264	0	-0.306047	1.80589	10.1913	669.893	267.831	-161.134	200	300	0	0	0	0	0	0	0	200	903	0	0	0	0	0	0	0	603	903	0
264	1	1.37242	1.04295	9.88614	578.34	206.796	-206.911	200	300	0	0	0	0	0	0	0	200	903	0	0	0	0	0	0	0	603	903	0
264	2	1.52501	1.50071	10.4965	29.0235	-220.45	67.7474	200	300	0	0	0	0	0	0	0	200	903	0	0	0	0	0	0	0	603	903	0
264	3	0	0	0	0	0	0	200	300	0	0	0	0	0	0	0	200	903	0	0	0	0	0	0	0	603	903	0
264	4	1.06724	2.874	10.8017	486.787	23.6906	-344.24	200	300	0	0	0	0	0	0	0	200	903	0	0	0	0	0	0	0	603	903	0
264	5	-0.458635	1.95848	11.1068	29.0235	23.6906	-298.464	200	300	0	0	0	0	0	0	0	200	903	0	0	0	0	0	0	0	603	903	0
264	6	-0.000871718	2.56883	10.4965	669.893	-220.45	-115.358	200	300	0	0	0	0	0	0	0	200	903	0	0	0	0	0	0	0	603	903	0
264	7	-0.000871718	1.95848	12.0224	852.998	-342.52	-115.358	200	300	0	0	0	0	0	0	0	200	903	0	0	0	0	0	0	0	603	903	0
264	8	0.60948	2.11106	11.1068	944.551	145.761	-161.134	200	300	0	0	0	0	0	0	0	200	903	0	0	0	0	0	0	0	603	903	0
264	9	0.914656	1.34812	10.8017	669.893	-37.3445	-161.134	200	300	0	0	0	0	0	0	0	200	903	0	0	0	0	0	0	0	603	903	0
265	0	-0.15346	1.50071	11.1068	395.235	-159.415	-69.5817	200	300	0	0	0	0	0	0	0	200	903	0	0	0	0	0	0	0	603	903	0
265	1	-1.06899	1.6533	10.4965	303.682	-586.661	-481.569	200	300	0	0	0	0	0	0	0	200	903	0	0	0	0	0	0	0	603	903	0
265	2	-0.15346	2.26365	11.1068	212.129	-37.3445	-23.8053	200	300	0	0	0	0	0	0	0	200	903	0	0	0	0	0	0	0	603	903	0
265	3	0.60948	2.11106	10.4965	29.0235	-98.3797	-298.464	200	300	0	0	0	0	0	0	0	200	903	0	0	0	0	0	0	0	603	903	0
265	4	1.06724	2.26365	10.8017	-62.5292	-37.3445	159.3	200	300	0	0	0	0	0	0	0	200	903	0	0	0	0	0	0	0	603	903	0
265	5	1.06724	2.11106	9.88614	669.893	-281.485	-206.911	200	300	0	0	0	0	0	0	0	200	903	0	0	0	0	0	0	0	603	903	0
265	6	0.151716	1.50071	11.1068	1036.1	-37.3445	-69.5817	200	300	0	0	0	0	0	0	0	200	903	0	0	0	0	0	0	0	603	903	0
265	7	-0.611223	1.6533	10.4965	486.787	-37.3445	159.3	200	300	0	0	0	0	0	0	0	200	903	0	0	0	0	0	0	0	603	903	0
265	8	-0.458635	0.432597	10.4965	578.34	23.6906	-161.134	200	300	0	0	0	0	0	0	0	200	903	0	0	0	0	0	0	0	603	903	0
265	9	0.762068	1.6533	11.7172	212.129	-525.626	-206.911	200	300	0	0	0	0	0	0	0	200	903	0	0	0	0	0	0	0	603	903	0
266	0	0.60948	2.26365	10.4965	395.235	23.6906	-344.24	200	300	0	0	0	0	0	0	0	200	903	0	0	0	0	0	0	0	603	903	0
266	1	0	0	0	0	0	0	200	300	0	0	0	0	0	0	0	200	903	0	0	0	0	0	0	0	603	903	0
266	2	0	0	0	0	0	0	200	300	0	0	0	0	0	0	0	200	903	0	0	0	0	0	0	0	603	903	0
266	3	0	0	0	0	0	0	200	300	0	0	0	0	0	0	0	200	903	0	0	0	0	0	0	0	603	903	0
266	4	-0.306047	2.26365	10.4965	761.445	-281.485	-390.016	200	300	0	0	0	0	0	0	0	200	903	0	0	0	0	0	0	0	603	903	0
266	5	0.151716	1.19554	10.8017	1036.1	-342.52	67.7474	200	300	0	0	0	0	0	0	0	200	903	0	0	0	0	0	0	0	603	903	0
266	6	0.304304	1.34812	12.0224	852.998	145.761	67.7474	200	300	0	0	0	0	0	0	0	200	903	0	0	0	0	0	0	0	603	903	0
266	7	0.762068	1.50071	10.1913	303.682	-220.45	-161.134	200	300	0	0	0	0	0	0	0	200	903	0	0	0	0	0	0	0	603	903	0
266	8	0.304304	1.34812	10.8017	120.576	-281.485	159.3	200	300	0	0	0	0	0	0	0	200	903	0	0	0	0	0	0	0	603	903	0
266	9	0	0	0	0	0	0	200	300	0	0	0	0	0	0	0	200	903	0	0	0	0	0	0	0	603	903	0
267	0	0.304304	2.72141	11.412	395.235	-220.45	-252.687	200	300	0	0	0	0	0	0	0	200	903	0	0	0	0	0	0	0	603	903	0
267	1	0.60948	1.19554	12.0224	212.129	23.6906	-435.793	200	300	0	0	0	0	0	0	0	200	903	0	0	0	0	0	0	0	603	903	0
267	2	0.762068	2.26365	11.7172	669.893	206.796	-115.358	200	300	0	0	0	0	0	0	0	200	903	0	0	0	0	0	0	0	603	903	0
267	3	-0.15346	0.280009	10.4965	1036.1	23.6906	-69.5817	200	300	0	0	0	0	0	0	0	200	903	0	0	0	0	0	0	0	603	903	0
267	4	0	0	0	0	0	0	200	300	0	0	0	0	0	0	0	200	903	0	0	0	0	0	0	0	603	903	0
267	5	1.06724	1.80589	9.88614	669.893	-98.3797	-344.24	200	300	0	0	0	0	0	0	0	200	903	0	0	0	0	0	0	0	603	903	0
267	6	-0.000871718	1.34812	10.1913	120.576	-220.45	-115.358	200	300	0	0	0	0	0	0	0	200	903	0	0	0	0	0	0	0	603	903	0
267	7	0.60948	1.6533	11.412	486.787	-220.45	-115.358	200	300	0	0	0	0	0	0	0	200	903	0	0	0	0	0	0	0	603	903	0
267	8	0.60948	2.11106	12.0224	486.787	-37.3445	-206.911	200	300	0	0	0	0	0	0	0	200	903	0	0	0	0	0	0	0	603	903	0
267	9	0.762068	1.80589	9.88614	212.129	-159.415	-206.911	200	300	0	0	0	0	0	0	0	200	903	0	0	0	0	0	0	0	603	903	0
268	0	0	0	0	0	0	0	200	300	0	0	0	0	0	0	0	200	903	0	0	0	0	0	0	0	603	903	0
268	1	-0.000871718	2.11106	9.88614	486.787	84.7258	-161.134	200	300	0	0	0	0	0	0	0	200	903	0	0	0	0	0	0	0	603	903	0
268	2	-0.458635	1.50071	10.8017	761.445	-98.3797	-161.134	200	300	0	0	0	0	0	0	0	200	903	0	0	0	0	0	0	0	603	903	0
268	3	0.304304	1.04295	14.4638	578.34	-37.3445	-69.5817	200	300	0	0	0	0	0	0	0	200	903	0	0	0	0	0	0	0	603	903	0
268	4	1.06724	0.737772	11.1068	669.893	267.831	-252.687	200	300	0	0	0	0	0	0	0	200	903	0	0	0	0	0	0	0	603	903	0
268	5	0.60948	1.50071	10.1913	486.787	-37.3445	-161.134	200	300	0	0	0	0	0	0	0	200	903	0	0	0	0	0	0	0	603	903	0
268	6	0.304304	1.34812	12.9379	395.235	-220.45	-206.911	200	300	0	0	0	0	0	0	0	200	903	0	0	0	0	0	0	0	603	903	0
268	7	-0.306047	2.11106	9.88614	578.34	-37.3445	21.9711	200	300	0	0	0	0	0	0	0	200	903	0	0	0	0	0	0	0	603	903	0
268	8	1.83018	1.50071	11.412	578.34	-37.3445	-115.358	200	300	0	0	0	0	0	0	0	200	903	0	0	0	0	0	0	0	603	903	0
268	9	-0.611223	2.56883	11.1068	1127.66	-342.52	-298.464	200	300	0	0	0	0	0	0	0	200	903	0	0	0	0	0	0	0	603	903	0
269	0	0.304304	2.26365	10.8017	761.445	-98.3797	-69.5817	200	300	0	0	0	0	0	0	0	200	903	0	0	0	0	0	0	0	603	903	0
269	1	0	0	0	0	0	0	200	300	0	0	0	0	0	0	0	200	903	0	0	0	0	0	0	0	603	903	0
269	2	0	0	0	0	0	0	200	300	0	0	0	0	0	0	0	200	903	0	0	0	0	0	0	0	603	903	0
269	3	0	0	0	0	0	0	200	300	0	0	0	0	0	0	0	200	903	0	0	0	0	0	0	0	603	903	0
269	4	1.21983	1.34812	12.0224	29.0235	-159.415	159.3	200	300	0	0	0	0	0	0	0	200	903	0	0	0	0	0	0	0	603	903	0
269	5	0.456892	2.41624	10.4965	578.34	-464.591	67.7474	200	300	0	0	0	0	0	0	0	200	903	0	0	0	0	0	0	0	603	903	0
269	6	0.304304	1.80589	11.1068	-62.5292	-159.415	-252.687	200	300	0	0	0	0	0	0	0	200	903	0	0	0	0	0	0	0	603	903	0
269	7	0	0	0	0	0	0	200	300	0	0	0	0	0	0	0	200	903	0	0	0	0	0	0	0	603	903	0
269	8	0.914656	1.95848	10.8017	669.893	-220.45	-115.358	200	300	0	0	0	0	0	0	0	200	903	0	0	0	0	0	0	0	603	903	0
269	9	0	0	0	0	0	0	200	300	0	0	0	0	0	0	0	200	903	0	0	0	0	0	0	0	603	903	0
270	0	-0.000871718	1.34812	11.1068	486.787	-403.556	21.9711	200	300	0	0	0	0	0	0	0	200	903	0	0	0	0	0	0	0	603	903	0
270	1	-0.306047	2.11106	10.8017	852.998	-342.52	159.3	200	300	0	0	0	0	0	0	0	200	903	0	0	0	0	0	0	0	603	903	0
270	2	0.304304	1.50071	10.8017	120.576	23.6906	-206.911	200	300	0	0	0	0	0	0	0	200	903	0	0	0	0	0	0	0	603	903	0
270	3	0	0	0	0	0	0	200	300	0	0	0	0	0	0	0	200	903	0	0	0	0	0	0	0	603	903	0
270	4	0	0	0	0	0	0	200	300	0	0	0	0	0	0	0	200	903	0	0	0	0	0	0	0	603	903	0
270	5	0	0	0	0	0	0	200	300	0	0	0	0	0	0	0	200	903	0	0	0	0	0	0	0	603	903	0
270	6	0.151716	1.6533	11.7172	669.893	-98.3797	-23.8053	200	300	0	0	0	0	0	0	0	200	903	0	0	0	0	0	0	0	603	903	0
270	7	-0.000871718	1.6533	12.9379	1127.66	23.6906	21.9711	200	300	0	0	0	0	0	0	0	200	903	0	0	0	0	0	0	0	603	903	0
270	8	0.304304	1.19554	11.7172	669.893	84.7258	-252.687	200	300	0	0	0	0	0	0	0	200	903	0	0	0	0	0	0	0	603	903	0
270	9	0.304304	1.80589	10.4965	212.129	-159.415	-298.464	200	300	0	0	0	0	0	0	0	200	903	0	0	0	0	0	0	0	603	903	0
271	0	0.456892	1.19554	12.6327	120.576	-37.3445	21.9711	200	300	0	0	0	0	0	0	0	200	903	0	0	0	0	0	0	0	603	903	0
271	1	-0.000871718	2.11106	10.4965	486.787	-525.626	-206.911	200	300	0	0	0	0	0	0	0	200	903	0	0	0	0	0	0	0	603	903	0
271	2	1.06724	1.50071	11.412	212.129	-220.45	-298.464	200	300	0	0	0	0	0	0	0	200	903	0	0	0	0	0	0	0	603	903	0
271	3	-0.000871718	2.41624	9.88614	944.551	-37.3445	-252.687	200	300	0	0	0	0	0	0	0	200	903	0	0	0	0	0	0	0	603	903	0
271	4	0.304304	1.95848	11.412	852.998	-281.485	-435.793	200	300	0	0	0	0	0	0	0	200	903	0	0	0	0	0	0	0	603	903	0
271	5	0	0	0	0	0	0	200	300	0	0	0	0	0	0	0	200	903	0	0	0	0	0	0	0	603	903	0
271	6	-0.000871718	1.80589	10.1913	486.787	-37.3445	-69.5817	200	300	0	0	0	0	0	0	0	200	903	0	0	0	0	0	0	0	603	903	0
271	7	0	0	0	0	0	0	200	300	0	0	0	0	0	0	0	200	903	0	0	0	0	0	0	0	603	903	0
271	8	1.98277	1.04295	9.88614	-62.5292	-342.52	21.9711	200	300	0	0	0	0	0	0	0	200	903	0	0	0	0	0	0	0	603	903	0
271	9	-0.306047	2.11106	10.8017	1310.76	-37.3445	159.3	200	300	0	0	0	0	0	0	0	200	903	0	0	0	0	0	0	0	603	903	0
272	0	0.762068	2.11106	11.412	212.129	-159.415	-69.5817	200	300	0	0	0	0	0	0	0	200	903	0	0	0	0	0	0	0	603	903	0
272	1	2.28795	1.95848	10.8017	486.787	206.796	-161.134	200	300	0	0	0	0	0	0	0	200	903	0	0	0	0	0	0	0	603	903	0
272	2	0	0	0	0	0	0	200	300	0	0	0	0	0	0	0	200	903	0	0	0	0	0	0	0	603	903	0
272	3	0	0	0	0	0	0	200	300	0	0	0	0	0	0	0	200	903	0	0	0	0	0	0	0	603	903	0
272	4	1.21983	1.50071	11.412	761.445	-98.3797	-298.464	200	300	0	0	0	0	0	0	0	200	903	0	0	0	0	0	0	0	603	903	0
272	5	-0.15346	0.127421	10.1913	669.893	23.6906	-252.687	200	300	0	0	0	0	0	0	0	200	903	0	0	0	0	0	0	0	603	903	0
272	6	-0.000871718	1.34812	12.3275	303.682	-220.45	-298.464	200	300	0	0	0	0	0	0	0	200	903	0	0	0	0	0	0	0	603	903	0
272	7	1.6776	1.04295	9.88614	395.235	-525.626	-69.5817	200	300	0	0	0	0	0	0	0	200	903	0	0	0	0	0	0	0	603	903	0
272	8	0	0	0	0	0	0	200	300	0	0	0	0	0	0	0	200	903	0	0	0	0	0	0	0	603	903	0
272	9	0	0	0	0	0	0	200	300	0	0	0	0	0	0	0	200	903	0	0	0	0	0	0	0	603	903	0
273	0	0	0	0	0	0	0	200	300	0	0	0	0	0	0	0	200	903	0	0	0	0	0	0	0	603	903	0
273	1	-0.15346	1.80589	9.88614	486.787	-159.415	113.524	200	300	0	0	0	0	0	0	0	200	903	0	0	0	0	0	0	0	603	903	0
273	2	0.914656	1.19554	11.1068	578.34	-98.3797	-115.358	200	300	0	0	0	0	0	0	0	200	903	0	0	0	0	0	0	0	603	903	0
273	3	1.6776	1.80589	12.3275	852.998	267.831	67.7474	200	300	0	0	0	0	0	0	0	200	903	0	0	0	0	0	0	0	603	903	0
273	4	0	0	0	0	0	0	200	300	0	0	0	0	0	0	0	200	903	0	0	0	0	0	0	0	603	903	0
273	5	1.06724	1.80589	11.7172	395.235	-37.3445	296.629	200	300	0	0	0	0	0	0	0	200	903	0	0	0	0	0	0	0	603	903	0
273	6	-0.15346	1.6533	10.1913	578.34	-98.3797	-298.464	200	300	0	0	0	0	0	0	0	200	903	0	0	0	0	0	0	0	603	903	0
273	7	-0.916399	2.26365	11.1068	212.129	145.761	-344.24	200	300	0	0	0	0	0	0	0	200	903	0	0	0	0	0	0	0	603	903	0
273	8	0.304304	0.89036	12.6327	395.235	-220.45	-206.911	200	300	0	0	0	0	0	0	0	200	903	0	0	0	0	0	0	0	603	903	0
273	9	0.914656	2.26365	11.412	944.551	-525.626	-69.5817	200	300	0	0	0	0	0	0	0	200	903	0	0	0	0	0	0	0	603	903	0
274	0	0.304304	1.50071	9.88614	1219.21	-403.556	-527.345	200	300	0	0	0	0	0	0	0	200	903	0	0	0	0	0	0	0	603	903	0
274	1	0.60948	1.19554	12.6327	944.551	84.7258	-252.687	200	300	0	0	0	0	0	0	0	200	903	0	0	0	0	0	0	0	603	903	0
274	2	-0.000871718	0.585184	10.4965	761.445	-220.45	159.3	200	300	0	0	0	0	0	0	0	200	903	0	0	0	0	0	0	0	603	903	0
274	3	-0.458635	1.04295	10.8017	120.576	-37.3445	21.9711	200	300	0	0	0	0	0	0	0	200	903	0	0	0	0	0	0	0	603	903	0
274	4	0.456892	1.80589	12.6327	303.682	-403.556	-115.358	200	300	0	0	0	0	0	0	0	200	903	0	0	0	0	0	0	0	603	903	0
274	5	0.762068	1.95848	11.1068	303.682	84.7258	-161.134	200	300	0	0	0	0	0	0	0	200	903	0	0	0	0	0	0	0	603	903	0
274	6	0	0	0	0	0	0	200	300	0	0	0	0	0	0	0	200	903	0	0	0	0	0	0	0	603	903	0
274	7	1.21983	2.56883	11.1068	120.576	23.6906	-252.687	200	300	0	0	0	0	0	0	0	200	903	0	0	0	0	0	0	0	603	903	0
274	8	0	0	0	0	0	0	200	300	0	0	0	0	0	0	0	200	903	0	0	0	0	0	0	0	603	903	0
274	9	0	0	0	0	0	0	200	300	0	0	0	0	0	0	0	200	903	0	0	0	0	0	0	0	603	903	0
275	0	-0.458635	1.50071	12.9379	761.445	-220.45	-69.5817	200	300	0	0	0	0	0	0	0	200	903	0	0	0	0	0	0	0	603	903	0
275	1	0.762068	1.50071	11.7172	303.682	-37.3445	-252.687	200	300	0	0	0	0	0	0	0	200	903	0	0	0	0	0	0	0	603	903	0
275	2	0.762068	1.6533	10.1913	303.682	-159.415	-435.793	200	300	0	0	0	0	0	0	0	200	903	0	0	0	0	0	0	0	603	903	0
275	3	0.151716	1.95848	12.3275	120.576	-342.52	-115.358	200	300	0	0	0	0	0	0	0	200	903	0	0	0	0	0	0	0	603	903	0
275	4	0	0	0	0	0	0	200	300	0	0	0	0	0	0	0	200	903	0	0	0	0	0	0	0	603	903	0
275	5	-0.458635	1.95848	12.0224	578.34	23.6906	-161.134	200	300	0	0	0	0	0	0	0	200	903	0	0	0	0	0	0	0	603	903	0
275	6	0.151716	1.6533	12.3275	761.445	206.796	-298.464	200	300	0	0	0	0	0	0	0	200	903	0	0	0	0	0	0	0	603	903	0
275	7	-0.611223	1.19554	11.412	1493.87	-342.52	159.3	200	300	0	0	0	0	0	0	0	200	903	0	0	0	0	0	0	0	603	903	0
275	8	0	0	0	0	0	0	200	300	0	0	0	0	0	0	0	200	903	0	0	0	0	0	0	0	603	903	0
275	9	0.914656	1.19554	12.0224	395.235	23.6906	159.3	200	300	0	0	0	0	0	0	0	200	903	0	0	0	0	0	0	0	603	903	0
276	0	0	0	0	0	0	0	200	300	0	0	0	0	0	0	0	200	903	0	0	0	0	0	0	0	603	903	0
276	1	-0.15346	2.11106	10.8017	761.445	-281.485	159.3	200	300	0	0	0	0	0	0	0	200	903	0	0	0	0	0	0	0	603	903	0
276	2	1.21983	2.56883	12.0224	303.682	-159.415	-161.134	200	300	0	0	0	0	0	0	0	200	903	0	0	0	0	0	0	0	603	903	0
276	3	0.762068	1.95848	12.0224	578.34	84.7258	-298.464	200	300	0	0	0	0	0	0	0	200	903	0	0	0	0	0	0	0	603	903	0
276	4	0	0	0	0	0	0	200	300	0	0	0	0	0	0	0	200	903	0	0	0	0	0	0	0	603	903	0
276	5	-0.458635	1.6533	9.88614	1127.66	-281.485	-161.134	200	300	0	0	0	0	0	0	0	200	903	0	0	0	0	0	0	0	603	903	0
276	6	-0.000871718	1.80589	10.4965	1493.87	-220.45	-161.134	200	300	0	0	0	0	0	0	0	200	903	0	0	0	0	0	0	0	603	903	0
276	7	-0.000871718	1.34812	11.7172	852.998	-403.556	-298.464	200	300	0	0	0	0	0	0	0	200	903	0	0	0	0	0	0	0	603	903	0
276	8	0	0	0	0	0	0	200	300	0	0	0	0	0	0	0	200	903	0	0	0	0	0	0	0	603	903	0
276	9	1.06724	1.34812	9.88614	-62.5292	-342.52	-298.464	200	300	0	0	0	0	0	0	0	200	903	0	0	0	0	0	0	0	603	903	0
277	0	0	0	0	0	0	0	200	300	0	0	0	0	0	0	0	200	903	0	0	0	0	0	0	0	603	903	0
277	1	-0.306047	1.80589	9.88614	-245.635	-342.52	-298.464	200	300	0	0	0	0	0	0	0	200	903	0	0	0	0	0	0	0	603	903	0
277	2	-0.611223	2.11106	10.4965	212.129	145.761	159.3	200	300	0	0	0	0	0	0	0	200	903	0	0	0	0	0	0	0	603	903	0
277	3	-0.15346	2.41624	14.1586	852.998	-159.415	67.7474	200	300	0	0	0	0	0	0	0	200	903	0	0	0	0	0	0	0	603	903	0
277	4	1.37242	1.34812	10.4965	669.893	206.796	-69.5817	200	300	0	0	0	0	0	0	0	200	903	0	0	0	0	0	0	0	603	903	0
277	5	0	0	0	0	0	0	200	300	0	0	0	0	0	0	0	200	903	0	0	0	0	0	0	0	603	903	0
277	6	-0.000871718	0.127421	11.1068	486.787	267.831	-206.911	200	300	0	0	0	0	0	0	0	200	903	0	0	0	0	0	0	0	603	903	0
277	7	0	0	0	0	0	0	200	300	0	0	0	0	0	0	0	200	903	0	0	0	0	0	0	0	603	903	0
277	8	-0.000871718	1.80589	11.412	578.34	206.796	-435.793	200	300	0	0	0	0	0	0	0	200	903	0	0	0	0	0	0	0	603	903	0
277	9	-0.000871718	2.11106	11.1068	29.0235	-159.415	159.3	200	300	0	0	0	0	0	0	0	200	903	0	0	0	0	0	0	0	603	903	0
278	0	0.456892	2.26365	10.4965	486.787	-98.3797	-252.687	200	300	0	0	0	0	0	0	0	200	903	0	0	0	0	0	0	0	603	903	0
278	1	0	0	0	0	0	0	200	300	0	0	0	0	0	0	0	200	903	0	0	0	0	0	0	0	603	903	0
278	2	0	0	0	0	0	0	200	300	0	0	0	0	0	0	0	200	903	0	0	0	0	0	0	0	603	903	0
278	3	0	0	0	0	0	0	200	300	0	0	0	0	0	0	0	200	903	0	0	0	0	0	0	0	603	903	0
278	4	-0.916399	1.6533	9.88614	395.235	-98.3797	-115.358	200	300	0	0	0	0	0	0	0	200	903	0	0	0	0	0	0	0	603	903	0
278	5	1.52501	1.04295	10.8017	669.893	-403.556	-206.911	200	300	0	0	0	0	0	0	0	200	903	0	0	0	0	0	0	0	603	903	0
278	6	1.06724	1.34812	11.1068	486.787	-37.3445	21.9711	200	300	0	0	0	0	0	0	0	200	903	0	0	0	0	0	0	0	603	903	0
278	7	0.914656	1.50071	9.88614	29.0235	-37.3445	-161.134	200	300	0	0	0	0	0	0	0	200	903	0	0	0	0	0	0	0	603	903	0
278	8	1.37242	2.874	12.6327	303.682	23.6906	-69.5817	200	300	0	0	0	0	0	0	0	200	903	0	0	0	0	0	0	0	603	903	0
278	9	-0.000871718	2.26365	9.88614	212.129	-281.485	-390.016	200	300	0	0	0	0	0	0	0	200	903	0	0	0	0	0	0	0	603	903	0
279	0	-0.15346	2.72141	10.4965	212.129	-37.3445	67.7474	200	300	0	0	0	0	0	0	0	200	903	0	0	0	0	0	0	0	603	903	0
279	1	-0.458635	2.56883	12.9379	852.998	-342.52	205.077	200	300	0	0	0	0	0	0	0	200	903	0	0	0	0	0	0	0	603	903	0
279	2	0.914656	1.6533	11.7172	1036.1	-464.591	67.7474	200	300	0	0	0	0	0	0	0	200	903	0	0	0	0	0	0	0	603	903	0
279	3	0	0	0	0	0	0	200	300	0	0	0	0	0	0	0	200	903	0	0	0	0	0	0	0	603	903	0
279	4	0	0	0	0	0	0	200	300	0	0	0	0	0	0	0	200	903	0	0	0	0	0	0	0	603	903	0
279	5	0	0	0	0	0	0	200	300	0	0	0	0	0	0	0	200	903	0	0	0	0	0	0	0	603	903	0
279	6	1.6776	0.89036	10.1913	303.682	145.761	-115.358	200	300	0	0	0	0	0	0	0	200	903	0	0	0	0	0	0	0	603	903	0
279	7	-0.306047	1.80589	10.8017	29.0235	-98.3797	-206.911	200	300	0	0	0	0	0	0	0	200	903	0	0	0	0	0	0	0	603	903	0
279	8	1.06724	1.50071	11.412	395.235	-98.3797	21.9711	200	300	0	0	0	0	0	0	0	200	903	0	0	0	0	0	0	0	603	903	0
279	9	2.74571	1.95848	10.1913	578.34	-220.45	-115.358	200	300	0	0	0	0	0	0	0	200	903	0	0	0	0	0	0	0	603	903	0
280	0	0.456892	2.26365	10.1913	486.787	145.761	21.9711	200	300	0	0	0	0	0	0	0	200	903	0	0	0	0	0	0	0	603	903	0
280	1	-0.306047	1.6533	10.4965	1219.21	-98.3797	-161.134	200	300	0	0	0	0	0	0	0	200	903	0	0	0	0	0	0	0	603	903	0
280	2	-0.611223	1.80589	11.412	486.787	23.6906	-298.464	200	300	0	0	0	0	0	0	0	200	903	0	0	0	0	0	0	0	603	903	0
280	3	-0.611223	1.6533	11.1068	578.34	-37.3445	-252.687	200	300	0	0	0	0	0	0	0	200	903	0	0	0	0	0	0	0	603	903	0
280	4	0.914656	1.6533	11.7172	852.998	-281.485	-206.911	200	300	0	0	0	0	0	0	0	200	903	0	0	0	0	0	0	0	603	903	0
280	5	0.762068	1.95848	11.1068	395.235	-98.3797	-344.24	200	300	0	0	0	0	0	0	0	200	903	0	0	0	0	0	0	0	603	903	0
280	6	0	0	0	0	0	0	200	300	0	0	0	0	0	0	0	200	903	0	0	0	0	0	0	0	603	903	0
280	7	-0.306047	2.26365	9.88614	486.787	-342.52	-252.687	200	300	0	0	0	0	0	0	0	200	903	0	0	0	0	0	0	0	603	903	0
280	8	-0.611223	2.56883	10.1913	395.235	-647.696	-69.5817	200	300	0	0	0	0	0	0	0	200	903	0	0	0	0	0	0	0	603	903	0
280	9	-0.000871718	2.11106	10.8017	120.576	-98.3797	113.524	200	300	0	0	0	0	0	0	0	200	903	0	0	0	0	0	0	0	603	903	0
281	0	0.456892	1.04295	11.1068	669.893	-98.3797	-206.911	200	300	0	0	0	0	0	0	0	200	903	0	0	0	0	0	0	0	603	903	0
281	1	0.60948	1.50071	11.7172	852.998	23.6906	-252.687	200	300	0	0	0	0	0	0	0	200	903	0	0	0	0	0	0	0	603	903	0
281	2	0	0	0	0	0	0	200	300	0	0	0	0	0	0	0	200	903	0	0	0	0	0	0	0	603	903	0
281	3	0.762068	1.6533	10.4965	578.34	-159.415	-23.8053	200	300	0	0	0	0	0	0	0	200	903	0	0	0	0	0	0	0	603	903	0
281	4	-0.306047	2.41624	10.4965	669.893	84.7258	-161.134	200	300	0	0	0	0	0	0	0	200	903	0	0	0	0	0	0	0	603	903	0
281	5	-0.000871718	2.41624	11.412	395.235	-37.3445	-344.24	200	300	0	0	0	0	0	0	0	200	903	0	0	0	0	0	0	0	603	903	0
281	6	1.37242	2.26365	12.0224	303.682	-159.415	-298.464	200	300	0	0	0	0	0	0	0	200	903	0	0	0	0	0	0	0	603	903	0
281	7	0.60948	2.41624	11.1068	578.34	23.6906	-252.687	200	300	0	0	0	0	0	0	0	200	903	0	0	0	0	0	0	0	603	903	0
281	8	0	0	0	0	0	0	200	300	0	0	0	0	0	0	0	200	903	0	0	0	0	0	0	0	603	903	0
281	9	1.52501	2.11106	11.1068	1036.1	-37.3445	-252.687	200	300	0	0	0	0	0	0	0	200	903	0	0	0	0	0	0	0	603	903	0
282	0	-0.763811	1.50071	9.88614	852.998	84.7258	-298.464	200	300	0	0	0	0	0	0	0	200	903	0	0	0	0	0	0	0	603	903	0
282	1	0	0	0	0	0	0	200	300	0	0	0	0	0	0	0	200	903	0	0	0	0	0	0	0	603	903	0
282	2	-0.916399	2.11106	11.412	578.34	-464.591	-206.911	200	300	0	0	0	0	0	0	0	200	903	0	0	0	0	0	0	0	603	903	0
282	3	0.60948	2.26365	9.88614	120.576	-220.45	159.3	200	300	0	0	0	0	0	0	0	200	903	0	0	0	0	0	0	0	603	903	0
282	4	0	0	0	0	0	0	200	300	0	0	0	0	0	0	0	200	903	0	0	0	0	0	0	0	603	903	0
282	5	0	0	0	0	0	0	200	300	0	0	0	0	0	0	0	200	903	0	0	0	0	0	0	0	603	903	0
282	6	0	0	0	0	0	0	200	300	0	0	0	0	0	0	0	200	903	0	0	0	0	0	0	0	603	903	0
282	7	1.21983	1.50071	11.412	669.893	-98.3797	-115.358	200	300	0	0	0	0	0	0	0	200	903	0	0	0	0	0	0	0	603	903	0
282	8	-1.06899	1.6533	11.412	120.576	84.7258	-206.911	200	300	0	0	0	0	0	0	0	200	903	0	0	0	0	0	0	0	603	903	0
282	9	1.06724	1.6533	10.8017	212.129	23.6906	-161.134	200	300	0	0	0	0	0	0	0	200	903	0	0	0	0	0	0	0	603	903	0
283	0	-0.000871718	2.11106	10.4965	578.34	-37.3445	-161.134	200	300	0	0	0	0	0	0	0	200	903	0	0	0	0	0	0	0	603	903	0
283	1	1.06724	2.56883	9.88614	303.682	23.6906	-115.358	200	300	0	0	0	0	0	0	0	200	903	0	0	0	0	0	0	0	603	903	0
283	2	0	0	0	0	0	0	200	300	0	0	0	0	0	0	0	200	903	0	0	0	0	0	0	0	603	903	0
283	3	1.21983	3.02659	11.7172	1127.66	23.6906	-161.134	200	300	0	0	0	0	0	0	0	200	903	0	0	0	0	0	0	0	603	903	0
283	4	-0.611223	1.50071	11.1068	669.893	-37.3445	-252.687	200	300	0	0	0	0	0	0	0	200	903	0	0	0	0	0	0	0	603	903	0
283	5	0.762068	1.34812	9.88614	761.445	-342.52	-69.5817	200	300	0	0	0	0	0	0	0	200	903	0	0	0	0	0	0	0	603	903	0
283	6	0	0	0	0	0	0	200	300	0	0	0	0	0	0	0	200	903	0	0	0	0	0	0	0	603	903	0
283	7	0	0	0	0	0	0	200	300	0	0	0	0	0	0	0	200	903	0	0	0	0	0	0	0	603	903	0
283	8	0	0	0	0	0	0	200	300	0	0	0	0	0	0	0	200	903	0	0	0	0	0	0	0	603	903	0
283	9	0	0	0	0	0	0	200	300	0	0	0	0	0	0	0	200	903	0	0	0	0	0	0	0	603	903	0
284	0	-0.15346	2.41624	11.1068	-62.5292	-98.3797	-161.134	200	300	0	0	0	0	0	0	0	200	903	0	0	0	0	0	0	0	603	903	0
284	1	0.762068	2.26365	11.412	486.787	-98.3797	-115.358	200	300	0	0	0	0	0	0	0	200	903	0	0	0	0	0	0	0	603	903	0
284	2	2.74571	2.26365	10.1913	578.34	-98.3797	-161.134	200	300	0	0	0	0	0	0	0	200	903	0	0	0	0	0	0	0	603	903	0
284	3	0	0	0	0	0	0	200	300	0	0	0	0	0	0	0	200	903	0	0	0	0	0	0	0	603	903	0
284	4	0	0	0	0	0	0	200	300	0	0	0	0	0	0	0	200	903	0	0	0	0	0	0	0	603	903	0
284	5	0	0	0	0	0	0	200	300	0	0	0	0	0	0	0	200	903	0	0	0	0	0	0	0	603	903	0
284	6	-0.611223	1.50071	10.8017	395.235	-159.415	-298.464	200	300	0	0	0	0	0	0	0	200	903	0	0	0	0	0	0	0	603	903	0
284	7	0.304304	1.95848	10.4965	1402.31	267.831	-435.793	200	300	0	0	0	0	0	0	0	200	903	0	0	0	0	0	0	0	603	903	0
284	8	0.304304	1.95848	13.8534	395.235	-281.485	-298.464	200	300	0	0	0	0	0	0	0	200	903	0	0	0	0	0	0	0	603	903	0
284	9	0.762068	1.34812	9.88614	212.129	23.6906	296.629	200	300	0	0	0	0	0	0	0	200	903	0	0	0	0	0	0	0	603	903	0
285	0	0.304304	1.80589	10.1913	395.235	-220.45	-252.687	200	300	0	0	0	0	0	0	0	200	903	0	0	0	0	0	0	0	603	903	0
285	1	0	0	0	0	0	0	200	300	0	0	0	0	0	0	0	200	903	0	0	0	0	0	0	0	603	903	0
285	2	-0.306047	1.50071	10.1913	303.682	84.7258	-252.687	200	300	0	0	0	0	0	0	0	200	903	0	0	0	0	0	0	0	603	903	0
285	3	0.914656	1.04295	10.4965	578.34	-220.45	-23.8053	200	300	0	0	0	0	0	0	0	200	903	0	0	0	0	0	0	0	603	903	0
285	4	3.05089	1.50071	10.4965	-245.635	23.6906	-23.8053	200	300	0	0	0	0	0	0	0	200	903	0	0	0	0	0	0	0	603	903	0
285	5	0.914656	1.34812	9.88614	212.129	-281.485	-161.134	200	300	0	0	0	0	0	0	0	200	903	0	0	0	0	0	0	0	603	903	0
285	6	-0.306047	2.72141	10.1913	669.893	-220.45	159.3	200	300	0	0	0	0	0	0	0	200	903	0	0	0	0	0	0	0	603	903	0
285	7	1.06724	2.11106	12.3275	212.129	-98.3797	159.3	200	300	0	0	0	0	0	0	0	200	903	0	0	0	0	0	0	0	603	903	0
285	8	-0.306047	1.50071	11.1068	212.129	23.6906	159.3	200	300	0	0	0	0	0	0	0	200	903	0	0	0	0	0	0	0	603	903	0
285	9	0.304304	2.11106	10.8017	120.576	328.866	-115.358	200	300	0	0	0	0	0	0	0	200	903	0	0	0	0	0	0	0	603	903	0
286	0	2.13536	2.72141	10.8017	944.551	-403.556	67.7474	200	300	0	0	0	0	0	0	0	200	903	0	0	0	0	0	0	0	603	903	0
286	1	-0.15346	2.26365	9.88614	669.893	-98.3797	-115.358	200	300	0	0	0	0	0	0	0	200	903	0	0	0	0	0	0	0	603	903	0
286	2	0	0	0	0	0	0	200	300	0	0	0	0	0	0	0	200	903	0	0	0	0	0	0	0	603	903	0
286	3	1.98277	1.6533	11.1068	761.445	-220.45	21.9711	200	300	0	0	0	0	0	0	0	200	903	0	0	0	0	0	0	0	603	903	0
286	4	-0.15346	1.19554	11.7172	669.893	23.6906	205.077	200	300	0	0	0	0	0	0	0	200	903	0	0	0	0	0	0	0	603	903	0
286	5	1.06724	1.50071	11.1068	120.576	23.6906	-69.5817	200	300	0	0	0	0	0	0	0	200	903	0	0	0	0	0	0	0	603	903	0
286	6	0	0	0	0	0	0	200	300	0	0	0	0	0	0	0	200	903	0	0	0	0	0	0	0	603	903	0
286	7	0	0	0	0	0	0	200	300	0	0	0	0	0	0	0	200	903	0	0	0	0	0	0	0	603	903	0
286	8	0	0	0	0	0	0	200	300	0	0	0	0	0	0	0	200	903	0	0	0	0	0	0	0	603	903	0
286	9	1.98277	2.26365	12.3275	669.893	-220.45	-390.016	200	300	0	0	0	0	0	0	0	200	903	0	0	0	0	0	0	0	603	903	0
287	0	0.151716	2.41624	10.1913	578.34	-159.415	-23.8053	200	300	0	0	0	0	0	0	0	200	903	0	0	0	0	0	0	0	603	903	0
287	1	0.151716	1.34812	11.1068	852.998	-159.415	-115.358	200	300	0	0	0	0	0	0	0	200	903	0	0	0	0	0	0	0	603	903	0
287	2	0.60948	1.95848	10.4965	852.998	84.7258	-161.134	200	300	0	0	0	0	0	0	0	200	903	0	0	0	0	0	0	0	603	903	0
287	3	0.60948	0.737772	10.4965	944.551	-37.3445	-344.24	200	300	0	0	0	0	0	0	0	200	903	0	0	0	0	0	0	0	603	903	0
287	4	0	0	0	0	0	0	200	300	0	0	0	0	0	0	0	200	903	0	0	0	0	0	0	0	603	903	0
287	5	0	0	0	0	0	0	200	300	0	0	0	0	0	0	0	200	903	0	0	0	0	0	0	0	603	903	0
287	6	-0.000871718	1.95848	9.88614	212.129	23.6906	-298.464	200	300	0	0	0	0	0	0	0	200	903	0	0	0	0	0	0	0	603	903	0
287	7	-0.000871718	-0.0251671	11.412	-154.082	-37.3445	-115.358	200	300	0	0	0	0	0	0	0	200	903	0	0	0	0	0	0	0	603	903	0
287	8	1.06724	2.11106	10.4965	486.787	-281.485	159.3	200	300	0	0	0	0	0	0	0	200	903	0	0	0	0	0	0	0	603	903	0
287	9	0	0	0	0	0	0	200	300	0	0	0	0	0	0	0	200	903	0	0	0	0	0	0	0	603	903	0
288	0	1.21983	1.50071	11.7172	578.34	-281.485	-115.358	200	300	0	0	0	0	0	0	0	200	903	0	0	0	0	0	0	0	603	903	0
288	1	-0.15346	1.34812	10.1913	120.576	-342.52	-206.911	200	300	0	0	0	0	0	0	0	200	903	0	0	0	0	0	0	0	603	903	0
288	2	-0.763811	1.80589	11.7172	212.129	23.6906	-252.687	200	300	0	0	0	0	0	0	0	200	903	0	0	0	0	0	0	0	603	903	0
288	3	-0.306047	1.34812	12.9379	303.682	-159.415	-298.464	200	300	0	0	0	0	0	0	0	200	903	0	0	0	0	0	0	0	603	903	0
288	4	0.456892	2.72141	11.1068	944.551	-37.3445	-206.911	200	300	0	0	0	0	0	0	0	200	903	0	0	0	0	0	0	0	603	903	0
288	5	0.60948	2.41624	9.88614	303.682	84.7258	-344.24	200	300	0	0	0	0	0	0	0	200	903	0	0	0	0	0	0	0	603	903	0
288	6	1.21983	2.41624	11.7172	578.34	-159.415	-252.687	200	300	0	0	0	0	0	0	0	200	903	0	0	0	0	0	0	0	603	903	0
288	7	-0.611223	2.11106	9.88614	486.787	-37.3445	-344.24	200	300	0	0	0	0	0	0	0	200	903	0	0	0	0	0	0	0	603	903	0
288	8	-0.306047	1.34812	10.4965	669.893	-220.45	-161.134	200	300	0	0	0	0	0	0	0	200	903	0	0	0	0	0	0	0	603	903	0
288	9	-0.15346	1.04295	12.9379	395.235	-220.45	-206.911	200	300	0	0	0	0	0	0	0	200	903	0	0	0	0	0	0	0	603	903	0
289	0	0	0	0	0	0	0	200	300	0	0	0	0	0	0	0	200	903	0	0	0	0	0	0	0	603	903	0
289	1	0	0	0	0	0	0	200	300	0	0	0	0	0	0	0	200	903	0	0	0	0	0	0	0	603	903	0
289	2	0	0	0	0	0	0	200	300	0	0	0	0	0	0	0	200	903	0	0	0	0	0	0	0	603	903	0
289	3	0	0	0	0	0	0	200	300	0	0	0	0	0	0	0	200	903	0	0	0	0	0	0	0	603	903	0
289	4	2.13536	0.89036	11.412	395.235	-281.485	-252.687	200	300	0	0	0	0	0	0	0	200	903	0	0	0	0	0	0	0	603	903	0
289	5	0.304304	1.95848	12.6327	761.445	-37.3445	-252.687	200	300	0	0	0	0	0	0	0	200	903	0	0	0	0	0	0	0	603	903	0
289	6	0.60948	2.11106	11.1068	578.34	206.796	-206.911	200	300	0	0	0	0	0	0	0	200	903	0	0	0	0	0	0	0	603	903	0
289	7	2.44053	1.6533	9.58096	486.787	-586.661	-206.911	200	300	0	0	0	0	0	0	0	200	903	0	0	0	0	0	0	0	603	903	0
289	8	0.914656	2.41624	10.1913	1036.1	-586.661	21.9711	200	300	0	0	0	0	0	0	0	200	903	0	0	0	0	0	0	0	603	903	0
289	9	0	0	0	0	0	0	200	300	0	0	0	0	0	0	0	200	903	0	0	0	0	0	0	0	603	903	0
290	0	0	0	0	0	0	0	200	300	0	0	0	0	0	0	0	200	903	0	0	0	0	0	0	0	603	903	0
290	1	-0.000871718	2.26365	11.7172	395.235	-403.556	113.524	200	300	0	0	0	0	0	0	0	200	903	0	0	0	0	0	0	0	603	903	0
290	2	1.06724	2.56883	12.3275	-245.635	-342.52	-252.687	200	300	0	0	0	0	0	0	0	200	903	0	0	0	0	0	0	0	603	903	0
290	3	1.06724	2.11106	11.1068	-245.635	-342.52	159.3	200	300	0	0	0	0	0	0	0	200	903	0	0	0	0	0	0	0	603	903	0
290	4	1.6776	2.26365	10.1913	669.893	84.7258	-161.134	200	300	0	0	0	0	0	0	0	200	903	0	0	0	0	0	0	0	603	903	0
290	5	0	0	0	0	0	0	200	300	0	0	0	0	0	0	0	200	903	0	0	0	0	0	0	0	603	903	0
290	6	0	0	0	0	0	0	200	300	0	0	0	0	0	0	0	200	903	0	0	0	0	0	0	0	603	903	0
290	7	1.83018	1.80589	11.1068	-62.5292	-159.415	-206.911	200	300	0	0	0	0	0	0	0	200	903	0	0	0	0	0	0	0	603	903	0
290	8	-0.15346	1.34812	10.1913	212.129	-98.3797	-206.911	200	300	0	0	0	0	0	0	0	200	903	0	0	0	0	0	0	0	603	903	0
290	9	0.762068	2.41624	11.412	1219.21	84.7258	-435.793	200	300	0	0	0	0	0	0	0	200	903	0	0	0	0	0	0	0	603	903	0
291	0	1.06724	2.41624	11.412	669.893	-281.485	-23.8053	200	300	0	0	0	0	0	0	0	200	903	0	0	0	0	0	0	0	603	903	0
291	1	0.762068	2.56883	10.1913	1493.87	23.6906	-115.358	200	300	0	0	0	0	0	0	0	200	903	0	0	0	0	0	0	0	603	903	0
291	2	0.151716	2.11106	9.88614	669.893	-403.556	-206.911	200	300	0	0	0	0	0	0	0	200	903	0	0	0	0	0	0	0	603	903	0
291	3	0	0	0	0	0	0	200	300	0	0	0	0	0	0	0	200	903	0	0	0	0	0	0	0	603	903	0
291	4	-0.611223	0.280009	11.412	303.682	-37.3445	67.7474	200	300	0	0	0	0	0	0	0	200	903	0	0	0	0	0	0	0	603	903	0
291	5	0.60948	1.34812	11.412	29.0235	-586.661	-161.134	200	300	0	0	0	0	0	0	0	200	903	0	0	0	0	0	0	0	603	903	0
291	6	-0.000871718	1.6533	10.8017	395.235	-98.3797	-23.8053	200	300	0	0	0	0	0	0	0	200	903	0	0	0	0	0	0	0	603	903	0
291	7	0.762068	1.95848	9.88614	303.682	23.6906	-390.016	200	300	0	0	0	0	0	0	0	200	903	0	0	0	0	0	0	0	603	903	0
291	8	-0.306047	2.26365	10.8017	29.0235	-98.3797	-23.8053	200	300	0	0	0	0	0	0	0	200	903	0	0	0	0	0	0	0	603	903	0
291	9	0	0	0	0	0	0	200	300	0	0	0	0	0	0	0	200	903	0	0	0	0	0	0	0	603	903	0
292	0	-0.000871718	1.50071	10.8017	944.551	23.6906	67.7474	200	300	0	0	0	0	0	0	0	200	903	0	0	0	0	0	0	0	603	903	0
292	1	0.304304	1.80589	11.412	669.893	-220.45	-161.134	200	300	0	0	0	0	0	0	0	200	903	0	0	0	0	0	0	0	603	903	0
292	2	0.456892	1.34812	12.3275	120.576	23.6906	-298.464	200	300	0	0	0	0	0	0	0	200	903	0	0	0	0	0	0	0	603	903	0
292	3	0	0	0	0	0	0	200	300	0	0	0	0	0	0	0	200	903	0	0	0	0	0	0	0	603	903	0
292	4	0.762068	2.26365	9.88614	-520.293	-37.3445	-206.911	200	300	0	0	0	0	0	0	0	200	903	0	0	0	0	0	0	0	603	903	0
292	5	0	0	0	0	0	0	200	300	0	0	0	0	0	0	0	200	903	0	0	0	0	0	0	0	603	903	0
292	6	-0.000871718	2.11106	11.412	486.787	-342.52	-344.24	200	300	0	0	0	0	0	0	0	200	903	0	0	0	0	0	0	0	603	903	0
292	7	1.06724	-0.0251671	11.412	761.445	-281.485	-206.911	200	300	0	0	0	0	0	0	0	200	903	0	0	0	0	0	0	0	603	903	0
292	8	-0.458635	1.50071	10.8017	395.235	-281.485	250.853	200	300	0	0	0	0	0	0	0	200	903	0	0	0	0	0	0	0	603	903	0
292	9	0	0	0	0	0	0	200	300	0	0	0	0	0	0	0	200	903	0	0	0	0	0	0	0	603	903	0
293	0	0.304304	0.89036	10.4965	120.576	23.6906	113.524	200	300	0	0	0	0	0	0	0	200	903	0	0	0	0	0	0	0	603	903	0
293	1	1.52501	2.56883	10.1913	669.893	-220.45	113.524	200	300	0	0	0	0	0	0	0	200	903	0	0	0	0	0	0	0	603	903	0
293	2	-0.15346	1.6533	10.8017	29.0235	-281.485	-161.134	200	300	0	0	0	0	0	0	0	200	903	0	0	0	0	0	0	0	603	903	0
293	3	1.21983	2.41624	11.412	852.998	23.6906	21.9711	200	300	0	0	0	0	0	0	0	200	903	0	0	0	0	0	0	0	603	903	0
293	4	0.456892	2.26365	11.412	395.235	-159.415	-206.911	200	300	0	0	0	0	0	0	0	200	903	0	0	0	0	0	0	0	603	903	0
293	5	0.762068	1.50071	10.1913	761.445	84.7258	-115.358	200	300	0	0	0	0	0	0	0	200	903	0	0	0	0	0	0	0	603	903	0
293	6	1.6776	-0.0251671	12.0224	852.998	-220.45	-206.911	200	300	0	0	0	0	0	0	0	200	903	0	0	0	0	0	0	0	603	903	0
293	7	-0.306047	2.11106	10.4965	761.445	-342.52	-252.687	200	300	0	0	0	0	0	0	0	200	903	0	0	0	0	0	0	0	603	903	0
293	8	-0.15346	1.95848	11.7172	303.682	-159.415	-161.134	200	300	0	0	0	0	0	0	0	200	903	0	0	0	0	0	0	0	603	903	0
293	9	1.83018	2.26365	10.1913	29.0235	-281.485	67.7474	200	300	0	0	0	0	0	0	0	200	903	0	0	0	0	0	0	0	603	903	0
294	0	0	0	0	0	0	0	200	300	0	0	0	0	0	0	0	200	903	0	0	0	0	0	0	0	603	903	0
294	1	0	0	0	0	0	0	200	300	0	0	0	0	0	0	0	200	903	0	0	0	0	0	0	0	603	903	0
294	2	0.60948	1.19554	12.0224	852.998	-342.52	-206.911	200	300	0	0	0	0	0	0	0	200	903	0	0	0	0	0	0	0	603	903	0
294	3	0.456892	1.6533	9.88614	761.445	84.7258	67.7474	200	300	0	0	0	0	0	0	0	200	903	0	0	0	0	0	0	0	603	903	0
294	4	-0.15346	-0.330343	10.8017	395.235	-98.3797	-115.358	200	300	0	0	0	0	0	0	0	200	903	0	0	0	0	0	0	0	603	903	0
294	5	0.151716	1.6533	13.5482	212.129	-464.591	-252.687	200	300	0	0	0	0	0	0	0	200	903	0	0	0	0	0	0	0	603	903	0
294	6	1.06724	2.41624	10.8017	120.576	-403.556	-298.464	200	300	0	0	0	0	0	0	0	200	903	0	0	0	0	0	0	0	603	903	0
294	7	0	0	0	0	0	0	200	300	0	0	0	0	0	0	0	200	903	0	0	0	0	0	0	0	603	903	0
294	8	0	0	0	0	0	0	200	300	0	0	0	0	0	0	0	200	903	0	0	0	0	0	0	0	603	903	0
294	9	0	0	0	0	0	0	200	300	0	0	0	0	0	0	0	200	903	0	0	0	0	0	0	0	603	903	0
295	0	1.21983	1.50071	11.1068	761.445	-281.485	-435.793	200	300	0	0	0	0	0	0	0	200	903	0	0	0	0	0	0	0	603	903	0
295	1	-0.458635	1.19554	10.8017	486.787	-647.696	-69.5817	200	300	0	0	0	0	0	0	0	200	903	0	0	0	0	0	0	0	603	903	0
295	2	0.151716	1.34812	10.4965	395.235	-220.45	-298.464	200	300	0	0	0	0	0	0	0	200	903	0	0	0	0	0	0	0	603	903	0
295	3	0.456892	1.19554	11.7172	395.235	23.6906	-252.687	200	300	0	0	0	0	0	0	0	200	903	0	0	0	0	0	0	0	603	903	0
295	4	0	0	0	0	0	0	200	300	0	0	0	0	0	0	0	200	903	0	0	0	0	0	0	0	603	903	0
295	5	-0.458635	1.80589	11.412	120.576	-98.3797	-115.358	200	300	0	0	0	0	0	0	0	200	903	0	0	0	0	0	0	0	603	903	0
295	6	0	0	0	0	0	0	200	300	0	0	0	0	0	0	0	200	903	0	0	0	0	0	0	0	603	903	0
295	7	-0.15346	1.95848	10.8017	486.787	267.831	-298.464	200	300	0	0	0	0	0	0	0	200	903	0	0	0	0	0	0	0	603	903	0
295	8	-0.000871718	1.50071	11.1068	303.682	-281.485	-206.911	200	300	0	0	0	0	0	0	0	200	903	0	0	0	0	0	0	0	603	903	0
295	9	1.21983	0.280009	10.8017	578.34	23.6906	205.077	200	300	0	0	0	0	0	0	0	200	903	0	0	0	0	0	0	0	603	903	0
296	0	1.52501	1.50071	11.1068	212.129	-220.45	-23.8053	200	300	0	0	0	0	0	0	0	200	903	0	0	0	0	0	0	0	603	903	0
296	1	0	0	0	0	0	0	200	300	0	0	0	0	0	0	0	200	903	0	0	0	0	0	0	0	603	903	0
296	2	-0.611223	1.19554	10.4965	303.682	328.866	-298.464	200	300	0	0	0	0	0	0	0	200	903	0	0	0	0	0	0	0	603	903	0
296	3	-0.000871718	2.11106	10.4965	486.787	-98.3797	296.629	200	300	0	0	0	0	0	0	0	200	903	0	0	0	0	0	0	0	603	903	0
296	4	-1.22157	2.41624	11.412	669.893	-281.485	-390.016	200	300	0	0	0	0	0	0	0	200	903	0	0	0	0	0	0	0	603	903	0
296	5	0.304304	0.89036	11.1068	1493.87	-159.415	-298.464	200	300	0	0	0	0	0	0	0	200	903	0	0	0	0	0	0	0	603	903	0
296	6	0.914656	0.89036	12.9379	303.682	-37.3445	205.077	200	300	0	0	0	0	0	0	0	200	903	0	0	0	0	0	0	0	603	903	0
296	7	0	0	0	0	0	0	200	300	0	0	0	0	0	0	0	200	903	0	0	0	0	0	0	0	603	903	0
296	8	0	0	0	0	0	0	200	300	0	0	0	0	0	0	0	200	903	0	0	0	0	0	0	0	603	903	0
296	9	0.456892	1.95848	9.88614	120.576	-342.52	-115.358	200	300	0	0	0	0	0	0	0	200	903	0	0	0	0	0	0	0	603	903	0
297	0	-0.306047	0.280009	11.412	-154.082	-37.3445	-161.134	200	300	0	0	0	0	0	0	0	200	903	0	0	0	0	0	0	0	603	903	0
297	1	-0.000871718	2.26365	12.9379	486.787	-37.3445	-206.911	200	300	0	0	0	0	0	0	0	200	903	0	0	0	0	0	0	0	603	903	0
297	2	0.60948	1.19554	11.412	852.998	-159.415	-298.464	200	300	0	0	0	0	0	0	0	200	903	0	0	0	0	0	0	0	603	903	0
297	3	2.28795	1.6533	10.1913	578.34	-220.45	-115.358	200	300	0	0	0	0	0	0	0	200	903	0	0	0	0	0	0	0	603	903	0
297	4	0	0	0	0	0	0	200	300	0	0	0	0	0	0	0	200	903	0	0	0	0	0	0	0	603	903	0
297	5	0	0	0	0	0	0	200	300	0	0	0	0	0	0	0	200	903	0	0	0	0	0	0	0	603	903	0
297	6	0	0	0	0	0	0	200	300	0	0	0	0	0	0	0	200	903	0	0	0	0	0	0	0	603	903	0
297	7	-0.458635	2.26365	11.1068	212.129	-220.45	-298.464	200	300	0	0	0	0	0	0	0	200	903	0	0	0	0	0	0	0	603	903	0
297	8	-0.306047	1.80589	12.0224	395.235	-830.802	67.7474	200	300	0	0	0	0	0	0	0	200	903	0	0	0	0	0	0	0	603	903	0
297	9	0.304304	2.11106	10.8017	395.235	-37.3445	-161.134	200	300	0	0	0	0	0	0	0	200	903	0	0	0	0	0	0	0	603	903	0
298	0	0	0	0	0	0	0	200	300	0	0	0	0	0	0	0	200	903	0	0	0	0	0	0	0	603	903	0
298	1	2.13536	1.34812	11.7172	578.34	-98.3797	-69.5817	200	300	0	0	0	0	0	0	0	200	903	0	0	0	0	0	0	0	603	903	0
298	2	0	0	0	0	0	0	200	300	0	0	0	0	0	0	0	200	903	0	0	0	0	0	0	0	603	903	0
298	3	-0.000871718	2.26365	10.8017	852.998	-159.415	67.7474	200	300	0	0	0	0	0	0	0	200	903	0	0	0	0	0	0	0	603	903	0
298	4	1.37242	2.56883	12.3275	120.576	-159.415	-344.24	200	300	0	0	0	0	0	0	0	200	903	0	0	0	0	0	0	0	603	903	0
298	5	0.914656	1.95848	11.1068	486.787	-37.3445	-69.5817	200	300	0	0	0	0	0	0	0	200	903	0	0	0	0	0	0	0	603	903	0
298	6	0.60948	1.50071	10.8017	669.893	-281.485	-344.24	200	300	0	0	0	0	0	0	0	200	903	0	0	0	0	0	0	0	603	903	0
298	7	0.914656	1.6533	13.5482	944.551	-159.415	-390.016	200	300	0	0	0	0	0	0	0	200	903	0	0	0	0	0	0	0	603	903	0
298	8	0	0	0	0	0	0	200	300	0	0	0	0	0	0	0	200	903	0	0	0	0	0	0	0	603	903	0
298	9	-0.458635	1.50071	10.8017	212.129	-281.485	-161.134	200	300	0	0	0	0	0	0	0	200	903	0	0	0	0	0	0	0	603	903	0
299	0	-0.306047	2.41624	11.1068	852.998	-37.3445	-252.687	200	300	0	0	0	0	0	0	0	200	903	0	0	0	0	0	0	0	603	903	0
299	1	0.456892	1.95848	10.8017	120.576	-281.485	-115.358	200	300	0	0	0	0	0	0	0	200	903	0	0	0	0	0	0	0	603	903	0
299	2	1.06724	2.11106	9.88614	303.682	-220.45	-69.5817	200	300	0	0	0	0	0	0	0	200	903	0	0	0	0	0	0	0	603	903	0
299	3	0.60948	1.80589	9.88614	395.235	-159.415	21.9711	200	300	0	0	0	0	0	0	0	200	903	0	0	0	0	0	0	0	603	903	0
299	4	0	0	0	0	0	0	200	300	0	0	0	0	0	0	0	200	903	0	0	0	0	0	0	0	603	903	0
299	5	1.06724	0.432597	11.412	761.445	84.7258	-252.687	200	300	0	0	0	0	0	0	0	200	903	0	0	0	0	0	0	0	603	903	0
299	6	0.60948	1.50071	11.7172	120.576	-525.626	-23.8053	200	300	0	0	0	0	0	0	0	200	903	0	0	0	0	0	0	0	603	903	0
299	7	0.60948	2.26365	12.0224	669.893	-37.3445	-161.134	200	300	0	0	0	0	0	0	0	200	903	0	0	0	0	0	0	0	603	903	0
299	8	2.13536	2.41624	11.1068	120.576	23.6906	-344.24	200	300	0	0	0	0	0	0	0	200	903	0	0	0	0	0	0	0	603	903	0
299	9	0.762068	2.26365	10.4965	1036.1	-37.3445	-69.5817	200	300	0	0	0	0	0	0	0	200	903	0	0	0	0	0	0	0	603	903	0
300	0	0	0	0	0	0	0	200	300	0	0	0	0	0	0	0	200	903	0	0	0	0	0	0	0	603	903	0
300	1	-0.763811	1.19554	12.3275	944.551	-281.485	-115.358	200	300	0	0	0	0	0	0	0	200	903	0	0	0	0	0	0	0	603	903	0
300	2	-0.000871718	1.19554	10.8017	761.445	-220.45	-161.134	200	300	0	0	0	0	0	0	0	200	903	0	0	0	0	0	0	0	603	903	0
300	3	0.914656	1.50071	11.1068	29.0235	84.7258	-344.24	200	300	0	0	0	0	0	0	0	200	903	0	0	0	0	0	0	0	603	903	0
300	4	0.762068	1.50071	10.1913	-62.5292	-220.45	-206.911	200	300	0	0	0	0	0	0	0	200	903	0	0	0	0	0	0	0	603	903	0
300	5	0	0	0	0	0	0	200	300	0	0	0	0	0	0	0	200	903	0	0	0	0	0	0	0	603	903	0
300	6	0	0	0	0	0	0	200	300	0	0	0	0	0	0	0	200	903	0	0	0	0	0	0	0	603	903	0
300	7	0.151716	1.95848	9.88614	486.787	-220.45	296.629	200	300	0	0	0	0	0	0	0	200	903	0	0	0	0	0	0	0	603	903	0
300	8	0.304304	2.11106	9.88614	395.235	206.796	-298.464	200	300	0	0	0	0	0	0	0	200	903	0	0	0	0	0	0	0	603	903	0
300	9	1.06724	1.04295	10.8017	395.235	-220.45	67.7474	200	300	0	0	0	0	0	0	0	200	903	0	0	0	0	0	0	0	603	903	0
301	0	1.21983	1.19554	11.1068	486.787	-37.3445	-23.8053	200	300	0	0	0	0	0	0	0	200	903	0	0	0	0	0	0	0	603	903	0
301	1	1.06724	1.34812	9.88614	29.0235	-37.3445	205.077	200	300	0	0	0	0	0	0	0	200	903	0	0	0	0	0	0	0	603	903	0
301	2	0	0	0	0	0	0	200	300	0	0	0	0	0	0	0	200	903	0	0	0	0	0	0	0	603	903	0
301	3	-0.916399	2.26365	10.4965	1036.1	-281.485	-69.5817	200	300	0	0	0	0	0	0	0	200	903	0	0	0	0	0	0	0	603	903	0
301	4	-0.306047	2.72141	11.7172	669.893	23.6906	-435.793	200	300	0	0	0	0	0	0	0	200	903	0	0	0	0	0	0	0	603	903	0
301	5	-0.611223	1.6533	11.412	212.129	-37.3445	-69.5817	200	300	0	0	0	0	0	0	0	200	903	0	0	0	0	0	0	0	603	903	0
301	6	0.762068	2.41624	10.8017	578.34	-37.3445	21.9711	200	300	0	0	0	0	0	0	0	200	903	0	0	0	0	0	0	0	603	903	0
301	7	0	0	0	0	0	0	200	300	0	0	0	0	0	0	0	200	903	0	0	0	0	0	0	0	603	903	0
301	8	1.37242	1.50071	10.8017	578.34	-403.556	-161.134	200	300	0	0	0	0	0	0	0	200	903	0	0	0	0	0	0	0	603	903	0
301	9	0	0	0	0	0	0	200	300	0	0	0	0	0	0	0	200	903	0	0	0	0	0	0	0	603	903	0
302	0	0	0	0	0	0	0	200	300	0	0	0	0	0	0	0	200	903	0	0	0	0	0	0	0	603	903	0
302	1	0.151716	1.95848	13.2431	395.235	-98.3797	-115.358	200	300	0	0	0	0	0	0	0	200	903	0	0	0	0	0	0	0	603	903	0
302	2	1.06724	2.11106	10.4965	120.576	-220.45	-161.134	200	300	0	0	0	0	0	0	0	200	903	0	0	0	0	0	0	0	603	903	0
302	3	0.151716	1.04295	10.1913	-337.188	23.6906	-344.24	200	300	0	0	0	0	0	0	0	200	903	0	0	0	0	0	0	0	603	903	0
302	4	0.914656	2.41624	11.7172	852.998	206.796	-69.5817	200	300	0	0	0	0	0	0	0	200	903	0	0	0	0	0	0	0	603	903	0
302	5	0.304304	2.26365	9.88614	669.893	-98.3797	-252.687	200	300	0	0	0	0	0	0	0	200	903	0	0	0	0	0	0	0	603	903	0
302	6	1.98277	1.80589	10.8017	1219.21	23.6906	-206.911	200	300	0	0	0	0	0	0	0	200	903	0	0	0	0	0	0	0	603	903	0
302	7	-0.000871718	1.50071	10.8017	395.235	-98.3797	-298.464	200	300	0	0	0	0	0	0	0	200	903	0	0	0	0	0	0	0	603	903	0
302	8	0.914656	1.6533	10.4965	852.998	-220.45	21.9711	200	300	0	0	0	0	0	0	0	200	903	0	0	0	0	0	0	0	603	903	0
302	9	2.28795	1.6533	9.88614	395.235	23.6906	-161.134	200	300	0	0	0	0	0	0	0	200	903	0	0	0	0	0	0	0	603	903	0
303	0	0	0	0	0	0	0	200	300	0	0	0	0	0	0	0	200	903	0	0	0	0	0	0	0	603	903	0
303	1	-0.306047	1.6533	9.88614	120.576	-281.485	-115.358	200	300	0	0	0	0	0	0	0	200	903	0	0	0	0	0	0	0	603	903	0
303	2	0.914656	2.41624	10.1913	120.576	23.6906	67.7474	200	300	0	0	0	0	0	0	0	200	903	0	0	0	0	0	0	0	603	903	0
303	3	-0.000871718	1.95848	10.4965	578.34	-220.45	-69.5817	200	300	0	0	0	0	0	0	0	200	903	0	0	0	0	0	0	0	603	903	0
303	4	1.37242	1.50071	10.8017	395.235	23.6906	-252.687	200	300	0	0	0	0	0	0	0	200	903	0	0	0	0	0	0	0	603	903	0
303	5	0	0	0	0	0	0	200	300	0	0	0	0	0	0	0	200	903	0	0	0	0	0	0	0	603	903	0
303	6	1.21983	2.26365	10.8017	761.445	-37.3445	-69.5817	200	300	0	0	0	0	0	0	0	200	903	0	0	0	0	0	0	0	603	903	0
303	7	0.304304	1.80589	10.8017	1127.66	-98.3797	-161.134	200	300	0	0	0	0	0	0	0	200	903	0	0	0	0	0	0	0	603	903	0
303	8	-0.15346	1.95848	10.8017	486.787	206.796	-206.911	200	300	0	0	0	0	0	0	0	200	903	0	0	0	0	0	0	0	603	903	0
303	9	-0.306047	2.11106	11.412	578.34	-37.3445	-161.134	200	300	0	0	0	0	0	0	0	200	903	0	0	0	0	0	0	0	603	903	0
304	0	-0.306047	2.56883	11.1068	761.445	-159.415	-252.687	200	300	0	0	0	0	0	0	0	200	903	0	0	0	0	0	0	0	603	903	0
304	1	0.456892	2.72141	11.412	578.34	-220.45	-298.464	200	300	0	0	0	0	0	0	0	200	903	0	0	0	0	0	0	0	603	903	0
304	2	0	0	0	0	0	0	200	300	0	0	0	0	0	0	0	200	903	0	0	0	0	0	0	0	603	903	0
304	3	0	0	0	0	0	0	200	300	0	0	0	0	0	0	0	200	903	0	0	0	0	0	0	0	603	903	0
304	4	0	0	0	0	0	0	200	300	0	0	0	0	0	0	0	200	903	0	0	0	0	0	0	0	603	903	0
304	5	-0.000871718	1.6533	11.1068	212.129	-342.52	67.7474	200	300	0	0	0	0	0	0	0	200	903	0	0	0	0	0	0	0	603	903	0
304	6	0.456892	1.04295	11.412	212.129	-220.45	-23.8053	200	300	0	0	0	0	0	0	0	200	903	0	0	0	0	0	0	0	603	903	0
304	7	1.6776	1.80589	9.88614	486.787	23.6906	-298.464	200	300	0	0	0	0	0	0	0	200	903	0	0	0	0	0	0	0	603	903	0
304	8	0	0	0	0	0	0	200	300	0	0	0	0	0	0	0	200	903	0	0	0	0	0	0	0	603	903	0
304	9	0	0	0	0	0	0	200	300	0	0	0	0	0	0	0	200	903	0	0	0	0	0	0	0	603	903	0
305	0	0.914656	1.80589	11.1068	486.787	-281.485	-161.134	200	300	0	0	0	0	0	0	0	200	903	0	0	0	0	0	0	0	603	903	0
305	1	-0.611223	1.50071	12.3275	486.787	84.7258	-206.911	200	300	0	0	0	0	0	0	0	200	903	0	0	0	0	0	0	0	603	903	0
305	2	0.304304	1.6533	11.412	761.445	-159.415	-115.358	200	300	0	0	0	0	0	0	0	200	903	0	0	0	0	0	0	0	603	903	0
305	3	0	0	0	0	0	0	200	300	0	0	0	0	0	0	0	200	903	0	0	0	0	0	0	0	603	903	0
305	4	0.60948	2.11106	12.0224	395.235	-403.556	-527.345	200	300	0	0	0	0	0	0	0	200	903	0	0	0	0	0	0	0	603	903	0
305	5	0	0	0	0	0	0	200	300	0	0	0	0	0	0	0	200	903	0	0	0	0	0	0	0	603	903	0
305	6	-0.763811	1.6533	11.1068	303.682	84.7258	-390.016	200	300	0	0	0	0	0	0	0	200	903	0	0	0	0	0	0	0	603	903	0
305	7	-0.000871718	2.56883	13.2431	578.34	-37.3445	-390.016	200	300	0	0	0	0	0	0	0	200	903	0	0	0	0	0	0	0	603	903	0
305	8	0.456892	1.6533	12.0224	852.998	-342.52	-23.8053	200	300	0	0	0	0	0	0	0	200	903	0	0	0	0	0	0	0	603	903	0
305	9	0	0	0	0	0	0	200	300	0	0	0	0	0	0	0	200	903	0	0	0	0	0	0	0	603	903	0
306	0	0.304304	0.89036	11.7172	944.551	-342.52	296.629	200	300	0	0	0	0	0	0	0	200	903	0	0	0	0	0	0	0	603	903	0
306	1	0	0	0	0	0	0	200	300	0	0	0	0	0	0	0	200	903	0	0	0	0	0	0	0	603	903	0
306	2	-0.611223	0.89036	11.7172	120.576	84.7258	-206.911	200	300	0	0	0	0	0	0	0	200	903	0	0	0	0	0	0	0	603	903	0
306	3	1.6776	2.41624	10.4965	120.576	-37.3445	-298.464	200	300	0	0	0	0	0	0	0	200	903	0	0	0	0	0	0	0	603	903	0
306	4	0.456892	0.585184	12.0224	29.0235	-159.415	21.9711	200	300	0	0	0	0	0	0	0	200	903	0	0	0	0	0	0	0	603	903	0
306	5	0	0	0	0	0	0	200	300	0	0	0	0	0	0	0	200	903	0	0	0	0	0	0	0	603	903	0
306	6	1.21983	1.34812	12.0224	1127.66	-281.485	-344.24	200	300	0	0	0	0	0	0	0	200	903	0	0	0	0	0	0	0	603	903	0
306	7	0	0	0	0	0	0	200	300	0	0	0	0	0	0	0	200	903	0	0	0	0	0	0	0	603	903	0
306	8	-0.611223	0.280009	11.412	761.445	-220.45	-69.5817	200	300	0	0	0	0	0	0	0	200	903	0	0	0	0	0	0	0	603	903	0
306	9	0.151716	1.50071	11.1068	395.235	-281.485	-206.911	200	300	0	0	0	0	0	0	0	200	903	0	0	0	0	0	0	0	603	903	0
307	0	0.60948	2.11106	11.1068	1127.66	-220.45	-252.687	200	300	0	0	0	0	0	0	0	200	903	0	0	0	0	0	0	0	603	903	0
307	1	0	0	0	0	0	0	200	300	0	0	0	0	0	0	0	200	903	0	0	0	0	0	0	0	603	903	0
307	2	0.151716	1.80589	10.1913	395.235	-220.45	-206.911	200	300	0	0	0	0	0	0	0	200	903	0	0	0	0	0	0	0	603	903	0
307	3	0	0	0	0	0	0	200	300	0	0	0	0	0	0	0	200	903	0	0	0	0	0	0	0	603	903	0
307	4	-0.000871718	1.50071	11.7172	395.235	-37.3445	-206.911	200	300	0	0	0	0	0	0	0	200	903	0	0	0	0	0	0	0	603	903	0
307	5	0.304304	0.89036	11.1068	852.998	-37.3445	-252.687	200	300	0	0	0	0	0	0	0	200	903	0	0	0	0	0	0	0	603	903	0
307	6	0.60948	1.50071	11.7172	395.235	84.7258	-161.134	200	300	0	0	0	0	0	0	0	200	903	0	0	0	0	0	0	0	603	903	0
307	7	0	0	0	0	0	0	200	300	0	0	0	0	0	0	0	200	903	0	0	0	0	0	0	0	603	903	0
307	8	-0.306047	2.56883	9.88614	395.235	84.7258	-481.569	200	300	0	0	0	0	0	0	0	200	903	0	0	0	0	0	0	0	603	903	0
307	9	0.456892	2.41624	10.4965	120.576	23.6906	-252.687	200	300	0	0	0	0	0	0	0	200	903	0	0	0	0	0	0	0	603	903	0
308	0	-0.15346	2.26365	13.2431	852.998	145.761	-115.358	200	300	0	0	0	0	0	0	0	200	903	0	0	0	0	0	0	0	603	903	0
308	1	1.06724	1.6533	10.4965	761.445	-342.52	-69.5817	200	300	0	0	0	0	0	0	0	200	903	0	0	0	0	0	0	0	603	903	0
308	2	0	0	0	0	0	0	200	300	0	0	0	0	0	0	0	200	903	0	0	0	0	0	0	0	603	903	0
308	3	0	0	0	0	0	0	200	300	0	0	0	0	0	0	0	200	903	0	0	0	0	0	0	0	603	903	0
308	4	0	0	0	0	0	0	200	300	0	0	0	0	0	0	0	200	903	0	0	0	0	0	0	0	603	903	0
308	5	-0.763811	1.80589	9.88614	395.235	84.7258	-206.911	200	300	0	0	0	0	0	0	0	200	903	0	0	0	0	0	0	0	603	903	0
308	6	0.914656	1.95848	11.1068	120.576	-159.415	-298.464	200	300	0	0	0	0	0	0	0	200	903	0	0	0	0	0	0	0	603	903	0
308	7	2.8983	1.50071	10.4965	395.235	-159.415	21.9711	200	300	0	0	0	0	0	0	0	200	903	0	0	0	0	0	0	0	603	903	0
308	8	0	0	0	0	0	0	200	300	0	0	0	0	0	0	0	200	903	0	0	0	0	0	0	0	603	903	0
308	9	-0.15346	2.26365	9.88614	486.787	-37.3445	-252.687	200	300	0	0	0	0	0	0	0	200	903	0	0	0	0	0	0	0	603	903	0
309	0	1.06724	1.34812	10.8017	669.893	-220.45	-298.464	200	300	0	0	0	0	0	0	0	200	903	0	0	0	0	0	0	0	603	903	0
309	1	-0.15346	1.19554	10.1913	578.34	-342.52	-161.134	200	300	0	0	0	0	0	0	0	200	903	0	0	0	0	0	0	0	603	903	0
309	2	0.914656	1.95848	11.412	395.235	84.7258	67.7474	200	300	0	0	0	0	0	0	0	200	903	0	0	0	0	0	0	0	603	903	0
309	3	0.151716	1.6533	10.8017	486.787	-220.45	113.524	200	300	0	0	0	0	0	0	0	200	903	0	0	0	0	0	0	0	603	903	0
309	4	0	0	0	0	0	0	200	300	0	0	0	0	0	0	0	200	903	0	0	0	0	0	0	0	603	903	0
309	5	0	0	0	0	0	0	200	300	0	0	0	0	0	0	0	200	903	0	0	0	0	0	0	0	603	903	0
309	6	-0.15346	2.72141	10.4965	852.998	-464.591	-206.911	200	300	0	0	0	0	0	0	0	200	903	0	0	0	0	0	0	0	603	903	0
309	7	-0.611223	1.50071	12.0224	486.787	-37.3445	21.9711	200	300	0	0	0	0	0	0	0	200	903	0	0	0	0	0	0	0	603	903	0
309	8	0.60948	1.19554	10.8017	486.787	-159.415	-69.5817	200	300	0	0	0	0	0	0	0	200	903	0	0	0	0	0	0	0	603	903	0
309	9	0	0	0	0	0	0	200	300	0	0	0	0	0	0	0	200	903	0	0	0	0	0	0	0	603	903	0
310	0	0.456892	1.04295	10.4965	-62.5292	-342.52	-298.464	200	300	0	0	0	0	0	0	0	200	903	0	0	0	0	0	0	0	603	903	0
310	1	-0.306047	2.11106	10.8017	486.787	23.6906	159.3	200	300	0	0	0	0	0	0	0	200	903	0	0	0	0	0	0	0	603	903	0
310	2	0.60948	2.11106	10.4965	212.129	84.7258	21.9711	200	300	0	0	0	0	0	0	0	200	903	0	0	0	0	0	0	0	603	903	0
310	3	1.98277	1.80589	11.1068	852.998	23.6906	-115.358	200	300	0	0	0	0	0	0	0	200	903	0	0	0	0	0	0	0	603	903	0
310	4	0.914656	2.874	12.0224	944.551	-98.3797	-115.358	200	300	0	0	0	0	0	0	0	200	903	0	0	0	0	0	0	0	603	903	0
310	5	0.762068	1.6533	10.8017	395.235	-98.3797	-252.687	200	300	0	0	0	0	0	0	0	200	903	0	0	0	0	0	0	0	603	903	0
310	6	0.304304	0.280009	10.1913	761.445	206.796	-252.687	200	300	0	0	0	0	0	0	0	200	903	0	0	0	0	0	0	0	603	903	0
310	7	0	0	0	0	0	0	200	300	0	0	0	0	0	0	0	200	903	0	0	0	0	0	0	0	603	903	0
310	8	-0.458635	2.874	11.7172	1493.87	84.7258	113.524	200	300	0	0	0	0	0	0	0	200	903	0	0	0	0	0	0	0	603	903	0
310	9	-0.458635	2.41624	11.412	120.576	-342.52	21.9711	200	300	0	0	0	0	0	0	0	200	903	0	0	0	0	0	0	0	603	903	0
311	0	0.762068	2.11106	10.8017	761.445	-464.591	159.3	200	300	0	0	0	0	0	0	0	200	903	0	0	0	0	0	0	0	603	903	0
311	1	0	0	0	0	0	0	200	300	0	0	0	0	0	0	0	200	903	0	0	0	0	0	0	0	603	903	0
311	2	0	0	0	0	0	0	200	300	0	0	0	0	0	0	0	200	903	0	0	0	0	0	0	0	603	903	0
311	3	-0.763811	-0.482931	10.8017	395.235	-342.52	-161.134	200	300	0	0	0	0	0	0	0	200	903	0	0	0	0	0	0	0	603	903	0
311	4	0	0	0	0	0	0	200	300	0	0	0	0	0	0	0	200	903	0	0	0	0	0	0	0	603	903	0
311	5	0.60948	1.19554	11.412	-154.082	-98.3797	-252.687	200	300	0	0	0	0	0	0	0	200	903	0	0	0	0	0	0	0	603	903	0
311	6	1.52501	1.95848	11.7172	395.235	23.6906	113.524	200	300	0	0	0	0	0	0	0	200	903	0	0	0	0	0	0	0	603	903	0
311	7	0.762068	0.585184	10.1913	120.576	-37.3445	21.9711	200	300	0	0	0	0	0	0	0	200	903	0	0	0	0	0	0	0	603	903	0
311	8	0	0	0	0	0	0	200	300	0	0	0	0	0	0	0	200	903	0	0	0	0	0	0	0	603	903	0
311	9	1.06724	1.19554	11.412	944.551	-159.415	-344.24	200	300	0	0	0	0	0	0	0	200	903	0	0	0	0	0	0	0	603	903	0
312	0	-0.15346	1.50071	11.7172	761.445	389.902	67.7474	200	300	0	0	0	0	0	0	0	200	903	0	0	0	0	0	0	0	603	903	0
312	1	0.914656	-0.330343	12.0224	669.893	-98.3797	-23.8053	200	300	0	0	0	0	0	0	0	200	903	0	0	0	0	0	0	0	603	903	0
312	2	2.59312	1.50071	10.8017	669.893	-220.45	21.9711	200	300	0	0	0	0	0	0	0	200	903	0	0	0	0	0	0	0	603	903	0
312	3	0	0	0	0	0	0	200	300	0	0	0	0	0	0	0	200	903	0	0	0	0	0	0	0	603	903	0
312	4	0	0	0	0	0	0	200	300	0	0	0	0	0	0	0	200	903	0	0	0	0	0	0	0	603	903	0
312	5	0.914656	2.26365	12.6327	120.576	-464.591	-206.911	200	300	0	0	0	0	0	0	0	200	903	0	0	0	0	0	0	0	603	903	0
312	6	0	0	0	0	0	0	200	300	0	0	0	0	0	0	0	200	903	0	0	0	0	0	0	0	603	903	0
312	7	0.914656	1.50071	11.412	1036.1	-281.485	-206.911	200	300	0	0	0	0	0	0	0	200	903	0	0	0	0	0	0	0	603	903	0
312	8	2.59312	1.19554	10.1913	578.34	-98.3797	67.7474	200	300	0	0	0	0	0	0	0	200	903	0	0	0	0	0	0	0	603	903	0
312	9	0	0	0	0	0	0	200	300	0	0	0	0	0	0	0	200	903	0	0	0	0	0	0	0	603	903	0
313	0	-0.15346	1.50071	9.88614	120.576	-37.3445	-252.687	200	300	0	0	0	0	0	0	0	200	903	0	0	0	0	0	0	0	603	903	0
313	1	2.8983	2.41624	11.1068	-62.5292	-37.3445	-298.464	200	300	0	0	0	0	0	0	0	200	903	0	0	0	0	0	0	0	603	903	0
313	2	-0.611223	1.6533	10.1913	120.576	23.6906	21.9711	200	300	0	0	0	0	0	0	0	200	903	0	0	0	0	0	0	0	603	903	0
313	3	0.456892	2.72141	11.7172	669.893	-159.415	-206.911	200	300	0	0	0	0	0	0	0	200	903	0	0	0	0	0	0	0	603	903	0
313	4	0.60948	2.26365	10.1913	761.445	-98.3797	-298.464	200	300	0	0	0	0	0	0	0	200	903	0	0	0	0	0	0	0	603	903	0
313	5	0.914656	1.34812	12.0224	486.787	-37.3445	-252.687	200	300	0	0	0	0	0	0	0	200	903	0	0	0	0	0	0	0	603	903	0
313	6	0	0	0	0	0	0	200	300	0	0	0	0	0	0	0	200	903	0	0	0	0	0	0	0	603	903	0
313	7	-0.306047	1.6533	11.1068	578.34	-342.52	-344.24	200	300	0	0	0	0	0	0	0	200	903	0	0	0	0	0	0	0	603	903	0
313	8	-0.763811	2.41624	13.2431	578.34	84.7258	-344.24	200	300	0	0	0	0	0	0	0	200	903	0	0	0	0	0	0	0	603	903	0
313	9	0.60948	2.26365	11.1068	-62.5292	-98.3797	-206.911	200	300	0	0	0	0	0	0	0	200	903	0	0	0	0	0	0	0	603	903	0
314	0	0	0	0	0	0	0	200	300	0	0	0	0	0	0	0	200	903	0	0	0	0	0	0	0	603	903	0
314	1	0	0	0	0	0	0	200	300	0	0	0	0	0	0	0	200	903	0	0	0	0	0	0	0	603	903	0
314	2	-0.15346	1.50071	10.4965	1036.1	267.831	-298.464	200	300	0	0	0	0	0	0	0	200	903	0	0	0	0	0	0	0	603	903	0
314	3	2.28795	1.80589	10.4965	303.682	206.796	-115.358	200	300	0	0	0	0	0	0	0	200	903	0	0	0	0	0	0	0	603	903	0
314	4	-0.458635	1.04295	10.8017	29.0235	-98.3797	-252.687	200	300	0	0	0	0	0	0	0	200	903	0	0	0	0	0	0	0	603	903	0
314	5	-0.000871718	2.11106	11.7172	578.34	-37.3445	-298.464	200	300	0	0	0	0	0	0	0	200	903	0	0	0	0	0	0	0	603	903	0
314	6	2.74571	1.95848	10.8017	212.129	-37.3445	-69.5817	200	300	0	0	0	0	0	0	0	200	903	0	0	0	0	0	0	0	603	903	0
314	7	1.21983	2.11106	9.88614	212.129	23.6906	159.3	200	300	0	0	0	0	0	0	0	200	903	0	0	0	0	0	0	0	603	903	0
314	8	0	0	0	0	0	0	200	300	0	0	0	0	0	0	0	200	903	0	0	0	0	0	0	0	603	903	0
314	9	0	0	0	0	0	0	200	300	0	0	0	0	0	0	0	200	903	0	0	0	0	0	0	0	603	903	0
315	0	-0.306047	1.34812	11.412	578.34	23.6906	-115.358	200	300	0	0	0	0	0	0	0	200	903	0	0	0	0	0	0	0	603	903	0
315	1	0.456892	1.19554	11.1068	303.682	-220.45	-115.358	200	300	0	0	0	0	0	0	0	200	903	0	0	0	0	0	0	0	603	903	0
315	2	0.304304	1.04295	10.4965	-62.5292	-159.415	-69.5817	200	300	0	0	0	0	0	0	0	200	903	0	0	0	0	0	0	0	603	903	0
315	3	0	0	0	0	0	0	200	300	0	0	0	0	0	0	0	200	903	0	0	0	0	0	0	0	603	903	0
315	4	0.914656	0.280009	10.8017	578.34	-37.3445	-115.358	200	300	0	0	0	0	0	0	0	200	903	0	0	0	0	0	0	0	603	903	0
315	5	-0.15346	2.26365	9.88614	578.34	23.6906	-115.358	200	300	0	0	0	0	0	0	0	200	903	0	0	0	0	0	0	0	603	903	0
315	6	-0.611223	2.11106	10.8017	578.34	145.761	-206.911	200	300	0	0	0	0	0	0	0	200	903	0	0	0	0	0	0	0	603	903	0
315	7	-0.458635	1.95848	12.6327	669.893	-159.415	-435.793	200	300	0	0	0	0	0	0	0	200	903	0	0	0	0	0	0	0	603	903	0
315	8	0.762068	0.432597	10.4965	486.787	-220.45	-206.911	200	300	0	0	0	0	0	0	0	200	903	0	0	0	0	0	0	0	603	903	0
315	9	0.151716	1.80589	10.1913	486.787	-37.3445	-252.687	200	300	0	0	0	0	0	0	0	200	903	0	0	0	0	0	0	0	603	903	0
316	0	0.456892	2.11106	11.1068	395.235	-281.485	-161.134	200	300	0	0	0	0	0	0	0	200	903	0	0	0	0	0	0	0	603	903	0
316	1	0	0	0	0	0	0	200	300	0	0	0	0	0	0	0	200	903	0	0	0	0	0	0	0	603	903	0
316	2	-0.763811	2.26365	10.8017	486.787	-159.415	-298.464	200	300	0	0	0	0	0	0	0	200	903	0	0	0	0	0	0	0	603	903	0
316	3	-0.15346	2.26365	12.6327	578.34	-220.45	-69.5817	200	300	0	0	0	0	0	0	0	200	903	0	0	0	0	0	0	0	603	903	0
316	4	0.151716	1.50071	10.1913	1219.21	-281.485	-206.911	200	300	0	0	0	0	0	0	0	200	903	0	0	0	0	0	0	0	603	903	0
316	5	0	0	0	0	0	0	200	300	0	0	0	0	0	0	0	200	903	0	0	0	0	0	0	0	603	903	0
316	6	0	0	0	0	0	0	200	300	0	0	0	0	0	0	0	200	903	0	0	0	0	0	0	0	603	903	0
316	7	0	0	0	0	0	0	200	300	0	0	0	0	0	0	0	200	903	0	0	0	0	0	0	0	603	903	0
316	8	1.6776	2.11106	11.1068	120.576	-342.52	-252.687	200	300	0	0	0	0	0	0	0	200	903	0	0	0	0	0	0	0	603	903	0
316	9	0.304304	1.34812	11.412	486.787	23.6906	-252.687	200	300	0	0	0	0	0	0	0	200	903	0	0	0	0	0	0	0	603	903	0
317	0	0.456892	2.41624	11.412	395.235	-98.3797	-161.134	200	300	0	0	0	0	0	0	0	200	903	0	0	0	0	0	0	0	603	903	0
317	1	0	0	0	0	0	0	200	300	0	0	0	0	0	0	0	200	903	0	0	0	0	0	0	0	603	903	0
317	2	0.60948	1.50071	11.1068	669.893	-37.3445	-298.464	200	300	0	0	0	0	0	0	0	200	903	0	0	0	0	0	0	0	603	903	0
317	3	0	0	0	0	0	0	200	300	0	0	0	0	0	0	0	200	903	0	0	0	0	0	0	0	603	903	0
317	4	-0.611223	1.80589	11.412	120.576	-647.696	-115.358	200	300	0	0	0	0	0	0	0	200	903	0	0	0	0	0	0	0	603	903	0
317	5	-0.763811	1.95848	12.3275	578.34	-403.556	-115.358	200	300	0	0	0	0	0	0	0	200	903	0	0	0	0	0	0	0	603	903	0
317	6	0.151716	2.26365	9.88614	212.129	-220.45	-344.24	200	300	0	0	0	0	0	0	0	200	903	0	0	0	0	0	0	0	603	903	0
317	7	0	0	0	0	0	0	200	300	0	0	0	0	0	0	0	200	903	0	0	0	0	0	0	0	603	903	0
317	8	0.914656	1.6533	11.1068	486.787	-342.52	-23.8053	200	300	0	0	0	0	0	0	0	200	903	0	0	0	0	0	0	0	603	903	0
317	9	0	0	0	0	0	0	200	300	0	0	0	0	0	0	0	200	903	0	0	0	0	0	0	0	603	903	0
318	0	0.151716	1.34812	10.1913	395.235	-98.3797	-206.911	200	300	0	0	0	0	0	0	0	200	903	0	0	0	0	0	0	0	603	903	0
318	1	-0.15346	-0.177755	12.0224	395.235	206.796	-161.134	200	300	0	0	0	0	0	0	0	200	903	0	0	0	0	0	0	0	603	903	0
318	2	0.456892	1.6533	11.1068	-62.5292	-159.415	-161.134	200	300	0	0	0	0	0	0	0	200	903	0	0	0	0	0	0	0	603	903	0
318	3	0.914656	2.11106	9.88614	1036.1	-281.485	-161.134	200	300	0	0	0	0	0	0	0	200	903	0	0	0	0	0	0	0	603	903	0
318	4	0.60948	1.80589	10.8017	395.235	-281.485	-390.016	200	300	0	0	0	0	0	0	0	200	903	0	0	0	0	0	0	0	603	903	0
318	5	0	0	0	0	0	0	200	300	0	0	0	0	0	0	0	200	903	0	0	0	0	0	0	0	603	903	0
318	6	-0.611223	2.11106	10.8017	578.34	-98.3797	-115.358	200	300	0	0	0	0	0	0	0	200	903	0	0	0	0	0	0	0	603	903	0
318	7	-0.000871718	-0.177755	13.2431	669.893	-464.591	-23.8053	200	300	0	0	0	0	0	0	0	200	903	0	0	0	0	0	0	0	603	903	0
318	8	0.60948	1.6533	10.1913	395.235	-830.802	-390.016	200	300	0	0	0	0	0	0	0	200	903	0	0	0	0	0	0	0	603	903	0
318	9	0	0	0	0	0	0	200	300	0	0	0	0	0	0	0	200	903	0	0	0	0	0	0	0	603	903	0
319	0	-0.763811	1.34812	11.7172	944.551	-159.415	-23.8053	200	300	0	0	0	0	0	0	0	200	903	0	0	0	0	0	0	0	603	903	0
319	1	0	0	0	0	0	0	200	300	0	0	0	0	0	0	0	200	903	0	0	0	0	0	0	0	603	903	0
319	2	-0.000871718	0.89036	11.1068	-154.082	-403.556	-115.358	200	300	0	0	0	0	0	0	0	200	903	0	0	0	0	0	0	0	603	903	0
319	3	0.151716	1.6533	10.8017	-154.082	-403.556	-161.134	200	300	0	0	0	0	0	0	0	200	903	0	0	0	0	0	0	0	603	903	0
319	4	0.914656	2.41624	11.1068	-245.635	23.6906	-115.358	200	300	0	0	0	0	0	0	0	200	903	0	0	0	0	0	0	0	603	903	0
319	5	2.59312	1.95848	11.1068	486.787	-220.45	113.524	200	300	0	0	0	0	0	0	0	200	903	0	0	0	0	0	0	0	603	903	0
319	6	1.06724	2.11106	10.8017	852.998	23.6906	-435.793	200	300	0	0	0	0	0	0	0	200	903	0	0	0	0	0	0	0	603	903	0
319	7	-0.000871718	1.6533	9.88614	852.998	-37.3445	-206.911	200	300	0	0	0	0	0	0	0	200	903	0	0	0	0	0	0	0	603	903	0
319	8	0.60948	1.19554	11.412	486.787	-98.3797	-252.687	200	300	0	0	0	0	0	0	0	200	903	0	0	0	0	0	0	0	603	903	0
319	9	0.151716	1.6533	11.1068	120.576	-98.3797	-206.911	200	300	0	0	0	0	0	0	0	200	903	0	0	0	0	0	0	0	603	903	0
320	0	0.151716	2.11106	10.8017	29.0235	23.6906	-390.016	200	300	0	0	0	0	0	0	0	200	903	0	0	0	0	0	0	0	603	903	0
320	1	2.13536	1.95848	9.88614	395.235	-281.485	-115.358	200	300	0	0	0	0	0	0	0	200	903	0	0	0	0	0	0	0	603	903	0
320	2	0.60948	1.80589	9.88614	303.682	-464.591	-115.358	200	300	0	0	0	0	0	0	0	200	903	0	0	0	0	0	0	0	603	903	0
320	3	0	0	0	0	0	0	200	300	0	0	0	0	0	0	0	200	903	0	0	0	0	0	0	0	603	903	0
320	4	1.06724	2.26365	10.1913	578.34	-98.3797	-298.464	200	300	0	0	0	0	0	0	0	200	903	0	0	0	0	0	0	0	603	903	0
320	5	-0.000871718	0.89036	11.1068	1310.76	-98.3797	21.9711	200	300	0	0	0	0	0	0	0	200	903	0	0	0	0	0	0	0	603	903	0
320	6	0.914656	1.50071	11.1068	395.235	-98.3797	-206.911	200	300	0	0	0	0	0	0	0	200	903	0	0	0	0	0	0	0	603	903	0
320	7	2.28795	1.6533	10.4965	212.129	-159.415	-161.134	200	300	0	0	0	0	0	0	0	200	903	0	0	0	0	0	0	0	603	903	0
320	8	1.37242	1.34812	10.4965	578.34	-37.3445	-344.24	200	300	0	0	0	0	0	0	0	200	903	0	0	0	0	0	0	0	603	903	0
320	9	-0.306047	1.80589	10.1913	578.34	206.796	-206.911	200	300	0	0	0	0	0	0	0	200	903	0	0	0	0	0	0	0	603	903	0
321	0	-0.15346	2.41624	11.7172	212.129	-98.3797	-206.911	200	300	0	0	0	0	0	0	0	200	903	0	0	0	0	0	0	0	603	903	0
321	1	-0.763811	2.56883	11.7172	395.235	-281.485	-115.358	200	300	0	0	0	0	0	0	0	200	903	0	0	0	0	0	0	0	603	903	0
321	2	-0.000871718	2.26365	11.1068	669.893	-159.415	-435.793	200	300	0	0	0	0	0	0	0	200	903	0	0	0	0	0	0	0	603	903	0
321	3	0.456892	0.737772	11.7172	944.551	84.7258	-206.911	200	300	0	0	0	0	0	0	0	200	903	0	0	0	0	0	0	0	603	903	0
321	4	0	0	0	0	0	0	200	300	0	0	0	0	0	0	0	200	903	0	0	0	0	0	0	0	603	903	0
321	5	-0.000871718	1.19554	10.1913	669.893	-98.3797	205.077	200	300	0	0	0	0	0	0	0	200	903	0	0	0	0	0	0	0	603	903	0
321	6	1.52501	1.34812	9.88614	29.0235	-281.485	67.7474	200	300	0	0	0	0	0	0	0	200	903	0	0	0	0	0	0	0	603	903	0
321	7	-0.458635	0.89036	10.4965	29.0235	-525.626	-206.911	200	300	0	0	0	0	0	0	0	200	903	0	0	0	0	0	0	0	603	903	0
321	8	0.762068	2.11106	10.4965	578.34	-281.485	205.077	200	300	0	0	0	0	0	0	0	200	903	0	0	0	0	0	0	0	603	903	0
321	9	1.98277	1.95848	10.8017	-154.082	450.937	-252.687	200	300	0	0	0	0	0	0	0	200	903	0	0	0	0	0	0	0	603	903	0
322	0	1.06724	2.11106	10.1913	486.787	-98.3797	67.7474	200	300	0	0	0	0	0	0	0	200	903	0	0	0	0	0	0	0	603	903	0
322	1	-0.15346	2.11106	10.1913	303.682	-159.415	-161.134	200	300	0	0	0	0	0	0	0	200	903	0	0	0	0	0	0	0	603	903	0
322	2	1.52501	1.6533	12.0224	761.445	84.7258	-435.793	200	300	0	0	0	0	0	0	0	200	903	0	0	0	0	0	0	0	603	903	0
322	3	-0.000871718	1.34812	11.7172	761.445	267.831	-161.134	200	300	0	0	0	0	0	0	0	200	903	0	0	0	0	0	0	0	603	903	0
322	4	1.37242	0.432597	12.0224	761.445	-220.45	-298.464	200	300	0	0	0	0	0	0	0	200	903	0	0	0	0	0	0	0	603	903	0
322	5	0.60948	1.50071	10.4965	395.235	-525.626	-161.134	200	300	0	0	0	0	0	0	0	200	903	0	0	0	0	0	0	0	603	903	0
322	6	0.762068	1.80589	11.1068	761.445	-220.45	-69.5817	200	300	0	0	0	0	0	0	0	200	903	0	0	0	0	0	0	0	603	903	0
322	7	0	0	0	0	0	0	200	300	0	0	0	0	0	0	0	200	903	0	0	0	0	0	0	0	603	903	0
322	8	-0.306047	1.6533	11.1068	120.576	23.6906	-252.687	200	300	0	0	0	0	0	0	0	200	903	0	0	0	0	0	0	0	603	903	0
322	9	-0.611223	1.50071	13.5482	486.787	-464.591	67.7474	200	300	0	0	0	0	0	0	0	200	903	0	0	0	0	0	0	0	603	903	0
323	0	0.60948	2.11106	10.8017	669.893	-342.52	-206.911	200	300	0	0	0	0	0	0	0	200	903	0	0	0	0	0	0	0	603	903	0
323	1	0	0	0	0	0	0	200	300	0	0	0	0	0	0	0	200	903	0	0	0	0	0	0	0	603	903	0
323	2	0.914656	1.04295	12.0224	578.34	206.796	-69.5817	200	300	0	0	0	0	0	0	0	200	903	0	0	0	0	0	0	0	603	903	0
323	3	-0.306047	1.19554	10.4965	-154.082	145.761	67.7474	200	300	0	0	0	0	0	0	0	200	903	0	0	0	0	0	0	0	603	903	0
323	4	-0.611223	1.34812	11.1068	120.576	-281.485	-206.911	200	300	0	0	0	0	0	0	0	200	903	0	0	0	0	0	0	0	603	903	0
323	5	-0.15346	1.95848	12.3275	395.235	-98.3797	-252.687	200	300	0	0	0	0	0	0	0	200	903	0	0	0	0	0	0	0	603	903	0
323	6	0.60948	1.95848	11.1068	303.682	23.6906	-161.134	200	300	0	0	0	0	0	0	0	200	903	0	0	0	0	0	0	0	603	903	0
323	7	0.304304	2.11106	9.88614	669.893	-37.3445	-206.911	200	300	0	0	0	0	0	0	0	200	903	0	0	0	0	0	0	0	603	903	0
323	8	0	0	0	0	0	0	200	300	0	0	0	0	0	0	0	200	903	0	0	0	0	0	0	0	603	903	0
323	9	1.06724	1.34812	12.0224	852.998	-342.52	-206.911	200	300	0	0	0	0	0	0	0	200	903	0	0	0	0	0	0	0	603	903	0
324	0	0	0	0	0	0	0	200	300	0	0	0	0	0	0	0	200	903	0	0	0	0	0	0	0	603	903	0
324	1	0.60948	1.50071	10.1913	212.129	-586.661	21.9711	200	300	0	0	0	0	0	0	0	200	903	0	0	0	0	0	0	0	603	903	0
324	2	0	0	0	0	0	0	200	300	0	0	0	0	0	0	0	200	903	0	0	0	0	0	0	0	603	903	0
324	3	0.60948	1.95848	10.8017	-245.635	-98.3797	-161.134	200	300	0	0	0	0	0	0	0	200	903	0	0	0	0	0	0	0	603	903	0
324	4	0	0	0	0	0	0	200	300	0	0	0	0	0	0	0	200	903	0	0	0	0	0	0	0	603	903	0
324	5	-0.458635	2.26365	10.4965	303.682	84.7258	-344.24	200	300	0	0	0	0	0	0	0	200	903	0	0	0	0	0	0	0	603	903	0
324	6	-0.000871718	2.41624	13.2431	486.787	84.7258	-23.8053	200	300	0	0	0	0	0	0	0	200	903	0	0	0	0	0	0	0	603	903	0
324	7	0.60948	1.34812	10.8017	486.787	-281.485	21.9711	200	300	0	0	0	0	0	0	0	200	903	0	0	0	0	0	0	0	603	903	0
324	8	0	0	0	0	0	0	200	300	0	0	0	0	0	0	0	200	903	0	0	0	0	0	0	0	603	903	0
324	9	0	0	0	0	0	0	200	300	0	0	0	0	0	0	0	200	903	0	0	0	0	0	0	0	603	903	0
325	0	-0.306047	1.95848	9.88614	395.235	267.831	-298.464	200	300	0	0	0	0	0	0	0	200	903	0	0	0	0	0	0	0	603	903	0
325	1	0.60948	1.95848	10.4965	486.787	145.761	-161.134	200	300	0	0	0	0	0	0	0	200	903	0	0	0	0	0	0	0	603	903	0
325	2	-0.458635	2.26365	10.8017	395.235	-220.45	-298.464	200	300	0	0	0	0	0	0	0	200	903	0	0	0	0	0	0	0	603	903	0
325	3	0.60948	1.04295	11.1068	120.576	-525.626	-481.569	200	300	0	0	0	0	0	0	0	200	903	0	0	0	0	0	0	0	603	903	0
325	4	0	0	0	0	0	0	200	300	0	0	0	0	0	0	0	200	903	0	0	0	0	0	0	0	603	903	0
325	5	0	0	0	0	0	0	200	300	0	0	0	0	0	0	0	200	903	0	0	0	0	0	0	0	603	903	0
325	6	0	0	0	0	0	0	200	300	0	0	0	0	0	0	0	200	903	0	0	0	0	0	0	0	603	903	0
325	7	0	0	0	0	0	0	200	300	0	0	0	0	0	0	0	200	903	0	0	0	0	0	0	0	603	903	0
325	8	0.456892	-0.177755	11.1068	486.787	-98.3797	67.7474	200	300	0	0	0	0	0	0	0	200	903	0	0	0	0	0	0	0	603	903	0
325	9	0.914656	1.50071	11.1068	-62.5292	23.6906	250.853	200	300	0	0	0	0	0	0	0	200	903	0	0	0	0	0	0	0	603	903	0
326	0	1.21983	1.50071	10.1913	120.576	84.7258	-206.911	200	300	0	0	0	0	0	0	0	200	903	0	0	0	0	0	0	0	603	903	0
326	1	0.914656	2.26365	11.412	1036.1	23.6906	-23.8053	200	300	0	0	0	0	0	0	0	200	903	0	0	0	0	0	0	0	603	903	0
326	2	0.456892	2.26365	11.7172	578.34	84.7258	-252.687	200	300	0	0	0	0	0	0	0	200	903	0	0	0	0	0	0	0	603	903	0
326	3	-1.06899	2.41624	10.1913	395.235	-159.415	21.9711	200	300	0	0	0	0	0	0	0	200	903	0	0	0	0	0	0	0	603	903	0
326	4	0.151716	2.11106	11.1068	1127.66	-98.3797	-161.134	200	300	0	0	0	0	0	0	0	200	903	0	0	0	0	0	0	0	603	903	0
326	5	-0.306047	1.34812	12.9379	1310.76	-98.3797	-344.24	200	300	0	0	0	0	0	0	0	200	903	0	0	0	0	0	0	0	603	903	0
326	6	0	0	0	0	0	0	200	300	0	0	0	0	0	0	0	200	903	0	0	0	0	0	0	0	603	903	0
326	7	0	0	0	0	0	0	200	300	0	0	0	0	0	0	0	200	903	0	0	0	0	0	0	0	603	903	0
326	8	0.914656	1.34812	11.1068	395.235	-342.52	-161.134	200	300	0	0	0	0	0	0	0	200	903	0	0	0	0	0	0	0	603	903	0
326	9	0	0	0	0	0	0	200	300	0	0	0	0	0	0	0	200	903	0	0	0	0	0	0	0	603	903	0
327	0	-0.458635	1.50071	11.7172	395.235	-98.3797	67.7474	200	300	0	0	0	0	0	0	0	200	903	0	0	0	0	0	0	0	603	903	0
327	1	-0.306047	1.95848	13.5482	303.682	23.6906	-115.358	200	300	0	0	0	0	0	0	0	200	903	0	0	0	0	0	0	0	603	903	0
327	2	0.762068	1.80589	11.412	669.893	-281.485	-206.911	200	300	0	0	0	0	0	0	0	200	903	0	0	0	0	0	0	0	603	903	0
327	3	0	0	0	0	0	0	200	300	0	0	0	0	0	0	0	200	903	0	0	0	0	0	0	0	603	903	0
327	4	0	0	0	0	0	0	200	300	0	0	0	0	0	0	0	200	903	0	0	0	0	0	0	0	603	903	0
327	5	0	0	0	0	0	0	200	300	0	0	0	0	0	0	0	200	903	0	0	0	0	0	0	0	603	903	0
327	6	2.28795	1.6533	10.8017	303.682	-342.52	-115.358	200	300	0	0	0	0	0	0	0	200	903	0	0	0	0	0	0	0	603	903	0
327	7	-0.306047	2.56883	10.8017	486.787	-403.556	-115.358	200	300	0	0	0	0	0	0	0	200	903	0	0	0	0	0	0	0	603	903	0
327	8	0.151716	2.56883	10.8017	212.129	-342.52	113.524	200	300	0	0	0	0	0	0	0	200	903	0	0	0	0	0	0	0	603	903	0
327	9	1.6776	2.72141	9.58096	1036.1	145.761	-252.687	200	300	0	0	0	0	0	0	0	200	903	0	0	0	0	0	0	0	603	903	0
328	0	0	0	0	0	0	0	200	300	0	0	0	0	0	0	0	200	903	0	0	0	0	0	0	0	603	903	0
328	1	0	0	0	0	0	0	200	300	0	0	0	0	0	0	0	200	903	0	0	0	0	0	0	0	603	903	0
328	2	-0.916399	1.34812	9.88614	669.893	-159.415	21.9711	200	300	0	0	0	0	0	0	0	200	903	0	0	0	0	0	0	0	603	903	0
328	3	-0.763811	2.11106	11.1068	395.235	-98.3797	-298.464	200	300	0	0	0	0	0	0	0	200	903	0	0	0	0	0	0	0	603	903	0
328	4	0.456892	1.50071	9.88614	29.0235	-37.3445	-161.134	200	300	0	0	0	0	0	0	0	200	903	0	0	0	0	0	0	0	603	903	0
328	5	0	0	0	0	0	0	200	300	0	0	0	0	0	0	0	200	903	0	0	0	0	0	0	0	603	903	0
328	6	0	0	0	0	0	0	200	300	0	0	0	0	0	0	0	200	903	0	0	0	0	0	0	0	603	903	0
328	7	0.304304	2.41624	12.3275	578.34	-220.45	-206.911	200	300	0	0	0	0	0	0	0	200	903	0	0	0	0	0	0	0	603	903	0
328	8	0	0	0	0	0	0	200	300	0	0	0	0	0	0	0	200	903	0	0	0	0	0	0	0	603	903	0
328	9	-0.306047	1.34812	11.412	1493.87	23.6906	67.7474	200	300	0	0	0	0	0	0	0	200	903	0	0	0	0	0	0	0	603	903	0
329	0	-0.611223	1.80589	13.2431	578.34	-37.3445	342.406	200	300	0	0	0	0	0	0	0	200	903	0	0	0	0	0	0	0	603	903	0
329	1	0.304304	1.95848	10.1913	852.998	23.6906	-206.911	200	300	0	0	0	0	0	0	0	200	903	0	0	0	0	0	0	0	603	903	0
329	2	0	0	0	0	0	0	200	300	0	0	0	0	0	0	0	200	903	0	0	0	0	0	0	0	603	903	0
329	3	0	0	0	0	0	0	200	300	0	0	0	0	0	0	0	200	903	0	0	0	0	0	0	0	603	903	0
329	4	0	0	0	0	0	0	200	300	0	0	0	0	0	0	0	200	903	0	0	0	0	0	0	0	603	903	0
329	5	1.37242	2.11106	10.4965	486.787	-403.556	-435.793	200	300	0	0	0	0	0	0	0	200	903	0	0	0	0	0	0	0	603	903	0
329	6	-0.458635	1.95848	10.1913	669.893	-525.626	-252.687	200	300	0	0	0	0	0	0	0	200	903	0	0	0	0	0	0	0	603	903	0
329	7	0.60948	1.50071	11.1068	944.551	-159.415	-115.358	200	300	0	0	0	0	0	0	0	200	903	0	0	0	0	0	0	0	603	903	0
329	8	2.28795	1.34812	10.4965	669.893	-159.415	-161.134	200	300	0	0	0	0	0	0	0	200	903	0	0	0	0	0	0	0	603	903	0
329	9	0	0	0	0	0	0	200	300	0	0	0	0	0	0	0	200	903	0	0	0	0	0	0	0	603	903	0
330	0	0	0	0	0	0	0	200	300	0	0	0	0	0	0	0	200	903	0	0	0	0	0	0	0	603	903	0
330	1	-0.458635	1.95848	9.88614	669.893	-220.45	-161.134	200	300	0	0	0	0	0	0	0	200	903	0	0	0	0	0	0	0	603	903	0
330	2	-0.15346	2.56883	11.1068	303.682	-220.45	-161.134	200	300	0	0	0	0	0	0	0	200	903	0	0	0	0	0	0	0	603	903	0
330	3	-0.306047	2.56883	12.9379	120.576	23.6906	-161.134	200	300	0	0	0	0	0	0	0	200	903	0	0	0	0	0	0	0	603	903	0
330	4	0.151716	2.11106	10.8017	761.445	-37.3445	-206.911	200	300	0	0	0	0	0	0	0	200	903	0	0	0	0	0	0	0	603	903	0
330	5	0	0	0	0	0	0	200	300	0	0	0	0	0	0	0	200	903	0	0	0	0	0	0	0	603	903	0
330	6	0.914656	1.80589	9.88614	669.893	-281.485	-344.24	200	300	0	0	0	0	0	0	0	200	903	0	0	0	0	0	0	0	603	903	0
330	7	0	0	0	0	0	0	200	300	0	0	0	0	0	0	0	200	903	0	0	0	0	0	0	0	603	903	0
330	8	0	0	0	0	0	0	200	300	0	0	0	0	0	0	0	200	903	0	0	0	0	0	0	0	603	903	0
330	9	-0.916399	1.04295	10.8017	29.0235	23.6906	-390.016	200	300	0	0	0	0	0	0	0	200	903	0	0	0	0	0	0	0	603	903	0
331	0	-0.611223	2.41624	13.8534	-62.5292	-98.3797	-298.464	200	300	0	0	0	0	0	0	0	200	903	0	0	0	0	0	0	0	603	903	0
331	1	0.60948	1.80589	10.1913	-62.5292	-403.556	-23.8053	200	300	0	0	0	0	0	0	0	200	903	0	0	0	0	0	0	0	603	903	0
331	2	0	0	0	0	0	0	200	300	0	0	0	0	0	0	0	200	903	0	0	0	0	0	0	0	603	903	0
331	3	0.762068	2.41624	9.88614	761.445	-98.3797	-298.464	200	300	0	0	0	0	0	0	0	200	903	0	0	0	0	0	0	0	603	903	0
331	4	0.456892	1.50071	9.88614	1310.76	-98.3797	-206.911	200	300	0	0	0	0	0	0	0	200	903	0	0	0	0	0	0	0	603	903	0
331	5	-0.15346	1.6533	10.4965	761.445	-159.415	-23.8053	200	300	0	0	0	0	0	0	0	200	903	0	0	0	0	0	0	0	603	903	0
331	6	-0.306047	1.6533	11.7172	578.34	-220.45	-344.24	200	300	0	0	0	0	0	0	0	200	903	0	0	0	0	0	0	0	603	903	0
331	7	0.456892	1.80589	12.6327	486.787	23.6906	-344.24	200	300	0	0	0	0	0	0	0	200	903	0	0	0	0	0	0	0	603	903	0
331	8	0.914656	1.95848	10.4965	1036.1	-37.3445	-252.687	200	300	0	0	0	0	0	0	0	200	903	0	0	0	0	0	0	0	603	903	0
331	9	0	0	0	0	0	0	200	300	0	0	0	0	0	0	0	200	903	0	0	0	0	0	0	0	603	903	0
332	0	0.762068	2.56883	11.1068	669.893	-403.556	-206.911	200	300	0	0	0	0	0	0	0	200	903	0	0	0	0	0	0	0	603	903	0
332	1	0	0	0	0	0	0	200	300	0	0	0	0	0	0	0	200	903	0	0	0	0	0	0	0	603	903	0
332	2	0	0	0	0	0	0	200	300	0	0	0	0	0	0	0	200	903	0	0	0	0	0	0	0	603	903	0
332	3	-1.06899	1.04295	12.6327	578.34	-342.52	-161.134	200	300	0	0	0	0	0	0	0	200	903	0	0	0	0	0	0	0	603	903	0
332	4	-0.000871718	1.19554	10.1913	395.235	-37.3445	-161.134	200	300	0	0	0	0	0	0	0	200	903	0	0	0	0	0	0	0	603	903	0
332	5	0.762068	1.50071	11.1068	212.129	-342.52	-298.464	200	300	0	0	0	0	0	0	0	200	903	0	0	0	0	0	0	0	603	903	0
332	6	0	0	0	0	0	0	200	300	0	0	0	0	0	0	0	200	903	0	0	0	0	0	0	0	603	903	0
332	7	0	0	0	0	0	0	200	300	0	0	0	0	0	0	0	200	903	0	0	0	0	0	0	0	603	903	0
332	8	-0.15346	1.6533	10.1913	303.682	145.761	-206.911	200	300	0	0	0	0	0	0	0	200	903	0	0	0	0	0	0	0	603	903	0
332	9	-0.15346	2.11106	12.0224	120.576	-281.485	-252.687	200	300	0	0	0	0	0	0	0	200	903	0	0	0	0	0	0	0	603	903	0
333	0	0.60948	1.95848	10.4965	761.445	23.6906	-298.464	200	300	0	0	0	0	0	0	0	200	903	0	0	0	0	0	0	0	603	903	0
333	1	0.151716	1.6533	11.412	669.893	84.7258	-252.687	200	300	0	0	0	0	0	0	0	200	903	0	0	0	0	0	0	0	603	903	0
333	2	0.151716	1.50071	10.1913	1127.66	-159.415	-298.464	200	300	0	0	0	0	0	0	0	200	903	0	0	0	0	0	0	0	603	903	0
333	3	-0.000871718	0.737772	10.1913	395.235	-37.3445	-206.911	200	300	0	0	0	0	0	0	0	200	903	0	0	0	0	0	0	0	603	903	0
333	4	-0.15346	1.34812	10.4965	395.235	-159.415	-69.5817	200	300	0	0	0	0	0	0	0	200	903	0	0	0	0	0	0	0	603	903	0
333	5	1.98277	2.26365	10.8017	29.0235	-464.591	21.9711	200	300	0	0	0	0	0	0	0	200	903	0	0	0	0	0	0	0	603	903	0
333	6	0.151716	0.432597	11.1068	669.893	84.7258	250.853	200	300	0	0	0	0	0	0	0	200	903	0	0	0	0	0	0	0	603	903	0
333	7	0.914656	1.80589	10.8017	395.235	-281.485	21.9711	200	300	0	0	0	0	0	0	0	200	903	0	0	0	0	0	0	0	603	903	0
333	8	1.06724	1.6533	10.8017	578.34	-98.3797	433.958	200	300	0	0	0	0	0	0	0	200	903	0	0	0	0	0	0	0	603	903	0
333	9	0	0	0	0	0	0	200	300	0	0	0	0	0	0	0	200	903	0	0	0	0	0	0	0	603	903	0
334	0	1.06724	1.34812	11.412	212.129	23.6906	-298.464	200	300	0	0	0	0	0	0	0	200	903	0	0	0	0	0	0	0	603	903	0
334	1	-0.15346	2.26365	10.1913	-337.188	23.6906	-298.464	200	300	0	0	0	0	0	0	0	200	903	0	0	0	0	0	0	0	603	903	0
334	2	-0.000871718	2.26365	11.1068	29.0235	206.796	-69.5817	200	300	0	0	0	0	0	0	0	200	903	0	0	0	0	0	0	0	603	903	0
334	3	-0.611223	0.89036	13.5482	303.682	-220.45	-390.016	200	300	0	0	0	0	0	0	0	200	903	0	0	0	0	0	0	0	603	903	0
334	4	0.304304	2.41624	10.1913	669.893	-159.415	-298.464	200	300	0	0	0	0	0	0	0	200	903	0	0	0	0	0	0	0	603	903	0
334	5	0.914656	1.34812	10.1913	1219.21	-159.415	-344.24	200	300	0	0	0	0	0	0	0	200	903	0	0	0	0	0	0	0	603	903	0
334	6	0	0	0	0	0	0	200	300	0	0	0	0	0	0	0	200	903	0	0	0	0	0	0	0	603	903	0
334	7	0	0	0	0	0	0	200	300	0	0	0	0	0	0	0	200	903	0	0	0	0	0	0	0	603	903	0
334	8	2.44053	1.95848	9.88614	303.682	-220.45	-298.464	200	300	0	0	0	0	0	0	0	200	903	0	0	0	0	0	0	0	603	903	0
334	9	-0.458635	1.95848	11.1068	29.0235	-342.52	-115.358	200	300	0	0	0	0	0	0	0	200	903	0	0	0	0	0	0	0	603	903	0
335	0	0.914656	0.737772	10.4965	-62.5292	-98.3797	21.9711	200	300	0	0	0	0	0	0	0	200	903	0	0	0	0	0	0	0	603	903	0
335	1	0.60948	1.80589	10.8017	303.682	-98.3797	-206.911	200	300	0	0	0	0	0	0	0	200	903	0	0	0	0	0	0	0	603	903	0
335	2	1.06724	2.26365	9.88614	669.893	-37.3445	-252.687	200	300	0	0	0	0	0	0	0	200	903	0	0	0	0	0	0	0	603	903	0
335	3	-0.916399	1.6533	11.7172	120.576	-220.45	-252.687	200	300	0	0	0	0	0	0	0	200	903	0	0	0	0	0	0	0	603	903	0
335	4	0	0	0	0	0	0	200	300	0	0	0	0	0	0	0	200	903	0	0	0	0	0	0	0	603	903	0
335	5	0.456892	1.6533	11.7172	120.576	84.7258	-298.464	200	300	0	0	0	0	0	0	0	200	903	0	0	0	0	0	0	0	603	903	0
335	6	-0.458635	2.72141	11.1068	303.682	145.761	-206.911	200	300	0	0	0	0	0	0	0	200	903	0	0	0	0	0	0	0	603	903	0
335	7	0.60948	2.26365	10.8017	120.576	-37.3445	-298.464	200	300	0	0	0	0	0	0	0	200	903	0	0	0	0	0	0	0	603	903	0
335	8	0.762068	1.6533	10.4965	395.235	-37.3445	159.3	200	300	0	0	0	0	0	0	0	200	903	0	0	0	0	0	0	0	603	903	0
335	9	0.60948	2.41624	9.88614	578.34	-98.3797	-481.569	200	300	0	0	0	0	0	0	0	200	903	0	0	0	0	0	0	0	603	903	0
336	0	0.60948	1.04295	12.6327	852.998	84.7258	-161.134	200	300	0	0	0	0	0	0	0	200	903	0	0	0	0	0	0	0	603	903	0
336	1	-0.15346	1.50071	10.1913	944.551	-281.485	-206.911	200	300	0	0	0	0	0	0	0	200	903	0	0	0	0	0	0	0	603	903	0
336	2	0.914656	0.280009	10.4965	669.893	-220.45	-206.911	200	300	0	0	0	0	0	0	0	200	903	0	0	0	0	0	0	0	603	903	0
336	3	-0.000871718	1.34812	11.1068	303.682	-281.485	-206.911	200	300	0	0	0	0	0	0	0	200	903	0	0	0	0	0	0	0	603	903	0
336	4	0.60948	1.6533	11.412	578.34	-159.415	-161.134	200	300	0	0	0	0	0	0	0	200	903	0	0	0	0	0	0	0	603	903	0
336	5	0.914656	2.41624	10.8017	-245.635	-37.3445	-206.911	200	300	0	0	0	0	0	0	0	200	903	0	0	0	0	0	0	0	603	903	0
336	6	0	0	0	0	0	0	200	300	0	0	0	0	0	0	0	200	903	0	0	0	0	0	0	0	603	903	0
336	7	0.762068	1.95848	12.0224	486.787	-220.45	-252.687	200	300	0	0	0	0	0	0	0	200	903	0	0	0	0	0	0	0	603	903	0
336	8	0	0	0	0	0	0	200	300	0	0	0	0	0	0	0	200	903	0	0	0	0	0	0	0	603	903	0
336	9	-0.763811	1.50071	10.8017	852.998	-159.415	-252.687	200	300	0	0	0	0	0	0	0	200	903	0	0	0	0	0	0	0	603	903	0
337	0	0.914656	1.6533	11.7172	303.682	-220.45	-161.134	200	300	0	0	0	0	0	0	0	200	903	0	0	0	0	0	0	0	603	903	0
337	1	0.914656	1.95848	11.412	120.576	-159.415	-252.687	200	300	0	0	0	0	0	0	0	200	903	0	0	0	0	0	0	0	603	903	0
337	2	0	0	0	0	0	0	200	300	0	0	0	0	0	0	0	200	903	0	0	0	0	0	0	0	603	903	0
337	3	0.762068	1.19554	11.1068	852.998	-220.45	159.3	200	300	0	0	0	0	0	0	0	200	903	0	0	0	0	0	0	0	603	903	0
337	4	-0.458635	2.11106	9.88614	578.34	-98.3797	-344.24	200	300	0	0	0	0	0	0	0	200	903	0	0	0	0	0	0	0	603	903	0
337	5	-0.458635	0.585184	11.1068	761.445	-403.556	-161.134	200	300	0	0	0	0	0	0	0	200	903	0	0	0	0	0	0	0	603	903	0
337	6	-0.611223	1.04295	12.3275	395.235	-159.415	-252.687	200	300	0	0	0	0	0	0	0	200	903	0	0	0	0	0	0	0	603	903	0
337	7	0.456892	1.34812	10.1913	-62.5292	-98.3797	-23.8053	200	300	0	0	0	0	0	0	0	200	903	0	0	0	0	0	0	0	603	903	0
337	8	0.456892	1.19554	10.8017	212.129	-159.415	-115.358	200	300	0	0	0	0	0	0	0	200	903	0	0	0	0	0	0	0	603	903	0
337	9	0	0	0	0	0	0	200	300	0	0	0	0	0	0	0	200	903	0	0	0	0	0	0	0	603	903	0
338	0	-0.306047	1.6533	9.88614	-62.5292	23.6906	-390.016	200	300	0	0	0	0	0	0	0	200	903	0	0	0	0	0	0	0	603	903	0
338	1	0.60948	2.26365	11.412	486.787	84.7258	205.077	200	300	0	0	0	0	0	0	0	200	903	0	0	0	0	0	0	0	603	903	0
338	2	-0.611223	2.26365	11.412	395.235	-98.3797	-252.687	200	300	0	0	0	0	0	0	0	200	903	0	0	0	0	0	0	0	603	903	0
338	3	0.60948	1.50071	11.7172	669.893	-98.3797	-23.8053	200	300	0	0	0	0	0	0	0	200	903	0	0	0	0	0	0	0	603	903	0
338	4	0	0	0	0	0	0	200	300	0	0	0	0	0	0	0	200	903	0	0	0	0	0	0	0	603	903	0
338	5	0	0	0	0	0	0	200	300	0	0	0	0	0	0	0	200	903	0	0	0	0	0	0	0	603	903	0
338	6	-0.763811	2.41624	9.88614	669.893	-98.3797	-390.016	200	300	0	0	0	0	0	0	0	200	903	0	0	0	0	0	0	0	603	903	0
338	7	0	0	0	0	0	0	200	300	0	0	0	0	0	0	0	200	903	0	0	0	0	0	0	0	603	903	0
338	8	-0.916399	1.95848	10.1913	-154.082	-464.591	-115.358	200	300	0	0	0	0	0	0	0	200	903	0	0	0	0	0	0	0	603	903	0
338	9	1.52501	2.11106	10.4965	852.998	-98.3797	-115.358	200	300	0	0	0	0	0	0	0	200	903	0	0	0	0	0	0	0	603	903	0
339	0	0.456892	1.19554	10.4965	669.893	84.7258	-115.358	200	300	0	0	0	0	0	0	0	200	903	0	0	0	0	0	0	0	603	903	0
339	1	0	0	0	0	0	0	200	300	0	0	0	0	0	0	0	200	903	0	0	0	0	0	0	0	603	903	0
339	2	1.06724	1.19554	13.5482	212.129	-98.3797	-161.134	200	300	0	0	0	0	0	0	0	200	903	0	0	0	0	0	0	0	603	903	0
339	3	0.762068	2.11106	9.88614	486.787	206.796	-23.8053	200	300	0	0	0	0	0	0	0	200	903	0	0	0	0	0	0	0	603	903	0
339	4	1.21983	2.72141	10.4965	-154.082	-220.45	-298.464	200	300	0	0	0	0	0	0	0	200	903	0	0	0	0	0	0	0	603	903	0
339	5	-0.306047	0.432597	11.412	395.235	23.6906	-161.134	200	300	0	0	0	0	0	0	0	200	903	0	0	0	0	0	0	0	603	903	0
339	6	0.762068	2.26365	11.7172	669.893	-342.52	-161.134	200	300	0	0	0	0	0	0	0	200	903	0	0	0	0	0	0	0	603	903	0
339	7	0.151716	1.50071	10.8017	852.998	-37.3445	-252.687	200	300	0	0	0	0	0	0	0	200	903	0	0	0	0	0	0	0	603	903	0
339	8	0	0	0	0	0	0	200	300	0	0	0	0	0	0	0	200	903	0	0	0	0	0	0	0	603	903	0
339	9	0	0	0	0	0	0	200	300	0	0	0	0	0	0	0	200	903	0	0	0	0	0	0	0	603	903	0
340	0	0	0	0	0	0	0	200	300	0	0	0	0	0	0	0	200	903	0	0	0	0	0	0	0	603	903	0
340	1	-0.306047	2.56883	10.4965	578.34	-281.485	-115.358	200	300	0	0	0	0	0	0	0	200	903	0	0	0	0	0	0	0	603	903	0
340	2	-0.15346	1.80589	12.3275	395.235	-342.52	-206.911	200	300	0	0	0	0	0	0	0	200	903	0	0	0	0	0	0	0	603	903	0
340	3	0.151716	2.41624	10.1913	669.893	-159.415	-252.687	200	300	0	0	0	0	0	0	0	200	903	0	0	0	0	0	0	0	603	903	0
340	4	0.914656	1.95848	10.4965	761.445	-220.45	-69.5817	200	300	0	0	0	0	0	0	0	200	903	0	0	0	0	0	0	0	603	903	0
340	5	1.06724	1.19554	10.4965	761.445	-98.3797	113.524	200	300	0	0	0	0	0	0	0	200	903	0	0	0	0	0	0	0	603	903	0
340	6	0	0	0	0	0	0	200	300	0	0	0	0	0	0	0	200	903	0	0	0	0	0	0	0	603	903	0
340	7	1.52501	1.80589	11.1068	303.682	23.6906	-69.5817	200	300	0	0	0	0	0	0	0	200	903	0	0	0	0	0	0	0	603	903	0
340	8	0.762068	2.11106	11.7172	669.893	-37.3445	-69.5817	200	300	0	0	0	0	0	0	0	200	903	0	0	0	0	0	0	0	603	903	0
340	9	0.60948	2.56883	10.4965	303.682	84.7258	-161.134	200	300	0	0	0	0	0	0	0	200	903	0	0	0	0	0	0	0	603	903	0
341	0	1.6776	1.95848	10.1913	852.998	-98.3797	-344.24	200	300	0	0	0	0	0	0	0	200	903	0	0	0	0	0	0	0	603	903	0
341	1	0.60948	2.41624	10.4965	1036.1	-98.3797	-252.687	200	300	0	0	0	0	0	0	0	200	903	0	0	0	0	0	0	0	603	903	0
341	2	0	0	0	0	0	0	200	300	0	0	0	0	0	0	0	200	903	0	0	0	0	0	0	0	603	903	0
341	3	0.456892	-0.177755	10.1913	578.34	-159.415	-206.911	200	300	0	0	0	0	0	0	0	200	903	0	0	0	0	0	0	0	603	903	0
341	4	-0.458635	1.80589	10.8017	761.445	-464.591	-252.687	200	300	0	0	0	0	0	0	0	200	903	0	0	0	0	0	0	0	603	903	0
341	5	-0.15346	2.26365	11.412	669.893	-37.3445	-206.911	200	300	0	0	0	0	0	0	0	200	903	0	0	0	0	0	0	0	603	903	0
341	6	0.304304	2.41624	11.1068	212.129	-98.3797	-206.911	200	300	0	0	0	0	0	0	0	200	903	0	0	0	0	0	0	0	603	903	0
341	7	0	0	0	0	0	0	200	300	0	0	0	0	0	0	0	200	903	0	0	0	0	0	0	0	603	903	0
341	8	-0.15346	2.26365	10.4965	761.445	-37.3445	-344.24	200	300	0	0	0	0	0	0	0	200	903	0	0	0	0	0	0	0	603	903	0
341	9	0	0	0	0	0	0	200	300	0	0	0	0	0	0	0	200	903	0	0	0	0	0	0	0	603	903	0
342	0	-0.458635	1.6533	10.4965	761.445	-98.3797	21.9711	200	300	0	0	0	0	0	0	0	200	903	0	0	0	0	0	0	0	603	903	0
342	1	-0.306047	1.6533	12.9379	29.0235	84.7258	-252.687	200	300	0	0	0	0	0	0	0	200	903	0	0	0	0	0	0	0	603	903	0
342	2	0.60948	1.95848	11.1068	212.129	84.7258	-115.358	200	300	0	0	0	0	0	0	0	200	903	0	0	0	0	0	0	0	603	903	0
342	3	0.304304	2.26365	10.4965	120.576	-37.3445	-206.911	200	300	0	0	0	0	0	0	0	200	903	0	0	0	0	0	0	0	603	903	0
342	4	0.456892	0.89036	11.1068	303.682	-525.626	-298.464	200	300	0	0	0	0	0	0	0	200	903	0	0	0	0	0	0	0	603	903	0
342	5	0	0	0	0	0	0	200	300	0	0	0	0	0	0	0	200	903	0	0	0	0	0	0	0	603	903	0
342	6	-0.763811	0.280009	10.8017	852.998	206.796	-206.911	200	300	0	0	0	0	0	0	0	200	903	0	0	0	0	0	0	0	603	903	0
342	7	-0.611223	1.19554	12.6327	395.235	84.7258	-298.464	200	300	0	0	0	0	0	0	0	200	903	0	0	0	0	0	0	0	603	903	0
342	8	0	0	0	0	0	0	200	300	0	0	0	0	0	0	0	200	903	0	0	0	0	0	0	0	603	903	0
342	9	1.52501	1.19554	9.88614	395.235	-586.661	-115.358	200	300	0	0	0	0	0	0	0	200	903	0	0	0	0	0	0	0	603	903	0
343	0	0.762068	2.26365	9.88614	1219.21	-159.415	-252.687	200	300	0	0	0	0	0	0	0	200	903	0	0	0	0	0	0	0	603	903	0
343	1	-0.458635	1.95848	9.88614	395.235	23.6906	-115.358	200	300	0	0	0	0	0	0	0	200	903	0	0	0	0	0	0	0	603	903	0
343	2	0	0	0	0	0	0	200	300	0	0	0	0	0	0	0	200	903	0	0	0	0	0	0	0	603	903	0
343	3	-0.15346	1.50071	10.8017	303.682	23.6906	-206.911	200	300	0	0	0	0	0	0	0	200	903	0	0	0	0	0	0	0	603	903	0
343	4	1.21983	1.50071	11.1068	578.34	-37.3445	-390.016	200	300	0	0	0	0	0	0	0	200	903	0	0	0	0	0	0	0	603	903	0
343	5	1.52501	0.432597	9.88614	212.129	206.796	-161.134	200	300	0	0	0	0	0	0	0	200	903	0	0	0	0	0	0	0	603	903	0
343	6	0	0	0	0	0	0	200	300	0	0	0	0	0	0	0	200	903	0	0	0	0	0	0	0	603	903	0
343	7	-0.15346	2.11106	9.88614	120.576	-281.485	-298.464	200	300	0	0	0	0	0	0	0	200	903	0	0	0	0	0	0	0	603	903	0
343	8	-0.000871718	2.41624	11.412	395.235	-37.3445	-344.24	200	300	0	0	0	0	0	0	0	200	903	0	0	0	0	0	0	0	603	903	0
343	9	-0.306047	1.04295	11.412	120.576	-98.3797	-161.134	200	300	0	0	0	0	0	0	0	200	903	0	0	0	0	0	0	0	603	903	0
344	0	0.304304	2.26365	10.8017	944.551	23.6906	-206.911	200	300	0	0	0	0	0	0	0	200	903	0	0	0	0	0	0	0	603	903	0
344	1	0.456892	1.6533	11.7172	578.34	-281.485	-390.016	200	300	0	0	0	0	0	0	0	200	903	0	0	0	0	0	0	0	603	903	0
344	2	0	0	0	0	0	0	200	300	0	0	0	0	0	0	0	200	903	0	0	0	0	0	0	0	603	903	0
344	3	-0.15346	1.6533	11.412	120.576	-159.415	-115.358	200	300	0	0	0	0	0	0	0	200	903	0	0	0	0	0	0	0	603	903	0
344	4	0	0	0	0	0	0	200	300	0	0	0	0	0	0	0	200	903	0	0	0	0	0	0	0	603	903	0
344	5	-0.15346	2.11106	11.412	29.0235	-37.3445	-298.464	200	300	0	0	0	0	0	0	0	200	903	0	0	0	0	0	0	0	603	903	0
344	6	0.151716	1.80589	12.6327	120.576	-159.415	-69.5817	200	300	0	0	0	0	0	0	0	200	903	0	0	0	0	0	0	0	603	903	0
344	7	0.60948	2.26365	10.8017	395.235	-159.415	-206.911	200	300	0	0	0	0	0	0	0	200	903	0	0	0	0	0	0	0	603	903	0
344	8	0	0	0	0	0	0	200	300	0	0	0	0	0	0	0	200	903	0	0	0	0	0	0	0	603	903	0
344	9	1.37242	2.11106	10.1913	1036.1	145.761	-252.687	200	300	0	0	0	0	0	0	0	200	903	0	0	0	0	0	0	0	603	903	0
345	0	-0.611223	1.6533	9.88614	395.235	267.831	-344.24	200	300	0	0	0	0	0	0	0	200	903	0	0	0	0	0	0	0	603	903	0
345	1	1.37242	1.50071	11.412	303.682	-220.45	-252.687	200	300	0	0	0	0	0	0	0	200	903	0	0	0	0	0	0	0	603	903	0
345	2	-0.611223	1.80589	12.6327	669.893	-98.3797	-344.24	200	300	0	0	0	0	0	0	0	200	903	0	0	0	0	0	0	0	603	903	0
345	3	0.762068	2.41624	11.7172	578.34	84.7258	-481.569	200	300	0	0	0	0	0	0	0	200	903	0	0	0	0	0	0	0	603	903	0
345	4	0.60948	0.89036	11.1068	395.235	23.6906	-298.464	200	300	0	0	0	0	0	0	0	200	903	0	0	0	0	0	0	0	603	903	0
345	5	0.151716	2.72141	9.88614	944.551	-281.485	-252.687	200	300	0	0	0	0	0	0	0	200	903	0	0	0	0	0	0	0	603	903	0
345	6	-0.458635	1.50071	11.412	944.551	-525.626	-252.687	200	300	0	0	0	0	0	0	0	200	903	0	0	0	0	0	0	0	603	903	0
345	7	0	0	0	0	0	0	200	300	0	0	0	0	0	0	0	200	903	0	0	0	0	0	0	0	603	903	0
345	8	0.60948	1.19554	10.4965	669.893	-403.556	-69.5817	200	300	0	0	0	0	0	0	0	200	903	0	0	0	0	0	0	0	603	903	0
345	9	-0.458635	1.6533	10.4965	120.576	145.761	-23.8053	200	300	0	0	0	0	0	0	0	200	903	0	0	0	0	0	0	0	603	903	0
346	0	0.60948	1.95848	10.8017	-154.082	-281.485	-161.134	200	300	0	0	0	0	0	0	0	200	903	0	0	0	0	0	0	0	603	903	0
346	1	0	0	0	0	0	0	200	300	0	0	0	0	0	0	0	200	903	0	0	0	0	0	0	0	603	903	0
346	2	0.914656	2.11106	9.88614	212.129	84.7258	-390.016	200	300	0	0	0	0	0	0	0	200	903	0	0	0	0	0	0	0	603	903	0
346	3	0.304304	3.48435	9.88614	486.787	23.6906	-23.8053	200	300	0	0	0	0	0	0	0	200	903	0	0	0	0	0	0	0	603	903	0
346	4	-0.15346	1.95848	9.88614	395.235	-159.415	-344.24	200	300	0	0	0	0	0	0	0	200	903	0	0	0	0	0	0	0	603	903	0
346	5	-0.306047	1.6533	11.1068	944.551	206.796	-69.5817	200	300	0	0	0	0	0	0	0	200	903	0	0	0	0	0	0	0	603	903	0
346	6	0.304304	1.19554	10.4965	212.129	-220.45	-115.358	200	300	0	0	0	0	0	0	0	200	903	0	0	0	0	0	0	0	603	903	0
346	7	1.37242	2.874	11.412	1493.87	84.7258	21.9711	200	300	0	0	0	0	0	0	0	200	903	0	0	0	0	0	0	0	603	903	0
346	8	0.456892	2.41624	9.88614	761.445	-37.3445	21.9711	200	300	0	0	0	0	0	0	0	200	903	0	0	0	0	0	0	0	603	903	0
346	9	2.59312	1.95848	11.1068	852.998	-220.45	159.3	200	300	0	0	0	0	0	0	0	200	903	0	0	0	0	0	0	0	603	903	0
347	0	-1.06899	2.11106	9.88614	852.998	-281.485	-344.24	200	300	0	0	0	0	0	0	0	200	903	0	0	0	0	0	0	0	603	903	0
347	1	-0.458635	1.50071	10.4965	669.893	84.7258	-23.8053	200	300	0	0	0	0	0	0	0	200	903	0	0	0	0	0	0	0	603	903	0
347	2	-0.000871718	1.95848	12.6327	303.682	-159.415	342.406	200	300	0	0	0	0	0	0	0	200	903	0	0	0	0	0	0	0	603	903	0
347	3	0.60948	1.50071	10.1913	212.129	-220.45	21.9711	200	300	0	0	0	0	0	0	0	200	903	0	0	0	0	0	0	0	603	903	0
347	4	2.28795	1.95848	10.4965	29.0235	-464.591	-115.358	200	300	0	0	0	0	0	0	0	200	903	0	0	0	0	0	0	0	603	903	0
347	5	1.37242	1.80589	9.88614	120.576	-98.3797	-161.134	200	300	0	0	0	0	0	0	0	200	903	0	0	0	0	0	0	0	603	903	0
347	6	0.151716	2.41624	10.1913	-245.635	-159.415	-161.134	200	300	0	0	0	0	0	0	0	200	903	0	0	0	0	0	0	0	603	903	0
347	7	0	0	0	0	0	0	200	300	0	0	0	0	0	0	0	200	903	0	0	0	0	0	0	0	603	903	0
347	8	-0.15346	1.80589	12.0224	1493.87	-98.3797	-161.134	200	300	0	0	0	0	0	0	0	200	903	0	0	0	0	0	0	0	603	903	0
347	9	0.304304	1.95848	12.0224	578.34	-37.3445	-115.358	200	300	0	0	0	0	0	0	0	200	903	0	0	0	0	0	0	0	603	903	0
348	0	0.60948	1.50071	12.3275	395.235	-98.3797	-298.464	200	300	0	0	0	0	0	0	0	200	903	0	0	0	0	0	0	0	603	903	0
348	1	0	0	0	0	0	0	200	300	0	0	0	0	0	0	0	200	903	0	0	0	0	0	0	0	603	903	0
348	2	0.304304	2.41624	12.3275	395.235	-281.485	-344.24	200	300	0	0	0	0	0	0	0	200	903	0	0	0	0	0	0	0	603	903	0
348	3	0	0	0	0	0	0	200	300	0	0	0	0	0	0	0	200	903	0	0	0	0	0	0	0	603	903	0
348	4	0.914656	2.11106	10.8017	1036.1	-159.415	-252.687	200	300	0	0	0	0	0	0	0	200	903	0	0	0	0	0	0	0	603	903	0
348	5	-0.15346	1.50071	10.4965	852.998	-342.52	-69.5817	200	300	0	0	0	0	0	0	0	200	903	0	0	0	0	0	0	0	603	903	0
348	6	1.06724	1.50071	10.8017	303.682	-281.485	-115.358	200	300	0	0	0	0	0	0	0	200	903	0	0	0	0	0	0	0	603	903	0
348	7	2.28795	1.04295	10.8017	29.0235	-159.415	-69.5817	200	300	0	0	0	0	0	0	0	200	903	0	0	0	0	0	0	0	603	903	0
348	8	0	0	0	0	0	0	200	300	0	0	0	0	0	0	0	200	903	0	0	0	0	0	0	0	603	903	0
348	9	-0.458635	2.26365	10.4965	120.576	206.796	-161.134	200	300	0	0	0	0	0	0	0	200	903	0	0	0	0	0	0	0	603	903	0
349	0	0.151716	1.34812	10.4965	120.576	145.761	-161.134	200	300	0	0	0	0	0	0	0	200	903	0	0	0	0	0	0	0	603	903	0
349	1	0.151716	1.80589	10.4965	578.34	-159.415	-252.687	200	300	0	0	0	0	0	0	0	200	903	0	0	0	0	0	0	0	603	903	0
349	2	0.456892	1.34812	10.4965	1036.1	-220.45	-390.016	200	300	0	0	0	0	0	0	0	200	903	0	0	0	0	0	0	0	603	903	0
349	3	0.60948	1.80589	11.1068	669.893	-37.3445	-161.134	200	300	0	0	0	0	0	0	0	200	903	0	0	0	0	0	0	0	603	903	0
349	4	0	0	0	0	0	0	200	300	0	0	0	0	0	0	0	200	903	0	0	0	0	0	0	0	603	903	0
349	5	0	0	0	0	0	0	200	300	0	0	0	0	0	0	0	200	903	0	0	0	0	0	0	0	603	903	0
349	6	0	0	0	0	0	0	200	300	0	0	0	0	0	0	0	200	903	0	0	0	0	0	0	0	603	903	0
349	7	-0.611223	1.95848	11.1068	395.235	-342.52	250.853	200	300	0	0	0	0	0	0	0	200	903	0	0	0	0	0	0	0	603	903	0
349	8	0.151716	1.80589	10.1913	761.445	-220.45	-69.5817	200	300	0	0	0	0	0	0	0	200	903	0	0	0	0	0	0	0	603	903	0
349	9	0.456892	1.80589	11.1068	852.998	-281.485	-344.24	200	300	0	0	0	0	0	0	0	200	903	0	0	0	0	0	0	0	603	903	0
350	0	0	0	0	0	0	0	200	300	0	0	0	0	0	0	0	200	903	0	0	0	0	0	0	0	603	903	0
350	1	-0.458635	0.432597	10.4965	303.682	-281.485	-161.134	200	300	0	0	0	0	0	0	0	200	903	0	0	0	0	0	0	0	603	903	0
350	2	0	0	0	0	0	0	200	300	0	0	0	0	0	0	0	200	903	0	0	0	0	0	0	0	603	903	0
350	3	-0.15346	1.6533	11.7172	303.682	23.6906	-206.911	200	300	0	0	0	0	0	0	0	200	903	0	0	0	0	0	0	0	603	903	0
350	4	-0.15346	2.26365	12.0224	395.235	-159.415	-161.134	200	300	0	0	0	0	0	0	0	200	903	0	0	0	0	0	0	0	603	903	0
350	5	0.60948	0.127421	11.7172	29.0235	-464.591	21.9711	200	300	0	0	0	0	0	0	0	200	903	0	0	0	0	0	0	0	603	903	0
350	6	0.60948	2.56883	9.88614	486.787	-281.485	-161.134	200	300	0	0	0	0	0	0	0	200	903	0	0	0	0	0	0	0	603	903	0
350	7	0.60948	2.874	12.9379	761.445	-37.3445	-252.687	200	300	0	0	0	0	0	0	0	200	903	0	0	0	0	0	0	0	603	903	0
350	8	-0.15346	2.11106	10.1913	1036.1	267.831	-69.5817	200	300	0	0	0	0	0	0	0	200	903	0	0	0	0	0	0	0	603	903	0
350	9	0.762068	0.432597	10.4965	578.34	23.6906	-252.687	200	300	0	0	0	0	0	0	0	200	903	0	0	0	0	0	0	0	603	903	0
351	0	-0.000871718	1.34812	11.1068	212.129	-281.485	296.629	200	300	0	0	0	0	0	0	0	200	903	0	0	0	0	0	0	0	603	903	0
351	1	0.456892	1.34812	10.4965	120.576	-342.52	-115.358	200	300	0	0	0	0	0	0	0	200	903	0	0	0	0	0	0	0	603	903	0
351	2	0.456892	1.95848	10.8017	303.682	23.6906	21.9711	200	300	0	0	0	0	0	0	0	200	903	0	0	0	0	0	0	0	603	903	0
351	3	0.914656	0.737772	10.8017	120.576	-281.485	-115.358	200	300	0	0	0	0	0	0	0	200	903	0	0	0	0	0	0	0	603	903	0
351	4	0	0	0	0	0	0	200	300	0	0	0	0	0	0	0	200	903	0	0	0	0	0	0	0	603	903	0
351	5	-0.15346	1.19554	12.3275	486.787	-342.52	-161.134	200	300	0	0	0	0	0	0	0	200	903	0	0	0	0	0	0	0	603	903	0
351	6	0.304304	1.50071	10.8017	578.34	389.902	-69.5817	200	300	0	0	0	0	0	0	0	200	903	0	0	0	0	0	0	0	603	903	0
351	7	0.304304	1.80589	10.8017	303.682	23.6906	-344.24	200	300	0	0	0	0	0	0	0	200	903	0	0	0	0	0	0	0	603	903	0
351	8	0	0	0	0	0	0	200	300	0	0	0	0	0	0	0	200	903	0	0	0	0	0	0	0	603	903	0
351	9	0.60948	2.11106	11.1068	669.893	-220.45	-206.911	200	300	0	0	0	0	0	0	0	200	903	0	0	0	0	0	0	0	603	903	0
352	0	0	0	0	0	0	0	200	300	0	0	0	0	0	0	0	200	903	0	0	0	0	0	0	0	603	903	0
352	1	-0.306047	2.56883	12.0224	669.893	-98.3797	-298.464	200	300	0	0	0	0	0	0	0	200	903	0	0	0	0	0	0	0	603	903	0
352	2	0.60948	2.41624	10.8017	1219.21	-220.45	-298.464	200	300	0	0	0	0	0	0	0	200	903	0	0	0	0	0	0	0	603	903	0
352	3	0.60948	1.04295	10.4965	1676.97	-220.45	-298.464	200	300	0	0	0	0	0	0	0	200	903	0	0	0	0	0	0	0	603	903	0
352	4	0	0	0	0	0	0	200	300	0	0	0	0	0	0	0	200	903	0	0	0	0	0	0	0	603	903	0
352	5	-0.000871718	1.04295	10.8017	852.998	-220.45	-23.8053	200	300	0	0	0	0	0	0	0	200	903	0	0	0	0	0	0	0	603	903	0
352	6	0.762068	1.34812	11.1068	303.682	-98.3797	-115.358	200	300	0	0	0	0	0	0	0	200	903	0	0	0	0	0	0	0	603	903	0
352	7	-0.458635	2.41624	11.1068	395.235	-159.415	67.7474	200	300	0	0	0	0	0	0	0	200	903	0	0	0	0	0	0	0	603	903	0
352	8	0.762068	1.80589	11.7172	486.787	-37.3445	-23.8053	200	300	0	0	0	0	0	0	0	200	903	0	0	0	0	0	0	0	603	903	0
352	9	0.151716	1.34812	10.4965	212.129	206.796	-344.24	200	300	0	0	0	0	0	0	0	200	903	0	0	0	0	0	0	0	603	903	0
353	0	1.06724	2.41624	11.412	852.998	-464.591	-23.8053	200	300	0	0	0	0	0	0	0	200	903	0	0	0	0	0	0	0	603	903	0
353	1	0.304304	2.41624	9.88614	761.445	-98.3797	-252.687	200	300	0	0	0	0	0	0	0	200	903	0	0	0	0	0	0	0	603	903	0
353	2	-0.458635	1.95848	10.8017	1036.1	-98.3797	-298.464	200	300	0	0	0	0	0	0	0	200	903	0	0	0	0	0	0	0	603	903	0
353	3	0.304304	1.34812	12.0224	578.34	-159.415	-298.464	200	300	0	0	0	0	0	0	0	200	903	0	0	0	0	0	0	0	603	903	0
353	4	0.914656	-0.0251671	12.3275	1219.21	-98.3797	67.7474	200	300	0	0	0	0	0	0	0	200	903	0	0	0	0	0	0	0	603	903	0
353	5	0.914656	1.34812	9.88614	29.0235	-98.3797	-344.24	200	300	0	0	0	0	0	0	0	200	903	0	0	0	0	0	0	0	603	903	0
353	6	0.151716	1.95848	9.88614	303.682	-281.485	-206.911	200	300	0	0	0	0	0	0	0	200	903	0	0	0	0	0	0	0	603	903	0
353	7	0	0	0	0	0	0	200	300	0	0	0	0	0	0	0	200	903	0	0	0	0	0	0	0	603	903	0
353	8	-0.611223	2.11106	10.8017	669.893	145.761	-252.687	200	300	0	0	0	0	0	0	0	200	903	0	0	0	0	0	0	0	603	903	0
353	9	0.151716	1.80589	10.4965	120.576	-342.52	-298.464	200	300	0	0	0	0	0	0	0	200	903	0	0	0	0	0	0	0	603	903	0
354	0	0	0	0	0	0	0	200	300	0	0	0	0	0	0	0	200	903	0	0	0	0	0	0	0	603	903	0
354	1	0	0	0	0	0	0	200	300	0	0	0	0	0	0	0	200	903	0	0	0	0	0	0	0	603	903	0
354	2	-0.306047	1.50071	9.88614	120.576	23.6906	-252.687	200	300	0	0	0	0	0	0	0	200	903	0	0	0	0	0	0	0	603	903	0
354	3	1.83018	1.80589	10.1913	120.576	84.7258	-252.687	200	300	0	0	0	0	0	0	0	200	903	0	0	0	0	0	0	0	603	903	0
354	4	-0.306047	1.95848	10.8017	212.129	-98.3797	-115.358	200	300	0	0	0	0	0	0	0	200	903	0	0	0	0	0	0	0	603	903	0
354	5	1.06724	2.72141	10.8017	486.787	-281.485	-252.687	200	300	0	0	0	0	0	0	0	200	903	0	0	0	0	0	0	0	603	903	0
354	6	0.60948	2.11106	11.1068	1036.1	-37.3445	-206.911	200	300	0	0	0	0	0	0	0	200	903	0	0	0	0	0	0	0	603	903	0
354	7	0	0	0	0	0	0	200	300	0	0	0	0	0	0	0	200	903	0	0	0	0	0	0	0	603	903	0
354	8	0	0	0	0	0	0	200	300	0	0	0	0	0	0	0	200	903	0	0	0	0	0	0	0	603	903	0
354	9	-0.15346	2.26365	10.1913	1036.1	84.7258	-344.24	200	300	0	0	0	0	0	0	0	200	903	0	0	0	0	0	0	0	603	903	0
355	0	-0.306047	1.80589	12.9379	212.129	-281.485	-435.793	200	300	0	0	0	0	0	0	0	200	903	0	0	0	0	0	0	0	603	903	0
355	1	0.456892	1.6533	11.1068	395.235	-98.3797	-206.911	200	300	0	0	0	0	0	0	0	200	903	0	0	0	0	0	0	0	603	903	0
355	2	0	0	0	0	0	0	200	300	0	0	0	0	0	0	0	200	903	0	0	0	0	0	0	0	603	903	0
355	3	0.456892	0.737772	11.1068	303.682	-37.3445	-344.24	200	300	0	0	0	0	0	0	0	200	903	0	0	0	0	0	0	0	603	903	0
355	4	0	0	0	0	0	0	200	300	0	0	0	0	0	0	0	200	903	0	0	0	0	0	0	0	603	903	0
355	5	-0.15346	2.26365	9.88614	486.787	-37.3445	21.9711	200	300	0	0	0	0	0	0	0	200	903	0	0	0	0	0	0	0	603	903	0
355	6	-0.458635	1.50071	13.2431	1036.1	23.6906	-252.687	200	300	0	0	0	0	0	0	0	200	903	0	0	0	0	0	0	0	603	903	0
355	7	0.60948	1.6533	12.3275	852.998	145.761	-115.358	200	300	0	0	0	0	0	0	0	200	903	0	0	0	0	0	0	0	603	903	0
355	8	1.06724	1.6533	9.88614	212.129	450.937	-161.134	200	300	0	0	0	0	0	0	0	200	903	0	0	0	0	0	0	0	603	903	0
355	9	0.60948	1.6533	9.88614	486.787	-586.661	205.077	200	300	0	0	0	0	0	0	0	200	903	0	0	0	0	0	0	0	603	903	0
356	0	0	0	0	0	0	0	200	300	0	0	0	0	0	0	0	200	903	0	0	0	0	0	0	0	603	903	0
356	1	-0.000871718	1.50071	10.8017	486.787	267.831	67.7474	200	300	0	0	0	0	0	0	0	200	903	0	0	0	0	0	0	0	603	903	0
356	2	0.60948	1.95848	11.412	486.787	84.7258	-481.569	200	300	0	0	0	0	0	0	0	200	903	0	0	0	0	0	0	0	603	903	0
356	3	0	0	0	0	0	0	200	300	0	0	0	0	0	0	0	200	903	0	0	0	0	0	0	0	603	903	0
356	4	0	0	0	0	0	0	200	300	0	0	0	0	0	0	0	200	903	0	0	0	0	0	0	0	603	903	0
356	5	-0.15346	0.280009	10.4965	761.445	145.761	-206.911	200	300	0	0	0	0	0	0	0	200	903	0	0	0	0	0	0	0	603	903	0
356	6	1.98277	1.19554	10.4965	-62.5292	-98.3797	-206.911	200	300	0	0	0	0	0	0	0	200	903	0	0	0	0	0	0	0	603	903	0
356	7	0	0	0	0	0	0	200	300	0	0	0	0	0	0	0	200	903	0	0	0	0	0	0	0	603	903	0
356	8	0.60948	2.11106	10.8017	29.0235	-159.415	-252.687	200	300	0	0	0	0	0	0	0	200	903	0	0	0	0	0	0	0	603	903	0
356	9	0	0	0	0	0	0	200	300	0	0	0	0	0	0	0	200	903	0	0	0	0	0	0	0	603	903	0
357	0	0.456892	2.41624	11.1068	578.34	-342.52	-206.911	200	300	0	0	0	0	0	0	0	200	903	0	0	0	0	0	0	0	603	903	0
357	1	0	0	0	0	0	0	200	300	0	0	0	0	0	0	0	200	903	0	0	0	0	0	0	0	603	903	0
357	2	0.456892	1.80589	11.7172	395.235	-403.556	-252.687	200	300	0	0	0	0	0	0	0	200	903	0	0	0	0	0	0	0	603	903	0
357	3	0.456892	0.432597	10.8017	303.682	23.6906	-206.911	200	300	0	0	0	0	0	0	0	200	903	0	0	0	0	0	0	0	603	903	0
357	4	-0.000871718	1.34812	11.412	120.576	206.796	-206.911	200	300	0	0	0	0	0	0	0	200	903	0	0	0	0	0	0	0	603	903	0
357	5	0.60948	2.41624	10.1913	761.445	-98.3797	-206.911	200	300	0	0	0	0	0	0	0	200	903	0	0	0	0	0	0	0	603	903	0
357	6	0	0	0	0	0	0	200	300	0	0	0	0	0	0	0	200	903	0	0	0	0	0	0	0	603	903	0
357	7	0	0	0	0	0	0	200	300	0	0	0	0	0	0	0	200	903	0	0	0	0	0	0	0	603	903	0
357	8	-0.611223	2.26365	11.7172	852.998	-464.591	-161.134	200	300	0	0	0	0	0	0	0	200	903	0	0	0	0	0	0	0	603	903	0
357	9	0.304304	1.34812	11.1068	120.576	23.6906	-481.569	200	300	0	0	0	0	0	0	0	200	903	0	0	0	0	0	0	0	603	903	0
358	0	0	0	0	0	0	0	200	300	0	0	0	0	0	0	0	200	903	0	0	0	0	0	0	0	603	903	0
358	1	-0.000871718	1.04295	11.7172	761.445	-281.485	21.9711	200	300	0	0	0	0	0	0	0	200	903	0	0	0	0	0	0	0	603	903	0
358	2	-0.611223	1.6533	9.88614	212.129	-98.3797	-344.24	200	300	0	0	0	0	0	0	0	200	903	0	0	0	0	0	0	0	603	903	0
358	3	-0.15346	2.26365	11.1068	852.998	145.761	-206.911	200	300	0	0	0	0	0	0	0	200	903	0	0	0	0	0	0	0	603	903	0
358	4	1.52501	2.26365	10.4965	120.576	-37.3445	-161.134	200	300	0	0	0	0	0	0	0	200	903	0	0	0	0	0	0	0	603	903	0
358	5	0.762068	2.41624	12.0224	212.129	-98.3797	-252.687	200	300	0	0	0	0	0	0	0	200	903	0	0	0	0	0	0	0	603	903	0
358	6	0	0	0	0	0	0	200	300	0	0	0	0	0	0	0	200	903	0	0	0	0	0	0	0	603	903	0
358	7	-0.458635	1.80589	11.1068	1127.66	-37.3445	-344.24	200	300	0	0	0	0	0	0	0	200	903	0	0	0	0	0	0	0	603	903	0
358	8	-0.306047	1.50071	10.4965	578.34	84.7258	-390.016	200	300	0	0	0	0	0	0	0	200	903	0	0	0	0	0	0	0	603	903	0
358	9	-0.916399	1.6533	14.1586	29.0235	23.6906	21.9711	200	300	0	0	0	0	0	0	0	200	903	0	0	0	0	0	0	0	603	903	0
359	0	0.304304	1.80589	11.412	486.787	-220.45	21.9711	200	300	0	0	0	0	0	0	0	200	903	0	0	0	0	0	0	0	603	903	0
359	1	0	0	0	0	0	0	200	300	0	0	0	0	0	0	0	200	903	0	0	0	0	0	0	0	603	903	0
359	2	-0.000871718	2.26365	10.1913	212.129	-98.3797	-69.5817	200	300	0	0	0	0	0	0	0	200	903	0	0	0	0	0	0	0	603	903	0
359	3	-0.458635	1.6533	10.1913	761.445	-220.45	-23.8053	200	300	0	0	0	0	0	0	0	200	903	0	0	0	0	0	0	0	603	903	0
359	4	-0.15346	1.19554	11.1068	1036.1	23.6906	-115.358	200	300	0	0	0	0	0	0	0	200	903	0	0	0	0	0	0	0	603	903	0
359	5	0.914656	1.19554	11.7172	303.682	-37.3445	-252.687	200	300	0	0	0	0	0	0	0	200	903	0	0	0	0	0	0	0	603	903	0
359	6	1.06724	0.585184	11.1068	944.551	-281.485	-69.5817	200	300	0	0	0	0	0	0	0	200	903	0	0	0	0	0	0	0	603	903	0
359	7	0.762068	1.6533	10.1913	303.682	-98.3797	-206.911	200	300	0	0	0	0	0	0	0	200	903	0	0	0	0	0	0	0	603	903	0
359	8	-0.000871718	2.56883	11.412	669.893	23.6906	-344.24	200	300	0	0	0	0	0	0	0	200	903	0	0	0	0	0	0	0	603	903	0
359	9	0.456892	2.41624	12.9379	120.576	-220.45	-344.24	200	300	0	0	0	0	0	0	0	200	903	0	0	0	0	0	0	0	603	903	0
360	0	0.456892	2.56883	11.412	120.576	-98.3797	-390.016	200	300	0	0	0	0	0	0	0	200	903	0	0	0	0	0	0	0	603	903	0
360	1	0.456892	1.95848	11.1068	669.893	23.6906	-390.016	200	300	0	0	0	0	0	0	0	200	903	0	0	0	0	0	0	0	603	903	0
360	2	2.13536	1.50071	9.88614	1676.97	206.796	-298.464	200	300	0	0	0	0	0	0	0	200	903	0	0	0	0	0	0	0	603	903	0
360	3	0	0	0	0	0	0	200	300	0	0	0	0	0	0	0	200	903	0	0	0	0	0	0	0	603	903	0
360	4	0	0	0	0	0	0	200	300	0	0	0	0	0	0	0	200	903	0	0	0	0	0	0	0	603	903	0
360	5	0.456892	1.6533	10.4965	303.682	-98.3797	-69.5817	200	300	0	0	0	0	0	0	0	200	903	0	0	0	0	0	0	0	603	903	0
360	6	-0.15346	1.95848	10.4965	1036.1	-37.3445	-69.5817	200	300	0	0	0	0	0	0	0	200	903	0	0	0	0	0	0	0	603	903	0
360	7	0.456892	2.26365	12.0224	212.129	23.6906	-115.358	200	300	0	-0.155487	6.74515	-21.067	-3836.15	3763.14	1289.2	378.627	1085.09	0	0	0	0	0	0	0	603	903	0
360	8	1.06724	2.11106	12.0224	486.787	-159.415	-252.687	200	300	0	-1.07101	7.81326	-24.4239	-3744.6	4617.63	1472.31	389.062	1056.32	0	0	0	0	0	0	0	603	903	0
360	9	1.06724	2.26365	10.4965	486.787	-98.3797	-252.687	200	300	0	-0.460663	11.1702	-28.6964	-4202.36	5716.26	1792.74	399.198	1049.44	0	0	0	0	0	0	0	603	903	0
361	0	0.304304	2.26365	11.7172	1585.42	267.831	-206.911	200	300	0	0.607452	14.5271	-30.2223	-5026.34	5716.26	2616.72	389.141	1069.31	0	0	0	0	0	0	0	603	903	0
361	1	-0.306047	1.6533	11.1068	303.682	-37.3445	-252.687	200	300	0	-0.613251	16.816	-36.9361	-5301	6570.75	2708.27	377.895	1046.52	0	0	0	0	0	0	0	603	903	0
361	2	0.304304	1.50071	11.7172	395.235	145.761	-161.134	200	300	0	-1.2236	19.1048	-43.9552	-5850.31	7303.17	2891.37	366.151	1036.1	0	0	0	0	0	0	0	603	903	0
361	3	3.05089	2.26365	12.3275	486.787	-37.3445	-435.793	200	300	0	1.06522	21.0884	-48.2276	-6308.08	7974.56	3349.14	365.353	1033.8	0	0	0	0	0	0	0	603	903	0
361	4	0.914656	2.41624	10.8017	486.787	-98.3797	-252.687	200	300	0	2.13333	22.1565	-50.669	-6857.39	8218.7	3349.14	362.204	1038.34	0	0	0	0	0	0	0	603	903	0
361	5	0.456892	2.11106	10.8017	29.0235	-159.415	-298.464	200	300	0	0.912628	23.2246	-54.3311	-7681.37	9195.26	3623.8	369.245	1044.38	0	0	0	0	0	0	0	603	903	0
361	6	0.762068	2.41624	11.1068	1036.1	84.7258	-344.24	200	300	0	-0.00289956	22.9195	-58.6036	-7772.92	9683.54	3806.9	365.238	1035.64	0	0	0	0	0	0	0	603	903	0
361	7	-0.763811	2.72141	10.4965	578.34	-220.45	-435.793	200	300	0	1.37039	23.3772	-65.0123	-8230.69	10599.1	4173.11	363.032	1029.6	0	0	0	0	0	0	0	603	903	0
361	8	1.21983	1.34812	10.8017	578.34	-647.696	159.3	200	300	0	1.2178	23.6824	-68.064	-9146.21	11148.4	3990.01	363.793	1037.38	0	0	0	0	0	0	0	603	903	0
361	9	-0.000871718	1.34812	11.412	669.893	-525.626	-206.911	200	300	0	-0.155487	23.9876	-72.3365	-9512.43	11758.7	4081.56	362.556	1034.5	0	0	0	0	0	0	0	603	903	0
362	0	0.762068	2.26365	10.1913	212.129	-37.3445	-115.358	200	300	0	-1.2236	24.2928	-75.3883	-9603.98	12308.1	3944.23	363.262	1030.39	0	0	0	0	0	0	0	603	903	0
362	1	2.74571	1.95848	10.8017	120.576	-98.3797	-115.358	200	300	0	-0.613251	26.2764	-80.8814	-10244.8	13162.5	4310.44	362.739	1029.67	0	0	0	0	0	0	0	603	903	0
362	2	0	0	0	0	0	0	200	300	0	-0.155487	27.9549	-85.1539	-9695.53	13467.7	4173.11	358.157	1016.86	0	0	0	0	0	0	0	603	903	0
362	3	-0.15346	1.50071	9.88614	29.0235	-403.556	-115.358	200	300	0	-2.90207	28.5652	-89.4264	-10244.8	14017	4401.99	356.744	1017.56	0	0	0	0	0	0	0	603	903	0
362	4	0.151716	2.41624	10.4965	944.551	-159.415	-115.358	200	300	0	-4.58054	25.9712	-96.7506	-11984.3	15176.7	4264.67	356.864	1026.87	0	0	0	0	0	0	0	603	903	0
362	5	-0.15346	1.95848	11.7172	578.34	-37.3445	-435.793	200	300	0	-4.12277	28.1075	-102.244	-11984.3	15848.1	4630.88	355.003	1020.21	0	0	0	0	0	0	0	603	903	0
362	6	0.762068	1.95848	10.8017	761.445	267.831	-161.134	200	300	0	-3.97018	29.1756	-106.211	-12808.3	15909.1	4813.98	349.788	1023.59	0	0	0	0	0	0	0	603	903	0
362	7	0.60948	1.80589	11.412	-62.5292	-342.52	-298.464	200	300	0	-7.32712	28.7178	-112.315	-13632.3	16763.6	4722.43	349.256	1024.38	0	0	0	0	0	0	0	603	903	0
362	8	1.06724	2.72141	9.88614	578.34	23.6906	-252.687	200	300	0	-9.00558	25.5135	-115.671	-14181.6	17496.1	4722.43	351.256	1025.6	0	0	0	0	0	0	0	603	903	0
362	9	0.304304	1.80589	11.1068	303.682	-403.556	-298.464	200	300	0	-7.78488	22.3091	-122.996	-14547.8	18045.4	4722.43	346.715	1021.28	0	0	0	0	0	0	0	603	903	0
363	0	0	0	0	0	0	0	200	300	0	-9.00558	22.4617	-126.047	-14456.3	18472.6	4264.67	346.553	1017.69	0	0	0	0	0	0	0	603	903	0
363	1	0.762068	2.11106	11.412	486.787	-159.415	113.524	200	300	0	-10.3789	20.1729	-129.404	-15188.7	19205	4035.78	348.411	1020.37	0	0	0	0	0	0	0	603	903	0
363	2	-0.611223	1.6533	10.4965	1036.1	-281.485	-161.134	200	300	0	-12.6677	17.5789	-134.592	-15738	19937.5	3852.68	348.132	1019.93	0	0	0	0	0	0	0	603	903	0
363	3	0.60948	1.34812	11.1068	303.682	-342.52	-161.134	200	300	0	-11.9048	14.6797	-138.56	-15371.8	20120.6	3394.91	345.212	1013.94	0	0	0	0	0	0	0	603	903	0
363	4	0	0	0	0	0	0	200	300	0	-12.3625	12.3909	-138.865	-16653.5	20547.8	3074.48	347.97	1022.93	0	0	0	0	0	0	0	603	903	0
363	5	0	0	0	0	0	0	200	300	0	-14.1936	11.628	-143.748	-16378.9	20791.9	2891.37	344.642	1016.94	0	0	0	0	0	0	0	603	903	0
363	6	-0.000871718	2.874	9.88614	120.576	-98.3797	-115.358	200	300	0	-15.1091	9.33914	-148.325	-16470.4	21524.4	2296.28	345.116	1014.04	0	0	0	0	0	0	0	603	903	0
363	7	-0.15346	1.04295	10.4965	578.34	-159.415	-390.016	200	300	0	-13.7358	7.20291	-154.429	-16470.4	21951.6	2387.83	342.147	1009.65	0	0	0	0	0	0	0	603	903	0
363	8	-0.000871718	2.56883	12.0224	944.551	-220.45	-298.464	200	300	0	-14.6513	5.06668	-159.617	-17386	21890.6	1975.85	337.145	1011.92	0	0	0	0	0	0	0	603	903	0
363	9	0.304304	1.34812	12.3275	1219.21	-281.485	-298.464	200	300	0	-17.5505	4.15116	-161.753	-18118.4	22806.1	2067.4	340.993	1015.01	0	0	0	0	0	0	0	603	903	0
364	0	0.60948	2.11106	12.0224	1036.1	-37.3445	-161.134	200	300	0	-19.6867	0.94681	-168.772	-18942.4	23477.5	1792.74	339.108	1015.24	0	0	0	0	0	0	0	603	903	0
364	1	1.06724	1.80589	9.88614	212.129	-37.3445	-298.464	200	300	0	-19.9919	-1.03683	-173.655	-18667.7	23843.7	1563.86	337.305	1010.5	0	0	0	0	0	0	0	603	903	0
364	2	1.06724	2.26365	11.7172	578.34	-159.415	21.9711	200	300	0	-21.06	-3.17306	-178.538	-19674.8	24637.2	1151.87	337.994	1013.2	0	0	0	0	0	0	0	603	903	0
364	3	0	0	0	0	0	0	200	300	0	-23.1963	-6.07223	-184.641	-19857.9	25430.6	1060.32	337.73	1010.55	0	0	0	0	0	0	0	603	903	0
364	4	-0.916399	2.26365	11.1068	486.787	-37.3445	21.9711	200	300	0	-22.1281	-9.12399	-187.998	-20498.8	25613.7	602.556	336.245	1012.04	0	0	0	0	0	0	0	603	903	0
364	5	-0.15346	1.80589	12.0224	578.34	-98.3797	21.9711	200	300	0	-24.7221	-10.8025	-191.66	-20498.8	26590.3	419.45	338.737	1009.95	0	0	0	0	0	0	0	603	903	0
364	6	0	0	0	0	0	0	200	300	0	-24.7221	-11.2602	-195.628	-20773.4	27017.5	99.0157	338.107	1009.19	0	0	0	0	0	0	0	603	903	0
364	7	0	0	0	0	0	0	200	300	0	-25.7903	-12.4809	-200.816	-21597.4	27261.7	-221.419	335.755	1010.55	0	0	0	0	0	0	0	603	903	0
364	8	0.60948	1.50071	10.4965	578.34	-586.661	-161.134	200	300	0	-27.9265	-15.0749	-203.562	-21780.5	27750	-404.524	336.322	1010	0	0	0	0	0	0	0	603	903	0
364	9	0.304304	1.80589	10.4965	120.576	-98.3797	-298.464	200	300	0	-27.7739	-16.143	-209.666	-21872	28421.3	-312.972	335.556	1007.32	0	0	0	0	0	0	0	603	903	0
365	0	1.37242	2.26365	9.88614	-62.5292	84.7258	-206.911	200	300	0	-26.4006	-17.3637	-214.854	-21872	28970.7	-908.065	334.839	1004.8	0	0	0	0	0	0	0	603	903	0
[truncated: 3,169 more rows]
