# Supplementary material for: The Effects of an Extemporaneous Speech Dual-task on Older Adult Gait Control
Source: Research Square preprint supplement (doi:10.21203/rs.3.rs-7674245/v1), 2025-11-18
Supplement: Supplementary file 69 [file DT5Walk11.xlsx]

## Sheet: Sheet1
Trajectories
		05:LFHD			05:RFHD			05:LBHD			05:RBHD			05:C7			05:T10			05:CLAV			05:STRN			05:RBAK			05:LSHO			05:LUPA			05:LELB			05:LFRM			05:LWRA			05:LWRB			05:LFIN
Frame	Sub Frame	X	Y	Z	X	Y	Z	X	Y	Z	X	Y	Z	X	Y	Z	X	Y	Z	X	Y	Z	X	Y	Z	X	Y	Z	X	Y	Z	X	Y	Z	X	Y	Z	X	Y	Z	X	Y	Z	X	Y	Z	X	Y	Z
		mm	mm	mm	mm	mm	mm	mm	mm	mm	mm	mm	mm	mm	mm	mm	mm	mm	mm	mm	mm	mm	mm	mm	mm	mm	mm	mm	mm	mm	mm	mm	mm	mm	mm	mm	mm	mm	mm	mm	mm	mm	mm	mm	mm	mm	mm	mm	mm
605	0	322.042	-1863.42	1609.04	436.489	-1852.93	1613.18	329.757	-2034.06	1637.28	448.406	-2033.34	1645.16	388.811	-2099.05	1499.05	393.076	-2181.85	1264.87	408.071	-1947.31	1423.36	416.004	-1890.73	1241.35	511.731	-2205.17	1322.81	222.222	-2048.15	1461.35	129.571	-2039.03	1230.51	116.026	-2023.26	1135.23	114.366	-1880.2	999.144	170.602	-1839.08	941.849	98.8856	-1862.83	922.503	127.251	-1782.09	870.109
606	0	322.376	-1853.45	1609.09	436.674	-1843.09	1613.07	329.906	-2024.05	1637.18	448.624	-2023.38	1644.73	388.689	-2089.19	1498.99	393.191	-2172.5	1265.02	408.029	-1937.74	1422.95	415.826	-1881.54	1240.94	511.606	-2195.58	1322.98	222.152	-2038.45	1461.14	129.057	-2027.89	1230.67	115.228	-2011.15	1135.52	115.608	-1865.33	1002.19	172.128	-1823.91	946.156	100.515	-1846.43	925.902	129.453	-1764.84	875.288
607	0	322.557	-1843.61	1608.92	436.938	-1833.28	1612.21	330.163	-2014.29	1636.68	448.79	-2013.54	1643.85	388.658	-2079.43	1498.53	393.464	-2163.22	1264.82	407.85	-1928.03	1422.28	415.637	-1872.36	1240.1	511.585	-2186.08	1322.7	222.046	-2028.82	1460.73	128.726	-2016.91	1230.47	114.615	-1999.27	1135.49	116.436	-1851.07	1004.62	173.839	-1808.91	949.976	102.333	-1830.83	928.668	131.755	-1747.95	880.049
608	0	322.784	-1833.71	1608.15	437.078	-1823.46	1611.2	330.401	-2004.43	1636	449.087	-2003.76	1642.84	388.711	-2069.61	1497.93	393.915	-2154.07	1264.52	407.66	-1918.42	1421.33	415.394	-1863.16	1238.96	511.824	-2176.5	1322.47	222.003	-2019.14	1460.02	128.425	-2006.01	1230.11	114.191	-1987.6	1135.15	117.514	-1836.96	1006.76	175.627	-1794.38	953.193	103.553	-1814.91	931.208	134.044	-1731.67	884.595
609	0	322.964	-1823.63	1607.12	437.487	-1813.46	1610.38	330.561	-1994.32	1635.28	448.981	-1993.36	1641.52	388.812	-2059.54	1497.31	394.292	-2144.62	1264.12	407.479	-1908.55	1420.14	415.028	-1853.84	1237.48	512.234	-2166.61	1322.28	222.145	-2009.48	1458.87	128.333	-1995.08	1229.34	113.645	-1975.66	1134.69	118.589	-1823.09	1008.62	177.064	-1779.73	955.817	105.334	-1799.69	933.308	136.412	-1715.63	888.535
610	0	323.039	-1813.57	1606.19	437.677	-1803.28	1608.91	330.717	-1984.25	1634.23	449.328	-1983.24	1640.26	388.995	-2049.46	1496.4	394.949	-2135.41	1263.5	407.215	-1898.66	1418.77	414.726	-1844.57	1235.91	512.683	-2156.65	1321.74	222.113	-1999.88	1457.77	128.303	-1984.25	1228.48	113.788	-1963.77	1134.22	119.918	-1809.5	1010.14	178.614	-1765.63	958.707	106.846	-1784.92	935.1	138.847	-1700.12	892.176
611	0	323.312	-1803.49	1604.91	437.692	-1793.16	1607.33	331.016	-1974.2	1632.92	449.622	-1973.22	1638.52	389.223	-2039.42	1495.22	395.456	-2125.95	1262.45	407.078	-1888.83	1417.26	414.485	-1835.28	1234.21	513.245	-2146.72	1320.85	222.208	-1990.28	1456.4	128.5	-1973.45	1227.33	113.477	-1952.59	1132.95	121.256	-1796.11	1011.3	180.404	-1751.85	960.793	108.48	-1770.37	936.846	140.968	-1685.06	895.529
612	0	323.585	-1793.28	1603.83	438.166	-1782.99	1605.81	331.418	-1964.01	1631.55	449.706	-1962.89	1636.92	389.41	-2029.3	1494.04	396.255	-2116.49	1261.52	407.057	-1878.82	1415.46	414.156	-1825.83	1232.37	513.937	-2136.64	1320.08	222.264	-1980.72	1454.73	128.422	-1962.79	1225.94	113.227	-1940.82	1132.12	122.331	-1783.07	1012.15	182.125	-1738.51	962.67	110.464	-1756.22	937.861	143.222	-1670.36	898.304
613	0	323.874	-1782.96	1602.4	438.586	-1772.81	1604.2	331.637	-1953.63	1630.22	450.376	-1952.73	1635.36	389.754	-2018.97	1492.79	397.134	-2106.82	1260.49	406.745	-1868.76	1413.63	413.892	-1816.29	1230.4	514.782	-2126.38	1319.28	222.479	-1971.17	1452.88	128.447	-1952.29	1224.25	112.183	-1929.09	1131.21	123.785	-1770.17	1012.65	183.711	-1725.36	963.938	112.239	-1742.43	938.613	145.549	-1656.07	900.722
614	0	324.245	-1772.67	1600.54	438.538	-1763.07	1601.58	332.095	-1943.45	1628.39	450.594	-1942.44	1633.18	390.102	-2008.86	1491.22	398.083	-2097.2	1259.01	406.583	-1858.67	1411.54	413.661	-1806.71	1228.18	515.646	-2116.19	1318.02	222.647	-1961.59	1451.01	128.915	-1941.87	1222.43	113.156	-1918.24	1129.21	125.321	-1757.75	1012.7	185.621	-1712.75	964.877	114.023	-1728.89	939.155	147.928	-1642.37	902.486
615	0	324.592	-1762.35	1598.8	439.188	-1752.52	1599.61	332.468	-1933.18	1626.56	450.801	-1932.26	1630.79	390.455	-1998.81	1489.48	399.177	-2087.6	1257.34	406.622	-1848.53	1409.44	413.621	-1796.81	1226.03	516.504	-2106.08	1316.6	222.869	-1952.04	1448.94	129.293	-1931.54	1220.61	112.645	-1907.01	1127.74	126.607	-1745.52	1012.52	187.322	-1700.41	965.215	115.751	-1715.94	939.243	150.072	-1629.04	903.855
616	0	325.15	-1752.01	1596.84	439.726	-1742.11	1597.7	332.872	-1922.61	1624.92	451.478	-1922.03	1629.16	390.926	-1988.58	1487.88	400.208	-2077.59	1255.89	406.56	-1838.39	1407.54	413.586	-1786.89	1224.14	517.521	-2095.63	1315.43	223.269	-1942.45	1446.68	129.812	-1921.1	1218.96	112.933	-1896.21	1125.7	128.007	-1733.59	1012.24	189.226	-1688.57	965.607	117.519	-1703.19	938.974	152.329	-1616.15	904.963
617	0	325.909	-1741.59	1595.08	440.655	-1731.6	1595.65	333.317	-1912.01	1623.21	452.016	-1911.59	1627.34	391.475	-1978.36	1486.25	401.445	-2067.73	1254.41	406.643	-1828.24	1405.5	413.773	-1776.72	1222.24	518.625	-2085.14	1314.21	223.632	-1932.79	1444.73	130.456	-1910.94	1216.9	114.263	-1885.65	1123.7	129.358	-1722	1011.52	190.552	-1676.88	965.328	118.93	-1690.89	938.706	154.534	-1603.81	905.43
618	0	326.404	-1731.06	1593.28	441.177	-1721.37	1593.28	333.901	-1901.73	1621.4	452.688	-1901.34	1625.1	392.064	-1968.3	1484.31	402.692	-2057.77	1252.56	406.906	-1818.02	1403.62	413.944	-1766.35	1220.33	519.688	-2074.86	1312.45	224.181	-1923.14	1442.38	131.124	-1900.94	1214.71	113.615	-1874.92	1122.08	130.7	-1710.75	1010.41	192.337	-1665.67	964.607	120.728	-1679.25	937.674	156.536	-1592.07	905.252
619	0	327.195	-1720.48	1591.34	441.881	-1711.03	1591.13	334.723	-1891.32	1619.5	453.326	-1890.92	1623.12	392.697	-1958.18	1482.52	403.916	-2047.68	1250.76	407.389	-1807.77	1401.88	414.384	-1756.09	1218.62	520.827	-2064.5	1310.81	224.732	-1913.51	1440.28	131.832	-1891.1	1212.69	114.371	-1864.43	1120.03	132.01	-1699.94	1009.19	193.819	-1654.81	963.68	121.989	-1668.07	936.517	158.441	-1580.77	904.924
620	0	328.018	-1710.07	1589.36	442.734	-1700.43	1589.27	335.573	-1880.69	1618.08	454.488	-1880.53	1621.55	393.557	-1947.94	1480.95	405.199	-2037.58	1249.36	408.034	-1797.58	1400.22	415.055	-1745.78	1216.91	521.976	-2053.99	1309.44	225.541	-1903.64	1438.11	132.778	-1881.28	1210.56	114.161	-1854.43	1118	133.346	-1689.49	1007.63	195.474	-1644.57	962.355	123.742	-1657.27	935.074	160.155	-1570	903.925
621	0	329.108	-1699.59	1587.79	443.846	-1689.85	1587.2	336.827	-1870.16	1616.7	455.384	-1869.81	1619.76	394.445	-1937.65	1479.33	406.332	-2027.29	1247.65	408.901	-1787.29	1398.66	415.976	-1735.47	1215.31	523.042	-2043.58	1307.76	226.497	-1893.68	1436.23	133.654	-1871.46	1208.75	116.464	-1844.71	1115.71	134.633	-1679.44	1005.78	196.764	-1634.61	960.6	124.985	-1647.23	933.251	161.766	-1559.88	902.5
622	0	330.385	-1689.11	1586.15	444.824	-1679.56	1585.41	337.825	-1859.73	1615.03	456.375	-1859.36	1617.88	395.466	-1927.37	1477.57	407.263	-2016.89	1245.91	409.788	-1777.02	1397.11	416.765	-1725.11	1213.72	523.938	-2033.18	1306	227.427	-1883.47	1434.38	134.587	-1861.94	1206.6	117.408	-1835.14	1113.76	135.854	-1669.75	1003.78	198.166	-1625.25	958.468	125.94	-1637.35	931.284	163.122	-1550.3	900.461
623	0	331.477	-1678.74	1584.67	446.059	-1668.9	1583.98	339.029	-1849.14	1613.69	458.018	-1849.02	1616.73	396.42	-1916.95	1476.12	408.167	-2006.32	1244.46	410.824	-1766.53	1395.58	417.793	-1714.69	1212.27	524.818	-2022.74	1304.48	228.248	-1873.1	1432.76	135.617	-1852.3	1204.97	117.801	-1825.32	1112.56	136.856	-1660.57	1001.56	199.348	-1616.08	956.297	127.378	-1628.44	928.964	164.444	-1541.2	898.397
624	0	332.761	-1668.32	1583.25	447.275	-1658.94	1582.22	340.61	-1838.67	1612.37	459.277	-1838.18	1615.06	397.473	-1906.43	1474.71	409.106	-1995.64	1243.07	412	-1756.07	1394.27	418.931	-1704.05	1210.88	525.584	-2012.15	1302.92	229.298	-1862.53	1431.13	136.911	-1842.67	1202.94	118.875	-1816.4	1110.41	138.205	-1651.75	999.15	200.195	-1607.48	953.622	128.208	-1619.88	926.395	165.401	-1532.86	895.384
625	0	334.434	-1657.82	1582.15	449.106	-1648.09	1581.07	342.476	-1828.36	1610.88	461.291	-1828.18	1613.61	398.617	-1895.95	1473.09	409.966	-1984.97	1241.31	413.122	-1745.58	1392.67	420.096	-1693.32	1209.59	526.369	-2001.72	1300.9	230.578	-1851.79	1429.84	138.309	-1833.04	1201.76	120.829	-1807.41	1108.71	139.041	-1643.3	996.327	201.498	-1599.25	950.673	129.467	-1611.96	923.178	166.129	-1525.02	891.994
626	0	336.163	-1647.55	1581.08	450.734	-1638.07	1579.55	344.164	-1818.22	1609.39	462.752	-1817.71	1611.76	399.816	-1885.56	1471.49	410.756	-1974.3	1239.51	414.66	-1734.94	1391.81	421.299	-1682.65	1208.41	527.068	-1991.26	1298.79	231.624	-1840.94	1428.58	139.562	-1823.42	1200.29	122.134	-1798.39	1107.13	140.038	-1635.19	993.541	202.041	-1591.14	947.039	130.086	-1604.57	920.294	166.795	-1517.63	888.263
627	0	338.012	-1637.15	1580.02	452.64	-1627.53	1578.39	345.89	-1807.76	1608.36	464.98	-1807.6	1610.61	401.002	-1875.15	1470.14	411.452	-1963.18	1237.98	415.85	-1724.47	1390.61	422.352	-1671.74	1207.51	527.913	-1980.63	1296.83	232.727	-1830.22	1427.72	140.899	-1813.78	1198.89	123.515	-1789.71	1105.53	141.008	-1627.41	990.457	202.9	-1583.81	943.841	130.703	-1597.55	917.074	167.272	-1510.92	884.113
628	0	339.965	-1626.87	1579.12	454.621	-1617.29	1577.55	347.911	-1797.57	1607.29	467.298	-1797.59	1609.58	402.389	-1864.83	1468.79	412.265	-1952.03	1236.31	417.228	-1714.05	1389.44	423.428	-1660.79	1206.68	528.868	-1969.79	1294.66	234.223	-1819.48	1426.61	142.034	-1804.24	1197.87	124.506	-1780.96	1104.06	141.822	-1619.95	987.194	203.525	-1576.67	940.221	131.312	-1590.99	913.661	167.609	-1504.63	879.411
629	0	342.143	-1616.74	1578.24	456.735	-1607.18	1576.33	350.037	-1787.55	1606.18	469.764	-1787.98	1608.38	403.816	-1854.69	1467.28	413.251	-1941.02	1234.27	418.81	-1703.47	1388.75	424.31	-1649.57	1206.02	529.89	-1959.07	1292.29	235.525	-1808.96	1425.78	143.479	-1794.45	1196.83	125.91	-1772.27	1102.73	142.617	-1612.79	983.737	204.307	-1570.03	935.819	132.017	-1585.06	909.738	167.698	-1498.94	874.233
630	0	344.371	-1606.58	1577.66	458.795	-1597.39	1575.15	352.249	-1777.36	1605.34	471.548	-1777.53	1607.05	405.362	-1844.59	1465.98	414.511	-1930.09	1232.44	420.126	-1693	1388.01	425.318	-1638.31	1205.67	531.191	-1948.33	1290.15	236.873	-1798.68	1424.81	144.828	-1784.88	1195.56	127.224	-1763.57	1101.53	143.334	-1605.89	980.184	204.711	-1563.62	931.425	132.401	-1579.3	905.751	167.724	-1493.79	868.91
631	0	346.495	-1596.54	1576.92	461.046	-1587.33	1574.42	354.575	-1767.28	1604.8	473.803	-1767.35	1606.16	407.192	-1834.53	1464.99	415.979	-1919.07	1231.01	421.611	-1682.59	1387.33	426.274	-1626.89	1205.24	532.676	-1937.47	1288.14	238.544	-1788.64	1424.13	146.162	-1775.23	1194.7	128.664	-1754.6	1100.73	144.187	-1599.24	976.447	205.324	-1557.68	926.638	132.759	-1574.1	901.481	167.462	-1489.14	863.021
632	0	348.754	-1586.49	1576.58	463.255	-1577.25	1573.83	356.744	-1757.17	1604.37	476.434	-1757.47	1605.69	409.006	-1824.41	1464.04	417.716	-1908.18	1229.68	423.255	-1672.12	1387.11	427.085	-1615.22	1205.27	534.135	-1926.55	1286.05	240.193	-1778.55	1423.74	147.749	-1765.63	1194.25	130.292	-1746.03	1099.72	144.845	-1592.94	972.78	205.551	-1552.3	921.362	132.782	-1569.1	897.597	166.857	-1485.15	856.774
633	0	351.144	-1576.49	1576.62	465.494	-1567.26	1573.54	359.338	-1747.37	1604.04	478.512	-1747.36	1605.05	410.947	-1814.65	1463.3	419.411	-1897.51	1228.56	424.707	-1661.73	1387.05	428.02	-1603.76	1205.58	535.548	-1915.71	1284.14	241.972	-1768.77	1423.46	149.238	-1756.09	1193.99	132.862	-1737.78	1099.08	145.45	-1586.98	969.174	205.631	-1547.1	916.228	133.101	-1564.72	893.549	166.228	-1481.68	850.679
634	0	353.207	-1566.51	1576.72	467.677	-1557.21	1573.56	361.476	-1737.37	1604.08	481.105	-1737.5	1605.15	412.809	-1804.64	1462.97	420.893	-1886.54	1227.79	426.228	-1651.32	1387.3	429.017	-1592.36	1206.26	537.223	-1904.84	1282.76	243.591	-1759.18	1423.58	150.78	-1746.81	1193.95	134.578	-1729.14	1098.78	145.976	-1581.24	965.774	205.79	-1542.24	911.786	132.57	-1560.88	890.238	165.1	-1478.87	844.449
635	0	355.227	-1556.7	1576.84	469.756	-1547.18	1573.8	363.96	-1727.39	1604.5	483.325	-1727.03	1605.44	414.897	-1794.64	1462.8	422.626	-1875.72	1227.4	427.731	-1641.19	1387.79	429.985	-1581.12	1207.03	538.996	-1893.84	1281.84	245.125	-1749.62	1423.92	152.578	-1737.53	1194.01	136.66	-1720.55	1098.82	146.329	-1575.9	962.479	205.983	-1538.18	906.659	132.544	-1557.24	886.683	163.925	-1476.66	838.206
636	0	357.526	-1546.62	1577.59	471.9	-1537.06	1574.16	366.546	-1717.54	1604.88	485.763	-1717.13	1605.81	417.091	-1784.79	1462.91	424.468	-1865.18	1227.17	429.026	-1631.2	1388.58	430.73	-1570.19	1207.95	540.717	-1882.95	1280.94	247.013	-1740.22	1424.66	154.371	-1728.57	1194.21	139.197	-1712.21	1099.05	146.684	-1570.98	959.565	205.596	-1534.44	901.764	131.878	-1554.38	883.256	162.36	-1475.16	832.025
637	0	359.597	-1536.75	1578.4	473.923	-1527.09	1574.83	368.716	-1707.71	1605.54	487.837	-1706.89	1606.1	419.149	-1775.05	1463.18	426.252	-1854.61	1227.06	430.313	-1621.02	1389.57	431.537	-1559.44	1209.16	542.282	-1872.12	1280.2	248.682	-1730.88	1425.68	156.111	-1719.58	1195.25	141.587	-1703.9	1099.69	146.874	-1566.45	956.841	204.843	-1531.52	897.108	130.994	-1551.97	880.433	160.651	-1474.3	826.183
638	0	361.504	-1526.88	1579.34	476.001	-1517.03	1575.8	370.937	-1697.79	1606.53	490.425	-1697.03	1607.34	421.117	-1765.19	1463.98	427.887	-1843.87	1227.58	431.568	-1611.18	1390.8	432.38	-1548.99	1210.47	544.255	-1861.37	1280.34	250.438	-1721.54	1426.99	158.357	-1710.71	1196.08	143.825	-1695.75	1100.63	147.013	-1562.26	954.546	204.346	-1528.59	892.865	130.18	-1550.02	877.748	158.621	-1474.08	820.691
639	0	363.538	-1517.13	1580	477.96	-1506.88	1576.8	373.26	-1687.75	1607.61	492.477	-1686.72	1608.11	423.12	-1755.33	1464.73	429.626	-1833.37	1228.07	432.83	-1601.28	1391.87	433.117	-1538.45	1211.71	546.192	-1850.55	1280.59	252.008	-1712.37	1428.33	160.455	-1702.08	1197.06	147.512	-1688.05	1101.31	147.065	-1558.52	952.477	203.604	-1526.58	888.719	129.125	-1548.31	875.836	156.431	-1474.48	815.335
640	0	365.511	-1507.26	1581.09	479.8	-1497.18	1577.4	375.391	-1678.2	1608.49	494.623	-1676.97	1608.86	425.212	-1745.67	1465.53	431.509	-1823.17	1228.59	433.926	-1591.4	1392.92	433.905	-1528.01	1213.02	548.066	-1839.9	1280.7	253.735	-1703.26	1429.63	162.876	-1693.65	1197.98	149.97	-1680.57	1102.51	147.011	-1555.25	950.767	202.455	-1524.63	885.252	128.003	-1547.39	873.685	154.284	-1475.42	810.406
641	0	367.308	-1497.49	1582.3	481.606	-1487.29	1578.37	377.163	-1668.35	1609.55	496.562	-1667.11	1609.8	426.966	-1736.01	1466.3	433.193	-1812.77	1229.16	435.139	-1581.62	1394.04	434.43	-1517.68	1214.28	550.059	-1829.22	1281.12	255.45	-1694.16	1431.15	164.717	-1685.42	1199.33	152.251	-1673.28	1103.89	146.721	-1552.13	949.462	201.321	-1523.46	882.035	126.731	-1546.66	872.225	151.925	-1476.76	805.744
642	0	369.002	-1487.67	1583.25	483.379	-1477.3	1579.51	379.251	-1658.46	1610.72	498.376	-1657.03	1610.93	428.729	-1726.24	1467.46	435.272	-1802.65	1230.19	435.915	-1571.83	1395.17	434.816	-1507.78	1215.42	552.16	-1818.64	1281.98	256.901	-1685.1	1432.54	166.604	-1677.5	1200.21	153.942	-1666.25	1105.29	146.274	-1549.1	948.477	199.872	-1522.05	879.508	125.674	-1545.93	871.056	149.489	-1478.31	801.724
643	0	370.654	-1477.76	1584.62	484.767	-1467.42	1580.3	380.896	-1648.66	1611.87	500.218	-1647.23	1611.92	430.515	-1716.71	1468.46	437.198	-1792.64	1231.03	436.714	-1562.07	1396.26	435.202	-1497.84	1216.53	554.141	-1808.02	1282.46	258.267	-1676.29	1434.04	168.439	-1670.07	1201.15	156.102	-1659.76	1106.27	145.87	-1546.82	947.433	198.715	-1520.79	877.228	124.418	-1545.6	870.318	147.248	-1480.31	797.833
644	0	371.945	-1467.96	1585.82	486.201	-1457.54	1581.46	382.577	-1638.82	1613.17	501.525	-1637.21	1612.88	432.063	-1707.01	1469.5	439.14	-1782.97	1231.93	437.254	-1552.38	1397.54	435.445	-1488.08	1217.92	556.329	-1797.7	1283.33	259.595	-1667.56	1435.45	169.972	-1662.89	1202.48	158.367	-1653.63	1107.62	145.383	-1544.34	946.955	197.451	-1519.59	875.471	123.569	-1545.36	869.489	144.826	-1482.54	794.586
645	0	373.191	-1457.95	1587.06	487.406	-1447.53	1582.51	383.831	-1628.75	1614.77	503.018	-1627.23	1614.37	433.513	-1697.41	1470.96	440.914	-1772.95	1233.28	437.75	-1542.59	1398.85	435.222	-1478.21	1219.2	558.38	-1787.16	1284.67	260.676	-1658.86	1436.89	171.324	-1655.87	1204.06	159.492	-1647.24	1108.54	144.657	-1542.1	946.415	196.245	-1518.27	874.182	122.387	-1545.11	869.233	142.594	-1484.75	791.596
646	0	374.2	-1448.13	1588.24	488.541	-1437.61	1583.6	384.896	-1618.77	1616.41	504.252	-1617.18	1615.83	434.955	-1687.63	1472.43	442.902	-1763.29	1234.88	438.204	-1533.03	1400.24	435.115	-1468.55	1220.48	560.54	-1776.77	1286.04	261.912	-1650.35	1438.4	172.572	-1649.38	1205.08	161.541	-1641.66	1110.3	143.983	-1539.9	946.209	194.847	-1517.34	873.216	121.419	-1544.9	869.324	140.56	-1487.17	789.033
647	0	375.427	-1438.35	1589.25	489.498	-1427.62	1584.36	386.236	-1608.96	1617.86	505.229	-1607.13	1616.96	436.438	-1678.29	1473.56	444.677	-1753.61	1235.99	438.663	-1523.62	1401.44	435.054	-1459.08	1221.75	562.499	-1766.38	1287.14	263.089	-1642.07	1439.8	173.579	-1643.29	1206.32	163.015	-1636.4	1111.64	143.271	-1538.01	945.977	193.269	-1516.47	872.343	120.548	-1544.88	869.392	138.606	-1489.59	787.04
648	0	375.934	-1428.54	1590.25	490.232	-1417.83	1585.09	387.105	-1599.01	1619.36	505.962	-1597.18	1618.38	437.635	-1668.79	1474.8	446.373	-1744.08	1237.11	439.036	-1514.1	1402.59	434.72	-1449.57	1223	564.508	-1756.22	1288.54	264.002	-1633.92	1441.17	174.539	-1637.28	1207.65	164.133	-1631.09	1113.02	142.673	-1536.34	946.108	192.043	-1515.42	871.82	119.729	-1544.82	869.529	136.955	-1491.85	785.416
649	0	376.43	-1418.67	1590.99	490.724	-1407.92	1585.98	387.736	-1589.08	1621.05	506.945	-1587.14	1620.15	438.827	-1659.34	1476.27	447.909	-1734.42	1238.47	439.22	-1504.72	1403.74	434.332	-1440.23	1224.09	566.435	-1745.95	1290.25	264.933	-1625.8	1442.48	175.619	-1631.5	1208.89	165.206	-1626.16	1114.59	142.002	-1534.55	946.268	191.055	-1514.48	871.412	119.058	-1544.65	869.924	135.502	-1493.94	784.127
650	0	376.829	-1408.75	1591.96	490.984	-1397.97	1586.81	388.311	-1579	1622.65	507.504	-1576.97	1621.78	439.924	-1649.9	1477.52	449.439	-1724.81	1239.85	439.422	-1495.23	1405.15	434.127	-1431.02	1225.41	568.229	-1735.81	1291.74	265.972	-1617.54	1444.09	176.446	-1625.84	1210.41	165.985	-1621.6	1116.14	141.587	-1532.95	946.69	190.537	-1513.59	871.161	118.394	-1544.55	870.482	134.134	-1495.82	783.287
651	0	377.023	-1399	1592.82	491.072	-1388.07	1587.49	388.709	-1569.12	1624.12	507.822	-1566.96	1623.1	441.154	-1640.53	1478.78	450.977	-1715.49	1241	439.583	-1485.76	1406.43	433.971	-1421.7	1226.82	569.842	-1725.71	1293.06	266.803	-1609.43	1445.45	177.181	-1620.6	1211.98	166.796	-1617.3	1117.59	141.193	-1531.41	947.235	189.655	-1512.69	871.6	117.93	-1544.35	871.224	133.45	-1497.5	782.917
652	0	376.882	-1389.3	1593.42	491.118	-1378.16	1588.29	389.112	-1559.26	1625.55	508.085	-1556.77	1624.83	442.208	-1631.15	1480.08	452.234	-1705.84	1242.21	439.483	-1476.4	1407.62	433.767	-1412.34	1228.15	571.477	-1715.61	1294.64	267.631	-1601.17	1446.8	177.513	-1615.35	1213.91	167.303	-1612.98	1119.15	140.713	-1529.76	947.744	188.746	-1511.72	871.883	117.459	-1543.96	872.028	132.612	-1498.77	782.789
653	0	376.586	-1379.6	1593.96	490.984	-1368.06	1589.14	389.167	-1549.22	1626.99	508.195	-1546.41	1626.58	443.142	-1621.51	1481.28	453.589	-1696.28	1243.64	439.85	-1466.93	1408.93	433.616	-1403.07	1229.3	573.275	-1705.45	1296.41	268.468	-1592.84	1448.15	177.812	-1610.25	1215.72	167.671	-1608.81	1120.87	140.46	-1528.21	948.25	188.253	-1510.74	872.043	117.237	-1543.48	872.826	131.985	-1499.62	782.779
654	0	376.195	-1369.98	1594.29	490.443	-1358.21	1589.45	389.254	-1539.45	1628.04	508.415	-1536.39	1627.73	444.504	-1612.01	1482.25	454.837	-1686.71	1244.57	440.22	-1457.59	1410.02	433.639	-1393.87	1230.38	574.813	-1695.4	1297.53	269.39	-1584.54	1449.32	178.932	-1605.22	1216.8	168.377	-1605	1122.27	140.483	-1526.64	948.87	187.899	-1509.57	872.187	117.25	-1543.19	873.417	131.786	-1500.27	782.984
655	0	375.637	-1360.42	1594.46	490.06	-1348.23	1589.92	389.368	-1529.75	1628.89	508.432	-1526.21	1629.06	445.204	-1602.58	1483.04	455.866	-1677.02	1245.26	440.5	-1448.27	1410.95	433.715	-1384.73	1231.23	576.204	-1685.3	1298.5	270.442	-1576	1450.34	179.581	-1600.67	1218.42	168.69	-1601.26	1123.85	140.233	-1525.1	949.545	187.503	-1508.51	872.789	117.675	-1542.57	874.207	131.455	-1500.48	783.368
656	0	375.135	-1350.62	1594.55	489.514	-1338.14	1590.53	389.144	-1519.77	1629.8	508.384	-1515.86	1630.24	446.029	-1593.03	1484	457.058	-1667.32	1246.34	440.706	-1438.72	1411.78	433.652	-1375.78	1231.99	577.661	-1675.26	1299.82	271.044	-1567.35	1451.14	180.594	-1595.62	1219.59	169.198	-1597.29	1125.18	140.187	-1523.5	950.05	187.682	-1506.91	873.352	117.849	-1541.98	874.826	131.508	-1500.44	783.437
657	0	374.583	-1340.94	1594.54	489.028	-1327.99	1590.84	389.245	-1509.87	1630.38	508.087	-1505.32	1630.95	446.738	-1583.39	1484.59	457.966	-1657.37	1246.95	440.865	-1429.28	1412.21	433.782	-1366.75	1232.47	578.757	-1665.15	1300.7	271.78	-1558.6	1451.87	181.137	-1590.57	1221.17	169.785	-1593.4	1126.58	140.225	-1521.72	950.397	187.691	-1505.47	873.882	118.18	-1541.01	875.57	131.623	-1500.1	783.653
658	0	373.912	-1331.24	1594.24	488.302	-1317.93	1591.01	389.162	-1500.18	1630.55	508.215	-1495.36	1631.73	447.5	-1573.87	1484.92	459.002	-1647.79	1247.32	441.133	-1419.78	1412.58	433.908	-1357.51	1232.7	579.854	-1655.36	1301.21	272.388	-1549.8	1452.37	182.211	-1585.56	1222.16	170.455	-1589.67	1127.54	140.419	-1520.04	950.638	187.673	-1504.18	874.352	118.43	-1540.26	875.866	131.819	-1499.56	783.954
659	0	373.272	-1321.46	1593.93	487.738	-1307.8	1590.84	389.016	-1490.2	1630.58	507.836	-1484.94	1632.2	447.973	-1564.19	1485.16	459.601	-1637.93	1247.43	441.386	-1410.18	1412.72	433.756	-1348.18	1232.89	580.489	-1645.39	1301.49	272.761	-1540.8	1452.77	182.822	-1580.3	1222.82	171.203	-1585.68	1128.42	140.372	-1518.22	950.848	187.904	-1502.38	874.129	119.587	-1539.46	876.033	132.065	-1498.82	784.003
660	0	372.734	-1311.58	1593.33	487.042	-1297.52	1590.77	388.796	-1480.19	1630.59	507.567	-1474.3	1632.6	448.354	-1554.39	1485.35	460.325	-1628.2	1247.92	441.562	-1400.51	1412.84	433.931	-1338.72	1232.84	581.324	-1635.7	1302.18	273.28	-1531.57	1452.91	183.697	-1574.84	1223.64	171.802	-1581.38	1129.33	140.605	-1516.05	950.785	188.115	-1500.08	874.342	120.147	-1538.33	876.19	132.586	-1497.73	784.013
661	0	371.858	-1301.68	1592.58	486.403	-1287.2	1590.55	388.643	-1470.13	1630.54	507.636	-1464.07	1633.1	448.704	-1544.36	1485.38	460.615	-1618.4	1248.13	441.809	-1390.61	1412.64	433.933	-1329.29	1232.53	581.674	-1625.76	1302.31	273.547	-1522.18	1452.97	184.521	-1569.25	1224.45	172.657	-1576.98	1130.11	141.07	-1513.74	950.619	188.305	-1498.11	874.381	120.764	-1536.85	876.234	132.939	-1496.43	784.013
662	0	371.4	-1291.8	1591.69	485.62	-1276.96	1589.89	388.36	-1460	1630.09	507.006	-1453.47	1632.91	449.046	-1534.56	1485.23	460.779	-1608.97	1248.01	441.786	-1380.85	1412.34	433.934	-1319.8	1232.04	581.936	-1616.31	1302.29	274.047	-1512.69	1452.64	185.263	-1563.41	1224.7	173.704	-1572.4	1130.37	141.281	-1511.28	950.584	188.965	-1495.71	874.097	121.628	-1535.49	876.188	133.218	-1495.08	783.811
663	0	370.374	-1281.65	1590.79	484.929	-1266.53	1589.42	387.875	-1449.72	1629.51	507.214	-1443.09	1633.07	449.166	-1524.27	1485.12	460.619	-1599.38	1248.06	442.087	-1370.83	1411.89	433.85	-1310.19	1231.33	581.992	-1606.54	1302.48	273.98	-1502.85	1452.56	185.92	-1557.18	1225.19	174.68	-1567.49	1130.89	141.828	-1508.58	950.188	189.074	-1492.74	873.93	122.554	-1533.62	876.014	133.53	-1493.52	783.606
664	0	369.812	-1271.45	1589.71	484.146	-1256.07	1588.7	387.549	-1439.42	1629.07	506.476	-1431.97	1632.57	449.339	-1514.05	1484.89	460.567	-1590.11	1248.26	442.071	-1360.72	1411.32	433.873	-1300.74	1230.4	582.115	-1596.98	1302.6	274.257	-1493	1451.88	186.54	-1550.76	1225.6	175.549	-1562.02	1131.36	142.214	-1505.67	950.016	189.376	-1489.4	873.618	123.377	-1531.93	875.979	134.053	-1491.71	783.412
665	0	368.966	-1261.15	1588.61	483.511	-1245.59	1587.81	387.129	-1429.12	1628.16	506.35	-1421.8	1632.48	449.278	-1503.77	1484.3	460.163	-1580.66	1247.93	442.008	-1350.57	1410.4	433.824	-1291.23	1229.42	581.76	-1587.27	1302.21	274.288	-1482.89	1451.56	187.341	-1543.96	1225.79	176.727	-1556.46	1131.42	142.6	-1502.11	949.627	190.126	-1486.02	872.981	124.812	-1529.73	875.674	134.608	-1489.88	782.977
666	0	368.291	-1250.92	1587.09	482.642	-1235.07	1586.75	386.545	-1418.75	1627.2	505.557	-1411.09	1631.8	449.006	-1493.42	1483.64	459.76	-1571.44	1247.51	441.77	-1340.36	1409.4	433.351	-1281.8	1228.17	581.338	-1577.76	1301.79	274.151	-1472.79	1450.97	188.19	-1536.72	1225.91	177.777	-1550.49	1131.51	143.255	-1498.57	949.017	190.473	-1482.66	872.399	126.077	-1527.21	875.287	135.023	-1487.67	782.638
667	0	367.319	-1240.35	1585.83	481.965	-1224.42	1585.84	385.864	-1408.03	1626.27	504.977	-1400.39	1631.38	448.759	-1482.77	1483.11	459.108	-1561.76	1247.35	441.672	-1329.98	1408.33	433.244	-1272.19	1226.85	580.849	-1567.94	1301.67	273.89	-1462.32	1450.41	189.072	-1529.19	1226.05	178.888	-1543.99	1131.81	143.88	-1494.46	948.532	190.398	-1478.32	871.893	127.367	-1524.18	875.001	135.567	-1485.12	781.968
668	0	366.499	-1230.05	1584.16	480.879	-1213.89	1584.45	385.104	-1397.52	1625.3	504.001	-1389.42	1630.83	448.364	-1472.1	1482.48	458.406	-1552.13	1247.13	441.452	-1319.69	1407.11	432.73	-1262.63	1225.2	580.373	-1558.29	1301.46	273.907	-1451.75	1449.62	189.518	-1521.37	1225.88	179.931	-1537	1131.95	144.486	-1489.89	948.125	190.633	-1473.75	871.657	128.368	-1520.47	874.718	136.475	-1482.66	781.344
669	0	365.702	-1219.54	1582.64	480.064	-1203.13	1583.44	384.435	-1387.1	1623.97	503.143	-1378.72	1629.82	447.826	-1461.56	1481.53	457.32	-1542.28	1246.45	441.011	-1309.09	1405.79	432.448	-1252.8	1223.85	579.488	-1548.45	1300.8	273.187	-1441.07	1448.86	190.069	-1513.28	1225.65	180.588	-1529.9	1131.76	145.176	-1484.97	947.724	192.355	-1469.58	871.113	129.417	-1516.61	874.345	137.331	-1479.67	780.402
670	0	364.613	-1209.04	1581.23	479.04	-1192.57	1582.14	383.412	-1376.52	1622.5	502.067	-1367.98	1628.79	447.18	-1450.93	1480.58	456.307	-1532.54	1245.73	440.335	-1298.67	1404.42	431.925	-1243.02	1222.24	578.724	-1538.94	1300.29	272.391	-1430.12	1448.13	190.451	-1504.67	1225.49	181.322	-1522.35	1131.62	145.638	-1479.56	947.118	192.793	-1464.55	870.354	130.667	-1512.12	874.095	138.339	-1476.27	779.65
671	0	363.623	-1198.51	1579.54	478.136	-1181.69	1581.13	382.589	-1365.82	1621.33	501.096	-1357.09	1627.71	446.276	-1440.21	1479.72	455.126	-1522.45	1245.27	439.886	-1287.95	1403.06	431.212	-1233.1	1220.65	577.349	-1528.74	1299.65	271.725	-1419.08	1447.23	190.327	-1495.92	1225.37	181.861	-1514.33	1131.59	146.083	-1473.63	946.612	193.168	-1458.89	869.918	131.779	-1507.26	873.857	139.175	-1472.5	778.787
672	0	362.401	-1187.95	1578.1	476.809	-1171.04	1579.8	381.383	-1355.19	1619.84	499.981	-1346.3	1626.5	445.318	-1429.38	1478.67	453.571	-1512.31	1244.46	439.208	-1277.37	1401.53	430.761	-1222.99	1218.91	576.375	-1519.15	1298.95	270.653	-1407.98	1446.23	190.374	-1486.84	1225.03	182.223	-1506.32	1131.2	146.518	-1467.33	945.885	193.784	-1453.05	869.182	132.414	-1501.67	873.34	140.449	-1468.16	777.871
673	0	361.114	-1177.16	1576.59	475.689	-1160.36	1578.43	380.203	-1344.54	1618.38	498.893	-1335.81	1625.35	443.997	-1418.69	1477.47	451.957	-1502.3	1243.5	438.215	-1266.6	1400.16	429.973	-1212.79	1217.52	574.808	-1509.3	1297.94	269.374	-1396.71	1445.36	190.001	-1477.45	1224.45	182.384	-1497.77	1130.7	146.724	-1460.54	945.267	194.24	-1446.87	868.191	132.93	-1495.62	872.668	141.676	-1463.47	776.763
674	0	359.696	-1166.65	1575.09	474.232	-1149.64	1577.19	378.883	-1333.86	1616.94	497.52	-1325.02	1624.35	442.545	-1407.85	1476.37	450.378	-1492.16	1242.75	437.336	-1255.84	1398.8	429.272	-1202.45	1215.98	572.844	-1498.96	1297.01	268.362	-1385.49	1444.06	189.75	-1467.62	1223.86	182.12	-1488.66	1130.24	146.844	-1453.2	944.316	194.478	-1440.06	867.389	133.255	-1489.15	872.117	142.613	-1458.21	775.572
675	0	358.255	-1155.95	1573.74	472.746	-1138.9	1575.98	377.352	-1323.19	1615.63	496.167	-1314.19	1623.14	441.046	-1397.1	1475.26	448.776	-1481.89	1241.97	436.389	-1245.19	1397.18	428.419	-1192.05	1214.49	571.39	-1489	1296.2	266.705	-1374.26	1442.97	188.156	-1457.84	1223.07	181.722	-1479.53	1129.58	146.962	-1445.45	943.459	194.7	-1432.73	866.669	133.29	-1482.1	871.378	143.805	-1452.56	774.263
676	0	356.542	-1145.27	1572.32	471.144	-1128.19	1574.67	375.92	-1312.56	1614.12	494.556	-1303.48	1621.7	439.512	-1386.26	1473.98	447.126	-1471.56	1240.8	435.056	-1234.43	1395.82	427.582	-1181.56	1212.86	569.821	-1479.11	1295.24	265.604	-1362.94	1441.59	188.251	-1447.48	1222.25	181.22	-1469.93	1128.75	146.894	-1437.29	942.103	195.003	-1425.4	865.278	134.226	-1474.28	870.211	144.844	-1446.11	772.861
677	0	354.831	-1134.63	1571.13	469.391	-1117.41	1573.58	374.259	-1302	1612.71	492.898	-1292.81	1620.59	437.752	-1375.51	1472.77	445.357	-1461.1	1239.71	433.906	-1223.71	1394.29	426.608	-1171.19	1211.41	567.855	-1468.92	1294.29	263.795	-1351.7	1440.13	186.438	-1437.15	1221.15	180.328	-1459.97	1127.65	146.526	-1428.61	941.064	195.105	-1417.32	864.057	133.886	-1466.08	869.172	145.879	-1439.38	771.239
678	0	352.726	-1123.97	1569.98	467.374	-1106.63	1572.68	372.327	-1291.27	1611.66	491.036	-1281.97	1619.68	435.932	-1364.49	1471.79	443.652	-1450.43	1239.01	432.476	-1212.99	1393.03	425.584	-1160.57	1209.95	565.949	-1458.57	1293.73	262.056	-1340.46	1438.97	184.933	-1426.47	1220.26	179.159	-1449.83	1126.69	145.982	-1419.38	939.556	194.517	-1408.36	863.071	133.671	-1457.25	867.935	146.845	-1431.82	769.679
679	0	350.562	-1113.24	1568.88	465.201	-1095.77	1571.72	370.334	-1280.53	1610.33	488.99	-1271.07	1618.56	433.875	-1353.52	1470.59	441.975	-1439.64	1238.15	430.853	-1201.99	1391.5	424.428	-1150.14	1208.37	564.02	-1448.16	1293.05	260.306	-1329.14	1437.36	183.097	-1415.67	1219.1	177.807	-1439.46	1125.63	145.376	-1409.62	938.151	194.23	-1399.01	861.975	133	-1447.88	866.722	147.477	-1423.69	767.986
680	0	348.511	-1102.4	1567.87	462.941	-1084.91	1570.85	368.225	-1269.95	1608.88	486.715	-1260.41	1617.24	431.76	-1342.54	1469.3	440.275	-1428.91	1236.89	429.117	-1191.11	1390.13	423.245	-1139.43	1206.88	561.828	-1437.67	1292.15	258.193	-1317.96	1436.08	181.538	-1404.76	1217.58	176.644	-1428.91	1124.19	144.461	-1399.54	936.654	193.675	-1389.58	860.334	132.395	-1437.94	865.339	147.639	-1414.9	766.591
681	0	345.861	-1091.55	1567.21	460.542	-1073.99	1570.01	365.845	-1259.26	1607.53	484.298	-1249.67	1615.91	429.502	-1331.41	1468.17	438.524	-1418.06	1235.79	427.425	-1180.13	1388.79	421.811	-1128.63	1205.38	559.648	-1427.08	1291.47	256.287	-1306.68	1434.42	179.344	-1393.73	1216.19	174.897	-1418.16	1122.67	143.395	-1389.03	935.272	192.51	-1379.44	858.833	131.2	-1427.53	863.82	147.992	-1405.53	764.72
682	0	343.912	-1080.93	1565.68	458.031	-1063.16	1569.25	363.293	-1248.41	1606.16	481.755	-1238.74	1614.62	427.12	-1320.2	1467.13	436.629	-1406.98	1234.88	425.349	-1169.13	1387.22	420.375	-1117.72	1203.88	557.531	-1416.27	1290.97	253.981	-1295.36	1432.76	177.315	-1382.57	1214.61	172.94	-1407.23	1121.16	142.101	-1378.07	933.552	191.591	-1368.53	857.503	129.637	-1416.58	862.229	147.331	-1395.38	763.16
683	0	341.017	-1069.92	1564.78	455.194	-1052.25	1568.24	360.847	-1237.55	1604.8	478.94	-1227.93	1613.25	424.635	-1309.15	1465.86	434.595	-1395.91	1233.71	423.403	-1157.96	1385.96	419.023	-1106.76	1202.46	555.23	-1405.52	1290.29	251.513	-1284.05	1431.08	175.189	-1371.42	1213	171.113	-1396.09	1119.44	140.741	-1366.7	931.792	190.22	-1357.4	855.78	128.554	-1405.23	860.396	146.936	-1384.61	761.247
684	0	338.493	-1059.1	1563.72	452.397	-1041.39	1567.27	357.866	-1226.81	1603.2	476.059	-1217.33	1612.03	421.882	-1298.05	1464.6	432.465	-1385.05	1232.43	421.139	-1146.93	1384.56	417.628	-1095.73	1201.21	552.711	-1394.86	1289.45	249.049	-1272.63	1429.37	173.237	-1360.27	1211.07	169.123	-1384.81	1117.64	139.177	-1355.08	929.96	189.224	-1345.85	853.872	127.231	-1393.42	858.202	146.106	-1373.23	759.423
685	0	335.512	-1048.21	1562.53	449.38	-1030.56	1566.39	354.654	-1215.84	1602.04	472.968	-1206.45	1611.12	419.062	-1287.16	1463.75	429.956	-1373.86	1231.35	418.93	-1135.87	1383.49	416.027	-1084.66	1199.98	550.187	-1384.12	1288.97	246.625	-1261.28	1427.43	171.364	-1348.85	1209.32	166.869	-1373.42	1115.96	137.515	-1343.05	927.974	187.439	-1333.53	852.138	125.709	-1381.24	856.211	145.242	-1361.07	757.283
686	0	332.621	-1037.14	1561.5	446.495	-1019.65	1565.62	351.378	-1204.87	1601.04	469.806	-1195.59	1610.42	416.08	-1276.17	1462.76	427.222	-1362.66	1230.2	416.831	-1124.75	1382.45	414.621	-1073.45	1199.04	547.519	-1373.39	1288.37	243.951	-1249.87	1425.68	168.914	-1337.22	1207.44	164.576	-1361.7	1113.92	135.862	-1330.85	925.865	185.813	-1320.89	850.599	123.396	-1368.61	854.087	143.917	-1348.38	755.013
687	0	329.582	-1026.06	1560.57	443.529	-1008.71	1564.98	348.049	-1193.94	1600.12	466.265	-1184.73	1609.67	413.26	-1265.54	1461.88	424.478	-1351.62	1228.88	414.437	-1113.8	1381.68	413.397	-1062.09	1198.48	544.565	-1362.8	1287.5	241.334	-1238.5	1423.98	166.598	-1325.51	1205.4	162.184	-1349.54	1111.94	134.027	-1318.2	923.824	184.269	-1308.36	848.5	122.694	-1355.96	851.762	142.538	-1335.01	753.033
688	0	326.336	-1014.98	1559.79	440.289	-997.862	1564.54	344.53	-1182.9	1599.41	462.71	-1173.92	1609.36	410.124	-1254.67	1461	421.618	-1340.64	1227.89	412.366	-1102.7	1381.61	411.963	-1050.67	1198.39	541.507	-1352.19	1286.89	238.428	-1227.16	1422.52	164.16	-1313.46	1203.64	159.969	-1337.29	1109.85	131.78	-1305.26	921.962	182.501	-1295.34	846.429	120.532	-1342.6	849.639	140.703	-1320.97	751.124
689	0	322.975	-1003.96	1559.16	437.016	-986.968	1564.24	340.724	-1171.73	1599.11	459.08	-1163.03	1609.58	406.976	-1243.79	1460.66	418.703	-1329.35	1227.49	409.998	-1091.7	1381.53	410.51	-1038.99	1198.53	538.418	-1341.42	1286.74	235.454	-1215.91	1421.39	161.044	-1301.01	1202.03	156.913	-1324.32	1108.04	129.805	-1291.8	919.984	180.642	-1281.52	845.158	117.931	-1328.86	847.671	138.539	-1306.2	749.531
690	0	319.792	-993.024	1558.72	433.641	-976.172	1564.21	337.018	-1160.68	1598.99	455.413	-1152.14	1610.04	404.219	-1233.01	1460.53	415.828	-1318.07	1227.27	407.656	-1080.72	1381.81	408.97	-1027.47	1199.02	535.389	-1330.59	1286.67	232.727	-1204.65	1420.52	158.183	-1288.38	1200.39	154.417	-1311.01	1106.49	127.71	-1277.96	918.565	178.355	-1267.63	843.741	115.591	-1314.71	845.946	136.183	-1290.88	748.177
691	0	316.542	-982.071	1558.68	430.455	-965.323	1564.71	333.45	-1149.86	1599	451.657	-1141.47	1610.46	400.812	-1222.16	1460.5	413.203	-1306.95	1227.02	405.235	-1069.73	1382.29	407.197	-1015.56	1199.6	532.273	-1319.87	1286.54	229.911	-1193.38	1419.84	155.944	-1275.4	1199.08	151.914	-1297.71	1104.86	125.313	-1263.74	917.289	176.806	-1253.35	842.328	113.657	-1300.07	844.398	133.835	-1275.15	746.868
692	0	313.149	-971.175	1558.88	427.244	-954.568	1565.6	329.628	-1139	1599.24	447.769	-1130.73	1611.44	397.99	-1211.4	1460.93	410.775	-1295.82	1227.27	402.871	-1058.73	1383.14	405.578	-1004.08	1200.73	529.284	-1309.05	1287.05	227.065	-1182.13	1419.38	153.232	-1262.12	1197.93	149.113	-1283.95	1103.47	122.991	-1249.01	916.132	174.378	-1238.54	841.216	111.97	-1284.96	842.977	130.989	-1258.57	745.932
693	0	309.896	-960.396	1559.2	423.808	-943.846	1566.59	325.853	-1128.09	1599.87	444.075	-1120.07	1612.67	395.046	-1200.43	1461.77	408.469	-1284.63	1228.02	400.307	-1047.89	1384.1	403.641	-992.767	1201.6	526.746	-1298.13	1288.18	224.227	-1170.99	1419.48	150.152	-1248.55	1196.98	146.559	-1269.82	1102.61	120.834	-1233.81	915.397	172.121	-1222.9	840.831	108.987	-1269.38	841.964	128.485	-1241.51	745.356
694	0	306.664	-949.824	1559.87	420.5	-933.414	1567.77	322.21	-1117.49	1600.54	440.402	-1109.59	1613.81	392.226	-1189.67	1462.59	406.568	-1273.7	1228.95	397.996	-1037	1385.24	401.691	-981.849	1202.79	524.252	-1287.15	1289.22	221.975	-1159.9	1419.62	147.891	-1235.1	1196.22	143.947	-1255.74	1101.86	118.521	-1218.32	914.821	169.765	-1207.13	840.241	106.306	-1253.13	841.475	125.631	-1224.11	744.943
695	0	303.474	-939.338	1560.8	417.114	-923.026	1569.1	318.654	-1107.16	1601.23	436.699	-1099.27	1615.16	389.523	-1179.11	1463.64	404.596	-1262.68	1229.7	395.686	-1026.24	1386.58	399.844	-970.674	1204.46	522.076	-1276.26	1290.58	219.402	-1148.9	1420.11	145.512	-1221.5	1195.84	141.452	-1241.58	1101.34	116.2	-1202.32	914.892	167.604	-1190.77	840.247	104.073	-1236.35	840.956	122.702	-1206.03	745.127
696	0	300.2	-929.056	1561.99	413.956	-912.706	1570.97	315.069	-1096.81	1602.21	433.322	-1089.1	1616.77	386.938	-1168.5	1465.02	402.722	-1251.75	1231.15	393.25	-1015.65	1387.99	397.706	-959.954	1205.95	520.148	-1265.26	1292.35	216.906	-1137.9	1420.9	143.155	-1207.75	1195.82	138.819	-1227.27	1101.26	113.784	-1185.79	914.889	164.506	-1173.7	840.701	101.223	-1219	841.085	119.573	-1187.34	745.441
697	0	297.079	-918.892	1563.24	410.729	-902.66	1572.59	311.838	-1086.74	1603.21	430.029	-1078.93	1618.29	384.262	-1158.31	1466.27	400.811	-1240.7	1232.32	390.927	-1005.16	1389.58	395.614	-949.339	1207.6	518.523	-1254.34	1294.2	214.366	-1127.03	1421.82	140.246	-1194.26	1196	136.219	-1213.07	1101.53	111.154	-1168.99	915.66	161.728	-1156.07	841.264	98.1196	-1201.15	841.435	116.573	-1168.23	746.414
698	0	294.131	-908.951	1564.65	407.858	-892.561	1574.39	308.906	-1076.97	1604.09	426.964	-1069.18	1619.56	382.112	-1147.96	1467.38	398.804	-1230.08	1233.19	388.721	-994.767	1391.14	393.921	-938.836	1209.33	516.64	-1243.69	1295.48	212.036	-1116.16	1422.98	137.452	-1180.93	1196.22	133.766	-1199.1	1101.48	108.649	-1152.03	916.51	159.266	-1138.51	841.935	95.0448	-1182.93	841.876	113.26	-1148.69	747.264
699	0	291.246	-899.164	1565.99	404.858	-882.766	1576.1	306.138	-1067.28	1604.92	423.953	-1059.48	1620.72	379.688	-1137.8	1468.46	396.811	-1219.65	1234.27	386.999	-984.394	1392.72	392.23	-928.693	1211.03	514.918	-1233.38	1297.04	209.897	-1105.43	1424.06	135.051	-1167.62	1196.77	131.129	-1185	1101.57	105.766	-1134.74	917.442	156.694	-1120.42	842.917	92.0389	-1164.28	842.449	109.922	-1128.77	748.725
700	0	288.587	-889.45	1567.41	402.291	-872.826	1578.04	303.55	-1057.59	1605.98	421.342	-1049.7	1622.2	377.394	-1127.56	1469.74	394.668	-1209.4	1235.85	384.942	-974.258	1394.19	390.724	-918.497	1212.52	513.08	-1223.05	1298.58	207.594	-1094.59	1425.13	132.654	-1154.45	1197.31	128.241	-1170.89	1102.1	103.005	-1117.38	918.464	153.978	-1101.64	844.463	88.6671	-1145.55	843.374	107.081	-1108.4	750.152
701	0	286.149	-879.873	1568.57	399.643	-863.12	1579.62	301.131	-1048.01	1606.95	418.825	-1040.05	1623.28	375.358	-1117.51	1471.04	392.504	-1199.7	1237.42	383.853	-964.103	1395.62	389.595	-908.341	1213.71	511.213	-1212.94	1300.11	205.777	-1083.78	1426.26	130.188	-1141.36	1197.82	125.413	-1156.88	1102.54	100.259	-1099.88	919.756	151.001	-1082.9	845.908	85.491	-1126.47	844.237	104.111	-1087.72	751.62
702	0	283.765	-870.317	1569.87	397.286	-853.483	1581.08	299.03	-1038.66	1607.69	416.564	-1030.53	1624.28	373.369	-1107.56	1472.1	389.753	-1190.35	1238.61	382.316	-954.074	1396.66	388.585	-898.288	1215.01	509.144	-1203.31	1301.11	204.231	-1073.08	1427.08	127.746	-1128.28	1198.21	122.667	-1142.8	1102.56	97.7107	-1082.19	920.919	148.411	-1064.27	847.17	83.1898	-1107.07	844.853	101.107	-1066.88	753.32
703	0	282.061	-860.993	1571.15	395.03	-844	1582.46	297.072	-1029.16	1608.64	414.548	-1020.99	1625.59	371.551	-1097.7	1473.46	387.261	-1181.32	1240.45	381.002	-944.193	1397.89	387.713	-888.247	1216.21	507.151	-1193.74	1302.55	202.393	-1062.35	1428.12	125.38	-1115.39	1198.87	119.819	-1128.59	1103.05	94.9057	-1064.34	922.17	145.702	-1045.26	848.988	80.3184	-1087.76	845.996	98.5875	-1045.68	755.236
704	0	280.14	-851.322	1572.32	393.309	-834.279	1583.91	295.218	-1019.57	1609.82	412.927	-1011.37	1627.08	369.763	-1087.95	1474.97	384.482	-1172.15	1242.2	379.918	-934.409	1399.11	386.951	-878.488	1217.38	505.286	-1184.34	1304	200.975	-1051.7	1429.46	122.863	-1102.43	1199.55	116.968	-1114.29	1103.83	92.648	-1046.73	923.671	143.18	-1026.19	851.035	77.6648	-1068.46	847.194	95.7701	-1024.16	757.623
705	0	278.569	-841.895	1573.31	391.712	-824.654	1585.34	293.764	-1010.1	1610.82	411.263	-1001.87	1628.11	368.287	-1078.19	1476.24	382.182	-1163.22	1243.82	378.97	-924.681	1400.53	386.208	-868.912	1218.46	503.285	-1175.21	1305.09	199.563	-1041.22	1430.85	120.617	-1089.32	1200.53	114.404	-1099.88	1104.36	90.053	-1028.94	925.516	140.784	-1007.28	853.258	75.1642	-1049.21	848.595	92.7709	-1002.75	760.434
706	0	277.155	-832.45	1574.68	390.264	-815.133	1586.52	292.235	-1000.69	1611.94	409.732	-992.313	1629.3	366.784	-1068.69	1477.66	379.934	-1154.25	1245.26	377.615	-915.269	1401.9	385.139	-859.698	1219.7	501.44	-1166.33	1306.44	197.859	-1031	1432.43	118.576	-1076.26	1201.5	111.952	-1085.31	1105.36	87.5094	-1011.14	927.667	137.846	-988.644	855.609	72.56	-1029.78	850.318	89.6415	-980.977	763.737
707	0	275.668	-822.715	1576.16	389.005	-805.552	1587.84	290.909	-991.003	1613.53	408.459	-982.778	1630.77	365.274	-1059.21	1479.24	378.208	-1145.04	1247.05	376.737	-905.705	1403.53	384.126	-850.651	1221.05	499.471	-1157.3	1307.89	196.608	-1020.67	1434.38	116.084	-1062.85	1203.08	109.454	-1070.69	1106.67	85.0587	-993.306	930.461	135.477	-969.798	858.308	69.7795	-1010.43	852.724	86.8445	-959.366	767.469
708	0	274.815	-813.326	1577.51	388.096	-796.044	1589.16	289.952	-981.397	1615.17	407.375	-973.178	1632.23	364.152	-1049.88	1480.89	376.762	-1135.7	1248.47	375.756	-896.346	1404.96	383.134	-841.635	1222.48	497.76	-1148.59	1309.48	195.283	-1010.59	1436.41	113.783	-1049.53	1204.76	106.974	-1056.03	1108.23	82.9969	-975.697	933.276	133.318	-950.656	861.547	67.2699	-991.138	855.258	83.9491	-937.777	771.673
709	0	273.938	-803.776	1578.82	387.149	-786.749	1590.04	289.003	-971.836	1616.56	406.403	-963.745	1633.63	362.907	-1040.6	1482.32	375.515	-1126.59	1249.57	374.73	-887.175	1406.75	382.016	-832.642	1224.22	495.906	-1139.98	1310.56	193.855	-1000.86	1438.59	111.942	-1036.41	1206.44	104.827	-1041.63	1109.74	81.0026	-957.935	936.248	131.003	-931.736	865.051	65.885	-972.142	857.98	81.3324	-915.985	776.202
710	0	273.294	-794.26	1580.21	386.737	-777.212	1591.35	288.251	-962.288	1618.37	405.659	-954.315	1635.07	361.799	-1031.55	1483.99	374.16	-1117.47	1250.9	373.821	-878.026	1408.48	380.727	-823.594	1225.98	494.284	-1131.26	1311.96	192.802	-991.137	1440.7	109.701	-1023.47	1208.2	102.683	-1027.41	1111.52	78.8162	-940.301	939.557	128.909	-912.924	869.069	63.6331	-952.896	861.003	78.8017	-894.634	781.104
711	0	272.76	-784.623	1581.81	386.278	-767.828	1592.56	287.367	-952.627	1620.39	405.094	-944.771	1636.77	360.576	-1022.46	1485.77	372.645	-1108.65	1252.69	373.022	-868.953	1410.13	379.461	-814.456	1227.7	492.704	-1122.47	1313.61	191.728	-981.517	1442.9	108.062	-1010.27	1210.2	100.558	-1013.1	1113.6	77.1358	-922.776	943.094	127.679	-893.847	872.987	61.4153	-933.691	864.487	76.5155	-873.104	786.097
712	0	272.52	-775.065	1583.35	386.079	-758.548	1593.72	286.942	-943.06	1622.26	404.637	-935.415	1638.22	359.515	-1013.44	1487.43	370.947	-1099.38	1254.05	372.166	-859.886	1411.92	378.297	-805.283	1229.47	491.072	-1113.66	1315.01	190.785	-972.075	1444.85	106.174	-997.611	1212.52	98.5734	-999.017	1115.59	75.5545	-905.25	946.675	125.652	-875.236	877.295	59.3943	-914.672	868.184	74.3454	-851.908	791.401
713	0	272.38	-765.775	1584.58	385.796	-749.496	1594.62	286.36	-933.548	1624.17	404.27	-926.278	1639.62	358.381	-1004.43	1488.9	369.478	-1090.12	1255.35	371.075	-851.044	1413.62	377.065	-796.086	1231.27	489.471	-1104.92	1316.3	189.669	-962.565	1447.2	104.194	-984.842	1214.44	96.6867	-985.245	1117.58	73.8639	-887.823	950.634	124.24	-856.486	881.337	58.3119	-895.519	871.933	72.4911	-830.642	797.13
714	0	272.098	-756.39	1586.28	386.324	-740.275	1596.31	285.944	-924.174	1625.91	403.79	-917.083	1640.98	357.231	-995.364	1490.5	367.943	-1080.67	1256.8	370.169	-841.924	1415.21	375.827	-787.063	1232.95	487.994	-1096.12	1317.54	188.296	-953.134	1449.37	102.733	-972.636	1216.17	94.8774	-971.761	1119.65	72.58	-870.563	954.835	122.694	-837.799	886.682	56.546	-876.247	875.913	70.7793	-809.69	802.877
715	0	271.775	-746.937	1587.89	386.202	-731.219	1597.36	285.322	-914.627	1627.85	403.49	-907.945	1642.5	356.124	-986.343	1491.89	366.604	-1071.34	1258.26	369.171	-832.836	1416.66	374.755	-778.08	1234.5	486.627	-1087.08	1319.07	187.298	-943.512	1451.26	101.364	-960.586	1217.82	92.9294	-958.325	1121.72	71.1972	-853.359	958.751	121.485	-819.296	891.556	54.8942	-857.342	880.017	69.2832	-788.814	808.735
716	0	272.014	-737.559	1589.41	386.169	-722.175	1598.23	285.092	-905.393	1629.19	403.162	-899.063	1643.21	355.085	-977.215	1493.06	365.53	-1062.16	1259.37	368.208	-823.889	1418	373.789	-769.148	1235.79	485.223	-1078.21	1319.96	186.084	-934.092	1453.18	99.5503	-948.592	1219.89	90.942	-945.051	1123.39	69.9548	-836.321	962.894	120.521	-800.948	896.434	53.7215	-838.296	884.054	68.2999	-767.94	814.722
717	0	271.741	-728.148	1591	386.159	-713.25	1599.22	284.592	-896.075	1630.39	402.798	-890.208	1644.11	354.04	-968.163	1494.06	364.448	-1053.14	1260.38	367.313	-814.779	1419.29	372.73	-760.24	1236.98	484.041	-1069.35	1321	184.894	-924.758	1454.79	98.0176	-937.049	1221.28	89.2513	-932.279	1124.88	69.2635	-819.562	966.965	119.6	-782.873	901.518	52.7123	-819.477	888.068	67.5405	-747.496	820.857
718	0	271.869	-718.491	1592.46	386.248	-704.117	1600.37	284.091	-886.724	1631.76	402.434	-881.155	1644.98	352.982	-958.948	1495.15	363.248	-1043.94	1261.67	366.244	-805.645	1420.25	371.861	-751.299	1238.03	482.9	-1060.15	1322.19	184.117	-915.175	1456.21	96.2671	-925.47	1223.04	86.9845	-919.167	1126.64	67.9472	-802.79	970.911	118.976	-765.046	906.483	51.6742	-800.677	892.158	67.1562	-727.253	826.836
719	0	271.892	-709.216	1593.52	386.3	-695.046	1601.1	283.717	-877.414	1632.68	402.104	-872.163	1645.53	352.097	-949.674	1496.05	362.166	-1034.79	1262.57	365.14	-796.523	1420.92	371.022	-742.18	1238.63	481.811	-1051.15	1322.9	183.391	-905.78	1457.07	94.5674	-914.081	1224.29	85.1179	-906.574	1127.83	67.1712	-786.331	974.565	118.418	-747.398	911.281	50.99	-782.378	895.976	67.1623	-707.261	832.652
720	0	271.713	-699.744	1594.53	386.125	-686.027	1601.63	283.277	-868.217	1633.24	401.567	-863.22	1645.64	351.293	-940.472	1496.54	361.489	-1025.77	1263.13	364.576	-787.233	1421.38	370.168	-733.104	1239.07	481.002	-1042.1	1323.48	182.511	-896.226	1458.05	93.1916	-902.88	1225.29	83.2362	-893.782	1129.06	66.3188	-770.033	978.258	118.132	-730.054	915.972	50.8295	-764.069	900.034	67.2044	-687.505	838.431
721	0	271.695	-690.458	1595.18	385.941	-676.913	1601.98	282.964	-858.952	1633.57	401.211	-854.218	1645.72	350.45	-931.136	1496.95	360.804	-1016.52	1263.63	363.734	-778.081	1421.66	369.198	-723.945	1239.31	480.249	-1032.79	1324.07	181.883	-886.88	1458.58	91.5112	-891.749	1226.26	81.4775	-881.339	1129.96	65.6701	-754.057	981.813	118.018	-713.055	920.523	49.6837	-746.291	903.899	67.6851	-668.159	844.156
722	0	271.439	-681.07	1595.69	385.84	-667.565	1602.49	282.221	-849.591	1633.91	400.82	-845.003	1645.81	349.908	-921.712	1497.44	360.277	-1007.3	1264.18	362.709	-768.799	1421.76	368.399	-714.787	1239.27	479.663	-1023.44	1324.59	181.261	-877.534	1459.08	90.1624	-880.499	1227.03	79.4047	-868.849	1130.96	65.1857	-738.169	985.169	117.839	-696.059	925.231	49.2751	-728.626	906.99	68.1788	-649.032	849.788
723	0	271.143	-671.574	1595.92	385.356	-658.341	1602.26	282.023	-840.137	1633.89	400.448	-835.807	1645.47	349.345	-912.271	1497.56	360.082	-998.15	1264.43	362.158	-759.492	1421.69	367.464	-705.58	1239.2	479.362	-1014.1	1324.85	180.643	-868.192	1459.22	88.5962	-869.356	1227.76	77.6901	-856.268	1131.8	64.7411	-722.601	988.355	118.044	-679.656	929.447	49.3685	-711.19	910.394	68.8435	-630.392	855.368
724	0	270.583	-662.044	1596.04	385.134	-648.892	1602.1	281.528	-830.883	1633.54	400.037	-826.577	1644.88	348.955	-902.764	1497.42	359.96	-989.041	1264.48	360.882	-750.155	1421.53	366.643	-696.367	1238.81	478.925	-1004.61	1324.85	180.061	-858.921	1459.3	87.4013	-858.311	1227.99	76.0376	-844.185	1132.09	64.3806	-707.265	991.535	118.112	-663.73	934.075	49.0447	-694.138	913.747	69.5637	-612.174	860.766
725	0	270.25	-652.617	1595.71	384.8	-639.426	1601.73	281.109	-821.247	1633.14	399.579	-817.111	1644.23	348.623	-893.211	1497.2	359.807	-979.906	1264.49	360.375	-740.724	1421	365.675	-687.31	1238.24	478.992	-994.941	1324.99	179.527	-849.747	1459.26	86.0565	-847.178	1228.26	74.4409	-831.902	1132.52	64.1892	-692.033	994.504	118.264	-647.91	937.983	49.0976	-677.245	917.042	70.3547	-594.288	866.05
726	0	269.701	-643.083	1595.12	384.108	-630.021	1600.72	280.789	-811.747	1632.53	399.319	-807.676	1643.37	348.323	-883.493	1496.81	359.898	-970.863	1264.39	359.371	-731.325	1420.22	364.666	-678.147	1237.33	479.216	-985.225	1324.99	179.249	-840.657	1458.6	84.8074	-836.085	1228.57	72.9125	-819.587	1132.81	64.1018	-677.209	997.14	118.691	-632.387	941.686	49.5228	-660.85	920.061	71.4491	-576.803	871.049
727	0	269.374	-633.453	1594.32	383.934	-620.425	1599.84	280.433	-802.235	1631.37	398.836	-798.148	1642.11	348.181	-873.885	1496.01	360.262	-961.799	1263.84	358.537	-721.809	1419.27	363.638	-669.092	1236.25	479.421	-975.392	1324.46	178.432	-831.741	1458.24	83.8469	-825.025	1228.22	71.6506	-807.637	1132.75	64.1697	-662.629	999.721	119.11	-617.29	945.079	49.6343	-644.548	922.806	72.4124	-559.783	875.713
728	0	268.791	-623.717	1593.54	383.45	-610.762	1598.58	279.881	-792.741	1630.23	398.398	-788.603	1640.55	347.971	-864.176	1495.11	360.655	-952.788	1263.11	357.767	-712.185	1418.16	362.605	-659.916	1234.85	479.888	-965.562	1323.85	178.567	-822.555	1457.17	83.1315	-813.97	1227.85	70.439	-795.776	1132.37	64.2768	-648.109	1001.94	119.725	-602.421	948.293	49.9829	-628.775	925.284	73.4795	-543.114	880.088
729	0	268.461	-613.956	1592.41	383.021	-601.118	1597.13	279.651	-782.921	1629.09	398.168	-778.926	1639.2	347.955	-854.316	1494.2	360.984	-943.608	1262.6	356.894	-702.567	1416.46	361.611	-650.607	1233.31	480.458	-955.46	1323.35	178.153	-813.727	1456.08	83.0107	-803.165	1226.62	69.3372	-783.99	1131.97	64.6074	-634.068	1003.81	120.125	-587.882	951.166	50.4522	-613.23	927.541	74.5654	-526.877	884.112
730	0	268.374	-604.285	1590.9	382.945	-591.35	1595.75	279.11	-773.121	1627.63	397.853	-769.217	1637.54	347.951	-844.501	1492.98	361.497	-934.35	1261.85	356.327	-692.839	1414.94	360.692	-641.297	1231.39	481.126	-945.297	1322.7	178.094	-804.563	1454.5	82.6104	-792.453	1225.65	68.4348	-772.368	1131.3	65.0949	-620.259	1005.34	120.94	-573.637	953.45	51.07	-597.983	929.533	75.8799	-511.048	887.744
731	0	268.14	-594.51	1589.43	382.977	-581.614	1594.19	278.747	-763.513	1625.79	397.497	-759.594	1635.27	347.978	-834.443	1491.53	362.27	-925.236	1260.57	355.543	-683.031	1412.97	359.751	-631.885	1229.48	481.872	-935.299	1321.61	177.925	-795.417	1453.01	81.6624	-781.869	1224.82	67.9602	-761.074	1130.16	65.5212	-606.883	1006.71	121.812	-559.654	955.605	51.5325	-583.191	931.333	77.1331	-495.648	890.977
732	0	267.795	-584.545	1587.92	382.318	-571.944	1592.02	278.708	-753.653	1623.82	397.236	-749.921	1633.21	347.982	-824.484	1489.94	362.913	-915.899	1259.27	354.913	-673.14	1411.13	358.992	-622.434	1227.41	482.53	-924.981	1320.56	177.893	-786.219	1450.94	82.0511	-771.356	1222.77	67.2593	-749.997	1128.77	65.9709	-593.624	1007.8	122.433	-546.074	957.543	52.2771	-568.75	932.635	78.3188	-480.731	893.936
733	0	267.409	-574.557	1586.13	382.347	-561.982	1590.22	278.458	-743.753	1621.92	397.117	-740.187	1631.01	348.079	-814.304	1488.44	363.496	-906.72	1258.21	354.186	-663.256	1409.05	358.155	-612.96	1225.12	483.418	-914.636	1319.61	177.781	-776.941	1448.94	81.8374	-761.018	1221.19	66.8806	-738.996	1127.28	66.4373	-580.737	1008.49	123.183	-532.832	959.265	52.7226	-554.504	933.956	79.5632	-466.179	896.587
734	0	267.54	-564.745	1584.25	382.242	-552.113	1588.14	278.35	-733.873	1619.8	396.969	-730.324	1628.67	348.192	-804.351	1486.54	364.441	-897.279	1256.69	353.783	-653.223	1406.87	357.711	-603.291	1222.83	484.348	-904.369	1318.33	177.664	-767.703	1446.8	81.6342	-750.964	1219.12	66.5161	-728.136	1125.44	66.9335	-568.191	1008.78	124.155	-519.79	960.276	53.3497	-540.846	934.703	80.8374	-452.058	898.679
735	0	267.403	-554.738	1582.2	382.297	-542.17	1586.02	278.171	-724.022	1617.46	396.809	-720.54	1626.19	348.394	-794.212	1484.66	365.283	-887.809	1254.92	353.262	-643.213	1404.69	357.202	-593.504	1220.61	485.135	-894.077	1316.89	177.822	-758.263	1444.44	81.8778	-741.044	1216.92	66.3367	-717.62	1123.15	67.6209	-555.983	1008.79	124.946	-507.134	961.07	54.1285	-527.489	935.298	82.0182	-438.48	900.375
736	0	267.548	-544.66	1580.48	382.196	-532.302	1583.83	278.273	-713.897	1615.43	396.992	-710.642	1624.2	348.678	-783.974	1482.93	366.17	-878.125	1253.34	353.003	-633.156	1402.57	356.903	-583.525	1218.44	486.135	-883.832	1315.61	177.96	-748.878	1442.09	82.0876	-731.414	1214.64	66.3753	-707.084	1121.24	68.067	-544.156	1008.47	125.699	-495.041	961.339	55.0454	-514.671	935.231	83.101	-425.321	901.676
737	0	267.823	-534.605	1578.29	382.6	-522.14	1581.99	278.191	-703.746	1613.36	397.093	-700.487	1621.88	349.024	-773.876	1481.02	367.243	-868.327	1251.86	352.843	-623.02	1400.42	356.714	-573.474	1216.3	487.09	-873.445	1314.2	178.049	-739.483	1439.55	81.9802	-721.853	1212.58	66.4443	-696.759	1119.07	68.7152	-532.687	1007.81	126.7	-483.19	961.176	55.9598	-502.458	934.937	84.1184	-412.726	902.482
738	0	267.986	-524.348	1576.5	382.742	-512.224	1579.63	278.668	-693.752	1611.18	397.381	-690.632	1619.7	349.569	-763.621	1479.12	368.166	-858.482	1249.98	353.036	-612.938	1398.35	356.843	-563.324	1213.98	487.956	-863.127	1312.43	178.609	-729.801	1437.21	82.6773	-712.487	1210.2	66.8802	-686.696	1116.62	69.6295	-521.623	1006.76	127.536	-471.833	960.784	56.8609	-490.778	934.266	85.1287	-400.775	902.91
739	0	268.641	-514.175	1574.61	383.39	-502.009	1577.81	278.917	-683.638	1609.09	397.648	-680.55	1617.59	350.094	-753.424	1477.29	369.14	-848.509	1248.3	353.356	-602.739	1396.45	357.225	-553.119	1212.14	489.024	-853.002	1310.96	179.17	-720.092	1434.87	83.5704	-703.135	1207.87	67.6466	-676.952	1114.43	70.3614	-510.919	1005.6	128.374	-460.947	959.878	57.8676	-479.656	933.079	86.0555	-389.404	902.932
740	0	269.382	-504.113	1572.69	383.955	-491.87	1576.03	279.618	-673.391	1607.49	398.479	-670.378	1615.95	350.811	-743.14	1475.63	370.129	-838.2	1247.01	353.746	-592.445	1394.7	357.661	-542.845	1210.29	489.925	-842.584	1309.66	179.878	-710.17	1433.01	85.0113	-693.841	1205.33	68.0923	-667.198	1112.55	71.1745	-500.721	1004.1	129.283	-450.578	958.846	58.645	-469.013	931.768	86.8245	-378.66	902.453
741	0	270.374	-493.897	1571.13	384.676	-481.672	1574.31	280.288	-663.331	1605.59	399.271	-660.205	1614.08	351.533	-732.787	1473.94	370.952	-827.933	1245.44	354.508	-582.063	1393.09	358.354	-532.423	1208.75	490.821	-832.115	1308.15	180.497	-700.002	1431.16	85.8066	-684.622	1203.61	68.8465	-657.718	1110.54	71.989	-490.926	1002.47	130.102	-440.541	957.455	59.5613	-459.157	930.396	87.4388	-368.57	901.597
742	0	271.05	-483.659	1569.81	386.093	-471.16	1572.85	281.302	-653.269	1603.9	400.345	-650.165	1612.32	352.437	-722.55	1472.24	371.786	-817.641	1243.55	355.251	-571.691	1391.67	358.919	-521.882	1207.32	491.618	-821.854	1306.3	181.289	-689.729	1429.69	87.173	-675.414	1201.7	69.802	-648.612	1108.53	72.7426	-481.697	1000.64	130.691	-431.386	955.794	60.3632	-449.898	928.446	88.0595	-359.05	900.304
743	0	272.095	-473.534	1568.47	387.326	-460.987	1571.43	282.784	-642.984	1602.45	401.543	-639.902	1610.61	353.249	-712.31	1470.7	372.428	-807.079	1241.94	356.174	-561.244	1390.32	359.739	-511.18	1206.17	492.348	-811.274	1304.46	182.217	-679.294	1428.25	88.2823	-666.211	1200.07	70.9315	-639.638	1106.82	73.557	-472.786	998.651	131.496	-422.332	954.114	61.1219	-441.182	926.371	88.6086	-350.281	898.559
744	0	273.694	-463.421	1567.18	388.605	-450.907	1569.96	284.117	-632.897	1601.19	403.28	-629.766	1609.28	354.208	-701.979	1469.25	372.975	-796.43	1240.44	357.173	-550.809	1389.12	360.622	-500.363	1205.27	493.165	-800.766	1302.53	183.082	-668.623	1427.05	89.6854	-656.767	1198.66	71.7947	-630.872	1105.29	74.3269	-464.309	996.376	132.226	-413.824	951.733	62.009	-433.153	923.932	88.9773	-342.003	896.277
745	0	275.447	-453.444	1565.94	390.292	-440.695	1568.62	285.864	-622.918	1599.94	404.988	-619.565	1607.81	355.462	-691.821	1467.75	373.581	-785.688	1238.68	358.508	-540.316	1388.15	361.521	-489.446	1204.34	494.088	-790.235	1300.45	184.236	-658.078	1425.97	90.9879	-647.269	1197.35	73.1168	-622.197	1103.83	75.0881	-456.164	993.871	133	-405.811	949.092	63.0077	-425.418	921.327	89.3655	-334.426	893.369
746	0	277.101	-443.375	1565.22	392.069	-430.704	1567.36	287.769	-612.993	1598.85	406.953	-609.568	1606.38	356.817	-681.731	1466.13	374.054	-774.827	1236.78	359.792	-529.848	1387.3	362.318	-478.462	1203.62	494.732	-779.528	1298.14	185.381	-647.377	1424.98	92.1788	-637.814	1196.18	74.2848	-613.728	1102.37	76.0447	-448.51	991.382	133.786	-398.168	946.217	63.6531	-418.484	918.314	89.6317	-327.37	890.174
747	0	279.376	-433.499	1564.2	394.157	-420.642	1566.21	289.579	-603.015	1598.04	409.268	-599.603	1605.22	358.022	-671.689	1464.76	374.646	-763.779	1235.05	361.181	-519.377	1386.53	363.281	-467.145	1203.28	495.408	-768.862	1295.84	186.715	-636.797	1424.13	93.2389	-628.066	1195.28	75.4189	-605.314	1101.34	76.7214	-440.994	988.494	134.325	-390.96	943.115	64.485	-411.666	915.464	89.9929	-320.894	886.352
748	0	281.537	-423.558	1563.54	396.185	-410.807	1565.16	292.271	-593.104	1597.38	411.652	-589.647	1604.02	359.698	-661.434	1463.51	375.285	-752.764	1233.18	362.787	-508.817	1385.85	364.261	-455.716	1202.89	496.389	-758.253	1293.67	188.073	-626.261	1423.34	94.3675	-618.375	1194.59	76.6977	-596.703	1100.42	77.8024	-433.946	985.485	135.443	-384.167	939.355	65.3698	-405.567	912.085	90.3659	-314.936	882.016
749	0	283.921	-413.679	1563.17	398.532	-400.926	1564.22	294.521	-583.316	1596.67	414.149	-579.77	1602.89	361.075	-651.584	1462.21	376.141	-741.706	1231.34	364.377	-498.343	1385.33	365.136	-444.194	1202.68	497.339	-747.476	1291.17	189.404	-615.75	1422.78	95.4533	-608.965	1193.75	77.9338	-588.225	1099.38	78.6374	-427.144	982.259	135.939	-377.75	935.55	65.91	-399.995	908.806	90.6151	-309.506	877.248
750	0	286.265	-403.766	1563.4	400.97	-390.999	1563.86	297.131	-573.514	1596.34	416.826	-569.891	1602.02	362.801	-641.496	1461.06	376.944	-730.609	1229.7	365.884	-487.844	1385.26	366.028	-432.539	1202.91	498.401	-736.959	1288.94	190.833	-605.323	1422.53	96.2674	-599.608	1193.19	79.2258	-579.681	1098.6	79.4454	-420.568	979.368	136.416	-371.895	931.477	66.513	-394.581	905.402	90.897	-304.611	872.228
751	0	288.737	-393.871	1563.74	403.63	-380.953	1563.9	299.717	-563.717	1596.45	419.673	-560.033	1601.74	364.63	-631.321	1460.48	377.743	-719.409	1228.59	367.504	-477.311	1385.4	367.117	-420.758	1203.45	499.207	-726.022	1287.07	192.271	-594.936	1422.58	97.28	-590.06	1193	80.5877	-571.063	1098.31	80.1244	-414.26	976.15	137.323	-366.206	927.216	67.0715	-389.551	901.849	90.738	-300.464	866.84
752	0	291.439	-383.942	1564.17	406.052	-371.223	1563.7	302.674	-553.757	1596.76	422.407	-550.138	1601.46	366.368	-621.205	1460.05	378.567	-708.383	1227.76	369.329	-466.789	1385.72	368.316	-409.1	1204	500.299	-715.424	1285.59	193.72	-584.433	1423.02	98.3345	-580.389	1193.42	82.0914	-562.428	1098.23	81.0383	-408.107	972.986	138.048	-361.044	922.537	67.4796	-385.092	898.337	90.7487	-296.824	861.104
753	0	294.093	-374.001	1564.95	409.028	-361.166	1563.93	305.449	-543.87	1597.23	425.101	-540.254	1601.33	368.027	-611.06	1459.82	379.318	-697.501	1227.09	371.15	-456.31	1386.32	369.505	-397.646	1204.75	501.36	-705.01	1284.32	195.303	-573.928	1423.63	99.6852	-570.907	1193.69	84.0696	-553.708	1098.38	82.009	-402.395	969.667	138.492	-356.768	917.674	67.7524	-381.015	894.902	90.6555	-293.885	855.185
754	0	296.777	-364.012	1565.91	411.799	-351.357	1564.59	308.497	-533.929	1598.05	427.911	-530.373	1601.64	369.684	-600.908	1460.04	380.013	-686.628	1226.9	372.891	-445.919	1387.12	370.654	-386.386	1205.77	502.124	-694.344	1283.4	196.826	-563.385	1424.57	101.207	-561.302	1194.32	85.7538	-544.89	1098.92	82.8098	-396.97	966.521	139.082	-352.725	912.816	68.2515	-377.664	891.151	90.4122	-291.678	849.132
755	0	299.631	-353.999	1566.99	414.64	-341.535	1565.28	310.965	-523.869	1599.05	430.792	-520.493	1602.28	371.405	-590.828	1460.65	380.516	-675.849	1227.24	374.539	-435.62	1387.98	372.008	-375.372	1207.11	503.149	-684.049	1283.04	198.359	-552.777	1425.85	102.807	-551.565	1195.35	87.761	-535.934	1100.06	83.8291	-391.857	963.622	139.793	-349.195	907.962	68.7079	-374.804	887.707	90.027	-290.285	842.937
756	0	302.488	-343.984	1568.18	417.303	-331.733	1565.86	313.85	-513.916	1600.38	433.489	-510.728	1603.03	373.17	-580.912	1461.3	381.128	-665.256	1227.66	376.31	-425.374	1389.26	373.189	-364.624	1208.56	503.917	-673.723	1282.73	200.02	-542.373	1427.43	104.364	-541.645	1197.18	89.8181	-526.837	1101.39	84.7081	-387.166	960.964	140.029	-346.22	903.265	68.7459	-372.408	884.745	89.5311	-289.516	836.906
757	0	305.163	-333.958	1569.64	420.247	-321.797	1566.83	316.392	-503.907	1601.72	435.901	-500.861	1603.89	374.692	-571.036	1462.12	381.728	-654.84	1228.08	377.81	-415.391	1390.65	374.422	-354.163	1210.14	504.794	-663.298	1282.94	201.5	-531.97	1429.15	106.078	-531.662	1198.55	91.7723	-517.826	1102.81	85.6702	-382.811	958.414	140.5	-343.874	898.53	68.7667	-370.625	881.896	88.8815	-289.567	830.979
758	0	307.665	-324.03	1570.91	422.951	-312.089	1567.99	318.798	-493.916	1603.32	438.425	-491.069	1605.11	376.222	-561.203	1463.28	382.563	-644.305	1229.03	379.268	-405.351	1392.16	375.44	-343.746	1211.75	506.329	-653.294	1283.6	202.734	-521.607	1431.16	107.547	-521.438	1200.43	93.7274	-508.697	1104.66	86.3365	-378.711	956.463	141.203	-341.416	894.724	68.9231	-369.016	879.492	88.1245	-290.174	825.346
759	0	310.323	-314.125	1572.42	425.696	-302.356	1568.98	321.193	-483.956	1604.89	440.889	-481.399	1606.21	377.678	-551.466	1464.31	383.666	-633.833	1229.73	380.635	-395.479	1393.64	376.561	-333.412	1213.55	507.506	-643.086	1284.08	204.201	-511.544	1432.96	109.094	-511.221	1202.23	95.7134	-499.766	1106.56	87.0425	-374.759	954.419	141.068	-339.999	890.577	68.904	-367.679	877.52	87.4756	-291.368	819.664
760	0	312.869	-304.169	1573.83	428.015	-292.8	1569.67	323.602	-474.045	1606.35	443.092	-471.898	1607.12	379.134	-541.844	1465.23	385.084	-623.32	1230.3	381.912	-385.658	1395.17	377.485	-323.27	1215.04	508.456	-632.717	1284.58	205.636	-501.64	1434.79	111.061	-501.147	1203.59	97.8244	-491.099	1108.02	87.7778	-371.053	952.908	141.169	-338.634	887.126	68.7714	-366.565	875.589	87.0415	-292.844	814.247
761	0	315.262	-294.357	1575.3	430.366	-283.336	1570.69	325.603	-464.209	1607.57	445.115	-462.365	1607.96	380.373	-532.167	1466.05	386.549	-612.956	1231.06	382.922	-375.908	1396.37	378.333	-313.199	1216.41	509.684	-622.459	1285.13	206.918	-491.923	1436.3	111.97	-491.356	1205.23	99.7896	-482.586	1109.46	88.3539	-367.463	951.506	141.201	-337.37	883.871	68.3881	-365.584	874.121	86.4516	-294.571	808.813
762	0	317.404	-284.563	1576.78	432.563	-273.655	1571.73	327.555	-454.401	1609.03	447.011	-452.753	1608.75	381.791	-522.453	1467.28	388.072	-602.619	1232.23	383.969	-366.104	1397.53	379.04	-303.23	1217.61	511.165	-612.286	1285.71	208.063	-482.321	1437.58	113.92	-481.781	1206.14	101.571	-474.145	1110.91	88.8176	-363.901	950.201	141.007	-336.064	881.014	68.1212	-364.45	872.884	85.9744	-296.617	803.607
763	0	319.373	-274.728	1578.2	434.701	-263.858	1572.82	329.418	-444.572	1610.42	448.893	-443.244	1609.62	383.028	-512.871	1468.21	389.744	-592.463	1233.15	385.015	-356.322	1398.65	379.822	-293.241	1218.9	512.818	-602.086	1286.53	209.44	-472.771	1438.89	114.881	-472.734	1207.43	103.466	-466	1112.1	89.1912	-360.394	949.059	140.888	-334.827	878.401	67.7626	-363.149	871.794	85.7637	-298.926	798.746
764	0	320.911	-264.904	1579.79	436.363	-254.348	1573.91	330.97	-434.853	1611.49	450.289	-433.678	1610.36	384.289	-503.227	1469.24	391.161	-582.534	1233.94	385.722	-346.588	1399.81	380.149	-283.293	1220.06	514.389	-591.96	1287.25	210.371	-463.491	1439.93	116.023	-463.978	1208.2	105.425	-458.285	1112.82	89.4697	-356.934	948.024	140.256	-334.512	875.366	67.4994	-361.863	870.914	85.2985	-301.425	794.093
765	0	322.389	-255.129	1581.22	437.865	-244.499	1574.97	332.47	-425.001	1612.85	451.772	-424.026	1611.35	385.423	-493.587	1470.38	392.382	-572.747	1235.02	386.32	-336.961	1400.82	380.503	-273.448	1221.1	516.077	-581.982	1288.41	211.497	-454.333	1440.93	117.073	-455.442	1209.17	107.059	-450.522	1113.85	89.7252	-353.47	947.081	140.089	-333.132	873.398	67.7721	-360.632	870.288	84.8223	-303.959	790.033
766	0	323.62	-245.323	1582.36	439.249	-234.677	1576.05	333.751	-415.284	1614.21	453.202	-414.207	1612.47	386.648	-483.907	1471.69	393.635	-563.346	1236.26	386.924	-327.315	1401.67	380.969	-263.837	1221.95	517.555	-572.02	1289.55	212.322	-445.456	1441.99	118.412	-447.4	1209.95	108.694	-443.298	1114.61	90.3386	-350.224	946.487	139.805	-331.63	871.899	67.2245	-359.037	869.928	84.759	-306.453	786.361
767	0	324.706	-235.578	1583.6	440.268	-224.949	1576.97	334.956	-405.528	1615.32	454.266	-404.414	1613.33	387.682	-474.321	1472.74	394.723	-554.213	1237.11	387.67	-317.67	1402.62	381.44	-254.463	1222.84	518.974	-562.103	1290.81	213.335	-436.584	1442.86	119.641	-439.827	1210.65	110.146	-436.366	1115.45	90.6129	-346.919	945.887	139.64	-330.535	870.1	67.3007	-357.486	869.701	84.6701	-308.842	783.511
768	0	325.354	-225.917	1584.74	440.83	-215.158	1577.94	336.092	-395.768	1616.58	455.282	-394.558	1614.49	388.577	-464.828	1473.91	395.698	-545.154	1238.09	388.003	-308.081	1403.57	381.745	-245.181	1223.82	520.205	-552.267	1291.91	214.096	-427.829	1443.89	120.821	-432.465	1211.47	111.575	-429.988	1116.21	90.9114	-343.815	945.608	139.934	-328.89	869.352	67.338	-356.068	869.657	84.464	-311.09	781.18
769	0	325.921	-216.161	1585.92	441.639	-205.12	1579.25	336.918	-386.054	1617.97	456.246	-384.63	1615.87	389.464	-455.287	1475.26	396.72	-536.028	1239.44	388.376	-298.467	1404.57	382.082	-235.956	1224.86	521.469	-542.409	1293.54	214.901	-419.118	1445.01	122.082	-425.839	1212.09	112.843	-423.893	1117.42	91.43	-340.753	945.605	139.999	-327.363	869.303	67.2781	-354.45	870.04	84.6039	-312.925	779.567
770	0	326.431	-206.519	1586.96	441.973	-195.182	1580.23	337.654	-376.455	1619.24	457.062	-374.652	1616.98	390.269	-445.714	1476.47	397.643	-526.987	1240.74	388.67	-288.929	1405.42	382.484	-226.659	1225.83	522.364	-532.819	1294.95	215.636	-410.448	1446.08	123.348	-419.364	1213.07	113.98	-418.239	1118.48	92.0165	-337.928	945.609	139.8	-325.819	868.375	67.5128	-352.84	870.514	85.0102	-314.306	778.347
771	0	326.743	-196.956	1587.89	442.19	-185.344	1581.16	338.519	-366.731	1620.43	457.8	-364.662	1618.03	391.099	-436.35	1477.65	398.475	-517.983	1241.68	389.213	-279.443	1406.45	382.832	-217.367	1226.82	523.324	-523.321	1296.15	216.341	-401.715	1447.21	123.849	-413.485	1214.48	115.244	-413.122	1119.47	92.6929	-335.142	945.776	140.394	-324.053	868.315	68.1994	-351.299	870.979	85.3956	-315.232	777.696
772	0	326.963	-187.374	1589.03	442.199	-175.53	1582.16	339.175	-357.162	1621.47	458.384	-354.576	1619.21	391.876	-426.81	1478.71	399.269	-508.925	1242.9	389.62	-270.025	1407.63	383.274	-208.199	1227.8	524.183	-513.842	1297.53	217.52	-392.969	1448.51	125.276	-407.764	1215.32	116.153	-408.262	1120.62	93.0835	-332.426	946.245	140.752	-322.218	868.813	68.6836	-349.623	871.559	85.9456	-315.566	777.46
773	0	326.845	-177.926	1589.99	442.447	-165.399	1583.48	339.732	-347.672	1622.75	459.145	-344.594	1620.58	392.576	-417.325	1480.13	399.849	-499.758	1244.35	390.14	-260.71	1408.79	383.775	-199.118	1228.87	524.867	-504.434	1299.02	217.901	-384.05	1449.64	126.236	-402.445	1216.4	117.056	-403.61	1122.13	93.7785	-329.902	946.607	141.793	-320.071	869.504	69.337	-347.932	872.304	86.9396	-315.657	777.393
774	0	326.616	-168.628	1590.65	442.158	-155.427	1584.41	340.366	-338.053	1623.87	459.638	-334.512	1621.76	393.365	-408.009	1481.29	400.38	-490.618	1245.75	390.701	-251.443	1409.83	384.33	-190.222	1229.9	525.595	-495.058	1300.38	218.451	-375.158	1450.78	127.372	-397.189	1217.96	117.764	-399.197	1123.56	94.2305	-327.338	947.083	142.588	-318.207	870.037	70.316	-346.262	872.991	87.8576	-315.116	777.822
775	0	326.37	-159.295	1591.5	441.876	-145.832	1585.38	340.905	-328.739	1624.69	460.163	-324.647	1622.79	393.884	-398.559	1482.17	400.993	-481.437	1246.65	391.072	-242.151	1410.68	384.783	-181.189	1230.81	526.174	-485.769	1301.44	219.257	-366.011	1452.04	128.234	-392.05	1219.28	118.579	-394.829	1124.92	94.7937	-324.842	947.773	143.466	-316.018	870.697	71.2839	-344.772	873.74	89.0682	-314.045	778.446
776	0	326.151	-149.976	1592.31	441.475	-136.015	1586.34	341.287	-319.386	1625.59	460.765	-314.764	1623.84	394.53	-389.224	1483.2	401.349	-472.19	1247.89	391.582	-232.858	1411.56	385.26	-172.108	1231.56	526.672	-476.511	1302.51	219.707	-356.907	1453.09	128.86	-386.764	1220.72	119.194	-390.479	1126.36	95.3845	-322.369	948.399	144.1	-313.602	871.669	72.3686	-342.871	874.415	90.3604	-312.507	779.112
777	0	325.912	-140.67	1593.12	441.1	-126.108	1587.26	341.771	-310.126	1626.24	461.224	-304.814	1624.58	394.983	-379.648	1483.98	401.687	-463.011	1248.92	392.169	-223.508	1412.25	385.759	-162.975	1232.21	527.111	-467.181	1303.62	220.102	-347.75	1454.18	129.617	-381.307	1222.25	119.743	-386.093	1127.94	95.9753	-319.846	949.026	145.078	-311.147	872.625	73.0858	-341.181	875.013	91.7099	-310.58	779.704
778	0	325.405	-131.56	1593.79	440.731	-116.39	1588.07	342.197	-300.926	1626.59	461.551	-295.098	1625.09	395.814	-370.424	1484.6	401.964	-453.864	1249.5	392.716	-214.16	1412.78	386.248	-153.88	1232.69	527.453	-458.031	1304.2	220.459	-338.435	1454.92	130.075	-375.815	1223.74	120.379	-381.654	1129.11	96.3455	-316.801	949.613	145.848	-308.823	873.038	75.2574	-339.376	875.569	92.9977	-308.32	780.506
779	0	325.138	-122.35	1594.47	440.744	-106.681	1589.18	342.668	-291.744	1626.82	461.744	-285.422	1625.47	395.809	-360.712	1485.08	402.08	-444.732	1250.3	393.186	-204.752	1413.16	386.731	-144.689	1232.96	527.777	-448.831	1304.81	220.866	-328.894	1455.64	130.632	-370.174	1224.86	120.833	-377.043	1130.41	97.0851	-314.334	950.1	146.935	-305.656	873.813	76.4579	-337.434	875.888	94.75	-305.575	781.02
780	0	324.966	-113.177	1595.2	440.67	-97.1655	1590.5	342.948	-282.685	1627.12	462.184	-275.863	1626.09	395.938	-351.109	1485.63	401.939	-435.594	1251.04	393.682	-195.331	1413.38	387.242	-135.488	1233.12	527.694	-439.7	1305.58	221.206	-319.304	1456.23	130.921	-363.969	1226.23	121.061	-372.238	1131.73	97.5963	-311.313	950.639	147.721	-302.372	875.4	77.484	-335.029	876.302	96.0234	-302.56	781.758
781	0	324.644	-104.039	1595.93	440.281	-87.4709	1591.36	343.194	-273.641	1627.05	462.528	-266.416	1626.37	396.181	-341.362	1485.89	401.846	-426.43	1251.54	394.289	-185.731	1413.5	387.752	-126.303	1233	527.493	-430.672	1305.99	221.514	-309.576	1456.6	131.372	-357.614	1227.46	121.522	-367.222	1132.91	98.1839	-308.149	951.008	148.18	-298.964	875.696	78.5184	-332.7	876.557	97.4305	-299.219	782.591
782	0	324.302	-94.9983	1596.61	439.818	-77.9759	1592.25	343.312	-264.707	1626.68	462.493	-257.114	1626.31	396.265	-331.579	1485.99	401.663	-417.275	1251.77	394.718	-176.22	1413.42	388.215	-116.991	1232.82	527.337	-421.577	1306.06	221.75	-299.698	1457.04	131.588	-350.997	1228.37	121.996	-361.985	1133.75	98.7156	-304.726	951.22	148.711	-295.276	876.077	79.53	-330.211	876.663	99.0572	-295.781	782.914
783	0	323.964	-85.8843	1597.02	439.547	-68.66	1593.36	343.346	-255.72	1626.23	462.443	-247.864	1626.28	396.419	-321.838	1486.23	401.236	-408.104	1252.09	395.033	-166.615	1413.23	388.623	-107.648	1232.48	527.03	-412.47	1306.26	221.947	-289.735	1457.01	131.915	-344.15	1229.48	122.539	-356.412	1134.57	99.1195	-300.903	951.644	149.436	-291.08	876.679	81.0231	-327.265	876.76	100.285	-292.048	783.373
784	0	323.821	-76.626	1597.41	439.31	-59.3133	1594.6	343.088	-246.792	1625.76	462.216	-238.713	1626.25	396.506	-311.979	1486.32	400.791	-398.719	1252.57	395.488	-156.872	1412.77	388.994	-98.2699	1231.88	526.546	-403.363	1306.58	221.995	-279.523	1457.03	131.776	-336.868	1230.39	122.998	-350.521	1135.58	99.4613	-296.786	951.941	150.697	-286.803	877.495	82.6011	-324.217	876.885	101.583	-288.114	783.776
785	0	323.389	-67.4848	1597.78	438.911	-50.0465	1595.59	342.873	-237.811	1624.93	461.742	-229.659	1626.12	396.535	-301.991	1486.2	400.132	-389.401	1252.6	395.889	-147.152	1412.19	389.46	-88.9007	1231.3	526.029	-394.277	1306.59	222.137	-269.206	1456.97	132.238	-329.195	1231.12	123.461	-344.224	1136.4	100.18	-292.55	952.028	151.289	-282.055	877.876	83.8121	-320.899	876.817	102.976	-283.956	783.979
786	0	322.854	-58.4096	1597.89	438.349	-40.9516	1596.63	342.06	-228.884	1623.66	461.131	-220.781	1625.87	396.334	-291.933	1485.8	399.43	-380.08	1252.43	396.335	-137.352	1411.64	389.809	-79.3329	1230.58	525.405	-385.228	1306.26	222.263	-258.851	1456.72	132.357	-321.522	1231.85	124.023	-337.646	1136.91	100.785	-287.771	952.086	151.872	-277.145	877.784	85.2398	-316.913	876.726	104.306	-279.556	784.048
787	0	322.546	-49.1102	1597.88	437.984	-31.8757	1597.77	341.116	-219.9	1622.29	460.245	-211.915	1625.62	396.273	-281.902	1485.48	398.677	-370.581	1252.35	396.628	-127.492	1410.95	390.091	-69.7637	1229.64	524.503	-376.162	1305.94	222.201	-248.313	1456.59	132.736	-313.226	1232.35	124.578	-330.572	1137.64	101.202	-282.512	952.199	152.353	-271.528	878.226	86.2853	-312.61	876.868	105.573	-274.893	784.178
788	0	321.979	-39.7976	1597.68	437.623	-23.0384	1598.89	340.113	-210.864	1620.86	459.028	-203.11	1625.14	396.111	-271.92	1485.01	397.714	-361.045	1252.2	396.912	-117.581	1409.96	390.331	-60.1696	1228.65	523.7	-367.018	1305.57	222.074	-237.667	1456.35	132.514	-305.018	1232.86	125.207	-323.326	1138.18	101.672	-276.805	952.303	152.657	-265.524	878.328	88.1543	-307.581	876.913	106.79	-269.878	784.145
789	0	321.5	-30.4955	1597.12	436.723	-13.9937	1599.42	338.733	-201.867	1618.9	457.752	-194.5	1624.54	395.751	-261.718	1484.21	396.666	-351.476	1251.67	397.228	-107.66	1408.96	390.652	-50.4153	1227.43	522.768	-357.873	1304.83	221.969	-226.967	1455.84	132.901	-296.3	1233.1	125.664	-315.513	1138.38	102.222	-270.387	952.234	153.187	-259.302	878.074	89.0876	-302.006	876.717	108.116	-264.563	783.71
790	0	320.827	-21.2164	1596.6	436.038	-5.12562	1600.18	337.249	-192.731	1616.88	456.026	-185.924	1623.88	394.975	-251.669	1483.42	395.367	-341.88	1251.09	397.467	-97.6752	1408.07	390.832	-40.5976	1226.32	521.675	-348.813	1304.03	221.692	-216.066	1455.19	133.016	-287.291	1233.29	125.867	-307.597	1138.66	102.626	-263.565	952.102	153.973	-252.068	878.025	89.9648	-295.861	876.504	109.073	-258.983	783.261
791	0	320.117	-11.7744	1595.83	435.175	3.66306	1600.99	335.43	-183.549	1614.83	454.235	-177.314	1623.27	394.441	-241.477	1482.72	393.997	-332.233	1250.74	397.513	-87.6414	1406.94	391.005	-30.7476	1225.16	520.298	-339.655	1303.47	221.586	-205.128	1454.21	132.959	-278.25	1233.58	126.05	-299.153	1138.92	102.951	-256.164	951.839	154.154	-244.535	878.154	90.8915	-289.148	876.402	110.027	-252.995	782.789
792	0	319.546	-2.1492	1594.93	434.245	12.4971	1601.52	333.35	-174.206	1612.61	452.236	-168.635	1622.58	393.729	-231.308	1481.84	392.502	-322.314	1250.06	397.544	-77.5496	1405.76	391.311	-20.7099	1223.89	518.833	-330.565	1302.63	221.03	-193.927	1453.53	132.851	-268.829	1233.32	126.106	-290.214	1138.94	103.469	-248.19	951.47	154.499	-236.647	877.825	91.3633	-281.41	876.461	111.149	-246.435	782.1
793	0	318.676	7.40435	1593.67	433.243	21.3185	1601.85	331.208	-164.839	1610.12	449.868	-160.172	1621.62	392.688	-221.042	1480.71	390.926	-312.347	1248.97	397.595	-67.4721	1404.58	391.516	-10.755	1222.54	517.144	-321.348	1301.58	220.685	-182.832	1452.64	132.496	-259.332	1233	126.031	-281.024	1138.52	103.601	-239.684	950.91	155.011	-228.856	876.997	91.6767	-273.245	875.738	112.066	-239.39	781.209
794	0	317.739	17.1164	1592.57	432.235	30.1742	1602.36	329.368	-155.143	1607.63	447.48	-151.639	1620.78	391.733	-210.971	1479.46	389.221	-302.301	1247.95	397.425	-57.4456	1403.34	391.72	-0.676251	1221.29	515.466	-312.007	1300.56	219.801	-171.556	1451.77	132.376	-249.047	1232.48	125.491	-271.376	1138.1	103.671	-230.597	950.174	155.512	-220.473	876.259	92.3642	-264.479	875.098	113.228	-231.756	780.232
795	0	316.413	26.8476	1591.49	430.913	38.9628	1602.75	326.511	-145.548	1605.22	444.706	-143.009	1619.87	390.59	-200.918	1478.46	387.386	-291.946	1247.02	397.316	-47.3361	1402.17	391.792	9.15379	1219.95	513.654	-302.749	1299.57	219.185	-160.479	1450.65	131.509	-238.675	1231.88	124.991	-261.278	1137.58	103.66	-221.007	949.216	155.792	-211.259	875.687	91.5167	-255.127	874.349	114.104	-223.708	779.186
796	0	315.11	36.5674	1590.18	429.459	47.7988	1602.94	323.932	-136.022	1602.64	442.017	-134.424	1619.02	389.206	-190.617	1477.24	385.93	-281.792	1245.83	396.972	-37.3157	1400.88	391.876	18.8655	1218.39	511.972	-293.512	1298.37	218.152	-149.284	1449.46	130.687	-227.851	1230.94	123.995	-250.688	1136.59	103.485	-210.836	948.11	156.045	-202.049	874.554	91.3957	-245.035	873.372	114.672	-215.026	777.849
797	0	313.902	46.3744	1588.82	427.874	56.7869	1603.05	321.207	-126.33	1600.05	439.055	-125.809	1617.95	388	-180.676	1475.91	384.239	-271.486	1244.58	396.529	-27.2535	1399.71	391.858	28.9613	1217.1	510.251	-284.087	1297.17	217.12	-138.302	1448.01	129.672	-216.785	1229.77	122.997	-239.813	1135.41	102.985	-200.174	946.881	156.086	-192.496	873.247	90.8244	-234.611	871.962	115.314	-205.86	776.258
798	0	312.463	56.3165	1587.56	426.261	65.7266	1603.27	318.109	-116.605	1597.8	436.12	-117.06	1617.06	386.373	-170.588	1474.76	382.716	-261.272	1243.52	395.934	-17.2375	1398.53	391.699	39.0161	1215.77	508.394	-274.46	1296.26	215.995	-127.287	1446.73	127.804	-205.417	1228.44	121.413	-228.511	1134.11	102.557	-189.017	945.327	155.69	-182.229	871.917	90.3624	-223.184	870.545	115.727	-196.053	774.577
799	0	310.802	66.1952	1586.09	424.198	74.8961	1603.08	315.147	-106.896	1595.4	433.035	-108.152	1616.01	384.475	-160.316	1473.39	381.122	-251.083	1242.17	395.193	-7.15544	1397.33	391.28	49.1266	1214.26	506.602	-264.813	1295.19	214.775	-116.429	1445.04	126.21	-193.867	1226.83	119.848	-216.942	1132.7	101.763	-177.329	943.667	155.314	-171.475	870.568	88.895	-211.328	869.017	115.679	-185.738	772.889
800	0	308.633	75.9297	1584.84	422.154	83.9528	1602.91	312.356	-97.0972	1593.03	429.773	-99.1341	1614.99	383.082	-150.434	1472.12	379.755	-240.83	1240.76	394.217	2.91827	1396.07	390.802	59.3778	1212.98	504.859	-255.271	1294	213.333	-105.681	1443.49	124.839	-182.078	1225.11	118.076	-205.287	1130.77	100.954	-165.2	941.781	154.835	-160.403	868.635	87.9237	-199.266	867.048	115.715	-174.975	771.095
801	0	306.536	85.7332	1583.68	420.057	93.3954	1602.77	309.661	-87.3774	1591.01	426.678	-89.9314	1613.81	380.866	-140.27	1470.75	378.31	-230.718	1239.5	392.986	12.9526	1394.97	390.122	69.5376	1211.89	503.218	-245.3	1293.07	211.711	-95.069	1441.77	122.893	-170.233	1223.1	116.036	-193.43	1128.9	99.9548	-152.908	939.752	153.752	-148.716	866.714	86.5627	-186.281	865.2	115.601	-163.516	769.055
802	0	304.14	95.5629	1582.44	417.525	102.748	1602.44	306.589	-77.5768	1589.1	423.764	-80.6356	1612.59	378.755	-129.996	1469.44	376.681	-220.389	1238.43	391.538	23.0586	1393.85	389.468	79.8731	1210.76	501.411	-235.335	1292.43	209.951	-84.4988	1440.07	120.822	-158.307	1221.22	114.09	-181.377	1126.87	98.5601	-139.995	937.888	152.244	-136.182	865.075	84.3118	-173.145	863.305	114.492	-151.36	766.929
803	0	301.55	105.241	1581.46	414.014	111.504	1601.4	304.105	-67.9026	1587.27	420.797	-71.0645	1611.21	376.518	-120.044	1468.08	375.144	-210.13	1236.92	390.177	33.2638	1392.8	388.555	90.3097	1209.74	499.814	-225.429	1291.61	208.139	-74.1114	1438.4	119.014	-146.48	1219.14	112.01	-169.224	1124.71	96.8311	-126.948	935.885	150.516	-123.59	863.056	81.7269	-159.524	861.238	113.331	-138.6	764.669
804	0	298.951	114.992	1580.4	411.894	121.635	1601.15	301.385	-58.1354	1585.58	417.983	-61.5677	1609.95	374.272	-109.958	1466.71	373.566	-199.807	1235.32	388.485	43.3792	1391.87	387.748	100.673	1209.04	497.876	-215.309	1290.53	206.048	-63.6933	1436.42	116.981	-134.855	1216.83	110.026	-157.08	1122.24	95.2001	-113.755	933.613	149.062	-110.579	860.684	80.4526	-145.587	858.97	111.415	-125.353	762.631
805	0	295.804	124.573	1579.55	408.879	131.412	1600.5	298.689	-48.5248	1584.24	415.246	-51.9942	1608.89	371.811	-100.171	1465.44	371.722	-189.367	1233.91	386.584	53.4911	1391.13	386.899	111.143	1208.39	495.952	-205.262	1289.68	203.993	-53.5343	1434.73	114.83	-123.243	1214.42	107.915	-144.948	1119.86	93.1833	-100.255	931.605	147.044	-97.0977	858.484	77.7559	-131.622	856.763	108.922	-111.278	760.544
806	0	292.836	134.282	1578.54	405.557	141.145	1599.71	295.852	-38.8531	1583.08	412.496	-42.0879	1607.98	369.226	-90.1962	1464.43	369.696	-178.867	1232.38	384.687	63.5736	1390.41	385.957	121.697	1207.83	493.633	-195.197	1288.99	201.65	-43.2316	1432.81	112.919	-111.607	1212.1	105.681	-132.608	1117.48	90.9718	-86.5851	929.432	144.574	-83.146	856.514	75.3125	-117.346	854.488	106.607	-96.7523	758.149
807	0	289.676	143.885	1577.94	402.636	151.143	1599.3	293.067	-29.1202	1582.21	409.564	-32.1956	1607.11	366.576	-80.4549	1463.29	367.647	-168.184	1231.01	382.666	73.6827	1389.96	385.083	132.361	1207.69	491.364	-184.98	1288.15	199.446	-33.1323	1431.01	110.837	-99.9614	1209.7	103.506	-120.244	1114.91	88.808	-72.7719	927.179	142.541	-68.9045	854.187	72.8758	-102.899	852.335	103.9	-81.4848	756.102
808	0	286.456	153.668	1577.57	399.153	160.957	1598.97	290.16	-19.5021	1581.62	406.544	-22.2878	1606.68	363.858	-70.6651	1462.47	365.498	-157.557	1229.79	380.709	83.8108	1389.87	384.161	143.171	1207.95	488.997	-175.001	1287.45	196.886	-23.0179	1429.43	108.98	-88.1442	1207.33	101.369	-107.641	1112.41	86.3103	-58.9814	925.269	139.935	-54.7356	851.878	71.0081	-88.5818	849.942	100.761	-65.769	754.395
809	0	283.286	163.242	1577.26	395.98	170.948	1599.16	286.82	-9.77049	1581.26	403.588	-12.4615	1606.55	361.11	-60.9101	1461.97	363.286	-146.654	1228.9	378.644	93.8848	1390.1	383.273	154.173	1208.47	486.345	-164.589	1286.95	194.632	-13.0146	1427.83	106.735	-76.311	1205.21	99.1768	-94.7731	1110.16	83.8503	-44.8087	923.146	137.378	-39.5959	850.196	67.9047	-73.6856	847.914	97.5205	-49.6456	752.323
810	0	280.084	173.102	1577.2	392.227	180.49	1599.04	284.142	-0.011535	1580.93	400.574	-2.71252	1606.58	358.49	-51.1028	1461.68	361.016	-135.824	1228.22	376.511	103.896	1390.34	382.175	165.062	1208.97	483.934	-154.456	1286.68	192.145	-2.95506	1426.5	104.838	-64.1653	1203.15	97.1418	-81.5854	1107.83	81.2118	-30.5215	921.471	134.288	-24.1443	848.34	65.8099	-58.9499	846.149	94.3901	-32.7699	750.692
811	0	276.962	182.7	1577.46	389.404	190.549	1599.69	281.033	9.77449	1580.92	397.465	7.03327	1606.86	355.758	-41.3316	1461.41	359.089	-125.224	1227.53	374.639	113.918	1391.06	381.097	175.994	1209.9	481.425	-144.149	1286.23	189.764	6.86017	1425.41	102.702	-51.9333	1201.21	95.3952	-68.2215	1105.76	78.9007	-16.078	920.197	131.599	-9.24421	846.209	62.8994	-43.7918	844.345	90.8609	-15.5313	749.442
812	0	273.838	192.455	1577.99	385.888	199.829	1600.3	277.791	19.4039	1581.25	394.092	16.6161	1607.54	353.231	-31.5899	1461.6	357.094	-114.354	1227.27	372.434	123.954	1391.97	379.817	186.892	1211.2	479.381	-133.926	1286.36	187.359	16.8169	1424.77	101.211	-39.1602	1199.46	93.4204	-54.7006	1103.97	76.107	-1.37423	919.001	129.345	6.31576	844.98	60.7891	-28.7056	842.882	87.167	2.13789	748.816
813	0	270.92	202.181	1578.74	383.054	209.443	1601.65	274.601	29.2656	1582.05	390.832	26.233	1608.78	350.403	-21.8146	1462.13	355.456	-103.804	1227.63	370.227	133.929	1393.16	378.315	197.657	1212.65	477.171	-123.416	1287.13	184.98	26.8447	1424.46	99.0151	-26.4849	1198.31	91.4982	-40.9903	1102.68	73.507	13.667	918.323	126.238	22.3475	844.546	57.2609	-13.0655	842.149	83.17	20.1761	748.672
814	0	268.206	211.778	1579.55	380.084	218.714	1602.7	271.39	38.8306	1582.87	387.477	35.5639	1609.81	348.162	-12.1569	1462.94	353.892	-93.0729	1228.11	368.133	143.825	1394.51	376.701	208.262	1214.24	475.348	-113.239	1287.95	182.677	36.5687	1424.51	96.6877	-13.9043	1197.34	89.9311	-27.1337	1101.69	70.9264	28.8956	918.025	123.338	38.612	844.027	55.0729	2.64958	841.423	79.0964	38.3683	749.012
815	0	265.552	221.483	1580.59	377.586	228.028	1604.13	268.28	48.5063	1583.83	384.275	44.7564	1611.23	345.621	-2.74553	1463.68	352.492	-82.7608	1228.48	366.055	153.646	1396.15	375.184	218.921	1216.26	473.627	-102.907	1288.7	180.292	46.424	1424.72	95.9252	-0.498135	1196.45	88.3657	-13.2289	1100.77	68.5381	44.3572	918.071	120.718	55.2009	843.799	52.7154	18.9509	841.333	75.151	56.9097	749.701
816	0	263.068	230.848	1581.86	375.256	237.075	1605.79	265.037	57.8887	1585.17	381.099	53.7373	1612.94	343.258	6.73699	1464.68	350.929	-72.3826	1229.23	363.763	163.192	1398	373.549	229.24	1218.38	472.131	-92.6661	1289.89	178.068	56.0065	1425.34	94.2113	12.4561	1196.06	86.9232	1.02178	1100.46	66.2164	60.4082	918.46	117.857	72.1916	844.249	50.03	35.4712	841.66	71.4708	75.7877	750.645
817	0	260.909	240.329	1583.05	372.812	245.987	1607.21	261.999	67.3933	1586.67	378.094	62.7297	1614.69	341.003	15.9358	1465.79	349.411	-62.0292	1230.14	361.888	172.695	1399.79	371.928	239.403	1220.45	470.623	-82.5643	1291.25	176.062	65.6093	1425.92	92.5011	25.3506	1195.98	85.2088	14.8431	1100.47	63.8945	76.4003	919.462	115.286	90.0825	845.304	47.9542	52.4804	842.198	67.5799	94.7534	752.291
818	0	258.694	249.47	1584.46	370.616	254.857	1608.67	259.384	76.5243	1588.18	375.306	71.5452	1616.42	338.954	25.018	1466.88	347.907	-51.9332	1231.21	359.952	182.004	1401.61	370.546	249.305	1222.49	468.825	-72.6072	1292.28	173.915	75.204	1426.81	90.9073	38.1033	1195.89	83.8793	28.8669	1100.5	61.9636	92.6488	920.473	112.419	107.251	846.088	44.9744	69.6738	843.186	64.0239	113.804	754.105
819	0	256.641	258.526	1585.98	368.65	263.703	1610.27	256.779	85.616	1589.72	372.621	80.3047	1618.04	336.914	34.1683	1468.01	345.821	-41.9337	1232.37	358.102	191.126	1403.48	369.319	259.337	1224.64	467.172	-62.8348	1293.37	172.264	84.6737	1427.81	89.3369	50.7551	1196.17	82.2877	42.6702	1100.79	59.6709	109.406	921.99	110.256	125.444	847.469	43.0438	87.3651	844.188	61.0683	133.435	755.868
820	0	254.639	267.485	1587.45	366.298	272.193	1611.68	254.421	94.7055	1591.43	370.369	88.9965	1619.89	334.701	43.2793	1469.18	344.023	-32.0971	1233.61	356.655	200.332	1405.17	368.41	269.057	1226.65	465.36	-53.312	1294.78	170.476	94.2048	1428.82	87.4872	63.2255	1196.54	80.6361	56.5381	1101.31	57.3995	126.346	923.502	107.914	143.802	849.308	41.0502	105.37	845.641	58.1236	153.093	758.269
821	0	252.818	276.317	1588.93	364.37	281.025	1613.19	252.595	103.611	1593.01	368.352	97.7216	1621.4	332.85	52.3754	1470.3	341.963	-22.4324	1234.91	355.321	209.412	1406.78	367.474	278.648	1228.26	463.571	-43.8704	1295.99	168.789	103.914	1429.77	85.8525	75.6474	1197.1	78.7718	70.1653	1101.8	55.6582	143.051	925.127	105.999	162.244	851.564	39.0814	123.607	847.132	55.6881	173.025	760.737
822	0	251.255	285.138	1590.47	362.766	289.799	1614.72	250.953	112.301	1594.39	366.672	106.584	1622.75	331.258	61.4522	1471.48	340.074	-12.8468	1236.03	354.16	218.525	1408.33	366.853	288.109	1229.81	461.532	-34.8075	1296.83	167.22	113.643	1430.93	84.4931	88.0113	1197.76	77.2981	83.8461	1102.21	53.8687	159.942	927.053	104.028	180.228	853.419	36.8027	141.967	848.685	53.274	192.97	763.571
823	0	249.392	293.714	1592.06	361.545	298.775	1616.43	249.513	120.978	1595.88	365.349	115.328	1624.31	329.678	70.5032	1472.84	338.073	-3.64114	1237.21	353.257	227.648	1409.89	366.359	297.345	1231.34	459.586	-25.8464	1298.01	165.859	123.38	1432.12	82.7787	100.236	1198.58	75.4524	97.5903	1103.01	51.8925	176.867	929.15	102.277	198.755	856	35.6118	160.649	850.603	51.4231	213.017	766.589
824	0	248.127	302.514	1593.48	360.085	307.559	1617.8	248.419	129.7	1597.55	364.355	124.22	1625.96	328.169	79.648	1474.29	336.182	5.45212	1238.65	352.326	236.614	1411.36	365.942	306.422	1232.67	457.689	-17.1463	1299.45	164.674	133.333	1433.5	80.8943	112.441	1199.62	73.6611	111.529	1104.04	50.2482	193.939	931.473	100.709	216.992	859.084	33.1984	179.458	853.035	49.9759	233.444	769.761
825	0	246.984	311.175	1594.63	358.386	316.316	1618.56	247.534	138.409	1599.21	363.462	133.211	1627.43	326.917	88.6469	1475.77	334.476	14.3796	1240.18	351.421	245.449	1412.47	365.466	315.066	1233.76	455.841	-8.65936	1300.67	163.322	143.129	1434.77	79.6901	124.937	1200.68	71.8956	125.263	1105.21	49.0273	211.05	933.963	98.7407	234.568	861.812	31.3734	197.924	855.248	48.7424	253.766	773.135
826	0	245.82	319.827	1596.01	357.696	325.37	1619.84	246.819	147.138	1600.82	362.692	142.177	1628.83	325.664	97.5048	1477.18	332.61	23.196	1241.19	350.867	254.269	1413.73	364.958	323.671	1235.09	454.028	-0.345904	1301.61	162.257	152.941	1436.26	78.278	137.272	1201.98	70.4508	139.116	1106.37	47.8492	227.963	936.652	97.7492	252.765	864.702	30.7553	216.392	857.65	47.8524	274.011	777.25
827	0	245.234	328.674	1597.44	356.95	334.28	1621.01	246.23	155.986	1602.6	362.119	151.009	1630.56	324.227	106.18	1478.55	330.982	31.9764	1242.35	350.359	262.962	1415.26	364.193	332.071	1236.42	452.299	7.96982	1302.86	161.344	162.67	1437.89	76.9638	149.678	1203.54	68.6265	152.83	1108.17	46.6239	244.775	939.9	96.856	270.107	867.891	29.2263	234.94	860.626	47.1855	294.237	781.558
828	0	244.795	337.526	1598.65	356.386	343.167	1622.1	245.773	164.919	1604.57	361.742	160.084	1632.15	323.232	114.982	1480.16	329.406	40.6888	1243.92	349.673	271.512	1416.69	363.727	340.635	1237.78	450.484	16.1321	1304.15	160.354	172.254	1439.69	75.4165	162.066	1205.33	67.1233	166.567	1109.99	45.6652	261.527	943.064	96.4307	288.271	871.959	28.3204	253.287	863.929	46.7422	314.548	786.412
829	0	244.446	346.477	1600.03	356.037	352.192	1623.11	245.373	173.83	1606.28	361.436	169.076	1633.54	322.423	123.566	1481.7	328.055	49.2832	1244.97	349.172	280.064	1418.13	362.814	348.617	1239.07	448.931	24.2277	1305.1	159.501	181.736	1441.67	73.895	174.433	1207.25	65.4837	179.967	1111.94	45.0717	278.268	946.646	95.6461	305.932	876.199	27.869	271.445	867.274	46.4877	334.691	791.291
830	0	244.143	355.397	1601.6	356.071	361.106	1624.29	245.015	182.82	1608.31	361.099	178.087	1635.28	321.162	132.037	1483.15	326.445	57.8013	1246.08	348.592	288.494	1419.72	362.156	357.243	1240.87	447.071	32.0306	1306.21	158.568	191.179	1443.79	72.7955	186.756	1209.5	64.0215	193.361	1113.94	44.3072	294.827	950.51	95.3428	323.309	880.828	27.0521	289.945	871.03	46.4392	354.766	796.976
831	0	244.111	364.568	1603	356.243	369.969	1625.42	244.687	191.991	1610.47	360.843	187.045	1637.25	320.321	140.655	1484.93	324.946	66.1895	1247.76	347.996	296.84	1421.48	361.472	365.745	1242.58	445.367	40.0132	1307.79	157.594	200.363	1446	71.244	199.153	1211.82	62.3682	206.609	1116.36	43.926	311.322	954.79	95.4065	340.989	885.882	26.3635	308.167	875.119	46.7077	374.713	802.814
832	0	244.437	373.865	1604.43	356.481	378.839	1626.36	244.32	200.992	1612.78	360.558	195.933	1639.04	319.427	149.217	1486.52	323.565	74.5239	1249.2	347.516	305.379	1423.01	360.707	373.974	1244.17	443.787	48.0187	1308.98	156.927	209.55	1447.94	69.7253	211.127	1214.14	61.0348	219.746	1118.73	43.8917	327.952	958.825	95.689	358.282	890.793	26.6657	326.219	879.222	47.2647	394.433	808.687
833	0	244.778	382.993	1605.8	356.886	387.706	1627.22	244.231	210.416	1614.68	360.33	204.92	1640.63	318.558	157.661	1488	322.173	82.8959	1250.37	346.99	313.789	1424.56	359.976	382.497	1245.8	442.254	56.0285	1309.95	156.185	218.614	1450.09	68.3678	223.039	1216.23	59.5851	232.444	1120.95	43.8246	343.985	962.982	96.1382	375.486	895.818	26.8023	344.361	883.439	48.1385	413.911	814.791
834	0	245.431	392.2	1607	357.407	396.419	1628.07	243.993	219.717	1616.78	360.038	213.808	1642.32	317.577	166.108	1489.53	320.878	91.2867	1252.09	346.273	322.135	1426.11	359.208	390.809	1247.3	440.719	64.0685	1311.13	155.376	227.603	1451.9	67.1889	234.824	1218.57	58.2586	245.062	1123.13	44.1274	360.09	967.57	96.5873	392.238	900.869	27.0912	362.29	887.815	49.2761	433.402	821.038
835	0	246.192	401.524	1608.29	358.064	405.118	1628.74	243.637	229.013	1618.85	359.965	222.653	1643.96	316.878	174.717	1490.94	319.496	99.7094	1253.6	345.778	330.622	1427.38	358.402	398.968	1248.54	439.375	72.2793	1312.49	154.848	236.444	1453.87	66.0373	246.376	1220.83	56.9998	257.538	1125.52	44.6917	375.989	971.912	97.5009	409.194	906.27	27.8337	379.917	892.56	50.6756	452.715	827.543
836	0	246.652	410.911	1609.53	358.869	414.128	1629.49	243.344	238.198	1620.88	359.872	231.526	1645.32	316.214	183.18	1492.16	318.334	108.219	1254.82	345.303	339.124	1428.48	357.629	407.284	1249.67	437.962	80.5083	1313.5	154.126	245.314	1455.62	64.6488	257.573	1222.95	55.6032	269.675	1127.73	45.0256	391.517	976.213	98.453	425.692	911.613	28.5749	397.696	897.075	52.2916	471.489	834.109
837	0	246.864	419.971	1610.51	359.563	422.862	1630.12	243.318	247.555	1622.26	359.737	240.399	1646.44	315.448	191.649	1493.25	317.256	116.862	1255.9	344.713	347.589	1429.65	356.99	415.79	1250.91	436.829	88.8388	1314.2	153.621	254.125	1457.17	63.7183	268.569	1224.74	54.448	281.629	1129.52	45.6751	406.99	980.651	99.4569	441.884	917.231	29.1608	414.906	901.561	53.926	490.215	840.769
838	0	247.356	429.183	1611.43	360.218	431.672	1630.71	243.127	256.788	1624.07	359.63	249.357	1647.51	314.853	200.256	1494.26	316.105	125.548	1256.87	344.163	356.098	1430.69	356.216	424.168	1251.87	435.761	97.2535	1315.05	153.02	262.965	1458.54	62.9914	279.437	1226.37	53.3138	293.48	1131.35	46.1458	422.156	984.928	100.819	458.112	922.878	30.2	432.016	906.161	56.063	508.595	847.342
839	0	247.7	438.428	1612.3	360.646	440.652	1630.99	243.185	266.145	1625.27	359.692	258.386	1648.36	314.25	208.916	1495.1	315.259	134.291	1257.83	343.764	364.811	1431.34	355.515	432.456	1252.34	434.802	105.691	1315.87	152.41	271.674	1459.91	61.9799	290.009	1227.95	52.0562	305.047	1132.97	46.8855	437.044	989.193	102.194	473.778	928.09	31.104	448.757	910.765	58.2615	526.634	853.825
840	0	247.972	447.653	1613.12	361.297	449.708	1631.24	243.064	275.252	1626.38	359.761	267.516	1648.82	313.708	217.591	1495.7	314.479	142.98	1258.58	343.442	373.5	1431.86	354.941	440.931	1252.73	434.206	114.18	1316.32	151.884	280.502	1460.92	61.0928	300.423	1229.21	51.1645	316.479	1134.19	47.785	451.801	993.12	103.635	489.294	933.374	31.9538	465.177	915.319	60.3225	544.308	860.142
841	0	248.446	456.992	1613.71	361.72	458.767	1631.32	243.164	284.584	1627.32	359.87	276.604	1649.29	313.146	226.467	1496.23	313.929	151.735	1259.21	342.604	382.211	1432.2	354.245	449.418	1253.07	433.397	122.768	1316.81	151.441	289.413	1461.62	60.2954	310.663	1230.25	50.2881	327.843	1135.3	48.5648	466.205	996.91	105.312	504.751	938.702	33.5977	481.346	918.963	62.6255	561.63	866.463
842	0	248.908	466.224	1614.02	361.999	467.934	1631.06	243.302	294.083	1628.07	360.105	285.763	1649.59	312.752	235.439	1496.75	313.647	160.564	1259.88	341.875	390.918	1432.18	353.505	457.768	1252.9	432.784	131.45	1317.37	151.003	298.189	1462.06	59.6199	320.794	1230.91	49.3511	339.038	1136.29	49.6282	480.226	1000.4	106.695	519.439	943.214	35.1525	497.197	922.701	65.1236	578.518	872.498
843	0	249.229	475.613	1613.98	362.271	477.123	1630.42	243.231	303.339	1628.66	360.304	295.049	1649.44	312.449	244.392	1496.91	313.569	169.228	1260.1	341.432	399.88	1431.98	352.882	466.215	1252.43	432.401	140.301	1317.72	150.622	307.026	1462.17	59.0053	330.753	1231.47	48.5784	350.013	1136.92	50.7249	494.197	1003.63	108.57	534.171	947.798	36.9794	512.796	926.279	67.6939	595.003	878.025
844	0	249.474	485.056	1613.88	362.518	486.427	1629.72	243.365	312.667	1628.74	360.479	304.326	1648.97	312.262	253.396	1496.8	313.742	177.941	1260.05	340.794	408.82	1431.52	352.228	474.694	1251.7	432.444	149.154	1317.8	150.325	315.775	1462.01	58.3609	340.594	1231.59	47.9738	360.947	1137.24	51.9778	507.742	1006.63	110.349	548.652	952.23	38.8387	528.126	929.659	70.3172	611.093	883.532
845	0	249.508	494.49	1613.74	362.54	495.621	1628.88	243.456	322.072	1628.74	360.564	313.685	1648.49	311.999	262.503	1496.65	313.901	186.738	1260.1	340.314	417.789	1430.99	351.545	483.222	1251.09	432.458	158.021	1317.95	150.051	324.508	1461.69	58.0067	350.462	1231.55	47.4514	371.841	1137.35	53.049	521.173	1009.61	112.043	562.533	956.293	40.7557	543.005	932.692	72.9464	627.054	888.988
846	0	249.609	503.897	1613.28	362.736	505.077	1627.9	243.553	331.414	1628.71	360.752	323.169	1647.77	312.031	271.658	1496.46	314.144	195.666	1260.26	339.882	426.864	1430.08	350.778	491.604	1250.06	432.492	166.975	1318.17	149.686	333.425	1461.2	57.5931	360.185	1231.34	46.7818	382.509	1137.28	54.3515	534.16	1012	113.836	576.274	960.069	42.7246	557.557	935.663	75.6008	642.308	893.838
847	0	249.694	513.354	1612.64	363.083	514.661	1626.82	243.749	340.91	1628.31	360.973	332.619	1646.74	312.095	280.96	1495.91	314.517	204.146	1259.98	339.431	436.056	1429.07	350.005	499.909	1248.62	432.924	176.057	1318.07	149.477	342.201	1460.61	57.2901	369.83	1230.85	46.3813	393.009	1136.93	55.7163	547.034	1014.09	115.938	589.72	963.555	44.8237	571.693	938.014	78.2827	657.186	898.457
848	0	249.725	522.909	1611.95	363.292	524.259	1625.52	243.79	350.438	1627.54	361.158	342.168	1645.51	311.992	290.4	1495.2	314.919	212.764	1259.55	338.899	445.279	1427.74	349.27	508.26	1247.12	433.406	185.263	1317.9	149.323	351.002	1459.56	57.1642	379.48	1230.11	46.2046	403.492	1136.24	57.0016	559.608	1015.93	117.66	602.617	966.718	46.6666	585.539	940.413	80.9537	671.492	902.444
849	0	249.623	532.651	1611.04	363.326	533.718	1624.2	243.777	360.128	1626.72	361.311	351.781	1644.26	312.019	299.881	1494.46	315.568	221.804	1259.15	338.369	454.615	1426.41	348.714	516.789	1245.5	434.016	194.343	1317.86	149.253	359.757	1458.23	57.0634	389.006	1229.02	45.907	413.82	1135.36	58.4859	571.859	1017.6	119.693	615.412	969.455	48.8075	599.015	942.167	83.5846	685.468	906.164
850	0	249.694	542.275	1609.87	363.091	543.313	1622.4	243.784	369.8	1625.64	361.485	361.468	1642.75	312.202	309.391	1493.6	316.322	229.968	1258.74	337.902	463.991	1424.68	348.087	525.589	1243.53	434.604	203.438	1317.63	149.127	368.631	1456.82	57.1305	398.569	1227.69	45.6906	424.072	1134.41	59.9055	583.855	1018.69	121.37	627.541	971.662	50.7642	612.137	943.741	86.1745	698.99	909.46
851	0	249.751	551.957	1608.51	363.43	553.076	1620.81	243.817	379.464	1624.28	361.54	371.118	1640.83	312.635	319.062	1492.48	317.017	238.58	1257.88	337.505	473.407	1422.83	347.804	534.396	1241.56	435.426	212.732	1317.18	149.184	377.447	1455.12	57.2711	407.919	1226.15	45.6046	434.147	1132.96	61.4789	595.315	1019.37	123.344	639.477	973.145	53.0685	624.853	945.086	89.0666	712.154	912.15
852	0	249.915	561.595	1607.13	363.473	562.912	1618.83	243.998	389.198	1622.77	361.702	380.823	1638.94	312.828	328.636	1491.3	317.981	247.203	1256.93	337.135	482.898	1420.95	347.43	543.156	1239.34	436.418	222.335	1316.66	149.31	386.274	1453.27	57.5766	417.257	1224.46	45.6247	444.128	1131.36	62.9052	606.713	1019.79	125.586	651.452	974.946	54.9626	637.35	945.701	91.7341	724.785	914.45
853	0	250.037	571.538	1605.54	363.498	572.521	1617.08	244.049	398.98	1621.23	361.897	390.524	1637.19	313.208	338.338	1490.07	319.019	256.144	1256.13	336.787	492.395	1418.94	347.336	552.133	1237.35	437.299	231.763	1316.23	149.335	395.171	1451.48	57.9582	426.54	1222.84	45.7047	454.076	1129.97	64.3764	617.902	1019.99	127.578	662.567	975.821	56.8498	649.376	946.215	94.2368	736.935	916.138
854	0	249.991	581.324	1604.06	363.499	582.205	1615.06	244.166	408.712	1619.57	361.975	400.283	1635.17	313.522	348.126	1488.66	320.068	264.77	1254.99	336.632	501.995	1417.03	347.314	561.166	1235.5	438.601	241.307	1315.61	149.52	404.001	1449.54	58.2607	435.614	1220.84	45.8774	463.655	1128.19	65.9959	628.733	1019.97	129.352	673.841	976.805	58.7547	660.988	946.51	96.6326	748.549	917.576
855	0	250.189	590.927	1602.22	364.021	592.158	1613.3	244.302	418.55	1617.61	362.064	410.036	1633.09	314.121	357.768	1487.11	321.446	273.384	1253.64	336.507	511.621	1415	347.194	570.172	1233.37	440.002	251.018	1314.71	149.798	412.767	1447.54	58.7855	444.648	1218.99	46.4643	473.244	1126.21	67.2608	639.174	1019.66	131.155	684.446	977.002	60.4381	672.186	946.464	98.975	759.86	918.532
856	0	250.756	600.766	1600.55	364.313	601.844	1611.34	244.447	428.454	1616.02	362.214	419.728	1631.18	314.732	367.514	1485.67	322.629	282.393	1252.46	336.574	521.277	1413.06	347.068	579.376	1231.27	441.193	260.988	1313.86	150.09	421.686	1445.53	59.2995	453.506	1216.93	46.7937	482.74	1124.3	68.6941	649.419	1018.84	132.741	694.385	976.521	62.067	682.907	945.864	101.23	770.611	918.727
857	0	251.084	610.635	1598.76	364.67	611.658	1609.41	244.724	438.407	1614.47	362.621	429.63	1629.34	315.241	377.078	1484.22	324.298	291.606	1251.36	336.484	530.837	1411.13	346.857	588.469	1228.91	442.608	270.82	1313.09	150.497	430.603	1443.6	59.9026	462.407	1215.2	47.3889	492.115	1122.51	70.2128	659.265	1017.75	134.58	704.634	976.104	63.6914	693.213	945.017	103.311	780.943	918.415
858	0	251.515	620.559	1596.96	365.35	621.669	1607.53	245.243	448.305	1612.62	363.221	439.428	1627.58	316.135	386.771	1482.86	325.502	300.421	1250.26	336.549	540.39	1409.12	346.849	597.721	1226.74	444	280.577	1312.16	151.099	439.526	1441.64	60.6715	471.157	1213.17	48.056	501.19	1120.57	71.4043	668.854	1016.4	136.177	714.024	974.993	65.2272	702.995	943.752	105.144	790.638	917.545
859	0	252.272	630.336	1595.43	365.796	631.322	1605.74	245.916	458.134	1610.95	363.681	449.218	1625.71	316.75	396.557	1481.21	326.995	309.562	1248.82	337.008	550.101	1407.51	347.175	607.345	1224.85	445.209	290.372	1311.05	151.756	448.694	1439.81	61.5724	479.869	1211.17	48.5636	510.16	1118.67	72.595	677.921	1014.83	137.335	722.641	973.095	66.6477	712.334	942.159	106.754	799.998	916.271
860	0	253.012	640.215	1594.03	366.75	641.321	1604.24	246.687	468.07	1609.5	364.482	459.107	1624.11	317.699	406.219	1479.82	328.315	319.333	1247.61	337.421	559.826	1405.7	347.684	616.841	1223.04	446.209	300.31	1310.03	152.514	457.844	1437.85	62.6227	488.675	1209.24	49.5038	518.988	1116.77	73.9643	686.817	1012.82	138.758	731.587	971.468	67.7032	721.24	940.209	108.247	808.633	914.422
861	0	253.968	650.249	1592.54	367.43	651.109	1602.53	247.493	478.091	1607.95	365.516	468.985	1622.41	318.537	416.137	1478.43	329.283	328.499	1246.27	337.834	569.497	1403.94	348.077	626.392	1221.12	447.23	310.192	1308.89	153.18	467.291	1436.14	63.8592	497.362	1207.02	50.2548	527.736	1115.02	75.0017	695.376	1010.62	139.557	739.349	968.505	68.9206	729.665	938.055	109.57	816.991	911.91
862	0	255.05	660.042	1591.4	368.854	661.181	1601.3	248.691	487.898	1606.32	366.62	478.821	1620.59	319.456	425.912	1476.99	330.403	337.735	1244.69	338.64	579.422	1402.38	348.84	636.167	1219.45	448.671	320.367	1307.32	154.007	476.702	1434.65	64.6608	505.995	1205.25	51.3396	536.169	1113.06	75.9486	703.462	1008.22	140.417	747.187	965.848	69.804	737.589	935.388	110.638	824.725	908.99
863	0	256.303	670.068	1590.55	369.938	670.865	1600.05	250.111	497.743	1604.98	367.844	488.676	1619.08	320.504	436.154	1475.6	331.53	347.966	1243.28	339.486	589.307	1401.08	349.683	646.073	1218.15	449.62	330.437	1306.2	154.98	486.594	1433.16	65.9133	514.685	1203.71	52.312	544.546	1111.03	76.8088	711.35	1005.7	141.226	754.737	962.92	70.5387	745.023	932.664	111.315	831.938	905.693
864	0	257.8	680.031	1589.67	371.792	680.922	1599.27	251.341	507.83	1603.84	369.392	498.533	1617.77	321.409	446.014	1474.61	332.27	357.639	1242.3	340.354	599.194	1399.76	350.486	655.935	1216.89	450.414	340.375	1305.09	155.759	496.458	1431.92	67.0239	523.422	1202.1	53.3188	552.933	1109.6	77.5389	718.794	1002.71	142.092	762.078	959.644	71.1064	752.002	929.439	111.77	838.69	901.636
865	0	259.5	689.998	1588.66	373.169	690.597	1597.95	252.958	517.778	1602.57	371.053	508.414	1616.39	322.5	456.034	1473.43	333.196	367.272	1241.25	341.488	609.165	1398.56	351.546	666.025	1215.57	451.349	350.345	1303.63	156.774	506.538	1430.81	68.143	532.138	1200.61	54.5801	560.981	1107.8	78.3216	726.12	999.393	142.775	768.966	955.699	71.7624	758.347	925.805	112.369	845.011	897.169
866	0	261.46	700.091	1587.86	375.461	700.706	1597.14	254.871	527.746	1601.53	372.639	518.204	1614.95	323.443	465.784	1472.24	333.977	377.124	1240.07	342.528	618.972	1397.56	352.37	676.035	1214.62	452.227	360.339	1302.16	157.843	516.561	1429.58	69.1954	540.816	1199.1	55.9293	569.081	1106.13	78.9919	733.016	995.88	142.981	775.293	951.37	71.9227	764.392	921.984	112.303	850.679	892.102
867	0	263.247	709.878	1587.34	377.743	710.359	1596.39	256.55	537.777	1600.68	374.519	527.956	1613.97	324.632	475.792	1471.05	334.559	387.137	1239.03	343.889	628.973	1396.72	353.475	686.394	1213.92	453.21	370.347	1300.65	158.996	526.635	1428.64	70.5695	549.799	1197.92	57.189	577.261	1104.85	79.3875	739.445	992.089	143.165	781.434	946.755	72.2139	769.836	917.76	112.098	855.921	886.752
868	0	265.478	719.886	1586.57	379.795	720.061	1595.22	258.55	547.609	1600	376.58	537.676	1613.09	325.846	485.337	1470.09	335.373	397.72	1237.95	345.015	638.611	1395.87	354.32	696.562	1213.32	454.139	380.624	1299.04	160.103	536.719	1427.98	71.9562	558.823	1196.85	58.5038	585.289	1103.79	79.7874	745.748	988.139	143.455	787.258	942.089	72.2487	774.902	913.476	111.703	860.588	880.78
869	0	267.986	729.732	1585.81	382.317	729.778	1594.12	260.525	557.49	1599.45	378.532	547.189	1611.99	327.07	495.179	1468.85	336.174	408.485	1236.16	346.473	648.532	1395.21	355.47	707.12	1212.75	455.029	390.835	1297.11	161.475	546.708	1427.22	73.022	567.824	1196.15	60.2426	593.362	1102.4	80.2074	751.836	984.045	143.456	792.766	936.814	72.1543	779.502	908.776	111.083	864.703	874.405
870	0	270.853	739.475	1585.24	384.934	739.196	1593.31	262.842	567.225	1598.8	380.625	556.773	1611.08	328.699	504.647	1467.67	337.096	419.671	1234.23	347.71	658.282	1394.64	356.477	717.574	1212.53	456.175	401.215	1295.03	162.805	556.494	1426.44	74.346	577.032	1194.96	61.8225	601.376	1101.08	80.2764	757.527	979.933	143.3	797.97	931.58	71.699	783.705	904.32	110.107	868.323	867.586
871	0	273.202	749.24	1585	387.322	748.593	1592.43	265	577.066	1598.55	383.074	566.252	1610.44	330.079	514.198	1466.56	338.17	430.931	1232.64	349.335	668.296	1394.17	357.475	728.236	1212.28	457.418	411.556	1293.07	164.1	566.313	1425.7	75.3691	586.412	1194.37	63.428	609.684	1100.16	80.4536	763.189	975.684	142.944	802.722	925.975	71.2274	787.661	899.556	108.854	871.187	860.562
872	0	275.809	758.908	1584.71	390.1	758.222	1592.03	267.426	586.561	1598.16	385.543	575.742	1609.73	331.709	523.76	1465.5	339.606	442.285	1231.04	350.562	678.113	1393.73	358.71	739.363	1212.17	458.606	421.985	1290.98	165.712	575.841	1425.1	76.6151	595.563	1193.69	65.149	617.881	1099.15	80.3678	768.529	971.254	142.502	807.336	920.114	70.3558	791.127	894.633	107.401	873.859	853.002
873	0	278.571	768.557	1584.67	392.591	767.572	1591.42	269.945	596.279	1597.84	387.929	585.166	1608.96	333.413	533.337	1464.35	341.332	452.827	1229.4	352.327	688.231	1393.38	359.96	750.542	1212.34	459.905	432.493	1288.84	167.312	585.497	1424.68	78.5756	605.049	1192.45	66.9839	625.903	1098.07	80.3733	773.442	966.836	141.687	811.322	913.844	69.5178	794.256	889.925	105.804	875.987	845.496
874	0	280.993	777.994	1585.01	395.4	777.054	1591.33	272.461	605.71	1597.81	390.446	594.515	1608.46	335.211	543.023	1463.56	343.272	463.483	1228.19	353.777	698.097	1393.35	361.143	761.668	1212.59	461.337	443.195	1287.02	168.978	594.942	1424.19	80.2175	614.331	1191.83	69.0209	634.086	1097.32	80.2813	778.236	962.479	140.811	815.054	907.733	68.609	797.011	885.101	104.024	877.446	837.895
875	0	283.652	787.556	1585.34	397.958	786.532	1591.25	275.042	615.273	1597.98	392.97	603.996	1608.18	336.998	552.585	1462.98	344.689	474.01	1227.26	355.584	708.218	1393.46	362.449	772.787	1212.92	462.741	453.527	1285.33	170.732	604.56	1424.02	81.6236	623.559	1191.44	71.2729	642.538	1096.88	80.0943	782.792	958.279	140.112	818.503	901.774	67.6663	799.343	880.403	101.889	878.411	830.374
876	0	286.375	797.078	1585.65	400.372	795.928	1591.08	277.523	624.708	1598.28	395.712	613.47	1607.99	338.931	562.206	1462.62	346.295	484.811	1226.34	357.327	718.136	1393.6	363.957	783.84	1213.46	464.326	464.027	1283.91	172.436	614.086	1423.82	83.4453	632.832	1191.21	73.2971	650.815	1096.4	79.8863	786.94	954.132	139.282	821.335	895.672	66.2588	801.119	876.012	99.6242	878.701	822.786
877	0	288.622	806.457	1586.3	403.363	805.527	1591.61	280.292	634.047	1598.53	398.39	622.842	1607.89	340.866	571.94	1462.19	347.705	495.093	1225.29	359.029	728.072	1393.96	365.572	794.717	1214.14	465.915	474.433	1282.65	174.235	623.665	1424.12	85.2565	642.007	1191.1	75.6168	659.126	1096.09	79.6431	790.633	950.435	137.803	823.494	889.703	65.075	802.463	871.819	97.0196	878.272	815.568
878	0	291.211	815.87	1587.03	405.981	814.795	1592.11	282.878	643.554	1599.02	400.946	632.325	1608.06	342.759	581.498	1462.27	349.013	505.372	1224.86	360.966	738.053	1394.49	367.151	805.222	1214.9	467.186	484.609	1281.78	175.981	633.286	1424.33	87.3223	651.292	1191.21	78.0671	667.469	1096.36	79.2507	794.218	947.124	136.768	825.55	884.191	63.6932	803.322	867.91	94.335	877.345	808.675
879	0	293.859	825.299	1587.83	408.341	824.329	1592.55	285.295	652.891	1599.71	403.579	641.68	1608.31	344.771	591.096	1462.45	350.515	515.971	1224.88	362.595	747.835	1394.96	368.727	815.523	1215.49	468.837	494.829	1281.32	177.837	642.927	1425.08	89.4053	660.343	1191.46	80.371	675.606	1096.72	79.1449	797.142	943.903	135.473	826.836	879.017	62.9477	803.846	864.854	91.8319	875.828	802.199
880	0	296.052	834.677	1588.63	410.872	833.904	1593.12	288.07	662.129	1600.31	406.076	651.088	1608.55	346.715	600.793	1462.69	351.838	525.956	1224.85	364.594	757.706	1395.59	370.345	825.756	1216.31	470.44	504.953	1280.93	179.59	652.631	1425.74	91.5848	669.421	1191.99	82.8358	683.523	1097.24	79.0325	800.118	941.288	134.386	827.991	874.592	61.5518	804.054	861.896	89.1429	873.806	796.212
881	0	298.489	844.001	1589.63	413.144	843.021	1593.62	290.388	671.432	1601.09	408.596	660.424	1609.03	348.473	610.327	1463.01	353.309	536.025	1225.01	366.021	767.295	1396.38	371.675	835.612	1217.28	471.976	514.987	1280.74	181.334	662.319	1426.61	93.7164	678.296	1192.61	85.2298	691.371	1098.04	78.8292	802.707	939.345	133.082	828.424	870.568	60.5196	803.946	859.791	86.6358	871.272	791.081
882	0	300.802	853.189	1590.72	415.612	852.434	1594.5	292.908	680.774	1601.86	411.133	669.689	1609.66	350.265	619.92	1463.69	354.663	546.012	1225.58	367.643	776.988	1397.13	372.989	845.59	1218.1	473.498	524.91	1280.82	182.891	672.013	1427.79	95.7187	686.916	1193.27	87.5431	698.989	1098.92	78.5195	805.179	937.836	131.85	828.869	867.405	58.873	803.891	858.343	84.087	868.509	786.342
883	0	303.124	862.562	1591.49	417.675	861.65	1594.86	295.227	689.889	1602.82	413.414	679.026	1610.1	352.138	629.316	1464.29	356.005	556.3	1225.99	369.04	786.467	1397.81	374.07	855.22	1218.85	475.2	534.933	1280.88	184.432	681.552	1428.94	97.6399	695.411	1194.13	89.8633	706.292	1100.14	78.6229	807.777	936.596	130.897	829.56	864.668	57.8064	803.655	857.249	81.8611	865.593	781.926
884	0	305.261	871.796	1592.48	420.186	871.048	1595.68	297.376	699.202	1603.59	415.635	688.221	1610.5	353.731	638.66	1464.8	357.717	566.121	1226.08	370.444	795.974	1398.66	375.077	864.965	1219.7	476.846	544.835	1280.88	185.899	691.043	1430.02	99.2583	703.485	1195	91.9544	713	1100.84	78.2488	810.185	935.773	129.399	829.321	862.223	56.8908	803.724	856.776	79.8461	862.48	778.198
885	0	307.504	880.988	1593.72	422.248	880.1	1596.41	299.555	708.392	1604.48	417.725	697.378	1611.16	355.236	647.975	1465.4	359.618	576.067	1226.73	371.605	805.394	1399.48	375.699	874.468	1220.58	478.615	554.695	1281.13	187.182	700.161	1431.18	100.764	711.117	1195.87	93.7632	719.576	1102.06	78.0772	812.693	935.391	128.68	830.065	860.74	56.0239	804.059	856.722	78.0919	859.351	775.116
886	0	309.348	890.274	1594.76	424.334	889.318	1597.21	301.456	717.749	1605.59	419.691	706.507	1611.87	356.698	657.435	1466.04	361.682	585.68	1227.74	372.558	814.689	1400.29	375.973	883.851	1221.38	480.349	564.574	1281.63	188.54	709.275	1432.45	101.89	718.467	1197.05	95.3181	725.805	1103.17	78.0032	815.149	935.121	127.605	830.357	859.412	55.0827	804.655	857.095	76.6436	856.484	772.471
887	0	311.393	899.71	1595.81	426.218	898.473	1597.83	303.263	726.991	1606.65	421.478	715.766	1612.36	358.284	666.6	1466.92	363.563	594.958	1228.54	373.552	824.089	1400.99	376.521	893.676	1222.28	482.172	574.251	1282.14	189.91	717.935	1433.47	103.171	725.356	1197.79	96.5965	731.537	1104.25	77.8712	817.68	934.918	127.335	831.776	858.523	54.4592	805.55	857.347	75.7328	853.68	769.979
888	0	313.308	908.956	1597.03	428.251	907.737	1598.82	305.056	736.324	1607.62	423.188	725.034	1613	359.88	675.916	1467.83	365.557	604.243	1229.55	374.3	833.431	1401.77	376.71	903.2	1223.08	484.167	584.148	1282.8	191.121	726.379	1434.38	103.794	731.742	1199.07	97.589	736.972	1105.19	78.0241	820.379	934.835	126.834	832.777	857.688	54.1523	806.916	857.741	75.1383	851.493	768.191
889	0	314.784	918.3	1598.18	429.732	916.926	1599.55	306.575	745.697	1608.85	424.952	734.238	1613.97	361.387	685.171	1468.92	367.44	613.467	1230.57	374.89	842.653	1402.68	376.639	912.478	1223.98	486.207	593.798	1283.75	192.219	734.609	1435.44	104.866	737.951	1200.05	98.1085	741.977	1106.22	77.8078	823.05	935.165	126.273	834.126	857.752	53.9765	808.541	858.438	74.8016	849.437	766.906
890	0	316.506	927.598	1599.28	431.241	926.195	1600.25	308.066	754.907	1610.12	426.297	743.414	1614.82	362.639	694.23	1469.97	369.151	622.171	1231.71	375.568	851.905	1403.64	376.653	921.465	1224.75	488.143	603.582	1284.83	193.306	742.663	1436.75	105.459	743.661	1201.44	98.7408	746.717	1107.46	77.8524	825.825	935.426	126.533	836.308	857.976	53.3392	810.193	859.193	74.8117	847.894	766.034
891	0	317.892	936.908	1600.44	432.607	935.53	1600.93	309.384	764.366	1611.2	427.521	752.731	1615.6	364.06	703.27	1471	370.745	631.314	1232.56	376.207	861.119	1404.61	376.658	930.436	1225.66	490.077	613.083	1285.97	194.251	750.45	1437.87	106.191	748.984	1202.57	99.1379	751.069	1108.65	78.0302	828.697	935.848	126.832	837.094	857.57	53.5186	812.368	859.905	74.7946	846.953	765.712
892	0	319.064	946.273	1601.59	434.123	944.793	1602.08	310.499	773.621	1612.54	428.72	762.086	1616.67	365.361	712.338	1472.25	372.374	640.138	1233.47	376.386	870.068	1405.63	376.519	939.321	1226.63	491.94	622.799	1287.21	195.229	758.229	1438.93	106.566	753.854	1203.93	99.3018	755.082	1109.93	77.8478	831.486	936.576	126.796	838.715	858.186	53.3161	814.288	860.76	75.3642	846.242	765.592
893	0	320.145	955.728	1602.58	435.194	954.204	1603.04	311.497	783.017	1614.18	429.805	771.477	1618.07	366.483	721.19	1473.55	373.578	649.149	1234.82	376.642	879.009	1406.73	376.343	948.183	1227.78	493.569	632.272	1288.71	196.156	765.778	1440.41	106.996	758.557	1205.68	99.5671	759.052	1111.51	78.0148	833.913	937.318	126.838	841.269	859.19	53.932	816.422	861.844	75.906	846.469	765.973
894	0	321.013	965.097	1603.72	435.525	963.742	1603.74	312.482	792.56	1615.53	430.65	780.884	1619.33	367.761	730.171	1474.76	374.942	658.105	1235.88	376.775	887.809	1407.95	376.191	957.026	1229.05	495.224	641.744	1290.13	197.068	773.247	1441.53	107.734	763.092	1207.33	99.7833	762.541	1112.82	78.1578	836.459	938.231	126.894	843.224	860.413	53.6926	818.497	862.92	76.3563	847.232	766.77
895	0	321.821	974.509	1604.76	436.703	973.031	1604.53	313.421	801.879	1617.12	431.465	790.285	1620.65	369.133	739.092	1476.06	376.325	667.562	1236.89	377.046	896.551	1409.39	376.009	965.838	1230.48	496.834	651.299	1291.48	197.938	780.805	1443.11	107.7	766.987	1209.04	100.011	765.949	1114.45	77.9176	838.758	939.341	126.893	845.682	861.549	54.1438	820.516	863.997	76.6534	848.372	767.9
896	0	322.343	983.732	1605.58	437.073	982.549	1605.39	314.047	811.385	1618.65	432.365	799.811	1622.22	370.229	747.927	1477.41	377.508	676.136	1238.12	377.336	905.402	1410.79	375.79	974.479	1231.82	498.628	660.664	1292.97	198.795	788.306	1444.62	108.694	771.251	1210.72	100.443	769.266	1116.01	78.1314	841.108	940.6	126.903	847.872	862.654	54.3453	822.163	865.101	77.2086	850.425	769.077
897	0	323.011	993.213	1606.27	437.771	992.005	1606.33	314.738	820.801	1620.06	432.93	809.32	1623.62	371.275	756.789	1478.58	378.723	685.547	1239.41	377.601	914.168	1411.91	375.57	983.084	1232.91	499.944	670.142	1294.38	199.614	795.903	1445.85	109.174	775.222	1212.64	100.783	772.324	1117.88	77.9574	843.255	941.832	127.021	850.785	864.161	54.8955	824.031	866.469	77.43	852.686	770.393
898	0	323.419	1002.57	1606.83	438.286	1001.35	1606.72	315.186	830.072	1621.33	433.402	818.717	1624.8	372.446	765.791	1479.68	380.069	694.514	1240.47	377.908	923.135	1412.95	375.323	991.677	1234.04	501.337	679.565	1295.6	200.449	803.622	1447.04	110.08	779.221	1214.3	101.255	775.581	1119.56	78.1378	845.646	942.849	127.371	854.599	865.939	55.5047	825.584	867.51	77.9497	855.411	771.876
899	0	323.589	1011.87	1607.43	438.723	1010.76	1607.34	315.805	839.487	1622.39	434.039	828.254	1626.01	373.233	774.666	1480.62	381.198	703.733	1241.16	378.021	931.98	1413.94	375.051	1000.4	1235.08	502.544	689.052	1296.61	201.222	811.471	1448.21	110.826	783.171	1215.95	102.054	778.692	1121	78.0996	847.647	943.916	127.29	856.878	866.755	56.2224	827.22	868.366	78.2698	858.601	773.307
900	0	323.963	1021.13	1607.93	438.989	1020.2	1607.93	316.342	848.777	1623.3	434.61	837.769	1627.15	373.945	783.586	1481.55	382.332	712.765	1242.1	378.182	940.877	1414.81	374.827	1009.12	1235.9	503.789	698.554	1297.64	201.87	819.555	1449.19	111.719	787.349	1217.44	102.48	782.144	1122.73	78.1522	850.048	944.881	127.484	860.722	868.306	57.1568	828.924	869.366	78.3244	862.036	774.654
901	0	324.043	1030.49	1608.17	439.1	1029.69	1608.23	316.594	858.057	1624.06	434.955	847.284	1627.95	374.73	792.641	1482.22	383.299	722.042	1242.97	378.364	949.808	1415.51	374.669	1017.96	1236.39	504.767	708.033	1298.36	202.503	827.858	1450.12	112.849	791.457	1219.24	103.372	785.631	1123.96	78.1501	852.286	945.83	127.663	864.59	869.613	57.934	830.604	870.282	78.5783	865.675	776.083
902	0	324.184	1039.7	1608.44	438.697	1039.31	1608.38	316.942	867.215	1624.53	435.386	856.888	1628.45	375.343	801.774	1482.63	384.176	731.081	1243.37	378.566	958.809	1416.02	374.425	1026.78	1236.87	505.722	717.505	1298.84	203.041	836.254	1450.63	113.587	796.088	1220.35	104.164	789.428	1125.34	78.3777	854.94	946.527	127.849	868.323	870.615	58.996	832.452	870.821	78.3798	869.723	777.608
903	0	323.78	1048.95	1608.72	438.955	1048.75	1608.89	317.325	876.641	1624.92	435.708	866.425	1629	375.906	810.996	1483.04	384.633	740.111	1243.79	378.697	967.967	1416.46	374.206	1035.71	1237.37	506.263	726.792	1299.28	203.498	844.866	1451.16	114.51	801.03	1221.44	105.067	793.33	1126.46	78.6544	857.724	947.271	128.053	872.43	871.656	60.836	834.56	871.227	78.1834	873.551	778.848
904	0	323.647	1058.34	1608.82	438.587	1058.53	1609.32	317.544	885.949	1625.11	435.957	875.992	1629.32	376.346	820.37	1483.33	385.307	748.973	1244.39	378.815	977.135	1416.61	374.237	1044.79	1237.63	506.629	735.921	1299.71	203.774	853.699	1451.59	115.286	806.322	1222.61	105.904	797.723	1127.31	78.8504	860.8	947.857	128.104	876.852	872.584	61.8062	836.947	871.589	78.1155	877.737	779.797
905	0	323.393	1067.61	1608.73	438.53	1068.08	1609.15	317.873	895.196	1625.09	436.307	885.754	1629.25	376.88	829.796	1483.44	385.39	758.014	1244.63	378.73	986.251	1416.44	374.167	1053.9	1237.22	507.21	745.426	1299.77	204.141	862.733	1451.98	116.197	812.056	1223.3	106.85	802.601	1128.14	79.2691	864.299	948.119	128.235	881.426	872.904	63.186	839.662	871.728	77.9076	882.01	780.525
906	0	323.1	1077	1608.56	438.538	1077.96	1609.43	318.119	904.682	1624.83	436.491	895.44	1629.01	377.131	839.331	1483.4	385.772	766.827	1244.7	378.839	995.607	1416.03	373.927	1062.88	1236.58	507.604	754.706	1299.75	204.558	872.009	1451.89	117.092	818.132	1223.76	108.175	807.915	1128.56	79.8219	868.302	948.056	128.649	886.361	873.011	64.7338	842.866	871.627	77.793	886.479	781.052
907	0	322.743	1086.56	1608.26	437.896	1087.59	1608.82	318.279	914.072	1624.38	436.763	905.167	1628.77	377.443	849.122	1483.28	385.807	775.962	1244.88	379.017	1005.17	1415.62	373.759	1071.89	1236	507.769	763.923	1299.88	204.849	881.241	1451.43	118.072	824.942	1224.16	109.22	813.585	1129	80.5954	872.71	947.852	128.985	891.837	872.991	66.0685	846.608	871.591	77.7069	890.978	781.258
908	0	322.426	1096.07	1607.99	437.656	1097.45	1608.74	318.158	923.532	1623.99	436.754	915.032	1628.4	377.634	858.855	1483.12	385.82	784.899	1245.11	378.898	1014.71	1414.82	373.704	1080.95	1234.79	507.747	773.194	1299.92	205.026	890.637	1451.3	118.719	832.046	1224.55	110.274	819.831	1129.26	81.3483	877.745	947.605	129.184	897.414	872.726	67.3398	850.78	871.537	78.0062	895.722	781.342
909	0	322.079	1105.67	1607.48	436.965	1107.49	1608.24	318.384	933.155	1623.34	436.951	924.962	1627.78	378.276	869.039	1482.72	385.961	794.034	1244.93	379.081	1024.55	1413.89	373.645	1090.09	1233.87	507.776	782.565	1299.65	205.293	900.326	1450.82	119.63	839.603	1224.7	111.42	826.603	1129.37	82.0563	883.097	947.36	129.526	903.386	872.584	68.6306	855.527	871.373	78.355	900.487	781.187
910	0	321.552	1115.42	1606.91	436.813	1117.34	1607.82	318.24	942.716	1622.46	436.94	934.867	1627.03	378.225	878.884	1482.27	385.548	803.26	1244.57	378.938	1034.34	1413.16	373.431	1099.27	1232.59	507.684	792.073	1299.31	205.428	910.083	1450.65	120.37	847.631	1224.65	112.468	833.83	1129.28	82.8238	889.119	946.995	129.862	909.496	872.256	69.7132	860.896	871.148	78.584	905.714	780.767
911	0	320.818	1125.13	1606.33	436.119	1127.37	1607.38	318.127	952.548	1621.7	436.728	944.822	1626.26	378.196	888.957	1481.81	385.164	812.242	1244.5	378.8	1044.28	1412.16	373.063	1108.45	1231.55	507.179	801.411	1299.08	205.385	919.901	1449.95	120.938	856.107	1224.5	113.295	841.536	1129.32	83.5482	895.623	946.684	129.775	916.419	872.218	70.6275	866.818	871.021	78.89	911.153	780.311
912	0	320.437	1134.92	1605.61	435.243	1137.48	1606.71	317.86	962.261	1620.62	436.656	954.967	1625.43	378.069	899.041	1481.32	384.965	821.895	1244.18	378.742	1054.21	1411.21	372.943	1117.94	1230.29	506.442	810.581	1298.64	205.231	929.936	1449.7	121.231	864.743	1224.38	114.208	849.465	1129.18	84.1267	902.617	946.321	132.311	922.784	871.824	71.4627	873.479	870.707	79.5505	917.062	779.835
913	0	319.671	1144.72	1604.76	434.838	1147.64	1605.87	317.674	972.039	1619.53	436.506	965.102	1624.34	377.885	909.277	1480.49	384.18	831.473	1243.54	378.634	1064.29	1410.15	372.633	1127.41	1229.01	506.09	820.173	1298.09	205.088	940.109	1449.18	121.863	873.766	1223.87	114.955	857.844	1128.78	84.7085	909.966	945.812	131.771	928.776	869.904	72.0078	880.571	870.171	80.4382	923.095	779.047
914	0	319.114	1154.7	1603.99	434.136	1157.75	1605.33	317.323	981.999	1618.42	436.237	975.176	1623.42	377.34	919.453	1479.72	383.161	840.767	1243.08	378.189	1074.34	1409	372.061	1136.83	1227.64	505.308	829.752	1297.53	204.631	950.498	1448.64	121.834	883.107	1223.61	115.33	866.734	1128.38	85.1744	917.964	945.026	133.089	936.542	869.58	72.6682	888.097	869.621	81.1416	929.463	778.075
915	0	318.418	1164.38	1602.94	433.39	1167.85	1604.28	316.859	992.029	1617.29	435.694	985.372	1622.28	376.801	929.793	1478.89	382.225	850.191	1242.62	377.925	1084.55	1407.77	371.925	1146.66	1226.33	504.695	839.554	1296.82	204.11	961.022	1447.93	122.175	892.807	1222.91	115.576	875.797	1127.84	85.5005	926.381	944.319	133.681	944.459	868.609	72.9521	896.288	869.174	82.1546	936.331	776.931
916	0	317.674	1174.61	1601.9	432.778	1178.06	1603.4	316.369	1002.02	1615.99	435.141	995.578	1620.99	376.112	940.138	1477.79	381.116	859.996	1241.84	377.501	1094.77	1406.35	371.415	1156.29	1224.72	503.714	849.18	1296	203.501	971.59	1446.73	121.382	902.665	1222.23	115.615	885.364	1127.23	85.9774	935.283	943.219	134.114	952.049	867.6	73.1509	904.854	868.436	83.241	943.656	775.404
917	0	316.852	1184.73	1600.64	431.78	1188.33	1602.11	315.681	1012.03	1614.58	434.256	1005.67	1619.63	375.285	950.563	1476.72	379.868	869.961	1240.78	376.874	1105.09	1404.83	370.925	1166.2	1223.03	502.561	858.916	1295.07	202.785	982.518	1445.55	122.076	912.806	1221.22	115.377	895.223	1126.24	86.1035	944.493	941.988	134.758	960.719	866.258	73.2627	913.972	867.523	84.226	951.203	773.857
918	0	315.878	1194.92	1599.44	430.317	1198.56	1601.04	314.72	1022.15	1613.26	433.45	1015.99	1618.46	374.217	960.99	1475.59	378.565	880.172	1239.92	376.333	1115.43	1403.58	370.558	1176.25	1221.5	501.102	868.424	1294.19	201.929	993.498	1444.59	121.047	923.209	1220.23	114.851	905.35	1125.32	86.0588	954.033	940.745	135.132	969.608	865.424	72.7057	923.3	866.499	85.2044	959.151	772.183
919	0	314.891	1205.18	1598.15	430.665	1208.79	1600.83	313.908	1032.48	1612.02	432.617	1026.32	1617.24	373.116	971.449	1474.62	377.085	890.352	1239.13	375.688	1125.99	1402.01	370.208	1186.34	1219.96	499.707	878.323	1293.31	200.936	1004.54	1443.3	120.227	934.026	1219.3	114.098	915.775	1124.26	85.9338	964.19	939.399	135.211	979.22	864.224	72.8194	933.195	865.536	86.133	967.412	770.386
920	0	313.72	1215.44	1596.99	428.709	1219.2	1599.11	312.792	1042.74	1610.63	431.463	1036.67	1616.05	371.806	981.996	1473.37	375.427	900.497	1238.08	374.884	1136.41	1400.79	369.746	1196.55	1218.47	498.085	888.124	1292.15	199.902	1015.67	1442.16	118.903	944.943	1218.19	113.22	926.447	1123.09	85.3914	974.403	938.248	135.286	988.772	862.792	72.1508	943.482	864.246	86.4304	976.268	768.802
921	0	312.381	1225.85	1595.95	427.691	1229.53	1598.57	311.432	1053.04	1609.16	430.313	1046.91	1615	370.342	992.554	1472.31	373.803	910.767	1237.07	374.062	1147.05	1399.58	369.301	1206.89	1217.22	496.519	898.056	1291.23	198.456	1026.76	1440.88	117.49	956.216	1217.04	112.023	937.371	1121.91	84.7492	985.178	936.968	134.987	998.873	861.535	71.515	954.091	862.87	86.7416	985.433	767.416
922	0	310.856	1236.21	1594.88	426.081	1239.81	1597.52	309.903	1063.43	1607.82	428.629	1057.3	1613.84	368.716	1003.26	1471.17	372.117	921.058	1236.16	372.886	1157.54	1398.31	368.562	1217.09	1215.79	494.549	907.958	1290.48	197.113	1038.06	1439.9	115.536	967.629	1216.03	110.502	948.534	1120.82	83.8702	996.139	935.854	134.156	1009.5	860.235	70.5657	965.061	861.688	86.5081	995.055	765.924
923	0	309.354	1246.72	1593.66	424.172	1250.43	1596.52	308.428	1073.97	1606.45	427.131	1067.8	1612.69	367.112	1014.09	1470	370.467	931.33	1235.26	372.057	1168.4	1396.91	368.055	1227.56	1214.1	492.817	918.021	1289.58	195.653	1049.41	1438.3	113.769	979.158	1214.81	108.86	959.78	1119.57	82.7767	1007.42	934.435	133.757	1020.93	859.185	69.4509	976.423	860.339	86.4543	1005.29	764.268
924	0	307.661	1257.34	1592.37	422.357	1260.93	1595.38	306.47	1084.39	1604.79	425.114	1078.15	1611.24	365.203	1024.89	1468.76	368.888	941.797	1234.25	370.669	1179.03	1395.38	367.301	1237.87	1212.55	490.969	928.247	1288.75	194.083	1060.74	1436.88	111.944	990.779	1213.33	107.21	971.195	1118.11	81.7225	1019.04	932.918	132.432	1031.85	857.541	68.135	988.042	858.939	85.8238	1016.07	762.643
925	0	305.947	1267.86	1591.14	420.867	1271.31	1594.51	304.356	1094.91	1603.3	423.046	1088.64	1609.88	363.169	1035.8	1467.68	367.006	952.261	1233.32	369.46	1189.82	1394.02	366.556	1248.38	1210.94	488.977	938.366	1288.1	192.4	1072.16	1435.31	110.331	1002.5	1211.92	105.259	982.576	1116.87	80.3954	1030.95	931.392	131.007	1043.06	856.031	66.7075	999.995	857.583	84.7732	1027.38	761.126
926	0	304.06	1278.5	1590.02	418.671	1281.78	1593.47	302.293	1105.61	1601.85	420.966	1099.15	1608.75	361.09	1046.7	1466.63	365.286	962.847	1232.56	368.194	1200.71	1392.66	365.622	1258.84	1209.25	486.989	948.698	1287.5	190.671	1083.84	1433.75	108.465	1014.21	1210.52	103.32	994.145	1115.55	78.7548	1042.94	930.004	129.437	1055.68	855.065	64.6598	1012.36	856.195	83.6324	1039.19	759.697
927	0	301.884	1289.19	1588.65	416.603	1292.35	1592.53	299.827	1116.16	1600.27	418.561	1109.6	1607.33	359.042	1057.6	1465.44	363.379	973.492	1231.39	366.449	1211.34	1391.21	364.679	1269.4	1207.81	485.11	959.041	1286.91	188.72	1095.22	1432.38	106.742	1025.72	1209.01	101.348	1005.82	1113.88	76.9996	1055.14	928.54	127.902	1067.87	853.687	62.9261	1024.9	854.572	82.0449	1051.58	758.224
928	0	299.542	1299.92	1587.21	414.353	1302.77	1591.37	297.398	1126.88	1598.49	415.901	1120.07	1606.1	356.692	1068.36	1464.22	361.479	984.253	1230.07	364.968	1222.29	1390.06	363.812	1280.1	1206.68	482.999	969.392	1286.21	186.6	1106.65	1430.71	104.445	1037.54	1207.31	99.1429	1017.61	1112.23	75.098	1067.64	927.018	125.315	1078.92	851.178	61.3048	1037.61	852.871	80.2515	1064.58	756.823
929	0	297.276	1310.56	1586.1	412.036	1313.4	1590.52	294.718	1137.6	1597.17	413.249	1130.55	1604.92	354.316	1079.1	1462.98	359.367	995.022	1228.85	363.09	1232.86	1388.77	362.701	1290.71	1205.37	480.811	979.777	1285.5	184.383	1118.16	1429.27	102.457	1049.42	1205.7	96.6828	1029.58	1110.66	73.1403	1080.38	925.387	123.99	1093.3	850.567	59.3696	1050.74	851.193	78.394	1078.06	755.146
930	0	294.751	1321.38	1584.91	409.475	1324	1589.66	291.938	1148.39	1596.17	410.46	1141.05	1604.16	351.688	1089.74	1461.99	357.088	1006.05	1227.7	361.463	1243.58	1387.95	361.732	1301.59	1204.52	478.427	990.288	1284.84	182.03	1129.32	1427.58	99.8039	1060.97	1204.11	94.3851	1041.55	1108.79	71.028	1093.29	923.85	121.879	1105.34	848.501	57.2852	1064.19	849.623	76.2905	1092.12	753.752
931	0	292.267	1332.17	1583.92	406.964	1334.71	1588.91	289.2	1159.35	1595.24	407.666	1151.76	1603.75	349.274	1100.45	1461.11	354.588	1016.85	1226.61	359.748	1254.21	1387.39	360.716	1312.57	1203.89	475.9	1000.63	1284.13	179.843	1140.7	1426.11	97.5725	1072.97	1202.24	91.923	1054.02	1107.09	68.8669	1106.41	922.222	119.944	1119.11	847.062	54.5559	1077.62	847.683	73.9794	1106.45	752.157
932	0	289.453	1343.07	1582.87	404.143	1345.21	1588.06	286.093	1170.07	1594.48	404.701	1162.43	1603.38	346.765	1111.09	1460.32	351.997	1027.72	1225.69	358.044	1264.88	1387.06	359.664	1323.64	1203.78	473.435	1011.17	1283.56	177.542	1151.69	1424.77	95.0899	1085.1	1200.52	89.3025	1066.61	1105.11	66.5343	1119.77	920.509	117.886	1132.83	845.501	52.1294	1091.33	845.878	71.441	1121.3	750.806
933	0	286.941	1353.91	1581.8	401.596	1356	1587.64	283.182	1180.98	1594.18	401.584	1173.17	1603.33	344.229	1121.73	1459.9	349.477	1038.69	1225.15	355.888	1275.41	1386.72	358.343	1334.81	1203.52	470.856	1021.76	1283.29	175.17	1162.72	1423.53	92.696	1097.47	1199.1	86.7203	1079.63	1103.44	64.3617	1133.52	919.025	115.555	1146.36	844.014	50.0303	1105.43	844.273	68.863	1136.72	749.616
934	0	284.269	1364.71	1581.12	398.678	1366.63	1587.03	280.23	1191.94	1593.83	398.452	1183.86	1603.42	341.774	1132.24	1459.65	347.047	1049.36	1224.82	354.086	1286.13	1386.86	357.13	1346.07	1203.7	468.507	1032.42	1283.07	172.811	1173.61	1422.72	90.3985	1110.21	1197.6	84.1688	1092.9	1102.05	62.2498	1147.46	917.651	113.306	1160.28	842.778	48.0922	1119.73	842.804	66.0771	1152.39	748.73
935	0	281.555	1375.48	1580.64	395.899	1377.59	1586.9	277.247	1202.76	1593.88	395.561	1194.68	1603.72	339.216	1142.69	1459.64	344.842	1059.98	1224.57	351.912	1296.56	1387.34	355.656	1356.96	1204.43	465.996	1043	1283.12	170.512	1184.36	1421.99	88.0364	1123.12	1196.2	81.89	1106.56	1100.58	60.0417	1161.63	916.542	110.402	1175.82	841.966	45.5984	1134.23	841.442	63.1592	1168.3	748.099
936	0	278.917	1386.13	1580.5	393.1	1387.95	1587.17	274.165	1213.54	1594.14	392.575	1205.32	1604.51	336.675	1153.16	1459.92	342.644	1070.41	1224.85	349.94	1307.27	1388.18	353.958	1367.87	1205.32	463.67	1053.73	1283.55	168.113	1194.99	1422.09	85.6766	1136.22	1195.25	79.5332	1120.23	1099.61	57.5966	1175.94	915.94	108.365	1189.93	841.01	43.315	1149.09	840.715	60.2002	1184.7	747.828
937	0	276.18	1396.85	1580.6	390.55	1398.88	1587.74	271.2	1224.24	1594.68	389.517	1215.7	1605.72	334.286	1163.56	1460.5	340.685	1080.99	1225.47	347.711	1317.7	1389.06	352.141	1378.72	1206.36	461.636	1064.43	1284.33	165.84	1205.67	1422.18	83.701	1149.46	1194.96	76.9519	1134.18	1099.24	55.4705	1190.87	915.754	106.055	1204.61	840.731	40.5428	1164.16	840.481	57.0683	1201.3	748.127
938	0	273.612	1407.16	1581.14	387.708	1409.01	1588.45	268.466	1234.93	1595.42	386.478	1226.25	1606.46	331.988	1173.96	1461.24	338.841	1091.54	1226.09	345.467	1328.18	1390.21	350.106	1389.48	1207.65	459.65	1075.17	1285.21	163.327	1216.09	1422.76	81.0889	1162.63	1194.54	74.8632	1148	1098.77	53.0543	1205.8	915.987	103.929	1219.82	840.913	37.706	1179.73	840.696	53.9967	1218.14	748.851
939	0	270.906	1417.6	1581.73	385.073	1419.4	1589.3	265.656	1245.37	1596.17	383.781	1236.49	1607.82	329.714	1184.31	1462.17	337.043	1102.06	1226.86	343.126	1338.63	1391.62	347.929	1400.22	1209.14	457.803	1085.78	1286.4	161.076	1226.67	1423.39	79.1133	1176.02	1194.51	72.6195	1161.89	1098.79	50.7091	1221.04	916.546	101.505	1234.35	841.261	35.5209	1195.52	840.928	50.8062	1235.27	750.062
940	0	268.337	1427.83	1582.64	382.568	1429.67	1590.5	262.872	1255.63	1597.11	381.103	1246.7	1609.03	327.373	1194.37	1463.29	335.358	1112.87	1227.92	340.795	1348.87	1393.15	345.788	1410.59	1210.84	456.168	1096.4	1287.86	158.761	1237.12	1424.47	76.4051	1188.83	1194.79	70.6062	1175.78	1098.99	48.3117	1236.45	917.561	99.0446	1250.55	842.133	32.7267	1211.61	841.747	47.7268	1252.87	751.326
941	0	265.871	1437.99	1583.58	379.855	1439.44	1591.49	260.233	1265.69	1598.26	378.459	1256.74	1610.27	325.102	1204.42	1464.42	333.597	1123.46	1229.12	338.757	1359.23	1394.48	343.71	1421.12	1212.42	454.498	1106.91	1289.32	156.567	1247.47	1425.56	74.5549	1201.89	1195.24	68.4804	1189.46	1099.69	46.0773	1252.14	918.75	96.4269	1266.68	843.377	30.0961	1228.15	842.85	44.8268	1270.41	752.967
942	0	263.697	1447.71	1584.62	377.794	1449.66	1592.67	257.798	1275.57	1599.2	375.986	1266.55	1611.41	323.099	1214.41	1465.53	331.526	1133.82	1230.26	336.66	1369.34	1395.83	341.862	1431.36	1214	452.856	1117.23	1290.56	154.577	1258	1426.66	72.5249	1214.69	1195.8	66.3327	1203.13	1100.11	43.8285	1268.05	920.145	93.9637	1283.05	844.664	27.6786	1245.03	843.959	42.162	1288.38	754.662
943	0	261.339	1457.45	1585.73	375.363	1459.24	1593.97	255.343	1285.29	1600.19	373.532	1276.18	1612.65	321.094	1224.37	1466.67	329.326	1143.95	1231.51	334.823	1379.46	1397.47	340.144	1441.73	1215.7	450.861	1127.37	1291.87	152.512	1268.28	1427.93	70.0309	1227.14	1196.39	64.0811	1216.49	1100.89	41.3986	1284.05	921.621	91.6112	1300.18	846.382	25.1364	1262.01	845.424	39.5518	1306.37	756.572
944	0	259.257	1466.91	1586.94	373.072	1468.53	1595.42	253.141	1294.85	1601.23	371.303	1285.64	1613.97	319.11	1234.11	1467.77	327.173	1154	1232.9	333.265	1389.43	1399.07	339.263	1452.11	1217.62	448.879	1137.23	1293.32	150.786	1278.86	1428.99	68.2383	1239.93	1197.27	61.8952	1230.02	1101.93	39.1989	1300.19	923.341	89.2849	1317.22	848.446	22.5001	1279.32	847.086	37.1366	1324.82	758.626
945	0	257.258	1476.5	1588.11	371.149	1477.94	1596.96	251.181	1304.3	1602.07	369.212	1294.99	1614.93	317.157	1243.84	1468.78	325.111	1163.86	1234.11	331.937	1399.42	1400.48	338.391	1462.24	1219.14	447.046	1147.07	1294.47	148.963	1289.24	1430.22	66.4135	1252.13	1198.37	59.7437	1243.39	1102.57	36.8793	1316.33	925.233	86.9397	1334.37	850.453	20.0393	1296.66	848.701	34.9039	1343.22	760.754
946	0	255.408	1485.73	1589.21	369.325	1487.65	1598.22	249.527	1313.71	1602.77	367.397	1304.44	1615.87	315.534	1253.65	1469.8	322.663	1173.33	1235.31	330.866	1409.26	1401.83	337.781	1472.19	1220.46	445.045	1156.54	1295.51	147.425	1299.97	1431.34	64.2391	1264.66	1199.11	57.3936	1256.8	1103.24	34.4064	1332.28	927.003	84.9058	1351.69	852.708	17.9237	1314.02	850.137	32.6763	1361.88	763.042
947	0	253.662	1495	1590.44	367.532	1496.83	1599.83	247.691	1322.86	1603.62	365.754	1313.66	1617.13	313.765	1263.39	1471.01	320.195	1182.65	1236.82	329.749	1419	1403.2	337.109	1481.79	1221.66	442.669	1165.76	1296.75	145.905	1310.65	1432.74	62.092	1277.02	1200.26	55.0841	1270.18	1104.29	32.3066	1348.54	928.964	82.6146	1368.95	854.998	15.834	1331.53	852.062	30.616	1380.48	765.849
948	0	252.084	1504.24	1591.61	365.852	1505.94	1601.24	246.245	1332.11	1604.55	364.22	1322.84	1618.38	312.176	1273.06	1472.37	317.913	1191.9	1238.49	329.073	1428.75	1404.5	336.582	1491.22	1222.66	440.637	1174.87	1298.03	144.615	1321.43	1434.15	60.0161	1289.35	1201.53	52.6091	1283.87	1105.55	30.3035	1364.66	931.202	80.5445	1386.07	857.508	13.256	1348.92	853.85	28.7536	1399.27	768.698
949	0	250.719	1513.34	1592.71	364.758	1515.38	1602.65	245.073	1341.34	1605.4	362.899	1332.16	1619.47	310.817	1282.68	1473.67	315.975	1201.02	1239.88	328.316	1438.26	1405.38	336.332	1500.52	1223.56	438.817	1183.8	1299.21	143.465	1332.2	1435.48	58.0857	1301.87	1202.69	50.5845	1297.6	1106.65	28.3904	1380.81	933.205	78.9992	1403.22	860.152	11.7871	1366.09	855.737	27.1218	1418.23	771.577
950	0	249.383	1522.53	1593.84	363.56	1524.68	1603.9	243.877	1350.41	1606.36	361.492	1341.29	1620.72	309.488	1292.19	1474.91	314.141	1210.16	1241.22	327.744	1447.82	1406.53	335.825	1509.61	1224.45	436.909	1192.53	1300.45	142.329	1342.92	1437	56.2789	1314.65	1204.1	48.2947	1311.38	1107.9	26.5963	1396.85	935.564	77.4979	1421.11	863.193	9.93886	1383.22	857.736	25.4768	1437.05	774.813
951	0	248.339	1531.87	1595.03	362.453	1533.58	1605.25	242.792	1359.54	1607.59	360.63	1350.4	1621.88	308.288	1301.6	1476.46	312.637	1219.54	1242.86	327.355	1457.31	1407.84	335.356	1518.43	1225.45	435.25	1201.18	1301.92	141.293	1353.46	1438.7	54.6724	1327.55	1205.86	46.3375	1325.07	1109.62	24.9316	1412.92	938.125	75.9914	1438.01	866.254	8.51733	1400.48	860.082	24.0216	1455.94	778.533
952	0	247.643	1540.87	1596.19	361.914	1542.87	1606.72	241.994	1368.74	1608.91	359.626	1359.59	1623.17	307.058	1310.82	1477.95	311.047	1228.76	1244.45	326.935	1466.63	1409.27	334.73	1527.24	1226.6	433.596	1209.72	1303.35	140.398	1364.03	1440.62	52.9175	1340.35	1207.68	44.2247	1338.84	1111.66	23.5045	1428.9	941.052	74.3554	1454.56	869.535	6.61921	1417.53	862.849	22.7069	1474.82	782.517
953	0	246.972	1550.05	1597.29	360.859	1551.95	1607.55	241.124	1377.75	1610.23	358.835	1368.5	1624.75	306.093	1319.96	1479.5	309.721	1237.85	1245.84	326.592	1475.81	1410.77	334.148	1536.16	1227.85	432.127	1218.29	1304.72	139.528	1374.33	1442.64	51.2927	1353.32	1209.71	42.5047	1352.41	1113.5	22.0594	1444.73	944.207	72.7337	1470.37	872.445	4.91775	1434.58	865.684	21.4926	1493.72	786.734
954	0	246.265	1559.03	1598.69	360.376	1560.9	1608.92	240.583	1386.99	1611.68	358.3	1377.72	1626.13	305.058	1329.15	1480.98	308.354	1246.71	1247.41	326.12	1484.75	1412.31	333.56	1545.01	1229.49	430.719	1226.78	1306.2	138.76	1384.5	1444.77	49.8291	1366.23	1211.96	40.6863	1366	1115.66	20.8404	1460.63	947.647	71.3607	1487.38	876.623	4.38407	1451.72	868.648	20.7139	1512.52	791.404
955	0	245.951	1568.36	1600.21	359.834	1569.67	1610.19	240.263	1396.24	1613.48	357.867	1386.72	1627.66	304.255	1338.25	1482.74	307.103	1255.63	1249.21	326.02	1493.88	1414.11	332.998	1553.78	1231.23	429.397	1235.14	1307.84	138.074	1394.57	1447.12	48.3381	1378.92	1214.35	39.0568	1379.45	1118.13	19.8526	1476.67	951.191	70.6805	1504.08	880.644	2.56929	1468.71	872.191	20.0447	1531.19	796.164
956	0	245.805	1577.5	1601.51	359.844	1579.04	1611.3	239.81	1405.35	1615.2	357.535	1396.18	1629.05	303.347	1347.19	1484.34	305.964	1264.36	1250.84	325.74	1502.93	1415.72	332.456	1562.58	1232.88	428.036	1243.71	1309.3	137.309	1404.41	1449.42	46.5667	1391.41	1216.49	37.4543	1392.66	1120.51	19.1234	1492.38	954.872	70.0543	1520.23	884.501	1.78524	1485.95	875.847	19.6484	1549.87	801.033
957	0	245.741	1586.67	1602.75	359.828	1588.1	1612.41	239.432	1414.55	1616.8	357.302	1405.1	1630.55	302.452	1356.11	1485.99	304.752	1273.01	1252.44	325.114	1511.82	1417.29	331.916	1571.49	1234.49	426.827	1252.12	1310.83	136.713	1414.27	1451.54	45.5094	1403.91	1218.78	35.8702	1405.7	1122.72	18.5153	1508.08	958.482	69.4541	1536.29	888.826	0.631723	1502.79	879.378	19.5909	1568.32	806.2
958	0	245.517	1595.73	1604.26	359.668	1596.9	1613.58	239.237	1423.8	1618.73	357.017	1414.09	1632.19	301.835	1365.15	1487.7	303.476	1281.81	1254.34	324.816	1520.71	1419.14	331.298	1580.2	1236.26	425.626	1260.6	1312.73	136.068	1423.83	1453.95	44.2749	1416.06	1221.27	34.3929	1418.64	1125.11	17.9954	1523.62	962.604	69.4463	1552.88	893.528	0.900354	1520.03	883.276	19.5574	1586.66	811.517
959	0	245.624	1604.99	1605.79	359.669	1605.83	1614.54	238.941	1432.95	1620.49	356.869	1423.06	1633.45	301.034	1374.17	1489.45	302.503	1290.54	1256.21	324.583	1529.71	1420.68	330.77	1588.97	1237.77	424.44	1269.09	1314.37	135.474	1433.73	1456.14	42.9989	1428.04	1223.81	32.9361	1431.36	1127.7	17.6755	1539.14	966.391	69.3332	1568.87	897.811	0.317916	1536.85	887.394	20.0012	1605.04	816.76
960	0	245.8	1614.21	1607.07	359.86	1614.83	1615.41	238.864	1442.25	1622.04	356.599	1432.16	1634.5	300.41	1383.25	1490.89	301.482	1299.47	1257.8	324.114	1538.59	1421.99	329.801	1597.41	1238.82	423.449	1277.67	1315.88	134.895	1443.23	1458.04	41.9291	1439.66	1225.84	31.4745	1443.79	1129.88	17.6754	1554.63	970.219	69.513	1584.64	902.211	0.839241	1554.32	891.161	20.6758	1623.12	822.013
961	0	245.997	1623.41	1608.16	359.977	1623.81	1616.16	238.57	1451.38	1623.47	356.342	1441.04	1635.83	299.577	1392.23	1492.23	300.655	1308.37	1259.26	323.659	1547.53	1423.22	329.728	1606.29	1240.28	422.391	1286.16	1317.42	134.401	1452.88	1459.82	40.78	1451.04	1227.8	30.0678	1456.03	1131.88	17.5817	1569.78	974.05	69.8885	1600.87	906.772	0.152177	1570.9	895.021	21.4504	1640.95	827.217
962	0	246.079	1632.46	1609.31	360.123	1632.73	1616.94	238.417	1460.56	1624.85	356.293	1450.11	1636.78	298.931	1401.31	1493.65	299.715	1317.17	1260.78	323.329	1556.52	1424.4	329.214	1614.82	1241.29	421.502	1294.73	1318.9	133.819	1462.41	1461.38	39.4048	1462.05	1229.69	28.5813	1468.11	1133.85	17.5547	1584.82	977.698	70.4212	1616.3	911.168	0.940439	1587.71	898.908	22.5249	1658.74	832.498
963	0	246.179	1641.75	1610.29	360.278	1641.66	1617.58	238.258	1469.77	1626.09	356.125	1458.99	1637.58	298.298	1410.36	1494.84	299.016	1326.12	1262.09	322.799	1565.39	1425.2	328.866	1623.39	1242.1	420.673	1303.39	1320.16	133.511	1471.98	1462.9	38.6931	1473.17	1231.15	27.2853	1480.04	1135.59	17.8153	1599.8	981.353	71.175	1631.93	915.604	0.863523	1604.22	902.679	23.8325	1676.28	837.573
964	0	246.126	1650.89	1611.1	360.365	1650.69	1618.1	238.177	1478.99	1626.89	355.746	1468.01	1638.28	297.797	1419.38	1495.79	298.453	1334.9	1263.15	322.632	1574.34	1426.04	328.65	1632.1	1242.87	420.084	1312.04	1321.26	133.011	1481.35	1464.16	37.6806	1483.84	1232.78	25.919	1491.72	1137.01	18.0543	1614.4	984.68	71.9803	1647.45	919.951	1.55929	1620.57	906.181	25.2795	1693.76	842.566
965	0	246.259	1660.04	1611.84	360.455	1659.6	1618.66	237.872	1488.1	1627.73	355.835	1477.05	1638.76	297.466	1428.52	1496.66	298.04	1343.62	1264.15	322.451	1583.27	1426.83	328.253	1640.65	1243.57	419.466	1320.7	1322.43	132.769	1490.74	1465.14	36.344	1494.24	1234.15	24.9121	1503.45	1138.34	18.2025	1628.77	988.024	72.7586	1662.46	924.327	2.71996	1636.58	909.41	26.8498	1710.67	847.795
966	0	246.036	1669.04	1612.38	360.454	1668.52	1618.98	237.733	1497.17	1628.38	355.672	1486.05	1639.19	297.09	1437.62	1497.4	297.582	1352.29	1265.18	322.204	1592.24	1427.35	328.015	1649.27	1243.97	419.207	1329.49	1323.42	132.433	1499.99	1466.02	35.6557	1504.86	1235.26	23.7164	1515.05	1139.55	18.598	1643.09	991.124	73.5181	1677.24	928.403	2.7372	1652.32	912.972	28.5859	1727.43	852.523
967	0	246.074	1678.14	1612.7	360.314	1677.69	1619	237.514	1506.35	1628.71	355.719	1495.27	1639.43	296.73	1446.67	1497.91	297.49	1360.97	1265.88	321.973	1601.22	1427.52	327.798	1658.11	1244.12	418.992	1338.39	1324.1	132.271	1509.22	1466.42	34.9563	1515.44	1235.98	22.8317	1526.58	1140.38	19.1712	1657.2	994.027	74.6966	1692.15	932.238	3.75113	1668	915.824	30.3407	1743.93	856.992
968	0	245.861	1687.26	1612.62	360.217	1686.86	1618.88	237.554	1515.59	1628.78	355.752	1504.34	1639.38	296.732	1455.79	1498.14	297.401	1369.64	1266.21	321.577	1610.13	1427.52	327.527	1666.76	1243.86	418.797	1347.26	1324.58	132.176	1518.36	1466.66	34.5325	1525.98	1236.48	22.0196	1538.06	1140.8	19.7961	1671.15	996.534	75.8145	1706.55	935.507	4.83434	1683.38	918.486	32.2739	1760.14	861.357
969	0	245.805	1696.38	1612.63	360.007	1695.88	1618.59	237.558	1524.61	1628.77	355.383	1513.35	1639.38	296.489	1464.9	1498.35	297.394	1378.24	1266.66	321.639	1619.24	1427.42	327.431	1675.43	1243.57	418.787	1356.12	1325.06	132.067	1527.49	1466.54	33.9982	1536.45	1236.81	21.1922	1549.33	1141.25	20.2972	1684.7	998.564	77.1176	1720.82	938.82	6.13257	1698.49	921.161	34.2439	1776.08	865.4
970	0	245.795	1705.63	1612.28	359.735	1704.96	1618.02	237.167	1533.64	1628.59	355.626	1522.59	1639	296.564	1474.15	1498.33	297.678	1386.94	1266.93	321.482	1628.33	1426.92	327.363	1684.29	1243.1	419.043	1365.2	1325.41	132.111	1536.43	1466.37	33.7042	1546.83	1236.81	20.5194	1560.57	1141.59	21.3879	1698.18	1000.72	78.5979	1735.03	941.683	7.33442	1713.31	923.473	36.233	1791.56	868.979
971	0	245.626	1714.69	1611.84	359.683	1714.35	1617.71	237.222	1542.74	1628.16	355.7	1531.85	1638.33	296.652	1483.4	1498.05	297.967	1395.74	1266.84	321.276	1637.43	1426.27	327.155	1692.99	1242.37	419.289	1374.22	1325.45	132.154	1545.38	1465.92	33.1762	1556.93	1236.51	20.313	1571.84	1141.46	22.1779	1711.48	1002.65	79.7592	1748.77	944.604	8.52921	1727.82	925.235	38.2302	1806.73	872.628
972	0	245.493	1723.89	1611.45	359.766	1723.61	1617.3	237.384	1551.97	1627.52	355.535	1540.97	1637.45	296.792	1492.6	1497.73	298.383	1404.49	1266.52	321.325	1646.53	1425.82	327.346	1701.91	1241.92	419.745	1383.36	1325.4	132.153	1554.31	1465.31	33.1991	1567.34	1236.17	19.9478	1582.71	1141.06	23.189	1724.43	1004.29	81.1929	1762.81	947.432	9.88172	1741.83	927.06	40.1831	1821.61	875.94
973	0	245.487	1733.04	1611.01	359.613	1732.67	1616.51	237.567	1561.17	1626.86	355.823	1550.27	1636.73	297.07	1501.81	1497.22	298.827	1413.12	1266.26	321.054	1655.66	1424.76	327.165	1710.84	1240.83	420.213	1392.61	1325.17	132.285	1563.16	1464.67	32.9965	1577.43	1235.82	19.9367	1593.79	1140.64	24.333	1737.17	1005.73	82.9595	1776.2	949.864	11.1987	1755.69	928.704	42.1533	1836.05	878.894
974	0	245.405	1742.11	1610.28	359.744	1742.28	1615.8	237.747	1570.28	1626.04	356.289	1559.56	1635.72	297.374	1511.21	1496.47	299.541	1421.91	1265.85	321.201	1664.8	1423.81	327.497	1719.78	1239.81	420.928	1401.89	1324.7	132.538	1572	1463.59	33.5704	1587.74	1235.01	20.0555	1604.61	1140.01	25.6116	1749.71	1006.6	84.0503	1788.68	951.188	12.2735	1769.04	930.064	44.1826	1850.37	881.422
975	0	245.633	1751.45	1609.58	360.087	1751.98	1614.93	237.98	1579.21	1624.97	356.534	1568.96	1634.59	297.672	1520.46	1495.72	300.23	1430.78	1265.09	321.113	1674.02	1422.58	327.41	1728.74	1238.51	421.726	1411.18	1324.1	132.78	1580.8	1462.33	33.9929	1597.79	1233.9	20.3501	1615.33	1138.93	26.8941	1762.04	1007.43	86.1179	1801.93	953.061	13.763	1782.34	930.953	46.3255	1864.19	883.607
976	0	245.852	1760.88	1608.7	360.319	1761.26	1614.11	238.31	1588.59	1623.93	356.82	1578.31	1633.28	298.146	1529.75	1494.79	301.084	1439.67	1264.32	321.062	1683.11	1421.4	327.6	1737.8	1237.28	422.508	1420.61	1323.52	132.952	1589.65	1460.9	34.5127	1607.78	1232.68	20.8553	1625.88	1137.91	28.3467	1774.05	1008.06	87.6065	1813.9	953.771	15.8341	1795.1	931.209	48.4548	1877.57	885.561
977	0	246.177	1770.13	1607.7	360.708	1770.7	1612.83	238.591	1597.85	1622.91	357.415	1587.61	1631.9	298.716	1539.21	1493.72	301.869	1448.58	1263.5	321.107	1692.39	1419.82	327.716	1746.92	1235.7	423.404	1430.02	1322.76	133.312	1598.4	1459.54	35.4062	1617.68	1231.16	21.3472	1636.29	1136.77	29.8429	1785.8	1008.02	89.5015	1826.23	954.59	17.4122	1807.71	931.595	50.4282	1890.68	886.877
978	0	246.709	1779.49	1606.72	360.868	1779.97	1611.19	239.2	1607.15	1621.55	358.071	1596.89	1630.27	299.208	1548.57	1492.56	303.006	1457.7	1262.4	321.444	1701.77	1418.34	327.704	1756.12	1233.94	424.384	1439.49	1321.69	133.718	1607.05	1457.82	36.2627	1627.37	1229.51	22.1264	1646.56	1135.23	31.5777	1797.48	1007.77	91.3329	1837.94	955.099	19.3292	1820.13	931.759	52.6034	1903.24	887.82
979	0	247.334	1788.79	1605.61	361.84	1789.37	1610.07	239.71	1616.29	1620.08	358.628	1606.12	1628.46	300.105	1557.97	1491.19	304.309	1467.02	1260.98	321.622	1711.02	1416.79	328.141	1765.26	1232.5	425.354	1449.02	1320.52	134.214	1615.7	1455.99	37.2576	1636.94	1227.64	23.0669	1656.7	1133.4	32.7906	1808.59	1007.26	93.1952	1849.95	955.31	20.8866	1831.91	932.253	54.7011	1915.41	888.49
980	0	247.947	1798.11	1604.53	362.269	1798.43	1608.67	240.26	1625.63	1618.59	358.67	1615.3	1627.07	300.8	1567.3	1489.85	305.522	1476.25	1259.67	321.903	1720.39	1415.21	328.472	1774.46	1231	426.479	1458.54	1319.57	134.835	1624.56	1454.23	38.3134	1646.27	1225.83	24.1641	1666.79	1131.64	34.6905	1819.56	1006.79	94.9046	1861.11	955.212	22.4813	1843.57	931.471	56.6721	1927.28	888.997
981	0	248.714	1807.34	1603.36	363.213	1807.69	1607.4	241.159	1635.05	1617.39	359.92	1624.56	1625.29	301.546	1576.64	1488.31	306.763	1485.5	1258.26	322.465	1729.79	1413.71	328.769	1783.68	1229.19	427.817	1468.2	1318.42	135.424	1633.36	1452.21	39.4718	1655.42	1223.77	25.2135	1676.56	1129.91	36.3933	1830.4	1005.86	97.1905	1872.22	954.802	24.8284	1854.77	930.525	58.8886	1938.71	888.966
982	0	249.643	1816.61	1602.22	364.717	1817.46	1606.31	241.927	1644.29	1615.7	361.298	1633.93	1623.45	302.463	1585.98	1486.65	308.401	1494.83	1256.69	323.084	1739.13	1412	329.514	1793.29	1227.68	429.068	1477.74	1316.82	136.167	1642.09	1450.34	40.885	1664.66	1221.9	26.5781	1686.33	1127.88	38.1112	1840.76	1004.64	99.0642	1882.8	953.891	26.4313	1865.62	929.445	60.9809	1949.62	888.397
983	0	250.744	1825.82	1601.1	365.539	1826.42	1604.78	242.839	1653.41	1614.25	361.861	1642.87	1621.69	303.513	1595.41	1485.06	309.736	1504.19	1254.96	323.774	1748.52	1410.43	330.266	1802.81	1226.29	430.39	1487.32	1315.37	137.053	1651.01	1448.35	42.2827	1673.72	1219.58	27.9301	1695.94	1125.69	39.5949	1850.7	1003.26	100.443	1892.6	952.458	28.0652	1875.92	928.189	62.9348	1960.18	887.502
984	0	252.106	1835.13	1600.12	366.844	1835.66	1603.48	244.073	1662.59	1612.73	363.402	1652.07	1619.86	304.647	1604.81	1483.53	311.13	1513.58	1253.46	324.722	1757.99	1408.99	331.097	1812.45	1224.54	431.643	1496.95	1314	138.059	1660.03	1446.45	43.9134	1682.79	1217.58	29.3089	1705.31	1123.72	41.2728	1860.53	1001.59	102.749	1902.88	951.341	29.7203	1885.85	926.53	64.7666	1970.16	886.181
985	0	253.579	1844.32	1599.3	368.379	1844.86	1602.28	245.69	1671.77	1611.27	365.065	1661.31	1617.99	306.017	1614.17	1481.84	312.5	1523.18	1251.7	325.769	1767.47	1407.2	332.194	1822.05	1223.01	433.033	1506.66	1312.44	139.199	1669.18	1444.45	45.4578	1691.6	1215.47	30.885	1714.45	1121.62	43.0745	1870.02	999.711	104.112	1912.04	949.28	31.6697	1895.53	924.699	66.8205	1979.85	884.625
986	0	255.036	1853.3	1598.37	369.634	1853.86	1600.81	247.18	1680.62	1609.63	366.846	1670.38	1616.01	307.247	1623.68	1480.08	313.962	1532.86	1249.88	327.014	1776.96	1405.83	333.422	1831.8	1221.54	434.14	1516.21	1310.73	140.498	1678.45	1442.79	46.9444	1700.28	1213.38	32.6137	1723.45	1119.48	44.7651	1879.1	997.743	105.815	1921.2	947.319	33.4115	1904.74	922.818	68.6361	1988.91	882.801
987	0	256.615	1862.33	1597.65	371.373	1862.98	1599.82	249.051	1689.55	1608.21	368.735	1679.39	1614.05	308.667	1633.26	1478.36	315.224	1542.7	1248.13	328.398	1786.47	1404.27	334.911	1841.72	1220.06	435.221	1525.87	1308.92	141.878	1688.06	1441.02	48.6812	1709.28	1211.35	34.1712	1732.14	1117.63	46.4054	1888.01	995.575	107.825	1930.21	945.428	34.9383	1913.42	920.591	70.0974	1997.59	880.558
988	0	258.501	1871.33	1597.17	373.349	1872.12	1599.02	251.279	1698.45	1606.81	370.897	1688.37	1612.21	309.989	1642.89	1476.75	316.175	1552.41	1246.54	330.038	1796.12	1402.82	336.426	1851.33	1218.71	436.258	1535.53	1307.13	143.298	1697.75	1439.34	50.5899	1718.33	1209.72	35.7548	1740.72	1115.73	47.9071	1896.35	993.268	109.605	1938.72	943.462	36.7608	1921.43	918.207	71.6384	2005.74	878.027
989	0	260.592	1880.2	1596.63	375.683	1881.31	1598.26	253.773	1707.37	1605.43	373.347	1697.34	1610.32	311.492	1652.41	1475.21	317.442	1562.44	1244.59	331.611	1805.74	1401.42	337.818	1861.19	1217.25	437.418	1545.24	1305.23	144.924	1707.57	1437.81	52.3288	1727.22	1207.9	37.7372	1749.41	1113.74	49.4727	1904.38	990.799	110.958	1946.56	940.669	38.2151	1929.2	915.574	73.1445	2013.35	875.144
990	0	262.942	1889.01	1596.06	377.891	1890.28	1597.15	256.233	1716.25	1603.95	375.593	1706.57	1608.53	313.094	1661.89	1473.57	318.574	1572.52	1242.58	333.349	1815.31	1399.92	339.649	1871.37	1216.13	438.579	1554.97	1303.04	146.53	1717.41	1436.32	54.0905	1736.22	1206.14	39.3278	1757.52	1111.85	50.9588	1912.16	988.196	111.828	1953.57	937.174	39.6084	1936.35	912.711	74.2479	2020.56	871.99
991	0	265.666	1897.86	1595.68	380.841	1899.12	1596.15	258.869	1724.85	1602.79	378.543	1715.29	1606.55	314.714	1671.41	1471.97	319.436	1582.58	1240.75	335.224	1824.92	1398.6	341.296	1881.59	1214.89	439.78	1564.83	1300.72	148.226	1727.45	1434.92	55.7595	1745.12	1204.6	41.0621	1765.87	1110.35	52.4341	1919.65	985.231	113.502	1961.09	934.342	41.0222	1943.26	909.852	75.0987	2027.27	868.285
992	0	268.467	1906.64	1595.36	383.366	1908	1595.35	262.288	1734.05	1601.82	381.416	1724.08	1604.81	316.37	1680.77	1470.32	320.504	1592.98	1238.81	337.354	1834.55	1397.53	343.113	1891.77	1213.91	440.948	1574.63	1298.35	150.019	1737.42	1433.64	57.3697	1754.23	1203.24	42.8287	1774.23	1108.9	54.1205	1926.77	982.49	115.2	1968.6	931.277	42.5407	1949.82	906.681	76.3709	2033.84	864.697
993	0	271.27	1915.33	1595.17	386.341	1916.73	1594.46	265.333	1742.72	1600.69	384.49	1732.65	1603.03	318.155	1690.06	1468.52	321.532	1603.38	1236.55	339.366	1844.13	1396.41	344.84	1902.34	1213.28	442.003	1584.42	1295.63	151.851	1747.16	1432.48	59.0554	1763.27	1201.97	44.5214	1782.19	1107.47	55.4291	1933.74	979.583	116.135	1973.47	926.852	43.7973	1955.94	903.65	77.2713	2039.49	860.65
994	0	274.347	1923.93	1595.02	389.377	1925.31	1593.71	267.894	1751.24	1599.62	387.562	1741.23	1601.44	320.2	1699.38	1466.9	322.737	1613.99	1234.41	341.448	1853.75	1395.78	346.562	1913.07	1212.88	443.234	1594.41	1293.01	153.82	1756.94	1431.56	60.7676	1772.4	1200.56	46.4086	1790.54	1106.05	56.7047	1940.38	976.615	117.392	1979.44	923.276	44.9148	1961.65	900.334	78.0187	2044.76	856.392
995	0	277.59	1932.65	1594.98	392.708	1933.92	1593.17	271.227	1760.08	1598.79	390.579	1749.82	1599.91	322.204	1708.66	1465.23	323.984	1624.78	1232.26	343.68	1863.34	1395.11	348.237	1923.69	1212.45	445.165	1604.64	1290.18	155.762	1766.57	1430.57	62.2814	1781.48	1199.81	48.2065	1798.85	1105.07	58.1608	1946.93	973.693	117.925	1985.89	919.869	45.8371	1967.28	897.507	78.6787	2049.65	851.815
996	0	280.987	1941.39	1595.11	395.95	1942.58	1592.55	274.53	1768.73	1598.07	393.972	1758.49	1598.39	324.43	1717.92	1463.77	325.482	1635.57	1230.01	345.867	1873	1394.31	350.281	1934.69	1212.22	446.725	1614.74	1287.5	157.792	1776.09	1429.81	63.8436	1790.55	1198.97	50.097	1807	1104.08	59.573	1953.3	970.393	119.717	1991.95	915.937	46.8735	1972.29	894.245	79.2048	2053.97	846.965
997	0	284.293	1950.14	1595.37	399.425	1951.14	1592.44	278.721	1778.07	1597.61	397.338	1767.39	1597.17	326.8	1727.27	1462.61	327.411	1646.38	1228.23	348.076	1882.84	1394.04	352.255	1945.96	1212.36	448.096	1624.8	1284.94	160.003	1785.61	1429.44	65.7483	1799.44	1198.08	52.3674	1815.37	1103.18	60.8796	1959.29	967.458	120.513	1997.11	911.789	47.4696	1977.08	890.909	79.5663	2057.74	841.968
998	0	287.817	1958.87	1595.91	402.741	1959.67	1592.65	281.323	1786.49	1597.26	400.501	1775.91	1596.45	329.224	1736.68	1461.77	329.151	1656.88	1226.81	350.397	1892.45	1394.09	354.036	1956.83	1212.69	449.751	1634.93	1282.83	162.267	1795.17	1429.25	67.5715	1808.46	1198.18	54.5953	1823.67	1102.69	61.8205	1964.87	964.544	121.004	2001.34	907.647	48.3151	1981.47	887.884	79.8392	2061.08	837.016
999	0	291.292	1967.78	1596.53	406.277	1968.28	1592.96	285.071	1795.64	1597.24	403.665	1784.62	1595.93	331.569	1746.04	1461.25	330.792	1667	1225.96	352.848	1902.19	1393.95	355.925	1967.67	1212.98	451.628	1645.04	1281.07	164.645	1804.76	1429.3	69.6046	1817.62	1198.51	56.931	1831.98	1102.82	63.1681	1970.47	961.634	121.882	2005.92	903.288	49.1873	1985.65	884.917	79.7423	2063.74	831.852
1000	0	294.731	1976.6	1597.31	409.678	1977.05	1593.16	288.218	1804.45	1597.14	406.861	1793.67	1595.4	334.049	1755.35	1460.8	332.504	1677.21	1225.16	355.259	1911.85	1394.12	357.879	1978.4	1213.4	453.481	1655.1	1279.5	167.071	1814.34	1429.52	71.8807	1826.63	1198.6	59.5161	1840.4	1102.83	64.368	1975.7	958.739	122.755	2009.98	898.854	49.9339	1989.23	881.816	79.7657	2065.96	826.709
1001	0	298.093	1985.4	1597.93	413.015	1985.71	1593.71	291.411	1813.23	1597.44	410.068	1801.99	1595.53	336.584	1764.65	1460.81	334.545	1687.54	1224.78	357.51	1921.36	1394.5	359.632	1988.62	1214.23	455.366	1665	1278.49	169.434	1823.81	1429.93	74.2325	1835.66	1198.88	62.1963	1848.83	1103.18	65.4755	1980.45	956.444	123.3	2013.51	895.068	50.4993	1992.11	878.96	79.2687	2067.46	821.809
1002	0	301.389	1994.28	1598.81	416.513	1994.44	1594.71	294.479	1822.08	1598.23	412.928	1810.66	1596.41	339.171	1773.89	1461.22	336.486	1697.65	1224.75	359.773	1930.83	1395.42	361.192	1998.32	1215.24	457.404	1675.04	1278.01	171.818	1833.01	1431.04	76.6775	1844.73	1199.86	64.9566	1857.33	1104.17	66.8777	1985.14	954.504	123.867	2016.66	891.596	50.7375	1994.43	876.834	78.6513	2068.46	817.207
1003	0	304.839	2003.28	1600.09	419.849	2003.14	1595.69	297.689	1831.13	1599.28	416.177	1819.51	1597.21	341.744	1783.12	1461.75	338.324	1707.64	1224.92	362.255	1940.27	1396.56	363.067	2008.46	1216.45	459.496	1684.94	1277.86	174.116	1842.24	1432.25	79.3925	1854.01	1201.25	67.5734	1865.42	1105.35	67.8773	1989.5	952.88	124.453	2019.44	888.266	50.8782	1996.91	874.897	78.1723	2069.12	812.966
1004	0	308.079	2012.12	1601.41	423.092	2011.97	1596.68	300.762	1839.78	1600.21	419.418	1828.39	1597.87	344.538	1792.33	1462.4	340.153	1717.48	1225.24	364.415	1949.54	1397.82	365.123	2018.4	1218.07	461.608	1694.72	1277.72	176.55	1851.09	1433.91	81.8742	1863	1202.66	70.4636	1873.76	1106.75	68.8558	1993.48	951.622	124.871	2021.67	885.364	51.1156	1998.81	873.653	77.4239	2069.16	808.956
1005	0	311.181	2020.87	1602.63	426.234	2020.68	1597.83	303.759	1848.62	1601.63	422.606	1836.98	1599.09	347.074	1801.33	1463.34	342.285	1727.55	1225.81	366.444	1958.72	1399.15	366.871	2028.11	1219.85	463.69	1704.57	1277.96	178.915	1860.06	1435.71	83.8112	1871.51	1204.14	73.3197	1881.93	1108.11	69.9288	1997.42	950.789	124.994	2023.82	882.92	50.9535	2000.45	872.618	76.7756	2068.78	805.301
1006	0	314.365	2029.86	1604.05	429.405	2029.4	1599.11	306.791	1857.66	1603.25	425.543	1845.72	1600.56	349.715	1810.32	1464.48	344.763	1737.67	1226.53	368.534	1967.84	1400.74	368.322	2038.02	1221.35	466.387	1714.61	1278.55	181.228	1868.83	1437.31	86.5679	1880.47	1205.69	76.0837	1889.57	1109.85	71.0309	2001.37	950.215	125.372	2025.91	880.883	51.0959	2002.13	871.938	76.0763	2068.07	801.732
1007	0	317.397	2038.68	1605.27	432.335	2038.22	1600.08	309.571	1866.43	1604.56	428.425	1854.46	1601.75	351.958	1819.13	1465.38	347.459	1747.52	1227.34	370.372	1976.92	1401.89	370.002	2047.64	1222.96	468.792	1724.5	1279.01	183.481	1877.55	1438.78	88.9042	1888.86	1207.07	79.0531	1897.47	1111.49	72.0218	2004.97	949.906	125.579	2027.66	879.22	51.3091	2003.92	871.71	75.8409	2067.47	798.577
1008	0	320.406	2047.5	1606.62	435.24	2046.87	1601.06	312.437	1875.38	1605.84	430.705	1863.14	1602.76	354.423	1828.12	1466.15	350.163	1757.27	1228.05	372.376	1986	1403.19	371.607	2057.13	1224.37	471.404	1734.23	1279.35	185.838	1886.31	1440.33	91.2869	1897.06	1208.47	81.4622	1904.43	1112.88	73.1216	2008.68	949.691	125.952	2029.76	877.66	51.4855	2005.9	871.537	75.5739	2066.62	795.577
1009	0	323.186	2056.33	1607.91	438.006	2055.55	1602.28	314.754	1884.07	1607.1	433.426	1871.87	1603.66	356.893	1837.23	1467.25	352.556	1766.4	1229.06	374.218	1995.09	1404.45	372.823	2066.67	1225.53	474.187	1744.16	1280.03	187.933	1894.73	1441.49	93.3086	1904.83	1209.63	84.3305	1911.74	1114.38	74.0561	2012.61	949.415	126.335	2031.81	876.392	51.7174	2008.01	871.904	75.1815	2065.76	792.743
1010	0	325.93	2065.17	1609.27	440.71	2064.23	1603.48	317.163	1892.8	1608.32	435.884	1880.55	1604.64	359.923	1846.48	1468.62	355.33	1775.74	1230.25	375.837	2004.17	1405.49	374.112	2075.92	1226.55	477.105	1753.96	1280.91	190.11	1903.18	1442.84	95.171	1912.29	1210.89	86.4254	1918.51	1115.79	75.0307	2016.41	949.61	126.72	2034.1	875.483	51.8934	2010.41	872.196	74.9564	2064.8	790.417
1011	0	328.288	2073.91	1610.78	443.087	2072.87	1604.69	319.612	1901.71	1609.47	438.03	1889.24	1605.39	362.258	1855.5	1469.52	358.183	1784.93	1231.14	377.35	2013.16	1406.51	375.299	2085.25	1227.81	480.396	1763.87	1281.76	192.294	1911.41	1444.06	97.2433	1919.52	1212.01	88.517	1924.87	1116.66	75.9894	2020.11	949.671	127.023	2036.32	874.796	52.3053	2012.81	872.488	74.8408	2064.01	788.092
1012	0	330.329	2082.55	1612.17	445.094	2081.56	1605.81	321.519	1910.25	1610.28	440.28	1897.87	1606.21	364.215	1864.23	1470.47	360.739	1793.86	1231.92	378.79	2022.11	1407.68	376.406	2094.33	1229.18	483.221	1773.33	1282.63	194.139	1919.27	1445.08	99.3655	1926.26	1212.93	90.6497	1931.09	1117.69	76.6454	2023.89	949.864	127.628	2038.6	874.104	52.3895	2015.38	872.939	74.8892	2063.46	786.606
1013	0	332.172	2091.36	1613.45	447.103	2090.25	1607.12	323.624	1919.18	1611.34	442.165	1906.6	1607.01	366.761	1873.18	1471.58	363.634	1802.92	1232.96	380.288	2031.15	1408.84	377.431	2103.41	1230.3	486.283	1782.86	1283.79	195.957	1927.04	1446.09	101	1932.88	1214.11	92.4547	1936.98	1118.63	77.4306	2027.49	950.002	127.781	2040.92	873.823	52.8424	2018.15	873.7	75.0383	2063.09	785.223
1014	0	333.918	2100.11	1614.68	448.898	2099.03	1608.14	325.558	1927.97	1612.26	443.846	1915.44	1608.05	369.182	1882.03	1472.49	366.239	1811.72	1233.82	381.705	2039.96	1409.78	378.561	2112.32	1231.28	489.765	1792.49	1284.85	197.798	1934.79	1447.3	103.144	1939.02	1214.79	94.1852	1942.41	1119.62	78.1822	2031.12	950.262	128.241	2043.53	873.767	52.8439	2020.43	874.158	75.3141	2062.98	783.902
1015	0	335.471	2108.87	1615.84	450.417	2107.99	1609.11	327.434	1936.71	1613.2	445.919	1924.38	1608.77	371.262	1890.69	1473.38	368.798	1820.6	1234.51	382.862	2048.64	1410.69	379.343	2120.9	1232.13	492.477	1801.73	1285.99	199.514	1942.34	1448.12	105.316	1945.32	1215.85	95.9222	1947.57	1120.33	78.9719	2034.7	950.388	129.04	2046.41	873.757	53.584	2023.35	874.497	75.4655	2063	782.983
1016	0	336.783	2117.65	1616.54	451.679	2116.93	1610.07	328.732	1945.25	1614.28	447.221	1933.38	1609.83	373.193	1899.27	1474.48	371.331	1829.33	1235.53	384.03	2057.41	1411.57	380.129	2129.16	1232.85	495.173	1811.02	1287.22	201.352	1949.82	1448.73	106.554	1950.14	1216.03	97.5968	1952.4	1121.11	79.648	2038.01	950.388	129.529	2049.33	873.653	54.2081	2025.99	874.853	75.9827	2063.86	782.595
1017	0	338.043	2126.53	1617.33	452.878	2125.9	1611.13	330.192	1954.08	1615.34	448.798	1942.38	1611.08	375.283	1907.83	1475.6	373.926	1838.17	1236.5	385.198	2066.15	1412.3	381.023	2137.82	1233.62	497.996	1820.23	1288.4	203.079	1957.4	1449.64	108.4	1955.53	1216.93	99.2497	1957.17	1122.16	80.5244	2041.33	950.642	130.012	2052.33	873.623	54.8842	2028.56	875.141	76.4787	2065.01	781.963
1018	0	338.999	2135.3	1617.94	453.819	2135.14	1611.72	331.929	1963.03	1616.33	450.382	1951.44	1612.28	377.358	1916.37	1476.38	376.367	1846.69	1237.29	386.534	2074.77	1413.19	382.161	2146.57	1234.5	500.724	1829.42	1289.49	204.889	1964.75	1450.27	110.425	1960.65	1217.62	100.805	1961.44	1122.93	81.2552	2044.45	950.985	130.594	2055.31	873.635	56.0992	2031	875.617	77.2095	2066.69	782.128
1019	0	339.828	2144.09	1618.67	454.66	2144.41	1612.54	333.373	1971.75	1617.3	451.727	1960.67	1613.4	379.418	1924.95	1477.3	378.597	1855.12	1238.03	387.875	2083.28	1414.42	383.283	2155.09	1235.63	503.052	1838.41	1290.46	206.542	1972.28	1451.24	111.293	1964.79	1218.62	102.39	1965.68	1123.8	82.1545	2047.41	951.364	131.228	2058.27	873.8	56.9583	2033.18	875.89	77.9228	2068.78	782.377
1020	0	340.323	2152.89	1619.05	455.378	2153.49	1613.75	334.484	1980.3	1618.43	453.016	1969.84	1614.94	381.241	1933.35	1478.5	380.646	1863.46	1238.88	388.964	2091.61	1415.63	384.392	2163.71	1237.11	505.296	1847.36	1291.79	208.213	1979.61	1452.04	113.536	1969.63	1219.49	103.792	1969.84	1124.63	82.7544	2050.26	951.729	131.961	2061.59	874.505	57.6738	2035.19	876.353	78.407	2071.07	783.059
1021	0	340.955	2161.62	1619.8	456.032	2162.81	1614.75	335.689	1989.11	1619.44	454.482	1979.07	1616.43	382.948	1941.78	1479.45	382.705	1871.5	1239.93	390.305	2099.99	1416.63	385.482	2171.96	1238.22	507.577	1856.33	1292.9	209.781	1987.14	1453.05	115.063	1973.97	1220.71	105.412	1973.74	1125.94	83.3733	2053	952.435	132.472	2064.68	875.146	58.7474	2037.43	877.003	79.0356	2073.81	783.762
1022	0	341.312	2170.25	1620.3	456.441	2172.05	1615.43	337.223	1998.12	1620.16	455.781	1988.4	1617.51	384.628	1950.26	1480.18	384.646	1879.69	1240.82	391.597	2108.47	1417.55	386.65	2180.43	1239.14	509.698	1865.34	1293.6	211.125	1994.45	1454.14	116.958	1978.82	1221.92	107.062	1977.88	1126.78	84.0788	2055.8	953.053	133.313	2068.06	875.715	60.2679	2039.7	877.494	79.7406	2076.86	784.525
1023	0	341.735	2179.16	1620.58	456.64	2181.24	1616.13	338.088	2006.71	1620.63	456.884	1997.72	1618.58	386.156	1958.66	1480.87	386.208	1887.62	1241.59	392.811	2116.85	1418.37	387.68	2188.63	1240.01	511.537	1874.03	1294.46	212.975	2002.34	1454.92	118.317	1982.91	1222.65	108.826	1981.96	1127.51	85.0222	2058.69	953.5	134.163	2071.18	876.229	61.5958	2041.72	877.735	80.7711	2080.15	785.156
1024	0	342.177	2188.11	1620.72	457.13	2190.7	1616.79	339.382	2015.68	1621.36	458.046	2006.95	1619.75	387.804	1967.31	1481.72	387.978	1896	1242.4	394.042	2125.37	1419.11	388.785	2197.19	1240.71	513.282	1882.78	1295.39	213.989	2010	1455.43	120.172	1987.75	1223.34	110.244	1985.97	1128.63	86.0985	2061.72	953.846	135.25	2075	876.88	64.057	2044	878.069	82.0852	2084	786.122
1025	0	342.449	2196.85	1620.74	457.622	2199.99	1617.3	340.591	2024.64	1622.04	459.171	2016.37	1620.72	389.399	1975.88	1482.37	389.572	1904.44	1243.12	395.336	2133.82	1419.55	389.966	2205.46	1241.07	514.844	1891.4	1296.02	215.686	2018.17	1456.02	121.863	1992.63	1224.42	111.913	1990.17	1129.58	87.1886	2064.8	954.088	136.175	2078.61	877.196	65.2655	2046.47	878.268	83.3142	2087.8	786.784
1026	0	343.002	2205.95	1620.7	458.028	2209.52	1617.56	341.379	2033.31	1622.31	460.084	2025.87	1621.33	390.628	1984.32	1482.77	390.705	1912.71	1243.65	396.627	2142.47	1419.93	391.301	2213.99	1241.44	516.284	1899.94	1296.51	217.106	2026.45	1456.56	123.418	1997.75	1225	113.526	1994.61	1130.14	88.4599	2068.04	954.181	137.656	2082.96	877.495	67.8135	2048.92	878.152	84.5926	2091.64	787.28
1027	0	343.244	2214.96	1620.54	458.356	2218.82	1617.92	342.131	2042.13	1622.63	460.888	2035.61	1621.97	391.873	1993.03	1483.22	391.86	1921.2	1244.2	397.969	2151.01	1420.2	392.554	2222.24	1241.61	517.379	1908.45	1297.04	218.33	2034.84	1456.6	125.069	2003.09	1225.85	115.256	1999.15	1130.88	89.8956	2071.49	954.217	138.602	2086.75	877.761	69.5956	2051.8	878.065	85.9391	2095.69	787.574
1028	0	343.535	2223.96	1620.36	458.474	2228.36	1618.09	343.13	2051.29	1623.08	461.931	2045.24	1622.74	393.041	2001.77	1483.56	392.937	1929.75	1244.78	399.211	2159.66	1420.29	393.916	2230.75	1241.78	518.554	1916.81	1297.59	219.613	2043.48	1457.06	126.478	2008.82	1226.53	116.485	2003.71	1131.56	90.7992	2075	954.011	139.993	2091.33	878.208	71.749	2054.79	878.026	87.5651	2100.22	788.257
1029	0	343.867	2233.06	1620.02	458.972	2237.89	1618.15	344.442	2060.71	1623.13	462.946	2054.48	1623.36	394.281	2010.63	1483.79	393.915	1938.46	1244.99	400.444	2168.34	1420.21	395.401	2239.14	1241.77	519.35	1925.29	1297.85	221.041	2052.36	1457.58	127.783	2014.64	1227.27	118.417	2008.84	1132.08	92.4185	2078.93	954.35	141.364	2095.85	878.488	73.953	2058.02	877.79	89.0006	2104.34	788.712
1030	0	344.096	2242.19	1619.65	458.931	2247.48	1617.99	344.709	2069.36	1623.02	463.698	2063.97	1623.72	395.146	2019.53	1483.79	394.567	1947.11	1245.04	401.744	2177.14	1420.3	396.786	2247.62	1241.76	520.07	1933.49	1298.03	221.903	2061.04	1457.36	129.056	2020.99	1227.85	119.883	2014.11	1132.63	94.018	2083.05	954.422	143.622	2101.61	879.119	76.5371	2061.47	877.288	90.8277	2108.76	788.892
1031	0	344.408	2251.49	1619.18	459.322	2256.88	1618.03	345.454	2078.48	1622.95	464.535	2073.64	1624.06	396.13	2028.65	1483.85	395.145	1955.79	1245.31	403.066	2186.05	1420.04	398.257	2256.16	1241.26	520.697	1941.84	1298.24	223.529	2070.59	1457.5	130.492	2027.72	1228.29	121.397	2019.89	1132.97	95.5646	2087.56	954.162	144.634	2105.83	878.806	79.4152	2065.83	877.221	92.3353	2113.11	789.03
1032	0	344.785	2260.8	1618.56	459.415	2266.53	1617.64	346.665	2088.1	1622.63	465.476	2083.28	1624.23	397.142	2037.79	1483.78	395.663	1964.52	1245.62	404.522	2195.11	1419.51	399.702	2264.57	1240.48	520.952	1950.08	1298.27	224.783	2080.37	1457.97	132.669	2034.69	1228.74	123.134	2025.95	1133.22	97.4088	2092.73	954.021	146.168	2111.62	878.849	81.2582	2069.9	876.934	94.4858	2118.14	788.899
1033	0	344.976	2269.93	1617.75	459.927	2276.23	1617.32	347.687	2097.61	1622.12	466.177	2093.02	1624.15	397.966	2047.02	1483.56	395.93	1973.23	1245.68	405.615	2204.26	1418.82	401.196	2273.26	1239.83	521.082	1958.46	1298.19	225.288	2089.54	1457.36	133.45	2042.27	1228.99	125.08	2032.5	1133.14	99.2114	2097.9	953.605	147.614	2117.26	878.603	84.1362	2074.93	876.681	96.5608	2122.78	788.537
1034	0	345.26	2279.33	1617.03	460.16	2285.92	1616.94	347.896	2106.57	1621.58	466.644	2102.66	1623.98	398.691	2056.38	1483.44	396.135	1981.98	1245.65	406.868	2213.38	1418.23	402.431	2281.67	1238.77	521.127	1966.7	1298.23	226.481	2099.36	1457.14	134.586	2049.99	1229.16	126.811	2039.48	1133.23	101.099	2103.67	953.215	148.998	2123.36	878.232	86.8042	2080.1	876.077	98.6282	2127.7	787.838
1035	0	345.465	2288.88	1615.94	459.443	2295.5	1616.06	348.527	2116.05	1620.93	467.37	2112.45	1623.75	399.544	2065.95	1483.23	396.351	1990.81	1245.68	408.035	2222.71	1417.32	403.72	2290.39	1237.79	521.354	1975.12	1298.22	227.163	2109.18	1456.72	135.783	2058.05	1229.26	128.113	2046.59	1133.66	103.124	2109.96	952.662	151.615	2128.78	877.485	88.748	2085.76	875.666	101.209	2133.14	787.329
1036	0	345.682	2298.45	1614.95	459.944	2305.38	1615.42	349.159	2125.58	1620.06	468.028	2122.21	1623.07	400.125	2075.58	1482.61	396.844	2000.02	1245.47	409.163	2232.18	1416.21	405.069	2299.32	1236.3	521.544	1983.56	1297.94	228.591	2119.59	1456.72	137.064	2066.56	1229.4	129.754	2054.21	1133.62	105.256	2116.9	952.083	154.518	2134.96	876.79	90.9396	2091.79	875.151	104.043	2138.73	786.464
1037	0	345.74	2307.93	1613.85	460.143	2315.24	1614.73	349.814	2135.24	1618.67	468.62	2132.07	1622.27	400.695	2085.38	1482	396.851	2008.9	1245.04	410.393	2241.71	1415.12	406.367	2308.03	1235.11	521.485	1992.13	1297.63	229.222	2129.73	1455.62	138.679	2075.8	1229.38	130.939	2062.14	1133.25	107.163	2123.76	951.407	157.104	2141.65	876.238	94.3774	2099.63	874.819	106.588	2144.5	785.262
1038	0	345.971	2317.51	1612.7	459.899	2324.83	1614.07	350.582	2145.03	1617.44	469.038	2141.76	1621.59	401.246	2095.19	1481.58	396.658	2018.01	1244.72	411.406	2251.23	1413.97	407.467	2317.03	1233.74	521.954	2001.06	1297.39	229.96	2140.37	1455.12	142.024	2086.27	1228.9	132.382	2070.66	1133	109.061	2131.23	950.746	159.165	2148.24	875.606	95.8316	2106.08	874.063	109.419	2150.76	784.251
1039	0	346.049	2327.05	1611.56	460.297	2334.84	1613.27	350.384	2154.24	1616.39	469.517	2151.71	1620.69	401.71	2105.1	1480.84	396.399	2027.27	1244.32	412.598	2260.99	1412.86	408.881	2326.1	1232.4	521.733	2009.76	1296.99	230.476	2151.07	1454.47	140.029	2094.03	1228.74	133.209	2079.39	1132.74	110.803	2139	949.875	160.77	2155.14	874.674	97.8603	2113.91	873.632	112.169	2156.84	783.017
1040	0	346.22	2336.75	1610.27	460.372	2344.65	1612.36	350.911	2163.99	1614.84	469.759	2161.6	1619.38	402.031	2115.21	1479.76	396.153	2036.54	1243.63	413.721	2270.7	1411.41	410.184	2335.2	1230.75	521.267	2018.54	1296.11	230.83	2161.83	1453.35	143.393	2105.53	1228.18	134.438	2088.68	1132.3	112.18	2147.2	948.687	162.359	2162.74	873.448	99.7376	2121.77	872.617	114.7	2163.52	781.673
1041	0	346.17	2346.47	1609.09	460.132	2354.46	1611.47	351.303	2173.67	1612.87	470.061	2171.48	1618.06	401.85	2125.17	1478.59	395.753	2045.92	1242.7	414.581	2280.45	1409.84	411.34	2344.4	1229.02	520.669	2027.08	1295.35	231.578	2172.86	1452.61	142.494	2114.69	1227.62	135.035	2098.09	1131.44	114.092	2155.91	947.887	165.238	2170.2	872.498	101.405	2130.11	871.458	117.522	2170.6	780.168
1042	0	346.079	2356.32	1607.67	460.133	2364.56	1610.59	351.48	2183.47	1611.29	470.154	2181.43	1616.82	401.899	2135.4	1477.67	395.058	2055.51	1242.13	415.507	2290.38	1408.41	412.58	2353.9	1227.36	519.94	2035.9	1294.68	231.865	2184.17	1451.69	143.063	2124.73	1226.73	135.559	2107.99	1130.77	115.59	2165.06	946.597	167.785	2178.67	871.454	103.283	2139.28	870.567	120.068	2177.99	778.478
1043	0	346.014	2366.23	1606.29	459.876	2374.38	1609.5	351.586	2193.34	1609.7	470.338	2191.39	1615.55	402.001	2145.51	1476.67	394.405	2065.14	1241.42	416.454	2300.44	1406.71	413.995	2363.45	1225.48	519.189	2044.63	1293.93	231.941	2195.11	1450.02	142.483	2135.45	1225.78	135.708	2118.24	1129.93	117.012	2174.49	945.206	169.598	2186.75	870.434	104.17	2148.21	869.358	122.884	2185.74	776.808
1044	0	345.737	2376.01	1604.97	459.86	2384.5	1608.55	351.4	2203.23	1607.9	470.249	2201.55	1614.17	401.759	2155.96	1475.31	393.723	2074.85	1240.32	417.147	2310.44	1404.83	415.239	2373.05	1223.42	518.252	2053.5	1292.95	232.216	2206.53	1448.68	142.47	2146.46	1224.66	135.742	2128.77	1128.82	118.334	2184.41	943.735	171.278	2195.55	868.873	105.202	2157.9	867.797	125.182	2193.9	774.921
1045	0	345.56	2385.94	1603.31	459.405	2394.62	1607.47	351.388	2213.23	1606.28	470.115	2211.55	1612.9	401.47	2166.33	1474.19	392.862	2084.68	1239.31	417.997	2320.55	1403.18	416.405	2382.74	1221.4	517.263	2062.51	1292.06	232.37	2217.77	1447.22	142.411	2157.7	1223.42	136.134	2139.73	1127.63	119.494	2194.7	942.185	173.033	2204.77	867.45	105.333	2167.66	866.108	127.555	2202.34	772.992
1046	0	345.357	2396	1601.96	459.029	2404.62	1606.4	351.446	2223.18	1604.72	470.092	2221.56	1611.77	401.199	2176.63	1473.07	392.295	2094.55	1238.49	418.635	2330.66	1401.5	417.569	2392.43	1219.44	516.542	2071.62	1291.25	232.674	2228.97	1445.31	142.516	2169.5	1222.21	135.466	2150.69	1126.5	120.396	2205.44	940.588	174.162	2214.62	866.209	106.38	2178.43	865.025	129.552	2211.35	771.078
1047	0	344.802	2406.04	1600.48	458.573	2414.77	1605.45	351.083	2233.3	1603.07	469.77	2231.76	1610.52	400.906	2187.33	1471.85	391.865	2104.41	1237.64	419.2	2340.89	1399.81	418.555	2402.13	1217.57	515.625	2080.89	1290.35	232.657	2240.5	1444.3	141.896	2181.01	1220.7	135.22	2161.97	1124.99	120.896	2216.39	938.982	174.827	2224.71	864.578	107.453	2189.9	863.626	131.137	2220.69	769.111
1048	0	344.232	2416.13	1599.28	457.925	2425	1604.49	350.414	2243.35	1601.29	469.154	2241.99	1608.98	400.461	2197.79	1470.53	391.347	2114.4	1236.57	419.486	2351.18	1398.14	419.352	2411.73	1215.74	514.854	2090.33	1289.5	232.41	2251.48	1442.68	141.234	2192.54	1219.24	135.198	2173.67	1123.5	121.634	2227.9	937.65	175.658	2234.99	862.931	107.018	2200.69	861.774	132.52	2230.6	767.412
1049	0	343.489	2426.27	1597.91	457.331	2435.1	1603.67	350.059	2253.5	1599.56	468.475	2252.44	1607.56	399.711	2208.14	1469.33	391.075	2124.37	1235.72	419.764	2361.51	1396.61	419.926	2421.22	1213.78	514.185	2099.89	1288.83	232.322	2262.68	1440.97	141.541	2204.6	1217.49	134.308	2185.02	1122.16	121.803	2239.38	935.955	176.324	2245.95	861.65	107.061	2212.51	860.324	133.378	2240.94	765.809
1050	0	342.761	2436.52	1596.68	456.538	2445.4	1602.6	349.452	2263.56	1597.85	467.886	2262.49	1606.28	399.256	2218.83	1468.22	390.794	2134.43	1234.86	419.841	2371.85	1394.94	420.454	2431.17	1211.95	513.745	2109.63	1288.24	232.267	2274.03	1439.4	140.55	2216.04	1216.08	134.041	2196.65	1120.52	121.872	2251.23	934.414	176.13	2257.76	860.171	106.617	2224.46	858.733	133.569	2251.79	764.08
1051	0	341.828	2446.71	1595.41	455.576	2455.69	1601.57	348.675	2273.92	1596.18	467.043	2272.92	1604.68	398.959	2229.51	1466.94	390.576	2144.6	1233.77	419.744	2382.2	1393.41	421.007	2441.15	1210.27	513.36	2119.46	1287.59	231.828	2284.89	1437.44	140.196	2227.82	1214.44	133.789	2208.51	1118.49	121.909	2263.3	932.741	176.646	2268.94	858.764	105.591	2236.65	857.107	133.827	2263.15	762.64
1052	0	340.902	2457.08	1593.9	454.563	2466.1	1600.55	347.65	2284.1	1594.42	466.048	2283.27	1603.29	398.037	2239.94	1465.57	390.54	2154.81	1232.54	419.515	2392.66	1392.01	421.342	2451.13	1208.85	513.052	2129.35	1287.09	231.752	2295.96	1435.87	139.935	2239.36	1212.26	133.417	2220.07	1116.65	121.48	2275.43	931.013	176.281	2281.4	856.745	105.54	2249.17	855.113	134.029	2275.21	760.682
1053	0	339.973	2467.53	1592.65	453.305	2476.45	1599.47	347.232	2294.97	1592.77	465.077	2293.74	1602.06	397.487	2250.53	1464.65	390.549	2165.02	1231.46	419.359	2403.12	1390.71	421.693	2461.24	1207.38	512.678	2139.55	1286.58	231.288	2306.85	1434.15	139.815	2251.07	1210.43	132.432	2231.74	1114.93	121.239	2288	929.295	175.905	2293.45	855.36	104.565	2261.89	853.528	133.663	2287.81	758.941
1054	0	338.675	2477.94	1591.47	452.168	2487.06	1598.18	345.691	2305.11	1591.7	464.073	2304.13	1601.02	396.911	2261.07	1463.41	390.54	2175.51	1230.41	419.218	2413.64	1389.43	422.275	2471.53	1206.02	512.605	2149.91	1286.08	230.87	2317.57	1432.44	139.338	2262.66	1208.81	131.797	2243.34	1112.95	120.617	2300.42	927.538	174.351	2306.13	853.488	104.542	2274.99	852.064	133.059	2300.92	756.822
1055	0	337.432	2488.34	1590.11	450.729	2497.47	1597.24	344.623	2315.57	1590.34	462.777	2314.74	1599.98	395.98	2271.58	1462.21	390.311	2186.06	1229.04	418.773	2424.21	1388.36	422.71	2481.91	1205.1	512.184	2160.2	1285.35	230.354	2328.17	1430.64	138.757	2273.8	1206.75	131.596	2255.39	1111.09	119.926	2312.97	925.902	174.124	2319.46	851.733	103.188	2287.73	850.173	132.15	2314.45	755.313
1056	0	335.925	2498.89	1588.95	449.253	2507.99	1596.38	343.196	2326.21	1589.37	461.513	2325.25	1599.34	395.221	2282.06	1461.34	390.021	2196.54	1227.82	418.469	2434.77	1387.74	423.06	2492.48	1204.3	511.45	2170.57	1284.93	229.521	2338.66	1429.12	138.544	2285.39	1204.9	130.662	2266.83	1108.96	119.245	2325.88	924.409	173.42	2332.55	850.104	102.355	2300.89	848.331	130.981	2328.6	753.77
1057	0	334.543	2509.48	1588.07	447.796	2518.71	1595.67	341.885	2336.53	1588.63	460.162	2336.02	1598.85	394.38	2292.54	1460.46	389.5	2207.18	1227.08	418.025	2445.41	1386.9	423.552	2503.37	1203.85	510.942	2181.2	1284.37	229.024	2349.19	1427.63	137.566	2296.44	1203.09	129.657	2278.79	1107.11	117.926	2338.53	922.721	171.538	2345.71	848.263	101.53	2314.08	846.727	129.436	2343.1	752.587
1058	0	332.86	2520	1586.94	446.366	2529.48	1595	340.678	2347.23	1587.95	458.79	2346.77	1598.41	393.87	2303.26	1459.72	389.082	2217.89	1226.32	417.8	2456.07	1386.46	423.904	2514.31	1203.31	510.543	2191.95	1283.8	228.753	2359.82	1426.18	137.486	2308.11	1201.34	129.516	2291	1105.48	117.265	2351.51	921.309	168.975	2360.45	847.372	100.576	2327.66	845.186	127.833	2357.98	751.546
1059	0	331.283	2530.6	1586.29	444.73	2540.24	1594.63	339.248	2357.77	1587.21	457.308	2357.52	1598.21	393.035	2313.79	1459.13	388.807	2228.6	1225.65	417.326	2466.78	1386.16	424.071	2525.4	1203.31	510	2202.76	1283.33	227.835	2370.27	1425.23	136.788	2319.34	1199.7	129.035	2303.32	1103.84	116.259	2364.66	920.203	168.713	2373.7	845.677	99.592	2341.19	843.845	126.293	2373.27	750.847
1060	0	329.584	2541.04	1585.66	442.852	2550.86	1594.52	337.215	2368.03	1586.86	455.945	2368.14	1598.37	392.049	2324.35	1458.86	388.225	2239.38	1225.26	416.778	2477.43	1386.2	424.153	2536.52	1203.55	509.637	2213.54	1283.19	227.115	2380.69	1423.94	136.683	2331.26	1198.34	128.515	2315.62	1102.22	115.133	2377.89	919.081	167.945	2387.18	844.564	98.252	2354.74	842.589	124.341	2388.91	750.328
1061	0	327.791	2551.55	1585.24	441.001	2561.54	1594.4	336.395	2378.72	1586.86	454.55	2378.99	1598.68	391.518	2334.89	1458.63	388.182	2250.03	1225.05	416.299	2488.24	1386.35	424.25	2547.55	1203.56	509.401	2224.51	1283.1	226.456	2391.24	1423.04	136.163	2342.86	1197.24	128.378	2328.39	1101.27	114.145	2391.18	918.226	167.306	2401.3	843.938	97.428	2368.31	841.647	122.469	2404.81	749.972
1062	0	326.185	2561.94	1584.97	439.179	2572.34	1594.42	335.136	2389.24	1586.34	453.369	2389.71	1598.95	390.746	2345.34	1458.5	387.976	2260.88	1224.82	415.664	2498.87	1386.44	424.111	2558.67	1203.83	509.412	2235.41	1282.96	226.001	2401.87	1422.72	136.248	2355.04	1196.09	127.69	2340.63	1100.13	113.266	2404.77	917.598	166.616	2415.79	843.344	98.0542	2383.55	841.328	120.653	2421.03	750.064
1063	0	324.638	2572.37	1584.99	437.248	2582.97	1594.91	333.538	2399.49	1586.66	451.85	2400.32	1599.39	390.008	2355.81	1458.6	387.758	2271.56	1224.78	414.982	2509.48	1386.77	423.989	2569.65	1204.4	509.124	2246.4	1283.07	225.693	2412.42	1422	136.334	2367.26	1195.33	127.289	2353.25	1099.15	112.377	2418.55	917.22	164.17	2428.05	841.959	95.7409	2396.55	840.557	118.799	2437.46	750.434
1064	0	322.863	2582.62	1584.98	435.601	2593.71	1595.51	332.271	2409.81	1586.71	450.653	2410.86	1600.25	389.47	2366.27	1459.07	387.822	2282.09	1225.11	414.465	2520.09	1387.49	423.649	2580.7	1205.38	509.213	2257.31	1283.47	225.195	2422.91	1421.9	136.092	2379.48	1194.78	126.88	2366.1	1098.74	111.517	2432.52	917.134	164.271	2444.91	842.718	95.7121	2411.73	840.783	116.988	2453.87	751.268
1065	0	321.057	2592.7	1585.49	433.929	2604.21	1596.42	330.82	2419.85	1587.33	449.285	2421.44	1601.11	389.025	2376.55	1459.7	387.794	2292.68	1225.66	414.017	2530.6	1388.4	423.469	2591.61	1206.46	509.686	2268.21	1283.98	224.736	2433.26	1422.32	135.26	2391.1	1194.44	127.533	2379.5	1098.68	110.393	2446.46	917.311	163.029	2459.81	843.104	94.7656	2426.36	840.958	115.251	2470.33	752.497
1066	0	319.316	2602.57	1585.88	432.112	2614.27	1597.31	330.353	2430.13	1587.56	448.121	2431.75	1602.03	388.668	2386.58	1460.26	387.817	2303.1	1226.16	413.489	2540.93	1389.54	423.198	2602.39	1207.74	509.72	2279.01	1284.64	224.341	2443.28	1422.77	135.33	2403.44	1194.48	126.54	2391.82	1098.48	109.826	2460.82	918.239	162.251	2475.24	843.967	93.5683	2441.15	841.173	113.409	2486.96	753.937
1067	0	317.825	2612.38	1586.38	430.284	2624.19	1598.04	329.084	2439.89	1588.22	446.892	2442.08	1603.09	388.429	2396.56	1460.92	387.809	2313.46	1226.79	412.968	2551.09	1390.56	422.77	2612.75	1208.91	510.186	2289.66	1285.29	224.045	2453.27	1423.37	134.661	2415.24	1194.85	126.356	2404.45	1098.63	109.097	2475.38	919.184	160.948	2490.24	844.688	93.5531	2456.93	842.019	111.64	2503.75	755.547
1068	0	316.324	2622.05	1586.75	428.758	2634.4	1598.9	328.134	2449.58	1588.96	445.959	2452.07	1604.04	388.189	2406.3	1461.74	387.876	2323.74	1227.75	412.432	2561.09	1391.53	422.455	2623	1210.09	510.493	2300.11	1286.19	223.551	2463.12	1423.89	135.064	2427.63	1195.28	126.43	2417.55	1099.14	108.448	2490.09	920.325	160.811	2507.15	846.767	92.6794	2472.39	843.155	110.402	2520.63	757.47
1069	0	315.144	2631.58	1587.27	427.634	2644.58	1599.59	327.469	2459.08	1589.55	445.206	2462	1604.91	387.789	2415.9	1462.35	387.841	2333.98	1228.42	412.027	2570.85	1392.32	422.309	2633.04	1211.16	510.695	2310.48	1286.81	223.495	2472.89	1424.99	134.456	2439.33	1195.59	126.301	2430.34	1099.57	107.904	2505.02	921.646	157.722	2518.67	846.406	92.1066	2488.19	844.352	109.532	2537.76	759.289
1070	0	314.131	2640.88	1587.56	426.376	2654.08	1600.41	326.878	2468.49	1589.94	444.634	2471.63	1605.89	387.6	2425.2	1462.92	387.799	2344.1	1228.78	411.857	2580.39	1393.25	422.248	2642.61	1212.18	510.629	2320.44	1287.44	223.434	2482.53	1425.68	134.307	2451.05	1196.03	125.59	2442.47	1099.8	107.323	2520.01	922.928	159.502	2538.78	849.336	91.076	2503.93	845.44	108.51	2554.73	760.944
1071	0	313.138	2650	1588.11	425.175	2663.55	1601.14	326.364	2477.78	1590.45	444.085	2481.15	1606.74	387.542	2434.55	1463.59	387.535	2354.03	1229.32	411.738	2589.93	1394.26	422.518	2652.23	1213.18	510.361	2330.03	1288.04	223.479	2492.03	1426.23	134.445	2462.96	1196.64	125.709	2455.39	1100.25	106.694	2535.02	924.279	157.715	2553.8	850.511	90.6759	2520.32	847.058	107.739	2571.91	762.774
1072	0	312.282	2659.2	1588.61	424.275	2672.93	1601.74	325.924	2486.99	1591.15	443.858	2490.55	1607.77	387.429	2443.72	1464.26	387.041	2363.8	1229.91	411.778	2599.18	1394.73	422.907	2661.6	1213.83	509.952	2339.38	1288.48	223.476	2501.64	1426.98	134.497	2474.89	1196.98	125.464	2468.05	1100.91	106.406	2550.23	926.074	157.738	2570.7	852.679	90.2302	2536.74	848.582	107.34	2589.25	765.026
1073	0	311.607	2668.34	1589.06	424.375	2683.25	1602.61	325.024	2495.68	1591.68	443.487	2500	1608.46	387.178	2452.93	1464.87	386.26	2373.34	1230.36	411.989	2608.34	1395.44	423.531	2670.97	1214.53	509.138	2348.51	1288.75	223.313	2511.32	1427.76	134.053	2486	1197.39	125.1	2480.48	1101.3	105.899	2565.25	927.545	157.388	2587.05	854.733	90.0559	2553.43	849.88	106.986	2606.5	767.196
1074	0	311.313	2677.33	1589.7	423.922	2692.36	1603.74	325.114	2504.8	1592.21	443.153	2508.94	1609.37	386.586	2461.84	1465.58	385.291	2382.55	1231.01	412.136	2617.4	1396.39	424.11	2680.13	1215.48	507.986	2357.06	1289.15	223.194	2521.03	1428.69	133.171	2496.93	1197.78	124.68	2492.81	1101.56	105.752	2580.46	929.356	157.4	2603.25	856.987	89.7378	2569.75	851.157	106.781	2623.87	769.683
1075	0	311.119	2686.25	1590.47	423.71	2701.32	1604.84	325.144	2513.8	1593.07	442.976	2518.16	1610.45	386.452	2470.85	1466.72	384.265	2391.63	1232.03	412.525	2626.3	1397.19	424.722	2688.81	1216.13	507.155	2365.48	1289.71	223.193	2530.72	1429.67	133.191	2508.54	1198.58	124.236	2505.37	1102.15	105.424	2595.35	931.127	157.197	2619.03	859.301	89.3626	2585.87	853.045	106.738	2641.18	772.257
1076	0	311.316	2695.24	1591.3	422.629	2708.6	1605.04	325.152	2522.68	1594.09	443.108	2527.31	1611.63	386.41	2479.85	1467.69	383.479	2400.44	1233.12	413.012	2634.97	1397.99	425.431	2697.65	1216.98	506.339	2373.65	1290.25	223.4	2540.36	1430.81	133.245	2520.24	1199.61	124.178	2517.99	1103.02	105.258	2610.2	933.021	157.176	2634.8	861.688	89.4439	2602.08	854.841	106.923	2658.43	775.028
1077	0	311.598	2704.11	1592.05	424.221	2719.35	1606.73	325.529	2531.81	1595.25	443.114	2536.08	1612.95	386.468	2488.5	1468.92	382.884	2409.04	1234.01	413.569	2643.11	1398.79	425.941	2706.28	1218.09	505.576	2381.71	1291.12	223.497	2549.7	1431.99	132.886	2531.46	1200.3	123.81	2530.68	1103.95	105.505	2625.04	935.057	157.496	2650.44	863.936	89.6834	2617.8	856.42	107.165	2675.66	778.075
1078	0	312.232	2713.11	1592.85	424.747	2727.95	1607.58	325.635	2540.55	1596.66	443.461	2544.94	1614.55	386.44	2497	1470.26	382.461	2417.59	1235.12	414.161	2651.72	1400.21	426.338	2714.52	1219.26	504.617	2389.58	1292.16	223.796	2559.07	1433.4	133.45	2543.44	1201.63	123.843	2543.39	1105	105.793	2639.6	937.272	157.919	2665.94	866.616	90.0937	2633.6	858.59	107.855	2692.95	781.61
1079	0	313.014	2721.97	1593.7	425.311	2736.52	1608.35	326.357	2549.46	1598.24	443.96	2553.44	1616.23	386.636	2505.25	1471.82	382.305	2425.97	1236.44	414.68	2659.78	1401.59	426.866	2722.85	1220.75	504.167	2397.36	1293.47	224.101	2568.09	1434.82	133.106	2554.7	1203.15	123.858	2556.14	1106.82	106.419	2654.34	939.826	158.256	2681.14	869.298	90.5102	2649.06	861.283	108.38	2709.94	785.227
1080	0	313.878	2730.69	1594.74	426.404	2745.27	1609.31	326.604	2558.06	1600.03	444.619	2562.22	1617.91	386.776	2513.33	1473.26	382.27	2434.41	1237.79	415.34	2667.66	1402.98	427.363	2730.8	1222.41	503.719	2405.06	1294.74	224.518	2576.95	1436.97	133.476	2566.51	1204.76	123.745	2568.46	1108.48	106.981	2668.66	942.631	158.974	2696.03	872.427	91.1955	2664.3	864.103	109.166	2726.79	789.34
1081	0	315.068	2739.38	1595.99	427.707	2753.76	1610.63	327.27	2566.75	1601.8	445.288	2570.55	1619.63	386.954	2521.35	1474.87	382.143	2442.69	1239.23	416.063	2675.55	1404.82	427.94	2738.59	1224.18	503.104	2412.69	1295.96	224.889	2585.55	1438.97	132.698	2577.53	1206.66	123.825	2580.81	1110.36	107.845	2682.94	945.714	160.107	2710.86	876.121	92.4985	2679.79	866.768	110.199	2743.58	793.706
1082	0	316.429	2748.04	1597.59	428.958	2761.94	1611.79	327.957	2575.38	1604.05	445.999	2578.95	1621.63	387.182	2529.14	1476.63	381.926	2450.96	1240.66	416.629	2683.17	1406.74	428.402	2746.52	1226.24	502.662	2420.28	1297.47	225.348	2594.03	1440.95	133.458	2589.37	1208.77	124.118	2593.16	1112.65	108.611	2697.02	949.027	160.969	2726.06	880.152	93.4662	2694.98	870.24	111.252	2760.05	798.183
1083	0	317.796	2756.62	1599.24	430.598	2770.16	1612.93	328.548	2583.83	1606.48	446.973	2587.38	1623.57	387.352	2536.81	1478.52	381.863	2459.17	1242.32	417.266	2690.78	1408.62	428.904	2754.12	1228.33	502.334	2427.92	1298.96	225.487	2602.3	1443.59	133.883	2600.93	1211.29	124.144	2605.29	1115.14	109.886	2711.23	952.654	162.254	2740.21	884.175	94.0808	2709.88	874.11	112.852	2776.38	803.113
1084	0	319.256	2765.12	1601	432.132	2778.16	1614.02	329.573	2592.4	1608.97	447.728	2595.49	1625.47	387.396	2544.48	1480.26	381.732	2467.21	1243.94	417.87	2698.35	1410.75	429.434	2761.96	1230.45	502.023	2435.45	1300.34	225.882	2610.57	1445.86	133.841	2611.83	1213.46	124.769	2617.2	1117.43	110.972	2725.12	956.404	163.506	2755.1	888.433	95.3675	2725.05	877.468	114.394	2792.56	807.898
1085	0	320.815	2773.47	1602.55	433.821	2786.12	1615.21	330.031	2600.68	1611.46	448.767	2603.44	1627.41	387.31	2551.89	1481.94	381.408	2475.23	1245.35	418.219	2705.74	1412.65	429.958	2769.68	1232.64	501.431	2442.88	1301.67	226.18	2618.72	1447.76	134.444	2622.79	1215.36	124.926	2628.65	1119.52	112.713	2739.2	960.198	165.344	2769.61	892.906	96.902	2740.36	880.938	116.419	2808.57	812.656
1086	0	322.687	2781.85	1604.31	435.548	2793.93	1616.18	330.861	2608.96	1614.16	449.72	2611.36	1629.24	387.407	2559.35	1483.5	381.204	2483.31	1246.91	418.708	2713.22	1414.65	430.315	2777.37	1234.48	501.067	2450.4	1303.07	226.368	2626.86	1450.36	134.756	2633.21	1217.73	125.085	2640.04	1122.07	113.982	2752.85	963.904	167.021	2783.87	897.114	98.5963	2755.59	884.929	118.765	2824.45	817.609
1087	0	324.326	2790.12	1606.12	437.417	2801.65	1617.13	331.722	2617.22	1616.65	451.146	2619.35	1631.01	387.755	2566.87	1485.09	381.094	2491.39	1248.34	419.265	2720.78	1416.45	431.09	2785.35	1236.55	500.837	2457.95	1304.16	226.679	2634.84	1452.28	134.959	2643.32	1219.8	125.296	2650.77	1124.15	115.653	2766.36	967.616	169.228	2798.09	901.51	100.281	2770.38	888.906	121.451	2840.2	822.549
1088	0	326.004	2798.34	1607.68	437.206	2804.6	1616.13	332.912	2625.63	1618.82	451.935	2627.16	1632.45	387.525	2574.15	1486.4	380.885	2499.43	1249.44	419.759	2728.04	1418.2	431.576	2793.08	1238.4	500.37	2465.37	1305.32	226.833	2642.76	1454.05	135.195	2653.12	1221.59	125.728	2661.5	1125.84	117.275	2779.66	971.165	171.178	2811.94	905.917	101.923	2784.97	892.522	124.099	2855.62	827.391
1089	0	327.878	2806.65	1609.17	441.28	2817.02	1618.68	333.72	2633.79	1621.05	452.989	2634.7	1634.03	387.476	2581.57	1487.68	380.835	2507.44	1250.63	420.1	2735.4	1419.82	431.838	2800.61	1240	499.934	2472.88	1306.38	227.125	2650.74	1455.64	135.503	2662.77	1223.3	126.08	2671.97	1127.6	118.993	2792.81	974.866	173.443	2825.82	910.284	104.127	2799.52	896.261	126.899	2870.82	832.096
1090	0	329.715	2814.79	1610.68	443.278	2824.85	1618.99	334.943	2642.01	1623.12	454.055	2642.36	1635.13	387.603	2589.14	1488.86	380.901	2515.25	1251.77	420.598	2742.95	1421.06	432.577	2808.46	1241.42	499.975	2480.5	1307.35	227.233	2658.64	1457.11	135.768	2672.01	1224.97	126.097	2682.03	1129.33	120.776	2805.47	978.122	175.74	2839.2	914.367	106.324	2813.85	899.868	130.02	2886.05	836.816
1091	0	331.433	2822.92	1611.95	445.154	2832.4	1619.43	335.7	2650	1624.79	455.193	2649.99	1635.9	387.956	2596.7	1489.79	381.184	2523.12	1252.74	421.072	2750.49	1422.17	433.085	2815.97	1242.59	499.917	2488	1308.01	227.661	2666.45	1457.99	135.937	2681.09	1226.2	126.454	2692.09	1130.76	122.762	2818.22	981.329	178.325	2852.54	918.684	108.686	2827.59	903.226	133.433	2901.06	841.445
1092	0	333.469	2831.24	1612.96	454.923	2828.82	1623.24	336.826	2658.27	1626.24	456.292	2657.53	1636.68	388.093	2604.17	1490.47	381.53	2530.86	1253.51	421.423	2757.9	1423.21	433.526	2823.43	1243.63	499.784	2495.49	1308.63	228.132	2674.24	1459.05	136.077	2690.02	1227.23	126.716	2701.89	1131.67	124.476	2830.58	984.308	180.821	2865.63	922.732	111.219	2841.46	906.028	136.792	2915.53	846.074
1093	0	335.229	2839.34	1614.17	449.191	2847.75	1620.44	337.668	2666.42	1627.49	457.083	2665.27	1637.11	388.267	2611.77	1491.16	381.963	2538.5	1254.22	421.913	2765.48	1424.03	433.966	2830.94	1244.5	500.041	2503.17	1309.21	228.683	2681.98	1459.7	136.539	2698.74	1228.22	127.004	2711.44	1132.56	126.027	2842.5	986.932	183.33	2878.35	926.73	113.534	2854.71	908.915	140.394	2929.89	850.817
1094	0	336.851	2847.54	1614.87	448.215	2849.32	1618.65	338.755	2674.68	1628.37	458.373	2672.91	1637.44	388.897	2619.57	1491.68	382.673	2546.36	1254.83	422.503	2773.12	1424.54	434.619	2838.8	1245.05	500.633	2510.92	1309.75	229.183	2689.73	1460.38	136.591	2707.17	1229.16	127.26	2720.97	1133.55	128.305	2854.49	989.866	186.034	2890.8	930.481	116.503	2868.17	911.971	143.898	2944.04	855.146
1095	0	338.541	2855.83	1615.41	455.486	2868.81	1620.85	340.124	2682.91	1628.89	459.578	2680.68	1637.27	389.263	2627.14	1491.85	383.493	2554.25	1255.12	422.88	2780.77	1424.79	435.01	2846.25	1245.27	501.289	2518.68	1310	229.505	2697.23	1460.59	136.894	2715.69	1229.51	127.739	2730.27	1133.72	130.38	2866.12	992.18	188.877	2903.1	934.106	118.916	2880.81	914.226	147.417	2957.7	859.225
1096	0	340.271	2863.98	1615.64	451.643	2864.72	1618.2	341.094	2691.12	1629.07	460.564	2688.39	1637.1	389.878	2634.86	1491.84	384.295	2561.79	1254.98	423.375	2788.55	1424.91	435.361	2853.72	1245.22	501.781	2526.34	1310.15	229.921	2704.86	1460.99	137.582	2724.15	1229.65	127.602	2739.19	1133.87	132.396	2877.5	994.317	191.597	2915.06	937.424	122.002	2893.7	916.371	151.036	2971.19	863.087
1097	0	341.845	2872.28	1615.65	456.584	2878.99	1619.82	341.888	2699.32	1629.4	461.45	2696.37	1636.79	390.512	2642.7	1491.96	385.476	2569.6	1255.08	424.047	2796.33	1424.64	435.888	2861.34	1244.87	502.602	2533.96	1310.39	230.574	2712.42	1460.59	137.933	2732.37	1229.57	128.207	2748.39	1133.95	134.46	2888.6	996.15	194.21	2926.46	940.237	124.24	2905.79	918.662	154.691	2984.29	866.74
1098	0	343.47	2880.76	1615.3	454.732	2880.38	1616.63	343.185	2707.72	1629.16	462.863	2704.37	1636.03	391.764	2650.8	1491.72	386.991	2577.45	1254.94	424.487	2804.08	1423.97	436.546	2869.01	1244.26	503.923	2541.8	1310.33	231.32	2719.99	1460.08	138.583	2740.56	1229.01	128.836	2757.49	1133.76	137.145	2899.82	997.806	197.395	2938.07	942.81	127.69	2918.26	920.587	158.597	2997.37	870.05
1099	0	344.992	2889.08	1614.67	459.493	2895.01	1617.71	344.066	2715.97	1628.67	463.9	2712.31	1635.1	392.32	2658.53	1491.25	388.137	2584.97	1254.56	425.19	2812	1423.27	437.012	2876.44	1243.32	505.3	2549.63	1310.1	232.192	2727.56	1459.21	139.675	2749.09	1228.43	129.8	2766.22	1132.91	139.34	2910.4	998.962	200.346	2949.3	945.266	130.307	2929.91	922.116	162.601	3009.95	873.247
1100	0	346.441	2897.46	1614	457.497	2896.23	1614.24	345.461	2724.53	1628.23	464.963	2720.32	1634.41	393.382	2666.32	1490.72	389.473	2592.33	1254.24	423.296	2820.25	1423.07	437.815	2883.95	1242.39	506.65	2557.59	1310.14	233.133	2734.89	1458.37	140.352	2757.03	1227.58	130.39	2774.77	1132.16	141.993	2920.89	1000.4	203.299	2960.05	947.439	133.239	2941.52	923.797	165.276	3022.25	875.765
1101	0	347.798	2905.92	1613.12	462.125	2911.25	1615.45	346.134	2732.74	1627.63	465.982	2728.65	1633.34	394.655	2674.47	1490.18	391.13	2599.93	1253.83	426.642	2827.76	1421.31	438.585	2891.58	1241.18	508.25	2565.43	1309.89	234.345	2742.54	1457.1	141.462	2765.16	1226.89	131.45	2783.27	1131.62	144.534	2931.17	1001.36	206.162	2970.51	949.373	134.462	2952.05	924.91	170.129	3033.82	878.944
1102	0	349.025	2914.17	1612.05	463.306	2919.2	1613.83	347.061	2741.17	1626.67	467.159	2736.93	1632.08	396.034	2682.66	1489.25	392.553	2607.36	1253.11	427.012	2835.95	1420.44	439.452	2899.19	1240.05	510.004	2573.3	1309.34	235.157	2749.77	1456.29	142.403	2772.89	1225.67	132.607	2791.74	1130.27	147.051	2941.09	1002.15	209.456	2980.8	950.912	137.727	2963.14	926.084	173.665	3045.27	881.155
1103	0	350.211	2922.52	1610.96	466.819	2932.51	1612.9	347.963	2749.51	1625.6	468.03	2745.11	1630.55	397.228	2690.53	1487.98	394.386	2614.78	1252.15	427.848	2843.89	1419.14	440.185	2906.66	1238.72	511.537	2581.2	1308.96	236.236	2757.13	1455.08	143.687	2780.79	1224.33	133.755	2799.77	1128.78	149.733	2950.67	1002.74	212.277	2990.59	952.419	140.529	2973.61	926.732	177.267	3056.3	883.391
1104	0	351.441	2931.03	1609.66	465.432	2935.35	1611.17	348.995	2757.98	1624.4	469.254	2753.48	1629.36	398.851	2698.76	1487.12	396.181	2622.46	1251.32	429.064	2852.1	1417.59	441.328	2914.67	1237.35	513.219	2589.24	1308.26	237.484	2764.63	1453.68	145.159	2788.22	1222.8	135.157	2807.74	1127.41	152.467	2959.93	1003.01	215.709	3000.28	953.562	143.557	2983.94	927.134	181.213	3066.69	885.199
1105	0	352.684	2939.36	1608.2	467.122	2944.14	1609.49	350.949	2766.6	1622.98	470.502	2761.86	1628	400.305	2706.82	1486.01	398.316	2630.01	1250.2	427.466	2860.55	1416.2	442.452	2922.32	1235.64	515.64	2597.44	1307.68	238.61	2771.9	1452.08	146.942	2796.25	1221.23	136.764	2815.84	1126.21	155.26	2969.06	1003.01	218.683	3009.4	954.029	146.375	2993.74	927.265	184.784	3077.13	886.561
1106	0	353.976	2947.73	1606.57	468.035	2952.39	1607.69	351.584	2774.87	1621.63	471.748	2770.17	1626.43	401.985	2715.11	1484.67	400.354	2637.69	1248.97	428.69	2868.84	1414.75	443.437	2929.93	1233.79	517.485	2605.52	1306.63	240.269	2779.5	1450.52	148.592	2803.51	1219.49	138.542	2823.43	1124.23	158.084	2977.95	1002.64	221.668	3018.19	954.224	149.939	3003.2	927.181	188.208	3086.91	887.151
1107	0	355.382	2956.29	1604.95	469.144	2960.5	1605.82	353.019	2783.46	1620.04	473.019	2778.6	1624.68	403.693	2723.15	1483.37	402.352	2645.44	1247.7	432.395	2876.53	1412.85	444.722	2938.1	1232.04	519.36	2613.66	1305.69	241.739	2787.06	1448.72	149.911	2810.63	1217.44	140.15	2830.94	1122.23	160.808	2986.49	1001.83	224.809	3026.96	954.104	152.696	3012.42	926.557	191.095	3096.29	887.682
1108	0	356.792	2964.69	1603.16	471.157	2969.67	1604.09	354.18	2791.64	1618.74	474.494	2787.14	1623.07	405.63	2731.54	1482.09	404.849	2653.3	1246.66	431.223	2885.29	1411.67	445.881	2945.97	1230.19	522.103	2622.14	1304.87	243.378	2794.67	1447	152.305	2818.1	1215.4	142.581	2838.55	1120.08	163.631	2994.7	1000.73	227.729	3035.42	953.476	155.477	3021.16	925.333	194.702	3105.15	887.496
1109	0	358.392	2973.03	1601.61	472.202	2977.67	1602.33	356.124	2800.41	1617.11	476.01	2795.57	1621.61	407.87	2739.97	1480.58	407.037	2661.1	1245.35	435.361	2893.55	1409.63	447.302	2954.18	1228.35	524.521	2630.57	1303.78	245.463	2802.52	1444.79	154.413	2825.44	1213.43	144.471	2845.89	1118.38	166.443	3002.66	999.452	230.808	3043.52	952.437	159.067	3029.57	924.396	197.449	3113.86	886.855
1110	0	359.798	2981.57	1599.8	476.596	2992.06	1601.13	357.674	2808.76	1615.28	477.656	2803.92	1620.08	409.938	2748.28	1479.05	409.421	2669.01	1243.97	433.796	2902	1408.21	448.74	2962.23	1226.59	527.109	2639.08	1302.69	247.424	2810.32	1443.22	156.647	2832.53	1211	146.766	2853.04	1116.19	168.935	3010.47	998.025	233.571	3051.38	951.402	162.122	3037.43	923.168	201.539	3121.53	886.182
1111	0	361.552	2989.93	1598.32	475.844	2994.79	1599.55	360.257	2817.67	1613.9	479.234	2812.31	1618.64	411.634	2756.54	1477.76	411.642	2676.94	1242.76	438.845	2910.31	1406.57	450.538	2970.7	1225.15	529.344	2647.54	1301.62	249.218	2818.12	1441.66	158.784	2839.45	1209.45	149.052	2860.29	1114.35	171.696	3017.62	996.459	236.276	3058.37	950.443	163.967	3045.13	920.973	204.306	3129.41	885.107
1112	0	363.326	2998.23	1596.97	477.905	3003.58	1598.2	361.975	2826	1612.37	481.341	2820.72	1617.11	414.203	2765.25	1476.34	414.073	2684.95	1241.52	440.652	2918.56	1404.85	452.125	2978.72	1223.39	531.605	2656.11	1300.37	251.226	2826.21	1440.28	161.381	2846.85	1207.79	151.495	2867.46	1112.71	174.36	3024.98	994.694	239.103	3065.7	948.402	167.257	3052.19	919.413	207.13	3136.6	883.307
1113	0	365.194	3006.72	1595.78	479.04	3011.06	1596.78	364.247	2834.49	1610.72	483.424	2829.3	1615.45	415.796	2773.65	1475.02	416.465	2693.13	1240.08	442.745	2927.23	1403.16	453.963	2987.21	1221.63	533.588	2664.46	1299.06	253.367	2834.36	1438.86	163.797	2853.73	1205.85	153.874	2874.43	1110.7	176.938	3032.02	992.602	241.927	3072.84	946.613	169.849	3058.93	917.504	210.029	3143.3	881.233
1114	0	367.682	3015.13	1594.64	481.144	3019.37	1595.57	366.637	2842.88	1608.95	485.515	2837.81	1613.72	418.794	2782.65	1473.68	418.786	2701.32	1238.67	445.022	2935.9	1401.72	455.808	2995.37	1219.87	536.41	2673.28	1298.05	255.515	2842.64	1437.29	166.032	2860.92	1204.15	156.483	2881.55	1108.9	179.311	3038.63	990.307	244.325	3079.08	944.159	172.327	3065.37	914.866	212.544	3149.55	878.66
1115	0	369.879	3023.65	1593.25	486.838	3034.32	1595.09	369.273	2851.5	1607.48	488.222	2846.11	1612.2	420.568	2791.04	1472.43	421.176	2709.52	1237.57	447.199	2944.44	1399.91	457.842	3003.94	1218.11	538.789	2682.07	1297.07	257.855	2851.37	1435.9	168.72	2868.28	1202.55	158.869	2888.49	1107.18	181.472	3045.1	987.715	246.85	3085.63	941.448	175.487	3071.35	912.407	214.96	3155.57	875.545
1116	0	372.694	3032.07	1592.38	489.758	3043.2	1594.11	372.057	2859.93	1606.08	490.795	2854.68	1610.52	424.505	2800.98	1471.35	423.264	2717.89	1236.64	449.564	2953.25	1398.38	459.874	3012.21	1216.22	541.404	2690.83	1295.87	260.283	2860.13	1434.64	171.24	2875.52	1201.08	161.479	2895.67	1105.9	184.125	3051.38	985.106	249.26	3091.84	938.586	177.742	3077.17	909.876	217.481	3161.08	872.093
1117	0	375.442	3040.73	1591.15	492.726	3051.99	1592.93	374.46	2868.28	1604.58	493.714	2862.99	1608.93	427.148	2809.93	1470.07	425.231	2726.05	1235.45	452.13	2962.16	1396.78	462	3020.82	1214.62	543.802	2699.54	1294.53	262.823	2869.06	1433.51	173.936	2883.37	1199.81	163.862	2902.7	1104.21	186.531	3057.58	982.105	251.711	3097.43	935.32	179.715	3082.83	906.628	219.537	3166.14	868.357
1118	0	378.827	3049.39	1590.45	491.639	3053	1590.87	377.731	2876.84	1602.92	496.663	2871.52	1607.59	429.63	2818.77	1468.95	427.044	2734.28	1234.57	454.727	2970.87	1395.39	464.059	3029.28	1213.11	545.82	2708.07	1293.14	265.39	2878.13	1432.49	176.473	2891.07	1198.56	166.61	2910.01	1103.05	189.188	3063.62	979.311	254.089	3102.71	931.784	182.046	3087.84	903.614	220.762	3171.03	863.896
1119	0	382.039	3057.84	1589.39	499.413	3069.84	1590.74	380.706	2885.59	1602.03	499.939	2880.1	1606.16	432.184	2827.36	1468.03	429.12	2742.99	1233.65	457.121	2979.35	1394.09	466.071	3037.83	1211.75	548.412	2716.85	1291.73	267.862	2887.04	1431.58	179.068	2899.24	1197.65	168.902	2917.33	1102.04	191.486	3069.68	976.287	256.434	3108.25	928.126	184.198	3092.75	900.349	222.903	3175.35	859.456
1120	0	385.547	3066.39	1588.64	502.821	3077.98	1589.61	384.257	2894.15	1600.96	503.03	2888.48	1604.72	434.974	2836.16	1466.81	430.978	2751.44	1232.39	459.96	2988.2	1392.99	468.375	3046.77	1210.63	550.673	2725.69	1290.03	270.599	2895.95	1430.81	181.89	2907.52	1196.92	171.779	2924.91	1101.24	193.922	3075.34	973.388	259.333	3114.05	924.53	186.571	3097.12	897.851	224.619	3179.22	854.598
1121	0	389.286	3074.94	1587.86	506.209	3085.22	1588.08	387.909	2902.79	1599.9	506.779	2896.79	1603.26	437.542	2844.54	1465.41	432.991	2760.32	1231.18	462.63	2996.99	1392.01	470.493	3055.76	1209.86	552.947	2734.62	1288.13	273.198	2904.77	1430.19	184.107	2915.97	1196.24	174.423	2932.51	1100.11	196.29	3080.94	970.407	261.01	3117.91	920.288	187.638	3101.83	893.966	225.888	3182.67	849.617
1122	0	393.071	3083.53	1587.21	510.187	3093.58	1587.27	390.867	2911.1	1599.27	510.092	2905.14	1601.99	440.202	2852.94	1464.24	435.055	2769.39	1230.01	465.366	3005.57	1391.16	472.46	3064.71	1209.19	555.277	2743.47	1286.28	275.861	2913.46	1429.66	186.365	2924.46	1195.72	176.859	2940.12	1099.58	198.218	3086.37	967.217	262.95	3122.42	916.057	189.154	3105.88	890.686	227.09	3185.9	844.201
1123	0	397.271	3091.96	1586.87	514.282	3101.61	1586.09	394.41	2919.51	1598.7	513.918	2913.26	1600.63	443.631	2861.72	1462.95	437.473	2778.67	1228.65	467.988	3014.16	1390.27	474.532	3073.88	1208.63	557.717	2752.64	1284.19	278.506	2922.1	1429.17	188.713	2933.26	1195.16	179.405	2947.83	1099.03	200.499	3091.52	964.016	264.837	3126.75	911.607	190.754	3110.07	888.025	227.819	3188.7	838.732
1124	0	401.503	3100.28	1586.31	518.506	3109.82	1585	398.8	2928.11	1597.83	517.856	2921.41	1599.29	446.464	2870.2	1461.49	440.256	2788.15	1226.75	470.679	3023.06	1389.47	476.573	3083.19	1207.94	560.324	2761.87	1281.9	281.244	2930.67	1428.35	190.497	2941.79	1194.62	182.044	2955.69	1098.4	202.437	3096.88	960.866	266.294	3130.62	906.483	191.513	3114.12	884.363	228.423	3191.18	832.633
1125	0	405.766	3108.85	1585.58	522.776	3117.93	1583.7	402.909	2936.64	1596.92	521.671	2929.45	1597.87	449.368	2878.53	1459.89	442.547	2797.9	1224.73	473.43	3031.78	1388.65	478.612	3092.83	1207.39	562.591	2771.03	1279.64	284.148	2939.35	1427.65	193.274	2950.75	1193.68	184.765	2963.51	1097.48	204.317	3102.14	957.534	268.076	3135.21	902.373	193.558	3118.02	881.844	229.104	3193.28	826.683
1126	0	410.183	3117.27	1585.16	526.009	3123.6	1582.33	406.213	2944.74	1596.41	525.698	2937.44	1596.47	451.971	2886.88	1458.82	445.164	2807.64	1223.06	476.256	3040.52	1387.61	480.828	3102.69	1206.9	565.373	2780.39	1277.33	287.071	2947.84	1426.89	195.44	2959.6	1193.36	187.673	2971.42	1096.88	206.129	3107.46	954.331	269.168	3138.87	897.396	193.397	3122.01	877.633	229.465	3195.14	820.418
1127	0	414.845	3125.59	1584.96	529.553	3129.25	1581.27	410.209	2952.85	1595.86	529.971	2945.26	1595.09	454.391	2894.99	1457.41	448.012	2817.32	1221.6	479.116	3049.37	1386.75	483.21	3112.67	1206.42	567.957	2789.59	1274.9	290.08	2956.33	1426.3	198.484	2968.45	1192.86	190.313	2979.38	1096.41	207.41	3112.54	950.998	270.248	3142.72	892.341	193.379	3125.62	874.292	229.159	3196.55	814.041
1128	0	419.204	3133.86	1584.9	532.871	3135.29	1580.66	414.872	2961.41	1595.04	533.808	2953.35	1593.8	458.433	2904.14	1456.25	450.781	2826.5	1220.09	482.1	3058.34	1386.23	485.575	3122.46	1205.89	571.207	2799.36	1273.11	293.067	2964.64	1425.5	200.826	2977.08	1192.18	193.61	2987.33	1095.02	208.803	3117.57	947.659	270.825	3146.05	887.507	195.947	3132.51	872.342	228.372	3197.89	808
[truncated: 69 more columns]

## Sheet: Sheet2
Devices
		025370 - Force			025370 - Moment			025370 - CoP			027571 - Force			027571 - Moment			027571 - CoP			037720 - Force			037720 - Moment			037720 - CoP
Frame	Sub Frame	Fx	Fy	Fz	Mx	My	Mz	Cx	Cy	Cz	Fx	Fy	Fz	Mx	My	Mz	Cx	Cy	Cz	Fx	Fy	Fz	Mx	My	Mz	Cx	Cy	Cz
		N	N	N	N.mm	N.mm	N.mm	mm	mm	mm	N	N	N	N.mm	N.mm	N.mm	mm	mm	mm	N	N	N	N.mm	N.mm	N.mm	mm	mm	mm
605	0	0	0	0	0	0	0	200	300	0	0	0	0	0	0	0	200	903	0	0	0	0	0	0	0	603	903	0
605	1	0	0	0	0	0	0	200	300	0	0	0	0	0	0	0	200	903	0	0	0	0	0	0	0	603	903	0
605	2	0	0	0	0	0	0	200	300	0	0	0	0	0	0	0	200	903	0	0	0	0	0	0	0	603	903	0
605	3	0	0	0	0	0	0	200	300	0	0	0	0	0	0	0	200	903	0	0	0	0	0	0	0	603	903	0
605	4	0	0	0	0	0	0	200	300	0	0	0	0	0	0	0	200	903	0	0	0	0	0	0	0	603	903	0
605	5	0	0	0	0	0	0	200	300	0	0	0	0	0	0	0	200	903	0	0	0	0	0	0	0	603	903	0
605	6	0	0	0	0	0	0	200	300	0	0	0	0	0	0	0	200	903	0	0	0	0	0	0	0	603	903	0
605	7	0	0	0	0	0	0	200	300	0	0	0	0	0	0	0	200	903	0	0	0	0	0	0	0	603	903	0
605	8	0	0	0	0	0	0	200	300	0	0	0	0	0	0	0	200	903	0	0	0	0	0	0	0	603	903	0
605	9	0	0	0	0	0	0	200	300	0	0	0	0	0	0	0	200	903	0	0	0	0	0	0	0	603	903	0
606	0	0	0	0	0	0	0	200	300	0	0	0	0	0	0	0	200	903	0	0	0	0	0	0	0	603	903	0
606	1	0	0	0	0	0	0	200	300	0	0	0	0	0	0	0	200	903	0	0	0	0	0	0	0	603	903	0
606	2	0	0	0	0	0	0	200	300	0	0	0	0	0	0	0	200	903	0	0	0	0	0	0	0	603	903	0
606	3	0	0	0	0	0	0	200	300	0	0	0	0	0	0	0	200	903	0	0	0	0	0	0	0	603	903	0
606	4	0	0	0	0	0	0	200	300	0	0	0	0	0	0	0	200	903	0	0	0	0	0	0	0	603	903	0
606	5	0	0	0	0	0	0	200	300	0	0	0	0	0	0	0	200	903	0	0	0	0	0	0	0	603	903	0
606	6	0	0	0	0	0	0	200	300	0	0	0	0	0	0	0	200	903	0	0	0	0	0	0	0	603	903	0
606	7	0	0	0	0	0	0	200	300	0	0	0	0	0	0	0	200	903	0	0	0	0	0	0	0	603	903	0
606	8	0	0	0	0	0	0	200	300	0	0	0	0	0	0	0	200	903	0	0	0	0	0	0	0	603	903	0
606	9	0	0	0	0	0	0	200	300	0	0	0	0	0	0	0	200	903	0	0	0	0	0	0	0	603	903	0
607	0	0	0	0	0	0	0	200	300	0	0	0	0	0	0	0	200	903	0	0	0	0	0	0	0	603	903	0
607	1	0	0	0	0	0	0	200	300	0	0	0	0	0	0	0	200	903	0	0	0	0	0	0	0	603	903	0
607	2	0	0	0	0	0	0	200	300	0	0	0	0	0	0	0	200	903	0	0	0	0	0	0	0	603	903	0
607	3	0	0	0	0	0	0	200	300	0	0	0	0	0	0	0	200	903	0	0	0	0	0	0	0	603	903	0
607	4	0	0	0	0	0	0	200	300	0	0	0	0	0	0	0	200	903	0	0	0	0	0	0	0	603	903	0
607	5	0	0	0	0	0	0	200	300	0	0	0	0	0	0	0	200	903	0	0	0	0	0	0	0	603	903	0
607	6	0	0	0	0	0	0	200	300	0	0	0	0	0	0	0	200	903	0	0	0	0	0	0	0	603	903	0
607	7	0	0	0	0	0	0	200	300	0	0	0	0	0	0	0	200	903	0	0	0	0	0	0	0	603	903	0
607	8	0	0	0	0	0	0	200	300	0	0	0	0	0	0	0	200	903	0	0	0	0	0	0	0	603	903	0
607	9	0	0	0	0	0	0	200	300	0	0	0	0	0	0	0	200	903	0	0	0	0	0	0	0	603	903	0
608	0	0	0	0	0	0	0	200	300	0	0	0	0	0	0	0	200	903	0	0	0	0	0	0	0	603	903	0
608	1	0	0	0	0	0	0	200	300	0	0	0	0	0	0	0	200	903	0	0	0	0	0	0	0	603	903	0
608	2	0	0	0	0	0	0	200	300	0	0	0	0	0	0	0	200	903	0	0	0	0	0	0	0	603	903	0
608	3	0	0	0	0	0	0	200	300	0	0	0	0	0	0	0	200	903	0	0	0	0	0	0	0	603	903	0
608	4	0	0	0	0	0	0	200	300	0	0	0	0	0	0	0	200	903	0	0	0	0	0	0	0	603	903	0
608	5	0	0	0	0	0	0	200	300	0	0	0	0	0	0	0	200	903	0	0	0	0	0	0	0	603	903	0
608	6	0	0	0	0	0	0	200	300	0	0	0	0	0	0	0	200	903	0	0	0	0	0	0	0	603	903	0
608	7	0	0	0	0	0	0	200	300	0	0	0	0	0	0	0	200	903	0	0	0	0	0	0	0	603	903	0
608	8	0	0	0	0	0	0	200	300	0	0	0	0	0	0	0	200	903	0	0	0	0	0	0	0	603	903	0
608	9	0	0	0	0	0	0	200	300	0	0	0	0	0	0	0	200	903	0	0	0	0	0	0	0	603	903	0
609	0	0	0	0	0	0	0	200	300	0	0	0	0	0	0	0	200	903	0	0	0	0	0	0	0	603	903	0
609	1	0	0	0	0	0	0	200	300	0	0	0	0	0	0	0	200	903	0	0	0	0	0	0	0	603	903	0
609	2	0	0	0	0	0	0	200	300	0	0	0	0	0	0	0	200	903	0	0	0	0	0	0	0	603	903	0
609	3	0	0	0	0	0	0	200	300	0	0	0	0	0	0	0	200	903	0	0	0	0	0	0	0	603	903	0
609	4	0	0	0	0	0	0	200	300	0	0	0	0	0	0	0	200	903	0	0	0	0	0	0	0	603	903	0
609	5	0	0	0	0	0	0	200	300	0	0	0	0	0	0	0	200	903	0	0	0	0	0	0	0	603	903	0
609	6	0	0	0	0	0	0	200	300	0	0	0	0	0	0	0	200	903	0	0	0	0	0	0	0	603	903	0
609	7	0	0	0	0	0	0	200	300	0	0	0	0	0	0	0	200	903	0	0	0	0	0	0	0	603	903	0
609	8	0	0	0	0	0	0	200	300	0	0	0	0	0	0	0	200	903	0	0	0	0	0	0	0	603	903	0
609	9	0	0	0	0	0	0	200	300	0	0	0	0	0	0	0	200	903	0	0	0	0	0	0	0	603	903	0
610	0	0	0	0	0	0	0	200	300	0	0	0	0	0	0	0	200	903	0	0	0	0	0	0	0	603	903	0
610	1	0	0	0	0	0	0	200	300	0	0	0	0	0	0	0	200	903	0	0	0	0	0	0	0	603	903	0
610	2	0	0	0	0	0	0	200	300	0	0	0	0	0	0	0	200	903	0	0	0	0	0	0	0	603	903	0
610	3	0	0	0	0	0	0	200	300	0	0	0	0	0	0	0	200	903	0	0	0	0	0	0	0	603	903	0
610	4	0	0	0	0	0	0	200	300	0	0	0	0	0	0	0	200	903	0	0	0	0	0	0	0	603	903	0
610	5	0	0	0	0	0	0	200	300	0	0	0	0	0	0	0	200	903	0	0	0	0	0	0	0	603	903	0
610	6	0	0	0	0	0	0	200	300	0	0	0	0	0	0	0	200	903	0	0	0	0	0	0	0	603	903	0
610	7	0	0	0	0	0	0	200	300	0	0	0	0	0	0	0	200	903	0	0	0	0	0	0	0	603	903	0
610	8	0	0	0	0	0	0	200	300	0	0	0	0	0	0	0	200	903	0	0	0	0	0	0	0	603	903	0
610	9	0	0	0	0	0	0	200	300	0	0	0	0	0	0	0	200	903	0	0	0	0	0	0	0	603	903	0
611	0	0	0	0	0	0	0	200	300	0	0	0	0	0	0	0	200	903	0	0	0	0	0	0	0	603	903	0
611	1	0	0	0	0	0	0	200	300	0	0	0	0	0	0	0	200	903	0	0	0	0	0	0	0	603	903	0
611	2	0	0	0	0	0	0	200	300	0	0	0	0	0	0	0	200	903	0	0	0	0	0	0	0	603	903	0
611	3	0	0	0	0	0	0	200	300	0	0	0	0	0	0	0	200	903	0	0	0	0	0	0	0	603	903	0
611	4	0	0	0	0	0	0	200	300	0	0	0	0	0	0	0	200	903	0	0	0	0	0	0	0	603	903	0
611	5	0	0	0	0	0	0	200	300	0	0	0	0	0	0	0	200	903	0	0	0	0	0	0	0	603	903	0
611	6	0	0	0	0	0	0	200	300	0	0	0	0	0	0	0	200	903	0	0	0	0	0	0	0	603	903	0
611	7	0	0	0	0	0	0	200	300	0	0	0	0	0	0	0	200	903	0	0	0	0	0	0	0	603	903	0
611	8	0	0	0	0	0	0	200	300	0	0	0	0	0	0	0	200	903	0	0	0	0	0	0	0	603	903	0
611	9	0	0	0	0	0	0	200	300	0	0	0	0	0	0	0	200	903	0	0	0	0	0	0	0	603	903	0
612	0	0	0	0	0	0	0	200	300	0	0	0	0	0	0	0	200	903	0	0	0	0	0	0	0	603	903	0
612	1	0	0	0	0	0	0	200	300	0	0	0	0	0	0	0	200	903	0	0	0	0	0	0	0	603	903	0
612	2	0	0	0	0	0	0	200	300	0	0	0	0	0	0	0	200	903	0	0	0	0	0	0	0	603	903	0
612	3	0	0	0	0	0	0	200	300	0	0	0	0	0	0	0	200	903	0	0	0	0	0	0	0	603	903	0
612	4	0	0	0	0	0	0	200	300	0	0	0	0	0	0	0	200	903	0	0	0	0	0	0	0	603	903	0
612	5	0	0	0	0	0	0	200	300	0	0	0	0	0	0	0	200	903	0	0	0	0	0	0	0	603	903	0
612	6	0	0	0	0	0	0	200	300	0	0	0	0	0	0	0	200	903	0	0	0	0	0	0	0	603	903	0
612	7	0	0	0	0	0	0	200	300	0	0	0	0	0	0	0	200	903	0	0	0	0	0	0	0	603	903	0
612	8	0	0	0	0	0	0	200	300	0	0	0	0	0	0	0	200	903	0	0	0	0	0	0	0	603	903	0
612	9	0	0	0	0	0	0	200	300	0	0	0	0	0	0	0	200	903	0	0	0	0	0	0	0	603	903	0
613	0	0	0	0	0	0	0	200	300	0	0	0	0	0	0	0	200	903	0	0	0	0	0	0	0	603	903	0
613	1	0	0	0	0	0	0	200	300	0	0	0	0	0	0	0	200	903	0	0	0	0	0	0	0	603	903	0
613	2	0	0	0	0	0	0	200	300	0	0	0	0	0	0	0	200	903	0	0	0	0	0	0	0	603	903	0
613	3	0	0	0	0	0	0	200	300	0	0	0	0	0	0	0	200	903	0	0	0	0	0	0	0	603	903	0
613	4	0	0	0	0	0	0	200	300	0	0	0	0	0	0	0	200	903	0	0	0	0	0	0	0	603	903	0
613	5	0	0	0	0	0	0	200	300	0	0	0	0	0	0	0	200	903	0	0	0	0	0	0	0	603	903	0
613	6	0	0	0	0	0	0	200	300	0	0	0	0	0	0	0	200	903	0	0	0	0	0	0	0	603	903	0
613	7	0	0	0	0	0	0	200	300	0	0	0	0	0	0	0	200	903	0	0	0	0	0	0	0	603	903	0
613	8	0	0	0	0	0	0	200	300	0	0	0	0	0	0	0	200	903	0	0	0	0	0	0	0	603	903	0
613	9	0	0	0	0	0	0	200	300	0	0	0	0	0	0	0	200	903	0	0	0	0	0	0	0	603	903	0
614	0	0	0	0	0	0	0	200	300	0	0	0	0	0	0	0	200	903	0	0	0	0	0	0	0	603	903	0
614	1	0	0	0	0	0	0	200	300	0	0	0	0	0	0	0	200	903	0	0	0	0	0	0	0	603	903	0
614	2	0	0	0	0	0	0	200	300	0	0	0	0	0	0	0	200	903	0	0	0	0	0	0	0	603	903	0
614	3	0	0	0	0	0	0	200	300	0	0	0	0	0	0	0	200	903	0	0	0	0	0	0	0	603	903	0
614	4	0	0	0	0	0	0	200	300	0	0	0	0	0	0	0	200	903	0	0	0	0	0	0	0	603	903	0
614	5	0	0	0	0	0	0	200	300	0	0	0	0	0	0	0	200	903	0	0	0	0	0	0	0	603	903	0
614	6	0	0	0	0	0	0	200	300	0	0	0	0	0	0	0	200	903	0	0	0	0	0	0	0	603	903	0
614	7	0	0	0	0	0	0	200	300	0	0	0	0	0	0	0	200	903	0	0	0	0	0	0	0	603	903	0
614	8	0	0	0	0	0	0	200	300	0	0	0	0	0	0	0	200	903	0	0	0	0	0	0	0	603	903	0
614	9	0	0	0	0	0	0	200	300	0	0	0	0	0	0	0	200	903	0	0	0	0	0	0	0	603	903	0
615	0	0	0	0	0	0	0	200	300	0	0	0	0	0	0	0	200	903	0	0	0	0	0	0	0	603	903	0
615	1	0	0	0	0	0	0	200	300	0	0	0	0	0	0	0	200	903	0	0	0	0	0	0	0	603	903	0
615	2	0	0	0	0	0	0	200	300	0	0	0	0	0	0	0	200	903	0	0	0	0	0	0	0	603	903	0
615	3	0	0	0	0	0	0	200	300	0	0	0	0	0	0	0	200	903	0	0	0	0	0	0	0	603	903	0
615	4	0	0	0	0	0	0	200	300	0	0	0	0	0	0	0	200	903	0	0	0	0	0	0	0	603	903	0
615	5	0	0	0	0	0	0	200	300	0	0	0	0	0	0	0	200	903	0	0	0	0	0	0	0	603	903	0
615	6	0	0	0	0	0	0	200	300	0	0	0	0	0	0	0	200	903	0	0	0	0	0	0	0	603	903	0
615	7	0	0	0	0	0	0	200	300	0	0	0	0	0	0	0	200	903	0	0	0	0	0	0	0	603	903	0
615	8	0	0	0	0	0	0	200	300	0	0	0	0	0	0	0	200	903	0	0	0	0	0	0	0	603	903	0
615	9	0	0	0	0	0	0	200	300	0	0	0	0	0	0	0	200	903	0	0	0	0	0	0	0	603	903	0
616	0	0	0	0	0	0	0	200	300	0	0	0	0	0	0	0	200	903	0	0	0	0	0	0	0	603	903	0
616	1	0	0	0	0	0	0	200	300	0	0	0	0	0	0	0	200	903	0	0	0	0	0	0	0	603	903	0
616	2	0	0	0	0	0	0	200	300	0	0	0	0	0	0	0	200	903	0	0	0	0	0	0	0	603	903	0
616	3	0	0	0	0	0	0	200	300	0	0	0	0	0	0	0	200	903	0	0	0	0	0	0	0	603	903	0
616	4	0	0	0	0	0	0	200	300	0	0	0	0	0	0	0	200	903	0	0	0	0	0	0	0	603	903	0
616	5	0	0	0	0	0	0	200	300	0	0	0	0	0	0	0	200	903	0	0	0	0	0	0	0	603	903	0
616	6	0	0	0	0	0	0	200	300	0	0	0	0	0	0	0	200	903	0	0	0	0	0	0	0	603	903	0
616	7	0	0	0	0	0	0	200	300	0	0	0	0	0	0	0	200	903	0	0	0	0	0	0	0	603	903	0
616	8	0	0	0	0	0	0	200	300	0	0	0	0	0	0	0	200	903	0	0	0	0	0	0	0	603	903	0
616	9	0	0	0	0	0	0	200	300	0	0	0	0	0	0	0	200	903	0	0	0	0	0	0	0	603	903	0
617	0	0	0	0	0	0	0	200	300	0	0	0	0	0	0	0	200	903	0	0	0	0	0	0	0	603	903	0
617	1	0	0	0	0	0	0	200	300	0	0	0	0	0	0	0	200	903	0	0	0	0	0	0	0	603	903	0
617	2	0	0	0	0	0	0	200	300	0	0	0	0	0	0	0	200	903	0	0	0	0	0	0	0	603	903	0
617	3	0	0	0	0	0	0	200	300	0	0	0	0	0	0	0	200	903	0	0	0	0	0	0	0	603	903	0
617	4	0	0	0	0	0	0	200	300	0	0	0	0	0	0	0	200	903	0	0	0	0	0	0	0	603	903	0
617	5	0	0	0	0	0	0	200	300	0	0	0	0	0	0	0	200	903	0	0	0	0	0	0	0	603	903	0
617	6	0	0	0	0	0	0	200	300	0	0	0	0	0	0	0	200	903	0	0	0	0	0	0	0	603	903	0
617	7	0	0	0	0	0	0	200	300	0	0	0	0	0	0	0	200	903	0	0	0	0	0	0	0	603	903	0
617	8	0	0	0	0	0	0	200	300	0	0	0	0	0	0	0	200	903	0	0	0	0	0	0	0	603	903	0
617	9	0	0	0	0	0	0	200	300	0	0	0	0	0	0	0	200	903	0	0	0	0	0	0	0	603	903	0
618	0	0	0	0	0	0	0	200	300	0	0	0	0	0	0	0	200	903	0	0	0	0	0	0	0	603	903	0
618	1	0	0	0	0	0	0	200	300	0	0	0	0	0	0	0	200	903	0	0	0	0	0	0	0	603	903	0
618	2	0	0	0	0	0	0	200	300	0	0	0	0	0	0	0	200	903	0	0	0	0	0	0	0	603	903	0
618	3	0	0	0	0	0	0	200	300	0	0	0	0	0	0	0	200	903	0	0	0	0	0	0	0	603	903	0
618	4	0	0	0	0	0	0	200	300	0	0	0	0	0	0	0	200	903	0	0	0	0	0	0	0	603	903	0
618	5	0	0	0	0	0	0	200	300	0	0	0	0	0	0	0	200	903	0	0	0	0	0	0	0	603	903	0
618	6	0	0	0	0	0	0	200	300	0	0	0	0	0	0	0	200	903	0	0	0	0	0	0	0	603	903	0
618	7	0	0	0	0	0	0	200	300	0	0	0	0	0	0	0	200	903	0	0	0	0	0	0	0	603	903	0
618	8	0	0	0	0	0	0	200	300	0	0	0	0	0	0	0	200	903	0	0	0	0	0	0	0	603	903	0
618	9	0	0	0	0	0	0	200	300	0	0	0	0	0	0	0	200	903	0	0	0	0	0	0	0	603	903	0
619	0	0	0	0	0	0	0	200	300	0	0	0	0	0	0	0	200	903	0	0	0	0	0	0	0	603	903	0
619	1	0	0	0	0	0	0	200	300	0	0	0	0	0	0	0	200	903	0	0	0	0	0	0	0	603	903	0
619	2	0	0	0	0	0	0	200	300	0	0	0	0	0	0	0	200	903	0	0	0	0	0	0	0	603	903	0
619	3	0	0	0	0	0	0	200	300	0	0	0	0	0	0	0	200	903	0	0	0	0	0	0	0	603	903	0
619	4	0	0	0	0	0	0	200	300	0	0	0	0	0	0	0	200	903	0	0	0	0	0	0	0	603	903	0
619	5	0	0	0	0	0	0	200	300	0	0	0	0	0	0	0	200	903	0	0	0	0	0	0	0	603	903	0
619	6	0	0	0	0	0	0	200	300	0	0	0	0	0	0	0	200	903	0	0	0	0	0	0	0	603	903	0
619	7	0	0	0	0	0	0	200	300	0	0	0	0	0	0	0	200	903	0	0	0	0	0	0	0	603	903	0
619	8	0	0	0	0	0	0	200	300	0	0	0	0	0	0	0	200	903	0	0	0	0	0	0	0	603	903	0
619	9	0	0	0	0	0	0	200	300	0	0	0	0	0	0	0	200	903	0	0	0	0	0	0	0	603	903	0
620	0	0	0	0	0	0	0	200	300	0	0	0	0	0	0	0	200	903	0	0	0	0	0	0	0	603	903	0
620	1	0	0	0	0	0	0	200	300	0	0	0	0	0	0	0	200	903	0	0	0	0	0	0	0	603	903	0
620	2	0	0	0	0	0	0	200	300	0	0	0	0	0	0	0	200	903	0	0	0	0	0	0	0	603	903	0
620	3	0	0	0	0	0	0	200	300	0	0	0	0	0	0	0	200	903	0	0	0	0	0	0	0	603	903	0
620	4	0	0	0	0	0	0	200	300	0	0	0	0	0	0	0	200	903	0	0	0	0	0	0	0	603	903	0
620	5	0	0	0	0	0	0	200	300	0	0	0	0	0	0	0	200	903	0	0	0	0	0	0	0	603	903	0
620	6	0	0	0	0	0	0	200	300	0	0	0	0	0	0	0	200	903	0	0	0	0	0	0	0	603	903	0
620	7	0	0	0	0	0	0	200	300	0	0	0	0	0	0	0	200	903	0	0	0	0	0	0	0	603	903	0
620	8	0	0	0	0	0	0	200	300	0	0	0	0	0	0	0	200	903	0	0	0	0	0	0	0	603	903	0
620	9	0	0	0	0	0	0	200	300	0	0	0	0	0	0	0	200	903	0	0	0	0	0	0	0	603	903	0
621	0	0	0	0	0	0	0	200	300	0	0	0	0	0	0	0	200	903	0	0	0	0	0	0	0	603	903	0
621	1	0	0	0	0	0	0	200	300	0	0	0	0	0	0	0	200	903	0	0	0	0	0	0	0	603	903	0
621	2	0	0	0	0	0	0	200	300	0	0	0	0	0	0	0	200	903	0	0	0	0	0	0	0	603	903	0
621	3	0	0	0	0	0	0	200	300	0	0	0	0	0	0	0	200	903	0	0	0	0	0	0	0	603	903	0
621	4	0	0	0	0	0	0	200	300	0	0	0	0	0	0	0	200	903	0	0	0	0	0	0	0	603	903	0
621	5	0	0	0	0	0	0	200	300	0	0	0	0	0	0	0	200	903	0	0	0	0	0	0	0	603	903	0
621	6	0	0	0	0	0	0	200	300	0	0	0	0	0	0	0	200	903	0	0	0	0	0	0	0	603	903	0
621	7	0	0	0	0	0	0	200	300	0	0	0	0	0	0	0	200	903	0	0	0	0	0	0	0	603	903	0
621	8	0	0	0	0	0	0	200	300	0	0	0	0	0	0	0	200	903	0	0	0	0	0	0	0	603	903	0
621	9	0	0	0	0	0	0	200	300	0	0	0	0	0	0	0	200	903	0	0	0	0	0	0	0	603	903	0
622	0	0	0	0	0	0	0	200	300	0	0	0	0	0	0	0	200	903	0	0	0	0	0	0	0	603	903	0
622	1	0	0	0	0	0	0	200	300	0	0	0	0	0	0	0	200	903	0	0	0	0	0	0	0	603	903	0
622	2	0	0	0	0	0	0	200	300	0	0	0	0	0	0	0	200	903	0	0	0	0	0	0	0	603	903	0
622	3	0	0	0	0	0	0	200	300	0	0	0	0	0	0	0	200	903	0	0	0	0	0	0	0	603	903	0
622	4	0	0	0	0	0	0	200	300	0	0	0	0	0	0	0	200	903	0	0	0	0	0	0	0	603	903	0
622	5	0	0	0	0	0	0	200	300	0	0	0	0	0	0	0	200	903	0	0	0	0	0	0	0	603	903	0
622	6	0	0	0	0	0	0	200	300	0	0	0	0	0	0	0	200	903	0	0	0	0	0	0	0	603	903	0
622	7	0	0	0	0	0	0	200	300	0	0	0	0	0	0	0	200	903	0	0	0	0	0	0	0	603	903	0
622	8	0	0	0	0	0	0	200	300	0	0	0	0	0	0	0	200	903	0	0	0	0	0	0	0	603	903	0
622	9	0	0	0	0	0	0	200	300	0	0	0	0	0	0	0	200	903	0	0	0	0	0	0	0	603	903	0
623	0	0	0	0	0	0	0	200	300	0	0	0	0	0	0	0	200	903	0	0	0	0	0	0	0	603	903	0
623	1	0	0	0	0	0	0	200	300	0	0	0	0	0	0	0	200	903	0	0	0	0	0	0	0	603	903	0
623	2	0	0	0	0	0	0	200	300	0	0	0	0	0	0	0	200	903	0	0	0	0	0	0	0	603	903	0
623	3	0	0	0	0	0	0	200	300	0	0	0	0	0	0	0	200	903	0	0	0	0	0	0	0	603	903	0
623	4	0	0	0	0	0	0	200	300	0	0	0	0	0	0	0	200	903	0	0	0	0	0	0	0	603	903	0
623	5	0	0	0	0	0	0	200	300	0	0	0	0	0	0	0	200	903	0	0	0	0	0	0	0	603	903	0
623	6	0	0	0	0	0	0	200	300	0	0	0	0	0	0	0	200	903	0	0	0	0	0	0	0	603	903	0
623	7	0	0	0	0	0	0	200	300	0	0	0	0	0	0	0	200	903	0	0	0	0	0	0	0	603	903	0
623	8	0	0	0	0	0	0	200	300	0	0	0	0	0	0	0	200	903	0	0	0	0	0	0	0	603	903	0
623	9	0	0	0	0	0	0	200	300	0	0	0	0	0	0	0	200	903	0	0	0	0	0	0	0	603	903	0
624	0	0	0	0	0	0	0	200	300	0	0	0	0	0	0	0	200	903	0	0	0	0	0	0	0	603	903	0
624	1	0	0	0	0	0	0	200	300	0	0	0	0	0	0	0	200	903	0	0	0	0	0	0	0	603	903	0
624	2	0	0	0	0	0	0	200	300	0	0	0	0	0	0	0	200	903	0	0	0	0	0	0	0	603	903	0
624	3	0	0	0	0	0	0	200	300	0	0	0	0	0	0	0	200	903	0	0	0	0	0	0	0	603	903	0
624	4	0	0	0	0	0	0	200	300	0	0	0	0	0	0	0	200	903	0	0	0	0	0	0	0	603	903	0
624	5	0	0	0	0	0	0	200	300	0	0	0	0	0	0	0	200	903	0	0	0	0	0	0	0	603	903	0
624	6	0	0	0	0	0	0	200	300	0	0	0	0	0	0	0	200	903	0	0	0	0	0	0	0	603	903	0
624	7	0	0	0	0	0	0	200	300	0	0	0	0	0	0	0	200	903	0	0	0	0	0	0	0	603	903	0
624	8	0	0	0	0	0	0	200	300	0	0	0	0	0	0	0	200	903	0	0	0	0	0	0	0	603	903	0
624	9	0	0	0	0	0	0	200	300	0	0	0	0	0	0	0	200	903	0	0	0	0	0	0	0	603	903	0
625	0	0	0	0	0	0	0	200	300	0	0	0	0	0	0	0	200	903	0	0	0	0	0	0	0	603	903	0
625	1	0	0	0	0	0	0	200	300	0	0	0	0	0	0	0	200	903	0	0	0	0	0	0	0	603	903	0
625	2	0	0	0	0	0	0	200	300	0	0	0	0	0	0	0	200	903	0	0	0	0	0	0	0	603	903	0
625	3	0	0	0	0	0	0	200	300	0	0	0	0	0	0	0	200	903	0	0	0	0	0	0	0	603	903	0
625	4	0	0	0	0	0	0	200	300	0	0	0	0	0	0	0	200	903	0	0	0	0	0	0	0	603	903	0
625	5	0	0	0	0	0	0	200	300	0	0	0	0	0	0	0	200	903	0	0	0	0	0	0	0	603	903	0
625	6	0	0	0	0	0	0	200	300	0	0	0	0	0	0	0	200	903	0	0	0	0	0	0	0	603	903	0
625	7	0	0	0	0	0	0	200	300	0	0	0	0	0	0	0	200	903	0	0	0	0	0	0	0	603	903	0
625	8	0	0	0	0	0	0	200	300	0	0	0	0	0	0	0	200	903	0	0	0	0	0	0	0	603	903	0
625	9	0	0	0	0	0	0	200	300	0	0	0	0	0	0	0	200	903	0	0	0	0	0	0	0	603	903	0
626	0	0	0	0	0	0	0	200	300	0	0	0	0	0	0	0	200	903	0	0	0	0	0	0	0	603	903	0
626	1	0	0	0	0	0	0	200	300	0	0	0	0	0	0	0	200	903	0	0	0	0	0	0	0	603	903	0
626	2	0	0	0	0	0	0	200	300	0	0	0	0	0	0	0	200	903	0	0	0	0	0	0	0	603	903	0
626	3	0	0	0	0	0	0	200	300	0	0	0	0	0	0	0	200	903	0	0	0	0	0	0	0	603	903	0
626	4	0	0	0	0	0	0	200	300	0	0	0	0	0	0	0	200	903	0	0	0	0	0	0	0	603	903	0
626	5	0	0	0	0	0	0	200	300	0	0	0	0	0	0	0	200	903	0	0	0	0	0	0	0	603	903	0
626	6	0	0	0	0	0	0	200	300	0	0	0	0	0	0	0	200	903	0	0	0	0	0	0	0	603	903	0
626	7	0	0	0	0	0	0	200	300	0	0	0	0	0	0	0	200	903	0	0	0	0	0	0	0	603	903	0
626	8	0	0	0	0	0	0	200	300	0	0	0	0	0	0	0	200	903	0	0	0	0	0	0	0	603	903	0
626	9	0	0	0	0	0	0	200	300	0	0	0	0	0	0	0	200	903	0	0	0	0	0	0	0	603	903	0
627	0	0	0	0	0	0	0	200	300	0	0	0	0	0	0	0	200	903	0	0	0	0	0	0	0	603	903	0
627	1	0	0	0	0	0	0	200	300	0	0	0	0	0	0	0	200	903	0	0	0	0	0	0	0	603	903	0
627	2	0	0	0	0	0	0	200	300	0	0	0	0	0	0	0	200	903	0	0	0	0	0	0	0	603	903	0
627	3	0	0	0	0	0	0	200	300	0	0	0	0	0	0	0	200	903	0	0	0	0	0	0	0	603	903	0
627	4	0	0	0	0	0	0	200	300	0	0	0	0	0	0	0	200	903	0	0	0	0	0	0	0	603	903	0
627	5	0	0	0	0	0	0	200	300	0	0	0	0	0	0	0	200	903	0	0	0	0	0	0	0	603	903	0
627	6	0	0	0	0	0	0	200	300	0	0	0	0	0	0	0	200	903	0	0	0	0	0	0	0	603	903	0
627	7	0	0	0	0	0	0	200	300	0	0	0	0	0	0	0	200	903	0	0	0	0	0	0	0	603	903	0
627	8	0	0	0	0	0	0	200	300	0	0	0	0	0	0	0	200	903	0	0	0	0	0	0	0	603	903	0
627	9	0	0	0	0	0	0	200	300	0	0	0	0	0	0	0	200	903	0	0	0	0	0	0	0	603	903	0
628	0	0	0	0	0	0	0	200	300	0	0	0	0	0	0	0	200	903	0	0	0	0	0	0	0	603	903	0
628	1	0	0	0	0	0	0	200	300	0	0	0	0	0	0	0	200	903	0	0	0	0	0	0	0	603	903	0
628	2	0	0	0	0	0	0	200	300	0	0	0	0	0	0	0	200	903	0	0	0	0	0	0	0	603	903	0
628	3	0	0	0	0	0	0	200	300	0	0	0	0	0	0	0	200	903	0	0	0	0	0	0	0	603	903	0
628	4	0	0	0	0	0	0	200	300	0	0	0	0	0	0	0	200	903	0	0	0	0	0	0	0	603	903	0
628	5	0	0	0	0	0	0	200	300	0	0	0	0	0	0	0	200	903	0	0	0	0	0	0	0	603	903	0
628	6	0	0	0	0	0	0	200	300	0	0	0	0	0	0	0	200	903	0	0	0	0	0	0	0	603	903	0
628	7	0	0	0	0	0	0	200	300	0	0	0	0	0	0	0	200	903	0	0	0	0	0	0	0	603	903	0
628	8	0	0	0	0	0	0	200	300	0	0	0	0	0	0	0	200	903	0	0	0	0	0	0	0	603	903	0
628	9	0	0	0	0	0	0	200	300	0	0	0	0	0	0	0	200	903	0	0	0	0	0	0	0	603	903	0
629	0	0	0	0	0	0	0	200	300	0	0	0	0	0	0	0	200	903	0	0	0	0	0	0	0	603	903	0
629	1	0	0	0	0	0	0	200	300	0	0	0	0	0	0	0	200	903	0	0	0	0	0	0	0	603	903	0
629	2	0	0	0	0	0	0	200	300	0	0	0	0	0	0	0	200	903	0	0	0	0	0	0	0	603	903	0
629	3	0	0	0	0	0	0	200	300	0	0	0	0	0	0	0	200	903	0	0	0	0	0	0	0	603	903	0
629	4	0	0	0	0	0	0	200	300	0	0	0	0	0	0	0	200	903	0	0	0	0	0	0	0	603	903	0
629	5	0	0	0	0	0	0	200	300	0	0	0	0	0	0	0	200	903	0	0	0	0	0	0	0	603	903	0
629	6	0	0	0	0	0	0	200	300	0	0	0	0	0	0	0	200	903	0	0	0	0	0	0	0	603	903	0
629	7	0	0	0	0	0	0	200	300	0	0	0	0	0	0	0	200	903	0	0	0	0	0	0	0	603	903	0
629	8	0	0	0	0	0	0	200	300	0	0	0	0	0	0	0	200	903	0	0	0	0	0	0	0	603	903	0
629	9	0	0	0	0	0	0	200	300	0	0	0	0	0	0	0	200	903	0	0	0	0	0	0	0	603	903	0
630	0	0	0	0	0	0	0	200	300	0	0	0	0	0	0	0	200	903	0	0	0	0	0	0	0	603	903	0
630	1	0	0	0	0	0	0	200	300	0	0	0	0	0	0	0	200	903	0	0	0	0	0	0	0	603	903	0
630	2	0	0	0	0	0	0	200	300	0	0	0	0	0	0	0	200	903	0	0	0	0	0	0	0	603	903	0
630	3	0	0	0	0	0	0	200	300	0	0	0	0	0	0	0	200	903	0	0	0	0	0	0	0	603	903	0
630	4	0	0	0	0	0	0	200	300	0	0	0	0	0	0	0	200	903	0	0	0	0	0	0	0	603	903	0
630	5	0	0	0	0	0	0	200	300	0	0	0	0	0	0	0	200	903	0	0	0	0	0	0	0	603	903	0
630	6	0	0	0	0	0	0	200	300	0	0	0	0	0	0	0	200	903	0	0	0	0	0	0	0	603	903	0
630	7	0	0	0	0	0	0	200	300	0	0	0	0	0	0	0	200	903	0	0	0	0	0	0	0	603	903	0
630	8	0	0	0	0	0	0	200	300	0	0	0	0	0	0	0	200	903	0	0	0	0	0	0	0	603	903	0
630	9	0	0	0	0	0	0	200	300	0	0	0	0	0	0	0	200	903	0	0	0	0	0	0	0	603	903	0
631	0	0	0	0	0	0	0	200	300	0	0	0	0	0	0	0	200	903	0	0	0	0	0	0	0	603	903	0
631	1	0	0	0	0	0	0	200	300	0	0	0	0	0	0	0	200	903	0	0	0	0	0	0	0	603	903	0
631	2	0	0	0	0	0	0	200	300	0	0	0	0	0	0	0	200	903	0	0	0	0	0	0	0	603	903	0
631	3	0	0	0	0	0	0	200	300	0	0	0	0	0	0	0	200	903	0	0	0	0	0	0	0	603	903	0
631	4	0	0	0	0	0	0	200	300	0	0	0	0	0	0	0	200	903	0	0	0	0	0	0	0	603	903	0
631	5	0	0	0	0	0	0	200	300	0	0	0	0	0	0	0	200	903	0	0	0	0	0	0	0	603	903	0
631	6	0	0	0	0	0	0	200	300	0	0	0	0	0	0	0	200	903	0	0	0	0	0	0	0	603	903	0
631	7	0	0	0	0	0	0	200	300	0	0	0	0	0	0	0	200	903	0	0	0	0	0	0	0	603	903	0
631	8	0	0	0	0	0	0	200	300	0	0	0	0	0	0	0	200	903	0	0	0	0	0	0	0	603	903	0
631	9	0	0	0	0	0	0	200	300	0	0	0	0	0	0	0	200	903	0	0	0	0	0	0	0	603	903	0
632	0	0	0	0	0	0	0	200	300	0	0	0	0	0	0	0	200	903	0	0	0	0	0	0	0	603	903	0
632	1	0	0	0	0	0	0	200	300	0	0	0	0	0	0	0	200	903	0	0	0	0	0	0	0	603	903	0
632	2	0	0	0	0	0	0	200	300	0	0	0	0	0	0	0	200	903	0	0	0	0	0	0	0	603	903	0
632	3	0	0	0	0	0	0	200	300	0	0	0	0	0	0	0	200	903	0	0	0	0	0	0	0	603	903	0
632	4	0	0	0	0	0	0	200	300	0	0	0	0	0	0	0	200	903	0	0	0	0	0	0	0	603	903	0
632	5	0	0	0	0	0	0	200	300	0	0	0	0	0	0	0	200	903	0	0	0	0	0	0	0	603	903	0
632	6	0	0	0	0	0	0	200	300	0	0	0	0	0	0	0	200	903	0	0	0	0	0	0	0	603	903	0
632	7	0	0	0	0	0	0	200	300	0	0	0	0	0	0	0	200	903	0	0	0	0	0	0	0	603	903	0
632	8	0	0	0	0	0	0	200	300	0	0	0	0	0	0	0	200	903	0	0	0	0	0	0	0	603	903	0
632	9	0	0	0	0	0	0	200	300	0	0	0	0	0	0	0	200	903	0	0	0	0	0	0	0	603	903	0
633	0	0	0	0	0	0	0	200	300	0	0	0	0	0	0	0	200	903	0	0	0	0	0	0	0	603	903	0
633	1	0	0	0	0	0	0	200	300	0	0	0	0	0	0	0	200	903	0	0	0	0	0	0	0	603	903	0
633	2	0	0	0	0	0	0	200	300	0	0	0	0	0	0	0	200	903	0	0	0	0	0	0	0	603	903	0
633	3	0	0	0	0	0	0	200	300	0	0	0	0	0	0	0	200	903	0	0	0	0	0	0	0	603	903	0
633	4	0	0	0	0	0	0	200	300	0	0	0	0	0	0	0	200	903	0	0	0	0	0	0	0	603	903	0
633	5	0	0	0	0	0	0	200	300	0	0	0	0	0	0	0	200	903	0	0	0	0	0	0	0	603	903	0
633	6	0	0	0	0	0	0	200	300	0	0	0	0	0	0	0	200	903	0	0	0	0	0	0	0	603	903	0
633	7	0	0	0	0	0	0	200	300	0	0	0	0	0	0	0	200	903	0	0	0	0	0	0	0	603	903	0
633	8	0	0	0	0	0	0	200	300	0	0	0	0	0	0	0	200	903	0	0	0	0	0	0	0	603	903	0
633	9	0	0	0	0	0	0	200	300	0	0	0	0	0	0	0	200	903	0	0	0	0	0	0	0	603	903	0
634	0	0	0	0	0	0	0	200	300	0	0	0	0	0	0	0	200	903	0	0	0	0	0	0	0	603	903	0
634	1	0	0	0	0	0	0	200	300	0	0	0	0	0	0	0	200	903	0	0	0	0	0	0	0	603	903	0
634	2	0	0	0	0	0	0	200	300	0	0	0	0	0	0	0	200	903	0	0	0	0	0	0	0	603	903	0
634	3	0	0	0	0	0	0	200	300	0	0	0	0	0	0	0	200	903	0	0	0	0	0	0	0	603	903	0
634	4	0	0	0	0	0	0	200	300	0	0	0	0	0	0	0	200	903	0	0	0	0	0	0	0	603	903	0
634	5	0	0	0	0	0	0	200	300	0	0	0	0	0	0	0	200	903	0	0	0	0	0	0	0	603	903	0
634	6	0	0	0	0	0	0	200	300	0	0	0	0	0	0	0	200	903	0	0	0	0	0	0	0	603	903	0
634	7	0	0	0	0	0	0	200	300	0	0	0	0	0	0	0	200	903	0	0	0	0	0	0	0	603	903	0
634	8	0	0	0	0	0	0	200	300	0	0	0	0	0	0	0	200	903	0	0	0	0	0	0	0	603	903	0
634	9	0	0	0	0	0	0	200	300	0	0	0	0	0	0	0	200	903	0	0	0	0	0	0	0	603	903	0
635	0	0	0	0	0	0	0	200	300	0	0	0	0	0	0	0	200	903	0	0	0	0	0	0	0	603	903	0
635	1	0	0	0	0	0	0	200	300	0	0	0	0	0	0	0	200	903	0	0	0	0	0	0	0	603	903	0
635	2	0	0	0	0	0	0	200	300	0	0	0	0	0	0	0	200	903	0	0	0	0	0	0	0	603	903	0
635	3	0	0	0	0	0	0	200	300	0	0	0	0	0	0	0	200	903	0	0	0	0	0	0	0	603	903	0
635	4	0	0	0	0	0	0	200	300	0	0	0	0	0	0	0	200	903	0	0	0	0	0	0	0	603	903	0
635	5	0	0	0	0	0	0	200	300	0	0	0	0	0	0	0	200	903	0	0	0	0	0	0	0	603	903	0
635	6	0	0	0	0	0	0	200	300	0	0	0	0	0	0	0	200	903	0	0	0	0	0	0	0	603	903	0
635	7	0	0	0	0	0	0	200	300	0	0	0	0	0	0	0	200	903	0	0	0	0	0	0	0	603	903	0
635	8	0	0	0	0	0	0	200	300	0	0	0	0	0	0	0	200	903	0	0	0	0	0	0	0	603	903	0
635	9	0	0	0	0	0	0	200	300	0	0	0	0	0	0	0	200	903	0	0	0	0	0	0	0	603	903	0
636	0	0	0	0	0	0	0	200	300	0	0	0	0	0	0	0	200	903	0	0	0	0	0	0	0	603	903	0
636	1	0	0	0	0	0	0	200	300	0	0	0	0	0	0	0	200	903	0	0	0	0	0	0	0	603	903	0
636	2	0	0	0	0	0	0	200	300	0	0	0	0	0	0	0	200	903	0	0	0	0	0	0	0	603	903	0
636	3	0	0	0	0	0	0	200	300	0	0	0	0	0	0	0	200	903	0	0	0	0	0	0	0	603	903	0
636	4	0	0	0	0	0	0	200	300	0	0	0	0	0	0	0	200	903	0	0	0	0	0	0	0	603	903	0
636	5	0	0	0	0	0	0	200	300	0	0	0	0	0	0	0	200	903	0	0	0	0	0	0	0	603	903	0
636	6	0	0	0	0	0	0	200	300	0	0	0	0	0	0	0	200	903	0	0	0	0	0	0	0	603	903	0
636	7	0	0	0	0	0	0	200	300	0	0	0	0	0	0	0	200	903	0	0	0	0	0	0	0	603	903	0
636	8	0	0	0	0	0	0	200	300	0	0	0	0	0	0	0	200	903	0	0	0	0	0	0	0	603	903	0
636	9	0	0	0	0	0	0	200	300	0	0	0	0	0	0	0	200	903	0	0	0	0	0	0	0	603	903	0
637	0	0	0	0	0	0	0	200	300	0	0	0	0	0	0	0	200	903	0	0	0	0	0	0	0	603	903	0
637	1	0	0	0	0	0	0	200	300	0	0	0	0	0	0	0	200	903	0	0	0	0	0	0	0	603	903	0
637	2	0	0	0	0	0	0	200	300	0	0	0	0	0	0	0	200	903	0	0	0	0	0	0	0	603	903	0
637	3	0	0	0	0	0	0	200	300	0	0	0	0	0	0	0	200	903	0	0	0	0	0	0	0	603	903	0
637	4	0	0	0	0	0	0	200	300	0	0	0	0	0	0	0	200	903	0	0	0	0	0	0	0	603	903	0
637	5	0	0	0	0	0	0	200	300	0	0	0	0	0	0	0	200	903	0	0	0	0	0	0	0	603	903	0
637	6	0	0	0	0	0	0	200	300	0	0	0	0	0	0	0	200	903	0	0	0	0	0	0	0	603	903	0
637	7	0	0	0	0	0	0	200	300	0	0	0	0	0	0	0	200	903	0	0	0	0	0	0	0	603	903	0
637	8	0	0	0	0	0	0	200	300	0	0	0	0	0	0	0	200	903	0	0	0	0	0	0	0	603	903	0
637	9	0	0	0	0	0	0	200	300	0	0	0	0	0	0	0	200	903	0	0	0	0	0	0	0	603	903	0
638	0	0	0	0	0	0	0	200	300	0	0	0	0	0	0	0	200	903	0	0	0	0	0	0	0	603	903	0
638	1	0	0	0	0	0	0	200	300	0	0	0	0	0	0	0	200	903	0	0	0	0	0	0	0	603	903	0
638	2	0	0	0	0	0	0	200	300	0	0	0	0	0	0	0	200	903	0	0	0	0	0	0	0	603	903	0
638	3	0	0	0	0	0	0	200	300	0	0	0	0	0	0	0	200	903	0	0	0	0	0	0	0	603	903	0
638	4	0	0	0	0	0	0	200	300	0	0	0	0	0	0	0	200	903	0	0	0	0	0	0	0	603	903	0
638	5	0	0	0	0	0	0	200	300	0	0	0	0	0	0	0	200	903	0	0	0	0	0	0	0	603	903	0
638	6	0	0	0	0	0	0	200	300	0	0	0	0	0	0	0	200	903	0	0	0	0	0	0	0	603	903	0
638	7	0	0	0	0	0	0	200	300	0	0	0	0	0	0	0	200	903	0	0	0	0	0	0	0	603	903	0
638	8	0	0	0	0	0	0	200	300	0	0	0	0	0	0	0	200	903	0	0	0	0	0	0	0	603	903	0
638	9	0	0	0	0	0	0	200	300	0	0	0	0	0	0	0	200	903	0	0	0	0	0	0	0	603	903	0
639	0	0	0	0	0	0	0	200	300	0	0	0	0	0	0	0	200	903	0	0	0	0	0	0	0	603	903	0
639	1	0	0	0	0	0	0	200	300	0	0	0	0	0	0	0	200	903	0	0	0	0	0	0	0	603	903	0
639	2	0	0	0	0	0	0	200	300	0	0	0	0	0	0	0	200	903	0	0	0	0	0	0	0	603	903	0
639	3	0	0	0	0	0	0	200	300	0	0	0	0	0	0	0	200	903	0	0	0	0	0	0	0	603	903	0
639	4	0	0	0	0	0	0	200	300	0	0	0	0	0	0	0	200	903	0	0	0	0	0	0	0	603	903	0
639	5	0	0	0	0	0	0	200	300	0	0	0	0	0	0	0	200	903	0	0	0	0	0	0	0	603	903	0
639	6	0	0	0	0	0	0	200	300	0	0	0	0	0	0	0	200	903	0	0	0	0	0	0	0	603	903	0
639	7	0	0	0	0	0	0	200	300	0	0	0	0	0	0	0	200	903	0	0	0	0	0	0	0	603	903	0
639	8	0	0	0	0	0	0	200	300	0	0	0	0	0	0	0	200	903	0	0	0	0	0	0	0	603	903	0
639	9	0	0	0	0	0	0	200	300	0	0	0	0	0	0	0	200	903	0	0	0	0	0	0	0	603	903	0
640	0	0	0	0	0	0	0	200	300	0	0	0	0	0	0	0	200	903	0	0	0	0	0	0	0	603	903	0
640	1	0	0	0	0	0	0	200	300	0	0	0	0	0	0	0	200	903	0	0	0	0	0	0	0	603	903	0
640	2	0	0	0	0	0	0	200	300	0	0	0	0	0	0	0	200	903	0	0	0	0	0	0	0	603	903	0
640	3	0	0	0	0	0	0	200	300	0	0	0	0	0	0	0	200	903	0	0	0	0	0	0	0	603	903	0
640	4	0	0	0	0	0	0	200	300	0	0	0	0	0	0	0	200	903	0	0	0	0	0	0	0	603	903	0
640	5	0	0	0	0	0	0	200	300	0	0	0	0	0	0	0	200	903	0	0	0	0	0	0	0	603	903	0
640	6	0	0	0	0	0	0	200	300	0	0	0	0	0	0	0	200	903	0	0	0	0	0	0	0	603	903	0
640	7	0	0	0	0	0	0	200	300	0	0	0	0	0	0	0	200	903	0	0	0	0	0	0	0	603	903	0
640	8	0	0	0	0	0	0	200	300	0	0	0	0	0	0	0	200	903	0	0	0	0	0	0	0	603	903	0
640	9	0	0	0	0	0	0	200	300	0	0	0	0	0	0	0	200	903	0	0	0	0	0	0	0	603	903	0
641	0	0	0	0	0	0	0	200	300	0	0	0	0	0	0	0	200	903	0	0	0	0	0	0	0	603	903	0
641	1	0	0	0	0	0	0	200	300	0	0	0	0	0	0	0	200	903	0	0	0	0	0	0	0	603	903	0
641	2	0	0	0	0	0	0	200	300	0	0	0	0	0	0	0	200	903	0	0	0	0	0	0	0	603	903	0
641	3	0	0	0	0	0	0	200	300	0	0	0	0	0	0	0	200	903	0	0	0	0	0	0	0	603	903	0
641	4	0	0	0	0	0	0	200	300	0	0	0	0	0	0	0	200	903	0	0	0	0	0	0	0	603	903	0
641	5	0	0	0	0	0	0	200	300	0	0	0	0	0	0	0	200	903	0	0	0	0	0	0	0	603	903	0
641	6	0	0	0	0	0	0	200	300	0	0	0	0	0	0	0	200	903	0	0	0	0	0	0	0	603	903	0
641	7	0	0	0	0	0	0	200	300	0	0	0	0	0	0	0	200	903	0	0	0	0	0	0	0	603	903	0
641	8	0	0	0	0	0	0	200	300	0	0	0	0	0	0	0	200	903	0	0	0	0	0	0	0	603	903	0
641	9	0	0	0	0	0	0	200	300	0	0	0	0	0	0	0	200	903	0	0	0	0	0	0	0	603	903	0
642	0	0	0	0	0	0	0	200	300	0	0	0	0	0	0	0	200	903	0	0	0	0	0	0	0	603	903	0
642	1	0	0	0	0	0	0	200	300	0	0	0	0	0	0	0	200	903	0	0	0	0	0	0	0	603	903	0
642	2	0	0	0	0	0	0	200	300	0	0	0	0	0	0	0	200	903	0	0	0	0	0	0	0	603	903	0
642	3	0	0	0	0	0	0	200	300	0	0	0	0	0	0	0	200	903	0	0	0	0	0	0	0	603	903	0
642	4	0	0	0	0	0	0	200	300	0	0	0	0	0	0	0	200	903	0	0	0	0	0	0	0	603	903	0
642	5	0	0	0	0	0	0	200	300	0	0	0	0	0	0	0	200	903	0	0	0	0	0	0	0	603	903	0
642	6	0	0	0	0	0	0	200	300	0	0	0	0	0	0	0	200	903	0	0	0	0	0	0	0	603	903	0
642	7	0	0	0	0	0	0	200	300	0	0	0	0	0	0	0	200	903	0	0	0	0	0	0	0	603	903	0
642	8	0	0	0	0	0	0	200	300	0	0	0	0	0	0	0	200	903	0	0	0	0	0	0	0	603	903	0
642	9	0	0	0	0	0	0	200	300	0	0	0	0	0	0	0	200	903	0	0	0	0	0	0	0	603	903	0
643	0	0	0	0	0	0	0	200	300	0	0	0	0	0	0	0	200	903	0	0	0	0	0	0	0	603	903	0
643	1	0	0	0	0	0	0	200	300	0	0	0	0	0	0	0	200	903	0	0	0	0	0	0	0	603	903	0
643	2	0	0	0	0	0	0	200	300	0	0	0	0	0	0	0	200	903	0	0	0	0	0	0	0	603	903	0
643	3	0	0	0	0	0	0	200	300	0	0	0	0	0	0	0	200	903	0	0	0	0	0	0	0	603	903	0
643	4	0	0	0	0	0	0	200	300	0	0	0	0	0	0	0	200	903	0	0	0	0	0	0	0	603	903	0
643	5	0	0	0	0	0	0	200	300	0	0	0	0	0	0	0	200	903	0	0	0	0	0	0	0	603	903	0
643	6	0	0	0	0	0	0	200	300	0	0	0	0	0	0	0	200	903	0	0	0	0	0	0	0	603	903	0
643	7	0	0	0	0	0	0	200	300	0	0	0	0	0	0	0	200	903	0	0	0	0	0	0	0	603	903	0
643	8	0	0	0	0	0	0	200	300	0	0	0	0	0	0	0	200	903	0	0	0	0	0	0	0	603	903	0
643	9	0	0	0	0	0	0	200	300	0	0	0	0	0	0	0	200	903	0	0	0	0	0	0	0	603	903	0
644	0	0	0	0	0	0	0	200	300	0	0	0	0	0	0	0	200	903	0	0	0	0	0	0	0	603	903	0
644	1	0	0	0	0	0	0	200	300	0	0	0	0	0	0	0	200	903	0	0	0	0	0	0	0	603	903	0
644	2	0	0	0	0	0	0	200	300	0	0	0	0	0	0	0	200	903	0	0	0	0	0	0	0	603	903	0
644	3	0	0	0	0	0	0	200	300	0	0	0	0	0	0	0	200	903	0	0	0	0	0	0	0	603	903	0
644	4	0	0	0	0	0	0	200	300	0	0	0	0	0	0	0	200	903	0	0	0	0	0	0	0	603	903	0
644	5	0	0	0	0	0	0	200	300	0	0	0	0	0	0	0	200	903	0	0	0	0	0	0	0	603	903	0
644	6	0	0	0	0	0	0	200	300	0	0	0	0	0	0	0	200	903	0	0	0	0	0	0	0	603	903	0
644	7	0	0	0	0	0	0	200	300	0	0	0	0	0	0	0	200	903	0	0	0	0	0	0	0	603	903	0
644	8	0	0	0	0	0	0	200	300	0	0	0	0	0	0	0	200	903	0	0	0	0	0	0	0	603	903	0
644	9	0	0	0	0	0	0	200	300	0	0	0	0	0	0	0	200	903	0	0	0	0	0	0	0	603	903	0
645	0	0	0	0	0	0	0	200	300	0	0	0	0	0	0	0	200	903	0	0	0	0	0	0	0	603	903	0
645	1	0	0	0	0	0	0	200	300	0	0	0	0	0	0	0	200	903	0	0	0	0	0	0	0	603	903	0
645	2	0	0	0	0	0	0	200	300	0	0	0	0	0	0	0	200	903	0	0	0	0	0	0	0	603	903	0
645	3	0	0	0	0	0	0	200	300	0	0	0	0	0	0	0	200	903	0	0	0	0	0	0	0	603	903	0
645	4	0	0	0	0	0	0	200	300	0	0	0	0	0	0	0	200	903	0	0	0	0	0	0	0	603	903	0
645	5	0	0	0	0	0	0	200	300	0	0	0	0	0	0	0	200	903	0	0	0	0	0	0	0	603	903	0
645	6	0	0	0	0	0	0	200	300	0	0	0	0	0	0	0	200	903	0	0	0	0	0	0	0	603	903	0
645	7	0	0	0	0	0	0	200	300	0	0	0	0	0	0	0	200	903	0	0	0	0	0	0	0	603	903	0
645	8	0	0	0	0	0	0	200	300	0	0	0	0	0	0	0	200	903	0	0	0	0	0	0	0	603	903	0
645	9	0	0	0	0	0	0	200	300	0	0	0	0	0	0	0	200	903	0	0	0	0	0	0	0	603	903	0
646	0	0	0	0	0	0	0	200	300	0	0	0	0	0	0	0	200	903	0	0	0	0	0	0	0	603	903	0
646	1	0	0	0	0	0	0	200	300	0	0	0	0	0	0	0	200	903	0	0	0	0	0	0	0	603	903	0
646	2	0	0	0	0	0	0	200	300	0	0	0	0	0	0	0	200	903	0	0	0	0	0	0	0	603	903	0
646	3	0	0	0	0	0	0	200	300	0	0	0	0	0	0	0	200	903	0	0	0	0	0	0	0	603	903	0
646	4	0	0	0	0	0	0	200	300	0	0	0	0	0	0	0	200	903	0	0	0	0	0	0	0	603	903	0
646	5	0	0	0	0	0	0	200	300	0	0	0	0	0	0	0	200	903	0	0	0	0	0	0	0	603	903	0
646	6	0	0	0	0	0	0	200	300	0	0	0	0	0	0	0	200	903	0	0	0	0	0	0	0	603	903	0
646	7	0	0	0	0	0	0	200	300	0	0	0	0	0	0	0	200	903	0	0	0	0	0	0	0	603	903	0
646	8	0	0	0	0	0	0	200	300	0	0	0	0	0	0	0	200	903	0	0	0	0	0	0	0	603	903	0
646	9	0	0	0	0	0	0	200	300	0	0	0	0	0	0	0	200	903	0	0	0	0	0	0	0	603	903	0
647	0	0	0	0	0	0	0	200	300	0	0	0	0	0	0	0	200	903	0	0	0	0	0	0	0	603	903	0
647	1	0	0	0	0	0	0	200	300	0	0	0	0	0	0	0	200	903	0	0	0	0	0	0	0	603	903	0
647	2	0	0	0	0	0	0	200	300	0	0	0	0	0	0	0	200	903	0	0	0	0	0	0	0	603	903	0
647	3	0	0	0	0	0	0	200	300	0	0	0	0	0	0	0	200	903	0	0	0	0	0	0	0	603	903	0
647	4	0	0	0	0	0	0	200	300	0	0	0	0	0	0	0	200	903	0	0	0	0	0	0	0	603	903	0
647	5	0	0	0	0	0	0	200	300	0	0	0	0	0	0	0	200	903	0	0	0	0	0	0	0	603	903	0
647	6	0	0	0	0	0	0	200	300	0	0	0	0	0	0	0	200	903	0	0	0	0	0	0	0	603	903	0
647	7	0	0	0	0	0	0	200	300	0	0	0	0	0	0	0	200	903	0	0	0	0	0	0	0	603	903	0
647	8	0	0	0	0	0	0	200	300	0	0	0	0	0	0	0	200	903	0	0	0	0	0	0	0	603	903	0
647	9	0	0	0	0	0	0	200	300	0	0	0	0	0	0	0	200	903	0	0	0	0	0	0	0	603	903	0
648	0	0	0	0	0	0	0	200	300	0	0	0	0	0	0	0	200	903	0	0	0	0	0	0	0	603	903	0
648	1	0	0	0	0	0	0	200	300	0	0	0	0	0	0	0	200	903	0	0	0	0	0	0	0	603	903	0
648	2	0	0	0	0	0	0	200	300	0	0	0	0	0	0	0	200	903	0	0	0	0	0	0	0	603	903	0
648	3	0	0	0	0	0	0	200	300	0	0	0	0	0	0	0	200	903	0	0	0	0	0	0	0	603	903	0
648	4	0	0	0	0	0	0	200	300	0	0	0	0	0	0	0	200	903	0	0	0	0	0	0	0	603	903	0
648	5	0	0	0	0	0	0	200	300	0	0	0	0	0	0	0	200	903	0	0	0	0	0	0	0	603	903	0
648	6	0	0	0	0	0	0	200	300	0	0	0	0	0	0	0	200	903	0	0	0	0	0	0	0	603	903	0
648	7	0	0	0	0	0	0	200	300	0	0	0	0	0	0	0	200	903	0	0	0	0	0	0	0	603	903	0
648	8	0	0	0	0	0	0	200	300	0	0	0	0	0	0	0	200	903	0	0	0	0	0	0	0	603	903	0
648	9	0	0	0	0	0	0	200	300	0	0	0	0	0	0	0	200	903	0	0	0	0	0	0	0	603	903	0
649	0	0	0	0	0	0	0	200	300	0	0	0	0	0	0	0	200	903	0	0	0	0	0	0	0	603	903	0
649	1	0	0	0	0	0	0	200	300	0	0	0	0	0	0	0	200	903	0	0	0	0	0	0	0	603	903	0
649	2	0	0	0	0	0	0	200	300	0	0	0	0	0	0	0	200	903	0	0	0	0	0	0	0	603	903	0
649	3	0	0	0	0	0	0	200	300	0	0	0	0	0	0	0	200	903	0	0	0	0	0	0	0	603	903	0
649	4	0	0	0	0	0	0	200	300	0	0	0	0	0	0	0	200	903	0	0	0	0	0	0	0	603	903	0
649	5	0	0	0	0	0	0	200	300	0	0	0	0	0	0	0	200	903	0	0	0	0	0	0	0	603	903	0
649	6	0	0	0	0	0	0	200	300	0	0	0	0	0	0	0	200	903	0	0	0	0	0	0	0	603	903	0
649	7	0	0	0	0	0	0	200	300	0	0	0	0	0	0	0	200	903	0	0	0	0	0	0	0	603	903	0
649	8	0	0	0	0	0	0	200	300	0	0	0	0	0	0	0	200	903	0	0	0	0	0	0	0	603	903	0
649	9	0	0	0	0	0	0	200	300	0	0	0	0	0	0	0	200	903	0	0	0	0	0	0	0	603	903	0
650	0	0	0	0	0	0	0	200	300	0	0	0	0	0	0	0	200	903	0	0	0	0	0	0	0	603	903	0
650	1	0	0	0	0	0	0	200	300	0	0	0	0	0	0	0	200	903	0	0	0	0	0	0	0	603	903	0
650	2	0	0	0	0	0	0	200	300	0	0	0	0	0	0	0	200	903	0	0	0	0	0	0	0	603	903	0
650	3	0	0	0	0	0	0	200	300	0	0	0	0	0	0	0	200	903	0	0	0	0	0	0	0	603	903	0
650	4	0	0	0	0	0	0	200	300	0	0	0	0	0	0	0	200	903	0	0	0	0	0	0	0	603	903	0
650	5	0	0	0	0	0	0	200	300	0	0	0	0	0	0	0	200	903	0	0	0	0	0	0	0	603	903	0
650	6	0	0	0	0	0	0	200	300	0	0	0	0	0	0	0	200	903	0	0	0	0	0	0	0	603	903	0
650	7	0	0	0	0	0	0	200	300	0	0	0	0	0	0	0	200	903	0	0	0	0	0	0	0	603	903	0
650	8	0	0	0	0	0	0	200	300	0	0	0	0	0	0	0	200	903	0	0	0	0	0	0	0	603	903	0
650	9	0	0	0	0	0	0	200	300	0	0	0	0	0	0	0	200	903	0	0	0	0	0	0	0	603	903	0
651	0	0	0	0	0	0	0	200	300	0	0	0	0	0	0	0	200	903	0	0	0	0	0	0	0	603	903	0
651	1	0	0	0	0	0	0	200	300	0	0	0	0	0	0	0	200	903	0	0	0	0	0	0	0	603	903	0
651	2	0	0	0	0	0	0	200	300	0	0	0	0	0	0	0	200	903	0	0	0	0	0	0	0	603	903	0
651	3	0	0	0	0	0	0	200	300	0	0	0	0	0	0	0	200	903	0	0	0	0	0	0	0	603	903	0
651	4	0	0	0	0	0	0	200	300	0	0	0	0	0	0	0	200	903	0	0	0	0	0	0	0	603	903	0
651	5	0	0	0	0	0	0	200	300	0	0	0	0	0	0	0	200	903	0	0	0	0	0	0	0	603	903	0
651	6	0	0	0	0	0	0	200	300	0	0	0	0	0	0	0	200	903	0	0	0	0	0	0	0	603	903	0
651	7	0	0	0	0	0	0	200	300	0	0	0	0	0	0	0	200	903	0	0	0	0	0	0	0	603	903	0
651	8	0	0	0	0	0	0	200	300	0	0	0	0	0	0	0	200	903	0	0	0	0	0	0	0	603	903	0
651	9	0	0	0	0	0	0	200	300	0	0	0	0	0	0	0	200	903	0	0	0	0	0	0	0	603	903	0
652	0	0	0	0	0	0	0	200	300	0	0	0	0	0	0	0	200	903	0	0	0	0	0	0	0	603	903	0
652	1	0	0	0	0	0	0	200	300	0	0	0	0	0	0	0	200	903	0	0	0	0	0	0	0	603	903	0
652	2	0	0	0	0	0	0	200	300	0	0	0	0	0	0	0	200	903	0	0	0	0	0	0	0	603	903	0
652	3	0	0	0	0	0	0	200	300	0	0	0	0	0	0	0	200	903	0	0	0	0	0	0	0	603	903	0
652	4	0	0	0	0	0	0	200	300	0	0	0	0	0	0	0	200	903	0	0	0	0	0	0	0	603	903	0
652	5	0	0	0	0	0	0	200	300	0	0	0	0	0	0	0	200	903	0	0	0	0	0	0	0	603	903	0
652	6	0	0	0	0	0	0	200	300	0	0	0	0	0	0	0	200	903	0	0	0	0	0	0	0	603	903	0
652	7	0	0	0	0	0	0	200	300	0	0	0	0	0	0	0	200	903	0	0	0	0	0	0	0	603	903	0
652	8	0	0	0	0	0	0	200	300	0	0	0	0	0	0	0	200	903	0	0	0	0	0	0	0	603	903	0
652	9	0	0	0	0	0	0	200	300	0	0	0	0	0	0	0	200	903	0	0	0	0	0	0	0	603	903	0
653	0	0	0	0	0	0	0	200	300	0	0	0	0	0	0	0	200	903	0	0	0	0	0	0	0	603	903	0
653	1	0	0	0	0	0	0	200	300	0	0	0	0	0	0	0	200	903	0	0	0	0	0	0	0	603	903	0
653	2	0	0	0	0	0	0	200	300	0	0	0	0	0	0	0	200	903	0	0	0	0	0	0	0	603	903	0
653	3	0	0	0	0	0	0	200	300	0	0	0	0	0	0	0	200	903	0	0	0	0	0	0	0	603	903	0
653	4	0	0	0	0	0	0	200	300	0	0	0	0	0	0	0	200	903	0	0	0	0	0	0	0	603	903	0
653	5	0	0	0	0	0	0	200	300	0	0	0	0	0	0	0	200	903	0	0	0	0	0	0	0	603	903	0
653	6	0	0	0	0	0	0	200	300	0	0	0	0	0	0	0	200	903	0	0	0	0	0	0	0	603	903	0
653	7	0	0	0	0	0	0	200	300	0	0	0	0	0	0	0	200	903	0	0	0	0	0	0	0	603	903	0
653	8	0	0	0	0	0	0	200	300	0	0	0	0	0	0	0	200	903	0	0	0	0	0	0	0	603	903	0
653	9	0	0	0	0	0	0	200	300	0	0	0	0	0	0	0	200	903	0	0	0	0	0	0	0	603	903	0
654	0	0	0	0	0	0	0	200	300	0	0	0	0	0	0	0	200	903	0	0	0	0	0	0	0	603	903	0
654	1	0	0	0	0	0	0	200	300	0	0	0	0	0	0	0	200	903	0	0	0	0	0	0	0	603	903	0
654	2	0	0	0	0	0	0	200	300	0	0	0	0	0	0	0	200	903	0	0	0	0	0	0	0	603	903	0
654	3	0	0	0	0	0	0	200	300	0	0	0	0	0	0	0	200	903	0	0	0	0	0	0	0	603	903	0
654	4	0	0	0	0	0	0	200	300	0	0	0	0	0	0	0	200	903	0	0	0	0	0	0	0	603	903	0
654	5	0	0	0	0	0	0	200	300	0	0	0	0	0	0	0	200	903	0	0	0	0	0	0	0	603	903	0
654	6	0	0	0	0	0	0	200	300	0	0	0	0	0	0	0	200	903	0	0	0	0	0	0	0	603	903	0
654	7	0	0	0	0	0	0	200	300	0	0	0	0	0	0	0	200	903	0	0	0	0	0	0	0	603	903	0
654	8	0	0	0	0	0	0	200	300	0	0	0	0	0	0	0	200	903	0	0	0	0	0	0	0	603	903	0
654	9	0	0	0	0	0	0	200	300	0	0	0	0	0	0	0	200	903	0	0	0	0	0	0	0	603	903	0
655	0	0	0	0	0	0	0	200	300	0	0	0	0	0	0	0	200	903	0	0	0	0	0	0	0	603	903	0
655	1	0	0	0	0	0	0	200	300	0	0	0	0	0	0	0	200	903	0	0	0	0	0	0	0	603	903	0
655	2	0	0	0	0	0	0	200	300	0	0	0	0	0	0	0	200	903	0	0	0	0	0	0	0	603	903	0
655	3	0	0	0	0	0	0	200	300	0	0	0	0	0	0	0	200	903	0	0	0	0	0	0	0	603	903	0
655	4	0	0	0	0	0	0	200	300	0	0	0	0	0	0	0	200	903	0	0	0	0	0	0	0	603	903	0
655	5	0	0	0	0	0	0	200	300	0	0	0	0	0	0	0	200	903	0	0	0	0	0	0	0	603	903	0
655	6	0	0	0	0	0	0	200	300	0	0	0	0	0	0	0	200	903	0	0	0	0	0	0	0	603	903	0
655	7	0	0	0	0	0	0	200	300	0	0	0	0	0	0	0	200	903	0	0	0	0	0	0	0	603	903	0
655	8	0	0	0	0	0	0	200	300	0	0	0	0	0	0	0	200	903	0	0	0	0	0	0	0	603	903	0
655	9	0	0	0	0	0	0	200	300	0	0	0	0	0	0	0	200	903	0	0	0	0	0	0	0	603	903	0
656	0	0	0	0	0	0	0	200	300	0	0	0	0	0	0	0	200	903	0	0	0	0	0	0	0	603	903	0
656	1	0	0	0	0	0	0	200	300	0	0	0	0	0	0	0	200	903	0	0	0	0	0	0	0	603	903	0
656	2	0	0	0	0	0	0	200	300	0	0	0	0	0	0	0	200	903	0	0	0	0	0	0	0	603	903	0
656	3	0	0	0	0	0	0	200	300	0	0	0	0	0	0	0	200	903	0	0	0	0	0	0	0	603	903	0
656	4	0	0	0	0	0	0	200	300	0	0	0	0	0	0	0	200	903	0	0	0	0	0	0	0	603	903	0
656	5	0	0	0	0	0	0	200	300	0	0	0	0	0	0	0	200	903	0	0	0	0	0	0	0	603	903	0
656	6	0	0	0	0	0	0	200	300	0	0	0	0	0	0	0	200	903	0	0	0	0	0	0	0	603	903	0
656	7	0	0	0	0	0	0	200	300	0	0	0	0	0	0	0	200	903	0	0	0	0	0	0	0	603	903	0
656	8	0	0	0	0	0	0	200	300	0	0	0	0	0	0	0	200	903	0	0	0	0	0	0	0	603	903	0
656	9	0	0	0	0	0	0	200	300	0	0	0	0	0	0	0	200	903	0	0	0	0	0	0	0	603	903	0
657	0	0	0	0	0	0	0	200	300	0	0	0	0	0	0	0	200	903	0	0	0	0	0	0	0	603	903	0
657	1	0	0	0	0	0	0	200	300	0	0	0	0	0	0	0	200	903	0	0	0	0	0	0	0	603	903	0
657	2	0	0	0	0	0	0	200	300	0	0	0	0	0	0	0	200	903	0	0	0	0	0	0	0	603	903	0
657	3	0	0	0	0	0	0	200	300	0	0	0	0	0	0	0	200	903	0	0	0	0	0	0	0	603	903	0
657	4	0	0	0	0	0	0	200	300	0	0	0	0	0	0	0	200	903	0	0	0	0	0	0	0	603	903	0
657	5	0	0	0	0	0	0	200	300	0	0	0	0	0	0	0	200	903	0	0	0	0	0	0	0	603	903	0
657	6	0	0	0	0	0	0	200	300	0	0	0	0	0	0	0	200	903	0	0	0	0	0	0	0	603	903	0
657	7	0	0	0	0	0	0	200	300	0	0	0	0	0	0	0	200	903	0	0	0	0	0	0	0	603	903	0
657	8	0	0	0	0	0	0	200	300	0	0	0	0	0	0	0	200	903	0	0	0	0	0	0	0	603	903	0
657	9	0	0	0	0	0	0	200	300	0	0	0	0	0	0	0	200	903	0	0	0	0	0	0	0	603	903	0
658	0	0	0	0	0	0	0	200	300	0	0	0	0	0	0	0	200	903	0	0	0	0	0	0	0	603	903	0
658	1	0	0	0	0	0	0	200	300	0	0	0	0	0	0	0	200	903	0	0	0	0	0	0	0	603	903	0
658	2	0	0	0	0	0	0	200	300	0	0	0	0	0	0	0	200	903	0	0	0	0	0	0	0	603	903	0
658	3	0	0	0	0	0	0	200	300	0	0	0	0	0	0	0	200	903	0	0	0	0	0	0	0	603	903	0
658	4	0	0	0	0	0	0	200	300	0	0	0	0	0	0	0	200	903	0	0	0	0	0	0	0	603	903	0
658	5	0	0	0	0	0	0	200	300	0	0	0	0	0	0	0	200	903	0	0	0	0	0	0	0	603	903	0
658	6	0	0	0	0	0	0	200	300	0	0	0	0	0	0	0	200	903	0	0	0	0	0	0	0	603	903	0
658	7	0	0	0	0	0	0	200	300	0	0	0	0	0	0	0	200	903	0	0	0	0	0	0	0	603	903	0
658	8	0	0	0	0	0	0	200	300	0	0	0	0	0	0	0	200	903	0	0	0	0	0	0	0	603	903	0
658	9	0	0	0	0	0	0	200	300	0	0	0	0	0	0	0	200	903	0	0	0	0	0	0	0	603	903	0
659	0	0	0	0	0	0	0	200	300	0	0	0	0	0	0	0	200	903	0	0	0	0	0	0	0	603	903	0
659	1	0	0	0	0	0	0	200	300	0	0	0	0	0	0	0	200	903	0	0	0	0	0	0	0	603	903	0
659	2	0	0	0	0	0	0	200	300	0	0	0	0	0	0	0	200	903	0	0	0	0	0	0	0	603	903	0
659	3	0	0	0	0	0	0	200	300	0	0	0	0	0	0	0	200	903	0	0	0	0	0	0	0	603	903	0
659	4	0	0	0	0	0	0	200	300	0	0	0	0	0	0	0	200	903	0	0	0	0	0	0	0	603	903	0
659	5	0	0	0	0	0	0	200	300	0	0	0	0	0	0	0	200	903	0	0	0	0	0	0	0	603	903	0
659	6	0	0	0	0	0	0	200	300	0	0	0	0	0	0	0	200	903	0	0	0	0	0	0	0	603	903	0
659	7	0	0	0	0	0	0	200	300	0	0	0	0	0	0	0	200	903	0	0	0	0	0	0	0	603	903	0
659	8	0	0	0	0	0	0	200	300	0	0	0	0	0	0	0	200	903	0	0	0	0	0	0	0	603	903	0
659	9	0	0	0	0	0	0	200	300	0	0	0	0	0	0	0	200	903	0	0	0	0	0	0	0	603	903	0
660	0	0	0	0	0	0	0	200	300	0	0	0	0	0	0	0	200	903	0	0	0	0	0	0	0	603	903	0
660	1	0	0	0	0	0	0	200	300	0	0	0	0	0	0	0	200	903	0	0	0	0	0	0	0	603	903	0
660	2	0	0	0	0	0	0	200	300	0	0	0	0	0	0	0	200	903	0	0	0	0	0	0	0	603	903	0
660	3	0	0	0	0	0	0	200	300	0	0	0	0	0	0	0	200	903	0	0	0	0	0	0	0	603	903	0
660	4	0	0	0	0	0	0	200	300	0	0	0	0	0	0	0	200	903	0	0	0	0	0	0	0	603	903	0
660	5	0	0	0	0	0	0	200	300	0	0	0	0	0	0	0	200	903	0	0	0	0	0	0	0	603	903	0
660	6	0	0	0	0	0	0	200	300	0	0	0	0	0	0	0	200	903	0	0	0	0	0	0	0	603	903	0
660	7	0	0	0	0	0	0	200	300	0	0	0	0	0	0	0	200	903	0	0	0	0	0	0	0	603	903	0
660	8	0	0	0	0	0	0	200	300	0	0	0	0	0	0	0	200	903	0	0	0	0	0	0	0	603	903	0
660	9	0	0	0	0	0	0	200	300	0	0	0	0	0	0	0	200	903	0	0	0	0	0	0	0	603	903	0
661	0	0	0	0	0	0	0	200	300	0	0	0	0	0	0	0	200	903	0	0	0	0	0	0	0	603	903	0
661	1	0	0	0	0	0	0	200	300	0	0	0	0	0	0	0	200	903	0	0	0	0	0	0	0	603	903	0
661	2	0	0	0	0	0	0	200	300	0	0	0	0	0	0	0	200	903	0	0	0	0	0	0	0	603	903	0
661	3	0	0	0	0	0	0	200	300	0	0	0	0	0	0	0	200	903	0	0	0	0	0	0	0	603	903	0
661	4	0	0	0	0	0	0	200	300	0	0	0	0	0	0	0	200	903	0	0	0	0	0	0	0	603	903	0
661	5	0	0	0	0	0	0	200	300	0	0	0	0	0	0	0	200	903	0	0	0	0	0	0	0	603	903	0
661	6	0	0	0	0	0	0	200	300	0	0	0	0	0	0	0	200	903	0	0	0	0	0	0	0	603	903	0
661	7	0	0	0	0	0	0	200	300	0	0	0	0	0	0	0	200	903	0	0	0	0	0	0	0	603	903	0
661	8	0	0	0	0	0	0	200	300	0	0	0	0	0	0	0	200	903	0	0	0	0	0	0	0	603	903	0
661	9	0	0	0	0	0	0	200	300	0	0	0	0	0	0	0	200	903	0	0	0	0	0	0	0	603	903	0
662	0	0	0	0	0	0	0	200	300	0	0	0	0	0	0	0	200	903	0	0	0	0	0	0	0	603	903	0
662	1	0	0	0	0	0	0	200	300	0	0	0	0	0	0	0	200	903	0	0	0	0	0	0	0	603	903	0
662	2	0	0	0	0	0	0	200	300	0	0	0	0	0	0	0	200	903	0	0	0	0	0	0	0	603	903	0
662	3	0	0	0	0	0	0	200	300	0	0	0	0	0	0	0	200	903	0	0	0	0	0	0	0	603	903	0
662	4	0	0	0	0	0	0	200	300	0	0	0	0	0	0	0	200	903	0	0	0	0	0	0	0	603	903	0
662	5	0	0	0	0	0	0	200	300	0	0	0	0	0	0	0	200	903	0	0	0	0	0	0	0	603	903	0
662	6	0	0	0	0	0	0	200	300	0	0	0	0	0	0	0	200	903	0	0	0	0	0	0	0	603	903	0
662	7	0	0	0	0	0	0	200	300	0	0	0	0	0	0	0	200	903	0	0	0	0	0	0	0	603	903	0
662	8	0	0	0	0	0	0	200	300	0	0	0	0	0	0	0	200	903	0	0	0	0	0	0	0	603	903	0
662	9	0	0	0	0	0	0	200	300	0	0	0	0	0	0	0	200	903	0	0	0	0	0	0	0	603	903	0
663	0	0	0	0	0	0	0	200	300	0	0	0	0	0	0	0	200	903	0	0	0	0	0	0	0	603	903	0
663	1	0	0	0	0	0	0	200	300	0	0	0	0	0	0	0	200	903	0	0	0	0	0	0	0	603	903	0
663	2	0	0	0	0	0	0	200	300	0	0	0	0	0	0	0	200	903	0	0	0	0	0	0	0	603	903	0
663	3	0	0	0	0	0	0	200	300	0	0	0	0	0	0	0	200	903	0	0	0	0	0	0	0	603	903	0
663	4	0	0	0	0	0	0	200	300	0	0	0	0	0	0	0	200	903	0	0	0	0	0	0	0	603	903	0
663	5	0	0	0	0	0	0	200	300	0	0	0	0	0	0	0	200	903	0	0	0	0	0	0	0	603	903	0
663	6	0	0	0	0	0	0	200	300	0	0	0	0	0	0	0	200	903	0	0	0	0	0	0	0	603	903	0
663	7	0	0	0	0	0	0	200	300	0	0	0	0	0	0	0	200	903	0	0	0	0	0	0	0	603	903	0
663	8	0	0	0	0	0	0	200	300	0	0	0	0	0	0	0	200	903	0	0	0	0	0	0	0	603	903	0
663	9	0	0	0	0	0	0	200	300	0	0	0	0	0	0	0	200	903	0	0	0	0	0	0	0	603	903	0
664	0	0	0	0	0	0	0	200	300	0	0	0	0	0	0	0	200	903	0	0	0	0	0	0	0	603	903	0
664	1	0	0	0	0	0	0	200	300	0	0	0	0	0	0	0	200	903	0	0	0	0	0	0	0	603	903	0
664	2	0	0	0	0	0	0	200	300	0	0	0	0	0	0	0	200	903	0	0	0	0	0	0	0	603	903	0
664	3	0	0	0	0	0	0	200	300	0	0	0	0	0	0	0	200	903	0	0	0	0	0	0	0	603	903	0
664	4	0	0	0	0	0	0	200	300	0	0	0	0	0	0	0	200	903	0	0	0	0	0	0	0	603	903	0
664	5	0	0	0	0	0	0	200	300	0	0	0	0	0	0	0	200	903	0	0	0	0	0	0	0	603	903	0
664	6	0	0	0	0	0	0	200	300	0	0	0	0	0	0	0	200	903	0	0	0	0	0	0	0	603	903	0
664	7	0	0	0	0	0	0	200	300	0	0	0	0	0	0	0	200	903	0	0	0	0	0	0	0	603	903	0
664	8	0	0	0	0	0	0	200	300	0	0	0	0	0	0	0	200	903	0	0	0	0	0	0	0	603	903	0
664	9	0	0	0	0	0	0	200	300	0	0	0	0	0	0	0	200	903	0	0	0	0	0	0	0	603	903	0
665	0	0	0	0	0	0	0	200	300	0	0	0	0	0	0	0	200	903	0	0	0	0	0	0	0	603	903	0
665	1	0	0	0	0	0	0	200	300	0	0	0	0	0	0	0	200	903	0	0	0	0	0	0	0	603	903	0
665	2	0	0	0	0	0	0	200	300	0	0	0	0	0	0	0	200	903	0	0	0	0	0	0	0	603	903	0
665	3	0	0	0	0	0	0	200	300	0	0	0	0	0	0	0	200	903	0	0	0	0	0	0	0	603	903	0
665	4	0	0	0	0	0	0	200	300	0	0	0	0	0	0	0	200	903	0	0	0	0	0	0	0	603	903	0
665	5	0	0	0	0	0	0	200	300	0	0	0	0	0	0	0	200	903	0	0	0	0	0	0	0	603	903	0
665	6	0	0	0	0	0	0	200	300	0	0	0	0	0	0	0	200	903	0	0	0	0	0	0	0	603	903	0
665	7	0	0	0	0	0	0	200	300	0	0	0	0	0	0	0	200	903	0	0	0	0	0	0	0	603	903	0
665	8	0	0	0	0	0	0	200	300	0	0	0	0	0	0	0	200	903	0	0	0	0	0	0	0	603	903	0
665	9	0	0	0	0	0	0	200	300	0	0	0	0	0	0	0	200	903	0	0	0	0	0	0	0	603	903	0
666	0	0	0	0	0	0	0	200	300	0	0	0	0	0	0	0	200	903	0	0	0	0	0	0	0	603	903	0
666	1	0	0	0	0	0	0	200	300	0	0	0	0	0	0	0	200	903	0	0	0	0	0	0	0	603	903	0
666	2	0	0	0	0	0	0	200	300	0	0	0	0	0	0	0	200	903	0	0	0	0	0	0	0	603	903	0
666	3	0	0	0	0	0	0	200	300	0	0	0	0	0	0	0	200	903	0	0	0	0	0	0	0	603	903	0
666	4	0	0	0	0	0	0	200	300	0	0	0	0	0	0	0	200	903	0	0	0	0	0	0	0	603	903	0
666	5	0	0	0	0	0	0	200	300	0	0	0	0	0	0	0	200	903	0	0	0	0	0	0	0	603	903	0
666	6	0	0	0	0	0	0	200	300	0	0	0	0	0	0	0	200	903	0	0	0	0	0	0	0	603	903	0
666	7	0	0	0	0	0	0	200	300	0	0	0	0	0	0	0	200	903	0	0	0	0	0	0	0	603	903	0
666	8	0	0	0	0	0	0	200	300	0	0	0	0	0	0	0	200	903	0	0	0	0	0	0	0	603	903	0
666	9	0	0	0	0	0	0	200	300	0	0	0	0	0	0	0	200	903	0	0	0	0	0	0	0	603	903	0
667	0	0	0	0	0	0	0	200	300	0	0	0	0	0	0	0	200	903	0	0	0	0	0	0	0	603	903	0
667	1	0	0	0	0	0	0	200	300	0	0	0	0	0	0	0	200	903	0	0	0	0	0	0	0	603	903	0
667	2	0	0	0	0	0	0	200	300	0	0	0	0	0	0	0	200	903	0	0	0	0	0	0	0	603	903	0
667	3	0	0	0	0	0	0	200	300	0	0	0	0	0	0	0	200	903	0	0	0	0	0	0	0	603	903	0
667	4	0	0	0	0	0	0	200	300	0	0	0	0	0	0	0	200	903	0	0	0	0	0	0	0	603	903	0
667	5	0	0	0	0	0	0	200	300	0	0	0	0	0	0	0	200	903	0	0	0	0	0	0	0	603	903	0
667	6	0	0	0	0	0	0	200	300	0	0	0	0	0	0	0	200	903	0	0	0	0	0	0	0	603	903	0
667	7	0	0	0	0	0	0	200	300	0	0	0	0	0	0	0	200	903	0	0	0	0	0	0	0	603	903	0
667	8	0	0	0	0	0	0	200	300	0	0	0	0	0	0	0	200	903	0	0	0	0	0	0	0	603	903	0
667	9	0	0	0	0	0	0	200	300	0	0	0	0	0	0	0	200	903	0	0	0	0	0	0	0	603	903	0
668	0	0	0	0	0	0	0	200	300	0	0	0	0	0	0	0	200	903	0	0	0	0	0	0	0	603	903	0
668	1	0	0	0	0	0	0	200	300	0	0	0	0	0	0	0	200	903	0	0	0	0	0	0	0	603	903	0
668	2	0	0	0	0	0	0	200	300	0	0	0	0	0	0	0	200	903	0	0	0	0	0	0	0	603	903	0
668	3	0	0	0	0	0	0	200	300	0	0	0	0	0	0	0	200	903	0	0	0	0	0	0	0	603	903	0
668	4	0	0	0	0	0	0	200	300	0	0	0	0	0	0	0	200	903	0	0	0	0	0	0	0	603	903	0
668	5	0	0	0	0	0	0	200	300	0	0	0	0	0	0	0	200	903	0	0	0	0	0	0	0	603	903	0
668	6	0	0	0	0	0	0	200	300	0	0	0	0	0	0	0	200	903	0	0	0	0	0	0	0	603	903	0
668	7	0	0	0	0	0	0	200	300	0	0	0	0	0	0	0	200	903	0	0	0	0	0	0	0	603	903	0
668	8	0	0	0	0	0	0	200	300	0	0	0	0	0	0	0	200	903	0	0	0	0	0	0	0	603	903	0
668	9	0	0	0	0	0	0	200	300	0	0	0	0	0	0	0	200	903	0	0	0	0	0	0	0	603	903	0
669	0	0	0	0	0	0	0	200	300	0	0	0	0	0	0	0	200	903	0	0	0	0	0	0	0	603	903	0
669	1	0	0	0	0	0	0	200	300	0	0	0	0	0	0	0	200	903	0	0	0	0	0	0	0	603	903	0
669	2	0	0	0	0	0	0	200	300	0	0	0	0	0	0	0	200	903	0	0	0	0	0	0	0	603	903	0
669	3	0	0	0	0	0	0	200	300	0	0	0	0	0	0	0	200	903	0	0	0	0	0	0	0	603	903	0
669	4	0	0	0	0	0	0	200	300	0	0	0	0	0	0	0	200	903	0	0	0	0	0	0	0	603	903	0
669	5	0	0	0	0	0	0	200	300	0	0	0	0	0	0	0	200	903	0	0	0	0	0	0	0	603	903	0
669	6	0	0	0	0	0	0	200	300	0	0	0	0	0	0	0	200	903	0	0	0	0	0	0	0	603	903	0
669	7	0	0	0	0	0	0	200	300	0	0	0	0	0	0	0	200	903	0	0	0	0	0	0	0	603	903	0
669	8	0	0	0	0	0	0	200	300	0	0	0	0	0	0	0	200	903	0	0	0	0	0	0	0	603	903	0
669	9	0	0	0	0	0	0	200	300	0	0	0	0	0	0	0	200	903	0	0	0	0	0	0	0	603	903	0
670	0	0	0	0	0	0	0	200	300	0	0	0	0	0	0	0	200	903	0	0	0	0	0	0	0	603	903	0
670	1	0	0	0	0	0	0	200	300	0	0	0	0	0	0	0	200	903	0	0	0	0	0	0	0	603	903	0
670	2	0	0	0	0	0	0	200	300	0	0	0	0	0	0	0	200	903	0	0	0	0	0	0	0	603	903	0
670	3	0	0	0	0	0	0	200	300	0	0	0	0	0	0	0	200	903	0	0	0	0	0	0	0	603	903	0
670	4	0	0	0	0	0	0	200	300	0	0	0	0	0	0	0	200	903	0	0	0	0	0	0	0	603	903	0
670	5	0	0	0	0	0	0	200	300	0	0	0	0	0	0	0	200	903	0	0	0	0	0	0	0	603	903	0
670	6	0	0	0	0	0	0	200	300	0	0	0	0	0	0	0	200	903	0	0	0	0	0	0	0	603	903	0
670	7	0	0	0	0	0	0	200	300	0	0	0	0	0	0	0	200	903	0	0	0	0	0	0	0	603	903	0
670	8	0	0	0	0	0	0	200	300	0	0	0	0	0	0	0	200	903	0	0	0	0	0	0	0	603	903	0
670	9	0	0	0	0	0	0	200	300	0	0	0	0	0	0	0	200	903	0	0	0	0	0	0	0	603	903	0
671	0	0	0	0	0	0	0	200	300	0	0	0	0	0	0	0	200	903	0	0	0	0	0	0	0	603	903	0
671	1	0	0	0	0	0	0	200	300	0	0	0	0	0	0	0	200	903	0	0	0	0	0	0	0	603	903	0
671	2	0	0	0	0	0	0	200	300	0	0	0	0	0	0	0	200	903	0	0	0	0	0	0	0	603	903	0
671	3	0	0	0	0	0	0	200	300	0	0	0	0	0	0	0	200	903	0	0	0	0	0	0	0	603	903	0
671	4	0	0	0	0	0	0	200	300	0	0	0	0	0	0	0	200	903	0	0	0	0	0	0	0	603	903	0
671	5	0	0	0	0	0	0	200	300	0	0	0	0	0	0	0	200	903	0	0	0	0	0	0	0	603	903	0
671	6	0	0	0	0	0	0	200	300	0	0	0	0	0	0	0	200	903	0	0	0	0	0	0	0	603	903	0
671	7	0	0	0	0	0	0	200	300	0	0	0	0	0	0	0	200	903	0	0	0	0	0	0	0	603	903	0
671	8	0	0	0	0	0	0	200	300	0	0	0	0	0	0	0	200	903	0	0	0	0	0	0	0	603	903	0
671	9	0	0	0	0	0	0	200	300	0	0	0	0	0	0	0	200	903	0	0	0	0	0	0	0	603	903	0
672	0	0	0	0	0	0	0	200	300	0	0	0	0	0	0	0	200	903	0	0	0	0	0	0	0	603	903	0
672	1	0	0	0	0	0	0	200	300	0	0	0	0	0	0	0	200	903	0	0	0	0	0	0	0	603	903	0
672	2	0	0	0	0	0	0	200	300	0	0	0	0	0	0	0	200	903	0	0	0	0	0	0	0	603	903	0
672	3	0	0	0	0	0	0	200	300	0	0	0	0	0	0	0	200	903	0	0	0	0	0	0	0	603	903	0
672	4	0	0	0	0	0	0	200	300	0	0	0	0	0	0	0	200	903	0	0	0	0	0	0	0	603	903	0
672	5	0	0	0	0	0	0	200	300	0	0	0	0	0	0	0	200	903	0	0	0	0	0	0	0	603	903	0
672	6	0	0	0	0	0	0	200	300	0	0	0	0	0	0	0	200	903	0	0	0	0	0	0	0	603	903	0
672	7	0	0	0	0	0	0	200	300	0	0	0	0	0	0	0	200	903	0	0	0	0	0	0	0	603	903	0
672	8	0	0	0	0	0	0	200	300	0	0	0	0	0	0	0	200	903	0	0	0	0	0	0	0	603	903	0
672	9	0	0	0	0	0	0	200	300	0	0	0	0	0	0	0	200	903	0	0	0	0	0	0	0	603	903	0
673	0	0	0	0	0	0	0	200	300	0	0	0	0	0	0	0	200	903	0	0	0	0	0	0	0	603	903	0
673	1	0	0	0	0	0	0	200	300	0	0	0	0	0	0	0	200	903	0	0	0	0	0	0	0	603	903	0
673	2	0	0	0	0	0	0	200	300	0	0	0	0	0	0	0	200	903	0	0	0	0	0	0	0	603	903	0
673	3	0	0	0	0	0	0	200	300	0	0	0	0	0	0	0	200	903	0	0	0	0	0	0	0	603	903	0
673	4	0	0	0	0	0	0	200	300	0	0	0	0	0	0	0	200	903	0	0	0	0	0	0	0	603	903	0
673	5	0	0	0	0	0	0	200	300	0	0	0	0	0	0	0	200	903	0	0	0	0	0	0	0	603	903	0
673	6	0	0	0	0	0	0	200	300	0	0	0	0	0	0	0	200	903	0	0	0	0	0	0	0	603	903	0
673	7	0	0	0	0	0	0	200	300	0	0	0	0	0	0	0	200	903	0	0	0	0	0	0	0	603	903	0
673	8	0	0	0	0	0	0	200	300	0	0	0	0	0	0	0	200	903	0	0	0	0	0	0	0	603	903	0
673	9	0	0	0	0	0	0	200	300	0	0	0	0	0	0	0	200	903	0	0	0	0	0	0	0	603	903	0
674	0	0	0	0	0	0	0	200	300	0	0	0	0	0	0	0	200	903	0	0	0	0	0	0	0	603	903	0
674	1	0	0	0	0	0	0	200	300	0	0	0	0	0	0	0	200	903	0	0	0	0	0	0	0	603	903	0
674	2	0	0	0	0	0	0	200	300	0	0	0	0	0	0	0	200	903	0	0	0	0	0	0	0	603	903	0
674	3	0	0	0	0	0	0	200	300	0	0	0	0	0	0	0	200	903	0	0	0	0	0	0	0	603	903	0
674	4	0	0	0	0	0	0	200	300	0	0	0	0	0	0	0	200	903	0	0	0	0	0	0	0	603	903	0
674	5	0	0	0	0	0	0	200	300	0	0	0	0	0	0	0	200	903	0	0	0	0	0	0	0	603	903	0
674	6	0	0	0	0	0	0	200	300	0	0	0	0	0	0	0	200	903	0	0	0	0	0	0	0	603	903	0
674	7	0	0	0	0	0	0	200	300	0	0	0	0	0	0	0	200	903	0	0	0	0	0	0	0	603	903	0
674	8	0	0	0	0	0	0	200	300	0	0	0	0	0	0	0	200	903	0	0	0	0	0	0	0	603	903	0
674	9	0	0	0	0	0	0	200	300	0	0	0	0	0	0	0	200	903	0	0	0	0	0	0	0	603	903	0
675	0	0	0	0	0	0	0	200	300	0	0	0	0	0	0	0	200	903	0	0	0	0	0	0	0	603	903	0
675	1	0	0	0	0	0	0	200	300	0	0	0	0	0	0	0	200	903	0	0	0	0	0	0	0	603	903	0
675	2	0	0	0	0	0	0	200	300	0	0	0	0	0	0	0	200	903	0	0	0	0	0	0	0	603	903	0
675	3	0	0	0	0	0	0	200	300	0	0	0	0	0	0	0	200	903	0	0	0	0	0	0	0	603	903	0
675	4	0	0	0	0	0	0	200	300	0	0	0	0	0	0	0	200	903	0	0	0	0	0	0	0	603	903	0
675	5	0	0	0	0	0	0	200	300	0	0	0	0	0	0	0	200	903	0	0	0	0	0	0	0	603	903	0
675	6	0	0	0	0	0	0	200	300	0	0	0	0	0	0	0	200	903	0	0	0	0	0	0	0	603	903	0
675	7	0	0	0	0	0	0	200	300	0	0	0	0	0	0	0	200	903	0	0	0	0	0	0	0	603	903	0
675	8	0	0	0	0	0	0	200	300	0	0	0	0	0	0	0	200	903	0	0	0	0	0	0	0	603	903	0
675	9	0	0	0	0	0	0	200	300	0	0	0	0	0	0	0	200	903	0	0	0	0	0	0	0	603	903	0
676	0	0	0	0	0	0	0	200	300	0	0	0	0	0	0	0	200	903	0	0	0	0	0	0	0	603	903	0
676	1	0	0	0	0	0	0	200	300	0	0	0	0	0	0	0	200	903	0	0	0	0	0	0	0	603	903	0
676	2	0	0	0	0	0	0	200	300	0	0	0	0	0	0	0	200	903	0	0	0	0	0	0	0	603	903	0
676	3	0	0	0	0	0	0	200	300	0	0	0	0	0	0	0	200	903	0	0	0	0	0	0	0	603	903	0
676	4	0	0	0	0	0	0	200	300	0	0	0	0	0	0	0	200	903	0	0	0	0	0	0	0	603	903	0
676	5	0	0	0	0	0	0	200	300	0	0	0	0	0	0	0	200	903	0	0	0	0	0	0	0	603	903	0
676	6	0	0	0	0	0	0	200	300	0	0	0	0	0	0	0	200	903	0	0	0	0	0	0	0	603	903	0
676	7	0	0	0	0	0	0	200	300	0	0	0	0	0	0	0	200	903	0	0	0	0	0	0	0	603	903	0
676	8	0	0	0	0	0	0	200	300	0	0	0	0	0	0	0	200	903	0	0	0	0	0	0	0	603	903	0
676	9	0	0	0	0	0	0	200	300	0	0	0	0	0	0	0	200	903	0	0	0	0	0	0	0	603	903	0
677	0	0	0	0	0	0	0	200	300	0	0	0	0	0	0	0	200	903	0	0	0	0	0	0	0	603	903	0
677	1	0	0	0	0	0	0	200	300	0	0	0	0	0	0	0	200	903	0	0	0	0	0	0	0	603	903	0
677	2	0	0	0	0	0	0	200	300	0	0	0	0	0	0	0	200	903	0	0	0	0	0	0	0	603	903	0
677	3	0	0	0	0	0	0	200	300	0	0	0	0	0	0	0	200	903	0	0	0	0	0	0	0	603	903	0
677	4	0	0	0	0	0	0	200	300	0	0	0	0	0	0	0	200	903	0	0	0	0	0	0	0	603	903	0
677	5	0	0	0	0	0	0	200	300	0	0	0	0	0	0	0	200	903	0	0	0	0	0	0	0	603	903	0
677	6	0	0	0	0	0	0	200	300	0	0	0	0	0	0	0	200	903	0	0	0	0	0	0	0	603	903	0
677	7	0	0	0	0	0	0	200	300	0	0	0	0	0	0	0	200	903	0	0	0	0	0	0	0	603	903	0
677	8	0	0	0	0	0	0	200	300	0	0	0	0	0	0	0	200	903	0	0	0	0	0	0	0	603	903	0
677	9	0	0	0	0	0	0	200	300	0	0	0	0	0	0	0	200	903	0	0	0	0	0	0	0	603	903	0
678	0	0	0	0	0	0	0	200	300	0	0	0	0	0	0	0	200	903	0	0	0	0	0	0	0	603	903	0
678	1	0	0	0	0	0	0	200	300	0	0	0	0	0	0	0	200	903	0	0	0	0	0	0	0	603	903	0
678	2	0	0	0	0	0	0	200	300	0	0	0	0	0	0	0	200	903	0	0	0	0	0	0	0	603	903	0
678	3	0	0	0	0	0	0	200	300	0	0	0	0	0	0	0	200	903	0	0	0	0	0	0	0	603	903	0
678	4	0	0	0	0	0	0	200	300	0	0	0	0	0	0	0	200	903	0	0	0	0	0	0	0	603	903	0
678	5	0	0	0	0	0	0	200	300	0	0	0	0	0	0	0	200	903	0	0	0	0	0	0	0	603	903	0
678	6	0	0	0	0	0	0	200	300	0	0	0	0	0	0	0	200	903	0	0	0	0	0	0	0	603	903	0
678	7	0	0	0	0	0	0	200	300	0	0	0	0	0	0	0	200	903	0	0	0	0	0	0	0	603	903	0
678	8	0	0	0	0	0	0	200	300	0	0	0	0	0	0	0	200	903	0	0	0	0	0	0	0	603	903	0
678	9	0	0	0	0	0	0	200	300	0	0	0	0	0	0	0	200	903	0	0	0	0	0	0	0	603	903	0
679	0	0	0	0	0	0	0	200	300	0	0	0	0	0	0	0	200	903	0	0	0	0	0	0	0	603	903	0
679	1	0	0	0	0	0	0	200	300	0	0	0	0	0	0	0	200	903	0	0	0	0	0	0	0	603	903	0
679	2	0	0	0	0	0	0	200	300	0	0	0	0	0	0	0	200	903	0	0	0	0	0	0	0	603	903	0
679	3	0	0	0	0	0	0	200	300	0	0	0	0	0	0	0	200	903	0	0	0	0	0	0	0	603	903	0
679	4	0	0	0	0	0	0	200	300	0	0	0	0	0	0	0	200	903	0	0	0	0	0	0	0	603	903	0
679	5	0	0	0	0	0	0	200	300	0	0	0	0	0	0	0	200	903	0	0	0	0	0	0	0	603	903	0
679	6	0	0	0	0	0	0	200	300	0	0	0	0	0	0	0	200	903	0	0	0	0	0	0	0	603	903	0
679	7	0	0	0	0	0	0	200	300	0	0	0	0	0	0	0	200	903	0	0	0	0	0	0	0	603	903	0
679	8	0	0	0	0	0	0	200	300	0	0	0	0	0	0	0	200	903	0	0	0	0	0	0	0	603	903	0
679	9	0	0	0	0	0	0	200	300	0	0	0	0	0	0	0	200	903	0	0	0	0	0	0	0	603	903	0
680	0	0	0	0	0	0	0	200	300	0	0	0	0	0	0	0	200	903	0	0	0	0	0	0	0	603	903	0
680	1	0	0	0	0	0	0	200	300	0	0	0	0	0	0	0	200	903	0	0	0	0	0	0	0	603	903	0
680	2	0	0	0	0	0	0	200	300	0	0	0	0	0	0	0	200	903	0	0	0	0	0	0	0	603	903	0
680	3	0	0	0	0	0	0	200	300	0	0	0	0	0	0	0	200	903	0	0	0	0	0	0	0	603	903	0
680	4	0	0	0	0	0	0	200	300	0	0	0	0	0	0	0	200	903	0	0	0	0	0	0	0	603	903	0
680	5	0	0	0	0	0	0	200	300	0	0	0	0	0	0	0	200	903	0	0	0	0	0	0	0	603	903	0
680	6	0	0	0	0	0	0	200	300	0	0	0	0	0	0	0	200	903	0	0	0	0	0	0	0	603	903	0
680	7	0	0	0	0	0	0	200	300	0	0	0	0	0	0	0	200	903	0	0	0	0	0	0	0	603	903	0
680	8	0	0	0	0	0	0	200	300	0	0	0	0	0	0	0	200	903	0	0	0	0	0	0	0	603	903	0
680	9	0	0	0	0	0	0	200	300	0	0	0	0	0	0	0	200	903	0	0	0	0	0	0	0	603	903	0
681	0	0	0	0	0	0	0	200	300	0	0	0	0	0	0	0	200	903	0	0	0	0	0	0	0	603	903	0
681	1	0	0	0	0	0	0	200	300	0	0	0	0	0	0	0	200	903	0	0	0	0	0	0	0	603	903	0
681	2	0	0	0	0	0	0	200	300	0	0	0	0	0	0	0	200	903	0	0	0	0	0	0	0	603	903	0
681	3	0	0	0	0	0	0	200	300	0	0	0	0	0	0	0	200	903	0	0	0	0	0	0	0	603	903	0
681	4	0	0	0	0	0	0	200	300	0	0	0	0	0	0	0	200	903	0	0	0	0	0	0	0	603	903	0
681	5	0	0	0	0	0	0	200	300	0	0	0	0	0	0	0	200	903	0	0	0	0	0	0	0	603	903	0
681	6	0	0	0	0	0	0	200	300	0	0	0	0	0	0	0	200	903	0	0	0	0	0	0	0	603	903	0
681	7	0	0	0	0	0	0	200	300	0	0	0	0	0	0	0	200	903	0	0	0	0	0	0	0	603	903	0
681	8	0	0	0	0	0	0	200	300	0	0	0	0	0	0	0	200	903	0	0	0	0	0	0	0	603	903	0
681	9	0	0	0	0	0	0	200	300	0	0	0	0	0	0	0	200	903	0	0	0	0	0	0	0	603	903	0
682	0	0	0	0	0	0	0	200	300	0	0	0	0	0	0	0	200	903	0	0	0	0	0	0	0	603	903	0
682	1	0	0	0	0	0	0	200	300	0	0	0	0	0	0	0	200	903	0	0	0	0	0	0	0	603	903	0
682	2	0	0	0	0	0	0	200	300	0	0	0	0	0	0	0	200	903	0	0	0	0	0	0	0	603	903	0
682	3	0	0	0	0	0	0	200	300	0	0	0	0	0	0	0	200	903	0	0	0	0	0	0	0	603	903	0
682	4	0	0	0	0	0	0	200	300	0	0	0	0	0	0	0	200	903	0	0	0	0	0	0	0	603	903	0
682	5	0	0	0	0	0	0	200	300	0	0	0	0	0	0	0	200	903	0	0	0	0	0	0	0	603	903	0
682	6	0	0	0	0	0	0	200	300	0	0	0	0	0	0	0	200	903	0	0	0	0	0	0	0	603	903	0
682	7	0	0	0	0	0	0	200	300	0	0	0	0	0	0	0	200	903	0	0	0	0	0	0	0	603	903	0
682	8	0	0	0	0	0	0	200	300	0	0	0	0	0	0	0	200	903	0	0	0	0	0	0	0	603	903	0
682	9	0	0	0	0	0	0	200	300	0	0	0	0	0	0	0	200	903	0	0	0	0	0	0	0	603	903	0
683	0	0	0	0	0	0	0	200	300	0	0	0	0	0	0	0	200	903	0	0	0	0	0	0	0	603	903	0
683	1	0	0	0	0	0	0	200	300	0	0	0	0	0	0	0	200	903	0	0	0	0	0	0	0	603	903	0
683	2	0	0	0	0	0	0	200	300	0	0	0	0	0	0	0	200	903	0	0	0	0	0	0	0	603	903	0
683	3	0	0	0	0	0	0	200	300	0	0	0	0	0	0	0	200	903	0	0	0	0	0	0	0	603	903	0
683	4	0	0	0	0	0	0	200	300	0	0	0	0	0	0	0	200	903	0	0	0	0	0	0	0	603	903	0
683	5	0	0	0	0	0	0	200	300	0	0	0	0	0	0	0	200	903	0	0	0	0	0	0	0	603	903	0
683	6	0	0	0	0	0	0	200	300	0	0	0	0	0	0	0	200	903	0	0	0	0	0	0	0	603	903	0
683	7	0	0	0	0	0	0	200	300	0	0	0	0	0	0	0	200	903	0	0	0	0	0	0	0	603	903	0
683	8	0	0	0	0	0	0	200	300	0	0	0	0	0	0	0	200	903	0	0	0	0	0	0	0	603	903	0
683	9	0	0	0	0	0	0	200	300	0	0	0	0	0	0	0	200	903	0	0	0	0	0	0	0	603	903	0
684	0	0	0	0	0	0	0	200	300	0	0	0	0	0	0	0	200	903	0	0	0	0	0	0	0	603	903	0
684	1	0	0	0	0	0	0	200	300	0	0	0	0	0	0	0	200	903	0	0	0	0	0	0	0	603	903	0
684	2	0	0	0	0	0	0	200	300	0	0	0	0	0	0	0	200	903	0	0	0	0	0	0	0	603	903	0
684	3	0	0	0	0	0	0	200	300	0	0	0	0	0	0	0	200	903	0	0	0	0	0	0	0	603	903	0
684	4	0	0	0	0	0	0	200	300	0	0	0	0	0	0	0	200	903	0	0	0	0	0	0	0	603	903	0
684	5	0	0	0	0	0	0	200	300	0	0	0	0	0	0	0	200	903	0	0	0	0	0	0	0	603	903	0
684	6	0	0	0	0	0	0	200	300	0	0	0	0	0	0	0	200	903	0	0	0	0	0	0	0	603	903	0
684	7	0	0	0	0	0	0	200	300	0	0	0	0	0	0	0	200	903	0	0	0	0	0	0	0	603	903	0
684	8	0	0	0	0	0	0	200	300	0	0	0	0	0	0	0	200	903	0	0	0	0	0	0	0	603	903	0
684	9	0	0	0	0	0	0	200	300	0	0	0	0	0	0	0	200	903	0	0	0	0	0	0	0	603	903	0
685	0	0	0	0	0	0	0	200	300	0	0	0	0	0	0	0	200	903	0	0	0	0	0	0	0	603	903	0
685	1	0	0	0	0	0	0	200	300	0	0	0	0	0	0	0	200	903	0	0	0	0	0	0	0	603	903	0
685	2	0	0	0	0	0	0	200	300	0	0	0	0	0	0	0	200	903	0	0	0	0	0	0	0	603	903	0
685	3	0	0	0	0	0	0	200	300	0	0	0	0	0	0	0	200	903	0	0	0	0	0	0	0	603	903	0
685	4	0	0	0	0	0	0	200	300	0	0	0	0	0	0	0	200	903	0	0	0	0	0	0	0	603	903	0
685	5	0	0	0	0	0	0	200	300	0	0	0	0	0	0	0	200	903	0	0	0	0	0	0	0	603	903	0
685	6	0	0	0	0	0	0	200	300	0	0	0	0	0	0	0	200	903	0	0	0	0	0	0	0	603	903	0
685	7	0	0	0	0	0	0	200	300	0	0	0	0	0	0	0	200	903	0	0	0	0	0	0	0	603	903	0
685	8	0	0	0	0	0	0	200	300	0	0	0	0	0	0	0	200	903	0	0	0	0	0	0	0	603	903	0
685	9	0	0	0	0	0	0	200	300	0	0	0	0	0	0	0	200	903	0	0	0	0	0	0	0	603	903	0
686	0	0	0	0	0	0	0	200	300	0	0	0	0	0	0	0	200	903	0	0	0	0	0	0	0	603	903	0
686	1	0	0	0	0	0	0	200	300	0	0	0	0	0	0	0	200	903	0	0	0	0	0	0	0	603	903	0
686	2	0	0	0	0	0	0	200	300	0	0	0	0	0	0	0	200	903	0	0	0	0	0	0	0	603	903	0
686	3	0	0	0	0	0	0	200	300	0	0	0	0	0	0	0	200	903	0	0	0	0	0	0	0	603	903	0
686	4	0	0	0	0	0	0	200	300	0	0	0	0	0	0	0	200	903	0	0	0	0	0	0	0	603	903	0
686	5	0	0	0	0	0	0	200	300	0	0	0	0	0	0	0	200	903	0	0	0	0	0	0	0	603	903	0
686	6	0	0	0	0	0	0	200	300	0	0	0	0	0	0	0	200	903	0	0	0	0	0	0	0	603	903	0
686	7	0	0	0	0	0	0	200	300	0	0	0	0	0	0	0	200	903	0	0	0	0	0	0	0	603	903	0
686	8	0	0	0	0	0	0	200	300	0	0	0	0	0	0	0	200	903	0	0	0	0	0	0	0	603	903	0
686	9	0	0	0	0	0	0	200	300	0	0	0	0	0	0	0	200	903	0	0	0	0	0	0	0	603	903	0
687	0	0	0	0	0	0	0	200	300	0	0	0	0	0	0	0	200	903	0	0	0	0	0	0	0	603	903	0
687	1	0	0	0	0	0	0	200	300	0	0	0	0	0	0	0	200	903	0	0	0	0	0	0	0	603	903	0
687	2	0	0	0	0	0	0	200	300	0	0	0	0	0	0	0	200	903	0	0	0	0	0	0	0	603	903	0
687	3	0	0	0	0	0	0	200	300	0	0	0	0	0	0	0	200	903	0	0	0	0	0	0	0	603	903	0
687	4	0	0	0	0	0	0	200	300	0	0	0	0	0	0	0	200	903	0	0	0	0	0	0	0	603	903	0
687	5	0	0	0	0	0	0	200	300	0	0	0	0	0	0	0	200	903	0	0	0	0	0	0	0	603	903	0
687	6	0	0	0	0	0	0	200	300	0	0	0	0	0	0	0	200	903	0	0	0	0	0	0	0	603	903	0
687	7	0	0	0	0	0	0	200	300	0	0	0	0	0	0	0	200	903	0	0	0	0	0	0	0	603	903	0
687	8	0	0	0	0	0	0	200	300	0	0	0	0	0	0	0	200	903	0	0	0	0	0	0	0	603	903	0
687	9	0	0	0	0	0	0	200	300	0	0	0	0	0	0	0	200	903	0	0	0	0	0	0	0	603	903	0
688	0	0	0	0	0	0	0	200	300	0	0	0	0	0	0	0	200	903	0	0	0	0	0	0	0	603	903	0
688	1	0	0	0	0	0	0	200	300	0	0	0	0	0	0	0	200	903	0	0	0	0	0	0	0	603	903	0
688	2	0	0	0	0	0	0	200	300	0	0	0	0	0	0	0	200	903	0	0	0	0	0	0	0	603	903	0
688	3	0	0	0	0	0	0	200	300	0	0	0	0	0	0	0	200	903	0	0	0	0	0	0	0	603	903	0
688	4	0	0	0	0	0	0	200	300	0	0	0	0	0	0	0	200	903	0	0	0	0	0	0	0	603	903	0
688	5	0	0	0	0	0	0	200	300	0	0	0	0	0	0	0	200	903	0	0	0	0	0	0	0	603	903	0
688	6	0	0	0	0	0	0	200	300	0	0	0	0	0	0	0	200	903	0	0	0	0	0	0	0	603	903	0
688	7	0	0	0	0	0	0	200	300	0	0	0	0	0	0	0	200	903	0	0	0	0	0	0	0	603	903	0
688	8	0	0	0	0	0	0	200	300	0	0	0	0	0	0	0	200	903	0	0	0	0	0	0	0	603	903	0
688	9	0	0	0	0	0	0	200	300	0	0	0	0	0	0	0	200	903	0	0	0	0	0	0	0	603	903	0
689	0	0	0	0	0	0	0	200	300	0	0	0	0	0	0	0	200	903	0	0	0	0	0	0	0	603	903	0
689	1	0	0	0	0	0	0	200	300	0	0	0	0	0	0	0	200	903	0	0	0	0	0	0	0	603	903	0
689	2	0	0	0	0	0	0	200	300	0	0	0	0	0	0	0	200	903	0	0	0	0	0	0	0	603	903	0
689	3	0	0	0	0	0	0	200	300	0	0	0	0	0	0	0	200	903	0	0	0	0	0	0	0	603	903	0
689	4	0	0	0	0	0	0	200	300	0	0	0	0	0	0	0	200	903	0	0	0	0	0	0	0	603	903	0
689	5	0	0	0	0	0	0	200	300	0	0	0	0	0	0	0	200	903	0	0	0	0	0	0	0	603	903	0
689	6	0	0	0	0	0	0	200	300	0	0	0	0	0	0	0	200	903	0	0	0	0	0	0	0	603	903	0
689	7	0	0	0	0	0	0	200	300	0	0	0	0	0	0	0	200	903	0	0	0	0	0	0	0	603	903	0
689	8	0	0	0	0	0	0	200	300	0	0	0	0	0	0	0	200	903	0	0	0	0	0	0	0	603	903	0
689	9	0	0	0	0	0	0	200	300	0	0	0	0	0	0	0	200	903	0	0	0	0	0	0	0	603	903	0
690	0	0	0	0	0	0	0	200	300	0	0	0	0	0	0	0	200	903	0	0	0	0	0	0	0	603	903	0
690	1	0	0	0	0	0	0	200	300	0	0	0	0	0	0	0	200	903	0	0	0	0	0	0	0	603	903	0
690	2	0	0	0	0	0	0	200	300	0	0	0	0	0	0	0	200	903	0	0	0	0	0	0	0	603	903	0
690	3	0	0	0	0	0	0	200	300	0	0	0	0	0	0	0	200	903	0	0	0	0	0	0	0	603	903	0
690	4	0	0	0	0	0	0	200	300	0	0	0	0	0	0	0	200	903	0	0	0	0	0	0	0	603	903	0
690	5	0	0	0	0	0	0	200	300	0	0	0	0	0	0	0	200	903	0	0	0	0	0	0	0	603	903	0
690	6	0	0	0	0	0	0	200	300	0	0	0	0	0	0	0	200	903	0	0	0	0	0	0	0	603	903	0
690	7	0	0	0	0	0	0	200	300	0	0	0	0	0	0	0	200	903	0	0	0	0	0	0	0	603	903	0
690	8	0	0	0	0	0	0	200	300	0	0	0	0	0	0	0	200	903	0	0	0	0	0	0	0	603	903	0
690	9	0	0	0	0	0	0	200	300	0	0	0	0	0	0	0	200	903	0	0	0	0	0	0	0	603	903	0
691	0	0	0	0	0	0	0	200	300	0	0	0	0	0	0	0	200	903	0	0	0	0	0	0	0	603	903	0
691	1	0	0	0	0	0	0	200	300	0	0	0	0	0	0	0	200	903	0	0	0	0	0	0	0	603	903	0
691	2	0	0	0	0	0	0	200	300	0	0	0	0	0	0	0	200	903	0	0	0	0	0	0	0	603	903	0
691	3	0	0	0	0	0	0	200	300	0	0	0	0	0	0	0	200	903	0	0	0	0	0	0	0	603	903	0
691	4	0	0	0	0	0	0	200	300	0	0	0	0	0	0	0	200	903	0	0	0	0	0	0	0	603	903	0
691	5	0	0	0	0	0	0	200	300	0	0	0	0	0	0	0	200	903	0	0	0	0	0	0	0	603	903	0
691	6	0	0	0	0	0	0	200	300	0	0	0	0	0	0	0	200	903	0	0	0	0	0	0	0	603	903	0
691	7	0	0	0	0	0	0	200	300	0	0	0	0	0	0	0	200	903	0	0	0	0	0	0	0	603	903	0
691	8	0	0	0	0	0	0	200	300	0	0	0	0	0	0	0	200	903	0	0	0	0	0	0	0	603	903	0
691	9	0	0	0	0	0	0	200	300	0	0	0	0	0	0	0	200	903	0	0	0	0	0	0	0	603	903	0
692	0	0	0	0	0	0	0	200	300	0	0	0	0	0	0	0	200	903	0	0	0	0	0	0	0	603	903	0
692	1	0	0	0	0	0	0	200	300	0	0	0	0	0	0	0	200	903	0	0	0	0	0	0	0	603	903	0
692	2	0	0	0	0	0	0	200	300	0	0	0	0	0	0	0	200	903	0	0	0	0	0	0	0	603	903	0
692	3	0	0	0	0	0	0	200	300	0	0	0	0	0	0	0	200	903	0	0	0	0	0	0	0	603	903	0
692	4	0	0	0	0	0	0	200	300	0	0	0	0	0	0	0	200	903	0	0	0	0	0	0	0	603	903	0
692	5	0	0	0	0	0	0	200	300	0	0	0	0	0	0	0	200	903	0	0	0	0	0	0	0	603	903	0
692	6	0	0	0	0	0	0	200	300	0	0	0	0	0	0	0	200	903	0	0	0	0	0	0	0	603	903	0
692	7	0	0	0	0	0	0	200	300	0	0	0	0	0	0	0	200	903	0	0	0	0	0	0	0	603	903	0
692	8	0	0	0	0	0	0	200	300	0	0	0	0	0	0	0	200	903	0	0	0	0	0	0	0	603	903	0
692	9	0	0	0	0	0	0	200	300	0	0	0	0	0	0	0	200	903	0	0	0	0	0	0	0	603	903	0
693	0	0	0	0	0	0	0	200	300	0	0	0	0	0	0	0	200	903	0	0	0	0	0	0	0	603	903	0
693	1	0	0	0	0	0	0	200	300	0	0	0	0	0	0	0	200	903	0	0	0	0	0	0	0	603	903	0
693	2	0	0	0	0	0	0	200	300	0	0	0	0	0	0	0	200	903	0	0	0	0	0	0	0	603	903	0
693	3	0	0	0	0	0	0	200	300	0	0	0	0	0	0	0	200	903	0	0	0	0	0	0	0	603	903	0
693	4	0	0	0	0	0	0	200	300	0	0	0	0	0	0	0	200	903	0	0	0	0	0	0	0	603	903	0
693	5	0	0	0	0	0	0	200	300	0	0	0	0	0	0	0	200	903	0	0	0	0	0	0	0	603	903	0
693	6	0	0	0	0	0	0	200	300	0	0	0	0	0	0	0	200	903	0	0	0	0	0	0	0	603	903	0
693	7	0	0	0	0	0	0	200	300	0	0	0	0	0	0	0	200	903	0	0	0	0	0	0	0	603	903	0
693	8	0	0	0	0	0	0	200	300	0	0	0	0	0	0	0	200	903	0	0	0	0	0	0	0	603	903	0
693	9	0	0	0	0	0	0	200	300	0	0	0	0	0	0	0	200	903	0	0	0	0	0	0	0	603	903	0
694	0	0	0	0	0	0	0	200	300	0	0	0	0	0	0	0	200	903	0	0	0	0	0	0	0	603	903	0
694	1	0	0	0	0	0	0	200	300	0	0	0	0	0	0	0	200	903	0	0	0	0	0	0	0	603	903	0
694	2	0	0	0	0	0	0	200	300	0	0	0	0	0	0	0	200	903	0	0	0	0	0	0	0	603	903	0
694	3	0	0	0	0	0	0	200	300	0	0	0	0	0	0	0	200	903	0	0	0	0	0	0	0	603	903	0
694	4	0	0	0	0	0	0	200	300	0	0	0	0	0	0	0	200	903	0	0	0	0	0	0	0	603	903	0
694	5	0	0	0	0	0	0	200	300	0	0	0	0	0	0	0	200	903	0	0	0	0	0	0	0	603	903	0
694	6	0	0	0	0	0	0	200	300	0	0	0	0	0	0	0	200	903	0	0	0	0	0	0	0	603	903	0
694	7	0	0	0	0	0	0	200	300	0	0	0	0	0	0	0	200	903	0	0	0	0	0	0	0	603	903	0
694	8	0	0	0	0	0	0	200	300	0	0	0	0	0	0	0	200	903	0	0	0	0	0	0	0	603	903	0
694	9	0	0	0	0	0	0	200	300	0	0	0	0	0	0	0	200	903	0	0	0	0	0	0	0	603	903	0
695	0	0	0	0	0	0	0	200	300	0	0	0	0	0	0	0	200	903	0	0	0	0	0	0	0	603	903	0
695	1	0	0	0	0	0	0	200	300	0	0	0	0	0	0	0	200	903	0	0	0	0	0	0	0	603	903	0
695	2	0	0	0	0	0	0	200	300	0	0	0	0	0	0	0	200	903	0	0	0	0	0	0	0	603	903	0
695	3	0	0	0	0	0	0	200	300	0	0	0	0	0	0	0	200	903	0	0	0	0	0	0	0	603	903	0
695	4	0	0	0	0	0	0	200	300	0	0	0	0	0	0	0	200	903	0	0	0	0	0	0	0	603	903	0
695	5	0	0	0	0	0	0	200	300	0	0	0	0	0	0	0	200	903	0	0	0	0	0	0	0	603	903	0
695	6	0	0	0	0	0	0	200	300	0	0	0	0	0	0	0	200	903	0	0	0	0	0	0	0	603	903	0
695	7	0	0	0	0	0	0	200	300	0	0	0	0	0	0	0	200	903	0	0	0	0	0	0	0	603	903	0
695	8	0	0	0	0	0	0	200	300	0	0	0	0	0	0	0	200	903	0	0	0	0	0	0	0	603	903	0
695	9	0	0	0	0	0	0	200	300	0	0	0	0	0	0	0	200	903	0	0	0	0	0	0	0	603	903	0
696	0	0	0	0	0	0	0	200	300	0	0	0	0	0	0	0	200	903	0	0	0	0	0	0	0	603	903	0
696	1	0	0	0	0	0	0	200	300	0	0	0	0	0	0	0	200	903	0	0	0	0	0	0	0	603	903	0
696	2	0	0	0	0	0	0	200	300	0	0	0	0	0	0	0	200	903	0	0	0	0	0	0	0	603	903	0
696	3	0	0	0	0	0	0	200	300	0	0	0	0	0	0	0	200	903	0	0	0	0	0	0	0	603	903	0
696	4	0	0	0	0	0	0	200	300	0	0	0	0	0	0	0	200	903	0	0	0	0	0	0	0	603	903	0
696	5	0	0	0	0	0	0	200	300	0	0	0	0	0	0	0	200	903	0	0	0	0	0	0	0	603	903	0
696	6	0	0	0	0	0	0	200	300	0	0	0	0	0	0	0	200	903	0	0	0	0	0	0	0	603	903	0
696	7	0	0	0	0	0	0	200	300	0	0	0	0	0	0	0	200	903	0	0	0	0	0	0	0	603	903	0
696	8	0	0	0	0	0	0	200	300	0	0	0	0	0	0	0	200	903	0	0	0	0	0	0	0	603	903	0
696	9	0	0	0	0	0	0	200	300	0	0	0	0	0	0	0	200	903	0	0	0	0	0	0	0	603	903	0
697	0	0	0	0	0	0	0	200	300	0	0	0	0	0	0	0	200	903	0	0	0	0	0	0	0	603	903	0
697	1	0	0	0	0	0	0	200	300	0	0	0	0	0	0	0	200	903	0	0	0	0	0	0	0	603	903	0
697	2	0	0	0	0	0	0	200	300	0	0	0	0	0	0	0	200	903	0	0	0	0	0	0	0	603	903	0
697	3	0	0	0	0	0	0	200	300	0	0	0	0	0	0	0	200	903	0	0	0	0	0	0	0	603	903	0
697	4	0	0	0	0	0	0	200	300	0	0	0	0	0	0	0	200	903	0	0	0	0	0	0	0	603	903	0
697	5	0	0	0	0	0	0	200	300	0	0	0	0	0	0	0	200	903	0	0	0	0	0	0	0	603	903	0
697	6	0	0	0	0	0	0	200	300	0	0	0	0	0	0	0	200	903	0	0	0	0	0	0	0	603	903	0
697	7	0	0	0	0	0	0	200	300	0	0	0	0	0	0	0	200	903	0	0	0	0	0	0	0	603	903	0
697	8	0	0	0	0	0	0	200	300	0	0	0	0	0	0	0	200	903	0	0	0	0	0	0	0	603	903	0
697	9	0	0	0	0	0	0	200	300	0	0	0	0	0	0	0	200	903	0	0	0	0	0	0	0	603	903	0
698	0	0	0	0	0	0	0	200	300	0	0	0	0	0	0	0	200	903	0	0	0	0	0	0	0	603	903	0
698	1	0	0	0	0	0	0	200	300	0	0	0	0	0	0	0	200	903	0	0	0	0	0	0	0	603	903	0
698	2	0	0	0	0	0	0	200	300	0	0	0	0	0	0	0	200	903	0	0	0	0	0	0	0	603	903	0
698	3	0	0	0	0	0	0	200	300	0	0	0	0	0	0	0	200	903	0	0	0	0	0	0	0	603	903	0
698	4	0	0	0	0	0	0	200	300	0	0	0	0	0	0	0	200	903	0	0	0	0	0	0	0	603	903	0
698	5	0	0	0	0	0	0	200	300	0	0	0	0	0	0	0	200	903	0	0	0	0	0	0	0	603	903	0
698	6	0	0	0	0	0	0	200	300	0	0	0	0	0	0	0	200	903	0	0	0	0	0	0	0	603	903	0
698	7	0	0	0	0	0	0	200	300	0	0	0	0	0	0	0	200	903	0	0	0	0	0	0	0	603	903	0
698	8	0	0	0	0	0	0	200	300	0	0	0	0	0	0	0	200	903	0	0	0	0	0	0	0	603	903	0
698	9	0	0	0	0	0	0	200	300	0	0	0	0	0	0	0	200	903	0	0	0	0	0	0	0	603	903	0
699	0	0	0	0	0	0	0	200	300	0	0	0	0	0	0	0	200	903	0	0	0	0	0	0	0	603	903	0
699	1	0	0	0	0	0	0	200	300	0	0	0	0	0	0	0	200	903	0	0	0	0	0	0	0	603	903	0
699	2	0	0	0	0	0	0	200	300	0	0	0	0	0	0	0	200	903	0	0	0	0	0	0	0	603	903	0
699	3	0	0	0	0	0	0	200	300	0	0	0	0	0	0	0	200	903	0	0	0	0	0	0	0	603	903	0
699	4	0	0	0	0	0	0	200	300	0	0	0	0	0	0	0	200	903	0	0	0	0	0	0	0	603	903	0
699	5	0	0	0	0	0	0	200	300	0	0	0	0	0	0	0	200	903	0	0	0	0	0	0	0	603	903	0
699	6	0	0	0	0	0	0	200	300	0	0	0	0	0	0	0	200	903	0	0	0	0	0	0	0	603	903	0
699	7	0	0	0	0	0	0	200	300	0	0	0	0	0	0	0	200	903	0	0	0	0	0	0	0	603	903	0
699	8	0	0	0	0	0	0	200	300	0	0	0	0	0	0	0	200	903	0	0	0	0	0	0	0	603	903	0
699	9	0	0	0	0	0	0	200	300	0	0	0	0	0	0	0	200	903	0	0	0	0	0	0	0	603	903	0
700	0	0	0	0	0	0	0	200	300	0	0	0	0	0	0	0	200	903	0	0	0	0	0	0	0	603	903	0
700	1	0	0	0	0	0	0	200	300	0	0	0	0	0	0	0	200	903	0	0	0	0	0	0	0	603	903	0
700	2	0	0	0	0	0	0	200	300	0	0	0	0	0	0	0	200	903	0	0	0	0	0	0	0	603	903	0
700	3	0	0	0	0	0	0	200	300	0	0	0	0	0	0	0	200	903	0	0	0	0	0	0	0	603	903	0
700	4	0	0	0	0	0	0	200	300	0	0	0	0	0	0	0	200	903	0	0	0	0	0	0	0	603	903	0
700	5	0	0	0	0	0	0	200	300	0	0	0	0	0	0	0	200	903	0	0	0	0	0	0	0	603	903	0
700	6	0	0	0	0	0	0	200	300	0	0	0	0	0	0	0	200	903	0	0	0	0	0	0	0	603	903	0
700	7	0	0	0	0	0	0	200	300	0	0	0	0	0	0	0	200	903	0	0	0	0	0	0	0	603	903	0
700	8	0	0	0	0	0	0	200	300	0	0	0	0	0	0	0	200	903	0	0	0	0	0	0	0	603	903	0
700	9	0	0	0	0	0	0	200	300	0	0	0	0	0	0	0	200	903	0	0	0	0	0	0	0	603	903	0
701	0	0	0	0	0	0	0	200	300	0	0	0	0	0	0	0	200	903	0	0	0	0	0	0	0	603	903	0
701	1	0	0	0	0	0	0	200	300	0	0	0	0	0	0	0	200	903	0	0	0	0	0	0	0	603	903	0
701	2	0	0	0	0	0	0	200	300	0	0	0	0	0	0	0	200	903	0	0	0	0	0	0	0	603	903	0
701	3	0	0	0	0	0	0	200	300	0	0	0	0	0	0	0	200	903	0	0	0	0	0	0	0	603	903	0
701	4	0	0	0	0	0	0	200	300	0	0	0	0	0	0	0	200	903	0	0	0	0	0	0	0	603	903	0
701	5	0	0	0	0	0	0	200	300	0	0	0	0	0	0	0	200	903	0	0	0	0	0	0	0	603	903	0
701	6	0	0	0	0	0	0	200	300	0	0	0	0	0	0	0	200	903	0	0	0	0	0	0	0	603	903	0
701	7	0	0	0	0	0	0	200	300	0	0	0	0	0	0	0	200	903	0	0	0	0	0	0	0	603	903	0
701	8	0	0	0	0	0	0	200	300	0	0	0	0	0	0	0	200	903	0	0	0	0	0	0	0	603	903	0
701	9	0	0	0	0	0	0	200	300	0	0	0	0	0	0	0	200	903	0	0	0	0	0	0	0	603	903	0
702	0	0	0	0	0	0	0	200	300	0	0	0	0	0	0	0	200	903	0	0	0	0	0	0	0	603	903	0
702	1	0	0	0	0	0	0	200	300	0	0	0	0	0	0	0	200	903	0	0	0	0	0	0	0	603	903	0
702	2	0	0	0	0	0	0	200	300	0	0	0	0	0	0	0	200	903	0	0	0	0	0	0	0	603	903	0
702	3	0	0	0	0	0	0	200	300	0	0	0	0	0	0	0	200	903	0	0	0	0	0	0	0	603	903	0
702	4	0	0	0	0	0	0	200	300	0	0	0	0	0	0	0	200	903	0	0	0	0	0	0	0	603	903	0
702	5	0	0	0	0	0	0	200	300	0	0	0	0	0	0	0	200	903	0	0	0	0	0	0	0	603	903	0
702	6	0	0	0	0	0	0	200	300	0	0	0	0	0	0	0	200	903	0	0	0	0	0	0	0	603	903	0
702	7	0	0	0	0	0	0	200	300	0	0	0	0	0	0	0	200	903	0	0	0	0	0	0	0	603	903	0
702	8	0	0	0	0	0	0	200	300	0	0	0	0	0	0	0	200	903	0	0	0	0	0	0	0	603	903	0
702	9	0	0	0	0	0	0	200	300	0	0	0	0	0	0	0	200	903	0	0	0	0	0	0	0	603	903	0
703	0	0	0	0	0	0	0	200	300	0	0	0	0	0	0	0	200	903	0	0	0	0	0	0	0	603	903	0
703	1	0	0	0	0	0	0	200	300	0	0	0	0	0	0	0	200	903	0	0	0	0	0	0	0	603	903	0
703	2	0	0	0	0	0	0	200	300	0	0	0	0	0	0	0	200	903	0	0	0	0	0	0	0	603	903	0
703	3	0	0	0	0	0	0	200	300	0	0	0	0	0	0	0	200	903	0	0	0	0	0	0	0	603	903	0
703	4	0	0	0	0	0	0	200	300	0	0	0	0	0	0	0	200	903	0	0	0	0	0	0	0	603	903	0
703	5	0	0	0	0	0	0	200	300	0	0	0	0	0	0	0	200	903	0	0	0	0	0	0	0	603	903	0
703	6	0	0	0	0	0	0	200	300	0	0	0	0	0	0	0	200	903	0	0	0	0	0	0	0	603	903	0
703	7	0	0	0	0	0	0	200	300	0	0	0	0	0	0	0	200	903	0	0	0	0	0	0	0	603	903	0
703	8	0	0	0	0	0	0	200	300	0	0	0	0	0	0	0	200	903	0	0	0	0	0	0	0	603	903	0
703	9	0	0	0	0	0	0	200	300	0	0	0	0	0	0	0	200	903	0	0	0	0	0	0	0	603	903	0
704	0	0	0	0	0	0	0	200	300	0	0	0	0	0	0	0	200	903	0	0	0	0	0	0	0	603	903	0
704	1	0	0	0	0	0	0	200	300	0	0	0	0	0	0	0	200	903	0	0	0	0	0	0	0	603	903	0
704	2	0	0	0	0	0	0	200	300	0	0	0	0	0	0	0	200	903	0	0	0	0	0	0	0	603	903	0
704	3	0	0	0	0	0	0	200	300	0	0	0	0	0	0	0	200	903	0	0	0	0	0	0	0	603	903	0
704	4	0	0	0	0	0	0	200	300	0	0	0	0	0	0	0	200	903	0	0	0	0	0	0	0	603	903	0
704	5	0	0	0	0	0	0	200	300	0	0	0	0	0	0	0	200	903	0	0	0	0	0	0	0	603	903	0
704	6	0	0	0	0	0	0	200	300	0	0	0	0	0	0	0	200	903	0	0	0	0	0	0	0	603	903	0
704	7	0	0	0	0	0	0	200	300	0	0	0	0	0	0	0	200	903	0	0	0	0	0	0	0	603	903	0
704	8	0	0	0	0	0	0	200	300	0	0	0	0	0	0	0	200	903	0	0	0	0	0	0	0	603	903	0
704	9	0	0	0	0	0	0	200	300	0	0	0	0	0	0	0	200	903	0	0	0	0	0	0	0	603	903	0
705	0	0	0	0	0	0	0	200	300	0	0	0	0	0	0	0	200	903	0	0	0	0	0	0	0	603	903	0
705	1	0	0	0	0	0	0	200	300	0	0	0	0	0	0	0	200	903	0	0	0	0	0	0	0	603	903	0
705	2	0	0	0	0	0	0	200	300	0	0	0	0	0	0	0	200	903	0	0	0	0	0	0	0	603	903	0
705	3	0	0	0	0	0	0	200	300	0	0	0	0	0	0	0	200	903	0	0	0	0	0	0	0	603	903	0
705	4	0	0	0	0	0	0	200	300	0	0	0	0	0	0	0	200	903	0	0	0	0	0	0	0	603	903	0
705	5	0	0	0	0	0	0	200	300	0	0	0	0	0	0	0	200	903	0	0	0	0	0	0	0	603	903	0
705	6	0	0	0	0	0	0	200	300	0	0	0	0	0	0	0	200	903	0	0	0	0	0	0	0	603	903	0
705	7	0	0	0	0	0	0	200	300	0	0	0	0	0	0	0	200	903	0	0	0	0	0	0	0	603	903	0
705	8	0	0	0	0	0	0	200	300	0	0	0	0	0	0	0	200	903	0	0	0	0	0	0	0	603	903	0
705	9	0	0	0	0	0	0	200	300	0	0	0	0	0	0	0	200	903	0	0	0	0	0	0	0	603	903	0
706	0	0	0	0	0	0	0	200	300	0	0	0	0	0	0	0	200	903	0	0	0	0	0	0	0	603	903	0
706	1	0	0	0	0	0	0	200	300	0	0	0	0	0	0	0	200	903	0	0	0	0	0	0	0	603	903	0
706	2	0	0	0	0	0	0	200	300	0	0	0	0	0	0	0	200	903	0	0	0	0	0	0	0	603	903	0
706	3	0	0	0	0	0	0	200	300	0	0	0	0	0	0	0	200	903	0	0	0	0	0	0	0	603	903	0
706	4	0	0	0	0	0	0	200	300	0	0	0	0	0	0	0	200	903	0	0	0	0	0	0	0	603	903	0
706	5	0	0	0	0	0	0	200	300	0	0	0	0	0	0	0	200	903	0	0	0	0	0	0	0	603	903	0
706	6	0	0	0	0	0	0	200	300	0	0	0	0	0	0	0	200	903	0	0	0	0	0	0	0	603	903	0
706	7	0	0	0	0	0	0	200	300	0	0	0	0	0	0	0	200	903	0	0	0	0	0	0	0	603	903	0
706	8	0	0	0	0	0	0	200	300	0	0	0	0	0	0	0	200	903	0	0	0	0	0	0	0	603	903	0
706	9	0	0	0	0	0	0	200	300	0	0	0	0	0	0	0	200	903	0	0	0	0	0	0	0	603	903	0
707	0	0	0	0	0	0	0	200	300	0	0	0	0	0	0	0	200	903	0	0	0	0	0	0	0	603	903	0
707	1	0	0	0	0	0	0	200	300	0	0	0	0	0	0	0	200	903	0	0	0	0	0	0	0	603	903	0
707	2	0	0	0	0	0	0	200	300	0	0	0	0	0	0	0	200	903	0	0	0	0	0	0	0	603	903	0
707	3	0	0	0	0	0	0	200	300	0	0	0	0	0	0	0	200	903	0	0	0	0	0	0	0	603	903	0
707	4	0	0	0	0	0	0	200	300	0	0	0	0	0	0	0	200	903	0	0	0	0	0	0	0	603	903	0
707	5	0	0	0	0	0	0	200	300	0	0	0	0	0	0	0	200	903	0	0	0	0	0	0	0	603	903	0
707	6	0	0	0	0	0	0	200	300	0	0	0	0	0	0	0	200	903	0	0	0	0	0	0	0	603	903	0
707	7	0	0	0	0	0	0	200	300	0	0	0	0	0	0	0	200	903	0	0	0	0	0	0	0	603	903	0
707	8	0	0	0	0	0	0	200	300	0	0	0	0	0	0	0	200	903	0	0	0	0	0	0	0	603	903	0
707	9	0	0	0	0	0	0	200	300	0	0	0	0	0	0	0	200	903	0	0	0	0	0	0	0	603	903	0
708	0	0	0	0	0	0	0	200	300	0	0	0	0	0	0	0	200	903	0	0	0	0	0	0	0	603	903	0
708	1	0	0	0	0	0	0	200	300	0	0	0	0	0	0	0	200	903	0	0	0	0	0	0	0	603	903	0
708	2	0	0	0	0	0	0	200	300	0	0	0	0	0	0	0	200	903	0	0	0	0	0	0	0	603	903	0
708	3	0	0	0	0	0	0	200	300	0	0	0	0	0	0	0	200	903	0	0	0	0	0	0	0	603	903	0
708	4	0	0	0	0	0	0	200	300	0	0	0	0	0	0	0	200	903	0	0	0	0	0	0	0	603	903	0
708	5	0	0	0	0	0	0	200	300	0	0	0	0	0	0	0	200	903	0	0	0	0	0	0	0	603	903	0
708	6	0	0	0	0	0	0	200	300	0	0	0	0	0	0	0	200	903	0	0	0	0	0	0	0	603	903	0
708	7	0	0	0	0	0	0	200	300	0	0	0	0	0	0	0	200	903	0	0	0	0	0	0	0	603	903	0
708	8	0	0	0	0	0	0	200	300	0	0	0	0	0	0	0	200	903	0	0	0	0	0	0	0	603	903	0
708	9	0	0	0	0	0	0	200	300	0	0	0	0	0	0	0	200	903	0	0	0	0	0	0	0	603	903	0
709	0	0	0	0	0	0	0	200	300	0	0	0	0	0	0	0	200	903	0	0	0	0	0	0	0	603	903	0
709	1	0	0	0	0	0	0	200	300	0	0	0	0	0	0	0	200	903	0	0	0	0	0	0	0	603	903	0
709	2	0	0	0	0	0	0	200	300	0	0	0	0	0	0	0	200	903	0	0	0	0	0	0	0	603	903	0
709	3	0	0	0	0	0	0	200	300	0	0	0	0	0	0	0	200	903	0	0	0	0	0	0	0	603	903	0
709	4	0	0	0	0	0	0	200	300	0	0	0	0	0	0	0	200	903	0	0	0	0	0	0	0	603	903	0
709	5	0	0	0	0	0	0	200	300	0	0	0	0	0	0	0	200	903	0	0	0	0	0	0	0	603	903	0
709	6	0	0	0	0	0	0	200	300	0	0	0	0	0	0	0	200	903	0	0	0	0	0	0	0	603	903	0
709	7	0	0	0	0	0	0	200	300	0	0	0	0	0	0	0	200	903	0	0	0	0	0	0	0	603	903	0
709	8	0	0	0	0	0	0	200	300	0	0	0	0	0	0	0	200	903	0	0	0	0	0	0	0	603	903	0
709	9	0	0	0	0	0	0	200	300	0	0	0	0	0	0	0	200	903	0	0	0	0	0	0	0	603	903	0
710	0	0.60948	3.02659	13.2431	1219.21	-403.556	-390.016	200	300	0	0	0	0	0	0	0	200	903	0	0	0	0	0	0	0	603	903	0
710	1	-0.611223	2.26365	9.88614	669.893	-159.415	-161.134	200	300	0	0	0	0	0	0	0	200	903	0	0	0	0	0	0	0	603	903	0
710	2	1.06724	1.50071	9.88614	120.576	-159.415	-115.358	200	300	0	0	0	0	0	0	0	200	903	0	0	0	0	0	0	0	603	903	0
710	3	-1.06899	2.41624	10.8017	486.787	-220.45	-298.464	200	300	0	0	0	0	0	0	0	200	903	0	0	0	0	0	0	0	603	903	0
710	4	0.151716	2.41624	10.8017	761.445	-220.45	-298.464	200	300	0	0	0	0	0	0	0	200	903	0	0	0	0	0	0	0	603	903	0
710	5	0.456892	1.50071	10.4965	1219.21	-98.3797	-206.911	200	300	0	0	0	0	0	0	0	200	903	0	0	0	0	0	0	0	603	903	0
710	6	0	0	0	0	0	0	200	300	0	0	0	0	0	0	0	200	903	0	0	0	0	0	0	0	603	903	0
710	7	0.914656	2.72141	12.0224	669.893	145.761	-298.464	200	300	0	0	0	0	0	0	0	200	903	0	0	0	0	0	0	0	603	903	0
710	8	0	0	0	0	0	0	200	300	0	0	0	0	0	0	0	200	903	0	0	0	0	0	0	0	603	903	0
710	9	1.37242	2.56883	11.1068	486.787	23.6906	-23.8053	200	300	0	0	0	0	0	0	0	200	903	0	0	0	0	0	0	0	603	903	0
711	0	-0.458635	1.95848	11.412	669.893	267.831	-69.5817	200	300	0	0	0	0	0	0	0	200	903	0	0	0	0	0	0	0	603	903	0
711	1	0.60948	1.19554	11.412	212.129	-98.3797	21.9711	200	300	0	0	0	0	0	0	0	200	903	0	0	0	0	0	0	0	603	903	0
711	2	0.60948	2.72141	10.8017	395.235	267.831	-298.464	200	300	0	0	0	0	0	0	0	200	903	0	0	0	0	0	0	0	603	903	0
711	3	0.762068	2.72141	9.88614	486.787	-220.45	-115.358	200	300	0	0	0	0	0	0	0	200	903	0	0	0	0	0	0	0	603	903	0
711	4	-0.306047	1.6533	11.1068	1860.08	-342.52	-161.134	200	300	0	0	0	0	0	0	0	200	903	0	0	0	0	0	0	0	603	903	0
711	5	0	0	0	0	0	0	200	300	0	0	0	0	0	0	0	200	903	0	0	0	0	0	0	0	603	903	0
711	6	0.304304	2.26365	9.88614	578.34	-37.3445	-161.134	200	300	0	0	0	0	0	0	0	200	903	0	0	0	0	0	0	0	603	903	0
711	7	-0.000871718	0.127421	11.1068	212.129	23.6906	-115.358	200	300	0	0	0	0	0	0	0	200	903	0	0	0	0	0	0	0	603	903	0
711	8	0.60948	2.26365	9.88614	578.34	-220.45	67.7474	200	300	0	0	0	0	0	0	0	200	903	0	0	0	0	0	0	0	603	903	0
711	9	1.6776	1.80589	10.8017	486.787	-281.485	67.7474	200	300	0	0	0	0	0	0	0	200	903	0	0	0	0	0	0	0	603	903	0
712	0	0	0	0	0	0	0	200	300	0	0	0	0	0	0	0	200	903	0	0	0	0	0	0	0	603	903	0
712	1	0	0	0	0	0	0	200	300	0	0	0	0	0	0	0	200	903	0	0	0	0	0	0	0	603	903	0
712	2	0	0	0	0	0	0	200	300	0	0	0	0	0	0	0	200	903	0	0	0	0	0	0	0	603	903	0
712	3	-0.458635	1.50071	11.412	1036.1	-281.485	-298.464	200	300	0	0	0	0	0	0	0	200	903	0	0	0	0	0	0	0	603	903	0
712	4	0.304304	1.19554	10.8017	944.551	206.796	-206.911	200	300	0	0	0	0	0	0	0	200	903	0	0	0	0	0	0	0	603	903	0
712	5	0.456892	1.80589	10.8017	120.576	-37.3445	205.077	200	300	0	0	0	0	0	0	0	200	903	0	0	0	0	0	0	0	603	903	0
712	6	0	0	0	0	0	0	200	300	0	0	0	0	0	0	0	200	903	0	0	0	0	0	0	0	603	903	0
712	7	0	0	0	0	0	0	200	300	0	0	0	0	0	0	0	200	903	0	0	0	0	0	0	0	603	903	0
712	8	0	0	0	0	0	0	200	300	0	0	0	0	0	0	0	200	903	0	0	0	0	0	0	0	603	903	0
712	9	2.28795	1.19554	10.1913	303.682	-159.415	-206.911	200	300	0	0	0	0	0	0	0	200	903	0	0	0	0	0	0	0	603	903	0
713	0	-0.611223	2.11106	9.88614	120.576	206.796	-115.358	200	300	0	0	0	0	0	0	0	200	903	0	0	0	0	0	0	0	603	903	0
713	1	0.914656	2.56883	11.1068	669.893	-220.45	-206.911	200	300	0	0	0	0	0	0	0	200	903	0	0	0	0	0	0	0	603	903	0
713	2	0.762068	2.56883	11.1068	120.576	23.6906	159.3	200	300	0	0	0	0	0	0	0	200	903	0	0	0	0	0	0	0	603	903	0
713	3	0.762068	2.72141	10.1913	-245.635	145.761	-115.358	200	300	0	0	0	0	0	0	0	200	903	0	0	0	0	0	0	0	603	903	0
713	4	-0.000871718	2.41624	9.88614	761.445	-159.415	-161.134	200	300	0	0	0	0	0	0	0	200	903	0	0	0	0	0	0	0	603	903	0
713	5	-0.306047	2.874	10.8017	486.787	23.6906	-390.016	200	300	0	0	0	0	0	0	0	200	903	0	0	0	0	0	0	0	603	903	0
713	6	-0.458635	1.80589	11.1068	486.787	84.7258	-344.24	200	300	0	0	0	0	0	0	0	200	903	0	0	0	0	0	0	0	603	903	0
713	7	-0.611223	1.50071	10.4965	852.998	-159.415	-298.464	200	300	0	0	0	0	0	0	0	200	903	0	0	0	0	0	0	0	603	903	0
713	8	0.456892	1.6533	11.1068	578.34	84.7258	-206.911	200	300	0	0	0	0	0	0	0	200	903	0	0	0	0	0	0	0	603	903	0
713	9	0	0	0	0	0	0	200	300	0	0	0	0	0	0	0	200	903	0	0	0	0	0	0	0	603	903	0
714	0	0.762068	2.56883	12.9379	303.682	-281.485	205.077	200	300	0	0	0	0	0	0	0	200	903	0	0	0	0	0	0	0	603	903	0
714	1	-0.458635	2.874	9.88614	395.235	-464.591	-252.687	200	300	0	0	0	0	0	0	0	200	903	0	0	0	0	0	0	0	603	903	0
714	2	-0.763811	2.26365	9.88614	578.34	-98.3797	-206.911	200	300	0	0	0	0	0	0	0	200	903	0	0	0	0	0	0	0	603	903	0
714	3	-0.000871718	1.80589	12.3275	1036.1	-464.591	-69.5817	200	300	0	0	0	0	0	0	0	200	903	0	0	0	0	0	0	0	603	903	0
714	4	1.06724	1.50071	10.8017	578.34	-37.3445	21.9711	200	300	0	0	0	0	0	0	0	200	903	0	0	0	0	0	0	0	603	903	0
714	5	0	0	0	0	0	0	200	300	0	0	0	0	0	0	0	200	903	0	0	0	0	0	0	0	603	903	0
714	6	0.914656	2.26365	11.7172	212.129	84.7258	-115.358	200	300	0	0	0	0	0	0	0	200	903	0	0	0	0	0	0	0	603	903	0
714	7	0	0	0	0	0	0	200	300	0	0	0	0	0	0	0	200	903	0	0	0	0	0	0	0	603	903	0
714	8	1.37242	1.50071	11.412	-62.5292	-37.3445	-23.8053	200	300	0	0	0	0	0	0	0	200	903	0	0	0	0	0	0	0	603	903	0
714	9	-0.763811	2.72141	11.1068	669.893	-98.3797	-390.016	200	300	0	0	0	0	0	0	0	200	903	0	0	0	0	0	0	0	603	903	0
715	0	0.914656	2.26365	11.7172	852.998	-525.626	-206.911	200	300	0	0	0	0	0	0	0	200	903	0	0	0	0	0	0	0	603	903	0
715	1	0	0	0	0	0	0	200	300	0	0	0	0	0	0	0	200	903	0	0	0	0	0	0	0	603	903	0
715	2	0	0	0	0	0	0	200	300	0	0	0	0	0	0	0	200	903	0	0	0	0	0	0	0	603	903	0
715	3	-0.15346	2.26365	9.88614	303.682	-37.3445	-115.358	200	300	0	0	0	0	0	0	0	200	903	0	0	0	0	0	0	0	603	903	0
715	4	0	0	0	0	0	0	200	300	0	0	0	0	0	0	0	200	903	0	0	0	0	0	0	0	603	903	0
715	5	-0.15346	2.26365	10.4965	120.576	-159.415	-161.134	200	300	0	0	0	0	0	0	0	200	903	0	0	0	0	0	0	0	603	903	0
715	6	-0.458635	2.41624	11.412	578.34	-281.485	21.9711	200	300	0	0	0	0	0	0	0	200	903	0	0	0	0	0	0	0	603	903	0
715	7	0.914656	2.11106	10.8017	486.787	84.7258	-206.911	200	300	0	0	0	0	0	0	0	200	903	0	0	0	0	0	0	0	603	903	0
715	8	0	0	0	0	0	0	200	300	0	0	0	0	0	0	0	200	903	0	0	0	0	0	0	0	603	903	0
715	9	0.456892	1.80589	9.88614	578.34	-220.45	21.9711	200	300	0	0	0	0	0	0	0	200	903	0	0	0	0	0	0	0	603	903	0
716	0	0	0	0	0	0	0	200	300	0	0	0	0	0	0	0	200	903	0	0	0	0	0	0	0	603	903	0
716	1	0.304304	1.80589	11.7172	303.682	145.761	-115.358	200	300	0	0	0	0	0	0	0	200	903	0	0	0	0	0	0	0	603	903	0
716	2	-0.000871718	2.72141	12.9379	29.0235	145.761	-344.24	200	300	0	0	0	0	0	0	0	200	903	0	0	0	0	0	0	0	603	903	0
716	3	0	0	0	0	0	0	200	300	0	0	0	0	0	0	0	200	903	0	0	0	0	0	0	0	603	903	0
716	4	2.13536	2.41624	11.412	852.998	-342.52	-252.687	200	300	0	0	0	0	0	0	0	200	903	0	0	0	0	0	0	0	603	903	0
716	5	0.762068	2.874	9.88614	1127.66	206.796	-252.687	200	300	0	0	0	0	0	0	0	200	903	0	0	0	0	0	0	0	603	903	0
716	6	0	0	0	0	0	0	200	300	0	0	0	0	0	0	0	200	903	0	0	0	0	0	0	0	603	903	0
716	7	0	0	0	0	0	0	200	300	0	0	0	0	0	0	0	200	903	0	0	0	0	0	0	0	603	903	0
716	8	-1.37416	1.80589	10.8017	120.576	-342.52	-298.464	200	300	0	0	0	0	0	0	0	200	903	0	0	0	0	0	0	0	603	903	0
716	9	-0.15346	1.6533	10.8017	120.576	-159.415	-206.911	200	300	0	0	0	0	0	0	0	200	903	0	0	0	0	0	0	0	603	903	0
717	0	0.456892	1.34812	11.1068	120.576	-98.3797	-206.911	200	300	0	0	0	0	0	0	0	200	903	0	0	0	0	0	0	0	603	903	0
717	1	0	0	0	0	0	0	200	300	0	0	0	0	0	0	0	200	903	0	0	0	0	0	0	0	603	903	0
717	2	1.98277	2.11106	12.3275	395.235	-220.45	-69.5817	200	300	0	0	0	0	0	0	0	200	903	0	0	0	0	0	0	0	603	903	0
717	3	0.60948	2.26365	10.1913	395.235	-342.52	-161.134	200	300	0	0	0	0	0	0	0	200	903	0	0	0	0	0	0	0	603	903	0
717	4	-0.15346	1.6533	11.1068	761.445	-98.3797	-298.464	200	300	0	0	0	0	0	0	0	200	903	0	0	0	0	0	0	0	603	903	0
717	5	-0.916399	0.585184	12.0224	395.235	206.796	159.3	200	300	0	0	0	0	0	0	0	200	903	0	0	0	0	0	0	0	603	903	0
717	6	0.456892	1.80589	12.0224	578.34	23.6906	-161.134	200	300	0	0	0	0	0	0	0	200	903	0	0	0	0	0	0	0	603	903	0
717	7	1.37242	2.874	9.58096	303.682	23.6906	21.9711	200	300	0	0	0	0	0	0	0	200	903	0	0	0	0	0	0	0	603	903	0
717	8	0	0	0	0	0	0	200	300	0	0	0	0	0	0	0	200	903	0	0	0	0	0	0	0	603	903	0
717	9	0	0	0	0	0	0	200	300	0	0	0	0	0	0	0	200	903	0	0	0	0	0	0	0	603	903	0
718	0	0.914656	2.41624	10.1913	578.34	-342.52	-390.016	200	300	0	0	0	0	0	0	0	200	903	0	0	0	0	0	0	0	603	903	0
718	1	0.151716	2.11106	10.1913	761.445	-98.3797	21.9711	200	300	0	0	0	0	0	0	0	200	903	0	0	0	0	0	0	0	603	903	0
718	2	0.60948	1.50071	11.412	120.576	-220.45	-115.358	200	300	0	0	0	0	0	0	0	200	903	0	0	0	0	0	0	0	603	903	0
718	3	0	0	0	0	0	0	200	300	0	0	0	0	0	0	0	200	903	0	0	0	0	0	0	0	603	903	0
718	4	0	0	0	0	0	0	200	300	0	0	0	0	0	0	0	200	903	0	0	0	0	0	0	0	603	903	0
718	5	0	0	0	0	0	0	200	300	0	0	0	0	0	0	0	200	903	0	0	0	0	0	0	0	603	903	0
718	6	0	0	0	0	0	0	200	300	0	0	0	0	0	0	0	200	903	0	0	0	0	0	0	0	603	903	0
718	7	0.151716	2.11106	10.1913	395.235	84.7258	21.9711	200	300	0	0	0	0	0	0	0	200	903	0	0	0	0	0	0	0	603	903	0
718	8	0.304304	2.41624	11.7172	761.445	-281.485	-298.464	200	300	0	0	0	0	0	0	0	200	903	0	0	0	0	0	0	0	603	903	0
718	9	0.456892	2.41624	10.4965	578.34	206.796	-298.464	200	300	0	0	0	0	0	0	0	200	903	0	0	0	0	0	0	0	603	903	0
719	0	2.28795	1.04295	11.412	944.551	-159.415	113.524	200	300	0	0	0	0	0	0	0	200	903	0	0	0	0	0	0	0	603	903	0
719	1	0	0	0	0	0	0	200	300	0	0	0	0	0	0	0	200	903	0	0	0	0	0	0	0	603	903	0
719	2	0	0	0	0	0	0	200	300	0	0	0	0	0	0	0	200	903	0	0	0	0	0	0	0	603	903	0
719	3	0	0	0	0	0	0	200	300	0	0	0	0	0	0	0	200	903	0	0	0	0	0	0	0	603	903	0
719	4	-0.000871718	2.26365	10.1913	120.576	-98.3797	-115.358	200	300	0	0	0	0	0	0	0	200	903	0	0	0	0	0	0	0	603	903	0
719	5	0	0	0	0	0	0	200	300	0	0	0	0	0	0	0	200	903	0	0	0	0	0	0	0	603	903	0
719	6	0.762068	2.56883	10.8017	669.893	-281.485	-206.911	200	300	0	0	0	0	0	0	0	200	903	0	0	0	0	0	0	0	603	903	0
719	7	2.44053	1.80589	9.58096	852.998	206.796	113.524	200	300	0	0	0	0	0	0	0	200	903	0	0	0	0	0	0	0	603	903	0
719	8	0	0	0	0	0	0	200	300	0	0	0	0	0	0	0	200	903	0	0	0	0	0	0	0	603	903	0
719	9	0.456892	2.56883	9.88614	486.787	-159.415	250.853	200	300	0	0	0	0	0	0	0	200	903	0	0	0	0	0	0	0	603	903	0
720	0	0.456892	1.95848	10.1913	395.235	-342.52	-161.134	200	300	0	0	0	0	0	0	0	200	903	0	0	0	0	0	0	0	603	903	0
720	1	-0.15346	2.72141	10.4965	944.551	84.7258	21.9711	200	300	0	0	0	0	0	0	0	200	903	0	0	0	0	0	0	0	603	903	0
720	2	1.21983	2.72141	11.1068	303.682	145.761	-206.911	200	300	0	0	0	0	0	0	0	200	903	0	0	0	0	0	0	0	603	903	0
720	3	0.762068	2.41624	11.412	1219.21	-281.485	-206.911	200	300	0	0	0	0	0	0	0	200	903	0	0	0	0	0	0	0	603	903	0
720	4	0	0	0	0	0	0	200	300	0	0	0	0	0	0	0	200	903	0	0	0	0	0	0	0	603	903	0
720	5	0.762068	1.80589	11.412	578.34	-98.3797	-115.358	200	300	0	0	0	0	0	0	0	200	903	0	0	0	0	0	0	0	603	903	0
720	6	-0.611223	1.50071	9.88614	944.551	-342.52	-115.358	200	300	0	0	0	0	0	0	0	200	903	0	0	0	0	0	0	0	603	903	0
720	7	-0.306047	1.80589	10.4965	395.235	84.7258	-161.134	200	300	0	0	0	0	0	0	0	200	903	0	0	0	0	0	0	0	603	903	0
720	8	-0.458635	2.26365	11.412	1036.1	-281.485	-252.687	200	300	0	0	0	0	0	0	0	200	903	0	0	0	0	0	0	0	603	903	0
720	9	0.762068	1.34812	10.8017	120.576	-220.45	205.077	200	300	0	0	0	0	0	0	0	200	903	0	0	0	0	0	0	0	603	903	0
721	0	2.59312	2.41624	10.1913	303.682	23.6906	113.524	200	300	0	0	0	0	0	0	0	200	903	0	0	0	0	0	0	0	603	903	0
721	1	0	0	0	0	0	0	200	300	0	0	0	0	0	0	0	200	903	0	0	0	0	0	0	0	603	903	0
721	2	-0.000871718	1.6533	10.1913	1493.87	-98.3797	-344.24	200	300	0	0	0	0	0	0	0	200	903	0	0	0	0	0	0	0	603	903	0
721	3	0.304304	2.11106	10.8017	669.893	-98.3797	-252.687	200	300	0	0	0	0	0	0	0	200	903	0	0	0	0	0	0	0	603	903	0
721	4	-0.306047	1.95848	11.412	1310.76	-281.485	-298.464	200	300	0	0	0	0	0	0	0	200	903	0	0	0	0	0	0	0	603	903	0
721	5	0.762068	1.6533	12.0224	761.445	145.761	-206.911	200	300	0	0	0	0	0	0	0	200	903	0	0	0	0	0	0	0	603	903	0
721	6	0.914656	2.72141	11.1068	486.787	23.6906	-298.464	200	300	0	0	0	0	0	0	0	200	903	0	0	0	0	0	0	0	603	903	0
721	7	0	0	0	0	0	0	200	300	0	0	0	0	0	0	0	200	903	0	0	0	0	0	0	0	603	903	0
721	8	2.28795	2.41624	12.0224	1402.32	-586.661	-252.687	200	300	0	0	0	0	0	0	0	200	903	0	0	0	0	0	0	0	603	903	0
721	9	-0.000871718	2.874	9.58096	761.445	-159.415	-115.358	200	300	0	0	0	0	0	0	0	200	903	0	0	0	0	0	0	0	603	903	0
722	0	0.304304	1.6533	11.1068	1310.76	-159.415	-252.687	200	300	0	0	0	0	0	0	0	200	903	0	0	0	0	0	0	0	603	903	0
722	1	-0.000871718	1.95848	12.0224	761.445	-281.485	21.9711	200	300	0	0	0	0	0	0	0	200	903	0	0	0	0	0	0	0	603	903	0
722	2	0.762068	1.80589	10.1913	212.129	-98.3797	-161.134	200	300	0	0	0	0	0	0	0	200	903	0	0	0	0	0	0	0	603	903	0
722	3	1.06724	2.26365	9.88614	303.682	-98.3797	-115.358	200	300	0	0	0	0	0	0	0	200	903	0	0	0	0	0	0	0	603	903	0
722	4	0.914656	2.72141	9.58096	212.129	23.6906	113.524	200	300	0	0	0	0	0	0	0	200	903	0	0	0	0	0	0	0	603	903	0
722	5	0	0	0	0	0	0	200	300	0	0	0	0	0	0	0	200	903	0	0	0	0	0	0	0	603	903	0
722	6	1.37242	2.56883	9.88614	486.787	-220.45	-252.687	200	300	0	0	0	0	0	0	0	200	903	0	0	0	0	0	0	0	603	903	0
722	7	-0.15346	2.56883	12.3275	852.998	-220.45	-206.911	200	300	0	0	0	0	0	0	0	200	903	0	0	0	0	0	0	0	603	903	0
722	8	0.304304	1.95848	11.1068	1585.42	-98.3797	-435.793	200	300	0	0	0	0	0	0	0	200	903	0	0	0	0	0	0	0	603	903	0
722	9	1.98277	2.11106	9.58096	944.551	-37.3445	-252.687	200	300	0	0	0	0	0	0	0	200	903	0	0	0	0	0	0	0	603	903	0
723	0	0	0	0	0	0	0	200	300	0	0	0	0	0	0	0	200	903	0	0	0	0	0	0	0	603	903	0
723	1	0	0	0	0	0	0	200	300	0	0	0	0	0	0	0	200	903	0	0	0	0	0	0	0	603	903	0
723	2	0	0	0	0	0	0	200	300	0	0	0	0	0	0	0	200	903	0	0	0	0	0	0	0	603	903	0
723	3	-0.916399	1.19554	11.1068	303.682	-37.3445	-69.5817	200	300	0	0	0	0	0	0	0	200	903	0	0	0	0	0	0	0	603	903	0
723	4	0	0	0	0	0	0	200	300	0	0	0	0	0	0	0	200	903	0	0	0	0	0	0	0	603	903	0
723	5	0.60948	0.280009	10.8017	1036.1	206.796	-206.911	200	300	0	0	0	0	0	0	0	200	903	0	0	0	0	0	0	0	603	903	0
723	6	0	0	0	0	0	0	200	300	0	0	0	0	0	0	0	200	903	0	0	0	0	0	0	0	603	903	0
723	7	0.762068	1.04295	10.8017	669.893	-98.3797	-252.687	200	300	0	0	0	0	0	0	0	200	903	0	0	0	0	0	0	0	603	903	0
723	8	0	0	0	0	0	0	200	300	0	0	0	0	0	0	0	200	903	0	0	0	0	0	0	0	603	903	0
723	9	1.06724	2.11106	10.8017	669.893	23.6906	-69.5817	200	300	0	0	0	0	0	0	0	200	903	0	0	0	0	0	0	0	603	903	0
724	0	0.914656	2.72141	10.1913	303.682	-159.415	-298.464	200	300	0	0	0	0	0	0	0	200	903	0	0	0	0	0	0	0	603	903	0
724	1	0.304304	1.50071	10.8017	303.682	-525.626	-115.358	200	300	0	0	0	0	0	0	0	200	903	0	0	0	0	0	0	0	603	903	0
724	2	0.60948	2.874	11.1068	761.445	-37.3445	-115.358	200	300	0	0	0	0	0	0	0	200	903	0	0	0	0	0	0	0	603	903	0
724	3	0	0	0	0	0	0	200	300	0	0	0	0	0	0	0	200	903	0	0	0	0	0	0	0	603	903	0
724	4	1.21983	1.6533	11.1068	578.34	-37.3445	-252.687	200	300	0	0	0	0	0	0	0	200	903	0	0	0	0	0	0	0	603	903	0
724	5	-0.763811	1.6533	9.88614	852.998	-403.556	-161.134	200	300	0	0	0	0	0	0	0	200	903	0	0	0	0	0	0	0	603	903	0
724	6	0	0	0	0	0	0	200	300	0	0	0	0	0	0	0	200	903	0	0	0	0	0	0	0	603	903	0
724	7	-0.458635	1.6533	11.412	212.129	206.796	-206.911	200	300	0	0	0	0	0	0	0	200	903	0	0	0	0	0	0	0	603	903	0
724	8	0.914656	2.72141	10.4965	578.34	23.6906	21.9711	200	300	0	0	0	0	0	0	0	200	903	0	0	0	0	0	0	0	603	903	0
724	9	1.98277	2.11106	9.88614	120.576	-220.45	-161.134	200	300	0	0	0	0	0	0	0	200	903	0	0	0	0	0	0	0	603	903	0
725	0	0	0	0	0	0	0	200	300	0	0	0	0	0	0	0	200	903	0	0	0	0	0	0	0	603	903	0
725	1	0	0	0	0	0	0	200	300	0	0	0	0	0	0	0	200	903	0	0	0	0	0	0	0	603	903	0
725	2	0	0	0	0	0	0	200	300	0	0	0	0	0	0	0	200	903	0	0	0	0	0	0	0	603	903	0
725	3	-1.06899	1.95848	10.8017	761.445	23.6906	159.3	200	300	0	0	0	0	0	0	0	200	903	0	0	0	0	0	0	0	603	903	0
725	4	0.151716	1.34812	11.412	852.998	-37.3445	-298.464	200	300	0	0	0	0	0	0	0	200	903	0	0	0	0	0	0	0	603	903	0
725	5	0.60948	1.80589	10.8017	120.576	-220.45	-344.24	200	300	0	0	0	0	0	0	0	200	903	0	0	0	0	0	0	0	603	903	0
725	6	0	0	0	0	0	0	200	300	0	0	0	0	0	0	0	200	903	0	0	0	0	0	0	0	603	903	0
725	7	0	0	0	0	0	0	200	300	0	0	0	0	0	0	0	200	903	0	0	0	0	0	0	0	603	903	0
725	8	0	0	0	0	0	0	200	300	0	0	0	0	0	0	0	200	903	0	0	0	0	0	0	0	603	903	0
725	9	0	0	0	0	0	0	200	300	0	0	0	0	0	0	0	200	903	0	0	0	0	0	0	0	603	903	0
726	0	0	0	0	0	0	0	200	300	0	0	0	0	0	0	0	200	903	0	0	0	0	0	0	0	603	903	0
726	1	1.06724	2.11106	12.3275	578.34	-159.415	-23.8053	200	300	0	0	0	0	0	0	0	200	903	0	0	0	0	0	0	0	603	903	0
726	2	1.06724	1.80589	10.8017	761.445	145.761	-161.134	200	300	0	0	0	0	0	0	0	200	903	0	0	0	0	0	0	0	603	903	0
726	3	0	0	0	0	0	0	200	300	0	0	0	0	0	0	0	200	903	0	0	0	0	0	0	0	603	903	0
726	4	0.60948	1.50071	11.412	303.682	-98.3797	-161.134	200	300	0	0	0	0	0	0	0	200	903	0	0	0	0	0	0	0	603	903	0
726	5	-0.306047	1.95848	9.88614	303.682	-98.3797	-481.569	200	300	0	0	0	0	0	0	0	200	903	0	0	0	0	0	0	0	603	903	0
726	6	1.06724	2.874	10.4965	486.787	267.831	-206.911	200	300	0	0	0	0	0	0	0	200	903	0	0	0	0	0	0	0	603	903	0
726	7	-0.611223	1.95848	11.412	303.682	-220.45	-23.8053	200	300	0	0	0	0	0	0	0	200	903	0	0	0	0	0	0	0	603	903	0
726	8	0.914656	2.11106	11.412	852.998	-403.556	-252.687	200	300	0	0	0	0	0	0	0	200	903	0	0	0	0	0	0	0	603	903	0
726	9	0	0	0	0	0	0	200	300	0	0	0	0	0	0	0	200	903	0	0	0	0	0	0	0	603	903	0
727	0	0	0	0	0	0	0	200	300	0	0	0	0	0	0	0	200	903	0	0	0	0	0	0	0	603	903	0
727	1	0	0	0	0	0	0	200	300	0	0	0	0	0	0	0	200	903	0	0	0	0	0	0	0	603	903	0
727	2	0	0	0	0	0	0	200	300	0	0	0	0	0	0	0	200	903	0	0	0	0	0	0	0	603	903	0
727	3	-1.37416	2.26365	10.8017	120.576	-342.52	-69.5817	200	300	0	0	0	0	0	0	0	200	903	0	0	0	0	0	0	0	603	903	0
727	4	0.151716	2.41624	12.6327	120.576	-37.3445	113.524	200	300	0	0	0	0	0	0	0	200	903	0	0	0	0	0	0	0	603	903	0
727	5	0.456892	1.04295	11.1068	29.0235	-342.52	-252.687	200	300	0	0	0	0	0	0	0	200	903	0	0	0	0	0	0	0	603	903	0
727	6	0.762068	2.72141	9.88614	669.893	267.831	-252.687	200	300	0	0	0	0	0	0	0	200	903	0	0	0	0	0	0	0	603	903	0
727	7	0.60948	2.41624	10.1913	944.551	-159.415	-23.8053	200	300	0	0	0	0	0	0	0	200	903	0	0	0	0	0	0	0	603	903	0
727	8	-0.15346	1.95848	9.88614	1127.66	-98.3797	-23.8053	200	300	0	0	0	0	0	0	0	200	903	0	0	0	0	0	0	0	603	903	0
727	9	0.456892	1.80589	11.1068	761.445	-37.3445	-298.464	200	300	0	0	0	0	0	0	0	200	903	0	0	0	0	0	0	0	603	903	0
728	0	-0.306047	1.80589	10.8017	578.34	-281.485	-206.911	200	300	0	0	0	0	0	0	0	200	903	0	0	0	0	0	0	0	603	903	0
728	1	-0.15346	1.50071	10.4965	395.235	-37.3445	-664.674	200	300	0	0	0	0	0	0	0	200	903	0	0	0	0	0	0	0	603	903	0
728	2	0.304304	2.26365	10.1913	669.893	-159.415	-161.134	200	300	0	0	0	0	0	0	0	200	903	0	0	0	0	0	0	0	603	903	0
728	3	0	0	0	0	0	0	200	300	0	0	0	0	0	0	0	200	903	0	0	0	0	0	0	0	603	903	0
728	4	0	0	0	0	0	0	200	300	0	0	0	0	0	0	0	200	903	0	0	0	0	0	0	0	603	903	0
728	5	0	0	0	0	0	0	200	300	0	0	0	0	0	0	0	200	903	0	0	0	0	0	0	0	603	903	0
728	6	1.21983	1.6533	11.412	761.445	-281.485	-23.8053	200	300	0	0	0	0	0	0	0	200	903	0	0	0	0	0	0	0	603	903	0
728	7	-0.611223	1.95848	10.4965	578.34	-220.45	-298.464	200	300	0	0	0	0	0	0	0	200	903	0	0	0	0	0	0	0	603	903	0
728	8	0.456892	2.11106	10.8017	212.129	23.6906	-115.358	200	300	0	0	0	0	0	0	0	200	903	0	0	0	0	0	0	0	603	903	0
728	9	0.762068	1.6533	12.3275	578.34	84.7258	-344.24	200	300	0	0	0	0	0	0	0	200	903	0	0	0	0	0	0	0	603	903	0
729	0	0	0	0	0	0	0	200	300	0	0	0	0	0	0	0	200	903	0	0	0	0	0	0	0	603	903	0
729	1	-0.15346	2.874	9.88614	669.893	-98.3797	-252.687	200	300	0	0	0	0	0	0	0	200	903	0	0	0	0	0	0	0	603	903	0
729	2	-0.15346	0.89036	10.8017	395.235	-220.45	-69.5817	200	300	0	0	0	0	0	0	0	200	903	0	0	0	0	0	0	0	603	903	0
729	3	-0.458635	2.874	11.412	852.998	-159.415	-252.687	200	300	0	0	0	0	0	0	0	200	903	0	0	0	0	0	0	0	603	903	0
729	4	0.304304	2.56883	10.4965	669.893	84.7258	-69.5817	200	300	0	0	0	0	0	0	0	200	903	0	0	0	0	0	0	0	603	903	0
729	5	0.762068	1.80589	10.8017	1402.32	-37.3445	-298.464	200	300	0	0	0	0	0	0	0	200	903	0	0	0	0	0	0	0	603	903	0
729	6	0.914656	2.26365	9.88614	669.893	-220.45	-23.8053	200	300	0	0	0	0	0	0	0	200	903	0	0	0	0	0	0	0	603	903	0
729	7	-0.916399	1.34812	11.412	-62.5292	-281.485	-161.134	200	300	0	0	0	0	0	0	0	200	903	0	0	0	0	0	0	0	603	903	0
729	8	0	0	0	0	0	0	200	300	0	0	0	0	0	0	0	200	903	0	0	0	0	0	0	0	603	903	0
729	9	-0.458635	2.41624	9.88614	761.445	-159.415	-206.911	200	300	0	0	0	0	0	0	0	200	903	0	0	0	0	0	0	0	603	903	0
730	0	-0.000871718	2.26365	10.4965	395.235	206.796	67.7474	200	300	0	0	0	0	0	0	0	200	903	0	0	0	0	0	0	0	603	903	0
730	1	1.21983	2.26365	9.88614	120.576	23.6906	-161.134	200	300	0	0	0	0	0	0	0	200	903	0	0	0	0	0	0	0	603	903	0
730	2	2.28795	2.11106	11.1068	578.34	-159.415	-344.24	200	300	0	0	0	0	0	0	0	200	903	0	0	0	0	0	0	0	603	903	0
730	3	0	0	0	0	0	0	200	300	0	0	0	0	0	0	0	200	903	0	0	0	0	0	0	0	603	903	0
730	4	0.304304	1.6533	10.4965	669.893	267.831	-206.911	200	300	0	0	0	0	0	0	0	200	903	0	0	0	0	0	0	0	603	903	0
730	5	0	0	0	0	0	0	200	300	0	0	0	0	0	0	0	200	903	0	0	0	0	0	0	0	603	903	0
730	6	-1.22157	1.6533	10.1913	486.787	-220.45	-206.911	200	300	0	0	0	0	0	0	0	200	903	0	0	0	0	0	0	0	603	903	0
730	7	0.151716	3.02659	10.8017	1768.53	145.761	21.9711	200	300	0	0	0	0	0	0	0	200	903	0	0	0	0	0	0	0	603	903	0
730	8	0.60948	2.72141	11.412	303.682	-342.52	-435.793	200	300	0	0	0	0	0	0	0	200	903	0	0	0	0	0	0	0	603	903	0
730	9	0	0	0	0	0	0	200	300	0	0	0	0	0	0	0	200	903	0	0	0	0	0	0	0	603	903	0
731	0	0	0	0	0	0	0	200	300	0	0	0	0	0	0	0	200	903	0	0	0	0	0	0	0	603	903	0
731	1	0	0	0	0	0	0	200	300	0	0	0	0	0	0	0	200	903	0	0	0	0	0	0	0	603	903	0
731	2	0.914656	1.6533	12.0224	120.576	84.7258	-161.134	200	300	0	0	0	0	0	0	0	200	903	0	0	0	0	0	0	0	603	903	0
731	3	0	0	0	0	0	0	200	300	0	0	0	0	0	0	0	200	903	0	0	0	0	0	0	0	603	903	0
731	4	0.60948	1.80589	10.4965	212.129	-98.3797	21.9711	200	300	0	0	0	0	0	0	0	200	903	0	0	0	0	0	0	0	603	903	0
731	5	0.60948	2.874	10.8017	-154.082	-403.556	-435.793	200	300	0	0	0	0	0	0	0	200	903	0	0	0	0	0	0	0	603	903	0
731	6	0.60948	2.11106	9.88614	486.787	-37.3445	-298.464	200	300	0	0	0	0	0	0	0	200	903	0	0	0	0	0	0	0	603	903	0
731	7	1.21983	2.41624	10.1913	212.129	-37.3445	-115.358	200	300	0	0	0	0	0	0	0	200	903	0	0	0	0	0	0	0	603	903	0
731	8	0	0	0	0	0	0	200	300	0	0	0	0	0	0	0	200	903	0	0	0	0	0	0	0	603	903	0
731	9	1.37242	2.41624	10.4965	1036.1	84.7258	-206.911	200	300	0	0	0	0	0	0	0	200	903	0	0	0	0	0	0	0	603	903	0
732	0	-0.306047	2.56883	11.7172	669.893	-281.485	-298.464	200	300	0	0	0	0	0	0	0	200	903	0	0	0	0	0	0	0	603	903	0
732	1	0.456892	2.11106	11.1068	1310.76	-281.485	205.077	200	300	0	0	0	0	0	0	0	200	903	0	0	0	0	0	0	0	603	903	0
732	2	0	0	0	0	0	0	200	300	0	0	0	0	0	0	0	200	903	0	0	0	0	0	0	0	603	903	0
732	3	0	0	0	0	0	0	200	300	0	0	0	0	0	0	0	200	903	0	0	0	0	0	0	0	603	903	0
732	4	0	0	0	0	0	0	200	300	0	0	0	0	0	0	0	200	903	0	0	0	0	0	0	0	603	903	0
732	5	0	0	0	0	0	0	200	300	0	0	0	0	0	0	0	200	903	0	0	0	0	0	0	0	603	903	0
732	6	-0.000871718	2.56883	10.4965	120.576	-98.3797	-252.687	200	300	0	0	0	0	0	0	0	200	903	0	0	0	0	0	0	0	603	903	0
732	7	0.914656	2.72141	10.8017	395.235	84.7258	-161.134	200	300	0	0	0	0	0	0	0	200	903	0	0	0	0	0	0	0	603	903	0
732	8	-0.000871718	2.874	13.8534	303.682	-159.415	-206.911	200	300	0	0	0	0	0	0	0	200	903	0	0	0	0	0	0	0	603	903	0
732	9	0	0	0	0	0	0	200	300	0	0	0	0	0	0	0	200	903	0	0	0	0	0	0	0	603	903	0
733	0	-0.306047	0.585184	10.1913	944.551	-159.415	-252.687	200	300	0	0	0	0	0	0	0	200	903	0	0	0	0	0	0	0	603	903	0
733	1	0	0	0	0	0	0	200	300	0	0	0	0	0	0	0	200	903	0	0	0	0	0	0	0	603	903	0
733	2	-1.06899	1.6533	11.1068	303.682	-37.3445	-298.464	200	300	0	0	0	0	0	0	0	200	903	0	0	0	0	0	0	0	603	903	0
733	3	0.762068	1.80589	10.4965	578.34	-220.45	-115.358	200	300	0	0	0	0	0	0	0	200	903	0	0	0	0	0	0	0	603	903	0
733	4	0.304304	2.26365	10.1913	395.235	-586.661	-527.345	200	300	0	0	0	0	0	0	0	200	903	0	0	0	0	0	0	0	603	903	0
733	5	0.60948	2.56883	10.4965	669.893	-464.591	-161.134	200	300	0	0	0	0	0	0	0	200	903	0	0	0	0	0	0	0	603	903	0
733	6	0.456892	2.41624	13.5482	486.787	-159.415	-115.358	200	300	0	0	0	0	0	0	0	200	903	0	0	0	0	0	0	0	603	903	0
733	7	-0.458635	2.26365	10.4965	1310.76	23.6906	-206.911	200	300	0	0	0	0	0	0	0	200	903	0	0	0	0	0	0	0	603	903	0
733	8	-0.306047	2.26365	10.8017	486.787	-281.485	-298.464	200	300	0	0	0	0	0	0	0	200	903	0	0	0	0	0	0	0	603	903	0
733	9	0.151716	1.80589	13.5482	395.235	-159.415	67.7474	200	300	0	0	0	0	0	0	0	200	903	0	0	0	0	0	0	0	603	903	0
734	0	0.762068	1.95848	10.1913	578.34	-220.45	67.7474	200	300	0	0	0	0	0	0	0	200	903	0	0	0	0	0	0	0	603	903	0
734	1	0	0	0	0	0	0	200	300	0	0	0	0	0	0	0	200	903	0	0	0	0	0	0	0	603	903	0
734	2	0.762068	1.34812	12.3275	120.576	-403.556	21.9711	200	300	0	0	0	0	0	0	0	200	903	0	0	0	0	0	0	0	603	903	0
734	3	0	0	0	0	0	0	200	300	0	0	0	0	0	0	0	200	903	0	0	0	0	0	0	0	603	903	0
734	4	-0.763811	3.02659	11.1068	212.129	-159.415	-69.5817	200	300	0	0	0	0	0	0	0	200	903	0	0	0	0	0	0	0	603	903	0
734	5	-0.458635	2.26365	13.8534	852.998	-98.3797	-435.793	200	300	0	0	0	0	0	0	0	200	903	0	0	0	0	0	0	0	603	903	0
734	6	0.914656	3.17918	11.1068	669.893	-98.3797	-710.451	200	300	0	0	0	0	0	0	0	200	903	0	0	0	0	0	0	0	603	903	0
734	7	0	0	0	0	0	0	200	300	0	0	0	0	0	0	0	200	903	0	0	0	0	0	0	0	603	903	0
734	8	-0.000871718	2.11106	10.8017	944.551	-220.45	-161.134	200	300	0	0	0	0	0	0	0	200	903	0	0	0	0	0	0	0	603	903	0
734	9	0	0	0	0	0	0	200	300	0	0	0	0	0	0	0	200	903	0	0	0	0	0	0	0	603	903	0
735	0	0.304304	1.80589	10.1913	120.576	-342.52	-161.134	200	300	0	0	0	0	0	0	0	200	903	0	0	0	0	0	0	0	603	903	0
735	1	0	0	0	0	0	0	200	300	0	0	0	0	0	0	0	200	903	0	0	0	0	0	0	0	603	903	0
735	2	0.456892	2.56883	10.4965	303.682	-342.52	-23.8053	200	300	0	0	0	0	0	0	0	200	903	0	0	0	0	0	0	0	603	903	0
735	3	0	0	0	0	0	0	200	300	0	0	0	0	0	0	0	200	903	0	0	0	0	0	0	0	603	903	0
735	4	0	0	0	0	0	0	200	300	0	0	0	0	0	0	0	200	903	0	0	0	0	0	0	0	603	903	0
735	5	0	0	0	0	0	0	200	300	0	0	0	0	0	0	0	200	903	0	0	0	0	0	0	0	603	903	0
735	6	0.762068	2.26365	11.7172	944.551	23.6906	-344.24	200	300	0	0	0	0	0	0	0	200	903	0	0	0	0	0	0	0	603	903	0
735	7	-0.15346	1.80589	12.9379	578.34	-342.52	-298.464	200	300	0	0	0	0	0	0	0	200	903	0	0	0	0	0	0	0	603	903	0
735	8	0.762068	1.80589	10.8017	120.576	-159.415	-344.24	200	300	0	0	0	0	0	0	0	200	903	0	0	0	0	0	0	0	603	903	0
735	9	0	0	0	0	0	0	200	300	0	0	0	0	0	0	0	200	903	0	0	0	0	0	0	0	603	903	0
736	0	1.06724	3.33177	9.88614	578.34	206.796	-69.5817	200	300	0	0	0	0	0	0	0	200	903	0	0	0	0	0	0	0	603	903	0
736	1	0	0	0	0	0	0	200	300	0	0	0	0	0	0	0	200	903	0	0	0	0	0	0	0	603	903	0
736	2	-0.306047	2.56883	10.1913	669.893	-220.45	-161.134	200	300	0	0	0	0	0	0	0	200	903	0	0	0	0	0	0	0	603	903	0
736	3	-1.22157	1.19554	12.0224	395.235	-159.415	-115.358	200	300	0	0	0	0	0	0	0	200	903	0	0	0	0	0	0	0	603	903	0
736	4	0.151716	1.95848	10.4965	578.34	-281.485	-206.911	200	300	0	0	0	0	0	0	0	200	903	0	0	0	0	0	0	0	603	903	0
736	5	0.914656	0.89036	10.4965	486.787	23.6906	-115.358	200	300	0	0	0	0	0	0	0	200	903	0	0	0	0	0	0	0	603	903	0
736	6	1.06724	1.80589	11.412	120.576	-98.3797	67.7474	200	300	0	0	0	0	0	0	0	200	903	0	0	0	0	0	0	0	603	903	0
736	7	0	0	0	0	0	0	200	300	0	0	0	0	0	0	0	200	903	0	0	0	0	0	0	0	603	903	0
736	8	0.304304	2.874	10.8017	303.682	267.831	-252.687	200	300	0	0	0	0	0	0	0	200	903	0	0	0	0	0	0	0	603	903	0
736	9	-0.15346	1.80589	13.5482	-62.5292	-37.3445	-115.358	200	300	0	0	0	0	0	0	0	200	903	0	0	0	0	0	0	0	603	903	0
737	0	0.762068	2.72141	11.1068	944.551	-159.415	-115.358	200	300	0	0	0	0	0	0	0	200	903	0	0	0	0	0	0	0	603	903	0
737	1	0.456892	2.56883	9.88614	578.34	-647.696	-206.911	200	300	0	0	0	0	0	0	0	200	903	0	0	0	0	0	0	0	603	903	0
737	2	0	0	0	0	0	0	200	300	0	0	0	0	0	0	0	200	903	0	0	0	0	0	0	0	603	903	0
737	3	-0.611223	-0.330343	10.1913	1310.76	-98.3797	-252.687	200	300	0	0	0	0	0	0	0	200	903	0	0	0	0	0	0	0	603	903	0
737	4	-0.15346	1.50071	10.1913	395.235	84.7258	-161.134	200	300	0	0	0	0	0	0	0	200	903	0	0	0	0	0	0	0	603	903	0
737	5	0.60948	2.11106	10.4965	486.787	-98.3797	-252.687	200	300	0	0	0	0	0	0	0	200	903	0	0	0	0	0	0	0	603	903	0
737	6	0.762068	2.26365	9.88614	303.682	-220.45	159.3	200	300	0	0	0	0	0	0	0	200	903	0	0	0	0	0	0	0	603	903	0
737	7	0.304304	1.19554	10.1913	120.576	-220.45	-69.5817	200	300	0	0	0	0	0	0	0	200	903	0	0	0	0	0	0	0	603	903	0
737	8	0.60948	2.56883	10.1913	669.893	-98.3797	159.3	200	300	0	0	0	0	0	0	0	200	903	0	0	0	0	0	0	0	603	903	0
737	9	0	0	0	0	0	0	200	300	0	0	0	0	0	0	0	200	903	0	0	0	0	0	0	0	603	903	0
738	0	0.456892	1.80589	10.8017	1036.1	328.867	113.524	200	300	0	0	0	0	0	0	0	200	903	0	0	0	0	0	0	0	603	903	0
738	1	-0.458635	2.26365	11.412	212.129	-98.3797	-115.358	200	300	0	0	0	0	0	0	0	200	903	0	0	0	0	0	0	0	603	903	0
738	2	0.762068	2.41624	11.1068	303.682	-37.3445	-115.358	200	300	0	0	0	0	0	0	0	200	903	0	0	0	0	0	0	0	603	903	0
738	3	1.21983	2.26365	10.4965	303.682	145.761	-298.464	200	300	0	0	0	0	0	0	0	200	903	0	0	0	0	0	0	0	603	903	0
738	4	0	0	0	0	0	0	200	300	0	0	0	0	0	0	0	200	903	0	0	0	0	0	0	0	603	903	0
738	5	0	0	0	0	0	0	200	300	0	0	0	0	0	0	0	200	903	0	0	0	0	0	0	0	603	903	0
738	6	1.06724	2.72141	10.1913	395.235	-159.415	-206.911	200	300	0	0	0	0	0	0	0	200	903	0	0	0	0	0	0	0	603	903	0
738	7	-1.22157	2.56883	10.8017	761.445	23.6906	-527.345	200	300	0	0	0	0	0	0	0	200	903	0	0	0	0	0	0	0	603	903	0
738	8	0.151716	1.95848	10.1913	1036.1	145.761	-115.358	200	300	0	0	0	0	0	0	0	200	903	0	0	0	0	0	0	0	603	903	0
738	9	0.60948	1.80589	11.7172	669.893	-525.626	-115.358	200	300	0	0	0	0	0	0	0	200	903	0	0	0	0	0	0	0	603	903	0
739	0	0	0	0	0	0	0	200	300	0	0	0	0	0	0	0	200	903	0	0	0	0	0	0	0	603	903	0
739	1	0.456892	1.80589	10.4965	212.129	-98.3797	-252.687	200	300	0	0	0	0	0	0	0	200	903	0	0	0	0	0	0	0	603	903	0
739	2	0	0	0	0	0	0	200	300	0	0	0	0	0	0	0	200	903	0	0	0	0	0	0	0	603	903	0
739	3	-0.000871718	2.26365	11.1068	120.576	-37.3445	67.7474	200	300	0	0	0	0	0	0	0	200	903	0	0	0	0	0	0	0	603	903	0
739	4	-0.15346	1.50071	12.9379	303.682	-281.485	-206.911	200	300	0	0	0	0	0	0	0	200	903	0	0	0	0	0	0	0	603	903	0
739	5	1.37242	2.72141	11.1068	761.445	-159.415	-23.8053	200	300	0	0	0	0	0	0	0	200	903	0	0	0	0	0	0	0	603	903	0
739	6	0	0	0	0	0	0	200	300	0	0	0	0	0	0	0	200	903	0	0	0	0	0	0	0	603	903	0
739	7	0	0	0	0	0	0	200	300	0	0	0	0	0	0	0	200	903	0	0	0	0	0	0	0	603	903	0
739	8	-0.15346	1.19554	10.4965	669.893	-220.45	-206.911	200	300	0	0	0	0	0	0	0	200	903	0	0	0	0	0	0	0	603	903	0
739	9	1.52501	1.6533	12.0224	944.551	-769.766	-252.687	200	300	0	0	0	0	0	0	0	200	903	0	0	0	0	0	0	0	603	903	0
740	0	-0.611223	1.50071	11.412	395.235	-98.3797	-298.464	200	300	0	0	0	0	0	0	0	200	903	0	0	0	0	0	0	0	603	903	0
740	1	0.304304	2.41624	11.1068	1127.66	23.6906	-344.24	200	300	0	0	0	0	0	0	0	200	903	0	0	0	0	0	0	0	603	903	0
740	2	0.762068	2.11106	11.1068	120.576	23.6906	-252.687	200	300	0	0	0	0	0	0	0	200	903	0	0	0	0	0	0	0	603	903	0
740	3	0	0	0	0	0	0	200	300	0	0	0	0	0	0	0	200	903	0	0	0	0	0	0	0	603	903	0
740	4	-0.458635	2.11106	11.7172	486.787	-403.556	-69.5817	200	300	0	0	0	0	0	0	0	200	903	0	0	0	0	0	0	0	603	903	0
740	5	0	0	0	0	0	0	200	300	0	0	0	0	0	0	0	200	903	0	0	0	0	0	0	0	603	903	0
740	6	-0.15346	1.6533	11.1068	669.893	-98.3797	-435.793	200	300	0	0	0	0	0	0	0	200	903	0	0	0	0	0	0	0	603	903	0
740	7	0.304304	1.50071	11.7172	486.787	23.6906	-206.911	200	300	0	0	0	0	0	0	0	200	903	0	0	0	0	0	0	0	603	903	0
740	8	0.762068	1.80589	10.1913	120.576	-220.45	159.3	200	300	0	0	0	0	0	0	0	200	903	0	0	0	0	0	0	0	603	903	0
740	9	2.13536	2.26365	10.1913	1585.42	-159.415	-252.687	200	300	0	0	0	0	0	0	0	200	903	0	0	0	0	0	0	0	603	903	0
741	0	0.762068	2.56883	10.4965	120.576	84.7258	-23.8053	200	300	0	0	0	0	0	0	0	200	903	0	0	0	0	0	0	0	603	903	0
741	1	-0.306047	2.874	10.4965	761.445	84.7258	-206.911	200	300	0	0	0	0	0	0	0	200	903	0	0	0	0	0	0	0	603	903	0
741	2	0	0	0	0	0	0	200	300	0	0	0	0	0	0	0	200	903	0	0	0	0	0	0	0	603	903	0
741	3	-0.611223	2.26365	10.8017	578.34	-37.3445	-298.464	200	300	0	0	0	0	0	0	0	200	903	0	0	0	0	0	0	0	603	903	0
741	4	0.762068	2.11106	11.7172	669.893	-281.485	-344.24	200	300	0	0	0	0	0	0	0	200	903	0	0	0	0	0	0	0	603	903	0
741	5	0.762068	1.6533	10.1913	395.235	-37.3445	21.9711	200	300	0	0	0	0	0	0	0	200	903	0	0	0	0	0	0	0	603	903	0
741	6	0	0	0	0	0	0	200	300	0	0	0	0	0	0	0	200	903	0	0	0	0	0	0	0	603	903	0
741	7	1.21983	3.02659	11.1068	578.34	-220.45	-161.134	200	300	0	0	0	0	0	0	0	200	903	0	0	0	0	0	0	0	603	903	0
741	8	0	0	0	0	0	0	200	300	0	0	0	0	0	0	0	200	903	0	0	0	0	0	0	0	603	903	0
741	9	1.98277	2.56883	9.58096	120.576	-220.45	-115.358	200	300	0	0	0	0	0	0	0	200	903	0	0	0	0	0	0	0	603	903	0
742	0	0.151716	2.41624	12.0224	486.787	-159.415	-206.911	200	300	0	0	0	0	0	0	0	200	903	0	0	0	0	0	0	0	603	903	0
742	1	0.762068	1.80589	11.1068	669.893	145.761	-161.134	200	300	0	0	0	0	0	0	0	200	903	0	0	0	0	0	0	0	603	903	0
742	2	0.762068	2.11106	11.412	303.682	-98.3797	-206.911	200	300	0	0	0	0	0	0	0	200	903	0	0	0	0	0	0	0	603	903	0
742	3	0	0	0	0	0	0	200	300	0	0	0	0	0	0	0	200	903	0	0	0	0	0	0	0	603	903	0
742	4	-0.306047	1.80589	10.4965	303.682	-525.626	-390.016	200	300	0	0	0	0	0	0	0	200	903	0	0	0	0	0	0	0	603	903	0
742	5	0.914656	2.72141	9.88614	944.551	84.7258	-298.464	200	300	0	0	0	0	0	0	0	200	903	0	0	0	0	0	0	0	603	903	0
742	6	-0.458635	2.56883	10.4965	212.129	-98.3797	-23.8053	200	300	0	0	0	0	0	0	0	200	903	0	0	0	0	0	0	0	603	903	0
742	7	0.304304	1.34812	10.1913	303.682	-98.3797	-115.358	200	300	0	0	0	0	0	0	0	200	903	0	0	0	0	0	0	0	603	903	0
742	8	0.151716	2.56883	10.4965	761.445	-220.45	-344.24	200	300	0	0	0	0	0	0	0	200	903	0	0	0	0	0	0	0	603	903	0
742	9	0	0	0	0	0	0	200	300	0	0	0	0	0	0	0	200	903	0	0	0	0	0	0	0	603	903	0
743	0	-0.458635	1.50071	11.412	486.787	-159.415	21.9711	200	300	0	0	0	0	0	0	0	200	903	0	0	0	0	0	0	0	603	903	0
743	1	0	0	0	0	0	0	200	300	0	0	0	0	0	0	0	200	903	0	0	0	0	0	0	0	603	903	0
743	2	0.151716	1.34812	10.8017	395.235	-159.415	-390.016	200	300	0	0	0	0	0	0	0	200	903	0	0	0	0	0	0	0	603	903	0
743	3	0.60948	1.80589	12.9379	212.129	-159.415	-69.5817	200	300	0	0	0	0	0	0	0	200	903	0	0	0	0	0	0	0	603	903	0
743	4	0.914656	1.95848	11.1068	120.576	145.761	-206.911	200	300	0	0	0	0	0	0	0	200	903	0	0	0	0	0	0	0	603	903	0
743	5	0	0	0	0	0	0	200	300	0	0	0	0	0	0	0	200	903	0	0	0	0	0	0	0	603	903	0
743	6	1.21983	2.41624	12.0224	212.129	-37.3445	-252.687	200	300	0	0	0	0	0	0	0	200	903	0	0	0	0	0	0	0	603	903	0
743	7	0	0	0	0	0	0	200	300	0	0	0	0	0	0	0	200	903	0	0	0	0	0	0	0	603	903	0
743	8	0.762068	2.56883	10.8017	761.445	23.6906	-161.134	200	300	0	0	0	0	0	0	0	200	903	0	0	0	0	0	0	0	603	903	0
743	9	-0.15346	2.41624	11.1068	1127.66	23.6906	-390.016	200	300	0	0	0	0	0	0	0	200	903	0	0	0	0	0	0	0	603	903	0
744	0	0	0	0	0	0	0	200	300	0	0	0	0	0	0	0	200	903	0	0	0	0	0	0	0	603	903	0
744	1	0	0	0	0	0	0	200	300	0	0	0	0	0	0	0	200	903	0	0	0	0	0	0	0	603	903	0
744	2	0	0	0	0	0	0	200	300	0	0	0	0	0	0	0	200	903	0	0	0	0	0	0	0	603	903	0
744	3	0	0	0	0	0	0	200	300	0	0	0	0	0	0	0	200	903	0	0	0	0	0	0	0	603	903	0
744	4	0	0	0	0	0	0	200	300	0	0	0	0	0	0	0	200	903	0	0	0	0	0	0	0	603	903	0
744	5	-0.458635	1.95848	10.4965	303.682	-464.591	67.7474	200	300	0	0	0	0	0	0	0	200	903	0	0	0	0	0	0	0	603	903	0
744	6	0.304304	2.26365	10.4965	1036.1	-464.591	67.7474	200	300	0	0	0	0	0	0	0	200	903	0	0	0	0	0	0	0	603	903	0
744	7	1.06724	2.72141	10.8017	669.893	328.867	-23.8053	200	300	0	0	0	0	0	0	0	200	903	0	0	0	0	0	0	0	603	903	0
744	8	0	0	0	0	0	0	200	300	0	0	0	0	0	0	0	200	903	0	0	0	0	0	0	0	603	903	0
744	9	0	0	0	0	0	0	200	300	0	0	0	0	0	0	0	200	903	0	0	0	0	0	0	0	603	903	0
745	0	0	0	0	0	0	0	200	300	0	0	0	0	0	0	0	200	903	0	0	0	0	0	0	0	603	903	0
745	1	-0.763811	2.11106	11.7172	212.129	-220.45	-23.8053	200	300	0	0	0	0	0	0	0	200	903	0	0	0	0	0	0	0	603	903	0
745	2	1.06724	3.02659	11.412	1402.32	145.761	-23.8053	200	300	0	0	0	0	0	0	0	200	903	0	0	0	0	0	0	0	603	903	0
745	3	0.151716	2.26365	11.7172	395.235	23.6906	21.9711	200	300	0	0	0	0	0	0	0	200	903	0	0	0	0	0	0	0	603	903	0
745	4	0	0	0	0	0	0	200	300	0	0	0	0	0	0	0	200	903	0	0	0	0	0	0	0	603	903	0
745	5	0.60948	2.26365	9.88614	669.893	-37.3445	-161.134	200	300	0	0	0	0	0	0	0	200	903	0	0	0	0	0	0	0	603	903	0
745	6	0	0	0	0	0	0	200	300	0	0	0	0	0	0	0	200	903	0	0	0	0	0	0	0	603	903	0
745	7	-1.06899	2.11106	11.1068	669.893	-464.591	-206.911	200	300	0	0	0	0	0	0	0	200	903	0	0	0	0	0	0	0	603	903	0
745	8	0.304304	1.80589	9.88614	761.445	-37.3445	-252.687	200	300	0	0	0	0	0	0	0	200	903	0	0	0	0	0	0	0	603	903	0
745	9	1.06724	1.50071	11.1068	212.129	-281.485	-206.911	200	300	0	0	0	0	0	0	0	200	903	0	0	0	0	0	0	0	603	903	0
746	0	0	0	0	0	0	0	200	300	0	0	0	0	0	0	0	200	903	0	0	0	0	0	0	0	603	903	0
746	1	0.456892	2.874	11.412	303.682	-98.3797	-115.358	200	300	0	0	0	0	0	0	0	200	903	0	0	0	0	0	0	0	603	903	0
746	2	0	0	0	0	0	0	200	300	0	0	0	0	0	0	0	200	903	0	0	0	0	0	0	0	603	903	0
746	3	-0.306047	2.56883	10.8017	578.34	-98.3797	-527.345	200	300	0	0	0	0	0	0	0	200	903	0	0	0	0	0	0	0	603	903	0
746	4	-0.458635	2.56883	10.8017	1585.42	-159.415	-252.687	200	300	0	0	0	0	0	0	0	200	903	0	0	0	0	0	0	0	603	903	0
746	5	0.762068	1.95848	12.3275	669.893	-98.3797	-298.464	200	300	0	0	0	0	0	0	0	200	903	0	0	0	0	0	0	0	603	903	0
746	6	0	0	0	0	0	0	200	300	0	0	0	0	0	0	0	200	903	0	0	0	0	0	0	0	603	903	0
746	7	0.151716	1.6533	9.88614	395.235	84.7258	-344.24	200	300	0	0	0	0	0	0	0	200	903	0	0	0	0	0	0	0	603	903	0
746	8	-0.458635	2.56883	9.88614	1402.32	-281.485	-252.687	200	300	0	0	0	0	0	0	0	200	903	0	0	0	0	0	0	0	603	903	0
746	9	-0.763811	2.72141	11.7172	303.682	-647.696	-252.687	200	300	0	0	0	0	0	0	0	200	903	0	0	0	0	0	0	0	603	903	0
747	0	-0.458635	1.50071	11.1068	669.893	-37.3445	-161.134	200	300	0	0	0	0	0	0	0	200	903	0	0	0	0	0	0	0	603	903	0
747	1	1.06724	2.26365	10.8017	852.998	-220.45	-206.911	200	300	0	0	0	0	0	0	0	200	903	0	0	0	0	0	0	0	603	903	0
747	2	0.456892	2.41624	10.4965	578.34	145.761	21.9711	200	300	0	0	0	0	0	0	0	200	903	0	0	0	0	0	0	0	603	903	0
747	3	0.914656	1.50071	9.88614	395.235	23.6906	21.9711	200	300	0	0	0	0	0	0	0	200	903	0	0	0	0	0	0	0	603	903	0
747	4	2.28795	1.19554	11.412	669.893	-281.485	21.9711	200	300	0	0	0	0	0	0	0	200	903	0	0	0	0	0	0	0	603	903	0
747	5	0	0	0	0	0	0	200	300	0	0	0	0	0	0	0	200	903	0	0	0	0	0	0	0	603	903	0
747	6	-0.000871718	1.80589	10.8017	-154.082	145.761	159.3	200	300	0	0	0	0	0	0	0	200	903	0	0	0	0	0	0	0	603	903	0
747	7	-0.000871718	2.26365	13.2431	486.787	-98.3797	-252.687	200	300	0	0	0	0	0	0	0	200	903	0	0	0	0	0	0	0	603	903	0
747	8	0.60948	2.56883	10.4965	395.235	-281.485	-252.687	200	300	0	0	0	0	0	0	0	200	903	0	0	0	0	0	0	0	603	903	0
747	9	0.456892	2.56883	10.1913	395.235	-98.3797	-298.464	200	300	0	0	0	0	0	0	0	200	903	0	0	0	0	0	0	0	603	903	0
748	0	0.60948	2.26365	12.0224	852.998	23.6906	-115.358	200	300	0	0	0	0	0	0	0	200	903	0	0	0	0	0	0	0	603	903	0
748	1	0	0	0	0	0	0	200	300	0	0	0	0	0	0	0	200	903	0	0	0	0	0	0	0	603	903	0
748	2	0.914656	1.34812	12.0224	1310.76	-647.696	-344.24	200	300	0	0	0	0	0	0	0	200	903	0	0	0	0	0	0	0	603	903	0
748	3	-0.763811	1.34812	11.7172	944.551	-342.52	-206.911	200	300	0	0	0	0	0	0	0	200	903	0	0	0	0	0	0	0	603	903	0
748	4	-0.15346	1.95848	11.412	395.235	-37.3445	-206.911	200	300	0	0	0	0	0	0	0	200	903	0	0	0	0	0	0	0	603	903	0
748	5	0.914656	0.89036	11.1068	120.576	-220.45	-252.687	200	300	0	0	0	0	0	0	0	200	903	0	0	0	0	0	0	0	603	903	0
748	6	0	0	0	0	0	0	200	300	0	0	0	0	0	0	0	200	903	0	0	0	0	0	0	0	603	903	0
748	7	0	0	0	0	0	0	200	300	0	0	0	0	0	0	0	200	903	0	0	0	0	0	0	0	603	903	0
748	8	0	0	0	0	0	0	200	300	0	0	0	0	0	0	0	200	903	0	0	0	0	0	0	0	603	903	0
748	9	0.762068	2.11106	10.4965	395.235	-98.3797	-23.8053	200	300	0	0	0	0	0	0	0	200	903	0	0	0	0	0	0	0	603	903	0
749	0	0.762068	1.04295	10.4965	944.551	-37.3445	-206.911	200	300	0	0	0	0	0	0	0	200	903	0	0	0	0	0	0	0	603	903	0
749	1	0	0	0	0	0	0	200	300	0	0	0	0	0	0	0	200	903	0	0	0	0	0	0	0	603	903	0
749	2	0.60948	1.50071	9.88614	761.445	-769.766	-206.911	200	300	0	0	0	0	0	0	0	200	903	0	0	0	0	0	0	0	603	903	0
749	3	0	0	0	0	0	0	200	300	0	0	0	0	0	0	0	200	903	0	0	0	0	0	0	0	603	903	0
749	4	0.762068	2.26365	11.1068	1310.76	267.831	-206.911	200	300	0	0	0	0	0	0	0	200	903	0	0	0	0	0	0	0	603	903	0
749	5	-0.763811	2.874	10.8017	669.893	145.761	-298.464	200	300	0	0	0	0	0	0	0	200	903	0	0	0	0	0	0	0	603	903	0
749	6	-0.15346	2.56883	9.88614	395.235	-159.415	-252.687	200	300	0	0	0	0	0	0	0	200	903	0	0	0	0	0	0	0	603	903	0
749	7	0	0	0	0	0	0	200	300	0	0	0	0	0	0	0	200	903	0	0	0	0	0	0	0	603	903	0
749	8	0	0	0	0	0	0	200	300	0	0	0	0	0	0	0	200	903	0	0	0	0	0	0	0	603	903	0
749	9	0	0	0	0	0	0	200	300	0	0	0	0	0	0	0	200	903	0	0	0	0	0	0	0	603	903	0
750	0	1.52501	1.04295	10.8017	486.787	-220.45	-161.134	200	300	0	0	0	0	0	0	0	200	903	0	0	0	0	0	0	0	603	903	0
750	1	0	0	0	0	0	0	200	300	0	0	0	0	0	0	0	200	903	0	0	0	0	0	0	0	603	903	0
750	2	1.21983	1.95848	10.4965	395.235	-281.485	-206.911	200	300	0	0	0	0	0	0	0	200	903	0	0	0	0	0	0	0	603	903	0
750	3	2.59312	3.17918	10.4965	669.893	23.6906	-390.016	200	300	0	0	0	0	0	0	0	200	903	0	0	0	0	0	0	0	603	903	0
750	4	0	0	0	0	0	0	200	300	0	0	0	0	0	0	0	200	903	0	0	0	0	0	0	0	603	903	0
750	5	0	0	0	0	0	0	200	300	0	0	0	0	0	0	0	200	903	0	0	0	0	0	0	0	603	903	0
750	6	1.21983	3.48435	9.58096	1310.76	-281.485	-573.122	200	300	0	0	0	0	0	0	0	200	903	0	0	0	0	0	0	0	603	903	0
750	7	-0.611223	3.17918	9.88614	1402.32	-37.3445	-206.911	200	300	0	0	0	0	0	0	0	200	903	0	0	0	0	0	0	0	603	903	0
750	8	0.914656	3.63694	10.4965	944.551	-220.45	-573.122	200	300	0	0	0	0	0	0	0	200	903	0	0	0	0	0	0	0	603	903	0
750	9	0	0	0	0	0	0	200	300	0	0	0	0	0	0	0	200	903	0	0	0	0	0	0	0	603	903	0
751	0	0	0	0	0	0	0	200	300	0	0	0	0	0	0	0	200	903	0	0	0	0	0	0	0	603	903	0
751	1	0	0	0	0	0	0	200	300	0	0	0	0	0	0	0	200	903	0	0	0	0	0	0	0	603	903	0
751	2	0	0	0	0	0	0	200	300	0	0	0	0	0	0	0	200	903	0	0	0	0	0	0	0	603	903	0
751	3	0	0	0	0	0	0	200	300	0	0	0	0	0	0	0	200	903	0	0	0	0	0	0	0	603	903	0
751	4	0	0	0	0	0	0	200	300	0	0	0	0	0	0	0	200	903	0	0	0	0	0	0	0	603	903	0
751	5	1.6776	5.31541	9.58096	1951.63	-586.661	-756.227	200	300	0	0	0	0	0	0	0	200	903	0	0	0	0	0	0	0	603	903	0
751	6	0.762068	6.23094	8.36026	761.445	-220.45	-847.78	200	300	0	0	0	0	0	0	0	200	903	0	0	0	0	0	0	0	603	903	0
751	7	-0.000871718	6.6887	10.4965	486.787	-403.556	-1076.66	200	300	0	0	0	0	0	0	0	200	903	0	0	0	0	0	0	0	603	903	0
751	8	0.762068	7.14646	8.05508	944.551	-403.556	-1305.54	200	300	0	0	0	0	0	0	0	200	903	0	0	0	0	0	0	0	603	903	0
751	9	0.914656	8.67234	7.74991	944.551	-586.661	-1213.99	200	300	0	0	0	0	0	0	0	200	903	0	0	0	0	0	0	0	603	903	0
752	0	-0.000871718	8.67234	8.36026	1127.66	-708.731	-1259.77	200	300	0	0	0	0	0	0	0	200	903	0	0	0	0	0	0	0	603	903	0
752	1	2.13536	9.89305	8.66543	1860.08	-403.556	-893.556	200	300	0	0	0	0	0	0	0	200	903	0	0	0	0	0	0	0	603	903	0
752	2	3.05089	9.74046	7.13956	1493.87	-586.661	-1397.1	200	300	0	0	0	0	0	0	0	200	903	0	0	0	0	0	0	0	603	903	0
752	3	2.13536	9.89305	6.5292	1493.87	-586.661	-1168.21	200	300	0	0	0	0	0	0	0	200	903	0	0	0	0	0	0	0	603	903	0
752	4	2.13536	9.74046	6.22403	1310.76	-952.872	-1351.32	200	300	0	0	0	0	0	0	0	200	903	0	0	0	0	0	0	0	603	903	0
752	5	4.119	10.8086	7.13956	944.551	-830.802	-1305.54	200	300	0	0	0	0	0	0	0	200	903	0	0	0	0	0	0	0	603	903	0
752	6	2.44053	12.1819	7.44473	1219.21	-769.766	-1259.77	200	300	0	0	0	0	0	0	0	200	903	0	0	0	0	0	0	0	603	903	0
752	7	4.119	12.3345	8.36026	1127.66	-647.696	-1168.21	200	300	0	0	0	0	0	0	0	200	903	0	0	0	0	0	0	0	603	903	0
752	8	4.42418	11.5715	5.91885	1036.1	-769.766	-1351.32	200	300	0	0	0	0	0	0	0	200	903	0	0	0	0	0	0	0	603	903	0
752	9	4.57677	13.4026	6.22403	1310.76	-769.766	-1259.77	200	300	0	0	0	0	0	0	0	200	903	0	0	0	0	0	0	0	603	903	0
753	0	4.57677	13.0974	5.91885	1585.42	-586.661	-1122.44	200	300	0	0	0	0	0	0	0	200	903	0	0	0	0	0	0	0	603	903	0
753	1	4.57677	13.0974	7.44473	1493.87	-403.556	-1259.77	200	300	0	0	0	0	0	0	0	200	903	0	0	0	0	0	0	0	603	903	0
753	2	4.27159	13.25	8.36026	1676.97	-586.661	-1213.99	200	300	0	0	0	0	0	0	0	200	903	0	0	0	0	0	0	0	603	903	0
753	3	5.3397	15.081	7.44473	1676.97	-891.837	-1305.54	200	300	0	0	0	0	0	0	0	200	903	0	0	0	0	0	0	0	603	903	0
753	4	6.713	15.3862	5.61368	1036.1	-769.766	-1671.76	200	300	0	0	0	0	0	0	0	200	903	0	0	0	0	0	0	0	603	903	0
753	5	5.64488	16.1491	5.00333	1493.87	-586.661	-1534.43	200	300	0	0	0	0	0	0	0	200	903	0	0	0	0	0	0	0	603	903	0
753	6	4.88194	16.6069	5.3085	1768.53	-769.766	-1534.43	200	300	0	0	0	0	0	0	0	200	903	0	0	0	0	0	0	0	603	903	0
753	7	4.88194	17.2173	5.00333	1951.63	-1013.91	-1580.2	200	300	0	0	0	0	0	0	0	200	903	0	0	0	0	0	0	0	603	903	0
753	8	5.64488	17.2173	7.44473	1768.53	-952.872	-1534.43	200	300	0	0	0	0	0	0	0	200	903	0	0	0	0	0	0	0	603	903	0
753	9	5.95006	17.2173	7.13956	1493.87	-708.731	-1488.65	200	300	0	0	0	0	0	0	0	200	903	0	0	0	0	0	0	0	603	903	0
754	0	6.86558	18.1328	7.13956	1860.08	-647.696	-1580.2	200	300	0	0	0	0	0	0	0	200	903	0	0	0	0	0	0	0	603	903	0
754	1	7.47593	17.2173	4.69815	1676.97	-708.731	-1442.87	200	300	0	0	0	0	0	0	0	200	903	0	0	0	0	0	0	0	603	903	0
754	2	7.9337	19.8113	5.3085	1402.32	-891.837	-1534.43	200	300	0	0	0	0	0	0	0	200	903	0	0	0	0	0	0	0	603	903	0
754	3	6.56041	20.5742	4.39297	1402.32	-647.696	-1397.1	200	300	0	0	0	0	0	0	0	200	903	0	0	0	0	0	0	0	603	903	0
754	4	7.17076	21.7949	7.13956	2226.29	-647.696	-1992.19	200	300	0	0	0	0	0	0	0	200	903	0	0	0	0	0	0	0	603	903	0
754	5	8.69664	22.7104	8.05508	1219.21	-891.837	-1992.19	200	300	0	0	0	0	0	0	0	200	903	0	0	0	0	0	0	0	603	903	0
754	6	8.08629	22.7104	6.83438	1585.42	-708.731	-2129.52	200	300	0	0	0	0	0	0	0	200	903	0	0	0	0	0	0	0	603	903	0
754	7	8.08629	23.4734	4.39297	1951.63	-1135.98	-2175.3	200	300	0	0	0	0	0	0	0	200	903	0	0	0	0	0	0	0	603	903	0
754	8	8.69664	24.2363	5.3085	2775.61	-769.766	-2083.74	200	300	0	0	0	0	0	0	0	200	903	0	0	0	0	0	0	0	603	903	0
754	9	7.9337	24.8467	5.61368	1860.08	-891.837	-2175.3	200	300	0	0	0	0	0	0	0	200	903	0	0	0	0	0	0	0	603	903	0
755	0	9.00181	24.8467	7.13956	1768.53	-1074.94	-2129.52	200	300	0	0	0	0	0	0	0	200	903	0	0	0	0	0	0	0	603	903	0
755	1	8.84923	26.0674	5.61368	1585.42	-1258.05	-2175.3	200	300	0	0	0	0	0	0	0	200	903	0	0	0	0	0	0	0	603	903	0
755	2	10.3751	27.5932	5.3085	1676.97	-891.837	-2221.07	200	300	0	0	0	0	0	0	0	200	903	0	0	0	0	0	0	0	603	903	0
755	3	10.8329	28.9665	6.22403	1493.87	-1197.01	-2221.07	200	300	0	0	0	0	0	0	0	200	903	0	0	0	0	0	0	0	603	903	0
755	4	11.5958	28.8139	2.8671	1676.97	-1013.91	-1900.64	200	300	0	0	0	0	0	0	0	200	903	0	0	0	0	0	0	0	603	903	0
755	5	12.0536	30.3398	5.91885	2317.84	-1197.01	-2495.73	200	300	0	0	0	0	0	0	0	200	903	0	0	0	0	0	0	0	603	903	0
755	6	11.138	31.2554	3.78262	2134.74	-1135.98	-2541.51	200	300	0	0	0	0	0	0	0	200	903	0	0	0	0	0	0	0	603	903	0
755	7	11.4432	30.645	5.91885	2043.18	-891.837	-2633.06	200	300	0	0	0	0	0	0	0	200	903	0	0	0	0	0	0	0	603	903	0
755	8	12.3587	29.7295	5.91885	2317.84	-952.872	-2541.51	200	300	0	0	0	0	0	0	0	200	903	0	0	0	0	0	0	0	603	903	0
755	9	12.3587	32.1709	7.13956	1951.63	-952.872	-2449.95	200	300	0	0	0	0	0	0	0	200	903	0	0	0	0	0	0	0	603	903	0
756	0	14.3424	33.3916	4.69815	2409.4	-1197.01	-2449.95	200	300	0	0	0	0	0	0	0	200	903	0	0	0	0	0	0	0	603	903	0
756	1	12.8165	33.6968	4.69815	2134.74	-1135.98	-2633.06	200	300	0	0	0	0	0	0	0	200	903	0	0	0	0	0	0	0	603	903	0
756	2	12.8165	33.6968	3.17227	2043.18	-1013.91	-2633.06	200	300	0	0	0	0	0	0	0	200	903	0	0	0	0	0	0	0	603	903	0
756	3	12.0536	34.3071	6.22403	2409.4	-1319.08	-1992.19	200	300	0	0	0	0	0	0	0	200	903	0	0	0	0	0	0	0	603	903	0
756	4	12.8165	34.4597	5.00333	2317.84	-1319.08	-2404.18	200	300	0	0	0	0	0	0	0	200	903	0	0	0	0	0	0	0	603	903	0
756	5	13.8846	34.1545	5.61368	2409.4	-1563.22	-2449.95	200	300	0	0	0	0	0	0	0	200	903	0	0	0	0	0	0	0	603	903	0
756	6	13.8846	34.4597	5.61368	2317.84	-1197.01	-2495.73	200	300	0	0	0	0	0	0	0	200	903	0	0	0	0	0	0	0	603	903	0
756	7	14.495	34.3071	3.47745	2592.5	-1013.91	-2449.95	200	300	0	0	0	0	0	0	0	200	903	0	0	0	0	0	0	0	603	903	0
756	8	14.1898	34.6123	6.83438	2043.18	-830.802	-2404.18	200	300	0	0	0	0	0	0	0	200	903	0	0	0	0	0	0	0	603	903	0
756	9	14.3424	34.9175	3.78262	1585.42	-1441.15	-2404.18	200	300	0	0	0	0	0	0	0	200	903	0	0	0	0	0	0	0	603	903	0
757	0	14.9527	36.2908	5.91885	1768.53	-1319.08	-2037.97	200	300	0	0	0	0	0	0	0	200	903	0	0	0	0	0	0	0	603	903	0
757	1	14.8002	36.4433	6.22403	2043.18	-1685.29	-2495.73	200	300	0	0	0	0	0	0	0	200	903	0	0	0	0	0	0	0	603	903	0
757	2	15.7157	36.9011	5.3085	2134.74	-1135.98	-2358.4	200	300	0	0	0	0	0	0	0	200	903	0	0	0	0	0	0	0	603	903	0
757	3	16.9364	36.9011	5.61368	2500.95	-1258.05	-2449.95	200	300	0	0	0	0	0	0	0	200	903	0	0	0	0	0	0	0	603	903	0
757	4	16.326	36.7485	3.78262	3324.92	-1258.05	-2312.62	200	300	0	0	0	0	0	0	0	200	903	0	0	0	0	0	0	0	603	903	0
757	5	15.5631	37.3589	3.47745	2317.84	-1013.91	-2633.06	200	300	0	0	0	0	0	0	0	200	903	0	0	0	0	0	0	0	603	903	0
757	6	15.7157	37.8166	2.8671	2592.5	-769.766	-2541.51	200	300	0	0	0	0	0	0	0	200	903	0	0	0	0	0	0	0	603	903	0
757	7	16.1734	37.9692	5.00333	2134.74	-1563.22	-1854.86	200	300	0	0	0	0	0	0	0	200	903	0	0	0	0	0	0	0	603	903	0
757	8	17.3941	38.8847	5.3085	2592.5	-1197.01	-2312.62	200	300	0	0	0	0	0	0	0	200	903	0	0	0	0	0	0	0	603	903	0
757	9	17.2416	39.0373	5.3085	2134.74	-1380.12	-2541.51	200	300	0	0	0	0	0	0	0	200	903	0	0	0	0	0	0	0	603	903	0
758	0	17.089	39.1899	3.78262	2226.29	-1135.98	-2175.3	200	300	0	0	0	0	0	0	0	200	903	0	0	0	0	0	0	0	603	903	0
758	1	17.2416	40.4106	5.61368	2317.84	-952.872	-2358.4	200	300	0	0	0	0	0	0	0	200	903	0	0	0	0	0	0	0	603	903	0
758	2	16.9364	40.5632	3.47745	2592.5	-1197.01	-2495.73	200	300	0	0	0	0	0	0	0	200	903	0	0	0	0	0	0	0	603	903	0
758	3	18.4623	40.1054	5.61368	2500.95	-891.837	-2541.51	200	300	0	0	0	0	0	0	0	200	903	0	0	0	0	0	0	0	603	903	0
758	4	16.9364	40.258	5.00333	2592.5	-1197.01	-2312.62	200	300	0	0	0	0	0	0	0	200	903	0	0	0	0	0	0	0	603	903	0
758	5	18.4623	40.7158	4.39297	2317.84	-1441.15	-2587.28	200	300	0	0	0	0	0	0	0	200	903	0	0	0	0	0	0	0	603	903	0
758	6	18.1571	40.8684	5.61368	2592.5	-1319.08	-2312.62	200	300	0	0	0	0	0	0	0	200	903	0	0	0	0	0	0	0	603	903	0
758	7	18.7674	42.0891	2.25674	2500.95	-1135.98	-2678.84	200	300	0	0	0	0	0	0	0	200	903	0	0	0	0	0	0	0	603	903	0
758	8	18.6149	41.3262	2.56192	2684.05	-1502.19	-2541.51	200	300	0	0	0	0	0	0	0	200	903	0	0	0	0	0	0	0	603	903	0
758	9	17.6993	41.7839	1.95157	3141.82	-1685.29	-2678.84	200	300	0	0	0	0	0	0	0	200	903	0	0	0	0	0	0	0	603	903	0
759	0	17.6993	42.6994	3.78262	2775.61	-1685.29	-2633.06	200	300	0	0	0	0	0	0	0	200	903	0	0	0	0	0	0	0	603	903	0
759	1	18.3097	42.2417	6.83438	3050.26	-1441.15	-2541.51	200	300	0	0	0	0	0	0	0	200	903	0	0	0	0	0	0	0	603	903	0
759	2	19.0726	42.6994	4.0878	2775.61	-1624.26	-2358.4	200	300	0	0	0	0	0	0	0	200	903	0	0	0	0	0	0	0	603	903	0
759	3	19.5304	42.852	1.95157	2684.05	-1502.19	-2221.07	200	300	0	0	0	0	0	0	0	200	903	0	0	0	0	0	0	0	603	903	0
759	4	19.5304	42.852	4.69815	2500.95	-1258.05	-2541.51	200	300	0	0	0	0	0	0	0	200	903	0	0	0	0	0	0	0	603	903	0
759	5	19.9881	43.9201	1.64639	2592.5	-1868.4	-2358.4	200	300	0	0	0	0	0	0	0	200	903	0	0	0	0	0	0	0	603	903	0
759	6	19.2252	44.2253	3.47745	2134.74	-1319.08	-2678.84	200	300	0	0	0	0	0	0	0	200	903	0	0	0	0	0	0	0	603	903	0
759	7	18.92	44.2253	3.47745	1768.53	-1319.08	-2816.16	200	300	0	0	0	0	0	0	0	200	903	0	0	0	0	0	0	0	603	903	0
759	8	20.1407	44.3779	4.69815	2867.16	-1197.01	-2495.73	200	300	0	0	0	0	0	0	0	200	903	0	0	0	0	0	0	0	603	903	0
759	9	20.4459	44.2253	1.95157	3599.58	-1441.15	-2678.84	200	300	0	0	0	0	0	0	0	200	903	0	0	0	0	0	0	0	603	903	0
760	0	19.8356	44.3779	1.95157	2867.16	-1380.12	-2724.61	200	300	0	0	0	0	0	0	0	200	903	0	0	0	0	0	0	0	603	903	0
760	1	19.3778	44.6831	1.95157	3416.48	-1929.43	-2816.16	200	300	0	0	0	0	0	0	0	200	903	0	0	0	0	0	0	0	603	903	0
760	2	20.4459	45.2934	1.34122	2592.5	-1502.19	-2816.16	200	300	0	0	0	0	0	0	0	200	903	0	0	0	0	0	0	0	603	903	0
760	3	19.3778	45.7512	2.8671	3141.82	-1990.47	-2678.84	200	300	0	0	0	0	0	0	0	200	903	0	0	0	0	0	0	0	603	903	0
760	4	19.8356	46.209	3.47745	2684.05	-1807.36	-2861.94	200	300	0	0	0	0	0	0	0	200	903	0	0	0	0	0	0	0	603	903	0
760	5	20.1407	46.9719	4.69815	2684.05	-1441.15	-2999.27	200	300	0	0	0	0	0	0	0	200	903	0	0	0	0	0	0	0	603	903	0
760	6	20.1407	46.9719	1.64639	3050.26	-1502.19	-2404.18	200	300	0	0	0	0	0	0	0	200	903	0	0	0	0	0	0	0	603	903	0
760	7	20.2933	46.3616	1.34122	3141.82	-1441.15	-3045.05	200	300	0	0	0	0	0	0	0	200	903	0	0	0	0	0	0	0	603	903	0
760	8	19.3778	46.8193	1.03604	2775.61	-1990.47	-3273.93	200	300	0	0	0	0	0	0	0	200	903	0	0	0	0	0	0	0	603	903	0
760	9	19.683	47.5823	2.56192	3416.48	-1868.4	-3365.48	200	300	0	0	0	0	0	0	0	200	903	0	0	0	0	0	0	0	603	903	0
761	0	19.3778	47.8874	6.22403	2867.16	-1624.26	-3228.15	200	300	0	0	0	0	0	0	0	200	903	0	0	0	0	0	0	0	603	903	0
761	1	20.4459	47.8874	2.25674	2775.61	-1624.26	-3319.7	200	300	0	0	0	0	0	0	0	200	903	0	0	0	0	0	0	0	603	903	0
761	2	20.5985	48.6504	0.425689	3233.37	-1868.4	-3365.48	200	300	0	0	0	0	0	0	0	200	903	0	0	0	0	0	0	0	603	903	0
761	3	20.5985	49.2607	0.425689	3050.26	-1685.29	-3045.05	200	300	0	0	0	0	0	0	0	200	903	0	0	0	0	0	0	0	603	903	0
761	4	19.9881	49.2607	1.95157	2867.16	-1624.26	-3228.15	200	300	0	0	0	0	0	0	0	200	903	0	0	0	0	0	0	0	603	903	0
761	5	21.514	48.9555	0.730865	3233.37	-1746.33	-3319.7	200	300	0	0	0	0	0	0	0	200	903	0	0	0	0	0	0	0	603	903	0
761	6	19.8356	49.2607	2.25674	3050.26	-1868.4	-3182.38	200	300	0	0	0	0	0	0	0	200	903	0	0	0	0	0	0	0	603	903	0
761	7	20.9037	49.1081	1.64639	3233.37	-1868.4	-2953.49	200	300	0	0	0	0	0	0	0	200	903	0	0	0	0	0	0	0	603	903	0
761	8	21.3614	48.4978	2.56192	3050.26	-1868.4	-3045.05	200	300	0	0	0	0	0	0	0	200	903	0	0	0	0	0	0	0	603	903	0
761	9	21.8192	49.5659	0.120513	2592.5	-1624.26	-2816.16	200	300	0	0	0	0	0	0	0	200	903	0	0	0	0	0	0	0	603	903	0
762	0	21.2088	49.5659	1.95157	2958.71	-1746.33	-3228.15	200	300	0	0	0	0	0	0	0	200	903	0	0	0	0	0	0	0	603	903	0
762	1	21.0563	50.634	0.730865	3416.48	-1563.22	-3273.93	200	300	0	0	0	0	0	0	0	200	903	0	0	0	0	0	0	0	603	903	0
762	2	21.2088	50.7866	2.25674	2775.61	-1685.29	-3365.48	200	300	0	0	0	0	0	0	0	200	903	0	0	0	0	0	0	0	603	903	0
762	3	21.0563	51.2444	4.69815	3233.37	-1441.15	-3319.7	200	300	0	0	0	0	0	0	0	200	903	0	0	0	0	0	0	0	603	903	0
762	4	21.8192	51.7021	2.56192	3508.03	-1624.26	-3319.7	200	300	0	0	0	0	0	0	0	200	903	0	0	0	0	0	0	0	603	903	0
762	5	21.9718	51.7021	0.730865	3874.24	-1441.15	-3365.48	200	300	0	0	0	0	0	0	0	200	903	0	0	0	0	0	0	0	603	903	0
762	6	21.9718	52.0073	1.64639	3599.58	-1868.4	-3640.14	200	300	0	0	0	0	0	0	0	200	903	0	0	0	0	0	0	0	603	903	0
762	7	21.9718	50.9392	0.425689	3508.03	-1929.43	-3548.59	200	300	0	0	0	0	0	0	0	200	903	0	0	0	0	0	0	0	603	903	0
762	8	22.7347	51.8547	0.425689	3050.26	-2112.54	-3594.36	200	300	0	0	0	0	0	0	0	200	903	0	0	0	0	0	0	0	603	903	0
762	9	22.7347	52.4651	1.95157	3324.92	-1868.4	-3319.7	200	300	0	0	0	0	0	0	0	200	903	0	0	0	0	0	0	0	603	903	0
763	0	22.4295	52.6177	2.8671	2592.5	-1868.4	-3411.26	200	300	0	0	0	0	0	0	0	200	903	0	0	0	0	0	0	0	603	903	0
763	1	22.5821	52.7702	3.17227	3233.37	-1685.29	-2953.49	200	300	0	0	0	0	0	0	0	200	903	0	0	0	0	0	0	0	603	903	0
763	2	22.4295	53.5332	0.730865	3233.37	-1868.4	-3502.81	200	300	0	0	0	0	0	0	0	200	903	0	0	0	0	0	0	0	603	903	0
763	3	22.4295	53.6858	1.64639	3233.37	-1441.15	-3502.81	200	300	0	0	0	0	0	0	0	200	903	0	0	0	0	0	0	0	603	903	0
763	4	22.1244	53.5332	-0.184663	3141.82	-1807.36	-3548.59	200	300	0	0	0	0	0	0	0	200	903	0	0	0	0	0	0	0	603	903	0
763	5	22.5821	53.9909	1.95157	3508.03	-1624.26	-3411.26	200	300	0	0	0	0	0	0	0	200	903	0	0	0	0	0	0	0	603	903	0
763	6	22.277	51.8547	5.00333	3691.13	-1685.29	-3548.59	200	300	0	0	0	0	0	0	0	200	903	0	0	0	0	0	0	0	603	903	0
763	7	23.0399	53.6858	1.64639	3233.37	-1624.26	-3182.38	200	300	0	0	0	0	0	0	0	200	903	0	0	0	0	0	0	0	603	903	0
763	8	24.5658	53.9909	1.95157	3141.82	-1746.33	-3869.02	200	300	0	0	0	0	0	0	0	200	903	0	0	0	0	0	0	0	603	903	0
763	9	23.4977	54.7539	0.120513	3141.82	-1624.26	-3411.26	200	300	0	0	0	0	0	0	0	200	903	0	0	0	0	0	0	0	603	903	0
764	0	21.9718	54.7539	0.120513	2867.16	-1441.15	-3777.47	200	300	0	0	0	0	0	0	0	200	903	0	0	0	0	0	0	0	603	903	0
764	1	22.5821	54.7539	0.730865	3874.24	-1990.47	-3548.59	200	300	0	0	0	0	0	0	0	200	903	0	0	0	0	0	0	0	603	903	0
764	2	23.1925	54.6013	1.64639	3416.48	-2112.54	-3319.7	200	300	0	0	0	0	0	0	0	200	903	0	0	0	0	0	0	0	603	903	0
764	3	23.8028	54.6013	3.17227	3508.03	-1563.22	-3273.93	200	300	0	0	0	0	0	0	0	200	903	0	0	0	0	0	0	0	603	903	0
764	4	23.9554	54.4487	1.03604	3599.58	-1685.29	-3685.92	200	300	0	0	0	0	0	0	0	200	903	0	0	0	0	0	0	0	603	903	0
764	5	24.5658	53.0754	1.34122	3508.03	-1807.36	-3273.93	200	300	0	0	0	0	0	0	0	200	903	0	0	0	0	0	0	0	603	903	0
764	6	24.2606	54.7539	2.56192	2775.61	-1807.36	-3457.03	200	300	0	0	0	0	0	0	0	200	903	0	0	0	0	0	0	0	603	903	0
764	7	23.6503	54.1435	0.425689	3050.26	-1624.26	-3319.7	200	300	0	0	0	0	0	0	0	200	903	0	0	0	0	0	0	0	603	903	0
764	8	26.0917	55.2117	2.56192	2684.05	-1563.22	-3457.03	200	300	0	0	0	0	0	0	0	200	903	0	0	0	0	0	0	0	603	903	0
764	9	23.8028	55.3642	2.8671	2958.71	-1563.22	-3182.38	200	300	0	0	0	0	0	0	0	200	903	0	0	0	0	0	0	0	603	903	0
765	0	24.5658	55.2117	2.8671	3050.26	-1685.29	-3228.15	200	300	0	0	0	0	0	0	0	200	903	0	0	0	0	0	0	0	603	903	0
765	1	24.871	55.0591	2.25674	3691.13	-2112.54	-3228.15	200	300	0	0	0	0	0	0	0	200	903	0	0	0	0	0	0	0	603	903	0
765	2	24.871	54.1435	1.03604	3416.48	-1685.29	-3411.26	200	300	0	0	0	0	0	0	0	200	903	0	0	0	0	0	0	0	603	903	0
765	3	23.8028	53.9909	1.34122	3416.48	-1746.33	-2724.61	200	300	0	0	0	0	0	0	0	200	903	0	0	0	0	0	0	0	603	903	0
765	4	24.2606	52.6177	1.03604	3416.48	-1624.26	-2907.72	200	300	0	0	0	0	0	0	0	200	903	0	0	0	0	0	0	0	603	903	0
765	5	24.108	54.2961	2.25674	2775.61	-1624.26	-3273.93	200	300	0	0	0	0	0	0	0	200	903	0	0	0	0	0	0	0	603	903	0
765	6	24.5658	54.2961	4.0878	2592.5	-1746.33	-2953.49	200	300	0	0	0	0	0	0	0	200	903	0	0	0	0	0	0	0	603	903	0
765	7	25.3287	54.4487	1.95157	2775.61	-2051.51	-2999.27	200	300	0	0	0	0	0	0	0	200	903	0	0	0	0	0	0	0	603	903	0
765	8	25.6339	53.0754	0.425689	2775.61	-1563.22	-3045.05	200	300	0	0	0	0	0	0	0	200	903	0	0	0	0	0	0	0	603	903	0
765	9	25.0235	54.2961	0.120513	3416.48	-1319.08	-2816.16	200	300	0	0	0	0	0	0	0	200	903	0	0	0	0	0	0	0	603	903	0
766	0	24.871	54.7539	0.120513	3416.48	-1685.29	-2770.39	200	300	0	0	0	0	0	0	0	200	903	0	0	0	0	0	0	0	603	903	0
766	1	27.1598	53.9909	1.64639	3050.26	-1746.33	-2770.39	200	300	0	0	0	0	0	0	0	200	903	0	0	0	0	0	0	0	603	903	0
766	2	24.871	52.7702	2.8671	3324.92	-1563.22	-3319.7	200	300	0	0	0	0	0	0	0	200	903	0	0	0	0	0	0	0	603	903	0
766	3	25.4813	53.6858	3.47745	2958.71	-1319.08	-2861.94	200	300	0	0	0	0	0	0	0	200	903	0	0	0	0	0	0	0	603	903	0
766	4	25.3287	54.1435	1.95157	2958.71	-1502.19	-2861.94	200	300	0	0	0	0	0	0	0	200	903	0	0	0	0	0	0	0	603	903	0
766	5	25.0235	54.4487	1.95157	3233.37	-1807.36	-2953.49	200	300	0	0	0	0	0	0	0	200	903	0	0	0	0	0	0	0	603	903	0
766	6	25.3287	53.8384	1.03604	3324.92	-1624.26	-2724.61	200	300	0	0	0	0	0	0	0	200	903	0	0	0	0	0	0	0	603	903	0
766	7	24.871	53.9909	1.95157	3324.92	-1502.19	-2724.61	200	300	0	0	0	0	0	0	0	200	903	0	0	0	0	0	0	0	603	903	0
766	8	25.1761	53.8384	1.64639	3508.03	-1380.12	-2861.94	200	300	0	0	0	0	0	0	0	200	903	0	0	0	0	0	0	0	603	903	0
766	9	24.108	53.0754	4.39297	3324.92	-2112.54	-2678.84	200	300	0	0	0	0	0	0	0	200	903	0	0	0	0	0	0	0	603	903	0
767	0	25.7865	53.3806	1.64639	3416.48	-2234.61	-2633.06	200	300	0	0	0	0	0	0	0	200	903	0	0	0	0	0	0	0	603	903	0
767	1	27.3124	52.9228	1.64639	2775.61	-1746.33	-2495.73	200	300	0	0	0	0	0	0	0	200	903	0	0	0	0	0	0	0	603	903	0
767	2	25.9391	53.5332	-0.184663	2775.61	-1502.19	-2175.3	200	300	0	0	0	0	0	0	0	200	903	0	0	0	0	0	0	0	603	903	0
767	3	25.3287	52.3125	1.03604	2958.71	-1563.22	-2724.61	200	300	0	0	0	0	0	0	0	200	903	0	0	0	0	0	0	0	603	903	0
767	4	25.9391	53.9909	0.730865	3599.58	-1441.15	-2633.06	200	300	0	0	0	0	0	0	0	200	903	0	0	0	0	0	0	0	603	903	0
767	5	25.4813	53.8384	2.56192	3050.26	-1746.33	-2541.51	200	300	0	0	0	0	0	0	0	200	903	0	0	0	0	0	0	0	603	903	0
767	6	27.0072	53.228	2.56192	3233.37	-1502.19	-2495.73	200	300	0	0	0	0	0	0	0	200	903	0	0	0	0	0	0	0	603	903	0
767	7	26.3968	50.634	3.17227	3508.03	-1563.22	-2449.95	200	300	0	0	0	0	0	0	0	200	903	0	0	0	0	0	0	0	603	903	0
767	8	26.2442	52.7702	1.03604	2867.16	-1441.15	-2404.18	200	300	0	0	0	0	0	0	0	200	903	0	0	0	0	0	0	0	603	903	0
767	9	26.5494	51.397	1.64639	2775.61	-1807.36	-2358.4	200	300	0	0	0	0	0	0	0	200	903	0	0	0	0	0	0	0	603	903	0
768	0	25.7865	52.3125	1.95157	2958.71	-1746.33	-2221.07	200	300	0	0	0	0	0	0	0	200	903	0	0	0	0	0	0	0	603	903	0
768	1	25.0235	52.7702	0.120513	2775.61	-1746.33	-2129.52	200	300	0	0	0	0	0	0	0	200	903	0	0	0	0	0	0	0	603	903	0
768	2	24.871	52.1599	2.56192	3324.92	-1502.19	-2266.85	200	300	0	0	0	0	0	0	0	200	903	0	0	0	0	0	0	0	603	903	0
768	3	26.702	52.3125	2.56192	3141.82	-1929.43	-2266.85	200	300	0	0	0	0	0	0	0	200	903	0	0	0	0	0	0	0	603	903	0
768	4	26.2442	51.7021	2.56192	3599.58	-1746.33	-1900.64	200	300	0	0	0	0	0	0	0	200	903	0	0	0	0	0	0	0	603	903	0
768	5	27.4649	49.7185	0.730865	3141.82	-1502.19	-2129.52	200	300	0	0	0	0	0	0	0	200	903	0	0	0	0	0	0	0	603	903	0
768	6	26.5494	51.397	1.64639	2775.61	-1319.08	-2083.74	200	300	0	0	0	0	0	0	0	200	903	0	0	0	0	0	0	0	603	903	0
768	7	25.6339	51.7021	2.25674	2500.95	-1746.33	-2266.85	200	300	0	0	0	0	0	0	0	200	903	0	0	0	0	0	0	0	603	903	0
768	8	25.7865	52.0073	2.25674	3141.82	-1685.29	-1671.76	200	300	0	0	0	0	0	0	0	200	903	0	0	0	0	0	0	0	603	903	0
768	9	25.6339	51.2444	4.0878	3233.37	-1502.19	-2129.52	200	300	0	0	0	0	0	0	0	200	903	0	0	0	0	0	0	0	603	903	0
769	0	25.6339	51.5495	4.69815	2775.61	-1197.01	-2083.74	200	300	0	0	0	0	0	0	0	200	903	0	0	0	0	0	0	0	603	903	0
769	1	25.9391	50.0237	3.17227	3324.92	-1624.26	-1992.19	200	300	0	0	0	0	0	0	0	200	903	0	0	0	0	0	0	0	603	903	0
769	2	26.702	50.3288	1.34122	3508.03	-1746.33	-1717.53	200	300	0	0	0	0	0	0	0	200	903	0	0	0	0	0	0	0	603	903	0
769	3	26.0917	49.8711	1.03604	2867.16	-1746.33	-1854.86	200	300	0	0	0	0	0	0	0	200	903	0	0	0	0	0	0	0	603	903	0
769	4	25.6339	49.2607	1.34122	2500.95	-1746.33	-1534.43	200	300	0	0	0	0	0	0	0	200	903	0	0	0	0	0	0	0	603	903	0
769	5	25.3287	49.8711	1.34122	2775.61	-1868.4	-1580.2	200	300	0	0	0	0	0	0	0	200	903	0	0	0	0	0	0	0	603	903	0
769	6	25.0235	50.0237	2.8671	2317.84	-1502.19	-1900.64	200	300	0	0	0	0	0	0	0	200	903	0	0	0	0	0	0	0	603	903	0
769	7	25.0235	48.3452	5.61368	2409.4	-1441.15	-1900.64	200	300	0	0	0	0	0	0	0	200	903	0	0	0	0	0	0	0	603	903	0
769	8	26.2442	49.2607	3.17227	2958.71	-1502.19	-1488.65	200	300	0	0	0	0	0	0	0	200	903	0	0	0	0	0	0	0	603	903	0
769	9	26.8546	49.1081	0.425689	2775.61	-1380.12	-1625.98	200	300	0	0	0	0	0	0	0	200	903	0	0	0	0	0	0	0	603	903	0
770	0	26.3968	48.04	1.64639	3599.58	-1441.15	-1259.77	200	300	0	0	0	0	0	0	0	200	903	0	0	0	0	0	0	0	603	903	0
770	1	25.6339	48.04	3.17227	2592.5	-1502.19	-1534.43	200	300	0	0	0	0	0	0	0	200	903	0	0	0	0	0	0	0	603	903	0
770	2	24.871	47.7348	2.25674	2134.74	-1563.22	-1442.87	200	300	0	0	0	0	0	0	0	200	903	0	0	0	0	0	0	0	603	903	0
770	3	24.871	47.5823	3.78262	2500.95	-1624.26	-1580.2	200	300	0	0	0	0	0	0	0	200	903	0	0	0	0	0	0	0	603	903	0
770	4	24.871	47.7348	6.22403	3324.92	-1258.05	-1534.43	200	300	0	0	0	0	0	0	0	200	903	0	0	0	0	0	0	0	603	903	0
770	5	25.9391	47.8874	4.39297	2500.95	-1197.01	-1122.44	200	300	0	0	0	0	0	0	0	200	903	0	0	0	0	0	0	0	603	903	0
770	6	26.0917	46.0564	2.8671	2500.95	-1563.22	-1580.2	200	300	0	0	0	0	0	0	0	200	903	0	0	0	0	0	0	0	603	903	0
770	7	25.1761	47.4297	2.56192	3050.26	-1563.22	-1259.77	200	300	0	0	0	0	0	0	0	200	903	0	0	0	0	0	0	0	603	903	0
770	8	24.2606	46.6667	2.8671	2867.16	-1258.05	-1305.54	200	300	0	0	0	0	0	0	0	200	903	0	0	0	0	0	0	0	603	903	0
770	9	24.5658	46.0564	1.64639	2684.05	-1197.01	-1305.54	200	300	0	0	0	0	0	0	0	200	903	0	0	0	0	0	0	0	603	903	0
771	0	24.7184	44.9883	3.17227	2500.95	-2051.51	-1305.54	200	300	0	0	0	0	0	0	0	200	903	0	0	0	0	0	0	0	603	903	0
771	1	25.1761	44.9883	4.39297	2043.18	-1685.29	-1397.1	200	300	0	0	0	0	0	0	0	200	903	0	0	0	0	0	0	0	603	903	0
771	2	25.4813	45.2934	4.0878	2317.84	-1319.08	-1122.44	200	300	0	0	0	0	0	0	0	200	903	0	0	0	0	0	0	0	603	903	0
771	3	25.7865	45.446	3.47745	2684.05	-1258.05	-756.227	200	300	0	0	0	0	0	0	0	200	903	0	0	0	0	0	0	0	603	903	0
771	4	25.3287	44.8357	5.00333	2043.18	-1380.12	-1213.99	200	300	0	0	0	0	0	0	0	200	903	0	0	0	0	0	0	0	603	903	0
771	5	24.2606	44.9883	4.0878	2775.61	-1807.36	-1213.99	200	300	0	0	0	0	0	0	0	200	903	0	0	0	0	0	0	0	603	903	0
771	6	26.702	44.8357	5.61368	2409.4	-1502.19	-1030.89	200	300	0	0	0	0	0	0	0	200	903	0	0	0	0	0	0	0	603	903	0
771	7	24.5658	44.2253	5.00333	3416.48	-1013.91	-1076.66	200	300	0	0	0	0	0	0	0	200	903	0	0	0	0	0	0	0	603	903	0
771	8	24.871	43.4624	4.69815	2775.61	-708.731	-985.109	200	300	0	0	0	0	0	0	0	200	903	0	0	0	0	0	0	0	603	903	0
771	9	25.3287	43.615	4.0878	2500.95	-1380.12	-664.674	200	300	0	0	0	0	0	0	0	200	903	0	0	0	0	0	0	0	603	903	0
772	0	24.7184	43.3098	2.25674	1951.63	-1624.26	-1076.66	200	300	0	0	0	0	0	0	0	200	903	0	0	0	0	0	0	0	603	903	0
772	1	25.0235	43.4624	2.25674	2317.84	-1502.19	-1030.89	200	300	0	0	0	0	0	0	0	200	903	0	0	0	0	0	0	0	603	903	0
772	2	23.9554	42.2417	1.64639	2226.29	-1502.19	-847.78	200	300	0	0	0	0	0	0	0	200	903	0	0	0	0	0	0	0	603	903	0
772	3	24.4132	43.615	4.39297	2684.05	-1197.01	-802.004	200	300	0	0	0	0	0	0	0	200	903	0	0	0	0	0	0	0	603	903	0
772	4	24.2606	41.7839	8.36026	2592.5	-1380.12	-573.122	200	300	0	0	0	0	0	0	0	200	903	0	0	0	0	0	0	0	603	903	0
772	5	25.6339	42.5469	4.39297	2775.61	-1380.12	-435.793	200	300	0	0	0	0	0	0	0	200	903	0	0	0	0	0	0	0	603	903	0
772	6	24.7184	41.7839	3.17227	2317.84	-1197.01	-756.227	200	300	0	0	0	0	0	0	0	200	903	0	0	0	0	0	0	0	603	903	0
772	7	25.0235	42.2417	3.17227	2043.18	-1074.94	-664.674	200	300	0	0	0	0	0	0	0	200	903	0	0	0	0	0	0	0	603	903	0
772	8	23.8028	42.0891	4.39297	2226.29	-1197.01	-756.227	200	300	0	0	0	0	0	0	0	200	903	0	0	0	0	0	0	0	603	903	0
772	9	24.5658	42.5469	3.17227	2317.84	-1319.08	-710.451	200	300	0	0	0	0	0	0	0	200	903	0	0	0	0	0	0	0	603	903	0
773	0	23.8028	41.6313	5.91885	2409.4	-1258.05	-802.004	200	300	0	0	0	0	0	0	0	200	903	0	0	0	0	0	0	0	603	903	0
773	1	23.3451	42.0891	8.05508	3141.82	-1013.91	-664.674	200	300	0	0	0	0	0	0	0	200	903	0	0	0	0	0	0	0	603	903	0
773	2	24.4132	40.8684	5.3085	2592.5	-1380.12	-435.793	200	300	0	0	0	0	0	0	0	200	903	0	0	0	0	0	0	0	603	903	0
773	3	25.3287	39.4951	3.17227	2500.95	-1258.05	-573.122	200	300	0	0	0	0	0	0	0	200	903	0	0	0	0	0	0	0	603	903	0
773	4	24.108	40.7158	4.69815	2043.18	-1441.15	-710.451	200	300	0	0	0	0	0	0	0	200	903	0	0	0	0	0	0	0	603	903	0
773	5	23.8028	41.021	4.69815	2867.16	-1258.05	-527.345	200	300	0	0	0	0	0	0	0	200	903	0	0	0	0	0	0	0	603	903	0
773	6	24.871	40.258	6.22403	1676.97	-1563.22	-481.569	200	300	0	0	0	0	0	0	0	200	903	0	0	0	0	0	0	0	603	903	0
773	7	23.8028	40.5632	4.39297	1951.63	-1380.12	-206.911	200	300	0	0	0	0	0	0	0	200	903	0	0	0	0	0	0	0	603	903	0
773	8	23.8028	40.1054	6.22403	2317.84	-1319.08	-390.016	200	300	0	0	0	0	0	0	0	200	903	0	0	0	0	0	0	0	603	903	0
773	9	24.2606	39.0373	6.22403	2226.29	-1074.94	-390.016	200	300	0	0	0	0	0	0	0	200	903	0	0	0	0	0	0	0	603	903	0
774	0	24.108	37.9692	4.69815	1860.08	-1258.05	-573.122	200	300	0	0	0	0	0	0	0	200	903	0	0	0	0	0	0	0	603	903	0
774	1	23.3451	39.4951	6.22403	1768.53	-1441.15	-527.345	200	300	0	0	0	0	0	0	0	200	903	0	0	0	0	0	0	0	603	903	0
774	2	23.3451	39.6477	5.00333	2317.84	-1197.01	-527.345	200	300	0	0	0	0	0	0	0	200	903	0	0	0	0	0	0	0	603	903	0
774	3	23.6503	40.4106	5.61368	2043.18	-586.661	-390.016	200	300	0	0	0	0	0	0	0	200	903	0	0	0	0	0	0	0	603	903	0
774	4	23.1925	39.6477	6.22403	1676.97	-1135.98	-481.569	200	300	0	0	0	0	0	0	0	200	903	0	0	0	0	0	0	0	603	903	0
774	5	23.8028	39.1899	5.00333	2592.5	-1380.12	-344.24	200	300	0	0	0	0	0	0	0	200	903	0	0	0	0	0	0	0	603	903	0
774	6	23.4977	38.5796	5.3085	2867.16	-1013.91	-527.345	200	300	0	0	0	0	0	0	0	200	903	0	0	0	0	0	0	0	603	903	0
774	7	24.2606	38.427	3.78262	2226.29	-1258.05	-298.464	200	300	0	0	0	0	0	0	0	200	903	0	0	0	0	0	0	0	603	903	0
774	8	23.3451	38.427	5.91885	1768.53	-1563.22	-206.911	200	300	0	0	0	0	0	0	0	200	903	0	0	0	0	0	0	0	603	903	0
774	9	23.1925	37.9692	3.47745	1860.08	-1013.91	-206.911	200	300	0	0	0	0	0	0	0	200	903	0	0	0	0	0	0	0	603	903	0
775	0	23.1925	38.5796	5.61368	1676.97	-1074.94	-527.345	200	300	0	0	0	0	0	0	0	200	903	0	0	0	0	0	0	0	603	903	0
775	1	23.6503	37.9692	5.61368	2043.18	-1013.91	-344.24	200	300	0	0	0	0	0	0	0	200	903	0	0	0	0	0	0	0	603	903	0
775	2	23.6503	38.7322	5.3085	2043.18	-769.766	-435.793	200	300	0	0	0	0	0	0	0	200	903	0	0	0	0	0	0	0	603	903	0
775	3	23.8028	39.3425	6.83438	2043.18	-1135.98	-206.911	200	300	0	0	0	0	0	0	0	200	903	0	0	0	0	0	0	0	603	903	0
775	4	23.6503	38.2744	4.69815	2134.74	-1258.05	-390.016	200	300	0	0	0	0	0	0	0	200	903	0	0	0	0	0	0	0	603	903	0
775	5	23.3451	37.9692	4.69815	1860.08	-1013.91	-344.24	200	300	0	0	0	0	0	0	0	200	903	0	0	0	0	0	0	0	603	903	0
775	6	22.4295	37.5115	5.00333	2226.29	-1074.94	-298.464	200	300	0	0	0	0	0	0	0	200	903	0	0	0	0	0	0	0	603	903	0
775	7	22.7347	38.427	6.83438	2226.29	-1197.01	-298.464	200	300	0	0	0	0	0	0	0	200	903	0	0	0	0	0	0	0	603	903	0
775	8	21.9718	37.5115	6.83438	1951.63	-1258.05	-664.674	200	300	0	0	0	0	0	0	0	200	903	0	0	0	0	0	0	0	603	903	0
775	9	23.3451	38.1218	5.3085	2409.4	-952.872	-206.911	200	300	0	0	0	0	0	0	0	200	903	0	0	0	0	0	0	0	603	903	0
776	0	24.4132	37.0537	5.00333	2592.5	-1135.98	-206.911	200	300	0	0	0	0	0	0	0	200	903	0	0	0	0	0	0	0	603	903	0
776	1	23.0399	37.5115	4.69815	2317.84	-1074.94	-390.016	200	300	0	0	0	0	0	0	0	200	903	0	0	0	0	0	0	0	603	903	0
776	2	22.7347	37.3589	4.0878	1951.63	-1197.01	-390.016	200	300	0	0	0	0	0	0	0	200	903	0	0	0	0	0	0	0	603	903	0
776	3	22.1244	37.0537	5.61368	1860.08	-1135.98	21.9711	200	300	0	0	0	0	0	0	0	200	903	0	0	0	0	0	0	0	603	903	0
776	4	22.4295	37.8166	5.61368	2134.74	-830.802	-344.24	200	300	0	0	0	0	0	0	0	200	903	0	0	0	0	0	0	0	603	903	0
776	5	23.1925	38.2744	6.22403	2043.18	-1013.91	-344.24	200	300	0	0	0	0	0	0	0	200	903	0	0	0	0	0	0	0	603	903	0
776	6	23.9554	37.9692	5.61368	2317.84	-1135.98	-115.358	200	300	0	0	0	0	0	0	0	200	903	0	0	0	0	0	0	0	603	903	0
776	7	23.1925	36.7485	4.0878	2134.74	-891.837	159.3	200	300	0	0	0	0	0	0	0	200	903	0	0	0	0	0	0	0	603	903	0
776	8	23.3451	37.2063	7.74991	2134.74	-891.837	-390.016	200	300	0	0	0	0	0	0	0	200	903	0	0	0	0	0	0	0	603	903	0
776	9	22.5821	35.07	5.00333	2226.29	-1074.94	-298.464	200	300	0	0	0	0	0	0	0	200	903	0	0	0	0	0	0	0	603	903	0
777	0	23.9554	36.9011	6.22403	1676.97	-1135.98	-161.134	200	300	0	0	0	0	0	0	0	200	903	0	0	0	0	0	0	0	603	903	0
777	1	22.1244	37.2063	6.5292	2134.74	-830.802	-69.5817	200	300	0	0	0	0	0	0	0	200	903	0	0	0	0	0	0	0	603	903	0
777	2	22.5821	37.3589	5.61368	1768.53	-1197.01	-344.24	200	300	0	0	0	0	0	0	0	200	903	0	0	0	0	0	0	0	603	903	0
777	3	22.8873	37.5115	5.91885	1127.66	-952.872	-298.464	200	300	0	0	0	0	0	0	0	200	903	0	0	0	0	0	0	0	603	903	0
777	4	23.3451	37.0537	4.0878	1951.63	-1135.98	-161.134	200	300	0	0	0	0	0	0	0	200	903	0	0	0	0	0	0	0	603	903	0
777	5	21.9718	35.9856	6.83438	2317.84	-1380.12	113.524	200	300	0	0	0	0	0	0	0	200	903	0	0	0	0	0	0	0	603	903	0
777	6	22.7347	36.1382	4.39297	2134.74	-1441.15	-23.8053	200	300	0	0	0	0	0	0	0	200	903	0	0	0	0	0	0	0	603	903	0
777	7	22.1244	36.2908	6.22403	1585.42	-952.872	-23.8053	200	300	0	0	0	0	0	0	0	200	903	0	0	0	0	0	0	0	603	903	0
777	8	22.8873	36.4433	8.05508	1676.97	-1013.91	21.9711	200	300	0	0	0	0	0	0	0	200	903	0	0	0	0	0	0	0	603	903	0
777	9	23.1925	37.0537	6.5292	1585.42	-1013.91	-23.8053	200	300	0	0	0	0	0	0	0	200	903	0	0	0	0	0	0	0	603	903	0
778	0	23.0399	36.7485	4.69815	2043.18	-1013.91	250.853	200	300	0	0	0	0	0	0	0	200	903	0	0	0	0	0	0	0	603	903	0
778	1	23.0399	36.9011	5.91885	1951.63	-769.766	-206.911	200	300	0	0	0	0	0	0	0	200	903	0	0	0	0	0	0	0	603	903	0
778	2	22.4295	36.2908	4.39297	2134.74	-769.766	-206.911	200	300	0	0	0	0	0	0	0	200	903	0	0	0	0	0	0	0	603	903	0
778	3	22.4295	35.833	5.00333	2226.29	-891.837	-206.911	200	300	0	0	0	0	0	0	0	200	903	0	0	0	0	0	0	0	603	903	0
778	4	22.277	36.4433	5.91885	1951.63	-1013.91	-115.358	200	300	0	0	0	0	0	0	0	200	903	0	0	0	0	0	0	0	603	903	0
778	5	22.4295	36.4433	7.74991	2043.18	-1074.94	-161.134	200	300	0	0	0	0	0	0	0	200	903	0	0	0	0	0	0	0	603	903	0
778	6	22.8873	36.4433	5.91885	1585.42	-952.872	-206.911	200	300	0	0	0	0	0	0	0	200	903	0	0	0	0	0	0	0	603	903	0
778	7	22.8873	36.5959	5.3085	1768.53	-1319.08	21.9711	200	300	0	0	0	0	0	0	0	200	903	0	0	0	0	0	0	0	603	903	0
778	8	22.8873	36.5959	4.69815	2409.4	-891.837	-115.358	200	300	0	0	0	0	0	0	0	200	903	0	0	0	0	0	0	0	603	903	0
778	9	22.277	35.5278	4.69815	2043.18	-1013.91	-69.5817	200	300	0	0	0	0	0	0	0	200	903	0	0	0	0	0	0	0	603	903	0
779	0	23.8028	36.7485	4.69815	2043.18	-1135.98	-69.5817	200	300	0	0	0	0	0	0	0	200	903	0	0	0	0	0	0	0	603	903	0
779	1	22.4295	36.2908	7.13956	1585.42	-891.837	-23.8053	200	300	0	0	0	0	0	0	0	200	903	0	0	0	0	0	0	0	603	903	0
779	2	23.1925	35.07	6.22403	1951.63	-647.696	-161.134	200	300	0	0	0	0	0	0	0	200	903	0	0	0	0	0	0	0	603	903	0
779	3	22.8873	36.7485	7.13956	1676.97	-830.802	-69.5817	200	300	0	0	0	0	0	0	0	200	903	0	0	0	0	0	0	0	603	903	0
779	4	23.0399	36.4433	5.00333	1768.53	-1074.94	67.7474	200	300	0	0	0	0	0	0	0	200	903	0	0	0	0	0	0	0	603	903	0
779	5	22.277	36.1382	5.61368	2043.18	-1013.91	-206.911	200	300	0	0	0	0	0	0	0	200	903	0	0	0	0	0	0	0	603	903	0
779	6	21.8192	35.833	4.39297	2684.05	-586.661	21.9711	200	300	0	0	0	0	0	0	0	200	903	0	0	0	0	0	0	0	603	903	0
779	7	21.8192	35.6804	6.83438	2134.74	-891.837	159.3	200	300	0	0	0	0	0	0	0	200	903	0	0	0	0	0	0	0	603	903	0
779	8	22.1244	35.5278	8.66543	1585.42	-1197.01	159.3	200	300	0	0	0	0	0	0	0	200	903	0	0	0	0	0	0	0	603	903	0
779	9	22.4295	34.9175	6.22403	1860.08	-1135.98	21.9711	200	300	0	0	0	0	0	0	0	200	903	0	0	0	0	0	0	0	603	903	0
780	0	23.0399	36.5959	3.78262	2043.18	-1074.94	159.3	200	300	0	0	0	0	0	0	0	200	903	0	0	0	0	0	0	0	603	903	0
780	1	23.1925	33.8493	7.13956	1676.97	-1013.91	113.524	200	300	0	0	0	0	0	0	0	200	903	0	0	0	0	0	0	0	603	903	0
780	2	22.5821	35.6804	3.78262	1768.53	-708.731	205.077	200	300	0	0	0	0	0	0	0	200	903	0	0	0	0	0	0	0	603	903	0
780	3	23.0399	35.3752	6.83438	2226.29	-1197.01	342.406	200	300	0	0	0	0	0	0	0	200	903	0	0	0	0	0	0	0	603	903	0
780	4	23.0399	35.3752	7.13956	2043.18	-891.837	250.853	200	300	0	0	0	0	0	0	0	200	903	0	0	0	0	0	0	0	603	903	0
780	5	23.3451	35.833	6.5292	1219.21	-708.731	67.7474	200	300	0	0	0	0	0	0	0	200	903	0	0	0	0	0	0	0	603	903	0
780	6	24.2606	35.9856	6.22403	1768.53	-647.696	159.3	200	300	0	0	0	0	0	0	0	200	903	0	0	0	0	0	0	0	603	903	0
780	7	23.6503	36.4433	7.13956	1768.53	-708.731	21.9711	200	300	0	0	0	0	0	0	0	200	903	0	0	0	0	0	0	0	603	903	0
780	8	23.0399	37.0537	5.3085	1310.76	-830.802	67.7474	200	300	0	0	0	0	0	0	0	200	903	0	0	0	0	0	0	0	603	903	0
780	9	24.108	36.1382	5.3085	1951.63	-952.872	388.182	200	300	0	0	0	0	0	0	0	200	903	0	0	0	0	0	0	0	603	903	0
781	0	22.5821	35.9856	6.83438	2592.5	-952.872	159.3	200	300	0	0	0	0	0	0	0	200	903	0	0	0	0	0	0	0	603	903	0
781	1	22.7347	34.6123	7.44473	2317.84	-769.766	67.7474	200	300	0	0	0	0	0	0	0	200	903	0	0	0	0	0	0	0	603	903	0
781	2	24.108	35.5278	5.91885	1860.08	-891.837	113.524	200	300	0	0	0	0	0	0	0	200	903	0	0	0	0	0	0	0	603	903	0
781	3	23.8028	36.1382	5.61368	2317.84	-1074.94	113.524	200	300	0	0	0	0	0	0	0	200	903	0	0	0	0	0	0	0	603	903	0
781	4	23.1925	35.9856	8.36026	1493.87	-1074.94	479.735	200	300	0	0	0	0	0	0	0	200	903	0	0	0	0	0	0	0	603	903	0
781	5	23.0399	36.9011	5.91885	2043.18	-769.766	21.9711	200	300	0	0	0	0	0	0	0	200	903	0	0	0	0	0	0	0	603	903	0
781	6	23.0399	36.2908	6.83438	1860.08	-830.802	296.629	200	300	0	0	0	0	0	0	0	200	903	0	0	0	0	0	0	0	603	903	0
781	7	23.0399	35.5278	9.58096	1768.53	-830.802	250.853	200	300	0	0	0	0	0	0	0	200	903	0	0	0	0	0	0	0	603	903	0
781	8	23.9554	35.9856	6.83438	1860.08	-830.802	296.629	200	300	0	0	0	0	0	0	0	200	903	0	0	0	0	0	0	0	603	903	0
781	9	24.4132	35.833	6.22403	1402.32	-952.872	388.182	200	300	0	0	0	0	0	0	0	200	903	0	0	0	0	0	0	0	603	903	0
782	0	23.6503	36.4433	7.44473	1768.53	-586.661	342.406	200	300	0	0	0	0	0	0	0	200	903	0	0	0	0	0	0	0	603	903	0
782	1	23.4977	36.7485	6.22403	1676.97	-891.837	250.853	200	300	0	0	0	0	0	0	0	200	903	0	0	0	0	0	0	0	603	903	0
782	2	23.6503	36.5959	7.13956	2134.74	-891.837	205.077	200	300	0	0	0	0	0	0	0	200	903	0	0	0	0	0	0	0	603	903	0
782	3	22.7347	36.5959	8.05508	2043.18	-1074.94	-23.8053	200	300	0	0	0	0	0	0	0	200	903	0	0	0	0	0	0	0	603	903	0
782	4	23.6503	35.833	5.00333	1951.63	-1013.91	479.735	200	300	0	0	0	0	0	0	0	200	903	0	0	0	0	0	0	0	603	903	0
782	5	24.871	35.9856	5.61368	2226.29	-1013.91	250.853	200	300	0	0	0	0	0	0	0	200	903	0	0	0	0	0	0	0	603	903	0
782	6	24.2606	35.833	5.3085	1493.87	-647.696	250.853	200	300	0	0	0	0	0	0	0	200	903	0	0	0	0	0	0	0	603	903	0
782	7	23.9554	35.6804	6.5292	1310.76	-1013.91	296.629	200	300	0	0	0	0	0	0	0	200	903	0	0	0	0	0	0	0	603	903	0
782	8	24.871	36.1382	7.44473	1585.42	-891.837	571.288	200	300	0	0	0	0	0	0	0	200	903	0	0	0	0	0	0	0	603	903	0
782	9	24.5658	35.833	6.5292	1493.87	-830.802	662.84	200	300	0	0	0	0	0	0	0	200	903	0	0	0	0	0	0	0	603	903	0
783	0	25.1761	36.5959	5.61368	2043.18	-403.556	342.406	200	300	0	0	0	0	0	0	0	200	903	0	0	0	0	0	0	0	603	903	0
783	1	25.7865	36.2908	5.91885	1585.42	-586.661	525.511	200	300	0	0	0	0	0	0	0	200	903	0	0	0	0	0	0	0	603	903	0
783	2	24.5658	36.2908	5.3085	1860.08	-769.766	250.853	200	300	0	0	0	0	0	0	0	200	903	0	0	0	0	0	0	0	603	903	0
783	3	24.2606	35.6804	5.61368	1860.08	-891.837	159.3	200	300	0	0	0	0	0	0	0	200	903	0	0	0	0	0	0	0	603	903	0
783	4	25.9391	36.9011	7.13956	1585.42	-708.731	388.182	200	300	0	0	0	0	0	0	0	200	903	0	0	0	0	0	0	0	603	903	0
783	5	23.8028	37.2063	7.13956	2043.18	-708.731	67.7474	200	300	0	0	0	0	0	0	0	200	903	0	0	0	0	0	0	0	603	903	0
783	6	24.7184	37.2063	6.22403	1585.42	-769.766	342.406	200	300	0	0	0	0	0	0	0	200	903	0	0	0	0	0	0	0	603	903	0
783	7	25.1761	38.8847	8.05508	2409.4	-1135.98	571.288	200	300	0	0	0	0	0	0	0	200	903	0	0	0	0	0	0	0	603	903	0
783	8	25.1761	37.664	6.22403	1951.63	-769.766	21.9711	200	300	0	0	0	0	0	0	0	200	903	0	0	0	0	0	0	0	603	903	0
783	9	24.7184	36.4433	5.61368	2226.29	-830.802	205.077	200	300	0	0	0	0	0	0	0	200	903	0	0	0	0	0	0	0	603	903	0
784	0	23.8028	35.833	5.91885	1951.63	-1013.91	479.735	200	300	0	0	0	0	0	0	0	200	903	0	0	0	0	0	0	0	603	903	0
784	1	23.8028	36.7485	6.22403	1402.32	-891.837	205.077	200	300	0	0	0	0	0	0	0	200	903	0	0	0	0	0	0	0	603	903	0
784	2	23.6503	36.5959	10.8017	1127.66	-830.802	342.406	200	300	0	0	0	0	0	0	0	200	903	0	0	0	0	0	0	0	603	903	0
784	3	25.1761	37.2063	6.83438	1310.76	-891.837	479.735	200	300	0	0	0	0	0	0	0	200	903	0	0	0	0	0	0	0	603	903	0
784	4	24.4132	35.5278	6.22403	1310.76	-830.802	388.182	200	300	0	0	0	0	0	0	0	200	903	0	0	0	0	0	0	0	603	903	0
784	5	25.3287	37.9692	7.74991	2043.18	-708.731	159.3	200	300	0	0	0	0	0	0	0	200	903	0	0	0	0	0	0	0	603	903	0
784	6	24.4132	35.833	7.74991	1951.63	-1013.91	433.958	200	300	0	0	0	0	0	0	0	200	903	0	0	0	0	0	0	0	603	903	0
784	7	24.4132	37.0537	6.22403	1768.53	-952.872	342.406	200	300	0	0	0	0	0	0	0	200	903	0	0	0	0	0	0	0	603	903	0
784	8	24.5658	37.3589	9.27579	2409.4	-1013.91	159.3	200	300	0	0	0	0	0	0	0	200	903	0	0	0	0	0	0	0	603	903	0
784	9	24.871	37.9692	6.83438	2043.18	-647.696	159.3	200	300	0	0	0	0	0	0	0	200	903	0	0	0	0	0	0	0	603	903	0
785	0	25.0235	37.0537	6.22403	944.551	-708.731	205.077	200	300	0	0	0	0	0	0	0	200	903	0	0	0	0	0	0	0	603	903	0
785	1	25.6339	37.8166	6.5292	1585.42	-1135.98	433.958	200	300	0	0	0	0	0	0	0	200	903	0	0	0	0	0	0	0	603	903	0
785	2	23.8028	37.9692	5.61368	2409.4	-1197.01	571.288	200	300	0	0	0	0	0	0	0	200	903	0	0	0	0	0	0	0	603	903	0
785	3	25.1761	38.1218	6.5292	2043.18	-1074.94	296.629	200	300	0	0	0	0	0	0	0	200	903	0	0	0	0	0	0	0	603	903	0
785	4	24.7184	36.9011	7.44473	2317.84	-769.766	296.629	200	300	0	0	0	0	0	0	0	200	903	0	0	0	0	0	0	0	603	903	0
785	5	25.3287	37.664	6.5292	1860.08	-830.802	388.182	200	300	0	0	0	0	0	0	0	200	903	0	0	0	0	0	0	0	603	903	0
785	6	26.0917	37.0537	5.00333	1951.63	-830.802	250.853	200	300	0	0	0	0	0	0	0	200	903	0	0	0	0	0	0	0	603	903	0
785	7	25.7865	37.5115	5.3085	1585.42	-830.802	388.182	200	300	0	0	0	0	0	0	0	200	903	0	0	0	0	0	0	0	603	903	0
785	8	24.4132	38.5796	6.5292	1768.53	-464.591	205.077	200	300	0	0	0	0	0	0	0	200	903	0	0	0	0	0	0	0	603	903	0
785	9	25.3287	38.7322	6.5292	1585.42	-891.837	571.288	200	300	0	0	0	0	0	0	0	200	903	0	0	0	0	0	0	0	603	903	0
786	0	24.7184	37.9692	6.5292	2317.84	-708.731	-69.5817	200	300	0	0	0	0	0	0	0	200	903	0	0	0	0	0	0	0	603	903	0
786	1	25.1761	38.2744	6.22403	2134.74	-830.802	250.853	200	300	0	0	0	0	0	0	0	200	903	0	0	0	0	0	0	0	603	903	0
786	2	25.6339	37.9692	6.83438	2043.18	-1013.91	296.629	200	300	0	0	0	0	0	0	0	200	903	0	0	0	0	0	0	0	603	903	0
786	3	25.7865	38.1218	5.00333	1768.53	-952.872	250.853	200	300	0	0	0	0	0	0	0	200	903	0	0	0	0	0	0	0	603	903	0
786	4	25.6339	38.2744	4.0878	1402.32	-952.872	250.853	200	300	0	0	0	0	0	0	0	200	903	0	0	0	0	0	0	0	603	903	0
786	5	24.7184	37.9692	4.39297	1493.87	-1074.94	296.629	200	300	0	0	0	0	0	0	0	200	903	0	0	0	0	0	0	0	603	903	0
786	6	26.0917	37.9692	5.61368	1402.32	-1013.91	296.629	200	300	0	0	0	0	0	0	0	200	903	0	0	0	0	0	0	0	603	903	0
786	7	25.1761	37.8166	4.69815	1219.21	-1135.98	388.182	200	300	0	0	0	0	0	0	0	200	903	0	0	0	0	0	0	0	603	903	0
786	8	25.9391	38.7322	6.5292	1585.42	-769.766	571.288	200	300	0	0	0	0	0	0	0	200	903	0	0	0	0	0	0	0	603	903	0
786	9	26.3968	38.7322	6.5292	2134.74	-769.766	571.288	200	300	0	0	0	0	0	0	0	200	903	0	0	0	0	0	0	0	603	903	0
787	0	25.7865	38.5796	5.61368	2134.74	-952.872	662.84	200	300	0	0	0	0	0	0	0	200	903	0	0	0	0	0	0	0	603	903	0
787	1	25.4813	38.8847	5.61368	2134.74	-1013.91	296.629	200	300	0	0	0	0	0	0	0	200	903	0	0	0	0	0	0	0	603	903	0
787	2	25.1761	38.2744	6.22403	1585.42	-1013.91	342.406	200	300	0	0	0	0	0	0	0	200	903	0	0	0	0	0	0	0	603	903	0
787	3	25.4813	38.427	6.5292	1768.53	-830.802	205.077	200	300	0	0	0	0	0	0	0	200	903	0	0	0	0	0	0	0	603	903	0
787	4	24.871	38.7322	9.27579	1951.63	-1074.94	296.629	200	300	0	0	0	0	0	0	0	200	903	0	0	0	0	0	0	0	603	903	0
787	5	25.9391	39.1899	6.5292	1860.08	-1135.98	571.288	200	300	0	0	0	0	0	0	0	200	903	0	0	0	0	0	0	0	603	903	0
787	6	26.702	39.3425	5.00333	1676.97	-1135.98	433.958	200	300	0	0	0	0	0	0	0	200	903	0	0	0	0	0	0	0	603	903	0
787	7	26.702	38.7322	4.39297	2134.74	-891.837	708.617	200	300	0	0	0	0	0	0	0	200	903	0	0	0	0	0	0	0	603	903	0
787	8	25.4813	38.5796	4.0878	2134.74	-1380.12	525.511	200	300	0	0	0	0	0	0	0	200	903	0	0	0	0	0	0	0	603	903	0
787	9	27.0072	38.1218	4.69815	1676.97	-891.837	662.84	200	300	0	0	0	0	0	0	0	200	903	0	0	0	0	0	0	0	603	903	0
788	0	25.4813	37.9692	6.5292	1860.08	-1074.94	205.077	200	300	0	0	0	0	0	0	0	200	903	0	0	0	0	0	0	0	603	903	0
788	1	26.0917	38.2744	7.44473	1310.76	-1135.98	571.288	200	300	0	0	0	0	0	0	0	200	903	0	0	0	0	0	0	0	603	903	0
788	2	26.2442	38.5796	6.22403	1219.21	-769.766	388.182	200	300	0	0	0	0	0	0	0	200	903	0	0	0	0	0	0	0	603	903	0
788	3	26.2442	39.1899	5.3085	1585.42	-952.872	342.406	200	300	0	0	0	0	0	0	0	200	903	0	0	0	0	0	0	0	603	903	0
788	4	28.0753	39.1899	7.13956	1585.42	-891.837	433.958	200	300	0	0	0	0	0	0	0	200	903	0	0	0	0	0	0	0	603	903	0
788	5	25.9391	39.4951	6.22403	2134.74	-830.802	388.182	200	300	0	0	0	0	0	0	0	200	903	0	0	0	0	0	0	0	603	903	0
788	6	26.0917	39.3425	7.13956	1951.63	-830.802	342.406	200	300	0	0	0	0	0	0	0	200	903	0	0	0	0	0	0	0	603	903	0
788	7	25.7865	38.7322	8.36026	1951.63	-464.591	342.406	200	300	0	0	0	0	0	0	0	200	903	0	0	0	0	0	0	0	603	903	0
788	8	26.702	38.1218	6.5292	1768.53	-1013.91	617.064	200	300	0	0	0	0	0	0	0	200	903	0	0	0	0	0	0	0	603	903	0
788	9	26.2442	38.7322	5.3085	1402.32	-830.802	525.511	200	300	0	0	0	0	0	0	0	200	903	0	0	0	0	0	0	0	603	903	0
789	0	26.2442	38.5796	4.69815	1585.42	-1135.98	891.722	200	300	0	0	0	0	0	0	0	200	903	0	0	0	0	0	0	0	603	903	0
789	1	25.4813	39.6477	6.22403	1951.63	-1135.98	433.958	200	300	0	0	0	0	0	0	0	200	903	0	0	0	0	0	0	0	603	903	0
789	2	26.3968	39.3425	4.69815	1402.32	-891.837	433.958	200	300	0	0	0	0	0	0	0	200	903	0	0	0	0	0	0	0	603	903	0
789	3	25.9391	39.0373	6.5292	1676.97	-1074.94	525.511	200	300	0	0	0	0	0	0	0	200	903	0	0	0	0	0	0	0	603	903	0
789	4	26.702	39.1899	6.83438	1860.08	-1135.98	525.511	200	300	0	0	0	0	0	0	0	200	903	0	0	0	0	0	0	0	603	903	0
789	5	26.8546	38.7322	7.13956	2134.74	-1380.12	479.735	200	300	0	0	0	0	0	0	0	200	903	0	0	0	0	0	0	0	603	903	0
789	6	26.5494	39.3425	5.00333	1860.08	-769.766	617.064	200	300	0	0	0	0	0	0	0	200	903	0	0	0	0	0	0	0	603	903	0
789	7	27.9227	37.3589	6.5292	1676.97	-647.696	662.84	200	300	0	0	0	0	0	0	0	200	903	0	0	0	0	0	0	0	603	903	0
789	8	27.0072	39.4951	5.00333	1402.32	-769.766	205.077	200	300	0	0	0	0	0	0	0	200	903	0	0	0	0	0	0	0	603	903	0
789	9	26.8546	39.6477	8.36026	1493.87	-891.837	388.182	200	300	0	0	0	0	0	0	0	200	903	0	0	0	0	0	0	0	603	903	0
790	0	26.8546	39.6477	9.27579	1493.87	-830.802	433.958	200	300	0	0	0	0	0	0	0	200	903	0	0	0	0	0	0	0	603	903	0
790	1	27.1598	37.9692	6.83438	1768.53	-586.661	250.853	200	300	0	0	0	0	0	0	0	200	903	0	0	0	0	0	0	0	603	903	0
790	2	26.8546	40.7158	5.3085	2134.74	-647.696	754.393	200	300	0	0	0	0	0	0	0	200	903	0	0	0	0	0	0	0	603	903	0
790	3	26.702	40.1054	6.22403	2043.18	-830.802	525.511	200	300	0	0	0	0	0	0	0	200	903	0	0	0	0	0	0	0	603	903	0
790	4	26.8546	39.3425	5.91885	1951.63	-1013.91	433.958	200	300	0	0	0	0	0	0	0	200	903	0	0	0	0	0	0	0	603	903	0
790	5	27.6175	39.3425	6.22403	1951.63	-1074.94	342.406	200	300	0	0	0	0	0	0	0	200	903	0	0	0	0	0	0	0	603	903	0
790	6	26.8546	39.1899	6.22403	1585.42	-891.837	388.182	200	300	0	0	0	0	0	0	0	200	903	0	0	0	0	0	0	0	603	903	0
790	7	27.3124	38.8847	7.74991	1402.32	-952.872	662.84	200	300	0	0	0	0	0	0	0	200	903	0	0	0	0	0	0	0	603	903	0
790	8	27.1598	40.1054	6.83438	1310.76	-708.731	617.064	200	300	0	0	0	0	0	0	0	200	903	0	0	0	0	0	0	0	603	903	0
790	9	27.4649	38.8847	5.3085	1219.21	-952.872	571.288	200	300	0	0	0	0	0	0	0	200	903	0	0	0	0	0	0	0	603	903	0
791	0	28.5331	39.9529	8.66543	1493.87	-830.802	891.722	200	300	0	0	0	0	0	0	0	200	903	0	0	0	0	0	0	0	603	903	0
791	1	26.3968	40.258	5.61368	1402.32	-586.661	525.511	200	300	0	0	0	0	0	0	0	200	903	0	0	0	0	0	0	0	603	903	0
791	2	27.0072	40.1054	6.5292	1951.63	-769.766	479.735	200	300	0	0	0	0	0	0	0	200	903	0	0	0	0	0	0	0	603	903	0
791	3	26.702	39.0373	8.05508	2134.74	-1074.94	342.406	200	300	0	0	0	0	0	0	0	200	903	0	0	0	0	0	0	0	603	903	0
791	4	27.9227	39.9529	6.22403	1676.97	-464.591	479.735	200	300	0	0	0	0	0	0	0	200	903	0	0	0	0	0	0	0	603	903	0
791	5	27.3124	40.258	9.58096	1951.63	-708.731	617.064	200	300	0	0	0	0	0	0	0	200	903	0	0	0	0	0	0	0	603	903	0
791	6	28.3805	40.5632	6.83438	1951.63	-525.626	433.958	200	300	0	0	0	0	0	0	0	200	903	0	0	0	0	0	0	0	603	903	0
791	7	26.702	40.5632	7.13956	2684.05	-830.802	250.853	200	300	0	0	0	0	0	0	0	200	903	0	0	0	0	0	0	0	603	903	0
791	8	26.702	40.5632	4.0878	1951.63	-525.626	754.393	200	300	0	0	0	0	0	0	0	200	903	0	0	0	0	0	0	0	603	903	0
791	9	26.702	39.9529	7.13956	1676.97	-1074.94	388.182	200	300	0	0	0	0	0	0	0	200	903	0	0	0	0	0	0	0	603	903	0
792	0	26.5494	38.7322	10.1913	1493.87	-891.837	296.629	200	300	0	0	0	0	0	0	0	200	903	0	0	0	0	0	0	0	603	903	0
792	1	27.9227	39.8003	7.44473	1127.66	-830.802	571.288	200	300	0	0	0	0	0	0	0	200	903	0	0	0	0	0	0	0	603	903	0
792	2	29.296	40.258	5.3085	1310.76	-952.872	617.064	200	300	0	0	0	0	0	0	0	200	903	0	0	0	0	0	0	0	603	903	0
792	3	27.7701	40.7158	4.69815	1310.76	-830.802	708.617	200	300	0	0	0	0	0	0	0	200	903	0	0	0	0	0	0	0	603	903	0
792	4	27.1598	40.8684	6.22403	1219.21	-891.837	571.288	200	300	0	0	0	0	0	0	0	200	903	0	0	0	0	0	0	0	603	903	0
792	5	28.2279	41.021	8.05508	1768.53	-830.802	388.182	200	300	0	0	0	0	0	0	0	200	903	0	0	0	0	0	0	0	603	903	0
792	6	27.0072	40.1054	10.1913	2134.74	-952.872	479.735	200	300	0	0	0	0	0	0	0	200	903	0	0	0	0	0	0	0	603	903	0
792	7	27.9227	40.7158	8.05508	1676.97	-708.731	479.735	200	300	0	0	0	0	0	0	0	200	903	0	0	0	0	0	0	0	603	903	0
792	8	28.0753	40.1054	6.83438	1860.08	-1013.91	571.288	200	300	0	0	0	0	0	0	0	200	903	0	0	0	0	0	0	0	603	903	0
792	9	29.296	40.1054	8.97061	1493.87	-952.872	342.406	200	300	0	0	0	0	0	0	0	200	903	0	0	0	0	0	0	0	603	903	0
793	0	27.1598	40.258	6.22403	1951.63	-769.766	433.958	200	300	0	0	0	0	0	0	0	200	903	0	0	0	0	0	0	0	603	903	0
793	1	27.3124	40.7158	7.44473	1585.42	-464.591	571.288	200	300	0	0	0	0	0	0	0	200	903	0	0	0	0	0	0	0	603	903	0
793	2	26.8546	40.258	9.27579	1493.87	-769.766	571.288	200	300	0	0	0	0	0	0	0	200	903	0	0	0	0	0	0	0	603	903	0
793	3	28.0753	40.258	8.05508	1585.42	-891.837	845.946	200	300	0	0	0	0	0	0	0	200	903	0	0	0	0	0	0	0	603	903	0
793	4	28.3805	39.3425	5.61368	2317.84	-830.802	571.288	200	300	0	0	0	0	0	0	0	200	903	0	0	0	0	0	0	0	603	903	0
793	5	27.3124	39.4951	5.61368	1768.53	-586.661	479.735	200	300	0	0	0	0	0	0	0	200	903	0	0	0	0	0	0	0	603	903	0
793	6	27.4649	39.4951	6.5292	1493.87	-1135.98	708.617	200	300	0	0	0	0	0	0	0	200	903	0	0	0	0	0	0	0	603	903	0
793	7	29.4486	39.8003	6.83438	1127.66	-769.766	662.84	200	300	0	0	0	0	0	0	0	200	903	0	0	0	0	0	0	0	603	903	0
793	8	26.8546	39.3425	7.44473	1310.76	-647.696	617.064	200	300	0	0	0	0	0	0	0	200	903	0	0	0	0	0	0	0	603	903	0
793	9	27.6175	40.1054	7.74991	1036.1	-525.626	617.064	200	300	0	0	0	0	0	0	0	200	903	0	0	0	0	0	0	0	603	903	0
794	0	28.5331	39.3425	6.5292	1310.76	-464.591	479.735	200	300	0	0	0	0	0	0	0	200	903	0	0	0	0	0	0	0	603	903	0
794	1	27.9227	40.7158	6.83438	1493.87	-769.766	662.84	200	300	0	0	0	0	0	0	0	200	903	0	0	0	0	0	0	0	603	903	0
794	2	27.0072	39.9529	6.83438	1585.42	-830.802	571.288	200	300	0	0	0	0	0	0	0	200	903	0	0	0	0	0	0	0	603	903	0
794	3	28.3805	39.9529	7.44473	2043.18	-525.626	845.946	200	300	0	0	0	0	0	0	0	200	903	0	0	0	0	0	0	0	603	903	0
794	4	26.5494	39.0373	7.74991	1493.87	-708.731	525.511	200	300	0	0	0	0	0	0	0	200	903	0	0	0	0	0	0	0	603	903	0
794	5	27.7701	39.8003	6.5292	1219.21	-769.766	662.84	200	300	0	0	0	0	0	0	0	200	903	0	0	0	0	0	0	0	603	903	0
794	6	27.3124	39.4951	6.22403	1036.1	-1197.01	525.511	200	300	0	0	0	0	0	0	0	200	903	0	0	0	0	0	0	0	603	903	0
794	7	27.7701	39.3425	6.5292	1310.76	-647.696	433.958	200	300	0	0	0	0	0	0	0	200	903	0	0	0	0	0	0	0	603	903	0
794	8	27.0072	38.5796	7.13956	852.998	-647.696	662.84	200	300	0	0	0	0	0	0	0	200	903	0	0	0	0	0	0	0	603	903	0
794	9	28.0753	39.9529	7.13956	1585.42	-525.626	754.393	200	300	0	0	0	0	0	0	0	200	903	0	0	0	0	0	0	0	603	903	0
795	0	26.702	40.4106	8.66543	1310.76	-708.731	571.288	200	300	0	0	0	0	0	0	0	200	903	0	0	0	0	0	0	0	603	903	0
795	1	27.3124	38.8847	8.36026	2409.4	-403.556	525.511	200	300	0	0	0	0	0	0	0	200	903	0	0	0	0	0	0	0	603	903	0
795	2	28.2279	39.0373	8.66543	1310.76	-464.591	983.275	200	300	0	0	0	0	0	0	0	200	903	0	0	0	0	0	0	0	603	903	0
795	3	27.3124	39.6477	6.5292	1402.32	-464.591	525.511	200	300	0	0	0	0	0	0	0	200	903	0	0	0	0	0	0	0	603	903	0
795	4	26.0917	39.3425	6.83438	944.551	-647.696	433.958	200	300	0	0	0	0	0	0	0	200	903	0	0	0	0	0	0	0	603	903	0
795	5	27.6175	40.258	7.13956	1676.97	-647.696	571.288	200	300	0	0	0	0	0	0	0	200	903	0	0	0	0	0	0	0	603	903	0
795	6	25.9391	39.9529	9.58096	1036.1	-647.696	708.617	200	300	0	0	0	0	0	0	0	200	903	0	0	0	0	0	0	0	603	903	0
795	7	27.6175	40.258	8.97061	1402.32	-830.802	571.288	200	300	0	0	0	0	0	0	0	200	903	0	0	0	0	0	0	0	603	903	0
795	8	28.2279	39.3425	8.36026	1402.32	-769.766	296.629	200	300	0	0	0	0	0	0	0	200	903	0	0	0	0	0	0	0	603	903	0
795	9	27.0072	38.427	7.13956	1676.97	-708.731	937.499	200	300	0	0	0	0	0	0	0	200	903	0	0	0	0	0	0	0	603	903	0
796	0	26.3968	38.2744	7.44473	1585.42	-830.802	662.84	200	300	0	0	0	0	0	0	0	200	903	0	0	0	0	0	0	0	603	903	0
796	1	26.8546	38.7322	8.66543	1127.66	-281.485	571.288	200	300	0	0	0	0	0	0	0	200	903	0	0	0	0	0	0	0	603	903	0
796	2	26.5494	38.5796	8.66543	852.998	-342.52	571.288	200	300	0	0	0	0	0	0	0	200	903	0	0	0	0	0	0	0	603	903	0
796	3	26.8546	38.7322	9.88614	1219.21	-342.52	800.17	200	300	0	0	0	0	0	0	0	200	903	0	0	0	0	0	0	0	603	903	0
796	4	27.4649	38.8847	7.44473	578.34	-403.556	845.946	200	300	0	0	0	0	0	0	0	200	903	0	0	0	0	0	0	0	603	903	0
796	5	26.3968	39.8003	7.74991	1493.87	-98.3797	617.064	200	300	0	0	0	0	0	0	0	200	903	0	0	0	0	0	0	0	603	903	0
796	6	26.2442	39.4951	8.97061	1402.32	23.6906	342.406	200	300	0	0	0	0	0	0	0	200	903	0	0	0	0	0	0	0	603	903	0
796	7	26.8546	38.2744	10.1913	1676.97	-342.52	525.511	200	300	0	0	0	0	0	0	0	200	903	0	0	0	0	0	0	0	603	903	0
796	8	25.3287	38.1218	9.58096	1310.76	-952.872	388.182	200	300	0	0	0	0	0	0	0	200	903	0	0	0	0	0	0	0	603	903	0
796	9	26.702	38.2744	9.88614	1219.21	-647.696	662.84	200	300	0	0	0	0	0	0	0	200	903	0	0	0	0	0	0	0	603	903	0
797	0	27.3124	38.1218	9.27579	1127.66	-342.52	479.735	200	300	0	0	0	0	0	0	0	200	903	0	0	0	0	0	0	0	603	903	0
797	1	26.3968	38.5796	7.13956	1219.21	-342.52	342.406	200	300	0	0	0	0	0	0	0	200	903	0	0	0	0	0	0	0	603	903	0
797	2	25.9391	39.1899	8.97061	944.551	-708.731	296.629	200	300	0	0	0	0	0	0	0	200	903	0	0	0	0	0	0	0	603	903	0
797	3	25.1761	38.1218	8.66543	761.445	-525.626	571.288	200	300	0	0	0	0	0	0	0	200	903	0	0	0	0	0	0	0	603	903	0
797	4	25.7865	38.2744	9.88614	852.998	-708.731	479.735	200	300	0	0	0	0	0	0	0	200	903	0	0	0	0	0	0	0	603	903	0
797	5	26.0917	37.3589	9.27579	1127.66	-464.591	754.393	200	300	0	0	0	0	0	0	0	200	903	0	0	0	0	0	0	0	603	903	0
797	6	27.0072	37.5115	9.88614	1036.1	-281.485	479.735	200	300	0	0	0	0	0	0	0	200	903	0	0	0	0	0	0	0	603	903	0
797	7	26.3968	37.664	8.66543	1127.66	-159.415	754.393	200	300	0	0	0	0	0	0	0	200	903	0	0	0	0	0	0	0	603	903	0
797	8	26.3968	37.5115	8.05508	669.893	-525.626	617.064	200	300	0	0	0	0	0	0	0	200	903	0	0	0	0	0	0	0	603	903	0
797	9	27.6175	37.2063	8.66543	578.34	-220.45	571.288	200	300	0	0	0	0	0	0	0	200	903	0	0	0	0	0	0	0	603	903	0
798	0	25.4813	37.8166	9.58096	852.998	-281.485	479.735	200	300	0	0	0	0	0	0	0	200	903	0	0	0	0	0	0	0	603	903	0
798	1	25.4813	37.8166	11.1068	1127.66	-403.556	525.511	200	300	0	0	0	0	0	0	0	200	903	0	0	0	0	0	0	0	603	903	0
798	2	25.4813	38.427	9.58096	578.34	-281.485	433.958	200	300	0	0	0	0	0	0	0	200	903	0	0	0	0	0	0	0	603	903	0
798	3	25.6339	37.664	8.66543	1127.66	-769.766	571.288	200	300	0	0	0	0	0	0	0	200	903	0	0	0	0	0	0	0	603	903	0
798	4	25.0235	37.0537	8.97061	1127.66	-647.696	479.735	200	300	0	0	0	0	0	0	0	200	903	0	0	0	0	0	0	0	603	903	0
798	5	25.0235	36.5959	9.58096	852.998	-342.52	754.393	200	300	0	0	0	0	0	0	0	200	903	0	0	0	0	0	0	0	603	903	0
798	6	26.702	36.2908	9.27579	669.893	-525.626	662.84	200	300	0	0	0	0	0	0	0	200	903	0	0	0	0	0	0	0	603	903	0
798	7	24.871	36.4433	9.88614	578.34	-586.661	708.617	200	300	0	0	0	0	0	0	0	200	903	0	0	0	0	0	0	0	603	903	0
798	8	25.4813	37.0537	8.05508	852.998	-98.3797	571.288	200	300	0	0	0	0	0	0	0	200	903	0	0	0	0	0	0	0	603	903	0
798	9	25.4813	36.7485	8.97061	395.235	-220.45	617.064	200	300	0	0	0	0	0	0	0	200	903	0	0	0	0	0	0	0	603	903	0
799	0	25.3287	36.2908	8.36026	120.576	-281.485	617.064	200	300	0	0	0	0	0	0	0	200	903	0	0	0	0	0	0	0	603	903	0
799	1	24.5658	36.9011	11.1068	1036.1	-220.45	571.288	200	300	0	0	0	0	0	0	0	200	903	0	0	0	0	0	0	0	603	903	0
799	2	25.6339	36.7485	10.4965	1127.66	23.6906	800.17	200	300	0	0	0	0	0	0	0	200	903	0	0	0	0	0	0	0	603	903	0
799	3	24.5658	34.4597	13.5482	669.893	-37.3445	571.288	200	300	0	0	0	0	0	0	0	200	903	0	0	0	0	0	0	0	603	903	0
799	4	25.6339	35.3752	9.88614	303.682	-281.485	617.064	200	300	0	0	0	0	0	0	0	200	903	0	0	0	0	0	0	0	603	903	0
799	5	24.2606	36.1382	10.4965	944.551	-586.661	479.735	200	300	0	0	0	0	0	0	0	200	903	0	0	0	0	0	0	0	603	903	0
799	6	24.2606	36.2908	8.36026	852.998	-37.3445	479.735	200	300	0	0	0	0	0	0	0	200	903	0	0	0	0	0	0	0	603	903	0
799	7	23.4977	35.6804	10.4965	29.0235	-586.661	845.946	200	300	0	0	0	0	0	0	0	200	903	0	0	0	0	0	0	0	603	903	0
799	8	23.6503	35.3752	12.0224	1036.1	-98.3797	433.958	200	300	0	0	0	0	0	0	0	200	903	0	0	0	0	0	0	0	603	903	0
799	9	23.4977	34.3071	10.8017	669.893	-647.696	388.182	200	300	0	0	0	0	0	0	0	200	903	0	0	0	0	0	0	0	603	903	0
800	0	25.4813	33.5442	9.58096	578.34	-220.45	571.288	200	300	0	0	0	0	0	0	0	200	903	0	0	0	0	0	0	0	603	903	0
800	1	24.5658	34.0019	9.88614	120.576	-37.3445	617.064	200	300	0	0	0	0	0	0	0	200	903	0	0	0	0	0	0	0	603	903	0
800	2	23.6503	33.5442	9.27579	395.235	23.6906	754.393	200	300	0	0	0	0	0	0	0	200	903	0	0	0	0	0	0	0	603	903	0
800	3	23.3451	34.7649	12.6327	120.576	-281.485	433.958	200	300	0	0	0	0	0	0	0	200	903	0	0	0	0	0	0	0	603	903	0
800	4	23.8028	35.07	10.8017	-245.635	-342.52	617.064	200	300	0	0	0	0	0	0	0	200	903	0	0	0	0	0	0	0	603	903	0
800	5	23.4977	34.4597	10.4965	303.682	84.7258	617.064	200	300	0	0	0	0	0	0	0	200	903	0	0	0	0	0	0	0	603	903	0
800	6	23.8028	33.8493	11.1068	852.998	23.6906	800.17	200	300	0	0	0	0	0	0	0	200	903	0	0	0	0	0	0	0	603	903	0
800	7	23.4977	33.0864	10.4965	761.445	-159.415	571.288	200	300	0	0	0	0	0	0	0	200	903	0	0	0	0	0	0	0	603	903	0
800	8	24.871	33.5442	11.1068	303.682	-37.3445	708.617	200	300	0	0	0	0	0	0	0	200	903	0	0	0	0	0	0	0	603	903	0
800	9	22.4295	33.8493	9.58096	120.576	-98.3797	342.406	200	300	0	0	0	0	0	0	0	200	903	0	0	0	0	0	0	0	603	903	0
801	0	22.4295	33.8493	11.412	669.893	-98.3797	479.735	200	300	0	0	0	0	0	0	0	200	903	0	0	0	0	0	0	0	603	903	0
801	1	22.5821	32.9338	13.5482	578.34	-403.556	433.958	200	300	0	0	0	0	0	0	0	200	903	0	0	0	0	0	0	0	603	903	0
801	2	23.0399	33.3916	10.4965	761.445	-159.415	617.064	200	300	0	0	0	0	0	0	0	200	903	0	0	0	0	0	0	0	603	903	0
801	3	23.8028	32.1709	10.4965	761.445	-281.485	800.17	200	300	0	0	0	0	0	0	0	200	903	0	0	0	0	0	0	0	603	903	0
801	4	22.8873	32.3235	9.58096	395.235	267.831	571.288	200	300	0	0	0	0	0	0	0	200	903	0	0	0	0	0	0	0	603	903	0
801	5	22.4295	32.4761	10.8017	212.129	23.6906	571.288	200	300	0	0	0	0	0	0	0	200	903	0	0	0	0	0	0	0	603	903	0
801	6	23.6503	32.0183	12.9379	120.576	-37.3445	571.288	200	300	0	0	0	0	0	0	0	200	903	0	0	0	0	0	0	0	603	903	0
801	7	22.1244	32.0183	11.7172	-520.293	-98.3797	342.406	200	300	0	0	0	0	0	0	0	200	903	0	0	0	0	0	0	0	603	903	0
801	8	22.5821	31.1028	12.3275	395.235	267.831	617.064	200	300	0	0	0	0	0	0	0	200	903	0	0	0	0	0	0	0	603	903	0
801	9	24.2606	31.7131	10.8017	852.998	267.831	388.182	200	300	0	0	0	0	0	0	0	200	903	0	0	0	0	0	0	0	603	903	0
802	0	22.7347	31.5605	10.4965	212.129	84.7258	525.511	200	300	0	0	0	0	0	0	0	200	903	0	0	0	0	0	0	0	603	903	0
802	1	21.9718	31.2554	11.7172	486.787	-37.3445	388.182	200	300	0	0	0	0	0	0	0	200	903	0	0	0	0	0	0	0	603	903	0
802	2	22.5821	30.7976	12.6327	29.0235	206.796	433.958	200	300	0	0	0	0	0	0	0	200	903	0	0	0	0	0	0	0	603	903	0
802	3	21.0563	30.645	12.0224	120.576	23.6906	250.853	200	300	0	0	0	0	0	0	0	200	903	0	0	0	0	0	0	0	603	903	0
802	4	21.514	31.5605	11.1068	212.129	-37.3445	525.511	200	300	0	0	0	0	0	0	0	200	903	0	0	0	0	0	0	0	603	903	0
802	5	21.6666	32.4761	10.1913	669.893	-342.52	800.17	200	300	0	0	0	0	0	0	0	200	903	0	0	0	0	0	0	0	603	903	0
802	6	23.1925	33.6968	3.47745	761.445	695.077	800.17	200	300	0	0	0	0	0	0	0	200	903	0	0	0	0	0	0	0	603	903	0
802	7	23.9554	33.3916	0.730865	1310.76	939.218	845.946	200	300	0	0	0	0	0	0	0	200	903	0	0	0	0	0	0	0	603	903	0
802	8	25.4813	33.0864	0.120513	1402.32	1061.29	1349.49	200	300	0	0	0	0	0	0	0	200	903	0	0	0	0	0	0	0	603	903	0
802	9	24.108	33.8493	1.95157	761.445	1305.43	1166.38	200	300	0	0	0	0	0	0	0	200	903	0	0	0	0	0	0	0	603	903	0
803	0	24.4132	33.0864	0.425689	944.551	1427.5	1303.71	200	300	0	0	0	0	0	0	0	200	903	0	0	0	0	0	0	0	603	903	0
803	1	25.9391	35.07	-1.10019	578.34	1061.29	1212.16	1164.64	-225.673	0	0	0	0	0	0	0	200	903	0	0	0	0	0	0	0	603	903	0
803	2	24.108	34.7649	-3.84677	486.787	1488.53	1486.81	586.957	173.456	0	0	0	0	0	0	0	200	903	0	0	0	0	0	0	0	603	903	0
803	3	23.6503	34.1545	-4.45712	1585.42	1610.6	937.499	561.355	-55.7048	0	0	0	0	0	0	0	200	903	0	0	0	0	0	0	0	603	903	0
803	4	22.277	31.8657	-5.983	1860.08	1610.6	891.722	469.197	-10.8938	0	0	0	0	0	0	0	200	903	0	0	0	0	0	0	0	603	903	0
803	5	21.0563	28.6614	-8.42441	1768.53	1976.82	662.84	434.653	90.0712	0	0	0	0	0	0	0	200	903	0	0	0	0	0	0	0	603	903	0
803	6	19.2252	26.9829	-11.171	1768.53	2220.96	617.064	398.815	141.686	0	0	0	0	0	0	0	200	903	0	0	0	0	0	0	0	603	903	0
803	7	19.8356	26.3725	-14.8331	2592.5	2159.92	617.064	345.615	125.222	0	0	0	0	0	0	0	200	903	0	0	0	0	0	0	0	603	903	0
803	8	19.683	24.0837	-17.5797	1951.63	2709.24	21.9711	354.112	188.984	0	0	0	0	0	0	0	200	903	0	0	0	0	0	0	0	603	903	0
803	9	20.4459	22.1001	-21.547	2684.05	3319.59	-23.8053	354.063	175.432	0	0	0	0	0	0	0	200	903	0	0	0	0	0	0	0	603	903	0
804	0	18.92	20.4216	-24.2935	2684.05	3624.77	-252.687	349.207	189.516	0	0	0	0	0	0	0	200	903	0	0	0	0	0	0	0	603	903	0
804	1	19.3778	19.0483	-27.6505	3508.03	3807.87	-344.24	337.715	173.13	0	0	0	0	0	0	0	200	903	0	0	0	0	0	0	0	603	903	0
804	2	18.3097	18.1328	-30.0919	3233.37	4113.05	-206.911	336.683	192.55	0	0	0	0	0	0	0	200	903	0	0	0	0	0	0	0	603	903	0
804	3	19.8356	16.9121	-34.0592	3233.37	4662.36	-756.227	336.89	205.066	0	0	0	0	0	0	0	200	903	0	0	0	0	0	0	0	603	903	0
804	4	19.683	15.2336	-38.0265	3508.03	4906.5	-710.451	329.029	207.748	0	0	0	0	0	0	0	200	903	0	0	0	0	0	0	0	603	903	0
804	5	19.8356	15.2336	-43.2144	3691.13	5699.96	-847.78	331.899	214.586	0	0	0	0	0	0	0	200	903	0	0	0	0	0	0	0	603	903	0
[truncated: 3,244 more rows]
