# Supplementary material for: The Effects of an Extemporaneous Speech Dual-task on Older Adult Gait Control
Source: Research Square preprint supplement (doi:10.21203/rs.3.rs-7674245/v1), 2025-11-18
Supplement: Supplementary file 71 [file DT7Walk06.xlsx]

## Sheet: Sheet1
Trajectories
		07:LFHD			07:RFHD			07:LBHD			07:RBHD			07:C7			07:T10			07:CLAV			07:STRN			07:RBAK			07:LSHO			07:LUPA			07:LELB			07:LFRM			07:LWRA			07:LWRB			07:LFIN
Frame	Sub Frame	X	Y	Z	X	Y	Z	X	Y	Z	X	Y	Z	X	Y	Z	X	Y	Z	X	Y	Z	X	Y	Z	X	Y	Z	X	Y	Z	X	Y	Z	X	Y	Z	X	Y	Z	X	Y	Z	X	Y	Z	X	Y	Z
		mm	mm	mm	mm	mm	mm	mm	mm	mm	mm	mm	mm	mm	mm	mm	mm	mm	mm	mm	mm	mm	mm	mm	mm	mm	mm	mm	mm	mm	mm	mm	mm	mm	mm	mm	mm	mm	mm	mm	mm	mm	mm	mm	mm	mm	mm	mm	mm
6520	0	173.106	-1138.4	1568.61	269.178	-1124.95	1578.75	161.287	-1285.04	1612.1	294.828	-1288.39	1623.5	275.812	-1354.57	1484.29	291.137	-1391.1	1212.53	252.388	-1235.57	1403.21	243.209	-1146.28	1266.97	378.155	-1389.66	1278.12	110.23	-1377.53	1414.73	57.4021	-1392.88	1230.02	39.1868	-1402.82	1087.02	-25.7486	-1362.19	929.413	-17.8915	-1329.6	850.775	-31.9472	-1394.85	855.516	-55.7055	-1355.16	772.177
6521	0	172.154	-1126.19	1570.38	267.843	-1112.94	1579.92	160.645	-1273.15	1612.39	294.111	-1276.25	1624.65	274.568	-1342.39	1484.95	289.334	-1378.98	1213.55	251.612	-1223.61	1403.8	243.067	-1134.11	1267.64	376.518	-1378.24	1278.64	108.718	-1364.36	1415.86	54.4079	-1378.15	1231.47	36.7898	-1385.95	1086.14	-33.6864	-1342.19	932.982	-26.859	-1308.25	853.919	-41.0437	-1373.61	858.114	-67.1265	-1331.6	776.621
6522	0	170.972	-1114.25	1571.15	267.255	-1100.64	1581.73	159.256	-1261.02	1613.71	293.14	-1264.26	1625.32	273.329	-1330.35	1485.92	287.245	-1367.61	1214.54	251.278	-1211.39	1404.6	242.985	-1121.96	1267.65	374.029	-1368.18	1279.46	107.277	-1350.89	1417.06	51.4118	-1363.23	1232.94	31.2046	-1368.92	1087.73	-41.7387	-1322.05	936.387	-36.5938	-1286.3	858.56	-50.5405	-1351.88	861.132	-78.8636	-1307.46	781.654
6523	0	170.393	-1102.4	1571.87	266.498	-1088.59	1582.75	158.579	-1249.2	1614.54	292.468	-1252.08	1626.32	272.197	-1318.52	1486.69	285.036	-1356.13	1215.74	250.95	-1199.33	1405.29	243.153	-1109.88	1267.87	372.059	-1357.09	1280.38	105.892	-1337.37	1418.61	48.0349	-1347.98	1234.46	25.3099	-1351.48	1089.75	-49.6457	-1301.36	940.243	-45.6969	-1263.92	862.757	-60.0092	-1329.59	864.581	-90.7304	-1283.01	787.429
6524	0	169.901	-1090.22	1572.94	266.123	-1076.41	1583.65	159.293	-1237.4	1614.55	292.033	-1239.93	1627.48	271.237	-1306.5	1487.53	282.795	-1344.73	1216.96	250.543	-1187.46	1406.08	243.833	-1097.86	1268.6	370.006	-1346.2	1281.26	104.73	-1324.05	1419.82	44.5389	-1332.36	1236.25	19.8374	-1333.89	1091.4	-57.6688	-1280.08	944.781	-55.027	-1241.15	868.084	-69.6335	-1306.81	868.47	-101.86	-1258.01	793.24
6525	0	169.63	-1078.41	1573.46	265.776	-1064.48	1584.45	158.711	-1225.4	1615.76	291.638	-1227.91	1628.54	270.189	-1294.66	1488.46	280.264	-1333.57	1218.16	250.35	-1175.57	1406.76	244.473	-1085.96	1268.85	367.792	-1335.45	1281.93	103.178	-1310.67	1421.16	40.9026	-1316.51	1238.11	13.9308	-1316.03	1093.67	-65.4661	-1258.79	949.047	-63.7408	-1218.3	872.754	-79.247	-1283.56	872.808	-113.343	-1232.71	800.093
6526	0	169.581	-1066.57	1574.05	265.437	-1052.74	1584.69	157.726	-1213.05	1617.6	291.438	-1215.89	1629.61	269.301	-1282.92	1489.37	277.948	-1322.49	1219.14	250.326	-1163.65	1407.61	245.166	-1074.21	1269.65	365.664	-1324.84	1282.72	101.516	-1297.24	1422.96	37.1529	-1300.66	1240.24	5.56685	-1298.07	1098.12	-73.3495	-1236.62	954.208	-72.5502	-1194.98	879.005	-88.8261	-1260.17	877.634	-124.33	-1207	807.639
6527	0	169.623	-1054.65	1574.67	265.433	-1041	1584.93	158.685	-1201.32	1618.13	291.373	-1203.84	1630.93	268.518	-1271.13	1490.33	275.768	-1311.43	1220.24	250.03	-1151.94	1408.3	245.627	-1062.66	1269.97	363.599	-1314.05	1283.56	100.254	-1284.16	1424.68	33.4246	-1284.65	1242.6	2.43803	-1279.9	1098.75	-80.9142	-1214.59	959.842	-81.1671	-1171.15	885.293	-98.3709	-1236.21	883.045	-135.245	-1181	815.575
6528	0	169.801	-1042.65	1575.07	265.917	-1029.07	1585.77	158.8	-1189.14	1619.09	291.233	-1191.79	1632.12	267.755	-1259.34	1491.5	273.567	-1300.21	1221.31	249.771	-1140.4	1409.08	245.951	-1051.16	1270.86	361.529	-1303.14	1284.36	99.3776	-1271.21	1425.89	29.7033	-1268.75	1245.09	-5.53464	-1261.72	1103.43	-88.4816	-1192.17	965.887	-89.4029	-1147.39	892.138	-107.603	-1212.1	888.779	-145.722	-1154.7	824.326
6529	0	170.086	-1030.74	1575.74	266.368	-1017.2	1586.62	158.506	-1176.94	1620.68	291.211	-1180	1633.39	266.66	-1247.92	1492.84	271.255	-1289.17	1222.41	249.365	-1128.86	1409.85	246.189	-1039.99	1271.9	359.422	-1292.45	1285.06	98.2391	-1258.54	1427.54	25.9671	-1252.8	1247.83	-11.4013	-1243.42	1106.76	-95.6271	-1169.73	972.171	-97.387	-1123.53	898.713	-116.966	-1187.58	895.223	-155.798	-1128.18	833.129
6530	0	170.553	-1018.71	1576.82	266.718	-1005.54	1586.9	157.902	-1164.63	1622.73	291.256	-1168.16	1634.35	265.88	-1236.25	1494.19	269.64	-1276.38	1223.62	248.767	-1117.38	1411	245.984	-1028.7	1272.54	357.432	-1281.61	1285.61	97.0363	-1245.81	1429.52	22.6891	-1237.36	1250.36	-16.6356	-1225.31	1109.99	-102.734	-1147.07	979.122	-105.245	-1099.12	906.904	-125.625	-1163.1	901.86	-165.419	-1101.55	842.932
6531	0	170.892	-1006.72	1577.67	267.362	-993.725	1587.7	158.73	-1152.75	1623.45	291.727	-1156.25	1635.47	265.197	-1224.36	1495.2	267.857	-1264.02	1225.24	248.494	-1105.97	1411.83	245.323	-1017.63	1273.31	355.429	-1271.02	1286.49	95.8003	-1233.42	1431.48	19.1096	-1221.71	1253.64	-22.1145	-1207.1	1113.66	-109.45	-1124.44	986.265	-112.495	-1074.96	915.054	-134.336	-1138.54	909.166	-174.424	-1074.79	853.098
6532	0	171.3	-994.837	1578.28	267.928	-982.004	1588.35	159.256	-1140.68	1624.9	292.137	-1144.45	1636.47	264.37	-1212.86	1496.04	265.841	-1253	1226.26	247.748	-1094.55	1412.39	244.689	-1006.45	1274.08	353.513	-1259.92	1287.08	94.6495	-1220.91	1433.72	15.9632	-1206.5	1256.52	-27.1076	-1189.1	1117.22	-115.706	-1102.07	993.394	-119.387	-1050.93	923.599	-142.516	-1113.66	916.863	-183.054	-1047.98	863.568
6533	0	171.949	-982.991	1579.33	268.548	-970.417	1588.67	159.626	-1128.74	1625.96	292.312	-1132.83	1637.59	263.613	-1201.11	1497.12	264.078	-1241.74	1227.15	246.804	-1083.27	1413.25	243.56	-995.184	1274.36	351.644	-1248.96	1287.7	93.4325	-1208.52	1435.34	12.792	-1191.32	1259.67	-32.1764	-1171.18	1121.04	-121.764	-1079.84	1001.07	-126.025	-1026.59	932.657	-150.253	-1088.98	924.519	-190.986	-1021.09	874.563
6534	0	172.448	-971.006	1580.5	269.018	-958.913	1589.07	159.767	-1116.52	1627.19	292.593	-1121.34	1638.49	262.916	-1189.53	1497.93	263.164	-1229.1	1227.09	245.835	-1071.8	1414.09	242.129	-983.911	1274.64	349.856	-1238	1288.18	92.3755	-1196.24	1437.18	9.76154	-1176.61	1262.74	-37.253	-1153.53	1124.95	-127.493	-1057.51	1008.78	-132.036	-1002.71	941.26	-157.821	-1064.3	932.833	-198.105	-994.286	885.396
6535	0	172.924	-959.307	1581.58	269.508	-947.492	1589.47	159.913	-1104.83	1628.4	292.712	-1109.84	1639.05	261.992	-1177.87	1498.76	262.232	-1216.24	1228.36	245.32	-1060.4	1414.08	241.056	-972.532	1275.35	348.425	-1226.97	1289	91.1953	-1183.87	1438.58	6.52747	-1161.63	1265.93	-41.1532	-1136.32	1127.92	-133.188	-1035.34	1016.55	-137.636	-978.905	950.714	-164.796	-1039.66	941.272	-204.883	-967.538	897.053
6536	0	173.093	-947.373	1582.34	269.75	-936.118	1589.66	159.863	-1092.94	1629.56	292.511	-1098.51	1638.98	261.114	-1166.29	1499.26	259.941	-1205.33	1229.05	244.302	-1048.97	1414.57	239.478	-961.308	1275.52	346.489	-1216.1	1289.29	90.1134	-1171.46	1440.09	3.52936	-1146.83	1268.91	-45.79	-1118.93	1131.39	-138.317	-1013.36	1024.58	-142.872	-955.206	960.242	-171.693	-1015.06	949.902	-210.977	-940.997	908.399
6537	0	173.307	-935.733	1583.05	270.019	-924.752	1590	159.565	-1081.19	1630.61	292.474	-1087.16	1639.22	260.085	-1154.6	1499.69	258.055	-1194.21	1229.43	243.255	-1037.59	1414.95	238.247	-950.022	1275.76	344.794	-1205.08	1289.44	89.0141	-1159.27	1441.09	0.839576	-1132.57	1271.31	-51.2945	-1101.55	1135.67	-143.206	-991.359	1032.51	-147.806	-931.857	969.535	-177.527	-990.711	958.078	-216.556	-914.651	920.24
6538	0	173.249	-924.062	1584.15	270.178	-913.357	1590.32	159.626	-1069.57	1631.26	292.598	-1075.86	1639.81	259.146	-1142.95	1499.95	255.95	-1183.2	1229.88	241.928	-1025.84	1415.62	236.574	-938.888	1275.45	343.121	-1194.02	1289.26	87.6466	-1146.84	1441.82	-1.7456	-1118.3	1273.25	-55.2872	-1084.58	1138.55	-147.696	-969.906	1040.45	-152.242	-908.66	979.307	-184.289	-966.534	967.528	-221.69	-888.615	931.967
6539	0	173.067	-912.393	1584.72	270.071	-902.042	1590.59	159.312	-1057.79	1631.9	292.39	-1064.61	1640.09	258.119	-1131.34	1500.04	254.692	-1172.06	1230.02	241.018	-1014.32	1415.29	235.418	-927.593	1275.48	341.964	-1182.8	1289.41	86.5901	-1134.81	1442.6	-4.83286	-1103.86	1275.67	-59.6018	-1067.69	1141.46	-151.818	-948.677	1048.23	-156.449	-885.533	988.813	-189.907	-942.475	976.171	-226.243	-862.793	943.67
6540	0	172.725	-900.849	1585.19	269.684	-890.688	1590.55	158.93	-1046.3	1632.34	291.884	-1053.28	1639.92	256.996	-1119.66	1500	253.25	-1160.68	1229.85	239.626	-1002.87	1415.14	234.289	-916.266	1275.45	340.471	-1171.42	1289.31	85.4641	-1122.86	1443.07	-7.48996	-1089.73	1277.3	-64.0156	-1051	1144.27	-155.535	-927.695	1055.89	-160.056	-862.961	998.26	-194.63	-918.755	984.336	-230.186	-837.332	955.794
6541	0	172.594	-889.209	1585.83	269.376	-879.324	1590.71	158.143	-1034.68	1632.96	291.079	-1042	1639.27	255.929	-1107.9	1499.74	251.773	-1149.49	1229.91	238.792	-991.387	1414.77	232.982	-904.94	1274.66	338.971	-1159.54	1289.36	84.1643	-1110.8	1443.17	-9.69501	-1075.84	1278.46	-67.747	-1034.52	1146.73	-159.019	-907.013	1063.34	-163.239	-841.057	1007.3	-199.013	-895.375	993.062	-233.656	-812.294	967.357
6542	0	171.664	-877.596	1585.89	268.817	-868.058	1590.65	157.338	-1023.05	1633.02	290.379	-1030.74	1639.34	254.833	-1096.13	1499.23	250.363	-1138.32	1229.82	237.715	-979.758	1414.61	231.835	-893.446	1274.11	337.766	-1148.52	1289.13	83.0026	-1098.74	1443.26	-12.3609	-1061.66	1280.19	-71.4734	-1018.31	1149.05	-161.899	-886.66	1070.63	-165.899	-819.065	1016.51	-202.845	-872.366	1001.37	-236.27	-788.24	979.276
6543	0	170.824	-865.996	1586.2	268.054	-856.731	1590.43	156.445	-1011.55	1632.94	289.44	-1019.54	1639.3	253.662	-1084.47	1499.11	249.3	-1126.39	1229.3	236.65	-968.142	1414.18	230.972	-881.817	1273.8	336.426	-1136.08	1288.81	81.7542	-1086.93	1443.05	-14.7061	-1047.88	1281.19	-75.0562	-1002.17	1151	-164.566	-866.698	1077.65	-168.055	-797.543	1025.83	-206.655	-849.762	1009.73	-238.536	-764.349	990.983
6544	0	170.047	-854.403	1586.21	267.247	-845.314	1590.24	155.258	-999.985	1632.82	288.292	-1008.17	1638.81	252.435	-1072.66	1498.6	248.186	-1114.87	1228.76	235.347	-956.386	1413.45	229.845	-869.99	1273.23	335.357	-1124.81	1288.46	80.6088	-1075.04	1442.58	-16.4273	-1034.36	1281.76	-78.3774	-986.001	1152.92	-166.523	-847.114	1084.62	-169.811	-776.466	1034.97	-209.72	-827.462	1018.09	-240.28	-741.148	1002.59
6545	0	169.147	-842.655	1586.06	266.372	-833.906	1589.92	154.08	-988.203	1632.48	286.984	-996.865	1638.32	251.334	-1060.76	1498.04	247.139	-1103.1	1228.15	233.83	-944.563	1413.01	228.491	-858.17	1272.36	334.254	-1112.8	1287.95	79.5215	-1063.19	1442.07	-18.434	-1020.62	1282.67	-81.2763	-970.361	1154.6	-168.321	-828.033	1091.33	-171.142	-755.931	1043.72	-212.223	-805.846	1026.2	-241.394	-718.698	1013.36
6546	0	168.174	-830.986	1585.72	265.369	-822.503	1589.64	152.66	-976.604	1632.05	285.28	-985.628	1637.1	250.143	-1048.93	1497.54	246.386	-1090.96	1227.31	232.488	-932.746	1412.47	227.454	-846.148	1272.01	333.354	-1100.56	1287.34	78.3463	-1051.49	1441.46	-20.1021	-1007.2	1283.1	-83.9434	-954.647	1156.04	-169.791	-809.235	1097.78	-172.106	-735.868	1052.18	-213.427	-784.805	1033.01	-242.108	-696.795	1024.36
6547	0	167.16	-819.228	1585.28	264.282	-811.097	1589.3	150.925	-964.768	1631.66	284.067	-974.105	1637.28	248.96	-1037.03	1496.93	245.513	-1078.99	1226.75	231.621	-920.752	1411.74	226.254	-834.091	1271.46	332.532	-1088.33	1286.83	77.4127	-1039.79	1440.77	-21.8223	-993.728	1283.41	-86.3522	-939.242	1157.17	-170.744	-790.869	1104.15	-172.833	-715.922	1060.93	-215.084	-763.982	1040.74	-242.389	-675.416	1034.79
6548	0	166.055	-807.511	1584.89	263.228	-799.567	1588.77	149.702	-952.84	1631.1	282.497	-962.685	1636.76	247.774	-1025.13	1496.38	244.818	-1066.92	1225.93	230.42	-908.763	1411.07	224.972	-822.063	1270.59	331.791	-1075.87	1286.1	76.3217	-1028.1	1439.58	-23.0867	-980.759	1283.18	-88.3915	-923.974	1158.14	-171.5	-773.024	1109.87	-172.682	-696.719	1069.36	-216.159	-743.585	1047.69	-242.237	-654.614	1044.95
6549	0	165.013	-795.73	1584.14	262.39	-787.869	1588.59	148.238	-941.103	1630.23	280.999	-951.162	1636.02	246.718	-1013.12	1495.59	244.3	-1054.81	1225.22	228.904	-896.591	1410.51	223.527	-810.152	1270.1	331.258	-1063.41	1285.45	75.3991	-1016.49	1438.63	-24.2268	-967.773	1282.86	-90.2647	-908.955	1158.75	-171.975	-755.3	1115.45	-172.642	-678.431	1076.09	-216.661	-723.781	1054.62	-241.711	-634.491	1054.54
6550	0	164.069	-783.805	1583.6	261.54	-776.259	1588.31	146.733	-929.3	1629.4	279.532	-939.515	1635.38	245.625	-1001.11	1494.77	243.834	-1042.54	1224.53	227.966	-884.574	1409.91	222.243	-798.02	1269.61	330.751	-1050.61	1284.84	74.4578	-1004.74	1437.73	-25.5528	-954.582	1282.66	-91.9578	-893.883	1159.42	-171.956	-738.19	1120.64	-171.81	-660.029	1084	-216.91	-704.386	1060.99	-240.798	-614.853	1063.83
6551	0	163.049	-771.83	1582.89	260.49	-764.563	1587.58	145.489	-917.273	1628.59	278.132	-927.882	1634.8	244.64	-989.054	1493.81	243.435	-1030.38	1223.66	226.787	-872.434	1409.08	220.7	-785.834	1268.64	330.39	-1037.97	1284.05	73.5281	-993.043	1436.18	-26.4452	-941.692	1281.85	-93.3675	-879.085	1159.59	-171.984	-721.251	1125.27	-171.152	-642.353	1090.33	-216.082	-685.271	1066.13	-239.375	-595.685	1072.44
6552	0	162.144	-759.825	1582.18	259.364	-753.017	1586.64	144.226	-905.277	1627.86	276.794	-916.284	1634.24	243.634	-977.101	1493.01	243.116	-1017.83	1222.35	225.39	-860.414	1408.06	219.401	-773.481	1267.93	329.877	-1025.09	1283.07	72.7202	-981.312	1435.05	-27.2509	-928.913	1280.86	-94.6086	-864.55	1159.69	-171.404	-704.8	1129.59	-169.98	-625.078	1096.19	-215.965	-666.904	1071.83	-237.634	-577.098	1080.23
6553	0	161.3	-747.935	1581.36	258.377	-741.264	1585.76	142.955	-893.37	1627	275.664	-904.555	1633.59	242.742	-964.91	1491.83	242.714	-1005.24	1221.57	224.782	-848.142	1407.39	218.166	-761.025	1267.66	329.574	-1012.11	1282.24	72.0046	-969.627	1433.66	-27.9876	-916.061	1279.94	-95.5298	-850.019	1159.78	-170.735	-688.607	1133.39	-168.514	-608.196	1102.11	-214.904	-648.889	1076.69	-235.712	-559.068	1087.56
6554	0	160.507	-735.975	1580.37	257.728	-729.331	1585.25	141.847	-881.371	1626.17	274.592	-892.711	1632.82	241.826	-952.706	1490.9	242.309	-992.337	1220.51	223.867	-835.847	1406.89	217.168	-748.379	1267.53	329.156	-999.089	1281.22	71.1428	-957.784	1432.48	-28.43	-903.35	1278.72	-96.2862	-835.664	1159.49	-169.885	-672.78	1137.05	-166.81	-591.643	1107.41	-214.054	-631.234	1081.5	-233.37	-541.434	1094.34
6555	0	159.634	-723.9	1579.54	256.983	-717.291	1584.52	140.911	-869.393	1625.17	273.62	-880.848	1631.88	240.877	-940.483	1490.13	241.934	-979.608	1219.37	222.808	-823.528	1406.02	215.926	-735.556	1266.88	328.806	-986.327	1280.26	70.4043	-945.943	1430.92	-28.8372	-890.531	1277.64	-97.1093	-821.508	1159.28	-168.814	-657.088	1140.04	-164.889	-575.581	1112.22	-212.748	-614.018	1085.37	-230.876	-524.239	1100.38
6556	0	158.926	-711.741	1579.05	256.225	-705.345	1583.56	140.112	-857.252	1624.21	272.83	-868.827	1630.69	240.201	-928.403	1489.03	241.754	-966.792	1218.1	221.895	-811.222	1404.97	214.922	-722.842	1266.34	328.552	-973.38	1279.23	69.7707	-934.065	1429.38	-29.2463	-877.719	1276.54	-97.2551	-807.373	1158.62	-167.547	-641.877	1142.5	-162.77	-559.866	1116.27	-211.102	-597.333	1088.66	-228.237	-507.448	1105.63
6557	0	158.227	-699.691	1578.28	255.744	-693.336	1582.95	139.444	-845.167	1623.41	272.158	-856.867	1629.91	239.614	-916.126	1488	241.804	-953.695	1216.84	221.186	-798.877	1404.26	214.027	-709.933	1265.61	328.465	-959.859	1278.15	69.3229	-922.03	1428.08	-29.4939	-865.027	1275.29	-97.4605	-793.566	1157.82	-166.093	-626.828	1144.83	-160.758	-544.566	1119.41	-209.535	-581.014	1092.07	-225.42	-491.203	1110.22
6558	0	157.649	-687.557	1577.55	255.205	-681.245	1582.12	138.787	-833.083	1622.6	271.629	-844.748	1629.03	239.023	-903.881	1486.9	241.702	-941.061	1215.98	220.544	-786.434	1403.55	213.14	-697.155	1264.77	328.389	-947.022	1277.43	68.8659	-910.053	1426.78	-29.6858	-852.284	1273.93	-97.7283	-779.719	1157.31	-164.47	-611.998	1146.68	-158.094	-529.453	1122.65	-207.695	-565.009	1094.56	-222.47	-475.346	1114.29
6559	0	157.087	-675.509	1576.42	254.716	-669.128	1581.28	138.449	-821.023	1621.63	271.08	-832.704	1628	238.557	-891.697	1485.86	241.747	-928.011	1214.46	219.929	-774.118	1402.45	212.607	-684.359	1264.51	328.344	-934.06	1276.14	68.616	-898.008	1425.3	-29.8239	-839.515	1272.66	-97.3679	-766.137	1156.21	-162.932	-597.513	1147.87	-155.779	-514.758	1124.58	-206.07	-549.349	1096.85	-219.406	-459.82	1117.51
6560	0	156.744	-663.566	1575.57	254.145	-657.109	1580.08	138.138	-809.065	1620.59	270.796	-820.597	1627.14	238.324	-879.359	1484.76	241.855	-914.917	1213.14	219.602	-761.627	1401.62	212.06	-671.379	1263.93	328.474	-920.878	1274.89	68.5922	-885.977	1423.76	-29.8004	-826.794	1271.21	-97.4662	-752.836	1155.2	-161.024	-583.269	1148.74	-153.08	-500.405	1126.36	-203.785	-534.325	1098.16	-216.288	-444.692	1119.86
6561	0	156.375	-651.68	1574.71	253.724	-645.085	1579.09	137.791	-797.06	1620	270.55	-808.366	1626.35	237.865	-867.549	1483.85	242.162	-901.817	1212.02	219.452	-749.153	1400.9	211.644	-658.402	1263.43	328.738	-907.55	1273.89	68.4741	-874.04	1422.15	-29.4073	-814.277	1269.46	-97.1007	-739.546	1153.95	-159.102	-569.243	1149.25	-150.581	-486.354	1127.23	-201.547	-519.489	1098.89	-213.276	-429.875	1121.58
6562	0	156.051	-639.729	1573.46	253.288	-633.031	1578.22	137.571	-785.18	1618.95	270.361	-796.225	1625.65	237.658	-855.073	1482.57	242.443	-888.445	1210.73	219.232	-736.711	1400.05	211.603	-645.21	1263.42	328.836	-894.352	1272.96	68.429	-861.587	1420.73	-29.38	-801.437	1268.47	-96.6355	-726.378	1152.43	-157.248	-555.463	1149.04	-148	-472.595	1127.53	-199.703	-505.013	1099.6	-210.239	-415.398	1122.46
6563	0	155.749	-627.778	1572.31	253.155	-620.846	1577.4	137.494	-773.259	1617.85	270.288	-784.145	1624.62	237.534	-842.862	1481.2	242.445	-874.977	1209.19	219.316	-724.13	1399.12	211.562	-631.934	1263.11	328.828	-881.031	1271.49	68.511	-849.091	1419.28	-28.6299	-788.812	1266.29	-96.095	-713.469	1150.79	-155.48	-541.958	1148.4	-145.544	-458.933	1127.31	-197.697	-490.849	1099.48	-207.273	-401.132	1122.59
6564	0	155.353	-615.857	1571.23	252.853	-608.792	1576.51	137.486	-761.375	1616.54	270.333	-772.142	1623.36	237.72	-830.876	1479.65	242.586	-861.662	1208.19	219.515	-711.276	1398.6	211.915	-618.568	1262.99	329.06	-868.188	1270.52	68.5278	-836.449	1417.73	-28.0587	-776.096	1264.44	-95.2347	-700.72	1148.81	-153.576	-528.618	1147.22	-143.073	-445.647	1126.59	-195.608	-476.997	1098.7	-204.388	-387.238	1122.13
6565	0	155.343	-603.754	1570.61	252.589	-596.697	1575.86	137.364	-749.6	1615.55	270.233	-760.028	1622.49	237.704	-818.675	1478.57	242.92	-848.012	1206.58	219.594	-698.542	1397.72	212.419	-605.057	1262.62	329.272	-854.958	1269.13	68.5602	-823.592	1416.11	-27.8806	-763.18	1262.51	-94.5878	-687.903	1146.46	-151.842	-515.441	1145.73	-140.844	-432.48	1125.01	-193.653	-463.473	1097.3	-201.634	-373.501	1120.75
6566	0	155.247	-591.747	1570.12	252.634	-584.58	1575.65	137.327	-737.602	1614.37	270.165	-748.039	1621.74	237.747	-806.456	1477.53	243.139	-834.315	1205.09	219.968	-685.895	1397.15	213.314	-591.563	1262.58	329.376	-841.819	1267.78	68.5181	-810.808	1414.7	-27.22	-750.202	1260.41	-93.7264	-675.157	1144.28	-150.019	-502.453	1143.54	-138.849	-419.631	1122.42	-191.722	-450.133	1095.17	-199.067	-360.129	1118.71
6567	0	155.132	-579.734	1569.66	252.583	-572.399	1575.39	137.37	-725.518	1613.87	270.082	-735.964	1621.68	237.834	-794.286	1476.77	243.485	-820.561	1203.76	219.942	-673.267	1396.98	214.258	-578.062	1262.51	329.47	-828.602	1266.67	68.8411	-798.57	1412.58	-26.8003	-737.339	1258.63	-92.6932	-662.65	1141.8	-148.226	-489.613	1140.8	-136.337	-406.835	1119.91	-189.685	-437.293	1092.72	-196.465	-347.119	1115.92
6568	0	155.208	-567.625	1569.37	252.58	-560.209	1575.5	137.29	-713.544	1613.39	270.061	-723.767	1621.53	237.84	-781.981	1476.28	243.486	-807.028	1202.8	220.234	-660.632	1396.93	215.114	-564.763	1262.7	329.357	-815.506	1265.76	68.8651	-785.716	1411.69	-26.022	-724.634	1256.61	-91.3618	-650.316	1139.31	-146.296	-477.182	1137.79	-134.208	-394.547	1116.42	-187.407	-424.951	1089.3	-194.053	-334.689	1112.15
6569	0	155.146	-555.425	1569.29	252.377	-548.046	1575.53	137.268	-701.498	1613.09	270.056	-711.648	1621.62	237.849	-769.542	1476.07	243.32	-793.448	1202.17	220.658	-647.863	1397.15	216.223	-551.538	1263.38	329.078	-802.443	1265.11	69.1801	-772.885	1411.28	-25.3867	-712.019	1255.32	-89.818	-637.919	1137.31	-144.338	-464.956	1134.26	-131.977	-382.396	1112.5	-185.291	-412.906	1085.24	-191.696	-322.5	1107.5
6570	0	155.299	-543.157	1569.76	252.395	-535.838	1576.2	137.312	-689.409	1613.22	270.046	-699.45	1621.77	237.714	-757.146	1476.07	242.708	-779.956	1201.67	221.014	-635.181	1397.58	217.131	-538.386	1264.21	328.45	-789.534	1264.45	68.8093	-759.75	1411.01	-24.5523	-699.365	1254.55	-88.2154	-626.016	1135.27	-142.218	-452.928	1130.35	-129.748	-370.689	1107.67	-182.912	-401.394	1080.54	-189.178	-310.793	1102.09
6571	0	155.372	-530.74	1570.71	252.548	-523.33	1577.33	137.321	-677.075	1613.72	270.073	-687.324	1622.11	237.492	-744.642	1476.33	242.099	-766.591	1201.42	221.22	-622.637	1397.99	217.872	-525.373	1265.37	327.745	-776.727	1264.19	68.6695	-746.652	1411.34	-23.5314	-686.899	1253.67	-86.4261	-614.307	1133.77	-140.06	-441.17	1125.92	-127.35	-359.448	1102.2	-180.314	-390.432	1075.18	-186.839	-299.511	1095.63
6572	0	155.24	-518.37	1571.48	252.684	-510.934	1578.67	137.37	-664.747	1614.22	270.171	-675.026	1622.61	237.24	-731.974	1476.69	241.172	-753.557	1201.99	221.46	-609.848	1398.77	218.186	-512.266	1266.2	326.826	-763.868	1264.69	68.2999	-733.408	1411.83	-22.7668	-674.547	1253.07	-84.2027	-602.982	1131.91	-137.952	-429.897	1121.4	-124.901	-348.34	1096.41	-177.914	-379.841	1069.66	-184.29	-288.695	1088.51
6573	0	155.313	-505.744	1573.4	252.646	-498.439	1579.8	137.443	-652.438	1614.75	270.196	-662.767	1623.07	236.925	-719.24	1477.26	240.287	-740.55	1202.3	221.387	-597.3	1399.41	218.281	-499.228	1267.22	325.957	-751.275	1264.99	67.7978	-720.283	1412.72	-22.3675	-661.998	1253.25	-82.6809	-591.596	1130.78	-135.755	-418.543	1116.41	-122.457	-337.639	1089.84	-175.288	-369.547	1063.41	-181.842	-278.048	1080.32
6574	0	155.224	-493.06	1574.98	252.555	-486.024	1580.86	137.519	-639.931	1615.67	270.175	-650.431	1623.43	236.476	-706.598	1477.74	239.523	-727.643	1202.87	220.833	-584.431	1400.24	218.309	-486.267	1268.23	325.19	-738.883	1265.61	67.2663	-707.211	1413.33	-21.8677	-649.74	1252.98	-80.8916	-580.542	1129.34	-133.657	-407.58	1111.11	-119.836	-327.271	1082.5	-172.902	-359.696	1056.76	-179.024	-267.79	1071.29
6575	0	155.241	-480.492	1576.54	252.776	-473.405	1582.38	137.316	-627.488	1616.75	270.06	-638.204	1623.71	235.939	-694.102	1478.39	238.901	-715.19	1203.38	220.307	-571.966	1400.66	217.804	-473.5	1268.58	324.536	-726.453	1266.31	66.6302	-694.406	1414.06	-21.5436	-637.399	1252.91	-79.205	-569.296	1128.27	-131.553	-396.767	1105.31	-117.037	-317.205	1075.65	-170.274	-350.276	1049.56	-176.29	-257.825	1061.41
6576	0	155.107	-467.663	1577.85	252.644	-461.004	1583.3	137.044	-614.799	1617.85	269.748	-625.889	1624.17	235.373	-681.58	1479.17	238.24	-703.061	1204.45	219.768	-559.445	1401.48	217.268	-460.93	1269.13	323.922	-714.338	1267.5	65.9108	-681.677	1414.91	-21.4619	-625.046	1252.96	-77.9266	-557.982	1127.6	-129.603	-386.166	1099.49	-114.667	-307.504	1067.36	-168.014	-341.121	1042.25	-173.542	-248.277	1050.73
6577	0	154.931	-455.085	1579.11	252.537	-448.618	1584.17	136.644	-602.255	1618.81	269.335	-613.523	1624.95	234.839	-669.092	1480.16	238.215	-690.838	1205.47	218.599	-546.944	1402.4	216.284	-448.639	1269.49	323.719	-701.526	1268.81	65.3219	-669.102	1415.87	-21.5465	-612.752	1253.04	-76.2973	-546.685	1126.55	-127.615	-375.708	1093.17	-112.459	-298.425	1058.68	-165.455	-332.48	1034.06	-170.56	-239.282	1039.36
6578	0	154.672	-442.432	1580.16	252.189	-436.17	1584.61	136.344	-589.397	1620.1	268.932	-601.043	1625.86	234.295	-656.732	1481.24	236.815	-679.841	1207.08	218.135	-534.8	1403.13	215.144	-436.546	1269.96	322.783	-690.856	1270.31	64.6088	-656.951	1416.71	-21.722	-600.622	1253.23	-74.8036	-535.392	1125.81	-125.814	-365.739	1086.76	-109.951	-289.791	1049.47	-162.928	-324.393	1026.06	-167.668	-230.972	1027.35
6579	0	154.311	-429.878	1580.65	251.732	-423.781	1584.92	135.712	-576.728	1621.37	268.424	-588.527	1626.76	233.686	-644.454	1482.47	236.75	-667.985	1208.42	217.371	-522.676	1404.13	213.816	-424.714	1270.58	322.643	-677.963	1271.81	63.9023	-644.76	1417.74	-21.7297	-588.567	1253.64	-73.3024	-524.097	1125.26	-123.806	-356.074	1080.05	-107.437	-281.605	1040.54	-160.328	-316.978	1017.67	-164.57	-223.366	1014.78
6580	0	153.913	-417.355	1580.93	251.304	-411.397	1585.47	135.086	-563.862	1622.68	267.727	-575.863	1628.18	233.188	-632.154	1483.82	236.675	-656.198	1209.85	216.45	-510.613	1405.07	212.427	-413.141	1271.65	322.435	-665.185	1273.45	63.2714	-632.733	1418.93	-21.712	-576.492	1254.25	-72.1053	-513.02	1125.09	-121.876	-347.041	1073.15	-105.037	-274.038	1030.87	-157.836	-310.161	1009.1	-161.661	-216.684	1002
6581	0	153.388	-404.743	1581.44	250.905	-398.788	1586.08	134.447	-551.079	1623.84	266.866	-563.197	1629.47	232.495	-619.948	1485.37	236.353	-644.557	1211.36	215.698	-498.735	1406.35	210.884	-401.757	1272.75	322.155	-652.469	1274.88	62.5524	-620.8	1420.1	-22.0339	-564.454	1254.93	-70.6397	-501.893	1124.89	-119.952	-338.365	1066.2	-102.532	-267.16	1021.3	-155.075	-303.943	1000.36	-158.502	-210.94	988.796
6582	0	152.711	-392.174	1582.05	250.265	-386.339	1586.62	133.575	-538.245	1625.42	266.034	-550.528	1631.08	231.801	-607.824	1487.14	236.11	-633.02	1212.91	214.69	-486.889	1407.83	209.086	-390.547	1273.72	321.984	-639.725	1276.24	61.7781	-609.113	1421.24	-21.5743	-552.709	1255.3	-69.1154	-491.051	1124.65	-118.029	-330.341	1059.28	-100.152	-261.051	1011.54	-152.028	-298.575	991.407	-155.484	-206.101	975.557
6583	0	151.947	-379.573	1582.63	249.892	-373.731	1587.64	132.632	-525.323	1626.76	265.172	-537.748	1632.86	231.149	-595.646	1488.84	236.045	-621.6	1214.69	213.768	-475.069	1409.41	207.516	-379.322	1275.01	322.002	-627.367	1277.93	61.138	-597.426	1422.6	-21.4425	-540.903	1256.1	-67.5104	-480.34	1124.65	-115.897	-322.873	1052.65	-97.55	-255.641	1002.13	-149.374	-293.954	983.111	-152.221	-202.25	962.601
6584	0	151.22	-366.893	1583.48	249.116	-361.203	1588.37	131.578	-512.444	1628.2	264.149	-524.998	1634.21	230.465	-583.34	1490.43	235.981	-610.14	1216.55	212.617	-463.195	1410.95	206.002	-367.834	1276.16	321.9	-615.128	1279.92	60.5171	-585.644	1424.12	-21.9582	-528.775	1256.94	-66.0967	-469.857	1124.65	-113.642	-315.776	1045.83	-95.078	-250.714	992.181	-146.54	-289.868	975.078	-149.014	-199.266	949.782
6585	0	150.528	-354.178	1584.36	248.11	-348.649	1589.11	130.745	-499.679	1629.31	263.246	-512.248	1635.34	229.704	-571.103	1492.09	236.126	-598.607	1217.96	211.852	-451.424	1412.05	204.846	-356.424	1277.59	322.073	-603.1	1281.44	60.0287	-573.923	1425.34	-21.6259	-516.959	1257.13	-64.307	-459.666	1124.26	-111.304	-309.287	1039.43	-92.4345	-246.624	982.926	-143.984	-286.322	967.538	-145.794	-197.065	937.105
6586	0	149.637	-341.366	1585.19	247.539	-335.976	1590.01	129.646	-486.771	1630.54	262.187	-499.6	1636.74	228.946	-558.562	1494.43	236.054	-587.173	1219.67	211.1	-439.379	1413.27	203.88	-344.848	1278.62	322.011	-591.171	1283.27	59.6156	-562.18	1426.41	-20.7731	-505.895	1257.18	-62.3283	-449.786	1123.79	-108.807	-303.094	1033.11	-89.6644	-243.043	973.991	-141.202	-283.444	959.773	-142.786	-195.673	924.528
6587	0	148.635	-328.711	1585.86	246.714	-323.262	1590.96	128.727	-473.957	1631.3	261.127	-486.802	1638.04	228.175	-546.16	1495.52	235.883	-575.746	1221.45	210.564	-427.198	1414.58	203.346	-333.45	1279.61	321.794	-579.14	1285.06	59.0137	-550.234	1427.49	-20.3127	-494.139	1257.49	-60.2959	-440.125	1123.37	-106.603	-297.735	1027.13	-87.0993	-239.76	965.391	-138.492	-280.838	952.769	-139.786	-195.09	912.691
6588	0	147.821	-315.872	1586.88	245.645	-310.599	1591.83	127.645	-461.024	1632.47	260.087	-474.067	1639.07	227.413	-533.756	1496.8	235.855	-564.317	1223.14	209.91	-414.942	1415.68	202.912	-321.735	1280.22	321.663	-567.304	1286.97	58.4415	-537.98	1428.55	-19.789	-482.559	1257.62	-58.0206	-430.777	1122.52	-104.224	-292.479	1020.9	-84.6482	-236.847	957.365	-135.861	-278.558	946.056	-136.986	-194.987	901.17
6589	0	146.941	-302.953	1588.02	244.908	-297.72	1593.13	126.65	-448.371	1633.05	258.931	-461.52	1639.64	226.813	-521.242	1498.21	235.987	-553.107	1225.09	209.421	-402.656	1416.83	202.592	-310.069	1280.59	321.689	-555.578	1289.18	57.778	-525.748	1429.3	-19.2673	-471.104	1257.4	-55.7864	-421.691	1121.37	-102.074	-287.657	1014.92	-82.3512	-234.189	949.472	-133.152	-276.571	939.419	-134.464	-195.403	890.088
6590	0	146.025	-290.122	1588.75	243.966	-284.895	1594.12	125.7	-435.651	1633.39	258.076	-448.78	1640.36	226.048	-508.597	1498.97	236.086	-541.534	1226.5	208.791	-390.266	1417.68	202.627	-298.42	1280.89	321.48	-543.484	1290.91	57.1409	-513.233	1430.07	-18.5272	-459.888	1257.23	-53.456	-412.884	1120.15	-99.9995	-282.956	1009.55	-80.1324	-231.715	942.121	-130.422	-274.894	933.152	-131.847	-196.274	879.645
6591	0	145.024	-277.307	1589.53	243.003	-272.116	1595.14	124.654	-422.935	1633.84	257.082	-436.018	1640.95	225.47	-495.941	1499.64	236.204	-529.802	1227.78	208.202	-377.659	1418.26	202.85	-286.437	1281.17	321.322	-531.557	1292.6	56.3757	-500.579	1430.81	-17.8467	-448.802	1256.73	-51.2345	-404.353	1118.79	-97.8843	-278.589	1003.98	-78.2249	-229.878	934.787	-127.793	-273.249	927.335	-129.493	-197.366	869.87
6592	0	144.081	-264.511	1590.22	241.857	-259.264	1595.7	123.619	-410.191	1634.1	256.054	-423.169	1641.41	224.913	-483.259	1500.1	236.301	-518.19	1229.1	207.81	-365.095	1418.99	202.898	-274.39	1280.85	321.241	-519.483	1294.17	55.631	-487.764	1431.28	-16.6738	-438.025	1256.07	-49.1676	-395.853	1117.41	-95.7203	-274.227	998.667	-75.9563	-227.747	928.033	-125.24	-271.696	921.525	-127.258	-198.956	860.621
6593	0	143.189	-251.632	1590.58	240.802	-246.341	1596.32	122.671	-397.555	1634.15	255.085	-410.398	1641.5	224.534	-470.484	1500.54	236.117	-506.556	1230.11	207.377	-352.386	1419.2	203.161	-262.445	1280.54	320.838	-507.569	1295.46	55.1227	-474.752	1431.59	-16.0358	-427.482	1254.8	-47.0191	-387.684	1115.69	-93.637	-270.081	993.286	-73.8035	-225.928	921.387	-122.736	-270.314	916.101	-124.662	-200.286	851.917
6594	0	142.069	-238.893	1590.66	239.839	-233.411	1596.76	121.905	-384.788	1633.91	254.268	-397.541	1641.52	223.998	-457.805	1501.06	236.028	-494.781	1231.01	207.134	-339.633	1419.49	203.727	-250.492	1280.44	320.554	-495.627	1296.58	54.3767	-461.756	1432.04	-15.4159	-417.003	1253.98	-45.1996	-379.764	1114.16	-91.6383	-266.338	988.305	-71.5425	-224.107	914.97	-120.169	-269.012	910.959	-122.312	-201.803	843.74
6595	0	141.127	-226.037	1590.73	238.78	-220.441	1596.88	121.115	-372.029	1633.42	253.427	-384.593	1641.63	223.524	-445.04	1501.17	236.04	-483.081	1231.87	206.873	-326.942	1419.67	204.068	-238.482	1279.81	320.347	-483.509	1297.67	53.7516	-448.79	1431.92	-14.9407	-406.396	1253.02	-43.0188	-371.945	1112.11	-89.6128	-262.521	983.358	-69.3192	-222.491	908.875	-117.679	-267.579	906.011	-119.762	-203.021	836.081
6596	0	140.239	-213.169	1590.5	237.767	-207.39	1596.88	120.301	-359.321	1633.02	252.68	-371.528	1641.54	223.024	-432.324	1501.34	235.95	-471.572	1232.6	206.583	-314.122	1419.62	204.286	-226.664	1278.84	320.167	-471.556	1298.47	53.2427	-435.857	1431.85	-14.3446	-396.087	1251.66	-41.5957	-364.252	1110.6	-87.64	-258.617	978.804	-67.1274	-220.73	903.126	-115.262	-266.025	901.41	-117.097	-204.154	829.181
6597	0	139.331	-200.38	1589.91	236.972	-194.332	1596.76	119.56	-346.611	1632.67	252.206	-358.526	1640.93	222.651	-419.524	1501.18	235.929	-459.581	1232.7	206.246	-301.359	1419.29	204.901	-214.799	1278.54	319.93	-459.474	1298.76	52.8841	-422.892	1431.8	-13.6653	-385.856	1250.7	-39.916	-356.635	1108.93	-85.7177	-254.808	973.934	-64.8505	-218.904	897.957	-112.839	-264.605	896.587	-114.876	-205.16	822.068
6598	0	138.517	-187.537	1589.35	235.973	-181.345	1596.34	119.005	-333.829	1632.05	251.429	-345.541	1640.86	222.332	-406.7	1500.89	235.762	-447.962	1232.95	206.154	-288.51	1419.05	205.134	-203.063	1277.23	319.802	-447.332	1298.79	52.1647	-409.942	1431.32	-13.2471	-375.674	1249.39	-38.56	-349.035	1107.29	-84.0938	-250.914	969.53	-62.8353	-216.907	892.958	-110.652	-262.868	892.491	-112.128	-205.833	816.253
6599	0	137.566	-174.684	1588.4	235.139	-168.254	1595.74	118.375	-320.945	1631.18	250.973	-332.33	1640.39	221.964	-393.821	1500.41	235.521	-436.283	1233.07	205.758	-275.608	1418.5	205.133	-191.303	1276.07	319.556	-435.23	1298.84	51.5686	-396.992	1431	-12.4715	-365.806	1248.01	-37.1805	-341.542	1105.51	-82.7491	-247.008	965.51	-61.2837	-214.613	887.687	-108.528	-260.932	888.503	-109.749	-206.216	810.733
6600	0	136.713	-161.88	1587.54	234.177	-155.274	1595.02	117.651	-308.132	1630.65	250.107	-319.213	1639.65	221.595	-381.053	1499.95	235.035	-424.402	1233.22	205.715	-262.732	1418.3	205.356	-179.327	1275.28	319.188	-423.152	1298.77	51.2138	-384.215	1430.63	-12.0016	-355.811	1246.67	-35.9576	-334.099	1103.84	-81.5566	-243.036	961.807	-59.8279	-211.974	883.469	-106.572	-258.684	884.962	-107.214	-206.253	805.766
6601	0	135.974	-148.962	1586.86	233.348	-142.245	1594.28	117.227	-295.225	1629.66	249.839	-306.185	1639.1	221.243	-368.282	1499.52	234.81	-412.455	1233.12	205.365	-249.879	1417.65	205.479	-167.192	1274.25	318.926	-411.06	1298.74	50.8713	-371.315	1429.93	-11.5499	-346.056	1245.28	-34.6947	-326.717	1102.21	-80.5228	-238.829	958.322	-58.6109	-209.097	879.657	-104.793	-256.304	881.485	-105.171	-205.971	801.243
6602	0	135.175	-136.031	1585.7	232.755	-129.09	1593.45	116.665	-282.432	1628.67	249.207	-292.949	1638.34	220.867	-355.38	1498.76	234.495	-400.418	1232.65	205.033	-236.967	1417	205.371	-155.064	1272.92	318.778	-398.862	1298.02	50.3226	-358.428	1429.38	-10.8159	-336.298	1244.23	-33.5025	-319.303	1100.51	-79.7416	-234.526	955.025	-57.7688	-205.942	875.943	-103.284	-253.651	878.511	-103.817	-205.48	796.455
6603	0	134.423	-123.177	1584.54	231.947	-115.953	1592.36	116.228	-269.582	1627.88	248.855	-279.731	1637.3	220.409	-342.486	1497.89	233.884	-388.005	1232.03	204.758	-223.978	1416.15	205.349	-142.499	1272.17	318.314	-386.692	1297.34	49.6282	-345.489	1428.67	-10.5709	-326.536	1242.77	-32.5637	-311.81	1099.06	-79.1281	-229.789	952.088	-57.0959	-202.242	872.434	-101.868	-250.578	875.55	-102.067	-204.345	792.617
6604	0	133.704	-110.302	1583.11	231.176	-102.941	1591.18	115.857	-256.694	1626.31	248.314	-266.721	1636.34	220.156	-329.56	1496.79	232.995	-375.964	1231.54	204.363	-211.015	1415.19	205.18	-130.14	1270.76	317.564	-374.688	1296.75	49.3065	-332.572	1427.79	-10.1945	-316.868	1241.63	-31.7496	-304.129	1097.59	-78.5162	-225.059	948.798	-56.626	-198.289	869.375	-100.097	-247.991	871.966	-101.17	-202.598	788.984
6605	0	133.059	-97.4002	1582.13	230.588	-89.8817	1590.06	115.228	-243.918	1625.42	247.868	-253.625	1635.18	219.344	-316.852	1495.96	232.262	-363.356	1230.73	204.066	-198.047	1414.28	205.27	-117.58	1270.18	316.872	-362.288	1295.91	48.6048	-319.582	1426.72	-10.2126	-306.99	1240.15	-31.0711	-296.226	1096.34	-78.3269	-219.868	945.844	-56.2175	-193.809	865.897	-98.9611	-244.286	869.589	-99.8748	-200.402	785.359
6606	0	132.628	-84.6746	1581	229.817	-76.8798	1588.55	114.927	-231.052	1624.1	247.359	-240.51	1633.58	218.704	-304.017	1494.76	231.263	-350.998	1229.81	203.659	-185.03	1413.18	205.039	-104.947	1268.77	316.08	-350.158	1294.83	48.0012	-306.6	1425.78	-10.2115	-296.966	1239.05	-30.7827	-288.063	1095.12	-78.1216	-214.473	943.362	-56.2309	-189.125	862.931	-98.2629	-240.136	867.123	-99.4037	-198.112	781.374
6607	0	131.742	-71.8447	1579.11	229.139	-63.9007	1587.32	114.433	-218.332	1622.41	246.991	-227.678	1632.3	218.104	-291.046	1493.32	230.449	-338.265	1228.55	203.129	-171.995	1411.9	204.872	-92.0711	1267.58	315.335	-337.736	1293.6	47.3811	-293.43	1424.72	-10.2884	-286.522	1237.89	-30.5564	-279.455	1093.68	-78.1562	-208.873	940.582	-56.5278	-183.902	860.426	-97.7311	-235.515	865.111	-98.4577	-194.818	779.118
6608	0	131.112	-58.9781	1578.29	228.39	-50.9302	1585.9	114.046	-205.528	1621.77	246.573	-214.643	1630.98	217.525	-278.261	1492.06	229.433	-325.612	1227.39	202.626	-158.976	1410.81	204.454	-79.1084	1266.18	314.544	-325.403	1292.3	46.6186	-280.375	1423.69	-10.4703	-276.003	1236.63	-29.6324	-271.374	1091.69	-78.4536	-202.839	938.31	-57.4809	-177.955	858.608	-97.4202	-230.489	863.039	-98.8285	-191.268	776.595
6609	0	130.449	-46.1622	1576.92	227.602	-38.1016	1584.56	113.55	-193.028	1619.95	246.01	-201.686	1629.29	216.907	-265.449	1490.63	228.191	-312.933	1226.28	202.129	-145.885	1409.52	204.21	-66.0544	1264.89	313.439	-313.185	1291.22	45.8085	-267.141	1422.5	-10.7009	-265.062	1235.66	-29.8502	-262.368	1090.66	-79.149	-196.452	936.506	-57.8675	-172.381	856.499	-97.416	-224.924	861.23	-99.0403	-186.866	774.368
6610	0	129.568	-33.3595	1575.42	226.989	-25.0558	1583.35	112.884	-180.289	1618.55	245.532	-188.827	1627.78	216.077	-252.727	1489.05	226.799	-300.141	1224.79	201.43	-132.863	1408.14	203.773	-52.9406	1263.32	312.196	-300.852	1289.68	44.8512	-253.94	1421.33	-11.3179	-253.766	1234.38	-30.3552	-252.878	1089.47	-79.8062	-189.135	934.843	-58.7467	-165.73	854.292	-97.7935	-218.816	859.621	-99.6202	-181.817	772.319
6611	0	128.948	-20.5023	1573.85	226.246	-12.1684	1581.91	112.399	-167.555	1617.11	244.915	-175.923	1626.45	215.296	-239.898	1487.51	225.411	-287.101	1223.28	200.862	-119.686	1406.89	203.398	-39.6816	1262.25	311.066	-288.49	1288.03	43.8834	-240.764	1420.23	-12.0664	-242.199	1233.42	-30.8275	-242.935	1088.23	-80.7472	-181.422	932.882	-59.8793	-158.738	852.114	-98.4127	-212.065	858.083	-100.254	-176.17	770.607
6612	0	128.174	-7.60836	1572.86	225.505	0.772475	1580.75	111.761	-154.511	1615.95	244.331	-163.041	1624.86	214.393	-227.189	1486.26	224.087	-274.24	1221.87	200.089	-106.691	1405.63	202.997	-26.5497	1261.05	309.86	-276.21	1286.63	42.8862	-227.518	1418.78	-13.0351	-230.32	1232.22	-31.2802	-232.6	1087.29	-82.0565	-173.371	931.155	-61.1272	-151.132	850.511	-99.2019	-204.925	856.861	-101.287	-169.87	768.694
6613	0	127.255	4.77342	1571.04	224.583	13.6377	1579.35	111.121	-142.078	1614.45	243.859	-150.151	1623.3	213.394	-214.298	1484.76	222.579	-261.437	1220.82	199.35	-93.5081	1404.32	202.282	-13.4934	1259.82	308.477	-263.632	1285.55	41.7247	-214.292	1417.9	-14.0548	-218.132	1231.53	-32.1502	-221.917	1086.53	-83.269	-164.462	930.051	-62.7141	-143.118	848.945	-100.202	-196.98	855.944	-102.698	-162.967	767.389
6614	0	126.66	17.7642	1570.5	223.778	26.5812	1578.27	110.309	-129.23	1613.09	243.091	-137.201	1622.26	212.388	-201.446	1483.33	221.191	-248.238	1219.3	198.43	-80.3711	1403.18	201.622	-0.319794	1258.86	307.196	-250.81	1283.94	40.6637	-201	1417	-15.4471	-205.598	1230.72	-33.2822	-210.869	1085.89	-85.0445	-155.281	928.936	-64.6605	-134.429	847.336	-101.822	-188.507	855.227	-104.427	-155.302	766.465
6615	0	125.656	30.5689	1569.34	222.808	39.4347	1576.95	109.489	-116.423	1611.99	242.409	-124.432	1620.55	211.312	-188.659	1482.17	219.595	-235.114	1217.81	197.52	-67.1701	1401.86	200.713	12.9046	1257.8	305.806	-238.089	1282.3	39.4436	-187.757	1416.06	-16.927	-193.077	1230.08	-34.2779	-199.315	1085.11	-86.726	-145.363	927.972	-66.6921	-125.074	846.557	-103.399	-179.286	854.465	-106.593	-146.935	765.347
6616	0	124.784	43.4036	1568.02	221.851	52.2357	1575.87	108.81	-103.734	1610.71	241.46	-111.692	1619.29	210.231	-175.872	1480.83	217.812	-222.013	1216.75	196.37	-54.1555	1400.94	199.686	26.1181	1257.16	304.094	-225.337	1281.24	38.1693	-174.71	1415.28	-18.2682	-180.338	1229.42	-36.2675	-187.25	1086.26	-88.8332	-134.934	927.283	-69.067	-115.094	845.749	-105.588	-169.64	854.26	-108.823	-137.926	764.744
6617	0	123.587	56.2895	1567.36	220.984	65.1629	1575.04	107.797	-90.9314	1609.74	240.603	-98.7872	1618.34	209.046	-163.212	1479.7	216.073	-208.811	1215.55	195.417	-41.0402	1400.23	198.378	39.3568	1256.46	302.708	-212.426	1279.65	36.7726	-161.5	1414.6	-20.0643	-167.568	1228.95	-38.1189	-175.285	1085.64	-91.3069	-123.881	926.717	-71.6495	-104.314	845.137	-107.863	-158.95	853.915	-111.377	-128.159	764.293
6618	0	122.797	69.2435	1566.56	220.011	78.0337	1574.28	106.953	-77.9756	1608.86	239.809	-85.9693	1617.34	207.708	-150.574	1478.91	214.34	-195.486	1214.42	193.912	-28.1167	1399.57	196.984	52.9265	1255.86	301.042	-199.534	1278.61	35.4275	-148.545	1414.09	-21.7349	-154.486	1228.59	-40.252	-162.76	1085.15	-93.8701	-112.302	926.574	-74.5374	-92.9741	844.946	-110.461	-147.666	853.974	-114.239	-117.531	764.072
6619	0	121.86	82.0933	1566.11	218.965	90.8748	1573.6	105.865	-65.0317	1608.68	238.715	-73.0168	1616.88	206.533	-137.889	1478.33	212.257	-182.83	1214.06	192.622	-15.0775	1399.24	195.23	66.3204	1255.86	299.711	-186.502	1277.52	33.9802	-135.811	1413.81	-23.5478	-141.52	1228.31	-42.3682	-149.888	1085.67	-96.4725	-100.166	926.568	-77.5753	-80.949	844.63	-113.259	-135.762	853.934	-117.36	-106.158	764.007
6620	0	120.68	95.0229	1565.76	217.96	103.779	1573.15	104.75	-51.978	1608.79	237.631	-60.0947	1616.64	205.266	-125.254	1478.19	210.26	-170.248	1214.16	191.298	-2.11698	1399.35	193.419	79.78	1256.04	298.431	-173.467	1276.98	32.6594	-123.049	1413.66	-25.4665	-128.549	1228.46	-44.4884	-136.936	1085.81	-99.3646	-87.4619	926.992	-80.8168	-68.1777	845.207	-116.261	-122.962	854.799	-120.761	-93.9058	764.503
6621	0	119.6	108.022	1565.97	216.946	116.73	1573.18	103.648	-38.8999	1609.27	236.544	-47.1559	1616.91	204.021	-112.562	1478.37	209.204	-156.884	1214.19	189.796	10.8307	1399.79	191.452	93.0099	1256.82	297.329	-160.412	1276.85	31.2632	-110.343	1413.9	-27.3259	-115.345	1229	-46.7145	-123.655	1086.59	-102.38	-74.2806	927.88	-84.1717	-54.8538	845.755	-119.471	-109.684	855.731	-124.362	-80.7789	765.497
6622	0	118.184	121.01	1566.17	215.843	129.673	1573.49	102.248	-25.7765	1610.11	235.375	-34.1056	1617.44	202.829	-99.8951	1479.15	208.327	-143.448	1214.71	188.703	23.515	1400.92	189.351	106.097	1257.84	296.405	-147.481	1277.41	29.9683	-97.8891	1414.69	-29.0901	-102.105	1229.9	-48.8564	-110.172	1087.63	-105.549	-60.5151	929.129	-87.7378	-40.7459	847.307	-122.714	-95.7425	856.988	-128.317	-66.7433	766.958
6623	0	117.151	133.926	1566.95	214.497	142.403	1573.84	100.87	-12.8988	1611.06	233.949	-21.1829	1618.36	201.734	-87.2207	1480.32	207.831	-130.227	1215.45	187.025	36.3245	1401.88	187.461	119.039	1259.32	295.547	-134.533	1278.37	28.7105	-85.5917	1415.78	-30.6683	-89.1754	1231.11	-50.8542	-96.9373	1088.23	-108.575	-46.3324	930.919	-90.9842	-26.2088	849.049	-125.926	-81.2443	858.823	-132.124	-51.8025	768.956
6624	0	115.755	146.769	1567.65	213.428	155.394	1574.69	99.5088	0.084862	1611.92	232.85	-8.19119	1619.41	200.559	-74.4745	1481.52	207.139	-117.567	1216.91	185.629	48.8533	1403.24	185.541	131.829	1260.88	294.82	-121.68	1279.7	27.5751	-73.2578	1417.53	-32.3906	-76.0364	1232.87	-52.7921	-83.2764	1089.35	-111.589	-31.6577	933.316	-94.6651	-10.9798	851.392	-129.355	-66.1163	861.021	-136.199	-36.0413	771.339
6625	0	114.6	159.523	1568.63	212.204	168.06	1575.54	98.3841	12.9845	1613.25	231.665	4.59598	1620.83	199.54	-61.8556	1482.81	206.36	-104.346	1218.62	184.315	61.539	1404.54	183.78	144.61	1262.56	294.198	-108.73	1281.31	26.6002	-60.8062	1419.2	-34.3233	-63.0184	1234.72	-55.6375	-69.5992	1091.4	-114.936	-16.6143	936.017	-98.3772	4.92752	853.834	-132.763	-50.3562	863.057	-140.453	-19.298	773.954
6626	0	113.537	172.343	1569.74	211.116	180.909	1576.65	97.1902	25.6962	1614.45	230.538	17.4237	1622.18	198.576	-49.2981	1484.34	205.773	-91.6077	1220.3	183.214	74.1206	1406.16	182.297	157.018	1264.15	293.477	-96.1935	1282.82	25.5013	-48.4072	1420.57	-35.7074	-50.1688	1236.29	-58.1038	-55.174	1094.23	-118.327	-0.911489	938.541	-102.209	21.3291	856.87	-136.616	-34.3276	865.783	-144.808	-1.95797	776.9
6627	0	112.219	184.686	1570.55	209.922	193.359	1577.87	96.2889	38.3479	1615.69	229.237	29.9689	1623.46	197.561	-36.8325	1485.6	204.984	-78.3703	1221.87	182.127	86.5742	1407.79	181.056	169.73	1265.99	292.631	-83.8543	1284.55	24.4483	-35.9525	1422.27	-37.1826	-37.3037	1238.33	-60.6469	-40.6306	1096.09	-121.985	14.852	941.491	-106.305	38.2622	859.597	-140.52	-17.6637	868.292	-149.301	16.1061	779.941
6628	0	111.169	197.104	1571.73	208.747	205.968	1579.32	95.2587	50.7921	1616.6	228.017	42.543	1624.72	196.521	-24.4923	1487.19	204.024	-65.744	1223.6	181.249	98.9283	1409.43	179.957	181.883	1267.39	291.687	-71.7682	1286.1	23.2959	-23.4697	1423.85	-38.8228	-24.3884	1240.31	-63.6658	-26.2144	1098.5	-125.583	31.3179	944.232	-110.441	55.6193	862.872	-144.662	-0.434525	871.031	-154.015	34.7192	783.062
6629	0	110.044	209.662	1573.06	207.674	218.238	1580.79	94.1903	63.1951	1617.58	227.081	54.8835	1626.25	195.363	-12.1862	1488.54	203.035	-53.0361	1224.95	180.398	111.296	1410.85	179.32	193.844	1268.64	290.557	-59.8226	1287.8	22.3028	-10.759	1425.37	-40.4763	-11.2809	1242.23	-66.2397	-11.6011	1099.53	-129.344	47.9172	947.36	-114.802	73.3723	866.098	-148.814	17.23	873.601	-158.904	53.9238	786.594
6630	0	109.316	221.901	1574.5	206.819	230.771	1582.4	92.8775	75.2208	1619.13	225.937	67.0924	1627.45	194.285	-0.045372	1489.97	201.592	-40.6213	1226.88	179.629	123.427	1412.26	179.085	205.63	1269.82	289.392	-48.1789	1289.27	21.1477	1.91939	1426.81	-42.2411	2.07406	1243.9	-69.0921	3.26512	1101.31	-133.117	64.9787	950.079	-119.09	91.5004	869.785	-153.08	35.2215	876.197	-163.892	73.7397	790.087
6631	0	108.45	234.029	1576.08	205.882	242.869	1583.91	92.0009	87.4252	1620.28	225.08	79.2305	1629	193.193	12.0044	1491.46	200.235	-28.4393	1228.32	179.367	135.648	1413.78	179.094	217.468	1270.96	287.989	-36.8764	1291.24	20.0157	14.7188	1428.35	-44.1229	15.6098	1245.73	-71.8524	18.5689	1102.92	-136.813	82.3236	953.527	-123.501	110.153	872.506	-157.407	53.6472	879.054	-169.064	93.8629	793.842
6632	0	107.558	246.217	1577.64	205.112	255.042	1585.67	91.4371	99.6717	1621.27	224.335	91.3731	1630.48	192.059	23.9272	1492.75	198.803	-16.5515	1230.14	178.544	147.579	1415.12	179.112	229.175	1271.76	286.51	-25.4048	1292.51	18.9219	27.7146	1429.91	-45.9774	29.7763	1247.47	-74.9466	33.9916	1105.13	-140.547	100.023	956.933	-127.554	128.705	876.09	-161.836	72.3926	882.216	-174.537	114.638	797.813
6633	0	107.069	258.305	1579.12	204.428	267.185	1587.22	90.4104	111.49	1622.69	223.26	103.293	1631.66	190.969	35.9455	1494.15	197.313	-4.73755	1231.52	178.151	159.536	1416.4	179.462	241.143	1272.88	285.074	-14.188	1294.02	17.7027	40.4965	1431.34	-48.0336	44.0735	1249.36	-77.7375	49.7118	1106.61	-144.424	118.229	960.174	-131.775	147.825	879.597	-166.168	91.4918	885.21	-180.029	135.743	802.11
6634	0	106.478	270.325	1580.81	203.718	279.043	1588.74	89.4693	123.647	1624.22	222.614	115.215	1632.76	189.835	47.8523	1495.61	195.743	6.90418	1233.15	177.782	171.53	1417.35	179.946	253.215	1274.03	283.472	-3.13711	1295.41	16.6933	53.4426	1432.85	-49.9462	58.6473	1251.23	-80.7008	65.3986	1108.51	-147.833	136.414	963.351	-135.547	167.029	883.211	-170.507	110.901	888.304	-185.157	157.425	806.506
6635	0	105.806	282.462	1581.96	203.193	291.099	1590.33	88.8533	135.574	1625.07	221.67	127.115	1634.3	188.758	59.6084	1496.77	194.378	18.5521	1234.65	177.24	183.261	1418.36	180.488	265.326	1275.45	282.098	7.89789	1296.7	15.5828	66.2766	1434.02	-52.16	73.1832	1253	-83.6829	81.1561	1110.53	-151.383	154.92	966.659	-139.321	186.511	886.958	-174.9	130.574	891.566	-190.598	179.088	811.275
6636	0	105.164	294.386	1583.56	202.483	302.901	1591.76	88.0627	147.542	1626.42	221.053	138.858	1635.69	187.801	71.4658	1498.27	193.067	29.9985	1236.03	177.039	195.152	1419.61	180.52	276.734	1275.74	280.649	18.9519	1298.41	14.5293	78.9408	1435.44	-54.3202	88.0438	1254.98	-86.5569	97.256	1112.24	-154.74	173.698	970.225	-142.893	206.217	890.886	-179.204	150.61	895.14	-195.822	201.491	816.498
6637	0	104.775	306.663	1585.4	201.968	314.742	1593.34	87.2858	159.631	1627.87	220.24	150.619	1636.83	186.721	83.3555	1499.49	191.618	41.3992	1237.48	176.5	206.752	1420.5	180.775	288.252	1276.84	279.096	29.9831	1299.67	13.7267	91.5342	1436.58	-56.1275	102.68	1256.7	-89.3475	113.331	1114.03	-157.689	192.781	973.931	-146.401	225.992	894.554	-183.379	170.939	898.651	-200.731	223.682	821.691
6638	0	104.113	318.499	1586.64	201.446	326.804	1594.81	86.7011	171.564	1628.52	219.62	162.39	1637.86	185.848	95.0207	1500.7	190.455	52.3483	1238.56	175.993	218.347	1421.44	180.687	299.763	1277.37	277.944	40.8588	1300.98	12.7405	103.879	1437.94	-57.8657	117.261	1258.38	-92.1266	129.387	1116.01	-160.698	211.863	977.748	-149.763	246.088	899.232	-187.167	191.668	902.477	-205.333	246.249	827.099
6639	0	103.643	330.737	1588.24	201.021	338.645	1596.42	85.9046	183.554	1630	218.799	174.379	1639.12	184.939	106.824	1502.14	188.87	63.4637	1240.45	175.558	229.995	1422.31	180.5	311.213	1278.46	276.622	51.888	1302.4	11.8425	116.261	1439.38	-59.9177	131.892	1260.14	-94.7523	145.381	1118.15	-163.658	230.797	981.766	-152.739	265.861	903.249	-191.079	212.307	906.4	-209.72	268.911	832.951
6640	0	103.162	342.643	1589.9	200.534	350.594	1597.93	85.2845	195.558	1631.49	218.186	186.117	1640.2	183.992	118.663	1503.36	188.019	74.4934	1241.51	174.953	241.529	1423.26	180.013	322.858	1279.28	275.542	62.7571	1303.85	11.014	128.499	1440.71	-61.6802	146.236	1262.26	-97.3296	161.404	1120.27	-166.3	250.032	985.917	-155.817	286.105	907.607	-194.712	233.006	910.657	-213.727	291.669	838.899
6641	0	102.648	354.815	1591.28	199.933	362.431	1599.2	84.6013	207.412	1632.38	217.449	197.818	1640.92	183.24	130.336	1504.66	186.88	85.5194	1243.02	174.209	253.063	1423.98	179.435	334.11	1279.91	274.404	73.8082	1305.29	10.0551	140.439	1442	-63.3504	160.269	1264.19	-99.7391	177.134	1122.39	-168.945	268.889	990.115	-158.448	306.29	912.714	-198.229	253.565	914.88	-217.435	314.495	845.194
6642	0	102.034	366.513	1592.13	199.635	374.348	1600.52	84.0207	219.346	1633.38	217.093	209.425	1642.34	182.488	142.179	1505.81	185.97	96.4018	1244.34	173.663	264.673	1424.61	178.466	345.425	1280.42	273.365	84.8163	1306.44	9.27304	152.421	1443.37	-64.8062	174.184	1266.29	-102.084	192.691	1124.52	-171.13	287.878	994.382	-161.166	326.342	917.494	-201.371	274.298	919.335	-220.665	337.269	851.702
6643	0	101.41	378.543	1593.46	199.044	386.086	1601.72	83.5544	231.125	1634.12	216.339	221.244	1643.03	181.847	153.817	1506.87	185.124	107.328	1245.34	172.842	276.196	1425.22	177.41	356.769	1280.76	272.282	95.7962	1307.64	8.56804	164.317	1444.57	-66.0894	187.738	1268.42	-104.375	208.148	1127.02	-173.333	306.711	999.107	-163.51	346.649	922.734	-204.275	295.056	923.911	-223.51	360.138	858.26
6644	0	100.911	390.242	1594.81	198.563	397.971	1602.67	82.8119	242.962	1635.41	215.886	232.877	1643.62	180.989	165.682	1507.67	184.148	118.082	1246.66	172.04	287.69	1425.87	176.341	368.05	1281.37	271.357	106.736	1308.83	7.70429	175.923	1445.92	-67.314	201.254	1270.02	-106.708	223.434	1129.2	-175.489	325.494	1003.42	-165.714	366.771	927.977	-207.069	315.656	928.513	-226.399	382.711	864.774
6645	0	100.519	402.259	1595.88	197.89	409.484	1603.49	82.3382	254.59	1636.07	215.16	244.514	1643.97	180.329	177.318	1508.44	183.177	128.911	1247.52	171.3	299.339	1426.15	175.173	379.15	1281.54	270.335	117.853	1309.38	6.88095	187.679	1447.1	-69.7496	214.038	1270.89	-108.804	238.482	1130.85	-177.277	344.117	1007.81	-167.559	386.98	933.172	-209.457	336.234	932.944	-228.771	405.265	871.357
6646	0	100.003	413.81	1596.81	197.467	421.235	1604.24	81.6781	266.248	1636.53	214.74	255.836	1644.42	179.646	189.052	1509.02	182.624	140.523	1247.87	170.284	310.71	1426.35	174.182	390.062	1281.78	269.764	129.369	1309.72	6.21226	199.193	1447.86	-70.9773	227.226	1272.23	-110.364	253.863	1132.47	-179.032	362.498	1012.28	-169.332	406.947	938.334	-211.791	356.613	937.372	-230.706	427.92	878.477
6647	0	99.6626	425.601	1597.62	197.054	432.759	1604.96	81.2784	277.846	1636.75	214.229	267.369	1644.53	179.041	200.768	1509.39	181.859	151.506	1248.51	169.572	322.417	1426.55	172.666	400.983	1281.43	268.876	140.396	1310.48	5.39852	210.65	1448.59	-72.3064	239.934	1273.75	-112.41	268.743	1134.35	-180.587	380.809	1016.43	-170.719	426.962	943.83	-213.901	377.072	941.864	-232.475	450.187	885.32
6648	0	99.1506	437.291	1598.63	196.716	444.361	1605.52	80.7335	289.433	1637.07	213.732	278.666	1644.62	178.305	212.464	1509.66	180.855	162.677	1248.83	168.679	334.044	1426.37	171.661	412.202	1281.25	267.89	151.677	1310.78	4.70627	222.028	1449.15	-72.6598	253.014	1275.54	-114.511	283.367	1135.87	-181.874	399.131	1020.71	-172.121	446.691	948.979	-215.812	397.461	946.301	-233.799	472.362	891.99
6649	0	98.7404	448.893	1598.88	195.987	455.575	1605.78	80.1864	300.901	1637.08	213.185	289.813	1644.34	177.716	224.138	1509.66	180.079	173.841	1248.84	167.629	345.478	1425.97	170.329	423.277	1280.58	267.107	162.949	1310.95	4.05723	233.578	1449.31	-74.3146	265.488	1276.21	-116.5	297.751	1136.95	-183.217	417.004	1024.6	-173.258	466.11	953.933	-217.537	417.527	950.255	-234.807	494.348	898.519
6650	0	98.5352	460.497	1599.76	195.809	467.156	1606.16	79.7058	312.395	1637.08	212.655	301.178	1643.96	177	235.867	1509.5	179.44	184.921	1248.91	166.941	357.042	1425.73	168.73	434.402	1279.79	266.388	174.399	1310.84	3.392	244.904	1449.31	-75.3123	278.074	1276.5	-118.125	312.137	1137.61	-184.136	434.873	1028.34	-173.906	485.468	958.92	-218.894	437.56	954.535	-235.752	515.953	905.06
6651	0	97.7948	472.194	1599.97	195.205	478.269	1606.37	79.0803	323.859	1636.99	212.241	312.254	1643.93	176.448	247.535	1509.22	178.733	196.157	1248.86	165.822	368.652	1425.1	167.64	445.92	1279.21	265.695	185.891	1310.55	2.54432	256.247	1449.24	-76.6106	290.332	1277.11	-119.721	326.466	1138.39	-184.804	452.55	1032.25	-174.597	504.548	963.716	-220.212	457.388	958.691	-236.146	537.503	912.068
6652	0	97.8328	483.758	1600.76	194.971	489.787	1606.59	78.6753	335.327	1636.54	211.711	323.49	1643	175.706	259.238	1508.73	178.201	207.284	1248.56	165.084	380.283	1424.56	166.749	457.375	1278.89	264.997	197.38	1310.26	1.94207	267.775	1449.02	-77.4074	302.642	1277.03	-121.543	339.866	1138.23	-185.346	469.84	1035.87	-174.347	523.519	969.038	-221.173	476.958	962.677	-236.406	558.479	918.917
6653	0	97.4046	495.196	1600.84	194.433	501.019	1606.56	78.1766	346.676	1636.09	211.368	334.241	1642.12	175.217	270.88	1508.15	177.949	218.435	1248.12	164.275	391.937	1423.94	165.571	468.925	1278.01	264.457	209.073	1309.83	1.20485	279.043	1448.59	-78.4161	314.692	1277.04	-123.013	353.94	1138.92	-185.771	486.914	1039.17	-174.553	541.963	973.254	-221.886	496.135	966.58	-236.168	579.286	925.642
6654	0	96.764	506.794	1600.76	194.327	512.367	1606.56	77.6031	358.202	1635.66	210.726	345.563	1641.45	174.603	282.721	1507.32	177.479	229.819	1247.62	163.433	403.704	1423.19	164.704	480.384	1277.31	263.931	220.669	1309.39	0.544165	290.558	1448.18	-79.1589	326.603	1275.68	-124.232	367.878	1139.31	-185.734	503.925	1042.5	-174.382	559.963	977.435	-222.565	514.933	970.243	-235.848	599.646	932.176
6655	0	96.5677	518.38	1601.08	193.528	523.534	1606.25	77.2158	369.562	1635	210.319	356.81	1640.5	174.097	294.446	1506.55	177.078	241.298	1246.97	162.606	415.45	1422.2	163.44	491.685	1276.13	263.408	232.523	1308.62	0.05886	302.078	1447.41	-80.1065	338.996	1276.42	-125.52	381.571	1139.14	-185.634	520.619	1045.72	-173.662	577.86	982.117	-222.995	533.743	974.194	-235.48	619.528	938.723
6656	0	96.5774	529.944	1600.86	193.572	535.06	1606.09	76.7406	381.057	1633.97	209.762	368.002	1639.51	173.644	306.235	1505.65	176.825	252.698	1246.27	161.85	427.283	1421.28	162.397	503.108	1274.84	263.074	244.379	1307.94	-0.691539	313.493	1446.65	-80.5758	351.072	1275.68	-126.587	394.945	1138.71	-185.517	536.751	1048.48	-173.085	595.186	985.634	-222.935	552.069	977.541	-234.166	639.045	944.933
6657	0	96.2044	541.453	1600.5	193.452	546.415	1605.69	76.1799	392.552	1633.17	209.325	379.266	1638.31	173.106	318.07	1504.78	176.462	264.366	1245.42	161.047	439.023	1420.09	161.331	514.344	1273.57	262.659	256.22	1307.1	-1.09764	325.063	1445.76	-81.0822	362.98	1274.96	-127.791	408.19	1138.71	-184.968	552.797	1051.18	-171.956	612.339	989.545	-222.412	570.006	980.594	-232.991	658.024	950.976
6658	0	95.789	552.943	1599.96	192.93	557.74	1604.98	75.8424	404.02	1632.44	208.789	390.535	1637.22	172.749	329.842	1503.65	176.327	275.978	1244.46	160.415	450.838	1419.26	160.181	525.749	1272.28	262.414	268.388	1306.2	-1.64904	336.423	1444.71	-81.905	375.122	1274.32	-128.947	421.304	1137.95	-184.267	568.642	1053.52	-170.773	629.014	992.888	-222.33	587.539	983.517	-231.43	676.759	956.815
6659	0	95.4178	564.716	1599.15	192.816	569.286	1604.29	75.443	415.49	1631.29	208.397	401.888	1635.98	172.375	341.704	1502.41	176.483	287.668	1243.35	159.518	462.647	1417.78	159.235	537.338	1270.87	262.238	280.527	1305.08	-1.87684	348.008	1443.72	-82.3056	387.297	1273.56	-129.742	434.469	1137.5	-183.584	583.984	1055.46	-169.788	645.252	995.482	-221.708	604.828	986.323	-229.844	694.658	962.315
6660	0	95.2354	576.159	1598.31	192.414	580.472	1603.37	74.998	427.139	1630.19	208.036	413.054	1635.21	172.018	353.507	1501.24	176.369	299.543	1242.02	159.015	474.55	1416.68	158.266	548.863	1269.47	262.175	292.861	1303.83	-2.336	359.404	1442.5	-82.7066	399.192	1272.7	-130.379	447.554	1136.57	-182.663	599.115	1057.38	-167.88	661.433	999.095	-220.829	621.72	989.012	-227.915	712.122	967.138
6661	0	94.9812	587.654	1597.76	192.208	591.961	1602.63	74.602	438.668	1629.33	207.652	424.475	1633.65	171.881	365.363	1499.96	176.407	311.431	1240.75	158.157	486.34	1415.33	157.384	560.788	1268.34	262.068	305.091	1302.73	-2.52128	370.798	1441.23	-83.3875	411.376	1271.4	-130.91	460.525	1136.05	-181.908	614.136	1059.35	-167.184	676.783	1000.89	-220.011	638.136	991.301	-225.816	729.314	971.936
6662	0	95.051	599.381	1597.11	192.089	603.439	1601.91	74.3528	450.206	1627.99	207.23	435.888	1632.35	171.675	377.227	1498.62	176.597	323.364	1239.42	157.674	498.277	1414.27	156.63	572.8	1267.36	262.132	317.445	1301.4	-2.79285	382.047	1439.92	-83.6756	423.436	1270.65	-131.616	473.229	1134.88	-180.892	628.795	1060.95	-165.259	692.336	1003.98	-218.884	654.273	992.903	-223.824	745.823	976.481
6663	0	94.7051	611.007	1596.21	192.108	614.788	1601.08	74.0366	461.757	1626.93	206.854	447.194	1631.21	171.34	389.111	1497.14	176.845	335.539	1238.21	157.094	510.262	1412.88	155.712	584.849	1266.18	262.065	329.849	1299.97	-2.86545	393.438	1438.56	-84.2025	435.375	1269.42	-131.901	486.059	1134.2	-179.641	643.21	1062.04	-163.764	707.228	1005.91	-218.068	670.1	995.007	-221.697	761.931	980.326
6664	0	94.7618	622.536	1595.53	191.865	626.425	1600.04	73.6554	473.391	1625.63	206.595	458.663	1629.77	171.416	400.915	1495.81	177.013	347.678	1236.69	156.353	521.876	1411.35	155.035	597.103	1265	262.414	342.357	1298.41	-3.06457	404.694	1437.05	-84.1702	447.348	1268.06	-132.197	498.521	1132.88	-178.564	657.016	1062.72	-161.832	722.021	1007.92	-216.613	685.498	996.254	-219.432	777.639	983.382
6665	0	94.6779	634.187	1594.49	191.807	637.87	1598.97	73.4754	484.96	1624.5	206.31	470.149	1628.51	171.5	412.702	1494.45	177.488	359.77	1235.25	155.577	533.882	1409.6	154.253	609.524	1263.63	262.569	355.06	1296.87	-2.89951	416.027	1435.51	-83.802	459.114	1266.55	-132.316	511.05	1131.52	-177.18	670.986	1063.43	-160.347	736.411	1009.04	-215.552	700.495	997.689	-217.263	792.87	986.197
6666	0	94.3553	645.766	1593.21	191.448	649.26	1598.05	73.2282	496.424	1623.44	206.089	481.738	1627.14	171.518	424.56	1493.08	177.913	372.218	1233.59	155.431	545.799	1408.5	153.744	621.868	1262.99	263.028	367.728	1295.4	-2.77019	427.13	1434.04	-84.1145	470.922	1265.56	-132.201	523.606	1130.55	-175.996	684.454	1063.83	-159.537	749.769	1009.26	-213.954	715.297	998.528	-215.025	807.641	988.458
6667	0	94.1992	657.334	1592.66	191.303	660.817	1597.24	73.0671	508.01	1621.9	205.819	493.017	1626.11	171.652	436.591	1491.56	178.419	384.867	1232	154.713	557.602	1407.17	152.629	634.118	1261.47	263.5	380.489	1293.74	-2.61931	438.323	1432.54	-83.9938	482.674	1263.98	-131.751	535.913	1129.04	-174.673	697.834	1064.09	-157.821	763.693	1010.04	-212.91	729.393	999.656	-212.897	822.081	990.365
6668	0	94.3468	668.78	1591.84	191.452	672.473	1596.35	72.8485	519.55	1621.03	205.59	504.555	1624.79	172.001	448.426	1490.26	179.124	397.419	1230.52	154.591	569.635	1406.08	152.224	646.605	1260.81	263.854	393.346	1292.08	-2.18877	449.655	1430.85	-83.5268	494.356	1262.29	-131.213	548.093	1127.43	-173.356	710.84	1064.01	-156.139	776.996	1010.79	-211.311	743.266	999.864	-210.718	836.043	991.781
6669	0	94.3278	680.376	1590.9	191.092	683.925	1595.67	72.6585	530.983	1619.87	205.492	515.887	1624.12	172.276	460.383	1488.75	179.773	410.14	1228.98	154.494	581.896	1404.78	151.684	659.03	1259.87	264.533	406.119	1290.63	-2.00999	460.877	1429.4	-82.9942	505.894	1260.91	-130.472	560.125	1126.14	-172.059	723.359	1063.65	-154.037	790.407	1011.53	-209.88	756.667	999.928	-208.89	849.504	992.469
6670	0	93.9828	692.009	1590.2	191.026	695.251	1595.06	72.6575	542.461	1618.35	205.539	527.4	1622.77	172.374	472.467	1487.2	180.319	423.071	1227.29	154.482	594.164	1403.93	151.394	671.673	1259.32	265.153	419.125	1289.09	-1.68746	472.403	1428.06	-82.9239	517.263	1259.56	-129.623	571.893	1124.3	-170.705	735.928	1063.38	-153.01	802.821	1011.06	-208.373	769.802	999.334	-207.113	862.661	992.853
6671	0	94.0443	703.478	1589.78	191.027	706.969	1594.49	72.7356	553.848	1617.31	205.514	538.819	1621.41	172.654	484.505	1486.03	181.125	435.987	1225.6	154.372	606.206	1402.97	151.262	684.273	1258.64	265.725	431.932	1287.77	-1.39227	484.185	1426.42	-81.8208	528.6	1257.46	-128.708	583.511	1121.94	-169.402	748.232	1062.53	-151.217	815.626	1011.17	-206.763	782.464	998.626	-205.508	875.474	992.427
6672	0	93.5792	714.887	1588.98	191.08	718.593	1594.05	72.6989	565.157	1616.07	205.466	550.314	1620.37	173.076	496.613	1484.61	181.774	449.036	1223.85	154.461	618.478	1402.06	151.422	697.087	1258.2	266.337	444.689	1286.36	-1.05512	496.091	1424.9	-80.882	540.185	1255.33	-127.51	595.062	1120.32	-168.19	760.203	1061.37	-149.359	828.239	1010.96	-205.252	794.858	996.873	-203.948	887.96	991.663
6673	0	93.5631	726.486	1588.37	190.797	730	1593.51	72.8517	576.561	1614.99	205.477	561.831	1619.25	173.373	508.587	1483.09	182.281	462.233	1222.38	154.649	630.765	1400.92	151.503	709.954	1257.3	266.924	457.481	1284.8	-0.673652	508.091	1423.24	-80.3628	551.673	1253.63	-126.632	606.388	1118.17	-166.948	771.889	1059.47	-148.502	839.965	1009.04	-203.925	807.061	995.717	-202.656	899.994	990.007
6674	0	93.6099	738.196	1587.92	190.663	741.656	1593.13	72.9215	588.023	1613.94	205.544	573.414	1618.3	173.594	520.597	1481.89	182.861	475.373	1220.95	154.939	643.194	1399.94	151.956	722.865	1256.39	267.423	470.513	1283.43	-0.334211	520.214	1421.54	-79.0091	563.444	1251.12	-125.566	617.794	1115.72	-165.838	783.52	1057.25	-147.107	851.687	1007.49	-202.6	818.87	993.78	-201.185	912.047	987.946
6675	0	93.5033	749.766	1587.75	190.582	753.417	1593.05	72.8754	599.564	1613.01	205.559	585.152	1617.49	173.781	532.602	1480.91	183.093	488.729	1219.36	155.316	655.464	1399.45	152.562	735.966	1255.9	268.015	483.205	1282.21	-0.014883	532.414	1419.87	-78.3198	575.008	1249	-124.413	628.991	1113.28	-164.681	794.874	1054.92	-145.614	863.302	1005.61	-201.031	830.25	991.311	-199.789	923.5	985.231
6676	0	93.661	761.337	1587.82	190.596	765.419	1593.25	72.8449	611.179	1612.46	205.709	596.776	1617.26	174.113	544.601	1480.15	183.373	501.825	1218.2	155.8	667.916	1399.26	153.604	749.142	1256.26	268.394	496.027	1281.19	0.279035	544.753	1418.73	-77.3085	586.479	1247.47	-122.624	640.539	1110.88	-163.437	805.942	1052.24	-144.191	874.547	1003.29	-199.652	841.086	988.559	-198.667	934.308	981.949
6677	0	93.5317	773.037	1587.83	190.388	777.144	1593.7	73.0169	622.81	1612.44	205.675	608.706	1617.36	174.32	556.693	1479.74	183.364	515.106	1217.3	156.392	680.258	1399.35	154.61	762.241	1256.74	268.637	508.721	1280.54	0.633955	557.161	1418.15	-75.9617	598.092	1245.92	-121.322	651.683	1109.51	-162.114	816.774	1049.67	-142.891	885.231	1000.39	-197.909	851.625	985.307	-197.37	944.678	978.379
6678	0	93.2471	784.864	1588.19	190.137	789.07	1594.29	73.0711	634.489	1612.49	205.84	620.644	1617.73	174.509	568.725	1479.73	183.289	528.274	1216.98	156.869	692.817	1399.73	155.655	775.323	1257.74	268.807	521.458	1280	0.799244	569.63	1417.72	-74.6444	609.765	1244.92	-119.584	662.737	1107.56	-160.691	827.348	1046.81	-141.477	895.44	997.097	-196.315	861.629	981.955	-196.183	954.053	973.665
6679	0	93.2381	796.841	1588.83	189.927	801.073	1595.14	73.1819	646.275	1612.89	205.733	632.657	1618.87	174.604	580.824	1480.17	183.092	541.311	1216.74	157.55	705.139	1400.58	156.486	788.556	1258.84	268.621	534.048	1279.82	0.906097	582.368	1417.77	-73.3637	621.546	1244.6	-117.536	673.723	1106.56	-159.298	837.39	1043.6	-139.947	905.208	993.324	-194.449	870.789	978.266	-194.636	963.33	968.94
6680	0	92.9123	808.62	1589.62	189.703	813.166	1596.25	73.3258	658.014	1613.36	205.954	644.825	1619.67	174.621	593.201	1480.74	182.698	554.036	1217.28	158.058	717.595	1401.82	157.525	801.889	1260.5	268.328	546.604	1280.3	1.10979	595.089	1418.27	-72.163	633.541	1244.2	-115.605	684.411	1105.49	-157.867	846.955	1040.48	-138.561	914.291	989.386	-192.585	879.303	974.256	-193.177	971.683	963.743
6681	0	92.6375	820.479	1590.64	189.518	825.278	1597.51	73.5562	669.858	1614.29	206.182	656.969	1620.75	174.781	605.339	1481.87	182.201	566.698	1217.84	159.091	730.153	1403.41	158.44	815.009	1262.46	267.939	558.831	1281.07	1.14013	608.158	1419.18	-71.2279	645.713	1244.45	-113.468	695.039	1105.14	-156.13	856.388	1037.19	-136.495	923.075	985.695	-190.35	887.565	970.234	-191.487	979.726	957.991
6682	0	92.4551	832.386	1591.62	189.563	837.453	1598.7	73.5642	681.863	1615.41	206.263	669.027	1621.78	174.651	617.791	1482.68	181.583	579.302	1218.82	159.445	742.711	1404.43	159.035	827.915	1263.81	267.357	571.361	1281.82	0.96981	621.316	1419.94	-70.8138	658.204	1245.31	-111.473	705.59	1105.01	-154.338	865.594	1033.69	-134.434	931.406	981.232	-188.132	895.197	965.729	-189.804	986.986	951.566
6683	0	92.2681	844.301	1592.68	189.445	849.685	1599.89	73.8533	693.698	1616.38	206.521	681.243	1622.69	174.508	630.128	1483.44	181.145	591.663	1219.93	159.7	754.995	1405.43	159.558	840.648	1265	266.657	583.444	1282.42	0.858832	634.325	1420.72	-70.0873	670.608	1245.75	-109.676	715.989	1104.9	-152.523	874.364	1030.01	-132.94	938.877	975.572	-185.965	902.438	961.202	-187.628	993.938	944.612
6684	0	92.268	856.277	1593.92	189.248	861.746	1601.01	73.7898	705.634	1617.24	206.466	693.339	1623.73	174.557	642.312	1484.44	180.408	604.296	1220.89	159.872	767.467	1406.59	159.761	853.156	1265.89	266.413	595.989	1283.27	0.738949	647.272	1421.79	-69.8134	683.065	1246.39	-108.089	726.486	1104.95	-150.571	883.119	1026.15	-130.253	946.623	971.191	-183.355	909.519	956.358	-185.389	1000.55	937.097
6685	0	92.0691	868.398	1595.22	189.099	873.926	1602.19	73.8849	717.599	1618.35	206.521	705.376	1624.55	174.301	654.586	1485.44	180.188	616.466	1222.09	159.62	779.655	1407.53	159.952	865.273	1266.73	266.051	608.366	1284.54	0.668447	659.892	1423.05	-69.9927	695.534	1247.12	-106.749	737.133	1105.08	-148.775	891.564	1022.18	-128.627	953.407	964.816	-181.069	916.305	951.301	-182.948	1006.66	929.349
6686	0	91.8848	880.557	1596.58	189.055	886.054	1603.46	73.8125	729.681	1619.54	206.444	717.462	1625.21	174.021	666.821	1486.36	179.859	628.725	1223.38	159.592	791.992	1408.58	159.79	877.154	1267.3	265.881	620.541	1285.36	0.34471	672.314	1423.9	-69.73	707.835	1248.03	-105.439	747.692	1104.83	-146.956	899.843	1017.69	-126.667	959.777	958.473	-178.73	922.511	946.202	-180.11	1012.21	921.221
6687	0	91.77	892.637	1597.93	189.027	898.043	1604.74	73.607	741.826	1620.67	206.404	729.502	1626.07	173.88	678.972	1487.32	179.533	640.833	1224.36	159.277	804.13	1409.49	159.566	889.058	1268.04	265.621	632.782	1286.27	0.132677	684.33	1425.05	-70.0462	719.878	1248.77	-104.153	758.378	1105	-145.116	907.668	1013.4	-124.195	965.881	952.589	-176.289	928.335	941.074	-177.279	1017.08	912.666
6688	0	92.0175	904.879	1599.77	188.79	910.163	1605.9	73.3847	754.004	1621.78	206.192	741.571	1626.97	173.741	691.129	1488.28	179.571	652.734	1225.65	158.725	816.178	1410.36	158.776	900.74	1268.92	265.596	645.293	1287.34	0.080844	696.169	1426.37	-69.8506	731.664	1249.75	-102.903	769.003	1105.49	-143.175	915.209	1009.29	-121.784	971.498	946.723	-173.893	933.63	935.766	-174.338	1021.39	904.159
6689	0	91.5549	917.015	1600.92	188.591	922.17	1607.14	73.2158	766.104	1623.06	205.989	753.643	1627.94	173.478	703.41	1489.47	179.641	664.498	1226.72	157.993	828.188	1411.3	157.595	912.434	1269.59	265.571	657.559	1288.49	-0.291889	707.744	1427.52	-69.7466	743.326	1250.52	-101.766	779.352	1106.2	-141.222	922.472	1005.17	-119.561	976.539	940.862	-171.551	938.364	930.983	-171.297	1024.82	895.822
6690	0	91.576	929.319	1602.55	188.495	934.224	1608.44	72.7834	778.327	1624.29	205.592	765.6	1628.77	173.119	715.381	1490.58	179.785	676.187	1227.87	157.262	840.042	1412.18	156.224	924.179	1270.29	265.611	669.829	1289.53	-0.475429	719.193	1428.58	-69.5572	754.781	1251.21	-100.528	789.547	1106.46	-139.408	929.105	1000.74	-117.081	981.067	935.253	-168.876	942.579	925.583	-168.102	1027.76	887.219
6691	0	91.3473	941.509	1603.91	188.221	946.333	1609.69	72.3676	790.562	1625.53	205.011	777.734	1629.63	172.884	727.646	1491.61	179.95	687.909	1229.21	156.55	852.126	1413.05	154.767	935.935	1271.23	265.631	682.239	1290.69	-0.744015	730.699	1429.83	-68.7211	766.009	1251.78	-99.2318	799.421	1106.73	-137.593	935.251	996.745	-114.645	985.4	929.574	-166.296	946.381	920.612	-165.113	1029.93	878.537
6692	0	90.7609	953.78	1605.19	187.938	958.378	1610.84	71.8805	802.82	1626.79	204.594	789.742	1630.78	172.661	739.782	1492.89	180.112	699.663	1230.3	155.858	864.155	1414.08	153.036	947.437	1271.79	265.681	694.497	1291.99	-1.24097	742.089	1430.98	-68.8695	777.088	1252.72	-97.9487	808.995	1107.27	-135.655	941.111	992.883	-112.373	989.035	924.509	-163.719	949.848	916.433	-162.28	1031.47	870.184
6693	0	90.4506	966.081	1606.51	187.509	970.536	1611.89	71.4507	815.037	1628.19	204.247	801.908	1631.73	172.165	752.054	1494.17	180.447	711.191	1231.91	154.589	875.726	1414.88	151.472	959.082	1272.35	265.955	706.807	1293.36	-1.53717	753.331	1432.09	-68.5915	787.824	1253.17	-96.5259	818.548	1108.2	-133.758	946.589	989.33	-110.168	992.508	919.375	-161.276	952.757	912.269	-159.36	1032.45	862.147
6694	0	90.131	978.364	1607.9	187.143	982.74	1613.1	70.7703	827.423	1629.21	203.575	813.99	1632.76	171.915	764.233	1495.44	180.713	722.877	1233.24	153.512	887.606	1415.87	149.928	970.288	1273.04	265.991	718.9	1294.85	-1.82675	764.583	1433.21	-68.0804	798.648	1253.68	-95.021	827.435	1108.15	-131.879	951.699	985.707	-108.024	995.866	914.676	-158.632	955.319	908.295	-156.615	1032.86	854.543
6695	0	89.7166	990.555	1609.19	186.741	994.816	1614.31	70.2578	839.69	1630.38	202.824	826.184	1633.82	171.439	776.312	1496.67	180.927	734.274	1234.89	152.817	899.585	1416.94	148.708	981.756	1273.77	265.978	730.969	1296.28	-2.41012	775.901	1434.33	-67.689	808.926	1254.23	-93.2101	836.088	1108.38	-130.044	956.388	981.985	-106.002	998.842	910.338	-156.118	957.529	904.394	-154.115	1032.59	847.307
6696	0	89.0735	1002.95	1610.2	186.334	1006.97	1615.34	69.5052	852.004	1631.59	202.176	838.241	1634.84	170.939	788.565	1498.07	181.091	745.715	1236.52	152.026	911.635	1418.05	148.008	993.099	1274.58	265.936	742.995	1298.18	-2.8542	787.392	1435.38	-66.968	819.068	1254.63	-91.2674	844.34	1108.34	-128.108	960.763	979.035	-104.067	1001.45	906.338	-153.498	959.549	900.927	-151.145	1032.29	840.845
6697	0	88.3543	1015.16	1611.11	185.723	1019.2	1616.21	68.8223	864.32	1632.6	201.571	850.419	1635.58	170.386	800.672	1499.12	181.16	757.052	1238.01	151.237	923.57	1419.21	146.969	1004.38	1275.4	266.038	755.141	1299.63	-3.36008	798.895	1436.44	-66.0582	829.132	1254.69	-89.438	852.167	1108.43	-126.186	965.105	976.057	-101.846	1004.02	902.222	-151.009	961.162	898.013	-148.71	1031.34	834.384
6698	0	87.7702	1027.36	1612.06	185.127	1031.39	1617	67.9945	876.586	1633.68	200.825	862.529	1636.21	169.873	812.71	1500.32	181.367	768.516	1239.45	150.335	935.393	1420.04	146.256	1015.77	1276.11	266.128	766.998	1301.39	-3.91498	810.425	1437.69	-65.7538	838.751	1255.03	-87.4128	859.809	1108.41	-124.11	968.729	973.16	-99.6912	1006.26	898.57	-148.36	962.746	895.127	-146.396	1030.13	828.382
6699	0	86.892	1039.62	1612.75	184.49	1043.56	1617.78	67.3688	888.821	1634.36	200.055	874.714	1637.06	169.493	824.935	1501.35	181.395	779.889	1240.84	149.498	947.316	1421	145.829	1027.42	1276.69	266.194	778.935	1302.93	-4.40359	822.058	1438.54	-64.9684	848.281	1255.3	-85.3366	867.378	1108.37	-122.003	972.474	970.512	-97.6023	1008.13	895.013	-145.749	964.216	892.21	-143.669	1028.95	823.418
6700	0	86.3066	1051.87	1613.44	183.803	1055.71	1618.35	66.5784	901.114	1635.09	199.395	886.771	1637.51	168.958	836.934	1502.34	181.403	791.275	1242.3	148.773	959.206	1421.67	145.572	1038.9	1277.29	266.127	790.759	1304.54	-4.81623	833.727	1439.35	-64.3667	857.879	1255.27	-83.4012	874.827	1108.3	-119.946	976.163	967.844	-94.91	1010.23	891.607	-143.037	965.742	889.884	-139.949	1028.19	818.646
6701	0	85.4565	1064.04	1613.87	182.986	1068	1618.68	65.8189	913.34	1635.46	198.526	899.164	1637.94	168.364	849.051	1503.13	181.34	802.756	1243.3	148.206	971.167	1422.17	145.1	1050.47	1277.34	266.164	802.809	1305.77	-5.19281	845.4	1439.81	-63.5059	867.252	1255.28	-81.5225	882.097	1107.75	-117.81	979.667	965.023	-92.654	1011.71	888.005	-140.393	967.052	886.951	-137.511	1027.31	813.693
6702	0	84.7591	1076.31	1613.96	182.214	1080.33	1618.95	65.0722	925.556	1635.76	197.814	911.416	1638.31	167.941	861.215	1503.71	181.313	814.203	1244.45	147.534	983.199	1422.43	144.598	1061.8	1277.18	266.096	814.683	1306.9	-5.64884	857.018	1440.18	-62.8284	876.836	1254.74	-79.7212	889.324	1107.29	-115.764	983.053	962.214	-90.4228	1013.15	884.441	-137.802	968.274	884.691	-134.666	1026.04	809.201
6703	0	84.0699	1088.5	1614.16	181.509	1092.51	1619.22	64.2944	937.713	1635.88	197.033	923.594	1638.77	167.376	873.377	1504.08	181.3	825.846	1245.36	147.127	995.035	1422.91	144.498	1073.3	1277.26	265.988	826.569	1308.04	-6.1307	868.696	1440.35	-62.0915	886.096	1254.3	-78.2284	896.435	1107.15	-113.565	986.408	959.263	-88.4299	1014.72	880.846	-135.305	969.471	882.108	-131.955	1025.19	804.994
6704	0	83.6117	1100.82	1614.38	180.754	1104.71	1619.44	63.6001	949.969	1636.05	196.309	935.896	1638.8	166.882	885.499	1504.55	181.362	837.685	1245.98	146.735	1007.15	1422.97	144.363	1084.7	1277.15	265.933	838.434	1308.95	-6.51371	880.478	1440.45	-61.7706	895.722	1253.46	-76.3113	903.874	1106.6	-111.259	989.891	956.9	-85.6638	1016.04	877.63	-132.656	970.656	879.763	-128.875	1024.59	801.153
6705	0	82.989	1113.06	1614.48	180.005	1116.9	1619.54	62.8994	962.155	1635.7	195.699	948.004	1638.65	166.462	897.662	1504.65	181.314	849.318	1246.31	146.177	1019.09	1423.13	144.128	1096.31	1276.83	265.944	850.373	1309.5	-6.93654	892.29	1440.46	-60.7328	905.018	1253.44	-74.8014	910.989	1106.32	-109.306	992.933	954.396	-83.1275	1017.73	874.781	-129.901	972.113	877.304	-126.45	1023.94	797.773
6706	0	82.0757	1125.3	1614.2	179.216	1129.25	1619.48	62.0907	974.425	1635.16	194.916	960.359	1638.63	165.989	909.911	1504.62	181.444	861.177	1246.43	145.671	1031.05	1422.96	144.123	1107.89	1276.6	266.076	862.372	1309.89	-7.38749	904.085	1440.49	-60.087	914.661	1252.79	-73.1675	918.445	1105.8	-107.336	996.164	952.259	-81.1987	1019.7	872.149	-127.161	973.536	875.43	-124.696	1023.86	794.735
6707	0	81.3852	1137.57	1614.04	178.403	1141.5	1619.36	61.2529	986.694	1634.63	194.013	972.609	1638.49	165.535	922.111	1504.63	181.345	872.942	1246.5	145.32	1043.17	1422.91	144.174	1119.55	1276.05	265.984	874.326	1310.1	-7.79247	915.994	1440.19	-59.5477	924.056	1252.27	-71.5075	926.213	1105.17	-105.466	999.721	949.861	-78.7296	1020.85	869.465	-124.608	975.233	873.502	-122.029	1023.05	791.402
6708	0	80.6803	1149.86	1613.6	177.754	1153.87	1619.14	60.5343	998.911	1634.23	193.095	984.806	1637.97	165.009	934.231	1504.39	181.195	884.923	1246.5	144.887	1055.4	1422.49	143.849	1131.48	1275.64	265.864	886.396	1310.1	-8.22748	927.913	1439.67	-59.0821	933.918	1251.25	-69.9461	933.591	1104.59	-103.655	1003.53	947.461	-76.6859	1023.14	867.039	-122.269	977.152	871.602	-119.551	1023.3	788.73
6709	0	80.097	1162.1	1612.9	177.1	1166.07	1618.81	59.7452	1011.12	1633.28	192.438	997.112	1637.4	164.581	946.634	1503.8	180.915	896.772	1246.33	144.48	1067.53	1421.94	143.773	1143.37	1274.94	265.522	898.325	1309.95	-8.59476	939.974	1438.94	-58.6015	943.354	1250.35	-68.4061	941.124	1103.8	-102.004	1007.55	945.376	-75.0164	1025.84	864.21	-119.757	979.438	869.822	-117.296	1023.85	785.847
6710	0	79.2769	1174.3	1612.14	176.454	1178.44	1618.31	59.0472	1023.32	1632.48	191.661	1009.31	1636.89	163.886	958.911	1503.16	180.635	908.855	1245.93	144.027	1079.9	1421.01	143.197	1155.39	1273.6	265.291	910.478	1309.54	-9.00278	952.062	1438.16	-57.9448	953.12	1249.51	-67.0695	948.778	1103.05	-100.708	1011.81	943.263	-73.4759	1029.02	862.038	-117.515	982.028	868.385	-115.004	1024.72	783.321
6711	0	78.5677	1186.68	1611.5	175.632	1190.72	1617.67	58.2904	1035.61	1631.49	190.775	1021.54	1636.13	163.595	971.319	1502.72	180.357	921.006	1245.26	143.562	1092.3	1420.31	143.219	1167.39	1273	264.983	922.624	1309.14	-9.36777	964.34	1437.4	-57.1874	962.872	1248.46	-65.8153	956.559	1102.18	-99.4837	1016.51	941.337	-72.0766	1032.66	859.852	-115.819	985.332	867.005	-114.169	1025.83	780.407
6712	0	77.9507	1199.08	1610.74	174.995	1202.97	1617.15	57.4791	1047.85	1630.52	190.036	1033.77	1635.34	162.777	983.714	1501.56	179.814	932.902	1244.6	143.048	1104.67	1419.28	142.771	1179.42	1271.37	264.452	934.711	1308.37	-9.91772	976.596	1436.58	-56.9528	972.625	1247.71	-64.7892	964.462	1101.44	-98.3345	1021.32	939.629	-71.0879	1036.61	857.875	-113.924	988.828	865.56	-111.611	1027.59	778.525
6713	0	77.2528	1211.24	1610.03	174.229	1215.2	1616.49	56.6598	1060.17	1629.39	189.251	1046.05	1634.3	162.35	996.298	1500.74	179.204	944.831	1243.86	142.687	1117.13	1418.45	142.885	1191.81	1270.61	263.919	946.782	1307.77	-10.535	989.073	1435.55	-56.5421	982.737	1246.46	-63.7741	972.724	1100.47	-97.6456	1026.83	937.904	-69.9904	1041.31	856.254	-112.444	992.715	864.031	-109.948	1030.3	776.868
6714	0	76.5924	1223.69	1608.9	173.454	1227.38	1615.7	55.928	1072.5	1627.83	188.513	1058.27	1633.24	161.469	1008.67	1499.44	178.552	956.947	1242.89	142.252	1129.71	1417.41	142.72	1203.93	1269.37	263.348	958.901	1306.76	-11.3372	1001.69	1434.38	-56.9037	992.823	1245.64	-63.0826	981.183	1099.57	-97.1293	1032.58	936.429	-69.2056	1046.61	854.504	-110.831	997.39	862.71	-108.526	1033.08	774.713
6715	0	75.8257	1235.91	1607.99	172.865	1239.69	1614.96	55.1442	1084.86	1626.56	187.709	1070.49	1631.85	160.827	1021.18	1498.24	177.642	968.843	1241.93	141.848	1142.36	1416.17	142.459	1216.13	1267.62	262.68	971.081	1305.81	-11.9642	1014.37	1433.27	-56.5657	1003.02	1244.47	-62.566	989.723	1098.63	-96.532	1038.78	934.851	-68.7485	1052.01	853.075	-109.696	1002.48	861.666	-107.143	1036.43	772.918
6716	0	75.1739	1248.33	1606.91	172.289	1252.15	1613.83	54.518	1097.16	1624.83	187.055	1082.86	1630.47	160.359	1033.74	1497.2	176.693	980.764	1240.87	141.285	1154.97	1415.08	142.14	1228.53	1266.35	261.89	983.138	1304.64	-12.8242	1027.16	1432.21	-56.6281	1013.54	1243.49	-62.1648	998.808	1097.46	-96.3138	1045.38	933.093	-67.7092	1057.81	851.347	-108.753	1008.41	860.138	-105.175	1040.68	771.751
6717	0	74.5194	1260.73	1605.65	171.688	1264.47	1612.88	53.7914	1109.54	1623.18	186.33	1095.12	1628.94	159.472	1046.26	1495.58	175.511	992.775	1239.39	140.523	1167.52	1413.45	141.805	1241	1265.1	260.826	995.043	1303.55	-13.6761	1040.06	1430.61	-56.9792	1024.13	1242.45	-61.8835	1008.04	1096.51	-96.2159	1052.52	931.762	-69.7028	1065.61	850.076	-108.026	1014.12	859.346	-104.403	1045.38	769.889
6718	0	73.9232	1273.22	1604.22	170.844	1276.8	1611.42	53.0626	1121.85	1621.65	185.485	1107.44	1627.32	158.442	1058.67	1494.23	174.261	1004.94	1238	140.006	1180.21	1412.3	141.216	1253.76	1263.14	259.615	1007.2	1302.11	-14.7638	1052.99	1429.37	-57.3906	1035.19	1240.85	-62.1021	1017.71	1095.61	-96.3738	1060.1	930.186	-67.7579	1071.54	848.791	-107.633	1020.84	858.202	-104.225	1050.59	767.965
6719	0	73.2683	1285.55	1603.02	170.137	1289.07	1610.19	52.2959	1134.28	1620.2	184.816	1119.81	1625.85	157.54	1071.08	1492.85	172.801	1017.3	1236.66	139.293	1192.74	1410.86	140.806	1266.46	1261.74	258.295	1019.2	1300.79	-15.8775	1065.97	1428.05	-58.0204	1046.56	1239.96	-62.2213	1027.76	1094.51	-96.6942	1068.18	928.828	-68.2603	1079.36	847.174	-107.416	1028.02	857.297	-103.602	1056.92	766.85
6720	0	72.5058	1298.09	1601.43	169.49	1301.57	1608.68	51.4289	1146.69	1618.86	184.033	1132.18	1624.25	156.31	1083.35	1491.33	170.876	1029.68	1235.15	138.491	1205.3	1409.32	140.274	1279.09	1260.87	256.683	1031.25	1299.35	-17.1062	1078.94	1426.68	-58.8766	1058.26	1238.98	-62.7191	1038.06	1093.75	-97.3792	1076.53	927.411	-68.9529	1087.8	845.639	-107.412	1035.72	856.091	-103.984	1063.57	765.491
6721	0	71.8028	1310.48	1600.1	168.934	1313.98	1607.42	50.6467	1159.11	1617.55	183.072	1144.41	1622.94	155.158	1095.57	1490.08	168.821	1042.23	1233.71	137.66	1217.91	1408.49	139.574	1291.47	1259.47	254.888	1043.15	1297.78	-18.5478	1091.93	1425.67	-59.8059	1070.19	1237.96	-63.3447	1048.82	1092.84	-98.2801	1085.48	926.458	-69.558	1096.54	844.993	-107.758	1043.91	855.564	-104.791	1070.94	764.563
6722	0	71.2377	1322.82	1599.17	168.328	1326.16	1606.31	49.8409	1171.67	1616.28	182.326	1156.68	1621.89	153.857	1107.98	1488.41	166.839	1054.79	1232.29	136.679	1230.46	1407.27	138.925	1304.24	1258.72	253.206	1055.51	1296.06	-20.0167	1105.05	1424.82	-61.0504	1082.44	1237.11	-64.0241	1060	1092.49	-99.4772	1095.05	925.812	-70.8974	1105.79	844.065	-108.506	1052.85	854.934	-105.638	1079.13	764.247
6723	0	70.596	1335.25	1597.88	167.57	1338.33	1604.8	49.0379	1184.15	1615.07	181.455	1169.04	1620.49	152.423	1120.22	1487.22	165.208	1068.47	1230.06	135.659	1242.96	1406.5	138.119	1316.78	1257.97	251.018	1067.58	1294.39	-21.591	1118.12	1424.04	-62.4706	1094.73	1236.15	-65.1878	1071.45	1091.78	-100.879	1105.22	925.216	-72.7043	1115.75	842.951	-109.293	1062.51	854.627	-106.552	1088.08	763.464
6724	0	69.8825	1347.67	1596.52	167.071	1350.7	1603.53	48.0851	1196.52	1613.92	180.445	1181.21	1619.33	150.886	1132.53	1485.79	162.456	1080.61	1229.1	134.466	1255.47	1405.44	137.044	1329.24	1256.74	248.778	1079.44	1292.67	-23.2621	1131.23	1423.14	-64.1258	1107.44	1235.48	-66.5304	1083.24	1091.39	-102.585	1115.89	924.558	-74.1036	1126.46	842.34	-110.595	1072.73	853.999	-107.71	1098.03	763.358
6725	0	69.3041	1360.09	1595.43	166.452	1362.98	1602.13	47.1173	1209	1612.81	179.691	1193.45	1617.85	149.378	1144.74	1484.37	160.085	1093.4	1227.54	133.23	1267.98	1404.62	135.862	1342.01	1256.43	246.724	1092.16	1291.05	-24.9252	1144.22	1422.24	-66.1924	1120.2	1235	-68.1771	1095.36	1090.9	-104.507	1127.26	923.77	-76.1025	1137.72	841.793	-112.303	1083.81	853.513	-109.712	1108.48	762.656
6726	0	68.5102	1372.44	1594.22	165.814	1375.14	1600.79	46.2485	1221.46	1612.03	178.608	1205.6	1616.56	147.432	1156.72	1483.17	157.831	1106.76	1225.89	131.83	1280.47	1403.55	134.492	1354.89	1255.54	244.299	1104.44	1289.4	-26.7939	1157.34	1421.48	-68.2926	1133.24	1234.27	-70.0791	1107.9	1090.09	-106.708	1139.34	923.205	-78.0438	1149.77	841.396	-114.52	1095.63	853.034	-111.728	1120.09	762.014
6727	0	68.015	1384.8	1593.24	165.065	1387.17	1599.45	45.3936	1233.87	1610.67	177.405	1217.52	1615.7	146.036	1168.95	1481.89	155.306	1119.64	1224.39	130.372	1292.88	1402.69	133.017	1368.1	1254.92	241.84	1116.98	1287.58	-28.508	1170.4	1420.74	-70.4545	1146.3	1233.72	-72.1064	1120.7	1089.53	-109.147	1151.79	922.419	-80.9187	1162.22	840.662	-117.159	1107.93	852.593	-114.541	1132.16	761.262
6728	0	67.275	1397.27	1592.2	164.459	1399.43	1598.27	44.275	1246.26	1609.82	176.663	1229.82	1614.08	144.102	1180.69	1480.79	152.909	1132.82	1222.99	128.848	1305.33	1401.95	131.343	1381.11	1254.56	239.554	1129.16	1285.72	-30.434	1183.37	1419.98	-72.8225	1159.48	1233.09	-74.5495	1133.87	1088.79	-112.017	1165.09	921.814	-83.8705	1175.48	839.973	-120.156	1121.02	851.996	-117.507	1145.27	760.922
6729	0	66.5356	1409.46	1591.9	163.887	1411.63	1597.61	43.1873	1258.65	1609.74	175.513	1241.89	1613.36	142.449	1192.61	1479.8	150.537	1145.84	1221.8	127.208	1317.67	1401.46	129.616	1394.36	1254.5	237.296	1141.57	1284.26	-32.4012	1196.27	1419.34	-75.2677	1173.1	1232.25	-77.1838	1147.38	1088.01	-115.186	1178.89	921.47	-86.9065	1189.84	839.727	-123.413	1134.84	851.529	-121.019	1159.15	760.194
6730	0	65.6705	1421.89	1591.59	162.947	1423.7	1596.88	41.9767	1271.2	1609.57	174.099	1253.83	1613.25	140.624	1204.66	1478.95	148.142	1159.07	1220.81	125.621	1330.11	1401.55	127.564	1407.49	1254.66	235.146	1154.28	1282.94	-34.2808	1209.11	1419	-77.8047	1186.84	1231.94	-80.0696	1161.4	1087.56	-118.566	1193.25	921.224	-90.98	1204.16	839.142	-127.019	1149.3	851.24	-124.735	1174.06	759.903
6731	0	64.8799	1434.29	1591.39	162.049	1435.76	1596.43	40.8739	1283.63	1609.9	173.193	1266.13	1612.62	138.937	1216.6	1478.66	146.245	1172.08	1219.99	123.948	1342.4	1401.57	125.613	1420.51	1255.39	233.247	1166.68	1282.02	-36.2888	1221.75	1418.78	-80.4436	1200.61	1231.89	-82.9588	1175.51	1087.35	-122.099	1208.05	921.321	-94.7714	1219.42	839.312	-130.822	1164.52	851.159	-129.252	1189.74	759.763
6732	0	63.9689	1446.65	1591.73	161.149	1447.95	1596.33	39.7375	1296.02	1610.34	171.778	1278.17	1612.65	137.205	1228.55	1478.78	144.529	1185.24	1219.71	122.298	1354.67	1401.97	123.413	1433.38	1256.04	231.552	1178.85	1281.51	-38.0624	1234.26	1419.12	-82.9691	1214.68	1232.12	-85.9549	1189.87	1087.67	-125.58	1223.51	921.759	-98.7047	1235.42	839.789	-134.819	1180.37	851.519	-133.404	1206.25	760.216
6733	0	63.0522	1459.01	1592.28	160.425	1460.17	1596.71	38.472	1308.51	1611.03	170.651	1290.44	1613.01	135.758	1240.57	1479.3	142.711	1197.83	1220.01	120.606	1366.81	1402.73	121.571	1446.16	1257.13	229.973	1191.19	1281.84	-39.7575	1246.53	1419.84	-85.5049	1228.91	1232.83	-88.8242	1204.52	1088.08	-129.646	1239.4	923	-103.125	1252.33	841.171	-139.054	1196.95	852.378	-138.421	1223.49	761.122
6734	0	61.9801	1471.27	1593.03	159.449	1472.38	1597.27	37.1705	1320.76	1611.84	169.437	1302.62	1613.7	134.298	1252.76	1479.85	141.4	1210.56	1220.6	119.103	1378.98	1403.8	119.882	1458.74	1258.69	228.458	1203.66	1282.54	-41.2084	1258.77	1420.82	-88.0102	1242.86	1233.78	-91.9232	1219.24	1089.07	-133.576	1255.79	924.26	-107.376	1269.16	842.47	-143.408	1214.04	853.532	-143.544	1241.67	762.628
6735	0	60.7138	1483.44	1594.01	158.242	1484.42	1598.03	36.0261	1332.88	1612.82	167.956	1314.68	1614.64	132.917	1264.92	1480.7	140.292	1222.99	1221.48	117.743	1391.19	1405.11	118.271	1471.09	1260.41	227.084	1215.84	1283.4	-42.6331	1271.06	1422.17	-90.4922	1256.94	1235.17	-94.9718	1234.22	1090.18	-137.642	1272.61	926.194	-112.896	1287.14	843.666	-148.029	1231.75	854.75	-149.061	1260.56	764.348
6736	0	59.4671	1495.45	1595	157.019	1496.47	1598.99	35.0318	1344.95	1613.68	167.179	1326.84	1615.29	131.652	1277.05	1481.64	138.978	1235.23	1222.65	116.479	1403.17	1406.36	116.725	1483.42	1261.74	225.986	1227.97	1284.41	-44.0193	1283.36	1423.48	-92.8119	1270.79	1236.41	-98.056	1249.1	1091.05	-141.935	1289.89	928.065	-117.639	1305.76	845.918	-152.703	1249.87	856.103	-154.68	1280.27	766.423
6737	0	58.2222	1507.61	1595.99	155.839	1508.68	1600.04	33.9596	1356.97	1614.53	166.17	1338.93	1616.21	130.381	1289.18	1482.79	137.739	1247.4	1224.02	115.387	1415.3	1407.67	115.537	1495.51	1262.83	224.804	1239.61	1285.9	-45.0832	1295.85	1424.79	-95.0517	1284.47	1238.1	-101.335	1264.15	1092.5	-146.229	1307.41	930.206	-122.681	1324.3	847.786	-157.4	1268.96	857.571	-160.604	1300.53	768.603
6738	0	57.1124	1519.56	1597.01	154.623	1520.93	1601.16	33.063	1368.93	1615.54	164.984	1350.96	1617.34	129.26	1301.28	1483.98	136.355	1258.88	1225.65	114.293	1427.12	1408.8	114.517	1507.3	1263.5	223.555	1251.12	1287.24	-46.2556	1308.33	1426.07	-97.0173	1297.99	1239.39	-104.592	1279.24	1093.73	-150.499	1325.36	932.367	-127.509	1343.46	850.147	-162.433	1287.99	859.215	-166.495	1321.57	770.657
6739	0	56.3745	1531.39	1598.18	153.418	1533.07	1602.44	32.2608	1380.68	1616.37	164.395	1363.12	1618.22	128.118	1313.29	1485.16	135.321	1271.06	1226.82	113.464	1438.94	1409.84	113.832	1519.02	1264.43	222.346	1262.77	1288.82	-47.3172	1320.84	1427.36	-98.881	1311.51	1241.19	-107.947	1294.39	1094.95	-154.929	1343.29	934.464	-132.59	1362.94	852.373	-167.283	1307.55	861.042	-172.128	1343.07	773.533
6740	0	55.122	1543.12	1599.3	152.233	1545.06	1603.82	31.4355	1392.45	1617.14	163.755	1375.24	1619.11	127.083	1325.15	1486.49	133.856	1282.47	1228.33	112.936	1450.97	1411	113.458	1530.25	1264.93	220.984	1274.05	1290.46	-48.3931	1333.41	1428.76	-100.893	1324.99	1242.81	-111.409	1309.57	1096.55	-159.212	1361.75	937.146	-137.361	1382.87	855.344	-172.406	1327.26	862.646	-177.855	1364.76	776.194
6741	0	53.4034	1555.14	1600.44	151.065	1557.06	1605.19	30.6691	1404.07	1618.02	163.022	1387.14	1620.2	126.083	1337.13	1487.66	132.338	1293.74	1230.05	112.188	1462.83	1411.94	113.341	1541.74	1265.82	219.654	1285.22	1291.94	-49.4276	1346.06	1430.13	-102.69	1338.56	1244.29	-114.733	1324.99	1097.91	-163.496	1380.4	939.705	-142.986	1402.48	857.64	-177.501	1347.25	864.931	-184.822	1386.76	778.141
6742	0	52.2449	1566.72	1601.62	149.892	1569.06	1606.52	30.0101	1415.65	1618.93	162.404	1399.31	1621.2	125.126	1348.89	1488.92	130.927	1305.11	1231.53	111.775	1474.61	1413.07	113.398	1553.26	1266.69	218.314	1296.3	1293.36	-50.3865	1358.78	1431.7	-104.29	1352.21	1246.21	-118.145	1340.39	1099.29	-167.979	1398.84	942.393	-147.568	1422.88	861.392	-182.583	1367.48	867.293	-190.39	1409.6	782.415
6743	0	51.1025	1578.33	1602.81	148.819	1580.97	1607.96	29.2981	1427.05	1619.84	161.79	1411.23	1622.15	124.139	1360.62	1490.22	129.329	1316.28	1232.84	111.471	1486.29	1414.39	113.738	1564.93	1267.93	216.831	1307.19	1294.76	-51.488	1371.26	1433.13	-106.325	1366.05	1247.85	-121.462	1355.83	1101	-172.086	1417.84	945.567	-152.521	1443.23	864.61	-187.438	1387.91	869.507	-196.219	1432.68	786.486
6744	0	49.9882	1589.85	1604.07	147.892	1592.94	1609.25	28.7256	1438.37	1620.98	161.348	1423.12	1623.26	123.384	1372.21	1491.51	127.5	1327.41	1234.51	111.317	1497.98	1415.64	113.754	1576.58	1268.95	215.388	1318.13	1296.03	-52.3535	1383.83	1434.83	-108.686	1380.05	1249.8	-124.821	1371.44	1102.64	-176.386	1436.61	948.922	-157.015	1463.81	868.366	-192.365	1408.56	872.328	-202.126	1455.9	790.944
6745	0	49.1297	1601.34	1605.44	146.92	1604.77	1610.45	28.3804	1449.82	1621.99	160.702	1434.95	1624.58	122.533	1383.8	1492.75	125.861	1338.54	1235.92	110.82	1509.55	1416.76	113.955	1588.15	1270.14	213.886	1328.91	1297.48	-53.1563	1396.27	1436.44	-110.691	1394.2	1251.72	-128.118	1387.11	1104.19	-180.138	1455.81	952.287	-161.865	1484.63	872.078	-196.837	1429.33	875.106	-207.719	1479.26	795.662
6746	0	48.262	1612.76	1606.67	145.897	1616.48	1611.69	28.0508	1461.1	1623.08	160.695	1446.89	1625.46	121.831	1395.31	1493.98	124.199	1349.33	1237.22	110.436	1520.92	1417.87	114.059	1599.47	1271.35	212.428	1339.62	1298.58	-53.9527	1408.63	1438.1	-112.787	1408.33	1253.57	-131.278	1402.77	1106.04	-183.842	1475.08	955.707	-166.053	1505.42	875.912	-201.049	1449.99	877.989	-213.108	1502.61	800.408
6747	0	47.282	1624.29	1607.71	144.683	1628.14	1612.86	27.8122	1472.49	1624.16	160.469	1458.74	1626.35	121.089	1406.71	1495.31	122.546	1360.08	1238.78	110.06	1532.33	1419.04	114.113	1610.93	1272.51	210.906	1350.26	1299.98	-54.7172	1420.75	1439.68	-114.572	1422.43	1255.5	-134.402	1418.47	1107.88	-187.326	1494.24	959.485	-170.165	1526.04	879.771	-205.834	1471.07	881.185	-218.193	1526.18	805.642
6748	0	46.3961	1635.82	1608.85	144.214	1640.08	1614.03	27.4743	1483.88	1625.31	160.211	1470.41	1627.61	120.391	1418.14	1496.76	120.656	1369.95	1240.87	109.736	1543.76	1420.47	113.954	1622.03	1273.75	209.569	1361.04	1301.47	-55.462	1432.9	1441.4	-116.711	1436.62	1257.61	-137.521	1434.14	1110.1	-190.961	1513.41	962.792	-174.22	1547.42	884.189	-210.243	1492.31	884.873	-223.231	1550.13	811.316
6749	0	45.6418	1647.11	1610.11	143.549	1651.91	1615.12	27.3107	1495.26	1626.36	160.066	1482.34	1628.44	119.73	1429.6	1498.04	119.122	1380.22	1242.61	109.277	1554.95	1421.61	113.52	1633.4	1275.1	208.234	1371.7	1302.81	-56.2139	1444.99	1443.15	-118.066	1450.53	1259.61	-140.475	1449.91	1112.16	-194.394	1532.77	966.717	-177.672	1568.18	889.049	-214.577	1513.56	888.607	-227.858	1573.47	816.954
6750	0	44.9724	1658.43	1611.31	142.458	1663.52	1616.16	27.2537	1506.55	1627.26	159.824	1494.01	1629.26	119.092	1440.96	1499.41	117.72	1390.99	1244.3	108.578	1566.21	1422.65	112.97	1644.59	1276.03	206.982	1382.26	1304.01	-56.972	1456.83	1445.05	-120.349	1464.67	1261.95	-143.459	1465.54	1114.28	-197.659	1552.14	970.997	-181.314	1589.08	893.896	-218.594	1534.94	892.694	-232.26	1596.88	822.897
6751	0	44.4157	1669.83	1612.67	142.018	1675.14	1617.21	27.0814	1517.74	1628.56	159.65	1505.64	1630.02	118.348	1452.37	1500.64	116.443	1401.73	1245.71	108.151	1577.49	1423.88	112.349	1655.84	1277.47	205.713	1392.87	1305.41	-57.7576	1468.64	1446.86	-122.048	1478.4	1263.93	-146.291	1481.06	1116.54	-200.714	1571.59	975.807	-184.67	1610.03	898.978	-222.694	1556.34	896.999	-236.445	1620.27	829.343
6752	0	43.8837	1681.21	1614.05	141.238	1686.68	1618.1	26.8217	1529.05	1629.82	159.6	1517.27	1630.87	117.676	1463.76	1501.88	115.249	1412.06	1247.39	107.651	1588.7	1424.94	111.251	1666.43	1277.89	204.506	1403.49	1306.8	-58.5506	1480.44	1448.52	-123.95	1492.12	1266.28	-149.189	1496.61	1118.69	-203.792	1591.13	980.167	-187.814	1630.77	904.489	-226.779	1577.43	901.55	-240.213	1643.55	835.849
6753	0	43.3704	1692.35	1615.21	141.623	1698.53	1618.86	26.6845	1540.45	1630.97	159.659	1528.59	1631.41	116.902	1475.15	1502.99	114.082	1422.57	1248.76	106.979	1599.94	1425.85	110.265	1677.55	1278.8	203.407	1414.16	1307.85	-59.3083	1492.21	1450.12	-125.807	1505.74	1268.2	-151.93	1512.17	1120.76	-206.779	1610.55	984.868	-191.031	1651.57	909.631	-230.429	1598.7	906.122	-243.83	1666.6	842.063
6754	0	43.059	1703.64	1616.21	141.273	1710.06	1619.56	26.1969	1551.74	1631.59	159.334	1540.14	1631.99	116.124	1486.46	1503.93	112.982	1433.27	1250.05	106.302	1611.13	1426.75	109.455	1688.56	1279.46	202.344	1424.88	1308.79	-60.0472	1503.8	1451.63	-127.153	1518.97	1270.15	-154.774	1527.51	1122.35	-209.49	1629.73	989.393	-194.072	1672.55	915.574	-234.037	1619.99	910.589	-247.141	1689.57	848.537
6755	0	42.4012	1715.1	1617.01	140.698	1721.29	1620.06	25.9341	1563.14	1632.36	159.132	1551.53	1632.31	115.482	1497.73	1504.72	111.973	1444.48	1250.84	105.701	1622.26	1427.45	108.372	1699.52	1279.99	201.516	1435.72	1309.61	-60.857	1515.37	1452.82	-129.304	1532.5	1271.85	-157.579	1542.86	1124.42	-212.253	1648.81	993.827	-196.854	1693.14	920.875	-237.415	1641.11	914.971	-250.309	1712.36	855.06
6756	0	42.1653	1726.36	1617.74	140.366	1732.56	1620.46	25.4378	1574.39	1633.13	158.739	1562.79	1632.39	114.742	1508.95	1505.34	111.177	1455.54	1251.47	104.954	1633.53	1427.8	107.427	1710.37	1280.73	200.498	1446.56	1310.36	-61.6263	1526.84	1453.79	-130.657	1545.64	1273.29	-160.164	1558.04	1126.19	-214.735	1667.72	998.517	-199.535	1713.55	926.404	-240.67	1662.21	919.462	-253.07	1734.98	861.383
6757	0	41.8869	1737.24	1618.53	140.303	1743.99	1620.69	25.2859	1585.69	1633.51	158.425	1574.13	1632.31	113.992	1520.15	1505.84	110.209	1466.48	1252.04	104.035	1644.74	1427.96	106.504	1721.11	1280.46	199.611	1457.34	1311.03	-62.3866	1538.19	1454.48	-132.629	1558.9	1274.7	-162.839	1573.2	1127.67	-217.297	1686.5	1002.56	-201.992	1734.15	931.776	-243.666	1683.05	924.189	-255.63	1757.37	867.59
6758	0	41.6019	1749.17	1618.69	140.006	1755.34	1620.67	24.9903	1596.98	1634.01	157.976	1585.36	1631.92	113.254	1531.44	1506.07	109.223	1477.06	1252.54	103.166	1655.87	1427.98	105.422	1731.53	1279.93	198.629	1468.19	1311.35	-63.2254	1549.51	1454.96	-134.196	1571.9	1275.92	-165.413	1588.2	1129	-219.41	1705.06	1006.78	-204.247	1754.08	936.956	-246.392	1703.78	928.818	-257.913	1779.67	873.812
6759	0	41.249	1760.52	1618.95	139.837	1766.59	1620.76	24.4688	1608.58	1634.09	157.453	1596.57	1631.72	112.488	1542.72	1506.2	108.329	1487.58	1252.91	102.516	1667.11	1427.94	104.719	1742.25	1279.84	197.885	1479.35	1311.24	-63.9552	1560.87	1455.43	-135.863	1584.81	1276.64	-167.87	1603.02	1130.09	-221.696	1723.33	1010.86	-206.278	1773.99	942.369	-249.131	1724.22	932.924	-260.091	1801.5	880.237
6760	0	41.0863	1771.75	1619.34	139.516	1777.57	1620.49	23.7948	1620.05	1634.08	157.072	1607.86	1631.26	111.903	1554	1506.28	107.678	1498.5	1253.13	101.531	1678.35	1427.74	103.842	1753.33	1279.49	196.996	1490.28	1311.64	-64.6766	1572.15	1455.61	-137.378	1597.64	1277.35	-170.302	1617.76	1131.42	-223.635	1741.56	1015.07	-208.151	1793.53	947.665	-251.435	1744.47	937.202	-262.167	1823.02	886.818
6761	0	40.7333	1783.24	1619.37	139.564	1788.97	1620.47	23.4819	1631.26	1634.11	156.372	1618.81	1631.08	111.27	1565.28	1506	106.868	1509.4	1253.15	101.012	1689.59	1427.75	103	1763.89	1279.22	196.248	1501.35	1311.32	-65.3043	1583.44	1455.82	-138.795	1610.27	1278.17	-172.69	1632.38	1131.92	-225.426	1759.3	1019.29	-210.067	1812.99	953.059	-253.606	1764.31	941.653	-263.94	1844.21	893.271
6762	0	40.6783	1794.6	1619.35	139.316	1800.22	1620.29	22.935	1642.67	1633.98	155.784	1630.03	1630.49	110.338	1576.68	1505.58	106.306	1520.41	1253.08	100.224	1700.88	1427.28	102.052	1775.21	1278.82	195.752	1512.65	1311.2	-65.8708	1594.64	1455.7	-140.243	1622.77	1278.74	-174.741	1646.95	1133.21	-227.269	1776.8	1022.98	-211.68	1831.84	958.416	-255.612	1783.98	945.585	-265.515	1865.06	899.489
6763	0	40.1972	1806	1619.21	138.981	1811.31	1619.8	22.2936	1654.32	1633.51	155.28	1641.07	1629.68	109.779	1588.06	1505.16	105.994	1531.64	1252.4	99.5897	1712.31	1426.88	101.111	1786.2	1278.1	195.221	1523.99	1310.7	-66.5622	1605.77	1455.43	-141.518	1635.33	1278.82	-176.876	1661.36	1133.47	-228.657	1794.14	1026.69	-213.037	1850.31	963.43	-257.548	1803.34	949.708	-266.808	1885.65	905.693
6764	0	39.9513	1817.56	1618.77	138.677	1822.53	1619.16	21.7374	1665.82	1632.77	154.633	1652.35	1629.13	109.092	1599.37	1504.57	105.666	1542.76	1252	98.9953	1723.67	1426.02	100.163	1797.35	1277.13	194.64	1535.31	1310.24	-67.1321	1616.79	1455.01	-142.589	1647.68	1279.02	-178.766	1675.35	1133.9	-229.933	1811.15	1030.21	-214.084	1868.81	967.986	-259.07	1822.44	953.713	-267.925	1905.79	911.445
6765	0	39.7836	1829.06	1618.2	138.292	1833.94	1618.53	21.3392	1677.17	1632.23	154.025	1663.7	1628.28	108.716	1610.92	1503.9	105.362	1553.99	1251.4	98.1011	1735.01	1425.08	99.3311	1808.58	1276.35	194.37	1546.94	1309.88	-67.6945	1627.99	1454.3	-143.722	1660.05	1278.72	-180.586	1689.35	1134.03	-231.117	1827.92	1033.39	-215.174	1886.89	972.614	-260.552	1840.97	957.56	-268.968	1925.54	917.404
6766	0	39.3883	1840.75	1617.42	137.853	1845.43	1617.94	20.6487	1688.81	1631.43	153.42	1675.07	1627.35	108.236	1622.44	1503.18	105.236	1565.31	1250.56	97.4189	1746.58	1424.09	98.3456	1819.95	1275.24	193.841	1558.47	1309.11	-68.2006	1639.1	1453.44	-144.527	1672.14	1278.34	-182.254	1703.25	1134.03	-232.071	1844.29	1036.5	-215.899	1904.4	976.98	-261.983	1859.15	961.01	-269.765	1944.84	923.003
6767	0	39.0219	1852.26	1616.6	137.414	1856.81	1617.03	20.1519	1700.48	1630.66	153.016	1686.47	1626.35	107.987	1633.99	1502.28	105.138	1576.66	1249.89	96.9099	1758.26	1422.99	97.3173	1831.02	1273.94	193.912	1570.26	1308.16	-68.5559	1650.38	1452.48	-145.341	1684.35	1277.87	-183.744	1716.94	1134.07	-232.618	1860.74	1039.52	-216.383	1921.55	980.997	-262.568	1877.38	964.718	-270.359	1963.32	928.349
6768	0	38.5765	1863.71	1615.83	137.299	1868.49	1616.2	19.7123	1711.73	1629.64	153.132	1698.72	1624.94	107.596	1645.63	1501.07	105.27	1588.21	1248.9	96.2321	1769.85	1421.85	96.4911	1842.43	1272.74	193.815	1582.19	1307.24	-68.8836	1661.48	1451.57	-146.093	1696.41	1277.42	-185	1730.4	1133.9	-233.108	1876.36	1042.26	-216.85	1938.38	984.826	-263.207	1894.97	967.979	-270.527	1981.67	933.542
6769	0	38.1675	1874.99	1615.26	136.759	1879.8	1615.25	19.4711	1723.39	1628.66	152.665	1710.19	1623.92	107.46	1657.31	1499.98	105.406	1599.58	1247.59	95.8116	1781.49	1420.59	95.793	1853.91	1271.52	193.783	1594.13	1306.05	-69.2516	1672.51	1450.18	-146.714	1708.42	1276.48	-186.28	1743.54	1133.34	-233.906	1891.67	1044.47	-217.198	1954.92	988.626	-263.859	1912.03	970.908	-270.816	1999.39	938.224
6770	0	37.9385	1886.65	1614.38	136.443	1891.5	1614.48	18.8474	1735.08	1627.45	152.156	1721.5	1622.87	107.127	1669.13	1498.75	105.583	1611.24	1246.31	95.3891	1793.26	1419.44	94.9177	1865.32	1270.36	193.807	1606.02	1305.03	-69.3696	1683.86	1449.14	-147.122	1720.25	1275.71	-187.341	1756.67	1132.76	-234.058	1906.87	1046.83	-217.382	1971.03	992.248	-264.405	1928.73	973.699	-270.717	2016.96	942.976
6771	0	37.4207	1898.41	1613.34	136.066	1903.13	1613.44	18.8386	1746.51	1626.38	151.922	1733.33	1621.56	107.174	1680.87	1497.47	105.865	1622.89	1245.15	94.743	1804.88	1418.12	94.1433	1876.83	1268.9	193.977	1618.26	1303.49	-69.4866	1695.06	1447.84	-147.909	1732.17	1274.96	-188.157	1769.66	1132.1	-234.352	1921.52	1048.79	-217.281	1986.61	995.13	-264.871	1944.96	976.125	-270.502	2033.9	947.42
6772	0	37.0589	1909.76	1612.36	135.322	1914.79	1612.28	18.6679	1758.07	1625.06	151.722	1744.98	1620.34	107.2	1692.81	1495.96	106.237	1634.61	1243.63	94.465	1816.79	1416.65	93.6608	1888.77	1267.38	194.41	1630.54	1302.09	-69.6322	1706.31	1446.28	-148.273	1743.94	1273.54	-188.725	1782.43	1131.03	-234.386	1936.05	1050.27	-217.163	2001.75	997.867	-264.777	1960.7	978.052	-270.32	2050.23	950.918
6773	0	36.7784	1921.58	1611.27	135.19	1926.66	1611.14	18.313	1769.67	1623.57	151.653	1756.78	1618.8	107.021	1704.63	1494.62	106.604	1646.35	1242.29	94.1811	1828.6	1415.06	93.163	1900.74	1265.8	194.39	1642.58	1300.82	-69.4688	1717.66	1444.73	-148.131	1755.65	1271.84	-189.176	1794.85	1129.88	-234.2	1950.14	1051.58	-216.839	2016.72	1000.31	-264.711	1976.07	979.757	-269.885	2066.05	954.15
6774	0	36.4003	1933.1	1610.12	134.551	1938.29	1609.97	18.3232	1781.29	1622.68	151.485	1768.63	1617.51	107.373	1716.55	1493.42	107.427	1658.25	1240.92	93.9552	1840.45	1413.49	92.7456	1912.9	1264.38	194.879	1654.97	1299.41	-69.3779	1728.97	1443	-147.605	1767.18	1270.44	-189.672	1807.31	1128.59	-234.046	1963.75	1052.46	-216.377	2031.33	1002.13	-264.483	1991.11	981.312	-269.434	2081.39	956.84
6775	0	36.1572	1944.8	1608.79	134.393	1950.22	1608.7	18.306	1792.89	1621.33	151.604	1780.49	1616.17	107.594	1728.37	1492.09	107.996	1670.24	1239.38	93.8016	1852.4	1411.94	92.2856	1925.16	1263.02	195.435	1667.38	1297.73	-69.2545	1740.18	1441.5	-147.777	1778.73	1269.34	-189.784	1819.8	1127.17	-233.757	1977.33	1053.01	-215.833	2045.27	1003.53	-264.061	2005.68	982.341	-268.81	2096.31	959.33
6776	0	35.5231	1956.54	1607.69	134.051	1962	1607.56	18.5202	1804.6	1620.11	151.602	1792.54	1615.05	107.738	1740.32	1490.35	108.57	1682.19	1237.82	93.6347	1864.45	1410.29	91.931	1937.55	1261.58	195.713	1679.52	1296.31	-68.9246	1751.53	1439.67	-147.031	1790.06	1267.49	-189.775	1831.84	1125.65	-233.209	1990.38	1053.18	-215.231	2058.9	1004.8	-263.45	2019.63	982.8	-267.919	2110.72	961.426
6777	0	35.7444	1968.08	1606.71	133.863	1973.99	1606.51	18.4296	1816.25	1619	151.708	1804.36	1613.79	108.094	1752.2	1489.17	109.082	1694.37	1236.46	93.5709	1876.54	1408.74	91.6448	1949.76	1260.3	196.395	1692.01	1295.16	-68.5265	1762.99	1437.91	-147.064	1801.45	1265.68	-189.553	1843.79	1124.35	-232.425	2003.32	1053.41	-214.422	2072.24	1005.64	-262.872	2033.18	983.217	-267.136	2124.43	962.975
6778	0	35.5116	1979.86	1605.67	133.801	1985.93	1605.6	18.9433	1827.86	1618.05	152.032	1816.37	1612.89	108.607	1764.48	1487.7	109.966	1706.79	1234.87	93.6819	1888.57	1407.45	91.5398	1961.97	1259.18	197.013	1704.48	1293.71	-68.02	1774.52	1436.29	-146.715	1812.81	1264.23	-188.741	1855.69	1122.62	-231.778	2015.73	1052.98	-213.464	2085.09	1006.05	-262.022	2046.43	983.272	-266.153	2137.82	963.701
6779	0	35.6056	1991.75	1604.64	133.596	1997.82	1604.55	18.9455	1839.49	1616.66	152.319	1828.36	1611.72	108.918	1776.48	1486.12	110.825	1719.09	1233.6	93.8375	1900.58	1406.15	91.6061	1974.16	1258.09	197.809	1717.08	1292.28	-67.5779	1785.64	1434.72	-145.973	1823.96	1262.43	-188.145	1867	1120.82	-230.702	2027.77	1052.57	-212.173	2097.51	1005.98	-260.994	2058.99	982.721	-265.085	2150.57	964.22
6780	0	35.3071	2003.18	1603.98	133.84	2009.95	1603.96	19.4638	1851.3	1615.4	152.537	1840.13	1610.77	109.287	1788.68	1484.84	111.675	1731.69	1231.96	94.1376	1912.76	1404.96	91.6042	1986.31	1256.97	198.468	1729.62	1290.66	-67.1426	1797.33	1433.11	-144.981	1834.96	1260.33	-187.123	1878.43	1118.95	-229.779	2039.51	1051.6	-211.085	2109.62	1005.76	-259.749	2071.26	981.891	-263.737	2162.98	964.4
6781	0	35.6539	2014.73	1603.28	133.657	2021.74	1603.12	19.7471	1863.03	1614.43	152.917	1852.17	1609.9	109.689	1800.63	1483.53	112.547	1744.37	1230.17	94.3817	1924.88	1403.7	91.9416	1998.65	1255.96	199.151	1742.21	1289.2	-66.6488	1808.86	1431.47	-143.598	1845.96	1258.4	-186.264	1889.31	1116.99	-228.47	2051.05	1050.38	-209.912	2121.07	1004.85	-258.569	2083.01	980.801	-262.658	2174.77	963.699
6782	0	35.6276	2026.62	1602.54	133.856	2033.83	1602.53	20.2668	1874.64	1613.15	153.399	1864.14	1608.74	110.376	1812.82	1482.18	113.244	1757.07	1228.74	94.8557	1937.11	1402.47	92.4825	2011.29	1255.02	199.816	1754.56	1287.94	-66.1035	1820.81	1429.86	-142.751	1857.14	1256.45	-184.995	1900.31	1114.84	-227.354	2062.27	1048.82	-208.645	2132.46	1003.35	-257.282	2094.27	979.069	-261.344	2186.22	962.498
6783	0	36.0925	2038.25	1601.73	133.948	2045.78	1601.91	20.8292	1886.31	1612.24	153.882	1876.18	1607.47	110.834	1824.98	1480.82	114.206	1769.85	1227.29	95.4073	1949.51	1401.22	93.0717	2023.91	1253.95	200.732	1767.14	1286.56	-65.3848	1832.73	1428.25	-141.638	1868.12	1254.49	-183.679	1910.83	1112.86	-226.138	2072.95	1046.7	-206.971	2143.41	1001.63	-255.777	2105.42	977.292	-259.884	2197.19	960.882
6784	0	35.8404	2050.32	1600.96	133.881	2057.63	1601.55	21.1674	1897.92	1611.02	154.401	1888.25	1606.71	111.482	1836.85	1479.85	115.069	1782.52	1225.94	96.1409	1961.91	1400.35	93.908	2036.88	1253.25	201.468	1779.58	1285.19	-64.7781	1844.63	1426.52	-140.359	1879.23	1252.48	-182.239	1921.51	1110.48	-224.628	2083.46	1044.11	-205.642	2153.76	999.014	-254.165	2115.69	974.637	-258.292	2207.68	958.424
6785	0	36.2023	2062	1600.86	134.21	2069.85	1601.63	21.4617	1909.87	1610.47	154.815	1900.18	1606.25	112.054	1848.97	1479	115.867	1795.49	1224.58	96.8473	1974.19	1399.51	94.9527	2050.07	1252.75	202.394	1792.34	1283.87	-63.9888	1856.72	1425.19	-139.128	1890.49	1250.5	-180.788	1931.72	1108.21	-223.034	2093.72	1041.36	-203.816	2163.91	996.384	-252.297	2125.78	971.825	-256.643	2217.6	955.455
6786	0	36.1868	2073.67	1600.97	134.324	2081.89	1601.93	22.3451	1921.41	1610.24	155.528	1912.44	1606.16	112.965	1861.06	1478.58	116.486	1808.38	1223.52	97.6768	1986.41	1399.35	96.0979	2063.02	1252.85	203.066	1805.02	1282.74	-63.1794	1868.95	1424.19	-137.872	1901.7	1249.19	-179.065	1942.02	1106.31	-221.325	2103.36	1038.41	-202.079	2173.49	993.121	-250.37	2135.14	968.458	-254.739	2226.94	952.087
6787	0	36.3532	2085.42	1601.25	134.241	2093.83	1602.44	22.579	1933.16	1609.77	156.06	1924.58	1606.13	113.308	1873.13	1478.34	117.043	1821.16	1222.75	98.6937	1998.77	1399.32	97.3652	2076.07	1253.26	203.546	1817.36	1282.13	-62.4167	1881.21	1423.33	-136.319	1912.8	1248.18	-176.876	1952.25	1104.7	-219.284	2112.86	1035.35	-200.129	2182.6	989.371	-248.17	2143.93	964.892	-252.788	2235.61	948.309
6788	0	36.2798	2097.19	1601.77	134.436	2106.17	1603.41	23.5506	1944.84	1609.89	156.541	1936.55	1606.71	114.173	1885.27	1478.39	117.324	1833.9	1222.5	99.8099	2011.08	1399.69	98.6404	2089.06	1254.17	204.31	1829.94	1281.66	-61.6594	1893.48	1423.26	-134.818	1923.89	1247.12	-174.727	1962.09	1103.44	-217.245	2121.95	1032.06	-197.747	2191.31	985.463	-245.775	2152.12	960.961	-250.836	2243.59	943.92
6789	0	36.4648	2108.67	1602.73	134.284	2118.28	1604.62	24.0717	1956.36	1610.25	157.539	1948.92	1607.7	114.635	1897.6	1478.87	117.571	1846.74	1222.44	100.905	2023.33	1400.36	100.029	2102.08	1255.26	204.392	1842.21	1281.68	-60.8544	1905.86	1423.5	-133.095	1935.04	1246.72	-172.332	1971.91	1102.46	-215.041	2130.53	1028.39	-195.509	2199.3	981.321	-242.9	2159.55	956.844	-248.43	2250.93	939.256
6790	0	36.3581	2120.51	1603.73	134.036	2130.33	1605.9	24.9567	1967.97	1610.7	158.355	1961.2	1608.7	115.448	1909.75	1479.62	117.734	1859.13	1222.81	101.95	2035.58	1401.37	101.342	2115.07	1256.53	204.683	1854.51	1282.06	-60.2963	1918.56	1423.97	-131.894	1946.43	1246.93	-169.928	1981.6	1101.68	-212.593	2138.69	1024.95	-193.134	2206.47	976.199	-240.779	2166.69	952.918	-245.989	2257.55	934.004
6791	0	36.4389	2131.91	1604.8	134.033	2142.53	1607.25	26.1369	1979.43	1611.38	159.671	1973.66	1609.8	116.109	1922.12	1480.26	117.835	1871.54	1223.52	103.06	2047.89	1402.41	102.655	2127.97	1258.02	204.889	1866.8	1282.5	-59.5237	1931.06	1424.71	-129.967	1957.42	1246.75	-167.381	1991.2	1101.3	-209.927	2146.53	1021.26	-190.019	2213.83	971.821	-237.81	2172.95	948.164	-243.207	2263.51	928.306
6792	0	36.2757	2143.45	1605.78	134.044	2154.76	1608.56	27.0522	1990.65	1612.24	160.562	1985.98	1610.91	116.78	1934.4	1481.22	117.843	1883.87	1224.25	104.129	2060.21	1403.32	103.899	2140.72	1259.23	205.055	1879.04	1283.5	-58.8551	1943.83	1425.79	-128.18	1968.86	1247.21	-164.906	2000.51	1101.32	-206.933	2154.31	1017.48	-186.925	2220.32	966.225	-234.591	2178.76	943.731	-240.244	2268.82	921.906
6793	0	36.4967	2154.81	1606.9	133.838	2166.7	1609.84	28.268	2002.09	1613.18	161.543	1998.04	1611.73	117.565	1946.44	1482.29	117.919	1896.05	1225.44	104.989	2072.56	1404.32	104.933	2153.24	1260.27	205.183	1891.36	1284.11	-58.2356	1956.59	1426.82	-126.658	1980.36	1247.88	-162.352	2010.04	1101.61	-204.135	2161.46	1013.38	-183.932	2226.15	960.471	-231.204	2184.1	938.961	-237.059	2273.57	915.075
6794	0	36.2074	2166.23	1608.01	133.868	2178.77	1611.14	29.7992	2013.2	1614.05	162.935	2010.57	1612.63	118.098	1958.57	1483.24	118.042	1908.19	1226.56	105.825	2084.81	1405.41	105.755	2165.28	1261.23	205.338	1903.58	1284.74	-57.6307	1969.1	1427.92	-126.423	1991.98	1248.66	-159.715	2019.62	1101.82	-201.133	2168.47	1009.4	-180.687	2231.56	954.59	-227.761	2188.93	934.12	-233.404	2277.88	908.039
6795	0	36.5067	2177.54	1609.55	133.993	2190.84	1612.37	30.1149	2024.73	1614.88	163.928	2022.55	1613.49	118.996	1970.58	1484.24	118.235	1920.11	1227.68	106.42	2096.83	1406.34	106.433	2177.04	1261.9	206.097	1916.03	1285.68	-56.9835	1981.53	1428.94	-124.11	2003.38	1249.24	-157.145	2029.03	1101.99	-197.873	2175.26	1005.26	-177.099	2236.42	948.554	-224.238	2193.23	929.166	-229.372	2281.71	900.341
6796	0	36.3249	2188.85	1611.16	133.847	2202.53	1613.75	31.6484	2035.92	1616.57	164.862	2034.74	1614.51	119.503	1982.55	1485.36	119.149	1932.3	1228.67	106.937	2108.77	1407.45	106.744	2188.72	1262.73	206.741	1928.26	1286.83	-56.3214	1993.62	1430.25	-122.957	2014.96	1250.27	-154.775	2038.43	1102.64	-194.552	2181.64	1001.14	-173.376	2240.96	942.487	-220.372	2197.27	924.14	-225.087	2284.77	892.633
6797	0	36.7406	2200.25	1612.79	134.02	2214.43	1615.07	32.3664	2047.22	1617.79	166.395	2047.22	1615.49	120.415	1994.66	1486.53	119.234	1944.06	1230.07	107.433	2120.72	1408.49	106.72	2200.09	1263.53	207.266	1940.23	1287.93	-55.869	2005.4	1431.6	-122.645	2026.6	1251.45	-152.349	2047.91	1103.2	-191.292	2187.6	996.944	-169.403	2245.09	936.39	-216.507	2201.07	919.399	-220.635	2287.27	884.665
6798	0	36.8814	2211.33	1614.48	134.15	2226.2	1616.48	33.3397	2058.61	1618.98	166.989	2058.93	1616.19	120.759	2006.68	1487.55	119.906	1955.72	1231.22	107.564	2132.35	1409.68	106.445	2211.52	1264.44	207.75	1952.14	1289.07	-55.3764	2016.9	1432.79	-121.396	2037.86	1251.97	-150.001	2057.27	1103.56	-187.741	2193.54	992.708	-165.263	2248.51	930.292	-212.52	2204.11	914.495	-215.867	2289.22	876.526
6799	0	36.9727	2222.8	1616.11	134.211	2237.85	1617.85	34.3494	2069.79	1620.53	168.449	2071.46	1617.33	121.595	2018.46	1488.91	120.434	1967.29	1232.52	107.832	2144.26	1410.71	106.14	2223.14	1265.39	208.617	1964.08	1290.4	-54.7668	2028.55	1434.19	-120.397	2049.13	1253.04	-147.506	2066.64	1104.16	-184.199	2199.02	988.765	-161.201	2251.75	924.466	-208.739	2207.04	910.01	-211.239	2290.51	868.564
6800	0	37.2133	2234.09	1617.82	134.528	2249.75	1619.02	34.8155	2081.13	1621.68	169.368	2083.4	1618.04	122.019	2030.43	1490.13	121.325	1978.83	1233.93	107.926	2156.02	1411.68	105.658	2234.81	1266.3	209.079	1976.03	1291.64	-54.4893	2039.7	1435.46	-119.329	2060.06	1253.92	-145.372	2075.88	1104.88	-180.628	2204.16	984.747	-157.01	2254.52	918.674	-204.491	2209.47	905.563	-206.157	2291.24	860.644
6801	0	37.3366	2245.58	1619.45	134.707	2261.45	1620.16	36.7475	2092.91	1623.98	170.337	2095.48	1618.76	122.708	2042.33	1491.34	121.882	1990.35	1235.07	107.858	2167.79	1412.61	104.953	2246.47	1267.23	210.279	1988.04	1292.9	-54.1055	2051.08	1436.48	-118.125	2070.9	1254.4	-142.909	2084.72	1105.26	-177.024	2208.93	980.995	-152.657	2256.77	913.076	-200.402	2211.77	901.485	-201.058	2291.37	852.869
6802	0	37.6555	2257.02	1620.93	134.739	2273.1	1621.41	37.2199	2104.18	1625.06	170.961	2107.22	1619.56	122.74	2054.23	1492.54	123.081	2001.71	1236.5	107.746	2179.52	1413.68	104.345	2257.97	1268.12	211.003	1999.84	1294.59	-53.7807	2062.12	1437.51	-116.974	2081.19	1254.9	-140.367	2093.41	1105.72	-173.446	2213.28	977.372	-148.621	2258.62	907.874	-196.138	2213.31	897.545	-195.918	2291.15	845.547
6803	0	37.6748	2268.45	1622.54	135.052	2285	1622.71	37.735	2115.82	1626.39	171.284	2118.9	1620.55	123.287	2065.91	1493.85	123.717	2013.08	1237.84	107.681	2191.18	1415	103.88	2269.06	1269.13	211.564	2011.45	1296.07	-53.4896	2073.38	1438.66	-115.689	2091.49	1255.77	-137.963	2101.87	1106.34	-169.997	2217.1	973.867	-144.409	2260.31	903.138	-192.239	2214.79	893.979	-190.993	2290.12	838.381
6804	0	38.1249	2279.96	1624.27	135.286	2296.72	1623.96	38.4807	2127.27	1627.98	171.921	2130.74	1621.42	123.531	2077.7	1495.43	124.382	2024.24	1239.17	107.667	2202.8	1416.13	103.543	2280.14	1269.85	212.428	2023.15	1297.76	-53.3373	2084.34	1439.95	-114.418	2101.52	1256.38	-135.525	2110.08	1106.86	-166.358	2220.85	971.032	-140.425	2261.66	898.953	-188.054	2215.81	890.756	-185.949	2288.83	831.79
6805	0	38.2291	2291.6	1625.79	135.169	2308.31	1625.15	38.6304	2138.91	1629.45	172.293	2142.54	1622.38	123.92	2089.61	1496.63	125.271	2035.44	1241.37	107.54	2214.32	1417.31	103.206	2291.22	1270.78	213.248	2034.7	1299.63	-53.0814	2095.7	1441.02	-113.135	2111.24	1256.95	-132.802	2117.64	1107.26	-163.035	2224.18	968.513	-136.505	2262.82	895.188	-184.12	2216.69	887.923	-180.959	2287.32	826.237
6806	0	38.3111	2303.19	1627.19	135.317	2320.21	1626.28	39.1073	2150.51	1630.63	172.503	2154.2	1623.27	123.79	2101.32	1497.93	125.864	2046.61	1242.4	107.665	2225.96	1418.5	103.104	2302.09	1271.69	213.844	2046.36	1301.18	-53.1667	2106.72	1442.21	-111.876	2120.78	1257.51	-130.17	2125.25	1107.95	-159.787	2227.31	965.711	-132.412	2264.08	891.893	-179.955	2217.43	885.497	-176.209	2285.41	820.514
6807	0	38.3365	2314.71	1628.08	135.339	2331.94	1627.27	39.2373	2161.96	1631.9	172.877	2166.08	1624.45	124.257	2113.18	1499.42	126.988	2057.75	1244.06	107.626	2237.5	1419.6	103.265	2312.99	1272.45	214.519	2057.73	1303.28	-52.5685	2118.36	1443.27	-110.515	2130.06	1257.94	-127.217	2132.2	1108.31	-156.235	2230.39	963.764	-128.723	2265.29	888.815	-175.868	2217.93	883.387	-171.652	2283.22	815.708
6808	0	38.2906	2326.46	1629.15	135.175	2343.67	1628.03	40.054	2173.52	1632.74	173.025	2177.83	1625.47	124.699	2124.99	1500.81	127.667	2068.88	1245.52	107.806	2249.19	1420.68	103.553	2324.15	1273.13	215.246	2069.15	1305.08	-52.5275	2129.58	1444.4	-108.846	2139.3	1258.35	-124.286	2139	1108.86	-152.78	2233.09	961.521	-125.191	2265.5	886.172	-171.763	2218.68	881.747	-167.214	2281.07	811.333
6809	0	38.3292	2337.88	1629.93	135.156	2355.49	1628.87	39.9838	2185.25	1634.1	173.164	2189.77	1626.31	124.545	2136.53	1501.92	128.94	2080.63	1246.34	108.123	2260.68	1421.14	103.999	2335.07	1273.74	215.923	2080.59	1306.72	-52.2751	2141.02	1445.22	-107.504	2148.35	1258.64	-121.382	2145.31	1109.46	-149.406	2235.52	959.852	-121.473	2266.27	883.55	-167.633	2219.25	880.011	-162.445	2279.24	807.696
6810	0	37.9016	2349.49	1630.58	134.928	2367.23	1629.48	40.0028	2196.61	1634.74	173.473	2201.65	1627.19	124.787	2148.44	1502.86	129.262	2091.16	1248.33	108.251	2272.06	1422.18	104.618	2346.06	1274.32	216.372	2091.78	1308.29	-52.0212	2152.53	1445.88	-106.014	2157.2	1258.79	-118.548	2151.25	1109.42	-146.179	2238.02	958.404	-117.762	2267.18	881.453	-163.977	2219.55	878.732	-158.405	2276.82	804.548
6811	0	37.6621	2360.88	1630.71	134.441	2378.88	1630.07	40.3922	2208.22	1635.56	173.57	2213.55	1628.04	124.882	2159.93	1503.84	129.534	2102.1	1249.56	108.569	2283.48	1422.55	105.233	2357.15	1274.82	216.796	2103.14	1309.73	-52.0094	2163.8	1446.5	-104.581	2165.87	1259.07	-115.518	2157.22	1109.95	-143.083	2240.23	956.625	-114.308	2267.7	879.394	-160.109	2220.07	877.556	-154.07	2274.93	801.658
6812	0	37.2195	2372.34	1630.95	134.169	2390.73	1630.44	40.5191	2219.65	1636.1	173.879	2225.57	1628.78	125.384	2171.75	1504.66	130.221	2113.14	1250.56	108.675	2294.92	1423.09	105.918	2368.01	1274.96	217.989	2114.41	1311.18	-51.5169	2175.53	1446.75	-103.257	2174.43	1259.24	-112.24	2163.07	1110.55	-139.755	2242.57	954.898	-110.812	2268.56	877.32	-155.731	2220.26	876.069	-149.867	2273.2	798.975
6813	0	37.0228	2383.92	1631.36	133.712	2402.51	1630.57	40.759	2231.03	1636.23	174.066	2237.47	1629.23	125.811	2183.55	1505.25	131.146	2124.31	1251.31	109.277	2306.5	1423.04	106.687	2378.93	1274.81	218.323	2125.54	1312.23	-51.4306	2186.93	1446.87	-100.986	2182.51	1259.18	-109.608	2168.56	1110.52	-136.499	2244.73	953.529	-107.431	2269.33	875.459	-152.226	2220.84	875.268	-145.887	2271.62	796.456
6814	0	36.5791	2395.16	1630.95	133.04	2414.14	1630.72	40.9569	2242.5	1636.33	174.306	2249.63	1629.77	126.199	2195.23	1505.73	131.716	2135.31	1252.29	109.62	2317.72	1423.62	107.418	2389.79	1274.82	218.962	2136.71	1312.98	-50.967	2198.28	1447.14	-99.3889	2190.32	1259.16	-106.647	2174.1	1110.53	-133.456	2246.8	952.228	-103.997	2270.04	873.843	-148.374	2221.19	874.145	-142.13	2270.29	794.281
6815	0	35.9655	2406.48	1630.82	132.591	2426.04	1630.86	41.0685	2253.77	1636.26	174.403	2261.35	1630.23	126.596	2206.82	1505.94	132.53	2146.42	1252.71	110.453	2329.12	1423.42	108.331	2400.67	1274.63	220.09	2147.98	1313.69	-50.5241	2209.93	1447.06	-97.8535	2198.28	1258.92	-104.004	2179.75	1110.73	-130.445	2248.94	951.042	-100.722	2271.07	872.519	-144.712	2221.6	873.227	-138.471	2269.26	792.519
6816	0	35.6447	2417.81	1630.31	131.85	2437.76	1630.66	41.0767	2265.2	1635.59	174.448	2273.42	1630.31	126.518	2218.41	1505.96	132.773	2157.38	1252.59	110.759	2340.48	1423.23	109.107	2411.73	1274.17	220.681	2159	1314.34	-50.2096	2221.31	1446.82	-96.5921	2206.44	1259.08	-101.373	2185.49	1111.02	-127.748	2251	949.648	-97.7603	2272.01	870.986	-140.452	2222.5	872.545	-134.624	2268.4	791.058
6817	0	34.7373	2429.02	1629.61	131.099	2449.45	1630.36	41.4546	2276.41	1635.42	174.621	2285.14	1630.49	127.034	2230.01	1506	133.311	2168.58	1253	111.151	2351.95	1422.72	109.995	2422.54	1273.71	222.369	2170.3	1314.78	-49.8347	2232.56	1446.53	-95.3978	2214.4	1258.76	-98.8945	2191.28	1111.07	-124.977	2253.3	948.29	-94.8656	2273.22	869.524	-137.128	2222.95	871.711	-131.413	2267.62	789.398
6818	0	34.3798	2440.36	1628.83	130.65	2461.31	1629.82	41.5318	2287.87	1634.64	174.999	2297.54	1630.25	127.294	2241.54	1505.73	133.873	2179.66	1252.51	111.865	2363.42	1422.23	110.99	2433.54	1272.86	222.635	2181.44	1314.59	-49.366	2244.13	1445.82	-93.61	2222.41	1258.35	-96.5947	2197.43	1111.28	-122.51	2255.82	947.261	-94.1214	2275.53	868.252	-133.602	2223.61	870.972	-128.085	2267.36	788.196
6819	0	33.8602	2451.63	1627.87	129.969	2472.98	1629.18	41.6778	2299.18	1634	174.969	2309.27	1630.12	127.996	2253.14	1505.08	134.423	2190.85	1252.26	112.405	2374.74	1421.61	112.005	2444.66	1272.03	222.914	2192.39	1314.45	-48.9581	2255.7	1445.39	-92.2614	2230.76	1258.01	-94.0824	2203.78	1111.51	-119.996	2258.73	946.292	-88.4078	2276.5	866.577	-130.331	2224.88	870.853	-124.884	2267.32	786.813
6820	0	33.2922	2462.99	1626.87	129.31	2484.63	1628.48	41.933	2310.73	1633.65	175.202	2321.46	1629.71	127.994	2264.83	1504.75	134.301	2201.71	1251.98	112.887	2386.27	1420.69	112.926	2455.62	1271.01	223.443	2203.53	1314.34	-48.6713	2266.92	1444.36	-90.98	2239.26	1257.44	-91.9895	2210.49	1111.62	-117.819	2261.83	945.37	-85.1798	2278.8	865.489	-127.29	2226.34	870.352	-122.28	2267.57	785.753
6821	0	33.0646	2474.39	1625.54	128.963	2496.44	1627.56	41.9791	2321.99	1632.7	175.297	2333.21	1629.26	127.871	2276.41	1503.88	134.718	2212.86	1251.05	113.511	2397.87	1419.87	113.954	2466.86	1269.98	223.598	2214.35	1313.99	-48.124	2278.59	1443.59	-89.7277	2248.16	1257.32	-89.71	2217.34	1111.65	-115.865	2265.27	944.377	-83.5073	2281.31	864.569	-124.32	2228.24	869.866	-119.134	2267.95	784.678
6822	0	32.4568	2485.78	1624.27	128.519	2508.17	1626.46	42.5533	2333.3	1631.41	175.443	2345.2	1628.43	128.372	2288.09	1503.17	135.387	2224.31	1250.74	113.906	2409.29	1418.75	114.893	2477.91	1268.83	223.837	2225.46	1313.37	-47.9347	2290.28	1442.55	-88.5691	2257.27	1256.71	-87.9506	2224.67	1111.81	-114.082	2269.08	943.546	-81.9979	2284.39	863.701	-121.586	2230.61	869.63	-116.651	2268.8	783.893
6823	0	32.2323	2497.27	1623.14	128.064	2519.79	1625.51	41.9881	2344.92	1630.42	175.514	2357.34	1627.61	128.491	2299.51	1502.51	135.205	2235.47	1250.19	114.293	2420.9	1418.02	115.738	2489.03	1267.56	224.217	2236.69	1312.73	-47.5682	2301.9	1441.53	-87.5296	2266.68	1256.28	-86.1882	2232.27	1111.7	-112.337	2273.61	942.886	-80.352	2287.82	862.557	-119.047	2233.6	869.696	-114.524	2270.21	783.273
6824	0	32.2246	2508.9	1621.91	127.788	2531.58	1624.39	42.1057	2356.42	1629	175.397	2368.75	1626.92	128.549	2311.17	1501.42	136.229	2246.97	1249.05	114.863	2432.29	1416.78	116.593	2500.29	1266.4	224.295	2247.51	1312.29	-47.4902	2313.46	1440.68	-86.5012	2276.44	1255.87	-83.7069	2240.48	1111.64	-110.817	2278.18	942.455	-78.588	2291.65	861.708	-116.931	2236.87	869.791	-112.827	2271.82	782.413
6825	0	31.9516	2520.47	1620.37	127.707	2543.37	1623.21	42.3669	2368.2	1627.98	175.334	2380.47	1626.12	129.047	2322.91	1500.34	135.572	2257.94	1247.8	115.131	2443.89	1415.83	117.319	2511.3	1265.24	224.404	2258.87	1311.29	-47.3392	2325.34	1439.57	-85.6701	2286.37	1254.99	-82.443	2248.64	1111.36	-110.145	2283.3	942.215	-77.6713	2296.02	861.049	-114.972	2240.77	869.76	-111.026	2274.09	781.616
6826	0	31.7599	2532.06	1618.89	127.579	2555.01	1622.02	41.9513	2379.9	1626.48	175.297	2392.19	1625.29	128.688	2334.51	1499.29	134.799	2268.71	1246	115.577	2455.53	1414.58	117.889	2522.48	1263.9	224.423	2269.98	1310.63	-47.0833	2337.13	1438.52	-84.917	2296.6	1254.22	-80.845	2257.36	1111.42	-108.73	2288.92	941.671	-76.967	2300.82	860.054	-113.451	2245.23	869.872	-109.507	2276.73	781.018
6827	0	31.7651	2543.75	1617.34	127.532	2566.66	1620.56	41.924	2391.49	1625.16	175.155	2403.63	1624.27	128.882	2346.23	1498.06	136.155	2280.8	1245.84	115.714	2467.15	1413.4	118.45	2533.94	1262.4	224.727	2281.15	1309.79	-46.86	2349.17	1437.47	-84.1213	2307.11	1253.62	-79.5983	2266.62	1111.26	-106.811	2295.05	940.406	-76.3221	2306.27	859.224	-111.721	2250.35	869.83	-108.112	2280.14	780.471
6828	0	31.8179	2555.57	1615.59	127.654	2578.53	1619.02	41.4892	2403.39	1623.61	174.911	2415.37	1622.9	129.254	2357.92	1496.94	134.76	2291.57	1243.47	115.995	2478.56	1411.8	118.851	2545.47	1261.11	224.764	2292.37	1308.81	-46.8225	2360.95	1436.16	-83.9185	2317.78	1252.35	-78.5084	2276.24	1110.72	-105.823	2301.96	940.034	-76.3435	2311.91	858.838	-110.867	2255.91	869.857	-106.902	2284.17	779.905
6829	0	31.7102	2567.52	1613.74	127.698	2590.21	1617.47	41.1365	2415.26	1621.94	174.56	2426.78	1621.97	128.874	2369.26	1495.74	134.815	2303.13	1243.16	116.127	2490.14	1410.5	119.29	2557.11	1259.87	224.518	2303.47	1307.64	-46.9117	2372.79	1434.67	-83.6068	2328.91	1251.6	-77.8347	2286.05	1110.32	-105.577	2309.5	939.026	-76.0554	2318.59	858.055	-109.742	2262.19	869.669	-106.356	2288.77	779.312
6830	0	31.9346	2579.34	1611.75	127.762	2601.82	1615.74	41.4645	2427.23	1621.15	174.579	2438.57	1620.83	128.766	2380.72	1494.44	135.165	2314.62	1242.31	116.091	2501.7	1409.11	119.52	2568.73	1258.49	224.424	2314.68	1306.51	-47.1587	2384.5	1433.37	-83.431	2339.93	1250.43	-77.2067	2296.35	1109.59	-105.611	2317.16	938.38	-75.7247	2325.43	857.073	-109.036	2269.12	869.654	-105.452	2294.06	778.596
6831	0	32.2073	2591.35	1610.02	127.942	2613.46	1613.9	40.7434	2438.94	1619.98	174.176	2450.27	1619.71	129.043	2392.16	1493.29	134.042	2325.56	1240.29	116.301	2513.21	1407.6	119.768	2580.4	1257.15	224.034	2325.93	1305.28	-46.914	2396.35	1432.22	-83.2094	2351.34	1249.12	-76.7593	2307.11	1108.81	-105.626	2325.91	937.827	-75.463	2332.87	856.182	-109.039	2276.66	869.524	-105.062	2300.17	777.905
6832	0	32.2069	2603.19	1608.21	128.082	2625.08	1612.22	40.4076	2450.86	1618.55	173.767	2461.61	1618.72	128.809	2403.52	1491.94	133.643	2337.36	1238.72	116.419	2524.84	1406.55	120.073	2592.16	1256.11	223.758	2337.25	1303.71	-46.9071	2408.09	1431.09	-83.3664	2362.69	1248.06	-76.7901	2318.09	1107.93	-105.849	2335.15	936.64	-75.7494	2341.31	855.029	-108.694	2285.23	869.379	-105.106	2307	777.504
6833	0	32.1774	2615.02	1606.33	128.4	2636.81	1610.68	39.622	2462.86	1617.29	173.457	2473.15	1617.97	128.373	2414.78	1490.54	133.643	2349.78	1237.94	116.138	2536.2	1405.83	120.021	2603.61	1255.39	223.675	2348.9	1302.36	-47.2884	2419.55	1429.93	-83.7022	2374.29	1246.94	-76.977	2329.3	1107.02	-105.68	2344.78	935.948	-76.1265	2350.09	854.203	-109.175	2294.16	869.154	-105.522	2314.48	776.658
6834	0	32.3648	2626.93	1604.75	128.486	2648.42	1609.15	39.4069	2474.89	1616.71	172.861	2484.5	1617.47	127.952	2425.92	1489.51	133.049	2361.39	1236.54	116.236	2547.65	1405.04	119.848	2615.33	1254.81	222.947	2360.06	1301.08	-47.6105	2430.94	1429.03	-83.7514	2385.85	1245.91	-77.2649	2340.76	1106.07	-106.524	2355.04	935.12	-77.0018	2359.7	853.31	-110.008	2303.87	868.73	-105.936	2323.01	776.287
6835	0	32.5623	2638.82	1603.28	128.383	2660	1607.42	39.0139	2486.96	1615.56	172.381	2495.95	1616.67	127.574	2437.11	1488.61	131.43	2372.74	1234.77	115.896	2558.98	1404.09	119.83	2627.14	1254.22	222.289	2371.56	1299.53	-47.7444	2442.6	1428.22	-84.3328	2397.58	1244.89	-77.9865	2352.59	1105.45	-107.673	2365.8	934.38	-77.8816	2370.1	852.406	-111.102	2314.44	868.22	-106.434	2332.38	775.468
6836	0	32.4195	2650.8	1601.6	128.689	2671.7	1605.86	37.9338	2498.91	1614.04	172.01	2507.81	1615.78	127.46	2448.53	1487.18	131.075	2384.9	1233.26	115.659	2570.54	1403.27	119.6	2638.89	1253.66	221.847	2383.41	1297.97	-48.298	2453.93	1427.32	-84.6038	2409.36	1243.95	-78.4487	2364.5	1104.29	-108.489	2377.32	933.276	-79.2446	2381.3	851.509	-112.114	2325.61	867.636	-107.634	2342.62	774.446
6837	0	32.3427	2662.7	1599.96	128.883	2683.34	1604.39	37.4417	2510.87	1613.61	171.195	2518.95	1615.11	127.008	2459.91	1486.07	131.042	2397.49	1232.43	115.236	2582.22	1402.82	119.19	2651	1253.26	220.806	2394.86	1296.4	-48.7849	2465.36	1426.05	-85.5971	2421.17	1243	-79.6095	2376.67	1103.52	-110.147	2389.23	932.767	-80.7733	2393.04	850.636	-113.432	2337.65	866.986	-109.137	2353.81	773.589
6838	0	32.4431	2674.6	1598.51	129.023	2694.83	1603.05	36.5012	2522.94	1612.88	170.915	2530.64	1614.4	126.069	2470.96	1485.09	130.763	2409.87	1231.68	114.606	2593.52	1401.57	118.785	2663.17	1252.8	219.934	2406.93	1294.91	-49.1177	2477.1	1425.17	-86.3106	2433.23	1241.98	-80.1067	2388.83	1102.36	-111.847	2401.88	931.909	-82.509	2405.66	849.689	-115.526	2350.1	865.946	-110.548	2365.87	772.249
6839	0	32.3907	2686.6	1597.15	129.022	2706.22	1601.63	36.1734	2534.61	1611.94	170.081	2541.84	1613.35	125.641	2482	1484.1	130.277	2422.44	1230.1	114.007	2605.11	1400.84	118.069	2675.51	1252.5	219.611	2418.76	1293.6	-49.817	2488.53	1424.29	-87.4316	2445.36	1241.11	-81.5611	2401.41	1101.37	-113.493	2414.99	930.751	-84.3967	2418.89	848.678	-117.638	2363.26	865.107	-113.122	2378.81	771.153
6840	0	32.3906	2698.51	1596.18	128.993	2717.79	1600.67	35.1615	2546.7	1611.11	169.26	2552.91	1612.73	125.122	2493.29	1482.98	129.509	2434.75	1228.52	113.271	2616.52	1400.17	117.314	2687.87	1252.3	218.636	2430.84	1291.82	-50.4958	2499.79	1423.29	-88.2539	2457.49	1240.11	-83.3058	2414.09	1100.21	-115.759	2428.4	929.871	-86.9064	2432.9	847.687	-119.92	2377.06	863.811	-115.494	2392.83	769.884
6841	0	32.2705	2710.46	1595.57	129.158	2729.4	1600.04	34.5744	2558.61	1610.77	168.543	2564.44	1612.29	124.426	2504.46	1482.12	128.538	2447.48	1227.4	112.574	2627.95	1399.73	116.347	2700.12	1252.29	218.124	2443.05	1290.32	-51.1594	2511.32	1422.65	-89.6463	2469.8	1239.07	-84.7498	2427.1	1098.98	-118.215	2442.29	929.076	-89.9207	2447.53	846.728	-122.49	2391.6	862.605	-118.255	2407.77	768.765
6842	0	32.1468	2722.24	1595.22	128.953	2740.86	1599.69	33.5344	2570.68	1610.74	167.822	2575.68	1612.3	123.817	2515.74	1481.74	128.502	2459.87	1226.17	111.92	2639.73	1400.38	115.392	2712.53	1252.83	216.916	2455.03	1289.11	-51.7555	2522.37	1422.32	-90.4206	2482.25	1238.33	-86.0996	2440.6	1097.77	-120.503	2456.91	928.404	-92.5639	2462.74	845.889	-125.211	2406.83	861.532	-121.531	2423.66	768.313
6843	0	31.7586	2734.21	1595.49	128.955	2752.41	1599.78	32.9991	2582.28	1610.77	167.038	2587.04	1612.47	122.669	2526.92	1481.42	127.93	2472.27	1225.49	111.153	2651.21	1400.89	114.236	2724.76	1253.73	216.636	2466.98	1288.55	-52.5177	2533.43	1422.03	-91.9902	2494.94	1237.78	-87.8339	2454.15	1097.33	-123.213	2471.89	927.811	-95.2463	2478.53	845.201	-128.098	2422.18	860.379	-124.806	2440.2	766.972
6844	0	32.0076	2746.19	1596.11	128.95	2763.97	1599.8	31.8606	2594.47	1611.36	166.196	2598.32	1612.86	122.3	2538.17	1481.62	127.664	2484.35	1224.84	110.132	2662.67	1401.05	113.221	2736.98	1254.64	216.204	2479.19	1287.88	-53.2426	2544.36	1422.07	-92.9014	2507.94	1238.01	-90.0023	2467.71	1096.57	-126	2487.5	927.633	-98.6066	2495.08	844.823	-131.085	2438.42	859.592	-128.744	2457.88	766.603
6845	0	31.8985	2758.03	1596.36	128.82	2775.49	1600.11	31.1907	2606.22	1611.89	165.616	2610.07	1613.2	121.532	2549.44	1482.03	127.697	2496.53	1224.73	109.357	2674.16	1401.85	112.165	2749.25	1255.59	216.19	2491.31	1287.92	-53.7524	2555.28	1422.32	-94.4857	2520.6	1237.44	-91.6012	2481.89	1095.99	-129.193	2503.35	927.727	-102.195	2512.26	844.631	-133.931	2455.43	858.938	-132.581	2476.16	765.862
6846	0	31.4166	2769.91	1596.67	128.699	2786.92	1600.44	30.2388	2618.21	1612.67	164.948	2621.56	1613.59	120.986	2560.94	1482.32	127.606	2508.26	1225.36	108.545	2685.51	1402.36	111.184	2761.59	1256.67	215.542	2503.09	1288.27	-54.1573	2566.25	1422.6	-95.443	2533.66	1237.85	-93.8181	2495.8	1095.64	-131.996	2519.74	927.626	-106.516	2530.08	845.043	-137.231	2472.67	858.366	-137.167	2495.49	766.215
6847	0	31.4133	2781.69	1597.21	128.721	2798.37	1600.9	29.8077	2629.98	1613.41	164.182	2632.68	1614.19	120.779	2572.38	1483.23	128.025	2520.33	1225.73	107.844	2696.79	1402.62	110.195	2773.77	1257.95	215.589	2515.01	1288.88	-54.6633	2577.05	1422.88	-96.7118	2546.37	1237.73	-95.198	2510.14	1095.48	-134.967	2536.55	928.281	-110.217	2548.37	845.613	-140.374	2490.58	858.121	-141.619	2515.4	766.449
6848	0	31.3985	2793.28	1597.91	128.578	2809.73	1601.68	29.1751	2641.6	1614.31	163.461	2643.89	1615	120.052	2583.71	1484.1	128.078	2532.08	1226.46	107.106	2708.15	1403.58	109.294	2785.46	1259.05	215.507	2526.81	1289.72	-54.7068	2588.18	1423.62	-97.7445	2559.12	1238.39	-96.9392	2524.44	1095.45	-137.932	2553.75	928.789	-113.851	2567.18	846.398	-143.603	2508.95	858.077	-146.433	2536.06	767.013
6849	0	31.0746	2804.86	1598.61	128.499	2821.12	1602.42	28.3729	2653	1614.93	163.052	2655.25	1615.95	119.971	2595.2	1484.89	128.706	2543.87	1226.95	106.733	2719.5	1404.3	108.767	2796.86	1259.9	215.971	2538.52	1290.59	-54.965	2599.16	1424.51	-98.5236	2571.65	1238.29	-99.2028	2538.45	1095.55	-140.915	2571.02	929.402	-117.202	2586.43	847.277	-147.186	2528.01	857.86	-151.236	2557.55	767.863
6850	0	30.7566	2816.21	1599.37	128.041	2832.44	1603.25	28.161	2664.57	1615.76	162.495	2666.3	1616.88	119.755	2606.62	1485.82	129.274	2555.5	1228.17	106.453	2730.88	1405.29	108.335	2808	1260.52	216.224	2550.04	1292.01	-55.3675	2610.41	1425.24	-99.2313	2584.51	1239.35	-101.054	2552.86	1095.61	-144.113	2589.07	930.516	-120.526	2606.17	848.246	-150.373	2547.6	858.014	-157.533	2579.95	769.131
6851	0	30.478	2827.42	1600.16	127.673	2843.67	1604.41	27.5565	2675.77	1616.46	161.7	2677.23	1618.25	119.147	2617.84	1486.85	129.323	2566.51	1229.44	106.341	2742.3	1406.41	108.061	2818.89	1261.3	216.271	2561.23	1293.42	-55.42	2621.81	1426.01	-100.115	2597.27	1240.17	-102.836	2567.27	1095.72	-147.287	2607.04	931.416	-123.879	2626.27	849.456	-153.782	2567.4	858.276	-161.156	2602.01	770.052
6852	0	30.1772	2838.48	1601.05	127.446	2854.87	1605.57	27.2709	2686.89	1617.4	161.545	2688.43	1619.56	119.341	2629.05	1487.83	129.075	2577.47	1230.56	106.362	2753.46	1407.35	108.337	2829.47	1261.96	216.105	2572.35	1294.3	-55.3882	2633.18	1426.71	-100.815	2609.89	1240.75	-104.327	2582.08	1095.92	-150.17	2625.69	932.96	-127.047	2646.73	850.83	-157.323	2587.64	858.569	-165.761	2625.2	772.113
6853	0	30.1134	2849.58	1601.87	127.153	2865.86	1606.48	27.0207	2698.05	1618.07	161.366	2699.74	1620.89	119.328	2640.33	1488.57	129.345	2588.87	1231.29	106.466	2764.4	1407.97	108.88	2840.18	1262.59	216.369	2583.27	1295.52	-55.7154	2644.65	1427.32	-101.548	2622.73	1241.27	-106.413	2596.34	1095.73	-152.963	2644.33	934.33	-129.018	2667.56	852.311	-161.042	2608.28	858.924	-170.534	2648.71	774.261
6854	0	29.6126	2860.6	1602.51	126.927	2876.91	1607.35	26.7606	2709.14	1618.76	161.235	2710.88	1621.92	119.107	2651.54	1489.42	129.371	2599.8	1232.61	106.964	2775.68	1408.83	109.69	2851.02	1263.27	216.451	2594.02	1296.74	-55.7311	2656.02	1427.93	-102.101	2635.7	1242.05	-108.374	2611.21	1096.01	-155.995	2663.35	935.877	-135.672	2689.49	855.512	-164.761	2629.33	859.701	-174.963	2672.36	776.525
6855	0	29.4696	2871.54	1603.02	126.785	2888.04	1608.32	26.4102	2720.07	1619.56	161.09	2721.72	1622.84	119.16	2662.49	1490.48	128.908	2610.38	1233.82	107.266	2786.75	1409.73	110.729	2862.04	1263.89	215.829	2604.54	1297.99	-55.5109	2667.66	1428.79	-102.608	2648.7	1242.88	-109.948	2626.26	1096.13	-158.76	2682.72	937.622	-138.979	2710.83	857.797	-168.447	2650.65	860.622	-179.309	2696.71	779.165
6856	0	29.1915	2882.47	1603.47	126.361	2899	1609.3	26.2392	2730.99	1620.33	160.749	2732.75	1623.94	119.053	2673.25	1491.65	128.633	2621.19	1234.77	107.693	2797.63	1410.47	111.723	2873.07	1264.67	215.519	2614.99	1299.02	-55.3976	2679.26	1429.59	-103.372	2661.98	1244.22	-112.243	2640.88	1096.79	-161.358	2702.22	939.642	-142.137	2732.44	860.587	-171.836	2672.32	862.008	-183.694	2721.02	782.2
6857	0	29.1135	2893.17	1604.1	126.135	2909.93	1610.23	25.6313	2741.21	1621.09	160.562	2743.75	1625.12	119.257	2684.28	1492.58	128.245	2631.71	1236.01	108.034	2808.3	1410.96	112.783	2883.89	1265.39	215.801	2625.69	1300.01	-55.4438	2690.76	1430.53	-104.018	2675.03	1244.81	-113.683	2656.21	1097.04	-164.012	2721.9	941.869	-145.075	2754.21	863.463	-175.337	2694.23	863.712	-187.545	2745.79	785.835
6858	0	29.0831	2903.97	1604.76	125.424	2920.56	1611.01	26.058	2752.29	1621.9	160.784	2755.09	1626.52	119.106	2695.26	1493.55	127.999	2642.31	1236.7	108.563	2819.26	1411.95	113.841	2894.76	1266.27	215.723	2636.19	1301	-55.3047	2702.02	1431.42	-104.9	2688.44	1245.91	-115.903	2671.09	1097.87	-166.398	2741.63	944.224	-147.827	2775.95	866.927	-178.925	2716.34	865.787	-191.744	2770.45	789.653
6859	0	28.6036	2914.68	1605.48	125.4	2931.46	1612.17	25.4385	2762.68	1622.81	160.872	2765.91	1628.03	119.183	2706.02	1494.49	127.935	2653.02	1237.86	109.095	2829.91	1413.07	114.754	2905.36	1267.41	215.204	2646.3	1302.05	-55.0476	2713.29	1432.66	-105.449	2701.66	1246.8	-117.67	2686.3	1098.42	-168.692	2761.64	947.342	-150.552	2797.87	870.899	-181.808	2738.62	868.198	-195.197	2795.32	794.388
6860	0	28.6665	2925.32	1606.25	125.176	2942.39	1613.18	26.2513	2773.78	1623.66	160.67	2776.5	1629.63	119.725	2716.79	1495.77	127.282	2662.97	1239.29	109.64	2840.61	1414.19	115.455	2915.85	1268.52	214.841	2656.59	1303.26	-54.8318	2724.69	1434.04	-106.209	2714.84	1248.06	-119.848	2701.5	1099.16	-170.847	2781.5	950.772	-153.149	2819.68	875.083	-185.295	2760.8	870.795	-198.461	2820.11	799.48
6861	0	28.6513	2936.01	1606.77	125.165	2953.2	1613.94	26.3074	2784.49	1624.78	160.621	2787.34	1630.85	119.807	2727.51	1497.11	127.099	2673.5	1240.72	110.012	2851.36	1415.44	115.977	2926.33	1269.56	214.398	2666.6	1304.47	-54.6629	2736.04	1435.69	-107.007	2728.06	1249.49	-121.288	2716.91	1100.48	-172.791	2801.69	954.374	-155.834	2841.51	879.799	-187.483	2783.6	873.883	-201.516	2844.88	804.776
6862	0	28.6743	2946.66	1607.1	125.542	2964.09	1614.58	26.6356	2795.13	1625.77	160.783	2798.37	1632.03	120.278	2738.38	1498.42	126.794	2683.74	1242.2	110.44	2861.94	1416.58	116.308	2936.99	1270.58	214.36	2677.01	1305.48	-54.499	2747.18	1437.04	-107.657	2741.28	1250.93	-123.093	2732.33	1101.54	-174.854	2821.65	958.064	-157.718	2863.41	884.617	-189.639	2806.02	877.009	-204.291	2869.77	810.636
6863	0	28.8466	2957.51	1607.61	125.556	2975.09	1615.05	26.9904	2806.02	1626.83	161.249	2809.71	1633.26	120.134	2749.07	1499.53	126.548	2694.01	1243.53	110.757	2872.54	1417.52	116.606	2947.46	1271.4	214.467	2687.45	1306.66	-54.5144	2758.29	1438.37	-108.641	2754.5	1252.39	-125.982	2746.73	1104.66	-176.44	2841.82	961.975	-159.278	2885.17	889.636	-191.997	2828.73	880.989	-206.647	2894.45	816.598
6864	0	29.0637	2968.13	1608.08	125.847	2985.98	1615.62	26.7006	2816.45	1628.03	161.771	2820.65	1634.44	120.262	2759.95	1500.53	126.223	2704.19	1245.12	111.083	2883.23	1418.5	116.696	2957.88	1272.23	214.099	2697.31	1308.1	-54.3591	2769.58	1439.83	-108.911	2767.57	1254.06	-130.048	2759.53	1105.55	-177.903	2861.88	966.356	-160.636	2906.86	894.842	-194.578	2850.95	885.1	-208.684	2919.01	822.79
6865	0	29.4114	2979.22	1608.69	125.998	2996.66	1615.91	27.0097	2827.49	1629.04	162.256	2831.52	1635.37	120.515	2770.53	1501.71	126.124	2714.53	1246.32	111.241	2893.59	1419.36	116.752	2968.31	1273.02	213.824	2707.54	1309.16	-54.4574	2780.76	1441.31	-109.946	2780.79	1255.77	-128.306	2778.5	1106.72	-179.345	2881.74	970.615	-161.88	2928.5	900.273	-197.088	2873.43	889.63	-210.368	2943.31	829.167
6866	0	29.8834	2989.92	1609.11	126.496	3007.5	1616.36	27.8299	2838.61	1629.92	162.579	2842.27	1636.12	120.533	2781.06	1502.68	125.821	2724.88	1247.29	111.402	2904.31	1420.28	116.738	2978.44	1273.66	213.411	2717.48	1310.18	-54.4387	2791.73	1442.54	-111.318	2793.96	1257.48	-131.06	2793.56	1107.88	-180.514	2901.79	975.131	-162.851	2949.97	906.032	-199.258	2895.71	894.255	-211.844	2967.74	835.659
6867	0	30.1996	3000.68	1609.49	126.942	3018.43	1616.6	28.0162	2849.42	1630.79	162.647	2853.21	1636.82	121.064	2791.9	1503.29	125.424	2734.99	1248.37	111.508	2914.71	1420.83	116.684	2988.59	1274.07	213.098	2727.93	1310.86	-54.4731	2802.66	1443.77	-112.027	2807.13	1258.74	-133.054	2809.17	1109.01	-181.968	2921.4	979.609	-163.781	2971.27	911.805	-201.209	2917.92	898.835	-212.944	2991.69	842.317
6868	0	30.5529	3011.67	1609.87	127.32	3029.13	1616.63	28.2666	2860.49	1631.56	162.965	2864.08	1637.3	120.656	2802.72	1504.13	125.357	2745.47	1249.3	111.563	2925.2	1421.42	116.452	2998.66	1274.61	212.569	2738.22	1311.42	-54.4438	2813.73	1444.83	-113.271	2820.26	1260.09	-135.07	2824.65	1110.41	-183.026	2941.09	984.262	-164.498	2992.52	917.451	-202.92	2939.91	903.516	-213.742	3015.32	849.07
6869	0	31.2263	3022.48	1610.28	127.836	3039.77	1616.82	28.3214	2871.21	1632.28	163.22	2874.59	1637.67	120.667	2813.14	1504.79	124.608	2755.38	1249.95	111.484	2935.67	1421.9	116.411	3008.89	1274.94	211.967	2748.14	1312.1	-54.7017	2824.56	1445.93	-114.114	2833.32	1261.37	-136.7	2840.05	1111.59	-184.295	2960.41	988.856	-165.22	3013.33	923.314	-204.306	2961.73	908.205	-214.535	3038.72	855.917
6870	0	31.6597	3033.36	1610.51	129.147	3051.17	1616.63	28.9555	2882.24	1632.75	163.299	2885.16	1637.84	120.627	2823.97	1504.98	123.953	2765.9	1250.12	111.535	2946.19	1422.03	116.317	3019.38	1275.17	211.791	2758.51	1312.45	-54.7546	2835.43	1446.76	-115.038	2846.38	1262.33	-136.83	2855.51	1112.16	-185.333	2979.79	993.23	-165.701	3033.98	929.11	-205.887	2983.28	912.82	-215.047	3061.78	862.567
6871	0	32.2637	3044.5	1610.49	129.716	3061.44	1617.19	29.8667	2893.26	1632.88	163.328	2895.45	1637.71	120.64	2834.67	1505.3	123.535	2776.1	1250.37	111.539	2956.89	1422.17	116.202	3029.54	1275.05	212.204	2768.93	1312.61	-54.624	2846.46	1447.27	-116.368	2859.31	1263.41	-139.582	2871.41	1113.45	-186.195	2998.67	997.481	-166.204	3054.38	934.684	-208.522	3004.6	917.324	-215.495	3084.45	869.08
6872	0	32.7642	3055.49	1610.37	130.469	3072.65	1616.07	30.2937	2904.47	1632.84	164.101	2906.5	1637.44	120.756	2845.41	1505.09	123.343	2786.77	1250.32	111.602	2967.49	1421.78	116.232	3040.42	1274.74	211.975	2779.42	1312.57	-54.8622	2857.24	1447.46	-117.399	2872.23	1264.02	-141.413	2886.73	1114.35	-186.973	3017.63	1001.62	-166.436	3074.64	940.128	-209.501	3025.69	921.918	-215.526	3106.98	875.626
6873	0	33.2304	3066.58	1609.97	131.282	3083.84	1615.49	29.9385	2915.54	1633.1	164.137	2917.25	1637.17	120.354	2856.16	1505.02	123.179	2797.21	1250.36	111.458	2978.01	1421.39	116.005	3050.85	1274.18	211.063	2789.9	1312.13	-55.1402	2868.3	1447.27	-117.539	2885.07	1264.34	-143.167	2902.11	1114.88	-187.528	3036.28	1005.54	-166.639	3094.37	945.489	-210.755	3046.44	926.454	-215.628	3129.03	882.033
6874	0	33.6926	3077.69	1609.53	131.716	3094.45	1614.98	29.5125	2926.31	1633	163.88	2927.75	1636.66	119.679	2867.19	1504.51	122.906	2807.57	1250.02	111.351	2988.92	1420.94	115.719	3061.46	1273.67	210.571	2800.23	1312.01	-55.1539	2879.25	1447.33	-119.337	2898.07	1264.83	-144.998	2917.3	1115.74	-188.095	3054.75	1009.53	-166.762	3114.04	950.791	-211.126	3067.03	930.823	-215.602	3150.77	888.485
6875	0	34.0427	3088.72	1609.17	132.236	3105.27	1614.34	30.1361	2937.72	1632.47	164.565	2938.77	1636.17	120.069	2877.92	1504.21	122.891	2818.33	1249.71	111.37	2999.47	1420.19	115.561	3072.01	1272.99	210.58	2811.15	1311.29	-55.285	2889.95	1447.12	-120.135	2910.96	1265.3	-146.444	2932.46	1116.36	-188.459	3072.76	1013.51	-166.769	3133.15	956.027	-211.635	3087.1	935.232	-215.416	3171.83	895.027
6876	0	34.6365	3099.66	1608.75	133.257	3116.59	1614.45	29.5773	2948.63	1632.34	164.487	2949.69	1635.5	119.945	2888.96	1503.39	123	2828.69	1249.05	111.232	3010.39	1419.43	115.235	3082.43	1272.01	210.723	2821.92	1310.69	-55.2943	2900.93	1446.91	-122.198	2924.01	1265.81	-147.675	2947.43	1116.68	-188.748	3090.57	1017.27	-166.59	3152.1	961.167	-211.651	3106.86	939.06	-215.242	3192.49	901.26
6877	0	35.0551	3110.71	1607.91	133.331	3127.25	1612.76	29.9722	2959.69	1631.43	164.288	2960.16	1634.77	120.194	2900.08	1502.57	123.012	2839.42	1248.28	111.058	3021.15	1418.59	114.795	3092.84	1270.95	210.406	2832.74	1309.69	-55.2653	2911.77	1446.29	-122.465	2936.79	1265.56	-148.762	2962.27	1116.99	-188.866	3107.95	1020.9	-166.365	3170.42	965.998	-211.93	3126.19	942.791	-214.784	3212.79	907.38
6878	0	35.2411	3121.9	1606.84	133.534	3137.98	1611.79	30.0572	2970.64	1630.8	164.853	2971.57	1634.03	120.204	2910.83	1501.77	122.829	2849.71	1247.63	110.98	3032.05	1417.57	114.436	3103.43	1269.75	210.133	2843.61	1308.91	-55.3422	2922.53	1445.74	-123.206	2949.53	1265.46	-150.248	2977.1	1117.15	-188.799	3125.55	1024.2	-165.994	3188.6	970.668	-212.312	3145.42	947.158	-214.294	3232.7	913.303
6879	0	35.6058	3132.86	1605.65	134.121	3149.43	1610.81	30.2276	2981.97	1629.68	164.77	2982.34	1633.12	120.942	2921.6	1501.28	123.373	2860.85	1246.41	110.834	3043.04	1416.25	114.05	3113.9	1268.34	210.08	2854.64	1307.91	-55.17	2933.59	1444.79	-122.509	2962.13	1264.61	-150.47	2991.54	1117.2	-188.79	3142.18	1027.42	-165.58	3206.28	975.02	-212.587	3163.94	950.996	-213.586	3252.21	918.965
6880	0	35.8881	3144.03	1604.65	134.318	3160.24	1609.5	30.7255	2992.95	1628.49	164.993	2993.51	1631.69	121.051	2932.83	1499.74	123.41	2871.92	1244.95	110.835	3054.16	1414.86	114.001	3125.14	1266.89	210.492	2865.81	1306.5	-55.157	2944.34	1443.8	-122.399	2974.64	1264	-151.901	3006.14	1117.06	-188.507	3158.57	1030.33	-164.862	3223.73	979.142	-212.758	3178.48	953.261	-213.095	3270.97	924.268
6881	0	36.2805	3155.14	1603.56	134.493	3171.06	1608.18	30.2549	3003.9	1627.54	165.354	3004.63	1630.38	120.217	2944.13	1498.22	124.066	2882.77	1243.82	110.786	3065.13	1413.45	113.596	3135.64	1265.47	210.964	2877.25	1305.07	-54.9712	2955.08	1442.79	-124.182	2987.38	1264.1	-152.502	3020.49	1116.76	-188.204	3174.9	1032.93	-164.256	3240.75	982.85	-213.043	3192.6	955.112	-212.282	3289.46	929.303
6882	0	36.1573	3166.27	1602.31	135.041	3182.67	1607.03	30.5306	3015.21	1626.46	165.771	3015.9	1629.32	121.777	2954.86	1497.56	124.162	2893.79	1242.51	110.749	3076.35	1412.27	113.391	3146.81	1264.07	211.585	2888.78	1303.87	-54.6578	2966.05	1441.69	-123.994	2999.61	1263.23	-151.337	3034.26	1116.44	-187.781	3190.65	1035.34	-163.366	3257.41	986.509	-211.996	3217.44	960.96	-211.343	3307.26	934.212
6883	0	36.4494	3177.17	1600.82	134.975	3193.42	1605.62	30.6039	3026.38	1625.12	165.398	3026.54	1628.24	120.707	2966.43	1495.79	125.284	2904.84	1241.59	110.641	3087.43	1411.02	112.916	3157.36	1262.75	211.542	2900.03	1302.61	-54.5596	2976.78	1440.37	-124.001	3011.89	1262.32	-151.701	3048.17	1115.91	-187.327	3206.32	1037.68	-162.505	3273.63	989.837	-211.565	3234.42	963.908	-210.512	3324.75	938.732
6884	0	36.8074	3188.32	1599.63	135.12	3204.52	1604.2	30.8947	3037.47	1623.92	166.123	3037.89	1626.85	120.554	2977.3	1494.42	125.655	2916	1239.94	110.774	3098.51	1409.76	112.544	3168.21	1261.45	213.69	2912.05	1301.09	-54.3514	2987.55	1439.02	-123.746	3023.95	1261.38	-153.835	3062.49	1115.38	-186.463	3221.47	1039.64	-161.532	3289.55	992.887	-209.16	3254.44	964.706	-209.476	3341.55	942.814
6885	0	36.9444	3199.43	1598.44	135.802	3216.2	1603.13	30.8486	3048.41	1622.77	165.979	3049.07	1625.34	121.35	2988.47	1493.03	126.293	2927.49	1238.39	110.911	3109.85	1408.5	112.386	3179.4	1260.24	214.206	2923.53	1299.85	-53.9693	2998.49	1437.8	-122.524	3035.91	1259.81	-154.512	3075.69	1114.81	-185.822	3236.26	1041.29	-160.715	3304.52	995.525	-210.188	3266.82	968.487	-208.258	3357.94	946.609
6886	0	36.764	3210.55	1597.14	135.265	3226.62	1601.61	31.3366	3059.71	1621.6	167.165	3061.05	1624.65	121.746	2999.75	1491.68	127.107	2938.94	1237.14	110.999	3121.1	1407.25	112.382	3190.92	1259.05	213.993	2935.08	1298.32	-53.6268	3009.3	1436.52	-122.306	3047.77	1258.88	-153.916	3089.26	1113.99	-184.968	3250.79	1042.84	-159.634	3319.45	997.889	-209.509	3282.34	970.442	-207.247	3373.56	949.788
6887	0	37.0535	3221.56	1595.61	135.542	3238.18	1600.28	31.6458	3070.71	1620.23	167.55	3072.27	1623.41	122.259	3011.1	1490.55	128.005	2950.06	1236.15	111.265	3132.31	1406	111.994	3202.06	1257.92	214.939	2946.98	1297.14	-53.2484	3020.18	1435.17	-121.862	3059.51	1257.79	-153.686	3102.26	1113.26	-184.079	3264.72	1043.84	-158.324	3334.18	999.834	-208.441	3297.28	971.844	-206.025	3388.92	952.496
6888	0	37.4134	3232.71	1594.48	136.153	3249.95	1599.21	32.0247	3081.68	1619.15	167.737	3083.41	1621.91	122.843	3022.3	1489.29	128.618	2961.82	1234.6	111.717	3143.77	1404.87	112.552	3213.86	1257.1	215.51	2958.79	1295.58	-52.4991	3031.32	1433.72	-121.161	3071.15	1256.43	-153.68	3114.93	1112.52	-182.983	3278.57	1044.73	-157.026	3348.42	1001.42	-207.828	3311.89	973.548	-203.773	3405.66	955.207
6889	0	37.3459	3243.61	1593.16	135.567	3260.32	1597.69	32.5771	3092.75	1618.12	168.246	3094.94	1620.91	123.733	3033.36	1488.15	129.297	2973.76	1232.9	112.046	3155.21	1403.84	112.878	3225.6	1256.17	216.121	2970.71	1294.15	-51.9499	3042.18	1432.28	-120.489	3082.72	1255.19	-152.506	3127.69	1111.36	-181.838	3292.09	1045.37	-155.779	3362.06	1002.54	-205.974	3325.99	974.137	-203.268	3417.87	956.848
6890	0	37.5488	3254.51	1591.86	135.783	3272.02	1596.58	33.1848	3103.82	1616.95	168.774	3106.38	1619.97	124.141	3044.82	1486.65	131.247	2985.6	1231.95	112.23	3166.47	1402.82	112.795	3237.05	1255.27	217.25	2982.84	1292.75	-51.3379	3053.19	1430.94	-119.811	3094.29	1254.02	-152.348	3139.87	1110.6	-180.91	3304.82	1045.59	-154.393	3375.36	1003.53	-204.832	3339.67	974.791	-200.881	3433.84	958.474
6891	0	37.6054	3265.48	1590.81	136.06	3283.87	1595.47	33.8703	3114.62	1615.79	169.9	3118.17	1618.83	124.917	3056.58	1485.43	132.156	2997.82	1230.4	112.833	3178.13	1401.98	113.155	3248.95	1254.53	218.676	2995	1291.53	-50.6785	3064.25	1429.73	-118.885	3105.71	1252.7	-151.025	3152.13	1109.41	-179.553	3317.47	1045.78	-153.192	3387.93	1004.18	-203.877	3352.79	975.396	-199.336	3447.06	959.208
6892	0	37.7125	3276.38	1590.02	136.249	3295.06	1594.9	34.4528	3125.51	1614.35	170.283	3129.66	1617.57	125.149	3067.65	1484.28	132.022	3010.61	1228.24	113.487	3189.79	1401.11	113.908	3261.38	1254.04	219.648	3007.19	1290.23	-49.7364	3075.51	1428.44	-117.797	3116.95	1251.25	-150.108	3163.93	1108.19	-178.446	3329.79	1045.51	-151.679	3400.8	1004.4	-202.321	3365.51	975.23	-197.807	3459.81	959.892
6893	0	37.7556	3287.06	1589.08	135.645	3305.8	1593.64	35.5779	3136.47	1613.42	171.129	3140.79	1616.6	126.534	3079.46	1482.98	134.107	3022.49	1227.53	114.119	3201.42	1400.12	114.42	3273.3	1253.27	220.012	3019.31	1288.46	-48.8991	3086.8	1427.02	-116.823	3128.24	1249.85	-148.874	3175.41	1106.66	-177.039	3341.64	1044.88	-150.403	3412.57	1004.3	-200.77	3377.8	974.658	-196.107	3472.08	959.744
6894	0	37.4057	3298.11	1588.29	135.976	3317.8	1593.09	36.4023	3146.96	1612.25	172.086	3152.51	1615.54	128.184	3091.25	1481.22	134.851	3035.22	1225.58	114.945	3213.28	1399.13	115.301	3285.36	1252.52	221.199	3031.32	1287.39	-47.9342	3098.27	1425.51	-115.417	3139.49	1248.18	-147.725	3186.78	1105.18	-175.76	3352.97	1043.67	-148.902	3424.57	1003.48	-199.072	3389.7	973.535	-194.36	3484.31	959.076
6895	0	37.8217	3308.71	1587.16	136.553	3329.67	1593.08	37.8778	3157.78	1610.62	173.373	3164.52	1614.26	128.532	3102.72	1479.87	135.742	3047.83	1223.83	115.915	3225.19	1397.97	116.383	3297.73	1251.52	223.434	3043.79	1286.03	-46.9504	3110.01	1423.93	-114.404	3150.69	1246.53	-146.601	3197.83	1103.45	-174.372	3364.46	1042.22	-146.639	3437.61	1002.33	-197.699	3401.2	972.354	-192.62	3495.82	957.718
6896	0	37.6858	3319.56	1586.33	136.111	3340.61	1591.9	39.0661	3168.31	1609.35	174.355	3175.77	1612.51	131.124	3116.18	1478.62	136.927	3060.43	1221.96	116.878	3236.98	1396.82	117.834	3310.18	1250.71	224.998	3056.18	1284.7	-45.9866	3121.67	1422.21	-113.382	3161.93	1244.79	-145.824	3208.52	1101.65	-173.209	3375.41	1040.48	-145.076	3448.95	1000.63	-196.023	3412.12	970.47	-191.012	3507.16	955.879
6897	0	37.7083	3330.06	1585.88	135.286	3352.06	1591.45	40.025	3178.86	1608.37	175.789	3188.19	1611.59	132.314	3128.07	1477.46	136.904	3072.4	1220.52	117.86	3248.88	1395.97	118.888	3322.5	1249.97	224.112	3068.21	1282.97	-45.1986	3133.22	1420.62	-112.054	3173.25	1243.01	-142.585	3222.78	1098.29	-171.679	3386.39	1038.28	-143.626	3459.56	998.539	-194.354	3423.13	968.325	-189.242	3518.08	953.797
6898	0	37.8388	3340.72	1585.72	134.556	3363.57	1591.07	41.5785	3189.75	1607.42	177.104	3199.8	1610.83	133.312	3139.53	1476.55	138.594	3085.52	1219.11	118.933	3260.67	1395.56	120.034	3335.11	1249.51	226.084	3080.79	1281.8	-43.9945	3145	1419.36	-110.776	3184.43	1241.45	-142.499	3230.25	1097.77	-170.345	3396.7	1035.77	-142.305	3469.91	995.901	-192.855	3433.1	965.69	-187.35	3528.3	951.093
6899	0	37.0136	3351.18	1585.62	135.199	3376.25	1591.86	43.0765	3200.02	1607.02	178.252	3212.07	1610.43	134.467	3151.12	1475.54	139.55	3098.18	1217.85	119.989	3272.72	1395.19	121.315	3347.88	1249.61	227.141	3093.55	1280.19	-42.963	3156.63	1418.42	-108.923	3195.45	1239.66	-139.2	3244.13	1094.24	-168.589	3406.55	1032.94	-140.561	3479.79	992.94	-191.414	3442.76	962.685	-186.121	3538.02	947.894
6900	0	36.8241	3361.56	1585.6	134.816	3388.12	1591.95	44.9572	3210.69	1606.72	180.282	3224.39	1610.2	135.527	3162.59	1475.21	140.152	3110.95	1216.93	121.247	3284.68	1395.18	122.577	3360.78	1250.09	227.307	3106.25	1278.6	-41.7476	3168.42	1417.61	-106.986	3206.48	1238.24	-137.164	3254.38	1092.74	-166.865	3416.35	1029.82	-138.848	3489.61	989.688	-189.067	3451.65	958.919	-184.336	3546.74	943.455
6901	0	36.4407	3372.09	1586.14	134.004	3400.12	1592.48	47.0207	3221.16	1606.64	181.46	3237.03	1609.87	137.122	3173.98	1475.46	140.292	3123.69	1216.3	122.434	3296.66	1395.38	123.796	3373.51	1250.72	228.203	3118.74	1277.87	-40.7134	3180	1417.13	-103.985	3220.36	1236.72	-135.006	3264.52	1091.8	-165.136	3425.7	1026.48	-138.633	3495.55	985.831	-187.067	3460.19	955.324	-182.805	3555.22	939.226
6902	0	36.094	3382.52	1586.82	133.292	3412.12	1593.22	48.7531	3231.74	1607.28	183.431	3249.5	1610.23	137.237	3185.81	1475.48	140.273	3135.61	1216.53	123.491	3308.37	1396.12	124.904	3386.2	1251.74	229.032	3130.99	1277.83	-39.4947	3191.87	1417.12	-103.951	3228.15	1237.58	-132.642	3274.59	1090.99	-161.626	3437.51	1023.95	-136.857	3504	981.591	-185.124	3467.76	951.236	-180.905	3562.8	934.327
6903	0	35.6158	3392.88	1587.91	132.503	3424.17	1594.06	50.8782	3242.72	1608.33	185.079	3262.61	1611.2	138.764	3197.88	1476.31	142.527	3149.22	1216.19	124.324	3319.57	1396.95	125.988	3398.79	1253.21	228.761	3142.88	1277.99	-38.4289	3203.65	1417.59	-102.036	3239.1	1237.36	-130.076	3285.04	1090.04	-161.195	3442.57	1019.7				-182.553	3474.82	946.923	-180.992	3565.99	928.572
[truncated: 69 more columns]

## Sheet: Sheet2
Devices
		025370 - Force			025370 - Moment			025370 - CoP			027571 - Force			027571 - Moment			027571 - CoP			037720 - Force			037720 - Moment			037720 - CoP
Frame	Sub Frame	Fx	Fy	Fz	Mx	My	Mz	Cx	Cy	Cz	Fx	Fy	Fz	Mx	My	Mz	Cx	Cy	Cz	Fx	Fy	Fz	Mx	My	Mz	Cx	Cy	Cz
		N	N	N	N.mm	N.mm	N.mm	mm	mm	mm	N	N	N	N.mm	N.mm	N.mm	mm	mm	mm	N	N	N	N.mm	N.mm	N.mm	mm	mm	mm
6520	0	0	0	0	0	0	0	200	300	0	0	0	0	0	0	0	200	903	0	0	0	0	0	0	0	603	903	0
6520	1	0	0	0	0	0	0	200	300	0	0	0	0	0	0	0	200	903	0	0	0	0	0	0	0	603	903	0
6520	2	0	0	0	0	0	0	200	300	0	0	0	0	0	0	0	200	903	0	0	0	0	0	0	0	603	903	0
6520	3	0	0	0	0	0	0	200	300	0	0	0	0	0	0	0	200	903	0	0	0	0	0	0	0	603	903	0
6520	4	0	0	0	0	0	0	200	300	0	0	0	0	0	0	0	200	903	0	0	0	0	0	0	0	603	903	0
6520	5	0	0	0	0	0	0	200	300	0	0	0	0	0	0	0	200	903	0	0	0	0	0	0	0	603	903	0
6520	6	0	0	0	0	0	0	200	300	0	0	0	0	0	0	0	200	903	0	0	0	0	0	0	0	603	903	0
6520	7	0	0	0	0	0	0	200	300	0	0	0	0	0	0	0	200	903	0	0	0	0	0	0	0	603	903	0
6520	8	0	0	0	0	0	0	200	300	0	0	0	0	0	0	0	200	903	0	0	0	0	0	0	0	603	903	0
6520	9	0	0	0	0	0	0	200	300	0	0	0	0	0	0	0	200	903	0	0	0	0	0	0	0	603	903	0
6521	0	0	0	0	0	0	0	200	300	0	0	0	0	0	0	0	200	903	0	0	0	0	0	0	0	603	903	0
6521	1	0	0	0	0	0	0	200	300	0	0	0	0	0	0	0	200	903	0	0	0	0	0	0	0	603	903	0
6521	2	0	0	0	0	0	0	200	300	0	0	0	0	0	0	0	200	903	0	0	0	0	0	0	0	603	903	0
6521	3	0	0	0	0	0	0	200	300	0	0	0	0	0	0	0	200	903	0	0	0	0	0	0	0	603	903	0
6521	4	0	0	0	0	0	0	200	300	0	0	0	0	0	0	0	200	903	0	0	0	0	0	0	0	603	903	0
6521	5	0	0	0	0	0	0	200	300	0	0	0	0	0	0	0	200	903	0	0	0	0	0	0	0	603	903	0
6521	6	0	0	0	0	0	0	200	300	0	0	0	0	0	0	0	200	903	0	0	0	0	0	0	0	603	903	0
6521	7	0	0	0	0	0	0	200	300	0	0	0	0	0	0	0	200	903	0	0	0	0	0	0	0	603	903	0
6521	8	0	0	0	0	0	0	200	300	0	0	0	0	0	0	0	200	903	0	0	0	0	0	0	0	603	903	0
6521	9	0	0	0	0	0	0	200	300	0	0	0	0	0	0	0	200	903	0	0	0	0	0	0	0	603	903	0
6522	0	0	0	0	0	0	0	200	300	0	0	0	0	0	0	0	200	903	0	0	0	0	0	0	0	603	903	0
6522	1	0	0	0	0	0	0	200	300	0	0	0	0	0	0	0	200	903	0	0	0	0	0	0	0	603	903	0
6522	2	0	0	0	0	0	0	200	300	0	0	0	0	0	0	0	200	903	0	0	0	0	0	0	0	603	903	0
6522	3	0	0	0	0	0	0	200	300	0	0	0	0	0	0	0	200	903	0	0	0	0	0	0	0	603	903	0
6522	4	0	0	0	0	0	0	200	300	0	0	0	0	0	0	0	200	903	0	0	0	0	0	0	0	603	903	0
6522	5	0	0	0	0	0	0	200	300	0	0	0	0	0	0	0	200	903	0	0	0	0	0	0	0	603	903	0
6522	6	0	0	0	0	0	0	200	300	0	0	0	0	0	0	0	200	903	0	0	0	0	0	0	0	603	903	0
6522	7	0	0	0	0	0	0	200	300	0	0	0	0	0	0	0	200	903	0	0	0	0	0	0	0	603	903	0
6522	8	0	0	0	0	0	0	200	300	0	0	0	0	0	0	0	200	903	0	0	0	0	0	0	0	603	903	0
6522	9	0	0	0	0	0	0	200	300	0	0	0	0	0	0	0	200	903	0	0	0	0	0	0	0	603	903	0
6523	0	0	0	0	0	0	0	200	300	0	0	0	0	0	0	0	200	903	0	0	0	0	0	0	0	603	903	0
6523	1	0	0	0	0	0	0	200	300	0	0	0	0	0	0	0	200	903	0	0	0	0	0	0	0	603	903	0
6523	2	0	0	0	0	0	0	200	300	0	0	0	0	0	0	0	200	903	0	0	0	0	0	0	0	603	903	0
6523	3	0	0	0	0	0	0	200	300	0	0	0	0	0	0	0	200	903	0	0	0	0	0	0	0	603	903	0
6523	4	0	0	0	0	0	0	200	300	0	0	0	0	0	0	0	200	903	0	0	0	0	0	0	0	603	903	0
6523	5	0	0	0	0	0	0	200	300	0	0	0	0	0	0	0	200	903	0	0	0	0	0	0	0	603	903	0
6523	6	0	0	0	0	0	0	200	300	0	0	0	0	0	0	0	200	903	0	0	0	0	0	0	0	603	903	0
6523	7	0	0	0	0	0	0	200	300	0	0	0	0	0	0	0	200	903	0	0	0	0	0	0	0	603	903	0
6523	8	0	0	0	0	0	0	200	300	0	0	0	0	0	0	0	200	903	0	0	0	0	0	0	0	603	903	0
6523	9	0	0	0	0	0	0	200	300	0	0	0	0	0	0	0	200	903	0	0	0	0	0	0	0	603	903	0
6524	0	0	0	0	0	0	0	200	300	0	0	0	0	0	0	0	200	903	0	0	0	0	0	0	0	603	903	0
6524	1	0	0	0	0	0	0	200	300	0	0	0	0	0	0	0	200	903	0	0	0	0	0	0	0	603	903	0
6524	2	0	0	0	0	0	0	200	300	0	0	0	0	0	0	0	200	903	0	0	0	0	0	0	0	603	903	0
6524	3	0	0	0	0	0	0	200	300	0	0	0	0	0	0	0	200	903	0	0	0	0	0	0	0	603	903	0
6524	4	0	0	0	0	0	0	200	300	0	0	0	0	0	0	0	200	903	0	0	0	0	0	0	0	603	903	0
6524	5	0	0	0	0	0	0	200	300	0	0	0	0	0	0	0	200	903	0	0	0	0	0	0	0	603	903	0
6524	6	0	0	0	0	0	0	200	300	0	0	0	0	0	0	0	200	903	0	0	0	0	0	0	0	603	903	0
6524	7	0	0	0	0	0	0	200	300	0	0	0	0	0	0	0	200	903	0	0	0	0	0	0	0	603	903	0
6524	8	0	0	0	0	0	0	200	300	0	0	0	0	0	0	0	200	903	0	0	0	0	0	0	0	603	903	0
6524	9	0	0	0	0	0	0	200	300	0	0	0	0	0	0	0	200	903	0	0	0	0	0	0	0	603	903	0
6525	0	0	0	0	0	0	0	200	300	0	0	0	0	0	0	0	200	903	0	0	0	0	0	0	0	603	903	0
6525	1	0	0	0	0	0	0	200	300	0	0	0	0	0	0	0	200	903	0	0	0	0	0	0	0	603	903	0
6525	2	0	0	0	0	0	0	200	300	0	0	0	0	0	0	0	200	903	0	0	0	0	0	0	0	603	903	0
6525	3	0	0	0	0	0	0	200	300	0	0	0	0	0	0	0	200	903	0	0	0	0	0	0	0	603	903	0
6525	4	0	0	0	0	0	0	200	300	0	0	0	0	0	0	0	200	903	0	0	0	0	0	0	0	603	903	0
6525	5	0	0	0	0	0	0	200	300	0	0	0	0	0	0	0	200	903	0	0	0	0	0	0	0	603	903	0
6525	6	0	0	0	0	0	0	200	300	0	0	0	0	0	0	0	200	903	0	0	0	0	0	0	0	603	903	0
6525	7	0	0	0	0	0	0	200	300	0	0	0	0	0	0	0	200	903	0	0	0	0	0	0	0	603	903	0
6525	8	0	0	0	0	0	0	200	300	0	0	0	0	0	0	0	200	903	0	0	0	0	0	0	0	603	903	0
6525	9	0	0	0	0	0	0	200	300	0	0	0	0	0	0	0	200	903	0	0	0	0	0	0	0	603	903	0
6526	0	0	0	0	0	0	0	200	300	0	0	0	0	0	0	0	200	903	0	0	0	0	0	0	0	603	903	0
6526	1	0	0	0	0	0	0	200	300	0	0	0	0	0	0	0	200	903	0	0	0	0	0	0	0	603	903	0
6526	2	0	0	0	0	0	0	200	300	0	0	0	0	0	0	0	200	903	0	0	0	0	0	0	0	603	903	0
6526	3	0	0	0	0	0	0	200	300	0	0	0	0	0	0	0	200	903	0	0	0	0	0	0	0	603	903	0
6526	4	0	0	0	0	0	0	200	300	0	0	0	0	0	0	0	200	903	0	0	0	0	0	0	0	603	903	0
6526	5	0	0	0	0	0	0	200	300	0	0	0	0	0	0	0	200	903	0	0	0	0	0	0	0	603	903	0
6526	6	0	0	0	0	0	0	200	300	0	0	0	0	0	0	0	200	903	0	0	0	0	0	0	0	603	903	0
6526	7	0	0	0	0	0	0	200	300	0	0	0	0	0	0	0	200	903	0	0	0	0	0	0	0	603	903	0
6526	8	0	0	0	0	0	0	200	300	0	0	0	0	0	0	0	200	903	0	0	0	0	0	0	0	603	903	0
6526	9	0	0	0	0	0	0	200	300	0	0	0	0	0	0	0	200	903	0	0	0	0	0	0	0	603	903	0
6527	0	0	0	0	0	0	0	200	300	0	0	0	0	0	0	0	200	903	0	0	0	0	0	0	0	603	903	0
6527	1	0	0	0	0	0	0	200	300	0	0	0	0	0	0	0	200	903	0	0	0	0	0	0	0	603	903	0
6527	2	0	0	0	0	0	0	200	300	0	0	0	0	0	0	0	200	903	0	0	0	0	0	0	0	603	903	0
6527	3	0	0	0	0	0	0	200	300	0	0	0	0	0	0	0	200	903	0	0	0	0	0	0	0	603	903	0
6527	4	0	0	0	0	0	0	200	300	0	0	0	0	0	0	0	200	903	0	0	0	0	0	0	0	603	903	0
6527	5	0	0	0	0	0	0	200	300	0	0	0	0	0	0	0	200	903	0	0	0	0	0	0	0	603	903	0
6527	6	0	0	0	0	0	0	200	300	0	0	0	0	0	0	0	200	903	0	0	0	0	0	0	0	603	903	0
6527	7	0	0	0	0	0	0	200	300	0	0	0	0	0	0	0	200	903	0	0	0	0	0	0	0	603	903	0
6527	8	0	0	0	0	0	0	200	300	0	0	0	0	0	0	0	200	903	0	0	0	0	0	0	0	603	903	0
6527	9	0	0	0	0	0	0	200	300	0	0	0	0	0	0	0	200	903	0	0	0	0	0	0	0	603	903	0
6528	0	0	0	0	0	0	0	200	300	0	0	0	0	0	0	0	200	903	0	0	0	0	0	0	0	603	903	0
6528	1	0	0	0	0	0	0	200	300	0	0	0	0	0	0	0	200	903	0	0	0	0	0	0	0	603	903	0
6528	2	0	0	0	0	0	0	200	300	0	0	0	0	0	0	0	200	903	0	0	0	0	0	0	0	603	903	0
6528	3	0	0	0	0	0	0	200	300	0	0	0	0	0	0	0	200	903	0	0	0	0	0	0	0	603	903	0
6528	4	0	0	0	0	0	0	200	300	0	0	0	0	0	0	0	200	903	0	0	0	0	0	0	0	603	903	0
6528	5	0	0	0	0	0	0	200	300	0	0	0	0	0	0	0	200	903	0	0	0	0	0	0	0	603	903	0
6528	6	0	0	0	0	0	0	200	300	0	0	0	0	0	0	0	200	903	0	0	0	0	0	0	0	603	903	0
6528	7	0	0	0	0	0	0	200	300	0	0	0	0	0	0	0	200	903	0	0	0	0	0	0	0	603	903	0
6528	8	0	0	0	0	0	0	200	300	0	0	0	0	0	0	0	200	903	0	0	0	0	0	0	0	603	903	0
6528	9	0	0	0	0	0	0	200	300	0	0	0	0	0	0	0	200	903	0	0	0	0	0	0	0	603	903	0
6529	0	0	0	0	0	0	0	200	300	0	0	0	0	0	0	0	200	903	0	0	0	0	0	0	0	603	903	0
6529	1	0	0	0	0	0	0	200	300	0	0	0	0	0	0	0	200	903	0	0	0	0	0	0	0	603	903	0
6529	2	0	0	0	0	0	0	200	300	0	0	0	0	0	0	0	200	903	0	0	0	0	0	0	0	603	903	0
6529	3	0	0	0	0	0	0	200	300	0	0	0	0	0	0	0	200	903	0	0	0	0	0	0	0	603	903	0
6529	4	0	0	0	0	0	0	200	300	0	0	0	0	0	0	0	200	903	0	0	0	0	0	0	0	603	903	0
6529	5	0	0	0	0	0	0	200	300	0	0	0	0	0	0	0	200	903	0	0	0	0	0	0	0	603	903	0
6529	6	0	0	0	0	0	0	200	300	0	0	0	0	0	0	0	200	903	0	0	0	0	0	0	0	603	903	0
6529	7	0	0	0	0	0	0	200	300	0	0	0	0	0	0	0	200	903	0	0	0	0	0	0	0	603	903	0
6529	8	0	0	0	0	0	0	200	300	0	0	0	0	0	0	0	200	903	0	0	0	0	0	0	0	603	903	0
6529	9	0	0	0	0	0	0	200	300	0	0	0	0	0	0	0	200	903	0	0	0	0	0	0	0	603	903	0
6530	0	0	0	0	0	0	0	200	300	0	0	0	0	0	0	0	200	903	0	0	0	0	0	0	0	603	903	0
6530	1	0	0	0	0	0	0	200	300	0	0	0	0	0	0	0	200	903	0	0	0	0	0	0	0	603	903	0
6530	2	0	0	0	0	0	0	200	300	0	0	0	0	0	0	0	200	903	0	0	0	0	0	0	0	603	903	0
6530	3	0	0	0	0	0	0	200	300	0	0	0	0	0	0	0	200	903	0	0	0	0	0	0	0	603	903	0
6530	4	0	0	0	0	0	0	200	300	0	0	0	0	0	0	0	200	903	0	0	0	0	0	0	0	603	903	0
6530	5	0	0	0	0	0	0	200	300	0	0	0	0	0	0	0	200	903	0	0	0	0	0	0	0	603	903	0
6530	6	0	0	0	0	0	0	200	300	0	0	0	0	0	0	0	200	903	0	0	0	0	0	0	0	603	903	0
6530	7	0	0	0	0	0	0	200	300	0	0	0	0	0	0	0	200	903	0	0	0	0	0	0	0	603	903	0
6530	8	0	0	0	0	0	0	200	300	0	0	0	0	0	0	0	200	903	0	0	0	0	0	0	0	603	903	0
6530	9	0	0	0	0	0	0	200	300	0	0	0	0	0	0	0	200	903	0	0	0	0	0	0	0	603	903	0
6531	0	0	0	0	0	0	0	200	300	0	0	0	0	0	0	0	200	903	0	0	0	0	0	0	0	603	903	0
6531	1	0	0	0	0	0	0	200	300	0	0	0	0	0	0	0	200	903	0	0	0	0	0	0	0	603	903	0
6531	2	0	0	0	0	0	0	200	300	0	0	0	0	0	0	0	200	903	0	0	0	0	0	0	0	603	903	0
6531	3	0	0	0	0	0	0	200	300	0	0	0	0	0	0	0	200	903	0	0	0	0	0	0	0	603	903	0
6531	4	0	0	0	0	0	0	200	300	0	0	0	0	0	0	0	200	903	0	0	0	0	0	0	0	603	903	0
6531	5	0	0	0	0	0	0	200	300	0	0	0	0	0	0	0	200	903	0	0	0	0	0	0	0	603	903	0
6531	6	0	0	0	0	0	0	200	300	0	0	0	0	0	0	0	200	903	0	0	0	0	0	0	0	603	903	0
6531	7	0	0	0	0	0	0	200	300	0	0	0	0	0	0	0	200	903	0	0	0	0	0	0	0	603	903	0
6531	8	0	0	0	0	0	0	200	300	0	0	0	0	0	0	0	200	903	0	0	0	0	0	0	0	603	903	0
6531	9	0	0	0	0	0	0	200	300	0	0	0	0	0	0	0	200	903	0	0	0	0	0	0	0	603	903	0
6532	0	0	0	0	0	0	0	200	300	0	0	0	0	0	0	0	200	903	0	0	0	0	0	0	0	603	903	0
6532	1	0	0	0	0	0	0	200	300	0	0	0	0	0	0	0	200	903	0	0	0	0	0	0	0	603	903	0
6532	2	0	0	0	0	0	0	200	300	0	0	0	0	0	0	0	200	903	0	0	0	0	0	0	0	603	903	0
6532	3	0	0	0	0	0	0	200	300	0	0	0	0	0	0	0	200	903	0	0	0	0	0	0	0	603	903	0
6532	4	0	0	0	0	0	0	200	300	0	0	0	0	0	0	0	200	903	0	0	0	0	0	0	0	603	903	0
6532	5	0	0	0	0	0	0	200	300	0	0	0	0	0	0	0	200	903	0	0	0	0	0	0	0	603	903	0
6532	6	0	0	0	0	0	0	200	300	0	0	0	0	0	0	0	200	903	0	0	0	0	0	0	0	603	903	0
6532	7	0	0	0	0	0	0	200	300	0	0	0	0	0	0	0	200	903	0	0	0	0	0	0	0	603	903	0
6532	8	0	0	0	0	0	0	200	300	0	0	0	0	0	0	0	200	903	0	0	0	0	0	0	0	603	903	0
6532	9	0	0	0	0	0	0	200	300	0	0	0	0	0	0	0	200	903	0	0	0	0	0	0	0	603	903	0
6533	0	0	0	0	0	0	0	200	300	0	0	0	0	0	0	0	200	903	0	0	0	0	0	0	0	603	903	0
6533	1	0	0	0	0	0	0	200	300	0	0	0	0	0	0	0	200	903	0	0	0	0	0	0	0	603	903	0
6533	2	0	0	0	0	0	0	200	300	0	0	0	0	0	0	0	200	903	0	0	0	0	0	0	0	603	903	0
6533	3	0	0	0	0	0	0	200	300	0	0	0	0	0	0	0	200	903	0	0	0	0	0	0	0	603	903	0
6533	4	0	0	0	0	0	0	200	300	0	0	0	0	0	0	0	200	903	0	0	0	0	0	0	0	603	903	0
6533	5	0	0	0	0	0	0	200	300	0	0	0	0	0	0	0	200	903	0	0	0	0	0	0	0	603	903	0
6533	6	0	0	0	0	0	0	200	300	0	0	0	0	0	0	0	200	903	0	0	0	0	0	0	0	603	903	0
6533	7	0	0	0	0	0	0	200	300	0	0	0	0	0	0	0	200	903	0	0	0	0	0	0	0	603	903	0
6533	8	0	0	0	0	0	0	200	300	0	0	0	0	0	0	0	200	903	0	0	0	0	0	0	0	603	903	0
6533	9	0	0	0	0	0	0	200	300	0	0	0	0	0	0	0	200	903	0	0	0	0	0	0	0	603	903	0
6534	0	0	0	0	0	0	0	200	300	0	0	0	0	0	0	0	200	903	0	0	0	0	0	0	0	603	903	0
6534	1	0	0	0	0	0	0	200	300	0	0	0	0	0	0	0	200	903	0	0	0	0	0	0	0	603	903	0
6534	2	0	0	0	0	0	0	200	300	0	0	0	0	0	0	0	200	903	0	0	0	0	0	0	0	603	903	0
6534	3	0	0	0	0	0	0	200	300	0	0	0	0	0	0	0	200	903	0	0	0	0	0	0	0	603	903	0
6534	4	0	0	0	0	0	0	200	300	0	0	0	0	0	0	0	200	903	0	0	0	0	0	0	0	603	903	0
6534	5	0	0	0	0	0	0	200	300	0	0	0	0	0	0	0	200	903	0	0	0	0	0	0	0	603	903	0
6534	6	0	0	0	0	0	0	200	300	0	0	0	0	0	0	0	200	903	0	0	0	0	0	0	0	603	903	0
6534	7	0	0	0	0	0	0	200	300	0	0	0	0	0	0	0	200	903	0	0	0	0	0	0	0	603	903	0
6534	8	0	0	0	0	0	0	200	300	0	0	0	0	0	0	0	200	903	0	0	0	0	0	0	0	603	903	0
6534	9	0	0	0	0	0	0	200	300	0	0	0	0	0	0	0	200	903	0	0	0	0	0	0	0	603	903	0
6535	0	0	0	0	0	0	0	200	300	0	0	0	0	0	0	0	200	903	0	0	0	0	0	0	0	603	903	0
6535	1	0	0	0	0	0	0	200	300	0	0	0	0	0	0	0	200	903	0	0	0	0	0	0	0	603	903	0
6535	2	0	0	0	0	0	0	200	300	0	0	0	0	0	0	0	200	903	0	0	0	0	0	0	0	603	903	0
6535	3	0	0	0	0	0	0	200	300	0	0	0	0	0	0	0	200	903	0	0	0	0	0	0	0	603	903	0
6535	4	0	0	0	0	0	0	200	300	0	0	0	0	0	0	0	200	903	0	0	0	0	0	0	0	603	903	0
6535	5	0	0	0	0	0	0	200	300	0	0	0	0	0	0	0	200	903	0	0	0	0	0	0	0	603	903	0
6535	6	0	0	0	0	0	0	200	300	0	0	0	0	0	0	0	200	903	0	0	0	0	0	0	0	603	903	0
6535	7	0	0	0	0	0	0	200	300	0	0	0	0	0	0	0	200	903	0	0	0	0	0	0	0	603	903	0
6535	8	0	0	0	0	0	0	200	300	0	0	0	0	0	0	0	200	903	0	0	0	0	0	0	0	603	903	0
6535	9	0	0	0	0	0	0	200	300	0	0	0	0	0	0	0	200	903	0	0	0	0	0	0	0	603	903	0
6536	0	0	0	0	0	0	0	200	300	0	0	0	0	0	0	0	200	903	0	0	0	0	0	0	0	603	903	0
6536	1	0	0	0	0	0	0	200	300	0	0	0	0	0	0	0	200	903	0	0	0	0	0	0	0	603	903	0
6536	2	0	0	0	0	0	0	200	300	0	0	0	0	0	0	0	200	903	0	0	0	0	0	0	0	603	903	0
6536	3	0	0	0	0	0	0	200	300	0	0	0	0	0	0	0	200	903	0	0	0	0	0	0	0	603	903	0
6536	4	0	0	0	0	0	0	200	300	0	0	0	0	0	0	0	200	903	0	0	0	0	0	0	0	603	903	0
6536	5	0	0	0	0	0	0	200	300	0	0	0	0	0	0	0	200	903	0	0	0	0	0	0	0	603	903	0
6536	6	0	0	0	0	0	0	200	300	0	0	0	0	0	0	0	200	903	0	0	0	0	0	0	0	603	903	0
6536	7	0	0	0	0	0	0	200	300	0	0	0	0	0	0	0	200	903	0	0	0	0	0	0	0	603	903	0
6536	8	0	0	0	0	0	0	200	300	0	0	0	0	0	0	0	200	903	0	0	0	0	0	0	0	603	903	0
6536	9	0	0	0	0	0	0	200	300	0	0	0	0	0	0	0	200	903	0	0	0	0	0	0	0	603	903	0
6537	0	0	0	0	0	0	0	200	300	0	0	0	0	0	0	0	200	903	0	0	0	0	0	0	0	603	903	0
6537	1	0	0	0	0	0	0	200	300	0	0	0	0	0	0	0	200	903	0	0	0	0	0	0	0	603	903	0
6537	2	0	0	0	0	0	0	200	300	0	0	0	0	0	0	0	200	903	0	0	0	0	0	0	0	603	903	0
6537	3	0	0	0	0	0	0	200	300	0	0	0	0	0	0	0	200	903	0	0	0	0	0	0	0	603	903	0
6537	4	0	0	0	0	0	0	200	300	0	0	0	0	0	0	0	200	903	0	0	0	0	0	0	0	603	903	0
6537	5	0	0	0	0	0	0	200	300	0	0	0	0	0	0	0	200	903	0	0	0	0	0	0	0	603	903	0
6537	6	0	0	0	0	0	0	200	300	0	0	0	0	0	0	0	200	903	0	0	0	0	0	0	0	603	903	0
6537	7	0	0	0	0	0	0	200	300	0	0	0	0	0	0	0	200	903	0	0	0	0	0	0	0	603	903	0
6537	8	0	0	0	0	0	0	200	300	0	0	0	0	0	0	0	200	903	0	0	0	0	0	0	0	603	903	0
6537	9	0	0	0	0	0	0	200	300	0	0	0	0	0	0	0	200	903	0	0	0	0	0	0	0	603	903	0
6538	0	0	0	0	0	0	0	200	300	0	0	0	0	0	0	0	200	903	0	0	0	0	0	0	0	603	903	0
6538	1	0	0	0	0	0	0	200	300	0	0	0	0	0	0	0	200	903	0	0	0	0	0	0	0	603	903	0
6538	2	0	0	0	0	0	0	200	300	0	0	0	0	0	0	0	200	903	0	0	0	0	0	0	0	603	903	0
6538	3	0	0	0	0	0	0	200	300	0	0	0	0	0	0	0	200	903	0	0	0	0	0	0	0	603	903	0
6538	4	0	0	0	0	0	0	200	300	0	0	0	0	0	0	0	200	903	0	0	0	0	0	0	0	603	903	0
6538	5	0	0	0	0	0	0	200	300	0	0	0	0	0	0	0	200	903	0	0	0	0	0	0	0	603	903	0
6538	6	0	0	0	0	0	0	200	300	0	0	0	0	0	0	0	200	903	0	0	0	0	0	0	0	603	903	0
6538	7	0	0	0	0	0	0	200	300	0	0	0	0	0	0	0	200	903	0	0	0	0	0	0	0	603	903	0
6538	8	0	0	0	0	0	0	200	300	0	0	0	0	0	0	0	200	903	0	0	0	0	0	0	0	603	903	0
6538	9	0	0	0	0	0	0	200	300	0	0	0	0	0	0	0	200	903	0	0	0	0	0	0	0	603	903	0
6539	0	0	0	0	0	0	0	200	300	0	0	0	0	0	0	0	200	903	0	0	0	0	0	0	0	603	903	0
6539	1	0	0	0	0	0	0	200	300	0	0	0	0	0	0	0	200	903	0	0	0	0	0	0	0	603	903	0
6539	2	0	0	0	0	0	0	200	300	0	0	0	0	0	0	0	200	903	0	0	0	0	0	0	0	603	903	0
6539	3	0	0	0	0	0	0	200	300	0	0	0	0	0	0	0	200	903	0	0	0	0	0	0	0	603	903	0
6539	4	0	0	0	0	0	0	200	300	0	0	0	0	0	0	0	200	903	0	0	0	0	0	0	0	603	903	0
6539	5	0	0	0	0	0	0	200	300	0	0	0	0	0	0	0	200	903	0	0	0	0	0	0	0	603	903	0
6539	6	0	0	0	0	0	0	200	300	0	0	0	0	0	0	0	200	903	0	0	0	0	0	0	0	603	903	0
6539	7	0	0	0	0	0	0	200	300	0	0	0	0	0	0	0	200	903	0	0	0	0	0	0	0	603	903	0
6539	8	0	0	0	0	0	0	200	300	0	0	0	0	0	0	0	200	903	0	0	0	0	0	0	0	603	903	0
6539	9	0	0	0	0	0	0	200	300	0	0	0	0	0	0	0	200	903	0	0	0	0	0	0	0	603	903	0
6540	0	0	0	0	0	0	0	200	300	0	0	0	0	0	0	0	200	903	0	0	0	0	0	0	0	603	903	0
6540	1	0	0	0	0	0	0	200	300	0	0	0	0	0	0	0	200	903	0	0	0	0	0	0	0	603	903	0
6540	2	0	0	0	0	0	0	200	300	0	0	0	0	0	0	0	200	903	0	0	0	0	0	0	0	603	903	0
6540	3	0	0	0	0	0	0	200	300	0	0	0	0	0	0	0	200	903	0	0	0	0	0	0	0	603	903	0
6540	4	0	0	0	0	0	0	200	300	0	0	0	0	0	0	0	200	903	0	0	0	0	0	0	0	603	903	0
6540	5	0	0	0	0	0	0	200	300	0	0	0	0	0	0	0	200	903	0	0	0	0	0	0	0	603	903	0
6540	6	0	0	0	0	0	0	200	300	0	0	0	0	0	0	0	200	903	0	0	0	0	0	0	0	603	903	0
6540	7	0	0	0	0	0	0	200	300	0	0	0	0	0	0	0	200	903	0	0	0	0	0	0	0	603	903	0
6540	8	0	0	0	0	0	0	200	300	0	0	0	0	0	0	0	200	903	0	0	0	0	0	0	0	603	903	0
6540	9	0	0	0	0	0	0	200	300	0	0	0	0	0	0	0	200	903	0	0	0	0	0	0	0	603	903	0
6541	0	0	0	0	0	0	0	200	300	0	0	0	0	0	0	0	200	903	0	0	0	0	0	0	0	603	903	0
6541	1	0	0	0	0	0	0	200	300	0	0	0	0	0	0	0	200	903	0	0	0	0	0	0	0	603	903	0
6541	2	0	0	0	0	0	0	200	300	0	0	0	0	0	0	0	200	903	0	0	0	0	0	0	0	603	903	0
6541	3	0	0	0	0	0	0	200	300	0	0	0	0	0	0	0	200	903	0	0	0	0	0	0	0	603	903	0
6541	4	0	0	0	0	0	0	200	300	0	0	0	0	0	0	0	200	903	0	0	0	0	0	0	0	603	903	0
6541	5	0	0	0	0	0	0	200	300	0	0	0	0	0	0	0	200	903	0	0	0	0	0	0	0	603	903	0
6541	6	0	0	0	0	0	0	200	300	0	0	0	0	0	0	0	200	903	0	0	0	0	0	0	0	603	903	0
6541	7	0	0	0	0	0	0	200	300	0	0	0	0	0	0	0	200	903	0	0	0	0	0	0	0	603	903	0
6541	8	0	0	0	0	0	0	200	300	0	0	0	0	0	0	0	200	903	0	0	0	0	0	0	0	603	903	0
6541	9	0	0	0	0	0	0	200	300	0	0	0	0	0	0	0	200	903	0	0	0	0	0	0	0	603	903	0
6542	0	0	0	0	0	0	0	200	300	0	0	0	0	0	0	0	200	903	0	0	0	0	0	0	0	603	903	0
6542	1	0	0	0	0	0	0	200	300	0	0	0	0	0	0	0	200	903	0	0	0	0	0	0	0	603	903	0
6542	2	0	0	0	0	0	0	200	300	0	0	0	0	0	0	0	200	903	0	0	0	0	0	0	0	603	903	0
6542	3	0	0	0	0	0	0	200	300	0	0	0	0	0	0	0	200	903	0	0	0	0	0	0	0	603	903	0
6542	4	0	0	0	0	0	0	200	300	0	0	0	0	0	0	0	200	903	0	0	0	0	0	0	0	603	903	0
6542	5	0	0	0	0	0	0	200	300	0	0	0	0	0	0	0	200	903	0	0	0	0	0	0	0	603	903	0
6542	6	0	0	0	0	0	0	200	300	0	0	0	0	0	0	0	200	903	0	0	0	0	0	0	0	603	903	0
6542	7	0	0	0	0	0	0	200	300	0	0	0	0	0	0	0	200	903	0	0	0	0	0	0	0	603	903	0
6542	8	0	0	0	0	0	0	200	300	0	0	0	0	0	0	0	200	903	0	0	0	0	0	0	0	603	903	0
6542	9	0	0	0	0	0	0	200	300	0	0	0	0	0	0	0	200	903	0	0	0	0	0	0	0	603	903	0
6543	0	0	0	0	0	0	0	200	300	0	0	0	0	0	0	0	200	903	0	0	0	0	0	0	0	603	903	0
6543	1	0	0	0	0	0	0	200	300	0	0	0	0	0	0	0	200	903	0	0	0	0	0	0	0	603	903	0
6543	2	0	0	0	0	0	0	200	300	0	0	0	0	0	0	0	200	903	0	0	0	0	0	0	0	603	903	0
6543	3	0	0	0	0	0	0	200	300	0	0	0	0	0	0	0	200	903	0	0	0	0	0	0	0	603	903	0
6543	4	0	0	0	0	0	0	200	300	0	0	0	0	0	0	0	200	903	0	0	0	0	0	0	0	603	903	0
6543	5	0	0	0	0	0	0	200	300	0	0	0	0	0	0	0	200	903	0	0	0	0	0	0	0	603	903	0
6543	6	0	0	0	0	0	0	200	300	0	0	0	0	0	0	0	200	903	0	0	0	0	0	0	0	603	903	0
6543	7	0	0	0	0	0	0	200	300	0	0	0	0	0	0	0	200	903	0	0	0	0	0	0	0	603	903	0
6543	8	0	0	0	0	0	0	200	300	0	0	0	0	0	0	0	200	903	0	0	0	0	0	0	0	603	903	0
6543	9	0	0	0	0	0	0	200	300	0	0	0	0	0	0	0	200	903	0	0	0	0	0	0	0	603	903	0
6544	0	0	0	0	0	0	0	200	300	0	0	0	0	0	0	0	200	903	0	0	0	0	0	0	0	603	903	0
6544	1	0	0	0	0	0	0	200	300	0	0	0	0	0	0	0	200	903	0	0	0	0	0	0	0	603	903	0
6544	2	0	0	0	0	0	0	200	300	0	0	0	0	0	0	0	200	903	0	0	0	0	0	0	0	603	903	0
6544	3	0	0	0	0	0	0	200	300	0	0	0	0	0	0	0	200	903	0	0	0	0	0	0	0	603	903	0
6544	4	0	0	0	0	0	0	200	300	0	0	0	0	0	0	0	200	903	0	0	0	0	0	0	0	603	903	0
6544	5	0	0	0	0	0	0	200	300	0	0	0	0	0	0	0	200	903	0	0	0	0	0	0	0	603	903	0
6544	6	0	0	0	0	0	0	200	300	0	0	0	0	0	0	0	200	903	0	0	0	0	0	0	0	603	903	0
6544	7	0	0	0	0	0	0	200	300	0	0	0	0	0	0	0	200	903	0	0	0	0	0	0	0	603	903	0
6544	8	0	0	0	0	0	0	200	300	0	0	0	0	0	0	0	200	903	0	0	0	0	0	0	0	603	903	0
6544	9	0	0	0	0	0	0	200	300	0	0	0	0	0	0	0	200	903	0	0	0	0	0	0	0	603	903	0
6545	0	0	0	0	0	0	0	200	300	0	0	0	0	0	0	0	200	903	0	0	0	0	0	0	0	603	903	0
6545	1	0	0	0	0	0	0	200	300	0	0	0	0	0	0	0	200	903	0	0	0	0	0	0	0	603	903	0
6545	2	0	0	0	0	0	0	200	300	0	0	0	0	0	0	0	200	903	0	0	0	0	0	0	0	603	903	0
6545	3	0	0	0	0	0	0	200	300	0	0	0	0	0	0	0	200	903	0	0	0	0	0	0	0	603	903	0
6545	4	0	0	0	0	0	0	200	300	0	0	0	0	0	0	0	200	903	0	0	0	0	0	0	0	603	903	0
6545	5	0	0	0	0	0	0	200	300	0	0	0	0	0	0	0	200	903	0	0	0	0	0	0	0	603	903	0
6545	6	0	0	0	0	0	0	200	300	0	0	0	0	0	0	0	200	903	0	0	0	0	0	0	0	603	903	0
6545	7	0	0	0	0	0	0	200	300	0	0	0	0	0	0	0	200	903	0	0	0	0	0	0	0	603	903	0
6545	8	0	0	0	0	0	0	200	300	0	0	0	0	0	0	0	200	903	0	0	0	0	0	0	0	603	903	0
6545	9	0	0	0	0	0	0	200	300	0	0	0	0	0	0	0	200	903	0	0	0	0	0	0	0	603	903	0
6546	0	0	0	0	0	0	0	200	300	0	0	0	0	0	0	0	200	903	0	0	0	0	0	0	0	603	903	0
6546	1	0	0	0	0	0	0	200	300	0	0	0	0	0	0	0	200	903	0	0	0	0	0	0	0	603	903	0
6546	2	0	0	0	0	0	0	200	300	0	0	0	0	0	0	0	200	903	0	0	0	0	0	0	0	603	903	0
6546	3	0	0	0	0	0	0	200	300	0	0	0	0	0	0	0	200	903	0	0	0	0	0	0	0	603	903	0
6546	4	0	0	0	0	0	0	200	300	0	0	0	0	0	0	0	200	903	0	0	0	0	0	0	0	603	903	0
6546	5	0	0	0	0	0	0	200	300	0	0	0	0	0	0	0	200	903	0	0	0	0	0	0	0	603	903	0
6546	6	0	0	0	0	0	0	200	300	0	0	0	0	0	0	0	200	903	0	0	0	0	0	0	0	603	903	0
6546	7	0	0	0	0	0	0	200	300	0	0	0	0	0	0	0	200	903	0	0	0	0	0	0	0	603	903	0
6546	8	0	0	0	0	0	0	200	300	0	0	0	0	0	0	0	200	903	0	0	0	0	0	0	0	603	903	0
6546	9	0	0	0	0	0	0	200	300	0	0	0	0	0	0	0	200	903	0	0	0	0	0	0	0	603	903	0
6547	0	0	0	0	0	0	0	200	300	0	0	0	0	0	0	0	200	903	0	0	0	0	0	0	0	603	903	0
6547	1	0	0	0	0	0	0	200	300	0	0	0	0	0	0	0	200	903	0	0	0	0	0	0	0	603	903	0
6547	2	0	0	0	0	0	0	200	300	0	0	0	0	0	0	0	200	903	0	0	0	0	0	0	0	603	903	0
6547	3	0	0	0	0	0	0	200	300	0	0	0	0	0	0	0	200	903	0	0	0	0	0	0	0	603	903	0
6547	4	0	0	0	0	0	0	200	300	0	0	0	0	0	0	0	200	903	0	0	0	0	0	0	0	603	903	0
6547	5	0	0	0	0	0	0	200	300	0	0	0	0	0	0	0	200	903	0	0	0	0	0	0	0	603	903	0
6547	6	0	0	0	0	0	0	200	300	0	0	0	0	0	0	0	200	903	0	0	0	0	0	0	0	603	903	0
6547	7	0	0	0	0	0	0	200	300	0	0	0	0	0	0	0	200	903	0	0	0	0	0	0	0	603	903	0
6547	8	0	0	0	0	0	0	200	300	0	0	0	0	0	0	0	200	903	0	0	0	0	0	0	0	603	903	0
6547	9	0	0	0	0	0	0	200	300	0	0	0	0	0	0	0	200	903	0	0	0	0	0	0	0	603	903	0
6548	0	0	0	0	0	0	0	200	300	0	0	0	0	0	0	0	200	903	0	0	0	0	0	0	0	603	903	0
6548	1	0	0	0	0	0	0	200	300	0	0	0	0	0	0	0	200	903	0	0	0	0	0	0	0	603	903	0
6548	2	0	0	0	0	0	0	200	300	0	0	0	0	0	0	0	200	903	0	0	0	0	0	0	0	603	903	0
6548	3	0	0	0	0	0	0	200	300	0	0	0	0	0	0	0	200	903	0	0	0	0	0	0	0	603	903	0
6548	4	0	0	0	0	0	0	200	300	0	0	0	0	0	0	0	200	903	0	0	0	0	0	0	0	603	903	0
6548	5	0	0	0	0	0	0	200	300	0	0	0	0	0	0	0	200	903	0	0	0	0	0	0	0	603	903	0
6548	6	0	0	0	0	0	0	200	300	0	0	0	0	0	0	0	200	903	0	0	0	0	0	0	0	603	903	0
6548	7	0	0	0	0	0	0	200	300	0	0	0	0	0	0	0	200	903	0	0	0	0	0	0	0	603	903	0
6548	8	0	0	0	0	0	0	200	300	0	0	0	0	0	0	0	200	903	0	0	0	0	0	0	0	603	903	0
6548	9	0	0	0	0	0	0	200	300	0	0	0	0	0	0	0	200	903	0	0	0	0	0	0	0	603	903	0
6549	0	0	0	0	0	0	0	200	300	0	0	0	0	0	0	0	200	903	0	0	0	0	0	0	0	603	903	0
6549	1	0	0	0	0	0	0	200	300	0	0	0	0	0	0	0	200	903	0	0	0	0	0	0	0	603	903	0
6549	2	0	0	0	0	0	0	200	300	0	0	0	0	0	0	0	200	903	0	0	0	0	0	0	0	603	903	0
6549	3	0	0	0	0	0	0	200	300	0	0	0	0	0	0	0	200	903	0	0	0	0	0	0	0	603	903	0
6549	4	0	0	0	0	0	0	200	300	0	0	0	0	0	0	0	200	903	0	0	0	0	0	0	0	603	903	0
6549	5	0	0	0	0	0	0	200	300	0	0	0	0	0	0	0	200	903	0	0	0	0	0	0	0	603	903	0
6549	6	0	0	0	0	0	0	200	300	0	0	0	0	0	0	0	200	903	0	0	0	0	0	0	0	603	903	0
6549	7	0	0	0	0	0	0	200	300	0	0	0	0	0	0	0	200	903	0	0	0	0	0	0	0	603	903	0
6549	8	0	0	0	0	0	0	200	300	0	0	0	0	0	0	0	200	903	0	0	0	0	0	0	0	603	903	0
6549	9	0	0	0	0	0	0	200	300	0	0	0	0	0	0	0	200	903	0	0	0	0	0	0	0	603	903	0
6550	0	0	0	0	0	0	0	200	300	0	0	0	0	0	0	0	200	903	0	0	0	0	0	0	0	603	903	0
6550	1	0	0	0	0	0	0	200	300	0	0	0	0	0	0	0	200	903	0	0	0	0	0	0	0	603	903	0
6550	2	0	0	0	0	0	0	200	300	0	0	0	0	0	0	0	200	903	0	0	0	0	0	0	0	603	903	0
6550	3	0	0	0	0	0	0	200	300	0	0	0	0	0	0	0	200	903	0	0	0	0	0	0	0	603	903	0
6550	4	0	0	0	0	0	0	200	300	0	0	0	0	0	0	0	200	903	0	0	0	0	0	0	0	603	903	0
6550	5	0	0	0	0	0	0	200	300	0	0	0	0	0	0	0	200	903	0	0	0	0	0	0	0	603	903	0
6550	6	0	0	0	0	0	0	200	300	0	0	0	0	0	0	0	200	903	0	0	0	0	0	0	0	603	903	0
6550	7	0	0	0	0	0	0	200	300	0	0	0	0	0	0	0	200	903	0	0	0	0	0	0	0	603	903	0
6550	8	0	0	0	0	0	0	200	300	0	0	0	0	0	0	0	200	903	0	0	0	0	0	0	0	603	903	0
6550	9	0	0	0	0	0	0	200	300	0	0	0	0	0	0	0	200	903	0	0	0	0	0	0	0	603	903	0
6551	0	0	0	0	0	0	0	200	300	0	0	0	0	0	0	0	200	903	0	0	0	0	0	0	0	603	903	0
6551	1	0	0	0	0	0	0	200	300	0	0	0	0	0	0	0	200	903	0	0	0	0	0	0	0	603	903	0
6551	2	0	0	0	0	0	0	200	300	0	0	0	0	0	0	0	200	903	0	0	0	0	0	0	0	603	903	0
6551	3	0	0	0	0	0	0	200	300	0	0	0	0	0	0	0	200	903	0	0	0	0	0	0	0	603	903	0
6551	4	0	0	0	0	0	0	200	300	0	0	0	0	0	0	0	200	903	0	0	0	0	0	0	0	603	903	0
6551	5	0	0	0	0	0	0	200	300	0	0	0	0	0	0	0	200	903	0	0	0	0	0	0	0	603	903	0
6551	6	0	0	0	0	0	0	200	300	0	0	0	0	0	0	0	200	903	0	0	0	0	0	0	0	603	903	0
6551	7	0	0	0	0	0	0	200	300	0	0	0	0	0	0	0	200	903	0	0	0	0	0	0	0	603	903	0
6551	8	0	0	0	0	0	0	200	300	0	0	0	0	0	0	0	200	903	0	0	0	0	0	0	0	603	903	0
6551	9	0	0	0	0	0	0	200	300	0	0	0	0	0	0	0	200	903	0	0	0	0	0	0	0	603	903	0
6552	0	0	0	0	0	0	0	200	300	0	0	0	0	0	0	0	200	903	0	0	0	0	0	0	0	603	903	0
6552	1	0	0	0	0	0	0	200	300	0	0	0	0	0	0	0	200	903	0	0	0	0	0	0	0	603	903	0
6552	2	0	0	0	0	0	0	200	300	0	0	0	0	0	0	0	200	903	0	0	0	0	0	0	0	603	903	0
6552	3	0	0	0	0	0	0	200	300	0	0	0	0	0	0	0	200	903	0	0	0	0	0	0	0	603	903	0
6552	4	0	0	0	0	0	0	200	300	0	0	0	0	0	0	0	200	903	0	0	0	0	0	0	0	603	903	0
6552	5	0	0	0	0	0	0	200	300	0	0	0	0	0	0	0	200	903	0	0	0	0	0	0	0	603	903	0
6552	6	0	0	0	0	0	0	200	300	0	0	0	0	0	0	0	200	903	0	0	0	0	0	0	0	603	903	0
6552	7	0	0	0	0	0	0	200	300	0	0	0	0	0	0	0	200	903	0	0	0	0	0	0	0	603	903	0
6552	8	0	0	0	0	0	0	200	300	0	0	0	0	0	0	0	200	903	0	0	0	0	0	0	0	603	903	0
6552	9	0	0	0	0	0	0	200	300	0	0	0	0	0	0	0	200	903	0	0	0	0	0	0	0	603	903	0
6553	0	0	0	0	0	0	0	200	300	0	0	0	0	0	0	0	200	903	0	0	0	0	0	0	0	603	903	0
6553	1	0	0	0	0	0	0	200	300	0	0	0	0	0	0	0	200	903	0	0	0	0	0	0	0	603	903	0
6553	2	0	0	0	0	0	0	200	300	0	0	0	0	0	0	0	200	903	0	0	0	0	0	0	0	603	903	0
6553	3	0	0	0	0	0	0	200	300	0	0	0	0	0	0	0	200	903	0	0	0	0	0	0	0	603	903	0
6553	4	0	0	0	0	0	0	200	300	0	0	0	0	0	0	0	200	903	0	0	0	0	0	0	0	603	903	0
6553	5	0	0	0	0	0	0	200	300	0	0	0	0	0	0	0	200	903	0	0	0	0	0	0	0	603	903	0
6553	6	0	0	0	0	0	0	200	300	0	0	0	0	0	0	0	200	903	0	0	0	0	0	0	0	603	903	0
6553	7	0	0	0	0	0	0	200	300	0	0	0	0	0	0	0	200	903	0	0	0	0	0	0	0	603	903	0
6553	8	0	0	0	0	0	0	200	300	0	0	0	0	0	0	0	200	903	0	0	0	0	0	0	0	603	903	0
6553	9	0	0	0	0	0	0	200	300	0	0	0	0	0	0	0	200	903	0	0	0	0	0	0	0	603	903	0
6554	0	0	0	0	0	0	0	200	300	0	0	0	0	0	0	0	200	903	0	0	0	0	0	0	0	603	903	0
6554	1	0	0	0	0	0	0	200	300	0	0	0	0	0	0	0	200	903	0	0	0	0	0	0	0	603	903	0
6554	2	0	0	0	0	0	0	200	300	0	0	0	0	0	0	0	200	903	0	0	0	0	0	0	0	603	903	0
6554	3	0	0	0	0	0	0	200	300	0	0	0	0	0	0	0	200	903	0	0	0	0	0	0	0	603	903	0
6554	4	0	0	0	0	0	0	200	300	0	0	0	0	0	0	0	200	903	0	0	0	0	0	0	0	603	903	0
6554	5	0	0	0	0	0	0	200	300	0	0	0	0	0	0	0	200	903	0	0	0	0	0	0	0	603	903	0
6554	6	0	0	0	0	0	0	200	300	0	0	0	0	0	0	0	200	903	0	0	0	0	0	0	0	603	903	0
6554	7	0	0	0	0	0	0	200	300	0	0	0	0	0	0	0	200	903	0	0	0	0	0	0	0	603	903	0
6554	8	0	0	0	0	0	0	200	300	0	0	0	0	0	0	0	200	903	0	0	0	0	0	0	0	603	903	0
6554	9	0	0	0	0	0	0	200	300	0	0	0	0	0	0	0	200	903	0	0	0	0	0	0	0	603	903	0
6555	0	0	0	0	0	0	0	200	300	0	0	0	0	0	0	0	200	903	0	0	0	0	0	0	0	603	903	0
6555	1	0	0	0	0	0	0	200	300	0	0	0	0	0	0	0	200	903	0	0	0	0	0	0	0	603	903	0
6555	2	0	0	0	0	0	0	200	300	0	0	0	0	0	0	0	200	903	0	0	0	0	0	0	0	603	903	0
6555	3	0	0	0	0	0	0	200	300	0	0	0	0	0	0	0	200	903	0	0	0	0	0	0	0	603	903	0
6555	4	0	0	0	0	0	0	200	300	0	0	0	0	0	0	0	200	903	0	0	0	0	0	0	0	603	903	0
6555	5	0	0	0	0	0	0	200	300	0	0	0	0	0	0	0	200	903	0	0	0	0	0	0	0	603	903	0
6555	6	0	0	0	0	0	0	200	300	0	0	0	0	0	0	0	200	903	0	0	0	0	0	0	0	603	903	0
6555	7	0	0	0	0	0	0	200	300	0	0	0	0	0	0	0	200	903	0	0	0	0	0	0	0	603	903	0
6555	8	0	0	0	0	0	0	200	300	0	0	0	0	0	0	0	200	903	0	0	0	0	0	0	0	603	903	0
6555	9	0	0	0	0	0	0	200	300	0	0	0	0	0	0	0	200	903	0	0	0	0	0	0	0	603	903	0
6556	0	0	0	0	0	0	0	200	300	0	0	0	0	0	0	0	200	903	0	0	0	0	0	0	0	603	903	0
6556	1	0	0	0	0	0	0	200	300	0	0	0	0	0	0	0	200	903	0	0	0	0	0	0	0	603	903	0
6556	2	0	0	0	0	0	0	200	300	0	0	0	0	0	0	0	200	903	0	0	0	0	0	0	0	603	903	0
6556	3	0	0	0	0	0	0	200	300	0	0	0	0	0	0	0	200	903	0	0	0	0	0	0	0	603	903	0
6556	4	0	0	0	0	0	0	200	300	0	0	0	0	0	0	0	200	903	0	0	0	0	0	0	0	603	903	0
6556	5	0	0	0	0	0	0	200	300	0	0	0	0	0	0	0	200	903	0	0	0	0	0	0	0	603	903	0
6556	6	0	0	0	0	0	0	200	300	0	0	0	0	0	0	0	200	903	0	0	0	0	0	0	0	603	903	0
6556	7	0	0	0	0	0	0	200	300	0	0	0	0	0	0	0	200	903	0	0	0	0	0	0	0	603	903	0
6556	8	0	0	0	0	0	0	200	300	0	0	0	0	0	0	0	200	903	0	0	0	0	0	0	0	603	903	0
6556	9	0	0	0	0	0	0	200	300	0	0	0	0	0	0	0	200	903	0	0	0	0	0	0	0	603	903	0
6557	0	0	0	0	0	0	0	200	300	0	0	0	0	0	0	0	200	903	0	0	0	0	0	0	0	603	903	0
6557	1	0	0	0	0	0	0	200	300	0	0	0	0	0	0	0	200	903	0	0	0	0	0	0	0	603	903	0
6557	2	0	0	0	0	0	0	200	300	0	0	0	0	0	0	0	200	903	0	0	0	0	0	0	0	603	903	0
6557	3	0	0	0	0	0	0	200	300	0	0	0	0	0	0	0	200	903	0	0	0	0	0	0	0	603	903	0
6557	4	0	0	0	0	0	0	200	300	0	0	0	0	0	0	0	200	903	0	0	0	0	0	0	0	603	903	0
6557	5	0	0	0	0	0	0	200	300	0	0	0	0	0	0	0	200	903	0	0	0	0	0	0	0	603	903	0
6557	6	0	0	0	0	0	0	200	300	0	0	0	0	0	0	0	200	903	0	0	0	0	0	0	0	603	903	0
6557	7	0	0	0	0	0	0	200	300	0	0	0	0	0	0	0	200	903	0	0	0	0	0	0	0	603	903	0
6557	8	0	0	0	0	0	0	200	300	0	0	0	0	0	0	0	200	903	0	0	0	0	0	0	0	603	903	0
6557	9	0	0	0	0	0	0	200	300	0	0	0	0	0	0	0	200	903	0	0	0	0	0	0	0	603	903	0
6558	0	0	0	0	0	0	0	200	300	0	0	0	0	0	0	0	200	903	0	0	0	0	0	0	0	603	903	0
6558	1	0	0	0	0	0	0	200	300	0	0	0	0	0	0	0	200	903	0	0	0	0	0	0	0	603	903	0
6558	2	0	0	0	0	0	0	200	300	0	0	0	0	0	0	0	200	903	0	0	0	0	0	0	0	603	903	0
6558	3	0	0	0	0	0	0	200	300	0	0	0	0	0	0	0	200	903	0	0	0	0	0	0	0	603	903	0
6558	4	0	0	0	0	0	0	200	300	0	0	0	0	0	0	0	200	903	0	0	0	0	0	0	0	603	903	0
6558	5	0	0	0	0	0	0	200	300	0	0	0	0	0	0	0	200	903	0	0	0	0	0	0	0	603	903	0
6558	6	0	0	0	0	0	0	200	300	0	0	0	0	0	0	0	200	903	0	0	0	0	0	0	0	603	903	0
6558	7	0	0	0	0	0	0	200	300	0	0	0	0	0	0	0	200	903	0	0	0	0	0	0	0	603	903	0
6558	8	0	0	0	0	0	0	200	300	0	0	0	0	0	0	0	200	903	0	0	0	0	0	0	0	603	903	0
6558	9	0	0	0	0	0	0	200	300	0	0	0	0	0	0	0	200	903	0	0	0	0	0	0	0	603	903	0
6559	0	0	0	0	0	0	0	200	300	0	0	0	0	0	0	0	200	903	0	0	0	0	0	0	0	603	903	0
6559	1	0	0	0	0	0	0	200	300	0	0	0	0	0	0	0	200	903	0	0	0	0	0	0	0	603	903	0
6559	2	0	0	0	0	0	0	200	300	0	0	0	0	0	0	0	200	903	0	0	0	0	0	0	0	603	903	0
6559	3	0	0	0	0	0	0	200	300	0	0	0	0	0	0	0	200	903	0	0	0	0	0	0	0	603	903	0
6559	4	0	0	0	0	0	0	200	300	0	0	0	0	0	0	0	200	903	0	0	0	0	0	0	0	603	903	0
6559	5	0	0	0	0	0	0	200	300	0	0	0	0	0	0	0	200	903	0	0	0	0	0	0	0	603	903	0
6559	6	0	0	0	0	0	0	200	300	0	0	0	0	0	0	0	200	903	0	0	0	0	0	0	0	603	903	0
6559	7	0	0	0	0	0	0	200	300	0	0	0	0	0	0	0	200	903	0	0	0	0	0	0	0	603	903	0
6559	8	0	0	0	0	0	0	200	300	0	0	0	0	0	0	0	200	903	0	0	0	0	0	0	0	603	903	0
6559	9	0	0	0	0	0	0	200	300	0	0	0	0	0	0	0	200	903	0	0	0	0	0	0	0	603	903	0
6560	0	0	0	0	0	0	0	200	300	0	0	0	0	0	0	0	200	903	0	0	0	0	0	0	0	603	903	0
6560	1	0	0	0	0	0	0	200	300	0	0	0	0	0	0	0	200	903	0	0	0	0	0	0	0	603	903	0
6560	2	0	0	0	0	0	0	200	300	0	0	0	0	0	0	0	200	903	0	0	0	0	0	0	0	603	903	0
6560	3	0	0	0	0	0	0	200	300	0	0	0	0	0	0	0	200	903	0	0	0	0	0	0	0	603	903	0
6560	4	0	0	0	0	0	0	200	300	0	0	0	0	0	0	0	200	903	0	0	0	0	0	0	0	603	903	0
6560	5	0	0	0	0	0	0	200	300	0	0	0	0	0	0	0	200	903	0	0	0	0	0	0	0	603	903	0
6560	6	0	0	0	0	0	0	200	300	0	0	0	0	0	0	0	200	903	0	0	0	0	0	0	0	603	903	0
6560	7	0	0	0	0	0	0	200	300	0	0	0	0	0	0	0	200	903	0	0	0	0	0	0	0	603	903	0
6560	8	0	0	0	0	0	0	200	300	0	0	0	0	0	0	0	200	903	0	0	0	0	0	0	0	603	903	0
6560	9	0	0	0	0	0	0	200	300	0	0	0	0	0	0	0	200	903	0	0	0	0	0	0	0	603	903	0
6561	0	0	0	0	0	0	0	200	300	0	0	0	0	0	0	0	200	903	0	0	0	0	0	0	0	603	903	0
6561	1	0	0	0	0	0	0	200	300	0	0	0	0	0	0	0	200	903	0	0	0	0	0	0	0	603	903	0
6561	2	0	0	0	0	0	0	200	300	0	0	0	0	0	0	0	200	903	0	0	0	0	0	0	0	603	903	0
6561	3	0	0	0	0	0	0	200	300	0	0	0	0	0	0	0	200	903	0	0	0	0	0	0	0	603	903	0
6561	4	0	0	0	0	0	0	200	300	0	0	0	0	0	0	0	200	903	0	0	0	0	0	0	0	603	903	0
6561	5	0	0	0	0	0	0	200	300	0	0	0	0	0	0	0	200	903	0	0	0	0	0	0	0	603	903	0
6561	6	0	0	0	0	0	0	200	300	0	0	0	0	0	0	0	200	903	0	0	0	0	0	0	0	603	903	0
6561	7	0	0	0	0	0	0	200	300	0	0	0	0	0	0	0	200	903	0	0	0	0	0	0	0	603	903	0
6561	8	0	0	0	0	0	0	200	300	0	0	0	0	0	0	0	200	903	0	0	0	0	0	0	0	603	903	0
6561	9	0	0	0	0	0	0	200	300	0	0	0	0	0	0	0	200	903	0	0	0	0	0	0	0	603	903	0
6562	0	0	0	0	0	0	0	200	300	0	0	0	0	0	0	0	200	903	0	0	0	0	0	0	0	603	903	0
6562	1	0	0	0	0	0	0	200	300	0	0	0	0	0	0	0	200	903	0	0	0	0	0	0	0	603	903	0
6562	2	0	0	0	0	0	0	200	300	0	0	0	0	0	0	0	200	903	0	0	0	0	0	0	0	603	903	0
6562	3	0	0	0	0	0	0	200	300	0	0	0	0	0	0	0	200	903	0	0	0	0	0	0	0	603	903	0
6562	4	0	0	0	0	0	0	200	300	0	0	0	0	0	0	0	200	903	0	0	0	0	0	0	0	603	903	0
6562	5	0	0	0	0	0	0	200	300	0	0	0	0	0	0	0	200	903	0	0	0	0	0	0	0	603	903	0
6562	6	0	0	0	0	0	0	200	300	0	0	0	0	0	0	0	200	903	0	0	0	0	0	0	0	603	903	0
6562	7	0	0	0	0	0	0	200	300	0	0	0	0	0	0	0	200	903	0	0	0	0	0	0	0	603	903	0
6562	8	0	0	0	0	0	0	200	300	0	0	0	0	0	0	0	200	903	0	0	0	0	0	0	0	603	903	0
6562	9	0	0	0	0	0	0	200	300	0	0	0	0	0	0	0	200	903	0	0	0	0	0	0	0	603	903	0
6563	0	0	0	0	0	0	0	200	300	0	0	0	0	0	0	0	200	903	0	0	0	0	0	0	0	603	903	0
6563	1	0	0	0	0	0	0	200	300	0	0	0	0	0	0	0	200	903	0	0	0	0	0	0	0	603	903	0
6563	2	0	0	0	0	0	0	200	300	0	0	0	0	0	0	0	200	903	0	0	0	0	0	0	0	603	903	0
6563	3	0	0	0	0	0	0	200	300	0	0	0	0	0	0	0	200	903	0	0	0	0	0	0	0	603	903	0
6563	4	0	0	0	0	0	0	200	300	0	0	0	0	0	0	0	200	903	0	0	0	0	0	0	0	603	903	0
6563	5	0	0	0	0	0	0	200	300	0	0	0	0	0	0	0	200	903	0	0	0	0	0	0	0	603	903	0
6563	6	0	0	0	0	0	0	200	300	0	0	0	0	0	0	0	200	903	0	0	0	0	0	0	0	603	903	0
6563	7	0	0	0	0	0	0	200	300	0	0	0	0	0	0	0	200	903	0	0	0	0	0	0	0	603	903	0
6563	8	0	0	0	0	0	0	200	300	0	0	0	0	0	0	0	200	903	0	0	0	0	0	0	0	603	903	0
6563	9	0	0	0	0	0	0	200	300	0	0	0	0	0	0	0	200	903	0	0	0	0	0	0	0	603	903	0
6564	0	0	0	0	0	0	0	200	300	0	0	0	0	0	0	0	200	903	0	0	0	0	0	0	0	603	903	0
6564	1	0	0	0	0	0	0	200	300	0	0	0	0	0	0	0	200	903	0	0	0	0	0	0	0	603	903	0
6564	2	0	0	0	0	0	0	200	300	0	0	0	0	0	0	0	200	903	0	0	0	0	0	0	0	603	903	0
6564	3	0	0	0	0	0	0	200	300	0	0	0	0	0	0	0	200	903	0	0	0	0	0	0	0	603	903	0
6564	4	0	0	0	0	0	0	200	300	0	0	0	0	0	0	0	200	903	0	0	0	0	0	0	0	603	903	0
6564	5	0	0	0	0	0	0	200	300	0	0	0	0	0	0	0	200	903	0	0	0	0	0	0	0	603	903	0
6564	6	0	0	0	0	0	0	200	300	0	0	0	0	0	0	0	200	903	0	0	0	0	0	0	0	603	903	0
6564	7	0	0	0	0	0	0	200	300	0	0	0	0	0	0	0	200	903	0	0	0	0	0	0	0	603	903	0
6564	8	0	0	0	0	0	0	200	300	0	0	0	0	0	0	0	200	903	0	0	0	0	0	0	0	603	903	0
6564	9	0	0	0	0	0	0	200	300	0	0	0	0	0	0	0	200	903	0	0	0	0	0	0	0	603	903	0
6565	0	0	0	0	0	0	0	200	300	0	0	0	0	0	0	0	200	903	0	0	0	0	0	0	0	603	903	0
6565	1	0	0	0	0	0	0	200	300	0	0	0	0	0	0	0	200	903	0	0	0	0	0	0	0	603	903	0
6565	2	0	0	0	0	0	0	200	300	0	0	0	0	0	0	0	200	903	0	0	0	0	0	0	0	603	903	0
6565	3	0	0	0	0	0	0	200	300	0	0	0	0	0	0	0	200	903	0	0	0	0	0	0	0	603	903	0
6565	4	0	0	0	0	0	0	200	300	0	0	0	0	0	0	0	200	903	0	0	0	0	0	0	0	603	903	0
6565	5	0	0	0	0	0	0	200	300	0	0	0	0	0	0	0	200	903	0	0	0	0	0	0	0	603	903	0
6565	6	0	0	0	0	0	0	200	300	0	0	0	0	0	0	0	200	903	0	0	0	0	0	0	0	603	903	0
6565	7	0	0	0	0	0	0	200	300	0	0	0	0	0	0	0	200	903	0	0	0	0	0	0	0	603	903	0
6565	8	0	0	0	0	0	0	200	300	0	0	0	0	0	0	0	200	903	0	0	0	0	0	0	0	603	903	0
6565	9	0	0	0	0	0	0	200	300	0	0	0	0	0	0	0	200	903	0	0	0	0	0	0	0	603	903	0
6566	0	0	0	0	0	0	0	200	300	0	0	0	0	0	0	0	200	903	0	0	0	0	0	0	0	603	903	0
6566	1	0	0	0	0	0	0	200	300	0	0	0	0	0	0	0	200	903	0	0	0	0	0	0	0	603	903	0
6566	2	0	0	0	0	0	0	200	300	0	0	0	0	0	0	0	200	903	0	0	0	0	0	0	0	603	903	0
6566	3	0	0	0	0	0	0	200	300	0	0	0	0	0	0	0	200	903	0	0	0	0	0	0	0	603	903	0
6566	4	0	0	0	0	0	0	200	300	0	0	0	0	0	0	0	200	903	0	0	0	0	0	0	0	603	903	0
6566	5	0	0	0	0	0	0	200	300	0	0	0	0	0	0	0	200	903	0	0	0	0	0	0	0	603	903	0
6566	6	0	0	0	0	0	0	200	300	0	0	0	0	0	0	0	200	903	0	0	0	0	0	0	0	603	903	0
6566	7	0	0	0	0	0	0	200	300	0	0	0	0	0	0	0	200	903	0	0	0	0	0	0	0	603	903	0
6566	8	0	0	0	0	0	0	200	300	0	0	0	0	0	0	0	200	903	0	0	0	0	0	0	0	603	903	0
6566	9	0	0	0	0	0	0	200	300	0	0	0	0	0	0	0	200	903	0	0	0	0	0	0	0	603	903	0
6567	0	0	0	0	0	0	0	200	300	0	0	0	0	0	0	0	200	903	0	0	0	0	0	0	0	603	903	0
6567	1	0	0	0	0	0	0	200	300	0	0	0	0	0	0	0	200	903	0	0	0	0	0	0	0	603	903	0
6567	2	0	0	0	0	0	0	200	300	0	0	0	0	0	0	0	200	903	0	0	0	0	0	0	0	603	903	0
6567	3	0	0	0	0	0	0	200	300	0	0	0	0	0	0	0	200	903	0	0	0	0	0	0	0	603	903	0
6567	4	0	0	0	0	0	0	200	300	0	0	0	0	0	0	0	200	903	0	0	0	0	0	0	0	603	903	0
6567	5	0	0	0	0	0	0	200	300	0	0	0	0	0	0	0	200	903	0	0	0	0	0	0	0	603	903	0
6567	6	0	0	0	0	0	0	200	300	0	0	0	0	0	0	0	200	903	0	0	0	0	0	0	0	603	903	0
6567	7	0	0	0	0	0	0	200	300	0	0	0	0	0	0	0	200	903	0	0	0	0	0	0	0	603	903	0
6567	8	0	0	0	0	0	0	200	300	0	0	0	0	0	0	0	200	903	0	0	0	0	0	0	0	603	903	0
6567	9	0	0	0	0	0	0	200	300	0	0	0	0	0	0	0	200	903	0	0	0	0	0	0	0	603	903	0
6568	0	0	0	0	0	0	0	200	300	0	0	0	0	0	0	0	200	903	0	0	0	0	0	0	0	603	903	0
6568	1	0	0	0	0	0	0	200	300	0	0	0	0	0	0	0	200	903	0	0	0	0	0	0	0	603	903	0
6568	2	0	0	0	0	0	0	200	300	0	0	0	0	0	0	0	200	903	0	0	0	0	0	0	0	603	903	0
6568	3	0	0	0	0	0	0	200	300	0	0	0	0	0	0	0	200	903	0	0	0	0	0	0	0	603	903	0
6568	4	0	0	0	0	0	0	200	300	0	0	0	0	0	0	0	200	903	0	0	0	0	0	0	0	603	903	0
6568	5	0	0	0	0	0	0	200	300	0	0	0	0	0	0	0	200	903	0	0	0	0	0	0	0	603	903	0
6568	6	0	0	0	0	0	0	200	300	0	0	0	0	0	0	0	200	903	0	0	0	0	0	0	0	603	903	0
6568	7	0	0	0	0	0	0	200	300	0	0	0	0	0	0	0	200	903	0	0	0	0	0	0	0	603	903	0
6568	8	0	0	0	0	0	0	200	300	0	0	0	0	0	0	0	200	903	0	0	0	0	0	0	0	603	903	0
6568	9	0	0	0	0	0	0	200	300	0	0	0	0	0	0	0	200	903	0	0	0	0	0	0	0	603	903	0
6569	0	0	0	0	0	0	0	200	300	0	0	0	0	0	0	0	200	903	0	0	0	0	0	0	0	603	903	0
6569	1	0	0	0	0	0	0	200	300	0	0	0	0	0	0	0	200	903	0	0	0	0	0	0	0	603	903	0
6569	2	0	0	0	0	0	0	200	300	0	0	0	0	0	0	0	200	903	0	0	0	0	0	0	0	603	903	0
6569	3	0	0	0	0	0	0	200	300	0	0	0	0	0	0	0	200	903	0	0	0	0	0	0	0	603	903	0
6569	4	0	0	0	0	0	0	200	300	0	0	0	0	0	0	0	200	903	0	0	0	0	0	0	0	603	903	0
6569	5	0	0	0	0	0	0	200	300	0	0	0	0	0	0	0	200	903	0	0	0	0	0	0	0	603	903	0
6569	6	0	0	0	0	0	0	200	300	0	0	0	0	0	0	0	200	903	0	0	0	0	0	0	0	603	903	0
6569	7	0	0	0	0	0	0	200	300	0	0	0	0	0	0	0	200	903	0	0	0	0	0	0	0	603	903	0
6569	8	0	0	0	0	0	0	200	300	0	0	0	0	0	0	0	200	903	0	0	0	0	0	0	0	603	903	0
6569	9	0	0	0	0	0	0	200	300	0	0	0	0	0	0	0	200	903	0	0	0	0	0	0	0	603	903	0
6570	0	0	0	0	0	0	0	200	300	0	0	0	0	0	0	0	200	903	0	0	0	0	0	0	0	603	903	0
6570	1	0	0	0	0	0	0	200	300	0	0	0	0	0	0	0	200	903	0	0	0	0	0	0	0	603	903	0
6570	2	0	0	0	0	0	0	200	300	0	0	0	0	0	0	0	200	903	0	0	0	0	0	0	0	603	903	0
6570	3	0	0	0	0	0	0	200	300	0	0	0	0	0	0	0	200	903	0	0	0	0	0	0	0	603	903	0
6570	4	3.17612	6.82347	-6.65411	368.039	-520.762	-1031.07	121.738	244.69	0	0	0	0	0	0	0	200	903	0	0	0	0	0	0	0	603	903	0
6570	5	0	0	0	0	0	0	200	300	0	0	0	0	0	0	0	200	903	0	0	0	0	0	0	0	603	903	0
6570	6	0	0	0	0	0	0	200	300	0	0	0	0	0	0	0	200	903	0	0	0	0	0	0	0	603	903	0
6570	7	2.41318	7.89158	-6.34894	825.803	-520.762	-1488.83	117.977	169.931	0	0	0	0	0	0	0	200	903	0	0	0	0	0	0	0	603	903	0
6570	8	0	0	0	0	0	0	200	300	0	0	0	0	0	0	0	200	903	0	0	0	0	0	0	0	603	903	0
6570	9	3.02354	7.58641	-7.26447	917.356	-1192.15	-1214.17	35.8931	173.72	0	0	0	0	0	0	0	200	903	0	0	0	0	0	0	0	603	903	0
6571	0	2.71836	5.90794	-7.87482	1192.01	-886.973	-1168.4	87.3659	148.63	0	0	0	0	0	0	0	200	903	0	0	0	0	0	0	0	603	903	0
6571	1	2.56577	7.58641	-8.48517	276.486	-642.832	-1168.4	124.24	267.415	0	0	0	0	0	0	0	200	903	0	0	0	0	0	0	0	603	903	0
6571	2	2.87095	8.04417	-6.95929	642.697	-825.938	-985.29	81.3186	207.649	0	0	0	0	0	0	0	200	903	0	0	0	0	0	0	0	603	903	0
6571	3	3.63389	9.41746	-7.56964	1741.33	-825.938	-1168.4	90.8881	69.9586	0	0	0	0	0	0	0	200	903	0	0	0	0	0	0	0	603	903	0
6571	4	4.702	9.11228	-7.87482	917.356	-642.832	-1031.07	118.369	183.508	0	0	0	0	0	0	0	200	903	0	0	0	0	0	0	0	603	903	0
6571	5	3.17612	9.11228	-5.12823	825.803	-520.762	-1397.28	98.452	138.969	0	0	0	0	0	0	0	200	903	0	0	0	0	0	0	0	603	903	0
6571	6	2.56577	9.87522	-8.17999	1283.57	-642.832	-1305.72	121.414	143.085	0	0	0	0	0	0	0	200	903	0	0	0	0	0	0	0	603	903	0
6571	7	2.41318	10.0278	-7.87482	1100.46	-581.797	-1443.05	126.119	160.256	0	0	0	0	0	0	0	200	903	0	0	0	0	0	0	0	603	903	0
6571	8	4.39683	9.57005	-6.65411	1008.91	-825.938	-1580.38	75.8756	148.378	0	0	0	0	0	0	0	200	903	0	0	0	0	0	0	0	603	903	0
6571	9	4.09165	9.87522	-8.79034	1008.91	-1009.04	-1397.28	85.21	185.225	0	0	0	0	0	0	0	200	903	0	0	0	0	0	0	0	603	903	0
6572	0	4.09165	10.0278	-7.26447	459.592	-948.008	-1397.28	69.5006	236.734	0	0	0	0	0	0	0	200	903	0	0	0	0	0	0	0	603	903	0
6572	1	3.4813	10.4856	-8.48517	825.803	-459.727	-1443.05	145.82	202.677	0	0	0	0	0	0	0	200	903	0	0	0	0	0	0	0	603	903	0
6572	2	3.63389	11.4011	-6.34894	1466.67	-520.762	-1443.05	117.977	68.9893	0	0	0	0	0	0	0	200	903	0	0	0	0	0	0	0	603	903	0
6572	3	4.54941	11.5537	-6.65411	642.697	-886.973	-1351.5	66.703	203.414	0	0	0	0	0	0	0	200	903	0	0	0	0	0	0	0	603	903	0
6572	4	5.00718	10.0278	-10.011	1008.91	-1192.15	-1443.05	80.9167	199.221	0	0	0	0	0	0	0	200	903	0	0	0	0	0	0	0	603	903	0
6572	5	3.93906	11.4011	-10.011	1466.67	-948.008	-1488.83	105.304	153.495	0	0	0	0	0	0	0	200	903	0	0	0	0	0	0	0	603	903	0
6572	6	6.07529	11.0959	-8.79034	1375.12	-1009.04	-1351.5	85.21	143.565	0	0	0	0	0	0	0	200	903	0	0	0	0	0	0	0	603	903	0
6572	7	3.63389	11.4011	-5.43341	1100.46	-1070.08	-1397.28	3.05583	97.464	0	0	0	0	0	0	0	200	903	0	0	0	0	0	0	0	603	903	0
6572	8	5.46494	11.5537	-6.95929	1100.46	-825.938	-1351.5	81.3186	141.872	0	0	0	0	0	0	0	200	903	0	0	0	0	0	0	0	603	903	0
6572	9	5.15977	12.0115	-9.70587	1100.46	-703.868	-1351.5	127.48	186.619	0	0	0	0	0	0	0	200	903	0	0	0	0	0	0	0	603	903	0
6573	0	4.09165	11.7063	-8.79034	1283.57	-1009.04	-1488.83	85.21	153.98	0	0	0	0	0	0	0	200	903	0	0	0	0	0	0	0	603	903	0
6573	1	4.09165	11.7063	-7.87482	1283.57	-1070.08	-1626.16	64.1138	137.004	0	0	0	0	0	0	0	200	903	0	0	0	0	0	0	0	603	903	0
6573	2	5.00718	12.4692	-7.56964	1100.46	-1619.4	-1305.72	-13.9329	154.622	0	0	0	0	0	0	0	200	903	0	0	0	0	0	0	0	603	903	0
6573	3	5.46494	11.5537	-10.011	1192.01	-1192.15	-1580.38	80.9167	180.93	0	0	0	0	0	0	0	200	903	0	0	0	0	0	0	0	603	903	0
6573	4	6.07529	12.3166	-8.17999	1466.67	-1070.08	-1259.95	69.1834	120.7	0	0	0	0	0	0	0	200	903	0	0	0	0	0	0	0	603	903	0
6573	5	5.00718	12.7744	-9.4007	1192.01	-1131.11	-1259.95	79.6777	173.199	0	0	0	0	0	0	0	200	903	0	0	0	0	0	0	0	603	903	0
6573	6	4.702	12.164	-7.87482	2565.3	-1192.15	-1443.05	48.6125	-25.7606	0	0	0	0	0	0	0	200	903	0	0	0	0	0	0	0	603	903	0
6573	7	5.31235	12.6218	-8.79034	1741.33	-1314.22	-1397.28	50.4928	101.904	0	0	0	0	0	0	0	200	903	0	0	0	0	0	0	0	603	903	0
6573	8	5.46494	12.3166	-9.09552	1924.44	-1314.22	-1488.83	55.5091	88.4194	0	0	0	0	0	0	0	200	903	0	0	0	0	0	0	0	603	903	0
6573	9	4.39683	12.0115	-10.011	917.356	-1192.15	-1122.62	80.9167	208.366	0	0	0	0	0	0	0	200	903	0	0	0	0	0	0	0	603	903	0
6574	0	3.78647	12.3166	-10.011	1375.12	-1253.18	-1717.71	74.8199	162.64	0	0	0	0	0	0	0	200	903	0	0	0	0	0	0	0	603	903	0
6574	1	5.46494	13.3847	-9.09552	1558.22	-1680.43	-1626.16	15.2463	128.682	0	0	0	0	0	0	0	200	903	0	0	0	0	0	0	0	603	903	0
6574	2	6.68564	11.2485	-9.70587	1100.46	-1192.15	-1443.05	77.1724	186.619	0	0	0	0	0	0	0	200	903	0	0	0	0	0	0	0	603	903	0
6574	3	5.15977	12.7744	-9.4007	1924.44	-948.008	-1488.83	99.1555	95.2879	0	0	0	0	0	0	0	200	903	0	0	0	0	0	0	0	603	903	0
6574	4	4.24424	13.5373	-10.011	1924.44	-1253.18	-1900.82	74.8199	107.769	0	0	0	0	0	0	0	200	903	0	0	0	0	0	0	0	603	903	0
6574	5	4.702	12.4692	-9.4007	2015.99	-1375.25	-1717.71	53.7071	85.549	0	0	0	0	0	0	0	200	903	0	0	0	0	0	0	0	603	903	0
6574	6	5.46494	12.164	-10.011	2199.09	-1253.18	-1671.94	74.8199	80.3333	0	0	0	0	0	0	0	200	903	0	0	0	0	0	0	0	603	903	0
6574	7	4.54941	11.7063	-10.6214	1924.44	-1070.08	-1717.71	99.2526	118.815	0	0	0	0	0	0	0	200	903	0	0	0	0	0	0	0	603	903	0
6574	8	4.85459	12.4692	-10.011	917.356	-2168.71	-1488.83	-16.6318	208.366	0	0	0	0	0	0	0	200	903	0	0	0	0	0	0	0	603	903	0
6574	9	4.24424	13.6899	-7.56964	1466.67	-1497.33	-1763.49	2.19339	106.243	0	0	0	0	0	0	0	200	903	0	0	0	0	0	0	0	603	903	0
6575	0	5.46494	14.3003	-10.011	2199.09	-1375.25	-1626.16	62.6263	80.3333	0	0	0	0	0	0	0	200	903	0	0	0	0	0	0	0	603	903	0
6575	1	5.9227	14.758	-10.3162	1558.22	-1802.5	-1626.16	25.2751	148.954	0	0	0	0	0	0	0	200	903	0	0	0	0	0	0	0	603	903	0
6575	2	5.9227	13.5373	-10.6214	1741.33	-1497.33	-1992.37	59.0275	136.055	0	0	0	0	0	0	0	200	903	0	0	0	0	0	0	0	603	903	0
6575	3	5.15977	15.8262	-11.8421	2473.75	-1192.15	-1900.82	99.3296	91.1053	0	0	0	0	0	0	0	200	903	0	0	0	0	0	0	0	603	903	0
6575	4	5.31235	16.5891	-10.011	2565.3	-1314.22	-1992.37	68.7231	43.7526	0	0	0	0	0	0	0	200	903	0	0	0	0	0	0	0	603	903	0
6575	5	6.83823	18.5727	-10.9266	2107.54	-1619.4	-2404.36	51.793	107.118	0	0	0	0	0	0	0	200	903	0	0	0	0	0	0	0	603	903	0
6575	6	7.75376	17.6572	-12.7576	2199.09	-1802.5	-2083.92	58.7119	127.625	0	0	0	0	0	0	0	200	903	0	0	0	0	0	0	0	603	903	0
6575	7	6.53306	16.7417	-13.0628	2199.09	-1497.33	-1992.37	85.3749	131.652	0	0	0	0	0	0	0	200	903	0	0	0	0	0	0	0	603	903	0
6575	8	5.00718	14.3003	-12.4525	2473.75	-1314.22	-1534.61	94.461	101.344	0	0	0	0	0	0	0	200	903	0	0	0	0	0	0	0	603	903	0
6575	9	5.46494	15.6736	-11.5369	1832.88	-1863.54	-2358.58	38.472	141.129	0	0	0	0	0	0	0	200	903	0	0	0	0	0	0	0	603	903	0
6576	0	5.9227	15.9787	-10.3162	2107.54	-1619.4	-2495.91	43.0244	95.7061	0	0	0	0	0	0	0	200	903	0	0	0	0	0	0	0	603	903	0
6576	1	6.07529	15.6736	-13.368	3023.07	-1619.4	-2267.03	78.8601	73.8575	0	0	0	0	0	0	0	200	903	0	0	0	0	0	0	0	603	903	0
6576	2	4.54941	14.6054	-9.70587	2290.65	-1619.4	-1992.37	33.153	63.9937	0	0	0	0	0	0	0	200	903	0	0	0	0	0	0	0	603	903	0
6576	3	3.63389	12.164	-12.4525	1832.88	-1741.47	-2129.7	60.1508	152.809	0	0	0	0	0	0	0	200	903	0	0	0	0	0	0	0	603	903	0
6576	4	3.93906	14.4529	-12.4525	2382.2	-1558.36	-2129.7	74.8552	108.696	0	0	0	0	0	0	0	200	903	0	0	0	0	0	0	0	603	903	0
6576	5	5.00718	13.6899	-11.5369	2473.75	-1436.29	-1809.26	75.505	85.5796	0	0	0	0	0	0	0	200	903	0	0	0	0	0	0	0	603	903	0
6576	6	4.85459	13.0796	-12.1473	2473.75	-1741.47	-2038.15	56.6374	96.3534	0	0	0	0	0	0	0	200	903	0	0	0	0	0	0	0	603	903	0
6576	7	2.87095	13.5373	-12.4525	2199.09	-1619.4	-2175.48	69.9537	123.401	0	0	0	0	0	0	0	200	903	0	0	0	0	0	0	0	603	903	0
6576	8	4.54941	13.5373	-10.011	2382.2	-1436.29	-2450.13	56.5295	62.043	0	0	0	0	0	0	0	200	903	0	0	0	0	0	0	0	603	903	0
6576	9	3.32871	13.2322	-9.09552	1924.44	-1375.25	-1900.82	48.7987	88.4194	0	0	0	0	0	0	0	200	903	0	0	0	0	0	0	0	603	903	0
6577	0	4.85459	13.0796	-11.5369	2015.99	-1802.5	-2175.48	43.7625	125.258	0	0	0	0	0	0	0	200	903	0	0	0	0	0	0	0	603	903	0
6577	1	3.93906	13.9951	-11.8421	2931.52	-1375.25	-2312.8	83.8673	52.4497	0	0	0	0	0	0	0	200	903	0	0	0	0	0	0	0	603	903	0
6577	2	3.32871	13.9951	-12.7576	2107.54	-1558.36	-2175.48	77.8488	134.802	0	0	0	0	0	0	0	200	903	0	0	0	0	0	0	0	603	903	0
6577	3	3.17612	14.1477	-10.9266	2015.99	-1619.4	-2038.15	51.793	115.497	0	0	0	0	0	0	0	200	903	0	0	0	0	0	0	0	603	903	0
6577	4	4.39683	13.8425	-11.8421	2015.99	-1680.43	-2129.7	58.0969	129.761	0	0	0	0	0	0	0	200	903	0	0	0	0	0	0	0	603	903	0
6577	5	5.9227	14.3003	-12.1473	2199.09	-1680.43	-2312.8	61.662	118.964	0	0	0	0	0	0	0	200	903	0	0	0	0	0	0	0	603	903	0
6577	6	4.39683	14.1477	-11.2318	2656.86	-1680.43	-1992.37	50.3857	63.4512	0	0	0	0	0	0	0	200	903	0	0	0	0	0	0	0	603	903	0
6577	7	3.4813	13.8425	-12.7576	2565.3	-1680.43	-2038.15	68.2804	98.92	0	0	0	0	0	0	0	200	903	0	0	0	0	0	0	0	603	903	0
6577	8	2.87095	13.5373	-11.2318	2473.75	-1680.43	-2312.8	50.3857	79.7537	0	0	0	0	0	0	0	200	903	0	0	0	0	0	0	0	603	903	0
6577	9	3.63389	13.3847	-12.1473	2290.65	-1497.33	-2175.48	76.7358	111.427	0	0	0	0	0	0	0	200	903	0	0	0	0	0	0	0	603	903	0
6578	0	3.93906	12.927	-11.8421	1832.88	-1924.57	-2175.48	37.4806	145.223	0	0	0	0	0	0	0	200	903	0	0	0	0	0	0	0	603	903	0
6578	1	3.78647	14.1477	-8.79034	2015.99	-1680.43	-2358.58	8.83223	70.6587	0	0	0	0	0	0	0	200	903	0	0	0	0	0	0	0	603	903	0
6578	2	3.4813	13.8425	-13.368	1924.44	-1375.25	-2221.25	97.1232	156.041	0	0	0	0	0	0	0	200	903	0	0	0	0	0	0	0	603	903	0
6578	3	2.2606	13.3847	-10.3162	1649.78	-1619.4	-2221.25	43.0244	140.079	0	0	0	0	0	0	0	200	903	0	0	0	0	0	0	0	603	903	0
6578	4	2.87095	12.3166	-8.79034	2107.54	-1802.5	-2267.03	-5.05464	60.2436	0	0	0	0	0	0	0	200	903	0	0	0	0	0	0	0	603	903	0
6578	5	3.63389	13.3847	-12.7576	2107.54	-1436.29	-2404.36	87.4172	134.802	0	0	0	0	0	0	0	200	903	0	0	0	0	0	0	0	603	903	0
6578	6	2.2606	13.2322	-10.6214	2290.65	-1924.57	-2175.48	18.8025	84.3366	0	0	0	0	0	0	0	200	903	0	0	0	0	0	0	0	603	903	0
6578	7	2.2606	11.8589	-11.8421	2382.2	-1741.47	-2267.03	52.9429	98.8365	0	0	0	0	0	0	0	200	903	0	0	0	0	0	0	0	603	903	0
6578	8	2.41318	12.0115	-11.5369	2290.65	-2107.68	-2038.15	17.3104	101.451	0	0	0	0	0	0	0	200	903	0	0	0	0	0	0	0	603	903	0
6578	9	2.71836	11.5537	-11.5369	2199.09	-1436.29	-2129.7	75.505	109.387	0	0	0	0	0	0	0	200	903	0	0	0	0	0	0	0	603	903	0
6579	0	3.4813	10.0278	-12.1473	2473.75	-1253.18	-2175.48	96.8342	96.3534	0	0	0	0	0	0	0	200	903	0	0	0	0	0	0	0	603	903	0
6579	1	2.2606	11.0959	-12.7576	1283.57	-1558.36	-2083.92	77.8488	199.388	0	0	0	0	0	0	0	200	903	0	0	0	0	0	0	0	603	903	0
6579	2	4.09165	11.4011	-11.5369	1741.33	-1802.5	-2312.8	43.7625	149.065	0	0	0	0	0	0	0	200	903	0	0	0	0	0	0	0	603	903	0
6579	3	1.95542	12.0115	-10.3162	2199.09	-1314.22	-2358.58	72.6065	86.8315	0	0	0	0	0	0	0	200	903	0	0	0	0	0	0	0	603	903	0
6579	4	2.41318	11.2485	-11.2318	1832.88	-1497.33	-2129.7	66.6882	136.812	0	0	0	0	0	0	0	200	903	0	0	0	0	0	0	0	603	903	0
6579	5	2.71836	10.7908	-11.2318	1649.78	-1619.4	-2267.03	55.8199	153.115	0	0	0	0	0	0	0	200	903	0	0	0	0	0	0	0	603	903	0
6579	6	1.80283	11.0959	-11.5369	1649.78	-1375.25	-2175.48	80.7954	157	0	0	0	0	0	0	0	200	903	0	0	0	0	0	0	0	603	903	0
6579	7	2.10801	11.2485	-12.4525	2199.09	-1436.29	-2312.8	84.6581	123.401	0	0	0	0	0	0	0	200	903	0	0	0	0	0	0	0	603	903	0
6579	8	1.95542	10.4856	-10.011	2473.75	-1375.25	-2221.25	62.6263	52.8978	0	0	0	0	0	0	0	200	903	0	0	0	0	0	0	0	603	903	0
6579	9	2.2606	10.1804	-10.6214	1649.78	-1558.36	-2267.03	53.2811	144.674	0	0	0	0	0	0	0	200	903	0	0	0	0	0	0	0	603	903	0
6580	0	2.41318	10.9433	-11.2318	2199.09	-1131.11	-2175.48	99.2932	104.207	0	0	0	0	0	0	0	200	903	0	0	0	0	0	0	0	603	903	0
6580	1	2.56577	10.333	-7.56964	2290.65	-1375.25	-2312.8	18.3197	-2.60965	0	0	0	0	0	0	0	200	903	0	0	0	0	0	0	0	603	903	0
6580	2	1.49766	10.1804	-12.4525	1832.88	-1497.33	-2175.48	79.7566	152.809	0	0	0	0	0	0	0	200	903	0	0	0	0	0	0	0	603	903	0
6580	3	0.887305	10.0278	-10.3162	1558.22	-1253.18	-2038.15	78.523	148.954	0	0	0	0	0	0	0	200	903	0	0	0	0	0	0	0	603	903	0
6580	4	1.80283	10.1804	-9.70587	825.803	-1375.25	-1946.59	58.3069	214.917	0	0	0	0	0	0	0	200	903	0	0	0	0	0	0	0	603	903	0
6580	5	2.41318	10.1804	-11.2318	1466.67	-1375.25	-2083.92	77.5565	169.417	0	0	0	0	0	0	0	200	903	0	0	0	0	0	0	0	603	903	0
6580	6	2.41318	8.9597	-9.09552	1741.33	-1253.18	-2129.7	62.2197	108.551	0	0	0	0	0	0	0	200	903	0	0	0	0	0	0	0	603	903	0
6580	7	1.65024	9.87522	-10.6214	1649.78	-1070.08	-2083.92	99.2526	144.674	0	0	0	0	0	0	0	200	903	0	0	0	0	0	0	0	603	903	0
6580	8	0.734717	9.57005	-8.79034	1832.88	-1253.18	-2129.7	57.4363	91.489	0	0	0	0	0	0	0	200	903	0	0	0	0	0	0	0	603	903	0
6580	9	2.10801	9.26487	-9.09552	2565.3	-1314.22	-2175.48	55.5091	17.9595	0	0	0	0	0	0	0	200	903	0	0	0	0	0	0	0	603	903	0
6581	0	2.87095	9.26487	-10.9266	1924.44	-1253.18	-1946.59	85.3086	123.876	0	0	0	0	0	0	0	200	903	0	0	0	0	0	0	0	603	903	0
6581	1	1.34507	7.89158	-10.3162	1558.22	-1253.18	-1809.26	78.523	148.954	0	0	0	0	0	0	0	200	903	0	0	0	0	0	0	0	603	903	0
6581	2	1.19248	7.58641	-10.6214	551.144	-1558.36	-1580.38	53.2811	248.11	0	0	0	0	0	0	0	200	903	0	0	0	0	0	0	0	603	903	0
6581	3	0.429541	8.04417	-8.79034	1100.46	-948.008	-1488.83	92.1534	174.81	0	0	0	0	0	0	0	200	903	0	0	0	0	0	0	0	603	903	0
6581	4	1.95542	8.19676	-8.79034	1008.91	-886.973	-1855.04	99.0969	185.225	0	0	0	0	0	0	0	200	903	0	0	0	0	0	0	0	603	903	0
6581	5	3.32871	8.50193	-9.4007	1466.67	-1131.11	-1580.38	79.6777	143.983	0	0	0	0	0	0	0	200	903	0	0	0	0	0	0	0	603	903	0
6581	6	1.80283	8.34935	-10.3162	1100.46	-1070.08	-1626.16	96.2723	193.327	0	0	0	0	0	0	0	200	903	0	0	0	0	0	0	0	603	903	0
6581	7	1.03989	5.90794	-9.70587	642.697	-581.797	-1305.72	140.057	233.783	0	0	0	0	0	0	0	200	903	0	0	0	0	0	0	0	603	903	0
6581	8	0.734717	7.43382	-7.56964	1649.78	-1192.15	-1763.49	42.5092	82.0534	0	0	0	0	0	0	0	200	903	0	0	0	0	0	0	0	603	903	0
6581	9	1.03989	7.89158	-7.26447	1741.33	-1192.15	-1717.71	35.8931	60.2948	0	0	0	0	0	0	0	200	903	0	0	0	0	0	0	0	603	903	0
6582	0	3.17612	6.51829	-7.87482	1741.33	-1009.04	-1717.71	71.8645	78.8735	0	0	0	0	0	0	0	200	903	0	0	0	0	0	0	0	603	903	0
6582	1	0	0	0	0	0	0	200	300	0	0	0	0	0	0	0	200	903	0	0	0	0	0	0	0	603	903	0
6582	2	1.19248	4.83982	-10.011	1283.57	-886.973	-1259.95	111.401	171.785	0	0	0	0	0	0	0	200	903	0	0	0	0	0	0	0	603	903	0
6582	3	0	0	0	0	0	0	200	300	0	0	0	0	0	0	0	200	903	0	0	0	0	0	0	0	603	903	0
6582	4	0	0	0	0	0	0	200	300	0	0	0	0	0	0	0	200	903	0	0	0	0	0	0	0	603	903	0
6582	5	2.10801	6.82347	-8.48517	1283.57	-886.973	-1488.83	95.4678	148.728	0	0	0	0	0	0	0	200	903	0	0	0	0	0	0	0	603	903	0
6582	6	0	0	0	0	0	0	200	300	0	0	0	0	0	0	0	200	903	0	0	0	0	0	0	0	603	903	0
6582	7	0.429541	5.29759	-8.79034	825.803	-703.868	-1397.28	119.927	206.056	0	0	0	0	0	0	0	200	903	0	0	0	0	0	0	0	603	903	0
6582	8	0	0	0	0	0	0	200	300	0	0	0	0	0	0	0	200	903	0	0	0	0	0	0	0	603	903	0
6582	9	0	0	0	0	0	0	200	300	0	0	0	0	0	0	0	200	903	0	0	0	0	0	0	0	603	903	0
6583	0	0	0	0	0	0	0	200	300	0	0	0	0	0	0	0	200	903	0	0	0	0	0	0	0	603	903	0
6583	1	0	0	0	0	0	0	200	300	0	0	0	0	0	0	0	200	903	0	0	0	0	0	0	0	603	903	0
6583	2	0	0	0	0	0	0	200	300	0	0	0	0	0	0	0	200	903	0	0	0	0	0	0	0	603	903	0
6583	3	0	0	0	0	0	0	200	300	0	0	0	0	0	0	0	200	903	0	0	0	0	0	0	0	603	903	0
6583	4	0	0	0	0	0	0	200	300	0	0	0	0	0	0	0	200	903	0	0	0	0	0	0	0	603	903	0
6583	5	0	0	0	0	0	0	200	300	0	0	0	0	0	0	0	200	903	0	0	0	0	0	0	0	603	903	0
6583	6	0	0	0	0	0	0	200	300	0	0	0	0	0	0	0	200	903	0	0	0	0	0	0	0	603	903	0
6583	7	0	0	0	0	0	0	200	300	0	0	0	0	0	0	0	200	903	0	0	0	0	0	0	0	603	903	0
6583	8	0	0	0	0	0	0	200	300	0	0	0	0	0	0	0	200	903	0	0	0	0	0	0	0	603	903	0
6583	9	0	0	0	0	0	0	200	300	0	0	0	0	0	0	0	200	903	0	0	0	0	0	0	0	603	903	0
6584	0	0	0	0	0	0	0	200	300	0	0	0	0	0	0	0	200	903	0	0	0	0	0	0	0	603	903	0
6584	1	0	0	0	0	0	0	200	300	0	0	0	0	0	0	0	200	903	0	0	0	0	0	0	0	603	903	0
6584	2	0	0	0	0	0	0	200	300	0	0	0	0	0	0	0	200	903	0	0	0	0	0	0	0	603	903	0
6584	3	0	0	0	0	0	0	200	300	0	0	0	0	0	0	0	200	903	0	0	0	0	0	0	0	603	903	0
6584	4	0	0	0	0	0	0	200	300	0	0	0	0	0	0	0	200	903	0	0	0	0	0	0	0	603	903	0
6584	5	0	0	0	0	0	0	200	300	0	0	0	0	0	0	0	200	903	0	0	0	0	0	0	0	603	903	0
6584	6	0	0	0	0	0	0	200	300	0	0	0	0	0	0	0	200	903	0	0	0	0	0	0	0	603	903	0
6584	7	0	0	0	0	0	0	200	300	0	0	0	0	0	0	0	200	903	0	0	0	0	0	0	0	603	903	0
6584	8	0	0	0	0	0	0	200	300	0	0	0	0	0	0	0	200	903	0	0	0	0	0	0	0	603	903	0
6584	9	0	0	0	0	0	0	200	300	0	0	0	0	0	0	0	200	903	0	0	0	0	0	0	0	603	903	0
6585	0	0	0	0	0	0	0	200	300	0	0	0	0	0	0	0	200	903	0	0	0	0	0	0	0	603	903	0
6585	1	0	0	0	0	0	0	200	300	0	0	0	0	0	0	0	200	903	0	0	0	0	0	0	0	603	903	0
6585	2	0	0	0	0	0	0	200	300	0	0	0	0	0	0	0	200	903	0	0	0	0	0	0	0	603	903	0
6585	3	0	0	0	0	0	0	200	300	0	0	0	0	0	0	0	200	903	0	0	0	0	0	0	0	603	903	0
6585	4	0	0	0	0	0	0	200	300	0	0	0	0	0	0	0	200	903	0	0	0	0	0	0	0	603	903	0
6585	5	0	0	0	0	0	0	200	300	0	0	0	0	0	0	0	200	903	0	0	0	0	0	0	0	603	903	0
6585	6	0	0	0	0	0	0	200	300	0	0	0	0	0	0	0	200	903	0	0	0	0	0	0	0	603	903	0
6585	7	0	0	0	0	0	0	200	300	0	0	0	0	0	0	0	200	903	0	0	0	0	0	0	0	603	903	0
6585	8	0	0	0	0	0	0	200	300	0	0	0	0	0	0	0	200	903	0	0	0	0	0	0	0	603	903	0
6585	9	0	0	0	0	0	0	200	300	0	0	0	0	0	0	0	200	903	0	0	0	0	0	0	0	603	903	0
6586	0	0	0	0	0	0	0	200	300	0	0	0	0	0	0	0	200	903	0	0	0	0	0	0	0	603	903	0
6586	1	0	0	0	0	0	0	200	300	0	0	0	0	0	0	0	200	903	0	0	0	0	0	0	0	603	903	0
6586	2	0	0	0	0	0	0	200	300	0	0	0	0	0	0	0	200	903	0	0	0	0	0	0	0	603	903	0
6586	3	0	0	0	0	0	0	200	300	0	0	0	0	0	0	0	200	903	0	0	0	0	0	0	0	603	903	0
6586	4	0	0	0	0	0	0	200	300	0	0	0	0	0	0	0	200	903	0	0	0	0	0	0	0	603	903	0
6586	5	0	0	0	0	0	0	200	300	0	0	0	0	0	0	0	200	903	0	0	0	0	0	0	0	603	903	0
6586	6	0	0	0	0	0	0	200	300	0	0	0	0	0	0	0	200	903	0	0	0	0	0	0	0	603	903	0
6586	7	0	0	0	0	0	0	200	300	0	0	0	0	0	0	0	200	903	0	0	0	0	0	0	0	603	903	0
6586	8	0	0	0	0	0	0	200	300	0	0	0	0	0	0	0	200	903	0	0	0	0	0	0	0	603	903	0
6586	9	0	0	0	0	0	0	200	300	0	0	0	0	0	0	0	200	903	0	0	0	0	0	0	0	603	903	0
6587	0	0	0	0	0	0	0	200	300	0	0	0	0	0	0	0	200	903	0	0	0	0	0	0	0	603	903	0
6587	1	0	0	0	0	0	0	200	300	0	0	0	0	0	0	0	200	903	0	0	0	0	0	0	0	603	903	0
6587	2	0	0	0	0	0	0	200	300	0	0	0	0	0	0	0	200	903	0	0	0	0	0	0	0	603	903	0
6587	3	0	0	0	0	0	0	200	300	0	0	0	0	0	0	0	200	903	0	0	0	0	0	0	0	603	903	0
6587	4	0	0	0	0	0	0	200	300	0	0	0	0	0	0	0	200	903	0	0	0	0	0	0	0	603	903	0
6587	5	0	0	0	0	0	0	200	300	0	0	0	0	0	0	0	200	903	0	0	0	0	0	0	0	603	903	0
6587	6	0	0	0	0	0	0	200	300	0	0	0	0	0	0	0	200	903	0	0	0	0	0	0	0	603	903	0
6587	7	0	0	0	0	0	0	200	300	0	0	0	0	0	0	0	200	903	0	0	0	0	0	0	0	603	903	0
6587	8	0	0	0	0	0	0	200	300	0	0	0	0	0	0	0	200	903	0	0	0	0	0	0	0	603	903	0
6587	9	0	0	0	0	0	0	200	300	0	0	0	0	0	0	0	200	903	0	0	0	0	0	0	0	603	903	0
6588	0	0	0	0	0	0	0	200	300	0	0	0	0	0	0	0	200	903	0	0	0	0	0	0	0	603	903	0
6588	1	0	0	0	0	0	0	200	300	0	0	0	0	0	0	0	200	903	0	0	0	0	0	0	0	603	903	0
6588	2	0	0	0	0	0	0	200	300	0	0	0	0	0	0	0	200	903	0	0	0	0	0	0	0	603	903	0
6588	3	0	0	0	0	0	0	200	300	0	0	0	0	0	0	0	200	903	0	0	0	0	0	0	0	603	903	0
6588	4	0	0	0	0	0	0	200	300	0	0	0	0	0	0	0	200	903	0	0	0	0	0	0	0	603	903	0
6588	5	0	0	0	0	0	0	200	300	0	0	0	0	0	0	0	200	903	0	0	0	0	0	0	0	603	903	0
6588	6	0	0	0	0	0	0	200	300	0	0	0	0	0	0	0	200	903	0	0	0	0	0	0	0	603	903	0
6588	7	0	0	0	0	0	0	200	300	0	0	0	0	0	0	0	200	903	0	0	0	0	0	0	0	603	903	0
6588	8	0	0	0	0	0	0	200	300	0	0	0	0	0	0	0	200	903	0	0	0	0	0	0	0	603	903	0
6588	9	0	0	0	0	0	0	200	300	0	0	0	0	0	0	0	200	903	0	0	0	0	0	0	0	603	903	0
6589	0	0	0	0	0	0	0	200	300	0	0	0	0	0	0	0	200	903	0	0	0	0	0	0	0	603	903	0
6589	1	0	0	0	0	0	0	200	300	0	0	0	0	0	0	0	200	903	0	0	0	0	0	0	0	603	903	0
6589	2	0	0	0	0	0	0	200	300	0	0	0	0	0	0	0	200	903	0	0	0	0	0	0	0	603	903	0
6589	3	0	0	0	0	0	0	200	300	0	0	0	0	0	0	0	200	903	0	0	0	0	0	0	0	603	903	0
6589	4	0	0	0	0	0	0	200	300	0	0	0	0	0	0	0	200	903	0	0	0	0	0	0	0	603	903	0
6589	5	0	0	0	0	0	0	200	300	0	0	0	0	0	0	0	200	903	0	0	0	0	0	0	0	603	903	0
6589	6	0	0	0	0	0	0	200	300	0	0	0	0	0	0	0	200	903	0	0	0	0	0	0	0	603	903	0
6589	7	0	0	0	0	0	0	200	300	0	0	0	0	0	0	0	200	903	0	0	0	0	0	0	0	603	903	0
6589	8	0	0	0	0	0	0	200	300	0	0	0	0	0	0	0	200	903	0	0	0	0	0	0	0	603	903	0
6589	9	0	0	0	0	0	0	200	300	0	0	0	0	0	0	0	200	903	0	0	0	0	0	0	0	603	903	0
6590	0	0	0	0	0	0	0	200	300	0	0	0	0	0	0	0	200	903	0	0	0	0	0	0	0	603	903	0
6590	1	0	0	0	0	0	0	200	300	0	0	0	0	0	0	0	200	903	0	0	0	0	0	0	0	603	903	0
6590	2	0	0	0	0	0	0	200	300	0	0	0	0	0	0	0	200	903	0	0	0	0	0	0	0	603	903	0
6590	3	0	0	0	0	0	0	200	300	0	0	0	0	0	0	0	200	903	0	0	0	0	0	0	0	603	903	0
6590	4	0	0	0	0	0	0	200	300	0	0	0	0	0	0	0	200	903	0	0	0	0	0	0	0	603	903	0
6590	5	0	0	0	0	0	0	200	300	0	0	0	0	0	0	0	200	903	0	0	0	0	0	0	0	603	903	0
6590	6	0	0	0	0	0	0	200	300	0	0	0	0	0	0	0	200	903	0	0	0	0	0	0	0	603	903	0
6590	7	0	0	0	0	0	0	200	300	0	0	0	0	0	0	0	200	903	0	0	0	0	0	0	0	603	903	0
6590	8	0	0	0	0	0	0	200	300	0	0	0	0	0	0	0	200	903	0	0	0	0	0	0	0	603	903	0
6590	9	0	0	0	0	0	0	200	300	0	0	0	0	0	0	0	200	903	0	0	0	0	0	0	0	603	903	0
6591	0	0	0	0	0	0	0	200	300	0	0	0	0	0	0	0	200	903	0	0	0	0	0	0	0	603	903	0
6591	1	0	0	0	0	0	0	200	300	0	0	0	0	0	0	0	200	903	0	0	0	0	0	0	0	603	903	0
6591	2	0	0	0	0	0	0	200	300	0	0	0	0	0	0	0	200	903	0	0	0	0	0	0	0	603	903	0
6591	3	0	0	0	0	0	0	200	300	0	0	0	0	0	0	0	200	903	0	0	0	0	0	0	0	603	903	0
6591	4	0	0	0	0	0	0	200	300	0	0	0	0	0	0	0	200	903	0	0	0	0	0	0	0	603	903	0
6591	5	0	0	0	0	0	0	200	300	0	0	0	0	0	0	0	200	903	0	0	0	0	0	0	0	603	903	0
6591	6	0	0	0	0	0	0	200	300	0	0	0	0	0	0	0	200	903	0	0	0	0	0	0	0	603	903	0
6591	7	0	0	0	0	0	0	200	300	0	0	0	0	0	0	0	200	903	0	0	0	0	0	0	0	603	903	0
6591	8	0	0	0	0	0	0	200	300	0	0	0	0	0	0	0	200	903	0	0	0	0	0	0	0	603	903	0
6591	9	0	0	0	0	0	0	200	300	0	0	0	0	0	0	0	200	903	0	0	0	0	0	0	0	603	903	0
6592	0	0	0	0	0	0	0	200	300	0	0	0	0	0	0	0	200	903	0	0	0	0	0	0	0	603	903	0
6592	1	0	0	0	0	0	0	200	300	0	0	0	0	0	0	0	200	903	0	0	0	0	0	0	0	603	903	0
6592	2	0	0	0	0	0	0	200	300	0	0	0	0	0	0	0	200	903	0	0	0	0	0	0	0	603	903	0
6592	3	0	0	0	0	0	0	200	300	0	0	0	0	0	0	0	200	903	0	0	0	0	0	0	0	603	903	0
6592	4	0	0	0	0	0	0	200	300	0	0	0	0	0	0	0	200	903	0	0	0	0	0	0	0	603	903	0
6592	5	0	0	0	0	0	0	200	300	0	0	0	0	0	0	0	200	903	0	0	0	0	0	0	0	603	903	0
6592	6	0	0	0	0	0	0	200	300	0	0	0	0	0	0	0	200	903	0	0	0	0	0	0	0	603	903	0
6592	7	0	0	0	0	0	0	200	300	0	0	0	0	0	0	0	200	903	0	0	0	0	0	0	0	603	903	0
6592	8	0	0	0	0	0	0	200	300	0	0	0	0	0	0	0	200	903	0	0	0	0	0	0	0	603	903	0
6592	9	0	0	0	0	0	0	200	300	0	0	0	0	0	0	0	200	903	0	0	0	0	0	0	0	603	903	0
6593	0	0	0	0	0	0	0	200	300	0	0	0	0	0	0	0	200	903	0	0	0	0	0	0	0	603	903	0
6593	1	0	0	0	0	0	0	200	300	0	0	0	0	0	0	0	200	903	0	0	0	0	0	0	0	603	903	0
6593	2	0	0	0	0	0	0	200	300	0	0	0	0	0	0	0	200	903	0	0	0	0	0	0	0	603	903	0
6593	3	0	0	0	0	0	0	200	300	0	0	0	0	0	0	0	200	903	0	0	0	0	0	0	0	603	903	0
6593	4	0	0	0	0	0	0	200	300	0	0	0	0	0	0	0	200	903	0	0	0	0	0	0	0	603	903	0
6593	5	0	0	0	0	0	0	200	300	0	0	0	0	0	0	0	200	903	0	0	0	0	0	0	0	603	903	0
6593	6	0	0	0	0	0	0	200	300	0	0	0	0	0	0	0	200	903	0	0	0	0	0	0	0	603	903	0
6593	7	0	0	0	0	0	0	200	300	0	0	0	0	0	0	0	200	903	0	0	0	0	0	0	0	603	903	0
6593	8	0	0	0	0	0	0	200	300	0	0	0	0	0	0	0	200	903	0	0	0	0	0	0	0	603	903	0
6593	9	0	0	0	0	0	0	200	300	0	0	0	0	0	0	0	200	903	0	0	0	0	0	0	0	603	903	0
6594	0	0	0	0	0	0	0	200	300	0	0	0	0	0	0	0	200	903	0	0	0	0	0	0	0	603	903	0
6594	1	0	0	0	0	0	0	200	300	0	0	0	0	0	0	0	200	903	0	0	0	0	0	0	0	603	903	0
6594	2	0	0	0	0	0	0	200	300	0	0	0	0	0	0	0	200	903	0	0	0	0	0	0	0	603	903	0
6594	3	0	0	0	0	0	0	200	300	0	0	0	0	0	0	0	200	903	0	0	0	0	0	0	0	603	903	0
6594	4	0	0	0	0	0	0	200	300	0	0	0	0	0	0	0	200	903	0	0	0	0	0	0	0	603	903	0
6594	5	0	0	0	0	0	0	200	300	0	0	0	0	0	0	0	200	903	0	0	0	0	0	0	0	603	903	0
6594	6	0	0	0	0	0	0	200	300	0	0	0	0	0	0	0	200	903	0	0	0	0	0	0	0	603	903	0
6594	7	0	0	0	0	0	0	200	300	0	0	0	0	0	0	0	200	903	0	0	0	0	0	0	0	603	903	0
6594	8	0	0	0	0	0	0	200	300	0	0	0	0	0	0	0	200	903	0	0	0	0	0	0	0	603	903	0
6594	9	0	0	0	0	0	0	200	300	0	0	0	0	0	0	0	200	903	0	0	0	0	0	0	0	603	903	0
6595	0	0	0	0	0	0	0	200	300	0	0	0	0	0	0	0	200	903	0	0	0	0	0	0	0	603	903	0
6595	1	0	0	0	0	0	0	200	300	0	0	0	0	0	0	0	200	903	0	0	0	0	0	0	0	603	903	0
6595	2	0	0	0	0	0	0	200	300	0	0	0	0	0	0	0	200	903	0	0	0	0	0	0	0	603	903	0
6595	3	0	0	0	0	0	0	200	300	0	0	0	0	0	0	0	200	903	0	0	0	0	0	0	0	603	903	0
6595	4	0	0	0	0	0	0	200	300	0	0	0	0	0	0	0	200	903	0	0	0	0	0	0	0	603	903	0
6595	5	0	0	0	0	0	0	200	300	0	0	0	0	0	0	0	200	903	0	0	0	0	0	0	0	603	903	0
6595	6	0	0	0	0	0	0	200	300	0	0	0	0	0	0	0	200	903	0	0	0	0	0	0	0	603	903	0
6595	7	0	0	0	0	0	0	200	300	0	0	0	0	0	0	0	200	903	0	0	0	0	0	0	0	603	903	0
6595	8	0	0	0	0	0	0	200	300	0	0	0	0	0	0	0	200	903	0	0	0	0	0	0	0	603	903	0
6595	9	0	0	0	0	0	0	200	300	0	0	0	0	0	0	0	200	903	0	0	0	0	0	0	0	603	903	0
6596	0	0	0	0	0	0	0	200	300	0	0	0	0	0	0	0	200	903	0	0	0	0	0	0	0	603	903	0
6596	1	0	0	0	0	0	0	200	300	0	0	0	0	0	0	0	200	903	0	0	0	0	0	0	0	603	903	0
6596	2	0	0	0	0	0	0	200	300	0	0	0	0	0	0	0	200	903	0	0	0	0	0	0	0	603	903	0
6596	3	0	0	0	0	0	0	200	300	0	0	0	0	0	0	0	200	903	0	0	0	0	0	0	0	603	903	0
6596	4	0	0	0	0	0	0	200	300	0	0	0	0	0	0	0	200	903	0	0	0	0	0	0	0	603	903	0
6596	5	0	0	0	0	0	0	200	300	0	0	0	0	0	0	0	200	903	0	0	0	0	0	0	0	603	903	0
6596	6	0	0	0	0	0	0	200	300	0	0	0	0	0	0	0	200	903	0	0	0	0	0	0	0	603	903	0
6596	7	0	0	0	0	0	0	200	300	0	0	0	0	0	0	0	200	903	0	0	0	0	0	0	0	603	903	0
6596	8	0	0	0	0	0	0	200	300	0	0	0	0	0	0	0	200	903	0	0	0	0	0	0	0	603	903	0
6596	9	0	0	0	0	0	0	200	300	0	0	0	0	0	0	0	200	903	0	0	0	0	0	0	0	603	903	0
6597	0	0	0	0	0	0	0	200	300	0	0	0	0	0	0	0	200	903	0	0	0	0	0	0	0	603	903	0
6597	1	0	0	0	0	0	0	200	300	0	0	0	0	0	0	0	200	903	0	0	0	0	0	0	0	603	903	0
6597	2	0	0	0	0	0	0	200	300	0	0	0	0	0	0	0	200	903	0	0	0	0	0	0	0	603	903	0
6597	3	0	0	0	0	0	0	200	300	0	0	0	0	0	0	0	200	903	0	0	0	0	0	0	0	603	903	0
6597	4	0	0	0	0	0	0	200	300	0	0	0	0	0	0	0	200	903	0	0	0	0	0	0	0	603	903	0
6597	5	0	0	0	0	0	0	200	300	0	0	0	0	0	0	0	200	903	0	0	0	0	0	0	0	603	903	0
6597	6	0	0	0	0	0	0	200	300	0	0	0	0	0	0	0	200	903	0	0	0	0	0	0	0	603	903	0
6597	7	0	0	0	0	0	0	200	300	0	0	0	0	0	0	0	200	903	0	0	0	0	0	0	0	603	903	0
6597	8	0	0	0	0	0	0	200	300	0	0	0	0	0	0	0	200	903	0	0	0	0	0	0	0	603	903	0
6597	9	0	0	0	0	0	0	200	300	0	0	0	0	0	0	0	200	903	0	0	0	0	0	0	0	603	903	0
6598	0	0	0	0	0	0	0	200	300	0	0	0	0	0	0	0	200	903	0	0	0	0	0	0	0	603	903	0
6598	1	0	0	0	0	0	0	200	300	0	0	0	0	0	0	0	200	903	0	0	0	0	0	0	0	603	903	0
6598	2	0	0	0	0	0	0	200	300	0	0	0	0	0	0	0	200	903	0	0	0	0	0	0	0	603	903	0
6598	3	0	0	0	0	0	0	200	300	0	0	0	0	0	0	0	200	903	0	0	0	0	0	0	0	603	903	0
6598	4	0	0	0	0	0	0	200	300	0	0	0	0	0	0	0	200	903	0	0	0	0	0	0	0	603	903	0
6598	5	0	0	0	0	0	0	200	300	0	0	0	0	0	0	0	200	903	0	0	0	0	0	0	0	603	903	0
6598	6	0	0	0	0	0	0	200	300	0	0	0	0	0	0	0	200	903	0	0	0	0	0	0	0	603	903	0
6598	7	0	0	0	0	0	0	200	300	0	0	0	0	0	0	0	200	903	0	0	0	0	0	0	0	603	903	0
6598	8	0	0	0	0	0	0	200	300	0	0	0	0	0	0	0	200	903	0	0	0	0	0	0	0	603	903	0
6598	9	0	0	0	0	0	0	200	300	0	0	0	0	0	0	0	200	903	0	0	0	0	0	0	0	603	903	0
6599	0	0	0	0	0	0	0	200	300	0	0	0	0	0	0	0	200	903	0	0	0	0	0	0	0	603	903	0
6599	1	0	0	0	0	0	0	200	300	0	0	0	0	0	0	0	200	903	0	0	0	0	0	0	0	603	903	0
6599	2	0	0	0	0	0	0	200	300	0	0	0	0	0	0	0	200	903	0	0	0	0	0	0	0	603	903	0
6599	3	0	0	0	0	0	0	200	300	0	0	0	0	0	0	0	200	903	0	0	0	0	0	0	0	603	903	0
6599	4	0	0	0	0	0	0	200	300	0	0	0	0	0	0	0	200	903	0	0	0	0	0	0	0	603	903	0
6599	5	0	0	0	0	0	0	200	300	0	0	0	0	0	0	0	200	903	0	0	0	0	0	0	0	603	903	0
6599	6	0	0	0	0	0	0	200	300	0	0	0	0	0	0	0	200	903	0	0	0	0	0	0	0	603	903	0
6599	7	0	0	0	0	0	0	200	300	0	0	0	0	0	0	0	200	903	0	0	0	0	0	0	0	603	903	0
6599	8	0	0	0	0	0	0	200	300	0	0	0	0	0	0	0	200	903	0	0	0	0	0	0	0	603	903	0
6599	9	0	0	0	0	0	0	200	300	0	0	0	0	0	0	0	200	903	0	0	0	0	0	0	0	603	903	0
6600	0	0	0	0	0	0	0	200	300	0	0	0	0	0	0	0	200	903	0	0	0	0	0	0	0	603	903	0
6600	1	0	0	0	0	0	0	200	300	0	0	0	0	0	0	0	200	903	0	0	0	0	0	0	0	603	903	0
6600	2	0	0	0	0	0	0	200	300	0	0	0	0	0	0	0	200	903	0	0	0	0	0	0	0	603	903	0
6600	3	0	0	0	0	0	0	200	300	0	0	0	0	0	0	0	200	903	0	0	0	0	0	0	0	603	903	0
6600	4	0	0	0	0	0	0	200	300	0	0	0	0	0	0	0	200	903	0	0	0	0	0	0	0	603	903	0
6600	5	0	0	0	0	0	0	200	300	0	0	0	0	0	0	0	200	903	0	0	0	0	0	0	0	603	903	0
6600	6	0	0	0	0	0	0	200	300	0	0	0	0	0	0	0	200	903	0	0	0	0	0	0	0	603	903	0
6600	7	0	0	0	0	0	0	200	300	0	0	0	0	0	0	0	200	903	0	0	0	0	0	0	0	603	903	0
6600	8	0	0	0	0	0	0	200	300	0	0	0	0	0	0	0	200	903	0	0	0	0	0	0	0	603	903	0
6600	9	0	0	0	0	0	0	200	300	0	0	0	0	0	0	0	200	903	0	0	0	0	0	0	0	603	903	0
6601	0	0	0	0	0	0	0	200	300	0	0	0	0	0	0	0	200	903	0	0	0	0	0	0	0	603	903	0
6601	1	0	0	0	0	0	0	200	300	0	0	0	0	0	0	0	200	903	0	0	0	0	0	0	0	603	903	0
6601	2	0	0	0	0	0	0	200	300	0	0	0	0	0	0	0	200	903	0	0	0	0	0	0	0	603	903	0
6601	3	0	0	0	0	0	0	200	300	0	0	0	0	0	0	0	200	903	0	0	0	0	0	0	0	603	903	0
6601	4	0	0	0	0	0	0	200	300	0	0	0	0	0	0	0	200	903	0	0	0	0	0	0	0	603	903	0
6601	5	0	0	0	0	0	0	200	300	0	0	0	0	0	0	0	200	903	0	0	0	0	0	0	0	603	903	0
6601	6	0	0	0	0	0	0	200	300	0	0	0	0	0	0	0	200	903	0	0	0	0	0	0	0	603	903	0
6601	7	0	0	0	0	0	0	200	300	0	0	0	0	0	0	0	200	903	0	0	0	0	0	0	0	603	903	0
6601	8	0	0	0	0	0	0	200	300	0	0	0	0	0	0	0	200	903	0	0	0	0	0	0	0	603	903	0
6601	9	0	0	0	0	0	0	200	300	0	0	0	0	0	0	0	200	903	0	0	0	0	0	0	0	603	903	0
6602	0	0	0	0	0	0	0	200	300	0	0	0	0	0	0	0	200	903	0	0	0	0	0	0	0	603	903	0
6602	1	0	0	0	0	0	0	200	300	0	0	0	0	0	0	0	200	903	0	0	0	0	0	0	0	603	903	0
6602	2	0	0	0	0	0	0	200	300	0	0	0	0	0	0	0	200	903	0	0	0	0	0	0	0	603	903	0
6602	3	0	0	0	0	0	0	200	300	0	0	0	0	0	0	0	200	903	0	0	0	0	0	0	0	603	903	0
6602	4	0	0	0	0	0	0	200	300	0	0	0	0	0	0	0	200	903	0	0	0	0	0	0	0	603	903	0
6602	5	0	0	0	0	0	0	200	300	0	0	0	0	0	0	0	200	903	0	0	0	0	0	0	0	603	903	0
6602	6	0	0	0	0	0	0	200	300	0	0	0	0	0	0	0	200	903	0	0	0	0	0	0	0	603	903	0
6602	7	0	0	0	0	0	0	200	300	0	0	0	0	0	0	0	200	903	0	0	0	0	0	0	0	603	903	0
6602	8	0	0	0	0	0	0	200	300	0	0	0	0	0	0	0	200	903	0	0	0	0	0	0	0	603	903	0
6602	9	0	0	0	0	0	0	200	300	0	0	0	0	0	0	0	200	903	0	0	0	0	0	0	0	603	903	0
6603	0	0	0	0	0	0	0	200	300	0	0	0	0	0	0	0	200	903	0	0	0	0	0	0	0	603	903	0
6603	1	0	0	0	0	0	0	200	300	0	0	0	0	0	0	0	200	903	0	0	0	0	0	0	0	603	903	0
6603	2	0	0	0	0	0	0	200	300	0	0	0	0	0	0	0	200	903	0	0	0	0	0	0	0	603	903	0
6603	3	0	0	0	0	0	0	200	300	0	0	0	0	0	0	0	200	903	0	0	0	0	0	0	0	603	903	0
6603	4	0	0	0	0	0	0	200	300	0	0	0	0	0	0	0	200	903	0	0	0	0	0	0	0	603	903	0
6603	5	0	0	0	0	0	0	200	300	0	0	0	0	0	0	0	200	903	0	0	0	0	0	0	0	603	903	0
6603	6	0	0	0	0	0	0	200	300	0	0	0	0	0	0	0	200	903	0	0	0	0	0	0	0	603	903	0
6603	7	0	0	0	0	0	0	200	300	0	0	0	0	0	0	0	200	903	0	0	0	0	0	0	0	603	903	0
6603	8	0	0	0	0	0	0	200	300	0	0	0	0	0	0	0	200	903	0	0	0	0	0	0	0	603	903	0
6603	9	0	0	0	0	0	0	200	300	0	0	0	0	0	0	0	200	903	0	0	0	0	0	0	0	603	903	0
6604	0	0	0	0	0	0	0	200	300	0	0	0	0	0	0	0	200	903	0	0	0	0	0	0	0	603	903	0
6604	1	0	0	0	0	0	0	200	300	0	0	0	0	0	0	0	200	903	0	0	0	0	0	0	0	603	903	0
6604	2	0	0	0	0	0	0	200	300	0	0	0	0	0	0	0	200	903	0	0	0	0	0	0	0	603	903	0
6604	3	0	0	0	0	0	0	200	300	0	0	0	0	0	0	0	200	903	0	0	0	0	0	0	0	603	903	0
6604	4	0	0	0	0	0	0	200	300	0	0	0	0	0	0	0	200	903	0	0	0	0	0	0	0	603	903	0
6604	5	0	0	0	0	0	0	200	300	0	0	0	0	0	0	0	200	903	0	0	0	0	0	0	0	603	903	0
6604	6	0	0	0	0	0	0	200	300	0	0	0	0	0	0	0	200	903	0	0	0	0	0	0	0	603	903	0
6604	7	0	0	0	0	0	0	200	300	0	0	0	0	0	0	0	200	903	0	0	0	0	0	0	0	603	903	0
6604	8	0	0	0	0	0	0	200	300	0	0	0	0	0	0	0	200	903	0	0	0	0	0	0	0	603	903	0
6604	9	0	0	0	0	0	0	200	300	0	0	0	0	0	0	0	200	903	0	0	0	0	0	0	0	603	903	0
6605	0	0	0	0	0	0	0	200	300	0	0	0	0	0	0	0	200	903	0	0	0	0	0	0	0	603	903	0
6605	1	0	0	0	0	0	0	200	300	0	0	0	0	0	0	0	200	903	0	0	0	0	0	0	0	603	903	0
6605	2	0	0	0	0	0	0	200	300	0	0	0	0	0	0	0	200	903	0	0	0	0	0	0	0	603	903	0
6605	3	0	0	0	0	0	0	200	300	0	0	0	0	0	0	0	200	903	0	0	0	0	0	0	0	603	903	0
6605	4	0	0	0	0	0	0	200	300	0	0	0	0	0	0	0	200	903	0	0	0	0	0	0	0	603	903	0
6605	5	0	0	0	0	0	0	200	300	0	0	0	0	0	0	0	200	903	0	0	0	0	0	0	0	603	903	0
6605	6	0	0	0	0	0	0	200	300	0	0	0	0	0	0	0	200	903	0	0	0	0	0	0	0	603	903	0
6605	7	0	0	0	0	0	0	200	300	0	0	0	0	0	0	0	200	903	0	0	0	0	0	0	0	603	903	0
6605	8	0	0	0	0	0	0	200	300	0	0	0	0	0	0	0	200	903	0	0	0	0	0	0	0	603	903	0
6605	9	0	0	0	0	0	0	200	300	0	0	0	0	0	0	0	200	903	0	0	0	0	0	0	0	603	903	0
6606	0	0	0	0	0	0	0	200	300	0	0	0	0	0	0	0	200	903	0	0	0	0	0	0	0	603	903	0
6606	1	0	0	0	0	0	0	200	300	0	0	0	0	0	0	0	200	903	0	0	0	0	0	0	0	603	903	0
6606	2	0	0	0	0	0	0	200	300	0	0	0	0	0	0	0	200	903	0	0	0	0	0	0	0	603	903	0
6606	3	0	0	0	0	0	0	200	300	0	0	0	0	0	0	0	200	903	0	0	0	0	0	0	0	603	903	0
6606	4	0	0	0	0	0	0	200	300	0	0	0	0	0	0	0	200	903	0	0	0	0	0	0	0	603	903	0
6606	5	0	0	0	0	0	0	200	300	0	0	0	0	0	0	0	200	903	0	0	0	0	0	0	0	603	903	0
6606	6	0	0	0	0	0	0	200	300	0	0	0	0	0	0	0	200	903	0	0	0	0	0	0	0	603	903	0
6606	7	0	0	0	0	0	0	200	300	0	0	0	0	0	0	0	200	903	0	0	0	0	0	0	0	603	903	0
6606	8	0	0	0	0	0	0	200	300	0	0	0	0	0	0	0	200	903	0	0	0	0	0	0	0	603	903	0
6606	9	0	0	0	0	0	0	200	300	0	0	0	0	0	0	0	200	903	0	0	0	0	0	0	0	603	903	0
6607	0	0	0	0	0	0	0	200	300	0	0	0	0	0	0	0	200	903	0	0	0	0	0	0	0	603	903	0
6607	1	0	0	0	0	0	0	200	300	0	0	0	0	0	0	0	200	903	0	0	0	0	0	0	0	603	903	0
6607	2	0	0	0	0	0	0	200	300	0	0	0	0	0	0	0	200	903	0	0	0	0	0	0	0	603	903	0
6607	3	0	0	0	0	0	0	200	300	0	0	0	0	0	0	0	200	903	0	0	0	0	0	0	0	603	903	0
6607	4	0	0	0	0	0	0	200	300	0	0	0	0	0	0	0	200	903	0	0	0	0	0	0	0	603	903	0
6607	5	0	0	0	0	0	0	200	300	0	0	0	0	0	0	0	200	903	0	0	0	0	0	0	0	603	903	0
6607	6	0	0	0	0	0	0	200	300	0	0	0	0	0	0	0	200	903	0	0	0	0	0	0	0	603	903	0
6607	7	0	0	0	0	0	0	200	300	0	0	0	0	0	0	0	200	903	0	0	0	0	0	0	0	603	903	0
6607	8	0	0	0	0	0	0	200	300	0	0	0	0	0	0	0	200	903	0	0	0	0	0	0	0	603	903	0
6607	9	0	0	0	0	0	0	200	300	0	0	0	0	0	0	0	200	903	0	0	0	0	0	0	0	603	903	0
6608	0	0	0	0	0	0	0	200	300	0	0	0	0	0	0	0	200	903	0	0	0	0	0	0	0	603	903	0
6608	1	0	0	0	0	0	0	200	300	0	0	0	0	0	0	0	200	903	0	0	0	0	0	0	0	603	903	0
6608	2	0	0	0	0	0	0	200	300	0	0	0	0	0	0	0	200	903	0	0	0	0	0	0	0	603	903	0
6608	3	0	0	0	0	0	0	200	300	0	0	0	0	0	0	0	200	903	0	0	0	0	0	0	0	603	903	0
6608	4	0	0	0	0	0	0	200	300	0	0	0	0	0	0	0	200	903	0	0	0	0	0	0	0	603	903	0
6608	5	0	0	0	0	0	0	200	300	0	0	0	0	0	0	0	200	903	0	0	0	0	0	0	0	603	903	0
6608	6	0	0	0	0	0	0	200	300	0	0	0	0	0	0	0	200	903	0	0	0	0	0	0	0	603	903	0
6608	7	0	0	0	0	0	0	200	300	0	0	0	0	0	0	0	200	903	0	0	0	0	0	0	0	603	903	0
6608	8	0	0	0	0	0	0	200	300	0	0	0	0	0	0	0	200	903	0	0	0	0	0	0	0	603	903	0
6608	9	0	0	0	0	0	0	200	300	0	0	0	0	0	0	0	200	903	0	0	0	0	0	0	0	603	903	0
6609	0	0	0	0	0	0	0	200	300	0	0	0	0	0	0	0	200	903	0	0	0	0	0	0	0	603	903	0
6609	1	0	0	0	0	0	0	200	300	0	0	0	0	0	0	0	200	903	0	0	0	0	0	0	0	603	903	0
6609	2	0	0	0	0	0	0	200	300	0	0	0	0	0	0	0	200	903	0	0	0	0	0	0	0	603	903	0
6609	3	0	0	0	0	0	0	200	300	0	0	0	0	0	0	0	200	903	0	0	0	0	0	0	0	603	903	0
6609	4	0	0	0	0	0	0	200	300	0	0	0	0	0	0	0	200	903	0	0	0	0	0	0	0	603	903	0
6609	5	0	0	0	0	0	0	200	300	0	0	0	0	0	0	0	200	903	0	0	0	0	0	0	0	603	903	0
6609	6	0	0	0	0	0	0	200	300	0	0	0	0	0	0	0	200	903	0	0	0	0	0	0	0	603	903	0
6609	7	0	0	0	0	0	0	200	300	0	0	0	0	0	0	0	200	903	0	0	0	0	0	0	0	603	903	0
6609	8	0	0	0	0	0	0	200	300	0	0	0	0	0	0	0	200	903	0	0	0	0	0	0	0	603	903	0
6609	9	0	0	0	0	0	0	200	300	0	0	0	0	0	0	0	200	903	0	0	0	0	0	0	0	603	903	0
6610	0	0	0	0	0	0	0	200	300	0	0	0	0	0	0	0	200	903	0	0	0	0	0	0	0	603	903	0
6610	1	0	0	0	0	0	0	200	300	0	0	0	0	0	0	0	200	903	0	0	0	0	0	0	0	603	903	0
6610	2	0	0	0	0	0	0	200	300	0	0	0	0	0	0	0	200	903	0	0	0	0	0	0	0	603	903	0
6610	3	0	0	0	0	0	0	200	300	0	0	0	0	0	0	0	200	903	0	0	0	0	0	0	0	603	903	0
6610	4	0	0	0	0	0	0	200	300	0	0	0	0	0	0	0	200	903	0	0	0	0	0	0	0	603	903	0
6610	5	0	0	0	0	0	0	200	300	0	0	0	0	0	0	0	200	903	0	0	0	0	0	0	0	603	903	0
6610	6	0	0	0	0	0	0	200	300	0	0	0	0	0	0	0	200	903	0	0	0	0	0	0	0	603	903	0
6610	7	0	0	0	0	0	0	200	300	0	0	0	0	0	0	0	200	903	0	0	0	0	0	0	0	603	903	0
6610	8	0	0	0	0	0	0	200	300	0	0	0	0	0	0	0	200	903	0	0	0	0	0	0	0	603	903	0
6610	9	0	0	0	0	0	0	200	300	0	0	0	0	0	0	0	200	903	0	0	0	0	0	0	0	603	903	0
6611	0	0	0	0	0	0	0	200	300	0	0	0	0	0	0	0	200	903	0	0	0	0	0	0	0	603	903	0
6611	1	0	0	0	0	0	0	200	300	0	0	0	0	0	0	0	200	903	0	0	0	0	0	0	0	603	903	0
6611	2	0	0	0	0	0	0	200	300	0	0	0	0	0	0	0	200	903	0	0	0	0	0	0	0	603	903	0
6611	3	0	0	0	0	0	0	200	300	0	0	0	0	0	0	0	200	903	0	0	0	0	0	0	0	603	903	0
6611	4	0	0	0	0	0	0	200	300	0	0	0	0	0	0	0	200	903	0	0	0	0	0	0	0	603	903	0
6611	5	0	0	0	0	0	0	200	300	0	0	0	0	0	0	0	200	903	0	0	0	0	0	0	0	603	903	0
6611	6	0	0	0	0	0	0	200	300	0	0	0	0	0	0	0	200	903	0	0	0	0	0	0	0	603	903	0
6611	7	0	0	0	0	0	0	200	300	0	0	0	0	0	0	0	200	903	0	0	0	0	0	0	0	603	903	0
6611	8	0	0	0	0	0	0	200	300	0	0	0	0	0	0	0	200	903	0	0	0	0	0	0	0	603	903	0
6611	9	0	0	0	0	0	0	200	300	0	0	0	0	0	0	0	200	903	0	0	0	0	0	0	0	603	903	0
6612	0	0	0	0	0	0	0	200	300	0	0	0	0	0	0	0	200	903	0	0	0	0	0	0	0	603	903	0
6612	1	0	0	0	0	0	0	200	300	0	0	0	0	0	0	0	200	903	0	0	0	0	0	0	0	603	903	0
6612	2	0	0	0	0	0	0	200	300	0	0	0	0	0	0	0	200	903	0	0	0	0	0	0	0	603	903	0
6612	3	0	0	0	0	0	0	200	300	0	0	0	0	0	0	0	200	903	0	0	0	0	0	0	0	603	903	0
6612	4	0	0	0	0	0	0	200	300	0	0	0	0	0	0	0	200	903	0	0	0	0	0	0	0	603	903	0
6612	5	0	0	0	0	0	0	200	300	0	0	0	0	0	0	0	200	903	0	0	0	0	0	0	0	603	903	0
6612	6	0	0	0	0	0	0	200	300	0	0	0	0	0	0	0	200	903	0	0	0	0	0	0	0	603	903	0
6612	7	0	0	0	0	0	0	200	300	0	0	0	0	0	0	0	200	903	0	0	0	0	0	0	0	603	903	0
6612	8	0	0	0	0	0	0	200	300	0	0	0	0	0	0	0	200	903	0	0	0	0	0	0	0	603	903	0
6612	9	0	0	0	0	0	0	200	300	0	0	0	0	0	0	0	200	903	0	0	0	0	0	0	0	603	903	0
6613	0	0	0	0	0	0	0	200	300	0	0	0	0	0	0	0	200	903	0	0	0	0	0	0	0	603	903	0
6613	1	0	0	0	0	0	0	200	300	0	0	0	0	0	0	0	200	903	0	0	0	0	0	0	0	603	903	0
6613	2	0	0	0	0	0	0	200	300	0	0	0	0	0	0	0	200	903	0	0	0	0	0	0	0	603	903	0
6613	3	0	0	0	0	0	0	200	300	0	0	0	0	0	0	0	200	903	0	0	0	0	0	0	0	603	903	0
6613	4	0	0	0	0	0	0	200	300	0	0	0	0	0	0	0	200	903	0	0	0	0	0	0	0	603	903	0
6613	5	0	0	0	0	0	0	200	300	0	0	0	0	0	0	0	200	903	0	0	0	0	0	0	0	603	903	0
6613	6	0	0	0	0	0	0	200	300	0	0	0	0	0	0	0	200	903	0	0	0	0	0	0	0	603	903	0
6613	7	0	0	0	0	0	0	200	300	0	0	0	0	0	0	0	200	903	0	0	0	0	0	0	0	603	903	0
6613	8	0	0	0	0	0	0	200	300	0	0	0	0	0	0	0	200	903	0	0	0	0	0	0	0	603	903	0
6613	9	0	0	0	0	0	0	200	300	0	0	0	0	0	0	0	200	903	0	0	0	0	0	0	0	603	903	0
6614	0	0	0	0	0	0	0	200	300	0	0	0	0	0	0	0	200	903	0	0	0	0	0	0	0	603	903	0
6614	1	0	0	0	0	0	0	200	300	0	0	0	0	0	0	0	200	903	0	0	0	0	0	0	0	603	903	0
6614	2	0	0	0	0	0	0	200	300	0	0	0	0	0	0	0	200	903	0	0	0	0	0	0	0	603	903	0
6614	3	0	0	0	0	0	0	200	300	0	0	0	0	0	0	0	200	903	0	0	0	0	0	0	0	603	903	0
6614	4	0	0	0	0	0	0	200	300	0	0	0	0	0	0	0	200	903	0	0	0	0	0	0	0	603	903	0
6614	5	0	0	0	0	0	0	200	300	0	0	0	0	0	0	0	200	903	0	0	0	0	0	0	0	603	903	0
6614	6	0	0	0	0	0	0	200	300	0	0	0	0	0	0	0	200	903	0	0	0	0	0	0	0	603	903	0
6614	7	0	0	0	0	0	0	200	300	0	0	0	0	0	0	0	200	903	0	0	0	0	0	0	0	603	903	0
6614	8	0	0	0	0	0	0	200	300	0	0	0	0	0	0	0	200	903	0	0	0	0	0	0	0	603	903	0
6614	9	0	0	0	0	0	0	200	300	0	0	0	0	0	0	0	200	903	0	0	0	0	0	0	0	603	903	0
6615	0	0	0	0	0	0	0	200	300	0	0	0	0	0	0	0	200	903	0	0	0	0	0	0	0	603	903	0
6615	1	0	0	0	0	0	0	200	300	0	0	0	0	0	0	0	200	903	0	0	0	0	0	0	0	603	903	0
6615	2	1.95542	9.57005	-20.6922	2107.54	-1070.08	-664.855	148.286	198.148	0	0	0	0	0	0	0	200	903	0	0	0	0	0	0	0	603	903	0
6615	3	2.56577	17.352	-28.9319	2199.09	-886.973	-985.29	169.343	223.991	0	0	0	0	0	0	0	200	903	0	0	0	0	0	0	0	603	903	0
6615	4	-2.46963	9.26487	-22.8284	1466.67	-948.008	-664.855	158.472	235.752	0	0	0	0	0	0	0	200	903	0	0	0	0	0	0	0	603	903	0
6615	5	-3.38516	0.567363	-11.5369	917.356	-1192.15	-161.315	96.6667	220.485	0	0	0	0	0	0	0	200	903	0	0	0	0	0	0	0	603	903	0
6615	6	-1.24893	8.34935	-11.2318	1192.01	-398.692	-1305.72	164.503	193.871	0	0	0	0	0	0	0	200	903	0	0	0	0	0	0	0	603	903	0
6615	7	2.71836	15.8262	-22.2181	2290.65	-703.868	-1305.72	168.32	196.902	0	0	0	0	0	0	0	200	903	0	0	0	0	0	0	0	603	903	0
6615	8	2.56577	11.4011	-28.0164	1832.88	-1741.47	-985.29	137.841	234.578	0	0	0	0	0	0	0	200	903	0	0	0	0	0	0	0	603	903	0
6615	9	-7.96279	5.45018	-25.2698	1283.57	-1375.25	-1076.84	145.577	249.206	0	0	0	0	0	0	0	200	903	0	0	0	0	0	0	0	603	903	0
6616	0	-8.87832	16.5891	-25.575	2015.99	-1497.33	-2267.03	141.454	221.174	0	0	0	0	0	0	0	200	903	0	0	0	0	0	0	0	603	903	0
6616	1	-0.638574	22.0823	-29.8475	2656.86	-1619.4	-2083.92	145.744	210.986	0	0	0	0	0	0	0	200	903	0	0	0	0	0	0	0	603	903	0
6616	2	-5.97915	15.3684	-34.1199	3023.07	-1680.43	-1809.26	150.749	211.399	0	0	0	0	0	0	0	200	903	0	0	0	0	0	0	0	603	903	0
6616	3	-10.4042	14.4529	-39.0027	4396.36	-1802.5	-2724.79	153.785	187.281	0	0	0	0	0	0	0	200	903	0	0	0	0	0	0	0	603	903	0
6616	4	-8.57314	23.1504	-44.1907	3480.83	-2168.71	-2953.67	150.924	221.232	0	0	0	0	0	0	0	200	903	0	0	0	0	0	0	0	603	903	0
6616	5	-9.79385	25.7444	-49.9891	4213.25	-3145.27	-2267.03	137.081	215.717	0	0	0	0	0	0	0	200	903	0	0	0	0	0	0	0	603	903	0
6616	6	-11.3197	15.521	-54.2615	5861.2	-3023.2	-2175.48	144.285	191.982	0	0	0	0	0	0	0	200	903	0	0	0	0	0	0	0	603	903	0
6616	7	-8.72573	6.97605	-63.1116	5494.99	-3084.24	-1992.37	151.13	212.932	0	0	0	0	0	0	0	200	903	0	0	0	0	0	0	0	603	903	0
6616	8	-2.46963	11.5537	-69.8255	6593.63	-3389.42	-1626.16	151.459	205.57	0	0	0	0	0	0	0	200	903	0	0	0	0	0	0	0	603	903	0
6616	9	-5.82656	11.7063	-78.6756	7417.6	-3755.63	-1946.59	152.264	205.719	0	0	0	0	0	0	0	200	903	0	0	0	0	0	0	0	603	903	0
6617	0	-12.3878	3.61912	-86.305	7966.92	-4121.84	-1717.71	152.241	207.689	0	0	0	0	0	0	0	200	903	0	0	0	0	0	0	0	603	903	0
6617	1	-9.33608	1.17771	-95.7654	8974	-4915.29	-1168.4	148.674	206.292	0	0	0	0	0	0	0	200	903	0	0	0	0	0	0	0	603	903	0
6617	2	-7.81021	6.82347	-103.395	10072.6	-4976.33	-1214.17	151.871	202.581	0	0	0	0	0	0	0	200	903	0	0	0	0	0	0	0	603	903	0
6617	3	-4.60586	3.9243	-109.193	11354.4	-4976.33	-1351.5	154.426	196.016	0	0	0	0	0	0	0	200	903	0	0	0	0	0	0	0	603	903	0
6617	4	-5.97915	-4.46804	-117.128	12178.3	-5220.47	-756.408	155.429	196.025	0	0	0	0	0	0	0	200	903	0	0	0	0	0	0	0	603	903	0
6617	5	-8.11538	-3.7051	-127.199	12636.1	-5708.75	-252.868	155.119	200.658	0	0	0	0	0	0	0	200	903	0	0	0	0	0	0	0	603	903	0
6617	6	-8.11538	-0.348165	-136.964	13093.9	-6197.03	-802.184	154.754	204.399	0	0	0	0	0	0	0	200	903	0	0	0	0	0	0	0	603	903	0
6617	7	-6.89468	-5.38356	-141.847	14558.7	-6624.28	-619.079	153.3	197.363	0	0	0	0	0	0	0	200	903	0	0	0	0	0	0	0	603	903	0
6617	8	-4.60586	-10.8767	-149.171	15199.6	-6258.07	388.001	158.048	198.106	0	0	0	0	0	0	0	200	903	0	0	0	0	0	0	0	603	903	0
6617	9	-1.85928	-8.58791	-159.547	15657.3	-6624.28	296.449	158.481	201.864	0	0	0	0	0	0	0	200	903	0	0	0	0	0	0	0	603	903	0
6618	0	0.734717	-5.99392	-166.871	15840.5	-6868.42	-115.539	158.84	205.074	0	0	0	0	0	0	0	200	903	0	0	0	0	0	0	0	603	903	0
6618	1	-2.01187	-7.36721	-173.585	16939.1	-7051.52	616.883	159.377	202.416	0	0	0	0	0	0	0	200	903	0	0	0	0	0	0	0	603	903	0
6618	2	-3.99551	-8.28273	-176.637	17305.3	-7173.59	754.213	159.388	202.029	0	0	0	0	0	0	0	200	903	0	0	0	0	0	0	0	603	903	0
6618	3	0.582129	-4.46804	-183.961	17671.5	-7661.88	571.107	158.351	203.939	0	0	0	0	0	0	0	200	903	0	0	0	0	0	0	0	603	903	0
6618	4	4.09165	-2.17922	-190.98	18129.3	-7295.66	708.436	161.799	205.073	0	0	0	0	0	0	0	200	903	0	0	0	0	0	0	0	603	903	0
6618	5	2.87095	-2.63698	-193.117	19594.1	-7295.66	799.989	162.221	198.537	0	0	0	0	0	0	0	200	903	0	0	0	0	0	0	0	603	903	0
6618	6	1.49766	-0.805928	-201.661	19594.1	-7600.84	388.001	162.309	202.837	0	0	0	0	0	0	0	200	903	0	0	0	0	0	0	0	603	903	0
6618	7	2.41318	3.77171	-205.018	19960.3	-8028.09	479.554	160.842	202.641	0	0	0	0	0	0	0	200	903	0	0	0	0	0	0	0	603	903	0
6618	8	4.09165	8.65452	-208.68	20418.1	-7906.02	525.331	162.114	202.156	0	0	0	0	0	0	0	200	903	0	0	0	0	0	0	0	603	903	0
6618	9	5.15977	7.89158	-215.089	20601.2	-8150.16	342.225	162.108	204.22	0	0	0	0	0	0	0	200	903	0	0	0	0	0	0	0	603	903	0
6619	0	6.22788	9.87522	-214.784	20784.3	-8394.3	296.449	160.917	203.232	0	0	0	0	0	0	0	200	903	0	0	0	0	0	0	0	603	903	0
6619	1	6.53306	16.5891	-223.024	21882.9	-8516.37	662.66	161.814	201.881	0	0	0	0	0	0	0	200	903	0	0	0	0	0	0	0	603	903	0
6619	2	5.31235	17.8098	-225.16	20784.3	-8333.27	250.672	162.99	207.691	0	0	0	0	0	0	0	200	903	0	0	0	0	0	0	0	603	903	0
6619	3	4.54941	18.2676	-232.484	21425.2	-8943.62	-298.644	161.53	207.842	0	0	0	0	0	0	0	200	903	0	0	0	0	0	0	0	603	903	0
6619	4	8.36411	22.54	-239.198	21974.5	-8821.55	67.5668	163.12	208.133	0	0	0	0	0	0	0	200	903	0	0	0	0	0	0	0	603	903	0
6619	5	10.1952	28.1858	-244.081	22249.1	-9187.76	250.672	162.358	208.845	0	0	0	0	0	0	0	200	903	0	0	0	0	0	0	0	603	903	0
6619	6	10.0426	30.322	-252.931	22523.8	-9187.76	-252.868	163.675	210.949	0	0	0	0	0	0	0	200	903	0	0	0	0	0	0	0	603	903	0
6619	7	8.36411	30.1694	-256.898	23073.1	-9370.86	-115.539	163.523	210.186	0	0	0	0	0	0	0	200	903	0	0	0	0	0	0	0	603	903	0
6619	8	9.88999	34.8996	-263.612	23622.4	-9553.97	159.12	163.757	210.389	0	0	0	0	0	0	0	200	903	0	0	0	0	0	0	0	603	903	0
6619	9	12.1788	38.4092	-271.242	23256.2	-9553.97	-207.091	164.777	214.26	0	0	0	0	0	0	0	200	903	0	0	0	0	0	0	0	603	903	0
6620	0	11.4159	38.5617	-275.514	24263.3	-9737.08	-207.091	164.659	211.934	0	0	0	0	0	0	0	200	903	0	0	0	0	0	0	0	603	903	0
6620	1	11.8736	39.4773	-284.669	24721.1	-10103.3	-252.868	164.509	213.159	0	0	0	0	0	0	0	200	903	0	0	0	0	0	0	0	603	903	0
6620	2	12.7892	43.1394	-291.383	24904.2	-10164.3	-207.091	165.117	214.531	0	0	0	0	0	0	0	200	903	0	0	0	0	0	0	0	603	903	0
6620	3	13.5521	45.5808	-298.707	25270.4	-10652.6	-390.197	164.338	215.401	0	0	0	0	0	0	0	200	903	0	0	0	0	0	0	0	603	903	0
6620	4	14.4676	46.1911	-306.642	25178.8	-10896.7	-481.75	164.464	217.889	0	0	0	0	0	0	0	200	903	0	0	0	0	0	0	0	603	903	0
6620	5	14.7728	46.8015	-312.745	25361.9	-11079.8	-435.973	164.572	218.905	0	0	0	0	0	0	0	200	903	0	0	0	0	0	0	0	603	903	0
6620	6	15.078	50.6162	-320.07	26094.4	-11018.8	-893.737	165.574	218.473	0	0	0	0	0	0	0	200	903	0	0	0	0	0	0	0	603	903	0
6620	7	16.1461	51.9895	-324.647	25911.3	-11140.9	-527.526	165.683	220.186	0	0	0	0	0	0	0	200	903	0	0	0	0	0	0	0	603	903	0
6620	8	16.6039	51.5317	-331.056	25911.3	-11690.2	-710.631	164.688	221.732	0	0	0	0	0	0	0	200	903	0	0	0	0	0	0	0	603	903	0
6620	9	16.7564	51.8369	-331.971	26643.7	-12056.4	-1351.5	163.682	219.741	0	0	0	0	0	0	0	200	903	0	0	0	0	0	0	0	603	903	0
6621	0	17.0616	55.1938	-343.873	27193	-11690.2	-1076.84	166.004	220.921	0	0	0	0	0	0	0	200	903	0	0	0	0	0	0	0	603	903	0
6621	1	17.0616	55.499	-349.061	27650.8	-12422.6	-939.513	164.411	220.785	0	0	0	0	0	0	0	200	903	0	0	0	0	0	0	0	603	903	0
6621	2	17.672	54.1257	-352.723	27833.9	-12544.7	-1305.72	164.435	221.089	0	0	0	0	0	0	0	200	903	0	0	0	0	0	0	0	603	903	0
6621	3	17.2142	57.0249	-355.165	28017	-12422.6	-1397.28	165.023	221.116	0	0	0	0	0	0	0	200	903	0	0	0	0	0	0	0	603	903	0
6621	4	18.7401	58.5508	-364.93	28108.5	-12727.8	-1305.72	165.123	222.976	0	0	0	0	0	0	0	200	903	0	0	0	0	0	0	0	603	903	0
6621	5	18.7401	59.1611	-370.424	28566.3	-12666.8	-1488.83	165.805	222.882	0	0	0	0	0	0	0	200	903	0	0	0	0	0	0	0	603	903	0
6621	6	17.0616	59.7715	-375.306	27833.9	-13094	-1671.94	165.111	225.837	0	0	0	0	0	0	0	200	903	0	0	0	0	0	0	0	603	903	0
6621	7	19.503	61.7551	-378.969	28108.5	-13277.1	-1809.26	164.965	225.829	0	0	0	0	0	0	0	200	903	0	0	0	0	0	0	0	603	903	0
6621	8	17.9771	62.9758	-382.326	28291.6	-13277.1	-2038.15	165.273	226.001	0	0	0	0	0	0	0	200	903	0	0	0	0	0	0	0	603	903	0
6621	9	17.5194	64.1965	-386.598	28291.6	-14131.6	-2175.48	163.446	226.819	0	0	0	0	0	0	0	200	903	0	0	0	0	0	0	0	603	903	0
6622	0	16.2987	64.5017	-392.091	28383.2	-13887.5	-2358.58	164.581	227.611	0	0	0	0	0	0	0	200	903	0	0	0	0	0	0	0	603	903	0
6622	1	16.4513	65.2646	-394.533	28474.7	-14009.5	-2358.58	164.491	227.827	0	0	0	0	0	0	0	200	903	0	0	0	0	0	0	0	603	903	0
6622	2	17.5194	66.7905	-397.584	29115.6	-14131.6	-2358.58	164.456	226.769	0	0	0	0	0	0	0	200	903	0	0	0	0	0	0	0	603	903	0
6622	3	15.6883	66.3327	-399.415	28932.5	-14009.5	-2267.03	164.925	227.563	0	0	0	0	0	0	0	200	903	0	0	0	0	0	0	0	603	903	0
6622	4	15.8409	66.7905	-402.162	28657.8	-14619.9	-2175.48	163.647	228.741	0	0	0	0	0	0	0	200	903	0	0	0	0	0	0	0	603	903	0
6622	5	15.3832	68.7741	-407.655	28566.3	-14436.8	-2679.02	164.586	229.925	0	0	0	0	0	0	0	200	903	0	0	0	0	0	0	0	603	903	0
6622	6	14.315	69.0793	-409.791	28932.5	-14925.1	-2633.24	163.579	229.397	0	0	0	0	0	0	0	200	903	0	0	0	0	0	0	0	603	903	0
6622	7	13.7047	68.1638	-409.486	29481.8	-14803	-2404.36	163.85	228.003	0	0	0	0	0	0	0	200	903	0	0	0	0	0	0	0	603	903	0
6622	8	12.6366	69.3845	-412.843	28383.2	-14986.1	-2358.58	163.7	231.249	0	0	0	0	0	0	0	200	903	0	0	0	0	0	0	0	603	903	0
6622	9	12.484	70.7578	-414.369	28200.1	-15047.1	-2450.13	163.687	231.945	0	0	0	0	0	0	0	200	903	0	0	0	0	0	0	0	603	903	0
6623	0	12.1788	70.7578	-419.252	28383.2	-15291.3	-2221.25	163.527	232.3	0	0	0	0	0	0	0	200	903	0	0	0	0	0	0	0	603	903	0
6623	1	12.7892	70.9104	-418.031	28108.5	-14986.1	-2450.13	164.151	232.76	0	0	0	0	0	0	0	200	903	0	0	0	0	0	0	0	603	903	0
6623	2	9.12705	71.8259	-421.388	27925.4	-15169.2	-2679.02	164.002	233.73	0	0	0	0	0	0	0	200	903	0	0	0	0	0	0	0	603	903	0
6623	3	8.97446	71.8259	-421.693	28291.6	-15535.4	-2633.24	163.159	232.909	0	0	0	0	0	0	0	200	903	0	0	0	0	0	0	0	603	903	0
6623	4	8.21152	72.5888	-422.609	28657.8	-15474.4	-2495.91	163.384	232.188	0	0	0	0	0	0	0	200	903	0	0	0	0	0	0	0	603	903	0
6623	5	6.99082	73.0466	-425.966	28657.8	-15718.5	-2816.34	163.099	232.723	0	0	0	0	0	0	0	200	903	0	0	0	0	0	0	0	603	903	0
6623	6	5.9227	73.1992	-421.693	28200.1	-16023.7	-2633.24	162.002	233.127	0	0	0	0	0	0	0	200	903	0	0	0	0	0	0	0	603	903	0
6623	7	4.39683	72.7414	-428.102	28108.5	-16267.8	-2633.24	162	234.342	0	0	0	0	0	0	0	200	903	0	0	0	0	0	0	0	603	903	0
6623	8	2.87095	71.2156	-428.102	28291.6	-15840.6	-2724.79	162.998	233.914	0	0	0	0	0	0	0	200	903	0	0	0	0	0	0	0	603	903	0
6623	9	2.87095	73.3518	-428.407	27833.9	-16023.7	-2953.67	162.597	235.029	0	0	0	0	0	0	0	200	903	0	0	0	0	0	0	0	603	903	0
6624	0	2.56577	74.2673	-432.374	27559.2	-16206.8	-2999.45	162.517	236.261	0	0	0	0	0	0	0	200	903	0	0	0	0	0	0	0	603	903	0
6624	1	0.429541	75.6406	-430.543	28017	-16512	-3136.78	161.649	234.926	0	0	0	0	0	0	0	200	903	0	0	0	0	0	0	0	603	903	0
6624	2	-1.85928	75.7932	-434.205	27925.4	-16145.8	-3045.23	162.815	235.686	0	0	0	0	0	0	0	200	903	0	0	0	0	0	0	0	603	903	0
6624	3	-1.85928	74.4199	-434.511	27467.7	-16573	-3228.33	161.858	236.785	0	0	0	0	0	0	0	200	903	0	0	0	0	0	0	0	603	903	0
6624	4	-2.31704	76.5561	-436.036	27833.9	-17122.3	-3365.66	160.732	236.166	0	0	0	0	0	0	0	200	903	0	0	0	0	0	0	0	603	903	0
6624	5	-0.94375	74.7251	-445.497	27559.2	-17793.7	-3136.78	160.059	238.138	0	0	0	0	0	0	0	200	903	0	0	0	0	0	0	0	603	903	0
6624	6	-5.3688	73.0466	-454.652	27467.7	-17854.8	-2953.67	160.729	239.585	0	0	0	0	0	0	0	200	903	0	0	0	0	0	0	0	603	903	0
6624	7	-13.456	77.3191	-456.483	26643.7	-18282	-2770.57	159.95	241.633	0	0	0	0	0	0	0	200	903	0	0	0	0	0	0	0	603	903	0
6624	8	-17.4232	82.6596	-451.906	26552.1	-18343	-3640.32	159.41	241.244	0	0	0	0	0	0	0	200	903	0	0	0	0	0	0	0	603	903	0
6624	9	-14.6767	82.6596	-451.906	26643.7	-18282	-3594.54	159.545	241.042	0	0	0	0	0	0	0	200	903	0	0	0	0	0	0	0	603	903	0
6625	0	-13.1508	82.0493	-461.061	26918.3	-18159.9	-3640.32	160.613	241.617	0	0	0	0	0	0	0	200	903	0	0	0	0	0	0	0	603	903	0
6625	1	-16.8129	84.7959	-467.47	26643.7	-18709.2	-4189.64	159.978	243.004	0	0	0	0	0	0	0	200	903	0	0	0	0	0	0	0	603	903	0
6625	2	-16.2025	90.4416	-468.385	26918.3	-19197.5	-4189.64	159.013	242.529	0	0	0	0	0	0	0	200	903	0	0	0	0	0	0	0	603	903	0
6625	3	-16.05	92.5779	-468.385	25911.3	-19197.5	-4372.74	159.013	244.68	0	0	0	0	0	0	0	200	903	0	0	0	0	0	0	0	603	903	0
6625	4	-17.7284	93.4934	-468.385	26094.4	-19380.6	-4647.4	158.622	244.289	0	0	0	0	0	0	0	200	903	0	0	0	0	0	0	0	603	903	0
6625	5	-11.6249	94.5615	-475.709	26277.5	-19197.5	-4784.73	159.644	244.762	0	0	0	0	0	0	0	200	903	0	0	0	0	0	0	0	603	903	0
6625	6	-7.81021	95.7822	-478.151	26369	-19014.4	-4555.85	160.233	244.852	0	0	0	0	0	0	0	200	903	0	0	0	0	0	0	0	603	903	0
6625	7	-10.862	96.0874	-478.761	26918.3	-19136.5	-4922.06	160.029	243.775	0	0	0	0	0	0	0	200	903	0	0	0	0	0	0	0	603	903	0
6625	8	-10.7094	94.1037	-481.813	26918.3	-19502.7	-5105.16	159.522	244.131	0	0	0	0	0	0	0	200	903	0	0	0	0	0	0	0	603	903	0
6625	9	-8.72573	92.883	-484.254	26369	-19563.7	-4784.73	159.6	245.547	0	0	0	0	0	0	0	200	903	0	0	0	0	0	0	0	603	903	0
6626	0	-7.19985	93.0356	-486.085	26185.9	-19380.6	-4922.06	160.129	246.129	0	0	0	0	0	0	0	200	903	0	0	0	0	0	0	0	603	903	0
6626	1	-5.21621	90.5942	-488.832	26369	-19502.7	-4922.06	160.103	246.057	0	0	0	0	0	0	0	200	903	0	0	0	0	0	0	0	603	903	0
6626	2	-4.91104	88.6106	-490.663	25545	-19991	-4876.28	159.257	247.938	0	0	0	0	0	0	0	200	903	0	0	0	0	0	0	0	603	903	0
6626	3	-8.11538	89.5261	-496.461	25728.1	-19929.9	-4876.28	159.856	248.177	0	0	0	0	0	0	0	200	903	0	0	0	0	0	0	0	603	903	0
6626	4	-8.11538	88.7632	-497.682	25361.9	-19624.8	-5150.94	160.568	249.04	0	0	0	0	0	0	0	200	903	0	0	0	0	0	0	0	603	903	0
6626	5	-5.67397	87.2373	-503.48	25361.9	-20296.2	-5013.61	159.688	249.627	0	0	0	0	0	0	0	200	903	0	0	0	0	0	0	0	603	903	0
6626	6	-4.75845	88.3054	-506.837	25728.1	-20296.2	-5242.49	159.955	249.238	0	0	0	0	0	0	0	200	903	0	0	0	0	0	0	0	603	903	0
6626	7	-4.45327	89.2209	-512.33	25361.9	-20357.2	-5517.15	160.266	250.497	0	0	0	0	0	0	0	200	903	0	0	0	0	0	0	0	603	903	0
6626	8	-5.21621	90.289	-512.941	25636.6	-20662.4	-5471.37	159.718	250.02	0	0	0	0	0	0	0	200	903	0	0	0	0	0	0	0	603	903	0
6626	9	-4.75845	90.7468	-513.551	25728.1	-20784.4	-5196.72	159.528	249.902	0	0	0	0	0	0	0	200	903	0	0	0	0	0	0	0	603	903	0
6627	0	-6.89468	93.7986	-514.772	25636.6	-20967.5	-5517.15	159.268	250.198	0	0	0	0	0	0	0	200	903	0	0	0	0	0	0	0	603	903	0
6627	1	-5.06362	94.2563	-520.875	25178.8	-20723.4	-5562.93	160.214	251.661	0	0	0	0	0	0	0	200	903	0	0	0	0	0	0	0	603	903	0
6627	2	-6.89468	93.9511	-523.927	25178.8	-20784.4	-5288.27	160.33	251.942	0	0	0	0	0	0	0	200	903	0	0	0	0	0	0	0	603	903	0
6627	3	-10.5568	92.883	-525.453	25545	-21455.8	-5517.15	159.167	251.385	0	0	0	0	0	0	0	200	903	0	0	0	0	0	0	0	603	903	0
6627	4	-9.64126	94.7141	-527.589	25178.8	-21211.7	-5608.7	159.795	252.276	0	0	0	0	0	0	0	200	903	0	0	0	0	0	0	0	603	903	0
6627	5	-11.7775	94.2563	-532.472	25270.4	-21455.8	-5517.15	159.705	252.541	0	0	0	0	0	0	0	200	903	0	0	0	0	0	0	0	603	903	0
6627	6	-13.6085	93.4934	-534.913	25545	-22066.2	-5379.82	158.748	252.245	0	0	0	0	0	0	0	200	903	0	0	0	0	0	0	0	603	903	0
6627	7	-14.2189	92.5779	-537.965	24629.5	-22127.2	-5288.27	158.869	254.217	0	0	0	0	0	0	0	200	903	0	0	0	0	0	0	0	603	903	0
6627	8	-15.1344	91.8149	-542.238	24538	-22188.2	-5379.82	159.08	254.747	0	0	0	0	0	0	0	200	903	0	0	0	0	0	0	0	603	903	0
6627	9	-17.1181	92.5779	-543.153	24904.2	-22676.5	-5654.48	158.25	254.149	0	0	0	0	0	0	0	200	903	0	0	0	0	0	0	0	603	903	0
6628	0	-17.1181	90.289	-544.069	24538	-22432.4	-5700.26	158.769	254.899	0	0	0	0	0	0	0	200	903	0	0	0	0	0	0	0	603	903	0
6628	1	-16.05	89.9839	-546.51	25087.3	-22493.4	-5654.48	158.842	254.095	0	0	0	0	0	0	0	200	903	0	0	0	0	0	0	0	603	903	0
6628	2	-15.1344	91.3572	-550.477	25178.8	-22493.4	-5929.14	159.138	254.26	0	0	0	0	0	0	0	200	903	0	0	0	0	0	0	0	603	903	0
6628	3	-15.8974	89.8313	-549.867	24812.6	-22920.7	-6066.47	158.316	254.875	0	0	0	0	0	0	0	200	903	0	0	0	0	0	0	0	603	903	0
6628	4	-17.7284	88.458	-553.529	24538	-23164.8	-6020.69	158.151	255.67	0	0	0	0	0	0	0	200	903	0	0	0	0	0	0	0	603	903	0
6628	5	-17.1181	89.8313	-553.224	23897.1	-22859.6	-6112.24	158.679	256.804	0	0	0	0	0	0	0	200	903	0	0	0	0	0	0	0	603	903	0
6628	6	-14.9818	88.3054	-555.665	23714	-22981.7	-6112.24	158.641	257.323	0	0	0	0	0	0	0	200	903	0	0	0	0	0	0	0	603	903	0
6628	7	-14.6767	88.458	-555.36	23805.5	-23042.7	-6341.13	158.508	257.135	0	0	0	0	0	0	0	200	903	0	0	0	0	0	0	0	603	903	0
6628	8	-15.7448	88.6106	-557.191	23530.9	-22981.7	-6295.35	158.754	257.769	0	0	0	0	0	0	0	200	903	0	0	0	0	0	0	0	603	903	0
6628	9	-16.8129	89.3735	-558.412	23622.4	-23042.7	-6341.13	158.735	257.697	0	0	0	0	0	0	0	200	903	0	0	0	0	0	0	0	603	903	0
6629	0	-14.8292	88.7632	-558.717	24263.3	-23409	-6753.11	158.102	256.573	0	0	0	0	0	0	0	200	903	0	0	0	0	0	0	0	603	903	0
6629	1	-17.4232	86.6269	-559.327	23805.5	-23592.1	-6386.9	157.821	257.439	0	0	0	0	0	0	0	200	903	0	0	0	0	0	0	0	603	903	0
6629	2	-17.2707	86.6269	-560.243	23622.4	-23592.1	-6524.23	157.89	257.835	0	0	0	0	0	0	0	200	903	0	0	0	0	0	0	0	603	903	0
6629	3	-16.5077	86.4743	-562.99	23439.3	-23714.1	-6661.56	157.878	258.366	0	0	0	0	0	0	0	200	903	0	0	0	0	0	0	0	603	903	0
6629	4	-18.0336	86.3218	-564.21	23439.3	-24080.3	-6432.68	157.32	258.456	0	0	0	0	0	0	0	200	903	0	0	0	0	0	0	0	603	903	0
6629	5	-19.7121	85.5588	-565.431	23073.1	-23958.3	-6478.46	157.628	259.194	0	0	0	0	0	0	0	200	903	0	0	0	0	0	0	0	603	903	0
6629	6	-20.0172	85.7114	-563.6	22432.2	-23775.2	-6753.11	157.816	260.198	0	0	0	0	0	0	0	200	903	0	0	0	0	0	0	0	603	903	0
6629	7	-19.7121	86.0166	-565.736	23164.7	-24202.4	-6661.56	157.22	259.054	0	0	0	0	0	0	0	200	903	0	0	0	0	0	0	0	603	903	0
6629	8	-19.8646	85.864	-568.483	22615.4	-24263.4	-6890.44	157.319	260.218	0	0	0	0	0	0	0	200	903	0	0	0	0	0	0	0	603	903	0
6629	9	-20.6276	83.4226	-567.262	22249.1	-24324.5	-6844.67	157.12	260.778	0	0	0	0	0	0	0	200	903	0	0	0	0	0	0	0	603	903	0
6630	0	-22.1535	84.9485	-570.924	22523.8	-24568.6	-6890.44	156.967	260.549	0	0	0	0	0	0	0	200	903	0	0	0	0	0	0	0	603	903	0
6630	1	-22.1535	84.3381	-568.788	22249.1	-24568.6	-6753.11	156.805	260.883	0	0	0	0	0	0	0	200	903	0	0	0	0	0	0	0	603	903	0
6630	2	-21.8483	83.27	-571.534	21882.9	-24629.7	-6936.22	156.906	261.712	0	0	0	0	0	0	0	200	903	0	0	0	0	0	0	0	603	903	0
6630	3	-20.1698	82.6596	-571.534	22340.7	-24385.5	-6890.44	157.333	260.911	0	0	0	0	0	0	0	200	903	0	0	0	0	0	0	0	603	903	0
6630	4	-22.4586	82.0493	-572.45	22157.6	-24690.7	-6707.34	156.868	261.293	0	0	0	0	0	0	0	200	903	0	0	0	0	0	0	0	603	903	0
6630	5	-24.1371	81.7441	-573.671	21425.2	-25117.9	-6936.22	156.215	262.653	0	0	0	0	0	0	0	200	903	0	0	0	0	0	0	0	603	903	0
6630	6	-24.2897	81.5915	-573.06	21608.3	-25179	-7119.32	156.062	262.293	0	0	0	0	0	0	0	200	903	0	0	0	0	0	0	0	603	903	0
6630	7	-24.1371	80.5234	-572.755	21333.6	-24751.7	-6936.22	156.785	262.753	0	0	0	0	0	0	0	200	903	0	0	0	0	0	0	0	603	903	0
6630	8	-23.8319	80.2182	-576.112	20784.3	-25423.1	-6890.44	155.871	263.923	0	0	0	0	0	0	0	200	903	0	0	0	0	0	0	0	603	903	0
6630	9	-23.2216	79.6079	-575.502	20692.8	-25362.1	-6890.44	155.931	264.044	0	0	0	0	0	0	0	200	903	0	0	0	0	0	0	0	603	903	0
6631	0	-24.9	78.8449	-577.638	21150.5	-25423.1	-6936.22	155.988	263.384	0	0	0	0	0	0	0	200	903	0	0	0	0	0	0	0	603	903	0
6631	1	-23.5268	78.8449	-576.112	20967.4	-25240	-7027.77	156.189	263.605	0	0	0	0	0	0	0	200	903	0	0	0	0	0	0	0	603	903	0
6631	2	-25.3578	77.3191	-577.638	20967.4	-25606.2	-7027.77	155.671	263.702	0	0	0	0	0	0	0	200	903	0	0	0	0	0	0	0	603	903	0
6631	3	-24.4423	76.4035	-577.028	20967.4	-26033.5	-7073.55	154.883	263.663	0	0	0	0	0	0	0	200	903	0	0	0	0	0	0	0	603	903	0
6631	4	-24.4423	74.8777	-580.69	20601.2	-25484.1	-6570.01	156.114	264.523	0	0	0	0	0	0	0	200	903	0	0	0	0	0	0	0	603	903	0
6631	5	-24.7475	75.9458	-582.216	20418.1	-25606.2	-6753.11	156.019	264.93	0	0	0	0	0	0	0	200	903	0	0	0	0	0	0	0	603	903	0
6631	6	-25.9682	75.7932	-582.826	19777.2	-26216.6	-6615.78	155.018	266.067	0	0	0	0	0	0	0	200	903	0	0	0	0	0	0	0	603	903	0
6631	7	-25.663	76.0984	-581.605	19319.5	-25728.3	-6844.67	155.763	266.783	0	0	0	0	0	0	0	200	903	0	0	0	0	0	0	0	603	903	0
6631	8	-25.8156	75.488	-582.521	19594.1	-25850.4	-6661.56	155.623	266.363	0	0	0	0	0	0	0	200	903	0	0	0	0	0	0	0	603	903	0
6631	9	-25.0526	75.3354	-584.047	19227.9	-26338.6	-6844.67	154.903	267.078	0	0	0	0	0	0	0	200	903	0	0	0	0	0	0	0	603	903	0
6632	0	-25.2052	74.4199	-585.878	19502.6	-26338.6	-6798.89	155.044	266.712	0	0	0	0	0	0	0	200	903	0	0	0	0	0	0	0	603	903	0
6632	1	-25.8156	73.1992	-582.521	19868.8	-26033.5	-7027.77	155.309	265.892	0	0	0	0	0	0	0	200	903	0	0	0	0	0	0	0	603	903	0
6632	2	-26.5785	73.3518	-587.709	19868.8	-26216.6	-7210.88	155.392	266.193	0	0	0	0	0	0	0	200	903	0	0	0	0	0	0	0	603	903	0
6632	3	-27.0363	72.5888	-587.709	19502.6	-26704.9	-7165.1	154.561	266.816	0	0	0	0	0	0	0	200	903	0	0	0	0	0	0	0	603	903	0
6632	4	-26.4259	71.6733	-588.319	18953.2	-26949	-6753.11	154.193	267.784	0	0	0	0	0	0	0	200	903	0	0	0	0	0	0	0	603	903	0
6632	5	-25.8156	71.063	-590.15	18678.6	-26582.8	-7119.32	154.956	268.349	0	0	0	0	0	0	0	200	903	0	0	0	0	0	0	0	603	903	0
6632	6	-25.5104	70.6052	-592.286	19227.9	-26399.7	-6936.22	155.428	267.536	0	0	0	0	0	0	0	200	903	0	0	0	0	0	0	0	603	903	0
6632	7	-26.2733	70.7578	-591.981	18861.7	-26826.9	-7073.55	154.683	268.138	0	0	0	0	0	0	0	200	903	0	0	0	0	0	0	0	603	903	0
6632	8	-27.3415	68.469	-592.592	18861.7	-26643.8	-6936.22	155.038	268.171	0	0	0	0	0	0	0	200	903	0	0	0	0	0	0	0	603	903	0
6632	9	-27.1889	69.2319	-591.066	18861.7	-26826.9	-6982	154.613	268.089	0	0	0	0	0	0	0	200	903	0	0	0	0	0	0	0	603	903	0
6633	0	-26.4259	68.9267	-592.286	18953.2	-27315.2	-7073.55	153.882	268	0	0	0	0	0	0	0	200	903	0	0	0	0	0	0	0	603	903	0
6633	1	-26.1208	66.7905	-595.033	18861.7	-27132.1	-7027.77	154.402	268.301	0	0	0	0	0	0	0	200	903	0	0	0	0	0	0	0	603	903	0
6633	2	-25.9682	66.0276	-595.338	18403.9	-27071.1	-6798.89	154.528	269.087	0	0	0	0	0	0	0	200	903	0	0	0	0	0	0	0	603	903	0
6633	3	-26.8837	65.5698	-596.254	18129.3	-27376.2	-6798.89	154.086	269.595	0	0	0	0	0	0	0	200	903	0	0	0	0	0	0	0	603	903	0
6633	4	-26.5785	65.5698	-593.812	17488.4	-27376.2	-6982	153.897	270.549	0	0	0	0	0	0	0	200	903	0	0	0	0	0	0	0	603	903	0
6633	5	-25.8156	65.112	-594.728	17671.5	-27071.1	-6844.67	154.482	270.286	0	0	0	0	0	0	0	200	903	0	0	0	0	0	0	0	603	903	0
6633	6	-26.1208	65.4172	-595.033	17763.1	-27193.1	-6753.11	154.3	270.148	0	0	0	0	0	0	0	200	903	0	0	0	0	0	0	0	603	903	0
6633	7	-26.5785	64.5017	-597.474	17122.2	-27742.4	-6386.9	153.567	271.342	0	0	0	0	0	0	0	200	903	0	0	0	0	0	0	0	603	903	0
6633	8	-27.1889	63.8913	-597.78	17122.2	-27681.4	-6615.78	153.693	271.357	0	0	0	0	0	0	0	200	903	0	0	0	0	0	0	0	603	903	0
6633	9	-25.5104	64.5017	-599	17305.3	-27803.5	-6295.35	153.584	271.11	0	0	0	0	0	0	0	200	903	0	0	0	0	0	0	0	603	903	0
6634	0	-28.4096	63.1284	-598.085	16939.1	-27986.6	-6753.11	153.206	271.678	0	0	0	0	0	0	0	200	903	0	0	0	0	0	0	0	603	903	0
6634	1	-26.5785	62.9758	-598.39	16756	-27681.4	-6478.46	153.74	271.998	0	0	0	0	0	0	0	200	903	0	0	0	0	0	0	0	603	903	0
6634	2	-25.5104	63.4336	-600.831	16664.4	-27620.4	-6615.78	154.03	272.264	0	0	0	0	0	0	0	200	903	0	0	0	0	0	0	0	603	903	0
6634	3	-26.2733	62.9758	-600.526	16389.8	-27498.3	-6615.78	154.21	272.708	0	0	0	0	0	0	0	200	903	0	0	0	0	0	0	0	603	903	0
6634	4	-27.7992	62.9758	-599.611	15932	-28047.6	-6936.22	153.224	273.429	0	0	0	0	0	0	0	200	903	0	0	0	0	0	0	0	603	903	0
6634	5	-27.6466	62.6706	-599	15748.9	-27925.6	-6249.57	153.38	273.708	0	0	0	0	0	0	0	200	903	0	0	0	0	0	0	0	603	903	0
6634	6	-27.7992	62.8232	-598.39	16206.7	-27925.6	-6707.34	153.332	272.916	0	0	0	0	0	0	0	200	903	0	0	0	0	0	0	0	603	903	0
6634	7	-26.7311	62.518	-599.305	15382.7	-27681.4	-6203.8	153.811	274.332	0	0	0	0	0	0	0	200	903	0	0	0	0	0	0	0	603	903	0
6634	8	-26.5785	61.2973	-600.831	14924.9	-28474.9	-6203.8	152.608	275.16	0	0	0	0	0	0	0	200	903	0	0	0	0	0	0	0	603	903	0
6634	9	-27.0363	61.4499	-599.611	15382.7	-27925.6	-6203.8	153.427	274.346	0	0	0	0	0	0	0	200	903	0	0	0	0	0	0	0	603	903	0
6635	0	-25.663	61.9077	-598.695	15016.5	-27925.6	-6341.13	153.356	274.918	0	0	0	0	0	0	0	200	903	0	0	0	0	0	0	0	603	903	0
6635	1	-26.8837	60.2292	-599	14833.4	-28169.7	-6570.01	152.972	275.236	0	0	0	0	0	0	0	200	903	0	0	0	0	0	0	0	603	903	0
6635	2	-25.663	60.0766	-597.169	14741.8	-28169.7	-6432.68	152.828	275.314	0	0	0	0	0	0	0	200	903	0	0	0	0	0	0	0	603	903	0
6635	3	-26.4259	59.1611	-599	14375.6	-28047.6	-6478.46	153.176	276.001	0	0	0	0	0	0	0	200	903	0	0	0	0	0	0	0	603	903	0
6635	4	-25.663	59.9241	-597.474	13917.8	-28352.8	-6249.57	152.546	276.706	0	0	0	0	0	0	0	200	903	0	0	0	0	0	0	0	603	903	0
6635	5	-26.5785	59.1611	-599	13643.2	-28230.7	-6478.46	152.87	277.223	0	0	0	0	0	0	0	200	903	0	0	0	0	0	0	0	603	903	0
6635	6	-26.8837	58.8559	-595.949	13368.5	-28291.8	-6203.8	152.527	277.568	0	0	0	0	0	0	0	200	903	0	0	0	0	0	0	0	603	903	0
6635	7	-25.8156	58.093	-595.643	13277	-28230.7	-6112.24	152.605	277.71	0	0	0	0	0	0	0	200	903	0	0	0	0	0	0	0	603	903	0
6635	8	-24.9	57.9404	-596.864	13002.3	-28596.9	-6158.02	152.088	278.216	0	0	0	0	0	0	0	200	903	0	0	0	0	0	0	0	603	903	0
6635	9	-25.2052	57.7878	-598.085	13460.1	-28291.8	-6203.8	152.696	277.495	0	0	0	0	0	0	0	200	903	0	0	0	0	0	0	0	603	903	0
6636	0	-26.5785	57.3301	-597.169	13185.4	-28413.8	-6341.13	152.419	277.92	0	0	0	0	0	0	0	200	903	0	0	0	0	0	0	0	603	903	0
6636	1	-26.8837	55.8042	-595.033	13277	-28596.9	-6020.69	151.941	277.687	0	0	0	0	0	0	0	200	903	0	0	0	0	0	0	0	603	903	0
6636	2	-26.7311	55.1938	-595.033	13277	-28719	-5974.92	151.735	277.687	0	0	0	0	0	0	0	200	903	0	0	0	0	0	0	0	603	903	0
6636	3	-26.4259	53.6679	-595.338	12269.9	-28352.8	-6066.47	152.375	279.39	0	0	0	0	0	0	0	200	903	0	0	0	0	0	0	0	603	903	0
6636	4	-25.663	53.8205	-596.864	12819.2	-28413.8	-5974.92	152.395	278.522	0	0	0	0	0	0	0	200	903	0	0	0	0	0	0	0	603	903	0
6636	5	-27.1889	53.5154	-594.423	11537.5	-28963.2	-5974.92	151.275	280.59	0	0	0	0	0	0	0	200	903	0	0	0	0	0	0	0	603	903	0
6636	6	-24.9	53.3628	-594.423	11537.5	-28841.1	-5974.92	151.481	280.59	0	0	0	0	0	0	0	200	903	0	0	0	0	0	0	0	603	903	0
6636	7	-26.4259	53.5154	-591.981	11445.9	-28169.7	-6066.47	152.415	280.665	0	0	0	0	0	0	0	200	903	0	0	0	0	0	0	0	603	903	0
6636	8	-25.663	52.4472	-591.066	10988.2	-28841.1	-6066.47	151.205	281.41	0	0	0	0	0	0	0	200	903	0	0	0	0	0	0	0	603	903	0
6636	9	-25.663	51.6843	-593.507	10713.5	-28963.2	-5929.14	151.2	281.949	0	0	0	0	0	0	0	200	903	0	0	0	0	0	0	0	603	903	0
6637	0	-26.2733	52.1421	-589.845	11445.9	-28658	-5883.36	151.414	280.595	0	0	0	0	0	0	0	200	903	0	0	0	0	0	0	0	603	903	0
6637	1	-27.0363	51.6843	-592.286	10896.6	-28719	-5929.14	151.512	281.603	0	0	0	0	0	0	0	200	903	0	0	0	0	0	0	0	603	903	0
6637	2	-27.1889	50.6162	-590.455	10621.9	-29146.3	-5791.81	150.638	282.011	0	0	0	0	0	0	0	200	903	0	0	0	0	0	0	0	603	903	0
6637	3	-25.9682	50.1584	-588.624	10713.5	-28963.2	-5746.03	150.795	281.799	0	0	0	0	0	0	0	200	903	0	0	0	0	0	0	0	603	903	0
6637	4	-25.8156	49.8533	-588.319	10164.2	-28535.9	-5517.15	151.496	282.723	0	0	0	0	0	0	0	200	903	0	0	0	0	0	0	0	603	903	0
6637	5	-25.8156	49.8533	-589.235	9981.08	-28780	-5700.26	151.157	283.061	0	0	0	0	0	0	0	200	903	0	0	0	0	0	0	0	603	903	0
6637	6	-27.494	49.2429	-587.709	9340.21	-28841.1	-5517.15	150.926	284.107	0	0	0	0	0	0	0	200	903	0	0	0	0	0	0	0	603	903	0
6637	7	-27.7992	48.9377	-586.793	9248.65	-28719	-5883.36	151.058	284.239	0	0	0	0	0	0	0	200	903	0	0	0	0	0	0	0	603	903	0
6637	8	-27.7992	49.2429	-585.573	9431.76	-29024.2	-5334.04	150.435	283.893	0	0	0	0	0	0	0	200	903	0	0	0	0	0	0	0	603	903	0
6637	9	-26.4259	48.6325	-584.352	8607.79	-28658	-5700.26	150.958	285.27	0	0	0	0	0	0	0	200	903	0	0	0	0	0	0	0	603	903	0
6638	0	-26.1208	48.48	-584.047	8150.02	-28780	-5517.15	150.723	286.046	0	0	0	0	0	0	0	200	903	0	0	0	0	0	0	0	603	903	0
6638	1	-26.2733	47.5644	-578.554	8058.47	-28719	-5700.26	150.361	286.071	0	0	0	0	0	0	0	200	903	0	0	0	0	0	0	0	603	903	0
6638	2	-27.494	47.717	-581.91	8516.23	-28780	-5517.15	150.542	285.365	0	0	0	0	0	0	0	200	903	0	0	0	0	0	0	0	603	903	0
6638	3	-27.6466	46.8015	-579.774	8241.57	-28780	-5425.6	150.36	285.785	0	0	0	0	0	0	0	200	903	0	0	0	0	0	0	0	603	903	0
6638	4	-27.0363	45.123	-577.943	7966.92	-28535.9	-5517.15	150.625	286.215	0	0	0	0	0	0	0	200	903	0	0	0	0	0	0	0	603	903	0
6638	5	-26.1208	44.3601	-580.385	8058.47	-28474.9	-5654.48	150.938	286.115	0	0	0	0	0	0	0	200	903	0	0	0	0	0	0	0	603	903	0
6638	6	-26.8837	43.9023	-577.943	7692.26	-28780	-5471.37	150.203	286.69	0	0	0	0	0	0	0	200	903	0	0	0	0	0	0	0	603	903	0
6638	7	-28.1044	43.292	-577.943	7326.05	-28596.9	-5288.27	150.519	287.324	0	0	0	0	0	0	0	200	903	0	0	0	0	0	0	0	603	903	0
6638	8	-28.7147	42.8342	-573.976	7051.39	-28902.1	-5242.49	149.646	287.715	0	0	0	0	0	0	0	200	903	0	0	0	0	0	0	0	603	903	0
6638	9	-28.1044	42.9868	-571.84	6776.73	-28841.1	-5379.82	149.564	288.149	0	0	0	0	0	0	0	200	903	0	0	0	0	0	0	0	603	903	0
6639	0	-25.0526	42.9868	-573.366	6593.63	-28719	-5013.61	149.912	288.5	0	0	0	0	0	0	0	200	903	0	0	0	0	0	0	0	603	903	0
6639	1	-27.3415	42.8342	-573.06	6593.63	-28474.9	-5105.16	150.311	288.494	0	0	0	0	0	0	0	200	903	0	0	0	0	0	0	0	603	903	0
6639	2	-28.8673	42.529	-570.619	6227.41	-28535.9	-5242.49	149.991	289.087	0	0	0	0	0	0	0	200	903	0	0	0	0	0	0	0	603	903	0
6639	3	-29.1725	41.6135	-568.483	6502.07	-28841.1	-5196.72	149.267	288.562	0	0	0	0	0	0	0	200	903	0	0	0	0	0	0	0	603	903	0
6639	4	-29.0199	41.6135	-566.346	6410.52	-28841.1	-5059.39	149.075	288.681	0	0	0	0	0	0	0	200	903	0	0	0	0	0	0	0	603	903	0
6639	5	-26.1208	39.935	-568.483	6502.07	-28535.9	-4922.06	149.803	288.562	0	0	0	0	0	0	0	200	903	0	0	0	0	0	0	0	603	903	0
6639	6	-28.4096	38.7143	-565.431	5861.2	-28474.9	-4830.5	149.64	289.634	0	0	0	0	0	0	0	200	903	0	0	0	0	0	0	0	603	903	0
6639	7	-28.8673	38.8669	-564.821	5403.44	-28474.9	-4967.83	149.586	290.433	0	0	0	0	0	0	0	200	903	0	0	0	0	0	0	0	603	903	0
6639	8	-28.1044	37.7988	-561.464	5586.54	-28291.8	-4693.18	149.611	290.05	0	0	0	0	0	0	0	200	903	0	0	0	0	0	0	0	603	903	0
6639	9	-27.494	38.2566	-560.853	4671.02	-28230.7	-4326.96	149.665	291.672	0	0	0	0	0	0	0	200	903	0	0	0	0	0	0	0	603	903	0
6640	0	-27.1889	37.9514	-557.802	4671.02	-28658	-4464.29	148.623	291.626	0	0	0	0	0	0	0	200	903	0	0	0	0	0	0	0	603	903	0
6640	1	-27.1889	37.1885	-557.496	4396.36	-28596.9	-4967.83	148.705	292.114	0	0	0	0	0	0	0	200	903	0	0	0	0	0	0	0	603	903	0
6640	2	-28.4096	38.2566	-556.581	5128.78	-28352.8	-4418.52	149.059	290.785	0	0	0	0	0	0	0	200	903	0	0	0	0	0	0	0	603	903	0
6640	3	-27.6466	37.4936	-552.919	4030.15	-28291.8	-4601.62	148.832	292.711	0	0	0	0	0	0	0	200	903	0	0	0	0	0	0	0	603	903	0
6640	4	-28.5622	36.5781	-547.731	3755.49	-28596.9	-4555.85	147.79	293.144	0	0	0	0	0	0	0	200	903	0	0	0	0	0	0	0	603	903	0
6640	5	-27.0363	36.5781	-549.257	3297.73	-28352.8	-4647.4	148.38	293.996	0	0	0	0	0	0	0	200	903	0	0	0	0	0	0	0	603	903	0
6640	6	-26.2733	36.5781	-549.562	3663.94	-28047.6	-4372.74	148.964	293.333	0	0	0	0	0	0	0	200	903	0	0	0	0	0	0	0	603	903	0
6640	7	-27.494	35.3574	-548.646	3663.94	-27986.6	-4372.74	148.99	293.322	0	0	0	0	0	0	0	200	903	0	0	0	0	0	0	0	603	903	0
6640	8	-24.7475	34.7471	-544.679	3755.49	-27925.6	-4510.07	148.73	293.105	0	0	0	0	0	0	0	200	903	0	0	0	0	0	0	0	603	903	0
6640	9	-27.494	34.7471	-543.763	3114.62	-27742.4	-4418.52	148.981	294.272	0	0	0	0	0	0	0	200	903	0	0	0	0	0	0	0	603	903	0
6641	0	-26.1208	32.7634	-541.932	3297.73	-27925.6	-4189.64	148.47	293.915	0	0	0	0	0	0	0	200	903	0	0	0	0	0	0	0	603	903	0
6641	1	-25.9682	32.916	-541.932	2565.3	-27925.6	-4143.86	148.47	295.266	0	0	0	0	0	0	0	200	903	0	0	0	0	0	0	0	603	903	0
6641	2	-24.1371	32.3056	-539.491	1924.44	-27864.5	-4189.64	148.35	296.433	0	0	0	0	0	0	0	200	903	0	0	0	0	0	0	0	603	903	0
6641	3	-26.8837	32.7634	-539.186	2473.75	-27437.3	-4189.64	149.114	295.412	0	0	0	0	0	0	0	200	903	0	0	0	0	0	0	0	603	903	0
6641	4	-26.1208	32.0005	-535.829	1924.44	-27620.4	-4006.53	148.453	296.409	0	0	0	0	0	0	0	200	903	0	0	0	0	0	0	0	603	903	0
6641	5	-25.3578	30.6272	-533.998	1741.33	-27925.6	-4052.31	147.705	296.739	0	0	0	0	0	0	0	200	903	0	0	0	0	0	0	0	603	903	0
6641	6	-23.8319	30.6272	-532.777	2015.99	-27742.4	-4006.53	147.929	296.216	0	0	0	0	0	0	0	200	903	0	0	0	0	0	0	0	603	903	0
6641	7	-25.663	30.7798	-534.303	1741.33	-27315.2	-4006.53	148.877	296.741	0	0	0	0	0	0	0	200	903	0	0	0	0	0	0	0	603	903	0
6641	8	-26.5785	29.8642	-531.556	2382.2	-27559.3	-3914.98	148.154	295.518	0	0	0	0	0	0	0	200	903	0	0	0	0	0	0	0	603	903	0
6641	9	-26.2733	29.5591	-528.505	1192.01	-27437.3	-3777.65	148.085	297.745	0	0	0	0	0	0	0	200	903	0	0	0	0	0	0	0	603	903	0
6642	0	-25.3578	26.2021	-527.894	1192.01	-27132.1	-3640.32	148.603	297.742	0	0	0	0	0	0	0	200	903	0	0	0	0	0	0	0	603	903	0
6642	1	-23.2216	28.0332	-527.589	276.486	-27254.2	-3777.65	148.342	299.476	0	0	0	0	0	0	0	200	903	0	0	0	0	0	0	0	603	903	0
6642	2	-24.4423	27.728	-526.979	368.039	-27437.3	-3548.77	147.935	299.302	0	0	0	0	0	0	0	200	903	0	0	0	0	0	0	0	603	903	0
6642	3	-25.3578	28.3384	-526.368	1008.91	-27193.1	-3640.32	148.338	298.083	0	0	0	0	0	0	0	200	903	0	0	0	0	0	0	0	603	903	0
6642	4	-25.8156	27.2702	-521.486	184.934	-26582.8	-3548.77	149.025	299.645	0	0	0	0	0	0	0	200	903	0	0	0	0	0	0	0	603	903	0
6642	5	-25.3578	27.2702	-520.57	1.82809	-27071.1	-3686.1	147.997	299.996	0	0	0	0	0	0	0	200	903	0	0	0	0	0	0	0	603	903	0
6642	6	-23.069	27.4228	-523.927	276.486	-27010	-3457.21	148.447	299.472	0	0	0	0	0	0	0	200	903	0	0	0	0	0	0	0	603	903	0
6642	7	-23.8319	26.3547	-521.18	-89.7247	-26643.8	-2907.9	148.878	300.172	0	0	0	0	0	0	0	200	903	0	0	0	0	0	0	0	603	903	0
6642	8	-26.1208	24.9814	-520.265	-89.7247	-27010	-3457.21	148.084	300.172	0	0	0	0	0	0	0	200	903	0	0	0	0	0	0	0	603	903	0
6642	9	-25.0526	25.134	-516.603	459.592	-26643.8	-2953.67	148.425	299.11	0	0	0	0	0	0	0	200	903	0	0	0	0	0	0	0	603	903	0
6643	0	-23.2216	25.2866	-515.687	-364.383	-26704.9	-2724.79	148.215	300.707	0	0	0	0	0	0	0	200	903	0	0	0	0	0	0	0	603	903	0
6643	1	-23.8319	24.8288	-515.687	-455.936	-26521.7	-2862.12	148.57	300.884	0	0	0	0	0	0	0	200	903	0	0	0	0	0	0	0	603	903	0
6643	2	-22.7638	24.2185	-511.72	-1646.12	-26704.9	-3319.89	147.814	303.217	0	0	0	0	0	0	0	200	903	0	0	0	0	0	0	0	603	903	0
6643	3	-25.2052	23.6081	-513.246	-1371.46	-26765.9	-3274.11	147.85	302.672	0	0	0	0	0	0	0	200	903	0	0	0	0	0	0	0	603	903	0
6643	4	-24.7475	24.3711	-510.805	-1005.25	-26399.7	-3045.23	148.317	301.968	0	0	0	0	0	0	0	200	903	0	0	0	0	0	0	0	603	903	0
6643	5	-23.2216	23.6081	-510.805	-1371.46	-26338.6	-3136.78	148.437	302.685	0	0	0	0	0	0	0	200	903	0	0	0	0	0	0	0	603	903	0
6643	6	-23.9845	22.8452	-510.194	-1737.67	-26888	-3136.78	147.299	303.406	0	0	0	0	0	0	0	200	903	0	0	0	0	0	0	0	603	903	0
6643	7	-24.5949	23.303	-509.279	-1646.12	-26521.7	-2770.57	147.923	303.232	0	0	0	0	0	0	0	200	903	0	0	0	0	0	0	0	603	903	0
6643	8	-23.9845	22.6926	-507.142	-1646.12	-25972.4	-2862.12	148.787	303.246	0	0	0	0	0	0	0	200	903	0	0	0	0	0	0	0	603	903	0
6643	9	-23.2216	21.7771	-504.396	-2012.33	-26155.5	-2679.02	148.145	303.99	0	0	0	0	0	0	0	200	903	0	0	0	0	0	0	0	603	903	0
6644	0	-21.3905	20.8616	-504.701	-1646.12	-26155.5	-2587.46	148.176	303.262	0	0	0	0	0	0	0	200	903	0	0	0	0	0	0	0	603	903	0
6644	1	-23.2216	20.5564	-503.48	-2103.89	-26033.5	-2999.45	148.293	304.179	0	0	0	0	0	0	0	200	903	0	0	0	0	0	0	0	603	903	0
6644	2	-23.9845	18.8779	-502.565	-2195.44	-25850.4	-2770.57	148.563	304.368	0	0	0	0	0	0	0	200	903	0	0	0	0	0	0	0	603	903	0
6644	3	-23.5268	19.7934	-500.734	-2836.31	-25850.4	-2495.91	148.375	305.664	0	0	0	0	0	0	0	200	903	0	0	0	0	0	0	0	603	903	0
6644	4	-22.3061	19.1831	-499.513	-3385.62	-25545.2	-2587.46	148.86	306.778	0	0	0	0	0	0	0	200	903	0	0	0	0	0	0	0	603	903	0
6644	5	-22.1535	19.3357	-499.818	-3294.07	-25545.2	-2633.24	148.891	306.591	0	0	0	0	0	0	0	200	903	0	0	0	0	0	0	0	603	903	0
6644	6	-22.6112	20.0986	-499.208	-3568.73	-25789.3	-2541.69	148.34	307.149	0	0	0	0	0	0	0	200	903	0	0	0	0	0	0	0	603	903	0
6644	7	-22.1535	19.3357	-495.546	-3202.52	-25667.3	-2450.13	148.204	306.463	0	0	0	0	0	0	0	200	903	0	0	0	0	0	0	0	603	903	0
6644	8	-22.9164	17.5046	-494.935	-3660.28	-25240	-2404.36	149.003	307.395	0	0	0	0	0	0	0	200	903	0	0	0	0	0	0	0	603	903	0
6644	9	-22.1535	18.4201	-494.325	-3477.18	-25423.1	-2587.46	148.57	307.034	0	0	0	0	0	0	0	200	903	0	0	0	0	0	0	0	603	903	0
6645	0	-21.5431	18.115	-494.935	-3477.18	-25362.1	-2404.36	148.757	307.026	0	0	0	0	0	0	0	200	903	0	0	0	0	0	0	0	603	903	0
6645	1	-22.9164	17.1994	-494.935	-3843.39	-25362.1	-2175.48	148.757	307.765	0	0	0	0	0	0	0	200	903	0	0	0	0	0	0	0	603	903	0
6645	2	-22.9164	16.7417	-492.494	-3934.94	-25301	-2129.7	148.627	307.99	0	0	0	0	0	0	0	200	903	0	0	0	0	0	0	0	603	903	0
6645	3	-21.3905	16.4365	-490.663	-4118.05	-25179	-2267.03	148.684	308.393	0	0	0	0	0	0	0	200	903	0	0	0	0	0	0	0	603	903	0
6645	4	-20.7802	16.2839	-489.747	-4301.15	-25056.9	-2175.48	148.837	308.782	0	0	0	0	0	0	0	200	903	0	0	0	0	0	0	0	603	903	0
6645	5	-21.0854	16.1313	-491.884	-4667.36	-24324.5	-2038.15	150.548	309.489	0	0	0	0	0	0	0	200	903	0	0	0	0	0	0	0	603	903	0
6645	6	-22.1535	16.1313	-489.747	-4850.47	-25056.9	-2175.48	148.837	309.904	0	0	0	0	0	0	0	200	903	0	0	0	0	0	0	0	603	903	0
6645	7	-22.1535	16.1313	-489.442	-4758.92	-25056.9	-2267.03	148.805	309.723	0	0	0	0	0	0	0	200	903	0	0	0	0	0	0	0	603	903	0
6645	8	-21.0854	15.8262	-487.611	-4942.02	-24873.8	-2038.15	148.988	310.135	0	0	0	0	0	0	0	200	903	0	0	0	0	0	0	0	603	903	0
6645	9	-21.2379	15.0632	-489.442	-4758.92	-24873.8	-1946.59	149.179	309.723	0	0	0	0	0	0	0	200	903	0	0	0	0	0	0	0	603	903	0
6646	0	-20.7802	14.9106	-487.306	-5033.57	-24873.8	-1855.04	148.957	310.329	0	0	0	0	0	0	0	200	903	0	0	0	0	0	0	0	603	903	0
6646	1	-20.1698	14.758	-485.78	-5308.23	-24507.6	-1992.37	149.55	310.927	0	0	0	0	0	0	0	200	903	0	0	0	0	0	0	0	603	903	0
6646	2	-20.9328	13.6899	-486.39	-5399.79	-24507.6	-1763.49	149.613	311.102	0	0	0	0	0	0	0	200	903	0	0	0	0	0	0	0	603	903	0
6646	3	-20.3224	13.6899	-484.559	-4942.02	-24568.6	-1763.49	149.297	310.199	0	0	0	0	0	0	0	200	903	0	0	0	0	0	0	0	603	903	0
6646	4	-20.3224	12.7744	-484.865	-5582.89	-24507.6	-1763.49	149.455	311.514	0	0	0	0	0	0	0	200	903	0	0	0	0	0	0	0	603	903	0
6646	5	-21.3905	12.3166	-484.559	-6315.31	-24324.5	-1717.71	149.801	313.033	0	0	0	0	0	0	0	200	903	0	0	0	0	0	0	0	603	903	0
6646	6	-20.7802	13.0796	-484.254	-6223.76	-24385.5	-1717.71	149.643	312.852	0	0	0	0	0	0	0	200	903	0	0	0	0	0	0	0	603	903	0
6646	7	-20.3224	12.6218	-483.644	-5949.1	-24263.4	-1580.38	149.832	312.301	0	0	0	0	0	0	0	200	903	0	0	0	0	0	0	0	603	903	0
6646	8	-20.0172	12.0115	-483.339	-6864.63	-24141.4	-1443.05	150.053	314.203	0	0	0	0	0	0	0	200	903	0	0	0	0	0	0	0	603	903	0
6646	9	-19.4069	10.333	-485.17	-6956.18	-24141.4	-1671.94	150.241	314.338	0	0	0	0	0	0	0	200	903	0	0	0	0	0	0	0	603	903	0
6647	0	-19.7121	11.8589	-485.17	-6589.97	-24202.4	-1351.5	150.116	313.583	0	0	0	0	0	0	0	200	903	0	0	0	0	0	0	0	603	903	0
6647	1	-19.4069	12.3166	-482.423	-6681.52	-23653.1	-1397.28	150.97	313.85	0	0	0	0	0	0	0	200	903	0	0	0	0	0	0	0	603	903	0
6647	2	-19.2543	12.0115	-481.813	-7139.29	-23714.1	-1488.83	150.781	314.818	0	0	0	0	0	0	0	200	903	0	0	0	0	0	0	0	603	903	0
6647	3	-18.4914	10.333	-482.728	-6956.18	-24019.3	-1443.05	150.243	314.41	0	0	0	0	0	0	0	200	903	0	0	0	0	0	0	0	603	903	0
6647	4	-18.1862	10.7908	-482.728	-6864.63	-23958.3	-893.737	150.369	314.221	0	0	0	0	0	0	0	200	903	0	0	0	0	0	0	0	603	903	0
6647	5	-19.2543	8.80711	-483.034	-7505.5	-23775.2	-1443.05	150.779	315.538	0	0	0	0	0	0	0	200	903	0	0	0	0	0	0	0	603	903	0
6647	6	-19.5595	9.57005	-481.813	-8054.81	-23897.2	-1122.62	150.401	316.718	0	0	0	0	0	0	0	200	903	0	0	0	0	0	0	0	603	903	0
6647	7	-17.1181	9.87522	-480.897	-8329.47	-23592.1	-1076.84	150.942	317.321	0	0	0	0	0	0	0	200	903	0	0	0	0	0	0	0	603	903	0
6647	8	-15.8974	9.87522	-484.254	-8787.24	-23958.3	-985.29	150.525	318.146	0	0	0	0	0	0	0	200	903	0	0	0	0	0	0	0	603	903	0
6647	9	-16.6603	9.41746	-480.897	-8054.81	-23225.8	-1122.62	151.703	316.75	0	0	0	0	0	0	0	200	903	0	0	0	0	0	0	0	603	903	0
6648	0	-17.4232	9.87522	-483.034	-8878.79	-23592.1	-1031.07	151.159	318.381	0	0	0	0	0	0	0	200	903	0	0	0	0	0	0	0	603	903	0
6648	1	-17.881	8.19676	-482.728	-8970.34	-23775.2	-1168.4	150.748	318.583	0	0	0	0	0	0	0	200	903	0	0	0	0	0	0	0	603	903	0
6648	2	-16.2025	9.87522	-483.339	-9245	-23409	-1122.62	151.568	319.127	0	0	0	0	0	0	0	200	903	0	0	0	0	0	0	0	603	903	0
6648	3	-15.8974	9.26487	-484.559	-8604.13	-23409	-1076.84	151.69	317.757	0	0	0	0	0	0	0	200	903	0	0	0	0	0	0	0	603	903	0
6648	4	-17.4232	8.9597	-485.475	-9153.45	-24019.3	-1076.84	150.524	318.855	0	0	0	0	0	0	0	200	903	0	0	0	0	0	0	0	603	903	0
6648	5	-15.4396	7.89158	-483.034	-9519.66	-23531	-893.737	151.285	319.708	0	0	0	0	0	0	0	200	903	0	0	0	0	0	0	0	603	903	0
6648	6	-15.7448	8.19676	-483.644	-9519.66	-23714.1	-756.408	150.968	319.683	0	0	0	0	0	0	0	200	903	0	0	0	0	0	0	0	603	903	0
6648	7	-14.9818	5.90794	-483.339	-9794.32	-23470	-847.961	151.442	320.264	0	0	0	0	0	0	0	200	903	0	0	0	0	0	0	0	603	903	0
6648	8	-14.8292	7.73899	-486.39	-10618.3	-23347.9	-893.737	151.998	321.831	0	0	0	0	0	0	0	200	903	0	0	0	0	0	0	0	603	903	0
6648	9	-15.4396	7.28123	-487.001	-10893	-23103.8	-481.75	152.559	322.367	0	0	0	0	0	0	0	200	903	0	0	0	0	0	0	0	603	903	0
6649	0	-15.4396	8.19676	-485.475	-10343.6	-23042.7	-939.513	152.536	321.306	0	0	0	0	0	0	0	200	903	0	0	0	0	0	0	0	603	903	0
6649	1	-13.9137	8.04417	-487.001	-11076.1	-23409	-481.75	151.932	322.743	0	0	0	0	0	0	0	200	903	0	0	0	0	0	0	0	603	903	0
6649	2	-11.9301	6.3657	-486.39	-11350.7	-23592.1	-802.184	151.496	323.337	0	0	0	0	0	0	0	200	903	0	0	0	0	0	0	0	603	903	0
6649	3	-13.1508	7.12864	-486.085	-11350.7	-23164.8	-619.079	152.344	323.351	0	0	0	0	0	0	0	200	903	0	0	0	0	0	0	0	603	903	0
6649	4	-14.0663	7.73899	-488.832	-11533.8	-22859.6	-527.526	153.236	323.595	0	0	0	0	0	0	0	200	903	0	0	0	0	0	0	0	603	903	0
6649	5	-14.0663	6.51829	-487.611	-11442.3	-23164.8	-664.855	152.493	323.466	0	0	0	0	0	0	0	200	903	0	0	0	0	0	0	0	603	903	0
6649	6	-12.3878	6.51829	-488.527	-11259.2	-22981.7	-527.526	152.957	323.047	0	0	0	0	0	0	0	200	903	0	0	0	0	0	0	0	603	903	0
6649	7	-12.693	6.21311	-490.053	-11808.5	-23042.7	-527.526	152.979	324.096	0	0	0	0	0	0	0	200	903	0	0	0	0	0	0	0	603	903	0
6649	8	-13.456	6.06053	-491.273	-11900	-22981.7	-619.079	153.22	324.223	0	0	0	0	0	0	0	200	903	0	0	0	0	0	0	0	603	903	0
6649	9	-11.1671	6.21311	-492.799	-12815.6	-23103.8	-573.302	153.117	326.006	0	0	0	0	0	0	0	200	903	0	0	0	0	0	0	0	603	903	0
6650	0	-14.0663	6.21311	-487.001	-13181.8	-23103.8	-527.526	152.559	327.067	0	0	0	0	0	0	0	200	903	0	0	0	0	0	0	0	603	903	0
6650	1	-12.2353	6.51829	-491.578	-13364.9	-22981.7	-390.197	153.249	327.188	0	0	0	0	0	0	0	200	903	0	0	0	0	0	0	0	603	903	0
6650	2	-11.6249	6.3657	-494.935	-13731.1	-23347.9	-298.644	152.826	327.743	0	0	0	0	0	0	0	200	903	0	0	0	0	0	0	0	603	903	0
6650	3	-12.3878	6.51829	-494.02	-13822.6	-22981.7	-527.526	153.48	327.98	0	0	0	0	0	0	0	200	903	0	0	0	0	0	0	0	603	903	0
6650	4	-13.1508	6.06053	-493.715	-14280.4	-22615.5	-161.315	154.193	328.924	0	0	0	0	0	0	0	200	903	0	0	0	0	0	0	0	603	903	0
6650	5	-11.7775	6.21311	-494.325	-13639.5	-23042.7	-344.421	153.385	327.592	0	0	0	0	0	0	0	200	903	0	0	0	0	0	0	0	603	903	0
6650	6	-11.9301	5.45018	-496.156	-13181.8	-23103.8	-161.315	153.434	326.568	0	0	0	0	0	0	0	200	903	0	0	0	0	0	0	0	603	903	0
6650	7	-11.4723	4.99241	-497.072	-13914.2	-22798.6	-161.315	154.134	327.992	0	0	0	0	0	0	0	200	903	0	0	0	0	0	0	0	603	903	0
6650	8	-11.6249	5.145	-496.156	-14555.1	-22981.7	67.5668	153.68	329.336	0	0	0	0	0	0	0	200	903	0	0	0	0	0	0	0	603	903	0
6650	9	-12.0827	4.99241	-493.104	-15470.6	-22981.7	-161.315	153.394	331.374	0	0	0	0	0	0	0	200	903	0	0	0	0	0	0	0	603	903	0
6651	0	-10.7094	6.21311	-497.072	-14646.6	-23103.8	204.896	153.52	329.466	0	0	0	0	0	0	0	200	903	0	0	0	0	0	0	0	603	903	0
6651	1	-10.7094	6.06053	-498.597	-15836.8	-22798.6	-115.539	154.275	331.763	0	0	0	0	0	0	0	200	903	0	0	0	0	0	0	0	603	903	0
6651	2	-11.7775	5.60276	-499.208	-15745.2	-22737.6	67.5668	154.453	331.54	0	0	0	0	0	0	0	200	903	0	0	0	0	0	0	0	603	903	0
6651	3	-11.4723	5.45018	-498.292	-15470.6	-23164.8	-69.7623	153.512	331.047	0	0	0	0	0	0	0	200	903	0	0	0	0	0	0	0	603	903	0
6651	4	-10.5568	4.83982	-498.597	-15562.1	-22432.4	-115.539	155.009	331.212	0	0	0	0	0	0	0	200	903	0	0	0	0	0	0	0	603	903	0
6651	5	-10.2516	4.22947	-499.513	-15745.2	-22676.5	-252.868	154.603	331.521	0	0	0	0	0	0	0	200	903	0	0	0	0	0	0	0	603	903	0
6651	6	-10.5568	4.22947	-501.954	-16477.7	-22859.6	-115.539	154.459	332.827	0	0	0	0	0	0	0	200	903	0	0	0	0	0	0	0	603	903	0
6651	7	-10.5568	4.53465	-503.175	-17118.5	-22798.6	-69.7623	154.691	334.021	0	0	0	0	0	0	0	200	903	0	0	0	0	0	0	0	603	903	0
6651	8	-10.7094	4.22947	-502.87	-17301.6	-22432.4	113.343	155.391	334.406	0	0	0	0	0	0	0	200	903	0	0	0	0	0	0	0	603	903	0
6651	9	-9.79385	4.53465	-502.87	-17576.3	-22493.4	21.7904	155.27	334.952	0	0	0	0	0	0	0	200	903	0	0	0	0	0	0	0	603	903	0
6652	0	-9.03091	3.9243	-503.785	-18034.1	-22737.6	113.343	154.867	335.797	0	0	0	0	0	0	0	200	903	0	0	0	0	0	0	0	603	903	0
6652	1	-9.79385	4.53465	-505.922	-17942.5	-22798.6	21.7904	154.937	335.465	0	0	0	0	0	0	0	200	903	0	0	0	0	0	0	0	603	903	0
6652	2	-8.57314	4.68724	-505.617	-17301.6	-22493.4	-23.9859	155.513	334.219	0	0	0	0	0	0	0	200	903	0	0	0	0	0	0	0	603	903	0
6652	3	-10.7094	3.16136	-503.785	-18034.1	-22554.5	21.7904	155.23	335.797	0	0	0	0	0	0	0	200	903	0	0	0	0	0	0	0	603	903	0
6652	4	-9.79385	2.85618	-507.142	-18034.1	-22676.5	159.12	155.286	335.56	0	0	0	0	0	0	0	200	903	0	0	0	0	0	0	0	603	903	0
6652	5	-8.57314	2.39842	-508.668	-18674.9	-22371.4	250.672	156.02	336.713	0	0	0	0	0	0	0	200	903	0	0	0	0	0	0	0	603	903	0
6652	6	-10.099	2.55101	-511.72	-19407.4	-22493.4	342.225	156.044	337.926	0	0	0	0	0	0	0	200	903	0	0	0	0	0	0	0	603	903	0
6652	7	-9.48867	2.55101	-510.499	-19498.9	-22554.5	113.343	155.819	338.196	0	0	0	0	0	0	0	200	903	0	0	0	0	0	0	0	603	903	0
6652	8	-8.26797	3.16136	-510.194	-19498.9	-22676.5	250.672	155.553	338.219	0	0	0	0	0	0	0	200	903	0	0	0	0	0	0	0	603	903	0
6652	9	-8.42056	3.00877	-513.551	-19956.7	-22371.4	67.5668	156.438	338.86	0	0	0	0	0	0	0	200	903	0	0	0	0	0	0	0	603	903	0
6653	0	-9.1835	2.39842	-513.551	-19498.9	-22371.4	159.12	156.438	337.969	0	0	0	0	0	0	0	200	903	0	0	0	0	0	0	0	603	903	0
6653	1	-8.72573	2.09324	-513.551	-19773.6	-22676.5	250.672	155.844	338.504	0	0	0	0	0	0	0	200	903	0	0	0	0	0	0	0	603	903	0
6653	2	-8.72573	1.02513	-515.382	-19407.4	-22676.5	388.001	156.001	337.656	0	0	0	0	0	0	0	200	903	0	0	0	0	0	0	0	603	903	0
6653	3	-6.5895	1.17771	-519.349	-20414.4	-22310.3	342.225	157.042	339.308	0	0	0	0	0	0	0	200	903	0	0	0	0	0	0	0	603	903	0
6653	4	-7.35244	0.719951	-518.739	-21238.4	-22493.4	708.436	156.638	340.942	0	0	0	0	0	0	0	200	903	0	0	0	0	0	0	0	603	903	0
6653	5	-8.11538	1.02513	-519.349	-21513.1	-22554.5	433.778	156.572	341.423	0	0	0	0	0	0	0	200	903	0	0	0	0	0	0	0	603	903	0
6653	6	-8.11538	1.3303	-518.129	-21513.1	-22188.2	754.213	157.176	341.521	0	0	0	0	0	0	0	200	903	0	0	0	0	0	0	0	603	903	0
6653	7	-6.74209	1.3303	-519.044	-21970.8	-22249.3	433.778	157.134	342.329	0	0	0	0	0	0	0	200	903	0	0	0	0	0	0	0	603	903	0
6653	8	-7.19985	1.17771	-521.791	-21696.2	-22371.4	479.554	157.126	341.58	0	0	0	0	0	0	0	200	903	0	0	0	0	0	0	0	603	903	0
6653	9	-7.65762	0.567363	-524.232	-21696.2	-22615.5	204.896	156.86	341.387	0	0	0	0	0	0	0	200	903	0	0	0	0	0	0	0	603	903	0
6654	0	-7.81021	-0.805928	-522.401	-22062.4	-22371.4	342.225	157.176	342.233	0	0	0	0	0	0	0	200	903	0	0	0	0	0	0	0	603	903	0
6654	1	-5.97915	-0.500753	-523.317	-22153.9	-22676.5	571.107	156.668	342.334	0	0	0	0	0	0	0	200	903	0	0	0	0	0	0	0	603	903	0
6654	2	-5.82656	-0.805928	-526.979	-22520.1	-22676.5	525.331	156.969	342.734	0	0	0	0	0	0	0	200	903	0	0	0	0	0	0	0	603	903	0
6654	3	-6.5895	-0.958516	-526.368	-23344.1	-22371.4	571.107	157.499	344.349	0	0	0	0	0	0	0	200	903	0	0	0	0	0	0	0	603	903	0
6654	4	-7.35244	-0.500753	-523.317	-22977.9	-22188.2	754.213	157.601	343.908	0	0	0	0	0	0	0	200	903	0	0	0	0	0	0	0	603	903	0
6654	5	-6.5895	-0.500753	-527.284	-23893.4	-22676.5	525.331	156.994	345.314	0	0	0	0	0	0	0	200	903	0	0	0	0	0	0	0	603	903	0
6654	6	-5.67397	-0.805928	-527.894	-23161	-22554.5	571.107	157.275	343.874	0	0	0	0	0	0	0	200	903	0	0	0	0	0	0	0	603	903	0
6654	7	-5.97915	-1.26369	-531.556	-23618.8	-22310.3	571.107	158.028	344.433	0	0	0	0	0	0	0	200	903	0	0	0	0	0	0	0	603	903	0
6654	8	-6.74209	-2.33181	-532.167	-23985	-22371.4	571.107	157.962	345.07	0	0	0	0	0	0	0	200	903	0	0	0	0	0	0	0	603	903	0
6654	9	-4.45327	-4.31545	-530.946	-24168.1	-22554.5	662.66	157.52	345.519	0	0	0	0	0	0	0	200	903	0	0	0	0	0	0	0	603	903	0
6655	0	-5.3688	-2.4844	-532.472	-25175.2	-22127.2	845.765	158.444	347.28	0	0	0	0	0	0	0	200	903	0	0	0	0	0	0	0	603	903	0
6655	1	-4.45327	-2.33181	-532.777	-25083.6	-22188.2	754.213	158.354	347.081	0	0	0	0	0	0	0	200	903	0	0	0	0	0	0	0	603	903	0
6655	2	-4.45327	-2.33181	-535.829	-25999.1	-22676.5	754.213	157.68	348.521	0	0	0	0	0	0	0	200	903	0	0	0	0	0	0	0	603	903	0
6655	3	-5.67397	-3.85769	-536.134	-25541.4	-22615.5	616.883	157.817	347.64	0	0	0	0	0	0	0	200	903	0	0	0	0	0	0	0	603	903	0
6655	4	-5.82656	-2.78957	-535.829	-24992.1	-22249.3	708.436	158.477	346.642	0	0	0	0	0	0	0	200	903	0	0	0	0	0	0	0	603	903	0
6655	5	-4.45327	-4.16286	-538.576	-25541.4	-22493.4	525.331	158.235	347.424	0	0	0	0	0	0	0	200	903	0	0	0	0	0	0	0	603	903	0
6655	6	-4.91104	-4.16286	-539.796	-25724.5	-22737.6	983.094	157.878	347.656	0	0	0	0	0	0	0	200	903	0	0	0	0	0	0	0	603	903	0
6655	7	-3.84292	-5.84133	-537.66	-26182.3	-22554.5	891.542	158.051	348.697	0	0	0	0	0	0	0	200	903	0	0	0	0	0	0	0	603	903	0
6655	8	-4.91104	-4.46804	-542.238	-27006.2	-22249.3	983.094	158.968	349.805	0	0	0	0	0	0	0	200	903	0	0	0	0	0	0	0	603	903	0
6655	9	-4.60586	-4.46804	-541.322	-27006.2	-22188.2	1074.65	159.011	349.889	0	0	0	0	0	0	0	200	903	0	0	0	0	0	0	0	603	903	0
6656	0	-4.1481	-4.01027	-541.017	-27830.2	-22554.5	1349.31	158.311	351.441	0	0	0	0	0	0	0	200	903	0	0	0	0	0	0	0	603	903	0
6656	1	-4.30068	-4.9258	-544.679	-27647.1	-22371.4	891.542	158.927	350.759	0	0	0	0	0	0	0	200	903	0	0	0	0	0	0	0	603	903	0
6656	2	-4.30068	-4.9258	-544.679	-27006.2	-22310.3	891.542	159.04	349.582	0	0	0	0	0	0	0	200	903	0	0	0	0	0	0	0	603	903	0
6656	3	-4.75845	-5.99392	-545.289	-27555.5	-22737.6	983.094	158.302	350.534	0	0	0	0	0	0	0	200	903	0	0	0	0	0	0	0	603	903	0
6656	4	-3.69033	-6.29909	-544.984	-27647.1	-22798.6	891.542	158.167	350.73	0	0	0	0	0	0	0	200	903	0	0	0	0	0	0	0	603	903	0
6656	5	-1.5541	-6.90944	-546.205	-28104.9	-22554.5	937.318	158.707	351.455	0	0	0	0	0	0	0	200	903	0	0	0	0	0	0	0	603	903	0
6656	6	-3.23257	-7.06203	-550.172	-28745.7	-22249.3	1120.42	159.559	352.249	0	0	0	0	0	0	0	200	903	0	0	0	0	0	0	0	603	903	0
6656	7	-4.45327	-6.45168	-548.951	-29295	-22432.4	1028.87	159.136	353.365	0	0	0	0	0	0	0	200	903	0	0	0	0	0	0	0	603	903	0
6656	8	-4.30068	-6.60427	-548.646	-29569.7	-22615.5	1028.87	158.779	353.896	0	0	0	0	0	0	0	200	903	0	0	0	0	0	0	0	603	903	0
6656	9	-2.7748	-8.13015	-548.951	-29844.4	-22249.3	937.318	159.469	354.366	0	0	0	0	0	0	0	200	903	0	0	0	0	0	0	0	603	903	0
6657	0	-3.69033	-7.06203	-552.003	-29020.4	-22371.4	937.318	159.472	352.573	0	0	0	0	0	0	0	200	903	0	0	0	0	0	0	0	603	903	0
6657	1	-3.84292	-8.7405	-553.529	-29478.2	-22676.5	1074.65	159.033	353.255	0	0	0	0	0	0	0	200	903	0	0	0	0	0	0	0	603	903	0
6657	2	-3.53774	-8.7405	-551.393	-30027.5	-22676.5	1349.31	158.874	354.457	0	0	0	0	0	0	0	200	903	0	0	0	0	0	0	0	603	903	0
6657	3	-4.1481	-9.04567	-550.172	-30485.2	-22432.4	1257.75	159.227	355.41	0	0	0	0	0	0	0	200	903	0	0	0	0	0	0	0	603	903	0
6657	4	-3.07998	-9.19826	-554.75	-30851.4	-22371.4	1303.53	159.673	355.613	0	0	0	0	0	0	0	200	903	0	0	0	0	0	0	0	603	903	0
6657	5	-3.07998	-9.04567	-555.36	-30759.9	-22859.6	1028.87	158.838	355.387	0	0	0	0	0	0	0	200	903	0	0	0	0	0	0	0	603	903	0
6657	6	-3.99551	-8.7405	-556.276	-31675.4	-22676.5	1349.31	159.235	356.942	0	0	0	0	0	0	0	200	903	0	0	0	0	0	0	0	603	903	0
6657	7	-4.1481	-8.7405	-555.36	-31400.8	-22432.4	1166.2	159.607	356.541	0	0	0	0	0	0	0	200	903	0	0	0	0	0	0	0	603	903	0
6657	8	-2.92739	-9.50344	-556.581	-30851.4	-22371.4	1257.75	159.806	355.43	0	0	0	0	0	0	0	200	903	0	0	0	0	0	0	0	603	903	0
6657	9	-3.38516	-10.7241	-559.327	-31492.3	-22798.6	1074.65	159.239	356.304	0	0	0	0	0	0	0	200	903	0	0	0	0	0	0	0	603	903	0
6658	0	-4.30068	-11.0293	-559.633	-31858.5	-22615.5	1211.98	159.589	356.928	0	0	0	0	0	0	0	200	903	0	0	0	0	0	0	0	603	903	0
6658	1	-3.84292	-12.4026	-559.633	-32041.6	-22615.5	1349.31	159.589	357.255	0	0	0	0	0	0	0	200	903	0	0	0	0	0	0	0	603	903	0
6658	2	-3.38516	-11.9448	-559.938	-32865.6	-22981.7	1349.31	158.957	358.695	0	0	0	0	0	0	0	200	903	0	0	0	0	0	0	0	603	903	0
6658	3	-1.85928	-12.4026	-562.379	-33231.8	-22798.6	1257.75	159.46	359.092	0	0	0	0	0	0	0	200	903	0	0	0	0	0	0	0	603	903	0
6658	4	-3.23257	-11.7923	-560.853	-33414.9	-22615.5	1349.31	159.677	359.579	0	0	0	0	0	0	0	200	903	0	0	0	0	0	0	0	603	903	0
6658	5	-4.45327	-12.5552	-560.853	-33506.5	-22737.6	1257.75	159.459	359.742	0	0	0	0	0	0	0	200	903	0	0	0	0	0	0	0	603	903	0
6658	6	-4.60586	-12.0974	-563.295	-32774.1	-22615.5	1211.98	159.851	358.183	0	0	0	0	0	0	0	200	903	0	0	0	0	0	0	0	603	903	0
6658	7	-3.99551	-13.013	-563.6	-33048.7	-23042.7	1257.75	159.115	358.639	0	0	0	0	0	0	0	200	903	0	0	0	0	0	0	0	603	903	0
6658	8	-3.99551	-13.4707	-566.041	-33414.9	-22676.5	1211.98	159.938	359.033	0	0	0	0	0	0	0	200	903	0	0	0	0	0	0	0	603	903	0
6658	9	-4.91104	-14.3863	-567.262	-34055.8	-22737.6	1440.86	159.917	360.035	0	0	0	0	0	0	0	200	903	0	0	0	0	0	0	0	603	903	0
6659	0	-5.21621	-16.3699	-566.652	-34147.4	-22859.6	1532.41	159.658	360.262	0	0	0	0	0	0	0	200	903	0	0	0	0	0	0	0	603	903	0
6659	1	-3.99551	-15.1492	-566.346	-34879.8	-22737.6	1440.86	159.852	361.587	0	0	0	0	0	0	0	200	903	0	0	0	0	0	0	0	603	903	0
6659	2	-4.45327	-15.4544	-569.093	-35337.5	-22615.5	1349.31	160.26	362.094	0	0	0	0	0	0	0	200	903	0	0	0	0	0	0	0	603	903	0
6659	3	-4.91104	-14.3863	-569.093	-34513.6	-22798.6	1303.53	159.939	360.647	0	0	0	0	0	0	0	200	903	0	0	0	0	0	0	0	603	903	0
6659	4	-5.3688	-14.6914	-567.872	-35246	-22798.6	1623.96	159.853	362.067	0	0	0	0	0	0	0	200	903	0	0	0	0	0	0	0	603	903	0
6659	5	-5.06362	-16.0647	-568.483	-35612.2	-23103.8	1486.63	159.359	362.644	0	0	0	0	0	0	0	200	903	0	0	0	0	0	0	0	603	903	0
6659	6	-5.06362	-15.7595	-571.229	-35246	-22676.5	1486.63	160.302	361.702	0	0	0	0	0	0	0	200	903	0	0	0	0	0	0	0	603	903	0
6659	7	-5.52139	-16.6751	-571.84	-35520.6	-23042.7	1532.41	159.704	362.116	0	0	0	0	0	0	0	200	903	0	0	0	0	0	0	0	603	903	0
6659	8	-5.06362	-17.2854	-570.924	-35062.9	-23225.8	1532.41	159.319	361.414	0	0	0	0	0	0	0	200	903	0	0	0	0	0	0	0	603	903	0
6659	9	-4.75845	-18.2009	-572.145	-36161.5	-22920.7	1532.41	159.939	363.203	0	0	0	0	0	0	0	200	903	0	0	0	0	0	0	0	603	903	0
6660	0	-2.92739	-18.3535	-575.197	-37168.6	-22920.7	1532.41	160.152	364.619	0	0	0	0	0	0	0	200	903	0	0	0	0	0	0	0	603	903	0
6660	1	-4.30068	-18.2009	-574.891	-36802.4	-23103.8	1395.08	159.812	364.016	0	0	0	0	0	0	0	200	903	0	0	0	0	0	0	0	603	903	0
6660	2	-5.97915	-19.4217	-576.112	-37260.2	-23164.8	1440.86	159.791	364.675	0	0	0	0	0	0	0	200	903	0	0	0	0	0	0	0	603	903	0
6660	3	-6.13174	-19.5742	-576.112	-36802.4	-22920.7	1669.74	160.215	363.881	0	0	0	0	0	0	0	200	903	0	0	0	0	0	0	0	603	903	0
6660	4	-4.45327	-19.5742	-577.028	-37626.4	-23103.8	1623.96	159.961	365.207	0	0	0	0	0	0	0	200	903	0	0	0	0	0	0	0	603	903	0
6660	5	-4.75845	-22.626	-579.469	-37534.8	-23286.9	1669.74	159.813	364.775	0	0	0	0	0	0	0	200	903	0	0	0	0	0	0	0	603	903	0
6660	6	-5.67397	-20.3372	-580.079	-37077	-23225.8	1669.74	159.961	363.917	0	0	0	0	0	0	0	200	903	0	0	0	0	0	0	0	603	903	0
6660	7	-5.97915	-21.1001	-578.859	-37626.4	-22798.6	1761.29	160.615	365.001	0	0	0	0	0	0	0	200	903	0	0	0	0	0	0	0	603	903	0
6660	8	-5.3688	-20.9475	-580.079	-37901	-22981.7	1669.74	160.382	365.338	0	0	0	0	0	0	0	200	903	0	0	0	0	0	0	0	603	903	0
6660	9	-4.1481	-23.0838	-581.605	-36802.4	-23409	2264.83	159.751	363.277	0	0	0	0	0	0	0	200	903	0	0	0	0	0	0	0	603	903	0
6661	0	-5.82656	-23.3889	-583.131	-37717.9	-23164.8	1898.62	160.275	364.682	0	0	0	0	0	0	0	200	903	0	0	0	0	0	0	0	603	903	0
6661	1	-5.82656	-24.4571	-582.826	-37809.5	-23286.9	1944.4	160.045	364.873	0	0	0	0	0	0	0	200	903	0	0	0	0	0	0	0	603	903	0
6661	2	-4.75845	-25.6778	-585.267	-38816.5	-23775.2	1852.85	159.377	366.323	0	0	0	0	0	0	0	200	903	0	0	0	0	0	0	0	603	903	0
6661	3	-3.84292	-26.2881	-588.93	-38816.5	-23653.1	1990.17	159.837	365.91	0	0	0	0	0	0	0	200	903	0	0	0	0	0	0	0	603	903	0
6661	4	-3.38516	-26.2881	-588.319	-39091.2	-23225.8	1623.96	160.522	366.446	0	0	0	0	0	0	0	200	903	0	0	0	0	0	0	0	603	903	0
6661	5	-2.46963	-26.8985	-587.404	-38633.4	-23347.9	2035.95	160.252	365.77	0	0	0	0	0	0	0	200	903	0	0	0	0	0	0	0	603	903	0
6661	6	-4.45327	-28.4243	-585.878	-39640.5	-23531	1944.4	159.836	367.66	0	0	0	0	0	0	0	200	903	0	0	0	0	0	0	0	603	903	0
6661	7	-3.07998	-29.7976	-587.098	-39274.3	-23592.1	2081.73	159.816	366.896	0	0	0	0	0	0	0	200	903	0	0	0	0	0	0	0	603	903	0
6661	8	-3.23257	-28.4243	-590.15	-39182.7	-23103.8	2035.95	160.851	366.395	0	0	0	0	0	0	0	200	903	0	0	0	0	0	0	0	603	903	0
6661	9	-4.60586	-30.1028	-593.202	-39182.7	-23653.1	2081.73	160.126	366.053	0	0	0	0	0	0	0	200	903	0	0	0	0	0	0	0	603	903	0
6662	0	-3.84292	-31.0183	-593.812	-38999.6	-23653.1	2035.95	160.167	365.677	0	0	0	0	0	0	0	200	903	0	0	0	0	0	0	0	603	903	0
6662	1	-2.7748	-31.3235	-593.812	-38816.5	-23286.9	2356.39	160.784	365.368	0	0	0	0	0	0	0	200	903	0	0	0	0	0	0	0	603	903	0
6662	2	-2.92739	-32.3916	-596.864	-39457.4	-23592.1	2264.83	160.473	366.108	0	0	0	0	0	0	0	200	903	0	0	0	0	0	0	0	603	903	0
6662	3	-4.1481	-34.2227	-597.169	-39823.6	-23592.1	2310.61	160.494	366.687	0	0	0	0	0	0	0	200	903	0	0	0	0	0	0	0	603	903	0
6662	4	-3.23257	-33.4597	-596.559	-40464.5	-23653.1	2219.06	160.351	367.83	0	0	0	0	0	0	0	200	903	0	0	0	0	0	0	0	603	903	0
6662	5	-2.16445	-33.7649	-597.474	-40556.1	-23531	2356.39	160.616	367.879	0	0	0	0	0	0	0	200	903	0	0	0	0	0	0	0	603	903	0
6662	6	-2.46963	-34.6804	-599.916	-40647.6	-23347.9	2219.06	161.081	367.755	0	0	0	0	0	0	0	200	903	0	0	0	0	0	0	0	603	903	0
6662	7	-3.99551	-34.833	-599.916	-40647.6	-23714.1	2447.94	160.471	367.755	0	0	0	0	0	0	0	200	903	0	0	0	0	0	0	0	603	903	0
6662	8	-3.53774	-36.0537	-599.611	-40647.6	-23714.1	2264.83	160.451	367.79	0	0	0	0	0	0	0	200	903	0	0	0	0	0	0	0	603	903	0
6662	9	-1.40151	-36.3589	-602.357	-40922.3	-23531	2585.27	160.935	367.937	0	0	0	0	0	0	0	200	903	0	0	0	0	0	0	0	603	903	0
6663	0	-0.638574	-37.5796	-603.273	-40281.4	-23409	2631.04	161.197	366.771	0	0	0	0	0	0	0	200	903	0	0	0	0	0	0	0	603	903	0
6663	1	-2.62222	-38.8003	-603.883	-40464.5	-23897.2	2585.27	160.427	367.007	0	0	0	0	0	0	0	200	903	0	0	0	0	0	0	0	603	903	0
6663	2	-3.23257	-39.2581	-604.799	-40464.5	-23592.1	2585.27	160.992	366.906	0	0	0	0	0	0	0	200	903	0	0	0	0	0	0	0	603	903	0
6663	3	-2.01187	-40.1736	-602.052	-40830.7	-23347.9	2447.94	161.219	367.819	0	0	0	0	0	0	0	200	903	0	0	0	0	0	0	0	603	903	0
6663	4	-2.16445	-40.784	-603.883	-40739.2	-23409	2814.15	161.236	367.462	0	0	0	0	0	0	0	200	903	0	0	0	0	0	0	0	603	903	0
6663	5	-2.01187	-40.784	-606.019	-40830.7	-23775.2	2676.82	160.768	367.375	0	0	0	0	0	0	0	200	903	0	0	0	0	0	0	0	603	903	0
6663	6	-2.92739	-42.0047	-607.85	-40647.6	-23775.2	2768.37	160.886	366.871	0	0	0	0	0	0	0	200	903	0	0	0	0	0	0	0	603	903	0
6663	7	-1.70669	-42.4624	-605.714	-41654.7	-23470	3043.03	161.252	368.77	0	0	0	0	0	0	0	200	903	0	0	0	0	0	0	0	603	903	0
6663	8	-2.31704	-42.7676	-605.714	-42112.4	-23164.8	3180.36	161.756	369.525	0	0	0	0	0	0	0	200	903	0	0	0	0	0	0	0	603	903	0
6663	9	-2.31704	-43.5305	-604.188	-41471.6	-23592.1	3043.03	160.952	368.64	0	0	0	0	0	0	0	200	903	0	0	0	0	0	0	0	603	903	0
6664	0	-1.70669	-43.9883	-610.292	-42204	-23592.1	3088.81	161.343	369.154	0	0	0	0	0	0	0	200	903	0	0	0	0	0	0	0	603	903	0
6664	1	-2.16445	-46.5823	-608.461	-42112.4	-23592.1	2997.26	161.227	369.211	0	0	0	0	0	0	0	200	903	0	0	0	0	0	0	0	603	903	0
6664	2	-2.7748	-45.6668	-608.156	-41746.2	-23592.1	3180.36	161.207	368.644	0	0	0	0	0	0	0	200	903	0	0	0	0	0	0	0	603	903	0
6664	3	-1.85928	-46.5823	-608.156	-41746.2	-23653.1	3409.24	161.107	368.644	0	0	0	0	0	0	0	200	903	0	0	0	0	0	0	0	603	903	0
6664	4	-1.40151	-48.1082	-610.292	-41746.2	-23531	2997.26	161.443	368.404	0	0	0	0	0	0	0	200	903	0	0	0	0	0	0	0	603	903	0
6664	5	-0.0282228	-49.0237	-609.376	-41837.8	-23286.9	2951.48	161.786	368.657	0	0	0	0	0	0	0	200	903	0	0	0	0	0	0	0	603	903	0
6664	6	-3.38516	-49.9392	-610.292	-42112.4	-23897.2	3409.24	160.843	369.004	0	0	0	0	0	0	0	200	903	0	0	0	0	0	0	0	603	903	0
6664	7	-2.7748	-50.0918	-608.766	-42936.4	-23592.1	3500.8	161.246	370.53	0	0	0	0	0	0	0	200	903	0	0	0	0	0	0	0	603	903	0
6664	8	-1.70669	-50.7022	-609.681	-43394.2	-23409	3088.81	161.605	371.175	0	0	0	0	0	0	0	200	903	0	0	0	0	0	0	0	603	903	0
6664	9	-2.01187	-51.7703	-611.207	-43028	-23286.9	3271.91	161.9	370.398	0	0	0	0	0	0	0	200	903	0	0	0	0	0	0	0	603	903	0
6665	0	-2.62222	-51.6177	-610.597	-42570.2	-23531	3455.02	161.462	369.719	0	0	0	0	0	0	0	200	903	0	0	0	0	0	0	0	603	903	0
6665	1	-3.38516	-51.9229	-608.461	-42936.4	-23592.1	3455.02	161.227	370.566	0	0	0	0	0	0	0	200	903	0	0	0	0	0	0	0	603	903	0
6665	2	-2.62222	-52.8384	-609.681	-43302.6	-23409	3455.02	161.605	371.025	0	0	0	0	0	0	0	200	903	0	0	0	0	0	0	0	603	903	0
6665	3	-2.16445	-54.822	-609.987	-43302.6	-23470	3134.58	161.524	370.99	0	0	0	0	0	0	0	200	903	0	0	0	0	0	0	0	603	903	0
6665	4	-2.46963	-54.2117	-612.123	-42387.1	-23775.2	3592.35	161.159	369.246	0	0	0	0	0	0	0	200	903	0	0	0	0	0	0	0	603	903	0
6665	5	-0.638574	-55.1272	-611.207	-42936.4	-23653.1	3592.35	161.301	370.249	0	0	0	0	0	0	0	200	903	0	0	0	0	0	0	0	603	903	0
6665	6	-3.23257	-56.1953	-612.428	-43211.1	-23714.1	3592.35	161.279	370.557	0	0	0	0	0	0	0	200	903	0	0	0	0	0	0	0	603	903	0
6665	7	-2.7748	-56.5005	-609.376	-42753.3	-23897.2	3455.02	160.784	370.159	0	0	0	0	0	0	0	200	903	0	0	0	0	0	0	0	603	903	0
6665	8	-2.46963	-57.416	-609.987	-43302.6	-23653.1	3683.9	161.224	370.99	0	0	0	0	0	0	0	200	903	0	0	0	0	0	0	0	603	903	0
6665	9	-0.791162	-58.179	-610.902	-43119.5	-23286.9	3683.9	161.881	370.583	0	0	0	0	0	0	0	200	903	0	0	0	0	0	0	0	603	903	0
6666	0	-2.31704	-58.7893	-611.818	-43394.2	-23470	3455.02	161.639	370.927	0	0	0	0	0	0	0	200	903	0	0	0	0	0	0	0	603	903	0
6666	1	-2.92739	-60.773	-612.733	-43668.8	-23714.1	3546.57	161.298	371.269	0	0	0	0	0	0	0	200	903	0	0	0	0	0	0	0	603	903	0
6666	2	-3.69033	-60.3152	-610.597	-44401.3	-23592.1	3638.12	161.362	372.718	0	0	0	0	0	0	0	200	903	0	0	0	0	0	0	0	603	903	0
6666	3	-2.62222	-61.2307	-609.071	-44401.3	-23225.8	3683.9	161.867	372.9	0	0	0	0	0	0	0	200	903	0	0	0	0	0	0	0	603	903	0
6666	4	-2.7748	-61.3833	-610.292	-44309.7	-23164.8	3500.8	162.043	372.604	0	0	0	0	0	0	0	200	903	0	0	0	0	0	0	0	603	903	0
6666	5	-2.01187	-61.3833	-612.123	-43760.4	-23286.9	3638.12	161.957	371.49	0	0	0	0	0	0	0	200	903	0	0	0	0	0	0	0	603	903	0
6666	6	-3.23257	-61.8411	-612.428	-44584.4	-23164.8	3729.68	162.175	372.799	0	0	0	0	0	0	0	200	903	0	0	0	0	0	0	0	603	903	0
6666	7	-2.62222	-64.4351	-609.376	-44309.7	-23225.8	3683.9	161.886	372.713	0	0	0	0	0	0	0	200	903	0	0	0	0	0	0	0	603	903	0
6666	8	-3.53774	-63.5196	-609.071	-44035.1	-22981.7	3409.24	162.268	372.299	0	0	0	0	0	0	0	200	903	0	0	0	0	0	0	0	603	903	0
6666	9	-2.31704	-63.6721	-608.766	-43943.5	-23470	3729.68	161.447	372.185	0	0	0	0	0	0	0	200	903	0	0	0	0	0	0	0	603	903	0
6667	0	-2.46963	-65.3506	-610.597	-43943.5	-23042.7	3775.45	162.262	371.968	0	0	0	0	0	0	0	200	903	0	0	0	0	0	0	0	603	903	0
6667	1	-3.23257	-66.4187	-609.987	-43851.9	-22920.7	3775.45	162.424	371.89	0	0	0	0	0	0	0	200	903	0	0	0	0	0	0	0	603	903	0
6667	2	-2.31704	-66.4187	-608.156	-44492.8	-23164.8	3821.23	161.91	373.16	0	0	0	0	0	0	0	200	903	0	0	0	0	0	0	0	603	903	0
6667	3	-3.23257	-68.555	-607.85	-44218.2	-23164.8	3592.35	161.891	372.745	0	0	0	0	0	0	0	200	903	0	0	0	0	0	0	0	603	903	0
6667	4	-2.16445	-67.3343	-606.935	-44767.5	-22859.6	3958.56	162.336	373.76	0	0	0	0	0	0	0	200	903	0	0	0	0	0	0	0	603	903	0
6667	5	-2.92739	-68.0972	-607.545	-45225.2	-22798.6	3729.68	162.474	374.439	0	0	0	0	0	0	0	200	903	0	0	0	0	0	0	0	603	903	0
6667	6	-3.23257	-67.792	-607.545	-44950.6	-23225.8	3683.9	161.771	373.987	0	0	0	0	0	0	0	200	903	0	0	0	0	0	0	0	603	903	0
6667	7	-3.23257	-69.0127	-605.714	-44950.6	-22981.7	3867.01	162.059	374.211	0	0	0	0	0	0	0	200	903	0	0	0	0	0	0	0	603	903	0
6667	8	-3.84292	-69.4705	-605.104	-45225.2	-22676.5	3821.23	162.525	374.74	0	0	0	0	0	0	0	200	903	0	0	0	0	0	0	0	603	903	0
6667	9	-2.31704	-70.9964	-604.188	-45316.8	-22798.6	3867.01	162.266	375.004	0	0	0	0	0	0	0	200	903	0	0	0	0	0	0	0	603	903	0
6668	0	-2.16445	-70.5386	-604.799	-44767.5	-22859.6	3867.01	162.203	374.02	0	0	0	0	0	0	0	200	903	0	0	0	0	0	0	0	603	903	0
6668	1	-2.62222	-71.6067	-604.799	-44401.3	-22310.3	4050.11	163.111	373.415	0	0	0	0	0	0	0	200	903	0	0	0	0	0	0	0	603	903	0
6668	2	-3.07998	-72.5222	-602.357	-45225.2	-22371.4	3958.56	162.86	375.08	0	0	0	0	0	0	0	200	903	0	0	0	0	0	0	0	603	903	0
6668	3	-3.53774	-72.8274	-601.137	-44675.9	-22676.5	3775.45	162.277	374.319	0	0	0	0	0	0	0	200	903	0	0	0	0	0	0	0	603	903	0
6668	4	-2.31704	-73.5904	-600.831	-44950.6	-22676.5	3821.23	162.258	374.814	0	0	0	0	0	0	0	200	903	0	0	0	0	0	0	0	603	903	0
6668	5	-1.5541	-75.4214	-601.442	-44767.5	-22554.5	3912.78	162.499	374.434	0	0	0	0	0	0	0	200	903	0	0	0	0	0	0	0	603	903	0
6668	6	-3.23257	-74.8111	-600.526	-45316.8	-22615.5	4050.11	162.341	375.462	0	0	0	0	0	0	0	200	903	0	0	0	0	0	0	0	603	903	0
6668	7	-1.5541	-75.574	-596.864	-45957.6	-22737.6	4050.11	161.905	376.999	0	0	0	0	0	0	0	200	903	0	0	0	0	0	0	0	603	903	0
6668	8	-2.7748	-76.0318	-597.169	-45866.1	-22127.2	4004.33	162.947	376.806	0	0	0	0	0	0	0	200	903	0	0	0	0	0	0	0	603	903	0
6668	9	-0.94375	-75.574	-595.033	-45316.8	-22005.1	3775.45	163.019	376.158	0	0	0	0	0	0	0	200	903	0	0	0	0	0	0	0	603	903	0
6669	0	-1.85928	-76.1843	-595.949	-45957.6	-22127.2	4050.11	162.871	377.117	0	0	0	0	0	0	0	200	903	0	0	0	0	0	0	0	603	903	0
6669	1	-3.07998	-77.2525	-595.643	-46049.2	-22432.4	3821.23	162.339	377.31	0	0	0	0	0	0	0	200	903	0	0	0	0	0	0	0	603	903	0
6669	2	-2.92739	-77.2525	-592.592	-46049.2	-22127.2	3775.45	162.66	377.708	0	0	0	0	0	0	0	200	903	0	0	0	0	0	0	0	603	903	0
6669	3	-2.46963	-78.168	-592.897	-44767.5	-22310.3	4141.66	162.371	375.506	0	0	0	0	0	0	0	200	903	0	0	0	0	0	0	0	603	903	0
6669	4	-1.85928	-78.6258	-591.676	-44859	-22127.2	4050.11	162.602	375.817	0	0	0	0	0	0	0	200	903	0	0	0	0	0	0	0	603	903	0
6669	5	-1.24893	-79.999	-591.981	-44218.2	-21944.1	4141.66	162.931	374.695	0	0	0	0	0	0	0	200	903	0	0	0	0	0	0	0	603	903	0
6669	6	-2.01187	-80.1516	-591.981	-45133.7	-21577.9	3958.56	163.55	376.242	0	0	0	0	0	0	0	200	903	0	0	0	0	0	0	0	603	903	0
6669	7	-1.5541	-80.4568	-589.845	-45225.2	-21944.1	4141.66	162.797	376.673	0	0	0	0	0	0	0	200	903	0	0	0	0	0	0	0	603	903	0
6669	8	-2.46963	-81.3723	-587.098	-45683	-21638.9	4187.44	163.143	377.812	0	0	0	0	0	0	0	200	903	0	0	0	0	0	0	0	603	903	0
6669	9	-1.40151	-82.2879	-586.488	-46049.2	-21700	4141.66	163	378.517	0	0	0	0	0	0	0	200	903	0	0	0	0	0	0	0	603	903	0
6670	0	-1.5541	-82.7456	-587.098	-45957.6	-22188.2	3775.45	162.207	378.279	0	0	0	0	0	0	0	200	903	0	0	0	0	0	0	0	603	903	0
6670	1	-2.46963	-81.9827	-583.742	-45957.6	-22188.2	4004.33	161.99	378.729	0	0	0	0	0	0	0	200	903	0	0	0	0	0	0	0	603	903	0
6670	2	-2.62222	-82.593	-584.657	-45774.5	-21333.8	4095.89	163.511	378.293	0	0	0	0	0	0	0	200	903	0	0	0	0	0	0	0	603	903	0
6670	3	-2.62222	-83.9663	-581.605	-46049.2	-21638.9	4050.11	162.794	379.176	0	0	0	0	0	0	0	200	903	0	0	0	0	0	0	0	603	903	0
6670	4	-1.24893	-84.5767	-580.995	-45866.1	-21577.9	4050.11	162.86	378.944	0	0	0	0	0	0	0	200	903	0	0	0	0	0	0	0	603	903	0
6670	5	-0.333399	-84.2715	-579.774	-44950.6	-21028.6	4141.66	163.73	377.531	0	0	0	0	0	0	0	200	903	0	0	0	0	0	0	0	603	903	0
6670	6	-1.24893	-84.4241	-577.943	-45042.1	-20540.3	4095.89	164.46	377.935	0	0	0	0	0	0	0	200	903	0	0	0	0	0	0	0	603	903	0
6670	7	-2.62222	-86.2551	-577.638	-44950.6	-21577.9	4233.22	162.645	377.818	0	0	0	0	0	0	0	200	903	0	0	0	0	0	0	0	603	903	0
6670	8	-2.16445	-86.4077	-575.197	-45225.2	-21089.6	4278.99	163.335	378.626	0	0	0	0	0	0	0	200	903	0	0	0	0	0	0	0	603	903	0
6670	9	-1.24893	-87.0181	-574.891	-44950.6	-21089.6	4050.11	163.315	378.19	0	0	0	0	0	0	0	200	903	0	0	0	0	0	0	0	603	903	0
6671	0	-0.791162	-88.544	-573.976	-45133.7	-21333.8	4416.32	162.832	378.633	0	0	0	0	0	0	0	200	903	0	0	0	0	0	0	0	603	903	0
6671	1	-1.5541	-88.3914	-571.229	-45591.4	-21333.8	4370.55	162.653	379.813	0	0	0	0	0	0	0	200	903	0	0	0	0	0	0	0	603	903	0
6671	2	-2.46963	-88.6966	-571.84	-45683	-20906.5	4599.43	163.44	379.888	0	0	0	0	0	0	0	200	903	0	0	0	0	0	0	0	603	903	0
6671	3	-1.5541	-88.544	-567.872	-45683	-20967.5	4233.22	163.077	380.446	0	0	0	0	0	0	0	200	903	0	0	0	0	0	0	0	603	903	0
6671	4	-1.40151	-89.6121	-566.957	-45133.7	-20967.5	4187.44	163.017	379.607	0	0	0	0	0	0	0	200	903	0	0	0	0	0	0	0	603	903	0
6671	5	-0.180811	-89.4595	-566.652	-45408.3	-20784.4	4187.44	163.321	380.134	0	0	0	0	0	0	0	200	903	0	0	0	0	0	0	0	603	903	0
6671	6	-1.09634	-89.7647	-566.346	-45408.3	-21211.7	3867.01	162.546	380.178	0	0	0	0	0	0	0	200	903	0	0	0	0	0	0	0	603	903	0
6671	7	-2.01187	-90.2224	-565.126	-45499.9	-20906.5	3958.56	163.006	380.513	0	-0.0262447	13.5138	-31.8548	511.413	1078.37	2.56305	233.853	886.946	0	0	0	0	0	0	0	603	903	0
6671	8	-2.46963	-90.9854	-561.464	-44950.6	-20601.3	3912.78	163.308	380.06	0	5.92468	18.8544	-31.8548	1426.94	956.302	414.55	230.021	858.205	0	0	0	0	0	0	0	603	903	0
6671	9	-1.24893	-91.4431	-559.022	-44950.6	-20540.3	4004.33	163.257	380.409	0	6.84021	6.03699	-18.7322	53.6492	1017.34	-88.9897	254.309	900.136	0	0	0	0	0	0	0	603	903	0
6672	0	-0.94375	-92.3587	-557.191	-45316.8	-20784.4	3912.78	162.698	381.331	0	0	0	0	0	0	0	200	903	0	0	0	0	0	0	0	603	903	0
6672	1	-1.24893	-93.732	-557.496	-44675.9	-20174.1	3912.78	163.813	380.137	0	2.41516	10.1569	-26.972	694.518	834.231	-88.9897	230.93	877.25	0	0	0	0	0	0	0	603	903	0
6672	2	-1.85928	-93.8845	-555.36	-44584.4	-20113.1	3912.78	163.784	380.28	0	3.63586	5.27405	-41.9256	1426.94	1139.41	-684.083	227.177	868.965	0	0	0	0	0	0	0	603	903	0
6672	3	-1.40151	-92.8164	-552.308	-44675.9	-20662.4	3867.01	162.589	380.889	0	4.85657	-10.7477	-38.8738	1243.83	1322.51	-500.977	234.021	871.003	0	0	0	0	0	0	0	603	903	0
6672	4	-1.70669	-94.9527	-552.919	-45225.2	-20418.2	3729.68	163.072	381.794	0	1.34705	-7.08557	-42.2308	1701.6	1688.72	-180.542	239.988	862.707	0	0	0	0	0	0	0	603	903	0
6672	5	-0.180811	-96.0208	-555.971	-44767.5	-20540.3	4004.33	163.055	380.521	0	3.63586	-4.33899	-52.6067	1976.26	1688.72	-958.741	232.101	865.433	0	0	0	0	0	0	0	603	903	0
6672	6	-0.485986	-95.2578	-548.646	-44584.4	-20357.2	4004.33	162.896	381.263	0	10.0446	-14.5624	-66.6448	2525.57	2299.08	-684.083	234.497	865.104	0	0	0	0	0	0	0	603	903	0
6672	7	-0.791162	-95.4104	-547.12	-44859	-20357.2	4050.11	162.792	381.991	0	6.38245	-15.1727	-65.4241	3807.31	2604.25	-88.9897	239.806	844.806	0	0	0	0	0	0	0	603	903	0
6672	8	-2.16445	-97.5467	-545.595	-45133.7	-19991	4004.33	163.359	382.724	0	0.126343	-5.4071	-70.6121	3441.1	2421.15	-775.635	234.288	854.268	0	0	0	0	0	0	0	603	903	0
6672	9	-1.09634	-97.3941	-542.848	-44035.1	-19929.9	3867.01	163.286	381.119	0	5.31433	-7.54333	-82.514	3166.44	2726.32	-958.741	233.041	864.625	0	0	0	0	0	0	0	603	903	0
6673	0	2.2606	-96.9363	-541.322	-44126.6	-19807.9	3729.68	163.408	381.516	0	10.8075	-13.6469	-91.0589	3990.42	2421.15	-500.977	226.589	859.178	0	0	0	0	0	0	0	603	903	0
6673	1	0.124365	-96.6311	-536.134	-43577.3	-19563.7	3867.01	163.51	381.281	0	-0.484008	-8.76404	-92.8899	4356.63	2909.43	-1050.29	231.321	856.099	0	0	0	0	0	0	0	603	903	0
6673	2	-1.85928	-98.4622	-538.27	-43760.4	-19807.9	3912.78	163.201	381.298	0	-1.09436	-6.32263	-98.9935	4356.63	2970.46	-958.741	230.007	858.991	0	0	0	0	0	0	0	603	903	0
6673	3	-1.24893	-99.9881	-535.829	-43577.3	-20174.1	3867.01	162.35	381.327	0	5.46692	-15.4779	-107.844	4081.97	3275.64	-546.754	230.374	865.149	0	0	0	0	0	0	0	603	903	0
6673	4	0.276953	-99.3777	-532.777	-43851.9	-19807.9	3729.68	162.821	382.308	0	1.9574	-15.4779	-115.168	4722.84	3031.5	-1096.07	226.322	861.992	0	0	0	0	0	0	0	603	903	0
6673	5	0.582129	-99.0725	-530.336	-43943.5	-19624.8	4004.33	162.996	382.86	0	-7.65564	-9.37439	-119.44	5546.82	3275.64	-1462.28	227.425	856.56	0	0	0	0	0	0	0	603	903	0
6673	6	-0.485986	-100.446	-529.725	-44401.3	-19685.8	4324.77	162.838	383.819	0	-4.45129	-11.5106	-124.628	5821.47	3031.5	-1050.29	224.324	856.289	0	0	0	0	0	0	0	603	903	0
6673	7	-0.94375	-101.209	-524.537	-43943.5	-19502.7	3455.02	162.819	383.776	0	0.126343	-15.0201	-133.173	5638.37	3397.71	-1553.83	225.513	860.661	0	0	0	0	0	0	0	603	903	0
6673	8	-0.94375	-99.5303	-522.706	-44126.6	-19258.6	3867.01	163.156	384.419	0	-5.21423	-6.17004	-140.497	6187.68	2970.46	-1416.5	221.142	858.959	0	0	0	0	0	0	0	603	903	0
6673	9	-0.333399	-99.9881	-519.655	-43668.8	-19441.7	3867.01	162.587	384.034	0	-11.0126	-3.57605	-144.77	6370.79	2848.39	-1096.07	219.675	858.994	0	0	0	0	0	0	0	603	903	0
6674	0	0.276953	-101.667	-520.875	-43485.7	-19319.6	3821.23	162.909	383.486	0	-5.672	-9.2218	-150.263	6462.34	2787.36	-1233.4	218.55	859.993	0	0	0	0	0	0	0	603	903	0
6674	1	-0.333399	-102.582	-517.518	-42570.2	-19197.5	3821.23	162.905	382.258	0	-3.68835	-3.27087	-156.977	6370.79	2665.29	-1324.95	216.979	862.416	0	0	0	0	0	0	0	603	903	0
6674	2	2.56577	-101.361	-512.636	-42936.4	-19136.5	3912.78	162.67	383.756	0	-12.0807	3.29041	-163.386	6920.11	3031.5	-1050.29	218.554	860.646	0	0	0	0	0	0	0	603	903	0
6674	3	-0.180811	-101.514	-505.617	-42387.1	-19014.4	3592.35	162.394	383.833	0	-16.6583	0.0860598	-169.489	7103.21	2665.29	-1324.95	215.725	861.09	0	0	0	0	0	0	0	603	903	0
6674	4	-0.0282228	-103.345	-505.922	-42204	-18831.3	3683.9	162.778	383.42	0	-11.0126	0.0860598	-174.067	7469.42	2604.25	-1462.28	214.961	860.089	0	0	0	0	0	0	0	603	903	0
6674	5	1.19248	-102.429	-505.006	-42112.4	-18526.1	3546.57	163.315	383.39	0	-14.0643	10.3094	-183.222	7560.98	2787.36	-1187.62	215.213	861.733	0	0	0	0	0	0	0	603	903	0
6674	6	0.582129	-101.209	-501.649	-42478.6	-18465.1	3638.12	163.191	384.678	0	-19.2523	12.1405	-189.631	7652.53	2238.04	-1508.06	211.802	862.645	0	0	0	0	0	0	0	603	903	0
6674	7	0.429541	-101.667	-496.461	-41654.7	-18709.2	3455.02	162.315	383.903	0	-20.3204	8.02063	-194.208	7744.08	1993.9	-1599.61	210.267	863.125	0	0	0	0	0	0	0	603	903	0
6674	8	0.734717	-103.04	-494.02	-42204	-18465.1	3546.57	162.623	385.43	0	-20.473	12.2931	-200.922	7652.53	2421.15	-912.965	212.05	864.913	0	0	0	0	0	0	0	603	903	0
6674	9	2.87095	-102.582	-493.104	-41746.2	-18159.9	3729.68	163.172	384.66	0	-22.1515	21.9061	-207.331	7835.63	2665.29	-1324.95	212.855	865.207	0	0	0	0	0	0	0	603	903	0
6675	0	2.2606	-100.904	-487.001	-41105.4	-18159.9	3592.35	162.711	384.405	0	-22.9144	20.5328	-208.552	7927.19	2177.01	-1691.16	210.439	864.989	0	0	0	0	0	0	0	603	903	0
6675	1	1.49766	-102.277	-485.17	-40739.2	-17915.8	3409.24	163.073	383.969	0	-25.661	19.7699	-215.265	8293.4	2421.15	-1187.62	211.247	864.474	0	0	0	0	0	0	0	603	903	0
6675	2	1.03989	-103.498	-479.677	-39915.2	-17854.8	3455.02	162.778	383.213	0	-28.1024	28.9252	-221.674	9025.82	2604.25	-1416.5	211.748	862.283	0	0	0	0	0	0	0	603	903	0
6675	3	2.41318	-102.124	-477.235	-40372.9	-17915.8	3500.8	162.459	384.598	0	-25.661	31.214	-228.083	8751.16	2360.11	-1462.28	210.348	864.632	0	0	0	0	0	0	0	603	903	0
6675	4	4.09165	-102.735	-474.183	-40189.8	-17610.6	3271.91	162.861	384.756	0	-26.2714	26.4838	-232.966	8842.71	1993.9	-821.412	208.559	865.043	0	0	0	0	0	0	0	603	903	0
6675	5	3.02354	-103.498	-467.164	-40281.4	-17549.6	3317.69	162.434	386.225	0	-30.2386	30.9088	-238.154	8659.61	2360.11	-1233.4	209.91	866.639	0	0	0	0	0	0	0	603	903	0
6675	6	1.80283	-103.04	-467.164	-40281.4	-17610.6	3363.47	162.303	386.225	0	-30.0861	36.7072	-241.205	8384.95	2482.18	-821.412	210.291	868.237	0	0	0	0	0	0	0	603	903	0
6675	7	3.02354	-101.819	-462.587	-39182.7	-17427.5	3317.69	162.326	384.704	0	-26.5765	33.9606	-246.088	8293.4	2360.11	-638.306	209.591	869.299	0	0	0	0	0	0	0	603	903	0
6675	8	3.93906	-101.667	-457.399	-40006.7	-17000.3	3180.36	162.833	387.466	0	-30.3912	33.1976	-257.075	8568.05	2238.04	-867.188	208.706	869.671	0	0	0	0	0	0	0	603	903	0
6675	9	3.93906	-102.582	-454.042	-39640.5	-16817.2	3088.81	162.961	387.306	0	-34.3585	39.4537	-266.23	8659.61	2482.18	-912.965	209.323	870.473	0	0	0	0	0	0	0	603	903	0
6676	0	3.02354	-101.361	-448.549	-38908.1	-16939.2	3226.14	162.235	386.742	0	-34.5111	40.6744	-270.807	8659.61	2665.29	-363.648	209.842	871.023	0	0	0	0	0	0	0	603	903	0
6676	1	4.54941	-100.141	-447.328	-38358.8	-16450.9	3134.58	163.224	385.751	0	-31.7645	38.5382	-277.521	8476.5	2421.15	-500.977	208.724	872.456	0	0	0	0	0	0	0	603	903	0
6676	2	4.24424	-100.751	-440.614	-37992.6	-16145.8	2905.7	163.356	386.226	0	-34.2059	39.4537	-288.202	9025.82	2421.15	-272.095	208.401	871.682	0	0	0	0	0	0	0	603	903	0
6676	3	4.24424	-101.972	-436.952	-37534.8	-16573	2905.7	162.071	385.901	0	-36.9525	43.8788	-295.527	8934.27	2848.39	-43.2133	209.638	872.768	0	0	0	0	0	0	0	603	903	0
6676	4	5.46494	-99.9881	-434.511	-37443.3	-16267.8	2676.82	162.561	386.173	0	-35.5792	42.2003	-301.63	8293.4	2848.39	2.56305	209.443	875.505	0	0	0	0	0	0	0	603	903	0
6676	5	5.31235	-99.5303	-430.848	-37443.3	-16145.8	2859.93	162.526	386.906	0	-32.3749	43.1158	-307.734	8018.74	2604.25	-88.9897	208.463	876.943	0	0	0	0	0	0	0	603	903	0
6676	6	4.85459	-99.8355	-424.745	-37809.5	-16084.7	3409.24	162.131	389.017	0	-37.868	48.9142	-317.194	8842.71	3275.64	94.1158	210.327	875.122	0	0	0	0	0	0	0	603	903	0
6676	7	5.46494	-100.293	-418.641	-37168.6	-15657.5	3180.36	162.599	388.784	0	-38.631	48.1512	-326.349	8293.4	3458.74	185.669	210.598	877.587	0	0	0	0	0	0	0	603	903	0
6676	8	6.38047	-98.0044	-414.369	-37351.7	-15474.4	2768.37	162.656	390.141	0	-36.6473	48.1512	-332.758	8384.95	3092.53	551.879	209.294	877.802	0	0	0	0	0	0	0	603	903	0
6676	9	6.83823	-96.4785	-412.233	-36253.1	-15657.5	2905.7	162.018	387.943	0	-36.1896	53.0341	-340.082	8110.29	3702.88	734.985	210.888	879.152	0	0	0	0	0	0	0	603	903	0
6677	0	5.46494	-97.6992	-407.045	-36344.6	-15230.2	2768.37	162.583	389.289	0	-38.9362	55.0177	-343.744	8384.95	3824.95	414.55	211.127	878.607	0	0	0	0	0	0	0	603	903	0
6677	1	7.44858	-96.7837	-400.331	-35154.4	-15108.2	2859.93	162.261	387.813	0	-35.8844	54.4073	-355.341	8201.84	3458.74	551.879	209.734	879.918	0	0	0	0	0	0	0	603	903	0
6677	2	6.38047	-95.2578	-393.922	-34879.8	-14986.1	2402.16	161.957	388.545	0	-36.4948	57.7643	-362.055	7835.63	4069.1	963.867	211.239	881.358	0	0	0	0	0	0	0	603	903	0
6677	3	7.75376	-95.8682	-391.786	-34696.7	-15230.2	2905.7	161.126	388.56	0	-36.6473	62.9523	-367.548	7194.76	3702.88	460.327	210.075	883.425	0	0	0	0	0	0	0	603	903	0
6677	4	6.83823	-94.6475	-389.039	-34330.5	-14558.9	2905.7	162.577	388.244	0	-36.3422	60.9686	-373.957	7835.63	4130.13	643.432	211.044	882.047	0	0	0	0	0	0	0	603	903	0
6677	5	7.44858	-94.6475	-382.02	-34055.8	-14375.7	2768.37	162.369	389.147	0	-36.037	60.5109	-379.145	7835.63	4313.24	1146.97	211.376	882.333	0	0	0	0	0	0	0	603	903	0
6677	6	9.43223	-93.4268	-377.138	-33689.6	-14497.8	2447.94	161.558	389.33	0	-34.6637	66.4618	-383.722	7286.32	4191.17	963.867	210.922	884.012	0	0	0	0	0	0	0	603	903	0
6677	7	8.05894	-92.6638	-368.593	-33781.1	-14131.6	2676.82	161.661	391.649	0	-34.8163	67.9877	-389.826	7286.32	4496.34	597.656	211.534	884.309	0	0	0	0	0	0	0	603	903	0
6677	8	8.97446	-92.6638	-365.236	-33140.3	-13887.5	2219.06	161.977	390.737	0	-33.1378	66.4618	-393.793	7286.32	4435.31	1192.75	211.263	884.497	0	0	0	0	0	0	0	603	903	0
6677	9	9.12705	-91.138	-362.184	-32774.1	-13826.4	2035.95	161.825	390.49	0	-32.2223	67.9877	-399.592	6920.11	4679.45	1192.75	211.711	885.682	0	0	0	0	0	0	0	603	903	0
6678	0	8.36411	-89.0017	-355.775	-32316.3	-13826.4	1990.17	161.137	390.833	0	-30.3912	73.1757	-405.085	6553.9	5045.66	1375.85	212.456	886.821	0	0	0	0	0	0	0	603	903	0
6678	1	10.8055	-88.0862	-349.672	-32407.8	-13216.1	2173.28	162.204	392.681	0	-29.3231	71.3446	-405.695	6462.34	4984.62	1284.3	212.287	887.071	0	0	0	0	0	0	0	603	903	0
6678	2	9.58481	-88.6966	-340.822	-31309.2	-13216.1	2081.73	161.223	391.864	0	-28.1024	69.5135	-409.662	6096.13	4862.55	1055.42	211.87	888.119	0	0	0	0	0	0	0	603	903	0
6678	3	10.8055	-86.8655	-336.854	-30851.4	-12666.8	1944.4	162.397	391.587	0	-26.8817	72.5653	-413.019	6645.45	5106.69	872.314	212.364	886.91	0	0	0	0	0	0	0	603	903	0
6678	4	11.1107	-85.7974	-334.413	-31034.5	-12971.9	1852.85	161.21	392.803	0	-24.7455	73.3282	-416.071	6645.45	5594.98	1421.63	213.447	887.028	0	0	0	0	0	0	0	603	903	0
6678	5	10.5003	-84.5767	-328.309	-29935.9	-12788.8	1852.85	161.046	391.182	0	-23.2196	72.2601	-419.123	6096.13	5594.98	1238.52	213.349	888.455	0	0	0	0	0	0	0	603	903	0
6678	6	11.4159	-84.7293	-322.206	-29661.3	-12239.5	1852.85	162.013	392.057	0	-21.8463	70.1239	-420.038	5821.47	5167.73	872.314	212.303	889.141	0	0	0	0	0	0	0	603	903	0
6678	7	12.0262	-83.0508	-316.713	-29752.8	-12300.6	1669.74	161.162	393.943	0	-20.3204	73.786	-425.226	6370.79	5717.05	1009.64	213.445	888.018	0	0	0	0	0	0	0	603	903	0
6678	8	11.4159	-80.762	-310.609	-29295	-12544.7	1532.41	159.613	394.315	0	-16.2006	73.3282	-424.616	5546.82	6144.29	1101.2	214.47	889.937	0	0	0	0	0	0	0	603	903	0
6678	9	12.1788	-79.2361	-306.032	-28562.6	-12056.4	1578.19	160.604	393.332	0	-14.6747	70.8868	-427.668	5272.16	5900.15	780.761	213.796	890.672	0	0	0	0	0	0	0	603	903	0
6679	0	10.6529	-78.9309	-299.623	-28379.5	-11446.1	1623.96	161.798	394.717	0	-15.7428	70.5817	-429.499	4997.5	5594.98	597.656	213.027	891.364	0	0	0	0	0	0	0	603	903	0
6679	1	10.6529	-79.3887	-291.993	-28013.3	-11079.8	1532.41	162.054	395.938	0	-11.7755	72.7179	-428.583	4997.5	6266.36	1238.52	214.621	891.34	0	0	0	0	0	0	0	603	903	0
6679	2	11.4159	-76.0318	-285.585	-27280.9	-11385	1395.08	160.134	395.526	0	-8.1134	71.955	-428.278	5363.71	6632.57	506.103	215.487	890.476	0	0	0	0	0	0	0	603	903	0
6679	3	12.7892	-75.2688	-281.312	-26182.3	-10896.7	1486.63	161.265	393.072	0	-8.1134	73.6334	-428.583	4539.73	6510.5	597.656	215.191	892.408	0	0	0	0	0	0	0	603	903	0
6679	4	11.5685	-74.8111	-274.293	-24809	-10713.6	1486.63	160.941	390.447	0	-7.96081	74.8541	-432.551	4539.73	6266.36	551.879	214.487	892.505	0	0	0	0	0	0	0	603	903	0
6679	5	10.5003	-73.4378	-266.969	-25358.3	-10713.6	1120.42	159.869	394.986	0	-3.84094	72.2601	-431.94	4448.18	6815.68	322.998	215.779	892.702	0	0	0	0	0	0	0	603	903	0
6679	6	9.88999	-73.4378	-259.95	-24900.5	-10713.6	1120.42	158.786	395.79	0	0.889283	72.2601	-432.551	4173.52	6998.78	780.761	216.18	893.351	0	0	0	0	0	0	0	603	903	0
6679	7	11.2633	-71.1489	-254.457	-25083.6	-10530.5	1349.31	158.616	398.577	0	0.278931	72.7179	-432.551	3624.21	6815.68	551.879	215.757	894.621	0	0	0	0	0	0	0	603	903	0
6679	8	10.9581	-69.6231	-249.574	-24625.9	-10103.3	1257.75	159.518	398.672	0	0.431519	73.4808	-431.635	3624.21	6815.68	368.774	215.79	894.604	0	0	0	0	0	0	0	603	903	0
6679	9	11.4159	-66.8765	-237.367	-24076.5	-10347.4	1166.2	156.407	401.432	0	1.9574	73.4808	-429.804	3898.86	7426.03	597.656	217.278	893.929	0	0	0	0	0	0	0	603	903	0
6680	0	10.0426	-64.5877	-236.451	-23893.4	-9615	983.094	159.336	401.05	0	3.48328	75.6171	-431.025	3715.76	7181.89	597.656	216.662	894.379	0	0	0	0	0	0	0	603	903	0
6680	1	10.5003	-64.5877	-227.601	-22886.4	-9309.83	891.542	159.096	400.555	0	2.72034	76.9904	-432.856	3441.1	6571.54	506.103	215.182	895.05	0	0	0	0	0	0	0	603	903	0
6680	2	10.9581	-62.604	-222.413	-21146.9	-9065.69	937.318	159.239	395.079	0	5.46692	75.1593	-433.771	3624.21	6144.29	780.761	214.165	894.645	0	0	0	0	0	0	0	603	903	0
6680	3	10.6529	-60.773	-217.225	-21604.6	-9187.76	1028.87	157.704	399.457	0	6.53503	74.8541	-434.382	3441.1	7120.85	597.656	216.393	895.078	0	0	0	0	0	0	0	603	903	0
6680	4	9.88999	-58.7893	-212.343	-21146.9	-8882.58	754.213	158.169	399.588	0	7.60315	76.2274	-434.687	2891.78	7059.82	826.538	216.241	896.347	0	0	0	0	0	0	0	603	903	0
6680	5	11.4159	-58.179	-205.934	-20780.6	-8760.51	845.765	157.46	400.909	0	7.14539	76.2274	-434.076	2983.34	7242.92	918.091	216.686	896.127	0	0	0	0	0	0	0	603	903	0
6680	6	9.7374	-56.9583	-198.915	-20322.9	-8577.41	983.094	156.879	402.169	0	7.29797	75.7697	-434.992	2250.91	7487.06	1101.2	217.212	897.825	0	0	0	0	0	0	0	603	903	0
6680	7	10.8055	-55.1272	-193.422	-20048.2	-8394.3	799.989	156.601	403.65	0	9.12903	77.4481	-434.992	2891.78	7792.24	826.538	217.914	896.352	0	0	0	0	0	0	0	603	903	0
6680	8	10.8055	-52.8384	-189.76	-20048.2	-8272.23	662.66	156.407	405.651	0	9.58679	78.2111	-435.602	3532.65	7487.06	780.761	217.188	894.89	0	0	0	0	0	0	0	603	903	0
6680	9	9.7374	-50.2444	-185.792	-19315.8	-7967.05	662.66	157.119	403.964	0	9.73938	75.9222	-432.856	2617.13	7487.06	780.761	217.297	896.954	0	0	0	0	0	0	0	603	903	0
6681	0	11.5685	-47.3452	-177.553	-18491.8	-7478.77	708.436	157.879	404.148	0	9.4342	76.5326	-438.959	2891.78	7303.96	780.761	216.639	896.412	0	0	0	0	0	0	0	603	903	0
6681	1	8.97446	-45.6668	-171.754	-18674.9	-7600.84	479.554	155.746	408.731	0	10.5023	77.9059	-439.264	2525.57	7853.28	918.091	217.878	897.25	0	0	0	0	0	0	0	603	903	0
6681	2	9.7374	-43.3779	-169.313	-18308.7	-7661.88	159.12	154.747	408.135	0	11.723	77.1429	-439.875	1884.7	7487.06	1330.08	217.021	898.715	0	0	0	0	0	0	0	603	903	0
6681	3	10.0426	-41.2417	-166.261	-18034.1	-7051.52	525.331	157.588	408.468	0	11.1127	76.9904	-439.875	1701.6	7853.28	918.091	217.853	899.132	0	0	0	0	0	0	0	603	903	0
6681	4	8.97446	-40.3262	-162.904	-16935.4	-6990.49	433.778	157.088	403.96	0	10.0446	76.5326	-441.706	1976.26	7914.31	1284.3	217.918	898.526	0	0	0	0	0	0	0	603	903	0
6681	5	8.82187	-39.5633	-156.19	-17301.6	-7051.52	296.449	154.853	410.773	0	10.9601	78.6688	-444.147	1884.7	7670.17	1467.41	217.269	898.757	0	0	0	0	0	0	0	603	903	0
6681	6	9.12705	-38.8003	-152.223	-16569.2	-6807.38	204.896	155.28	408.848	0	11.723	77.1429	-445.368	1701.6	7731.21	1330.08	217.359	899.179	0	0	0	0	0	0	0	603	903	0
6681	7	9.27964	-36.5115	-147.34	-15928.4	-6441.17	159.12	156.284	408.106	0	9.58679	78.0585	-447.809	1518.49	7853.28	1284.3	217.537	899.609	0	0	0	0	0	0	0	603	903	0
6681	8	8.82187	-35.4434	-146.73	-15379	-6074.96	342.225	158.598	404.812	0	8.51868	78.6688	-451.777	1060.73	7975.35	1467.41	217.653	900.652	0	0	0	0	0	0	0	603	903	0
6681	9	6.83823	-31.7813	-140.016	-15653.7	-6319.1	113.343	154.869	411.799	0	9.58679	78.8214	-459.101	419.86	8341.56	1558.96	218.169	902.086	0	0	0	0	0	0	0	603	903	0
6682	0	6.22788	-29.7976	-132.997	-15562.1	-5891.86	-390.197	155.699	417.011	0	13.4015	79.7369	-461.847	53.6492	8646.74	1558.96	218.722	902.884	0	0	0	0	0	0	0	603	903	0
6682	1	7.75376	-27.814	-130.25	-15104.4	-5891.86	-23.9859	154.765	415.964	0	14.6222	84.0094	-462.763	-495.667	8524.66	1558.96	218.421	904.071	0	0	0	0	0	0	0	603	903	0
6682	2	9.58481	-26.4407	-126.893	-14829.7	-5891.86	616.883	153.568	416.868	0	12.486	82.9413	-463.068	-312.562	8402.59	1238.52	218.145	903.675	0	0	0	0	0	0	0	603	903	0
6682	3	7.90635	-24.4571	-122.926	-14463.5	-6013.93	-69.7623	151.077	417.66	0	14.7748	81.568	-468.561	-587.22	8585.7	1513.18	218.324	904.253	0	0	0	0	0	0	0	603	903	0
6682	4	6.99082	-25.3726	-118.043	-14372	-5220.47	-69.7623	155.775	421.752	0	17.2162	83.0939	-474.055	-129.456	8768.81	1513.18	218.497	903.273	0	0	0	0	0	0	0	603	903	0
6682	5	6.83823	-21.5579	-112.245	-13090.2	-5281.5	159.12	152.947	416.622	0	14.4696	86.6034	-474.665	-953.431	9012.95	1467.41	218.988	905.009	0	0	0	0	0	0	0	603	903	0
6682	6	7.44858	-20.1846	-107.972	-12724	-4793.22	113.343	155.607	417.845	0	14.1644	88.1293	-477.717	-678.773	8341.56	1558.96	217.461	904.421	0	0	0	0	0	0	0	603	903	0
6682	7	7.75376	-19.2691	-105.531	-12266.2	-4732.19	-69.7623	155.158	416.233	0	15.8429	88.4344	-482.294	-770.326	8463.63	1650.51	217.549	904.597	0	0	0	0	0	0	0	603	903	0
6682	8	7.90635	-18.6587	-97.2913	-11076.1	-4427.01	-23.9859	154.497	413.844	0	14.1644	89.35	-487.482	-1502.75	8890.88	1833.62	218.238	906.083	0	0	0	0	0	0	0	603	903	0
6682	9	6.68564	-17.438	-99.7327	-11442.3	-4549.08	-23.9859	154.387	414.729	0	12.6385	87.8241	-486.262	-1960.51	8707.77	1742.07	217.908	907.032	0	0	0	0	0	0	0	603	903	0
6683	0	6.38047	-16.0647	-94.5447	-11167.6	-4060.8	21.7904	157.049	418.12	0	12.7911	88.8922	-491.45	-1319.64	8280.52	1558.96	216.849	905.685	0	0	0	0	0	0	0	603	903	0
6683	1	6.83823	-15.4544	-90.5775	-11259.2	-3999.77	-207.091	155.841	424.304	0	12.3334	88.587	-495.112	-1685.85	9196.05	1604.74	218.574	906.405	0	0	0	0	0	0	0	603	903	0
6683	2	6.07529	-14.3863	-88.7464	-11350.7	-3816.66	-207.091	156.994	427.901	0	12.7911	89.5026	-497.248	-1319.64	9501.23	1604.74	219.108	905.654	0	0	0	0	0	0	0	603	903	0
6683	3	5.00718	-13.7759	-87.2205	-10709.8	-3511.49	-252.868	159.74	422.79	0	12.0282	89.5026	-500.91	-2418.28	8768.81	1650.51	217.506	907.828	0	0	0	0	0	0	0	603	903	0
6683	4	7.296	-14.2337	-84.1688	-10526.7	-3572.52	113.343	157.555	425.067	0	12.0282	87.2137	-506.403	-2876.04	8402.59	1375.85	216.593	908.679	0	0	0	0	0	0	0	603	903	0
6683	5	3.93906	-13.6233	-77.7601	-9977.42	-3694.59	-69.7623	152.487	428.31	0	10.1971	88.8922	-510.981	-2601.38	8951.91	1925.17	217.519	908.091	0	0	0	0	0	0	0	603	903	0
6683	6	5.00718	-11.3345	-77.1497	-9794.32	-3572.52	-481.75	153.694	426.952	0	9.12903	89.6552	-512.507	-2967.59	8829.84	2291.38	217.229	908.79	0	0	0	0	0	0	0	603	903	0
6683	7	6.22788	-11.0293	-76.5394	-8878.79	-3511.49	-298.644	154.122	416.003	0	8.51868	86.2982	-516.779	-3791.57	8890.88	1879.39	217.204	910.337	0	0	0	0	0	0	0	603	903	0
6683	8	3.17612	-10.419	-75.0135	-9061.9	-3572.52	-252.868	152.375	420.804	0	9.12903	85.6879	-519.526	-3700.01	8951.91	1879.39	217.231	910.122	0	0	0	0	0	0	0	603	903	0
6683	9	2.87095	-11.0293	-71.0462	-8421.02	-3389.42	-252.868	152.293	418.529	0	8.97644	87.6715	-521.357	-2967.59	9257.09	1925.17	217.756	908.692	0	0	0	0	0	0	0	603	903	0
6684	0	4.39683	-8.89309	-68.2996	-8787.24	-3145.27	-435.973	153.949	428.657	0	9.4342	87.3663	-523.188	-3425.36	9196.05	1787.84	217.577	909.547	0	0	0	0	0	0	0	603	903	0
6684	1	5.15977	-7.97756	-68.2996	-8054.81	-3084.24	-344.421	154.843	417.934	0	10.8075	85.5353	-525.934	-3974.67	8585.7	2016.72	216.325	910.557	0	0	0	0	0	0	0	603	903	0
6684	2	5.46494	-7.97756	-62.8065	-7871.71	-3206.31	-298.644	148.949	425.333	0	10.3497	89.0448	-530.207	-3516.91	8768.81	1742.07	216.538	909.633	0	0	0	0	0	0	0	603	903	0
6684	3	3.02354	-7.5198	-62.5013	-7780.16	-2779.06	-481.75	155.536	424.48	0	11.2653	88.587	-531.733	-3425.36	8890.88	1650.51	216.721	909.442	0	0	0	0	0	0	0	603	903	0
6684	4	3.93906	-5.53615	-60.6702	-8054.81	-2656.99	-481.75	156.206	432.764	0	14.0118	87.0612	-532.953	-3333.8	8707.77	2108.28	216.339	909.255	0	0	0	0	0	0	0	603	903	0
6684	5	3.78647	-3.24733	-59.1443	-7505.5	-2779.06	-207.091	153.012	426.901	0	14.1644	86.6034	-533.259	-4249.33	9196.05	1558.96	217.245	910.969	0	0	0	0	0	0	0	603	903	0
6684	6	2.56577	-3.85769	-57.9236	-6956.18	-2595.96	-435.973	155.183	420.092	0	13.7067	87.0612	-534.479	-4615.54	9318.12	1330.08	217.434	911.636	0	0	0	0	0	0	0	603	903	0
6684	7	2.87095	-4.01027	-54.5667	-7505.5	-2534.92	-344.421	153.545	437.547	0	15.2325	85.5353	-538.752	-4157.78	9257.09	1604.74	217.182	910.717	0	0	0	0	0	0	0	603	903	0
6684	8	4.702	-2.78957	-53.0408	-7413.95	-2412.85	-435.973	154.51	439.778	0	19.505	84.162	-539.972	-4249.33	8951.91	1421.63	216.578	910.87	0	0	0	0	0	0	0	603	903	0
6684	9	3.02354	-2.63698	-50.5994	-6681.52	-2168.71	-573.302	157.14	432.047	0	18.1317	85.993	-543.94	-4707.09	9318.12	1238.52	217.131	911.654	0	0	0	0	0	0	0	603	903	0
6685	0	3.4813	-3.55251	-47.2425	-6132.21	-1924.57	-481.75	159.262	429.803	0	17.8265	84.0094	-545.16	-4707.09	9318.12	1055.42	217.092	911.634	0	0	0	0	0	0	0	603	903	0
6685	1	2.87095	-2.94216	-46.327	-5674.44	-1985.61	-390.197	157.139	422.487	0	18.1317	81.568	-546.686	-4707.09	9562.26	1238.52	217.491	911.61	0	0	0	0	0	0	0	603	903	0
6685	2	2.87095	-2.63698	-44.4959	-4667.36	-2046.64	-710.631	154.004	404.894	0	20.7257	82.9413	-547.297	-5256.41	9012.95	1284.3	216.468	912.604	0	0	0	0	0	0	0	603	903	0
6685	3	3.93906	-3.39992	-42.3597	-5216.68	-1802.5	-573.302	157.448	423.152	0	19.0472	83.8568	-550.348	-5256.41	9012.95	1421.63	216.377	912.551	0	0	0	0	0	0	0	603	903	0
6685	4	1.65024	-4.46804	-38.3924	-5125.13	-1680.43	-207.091	156.23	433.493	0	20.7257	82.3309	-551.874	-5439.52	9440.19	1513.18	217.106	912.856	0	0	0	0	0	0	0	603	903	0
6685	5	2.87095	-3.85769	-36.8665	-5582.89	-1924.57	-69.7623	147.796	451.435	0	18.5895	80.1947	-552.18	-5073.31	9318.12	1330.08	216.875	912.188	0	0	0	0	0	0	0	603	903	0
6685	6	2.87095	-2.78957	-37.4769	-5399.79	-1375.25	-252.868	163.304	444.083	0	18.5895	83.2465	-555.536	-5347.96	9318.12	1558.96	216.773	912.627	0	0	0	0	0	0	0	603	903	0
6685	7	1.80283	-2.02663	-36.8665	-4118.05	-1192.15	-298.644	167.663	411.702	0	17.0636	81.8732	-558.283	-5439.52	9379.16	1421.63	216.8	912.743	0	0	0	0	0	0	0	603	903	0
6685	8	3.02354	-1.72146	-33.5096	-5033.57	-1558.36	-481.75	153.495	450.213	0	19.1998	79.8895	-558.283	-5347.96	9501.23	1330.08	217.019	912.579	0	0	0	0	0	0	0	603	903	0
6685	9	2.2606	-1.41628	-31.0682	-4484.26	-1558.36	-527.526	149.841	444.336	0	18.7421	80.6525	-558.283	-5439.52	9135.02	1558.96	216.363	912.743	0	0	0	0	0	0	0	603	903	0
6686	0	3.02354	-0.348165	-30.4578	-3568.73	-1192.15	-573.302	160.859	417.17	0	19.8102	80.4999	-560.419	-5622.62	9012.95	1558.96	216.083	913.033	0	0	0	0	0	0	0	603	903	0
6686	1	1.65024	-0.805928	-30.763	-3294.07	-1253.18	-298.644	159.263	407.079	0	17.8265	79.8895	-560.419	-5897.28	9318.12	1284.3	216.627	913.523	0	0	0	0	0	0	0	603	903	0
6686	2	0.887305	-2.4844	-28.0164	-3477.18	-1314.22	-527.526	153.091	424.112	0	18.8947	79.4318	-562.25	-5805.73	9073.98	1696.29	216.139	913.326	0	0	0	0	0	0	0	603	903	0
6686	3	2.71836	-1.26369	-25.8802	-3477.18	-1131.11	-298.644	156.294	434.357	0	16.3007	78.974	-564.997	-5622.62	8768.81	1558.96	215.52	912.952	0	0	0	0	0	0	0	603	903	0
6686	4	1.34507	-0.500753	-25.575	-2836.31	-948.008	-161.315	162.932	410.902	0	18.2843	77.9059	-566.218	-6171.94	9012.95	1558.96	215.918	913.9	0	0	0	0	0	0	0	603	903	0
6686	5	1.95542	-1.72146	-22.2181	-2836.31	-1253.18	-435.973	143.596	427.658	0	16.6058	77.1429	-566.828	-6355.04	8951.91	1833.62	215.793	914.212	0	0	0	0	0	0	0	603	903	0
6686	6	1.34507	-1.56887	-23.4388	-3202.52	-764.903	-481.75	167.366	436.633	0	17.5214	77.1429	-567.743	-5805.73	9012.95	1696.29	215.875	913.226	0	0	0	0	0	0	0	603	903	0
6686	7	0.276953	-0.500753	-20.9974	-2927.86	-764.903	-344.421	163.572	439.439	0	17.2162	76.8378	-569.269	-6080.39	8951.91	1284.3	215.725	913.681	0	0	0	0	0	0	0	603	903	0
6686	8	1.19248	0.262187	-20.387	-2653.2	-825.938	-298.644	159.487	430.142	0	19.8102	76.9904	-570.49	-6538.15	9135.02	1558.96	216.013	914.461	0	0	0	0	0	0	0	603	903	0
6686	9	-0.180811	-0.0429889	-18.556	-2653.2	-581.797	-344.421	168.646	442.984	0	17.3688	73.786	-570.49	-6904.36	9196.05	1558.96	216.12	915.103	0	0	0	0	0	0	0	603	903	0
6687	0	0.124365	-0.195577	-17.0301	-2744.75	-581.797	-298.644	165.837	461.171	0	16.4532	75.3119	-575.373	-6721.25	8951.91	1467.41	215.558	914.682	0	0	0	0	0	0	0	603	903	0
6687	1	1.19248	-0.195577	-16.7249	-2103.89	-1131.11	21.7904	132.37	425.794	0	17.3688	74.0912	-577.204	-6629.7	9012.95	1330.08	215.615	914.486	0	0	0	0	0	0	0	603	903	0
6687	2	0.887305	0.262187	-17.0301	-1829.23	-520.762	113.343	169.421	407.411	0	17.9791	73.3282	-578.425	-6538.15	9196.05	1284.3	215.898	914.303	0	0	0	0	0	0	0	603	903	0
6687	3	-0.333399	0.262187	-15.8094	-1463.02	-215.586	-69.7623	186.363	392.541	0	18.4369	73.4808	-579.34	-6995.91	9196.05	1055.42	215.873	915.076	0	0	0	0	0	0	0	603	903	0
6687	4	-0.638574	-0.0429889	-13.368	-1463.02	-154.551	204.896	188.439	409.442	0	16.911	73.3282	-581.476	-6171.94	8585.7	1192.75	214.765	913.614	0	0	0	0	0	0	0	603	903	0
6687	5	0.582129	0.414775	-11.5369	-1188.36	-581.797	-344.421	149.571	403.005	0	17.0636	72.5653	-583.307	-6904.36	9257.09	1284.3	215.87	914.837	0	0	0	0	0	0	0	603	903	0
6687	6	0.582129	0.719951	-11.8421	-1279.91	-459.727	-69.7623	161.179	408.081	0	19.0472	71.192	-586.054	-6904.36	9012.95	1513.18	215.379	914.781	0	0	0	0	0	0	0	603	903	0
6687	7	0	0	0	0	0	0	200	300	0	20.5731	72.2601	-589.106	-6995.91	8890.88	1146.97	215.092	914.875	0	0	0	0	0	0	0	603	903	0
6687	8	-1.40151	0.872538	-10.3162	-1463.02	-520.762	-207.091	149.52	441.817	0	18.5895	69.8187	-589.106	-7545.23	9012.95	1284.3	215.299	915.808	0	0	0	0	0	0	0	603	903	0
6687	9	0	0	0	0	0	0	200	300	0	17.0636	69.6661	-591.852	-7179.02	9318.12	1101.2	215.744	915.13	0	0	0	0	0	0	0	603	903	0
6688	0	0	0	0	0	0	0	200	300	0	17.2162	69.9713	-591.547	-7545.23	9318.12	1101.2	215.752	915.755	0	0	0	0	0	0	0	603	903	0
6688	1	0.429541	3.00877	-9.70587	-1005.25	89.5895	-390.197	209.23	403.572	0	18.1317	69.0558	-593.073	-7270.57	9196.05	1192.75	215.506	915.259	0	0	0	0	0	0	0	603	903	0
6688	2	0	0	0	0	0	0	200	300	0	17.2162	68.4454	-592.158	-6995.91	8829.84	1192.75	214.911	914.814	0	0	0	0	0	0	0	603	903	0
6688	3	0	0	0	0	0	0	200	300	0	17.5214	67.6825	-596.735	-6995.91	9073.98	1421.63	215.206	914.724	0	0	0	0	0	0	0	603	903	0
6688	4	0	0	0	0	0	0	200	300	0	17.2162	67.9877	-599.177	-7728.33	8707.77	1330.08	214.533	915.898	0	0	0	0	0	0	0	603	903	0
6688	5	0	0	0	0	0	0	200	300	0	17.8265	66.767	-600.702	-7453.68	8829.84	1192.75	214.699	915.408	0	0	0	0	0	0	0	603	903	0
6688	6	0	0	0	0	0	0	200	300	0	17.5214	64.6307	-603.449	-7453.68	9318.12	1513.18	215.441	915.352	0	0	0	0	0	0	0	603	903	0
6688	7	0	0	0	0	0	0	200	300	0	16.1481	65.3937	-603.754	-8094.54	9012.95	1284.3	214.928	916.407	0	0	0	0	0	0	0	603	903	0
6688	8	0	0	0	0	0	0	200	300	0	18.1317	64.3256	-603.144	-8094.54	8890.88	1101.2	214.741	916.421	0	0	0	0	0	0	0	603	903	0
6688	9	0	0	0	0	0	0	200	300	0	16.6058	63.41	-604.975	-7453.68	8646.74	1146.97	214.293	915.321	0	0	0	0	0	0	0	603	903	0
6689	0	0	0	0	0	0	0	200	300	0	16.4532	63.2574	-606.501	-7362.12	9012.95	1330.08	214.861	915.139	0	0	0	0	0	0	0	603	903	0
6689	1	0	0	0	0	0	0	200	300	0	16.7584	61.1212	-607.416	-7911.44	9012.95	1101.2	214.838	916.025	0	0	0	0	0	0	0	603	903	0
6689	2	0	0	0	0	0	0	200	300	0	16.6058	62.3419	-608.942	-8094.54	8524.66	1375.85	213.999	916.293	0	0	0	0	0	0	0	603	903	0
6689	3	0	0	0	0	0	0	200	300	0	15.8429	59.5953	-607.721	-7819.89	8829.84	1284.3	214.529	915.868	0	0	0	0	0	0	0	603	903	0
6689	4	0	0	0	0	0	0	200	300	0	16.4532	59.4427	-611.078	-7362.12	8890.88	1467.41	214.549	915.048	0	0	0	0	0	0	0	603	903	0
6689	5	0	0	0	0	0	0	200	300	0	16.911	58.3746	-610.468	-7453.68	8951.91	1146.97	214.664	915.21	0	0	0	0	0	0	0	603	903	0
6689	6	0	0	0	0	0	0	200	300	0	15.9955	57.6117	-610.163	-8369.2	8768.81	1238.52	214.371	916.716	0	0	0	0	0	0	0	603	903	0
6689	7	0	0	0	0	0	0	200	300	0	18.5895	59.1376	-611.078	-8277.65	8707.77	918.091	214.25	916.546	0	0	0	0	0	0	0	603	903	0
6689	8	0	0	0	0	0	0	200	300	0	15.3851	57.4591	-611.384	-7362.12	9012.95	963.867	214.742	915.042	0	0	0	0	0	0	0	603	903	0
6689	9	0	0	0	0	0	0	200	300	0	16.911	56.6962	-614.435	-8002.99	8707.77	1009.64	214.172	916.025	0	0	0	0	0	0	0	603	903	0
6690	0	0	0	0	0	0	0	200	300	0	16.6058	56.6962	-614.741	-8369.2	8890.88	1055.42	214.463	916.614	0	0	0	0	0	0	0	603	903	0
6690	1	0	0	0	0	0	0	200	300	0	15.9955	54.4073	-615.046	-8735.41	9073.98	1146.97	214.753	917.203	0	0	0	0	0	0	0	603	903	0
6690	2	0	0	0	0	0	0	200	300	0	15.6903	53.0341	-615.961	-8277.65	8707.77	1513.18	214.137	916.439	0	0	0	0	0	0	0	603	903	0
6690	3	0	0	0	0	0	0	200	300	0	16.911	52.7289	-615.046	-8460.75	8585.7	1192.75	213.959	916.756	0	0	0	0	0	0	0	603	903	0
6690	4	0	0	0	0	0	0	200	300	0	16.6058	52.4237	-614.435	-8369.2	8829.84	918.091	214.371	916.621	0	0	0	0	0	0	0	603	903	0
6690	5	0	0	0	0	0	0	200	300	0	15.5377	52.2711	-615.351	-8460.75	8768.81	1146.97	214.25	916.75	0	0	0	0	0	0	0	603	903	0
6690	6	0	0	0	0	0	0	200	300	0	14.7748	51.0504	-615.046	-7270.57	8585.7	780.761	213.959	914.821	0	0	0	0	0	0	0	603	903	0
6690	7	0	0	0	0	0	0	200	300	0	17.0636	51.3556	-617.487	-7911.44	8524.66	872.314	213.805	915.812	0	0	0	0	0	0	0	603	903	0
6690	8	0	0	0	0	0	0	200	300	0	16.7584	51.0504	-618.403	-8643.86	8707.77	1330.08	214.081	916.978	0	0	0	0	0	0	0	603	903	0
6690	9	0	0	0	0	0	0	200	300	0	15.8429	48.7616	-617.487	-9284.73	8707.77	872.314	214.102	918.036	0	0	0	0	0	0	0	603	903	0
6691	0	0	0	0	0	0	0	200	300	0	15.8429	47.6935	-617.487	-8186.1	8524.66	963.867	213.805	916.257	0	0	0	0	0	0	0	603	903	0
6691	1	0	0	0	0	0	0	200	300	0	16.4532	47.5409	-616.266	-8643.86	8585.7	1055.42	213.932	917.026	0	0	0	0	0	0	0	603	903	0
6691	2	0	0	0	0	0	0	200	300	0	17.0636	45.0995	-614.741	-8643.86	8524.66	872.314	213.867	917.061	0	0	0	0	0	0	0	603	903	0
6691	3	0	0	0	0	0	0	200	300	0	16.3007	47.0831	-615.046	-8918.52	8524.66	597.656	213.86	917.501	0	0	0	0	0	0	0	603	903	0
6691	4	0	0	0	0	0	0	200	300	0	16.1481	46.778	-615.961	-8369.2	8707.77	643.432	214.137	916.587	0	0	0	0	0	0	0	603	903	0
6691	5	0	0	0	0	0	0	200	300	0	17.8265	45.8624	-615.351	-7911.44	8524.66	872.314	213.853	915.857	0	0	0	0	0	0	0	603	903	0
6691	6	0	0	0	0	0	0	200	300	0	17.8265	44.7943	-614.435	-9284.73	8219.49	918.091	213.377	918.111	0	0	0	0	0	0	0	603	903	0
6691	7	0	0	0	0	0	0	200	300	0	17.5214	44.0314	-614.741	-9284.73	8341.56	963.867	213.569	918.104	0	0	0	0	0	0	0	603	903	0
6691	8	0	0	0	0	0	0	200	300	0	17.3688	43.5736	-612.604	-8552.31	8402.59	963.867	213.716	916.961	0	0	0	0	0	0	0	603	903	0
6691	9	0	0	0	0	0	0	200	300	0	18.4369	43.8788	-612.299	-9010.07	8829.84	734.985	214.421	917.715	0	0	0	0	0	0	0	603	903	0
6692	0	0	0	0	0	0	0	200	300	0	18.7421	43.2684	-611.689	-9101.62	8768.81	780.761	214.335	917.88	0	0	0	0	0	0	0	603	903	0
6692	1	0	0	0	0	0	0	200	300	0	18.1317	42.0477	-609.858	-9193.18	8768.81	597.656	214.378	918.074	0	0	0	0	0	0	0	603	903	0
6692	2	0	0	0	0	0	0	200	300	0	16.7584	42.6581	-611.689	-8552.31	8768.81	460.327	214.335	916.982	0	0	0	0	0	0	0	603	903	0
6692	3	0	0	0	0	0	0	200	300	0	19.0472	40.9796	-610.163	-8826.97	8768.81	872.314	214.371	917.467	0	0	0	0	0	0	0	603	903	0
6692	4	0	0	0	0	0	0	200	300	0	19.3524	40.5219	-608.942	-9193.18	8341.56	597.656	213.698	918.097	0	0	0	0	0	0	0	603	903	0
6692	5	0	0	0	0	0	0	200	300	0	18.2843	40.2167	-608.637	-8735.41	8463.63	506.103	213.906	917.352	0	0	0	0	0	0	0	603	903	0
6692	6	0	0	0	0	0	0	200	300	0	18.5895	39.4537	-607.416	-8826.97	8463.63	689.209	213.934	917.532	0	0	0	0	0	0	0	603	903	0
6692	7	0	0	0	0	0	0	200	300	0	19.1998	39.6063	-606.806	-8826.97	8036.38	734.985	213.244	917.547	0	0	0	0	0	0	0	603	903	0
6692	8	0	0	0	0	0	0	200	300	0	19.3524	38.8434	-604.975	-8186.1	8585.7	643.432	214.192	916.531	0	0	0	0	0	0	0	603	903	0
6692	9	0	0	0	0	0	0	200	300	0	18.8947	39.6063	-604.975	-8826.97	7975.35	506.103	213.183	917.591	0	0	0	0	0	0	0	603	903	0
6693	0	0	0	0	0	0	0	200	300	0	18.8947	37.3175	-604.67	-9284.73	8463.63	918.091	213.997	918.355	0	0	0	0	0	0	0	603	903	0
6693	1	0	0	0	0	0	0	200	300	0	20.5731	36.7072	-602.839	-8826.97	8463.63	551.879	214.04	917.642	0	0	0	0	0	0	0	603	903	0
6693	2	0	0	0	0	0	0	200	300	0	20.4205	34.5709	-601.008	-9284.73	7975.35	551.879	213.27	918.449	0	0	0	0	0	0	0	603	903	0
6693	3	0	0	0	0	0	0	200	300	0	19.9628	36.0968	-599.177	-9650.94	8097.42	643.432	213.514	919.107	0	0	0	0	0	0	0	603	903	0
6693	4	0	0	0	0	0	0	200	300	0	20.2679	35.9442	-595.514	-9467.83	8463.63	551.879	214.212	918.899	0	0	0	0	0	0	0	603	903	0
6693	5	0	0	0	0	0	0	200	300	0	21.0309	35.4865	-596.735	-9467.83	8524.66	460.327	214.286	918.866	0	0	0	0	0	0	0	603	903	0
6693	6	0	0	0	0	0	0	200	300	0	21.3361	35.3339	-595.82	-9650.94	8524.66	551.879	214.307	919.198	0	0	0	0	0	0	0	603	903	0
6693	7	0	0	0	0	0	0	200	300	0	21.0309	35.0287	-595.209	-9925.6	8463.63	368.774	214.22	919.676	0	0	0	0	0	0	0	603	903	0
6693	8	0	0	0	0	0	0	200	300	0	22.8619	33.808	-593.683	-9650.94	8341.56	414.55	214.051	919.256	0	0	0	0	0	0	0	603	903	0
6693	9	0	0	0	0	0	0	200	300	0	21.4886	33.1976	-594.599	-9559.39	8829.84	368.774	214.85	919.077	0	0	0	0	0	0	0	603	903	0
6694	0	0	0	0	0	0	0	200	300	0	21.7938	33.3502	-590.326	-10017.2	7670.17	231.445	212.993	919.969	0	0	0	0	0	0	0	603	903	0
6694	1	0	0	0	0	0	0	200	300	0	22.2516	31.9769	-588.495	-10291.8	8402.59	414.55	214.278	920.488	0	0	0	0	0	0	0	603	903	0
6694	2	0	0	0	0	0	0	200	300	0	21.7938	32.5873	-588.495	-10291.8	8463.63	414.55	214.382	920.488	0	0	0	0	0	0	0	603	903	0
6694	3	0	0	0	0	0	0	200	300	0	21.9464	32.2821	-586.359	-9925.6	8219.49	506.103	214.018	919.928	0	0	0	0	0	0	0	603	903	0
6694	4	0	0	0	0	0	0	200	300	0	22.7094	32.2821	-585.138	-9925.6	8280.52	689.209	214.151	919.963	0	0	0	0	0	0	0	603	903	0
6694	5	0	0	0	0	0	0	200	300	0	22.5568	31.0614	-584.528	-9650.94	8524.66	368.774	214.584	919.511	0	0	0	0	0	0	0	603	903	0
6694	6	0	0	0	0	0	0	200	300	0	21.1835	30.1459	-582.697	-10017.2	8524.66	368.774	214.63	920.191	0	0	0	0	0	0	0	603	903	0
6694	7	0	0	0	0	0	0	200	300	0	23.7775	30.9088	-582.392	-10658	8219.49	368.774	214.113	921.3	0	0	0	0	0	0	0	603	903	0
6694	8	0	0	0	0	0	0	200	300	0	22.2516	31.214	-579.951	-10200.3	8036.38	551.879	213.857	920.588	0	0	0	0	0	0	0	603	903	0
6694	9	0	0	0	0	0	0	200	300	0	24.3878	30.451	-578.73	-10566.5	8280.52	139.892	214.308	921.258	0	0	0	0	0	0	0	603	903	0
6695	0	0	0	0	0	0	0	200	300	0	24.3878	29.9933	-578.73	-10932.7	8402.59	277.221	214.519	921.891	0	0	0	0	0	0	0	603	903	0
6695	1	0	0	0	0	0	0	200	300	0	24.693	29.2303	-576.288	-10749.6	8158.45	185.669	214.157	921.653	0	0	0	0	0	0	0	603	903	0
6695	2	0	0	0	0	0	0	200	300	0	24.0826	28.4674	-575.068	-11207.3	8341.56	368.774	214.505	922.489	0	0	0	0	0	0	0	603	903	0
6695	3	0	0	0	0	0	0	200	300	0	24.3878	26.7889	-575.678	-11024.2	7975.35	139.892	213.854	922.15	0	0	0	0	0	0	0	603	903	0
6695	4	0	0	0	0	0	0	200	300	0	23.7775	27.7045	-571.406	-10932.7	8219.49	2.56305	214.385	922.133	0	0	0	0	0	0	0	603	903	0
6695	5	0	0	0	0	0	0	200	300	0	24.2352	27.5519	-571.406	-11207.3	8158.45	185.669	214.278	922.614	0	0	0	0	0	0	0	603	903	0
6695	6	0	0	0	0	0	0	200	300	0	24.0826	27.5519	-569.269	-11207.3	7975.35	185.669	214.01	922.687	0	0	0	0	0	0	0	603	903	0
6695	7	0	0	0	0	0	0	200	300	0	25.3033	26.7889	-568.659	-10749.6	8158.45	460.327	214.347	921.903	0	0	0	0	0	0	0	603	903	0
6695	8	0	0	0	0	0	0	200	300	0	25.3033	26.1786	-565.607	-11939.8	8158.45	185.669	214.424	924.11	0	0	0	0	0	0	0	603	903	0
6695	9	0	0	0	0	0	0	200	300	0	23.7775	24.6527	-565.607	-11390.4	8158.45	231.445	214.424	923.138	0	0	0	0	0	0	0	603	903	0
6696	0	0	0	0	0	0	0	200	300	0	24.3878	24.5001	-562.555	-11939.8	8341.56	48.3394	214.828	924.224	0	0	0	0	0	0	0	603	903	0
6696	1	0	0	0	0	0	0	200	300	0	25.3033	25.2631	-560.724	-11482	8219.49	231.445	214.659	923.477	0	0	0	0	0	0	0	603	903	0
6696	2	0	0	0	0	0	0	200	300	0	27.1344	24.0424	-560.419	-11207.3	8158.45	322.998	214.558	922.998	0	0	0	0	0	0	0	603	903	0
6696	3	0	0	0	0	0	0	200	300	0	25.1508	21.7535	-558.893	-11756.7	7975.35	368.774	214.27	924.036	0	0	0	0	0	0	0	603	903	0
6696	4	0	0	0	0	0	0	200	300	0	24.3878	23.2794	-559.809	-12031.3	8036.38	-88.9897	214.356	924.492	0	0	0	0	0	0	0	603	903	0
6696	5	0	0	0	0	0	0	200	300	0	24.5404	21.9061	-558.283	-12031.3	7914.31	94.1158	214.176	924.551	0	0	0	0	0	0	0	603	903	0
6696	6	0	0	0	0	0	0	200	300	0	25.7611	19.6173	-555.231	-11482	7426.03	231.445	213.375	923.68	0	0	0	0	0	0	0	603	903	0
6696	7	0	0	0	0	0	0	200	300	0	25.9137	21.1432	-554.011	-12397.5	8341.56	48.3394	215.057	925.378	0	0	0	0	0	0	0	603	903	0
6696	8	0	0	0	0	0	0	200	300	0	25.1508	21.2958	-552.18	-12122.9	8280.52	48.3394	214.996	924.955	0	0	0	0	0	0	0	603	903	0
6696	9	0	0	0	0	0	0	200	300	0	25.1508	20.838	-551.569	-12489.1	7670.17	-180.542	213.906	925.643	0	0	0	0	0	0	0	603	903	0
6697	0	0	0	0	0	0	0	200	300	0	25.1508	19.9225	-550.043	-11665.1	8036.38	-134.766	214.61	924.208	0	0	0	0	0	0	0	603	903	0
6697	1	0	0	0	0	0	0	200	300	0	26.2189	19.1595	-549.738	-12580.6	8036.38	-180.542	214.619	925.885	0	0	0	0	0	0	0	603	903	0
6697	2	0	0	0	0	0	0	200	300	0	24.693	19.6173	-547.907	-13038.4	7853.28	-272.095	214.333	926.797	0	0	0	0	0	0	0	603	903	0
6697	3	0	0	0	0	0	0	200	300	0	25.9137	17.9388	-543.024	-13038.4	7853.28	-226.319	214.462	927.011	0	0	0	0	0	0	0	603	903	0
6697	4	0	0	0	0	0	0	200	300	0	28.6603	18.244	-544.245	-12946.8	8036.38	2.56305	214.766	926.789	0	0	0	0	0	0	0	603	903	0
6697	5	0	0	0	0	0	0	200	300	0	27.1344	18.0914	-542.414	-12855.3	8036.38	-180.542	214.816	926.7	0	0	0	0	0	0	0	603	903	0
6697	6	0	0	0	0	0	0	200	300	0	25.9137	16.8707	-540.583	-13679.3	7975.35	-180.542	214.753	928.305	0	0	0	0	0	0	0	603	903	0
6697	7	0	0	0	0	0	0	200	300	0	24.693	17.1759	-540.583	-13129.9	7487.06	-180.542	213.85	927.289	0	0	0	0	0	0	0	603	903	0
6697	8	0	0	0	0	0	0	200	300	0	24.8456	17.3285	-539.362	-13129.9	7975.35	48.3394	214.787	927.344	0	0	0	0	0	0	0	603	903	0
6697	9	0	0	0	0	0	0	200	300	0	25.9137	16.1078	-537.836	-13404.6	7731.21	2.56305	214.375	927.923	0	0	0	0	0	0	0	603	903	0
6698	0	0	0	0	0	0	0	200	300	0	25.4559	15.8026	-536.005	-14045.5	7548.1	-455.201	214.082	929.204	0	0	0	0	0	0	0	603	903	0
6698	1	0	0	0	0	0	0	200	300	0	24.8456	14.8871	-534.784	-14137	7609.14	-134.766	214.228	929.435	0	0	0	0	0	0	0	603	903	0
6698	2	0	0	0	0	0	0	200	300	0	24.693	15.3448	-534.174	-14137	7914.31	-88.9897	214.816	929.465	0	0	0	0	0	0	0	603	903	0
6698	3	0	0	0	0	0	0	200	300	0	25.6085	13.6664	-532.953	-14045.5	8097.42	-180.542	215.193	929.354	0	0	0	0	0	0	0	603	903	0
6698	4	0	0	0	0	0	0	200	300	0	25.1508	14.4293	-532.343	-15052.6	7853.28	-272.095	214.752	931.276	0	0	0	0	0	0	0	603	903	0
6698	5	0	0	0	0	0	0	200	300	0	23.9301	13.5138	-530.817	-14411.7	7731.21	-363.648	214.565	930.15	0	0	0	0	0	0	0	603	903	0
6698	6	0	0	0	0	0	0	200	300	0	23.9301	12.7509	-529.596	-14961	8097.42	-180.542	215.29	931.25	0	0	0	0	0	0	0	603	903	0
6698	7	0	0	0	0	0	0	200	300	0	24.9982	12.4457	-527.46	-14411.7	8158.45	-226.319	215.467	930.323	0	0	0	0	0	0	0	603	903	0
6698	8	0	0	0	0	0	0	200	300	0	26.524	12.1405	-526.24	-14869.4	7609.14	-500.977	214.459	931.256	0	0	0	0	0	0	0	603	903	0
6698	9	0	0	0	0	0	0	200	300	0	24.3878	11.6827	-525.629	-15418.8	8158.45	-272.095	215.521	932.334	0	0	0	0	0	0	0	603	903	0
6699	0	0	0	0	0	0	0	200	300	0	24.3878	11.5302	-526.24	-15510.3	7914.31	-317.872	215.039	932.474	0	0	0	0	0	0	0	603	903	0
6699	1	0	0	0	0	0	0	200	300	0	23.9301	11.225	-524.714	-15510.3	7975.35	-409.424	215.199	932.56	0	0	0	0	0	0	0	603	903	0
6699	2	0	0	0	0	0	0	200	300	0	25.3033	10.6146	-524.103	-15785	7731.21	-317.872	214.751	933.118	0	0	0	0	0	0	0	603	903	0
6699	3	0	0	0	0	0	0	200	300	0	24.3878	9.6991	-521.967	-15968.1	7975.35	-226.319	215.279	933.592	0	0	0	0	0	0	0	603	903	0
6699	4	0	0	0	0	0	0	200	300	0	24.2352	9.39392	-520.441	-15968.1	8036.38	-226.319	215.441	933.682	0	0	0	0	0	0	0	603	903	0
6699	5	0	0	0	0	0	0	200	300	0	23.7775	9.24133	-519.831	-16059.6	7609.14	-363.648	214.638	933.894	0	0	0	0	0	0	0	603	903	0
6699	6	0	0	0	0	0	0	200	300	0	24.3878	8.47839	-518.61	-16151.2	7487.06	-592.53	214.437	934.143	0	0	0	0	0	0	0	603	903	0
6699	7	0	0	0	0	0	0	200	300	0	24.8456	7.71545	-518.305	-16425.8	7609.14	-272.095	214.681	934.691	0	0	0	0	0	0	0	603	903	0
6699	8	0	0	0	0	0	0	200	300	0	23.4723	8.47839	-518	-16883.6	7731.21	-409.424	214.925	935.594	0	0	0	0	0	0	0	603	903	0
6699	9	0	0	0	0	0	0	200	300	0	23.3197	7.71545	-516.779	-16700.5	7426.03	-226.319	214.37	935.317	0	0	0	0	0	0	0	603	903	0
6700	0	0	0	0	0	0	0	200	300	0	24.693	6.95251	-516.474	-17158.3	7792.24	-592.53	215.087	936.222	0	0	0	0	0	0	0	603	903	0
6700	1	0	0	0	0	0	0	200	300	0	24.693	6.64734	-513.727	-16792.1	7609.14	-684.083	214.812	935.687	0	0	0	0	0	0	0	603	903	0
6700	2	0	0	0	0	0	0	200	300	0	23.4723	6.18958	-513.117	-17524.5	7670.17	-500.977	214.948	937.153	0	0	0	0	0	0	0	603	903	0
6700	3	0	0	0	0	0	0	200	300	0	26.0663	6.79993	-511.896	-17799.1	7242.92	-821.412	214.149	937.771	0	0	0	0	0	0	0	603	903	0
6700	4	0	0	0	0	0	0	200	300	0	24.693	6.79993	-511.286	-17707.6	7609.14	-958.741	214.882	937.633	0	0	0	0	0	0	0	603	903	0
6700	5	0	0	0	0	0	0	200	300	0	24.9982	5.8844	-511.896	-18165.3	7731.21	-638.306	215.103	938.486	0	0	0	0	0	0	0	603	903	0
6700	6	0	0	0	0	0	0	200	300	0	24.9982	6.03699	-510.981	-18714.7	7548.1	-729.859	214.772	939.625	0	0	0	0	0	0	0	603	903	0
6700	7	0	0	0	0	0	0	200	300	0	24.5404	4.96887	-506.098	-19355.5	7487.06	-684.083	214.794	941.245	0	0	0	0	0	0	0	603	903	0
6700	8	0	0	0	0	0	0	200	300	0	23.6249	4.96887	-507.624	-19721.7	7731.21	-684.083	215.23	941.851	0	0	0	0	0	0	0	603	903	0
6700	9	0	0	0	0	0	0	200	300	0	24.9982	5.42664	-505.793	-18806.2	7670.17	-1050.29	215.165	940.182	0	0	0	0	0	0	0	603	903	0
6701	0	0	0	0	0	0	0	200	300	0	24.8456	3.59558	-505.488	-19538.6	7548.1	-867.188	214.932	941.653	0	0	0	0	0	0	0	603	903	0
6701	1	0	0	0	0	0	0	200	300	0	23.9301	6.18958	-506.403	-19996.4	7792.24	-821.412	215.387	942.487	0	0	0	0	0	0	0	603	903	0
6701	2	0	0	0	0	0	0	200	300	0	25.7611	5.12146	-505.488	-20362.6	7731.21	-912.965	215.295	943.283	0	0	0	0	0	0	0	603	903	0
6701	3	0	0	0	0	0	0	200	300	0	25.4559	4.6637	-505.488	-20179.5	7426.03	-821.412	214.691	942.921	0	0	0	0	0	0	0	603	903	0
6701	4	0	0	0	0	0	0	200	300	0	24.8456	4.6637	-502.131	-20362.6	7670.17	-821.412	215.275	943.552	0	0	0	0	0	0	0	603	903	0
6701	5	0	0	0	0	0	0	200	300	0	24.9982	4.96887	-501.215	-20911.9	7853.28	-775.635	215.668	944.723	0	0	0	0	0	0	0	603	903	0
6701	6	0	0	0	0	0	0	200	300	0	24.0826	5.12146	-501.52	-21461.2	7731.21	-821.412	215.416	945.792	0	0	0	0	0	0	0	603	903	0
6701	7	0	0	0	0	0	0	200	300	0	23.6249	3.90076	-498.774	-21186.6	7792.24	-1096.07	215.623	945.477	0	0	0	0	0	0	0	603	903	0
6701	8	0	0	0	0	0	0	200	300	0	24.5404	4.6637	-499.994	-21552.8	7548.1	-1141.85	215.096	946.106	0	0	0	0	0	0	0	603	903	0
6701	9	0	0	0	0	0	0	200	300	0	24.2352	4.51111	-495.417	-21919	7731.21	-1141.85	215.605	947.244	0	0	0	0	0	0	0	603	903	0
6702	0	0	0	0	0	0	0	200	300	0	23.3197	4.20593	-498.163	-22285.2	7487.06	-1324.95	215.029	947.735	0	0	0	0	0	0	0	603	903	0
6702	1	0	0	0	0	0	0	200	300	0	23.9301	4.20593	-496.943	-22010.6	7242.92	-1050.29	214.575	947.292	0	0	0	0	0	0	0	603	903	0
6702	2	0	0	0	0	0	0	200	300	0	24.3878	3.44299	-496.027	-22559.9	7853.28	-958.741	215.832	948.481	0	0	0	0	0	0	0	603	903	0
6702	3	0	0	0	0	0	0	200	300	0	24.9982	4.35852	-495.417	-23109.2	7792.24	-1050.29	215.729	949.646	0	0	0	0	0	0	0	603	903	0
6702	4	0	0	0	0	0	0	200	300	0	23.7775	3.90076	-495.722	-23658.5	7548.1	-775.635	215.226	950.725	0	0	0	0	0	0	0	603	903	0
6702	5	0	0	0	0	0	0	200	300	0	23.3197	3.59558	-494.806	-23292.3	7792.24	-1279.18	215.748	950.074	0	0	0	0	0	0	0	603	903	0
6702	6	0	0	0	0	0	0	200	300	0	24.2352	3.44299	-493.586	-23200.7	8036.38	-1141.85	216.282	950.005	0	0	0	0	0	0	0	603	903	0
6702	7	0	0	0	0	0	0	200	300	0	24.3878	2.83264	-492.06	-23841.6	7914.31	-1141.85	216.084	951.453	0	0	0	0	0	0	0	603	903	0
6702	8	0	0	0	0	0	0	200	300	0	23.0145	3.44299	-492.06	-24116.3	7548.1	-1508.06	215.34	952.011	0	0	0	0	0	0	0	603	903	0
6702	9	0	0	0	0	0	0	200	300	0	23.6249	3.59558	-492.365	-24024.7	7792.24	-1187.62	215.826	951.795	0	0	0	0	0	0	0	603	903	0
6703	0	0	0	0	0	0	0	200	300	0	24.5404	3.13782	-492.06	-24116.3	7670.17	-1370.73	215.588	952.011	0	0	0	0	0	0	0	603	903	0
6703	1	0	0	0	0	0	0	200	300	0	24.693	3.29041	-491.755	-25031.8	7487.06	-1370.73	215.225	953.903	0	0	0	0	0	0	0	603	903	0
6703	2	0	0	0	0	0	0	200	300	0	23.3197	1.91711	-487.482	-26038.9	7487.06	-1508.06	215.359	956.415	0	0	0	0	0	0	0	603	903	0
6703	3	0	0	0	0	0	0	200	300	0	25.1508	3.29041	-490.229	-26130.4	7914.31	-1462.28	216.144	956.303	0	0	0	0	0	0	0	603	903	0
6703	4	0	0	0	0	0	0	200	300	0	24.0826	3.13782	-489.924	-26222	7975.35	-1416.5	216.279	956.523	0	0	0	0	0	0	0	603	903	0
6703	5	0	0	0	0	0	0	200	300	0	24.693	3.13782	-490.229	-26313.5	7548.1	-1599.61	215.397	956.676	0	0	0	0	0	0	0	603	903	0
6703	6	0	0	0	0	0	0	200	300	0	24.2352	3.59558	-489.618	-27137.5	7731.21	-1691.16	215.79	958.426	0	0	0	0	0	0	0	603	903	0
6703	7	0	0	0	0	0	0	200	300	0	24.2352	1.45935	-490.534	-27778.4	7914.31	-1508.06	216.134	959.629	0	0	0	0	0	0	0	603	903	0
6703	8	0	0	0	0	0	0	200	300	0	23.1671	3.29041	-491.144	-27595.3	7914.31	-1462.28	216.114	959.186	0	0	0	0	0	0	0	603	903	0
6703	9	0	0	0	0	0	0	200	300	0	24.0826	2.83264	-489.618	-28144.6	7548.1	-1645.39	215.416	960.483	0	0	0	0	0	0	0	603	903	0
6704	0	0	0	0	0	0	0	200	300	0	23.6249	2.68005	-489.924	-29060.1	7731.21	-1553.83	215.78	962.316	0	0	0	0	0	0	0	603	903	0
6704	1	0	0	0	0	0	0	200	300	0	22.4042	2.52747	-488.703	-28877	8280.52	-1553.83	216.944	962.089	0	0	0	0	0	0	0	603	903	0
6704	2	0	0	0	0	0	0	200	300	0	23.0145	1.30676	-489.924	-28785.5	8158.45	-1691.16	216.653	961.755	0	0	0	0	0	0	0	603	903	0
6704	3	0	0	0	0	0	0	200	300	0	24.0826	2.68005	-488.093	-28236.1	7670.17	-1462.28	215.715	960.85	0	0	0	0	0	0	0	603	903	0
6704	4	0	0	0	0	0	0	200	300	0	23.6249	1.15418	-489.313	-29334.8	7853.28	-1828.49	216.05	962.951	0	0	0	0	0	0	0	603	903	0
6704	5	0	0	0	0	0	0	200	300	0	22.5568	2.0697	-490.534	-30433.4	7792.24	-1645.39	215.885	965.041	0	0	0	0	0	0	0	603	903	0
6704	6	0	0	0	0	0	0	200	300	0	22.8619	2.0697	-489.618	-30433.4	8219.49	-1691.16	216.788	965.157	0	0	0	0	0	0	0	603	903	0
6704	7	0	0	0	0	0	0	200	300	0	23.9301	1.00159	-489.008	-30799.6	7548.1	-1691.16	215.436	965.984	0	0	0	0	0	0	0	603	903	0
6704	8	0	0	0	0	0	0	200	300	0	25.6085	1.30676	-489.008	-31074.3	8219.49	-1691.16	216.809	966.546	0	0	0	0	0	0	0	603	903	0
6704	9	0	0	0	0	0	0	200	300	0	23.1671	2.22229	-489.313	-31715.2	8402.59	-1599.61	217.172	967.816	0	0	0	0	0	0	0	603	903	0
6705	0	0	0	0	0	0	0	200	300	0	22.7094	1.45935	-489.924	-32356	7975.35	-2057.37	216.279	969.043	0	0	0	0	0	0	0	603	903	0
6705	1	0	0	0	0	0	0	200	300	0	22.5568	2.0697	-489.008	-32264.5	7731.21	-1370.73	215.81	968.979	0	0	0	0	0	0	0	603	903	0
6705	2	0	0	0	0	0	0	200	300	0	23.3197	1.91711	-488.703	-32539.1	8341.56	-2057.37	217.069	969.583	0	0	0	0	0	0	0	603	903	0
6705	3	0	0	0	0	0	0	200	300	0	23.1671	1.61194	-490.229	-32813.8	8158.45	-1920.04	216.642	969.936	0	0	0	0	0	0	0	603	903	0
6705	4	0	0	0	0	0	0	200	300	0	22.2516	1.76453	-487.482	-32996.9	7609.14	-1874.27	215.609	970.688	0	0	0	0	0	0	0	603	903	0
6705	5	0	0	0	0	0	0	200	300	0	22.8619	1.00159	-488.398	-33820.9	8402.59	-2011.6	217.204	972.249	0	0	0	0	0	0	0	603	903	0
6705	6	0	0	0	0	0	0	200	300	0	23.1671	1.61194	-489.618	-34461.7	8341.56	-1920.04	217.037	973.385	0	0	0	0	0	0	0	603	903	0
6705	7	0	0	0	0	0	0	200	300	0	23.0145	0.238648	-489.618	-34553.3	8280.52	-1828.49	216.912	973.572	0	0	0	0	0	0	0	603	903	0
6705	8	0	0	0	0	0	0	200	300	0	21.9464	1.61194	-490.534	-35285.7	8463.63	-2148.93	217.254	974.933	0	0	0	0	0	0	0	603	903	0
6705	9	0	0	0	0	0	0	200	300	0	24.2352	1.15418	-490.534	-35468.8	8341.56	-2011.6	217.005	975.307	0	0	0	0	0	0	0	603	903	0
6706	0	0	0	0	0	0	0	200	300	0	23.0145	1.15418	-491.144	-35377.3	8524.66	-2240.48	217.357	975.03	0	0	0	0	0	0	0	603	903	0
6706	1	0	0	0	0	0	0	200	300	0	23.6249	1.15418	-491.755	-35651.9	8219.49	-1965.82	216.715	975.5	0	0	0	0	0	0	0	603	903	0
6706	2	0	0	0	0	0	0	200	300	0	23.0145	-0.219116	-490.534	-36567.5	8219.49	-2011.6	216.756	977.546	0	0	0	0	0	0	0	603	903	0
6706	3	0	0	0	0	0	0	200	300	0	25.3033	0.543823	-491.144	-37116.8	8341.56	-1965.82	216.984	978.572	0	0	0	0	0	0	0	603	903	0
6706	4	0	0	0	0	0	0	200	300	0	23.0145	1.15418	-493.586	-36933.7	8646.74	-2011.6	217.518	977.827	0	0	0	0	0	0	0	603	903	0
6706	5	0	0	0	0	0	0	200	300	0	22.8619	1.30676	-493.891	-37025.2	7853.28	-2286.26	215.901	977.966	0	0	0	0	0	0	0	603	903	0
6706	6	0	0	0	0	0	0	200	300	0	22.8619	0.696411	-493.586	-38306.9	8646.74	-2377.81	217.518	980.61	0	0	0	0	0	0	0	603	903	0
6706	7	0	0	0	0	0	0	200	300	0	22.099	-0.524292	-496.332	-38490.1	8768.81	-2011.6	217.667	980.549	0	0	0	0	0	0	0	603	903	0
6706	8	0	0	0	0	0	0	200	300	0	22.2516	0.543823	-493.281	-38673.2	8402.59	-2011.6	217.034	981.4	0	0	0	0	0	0	0	603	903	0
6706	9	0	0	0	0	0	0	200	300	0	23.7775	1.30676	-493.586	-38123.8	8585.7	-1828.49	217.395	980.239	0	0	0	0	0	0	0	603	903	0
6707	0	0	0	0	0	0	0	200	300	0	23.7775	0.391236	-493.281	-39314	8829.84	-1920.04	217.9	982.699	0	0	0	0	0	0	0	603	903	0
6707	1	0	0	0	0	0	0	200	300	0	23.1671	0.543823	-495.417	-39680.3	8585.7	-2057.37	217.33	983.095	0	0	0	0	0	0	0	603	903	0
6707	2	0	0	0	0	0	0	200	300	0	22.4042	1.61194	-493.891	-40412.7	8707.77	-2240.48	217.631	984.825	0	0	0	0	0	0	0	603	903	0
6707	3	0	0	0	0	0	0	200	300	0	23.1671	1.00159	-494.806	-40412.7	8646.74	-2057.37	217.475	984.674	0	0	0	0	0	0	0	603	903	0
6707	4	0	0	0	0	0	0	200	300	0	23.7775	0.696411	-495.722	-40962	9196.05	-2148.93	218.551	985.631	0	0	0	0	0	0	0	603	903	0
6707	5	0	0	0	0	0	0	200	300	0	22.5568	1.00159	-495.112	-41694.4	8768.81	-2423.59	217.711	987.212	0	0	0	0	0	0	0	603	903	0
6707	6	0	0	0	0	0	0	200	300	0	21.9464	1.30676	-495.417	-42243.7	8829.84	-2606.69	217.823	988.269	0	0	0	0	0	0	0	603	903	0
6707	7	0	0	0	0	0	0	200	300	0	23.4723	1.15418	-496.638	-41694.4	9135.02	-2240.48	218.394	986.953	0	0	0	0	0	0	0	603	903	0
6707	8	0	0	0	0	0	0	200	300	0	23.3197	1.45935	-496.943	-42793	9379.16	-2377.81	218.874	989.113	0	0	0	0	0	0	0	603	903	0
6707	9	0	0	0	0	0	0	200	300	0	23.0145	0.696411	-498.163	-42793	8951.91	-2240.48	217.97	988.902	0	0	0	0	0	0	0	603	903	0
6708	0	0	0	0	0	0	0	200	300	0	21.9464	1.30676	-497.858	-43708.6	8951.91	-2377.81	217.981	990.793	0	0	0	0	0	0	0	603	903	0
6708	1	0	0	0	0	0	0	200	300	0	23.1671	-0.371704	-495.417	-42884.6	9501.23	-2515.14	219.178	989.563	0	0	0	0	0	0	0	603	903	0
6708	2	0	0	0	0	0	0	200	300	0	22.8619	0.848999	-497.248	-44166.3	9379.16	-2515.14	218.862	991.822	0	0	0	0	0	0	0	603	903	0
6708	3	0	0	0	0	0	0	200	300	0	22.099	2.52747	-497.858	-44166.3	8585.7	-2515.14	217.245	991.713	0	0	0	0	0	0	0	603	903	0
6708	4	0	0	0	0	0	0	200	300	0	21.9464	1.61194	-498.469	-45081.8	9257.09	-2744.02	218.571	993.441	0	0	0	0	0	0	0	603	903	0
6708	5	0	0	0	0	0	0	200	300	0	23.0145	1.61194	-500.91	-44990.3	9501.23	-2377.81	218.968	992.817	0	0	0	0	0	0	0	603	903	0
6708	6	0	0	0	0	0	0	200	300	0	22.7094	1.91711	-500.3	-45722.7	9196.05	-2515.14	218.381	994.391	0	0	0	0	0	0	0	603	903	0
6708	7	0	0	0	0	0	0	200	300	0	22.7094	1.76453	-500.3	-46729.8	9135.02	-2560.91	218.259	996.404	0	0	0	0	0	0	0	603	903	0
6708	8	0	0	0	0	0	0	200	300	0	24.2352	0.543823	-502.131	-46912.9	9562.26	-2423.59	219.043	996.428	0	0	0	0	0	0	0	603	903	0
6708	9	0	0	0	0	0	0	200	300	0	22.7094	1.30676	-499.689	-46821.4	9684.33	-2286.26	219.381	996.701	0	0	0	0	0	0	0	603	903	0
6709	0	0	0	0	0	0	0	200	300	0	24.9982	1.91711	-501.52	-47462.2	9379.16	-2423.59	218.701	997.637	0	0	0	0	0	0	0	603	903	0
6709	1	0	0	0	0	0	0	200	300	0	22.099	1.00159	-500.91	-48011.5	9379.16	-2698.24	218.724	998.849	0	0	0	0	0	0	0	603	903	0
6709	2	0	0	0	0	0	0	200	300	0	23.4723	1.15418	-504.267	-48927.1	9623.3	-2835.57	219.084	1000.03	0	0	0	0	0	0	0	603	903	0
6709	3	0	0	0	0	0	0	200	300	0	23.9301	2.22229	-500.91	-48103.1	9562.26	-2515.14	219.09	999.031	0	0	0	0	0	0	0	603	903	0
6709	4	0	0	0	0	0	0	200	300	0	24.693	1.45935	-504.267	-48652.4	9135.02	-2789.8	218.115	999.482	0	0	0	0	0	0	0	603	903	0
6709	5	0	0	0	0	0	0	200	300	0	23.6249	-0.0665281	-506.403	-49751.1	9196.05	-2789.8	218.16	1001.24	0	0	0	0	0	0	0	603	903	0
6709	6	0	0	0	0	0	0	200	300	0	22.4042	1.15418	-505.182	-50208.8	10050.5	-2927.13	219.895	1002.39	0	0	0	0	0	0	0	603	903	0
6709	7	0	0	0	0	0	0	200	300	0	22.5568	1.00159	-505.182	-49842.6	9623.3	-2835.57	219.049	1001.66	0	0	0	0	0	0	0	603	903	0
6709	8	0	0	0	0	0	0	200	300	0	23.4723	-1.13464	-506.403	-49659.5	9501.23	-2698.24	218.762	1001.06	0	0	0	0	0	0	0	603	903	0
6709	9	0	0	0	0	0	0	200	300	0	23.7775	0.696411	-505.182	-50575	9928.47	-3064.45	219.653	1003.11	0	0	0	0	0	0	0	603	903	0
6710	0	0	0	0	0	0	0	200	300	0	22.5568	0.848999	-507.319	-50758.1	9989.51	-2881.35	219.691	1003.05	0	0	0	0	0	0	0	603	903	0
6710	1	0	0	0	0	0	0	200	300	0	22.8619	-0.219116	-505.793	-51673.7	9623.3	-3018.68	219.026	1005.16	0	0	0	0	0	0	0	603	903	0
6710	2	0	0	0	0	0	0	200	300	0	23.6249	-0.0665281	-507.013	-51856.8	9745.37	-2927.13	219.221	1005.28	0	0	0	0	0	0	0	603	903	0
6710	3	0	0	0	0	0	0	200	300	0	24.3878	0.848999	-508.234	-52680.7	9745.37	-3018.68	219.175	1006.65	0	0	0	0	0	0	0	603	903	0
6710	4	0	0	0	0	0	0	200	300	0	23.1671	0.391236	-509.15	-52589.2	10050.5	-2972.9	219.74	1006.29	0	0	0	0	0	0	0	603	903	0
6710	5	0	0	0	0	0	0	200	300	0	23.7775	0.0860598	-510.676	-53870.9	9684.33	-2835.57	218.964	1008.49	0	0	0	0	0	0	0	603	903	0
6710	6	0	0	0	0	0	0	200	300	0	24.3878	0.0860598	-509.76	-53779.4	9501.23	-2927.13	218.639	1008.5	0	0	0	0	0	0	0	603	903	0
6710	7	0	0	0	0	0	0	200	300	0	24.3878	-0.219116	-511.286	-53870.9	9806.4	-3247.56	219.18	1008.36	0	0	0	0	0	0	0	603	903	0
6710	8	0	0	0	0	0	0	200	300	0	23.4723	-0.829468	-508.539	-54786.5	9684.33	-3156.01	219.043	1010.73	0	0	0	0	0	0	0	603	903	0
6710	9	0	0	0	0	0	0	200	300	0	25.3033	-0.371704	-511.286	-54969.6	9684.33	-3156.01	218.941	1010.51	0	0	0	0	0	0	0	603	903	0
6711	0	0	0	0	0	0	0	200	300	0	25.1508	-0.67688	-512.201	-55244.2	10294.7	-3339.11	220.099	1010.86	0	0	0	0	0	0	0	603	903	0
6711	1	0	0	0	0	0	0	200	300	0	26.9818	-0.829468	-513.422	-55427.3	10172.6	-3339.11	219.813	1010.96	0	0	0	0	0	0	0	603	903	0
6711	2	0	0	0	0	0	0	200	300	0	24.0826	-0.982055	-515.558	-56159.7	9867.44	-3430.67	219.139	1011.93	0	0	0	0	0	0	0	603	903	0
6711	3	0	0	0	0	0	0	200	300	0	26.3715	-2.20276	-513.727	-56526	10050.5	-3247.56	219.564	1013.03	0	0	0	0	0	0	0	603	903	0
6711	4	0	0	0	0	0	0	200	300	0	25.6085	-2.20276	-515.558	-56617.5	10172.6	-3384.89	219.731	1012.82	0	0	0	0	0	0	0	603	903	0
6711	5	0	0	0	0	0	0	200	300	0	25.6085	-2.50793	-514.033	-56892.2	10355.7	-3613.77	220.146	1013.68	0	0	0	0	0	0	0	603	903	0
6711	6	0	0	0	0	0	0	200	300	0	24.5404	-2.50793	-515.864	-57807.7	9928.47	-3476.44	219.246	1015.06	0	0	0	0	0	0	0	603	903	0
6711	7	0	0	0	0	0	0	200	300	0	24.693	-2.35535	-516.779	-57716.1	10355.7	-3659.55	220.039	1014.68	0	0	0	0	0	0	0	603	903	0
6711	8	0	0	0	0	0	0	200	300	0	24.2352	-3.11829	-516.169	-58265.5	10538.8	-3567.99	220.417	1015.88	0	0	0	0	0	0	0	603	903	0
6711	9	0	0	0	0	0	0	200	300	0	24.0826	-3.27087	-519.831	-58265.5	10294.7	-3705.32	219.804	1015.09	0	0	0	0	0	0	0	603	903	0
6712	0	0	0	0	0	0	0	200	300	0	24.5404	-3.42346	-518.305	-59272.5	10050.5	-3705.32	219.391	1017.36	0	0	0	0	0	0	0	603	903	0
6712	1	0	0	0	0	0	0	200	300	0	23.7775	-3.72864	-519.831	-59638.8	10050.5	-3613.77	219.334	1017.73	0	0	0	0	0	0	0	603	903	0
6712	2	0	0	0	0	0	0	200	300	0	23.3197	-4.49158	-520.136	-59730.3	10477.8	-3659.55	220.144	1017.84	0	0	0	0	0	0	0	603	903	0
6712	3	0	0	0	0	0	0	200	300	0	23.9301	-4.64417	-519.526	-58997.9	10172.6	-3796.88	219.581	1016.56	0	0	0	0	0	0	0	603	903	0
6712	4	0	0	0	0	0	0	200	300	0	23.6249	-4.94934	-522.272	-60188.1	10660.9	-3751.1	220.413	1018.24	0	0	0	0	0	0	0	603	903	0
6712	5	0	0	0	0	0	0	200	300	0	23.1671	-5.86487	-522.577	-59913.4	10783	-3613.77	220.634	1017.65	0	0	0	0	0	0	0	603	903	0
6712	6	0	0	0	0	0	0	200	300	0	22.7094	-5.86487	-525.019	-60828.9	10844	-3979.98	220.654	1018.86	0	0	0	0	0	0	0	603	903	0
6712	7	0	0	0	0	0	0	200	300	0	23.7775	-6.32263	-524.714	-61286.7	10477.8	-4025.76	219.969	1019.8	0	0	0	0	0	0	0	603	903	0
6712	8	0	0	0	0	0	0	200	300	0	23.6249	-7.39075	-526.24	-61286.7	10538.8	-4117.31	220.027	1019.46	0	0	0	0	0	0	0	603	903	0
6712	9	0	0	0	0	0	0	200	300	0	24.0826	-7.84851	-527.46	-62568.4	11027.1	-3430.67	220.906	1021.62	0	0	0	0	0	0	0	603	903	0
6713	0	0	0	0	0	0	0	200	300	0	25.3033	-8.15369	-527.46	-63117.8	10721.9	-4208.86	220.327	1022.66	0	0	0	0	0	0	0	603	903	0
6713	1	0	0	0	0	0	0	200	300	0	23.1671	-8.61145	-528.681	-62660	10172.6	-4208.86	219.242	1021.52	0	0	0	0	0	0	0	603	903	0
6713	2	0	0	0	0	0	0	200	300	0	23.0145	-8.30627	-529.902	-63026.2	11149.2	-4163.09	221.04	1021.94	0	0	0	0	0	0	0	603	903	0
6713	3	0	0	0	0	0	0	200	300	0	23.3197	-9.2218	-530.207	-63758.6	11027.1	-4346.19	220.798	1023.25	0	0	0	0	0	0	0	603	903	0
6713	4	0	0	0	0	0	0	200	300	0	23.0145	-9.52698	-531.122	-64033.3	10783	-4483.52	220.302	1023.56	0	0	0	0	0	0	0	603	903	0
6713	5	0	0	0	0	0	0	200	300	0	22.5568	-11.0529	-531.122	-63850.2	10721.9	-4391.97	220.187	1023.22	0	0	0	0	0	0	0	603	903	0
6713	6	0	0	0	0	0	0	200	300	0	23.4723	-10.2899	-532.343	-63392.4	11454.4	-4529.3	221.517	1022.08	0	0	0	0	0	0	0	603	903	0
6713	7	0	0	0	0	0	0	200	300	0	23.9301	-10.7477	-532.343	-64948.8	11393.3	-4346.19	221.402	1025.01	0	0	0	0	0	0	0	603	903	0
6713	8	0	0	0	0	0	0	200	300	0	24.0826	-12.121	-534.174	-66047.4	11088.1	-4483.52	220.758	1026.64	0	0	0	0	0	0	0	603	903	0
6713	9	0	0	0	0	0	0	200	300	0	23.4723	-12.2736	-535.7	-66047.4	10966.1	-4575.07	220.471	1026.29	0	0	0	0	0	0	0	603	903	0
6714	0	0	0	0	0	0	0	200	300	0	23.6249	-12.2736	-532.343	-65589.7	11515.4	-4254.64	221.632	1026.21	0	0	0	0	0	0	0	603	903	0
6714	1	0	0	0	0	0	0	200	300	0	25.1508	-13.1891	-535.09	-65955.9	11393.3	-4620.85	221.292	1026.26	0	0	0	0	0	0	0	603	903	0
6714	2	0	0	0	0	0	0	200	300	0	24.3878	-12.8839	-534.784	-66322.1	10844	-4849.73	220.277	1027.02	0	0	0	0	0	0	0	603	903	0
6714	3	0	0	0	0	0	0	200	300	0	23.7775	-13.6469	-537.226	-67054.5	11454.4	-4712.4	221.321	1027.82	0	0	0	0	0	0	0	603	903	0
6714	4	0	0	0	0	0	0	200	300	0	25.6085	-14.715	-537.531	-67420.7	11637.5	-4666.63	221.65	1028.43	0	0	0	0	0	0	0	603	903	0
6714	5	0	0	0	0	0	0	200	300	0	24.0826	-15.9357	-539.362	-67603.8	11088.1	-4849.73	220.558	1028.34	0	0	0	0	0	0	0	603	903	0
6714	6	0	0	0	0	0	0	200	300	0	26.524	-15.1727	-540.278	-68153.2	11393.3	-5078.62	221.088	1029.14	0	0	0	0	0	0	0	603	903	0
6714	7	0	0	0	0	0	0	200	300	0	24.693	-16.3934	-537.531	-68336.2	11759.5	-5215.94	221.877	1030.13	0	0	0	0	0	0	0	603	903	0
6714	8	0	0	0	0	0	0	200	300	0	23.7775	-17.1564	-540.888	-68794	11942.6	-5124.39	222.08	1030.19	0	0	0	0	0	0	0	603	903	0
6714	9	0	0	0	0	0	0	200	300	0	24.3878	-17.0038	-540.583	-68702.5	11698.5	-5307.5	221.641	1030.09	0	0	0	0	0	0	0	603	903	0
6715	0	0	0	0	0	0	0	200	300	0	25.1508	-17.7667	-542.109	-68702.5	11576.4	-5353.27	221.354	1029.73	0	0	0	0	0	0	0	603	903	0
6715	1	0	0	0	0	0	0	200	300	0	24.3878	-17.1564	-543.635	-69343.3	11759.5	-5261.72	221.631	1030.56	0	0	0	0	0	0	0	603	903	0
6715	2	0	0	0	0	0	0	200	300	0	24.3878	-18.6823	-545.16	-69618	11820.6	-5444.83	221.683	1030.7	0	0	0	0	0	0	0	603	903	0
6715	3	0	0	0	0	0	0	200	300	0	26.6766	-18.5297	-546.686	-70442	11454.4	-5215.94	220.952	1031.85	0	0	0	0	0	0	0	603	903	0
6715	4	0	0	0	0	0	0	200	300	0	24.8456	-19.2926	-546.992	-70350.4	11454.4	-5261.72	220.941	1031.61	0	0	0	0	0	0	0	603	903	0
6715	5	0	0	0	0	0	0	200	300	0	24.8456	-21.2762	-549.128	-70716.6	11942.6	-5353.27	221.748	1031.78	0	0	0	0	0	0	0	603	903	0
6715	6	0	0	0	0	0	0	200	300	0	24.8456	-21.2762	-551.264	-70899.7	11820.6	-5261.72	221.443	1031.61	0	0	0	0	0	0	0	603	903	0
6715	7	0	0	0	0	0	0	200	300	0	23.9301	-21.734	-550.959	-71723.7	11881.6	-5261.72	221.565	1033.18	0	0	0	0	0	0	0	603	903	0
6715	8	0	0	0	0	0	0	200	300	0	23.7775	-22.8021	-554.316	-71357.5	12308.8	-5673.71	222.205	1031.73	0	0	0	0	0	0	0	603	903	0
6715	9	0	0	0	0	0	0	200	300	0	23.9301	-24.0228	-557.367	-70899.7	12247.8	-5719.48	221.974	1030.2	0	0	0	0	0	0	0	603	903	0
6716	0	0	0	0	0	0	0	200	300	0	24.3878	-24.6332	-559.504	-71449.1	12003.7	-5811.04	221.454	1030.7	0	0	0	0	0	0	0	603	903	0
6716	1	0	0	0	0	0	0	200	300	0	23.6249	-25.3961	-560.114	-72364.6	11759.5	-5627.93	220.995	1032.2	0	0	0	0	0	0	0	603	903	0
6716	2	0	0	0	0	0	0	200	300	0	23.1671	-26.6168	-561.335	-73371.6	12186.8	-5994.14	221.71	1033.71	0	0	0	0	0	0	0	603	903	0
6716	3	0	0	0	0	0	0	200	300	0	24.5404	-27.5323	-562.555	-73005.4	12247.8	-5948.37	221.772	1032.77	0	0	0	0	0	0	0	603	903	0
6716	4	0	0	0	0	0	0	200	300	0	24.5404	-27.9901	-564.387	-72822.4	11698.5	-5948.37	220.728	1032.03	0	0	0	0	0	0	0	603	903	0
6716	5	0	0	0	0	0	0	200	300	0	23.9301	-29.0582	-566.523	-73646.3	12492	-6177.25	222.05	1033	0	0	0	0	0	0	0	603	903	0
6716	6	0	0	0	0	0	0	200	300	0	23.3197	-29.9738	-567.133	-73463.2	12247.8	-5948.37	221.596	1032.53	0	0	0	0	0	0	0	603	903	0
6716	7	0	0	0	0	0	0	200	300	0	22.5568	-30.4315	-571.1	-73921	12308.8	-6360.35	221.553	1032.44	0	0	0	0	0	0	0	603	903	0
6716	8	0	0	0	0	0	0	200	300	0	24.3878	-31.4996	-569.575	-74378.7	12247.8	-6360.35	221.503	1033.59	0	0	0	0	0	0	0	603	903	0
6716	9	0	0	0	0	0	0	200	300	0	25.3033	-31.6522	-570.795	-74287.2	12430.9	-6131.47	221.778	1033.15	0	0	0	0	0	0	0	603	903	0
6717	0	0	0	0	0	0	0	200	300	0	24.5404	-33.3307	-573.237	-75294.2	12614	-6543.46	222.005	1034.35	0	0	0	0	0	0	0	603	903	0
6717	1	0	0	0	0	0	0	200	300	0	23.1671	-33.3307	-575.068	-74561.8	12308.8	-6360.35	221.404	1032.66	0	0	0	0	0	0	0	603	903	0
6717	2	0	0	0	0	0	0	200	300	0	23.6249	-34.8566	-573.542	-74745	12430.9	-6772.34	221.674	1033.32	0	0	0	0	0	0	0	603	903	0
6717	3	0	0	0	0	0	0	200	300	0	24.2352	-35.4669	-575.678	-75385.8	12614	-6635.01	221.912	1033.95	0	0	0	0	0	0	0	603	903	0
6717	4	0	0	0	0	0	0	200	300	0	24.693	-35.7721	-577.509	-75294.2	12308.8	-6680.79	221.314	1033.38	0	0	0	0	0	0	0	603	903	0
6717	5	0	0	0	0	0	0	200	300	0	23.1671	-35.9247	-575.983	-76118.3	12492	-6726.56	221.688	1035.15	0	0	0	0	0	0	0	603	903	0
6717	6	0	0	0	0	0	0	200	300	0	26.6766	-37.298	-580.561	-76392.9	12614	-6726.56	221.727	1034.58	0	0	0	0	0	0	0	603	903	0
6717	7	0	0	0	0	0	0	200	300	0	25.3033	-37.4506	-582.697	-76118.3	12186.8	-6360.35	220.914	1033.63	0	0	0	0	0	0	0	603	903	0
6717	8	0	0	0	0	0	0	200	300	0	24.693	-38.6713	-582.087	-76392.9	12736.1	-6863.89	221.88	1034.24	0	0	0	0	0	0	0	603	903	0
6717	9	0	0	0	0	0	0	200	300	0	25.1508	-39.7394	-585.138	-77400	12553	-6818.12	221.453	1035.28	0	0	0	0	0	0	0	603	903	0
6718	0	0	0	0	0	0	0	200	300	0	24.2352	-40.6549	-583.613	-77033.8	12736.1	-6955.45	221.823	1034.99	0	0	0	0	0	0	0	603	903	0
6718	1	0	0	0	0	0	0	200	300	0	24.0826	-40.5023	-585.444	-77033.8	12675.1	-6680.79	221.65	1034.58	0	0	0	0	0	0	0	603	903	0
6718	2	0	0	0	0	0	0	200	300	0	25.3033	-40.8075	-586.359	-77308.4	12553	-7321.66	221.408	1034.84	0	0	0	0	0	0	0	603	903	0
6718	3	0	0	0	0	0	0	200	300	0	24.5404	-41.723	-586.359	-78040.9	11881.6	-7138.55	220.263	1036.09	0	0	0	0	0	0	0	603	903	0
6718	4	0	0	0	0	0	0	200	300	0	24.3878	-42.1808	-590.021	-76759.1	12919.2	-7275.88	221.896	1033.1	0	0	0	0	0	0	0	603	903	0
6718	5	0	0	0	0	0	0	200	300	0	24.5404	-42.7911	-590.632	-78590.1	12736.1	-6909.67	221.564	1036.06	0	0	0	0	0	0	0	603	903	0
6718	6	0	0	0	0	0	0	200	300	0	25.9137	-44.0118	-591.547	-78315.5	12675.1	-7367.43	221.427	1035.39	0	0	0	0	0	0	0	603	903	0
6718	7	0	0	0	0	0	0	200	300	0	25.6085	-44.0118	-590.937	-78407.1	12736.1	-7413.21	221.552	1035.68	0	0	0	0	0	0	0	603	903	0
6718	8	0	0	0	0	0	0	200	300	0	24.8456	-44.9274	-592.768	-78864.8	12980.2	-7504.76	221.898	1036.05	0	0	0	0	0	0	0	603	903	0
6718	9	0	0	0	0	0	0	200	300	0	26.524	-44.7748	-591.852	-79139.5	13285.4	-7504.76	222.447	1036.72	0	0	0	0	0	0	0	603	903	0
6719	0	0	0	0	0	0	0	200	300	0	26.524	-45.3851	-594.599	-78864.8	12858.2	-7642.09	221.625	1035.64	0	0	0	0	0	0	0	603	903	0
6719	1	0	0	0	0	0	0	200	300	0	26.8292	-45.3851	-595.209	-78773.3	12675.1	-7550.54	221.295	1035.35	0	0	0	0	0	0	0	603	903	0
6719	2	0	0	0	0	0	0	200	300	0	25.1508	-47.0636	-596.125	-79963.4	13102.3	-7458.99	221.979	1037.14	0	0	0	0	0	0	0	603	903	0
6719	3	0	0	0	0	0	0	200	300	0	25.3033	-47.3688	-597.04	-79963.4	12736.1	-7275.88	221.332	1036.93	0	0	0	0	0	0	0	603	903	0
6719	4	0	0	0	0	0	0	200	300	0	25.1508	-47.9791	-596.735	-80055	12553	-7550.54	221.036	1037.16	0	0	0	0	0	0	0	603	903	0
6719	5	0	0	0	0	0	0	200	300	0	26.0663	-48.4369	-596.43	-80055	12919.2	-7642.09	221.661	1037.22	0	0	0	0	0	0	0	603	903	0
[truncated: 1,844 more rows]
