# Supplementary material for: The Effects of an Extemporaneous Speech Dual-task on Older Adult Gait Control
Source: Research Square preprint supplement (doi:10.21203/rs.3.rs-7674245/v1), 2025-11-18
Supplement: Supplementary file 73 [file DT7Walk08.xlsx]

## Sheet: Sheet1
Trajectories
		07:LFHD			07:RFHD			07:LBHD			07:RBHD			07:C7			07:T10			07:CLAV			07:STRN			07:RBAK			07:LSHO			07:LUPA			07:LELB			07:LFRM			07:LWRA			07:LWRB			07:LFIN
Frame	Sub Frame	X	Y	Z	X	Y	Z	X	Y	Z	X	Y	Z	X	Y	Z	X	Y	Z	X	Y	Z	X	Y	Z	X	Y	Z	X	Y	Z	X	Y	Z	X	Y	Z	X	Y	Z	X	Y	Z	X	Y	Z	X	Y	Z
		mm	mm	mm	mm	mm	mm	mm	mm	mm	mm	mm	mm	mm	mm	mm	mm	mm	mm	mm	mm	mm	mm	mm	mm	mm	mm	mm	mm	mm	mm	mm	mm	mm	mm	mm	mm	mm	mm	mm	mm	mm	mm	mm	mm	mm	mm	mm	mm
8537	0	143.172	-1114.25	1614.18	241.092	-1118.72	1622.9	112.305	-1263.8	1594.57	243.425	-1288.25	1598.02	218.865	-1326.74	1484.04				201.469	-1205.23	1401.85	200.616	-1142.25	1248.94	316.766	-1391.55	1297.94	43.5085	-1328	1429.63	8.60394	-1384.88	1251.87	12.7229	-1438.95	1116.27	-33.6528	-1432.94	945.486	-15.4646	-1419.92	864.066	-32.3426	-1482.97	879.165	-43.073	-1462.56	787.463
8538	0	142.273	-1102.38	1613.19	240.222	-1106.74	1622.04	111.601	-1251.99	1593.52	242.55	-1276.38	1596.22	217.852	-1314.46	1482.44				200.667	-1192.92	1400.63	199.78	-1129.64	1247.66	315.585	-1379.26	1296.41	42.5834	-1315.47	1428.45	7.68253	-1372.8	1250.96	11.5135	-1427.03	1115.66	-34.6856	-1422.06	944.573	-16.5222	-1409.52	863.144	-33.11	-1472.39	878.548	-44.1771	-1452.55	786.66
8539	0	141.453	-1090.24	1612.38	239.245	-1094.8	1620.99	110.933	-1239.69	1592.4	242.057	-1264.05	1595.58	216.898	-1302.24	1481.48				199.703	-1180.44	1399.63	199.264	-1117.11	1247.12	314.443	-1366.64	1295.28	41.6385	-1303.04	1427.6	6.59984	-1360.19	1250.12	10.6149	-1414.81	1114.76	-36.1241	-1410.68	943.915	-17.9671	-1398.17	862.111	-34.261	-1461.16	878.093	-45.4327	-1442	785.603
8540	0	140.471	-1078.3	1611.56	238.416	-1082.69	1619.94	110.11	-1227.72	1591.8	241.323	-1251.89	1594.54	215.897	-1289.99	1480.4				198.712	-1167.89	1398.82	198.21	-1104.42	1246.4	313.035	-1354.19	1293.88	40.4663	-1290.34	1426.8	5.48082	-1347.57	1249.08	9.12154	-1402.23	1114.19	-37.5891	-1398.31	943.568	-17.4402	-1387.79	860.177	-35.6722	-1449.27	877.447	-47.3605	-1430.21	785.338
8541	0	139.67	-1066.24	1610.99	237.633	-1070.57	1619.22	109.511	-1215.78	1590.87	240.597	-1239.91	1593.69	214.79	-1278.05	1479.17				197.699	-1155.42	1397.96	196.879	-1091.59	1245.58	311.72	-1341.32	1292.71	39.5486	-1278.19	1425.64	4.13774	-1334.88	1248.49	7.80799	-1389.4	1113.44	-39.3875	-1385.92	942.759	-21.829	-1373.58	861.192	-37.2832	-1436.79	876.819	-49.0713	-1417.98	784.63
8542	0	138.817	-1054.21	1610.55	237.078	-1058.36	1618.98	108.582	-1203.53	1590.44	239.807	-1227.64	1592.84	213.805	-1265.57	1478.32				196.488	-1142.88	1397.26	195.41	-1078.52	1245	310.409	-1328.48	1291.38	38.4813	-1265.67	1425.63	2.78445	-1322.01	1247.73	6.43739	-1376.16	1112.57	-41.244	-1372.66	942.408	-20.8244	-1362.59	857.951	-39.2861	-1423.53	876.32	-51.4752	-1404.8	784.362
8543	0	138	-1041.86	1610.58	236.081	-1046.23	1618.64	107.76	-1191.2	1590.28	239.003	-1215.25	1592.29	212.652	-1253.14	1477.6				195.148	-1130.5	1396.87	193.91	-1065.35	1244.92	309.077	-1315.63	1290.41	37.244	-1253.39	1424.88	1.29036	-1308.81	1247.31	4.82722	-1362.7	1111.7	-43.4441	-1358.86	941.726	-23.4378	-1348.53	857.454	-41.544	-1409.71	875.643	-53.8203	-1390.86	783.632
8544	0	137.402	-1029.59	1611.11	235.078	-1034.12	1618.21	106.802	-1178.82	1590.29	238.076	-1203.04	1592.05	211.29	-1241.2	1477.29				193.83	-1117.92	1396.56	192.298	-1052.24	1245.08	307.841	-1302.69	1289.62	35.9798	-1240.85	1424.8	-0.529243	-1295.64	1246.91	2.72276	-1349.02	1111.05	-45.7028	-1344.7	941.006	-25.8437	-1334.06	856.763	-43.7674	-1395.27	874.703	-56.5781	-1376.1	782.981
8545	0	136.75	-1017.28	1611.47	234.221	-1022.01	1617.89	106.018	-1166.61	1590.59	237.165	-1190.72	1592.22	210.366	-1228.51	1477.07				192.722	-1105.34	1397.12	190.701	-1039.06	1245.72	306.422	-1289.97	1288.91	34.6639	-1228.78	1424.76	-2.14455	-1282.45	1246.36	0.726273	-1335.05	1110.51	-48.0631	-1330.23	940.036	-28.2952	-1319.03	856.299	-46.482	-1380.36	874.05	-59.3911	-1360.97	782.036
8546	0	135.966	-1004.93	1612	234.419	-1009.25	1619.45	105.126	-1154.28	1591.48	236.278	-1178.49	1592.76	209.083	-1216.43	1477.36				191.355	-1092.97	1397.64	188.799	-1026.05	1246.68	305.215	-1277.07	1288.87	33.3731	-1216.39	1425.19	-3.9113	-1268.88	1246.45	-1.38664	-1320.86	1110.24	-50.6488	-1314.85	940.576	-31.1458	-1303.37	856.214	-49.3457	-1364.77	873.699	-62.5293	-1344.57	781.97
8547	0	135.084	-992.658	1612.48	233.507	-996.97	1619.97	104.086	-1141.59	1593.02	235.443	-1166.17	1593.61	207.986	-1204.35	1478.21				189.775	-1080.62	1398.19	187.054	-1013.11	1247.78	304.117	-1264.29	1289.11	32.2892	-1204.39	1425.74	-5.81412	-1255.39	1246.79	-3.73141	-1306.46	1110.08	-53.3931	-1299	940.682	-37.1152	-1284.88	858.869	-52.0429	-1348.22	873.68	-65.8763	-1327.48	781.913
8548	0	134.071	-980.159	1613.44	232.616	-984.533	1620.72	103.066	-1129.35	1594.07	234.514	-1153.66	1594.72	206.848	-1192.31	1479.24				188.454	-1068.32	1399.48	185.364	-1000.18	1249.22	303.002	-1251.55	1289.65	30.9154	-1192.3	1426.82	-7.51319	-1241.74	1247.28	-5.62543	-1291.92	1109.87	-56.2565	-1282.76	941.122	-38.1775	-1269.42	857.189	-55.2817	-1331.42	873.541	-69.5313	-1309.7	782.202
8549	0	133.557	-967.759	1615.02	230.921	-972.851	1620.44	102.247	-1116.9	1595.64	233.52	-1141.56	1595.76	205.769	-1180.17	1479.99				187.162	-1055.93	1400.89	183.548	-987.501	1250.95	301.866	-1239	1290.39	29.8512	-1180.35	1427.99	-9.26372	-1227.99	1247.78	-8.03205	-1277.13	1110.44	-59.4404	-1265.97	941.808	-41.6776	-1251.74	857.668	-58.5714	-1313.86	873.69	-73.2785	-1291.14	782.693
8550	0	132.695	-955.492	1616.19	230.161	-960.519	1621.48	101.516	-1104.76	1596.95	232.751	-1129.21	1596.95	204.737	-1167.94	1481.13				186.081	-1043.74	1402.26	182.189	-975.071	1252.78	300.928	-1226.32	1291.61	28.8003	-1168.45	1429.05	-10.9314	-1214.34	1248.71	-10.5339	-1261.8	1110.8	-62.6486	-1248.67	942.37	-45.1463	-1233.5	858.716	-62.3048	-1295.91	873.752	-77.3494	-1271.97	783.213
8551	0	131.734	-943.424	1617.04	229.279	-948.153	1622.45	100.652	-1092.42	1598.35	231.944	-1116.84	1598.4	203.575	-1155.98	1482.45	210.363	-1216.59	1230.76	185.053	-1031.58	1403.57	181.071	-962.635	1253.95	299.961	-1213.96	1292.85	27.8244	-1156.16	1430.27	-12.7958	-1200.65	1249.74	-11.9503	-1247.06	1110.4	-65.6787	-1231.29	943.576	-48.5936	-1214.84	859.347	-66.0658	-1277.31	873.938	-81.3845	-1251.98	783.766
8552	0	131.024	-931.145	1618.58	228.384	-935.958	1623.58	99.9343	-1080.37	1599.59	231.431	-1104.57	1599.97	202.63	-1143.62	1483.59	209.416	-1204.17	1232.09	184.251	-1019.88	1404.61	180.232	-950.513	1255.47	298.987	-1201.99	1294.16	26.9061	-1143.87	1431.6	-14.2572	-1187.13	1250.54	-14.9827	-1231.93	1111.33	-69.0336	-1213.28	944.147	-52.2983	-1195.69	860.246	-70.082	-1258.22	874.103	-85.5288	-1231.41	784.172
8553	0	130.264	-919.071	1619.97	227.76	-923.683	1625.21	99.3773	-1068.43	1600.89	230.739	-1092.54	1601.27	201.56	-1131.65	1485.08	208.616	-1192.1	1233.4	183.285	-1007.79	1405.66	179.391	-938.607	1256.59	298.103	-1190.19	1295.56	26.0148	-1131.66	1432.63	-15.8323	-1173.48	1251.31	-17.4599	-1216.94	1111.71	-72.3237	-1195.14	944.925	-57.604	-1174.93	863.045	-73.9524	-1238.93	874.138	-90.0181	-1210.37	784.692
8554	0	129.374	-907.128	1621.09	226.637	-911.69	1626.26	98.747	-1056.44	1602.29	230.199	-1080.29	1602.59	200.652	-1119.75	1486.37	207.597	-1180.19	1234.79	182.676	-995.877	1406.6	179.244	-927.03	1257.63	296.98	-1178.61	1297.03	24.8813	-1119.14	1433.77	-17.4579	-1159.86	1252.34	-19.4774	-1202.07	1111.35	-75.7328	-1176.76	945.616	-59.8647	-1156.18	862.72	-78.1039	-1219.06	874.173	-94.5949	-1188.38	785.961
8555	0	128.424	-895.152	1622.28	225.811	-899.59	1627.37	98.0686	-1044.42	1603.59	229.577	-1068.16	1603.87	199.675	-1107.97	1487.6	206.513	-1168.49	1236.07	182.169	-984.072	1407.85	179.242	-915.436	1258.51	295.911	-1167.24	1298.63	23.9063	-1106.75	1434.69	-19.0948	-1146.21	1253.11	-22.026	-1186.99	1111.46	-79.1362	-1158.01	946.801	-64.0174	-1135.62	863.974	-82.4755	-1198.88	874.18	-99.2817	-1166.25	786.762
8556	0	127.749	-883.392	1623.27	225.337	-887.501	1628.87	97.5601	-1032.67	1604.82	229.125	-1056.11	1605.41	198.55	-1096.16	1488.86	205.273	-1157.12	1237.28	181.721	-972.592	1408.49	179.38	-903.721	1259.19	294.491	-1156.31	1299.76	22.7878	-1094.36	1435.65	-20.6523	-1132.64	1253.5	-25.3955	-1171.67	1112.16	-82.6029	-1139.16	947.327	-67.7507	-1115.11	865.475	-86.7851	-1179.17	874.412	-104.088	-1143.44	788.03
8557	0	127.171	-871.477	1624.34	224.721	-875.601	1630.28	97.2731	-1021.01	1605.83	228.618	-1044.35	1606.52	197.632	-1084.52	1490.03	204.043	-1145.72	1238.47	181.42	-960.985	1409.43	179.527	-892.008	1259.82	293.324	-1145.15	1301.18	21.8937	-1082.07	1436.31	-22.288	-1118.75	1254.18	-27.8417	-1156.39	1112.07	-86.0341	-1119.83	948.528	-71.4098	-1094.44	866.558	-91.0729	-1157.8	874.711	-108.846	-1120.54	789.192
8558	0	126.434	-859.765	1625.47	224.07	-863.781	1631.39	96.6724	-1009.16	1607.05	228.307	-1032.49	1607.97	196.677	-1072.87	1491.16	202.826	-1134.24	1239.92	181.006	-949.553	1410.17	180.175	-880.369	1260.65	291.939	-1134.33	1302.26	20.9637	-1069.52	1437.3	-24.0697	-1104.61	1254.99	-29.7984	-1141.29	1111.31	-89.4112	-1100.42	949.618	-75.2738	-1073.22	868.421	-95.212	-1136.84	874.86	-113.597	-1096.99	790.632
8559	0	125.852	-848.033	1626.76	223.128	-852.186	1632.08	96.174	-997.549	1608.36	227.789	-1020.79	1609.14	195.762	-1061.58	1492.36	201.361	-1123.2	1240.93	180.834	-938.294	1410.69	180.648	-868.692	1261.31	290.547	-1123.55	1303.51	20.0162	-1057.18	1438.1	-25.7864	-1090.7	1255.76	-32.7154	-1125.73	1111.36	-92.7713	-1080.82	950.583	-80.012	-1050.97	871.286	-99.3671	-1115.47	875.279	-118.399	-1073.19	792.654
8560	0	125.116	-836.502	1627.52	222.652	-840.352	1633.16	95.839	-986.013	1609.34	227.245	-1009.09	1610.29	194.849	-1050.27	1493.5	200.047	-1112.17	1241.85	180.724	-926.975	1411.6	180.99	-856.958	1262.27	289.141	-1112.89	1304.25	19.0528	-1044.86	1439.04	-27.5803	-1076.79	1256.32	-35.737	-1110.14	1111.61	-95.9799	-1060.91	951.875	-83.0851	-1029.77	872.572	-103.584	-1094.05	875.894	-122.93	-1049.31	794.672
8561	0	124.571	-824.931	1628.56	222.493	-828.649	1634.78	95.2936	-974.523	1610.48	226.763	-997.5	1611.37	193.953	-1038.9	1494.57	198.53	-1101.43	1242.61	180.446	-915.809	1412.41	181.767	-845.461	1263.68	287.77	-1102.1	1305.36	18.2912	-1032.82	1439.79	-29.3622	-1062.76	1257.08	-39.1976	-1094.31	1112.17	-99.11	-1041.1	953.355	-86.6834	-1008.18	874.994	-107.781	-1072.41	876.581	-127.54	-1025.1	797.261
8562	0	124.312	-813.287	1629.75	221.759	-817.048	1635.55	94.9085	-963.024	1611.42	226.293	-985.871	1612.52	193.182	-1027.7	1495.64	197.401	-1090.18	1243.9	180.19	-904.664	1413.16	182.083	-834.017	1264.58	286.391	-1091.48	1306.23	17.6288	-1020.85	1440.57	-31.2467	-1048.72	1257.62	-41.1321	-1078.74	1111.43	-102.145	-1021.03	955.13	-89.8631	-986.614	876.943	-111.801	-1050.51	877.436	-131.939	-1000.69	799.898
8563	0	123.659	-801.837	1630.55	221.16	-805.587	1636.42	94.3457	-951.48	1612.55	225.911	-974.416	1613.68	192.496	-1016.52	1496.58	196.041	-1079.47	1244.87	180.072	-893.609	1413.99	182.181	-822.802	1265.69	285.165	-1081.01	1306.98	16.7865	-1008.74	1441.71	-32.9905	-1034.69	1258.16	-44.2805	-1062.95	1111.49	-105.151	-1000.86	956.675	-92.2032	-965.644	878.558	-115.915	-1028.48	878.924	-136.191	-976.36	802.731
8564	0	123.161	-790.451	1631.47	220.417	-794.236	1637.03	94.0209	-940.206	1613.47	225.495	-962.912	1614.93	191.755	-1005.35	1497.72	194.895	-1068.66	1245.88	179.785	-882.533	1414.85	182.008	-811.69	1266.59	284.166	-1070.4	1307.92	16.1412	-997.141	1442.75	-34.5928	-1020.65	1259.32	-46.9478	-1047.08	1111.85	-108.092	-980.593	958.523	-95.2394	-943.904	881.883	-119.964	-1006.59	880.574	-140.189	-952.26	806.367
8565	0	122.461	-779.138	1632.02	219.828	-782.699	1637.73	93.46	-928.801	1614.7	225.116	-951.536	1615.91	191.06	-994.287	1498.6	193.788	-1057.98	1246.9	179.514	-871.594	1415.78	181.573	-800.583	1267.11	282.921	-1060.04	1308.77	15.4427	-985.413	1443.7	-36.3982	-1006.59	1260.31	-49.991	-1031.11	1112.22	-111.047	-960.293	960.897	-97.9892	-922.484	884.545	-123.714	-984.506	882.44	-144.08	-927.889	810.119
8566	0	121.83	-767.814	1632.35	219.685	-771.215	1639.01	93.0454	-917.49	1615.35	224.54	-940.162	1616.82	190.35	-983.261	1499.59	192.789	-1047.04	1248	179.019	-860.58	1416.28	181.192	-789.553	1267.98	281.805	-1049.43	1309.68	14.7252	-973.839	1444.73	-37.9731	-992.915	1261.28	-52.6502	-1015.21	1112.71	-113.98	-940.196	963.595	-100.723	-900.788	887.803	-127.256	-962.303	884.238	-147.71	-903.729	813.854
8567	0	121.436	-756.531	1632.88	219.121	-759.906	1639.47	92.5953	-906.323	1616.01	223.971	-928.901	1617.58	189.665	-972.194	1500.38	191.617	-1036.84	1248.47	178.705	-849.649	1417.06	180.77	-778.75	1268.77	280.744	-1038.87	1310.25	13.9609	-962.391	1445.75	-39.9006	-979.064	1262.16	-55.5726	-999.271	1113.51	-116.644	-920.097	966.157	-103.536	-879.21	891.311	-130.976	-940.315	886.464	-151.261	-879.639	817.798
8568	0	121.009	-745.255	1633.56	218.523	-748.635	1639.73	91.9352	-895.139	1616.85	223.538	-917.72	1618.33	189.022	-961.218	1501.13	190.857	-1025.66	1249.35	178.172	-838.857	1417.52	180.027	-768.048	1269.05	279.721	-1028.32	1310.8	13.3727	-951.053	1446.4	-41.5046	-965.352	1263.12	-58.3093	-983.635	1113.69	-119.331	-900.075	968.944	-106.236	-857.707	894.987	-134.578	-918.251	889.051	-154.51	-855.746	821.946
8569	0	120.344	-734.029	1633.74	217.997	-737.427	1639.97	91.4537	-883.948	1617.39	223.086	-906.457	1619.02	188.378	-950.228	1501.63	189.963	-1014.82	1250.15	177.486	-827.921	1417.76	179.37	-757.201	1269.29	278.813	-1017.71	1311.27	12.7896	-939.622	1447.44	-43.0955	-951.777	1264.1	-61.1524	-967.733	1114.49	-121.993	-880.099	971.877	-108.554	-836.437	898.674	-137.961	-896.32	891.457	-157.586	-831.986	826.169
8570	0	119.792	-722.82	1633.79	217.393	-726.241	1639.91	90.8996	-872.701	1618.03	222.645	-895.302	1619.64	187.78	-939.176	1502.16	189.09	-1003.99	1250.85	176.988	-816.969	1418.02	178.838	-746.54	1269.85	277.736	-1007.09	1311.87	11.9981	-928.26	1448.12	-44.7938	-938.183	1264.88	-63.8695	-951.984	1114.84	-124.187	-860.4	974.672	-111.114	-815.113	902.454	-141.392	-874.512	894.33	-160.374	-808.269	830.601
8571	0	119.518	-711.554	1633.73	217.031	-715.029	1639.92	90.4109	-861.603	1618.37	222.085	-884.206	1620.08	187.156	-928.127	1502.71	188.11	-993.409	1251.12	176.413	-806.061	1418.26	178.14	-735.979	1269.82	276.863	-996.212	1312.05	11.3325	-917.037	1448.71	-46.5877	-924.68	1265.39	-66.5851	-936.115	1115.38	-126.827	-840.651	977.517	-113.582	-794.015	906.108	-144.486	-852.769	897.14	-163.013	-784.857	835.076
8572	0	118.875	-700.529	1632.89	216.648	-703.912	1639.56	89.8221	-850.598	1618.68	221.402	-873.146	1620.29	186.349	-917.128	1502.64	187.132	-982.813	1251.18	175.846	-795.226	1418.39	177.236	-725.277	1269.39	275.898	-985.481	1312.2	10.4575	-905.822	1449.6	-48.229	-911.451	1265.97	-69.3335	-920.634	1115.67	-129.172	-821.227	980.354	-115.688	-772.796	910.481	-147.606	-831.3	899.92	-165.53	-761.755	839.174
8573	0	118.645	-689.563	1632.71	216.215	-692.816	1638.92	89.2444	-839.45	1619.01	220.852	-862.122	1620.5	185.731	-906.039	1502.66	186.29	-972.125	1251.45	175.07	-784.247	1418.2	176.618	-714.611	1269.62	275.059	-974.789	1312.27	9.62596	-894.544	1449.97	-49.8926	-898.206	1266.55	-72.0007	-904.931	1116.09	-131.38	-801.804	983.05	-117.796	-752.253	913.906	-150.505	-809.753	902.822	-167.939	-738.729	844.046
8574	0	118.281	-678.286	1632.38	215.869	-681.767	1638.2	88.668	-828.283	1619.28	220.164	-851.157	1620.7	184.996	-894.935	1502.69	185.736	-961.08	1251.69	174.308	-773.261	1417.9	175.604	-703.973	1269.11	274.271	-963.92	1312.26	9.11989	-883.449	1449.55	-51.5395	-885.059	1266.9	-74.6105	-889.28	1116.01	-133.525	-782.668	985.978	-119.937	-731.815	917.385	-153.143	-788.695	905.289	-169.984	-716.147	848.269
8575	0	117.94	-667.051	1631.61	215.408	-670.669	1637.07	88.0887	-817.145	1619.47	219.419	-840.192	1620.66	184.322	-883.865	1502.44	185.21	-950.121	1251.49	173.499	-762.292	1417.59	174.935	-693.164	1268.71	273.692	-952.831	1312.02	8.52832	-872.363	1449.34	-53.177	-871.932	1267.15	-77.4077	-874.095	1116.3	-135.549	-763.729	988.597	-121.466	-711.644	921.536	-155.643	-767.761	907.972	-172.033	-693.769	852.762
8576	0	117.599	-656.025	1630.53	215.121	-659.628	1636.06	87.2739	-805.811	1619.78	218.66	-829.132	1620.44	183.698	-872.83	1502.12	184.844	-938.964	1251.24	172.725	-751.329	1417.19	174.48	-682.235	1268.69	273.094	-941.801	1311.34	7.6926	-861.317	1449.21	-54.7414	-858.92	1267.07	-79.7074	-858.625	1116.36	-137.435	-745.038	991.068	-123.184	-691.7	925.187	-158.007	-747.105	910.65	-173.774	-671.616	857.219
8577	0	117.26	-644.599	1629.54	215.096	-648.45	1635.2	86.6062	-794.419	1619.79	217.926	-818.241	1620.22	182.941	-861.723	1501.63	184.798	-927.404	1250.84	171.909	-740.163	1416.63	173.215	-671.127	1267.72	272.054	-931.115	1311.51	6.89445	-850.216	1448.94	-56.0624	-846.057	1266.87	-82.4686	-843.297	1116.41	-139.183	-726.583	993.504	-124.873	-671.656	928.684	-160.242	-726.683	913.266	-175.598	-649.909	861.635
8578	0	116.892	-633.165	1628.81	214.632	-637.493	1633.63	85.8538	-782.961	1619.69	216.996	-807.199	1619.67	182.144	-850.584	1500.95	184.335	-916.511	1250.17	170.935	-729.026	1415.75	172.191	-660.171	1267.13	271.359	-920.202	1310.97	6.1644	-839.109	1448.27	-57.6764	-832.967	1266.58	-84.842	-828.18	1116.34	-140.727	-708.306	995.965	-126.084	-652.408	932.035	-162.268	-706.585	915.713	-176.931	-628.556	865.787
8579	0	116.654	-621.827	1627.92	214.389	-626.325	1632.4	85.1555	-771.487	1619.29	216.151	-796.157	1619.08	181.424	-839.389	1500.38	184.015	-905.624	1249.43	170.107	-717.901	1414.99	171.391	-649.047	1266.46	270.859	-908.863	1310.33	5.44712	-828.041	1447.61	-59.0778	-820.143	1266.29	-86.8268	-813.171	1115.77	-142.375	-690.404	998.292	-127.156	-633.427	935.493	-163.942	-686.849	917.972	-178.223	-607.716	869.938
8580	0	116.289	-610.22	1627.05	214.35	-615.008	1631.42	84.453	-759.972	1619	215.433	-784.903	1618.57	180.64	-828.044	1499.47	183.857	-894.417	1248.42	169.207	-706.649	1414.17	170.294	-638.008	1265.29	270.469	-897.212	1309.56	4.7826	-817.058	1446.66	-60.382	-807.278	1265.67	-89.1723	-798.408	1115.52	-143.772	-672.612	1000.44	-128.356	-614.759	938.459	-165.931	-667.292	920.532	-179.475	-587.115	874.033
8581	0	116.584	-598.69	1626.4	213.752	-603.831	1629.77	83.6976	-748.405	1618.45	214.74	-773.669	1617.82	179.923	-816.714	1498.55	183.8	-882.846	1247.76	168.284	-695.303	1413.09	169.231	-626.886	1264.44	270.061	-885.705	1308.66	4.08431	-805.982	1445.67	-61.6029	-794.553	1265.03	-90.9483	-783.599	1114.8	-145.034	-655.277	1002.46	-129.331	-596.37	941.7	-167.626	-648.172	922.926	-180.431	-566.913	877.932
8582	0	115.821	-587.224	1625.17	213.537	-592.521	1628.68	83.1323	-736.863	1617.54	214.024	-762.395	1616.51	179.195	-805.225	1497.39	183.647	-871.577	1246.69	167.349	-683.797	1412	168.494	-615.832	1263.74	269.655	-874.185	1307.56	3.38225	-794.891	1444.46	-62.7357	-781.768	1264.47	-92.9338	-769.1	1114.24	-146.114	-638.087	1004.31	-130.238	-578.382	944.476	-169.185	-629.445	925.276	-181.416	-547.329	881.705
8583	0	115.424	-575.744	1624.14	213.3	-581.184	1627.71	82.3224	-725.171	1616.78	213.246	-751.013	1615.49	178.454	-793.67	1496.42	183.548	-860.388	1244.8	166.694	-672.283	1411.09	167.178	-604.562	1261.89	269.316	-862.253	1306.54	2.80346	-783.815	1443.23	-64.0222	-769.113	1263.33	-94.7238	-754.79	1113.45	-147.097	-621.269	1005.93	-130.99	-560.754	947.111	-170.524	-611.2	927.332	-182.151	-528.209	885.109
8584	0	115.059	-564.147	1623.06	212.864	-569.836	1626.45	81.6453	-713.467	1615.66	212.49	-739.685	1614.29	177.796	-781.957	1495.13	183.639	-848.427	1244.42	165.714	-660.605	1409.73	166.01	-593.16	1260.38	269.025	-850.25	1305.36	2.23209	-772.637	1441.76	-65.0003	-756.649	1262.33	-96.402	-740.524	1112.67	-148.064	-604.854	1007.57	-131.683	-543.477	949.67	-171.957	-593.188	929.341	-182.84	-509.372	888.528
8585	0	115.204	-552.541	1622.09	212.443	-558.417	1625.33	81.0334	-701.82	1614.68	211.782	-728.275	1613.11	177.211	-770.144	1493.76	183.636	-836.71	1242.83	164.926	-648.842	1408.52	165.147	-581.656	1259.24	268.797	-837.986	1303.92	1.68467	-761.363	1440.34	-65.9101	-744.104	1261.19	-97.7373	-726.486	1111.66	-148.796	-588.669	1008.93	-132.313	-526.549	952.033	-172.743	-575.697	930.718	-183.422	-491.055	891.75
8586	0	114.764	-541.056	1621.35	211.993	-546.935	1624.31	80.4232	-690.272	1613.48	211.089	-716.81	1611.55	176.805	-758.354	1492.45	183.602	-824.994	1241.32	164.081	-636.922	1406.98	164.045	-569.791	1257.44	268.602	-825.78	1302.29	1.23682	-750.037	1438.86	-66.4958	-731.867	1259.87	-98.9487	-712.67	1110.67	-149.534	-572.926	1010.1	-132.66	-510.114	954.255	-173.642	-558.628	932.206	-183.895	-473.356	894.707
8587	0	114.15	-529.499	1620.42	211.555	-535.38	1623.41	79.86	-678.744	1612.01	210.645	-705.29	1610.57	176.45	-746.45	1491.04	183.949	-812.728	1240	163.355	-624.965	1405.74	163.127	-557.842	1256.44	268.624	-812.938	1301	0.929818	-738.655	1437.25	-67.2594	-719.486	1258.63	-100.113	-699.059	1109.54	-150.152	-557.564	1011.05	-133.038	-494.101	956.007	-174.358	-542.039	933.54	-184.241	-456.199	897.268
8588	0	113.083	-517.907	1618.9	210.8	-523.851	1622.11	79.2088	-667.015	1611	210.126	-693.63	1609.15	176.162	-734.495	1489.8	184.161	-800.447	1238.48	162.589	-612.818	1404.38	162.097	-545.74	1254.78	268.677	-800.159	1299.63	0.693076	-727.078	1435.87	-67.7588	-707.264	1257.16	-101.095	-685.51	1108.47	-150.719	-542.523	1011.93	-133.459	-478.439	957.559	-175.116	-525.817	934.795	-184.565	-439.435	899.62
8589	0	112.849	-506.273	1617.94	210.32	-512.107	1621.15	78.7455	-655.439	1609.7	209.588	-681.861	1607.5	175.87	-722.297	1488.05	184.192	-788.394	1236.58	162.007	-600.63	1402.95	161.144	-533.346	1253.69	268.622	-787.591	1297.89	0.337275	-715.61	1434.12	-67.9977	-695.089	1255.77	-101.704	-672.338	1107.07	-151.072	-527.899	1012.43	-133.794	-463.091	958.919	-175.423	-510.023	935.442	-184.839	-423.183	901.565
8590	0	112.286	-494.717	1617.08	209.654	-500.407	1619.93	78.411	-644.093	1607.99	209.142	-670.237	1606.25	175.775	-710.209	1486.48	184.6	-775.778	1234.88	161.359	-588.347	1401.52	159.951	-520.776	1251.64	268.751	-774.918	1296.03	0.188832	-704.032	1432.46	-68.5534	-682.841	1254.3	-102.172	-659.337	1105.66	-151.37	-513.718	1012.72	-133.821	-448.24	960.153	-175.842	-494.937	936.005	-184.946	-407.542	903.32
8591	0	111.218	-483.23	1615.6	208.768	-488.667	1618.42	77.9769	-632.486	1606.89	208.829	-658.4	1604.56	175.753	-697.92	1484.91	185.137	-763.052	1233.4	160.667	-576.003	1399.97	158.942	-508.145	1250.09	269.055	-761.76	1294.31	0.084349	-692.339	1430.76	-68.6963	-670.78	1252.75	-102.854	-646.568	1104.3	-151.462	-499.984	1012.59	-134.058	-433.969	960.673	-176.108	-480.223	936.38	-185.064	-392.449	904.648
8592	0	110.545	-471.532	1614.48	208.104	-476.822	1617.3	77.786	-620.975	1605.51	208.579	-646.444	1603.13	175.779	-685.64	1483.24	185.607	-750.298	1231.78	160.242	-563.558	1398.83	158.279	-495.538	1249.21	269.56	-748.458	1292.81	-0.0134	-680.544	1429.26	-68.562	-658.712	1251.49	-103.039	-634.032	1102.98	-151.622	-486.676	1012.66	-133.937	-419.859	961.742	-176.211	-465.897	936.665	-185.064	-377.938	905.694
8593	0	110.139	-459.884	1613.52	207.617	-464.758	1616.32	77.5392	-609.457	1604.04	208.562	-634.459	1601.77	175.879	-673.265	1481.66	186.321	-737.261	1230.22	159.696	-550.984	1397.49	157.435	-482.729	1247.69	270.036	-735.14	1291.44	0.057299	-668.781	1427.77	-68.7797	-646.667	1249.82	-103.194	-621.815	1101.53	-151.556	-473.607	1012.45	-133.971	-406.549	961.658	-176.004	-452.191	936.303	-184.985	-363.872	906.641
8594	0	109.411	-448.158	1612.61	206.726	-452.833	1614.94	77.339	-597.742	1603.3	208.526	-622.428	1600.17	176.043	-660.807	1480.07	186.992	-724.128	1228.42	159.338	-538.405	1396.25	156.634	-470.031	1246.57	270.591	-721.961	1289.69	0.226387	-656.994	1426.13	-68.7074	-634.782	1248.36	-102.961	-609.968	1099.86	-151.46	-460.975	1011.92	-133.838	-393.461	961.984	-175.945	-439.08	936.113	-184.86	-350.505	906.872
8595	0	108.644	-436.47	1611.44	206.227	-440.583	1614.11	77.3116	-586.151	1601.8	208.528	-610.283	1598.56	176.244	-648.285	1478.54	187.358	-711.089	1226.61	159.112	-525.653	1395.06	156.012	-457.187	1245.78	271.419	-708.442	1288.22	0.328301	-645.073	1424.6	-68.5643	-622.917	1246.63	-102.756	-598.384	1098.09	-151.368	-448.771	1011.34	-133.599	-380.814	961.924	-175.616	-426.254	935.491	-184.677	-337.515	907.082
8596	0	107.562	-424.855	1610.1	205.523	-428.299	1613.03	77.3242	-574.543	1600.52	208.726	-597.966	1597.41	176.426	-635.672	1476.99	188.258	-697.441	1225.12	158.734	-512.897	1393.86	155.831	-444.103	1244.88	271.784	-695.766	1286.83	0.502206	-632.946	1422.95	-68.3653	-610.905	1245.43	-102.405	-587.026	1096.33	-151.121	-436.902	1010.23	-133.309	-368.677	961.224	-175.361	-413.928	934.455	-184.377	-325.037	906.686
8597	0	106.946	-413.12	1609.37	205.149	-415.985	1611.98	77.5498	-563.046	1599.29	208.967	-585.66	1595.68	176.717	-623.134	1475.46	189.134	-683.945	1223.37	158.739	-500.063	1392.69	155.661	-431.004	1243.9	272.631	-682.288	1285.53	0.783368	-620.736	1421.26	-67.8619	-599.32	1243.45	-101.844	-575.884	1094.49	-150.768	-425.374	1008.85	-133.068	-356.966	960.17	-174.993	-402.187	933.359	-184.062	-313.12	905.776
8598	0	106.186	-401.257	1608.57	204.079	-403.529	1610.75	77.8016	-551.479	1598.24	209.27	-573.037	1594.46	177.067	-610.515	1474.21	189.606	-670.659	1221.93	158.848	-487.206	1391.78	155.754	-417.875	1242.98	273.062	-669.655	1284	1.15498	-608.524	1419.61	-67.1583	-587.748	1241.64	-101.269	-565.063	1092.68	-150.3	-414.221	1007.39	-132.664	-345.71	958.856	-174.558	-390.845	932.056	-183.528	-301.717	904.793
8599	0	105.484	-389.275	1608.14	203.398	-390.995	1610.22	77.9137	-539.553	1597.51	209.695	-560.34	1593.42	177.284	-597.951	1473.24	190.308	-657.049	1220.5	158.936	-474.302	1391	156.064	-404.592	1242.46	273.953	-655.739	1283.06	1.47862	-596.15	1418.32	-66.5522	-576.286	1239.78	-100.469	-554.351	1090.69	-149.729	-403.618	1005.71	-132.194	-334.725	957.497	-173.969	-379.966	930.388	-183.088	-290.734	903.176
8600	0	104.739	-377.214	1607.97	202.73	-378.249	1609.92	78.149	-527.655	1597.11	209.945	-547.575	1592.67	177.62	-585.184	1472.45	190.661	-643.728	1219.18	159.144	-461.38	1390.57	156.57	-391.182	1242.26	274.936	-641.886	1282.26	1.7104	-583.755	1417.16	-65.7404	-564.923	1238.46	-99.4349	-543.725	1089.07	-148.925	-393.272	1003.43	-131.398	-324.392	955.343	-173.175	-369.751	928.306	-182.555	-280.556	901.425
8601	0	104.06	-365.107	1608.02	202.32	-365.307	1609.98	78.4736	-515.786	1596.94	210.351	-534.717	1592.46	177.801	-572.595	1472.17	190.661	-630.493	1218.55	159.299	-448.495	1390.49	156.973	-377.655	1242.14	275.141	-628.666	1281.85	1.86417	-571.312	1416.53	-64.9298	-553.764	1237.18	-98.0737	-533.417	1087.45	-148.101	-383.374	1001.47	-130.774	-314.587	953.453	-172.102	-360.269	926.103	-181.817	-271.119	898.959
8602	0	103.318	-352.922	1608.33	201.504	-352.535	1610.21	78.8844	-503.672	1597.27	210.889	-521.768	1592.66	177.848	-559.888	1472.4	190.504	-617.198	1218.31	159.634	-435.594	1391.01	157.73	-364.017	1243.07	275.051	-615.791	1281.57	2.04939	-558.548	1416.25	-63.8511	-542.827	1236.45	-96.6403	-523.239	1086.52	-147.068	-373.953	999.236	-130.023	-305.271	950.946	-170.798	-351.236	923.321	-181.137	-262.458	896.646
8603	0	102.719	-340.577	1609	200.836	-339.653	1610.93	79.2366	-491.599	1598.01	211.313	-508.844	1593.18	177.951	-547.156	1472.9	190.284	-603.898	1218.73	160.009	-422.659	1391.91	158.416	-350.422	1244.17	274.875	-602.947	1281.78	2.01377	-545.562	1416.52	-62.7159	-531.7	1236.21	-94.6866	-513.133	1085.75	-145.901	-365.035	997.114	-128.925	-296.571	948.532	-169.26	-342.962	920.908	-180.326	-254.541	893.852
8604	0	102.295	-328.1	1609.93	200.35	-326.674	1611.87	79.6257	-479.3	1598.95	211.772	-495.735	1594.17	177.958	-534.349	1473.62	189.892	-590.822	1219.53	160.386	-409.757	1392.99	159.301	-336.746	1245.7	274.515	-590.175	1282.78	2.00652	-532.407	1417.11	-61.1805	-520.668	1236.13	-92.6957	-503.29	1085.6	-144.307	-356.318	995.016	-127.65	-288.449	945.552	-167.522	-335.63	918.626	-179.267	-247.312	890.708
8605	0	101.851	-315.672	1610.78	199.83	-313.745	1612.57	79.8433	-466.988	1600.17	212.25	-482.778	1595.25	177.775	-521.581	1474.67	188.588	-579.038	1220.94	160.622	-396.812	1393.99	160.046	-323.358	1247.36	273.837	-577.507	1283.78	1.97913	-519.207	1418	-60.2392	-509.487	1236.47	-90.547	-493.796	1085.49	-142.608	-348.364	992.671	-126.031	-280.956	942.592	-165.486	-328.84	916.075	-177.972	-240.84	887.275
8606	0	101.583	-303.218	1611.9	199.576	-300.767	1613.72	80.1594	-454.544	1601.37	212.329	-469.893	1596.35	177.411	-508.84	1475.84	187.548	-567.197	1222.15	160.883	-383.989	1395.19	160.543	-310.126	1248.71	273.305	-565.169	1284.93	1.64738	-505.893	1418.99	-59.109	-498.196	1237.1	-88.4102	-484.315	1085.95	-140.95	-340.781	990.475	-124.594	-273.934	939.298	-163.179	-322.444	913.35	-176.381	-235.065	883.457
8607	0	101.305	-290.621	1612.97	199.22	-287.918	1614.46	80.1653	-441.997	1602.56	212.492	-457.043	1597.75	177.03	-496.082	1477.18	186.911	-554.604	1223.64	160.913	-371.168	1396.3	161.288	-297.183	1250.48	272.724	-552.447	1286.15	1.3879	-492.497	1420.49	-58.1633	-486.633	1237.74	-86.2925	-474.927	1086.5	-138.942	-333.316	988.243	-122.599	-267.688	935.882	-160.694	-316.565	910.499	-174.485	-229.766	879.187
8608	0	101.174	-277.943	1613.9	199.087	-275.193	1615.24	80.2252	-429.485	1603.99	212.432	-444.392	1598.68	176.761	-483.381	1478.44	187.509	-540.366	1224.21	160.929	-358.484	1397.49	161.699	-284.591	1251.68	272.016	-540.127	1287.53	1.05663	-479.306	1421.63	-57.3676	-474.886	1238.66	-84.045	-465.648	1087.2	-136.738	-326.175	985.677	-120.429	-261.506	932.445	-158.416	-311.22	907.864	-172.208	-225.046	874.547
8609	0	101.281	-265.447	1615.16	198.96	-262.608	1616.07	79.9523	-416.874	1605.62	212.331	-431.66	1600.1	176.416	-470.978	1479.83	186.032	-529.627	1226.61	160.852	-346.076	1398.78	161.672	-272.386	1252.55	271.613	-527.462	1288.76	0.677279	-466.319	1423.23	-56.779	-463.177	1239.41	-81.7663	-456.594	1087.75	-134.457	-319.297	983.479	-118.125	-256.003	928.305	-155.717	-306.119	904.888	-169.692	-220.727	869.851
8610	0	100.995	-252.594	1616.15	198.813	-250.018	1616.95	79.7474	-404.079	1607.2	212.037	-419.239	1601.44	176.203	-458.547	1481.08	185.84	-516.953	1228.1	160.445	-333.748	1400.02	161.397	-260.387	1253.59	271.287	-515.029	1290.3	0.243894	-453.8	1424.64	-56.5381	-451.313	1240.57	-79.8293	-447.213	1088.87	-132.342	-312.68	980.897	-115.584	-250.51	924.509	-153.052	-301.451	901.787	-166.9	-217.235	864.475
8611	0	100.903	-239.966	1616.85	198.672	-237.507	1617.78	79.4222	-391.401	1608.59	211.55	-406.702	1602.91	175.851	-446.17	1482.39	185.415	-504.922	1229.69	159.915	-321.596	1401.19	160.612	-248.405	1254.39	271.119	-502.685	1291.51	-0.087258	-441.541	1426.12	-56.2808	-439.695	1241.73	-77.8798	-437.919	1089.74	-130.025	-306.181	978.168	-112.895	-245.447	920.256	-150.008	-296.919	898.803	-163.618	-213.804	858.966
8612	0	100.783	-227.262	1617.92	198.759	-225.009	1618.8	78.7936	-378.664	1610.04	211.102	-394.364	1604.11	175.537	-434.013	1483.83	185.262	-492.988	1230.89	159.352	-309.481	1402.36	159.669	-236.709	1255.44	270.711	-490.618	1292.89	-0.434987	-429.762	1427.48	-55.8812	-428.428	1242.78	-76.1037	-428.587	1090.78	-127.523	-299.888	975.24	-109.859	-240.97	915.718	-146.994	-292.921	895.487	-160.204	-211.068	853.253
8613	0	100.576	-214.65	1618.92	198.549	-212.559	1619.5	78.2501	-366.049	1611.66	210.403	-381.988	1605.46	175.378	-421.723	1485.01	185.172	-481.017	1232.15	158.744	-297.518	1403.42	158.391	-225.062	1256.31	270.526	-478.261	1293.96	-0.752024	-418.271	1428.67	-55.6904	-417.553	1243.73	-74.5081	-419.206	1091.78	-125.034	-293.91	972.26	-106.68	-236.78	911.036	-143.785	-289.312	892.19	-156.434	-208.676	847.153
8614	0	100.214	-201.999	1619.68	198.072	-200.218	1620.15	77.6735	-353.42	1613.16	209.898	-369.71	1607.27	174.977	-409.593	1486.46	185.35	-469.193	1233.64	157.949	-285.559	1404.77	156.952	-213.375	1257.53	270.871	-465.681	1295.59	-1.0353	-406.967	1429.93	-55.5178	-406.818	1244.84	-72.6667	-409.819	1092.66	-122.489	-288.275	969.547	-103.395	-232.946	906.753	-140.337	-286.076	888.895	-152.579	-206.9	841.258
8615	0	99.8698	-189.329	1620.63	197.81	-187.762	1621.13	77.0676	-340.665	1614.85	209.061	-357.464	1608.89	174.693	-397.417	1487.83	185.467	-457.056	1235.02	157	-273.759	1405.95	155.327	-201.781	1258.55	270.81	-453.759	1296.84	-1.47241	-395.763	1431.39	-55.1063	-396.386	1245.81	-71.2971	-400.516	1093.78	-119.78	-282.849	966.765	-100.354	-229.503	902.301	-137.027	-283.12	885.83	-148.502	-205.618	835.507
8616	0	99.314	-176.75	1621.62	197.367	-175.401	1622.11	76.3027	-328.085	1616.35	208.26	-345.079	1610.61	174.309	-385.259	1489.41	185.719	-445.701	1236.4	156.102	-261.949	1407.09	153.809	-190.325	1259.54	270.793	-442.872	1298.09	-1.84101	-384.724	1432.57	-54.7267	-386.205	1246.89	-69.629	-391.289	1094.8	-117.354	-277.855	963.843	-97.1286	-226.504	898.196	-133.476	-280.769	882.737	-144.249	-204.921	829.645
8617	0	98.6497	-164.278	1622.61	196.822	-163.027	1623.11	75.4448	-315.594	1617.8	207.425	-332.765	1612.11	173.794	-373.14	1490.89	186.07	-433.776	1237.83	155.017	-250.186	1408.21	152.298	-178.925	1260.59	270.864	-431.585	1299.26	-2.12015	-373.682	1433.97	-54.2414	-376.244	1248.06	-68.3138	-382.257	1096.18	-114.641	-273.126	961.424	-93.9136	-223.844	894.218	-130.01	-278.699	880.009	-140.07	-204.661	824.132
8618	0	98	-151.754	1623.57	196.07	-150.68	1623.84	74.4714	-303.04	1619.31	206.597	-320.463	1613.79	173.366	-360.978	1492.52	186.375	-422.122	1238.94	154.211	-238.435	1409.5	151.021	-167.587	1261.55	271.952	-417.311	1301.09	-2.50523	-362.592	1435.25	-53.3981	-366.379	1249.2	-66.6333	-373.439	1097.16	-112.161	-268.792	958.907	-90.7782	-221.415	890.145	-126.408	-276.835	877.629	-135.859	-204.858	818.896
8619	0	97.3718	-139.342	1624.47	195.402	-138.353	1624.8	73.7213	-290.704	1620.81	205.573	-308.228	1615.24	172.86	-348.861	1493.89	186.52	-410.547	1240.59	153.297	-226.85	1410.59	149.912	-156.385	1262.6	271.941	-405.308	1302.86	-2.90304	-351.553	1436.49	-52.7779	-356.683	1250.09	-64.9195	-364.678	1098.28	-109.511	-264.81	956.561	-87.6041	-219.253	886.808	-122.799	-275.414	875.268	-131.745	-205.619	813.888
8620	0	96.4861	-127.086	1625.01	194.611	-126.07	1625.58	72.8113	-278.276	1622.21	204.761	-295.946	1616.55	172.266	-336.842	1495.45	186.813	-398.941	1242.01	152.735	-215.151	1411.98	148.938	-145.224	1263.39	271.914	-393.579	1304.6	-3.31959	-340.378	1437.59	-52.2802	-346.706	1251.1	-62.9671	-356.194	1099.49	-106.799	-261.13	954.271	-84.6578	-217.509	884.04	-119.103	-274.301	873.432	-127.799	-206.724	809.322
8621	0	95.5059	-114.728	1625.76	193.741	-113.752	1626.57	71.9752	-265.956	1623.24	203.915	-283.679	1617.94	171.813	-324.823	1496.88	187.056	-387.588	1243.91	151.82	-203.509	1412.94	148.164	-133.996	1264.17	272.086	-381.677	1306.63	-3.67843	-329.121	1438.69	-51.5651	-336.904	1251.7	-60.7144	-347.938	1100.5	-104.25	-257.541	952.965	-81.903	-215.755	881.11	-115.579	-273.161	872.016	-123.965	-207.988	805.251
8622	0	94.9803	-102.392	1626.77	192.791	-101.39	1627.31	71.1761	-253.722	1624.25	203.112	-271.461	1619.43	171.285	-312.885	1498.27	187.327	-376.16	1245.65	151.256	-191.851	1414.12	147.62	-122.699	1265.05	272.039	-369.874	1308.47	-4.109	-317.775	1439.74	-50.7594	-326.99	1252.38	-58.1685	-339.777	1101.33	-101.545	-254.176	951.332	-79.2831	-214.169	878.649	-112.027	-272.112	870.841	-120.204	-209.361	801.986
8623	0	93.8734	-90.2482	1627.07	191.836	-89.1733	1627.91	70.2686	-241.539	1625.08	202.162	-259.167	1620.5	170.67	-300.915	1499.37	187.357	-364.799	1246.82	150.588	-180.201	1414.85	147.4	-111.45	1265.84	272.129	-358.093	1310.01	-4.43121	-306.412	1440.42	-49.9826	-317.129	1252.94	-55.8587	-332.171	1102.44	-99.0174	-251.049	949.953	-76.5822	-212.459	876.131	-108.513	-271.34	869.79	-116.664	-211.019	798.353
8624	0	92.4839	-78.1298	1627.17	190.756	-76.9172	1628.51	69.3232	-229.427	1625.73	201.331	-246.893	1621.36	170.166	-289.04	1500.44	187.433	-353.418	1248.02	149.72	-168.79	1415.4	147.242	-100.155	1266.31	272.055	-346.367	1311.46	-4.68866	-295.094	1440.92	-48.8854	-307.519	1253.06	-53.2859	-324.664	1103.27	-96.4135	-248.027	948.525	-73.8244	-211.185	873.65	-105.162	-270.531	869.088	-113.087	-212.476	795.607
8625	0	91.5314	-65.9655	1627.48	189.796	-64.5549	1628.96	68.5476	-217.406	1626.15	200.609	-234.59	1622.2	169.618	-277.091	1501.4	187.473	-342.062	1249.07	149.285	-157.12	1416.01	147.22	-88.8585	1266.76	271.941	-334.757	1312.82	-5.0396	-283.702	1441.32	-47.8565	-297.934	1253.23	-50.5737	-317.37	1103.77	-93.6915	-244.88	947.559	-70.9464	-209.8	871.649	-101.687	-269.652	868.384	-109.642	-213.933	792.832
8626	0	90.8377	-53.9088	1627.77	188.775	-52.2966	1629.28	67.7876	-205.42	1626.47	199.971	-222.352	1622.84	169.107	-265.17	1502.14	187.519	-330.654	1250.17	148.928	-145.426	1416.41	147.193	-77.5792	1266.75	272.005	-323.113	1314.03	-5.36186	-272.323	1441.58	-46.8536	-288.359	1253.33	-47.7306	-310.051	1104.24	-90.7643	-241.962	946.326	-68.2493	-208.42	869.57	-98.1027	-268.53	867.738	-106.122	-215.284	790.401
8627	0	89.4643	-41.9691	1627.4	187.607	-40.0338	1629.49	67.2266	-193.416	1626.4	199.314	-210.109	1623.33	168.74	-253.199	1502.57	187.627	-319.177	1250.86	148.632	-133.803	1416.73	147.216	-66.3303	1266.71	271.917	-311.404	1314.93	-5.46219	-260.961	1441.69	-45.7143	-279.165	1253.17	-45.203	-303.064	1104.91	-87.9369	-239.275	945.378	-65.5256	-206.806	867.933	-94.3944	-267.636	867.202	-102.661	-216.775	789.147
8628	0	88.3048	-30.031	1627.37	186.524	-27.74	1629.68	66.4628	-181.411	1626.42	198.702	-197.741	1623.74	168.188	-241.286	1503.02	187.591	-307.58	1251.43	148.289	-122.13	1416.76	147.391	-54.9752	1266.92	271.91	-299.972	1315.82	-5.72034	-249.455	1441.69	-44.587	-270.15	1253.05	-43.1878	-296.007	1106.14	-85.0569	-236.142	944.466	-62.1723	-205.833	866.711	-90.6663	-266.519	866.984	-99.2026	-217.799	787.201
8629	0	87.1341	-17.9806	1627.16	185.398	-15.5801	1629.8	65.7742	-169.614	1626.01	198.105	-185.524	1623.89	167.877	-229.314	1503.19	187.463	-296.044	1251.76	147.993	-110.253	1416.72	147.484	-43.7745	1266.43	271.761	-288.398	1316.37	-6.02328	-237.912	1441.32	-43.2965	-261.254	1253	-40.3928	-288.635	1106.13	-81.9441	-233.021	943.388	-58.8092	-204.408	864.969	-86.8229	-265.33	866.522	-95.8574	-218.299	785.812
8630	0	86.222	-6.06589	1626.88	184.398	-3.30898	1629.98	65.158	-157.845	1625.68	197.7	-173.25	1623.74	167.398	-217.3	1503.25	187.401	-284.5	1251.86	147.61	-98.4655	1416.47	147.36	-32.1846	1266.11	271.516	-276.729	1316.56	-6.20261	-226.34	1441.12	-42.1779	-252.386	1252.91	-38.1184	-281.325	1106.46	-78.9952	-229.806	942.32	-55.5376	-202.674	863.899	-83.2124	-263.932	866.601	-92.2333	-218.706	784.34
8631	0	85.4974	5.77998	1626.87	183.292	8.83338	1629.96	64.8125	-146.048	1625.2	197.275	-160.949	1623.2	167.118	-205.225	1502.99	187.313	-272.796	1251.79	147.339	-86.6419	1416.17	147.614	-20.638	1265.75	271.393	-264.9	1316.65	-6.32827	-214.712	1440.61	-41.063	-243.619	1252.68	-35.989	-273.979	1106.91	-76.2516	-226.481	941.455	-52.5211	-200.778	862.598	-79.2191	-262.322	866.234	-88.64	-218.904	783.143
8632	0	84.0676	17.4975	1626.33	182.256	20.9923	1629.93	64.2751	-134.251	1624.43	196.915	-148.752	1623.27	166.722	-193.083	1502.69	187.169	-260.995	1251.65	147.174	-74.7889	1415.7	147.607	-8.94955	1265.23	271.442	-253.517	1316.86	-6.55846	-203.04	1440.03	-40.0442	-234.732	1252.39	-33.5361	-266.997	1106.71	-73.5452	-223.087	940.623	-49.4303	-198.745	861.625	-75.5754	-260.472	866.324	-85.1287	-218.589	782.354
8633	0	82.9363	29.324	1625.9	181.357	33.259	1629.81	63.9824	-122.581	1623.56	196.706	-136.415	1622.27	166.335	-180.929	1502.3	186.983	-249.26	1251.36	146.944	-62.7433	1415.02	147.476	2.86019	1264.3	271.268	-242.013	1316.88	-6.79132	-191.166	1439.31	-39.0244	-225.702	1252	-32.1905	-258.8	1107.49	-71.0282	-219.335	939.894	-46.5765	-196.261	860.138	-71.6688	-257.937	865.995	-81.467	-217.905	781.469
8634	0	82.144	41.0454	1625.39	180.208	45.3232	1629.32	63.4997	-110.924	1622.36	196.406	-124.278	1621.49	165.858	-168.742	1501.66	186.655	-237.477	1250.81	146.665	-50.7285	1414.18	147.572	14.8256	1263.33	271.092	-230.352	1316.52	-6.88498	-179.106	1438.56	-38.1545	-216.477	1251.56	-30.3567	-251.053	1107.68	-68.4765	-215.426	939.048	-44.4902	-193.024	859.688	-68.167	-255.35	866.029	-77.888	-217.076	780.505
8635	0	81.1188	52.8689	1624.88	179.21	57.4595	1628.79	63.0869	-99.1501	1621.36	196.017	-112.034	1620.18	165.497	-156.524	1500.65	186.179	-225.652	1249.83	146.567	-38.6084	1413.1	147.678	26.6854	1262.32	270.643	-218.538	1315.74	-7.14777	-167.065	1437.34	-37.3568	-207.052	1251.1	-28.8167	-243.104	1107.81	-66.1413	-211.066	938.57	-40.9246	-190.749	858.791	-64.7985	-252.363	866.126	-74.5185	-215.907	779.609
8636	0	80.2498	64.4903	1624.33	178.22	69.6631	1628.33	62.8218	-87.482	1620.17	195.623	-99.7743	1619.45	164.972	-144.125	1499.66	185.754	-213.694	1249.05	146.255	-26.4804	1412.14	147.81	38.6166	1261.11	270.361	-206.792	1315.18	-7.46805	-154.772	1436.39	-36.6134	-197.14	1250.73	-27.2529	-234.729	1107.88	-64.066	-206.395	938.067	-38.7976	-186.961	858.209	-61.6575	-248.96	866.325	-71.08	-214.295	778.896
8637	0	79.3086	76.2855	1623.74	177.334	81.6946	1627.89	62.2978	-75.8035	1618.74	195.327	-87.6585	1618.1	164.437	-131.861	1498.7	185.324	-201.997	1248.17	146.022	-14.0118	1410.8	147.861	50.6585	1259.89	269.941	-194.962	1314.45	-7.86463	-142.259	1435.24	-36.0441	-186.833	1250.27	-25.7653	-226.09	1108	-62.1959	-201.27	937.766	-36.9639	-182.77	857.7	-58.8875	-245.038	866.525	-67.6235	-212.336	778.618
8638	0	78.2999	88.1435	1622.85	176.415	93.7428	1627.27	62.0801	-64.0178	1617.26	194.952	-75.4138	1616.37	163.978	-119.423	1497.5	184.909	-190.337	1247.2	145.791	-1.61244	1409.75	147.998	62.7391	1258.28	269.475	-182.888	1313.39	-8.35006	-129.72	1433.92	-35.8304	-176.279	1249.53	-24.7115	-217.391	1107.58	-60.6075	-195.741	937.326	-35.641	-177.891	857.635	-56.0372	-240.677	866.594	-64.4415	-209.985	777.745
8639	0	77.4638	99.8536	1622.14	175.533	105.856	1626.51	61.5668	-52.2085	1615.69	194.624	-63.2734	1615.05	163.459	-106.898	1496.06	184.36	-178.197	1245.97	145.429	10.9285	1408.18	147.974	74.9171	1256.9	268.857	-170.875	1312.3	-8.79801	-116.858	1432.65	-35.6751	-165.427	1248.76	-23.5736	-208.208	1107.38	-59.0396	-189.748	936.711	-33.4868	-173.207	856.487	-53.892	-235.738	867.038	-61.3944	-207.482	776.667
8640	0	76.528	111.746	1621.37	174.774	117.85	1625.65	60.9229	-40.4101	1614.27	194.143	-51.1618	1613.26	162.77	-94.2459	1494.45	183.649	-166.001	1244.7	145.167	23.408	1406.78	147.906	87.2878	1255.15	268.271	-158.795	1311.12	-9.5685	-104.043	1431.17	-35.7544	-154.15	1247.81	-22.8454	-198.505	1106.99	-58.0412	-183.166	936.283	-32.209	-167.704	855.757	-51.7062	-230.615	866.745	-58.8002	-203.781	776.274
8641	0	75.6729	123.618	1619.99	173.907	129.896	1624.68	60.4657	-28.5243	1612.49	193.467	-39.0463	1611.42	161.988	-81.6919	1493.03	182.778	-153.661	1243.16	144.697	36.0306	1404.94	147.712	99.6795	1253.08	267.493	-146.77	1309.8	-10.2617	-90.9654	1429.45	-35.9697	-142.664	1246.52	-21.8343	-189.014	1106.63	-57	-176.082	935.54	-30.9033	-162.025	854.504	-50.1566	-224.615	866.753	-56.5334	-199.538	775.498
8642	0	74.8799	135.504	1618.79	173.213	141.924	1623.46	59.7424	-16.5297	1610.83	192.641	-26.9583	1609.09	161.191	-69.0298	1491.1	181.954	-141.17	1241.41	144.144	48.6088	1403.17	147.661	112.355	1251.28	266.653	-134.646	1308.25	-11.2391	-77.9574	1427.63	-36.4545	-130.82	1245.24	-21.2663	-178.685	1105.9	-55.8546	-168.634	934.912	-30.0055	-155.014	853.83	-48.8549	-218.082	866.406	-54.6145	-194.78	774.76
8643	0	74.147	147.651	1617.65	172.396	153.801	1622.04	58.8662	-4.55293	1608.69	191.958	-15.0078	1607.21	160.347	-56.5438	1489.41	181.09	-128.679	1239.7	143.674	61.3561	1401.12	147.464	124.932	1249.28	265.7	-122.406	1306.73	-11.9015	-64.7674	1425.52	-36.8618	-119.019	1243.65	-20.991	-168.004	1104.95	-55.2006	-160.637	933.809	-29.0653	-148.118	852.598	-47.904	-211.014	866.311	-52.9642	-189.313	774.111
8644	0	73.5444	159.599	1616.19	171.868	165.868	1620.79	58.1145	7.60906	1607.03	191.019	-2.94842	1605.53	159.401	-44.0152	1487.52	180.076	-116.105	1238.17	143.008	74.0407	1399.1	147.298	137.541	1246.97	264.76	-110.165	1305.05	-12.9913	-51.743	1423.68	-37.5899	-106.678	1242.12	-21.2622	-157.097	1103.83	-54.9246	-151.942	932.798	-28.7813	-140.527	851.189	-47.2534	-203.159	866.007	-51.9122	-183.077	773.404
8645	0	72.9791	171.922	1615.03	171.095	177.745	1619.1	57.0793	19.8656	1605.01	189.969	8.96697	1603.22	158.298	-31.3167	1485.48	178.9	-103.377	1236.34	142.477	86.8131	1397.16	146.933	150.278	1244.9	263.714	-97.8954	1303.32	-13.9879	-38.5695	1421.57	-37.9389	-94.7864	1240.04	-21.4603	-145.665	1102.67	-54.8559	-142.77	931.408	-28.5415	-132.299	850.142	-46.849	-194.745	865.464	-51.0513	-176.296	772.465
8646	0	72.2747	184.102	1613.62	170.652	189.689	1617.78	55.8541	32.2846	1603.55	188.914	20.8959	1600.94	157.15	-18.8791	1483.64	177.546	-90.6547	1234.24	141.747	99.5721	1395.38	146.579	162.904	1243.03	262.346	-85.5291	1301.34	-15.1766	-25.5431	1419.5	-38.5641	-82.6815	1238.07	-22.138	-134.147	1101.51	-55.1983	-133.136	930.152	-28.6842	-123.576	848.673	-46.8849	-185.913	864.771	-50.7301	-168.792	771.454
8647	0	71.8447	196.572	1612.33	170.058	201.582	1616.58	54.6244	44.8174	1601.53	187.531	32.8164	1599.27	155.796	-6.26764	1481.68	176.028	-77.8604	1232.28	140.805	112.307	1393.64	145.967	175.576	1240.97	260.944	-73.0804	1299.51	-16.4532	-12.3574	1417.52	-40.3238	-69.5983	1236.87	-23.0384	-122.218	1099.98	-55.7289	-122.904	928.806	-29.2051	-114.183	847.143	-47.4397	-176.352	864.065	-50.9042	-160.498	770.379
8648	0	71.3339	209.106	1611.56	169.71	213.612	1615.53	53.2588	57.3565	1599.9	186.231	44.7647	1597.34	154.408	6.27387	1479.98	174.469	-65.0194	1230.35	139.831	125.095	1392.08	145.457	188.544	1239.6	259.306	-60.5429	1297.51	-18.0119	0.524664	1415.66	-40.9165	-57.4713	1234.63	-24.0961	-109.86	1098.78	-56.7962	-111.961	927.718	-30.0448	-103.941	846.058	-48.2347	-166.036	863.079	-51.4736	-151.252	769.448
8649	0	70.9349	221.592	1610.16	169.238	225.403	1614.3	52.0306	70.0708	1598.28	184.985	56.6446	1595.92	153.048	18.8586	1478.09	172.865	-52.2121	1228.57	138.649	137.877	1390.37	144.52	200.933	1237.54	257.644	-48.0638	1295.71	-19.2596	13.6688	1413.81	-42.1077	-44.5792	1233	-25.583	-97.5131	1097.32	-57.9615	-100.631	926.246	-31.1775	-93.102	844.53	-49.3049	-155.037	862.159	-52.3213	-141.214	768.218
8650	0	70.5189	234.283	1609.31	168.743	237.337	1613.08	50.5926	82.7908	1596.73	183.367	68.6383	1594.24	151.589	31.3807	1476.48	171.161	-39.3567	1226.87	137.674	150.746	1389.08	143.74	214.109	1236.54	255.931	-35.3952	1293.98	-20.712	26.7015	1412.29	-43.6105	-31.616	1231.48	-26.9073	-84.5718	1095.98	-59.3876	-88.6543	924.802	-32.6439	-81.552	842.89	-50.8422	-143.361	861.127	-53.5711	-130.246	767.13
8651	0	70.2872	246.861	1608.45	168.198	249.181	1612.12	49.1114	95.7015	1595.6	181.572	80.339	1592.78	149.97	43.9263	1475.08	169.311	-26.2984	1225.34	136.337	163.47	1387.78	142.568	226.956	1234.96	254.202	-22.7572	1292.51	-22.2659	39.8958	1410.96	-45.2554	-18.3037	1230.36	-28.5584	-71.3097	1094.74	-61.3317	-75.9603	923.631	-34.4065	-69.1062	841.745	-52.8292	-130.797	860.093	-55.4305	-118.184	766.118
8652	0	69.9799	259.582	1607.64	168.103	261.259	1611.52	47.5662	108.596	1594.04	180.025	92.3202	1591.6	148.289	56.4712	1473.69	167.486	-13.2617	1223.75	135.198	176.397	1386.83	141.405	240.082	1234.19	252.282	-9.92796	1290.88	-23.9769	53.0333	1409.54	-47.3315	-4.71015	1228.97	-30.7092	-57.9794	1093.37	-63.5191	-62.6432	922.488	-36.5276	-55.874	840.59	-55.0556	-117.47	858.911	-57.6283	-105.189	764.855
8653	0	69.1936	272.312	1606.93	167.281	273.215	1610.67	46.0455	121.512	1593.43	178.716	104.451	1590.5	146.566	68.9084	1472.66	165.607	-0.099015	1222.27	133.636	189.072	1385.94	140.1	253.129	1233.54	250.464	2.57145	1289.54	-25.6615	66.148	1408.56	-49.1162	8.60836	1227.68	-32.9241	-44.2698	1092.08	-65.7717	-48.6443	921.019	-38.8556	-41.9302	839.332	-57.6573	-103.595	857.698	-60.2855	-91.2356	763.63
8654	0	68.8046	285.022	1606.97	166.757	285.502	1610.55	44.6528	134.433	1592.99	177.151	116.61	1590.16	144.913	81.3009	1472.21	163.742	12.9699	1221.24	132.393	201.877	1385.74	138.581	266.105	1233.02	248.602	15.2901	1288.33	-27.3545	79.3233	1407.82	-51.2305	22.5393	1226.96	-35.1787	-30.1584	1091.14	-68.5744	-34.1052	920.124	-41.5787	-27.1735	838.338	-60.618	-88.8814	856.569	-63.1939	-76.2642	762.534
8655	0	67.7495	297.72	1606.77	166.05	297.638	1610.76	43.1739	147.315	1593.06	175.14	128.634	1590.57	143.302	93.7516	1472.19	162.027	26.0972	1220.94	130.923	214.536	1385.93	136.857	279.326	1233.12	246.838	27.954	1287.83	-29.1263	92.2288	1407.78	-53.7802	36.7153	1226.63	-37.8732	-15.7478	1090.53	-71.4539	-18.6067	919.358	-44.699	-11.6032	837.559	-63.8692	-73.195	855.597	-66.7624	-60.0871	761.73
8656	0	67.0608	310.541	1607.43	165.211	310.108	1611.09	41.8622	160.165	1593.56	173.748	140.968	1591.18	141.772	106.093	1472.53	160.397	39.0903	1221.02	129.643	227.26	1386.86	135.459	292.602	1234.17	245.231	40.7326	1287.83	-30.682	105.197	1408.01	-56.0443	51.094	1226.68	-40.6431	-1.13662	1089.87	-74.4534	-2.58274	919.285	-47.7987	4.82852	837.356	-67.4498	-56.7038	854.961	-70.4392	-42.9304	761.208
8657	0	65.9304	323.084	1608.18	164.323	322.456	1611.93	40.4583	172.803	1594.7	172.238	153.425	1591.97	140.265	118.437	1473.34	158.971	52.0419	1221.48	128.082	239.867	1387.84	133.817	305.638	1235.54	243.723	53.3414	1288.26	-32.3472	117.893	1408.85	-58.3494	65.4007	1226.79	-43.3109	13.9586	1089.99	-77.8844	13.8996	919.247	-51.2421	22.0677	837.349	-71.236	-39.6504	854.329	-74.6943	-24.8916	760.895
8658	0	65.2699	335.733	1609.37	163.247	334.998	1612.93	39.3104	185.4	1596.26	171.047	165.773	1593.42	138.935	130.738	1474.65	157.639	64.8202	1222.6	126.536	252.223	1389.53	132.351	318.688	1237.52	242.355	66.0325	1289.35	-33.883	130.432	1410.24	-60.6464	79.8809	1227.81	-46.3569	29.1746	1090.32	-81.2563	31.1973	919.796	-55.0233	40.0362	837.95	-75.2416	-21.6914	854.348	-79.4768	-5.74426	761.027
8659	0	63.7157	348.203	1610.54	162.065	347.517	1614.19	38.2072	197.784	1597.88	169.947	178.371	1595.42	137.655	143.081	1476.14	156.459	77.6661	1224.36	125.279	264.777	1391.24	130.75	331.484	1239.66	241.285	78.7311	1290.84	-35.0681	143.05	1411.96	-62.7398	94.5099	1229.15	-49.4826	44.8217	1091.16	-85.2611	49.1707	920.791	-59.0788	58.923	838.916	-79.4576	-2.93862	854.656	-84.2409	14.4816	761.845
8660	0	62.5853	360.714	1612.07	160.832	360.071	1615.55	37.239	210.095	1600.13	169.012	190.723	1597.4	136.639	155.27	1477.92	155.6	90.2939	1226.26	124.014	277.044	1393.6	129.178	344.113	1241.93	240.166	91.4185	1292.53	-36.354	155.351	1414.1	-64.8842	108.835	1230.89	-52.3648	60.4073	1092.14	-89.0628	67.6939	921.943	-63.315	78.4302	840.31	-83.9322	16.4775	855.189	-89.6514	35.6412	762.749
8661	0	61.7873	372.838	1613.94	159.663	372.687	1617.4	36.3824	222.375	1601.93	168.315	203.259	1599.58	135.63	167.363	1480.06	154.569	102.856	1228.21	122.899	289.322	1395.74	127.658	356.52	1244.3	239.136	103.706	1294.71	-37.4085	167.693	1416.39	-66.7443	123.3	1232.89	-54.906	75.7217	1093.64	-92.9759	86.4428	923.506	-67.8057	98.5873	841.756	-88.5246	36.4976	855.938	-94.7614	57.4867	763.922
8662	0	60.3116	385.027	1615.61	158.331	384.946	1618.96	35.8362	234.236	1604.42	167.93	215.758	1601.45	134.773	179.548	1482.13	153.619	115.321	1230.47	122.059	301.447	1397.98	126.825	368.744	1246.82	238.295	115.955	1297.1	-38.2066	180.258	1418.77	-68.7604	137.369	1235.08	-58.25	91.3509	1094.87	-97.0492	105.72	925.484	-72.3644	119.358	843.87	-93.5118	57.1383	856.646	-100.328	80.2661	765.293
8663	0	59.4443	396.987	1617.62	157.487	397.52	1621.13	35.122	246.251	1606.45	167.224	228.103	1603.76	133.866	191.695	1484.08	152.682	127.586	1232.71	121.09	313.484	1400.26	125.839	380.708	1248.91	237.192	128.031	1299.22	-39.2809	192.679	1421.25	-70.5578	151.588	1237.4	-61.4336	106.949	1096.68	-101.334	125.414	927.145	-77.359	140.617	845.792	-98.7278	78.22	857.555	-106.268	103.598	766.97
8664	0	58.2464	408.905	1619.26	156.426	409.582	1622.74	34.7166	257.923	1608.28	166.914	240.333	1605.55	133.052	203.507	1486.3	151.596	139.58	1234.77	120.727	325.601	1402.14	125.139	392.519	1250.89	236.253	139.745	1301.41	-40.158	205.475	1423.3	-72.5566	165.606	1239.63	-64.1389	121.944	1097.81	-105.8	145.091	929.231	-82.6354	161.881	848.214	-103.899	99.7018	858.255	-112.611	127.575	768.195
8665	0	57.2874	420.719	1620.91	155.722	421.863	1624.74	34.1872	269.781	1610.18	166.425	252.46	1607.39	132.106	215.374	1488.27	150.614	151.345	1236.98	120.098	337.25	1404.28	124.673	404.05	1252.76	235.064	151.106	1303.64	-41.2567	218.089	1425.52	-74.5338	179.476	1241.79	-67.2091	137.657	1099.01	-110.258	164.842	931.067	-88.0473	184.293	850.972	-109.345	121.466	859.079	-118.549	151.955	769.907
8666	0	56.7348	432.558	1623.05	154.928	433.572	1626.52	33.8494	281.471	1611.99	166.193	264.346	1609.56	131.385	227.074	1490.25	149.258	163.027	1239.3	119.761	349.188	1406.07	124.628	415.539	1254.39	233.903	162.399	1305.87	-42.0416	230.89	1427.47	-76.5042	193.441	1243.94	-70.3114	153.16	1100.25	-114.642	185.145	933.05	-93.2849	206.446	852.711	-114.976	143.951	860.357	-124.751	177.051	772.193
8667	0	56.1532	444.297	1624.74	154.491	445.404	1628.4	33.3694	293.295	1614.06	165.787	276.18	1611.5	130.437	238.786	1492.11	147.894	174.567	1241.36	119.402	360.839	1407.87	124.81	427.14	1255.97	232.622	173.547	1307.71	-43.0282	243.574	1429.49	-78.2472	207.376	1245.62	-73.7763	168.286	1101.54	-119.304	205.423	935.379	-98.551	229.286	855.593	-120.491	166.327	861.409	-131.02	202.962	775.082
8668	0	55.8585	456.071	1626.65	154.055	456.991	1629.91	33.122	304.934	1615.57	165.499	287.802	1612.98	129.762	250.216	1493.9	146.393	186.005	1243.12	119.38	372.478	1409.53	125.507	438.635	1257.89	231.122	184.374	1309.5	-43.7814	256.245	1431.3	-80.3291	221.567	1247.23	-77.1248	183.675	1102.31	-123.705	225.92	937.511	-103.382	251.782	858.19	-126.107	188.982	862.578	-137.378	228.699	777.78
8669	0	55.7107	467.623	1628.17	154.054	468.435	1631.66	32.5013	316.725	1617.61	164.988	299.286	1614.62	128.783	261.737	1495.66	144.88	197.285	1244.88	118.993	383.906	1411.08	125.926	449.857	1259.41	229.607	195.109	1311.08	-44.8396	268.813	1433.22	-82.4338	235.669	1249.08	-80.5353	199.093	1103.27	-128.392	246.515	939.972	-108.554	275.022	861.258	-131.598	211.826	863.847	-143.853	254.495	780.792
8670	0	55.7335	479.412	1629.97	153.939	479.768	1633.49	32.2445	328.381	1619.05	164.505	310.756	1616.54	128.12	273.158	1497.2	143.175	208.548	1246.52	119.226	395.429	1412.68	126.694	461.291	1261.01	228.034	205.868	1312.69	-45.553	281.589	1434.86	-84.5919	249.853	1250.63	-84.111	214.504	1104.46	-132.674	267.359	942.536	-113.437	297.607	864.479	-137.158	234.951	865.533	-150.22	280.865	784.521
8671	0	55.7172	490.994	1631.68	154.078	491.198	1635.03	31.6705	340.212	1621.01	164.009	321.919	1618.13	127.349	284.577	1498.9	141.653	219.721	1247.97	119.039	406.767	1414.07	127.36	472.515	1262.41	226.495	216.478	1314.09	-46.3821	294.001	1436.59	-86.5139	263.942	1252.23	-87.5885	229.854	1105.2	-137.14	288.068	945.302	-118.246	320.63	868.183	-142.638	258.075	867.545	-156.476	307.399	788.645
8672	0	55.8858	502.626	1633.12	153.935	502.251	1636.21	31.2292	351.931	1622.43	163.398	333.128	1619.48	126.65	295.863	1500.36	140.065	230.684	1249.42	118.931	418.228	1415.44	127.965	483.733	1263.8	225.093	227.109	1315.53	-46.9709	306.429	1438.26	-88.4496	277.985	1254.12	-91.1237	245.442	1106.27	-141.342	309.003	948.169	-122.86	343.656	872.191	-148.119	281.242	869.572	-162.481	333.85	793.135
8673	0	56.442	514.299	1634.75	154.439	513.587	1637.79	30.638	363.68	1624.04	162.973	344.266	1620.94	125.995	307.219	1501.93	138.602	241.681	1251.04	119.144	429.371	1417.01	128.362	494.977	1265.09	223.553	237.581	1316.96	-47.7949	318.881	1440.05	-90.5722	292.009	1255.36	-94.6821	260.93	1107.25	-145.251	329.965	951.486	-127.226	366.412	875.958	-153.62	304.663	872.489	-169.054	360.036	797.715
8674	0	56.9421	525.875	1636.25	154.507	524.461	1639.05	30.2077	375.429	1625.67	162.044	355.068	1622.93	125.158	318.553	1503.34	137.162	252.628	1252.53	119.047	440.55	1418.38	128.787	506.236	1266.54	222.21	247.991	1318.56	-48.418	331.24	1441.6	-92.5358	306.094	1257.34	-98.1376	276.467	1108.66	-149.137	350.765	954.874	-131.554	389.574	880.174	-158.918	328.047	875.48	-174.459	386.784	803.487
8675	0	57.1823	537.483	1637.45	154.962	535.582	1640.29	29.5745	387.188	1626.73	161.415	366.047	1624.19	124.515	329.732	1504.66	135.814	263.412	1254.01	118.987	451.861	1419.58	128.929	517.536	1267.87	220.831	258.497	1319.77	-49.1632	343.483	1443.33	-94.6028	319.911	1258.99	-101.785	291.969	1109.81	-153.147	371.55	958.65	-135.589	412.28	884.877	-164.127	351.35	878.664	-180.088	412.689	809.448
8676	0	57.6617	549.153	1638.5	155.395	546.607	1641.5	29.1171	398.774	1627.95	160.699	377.081	1625.27	123.838	340.94	1506.04	134.6	274.196	1255.4	118.693	462.929	1420.54	128.879	528.541	1268.83	219.602	268.89	1320.96	-49.9063	355.618	1444.84	-96.4124	333.794	1260.75	-105.319	307.478	1110.9	-157.118	392.504	962.499	-139.802	434.9	890.023	-169.277	374.547	882.247	-185.385	438.658	815.481
8677	0	58.1419	560.67	1639.35	155.724	557.592	1642.37	28.6256	410.517	1628.85	160.2	387.804	1626.39	123.152	352.101	1507.12	133.475	284.93	1256.75	118.618	474.037	1421.43	128.765	539.621	1269.75	218.544	279.372	1322.27	-50.4909	367.72	1446.4	-98.1687	347.433	1262.26	-108.72	322.951	1112.03	-160.791	413.331	966.67	-143.365	457.296	894.876	-174.198	397.813	886.101	-190.534	464.364	822.072
8678	0	58.6121	572.121	1640.1	156.257	568.597	1643.03	27.9739	422.333	1630.07	159.583	398.575	1627.5	122.516	363.228	1507.89	132.402	295.593	1258.01	118.217	484.898	1422.29	128.676	550.523	1270.39	217.384	289.73	1323.47	-51.2542	379.751	1447.69	-100.399	361.248	1263.85	-112.227	338.359	1113.39	-164.329	433.863	970.93	-147.379	479.67	900.369	-178.949	421.227	890.262	-195.222	489.459	828.757
8679	0	59.0844	583.722	1640.66	156.705	579.38	1643.57	27.4641	434.084	1630.59	158.921	409.504	1628.15	121.818	374.374	1508.73	131.518	306.212	1258.91	118.093	495.904	1422.96	128.056	560.936	1270.84	216.262	300.14	1324.41	-51.8639	391.527	1448.79	-102.272	375	1265.09	-115.903	353.73	1114.23	-167.797	454.198	975.136	-150.914	501.59	905.566	-183.811	443.966	894.344	-199.621	514.485	835.365
8680	0	59.761	595.357	1640.95	157.231	590.322	1643.81	26.9264	445.924	1631.17	158.175	420.378	1628.87	121.264	385.327	1509.47	130.556	316.797	1259.69	117.582	506.746	1423.24	127.82	571.557	1271.22	215.296	310.522	1324.98	-52.5965	403.258	1449.86	-104.613	388.398	1265.73	-119.253	368.949	1115.14	-171.449	474.361	979.374	-154.322	523.297	911.485	-188.456	466.576	898.695	-203.725	539.09	841.787
8681	0	60.2838	606.864	1641.09	157.73	601.121	1643.96	26.3802	457.634	1631.54	157.505	431.137	1629.27	120.686	396.319	1510.01	129.538	327.401	1260.51	117.211	517.625	1423.43	127.373	581.971	1271.2	214.381	320.958	1325.52	-53.2726	415.004	1450.83	-106.483	401.922	1266.95	-122.709	384.383	1116.26	-174.798	494.054	983.668	-157.711	544.766	916.676	-192.778	489.061	903.11	-207.676	563.201	848.572
8682	0	60.8258	618.36	1641.12	158.235	611.996	1643.9	25.8854	469.44	1631.89	156.764	441.974	1629.52	120.058	407.303	1510.35	128.554	337.956	1260.86	116.877	528.572	1423.47	126.855	592.437	1271.24	213.708	331.395	1326.11	-53.8623	426.447	1451.43	-108.104	415.575	1268.53	-126.25	399.491	1117.07	-178.086	513.657	987.81	-160.76	565.923	922.277	-196.834	511.231	907.72	-211.294	586.899	855.034
8683	0	61.2273	629.807	1640.9	158.766	622.874	1643.67	25.2556	481.228	1632.05	156.01	452.867	1629.72	119.393	418.371	1510.46	127.724	348.441	1261.13	116.314	539.186	1423.39	126.801	603.044	1271.32	212.803	341.763	1326.33	-54.5434	437.975	1451.89	-110.273	428.754	1269.15	-129.848	414.638	1117.83	-181.287	533.018	992.261	-163.92	586.629	927.676	-200.73	532.967	911.789	-214.536	610.414	861.673
8684	0	61.6486	641.384	1640.43	159.138	633.616	1643.36	24.8567	492.899	1631.99	155.24	463.699	1629.82	118.865	429.232	1510.43	127.004	358.814	1261.08	115.876	550.093	1423.23	125.968	613.541	1270.6	211.905	352.291	1326.18	-54.9648	449.21	1452.22	-112.218	441.949	1269.86	-133.154	429.872	1118.21	-184.294	551.901	996.287	-166.861	607.124	932.851	-204.543	554.294	915.888	-217.652	633.221	868.25
8685	0	62.2357	652.893	1639.97	159.686	644.591	1642.85	24.3384	504.532	1631.97	154.627	474.572	1629.62	118.442	440.107	1510.27	126.279	369.318	1261.23	115.581	560.825	1422.97	125.74	624.197	1270.38	210.963	362.778	1326.18	-55.4648	460.44	1452.39	-113.946	455.19	1270.46	-136.462	445.061	1118.64	-187.089	570.617	1000.02	-169.549	627.22	938.117	-208.173	575.43	920.153	-220.399	655.793	874.691
8686	0	62.6506	664.306	1639.26	160.054	655.488	1642.02	23.882	516.185	1631.68	154.144	485.389	1629.5	117.924	451.049	1510.03	125.642	380.045	1260.97	114.985	571.745	1422.38	125.286	634.844	1269.81	210.31	373.465	1325.8	-55.929	471.721	1452.24	-116.008	468.154	1271	-139.751	460.114	1118.93	-189.759	589.132	1003.5	-171.951	646.984	942.937	-211.408	595.998	924.178	-223.097	677.711	880.662
8687	0	62.8691	675.668	1638.46	160.135	666.283	1641.29	23.5448	527.666	1631.18	153.547	496.225	1629.26	117.447	461.941	1509.57	124.787	389.688	1260.59	114.962	582.836	1421.56	124.816	645.561	1269.16	209.575	384.137	1325.27	-56.4875	482.75	1452.07	-117.551	481.205	1271.34	-143.536	475.059	1119.99	-192.364	607.347	1007.28	-174.371	666.317	947.681	-214.637	616.277	928.217	-225.596	698.958	886.515
8688	0	63.0115	686.945	1637.57	160.509	677.427	1640.55	23.1809	539.189	1631.08	153.048	507.198	1628.86	116.931	472.864	1508.97	124.411	400.32	1259.98	114.667	593.455	1421.11	124.364	656.391	1268.54	209.078	394.817	1324.59	-56.7672	493.734	1451.51	-119.163	493.714	1271.16	-146.352	489.705	1119.74	-194.871	625.095	1010.37	-176.472	685.178	952.353	-217.491	636.061	931.903	-227.674	719.925	892.302
8689	0	63.3617	698.319	1636.58	160.65	688.41	1639.5	23.0077	550.629	1630.34	152.731	518.416	1628.01	116.565	483.963	1508.24	124.278	411.812	1259.24	114.329	604.501	1420.19	123.723	666.969	1267.44	208.672	405.694	1323.88	-57.0487	504.6	1451.09	-120.559	506.293	1271.57	-149.043	504.654	1119.68	-196.949	642.587	1013.4	-178.573	703.745	956.603	-220.236	655.501	935.745	-229.807	740.364	897.746
8690	0	63.6668	709.635	1635.62	160.664	699.352	1638.36	22.7329	562.028	1629.66	152.346	529.427	1627.62	116.377	494.983	1507.48	124.029	422.575	1258.39	113.989	615.309	1419.44	123.451	677.703	1266.51	208.379	416.575	1322.91	-57.3074	515.563	1450.29	-121.965	519.038	1271.1	-151.597	519.426	1119.56	-199.078	659.868	1016.41	-180.496	721.848	960.419	-222.749	674.442	939.01	-231.841	759.956	902.885
8691	0	63.6811	720.867	1634.56	160.906	710.547	1637.41	22.5775	573.405	1628.72	152.121	540.501	1626.72	116.183	505.98	1506.61	123.985	433.286	1257.58	113.221	626.177	1418.14	122.854	688.242	1265.54	207.986	427.499	1322.06	-57.5131	526.295	1449.69	-123.169	531.269	1270.69	-154.112	534.072	1119.63	-200.953	676.511	1019.1	-182.224	739.557	964.341	-225.025	692.93	942.277	-233.567	779.241	908.006
8692	0	63.6616	732.102	1633.43	160.991	721.742	1636.38	22.5662	584.615	1627.59	152.067	551.51	1625.79	116.117	517.159	1505.67	123.949	444.114	1256.57	113.217	637.073	1417.15	122.421	699.236	1264.38	207.669	438.728	1321.02	-57.6619	537.279	1448.8	-124.365	543.723	1270.37	-156.246	548.483	1119.32	-202.58	693.065	1021.86	-183.614	756.77	968.024	-227.013	710.885	945.084	-235.114	797.904	912.547
8693	0	63.8831	743.344	1632.43	160.893	732.667	1635.08	22.5292	595.9	1626.79	151.993	562.618	1624.68	116.027	528.35	1504.7	123.931	455.127	1255.64	112.83	648.28	1416.08	121.67	710.005	1262.98	207.599	450.156	1319.87	-57.744	548.117	1447.95	-124.983	556.158	1269.73	-158.237	562.803	1119.13	-204.063	709.136	1024.27	-185.17	773.496	971.228	-228.967	728.533	947.974	-236.629	816.066	916.853
8694	0	63.9821	754.59	1631.12	161.056	743.878	1633.97	22.5577	607.096	1625.86	151.89	573.943	1623.29	116.049	539.618	1503.51	124.132	466.152	1254.39	112.827	659.494	1414.83	121.404	721.24	1261.93	207.776	461.487	1318.57	-57.8368	559.1	1446.82	-125.857	568.479	1269.2	-159.933	576.883	1118.92	-205.446	724.887	1026.11	-186.487	789.837	974.016	-230.811	745.458	950.47	-238.001	833.519	920.69
8695	0	63.8926	765.689	1629.78	161.068	755.158	1632.39	22.7417	618.161	1624.39	152.078	584.93	1622.25	116.149	550.914	1502.03	124.495	477.263	1253.15	112.55	670.594	1413.55	120.724	732.352	1260.5	207.875	473.037	1317.29	-57.7486	569.927	1445.69	-126.695	580.623	1268.55	-161.386	590.696	1118.24	-206.581	740.2	1028.19	-187.356	805.79	976.674	-232.407	761.976	953.04	-239.142	850.39	924.243
8696	0	63.9753	776.824	1628.76	160.934	766.062	1631.33	22.7991	629.301	1623.12	152.293	596.075	1620.86	116.407	562.261	1500.92	124.773	488.441	1251.98	112.17	682.069	1412.2	120.1	743.838	1259.12	208.185	484.692	1315.87	-57.689	580.815	1444.65	-127.012	592.724	1267.73	-162.492	604.265	1117.63	-207.514	755.167	1029.61	-188.283	821.237	978.999	-233.732	778.103	955.041	-240.365	866.648	927.169
8697	0	64.2403	788.002	1627.38	161.146	777.262	1629.84	23.0527	640.398	1622.1	152.365	607.223	1619.54	116.742	573.62	1499.58	125.325	499.831	1250.47	112.1	693.589	1410.98	119.569	755.35	1258.03	208.707	496.487	1314.31	-57.3048	591.698	1443.35	-127.328	604.971	1266.59	-163.63	617.777	1117.14	-208.471	769.78	1030.92	-189.194	836.311	980.684	-234.985	793.393	956.632	-241.086	882.657	930.163
8698	0	64.4525	799.205	1626.15	161.149	788.505	1628.42	23.3766	651.554	1620.62	152.695	618.552	1617.91	117.187	584.963	1498.02	125.866	511.29	1249.03	111.833	704.787	1409.43	118.758	766.872	1256.35	209.425	508.359	1312.63	-56.9497	602.344	1441.85	-127.661	617.176	1265.83	-164.413	631.028	1116.49	-209.133	783.903	1031.74	-189.704	850.872	982.263	-235.904	808.596	958.312	-241.83	897.815	932.219
8699	0	64.7292	810.341	1624.74	161.42	799.829	1626.74	23.65	662.632	1619.58	153.088	629.678	1616.68	117.743	596.392	1496.45	126.659	522.878	1247.46	111.803	716.312	1408.18	118.28	778.456	1255.11	210.159	520.45	1311.11	-56.5785	613.217	1440.38	-127.617	628.999	1264.81	-164.901	643.911	1115.84	-209.523	797.757	1032.42	-190.255	864.951	983.013	-236.594	822.811	958.925	-242.462	912.454	933.803
8700	0	64.8884	821.441	1623.56	161.673	811.089	1625.43	24.1128	673.716	1618.36	153.564	640.93	1615.12	118.464	607.731	1495.27	127.477	534.616	1246.24	111.726	727.934	1406.85	117.77	790.311	1253.84	211.113	532.596	1309.42	-56.0923	624.101	1439.16	-127.527	640.739	1263.96	-165.223	656.757	1114.81	-209.793	811.13	1032.76	-190.756	878.64	983.847	-237.186	836.842	959.81	-243.008	926.604	935.284
8701	0	65.0412	832.637	1622.14	161.919	822.38	1623.98	24.5158	684.658	1616.97	154.014	652.198	1613.98	119.309	619.057	1493.78	128.414	546.552	1244.54	112.241	739.448	1406.01	117.25	802.046	1252.79	211.952	544.951	1307.72	-55.5601	634.918	1438	-127.406	652.477	1262.83	-165.572	669.36	1114.23	-210.106	824.154	1032.85	-190.904	891.817	984.353	-237.435	850.249	960.256	-243.267	940.156	936.252
8702	0	65.3591	843.789	1620.84	162.256	833.653	1622.66	25.1842	695.652	1615.68	154.731	663.566	1612.51	120.103	630.468	1492.27	129.541	558.604	1242.89	112.436	751.122	1404.99	116.795	813.963	1251.87	213.071	557.36	1306.02	-54.849	645.62	1436.76	-127.077	664.085	1261.99	-165.381	681.609	1113.29	-210.008	836.735	1032.73	-190.984	904.536	984.325	-237.668	863.151	959.862	-243.538	952.998	936.457
8703	0	65.6836	855.031	1619.77	162.55	845.075	1621.47	25.8197	706.671	1614.36	155.632	674.906	1611.08	121.036	641.986	1490.67	130.57	570.821	1241.35	112.156	762.358	1403.9	116.306	825.917	1251	214.207	569.816	1304.4	-54.017	656.363	1435.61	-126.6	675.639	1260.72	-165.089	693.496	1112.57	-209.895	848.79	1032.31	-190.992	916.704	984.102	-237.675	875.38	959.63	-243.552	965.294	936.504
8704	0	66.011	866.254	1618.64	162.944	856.498	1620.28	26.5088	717.791	1613.33	156.321	686.481	1609.92	122.026	653.285	1489.42	131.712	583.266	1239.65	112.322	774.054	1402.66	116.041	838.141	1250.31	215.423	582.468	1302.58	-53.122	667.108	1434.44	-125.819	686.868	1259.61	-164.476	705.264	1111.44	-209.594	860.585	1031.66	-190.855	928.61	983.448	-237.527	887.272	959.019	-243.566	977.07	935.932
8705	0	66.4897	877.511	1617.78	163.421	868.025	1619.45	27.488	728.818	1612.29	157.212	698.098	1608.43	123.2	665.036	1487.91	133.013	595.876	1237.87	112.815	785.937	1402.03	115.899	850.471	1249.66	216.841	595.13	1300.78	-52.0792	677.927	1433.21	-124.548	697.778	1258.46	-163.873	716.576	1110.59	-209.166	871.924	1030.74	-190.398	939.967	982.578	-237.091	898.538	958.18	-243.374	988.495	934.931
8706	0	66.7024	888.728	1616.92	163.774	879.612	1618.47	28.4974	739.815	1610.71	158.33	709.48	1607.22	124.171	676.603	1486.42	134.38	608.25	1236.74	113.372	797.748	1400.9	115.864	862.785	1248.92	218.111	607.736	1299.1	-50.9725	688.9	1431.79	-123.609	708.646	1256.93	-162.992	727.549	1109.11	-208.665	882.861	1029.52	-190.043	950.789	981.2	-236.631	909.224	956.589	-242.808	999.239	933.396
8707	0	67.0942	899.921	1616.18	164.127	891.258	1617.52	29.3618	750.979	1609.69	159.537	721.113	1605.68	125.262	688.394	1484.98	135.631	621.111	1234.93	114.318	809.985	1400.02	116.251	875.33	1248.13	219.431	620.306	1297.56	-49.8065	700.015	1430.59	-122.051	719.298	1255.78	-161.925	738.146	1107.8	-207.905	893.388	1027.59	-189.672	961.268	979.084	-236.173	919.573	955.052	-242.134	1009.61	931.387
8708	0	67.4373	911.127	1615.47	164.604	902.975	1616.87	30.442	762.016	1608.22	160.579	732.799	1604.42	126.469	700.283	1483.66	136.883	633.821	1233.35	114.751	821.932	1398.67	116.726	887.804	1247.17	220.852	633.12	1296.04	-48.7362	711.48	1429.01	-121.194	730.12	1254.16	-160.697	748.779	1106.25	-207.151	903.59	1025.8	-188.719	971.455	977.071	-235.315	929.527	953.129	-241.698	1019.28	928.994
8709	0	67.6925	922.173	1614.99	164.991	914.695	1616.41	31.5797	773.073	1607.09	161.881	744.635	1602.98	127.728	712.159	1482.56	138.203	646.732	1231.69	115.658	834.124	1397.78	117.645	900.573	1246.51	222.209	645.787	1294.4	-47.5753	722.997	1427.61	-119.852	740.818	1252.37	-159.301	759.172	1104.67	-206.126	913.379	1023.45	-188.005	981.027	974.377	-234.475	938.984	951.001	-240.934	1028.64	926.11
8710	0	68.0984	933.656	1614.7	165.256	926.518	1616.17	32.7561	784.075	1606.01	163.206	756.465	1602.04	128.972	724.058	1481.49	139.238	659.383	1230.25	117.053	846.548	1397.07	118.365	913.323	1245.71	223.546	658.608	1292.85	-46.3786	734.612	1426.26	-117.883	751.323	1250.95	-157.625	769.154	1103.12	-205.113	922.805	1020.82	-187.209	990.219	971.413	-233.348	947.696	947.93	-240.104	1037.19	922.701
8711	0	68.3253	944.839	1614.64	165.597	938.455	1616.33	33.8001	795.24	1605.53	164.664	768.536	1601.29	130.369	736.162	1480.69	140.359	672.402	1229.02	117.613	858.691	1396.6	119.563	926.344	1245.6	224.782	671.457	1291.63	-45.1262	746.133	1425.23	-116.53	761.978	1249.38	-155.899	779.205	1101.44	-203.941	931.717	1018.02	-186.117	998.987	968.263	-231.933	956.062	944.994	-239.197	1045.38	918.951
8712	0	68.5825	956.374	1614.86	165.733	950.387	1616.51	34.9973	806.37	1605.29	166.039	780.401	1601.27	131.693	748.1	1480.09	141.381	685.38	1227.97	119.068	871.122	1396.54	120.903	939.571	1245.75	226.132	684.481	1290.52	-43.6613	757.89	1424.36	-114.67	772.279	1248.34	-153.589	788.982	1100.18	-202.416	940.415	1014.92	-184.871	1007.28	964.737	-230.26	963.791	941.25	-238.106	1052.77	914.85
8713	0	68.5693	967.558	1615.25	165.879	962.536	1617.03	36.4404	817.414	1605.25	167.638	792.606	1601.44	133.09	760.069	1479.84	142.473	698.433	1227.28	120.354	883.538	1396.94	121.89	952.551	1246.27	227.281	697.189	1289.9	-42.323	769.487	1423.77	-112.586	782.542	1247.46	-150.936	798.665	1098.86	-200.838	948.466	1011.65	-183.613	1014.97	960.874	-228.542	970.827	937.721	-237.059	1059.39	910.399
8714	0	68.6725	978.683	1615.54	166.048	974.684	1618.16	37.8467	828.456	1605.63	169.484	805.079	1601.79	134.624	772.315	1480.21	143.442	711.306	1227.01	121.628	895.992	1397.7	123.298	965.899	1247.51	228.572	710.141	1289.58	-40.9667	781.204	1423.74	-110.416	792.818	1246.66	-148.062	808.305	1097.71	-198.964	956.274	1008.57	-182.097	1022.18	956.888	-226.306	977.101	933.526	-235.719	1065.43	905.716
8715	0	68.6052	989.996	1616.45	165.826	987.007	1619.16	39.311	839.627	1606.32	171.297	817.257	1602.9	135.876	784.427	1480.78	144.289	724.086	1227.38	122.94	908.381	1398.94	124.587	979.028	1249.14	229.709	722.887	1290.03	-39.5104	793.008	1424.02	-107.806	802.947	1246.43	-145.046	817.535	1097.35	-197.006	963.569	1005.28	-180.559	1028.77	952.484	-223.984	982.87	930.055	-234.379	1070.34	900.64
8716	0	68.566	1001.28	1617.41	165.547	999.489	1620.19	40.9866	850.624	1607.45	173.185	829.909	1604.23	136.98	796.458	1481.62	144.918	736.842	1228.11	123.876	920.613	1399.79	125.949	992.096	1250.84	230.559	735.703	1290.54	-38.2777	805.009	1424.55	-105.64	813.373	1246.54	-141.827	826.82	1096.86	-194.619	970.306	1001.92	-178.581	1034.74	948.079	-220.975	987.827	925.922	-232.64	1074.75	895.251
8717	0	68.3694	1012.54	1617.9	165.267	1011.91	1621.25	42.8244	861.379	1608.7	174.957	842.362	1605.76	138.203	808.817	1482.56	145.592	749.578	1228.93	125.071	932.956	1401.12	126.815	1005.1	1252.06	231.52	748.429	1291.17	-36.966	817.239	1425.43	-103.202	823.85	1246.7	-137.842	835.694	1096.89	-192.104	976.702	998.685	-176.483	1040.21	943.314	-217.935	992.049	922.01	-230.701	1078.24	889.675
8718	0	68.0644	1023.71	1618.98	165.035	1024.41	1622.45	44.6915	872.233	1610.01	177.172	855.047	1607.38	139.315	821.093	1483.78	146.322	762.124	1230.36	126.347	945.448	1402.6	127.815	1017.73	1253.69	232.346	761.326	1292.33	-35.8296	829.5	1426.66	-100.559	834.44	1247.3	-134.211	844.788	1097.5	-189.329	982.88	995.55	-174.043	1045.13	938.873	-214.762	995.93	918.31	-228.314	1081.23	883.914
8719	0	67.61	1034.89	1620.16	164.65	1036.99	1623.64	46.6702	882.972	1611.54	179.206	867.8	1609.15	140.575	833.451	1484.97	147.027	774.529	1231.56	127.339	957.802	1403.91	129.084	1030.4	1255.59	233.123	773.945	1293.48	-34.7009	841.705	1428.09	-98.3092	845.45	1248.3	-130.412	853.612	1098.07	-186.024	988.801	992.099	-171.229	1049.46	934.447	-211.067	999.412	914.446	-225.574	1083.48	877.882
8720	0	66.8631	1045.89	1621.11	164.292	1049.71	1624.66	48.6096	893.734	1613.27	181.422	880.517	1610.64	141.651	845.724	1486.14	147.736	786.696	1233.01	128.025	969.992	1405.12	129.609	1042.77	1256.51	234.002	786.557	1294.64	-33.6443	853.868	1429.5	-96.2157	856.477	1249.21	-126.613	862.497	1098.78	-182.794	994.063	988.835	-168.29	1053.5	929.689	-207.482	1002.33	910.897	-222.554	1085.32	871.788
8721	0	66.5163	1056.94	1622.34	163.813	1062.35	1625.63	50.6043	904.462	1614.79	183.371	893.367	1612.14	142.706	857.647	1487.41	148.34	798.771	1234.32	128.891	982.097	1406.61	130.307	1054.77	1257.77	234.792	798.906	1295.84	-32.7803	865.994	1431.15	-94.3889	867.51	1250.03	-123.103	871.356	1099.4	-179.525	999.075	985.58	-164.795	1057.04	925.009	-203.325	1004.98	907.284	-218.942	1086.56	865.555
8722	0	66.2784	1068.03	1623.54	163.432	1074.93	1626.73	52.5003	915.336	1616.57	185.559	905.955	1613.06	144.287	870.365	1488.49	149.07	810.712	1235.93	129.434	994.093	1407.78	130.479	1066.7	1258.78	235.788	811.346	1297.03	-31.694	877.695	1432.83	-92.2083	878.452	1250.84	-119.568	880.249	1100.65	-176.049	1004.07	982.421	-161.116	1060.25	920.087	-199.034	1007.34	903.56	-214.964	1087.33	859.158
8723	0	66.0743	1079.27	1625.3	163.194	1087.45	1628.02	54.4269	926.263	1617.88	187.416	918.842	1614.29	145.492	882.433	1489.99	149.878	822.878	1237.18	130.093	1006.15	1409.02	130.653	1078.57	1259.75	236.755	823.764	1298.19	-30.7367	889.295	1434.32	-90.7883	889.411	1251.8	-116.193	889.158	1101.75	-172.436	1008.9	979.451	-157.201	1063.52	914.965	-194.689	1009.31	900.104	-210.636	1087.69	852.752
8724	0	65.8258	1090.37	1626.8	162.991	1099.91	1629.31	56.1169	937.338	1619.58	189.286	931.432	1615.39	146.644	894.42	1491.1	150.561	834.455	1238.7	130.536	1017.98	1409.98	130.435	1090.48	1260.7	237.725	836.051	1299.16	-29.7584	900.651	1435.59	-89.0239	900.087	1252.99	-112.812	898.111	1102.57	-168.615	1013.27	976.052	-152.748	1065.83	909.532	-190.161	1010.95	896.828	-205.622	1087.91	846.31
8725	0	65.8602	1101.59	1628.33	162.726	1112.23	1630.48	57.8563	948.433	1620.7	190.868	944.191	1615.91	147.806	906.666	1492.05	152.121	847.328	1239.22	130.908	1029.84	1410.81	129.99	1102.25	1261.49	239.243	848.799	1299.72	-28.7091	911.815	1436.94	-87.361	910.476	1254.09	-109.597	906.93	1103.53	-164.692	1017.69	972.877	-148.449	1067.86	904.725	-184.629	1012.14	892.391	-200.261	1087.57	839.757
8726	0	65.8791	1112.87	1630.21	162.703	1124.48	1631.86	59.2274	959.497	1622.03	192.429	956.773	1616.53	148.783	918.79	1493.33	153.038	858.795	1240.38	131.2	1041.51	1411.45	129.294	1113.9	1262.22	240.24	861.053	1300.84	-27.9094	922.949	1438.07	-85.7765	920.579	1254.72	-106.574	915.64	1104.56	-160.72	1021.67	969.963	-143.948	1069.7	899.927	-179.82	1013.45	889.49	-194.91	1086.87	833.076
8727	0	66.0044	1124.17	1631.87	162.815	1136.56	1633.46	60.6487	970.789	1623.14	193.806	969.065	1616.75	149.759	930.914	1494.29	154.05	870.875	1241.64	131.385	1053.35	1412.17	128.73	1125.49	1262.94	241.232	873.084	1301.76	-27.0089	934.048	1439.11	-84.0227	930.671	1255.43	-103.442	924.331	1105.25	-156.739	1025.53	966.986	-139.123	1071.08	895.533	-174.947	1014.28	886.285	-189.184	1085.57	826.663
8728	0	66.2735	1135.5	1633.83	162.919	1148.72	1634.92	61.9732	982.051	1624.07	194.884	981.574	1617.37	150.662	942.906	1495.55	154.981	882.618	1242.52	131.78	1065.06	1413.01	128.054	1136.8	1263.54	242.33	885.165	1302.8	-26.1436	945.038	1440.18	-82.0302	940.235	1255.96	-100.595	932.623	1105.72	-152.771	1028.95	964.539	-134.567	1072.19	891.775	-169.873	1015.02	883.785	-183.433	1083.94	821.084
8729	0	66.4639	1146.8	1635.85	163.205	1160.63	1636.68	63.0126	993.377	1625.11	196.036	993.751	1617.96	151.423	955.015	1496.52	155.874	894.127	1243.76	131.866	1076.68	1413.68	127.55	1148.11	1264.25	243.33	897.04	1303.9	-25.5445	956.052	1441.24	-80.6554	949.827	1256.8	-97.5022	940.976	1106.61	-148.428	1031.33	961.516	-130.079	1073.05	888.052	-164.767	1015.49	881.547	-177.625	1082.04	816.168
8730	0	66.8635	1158.19	1637.65	163.56	1172.33	1638.46	64.0247	1004.99	1626.17	196.855	1005.73	1618.45	151.981	966.906	1497.75	156.859	905.673	1244.91	132.395	1088.45	1414.71	127.408	1159.35	1264.92	244.251	908.933	1305.09	-24.91	967.228	1442.22	-78.9306	959.443	1257.21	-94.3745	949.035	1107.76	-144.433	1034.37	959.537	-125.769	1074.15	884.947	-159.601	1015.86	879.627	-171.847	1079.98	811.518
8731	0	67.137	1169.66	1639.46	163.83	1184.18	1639.95	64.8678	1016.41	1627.02	197.538	1017.71	1618.86	152.946	978.839	1498.87	157.856	916.997	1245.89	132.687	1100.03	1415.45	127.283	1170.6	1265.53	245.141	920.598	1306.21	-24.1978	978.434	1443.25	-77.0834	968.88	1257.99	-91.1501	956.929	1108.42	-140.552	1037.15	957.832	-121.292	1074.81	882.038	-154.317	1016.19	877.976	-166.094	1077.63	807.275
8732	0	67.2986	1180.9	1641.18	164.074	1195.64	1641.71	65.4395	1027.76	1627.51	198.059	1029.58	1619.29	153.524	990.814	1500.11	158.63	928.189	1247.26	133.183	1111.64	1416.22	127.271	1181.81	1266.07	245.811	932.111	1307.46	-23.643	989.796	1444.3	-75.0149	978.166	1258.56	-87.9698	964.466	1109.23	-136.636	1039.77	956.331	-116.826	1075.68	880.001	-149.058	1016.57	877.035	-160.372	1075.14	803.821
8733	0	67.567	1192.27	1642.48	164.252	1207.23	1643.33	66.0535	1039.15	1628.02	198.663	1041.29	1619.98	153.988	1002.8	1501.15	159.255	939.414	1248.49	133.147	1123.26	1416.7	127.679	1193.04	1266.73	246.492	943.559	1308.87	-23.0941	1001.33	1445.09	-73.179	987.657	1259.36	-84.5319	971.932	1110.33	-132.604	1042.4	955.13	-112.661	1076.87	878.135	-143.743	1017.11	876.09	-154.73	1072.77	800.985
8734	0	67.6415	1203.56	1643.85	164.356	1219	1644.63	66.5148	1050.56	1628.58	199.161	1053.18	1620.47	154.388	1014.73	1502.04	159.964	950.673	1249.77	133.833	1134.91	1417.32	128.166	1204.32	1267.01	247.121	954.994	1310.17	-22.5169	1012.92	1446.03	-71.4991	997.162	1259.98	-81.2192	979.137	1111.28	-128.64	1045.16	954.086	-108.186	1077.18	876.89	-138.628	1017.61	875.928	-149.143	1070.17	798.729
8735	0	67.5073	1214.75	1644.55	164.177	1230.31	1645.94	67.0711	1061.87	1628.75	199.681	1064.98	1621.01	154.946	1026.35	1503.21	160.653	961.822	1251.03	134.664	1146.64	1418.07	128.885	1215.5	1267.32	247.758	966.21	1311.29	-22.0353	1024.84	1446.83	-69.602	1006.36	1260.97	-77.9043	986.123	1112.41	-124.593	1047.6	953.36	-103.916	1078.17	875.455	-133.654	1018.18	875.842	-143.552	1068.27	796.668
8736	0	67.3765	1225.95	1645.29	163.99	1241.92	1647.13	67.6338	1073	1628.83	200.316	1076.64	1621.92	155.29	1038.16	1504.08	161.011	973.116	1252.29	135.31	1158.2	1418.61	129.753	1226.73	1267.53	248.294	977.333	1312.6	-21.5382	1036.62	1447.47	-67.8554	1015.72	1261.22	-74.8651	993.216	1113.71	-120.56	1050.5	953.114	-99.4849	1079.07	874.498	-128.859	1018.98	875.914	-138.167	1066.25	794.828
8737	0	67.0438	1237.05	1645.99	163.571	1253.37	1648.19	68.0927	1084.19	1628.78	200.727	1088.55	1622.47	155.582	1049.87	1504.77	161.402	984.117	1253.42	135.933	1169.71	1419.06	131.015	1237.82	1268	248.718	988.704	1313.82	-21.2387	1048.66	1448.07	-66.1531	1025.18	1261.83	-71.8298	1000.27	1114.61	-116.789	1053.31	952.656	-95.3936	1080.46	873.607	-124.213	1020.05	876.447	-132.755	1065.14	793.934
8738	0	66.6749	1248.09	1646.21	163.247	1264.99	1648.98	68.682	1095.29	1628.65	201.243	1100.32	1623.06	155.998	1061.66	1505.37	161.711	995.224	1254.4	136.602	1181.11	1419.26	132.151	1248.85	1268.42	249.005	999.586	1314.83	-20.8433	1060.56	1448.55	-64.73	1034.4	1262.35	-69.0124	1007.22	1115.94	-112.899	1056.55	952.498	-91.2152	1081.66	872.835	-119.725	1021.38	876.77	-127.885	1064.03	793.136
8739	0	66.2174	1259.15	1646.16	162.589	1276.64	1649.47	69.3244	1106.28	1628.61	201.819	1112.14	1623.64	156.312	1073.24	1505.9	162.113	1006.08	1254.99	137.186	1192.58	1419.43	133.257	1259.93	1268.29	249.321	1010.61	1315.62	-20.4706	1072.49	1448.76	-63.0548	1043.82	1262.48	-66.0996	1014.19	1116.95	-109.396	1059.61	952.095	-87.1923	1083.29	872.259	-115.353	1022.79	877.313	-122.79	1063.38	792.4
8740	0	65.6552	1269.87	1646.06	161.802	1288.27	1649.94	69.9148	1117.25	1628.5	202.345	1124.12	1624.08	156.881	1085.11	1506.13	162.324	1016.9	1255.72	137.781	1203.92	1419.18	134.428	1270.96	1268.05	249.776	1021.91	1316.11	-20.0307	1084.45	1448.98	-61.6934	1053.23	1263.36	-63.4505	1021.38	1117.65	-105.903	1063.11	952.08	-83.0951	1084.63	871.526	-111.204	1024.55	877.874	-118.18	1063.14	791.929
8741	0	64.9255	1280.56	1645.88	160.966	1299.96	1650.11	70.7673	1128.07	1628.15	203.295	1136.16	1624.64	157.245	1096.75	1506.41	162.715	1028.12	1256.22	138.513	1215.4	1419.13	135.562	1282.03	1267.74	250.105	1032.63	1316.9	-19.5516	1096.38	1449	-60.5536	1062.63	1263.79	-60.5977	1028.71	1118.84	-102.463	1066.78	952.131	-79.5548	1086.77	871.216	-107.135	1026.62	878.779	-113.628	1063.29	791.934
8742	0	64.1272	1291.5	1645.26	159.946	1311.74	1650.01	71.5815	1138.96	1627.69	203.69	1148.62	1624.61	157.279	1108.43	1506.19	163.048	1039.15	1256.38	139.334	1226.92	1418.91	136.691	1293.3	1267.36	250.461	1043.8	1316.95	-19.2335	1108.36	1448.78	-59.2239	1072.18	1263.91	-58.2226	1036.04	1119.54	-99.3776	1070.55	952.002	-77.0983	1089.77	871.188	-103.044	1029.05	879.416	-109.495	1063.84	791.76
8743	0	63.2399	1302.18	1644.5	158.372	1323.37	1649.48	72.4502	1149.77	1627.08	204.493	1160.87	1624.78	157.512	1119.9	1506.15	163.206	1050.37	1256.46	140.145	1238.44	1418.57	137.967	1304.52	1266.86	250.714	1054.58	1317.21	-18.8385	1120.31	1448.4	-58.1079	1081.68	1264.07	-55.8472	1043.58	1120.34	-96.5702	1074.59	952.149	-71.391	1091.83	871.571	-99.306	1031.72	880.086	-105.669	1064.71	791.426
8744	0	62.2742	1312.52	1643.76	156.709	1335.08	1648.86	73.5013	1160.53	1626.55	205.27	1173.24	1624.61	157.868	1131.56	1505.72	163.471	1061.41	1256.21	140.819	1249.94	1418.04	139.07	1315.88	1266.14	250.962	1065.4	1317.19	-18.5774	1132.21	1447.98	-56.935	1091.24	1264.27	-53.5022	1051.37	1120.87	-94.041	1078.83	952.095	-68.7226	1095.18	871.387	-95.8148	1034.75	880.853	-102.223	1066.16	792.004
8745	0	61.2823	1323.42	1642.81	155.391	1346.99	1648.37	74.5337	1171.35	1625.97	206.164	1185.84	1624.39	158.118	1143.31	1505.39	163.628	1072.43	1256.02	141.454	1261.47	1417.24	140.208	1327.1	1265.28	251.156	1076.3	1316.89	-18.3308	1144.18	1447.6	-55.7573	1101.13	1264.16	-51.3022	1059.38	1121.45	-91.7102	1083.39	952.218	-66.6629	1098.86	871.095	-92.6763	1038.08	881.916	-98.4262	1067.74	792.154
8746	0	60.2685	1333.57	1641.72	153.83	1358.88	1647.38	75.7188	1182.08	1625.16	207.12	1198.34	1624.07	158.391	1154.88	1504.79	163.835	1083.6	1255.44	142.266	1273.04	1416.75	141.297	1338.35	1264.49	251.396	1087.36	1316.64	-17.9682	1156.26	1446.82	-54.5326	1110.98	1264.05	-49.3871	1067.42	1122.19	-89.4967	1088.52	952.464	-64.6201	1103	871.178	-89.8357	1041.89	882.847	-95.5535	1070.06	792.231
8747	0	59.1714	1344.14	1640.53	152.49	1370.81	1646.65	76.8901	1192.89	1624.37	208.015	1210.98	1623.66	158.28	1166.7	1503.81	163.829	1094.76	1254.78	142.593	1284.63	1415.59	142.296	1349.46	1263.27	251.603	1098.32	1316.07	-17.6338	1168.21	1446	-53.5503	1120.93	1263.72	-47.4712	1075.78	1122.45	-87.8337	1093.76	952.59	-63.029	1107.85	871.011	-87.2468	1046.18	883.599	-93.1545	1072.77	792.524
8748	0	58.1596	1354.73	1639.37	150.972	1382.7	1645.49	78.1353	1203.67	1623.54	209.008	1223.66	1623.06	159.107	1178.78	1503.21	163.822	1106.25	1253.99	143.507	1296.29	1414.88	143.515	1360.37	1261.8	251.629	1109.44	1315.53	-17.3418	1180.18	1445.14	-52.6026	1131.01	1263.49	-46.0083	1084.31	1122.78	-86.3228	1099.52	952.747	-61.7924	1112.83	871.04	-84.7989	1051.13	884.4	-91.1109	1076.05	792.919
8749	0	57.4448	1365.19	1637.72	149.671	1394.71	1644.27	79.0509	1214.66	1622.39	209.706	1236.35	1622.32	159.221	1190.68	1502.18	163.841	1117.79	1253.08	144.013	1308.09	1413.67	144.306	1371.85	1260.87	251.717	1120.65	1314.66	-17.1267	1192.12	1444.3	-51.7614	1141.29	1263.19	-44.5519	1093.46	1122.95	-85.172	1105.86	952.762	-61.3933	1119.05	871.102	-82.894	1056.52	885.015	-89.4708	1080.06	793.174
8750	0	56.3222	1376.16	1636.4	148.326	1406.61	1642.75	80.1054	1225.71	1621.43	210.352	1249.08	1621.3	159.131	1202.5	1501.15	163.718	1128.85	1252.07	144.571	1319.78	1412.42	145.121	1383.24	1259.27	251.72	1131.92	1313.86	-16.7349	1204.23	1442.96	-50.9101	1151.83	1262.37	-43.3526	1102.61	1122.94	-84.1633	1112.64	952.648	-58.6556	1124.75	870.712	-81.2614	1062.5	885.511	-87.7775	1084.79	793.321
8751	0	55.4672	1387.03	1634.68	147.141	1418.65	1641.43	80.9619	1236.9	1620.02	210.907	1261.7	1620.35	159.371	1214.35	1499.9	163.753	1140.3	1250.92	144.809	1331.6	1411.03	146.183	1394.8	1257.92	251.873	1143.19	1312.77	-16.543	1216.24	1441.85	-50.1712	1162.48	1261.63	-42.2846	1112.07	1122.71	-82.5718	1119.71	952.416	-58.1506	1131.38	870.253	-79.9312	1069.07	885.825	-86.7435	1089.98	793.263
8752	0	54.7024	1398.1	1633.08	146.203	1430.67	1640.01	81.6242	1248.23	1618.74	211.26	1274.15	1619.12	159.487	1226.31	1498.55	163.88	1152.06	1249.66	145.438	1343.52	1409.82	146.69	1406.35	1256.27	252	1154.54	1311.87	-16.4217	1228.37	1440.6	-49.673	1173.33	1261.02	-41.3678	1121.98	1122.64	-82.2117	1127.49	952.197	-58.1882	1138.57	869.804	-78.9672	1076.27	886.08	-85.6924	1096.14	792.935
8753	0	54.1848	1409.47	1631.52	145.288	1442.73	1638.42	82.0888	1259.72	1616.87	211.785	1286.65	1617.62	159.606	1238.18	1497.26	163.623	1163.43	1248.58	145.851	1355.36	1408.18	147.145	1418.11	1254.46	251.966	1165.96	1310.7	-16.248	1240.52	1439.26	-49.3311	1184.43	1259.9	-40.831	1131.97	1122.11	-81.8777	1135.93	951.717	-57.5452	1146.58	869.367	-78.3033	1084.15	886.139	-85.246	1103.08	792.624
8754	0	53.5754	1420.9	1629.66	144.464	1454.69	1636.74	82.6318	1271.28	1615.25	212.01	1298.94	1616.24	159.423	1249.77	1495.59	163.606	1175.12	1247.1	145.747	1367.22	1406.35	147.909	1430	1253.12	252.081	1177.48	1309.45	-16.182	1252.77	1437.74	-49.1169	1195.6	1259.05	-40.5144	1142.16	1121.53	-81.7364	1144.76	951.228	-58.1426	1154.62	868.462	-77.9749	1092.57	885.666	-84.9466	1110.62	792.625
8755	0	53.2392	1432.48	1627.92	143.908	1466.6	1635.28	82.8294	1283.03	1613.7	212.005	1311.29	1614.52	159.726	1262.07	1494.11	163.5	1186.98	1245.75	145.998	1379.21	1404.89	148.401	1441.8	1251.32	251.904	1188.98	1308.22	-16.2266	1264.83	1436.13	-49.0958	1207.06	1257.9	-40.3506	1152.84	1120.64	-81.986	1154.35	950.669	-58.5559	1163.82	867.684	-77.9352	1101.58	885.367	-85.0735	1118.92	791.971
8756	0	52.7394	1444.23	1626.19	143.478	1478.59	1633.71	82.7526	1294.92	1611.8	212.015	1323.59	1613.03	159.707	1273.9	1492.8	163.09	1198.27	1244.77	146.115	1391.13	1403.21	148.553	1453.62	1249.52	251.752	1200.65	1306.93	-16.2465	1277	1434.82	-49.0808	1218.62	1256.84	-40.2798	1163.76	1119.89	-82.3916	1164.22	949.941	-60.9546	1173.89	867.325	-78.3412	1111.11	884.767	-85.7973	1127.81	791.625
8757	0	52.4971	1456.21	1624.73	143.218	1490.66	1632.14	82.7557	1306.77	1610.38	211.941	1335.64	1611.55	159.612	1285.83	1491.23	162.712	1210.27	1243.33	146.252	1403.24	1401.57	148.835	1465.36	1247.72	251.572	1212.33	1305.6	-16.2301	1289.17	1433.26	-49.2741	1230.24	1255.83	-40.5083	1174.93	1118.83	-82.9138	1174.61	948.986	-60.3397	1183.92	866.066	-78.7382	1121.42	884.148	-86.3734	1137.53	790.358
8758	0	52.2916	1468.18	1623.1	143.029	1502.66	1630.81	82.4448	1318.85	1608.48	211.591	1347.54	1610.15	159.543	1297.75	1489.66	162.185	1222.14	1242.18	146.317	1415.38	1400.3	149.186	1477.58	1246.46	251.233	1224.17	1304.07	-16.3626	1301.19	1431.8	-49.6406	1242.21	1254.37	-40.9173	1186.27	1117.84	-83.7581	1185.45	947.888	-62.0282	1194.52	865.382	-79.669	1132	883.229	-87.5522	1148.1	789.744
8759	0	52.1111	1480.32	1621.69	142.595	1514.62	1629.41	82.1667	1330.88	1607.26	211.321	1359.41	1608.88	159.319	1309.53	1488.22	161.757	1234.3	1240.47	146.207	1427.53	1399.07	149.136	1489.7	1245.23	250.851	1236.14	1302.53	-16.4987	1313.28	1430.54	-49.8735	1254.15	1253.22	-41.5348	1197.94	1116.74	-84.8512	1196.81	947.108	-63.1648	1205.58	864.416	-80.9272	1143.19	882.368	-88.9886	1159.43	789.055
8760	0	51.9485	1492.64	1620.61	143.098	1526.76	1628.73	81.6354	1343.18	1605.7	210.894	1371.29	1607.77	159.062	1321.69	1486.78	160.915	1246.05	1239.25	146.034	1439.61	1397.82	149.1	1502.05	1244.12	250.269	1248.13	1301.03	-16.6838	1325.4	1429.38	-50.2413	1266.34	1252.2	-42.2482	1210.01	1115.61	-86.2581	1208.83	946.18	-64.9639	1217.76	863.27	-82.104	1155.21	881.62	-90.8131	1171.38	788.085
8761	0	51.9206	1505.01	1619.62	142.791	1538.47	1627.33	80.858	1355.37	1604.35	210.337	1383.04	1606.5	158.661	1333.17	1485.56	160.411	1258.31	1237.66	146.069	1451.81	1397.12	149.177	1514.57	1243.67	249.607	1260.21	1299.45	-17.055	1337.47	1428.37	-50.8821	1278.55	1250.94	-43.305	1222.26	1114.46	-87.5291	1221.33	945.164	-66.2747	1229.88	862.118	-83.6941	1167.79	880.587	-92.8505	1184.07	786.979
8762	0	52.2018	1517.33	1618.24	143.135	1550.55	1626.4	80.0977	1367.74	1603.29	209.661	1394.5	1605.63	158.201	1345.38	1484.25	159.649	1271.34	1236.06	145.416	1464.02	1395.95	148.604	1527.05	1242.59	248.925	1272.36	1298.06	-17.5346	1349.45	1427.32	-51.7375	1290.78	1250.23	-44.3438	1234.71	1113.44	-89.4725	1234.22	944.06	-67.8672	1243.29	861.251	-85.3719	1181.02	879.398	-95.1198	1197.67	786.224
8763	0	51.9995	1529.96	1617.28	143.19	1562.56	1625.25	79.2972	1380.12	1602.36	208.926	1406.19	1604.46	157.732	1357.18	1483.07	159.089	1283.77	1234.84	144.837	1476.29	1394.88	148.176	1539.83	1241.77	248.328	1284.96	1296.48	-17.9373	1361.63	1426.25	-52.5481	1303.33	1249.27	-45.5838	1247.64	1112.42	-91.166	1247.72	943.128	-70.7359	1257.31	860.173	-87.4649	1194.86	878.191	-97.7173	1211.8	785.11
8764	0	52.1448	1542.6	1616.39	143.569	1574.52	1624.41	78.1771	1392.51	1601.78	208.151	1417.65	1603.13	157.239	1369.14	1482.08	158.373	1296.23	1233.77	144.089	1488.56	1394.08	146.955	1552.18	1240.94	247.528	1297.44	1295.12	-18.3732	1373.81	1425.44	-53.5333	1316.15	1248.22	-46.7574	1260.97	1111.04	-93.7644	1261.9	942.242	-74.3365	1272.11	859.542	-89.7529	1209.21	876.87	-100.67	1226.68	783.803
8765	0	51.9095	1555.04	1615.61	143.802	1586.28	1623.37	77.2024	1404.83	1600.9	207.166	1429.12	1602.44	156.687	1380.99	1480.93	157.632	1308.81	1232.56	143.454	1500.78	1393.54	146.531	1565.43	1240.88	246.659	1310	1293.87	-19.1877	1385.82	1424.51	-54.5347	1328.83	1247.27	-48.4161	1274.13	1109.78	-96.1249	1276.34	941.097	-76.6268	1287.23	858.586	-92.1472	1224.15	875.596	-103.807	1242.25	782.536
8766	0	52.205	1567.7	1614.97	144.232	1598.01	1622.45	76.0572	1417.25	1600.38	206.219	1440.22	1601.8	155.96	1392.76	1479.82	156.932	1322.61	1230.37	142.519	1513.05	1392.99	145.493	1578.45	1240.8	246.021	1322.92	1292.12	-19.8887	1397.93	1423.84	-55.4583	1341.98	1246.22	-50.1965	1287.76	1108.69	-98.088	1291.33	939.928	-79.8917	1302.9	857.582	-94.9152	1239.56	873.753	-106.938	1258.61	781.383
8767	0	52.2761	1580.38	1614.69	144.885	1609.91	1622.1	74.8404	1429.74	1600.12	205.428	1451.55	1601.38	155.095	1404.45	1478.87	156.087	1335.68	1229.19	141.969	1525.44	1392.96	144.239	1591.38	1240.89	245.035	1335.76	1290.44	-20.8087	1410.05	1423.06	-57.1763	1355.05	1245.3	-52.034	1301.67	1107.47	-100.859	1306.63	938.772	-82.9963	1319.1	856.333	-97.7803	1255.56	872.404	-110.273	1275.67	780.299
8768	0	52.4934	1593.04	1614.72	145.351	1621.81	1621.84	73.4497	1442.25	1600.4	204.349	1462.77	1601.42	154.197	1416.13	1478.42	155.266	1348.64	1228.17	141.002	1537.6	1392.99	143.361	1604.63	1241.2	244.246	1348.73	1289.34	-21.6977	1422.13	1422.58	-58.6016	1368.45	1244.3	-54.1069	1315.79	1106.19	-103.272	1322.66	937.611	-86.1786	1335.65	855.247	-100.788	1272.08	870.635	-114.163	1293.26	778.882
8769	0	52.7702	1605.89	1615.06	145.997	1633.49	1621.97	72.0987	1454.71	1601.18	203.233	1473.75	1601.61	153.396	1427.9	1478.16	154.543	1362.26	1226.79	139.973	1549.72	1393.44	141.399	1617.21	1241.56	243.505	1361.68	1288.2	-22.6151	1433.97	1422.09	-60.1425	1382	1243.39	-56.3293	1330.42	1104.69	-106.271	1338.86	936.669	-89.3959	1353.22	854.48	-103.826	1289.11	868.896	-117.707	1311.36	777.881
8770	0	53.1452	1618.66	1615.43	146.698	1645.2	1622.25	70.7257	1467.42	1601.81	202.011	1484.63	1602.49	152.672	1439.75	1478.11	153.951	1375.04	1226.35	139.14	1561.88	1394.25	140.981	1630.88	1243.12	242.908	1374.63	1287.59	-23.4513	1445.7	1421.97	-61.6664	1395.75	1242.84	-58.4661	1345.36	1103.7	-109.083	1355.67	935.9	-92.2173	1371.43	853.416	-106.969	1306.63	867.806	-121.632	1330.44	776.95
8771	0	53.4914	1631.63	1616.46	147.327	1657.08	1622.68	69.2503	1480.06	1602.83	200.841	1495.84	1603.11	152.033	1451.52	1478.4	153.568	1388.01	1226.26	138.133	1573.95	1395.04	139.731	1643.81	1244.32	242.381	1387.53	1287.21	-24.1675	1457.35	1422.3	-63.1851	1409.69	1242.33	-60.6344	1360.56	1102.77	-111.97	1373.05	935.388	-93.7356	1388.94	853.008	-110.089	1324.86	866.594	-125.601	1349.82	776.439
8772	0	53.8535	1644.56	1617.34	148.115	1668.73	1623.5	67.6349	1492.76	1603.99	199.439	1507.01	1603.87	151.351	1463.38	1478.89	153.37	1400.71	1226.27	137.162	1586.1	1396.01	138.803	1657.07	1246.03	242.096	1400.49	1287.39	-24.826	1468.93	1422.75	-64.5971	1423.5	1242.25	-62.9308	1376.14	1102.07	-114.964	1390.67	934.91	-97.8658	1407.86	852.604	-113.657	1343.45	865.474	-130.058	1370.03	776.223
8773	0	54.3314	1657.62	1618.14	148.968	1680.32	1624.28	65.8861	1505.51	1605.21	197.98	1517.8	1604.97	150.616	1475.11	1479.64	153.459	1413.54	1226.74	136.168	1598.05	1397.18	137.564	1669.68	1247.49	241.649	1413.13	1288.05	-25.3971	1480.48	1423.27	-66.1187	1437.59	1242.44	-65.0839	1391.85	1101.48	-117.797	1409.05	934.928	-100.118	1426.91	852.588	-116.789	1362.89	865.042	-134.328	1390.81	775.796
8774	0	54.8683	1670.39	1619.2	149.863	1691.87	1625.18	64.3551	1518.22	1606.52	196.583	1528.68	1605.96	150.13	1486.83	1480.41	153.58	1425.98	1227.34	135.393	1610.15	1398.43	136.821	1682.27	1249.13	241.656	1425.88	1288.67	-25.7485	1492.06	1423.95	-67.5239	1451.36	1242.66	-67.1168	1407.59	1101.04	-120.973	1427.65	934.978	-107.331	1449.08	852.5	-120.343	1382.61	864.612	-138.63	1412.13	775.92
8775	0	55.3537	1683.11	1620.22	150.856	1703.56	1626.11	62.8562	1530.86	1607.84	195.228	1539.59	1607.25	149.43	1498.53	1481.23	153.822	1438.85	1228.19	134.904	1622.03	1399.79	136.029	1694.63	1250.67	241.528	1438.25	1289.7	-26.2606	1503.67	1424.69	-68.5966	1465.34	1243.07	-69.2345	1423.52	1100.89	-123.644	1446.84	935.594	-108.861	1468.57	853.397	-124.171	1402.87	864.139	-142.794	1434.15	776.465
8776	0	56.0337	1695.84	1621.38	151.822	1714.89	1627.34	61.4817	1543.46	1608.88	193.898	1550.23	1608.82	148.971	1510.33	1482.31	153.899	1450.71	1229.15	134.696	1634.01	1401.19	135.276	1706.25	1251.42	241.54	1450.34	1291.12	-26.6625	1515.43	1425.58	-69.6414	1479.1	1243.24	-71.4559	1439.39	1100.65	-126.859	1466.11	935.982	-112.445	1489.25	853.963	-127.799	1423.62	863.656	-146.897	1456.67	777.053
8777	0	56.4309	1708.47	1622.54	152.767	1726.31	1628.83	59.6743	1555.98	1609.77	192.629	1560.94	1610.11	148.417	1522.07	1483.63	153.901	1462.66	1230.42	134.334	1645.77	1402.5	135.169	1718.14	1252.79	241.533	1462.4	1292.45	-27.1034	1527.38	1426.33	-70.7596	1492.94	1243.92	-73.6162	1455.34	1100.5	-129.749	1485.68	936.485	-115.078	1509.78	854.784	-131.742	1444.62	863.448	-151.118	1479.68	777.813
8778	0	56.9454	1720.87	1623.48	153.322	1737.52	1630.35	58.3308	1568.37	1611.04	191.255	1571.84	1612.05	147.838	1533.73	1484.97	153.911	1474.57	1231.68	134.184	1657.65	1403.83	135.172	1729.68	1254.13	241.33	1473.98	1294.09	-27.5146	1539.43	1427.23	-71.7439	1506.9	1244.62	-75.7934	1471.45	1100.29	-132.297	1505.72	937.447	-118.688	1531.86	856.103	-135.406	1466.05	863.859	-155.167	1503.21	778.91
8779	0	57.6529	1733.42	1624.32	154.186	1748.67	1631.82	57.1475	1580.85	1611.92	190.042	1582.67	1613.65	147.48	1545.31	1486.42	153.626	1486.42	1233.47	134.189	1669.35	1405.18	135.47	1740.85	1255.26	240.993	1485.26	1295.9	-28.0175	1551.47	1428.35	-72.709	1520.9	1245.4	-78.0409	1487.53	1100.65	-135.175	1525.82	938.622	-121.371	1553.42	857.688	-138.742	1488.12	864.06	-159.113	1527.25	780.31
8780	0	58.255	1745.76	1625.81	155.038	1760.04	1633.43	55.8646	1593.08	1613	188.869	1593.39	1615.23	147.005	1556.7	1487.88	153.298	1497.98	1234.62	134.351	1680.88	1406.52	136.205	1752.34	1256.31	240.672	1496.79	1297.27	-28.2566	1563.79	1429.41	-73.4986	1535.21	1246.2	-80.2919	1503.74	1101.06	-137.746	1546.32	939.71	-124.014	1575.36	859.625	-142.413	1510	864.38	-162.746	1551.28	781.561
8781	0	58.5759	1757.86	1626.99	155.594	1771.06	1635.05	54.7555	1605.26	1614.15	187.788	1604.22	1616.92	146.562	1568.14	1489.3	152.498	1509.35	1236.66	134.387	1692.26	1407.78	136.946	1763.6	1257.47	239.862	1507.48	1299.17	-28.7378	1575.82	1430.65	-74.7971	1549.37	1247.11	-81.9567	1520.29	1101.03	-140.308	1566.57	941.381	-126.685	1597.33	861.475	-145.49	1532.24	864.948	-166.543	1576.1	783.945
8782	0	59.2211	1769.99	1628.23	156.651	1782.27	1636.92	53.7802	1617.54	1615.39	186.726	1614.91	1618.86	146.088	1579.55	1490.69	151.854	1520.75	1238.2	134.611	1703.68	1409.26	137.849	1774.85	1258.74	239.08	1518.44	1300.84	-28.9096	1588.15	1432.03	-75.9256	1563.6	1248.31	-84.3437	1536.46	1101.83	-142.585	1587.38	943.157	-128.638	1619.15	863.953	-148.777	1554.82	866.078	-169.998	1600.98	786.716
8783	0	59.5365	1782.39	1629.55	157.451	1793.56	1638.56	52.8342	1629.63	1616.83	185.802	1625.71	1620.55	145.81	1590.88	1492.18	151.241	1532.21	1239.47	135.036	1715.06	1410.83	138.815	1786.44	1260.21	238.287	1529.33	1302.23	-29.2753	1600.25	1433.38	-77.0203	1577.9	1249.76	-86.5903	1552.87	1102.57	-144.734	1608.15	945.434	-131.308	1641	866.676	-151.956	1577.36	867.226	-173.314	1626.11	789.854
8784	0	59.8283	1794.36	1630.5	157.97	1804.54	1640.02	51.9513	1641.59	1618.05	185.01	1636.68	1622.17	145.416	1602.16	1493.68	150.273	1543.42	1241.28	135.347	1726.34	1412.23	139.977	1797.64	1261.72	237.462	1540.14	1303.6	-29.5236	1612.38	1434.95	-78.1682	1592.29	1250.92	-88.8126	1569.02	1103.34	-146.658	1629.17	947.655	-133.656	1663.92	870.077	-154.934	1600.24	868.962	-176.341	1651.42	793.117
8785	0	61.2838	1805.83	1632.79	158.652	1815.47	1641.74	51.2971	1653.61	1619.4	184.292	1647.47	1623.85	145.141	1613.34	1495.27	149.483	1554.65	1242.79	135.442	1737.64	1413.57	140.621	1808.76	1263.25	236.664	1550.84	1305.23	-29.7408	1624.39	1436.51	-79.3323	1606.65	1252.4	-90.9343	1585.27	1104.45	-149.154	1649.7	949.708	-135.552	1686.46	873.334	-157.789	1623.02	871.139	-179.395	1676.61	796.865
8786	0	61.4994	1818.07	1633.81	159.362	1826.67	1643.35	50.7193	1665.4	1620.84	183.741	1658.17	1625.56	144.9	1624.48	1496.71	149.06	1565.81	1243.95	135.684	1748.73	1415.13	141.304	1819.69	1264.67	236.018	1561.69	1306.39	-30.2149	1636.24	1438.21	-80.6099	1620.94	1254.03	-92.7993	1601.71	1105.25	-150.689	1670.53	952.921	-137.212	1708.86	877.125	-160.666	1645.93	873.447	-182.054	1701.97	801.21
8787	0	62.2443	1829.87	1635.43	160.12	1837.71	1644.95	50.297	1677.13	1622.32	183.16	1669.08	1627.03	144.687	1635.54	1498.33	148.127	1576.66	1246.1	135.906	1759.86	1416.74	141.827	1830.9	1266.34	235.125	1572.38	1308.05	-30.3348	1648.16	1439.81	-81.6337	1635.14	1255.74	-95.0335	1617.81	1107.09	-152.394	1691.48	956.001	-138.729	1731.2	881.343	-163.324	1668.82	876.063	-184.354	1727.2	805.883
8788	0	62.9226	1841.5	1637.27	160.824	1848.5	1646.64	49.9686	1689.02	1623.59	182.894	1680.05	1628.46	144.346	1646.69	1499.72	147.557	1587.63	1247.34	136.016	1770.96	1418.22	142.076	1842.12	1267.94	234.698	1583.29	1309.37	-30.7112	1659.83	1441.68	-83.2087	1649.28	1257.36	-96.8518	1633.76	1108.1	-154.08	1712.18	959.609	-140.335	1753.66	885.68	-165.833	1691.68	878.897	-186.465	1752.4	810.887
8789	0	63.7784	1852.64	1638.82	161.588	1859.68	1647.94	49.6246	1700.65	1625.17	182.65	1690.76	1629.61	144.079	1657.9	1500.93	146.747	1598.52	1248.98	136.163	1782.02	1419.65	142.135	1853.12	1269.47	233.912	1593.82	1311.08	-30.9078	1671.53	1443.51	-84.3904	1663.28	1259.09	-99.0804	1649.76	1108.78	-155.762	1732.61	963.264	-141.591	1775.64	889.616	-168.22	1714.63	881.959	-188.538	1777.67	815.868
8790	0	64.2969	1864.63	1640.05	162.428	1870.67	1648.98	49.3743	1712.38	1626.53	182.884	1702.44	1630.47	143.79	1669.04	1502.27	146.082	1609.3	1250.7	136.117	1793.11	1420.74	141.941	1864.27	1270.41	233.221	1604.54	1312.5	-31.2933	1683.38	1444.95	-85.2163	1677.04	1260.49	-101.248	1665.69	1110.17	-157.321	1753.22	966.845	-142.526	1797.72	894.295	-170.733	1737.32	885.275	-190.24	1802.67	821.174
8791	0	65.2402	1876.21	1641.5	163.155	1881.59	1650	49.3292	1724.11	1627.6	182.627	1713.2	1631.09	143.495	1680.23	1503.46	145.674	1620.11	1252.04	135.716	1804.21	1421.63	141.559	1875.35	1271.32	232.655	1615.24	1313.71	-31.7283	1694.87	1446.3	-86.6511	1690.82	1262.2	-103.221	1681.53	1111.58	-158.539	1773.76	970.503	-143.814	1819.63	898.757	-172.931	1759.88	888.534	-191.554	1827.47	826.521
8792	0	65.9067	1887.53	1642.86	163.967	1892.57	1650.72	49.0932	1735.61	1628.73	182.405	1723.98	1631.67	143.09	1691.38	1504.36	145.157	1630.89	1253.05	135.461	1815.17	1422.21	141.114	1886.1	1271.81	231.788	1625.76	1314.84	-32.1421	1706.33	1447.35	-87.7458	1704.44	1263.52	-105.269	1697.19	1112.54	-159.875	1793.95	973.851	-144.563	1841.46	903.778	-174.961	1782.38	892.047	-192.885	1852	831.791
8793	0	66.9888	1899.23	1643.64	164.926	1903.59	1651.35	48.7486	1747.39	1629.69	182.121	1735.13	1631.86	142.677	1702.46	1505.07	144.722	1641.52	1254.02	134.985	1826.18	1422.66	140.535	1896.98	1272.19	231.39	1636.66	1315.82	-32.5521	1717.82	1448.4	-88.7213	1717.86	1264.58	-107.295	1712.92	1113.63	-161.276	1813.92	977.519	-145.943	1863.22	908.287	-176.807	1804.87	895.676	-193.842	1876.28	837.248
8794	0	67.4363	1911.04	1644.46	165.572	1914.48	1651.75	48.5269	1759.02	1630.25	182.167	1745.92	1631.76	142.382	1713.64	1505.66	144.524	1652.31	1255.12	134.641	1837.2	1422.94	139.997	1907.38	1272.31	230.911	1647.45	1316.47	-32.8602	1729.13	1449.24	-90.3455	1731.48	1265.66	-109.215	1728.34	1114.28	-162.457	1834.09	981.307	-146.467	1884.91	913.455	-178.671	1827.05	899.31	-194.793	1900.32	842.626
8795	0	68.3558	1922.36	1645.43	166.641	1925.46	1651.84	48.4378	1770.61	1631.08	181.79	1756.86	1631.69	141.893	1724.85	1505.85	144.053	1663.09	1255.66	134.368	1848.14	1423.22	139.408	1918.16	1272.38	230.407	1658.24	1316.62	-33.3799	1740.14	1449.8	-91.6123	1744.86	1266.2	-111.127	1743.85	1114.83	-163.555	1853.95	985.112	-147.598	1906.19	918.196	-180.217	1849.1	902.69	-195.605	1924.1	848.236
8796	0	69.1077	1934.08	1646.14	167.218	1936.4	1652.06	47.9942	1782.5	1631.34	181.341	1767.53	1630.94	141.507	1735.99	1506.06	143.551	1673.84	1255.81	133.732	1859.24	1423.2	138.68	1928.99	1272.26	229.896	1669.2	1316.84	-33.794	1751.22	1450.28	-92.2393	1757.81	1267.04	-113.092	1759.28	1115.53	-164.984	1873.15	988.32	-148.231	1926.87	922.834	-181.697	1870.87	906.105	-196.352	1947.45	853.837
8797	0	69.9355	1945.4	1646.71	167.886	1947.44	1652.03	47.6192	1794.03	1631.97	180.94	1778.43	1630.76	141.214	1747.32	1505.96	143.29	1684.6	1255.9	133.306	1870.17	1423.1	138.109	1939.83	1271.98	229.644	1680.13	1316.91	-33.8885	1762.38	1450.47	-93.6798	1770.86	1267.36	-115.021	1774.69	1116.02	-165.752	1892.55	991.677	-148.929	1947.71	927.785	-182.944	1892.31	909.465	-196.913	1970.35	859.103
8798	0	70.61	1957.12	1646.93	168.892	1958.48	1651.72	47.4868	1805.86	1631.81	180.558	1789.32	1629.97	140.755	1758.49	1505.74	143.126	1695.45	1255.58	132.826	1881.17	1422.72	137.24	1950.8	1271.46	229.222	1691	1316.67	-34.237	1773.4	1450.42	-94.9083	1783.81	1267.46	-116.735	1789.59	1117.53	-166.847	1911.27	994.877	-149.196	1968.11	932.569	-184.199	1913.41	912.729	-197.34	1992.93	864.688
8799	0	71.3643	1968.64	1647.03	169.474	1969.25	1651.13	46.9391	1817.52	1631.81	180.246	1800.22	1629.38	140.963	1770.11	1505.12	143.176	1706.34	1255.1	132.219	1892.27	1422.13	136.617	1961.74	1270.93	228.811	1702.11	1316.34	-34.4982	1784.05	1450.04	-95.7247	1796.46	1267.56	-118.391	1805.51	1115.49	-167.394	1930.05	997.961	-149.676	1987.96	936.885	-185.12	1934.23	915.857	-197.792	2014.98	870.001
8800	0	72.1242	1980.19	1646.57	170.074	1980.27	1650.45	46.5865	1829.36	1631.62	179.669	1811.1	1628.65	140.35	1781.28	1504.8	143.123	1717.14	1254.58	131.505	1903.46	1421.48	135.597	1972.52	1270.09	228.966	1713.54	1315.6	-34.9251	1794.71	1449.58	-96.5948	1809.06	1267.3	-119.275	1820.84	1116.45	-168.274	1948.14	1000.92	-150.05	2007.64	941.103	-186.123	1954.69	919.094	-198.113	2036.72	875.006
8801	0	72.5776	1991.95	1645.98	170.792	1991.2	1649.5	46.3693	1841.03	1631.37	178.71	1821.8	1628.09	140.339	1792.53	1504.12	143.428	1727.93	1254.2	131.16	1914.72	1420.52	134.807	1983.74	1269.07	228.903	1724.84	1315.17	-35.1679	1805.44	1448.7	-97.2575	1821.48	1266.9	-121.07	1835.64	1116.15	-168.61	1966.38	1003.7	-149.96	2026.99	945.215	-186.881	1974.77	922.137	-198.049	2058.01	880.24
8802	0	73.2355	2003.44	1645.16	171.401	2002.23	1648.25	45.8982	1852.88	1631.1	178.523	1832.8	1626.86	140.033	1803.99	1503.31	143.735	1738.96	1253.41	130.399	1925.97	1419.47	133.95	1994.43	1267.95	228.996	1736.32	1314.32	-35.4083	1816.11	1447.93	-97.8707	1833.9	1266.33	-122.498	1850.25	1115.8	-169.166	1984.1	1006.21	-150.333	2045.5	948.95	-187.465	1994.43	925.228	-198.475	2078.71	885.356
8803	0	73.7455	2015.25	1644.3	172.233	2013.47	1647.31	45.5349	1864.47	1630.64	178.007	1843.71	1626.15	139.695	1815.43	1502.34	144.277	1749.94	1252.71	129.722	1937.3	1418.21	133.096	2005.24	1266.6	229.013	1747.92	1313.21	-35.5667	1827.02	1446.71	-98.5741	1846.23	1265.63	-123.831	1864.74	1115.29	-169.641	2001.32	1008.71	-150.422	2064.3	952.987	-188.194	2013.64	928.083	-198.524	2098.94	889.91
8804	0	74.5495	2026.66	1643.55	172.624	2024.07	1645.96	45.1966	1876.32	1629.87	177.279	1854.26	1625.14	139.615	1826.69	1501.63	144.575	1761.37	1251.78	129.224	1948.56	1417.26	132.281	2016.37	1265.42	229.305	1759.68	1312.41	-35.6762	1837.87	1445.91	-98.3947	1858.39	1264.94	-124.859	1879.22	1114.99	-169.973	2018.4	1011.01	-150.448	2081.91	956.917	-188.667	2032.51	931.033	-198.179	2118.57	894.696
8805	0	75.0619	2038.29	1642.58	173.34	2035.27	1644.9	44.6297	1888.18	1629.22	177.237	1865.48	1624.02	139.437	1838.19	1500.72	145.211	1772.7	1250.8	128.948	1959.81	1416.45	131.418	2027.27	1264.36	229.589	1771.47	1311.51	-35.8081	1848.41	1444.95	-99.3994	1870.67	1264.12	-126.006	1893.38	1114.32	-170.13	2035.02	1013.48	-150.201	2099.38	960.567	-189.018	2050.84	933.803	-197.95	2137.82	899.525
8806	0	75.6309	2049.91	1641.81	173.751	2046.28	1643.72	44.36	1899.96	1628.22	176.492	1876.45	1622.9	139.469	1849.66	1499.38	145.544	1784.14	1249.63	128.37	1971.23	1415.18	130.649	2038.39	1263.24	229.775	1783.51	1310.28	-36.0876	1859.18	1443.49	-99.9644	1882.91	1263.44	-126.65	1907.4	1113.72	-170.176	2051.25	1015.6	-150.056	2116.4	963.821	-189.377	2068.69	936.142	-197.703	2156.37	903.661
8807	0	76.3647	2061.58	1640.84	174.486	2057.44	1642.63	44.0046	1911.6	1627.44	176.185	1887.68	1621.3	139.103	1861.1	1498.22	146.109	1795.55	1248.45	127.943	1982.76	1413.93	129.909	2049.9	1261.82	230.063	1795.42	1308.98	-36.0333	1870.07	1442.41	-99.4346	1894.82	1262.22	-127.531	1921.05	1112.81	-170.298	2067.16	1017.47	-149.902	2132.96	966.752	-189.412	2086.18	938.593	-197.473	2174.34	907.701
8808	0	76.7115	2073.28	1639.98	175.112	2068.88	1641.48	43.7238	1923.77	1625.95	176.12	1899.07	1619.97	139.406	1872.79	1496.97	146.591	1807.13	1247.01	127.543	1994.34	1412.77	129.192	2061.59	1260.43	230.608	1807.49	1308.1	-35.9396	1880.96	1441.16	-100.094	1907.04	1261.53	-128.105	1934.71	1112.04	-170.109	2082.59	1019.34	-149.573	2149.01	969.389	-189.18	2103.37	941.134	-196.971	2191.8	911.531
8809	0	77.2668	2084.97	1639.13	175.601	2080.24	1640.57	43.4173	1935.49	1624.63	175.493	1910.15	1618.45	139.322	1884.37	1495.76	147.285	1818.74	1245.77	127.234	2005.92	1411.61	128.381	2073.16	1259.2	231.025	1819.89	1306.41	-35.9982	1891.82	1439.63	-100.193	1918.94	1260.44	-128.58	1947.93	1111.06	-169.808	2097.71	1020.92	-149.099	2164.72	972.163	-189.116	2119.71	942.851	-196.435	2208.78	915.179
8810	0	77.621	2096.69	1638.06	176.001	2091.57	1639.37	43.3741	1947.35	1623.91	175.7	1921.88	1616.91	139.72	1896.2	1494.41	147.783	1830.39	1244.52	126.996	2017.71	1410.19	127.921	2084.92	1257.9	231.42	1831.99	1305.1	-35.7126	1903.02	1438.33	-100.09	1930.82	1259.15	-128.65	1961.04	1110.27	-169.549	2112.19	1022.24	-148.42	2180.1	974.52	-188.832	2135.57	944.51	-195.888	2224.93	918.223
8811	0	78.0031	2108.4	1637.13	176.568	2102.99	1638.38	43.4114	1959.24	1622.13	175.288	1933.23	1615.16	139.913	1908.09	1493.24	148.542	1842.22	1243.19	126.825	2029.44	1408.82	127.479	2096.78	1256.57	231.93	1844.4	1303.69	-35.5218	1914.2	1437.03	-100.124	1942.64	1257.79	-128.812	1973.66	1109.34	-169.009	2126.52	1023.17	-147.879	2194.76	976.281	-188.635	2150.79	945.96	-195.256	2240.64	920.711
8812	0	78.4711	2120.18	1636.18	176.774	2114.46	1637.2	43.2565	1971.09	1620.8	176.433	1945.66	1613.74	140.285	1919.98	1491.87	149.177	1854.16	1241.9	126.665	2041.39	1407.51	126.984	2108.78	1255.13	232.67	1856.67	1302.61	-35.2205	1925.44	1435.61	-99.7074	1954.21	1256.73	-128.707	1986.18	1108.32	-168.618	2140.04	1023.95	-147.353	2208.89	977.946	-188.122	2165.54	947.337	-194.553	2255.7	923.096
8813	0	78.5382	2131.77	1635.31	177.11	2126.08	1636.45	43.5544	1982.76	1619.62	175.46	1956.39	1612.13	140.9	1931.96	1490.87	149.924	1866.28	1240.87	126.566	2053.31	1406.21	126.497	2120.69	1254.02	233.305	1868.99	1301.44	-34.8004	1936.84	1434.45	-99.5161	1965.94	1255.74	-128.696	1998.46	1107.3	-168.291	2153.21	1024.46	-146.761	2222.58	979.438	-187.576	2179.71	948.374	-193.815	2270.25	925.268
8814	0	78.9986	2143.4	1634.38	177.318	2137.65	1635.46	43.5718	1994.41	1617.88	176.809	1968.99	1611.08	141.35	1943.73	1489.51	150.979	1878.36	1239.52	126.656	2065.25	1405.22	126.175	2132.92	1253.19	234.167	1881.6	1300.05	-34.2349	1948.13	1433.38	-99.0795	1977.45	1254.85	-128.224	2010.28	1106.21	-167.687	2166	1025.14	-145.888	2235.81	980.729	-186.993	2193.28	948.938	-193.209	2284	927.123
8815	0	78.9381	2155.04	1633.5	177.594	2149.4	1634.72	44.1387	2006	1616.87	177.164	1980.99	1609.86	142.169	1955.87	1488.09	152.05	1890.83	1238.29	126.969	2077.32	1404.34	125.979	2145.16	1252.32	235.043	1894.13	1298.52	-33.6778	1959.39	1432.3	-98.4018	1988.85	1253.68	-127.971	2021.7	1105.09	-167.144	2178.4	1025.37	-145.179	2248.58	981.692	-186.263	2206.31	949.129	-192.441	2297.15	928.431
8816	0	79.1446	2166.43	1632.63	177.746	2161.18	1633.81	44.204	2017.67	1615.69	176.468	1992.08	1608.76	142.964	1967.66	1486.89	153.069	1903.3	1236.88	127.209	2089.28	1403.38	125.767	2157.5	1251.44	236.018	1906.84	1297.12	-32.8735	1970.97	1431.36	-98.0246	2000.43	1252.81	-127.505	2033.04	1103.92	-166.447	2190.38	1025.31	-144.617	2260.78	982.34	-185.679	2218.82	949.425	-191.693	2309.86	929.157
8817	0	79.5072	2178.09	1631.61	177.758	2172.85	1632.81	44.9904	2029.01	1614.29	178.051	2004.37	1607.73	143.59	1979.67	1485.48	154.065	1915.98	1235.34	127.909	2101.4	1402.03	125.697	2169.98	1250.77	237.705	1920.11	1295.58	-32.1633	1982.17	1430.13	-96.0407	2011.38	1250.94	-126.969	2043.93	1102.54	-165.579	2202.01	1025.06	-144.035	2272.41	982.319	-184.757	2230.92	949.371	-190.852	2322.04	929.748
8818	0	79.3562	2189.69	1630.26	178.05	2184.9	1631.71	45.5677	2040.43	1613.13	178.039	2015.96	1606.68	144.848	1991.67	1484.04	155.736	1929.21	1233.52	128.253	2113.56	1401.21	125.816	2182.58	1249.99	238.911	1932.91	1294.18	-31.0119	1993.67	1428.8	-95.6371	2022.7	1249.97	-126.084	2054.74	1101.47	-165.086	2212.91	1024.27	-143.298	2283.69	981.918	-184.056	2242.41	948.904	-189.93	2333.64	929.577
8819	0	79.438	2201.02	1629.17	178.014	2196.62	1630.61	45.8794	2051.75	1611.6	179.445	2027.93	1605.46	145.588	2003.51	1482.85	156.79	1942.03	1231.75	128.962	2125.77	1399.98	126.047	2195.11	1249.19	240.2	1945.72	1292.65	-30.0954	2005.23	1427.53	-95.5917	2033.95	1248.85	-125.499	2065.09	1099.98	-164.151	2223.84	1023.48	-142.583	2294.6	981.389	-183.218	2253.36	947.91	-189.135	2344.76	929.001
8820	0	79.4507	2212.71	1627.91	178.154	2208.51	1629.5	47.0238	2063.01	1610.85	180.259	2040.05	1604.3	146.36	2015.43	1481.31	158.141	1954.98	1230.16	129.373	2137.94	1399.19	126.497	2207.77	1248.46	241.388	1958.55	1291.11	-29.223	2016.78	1425.92	-93.8476	2044.91	1247.14	-124.562	2075.25	1098.53	-163.57	2234.11	1022.18	-141.681	2305.34	980.462	-182.515	2264.03	946.927	-188.402	2355.37	927.953
8821	0	79.6402	2224.13	1626.86	178.276	2220.5	1628.41	47.7839	2074.28	1609.24	181.455	2052.17	1603.2	147.899	2027.45	1480.3	159.455	1967.98	1228.57	130.249	2150.26	1398.14	127.121	2220.52	1247.69	242.635	1971.37	1289.41	-28.1592	2028.44	1424.5	-92.9526	2055.64	1245.73	-123.534	2085.2	1096.6	-162.751	2244.06	1020.47	-141.156	2315.31	978.789	-181.636	2274.12	945.29	-187.454	2365.61	926.326
8822	0	79.9237	2235.74	1626.25	178.495	2232.55	1627.84	48.5327	2085.6	1608.81	182.358	2064.13	1602.51	148.643	2039.48	1478.95	160.656	1981.06	1226.84	131.242	2162.67	1397.14	128.14	2233.42	1247.23	243.898	1984.25	1287.96	-26.9972	2040.22	1423.14	-92.3179	2066.43	1244.21	-122.247	2094.95	1094.77	-161.926	2253.66	1018.46	-140.284	2325.12	976.977	-180.808	2283.76	943.404	-186.768	2375.16	924.176
8823	0	79.929	2247.29	1626.09	178.51	2244.48	1627.5	49.8945	2097.25	1608.5	183.295	2076.4	1602.11	149.664	2051.32	1478.33	161.654	1994.15	1225.27	132.003	2174.92	1397.25	129.137	2246.44	1247.14	245.003	1997	1286.89	-26.0469	2051.91	1421.87	-90.5212	2076.86	1242.55	-120.89	2104.67	1093.1	-160.998	2262.89	1016.31	-139.193	2334.68	974.719	-179.988	2292.76	940.823	-186.179	2384.14	921.703
8824	0	80.1469	2258.31	1626.13	178.706	2256.73	1627.27	50.5673	2108.57	1607.99	183.828	2088.07	1602.29	150.654	2063.51	1477.8	162.1	2007.16	1224.04	133.216	2187.3	1397	130.214	2259.38	1247.41	246.014	2009.87	1285.93	-25.0277	2063.54	1421.03	-89.2469	2087.19	1241.12	-119.384	2114.23	1091.61	-160.157	2271.71	1013.8	-138.595	2343.33	971.989	-178.889	2301.27	938.44	-185.53	2392.44	918.995
8825	0	80.3767	2270.29	1625.95	179.151	2268.88	1627.32	51.8594	2120.25	1608.26	185.596	2100.92	1601.96	151.581	2075.57	1477.43	163.098	2020.38	1223.03	134.067	2199.6	1397.17	131.603	2272.54	1247.93	247.133	2022.64	1285.21	-24.1058	2075.49	1420.16	-88.0033	2097.52	1240.28	-117.517	2123.51	1089.96	-158.937	2280.17	1011.13	-137.83	2351.74	968.793	-177.611	2308.98	935.44	-185.054	2399.99	915.648
8826	0	80.5706	2282.03	1626.36	179.352	2281.01	1627.82	53.0157	2131.92	1608.92	186.522	2112.73	1602.54	152.593	2087.75	1477.64	162.951	2033.15	1222.48	135.002	2212	1397.73	132.883	2285.73	1248.98	247.577	2035.35	1284.82	-22.9548	2087.61	1420.02	-85.9456	2107.6	1239.18	-115.566	2132.78	1089.13	-157.586	2288.44	1008.24	-137.033	2359.37	965.368	-176.057	2315.97	931.811	-184.445	2406.77	911.692
8827	0	81.0929	2293.75	1627.11	179.686	2293.2	1628.5	54.1047	2143.43	1609.97	187.357	2124.83	1603.54	153.075	2099.83	1478.27	163.677	2046.14	1222.67	135.805	2224.28	1398.69	134.117	2298.91	1250.41	248.774	2048.26	1284.96	-21.9864	2099.81	1420.25	-84.1239	2117.71	1238.96	-113.246	2141.89	1088.48	-156.49	2295.68	1005.29	-136.067	2366.59	961.6	-174.446	2322.26	928.43	-183.707	2413	907.67
8828	0	81.3799	2305.56	1627.94	180.146	2305.42	1629.19	54.8157	2155.29	1610.99	188.396	2136.98	1604.59	153.907	2112.02	1478.96	163.954	2058.71	1222.88	136.606	2236.64	1399.95	135.344	2312.14	1251.94	249.013	2060.94	1285.2	-21.2548	2112.06	1420.7	-82.1776	2128.02	1239.05	-110.785	2150.94	1088.23	-154.723	2303.15	1002.33	-135.009	2373.28	957.746	-172.654	2328.1	925.143	-182.764	2418.27	902.658
8829	0	81.9842	2317.32	1628.71	180.65	2317.58	1629.95	56.0801	2166.94	1612.1	189.776	2149.4	1605.42	154.437	2124.26	1479.66	164.29	2071.6	1223.8	137.54	2249	1401.19	136.557	2325.22	1253.56	248.643	2072.84	1285.76	-20.5001	2124.43	1421.57	-80.3351	2138.27	1239.26	-108.021	2159.74	1088.17	-153.091	2309.69	999.106	-133.747	2379.48	953.47	-170.715	2332.87	921.096	-182.101	2422.66	897.559
8830	0	82.3034	2329.16	1629.8	181.233	2329.71	1630.72	57.1958	2178.63	1613.53	190.667	2161.41	1606.66	155.23	2136.28	1480.62	164.593	2084.11	1224.72	138.285	2261.31	1402.42	137.491	2337.89	1255.17	249.363	2085.49	1286.82	-20.081	2136.88	1422.58	-78.6094	2148.93	1239.7	-104.99	2168.8	1088.79	-151.397	2316.02	996	-132.42	2385.08	948.958	-168.567	2337.3	917.168	-180.939	2426.7	892.422
8831	0	83.176	2341.16	1630.89	181.648	2341.67	1631.57	57.8586	2190.47	1615.17	191.431	2173.3	1607.91	155.585	2148.33	1481.76	164.407	2096.38	1225.52	138.682	2273.51	1403.71	138.18	2350.45	1256.49	249.595	2097.97	1288.09	-19.7066	2149.25	1423.8	-77.1532	2159.78	1240.54	-102.527	2177.27	1089.06	-149.522	2322.06	992.857	-131.19	2390.04	944.234	-166.442	2341.33	913.698	-179.938	2429.59	886.304
8832	0	83.8625	2352.78	1631.92	182.347	2353.7	1632.34	58.937	2202.14	1616.41	192.302	2185.4	1608.99	156.419	2160.45	1483.14	164.76	2108.63	1226.78	139.27	2285.63	1404.64	138.743	2362.65	1257.54	249.986	2110.26	1289.28	-19.2775	2161.53	1425.01	-75.7371	2170.77	1241.24	-99.5807	2186.04	1089.83	-147.561	2327.64	989.51	-129.534	2394.51	938.939	-163.706	2344.73	909.532	-178.411	2432.26	880.242
8833	0	84.3049	2364.74	1633.08	183.131	2365.77	1633.09	59.7397	2214.03	1618.29	193.184	2197.34	1610.06	156.828	2172.61	1484.3	165.056	2120.7	1228.21	139.641	2297.66	1405.81	138.955	2374.5	1258.61	250.069	2122.54	1290.37	-19.0222	2173.54	1426.21	-74.4512	2181.84	1242.13	-96.8685	2194.75	1090.46	-145.394	2333.04	986.151	-127.738	2398.83	934.008	-161.258	2348.01	906.033	-176.625	2434.24	873.899
8834	0	85.3578	2376.68	1634.46	183.868	2377.7	1633.93	60.4486	2225.93	1619.89	193.728	2209.07	1611.28	157.459	2184.39	1485.36	165.181	2132.91	1228.97	140.039	2309.55	1407.16	138.897	2386.14	1259.74	250.687	2134.82	1291.59	-18.503	2185.58	1427.56	-73.5153	2192.72	1242.93	-94.0984	2203.73	1091.34	-143.184	2338.44	982.796	-125.36	2402.84	928.76	-158.342	2350.18	901.066	-174.692	2435.7	867.169
8835	0	86.0611	2388.49	1635.53	184.562	2389.53	1634.66	61.0178	2237.8	1621.64	194.368	2220.98	1612.31	158.123	2196.49	1486.51	166.456	2144.99	1230.34	139.837	2321.24	1408.25	138.528	2397.61	1260.75	251.54	2147.05	1292.76	-18.1131	2197.03	1428.84	-72.6382	2203.81	1243.94	-91.8549	2212.33	1092.09	-140.753	2343.17	979.108	-123.429	2405.94	923.3	-155.598	2352.28	896.84	-172.318	2436.67	860.4
8836	0	86.4104	2400.42	1636.65	185.173	2401.34	1635.42	61.497	2249.73	1622.98	194.599	2232.7	1613.18	158.599	2208.09	1487.69	166.281	2156.52	1232.15	139.975	2332.96	1409.39	137.877	2409.13	1261.81	252.149	2158.97	1293.92	-17.7963	2208.24	1430.23	-71.6032	2214.47	1244.67	-89.494	2221.32	1093.2	-138.416	2347.95	975.719	-120.853	2408.83	917.441	-152.652	2354.47	893.587	-169.592	2437.3	853.648
8837	0	87.2438	2412.37	1637.84	185.845	2413.17	1636.28	62.0707	2261.5	1624.48	194.804	2244.23	1614.23	158.841	2219.81	1488.91	166.574	2168.09	1233.09	139.888	2344.51	1410.42	137.081	2420.81	1262.77	252.769	2171.01	1294.99	-17.161	2219.48	1431.37	-70.8418	2225.31	1245.89	-86.9678	2230.36	1094.21	-136.233	2352.24	972.024	-118.45	2411.29	911.942	-149.854	2356.12	889.726	-166.829	2437.04	846.617
8838	0	87.7522	2424.09	1638.95	186.405	2424.9	1637.14	62.3012	2273.47	1625.96	195.199	2255.96	1615.27	159.366	2231.65	1489.84	167.478	2179.92	1233.88	139.824	2356.12	1411.41	136.215	2432.36	1263.87	253.73	2183.18	1295.93	-16.9134	2230.23	1432.36	-70.233	2235.5	1246.76	-85.3101	2239.12	1095.12	-133.656	2356.7	968.689	-114.247	2413.21	906.505	-146.825	2357.06	885.875	-163.624	2436.58	839.627
8839	0	88.1012	2436.16	1639.94	186.989	2436.56	1638.06	62.5206	2285.27	1626.99	195.35	2267.59	1616.29	159.843	2243.34	1490.84	168.218	2191.6	1234.93	139.751	2367.72	1412.48	135.357	2443.86	1264.9	254.455	2195.07	1297.02	-16.5258	2241.26	1433.53	-68.9783	2245.51	1247.5	-83.6025	2248.08	1096.21	-131.283	2360.42	965.38	-111.13	2414.97	900.986	-143.742	2358.09	882.014	-159.968	2435.63	832.924
8840	0	88.6637	2448	1641.01	187.333	2448.16	1639.01	62.2448	2297.28	1628.01	195.547	2279.31	1617.25	160.038	2255.01	1491.87	168.66	2203.27	1235.85	139.463	2379.28	1413.59	134.472	2455.19	1265.85	255.174	2207	1297.98	-16.2951	2252.04	1434.55	-68.2567	2255.42	1248.14	-81.8257	2256.82	1096.91	-128.672	2364.33	962.442	-109.144	2416.33	896.038	-140.365	2358.84	878.38	-156.393	2434.27	826.528
8841	0	88.7716	2459.59	1642.11	187.633	2459.81	1640.02	62.6319	2308.98	1629.21	195.624	2291.02	1618.38	160.116	2266.71	1493.08	169.015	2214.87	1236.99	139.425	2390.85	1414.62	133.919	2466.46	1266.79	255.575	2218.64	1298.97	-16.0473	2263.03	1435.38	-67.2812	2265.38	1248.94	-80.0859	2265.47	1097.87	-126.329	2367.7	959.415	-107.066	2417.04	891.766	-137.757	2359.22	876.454	-152.731	2432.25	820.451
8842	0	89.1187	2471.15	1643.22	187.88	2471.48	1641.03	62.6091	2320.81	1630.5	195.76	2302.86	1619.28	160.017	2278.41	1494.36	169.951	2226.2	1238.25	139.273	2402.33	1415.49	133.641	2477.53	1267.52	256.21	2230.2	1300.5	-16.1075	2274.09	1436.31	-66.5277	2275.23	1249.71	-78.0376	2273.92	1098.94	-123.947	2370.71	956.914	-104.209	2417.75	887.59	-134.725	2359.44	874.254	-148.523	2429.96	814.661
8843	0	89.2342	2482.76	1644.1	188.027	2483.08	1641.97	62.6083	2332.49	1631.32	195.587	2314.49	1620.22	160.632	2290.29	1495.19	170.335	2237.45	1239.58	139.181	2413.8	1416.6	133.318	2488.36	1268.32	256.412	2241.77	1301.51	-15.7739	2285.34	1437.34	-65.6486	2285.02	1250.43	-76.1503	2282.23	1099.96	-121.428	2373.75	954.858	-101.53	2418.2	883.688	-131.594	2359.43	872.144	-144.886	2427.47	809.549
8844	0	89.0095	2494.62	1645.09	188.207	2494.9	1643.06	62.2077	2344.29	1632.13	195.462	2326.02	1621.33	160.272	2301.91	1496.38	170.404	2248.71	1240.75	139.178	2425.38	1417.68	133.336	2499.56	1269	256.725	2253.17	1302.97	-15.712	2296.66	1438.36	-64.6984	2294.86	1251.29	-73.7136	2290.27	1100.98	-118.925	2376.46	952.879	-98.8208	2418.41	880.277	-128.495	2359.45	870.649	-141.133	2424.1	804.777
8845	0	89.1019	2506.34	1645.84	187.508	2506.08	1644.16	62.2825	2356.13	1633.08	195.241	2337.61	1622.38	160.43	2313.76	1497.39	170.908	2260.01	1242.07	139.372	2436.74	1418.3	133.447	2510.78	1269.62	257.055	2264.45	1304.5	-15.5203	2308.24	1439.32	-63.7591	2304.72	1252.1	-71.865	2297.78	1101.8	-116.505	2379.05	951.26	-95.9279	2418.89	877.692	-125.485	2359.28	869.469	-137.427	2421.1	800.809
8846	0	89.001	2518.14	1646.77	187.797	2518.06	1645.08	61.9631	2367.97	1633.73	195.136	2349.65	1623.22	160.45	2325.55	1498.56	170.783	2270.99	1243.46	139.213	2448.44	1419.06	133.647	2521.95	1270.06	257.109	2275.79	1306.06	-15.3252	2319.92	1440.05	-62.8248	2314.48	1252.52	-69.6658	2305.34	1102.87	-113.778	2381.55	950.229	-93.4324	2418.59	874.528	-122.524	2359.13	868.972	-133.503	2418.2	797.369
8847	0	88.7004	2529.76	1647.26	187.745	2529.9	1645.86	61.8525	2379.74	1634.4	194.981	2361.38	1623.89	160.423	2337.27	1499.41	171.847	2282.41	1244.82	139.289	2459.88	1419.37	134.048	2533.05	1270.15	257.24	2287.02	1307.07	-15.6441	2331.58	1440.85	-61.7092	2324.06	1253.04	-67.2323	2312.36	1103.89	-111.377	2384.03	949.062	-90.3946	2419.05	872.666	-119.319	2359.05	868.677	-130.056	2415.07	794.23
8848	0	88.5796	2541.41	1647.72	187.372	2541.6	1646.76	61.4232	2391.51	1634.24	194.616	2372.88	1624.52	160.11	2349.3	1500.07	171.823	2293.55	1245.74	139.401	2471.57	1419.77	134.411	2544.29	1270.55	257.362	2298.29	1308.24	-15.8879	2343.31	1441.33	-60.566	2333.42	1253.42	-64.9473	2319.34	1104.69	-108.864	2386.27	948.076	-87.8601	2419.44	870.971	-115.758	2359.39	868.658	-126.413	2412.24	791.909
8849	0	88.0074	2553.28	1648.15	187.005	2553.17	1647.62	60.8859	2403.24	1634.47	194.348	2384.69	1625.17	160.079	2360.94	1500.94	171.73	2304.66	1247	139.422	2483.12	1420.19	134.923	2555.35	1270.7	257.364	2309.17	1309.49	-15.8156	2355.49	1442.04	-59.6065	2342.77	1254.09	-62.5276	2326.13	1105.91	-106.265	2388.66	947.322	-84.9281	2419.44	868.996	-112.862	2359.35	868.453	-122.838	2409.62	790.044
8850	0	87.727	2565.02	1648.59	186.294	2564.89	1648.3	60.5438	2414.73	1634.42	194.165	2396.63	1625.47	159.588	2372.62	1501.55	171.874	2315.51	1247.9	139.659	2494.68	1420.37	135.376	2566.31	1270.5	257.154	2320.32	1310.47	-15.8884	2367.5	1442.35	-58.7049	2351.97	1254.71	-60.6657	2332.79	1106.76	-103.555	2391.03	946.701	-81.6876	2420.33	867.837	-109.97	2359.59	868.974	-119.271	2407.47	788.376
8851	0	87.1348	2576.67	1648.84	186.219	2576.9	1648.74	60.2921	2426.7	1634.01	193.809	2408.28	1625.78	159.719	2384.58	1501.77	171.747	2326.42	1248.73	139.887	2506.23	1420.41	136.076	2577.36	1270.23	257.364	2331.52	1311.38	-16.0617	2379.45	1442.78	-58.0692	2361.03	1254.99	-58.3989	2339.4	1107.59	-101.139	2393.44	945.964	-78.9533	2420.69	866.466	-106.727	2359.98	868.872	-115.73	2405.56	787.09
8852	0	86.6367	2588.32	1648.72	185.527	2588.48	1649.2	60.0211	2438.34	1633.63	193.6	2420.35	1625.74	159.454	2396.27	1502.22	171.84	2337.69	1249.22	140.141	2517.76	1420.26	136.672	2588.4	1269.94	257.171	2342.14	1312.08	-16.0706	2391.43	1443.03	-57.1132	2370.04	1255.15	-56.6598	2346.04	1108.58	-98.5726	2395.94	945.49	-75.7484	2421.74	865.717	-103.304	2360.79	869.389	-112.256	2404.04	786.131
8853	0	86.2549	2600.08	1648.82	184.61	2600.29	1649.53	59.5642	2450.23	1633.21	193.192	2432.05	1625.91	159.016	2408.03	1502.38	171.873	2348.62	1249.68	140.262	2529.48	1420.32	137.194	2599.34	1269.49	257.041	2353.2	1312.44	-16.274	2403.48	1442.95	-56.3323	2378.91	1255.15	-54.5943	2352.47	1109.06	-96.1086	2398.68	945.193	-73.3164	2422.37	864.738	-100.337	2361.62	869.734	-108.879	2403.05	785.491
8854	0	85.4752	2611.77	1648.57	184.426	2612.52	1649.77	59.101	2461.76	1632.35	192.925	2444.07	1625.57	159.089	2419.85	1502.44	171.425	2359.44	1250.03	140.623	2541.15	1420.07	137.874	2610.52	1268.9	257.01	2364.03	1313.07	-16.3261	2415.54	1442.91	-55.3962	2387.96	1255.47	-53.1817	2359.33	1110.08	-93.9472	2401.49	944.773	-71.5181	2424.34	864.361	-97.2329	2362.86	869.992	-105.547	2402.42	784.958
8855	0	84.6273	2623.49	1647.89	183.267	2623.71	1649.91	58.6449	2473.26	1631.37	192.485	2455.93	1625.28	158.401	2431.54	1502.41	171.189	2370.59	1249.8	140.636	2552.62	1419.41	138.412	2621.61	1268.2	257.037	2374.98	1313.35	-16.4504	2427.65	1442.37	-54.8431	2396.82	1255.46	-51.3053	2366.36	1110.92	-91.7872	2404.49	944.587	-66.2264	2424.76	862.846	-94.5836	2364.46	870.825	-102.32	2402.38	784.626
8856	0	83.9788	2635.3	1647.44	182.683	2636.07	1649.59	58.7689	2485.17	1630.69	192.394	2468.12	1624.66	158.572	2443.34	1502.14	171.194	2381.81	1249.84	140.98	2564.42	1418.9	139.22	2632.77	1267.42	256.885	2385.81	1313.41	-16.6491	2439.73	1442.01	-54.158	2405.97	1255.67	-49.653	2373.33	1111.58	-89.952	2407.72	944.399	-63.9251	2426.92	862.349	-91.8174	2366.47	871.232	-99.97	2402.52	784.581
8857	0	82.9845	2646.91	1646.63	181.923	2648.13	1649.45	58.3434	2496.86	1629.27	192.098	2480.07	1624.28	157.922	2455.12	1501.71	170.863	2392.92	1249.6	141.125	2575.97	1418	139.808	2643.89	1266.58	256.699	2396.75	1313.07	-16.7351	2451.8	1441.56	-53.5424	2415.26	1255.63	-48.5917	2380.31	1112.13	-88.1713	2411.46	944.607	-61.9121	2429.37	862.173	-89.3394	2368.78	871.962	-96.3849	2403.14	784.367
8858	0	82.2236	2658.56	1646.06	181.084	2660.28	1649.03	57.8191	2508.57	1628.16	191.733	2491.99	1623.67	157.888	2466.8	1501.19	170.552	2403.96	1249.1	141.095	2587.51	1417.19	140.45	2655.31	1265.5	256.25	2407.49	1313.14	-17.0963	2463.8	1441.07	-52.9849	2424.81	1255.74	-47.3427	2387.65	1112.88	-86.7466	2415.62	944.679	-61.7678	2432.75	862.697	-86.9675	2371.59	872.749	-94.2195	2404.09	784.359
8859	0	81.3322	2670.17	1645.38	180.152	2672.25	1648.57	57.7093	2520.26	1626.9	191.211	2503.98	1622.65	157.192	2478.49	1500.38	170.121	2415.17	1248.81	141.262	2599.14	1416.42	141.018	2666.45	1264.53	255.528	2418.56	1312.38	-17.3045	2475.69	1440.24	-52.2461	2434.52	1255.77	-46.0119	2395.21	1113.29	-85.7052	2419.86	944.917	-61.914	2436.54	863.239	-84.8861	2374.82	873.553	-92.0812	2405.77	784.633
8860	0	80.3076	2681.93	1644.24	179.141	2684.22	1647.99	57.4846	2531.84	1625.36	191.099	2516.23	1621.62	156.964	2490.35	1499.59	169.631	2426.45	1248.06	141.353	2610.98	1415.43	141.454	2677.63	1263.4	255.375	2429.59	1312.11	-17.6914	2487.66	1439.4	-51.9168	2444.33	1255.49	-44.8574	2403.03	1113.88	-84.1185	2424.68	945.001	-61.1305	2440.79	863.366	-83.1137	2378.53	874.354	-90.2494	2407.83	784.69
8861	0	79.2699	2693.61	1643.19	178.117	2696.29	1647.21	57.0512	2543.67	1624.02	190.823	2528.62	1620.55	156.654	2502.26	1498.77	169.379	2437.65	1247.44	141.179	2622.64	1414.03	141.817	2688.93	1261.95	255.114	2440.74	1311.49	-17.8341	2499.8	1438.5	-51.5136	2454.4	1255.49	-43.9021	2411.2	1114.22	-83.2602	2429.87	944.885	-60.4645	2445.44	863.481	-81.4036	2382.87	875.106	-88.6784	2410.54	785.008
8862	0	78.3851	2705.29	1642.25	176.83	2708.27	1646.35	56.8449	2555.09	1621.99	190.586	2540.85	1619.23	155.984	2514.17	1497.8	168.662	2449	1246.28	141.047	2634.4	1412.81	142.204	2700.27	1260.6	254.556	2451.85	1310.78	-18.1165	2511.93	1437.32	-51.1337	2464.53	1255.06	-42.8078	2419.77	1114.45	-82.6762	2435.61	944.925	-59.8747	2450.39	863.292	-79.9598	2387.72	875.563	-87.5401	2413.85	785.299
8863	0	77.2982	2716.85	1640.96	175.99	2720.49	1645.35	56.5598	2566.78	1620.59	190.183	2553.04	1617.79	155.659	2526.18	1496.52	168.352	2460.47	1245.37	140.897	2646.3	1411.62	142.46	2711.71	1259.26	253.837	2462.76	1310.15	-18.548	2524.08	1436.4	-50.984	2474.73	1254.28	-42.3137	2428.31	1114.41	-81.4546	2441.81	944.591	-59.716	2456	863.081	-79.0035	2393.13	876.005	-86.6143	2417.88	785.426
8864	0	76.1306	2728.68	1639.59	174.895	2732.58	1644.33	55.9865	2578.48	1618.98	189.873	2565.28	1616.45	155.23	2538.26	1495.37	167.563	2471.84	1244.35	140.723	2658.2	1410.36	142.464	2723.15	1257.62	253.382	2474.18	1309.17	-18.7544	2536.24	1435.21	-50.5465	2485.46	1254.06	-41.8915	2437.35	1114.46	-81.8381	2448.45	944.852	-59.9052	2461.95	862.639	-77.8889	2399.04	876.424	-85.791	2422.47	785.245
8865	0	75.2762	2740.43	1638.55	173.73	2744.72	1643.18	55.6537	2590.31	1617.37	189.825	2577.73	1614.8	154.738	2550.23	1494.17	166.96	2483.29	1243.27	140.209	2669.92	1408.56	142.445	2734.7	1255.86	253.239	2485.65	1308.2	-19.332	2548.32	1433.91	-50.3395	2495.84	1252.94	-41.4635	2446.63	1114.24	-81.9055	2455.61	944.719	-59.8971	2468.61	862.436	-77.2896	2405.7	876.614	-85.4698	2427.83	785.142
8866	0	74.037	2752.11	1637.07	172.643	2756.97	1641.88	55.7029	2602.06	1615.55	189.415	2590.22	1612.95	154.013	2562.18	1492.94	166.675	2494.93	1242.11	139.749	2681.75	1406.86	142.354	2746.42	1254.05	252.627	2496.81	1307.23	-19.7325	2560.44	1432.48	-50.8749	2506.74	1252.09	-41.3471	2456.34	1113.62	-81.8197	2463.42	944.28	-60.4424	2475.65	861.593	-76.569	2413.18	876.832	-85.3521	2433.89	785.058
8867	0	72.9352	2763.8	1635.61	171.535	2769.3	1640.55	55.1164	2613.68	1613.91	188.923	2602.37	1611.45	153.412	2574.22	1491.43	166.038	2506.44	1240.85	139.316	2693.53	1405.21	142.137	2757.77	1252.27	251.702	2508.21	1306.34	-20.4744	2572.29	1430.99	-50.8594	2517.76	1251.19	-41.3502	2466.36	1113.07	-82.4187	2471.51	943.479	-60.7283	2483.43	861.128	-77.0604	2420.78	876.529	-85.3636	2440.76	784.632
8868	0	71.8862	2775.62	1634.59	170.451	2781.47	1639.27	54.6181	2625.48	1612.35	188.328	2614.5	1609.68	152.588	2586.19	1490	165.133	2517.78	1239.69	138.806	2705.35	1403.62	141.858	2769.38	1250.58	251.239	2519.72	1305.14	-21.1956	2584.22	1429.61	-51.3549	2528.75	1250.02	-41.7379	2476.72	1112.42	-82.8883	2480.51	943.103	-61.3415	2491.8	860.368	-77.4284	2429.06	876.419	-85.92	2448.14	783.982
8869	0	70.6988	2787.45	1632.94	169.302	2793.6	1637.87	54.39	2637.18	1610.7	187.895	2626.51	1608.09	151.725	2598.04	1488.83	164.154	2529.4	1238.47	138.163	2717.11	1401.97	141.458	2780.92	1248.91	250.448	2531.3	1303.91	-21.9866	2596.04	1428.11	-51.8411	2540.22	1249.32	-42.5095	2487.36	1111.29	-83.182	2490.06	942.013	-62.4224	2500.77	859.319	-77.9478	2438.08	875.845	-86.6176	2456.53	783.486
8870	0	69.7646	2799.13	1631.4	168.284	2805.72	1636.42	53.7118	2649.23	1609.02	187.42	2638.92	1606.57	151.134	2610.05	1487.17	163.246	2541.25	1237.24	137.539	2728.95	1400.38	141.009	2792.6	1247.26	249.554	2542.91	1302.45	-22.917	2608.12	1426.82	-52.3618	2551.66	1248.09	-42.6686	2498.72	1110.15	-84.5265	2499.9	941.06	-63.6369	2510.32	858.428	-78.6126	2447.69	875.089	-87.8256	2465.41	782.851
8871	0	68.6238	2810.97	1630.14	167.048	2817.75	1635.05	52.7745	2660.82	1607.63	186.475	2651.03	1605.17	149.847	2621.8	1486.08	162.171	2553.27	1236.03	136.677	2740.82	1398.96	140.44	2804.48	1245.89	248.121	2554.24	1301.49	-23.6909	2620.09	1425.4	-53.1485	2563.1	1246.35	-43.8183	2509.74	1109.45	-85.9512	2510.38	940.343	-64.6128	2520.52	857.419	-79.9499	2457.86	874.57	-89.5696	2475.27	782.459
8872	0	67.3279	2822.73	1628.43	165.906	2829.84	1633.55	52.5749	2672.71	1606.71	185.806	2663.08	1604.1	149.07	2633.51	1484.86	160.57	2565.13	1234.56	135.694	2752.6	1397.69	139.682	2816.31	1244.73	247.061	2566.1	1300.07	-24.7817	2632.17	1424.2	-54.6362	2575.03	1245.42	-44.8686	2521.57	1108.82	-87.111	2521.29	939.684	-66.4712	2531.22	856.386	-80.6278	2468.86	873.794	-90.9068	2485.86	781.577
8873	0	66.2716	2834.6	1627.11	164.89	2841.98	1631.97	51.4779	2684.3	1605.71	185.193	2675.15	1603.09	147.806	2645.29	1483.43	159.129	2577.2	1233.32	134.732	2764.53	1396.53	138.866	2828.3	1243.66	245.65	2577.98	1298.54	-25.9193	2644.14	1423.13	-55.6625	2587.13	1244.46	-46.2016	2533.32	1107.58	-88.89	2533.19	938.877	-68.0238	2542.82	855.362	-82.6347	2480.35	872.92	-93.1412	2497.27	780.907
8874	0	65.2723	2846.47	1625.64	164.068	2854.1	1630.53	50.6419	2696	1604.59	184.635	2687.33	1602.04	146.6	2656.96	1482.06	157.81	2589.04	1232.13	133.774	2776.4	1395.57	137.856	2840.29	1242.78	243.912	2589.67	1297.07	-27.2062	2656.07	1421.99	-56.9969	2599.46	1243.53	-47.8438	2545.53	1106.38	-90.8052	2545.05	937.336	-69.9307	2554.95	854.178	-84.6082	2492.5	871.827	-94.9348	2509.34	779.717
8875	0	64.5175	2858.3	1624.28	162.497	2865.76	1628.9	49.6362	2707.88	1603.89	183.319	2698.97	1601.16	145.031	2668.52	1480.86	156.095	2601.24	1230.61	132.619	2788.2	1394.56	136.811	2852.37	1241.92	242.488	2601.55	1295.71	-28.4183	2667.98	1420.91	-58.3106	2611.72	1242.2	-49.7269	2558.06	1105.32	-92.9096	2557.77	936.314	-72.6464	2567.79	853.32	-86.7866	2505.35	870.752	-97.2934	2522.35	778.486
8876	0	63.3075	2870.15	1622.97	161.755	2877.65	1627.27	47.7955	2719.08	1603.57	182.383	2710.6	1600.47	144.304	2680.23	1479.79	154.763	2613.62	1229.15	131.214	2800.01	1393.75	135.456	2864.48	1241.35	241.147	2613.67	1294.05	-29.9418	2680.08	1420.02	-60.2091	2624.4	1241.17	-51.3752	2570.92	1104.09	-95.4649	2571.05	935.141	-74.7785	2580.89	851.974	-89.3914	2518.85	869.46	-100.223	2536.01	777.264
8877	0	62.1863	2881.98	1621.47	160.446	2889.45	1625.84	46.7822	2730.61	1602.37	181.203	2722.33	1599.96	143.362	2691.63	1478.79	153.133	2625.89	1227.97	129.843	2811.94	1393.02	133.918	2876.96	1240.88	239.124	2625.57	1292.66	-31.285	2692.11	1419.07	-62.1842	2637.09	1240.05	-53.6388	2583.98	1102.74	-98.149	2584.94	934.379	-77.9612	2595.18	850.884	-92.0757	2532.94	868.024	-103.074	2550.46	776.086
8878	0	61.1695	2893.84	1620.26	159.757	2901.47	1624.69	45.9766	2742.9	1602.48	180.015	2734.03	1599.54	141.184	2702.95	1477.73	151.746	2638.46	1226.59	128.513	2823.82	1392.63	132.331	2889.39	1240.44	238.216	2638.02	1291.31	-32.8131	2704.05	1418.21	-64.1931	2649.88	1238.87	-55.8246	2597.37	1101.36	-100.62	2599.35	933.216	-80.6556	2609.81	849.452	-95.1545	2547.55	866.431	-106.253	2565.59	774.689
8879	0	60.1689	2905.75	1619.83	158.712	2913.2	1624	45.3348	2754.65	1601.94	179.033	2745.88	1599.2	140.002	2714.51	1476.95	150.224	2650.97	1225.24	127.048	2835.53	1392.35	130.753	2902.07	1240.39	236.404	2650.35	1289.77	-34.2112	2715.68	1417.68	-65.9286	2662.74	1237.73	-58.4197	2611.04	1100.11	-103.756	2613.98	931.762	-83.3595	2625.1	848.431	-98.2374	2562.77	865.05	-109.713	2581.63	773.406
8880	0	59.2952	2917.74	1619.69	157.748	2925	1623.51	43.7206	2766.74	1602.58	177.698	2757.63	1599.48	138.713	2725.96	1476.89	148.706	2663.51	1224.38	125.644	2847.31	1392.53	128.946	2914.38	1240.75	235.509	2662.72	1288.96	-35.7032	2727.14	1417.16	-68.1087	2675.98	1237.26	-61.0009	2624.97	1099.16	-106.38	2629.46	930.806	-86.817	2641.45	847.405	-101.371	2578.79	863.503	-113.563	2598.45	772.529
8881	0	58.2531	2929.76	1619.5	157.123	2936.91	1623.47	42.5214	2778.68	1602.93	176.24	2769.12	1599.73	137.352	2737.44	1476.8	147.972	2675.96	1224.09	124.229	2859.08	1392.91	127.245	2926.86	1241.56	233.932	2674.78	1288.38	-37.1337	2738.84	1417.02	-70.29	2689.25	1236.58	-63.0554	2639.15	1097.73	-109.393	2645.4	929.815	-90.5212	2658	846.891	-104.96	2595.18	862.229	-117.169	2615.91	771.328
8882	0	57.4269	2941.8	1620.06	156.125	2948.8	1623.62	41.1064	2790.76	1603.81	174.67	2780.81	1600.63	135.85	2748.86	1477.4	146.361	2688.26	1223.95	122.636	2870.68	1393.79	125.335	2939.1	1242.67	232.476	2686.7	1288.26	-38.4035	2750.2	1417.47	-72.2635	2702.67	1236.23	-66.243	2653.74	1097.01	-112.7	2661.84	929.287	-93.6512	2675.26	846.275	-108.567	2612.44	861.018	-121.607	2634.13	770.656
8883	0	56.3158	2953.88	1620.58	155.047	2960.61	1624.17	39.6664	2802.37	1604.55	173.487	2792.43	1601.57	135.001	2760.47	1478.01	145.83	2700.43	1224.28	121.278	2882.32	1394.87	123.673	2951.56	1244.04	231.787	2699	1288.66	-39.7325	2761.41	1418.13	-74.1823	2716.1	1236.39	-68.171	2668.63	1096.72	-116.246	2678.91	929.41	-97.5912	2693.35	846.223	-112.206	2630.26	860.479	-126.112	2653.22	770.576
8884	0	55.4859	2965.74	1621.12	154.389	2972.49	1624.71	38.3985	2814.59	1605.99	172.094	2804.12	1602.72	134.3	2772.16	1479	144.712	2712.38	1224.77	120.045	2893.8	1395.94	122.1	2963.75	1245.57	231.185	2711.2	1289.05	-40.775	2772.86	1419.04	-76.0976	2729.67	1236.78	-71.11	2683.71	1096.61	-119.29	2696.24	929.55	-101.311	2711.94	846.634	-115.96	2648.77	859.837	-130.277	2673.12	770.544
8885	0	54.4485	2977.63	1621.86	153.171	2984.09	1625.53	37.7622	2826.26	1606.79	170.414	2814.97	1604.08	132.966	2783.49	1479.92	143.895	2724.13	1225.8	118.811	2905.29	1397.27	120.66	2976	1247.3	230.276	2723.2	1290.11	-41.9158	2784.27	1420.12	-77.9603	2743.15	1237.87	-73.9666	2698.71	1096.66	-122.601	2714.39	930.052	-105.99	2730.98	847.655	-120.074	2667.66	859.697	-134.376	2693.58	770.618
8886	0	53.5204	2989.41	1622.5	152.537	2996.32	1626.36	35.7178	2837.9	1608.4	169.613	2827.21	1605.7	131.481	2794.77	1481.14	143.196	2735.95	1227.3	117.861	2916.78	1398.71	119.362	2987.94	1249.05	229.607	2734.67	1291.65	-42.7916	2795.71	1421.34	-79.5755	2756.52	1238.57	-76.1952	2714.11	1096.99	-125.608	2732.51	930.872	-109.019	2750.7	848.381	-124.04	2687.31	859.771	-138.906	2714.92	771.036
8887	0	52.5743	3001.04	1623.34	151.331	3007.8	1627.35	35.0735	2849.87	1609.81	168.883	2839.01	1607.15	130.41	2806.22	1482.37	142.673	2747.86	1228.16	116.982	2928.2	1400.02	118.316	2999.46	1250.41	228.263	2746.1	1293.04	-43.9563	2807.34	1422.5	-80.9905	2770.04	1239.58	-78.983	2729.39	1097.08	-129.701	2751.22	931.227	-112.339	2770.71	849.314	-128.118	2707.3	859.669	-143.717	2736.8	772.018
[truncated: 69 more columns]

## Sheet: Sheet2
Devices
		025370 - Force			025370 - Moment			025370 - CoP			027571 - Force			027571 - Moment			027571 - CoP			037720 - Force			037720 - Moment			037720 - CoP
Frame	Sub Frame	Fx	Fy	Fz	Mx	My	Mz	Cx	Cy	Cz	Fx	Fy	Fz	Mx	My	Mz	Cx	Cy	Cz	Fx	Fy	Fz	Mx	My	Mz	Cx	Cy	Cz
		N	N	N	N.mm	N.mm	N.mm	mm	mm	mm	N	N	N	N.mm	N.mm	N.mm	mm	mm	mm	N	N	N	N.mm	N.mm	N.mm	mm	mm	mm
8537	0	0	0	0	0	0	0	200	300	0	0	0	0	0	0	0	200	903	0	0	0	0	0	0	0	603	903	0
8537	1	0	0	0	0	0	0	200	300	0	0	0	0	0	0	0	200	903	0	0	0	0	0	0	0	603	903	0
8537	2	0	0	0	0	0	0	200	300	0	0	0	0	0	0	0	200	903	0	0	0	0	0	0	0	603	903	0
8537	3	0	0	0	0	0	0	200	300	0	0	0	0	0	0	0	200	903	0	0	0	0	0	0	0	603	903	0
8537	4	0	0	0	0	0	0	200	300	0	0	0	0	0	0	0	200	903	0	0	0	0	0	0	0	603	903	0
8537	5	0	0	0	0	0	0	200	300	0	0	0	0	0	0	0	200	903	0	0	0	0	0	0	0	603	903	0
8537	6	0	0	0	0	0	0	200	300	0	0	0	0	0	0	0	200	903	0	0	0	0	0	0	0	603	903	0
8537	7	0	0	0	0	0	0	200	300	0	0	0	0	0	0	0	200	903	0	0	0	0	0	0	0	603	903	0
8537	8	0	0	0	0	0	0	200	300	0	0	0	0	0	0	0	200	903	0	0	0	0	0	0	0	603	903	0
8537	9	0	0	0	0	0	0	200	300	0	0	0	0	0	0	0	200	903	0	0	0	0	0	0	0	603	903	0
8538	0	0	0	0	0	0	0	200	300	0	0	0	0	0	0	0	200	903	0	0	0	0	0	0	0	603	903	0
8538	1	0	0	0	0	0	0	200	300	0	0	0	0	0	0	0	200	903	0	0	0	0	0	0	0	603	903	0
8538	2	0	0	0	0	0	0	200	300	0	0	0	0	0	0	0	200	903	0	0	0	0	0	0	0	603	903	0
8538	3	0	0	0	0	0	0	200	300	0	0	0	0	0	0	0	200	903	0	0	0	0	0	0	0	603	903	0
8538	4	0	0	0	0	0	0	200	300	0	0	0	0	0	0	0	200	903	0	0	0	0	0	0	0	603	903	0
8538	5	0	0	0	0	0	0	200	300	0	0	0	0	0	0	0	200	903	0	0	0	0	0	0	0	603	903	0
8538	6	0	0	0	0	0	0	200	300	0	0	0	0	0	0	0	200	903	0	0	0	0	0	0	0	603	903	0
8538	7	0	0	0	0	0	0	200	300	0	0	0	0	0	0	0	200	903	0	0	0	0	0	0	0	603	903	0
8538	8	0	0	0	0	0	0	200	300	0	0	0	0	0	0	0	200	903	0	0	0	0	0	0	0	603	903	0
8538	9	0	0	0	0	0	0	200	300	0	0	0	0	0	0	0	200	903	0	0	0	0	0	0	0	603	903	0
8539	0	0	0	0	0	0	0	200	300	0	0	0	0	0	0	0	200	903	0	0	0	0	0	0	0	603	903	0
8539	1	0	0	0	0	0	0	200	300	0	0	0	0	0	0	0	200	903	0	0	0	0	0	0	0	603	903	0
8539	2	0	0	0	0	0	0	200	300	0	0	0	0	0	0	0	200	903	0	0	0	0	0	0	0	603	903	0
8539	3	0	0	0	0	0	0	200	300	0	0	0	0	0	0	0	200	903	0	0	0	0	0	0	0	603	903	0
8539	4	0	0	0	0	0	0	200	300	0	0	0	0	0	0	0	200	903	0	0	0	0	0	0	0	603	903	0
8539	5	0	0	0	0	0	0	200	300	0	0	0	0	0	0	0	200	903	0	0	0	0	0	0	0	603	903	0
8539	6	0	0	0	0	0	0	200	300	0	0	0	0	0	0	0	200	903	0	0	0	0	0	0	0	603	903	0
8539	7	0	0	0	0	0	0	200	300	0	0	0	0	0	0	0	200	903	0	0	0	0	0	0	0	603	903	0
8539	8	0	0	0	0	0	0	200	300	0	0	0	0	0	0	0	200	903	0	0	0	0	0	0	0	603	903	0
8539	9	0	0	0	0	0	0	200	300	0	0	0	0	0	0	0	200	903	0	0	0	0	0	0	0	603	903	0
8540	0	0	0	0	0	0	0	200	300	0	0	0	0	0	0	0	200	903	0	0	0	0	0	0	0	603	903	0
8540	1	0	0	0	0	0	0	200	300	0	0	0	0	0	0	0	200	903	0	0	0	0	0	0	0	603	903	0
8540	2	0	0	0	0	0	0	200	300	0	0	0	0	0	0	0	200	903	0	0	0	0	0	0	0	603	903	0
8540	3	0	0	0	0	0	0	200	300	0	0	0	0	0	0	0	200	903	0	0	0	0	0	0	0	603	903	0
8540	4	0	0	0	0	0	0	200	300	0	0	0	0	0	0	0	200	903	0	0	0	0	0	0	0	603	903	0
8540	5	0	0	0	0	0	0	200	300	0	0	0	0	0	0	0	200	903	0	0	0	0	0	0	0	603	903	0
8540	6	0	0	0	0	0	0	200	300	0	0	0	0	0	0	0	200	903	0	0	0	0	0	0	0	603	903	0
8540	7	0	0	0	0	0	0	200	300	0	0	0	0	0	0	0	200	903	0	0	0	0	0	0	0	603	903	0
8540	8	0	0	0	0	0	0	200	300	0	0	0	0	0	0	0	200	903	0	0	0	0	0	0	0	603	903	0
8540	9	0	0	0	0	0	0	200	300	0	0	0	0	0	0	0	200	903	0	0	0	0	0	0	0	603	903	0
8541	0	0	0	0	0	0	0	200	300	0	0	0	0	0	0	0	200	903	0	0	0	0	0	0	0	603	903	0
8541	1	0	0	0	0	0	0	200	300	0	0	0	0	0	0	0	200	903	0	0	0	0	0	0	0	603	903	0
8541	2	0	0	0	0	0	0	200	300	0	0	0	0	0	0	0	200	903	0	0	0	0	0	0	0	603	903	0
8541	3	0	0	0	0	0	0	200	300	0	0	0	0	0	0	0	200	903	0	0	0	0	0	0	0	603	903	0
8541	4	0	0	0	0	0	0	200	300	0	0	0	0	0	0	0	200	903	0	0	0	0	0	0	0	603	903	0
8541	5	0	0	0	0	0	0	200	300	0	0	0	0	0	0	0	200	903	0	0	0	0	0	0	0	603	903	0
8541	6	0	0	0	0	0	0	200	300	0	0	0	0	0	0	0	200	903	0	0	0	0	0	0	0	603	903	0
8541	7	0	0	0	0	0	0	200	300	0	0	0	0	0	0	0	200	903	0	0	0	0	0	0	0	603	903	0
8541	8	0	0	0	0	0	0	200	300	0	0	0	0	0	0	0	200	903	0	0	0	0	0	0	0	603	903	0
8541	9	0	0	0	0	0	0	200	300	0	0	0	0	0	0	0	200	903	0	0	0	0	0	0	0	603	903	0
8542	0	0	0	0	0	0	0	200	300	0	0	0	0	0	0	0	200	903	0	0	0	0	0	0	0	603	903	0
8542	1	0	0	0	0	0	0	200	300	0	0	0	0	0	0	0	200	903	0	0	0	0	0	0	0	603	903	0
8542	2	0	0	0	0	0	0	200	300	0	0	0	0	0	0	0	200	903	0	0	0	0	0	0	0	603	903	0
8542	3	0	0	0	0	0	0	200	300	0	0	0	0	0	0	0	200	903	0	0	0	0	0	0	0	603	903	0
8542	4	0	0	0	0	0	0	200	300	0	0	0	0	0	0	0	200	903	0	0	0	0	0	0	0	603	903	0
8542	5	0	0	0	0	0	0	200	300	0	0	0	0	0	0	0	200	903	0	0	0	0	0	0	0	603	903	0
8542	6	0	0	0	0	0	0	200	300	0	0	0	0	0	0	0	200	903	0	0	0	0	0	0	0	603	903	0
8542	7	0	0	0	0	0	0	200	300	0	0	0	0	0	0	0	200	903	0	0	0	0	0	0	0	603	903	0
8542	8	0	0	0	0	0	0	200	300	0	0	0	0	0	0	0	200	903	0	0	0	0	0	0	0	603	903	0
8542	9	0	0	0	0	0	0	200	300	0	0	0	0	0	0	0	200	903	0	0	0	0	0	0	0	603	903	0
8543	0	0	0	0	0	0	0	200	300	0	0	0	0	0	0	0	200	903	0	0	0	0	0	0	0	603	903	0
8543	1	0	0	0	0	0	0	200	300	0	0	0	0	0	0	0	200	903	0	0	0	0	0	0	0	603	903	0
8543	2	0	0	0	0	0	0	200	300	0	0	0	0	0	0	0	200	903	0	0	0	0	0	0	0	603	903	0
8543	3	0	0	0	0	0	0	200	300	0	0	0	0	0	0	0	200	903	0	0	0	0	0	0	0	603	903	0
8543	4	0	0	0	0	0	0	200	300	0	0	0	0	0	0	0	200	903	0	0	0	0	0	0	0	603	903	0
8543	5	0	0	0	0	0	0	200	300	0	0	0	0	0	0	0	200	903	0	0	0	0	0	0	0	603	903	0
8543	6	0	0	0	0	0	0	200	300	0	0	0	0	0	0	0	200	903	0	0	0	0	0	0	0	603	903	0
8543	7	0	0	0	0	0	0	200	300	0	0	0	0	0	0	0	200	903	0	0	0	0	0	0	0	603	903	0
8543	8	0	0	0	0	0	0	200	300	0	0	0	0	0	0	0	200	903	0	0	0	0	0	0	0	603	903	0
8543	9	0	0	0	0	0	0	200	300	0	0	0	0	0	0	0	200	903	0	0	0	0	0	0	0	603	903	0
8544	0	0	0	0	0	0	0	200	300	0	0	0	0	0	0	0	200	903	0	0	0	0	0	0	0	603	903	0
8544	1	0	0	0	0	0	0	200	300	0	0	0	0	0	0	0	200	903	0	0	0	0	0	0	0	603	903	0
8544	2	0	0	0	0	0	0	200	300	0	0	0	0	0	0	0	200	903	0	0	0	0	0	0	0	603	903	0
8544	3	0	0	0	0	0	0	200	300	0	0	0	0	0	0	0	200	903	0	0	0	0	0	0	0	603	903	0
8544	4	0	0	0	0	0	0	200	300	0	0	0	0	0	0	0	200	903	0	0	0	0	0	0	0	603	903	0
8544	5	0	0	0	0	0	0	200	300	0	0	0	0	0	0	0	200	903	0	0	0	0	0	0	0	603	903	0
8544	6	0	0	0	0	0	0	200	300	0	0	0	0	0	0	0	200	903	0	0	0	0	0	0	0	603	903	0
8544	7	0	0	0	0	0	0	200	300	0	0	0	0	0	0	0	200	903	0	0	0	0	0	0	0	603	903	0
8544	8	0	0	0	0	0	0	200	300	0	0	0	0	0	0	0	200	903	0	0	0	0	0	0	0	603	903	0
8544	9	0	0	0	0	0	0	200	300	0	0	0	0	0	0	0	200	903	0	0	0	0	0	0	0	603	903	0
8545	0	0	0	0	0	0	0	200	300	0	0	0	0	0	0	0	200	903	0	0	0	0	0	0	0	603	903	0
8545	1	0	0	0	0	0	0	200	300	0	0	0	0	0	0	0	200	903	0	0	0	0	0	0	0	603	903	0
8545	2	0	0	0	0	0	0	200	300	0	0	0	0	0	0	0	200	903	0	0	0	0	0	0	0	603	903	0
8545	3	0	0	0	0	0	0	200	300	0	0	0	0	0	0	0	200	903	0	0	0	0	0	0	0	603	903	0
8545	4	0	0	0	0	0	0	200	300	0	0	0	0	0	0	0	200	903	0	0	0	0	0	0	0	603	903	0
8545	5	0	0	0	0	0	0	200	300	0	0	0	0	0	0	0	200	903	0	0	0	0	0	0	0	603	903	0
8545	6	0	0	0	0	0	0	200	300	0	0	0	0	0	0	0	200	903	0	0	0	0	0	0	0	603	903	0
8545	7	0	0	0	0	0	0	200	300	0	0	0	0	0	0	0	200	903	0	0	0	0	0	0	0	603	903	0
8545	8	0	0	0	0	0	0	200	300	0	0	0	0	0	0	0	200	903	0	0	0	0	0	0	0	603	903	0
8545	9	0	0	0	0	0	0	200	300	0	0	0	0	0	0	0	200	903	0	0	0	0	0	0	0	603	903	0
8546	0	0	0	0	0	0	0	200	300	0	0	0	0	0	0	0	200	903	0	0	0	0	0	0	0	603	903	0
8546	1	0	0	0	0	0	0	200	300	0	0	0	0	0	0	0	200	903	0	0	0	0	0	0	0	603	903	0
8546	2	0	0	0	0	0	0	200	300	0	0	0	0	0	0	0	200	903	0	0	0	0	0	0	0	603	903	0
8546	3	0	0	0	0	0	0	200	300	0	0	0	0	0	0	0	200	903	0	0	0	0	0	0	0	603	903	0
8546	4	0	0	0	0	0	0	200	300	0	0	0	0	0	0	0	200	903	0	0	0	0	0	0	0	603	903	0
8546	5	0	0	0	0	0	0	200	300	0	0	0	0	0	0	0	200	903	0	0	0	0	0	0	0	603	903	0
8546	6	0	0	0	0	0	0	200	300	0	0	0	0	0	0	0	200	903	0	0	0	0	0	0	0	603	903	0
8546	7	0	0	0	0	0	0	200	300	0	0	0	0	0	0	0	200	903	0	0	0	0	0	0	0	603	903	0
8546	8	0	0	0	0	0	0	200	300	0	0	0	0	0	0	0	200	903	0	0	0	0	0	0	0	603	903	0
8546	9	0	0	0	0	0	0	200	300	0	0	0	0	0	0	0	200	903	0	0	0	0	0	0	0	603	903	0
8547	0	0	0	0	0	0	0	200	300	0	0	0	0	0	0	0	200	903	0	0	0	0	0	0	0	603	903	0
8547	1	0	0	0	0	0	0	200	300	0	0	0	0	0	0	0	200	903	0	0	0	0	0	0	0	603	903	0
8547	2	0	0	0	0	0	0	200	300	0	0	0	0	0	0	0	200	903	0	0	0	0	0	0	0	603	903	0
8547	3	0	0	0	0	0	0	200	300	0	0	0	0	0	0	0	200	903	0	0	0	0	0	0	0	603	903	0
8547	4	0	0	0	0	0	0	200	300	0	0	0	0	0	0	0	200	903	0	0	0	0	0	0	0	603	903	0
8547	5	0	0	0	0	0	0	200	300	0	0	0	0	0	0	0	200	903	0	0	0	0	0	0	0	603	903	0
8547	6	0	0	0	0	0	0	200	300	0	0	0	0	0	0	0	200	903	0	0	0	0	0	0	0	603	903	0
8547	7	0	0	0	0	0	0	200	300	0	0	0	0	0	0	0	200	903	0	0	0	0	0	0	0	603	903	0
8547	8	0	0	0	0	0	0	200	300	0	0	0	0	0	0	0	200	903	0	0	0	0	0	0	0	603	903	0
8547	9	0	0	0	0	0	0	200	300	0	0	0	0	0	0	0	200	903	0	0	0	0	0	0	0	603	903	0
8548	0	0	0	0	0	0	0	200	300	0	0	0	0	0	0	0	200	903	0	0	0	0	0	0	0	603	903	0
8548	1	0	0	0	0	0	0	200	300	0	0	0	0	0	0	0	200	903	0	0	0	0	0	0	0	603	903	0
8548	2	0	0	0	0	0	0	200	300	0	0	0	0	0	0	0	200	903	0	0	0	0	0	0	0	603	903	0
8548	3	0	0	0	0	0	0	200	300	0	0	0	0	0	0	0	200	903	0	0	0	0	0	0	0	603	903	0
8548	4	0	0	0	0	0	0	200	300	0	0	0	0	0	0	0	200	903	0	0	0	0	0	0	0	603	903	0
8548	5	0	0	0	0	0	0	200	300	0	0	0	0	0	0	0	200	903	0	0	0	0	0	0	0	603	903	0
8548	6	0	0	0	0	0	0	200	300	0	0	0	0	0	0	0	200	903	0	0	0	0	0	0	0	603	903	0
8548	7	0	0	0	0	0	0	200	300	0	0	0	0	0	0	0	200	903	0	0	0	0	0	0	0	603	903	0
8548	8	0	0	0	0	0	0	200	300	0	0	0	0	0	0	0	200	903	0	0	0	0	0	0	0	603	903	0
8548	9	0	0	0	0	0	0	200	300	0	0	0	0	0	0	0	200	903	0	0	0	0	0	0	0	603	903	0
8549	0	0	0	0	0	0	0	200	300	0	0	0	0	0	0	0	200	903	0	0	0	0	0	0	0	603	903	0
8549	1	0	0	0	0	0	0	200	300	0	0	0	0	0	0	0	200	903	0	0	0	0	0	0	0	603	903	0
8549	2	0	0	0	0	0	0	200	300	0	0	0	0	0	0	0	200	903	0	0	0	0	0	0	0	603	903	0
8549	3	0	0	0	0	0	0	200	300	0	0	0	0	0	0	0	200	903	0	0	0	0	0	0	0	603	903	0
8549	4	0	0	0	0	0	0	200	300	0	0	0	0	0	0	0	200	903	0	0	0	0	0	0	0	603	903	0
8549	5	0	0	0	0	0	0	200	300	0	0	0	0	0	0	0	200	903	0	0	0	0	0	0	0	603	903	0
8549	6	0	0	0	0	0	0	200	300	0	0	0	0	0	0	0	200	903	0	0	0	0	0	0	0	603	903	0
8549	7	0	0	0	0	0	0	200	300	0	0	0	0	0	0	0	200	903	0	0	0	0	0	0	0	603	903	0
8549	8	0	0	0	0	0	0	200	300	0	0	0	0	0	0	0	200	903	0	0	0	0	0	0	0	603	903	0
8549	9	0	0	0	0	0	0	200	300	0	0	0	0	0	0	0	200	903	0	0	0	0	0	0	0	603	903	0
8550	0	0	0	0	0	0	0	200	300	0	0	0	0	0	0	0	200	903	0	0	0	0	0	0	0	603	903	0
8550	1	0	0	0	0	0	0	200	300	0	0	0	0	0	0	0	200	903	0	0	0	0	0	0	0	603	903	0
8550	2	0	0	0	0	0	0	200	300	0	0	0	0	0	0	0	200	903	0	0	0	0	0	0	0	603	903	0
8550	3	0	0	0	0	0	0	200	300	0	0	0	0	0	0	0	200	903	0	0	0	0	0	0	0	603	903	0
8550	4	0	0	0	0	0	0	200	300	0	0	0	0	0	0	0	200	903	0	0	0	0	0	0	0	603	903	0
8550	5	0	0	0	0	0	0	200	300	0	0	0	0	0	0	0	200	903	0	0	0	0	0	0	0	603	903	0
8550	6	0	0	0	0	0	0	200	300	0	0	0	0	0	0	0	200	903	0	0	0	0	0	0	0	603	903	0
8550	7	0	0	0	0	0	0	200	300	0	0	0	0	0	0	0	200	903	0	0	0	0	0	0	0	603	903	0
8550	8	0	0	0	0	0	0	200	300	0	0	0	0	0	0	0	200	903	0	0	0	0	0	0	0	603	903	0
8550	9	0	0	0	0	0	0	200	300	0	0	0	0	0	0	0	200	903	0	0	0	0	0	0	0	603	903	0
8551	0	0	0	0	0	0	0	200	300	0	0	0	0	0	0	0	200	903	0	0	0	0	0	0	0	603	903	0
8551	1	0	0	0	0	0	0	200	300	0	0	0	0	0	0	0	200	903	0	0	0	0	0	0	0	603	903	0
8551	2	0	0	0	0	0	0	200	300	0	0	0	0	0	0	0	200	903	0	0	0	0	0	0	0	603	903	0
8551	3	0	0	0	0	0	0	200	300	0	0	0	0	0	0	0	200	903	0	0	0	0	0	0	0	603	903	0
8551	4	0	0	0	0	0	0	200	300	0	0	0	0	0	0	0	200	903	0	0	0	0	0	0	0	603	903	0
8551	5	0	0	0	0	0	0	200	300	0	0	0	0	0	0	0	200	903	0	0	0	0	0	0	0	603	903	0
8551	6	0	0	0	0	0	0	200	300	0	0	0	0	0	0	0	200	903	0	0	0	0	0	0	0	603	903	0
8551	7	0	0	0	0	0	0	200	300	0	0	0	0	0	0	0	200	903	0	0	0	0	0	0	0	603	903	0
8551	8	0	0	0	0	0	0	200	300	0	0	0	0	0	0	0	200	903	0	0	0	0	0	0	0	603	903	0
8551	9	0	0	0	0	0	0	200	300	0	0	0	0	0	0	0	200	903	0	0	0	0	0	0	0	603	903	0
8552	0	0	0	0	0	0	0	200	300	0	0	0	0	0	0	0	200	903	0	0	0	0	0	0	0	603	903	0
8552	1	0	0	0	0	0	0	200	300	0	0	0	0	0	0	0	200	903	0	0	0	0	0	0	0	603	903	0
8552	2	0	0	0	0	0	0	200	300	0	0	0	0	0	0	0	200	903	0	0	0	0	0	0	0	603	903	0
8552	3	0	0	0	0	0	0	200	300	0	0	0	0	0	0	0	200	903	0	0	0	0	0	0	0	603	903	0
8552	4	0	0	0	0	0	0	200	300	0	0	0	0	0	0	0	200	903	0	0	0	0	0	0	0	603	903	0
8552	5	0	0	0	0	0	0	200	300	0	0	0	0	0	0	0	200	903	0	0	0	0	0	0	0	603	903	0
8552	6	0	0	0	0	0	0	200	300	0	0	0	0	0	0	0	200	903	0	0	0	0	0	0	0	603	903	0
8552	7	0	0	0	0	0	0	200	300	0	0	0	0	0	0	0	200	903	0	0	0	0	0	0	0	603	903	0
8552	8	0	0	0	0	0	0	200	300	0	0	0	0	0	0	0	200	903	0	0	0	0	0	0	0	603	903	0
8552	9	0	0	0	0	0	0	200	300	0	0	0	0	0	0	0	200	903	0	0	0	0	0	0	0	603	903	0
8553	0	0	0	0	0	0	0	200	300	0	0	0	0	0	0	0	200	903	0	0	0	0	0	0	0	603	903	0
8553	1	0	0	0	0	0	0	200	300	0	0	0	0	0	0	0	200	903	0	0	0	0	0	0	0	603	903	0
8553	2	0	0	0	0	0	0	200	300	0	0	0	0	0	0	0	200	903	0	0	0	0	0	0	0	603	903	0
8553	3	0	0	0	0	0	0	200	300	0	0	0	0	0	0	0	200	903	0	0	0	0	0	0	0	603	903	0
8553	4	0	0	0	0	0	0	200	300	0	0	0	0	0	0	0	200	903	0	0	0	0	0	0	0	603	903	0
8553	5	0	0	0	0	0	0	200	300	0	0	0	0	0	0	0	200	903	0	0	0	0	0	0	0	603	903	0
8553	6	0	0	0	0	0	0	200	300	0	0	0	0	0	0	0	200	903	0	0	0	0	0	0	0	603	903	0
8553	7	0	0	0	0	0	0	200	300	0	0	0	0	0	0	0	200	903	0	0	0	0	0	0	0	603	903	0
8553	8	0	0	0	0	0	0	200	300	0	0	0	0	0	0	0	200	903	0	0	0	0	0	0	0	603	903	0
8553	9	0	0	0	0	0	0	200	300	0	0	0	0	0	0	0	200	903	0	0	0	0	0	0	0	603	903	0
8554	0	0	0	0	0	0	0	200	300	0	0	0	0	0	0	0	200	903	0	0	0	0	0	0	0	603	903	0
8554	1	0	0	0	0	0	0	200	300	0	0	0	0	0	0	0	200	903	0	0	0	0	0	0	0	603	903	0
8554	2	0	0	0	0	0	0	200	300	0	0	0	0	0	0	0	200	903	0	0	0	0	0	0	0	603	903	0
8554	3	0	0	0	0	0	0	200	300	0	0	0	0	0	0	0	200	903	0	0	0	0	0	0	0	603	903	0
8554	4	0	0	0	0	0	0	200	300	0	0	0	0	0	0	0	200	903	0	0	0	0	0	0	0	603	903	0
8554	5	0	0	0	0	0	0	200	300	0	0	0	0	0	0	0	200	903	0	0	0	0	0	0	0	603	903	0
8554	6	0	0	0	0	0	0	200	300	0	0	0	0	0	0	0	200	903	0	0	0	0	0	0	0	603	903	0
8554	7	0	0	0	0	0	0	200	300	0	0	0	0	0	0	0	200	903	0	0	0	0	0	0	0	603	903	0
8554	8	0	0	0	0	0	0	200	300	0	0	0	0	0	0	0	200	903	0	0	0	0	0	0	0	603	903	0
8554	9	0	0	0	0	0	0	200	300	0	0	0	0	0	0	0	200	903	0	0	0	0	0	0	0	603	903	0
8555	0	0	0	0	0	0	0	200	300	0	0	0	0	0	0	0	200	903	0	0	0	0	0	0	0	603	903	0
8555	1	0	0	0	0	0	0	200	300	0	0	0	0	0	0	0	200	903	0	0	0	0	0	0	0	603	903	0
8555	2	0	0	0	0	0	0	200	300	0	0	0	0	0	0	0	200	903	0	0	0	0	0	0	0	603	903	0
8555	3	0	0	0	0	0	0	200	300	0	0	0	0	0	0	0	200	903	0	0	0	0	0	0	0	603	903	0
8555	4	0	0	0	0	0	0	200	300	0	0	0	0	0	0	0	200	903	0	0	0	0	0	0	0	603	903	0
8555	5	0	0	0	0	0	0	200	300	0	0	0	0	0	0	0	200	903	0	0	0	0	0	0	0	603	903	0
8555	6	0	0	0	0	0	0	200	300	0	0	0	0	0	0	0	200	903	0	0	0	0	0	0	0	603	903	0
8555	7	0	0	0	0	0	0	200	300	0	0	0	0	0	0	0	200	903	0	0	0	0	0	0	0	603	903	0
8555	8	0	0	0	0	0	0	200	300	0	0	0	0	0	0	0	200	903	0	0	0	0	0	0	0	603	903	0
8555	9	0	0	0	0	0	0	200	300	0	0	0	0	0	0	0	200	903	0	0	0	0	0	0	0	603	903	0
8556	0	0	0	0	0	0	0	200	300	0	0	0	0	0	0	0	200	903	0	0	0	0	0	0	0	603	903	0
8556	1	0	0	0	0	0	0	200	300	0	0	0	0	0	0	0	200	903	0	0	0	0	0	0	0	603	903	0
8556	2	0	0	0	0	0	0	200	300	0	0	0	0	0	0	0	200	903	0	0	0	0	0	0	0	603	903	0
8556	3	0	0	0	0	0	0	200	300	0	0	0	0	0	0	0	200	903	0	0	0	0	0	0	0	603	903	0
8556	4	0	0	0	0	0	0	200	300	0	0	0	0	0	0	0	200	903	0	0	0	0	0	0	0	603	903	0
8556	5	0	0	0	0	0	0	200	300	0	0	0	0	0	0	0	200	903	0	0	0	0	0	0	0	603	903	0
8556	6	0	0	0	0	0	0	200	300	0	0	0	0	0	0	0	200	903	0	0	0	0	0	0	0	603	903	0
8556	7	0	0	0	0	0	0	200	300	0	0	0	0	0	0	0	200	903	0	0	0	0	0	0	0	603	903	0
8556	8	0	0	0	0	0	0	200	300	0	0	0	0	0	0	0	200	903	0	0	0	0	0	0	0	603	903	0
8556	9	0	0	0	0	0	0	200	300	0	0	0	0	0	0	0	200	903	0	0	0	0	0	0	0	603	903	0
8557	0	0	0	0	0	0	0	200	300	0	0	0	0	0	0	0	200	903	0	0	0	0	0	0	0	603	903	0
8557	1	0	0	0	0	0	0	200	300	0	0	0	0	0	0	0	200	903	0	0	0	0	0	0	0	603	903	0
8557	2	0	0	0	0	0	0	200	300	0	0	0	0	0	0	0	200	903	0	0	0	0	0	0	0	603	903	0
8557	3	0	0	0	0	0	0	200	300	0	0	0	0	0	0	0	200	903	0	0	0	0	0	0	0	603	903	0
8557	4	0	0	0	0	0	0	200	300	0	0	0	0	0	0	0	200	903	0	0	0	0	0	0	0	603	903	0
8557	5	0	0	0	0	0	0	200	300	0	0	0	0	0	0	0	200	903	0	0	0	0	0	0	0	603	903	0
8557	6	0	0	0	0	0	0	200	300	0	0	0	0	0	0	0	200	903	0	0	0	0	0	0	0	603	903	0
8557	7	0	0	0	0	0	0	200	300	0	0	0	0	0	0	0	200	903	0	0	0	0	0	0	0	603	903	0
8557	8	0	0	0	0	0	0	200	300	0	0	0	0	0	0	0	200	903	0	0	0	0	0	0	0	603	903	0
8557	9	0	0	0	0	0	0	200	300	0	0	0	0	0	0	0	200	903	0	0	0	0	0	0	0	603	903	0
8558	0	0	0	0	0	0	0	200	300	0	0	0	0	0	0	0	200	903	0	0	0	0	0	0	0	603	903	0
8558	1	0	0	0	0	0	0	200	300	0	0	0	0	0	0	0	200	903	0	0	0	0	0	0	0	603	903	0
8558	2	0	0	0	0	0	0	200	300	0	0	0	0	0	0	0	200	903	0	0	0	0	0	0	0	603	903	0
8558	3	0	0	0	0	0	0	200	300	0	0	0	0	0	0	0	200	903	0	0	0	0	0	0	0	603	903	0
8558	4	0	0	0	0	0	0	200	300	0	0	0	0	0	0	0	200	903	0	0	0	0	0	0	0	603	903	0
8558	5	0	0	0	0	0	0	200	300	0	0	0	0	0	0	0	200	903	0	0	0	0	0	0	0	603	903	0
8558	6	0	0	0	0	0	0	200	300	0	0	0	0	0	0	0	200	903	0	0	0	0	0	0	0	603	903	0
8558	7	0	0	0	0	0	0	200	300	0	0	0	0	0	0	0	200	903	0	0	0	0	0	0	0	603	903	0
8558	8	0	0	0	0	0	0	200	300	0	0	0	0	0	0	0	200	903	0	0	0	0	0	0	0	603	903	0
8558	9	0	0	0	0	0	0	200	300	0	0	0	0	0	0	0	200	903	0	0	0	0	0	0	0	603	903	0
8559	0	0	0	0	0	0	0	200	300	0	0	0	0	0	0	0	200	903	0	0	0	0	0	0	0	603	903	0
8559	1	0	0	0	0	0	0	200	300	0	0	0	0	0	0	0	200	903	0	0	0	0	0	0	0	603	903	0
8559	2	0	0	0	0	0	0	200	300	0	0	0	0	0	0	0	200	903	0	0	0	0	0	0	0	603	903	0
8559	3	0	0	0	0	0	0	200	300	0	0	0	0	0	0	0	200	903	0	0	0	0	0	0	0	603	903	0
8559	4	0	0	0	0	0	0	200	300	0	0	0	0	0	0	0	200	903	0	0	0	0	0	0	0	603	903	0
8559	5	0	0	0	0	0	0	200	300	0	0	0	0	0	0	0	200	903	0	0	0	0	0	0	0	603	903	0
8559	6	0	0	0	0	0	0	200	300	0	0	0	0	0	0	0	200	903	0	0	0	0	0	0	0	603	903	0
8559	7	0	0	0	0	0	0	200	300	0	0	0	0	0	0	0	200	903	0	0	0	0	0	0	0	603	903	0
8559	8	0	0	0	0	0	0	200	300	0	0	0	0	0	0	0	200	903	0	0	0	0	0	0	0	603	903	0
8559	9	0	0	0	0	0	0	200	300	0	0	0	0	0	0	0	200	903	0	0	0	0	0	0	0	603	903	0
8560	0	0	0	0	0	0	0	200	300	0	0	0	0	0	0	0	200	903	0	0	0	0	0	0	0	603	903	0
8560	1	0	0	0	0	0	0	200	300	0	0	0	0	0	0	0	200	903	0	0	0	0	0	0	0	603	903	0
8560	2	0	0	0	0	0	0	200	300	0	0	0	0	0	0	0	200	903	0	0	0	0	0	0	0	603	903	0
8560	3	0	0	0	0	0	0	200	300	0	0	0	0	0	0	0	200	903	0	0	0	0	0	0	0	603	903	0
8560	4	0	0	0	0	0	0	200	300	0	0	0	0	0	0	0	200	903	0	0	0	0	0	0	0	603	903	0
8560	5	0	0	0	0	0	0	200	300	0	0	0	0	0	0	0	200	903	0	0	0	0	0	0	0	603	903	0
8560	6	0	0	0	0	0	0	200	300	0	0	0	0	0	0	0	200	903	0	0	0	0	0	0	0	603	903	0
8560	7	0	0	0	0	0	0	200	300	0	0	0	0	0	0	0	200	903	0	0	0	0	0	0	0	603	903	0
8560	8	0	0	0	0	0	0	200	300	0	0	0	0	0	0	0	200	903	0	0	0	0	0	0	0	603	903	0
8560	9	0	0	0	0	0	0	200	300	0	0	0	0	0	0	0	200	903	0	0	0	0	0	0	0	603	903	0
8561	0	0	0	0	0	0	0	200	300	0	0	0	0	0	0	0	200	903	0	0	0	0	0	0	0	603	903	0
8561	1	0	0	0	0	0	0	200	300	0	0	0	0	0	0	0	200	903	0	0	0	0	0	0	0	603	903	0
8561	2	0	0	0	0	0	0	200	300	0	0	0	0	0	0	0	200	903	0	0	0	0	0	0	0	603	903	0
8561	3	0	0	0	0	0	0	200	300	0	0	0	0	0	0	0	200	903	0	0	0	0	0	0	0	603	903	0
8561	4	0	0	0	0	0	0	200	300	0	0	0	0	0	0	0	200	903	0	0	0	0	0	0	0	603	903	0
8561	5	0	0	0	0	0	0	200	300	0	0	0	0	0	0	0	200	903	0	0	0	0	0	0	0	603	903	0
8561	6	0	0	0	0	0	0	200	300	0	0	0	0	0	0	0	200	903	0	0	0	0	0	0	0	603	903	0
8561	7	0	0	0	0	0	0	200	300	0	0	0	0	0	0	0	200	903	0	0	0	0	0	0	0	603	903	0
8561	8	0	0	0	0	0	0	200	300	0	0	0	0	0	0	0	200	903	0	0	0	0	0	0	0	603	903	0
8561	9	0	0	0	0	0	0	200	300	0	0	0	0	0	0	0	200	903	0	0	0	0	0	0	0	603	903	0
8562	0	0	0	0	0	0	0	200	300	0	0	0	0	0	0	0	200	903	0	0	0	0	0	0	0	603	903	0
8562	1	0	0	0	0	0	0	200	300	0	0	0	0	0	0	0	200	903	0	0	0	0	0	0	0	603	903	0
8562	2	0	0	0	0	0	0	200	300	0	0	0	0	0	0	0	200	903	0	0	0	0	0	0	0	603	903	0
8562	3	0	0	0	0	0	0	200	300	0	0	0	0	0	0	0	200	903	0	0	0	0	0	0	0	603	903	0
8562	4	0	0	0	0	0	0	200	300	0	0	0	0	0	0	0	200	903	0	0	0	0	0	0	0	603	903	0
8562	5	0	0	0	0	0	0	200	300	0	0	0	0	0	0	0	200	903	0	0	0	0	0	0	0	603	903	0
8562	6	0	0	0	0	0	0	200	300	0	0	0	0	0	0	0	200	903	0	0	0	0	0	0	0	603	903	0
8562	7	0	0	0	0	0	0	200	300	0	0	0	0	0	0	0	200	903	0	0	0	0	0	0	0	603	903	0
8562	8	0	0	0	0	0	0	200	300	0	0	0	0	0	0	0	200	903	0	0	0	0	0	0	0	603	903	0
8562	9	0	0	0	0	0	0	200	300	0	0	0	0	0	0	0	200	903	0	0	0	0	0	0	0	603	903	0
8563	0	0	0	0	0	0	0	200	300	0	0	0	0	0	0	0	200	903	0	0	0	0	0	0	0	603	903	0
8563	1	0	0	0	0	0	0	200	300	0	0	0	0	0	0	0	200	903	0	0	0	0	0	0	0	603	903	0
8563	2	0	0	0	0	0	0	200	300	0	0	0	0	0	0	0	200	903	0	0	0	0	0	0	0	603	903	0
8563	3	0	0	0	0	0	0	200	300	0	0	0	0	0	0	0	200	903	0	0	0	0	0	0	0	603	903	0
8563	4	0	0	0	0	0	0	200	300	0	0	0	0	0	0	0	200	903	0	0	0	0	0	0	0	603	903	0
8563	5	0	0	0	0	0	0	200	300	0	0	0	0	0	0	0	200	903	0	0	0	0	0	0	0	603	903	0
8563	6	0	0	0	0	0	0	200	300	0	0	0	0	0	0	0	200	903	0	0	0	0	0	0	0	603	903	0
8563	7	0	0	0	0	0	0	200	300	0	0	0	0	0	0	0	200	903	0	0	0	0	0	0	0	603	903	0
8563	8	0	0	0	0	0	0	200	300	0	0	0	0	0	0	0	200	903	0	0	0	0	0	0	0	603	903	0
8563	9	0	0	0	0	0	0	200	300	0	0	0	0	0	0	0	200	903	0	0	0	0	0	0	0	603	903	0
8564	0	0	0	0	0	0	0	200	300	0	0	0	0	0	0	0	200	903	0	0	0	0	0	0	0	603	903	0
8564	1	0	0	0	0	0	0	200	300	0	0	0	0	0	0	0	200	903	0	0	0	0	0	0	0	603	903	0
8564	2	0	0	0	0	0	0	200	300	0	0	0	0	0	0	0	200	903	0	0	0	0	0	0	0	603	903	0
8564	3	0	0	0	0	0	0	200	300	0	0	0	0	0	0	0	200	903	0	0	0	0	0	0	0	603	903	0
8564	4	0	0	0	0	0	0	200	300	0	0	0	0	0	0	0	200	903	0	0	0	0	0	0	0	603	903	0
8564	5	0	0	0	0	0	0	200	300	0	0	0	0	0	0	0	200	903	0	0	0	0	0	0	0	603	903	0
8564	6	0	0	0	0	0	0	200	300	0	0	0	0	0	0	0	200	903	0	0	0	0	0	0	0	603	903	0
8564	7	0	0	0	0	0	0	200	300	0	0	0	0	0	0	0	200	903	0	0	0	0	0	0	0	603	903	0
8564	8	0	0	0	0	0	0	200	300	0	0	0	0	0	0	0	200	903	0	0	0	0	0	0	0	603	903	0
8564	9	0	0	0	0	0	0	200	300	0	0	0	0	0	0	0	200	903	0	0	0	0	0	0	0	603	903	0
8565	0	0	0	0	0	0	0	200	300	0	0	0	0	0	0	0	200	903	0	0	0	0	0	0	0	603	903	0
8565	1	0	0	0	0	0	0	200	300	0	0	0	0	0	0	0	200	903	0	0	0	0	0	0	0	603	903	0
8565	2	0	0	0	0	0	0	200	300	0	0	0	0	0	0	0	200	903	0	0	0	0	0	0	0	603	903	0
8565	3	0	0	0	0	0	0	200	300	0	0	0	0	0	0	0	200	903	0	0	0	0	0	0	0	603	903	0
8565	4	0	0	0	0	0	0	200	300	0	0	0	0	0	0	0	200	903	0	0	0	0	0	0	0	603	903	0
8565	5	0	0	0	0	0	0	200	300	0	0	0	0	0	0	0	200	903	0	0	0	0	0	0	0	603	903	0
8565	6	0	0	0	0	0	0	200	300	0	0	0	0	0	0	0	200	903	0	0	0	0	0	0	0	603	903	0
8565	7	0	0	0	0	0	0	200	300	0	0	0	0	0	0	0	200	903	0	0	0	0	0	0	0	603	903	0
8565	8	0	0	0	0	0	0	200	300	0	0	0	0	0	0	0	200	903	0	0	0	0	0	0	0	603	903	0
8565	9	0	0	0	0	0	0	200	300	0	0	0	0	0	0	0	200	903	0	0	0	0	0	0	0	603	903	0
8566	0	0	0	0	0	0	0	200	300	0	0	0	0	0	0	0	200	903	0	0	0	0	0	0	0	603	903	0
8566	1	0	0	0	0	0	0	200	300	0	0	0	0	0	0	0	200	903	0	0	0	0	0	0	0	603	903	0
8566	2	0	0	0	0	0	0	200	300	0	0	0	0	0	0	0	200	903	0	0	0	0	0	0	0	603	903	0
8566	3	0	0	0	0	0	0	200	300	0	0	0	0	0	0	0	200	903	0	0	0	0	0	0	0	603	903	0
8566	4	0	0	0	0	0	0	200	300	0	0	0	0	0	0	0	200	903	0	0	0	0	0	0	0	603	903	0
8566	5	0	0	0	0	0	0	200	300	0	0	0	0	0	0	0	200	903	0	0	0	0	0	0	0	603	903	0
8566	6	0	0	0	0	0	0	200	300	0	0	0	0	0	0	0	200	903	0	0	0	0	0	0	0	603	903	0
8566	7	0	0	0	0	0	0	200	300	0	0	0	0	0	0	0	200	903	0	0	0	0	0	0	0	603	903	0
8566	8	0	0	0	0	0	0	200	300	0	0	0	0	0	0	0	200	903	0	0	0	0	0	0	0	603	903	0
8566	9	0	0	0	0	0	0	200	300	0	0	0	0	0	0	0	200	903	0	0	0	0	0	0	0	603	903	0
8567	0	0	0	0	0	0	0	200	300	0	0	0	0	0	0	0	200	903	0	0	0	0	0	0	0	603	903	0
8567	1	0	0	0	0	0	0	200	300	0	0	0	0	0	0	0	200	903	0	0	0	0	0	0	0	603	903	0
8567	2	0	0	0	0	0	0	200	300	0	0	0	0	0	0	0	200	903	0	0	0	0	0	0	0	603	903	0
8567	3	0	0	0	0	0	0	200	300	0	0	0	0	0	0	0	200	903	0	0	0	0	0	0	0	603	903	0
8567	4	0	0	0	0	0	0	200	300	0	0	0	0	0	0	0	200	903	0	0	0	0	0	0	0	603	903	0
8567	5	0	0	0	0	0	0	200	300	0	0	0	0	0	0	0	200	903	0	0	0	0	0	0	0	603	903	0
8567	6	0	0	0	0	0	0	200	300	0	0	0	0	0	0	0	200	903	0	0	0	0	0	0	0	603	903	0
8567	7	0	0	0	0	0	0	200	300	0	0	0	0	0	0	0	200	903	0	0	0	0	0	0	0	603	903	0
8567	8	0	0	0	0	0	0	200	300	0	0	0	0	0	0	0	200	903	0	0	0	0	0	0	0	603	903	0
8567	9	0	0	0	0	0	0	200	300	0	0	0	0	0	0	0	200	903	0	0	0	0	0	0	0	603	903	0
8568	0	0	0	0	0	0	0	200	300	0	0	0	0	0	0	0	200	903	0	0	0	0	0	0	0	603	903	0
8568	1	0	0	0	0	0	0	200	300	0	0	0	0	0	0	0	200	903	0	0	0	0	0	0	0	603	903	0
8568	2	0	0	0	0	0	0	200	300	0	0	0	0	0	0	0	200	903	0	0	0	0	0	0	0	603	903	0
8568	3	0	0	0	0	0	0	200	300	0	0	0	0	0	0	0	200	903	0	0	0	0	0	0	0	603	903	0
8568	4	0	0	0	0	0	0	200	300	0	0	0	0	0	0	0	200	903	0	0	0	0	0	0	0	603	903	0
8568	5	0	0	0	0	0	0	200	300	0	0	0	0	0	0	0	200	903	0	0	0	0	0	0	0	603	903	0
8568	6	0	0	0	0	0	0	200	300	0	0	0	0	0	0	0	200	903	0	0	0	0	0	0	0	603	903	0
8568	7	0	0	0	0	0	0	200	300	0	0	0	0	0	0	0	200	903	0	0	0	0	0	0	0	603	903	0
8568	8	0	0	0	0	0	0	200	300	0	0	0	0	0	0	0	200	903	0	0	0	0	0	0	0	603	903	0
8568	9	0	0	0	0	0	0	200	300	0	0	0	0	0	0	0	200	903	0	0	0	0	0	0	0	603	903	0
8569	0	0	0	0	0	0	0	200	300	0	0	0	0	0	0	0	200	903	0	0	0	0	0	0	0	603	903	0
8569	1	0	0	0	0	0	0	200	300	0	0	0	0	0	0	0	200	903	0	0	0	0	0	0	0	603	903	0
8569	2	0	0	0	0	0	0	200	300	0	0	0	0	0	0	0	200	903	0	0	0	0	0	0	0	603	903	0
8569	3	0	0	0	0	0	0	200	300	0	0	0	0	0	0	0	200	903	0	0	0	0	0	0	0	603	903	0
8569	4	0	0	0	0	0	0	200	300	0	0	0	0	0	0	0	200	903	0	0	0	0	0	0	0	603	903	0
8569	5	0	0	0	0	0	0	200	300	0	0	0	0	0	0	0	200	903	0	0	0	0	0	0	0	603	903	0
8569	6	0	0	0	0	0	0	200	300	0	0	0	0	0	0	0	200	903	0	0	0	0	0	0	0	603	903	0
8569	7	0	0	0	0	0	0	200	300	0	0	0	0	0	0	0	200	903	0	0	0	0	0	0	0	603	903	0
8569	8	0	0	0	0	0	0	200	300	0	0	0	0	0	0	0	200	903	0	0	0	0	0	0	0	603	903	0
8569	9	0	0	0	0	0	0	200	300	0	0	0	0	0	0	0	200	903	0	0	0	0	0	0	0	603	903	0
8570	0	0	0	0	0	0	0	200	300	0	0	0	0	0	0	0	200	903	0	0	0	0	0	0	0	603	903	0
8570	1	0	0	0	0	0	0	200	300	0	0	0	0	0	0	0	200	903	0	0	0	0	0	0	0	603	903	0
8570	2	0	0	0	0	0	0	200	300	0	0	0	0	0	0	0	200	903	0	0	0	0	0	0	0	603	903	0
8570	3	0	0	0	0	0	0	200	300	0	0	0	0	0	0	0	200	903	0	0	0	0	0	0	0	603	903	0
8570	4	0	0	0	0	0	0	200	300	0	0	0	0	0	0	0	200	903	0	0	0	0	0	0	0	603	903	0
8570	5	0	0	0	0	0	0	200	300	0	0	0	0	0	0	0	200	903	0	0	0	0	0	0	0	603	903	0
8570	6	0	0	0	0	0	0	200	300	0	0	0	0	0	0	0	200	903	0	0	0	0	0	0	0	603	903	0
8570	7	0	0	0	0	0	0	200	300	0	0	0	0	0	0	0	200	903	0	0	0	0	0	0	0	603	903	0
8570	8	0	0	0	0	0	0	200	300	0	0	0	0	0	0	0	200	903	0	0	0	0	0	0	0	603	903	0
8570	9	0	0	0	0	0	0	200	300	0	0	0	0	0	0	0	200	903	0	0	0	0	0	0	0	603	903	0
8571	0	0	0	0	0	0	0	200	300	0	0	0	0	0	0	0	200	903	0	0	0	0	0	0	0	603	903	0
8571	1	0	0	0	0	0	0	200	300	0	0	0	0	0	0	0	200	903	0	0	0	0	0	0	0	603	903	0
8571	2	0	0	0	0	0	0	200	300	0	0	0	0	0	0	0	200	903	0	0	0	0	0	0	0	603	903	0
8571	3	0	0	0	0	0	0	200	300	0	0	0	0	0	0	0	200	903	0	0	0	0	0	0	0	603	903	0
8571	4	0	0	0	0	0	0	200	300	0	0	0	0	0	0	0	200	903	0	0	0	0	0	0	0	603	903	0
8571	5	0	0	0	0	0	0	200	300	0	0	0	0	0	0	0	200	903	0	0	0	0	0	0	0	603	903	0
8571	6	0	0	0	0	0	0	200	300	0	0	0	0	0	0	0	200	903	0	0	0	0	0	0	0	603	903	0
8571	7	0	0	0	0	0	0	200	300	0	0	0	0	0	0	0	200	903	0	0	0	0	0	0	0	603	903	0
8571	8	0	0	0	0	0	0	200	300	0	0	0	0	0	0	0	200	903	0	0	0	0	0	0	0	603	903	0
8571	9	0	0	0	0	0	0	200	300	0	0	0	0	0	0	0	200	903	0	0	0	0	0	0	0	603	903	0
8572	0	0	0	0	0	0	0	200	300	0	0	0	0	0	0	0	200	903	0	0	0	0	0	0	0	603	903	0
8572	1	0	0	0	0	0	0	200	300	0	0	0	0	0	0	0	200	903	0	0	0	0	0	0	0	603	903	0
8572	2	0	0	0	0	0	0	200	300	0	0	0	0	0	0	0	200	903	0	0	0	0	0	0	0	603	903	0
8572	3	0	0	0	0	0	0	200	300	0	0	0	0	0	0	0	200	903	0	0	0	0	0	0	0	603	903	0
8572	4	0	0	0	0	0	0	200	300	0	0	0	0	0	0	0	200	903	0	0	0	0	0	0	0	603	903	0
8572	5	0	0	0	0	0	0	200	300	0	0	0	0	0	0	0	200	903	0	0	0	0	0	0	0	603	903	0
8572	6	0	0	0	0	0	0	200	300	0	0	0	0	0	0	0	200	903	0	0	0	0	0	0	0	603	903	0
8572	7	0	0	0	0	0	0	200	300	0	0	0	0	0	0	0	200	903	0	0	0	0	0	0	0	603	903	0
8572	8	0	0	0	0	0	0	200	300	0	0	0	0	0	0	0	200	903	0	0	0	0	0	0	0	603	903	0
8572	9	0	0	0	0	0	0	200	300	0	0	0	0	0	0	0	200	903	0	0	0	0	0	0	0	603	903	0
8573	0	0	0	0	0	0	0	200	300	0	0	0	0	0	0	0	200	903	0	0	0	0	0	0	0	603	903	0
8573	1	0	0	0	0	0	0	200	300	0	0	0	0	0	0	0	200	903	0	0	0	0	0	0	0	603	903	0
8573	2	0	0	0	0	0	0	200	300	0	0	0	0	0	0	0	200	903	0	0	0	0	0	0	0	603	903	0
8573	3	0	0	0	0	0	0	200	300	0	0	0	0	0	0	0	200	903	0	0	0	0	0	0	0	603	903	0
8573	4	0	0	0	0	0	0	200	300	0	0	0	0	0	0	0	200	903	0	0	0	0	0	0	0	603	903	0
8573	5	0	0	0	0	0	0	200	300	0	0	0	0	0	0	0	200	903	0	0	0	0	0	0	0	603	903	0
8573	6	0	0	0	0	0	0	200	300	0	0	0	0	0	0	0	200	903	0	0	0	0	0	0	0	603	903	0
8573	7	0	0	0	0	0	0	200	300	0	0	0	0	0	0	0	200	903	0	0	0	0	0	0	0	603	903	0
8573	8	0	0	0	0	0	0	200	300	0	0	0	0	0	0	0	200	903	0	0	0	0	0	0	0	603	903	0
8573	9	0	0	0	0	0	0	200	300	0	0	0	0	0	0	0	200	903	0	0	0	0	0	0	0	603	903	0
8574	0	0	0	0	0	0	0	200	300	0	0	0	0	0	0	0	200	903	0	0	0	0	0	0	0	603	903	0
8574	1	0	0	0	0	0	0	200	300	0	0	0	0	0	0	0	200	903	0	0	0	0	0	0	0	603	903	0
8574	2	0	0	0	0	0	0	200	300	0	0	0	0	0	0	0	200	903	0	0	0	0	0	0	0	603	903	0
8574	3	0	0	0	0	0	0	200	300	0	0	0	0	0	0	0	200	903	0	0	0	0	0	0	0	603	903	0
8574	4	0	0	0	0	0	0	200	300	0	0	0	0	0	0	0	200	903	0	0	0	0	0	0	0	603	903	0
8574	5	0	0	0	0	0	0	200	300	0	0	0	0	0	0	0	200	903	0	0	0	0	0	0	0	603	903	0
8574	6	0	0	0	0	0	0	200	300	0	0	0	0	0	0	0	200	903	0	0	0	0	0	0	0	603	903	0
8574	7	0	0	0	0	0	0	200	300	0	0	0	0	0	0	0	200	903	0	0	0	0	0	0	0	603	903	0
8574	8	0	0	0	0	0	0	200	300	0	0	0	0	0	0	0	200	903	0	0	0	0	0	0	0	603	903	0
8574	9	0	0	0	0	0	0	200	300	0	0	0	0	0	0	0	200	903	0	0	0	0	0	0	0	603	903	0
8575	0	0	0	0	0	0	0	200	300	0	0	0	0	0	0	0	200	903	0	0	0	0	0	0	0	603	903	0
8575	1	0	0	0	0	0	0	200	300	0	0	0	0	0	0	0	200	903	0	0	0	0	0	0	0	603	903	0
8575	2	0	0	0	0	0	0	200	300	0	0	0	0	0	0	0	200	903	0	0	0	0	0	0	0	603	903	0
8575	3	0	0	0	0	0	0	200	300	0	0	0	0	0	0	0	200	903	0	0	0	0	0	0	0	603	903	0
8575	4	0	0	0	0	0	0	200	300	0	0	0	0	0	0	0	200	903	0	0	0	0	0	0	0	603	903	0
8575	5	0	0	0	0	0	0	200	300	0	0	0	0	0	0	0	200	903	0	0	0	0	0	0	0	603	903	0
8575	6	0	0	0	0	0	0	200	300	0	0	0	0	0	0	0	200	903	0	0	0	0	0	0	0	603	903	0
8575	7	0	0	0	0	0	0	200	300	0	0	0	0	0	0	0	200	903	0	0	0	0	0	0	0	603	903	0
8575	8	0	0	0	0	0	0	200	300	0	0	0	0	0	0	0	200	903	0	0	0	0	0	0	0	603	903	0
8575	9	0	0	0	0	0	0	200	300	0	0	0	0	0	0	0	200	903	0	0	0	0	0	0	0	603	903	0
8576	0	0	0	0	0	0	0	200	300	0	0	0	0	0	0	0	200	903	0	0	0	0	0	0	0	603	903	0
8576	1	0	0	0	0	0	0	200	300	0	0	0	0	0	0	0	200	903	0	0	0	0	0	0	0	603	903	0
8576	2	0	0	0	0	0	0	200	300	0	0	0	0	0	0	0	200	903	0	0	0	0	0	0	0	603	903	0
8576	3	0	0	0	0	0	0	200	300	0	0	0	0	0	0	0	200	903	0	0	0	0	0	0	0	603	903	0
8576	4	0	0	0	0	0	0	200	300	0	0	0	0	0	0	0	200	903	0	0	0	0	0	0	0	603	903	0
8576	5	0	0	0	0	0	0	200	300	0	0	0	0	0	0	0	200	903	0	0	0	0	0	0	0	603	903	0
8576	6	0	0	0	0	0	0	200	300	0	0	0	0	0	0	0	200	903	0	0	0	0	0	0	0	603	903	0
8576	7	0	0	0	0	0	0	200	300	0	0	0	0	0	0	0	200	903	0	0	0	0	0	0	0	603	903	0
8576	8	0	0	0	0	0	0	200	300	0	0	0	0	0	0	0	200	903	0	0	0	0	0	0	0	603	903	0
8576	9	0	0	0	0	0	0	200	300	0	0	0	0	0	0	0	200	903	0	0	0	0	0	0	0	603	903	0
8577	0	0	0	0	0	0	0	200	300	0	0	0	0	0	0	0	200	903	0	0	0	0	0	0	0	603	903	0
8577	1	0	0	0	0	0	0	200	300	0	0	0	0	0	0	0	200	903	0	0	0	0	0	0	0	603	903	0
8577	2	0	0	0	0	0	0	200	300	0	0	0	0	0	0	0	200	903	0	0	0	0	0	0	0	603	903	0
8577	3	0	0	0	0	0	0	200	300	0	0	0	0	0	0	0	200	903	0	0	0	0	0	0	0	603	903	0
8577	4	0	0	0	0	0	0	200	300	0	0	0	0	0	0	0	200	903	0	0	0	0	0	0	0	603	903	0
8577	5	0	0	0	0	0	0	200	300	0	0	0	0	0	0	0	200	903	0	0	0	0	0	0	0	603	903	0
8577	6	0	0	0	0	0	0	200	300	0	0	0	0	0	0	0	200	903	0	0	0	0	0	0	0	603	903	0
8577	7	0	0	0	0	0	0	200	300	0	0	0	0	0	0	0	200	903	0	0	0	0	0	0	0	603	903	0
8577	8	0	0	0	0	0	0	200	300	0	0	0	0	0	0	0	200	903	0	0	0	0	0	0	0	603	903	0
8577	9	0	0	0	0	0	0	200	300	0	0	0	0	0	0	0	200	903	0	0	0	0	0	0	0	603	903	0
8578	0	0	0	0	0	0	0	200	300	0	0	0	0	0	0	0	200	903	0	0	0	0	0	0	0	603	903	0
8578	1	0	0	0	0	0	0	200	300	0	0	0	0	0	0	0	200	903	0	0	0	0	0	0	0	603	903	0
8578	2	0	0	0	0	0	0	200	300	0	0	0	0	0	0	0	200	903	0	0	0	0	0	0	0	603	903	0
8578	3	0	0	0	0	0	0	200	300	0	0	0	0	0	0	0	200	903	0	0	0	0	0	0	0	603	903	0
8578	4	0	0	0	0	0	0	200	300	0	0	0	0	0	0	0	200	903	0	0	0	0	0	0	0	603	903	0
8578	5	0	0	0	0	0	0	200	300	0	0	0	0	0	0	0	200	903	0	0	0	0	0	0	0	603	903	0
8578	6	0	0	0	0	0	0	200	300	0	0	0	0	0	0	0	200	903	0	0	0	0	0	0	0	603	903	0
8578	7	0	0	0	0	0	0	200	300	0	0	0	0	0	0	0	200	903	0	0	0	0	0	0	0	603	903	0
8578	8	0	0	0	0	0	0	200	300	0	0	0	0	0	0	0	200	903	0	0	0	0	0	0	0	603	903	0
8578	9	0	0	0	0	0	0	200	300	0	0	0	0	0	0	0	200	903	0	0	0	0	0	0	0	603	903	0
8579	0	0	0	0	0	0	0	200	300	0	0	0	0	0	0	0	200	903	0	0	0	0	0	0	0	603	903	0
8579	1	0	0	0	0	0	0	200	300	0	0	0	0	0	0	0	200	903	0	0	0	0	0	0	0	603	903	0
8579	2	0	0	0	0	0	0	200	300	0	0	0	0	0	0	0	200	903	0	0	0	0	0	0	0	603	903	0
8579	3	0	0	0	0	0	0	200	300	0	0	0	0	0	0	0	200	903	0	0	0	0	0	0	0	603	903	0
8579	4	0	0	0	0	0	0	200	300	0	0	0	0	0	0	0	200	903	0	0	0	0	0	0	0	603	903	0
8579	5	0	0	0	0	0	0	200	300	0	0	0	0	0	0	0	200	903	0	0	0	0	0	0	0	603	903	0
8579	6	0	0	0	0	0	0	200	300	0	0	0	0	0	0	0	200	903	0	0	0	0	0	0	0	603	903	0
8579	7	0	0	0	0	0	0	200	300	0	0	0	0	0	0	0	200	903	0	0	0	0	0	0	0	603	903	0
8579	8	0	0	0	0	0	0	200	300	0	0	0	0	0	0	0	200	903	0	0	0	0	0	0	0	603	903	0
8579	9	0	0	0	0	0	0	200	300	0	0	0	0	0	0	0	200	903	0	0	0	0	0	0	0	603	903	0
8580	0	0	0	0	0	0	0	200	300	0	0	0	0	0	0	0	200	903	0	0	0	0	0	0	0	603	903	0
8580	1	0	0	0	0	0	0	200	300	0	0	0	0	0	0	0	200	903	0	0	0	0	0	0	0	603	903	0
8580	2	0	0	0	0	0	0	200	300	0	0	0	0	0	0	0	200	903	0	0	0	0	0	0	0	603	903	0
8580	3	0	0	0	0	0	0	200	300	0	0	0	0	0	0	0	200	903	0	0	0	0	0	0	0	603	903	0
8580	4	0	0	0	0	0	0	200	300	0	0	0	0	0	0	0	200	903	0	0	0	0	0	0	0	603	903	0
8580	5	0	0	0	0	0	0	200	300	0	0	0	0	0	0	0	200	903	0	0	0	0	0	0	0	603	903	0
8580	6	0	0	0	0	0	0	200	300	0	0	0	0	0	0	0	200	903	0	0	0	0	0	0	0	603	903	0
8580	7	0	0	0	0	0	0	200	300	0	0	0	0	0	0	0	200	903	0	0	0	0	0	0	0	603	903	0
8580	8	0	0	0	0	0	0	200	300	0	0	0	0	0	0	0	200	903	0	0	0	0	0	0	0	603	903	0
8580	9	0	0	0	0	0	0	200	300	0	0	0	0	0	0	0	200	903	0	0	0	0	0	0	0	603	903	0
8581	0	0	0	0	0	0	0	200	300	0	0	0	0	0	0	0	200	903	0	0	0	0	0	0	0	603	903	0
8581	1	0	0	0	0	0	0	200	300	0	0	0	0	0	0	0	200	903	0	0	0	0	0	0	0	603	903	0
8581	2	0	0	0	0	0	0	200	300	0	0	0	0	0	0	0	200	903	0	0	0	0	0	0	0	603	903	0
8581	3	0	0	0	0	0	0	200	300	0	0	0	0	0	0	0	200	903	0	0	0	0	0	0	0	603	903	0
8581	4	0	0	0	0	0	0	200	300	0	0	0	0	0	0	0	200	903	0	0	0	0	0	0	0	603	903	0
8581	5	0	0	0	0	0	0	200	300	0	0	0	0	0	0	0	200	903	0	0	0	0	0	0	0	603	903	0
8581	6	0	0	0	0	0	0	200	300	0	0	0	0	0	0	0	200	903	0	0	0	0	0	0	0	603	903	0
8581	7	0	0	0	0	0	0	200	300	0	0	0	0	0	0	0	200	903	0	0	0	0	0	0	0	603	903	0
8581	8	0	0	0	0	0	0	200	300	0	0	0	0	0	0	0	200	903	0	0	0	0	0	0	0	603	903	0
8581	9	0	0	0	0	0	0	200	300	0	0	0	0	0	0	0	200	903	0	0	0	0	0	0	0	603	903	0
8582	0	0	0	0	0	0	0	200	300	0	0	0	0	0	0	0	200	903	0	0	0	0	0	0	0	603	903	0
8582	1	0	0	0	0	0	0	200	300	0	0	0	0	0	0	0	200	903	0	0	0	0	0	0	0	603	903	0
8582	2	0	0	0	0	0	0	200	300	0	0	0	0	0	0	0	200	903	0	0	0	0	0	0	0	603	903	0
8582	3	0	0	0	0	0	0	200	300	0	0	0	0	0	0	0	200	903	0	0	0	0	0	0	0	603	903	0
8582	4	0	0	0	0	0	0	200	300	0	0	0	0	0	0	0	200	903	0	0	0	0	0	0	0	603	903	0
8582	5	0	0	0	0	0	0	200	300	0	0	0	0	0	0	0	200	903	0	0	0	0	0	0	0	603	903	0
8582	6	0	0	0	0	0	0	200	300	0	0	0	0	0	0	0	200	903	0	0	0	0	0	0	0	603	903	0
8582	7	0	0	0	0	0	0	200	300	0	0	0	0	0	0	0	200	903	0	0	0	0	0	0	0	603	903	0
8582	8	0	0	0	0	0	0	200	300	0	0	0	0	0	0	0	200	903	0	0	0	0	0	0	0	603	903	0
8582	9	0	0	0	0	0	0	200	300	0	0	0	0	0	0	0	200	903	0	0	0	0	0	0	0	603	903	0
8583	0	0	0	0	0	0	0	200	300	0	0	0	0	0	0	0	200	903	0	0	0	0	0	0	0	603	903	0
8583	1	0	0	0	0	0	0	200	300	0	0	0	0	0	0	0	200	903	0	0	0	0	0	0	0	603	903	0
8583	2	0	0	0	0	0	0	200	300	0	0	0	0	0	0	0	200	903	0	0	0	0	0	0	0	603	903	0
8583	3	0	0	0	0	0	0	200	300	0	0	0	0	0	0	0	200	903	0	0	0	0	0	0	0	603	903	0
8583	4	0	0	0	0	0	0	200	300	0	0	0	0	0	0	0	200	903	0	0	0	0	0	0	0	603	903	0
8583	5	0	0	0	0	0	0	200	300	0	0	0	0	0	0	0	200	903	0	0	0	0	0	0	0	603	903	0
8583	6	0	0	0	0	0	0	200	300	0	0	0	0	0	0	0	200	903	0	0	0	0	0	0	0	603	903	0
8583	7	0	0	0	0	0	0	200	300	0	0	0	0	0	0	0	200	903	0	0	0	0	0	0	0	603	903	0
8583	8	0	0	0	0	0	0	200	300	0	0	0	0	0	0	0	200	903	0	0	0	0	0	0	0	603	903	0
8583	9	0	0	0	0	0	0	200	300	0	0	0	0	0	0	0	200	903	0	0	0	0	0	0	0	603	903	0
8584	0	0	0	0	0	0	0	200	300	0	0	0	0	0	0	0	200	903	0	0	0	0	0	0	0	603	903	0
8584	1	0	0	0	0	0	0	200	300	0	0	0	0	0	0	0	200	903	0	0	0	0	0	0	0	603	903	0
8584	2	0	0	0	0	0	0	200	300	0	0	0	0	0	0	0	200	903	0	0	0	0	0	0	0	603	903	0
8584	3	0	0	0	0	0	0	200	300	0	0	0	0	0	0	0	200	903	0	0	0	0	0	0	0	603	903	0
8584	4	0	0	0	0	0	0	200	300	0	0	0	0	0	0	0	200	903	0	0	0	0	0	0	0	603	903	0
8584	5	0	0	0	0	0	0	200	300	0	0	0	0	0	0	0	200	903	0	0	0	0	0	0	0	603	903	0
8584	6	0	0	0	0	0	0	200	300	0	0	0	0	0	0	0	200	903	0	0	0	0	0	0	0	603	903	0
8584	7	0	0	0	0	0	0	200	300	0	0	0	0	0	0	0	200	903	0	0	0	0	0	0	0	603	903	0
8584	8	0	0	0	0	0	0	200	300	0	0	0	0	0	0	0	200	903	0	0	0	0	0	0	0	603	903	0
8584	9	0	0	0	0	0	0	200	300	0	0	0	0	0	0	0	200	903	0	0	0	0	0	0	0	603	903	0
8585	0	0	0	0	0	0	0	200	300	0	0	0	0	0	0	0	200	903	0	0	0	0	0	0	0	603	903	0
8585	1	0	0	0	0	0	0	200	300	0	0	0	0	0	0	0	200	903	0	0	0	0	0	0	0	603	903	0
8585	2	0	0	0	0	0	0	200	300	0	0	0	0	0	0	0	200	903	0	0	0	0	0	0	0	603	903	0
8585	3	0	0	0	0	0	0	200	300	0	0	0	0	0	0	0	200	903	0	0	0	0	0	0	0	603	903	0
8585	4	0	0	0	0	0	0	200	300	0	0	0	0	0	0	0	200	903	0	0	0	0	0	0	0	603	903	0
8585	5	0	0	0	0	0	0	200	300	0	0	0	0	0	0	0	200	903	0	0	0	0	0	0	0	603	903	0
8585	6	0	0	0	0	0	0	200	300	0	0	0	0	0	0	0	200	903	0	0	0	0	0	0	0	603	903	0
8585	7	0	0	0	0	0	0	200	300	0	0	0	0	0	0	0	200	903	0	0	0	0	0	0	0	603	903	0
8585	8	0	0	0	0	0	0	200	300	0	0	0	0	0	0	0	200	903	0	0	0	0	0	0	0	603	903	0
8585	9	0	0	0	0	0	0	200	300	0	0	0	0	0	0	0	200	903	0	0	0	0	0	0	0	603	903	0
8586	0	0	0	0	0	0	0	200	300	0	0	0	0	0	0	0	200	903	0	0	0	0	0	0	0	603	903	0
8586	1	0	0	0	0	0	0	200	300	0	0	0	0	0	0	0	200	903	0	0	0	0	0	0	0	603	903	0
8586	2	0	0	0	0	0	0	200	300	0	0	0	0	0	0	0	200	903	0	0	0	0	0	0	0	603	903	0
8586	3	0	0	0	0	0	0	200	300	0	0	0	0	0	0	0	200	903	0	0	0	0	0	0	0	603	903	0
8586	4	0	0	0	0	0	0	200	300	0	0	0	0	0	0	0	200	903	0	0	0	0	0	0	0	603	903	0
8586	5	0	0	0	0	0	0	200	300	0	0	0	0	0	0	0	200	903	0	0	0	0	0	0	0	603	903	0
8586	6	0	0	0	0	0	0	200	300	0	0	0	0	0	0	0	200	903	0	0	0	0	0	0	0	603	903	0
8586	7	0	0	0	0	0	0	200	300	0	0	0	0	0	0	0	200	903	0	0	0	0	0	0	0	603	903	0
8586	8	0	0	0	0	0	0	200	300	0	0	0	0	0	0	0	200	903	0	0	0	0	0	0	0	603	903	0
8586	9	0	0	0	0	0	0	200	300	0	0	0	0	0	0	0	200	903	0	0	0	0	0	0	0	603	903	0
8587	0	0	0	0	0	0	0	200	300	0	0	0	0	0	0	0	200	903	0	0	0	0	0	0	0	603	903	0
8587	1	0	0	0	0	0	0	200	300	0	0	0	0	0	0	0	200	903	0	0	0	0	0	0	0	603	903	0
8587	2	0	0	0	0	0	0	200	300	0	0	0	0	0	0	0	200	903	0	0	0	0	0	0	0	603	903	0
8587	3	0	0	0	0	0	0	200	300	0	0	0	0	0	0	0	200	903	0	0	0	0	0	0	0	603	903	0
8587	4	0	0	0	0	0	0	200	300	0	0	0	0	0	0	0	200	903	0	0	0	0	0	0	0	603	903	0
8587	5	0	0	0	0	0	0	200	300	0	0	0	0	0	0	0	200	903	0	0	0	0	0	0	0	603	903	0
8587	6	0	0	0	0	0	0	200	300	0	0	0	0	0	0	0	200	903	0	0	0	0	0	0	0	603	903	0
8587	7	0	0	0	0	0	0	200	300	0	0	0	0	0	0	0	200	903	0	0	0	0	0	0	0	603	903	0
8587	8	0	0	0	0	0	0	200	300	0	0	0	0	0	0	0	200	903	0	0	0	0	0	0	0	603	903	0
8587	9	0	0	0	0	0	0	200	300	0	0	0	0	0	0	0	200	903	0	0	0	0	0	0	0	603	903	0
8588	0	0	0	0	0	0	0	200	300	0	0	0	0	0	0	0	200	903	0	0	0	0	0	0	0	603	903	0
8588	1	0	0	0	0	0	0	200	300	0	0	0	0	0	0	0	200	903	0	0	0	0	0	0	0	603	903	0
8588	2	0	0	0	0	0	0	200	300	0	0	0	0	0	0	0	200	903	0	0	0	0	0	0	0	603	903	0
8588	3	0	0	0	0	0	0	200	300	0	0	0	0	0	0	0	200	903	0	0	0	0	0	0	0	603	903	0
8588	4	0	0	0	0	0	0	200	300	0	0	0	0	0	0	0	200	903	0	0	0	0	0	0	0	603	903	0
8588	5	0	0	0	0	0	0	200	300	0	0	0	0	0	0	0	200	903	0	0	0	0	0	0	0	603	903	0
8588	6	0	0	0	0	0	0	200	300	0	0	0	0	0	0	0	200	903	0	0	0	0	0	0	0	603	903	0
8588	7	0	0	0	0	0	0	200	300	0	0	0	0	0	0	0	200	903	0	0	0	0	0	0	0	603	903	0
8588	8	0	0	0	0	0	0	200	300	0	0	0	0	0	0	0	200	903	0	0	0	0	0	0	0	603	903	0
8588	9	0	0	0	0	0	0	200	300	0	0	0	0	0	0	0	200	903	0	0	0	0	0	0	0	603	903	0
8589	0	0	0	0	0	0	0	200	300	0	0	0	0	0	0	0	200	903	0	0	0	0	0	0	0	603	903	0
8589	1	0	0	0	0	0	0	200	300	0	0	0	0	0	0	0	200	903	0	0	0	0	0	0	0	603	903	0
8589	2	0	0	0	0	0	0	200	300	0	0	0	0	0	0	0	200	903	0	0	0	0	0	0	0	603	903	0
8589	3	0	0	0	0	0	0	200	300	0	0	0	0	0	0	0	200	903	0	0	0	0	0	0	0	603	903	0
8589	4	0	0	0	0	0	0	200	300	0	0	0	0	0	0	0	200	903	0	0	0	0	0	0	0	603	903	0
8589	5	0	0	0	0	0	0	200	300	0	0	0	0	0	0	0	200	903	0	0	0	0	0	0	0	603	903	0
8589	6	0	0	0	0	0	0	200	300	0	0	0	0	0	0	0	200	903	0	0	0	0	0	0	0	603	903	0
8589	7	0	0	0	0	0	0	200	300	0	0	0	0	0	0	0	200	903	0	0	0	0	0	0	0	603	903	0
8589	8	0	0	0	0	0	0	200	300	0	0	0	0	0	0	0	200	903	0	0	0	0	0	0	0	603	903	0
8589	9	0	0	0	0	0	0	200	300	0	0	0	0	0	0	0	200	903	0	0	0	0	0	0	0	603	903	0
8590	0	0	0	0	0	0	0	200	300	0	0	0	0	0	0	0	200	903	0	0	0	0	0	0	0	603	903	0
8590	1	0	0	0	0	0	0	200	300	0	0	0	0	0	0	0	200	903	0	0	0	0	0	0	0	603	903	0
8590	2	0	0	0	0	0	0	200	300	0	0	0	0	0	0	0	200	903	0	0	0	0	0	0	0	603	903	0
8590	3	0	0	0	0	0	0	200	300	0	0	0	0	0	0	0	200	903	0	0	0	0	0	0	0	603	903	0
8590	4	0	0	0	0	0	0	200	300	0	0	0	0	0	0	0	200	903	0	0	0	0	0	0	0	603	903	0
8590	5	0	0	0	0	0	0	200	300	0	0	0	0	0	0	0	200	903	0	0	0	0	0	0	0	603	903	0
8590	6	0	0	0	0	0	0	200	300	0	0	0	0	0	0	0	200	903	0	0	0	0	0	0	0	603	903	0
8590	7	0	0	0	0	0	0	200	300	0	0	0	0	0	0	0	200	903	0	0	0	0	0	0	0	603	903	0
8590	8	0	0	0	0	0	0	200	300	0	0	0	0	0	0	0	200	903	0	0	0	0	0	0	0	603	903	0
8590	9	0	0	0	0	0	0	200	300	0	0	0	0	0	0	0	200	903	0	0	0	0	0	0	0	603	903	0
8591	0	0	0	0	0	0	0	200	300	0	0	0	0	0	0	0	200	903	0	0	0	0	0	0	0	603	903	0
8591	1	0	0	0	0	0	0	200	300	0	0	0	0	0	0	0	200	903	0	0	0	0	0	0	0	603	903	0
8591	2	0	0	0	0	0	0	200	300	0	0	0	0	0	0	0	200	903	0	0	0	0	0	0	0	603	903	0
8591	3	0	0	0	0	0	0	200	300	0	0	0	0	0	0	0	200	903	0	0	0	0	0	0	0	603	903	0
8591	4	0	0	0	0	0	0	200	300	0	0	0	0	0	0	0	200	903	0	0	0	0	0	0	0	603	903	0
8591	5	0	0	0	0	0	0	200	300	0	0	0	0	0	0	0	200	903	0	0	0	0	0	0	0	603	903	0
8591	6	0	0	0	0	0	0	200	300	0	0	0	0	0	0	0	200	903	0	0	0	0	0	0	0	603	903	0
8591	7	0	0	0	0	0	0	200	300	0	0	0	0	0	0	0	200	903	0	0	0	0	0	0	0	603	903	0
8591	8	0	0	0	0	0	0	200	300	0	0	0	0	0	0	0	200	903	0	0	0	0	0	0	0	603	903	0
8591	9	0	0	0	0	0	0	200	300	0	0	0	0	0	0	0	200	903	0	0	0	0	0	0	0	603	903	0
8592	0	0	0	0	0	0	0	200	300	0	0	0	0	0	0	0	200	903	0	0	0	0	0	0	0	603	903	0
8592	1	0	0	0	0	0	0	200	300	0	0	0	0	0	0	0	200	903	0	0	0	0	0	0	0	603	903	0
8592	2	0	0	0	0	0	0	200	300	0	0	0	0	0	0	0	200	903	0	0	0	0	0	0	0	603	903	0
8592	3	0	0	0	0	0	0	200	300	0	0	0	0	0	0	0	200	903	0	0	0	0	0	0	0	603	903	0
8592	4	0	0	0	0	0	0	200	300	0	0	0	0	0	0	0	200	903	0	0	0	0	0	0	0	603	903	0
8592	5	0	0	0	0	0	0	200	300	0	0	0	0	0	0	0	200	903	0	0	0	0	0	0	0	603	903	0
8592	6	0	0	0	0	0	0	200	300	0	0	0	0	0	0	0	200	903	0	0	0	0	0	0	0	603	903	0
8592	7	0	0	0	0	0	0	200	300	0	0	0	0	0	0	0	200	903	0	0	0	0	0	0	0	603	903	0
8592	8	0	0	0	0	0	0	200	300	0	0	0	0	0	0	0	200	903	0	0	0	0	0	0	0	603	903	0
8592	9	0	0	0	0	0	0	200	300	0	0	0	0	0	0	0	200	903	0	0	0	0	0	0	0	603	903	0
8593	0	0	0	0	0	0	0	200	300	0	0	0	0	0	0	0	200	903	0	0	0	0	0	0	0	603	903	0
8593	1	0	0	0	0	0	0	200	300	0	0	0	0	0	0	0	200	903	0	0	0	0	0	0	0	603	903	0
8593	2	0	0	0	0	0	0	200	300	0	0	0	0	0	0	0	200	903	0	0	0	0	0	0	0	603	903	0
8593	3	0	0	0	0	0	0	200	300	0	0	0	0	0	0	0	200	903	0	0	0	0	0	0	0	603	903	0
8593	4	0	0	0	0	0	0	200	300	0	0	0	0	0	0	0	200	903	0	0	0	0	0	0	0	603	903	0
8593	5	0	0	0	0	0	0	200	300	0	0	0	0	0	0	0	200	903	0	0	0	0	0	0	0	603	903	0
8593	6	0	0	0	0	0	0	200	300	0	0	0	0	0	0	0	200	903	0	0	0	0	0	0	0	603	903	0
8593	7	0	0	0	0	0	0	200	300	0	0	0	0	0	0	0	200	903	0	0	0	0	0	0	0	603	903	0
8593	8	0	0	0	0	0	0	200	300	0	0	0	0	0	0	0	200	903	0	0	0	0	0	0	0	603	903	0
8593	9	0	0	0	0	0	0	200	300	0	0	0	0	0	0	0	200	903	0	0	0	0	0	0	0	603	903	0
8594	0	0	0	0	0	0	0	200	300	0	0	0	0	0	0	0	200	903	0	0	0	0	0	0	0	603	903	0
8594	1	0	0	0	0	0	0	200	300	0	0	0	0	0	0	0	200	903	0	0	0	0	0	0	0	603	903	0
8594	2	0	0	0	0	0	0	200	300	0	0	0	0	0	0	0	200	903	0	0	0	0	0	0	0	603	903	0
8594	3	0	0	0	0	0	0	200	300	0	0	0	0	0	0	0	200	903	0	0	0	0	0	0	0	603	903	0
8594	4	0	0	0	0	0	0	200	300	0	0	0	0	0	0	0	200	903	0	0	0	0	0	0	0	603	903	0
8594	5	0	0	0	0	0	0	200	300	0	0	0	0	0	0	0	200	903	0	0	0	0	0	0	0	603	903	0
8594	6	0	0	0	0	0	0	200	300	0	0	0	0	0	0	0	200	903	0	0	0	0	0	0	0	603	903	0
8594	7	0	0	0	0	0	0	200	300	0	0	0	0	0	0	0	200	903	0	0	0	0	0	0	0	603	903	0
8594	8	0	0	0	0	0	0	200	300	0	0	0	0	0	0	0	200	903	0	0	0	0	0	0	0	603	903	0
8594	9	0	0	0	0	0	0	200	300	0	0	0	0	0	0	0	200	903	0	0	0	0	0	0	0	603	903	0
8595	0	0	0	0	0	0	0	200	300	0	0	0	0	0	0	0	200	903	0	0	0	0	0	0	0	603	903	0
8595	1	0	0	0	0	0	0	200	300	0	0	0	0	0	0	0	200	903	0	0	0	0	0	0	0	603	903	0
8595	2	0	0	0	0	0	0	200	300	0	0	0	0	0	0	0	200	903	0	0	0	0	0	0	0	603	903	0
8595	3	0	0	0	0	0	0	200	300	0	0	0	0	0	0	0	200	903	0	0	0	0	0	0	0	603	903	0
8595	4	0	0	0	0	0	0	200	300	0	0	0	0	0	0	0	200	903	0	0	0	0	0	0	0	603	903	0
8595	5	0	0	0	0	0	0	200	300	0	0	0	0	0	0	0	200	903	0	0	0	0	0	0	0	603	903	0
8595	6	0	0	0	0	0	0	200	300	0	0	0	0	0	0	0	200	903	0	0	0	0	0	0	0	603	903	0
8595	7	0	0	0	0	0	0	200	300	0	0	0	0	0	0	0	200	903	0	0	0	0	0	0	0	603	903	0
8595	8	0	0	0	0	0	0	200	300	0	0	0	0	0	0	0	200	903	0	0	0	0	0	0	0	603	903	0
8595	9	0	0	0	0	0	0	200	300	0	0	0	0	0	0	0	200	903	0	0	0	0	0	0	0	603	903	0
8596	0	0	0	0	0	0	0	200	300	0	0	0	0	0	0	0	200	903	0	0	0	0	0	0	0	603	903	0
8596	1	0	0	0	0	0	0	200	300	0	0	0	0	0	0	0	200	903	0	0	0	0	0	0	0	603	903	0
8596	2	0	0	0	0	0	0	200	300	0	0	0	0	0	0	0	200	903	0	0	0	0	0	0	0	603	903	0
8596	3	0	0	0	0	0	0	200	300	0	0	0	0	0	0	0	200	903	0	0	0	0	0	0	0	603	903	0
8596	4	0	0	0	0	0	0	200	300	0	0	0	0	0	0	0	200	903	0	0	0	0	0	0	0	603	903	0
8596	5	0	0	0	0	0	0	200	300	0	0	0	0	0	0	0	200	903	0	0	0	0	0	0	0	603	903	0
8596	6	0	0	0	0	0	0	200	300	0	0	0	0	0	0	0	200	903	0	0	0	0	0	0	0	603	903	0
8596	7	0	0	0	0	0	0	200	300	0	0	0	0	0	0	0	200	903	0	0	0	0	0	0	0	603	903	0
8596	8	0	0	0	0	0	0	200	300	0	0	0	0	0	0	0	200	903	0	0	0	0	0	0	0	603	903	0
8596	9	0	0	0	0	0	0	200	300	0	0	0	0	0	0	0	200	903	0	0	0	0	0	0	0	603	903	0
8597	0	0	0	0	0	0	0	200	300	0	0	0	0	0	0	0	200	903	0	0	0	0	0	0	0	603	903	0
8597	1	0	0	0	0	0	0	200	300	0	0	0	0	0	0	0	200	903	0	0	0	0	0	0	0	603	903	0
8597	2	0	0	0	0	0	0	200	300	0	0	0	0	0	0	0	200	903	0	0	0	0	0	0	0	603	903	0
8597	3	0	0	0	0	0	0	200	300	0	0	0	0	0	0	0	200	903	0	0	0	0	0	0	0	603	903	0
8597	4	0	0	0	0	0	0	200	300	0	0	0	0	0	0	0	200	903	0	0	0	0	0	0	0	603	903	0
8597	5	0	0	0	0	0	0	200	300	0	0	0	0	0	0	0	200	903	0	0	0	0	0	0	0	603	903	0
8597	6	0	0	0	0	0	0	200	300	0	0	0	0	0	0	0	200	903	0	0	0	0	0	0	0	603	903	0
8597	7	0	0	0	0	0	0	200	300	0	0	0	0	0	0	0	200	903	0	0	0	0	0	0	0	603	903	0
8597	8	0	0	0	0	0	0	200	300	0	0	0	0	0	0	0	200	903	0	0	0	0	0	0	0	603	903	0
8597	9	0	0	0	0	0	0	200	300	0	0	0	0	0	0	0	200	903	0	0	0	0	0	0	0	603	903	0
8598	0	0	0	0	0	0	0	200	300	0	0	0	0	0	0	0	200	903	0	0	0	0	0	0	0	603	903	0
8598	1	0	0	0	0	0	0	200	300	0	0	0	0	0	0	0	200	903	0	0	0	0	0	0	0	603	903	0
8598	2	0	0	0	0	0	0	200	300	0	0	0	0	0	0	0	200	903	0	0	0	0	0	0	0	603	903	0
8598	3	0	0	0	0	0	0	200	300	0	0	0	0	0	0	0	200	903	0	0	0	0	0	0	0	603	903	0
8598	4	0	0	0	0	0	0	200	300	0	0	0	0	0	0	0	200	903	0	0	0	0	0	0	0	603	903	0
8598	5	0	0	0	0	0	0	200	300	0	0	0	0	0	0	0	200	903	0	0	0	0	0	0	0	603	903	0
8598	6	0	0	0	0	0	0	200	300	0	0	0	0	0	0	0	200	903	0	0	0	0	0	0	0	603	903	0
8598	7	0	0	0	0	0	0	200	300	0	0	0	0	0	0	0	200	903	0	0	0	0	0	0	0	603	903	0
8598	8	0	0	0	0	0	0	200	300	0	0	0	0	0	0	0	200	903	0	0	0	0	0	0	0	603	903	0
8598	9	0	0	0	0	0	0	200	300	0	0	0	0	0	0	0	200	903	0	0	0	0	0	0	0	603	903	0
8599	0	0	0	0	0	0	0	200	300	0	0	0	0	0	0	0	200	903	0	0	0	0	0	0	0	603	903	0
8599	1	0	0	0	0	0	0	200	300	0	0	0	0	0	0	0	200	903	0	0	0	0	0	0	0	603	903	0
8599	2	0	0	0	0	0	0	200	300	0	0	0	0	0	0	0	200	903	0	0	0	0	0	0	0	603	903	0
8599	3	0	0	0	0	0	0	200	300	0	0	0	0	0	0	0	200	903	0	0	0	0	0	0	0	603	903	0
8599	4	0	0	0	0	0	0	200	300	0	0	0	0	0	0	0	200	903	0	0	0	0	0	0	0	603	903	0
8599	5	0	0	0	0	0	0	200	300	0	0	0	0	0	0	0	200	903	0	0	0	0	0	0	0	603	903	0
8599	6	0	0	0	0	0	0	200	300	0	0	0	0	0	0	0	200	903	0	0	0	0	0	0	0	603	903	0
8599	7	0	0	0	0	0	0	200	300	0	0	0	0	0	0	0	200	903	0	0	0	0	0	0	0	603	903	0
8599	8	0	0	0	0	0	0	200	300	0	0	0	0	0	0	0	200	903	0	0	0	0	0	0	0	603	903	0
8599	9	0	0	0	0	0	0	200	300	0	0	0	0	0	0	0	200	903	0	0	0	0	0	0	0	603	903	0
8600	0	0	0	0	0	0	0	200	300	0	0	0	0	0	0	0	200	903	0	0	0	0	0	0	0	603	903	0
8600	1	0	0	0	0	0	0	200	300	0	0	0	0	0	0	0	200	903	0	0	0	0	0	0	0	603	903	0
8600	2	0	0	0	0	0	0	200	300	0	0	0	0	0	0	0	200	903	0	0	0	0	0	0	0	603	903	0
8600	3	0.429541	6.3657	-8.48517	734.25	-1558.36	-1809.26	16.343	213.467	0	0	0	0	0	0	0	200	903	0	0	0	0	0	0	0	603	903	0
8600	4	0	0	0	0	0	0	200	300	0	0	0	0	0	0	0	200	903	0	0	0	0	0	0	0	603	903	0
8600	5	-0.638574	7.58641	-10.011	1192.01	-1070.08	-1900.82	93.1102	180.93	0	0	0	0	0	0	0	200	903	0	0	0	0	0	0	0	603	903	0
8600	6	-0.638574	7.89158	-8.79034	1558.22	-1253.18	-2129.7	57.4363	122.734	0	0	0	0	0	0	0	200	903	0	0	0	0	0	0	0	603	903	0
8600	7	0.276953	8.50193	-7.26447	1649.78	-1253.18	-2129.7	27.4912	72.8976	0	0	0	0	0	0	0	200	903	0	0	0	0	0	0	0	603	903	0
8600	8	1.95542	8.34935	-7.87482	1466.67	-1314.22	-2038.15	33.1111	113.752	0	0	0	0	0	0	0	200	903	0	0	0	0	0	0	0	603	903	0
8600	9	-0.333399	9.87522	-9.4007	1375.12	-764.903	-2358.58	118.633	153.722	0	0	0	0	0	0	0	200	903	0	0	0	0	0	0	0	603	903	0
8601	0	-0.791162	10.6382	-11.2318	1741.33	-1131.11	-2129.7	99.2932	144.964	0	0	0	0	0	0	0	200	903	0	0	0	0	0	0	0	603	903	0
8601	1	-0.791162	10.6382	-10.9266	2107.54	-1497.33	-2404.36	62.9648	107.118	0	0	0	0	0	0	0	200	903	0	0	0	0	0	0	0	603	903	0
8601	2	0.429541	11.2485	-11.8421	2290.65	-1619.4	-2724.79	63.251	106.568	0	0	0	0	0	0	0	200	903	0	0	0	0	0	0	0	603	903	0
8601	3	0.734717	12.164	-11.5369	1924.44	-1253.18	-2953.67	91.3763	133.193	0	0	0	0	0	0	0	200	903	0	0	0	0	0	0	0	603	903	0
8601	4	1.19248	13.2322	-13.6732	1924.44	-2046.64	-2907.9	50.3169	159.254	0	0	0	0	0	0	0	200	903	0	0	0	0	0	0	0	603	903	0
8601	5	-0.333399	14.758	-12.4525	2107.54	-1680.43	-3182.56	65.0522	130.753	0	0	0	0	0	0	0	200	903	0	0	0	0	0	0	0	603	903	0
8601	6	1.03989	15.8262	-11.5369	2473.75	-1680.43	-3411.44	54.3433	85.5796	0	0	0	0	0	0	0	200	903	0	0	0	0	0	0	0	603	903	0
8601	7	-0.791162	16.7417	-9.4007	2839.96	-1924.57	-3823.43	-4.72646	-2.10135	0	0	0	0	0	0	0	200	903	0	0	0	0	0	0	0	603	903	0
8601	8	-0.0282228	16.8943	-12.7576	2931.52	-1924.57	-4235.41	49.1435	70.2147	0	0	0	0	0	0	0	200	903	0	0	0	0	0	0	0	603	903	0
8601	9	-0.485986	17.5046	-14.8939	2565.3	-2412.85	-4235.41	37.9969	127.761	0	0	0	0	0	0	0	200	903	0	0	0	0	0	0	0	603	903	0
8602	0	-2.01187	19.1831	-15.5042	2839.96	-2229.75	-4464.29	56.1845	116.826	0	0	0	0	0	0	0	200	903	0	0	0	0	0	0	0	603	903	0
8602	1	-1.40151	19.946	-14.5887	2931.52	-2168.71	-4464.29	51.3429	99.0555	0	0	0	0	0	0	0	200	903	0	0	0	0	0	0	0	603	903	0
8602	2	-0.333399	20.4038	-14.2835	3206.17	-1924.57	-4601.62	65.2592	75.5332	0	0	0	0	0	0	0	200	903	0	0	0	0	0	0	0	603	903	0
8602	3	0.276953	19.946	-16.1146	2931.52	-1985.61	-4464.29	76.7819	118.083	0	0	0	0	0	0	0	200	903	0	0	0	0	0	0	0	603	903	0
8602	4	-0.180811	20.709	-16.1146	3023.07	-2473.89	-4555.85	46.4813	112.401	0	0	0	0	0	0	0	200	903	0	0	0	0	0	0	0	603	903	0
8602	5	0.734717	20.709	-15.8094	3114.62	-2168.71	-4647.4	62.8213	102.989	0	0	0	0	0	0	0	200	903	0	0	0	0	0	0	0	603	903	0
8602	6	-0.180811	21.3193	-15.199	3480.83	-2107.68	-4738.95	61.3283	70.9834	0	0	0	0	0	0	0	200	903	0	0	0	0	0	0	0	603	903	0
8602	7	1.19248	19.6408	-14.8939	3480.83	-2351.82	-4418.52	42.0949	66.2908	0	0	0	0	0	0	0	200	903	0	0	0	0	0	0	0	603	903	0
8602	8	1.49766	22.3874	-16.7249	3572.38	-2412.85	-4693.18	55.7331	86.4034	0	0	0	0	0	0	0	200	903	0	0	0	0	0	0	0	603	903	0
8602	9	1.34507	20.8616	-18.556	4671.02	-2229.75	-3960.75	79.8367	48.2741	0	0	0	0	0	0	0	200	903	0	0	0	0	0	0	0	603	903	0
8603	0	2.10801	21.1667	-15.8094	3572.38	-2290.78	-3823.43	55.0999	74.034	0	0	0	0	0	0	0	200	903	0	0	0	0	0	0	0	603	903	0
8603	1	4.24424	21.3193	-17.0301	3206.17	-2473.89	-3686.1	54.7344	111.735	0	0	0	0	0	0	0	200	903	0	0	0	0	0	0	0	603	903	0
8603	2	5.77012	22.0823	-18.8611	3572.38	-2290.78	-3686.1	78.545	110.596	0	0	0	0	0	0	0	200	903	0	0	0	0	0	0	0	603	903	0
8603	3	5.15977	21.4719	-17.3353	3663.94	-2229.75	-3502.99	71.3751	88.6426	0	0	0	0	0	0	0	200	903	0	0	0	0	0	0	0	603	903	0
8603	4	4.09165	22.6926	-17.0301	3663.94	-2595.96	-3457.21	47.5664	84.8551	0	0	0	0	0	0	0	200	903	0	0	0	0	0	0	0	603	903	0
8603	5	5.77012	22.0823	-14.8939	4121.7	-2534.92	-3548.77	29.8009	23.2617	0	0	0	0	0	0	0	200	903	0	0	0	0	0	0	0	603	903	0
8603	6	5.9227	22.54	-15.8094	3663.94	-2290.78	-3548.77	55.0999	68.2429	0	0	0	0	0	0	0	200	903	0	0	0	0	0	0	0	603	903	0
8603	7	6.53306	23.6081	-17.0301	3755.49	-2412.85	-3548.77	58.3183	79.4791	0	0	0	0	0	0	0	200	903	0	0	0	0	0	0	0	603	903	0
8603	8	7.296	24.2185	-15.199	4030.15	-2473.89	-3136.78	37.2339	34.8418	0	0	0	0	0	0	0	200	903	0	0	0	0	0	0	0	603	903	0
8603	9	5.00718	24.0659	-17.3353	3572.38	-2473.89	-3365.66	57.2917	93.9239	0	0	0	0	0	0	0	200	903	0	0	0	0	0	0	0	603	903	0
8604	0	5.46494	23.9133	-16.1146	3938.6	-2290.78	-3411.44	57.844	55.5878	0	0	0	0	0	0	0	200	903	0	0	0	0	0	0	0	603	903	0
8604	1	7.44858	24.3711	-15.5042	3847.04	-2656.99	-3091	28.6276	51.8711	0	0	0	0	0	0	0	200	903	0	0	0	0	0	0	0	603	903	0
8604	2	7.296	23.9133	-16.7249	3663.94	-2595.96	-3228.33	44.785	80.9294	0	0	0	0	0	0	0	200	903	0	0	0	0	0	0	0	603	903	0
8604	3	6.99082	24.2185	-16.7249	3389.28	-2534.92	-3274.11	48.4344	97.3515	0	0	0	0	0	0	0	200	903	0	0	0	0	0	0	0	603	903	0
8604	4	9.12705	24.5237	-15.8094	3297.73	-2351.82	-3274.11	51.2392	91.407	0	0	0	0	0	0	0	200	903	0	0	0	0	0	0	0	603	903	0
8604	5	6.99082	25.7444	-12.4525	3847.04	-2656.99	-3365.66	-13.3711	-8.93857	0	0	0	0	0	0	0	200	903	0	0	0	0	0	0	0	603	903	0
8604	6	7.75376	24.9814	-13.6732	3663.94	-2290.78	-3182.56	32.4614	32.0343	0	0	0	0	0	0	0	200	903	0	0	0	0	0	0	0	603	903	0
8604	7	8.5167	26.2021	-17.3353	4121.7	-2473.89	-3136.78	57.2917	62.2361	0	0	0	0	0	0	0	200	903	0	0	0	0	0	0	0	603	903	0
8604	8	7.44858	25.4392	-17.0301	4121.7	-2595.96	-2724.79	47.5664	57.9754	0	0	0	0	0	0	0	200	903	0	0	0	0	0	0	0	603	903	0
8604	9	7.296	25.4392	-15.8094	3755.49	-2595.96	-2541.69	35.7964	62.4519	0	0	0	0	0	0	0	200	903	0	0	0	0	0	0	0	603	903	0
8605	0	8.66929	25.897	-15.199	3389.28	-2534.92	-2679.02	33.2182	77.007	0	0	0	0	0	0	0	200	903	0	0	0	0	0	0	0	603	903	0
8605	1	8.97446	26.8125	-13.6732	4030.15	-2656.99	-2587.46	5.67813	5.25107	0	0	0	0	0	0	0	200	903	0	0	0	0	0	0	0	603	903	0
8605	2	8.97446	26.0495	-17.3353	3389.28	-2534.92	-2953.67	53.7708	104.486	0	0	0	0	0	0	0	200	903	0	0	0	0	0	0	0	603	903	0
8605	3	7.90635	27.728	-15.8094	3663.94	-2290.78	-3136.78	55.0999	68.2429	0	0	0	0	0	0	0	200	903	0	0	0	0	0	0	0	603	903	0
8605	4	8.05894	26.8125	-15.5042	4304.81	-2229.75	-3136.78	56.1845	22.346	0	0	0	0	0	0	0	200	903	0	0	0	0	0	0	0	603	903	0
8605	5	8.97446	27.2702	-15.5042	4213.25	-2229.75	-3319.89	56.1845	28.251	0	0	0	0	0	0	0	200	903	0	0	0	0	0	0	0	603	903	0
8605	6	9.27964	27.1177	-18.2508	3480.83	-2412.85	-3411.44	67.7947	109.278	0	0	0	0	0	0	0	200	903	0	0	0	0	0	0	0	603	903	0
8605	7	8.66929	26.6599	-16.4197	3755.49	-2473.89	-3274.11	49.3346	71.282	0	0	0	0	0	0	0	200	903	0	0	0	0	0	0	0	603	903	0
8605	8	8.66929	27.5754	-17.3353	3297.73	-2718.03	-3136.78	43.2081	109.768	0	0	0	0	0	0	0	200	903	0	0	0	0	0	0	0	603	903	0
8605	9	8.05894	27.4228	-16.1146	3938.6	-2718.03	-2724.79	31.3309	55.5878	0	0	0	0	0	0	0	200	903	0	0	0	0	0	0	0	603	903	0
8606	0	8.97446	25.4392	-15.5042	3938.6	-2351.82	-3182.56	48.3111	45.9661	0	0	0	0	0	0	0	200	903	0	0	0	0	0	0	0	603	903	0
8606	1	9.27964	27.2702	-18.2508	3663.94	-2534.92	-3182.56	61.1062	99.245	0	0	0	0	0	0	0	200	903	0	0	0	0	0	0	0	603	903	0
8606	2	9.27964	27.728	-14.5887	3480.83	-2595.96	-3411.44	22.0567	61.4019	0	0	0	0	0	0	0	200	903	0	0	0	0	0	0	0	603	903	0
8606	3	7.90635	27.8806	-18.556	4213.25	-2229.75	-3411.44	79.8367	72.9435	0	0	0	0	0	0	0	200	903	0	0	0	0	0	0	0	603	903	0
8606	4	7.60117	27.2702	-16.1146	3755.49	-2534.92	-3319.89	42.6937	66.9505	0	0	0	0	0	0	0	200	903	0	0	0	0	0	0	0	603	903	0
8606	5	9.12705	27.8806	-15.5042	4121.7	-2901.13	-3228.33	12.8809	34.156	0	0	0	0	0	0	0	200	903	0	0	0	0	0	0	0	603	903	0
8606	6	9.7374	26.8125	-18.8611	3938.6	-2718.03	-3136.78	55.8927	91.1794	0	0	0	0	0	0	0	200	903	0	0	0	0	0	0	0	603	903	0
8606	7	7.60117	25.2866	-13.9783	4487.91	-2901.13	-3457.21	-7.54507	-21.0621	0	0	0	0	0	0	0	200	903	0	0	0	0	0	0	0	603	903	0
8606	8	6.38047	24.9814	-18.2508	3663.94	-2901.13	-3731.87	41.0407	99.245	0	0	0	0	0	0	0	200	903	0	0	0	0	0	0	0	603	903	0
8606	9	5.15977	28.0332	-17.6404	3572.38	-2901.13	-4372.74	35.5407	97.4889	0	0	0	0	0	0	0	200	903	0	0	0	0	0	0	0	603	903	0
8607	0	7.60117	31.6953	-17.3353	4213.25	-2718.03	-4555.85	43.2081	56.9548	0	0	0	0	0	0	0	200	903	0	0	0	0	0	0	0	603	903	0
8607	1	9.12705	30.0168	-17.9456	4304.81	-2595.96	-3960.75	55.3431	60.1193	0	0	0	0	0	0	0	200	903	0	0	0	0	0	0	0	603	903	0
8607	2	7.44858	29.1013	-17.6404	4304.81	-3084.24	-3869.2	25.1609	55.9695	0	0	0	0	0	0	0	200	903	0	0	0	0	0	0	0	603	903	0
8607	3	8.21152	29.8642	-19.1663	4121.7	-2595.96	-4464.29	64.5563	84.9508	0	0	0	0	0	0	0	200	903	0	0	0	0	0	0	0	603	903	0
8607	4	7.90635	31.2375	-18.2508	4213.25	-2656.99	-4555.85	54.4177	69.1468	0	0	0	0	0	0	0	200	903	0	0	0	0	0	0	0	603	903	0
8607	5	8.21152	36.1203	-18.2508	4030.15	-3084.24	-4693.18	31.0079	79.1796	0	0	0	0	0	0	0	200	903	0	0	0	0	0	0	0	603	903	0
8607	6	8.05894	36.5781	-19.7767	4854.12	-3389.42	-5013.61	28.6155	54.5531	0	0	0	0	0	0	0	200	903	0	0	0	0	0	0	0	603	903	0
8607	7	7.296	35.0522	-20.0818	4945.68	-2901.13	-5242.49	55.5345	53.7241	0	0	0	0	0	0	0	200	903	0	0	0	0	0	0	0	603	903	0
8607	8	9.58481	35.6626	-18.556	5037.23	-3145.27	-4830.5	30.498	28.5386	0	0	0	0	0	0	0	200	903	0	0	0	0	0	0	0	603	903	0
8607	9	9.7374	35.3574	-18.556	4030.15	-3145.27	-4464.29	30.498	82.8112	0	0	0	0	0	0	0	200	903	0	0	0	0	0	0	0	603	903	0
8608	0	8.97446	34.2893	-16.7249	4671.02	-2901.13	-4738.95	26.5382	20.715	0	0	0	0	0	0	0	200	903	0	0	0	0	0	0	0	603	903	0
8608	1	7.75376	33.6789	-20.387	4671.02	-2779.06	-4601.62	63.6847	70.8828	0	0	0	0	0	0	0	200	903	0	0	0	0	0	0	0	603	903	0
8608	2	6.99082	34.7471	-20.6922	5037.23	-3206.31	-4967.83	45.0474	56.5639	0	0	0	0	0	0	0	200	903	0	0	0	0	0	0	0	603	903	0
8608	3	7.90635	33.2212	-18.8611	5311.89	-3206.31	-4143.86	30.0045	18.3688	0	0	0	0	0	0	0	200	903	0	0	0	0	0	0	0	603	903	0
8608	4	8.36411	30.0168	-19.7767	4762.57	-3389.42	-4464.29	28.6155	59.1824	0	0	0	0	0	0	0	200	903	0	0	0	0	0	0	0	603	903	0
8608	5	8.5167	31.0849	-21.3026	4671.02	-3328.38	-4372.74	43.7567	80.7297	0	0	0	0	0	0	0	200	903	0	0	0	0	0	0	0	603	903	0
8608	6	8.97446	32.7634	-20.387	4396.36	-3511.49	-4235.41	27.7588	84.355	0	0	0	0	0	0	0	200	903	0	0	0	0	0	0	0	603	903	0
8608	7	7.44858	31.6953	-22.5233	4396.36	-3206.31	-4235.41	57.6445	104.808	0	0	0	0	0	0	0	200	903	0	0	0	0	0	0	0	603	903	0
8608	8	7.90635	31.3901	-19.4715	5128.78	-3084.24	-4189.64	41.6023	36.6006	0	0	0	0	0	0	0	200	903	0	0	0	0	0	0	0	603	903	0
8608	9	8.97446	30.4746	-19.4715	5037.23	-3328.38	-4143.86	29.064	41.3024	0	0	0	0	0	0	0	200	903	0	0	0	0	0	0	0	603	903	0
8609	0	9.12705	31.0849	-20.387	5037.23	-3328.38	-3914.98	36.7403	52.9199	0	0	0	0	0	0	0	200	903	0	0	0	0	0	0	0	603	903	0
8609	1	8.66929	31.6953	-21.3026	4671.02	-3206.31	-4189.64	49.487	80.7297	0	0	0	0	0	0	0	200	903	0	0	0	0	0	0	0	603	903	0
8609	2	8.97446	32.1531	-19.4715	5586.54	-3572.52	-4189.64	16.5256	13.0911	0	0	0	0	0	0	0	200	903	0	0	0	0	0	0	0	603	903	0
8609	3	7.44858	31.6953	-17.0301	4671.02	-3450.45	-4235.41	-2.60905	25.7198	0	0	0	0	0	0	0	200	903	0	0	0	0	0	0	0	603	903	0
8609	4	8.82187	32.3056	-20.0818	4945.68	-3145.27	-3777.65	43.3772	53.7241	0	0	0	0	0	0	0	200	903	0	0	0	0	0	0	0	603	903	0
8609	5	9.7374	31.8479	-21.9129	5311.89	-3206.31	-3914.98	53.6794	57.5909	0	0	0	0	0	0	0	200	903	0	0	0	0	0	0	0	603	903	0
8609	6	9.27964	30.4746	-20.9974	5037.23	-2901.13	-3686.1	61.8335	60.102	0	0	0	0	0	0	0	200	903	0	0	0	0	0	0	0	603	903	0
8609	7	8.82187	31.3901	-20.0818	4304.81	-3206.31	-3869.2	40.3379	85.6369	0	0	0	0	0	0	0	200	903	0	0	0	0	0	0	0	603	903	0
8609	8	8.82187	32.0005	-18.556	4854.12	-3450.45	-3411.44	14.0517	38.4064	0	0	0	0	0	0	0	200	903	0	0	0	0	0	0	0	603	903	0
8609	9	8.97446	29.7116	-17.9456	4671.02	-3450.45	-3640.32	7.72742	39.7126	0	0	0	0	0	0	0	200	903	0	0	0	0	0	0	0	603	903	0
8610	0	9.58481	31.2375	-21.6077	5220.33	-3328.38	-4143.86	45.9634	58.4043	0	0	0	0	0	0	0	200	903	0	0	0	0	0	0	0	603	903	0
8610	1	8.21152	30.4746	-21.6077	5861.2	-3023.2	-3914.98	60.0869	28.7451	0	0	0	0	0	0	0	200	903	0	0	0	0	0	0	0	603	903	0
8610	2	8.05894	30.322	-20.387	4945.68	-3450.45	-3731.87	30.7526	57.4106	0	0	0	0	0	0	0	200	903	0	0	0	0	0	0	0	603	903	0
8610	3	8.66929	30.0168	-20.6922	4579.46	-3450.45	-4006.53	33.2487	78.6864	0	0	0	0	0	0	0	200	903	0	0	0	0	0	0	0	603	903	0
8610	4	8.97446	30.4746	-22.5233	5037.23	-3328.38	-3869.2	52.2247	76.3543	0	0	0	0	0	0	0	200	903	0	0	0	0	0	0	0	603	903	0
8610	5	9.27964	28.7961	-19.4715	4579.46	-3084.24	-3686.1	41.6023	64.8119	0	0	0	0	0	0	0	200	903	0	0	0	0	0	0	0	603	903	0
8610	6	8.66929	30.0168	-20.387	4854.12	-3145.27	-3731.87	45.7217	61.9013	0	0	0	0	0	0	0	200	903	0	0	0	0	0	0	0	603	903	0
8610	7	8.05894	28.7961	-19.4715	5403.44	-3389.42	-3914.98	25.9294	22.4949	0	0	0	0	0	0	0	200	903	0	0	0	0	0	0	0	603	903	0
8610	8	8.5167	28.1858	-20.0818	5403.44	-3023.2	-3823.43	49.4559	30.9292	0	0	0	0	0	0	0	200	903	0	0	0	0	0	0	0	603	903	0
8610	9	7.90635	28.3384	-21.6077	4762.57	-3389.42	-3594.54	43.1387	79.5895	0	0	0	0	0	0	0	200	903	0	0	0	0	0	0	0	603	903	0
8611	0	8.05894	28.7961	-18.2508	5128.78	-3450.45	-3823.43	10.9424	18.9831	0	0	0	0	0	0	0	200	903	0	0	0	0	0	0	0	603	903	0
8611	1	7.75376	27.4228	-21.3026	4671.02	-3267.34	-3777.65	46.6219	80.7297	0	0	0	0	0	0	0	200	903	0	0	0	0	0	0	0	603	903	0
8611	2	7.44858	28.3384	-20.6922	4945.68	-3328.38	-3548.77	39.1481	60.9884	0	0	0	0	0	0	0	200	903	0	0	0	0	0	0	0	603	903	0
8611	3	8.66929	27.4228	-19.1663	5311.89	-2840.1	-3411.44	51.8183	22.8531	0	0	0	0	0	0	0	200	903	0	0	0	0	0	0	0	603	903	0
8611	4	8.05894	25.2866	-21.3026	4396.36	-3145.27	-3502.99	52.3522	93.6229	0	0	0	0	0	0	0	200	903	0	0	0	0	0	0	0	603	903	0
8611	5	7.14341	26.9651	-20.9974	4487.91	-3267.34	-3457.21	44.3927	86.2632	0	0	0	0	0	0	0	200	903	0	0	0	0	0	0	0	603	903	0
8611	6	7.90635	27.5754	-19.7767	4213.25	-2840.1	-3686.1	56.3915	86.9584	0	0	0	0	0	0	0	200	903	0	0	0	0	0	0	0	603	903	0
8611	7	6.53306	26.5073	-18.8611	4396.36	-3023.2	-3274.11	39.7126	66.9092	0	0	0	0	0	0	0	200	903	0	0	0	0	0	0	0	603	903	0
8611	8	7.44858	27.2702	-19.7767	4762.57	-3572.52	-3228.33	19.3568	59.1824	0	0	0	0	0	0	0	200	903	0	0	0	0	0	0	0	603	903	0
8611	9	7.90635	26.3547	-21.3026	5037.23	-3084.24	-3457.21	55.2174	63.5387	0	0	0	0	0	0	0	200	903	0	0	0	0	0	0	0	603	903	0
8612	0	6.68564	25.7444	-21.6077	4762.57	-3023.2	-3823.43	60.0869	79.5895	0	0	0	0	0	0	0	200	903	0	0	0	0	0	0	0	603	903	0
8612	1	6.83823	26.2021	-19.7767	4396.36	-3206.31	-3045.23	37.8741	77.6997	0	0	0	0	0	0	0	200	903	0	0	0	0	0	0	0	603	903	0
8612	2	8.21152	26.8125	-20.6922	4671.02	-3511.49	-3731.87	30.2991	74.2619	0	0	0	0	0	0	0	200	903	0	0	0	0	0	0	0	603	903	0
8612	3	9.27964	25.5918	-20.6922	4579.46	-2962.17	-3686.1	56.8461	78.6864	0	0	0	0	0	0	0	200	903	0	0	0	0	0	0	0	603	903	0
8612	4	7.14341	26.5073	-20.6922	4671.02	-2656.99	-3594.54	71.5944	74.2619	0	0	0	0	0	0	0	200	903	0	0	0	0	0	0	0	603	903	0
8612	5	5.77012	25.7444	-19.7767	4671.02	-3145.27	-3594.54	40.9604	63.8118	0	0	0	0	0	0	0	200	903	0	0	0	0	0	0	0	603	903	0
8612	6	6.07529	25.5918	-19.4715	5037.23	-3145.27	-3960.75	38.4677	41.3024	0	0	0	0	0	0	0	200	903	0	0	0	0	0	0	0	603	903	0
8612	7	6.53306	25.4392	-18.8611	4396.36	-3145.27	-3686.1	33.2405	66.9092	0	0	0	0	0	0	0	200	903	0	0	0	0	0	0	0	603	903	0
8612	8	6.22788	25.5918	-20.387	4213.25	-3084.24	-3411.44	48.7156	93.3365	0	0	0	0	0	0	0	200	903	0	0	0	0	0	0	0	603	903	0
8612	9	6.38047	24.8288	-19.7767	4579.46	-3145.27	-3823.43	40.9604	68.4411	0	0	0	0	0	0	0	200	903	0	0	0	0	0	0	0	603	903	0
8613	0	5.00718	26.0495	-20.6922	4396.36	-2656.99	-3777.65	71.5944	87.5354	0	0	0	0	0	0	0	200	903	0	0	0	0	0	0	0	603	903	0
8613	1	5.9227	24.2185	-18.556	4945.68	-2779.06	-3686.1	50.2334	33.4725	0	0	0	0	0	0	0	200	903	0	0	0	0	0	0	0	603	903	0
8613	2	5.77012	24.3711	-18.2508	4121.7	-3023.2	-3777.65	34.3522	74.1632	0	0	0	0	0	0	0	200	903	0	0	0	0	0	0	0	603	903	0
8613	3	6.07529	22.6926	-19.4715	4030.15	-3023.2	-3777.65	44.7369	93.0232	0	0	0	0	0	0	0	200	903	0	0	0	0	0	0	0	603	903	0
8613	4	5.15977	24.2185	-20.387	3938.6	-2718.03	-3777.65	66.6785	106.809	0	0	0	0	0	0	0	200	903	0	0	0	0	0	0	0	603	903	0
8613	5	7.296	24.5237	-18.2508	4671.02	-3084.24	-3457.21	31.0079	44.065	0	0	0	0	0	0	0	200	903	0	0	0	0	0	0	0	603	903	0
8613	6	4.702	24.2185	-16.1146	4304.81	-3084.24	-3548.77	8.60545	32.8623	0	0	0	0	0	0	0	200	903	0	0	0	0	0	0	0	603	903	0
8613	7	5.00718	22.6926	-17.6404	4396.36	-3084.24	-3686.1	25.1609	50.7795	0	0	0	0	0	0	0	200	903	0	0	0	0	0	0	0	603	903	0
8613	8	5.00718	22.3874	-19.4715	4030.15	-2656.99	-3686.1	63.5445	93.0232	0	0	0	0	0	0	0	200	903	0	0	0	0	0	0	0	603	903	0
8613	9	4.24424	21.6245	-19.7767	3755.49	-2962.17	-3365.66	50.219	110.105	0	0	0	0	0	0	0	200	903	0	0	0	0	0	0	0	603	903	0
8614	0	3.78647	22.9978	-17.3353	3755.49	-3145.27	-3594.54	18.5621	83.3613	0	0	0	0	0	0	0	200	903	0	0	0	0	0	0	0	603	903	0
8614	1	4.09165	21.1667	-17.6404	3663.94	-2534.92	-3731.87	56.3005	92.299	0	0	0	0	0	0	0	200	903	0	0	0	0	0	0	0	603	903	0
8614	2	5.77012	22.8452	-17.0301	4213.25	-2779.06	-3457.21	36.8145	52.5994	0	0	0	0	0	0	0	200	903	0	0	0	0	0	0	0	603	903	0
8614	3	4.24424	21.6245	-15.8094	4671.02	-2656.99	-3640.32	31.9357	4.5415	0	0	0	0	0	0	0	200	903	0	0	0	0	0	0	0	603	903	0
8614	4	3.32871	20.8616	-18.556	3755.49	-2595.96	-3731.87	60.1012	97.6128	0	0	0	0	0	0	0	200	903	0	0	0	0	0	0	0	603	903	0
8614	5	3.17612	21.0141	-16.1146	3663.94	-2840.1	-3640.32	23.7558	72.6319	0	0	0	0	0	0	0	200	903	0	0	0	0	0	0	0	603	903	0
8614	6	4.54941	21.7771	-16.4197	4030.15	-2718.03	-3502.99	34.4658	54.5546	0	0	0	0	0	0	0	200	903	0	0	0	0	0	0	0	603	903	0
8614	7	5.77012	20.709	-18.556	3572.38	-2718.03	-3319.89	53.5227	107.481	0	0	0	0	0	0	0	200	903	0	0	0	0	0	0	0	603	903	0
8614	8	3.78647	20.8616	-17.9456	3938.6	-2656.99	-3777.65	51.9419	80.5261	0	0	0	0	0	0	0	200	903	0	0	0	0	0	0	0	603	903	0
8614	9	3.63389	20.709	-19.1663	4030.15	-2412.85	-3365.66	74.1098	89.7276	0	0	0	0	0	0	0	200	903	0	0	0	0	0	0	0	603	903	0
8615	0	2.71836	19.946	-16.4197	4121.7	-2534.92	-3365.66	45.6174	48.9789	0	0	0	0	0	0	0	200	903	0	0	0	0	0	0	0	603	903	0
8615	1	3.93906	18.4201	-15.199	3572.38	-2412.85	-3365.66	41.2497	64.9598	0	0	0	0	0	0	0	200	903	0	0	0	0	0	0	0	603	903	0
8615	2	5.31235	19.3357	-16.4197	3389.28	-2534.92	-3411.44	45.6174	93.5851	0	0	0	0	0	0	0	200	903	0	0	0	0	0	0	0	603	903	0
8615	3	3.63389	20.2512	-15.199	4121.7	-2656.99	-3548.77	25.1867	28.8182	0	0	0	0	0	0	0	200	903	0	0	0	0	0	0	0	603	903	0
8615	4	2.87095	19.6408	-18.2508	3480.83	-2534.92	-3411.44	61.1062	109.278	0	0	0	0	0	0	0	200	903	0	0	0	0	0	0	0	603	903	0
8615	5	2.10801	19.6408	-16.4197	3755.49	-2656.99	-3274.11	38.183	71.282	0	0	0	0	0	0	0	200	903	0	0	0	0	0	0	0	603	903	0
8615	6	4.09165	18.4201	-15.8094	3938.6	-2595.96	-3411.44	35.7964	50.8698	0	0	0	0	0	0	0	200	903	0	0	0	0	0	0	0	603	903	0
8615	7	3.93906	18.115	-17.3353	3572.38	-2962.17	-3319.89	29.1247	93.9239	0	0	0	0	0	0	0	200	903	0	0	0	0	0	0	0	603	903	0
8615	8	3.17612	18.4201	-16.1146	3206.17	-2168.71	-2953.67	65.4192	101.039	0	0	0	0	0	0	0	200	903	0	0	0	0	0	0	0	603	903	0
8615	9	2.71836	18.8779	-13.9783	3023.07	-2168.71	-2862.12	44.8519	83.7318	0	0	0	0	0	0	0	200	903	0	0	0	0	0	0	0	603	903	0
8616	0	3.17612	16.5891	-14.5887	3206.17	-2534.92	-3502.99	26.2405	80.2287	0	0	0	0	0	0	0	200	903	0	0	0	0	0	0	0	603	903	0
8616	1	3.02354	18.5727	-14.8939	3663.94	-2229.75	-3319.89	50.2909	53.9968	0	0	0	0	0	0	0	200	903	0	0	0	0	0	0	0	603	903	0
8616	2	2.87095	17.1994	-17.0301	3297.73	-2290.78	-3136.78	65.4862	106.359	0	0	0	0	0	0	0	200	903	0	0	0	0	0	0	0	603	903	0
8616	3	1.65024	15.8262	-15.8094	3389.28	-2534.92	-3365.66	39.6572	85.616	0	0	0	0	0	0	0	200	903	0	0	0	0	0	0	0	603	903	0
8616	4	2.41318	17.1994	-14.2835	2656.86	-2473.89	-3228.33	26.8012	113.991	0	0	0	0	0	0	0	200	903	0	0	0	0	0	0	0	603	903	0
8616	5	2.87095	17.352	-15.8094	3023.07	-2046.64	-3091	70.5427	108.78	0	0	0	0	0	0	0	200	903	0	0	0	0	0	0	0	603	903	0
8616	6	4.39683	16.1313	-15.199	2748.41	-2351.82	-3045.23	45.2654	119.172	0	0	0	0	0	0	0	200	903	0	0	0	0	0	0	0	603	903	0
8616	7	3.17612	16.8943	-16.1146	2839.96	-1985.61	-3091	76.7819	123.764	0	0	0	0	0	0	0	200	903	0	0	0	0	0	0	0	603	903	0
8616	8	1.65024	16.7417	-15.8094	3023.07	-2229.75	-3045.23	58.9606	108.78	0	0	0	0	0	0	0	200	903	0	0	0	0	0	0	0	603	903	0
8616	9	1.65024	15.0632	-13.9783	3297.73	-1863.54	-2862.12	66.684	64.083	0	0	0	0	0	0	0	200	903	0	0	0	0	0	0	0	603	903	0
8617	0	2.56577	15.8262	-13.368	2656.86	-1924.57	-2770.57	56.0313	101.252	0	0	0	0	0	0	0	200	903	0	0	0	0	0	0	0	603	903	0
8617	1	2.2606	16.7417	-16.4197	2839.96	-2351.82	-3182.56	56.7689	127.04	0	0	0	0	0	0	0	200	903	0	0	0	0	0	0	0	603	903	0
8617	2	2.10801	16.1313	-15.8094	2748.41	-2229.75	-2770.57	58.9606	126.153	0	0	0	0	0	0	0	200	903	0	0	0	0	0	0	0	603	903	0
8617	3	1.49766	16.2839	-13.6732	3023.07	-1985.61	-2907.9	54.7807	78.9049	0	0	0	0	0	0	0	200	903	0	0	0	0	0	0	0	603	903	0
8617	4	2.10801	15.521	-13.6732	2839.96	-2046.64	-2724.79	50.3169	92.2965	0	0	0	0	0	0	0	200	903	0	0	0	0	0	0	0	603	903	0
8617	5	2.71836	14.9106	-13.9783	2290.65	-2534.92	-2862.12	18.6535	136.129	0	0	0	0	0	0	0	200	903	0	0	0	0	0	0	0	603	903	0
8617	6	2.56577	15.2158	-14.5887	2656.86	-1802.5	-2679.02	76.4453	117.882	0	0	0	0	0	0	0	200	903	0	0	0	0	0	0	0	603	903	0
8617	7	1.65024	15.3684	-14.8939	2656.86	-1863.54	-2816.34	74.8789	121.614	0	0	0	0	0	0	0	200	903	0	0	0	0	0	0	0	603	903	0
8617	8	1.34507	15.521	-13.368	2748.41	-2107.68	-2862.12	42.334	94.4035	0	0	0	0	0	0	0	200	903	0	0	0	0	0	0	0	603	903	0
8617	9	2.10801	15.521	-12.1473	2839.96	-1924.57	-3274.11	41.5636	66.2058	0	0	0	0	0	0	0	200	903	0	0	0	0	0	0	0	603	903	0
8618	0	2.2606	13.9951	-11.5369	2931.52	-1924.57	-2541.69	33.1816	45.9015	0	0	0	0	0	0	0	200	903	0	0	0	0	0	0	0	603	903	0
8618	1	1.80283	14.6054	-14.8939	2839.96	-1924.57	-2862.12	70.7809	109.32	0	0	0	0	0	0	0	200	903	0	0	0	0	0	0	0	603	903	0
8618	2	1.34507	13.6899	-14.2835	2015.99	-1924.57	-2816.34	65.2592	158.859	0	0	0	0	0	0	0	200	903	0	0	0	0	0	0	0	603	903	0
8618	3	1.19248	14.9106	-12.7576	2015.99	-2107.68	-2907.9	34.7909	141.978	0	0	0	0	0	0	0	200	903	0	0	0	0	0	0	0	603	903	0
8618	4	2.71836	13.5373	-12.7576	2473.75	-1924.57	-2770.57	49.1435	106.096	0	0	0	0	0	0	0	200	903	0	0	0	0	0	0	0	603	903	0
8618	5	2.10801	14.3003	-13.6732	2656.86	-1985.61	-2770.57	54.7807	105.688	0	0	0	0	0	0	0	200	903	0	0	0	0	0	0	0	603	903	0
8618	6	1.80283	13.3847	-13.368	3114.62	-2107.68	-2816.34	42.334	67.0089	0	0	0	0	0	0	0	200	903	0	0	0	0	0	0	0	603	903	0
8618	7	3.4813	12.4692	-13.0628	2931.52	-1558.36	-2862.12	80.7025	75.583	0	0	0	0	0	0	0	200	903	0	0	0	0	0	0	0	603	903	0
8618	8	1.19248	12.927	-13.368	2382.2	-1802.5	-2679.02	65.1628	121.798	0	0	0	0	0	0	0	200	903	0	0	0	0	0	0	0	603	903	0
8618	9	2.2606	13.8425	-12.1473	1924.44	-1863.54	-2450.13	46.5882	141.575	0	0	0	0	0	0	0	200	903	0	0	0	0	0	0	0	603	903	0
8619	0	1.95542	12.4692	-13.6732	2199.09	-2168.71	-2679.02	41.3891	139.167	0	0	0	0	0	0	0	200	903	0	0	0	0	0	0	0	603	903	0
8619	1	1.03989	13.2322	-13.6732	2748.41	-1741.47	-2724.79	72.6362	98.9923	0	0	0	0	0	0	0	200	903	0	0	0	0	0	0	0	603	903	0
8619	2	3.63389	12.164	-13.0628	2656.86	-1497.33	-2541.69	85.3749	96.609	0	0	0	0	0	0	0	200	903	0	0	0	0	0	0	0	603	903	0
8619	3	1.03989	10.9433	-9.4007	2290.65	-1924.57	-2587.46	-4.72646	56.3322	0	0	0	0	0	0	0	200	903	0	0	0	0	0	0	0	603	903	0
8619	4	1.95542	12.164	-11.5369	2015.99	-1985.61	-2816.34	27.8912	125.258	0	0	0	0	0	0	0	200	903	0	0	0	0	0	0	0	603	903	0
8619	5	2.41318	13.2322	-13.368	1466.67	-1924.57	-2541.69	56.0313	190.285	0	0	0	0	0	0	0	200	903	0	0	0	0	0	0	0	603	903	0
8619	6	0.734717	11.7063	-13.368	2199.09	-1863.54	-2450.13	60.597	135.495	0	0	0	0	0	0	0	200	903	0	0	0	0	0	0	0	603	903	0
8619	7	1.65024	12.3166	-10.9266	2290.65	-1802.5	-2541.69	35.0351	90.3601	0	0	0	0	0	0	0	200	903	0	0	0	0	0	0	0	603	903	0
8619	8	1.65024	11.0959	-9.70587	2290.65	-1924.57	-2358.58	1.71063	63.9937	0	0	0	0	0	0	0	200	903	0	0	0	0	0	0	0	603	903	0
8619	9	1.49766	9.87522	-11.5369	2473.75	-1375.25	-2404.36	80.7954	85.5796	0	0	0	0	0	0	0	200	903	0	0	0	0	0	0	0	603	903	0
8620	0	1.95542	10.9433	-13.0628	1924.44	-1741.47	-2083.92	66.6852	152.678	0	0	0	0	0	0	0	200	903	0	0	0	0	0	0	0	603	903	0
8620	1	0.734717	11.7063	-13.0628	1832.88	-1619.4	-2495.91	76.03	159.687	0	0	0	0	0	0	0	200	903	0	0	0	0	0	0	0	603	903	0
8620	2	2.10801	11.4011	-10.3162	2290.65	-1436.29	-2404.36	60.7737	77.9569	0	0	0	0	0	0	0	200	903	0	0	0	0	0	0	0	603	903	0
8620	3	1.80283	11.0959	-10.011	2382.2	-1375.25	-2221.25	62.6263	62.043	0	0	0	0	0	0	0	200	903	0	0	0	0	0	0	0	603	903	0
8620	4	1.34507	10.7908	-10.011	2748.41	-1741.47	-1946.59	26.0456	25.4623	0	0	0	0	0	0	0	200	903	0	0	0	0	0	0	0	603	903	0
8620	5	1.49766	10.333	-11.8421	2199.09	-1680.43	-2312.8	58.0969	114.299	0	0	0	0	0	0	0	200	903	0	0	0	0	0	0	0	603	903	0
8620	6	0.734717	10.9433	-12.1473	2473.75	-1497.33	-1900.82	76.7358	96.3534	0	0	0	0	0	0	0	200	903	0	0	0	0	0	0	0	603	903	0
8620	7	0.429541	10.6382	-10.6214	2107.54	-1680.43	-2587.46	41.7882	101.576	0	0	0	0	0	0	0	200	903	0	0	0	0	0	0	0	603	903	0
8620	8	0.734717	9.87522	-10.3162	2107.54	-1802.5	-1763.49	25.2751	95.7061	0	0	0	0	0	0	0	200	903	0	0	0	0	0	0	0	603	903	0
8620	9	1.19248	9.26487	-10.3162	1832.88	-1497.33	-2267.03	54.8573	122.33	0	0	0	0	0	0	0	200	903	0	0	0	0	0	0	0	603	903	0
8621	0	1.65024	10.1804	-11.5369	2015.99	-1314.22	-2221.25	86.0858	125.258	0	0	0	0	0	0	0	200	903	0	0	0	0	0	0	0	603	903	0
8621	1	0.429541	10.0278	-11.5369	2107.54	-1436.29	-2129.7	75.505	117.322	0	0	0	0	0	0	0	200	903	0	0	0	0	0	0	0	603	903	0
8621	2	0.429541	10.1804	-10.011	2748.41	-1497.33	-2129.7	50.4327	25.4623	0	0	0	0	0	0	0	200	903	0	0	0	0	0	0	0	603	903	0
8621	3	0.887305	9.72264	-9.4007	1283.57	-1680.43	-2312.8	21.244	163.46	0	0	0	0	0	0	0	200	903	0	0	0	0	0	0	0	603	903	0
8621	4	1.34507	10.0278	-10.3162	2382.2	-1558.36	-2175.48	48.9408	69.0822	0	0	0	0	0	0	0	200	903	0	0	0	0	0	0	0	603	903	0
8621	5	1.19248	8.9597	-11.8421	2199.09	-1497.33	-2038.15	73.5592	114.299	0	0	0	0	0	0	0	200	903	0	0	0	0	0	0	0	603	903	0
8621	6	-0.180811	8.04417	-11.2318	2107.54	-1497.33	-1992.37	66.6882	112.359	0	0	0	0	0	0	0	200	903	0	0	0	0	0	0	0	603	903	0
8621	7	0.429541	8.34935	-9.4007	1558.22	-1436.29	-2129.7	47.2145	134.244	0	0	0	0	0	0	0	200	903	0	0	0	0	0	0	0	603	903	0
8621	8	1.34507	9.26487	-10.011	1832.88	-1680.43	-1900.82	32.1424	116.914	0	0	0	0	0	0	0	200	903	0	0	0	0	0	0	0	603	903	0
8621	9	3.02354	6.67088	-9.09552	1466.67	-948.008	-1992.37	95.7719	138.748	0	0	0	0	0	0	0	200	903	0	0	0	0	0	0	0	603	903	0
8622	0	0.887305	9.11228	-10.6214	2107.54	-1253.18	-1992.37	82.0133	101.576	0	0	0	0	0	0	0	200	903	0	0	0	0	0	0	0	603	903	0
8622	1	0.124365	8.80711	-10.9266	2382.2	-1436.29	-2221.25	68.5508	81.9811	0	0	0	0	0	0	0	200	903	0	0	0	0	0	0	0	603	903	0
8622	2	-0.0282228	7.28123	-9.70587	2199.09	-1192.15	-2129.7	77.1724	73.4264	0	0	0	0	0	0	0	200	903	0	0	0	0	0	0	0	603	903	0
8622	3	0.734717	8.19676	-10.011	1466.67	-1192.15	-1992.37	80.9167	153.495	0	0	0	0	0	0	0	200	903	0	0	0	0	0	0	0	603	903	0
8622	4	1.49766	8.80711	-11.2318	1466.67	-1375.25	-1946.59	77.5565	169.417	0	0	0	0	0	0	0	200	903	0	0	0	0	0	0	0	603	903	0
8622	5	1.03989	7.58641	-6.95929	917.356	-1619.4	-1809.26	-32.6955	168.183	0	0	0	0	0	0	0	200	903	0	0	0	0	0	0	0	603	903	0
8622	6	-0.0282228	8.80711	-12.4525	1649.78	-1070.08	-1809.26	114.067	167.514	0	0	0	0	0	0	0	200	903	0	0	0	0	0	0	0	603	903	0
8622	7	0.124365	7.89158	-8.79034	2382.2	-1070.08	-1900.82	78.2666	28.9982	0	0	0	0	0	0	0	200	903	0	0	0	0	0	0	0	603	903	0
8622	8	0.887305	6.3657	-9.09552	1558.22	-1436.29	-1900.82	42.0882	128.682	0	0	0	0	0	0	0	200	903	0	0	0	0	0	0	0	603	903	0
8622	9	0.887305	7.89158	-10.6214	1558.22	-1070.08	-1809.26	99.2526	153.294	0	0	0	0	0	0	0	200	903	0	0	0	0	0	0	0	603	903	0
8623	0	0.887305	8.50193	-9.09552	1283.57	-825.938	-1900.82	109.193	158.879	0	0	0	0	0	0	0	200	903	0	0	0	0	0	0	0	603	903	0
8623	1	-0.791162	8.50193	-10.6214	1466.67	-1192.15	-1900.82	87.7597	161.913	0	0	0	0	0	0	0	200	903	0	0	0	0	0	0	0	603	903	0
8623	2	-0.333399	8.34935	-8.79034	1558.22	-1253.18	-2267.03	57.4363	122.734	0	0	0	0	0	0	0	200	903	0	0	0	0	0	0	0	603	903	0
8623	3	1.19248	7.12864	-8.79034	1558.22	-1192.15	-1855.04	64.3797	122.734	0	0	0	0	0	0	0	200	903	0	0	0	0	0	0	0	603	903	0
8623	4	0.734717	7.43382	-9.4007	1466.67	-1070.08	-1809.26	86.1703	143.983	0	0	0	0	0	0	0	200	903	0	0	0	0	0	0	0	603	903	0
8623	5	0.276953	7.43382	-9.70587	1192.01	-1192.15	-1717.71	77.1724	177.186	0	0	0	0	0	0	0	200	903	0	0	0	0	0	0	0	603	903	0
8623	6	-0.0282228	7.73899	-10.011	734.25	-1253.18	-1809.26	74.8199	226.656	0	0	0	0	0	0	0	200	903	0	0	0	0	0	0	0	603	903	0
8623	7	-0.180811	8.50193	-7.56964	1649.78	-1253.18	-1992.37	34.4461	82.0534	0	0	0	0	0	0	0	200	903	0	0	0	0	0	0	0	603	903	0
8623	8	0.429541	7.58641	-7.26447	1283.57	-1253.18	-1626.16	27.4912	123.309	0	0	0	0	0	0	0	200	903	0	0	0	0	0	0	0	603	903	0
8623	9	0.887305	6.97605	-9.70587	1375.12	-1253.18	-1946.59	70.8839	158.321	0	0	0	0	0	0	0	200	903	0	0	0	0	0	0	0	603	903	0
8624	0	0	0	0	0	0	0	200	300	0	0	0	0	0	0	0	200	903	0	0	0	0	0	0	0	603	903	0
8624	1	0.276953	6.82347	-11.2318	1192.01	-886.973	-1214.17	121.03	193.871	0	0	0	0	0	0	0	200	903	0	0	0	0	0	0	0	603	903	0
8624	2	-0.333399	7.89158	-8.17999	1008.91	-1131.11	-1946.59	61.7219	176.661	0	0	0	0	0	0	0	200	903	0	0	0	0	0	0	0	603	903	0
8624	3	1.03989	7.12864	-8.48517	1283.57	-1131.11	-1534.61	66.6952	148.728	0	0	0	0	0	0	0	200	903	0	0	0	0	0	0	0	603	903	0
8624	4	1.03989	6.82347	-10.3162	1100.46	-1131.11	-1763.49	90.3558	193.327	0	0	0	0	0	0	0	200	903	0	0	0	0	0	0	0	603	903	0
8624	5	0	0	0	0	0	0	200	300	0	0	0	0	0	0	0	200	903	0	0	0	0	0	0	0	603	903	0
8624	6	-0.180811	6.3657	-9.4007	1008.91	-1619.4	-1397.28	27.7367	192.677	0	0	0	0	0	0	0	200	903	0	0	0	0	0	0	0	603	903	0
8624	7	0	0	0	0	0	0	200	300	0	0	0	0	0	0	0	200	903	0	0	0	0	0	0	0	603	903	0
8624	8	1.34507	7.12864	-7.56964	1008.91	-1009.04	-1351.5	66.6987	166.717	0	0	0	0	0	0	0	200	903	0	0	0	0	0	0	0	603	903	0
8624	9	1.49766	7.28123	-9.09552	1741.33	-1131.11	-1626.16	75.6406	108.551	0	0	0	0	0	0	0	200	903	0	0	0	0	0	0	0	603	903	0
8625	0	-0.333399	7.28123	-7.87482	1558.22	-1070.08	-1809.26	64.1138	102.126	0	0	0	0	0	0	0	200	903	0	0	0	0	0	0	0	603	903	0
8625	1	-0.638574	6.06053	-10.3162	1558.22	-886.973	-1671.94	114.022	148.954	0	0	0	0	0	0	0	200	903	0	0	0	0	0	0	0	603	903	0
8625	2	0	0	0	0	0	0	200	300	0	0	0	0	0	0	0	200	903	0	0	0	0	0	0	0	603	903	0
8625	3	0.887305	6.3657	-7.87482	825.803	-1192.15	-1626.16	48.6125	195.134	0	0	0	0	0	0	0	200	903	0	0	0	0	0	0	0	603	903	0
8625	4	0.734717	6.51829	-8.79034	551.144	-1070.08	-1580.38	78.2666	237.301	0	0	0	0	0	0	0	200	903	0	0	0	0	0	0	0	603	903	0
8625	5	0.276953	6.67088	-9.09552	825.803	-825.938	-1717.71	109.193	209.208	0	0	0	0	0	0	0	200	903	0	0	0	0	0	0	0	603	903	0
8625	6	1.34507	6.97605	-7.87482	1466.67	-825.938	-1717.71	95.1165	113.752	0	0	0	0	0	0	0	200	903	0	0	0	0	0	0	0	603	903	0
8625	7	0	0	0	0	0	0	200	300	0	0	0	0	0	0	0	200	903	0	0	0	0	0	0	0	603	903	0
8625	8	0	0	0	0	0	0	200	300	0	0	0	0	0	0	0	200	903	0	0	0	0	0	0	0	603	903	0
8625	9	0.429541	5.29759	-8.79034	917.356	-1009.04	-1580.38	85.21	195.641	0	0	0	0	0	0	0	200	903	0	0	0	0	0	0	0	603	903	0
8626	0	0.124365	6.82347	-9.70587	1100.46	-1131.11	-1671.94	83.4609	186.619	0	0	0	0	0	0	0	200	903	0	0	0	0	0	0	0	603	903	0
8626	1	0.276953	5.90794	-8.17999	1100.46	-1192.15	-1534.61	54.2604	165.469	0	0	0	0	0	0	0	200	903	0	0	0	0	0	0	0	603	903	0
8626	2	0	0	0	0	0	0	200	300	0	0	0	0	0	0	0	200	903	0	0	0	0	0	0	0	603	903	0
8626	3	1.34507	6.3657	-7.87482	1466.67	-825.938	-1214.17	95.1165	113.752	0	0	0	0	0	0	0	200	903	0	0	0	0	0	0	0	603	903	0
8626	4	1.19248	6.51829	-9.4007	1832.88	-1070.08	-1443.05	86.1703	105.027	0	0	0	0	0	0	0	200	903	0	0	0	0	0	0	0	603	903	0
8626	5	-0.485986	6.21311	-9.09552	1192.01	-764.903	-1534.61	115.903	168.945	0	0	0	0	0	0	0	200	903	0	0	0	0	0	0	0	603	903	0
8626	6	1.19248	6.67088	-8.17999	1008.91	-948.008	-1717.71	84.1065	176.661	0	0	0	0	0	0	0	200	903	0	0	0	0	0	0	0	603	903	0
8626	7	0	0	0	0	0	0	200	300	0	0	0	0	0	0	0	200	903	0	0	0	0	0	0	0	603	903	0
8626	8	0.734717	6.51829	-7.87482	1192.01	-1009.04	-1534.61	71.8645	148.63	0	0	0	0	0	0	0	200	903	0	0	0	0	0	0	0	603	903	0
8626	9	0.429541	6.06053	-9.09552	1375.12	-948.008	-1397.28	95.7719	148.814	0	0	0	0	0	0	0	200	903	0	0	0	0	0	0	0	603	903	0
8627	0	0	0	0	0	0	0	200	300	0	0	0	0	0	0	0	200	903	0	0	0	0	0	0	0	603	903	0
8627	1	0.734717	6.21311	-10.3162	917.356	-1436.29	-1351.5	60.7737	211.076	0	0	0	0	0	0	0	200	903	0	0	0	0	0	0	0	603	903	0
8627	2	0	0	0	0	0	0	200	300	0	0	0	0	0	0	0	200	903	0	0	0	0	0	0	0	603	903	0
8627	3	0	0	0	0	0	0	200	300	0	0	0	0	0	0	0	200	903	0	0	0	0	0	0	0	603	903	0
8627	4	1.34507	6.67088	-7.87482	1375.12	-1314.22	-1534.61	33.1111	125.378	0	0	0	0	0	0	0	200	903	0	0	0	0	0	0	0	603	903	0
8627	5	0.887305	6.06053	-9.70587	1924.44	-764.903	-1626.16	121.192	101.725	0	0	0	0	0	0	0	200	903	0	0	0	0	0	0	0	603	903	0
8627	6	0.276953	5.75535	-9.4007	1466.67	-1070.08	-1488.83	86.1703	143.983	0	0	0	0	0	0	0	200	903	0	0	0	0	0	0	0	603	903	0
8627	7	0	0	0	0	0	0	200	300	0	0	0	0	0	0	0	200	903	0	0	0	0	0	0	0	603	903	0
8627	8	0.429541	6.97605	-7.87482	1283.57	-1192.15	-1443.05	48.6125	137.004	0	0	0	0	0	0	0	200	903	0	0	0	0	0	0	0	603	903	0
8627	9	0	0	0	0	0	0	200	300	0	0	0	0	0	0	0	200	903	0	0	0	0	0	0	0	603	903	0
8628	0	1.49766	6.51829	-9.09552	1100.46	-764.903	-1488.83	115.903	179.011	0	0	0	0	0	0	0	200	903	0	0	0	0	0	0	0	603	903	0
8628	1	-0.0282228	6.51829	-8.79034	1558.22	-1253.18	-1443.05	57.4363	122.734	0	0	0	0	0	0	0	200	903	0	0	0	0	0	0	0	603	903	0
8628	2	0	0	0	0	0	0	200	300	0	0	0	0	0	0	0	200	903	0	0	0	0	0	0	0	603	903	0
8628	3	0	0	0	0	0	0	200	300	0	0	0	0	0	0	0	200	903	0	0	0	0	0	0	0	603	903	0
8628	4	0	0	0	0	0	0	200	300	0	0	0	0	0	0	0	200	903	0	0	0	0	0	0	0	603	903	0
8628	5	0.734717	6.67088	-8.48517	825.803	-948.008	-1671.94	88.2747	202.677	0	0	0	0	0	0	0	200	903	0	0	0	0	0	0	0	603	903	0
8628	6	0.429541	6.67088	-10.011	734.25	-1009.04	-1580.38	99.207	226.656	0	0	0	0	0	0	0	200	903	0	0	0	0	0	0	0	603	903	0
8628	7	2.41318	6.51829	-9.70587	1283.57	-1070.08	-1351.5	89.7494	167.754	0	0	0	0	0	0	0	200	903	0	0	0	0	0	0	0	603	903	0
8628	8	0	0	0	0	0	0	200	300	0	0	0	0	0	0	0	200	903	0	0	0	0	0	0	0	603	903	0
8628	9	0	0	0	0	0	0	200	300	0	0	0	0	0	0	0	200	903	0	0	0	0	0	0	0	603	903	0
8629	0	1.49766	5.60276	-9.09552	825.803	-825.938	-1580.38	109.193	209.208	0	0	0	0	0	0	0	200	903	0	0	0	0	0	0	0	603	903	0
8629	1	0.734717	6.21311	-8.48517	1008.91	-764.903	-1763.49	109.854	181.097	0	0	0	0	0	0	0	200	903	0	0	0	0	0	0	0	603	903	0
8629	2	0.124365	6.06053	-9.09552	1192.01	-1009.04	-1534.61	89.0615	168.945	0	0	0	0	0	0	0	200	903	0	0	0	0	0	0	0	603	903	0
8629	3	0	0	0	0	0	0	200	300	0	0	0	0	0	0	0	200	903	0	0	0	0	0	0	0	603	903	0
8629	4	0	0	0	0	0	0	200	300	0	0	0	0	0	0	0	200	903	0	0	0	0	0	0	0	603	903	0
8629	5	0.582129	5.60276	-8.79034	917.356	-1009.04	-1626.16	85.21	195.641	0	0	0	0	0	0	0	200	903	0	0	0	0	0	0	0	603	903	0
8629	6	0	0	0	0	0	0	200	300	0	0	0	0	0	0	0	200	903	0	0	0	0	0	0	0	603	903	0
8629	7	0.429541	6.51829	-9.09552	1008.91	-886.973	-1443.05	102.482	189.076	0	0	0	0	0	0	0	200	903	0	0	0	0	0	0	0	603	903	0
8629	8	1.19248	6.67088	-7.87482	917.356	-1009.04	-1214.17	71.8645	183.508	0	0	0	0	0	0	0	200	903	0	0	0	0	0	0	0	603	903	0
8629	9	0	0	0	0	0	0	200	300	0	0	0	0	0	0	0	200	903	0	0	0	0	0	0	0	603	903	0
8630	0	0	0	0	0	0	0	200	300	0	0	0	0	0	0	0	200	903	0	0	0	0	0	0	0	603	903	0
8630	1	1.34507	6.06053	-7.87482	1100.46	-703.868	-1443.05	110.618	160.256	0	0	0	0	0	0	0	200	903	0	0	0	0	0	0	0	603	903	0
8630	2	0	0	0	0	0	0	200	300	0	0	0	0	0	0	0	200	903	0	0	0	0	0	0	0	603	903	0
8630	3	0	0	0	0	0	0	200	300	0	0	0	0	0	0	0	200	903	0	0	0	0	0	0	0	603	903	0
8630	4	0.734717	6.82347	-7.56964	1192.01	-1192.15	-1488.83	42.5092	142.527	0	0	0	0	0	0	0	200	903	0	0	0	0	0	0	0	603	903	0
8630	5	0	0	0	0	0	0	200	300	0	0	0	0	0	0	0	200	903	0	0	0	0	0	0	0	603	903	0
8630	6	1.65024	5.75535	-9.4007	1283.57	-1314.22	-1168.4	60.1998	163.46	0	0	0	0	0	0	0	200	903	0	0	0	0	0	0	0	603	903	0
8630	7	0.429541	6.51829	-9.09552	1008.91	-886.973	-1076.84	102.482	189.076	0	0	0	0	0	0	0	200	903	0	0	0	0	0	0	0	603	903	0
8630	8	0	0	0	0	0	0	200	300	0	0	0	0	0	0	0	200	903	0	0	0	0	0	0	0	603	903	0
8630	9	0	0	0	0	0	0	200	300	0	0	0	0	0	0	0	200	903	0	0	0	0	0	0	0	603	903	0
8631	0	0	0	0	0	0	0	200	300	0	0	0	0	0	0	0	200	903	0	0	0	0	0	0	0	603	903	0
8631	1	1.19248	7.12864	-9.09552	1558.22	-1314.22	-1076.84	55.5091	128.682	0	0	0	0	0	0	0	200	903	0	0	0	0	0	0	0	603	903	0
8631	2	0.582129	6.3657	-9.4007	2199.09	-1314.22	-1488.83	60.1998	66.0712	0	0	0	0	0	0	0	200	903	0	0	0	0	0	0	0	603	903	0
8631	3	1.95542	6.3657	-9.09552	1466.67	-1009.04	-1305.72	89.0615	138.748	0	0	0	0	0	0	0	200	903	0	0	0	0	0	0	0	603	903	0
8631	4	0	0	0	0	0	0	200	300	0	0	0	0	0	0	0	200	903	0	0	0	0	0	0	0	603	903	0
8631	5	1.65024	6.67088	-7.56964	734.25	-1009.04	-1214.17	66.6987	203.001	0	0	0	0	0	0	0	200	903	0	0	0	0	0	0	0	603	903	0
8631	6	2.10801	6.97605	-9.70587	734.25	-1253.18	-1580.38	70.8839	224.35	0	0	0	0	0	0	0	200	903	0	0	0	0	0	0	0	603	903	0
8631	7	1.49766	6.82347	-9.09552	1924.44	-825.938	-1214.17	109.193	88.4194	0	0	0	0	0	0	0	200	903	0	0	0	0	0	0	0	603	903	0
8631	8	0	0	0	0	0	0	200	300	0	0	0	0	0	0	0	200	903	0	0	0	0	0	0	0	603	903	0
8631	9	0	0	0	0	0	0	200	300	0	0	0	0	0	0	0	200	903	0	0	0	0	0	0	0	603	903	0
8632	0	1.95542	5.90794	-8.17999	1741.33	-948.008	-1488.83	84.1065	87.1232	0	0	0	0	0	0	0	200	903	0	0	0	0	0	0	0	603	903	0
8632	1	1.65024	7.28123	-10.9266	917.356	-1009.04	-1626.16	107.652	216.044	0	0	0	0	0	0	0	200	903	0	0	0	0	0	0	0	603	903	0
8632	2	1.34507	7.58641	-6.65411	1192.01	-1070.08	-1488.83	39.1854	120.861	0	0	0	0	0	0	0	200	903	0	0	0	0	0	0	0	603	903	0
8632	3	0.887305	6.67088	-10.011	734.25	-1009.04	-1351.5	99.207	226.656	0	0	0	0	0	0	0	200	903	0	0	0	0	0	0	0	603	903	0
8632	4	0.887305	7.73899	-9.4007	1466.67	-1009.04	-1351.5	92.6629	143.983	0	0	0	0	0	0	0	200	903	0	0	0	0	0	0	0	603	903	0
8632	5	2.10801	6.82347	-8.17999	1649.78	-764.903	-1580.38	106.491	98.3155	0	0	0	0	0	0	0	200	903	0	0	0	0	0	0	0	603	903	0
8632	6	2.10801	7.28123	-8.79034	1192.01	-948.008	-1580.38	92.1534	164.395	0	0	0	0	0	0	0	200	903	0	0	0	0	0	0	0	603	903	0
8632	7	0	0	0	0	0	0	200	300	0	0	0	0	0	0	0	200	903	0	0	0	0	0	0	0	603	903	0
8632	8	1.34507	7.89158	-8.48517	1558.22	-703.868	-1488.83	117.047	116.359	0	0	0	0	0	0	0	200	903	0	0	0	0	0	0	0	603	903	0
8632	9	0.276953	7.58641	-7.26447	1192.01	-1070.08	-1580.38	52.6969	135.912	0	0	0	0	0	0	0	200	903	0	0	0	0	0	0	0	603	903	0
8633	0	1.65024	7.89158	-7.87482	1649.78	-1253.18	-1397.28	40.8618	90.4995	0	0	0	0	0	0	0	200	903	0	0	0	0	0	0	0	603	903	0
8633	1	0	0	0	0	0	0	200	300	0	0	0	0	0	0	0	200	903	0	0	0	0	0	0	0	603	903	0
8633	2	1.34507	7.73899	-9.4007	1375.12	-886.973	-1168.4	105.648	153.722	0	0	0	0	0	0	0	200	903	0	0	0	0	0	0	0	603	903	0
8633	3	0.734717	6.97605	-9.09552	825.803	-1253.18	-1488.83	62.2197	209.208	0	0	0	0	0	0	0	200	903	0	0	0	0	0	0	0	603	903	0
8633	4	0	0	0	0	0	0	200	300	0	0	0	0	0	0	0	200	903	0	0	0	0	0	0	0	603	903	0
8633	5	0	0	0	0	0	0	200	300	0	0	0	0	0	0	0	200	903	0	0	0	0	0	0	0	603	903	0
8633	6	0	0	0	0	0	0	200	300	0	0	0	0	0	0	0	200	903	0	0	0	0	0	0	0	603	903	0
8633	7	0	0	0	0	0	0	200	300	0	0	0	0	0	0	0	200	903	0	0	0	0	0	0	0	603	903	0
8633	8	0	0	0	0	0	0	200	300	0	0	0	0	0	0	0	200	903	0	0	0	0	0	0	0	603	903	0
8633	9	0	0	0	0	0	0	200	300	0	0	0	0	0	0	0	200	903	0	0	0	0	0	0	0	603	903	0
8634	0	0	0	0	0	0	0	200	300	0	0	0	0	0	0	0	200	903	0	0	0	0	0	0	0	603	903	0
8634	1	0.582129	8.19676	-7.26447	459.592	-1192.15	-1397.28	35.8931	236.734	0	0	0	0	0	0	0	200	903	0	0	0	0	0	0	0	603	903	0
8634	2	-0.638574	5.29759	-8.79034	917.356	-642.832	-1443.05	126.871	195.641	0	0	0	0	0	0	0	200	903	0	0	0	0	0	0	0	603	903	0
8634	3	0	0	0	0	0	0	200	300	0	0	0	0	0	0	0	200	903	0	0	0	0	0	0	0	603	903	0
8634	4	1.03989	6.3657	-8.79034	825.803	-1192.15	-1671.94	64.3797	206.056	0	0	0	0	0	0	0	200	903	0	0	0	0	0	0	0	603	903	0
8634	5	0	0	0	0	0	0	200	300	0	0	0	0	0	0	0	200	903	0	0	0	0	0	0	0	603	903	0
8634	6	0	0	0	0	0	0	200	300	0	0	0	0	0	0	0	200	903	0	0	0	0	0	0	0	603	903	0
8634	7	0	0	0	0	0	0	200	300	0	0	0	0	0	0	0	200	903	0	0	0	0	0	0	0	603	903	0
8634	8	0	0	0	0	0	0	200	300	0	0	0	0	0	0	0	200	903	0	0	0	0	0	0	0	603	903	0
8634	9	0.734717	8.50193	-9.4007	1558.22	-1192.15	-1534.61	73.1851	134.244	0	0	0	0	0	0	0	200	903	0	0	0	0	0	0	0	603	903	0
8635	0	0	0	0	0	0	0	200	300	0	0	0	0	0	0	0	200	903	0	0	0	0	0	0	0	603	903	0
8635	1	0	0	0	0	0	0	200	300	0	0	0	0	0	0	0	200	903	0	0	0	0	0	0	0	603	903	0
8635	2	0.887305	5.75535	-8.48517	551.144	-948.008	-1259.95	88.2747	235.046	0	0	0	0	0	0	0	200	903	0	0	0	0	0	0	0	603	903	0
8635	3	0	0	0	0	0	0	200	300	0	0	0	0	0	0	0	200	903	0	0	0	0	0	0	0	603	903	0
8635	4	-0.0282228	6.21311	-7.87482	734.25	-642.832	-1580.38	118.369	206.76	0	0	0	0	0	0	0	200	903	0	0	0	0	0	0	0	603	903	0
8635	5	0	0	0	0	0	0	200	300	0	0	0	0	0	0	0	200	903	0	0	0	0	0	0	0	603	903	0
8635	6	0	0	0	0	0	0	200	300	0	0	0	0	0	0	0	200	903	0	0	0	0	0	0	0	603	903	0
8635	7	0.887305	7.28123	-8.79034	1466.67	-1375.25	-1443.05	43.5494	133.15	0	0	0	0	0	0	0	200	903	0	0	0	0	0	0	0	603	903	0
8635	8	0	0	0	0	0	0	200	300	0	0	0	0	0	0	0	200	903	0	0	0	0	0	0	0	603	903	0
8635	9	-0.485986	6.51829	-9.09552	642.697	-948.008	-1717.71	95.7719	229.339	0	0	0	0	0	0	0	200	903	0	0	0	0	0	0	0	603	903	0
8636	0	0.429541	7.28123	-6.95929	642.697	-1070.08	-1443.05	46.2374	207.649	0	0	0	0	0	0	0	200	903	0	0	0	0	0	0	0	603	903	0
8636	1	1.19248	6.67088	-8.17999	1375.12	-825.938	-1351.5	99.0295	131.892	0	0	0	0	0	0	0	200	903	0	0	0	0	0	0	0	603	903	0
8636	2	-0.180811	5.29759	-9.4007	1375.12	-825.938	-1717.71	112.141	153.722	0	0	0	0	0	0	0	200	903	0	0	0	0	0	0	0	603	903	0
8636	3	0	0	0	0	0	0	200	300	0	0	0	0	0	0	0	200	903	0	0	0	0	0	0	0	603	903	0
8636	4	-0.333399	7.28123	-9.09552	825.803	-1253.18	-1671.94	62.2197	209.208	0	0	0	0	0	0	0	200	903	0	0	0	0	0	0	0	603	903	0
8636	5	0	0	0	0	0	0	200	300	0	0	0	0	0	0	0	200	903	0	0	0	0	0	0	0	603	903	0
8636	6	0	0	0	0	0	0	200	300	0	0	0	0	0	0	0	200	903	0	0	0	0	0	0	0	603	903	0
8636	7	-0.791162	6.06053	-9.09552	1008.91	-1131.11	-1397.28	75.6406	189.076	0	0	0	0	0	0	0	200	903	0	0	0	0	0	0	0	603	903	0
8636	8	0	0	0	0	0	0	200	300	0	0	0	0	0	0	0	200	903	0	0	0	0	0	0	0	603	903	0
8636	9	-0.94375	6.3657	-8.79034	917.356	-825.938	-1671.94	106.04	195.641	0	0	0	0	0	0	0	200	903	0	0	0	0	0	0	0	603	903	0
8637	0	0	0	0	0	0	0	200	300	0	0	0	0	0	0	0	200	903	0	0	0	0	0	0	0	603	903	0
8637	1	0	0	0	0	0	0	200	300	0	0	0	0	0	0	0	200	903	0	0	0	0	0	0	0	603	903	0
8637	2	0	0	0	0	0	0	200	300	0	0	0	0	0	0	0	200	903	0	0	0	0	0	0	0	603	903	0
8637	3	0	0	0	0	0	0	200	300	0	0	0	0	0	0	0	200	903	0	0	0	0	0	0	0	603	903	0
8637	4	-0.485986	6.51829	-8.17999	825.803	-1009.04	-1809.26	76.645	199.046	0	0	0	0	0	0	0	200	903	0	0	0	0	0	0	0	603	903	0
8637	5	-0.333399	7.12864	-7.26447	1375.12	-886.973	-1717.71	77.9025	110.706	0	0	0	0	0	0	0	200	903	0	0	0	0	0	0	0	603	903	0
8637	6	0	0	0	0	0	0	200	300	0	0	0	0	0	0	0	200	903	0	0	0	0	0	0	0	603	903	0
8637	7	0	0	0	0	0	0	200	300	0	0	0	0	0	0	0	200	903	0	0	0	0	0	0	0	603	903	0
8637	8	0.887305	5.29759	-9.09552	551.144	-825.938	-1580.38	109.193	239.405	0	0	0	0	0	0	0	200	903	0	0	0	0	0	0	0	603	903	0
8637	9	-0.333399	7.28123	-9.70587	734.25	-825.938	-1397.28	114.903	224.35	0	0	0	0	0	0	0	200	903	0	0	0	0	0	0	0	603	903	0
8638	0	0	0	0	0	0	0	200	300	0	0	0	0	0	0	0	200	903	0	0	0	0	0	0	0	603	903	0
8638	1	0	0	0	0	0	0	200	300	0	0	0	0	0	0	0	200	903	0	0	0	0	0	0	0	603	903	0
8638	2	0	0	0	0	0	0	200	300	0	0	0	0	0	0	0	200	903	0	0	0	0	0	0	0	603	903	0
8638	3	1.03989	6.06053	-8.48517	734.25	-886.973	-1626.16	95.4678	213.467	0	0	0	0	0	0	0	200	903	0	0	0	0	0	0	0	603	903	0
8638	4	-0.0282228	6.82347	-9.09552	1100.46	-1070.08	-1763.49	82.3511	179.011	0	0	0	0	0	0	0	200	903	0	0	0	0	0	0	0	603	903	0
8638	5	-0.485986	7.12864	-7.26447	917.356	-825.938	-1855.04	86.3044	173.72	0	0	0	0	0	0	0	200	903	0	0	0	0	0	0	0	603	903	0
8638	6	-0.180811	6.67088	-7.56964	1375.12	-1192.15	-1488.83	42.5092	118.338	0	0	0	0	0	0	0	200	903	0	0	0	0	0	0	0	603	903	0
8638	7	0	0	0	0	0	0	200	300	0	0	0	0	0	0	0	200	903	0	0	0	0	0	0	0	603	903	0
8638	8	1.03989	6.06053	-9.09552	825.803	-948.008	-1671.94	95.7719	209.208	0	0	0	0	0	0	0	200	903	0	0	0	0	0	0	0	603	903	0
8638	9	-0.180811	6.67088	-8.79034	825.803	-825.938	-1671.94	106.04	206.056	0	0	0	0	0	0	0	200	903	0	0	0	0	0	0	0	603	903	0
8639	0	0	0	0	0	0	0	200	300	0	0	0	0	0	0	0	200	903	0	0	0	0	0	0	0	603	903	0
8639	1	0	0	0	0	0	0	200	300	0	0	0	0	0	0	0	200	903	0	0	0	0	0	0	0	603	903	0
8639	2	0	0	0	0	0	0	200	300	0	0	0	0	0	0	0	200	903	0	0	0	0	0	0	0	603	903	0
8639	3	0.429541	5.90794	-8.48517	1192.01	-1009.04	-1763.49	81.0815	159.518	0	0	0	0	0	0	0	200	903	0	0	0	0	0	0	0	603	903	0
8639	4	-0.791162	6.3657	-8.79034	1008.91	-1314.22	-1488.83	50.4928	185.225	0	0	0	0	0	0	0	200	903	0	0	0	0	0	0	0	603	903	0
8639	5	0.276953	6.82347	-7.56964	1283.57	-1009.04	-1855.04	66.6987	130.432	0	0	0	0	0	0	0	200	903	0	0	0	0	0	0	0	603	903	0
8639	6	0	0	0	0	0	0	200	300	0	0	0	0	0	0	0	200	903	0	0	0	0	0	0	0	603	903	0
8639	7	0.429541	7.28123	-7.87482	1375.12	-1314.22	-1534.61	33.1111	125.378	0	0	0	0	0	0	0	200	903	0	0	0	0	0	0	0	603	903	0
8639	8	1.65024	6.3657	-9.4007	1008.91	-948.008	-1580.38	99.1555	192.677	0	0	0	0	0	0	0	200	903	0	0	0	0	0	0	0	603	903	0
8639	9	0	0	0	0	0	0	200	300	0	0	0	0	0	0	0	200	903	0	0	0	0	0	0	0	603	903	0
8640	0	-0.180811	6.3657	-8.17999	642.697	-948.008	-1717.71	84.1065	221.431	0	0	0	0	0	0	0	200	903	0	0	0	0	0	0	0	603	903	0
8640	1	0	0	0	0	0	0	200	300	0	0	0	0	0	0	0	200	903	0	0	0	0	0	0	0	603	903	0
8640	2	0.124365	7.73899	-6.65411	1100.46	-825.938	-1626.16	75.8756	134.619	0	0	0	0	0	0	0	200	903	0	0	0	0	0	0	0	603	903	0
8640	3	0.582129	6.97605	-7.56964	1466.67	-886.973	-1626.16	82.8249	106.243	0	0	0	0	0	0	0	200	903	0	0	0	0	0	0	0	603	903	0
8640	4	0.124365	6.3657	-9.70587	1283.57	-1192.15	-1671.94	77.1724	167.754	0	0	0	0	0	0	0	200	903	0	0	0	0	0	0	0	603	903	0
8640	5	-0.0282228	6.51829	-9.09552	1466.67	-1192.15	-1626.16	68.9301	138.748	0	0	0	0	0	0	0	200	903	0	0	0	0	0	0	0	603	903	0
8640	6	1.19248	6.3657	-8.17999	1008.91	-1070.08	-1534.61	69.1834	176.661	0	0	0	0	0	0	0	200	903	0	0	0	0	0	0	0	603	903	0
8640	7	0	0	0	0	0	0	200	300	0	0	0	0	0	0	0	200	903	0	0	0	0	0	0	0	603	903	0
8640	8	0	0	0	0	0	0	200	300	0	0	0	0	0	0	0	200	903	0	0	0	0	0	0	0	603	903	0
8640	9	0.429541	7.58641	-9.4007	1466.67	-1070.08	-1626.16	86.1703	143.983	0	0	0	0	0	0	0	200	903	0	0	0	0	0	0	0	603	903	0
8641	0	0	0	0	0	0	0	200	300	0	0	0	0	0	0	0	200	903	0	0	0	0	0	0	0	603	903	0
8641	1	-0.638574	6.82347	-9.70587	1558.22	-1192.15	-1809.26	77.1724	139.455	0	0	0	0	0	0	0	200	903	0	0	0	0	0	0	0	603	903	0
8641	2	-0.638574	6.82347	-8.17999	1100.46	-1192.15	-1717.71	54.2604	165.469	0	0	0	0	0	0	0	200	903	0	0	0	0	0	0	0	603	903	0
8641	3	0.124365	7.28123	-7.87482	917.356	-1375.25	-1717.71	25.3604	183.508	0	0	0	0	0	0	0	200	903	0	0	0	0	0	0	0	603	903	0
8641	4	0.429541	6.82347	-8.17999	1283.57	-1131.11	-1122.62	61.7219	143.085	0	0	0	0	0	0	0	200	903	0	0	0	0	0	0	0	603	903	0
8641	5	0.734717	5.45018	-8.48517	1466.67	-1192.15	-1671.94	59.502	127.149	0	0	0	0	0	0	0	200	903	0	0	0	0	0	0	0	603	903	0
8641	6	-0.180811	6.3657	-9.4007	1283.57	-1009.04	-1488.83	92.6629	163.46	0	0	0	0	0	0	0	200	903	0	0	0	0	0	0	0	603	903	0
8641	7	1.65024	6.82347	-7.56964	1100.46	-825.938	-2129.7	90.8881	154.622	0	0	0	0	0	0	0	200	903	0	0	0	0	0	0	0	603	903	0
8641	8	0	0	0	0	0	0	200	300	0	0	0	0	0	0	0	200	903	0	0	0	0	0	0	0	603	903	0
8641	9	0.276953	7.58641	-7.26447	1100.46	-1253.18	-1671.94	27.4912	148.514	0	0	0	0	0	0	0	200	903	0	0	0	0	0	0	0	603	903	0
8642	0	0.276953	7.73899	-9.70587	1375.12	-948.008	-1717.71	102.326	158.321	0	0	0	0	0	0	0	200	903	0	0	0	0	0	0	0	603	903	0
8642	1	-0.0282228	6.51829	-8.48517	1558.22	-1009.04	-1626.16	81.0815	116.359	0	0	0	0	0	0	0	200	903	0	0	0	0	0	0	0	603	903	0
8642	2	-0.0282228	6.67088	-9.4007	1466.67	-1375.25	-1717.71	53.7071	143.983	0	0	0	0	0	0	0	200	903	0	0	0	0	0	0	0	603	903	0
8642	3	0	0	0	0	0	0	200	300	0	0	0	0	0	0	0	200	903	0	0	0	0	0	0	0	603	903	0
8642	4	1.03989	6.67088	-7.56964	825.803	-1070.08	-1626.16	58.6355	190.906	0	0	0	0	0	0	0	200	903	0	0	0	0	0	0	0	603	903	0
8642	5	2.87095	6.67088	-7.87482	1100.46	-1070.08	-1717.71	64.1138	160.256	0	0	0	0	0	0	0	200	903	0	0	0	0	0	0	0	603	903	0
8642	6	0.429541	6.82347	-9.70587	1192.01	-1009.04	-1763.49	96.0379	177.186	0	0	0	0	0	0	0	200	903	0	0	0	0	0	0	0	603	903	0
8642	7	-0.180811	6.82347	-8.17999	1192.01	-948.008	-1671.94	84.1065	154.277	0	0	0	0	0	0	0	200	903	0	0	0	0	0	0	0	603	903	0
8642	8	0	0	0	0	0	0	200	300	0	0	0	0	0	0	0	200	903	0	0	0	0	0	0	0	603	903	0
8642	9	0	0	0	0	0	0	200	300	0	0	0	0	0	0	0	200	903	0	0	0	0	0	0	0	603	903	0
8643	0	0	0	0	0	0	0	200	300	0	0	0	0	0	0	0	200	903	0	0	0	0	0	0	0	603	903	0
8643	1	0.887305	6.67088	-9.09552	1741.33	-1192.15	-1580.38	68.9301	108.551	0	0	0	0	0	0	0	200	903	0	0	0	0	0	0	0	603	903	0
8643	2	0.734717	6.82347	-9.70587	1100.46	-1131.11	-1626.16	83.4609	186.619	0	0	0	0	0	0	0	200	903	0	0	0	0	0	0	0	603	903	0
8643	3	0.582129	6.51829	-9.09552	1375.12	-1009.04	-1534.61	89.0615	148.814	0	0	0	0	0	0	0	200	903	0	0	0	0	0	0	0	603	903	0
8643	4	0	0	0	0	0	0	200	300	0	0	0	0	0	0	0	200	903	0	0	0	0	0	0	0	603	903	0
8643	5	0	0	0	0	0	0	200	300	0	0	0	0	0	0	0	200	903	0	0	0	0	0	0	0	603	903	0
8643	6	2.2606	6.21311	-8.17999	1008.91	-1070.08	-1626.16	69.1834	176.661	0	0	0	0	0	0	0	200	903	0	0	0	0	0	0	0	603	903	0
8643	7	1.19248	5.90794	-9.09552	1192.01	-642.832	-1717.71	129.324	168.945	0	0	0	0	0	0	0	200	903	0	0	0	0	0	0	0	603	903	0
8643	8	-0.333399	6.82347	-9.4007	1008.91	-886.973	-1534.61	105.648	192.677	0	0	0	0	0	0	0	200	903	0	0	0	0	0	0	0	603	903	0
8643	9	0	0	0	0	0	0	200	300	0	0	0	0	0	0	0	200	903	0	0	0	0	0	0	0	603	903	0
8644	0	0.276953	6.97605	-7.87482	1558.22	-1131.11	-1626.16	56.3632	102.126	0	0	0	0	0	0	0	200	903	0	0	0	0	0	0	0	603	903	0
8644	1	0	0	0	0	0	0	200	300	0	0	0	0	0	0	0	200	903	0	0	0	0	0	0	0	603	903	0
8644	2	0.887305	5.60276	-9.09552	1100.46	-1009.04	-1580.38	89.0615	179.011	0	0	0	0	0	0	0	200	903	0	0	0	0	0	0	0	603	903	0
8644	3	0.276953	5.90794	-9.09552	1375.12	-1253.18	-1443.05	62.2197	148.814	0	0	0	0	0	0	0	200	903	0	0	0	0	0	0	0	603	903	0
8644	4	0	0	0	0	0	0	200	300	0	0	0	0	0	0	0	200	903	0	0	0	0	0	0	0	603	903	0
8644	5	0	0	0	0	0	0	200	300	0	0	0	0	0	0	0	200	903	0	0	0	0	0	0	0	603	903	0
8644	6	0	0	0	0	0	0	200	300	0	0	0	0	0	0	0	200	903	0	0	0	0	0	0	0	603	903	0
8644	7	0.429541	6.82347	-9.09552	1649.78	-886.973	-1534.61	102.482	118.616	0	0	0	0	0	0	0	200	903	0	0	0	0	0	0	0	603	903	0
8644	8	-0.485986	5.29759	-9.09552	1375.12	-886.973	-1534.61	102.482	148.814	0	0	0	0	0	0	0	200	903	0	0	0	0	0	0	0	603	903	0
8644	9	0	0	0	0	0	0	200	300	0	0	0	0	0	0	0	200	903	0	0	0	0	0	0	0	603	903	0
8645	0	0	0	0	0	0	0	200	300	0	0	0	0	0	0	0	200	903	0	0	0	0	0	0	0	603	903	0
8645	1	0	0	0	0	0	0	200	300	0	0	0	0	0	0	0	200	903	0	0	0	0	0	0	0	603	903	0
8645	2	0	0	0	0	0	0	200	300	0	0	0	0	0	0	0	200	903	0	0	0	0	0	0	0	603	903	0
8645	3	0	0	0	0	0	0	200	300	0	0	0	0	0	0	0	200	903	0	0	0	0	0	0	0	603	903	0
8645	4	-0.333399	5.29759	-8.48517	917.356	-825.938	-1122.62	102.661	191.887	0	0	0	0	0	0	0	200	903	0	0	0	0	0	0	0	603	903	0
8645	5	0	0	0	0	0	0	200	300	0	0	0	0	0	0	0	200	903	0	0	0	0	0	0	0	603	903	0
8645	6	0	0	0	0	0	0	200	300	0	0	0	0	0	0	0	200	903	0	0	0	0	0	0	0	603	903	0
8645	7	0	0	0	0	0	0	200	300	0	0	0	0	0	0	0	200	903	0	0	0	0	0	0	0	603	903	0
8645	8	0	0	0	0	0	0	200	300	0	0	0	0	0	0	0	200	903	0	0	0	0	0	0	0	603	903	0
8645	9	0	0	0	0	0	0	200	300	0	0	0	0	0	0	0	200	903	0	0	0	0	0	0	0	603	903	0
8646	0	0	0	0	0	0	0	200	300	0	0	0	0	0	0	0	200	903	0	0	0	0	0	0	0	603	903	0
8646	1	0	0	0	0	0	0	200	300	0	0	0	0	0	0	0	200	903	0	0	0	0	0	0	0	603	903	0
8646	2	0	0	0	0	0	0	200	300	0	0	0	0	0	0	0	200	903	0	0	0	0	0	0	0	603	903	0
8646	3	0	0	0	0	0	0	200	300	0	0	0	0	0	0	0	200	903	0	0	0	0	0	0	0	603	903	0
8646	4	0	0	0	0	0	0	200	300	0	0	0	0	0	0	0	200	903	0	0	0	0	0	0	0	603	903	0
8646	5	0	0	0	0	0	0	200	300	0	0	0	0	0	0	0	200	903	0	0	0	0	0	0	0	603	903	0
8646	6	0	0	0	0	0	0	200	300	0	0	0	0	0	0	0	200	903	0	0	0	0	0	0	0	603	903	0
8646	7	0	0	0	0	0	0	200	300	0	0	0	0	0	0	0	200	903	0	0	0	0	0	0	0	603	903	0
8646	8	0	0	0	0	0	0	200	300	0	0	0	0	0	0	0	200	903	0	0	0	0	0	0	0	603	903	0
8646	9	0	0	0	0	0	0	200	300	0	0	0	0	0	0	0	200	903	0	0	0	0	0	0	0	603	903	0
8647	0	0	0	0	0	0	0	200	300	0	0	0	0	0	0	0	200	903	0	0	0	0	0	0	0	603	903	0
8647	1	0	0	0	0	0	0	200	300	0	0	0	0	0	0	0	200	903	0	0	0	0	0	0	0	603	903	0
8647	2	0	0	0	0	0	0	200	300	0	0	0	0	0	0	0	200	903	0	0	0	0	0	0	0	603	903	0
8647	3	0	0	0	0	0	0	200	300	0	0	0	0	0	0	0	200	903	0	0	0	0	0	0	0	603	903	0
8647	4	0	0	0	0	0	0	200	300	0	0	0	0	0	0	0	200	903	0	0	0	0	0	0	0	603	903	0
8647	5	0	0	0	0	0	0	200	300	0	0	0	0	0	0	0	200	903	0	0	0	0	0	0	0	603	903	0
8647	6	0	0	0	0	0	0	200	300	0	0	0	0	0	0	0	200	903	0	0	0	0	0	0	0	603	903	0
8647	7	0	0	0	0	0	0	200	300	0	0	0	0	0	0	0	200	903	0	0	0	0	0	0	0	603	903	0
8647	8	0	0	0	0	0	0	200	300	0	0	0	0	0	0	0	200	903	0	0	0	0	0	0	0	603	903	0
8647	9	0	0	0	0	0	0	200	300	0	0	0	0	0	0	0	200	903	0	0	0	0	0	0	0	603	903	0
8648	0	0	0	0	0	0	0	200	300	0	0	0	0	0	0	0	200	903	0	0	0	0	0	0	0	603	903	0
8648	1	0	0	0	0	0	0	200	300	0	0	0	0	0	0	0	200	903	0	0	0	0	0	0	0	603	903	0
8648	2	0	0	0	0	0	0	200	300	0	0	0	0	0	0	0	200	903	0	0	0	0	0	0	0	603	903	0
8648	3	0	0	0	0	0	0	200	300	0	0	0	0	0	0	0	200	903	0	0	0	0	0	0	0	603	903	0
8648	4	0	0	0	0	0	0	200	300	0	0	0	0	0	0	0	200	903	0	0	0	0	0	0	0	603	903	0
8648	5	0	0	0	0	0	0	200	300	0	0	0	0	0	0	0	200	903	0	0	0	0	0	0	0	603	903	0
8648	6	0	0	0	0	0	0	200	300	0	0	0	0	0	0	0	200	903	0	0	0	0	0	0	0	603	903	0
8648	7	0	0	0	0	0	0	200	300	0	0	0	0	0	0	0	200	903	0	0	0	0	0	0	0	603	903	0
8648	8	0	0	0	0	0	0	200	300	0	0	0	0	0	0	0	200	903	0	0	0	0	0	0	0	603	903	0
8648	9	0	0	0	0	0	0	200	300	0	0	0	0	0	0	0	200	903	0	0	0	0	0	0	0	603	903	0
8649	0	0	0	0	0	0	0	200	300	0	0	0	0	0	0	0	200	903	0	0	0	0	0	0	0	603	903	0
8649	1	0	0	0	0	0	0	200	300	0	0	0	0	0	0	0	200	903	0	0	0	0	0	0	0	603	903	0
8649	2	0	0	0	0	0	0	200	300	0	0	0	0	0	0	0	200	903	0	0	0	0	0	0	0	603	903	0
8649	3	0	0	0	0	0	0	200	300	0	0	0	0	0	0	0	200	903	0	0	0	0	0	0	0	603	903	0
8649	4	0	0	0	0	0	0	200	300	0	0	0	0	0	0	0	200	903	0	0	0	0	0	0	0	603	903	0
8649	5	0	0	0	0	0	0	200	300	0	0	0	0	0	0	0	200	903	0	0	0	0	0	0	0	603	903	0
8649	6	0	0	0	0	0	0	200	300	0	0	0	0	0	0	0	200	903	0	0	0	0	0	0	0	603	903	0
8649	7	0	0	0	0	0	0	200	300	0	0	0	0	0	0	0	200	903	0	0	0	0	0	0	0	603	903	0
8649	8	0	0	0	0	0	0	200	300	0	0	0	0	0	0	0	200	903	0	0	0	0	0	0	0	603	903	0
8649	9	0	0	0	0	0	0	200	300	0	0	0	0	0	0	0	200	903	0	0	0	0	0	0	0	603	903	0
8650	0	0	0	0	0	0	0	200	300	0	0	0	0	0	0	0	200	903	0	0	0	0	0	0	0	603	903	0
8650	1	0	0	0	0	0	0	200	300	0	0	0	0	0	0	0	200	903	0	0	0	0	0	0	0	603	903	0
8650	2	0	0	0	0	0	0	200	300	0	0	0	0	0	0	0	200	903	0	0	0	0	0	0	0	603	903	0
8650	3	0	0	0	0	0	0	200	300	0	0	0	0	0	0	0	200	903	0	0	0	0	0	0	0	603	903	0
8650	4	0	0	0	0	0	0	200	300	0	0	0	0	0	0	0	200	903	0	0	0	0	0	0	0	603	903	0
8650	5	0	0	0	0	0	0	200	300	0	0	0	0	0	0	0	200	903	0	0	0	0	0	0	0	603	903	0
8650	6	0	0	0	0	0	0	200	300	0	0	0	0	0	0	0	200	903	0	0	0	0	0	0	0	603	903	0
8650	7	0	0	0	0	0	0	200	300	0	0	0	0	0	0	0	200	903	0	0	0	0	0	0	0	603	903	0
8650	8	4.24424	12.7744	-27.4061	-1279.91	-1924.57	-1946.59	129.776	346.702	0	0	0	0	0	0	0	200	903	0	0	0	0	0	0	0	603	903	0
8650	9	0.734717	24.6762	-35.951	-2561.65	-2656.99	-2267.03	126.094	371.254	0	0	0	0	0	0	0	200	903	0	0	0	0	0	0	0	603	903	0
8651	0	-9.64126	15.521	-27.7112	-2195.44	-2351.82	-1259.95	115.131	379.226	0	0	0	0	0	0	0	200	903	0	0	0	0	0	0	0	603	903	0
8651	1	-8.57314	0.567363	-9.4007	-913.7	-1741.47	-207.091	14.7514	397.195	0	0	0	0	0	0	0	200	903	0	0	0	0	0	0	0	603	903	0
8651	2	3.78647	5.75535	-8.17999	-822.147	-825.938	-1809.26	99.0295	400.507	0	0	0	0	0	0	0	200	903	0	0	0	0	0	0	0	603	903	0
8651	3	10.8055	18.4201	-24.6595	-1188.36	-886.973	-1305.72	164.031	348.191	0	0	0	0	0	0	0	200	903	0	0	0	0	0	0	0	603	903	0
8651	4	1.49766	14.9106	-33.2044	-1188.36	-2046.64	-1305.72	138.362	335.789	0	0	0	0	0	0	0	200	903	0	0	0	0	0	0	0	603	903	0
8651	5	-13.1508	8.80711	-31.9837	-1920.78	-3450.45	-1671.94	92.1185	360.055	0	0	0	0	0	0	0	200	903	0	0	0	0	0	0	0	603	903	0
8651	6	-12.2353	23.9133	-32.2889	-3385.62	-3816.66	-2404.36	81.7964	404.854	0	0	0	0	0	0	0	200	903	0	0	0	0	0	0	0	603	903	0
8651	7	-1.85928	32.6108	-39.9183	-2286.99	-3694.59	-2038.15	107.446	357.292	0	0	0	0	0	0	0	200	903	0	0	0	0	0	0	0	603	903	0
8651	8	2.87095	19.946	-48.158	-2927.86	-3694.59	-2404.36	123.282	360.797	0	0	0	0	0	0	0	200	903	0	0	0	0	0	0	0	603	903	0
8651	9	-2.16445	13.3847	-55.1771	-2286.99	-4427.01	-2450.13	119.767	341.448	0	0	0	0	0	0	0	200	903	0	0	0	0	0	0	0	603	903	0
8652	0	-7.19985	21.6245	-57.3133	-4026.49	-5830.82	-1626.16	98.2641	370.254	0	0	0	0	0	0	0	200	903	0	0	0	0	0	0	0	603	903	0
8652	1	-9.1835	24.5237	-72.8773	-5033.57	-7600.84	-1397.28	95.7035	369.069	0	0	0	0	0	0	0	200	903	0	0	0	0	0	0	0	603	903	0
8652	2	-13.7611	10.9433	-82.9481	-5674.44	-8577.41	-1534.61	96.593	368.41	0	0	0	0	0	0	0	200	903	0	0	0	0	0	0	0	603	903	0
8652	3	-10.4042	5.145	-93.6292	-6223.76	-8943.62	-527.526	104.478	366.472	0	0	0	0	0	0	0	200	903	0	0	0	0	0	0	0	603	903	0
8652	4	1.95542	12.927	-103.395	-7139.29	-9431.9	-390.197	108.778	369.049	0	0	0	0	0	0	0	200	903	0	0	0	0	0	0	0	603	903	0
8652	5	-0.94375	13.5373	-112.55	-8329.47	-10530.5	-756.408	106.437	374.007	0	0	0	0	0	0	0	200	903	0	0	0	0	0	0	0	603	903	0
8652	6	-13.1508	6.97605	-122.011	-8237.92	-12178.5	-435.973	100.185	367.518	0	0	0	0	0	0	0	200	903	0	0	0	0	0	0	0	603	903	0
8652	7	-14.5241	5.145	-131.776	-8695.69	-13094	21.7904	100.634	365.988	0	0	0	0	0	0	0	200	903	0	0	0	0	0	0	0	603	903	0
8652	8	-6.43691	9.11228	-142.152	-10069	-13887.5	-69.7623	102.306	370.832	0	0	0	0	0	0	0	200	903	0	0	0	0	0	0	0	603	903	0
8652	9	-2.46963	6.67088	-153.444	-10069	-13826.4	113.343	109.892	365.62	0	0	0	0	0	0	0	200	903	0	0	0	0	0	0	0	603	903	0
8653	0	-5.3688	-2.94216	-161.073	-10984.5	-15230.2	754.213	105.445	368.196	0	0	0	0	0	0	0	200	903	0	0	0	0	0	0	0	603	903	0
8653	1	-8.42056	-2.33181	-172.059	-12357.8	-16267.8	937.318	105.452	371.823	0	0	0	0	0	0	0	200	903	0	0	0	0	0	0	0	603	903	0
8653	2	-9.79385	4.53465	-178.468	-12815.6	-17183.4	937.318	103.717	371.809	0	0	0	0	0	0	0	200	903	0	0	0	0	0	0	0	603	903	0
8653	3	-7.96279	-1.72146	-186.403	-13364.9	-17732.7	1440.86	104.869	371.699	0	0	0	0	0	0	0	200	903	0	0	0	0	0	0	0	603	903	0
8653	4	-6.89468	-8.43532	-191.591	-13548	-18404.1	1623.96	103.941	370.713	0	0	0	0	0	0	0	200	903	0	0	0	0	0	0	0	603	903	0
8653	5	-4.75845	-3.39992	-203.187	-14555.1	-18282	1120.42	110.024	371.634	0	0	0	0	0	0	0	200	903	0	0	0	0	0	0	0	603	903	0
8653	6	-5.06362	3.31394	-208.375	-14555.1	-19197.5	1120.42	107.87	369.85	0	0	0	0	0	0	0	200	903	0	0	0	0	0	0	0	603	903	0
8653	7	-6.5895	1.02513	-210.817	-15562.1	-20052	1257.75	104.884	373.818	0	0	0	0	0	0	0	200	903	0	0	0	0	0	0	0	603	903	0
8653	8	-11.0146	0.109599	-214.479	-16111.5	-20906.5	662.66	102.524	375.119	0	0	0	0	0	0	0	200	903	0	0	0	0	0	0	0	603	903	0
8653	9	-7.65762	8.65452	-224.55	-16569.2	-21211.7	388.001	105.537	373.789	0	0	0	0	0	0	0	200	903	0	0	0	0	0	0	0	603	903	0
8654	0	-3.38516	9.26487	-236.146	-17210.1	-21638.9	662.66	108.366	372.879	0	0	0	0	0	0	0	200	903	0	0	0	0	0	0	0	603	903	0
8654	1	-6.74209	7.12864	-242.86	-18125.6	-22615.5	754.213	106.879	374.634	0	0	0	0	0	0	0	200	903	0	0	0	0	0	0	0	603	903	0
8654	2	-9.64126	11.8589	-246.522	-19590.5	-23164.8	-252.868	106.034	379.467	0	0	0	0	0	0	0	200	903	0	0	0	0	0	0	0	603	903	0
8654	3	-5.67397	21.1667	-254.762	-21330	-24263.4	-710.631	104.76	383.725	0	0	0	0	0	0	0	200	903	0	0	0	0	0	0	0	603	903	0
8654	4	-2.7748	24.3711	-260.866	-21330	-24324.5	-1076.84	106.755	381.766	0	0	0	0	0	0	0	200	903	0	0	0	0	0	0	0	603	903	0
8654	5	-3.23257	24.9814	-269.105	-21238.4	-24690.7	-1443.05	108.249	378.922	0	0	0	0	0	0	0	200	903	0	0	0	0	0	0	0	603	903	0
8654	6	-1.09634	28.1858	-276.735	-21879.3	-25117.9	-1946.59	109.235	379.062	0	0	0	0	0	0	0	200	903	0	0	0	0	0	0	0	603	903	0
8654	7	-0.180811	36.7307	-284.364	-23161	-25850.4	-2267.03	109.094	381.448	0	0	0	0	0	0	0	200	903	0	0	0	0	0	0	0	603	903	0
8654	8	-3.07998	39.3247	-289.552	-24351.2	-27010	-2404.36	106.718	384.1	0	0	0	0	0	0	0	200	903	0	0	0	0	0	0	0	603	903	0
8654	9	-2.7748	41.3083	-296.876	-25816	-27559.3	-3640.32	107.169	386.959	0	0	0	0	0	0	0	200	903	0	0	0	0	0	0	0	603	903	0
8655	0	3.02354	48.1748	-308.168	-26182.3	-28047.6	-3869.2	108.986	384.961	0	0	0	0	0	0	0	200	903	0	0	0	0	0	0	0	603	903	0
8655	1	4.09165	55.499	-315.187	-27464	-28474.9	-4235.41	109.657	387.136	0	0	0	0	0	0	0	200	903	0	0	0	0	0	0	0	603	903	0
8655	2	3.02354	56.5671	-321.901	-27830.2	-29329.4	-4967.83	108.887	386.456	0	0	0	0	0	0	0	200	903	0	0	0	0	0	0	0	603	903	0
8655	3	1.65024	57.3301	-327.089	-29020.4	-30000.8	-5562.93	108.279	388.723	0	0	0	0	0	0	0	200	903	0	0	0	0	0	0	0	603	903	0
8655	4	2.71836	64.1965	-333.192	-29295	-30611.1	-5791.81	108.128	387.922	0	0	0	0	0	0	0	200	903	0	0	0	0	0	0	0	603	903	0
8655	5	4.702	66.7905	-343.263	-30759.9	-30916.3	-6203.8	109.934	389.61	0	0	0	0	0	0	0	200	903	0	0	0	0	0	0	0	603	903	0
8655	6	6.22788	66.1802	-352.113	-32041.6	-32014.9	-6432.68	109.078	390.998	0	0	0	0	0	0	0	200	903	0	0	0	0	0	0	0	603	903	0
8655	7	4.85459	68.0112	-359.437	-32774.1	-32625.3	-6844.67	109.232	391.182	0	0	0	0	0	0	0	200	903	0	0	0	0	0	0	0	603	903	0
8655	8	6.07529	72.1311	-365.541	-34330.5	-33235.6	-6982	109.078	393.917	0	0	0	0	0	0	0	200	903	0	0	0	0	0	0	0	603	903	0
8655	9	6.38047	73.3518	-370.729	-34788.2	-33846	-7393.98	108.704	393.837	0	0	0	0	0	0	0	200	903	0	0	0	0	0	0	0	603	903	0
8656	0	7.44858	70.7578	-379.884	-36161.5	-34334.2	-7439.76	109.619	395.191	0	0	0	0	0	0	0	200	903	0	0	0	0	0	0	0	603	903	0
8656	1	7.60117	72.2837	-389.65	-36619.3	-35127.7	-7805.97	109.848	393.98	0	0	0	0	0	0	0	200	903	0	0	0	0	0	0	0	603	903	0
8656	2	8.97446	74.8777	-396.364	-38450.3	-35616	-8126.4	110.143	397.008	0	0	0	0	0	0	0	200	903	0	0	0	0	0	0	0	603	903	0
8656	3	10.5003	73.1992	-401.857	-39365.8	-36348.4	-7760.19	109.549	397.96	0	0	0	0	0	0	0	200	903	0	0	0	0	0	0	0	603	903	0
8656	4	7.296	72.5888	-406.74	-39365.8	-37386	-8355.29	108.084	396.784	0	0	0	0	0	0	0	200	903	0	0	0	0	0	0	0	603	903	0
8656	5	8.97446	72.4363	-413.453	-40922.3	-37569.1	-8721.5	109.133	398.977	0	0	0	0	0	0	0	200	903	0	0	0	0	0	0	0	603	903	0
8656	6	10.8055	74.8777	-421.998	-41013.8	-38301.5	-8446.84	109.238	397.189	0	0	0	0	0	0	0	200	903	0	0	0	0	0	0	0	603	903	0
8656	7	10.3478	72.5888	-424.44	-41563.1	-38728.8	-8492.62	108.753	397.925	0	0	0	0	0	0	0	200	903	0	0	0	0	0	0	0	603	903	0
8656	8	9.7374	71.6733	-430.848	-42295.5	-39339.1	-8904.6	108.694	398.168	0	0	0	0	0	0	0	200	903	0	0	0	0	0	0	0	603	903	0
8656	9	10.1952	74.8777	-433.29	-43394.2	-39522.2	-9225.04	108.786	400.15	0	0	0	0	0	0	0	200	903	0	0	0	0	0	0	0	603	903	0
8657	0	11.5685	76.4035	-437.562	-44584.4	-39827.4	-8813.05	108.979	401.893	0	0	0	0	0	0	0	200	903	0	0	0	0	0	0	0	603	903	0
8657	1	11.2633	75.9458	-443.971	-44675.9	-40437.8	-9179.26	108.918	400.628	0	0	0	0	0	0	0	200	903	0	0	0	0	0	0	0	603	903	0
8657	2	10.3478	76.0984	-446.107	-45316.8	-40437.8	-9087.71	109.354	401.583	0	0	0	0	0	0	0	200	903	0	0	0	0	0	0	0	603	903	0
8657	3	9.58481	78.8449	-450.685	-45225.2	-40865	-9591.25	109.327	400.348	0	0	0	0	0	0	0	200	903	0	0	0	0	0	0	0	603	903	0
8657	4	8.82187	79.9131	-451.295	-45408.3	-41231.2	-9408.14	108.638	400.618	0	0	0	0	0	0	0	200	903	0	0	0	0	0	0	0	603	903	0
8657	5	9.7374	78.3872	-455.263	-45957.6	-41963.6	-10003.2	107.825	400.948	0	0	0	0	0	0	0	200	903	0	0	0	0	0	0	0	603	903	0
8657	6	8.5167	79.7605	-455.263	-46690.1	-42451.9	-9499.7	106.753	402.556	0	0	0	0	0	0	0	200	903	0	0	0	0	0	0	0	603	903	0
8657	7	9.12705	82.3545	-460.145	-48063.4	-42146.7	-9911.68	108.406	404.453	0	0	0	0	0	0	0	200	903	0	0	0	0	0	0	0	603	903	0
8657	8	7.90635	81.4389	-462.892	-48429.6	-41963.6	-9270.81	109.345	404.624	0	0	0	0	0	0	0	200	903	0	0	0	0	0	0	0	603	903	0
8657	9	7.44858	82.9648	-461.976	-48704.2	-42207.8	-9911.68	108.637	405.426	0	0	0	0	0	0	0	200	903	0	0	0	0	0	0	0	603	903	0
8658	0	5.77012	83.4226	-464.113	-48978.9	-42940.2	-10049	107.479	405.532	0	0	0	0	0	0	0	200	903	0	0	0	0	0	0	0	603	903	0
8658	1	6.38047	85.7114	-465.028	-48612.7	-42512.9	-10094.8	108.58	404.537	0	0	0	0	0	0	0	200	903	0	0	0	0	0	0	0	603	903	0
8658	2	5.46494	84.3381	-467.775	-48521.1	-43306.4	-9911.68	107.42	403.728	0	0	0	0	0	0	0	200	903	0	0	0	0	0	0	0	603	903	0
8658	3	4.39683	83.27	-476.014	-49619.8	-43611.6	-10003.2	108.382	404.24	0	0	0	0	0	0	0	200	903	0	0	0	0	0	0	0	603	903	0
8658	4	6.53306	83.1174	-482.728	-52915.7	-44893.3	-9774.35	107.001	409.618	0	0	0	0	0	0	0	200	903	0	0	0	0	0	0	0	603	903	0
8658	5	-0.333399	83.27	-489.442	-54563.6	-45808.8	-8584.17	106.406	411.481	0	0	0	0	0	0	0	200	903	0	0	0	0	0	0	0	603	903	0
8658	6	-12.3878	89.5261	-489.442	-54655.2	-46175.1	-7897.52	105.658	411.668	0	0	0	0	0	0	0	200	903	0	0	0	0	0	0	0	603	903	0
8658	7	-12.5404	90.5942	-487.001	-55204.5	-46236.1	-8263.73	105.06	413.356	0	0	0	0	0	0	0	200	903	0	0	0	0	0	0	0	603	903	0
8658	8	-8.26797	91.052	-489.442	-55479.1	-46419.2	-7851.75	105.159	413.352	0	0	0	0	0	0	0	200	903	0	0	0	0	0	0	0	603	903	0
8658	9	-13.9137	93.0356	-502.26	-55479.1	-46663.3	-7027.77	107.093	410.459	0	0	0	0	0	0	0	200	903	0	0	0	0	0	0	0	603	903	0
8659	0	-18.7965	97.1555	-504.396	-56303.1	-47456.8	-8034.85	105.914	411.625	0	0	0	0	0	0	0	200	903	0	0	0	0	0	0	0	603	903	0
8659	1	-13.3034	100.665	-504.701	-57768	-48311.3	-8950.38	104.277	414.46	0	0	0	0	0	0	0	200	903	0	0	0	0	0	0	0	603	903	0
8659	2	-14.3715	106.616	-507.142	-59049.7	-48189.2	-9087.71	104.979	416.436	0	0	0	0	0	0	0	200	903	0	0	0	0	0	0	0	603	903	0
8659	3	-15.287	107.531	-510.194	-59049.7	-48006.1	-9362.37	105.906	415.74	0	0	0	0	0	0	0	200	903	0	0	0	0	0	0	0	603	903	0
8659	4	-10.099	105.09	-516.908	-59415.9	-48616.5	-9911.68	105.948	414.945	0	0	0	0	0	0	0	200	903	0	0	0	0	0	0	0	603	903	0
8659	5	-8.26797	107.379	-512.636	-59782.1	-48433.4	-9865.91	105.521	416.617	0	0	0	0	0	0	0	200	903	0	0	0	0	0	0	0	603	903	0
8659	6	-10.862	110.583	-512.941	-59690.6	-48189.2	-10461	106.053	416.369	0	0	0	0	0	0	0	200	903	0	0	0	0	0	0	0	603	903	0
8659	7	-10.2516	105.548	-516.908	-60148.3	-48738.5	-10644.1	105.711	416.362	0	0	0	0	0	0	0	200	903	0	0	0	0	0	0	0	603	903	0
8659	8	-9.1835	104.937	-515.992	-60423	-49104.7	-10186.3	104.834	417.101	0	0	0	0	0	0	0	200	903	0	0	0	0	0	0	0	603	903	0
8659	9	-7.65762	106.769	-521.486	-60606.1	-48921.6	-10552.6	106.188	416.218	0	0	0	0	0	0	0	200	903	0	0	0	0	0	0	0	603	903	0
8660	0	-3.84292	104.022	-523.012	-62620.3	-49165.8	-11376.5	105.995	419.73	0	0	0	0	0	0	0	200	903	0	0	0	0	0	0	0	603	903	0
8660	1	-6.28433	102.191	-524.232	-62070.9	-49471	-10735.7	105.632	418.404	0	0	0	0	0	0	0	200	903	0	0	0	0	0	0	0	603	903	0
8660	2	-6.28433	103.259	-525.453	-63261.1	-49532	-10827.2	105.735	420.394	0	0	0	0	0	0	0	200	903	0	0	0	0	0	0	0	603	903	0
8660	3	-2.92739	102.191	-527.894	-63169.6	-49348.9	-11513.9	106.518	419.663	0	0	0	0	0	0	0	200	903	0	0	0	0	0	0	0	603	903	0
8660	4	-2.7748	100.512	-530.031	-62986.5	-48921.6	-11239.2	107.7	418.836	0	0	0	0	0	0	0	200	903	0	0	0	0	0	0	0	603	903	0
8660	5	-4.75845	101.275	-527.589	-63078	-49532	-10918.8	106.116	419.559	0	0	0	0	0	0	0	200	903	0	0	0	0	0	0	0	603	903	0
8660	6	-5.21621	102.191	-526.063	-63810.4	-49898.2	-11513.9	105.148	421.298	0	0	0	0	0	0	0	200	903	0	0	0	0	0	0	0	603	903	0
8660	7	-4.30068	103.412	-526.979	-65183.7	-49532	-11376.5	106.008	423.693	0	0	0	0	0	0	0	200	903	0	0	0	0	0	0	0	603	903	0
8660	8	-6.43691	104.48	-529.725	-64542.9	-49471	-10964.5	106.61	421.842	0	0	0	0	0	0	0	200	903	0	0	0	0	0	0	0	603	903	0
8660	9	-7.50503	102.343	-529.725	-64909.1	-50081.3	-10827.2	105.458	422.533	0	0	0	0	0	0	0	200	903	0	0	0	0	0	0	0	603	903	0
8661	0	-8.11538	103.412	-533.388	-64726	-50264.4	-10781.4	105.764	421.349	0	0	0	0	0	0	0	200	903	0	0	0	0	0	0	0	603	903	0
8661	1	-11.0146	104.022	-532.167	-65092.2	-50264.4	-10186.3	105.548	422.315	0	0	0	0	0	0	0	200	903	0	0	0	0	0	0	0	603	903	0
8661	2	-11.4723	104.175	-533.998	-65641.5	-50325.4	-10323.7	105.757	422.925	0	0	0	0	0	0	0	200	903	0	0	0	0	0	0	0	603	903	0
8661	3	-11.9301	103.106	-537.05	-66831.7	-50752.7	-9865.91	105.497	424.442	0	0	0	0	0	0	0	200	903	0	0	0	0	0	0	0	603	903	0
8661	4	-13.1508	104.48	-539.186	-67381	-51057.9	-9682.8	105.306	424.968	0	0	0	0	0	0	0	200	903	0	0	0	0	0	0	0	603	903	0
8661	5	-13.1508	104.48	-540.712	-67564.1	-50935.8	-10003.2	105.799	424.954	0	0	0	0	0	0	0	200	903	0	0	0	0	0	0	0	603	903	0
8661	6	-13.3034	102.954	-540.712	-68205	-51118.9	-10003.2	105.46	426.139	0	0	0	0	0	0	0	200	903	0	0	0	0	0	0	0	603	903	0
8661	7	-16.8129	104.785	-538.576	-67472.5	-51729.3	-9545.47	103.952	425.28	0	0	0	0	0	0	0	200	903	0	0	0	0	0	0	0	603	903	0
8661	8	-15.287	105.243	-544.374	-68296.5	-51973.4	-9774.35	104.526	425.459	0	0	0	0	0	0	0	200	903	0	0	0	0	0	0	0	603	903	0
8661	9	-14.2189	104.022	-546.815	-68205	-51729.3	-10003.2	105.399	424.731	0	0	0	0	0	0	0	200	903	0	0	0	0	0	0	0	603	903	0
8662	0	-14.9818	103.869	-548.341	-68571.2	-51912.4	-9774.35	105.328	425.052	0	0	0	0	0	0	0	200	903	0	0	0	0	0	0	0	603	903	0
8662	1	-15.8974	103.106	-550.172	-70036	-52400.6	-9728.58	104.756	427.298	0	0	0	0	0	0	0	200	903	0	0	0	0	0	0	0	603	903	0
8662	2	-16.6603	103.869	-549.562	-69303.6	-51912.4	-10049	105.539	426.107	0	0	0	0	0	0	0	200	903	0	0	0	0	0	0	0	603	903	0
8662	3	-14.2189	102.191	-549.867	-70310.7	-51912.4	-10277.9	105.591	427.869	0	0	0	0	0	0	0	200	903	0	0	0	0	0	0	0	603	903	0
8662	4	-13.6085	103.106	-552.919	-69944.5	-52400.6	-10049	105.229	426.5	0	0	0	0	0	0	0	200	903	0	0	0	0	0	0	0	603	903	0
8662	5	-14.0663	99.9021	-551.393	-70127.6	-52034.4	-10277.9	105.631	427.183	0	0	0	0	0	0	0	200	903	0	0	0	0	0	0	0	603	903	0
8662	6	-15.7448	100.97	-554.445	-70310.7	-52278.6	-10232.1	105.71	426.813	0	0	0	0	0	0	0	200	903	0	0	0	0	0	0	0	603	903	0
8662	7	-15.1344	101.428	-554.445	-70585.4	-52522.7	-10186.3	105.27	427.308	0	0	0	0	0	0	0	200	903	0	0	0	0	0	0	0	603	903	0
8662	8	-14.3715	100.055	-556.581	-71500.9	-52950	-10277.9	104.866	428.464	0	0	0	0	0	0	0	200	903	0	0	0	0	0	0	0	603	903	0
8662	9	-14.2189	100.055	-558.412	-71043.1	-53194.1	-10094.8	104.74	427.224	0	0	0	0	0	0	0	200	903	0	0	0	0	0	0	0	603	903	0
8663	0	-15.1344	98.3762	-559.633	-72599.5	-53133.1	-9820.13	105.057	429.727	0	0	0	0	0	0	0	200	903	0	0	0	0	0	0	0	603	903	0
8663	1	-16.5077	99.4443	-560.548	-71775.5	-53255.1	-9820.13	104.995	428.045	0	0	0	0	0	0	0	200	903	0	0	0	0	0	0	0	603	903	0
8663	2	-16.6603	98.3762	-559.327	-72050.2	-52888.9	-9957.46	105.442	428.816	0	0	0	0	0	0	0	200	903	0	0	0	0	0	0	0	603	903	0
8663	3	-17.2707	98.2236	-559.938	-72416.4	-53133.1	-9225.04	105.109	429.329	0	0	0	0	0	0	0	200	903	0	0	0	0	0	0	0	603	903	0
8663	4	-17.2707	97.4607	-562.074	-72874.2	-53743.4	-9774.35	104.384	429.652	0	0	0	0	0	0	0	200	903	0	0	0	0	0	0	0	603	903	0
8663	5	-17.2707	97.0029	-563.905	-73240.4	-53316.2	-9728.58	105.452	429.881	0	0	0	0	0	0	0	200	903	0	0	0	0	0	0	0	603	903	0
8663	6	-19.5595	97.0029	-563.905	-72782.6	-53133.1	-9362.37	105.777	429.069	0	0	0	0	0	0	0	200	903	0	0	0	0	0	0	0	603	903	0
8663	7	-19.4069	96.6977	-563.905	-73698.1	-53804.5	-9408.14	104.586	430.692	0	0	0	0	0	0	0	200	903	0	0	0	0	0	0	0	603	903	0
8663	8	-19.1017	96.24	-566.041	-73423.5	-54048.6	-9408.14	104.515	429.714	0	0	0	0	0	0	0	200	903	0	0	0	0	0	0	0	603	903	0
8663	9	-19.4069	94.1037	-564.821	-73331.9	-53682.4	-9316.59	104.957	429.832	0	0	0	0	0	0	0	200	903	0	0	0	0	0	0	0	603	903	0
8664	0	-19.1017	94.1037	-567.567	-74064.3	-53987.6	-8904.6	104.879	430.494	0	0	0	0	0	0	0	200	903	0	0	0	0	0	0	0	603	903	0
8664	1	-20.7802	92.883	-569.093	-74064.3	-54353.8	-9316.59	104.491	430.145	0	0	0	0	0	0	0	200	903	0	0	0	0	0	0	0	603	903	0
8664	2	-20.1698	94.2563	-566.346	-75071.4	-54292.7	-9270.81	104.135	432.554	0	0	0	0	0	0	0	200	903	0	0	0	0	0	0	0	603	903	0
8664	3	-21.2379	94.1037	-562.99	-75529.2	-54048.6	-8996.15	103.997	434.157	0	0	0	0	0	0	0	200	903	0	0	0	0	0	0	0	603	903	0
8664	4	-20.3224	93.1882	-566.041	-75437.7	-54536.9	-9179.26	103.652	433.272	0	0	0	0	0	0	0	200	903	0	0	0	0	0	0	0	603	903	0
8664	5	-20.1698	92.5779	-568.483	-75437.7	-54414.8	-9087.71	104.281	432.7	0	0	0	0	0	0	0	200	903	0	0	0	0	0	0	0	603	903	0
8664	6	-21.5431	91.9675	-569.093	-74430.5	-54292.7	-8950.38	104.598	430.788	0	0	0	0	0	0	0	200	903	0	0	0	0	0	0	0	603	903	0
8664	7	-20.3224	90.289	-566.652	-74522.1	-54353.8	-9087.71	104.079	431.513	0	0	0	0	0	0	0	200	903	0	0	0	0	0	0	0	603	903	0
8664	8	-22.3061	89.3735	-564.515	-75163	-54903.1	-8813.05	102.743	433.146	0	0	0	0	0	0	0	200	903	0	0	0	0	0	0	0	603	903	0
8664	9	-20.6276	89.2209	-566.957	-76170.1	-54658.9	-8858.83	103.592	434.349	0	0	0	0	0	0	0	200	903	0	0	0	0	0	0	0	603	903	0
8665	0	-21.2379	88.6106	-569.093	-76261.6	-54231.7	-8675.72	104.705	434.005	0	0	0	0	0	0	0	200	903	0	0	0	0	0	0	0	603	903	0
8665	1	-21.3905	88.7632	-566.957	-76444.7	-54475.8	-8721.5	103.915	434.833	0	0	0	0	0	0	0	200	903	0	0	0	0	0	0	0	603	903	0
8665	2	-22.3061	85.7114	-567.872	-76353.1	-54903.1	-8629.94	103.318	434.455	0	0	0	0	0	0	0	200	903	0	0	0	0	0	0	0	603	903	0
8665	3	-22.7638	87.695	-566.652	-75895.4	-54842.1	-8446.84	103.217	433.937	0	0	0	0	0	0	0	200	903	0	0	0	0	0	0	0	603	903	0
8665	4	-22.0009	86.6269	-566.041	-75895.4	-54353.8	-8492.62	103.976	434.081	0	0	0	0	0	0	0	200	903	0	0	0	0	0	0	0	603	903	0
8665	5	-23.069	86.0166	-567.872	-76170.1	-55025.2	-8401.06	103.103	434.132	0	0	0	0	0	0	0	200	903	0	0	0	0	0	0	0	603	903	0
8665	6	-21.6957	85.4062	-567.567	-76627.8	-54842.1	-8217.96	103.373	435.011	0	0	0	0	0	0	0	200	903	0	0	0	0	0	0	0	603	903	0
8665	7	-23.9845	84.4907	-569.398	-77085.6	-54842.1	-7851.75	103.684	435.381	0	0	0	0	0	0	0	200	903	0	0	0	0	0	0	0	603	903	0
8665	8	-24.7475	84.3381	-566.957	-77360.2	-54903.1	-8080.63	103.162	436.448	0	0	0	0	0	0	0	200	903	0	0	0	0	0	0	0	603	903	0
8665	9	-23.3742	84.3381	-566.652	-76810.9	-55330.3	-7531.31	102.356	435.552	0	0	0	0	0	0	0	200	903	0	0	0	0	0	0	0	603	903	0
8666	0	-22.7638	83.7278	-568.788	-76719.4	-55391.4	-8080.63	102.615	434.882	0	0	0	0	0	0	0	200	903	0	0	0	0	0	0	0	603	903	0
8666	1	-24.9	82.5071	-569.093	-76994	-55025.2	-7668.64	103.311	435.293	0	0	0	0	0	0	0	200	903	0	0	0	0	0	0	0	603	903	0
8666	2	-23.3742	81.4389	-566.652	-77451.8	-54964.1	-7943.3	103.002	436.683	0	0	0	0	0	0	0	200	903	0	0	0	0	0	0	0	603	903	0
8666	3	-25.5104	81.7441	-564.21	-78001.1	-55269.3	-7714.42	102.041	438.248	0	0	0	0	0	0	0	200	903	0	0	0	0	0	0	0	603	903	0
8666	4	-25.3578	81.8967	-566.652	-77634.9	-55269.3	-8034.85	102.463	437.006	0	0	0	0	0	0	0	200	903	0	0	0	0	0	0	0	603	903	0
8666	5	-25.2052	80.5234	-568.483	-78367.3	-55147.2	-7851.75	102.992	437.854	0	0	0	0	0	0	0	200	903	0	0	0	0	0	0	0	603	903	0
8666	6	-25.8156	80.0657	-567.872	-78001.1	-55086.2	-7531.31	102.995	437.357	0	0	0	0	0	0	0	200	903	0	0	0	0	0	0	0	603	903	0
8666	7	-24.2897	78.6924	-565.126	-78092.6	-55513.4	-7485.54	101.768	438.186	0	0	0	0	0	0	0	200	903	0	0	0	0	0	0	0	603	903	0
8666	8	-26.1208	77.9294	-567.567	-78275.8	-55208.3	-7393.98	102.728	437.915	0	0	0	0	0	0	0	200	903	0	0	0	0	0	0	0	603	903	0
8666	9	-24.9	75.1828	-566.346	-78642	-55269.3	-7393.98	102.411	438.858	0	0	0	0	0	0	0	200	903	0	0	0	0	0	0	0	603	903	0
8667	0	-25.3578	76.0984	-568.788	-79557.5	-55940.7	-7302.43	101.649	439.872	0	0	0	0	0	0	0	200	903	0	0	0	0	0	0	0	603	903	0
8667	1	-25.2052	76.5561	-567.567	-79099.8	-55879.6	-7393.98	101.545	439.366	0	0	0	0	0	0	0	200	903	0	0	0	0	0	0	0	603	903	0
8667	2	-26.5785	75.6406	-568.178	-79740.6	-55147.2	-7348.21	102.94	440.345	0	0	0	0	0	0	0	200	903	0	0	0	0	0	0	0	603	903	0
8667	3	-26.8837	75.0303	-566.957	-79099.8	-55818.6	-7210.88	101.547	439.516	0	0	0	0	0	0	0	200	903	0	0	0	0	0	0	0	603	903	0
8667	4	-25.3578	74.7251	-567.567	-79374.4	-56306.9	-7210.88	100.793	439.85	0	0	0	0	0	0	0	200	903	0	0	0	0	0	0	0	603	903	0
8667	5	-25.8156	73.0466	-570.314	-79557.5	-56306.9	-6982	101.27	439.498	0	0	0	0	0	0	0	200	903	0	0	0	0	0	0	0	603	903	0
8667	6	-25.3578	72.5888	-563.905	-79832.2	-55696.5	-7027.77	101.231	441.57	0	0	0	0	0	0	0	200	903	0	0	0	0	0	0	0	603	903	0
8667	7	-27.0363	71.8259	-570.009	-80747.7	-56123.8	-7027.77	101.539	441.66	0	0	0	0	0	0	0	200	903	0	0	0	0	0	0	0	603	903	0
8667	8	-26.5785	71.6733	-568.788	-80747.7	-56245.9	-6707.34	101.113	441.965	0	0	0	0	0	0	0	200	903	0	0	0	0	0	0	0	603	903	0
8667	9	-25.663	71.5207	-568.483	-81297	-55940.7	-6707.34	101.597	443.007	0	0	0	0	0	0	0	200	903	0	0	0	0	0	0	0	603	903	0
8668	0	-25.3578	70.7578	-570.924	-80747.7	-56062.8	-6890.44	101.804	441.433	0	0	0	0	0	0	0	200	903	0	0	0	0	0	0	0	603	903	0
8668	1	-26.1208	70.4526	-568.178	-80564.6	-56551	-6890.44	100.469	441.795	0	0	0	0	0	0	0	200	903	0	0	0	0	0	0	0	603	903	0
8668	2	-27.0363	69.6897	-571.534	-81113.9	-56367.9	-6478.46	101.374	441.923	0	0	0	0	0	0	0	200	903	0	0	0	0	0	0	0	603	903	0
8668	3	-27.494	67.8586	-569.398	-80930.8	-56429	-6341.13	100.897	442.134	0	0	0	0	0	0	0	200	903	0	0	0	0	0	0	0	603	903	0
8668	4	-27.0363	67.8586	-570.619	-82121	-56490	-6203.8	101.002	443.916	0	0	0	0	0	0	0	200	903	0	0	0	0	0	0	0	603	903	0
8668	5	-25.0526	68.3164	-571.534	-81754.8	-57039.3	-6249.57	100.2	443.044	0	0	0	0	0	0	0	200	903	0	0	0	0	0	0	0	603	903	0
8668	6	-27.0363	67.706	-572.755	-82487.2	-57039.3	-5700.26	100.412	444.018	0	0	0	0	0	0	0	200	903	0	0	0	0	0	0	0	603	903	0
8668	7	-28.5622	66.7905	-571.534	-82395.7	-56734.1	-6020.69	100.734	444.166	0	0	0	0	0	0	0	200	903	0	0	0	0	0	0	0	603	903	0
8668	8	-27.9518	66.4853	-570.619	-82761.9	-56734.1	-6203.8	100.574	445.039	0	0	0	0	0	0	0	200	903	0	0	0	0	0	0	0	603	903	0
8668	9	-26.8837	65.4172	-570.619	-82578.7	-56734.1	-5883.36	100.574	444.718	0	0	0	0	0	0	0	200	903	0	0	0	0	0	0	0	603	903	0
8669	0	-27.0363	64.3491	-571.534	-82395.7	-57039.3	-5883.36	100.2	444.166	0	0	0	0	0	0	0	200	903	0	0	0	0	0	0	0	603	903	0
8669	1	-27.6466	64.6543	-572.755	-83494.3	-57161.4	-5929.14	100.199	445.777	0	0	0	0	0	0	0	200	903	0	0	0	0	0	0	0	603	903	0
8669	2	-28.4096	65.112	-573.366	-82578.7	-57344.5	-5929.14	99.9862	444.025	0	0	0	0	0	0	0	200	903	0	0	0	0	0	0	0	603	903	0
8669	3	-26.8837	64.6543	-571.229	-83769	-57527.6	-5608.7	99.2916	446.647	0	0	0	0	0	0	0	200	903	0	0	0	0	0	0	0	603	903	0
8669	4	-28.1044	63.4336	-573.06	-83494.3	-57222.4	-5700.26	100.146	445.699	0	0	0	0	0	0	0	200	903	0	0	0	0	0	0	0	603	903	0
8669	5	-27.7992	64.1965	-571.534	-83494.3	-57405.5	-5150.94	99.5589	446.088	0	0	0	0	0	0	0	200	903	0	0	0	0	0	0	0	603	903	0
8669	6	-26.8837	62.2129	-573.366	-83860.5	-57588.6	-5288.27	99.5603	446.26	0	0	0	0	0	0	0	200	903	0	0	0	0	0	0	0	603	903	0
8669	7	-26.5785	62.3655	-567.872	-83952	-57893.8	-5105.16	98.0514	447.836	0	0	0	0	0	0	0	200	903	0	0	0	0	0	0	0	603	903	0
8669	8	-27.6466	62.0603	-572.145	-85233.8	-57222.4	-5334.04	99.9861	448.972	0	0	0	0	0	0	0	200	903	0	0	0	0	0	0	0	603	903	0
8669	9	-27.6466	61.2973	-569.093	-85233.8	-57283.5	-5059.39	99.3426	449.771	0	0	0	0	0	0	0	200	903	0	0	0	0	0	0	0	603	903	0
8670	0	-27.1889	61.7551	-570.314	-84592.9	-57527.6	-5288.27	99.1299	448.327	0	0	0	0	0	0	0	200	903	0	0	0	0	0	0	0	603	903	0
8670	1	-27.0363	62.0603	-567.567	-84867.6	-57405.5	-5013.61	98.8569	449.529	0	0	0	0	0	0	0	200	903	0	0	0	0	0	0	0	603	903	0
8670	2	-27.0363	60.5344	-571.84	-85233.8	-57344.5	-5242.49	99.7193	449.052	0	0	0	0	0	0	0	200	903	0	0	0	0	0	0	0	603	903	0
8670	3	-28.5622	60.2292	-570.314	-85233.8	-57954.8	-5288.27	98.3808	449.451	0	0	0	0	0	0	0	200	903	0	0	0	0	0	0	0	603	903	0
8670	4	-25.9682	59.4663	-567.567	-85416.9	-57771.7	-4876.28	98.2116	450.497	0	0	0	0	0	0	0	200	903	0	0	0	0	0	0	0	603	903	0
8670	5	-27.3415	58.7034	-564.821	-85050.7	-57466.6	-4418.52	98.257	450.58	0	0	0	0	0	0	0	200	903	0	0	0	0	0	0	0	603	903	0
8670	6	-26.7311	57.7878	-566.041	-85050.7	-57344.5	-4738.95	98.692	450.255	0	0	0	0	0	0	0	200	903	0	0	0	0	0	0	0	603	903	0
8670	7	-26.8837	57.4826	-567.872	-85508.4	-57710.7	-4555.85	98.3738	450.577	0	0	0	0	0	0	0	200	903	0	0	0	0	0	0	0	603	903	0
8670	8	-27.1889	56.8723	-566.041	-85325.4	-57588.6	-4693.18	98.2607	450.74	0	0	0	0	0	0	0	200	903	0	0	0	0	0	0	0	603	903	0
8670	9	-27.6466	54.8887	-562.99	-85325.4	-57222.4	-4464.29	98.3597	451.558	0	0	0	0	0	0	0	200	903	0	0	0	0	0	0	0	603	903	0
8671	0	-28.257	55.0412	-562.99	-85142.2	-57283.5	-4464.29	98.2513	451.232	0	0	0	0	0	0	0	200	903	0	0	0	0	0	0	0	603	903	0
8671	1	-26.7311	54.4309	-562.379	-86240.8	-57893.8	-4418.52	97.0556	453.35	0	0	0	0	0	0	0	200	903	0	0	0	0	0	0	0	603	903	0
8671	2	-26.8837	53.6679	-563.905	-86240.8	-57893.8	-4098.08	97.3341	452.935	0	0	0	0	0	0	0	200	903	0	0	0	0	0	0	0	603	903	0
8671	3	-29.0199	53.8205	-559.633	-86240.8	-57161.4	-3960.75	97.8591	454.103	0	0	0	0	0	0	0	200	903	0	0	0	0	0	0	0	603	903	0
8671	4	-27.9518	53.0576	-562.99	-86424	-57161.4	-4098.08	98.4681	453.509	0	0	0	0	0	0	0	200	903	0	0	0	0	0	0	0	603	903	0
8671	5	-28.5622	53.0576	-560.853	-87156.4	-57161.4	-3960.75	98.0814	455.4	0	0	0	0	0	0	0	200	903	0	0	0	0	0	0	0	603	903	0
8671	6	-26.5785	52.5998	-558.717	-86790.2	-57100.4	-3823.43	97.801	455.338	0	0	0	0	0	0	0	200	903	0	0	0	0	0	0	0	603	903	0
8671	7	-27.0363	50.1584	-557.802	-87247.9	-57344.5	-3686.1	97.1955	456.414	0	0	0	0	0	0	0	200	903	0	0	0	0	0	0	0	603	903	0
8671	8	-26.8837	51.2265	-558.717	-85783.1	-57649.7	-3914.98	96.8178	453.536	0	0	0	0	0	0	0	200	903	0	0	0	0	0	0	0	603	903	0
8671	9	-28.1044	51.2265	-558.107	-86332.4	-57527.6	-3823.43	96.9237	454.688	0	0	0	0	0	0	0	200	903	0	0	0	0	0	0	0	603	903	0
8672	0	-27.494	50.311	-556.886	-86424	-57405.5	-3457.21	96.9169	455.192	0	0	0	0	0	0	0	200	903	0	0	0	0	0	0	0	603	903	0
8672	1	-28.8673	49.5481	-553.224	-87064.9	-57283.5	-3457.21	96.4552	457.377	0	0	0	0	0	0	0	200	903	0	0	0	0	0	0	0	603	903	0
8672	2	-27.6466	48.7851	-554.139	-86881.7	-58015.9	-3091	95.3046	456.787	0	0	0	0	0	0	0	200	903	0	0	0	0	0	0	0	603	903	0
8672	3	-28.1044	49.0903	-556.581	-86607.1	-57832.8	-3319.89	96.0928	455.606	0	0	0	0	0	0	0	200	903	0	0	0	0	0	0	0	603	903	0
8672	4	-28.257	46.4963	-555.665	-86881.7	-57405.5	-3182.56	96.6905	456.356	0	0	0	0	0	0	0	200	903	0	0	0	0	0	0	0	603	903	0
8672	5	-28.7147	48.0222	-553.529	-86790.2	-57222.4	-3182.56	96.6226	456.794	0	0	0	0	0	0	0	200	903	0	0	0	0	0	0	0	603	903	0
8672	6	-28.7147	47.717	-550.172	-87888.8	-57588.6	-3274.11	95.3262	459.748	0	0	0	0	0	0	0	200	903	0	0	0	0	0	0	0	603	903	0
8672	7	-27.6466	47.2593	-550.172	-87888.8	-57466.6	-2953.67	95.548	459.748	0	0	0	0	0	0	0	200	903	0	0	0	0	0	0	0	603	903	0
8672	8	-28.4096	46.8015	-551.088	-87705.7	-57405.5	-2862.12	95.8323	459.15	0	0	0	0	0	0	0	200	903	0	0	0	0	0	0	0	603	903	0
8672	9	-29.0199	46.1911	-550.172	-87339.5	-57405.5	-3091	95.659	458.749	0	0	0	0	0	0	0	200	903	0	0	0	0	0	0	0	603	903	0
8673	0	-30.088	45.5808	-548.646	-88163.5	-57527.6	-2999.45	95.1463	460.693	0	0	0	0	0	0	0	200	903	0	0	0	0	0	0	0	603	903	0
8673	1	-29.7829	44.9704	-546.205	-88071.9	-57100.4	-2816.34	95.4598	461.243	0	0	0	0	0	0	0	200	903	0	0	0	0	0	0	0	603	903	0
8673	2	-29.3251	44.0549	-545.289	-86973.3	-57222.4	-2679.02	95.0604	459.499	0	0	0	0	0	0	0	200	903	0	0	0	0	0	0	0	603	903	0
8673	3	-28.7147	43.5971	-546.51	-87797.3	-57527.6	-2679.02	94.7364	460.651	0	0	0	0	0	0	0	200	903	0	0	0	0	0	0	0	603	903	0
8673	4	-29.0199	44.0549	-546.205	-87614.1	-57588.6	-2587.46	94.5659	460.405	0	0	0	0	0	0	0	200	903	0	0	0	0	0	0	0	603	903	0
8673	5	-30.088	43.4446	-544.984	-87064.9	-57039.3	-2221.25	95.3377	459.757	0	0	0	0	0	0	0	200	903	0	0	0	0	0	0	0	603	903	0
8673	6	-30.3932	42.6816	-541.017	-87614.1	-56978.3	-2267.03	94.683	461.943	0	0	0	0	0	0	0	200	903	0	0	0	0	0	0	0	603	903	0
8673	7	-30.088	41.0032	-540.407	-87705.7	-57405.5	-2312.8	93.7734	462.296	0	0	0	0	0	0	0	200	903	0	0	0	0	0	0	0	603	903	0
8673	8	-29.4777	41.9187	-539.491	-87888.8	-57222.4	-2129.7	93.9326	462.911	0	0	0	0	0	0	0	200	903	0	0	0	0	0	0	0	603	903	0
8673	9	-29.9354	41.0032	-539.796	-88621.2	-57283.5	-1946.59	93.8795	464.175	0	0	0	0	0	0	0	200	903	0	0	0	0	0	0	0	603	903	0
8674	0	-31.6139	41.0032	-539.186	-88529.7	-56978.3	-1992.37	94.3253	464.191	0	0	0	0	0	0	0	200	903	0	0	0	0	0	0	0	603	903	0
8674	1	-30.2406	40.8506	-536.439	-88621.2	-56917.2	-2083.92	93.8981	465.203	0	0	0	0	0	0	0	200	903	0	0	0	0	0	0	0	603	903	0
8674	2	-30.6984	40.5454	-532.472	-88804.3	-56734.1	-1809.26	93.4514	466.777	0	0	0	0	0	0	0	200	903	0	0	0	0	0	0	0	603	903	0
8674	3	-29.6303	40.2402	-533.693	-88712.8	-56795.2	-1717.71	93.5807	466.224	0	0	0	0	0	0	0	200	903	0	0	0	0	0	0	0	603	903	0
8674	4	-30.088	39.3247	-534.608	-88529.7	-56978.3	-1763.49	93.4205	465.597	0	0	0	0	0	0	0	200	903	0	0	0	0	0	0	0	603	903	0
8674	5	-30.5458	39.935	-533.693	-87888.8	-57039.3	-1305.72	93.1233	464.681	0	0	0	0	0	0	0	200	903	0	0	0	0	0	0	0	603	903	0
8674	6	-29.1725	39.3247	-530.946	-88163.5	-56551	-1855.04	93.4901	466.05	0	0	0	0	0	0	0	200	903	0	0	0	0	0	0	0	603	903	0
8674	7	-30.3932	38.4092	-527.284	-88163.5	-56612.1	-1488.83	92.6346	467.203	0	0	0	0	0	0	0	200	903	0	0	0	0	0	0	0	603	903	0
8674	8	-29.6303	38.5617	-528.2	-88438.1	-56917.2	-1900.82	92.2429	467.433	0	0	0	0	0	0	0	200	903	0	0	0	0	0	0	0	603	903	0
8674	9	-29.6303	37.6462	-529.115	-88895.9	-56856.2	-1671.94	92.5447	468.009	0	0	0	0	0	0	0	200	903	0	0	0	0	0	0	0	603	903	0
8675	0	-31.0036	37.1885	-528.2	-89170.5	-56367.9	-1488.83	93.2829	468.82	0	0	0	0	0	0	0	200	903	0	0	0	0	0	0	0	603	903	0
8675	1	-28.7147	37.0359	-525.148	-88987.5	-56245.9	-1443.05	92.8952	469.452	0	0	0	0	0	0	0	200	903	0	0	0	0	0	0	0	603	903	0
8675	2	-30.5458	37.1885	-523.927	-89353.7	-56184.8	-1580.38	92.7621	470.546	0	0	0	0	0	0	0	200	903	0	0	0	0	0	0	0	603	903	0
8675	3	-29.3251	37.0359	-522.706	-88895.9	-56612.1	-1397.28	91.6943	470.069	0	0	0	0	0	0	0	200	903	0	0	0	0	0	0	0	603	903	0
8675	4	-28.4096	35.3574	-523.927	-89262.1	-55574.5	-1443.05	93.9271	470.371	0	0	0	0	0	0	0	200	903	0	0	0	0	0	0	0	603	903	0
8675	5	-27.9518	35.8152	-520.57	-88438.1	-56367.9	-1488.83	91.7188	469.887	0	0	0	0	0	0	0	200	903	0	0	0	0	0	0	0	603	903	0
8675	6	-30.3932	35.8152	-520.875	-88346.6	-56245.9	-1626.16	92.0167	469.612	0	0	0	0	0	0	0	200	903	0	0	0	0	0	0	0	603	903	0
8675	7	-30.088	35.2048	-519.044	-88255	-56001.7	-1351.5	92.1061	470.034	0	0	0	0	0	0	0	200	903	0	0	0	0	0	0	0	603	903	0
8675	8	-29.3251	34.4419	-517.518	-88346.6	-55879.6	-985.29	92.0238	470.712	0	0	0	0	0	0	0	200	903	0	0	0	0	0	0	0	603	903	0
8675	9	-27.0363	33.6789	-518.129	-88621.2	-56429	-939.513	91.0908	471.041	0	0	0	0	0	0	0	200	903	0	0	0	0	0	0	0	603	903	0
8676	0	-28.8673	31.8479	-517.518	-88804.3	-56062.8	-939.513	91.67	471.596	0	0	0	0	0	0	0	200	903	0	0	0	0	0	0	0	603	903	0
8676	1	-29.4777	32.916	-515.382	-89262.1	-55391.4	-1122.62	92.5237	473.196	0	0	0	0	0	0	0	200	903	0	0	0	0	0	0	0	603	903	0
8676	2	-29.9354	32.3056	-513.246	-89536.7	-55635.5	-847.961	91.6007	474.452	0	0	0	0	0	0	0	200	903	0	0	0	0	0	0	0	603	903	0
8676	3	-28.1044	32.3056	-512.941	-89628.3	-55940.7	-1168.4	90.9412	474.734	0	0	0	0	0	0	0	200	903	0	0	0	0	0	0	0	603	903	0
8676	4	-28.4096	32.6108	-511.11	-88255	-55635.5	-664.855	91.1476	472.673	0	0	0	0	0	0	0	200	903	0	0	0	0	0	0	0	603	903	0
8676	5	-28.5622	31.6953	-512.636	-89079	-55696.5	-893.737	91.3526	473.767	0	0	0	0	0	0	0	200	903	0	0	0	0	0	0	0	603	903	0
8676	6	-29.4777	30.1694	-511.415	-89445.2	-55696.5	-1168.4	91.0932	474.898	0	0	0	0	0	0	0	200	903	0	0	0	0	0	0	0	603	903	0
8676	7	-30.088	31.3901	-509.279	-89994.5	-56062.8	-893.737	89.9173	476.71	0	0	0	0	0	0	0	200	903	0	0	0	0	0	0	0	603	903	0
8676	8	-28.8673	30.9324	-509.889	-88987.5	-55269.3	-847.961	91.6052	474.523	0	0	0	0	0	0	0	200	903	0	0	0	0	0	0	0	603	903	0
8676	9	-28.4096	29.8642	-506.532	-88987.5	-55269.3	-664.855	90.8869	475.68	0	0	0	0	0	0	0	200	903	0	0	0	0	0	0	0	603	903	0
8677	0	-28.4096	29.7116	-507.753	-88163.5	-55574.5	-802.184	90.5482	473.635	0	0	0	0	0	0	0	200	903	0	0	0	0	0	0	0	603	903	0
8677	1	-28.4096	29.5591	-508.058	-89170.5	-55696.5	-847.961	90.3736	475.513	0	0	0	0	0	0	0	200	903	0	0	0	0	0	0	0	603	903	0
8677	2	-29.4777	27.728	-504.701	-89628.3	-55025.2	-710.631	90.9747	477.587	0	0	0	0	0	0	0	200	903	0	0	0	0	0	0	0	603	903	0
8677	3	-27.9518	29.2539	-504.091	-89628.3	-55086.2	-664.855	90.7216	477.802	0	0	0	0	0	0	0	200	903	0	0	0	0	0	0	0	603	903	0
8677	4	-28.4096	29.2539	-505.922	-89628.3	-55574.5	-756.408	90.152	477.159	0	0	0	0	0	0	0	200	903	0	0	0	0	0	0	0	603	903	0
8677	5	-27.6466	30.0168	-501.954	-89811.4	-55391.4	-756.408	89.6486	478.923	0	0	0	0	0	0	0	200	903	0	0	0	0	0	0	0	603	903	0
8677	6	-29.3251	29.2539	-504.701	-89994.5	-55025.2	-664.855	90.9747	478.313	0	0	0	0	0	0	0	200	903	0	0	0	0	0	0	0	603	903	0
8677	7	-30.2406	28.4909	-501.039	-90177.6	-55147.2	-481.75	89.9342	479.981	0	0	0	0	0	0	0	200	903	0	0	0	0	0	0	0	603	903	0
8677	8	-28.7147	26.9651	-500.429	-90452.3	-55452.4	-527.526	89.1902	480.75	0	0	0	0	0	0	0	200	903	0	0	0	0	0	0	0	603	903	0
8677	9	-28.1044	28.3384	-501.039	-89536.7	-55391.4	-390.197	89.447	478.702	0	0	0	0	0	0	0	200	903	0	0	0	0	0	0	0	603	903	0
8678	0	-27.9518	28.1858	-501.039	-89903	-54536.9	-435.973	91.1524	479.433	0	0	0	0	0	0	0	200	903	0	0	0	0	0	0	0	603	903	0
8678	1	-29.1725	28.4909	-499.513	-89811.4	-55086.2	-390.197	89.7202	479.798	0	0	0	0	0	0	0	200	903	0	0	0	0	0	0	0	603	903	0
8678	2	-29.0199	27.4228	-497.987	-89445.2	-55147.2	-527.526	89.2597	479.613	0	0	0	0	0	0	0	200	903	0	0	0	0	0	0	0	603	903	0
8678	3	-28.7147	27.2702	-497.377	-89536.7	-54781	-573.302	89.8601	480.018	0	0	0	0	0	0	0	200	903	0	0	0	0	0	0	0	603	903	0
8678	4	-28.1044	26.6599	-495.851	-89994.5	-54720	-115.539	89.6443	481.495	0	0	0	0	0	0	0	200	903	0	0	0	0	0	0	0	603	903	0
8678	5	-28.1044	26.5073	-498.292	-89994.5	-55269.3	-390.197	89.0826	480.606	0	0	0	0	0	0	0	200	903	0	0	0	0	0	0	0	603	903	0
8678	6	-28.8673	26.0495	-497.682	-90818.5	-54964.1	-344.421	89.5597	482.483	0	0	0	0	0	0	0	200	903	0	0	0	0	0	0	0	603	903	0
8678	7	-28.257	25.7444	-494.63	-90635.4	-54597.9	-252.868	89.6187	483.239	0	0	0	0	0	0	0	200	903	0	0	0	0	0	0	0	603	903	0
8678	8	-27.3415	26.0495	-493.409	-91001.6	-54475.8	-390.197	89.593	484.434	0	0	0	0	0	0	0	200	903	0	0	0	0	0	0	0	603	903	0
8678	9	-25.3578	26.3547	-494.935	-91001.6	-54903.1	-481.75	89.0702	483.866	0	0	0	0	0	0	0	200	903	0	0	0	0	0	0	0	603	903	0
8679	0	-27.0363	26.8125	-490.663	-90910	-54842.1	-573.302	88.2287	485.28	0	0	0	0	0	0	0	200	903	0	0	0	0	0	0	0	603	903	0
8679	1	-28.5622	24.9814	-493.715	-91001.6	-54231.7	-161.315	90.1558	484.32	0	0	0	0	0	0	0	200	903	0	0	0	0	0	0	0	603	903	0
8679	2	-29.0199	25.5918	-491.273	-90177.6	-54781	-161.315	88.4918	483.559	0	0	0	0	0	0	0	200	903	0	0	0	0	0	0	0	603	903	0
8679	3	-27.6466	25.2866	-489.747	-90360.8	-54781	-527.526	88.1443	484.505	0	0	0	0	0	0	0	200	903	0	0	0	0	0	0	0	603	903	0
8679	4	-26.2733	24.2185	-490.968	-91001.6	-54292.7	-344.421	89.417	485.351	0	0	0	0	0	0	0	200	903	0	0	0	0	0	0	0	603	903	0
8679	5	-27.1889	24.5237	-492.189	-90818.5	-54353.8	-298.644	89.5672	484.52	0	0	0	0	0	0	0	200	903	0	0	0	0	0	0	0	603	903	0
8679	6	-27.7992	24.3711	-491.884	-91001.6	-54720	-344.421	88.7542	485.006	0	0	0	0	0	0	0	200	903	0	0	0	0	0	0	0	603	903	0
8679	7	-25.3578	24.2185	-490.053	-90727	-54597.9	-252.868	88.5876	485.137	0	0	0	0	0	0	0	200	903	0	0	0	0	0	0	0	603	903	0
8679	8	-26.8837	23.6081	-486.39	-91917.1	-54353.8	-161.315	88.2507	488.978	0	0	0	0	0	0	0	200	903	0	0	0	0	0	0	0	603	903	0
8679	9	-26.2733	23.7607	-488.527	-92191.8	-54109.6	-207.091	89.2392	488.714	0	0	0	0	0	0	0	200	903	0	0	0	0	0	0	0	603	903	0
8680	0	-25.9682	24.2185	-489.747	-92100.2	-54597.9	-435.973	88.5182	488.057	0	0	0	0	0	0	0	200	903	0	0	0	0	0	0	0	603	903	0
8680	1	-25.8156	23.9133	-490.358	-92191.8	-54170.7	-252.868	89.5283	488.009	0	0	0	0	0	0	0	200	903	0	0	0	0	0	0	0	603	903	0
8680	2	-26.8837	23.303	-489.747	-92008.7	-54109.6	-207.091	89.5152	487.87	0	0	0	0	0	0	0	200	903	0	0	0	0	0	0	0	603	903	0
8680	3	-26.8837	22.3874	-487.916	-92283.4	-54475.8	-344.421	88.35	489.138	0	0	0	0	0	0	0	200	903	0	0	0	0	0	0	0	603	903	0
8680	4	-25.663	23.1504	-487.611	-91550.9	-54781	-298.644	87.6543	487.754	0	0	0	0	0	0	0	200	903	0	0	0	0	0	0	0	603	903	0
8680	5	-26.1208	22.8452	-489.442	-91276.2	-54170.7	-115.539	89.3216	486.49	0	0	0	0	0	0	0	200	903	0	0	0	0	0	0	0	603	903	0
8680	6	-25.663	21.4719	-487.306	-91825.6	-54048.6	21.7904	89.0869	488.435	0	0	0	0	0	0	0	200	903	0	0	0	0	0	0	0	603	903	0
8680	7	-26.4259	21.3193	-487.916	-92374.9	-54353.8	-207.091	88.6002	489.325	0	0	0	0	0	0	0	200	903	0	0	0	0	0	0	0	603	903	0
8680	8	-25.9682	21.3193	-486.39	-92283.4	-54536.9	21.7904	87.8743	489.731	0	0	0	0	0	0	0	200	903	0	0	0	0	0	0	0	603	903	0
8680	9	-25.3578	21.6245	-486.39	-92649.6	-53987.6	21.7904	89.0037	490.484	0	0	0	0	0	0	0	200	903	0	0	0	0	0	0	0	603	903	0
8681	0	-23.5268	19.0305	-487.306	-92649.6	-53987.6	-69.7623	89.2122	490.126	0	0	0	0	0	0	0	200	903	0	0	0	0	0	0	0	603	903	0
8681	1	-25.663	20.5564	-487.306	-93473.5	-53865.5	-390.197	89.4627	491.817	0	0	0	0	0	0	0	200	903	0	0	0	0	0	0	0	603	903	0
8681	2	-26.2733	20.8616	-487.306	-93290.4	-54170.7	-69.7623	88.8364	491.441	0	0	0	0	0	0	0	200	903	0	0	0	0	0	0	0	603	903	0
8681	3	-26.1208	20.8616	-487.001	-93473.5	-53804.5	159.12	89.5188	491.937	0	0	0	0	0	0	0	200	903	0	0	0	0	0	0	0	603	903	0
8681	4	-25.663	20.709	-484.254	-93565.1	-54658.9	-161.315	87.1276	493.215	0	0	0	0	0	0	0	200	903	0	0	0	0	0	0	0	603	903	0
8681	5	-24.4423	20.5564	-485.475	-94205.9	-54231.7	113.343	88.2915	494.049	0	0	0	0	0	0	0	200	903	0	0	0	0	0	0	0	603	903	0
8681	6	-24.9	19.6408	-486.39	-94205.9	-53926.5	113.343	89.1292	493.684	0	0	0	0	0	0	0	200	903	0	0	0	0	0	0	0	603	903	0
8681	7	-25.0526	20.0986	-486.696	-94022.9	-53743.4	250.672	89.5749	493.186	0	0	0	0	0	0	0	200	903	0	0	0	0	0	0	0	603	903	0
8681	8	-25.663	19.4883	-483.339	-94114.4	-54231.7	159.12	87.7977	494.717	0	0	0	0	0	0	0	200	903	0	0	0	0	0	0	0	603	903	0
8681	9	-25.0526	19.6408	-484.559	-93656.6	-54231.7	250.672	88.0804	493.282	0	0	0	0	0	0	0	200	903	0	0	0	0	0	0	0	603	903	0
8682	0	-24.4423	18.5727	-484.559	-93290.4	-53865.5	113.343	88.8362	492.526	0	0	0	0	0	0	0	200	903	0	0	0	0	0	0	0	603	903	0
8682	1	-23.9845	18.5727	-485.475	-93748.2	-54109.6	113.343	88.5429	493.106	0	0	0	0	0	0	0	200	903	0	0	0	0	0	0	0	603	903	0
8682	2	-23.9845	17.6572	-486.39	-94205.9	-54414.8	-69.7623	88.1253	493.684	0	0	0	0	0	0	0	200	903	0	0	0	0	0	0	0	603	903	0
8682	3	-24.7475	18.115	-485.475	-94938.4	-54170.7	21.7904	88.4172	495.558	0	0	0	0	0	0	0	200	903	0	0	0	0	0	0	0	603	903	0
8682	4	-25.2052	18.115	-483.644	-95213	-53865.5	159.12	88.6257	496.866	0	0	0	0	0	0	0	200	903	0	0	0	0	0	0	0	603	903	0
8682	5	-23.8319	18.7253	-483.644	-95670.8	-53987.6	250.672	88.3733	497.812	0	0	0	0	0	0	0	200	903	0	0	0	0	0	0	0	603	903	0
8682	6	-23.6793	18.2676	-483.949	-95396.1	-53438.2	21.7904	89.5788	497.12	0	0	0	0	0	0	0	200	903	0	0	0	0	0	0	0	603	903	0
8682	7	-22.4586	17.9624	-485.78	-95487.7	-52950	159.12	91.0001	496.566	0	0	0	0	0	0	0	200	903	0	0	0	0	0	0	0	603	903	0
8682	8	-24.1371	17.1994	-485.78	-95487.7	-53499.3	433.778	89.8693	496.566	0	0	0	0	0	0	0	200	903	0	0	0	0	0	0	0	603	903	0
8682	9	-22.3061	17.352	-483.644	-95304.6	-54170.7	204.896	87.9947	497.055	0	0	0	0	0	0	0	200	903	0	0	0	0	0	0	0	603	903	0
8683	0	-23.3742	17.1994	-483.949	-95579.3	-53926.5	159.12	88.5698	497.499	0	0	0	0	0	0	0	200	903	0	0	0	0	0	0	0	603	903	0
8683	1	-22.4586	16.4365	-482.118	-95487.7	-53743.4	433.778	88.5264	498.059	0	0	0	0	0	0	0	200	903	0	0	0	0	0	0	0	603	903	0
8683	2	-22.7638	16.1313	-485.17	-95762.3	-53621.3	250.672	89.4792	497.379	0	0	0	0	0	0	0	200	903	0	0	0	0	0	0	0	603	903	0
8683	3	-22.4586	15.0632	-479.371	-95853.9	-54292.7	433.778	86.7418	499.958	0	0	0	0	0	0	0	200	903	0	0	0	0	0	0	0	603	903	0
8683	4	-22.3061	15.3684	-486.39	-96861	-54109.6	479.554	88.7527	499.142	0	0	0	0	0	0	0	200	903	0	0	0	0	0	0	0	603	903	0
8683	5	-23.069	15.0632	-483.949	-97227.2	-53621.3	616.883	89.2004	500.904	0	0	0	0	0	0	0	200	903	0	0	0	0	0	0	0	603	903	0
8683	6	-22.3061	15.521	-483.644	-97410.3	-53743.4	479.554	88.8781	501.409	0	0	0	0	0	0	0	200	903	0	0	0	0	0	0	0	603	903	0
8683	7	-21.5431	15.6736	-483.644	-97410.3	-54231.7	616.883	87.8685	501.409	0	0	0	0	0	0	0	200	903	0	0	0	0	0	0	0	603	903	0
8683	8	-21.6957	15.6736	-485.78	-97410.3	-54048.6	433.778	88.7386	500.523	0	0	0	0	0	0	0	200	903	0	0	0	0	0	0	0	603	903	0
8683	9	-23.069	14.1477	-485.475	-97410.3	-53682.4	433.778	89.423	500.65	0	0	0	0	0	0	0	200	903	0	0	0	0	0	0	0	603	903	0
8684	0	-21.6957	15.0632	-485.17	-97868	-53682.4	571.107	89.3534	501.719	0	0	0	0	0	0	0	200	903	0	0	0	0	0	0	0	603	903	0
8684	1	-22.3061	14.758	-485.17	-97135.6	-54231.7	571.107	88.2212	500.21	0	0	0	0	0	0	0	200	903	0	0	0	0	0	0	0	603	903	0
8684	2	-21.3905	14.4529	-485.78	-97593.4	-53987.6	479.554	88.8642	500.9	0	0	0	0	0	0	0	200	903	0	0	0	0	0	0	0	603	903	0
8684	3	-20.7802	13.3847	-487.611	-98142.7	-53865.5	616.883	89.5319	501.273	0	0	0	0	0	0	0	200	903	0	0	0	0	0	0	0	603	903	0
8684	4	-20.6276	13.2322	-485.17	-98234.2	-54109.6	662.66	88.4728	502.474	0	0	0	0	0	0	0	200	903	0	0	0	0	0	0	0	603	903	0
8684	5	-21.3905	12.7744	-488.832	-98142.7	-54109.6	891.542	89.3083	500.77	0	0	0	0	0	0	0	200	903	0	0	0	0	0	0	0	603	903	0
8684	6	-21.5431	12.927	-487.306	-98508.9	-53682.4	754.213	89.8384	502.15	0	0	0	0	0	0	0	200	903	0	0	0	0	0	0	0	603	903	0
8684	7	-19.4069	12.7744	-487.306	-99332.9	-53865.5	616.883	89.4627	503.841	0	0	0	0	0	0	0	200	903	0	0	0	0	0	0	0	603	903	0
8684	8	-20.7802	12.3166	-486.696	-99516	-53560.3	754.213	89.9511	504.473	0	0	0	0	0	0	0	200	903	0	0	0	0	0	0	0	603	903	0
8684	9	-20.0172	12.7744	-489.747	-98783.6	-53682.4	754.213	90.3876	501.703	0	0	0	0	0	0	0	200	903	0	0	0	0	0	0	0	603	903	0
8685	0	-20.9328	12.0115	-490.968	-99882.2	-53743.4	983.094	90.5358	503.439	0	0	0	0	0	0	0	200	903	0	0	0	0	0	0	0	603	903	0
8685	1	-19.2543	12.0115	-489.442	-100065	-54231.7	616.883	89.1969	504.448	0	0	0	0	0	0	0	200	903	0	0	0	0	0	0	0	603	903	0
8685	2	-20.475	11.7063	-490.053	-100889	-54170.7	1120.42	89.4595	505.874	0	0	0	0	0	0	0	200	903	0	0	0	0	0	0	0	603	903	0
8685	3	-19.1017	10.7908	-490.358	-99882.2	-53865.5	1166.2	90.1506	503.693	0	0	0	0	0	0	0	200	903	0	0	0	0	0	0	0	603	903	0
8685	4	-19.2543	10.9433	-492.189	-100065	-53987.6	1166.2	90.3113	503.307	0	0	0	0	0	0	0	200	903	0	0	0	0	0	0	0	603	903	0
8685	5	-19.5595	10.1804	-489.137	-100065	-54292.7	754.213	89.003	504.575	0	0	0	0	0	0	0	200	903	0	0	0	0	0	0	0	603	903	0
8685	6	-19.8646	10.333	-493.104	-100432	-54414.8	1074.65	89.6485	503.672	0	0	0	0	0	0	0	200	903	0	0	0	0	0	0	0	603	903	0
8685	7	-20.1698	10.1804	-491.273	-100981	-53804.5	891.542	90.4796	505.549	0	0	0	0	0	0	0	200	903	0	0	0	0	0	0	0	603	903	0
8685	8	-18.7965	9.41746	-491.884	-101805	-54109.6	845.765	89.9951	506.969	0	0	0	0	0	0	0	200	903	0	0	0	0	0	0	0	603	903	0
8685	9	-18.9491	8.34935	-492.799	-102080	-54597.9	891.542	89.2086	507.142	0	0	0	0	0	0	0	200	903	0	0	0	0	0	0	0	603	903	0
8686	0	-17.7284	9.11228	-495.851	-101164	-54597.9	983.094	89.8905	504.021	0	0	0	0	0	0	0	200	903	0	0	0	0	0	0	0	603	903	0
8686	1	-19.5595	9.26487	-497.072	-102354	-54231.7	891.542	90.8976	505.914	0	0	0	0	0	0	0	200	903	0	0	0	0	0	0	0	603	903	0
8686	2	-16.5077	7.89158	-495.241	-102903	-54353.8	1120.42	90.2477	507.785	0	0	0	0	0	0	0	200	903	0	0	0	0	0	0	0	603	903	0
8686	3	-18.6439	9.11228	-496.156	-102446	-54720	1395.08	89.7122	506.479	0	0	0	0	0	0	0	200	903	0	0	0	0	0	0	0	603	903	0
8686	4	-17.4232	8.34935	-496.156	-102629	-54475.8	983.094	90.2042	506.848	0	0	0	0	0	0	0	200	903	0	0	0	0	0	0	0	603	903	0
8686	5	-17.7284	7.12864	-498.903	-103178	-54231.7	983.094	91.298	506.81	0	0	0	0	0	0	0	200	903	0	0	0	0	0	0	0	603	903	0
8686	6	-18.4914	6.67088	-497.682	-102537	-54536.9	1028.87	90.4182	506.03	0	0	0	0	0	0	0	200	903	0	0	0	0	0	0	0	603	903	0
8686	7	-18.1862	6.06053	-499.513	-103178	-54353.8	1074.65	91.1865	506.557	0	0	0	0	0	0	0	200	903	0	0	0	0	0	0	0	603	903	0
8686	8	-17.881	6.82347	-498.597	-103087	-54353.8	1303.53	90.9867	506.753	0	0	0	0	0	0	0	200	903	0	0	0	0	0	0	0	603	903	0
8686	9	-17.4232	5.75535	-499.818	-104368	-54292.7	1440.86	91.375	508.813	0	0	0	0	0	0	0	200	903	0	0	0	0	0	0	0	603	903	0
8687	0	-16.5077	5.90794	-500.734	-104643	-54964.1	1623.96	90.2328	508.979	0	0	0	0	0	0	0	200	903	0	0	0	0	0	0	0	603	903	0
8687	1	-17.1181	6.51829	-502.565	-103911	-54720	1532.41	91.1185	506.761	0	0	0	0	0	0	0	200	903	0	0	0	0	0	0	0	603	903	0
8687	2	-17.5758	6.06053	-501.649	-105009	-54170.7	1578.19	92.0149	509.328	0	0	0	0	0	0	0	200	903	0	0	0	0	0	0	0	603	903	0
8687	3	-18.0336	4.83982	-501.039	-105009	-54536.9	1257.75	91.1524	509.583	0	0	0	0	0	0	0	200	903	0	0	0	0	0	0	0	603	903	0
8687	4	-16.9655	5.45018	-501.344	-105742	-54536.9	1486.63	91.2187	510.916	0	0	0	0	0	0	0	200	903	0	0	0	0	0	0	0	603	903	0
8687	5	-16.6603	5.75535	-502.87	-105192	-54658.9	2081.73	91.306	509.184	0	0	0	0	0	0	0	200	903	0	0	0	0	0	0	0	603	903	0
8687	6	-16.9655	4.99241	-504.091	-105009	-54353.8	1761.29	92.1746	508.314	0	0	0	0	0	0	0	200	903	0	0	0	0	0	0	0	603	903	0
8687	7	-17.881	3.9243	-504.091	-104826	-54536.9	1669.74	91.8114	507.951	0	0	0	0	0	0	0	200	903	0	0	0	0	0	0	0	603	903	0
8687	8	-17.4232	3.9243	-503.48	-105650	-55025.2	1669.74	90.7104	509.84	0	0	0	0	0	0	0	200	903	0	0	0	0	0	0	0	603	903	0
8687	9	-17.5758	3.00877	-504.701	-106108	-54720	1715.52	91.5794	510.239	0	0	0	0	0	0	0	200	903	0	0	0	0	0	0	0	603	903	0
8688	0	-16.6603	2.70359	-504.701	-106199	-54597.9	1761.29	91.8213	510.42	0	0	0	0	0	0	0	200	903	0	0	0	0	0	0	0	603	903	0
8688	1	-16.8129	3.00877	-506.532	-107481	-54414.8	1623.96	92.5738	512.19	0	0	0	0	0	0	0	200	903	0	0	0	0	0	0	0	603	903	0
8688	2	-16.05	2.39842	-505.006	-107664	-55025.2	1944.4	91.0406	513.194	0	0	0	0	0	0	0	200	903	0	0	0	0	0	0	0	603	903	0
8688	3	-17.1181	3.46653	-508.058	-106840	-54842.1	1807.07	92.0555	510.291	0	0	0	0	0	0	0	200	903	0	0	0	0	0	0	0	603	903	0
8688	4	-17.2707	3.16136	-505.922	-108122	-54781	1669.74	91.7204	513.713	0	0	0	0	0	0	0	200	903	0	0	0	0	0	0	0	603	903	0
8688	5	-17.2707	1.3303	-506.532	-108671	-54475.8	1761.29	92.4533	514.54	0	0	0	0	0	0	0	200	903	0	0	0	0	0	0	0	603	903	0
8688	6	-16.05	2.85618	-508.363	-108122	-54536.9	1990.17	92.7206	512.686	0	0	0	0	0	0	0	200	903	0	0	0	0	0	0	0	603	903	0
8688	7	-16.2025	2.24583	-510.499	-108030	-54842.1	1852.85	92.5717	511.617	0	0	0	0	0	0	0	200	903	0	0	0	0	0	0	0	603	903	0
8688	8	-17.2707	2.09324	-512.025	-108397	-54781	1944.4	93.0111	511.702	0	0	0	0	0	0	0	200	903	0	0	0	0	0	0	0	603	903	0
8688	9	-16.05	1.17771	-510.194	-108763	-54781	1761.29	92.6271	513.179	0	0	0	0	0	0	0	200	903	0	0	0	0	0	0	0	603	903	0
8689	0	-16.9655	0.719951	-512.025	-108946	-54903.1	2219.06	92.7727	512.775	0	0	0	0	0	0	0	200	903	0	0	0	0	0	0	0	603	903	0
8689	1	-15.8974	-1.26369	-510.499	-109221	-54903.1	2035.95	92.4522	513.949	0	0	0	0	0	0	0	200	903	0	0	0	0	0	0	0	603	903	0
8689	2	-16.3551	0.567363	-514.467	-109495	-54720	2035.95	93.6375	512.833	0	0	0	0	0	0	0	200	903	0	0	0	0	0	0	0	603	903	0
8689	3	-16.5077	0.109599	-510.499	-110228	-54292.7	2035.95	93.6478	515.921	0	0	0	0	0	0	0	200	903	0	0	0	0	0	0	0	603	903	0
8689	4	-16.6603	0.109599	-514.772	-110319	-54170.7	2081.73	94.7676	514.307	0	0	0	0	0	0	0	200	903	0	0	0	0	0	0	0	603	903	0
8689	5	-16.6603	0.414775	-513.551	-110685	-54109.6	2219.06	94.6363	515.53	0	0	0	0	0	0	0	200	903	0	0	0	0	0	0	0	603	903	0
8689	6	-15.5922	-0.0429889	-514.467	-111143	-54475.8	2035.95	94.112	516.036	0	0	0	0	0	0	0	200	903	0	0	0	0	0	0	0	603	903	0
8689	7	-15.287	-0.348165	-516.908	-111326	-55147.2	2081.73	93.3133	515.37	0	0	0	0	0	0	0	200	903	0	0	0	0	0	0	0	603	903	0
8689	8	-15.4396	-1.56887	-516.908	-111784	-55025.2	2402.16	93.5494	516.255	0	0	0	0	0	0	0	200	903	0	0	0	0	0	0	0	603	903	0
8689	9	-16.3551	-1.26369	-518.434	-111418	-54658.9	2219.06	94.5691	514.912	0	0	0	0	0	0	0	200	903	0	0	0	0	0	0	0	603	903	0
8690	0	-16.3551	-1.26369	-516.908	-111418	-54536.9	2264.83	94.494	515.547	0	0	0	0	0	0	0	200	903	0	0	0	0	0	0	0	603	903	0
8690	1	-14.3715	-1.87404	-517.824	-111693	-55086.2	2447.94	93.6198	515.696	0	0	0	0	0	0	0	200	903	0	0	0	0	0	0	0	603	903	0
8690	2	-15.7448	-2.33181	-519.96	-112516	-55025.2	2493.72	94.1742	516.395	0	0	0	0	0	0	0	200	903	0	0	0	0	0	0	0	603	903	0
8690	3	-14.8292	-2.78957	-519.96	-112516	-54720	2264.83	94.7611	516.395	0	0	0	0	0	0	0	200	903	0	0	0	0	0	0	0	603	903	0
8690	4	-15.287	-2.4844	-521.791	-112608	-54720	2402.16	95.1304	515.811	0	0	0	0	0	0	0	200	903	0	0	0	0	0	0	0	603	903	0
8690	5	-15.5922	-3.7051	-519.655	-112883	-55208.3	2631.04	93.7597	517.226	0	0	0	0	0	0	0	200	903	0	0	0	0	0	0	0	603	903	0
8690	6	-14.6767	-3.85769	-520.57	-113432	-55269.3	2447.94	93.8293	517.9	0	0	0	0	0	0	0	200	903	0	0	0	0	0	0	0	603	903	0
8690	7	-14.6767	-4.01027	-523.317	-114256	-55086.2	2447.94	94.7364	518.331	0	0	0	0	0	0	0	200	903	0	0	0	0	0	0	0	603	903	0
8690	8	-14.8292	-3.55251	-524.232	-114439	-54781	2676.82	95.5024	518.299	0	0	0	0	0	0	0	200	903	0	0	0	0	0	0	0	603	903	0
8690	9	-14.9818	-3.85769	-524.537	-113890	-55269.3	2951.48	94.6323	517.124	0	0	0	0	0	0	0	200	903	0	0	0	0	0	0	0	603	903	0
8691	0	-14.9818	-3.7051	-524.537	-115172	-55269.3	2631.04	94.6323	519.568	0	0	0	0	0	0	0	200	903	0	0	0	0	0	0	0	603	903	0
8691	1	-13.456	-4.16286	-524.537	-115263	-54781	2676.82	95.5632	519.742	0	0	0	0	0	0	0	200	903	0	0	0	0	0	0	0	603	903	0
8691	2	-13.6085	-4.01027	-526.674	-114988	-54781	2722.6	95.9868	518.33	0	0	0	0	0	0	0	200	903	0	0	0	0	0	0	0	603	903	0
8691	3	-14.3715	-5.07839	-526.979	-115263	-55513.4	2676.82	94.6572	518.724	0	0	0	0	0	0	0	200	903	0	0	0	0	0	0	0	603	903	0
8691	4	-15.4396	-5.53615	-526.368	-115538	-55635.5	2768.37	94.3031	519.5	0	0	0	0	0	0	0	200	903	0	0	0	0	0	0	0	603	903	0
8691	5	-14.9818	-7.06203	-528.2	-115446	-54781	2722.6	96.2873	518.565	0	0	0	0	0	0	0	200	903	0	0	0	0	0	0	0	603	903	0
8691	6	-13.7611	-6.1465	-529.115	-116911	-55208.3	2859.93	95.6593	520.956	0	0	0	0	0	0	0	200	903	0	0	0	0	0	0	0	603	903	0
8691	7	-14.3715	-6.60427	-531.251	-117277	-55391.4	2905.7	95.7341	520.757	0	0	0	0	0	0	0	200	903	0	0	0	0	0	0	0	603	903	0
8691	8	-13.3034	-6.45168	-532.167	-115721	-54964.1	2951.48	96.7164	517.452	0	0	0	0	0	0	0	200	903	0	0	0	0	0	0	0	603	903	0
8691	9	-13.9137	-6.29909	-533.998	-117643	-54903.1	3180.36	97.1848	520.307	0	0	0	0	0	0	0	200	903	0	0	0	0	0	0	0	603	903	0
8692	0	-13.9137	-6.29909	-531.556	-118010	-55330.3	2905.7	95.9088	522.008	0	0	0	0	0	0	0	200	903	0	0	0	0	0	0	0	603	903	0
8692	1	-13.3034	-7.21462	-532.777	-117643	-55330.3	2905.7	96.1473	520.812	0	0	0	0	0	0	0	200	903	0	0	0	0	0	0	0	603	903	0
8692	2	-12.5404	-10.1138	-534.608	-117918	-55330.3	2905.7	96.503	520.569	0	0	0	0	0	0	0	200	903	0	0	0	0	0	0	0	603	903	0
8692	3	-12.8456	-7.97756	-532.777	-118193	-55147.2	3043.03	96.491	521.843	0	0	0	0	0	0	0	200	903	0	0	0	0	0	0	0	603	903	0
8692	4	-13.456	-8.7405	-537.355	-118376	-55696.5	3088.81	96.3505	520.294	0	0	0	0	0	0	0	200	903	0	0	0	0	0	0	0	603	903	0
8692	5	-14.0663	-9.19826	-535.219	-119749	-55818.6	3088.81	95.7087	523.739	0	0	0	0	0	0	0	200	903	0	0	0	0	0	0	0	603	903	0
8692	6	-12.3878	-9.65603	-535.829	-120115	-55574.5	3271.91	96.2832	524.167	0	0	0	0	0	0	0	200	903	0	0	0	0	0	0	0	603	903	0
8692	7	-12.8456	-8.7405	-540.101	-119383	-55147.2	3134.58	97.8947	521.038	0	0	0	0	0	0	0	200	903	0	0	0	0	0	0	0	603	903	0
8692	8	-10.862	-9.50344	-537.355	-120573	-54842.1	3363.47	97.9407	524.383	0	0	0	0	0	0	0	200	903	0	0	0	0	0	0	0	603	903	0
8692	9	-13.3034	-9.9612	-540.407	-120573	-54842.1	3363.47	98.5171	523.116	0	0	0	0	0	0	0	200	903	0	0	0	0	0	0	0	603	903	0
8693	0	-13.3034	-9.80861	-539.186	-120115	-54964.1	3134.58	98.0609	522.772	0	0	0	0	0	0	0	200	903	0	0	0	0	0	0	0	603	903	0
8693	1	-12.2353	-11.0293	-540.407	-120939	-55635.5	3363.47	97.0488	523.793	0	0	0	0	0	0	0	200	903	0	0	0	0	0	0	0	603	903	0
8693	2	-11.7775	-11.4871	-542.543	-120665	-55818.6	3455.02	97.1167	522.406	0	0	0	0	0	0	0	200	903	0	0	0	0	0	0	0	603	903	0
8693	3	-12.693	-12.7078	-541.627	-121122	-55452.4	3226.14	97.6189	523.627	0	0	0	0	0	0	0	200	903	0	0	0	0	0	0	0	603	903	0
8693	4	-12.693	-12.4026	-544.679	-122404	-55513.4	3500.8	98.0805	524.727	0	0	0	0	0	0	0	200	903	0	0	0	0	0	0	0	603	903	0
8693	5	-13.1508	-13.013	-543.763	-122404	-55879.6	3500.8	97.2354	525.106	0	0	0	0	0	0	0	200	903	0	0	0	0	0	0	0	603	903	0
8693	6	-12.3878	-12.8604	-544.374	-122038	-55940.7	3729.68	97.2385	524.18	0	0	0	0	0	0	0	200	903	0	0	0	0	0	0	0	603	903	0
8693	7	-11.6249	-12.4026	-547.12	-122862	-55574.5	3821.23	98.4237	524.561	0	0	0	0	0	0	0	200	903	0	0	0	0	0	0	0	603	903	0
8693	8	-11.0146	-14.5388	-546.51	-123045	-55391.4	3683.9	98.6453	525.147	0	0	0	0	0	0	0	200	903	0	0	0	0	0	0	0	603	903	0
8693	9	-12.9982	-13.9285	-548.646	-123228	-55757.6	3683.9	98.3725	524.604	0	0	0	0	0	0	0	200	903	0	0	0	0	0	0	0	603	903	0
8694	0	-12.693	-16.0647	-547.731	-123228	-56184.8	3729.68	97.4226	524.98	0	0	0	0	0	0	0	200	903	0	0	0	0	0	0	0	603	903	0
8694	1	-11.4723	-15.7595	-549.257	-123503	-55696.5	3912.78	98.5965	524.855	0	0	0	0	0	0	0	200	903	0	0	0	0	0	0	0	603	903	0
8694	2	-11.7775	-16.5225	-552.003	-123503	-55879.6	3912.78	98.7693	523.736	0	0	0	0	0	0	0	200	903	0	0	0	0	0	0	0	603	903	0
8694	3	-12.3878	-16.8277	-552.003	-124785	-56184.8	4004.33	98.2165	526.058	0	0	0	0	0	0	0	200	903	0	0	0	0	0	0	0	603	903	0
8694	4	-11.7775	-16.0647	-551.698	-125151	-56367.9	4187.44	97.8283	526.847	0	0	0	0	0	0	0	200	903	0	0	0	0	0	0	0	603	903	0
8694	5	-11.9301	-16.5225	-553.834	-124693	-55879.6	4004.33	99.104	525.145	0	0	0	0	0	0	0	200	903	0	0	0	0	0	0	0	603	903	0
8694	6	-11.0146	-17.7432	-554.445	-125609	-55818.6	4278.99	99.3252	526.548	0	0	0	0	0	0	0	200	903	0	0	0	0	0	0	0	603	903	0
8694	7	-10.862	-17.5906	-557.191	-125700	-56551	4324.77	98.507	525.596	0	0	0	0	0	0	0	200	903	0	0	0	0	0	0	0	603	903	0
8694	8	-11.3197	-18.3535	-557.496	-125975	-56001.7	4324.77	99.5478	525.965	0	0	0	0	0	0	0	200	903	0	0	0	0	0	0	0	603	903	0
8694	9	-11.7775	-19.7268	-556.581	-125334	-56184.8	4324.77	99.0536	525.185	0	0	0	0	0	0	0	200	903	0	0	0	0	0	0	0	603	903	0
8695	0	-11.4723	-19.5742	-559.022	-125975	-56551	4599.43	98.8394	525.348	0	0	0	0	0	0	0	200	903	0	0	0	0	0	0	0	603	903	0
8695	1	-10.4042	-20.6424	-561.769	-126799	-56367.9	4462.1	99.6599	525.713	0	0	0	0	0	0	0	200	903	0	0	0	0	0	0	0	603	903	0
8695	2	-11.3197	-20.7949	-559.633	-127440	-56245.9	4828.31	99.495	527.72	0	0	0	0	0	0	0	200	903	0	0	0	0	0	0	0	603	903	0
8695	3	-12.3878	-21.2527	-564.21	-127256	-56367.9	4645.21	100.094	525.548	0	0	0	0	0	0	0	200	903	0	0	0	0	0	0	0	603	903	0
8695	4	-12.5404	-21.4053	-563.295	-128447	-57039.3	5148.75	98.7398	528.027	0	0	0	0	0	0	0	200	903	0	0	0	0	0	0	0	603	903	0
8695	5	-11.3197	-22.0156	-563.905	-128813	-56795.2	4736.76	99.2824	528.43	0	0	0	0	0	0	0	200	903	0	0	0	0	0	0	0	603	903	0
8695	6	-10.862	-22.1682	-567.567	-128264	-56490	5102.97	100.47	525.988	0	0	0	0	0	0	0	200	903	0	0	0	0	0	0	0	603	903	0
8695	7	-12.0827	-23.6941	-567.872	-128996	-56245.9	4919.86	100.953	527.157	0	0	0	0	0	0	0	200	903	0	0	0	0	0	0	0	603	903	0
8695	8	-10.7094	-23.8467	-567.262	-129088	-57039.3	4645.21	99.448	527.562	0	0	0	0	0	0	0	200	903	0	0	0	0	0	0	0	603	903	0
8695	9	-12.8456	-25.5252	-565.431	-128904	-56551	5102.97	99.986	527.976	0	0	0	0	0	0	0	200	903	0	0	0	0	0	0	0	603	903	0
8696	0	-11.7775	-24.7622	-568.178	-129728	-56612.1	5148.75	100.362	528.324	0	0	0	0	0	0	0	200	903	0	0	0	0	0	0	0	603	903	0
8696	1	-10.862	-24.9148	-572.145	-130095	-56917.2	4919.86	100.52	527.381	0	0	0	0	0	0	0	200	903	0	0	0	0	0	0	0	603	903	0
8696	2	-12.0827	-25.0674	-571.229	-130461	-57100.4	5148.75	100.04	528.386	0	0	0	0	0	0	0	200	903	0	0	0	0	0	0	0	603	903	0
8696	3	-10.5568	-25.5252	-571.84	-130827	-56612.1	5469.18	101	528.783	0	0	0	0	0	0	0	200	903	0	0	0	0	0	0	0	603	903	0
8696	4	-11.3197	-25.9829	-574.586	-130461	-56612.1	5652.29	101.473	527.052	0	0	0	0	0	0	0	200	903	0	0	0	0	0	0	0	603	903	0
8696	5	-10.862	-27.3562	-573.671	-130644	-57039.3	5331.85	100.571	527.733	0	0	0	0	0	0	0	200	903	0	0	0	0	0	0	0	603	903	0
8696	6	-11.0146	-27.6614	-576.722	-131010	-57039.3	5606.51	101.097	527.163	0	0	0	0	0	0	0	200	903	0	0	0	0	0	0	0	603	903	0
8696	7	-11.9301	-28.4243	-577.333	-131193	-56734.1	5514.96	101.731	527.24	0	0	0	0	0	0	0	200	903	0	0	0	0	0	0	0	603	903	0
8696	8	-12.0827	-29.4925	-576.417	-131376	-56367.9	5652.29	102.21	527.919	0	0	0	0	0	0	0	200	903	0	0	0	0	0	0	0	603	903	0
8696	9	-11.0146	-30.2554	-577.333	-132475	-57039.3	5835.39	101.202	529.46	0	0	0	0	0	0	0	200	903	0	0	0	0	0	0	0	603	903	0
8697	0	-11.0146	-30.7132	-577.638	-132750	-57100.4	5652.29	101.149	529.815	0	0	0	0	0	0	0	200	903	0	0	0	0	0	0	0	603	903	0
8697	1	-11.1671	-30.1028	-581.605	-132750	-56673.1	6018.5	102.557	528.247	0	0	0	0	0	0	0	200	903	0	0	0	0	0	0	0	603	903	0
8697	2	-12.3878	-30.2554	-580.69	-133299	-56917.2	5926.94	101.983	529.553	0	0	0	0	0	0	0	200	903	0	0	0	0	0	0	0	603	903	0
8697	3	-11.3197	-32.5442	-580.995	-133848	-57039.3	6110.05	101.825	530.378	0	0	0	0	0	0	0	200	903	0	0	0	0	0	0	0	603	903	0
8697	4	-12.0827	-31.6287	-578.859	-132933	-56612.1	6018.5	102.201	529.646	0	0	0	0	0	0	0	200	903	0	0	0	0	0	0	0	603	903	0
8697	5	-10.5568	-31.7813	-582.216	-133207	-56612.1	6064.27	102.764	528.794	0	0	0	0	0	0	0	200	903	0	0	0	0	0	0	0	603	903	0
8697	6	-10.5568	-32.8494	-584.047	-133024	-57100.4	6110.05	102.233	527.763	0	0	0	0	0	0	0	200	903	0	0	0	0	0	0	0	603	903	0
8697	7	-11.7775	-33.9175	-583.742	-133848	-57039.3	6018.5	102.287	529.294	0	0	0	0	0	0	0	200	903	0	0	0	0	0	0	0	603	903	0
8697	8	-10.099	-34.5279	-582.216	-133848	-56734.1	6201.6	102.555	529.895	0	0	0	0	0	0	0	200	903	0	0	0	0	0	0	0	603	903	0
8697	9	-12.0827	-34.833	-584.047	-134764	-56551	6293.15	103.174	530.742	0	0	0	0	0	0	0	200	903	0	0	0	0	0	0	0	603	903	0
8698	0	-11.0146	-36.3589	-584.047	-135130	-57222.4	6201.6	102.024	531.369	0	0	0	0	0	0	0	200	903	0	0	0	0	0	0	0	603	903	0
8698	1	-10.862	-34.6804	-588.319	-135496	-57405.5	6293.15	102.425	530.311	0	0	0	0	0	0	0	200	903	0	0	0	0	0	0	0	603	903	0
8698	2	-11.4723	-38.0374	-588.319	-135496	-56734.1	6430.48	103.566	530.311	0	0	0	0	0	0	0	200	903	0	0	0	0	0	0	0	603	903	0
8698	3	-11.7775	-36.6641	-590.15	-135405	-56429	6659.37	104.382	529.441	0	0	0	0	0	0	0	200	903	0	0	0	0	0	0	0	603	903	0
8698	4	-11.4723	-36.9693	-588.014	-136046	-56673.1	6476.26	103.619	531.364	0	0	0	0	0	0	0	200	903	0	0	0	0	0	0	0	603	903	0
8698	5	-10.2516	-37.7322	-588.93	-135038	-57283.5	6659.37	102.733	529.295	0	0	0	0	0	0	0	200	903	0	0	0	0	0	0	0	603	903	0
8698	6	-8.57314	-37.8848	-592.592	-135862	-56673.1	6842.47	104.364	529.268	0	0	0	0	0	0	0	200	903	0	0	0	0	0	0	0	603	903	0
8698	7	-10.2516	-38.3425	-592.286	-136778	-57100.4	6842.47	103.593	530.932	0	0	0	0	0	0	0	200	903	0	0	0	0	0	0	0	603	903	0
8698	8	-11.6249	-39.1055	-592.897	-137236	-57344.5	6842.47	103.281	531.466	0	0	0	0	0	0	0	200	903	0	0	0	0	0	0	0	603	903	0
8698	9	-12.2353	-38.8003	-591.676	-135862	-56856.2	6934.02	103.907	529.623	0	0	0	0	0	0	0	200	903	0	0	0	0	0	0	0	603	903	0
8699	0	-11.0146	-39.7158	-591.981	-137419	-56673.1	7117.13	104.265	532.134	0	0	0	0	0	0	0	200	903	0	0	0	0	0	0	0	603	903	0
8699	1	-11.3197	-40.1736	-592.592	-137785	-57527.6	7117.13	102.922	532.513	0	0	0	0	0	0	0	200	903	0	0	0	0	0	0	0	603	903	0
8699	2	-10.7094	-41.0891	-595.949	-137694	-57283.5	7117.13	103.879	531.049	0	0	0	0	0	0	0	200	903	0	0	0	0	0	0	0	603	903	0
8699	3	-11.4723	-43.2254	-597.78	-137419	-56795.2	7208.68	104.99	529.882	0	0	0	0	0	0	0	200	903	0	0	0	0	0	0	0	603	903	0
8699	4	-11.7775	-42.7676	-595.643	-138060	-56734.1	7574.89	104.751	531.783	0	0	0	0	0	0	0	200	903	0	0	0	0	0	0	0	603	903	0
8699	5	-11.4723	-44.2935	-596.254	-138334	-57100.4	7620.67	104.235	532.006	0	0	0	0	0	0	0	200	903	0	0	0	0	0	0	0	603	903	0
8699	6	-10.862	-43.3779	-597.474	-139158	-57039.3	7529.12	104.533	532.911	0	0	0	0	0	0	0	200	903	0	0	0	0	0	0	0	603	903	0
8699	7	-11.1671	-44.2935	-598.695	-139250	-56612.1	7162.91	105.441	532.589	0	0	0	0	0	0	0	200	903	0	0	0	0	0	0	0	603	903	0
8699	8	-12.2353	-44.2935	-599	-138792	-56917.2	7574.89	104.98	531.706	0	0	0	0	0	0	0	200	903	0	0	0	0	0	0	0	603	903	0
8699	9	-10.4042	-44.5987	-598.085	-139982	-57161.4	7162.91	104.426	534.051	0	0	0	0	0	0	0	200	903	0	0	0	0	0	0	0	603	903	0
8700	0	-11.6249	-45.209	-599.916	-139525	-57100.4	7712.22	104.819	532.574	0	0	0	0	0	0	0	200	903	0	0	0	0	0	0	0	603	903	0
8700	1	-10.862	-46.2771	-599.611	-139433	-57100.4	7666.45	104.771	532.539	0	0	0	0	0	0	0	200	903	0	0	0	0	0	0	0	603	903	0
8700	2	-10.862	-47.9556	-600.831	-139891	-56673.1	7895.33	105.676	532.829	0	0	0	0	0	0	0	200	903	0	0	0	0	0	0	0	603	903	0
8700	3	-12.3878	-48.4133	-601.137	-139616	-56856.2	7803.77	105.419	532.254	0	0	0	0	0	0	0	200	903	0	0	0	0	0	0	0	603	903	0
8700	4	-11.6249	-48.4133	-602.662	-140074	-56673.1	7849.55	105.962	532.425	0	0	0	0	0	0	0	200	903	0	0	0	0	0	0	0	603	903	0
8700	5	-12.2353	-50.397	-601.137	-140349	-56612.1	8124.21	105.825	533.472	0	0	0	0	0	0	0	200	903	0	0	0	0	0	0	0	603	903	0
8700	6	-11.3197	-50.2444	-600.831	-140440	-57222.4	7986.88	104.761	533.743	0	0	0	0	0	0	0	200	903	0	0	0	0	0	0	0	603	903	0
8700	7	-11.3197	-50.5496	-604.188	-141447	-57039.3	7986.88	105.593	534.111	0	0	0	0	0	0	0	200	903	0	0	0	0	0	0	0	603	903	0
8700	8	-10.7094	-50.8548	-601.442	-140989	-56734.1	8169.98	105.67	534.419	0	0	0	0	0	0	0	200	903	0	0	0	0	0	0	0	603	903	0
8700	9	-12.0827	-50.8548	-605.104	-140257	-56734.1	8398.87	106.241	531.79	0	0	0	0	0	0	0	200	903	0	0	0	0	0	0	0	603	903	0
8701	0	-11.7775	-51.9229	-602.968	-141996	-57222.4	8353.09	105.099	535.496	0	0	0	0	0	0	0	200	903	0	0	0	0	0	0	0	603	903	0
8701	1	-10.2516	-53.6013	-605.409	-141996	-56795.2	8215.76	106.187	534.546	0	0	0	0	0	0	0	200	903	0	0	0	0	0	0	0	603	903	0
8701	2	-10.7094	-54.0591	-604.493	-141539	-56367.9	8536.19	106.752	534.144	0	0	0	0	0	0	0	200	903	0	0	0	0	0	0	0	603	903	0
8701	3	-10.7094	-53.4487	-605.409	-141722	-56367.9	8536.19	106.893	534.093	0	0	0	0	0	0	0	200	903	0	0	0	0	0	0	0	603	903	0
8701	4	-11.3197	-56.0427	-605.714	-141996	-56795.2	8398.87	106.234	534.428	0	0	0	0	0	0	0	200	903	0	0	0	0	0	0	0	603	903	0
8701	5	-10.862	-55.8902	-604.188	-141722	-56673.1	8581.97	106.2	534.566	0	0	0	0	0	0	0	200	903	0	0	0	0	0	0	0	603	903	0
8701	6	-11.3197	-55.8902	-601.442	-142180	-56123.8	8536.19	106.685	536.398	0	0	0	0	0	0	0	200	903	0	0	0	0	0	0	0	603	903	0
8701	7	-10.4042	-57.5686	-605.104	-142180	-56673.1	8627.75	106.342	534.967	0	0	0	0	0	0	0	200	903	0	0	0	0	0	0	0	603	903	0
8701	8	-10.5568	-57.2634	-607.24	-141996	-56673.1	8627.75	106.671	533.839	0	0	0	0	0	0	0	200	903	0	0	0	0	0	0	0	603	903	0
8701	9	-10.862	-58.179	-605.714	-142912	-56306.9	8810.85	107.04	535.94	0	0	0	0	0	0	0	200	903	0	0	0	0	0	0	0	603	903	0
8702	0	-11.3197	-59.2471	-606.019	-143278	-56612.1	8902.41	106.584	536.425	0	0	0	0	0	0	0	200	903	0	0	0	0	0	0	0	603	903	0
8702	1	-11.1671	-58.7893	-604.799	-143095	-56551	8902.41	106.496	536.6	0	0	0	0	0	0	0	200	903	0	0	0	0	0	0	0	603	903	0
8702	2	-9.64126	-59.3997	-605.714	-143004	-56367.9	9177.06	106.94	536.091	0	0	0	0	0	0	0	200	903	0	0	0	0	0	0	0	603	903	0
8702	3	-9.33608	-60.01	-606.325	-143187	-56123.8	9085.51	107.436	536.155	0	0	0	0	0	0	0	200	903	0	0	0	0	0	0	0	603	903	0
8702	4	-9.33608	-62.7566	-607.24	-143919	-56123.8	9085.51	107.576	537.005	0	0	0	0	0	0	0	200	903	0	0	0	0	0	0	0	603	903	0
8702	5	-10.5568	-60.9256	-606.63	-142912	-56306.9	9039.73	107.181	535.584	0	0	0	0	0	0	0	200	903	0	0	0	0	0	0	0	603	903	0
8702	6	-10.5568	-61.8411	-604.493	-142637	-56123.8	8993.96	107.156	535.962	0	0	0	0	0	0	0	200	903	0	0	0	0	0	0	0	603	903	0
8702	7	-11.0146	-63.0618	-602.052	-142820	-55818.6	9085.51	107.286	537.223	0	0	0	0	0	0	0	200	903	0	0	0	0	0	0	0	603	903	0
8702	8	-9.79385	-64.1299	-604.799	-143004	-55879.6	9131.29	107.606	536.448	0	0	0	0	0	0	0	200	903	0	0	0	0	0	0	0	603	903	0
8702	9	-9.1835	-64.5877	-606.325	-143278	-56062.8	9314.39	107.537	536.306	0	0	0	0	0	0	0	200	903	0	0	0	0	0	0	0	603	903	0
8703	0	-9.48867	-65.8084	-605.409	-143095	-56245.9	9268.62	107.094	536.361	0	0	0	0	0	0	0	200	903	0	0	0	0	0	0	0	603	903	0
8703	1	-9.79385	-67.6394	-601.747	-143095	-55147.2	9222.84	108.355	537.8	0	0	0	0	0	0	0	200	903	0	0	0	0	0	0	0	603	903	0
8703	2	-9.94644	-66.7239	-602.662	-144102	-55818.6	9360.17	107.38	539.109	0	0	0	0	0	0	0	200	903	0	0	0	0	0	0	0	603	903	0
8703	3	-8.57314	-67.1817	-603.578	-144102	-55696.5	9360.17	107.723	538.747	0	0	0	0	0	0	0	200	903	0	0	0	0	0	0	0	603	903	0
8703	4	-9.03091	-68.7075	-605.104	-143736	-55269.3	9451.72	108.661	537.539	0	0	0	0	0	0	0	200	903	0	0	0	0	0	0	0	603	903	0
8703	5	-8.57314	-67.792	-602.052	-143644	-55147.2	9451.72	108.401	538.591	0	0	0	0	0	0	0	200	903	0	0	0	0	0	0	0	603	903	0
8703	6	-9.1835	-68.555	-604.799	-143828	-55574.5	9497.5	108.111	537.811	0	0	0	0	0	0	0	200	903	0	0	0	0	0	0	0	603	903	0
8703	7	-8.72573	-69.9282	-602.052	-143644	-55574.5	9589.05	107.692	538.591	0	0	0	0	0	0	0	200	903	0	0	0	0	0	0	0	603	903	0
8703	8	-8.87832	-70.2334	-596.864	-142546	-54964.1	9451.72	107.912	538.825	0	0	0	0	0	0	0	200	903	0	0	0	0	0	0	0	603	903	0
8703	9	-7.96279	-71.1489	-600.526	-143370	-54903.1	9589.05	108.575	538.74	0	0	0	0	0	0	0	200	903	0	0	0	0	0	0	0	603	903	0
8704	0	-7.50503	-72.2171	-602.357	-142088	-55330.3	9634.83	108.144	535.887	0	0	0	0	0	0	0	200	903	0	0	0	0	0	0	0	603	903	0
8704	1	-7.81021	-73.1326	-597.169	-143187	-54964.1	9680.6	107.959	539.776	0	0	0	0	0	0	0	200	903	0	0	0	0	0	0	0	603	903	0
8704	2	-8.26797	-74.6585	-600.831	-143004	-54536.9	9589.05	109.231	538.01	0	0	0	0	0	0	0	200	903	0	0	0	0	0	0	0	603	903	0
8704	3	-7.35244	-74.0481	-597.78	-143553	-54658.9	9634.83	108.563	540.144	0	0	0	0	0	0	0	200	903	0	0	0	0	0	0	0	603	903	0
8704	4	-7.04727	-74.6585	-598.085	-143553	-54597.9	9772.16	108.712	540.021	0	0	0	0	0	0	0	200	903	0	0	0	0	0	0	0	603	903	0
8704	5	-6.74209	-76.1843	-598.085	-143095	-54720	9634.83	108.508	539.256	0	0	0	0	0	0	0	200	903	0	0	0	0	0	0	0	603	903	0
8704	6	-7.35244	-75.2688	-599.611	-142363	-54170.7	9680.6	109.657	537.425	0	0	0	0	0	0	0	200	903	0	0	0	0	0	0	0	603	903	0
8704	7	-7.19985	-75.2688	-598.39	-143736	-54292.7	9909.49	109.269	540.205	0	0	0	0	0	0	0	200	903	0	0	0	0	0	0	0	603	903	0
8704	8	-6.28433	-77.8628	-594.117	-142820	-54292.7	10001	108.616	540.391	0	0	0	0	0	0	0	200	903	0	0	0	0	0	0	0	603	903	0
8704	9	-7.50503	-77.4051	-595.033	-142454	-54353.8	10001	108.654	539.406	0	0	0	0	0	0	0	200	903	0	0	0	0	0	0	0	603	903	0
8705	0	-6.43691	-78.3206	-594.117	-142546	-53865.5	9909.49	109.335	539.929	0	0	0	0	0	0	0	200	903	0	0	0	0	0	0	0	603	903	0
8705	1	-5.52139	-80.3042	-595.338	-142271	-53743.4	10092.6	109.726	538.975	0	0	0	0	0	0	0	200	903	0	0	0	0	0	0	0	603	903	0
8705	2	-6.43691	-79.5413	-593.812	-142180	-53682.4	10092.6	109.597	539.435	0	0	0	0	0	0	0	200	903	0	0	0	0	0	0	0	603	903	0
8705	3	-6.74209	-80.762	-592.897	-142271	-53621.3	9909.49	109.56	539.959	0	0	0	0	0	0	0	200	903	0	0	0	0	0	0	0	603	903	0
8705	4	-7.35244	-81.8301	-591.066	-141813	-53377.2	10001	109.693	539.928	0	0	0	0	0	0	0	200	903	0	0	0	0	0	0	0	603	903	0
8705	5	-6.13174	-81.5249	-589.235	-142088	-53011	10138.4	110.034	541.14	0	0	0	0	0	0	0	200	903	0	0	0	0	0	0	0	603	903	0
8705	6	-4.1481	-82.2879	-591.066	-142180	-53011	10275.7	110.313	540.548	0	0	0	0	0	0	0	200	903	0	0	0	0	0	0	0	603	903	0
8705	7	-6.13174	-82.7456	-590.455	-141722	-53316.2	9955.26	109.703	540.021	0	0	0	0	0	0	0	200	903	0	0	0	0	0	0	0	603	903	0
8705	8	-6.5895	-83.6612	-588.014	-142180	-52888.9	9726.38	110.055	541.796	0	0	0	0	0	0	0	200	903	0	0	0	0	0	0	0	603	903	0
8705	9	-6.13174	-84.2715	-587.098	-141722	-53072	10413	109.603	541.394	0	0	0	0	0	0	0	200	903	0	0	0	0	0	0	0	603	903	0
8706	0	-5.97915	-84.7293	-580.995	-141722	-52950	10184.1	108.863	543.93	0	0	0	0	0	0	0	200	903	0	0	0	0	0	0	0	603	903	0
8706	1	-5.3688	-85.0344	-584.657	-141264	-52400.6	10504.6	110.374	541.619	0	0	0	0	0	0	0	200	903	0	0	0	0	0	0	0	603	903	0
8706	2	-4.91104	-85.7974	-583.436	-140715	-52339.6	10184.1	110.291	541.183	0	0	0	0	0	0	0	200	903	0	0	0	0	0	0	0	603	903	0
8706	3	-5.3688	-87.0181	-582.826	-139982	-52156.5	10138.4	110.511	540.179	0	0	0	0	0	0	0	200	903	0	0	0	0	0	0	0	603	903	0
8706	4	-6.74209	-87.9336	-582.216	-139891	-52461.7	10458.8	109.893	540.273	0	0	0	0	0	0	0	200	903	0	0	0	0	0	0	0	603	903	0
8706	5	-5.67397	-89.1543	-579.774	-139891	-52156.5	10046.8	110.04	541.285	0	0	0	0	0	0	0	200	903	0	0	0	0	0	0	0	603	903	0
8706	6	-4.75845	-89.0017	-579.164	-140349	-52156.5	10229.9	109.945	542.33	0	0	0	0	0	0	0	200	903	0	0	0	0	0	0	0	603	903	0
8706	7	-3.69033	-89.7647	-577.638	-140074	-52034.4	10458.8	109.919	542.494	0	0	0	0	0	0	0	200	903	0	0	0	0	0	0	0	603	903	0
8706	8	-4.75845	-90.0698	-576.112	-139525	-52217.5	10229.9	109.362	542.183	0	0	0	0	0	0	0	200	903	0	0	0	0	0	0	0	603	903	0
8706	9	-5.3688	-90.9854	-575.807	-139616	-51424.1	10275.7	110.692	542.47	0	0	0	0	0	0	0	200	903	0	0	0	0	0	0	0	603	903	0
8707	0	-4.30068	-91.5957	-573.366	-139158	-51241	10321.5	110.631	542.705	0	0	0	0	0	0	0	200	903	0	0	0	0	0	0	0	603	903	0
8707	1	-5.97915	-91.9009	-568.483	-138517	-51668.2	10779.2	109.112	543.662	0	0	0	0	0	0	0	200	903	0	0	0	0	0	0	0	603	903	0
8707	2	-4.1481	-92.2061	-568.788	-138151	-51485.1	10458.8	109.483	542.887	0	0	0	0	0	0	0	200	903	0	0	0	0	0	0	0	603	903	0
8707	3	-4.1481	-92.969	-570.619	-138060	-50813.7	10367.2	110.95	541.947	0	2.72034	7.86804	-26.3616	-3516.91	-813.718	-1645.39	169.132	1036.41	0	0	0	0	0	0	0	603	903	0
8707	4	-3.99551	-94.1897	-566.957	-137327	-50752.7	10596.1	110.482	542.218	0	12.486	16.413	-38.8738	-4066.22	-81.2963	-2789.8	197.909	1007.6	0	0	0	0	0	0	0	603	903	0
8707	5	-5.67397	-94.1897	-566.041	-137327	-50813.7	10184.1	110.23	542.61	0	18.1317	12.7509	-32.7703	-3425.36	-203.367	-2103.15	193.794	1007.53	0	0	0	0	0	0	0	603	903	0
8707	6	-4.91104	-94.6475	-564.515	-137510	-50935.8	10367.2	109.771	543.59	0	5.92468	1.91711	-19.6478	-3150.7	-325.437	-1416.5	183.436	1063.36	0	0	0	0	0	0	0	603	903	0
8707	7	-3.99551	-96.1734	-563.6	-137236	-50508.6	10641.9	110.382	543.499	0	-1.70471	3.13782	-20.2581	-3883.12	-569.578	-2057.37	171.884	1094.68	0	0	0	0	0	0	0	603	903	0
8707	8	-1.85928	-96.7837	-562.379	-137327	-50203.4	10687.7	110.73	544.19	0	2.56775	5.73181	-35.2117	-3791.57	-447.507	-1370.73	187.291	1010.68	0	0	0	0	0	0	0	603	903	0
8707	9	-2.7748	-95.563	-561.159	-136595	-50508.6	10184.1	109.992	543.416	0	5.7721	-6.17004	-41.3152	-4798.65	223.88	-638.306	205.419	1019.15	0	0	0	0	0	0	0	603	903	0
8708	0	-3.99551	-96.326	-559.022	-136686	-50203.4	10550.4	110.194	544.51	0	1.65222	-10.7477	-43.7566	-5897.28	-752.683	-1462.28	182.798	1037.77	0	0	0	0	0	0	0	603	903	0
8708	1	-3.69033	-99.0725	-557.191	-136320	-49959.2	10870.8	110.337	544.656	0	1.9574	-6.32263	-51.386	-6538.15	-1118.89	-1828.49	178.226	1030.24	0	0	0	0	0	0	0	603	903	0
8708	2	-3.53774	-98.9199	-552.919	-134947	-49471	10229.9	110.528	544.063	0	10.6549	-11.6632	-67.5604	-7819.89	-996.824	-1141.85	185.245	1018.75	0	0	0	0	0	0	0	603	903	0
8708	3	-1.24893	-97.6992	-551.698	-134947	-49776.1	10321.5	109.777	544.603	0	12.0282	-16.0883	-73.0535	-7728.33	-1363.03	-1462.28	181.342	1008.79	0	0	0	0	0	0	0	603	903	0
8708	4	-2.92739	-98.9199	-552.614	-134398	-49654.1	10413	110.147	543.204	0	3.48328	-12.7313	-75.4949	-9193.18	-1973.39	-1462.28	173.861	1024.77	0	0	0	0	0	0	0	603	903	0
8708	5	-3.53774	-101.056	-550.477	-133848	-49287.9	10413	110.463	543.149	0	0.889283	-10.2899	-80.0726	-9559.39	-1485.1	-821.412	181.453	1022.38	0	0	0	0	0	0	0	603	903	0
8708	6	-2.7748	-101.209	-547.12	-133940	-49104.7	10367.2	110.249	544.809	0	9.12903	-13.6469	-88.9227	-10841.1	-1546.14	-1736.94	182.613	1024.92	0	0	0	0	0	0	0	603	903	0
8708	7	-1.5541	-100.141	-543.763	-133024	-49226.8	10184.1	109.47	544.636	0	8.06091	-10.5951	-92.8899	-10474.9	-2217.53	-1691.16	176.127	1015.77	0	0	0	0	0	0	0	603	903	0
8708	8	-1.40151	-101.514	-543.153	-133574	-48982.7	10733.5	109.818	545.923	0	0.126343	-7.69592	-95.9417	-11573.5	-2583.74	-1233.4	173.07	1023.63	0	0	0	0	0	0	0	603	903	0
8708	9	-1.70669	-103.65	-542.238	-132933	-48555.4	10504.6	110.454	545.156	0	2.87293	-10.9003	-103.571	-11390.4	-2400.63	-1508.06	176.821	1012.98	0	0	0	0	0	0	0	603	903	0
8709	0	-1.40151	-102.124	-540.101	-132841	-48006.1	10229.9	111.116	545.956	0	7.90833	-13.0365	-107.233	-12763.7	-2644.77	-1324.95	175.336	1022.03	0	0	0	0	0	0	0	603	903	0
8709	1	-2.31704	-101.514	-536.744	-132200	-48006.1	10275.7	110.561	546.3	0	1.80481	-9.2218	-114.252	-13129.9	-2949.95	-912.965	174.18	1017.92	0	0	0	0	0	0	0	603	903	0
8709	2	-2.62222	-102.429	-534.303	-131102	-48189.2	10367.2	109.809	545.37	0	-1.39954	-9.67957	-115.778	-14228.6	-3133.05	-1096.07	172.939	1025.9	0	0	0	0	0	0	0	603	903	0
8709	3	-2.16445	-104.566	-532.777	-130186	-47762	10229.9	110.353	544.354	0	2.41516	-12.2736	-121.576	-14411.7	-3194.09	-1096.07	173.728	1021.54	0	0	0	0	0	0	0	603	903	0
8709	4	-1.40151	-103.803	-530.336	-130095	-47639.9	10275.7	110.17	545.306	0	2.41516	-8.45886	-127.68	-15235.7	-3682.37	-455.201	171.159	1022.33	0	0	0	0	0	0	0	603	903	0
8709	5	-0.180811	-103.345	-528.81	-129637	-47578.9	10275.7	110.027	545.148	0	-2.00989	-3.88123	-130.427	-15693.4	-4109.62	-958.741	168.491	1023.32	0	0	0	0	0	0	0	603	903	0
8709	6	-2.01187	-105.329	-527.894	-128996	-47395.8	10641.9	110.217	544.359	0	-2.62024	-4.49158	-135.92	-16151.2	-4475.83	-1370.73	167.07	1021.83	0	0	0	0	0	0	0	603	903	0
8709	7	-2.31704	-105.786	-520.265	-128264	-46419.2	10229.9	110.778	546.535	0	-1.24695	-4.03381	-138.056	-17066.7	-4475.83	-729.859	167.58	1026.62	0	0	0	0	0	0	0	603	903	0
8709	8	-1.40151	-105.634	-519.044	-128080	-46724.4	10275.7	109.98	546.762	0	-2.16248	3.29041	-148.127	-17890.7	-5147.21	-1004.52	165.251	1023.78	0	0	0	0	0	0	0	603	903	0
8709	9	-0.638574	-104.413	-515.992	-127897	-46602.3	10001	109.684	547.867	0	-4.29871	4.96887	-148.432	-18165.3	-5147.21	-1508.06	165.323	1025.38	0	0	0	0	0	0	0	603	903	0
8710	0	1.19248	-106.549	-514.467	-126982	-45992	10275.7	110.603	546.822	0	-3.99353	2.83264	-153.315	-18623.1	-5635.5	-729.859	163.242	1024.47	0	0	0	0	0	0	0	603	903	0
8710	1	-0.333399	-107.007	-512.941	-126341	-45686.8	10092.6	110.932	546.307	0	-5.21423	8.47839	-160.639	-19721.7	-5940.67	-958.741	163.018	1025.77	0	0	0	0	0	0	0	603	903	0
8710	2	-1.09634	-105.481	-509.889	-125883	-45992	10138.4	109.8	546.884	0	-7.96081	13.6664	-166.742	-20637.3	-6184.81	-592.53	162.908	1026.77	0	0	0	0	0	0	0	603	903	0
8710	3	0.124365	-107.465	-504.091	-125609	-45686.8	10001	109.368	549.178	0	-13.1488	11.8353	-170.099	-21003.5	-6734.13	-272.095	160.411	1026.48	0	0	0	0	0	0	0	603	903	0
8710	4	0.124365	-107.923	-501.954	-123778	-44893.3	10138.4	110.563	546.591	0	-14.2169	12.1405	-176.203	-21735.9	-7100.34	-43.2133	159.704	1026.36	0	0	0	0	0	0	0	603	903	0
8710	5	-0.180811	-107.465	-499.208	-124052	-44771.2	10092.6	110.315	548.498	0	-16.2006	20.6854	-180.17	-23109.2	-7649.66	-317.872	157.542	1031.26	0	0	0	0	0	0	0	603	903	0
8710	6	0.582129	-105.786	-497.072	-123320	-44893.3	9955.26	109.684	548.093	0	-17.5739	21.9061	-191.157	-23750.1	-8260.01	368.774	156.789	1027.24	0	0	0	0	0	0	0	603	903	0
8710	7	0.887305	-106.855	-493.104	-121855	-44466.1	9314.39	109.824	547.118	0	-19.5575	20.2277	-195.734	-24299.4	-8748.29	368.774	155.305	1027.14	0	0	0	0	0	0	0	603	903	0
8710	8	1.19248	-108.533	-489.442	-121031	-43611.6	9955.26	110.895	547.283	0	-19.8627	24.5001	-201.533	-25581.1	-9114.5	231.445	154.774	1029.93	0	0	0	0	0	0	0	603	903	0
8710	9	0.124365	-107.465	-485.475	-121031	-43611.6	9817.93	110.167	549.304	0	-24.4403	30.7562	-206.721	-27046	-9175.53	551.879	155.614	1033.83	0	0	0	0	0	0	0	603	903	0
8711	0	2.41318	-106.549	-482.728	-120024	-43672.6	9451.72	109.53	548.636	0	-22.7618	30.7562	-215.876	-28053	-9785.89	872.314	154.669	1032.95	0	0	0	0	0	0	0	603	903	0
8711	1	2.56577	-106.244	-479.371	-119108	-43306.4	9360.17	109.66	548.468	0	-24.7455	30.6036	-221.979	-28236.1	-10274.2	322.998	153.716	1030.2	0	0	0	0	0	0	0	603	903	0
8711	2	1.80283	-106.855	-474.183	-118559	-42574	9177.06	110.216	550.028	0	-25.9662	35.0287	-228.388	-29609.4	-10640.4	1101.2	153.411	1032.65	0	0	0	0	0	0	0	603	903	0
8711	3	1.65024	-106.549	-472.963	-118010	-42390.9	9405.95	110.372	549.512	0	-27.9498	36.7072	-236.628	-31348.9	-10762.4	1101.2	154.517	1035.48	0	0	0	0	0	0	0	603	903	0
8711	4	3.17612	-105.481	-466.554	-117003	-42268.8	9085.51	109.402	550.78	0	-27.0343	35.1813	-246.088	-32722.2	-11372.8	460.327	153.786	1035.97	0	0	0	0	0	0	0	603	903	0
8711	5	3.4813	-106.702	-462.892	-114897	-41658.5	9039.73	110.004	548.215	0	-32.8326	38.0804	-255.243	-33363.1	-11922.1	1284.3	153.291	1033.71	0	0	0	0	0	0	0	603	903	0
8711	6	4.54941	-106.397	-461.671	-114531	-41109.1	8856.63	110.956	548.078	0	-33.443	43.421	-264.094	-35011	-12593.5	1421.63	152.314	1035.57	0	0	0	0	0	0	0	603	903	0
8711	7	4.09165	-105.786	-456.788	-113249	-40926	8948.18	110.405	547.924	0	-32.2223	44.6417	-271.723	-36842.1	-12654.5	1238.52	153.429	1038.59	0	0	0	0	0	0	0	603	903	0
8711	8	3.32871	-105.634	-452.516	-111876	-40681.9	8719.3	110.098	547.23	0	-33.2904	45.0995	-282.099	-38490.1	-13325.9	1742.07	152.762	1039.44	0	0	0	0	0	0	0	603	903	0
8711	9	3.78647	-106.397	-446.412	-111143	-40742.9	8719.3	108.733	548.97	0	-37.5629	48.3038	-292.17	-39680.3	-13875.2	2062.5	152.51	1038.81	0	0	0	0	0	0	0	603	903	0
8712	0	3.63389	-105.634	-439.393	-110594	-39705.3	8536.19	109.636	551.697	0	-37.2577	47.9987	-301.63	-41419.7	-14485.6	1742.07	151.976	1040.32	0	0	0	0	0	0	0	603	903	0
8712	1	5.00718	-105.329	-438.173	-109861	-40132.6	8719.3	108.409	550.727	0	-36.6473	47.8461	-308.039	-42976.2	-14424.6	2245.6	153.173	1042.52	0	0	0	0	0	0	0	603	903	0
8712	2	5.46494	-105.176	-434.511	-109129	-39278.1	8353.09	109.604	551.154	0	-39.6991	51.9659	-316.279	-44532.5	-14729.7	2566.04	153.428	1043.8	0	0	0	0	0	0	0	603	903	0
8712	3	5.00718	-105.176	-430.543	-107756	-38606.7	8353.09	110.33	550.279	0	-41.9879	55.6281	-327.265	-45631.2	-15462.2	2199.83	152.753	1042.43	0	0	0	0	0	0	0	603	903	0
8712	4	4.85459	-103.65	-425.66	-105833	-38118.4	8215.76	110.449	548.633	0	-41.3776	55.0177	-334.894	-46729.8	-15828.4	2749.15	152.736	1042.54	0	0	0	0	0	0	0	603	903	0
8712	5	5.77012	-103.04	-419.862	-105833	-38301.5	8078.43	108.776	552.067	0	-40.3094	57.0013	-344.965	-48835.5	-16377.7	2932.25	152.524	1044.57	0	0	0	0	0	0	0	603	903	0
8712	6	6.53306	-103.345	-416.2	-105009	-37752.2	7941.1	109.293	552.305	0	-41.8353	62.6471	-351.374	-50758.1	-16377.7	2566.04	153.39	1047.46	0	0	0	0	0	0	0	603	903	0
8712	7	7.75376	-101.667	-411.928	-103727	-37325	7895.33	109.389	551.81	0	-42.4457	62.0367	-361.75	-52497.6	-16804.9	2794.92	153.545	1048.12	0	0	0	0	0	0	0	603	903	0
8712	8	6.99082	-101.209	-407.96	-101988	-37019.8	7483.34	109.256	549.995	0	-41.8353	60.0531	-369.99	-52955.4	-17049.1	3161.13	153.92	1046.13	0	0	0	0	0	0	0	603	903	0
8712	9	6.22788	-101.209	-403.383	-101072	-36653.6	7391.79	109.134	550.562	0	-39.3939	66.4618	-373.957	-54420.2	-16804.9	2703.37	155.062	1048.53	0	0	0	0	0	0	0	603	903	0
8713	0	5.61753	-101.972	-396.974	-99699.1	-35921.2	7712.22	109.513	551.148	0	-42.9034	70.2765	-381.281	-56617.5	-17781.5	2703.37	153.364	1051.49	0	0	0	0	0	0	0	603	903	0
8713	1	8.36411	-100.293	-391.786	-98051.2	-35554.9	7254.46	109.249	550.267	0	-41.0724	69.6661	-388.91	-57075.3	-18086.7	3069.58	153.494	1049.76	0	0	0	0	0	0	0	603	903	0
8713	2	8.21152	-99.2251	-385.377	-97318.8	-35310.8	7025.58	108.373	552.529	0	-41.5302	72.2601	-396.235	-57990.8	-17781.5	2566.04	155.124	1049.35	0	0	0	0	0	0	0	603	903	0
8713	3	8.21152	-98.9199	-382.936	-96220.1	-34822.5	7117.13	109.064	551.27	0	-40.9198	77.1429	-401.423	-59364.1	-18086.7	2566.04	154.944	1050.88	0	0	0	0	0	0	0	603	903	0
8713	4	7.296	-97.3941	-377.748	-94572.1	-34151.1	6979.8	109.593	550.358	0	-41.5302	76.9904	-407.831	-60828.9	-18636	2245.6	154.305	1052.15	0	0	0	0	0	0	0	603	903	0
8713	5	8.05894	-96.9363	-369.508	-94205.9	-33907	6659.37	108.237	554.95	0	-40.3094	74.3964	-413.325	-61561.4	-18819.1	2154.05	154.469	1051.94	0	0	0	0	0	0	0	603	903	0
8713	6	6.99082	-96.0208	-361.268	-92832.6	-33235.6	6384.71	108.003	556.963	0	-39.2413	79.2792	-417.292	-62202.2	-18697	2382.93	155.194	1052.06	0	0	0	0	0	0	0	603	903	0
8713	7	8.36411	-94.8001	-360.353	-91550.9	-32625.3	6430.48	109.463	554.059	0	-38.1732	81.7206	-420.954	-64124.8	-18758.1	2199.83	155.439	1055.33	0	0	0	0	0	0	0	603	903	0
8713	8	9.12705	-93.5794	-356.691	-89445.2	-32259	6384.71	109.56	550.764	0	-37.1051	80.6525	-425.837	-64124.8	-19124.3	1650.51	155.09	1053.59	0	0	0	0	0	0	0	603	903	0
8713	9	8.05894	-92.3587	-350.282	-89079	-32137	6201.6	108.254	554.307	0	-36.037	81.1102	-431.33	-65131.9	-18880.1	1696.29	156.228	1054	0	0	0	0	0	0	0	603	903	0
8714	0	8.5167	-92.8164	-345.399	-87888.8	-31404.6	6110.05	109.078	554.456	0	-36.7999	84.3146	-433.771	-65772.8	-18819.1	1513.18	156.615	1054.63	0	0	0	0	0	0	0	603	903	0
8714	1	9.12705	-90.6802	-338.075	-84867.6	-30611.1	5881.17	109.455	551.032	0	-30.6964	82.3309	-436.823	-66047.4	-18941.2	963.867	156.639	1054.2	0	0	0	0	0	0	0	603	903	0
8714	2	9.88999	-89.6121	-331.666	-84226.7	-29939.7	5972.72	109.729	553.95	0	-32.0697	81.2628	-440.485	-67329.2	-19185.3	963.867	156.445	1055.85	0	0	0	0	0	0	0	603	903	0
8714	3	10.9581	-88.8491	-326.173	-83036.5	-30000.8	5789.61	108.022	554.578	0	-31.1542	82.1783	-442.621	-67420.7	-19185.3	872.314	156.655	1055.32	0	0	0	0	0	0	0	603	903	0
8714	4	10.0426	-87.4759	-320.375	-81480.1	-29329.4	5606.51	108.453	554.327	0	-31.0016	84.0094	-445.063	-68061.6	-19002.2	94.1158	157.304	1055.93	0	0	0	0	0	0	0	603	903	0
8714	5	9.43223	-86.4077	-314.576	-79557.5	-28230.7	5286.07	110.258	552.904	0	-24.1351	81.1102	-445.368	-68610.9	-18941.2	414.55	157.471	1057.05	0	0	0	0	0	0	0	603	903	0
8714	6	8.97446	-85.6448	-306.337	-78367.3	-28230.7	5514.96	107.844	555.821	0	-25.661	82.3309	-449.64	-69434.9	-19185.3	185.669	157.332	1057.42	0	0	0	0	0	0	0	603	903	0
8714	7	11.5685	-85.7974	-300.538	-76902.5	-27559.3	4965.64	108.3	555.882	0	-23.6774	82.3309	-450.861	-70350.4	-19368.4	-226.319	157.041	1059.04	0	0	0	0	0	0	0	603	903	0
8714	8	10.8055	-83.356	-294.74	-75712.3	-26826.9	5331.85	108.981	556.878	0	-22.1515	80.8051	-452.082	-69984.2	-18636	-592.53	158.777	1057.8	0	0	0	0	0	0	0	603	903	0
8714	9	10.1952	-82.1353	-289.857	-74522.1	-26155.5	4874.09	109.764	557.099	0	-20.473	80.0421	-451.777	-70258.9	-18574.9	-455.201	158.885	1058.52	0	0	0	0	0	0	0	603	903	0
8715	0	9.43223	-81.6775	-284.669	-73240.4	-26033.5	4828.31	108.548	557.282	0	-20.0153	82.6361	-452.082	-70991.3	-18819.1	-958.741	158.372	1060.03	0	0	0	0	0	0	0	603	903	0
8715	1	8.97446	-79.0835	-278.566	-71317.8	-25484.1	4599.43	108.517	556.018	0	-16.3531	82.0258	-453.913	-71265.9	-18697	-1370.73	158.809	1060	0	0	0	0	0	0	0	603	903	0
8715	2	9.43223	-77.0999	-268.8	-69944.5	-24507.6	4919.86	108.826	560.21	0	-16.8109	80.8051	-455.744	-70991.3	-18452.9	-1370.73	159.51	1058.77	0	0	0	0	0	0	0	603	903	0
8715	3	9.7374	-76.1843	-263.917	-68845.9	-24263.4	4370.55	108.064	560.861	0	-15.285	81.2628	-452.692	-70808.2	-18330.8	-1920.04	159.507	1059.42	0	0	0	0	0	0	0	603	903	0
8715	4	10.5003	-74.0481	-256.593	-66923.2	-23714.1	4187.44	107.581	560.815	0	-12.8436	82.1783	-457.88	-72181.5	-18452.9	-2011.6	159.699	1060.64	0	0	0	0	0	0	0	603	903	0
8715	5	9.12705	-71.3015	-253.236	-64726	-22920.7	4462.1	109.489	555.595	0	-13.3014	81.1102	-457.27	-72089.9	-18636	-2103.15	159.245	1060.65	0	0	0	0	0	0	0	603	903	0
8715	6	7.44858	-69.9282	-246.827	-63261.1	-22554.5	4278.99	108.623	556.297	0	-10.86	80.6525	-457.575	-71906.8	-18086.7	-2606.69	160.473	1060.15	0	0	0	0	0	0	0	603	903	0
8715	7	6.83823	-68.8601	-238.588	-61796.3	-22371.4	4095.89	106.234	559.009	0	-9.02893	82.6361	-457.575	-72181.5	-17903.6	-2423.59	160.873	1060.75	0	0	0	0	0	0	0	603	903	0
8715	8	6.68564	-67.4868	-229.432	-60239.9	-22127.2	3912.78	103.557	562.56	0	-8.41858	82.4835	-458.491	-72730.8	-18208.7	-2652.47	160.285	1061.63	0	0	0	0	0	0	0	603	903	0
8715	9	8.21152	-65.198	-225.465	-59507.5	-20906.5	3821.23	107.274	563.932	0	-8.1134	81.8732	-457.88	-72089.9	-18025.6	-3018.68	160.632	1060.44	0	0	0	0	0	0	0	603	903	0
8716	0	7.44858	-63.6721	-221.498	-57859.5	-20357.2	3821.23	108.093	561.219	0	-7.35046	81.8732	-459.711	-72913.9	-18208.7	-3018.68	160.391	1061.61	0	0	0	0	0	0	0	603	903	0
8716	1	7.296	-61.8411	-216.005	-56760.9	-20174.1	3317.69	106.603	562.776	0	-6.28235	80.0421	-462.763	-73463.2	-17232.2	-2835.57	162.762	1061.75	0	0	0	0	0	0	0	603	903	0
8716	2	6.99082	-59.3997	-208.375	-54655.2	-19868.9	3409.24	104.648	562.292	0	-2.62024	80.1947	-467.646	-75660.5	-17537.4	-3613.77	162.499	1064.79	0	0	0	0	0	0	0	603	903	0
8716	3	6.83823	-57.1109	-201.967	-53922.8	-18953.4	3180.36	106.156	566.988	0	-1.39954	82.3309	-471.003	-76667.5	-17415.3	-4346.19	163.025	1065.78	0	0	0	0	0	0	0	603	903	0
8716	4	7.44858	-56.3479	-195.863	-52549.4	-18831.3	2905.7	103.855	568.297	0	5.92468	85.2301	-470.087	-76667.5	-17171.1	-4758.18	163.472	1066.09	0	0	0	0	0	0	0	603	903	0
8716	5	7.90635	-53.4487	-191.591	-49345.1	-18404.1	3271.91	103.941	557.555	0	3.78845	87.0612	-469.172	-76484.5	-17232.2	-4941.29	163.271	1066.02	0	0	0	0	0	0	0	603	903	0
8716	6	6.22788	-51.7703	-187.013	-48887.3	-17549.6	2997.26	106.159	561.411	0	2.41516	84.7723	-472.529	-77308.4	-17415.3	-4712.4	163.145	1066.61	0	0	0	0	0	0	0	603	903	0
8716	7	5.77012	-50.397	-181.825	-47697.2	-16878.2	2768.37	107.173	562.325	0	5.46692	87.9767	-475.275	-77491.5	-17049.1	-5307.5	164.128	1066.05	0	0	0	0	0	0	0	603	903	0
8716	8	6.53306	-48.7185	-176.332	-46232.3	-16878.2	2676.82	104.282	562.189	0	5.46692	89.8077	-475.886	-78498.6	-16682.9	-5261.72	164.944	1067.95	0	0	0	0	0	0	0	603	903	0
8716	9	5.77012	-46.4297	-169.008	-45683	-16573	2585.27	101.939	570.301	0	4.09363	91.944	-473.749	-78773.3	-17354.2	-4620.85	163.368	1069.28	0	0	0	0	0	0	0	603	903	0
8717	0	6.53306	-44.7512	-165.346	-44492.8	-15840.6	2447.94	104.197	569.09	0	4.70398	93.775	-478.327	-78407.1	-17659.4	-4391.97	163.081	1066.92	0	0	0	0	0	0	0	603	903	0
8717	1	5.61753	-41.8521	-162.294	-43577.3	-15474.4	2219.06	104.652	568.509	0	1.80481	94.6906	-481.989	-79597.2	-17171.1	-4437.74	164.374	1068.14	0	0	0	0	0	0	0	603	903	0
8717	2	6.07529	-39.7158	-158.326	-43302.6	-15047.1	2035.95	104.961	573.502	0	0.736695	95.9113	-481.989	-79780.4	-17171.1	-3567.99	164.374	1068.52	0	0	0	0	0	0	0	603	903	0
8717	3	4.85459	-38.6477	-155.275	-42020.9	-14436.8	1944.4	107.024	570.623	0	1.19446	95.6061	-481.074	-79780.4	-17781.5	-3613.77	163.038	1068.84	0	0	0	0	0	0	0	603	903	0
8717	4	5.15977	-36.0537	-148.561	-39640.5	-13948.5	1578.19	106.109	566.83	0	-1.09436	93.775	-482.599	-80238.1	-17720.5	-3430.67	163.281	1069.26	0	0	0	0	0	0	0	603	903	0
8717	5	5.77012	-34.833	-143.678	-39274.3	-13704.4	1578.19	104.618	573.349	0	-2.62024	93.4698	-486.262	-80970.5	-17293.2	-2698.24	164.436	1069.52	0	0	0	0	0	0	0	603	903	0
8717	6	7.60117	-34.833	-139.711	-38267.2	-13399.2	1715.52	104.093	573.903	0	-0.0262447	94.538	-487.177	-81611.4	-17415.3	-2560.91	164.253	1070.52	0	0	0	0	0	0	0	603	903	0
8717	7	5.31235	-32.6968	-137.269	-36619.3	-13033	1623.96	105.055	566.769	0	-5.06165	91.7914	-484.43	-81519.8	-17781.5	-2377.81	163.294	1071.28	0	0	0	0	0	0	0	603	903	0
8717	8	3.17612	-32.3916	-133.912	-35612.2	-12727.8	1807.07	104.954	565.937	0	-3.99353	91.7914	-487.482	-81977.6	-17720.5	-1920.04	163.649	1071.17	0	0	0	0	0	0	0	603	903	0
8717	9	3.78647	-31.4761	-127.504	-34879.8	-12178.5	1623.96	104.485	573.559	0	-4.29871	90.7233	-491.755	-83076.3	-17415.3	-1782.72	164.585	1071.94	0	0	0	0	0	0	0	603	903	0
8718	0	4.85459	-26.5933	-122.621	-32957.2	-11690.2	1440.86	104.664	568.773	0	-4.45129	89.5026	-497.858	-84449.5	-17842.5	-1828.49	164.161	1072.63	0	0	0	0	0	0	0	603	903	0
8718	1	4.09165	-23.5415	-116.823	-32041.6	-11201.9	571.107	104.112	574.276	0	-8.41858	90.2655	-499.079	-85181.9	-18086.7	-592.53	163.76	1073.68	0	0	0	0	0	0	0	603	903	0
8718	2	5.15977	-24.1519	-115.602	-31217.7	-10774.7	708.436	106.795	570.045	0	-9.18152	92.7069	-502.131	-85456.6	-18513.9	-409.424	163.129	1073.19	0	0	0	0	0	0	0	603	903	0
8718	3	4.24424	-22.7786	-111.635	-30851.4	-10469.5	891.542	106.216	576.361	0	-8.57117	94.0802	-505.488	-86738.4	-17842.5	-1004.52	164.702	1074.59	0	0	0	0	0	0	0	603	903	0
8718	4	4.39683	-20.032	-106.141	-29661.3	-9981.22	433.778	105.963	579.45	0	-8.1134	93.9276	-507.929	-87745.4	-18147.7	94.1158	164.271	1075.75	0	0	0	0	0	0	0	603	903	0
8718	5	4.24424	-18.8113	-101.564	-28013.3	-10042.3	250.672	101.124	575.82	0	-8.26599	96.369	-508.845	-87470.8	-18391.8	2.56305	163.856	1074.9	0	0	0	0	0	0	0	603	903	0
8718	6	5.46494	-19.2691	-97.5965	-27372.4	-9126.72	433.778	106.485	580.465	0	-8.1134	97.4371	-511.896	-88020.1	-18452.9	-1279.18	163.952	1074.95	0	0	0	0	0	0	0	603	903	0
8718	7	5.61753	-19.1165	-95.7654	-26548.5	-8760.51	204.896	108.521	577.224	0	-5.06165	97.132	-514.948	-88111.6	-18086.7	-912.965	164.877	1074.11	0	0	0	0	0	0	0	603	903	0
8718	8	5.15977	-17.1328	-92.1033	-25816	-8455.34	21.7904	108.197	580.294	0	-4.90906	96.8268	-512.201	-89576.5	-18086.7	-1096.07	164.688	1077.89	0	0	0	0	0	0	0	603	903	0
8718	9	5.77012	-16.0647	-88.136	-24259.6	-8028.09	388.001	108.913	575.252	0	-5.36682	99.5734	-517.389	-89851.1	-18330.8	-1828.49	164.571	1076.66	0	0	0	0	0	0	0	603	903	0
8719	0	3.63389	-16.0647	-83.8636	-23527.2	-7661.88	113.343	108.639	580.542	0	-4.60388	99.4208	-519.526	-89668.1	-18452.9	-2057.37	164.481	1075.6	0	0	0	0	0	0	0	603	903	0
8719	1	3.63389	-14.0811	-79.8963	-22794.8	-7539.81	-207.091	105.63	585.305	0	-0.0262447	97.5897	-523.493	-90583.6	-18391.8	-2194.7	164.867	1076.04	0	0	0	0	0	0	0	603	903	0
8719	2	6.07529	-13.1655	-80.8118	-22337	-7661.88	-23.9859	105.189	576.408	0	1.04187	98.3527	-526.24	-92048.4	-18330.8	-3110.23	165.166	1077.92	0	0	0	0	0	0	0	603	903	0
8719	3	4.702	-13.3181	-77.4549	-21513.1	-7356.7	113.343	105.02	577.75	0	1.04187	97.5897	-528.376	-92323.1	-18513.9	-3018.68	164.961	1077.73	0	0	0	0	0	0	0	603	903	0
8719	4	1.95542	-13.013	-75.0135	-21238.4	-7234.63	67.5668	103.556	583.128	0	2.41516	94.2328	-533.259	-93421.7	-18513.9	-2698.24	165.282	1078.19	0	0	0	0	0	0	0	603	903	0
8719	5	2.71836	-12.5552	-71.6566	-20414.4	-7234.63	-161.315	99.0374	584.893	0	6.38245	93.4698	-533.869	-93421.7	-18086.7	-3339.11	166.122	1077.99	0	0	0	0	0	0	0	603	903	0
8719	6	3.32871	-9.19826	-67.0789	-19224.2	-6746.35	-23.9859	99.4267	586.592	0	7.75574	94.3854	-536.921	-94062.6	-17842.5	-2972.9	166.769	1078.19	0	0	0	0	0	0	0	603	903	0
8719	7	3.63389	-7.97756	-63.722	-18308.7	-6136	-298.644	103.707	587.322	0	5.46692	93.1647	-539.972	-93787.9	-18574.9	-2698.24	165.6	1076.69	0	0	0	0	0	0	0	603	903	0
8719	8	3.78647	-6.60427	-61.8909	-17393.2	-5769.79	-802.184	106.775	581.03	0	4.85657	89.8077	-545.16	-93604.8	-18513.9	-3430.67	166.04	1074.7	0	0	0	0	0	0	0	603	903	0
8719	9	4.85459	-5.07839	-56.3978	-15745.2	-5586.68	-847.961	100.941	579.182	0	5.7721	92.7069	-549.738	-93055.5	-18636	-2881.35	166.1	1072.27	0	0	0	0	0	0	0	603	903	0
8720	0	4.39683	-4.16286	-53.6512	-14463.5	-4976.33	-344.421	107.247	569.584	0	7.45056	92.0966	-551.874	-92231.5	-18513.9	-3156.01	166.453	1070.12	0	0	0	0	0	0	0	603	903	0
8720	1	2.2606	-4.01027	-45.7166	-11808.5	-4365.98	-161.315	104.499	558.297	0	7.90833	89.6552	-556.452	-92689.3	-19307.4	-3064.45	165.303	1069.57	0	0	0	0	0	0	0	603	903	0
8720	2	3.02354	-4.46804	-42.3597	-11808.5	-4243.91	-710.631	99.8126	578.767	0	6.53503	89.9603	-558.893	-92780.8	-19978.8	-2332.03	164.253	1069.01	0	0	0	0	0	0	0	603	903	0
8720	3	5.77012	-2.33181	-39.0027	-10343.6	-3755.63	-619.079	103.709	565.203	0	7.29797	90.8759	-560.724	-92872.4	-18819.1	-2148.93	166.438	1068.63	0	0	0	0	0	0	0	603	903	0
8720	4	3.17612	-1.87404	-37.1717	-9794.32	-2962.17	-710.631	120.311	563.489	0	7.45056	90.5707	-563.776	-92048.4	-19124.3	-2789.8	166.078	1066.27	0	0	0	0	0	0	0	603	903	0
8720	5	1.34507	-3.09475	-33.2044	-8878.79	-3023.2	-619.079	108.952	567.398	0	8.06091	89.35	-567.133	-91590.7	-19124.3	-2057.37	166.279	1064.5	0	0	0	0	0	0	0	603	903	0
8720	6	1.95542	-3.55251	-27.4061	-7963.26	-2779.06	-573.302	98.5968	590.566	0	8.67126	89.9603	-567.743	-91590.7	-19612.5	-1828.49	165.455	1064.32	0	0	0	0	0	0	0	603	903	0
8720	7	2.10801	-0.500753	-23.4388	-6956.18	-1863.54	-69.7623	120.493	596.781	0	8.82385	88.8922	-572.016	-92231.5	-19490.5	-2194.7	165.927	1064.24	0	0	0	0	0	0	0	603	903	0
8720	8	2.71836	-0.195577	-21.6077	-6040.65	-1802.5	-344.421	116.581	579.56	0	8.97644	87.8241	-573.847	-92140	-19917.7	-1645.39	165.291	1063.57	0	0	0	0	0	0	0	603	903	0
8720	9	1.49766	-1.56887	-18.2508	-4942.02	-1558.36	-390.197	114.614	570.784	0	8.36609	88.8922	-575.068	-91773.8	-20161.9	-1508.06	164.94	1062.59	0	0	0	0	0	0	0	603	903	0
8721	0	0.429541	-0.805928	-15.199	-3660.28	-1192.15	-115.539	121.564	540.823	0	9.58679	88.8922	-576.899	-91499.1	-19612.5	-2103.15	166.003	1061.61	0	0	0	0	0	0	0	603	903	0
8721	1	0.124365	0.567363	-11.5369	-2470.1	-703.868	-161.315	138.99	514.104	0	12.9437	88.7396	-580.561	-91590.7	-20161.9	-1599.61	165.272	1060.76	0	0	0	0	0	0	0	603	903	0
8721	2	0	0	0	0	0	0	200	300	0	10.3497	87.6715	-580.561	-92140	-20100.8	-1599.61	165.377	1061.71	0	0	0	0	0	0	0	603	903	0
8721	3	0	0	0	0	0	0	200	300	0	10.0446	87.8241	-583.002	-92506.2	-19978.8	-2011.6	165.731	1061.67	0	0	0	0	0	0	0	603	903	0
8721	4	0	0	0	0	0	0	200	300	0	10.6549	87.0612	-583.918	-92048.4	-19856.7	-1645.39	165.994	1060.64	0	0	0	0	0	0	0	603	903	0
8721	5	0	0	0	0	0	0	200	300	0	12.0282	87.2137	-583.918	-92414.6	-19978.8	-1645.39	165.785	1061.27	0	0	0	0	0	0	0	603	903	0
8721	6	0	0	0	0	0	0	200	300	0	11.2653	87.2137	-584.833	-93513.2	-20100.8	-1920.04	165.63	1062.9	0	0	0	0	0	0	0	603	903	0
8721	7	0	0	0	0	0	0	200	300	0	10.5023	86.9086	-584.833	-93055.5	-20039.8	-1874.27	165.734	1062.11	0	0	0	0	0	0	0	603	903	0
8721	8	0	0	0	0	0	0	200	300	0	10.8075	85.6879	-584.223	-94245.7	-19368.4	-1782.72	166.848	1064.32	0	0	0	0	0	0	0	603	903	0
8721	9	0	0	0	0	0	0	200	300	0	12.7911	86.2982	-583.002	-94703.5	-19551.5	-2057.37	166.464	1065.44	0	0	0	0	0	0	0	603	903	0
8722	0	0	0	0	0	0	0	200	300	0	12.486	85.0775	-581.171	-95344.3	-19246.3	-1920.04	166.884	1067.06	0	0	0	0	0	0	0	603	903	0
8722	1	0	0	0	0	0	0	200	300	0	12.6385	84.4672	-581.171	-96534.5	-19551.5	-1645.39	166.358	1069.1	0	0	0	0	0	0	0	603	903	0
8722	2	0	0	0	0	0	0	200	300	0	11.5704	84.4672	-579.645	-97358.5	-18819.1	-1874.27	167.533	1070.96	0	0	0	0	0	0	0	603	903	0
8722	3	0	0	0	0	0	0	200	300	0	12.1808	84.0094	-580.256	-97358.5	-18880.1	-2103.15	167.462	1070.79	0	0	0	0	0	0	0	603	903	0
8722	4	0	0	0	0	0	0	200	300	0	12.6385	81.7206	-577.204	-98182.5	-18452.9	-2103.15	168.031	1073.1	0	0	0	0	0	0	0	603	903	0
8722	5	0	0	0	0	0	0	200	300	0	12.486	81.7206	-578.425	-98823.3	-18086.7	-2286.26	168.731	1073.85	0	0	0	0	0	0	0	603	903	0
8722	6	0	0	0	0	0	0	200	300	0	11.723	80.9576	-577.814	-98457.1	-18086.7	-2332.03	168.698	1073.4	0	0	0	0	0	0	0	603	903	0
8722	7	0	0	0	0	0	0	200	300	0	11.8756	81.4154	-576.594	-99922	-18330.8	-2286.26	168.208	1076.3	0	0	0	0	0	0	0	603	903	0
8722	8	0	0	0	0	0	0	200	300	0	12.9437	80.9576	-578.119	-100288	-17964.6	-2469.36	168.926	1076.47	0	0	0	0	0	0	0	603	903	0
8722	9	0	0	0	0	0	0	200	300	0	13.2489	81.4154	-578.425	-101204	-17598.4	-2332.03	169.575	1077.96	0	0	0	0	0	0	0	603	903	0
8723	0	0	0	0	0	0	0	200	300	0	13.2489	79.5844	-578.73	-102394	-17415.3	-2011.6	169.908	1079.93	0	0	0	0	0	0	0	603	903	0
8723	1	0	0	0	0	0	0	200	300	0	12.486	77.9059	-577.509	-101753	-17598.4	-2240.48	169.527	1079.19	0	0	0	0	0	0	0	603	903	0
8723	2	0	0	0	0	0	0	200	300	0	12.9437	79.5844	-576.288	-103126	-17415.3	-2377.81	169.78	1081.95	0	0	0	0	0	0	0	603	903	0
8723	3	0	0	0	0	0	0	200	300	0	12.9437	80.1947	-575.678	-103401	-16927	-2286.26	170.596	1082.62	0	0	0	0	0	0	0	603	903	0
8723	4	0	0	0	0	0	0	200	300	0	14.6222	78.8214	-574.763	-103767	-16743.9	-2377.81	170.868	1083.54	0	0	0	0	0	0	0	603	903	0
8723	5	0	0	0	0	0	0	200	300	0	13.4015	80.1947	-577.204	-104683	-16682.9	-2148.93	171.097	1084.36	0	0	0	0	0	0	0	603	903	0
8723	6	0	0	0	0	0	0	200	300	0	13.2489	79.1266	-576.288	-105232	-16927	-2560.91	170.628	1085.6	0	0	0	0	0	0	0	603	903	0
8723	7	0	0	0	0	0	0	200	300	0	11.8756	79.2792	-575.983	-105507	-16560.8	-2698.24	171.248	1086.18	0	0	0	0	0	0	0	603	903	0
8723	8	0	0	0	0	0	0	200	300	0	13.4015	78.5162	-575.678	-106422	-16072.5	-2606.69	172.081	1087.86	0	0	0	0	0	0	0	603	903	0
8723	9	0	0	0	0	0	0	200	300	0	13.8593	77.6007	-575.068	-107704	-16438.7	-2240.48	171.414	1090.29	0	0	0	0	0	0	0	603	903	0
8724	0	0	0	0	0	0	0	200	300	0	13.8593	76.5326	-574.457	-107795	-16072.5	-2103.15	172.021	1090.65	0	0	0	0	0	0	0	603	903	0
8724	1	0	0	0	0	0	0	200	300	0	13.2489	75.3119	-573.542	-108803	-15767.3	-1691.16	172.509	1092.7	0	0	0	0	0	0	0	603	903	0
8724	2	0	0	0	0	0	0	200	300	0	14.317	74.0912	-573.847	-108162	-15340.1	-2377.81	173.268	1091.49	0	0	0	0	0	0	0	603	903	0
8724	3	0	0	0	0	0	0	200	300	0	14.6222	73.9386	-574.457	-108986	-15706.3	-2148.93	172.659	1092.72	0	0	0	0	0	0	0	603	903	0
8724	4	0	0	0	0	0	0	200	300	0	13.2489	73.1757	-575.373	-109260	-16377.7	-2194.7	171.536	1092.89	0	0	0	0	0	0	0	603	903	0
8724	5	0	0	0	0	0	0	200	300	0	15.6903	73.3282	-575.373	-109810	-15401.1	-2148.93	173.233	1093.85	0	0	0	0	0	0	0	603	903	0
8724	6	0	0	0	0	0	0	200	300	0	13.5541	71.955	-576.594	-109627	-15828.4	-1965.82	172.548	1093.13	0	0	0	0	0	0	0	603	903	0
8724	7	0	0	0	0	0	0	200	300	0	16.1481	72.4127	-578.119	-110084	-15645.3	-2057.37	172.938	1093.42	0	0	0	0	0	0	0	603	903	0
8724	8	0	0	0	0	0	0	200	300	0	14.6222	70.7343	-578.73	-110634	-15462.2	-1828.49	173.283	1094.17	0	0	0	0	0	0	0	603	903	0
8724	9	0	0	0	0	0	0	200	300	0	14.0118	67.8351	-579.035	-110451	-15218	-1645.39	173.718	1093.75	0	0	0	0	0	0	0	603	903	0
8725	0	0	0	0	0	0	0	200	300	0	14.1644	68.598	-579.035	-110725	-15401.1	-1828.49	173.402	1094.22	0	0	0	0	0	0	0	603	903	0
8725	1	0	0	0	0	0	0	200	300	0	14.9274	69.361	-579.951	-111000	-15523.2	-1828.49	173.234	1094.4	0	0	0	0	0	0	0	603	903	0
8725	2	0	0	0	0	0	0	200	300	0	14.6222	67.0721	-579.951	-111183	-15034.9	-1828.49	174.076	1094.71	0	0	0	0	0	0	0	603	903	0
8725	3	0	0	0	0	0	0	200	300	0	13.7067	68.1403	-581.476	-111915	-14912.8	-1736.94	174.354	1095.47	0	0	0	0	0	0	0	603	903	0
8725	4	0	0	0	0	0	0	200	300	0	15.5377	66.9196	-582.392	-112098	-15523.2	-1599.61	173.346	1095.48	0	0	0	0	0	0	0	603	903	0
8725	5	0	0	0	0	0	0	200	300	0	14.317	66.1566	-582.392	-111915	-15218	-1828.49	173.87	1095.17	0	0	0	0	0	0	0	603	903	0
8725	6	0	0	0	0	0	0	200	300	0	14.317	64.9359	-582.697	-111915	-14973.9	-1553.83	174.302	1095.06	0	0	0	0	0	0	0	603	903	0
8725	7	0	0	0	0	0	0	200	300	0	14.7748	66.004	-579.951	-112556	-14851.8	-1416.5	174.391	1097.08	0	0	0	0	0	0	0	603	903	0
8725	8	0	0	0	0	0	0	200	300	0	14.6222	65.5463	-582.697	-113197	-15279.1	-1416.5	173.779	1097.26	0	0	0	0	0	0	0	603	903	0
8725	9	0	0	0	0	0	0	200	300	0	13.7067	64.0204	-585.138	-113838	-15279.1	-1370.73	173.888	1097.55	0	0	0	0	0	0	0	603	903	0
8726	0	0	0	0	0	0	0	200	300	0	14.317	63.2574	-585.749	-113106	-14790.8	-1324.95	174.749	1096.1	0	0	0	0	0	0	0	603	903	0
8726	1	0	0	0	0	0	0	200	300	0	14.0118	63.1049	-584.528	-113380	-14363.5	-1553.83	175.427	1096.97	0	0	0	0	0	0	0	603	903	0
8726	2	0	0	0	0	0	0	200	300	0	13.7067	60.5109	-587.275	-114479	-14607.7	-1508.06	175.126	1097.93	0	0	0	0	0	0	0	603	903	0
8726	3	0	0	0	0	0	0	200	300	0	14.317	62.3419	-584.528	-114204	-14668.7	-1508.06	174.905	1098.38	0	0	0	0	0	0	0	603	903	0
8726	4	0	0	0	0	0	0	200	300	0	12.7911	62.4945	-584.833	-113655	-14241.5	-1233.4	175.649	1097.34	0	0	0	0	0	0	0	603	903	0
8726	5	0	0	0	0	0	0	200	300	0	15.08	60.816	-585.749	-113289	-14424.6	-1599.61	175.374	1096.41	0	0	0	0	0	0	0	603	903	0
8726	6	0	0	0	0	0	0	200	300	0	14.6222	62.1893	-586.664	-114479	-14790.8	-1553.83	174.788	1098.14	0	0	0	0	0	0	0	603	903	0
8726	7	0	0	0	0	0	0	200	300	0	15.08	60.5109	-587.275	-115577	-14424.6	-1462.28	175.438	1099.8	0	0	0	0	0	0	0	603	903	0
8726	8	0	0	0	0	0	0	200	300	0	13.8593	59.2902	-587.275	-115120	-14119.4	-1233.4	175.958	1099.02	0	0	0	0	0	0	0	603	903	0
8726	9	0	0	0	0	0	0	200	300	0	14.317	59.5953	-583.918	-114937	-13997.3	-1279.18	176.029	1099.84	0	0	0	0	0	0	0	603	903	0
8727	0	0	0	0	0	0	0	200	300	0	15.08	60.3583	-585.444	-115394	-14424.6	-1645.39	175.361	1100.11	0	0	0	0	0	0	0	603	903	0
8727	1	0	0	0	0	0	0	200	300	0	14.6222	59.7479	-584.833	-115303	-14424.6	-1782.72	175.336	1100.16	0	0	0	0	0	0	0	603	903	0
8727	2	0	0	0	0	0	0	200	300	0	14.0118	59.2902	-585.749	-115944	-13631.1	-1599.61	176.729	1100.94	0	0	0	0	0	0	0	603	903	0
8727	3	0	0	0	0	0	0	200	300	0	16.4532	59.4427	-584.528	-115761	-14119.4	-1599.61	175.845	1101.04	0	0	0	0	0	0	0	603	903	0
8727	4	0	0	0	0	0	0	200	300	0	13.8593	58.3746	-586.054	-115761	-13875.2	-1645.39	176.324	1100.53	0	0	0	0	0	0	0	603	903	0
8727	5	0	0	0	0	0	0	200	300	0	15.2325	57.4591	-584.528	-115577	-13509	-1462.28	176.889	1100.73	0	0	0	0	0	0	0	603	903	0
8727	6	0	0	0	0	0	0	200	300	0	15.2325	58.0695	-583.613	-115669	-13387	-1599.61	177.062	1101.19	0	0	0	0	0	0	0	603	903	0
8727	7	0	0	0	0	0	0	200	300	0	15.2325	57.4591	-583.307	-116768	-13631.1	-1553.83	176.631	1103.18	0	0	0	0	0	0	0	603	903	0
8727	8	0	0	0	0	0	0	200	300	0	16.1481	55.1703	-583.002	-116401	-13387	-1416.5	177.038	1102.66	0	0	0	0	0	0	0	603	903	0
8727	9	0	0	0	0	0	0	200	300	0	15.08	56.391	-584.223	-115944	-12715.6	-1462.28	178.235	1101.46	0	0	0	0	0	0	0	603	903	0
8728	0	0	0	0	0	0	0	200	300	0	15.8429	55.9332	-583.002	-116493	-12959.7	-1782.72	177.771	1102.82	0	0	0	0	0	0	0	603	903	0
8728	1	0	0	0	0	0	0	200	300	0	16.6058	53.1866	-582.087	-116401	-12959.7	-1736.94	177.736	1102.97	0	0	0	0	0	0	0	603	903	0
8728	2	0	0	0	0	0	0	200	300	0	15.08	55.6281	-580.866	-115944	-12837.6	-1874.27	177.899	1102.6	0	0	0	0	0	0	0	603	903	0
8728	3	0	0	0	0	0	0	200	300	0	16.7584	55.9332	-579.34	-116493	-12532.5	-1736.94	178.368	1104.08	0	0	0	0	0	0	0	603	903	0
8728	4	0	0	0	0	0	0	200	300	0	16.4532	53.797	-578.119	-116676	-12349.4	-1691.16	178.639	1104.82	0	0	0	0	0	0	0	603	903	0
8728	5	0	0	0	0	0	0	200	300	0	16.7584	55.1703	-580.866	-116493	-13081.8	-1920.04	177.479	1103.55	0	0	0	0	0	0	0	603	903	0
8728	6	0	0	0	0	0	0	200	300	0	16.7584	53.797	-579.34	-116859	-12532.5	-1828.49	178.368	1104.71	0	0	0	0	0	0	0	603	903	0
8728	7	0	0	0	0	0	0	200	300	0	15.9955	53.6444	-579.951	-117225	-12349.4	-1691.16	178.706	1105.13	0	0	0	0	0	0	0	603	903	0
8728	8	0	0	0	0	0	0	200	300	0	15.9955	53.3392	-577.509	-117592	-12166.3	-2103.15	178.933	1106.62	0	0	0	0	0	0	0	603	903	0
8728	9	0	0	0	0	0	0	200	300	0	17.3688	53.0341	-577.814	-116127	-12288.3	-1965.82	178.733	1103.98	0	0	0	0	0	0	0	603	903	0
8729	0	0	0	0	0	0	0	200	300	0	17.5214	53.3392	-577.204	-117225	-12166.3	-1920.04	178.922	1106.09	0	0	0	0	0	0	0	603	903	0
8729	1	0	0	0	0	0	0	200	300	0	16.1481	52.8815	-577.204	-117500	-11861.1	-2377.81	179.451	1106.57	0	0	0	0	0	0	0	603	903	0
8729	2	0	0	0	0	0	0	200	300	0	16.6058	51.3556	-576.288	-117866	-11800	-2057.37	179.524	1107.53	0	0	0	0	0	0	0	603	903	0
8729	3	0	0	0	0	0	0	200	300	0	16.7584	51.203	-576.899	-117225	-11678	-2057.37	179.757	1106.2	0	0	0	0	0	0	0	603	903	0
8729	4	0	0	0	0	0	0	200	300	0	19.6576	50.5927	-575.983	-117592	-11861.1	-1874.27	179.407	1107.16	0	0	0	0	0	0	0	603	903	0
8729	5	0	0	0	0	0	0	200	300	0	17.5214	49.5245	-576.288	-118233	-11800	-2011.6	179.524	1108.16	0	0	0	0	0	0	0	603	903	0
8729	6	0	0	0	0	0	0	200	300	0	17.0636	49.6771	-575.678	-118599	-11616.9	-2103.15	179.82	1109.02	0	0	0	0	0	0	0	603	903	0
8729	7	0	0	0	0	0	0	200	300	0	16.4532	49.3719	-575.373	-117409	-11555.9	-1553.83	179.916	1107.06	0	0	0	0	0	0	0	603	903	0
8729	8	0	0	0	0	0	0	200	300	0	18.1317	48.9142	-575.983	-118141	-11494.9	-1782.72	180.043	1108.11	0	0	0	0	0	0	0	603	903	0
8729	9	0	0	0	0	0	0	200	300	0	17.9791	47.9987	-575.068	-118233	-11067.6	-1965.82	180.754	1108.6	0	0	0	0	0	0	0	603	903	0
8730	0	0	0	0	0	0	0	200	300	0	17.0636	47.3883	-575.068	-118690	-11067.6	-2057.37	180.754	1109.39	0	0	0	0	0	0	0	603	903	0
8730	1	0	0	0	0	0	0	200	300	0	17.2162	46.9305	-572.626	-118599	-10945.6	-2057.37	180.885	1110.11	0	0	0	0	0	0	0	603	903	0
8730	2	0	0	0	0	0	0	200	300	0	16.911	46.4728	-572.626	-118416	-11189.7	-2148.93	180.459	1109.79	0	0	0	0	0	0	0	603	903	0
8730	3	0	0	0	0	0	0	200	300	0	17.674	46.4728	-571.711	-118416	-10701.4	-2423.59	181.282	1110.13	0	0	0	0	0	0	0	603	903	0
8730	4	0	0	0	0	0	0	200	300	0	18.2843	44.9469	-568.659	-118782	-11372.8	-2103.15	180.001	1111.88	0	0	0	0	0	0	0	603	903	0
8730	5	0	0	0	0	0	0	200	300	0	17.2162	45.7098	-572.626	-118873	-10823.5	-2057.37	181.099	1110.59	0	0	0	0	0	0	0	603	903	0
8730	6	0	0	0	0	0	0	200	300	0	17.8265	44.6417	-571.711	-119240	-10518.3	-2011.6	181.602	1111.57	0	0	0	0	0	0	0	603	903	0
8730	7	0	0	0	0	0	0	200	300	0	18.1317	43.8788	-571.1	-118507	-10396.2	-2148.93	181.796	1110.51	0	0	0	0	0	0	0	603	903	0
8730	8	0	0	0	0	0	0	200	300	0	19.9628	43.2684	-568.659	-118416	-10518.3	-2057.37	181.503	1111.24	0	0	0	0	0	0	0	603	903	0
8730	9	0	0	0	0	0	0	200	300	0	18.7421	42.9633	-568.964	-119331	-10457.3	-2057.37	181.621	1112.73	0	0	0	0	0	0	0	603	903	0
8731	0	0	0	0	0	0	0	200	300	0	17.3688	43.421	-567.438	-118965	-10274.2	-2286.26	181.894	1112.65	0	0	0	0	0	0	0	603	903	0
8731	1	0	0	0	0	0	0	200	300	0	17.0636	41.2848	-567.743	-118782	-10030	-2240.48	182.334	1112.22	0	0	0	0	0	0	0	603	903	0
8731	2	0	0	0	0	0	0	200	300	0	18.8947	41.59	-567.438	-117958	-10213.1	-2377.81	182.001	1110.88	0	0	0	0	0	0	0	603	903	0
8731	3	0	0	0	0	0	0	200	300	0	17.3688	41.7426	-565.912	-118599	-10213.1	-2332.03	181.953	1112.57	0	0	0	0	0	0	0	603	903	0
8731	4	0	0	0	0	0	0	200	300	0	17.674	40.3693	-565.607	-118782	-10030	-2194.7	182.267	1113.01	0	0	0	0	0	0	0	603	903	0
8731	5	0	0	0	0	0	0	200	300	0	17.5214	38.5382	-565.912	-118782	-9785.89	-2332.03	182.708	1112.89	0	0	0	0	0	0	0	603	903	0
8731	6	0	0	0	0	0	0	200	300	0	19.8102	38.6908	-564.081	-118690	-9907.96	-2148.93	182.435	1113.41	0	0	0	0	0	0	0	603	903	0
8731	7	0	0	0	0	0	0	200	300	0	18.8947	37.9279	-562.555	-118690	-10030	-2332.03	182.171	1113.98	0	0	0	0	0	0	0	603	903	0
8731	8	0	0	0	0	0	0	200	300	0	18.7421	38.3856	-562.25	-119056	-9419.67	-2240.48	183.246	1114.75	0	0	0	0	0	0	0	603	903	0
8731	9	0	0	0	0	0	0	200	300	0	17.2162	36.0968	-561.03	-119056	-9541.75	-2286.26	182.992	1115.21	0	0	0	0	0	0	0	603	903	0
8732	0	0	0	0	0	0	0	200	300	0	17.3688	37.4701	-562.555	-118416	-9541.75	-2286.26	183.039	1113.5	0	0	0	0	0	0	0	603	903	0
8732	1	0	0	0	0	0	0	200	300	0	18.7421	36.402	-562.25	-118416	-9297.6	-2332.03	183.464	1113.61	0	0	0	0	0	0	0	603	903	0
8732	2	0	0	0	0	0	0	200	300	0	18.7421	35.9442	-560.724	-118233	-9358.64	-2240.48	183.31	1113.86	0	0	0	0	0	0	0	603	903	0
8732	3	0	0	0	0	0	0	200	300	0	18.7421	35.1813	-559.809	-118690	-9602.78	-2240.48	182.846	1115.02	0	0	0	0	0	0	0	603	903	0
8732	4	0	0	0	0	0	0	200	300	0	18.1317	35.3339	-559.504	-118965	-9663.82	-2194.7	182.728	1115.63	0	0	0	0	0	0	0	603	903	0
8732	5	0	0	0	0	0	0	200	300	0	18.1317	34.7235	-557.673	-119148	-9175.53	-2286.26	183.547	1116.65	0	0	0	0	0	0	0	603	903	0
8732	6	0	0	0	0	0	0	200	300	0	17.674	33.045	-558.283	-118416	-9053.46	-2194.7	183.783	1115.11	0	0	0	0	0	0	0	603	903	0
8732	7	0	0	0	0	0	0	200	300	0	18.8947	34.1132	-558.283	-118416	-8992.43	-2332.03	183.893	1115.11	0	0	0	0	0	0	0	603	903	0
8732	8	0	0	0	0	0	0	200	300	0	18.7421	33.045	-555.536	-119423	-8992.43	-2240.48	183.813	1117.97	0	0	0	0	0	0	0	603	903	0
8732	9	0	0	0	0	0	0	200	300	0	17.674	32.7399	-555.842	-118233	-8565.18	-2515.14	184.591	1115.71	0	0	0	0	0	0	0	603	903	0
8733	0	0	0	0	0	0	0	200	300	0	17.3688	31.9769	-551.569	-118782	-8504.15	-2240.48	184.582	1118.35	0	0	0	0	0	0	0	603	903	0
8733	1	0	0	0	0	0	0	200	300	0	18.5895	32.4347	-553.705	-118141	-8870.36	-2423.59	183.98	1116.36	0	0	0	0	0	0	0	603	903	0
8733	2	0	0	0	0	0	0	200	300	0	18.7421	31.9769	-550.348	-118324	-8870.36	-2515.14	183.882	1118	0	0	0	0	0	0	0	603	903	0
8733	3	0	0	0	0	0	0	200	300	0	18.8947	32.2821	-551.569	-118782	-8443.11	-2377.81	184.693	1118.35	0	0	0	0	0	0	0	603	903	0
8733	4	0	0	0	0	0	0	200	300	0	18.1317	30.2985	-550.348	-118782	-8382.08	-2286.26	184.77	1118.83	0	0	0	0	0	0	0	603	903	0
8733	5	0	0	0	0	0	0	200	300	0	18.2843	31.5192	-550.959	-119606	-8565.18	-2423.59	184.454	1120.09	0	0	0	0	0	0	0	603	903	0
8733	6	0	0	0	0	0	0	200	300	0	18.8947	30.7562	-546.992	-118324	-8260.01	-2377.81	184.899	1119.32	0	0	0	0	0	0	0	603	903	0
8733	7	0	0	0	0	0	0	200	300	0	18.2843	29.6881	-548.517	-118233	-7954.83	-2332.03	185.498	1118.55	0	0	0	0	0	0	0	603	903	0
8733	8	0	0	0	0	0	0	200	300	0	17.8265	29.2303	-546.381	-118507	-7954.83	-2560.91	185.441	1119.89	0	0	0	0	0	0	0	603	903	0
8733	9	0	0	0	0	0	0	200	300	0	19.8102	28.7726	-545.16	-118599	-8260.01	-2652.47	184.848	1120.55	0	0	0	0	0	0	0	603	903	0
8734	0	0	0	0	0	0	0	200	300	0	17.2162	29.0778	-545.16	-118141	-8076.9	-2560.91	185.184	1119.71	0	0	0	0	0	0	0	603	903	0
8734	1	0	0	0	0	0	0	200	300	0	18.7421	27.5519	-543.329	-117866	-7832.76	-2469.36	185.584	1119.93	0	0	0	0	0	0	0	603	903	0
8734	2	0	0	0	0	0	0	200	300	0	18.5895	28.0096	-543.94	-117592	-7771.73	-2515.14	185.712	1119.19	0	0	0	0	0	0	0	603	903	0
8734	3	0	0	0	0	0	0	200	300	0	17.9791	26.6364	-540.888	-117866	-8076.9	-2469.36	185.067	1120.91	0	0	0	0	0	0	0	603	903	0
8734	4	0	0	0	0	0	0	200	300	0	17.674	26.1786	-542.414	-118049	-7893.8	-2606.69	185.447	1120.64	0	0	0	0	0	0	0	603	903	0
8734	5	0	0	0	0	0	0	200	300	0	18.4369	26.1786	-540.583	-117775	-7466.55	-2332.03	186.188	1120.87	0	0	0	0	0	0	0	603	903	0
8734	6	0	0	0	0	0	0	200	300	0	17.8265	25.4156	-539.972	-117592	-7649.66	-2744.02	185.833	1120.77	0	0	0	0	0	0	0	603	903	0
8734	7	0	0	0	0	0	0	200	300	0	18.5895	26.3312	-537.836	-118141	-7588.62	-2744.02	185.89	1122.66	0	0	0	0	0	0	0	603	903	0
8734	8	0	0	0	0	0	0	200	300	0	17.5214	25.7208	-537.836	-117317	-7710.69	-2789.8	185.664	1121.13	0	0	0	0	0	0	0	603	903	0
8734	9	0	0	0	0	0	0	200	300	0	19.505	25.2631	-536.31	-117866	-7344.48	-2744.02	186.306	1122.77	0	0	0	0	0	0	0	603	903	0
8735	0	0	0	0	0	0	0	200	300	0	16.911	24.5001	-536.921	-117409	-7344.48	-2835.57	186.321	1121.67	0	0	0	0	0	0	0	603	903	0
8735	1	0	0	0	0	0	0	200	300	0	17.8265	22.2113	-535.395	-117225	-7710.69	-2698.24	185.598	1121.95	0	0	0	0	0	0	0	603	903	0
8735	2	0	0	0	0	0	0	200	300	0	17.9791	23.2794	-533.869	-117683	-7527.59	-2698.24	185.9	1123.43	0	0	0	0	0	0	0	603	903	0
8735	3	0	0	0	0	0	0	200	300	0	17.674	23.432	-532.343	-117866	-7344.48	-2515.14	186.203	1124.41	0	0	0	0	0	0	0	603	903	0
8735	4	0	0	0	0	0	0	200	300	0	19.8102	23.1268	-532.038	-117866	-7100.34	-2606.69	186.654	1124.54	0	0	0	0	0	0	0	603	903	0
8735	5	0	0	0	0	0	0	200	300	0	16.6058	21.9061	-531.733	-117409	-7344.48	-2423.59	186.188	1123.8	0	0	0	0	0	0	0	603	903	0
8735	6	0	0	0	0	0	0	200	300	0	17.9791	21.7535	-531.733	-117317	-7039.31	-2515.14	186.762	1123.63	0	0	0	0	0	0	0	603	903	0
8735	7	0	0	0	0	0	0	200	300	0	17.674	20.9906	-529.902	-117775	-6856.2	-2744.02	187.061	1125.26	0	0	0	0	0	0	0	603	903	0
8735	8	0	0	0	0	0	0	200	300	0	16.6058	19.7699	-529.291	-116493	-6856.2	-2835.57	187.046	1123.09	0	0	0	0	0	0	0	603	903	0
8735	9	0	0	0	0	0	0	200	300	0	15.6903	19.6173	-528.986	-117775	-6917.24	-2606.69	186.924	1125.64	0	0	0	0	0	0	0	603	903	0
8736	0	0	0	0	0	0	0	200	300	0	17.3688	20.2277	-526.85	-116859	-7283.45	-2652.47	186.175	1124.81	0	0	0	0	0	0	0	603	903	0
8736	1	0	0	0	0	0	0	200	300	0	17.5214	19.9225	-527.155	-117225	-6978.27	-2606.69	186.762	1125.37	0	0	0	0	0	0	0	603	903	0
8736	2	0	0	0	0	0	0	200	300	0	17.674	19.4647	-527.46	-117592	-6978.27	-2835.57	186.77	1125.94	0	0	0	0	0	0	0	603	903	0
8736	3	0	0	0	0	0	0	200	300	0	16.7584	18.8544	-527.765	-117317	-7100.34	-2744.02	186.546	1125.29	0	0	0	0	0	0	0	603	903	0
8736	4	0	0	0	0	0	0	200	300	0	16.6058	18.5492	-526.85	-117042	-6673.1	-2927.13	187.334	1125.16	0	0	0	0	0	0	0	603	903	0
8736	5	0	0	0	0	0	0	200	300	0	17.674	15.8026	-525.324	-117134	-6856.2	-2835.57	186.949	1125.97	0	0	0	0	0	0	0	603	903	0
[truncated: 1,514 more rows]
