# Supplementary material for: The Effects of an Extemporaneous Speech Dual-task on Older Adult Gait Control
Source: Research Square preprint supplement (doi:10.21203/rs.3.rs-7674245/v1), 2025-11-18
Supplement: Supplementary file 77 [file DT7Walk11.xlsx]

## Sheet: Sheet1
Trajectories
		07:LFHD			07:RFHD			07:LBHD			07:RBHD			07:C7			07:T10			07:CLAV			07:STRN			07:RBAK			07:LSHO			07:LUPA			07:LELB			07:LFRM			07:LWRA			07:LWRB			07:LFIN
Frame	Sub Frame	X	Y	Z	X	Y	Z	X	Y	Z	X	Y	Z	X	Y	Z	X	Y	Z	X	Y	Z	X	Y	Z	X	Y	Z	X	Y	Z	X	Y	Z	X	Y	Z	X	Y	Z	X	Y	Z	X	Y	Z	X	Y	Z
		mm	mm	mm	mm	mm	mm	mm	mm	mm	mm	mm	mm	mm	mm	mm	mm	mm	mm	mm	mm	mm	mm	mm	mm	mm	mm	mm	mm	mm	mm	mm	mm	mm	mm	mm	mm	mm	mm	mm	mm	mm	mm	mm	mm	mm	mm	mm	mm
10537	0	138.967	-1177.58	1593.17	236.791	-1176.65	1597.59	112.655	-1327.56	1610.61	246.441	-1346.9	1612.26	217.603	-1399.86	1487.51				202.393	-1285.15	1395.43	202.994	-1221.74	1243.3	319.837	-1469.6	1301.17	45.9589	-1410.72	1424.79	16.7539	-1469.22	1246.48	27.137	-1523.16	1110.06	-7.14573	-1525.8	938.006	21.4784	-1523.17	854.62	-3.71961	-1580.73	875.571	-0.479709	-1573.87	780.887
10538	0	138.174	-1165.23	1591.91	235.838	-1164.06	1596.61	113.578	-1315.58	1608.4	246.166	-1334.12	1611.33	217.199	-1387.14	1486.52				202.056	-1272.45	1394.51	202.589	-1209.01	1242.67	319.116	-1456.98	1299.6	45.5799	-1398.34	1423.76	17.0228	-1457.84	1245.09	27.5374	-1512.15	1109.46	-7.13096	-1516.11	937.96	21.4502	-1513.88	854.346	-3.31667	-1571.4	875.875	0.019697	-1565.39	781.528
10539	0	137.196	-1152.82	1590.79	235.485	-1150.82	1596.62	113.008	-1303.37	1607.41	245.835	-1321.32	1610.67	216.697	-1374.51	1485.37				201.474	-1259.83	1393.28	201.918	-1196.24	1241.85	318.429	-1443.85	1298.43	45.1572	-1385.56	1423.08	16.5753	-1445.65	1244.98	27.5647	-1500.69	1109.41	-7.3344	-1505.51	937.995	21.016	-1503.75	854.125	-3.39405	-1561.34	876.19	0.106576	-1556	781.474
10540	0	136.386	-1140.27	1590.08	234.316	-1138.32	1595.56	112.577	-1290.83	1606.66	245.491	-1308.46	1609.93	216.344	-1361.72	1484.53				200.867	-1247.06	1392.57	201.125	-1183.16	1241.21	317.635	-1431.1	1297.18	44.742	-1373	1422.3	16.2743	-1433.83	1244.58	27.2706	-1488.99	1109.36	-7.864	-1494.7	937.912	20.5064	-1493	853.806	-3.46339	-1550.39	876.297	-0.11008	-1545.67	781.643
10541	0	135.587	-1127.9	1589.47	233.143	-1126.08	1594.32	112.092	-1278.51	1605.96	245.037	-1295.85	1609.19	215.87	-1349.03	1483.46				200.189	-1234.37	1391.61	200.117	-1170.11	1240.39	316.893	-1417.96	1295.99	44.0821	-1360.35	1421.9	15.8907	-1421.82	1243.95	27.0738	-1477.28	1108.86	-8.66969	-1483.07	937.958	19.688	-1481.47	853.763	-4.1623	-1538.97	876.333	-0.94121	-1534.32	781.816
10542	0	134.668	-1115.55	1588.42	232.822	-1112.85	1594.2	111.488	-1266.17	1605.47	244.235	-1283.31	1607.96	215.355	-1336.33	1482.6				199.326	-1221.48	1390.97	199.233	-1156.85	1240.35	316.173	-1404.64	1294.93	43.2901	-1347.56	1421.5	15.1931	-1409.26	1243.86	26.3342	-1465.05	1108.66	-9.88007	-1471.13	937.575	18.0183	-1469.09	853.414	-5.02664	-1526.81	875.987	-2.05153	-1522.21	781.23
10543	0	133.677	-1103.04	1587.85	231.85	-1100.25	1593.33	111.147	-1253.85	1604.85	244	-1270.48	1608.15	214.797	-1323.54	1482				198.39	-1208.69	1390.34	198.081	-1143.63	1240.17	315.269	-1391.37	1293.63	42.6864	-1335.02	1420.92	14.2915	-1396.69	1243.52	25.4442	-1452.53	1108.41	-11.2664	-1458.38	937.427	15.8304	-1455.63	853.473	-6.43225	-1514.06	875.687	-3.72419	-1509.05	780.857
10544	0	132.991	-1090.67	1587.23	230.938	-1087.96	1592.48	110.879	-1241.49	1604.66	243.66	-1257.92	1607.88	214.274	-1310.92	1481.36	227.892	-1383.66	1227.22	197.491	-1195.74	1390.04	196.557	-1130.15	1239.89	314.622	-1377.86	1292.61	42.1449	-1322.27	1420.61	13.5496	-1383.93	1243.07	24.386	-1439.59	1108.11	-12.9386	-1445.36	937.063	13.7435	-1441.9	853.069	-7.83334	-1500.54	875.061	-5.80073	-1495.04	780.388
10545	0	132.427	-1078.1	1587.26	230.479	-1074.9	1592.57	110.423	-1228.89	1605.19	243.178	-1245.05	1608.2	213.771	-1298.23	1481.17	227.367	-1369.37	1226.78	196.642	-1182.91	1390.29	195.289	-1116.72	1240.21	313.881	-1364.26	1291.61	41.4665	-1309.84	1420.39	12.6297	-1371.04	1242.72	23.1393	-1426.41	1107.54	-15.093	-1431.48	936.991	11.3962	-1427.62	852.586	-9.59638	-1486.31	874.497	-8.33084	-1480.01	779.981
10546	0	131.938	-1065.66	1587.3	230.024	-1062.18	1592.73	110.164	-1216.43	1605.41	242.712	-1232.42	1608.54	213.074	-1285.44	1481.01	226.489	-1355.62	1226.39	195.618	-1170.09	1390.51	193.822	-1103.17	1240.98	313.176	-1350.62	1291.01	40.5945	-1297.35	1420.57	11.1247	-1357.51	1243.44	21.6558	-1412.92	1107.23	-17.3666	-1417	936.897	8.51012	-1412.44	852.147	-11.8032	-1471.63	873.868	-11.4291	-1464.32	779.342
10547	0	131.382	-1053.07	1587.78	229.014	-1050.09	1592.26	109.56	-1203.58	1606.11	242.147	-1219.79	1609.04	212.467	-1272.8	1481.18	225.792	-1342.15	1226.14	194.566	-1157.29	1391.18	192.417	-1089.58	1241.61	312.499	-1337.09	1290.58	40.0128	-1285.01	1420.54	10.3591	-1344.86	1242.05	20.1472	-1398.99	1106.77	-19.8364	-1402.08	936.584	4.85111	-1396.28	852.299	-14.3151	-1456.18	873.129	-14.7925	-1447.99	778.62
10548	0	130.915	-1040.43	1588.16	228.501	-1037.65	1592.43	108.923	-1191.05	1606.98	241.65	-1207.13	1609.54	211.793	-1260.07	1481.81	225.236	-1328.68	1225.98	193.661	-1144.33	1391.67	191.09	-1076.03	1242.52	311.983	-1323.61	1290.42	39.3988	-1272.46	1420.89	9.19809	-1331.34	1242.02	16.894	-1384.09	1108.19	-22.5041	-1386.68	936.351	1.65461	-1379.83	851.729	-16.8321	-1439.96	872.434	-18.6966	-1430.45	778.159
10549	0	130.571	-1027.79	1588.95	227.844	-1025.22	1592.48	108.5	-1178.39	1607.85	241.06	-1194.78	1610	211.199	-1247.35	1482.19	224.875	-1315.17	1226.4	192.974	-1131.6	1392.5	189.91	-1062.5	1243.75	311.6	-1310.14	1290.82	38.7012	-1260.2	1421.85	7.55138	-1316.93	1243.05	15.0141	-1369.49	1107.97	-25.434	-1370.57	936.235	-1.85651	-1362.69	851.568	-19.8706	-1423.14	871.784	-22.702	-1412.48	777.347
10550	0	130.342	-1015.26	1589.93	227.815	-1012.61	1593.39	107.983	-1165.73	1608.91	240.683	-1182.12	1610.95	210.68	-1234.61	1482.79	224.95	-1301.66	1227.25	192.142	-1118.75	1393.36	188.632	-1049.15	1244.72	311.296	-1296.92	1291.42	38.0765	-1247.44	1422.53	6.36996	-1302.98	1243.35	13.9038	-1354.93	1107.19	-28.5722	-1353.63	936.493	-5.87392	-1344.53	851.811	-23.137	-1405.41	871.184	-27.2493	-1393.1	777.413
10551	0	129.9	-1002.67	1590.84	227.686	-1000.15	1594.49	107.685	-1153.32	1609.53	240.339	-1169.66	1611.72	210.241	-1221.97	1483.41	224.872	-1288.35	1227.91	191.543	-1105.97	1394.31	187.711	-1036.06	1245.95	311.046	-1283.77	1292.29	37.7508	-1235.06	1423.18	5.1796	-1288.94	1244.02	12.0864	-1340.06	1107.01	-31.7564	-1336.21	936.648	-9.99834	-1325.68	852.199	-26.8157	-1387.09	870.603	-31.867	-1373.3	776.921
10552	0	129.661	-990.443	1591.94	227.451	-987.626	1595.72	107.202	-1140.85	1610.27	239.507	-1157.54	1611.6	209.728	-1209.44	1484.32	224.68	-1275.42	1228.58	191.059	-1093.32	1395.27	187.109	-1023.28	1246.9	310.971	-1270.86	1293.2	37.2001	-1222.21	1424.08	3.98298	-1274.86	1244.27	9.30646	-1324.68	1107.53	-35.1839	-1318.54	936.74	-14.1336	-1306.51	852.47	-30.7579	-1368.21	869.96	-36.7593	-1352.75	776.637
10553	0	129.375	-977.859	1592.97	227.098	-975.223	1596.89	106.769	-1128.38	1610.87	239.233	-1144.9	1612.93	209.382	-1196.77	1485.31	224.645	-1262.71	1229.39	190.727	-1080.79	1396.08	186.366	-1010.68	1247.92	310.804	-1258.3	1294.28	36.7654	-1209.47	1424.79	2.91971	-1260.8	1244.49	7.14848	-1309.34	1107.27	-38.7072	-1300.14	936.935	-18.4711	-1286.59	853.025	-34.8416	-1348.56	869.333	-41.669	-1331.39	776.266
10554	0	129.024	-965.279	1594.26	226.87	-962.818	1598.44	106.319	-1115.94	1611.63	238.885	-1132.63	1614.06	209.121	-1184.27	1486.18	224.415	-1250.09	1230.67	190.528	-1068.2	1397	186.619	-998.39	1248.77	310.561	-1245.9	1295.47	36.3551	-1196.52	1425.69	1.7962	-1246.39	1245.21	5.09817	-1293.79	1106.97	-42.3232	-1281.33	937.211	-22.4906	-1266.19	853.379	-39.4252	-1328.64	868.748	-46.8938	-1309.4	775.873
10555	0	128.935	-953.108	1594.89	226.703	-950.521	1599.92	106.151	-1103.78	1612.14	238.617	-1120.45	1614.94	208.85	-1171.82	1487.3	224.223	-1237.75	1231.7	190.614	-1055.86	1397.85	186.871	-986.239	1249.34	310.294	-1233.7	1296.74	36.0808	-1183.68	1426.54	0.709808	-1232.05	1245.57	2.74735	-1278.02	1106.98	-45.8853	-1262.05	937.521	-26.6176	-1245.48	853.504	-43.7082	-1307.9	868.096	-52.4339	-1286.46	776.206
10556	0	128.781	-940.848	1595.83	226.43	-938.192	1601.25	105.99	-1091.56	1613.11	238.511	-1108.09	1615.9	208.793	-1159.45	1488.18	223.888	-1225.55	1232.84	190.84	-1043.42	1398.74	187.317	-973.968	1250.08	310.065	-1221.69	1297.98	35.7887	-1170.65	1427.59	-0.538154	-1217.37	1246.51	0.291287	-1262.27	1106.97	-49.4163	-1242.39	938.114	-33.475	-1222.32	857.297	-48.3427	-1286.85	867.721	-57.7998	-1263.1	776.376
10557	0	128.536	-928.586	1597.25	225.959	-926.139	1602.28	105.886	-1079.46	1613.66	238.421	-1095.76	1617.21	208.579	-1147.31	1489.3	223.333	-1213.35	1234.27	191.102	-1031.24	1399.55	188.187	-961.67	1251.08	309.476	-1209.99	1299.19	35.6008	-1157.8	1428.51	-1.80259	-1202.88	1246.91	-1.16979	-1246.45	1106.11	-53.0164	-1222.18	939.025	-35.3955	-1202.3	855.494	-52.6691	-1264.99	867.803	-63.273	-1239.16	777.252
10558	0	128.33	-916.771	1598.33	226	-913.892	1604.02	105.821	-1067.41	1614.36	238.449	-1083.64	1618.61	208.529	-1135.1	1490.37	222.609	-1201.42	1235.5	191.499	-1018.92	1400.72	189.222	-949.6	1251.89	308.941	-1198.37	1300.42	35.2402	-1144.68	1429.72	-3.08292	-1188	1247.73	-3.81728	-1230.17	1106.18	-56.7552	-1201.66	940.003	-39.5625	-1180.03	857.221	-57.532	-1243.21	867.628	-68.809	-1214.81	777.843
10559	0	128.158	-904.742	1599.36	225.616	-901.913	1605.14	105.8	-1055.49	1615.22	238.333	-1071.61	1619.68	208.46	-1123	1491.35	221.721	-1189.76	1236.55	191.976	-1006.92	1401.7	190.121	-937.233	1252.74	308.24	-1186.89	1301.43	34.9964	-1131.82	1430.88	-4.52483	-1173.15	1248.38	-6.57381	-1213.86	1106.67	-60.2414	-1181.04	940.657	-45.1437	-1156.36	860.249	-62.5229	-1221.04	868.061	-74.2154	-1189.84	779.1
10560	0	127.963	-893.037	1600.06	225.288	-889.919	1606.14	105.917	-1043.94	1616.08	238.484	-1059.53	1620.83	208.364	-1111.22	1492.61	220.965	-1177.99	1237.69	192.303	-994.932	1402.51	191.739	-925.38	1254.84	307.628	-1175.46	1302.38	34.8866	-1118.94	1432.02	-5.7273	-1158.38	1249.35	-9.66538	-1197.4	1107.22	-63.8576	-1159.86	942.136	-47.3463	-1135.01	860.2	-67.252	-1198.32	868.417	-79.5201	-1164.46	780.591
10561	0	127.778	-881.236	1601.13	225.374	-877.725	1607.68	106.153	-1032.11	1617.04	238.717	-1047.36	1622.22	208.266	-1099.39	1493.52	220.085	-1166.52	1238.83	192.801	-983.096	1403.69	192.527	-913.297	1255.39	306.881	-1164.17	1303.52	34.7801	-1106.2	1433.26	-7.14681	-1143.56	1250.23	-11.4458	-1181.28	1106.62	-67.164	-1138.59	943.657	-51.0204	-1111.94	862.599	-72.007	-1175.07	869.2	-84.8214	-1138.62	782.577
10562	0	127.657	-869.33	1602.22	225.18	-865.763	1608.81	106.425	-1020.24	1618.15	239.089	-1035.33	1623.61	208.353	-1087.68	1494.81	219.498	-1154.86	1240.24	193.199	-971.189	1404.76	193.366	-901.38	1256.58	306.101	-1153.07	1304.59	34.4109	-1093.47	1434.98	-8.74269	-1128.55	1251.46	-14.1574	-1164.74	1107.16	-70.634	-1117.01	945.62	-56.1983	-1087.4	866.47	-76.8896	-1151.52	870.223	-89.9483	-1112.45	784.93
10563	0	127.666	-857.638	1603.26	225.02	-853.758	1609.62	106.865	-1008.72	1619.24	239.502	-1023.25	1624.84	208.31	-1075.95	1496.19	218.62	-1143.56	1241.49	193.661	-959.585	1405.95	194.044	-889.752	1257.65	305.484	-1141.97	1305.5	34.4767	-1080.98	1436.3	-10.0525	-1113.97	1252.43	-17.4571	-1148.43	1107.78	-73.9728	-1095.44	947.805	-59.6768	-1064.05	869.238	-81.7644	-1127.77	871.782	-94.8043	-1086.29	787.71
10564	0	127.691	-846.07	1604.08	225.165	-841.881	1610.65	107.088	-997.028	1620.61	239.871	-1011.35	1626.02	208.401	-1064.19	1497.33	217.873	-1132.07	1242.83	193.914	-947.993	1406.87	194.554	-878.16	1258.93	304.926	-1130.76	1306.64	34.2685	-1068.63	1437.79	-11.5037	-1099.35	1253.82	-19.6178	-1131.94	1108.02	-77.1842	-1073.77	950.18	-62.6604	-1040.83	872.267	-86.4266	-1103.88	873.556	-99.46	-1059.69	790.955
10565	0	127.636	-834.484	1604.74	225.307	-829.994	1611.59	107.594	-985.486	1621.85	240.324	-999.432	1627.13	208.353	-1052.43	1498.48	217.202	-1120.72	1243.98	194.041	-936.31	1407.94	194.777	-866.584	1259.93	304.244	-1119.7	1307.78	34.0361	-1056.32	1439.17	-12.9949	-1084.82	1255.13	-22.3511	-1115.61	1108.69	-80.2971	-1051.8	952.717	-65.783	-1017.03	875.09	-90.7905	-1079.7	875.432	-103.912	-1032.89	794.296
10566	0	128.066	-822.865	1606.36	225.579	-818.319	1612.46	107.948	-973.824	1623.16	240.776	-987.681	1628.25	208.267	-1040.89	1499.75	216.638	-1109.34	1245.13	194.276	-924.835	1408.97	195.004	-855.186	1261.01	303.574	-1108.74	1308.63	34.111	-1044.1	1440.51	-14.1979	-1070.59	1256.44	-25.0613	-1099.14	1109.28	-83.1246	-1030	955.662	-68.18	-993.972	877.991	-95.1399	-1055.44	877.794	-107.935	-1006.1	797.924
10567	0	128.457	-811.36	1607.13	225.939	-806.58	1613.03	108.535	-962.364	1624.39	241.289	-975.948	1629.25	208.303	-1029.24	1500.62	215.975	-1098.12	1246.1	194.35	-913.296	1409.75	194.965	-843.742	1261.82	303.044	-1097.62	1309.77	34.0701	-1031.99	1441.9	-15.8206	-1056.23	1257.94	-27.9096	-1082.82	1110.24	-86.0285	-1008.09	958.641	-71.0766	-970.442	882.248	-99.4704	-1031.2	880.714	-112.003	-979.378	802.768
10568	0	128.846	-799.802	1608.04	226.275	-795.048	1613.33	108.872	-950.568	1625.8	241.754	-964.376	1629.81	208.124	-1017.57	1501.51	215.569	-1086.43	1247.29	194.347	-901.688	1410.47	194.748	-832.327	1262.46	302.508	-1086.46	1310.47	33.8042	-1019.78	1443.1	-17.2679	-1042.11	1259.33	-30.7167	-1066.64	1110.74	-89.0067	-986.281	962.325	-73.7787	-946.978	886.656	-103.49	-1006.9	883.668	-115.752	-952.532	807.327
10569	0	129.321	-788.015	1608.97	226.773	-783.588	1613.59	109.168	-939.017	1626.94	242.097	-952.816	1630.54	207.828	-1006.07	1502.46	214.958	-1075.14	1248.11	194.351	-890.05	1411.32	194.709	-820.991	1263.09	301.978	-1075.44	1311.31	33.5358	-1007.62	1444.39	-18.8939	-1027.94	1260.46	-33.7571	-1050.37	1111.55	-91.7425	-964.637	965.682	-76.5236	-923.478	891.174	-107.493	-982.56	886.867	-119.27	-925.895	812.149
10570	0	130.013	-776.387	1609.38	227.466	-772.07	1613.75	109.507	-927.084	1628.09	242.309	-941.374	1630.96	207.615	-994.477	1503.03	214.273	-1063.77	1248.81	194.441	-878.54	1411.95	194.759	-809.722	1263.56	301.319	-1064.16	1311.81	33.2166	-995.588	1445.22	-20.3834	-1013.95	1261.34	-36.4515	-1034.22	1111.87	-94.2705	-943.19	969.095	-79.0363	-900.069	895.751	-111.009	-958.502	889.761	-122.373	-899.332	817.05
10571	0	130.862	-764.622	1610.3	228.279	-760.727	1613.93	110	-915.338	1628.79	242.517	-930.042	1631.2	207.311	-982.815	1503.56	213.74	-1052.49	1248.93	194.311	-867.052	1412.38	194.531	-798.349	1263.89	300.492	-1053.15	1312.07	32.8944	-983.663	1446.05	-21.9906	-999.814	1262.34	-39.3956	-1018.1	1112.47	-96.7555	-921.78	972.7	-81.1926	-876.928	900.652	-114.355	-934.62	893.081	-125.536	-872.878	822.644
10572	0	131.581	-752.744	1610.91	229.293	-749.365	1614.37	110.141	-903.274	1629.8	242.843	-918.567	1631.79	207.038	-971.213	1504.01	213.152	-1041.02	1249.65	194.007	-855.531	1412.65	194.374	-786.994	1264.2	300.056	-1041.68	1312.42	32.571	-971.579	1446.52	-23.3272	-986.056	1263.18	-42.5061	-1001.84	1112.96	-99.1764	-900.559	976.462	-83.4207	-853.963	905.63	-117.668	-910.694	896.52	-128.334	-846.849	827.939
10573	0	132.384	-740.826	1611.21	230.173	-737.985	1614.31	110.432	-891.343	1630.32	243.033	-907.206	1631.87	206.767	-959.608	1504.24	212.797	-1029.34	1250.17	193.991	-843.876	1413.05	194.371	-775.63	1264.39	299.373	-1030.29	1312.53	32.2701	-959.503	1446.91	-24.82	-972.08	1263.6	-45.165	-985.708	1113.08	-101.437	-879.566	979.978	-85.7297	-830.967	910.449	-120.637	-887.098	899.892	-130.872	-820.937	833.911
10574	0	133.264	-728.964	1611.48	231.026	-726.605	1614.09	110.568	-879.301	1630.68	243.059	-895.85	1631.47	206.598	-947.779	1504.24	212.203	-1018.07	1249.97	193.866	-832.244	1413.02	194.168	-764.007	1264.14	298.999	-1018.77	1312.44	32.0413	-947.363	1447.4	-26.42	-958.06	1264.07	-48.0714	-969.585	1113.23	-103.549	-858.997	983.436	-87.6944	-808.547	915.242	-123.424	-863.941	903.468	-133.176	-795.573	839.28
10575	0	134.287	-716.941	1611.91	232.208	-715.027	1614.36	110.572	-867.166	1630.86	243.065	-884.505	1631.33	206.262	-935.993	1504.17	211.53	-1006.32	1250.24	193.711	-820.537	1412.69	193.939	-752.371	1263.73	298.344	-1007.37	1312.28	31.9195	-935.403	1447.4	-27.8593	-944.14	1264.52	-50.5693	-953.443	1113.3	-105.617	-838.54	986.902	-89.5316	-786.513	920.067	-126.108	-840.921	907.28	-135.218	-770.577	845.192
10576	0	135.096	-704.791	1612	232.999	-703.519	1614.2	110.613	-854.986	1630.72	243.034	-872.961	1631.22	205.888	-924.134	1504.21	210.963	-994.745	1250.05	193.401	-808.729	1412.19	193.582	-740.699	1263.3	297.708	-995.761	1311.96	31.6542	-923.236	1447.43	-29.3081	-930.256	1264.64	-53.3709	-937.113	1113.69	-107.414	-818.375	990.408	-91.1215	-764.543	925.062	-128.45	-818.108	910.95	-137.255	-745.709	850.764
10577	0	135.877	-692.683	1611.73	233.851	-691.929	1614.17	110.77	-842.819	1630.5	242.971	-861.453	1630.75	205.754	-912.139	1503.92	210.626	-982.963	1249.54	193.235	-796.815	1411.88	193.505	-728.967	1263.11	297.415	-983.785	1311.53	31.347	-911.12	1447.18	-30.5307	-916.302	1264.64	-55.8863	-921.11	1113.43	-109.239	-798.385	993.547	-92.5334	-742.541	930.729	-130.511	-795.851	914.17	-139.085	-721.538	856.611
10578	0	136.494	-680.718	1611.47	234.669	-680.255	1614.09	110.926	-830.801	1630.22	242.951	-849.916	1629.74	205.62	-900.129	1503.54	210.393	-971.43	1249.08	193.218	-784.866	1411.43	193.424	-717.264	1262.5	297.066	-972.152	1311.04	31.1051	-898.783	1447.03	-31.6225	-902.478	1264.82	-58.2433	-904.936	1113.6	-110.798	-778.694	996.866	-93.8778	-721.434	935.329	-132.071	-773.955	917.405	-140.654	-698.069	862.333
10579	0	136.936	-668.594	1611.28	235.231	-668.44	1613.94	111.183	-818.556	1629.6	243.064	-838.112	1629.47	205.547	-888.082	1503.13	210.297	-960.234	1248.44	193.305	-772.878	1411.02	193.1	-705.519	1261.38	297.336	-960.112	1309.88	31.0022	-886.501	1446.91	-32.4857	-888.439	1264.94	-60.2179	-888.79	1113.59	-112.18	-759.312	1000.3	-95.2188	-700.713	939.51	-133.892	-752.325	921.073	-141.854	-674.917	867.895
10580	0	137.377	-656.397	1611.47	235.417	-656.625	1613.36	111.295	-806.409	1629	243.192	-826.27	1629.01	205.535	-875.832	1502.5	211.011	-947.264	1247.9	193.255	-760.748	1410.36	192.706	-693.71	1260.39	296.518	-948.764	1310.09	31.0789	-874.133	1446.56	-33.5489	-874.367	1264.94	-62.1736	-872.538	1113.54	-113.351	-740.122	1003.27	-96.3433	-680.207	944.115	-135.543	-731.107	924.819	-143.037	-652.223	873.514
10581	0	137.567	-644.362	1611.01	235.811	-644.603	1613.31	111.335	-794.384	1628.27	243.279	-814.334	1628.31	205.498	-863.673	1501.92	210.91	-935.495	1247.34	193.268	-748.496	1409.52	192.836	-681.857	1260.06	296.282	-936.768	1309.19	31.03	-861.811	1446.07	-34.3524	-860.26	1264.68	-64.0982	-856.566	1113.64	-114.597	-721.285	1006.44	-97.1667	-660.02	949.1	-136.754	-710.271	928.032	-143.822	-630.117	879.047
10582	0	137.777	-632.259	1610.67	235.72	-632.585	1612.66	111.578	-782.327	1627.51	243.477	-802.198	1627.19	205.673	-851.294	1501.19	210.932	-923.521	1246.75	193.324	-736.254	1408.71	192.565	-669.941	1258.77	296.189	-924.515	1308.18	31.0375	-849.39	1445.35	-35.0976	-846.167	1264.46	-65.5988	-840.704	1113.54	-115.487	-702.861	1009.46	-97.9609	-640.477	952.746	-137.762	-689.843	931.331	-144.552	-608.525	883.919
10583	0	137.712	-620.214	1610.05	235.853	-620.285	1612.34	111.82	-770.308	1626.5	243.721	-790.022	1625.99	205.869	-838.845	1500.23	211.142	-911.332	1246.07	193.409	-723.826	1407.69	192.416	-657.972	1257.84	296.287	-911.684	1307.3	31.1125	-836.887	1444.66	-35.4655	-832.118	1264.35	-66.9841	-824.952	1113.29	-116.152	-684.559	1012.25	-98.19	-620.986	957.564	-138.601	-669.828	934.326	-145.05	-587.458	888.871
10584	0	137.658	-608.156	1609.31	235.869	-607.885	1611.71	112.123	-758.379	1625.56	244.14	-777.713	1625.3	206.103	-826.315	1499.3	211.571	-898.985	1245.21	193.506	-711.341	1406.68	192.472	-645.693	1256.84	296.422	-899.143	1306.41	31.3314	-824.305	1443.92	-36.13	-817.765	1263.92	-68.4522	-809.349	1113.18	-116.583	-666.511	1014.64	-98.5476	-602	961.077	-139.334	-650.094	937.387	-145.155	-566.827	893.445
10585	0	137.533	-596.079	1608.52	235.748	-595.518	1610.89	112.593	-746.409	1624.63	244.618	-765.365	1624.41	206.471	-813.74	1498.22	212.037	-886.546	1244.19	193.522	-698.764	1405.31	192.404	-633.33	1255.39	296.679	-886.586	1305.43	31.6861	-811.754	1443.23	-36.2935	-803.691	1263.51	-69.4949	-793.787	1112.98	-116.856	-648.835	1017.1	-98.5363	-583.594	964.539	-139.914	-630.783	940.38	-145.059	-546.788	898.221
10586	0	137.453	-584.117	1607.67	235.469	-583.113	1609.78	112.908	-734.496	1623.6	245.108	-752.829	1622.99	206.903	-801.149	1496.99	212.441	-874.096	1243.16	193.737	-686.198	1404.24	192.36	-620.603	1254.23	297.048	-873.697	1304.16	32.0556	-799.25	1442.28	-36.7032	-789.515	1262.96	-70.5593	-778.448	1112.59	-117.011	-631.565	1019.47	-98.235	-565.589	967.728	-140.325	-612.068	943.022	-144.849	-527.173	902.094
10587	0	137.391	-572.068	1606.86	235.28	-570.74	1608.78	113.373	-722.581	1622.34	245.679	-740.408	1621.87	207.319	-788.458	1495.64	212.909	-861.509	1241.98	193.906	-673.46	1403.18	191.895	-607.786	1252.46	297.561	-860.835	1302.8	32.3768	-786.696	1441.19	-37.0418	-775.514	1262.44	-71.4935	-763.319	1112.38	-117.052	-614.494	1021.31	-97.9568	-547.815	971.026	-140.617	-593.503	945.538	-144.448	-508.011	906.005
10588	0	137.384	-559.904	1605.84	235.227	-558.285	1607.71	113.797	-710.558	1621.28	246.183	-728.021	1620.44	207.762	-775.843	1494.55	213.758	-848.595	1240.6	194.051	-660.699	1401.66	192.142	-594.793	1251.67	298.042	-847.884	1301.21	32.843	-774.106	1439.94	-36.9741	-761.642	1261.71	-72.0799	-748.421	1111.46	-116.929	-597.804	1023.1	-97.5727	-530.553	973.48	-140.662	-575.463	947.83	-143.921	-489.423	909.533
10589	0	137.334	-547.941	1604.37	235.425	-545.742	1606.48	114.435	-698.559	1619.99	246.78	-715.454	1619.2	208.432	-763.094	1493.03	214.49	-835.796	1238.89	194.305	-647.956	1400.32	191.789	-581.693	1249.43	298.793	-834.724	1299.74	33.3968	-761.646	1438.57	-37.01	-747.8	1260.55	-72.6572	-733.705	1110.89	-116.506	-581.516	1024.41	-96.9158	-513.79	975.719	-140.489	-558.005	949.772	-143.238	-471.354	912.543
10590	0	137.444	-535.697	1602.9	235.317	-533.288	1604.82	115.107	-686.55	1618.77	247.54	-702.871	1618.01	209.152	-750.508	1491.62	215.479	-822.729	1237.41	194.738	-635.113	1399.11	191.83	-568.919	1248.31	299.684	-821.321	1298.13	34.1065	-749.268	1437.12	-36.9283	-734.236	1259.71	-72.9664	-719.12	1110.12	-116.166	-565.675	1025.79	-96.1565	-497.543	977.403	-140.188	-541.019	951.4	-142.42	-453.856	915.3
10591	0	137.56	-523.535	1601.55	235.455	-520.86	1603.48	115.687	-674.345	1617.67	248.224	-690.413	1616.5	209.907	-737.843	1490.01	216.383	-809.672	1235.9	195.094	-622.301	1397.86	192	-555.886	1247.4	300.684	-807.826	1296.58	34.6666	-736.806	1435.88	-36.6057	-720.846	1258.57	-73.1117	-704.977	1109.11	-115.453	-550.04	1026.79	-95.3446	-481.515	979.34	-139.806	-524.4	952.891	-141.5	-436.832	917.711
10592	0	137.794	-511.305	1600.14	235.822	-508.319	1601.98	116.345	-662.104	1616.39	248.917	-677.782	1615.33	210.696	-725.207	1488.39	217.298	-796.269	1234.25	195.384	-609.43	1396.6	192.01	-542.825	1245.95	301.683	-794.308	1294.67	35.545	-724.462	1434.38	-36.3203	-707.534	1257.58	-73.1123	-690.949	1108.13	-114.881	-534.998	1027.51	-94.4534	-465.976	980.76	-139.322	-508.403	953.953	-140.525	-420.367	919.984
10593	0	138.325	-499.014	1598.52	236.246	-495.725	1600.56	117.166	-649.88	1614.88	249.581	-665.297	1613.95	211.626	-712.492	1486.71	218.594	-782.741	1231.76	195.815	-596.447	1395.09	192.023	-529.742	1245.16	302.838	-780.77	1292.75	36.4126	-712.329	1432.66	-35.814	-694.64	1256.2	-72.8776	-677.426	1106.86	-114.078	-520.358	1027.93	-93.4149	-451.014	981.856	-138.551	-492.899	954.618	-139.452	-404.652	921.434
10594	0	138.714	-486.71	1597.04	236.485	-483.332	1598.89	117.752	-637.532	1613.55	250.231	-652.74	1612.42	212.605	-699.671	1484.85	219.786	-769.029	1229.89	196.408	-583.434	1393.85	192.05	-516.393	1243.77	304.21	-766.85	1290.83	37.4598	-700.078	1431.09	-35.1301	-681.77	1254.78	-72.5676	-664.111	1105.7	-113.235	-506.055	1028.16	-92.4904	-436.629	982.006	-137.818	-477.957	955.039	-138.311	-389.389	922.492
10595	0	139.236	-474.204	1595.71	237.494	-470.633	1597.9	118.522	-625.179	1611.92	251.112	-640.265	1610.95	213.563	-686.859	1483.18	221.46	-754.941	1228.02	196.989	-570.336	1392.38	192.118	-502.99	1242.77	305.543	-753.337	1288.79	38.6169	-688.03	1429.06	-34.2783	-669.195	1253.03	-72.146	-651.064	1104.34	-112.265	-492.22	1027.94	-91.2468	-422.408	982.62	-136.992	-463.477	955.201	-137.156	-374.661	923.354
10596	0	139.897	-461.612	1594.66	237.849	-457.969	1596.67	119.388	-612.685	1610.39	251.877	-627.437	1609.37	214.609	-673.905	1481.42	222.827	-741.146	1226.1	197.713	-557.199	1391.12	193.033	-489.265	1242.26	307.104	-739.534	1287.04	39.63	-675.594	1427.21	-33.3518	-656.907	1251.39	-71.3816	-638.45	1102.69	-111.265	-478.965	1027.44	-90.0443	-408.921	982.692	-136.095	-449.557	955.086	-135.982	-360.541	923.667
10597	0	140.375	-449.042	1593.99	238.387	-445.164	1595.85	120.124	-600.12	1609.16	252.7	-614.713	1608.27	215.726	-661.017	1480.12	224.383	-727.257	1223.88	198.496	-543.985	1389.9	193.553	-475.609	1241.04	308.481	-725.716	1285.41	40.7142	-663.073	1425.55	-32.1367	-644.659	1249.65	-70.4692	-626.357	1100.88	-110.201	-466.161	1026.71	-88.8423	-395.877	982.461	-134.851	-436.248	954.466	-134.723	-347.079	923.664
10598	0	140.918	-436.199	1593.23	238.861	-432.251	1595.41	120.97	-587.414	1607.94	253.508	-601.781	1607.34	216.749	-647.922	1479	225.323	-713.643	1222.38	199.519	-530.704	1389.05	194.427	-461.679	1240.22	309.86	-712.05	1284.02	41.81	-650.471	1423.96	-30.7343	-632.847	1248.06	-69.2215	-614.188	1099.33	-109.011	-453.866	1025.71	-87.6516	-383.287	981.953	-133.798	-423.607	953.625	-133.441	-334.093	923.341
10599	0	141.403	-423.458	1592.86	239.448	-419.174	1595.63	121.787	-574.712	1607.31	254.479	-588.797	1606.78	217.845	-634.803	1478.45	226.467	-699.645	1221.38	200.597	-517.44	1388.63	195.697	-447.644	1239.97	310.888	-698.423	1282.97	42.8585	-637.656	1422.66	-29.3652	-621.02	1246.49	-67.632	-602.57	1097.51	-107.717	-442.019	1024.09	-86.4397	-371.271	980.965	-132.275	-411.562	952.518	-132.229	-322.086	922.531
10600	0	141.897	-410.515	1593.05	239.777	-406.023	1595.95	122.777	-561.982	1606.71	255.382	-575.639	1606.6	218.896	-621.599	1478.21	227.264	-685.943	1220.5	201.519	-504.101	1388.22	197.1	-433.868	1240.34	311.671	-684.957	1282.16	43.8988	-624.72	1421.9	-27.5188	-609.482	1245.44	-65.8186	-591.088	1096.46	-106.243	-430.749	1022.95	-85.0033	-359.845	979.861	-130.528	-400.35	950.769	-130.95	-310.831	921.445
10601	0	142.365	-397.63	1593.63	240.357	-392.788	1596.92	123.767	-549.171	1606.83	256.564	-562.247	1606.92	219.962	-608.332	1478.32	227.607	-672.451	1220.09	202.699	-490.733	1388.56	198.519	-419.95	1240.88	312.468	-671.177	1282.35	44.9044	-611.638	1421.61	-25.8824	-598.177	1244.54	-63.6076	-579.989	1095.32	-104.719	-420.122	1021.3	-83.8443	-349.261	977.734	-128.663	-390	949.078	-129.691	-300.411	920.04
10602	0	142.871	-384.63	1594.74	241.165	-379.327	1598.27	124.887	-536.344	1607.23	257.656	-548.811	1607.64	220.928	-595.044	1478.79	227.776	-658.855	1220.92	203.822	-477.443	1389.23	199.962	-406.069	1241.78	312.912	-657.773	1282.46	45.8389	-598.377	1422.18	-23.4572	-586.935	1244.3	-61.0826	-569.222	1094.74	-102.889	-409.978	1019.76	-82.2668	-339.196	976.221	-126.62	-380.47	947.035	-128.285	-290.861	918.144
10603	0	143.366	-371.532	1595.8	241.565	-365.991	1599.43	125.844	-523.202	1608.06	258.761	-535.408	1608.49	221.793	-581.712	1479.54	227.823	-645.608	1221.5	204.967	-464.162	1390.08	201.331	-392.208	1243.06	313.169	-644.387	1282.89	46.6575	-584.809	1423.16	-21.3604	-575.398	1244.56	-58.3527	-558.669	1094.79	-100.999	-400.514	1017.95	-80.8239	-329.649	974.428	-124.245	-371.711	944.845	-126.717	-282.206	915.788
10604	0	143.919	-358.519	1597.01	241.828	-352.662	1600.26	126.872	-510.348	1608.82	259.735	-522.062	1609.29	222.538	-568.299	1480.45	228.146	-632.364	1222.54	205.873	-451.065	1390.92	202.687	-378.567	1244.51	313.309	-631.084	1283.9	47.3118	-571.268	1424.22	-19.7141	-563.995	1244.73	-55.3894	-548.585	1094.83	-98.8724	-391.447	1016.27	-79.04	-320.857	972.085	-121.691	-363.695	942.394	-125.097	-274.397	912.872
10605	0	144.575	-345.438	1598.42	242.291	-339.274	1601.65	127.869	-497.341	1609.84	260.716	-508.767	1609.8	223.171	-554.958	1481.7	228.124	-619.646	1223.88	206.656	-437.9	1391.81	203.658	-365.014	1245.62	313.524	-617.697	1284.79	47.9042	-557.701	1425.62	-17.8079	-552.069	1245.77	-52.3052	-538.765	1095.14	-96.6951	-382.973	1014.2	-77.1397	-312.596	969.734	-119.008	-356.431	939.934	-123.29	-267.349	909.709
10606	0	145.004	-332.377	1599.8	242.835	-325.935	1602.83	128.822	-484.415	1611.04	261.684	-495.359	1610.87	223.742	-541.696	1482.93	227.873	-607.422	1225.83	207.269	-424.855	1392.76	204.421	-351.62	1246.85	313.593	-605.008	1286.43	48.2945	-544.286	1427.38	-16.1598	-540.107	1246.75	-49.3923	-528.97	1096.14	-94.4547	-374.791	1012.44	-75.2164	-304.853	967.05	-116.295	-349.43	937.435	-121.29	-260.846	905.791
10607	0	145.551	-319.363	1601.06	243.369	-312.724	1603.87	129.698	-471.277	1612.56	262.827	-482.042	1611.66	224.463	-528.617	1484.26	227.574	-595.464	1227.55	207.654	-412.075	1393.96	204.72	-338.676	1247.64	313.9	-592.243	1287.81	48.807	-531.196	1428.99	-14.9323	-527.984	1247.96	-46.368	-519.463	1096.86	-92.0873	-366.97	1010.19	-73.0542	-297.547	964.038	-113.439	-343.097	934.521	-118.75	-254.974	901.697
10608	0	146.004	-306.382	1602.37	243.809	-299.629	1604.59	130.359	-458.351	1613.9	263.469	-468.809	1612.5	225.142	-515.474	1485.47	227.856	-583.506	1229.36	207.793	-399.271	1395	204.686	-326.046	1248.55	314.627	-578.926	1289.36	49.3638	-518.273	1430.75	-13.6121	-516.101	1249.13	-43.3152	-509.981	1097.76	-89.6453	-359.483	1008.24	-70.7962	-290.737	960.602	-110.324	-337.039	931.845	-116.103	-249.672	897.028
10609	0	146.349	-293.362	1603.51	244.185	-286.582	1605.27	130.941	-445.301	1615.65	263.91	-455.841	1613.81	225.816	-502.625	1486.81	228.335	-570.627	1231.12	207.633	-386.565	1396.04	204.329	-313.643	1249.44	315.222	-565.92	1291.22	49.8634	-505.814	1432.63	-12.037	-504.443	1250.25	-40.511	-500.635	1098.75	-87.1186	-352.138	1005.72	-68.0709	-284.171	957.171	-107.277	-331.423	928.783	-113.15	-244.994	891.998
10610	0	146.607	-280.523	1604.46	244.554	-273.562	1605.93	131.406	-432.512	1616.92	264.2	-442.756	1614.91	226.357	-489.874	1488.03	229.154	-557.982	1232.69	207.561	-373.809	1397.31	203.727	-301.599	1250.43	316.001	-553.366	1292.43	50.2617	-493.638	1434.16	-11.0079	-492.913	1251.47	-37.7741	-491.218	1099.78	-84.6154	-345.079	1003.14	-65.5656	-278.063	953.227	-104.042	-326.222	925.342	-110.035	-240.654	886.611
10611	0	146.84	-267.764	1605.16	244.792	-260.692	1606.46	131.755	-419.685	1618.49	264.816	-429.838	1615.61	226.969	-477.237	1489.32	230.066	-545.274	1234.07	207.535	-361.225	1398.56	202.745	-289.723	1251.3	316.882	-540.163	1294.03	50.6609	-481.574	1435.8	-10.0393	-481.682	1252.96	-35.3204	-481.865	1100.76	-81.8578	-338.335	1000.27	-62.6996	-272.93	948.944	-100.519	-321.403	921.998	-106.652	-237.008	880.964
10612	0	146.954	-255.022	1605.81	244.686	-247.827	1606.58	132.268	-406.876	1620.17	264.98	-416.887	1617.26	227.559	-464.682	1490.54	231.18	-532.748	1235.66	207.238	-349.012	1399.96	201.799	-277.936	1252.4	317.991	-527.692	1295.44	50.9751	-469.734	1437.32	-8.92935	-471.044	1253.95	-32.7975	-472.609	1101.73	-79.007	-331.789	997.339	-59.588	-267.872	944.454	-97.3726	-317.213	918.515	-103.017	-233.988	875.188
10613	0	146.991	-242.277	1606.37	244.797	-234.963	1607.04	132.423	-394.054	1621.71	265.32	-403.976	1618.36	228.082	-452.237	1491.97	232.367	-520.189	1237.59	207.054	-336.551	1401.19	200.716	-265.973	1253.56	319.4	-514.495	1297.04	51.2659	-457.894	1438.69	-7.55295	-460.329	1255.33	-30.3875	-463.371	1102.86	-76.3511	-325.732	994.447	-56.5971	-263.123	939.495	-94.0209	-313.424	914.754	-99.2172	-231.723	868.839
10614	0	146.966	-229.546	1606.89	244.803	-222.151	1607.49	132.611	-381.298	1623.35	265.674	-390.928	1619.89	228.456	-439.795	1493.29	233.579	-507.686	1239.17	206.652	-324.2	1402.51	199.636	-253.919	1254.81	320.988	-501.677	1298.37	51.6776	-446.107	1440.32	-6.70228	-449.88	1256.35	-28.1383	-454.141	1104.03	-73.5439	-319.83	991.198	-53.4863	-258.95	934.614	-90.5495	-309.861	911.109	-95.5529	-229.749	862.593
10615	0	146.831	-216.822	1607.46	244.683	-209.295	1607.77	132.706	-368.443	1624.63	266.356	-377.763	1620.88	228.702	-427.429	1494.74	234.704	-495.421	1240.52	206.585	-311.917	1403.77	198.334	-241.978	1255.49	321.96	-489.057	1299.97	51.8427	-434.446	1441.39	-5.53182	-439.641	1257.45	-25.7813	-445.121	1104.76	-70.7376	-314.292	987.771	-50.3678	-255.259	929.636	-87.1633	-307.071	907.375	-91.8369	-228.49	856.314
10616	0	146.748	-204.216	1607.86	244.505	-196.61	1608.11	132.72	-355.744	1626.05	265.813	-365.268	1622.62	228.855	-415.05	1496.06	235.806	-483.362	1242.15	206.549	-299.759	1405.17	197.648	-230.168	1256.97	322.771	-476.542	1301.34	52.0612	-422.713	1442.76	-4.44381	-429.563	1258.51	-23.5611	-436.042	1105.72	-68.2832	-309.422	984.562	-47.3269	-252.193	924.399	-83.6003	-304.637	903.767	-88.0591	-227.578	849.971
10617	0	146.743	-191.396	1608.6	244.531	-183.88	1608.71	132.606	-342.893	1627.35	265.461	-352.531	1623.77	229.044	-402.697	1497.5	236.817	-471.347	1243.76	206.37	-287.646	1406.47	197.146	-218.572	1258.09	323.67	-464.011	1303.1	52.2254	-411.047	1443.88	-3.30784	-419.327	1259.46	-21.3003	-426.974	1106.98	-65.6382	-304.57	981.33	-44.4924	-249.179	919.442	-80.2437	-302.553	900.133	-84.4041	-227.495	843.855
10618	0	146.709	-178.631	1609.01	244.513	-171.176	1609.28	132.555	-330.03	1628.46	265.336	-339.711	1625.23	229.173	-390.389	1498.75	237.644	-459.264	1245.36	206.159	-275.571	1407.47	196.86	-206.939	1259.02	324.595	-451.77	1304.91	52.4852	-399.338	1445	-2.20888	-408.936	1260.25	-18.9961	-417.982	1107.97	-63.0801	-300.168	978.148	-41.6338	-246.695	914.701	-76.7984	-300.92	896.666	-80.8252	-227.839	837.67
10619	0	146.62	-165.947	1609.42	244.57	-158.526	1609.9	132.236	-317.267	1629.56	265.256	-326.98	1626.37	229.282	-378.166	1500.15	238.429	-447.351	1246.93	206.25	-263.517	1408.65	197.139	-195.433	1260.52	325.191	-439.814	1306.37	52.7702	-387.607	1445.88	-1.0291	-398.443	1260.97	-16.6378	-409.247	1108.8	-60.6598	-296.25	974.934	-39.0269	-244.572	910.076	-73.302	-299.791	893.435	-77.3413	-228.725	831.907
10620	0	146.581	-153.212	1609.88	244.581	-145.968	1610.58	131.856	-304.374	1630.38	265.022	-314.435	1627.51	229.368	-366	1501.24	239.547	-434.886	1247.91	206.368	-251.585	1409.69	197.32	-183.936	1261.29	326.139	-426.955	1308.05	52.9964	-375.792	1446.87	0.055217	-387.854	1261.59	-14.2832	-400.403	1109.73	-58.2186	-292.632	972.322	-36.5542	-242.717	905.556	-69.9342	-299.017	890.394	-74.1233	-230.241	826.379
10621	0	146.457	-140.464	1610.33	244.534	-133.452	1611.1	131.412	-291.515	1631.03	264.353	-301.988	1628.87	229.338	-353.775	1502.29	239.964	-423.218	1249.35	206.457	-239.573	1410.64	197.695	-172.182	1261.96	326.553	-415.102	1309.56	53.0845	-364.015	1447.52	0.996622	-377.129	1262.01	-11.8998	-391.806	1110.25	-55.8636	-289.088	969.185	-34.1429	-241.144	901.251	-66.8185	-298.322	887.698	-70.9196	-231.903	821.282
10622	0	146.278	-127.793	1610.43	244.379	-120.996	1611.59	130.968	-278.903	1631.56	263.863	-289.593	1629.7	229.346	-341.585	1503.28	240.388	-411.578	1250.24	206.623	-227.594	1411.41	198.32	-160.403	1262.58	326.887	-403.191	1310.67	53.2198	-352.184	1447.91	2.17964	-366.43	1262.12	-9.32873	-383.322	1110.96	-53.0248	-285.711	966.384	-31.7918	-239.717	897.458	-63.3858	-297.958	885.088	-67.9157	-234.008	816.411
10623	0	146.21	-115.301	1610.4	244.259	-108.614	1611.86	130.563	-266.226	1632.1	263.363	-277.206	1630.54	229.3	-329.471	1503.93	240.724	-399.6	1251.51	206.753	-215.691	1411.88	198.862	-148.455	1262.82	327.029	-391.327	1311.92	53.4227	-340.362	1448.13	3.87174	-355.966	1262.32	-6.77578	-374.921	1111.74	-50.6311	-282.93	963.632	-29.3536	-238.862	893.444	-60.2352	-297.701	883.06	-64.8347	-236.424	811.738
10624	0	146.194	-102.763	1610.72	244.187	-96.1858	1612.24	130.213	-253.566	1632.38	262.954	-264.745	1631.21	229.331	-317.408	1504.7	241.114	-387.985	1251.88	207.043	-203.761	1412.49	199.542	-136.658	1263.16	327.421	-379.347	1312.84	53.6997	-328.477	1448.36	4.84363	-345.28	1262.34	-4.06651	-366.721	1112.07	-48.0347	-279.967	961.53	-26.8695	-238.12	889.326	-57.1355	-297.697	881.07	-61.7701	-238.828	807.637
10625	0	146.049	-90.2764	1610.67	243.843	-83.9164	1612.44	129.982	-241.136	1632.48	262.838	-252.242	1631.54	229.514	-305.399	1505.35	241.525	-376.185	1252.83	207.366	-191.736	1412.89	200.39	-124.575	1263.82	327.75	-367.55	1313.77	54.0435	-316.484	1448.55	6.18639	-334.813	1262.36	-1.34794	-358.501	1112.58	-45.3414	-277.126	959.393	-24.1686	-237.309	885.767	-53.7894	-297.486	879.498	-58.916	-241.13	804.156
10626	0	145.732	-77.8716	1610.49	243.595	-71.5205	1612.46	129.526	-228.806	1632.51	262.558	-239.873	1631.95	229.442	-293.29	1505.69	241.849	-364.315	1253.2	207.539	-179.831	1412.92	200.944	-112.832	1263.91	327.95	-355.717	1314.43	54.1719	-304.513	1448.52	7.5805	-324.729	1262.19	1.26297	-350.692	1113.03	-42.6721	-274.398	957.611	-21.5585	-236.787	882.417	-50.6902	-297.605	878.185	-55.771	-243.662	800.484
10627	0	145.402	-65.6614	1610.1	243.412	-59.1326	1612.55	129.398	-216.454	1631.91	262.119	-227.64	1632.16	229.47	-281.291	1505.87	242.087	-352.557	1253.14	207.918	-167.845	1413.09	201.624	-101.068	1263.98	328.128	-344.014	1314.59	54.2685	-292.516	1448.35	8.93162	-314.91	1261.92	3.92356	-342.747	1113.42	-40.1507	-271.597	955.687	-18.9508	-236.406	879.523	-47.3539	-297.449	876.935	-52.947	-246.502	797.96
10628	0	145.228	-53.3611	1609.88	243.176	-46.8122	1612.64	128.96	-204.186	1631.65	261.962	-215.163	1632.25	229.432	-269.289	1505.89	242.333	-340.671	1253.28	208.219	-155.841	1413.14	202.277	-89.3554	1263.68	328.287	-332.189	1314.88	54.4448	-280.458	1447.91	10.3462	-305.208	1261.87	6.3824	-335.021	1114.16	-37.4796	-269.223	954.398	-16.1953	-236.13	877.56	-44.2652	-297.289	876.274	-50.1434	-248.808	795.655
10629	0	144.758	-41.1045	1609.16	242.882	-34.3626	1612.35	128.81	-191.916	1631.4	261.788	-202.759	1632.35	229.455	-257.186	1505.73	242.661	-328.708	1253.22	208.427	-143.858	1412.93	202.734	-77.6124	1263.61	328.473	-320.501	1314.9	54.4761	-268.419	1447.5	11.4902	-295.537	1261.46	8.74581	-326.997	1114.6	-35.0346	-266.207	953.005	-13.4748	-235.478	875.161	-41.1291	-296.86	875.724	-47.2518	-250.994	793.594
10630	0	144.431	-28.9697	1608.25	242.553	-22.0296	1611.82	128.667	-179.652	1630.85	261.602	-190.329	1632.13	229.507	-245.112	1505.32	242.971	-316.844	1252.9	208.877	-131.851	1412.61	203.519	-66.2853	1262.99	328.813	-308.653	1314.71	54.7015	-256.469	1446.91	12.8155	-286.068	1261.07	11.1997	-319.143	1114.81	-32.1759	-263.572	951.638	-10.8007	-234.863	873.088	-37.7205	-296.346	874.926	-44.3725	-253.076	791.517
10631	0	144.067	-16.7578	1607.48	242.204	-9.64003	1611.2	128.623	-167.588	1630.18	261.621	-177.767	1631.63	229.6	-233.148	1504.94	243.234	-304.724	1252.61	209.165	-119.808	1412.22	204.099	-54.3279	1262.12	329.016	-296.787	1314.55	54.8957	-244.37	1446.16	14.3669	-276.728	1260.53	13.4463	-311.056	1114.98	-29.9165	-260.665	950.431	-8.06123	-234.025	871.165	-34.6826	-295.787	874.849	-41.2155	-255.02	789.607
10632	0	143.626	-4.50977	1606.56	241.575	2.71534	1610.2	128.524	-155.277	1629.43	261.811	-165.338	1631.07	229.479	-220.923	1504.23	243.315	-292.68	1251.87	209.477	-107.677	1411.58	204.732	-42.537	1261.73	329.076	-285.001	1314.25	54.9276	-232.22	1445.24	15.5493	-267.231	1259.94	15.6051	-302.948	1115.15	-27.5692	-257.505	949.158	-5.67352	-232.923	869.139	-31.7236	-294.774	874.714	-38.0414	-256.495	788.223
10633	0	143.274	7.68509	1605.37	241.274	15.3661	1609.38	128.433	-143.184	1628.13	261.461	-152.864	1630.36	229.29	-208.72	1503.46	243.318	-280.677	1251.03	209.592	-95.4975	1410.56	205.307	-30.228	1260.84	329.078	-273.281	1313.56	55.0655	-220.017	1444.04	16.7669	-257.694	1259.3	17.3587	-294.835	1115.38	-25.3871	-254.318	948.027	-3.28338	-231.551	867.463	-28.4827	-293.164	874.349	-35.0263	-257.747	786.948
10634	0	142.784	19.8127	1604.29	240.602	27.6984	1608.1	128.362	-131.104	1627.41	261.367	-140.361	1629.18	229.203	-196.561	1502.46	243.131	-268.464	1250.02	209.867	-83.2578	1409.47	206.024	-18.0805	1259.93	328.871	-261.58	1312.49	55.1873	-207.804	1442.72	17.8228	-248.047	1258.53	19.1292	-286.63	1115.39	-23.47	-250.986	946.915	-1.5671	-229.863	866.396	-25.5673	-291.641	874.302	-31.9747	-258.787	785.712
10635	0	142.327	32.2165	1603.04	239.978	40.2965	1606.93	128.454	-118.914	1626.07	261.36	-127.651	1627.9	229.135	-184.294	1501.35	243.084	-256.341	1248.61	210.055	-70.953	1408.47	206.599	-5.7316	1258.62	328.901	-249.766	1311.64	55.1265	-195.507	1441.25	18.7456	-238.025	1257.81	20.7926	-278.452	1114.98	-21.592	-247.367	946.077	0.623503	-227.892	865.994	-22.8661	-289.76	874.458	-29.1704	-259.278	784.832
10636	0	141.723	44.3095	1602.08	239.596	52.7499	1606.21	128.225	-106.864	1624.62	261.437	-115.22	1626.89	228.861	-171.712	1499.81	242.816	-244.464	1247.37	210.288	-58.429	1407.26	207.111	6.34913	1257.01	328.607	-237.674	1310.67	55.0473	-182.894	1439.96	19.5409	-227.803	1256.88	22.4416	-269.863	1114.83	-20.0339	-243.329	945.659	1.75264	-225.201	865.19	-20.2787	-287.447	874.706	-26.5439	-259.471	784.378
10637	0	141.207	56.5466	1601.02	239.047	65.2706	1605.22	128.245	-94.7034	1623.43	261.439	-102.634	1625.54	228.572	-159.225	1498.44	242.473	-232.381	1245.77	210.205	-45.9103	1405.81	207.731	19.0034	1255.76	328.354	-225.599	1309.42	54.9587	-170.446	1438.3	20.0751	-217.32	1255.92	23.7929	-261.095	1114.67	-18.7144	-239.181	944.772	3.62928	-222.657	863.723	-17.9481	-284.786	874.872	-23.6196	-259.396	783.871
10638	0	140.611	68.8103	1599.19	238.249	77.7368	1603.82	127.955	-82.598	1621.38	261.08	-90.2404	1623.71	228.378	-146.754	1496.91	242.19	-220.014	1244.12	210.326	-33.3666	1404.16	208.103	31.3181	1253.86	328.076	-213.54	1307.9	54.7603	-157.625	1436.63	20.5901	-206.701	1254.73	25.1307	-252.192	1114.21	-17.5604	-234.501	944.384	4.14467	-218.986	863.128	-15.5996	-281.565	875.23	-21.4034	-258.491	783.675
10639	0	139.975	80.9842	1598.41	237.803	90.2341	1602.86	127.757	-70.4641	1619.78	260.937	-77.6263	1621.69	227.983	-134.142	1495.16	241.681	-207.714	1242.54	210.218	-20.7367	1402.57	208.677	43.8884	1252.1	327.646	-201.296	1306.49	54.3442	-144.826	1434.77	20.7692	-195.887	1253.72	26.274	-243.066	1113.79	-16.4175	-229.389	943.968	5.80312	-215.749	861.696	-13.5936	-277.926	875.557	-19.3669	-257.155	783.367
10640	0	139.416	93.2478	1597.16	237.223	102.774	1601.79	127.507	-58.2947	1617.7	260.817	-65.3081	1619.91	227.447	-121.414	1493.26	241.119	-195.19	1240.71	210.092	-7.94487	1400.59	208.982	56.3657	1250.1	327.123	-189.119	1304.85	54.061	-131.708	1433.04	20.9085	-184.691	1252.62	26.8051	-233.728	1113.97	-15.4072	-223.734	943.477	6.22871	-210.808	861.079	-11.7418	-273.551	876.172	-17.6701	-254.853	783.592
10641	0	138.998	105.657	1595.63	236.638	115.216	1600.5	127.259	-46.0067	1615.84	260.358	-52.7339	1617.9	227.026	-108.834	1491.64	240.474	-182.5	1238.91	210.005	4.74416	1398.97	209.226	69.0047	1247.97	326.522	-176.911	1303.24	53.5776	-118.697	1431.23	20.9942	-173.3	1251.5	27.665	-223.919	1113.4	-14.546	-217.846	942.806	6.91587	-205.97	860.506	-10.0068	-268.648	876.559	-16.1905	-251.908	783.604
10642	0	138.345	117.935	1594.59	236.131	127.645	1599.44	126.957	-33.8192	1613.76	260.168	-40.3698	1616.01	226.541	-96.1677	1489.58	239.718	-169.727	1237.31	209.747	17.5947	1396.92	209.458	81.9235	1246.24	325.893	-164.536	1301.54	53.1549	-105.557	1429.25	20.8618	-161.795	1250.36	28.458	-213.816	1112.93	-13.9524	-211.281	942.637	7.53838	-200.567	859.64	-8.65256	-263.217	876.801	-14.8725	-248.324	783.488
10643	0	137.993	130.373	1593.4	235.577	140.108	1598.04	126.395	-21.5685	1612.06	259.736	-28.0086	1614.04	225.97	-83.6347	1487.84	238.773	-156.969	1235.45	209.679	30.496	1395.31	209.568	94.8801	1244.6	325.087	-152.277	1299.77	52.338	-92.328	1427.61	20.6047	-150.084	1249.18	28.6756	-203.645	1112.34	-13.5682	-203.911	942.337	7.473	-194.144	859.345	-7.68949	-257.046	877.358	-13.8383	-243.808	783.713
10644	0	137.353	142.766	1592.18	235.089	152.421	1596.95	126.217	-9.03471	1610.11	259.214	-15.6294	1612.22	225.17	-70.9744	1486.02	237.54	-144.124	1233.43	208.899	43.3713	1393.36	209.378	107.815	1242.6	324.015	-139.794	1297.77	51.5271	-78.9709	1425.72	20.0716	-138.116	1247.96	28.8455	-193.003	1111.88	-13.5542	-196.299	941.953	9.07107	-187.96	857.46	-6.83089	-249.976	877.758	-13.3948	-238.283	784.035
10645	0	137.153	155.224	1590.82	234.559	164.819	1595.58	125.388	3.16143	1608.53	258.508	-3.35474	1610.29	224.14	-58.2644	1484.15	236.38	-131.18	1231.62	208.576	56.2992	1391.8	209.165	120.799	1240.95	322.873	-127.508	1295.96	50.654	-65.6293	1424.08	19.4487	-126.068	1246.91	28.65	-182.098	1111.22	-13.1355	-187.932	941.541	7.65261	-179.723	858.232	-6.41493	-242.366	877.934	-13.0628	-232.006	783.956
10646	0	136.361	167.73	1589.76	234.159	177.129	1594.58	124.961	15.6769	1606.73	257.918	8.75937	1609.29	223.253	-45.6279	1482.59	234.857	-118.22	1229.79	207.835	69.1397	1390.47	208.929	133.84	1239.61	321.448	-115.066	1294.05	49.4111	-52.2512	1422.42	18.5684	-113.78	1245.95	28.2549	-170.803	1110.73	-13.3531	-178.823	941.232	7.72528	-171.623	857.489	-6.20907	-233.877	878.267	-12.9493	-224.878	783.991
10647	0	136.035	180.249	1588.66	233.939	189.499	1593.6	124.042	28.2533	1605.76	257.245	21.065	1607.51	222.085	-33.0111	1480.91	233.224	-105.111	1228.03	207.187	82.0628	1389.01	208.44	146.779	1238.23	319.877	-102.439	1292.25	48.3652	-38.8143	1421.09	17.639	-101.246	1244.87	27.5159	-159.136	1110.13	-14.0253	-168.957	940.838	7.15046	-162.516	857.122	-6.64828	-224.609	878.405	-13.3226	-216.685	784.247
10648	0	135.833	192.821	1587.25	233.579	201.859	1592.38	123.417	40.9123	1604.17	256.39	33.2595	1606.07	221.07	-20.3908	1479.17	231.628	-92.0039	1226.52	206.449	94.9107	1387.8	207.797	159.765	1236.74	318.363	-89.7138	1290.49	47.1253	-25.5304	1419.74	16.583	-88.4994	1243.89	26.8969	-147.115	1109.6	-14.8883	-158.472	940.35	6.18689	-152.539	856.533	-7.38281	-214.698	878.548	-13.8366	-207.529	784.102
10649	0	135.266	205.484	1586.53	233.164	213.935	1591.03	122.625	53.3827	1602.96	255.546	45.4954	1604.79	219.864	-7.92477	1477.88	229.944	-78.8552	1224.74	205.495	107.688	1386.43	207.234	173.112	1236.01	316.609	-76.9939	1288.53	45.8721	-12.0966	1418.43	15.1818	-75.6467	1243	25.5797	-134.921	1108.8	-16.4229	-147.141	940.24	5.39195	-142.032	856.003	-8.54672	-203.872	878.431	-15.02	-197.525	783.915
10650	0	135.037	218.054	1585.56	232.823	226.178	1590	121.493	66.0785	1602.02	254.509	57.5035	1603.56	218.519	4.58937	1476.38	228.092	-65.5477	1223	204.505	120.625	1385.48	206.322	186.484	1235.29	314.853	-64.0938	1286.71	44.4802	1.1468	1417.34	13.7299	-62.5281	1242.15	24.3117	-122.141	1108.19	-17.6156	-135.372	939.323	4.25364	-130.794	855.246	-9.97611	-192.265	878.196	-16.4723	-186.515	783.839
10651	0	134.76	230.793	1584.61	232.555	238.436	1589.27	120.424	78.7706	1601.27	253.361	69.6807	1602.79	217.144	17.0503	1475.29	226.458	-52.0639	1221.56	203.316	133.516	1384.71	205.017	199.911	1234.58	313.18	-51.2158	1285.1	43.1267	14.3684	1416.28	12.1156	-49.2538	1241.33	22.5157	-109.083	1107.38	-19.3711	-122.686	938.666	2.43319	-118.362	854.695	-11.9123	-179.876	877.786	-18.3506	-174.475	783.235
10652	0	134.156	243.559	1584.44	232.375	250.752	1588.99	119.639	91.6797	1601.04	252.412	81.7966	1602.3	215.927	29.4644	1474.56	224.925	-38.4462	1220.19	202.419	146.404	1384.31	203.278	212.971	1233.54	311.62	-37.9375	1283.26	41.736	27.4053	1415.48	10.3798	-35.7227	1240.54	20.744	-95.5456	1106.55	-21.4959	-109.266	938.119	0.355861	-105.215	853.986	-14.1415	-166.586	877.228	-20.4637	-161.572	782.616
10653	0	133.917	256.377	1584.46	231.86	263.041	1588.75	118.256	104.509	1601.15	251.202	94.1101	1602.14	214.796	41.8996	1474.2	223.338	-24.8838	1219.19	201.254	159.187	1384.24	202.111	226.527	1233.98	310.169	-25.089	1282.17	40.5673	40.308	1415.05	8.53234	-22.0272	1239.98	18.5191	-81.8009	1105.88	-23.7864	-95.4572	937.327	-2.38072	-91.0477	853.284	-16.6188	-152.586	876.52	-23.0282	-147.569	781.935
10654	0	133.629	269.271	1584.9	231.568	275.303	1589.1	117.005	117.458	1601.62	250.183	106.365	1602.55	213.561	54.4287	1474.26	222.002	-11.2941	1218.53	200.204	171.96	1384.89	200.62	240.038	1234.85	308.923	-12.0171	1281.44	39.4625	53.0755	1414.82	6.91626	-8.297	1239.24	16.4954	-67.6394	1105.13	-26.447	-80.5158	936.991	-4.92828	-76.3292	852.675	-19.7256	-137.658	875.853	-26.1496	-132.636	781.265
10655	0	132.935	281.936	1585.67	231.391	287.85	1590.21	115.843	130.361	1602.26	249.129	118.585	1603.34	212.438	67.068	1474.64	220.915	2.12016	1218.46	199.12	184.758	1385.61	199.323	253.541	1236.1	307.856	1.05396	1281.16	38.2323	65.5615	1415.12	5.23681	5.68928	1239.16	14.0992	-52.9332	1104.83	-29.5863	-65.1671	936.721	-8.60595	-60.1572	852.464	-22.9078	-121.85	875.317	-29.6453	-116.452	780.653
10656	0	132.695	294.826	1586.86	230.815	300.075	1590.97	114.889	143.145	1603.11	247.807	130.94	1604.09	211.461	79.6274	1475.35	220.092	15.4003	1218.87	198.089	197.445	1386.63	197.675	266.787	1237	306.883	14.0433	1281.49	37.4403	78.0517	1415.68	3.45305	19.7474	1239.32	11.9341	-38.102	1104.49	-32.7773	-48.8092	936.386	-11.8709	-43.458	852.203	-26.635	-105.202	874.831	-33.6187	-99.1192	780.253
10657	0	132.086	307.479	1588.01	230.341	312.451	1592.19	113.933	155.733	1603.81	246.824	143.19	1605.1	210.66	92.236	1476.33	219.272	28.4264	1219.44	197.114	210.075	1387.68	196.319	280.122	1238.58	306.106	27.1097	1282.32	36.5704	90.3588	1416.7	1.83409	33.891	1239.66	9.47978	-22.8383	1104.66	-35.9343	-31.753	936.58	-14.9025	-26.0945	852.303	-30.346	-87.7125	874.359	-37.7701	-80.7908	779.751
10658	0	131.643	319.843	1589.05	229.665	324.649	1593.55	113.019	168.272	1605.33	245.968	155.296	1606.24	209.969	104.664	1477.41	218.834	41.3464	1220.49	196.439	222.701	1389.23	195.4	293.429	1240.68	305.495	40.1601	1283.32	36.016	102.765	1418.14	0.38936	47.9924	1240.39	7.25351	-7.56942	1104.86	-39.4153	-14.1179	936.823	-19.1323	-7.30987	852.644	-34.3704	-69.3125	874.164	-42.4659	-61.2559	779.76
10659	0	131.363	332.462	1591.09	229.264	336.876	1595.23	112.074	180.766	1606.54	245.066	167.403	1607.54	209.216	117.13	1478.56	218.524	54.4073	1221.59	195.643	235.223	1390.53	194.369	306.489	1242.52	305.001	53.0192	1284.41	35.3562	115.284	1419.48	-1.04562	62.0436	1241.64	4.77156	7.85788	1105.06	-42.8156	4.11419	937.325	-23.0071	11.962	853.021	-38.7398	-50.1664	873.838	-47.2892	-40.6903	779.791
10660	0	130.628	344.528	1592.64	228.536	348.885	1596.87	111.487	192.834	1607.44	244.64	179.539	1609.21	208.647	129.488	1480.01	217.945	67.2495	1222.66	195.286	247.559	1392.18	193.562	319.338	1244.37	304.648	65.5222	1286.07	34.6862	127.736	1420.88	-2.39586	76.1874	1242.61	2.34287	23.565	1105.54	-46.5528	22.7873	938.003	-26.9633	31.7139	853.489	-43.2236	-30.4358	873.608	-53.0255	-18.9941	780.718
10661	0	129.997	356.514	1593.85	228.388	360.999	1598.86	110.763	204.67	1608.52	243.732	191.487	1610.34	208.132	141.651	1481.24	217.52	79.8888	1224.29	194.742	259.828	1393.5	192.684	331.565	1245.4	303.964	77.8863	1287.4	34.1896	140.482	1422.26	-3.88228	90.3355	1243.74	-0.334319	39.3053	1105.88	-50.4959	41.8907	938.419	-31.1339	52.36	854.364	-47.783	-10.0134	873.119	-57.8833	3.18743	779.697
10662	0	129.395	368.406	1595.47	227.756	372.836	1600.6	110.005	216.451	1609.76	243.454	203.272	1611.89	207.521	153.825	1482.63	216.991	92.1836	1225.75	194.492	271.991	1394.79	192.592	343.812	1247.08	303.507	89.9911	1289.11	33.5225	153.292	1423.77	-5.45882	104.734	1245.22	-3.01098	55.1933	1106.32	-54.6117	61.408	939.212	-35.7517	73.6027	855.047	-52.4414	11.1143	872.504	-63.3314	26.3923	779.671
10663	0	129.483	380.331	1597.31	227.332	384.726	1602.25	109.674	228.288	1611.05	242.791	215.077	1613.31	207.007	165.796	1484.04	216.322	104.304	1227.45	194.313	283.966	1396.11	193.123	355.948	1249.06	302.782	101.796	1290.43	32.9039	166.157	1425.16	-6.80778	119.122	1246.03	-5.81592	71.3358	1106.71	-58.4944	81.4702	939.793	-40.5609	95.4561	855.881	-57.282	32.5074	872.084	-68.8828	50.1016	779.559
10664	0	129.046	391.922	1598.76	227.077	396.299	1603.98	109.776	239.958	1612.08	242.579	226.738	1614.6	206.453	177.562	1485.22	215.541	116.284	1228.84	194.444	295.999	1397.65	192.883	367.555	1249.5	302.041	113.29	1291.86	32.3357	178.983	1426.47	-8.46416	133.761	1247.22	-8.89854	87.6012	1106.86	-62.6701	101.755	940.504	-44.9829	117.682	856.725	-62.2939	54.4048	871.554	-74.8484	74.6486	779.809
10665	0	128.786	403.655	1599.81	226.904	407.94	1605.67	109.271	251.406	1613.6	242.523	238.366	1615.98	205.99	189.257	1486.55	214.602	128.034	1230.43	194.381	307.68	1398.99	193.552	379.372	1250.81	301.19	124.693	1293.3	31.7407	191.682	1427.82	-10.2536	148.551	1248.16	-11.8537	104.014	1106.92	-66.6998	122.444	941.363	-50.598	140.578	857.813	-67.1752	76.7739	871.294	-80.68	99.6617	780.37
10666	0	128.501	415.173	1601.87	226.745	419.428	1607.31	109.359	263.299	1614.48	242.381	249.961	1617.29	205.491	200.876	1487.73	213.277	140.009	1231.6	194.346	319.394	1400.07	194.26	391.131	1251.98	300.068	135.978	1294.4	31.2759	204.503	1429.13	-11.9817	163.318	1248.75	-15.255	120.701	1107.31	-70.9966	143.497	942.303	-55.8151	163.708	859.085	-72.3325	99.5199	870.943	-86.7876	125.32	780.852
10667	0	128.778	426.792	1603.35	226.969	431.003	1609.01	109.125	274.727	1615.83	241.981	261.276	1618.89	204.926	212.395	1488.9	212.097	151.534	1232.72	194.383	330.96	1401.35	195.119	402.927	1253.09	298.853	146.948	1295.62	30.5927	216.974	1430.34	-13.8296	178.402	1249.74	-18.3149	137.496	1107.13	-75.0989	164.987	942.994	-60.317	186.998	860.347	-77.4323	122.622	870.745	-92.7879	151.355	781.958
10668	0	128.889	438.262	1604.92	226.945	442.242	1610.54	109.403	286.412	1617.22	242.161	272.585	1619.77	204.541	223.914	1490.18	210.677	163.01	1233.98	194.649	342.682	1402.7	196.241	414.632	1254.66	297.513	157.86	1296.6	30.3469	229.515	1431.65	-15.6644	193.423	1250.6	-21.5356	154.43	1107.09	-79.1689	186.67	944.178	-66.1415	210.773	862.797	-82.4787	146.244	870.831	-98.745	177.756	783.145
10669	0	129.005	449.731	1606.58	227.268	453.775	1612.15	109.31	297.664	1618.5	242.119	283.902	1621.07	204.271	235.254	1491.57	209.226	174.234	1234.93	194.601	354.051	1403.97	196.981	426.102	1255.73	296.296	168.758	1297.66	29.8562	241.744	1433.06	-17.6137	208.473	1251.23	-24.8461	171.541	1107.41	-83.2415	208.693	945.396	-70.6057	234.893	864.585	-87.4238	170.197	871.293	-104.558	204.532	784.686
10670	0	129.497	461.157	1608.43	227.329	465.018	1613.44	109.31	309.114	1620.21	242.271	295.287	1622.21	203.864	246.719	1492.6	208.003	185.395	1236.38	194.725	365.509	1405.03	197.782	437.327	1256.78	295.215	179.45	1298.84	29.5343	254.019	1434.34	-19.5426	223.56	1252.05	-28.1222	188.869	1107.71	-87.1146	230.999	947.13	-74.5467	258.82	866.489	-92.4529	194.582	871.758	-110.281	231.929	786.694
10671	0	129.373	472.404	1609.58	227.592	476.33	1614.62	109.478	320.353	1621.47	242.483	306.496	1623.32	203.672	258.03	1493.92	206.946	196.553	1237.73	194.576	376.769	1405.84	198.349	448.5	1257.86	294.123	190.306	1300.1	29.2472	266.001	1435.77	-21.2515	238.395	1253.46	-30.9247	206.53	1107.53	-90.8893	253.55	948.823	-79.0198	283.831	869.445	-97.4503	219.163	872.62	-115.867	259.411	789.282
10672	0	129.723	483.751	1611.16	227.749	487.337	1615.85	109.794	331.708	1622.91	242.712	317.717	1624.77	203.433	269.239	1495.23	205.797	207.613	1238.95	194.564	387.944	1406.96	198.648	459.611	1259.14	292.908	200.944	1301.34	28.9734	278.015	1437.19	-22.7353	253.115	1254.52	-34.1558	224.023	1108.16	-94.593	276.268	951.011	-82.5072	308.041	871.975	-102.231	244.179	874.121	-121.145	287.266	792.214
10673	0	129.773	494.92	1612.38	228.246	498.724	1617.18	109.999	342.9	1624.38	242.982	328.789	1625.95	203.003	280.511	1496.35	204.832	218.377	1240.49	194.655	399.166	1408.38	198.92	470.871	1260.59	292.015	211.461	1302.69	28.4478	289.776	1438.61	-24.7021	268.104	1255.78	-37.3974	241.513	1108.85	-97.9954	299.101	953.582	-86.1383	333.21	875.248	-107.137	269.351	876.007	-126.08	315.137	795.814
10674	0	130.768	506.314	1613.45	228.333	509.77	1618	110.182	354.244	1625.75	242.91	339.877	1627.24	202.783	291.65	1497.64	203.826	229.376	1241.51	194.58	410.119	1409.61	198.753	482.182	1261.51	291.236	222.311	1303.85	28.1569	301.645	1439.94	-26.3349	282.88	1257.16	-40.3623	259.16	1109.77	-101.224	322.309	956.435	-89.6341	358.67	878.944	-111.853	294.625	878.188	-130.958	343.752	799.848
10675	0	130.5	517.439	1614.57	228.636	520.918	1618.67	110.455	365.44	1627.06	243.425	351.081	1628.15	202.645	302.692	1498.86	203.248	240.233	1242.81	194.995	421.267	1410.87	198.474	493.351	1262.61	290.375	232.912	1304.83	27.7251	313.226	1441.58	-27.6099	297.337	1258.61	-43.3414	276.771	1110.47	-104.417	345.556	959.606	-92.0371	383.223	882.613	-116.444	320.172	880.88	-135.4	371.852	803.975
10676	0	131.405	528.566	1615.54	229.276	532.068	1619.64	110.779	376.614	1628.61	243.665	362.206	1629.17	202.218	313.718	1499.74	202.692	250.993	1244.05	194.503	432.128	1411.59	198.094	504.286	1263.53	289.791	243.365	1305.93	27.434	324.831	1442.99	-29.3817	311.997	1260.23	-46.363	294.312	1111.55	-107.352	368.833	962.961	-95.0651	408.255	887.31	-120.859	345.921	883.772	-139.156	400.173	808.977
10677	0	131.364	539.748	1616.61	229.442	542.822	1620.24	110.964	387.925	1629.73	243.886	373.174	1630.06	201.891	324.781	1500.71	201.888	261.806	1244.86	194.42	443.262	1412.38	197.715	515.054	1264.52	288.983	253.948	1306.89	27.0357	336.24	1444.76	-31.036	326.528	1261.52	-49.4804	312.053	1113.11	-110.183	392.18	966.744	-97.6317	433.05	891.684	-125.041	371.848	887.254	-142.798	428.42	814.019
10678	0	131.914	550.805	1617.43	230.184	554.007	1621.01	111.095	399.211	1630.71	244.016	384.015	1630.72	201.552	335.762	1501.65	200.769	272.016	1245.98	194.49	454.199	1413.23	197.33	525.731	1265.15	288.05	264.611	1307.5	26.6821	347.619	1445.93	-32.7771	340.932	1263.16	-52.2508	329.518	1113.69	-112.716	415.526	970.584	-99.6996	458.039	896.722	-129.191	397.506	890.998	-146.184	456.624	819.883
10679	0	132.885	562.205	1618.2	230.366	564.798	1621.24	111.171	410.495	1631.59	244.135	394.841	1631.38	201.273	346.631	1502.48	199.986	282.544	1246.87	194.126	465.048	1413.71	196.711	536.307	1265.21	287.273	275.311	1307.96	26.371	358.98	1446.81	-34.3877	355.226	1264.39	-55.1169	346.8	1114.63	-115.091	438.324	974.521	-101.567	482.645	901.633	-132.707	422.969	894.705	-149.015	484.599	825.426
10680	0	132.891	573.293	1618.73	230.887	575.858	1621.66	111.28	421.781	1632.74	244.196	405.706	1631.77	200.747	357.648	1502.92	199.151	293.11	1247.57	193.533	475.847	1414.16	196.376	546.794	1265.79	286.587	285.912	1308.47	25.9304	370.223	1447.93	-35.8669	369.498	1265.4	-57.6826	364.502	1115.78	-117.178	461.232	978.773	-103.42	506.992	907.126	-136.135	448.806	898.853	-151.306	512.467	831.504
10681	0	133.687	584.478	1619.63	231.393	586.635	1622.07	111.348	433.053	1633.43	244.049	416.551	1632.14	200.364	368.629	1503.34	198.556	304.051	1247.76	193.405	486.75	1414.8	196.263	557.512	1266.41	285.975	296.448	1308.96	25.6865	381.599	1448.74	-37.1938	383.714	1266.53	-60.6075	381.732	1116.47	-119.253	483.694	983.283	-105.098	531.258	912.656	-139.098	474.12	903.286	-153.608	540.123	837.684
10682	0	134.331	595.832	1620.15	231.972	597.427	1622.38	111.306	444.482	1633.9	243.921	427.333	1632.32	200.072	379.556	1503.78	198.426	315.634	1247.8	193.202	497.639	1415.32	195.829	568.324	1266.43	285.276	307.187	1309.17	25.3244	392.782	1449.43	-38.4932	397.965	1267.37	-63.4052	398.771	1117.81	-120.986	505.917	987.786	-106.477	555.309	918.396	-141.95	499.247	908.025	-155.292	567.088	844.187
10683	0	134.44	606.937	1620.39	232.635	608.146	1622.52	111.207	455.764	1634.21	243.94	438.041	1632.42	199.76	390.544	1503.9	197.797	326.417	1247.92	192.929	508.647	1415.44	195.509	579.081	1266.72	284.473	317.984	1309.32	25.0155	404.085	1449.9	-39.9821	412.035	1268.31	-65.8285	415.712	1118.97	-122.612	527.905	992.365	-107.535	578.962	924.33	-144.403	523.967	912.314	-157.048	593.985	850.978
10684	0	135.121	618.087	1620.77	233.138	618.786	1622.65	111.094	467.146	1634.46	243.392	448.648	1632.71	199.353	401.589	1503.99	197.345	337.313	1248	192.636	519.583	1415.78	195.188	590.179	1266.77	283.709	328.969	1309.39	24.6362	415.327	1450.24	-41.3992	425.931	1269.35	-68.29	432.797	1119.49	-124.139	549.358	996.84	-108.686	602.314	930.213	-146.454	548.477	917.281	-158.013	620.449	857.983
10685	0	135.567	629.48	1621.18	233.379	629.535	1622.56	110.895	478.527	1634.59	243.252	459.457	1632.48	199.024	412.634	1504.04	196.913	348.461	1248.13	192.384	530.803	1415.57	195.023	601.159	1266.91	282.622	339.44	1309.53	24.4278	426.608	1450.35	-42.6659	439.756	1270	-70.8385	449.435	1120.53	-125.198	570.643	1001.26	-109.538	625.221	936.277	-148.311	572.518	922.058	-159.127	646.341	865.063
10686	0	136.605	640.617	1621.15	233.799	640.176	1622.55	110.686	489.886	1634.56	242.822	469.933	1632.68	198.584	423.797	1503.79	196.632	359.532	1247.98	191.993	541.733	1415.48	194.737	612.388	1266.72	282.402	350.749	1309.12	24.102	437.84	1450.14	-43.8545	453.424	1270.44	-72.7542	465.965	1121.25	-126.409	591.551	1005.94	-110.184	647.781	942.49	-149.816	596.104	926.865	-159.889	671.755	872.258
10687	0	136.567	651.837	1621.15	234.697	651.109	1622.5	110.374	501.252	1634.52	242.536	480.585	1632.38	198.358	434.905	1503.56	196.405	370.62	1247.75	191.975	553.021	1415.24	194.313	623.307	1266.36	282.255	362.446	1308.28	23.8145	449.213	1450.01	-44.7305	467.005	1270.73	-74.699	482.562	1121.63	-127.227	612.031	1010.27	-110.583	669.928	948.53	-150.895	619.165	931.478	-160.238	696.696	879.244
10688	0	137.302	663.202	1621	235.252	661.965	1622.19	110.209	512.66	1634.32	242.179	491.34	1632.06	198.165	446.142	1503.05	196.38	381.759	1247.36	191.607	564.138	1414.96	194.361	634.609	1266.05	281.641	373.944	1308.22	23.6591	460.481	1449.87	-45.5558	480.537	1270.92	-76.6879	498.727	1122.32	-127.879	632.098	1014.67	-110.851	691.606	954.576	-151.968	642.03	936.481	-160.447	721.044	886.527
10689	0	137.954	674.523	1620.9	235.584	672.564	1621.84	110.041	524.089	1633.78	241.841	502.234	1631.32	197.965	457.418	1502.38	196.422	393.048	1246.86	191.431	575.562	1414.39	193.892	645.778	1265.29	281.422	385.385	1307.53	23.5582	471.848	1449.31	-46.4817	494.212	1271.11	-78.3512	514.725	1122.64	-128.234	651.9	1019.01	-110.926	712.789	960.839	-152.484	664.16	941.017	-160.077	744.981	893.817
10690	0	138.578	685.877	1620.59	236.252	683.52	1621.59	109.82	535.433	1633.16	241.441	512.909	1630.58	197.816	468.766	1501.71	196.148	404.495	1245.94	191.268	586.871	1413.82	193.662	656.99	1264.61	281.169	396.878	1306.67	23.4038	483.069	1448.67	-46.771	507.743	1270.93	-79.8743	530.671	1122.92	-128.699	671.045	1023.13	-110.637	733.54	966.911	-152.877	685.923	946.006	-159.953	767.944	900.873
10691	0	138.942	697.037	1620.25	236.573	694.391	1621.2	109.674	546.847	1632.31	241.002	523.737	1629.87	197.597	480.195	1500.96	196.092	416.143	1245.06	190.854	598.236	1413.04	193.232	668.356	1263.8	281.022	408.641	1305.65	23.2993	494.508	1447.84	-47.2952	521.027	1270.87	-81.4919	546.275	1123.43	-129.023	690.044	1027.41	-110.482	753.711	972.685	-153.185	707.134	950.192	-159.416	790.656	907.864
10692	0	139.313	708.461	1619.87	236.714	705.264	1620.7	109.373	558.359	1631.4	240.819	534.71	1628.87	197.64	491.654	1500.06	196.316	427.776	1244.38	190.797	609.946	1412.3	192.895	679.8	1263.04	281.021	420.649	1304.55	23.1885	505.891	1447.1	-48.2441	534.324	1270.68	-82.6899	561.844	1123.69	-128.737	708.566	1031.44	-109.808	773.542	978.316	-153.147	727.915	955.095	-158.577	812.768	914.747
10693	0	139.873	719.9	1619.25	237.206	716.351	1620.25	109.206	569.908	1630.37	240.669	545.706	1627.61	197.671	503.162	1498.98	196.832	439.348	1243.36	190.641	621.451	1411.23	192.661	691.455	1262.16	281.321	432.541	1303.42	23.3134	517.233	1446.18	-48.3534	547.366	1270.36	-83.8499	577.035	1123.45	-128.586	726.631	1035.14	-109.105	792.803	983.839	-153.031	748.243	959.219	-157.443	834.086	921.39
10694	0	140.162	731.31	1618.67	237.842	727.532	1619.8	109.218	581.352	1629.45	240.475	556.985	1626.2	197.759	514.756	1497.63	197.349	450.909	1242.19	190.443	633.152	1410.14	192.079	703.308	1260.76	281.612	444.648	1302.21	23.4824	528.684	1445.02	-48.7973	560.501	1269.7	-84.7894	591.96	1123.45	-128.2	744.229	1038.54	-108.114	811.403	988.908	-152.211	768.025	963.278	-156.117	854.917	927.816
10695	0	140.385	742.933	1618.38	237.808	738.552	1619.18	109.096	592.781	1628.23	240.316	568.009	1625.19	197.928	526.527	1496.53	197.977	462.618	1241.1	190.236	644.928	1408.9	191.702	714.94	1259.75	282.002	456.875	1301.08	23.6298	540.011	1443.82	-48.8494	573.264	1268.87	-85.5867	607.021	1123.3	-127.63	761.499	1041.92	-106.997	829.664	993.938	-151.806	787.383	967.782	-154.618	875.174	933.961
10696	0	140.704	754.179	1617.45	238.127	749.832	1618.56	109.168	604.256	1626.72	240.358	579.197	1623.5	198.253	538.285	1495.36	198.685	474.517	1239.68	190.688	656.989	1408.01	191.139	726.916	1258.39	282.562	469.253	1299.69	23.928	551.363	1442.51	-48.6259	586.041	1268.56	-86.1118	621.522	1123.1	-126.817	778.371	1045	-105.709	847.359	998.495	-151.053	806.041	971.391	-152.969	894.628	939.831
10697	0	141.02	765.655	1617.34	238.542	761.206	1617.85	109.258	615.646	1625.37	240.178	590.54	1622.19	198.591	550.117	1494	199.334	486.538	1238.32	190.388	668.799	1406.59	191.013	738.854	1257.33	283.207	481.563	1298.26	24.239	562.866	1441.03	-48.8863	598.755	1267.52	-86.5577	635.618	1122.39	-125.943	794.738	1047.95	-104.414	864.432	1002.78	-150	824.217	974.816	-151.204	913.515	945.177
10698	0	141.244	777.068	1616.66	238.775	772.661	1617.44	109.539	627.029	1623.85	240.499	601.892	1620.7	198.936	562.008	1492.61	200.306	498.67	1237.04	190.343	680.613	1405.46	190.661	750.982	1256.12	283.963	493.939	1296.67	24.8039	574.18	1439.77	-48.5183	611.118	1266.45	-86.8684	649.754	1122.17	-124.913	810.584	1050.49	-102.84	881.022	1006.83	-148.867	841.693	977.809	-149.288	931.737	950.294
10699	0	141.577	788.563	1615.92	239.202	784.069	1617.06	109.711	638.491	1622.42	240.888	613.315	1619.21	199.502	573.899	1491.3	201.288	510.962	1235.86	190.395	692.796	1404.19	190.583	763.212	1255.29	284.9	506.688	1295.17	25.156	585.52	1438.47	-48.0997	623.573	1265.26	-86.7108	663.513	1121.25	-123.649	825.962	1052.96	-101.107	897.149	1010.61	-147.57	858.695	981.114	-147.279	949.232	955.172
10700	0	141.808	800.137	1615.23	239.071	795.568	1616.27	110.027	649.977	1621.06	241.122	625.029	1617.72	200.135	585.94	1489.97	202.389	523.348	1234.38	190.666	704.972	1403.05	190.149	775.556	1253.91	285.779	519.424	1293.75	25.7469	596.971	1437	-47.7834	635.8	1264.31	-86.7378	677.064	1120.81	-122.339	840.884	1055.07	-99.3964	912.638	1013.77	-146.24	875.241	983.841	-145.074	966.134	959.576
10701	0	141.892	811.56	1614.53	239.266	807.337	1615.66	110.521	661.296	1619.81	241.622	636.633	1616.32	200.988	597.997	1488.68	203.446	535.828	1232.94	190.871	717.149	1401.81	190.036	787.953	1252.92	287.087	532.038	1292.17	26.4088	608.498	1435.48	-47.2496	648.072	1263.02	-86.2394	689.998	1119.9	-120.978	855.44	1056.59	-97.4784	927.56	1016.84	-144.557	890.934	985.863	-143.018	982.124	963.22
10702	0	141.977	823.12	1614.06	239.341	819.188	1615.12	111.001	672.695	1618.14	242.176	648.379	1614.95	201.662	610.13	1487.17	204.68	548.247	1231.47	191.246	729.346	1400.75	189.799	800.327	1251.77	288.152	544.779	1290.78	27.2015	619.925	1434.21	-46.3364	660.077	1261.74	-85.9041	702.597	1118.95	-119.375	869.335	1058.04	-95.6639	941.892	1019.08	-142.954	906.106	988.302	-140.695	997.668	966.822
10703	0	141.752	834.626	1613.65	239.467	831.101	1614.62	111.497	684.205	1616.99	242.81	660.295	1613.38	202.479	622.315	1485.95	205.633	560.917	1229.99	191.597	741.679	1399.71	189.984	813.04	1251.02	289.233	557.47	1289.5	28.0457	631.569	1432.86	-45.3104	671.785	1260.78	-85.3927	715.006	1117.81	-117.81	882.742	1059.22	-93.6805	955.698	1021.27	-141.394	920.622	990.241	-138.437	1012.58	969.616
10704	0	141.848	846.106	1612.81	239.435	843.147	1614.03	112.28	695.471	1615.84	243.665	672.273	1612.07	203.284	634.509	1484.7	206.707	573.762	1228.55	192.058	754.015	1398.69	190.035	825.513	1249.96	290.554	569.937	1287.82	28.8121	643.413	1431.57	-44.8534	683.623	1259.63	-84.4487	726.966	1116.77	-116.099	895.825	1059.94	-91.7658	968.992	1023	-139.399	934.376	991.136	-136.017	1026.74	972.127
10705	0	141.912	857.684	1612.13	239.367	855.016	1613.25	113.046	706.835	1614.34	244.6	684.365	1610.64	204.284	646.656	1483.49	207.576	586.57	1227.26	192.594	766.441	1397.65	190.478	838.272	1249.25	291.496	582.883	1286.67	29.6015	655.356	1430.26	-43.8192	695.265	1258.13	-83.4234	738.502	1115.3	-114.523	908.115	1060.35	-89.6084	981.65	1024.36	-137.513	947.937	991.956	-133.696	1040.23	974.202
10706	0	141.959	869.14	1611.3	239.373	867.022	1612.71	113.714	718.167	1613.02	245.38	696.318	1609.33	205.129	658.828	1482.03	208.698	599.537	1225.86	193.188	778.819	1396.7	191.084	851.108	1248.41	292.572	595.674	1285.34	30.4123	667.409	1429.02	-42.8045	706.791	1256.69	-82.5566	749.651	1113.69	-112.809	920.118	1060.5	-87.6541	993.883	1025.06	-135.562	960.526	992.453	-131.353	1053.19	975.489
10707	0	141.966	880.559	1610.66	239.389	879.151	1612.21	114.688	729.468	1611.69	246.735	708.543	1607.9	206.054	670.819	1480.9	209.583	612.463	1224.55	193.926	791.443	1395.69	191.938	864.094	1247.85	293.457	608.466	1283.95	31.2694	679.545	1427.92	-41.4718	718.157	1254.74	-81.5056	760.694	1111.82	-111.014	931.74	1060.23	-85.6308	1005.68	1025.59	-133.629	973.008	992.661	-128.882	1065.68	976.223
10708	0	141.835	892.047	1610.23	239.211	891.342	1611.67	115.56	740.839	1611	247.498	720.728	1607.17	206.895	682.797	1479.97	210.478	625.662	1223.01	195.162	804.02	1395.38	193.165	877.342	1247.5	294.583	621.246	1282.57	32.1114	691.598	1426.44	-40.5511	729.801	1253.58	-80.0254	771.348	1109.9	-109.212	942.785	1059.29	-83.6824	1016.96	1025.42	-131.866	984.559	992.071	-126.507	1077.45	976.269
10709	0	141.67	903.503	1610.06	239.089	903.563	1611.59	116.509	752.153	1610.69	248.683	733.149	1606.45	207.866	694.868	1479.07	211.184	639.06	1221.45	195.777	816.488	1394.97	194.236	890.412	1247.44	295.592	634.172	1281.44	33.1208	703.472	1425.24	-39.4392	741.019	1251.85	-78.3904	781.809	1108.27	-107.502	953.487	1058.43	-81.703	1027.73	1024.92	-129.718	995.446	991.024	-124.351	1088.37	975.775
10710	0	141.288	914.957	1609.82	238.794	915.72	1611.55	117.545	763.459	1610.59	249.651	745.32	1606.98	208.86	706.872	1478.71	211.742	652.319	1220.52	196.643	828.907	1395.2	195.553	903.485	1248.2	296.491	647.07	1280.44	34.1054	715.309	1424.39	-37.692	751.956	1251.27	-76.8308	791.829	1106.79	-105.629	963.55	1056.72	-79.5498	1038.05	1023.78	-127.467	1005.76	989.217	-122.004	1098.79	974.739
10711	0	141.079	926.57	1610.02	238.634	927.952	1611.87	118.622	774.74	1610.63	251.068	757.724	1607.21	209.945	718.95	1478.57	212.545	665.684	1219.8	197.86	841.351	1395.89	196.837	916.756	1249.19	297.447	660.153	1279.82	35.2841	727.136	1424.07	-36.2189	762.633	1250.1	-75.093	801.696	1105.24	-103.757	973.24	1055.05	-77.5815	1047.74	1022.25	-125.087	1015.47	987.464	-119.82	1108.44	973.009
10712	0	140.928	938.019	1610.45	238.459	940.309	1612.58	119.714	786.009	1611.3	252.459	770.093	1607.99	211.065	731.055	1478.83	213.096	679.055	1219.18	198.474	853.66	1396.68	197.839	929.84	1250.46	298.148	673.008	1279.51	36.3192	738.986	1424	-34.8988	773.075	1249.35	-72.7181	811.202	1104.13	-101.651	982.454	1052.96	-75.6245	1056.84	1019.95	-122.499	1024.49	985.111	-117.686	1117.37	970.744
10713	0	140.726	949.516	1611.31	238.301	952.669	1613.61	120.899	797.305	1612.1	253.537	782.651	1609.12	211.813	743.288	1479.51	213.478	692.187	1219.31	199.684	865.964	1397.83	198.938	943.195	1252	298.723	685.912	1279.42	37.1983	750.928	1424.32	-33.2391	783.438	1248.79	-70.4458	820.405	1103.17	-99.6684	991.239	1050.56	-73.7451	1065.51	1017.57	-120.098	1032.4	981.999	-115.678	1125.46	967.502
10714	0	140.504	960.961	1612.37	238.133	964.966	1614.81	122	808.619	1613.36	254.652	795.147	1610.42	212.681	755.462	1480.38	213.889	705.107	1219.82	200.731	878.574	1399.22	199.956	956.578	1253.79	299.082	698.677	1280.1	38.0811	763.151	1424.85	-31.1834	793.686	1248.65	-68.295	829.325	1102.62	-97.6333	999.4	1047.98	-71.7633	1073.6	1014.35	-117.576	1040.06	978.729	-113.577	1132.9	963.662
10715	0	140.638	972.502	1613.6	238.002	977.333	1615.89	123.274	819.937	1614.48	256.364	807.318	1611.39	213.393	767.714	1481.15	214.274	718.087	1220.34	201.253	890.742	1400.31	200.944	969.674	1255.65	299.664	711.537	1280.71	38.8853	775.427	1425.55	-29.297	803.936	1248.99	-65.4966	838.102	1101.78	-95.2995	1007.2	1045.14	-70.0044	1081.05	1010.91	-114.944	1046.77	975.242	-111.627	1139.32	958.975
10716	0	140.239	983.848	1614.39	237.821	989.696	1616.97	124.591	831.238	1615.39	257.506	819.838	1612.62	214.167	779.983	1482.04	214.662	730.816	1221.45	202.023	903.244	1401.57	201.789	982.585	1256.99	300.113	724.253	1281.62	39.7659	787.887	1426.7	-27.5823	814.054	1249.26	-63.0271	845.983	1101.1	-93.0211	1014.63	1041.83	-67.8127	1088.15	1007.14	-112.391	1052.87	971.361	-109.507	1145.29	953.957
10717	0	140.469	995.456	1616.03	237.929	1001.96	1618.6	125.718	842.572	1616.58	258.656	832.336	1613.39	214.783	792.18	1483.21	215.148	743.19	1222.65	202.531	915.52	1402.59	202.496	995.214	1258.36	300.687	736.861	1282.62	40.1059	800.437	1427.86	-25.669	824.176	1249.42	-60.1313	854.478	1101.32	-91.0001	1021.51	1038.56	-65.7894	1094.65	1002.66	-109.691	1058.55	967.074	-107.288	1150.58	948.081
10718	0	140.4	1007.11	1617.78	237.969	1014.16	1620.08	126.69	854.111	1617.87	259.677	844.69	1614.22	215.348	804.521	1484.16	215.691	755.451	1223.91	203.334	928.065	1403.87	203.068	1007.41	1259.48	301.201	749.431	1283.98	40.576	812.777	1429.07	-24.2727	834.736	1249.81	-57.6395	862.466	1101.36	-88.9039	1028.21	1035	-63.7043	1100.77	997.795	-107.145	1063.93	962.802	-104.988	1155.3	941.646
10719	0	140.503	1018.72	1619.37	237.872	1026.48	1621.34	127.715	865.647	1618.83	260.62	857.042	1614.84	215.994	816.729	1485.28	216.216	767.655	1225.39	203.515	940.098	1404.89	203.404	1019.48	1260.21	301.716	761.952	1285.13	41.1222	825.03	1430.37	-23.0452	845.3	1250.48	-55.0164	870.487	1101.05	-86.7526	1034.56	1031.12	-61.5009	1106.5	992.573	-104.427	1068.57	957.888	-102.546	1159.63	934.849
10720	0	140.594	1030.31	1621.16	238.028	1038.78	1622.77	128.612	877.083	1620.09	261.516	869.156	1616.01	216.637	828.867	1486.48	216.773	779.537	1226.51	203.671	952.128	1405.92	203.506	1031.41	1261.14	302.335	774.35	1286.35	41.6645	836.799	1431.49	-21.957	855.766	1251.2	-52.2431	878.465	1101.02	-84.5837	1040.75	1026.96	-59.4511	1111.57	986.392	-102.109	1072.62	952.988	-100.234	1163.02	927.194
10721	0	140.49	1041.99	1622.75	238.183	1050.83	1624.28	129.337	888.702	1621.51	262.265	881.546	1616.48	217.159	841.068	1487.59	217.337	791.356	1228.17	203.849	964.175	1407.12	203.286	1043.2	1262.03	303.026	786.666	1287.77	42.1814	848.416	1432.72	-20.6236	865.852	1251.68	-49.6919	886.376	1101.41	-82.2731	1046.48	1022.42	-56.9858	1116.47	980.38	-99.1197	1076.37	947.078	-97.6147	1165.99	919.379
10722	0	140.596	1053.56	1624.43	238.008	1062.86	1625.53	130.139	900.293	1622.76	263.128	893.745	1617.41	217.848	853.147	1488.76	218.02	803.12	1229.41	203.956	976.069	1408.35	202.814	1054.98	1263.08	303.65	798.953	1289.21	42.8167	859.814	1433.99	-19.4317	876.284	1252.42	-47.0605	894.612	1101.45	-79.977	1052.05	1017.76	-54.7233	1120.72	973.826	-96.4675	1079.39	941.467	-95.1056	1168.18	910.843
10723	0	140.603	1065.18	1626.05	237.875	1074.94	1626.6	130.777	911.812	1624.05	263.807	905.875	1618.47	218.49	865.183	1490.07	218.957	814.724	1230.8	203.578	987.881	1409.12	202.064	1066.64	1263.95	304.549	811.103	1290.52	43.2911	870.881	1435.13	-18.1893	886.352	1253.15	-44.6388	902.699	1101.94	-77.7213	1057.24	1012.96	-52.3347	1124.51	966.832	-93.8231	1081.79	935.667	-92.5277	1169.78	902.181
10724	0	140.476	1076.78	1627.35	237.898	1086.92	1627.82	131.308	923.412	1625.63	264.256	918.077	1618.92	218.976	877.151	1491.2	219.757	826.326	1231.92	203.578	999.515	1410.17	201.094	1078.08	1264.77	305.311	823.382	1291.72	43.7516	881.979	1436.07	-17.099	896.072	1253.84	-42.1998	911.05	1102.78	-75.5437	1062.05	1007.95	-50.1976	1127.6	959.461	-91.1581	1083.73	929.723	-90.2663	1170.31	893.212
10725	0	140.358	1088.32	1628.63	237.852	1099.01	1628.96	131.763	934.77	1626.85	264.743	930.157	1619.86	219.552	889.142	1492.3	220.833	837.891	1233.35	203.29	1011.16	1410.88	200.104	1089.6	1265.45	306.226	835.45	1293	44.1613	892.787	1437.18	-15.4361	905.774	1254.75	-39.733	919.135	1102.85	-73.304	1066.76	1002.73	-47.9879	1130.29	951.889	-88.5455	1085.03	923.724	-87.7957	1170.17	883.908
10726	0	140.324	1099.97	1629.83	237.656	1111.02	1630.12	132.177	946.314	1628.24	265.235	942.285	1620.97	219.936	900.948	1493.6	221.896	849.578	1234.5	203.267	1023.01	1411.93	199.149	1100.71	1266.28	307.203	847.443	1294.45	44.6525	903.6	1438.18	-14.691	915.31	1254.99	-37.6506	927.348	1103.82	-70.8673	1070.86	997.381	-45.7844	1132.39	944.513	-85.9464	1086.09	918.004	-85.3617	1169.39	874.632
10727	0	140.243	1111.6	1631.07	237.485	1122.88	1631.05	132.647	957.937	1629.56	265.601	954.272	1622.14	220.398	912.801	1495.01	222.778	860.867	1236.01	203.037	1034.44	1412.96	198.209	1111.84	1267.08	308.194	859.516	1295.76	45.1033	914.397	1439.15	-13.1219	924.872	1255.77	-35.1927	935.561	1104.42	-68.7152	1074.33	992.511	-43.756	1133.93	937.038	-83.2603	1086.11	912.283	-82.8385	1167.79	865.95
10728	0	140.036	1123.2	1632.28	237.292	1134.72	1632.16	132.927	969.528	1630.9	265.944	966.239	1623.56	220.797	924.549	1496.18	223.981	872.348	1237.32	203.11	1045.91	1414.28	197.834	1122.97	1268.32	309.279	871.402	1297.23	45.5357	925.207	1440.42	-12.2529	934.483	1256.7	-32.9901	943.541	1104.92	-66.6435	1077.38	987.628	-41.5434	1134.84	930.039	-80.903	1085.96	906.835	-80.4696	1165.45	857.19
10729	0	139.828	1134.93	1633.43	237.291	1146.76	1633.47	133.085	981.169	1632.05	266.132	978.201	1624.92	221.106	936.284	1497.61	224.968	883.749	1238.65	203.293	1057.45	1415.81	197.475	1134.05	1269.6	310.344	883.656	1298.56	45.8764	936.171	1441.59	-11.2018	944.084	1257.53	-30.6251	951.409	1105.79	-64.5483	1080.05	983.31	-39.4998	1135.68	923.368	-78.6982	1085.16	902.072	-78.2529	1162.34	848.757
10730	0	139.641	1146.42	1634.58	237.085	1158.54	1634.67	133.293	992.777	1633.43	266.326	990.16	1626.11	221.624	948	1498.88	225.979	895.092	1240.23	203.398	1068.94	1416.98	197.158	1145.09	1270.56	311.252	895.366	1300.02	45.9749	947.039	1442.81	-9.81085	953.943	1258.19	-28.2415	959.217	1106.58	-62.5834	1082.29	979.175	-37.1948	1135.71	916.783	-76.5018	1084.07	897.821	-75.994	1158.72	841.044
10731	0	139.43	1157.89	1635.18	236.837	1170.44	1635.67	133.435	1004.39	1634.3	266.362	1002.07	1627.33	221.663	959.807	1500.1	226.712	905.813	1241.51	203.482	1080.4	1417.95	196.97	1156.28	1271.31	311.837	906.98	1301.53	46.3246	958.108	1443.64	-8.64853	963.639	1258.94	-25.7223	966.665	1107.37	-60.5067	1084.19	975.28	-35.305	1134.69	910.405	-74.3209	1082.41	893.624	-73.4649	1154.95	833.413
10732	0	138.937	1169.71	1636.08	236.261	1182.28	1636.51	133.473	1015.96	1635.32	266.485	1014.03	1628.35	221.973	971.429	1501.28	227.643	917.379	1242.72	203.53	1091.75	1418.71	197.096	1167.47	1272.01	312.662	918.675	1303.07	46.6607	969.42	1444.56	-7.38535	973.422	1259.17	-23.1575	973.737	1107.91	-58.2407	1085.78	971.692	-33.1401	1133.86	904.714	-72.252	1080.66	890.566	-71.3966	1150.02	826.12
10733	0	138.635	1181.13	1636.79	235.676	1194.13	1637.27	133.514	1027.55	1635.99	266.703	1025.87	1629.17	222.036	983.305	1502.33	228.369	928.994	1244.03	203.452	1103.17	1419.25	197.473	1178.8	1272.67	313.287	930.273	1304.47	47.031	980.855	1445.28	-5.98356	983.238	1259.47	-20.365	980.647	1108.52	-55.8904	1087.22	968.426	-31.119	1132.31	898.925	-70.1053	1078.91	887.568	-68.9828	1144.95	820.201
10734	0	138.17	1192.74	1637.22	235.221	1206	1638.05	133.667	1039.05	1636.67	266.757	1038.07	1630.13	222.346	994.881	1503.38	228.914	940.321	1245.12	203.685	1114.49	1419.75	198.002	1190.19	1273.07	313.931	941.842	1305.67	47.3472	992.41	1445.75	-4.75014	992.79	1259.98	-17.6144	987.296	1109.03	-53.6723	1088.09	965.669	-28.8563	1130.9	893.992	-67.7722	1076.85	885.006	-66.5972	1140.07	814.695
10735	0	137.662	1204.35	1637.81	234.656	1217.88	1638.84	133.793	1050.53	1636.81	266.753	1050.08	1630.66	222.565	1006.82	1504.1	229.402	951.622	1245.92	204.345	1126.15	1420.39	198.528	1201.48	1273.48	314.316	953.197	1306.8	47.604	1004	1446.24	-3.2674	1002.21	1259.92	-14.8052	993.742	1109.49	-51.4895	1088.95	963.102	-26.917	1128.62	889.279	-65.6712	1074.76	882.683	-64.6252	1134.61	809.62
10736	0	137.073	1215.69	1638.32	233.935	1229.76	1639.75	133.777	1062.03	1636.9	266.752	1062.13	1631.23	222.605	1018.71	1504.75	229.752	962.972	1246.66	204.411	1137.72	1420.72	199.241	1212.88	1273.87	314.713	964.666	1307.9	47.8535	1015.73	1446.74	-2.01882	1011.47	1260.17	-12.0806	999.907	1110.1	-49.2134	1089.62	960.646	-24.728	1126.76	885.569	-63.3274	1072.52	880.904	-62.7345	1129.06	805.308
10737	0	136.354	1227.24	1638.6	233.351	1241.77	1640.6	133.899	1073.46	1636.77	266.887	1074.19	1631.68	222.732	1030.65	1505.18	230.145	973.97	1247.16	204.797	1149.39	1420.96	200.002	1224.2	1274.19	315.057	976.001	1308.86	48.0377	1027.61	1446.98	-0.853111	1020.55	1260	-9.59433	1006.11	1110.72	-47.1381	1090.31	958.33	-22.8893	1125.04	882.412	-61.0297	1070.21	879.409	-60.7681	1123.53	801.673
10738	0	135.715	1238.61	1638.97	231.939	1253.29	1641.04	134.074	1084.85	1636.57	267.051	1086.17	1631.65	222.97	1042.64	1505.54	230.543	985.668	1247.83	205.568	1161.27	1421.18	200.69	1235.61	1273.99	315.529	987.524	1309.43	48.1649	1039.4	1447.26	0.383338	1029.32	1259.98	-7.11416	1012.25	1110.95	-44.9659	1090.86	956.304	-20.2401	1121.97	878.982	-58.3429	1067.97	877.882	-58.5774	1118.31	798.599
10739	0	135.065	1249.96	1639.24	231.403	1265.31	1641.65	134.366	1096.19	1635.78	267.221	1098.45	1631.82	223.105	1054.65	1505.65	230.887	996.858	1248.2	205.597	1172.87	1420.68	201.433	1247.06	1273.56	315.82	998.661	1310.11	48.4335	1051.46	1447.34	1.77536	1038.01	1259.83	-4.57079	1018.18	1111.48	-42.7749	1091.18	954.373	-17.9558	1120.08	876.308	-55.7069	1065.78	876.671	-56.2984	1113.13	795.482
10740	0	134.242	1261.37	1639.03	230.317	1277.05	1641.9	134.549	1107.6	1635.24	267.406	1110.61	1631.82	223.287	1066.82	1505.61	231.254	1008.33	1248.56	205.859	1184.69	1420.22	202.225	1258.6	1273.19	316.206	1010.23	1310.61	48.6576	1063.57	1447.13	3.24338	1046.33	1259.97	-2.42039	1024.37	1112.08	-40.9045	1091.72	953.005	-15.6826	1118.14	873.894	-53.0605	1063.54	875.888	-53.8719	1108.1	793.269
10741	0	133.514	1272.66	1638.75	229.688	1289.19	1641.99	134.783	1118.98	1634.62	267.677	1122.78	1631.44	223.534	1079.19	1505.35	231.343	1019.46	1248.79	206.682	1196.47	1419.86	203.186	1270.19	1272.7	316.428	1021.55	1310.82	48.801	1075.79	1446.79	4.00886	1055.06	1260.06	-0.404286	1030.62	1112.7	-38.9702	1092.21	951.437	-13.46	1116.58	872.023	-50.3641	1061.52	875.211	-51.2701	1103.45	791.501
10742	0	132.691	1283.81	1638.32	228.434	1300.95	1641.76	135.01	1130.33	1633.66	267.755	1135.11	1630.73	223.219	1091.07	1504.86	231.556	1030.93	1248.54	206.973	1208.24	1418.88	203.55	1281.91	1271.1	316.617	1033.02	1310.71	48.9395	1088.01	1446.13	5.48278	1063.49	1259.95	1.47464	1036.81	1113.26	-37.181	1093.04	950.128	-11.9671	1115.14	869.57	-47.4461	1059.69	874.795	-48.7775	1099.06	789.464
10743	0	131.873	1295.31	1637.48	227.54	1312.95	1641.55	135.364	1141.73	1632.47	268.07	1147.37	1629.88	223.487	1103.32	1504.33	231.398	1042.18	1248.45	207.016	1220.13	1417.5	204.393	1293.53	1270.07	316.665	1044.38	1310.56	48.9824	1100.3	1445.48	6.31828	1072.1	1260.03	3.10985	1043.15	1113.89	-35.6094	1093.72	949.187	-10.4884	1114.2	867.931	-44.9275	1058.23	874.672	-46.0511	1095.25	788.278
10744	0	131.105	1306.83	1637	226.579	1324.98	1641.11	135.56	1153.22	1631.44	268.349	1159.56	1629.28	223.479	1115.62	1503.69	231.398	1053.57	1248.2	207.622	1232.25	1416.73	204.923	1305.25	1268.73	316.753	1056	1310.3	49.1353	1112.75	1444.86	7.38137	1081.17	1259.8	4.62112	1049.59	1114.33	-34.0813	1094.97	948.584	-8.0229	1113.32	867.795	-42.3429	1057.02	875.119	-43.9195	1091.21	787.223
10745	0	130.543	1318.12	1636.48	225.661	1336.88	1640.55	135.894	1164.77	1630.11	268.441	1171.95	1628.4	223.467	1128.07	1502.94	231.288	1065.01	1247.7	207.806	1244.26	1415.56	205.568	1316.88	1267.6	316.779	1067.45	1309.92	49.2032	1125.07	1444.12	8.11067	1090.26	1259.81	6.2717	1056.29	1115.23	-32.8602	1096.37	948.108	-6.69389	1113.54	867.045	-40.0647	1056.38	875.389	-41.3319	1088.01	786.517
10746	0	129.907	1329.62	1635.38	225.064	1348.96	1640.04	136.128	1176.28	1628.86	268.618	1184.21	1627.29	223.389	1140.22	1501.96	231.033	1076.73	1246.86	208.173	1256.3	1414.57	206.24	1328.59	1266.26	316.669	1078.97	1309.25	49.1587	1137.55	1443.29	8.88122	1099.73	1259.39	7.60817	1063.24	1115.74	-31.7779	1098.13	947.947	-5.98976	1113.92	866.526	-37.7886	1055.79	876.528	-39.4642	1084.99	786.532
10747	0	129.354	1340.97	1634.6	224.477	1361.08	1639.24	136.16	1188.05	1627.4	268.673	1196.66	1626.2	223.321	1152.47	1500.98	230.548	1088.05	1246.16	208.224	1268.33	1413.17	206.737	1340.45	1264.62	316.313	1090.59	1308.53	49.0356	1150.06	1442.37	9.35724	1109.31	1259.4	8.91106	1070.44	1116.43	-31.0409	1100.3	947.942	-5.3159	1115.05	866.315	-35.7333	1056.21	877.318	-37.0931	1082.45	786.895
10748	0	128.379	1353.02	1633.49	223.847	1373.18	1638.47	136.241	1199.77	1626.15	268.663	1208.96	1624.97	223.068	1165	1499.8	230.064	1099.67	1245.15	208.648	1280.68	1412.26	207.361	1352.27	1263.49	315.955	1102.28	1307.63	49.0428	1162.59	1441.48	9.76666	1119.22	1259.2	10.2822	1077.91	1117.02	-30.3807	1103	948.25	-5.09335	1116.57	865.816	-33.9431	1057.21	878.396	-35.2311	1080.91	787.097
10749	0	127.869	1364.59	1632.37	223.075	1385.3	1637.39	136.381	1211.49	1624.66	268.649	1221.11	1623.85	222.951	1177.17	1498.65	229.531	1111.54	1244.16	208.739	1292.93	1410.87	207.642	1364.18	1261.93	315.509	1114	1306.53	48.8472	1175.08	1440.33	10.1778	1129.44	1258.84	11.2962	1085.62	1117.99	-29.839	1106.27	948.404	-4.57883	1118.86	866.054	-32.3257	1058.75	879.686	-33.6559	1079.96	787.48
10750	0	127.217	1376.21	1630.88	222.449	1397.36	1636.2	136.38	1223.43	1623.04	268.724	1233.39	1622.41	222.639	1189.45	1497.22	228.696	1123.07	1242.89	208.381	1305.03	1409.17	207.707	1376.12	1260.07	315.211	1126.01	1305.26	48.4434	1187.58	1439.15	10.3354	1139.6	1258.26	12.2189	1093.67	1118.11	-29.3295	1109.93	948.521	-4.10116	1121.22	865.851	-30.6725	1061.12	880.733	-32.3279	1079.66	788.225
10751	0	126.744	1388.09	1629.78	221.883	1409.49	1634.95	136.404	1235.33	1621.52	268.48	1245.71	1620.78	222.275	1201.76	1495.64	228.446	1135.18	1241.69	208.391	1317.31	1407.82	207.999	1388.29	1258.6	314.869	1138.03	1303.96	48.2632	1200.24	1437.97	10.3774	1150.04	1258.02	12.8282	1102	1118.47	-29.1017	1114.38	948.925	-5.14194	1124.85	865.669	-29.5244	1064.08	881.822	-31.3596	1080.41	788.979
10752	0	126.443	1399.89	1627.95	221.38	1421.78	1633.36	136.223	1247.28	1619.84	268.367	1258.08	1619.32	222.11	1214.3	1494.13	227.707	1147.1	1240.4	208.034	1329.71	1405.92	207.983	1400.51	1256.65	314.263	1149.86	1302.7	47.9428	1212.87	1436.65	10.4571	1160.78	1257.08	13.6174	1110.84	1118.69	-28.7722	1119.52	948.858	-4.94139	1128.61	865.578	-28.676	1067.94	883.125	-30.4701	1082.18	789.539
10753	0	125.76	1412.01	1625.97	220.731	1433.94	1631.61	136.061	1259.22	1618.27	268.088	1270.4	1617.49	221.554	1226.73	1492.45	226.923	1159.07	1238.83	207.572	1341.97	1403.85	207.847	1412.74	1254.72	313.846	1161.89	1301.01	47.4534	1225.42	1434.98	10.1936	1171.41	1256.62	13.8977	1119.98	1118.61	-29.2321	1125.08	949.162	-6.09032	1132.95	866.114	-28.3346	1072.42	884.051	-29.9498	1084.85	790.065
10754	0	125.139	1424.26	1624.81	220.125	1446.07	1630.35	135.675	1271.38	1616.54	267.724	1282.68	1615.99	220.749	1238.81	1490.93	226.402	1171.61	1237.12	207.081	1354.14	1402.42	207.397	1425.1	1252.94	313.239	1174.04	1299.53	46.8988	1237.96	1433.45	10.0531	1182.5	1255.83	13.9064	1129.25	1118.67	-29.403	1131.46	949.644	-6.93415	1138.4	866.249	-28.0575	1077.71	884.825	-29.793	1088.31	790.8
10755	0	125.114	1436	1623.23	219.577	1458.17	1628.93	135.25	1283.43	1614.77	267.429	1294.89	1614.64	220.384	1250.95	1489.5	225.605	1183.92	1235.68	206.962	1366.5	1401.26	207.204	1437.51	1251.46	312.655	1186.16	1297.83	46.383	1250.44	1432.25	9.72727	1193.65	1255.05	13.8488	1139.26	1118.41	-29.574	1138.69	949.481	-6.83611	1144.3	865.616	-28.2327	1084.02	885.702	-29.9674	1092.9	791.198
10756	0	124.403	1448.18	1621.92	218.927	1470.5	1627.34	134.901	1295.67	1613.33	267.018	1307.15	1613.07	219.849	1263.05	1487.96	224.911	1196.43	1234.12	206.467	1378.95	1399.69	206.856	1449.94	1250.02	311.926	1198.35	1296.24	45.733	1262.83	1430.88	9.00957	1204.83	1254.3	13.3775	1149.31	1118.18	-30.4724	1146.29	949.298	-7.2995	1151.03	865.623	-28.5297	1091.1	886.404	-30.5705	1098.4	791.77
10757	0	123.785	1460.32	1620.55	218.386	1482.74	1626.09	134.426	1307.82	1611.72	266.525	1319.51	1611.65	219.191	1275.45	1486.11	223.932	1208.7	1232.52	205.756	1391.29	1398.27	206.242	1462.25	1248.94	311.217	1210.74	1294.43	44.9201	1275.21	1429.42	8.36131	1216.21	1253.32	12.9165	1159.87	1117.63	-31.9188	1155.01	949.166	-8.22738	1158.68	865.402	-29.5192	1098.95	886.995	-31.3648	1105	792.234
10758	0	122.992	1472.58	1619.09	217.571	1494.91	1624.64	133.682	1320.06	1610.22	265.902	1331.67	1610.33	218.412	1287.77	1484.63	222.974	1221.17	1230.83	205.061	1403.64	1397.02	205.63	1474.8	1247.36	310.173	1223.01	1292.85	44.1722	1287.66	1428.15	7.69871	1227.94	1252.16	12.1391	1170.91	1116.96	-33.1104	1164.25	948.964	-10.5624	1167.43	865.09	-30.6496	1107.69	887.473	-32.7051	1112.5	792.369
10759	0	122.239	1484.84	1617.78	216.87	1507.35	1623.33	133.012	1332.46	1608.94	265.186	1344.07	1608.95	217.576	1299.95	1483.14	221.7	1233.46	1229.32	204.22	1416.03	1395.62	205.017	1487.35	1245.87	309.106	1235.32	1291.24	43.3182	1300	1426.9	6.80663	1239.77	1251.49	11.1623	1182.18	1116.48	-34.5819	1174.29	948.634	-10.8114	1176.58	864.789	-32.1271	1117.34	887.449	-34.4112	1121.24	792.496
10760	0	121.509	1497.2	1616.33	216.052	1519.68	1622.04	132.391	1344.71	1607.79	264.418	1356.58	1607.4	216.631	1312.13	1481.95	220.616	1246.11	1227.61	203.278	1428.45	1394.16	204.229	1499.91	1244.89	307.915	1247.77	1289.59	42.3666	1312.31	1425.62	5.68438	1251.95	1250.59	9.84578	1193.73	1115.79	-36.2925	1185.03	948.133	-12.9584	1187	863.981	-33.9678	1127.66	887.363	-36.3047	1131.13	792.525
10761	0	120.597	1509.65	1615.23	215.068	1532.03	1620.51	131.5	1357.05	1606.52	263.616	1368.88	1606.18	215.639	1324.43	1480.42	219.43	1258.66	1226.24	202.281	1440.95	1392.93	203.281	1512.39	1243.65	306.726	1260.2	1288.02	41.4179	1324.77	1424.51	4.59498	1264.11	1249.54	8.52687	1205.61	1115.06	-38.06	1196.52	947.44	-15.2205	1198.11	863.451	-35.9361	1139	886.978	-38.3473	1141.91	791.954
10762	0	119.784	1521.97	1613.99	214.355	1544.48	1619.31	130.618	1369.36	1605.48	262.8	1381.23	1604.92	214.654	1336.52	1479.23	218.194	1271.47	1224.86	201.077	1453.27	1391.77	202.174	1525.16	1242.49	305.41	1272.71	1286.64	40.3664	1337.07	1423.49	3.28554	1276.56	1248.77	6.71263	1217.79	1114.5	-40.1531	1208.59	946.657	-17.8345	1210.2	862.755	-38.2402	1151.08	886.423	-40.8998	1153.68	791.29
10763	0	119.019	1534.19	1612.75	213.43	1556.74	1617.97	129.771	1381.74	1604.61	261.943	1393.52	1604.08	213.645	1348.57	1478.15	216.857	1283.69	1223.85	200.051	1465.72	1391.01	200.757	1537.81	1242.15	304.102	1285.18	1285.25	39.2566	1349.53	1422.76	1.77577	1289.05	1247.88	4.84699	1230.44	1113.64	-42.5321	1221.36	945.906	-20.5443	1223.19	862.02	-40.8417	1164	885.771	-43.9705	1166.59	790.653
10764	0	117.555	1546.5	1611.64	212.552	1569.12	1616.92	128.929	1394.08	1603.97	260.945	1405.9	1603.2	212.401	1360.49	1477.06	215.391	1296.69	1222.36	198.863	1478.09	1390.26	199.353	1550.63	1241.54	302.641	1297.76	1283.74	37.9198	1361.71	1421.92	0.054965	1301.86	1246.98	2.98206	1243.45	1112.62	-45.1598	1234.82	945.024	-23.4232	1236.72	861.142	-43.6114	1177.64	884.782	-47.2492	1180.64	789.826
10765	0	116.595	1559.06	1611.16	211.557	1581.65	1616.08	127.932	1406.48	1603.68	259.977	1418.27	1602.9	211.278	1372.44	1476.47	213.999	1309.26	1221.43	197.52	1490.33	1390.04	197.97	1563.4	1241.42	301.31	1310.55	1282.3	36.6646	1373.92	1421.27	-1.71967	1314.73	1246.43	0.687168	1256.76	1111.62	-47.9187	1249.1	944.174	-26.2122	1251.61	860.491	-46.8654	1192.02	883.553	-50.611	1195.6	788.7
10766	0	115.534	1571.31	1610.85	210.635	1594.08	1615.68	126.966	1418.76	1604.26	259.071	1430.7	1603.07	210.058	1384.33	1476.09	212.923	1322.65	1220.27	196.392	1502.58	1390.29	196.328	1576.28	1241.69	299.972	1323.21	1281.28	35.4398	1385.85	1420.87	-3.47751	1327.99	1245.68	-1.76591	1270.4	1110.81	-51.2933	1263.67	943.712	-30.2481	1266.82	859.466	-50.2298	1207.18	882.49	-54.4206	1211.55	787.669
10767	0	114.582	1583.73	1610.92	209.37	1606.61	1615.16	126.142	1431.18	1604.94	258.223	1443.26	1603.51	209.015	1396.17	1476.31	211.864	1335.18	1219.98	195.14	1514.72	1390.81	194.659	1588.78	1242.28	298.795	1335.85	1281.01	34.3313	1397.7	1421.03	-5.43991	1341.31	1245.11	-4.06555	1284.52	1110	-54.4903	1279.18	942.969	-35.0921	1283.49	859.039	-53.5949	1223.15	881.476	-58.8179	1228.54	786.483
10768	0	113.54	1596.04	1610.98	208.228	1619.24	1615.04	125.327	1443.49	1605.95	257.435	1455.94	1604.18	208.063	1408.08	1476.68	210.865	1347.92	1220.07	193.728	1526.72	1391.58	193.298	1601.48	1243.51	297.932	1348.65	1280.81	33.1632	1409.28	1421.25	-7.41469	1354.69	1245.02	-6.51055	1298.96	1109.3	-57.7999	1295.36	942.571	-39.2608	1300.57	858.558	-57.1827	1240.02	880.288	-63.3304	1246.63	785.882
10769	0	112.305	1608.33	1611.39	206.976	1631.74	1615.15	124.482	1455.79	1607.31	256.496	1468.55	1605.5	207.174	1419.83	1477.58	210.055	1360.48	1220.46	192.576	1538.7	1392.79	191.937	1614.14	1245.02	297.046	1360.73	1281.06	32.1331	1420.68	1422.02	-9.093	1368.32	1244.88	-8.78006	1313.77	1108.81	-61.364	1312.16	942.488	-43.4561	1318.65	858.507	-60.8472	1257.68	879.273	-67.9168	1265.86	785.017
10770	0	111.06	1620.43	1611.76	205.562	1644.31	1615.29	123.697	1468.02	1608.91	255.612	1481.26	1606.55	206.347	1431.49	1478.71	209.503	1373.41	1221.18	191.376	1550.56	1394.08	190.301	1626.5	1246.63	296.519	1373.22	1281.96	31.3452	1432.03	1423.06	-10.9765	1381.75	1245.43	-11.2789	1328.61	1108.8	-64.9015	1329.69	942.651	-47.407	1337.57	858.863	-64.7034	1276.26	878.332	-73.031	1286.05	784.507
10771	0	109.785	1632.63	1612.35	204.193	1656.91	1615.5	123.137	1480.1	1610.48	254.901	1494	1607.77	205.431	1443.12	1479.79	208.933	1386.24	1221.9	190.377	1562.31	1395.52	188.893	1638.79	1248.43	296.084	1385.39	1283.01	30.6034	1443.34	1424.15	-12.4763	1395.31	1246.21	-13.648	1343.72	1108.76	-68.658	1347.77	942.922	-52.1051	1357.3	858.923	-68.6665	1295.6	877.878	-78.0824	1307.33	784.487
10772	0	108.333	1644.5	1612.78	202.588	1669.39	1615.77	122.776	1492.16	1612.03	254.5	1506.93	1609.18	204.718	1454.66	1481.15	208.671	1398.4	1222.96	189.507	1573.9	1397.05	188.035	1650.9	1250.45	295.637	1397.3	1284.45	29.9618	1454.7	1425.36	-13.9148	1408.5	1247.18	-15.8225	1359.05	1108.65	-72.1565	1366.58	943.169	-56.2177	1377.86	859.455	-72.8084	1315.68	877.266	-83.2475	1329.54	783.976
10773	0	106.87	1656.2	1613.16	200.883	1681.92	1616.19	122.339	1504.03	1613.52	254.116	1519.71	1610.51	204.17	1466.14	1482.68	208.586	1409.77	1224.5	188.868	1585.36	1398.67	186.871	1662.46	1251.99	295.452	1409.08	1285.88	29.4038	1466.15	1426.6	-15.2142	1421.85	1248.06	-18.2864	1374.25	1108.89	-75.8176	1385.59	943.726	-60.3291	1398.95	860.228	-77.2212	1336.4	876.64	-88.2023	1352.63	783.975
10774	0	105.341	1667.76	1613.76	199.194	1694.4	1616.67	122.359	1515.68	1614.96	254.008	1532.65	1612.14	203.529	1477.54	1484.04	208.649	1421.4	1226.09	188.305	1596.82	1400.07	186.284	1673.88	1253.66	295.326	1420.77	1287.6	28.9215	1477.72	1427.84	-16.4531	1435.13	1249.03	-20.7749	1389.6	1108.92	-79.4905	1405.17	944.425	-65.6448	1420.88	860.805	-81.6351	1357.73	876.235	-93.8242	1376.56	783.826
10775	0	103.855	1679.13	1614.24	197.274	1706.86	1617.1	122.437	1527.18	1616.34	253.821	1545.62	1613.47	202.789	1488.95	1485.46	208.606	1432.77	1227.53	187.957	1608.28	1401.43	186.021	1685.18	1255.01	295.037	1432.02	1289.01	28.226	1489.41	1429.04	-17.5642	1448.54	1249.98	-23.3705	1405.1	1108.83	-83.2436	1425.23	945.247	-69.3486	1443.05	861.858	-86.2633	1379.61	875.644	-99.0052	1401.12	784.235
10776	0	102.281	1690.31	1614.74	195.619	1719.38	1617.39	122.308	1538.67	1617.37	253.795	1558.57	1615.07	202.189	1500.25	1486.83	208.204	1444.65	1228.8	187.725	1619.57	1402.93	185.71	1696.62	1256.43	294.726	1443.11	1290.63	27.6472	1501.08	1430.1	-18.7902	1461.93	1250.79	-25.7574	1420.63	1109.08	-86.995	1445.51	946.18	-73.5502	1465.39	862.996	-90.9242	1401.75	875.326	-104.288	1426.35	784.917
10777	0	100.688	1701.32	1615.01	193.692	1731.67	1617.63	122.524	1550.07	1618.93	253.878	1571.5	1616.6	201.768	1511.46	1488.39	207.921	1455.5	1230.46	187.457	1630.74	1404.2	185.766	1707.57	1257.4	294.237	1454.05	1292.11	27.0521	1512.73	1431.23	-19.9489	1475.53	1251.74	-28.3457	1436.35	1108.86	-90.4386	1466.31	947.132	-77.8694	1489.01	864.4	-95.2968	1424.53	875.175	-109.731	1452.13	785.795
10778	0	99.1128	1712.17	1615.32	191.614	1743.76	1617.73	123.155	1561.12	1620.33	253.9	1584.52	1618.13	201.292	1522.7	1489.79	207.319	1466.63	1231.87	187.341	1642	1405.47	186.267	1718.63	1258.44	293.473	1464.7	1293.48	26.6294	1524.52	1432.47	-21.3987	1489.27	1252.74	-31.027	1452.19	1108.89	-94.0499	1487.16	948.399	-81.7752	1512.45	866.252	-99.815	1447.43	875.385	-114.942	1478.34	786.922
10779	0	97.7035	1722.91	1615.42	189.81	1755.73	1617.96	123.687	1572.3	1622.2	254.135	1597.24	1619.65	200.912	1533.89	1491.14	206.545	1477.55	1233.45	187.35	1653.18	1406.73	186.786	1729.78	1259.58	292.834	1475.46	1294.67	26.3006	1536.22	1433.55	-22.7257	1503.19	1253.22	-33.5293	1468.21	1108.96	-97.4578	1508.46	949.558	-85.6279	1535.76	868.263	-104.283	1470.82	875.432	-120.226	1504.8	788.624
10780	0	96.6226	1733.41	1615.53	188.111	1767.6	1618	124.106	1583.43	1623.8	254.395	1609.94	1621.19	200.834	1545	1492.61	205.721	1488.5	1234.48	187.433	1664.3	1407.85	187.673	1741.33	1260.89	291.97	1486.05	1295.82	26.112	1547.85	1434.7	-23.8985	1517.08	1253.83	-36.2894	1484.26	1109.1	-100.905	1529.51	951.145	-89.5448	1559.38	870.352	-108.533	1494.44	875.862	-125.359	1531.43	790.241
10781	0	95.085	1744.26	1616.08	186.41	1779.37	1618.08	124.394	1594.12	1625.41	254.539	1622.59	1622.64	200.59	1556.25	1493.89	204.848	1499.42	1235.81	187.38	1675.48	1408.98	188.371	1752.74	1262.09	291.065	1496.73	1297.23	25.849	1559.31	1435.92	-25.4787	1531.03	1254.98	-38.7712	1500.58	1109.27	-103.977	1551.27	952.848	-92.994	1583.28	873.342	-112.37	1518.32	876.521	-130.333	1558.79	793.157
10782	0	93.9327	1754.89	1616.48	184.825	1791.12	1618.21	124.698	1605.18	1627.32	254.505	1635.05	1624.21	200.155	1567.53	1495.27	203.934	1510.17	1237.26	187.484	1686.57	1410.13	189.312	1763.49	1263.19	290.303	1507.55	1298.08	25.687	1570.7	1437.26	-26.9501	1545.06	1256.12	-41.4077	1516.94	1109.86	-107.108	1572.76	955.225	-96.6274	1607.29	876.286	-116.396	1542.29	877.827	-135.189	1586.02	796.351
10783	0	92.9026	1765.5	1616.98	183.415	1802.62	1618.47	125.201	1616.26	1628.91	254.689	1647.33	1625.59	200.227	1578.6	1496.79	203.043	1521.08	1238.38	187.358	1697.6	1411.1	189.637	1774.61	1264.21	289.495	1518.12	1298.93	25.5324	1582.08	1438.56	-28.2118	1559.06	1257.22	-43.7653	1533.64	1109.76	-110.09	1594.62	957.656	-99.883	1631.14	879.566	-120.256	1566.51	879.52	-139.691	1613.33	799.819
10784	0	91.9224	1776.11	1617.37	182.116	1814.1	1618.81	125.505	1627.3	1630.49	254.81	1659.62	1627.14	200.174	1589.82	1497.94	202.272	1531.9	1239.35	187.398	1708.7	1412.33	189.993	1785.43	1265.35	288.828	1528.71	1300.17	25.4648	1593.39	1439.85	-29.4273	1572.99	1258.06	-46.2517	1550.09	1110.53	-112.769	1616.53	960.216	-102.342	1654.71	883.186	-123.82	1590.84	881.549	-143.877	1640.69	804.07
10785	0	91.2583	1786.51	1617.9	180.933	1825.62	1619.26	126.048	1638.19	1632.14	255.016	1671.55	1628.59	200.095	1600.94	1499.29	201.777	1542.66	1240.69	187.488	1719.58	1413.63	190.098	1796.06	1266.49	288.316	1539.36	1301.41	25.4762	1604.61	1441.44	-30.5597	1586.97	1259.61	-48.7911	1566.62	1111.21	-115.326	1638.37	963.354	-105.547	1678.44	887.483	-127.519	1615.59	883.954	-147.749	1668.01	808.772
10786	0	90.4339	1797.08	1618.4	179.671	1836.92	1619.55	126.483	1649.14	1633.49	255.121	1683.75	1629.83	199.917	1612.06	1500.48	201.203	1553.43	1242.11	187.291	1730.58	1414.6	189.871	1806.93	1267.59	287.862	1550.08	1302.57	25.253	1615.81	1443	-31.9069	1600.73	1261.03	-51.0485	1583.17	1112.13	-117.891	1660.27	966.829	-108.162	1702.69	892.256	-130.912	1639.92	886.97	-151.216	1695.24	813.612
10787	0	89.6812	1807.66	1618.9	178.615	1848.19	1619.82	126.715	1660.17	1634.33	255.04	1695.74	1630.64	199.908	1623.35	1501.5	200.689	1564.18	1243.28	187.201	1741.57	1415.44	189.355	1817.17	1267.87	287.502	1560.75	1303.39	24.9181	1627.01	1444.23	-33.3696	1614.58	1262.25	-53.4887	1599.81	1112.75	-120.185	1682.05	970.33	-110.206	1726.53	897.256	-134.249	1664.41	890.187	-154.234	1722.23	818.889
10788	0	88.8794	1818.22	1619.23	177.577	1859.49	1620.02	127.333	1671.01	1635.64	255.36	1707.78	1631.54	199.814	1634.61	1502.64	200.272	1574.84	1244.23	186.992	1752.54	1416.16	188.641	1828.2	1268.35	286.927	1571.36	1304.44	24.6143	1638.36	1445.48	-34.5548	1628.29	1263.56	-56.0561	1616.22	1114.11	-122.46	1703.81	974.255	-112	1750.14	901.673	-137.575	1688.77	893.761	-157.273	1749.38	824.672
10789	0	87.9674	1828.99	1619.57	176.691	1870.75	1620.2	127.618	1681.89	1636.68	255.943	1720.22	1632.21	199.668	1645.77	1503.63	199.904	1585.43	1245.51	186.914	1763.62	1416.77	187.779	1838.79	1268.64	286.624	1582.05	1305.64	24.3803	1649.78	1446.75	-35.6534	1642	1264.92	-58.5209	1632.54	1115.05	-124.033	1725.63	978.384	-113.75	1773.73	907.162	-140.62	1712.96	897.54	-159.576	1776.12	830.409
10790	0	87.652	1839.51	1619.88	175.69	1882.05	1620.48	128.529	1693	1637.23	255.936	1732.15	1632.71	199.617	1656.99	1504.37	199.339	1596.04	1246.5	186.636	1774.55	1417.21	186.925	1849.39	1268.98	286.347	1592.65	1306.6	24.0503	1661.23	1447.73	-37.0913	1655.74	1266.12	-60.9199	1648.77	1116.1	-126.125	1747.13	982.376	-115.263	1796.71	912.249	-143.386	1737.12	901.642	-161.627	1802.59	836.559
10791	0	86.8637	1850.27	1620.31	174.844	1893.42	1620.76	128.711	1703.97	1637.65	256.216	1743.86	1633.24	199.222	1668.18	1505.05	198.92	1606.62	1247.14	186.42	1785.52	1417.68	186.517	1860.33	1269.49	285.791	1603.39	1307.21	23.6107	1672.54	1448.78	-38.7485	1669.55	1267.13	-63.3089	1664.91	1117.21	-127.7	1768.25	986.646	-116.592	1819.88	918.276	-146.008	1760.89	905.635	-163.497	1828.54	842.774
10792	0	86.2211	1861	1620.59	174	1904.56	1620.68	129.19	1714.95	1638.16	256.187	1755.58	1633.6	198.917	1679.27	1505.59	198.174	1617.21	1247.91	186.043	1796.56	1417.93	185.774	1870.65	1269.11	285.183	1613.81	1307.91	23.2433	1683.99	1449.65	-39.6059	1683.09	1268.08	-66.0012	1681.06	1118.12	-129.359	1789.42	990.954	-117.677	1842.33	923.646	-148.7	1784.35	910.128	-165.069	1854.18	849.094
10793	0	85.7465	1871.86	1620.89	173.161	1915.79	1620.53	129.273	1725.99	1638.68	256.178	1767.47	1633.43	198.738	1690.52	1505.98	197.531	1627.76	1248.41	185.713	1807.48	1417.91	185.091	1881.11	1268.76	284.356	1624.49	1308.08	22.7356	1695.48	1450.35	-41.4449	1696.76	1269.37	-68.4781	1697.08	1119.17	-130.776	1810.23	995.223	-118.759	1865.17	929.484	-150.924	1807.56	914.631	-166.173	1879.68	855.64
10794	0	84.9942	1882.6	1620.69	172.453	1927.06	1620.4	129.573	1736.92	1638.96	256.358	1778.92	1633.35	198.229	1701.81	1505.99	197.023	1638.45	1248.95	185.082	1818.32	1417.68	184.717	1891.61	1268.48	283.738	1635.2	1308.36	22.3197	1707.08	1450.86	-43.2944	1710.64	1270.36	-71.0255	1713.12	1119.71	-132.132	1830.87	999.344	-119.687	1886.76	934.673	-152.959	1830.49	919.091	-167.415	1904.44	861.967
10795	0	84.4822	1893.43	1620.6	171.666	1938.45	1620.06	129.586	1748.04	1639.11	256.169	1790.62	1632.82	197.734	1712.8	1506.28	196.301	1649.08	1249.01	184.561	1829.31	1417.44	184.091	1902.16	1267.99	283.318	1645.76	1308.45	21.8715	1718.29	1451.17	-44.8009	1724.34	1270.87	-73.2011	1729.24	1120.75	-133.347	1851.11	1003.63	-120.173	1908.72	940.641	-154.805	1853.11	923.469	-168.399	1928.91	868.621
10796	0	83.8353	1904.34	1620.35	170.715	1949.71	1619.64	129.689	1759.09	1638.91	256.151	1802.31	1632.72	197.509	1723.96	1506.33	195.608	1659.79	1249.15	184.268	1840.27	1417.16	183.911	1912.63	1267.51	282.746	1656.48	1308.68	21.4085	1729.6	1451.52	-46.1878	1737.89	1271.16	-75.8179	1744.95	1121.12	-134.468	1870.79	1007.33	-120.639	1929.76	945.975	-156.35	1875.36	927.547	-168.827	1952.73	874.88
10797	0	83.3822	1915.33	1620.25	170.09	1961.18	1619.17	129.846	1770.31	1638.78	256.07	1814.05	1632.08	197.215	1735.35	1505.98	194.933	1670.52	1249.09	183.796	1851.33	1416.58	183.462	1923.38	1266.79	282.038	1667.18	1308.43	20.9477	1740.95	1451.43	-47.3963	1751.23	1271.88	-78.1614	1760.7	1122.06	-135.257	1890.29	1011.42	-121.195	1950.38	951.175	-157.694	1897.07	931.83	-169.285	1976.11	881.225
10798	0	82.7011	1926.39	1620.05	169.334	1972.5	1618.52	129.86	1781.5	1638.54	255.703	1825.87	1631.41	196.757	1746.52	1505.59	194.286	1681.25	1248.81	183.566	1862.51	1416.37	183.176	1934.04	1266.32	281.516	1677.95	1308.19	20.4841	1752.27	1451.26	-48.8092	1764.59	1271.98	-80.5515	1776.54	1122.37	-136.005	1909.4	1015.2	-121.467	1970.88	956.369	-158.753	1918.52	936.07	-169.51	1998.92	887.481
10799	0	82.0597	1937.28	1619.5	168.592	1983.68	1618	129.817	1792.62	1638.02	255.522	1837.38	1630.62	196.366	1757.69	1505.38	193.82	1691.99	1248.61	182.97	1873.62	1415.98	182.652	1944.57	1265.73	280.78	1688.76	1307.82	20.1175	1763.4	1451.32	-49.9674	1777.81	1272.22	-82.6537	1792.06	1123.02	-136.971	1928.09	1018.99	-121.591	1990.61	961.727	-159.899	1939.35	940.093	-169.854	2021.19	893.922
10800	0	81.4739	1948.24	1619.06	167.686	1994.98	1617.24	129.652	1803.92	1637.37	255.387	1849.13	1630.01	196.014	1768.92	1504.94	193.323	1702.84	1248.3	182.612	1884.71	1415.51	182.234	1955.49	1265.1	280.279	1699.58	1307.63	19.7442	1774.91	1450.89	-50.5574	1790.96	1272.48	-84.2404	1807.71	1123.84	-137.449	1946.64	1022.86	-121.675	2010.28	966.855	-160.76	1959.86	944.279	-169.864	2042.75	899.9
10801	0	80.8396	1959.31	1618.27	167.067	2006.37	1616.33	129.607	1815.03	1636.9	255.299	1860.85	1629.2	195.625	1780.22	1504.08	192.959	1713.61	1248.35	182.237	1895.97	1414.89	181.878	1966.21	1264.09	279.638	1710.36	1307.36	19.6709	1786.48	1450.53	-52.1471	1804.24	1272.47	-86.0177	1823.08	1124.08	-137.996	1964.69	1025.95	-121.621	2029.26	971.648	-161.445	1979.87	948.02	-169.888	2063.9	905.632
10802	0	80.3955	1970.45	1617.51	166.151	2017.62	1615.21	129.71	1826.23	1636.31	255.028	1872.33	1628.09	195.4	1791.79	1503.38	192.796	1724.51	1247.71	181.69	1907.36	1414.17	181.339	1977.09	1263.26	279.41	1721.7	1306.85	19.1474	1797.82	1449.77	-52.522	1817.16	1272.29	-88.0108	1837.77	1123.96	-138.478	1982.18	1028.96	-121.818	2047.43	975.749	-162.135	1999.22	951.471	-169.535	2084.31	910.923
10803	0	79.7081	1981.53	1616.51	165.618	2029.17	1614.32	129.625	1837.42	1635.57	254.607	1884.01	1626.99	195.028	1803.04	1502.64	192.523	1735.59	1247.01	181.222	1918.74	1413.44	180.896	1988.12	1262.29	279.008	1732.89	1306.12	18.638	1809.08	1449.04	-53.889	1830.43	1271.87	-89.4928	1852.8	1123.98	-138.573	1999.45	1032.01	-121.561	2065.64	980.169	-162.268	2018.59	955.148	-169.037	2104.22	916.094
10804	0	79.2481	1992.65	1615.79	164.871	2040.45	1613.18	129.384	1848.94	1634.34	254.204	1895.29	1625.7	194.764	1814.26	1501.89	192.416	1746.4	1246.48	180.939	1930.07	1412.75	180.247	1998.86	1261.24	278.852	1744.53	1305.17	18.3666	1820.59	1448.58	-54.7241	1843.31	1271.72	-91.0038	1867.51	1124.21	-138.683	2016.49	1035.02	-121.201	2083.24	984.258	-162.498	2037.06	958.555	-168.787	2123.48	921.057
10805	0	78.6111	2003.79	1614.76	164.195	2051.66	1612.23	129.193	1860.2	1633.22	254.132	1907.09	1624.79	194.328	1825.67	1500.73	192.071	1757.55	1245.7	180.448	1941.46	1411.81	179.72	2010.01	1260.34	278.515	1756.11	1304.08	17.8791	1832.01	1447.64	-55.417	1856.14	1271.42	-92.124	1882.09	1123.99	-138.793	2032.96	1037.45	-120.679	2100.42	987.968	-162.942	2055.13	961.596	-168.221	2142.08	925.798
10806	0	78.1422	2014.93	1613.72	163.592	2063.05	1611.2	128.951	1871.58	1632.05	253.64	1918.48	1623.26	194.22	1837.1	1499.64	192.318	1768.8	1244.8	179.97	1953.1	1411.02	178.915	2021.13	1259.24	278.351	1767.72	1302.98	17.6003	1843.19	1446.78	-55.906	1868.86	1270.81	-93.2759	1896.33	1123.74	-138.927	2048.98	1039.64	-120.237	2117.19	991.261	-162.747	2072.65	964.297	-167.703	2160.25	929.924
10807	0	77.6451	2026.27	1612.65	163.065	2074.55	1610.05	128.938	1882.82	1630.87	253.576	1930.35	1622.25	193.893	1848.66	1498.5	192.285	1780.26	1243.74	179.457	1964.78	1410.06	178.101	2032.51	1258.14	278.56	1779.59	1302.05	17.4024	1854.69	1445.93	-56.4333	1881.48	1270.4	-94.0226	1910.57	1123.48	-138.742	2064.66	1041.7	-119.794	2133.51	994.287	-162.529	2089.66	966.504	-167.117	2177.86	933.686
10808	0	77.3596	2037.57	1611.72	162.608	2086.05	1609.08	128.661	1894.23	1629.66	253.345	1941.97	1620.91	194.001	1860.08	1497.42	192.598	1792.01	1242.84	179.105	1976.51	1409.03	177.462	2043.97	1257.03	278.718	1791.41	1300.91	17.2223	1866.02	1444.79	-56.8109	1894.21	1269.7	-94.745	1924.47	1123.02	-138.436	2080.12	1043.31	-119.069	2149.29	996.935	-162.418	2106.26	968.587	-166.328	2194.85	937.023
10809	0	76.9437	2048.88	1610.45	161.883	2097.48	1607.88	128.665	1905.5	1628.3	253.332	1953.58	1619.52	193.975	1871.69	1496.05	192.832	1803.82	1241.79	178.731	1988.34	1407.94	176.907	2055.58	1255.93	279.099	1803.44	1299.71	17.1187	1877.39	1443.92	-57.1312	1906.55	1268.91	-95.255	1938.25	1122.6	-138.049	2095.16	1044.78	-118.64	2164.5	998.596	-162.094	2122.25	970.51	-165.336	2211.37	940.01
10810	0	76.7624	2060.28	1609.4	161.716	2109.05	1606.97	128.544	1917.05	1626.8	252.851	1965.23	1618.2	193.753	1883.22	1494.66	193.085	1815.93	1240.52	178.48	2000.14	1406.89	176.239	2067.51	1254.91	279.312	1815.57	1298.23	17.1128	1888.84	1442.54	-57.1842	1918.84	1268.04	-95.6542	1951.66	1121.97	-137.882	2109.64	1045.95	-117.843	2179.48	1000.66	-161.625	2137.77	971.94	-164.552	2227.09	942.399
10811	0	76.3058	2071.7	1608.37	161.217	2120.46	1606	128.121	1928.42	1625.19	252.769	1976.84	1616.79	194.074	1895.04	1493.5	193.663	1827.97	1239.67	178.367	2012.1	1405.97	175.451	2079.45	1254.02	279.635	1827.74	1296.97	17.0123	1900.08	1441.82	-57.1334	1930.97	1266.66	-95.8239	1964.86	1121.43	-137.166	2123.9	1046.83	-117.071	2194.13	1002.27	-161.102	2152.79	973.407	-163.825	2242.41	944.193
10812	0	76.2187	2083.27	1607.42	161.005	2131.99	1605.08	128.278	1939.96	1624.27	252.624	1988.3	1615.56	194.188	1906.64	1492.5	194.014	1840.38	1238.66	178.145	2024.07	1404.96	175.06	2091.69	1253.17	280.232	1840.04	1295.78	17.3	1911.72	1440.64	-57.2557	1943.24	1266.2	-96.0665	1977.91	1120.67	-136.733	2137.67	1047.37	-116.444	2208.06	1003.26	-160.809	2167.31	973.91	-162.698	2257.14	945.936
10813	0	75.8887	2094.75	1606.48	160.706	2143.44	1604.26	128.032	1951.42	1622.41	252.678	2000.02	1614.27	194.529	1918.59	1490.99	194.588	1852.64	1237.69	177.962	2036.22	1404.09	174.39	2103.89	1252.41	280.702	1852.11	1294.65	17.2629	1922.99	1439.45	-57.2385	1955.25	1265.19	-96.0474	1990.71	1119.95	-136.408	2151.04	1047.63	-115.739	2221.69	1003.86	-160.005	2181.17	974.353	-161.948	2271.19	947.035
10814	0	75.9555	2106.27	1605.43	160.596	2155.04	1603.52	128.288	1963.11	1621.17	252.401	2011.23	1613.17	194.723	1930.31	1489.76	195.258	1865.14	1236.65	178.012	2048.3	1403.21	174.086	2116.38	1251.86	281.545	1864.54	1293.67	17.736	1934.62	1438.55	-56.1257	1967	1264.04	-95.775	2003.07	1119.04	-135.508	2163.96	1047.55	-114.677	2234.88	1004.34	-159.044	2194.61	974.518	-160.66	2284.71	947.475
10815	0	75.9422	2117.94	1604.72	160.696	2166.73	1602.75	128.075	1974.41	1619.82	253.659	2023.79	1612.38	195.189	1942.31	1488.4	195.912	1877.57	1235.5	177.989	2060.49	1402.44	173.999	2128.9	1251.22	282.495	1876.97	1292.34	17.87	1946.11	1437.36	-56.4204	1978.91	1263.44	-95.7078	2015.3	1118.19	-134.939	2176.64	1047.08	-113.776	2247.55	1004.22	-158.493	2207.57	974.233	-159.822	2297.71	947.536
10816	0	75.8663	2129.48	1603.84	160.679	2178.37	1602.03	128.456	1986.09	1618.65	253.48	2035.48	1610.84	195.485	1954.19	1487.27	196.621	1889.75	1234.14	178.091	2072.82	1401.54	173.669	2141.4	1250.48	283.179	1889.49	1291.17	18.4035	1957.76	1436.31	-55.914	1990.71	1262.19	-95.0744	2027.21	1117.4	-134.132	2188.73	1046.34	-112.802	2259.69	1003.65	-157.569	2220.03	973.863	-158.524	2310.29	947.242
10817	0	76.0494	2141.2	1602.79	160.75	2190.07	1601.36	128.004	1997.46	1616.85	253.199	2046.84	1609.4	196.028	1966.14	1486.1	197.418	1902.25	1232.91	178.174	2085.14	1400.47	173.707	2153.94	1249.91	284.063	1902.08	1290.15	18.7932	1969.58	1435.07	-54.9879	2002.3	1261.13	-94.89	2038.71	1116.15	-133.291	2200.65	1045.45	-111.801	2271.6	1002.8	-156.682	2231.99	972.842	-157.587	2322.34	946.247
10818	0	76.0645	2152.89	1601.88	160.864	2201.56	1600.83	128.242	2009.31	1615.5	253.582	2058.74	1608.15	196.47	1978.34	1484.74	198.298	1914.81	1231.57	178.516	2097.47	1399.76	173.94	2166.46	1249	285.039	1914.62	1289.31	19.1737	1981.36	1433.64	-55.0679	2014.02	1259.56	-94.0702	2050.09	1114.83	-132.611	2212.15	1044.06	-110.951	2282.9	1001.48	-155.902	2243.41	971.646	-156.376	2333.76	944.856
10819	0	76.5382	2164.47	1601.18	161.138	2213.2	1600.32	128.641	2020.74	1613.96	253.926	2070.44	1606.88	196.947	1990.22	1483.57	199.008	1927.63	1230.26	178.896	2109.92	1398.75	174.486	2178.91	1248.27	285.963	1927.33	1288.04	19.6813	1993.59	1432.44	-54.4565	2025.66	1258.3	-93.4859	2060.99	1113.24	-131.737	2223.1	1042.32	-109.834	2294.02	999.73	-155.133	2254.4	969.514	-155.238	2344.74	942.774
10820	0	76.7102	2176.44	1600.83	161.507	2224.83	1600.11	128.511	2032.61	1612.11	254.108	2081.93	1605.85	197.682	2002.2	1482.49	200.023	1940.23	1229.05	179.482	2122.36	1398.19	175.171	2191.31	1247.63	287.788	1940.59	1286.9	20.4213	2005.67	1431.41	-53.9104	2037.18	1256.87	-92.728	2071.91	1111.5	-130.551	2233.8	1040.25	-108.977	2304.3	997.443	-154.024	2264.97	967.474	-154.11	2355.18	940.523
10821	0	77.0758	2188.13	1600.64	161.903	2236.5	1600.47	128.982	2044.19	1611.29	254.117	2093.2	1605.51	198.183	2014.17	1481.57	200.958	1953.53	1227.83	180.129	2134.76	1397.9	176.155	2203.91	1247.42	288.556	1953.21	1285.88	20.8699	2017.61	1430.3	-53.0698	2048.54	1255.69	-91.8755	2082.48	1109.9	-129.705	2243.99	1037.98	-107.906	2314.42	995.171	-153.247	2274.84	964.972	-153.102	2364.9	937.785
10822	0	77.2939	2200.03	1600.55	162.359	2248.31	1600.7	128.486	2055.91	1610.19	254.355	2104.81	1605.08	198.659	2026.02	1480.94	201.77	1966.45	1227.1	180.806	2147.21	1397.9	177.125	2216.64	1247.15	289.515	1965.99	1285.07	21.4539	2029.52	1429.55	-52.4094	2059.77	1254.72	-90.731	2092.96	1108.51	-128.779	2253.69	1035.58	-106.808	2324.1	992.18	-151.692	2284.19	962.322	-151.936	2374.03	934.704
10823	0	77.8155	2212.15	1600.46	162.865	2260.18	1601.1	128.974	2067.9	1609.62	254.3	2116.2	1604.89	199.607	2038.15	1480.54	202.795	1979.04	1226.51	181.547	2159.73	1397.84	178.025	2229.54	1247.44	290.082	1978.46	1284.6	22.1604	2041.82	1428.93	-51.3123	2071.13	1253.76	-89.3561	2103.18	1107.18	-127.617	2263.06	1032.68	-105.444	2333.38	988.797	-150.246	2292.76	958.977	-151.047	2382.48	930.833
10824	0	78.3448	2224.37	1600.43	163.514	2272.06	1601.72	128.813	2079.79	1609.29	254.584	2127.89	1604.91	200.329	2050.2	1480.65	203.332	1991.78	1226.47	182.239	2172.26	1398.14	179.158	2242.75	1248.04	291.091	1991.21	1284.41	23.0098	2054.1	1428.53	-50.1214	2082.06	1253.19	-87.5247	2113.2	1106.31	-126.247	2272.01	1029.42	-104.184	2342.13	985.065	-148.746	2300.75	955.52	-149.88	2390.15	926.56
10825	0	78.9681	2236.71	1600.88	164.528	2284.12	1602.68	129.446	2092.07	1609.5	254.925	2139.65	1605.41	200.873	2062.23	1480.83	203.728	2004.53	1226.14	183.018	2184.76	1398.68	180.174	2256.05	1249.14	291.355	2003.66	1284.47	23.8303	2066.33	1428.72	-47.9192	2092.94	1252.58	-85.6355	2122.98	1105.51	-124.644	2280.45	1026.17	-103.051	2349.88	980.622	-146.907	2307.77	951.572	-148.659	2397.09	922.064
10826	0	79.5137	2249.09	1601.69	165.319	2296.15	1604	128.885	2104.1	1609.65	255.098	2151.28	1606.64	202.341	2074.51	1481.81	204.181	2017.23	1226.99	183.841	2197.17	1399.98	181.107	2269.3	1250.75	292.146	2016.34	1285.39	24.4259	2078.58	1429.56	-47.0784	2103.87	1252.59	-83.3033	2132.5	1105.2	-123.157	2288.4	1022.94	-101.585	2356.99	976.556	-145.336	2314.3	948.099	-147.36	2403.1	917.092
10827	0	80.233	2261.6	1602.78	166.358	2308.22	1605.42	129.36	2116.35	1610.7	255.183	2162.68	1607.71	202.312	2086.66	1482.51	204.106	2029.76	1228.18	184.691	2209.62	1401.54	182.026	2282.41	1252.62	292.176	2028.77	1286.16	24.894	2090.85	1430.43	-45.0857	2114.61	1252.87	-81.0975	2141.72	1105.12	-121.318	2295.6	1019.97	-100.127	2363.7	972.316	-143.198	2320.02	944.111	-146.135	2408.24	912.183
10828	0	81.1353	2274.05	1603.98	167.558	2320.11	1607.07	129.16	2128.54	1611.31	255.177	2174.14	1608.75	203.163	2098.73	1483.66	204.149	2042.19	1229.54	185.16	2221.91	1403.04	182.776	2295.13	1254.61	292.259	2041.28	1287.12	25.357	2103.24	1431.77	-44.4612	2125.64	1253.61	-78.6304	2150.79	1105.56	-119.489	2302.53	1016.98	-98.4562	2369.78	967.933	-141.061	2324.92	940.335	-144.395	2412.81	906.66
10829	0	81.9431	2286.73	1605.36	168.824	2331.94	1608.8	128.908	2140.84	1612.18	255.362	2185.26	1610.2	203.924	2111	1484.77	204.595	2054.68	1230.08	185.708	2234.23	1404.56	183.259	2307.83	1256.47	292.926	2054.04	1288.45	25.7064	2115.61	1433.06	-42.5444	2136.47	1254.53	-76.1	2159.9	1106.1	-117.423	2309.02	1013.83	-96.7089	2375.1	963.289	-138.916	2329.48	936.354	-142.541	2416.5	900.686
10830	0	83.1749	2299.37	1606.89	170.157	2343.88	1610.45	128.896	2153.09	1613.13	255.666	2196.1	1611.6	204.61	2123.2	1486.19	204.721	2067.1	1231.46	186.099	2246.48	1406.11	183.678	2320.47	1258.32	293.377	2066.5	1289.99	26.2094	2128.03	1434.65	-41.8596	2147.34	1255.28	-73.2264	2168.87	1106.79	-115.149	2315.18	1010.73	-94.76	2379.83	958.205	-136.446	2333.56	932.5	-140.311	2419.65	894.602
10831	0	84.1527	2312.16	1608.57	171.865	2355.82	1612.32	128.324	2165.35	1614.15	255.856	2207.32	1612.73	204.758	2135.3	1487.23	204.534	2079.26	1232.36	186.557	2258.69	1407.88	183.949	2332.91	1260.05	294.458	2079.33	1291.34	26.6396	2140.24	1436.18	-40.6313	2158.38	1256.26	-70.6091	2177.46	1107.42	-113.071	2321.11	1007.54	-92.3114	2384.43	953.441	-134.076	2337.3	928.732	-137.643	2422.11	888.204
10832	0	85.1907	2324.79	1610.11	173.398	2367.74	1613.99	127.763	2177.79	1614.83	255.542	2218.35	1613.54	205.187	2147.4	1488.29	205.12	2091.68	1233.97	186.642	2270.8	1409.35	183.966	2345.19	1261.66	294.756	2091.72	1292.59	26.924	2151.96	1437.73	-39.6876	2169.12	1257.45	-68.3762	2185.75	1108.18	-110.6	2326.74	1004.25	-90.0951	2388.39	948.207	-131.396	2340.6	925.055	-134.981	2424.07	881.774
10833	0	86.2542	2337.59	1611.76	175.155	2379.72	1615.75	127.662	2190.13	1615.86	255.721	2229.51	1614.59	205.736	2159.38	1489.63	205.347	2103.68	1235.26	186.602	2282.97	1410.57	183.757	2357.25	1262.94	294.918	2104.07	1293.82	27.0298	2163.78	1439.16	-38.7541	2180.02	1258.44	-66.3116	2194.21	1108.71	-108.051	2331.97	1000.61	-87.1641	2391.95	942.747	-128.993	2343.52	921.17	-131.823	2425.52	875.004
10834	0	87.2056	2350.4	1613.37	176.553	2391.39	1617.38	126.838	2202.39	1616.86	255.529	2240.76	1615.16	206.274	2171.23	1491.14	205.378	2115.47	1236.5	186.355	2295.02	1411.7	183.215	2369.12	1264.02	295.33	2116.41	1295.11	27.3668	2175.54	1440.28	-37.387	2190.18	1259.17	-64.7609	2202.05	1109.29	-105.357	2337.08	997.261	-84.4291	2394.76	936.867	-126.065	2346.04	917.508	-128.634	2426.54	868.334
10835	0	88.5387	2362.98	1614.83	177.876	2403.16	1618.96	126.336	2214.74	1617.81	255.5	2251.83	1616.26	206.186	2183.5	1492.05	206.444	2127.54	1238.35	186.225	2307.07	1412.98	182.431	2381.01	1265.1	295.937	2128.6	1296.47	27.2356	2186.76	1441.61	-36.8807	2200.59	1260.22	-62.4307	2210.34	1110.06	-102.842	2341.67	993.705	-81.2965	2397.6	931.688	-122.917	2348.14	913.509	-125.035	2426.96	861.598
10836	0	89.5221	2375.9	1616.81	179.376	2414.9	1620.7	126.024	2227.2	1618.72	255.374	2262.44	1617.16	206.076	2195.31	1493.2	206.008	2139.04	1238.53	186.282	2319.09	1413.91	181.608	2392.51	1266.16	296.42	2140.83	1297.64	27.9029	2198.38	1443.28	-36.007	2210.46	1261.1	-60.5919	2218.61	1110.7	-99.9731	2345.71	990.188	-77.9946	2399.61	926.184	-119.857	2349.89	909.741	-121.309	2426.62	855.043
10837	0	90.4338	2388.44	1618.52	180.715	2426.58	1622.29	125.579	2239.46	1620.04	255.126	2273.5	1618.21	206.945	2207.23	1494.56	207.155	2151.02	1240.45	185.703	2330.9	1415	180.495	2403.98	1267.26	296.993	2153.05	1299.03	27.8961	2209.4	1444.71	-35.0412	2220.3	1262.1	-58.5967	2226.57	1111.74	-97.2437	2349.74	986.923	-74.5889	2401.14	921.214	-116.723	2351.29	905.989	-117.387	2425.96	848.79
10838	0	91.2808	2401.19	1620.29	182.04	2438.32	1623.66	124.834	2251.74	1621.42	254.762	2284.56	1619.24	206.57	2219.23	1495.65	208.36	2162.83	1242.19	185.446	2342.7	1416.21	179.449	2415.44	1268.34	297.706	2165.36	1300.23	28.1183	2220.75	1446.16	-34.3697	2230.01	1263.1	-56.7486	2234.48	1112.59	-94.4073	2353.37	983.701	-71.1265	2402.35	916.159	-113.685	2352.29	902.896	-113.452	2424.84	842.639
10839	0	92.0736	2413.75	1621.64	183.26	2450.06	1625.06	124.267	2263.97	1622.26	254.616	2295.98	1620.13	206.941	2231.2	1496.75	208.182	2174.14	1243.11	184.942	2354.48	1417.33	178.422	2426.84	1269.19	298.301	2177.39	1301.59	28.0805	2231.56	1447.22	-33.7119	2239.47	1263.87	-54.3491	2242.41	1113.54	-91.6649	2356.72	980.714	-67.8035	2403.27	911.612	-110.193	2353.13	899.752	-109.205	2423.34	837.066
10840	0	92.8055	2426.41	1623	184.331	2461.92	1626.41	123.704	2276.79	1623.07	254.141	2307.03	1621.1	207.321	2243.21	1498.28	210.351	2185.92	1245.48	184.364	2366.15	1418.18	177.264	2438.16	1270.07	298.976	2189.33	1303.15	28.1524	2242.74	1448.28	-32.8891	2248.97	1264.63	-52.6869	2249.6	1114.24	-88.8856	2359.82	977.74	-64.5237	2404.08	907.317	-106.845	2353.67	896.934	-105.361	2421.32	831.482
10841	0	93.4516	2439	1624.3	185.303	2473.69	1627.74	123.119	2289.03	1624.06	253.69	2318.25	1622.04	207.421	2255.06	1499.38	210.767	2197.24	1246.47	184.076	2377.78	1419.14	176.279	2449.41	1270.79	299.68	2201.48	1304.62	28.2018	2253.54	1449.41	-32.0733	2258.42	1265.34	-50.2141	2256.73	1114.69	-85.8119	2362.77	975.357	-61.3377	2404.17	903.541	-103.638	2353.92	894.555	-101.326	2418.94	826.418
10842	0	94.0146	2451.63	1626.01	186.107	2485.35	1628.82	122.63	2301.42	1625.38	253.184	2329.4	1622.97	207.394	2266.98	1500.55	212.113	2209.08	1247.64	183.666	2389.36	1419.92	175.376	2460.45	1271.45	300.414	2213.4	1305.81	28.3703	2264.62	1450.31	-30.9622	2267.71	1265.91	-48.1575	2263.91	1115.56	-83.0081	2365.21	972.79	-58.0774	2404.54	900.065	-100.346	2353.85	892.144	-97.1827	2416.54	821.84
10843	0	94.4553	2464.03	1626.88	187.025	2497.16	1630	121.661	2313.64	1626.24	252.629	2340.27	1623.94	207.673	2278.96	1501.76	213.036	2220.58	1248.94	183.545	2400.98	1420.95	174.737	2471.65	1272.13	301.202	2225.21	1307.46	28.419	2275.57	1451.2	-29.9013	2276.78	1266.32	-45.5908	2270.61	1116.13	-80.0725	2367.49	970.872	-55.0732	2404.68	896.74	-96.8576	2353.73	890.074	-93.5974	2413.65	817.703
10844	0	94.9804	2476.53	1627.9	187.805	2509	1631.13	120.992	2325.98	1627.32	251.741	2351.45	1624.98	206.965	2290.76	1502.76	213.778	2231.56	1250.6	183.047	2412.49	1421.73	174.313	2482.84	1272.78	301.659	2236.92	1308.88	28.4784	2286.53	1451.94	-28.5551	2285.81	1266.89	-43.0164	2276.98	1116.77	-77.4716	2369.43	968.607	-52.1461	2404.62	893.9	-94.0792	2353.37	888.365	-90.077	2410.69	813.975
10845	0	95.2288	2489.07	1628.9	188.351	2520.71	1632.05	120.066	2338.32	1627.9	251.469	2362.67	1625.67	207.501	2302.74	1503.89	214.317	2242.9	1251.56	182.814	2423.97	1422.19	173.946	2494.11	1273.37	302.391	2248.56	1310.48	28.7483	2297.76	1452.88	-26.59	2294.52	1267.13	-40.2801	2283.12	1117.13	-74.9314	2371.21	966.976	-49.3126	2404.83	891.234	-90.4349	2352.98	886.924	-86.8417	2407.53	810.849
10846	0	95.6005	2501.51	1629.45	188.83	2532.48	1632.66	119.411	2350.67	1628.59	250.579	2374.26	1626.37	207.217	2314.7	1504.68	215.333	2254.23	1252.71	182.471	2435.52	1422.5	173.749	2505.38	1273.41	303.105	2260.4	1311.56	28.9737	2309.05	1453.25	-24.8397	2303.43	1267.4	-37.5267	2289.13	1117.45	-72.2139	2372.9	965.091	-46.7485	2404.89	888.522	-87.091	2352.64	885.745	-83.4713	2404.76	807.597
10847	0	95.8199	2513.86	1629.76	189.238	2544.3	1633.18	119.546	2362.81	1629.09	250.237	2385.54	1626.88	207.25	2326.27	1505.36	215.936	2265.73	1253.09	182.552	2447.14	1422.69	173.832	2516.49	1273.37	303.789	2271.98	1312.65	29.1713	2320.16	1453.2	-23.7246	2311.78	1267.15	-34.6197	2294.87	1117.65	-69.3603	2374.57	963.04	-43.8712	2405	885.984	-83.8326	2351.99	884.4	-80.1526	2402.02	804.856
10848	0	96.0497	2526.16	1630.01	189.56	2555.96	1633.76	117.87	2374.82	1628.97	249.603	2397.06	1627.45	206.765	2338.56	1505.52	216.639	2277.06	1254.11	182.455	2458.69	1422.96	174.225	2527.78	1273.4	304.085	2283.58	1313.74	29.3858	2331.49	1453.01	-22.4893	2320.11	1266.83	-31.6023	2300.62	1118.02	-66.5473	2376.27	961.53	-41.0833	2405.22	883.866	-80.1427	2351.46	882.923	-77.0627	2399.31	802.229
10849	0	96.252	2538.3	1630.13	189.801	2567.66	1634.1	117.974	2386.91	1629.33	249.424	2408.61	1627.89	206.899	2350.38	1505.8	217.083	2288.06	1254.67	182.594	2470.23	1422.77	174.601	2539.14	1273.32	304.593	2295.1	1314.48	29.7108	2342.57	1453	-20.8818	2328.25	1266.51	-28.6718	2306.38	1117.94	-63.84	2377.79	960.088	-38.4413	2405.17	881.5	-76.5292	2351.31	882.084	-74.02	2396.99	800.048
10850	0	96.191	2550.36	1630.13	190.116	2579.48	1634.37	116.786	2399	1628.79	248.789	2420.11	1628.14	207.469	2362.13	1506.28	217.914	2299.69	1254.6	182.654	2481.77	1422.63	175.17	2550.5	1272.82	305.211	2306.93	1314.77	30.2742	2354	1452.61	-19.1248	2336.21	1266.03	-25.8764	2312.01	1118.02	-61.0506	2379.09	958.172	-35.5138	2405.35	879.51	-73.3355	2350.57	881.179	-70.8841	2394.72	797.941
10851	0	96.1236	2562.27	1629.87	190.282	2591.33	1634.51	116.64	2410.97	1628.95	248.497	2431.67	1628.18	207.583	2374.15	1506.25	218.834	2311.19	1254.62	182.826	2493.26	1422.24	175.637	2561.67	1272.45	305.91	2318.49	1315.39	30.3722	2365.01	1451.98	-17.6428	2344.23	1265.41	-22.8794	2317.77	1118.11	-58.469	2380.82	956.744	-32.6815	2405.84	877.707	-69.7733	2350.38	880.317	-67.6739	2392.69	796.15
10852	0	96.0841	2574.11	1629.58	190.088	2602.93	1634.48	116.194	2422.72	1628.68	248.092	2443.12	1628.33	207.024	2385.9	1505.82	219.036	2322.36	1254.66	183.103	2504.97	1421.96	176.143	2572.95	1271.91	306.155	2329.89	1315.54	30.7586	2376.34	1451.35	-16.3158	2352.15	1265.06	-19.5412	2323.76	1118.42	-55.7472	2382.66	955.462	-29.9991	2406.33	875.901	-65.7981	2350.45	879.56	-64.6493	2391.08	794.669
10853	0	95.839	2585.89	1629.09	189.841	2614.48	1634.19	116.147	2434.61	1628.03	247.82	2454.95	1628.25	206.955	2397.78	1505.5	219.629	2333.93	1254.43	183.468	2516.67	1421.38	176.749	2584.38	1271.12	306.714	2341.64	1315.39	31.1071	2387.77	1450.63	-14.2805	2359.99	1264.27	-16.9458	2329.52	1118.12	-52.9311	2384.53	954.372	-27.5545	2406.98	874.287	-62.0958	2350.44	878.786	-61.3828	2389.7	793.244
10854	0	95.8485	2597.6	1628.24	189.938	2626.34	1633.8	115.632	2446.25	1627.09	247.574	2466.32	1627.89	208.004	2409.56	1505.37	220.376	2345.57	1253.8	183.653	2528.37	1420.46	177.424	2595.73	1270.23	307.406	2353.21	1315.16	31.5695	2399.02	1449.55	-12.6459	2367.99	1263.53	-14.388	2335.55	1117.93	-50.134	2386.49	953.166	-27.8448	2409.12	873.688	-58.5115	2350.8	878.174	-58.1416	2388.48	791.787
10855	0	95.6769	2609.32	1627.33	189.645	2637.98	1633.13	115.288	2457.91	1625.92	247.547	2478.32	1627.26	207.255	2421.36	1504.16	220.502	2356.92	1253.08	184.118	2540.21	1419.7	178.09	2607.27	1269.13	307.776	2364.58	1314.78	31.8296	2410.65	1448.38	-11.3451	2376.21	1262.86	-11.4964	2341.68	1118.07	-47.5764	2388.66	951.896	-19.9829	2408.41	870.952	-54.0634	2351.43	877.403	-55.4254	2387.63	790.669
10856	0	95.2337	2620.95	1626.26	189.251	2649.65	1632.27	115.329	2469.68	1625.38	247.478	2490.16	1626.69	208.114	2433.14	1503.8	221.258	2368.72	1252.45	184.433	2552.09	1418.63	178.78	2619.15	1268.07	307.925	2376.21	1314.08	32.2344	2422.45	1447.21	-9.43642	2384.54	1262.29	-8.8517	2348.25	1118.21	-44.8993	2391.31	950.937	-17.2939	2410.03	869.776	-50.5702	2352.34	877.354	-50.8304	2386.93	789.873
10857	0	95.0461	2632.55	1624.87	189.091	2661.52	1631.29	115.529	2481.36	1624.52	247.327	2501.76	1625.97	207.952	2445.32	1502.49	221.531	2380.32	1251.63	184.709	2563.93	1417.45	179.304	2630.87	1266.86	308.745	2387.84	1313.68	32.4656	2434.18	1445.69	-7.6205	2393.22	1261.89	-6.42042	2355.03	1118.47	-42.3716	2394.22	950.013	-15.2025	2412.02	868.713	-46.8193	2353.6	877.465	-47.4744	2386.67	789.485
10858	0	94.7258	2644.19	1623.66	188.086	2672.98	1630.3	115.18	2492.78	1622.99	247.039	2513.75	1625.12	208.271	2457.07	1501.86	222.101	2391.88	1250.77	185.054	2575.84	1416.28	179.881	2642.59	1265.58	309.393	2399.44	1312.93	32.777	2445.86	1444.7	-5.97656	2402.28	1261.2	-3.79328	2362.12	1118.53	-40.0109	2397.49	949.467	-13.2087	2414.37	868.28	-43.3174	2355.34	877.303	-44.1535	2386.7	788.641
10859	0	94.3997	2655.73	1622.46	188.072	2684.87	1629.34	115.148	2504.47	1621.93	247.143	2525.5	1624.32	208.597	2469.06	1500.8	221.824	2403.72	1249.27	185.553	2587.78	1415.24	180.506	2654.27	1264.37	309.107	2410.78	1311.93	32.9335	2457.73	1443.71	-4.5201	2411.73	1260.95	-1.67738	2369.56	1118.67	-37.4285	2400.8	949.235	-11.5604	2417.16	867.731	-39.8237	2357.54	877.587	-40.9662	2387.11	787.965
10860	0	94.1243	2667.16	1621.3	187.746	2696.58	1628.36	115.159	2516.17	1620.72	246.903	2537.22	1623.88	208.777	2481.24	1499.43	222.079	2415.54	1248.22	185.914	2599.71	1414.07	181.158	2665.97	1263.15	309.461	2422.61	1310.79	33.3852	2469.73	1442.6	-3.07382	2421.48	1260.48	1.11086	2377.63	1119.11	-34.5026	2405.03	948.702	-8.34225	2420.21	866.857	-36.4376	2360.32	877.94	-37.6714	2388.1	787.823
10861	0	93.7207	2678.79	1619.85	187.299	2708.42	1627.17	115.591	2527.98	1619.61	247.018	2549.23	1622.91	208.894	2493.25	1498.1	222.057	2427.19	1247.04	186.248	2611.76	1412.83	181.708	2677.64	1261.74	309.742	2434.38	1309.78	33.5609	2481.81	1441.31	-1.82902	2431.65	1259.87	3.4559	2386.08	1119.01	-32.9901	2409.69	948.714	-7.75819	2423.95	866.583	-33.1923	2363.47	878.408	-34.5359	2389.52	787.734
10862	0	93.2875	2690.31	1617.86	186.912	2720.18	1625.89	114.873	2539.18	1617.4	246.862	2560.77	1621.65	209.214	2505.25	1496.99	221.83	2438.92	1245.84	186.527	2623.81	1411.39	182.275	2689.41	1260.22	309.336	2445.68	1308.71	33.7881	2494.12	1439.99	-0.956694	2441.86	1259.12	4.62074	2394.39	1119.41	-31.4497	2414.58	948.414	-3.99503	2427.98	865.99	-30.2471	2367.55	878.675	-31.6242	2391.39	787.389
10863	0	93.1322	2701.93	1616.3	186.397	2731.96	1624.31	114.584	2550.84	1616.05	246.99	2573.23	1620.23	209.362	2517.08	1495.65	221.939	2450.89	1244.57	186.706	2635.94	1409.7	182.657	2701.48	1258.52	309.427	2457.31	1307.46	33.9659	2506.38	1438.6	-0.033491	2452.52	1258.41	6.59251	2403.86	1119.02	-29.5383	2420.36	948.227	-3.82658	2433.02	866.035	-27.7602	2371.95	879.174	-28.6832	2393.98	787.232
10864	0	92.8234	2713.48	1614.44	186.161	2743.85	1622.84	115.241	2562.4	1614.69	247.356	2585.28	1618.64	209.501	2529.22	1494.01	221.797	2462.84	1242.92	186.943	2648.09	1407.95	183.122	2713.68	1256.83	309.516	2469.26	1305.82	34.1464	2518.73	1437.06	0.696358	2463.11	1257.14	7.58663	2413.12	1118.98	-27.5589	2426.39	947.48	-0.58043	2437.61	864.827	-25.2793	2377.08	879.388	-25.9676	2397.18	787.278
10865	0	92.6037	2725.08	1612.75	185.696	2755.71	1621.48	115.261	2573.98	1612.52	247.175	2597.25	1617.61	209.026	2541.43	1491.89	220.957	2474.52	1241.43	187.065	2660.15	1406.44	183.635	2725.96	1255.39	309.492	2481.04	1304.3	33.9952	2531.01	1435.45	1.14243	2474.54	1256.66	8.76045	2423.09	1118.52	-25.9331	2433.28	946.763	-1.87724	2444.01	864.859	-23.3418	2382.69	879.607	-23.62	2401.04	786.964
10866	0	92.3111	2736.6	1611.27	184.929	2767.26	1620.18	114.995	2585.48	1611.14	247.025	2609.1	1616.22	209.417	2553.15	1491.01	220.644	2486.5	1240.06	187.226	2672.29	1405.14	183.84	2738.32	1254.06	309.036	2492.53	1302.83	34.0021	2543.32	1434.07	1.49327	2485.79	1255.37	9.63703	2433.43	1117.94	-25.0254	2440.61	946.043	-0.352841	2450.2	864.226	-21.687	2389.05	879.838	-21.3471	2405.48	786.774
10867	0	91.8479	2748.2	1610.02	184.646	2779.12	1618.97	115.135	2597.26	1609.42	246.976	2620.85	1614.77	209.025	2565.05	1489.47	220.253	2498.51	1238.59	187.216	2684.39	1403.79	184.049	2750.6	1252.76	308.47	2504.19	1301.25	33.5347	2555.67	1432.82	1.84251	2497.48	1254.35	10.4498	2444.23	1117.22	-24.0577	2448.63	945.721	0.34635	2457.16	863.578	-20.1501	2396.08	880.164	-19.8077	2410.59	786.38
10868	0	91.4025	2759.68	1608.73	184.275	2790.99	1617.83	115.029	2609.06	1607.43	247.259	2633.39	1613.27	208.722	2577.28	1487.53	219.827	2510.84	1236.93	187.218	2696.57	1402.43	183.996	2762.67	1251.42	308.524	2516.26	1299.59	33.5132	2567.94	1431.37	2.09482	2509.36	1253.23	10.9643	2455.39	1116.53	-23.8313	2457.09	944.561	0.842616	2464.66	862.659	-19.2336	2403.89	880.268	-18.4163	2416.73	786.461
10869	0	90.954	2771.39	1607.6	183.84	2802.94	1616.79	114.252	2619.97	1606.18	246.843	2645.2	1611.73	208.09	2589.27	1485.98	219.114	2523.07	1235.39	187.171	2708.76	1401.2	184.086	2774.85	1250.19	308.134	2528.24	1297.98	32.9378	2580.29	1430.03	1.64269	2521.51	1252.05	11.3889	2467.04	1115.88	-23.2859	2466.67	944.206	1.18512	2473.08	862.071	-18.5884	2412.56	880.137	-17.4177	2423.64	786.554
10870	0	90.57	2782.94	1606.59	182.821	2814.64	1615.78	114.997	2631.86	1604.23	247.098	2657.38	1610.16	208.129	2600.84	1485.07	217.568	2535.12	1233.58	186.99	2720.91	1400	184.051	2787.28	1249.16	306.837	2539.97	1296.29	32.5872	2592.71	1428.77	1.62214	2533.77	1250.89	11.0665	2478.84	1114.96	-23.1402	2476.69	943.555	2.60841	2481.74	860.862	-18.2165	2421.98	880.134	-16.5495	2431.53	785.805
[truncated: 69 more columns]

## Sheet: Sheet2
Devices
		025370 - Force			025370 - Moment			025370 - CoP			027571 - Force			027571 - Moment			027571 - CoP			037720 - Force			037720 - Moment			037720 - CoP
Frame	Sub Frame	Fx	Fy	Fz	Mx	My	Mz	Cx	Cy	Cz	Fx	Fy	Fz	Mx	My	Mz	Cx	Cy	Cz	Fx	Fy	Fz	Mx	My	Mz	Cx	Cy	Cz
		N	N	N	N.mm	N.mm	N.mm	mm	mm	mm	N	N	N	N.mm	N.mm	N.mm	mm	mm	mm	N	N	N	N.mm	N.mm	N.mm	mm	mm	mm
10537	0	0	0	0	0	0	0	200	300	0	0	0	0	0	0	0	200	903	0	0	0	0	0	0	0	603	903	0
10537	1	0	0	0	0	0	0	200	300	0	0	0	0	0	0	0	200	903	0	0	0	0	0	0	0	603	903	0
10537	2	0	0	0	0	0	0	200	300	0	0	0	0	0	0	0	200	903	0	0	0	0	0	0	0	603	903	0
10537	3	0	0	0	0	0	0	200	300	0	0	0	0	0	0	0	200	903	0	0	0	0	0	0	0	603	903	0
10537	4	0	0	0	0	0	0	200	300	0	0	0	0	0	0	0	200	903	0	0	0	0	0	0	0	603	903	0
10537	5	0	0	0	0	0	0	200	300	0	0	0	0	0	0	0	200	903	0	0	0	0	0	0	0	603	903	0
10537	6	0	0	0	0	0	0	200	300	0	0	0	0	0	0	0	200	903	0	0	0	0	0	0	0	603	903	0
10537	7	0	0	0	0	0	0	200	300	0	0	0	0	0	0	0	200	903	0	0	0	0	0	0	0	603	903	0
10537	8	0	0	0	0	0	0	200	300	0	0	0	0	0	0	0	200	903	0	0	0	0	0	0	0	603	903	0
10537	9	0	0	0	0	0	0	200	300	0	0	0	0	0	0	0	200	903	0	0	0	0	0	0	0	603	903	0
10538	0	0	0	0	0	0	0	200	300	0	0	0	0	0	0	0	200	903	0	0	0	0	0	0	0	603	903	0
10538	1	0	0	0	0	0	0	200	300	0	0	0	0	0	0	0	200	903	0	0	0	0	0	0	0	603	903	0
10538	2	0	0	0	0	0	0	200	300	0	0	0	0	0	0	0	200	903	0	0	0	0	0	0	0	603	903	0
10538	3	0	0	0	0	0	0	200	300	0	0	0	0	0	0	0	200	903	0	0	0	0	0	0	0	603	903	0
10538	4	0	0	0	0	0	0	200	300	0	0	0	0	0	0	0	200	903	0	0	0	0	0	0	0	603	903	0
10538	5	0	0	0	0	0	0	200	300	0	0	0	0	0	0	0	200	903	0	0	0	0	0	0	0	603	903	0
10538	6	0	0	0	0	0	0	200	300	0	0	0	0	0	0	0	200	903	0	0	0	0	0	0	0	603	903	0
10538	7	0	0	0	0	0	0	200	300	0	0	0	0	0	0	0	200	903	0	0	0	0	0	0	0	603	903	0
10538	8	0	0	0	0	0	0	200	300	0	0	0	0	0	0	0	200	903	0	0	0	0	0	0	0	603	903	0
10538	9	0	0	0	0	0	0	200	300	0	0	0	0	0	0	0	200	903	0	0	0	0	0	0	0	603	903	0
10539	0	0	0	0	0	0	0	200	300	0	0	0	0	0	0	0	200	903	0	0	0	0	0	0	0	603	903	0
10539	1	0	0	0	0	0	0	200	300	0	0	0	0	0	0	0	200	903	0	0	0	0	0	0	0	603	903	0
10539	2	0	0	0	0	0	0	200	300	0	0	0	0	0	0	0	200	903	0	0	0	0	0	0	0	603	903	0
10539	3	0	0	0	0	0	0	200	300	0	0	0	0	0	0	0	200	903	0	0	0	0	0	0	0	603	903	0
10539	4	0	0	0	0	0	0	200	300	0	0	0	0	0	0	0	200	903	0	0	0	0	0	0	0	603	903	0
10539	5	0	0	0	0	0	0	200	300	0	0	0	0	0	0	0	200	903	0	0	0	0	0	0	0	603	903	0
10539	6	0	0	0	0	0	0	200	300	0	0	0	0	0	0	0	200	903	0	0	0	0	0	0	0	603	903	0
10539	7	0	0	0	0	0	0	200	300	0	0	0	0	0	0	0	200	903	0	0	0	0	0	0	0	603	903	0
10539	8	0	0	0	0	0	0	200	300	0	0	0	0	0	0	0	200	903	0	0	0	0	0	0	0	603	903	0
10539	9	0	0	0	0	0	0	200	300	0	0	0	0	0	0	0	200	903	0	0	0	0	0	0	0	603	903	0
10540	0	0	0	0	0	0	0	200	300	0	0	0	0	0	0	0	200	903	0	0	0	0	0	0	0	603	903	0
10540	1	0	0	0	0	0	0	200	300	0	0	0	0	0	0	0	200	903	0	0	0	0	0	0	0	603	903	0
10540	2	0	0	0	0	0	0	200	300	0	0	0	0	0	0	0	200	903	0	0	0	0	0	0	0	603	903	0
10540	3	0	0	0	0	0	0	200	300	0	0	0	0	0	0	0	200	903	0	0	0	0	0	0	0	603	903	0
10540	4	0	0	0	0	0	0	200	300	0	0	0	0	0	0	0	200	903	0	0	0	0	0	0	0	603	903	0
10540	5	0	0	0	0	0	0	200	300	0	0	0	0	0	0	0	200	903	0	0	0	0	0	0	0	603	903	0
10540	6	0	0	0	0	0	0	200	300	0	0	0	0	0	0	0	200	903	0	0	0	0	0	0	0	603	903	0
10540	7	0	0	0	0	0	0	200	300	0	0	0	0	0	0	0	200	903	0	0	0	0	0	0	0	603	903	0
10540	8	0	0	0	0	0	0	200	300	0	0	0	0	0	0	0	200	903	0	0	0	0	0	0	0	603	903	0
10540	9	0	0	0	0	0	0	200	300	0	0	0	0	0	0	0	200	903	0	0	0	0	0	0	0	603	903	0
10541	0	0	0	0	0	0	0	200	300	0	0	0	0	0	0	0	200	903	0	0	0	0	0	0	0	603	903	0
10541	1	0	0	0	0	0	0	200	300	0	0	0	0	0	0	0	200	903	0	0	0	0	0	0	0	603	903	0
10541	2	0	0	0	0	0	0	200	300	0	0	0	0	0	0	0	200	903	0	0	0	0	0	0	0	603	903	0
10541	3	0	0	0	0	0	0	200	300	0	0	0	0	0	0	0	200	903	0	0	0	0	0	0	0	603	903	0
10541	4	0	0	0	0	0	0	200	300	0	0	0	0	0	0	0	200	903	0	0	0	0	0	0	0	603	903	0
10541	5	0	0	0	0	0	0	200	300	0	0	0	0	0	0	0	200	903	0	0	0	0	0	0	0	603	903	0
10541	6	0	0	0	0	0	0	200	300	0	0	0	0	0	0	0	200	903	0	0	0	0	0	0	0	603	903	0
10541	7	0	0	0	0	0	0	200	300	0	0	0	0	0	0	0	200	903	0	0	0	0	0	0	0	603	903	0
10541	8	0	0	0	0	0	0	200	300	0	0	0	0	0	0	0	200	903	0	0	0	0	0	0	0	603	903	0
10541	9	0	0	0	0	0	0	200	300	0	0	0	0	0	0	0	200	903	0	0	0	0	0	0	0	603	903	0
10542	0	0	0	0	0	0	0	200	300	0	0	0	0	0	0	0	200	903	0	0	0	0	0	0	0	603	903	0
10542	1	0	0	0	0	0	0	200	300	0	0	0	0	0	0	0	200	903	0	0	0	0	0	0	0	603	903	0
10542	2	0	0	0	0	0	0	200	300	0	0	0	0	0	0	0	200	903	0	0	0	0	0	0	0	603	903	0
10542	3	0	0	0	0	0	0	200	300	0	0	0	0	0	0	0	200	903	0	0	0	0	0	0	0	603	903	0
10542	4	0	0	0	0	0	0	200	300	0	0	0	0	0	0	0	200	903	0	0	0	0	0	0	0	603	903	0
10542	5	0	0	0	0	0	0	200	300	0	0	0	0	0	0	0	200	903	0	0	0	0	0	0	0	603	903	0
10542	6	0	0	0	0	0	0	200	300	0	0	0	0	0	0	0	200	903	0	0	0	0	0	0	0	603	903	0
10542	7	0	0	0	0	0	0	200	300	0	0	0	0	0	0	0	200	903	0	0	0	0	0	0	0	603	903	0
10542	8	0	0	0	0	0	0	200	300	0	0	0	0	0	0	0	200	903	0	0	0	0	0	0	0	603	903	0
10542	9	0	0	0	0	0	0	200	300	0	0	0	0	0	0	0	200	903	0	0	0	0	0	0	0	603	903	0
10543	0	0	0	0	0	0	0	200	300	0	0	0	0	0	0	0	200	903	0	0	0	0	0	0	0	603	903	0
10543	1	0	0	0	0	0	0	200	300	0	0	0	0	0	0	0	200	903	0	0	0	0	0	0	0	603	903	0
10543	2	0	0	0	0	0	0	200	300	0	0	0	0	0	0	0	200	903	0	0	0	0	0	0	0	603	903	0
10543	3	0	0	0	0	0	0	200	300	0	0	0	0	0	0	0	200	903	0	0	0	0	0	0	0	603	903	0
10543	4	0	0	0	0	0	0	200	300	0	0	0	0	0	0	0	200	903	0	0	0	0	0	0	0	603	903	0
10543	5	0	0	0	0	0	0	200	300	0	0	0	0	0	0	0	200	903	0	0	0	0	0	0	0	603	903	0
10543	6	0	0	0	0	0	0	200	300	0	0	0	0	0	0	0	200	903	0	0	0	0	0	0	0	603	903	0
10543	7	0	0	0	0	0	0	200	300	0	0	0	0	0	0	0	200	903	0	0	0	0	0	0	0	603	903	0
10543	8	0	0	0	0	0	0	200	300	0	0	0	0	0	0	0	200	903	0	0	0	0	0	0	0	603	903	0
10543	9	0	0	0	0	0	0	200	300	0	0	0	0	0	0	0	200	903	0	0	0	0	0	0	0	603	903	0
10544	0	0	0	0	0	0	0	200	300	0	0	0	0	0	0	0	200	903	0	0	0	0	0	0	0	603	903	0
10544	1	0	0	0	0	0	0	200	300	0	0	0	0	0	0	0	200	903	0	0	0	0	0	0	0	603	903	0
10544	2	0	0	0	0	0	0	200	300	0	0	0	0	0	0	0	200	903	0	0	0	0	0	0	0	603	903	0
10544	3	0	0	0	0	0	0	200	300	0	0	0	0	0	0	0	200	903	0	0	0	0	0	0	0	603	903	0
10544	4	0	0	0	0	0	0	200	300	0	0	0	0	0	0	0	200	903	0	0	0	0	0	0	0	603	903	0
10544	5	0	0	0	0	0	0	200	300	0	0	0	0	0	0	0	200	903	0	0	0	0	0	0	0	603	903	0
10544	6	0	0	0	0	0	0	200	300	0	0	0	0	0	0	0	200	903	0	0	0	0	0	0	0	603	903	0
10544	7	0	0	0	0	0	0	200	300	0	0	0	0	0	0	0	200	903	0	0	0	0	0	0	0	603	903	0
10544	8	0	0	0	0	0	0	200	300	0	0	0	0	0	0	0	200	903	0	0	0	0	0	0	0	603	903	0
10544	9	0	0	0	0	0	0	200	300	0	0	0	0	0	0	0	200	903	0	0	0	0	0	0	0	603	903	0
10545	0	0	0	0	0	0	0	200	300	0	0	0	0	0	0	0	200	903	0	0	0	0	0	0	0	603	903	0
10545	1	0	0	0	0	0	0	200	300	0	0	0	0	0	0	0	200	903	0	0	0	0	0	0	0	603	903	0
10545	2	0	0	0	0	0	0	200	300	0	0	0	0	0	0	0	200	903	0	0	0	0	0	0	0	603	903	0
10545	3	0	0	0	0	0	0	200	300	0	0	0	0	0	0	0	200	903	0	0	0	0	0	0	0	603	903	0
10545	4	0	0	0	0	0	0	200	300	0	0	0	0	0	0	0	200	903	0	0	0	0	0	0	0	603	903	0
10545	5	0	0	0	0	0	0	200	300	0	0	0	0	0	0	0	200	903	0	0	0	0	0	0	0	603	903	0
10545	6	0	0	0	0	0	0	200	300	0	0	0	0	0	0	0	200	903	0	0	0	0	0	0	0	603	903	0
10545	7	0	0	0	0	0	0	200	300	0	0	0	0	0	0	0	200	903	0	0	0	0	0	0	0	603	903	0
10545	8	0	0	0	0	0	0	200	300	0	0	0	0	0	0	0	200	903	0	0	0	0	0	0	0	603	903	0
10545	9	0	0	0	0	0	0	200	300	0	0	0	0	0	0	0	200	903	0	0	0	0	0	0	0	603	903	0
10546	0	0	0	0	0	0	0	200	300	0	0	0	0	0	0	0	200	903	0	0	0	0	0	0	0	603	903	0
10546	1	0	0	0	0	0	0	200	300	0	0	0	0	0	0	0	200	903	0	0	0	0	0	0	0	603	903	0
10546	2	0	0	0	0	0	0	200	300	0	0	0	0	0	0	0	200	903	0	0	0	0	0	0	0	603	903	0
10546	3	0	0	0	0	0	0	200	300	0	0	0	0	0	0	0	200	903	0	0	0	0	0	0	0	603	903	0
10546	4	0	0	0	0	0	0	200	300	0	0	0	0	0	0	0	200	903	0	0	0	0	0	0	0	603	903	0
10546	5	0	0	0	0	0	0	200	300	0	0	0	0	0	0	0	200	903	0	0	0	0	0	0	0	603	903	0
10546	6	0	0	0	0	0	0	200	300	0	0	0	0	0	0	0	200	903	0	0	0	0	0	0	0	603	903	0
10546	7	0	0	0	0	0	0	200	300	0	0	0	0	0	0	0	200	903	0	0	0	0	0	0	0	603	903	0
10546	8	0	0	0	0	0	0	200	300	0	0	0	0	0	0	0	200	903	0	0	0	0	0	0	0	603	903	0
10546	9	0	0	0	0	0	0	200	300	0	0	0	0	0	0	0	200	903	0	0	0	0	0	0	0	603	903	0
10547	0	0	0	0	0	0	0	200	300	0	0	0	0	0	0	0	200	903	0	0	0	0	0	0	0	603	903	0
10547	1	0	0	0	0	0	0	200	300	0	0	0	0	0	0	0	200	903	0	0	0	0	0	0	0	603	903	0
10547	2	0	0	0	0	0	0	200	300	0	0	0	0	0	0	0	200	903	0	0	0	0	0	0	0	603	903	0
10547	3	0	0	0	0	0	0	200	300	0	0	0	0	0	0	0	200	903	0	0	0	0	0	0	0	603	903	0
10547	4	0	0	0	0	0	0	200	300	0	0	0	0	0	0	0	200	903	0	0	0	0	0	0	0	603	903	0
10547	5	0	0	0	0	0	0	200	300	0	0	0	0	0	0	0	200	903	0	0	0	0	0	0	0	603	903	0
10547	6	0	0	0	0	0	0	200	300	0	0	0	0	0	0	0	200	903	0	0	0	0	0	0	0	603	903	0
10547	7	0	0	0	0	0	0	200	300	0	0	0	0	0	0	0	200	903	0	0	0	0	0	0	0	603	903	0
10547	8	0	0	0	0	0	0	200	300	0	0	0	0	0	0	0	200	903	0	0	0	0	0	0	0	603	903	0
10547	9	0	0	0	0	0	0	200	300	0	0	0	0	0	0	0	200	903	0	0	0	0	0	0	0	603	903	0
10548	0	0	0	0	0	0	0	200	300	0	0	0	0	0	0	0	200	903	0	0	0	0	0	0	0	603	903	0
10548	1	0	0	0	0	0	0	200	300	0	0	0	0	0	0	0	200	903	0	0	0	0	0	0	0	603	903	0
10548	2	0	0	0	0	0	0	200	300	0	0	0	0	0	0	0	200	903	0	0	0	0	0	0	0	603	903	0
10548	3	0	0	0	0	0	0	200	300	0	0	0	0	0	0	0	200	903	0	0	0	0	0	0	0	603	903	0
10548	4	0	0	0	0	0	0	200	300	0	0	0	0	0	0	0	200	903	0	0	0	0	0	0	0	603	903	0
10548	5	0	0	0	0	0	0	200	300	0	0	0	0	0	0	0	200	903	0	0	0	0	0	0	0	603	903	0
10548	6	0	0	0	0	0	0	200	300	0	0	0	0	0	0	0	200	903	0	0	0	0	0	0	0	603	903	0
10548	7	0	0	0	0	0	0	200	300	0	0	0	0	0	0	0	200	903	0	0	0	0	0	0	0	603	903	0
10548	8	0	0	0	0	0	0	200	300	0	0	0	0	0	0	0	200	903	0	0	0	0	0	0	0	603	903	0
10548	9	0	0	0	0	0	0	200	300	0	0	0	0	0	0	0	200	903	0	0	0	0	0	0	0	603	903	0
10549	0	0	0	0	0	0	0	200	300	0	0	0	0	0	0	0	200	903	0	0	0	0	0	0	0	603	903	0
10549	1	0	0	0	0	0	0	200	300	0	0	0	0	0	0	0	200	903	0	0	0	0	0	0	0	603	903	0
10549	2	0	0	0	0	0	0	200	300	0	0	0	0	0	0	0	200	903	0	0	0	0	0	0	0	603	903	0
10549	3	0	0	0	0	0	0	200	300	0	0	0	0	0	0	0	200	903	0	0	0	0	0	0	0	603	903	0
10549	4	0	0	0	0	0	0	200	300	0	0	0	0	0	0	0	200	903	0	0	0	0	0	0	0	603	903	0
10549	5	0	0	0	0	0	0	200	300	0	0	0	0	0	0	0	200	903	0	0	0	0	0	0	0	603	903	0
10549	6	0	0	0	0	0	0	200	300	0	0	0	0	0	0	0	200	903	0	0	0	0	0	0	0	603	903	0
10549	7	0	0	0	0	0	0	200	300	0	0	0	0	0	0	0	200	903	0	0	0	0	0	0	0	603	903	0
10549	8	0	0	0	0	0	0	200	300	0	0	0	0	0	0	0	200	903	0	0	0	0	0	0	0	603	903	0
10549	9	0	0	0	0	0	0	200	300	0	0	0	0	0	0	0	200	903	0	0	0	0	0	0	0	603	903	0
10550	0	0	0	0	0	0	0	200	300	0	0	0	0	0	0	0	200	903	0	0	0	0	0	0	0	603	903	0
10550	1	0	0	0	0	0	0	200	300	0	0	0	0	0	0	0	200	903	0	0	0	0	0	0	0	603	903	0
10550	2	0	0	0	0	0	0	200	300	0	0	0	0	0	0	0	200	903	0	0	0	0	0	0	0	603	903	0
10550	3	0	0	0	0	0	0	200	300	0	0	0	0	0	0	0	200	903	0	0	0	0	0	0	0	603	903	0
10550	4	0	0	0	0	0	0	200	300	0	0	0	0	0	0	0	200	903	0	0	0	0	0	0	0	603	903	0
10550	5	0	0	0	0	0	0	200	300	0	0	0	0	0	0	0	200	903	0	0	0	0	0	0	0	603	903	0
10550	6	0	0	0	0	0	0	200	300	0	0	0	0	0	0	0	200	903	0	0	0	0	0	0	0	603	903	0
10550	7	0	0	0	0	0	0	200	300	0	0	0	0	0	0	0	200	903	0	0	0	0	0	0	0	603	903	0
10550	8	0	0	0	0	0	0	200	300	0	0	0	0	0	0	0	200	903	0	0	0	0	0	0	0	603	903	0
10550	9	0	0	0	0	0	0	200	300	0	0	0	0	0	0	0	200	903	0	0	0	0	0	0	0	603	903	0
10551	0	0	0	0	0	0	0	200	300	0	0	0	0	0	0	0	200	903	0	0	0	0	0	0	0	603	903	0
10551	1	0	0	0	0	0	0	200	300	0	0	0	0	0	0	0	200	903	0	0	0	0	0	0	0	603	903	0
10551	2	0	0	0	0	0	0	200	300	0	0	0	0	0	0	0	200	903	0	0	0	0	0	0	0	603	903	0
10551	3	0	0	0	0	0	0	200	300	0	0	0	0	0	0	0	200	903	0	0	0	0	0	0	0	603	903	0
10551	4	0	0	0	0	0	0	200	300	0	0	0	0	0	0	0	200	903	0	0	0	0	0	0	0	603	903	0
10551	5	0	0	0	0	0	0	200	300	0	0	0	0	0	0	0	200	903	0	0	0	0	0	0	0	603	903	0
10551	6	0	0	0	0	0	0	200	300	0	0	0	0	0	0	0	200	903	0	0	0	0	0	0	0	603	903	0
10551	7	0	0	0	0	0	0	200	300	0	0	0	0	0	0	0	200	903	0	0	0	0	0	0	0	603	903	0
10551	8	0	0	0	0	0	0	200	300	0	0	0	0	0	0	0	200	903	0	0	0	0	0	0	0	603	903	0
10551	9	0	0	0	0	0	0	200	300	0	0	0	0	0	0	0	200	903	0	0	0	0	0	0	0	603	903	0
10552	0	0	0	0	0	0	0	200	300	0	0	0	0	0	0	0	200	903	0	0	0	0	0	0	0	603	903	0
10552	1	0	0	0	0	0	0	200	300	0	0	0	0	0	0	0	200	903	0	0	0	0	0	0	0	603	903	0
10552	2	0	0	0	0	0	0	200	300	0	0	0	0	0	0	0	200	903	0	0	0	0	0	0	0	603	903	0
10552	3	0	0	0	0	0	0	200	300	0	0	0	0	0	0	0	200	903	0	0	0	0	0	0	0	603	903	0
10552	4	0	0	0	0	0	0	200	300	0	0	0	0	0	0	0	200	903	0	0	0	0	0	0	0	603	903	0
10552	5	0	0	0	0	0	0	200	300	0	0	0	0	0	0	0	200	903	0	0	0	0	0	0	0	603	903	0
10552	6	0	0	0	0	0	0	200	300	0	0	0	0	0	0	0	200	903	0	0	0	0	0	0	0	603	903	0
10552	7	0	0	0	0	0	0	200	300	0	0	0	0	0	0	0	200	903	0	0	0	0	0	0	0	603	903	0
10552	8	0	0	0	0	0	0	200	300	0	0	0	0	0	0	0	200	903	0	0	0	0	0	0	0	603	903	0
10552	9	0	0	0	0	0	0	200	300	0	0	0	0	0	0	0	200	903	0	0	0	0	0	0	0	603	903	0
10553	0	0	0	0	0	0	0	200	300	0	0	0	0	0	0	0	200	903	0	0	0	0	0	0	0	603	903	0
10553	1	0	0	0	0	0	0	200	300	0	0	0	0	0	0	0	200	903	0	0	0	0	0	0	0	603	903	0
10553	2	0	0	0	0	0	0	200	300	0	0	0	0	0	0	0	200	903	0	0	0	0	0	0	0	603	903	0
10553	3	0	0	0	0	0	0	200	300	0	0	0	0	0	0	0	200	903	0	0	0	0	0	0	0	603	903	0
10553	4	0	0	0	0	0	0	200	300	0	0	0	0	0	0	0	200	903	0	0	0	0	0	0	0	603	903	0
10553	5	0	0	0	0	0	0	200	300	0	0	0	0	0	0	0	200	903	0	0	0	0	0	0	0	603	903	0
10553	6	0	0	0	0	0	0	200	300	0	0	0	0	0	0	0	200	903	0	0	0	0	0	0	0	603	903	0
10553	7	0	0	0	0	0	0	200	300	0	0	0	0	0	0	0	200	903	0	0	0	0	0	0	0	603	903	0
10553	8	0	0	0	0	0	0	200	300	0	0	0	0	0	0	0	200	903	0	0	0	0	0	0	0	603	903	0
10553	9	0	0	0	0	0	0	200	300	0	0	0	0	0	0	0	200	903	0	0	0	0	0	0	0	603	903	0
10554	0	0	0	0	0	0	0	200	300	0	0	0	0	0	0	0	200	903	0	0	0	0	0	0	0	603	903	0
10554	1	0	0	0	0	0	0	200	300	0	0	0	0	0	0	0	200	903	0	0	0	0	0	0	0	603	903	0
10554	2	0	0	0	0	0	0	200	300	0	0	0	0	0	0	0	200	903	0	0	0	0	0	0	0	603	903	0
10554	3	0	0	0	0	0	0	200	300	0	0	0	0	0	0	0	200	903	0	0	0	0	0	0	0	603	903	0
10554	4	0	0	0	0	0	0	200	300	0	0	0	0	0	0	0	200	903	0	0	0	0	0	0	0	603	903	0
10554	5	0	0	0	0	0	0	200	300	0	0	0	0	0	0	0	200	903	0	0	0	0	0	0	0	603	903	0
10554	6	0	0	0	0	0	0	200	300	0	0	0	0	0	0	0	200	903	0	0	0	0	0	0	0	603	903	0
10554	7	0	0	0	0	0	0	200	300	0	0	0	0	0	0	0	200	903	0	0	0	0	0	0	0	603	903	0
10554	8	0	0	0	0	0	0	200	300	0	0	0	0	0	0	0	200	903	0	0	0	0	0	0	0	603	903	0
10554	9	0	0	0	0	0	0	200	300	0	0	0	0	0	0	0	200	903	0	0	0	0	0	0	0	603	903	0
10555	0	0	0	0	0	0	0	200	300	0	0	0	0	0	0	0	200	903	0	0	0	0	0	0	0	603	903	0
10555	1	0	0	0	0	0	0	200	300	0	0	0	0	0	0	0	200	903	0	0	0	0	0	0	0	603	903	0
10555	2	0	0	0	0	0	0	200	300	0	0	0	0	0	0	0	200	903	0	0	0	0	0	0	0	603	903	0
10555	3	0	0	0	0	0	0	200	300	0	0	0	0	0	0	0	200	903	0	0	0	0	0	0	0	603	903	0
10555	4	0	0	0	0	0	0	200	300	0	0	0	0	0	0	0	200	903	0	0	0	0	0	0	0	603	903	0
10555	5	0	0	0	0	0	0	200	300	0	0	0	0	0	0	0	200	903	0	0	0	0	0	0	0	603	903	0
10555	6	0	0	0	0	0	0	200	300	0	0	0	0	0	0	0	200	903	0	0	0	0	0	0	0	603	903	0
10555	7	0	0	0	0	0	0	200	300	0	0	0	0	0	0	0	200	903	0	0	0	0	0	0	0	603	903	0
10555	8	0	0	0	0	0	0	200	300	0	0	0	0	0	0	0	200	903	0	0	0	0	0	0	0	603	903	0
10555	9	0	0	0	0	0	0	200	300	0	0	0	0	0	0	0	200	903	0	0	0	0	0	0	0	603	903	0
10556	0	0	0	0	0	0	0	200	300	0	0	0	0	0	0	0	200	903	0	0	0	0	0	0	0	603	903	0
10556	1	0	0	0	0	0	0	200	300	0	0	0	0	0	0	0	200	903	0	0	0	0	0	0	0	603	903	0
10556	2	0	0	0	0	0	0	200	300	0	0	0	0	0	0	0	200	903	0	0	0	0	0	0	0	603	903	0
10556	3	0	0	0	0	0	0	200	300	0	0	0	0	0	0	0	200	903	0	0	0	0	0	0	0	603	903	0
10556	4	0	0	0	0	0	0	200	300	0	0	0	0	0	0	0	200	903	0	0	0	0	0	0	0	603	903	0
10556	5	0	0	0	0	0	0	200	300	0	0	0	0	0	0	0	200	903	0	0	0	0	0	0	0	603	903	0
10556	6	0	0	0	0	0	0	200	300	0	0	0	0	0	0	0	200	903	0	0	0	0	0	0	0	603	903	0
10556	7	0	0	0	0	0	0	200	300	0	0	0	0	0	0	0	200	903	0	0	0	0	0	0	0	603	903	0
10556	8	0	0	0	0	0	0	200	300	0	0	0	0	0	0	0	200	903	0	0	0	0	0	0	0	603	903	0
10556	9	0	0	0	0	0	0	200	300	0	0	0	0	0	0	0	200	903	0	0	0	0	0	0	0	603	903	0
10557	0	0	0	0	0	0	0	200	300	0	0	0	0	0	0	0	200	903	0	0	0	0	0	0	0	603	903	0
10557	1	0	0	0	0	0	0	200	300	0	0	0	0	0	0	0	200	903	0	0	0	0	0	0	0	603	903	0
10557	2	0	0	0	0	0	0	200	300	0	0	0	0	0	0	0	200	903	0	0	0	0	0	0	0	603	903	0
10557	3	0	0	0	0	0	0	200	300	0	0	0	0	0	0	0	200	903	0	0	0	0	0	0	0	603	903	0
10557	4	0	0	0	0	0	0	200	300	0	0	0	0	0	0	0	200	903	0	0	0	0	0	0	0	603	903	0
10557	5	0	0	0	0	0	0	200	300	0	0	0	0	0	0	0	200	903	0	0	0	0	0	0	0	603	903	0
10557	6	0	0	0	0	0	0	200	300	0	0	0	0	0	0	0	200	903	0	0	0	0	0	0	0	603	903	0
10557	7	0	0	0	0	0	0	200	300	0	0	0	0	0	0	0	200	903	0	0	0	0	0	0	0	603	903	0
10557	8	0	0	0	0	0	0	200	300	0	0	0	0	0	0	0	200	903	0	0	0	0	0	0	0	603	903	0
10557	9	0	0	0	0	0	0	200	300	0	0	0	0	0	0	0	200	903	0	0	0	0	0	0	0	603	903	0
10558	0	0	0	0	0	0	0	200	300	0	0	0	0	0	0	0	200	903	0	0	0	0	0	0	0	603	903	0
10558	1	0	0	0	0	0	0	200	300	0	0	0	0	0	0	0	200	903	0	0	0	0	0	0	0	603	903	0
10558	2	0	0	0	0	0	0	200	300	0	0	0	0	0	0	0	200	903	0	0	0	0	0	0	0	603	903	0
10558	3	0	0	0	0	0	0	200	300	0	0	0	0	0	0	0	200	903	0	0	0	0	0	0	0	603	903	0
10558	4	0	0	0	0	0	0	200	300	0	0	0	0	0	0	0	200	903	0	0	0	0	0	0	0	603	903	0
10558	5	0	0	0	0	0	0	200	300	0	0	0	0	0	0	0	200	903	0	0	0	0	0	0	0	603	903	0
10558	6	0	0	0	0	0	0	200	300	0	0	0	0	0	0	0	200	903	0	0	0	0	0	0	0	603	903	0
10558	7	0	0	0	0	0	0	200	300	0	0	0	0	0	0	0	200	903	0	0	0	0	0	0	0	603	903	0
10558	8	0	0	0	0	0	0	200	300	0	0	0	0	0	0	0	200	903	0	0	0	0	0	0	0	603	903	0
10558	9	0	0	0	0	0	0	200	300	0	0	0	0	0	0	0	200	903	0	0	0	0	0	0	0	603	903	0
10559	0	0	0	0	0	0	0	200	300	0	0	0	0	0	0	0	200	903	0	0	0	0	0	0	0	603	903	0
10559	1	0	0	0	0	0	0	200	300	0	0	0	0	0	0	0	200	903	0	0	0	0	0	0	0	603	903	0
10559	2	0	0	0	0	0	0	200	300	0	0	0	0	0	0	0	200	903	0	0	0	0	0	0	0	603	903	0
10559	3	0	0	0	0	0	0	200	300	0	0	0	0	0	0	0	200	903	0	0	0	0	0	0	0	603	903	0
10559	4	0	0	0	0	0	0	200	300	0	0	0	0	0	0	0	200	903	0	0	0	0	0	0	0	603	903	0
10559	5	0	0	0	0	0	0	200	300	0	0	0	0	0	0	0	200	903	0	0	0	0	0	0	0	603	903	0
10559	6	0	0	0	0	0	0	200	300	0	0	0	0	0	0	0	200	903	0	0	0	0	0	0	0	603	903	0
10559	7	0	0	0	0	0	0	200	300	0	0	0	0	0	0	0	200	903	0	0	0	0	0	0	0	603	903	0
10559	8	0	0	0	0	0	0	200	300	0	0	0	0	0	0	0	200	903	0	0	0	0	0	0	0	603	903	0
10559	9	0	0	0	0	0	0	200	300	0	0	0	0	0	0	0	200	903	0	0	0	0	0	0	0	603	903	0
10560	0	0	0	0	0	0	0	200	300	0	0	0	0	0	0	0	200	903	0	0	0	0	0	0	0	603	903	0
10560	1	0	0	0	0	0	0	200	300	0	0	0	0	0	0	0	200	903	0	0	0	0	0	0	0	603	903	0
10560	2	0	0	0	0	0	0	200	300	0	0	0	0	0	0	0	200	903	0	0	0	0	0	0	0	603	903	0
10560	3	0	0	0	0	0	0	200	300	0	0	0	0	0	0	0	200	903	0	0	0	0	0	0	0	603	903	0
10560	4	0	0	0	0	0	0	200	300	0	0	0	0	0	0	0	200	903	0	0	0	0	0	0	0	603	903	0
10560	5	0	0	0	0	0	0	200	300	0	0	0	0	0	0	0	200	903	0	0	0	0	0	0	0	603	903	0
10560	6	0	0	0	0	0	0	200	300	0	0	0	0	0	0	0	200	903	0	0	0	0	0	0	0	603	903	0
10560	7	0	0	0	0	0	0	200	300	0	0	0	0	0	0	0	200	903	0	0	0	0	0	0	0	603	903	0
10560	8	0	0	0	0	0	0	200	300	0	0	0	0	0	0	0	200	903	0	0	0	0	0	0	0	603	903	0
10560	9	0	0	0	0	0	0	200	300	0	0	0	0	0	0	0	200	903	0	0	0	0	0	0	0	603	903	0
10561	0	0	0	0	0	0	0	200	300	0	0	0	0	0	0	0	200	903	0	0	0	0	0	0	0	603	903	0
10561	1	0	0	0	0	0	0	200	300	0	0	0	0	0	0	0	200	903	0	0	0	0	0	0	0	603	903	0
10561	2	0	0	0	0	0	0	200	300	0	0	0	0	0	0	0	200	903	0	0	0	0	0	0	0	603	903	0
10561	3	0	0	0	0	0	0	200	300	0	0	0	0	0	0	0	200	903	0	0	0	0	0	0	0	603	903	0
10561	4	0	0	0	0	0	0	200	300	0	0	0	0	0	0	0	200	903	0	0	0	0	0	0	0	603	903	0
10561	5	0	0	0	0	0	0	200	300	0	0	0	0	0	0	0	200	903	0	0	0	0	0	0	0	603	903	0
10561	6	0	0	0	0	0	0	200	300	0	0	0	0	0	0	0	200	903	0	0	0	0	0	0	0	603	903	0
10561	7	0	0	0	0	0	0	200	300	0	0	0	0	0	0	0	200	903	0	0	0	0	0	0	0	603	903	0
10561	8	0	0	0	0	0	0	200	300	0	0	0	0	0	0	0	200	903	0	0	0	0	0	0	0	603	903	0
10561	9	0	0	0	0	0	0	200	300	0	0	0	0	0	0	0	200	903	0	0	0	0	0	0	0	603	903	0
10562	0	0	0	0	0	0	0	200	300	0	0	0	0	0	0	0	200	903	0	0	0	0	0	0	0	603	903	0
10562	1	0	0	0	0	0	0	200	300	0	0	0	0	0	0	0	200	903	0	0	0	0	0	0	0	603	903	0
10562	2	0	0	0	0	0	0	200	300	0	0	0	0	0	0	0	200	903	0	0	0	0	0	0	0	603	903	0
10562	3	0	0	0	0	0	0	200	300	0	0	0	0	0	0	0	200	903	0	0	0	0	0	0	0	603	903	0
10562	4	0	0	0	0	0	0	200	300	0	0	0	0	0	0	0	200	903	0	0	0	0	0	0	0	603	903	0
10562	5	0	0	0	0	0	0	200	300	0	0	0	0	0	0	0	200	903	0	0	0	0	0	0	0	603	903	0
10562	6	0	0	0	0	0	0	200	300	0	0	0	0	0	0	0	200	903	0	0	0	0	0	0	0	603	903	0
10562	7	0	0	0	0	0	0	200	300	0	0	0	0	0	0	0	200	903	0	0	0	0	0	0	0	603	903	0
10562	8	0	0	0	0	0	0	200	300	0	0	0	0	0	0	0	200	903	0	0	0	0	0	0	0	603	903	0
10562	9	0	0	0	0	0	0	200	300	0	0	0	0	0	0	0	200	903	0	0	0	0	0	0	0	603	903	0
10563	0	0	0	0	0	0	0	200	300	0	0	0	0	0	0	0	200	903	0	0	0	0	0	0	0	603	903	0
10563	1	0	0	0	0	0	0	200	300	0	0	0	0	0	0	0	200	903	0	0	0	0	0	0	0	603	903	0
10563	2	0	0	0	0	0	0	200	300	0	0	0	0	0	0	0	200	903	0	0	0	0	0	0	0	603	903	0
10563	3	0	0	0	0	0	0	200	300	0	0	0	0	0	0	0	200	903	0	0	0	0	0	0	0	603	903	0
10563	4	0	0	0	0	0	0	200	300	0	0	0	0	0	0	0	200	903	0	0	0	0	0	0	0	603	903	0
10563	5	0	0	0	0	0	0	200	300	0	0	0	0	0	0	0	200	903	0	0	0	0	0	0	0	603	903	0
10563	6	0	0	0	0	0	0	200	300	0	0	0	0	0	0	0	200	903	0	0	0	0	0	0	0	603	903	0
10563	7	0	0	0	0	0	0	200	300	0	0	0	0	0	0	0	200	903	0	0	0	0	0	0	0	603	903	0
10563	8	0	0	0	0	0	0	200	300	0	0	0	0	0	0	0	200	903	0	0	0	0	0	0	0	603	903	0
10563	9	0	0	0	0	0	0	200	300	0	0	0	0	0	0	0	200	903	0	0	0	0	0	0	0	603	903	0
10564	0	0	0	0	0	0	0	200	300	0	0	0	0	0	0	0	200	903	0	0	0	0	0	0	0	603	903	0
10564	1	0	0	0	0	0	0	200	300	0	0	0	0	0	0	0	200	903	0	0	0	0	0	0	0	603	903	0
10564	2	0	0	0	0	0	0	200	300	0	0	0	0	0	0	0	200	903	0	0	0	0	0	0	0	603	903	0
10564	3	0	0	0	0	0	0	200	300	0	0	0	0	0	0	0	200	903	0	0	0	0	0	0	0	603	903	0
10564	4	0	0	0	0	0	0	200	300	0	0	0	0	0	0	0	200	903	0	0	0	0	0	0	0	603	903	0
10564	5	0	0	0	0	0	0	200	300	0	0	0	0	0	0	0	200	903	0	0	0	0	0	0	0	603	903	0
10564	6	0	0	0	0	0	0	200	300	0	0	0	0	0	0	0	200	903	0	0	0	0	0	0	0	603	903	0
10564	7	0	0	0	0	0	0	200	300	0	0	0	0	0	0	0	200	903	0	0	0	0	0	0	0	603	903	0
10564	8	0	0	0	0	0	0	200	300	0	0	0	0	0	0	0	200	903	0	0	0	0	0	0	0	603	903	0
10564	9	0	0	0	0	0	0	200	300	0	0	0	0	0	0	0	200	903	0	0	0	0	0	0	0	603	903	0
10565	0	0	0	0	0	0	0	200	300	0	0	0	0	0	0	0	200	903	0	0	0	0	0	0	0	603	903	0
10565	1	0	0	0	0	0	0	200	300	0	0	0	0	0	0	0	200	903	0	0	0	0	0	0	0	603	903	0
10565	2	0	0	0	0	0	0	200	300	0	0	0	0	0	0	0	200	903	0	0	0	0	0	0	0	603	903	0
10565	3	0	0	0	0	0	0	200	300	0	0	0	0	0	0	0	200	903	0	0	0	0	0	0	0	603	903	0
10565	4	0	0	0	0	0	0	200	300	0	0	0	0	0	0	0	200	903	0	0	0	0	0	0	0	603	903	0
10565	5	0	0	0	0	0	0	200	300	0	0	0	0	0	0	0	200	903	0	0	0	0	0	0	0	603	903	0
10565	6	0	0	0	0	0	0	200	300	0	0	0	0	0	0	0	200	903	0	0	0	0	0	0	0	603	903	0
10565	7	0	0	0	0	0	0	200	300	0	0	0	0	0	0	0	200	903	0	0	0	0	0	0	0	603	903	0
10565	8	0	0	0	0	0	0	200	300	0	0	0	0	0	0	0	200	903	0	0	0	0	0	0	0	603	903	0
10565	9	0	0	0	0	0	0	200	300	0	0	0	0	0	0	0	200	903	0	0	0	0	0	0	0	603	903	0
10566	0	0	0	0	0	0	0	200	300	0	0	0	0	0	0	0	200	903	0	0	0	0	0	0	0	603	903	0
10566	1	0	0	0	0	0	0	200	300	0	0	0	0	0	0	0	200	903	0	0	0	0	0	0	0	603	903	0
10566	2	0	0	0	0	0	0	200	300	0	0	0	0	0	0	0	200	903	0	0	0	0	0	0	0	603	903	0
10566	3	0	0	0	0	0	0	200	300	0	0	0	0	0	0	0	200	903	0	0	0	0	0	0	0	603	903	0
10566	4	0	0	0	0	0	0	200	300	0	0	0	0	0	0	0	200	903	0	0	0	0	0	0	0	603	903	0
10566	5	0	0	0	0	0	0	200	300	0	0	0	0	0	0	0	200	903	0	0	0	0	0	0	0	603	903	0
10566	6	0	0	0	0	0	0	200	300	0	0	0	0	0	0	0	200	903	0	0	0	0	0	0	0	603	903	0
10566	7	0	0	0	0	0	0	200	300	0	0	0	0	0	0	0	200	903	0	0	0	0	0	0	0	603	903	0
10566	8	0	0	0	0	0	0	200	300	0	0	0	0	0	0	0	200	903	0	0	0	0	0	0	0	603	903	0
10566	9	0	0	0	0	0	0	200	300	0	0	0	0	0	0	0	200	903	0	0	0	0	0	0	0	603	903	0
10567	0	0	0	0	0	0	0	200	300	0	0	0	0	0	0	0	200	903	0	0	0	0	0	0	0	603	903	0
10567	1	0	0	0	0	0	0	200	300	0	0	0	0	0	0	0	200	903	0	0	0	0	0	0	0	603	903	0
10567	2	0	0	0	0	0	0	200	300	0	0	0	0	0	0	0	200	903	0	0	0	0	0	0	0	603	903	0
10567	3	0	0	0	0	0	0	200	300	0	0	0	0	0	0	0	200	903	0	0	0	0	0	0	0	603	903	0
10567	4	0	0	0	0	0	0	200	300	0	0	0	0	0	0	0	200	903	0	0	0	0	0	0	0	603	903	0
10567	5	0	0	0	0	0	0	200	300	0	0	0	0	0	0	0	200	903	0	0	0	0	0	0	0	603	903	0
10567	6	0	0	0	0	0	0	200	300	0	0	0	0	0	0	0	200	903	0	0	0	0	0	0	0	603	903	0
10567	7	0	0	0	0	0	0	200	300	0	0	0	0	0	0	0	200	903	0	0	0	0	0	0	0	603	903	0
10567	8	0	0	0	0	0	0	200	300	0	0	0	0	0	0	0	200	903	0	0	0	0	0	0	0	603	903	0
10567	9	0	0	0	0	0	0	200	300	0	0	0	0	0	0	0	200	903	0	0	0	0	0	0	0	603	903	0
10568	0	0	0	0	0	0	0	200	300	0	0	0	0	0	0	0	200	903	0	0	0	0	0	0	0	603	903	0
10568	1	0	0	0	0	0	0	200	300	0	0	0	0	0	0	0	200	903	0	0	0	0	0	0	0	603	903	0
10568	2	0	0	0	0	0	0	200	300	0	0	0	0	0	0	0	200	903	0	0	0	0	0	0	0	603	903	0
10568	3	0	0	0	0	0	0	200	300	0	0	0	0	0	0	0	200	903	0	0	0	0	0	0	0	603	903	0
10568	4	0	0	0	0	0	0	200	300	0	0	0	0	0	0	0	200	903	0	0	0	0	0	0	0	603	903	0
10568	5	0	0	0	0	0	0	200	300	0	0	0	0	0	0	0	200	903	0	0	0	0	0	0	0	603	903	0
10568	6	0	0	0	0	0	0	200	300	0	0	0	0	0	0	0	200	903	0	0	0	0	0	0	0	603	903	0
10568	7	0	0	0	0	0	0	200	300	0	0	0	0	0	0	0	200	903	0	0	0	0	0	0	0	603	903	0
10568	8	0	0	0	0	0	0	200	300	0	0	0	0	0	0	0	200	903	0	0	0	0	0	0	0	603	903	0
10568	9	0	0	0	0	0	0	200	300	0	0	0	0	0	0	0	200	903	0	0	0	0	0	0	0	603	903	0
10569	0	0	0	0	0	0	0	200	300	0	0	0	0	0	0	0	200	903	0	0	0	0	0	0	0	603	903	0
10569	1	0	0	0	0	0	0	200	300	0	0	0	0	0	0	0	200	903	0	0	0	0	0	0	0	603	903	0
10569	2	0	0	0	0	0	0	200	300	0	0	0	0	0	0	0	200	903	0	0	0	0	0	0	0	603	903	0
10569	3	0	0	0	0	0	0	200	300	0	0	0	0	0	0	0	200	903	0	0	0	0	0	0	0	603	903	0
10569	4	0	0	0	0	0	0	200	300	0	0	0	0	0	0	0	200	903	0	0	0	0	0	0	0	603	903	0
10569	5	0	0	0	0	0	0	200	300	0	0	0	0	0	0	0	200	903	0	0	0	0	0	0	0	603	903	0
10569	6	0	0	0	0	0	0	200	300	0	0	0	0	0	0	0	200	903	0	0	0	0	0	0	0	603	903	0
10569	7	0	0	0	0	0	0	200	300	0	0	0	0	0	0	0	200	903	0	0	0	0	0	0	0	603	903	0
10569	8	0	0	0	0	0	0	200	300	0	0	0	0	0	0	0	200	903	0	0	0	0	0	0	0	603	903	0
10569	9	0	0	0	0	0	0	200	300	0	0	0	0	0	0	0	200	903	0	0	0	0	0	0	0	603	903	0
10570	0	0	0	0	0	0	0	200	300	0	0	0	0	0	0	0	200	903	0	0	0	0	0	0	0	603	903	0
10570	1	0	0	0	0	0	0	200	300	0	0	0	0	0	0	0	200	903	0	0	0	0	0	0	0	603	903	0
10570	2	0	0	0	0	0	0	200	300	0	0	0	0	0	0	0	200	903	0	0	0	0	0	0	0	603	903	0
10570	3	0	0	0	0	0	0	200	300	0	0	0	0	0	0	0	200	903	0	0	0	0	0	0	0	603	903	0
10570	4	0	0	0	0	0	0	200	300	0	0	0	0	0	0	0	200	903	0	0	0	0	0	0	0	603	903	0
10570	5	0	0	0	0	0	0	200	300	0	0	0	0	0	0	0	200	903	0	0	0	0	0	0	0	603	903	0
10570	6	0	0	0	0	0	0	200	300	0	0	0	0	0	0	0	200	903	0	0	0	0	0	0	0	603	903	0
10570	7	0	0	0	0	0	0	200	300	0	0	0	0	0	0	0	200	903	0	0	0	0	0	0	0	603	903	0
10570	8	0	0	0	0	0	0	200	300	0	0	0	0	0	0	0	200	903	0	0	0	0	0	0	0	603	903	0
10570	9	0	0	0	0	0	0	200	300	0	0	0	0	0	0	0	200	903	0	0	0	0	0	0	0	603	903	0
10571	0	0	0	0	0	0	0	200	300	0	0	0	0	0	0	0	200	903	0	0	0	0	0	0	0	603	903	0
10571	1	0	0	0	0	0	0	200	300	0	0	0	0	0	0	0	200	903	0	0	0	0	0	0	0	603	903	0
10571	2	0	0	0	0	0	0	200	300	0	0	0	0	0	0	0	200	903	0	0	0	0	0	0	0	603	903	0
10571	3	0	0	0	0	0	0	200	300	0	0	0	0	0	0	0	200	903	0	0	0	0	0	0	0	603	903	0
10571	4	0	0	0	0	0	0	200	300	0	0	0	0	0	0	0	200	903	0	0	0	0	0	0	0	603	903	0
10571	5	0	0	0	0	0	0	200	300	0	0	0	0	0	0	0	200	903	0	0	0	0	0	0	0	603	903	0
10571	6	0	0	0	0	0	0	200	300	0	0	0	0	0	0	0	200	903	0	0	0	0	0	0	0	603	903	0
10571	7	0	0	0	0	0	0	200	300	0	0	0	0	0	0	0	200	903	0	0	0	0	0	0	0	603	903	0
10571	8	0	0	0	0	0	0	200	300	0	0	0	0	0	0	0	200	903	0	0	0	0	0	0	0	603	903	0
10571	9	0	0	0	0	0	0	200	300	0	0	0	0	0	0	0	200	903	0	0	0	0	0	0	0	603	903	0
10572	0	0	0	0	0	0	0	200	300	0	0	0	0	0	0	0	200	903	0	0	0	0	0	0	0	603	903	0
10572	1	0	0	0	0	0	0	200	300	0	0	0	0	0	0	0	200	903	0	0	0	0	0	0	0	603	903	0
10572	2	0	0	0	0	0	0	200	300	0	0	0	0	0	0	0	200	903	0	0	0	0	0	0	0	603	903	0
10572	3	0	0	0	0	0	0	200	300	0	0	0	0	0	0	0	200	903	0	0	0	0	0	0	0	603	903	0
10572	4	0	0	0	0	0	0	200	300	0	0	0	0	0	0	0	200	903	0	0	0	0	0	0	0	603	903	0
10572	5	0	0	0	0	0	0	200	300	0	0	0	0	0	0	0	200	903	0	0	0	0	0	0	0	603	903	0
10572	6	0	0	0	0	0	0	200	300	0	0	0	0	0	0	0	200	903	0	0	0	0	0	0	0	603	903	0
10572	7	0	0	0	0	0	0	200	300	0	0	0	0	0	0	0	200	903	0	0	0	0	0	0	0	603	903	0
10572	8	0	0	0	0	0	0	200	300	0	0	0	0	0	0	0	200	903	0	0	0	0	0	0	0	603	903	0
10572	9	0	0	0	0	0	0	200	300	0	0	0	0	0	0	0	200	903	0	0	0	0	0	0	0	603	903	0
10573	0	0	0	0	0	0	0	200	300	0	0	0	0	0	0	0	200	903	0	0	0	0	0	0	0	603	903	0
10573	1	0	0	0	0	0	0	200	300	0	0	0	0	0	0	0	200	903	0	0	0	0	0	0	0	603	903	0
10573	2	0	0	0	0	0	0	200	300	0	0	0	0	0	0	0	200	903	0	0	0	0	0	0	0	603	903	0
10573	3	0	0	0	0	0	0	200	300	0	0	0	0	0	0	0	200	903	0	0	0	0	0	0	0	603	903	0
10573	4	0	0	0	0	0	0	200	300	0	0	0	0	0	0	0	200	903	0	0	0	0	0	0	0	603	903	0
10573	5	0	0	0	0	0	0	200	300	0	0	0	0	0	0	0	200	903	0	0	0	0	0	0	0	603	903	0
10573	6	0	0	0	0	0	0	200	300	0	0	0	0	0	0	0	200	903	0	0	0	0	0	0	0	603	903	0
10573	7	0	0	0	0	0	0	200	300	0	0	0	0	0	0	0	200	903	0	0	0	0	0	0	0	603	903	0
10573	8	0	0	0	0	0	0	200	300	0	0	0	0	0	0	0	200	903	0	0	0	0	0	0	0	603	903	0
10573	9	0	0	0	0	0	0	200	300	0	0	0	0	0	0	0	200	903	0	0	0	0	0	0	0	603	903	0
10574	0	0	0	0	0	0	0	200	300	0	0	0	0	0	0	0	200	903	0	0	0	0	0	0	0	603	903	0
10574	1	0	0	0	0	0	0	200	300	0	0	0	0	0	0	0	200	903	0	0	0	0	0	0	0	603	903	0
10574	2	0	0	0	0	0	0	200	300	0	0	0	0	0	0	0	200	903	0	0	0	0	0	0	0	603	903	0
10574	3	0	0	0	0	0	0	200	300	0	0	0	0	0	0	0	200	903	0	0	0	0	0	0	0	603	903	0
10574	4	0	0	0	0	0	0	200	300	0	0	0	0	0	0	0	200	903	0	0	0	0	0	0	0	603	903	0
10574	5	0	0	0	0	0	0	200	300	0	0	0	0	0	0	0	200	903	0	0	0	0	0	0	0	603	903	0
10574	6	0	0	0	0	0	0	200	300	0	0	0	0	0	0	0	200	903	0	0	0	0	0	0	0	603	903	0
10574	7	0	0	0	0	0	0	200	300	0	0	0	0	0	0	0	200	903	0	0	0	0	0	0	0	603	903	0
10574	8	0	0	0	0	0	0	200	300	0	0	0	0	0	0	0	200	903	0	0	0	0	0	0	0	603	903	0
10574	9	0	0	0	0	0	0	200	300	0	0	0	0	0	0	0	200	903	0	0	0	0	0	0	0	603	903	0
10575	0	0	0	0	0	0	0	200	300	0	0	0	0	0	0	0	200	903	0	0	0	0	0	0	0	603	903	0
10575	1	0	0	0	0	0	0	200	300	0	0	0	0	0	0	0	200	903	0	0	0	0	0	0	0	603	903	0
10575	2	0	0	0	0	0	0	200	300	0	0	0	0	0	0	0	200	903	0	0	0	0	0	0	0	603	903	0
10575	3	0	0	0	0	0	0	200	300	0	0	0	0	0	0	0	200	903	0	0	0	0	0	0	0	603	903	0
10575	4	0	0	0	0	0	0	200	300	0	0	0	0	0	0	0	200	903	0	0	0	0	0	0	0	603	903	0
10575	5	0	0	0	0	0	0	200	300	0	0	0	0	0	0	0	200	903	0	0	0	0	0	0	0	603	903	0
10575	6	0	0	0	0	0	0	200	300	0	0	0	0	0	0	0	200	903	0	0	0	0	0	0	0	603	903	0
10575	7	0	0	0	0	0	0	200	300	0	0	0	0	0	0	0	200	903	0	0	0	0	0	0	0	603	903	0
10575	8	0	0	0	0	0	0	200	300	0	0	0	0	0	0	0	200	903	0	0	0	0	0	0	0	603	903	0
10575	9	0	0	0	0	0	0	200	300	0	0	0	0	0	0	0	200	903	0	0	0	0	0	0	0	603	903	0
10576	0	0	0	0	0	0	0	200	300	0	0	0	0	0	0	0	200	903	0	0	0	0	0	0	0	603	903	0
10576	1	0	0	0	0	0	0	200	300	0	0	0	0	0	0	0	200	903	0	0	0	0	0	0	0	603	903	0
10576	2	0	0	0	0	0	0	200	300	0	0	0	0	0	0	0	200	903	0	0	0	0	0	0	0	603	903	0
10576	3	0	0	0	0	0	0	200	300	0	0	0	0	0	0	0	200	903	0	0	0	0	0	0	0	603	903	0
10576	4	0	0	0	0	0	0	200	300	0	0	0	0	0	0	0	200	903	0	0	0	0	0	0	0	603	903	0
10576	5	0	0	0	0	0	0	200	300	0	0	0	0	0	0	0	200	903	0	0	0	0	0	0	0	603	903	0
10576	6	0	0	0	0	0	0	200	300	0	0	0	0	0	0	0	200	903	0	0	0	0	0	0	0	603	903	0
10576	7	0	0	0	0	0	0	200	300	0	0	0	0	0	0	0	200	903	0	0	0	0	0	0	0	603	903	0
10576	8	0	0	0	0	0	0	200	300	0	0	0	0	0	0	0	200	903	0	0	0	0	0	0	0	603	903	0
10576	9	0	0	0	0	0	0	200	300	0	0	0	0	0	0	0	200	903	0	0	0	0	0	0	0	603	903	0
10577	0	0	0	0	0	0	0	200	300	0	0	0	0	0	0	0	200	903	0	0	0	0	0	0	0	603	903	0
10577	1	0	0	0	0	0	0	200	300	0	0	0	0	0	0	0	200	903	0	0	0	0	0	0	0	603	903	0
10577	2	0	0	0	0	0	0	200	300	0	0	0	0	0	0	0	200	903	0	0	0	0	0	0	0	603	903	0
10577	3	0	0	0	0	0	0	200	300	0	0	0	0	0	0	0	200	903	0	0	0	0	0	0	0	603	903	0
10577	4	0	0	0	0	0	0	200	300	0	0	0	0	0	0	0	200	903	0	0	0	0	0	0	0	603	903	0
10577	5	0	0	0	0	0	0	200	300	0	0	0	0	0	0	0	200	903	0	0	0	0	0	0	0	603	903	0
10577	6	0	0	0	0	0	0	200	300	0	0	0	0	0	0	0	200	903	0	0	0	0	0	0	0	603	903	0
10577	7	0	0	0	0	0	0	200	300	0	0	0	0	0	0	0	200	903	0	0	0	0	0	0	0	603	903	0
10577	8	0	0	0	0	0	0	200	300	0	0	0	0	0	0	0	200	903	0	0	0	0	0	0	0	603	903	0
10577	9	0	0	0	0	0	0	200	300	0	0	0	0	0	0	0	200	903	0	0	0	0	0	0	0	603	903	0
10578	0	0	0	0	0	0	0	200	300	0	0	0	0	0	0	0	200	903	0	0	0	0	0	0	0	603	903	0
10578	1	0	0	0	0	0	0	200	300	0	0	0	0	0	0	0	200	903	0	0	0	0	0	0	0	603	903	0
10578	2	0	0	0	0	0	0	200	300	0	0	0	0	0	0	0	200	903	0	0	0	0	0	0	0	603	903	0
10578	3	0	0	0	0	0	0	200	300	0	0	0	0	0	0	0	200	903	0	0	0	0	0	0	0	603	903	0
10578	4	0	0	0	0	0	0	200	300	0	0	0	0	0	0	0	200	903	0	0	0	0	0	0	0	603	903	0
10578	5	0	0	0	0	0	0	200	300	0	0	0	0	0	0	0	200	903	0	0	0	0	0	0	0	603	903	0
10578	6	0	0	0	0	0	0	200	300	0	0	0	0	0	0	0	200	903	0	0	0	0	0	0	0	603	903	0
10578	7	0	0	0	0	0	0	200	300	0	0	0	0	0	0	0	200	903	0	0	0	0	0	0	0	603	903	0
10578	8	0	0	0	0	0	0	200	300	0	0	0	0	0	0	0	200	903	0	0	0	0	0	0	0	603	903	0
10578	9	0	0	0	0	0	0	200	300	0	0	0	0	0	0	0	200	903	0	0	0	0	0	0	0	603	903	0
10579	0	0	0	0	0	0	0	200	300	0	0	0	0	0	0	0	200	903	0	0	0	0	0	0	0	603	903	0
10579	1	0	0	0	0	0	0	200	300	0	0	0	0	0	0	0	200	903	0	0	0	0	0	0	0	603	903	0
10579	2	0	0	0	0	0	0	200	300	0	0	0	0	0	0	0	200	903	0	0	0	0	0	0	0	603	903	0
10579	3	0	0	0	0	0	0	200	300	0	0	0	0	0	0	0	200	903	0	0	0	0	0	0	0	603	903	0
10579	4	0	0	0	0	0	0	200	300	0	0	0	0	0	0	0	200	903	0	0	0	0	0	0	0	603	903	0
10579	5	0	0	0	0	0	0	200	300	0	0	0	0	0	0	0	200	903	0	0	0	0	0	0	0	603	903	0
10579	6	0	0	0	0	0	0	200	300	0	0	0	0	0	0	0	200	903	0	0	0	0	0	0	0	603	903	0
10579	7	0	0	0	0	0	0	200	300	0	0	0	0	0	0	0	200	903	0	0	0	0	0	0	0	603	903	0
10579	8	0	0	0	0	0	0	200	300	0	0	0	0	0	0	0	200	903	0	0	0	0	0	0	0	603	903	0
10579	9	0	0	0	0	0	0	200	300	0	0	0	0	0	0	0	200	903	0	0	0	0	0	0	0	603	903	0
10580	0	0	0	0	0	0	0	200	300	0	0	0	0	0	0	0	200	903	0	0	0	0	0	0	0	603	903	0
10580	1	0	0	0	0	0	0	200	300	0	0	0	0	0	0	0	200	903	0	0	0	0	0	0	0	603	903	0
10580	2	0	0	0	0	0	0	200	300	0	0	0	0	0	0	0	200	903	0	0	0	0	0	0	0	603	903	0
10580	3	0	0	0	0	0	0	200	300	0	0	0	0	0	0	0	200	903	0	0	0	0	0	0	0	603	903	0
10580	4	0	0	0	0	0	0	200	300	0	0	0	0	0	0	0	200	903	0	0	0	0	0	0	0	603	903	0
10580	5	0	0	0	0	0	0	200	300	0	0	0	0	0	0	0	200	903	0	0	0	0	0	0	0	603	903	0
10580	6	0	0	0	0	0	0	200	300	0	0	0	0	0	0	0	200	903	0	0	0	0	0	0	0	603	903	0
10580	7	0	0	0	0	0	0	200	300	0	0	0	0	0	0	0	200	903	0	0	0	0	0	0	0	603	903	0
10580	8	0	0	0	0	0	0	200	300	0	0	0	0	0	0	0	200	903	0	0	0	0	0	0	0	603	903	0
10580	9	0	0	0	0	0	0	200	300	0	0	0	0	0	0	0	200	903	0	0	0	0	0	0	0	603	903	0
10581	0	0	0	0	0	0	0	200	300	0	0	0	0	0	0	0	200	903	0	0	0	0	0	0	0	603	903	0
10581	1	0	0	0	0	0	0	200	300	0	0	0	0	0	0	0	200	903	0	0	0	0	0	0	0	603	903	0
10581	2	0	0	0	0	0	0	200	300	0	0	0	0	0	0	0	200	903	0	0	0	0	0	0	0	603	903	0
10581	3	0	0	0	0	0	0	200	300	0	0	0	0	0	0	0	200	903	0	0	0	0	0	0	0	603	903	0
10581	4	0	0	0	0	0	0	200	300	0	0	0	0	0	0	0	200	903	0	0	0	0	0	0	0	603	903	0
10581	5	0	0	0	0	0	0	200	300	0	0	0	0	0	0	0	200	903	0	0	0	0	0	0	0	603	903	0
10581	6	0	0	0	0	0	0	200	300	0	0	0	0	0	0	0	200	903	0	0	0	0	0	0	0	603	903	0
10581	7	0	0	0	0	0	0	200	300	0	0	0	0	0	0	0	200	903	0	0	0	0	0	0	0	603	903	0
10581	8	0	0	0	0	0	0	200	300	0	0	0	0	0	0	0	200	903	0	0	0	0	0	0	0	603	903	0
10581	9	0	0	0	0	0	0	200	300	0	0	0	0	0	0	0	200	903	0	0	0	0	0	0	0	603	903	0
10582	0	0	0	0	0	0	0	200	300	0	0	0	0	0	0	0	200	903	0	0	0	0	0	0	0	603	903	0
10582	1	0	0	0	0	0	0	200	300	0	0	0	0	0	0	0	200	903	0	0	0	0	0	0	0	603	903	0
10582	2	0	0	0	0	0	0	200	300	0	0	0	0	0	0	0	200	903	0	0	0	0	0	0	0	603	903	0
10582	3	0	0	0	0	0	0	200	300	0	0	0	0	0	0	0	200	903	0	0	0	0	0	0	0	603	903	0
10582	4	0	0	0	0	0	0	200	300	0	0	0	0	0	0	0	200	903	0	0	0	0	0	0	0	603	903	0
10582	5	0	0	0	0	0	0	200	300	0	0	0	0	0	0	0	200	903	0	0	0	0	0	0	0	603	903	0
10582	6	0	0	0	0	0	0	200	300	0	0	0	0	0	0	0	200	903	0	0	0	0	0	0	0	603	903	0
10582	7	0	0	0	0	0	0	200	300	0	0	0	0	0	0	0	200	903	0	0	0	0	0	0	0	603	903	0
10582	8	0	0	0	0	0	0	200	300	0	0	0	0	0	0	0	200	903	0	0	0	0	0	0	0	603	903	0
10582	9	0	0	0	0	0	0	200	300	0	0	0	0	0	0	0	200	903	0	0	0	0	0	0	0	603	903	0
10583	0	0	0	0	0	0	0	200	300	0	0	0	0	0	0	0	200	903	0	0	0	0	0	0	0	603	903	0
10583	1	0	0	0	0	0	0	200	300	0	0	0	0	0	0	0	200	903	0	0	0	0	0	0	0	603	903	0
10583	2	0	0	0	0	0	0	200	300	0	0	0	0	0	0	0	200	903	0	0	0	0	0	0	0	603	903	0
10583	3	0	0	0	0	0	0	200	300	0	0	0	0	0	0	0	200	903	0	0	0	0	0	0	0	603	903	0
10583	4	0	0	0	0	0	0	200	300	0	0	0	0	0	0	0	200	903	0	0	0	0	0	0	0	603	903	0
10583	5	0	0	0	0	0	0	200	300	0	0	0	0	0	0	0	200	903	0	0	0	0	0	0	0	603	903	0
10583	6	0	0	0	0	0	0	200	300	0	0	0	0	0	0	0	200	903	0	0	0	0	0	0	0	603	903	0
10583	7	0	0	0	0	0	0	200	300	0	0	0	0	0	0	0	200	903	0	0	0	0	0	0	0	603	903	0
10583	8	0	0	0	0	0	0	200	300	0	0	0	0	0	0	0	200	903	0	0	0	0	0	0	0	603	903	0
10583	9	0	0	0	0	0	0	200	300	0	0	0	0	0	0	0	200	903	0	0	0	0	0	0	0	603	903	0
10584	0	0	0	0	0	0	0	200	300	0	0	0	0	0	0	0	200	903	0	0	0	0	0	0	0	603	903	0
10584	1	0	0	0	0	0	0	200	300	0	0	0	0	0	0	0	200	903	0	0	0	0	0	0	0	603	903	0
10584	2	0	0	0	0	0	0	200	300	0	0	0	0	0	0	0	200	903	0	0	0	0	0	0	0	603	903	0
10584	3	0	0	0	0	0	0	200	300	0	0	0	0	0	0	0	200	903	0	0	0	0	0	0	0	603	903	0
10584	4	0	0	0	0	0	0	200	300	0	0	0	0	0	0	0	200	903	0	0	0	0	0	0	0	603	903	0
10584	5	0	0	0	0	0	0	200	300	0	0	0	0	0	0	0	200	903	0	0	0	0	0	0	0	603	903	0
10584	6	0	0	0	0	0	0	200	300	0	0	0	0	0	0	0	200	903	0	0	0	0	0	0	0	603	903	0
10584	7	0	0	0	0	0	0	200	300	0	0	0	0	0	0	0	200	903	0	0	0	0	0	0	0	603	903	0
10584	8	0	0	0	0	0	0	200	300	0	0	0	0	0	0	0	200	903	0	0	0	0	0	0	0	603	903	0
10584	9	0	0	0	0	0	0	200	300	0	0	0	0	0	0	0	200	903	0	0	0	0	0	0	0	603	903	0
10585	0	0	0	0	0	0	0	200	300	0	0	0	0	0	0	0	200	903	0	0	0	0	0	0	0	603	903	0
10585	1	0	0	0	0	0	0	200	300	0	0	0	0	0	0	0	200	903	0	0	0	0	0	0	0	603	903	0
10585	2	0	0	0	0	0	0	200	300	0	0	0	0	0	0	0	200	903	0	0	0	0	0	0	0	603	903	0
10585	3	0	0	0	0	0	0	200	300	0	0	0	0	0	0	0	200	903	0	0	0	0	0	0	0	603	903	0
10585	4	0	0	0	0	0	0	200	300	0	0	0	0	0	0	0	200	903	0	0	0	0	0	0	0	603	903	0
10585	5	0	0	0	0	0	0	200	300	0	0	0	0	0	0	0	200	903	0	0	0	0	0	0	0	603	903	0
10585	6	0	0	0	0	0	0	200	300	0	0	0	0	0	0	0	200	903	0	0	0	0	0	0	0	603	903	0
10585	7	0	0	0	0	0	0	200	300	0	0	0	0	0	0	0	200	903	0	0	0	0	0	0	0	603	903	0
10585	8	0	0	0	0	0	0	200	300	0	0	0	0	0	0	0	200	903	0	0	0	0	0	0	0	603	903	0
10585	9	0	0	0	0	0	0	200	300	0	0	0	0	0	0	0	200	903	0	0	0	0	0	0	0	603	903	0
10586	0	0	0	0	0	0	0	200	300	0	0	0	0	0	0	0	200	903	0	0	0	0	0	0	0	603	903	0
10586	1	0	0	0	0	0	0	200	300	0	0	0	0	0	0	0	200	903	0	0	0	0	0	0	0	603	903	0
10586	2	0	0	0	0	0	0	200	300	0	0	0	0	0	0	0	200	903	0	0	0	0	0	0	0	603	903	0
10586	3	0	0	0	0	0	0	200	300	0	0	0	0	0	0	0	200	903	0	0	0	0	0	0	0	603	903	0
10586	4	0	0	0	0	0	0	200	300	0	0	0	0	0	0	0	200	903	0	0	0	0	0	0	0	603	903	0
10586	5	0	0	0	0	0	0	200	300	0	0	0	0	0	0	0	200	903	0	0	0	0	0	0	0	603	903	0
10586	6	0	0	0	0	0	0	200	300	0	0	0	0	0	0	0	200	903	0	0	0	0	0	0	0	603	903	0
10586	7	0	0	0	0	0	0	200	300	0	0	0	0	0	0	0	200	903	0	0	0	0	0	0	0	603	903	0
10586	8	0	0	0	0	0	0	200	300	0	0	0	0	0	0	0	200	903	0	0	0	0	0	0	0	603	903	0
10586	9	0	0	0	0	0	0	200	300	0	0	0	0	0	0	0	200	903	0	0	0	0	0	0	0	603	903	0
10587	0	0	0	0	0	0	0	200	300	0	0	0	0	0	0	0	200	903	0	0	0	0	0	0	0	603	903	0
10587	1	0	0	0	0	0	0	200	300	0	0	0	0	0	0	0	200	903	0	0	0	0	0	0	0	603	903	0
10587	2	0	0	0	0	0	0	200	300	0	0	0	0	0	0	0	200	903	0	0	0	0	0	0	0	603	903	0
10587	3	0	0	0	0	0	0	200	300	0	0	0	0	0	0	0	200	903	0	0	0	0	0	0	0	603	903	0
10587	4	0	0	0	0	0	0	200	300	0	0	0	0	0	0	0	200	903	0	0	0	0	0	0	0	603	903	0
10587	5	0	0	0	0	0	0	200	300	0	0	0	0	0	0	0	200	903	0	0	0	0	0	0	0	603	903	0
10587	6	0	0	0	0	0	0	200	300	0	0	0	0	0	0	0	200	903	0	0	0	0	0	0	0	603	903	0
10587	7	0	0	0	0	0	0	200	300	0	0	0	0	0	0	0	200	903	0	0	0	0	0	0	0	603	903	0
10587	8	0	0	0	0	0	0	200	300	0	0	0	0	0	0	0	200	903	0	0	0	0	0	0	0	603	903	0
10587	9	0	0	0	0	0	0	200	300	0	0	0	0	0	0	0	200	903	0	0	0	0	0	0	0	603	903	0
10588	0	0	0	0	0	0	0	200	300	0	0	0	0	0	0	0	200	903	0	0	0	0	0	0	0	603	903	0
10588	1	0	0	0	0	0	0	200	300	0	0	0	0	0	0	0	200	903	0	0	0	0	0	0	0	603	903	0
10588	2	0	0	0	0	0	0	200	300	0	0	0	0	0	0	0	200	903	0	0	0	0	0	0	0	603	903	0
10588	3	0	0	0	0	0	0	200	300	0	0	0	0	0	0	0	200	903	0	0	0	0	0	0	0	603	903	0
10588	4	0	0	0	0	0	0	200	300	0	0	0	0	0	0	0	200	903	0	0	0	0	0	0	0	603	903	0
10588	5	0	0	0	0	0	0	200	300	0	0	0	0	0	0	0	200	903	0	0	0	0	0	0	0	603	903	0
10588	6	0	0	0	0	0	0	200	300	0	0	0	0	0	0	0	200	903	0	0	0	0	0	0	0	603	903	0
10588	7	0	0	0	0	0	0	200	300	0	0	0	0	0	0	0	200	903	0	0	0	0	0	0	0	603	903	0
10588	8	0	0	0	0	0	0	200	300	0	0	0	0	0	0	0	200	903	0	0	0	0	0	0	0	603	903	0
10588	9	0	0	0	0	0	0	200	300	0	0	0	0	0	0	0	200	903	0	0	0	0	0	0	0	603	903	0
10589	0	0	0	0	0	0	0	200	300	0	0	0	0	0	0	0	200	903	0	0	0	0	0	0	0	603	903	0
10589	1	0	0	0	0	0	0	200	300	0	0	0	0	0	0	0	200	903	0	0	0	0	0	0	0	603	903	0
10589	2	0	0	0	0	0	0	200	300	0	0	0	0	0	0	0	200	903	0	0	0	0	0	0	0	603	903	0
10589	3	0	0	0	0	0	0	200	300	0	0	0	0	0	0	0	200	903	0	0	0	0	0	0	0	603	903	0
10589	4	0	0	0	0	0	0	200	300	0	0	0	0	0	0	0	200	903	0	0	0	0	0	0	0	603	903	0
10589	5	0	0	0	0	0	0	200	300	0	0	0	0	0	0	0	200	903	0	0	0	0	0	0	0	603	903	0
10589	6	0	0	0	0	0	0	200	300	0	0	0	0	0	0	0	200	903	0	0	0	0	0	0	0	603	903	0
10589	7	0	0	0	0	0	0	200	300	0	0	0	0	0	0	0	200	903	0	0	0	0	0	0	0	603	903	0
10589	8	0	0	0	0	0	0	200	300	0	0	0	0	0	0	0	200	903	0	0	0	0	0	0	0	603	903	0
10589	9	0	0	0	0	0	0	200	300	0	0	0	0	0	0	0	200	903	0	0	0	0	0	0	0	603	903	0
10590	0	0	0	0	0	0	0	200	300	0	0	0	0	0	0	0	200	903	0	0	0	0	0	0	0	603	903	0
10590	1	0	0	0	0	0	0	200	300	0	0	0	0	0	0	0	200	903	0	0	0	0	0	0	0	603	903	0
10590	2	0	0	0	0	0	0	200	300	0	0	0	0	0	0	0	200	903	0	0	0	0	0	0	0	603	903	0
10590	3	0	0	0	0	0	0	200	300	0	0	0	0	0	0	0	200	903	0	0	0	0	0	0	0	603	903	0
10590	4	0	0	0	0	0	0	200	300	0	0	0	0	0	0	0	200	903	0	0	0	0	0	0	0	603	903	0
10590	5	0	0	0	0	0	0	200	300	0	0	0	0	0	0	0	200	903	0	0	0	0	0	0	0	603	903	0
10590	6	0	0	0	0	0	0	200	300	0	0	0	0	0	0	0	200	903	0	0	0	0	0	0	0	603	903	0
10590	7	0	0	0	0	0	0	200	300	0	0	0	0	0	0	0	200	903	0	0	0	0	0	0	0	603	903	0
10590	8	0	0	0	0	0	0	200	300	0	0	0	0	0	0	0	200	903	0	0	0	0	0	0	0	603	903	0
10590	9	0	0	0	0	0	0	200	300	0	0	0	0	0	0	0	200	903	0	0	0	0	0	0	0	603	903	0
10591	0	0	0	0	0	0	0	200	300	0	0	0	0	0	0	0	200	903	0	0	0	0	0	0	0	603	903	0
10591	1	0	0	0	0	0	0	200	300	0	0	0	0	0	0	0	200	903	0	0	0	0	0	0	0	603	903	0
10591	2	0	0	0	0	0	0	200	300	0	0	0	0	0	0	0	200	903	0	0	0	0	0	0	0	603	903	0
10591	3	0	0	0	0	0	0	200	300	0	0	0	0	0	0	0	200	903	0	0	0	0	0	0	0	603	903	0
10591	4	0	0	0	0	0	0	200	300	0	0	0	0	0	0	0	200	903	0	0	0	0	0	0	0	603	903	0
10591	5	0	0	0	0	0	0	200	300	0	0	0	0	0	0	0	200	903	0	0	0	0	0	0	0	603	903	0
10591	6	0	0	0	0	0	0	200	300	0	0	0	0	0	0	0	200	903	0	0	0	0	0	0	0	603	903	0
10591	7	0	0	0	0	0	0	200	300	0	0	0	0	0	0	0	200	903	0	0	0	0	0	0	0	603	903	0
10591	8	0	0	0	0	0	0	200	300	0	0	0	0	0	0	0	200	903	0	0	0	0	0	0	0	603	903	0
10591	9	0	0	0	0	0	0	200	300	0	0	0	0	0	0	0	200	903	0	0	0	0	0	0	0	603	903	0
10592	0	0	0	0	0	0	0	200	300	0	0	0	0	0	0	0	200	903	0	0	0	0	0	0	0	603	903	0
10592	1	0	0	0	0	0	0	200	300	0	0	0	0	0	0	0	200	903	0	0	0	0	0	0	0	603	903	0
10592	2	0	0	0	0	0	0	200	300	0	0	0	0	0	0	0	200	903	0	0	0	0	0	0	0	603	903	0
10592	3	0	0	0	0	0	0	200	300	0	0	0	0	0	0	0	200	903	0	0	0	0	0	0	0	603	903	0
10592	4	0	0	0	0	0	0	200	300	0	0	0	0	0	0	0	200	903	0	0	0	0	0	0	0	603	903	0
10592	5	0	0	0	0	0	0	200	300	0	0	0	0	0	0	0	200	903	0	0	0	0	0	0	0	603	903	0
10592	6	0	0	0	0	0	0	200	300	0	0	0	0	0	0	0	200	903	0	0	0	0	0	0	0	603	903	0
10592	7	0	0	0	0	0	0	200	300	0	0	0	0	0	0	0	200	903	0	0	0	0	0	0	0	603	903	0
10592	8	0	0	0	0	0	0	200	300	0	0	0	0	0	0	0	200	903	0	0	0	0	0	0	0	603	903	0
10592	9	0	0	0	0	0	0	200	300	0	0	0	0	0	0	0	200	903	0	0	0	0	0	0	0	603	903	0
10593	0	0	0	0	0	0	0	200	300	0	0	0	0	0	0	0	200	903	0	0	0	0	0	0	0	603	903	0
10593	1	0	0	0	0	0	0	200	300	0	0	0	0	0	0	0	200	903	0	0	0	0	0	0	0	603	903	0
10593	2	0	0	0	0	0	0	200	300	0	0	0	0	0	0	0	200	903	0	0	0	0	0	0	0	603	903	0
10593	3	0	0	0	0	0	0	200	300	0	0	0	0	0	0	0	200	903	0	0	0	0	0	0	0	603	903	0
10593	4	0	0	0	0	0	0	200	300	0	0	0	0	0	0	0	200	903	0	0	0	0	0	0	0	603	903	0
10593	5	0	0	0	0	0	0	200	300	0	0	0	0	0	0	0	200	903	0	0	0	0	0	0	0	603	903	0
10593	6	0	0	0	0	0	0	200	300	0	0	0	0	0	0	0	200	903	0	0	0	0	0	0	0	603	903	0
10593	7	0	0	0	0	0	0	200	300	0	0	0	0	0	0	0	200	903	0	0	0	0	0	0	0	603	903	0
10593	8	0	0	0	0	0	0	200	300	0	0	0	0	0	0	0	200	903	0	0	0	0	0	0	0	603	903	0
10593	9	0	0	0	0	0	0	200	300	0	0	0	0	0	0	0	200	903	0	0	0	0	0	0	0	603	903	0
10594	0	0	0	0	0	0	0	200	300	0	0	0	0	0	0	0	200	903	0	0	0	0	0	0	0	603	903	0
10594	1	0	0	0	0	0	0	200	300	0	0	0	0	0	0	0	200	903	0	0	0	0	0	0	0	603	903	0
10594	2	0	0	0	0	0	0	200	300	0	0	0	0	0	0	0	200	903	0	0	0	0	0	0	0	603	903	0
10594	3	0	0	0	0	0	0	200	300	0	0	0	0	0	0	0	200	903	0	0	0	0	0	0	0	603	903	0
10594	4	0	0	0	0	0	0	200	300	0	0	0	0	0	0	0	200	903	0	0	0	0	0	0	0	603	903	0
10594	5	0	0	0	0	0	0	200	300	0	0	0	0	0	0	0	200	903	0	0	0	0	0	0	0	603	903	0
10594	6	0	0	0	0	0	0	200	300	0	0	0	0	0	0	0	200	903	0	0	0	0	0	0	0	603	903	0
10594	7	0	0	0	0	0	0	200	300	0	0	0	0	0	0	0	200	903	0	0	0	0	0	0	0	603	903	0
10594	8	0	0	0	0	0	0	200	300	0	0	0	0	0	0	0	200	903	0	0	0	0	0	0	0	603	903	0
10594	9	0	0	0	0	0	0	200	300	0	0	0	0	0	0	0	200	903	0	0	0	0	0	0	0	603	903	0
10595	0	0	0	0	0	0	0	200	300	0	0	0	0	0	0	0	200	903	0	0	0	0	0	0	0	603	903	0
10595	1	0	0	0	0	0	0	200	300	0	0	0	0	0	0	0	200	903	0	0	0	0	0	0	0	603	903	0
10595	2	0	0	0	0	0	0	200	300	0	0	0	0	0	0	0	200	903	0	0	0	0	0	0	0	603	903	0
10595	3	0	0	0	0	0	0	200	300	0	0	0	0	0	0	0	200	903	0	0	0	0	0	0	0	603	903	0
10595	4	0	0	0	0	0	0	200	300	0	0	0	0	0	0	0	200	903	0	0	0	0	0	0	0	603	903	0
10595	5	0	0	0	0	0	0	200	300	0	0	0	0	0	0	0	200	903	0	0	0	0	0	0	0	603	903	0
10595	6	0	0	0	0	0	0	200	300	0	0	0	0	0	0	0	200	903	0	0	0	0	0	0	0	603	903	0
10595	7	0	0	0	0	0	0	200	300	0	0	0	0	0	0	0	200	903	0	0	0	0	0	0	0	603	903	0
10595	8	0	0	0	0	0	0	200	300	0	0	0	0	0	0	0	200	903	0	0	0	0	0	0	0	603	903	0
10595	9	0	0	0	0	0	0	200	300	0	0	0	0	0	0	0	200	903	0	0	0	0	0	0	0	603	903	0
10596	0	0	0	0	0	0	0	200	300	0	0	0	0	0	0	0	200	903	0	0	0	0	0	0	0	603	903	0
10596	1	0	0	0	0	0	0	200	300	0	0	0	0	0	0	0	200	903	0	0	0	0	0	0	0	603	903	0
10596	2	0	0	0	0	0	0	200	300	0	0	0	0	0	0	0	200	903	0	0	0	0	0	0	0	603	903	0
10596	3	0	0	0	0	0	0	200	300	0	0	0	0	0	0	0	200	903	0	0	0	0	0	0	0	603	903	0
10596	4	0	0	0	0	0	0	200	300	0	0	0	0	0	0	0	200	903	0	0	0	0	0	0	0	603	903	0
10596	5	0	0	0	0	0	0	200	300	0	0	0	0	0	0	0	200	903	0	0	0	0	0	0	0	603	903	0
10596	6	0	0	0	0	0	0	200	300	0	0	0	0	0	0	0	200	903	0	0	0	0	0	0	0	603	903	0
10596	7	0	0	0	0	0	0	200	300	0	0	0	0	0	0	0	200	903	0	0	0	0	0	0	0	603	903	0
10596	8	0	0	0	0	0	0	200	300	0	0	0	0	0	0	0	200	903	0	0	0	0	0	0	0	603	903	0
10596	9	0	0	0	0	0	0	200	300	0	0	0	0	0	0	0	200	903	0	0	0	0	0	0	0	603	903	0
10597	0	0	0	0	0	0	0	200	300	0	0	0	0	0	0	0	200	903	0	0	0	0	0	0	0	603	903	0
10597	1	0	0	0	0	0	0	200	300	0	0	0	0	0	0	0	200	903	0	0	0	0	0	0	0	603	903	0
10597	2	0	0	0	0	0	0	200	300	0	0	0	0	0	0	0	200	903	0	0	0	0	0	0	0	603	903	0
10597	3	0	0	0	0	0	0	200	300	0	0	0	0	0	0	0	200	903	0	0	0	0	0	0	0	603	903	0
10597	4	0	0	0	0	0	0	200	300	0	0	0	0	0	0	0	200	903	0	0	0	0	0	0	0	603	903	0
10597	5	0	0	0	0	0	0	200	300	0	0	0	0	0	0	0	200	903	0	0	0	0	0	0	0	603	903	0
10597	6	0	0	0	0	0	0	200	300	0	0	0	0	0	0	0	200	903	0	0	0	0	0	0	0	603	903	0
10597	7	0	0	0	0	0	0	200	300	0	0	0	0	0	0	0	200	903	0	0	0	0	0	0	0	603	903	0
10597	8	0	0	0	0	0	0	200	300	0	0	0	0	0	0	0	200	903	0	0	0	0	0	0	0	603	903	0
10597	9	0	0	0	0	0	0	200	300	0	0	0	0	0	0	0	200	903	0	0	0	0	0	0	0	603	903	0
10598	0	0	0	0	0	0	0	200	300	0	0	0	0	0	0	0	200	903	0	0	0	0	0	0	0	603	903	0
10598	1	0	0	0	0	0	0	200	300	0	0	0	0	0	0	0	200	903	0	0	0	0	0	0	0	603	903	0
10598	2	0	0	0	0	0	0	200	300	0	0	0	0	0	0	0	200	903	0	0	0	0	0	0	0	603	903	0
10598	3	0	0	0	0	0	0	200	300	0	0	0	0	0	0	0	200	903	0	0	0	0	0	0	0	603	903	0
10598	4	0	0	0	0	0	0	200	300	0	0	0	0	0	0	0	200	903	0	0	0	0	0	0	0	603	903	0
10598	5	0	0	0	0	0	0	200	300	0	0	0	0	0	0	0	200	903	0	0	0	0	0	0	0	603	903	0
10598	6	0	0	0	0	0	0	200	300	0	0	0	0	0	0	0	200	903	0	0	0	0	0	0	0	603	903	0
10598	7	0	0	0	0	0	0	200	300	0	0	0	0	0	0	0	200	903	0	0	0	0	0	0	0	603	903	0
10598	8	-0.485986	8.19676	-10.011	2107.54	-1375.25	-2129.7	62.6263	89.4785	0	0	0	0	0	0	0	200	903	0	0	0	0	0	0	0	603	903	0
10598	9	-1.40151	8.65452	-8.17999	1100.46	-1253.18	-2450.13	46.7989	165.469	0	0	0	0	0	0	0	200	903	0	0	0	0	0	0	0	603	903	0
10599	0	-0.791162	8.9597	-12.1473	1375.12	-1314.22	-2038.15	91.8095	186.796	0	0	0	0	0	0	0	200	903	0	0	0	0	0	0	0	603	903	0
10599	1	-0.485986	9.87522	-11.2318	2656.86	-1131.11	-2358.58	99.2932	63.4512	0	0	0	0	0	0	0	200	903	0	0	0	0	0	0	0	603	903	0
10599	2	0.429541	10.0278	-9.09552	1649.78	-1192.15	-2038.15	68.9301	118.616	0	0	0	0	0	0	0	200	903	0	0	0	0	0	0	0	603	903	0
10599	3	1.03989	11.0959	-10.9266	1375.12	-1497.33	-2450.13	62.9648	174.149	0	0	0	0	0	0	0	200	903	0	0	0	0	0	0	0	603	903	0
10599	4	-0.0282228	11.7063	-11.8421	1924.44	-1802.5	-2724.79	47.7888	137.492	0	0	0	0	0	0	0	200	903	0	0	0	0	0	0	0	603	903	0
10599	5	-1.09634	12.6218	-10.9266	2382.2	-1253.18	-2816.34	85.3086	81.9811	0	0	0	0	0	0	0	200	903	0	0	0	0	0	0	0	603	903	0
10599	6	-1.09634	12.3166	-11.8421	2839.96	-1558.36	-2907.9	68.4051	60.1809	0	0	0	0	0	0	0	200	903	0	0	0	0	0	0	0	603	903	0
10599	7	-0.791162	12.927	-11.2318	3023.07	-1741.47	-3502.99	44.9515	30.8462	0	0	0	0	0	0	0	200	903	0	0	0	0	0	0	0	603	903	0
10599	8	-0.180811	13.8425	-12.1473	2656.86	-1924.57	-3502.99	41.5636	81.2796	0	0	0	0	0	0	0	200	903	0	0	0	0	0	0	0	603	903	0
10599	9	-0.485986	13.9951	-15.5042	2931.52	-1863.54	-3411.44	79.8045	110.921	0	0	0	0	0	0	0	200	903	0	0	0	0	0	0	0	603	903	0
10600	0	-0.94375	13.9951	-14.5887	3297.73	-1558.36	-3411.44	93.1802	73.9531	0	0	0	0	0	0	0	200	903	0	0	0	0	0	0	0	603	903	0
10600	1	1.95542	14.9106	-14.8939	2199.09	-1802.5	-3686.1	78.9769	152.349	0	0	0	0	0	0	0	200	903	0	0	0	0	0	0	0	603	903	0
10600	2	-0.94375	15.9787	-13.9783	2839.96	-2229.75	-4281.19	40.4855	96.8311	0	0	0	0	0	0	0	200	903	0	0	0	0	0	0	0	603	903	0
10600	3	0.582129	17.1994	-14.8939	4030.15	-2229.75	-3960.75	50.2909	29.4088	0	0	0	0	0	0	0	200	903	0	0	0	0	0	0	0	603	903	0
10600	4	-0.333399	17.5046	-17.3353	3206.17	-2168.71	-4189.64	74.896	115.049	0	0	0	0	0	0	0	200	903	0	0	0	0	0	0	0	603	903	0
10600	5	-0.94375	17.5046	-15.5042	3114.62	-2229.75	-4326.96	56.1845	99.1113	0	0	0	0	0	0	0	200	903	0	0	0	0	0	0	0	603	903	0
10600	6	-0.791162	19.1831	-18.2508	3663.94	-2229.75	-4189.64	77.8274	99.245	0	0	0	0	0	0	0	200	903	0	0	0	0	0	0	0	603	903	0
10600	7	-0.94375	19.6408	-16.7249	3938.6	-2290.78	-4693.18	63.0318	64.5073	0	0	0	0	0	0	0	200	903	0	0	0	0	0	0	0	603	903	0
10600	8	0.429541	19.4883	-16.1146	4487.91	-2595.96	-4418.52	38.9061	21.4996	0	0	0	0	0	0	0	200	903	0	0	0	0	0	0	0	603	903	0
10600	9	1.80283	20.4038	-19.4715	3663.94	-2534.92	-4601.62	69.8137	111.831	0	0	0	0	0	0	0	200	903	0	0	0	0	0	0	0	603	903	0
10601	0	1.03989	21.3193	-18.2508	3297.73	-2290.78	-4601.62	74.4832	119.311	0	0	0	0	0	0	0	200	903	0	0	0	0	0	0	0	603	903	0
10601	1	0.276953	21.4719	-18.2508	3572.38	-2595.96	-4647.4	57.7619	104.261	0	0	0	0	0	0	0	200	903	0	0	0	0	0	0	0	603	903	0
10601	2	0.124365	22.6926	-17.3353	4487.91	-2656.99	-4784.73	46.729	41.1109	0	0	0	0	0	0	0	200	903	0	0	0	0	0	0	0	603	903	0
10601	3	0.887305	23.1504	-16.4197	3572.38	-2473.89	-4830.5	49.3346	82.4335	0	0	0	0	0	0	0	200	903	0	0	0	0	0	0	0	603	903	0
10601	4	1.49766	23.7607	-17.0301	4030.15	-2595.96	-4830.5	47.5664	63.3513	0	0	0	0	0	0	0	200	903	0	0	0	0	0	0	0	603	903	0
10601	5	0.887305	23.4555	-18.2508	4030.15	-2534.92	-4784.73	61.1062	79.1796	0	0	0	0	0	0	0	200	903	0	0	0	0	0	0	0	603	903	0
10601	6	-0.0282228	23.303	-19.1663	3938.6	-2962.17	-4601.62	45.4493	94.5044	0	0	0	0	0	0	0	200	903	0	0	0	0	0	0	0	603	903	0
10601	7	0.276953	22.2348	-18.2508	4213.25	-2595.96	-4738.95	57.7619	69.1468	0	0	0	0	0	0	0	200	903	0	0	0	0	0	0	0	603	903	0
10601	8	1.65024	22.0823	-17.3353	4396.36	-2656.99	-4738.95	46.729	46.3922	0	0	0	0	0	0	0	200	903	0	0	0	0	0	0	0	603	903	0
10601	9	1.95542	22.2348	-17.6404	3480.83	-2779.06	-4510.07	42.4607	102.679	0	0	0	0	0	0	0	200	903	0	0	0	0	0	0	0	603	903	0
10602	0	2.10801	22.0823	-18.2508	4030.15	-2473.89	-4464.29	64.4504	79.1796	0	0	0	0	0	0	0	200	903	0	0	0	0	0	0	0	603	903	0
10602	1	1.49766	22.9978	-19.7767	4854.12	-2901.13	-4235.41	53.3053	54.5531	0	0	0	0	0	0	0	200	903	0	0	0	0	0	0	0	603	903	0
10602	2	3.93906	22.54	-19.1663	4396.36	-3084.24	-4281.19	39.0803	70.6206	0	0	0	0	0	0	0	200	903	0	0	0	0	0	0	0	603	903	0
10602	3	1.65024	21.6245	-15.8094	4030.15	-2840.1	-4372.74	20.3536	45.0788	0	0	0	0	0	0	0	200	903	0	0	0	0	0	0	0	603	903	0
10602	4	2.71836	22.2348	-17.6404	4213.25	-3084.24	-3914.98	25.1609	61.1594	0	0	0	0	0	0	0	200	903	0	0	0	0	0	0	0	603	903	0
10602	5	3.32871	22.9978	-20.0818	4579.46	-2840.1	-3823.43	58.5738	71.96	0	0	0	0	0	0	0	200	903	0	0	0	0	0	0	0	603	903	0
10602	6	2.87095	22.0823	-19.4715	4396.36	-2718.03	-3640.32	60.4099	74.2156	0	0	0	0	0	0	0	200	903	0	0	0	0	0	0	0	603	903	0
10602	7	4.85459	20.4038	-17.0301	4030.15	-2534.92	-3548.77	51.1504	63.3513	0	0	0	0	0	0	0	200	903	0	0	0	0	0	0	0	603	903	0
10602	8	5.15977	22.9978	-17.0301	3847.04	-2779.06	-3228.33	36.8145	74.1032	0	0	0	0	0	0	0	200	903	0	0	0	0	0	0	0	603	903	0
10602	9	6.22788	24.9814	-17.9456	4121.7	-2718.03	-4006.53	48.5408	70.3227	0	0	0	0	0	0	0	200	903	0	0	0	0	0	0	0	603	903	0
10603	0	6.38047	27.1177	-18.8611	4121.7	-3084.24	-4052.31	36.4765	81.4713	0	0	0	0	0	0	0	200	903	0	0	0	0	0	0	0	603	903	0
10603	1	5.31235	25.2866	-19.7767	4030.15	-3084.24	-3960.75	44.0466	96.2171	0	0	0	0	0	0	0	200	903	0	0	0	0	0	0	0	603	903	0
10603	2	4.702	25.4392	-17.9456	4487.91	-3145.27	-3457.21	24.733	49.916	0	0	0	0	0	0	0	200	903	0	0	0	0	0	0	0	603	903	0
10603	3	6.38047	27.5754	-18.556	4396.36	-2718.03	-4098.08	53.5227	63.0757	0	0	0	0	0	0	0	200	903	0	0	0	0	0	0	0	603	903	0
10603	4	7.75376	30.4746	-19.1663	5128.78	-2901.13	-4922.06	48.6338	32.4066	0	0	0	0	0	0	0	200	903	0	0	0	0	0	0	0	603	903	0
10603	5	7.296	33.5263	-20.6922	4487.91	-3389.42	-5196.72	36.1984	83.1109	0	0	0	0	0	0	0	200	903	0	0	0	0	0	0	0	603	903	0
10603	6	5.77012	31.8479	-18.8611	4671.02	-3145.27	-4464.29	33.2405	52.3471	0	0	0	0	0	0	0	200	903	0	0	0	0	0	0	0	603	903	0
10603	7	5.46494	31.6953	-20.9974	4487.91	-2595.96	-4784.73	76.3675	86.2632	0	0	0	0	0	0	0	200	903	0	0	0	0	0	0	0	603	903	0
10603	8	5.00718	30.6272	-18.8611	4579.46	-3206.31	-4738.95	30.0045	57.2011	0	0	0	0	0	0	0	200	903	0	0	0	0	0	0	0	603	903	0
10603	9	5.31235	30.322	-19.4715	4671.02	-2779.06	-5608.7	57.2753	60.11	0	0	0	0	0	0	0	200	903	0	0	0	0	0	0	0	603	903	0
10604	0	5.00718	32.0005	-21.9129	4579.46	-3450.45	-5105.16	42.5379	91.0152	0	0	0	0	0	0	0	200	903	0	0	0	0	0	0	0	603	903	0
10604	1	2.41318	29.4065	-19.1663	4487.91	-3450.45	-5059.39	19.9733	65.8438	0	0	0	0	0	0	0	200	903	0	0	0	0	0	0	0	603	903	0
10604	2	0.276953	28.1858	-21.3026	4396.36	-3145.27	-5471.37	52.3522	93.6229	0	0	0	0	0	0	0	200	903	0	0	0	0	0	0	0	603	903	0
10604	3	-0.0282228	29.5591	-19.4715	4579.46	-2901.13	-6112.24	51.0061	64.8119	0	0	0	0	0	0	0	200	903	0	0	0	0	0	0	0	603	903	0
10604	4	1.34507	29.4065	-19.4715	4671.02	-3389.42	-6341.13	25.9294	60.11	0	0	0	0	0	0	0	200	903	0	0	0	0	0	0	0	603	903	0
10604	5	-0.638574	28.9487	-21.3026	5678.1	-3328.38	-6432.68	43.7567	33.4546	0	0	0	0	0	0	0	200	903	0	0	0	0	0	0	0	603	903	0
10604	6	0.124365	29.7116	-17.6404	4945.68	-3511.49	-6386.9	0.941177	19.6399	0	0	0	0	0	0	0	200	903	0	0	0	0	0	0	0	603	903	0
10604	7	-0.0282228	30.1694	-21.6077	4945.68	-3267.34	-6112.24	48.7881	71.1154	0	0	0	0	0	0	0	200	903	0	0	0	0	0	0	0	603	903	0
10604	8	-0.180811	30.4746	-19.7767	5128.78	-3328.38	-6524.23	31.7017	40.6651	0	0	0	0	0	0	0	200	903	0	0	0	0	0	0	0	603	903	0
10604	9	2.41318	31.0849	-20.6922	4854.12	-3145.27	-6249.57	47.9971	65.4129	0	0	0	0	0	0	0	200	903	0	0	0	0	0	0	0	603	903	0
10605	0	5.00718	32.4582	-23.1336	5403.44	-3877.7	-5608.7	32.3782	66.4247	0	0	0	0	0	0	0	200	903	0	0	0	0	0	0	0	603	903	0
10605	1	4.09165	32.3056	-22.2181	4487.91	-3450.45	-5562.93	44.7008	98.0063	0	0	0	0	0	0	0	200	903	0	0	0	0	0	0	0	603	903	0
10605	2	3.63389	30.7798	-23.744	4671.02	-3267.34	-5379.82	62.3926	103.276	0	0	0	0	0	0	0	200	903	0	0	0	0	0	0	0	603	903	0
10605	3	4.09165	33.2212	-20.0818	5220.33	-3145.27	-5700.26	43.3772	40.0471	0	0	0	0	0	0	0	200	903	0	0	0	0	0	0	0	603	903	0
10605	4	5.46494	32.3056	-20.9974	5403.44	-3267.34	-5517.15	44.3927	42.6612	0	0	0	0	0	0	0	200	903	0	0	0	0	0	0	0	603	903	0
10605	5	6.22788	30.9324	-23.1336	5769.65	-3633.56	-5379.82	42.9317	50.5944	0	0	0	0	0	0	0	200	903	0	0	0	0	0	0	0	603	903	0
10605	6	4.39683	30.7798	-23.744	5678.1	-3450.45	-5288.27	54.6809	60.8614	0	0	0	0	0	0	0	200	903	0	0	0	0	0	0	0	603	903	0
10605	7	4.24424	31.6953	-23.4388	5494.99	-3633.56	-5196.72	44.9767	65.5598	0	0	0	0	0	0	0	200	903	0	0	0	0	0	0	0	603	903	0
10605	8	4.39683	32.1531	-21.6077	5220.33	-3572.52	-5288.27	34.6647	58.4043	0	0	0	0	0	0	0	200	903	0	0	0	0	0	0	0	603	903	0
10605	9	5.31235	30.6272	-21.6077	4945.68	-3511.49	-5242.49	37.4893	71.1154	0	0	0	0	0	0	0	200	903	0	0	0	0	0	0	0	603	903	0
10606	0	5.15977	29.4065	-23.744	4945.68	-3755.63	-4876.28	41.8281	91.708	0	0	0	0	0	0	0	200	903	0	0	0	0	0	0	0	603	903	0
10606	1	6.07529	32.1531	-20.0818	5403.44	-3511.49	-5105.16	25.1413	30.9292	0	0	0	0	0	0	0	200	903	0	0	0	0	0	0	0	603	903	0
10606	2	4.702	31.8479	-23.1336	4854.12	-3145.27	-5242.49	64.0387	90.1701	0	0	0	0	0	0	0	200	903	0	0	0	0	0	0	0	603	903	0
10606	3	3.63389	30.322	-21.6077	5494.99	-3511.49	-5471.37	37.4893	45.6932	0	0	0	0	0	0	0	200	903	0	0	0	0	0	0	0	603	903	0
10606	4	5.00718	31.2375	-22.5233	5494.99	-3389.42	-5196.72	49.5149	56.0303	0	0	0	0	0	0	0	200	903	0	0	0	0	0	0	0	603	903	0
10606	5	5.31235	31.2375	-23.4388	5494.99	-3633.56	-5013.61	44.9767	65.5598	0	0	0	0	0	0	0	200	903	0	0	0	0	0	0	0	603	903	0
10606	6	4.09165	30.9324	-24.3543	5769.65	-3633.56	-5196.72	50.8044	63.0953	0	0	0	0	0	0	0	200	903	0	0	0	0	0	0	0	603	903	0
10606	7	5.77012	29.7116	-23.4388	5311.89	-3633.56	-5105.16	44.9767	73.3719	0	0	0	0	0	0	0	200	903	0	0	0	0	0	0	0	603	903	0
10606	8	3.93906	29.7116	-22.8284	5586.54	-3938.73	-4876.28	27.4637	55.2812	0	0	0	0	0	0	0	200	903	0	0	0	0	0	0	0	603	903	0
10606	9	4.85459	28.4909	-22.2181	5769.65	-3999.77	-4967.83	19.9769	40.3173	0	0	0	0	0	0	0	200	903	0	0	0	0	0	0	0	603	903	0
10607	0	5.46494	29.1013	-24.0491	5403.44	-3633.56	-5059.39	48.9112	75.3167	0	0	0	0	0	0	0	200	903	0	0	0	0	0	0	0	603	903	0
10607	1	4.54941	29.4065	-23.744	5403.44	-3389.42	-5105.16	57.2515	72.4289	0	0	0	0	0	0	0	200	903	0	0	0	0	0	0	0	603	903	0
10607	2	5.46494	30.0168	-20.9974	6410.52	-3511.49	-4876.28	32.7655	-5.30099	0	0	0	0	0	0	0	200	903	0	0	0	0	0	0	0	603	903	0
10607	3	4.09165	29.7116	-20.6922	5403.44	-3877.7	-4601.62	12.601	38.8659	0	0	0	0	0	0	0	200	903	0	0	0	0	0	0	0	603	903	0
10607	4	4.39683	28.4909	-22.5233	5128.78	-3694.59	-5105.16	35.9655	72.2895	0	0	0	0	0	0	0	200	903	0	0	0	0	0	0	0	603	903	0
10607	5	4.85459	29.4065	-23.744	5586.54	-3633.56	-5105.16	46.9692	64.7172	0	0	0	0	0	0	0	200	903	0	0	0	0	0	0	0	603	903	0
10607	6	4.39683	29.4065	-25.2698	5494.99	-3572.52	-4601.62	58.6251	82.5474	0	0	0	0	0	0	0	200	903	0	0	0	0	0	0	0	603	903	0
10607	7	5.9227	28.6435	-22.8284	6135.86	-3328.38	-4876.28	54.2002	31.2184	0	0	0	0	0	0	0	200	903	0	0	0	0	0	0	0	603	903	0
10607	8	3.93906	29.4065	-19.7767	5403.44	-3694.59	-4967.83	13.1844	26.7771	0	0	0	0	0	0	0	200	903	0	0	0	0	0	0	0	603	903	0
10607	9	4.24424	27.1177	-22.5233	5494.99	-3633.56	-5013.61	38.6754	56.0303	0	0	0	0	0	0	0	200	903	0	0	0	0	0	0	0	603	903	0
10608	0	5.00718	29.1013	-23.4388	5494.99	-3389.42	-4693.18	55.3929	65.5598	0	0	0	0	0	0	0	200	903	0	0	0	0	0	0	0	603	903	0
10608	1	4.24424	28.4909	-24.0491	5220.33	-3572.52	-4738.95	51.4491	82.9305	0	0	0	0	0	0	0	200	903	0	0	0	0	0	0	0	603	903	0
10608	2	5.9227	28.7961	-22.5233	5128.78	-3755.63	-4967.83	33.2556	72.2895	0	0	0	0	0	0	0	200	903	0	0	0	0	0	0	0	603	903	0
10608	3	4.39683	28.6435	-21.9129	4671.02	-3694.59	-4464.29	31.3965	86.8371	0	0	0	0	0	0	0	200	903	0	0	0	0	0	0	0	603	903	0
10608	4	5.00718	28.1858	-22.8284	5037.23	-3633.56	-4464.29	40.832	79.3441	0	0	0	0	0	0	0	200	903	0	0	0	0	0	0	0	603	903	0
10608	5	5.46494	27.8806	-23.1336	5037.23	-3206.31	-4372.74	61.4003	82.2549	0	0	0	0	0	0	0	200	903	0	0	0	0	0	0	0	603	903	0
10608	6	6.07529	28.0332	-21.9129	5128.78	-3511.49	-4189.64	39.7526	65.947	0	0	0	0	0	0	0	200	903	0	0	0	0	0	0	0	603	903	0
10608	7	4.54941	27.5754	-23.744	5403.44	-3511.49	-4555.85	52.1104	72.4289	0	0	0	0	0	0	0	200	903	0	0	0	0	0	0	0	603	903	0
10608	8	3.4813	26.6599	-21.3026	6227.41	-3450.45	-4464.29	38.0264	7.66815	0	0	0	0	0	0	0	200	903	0	0	0	0	0	0	0	603	903	0
10608	9	4.24424	26.2021	-21.3026	5494.99	-3389.42	-4418.52	40.8916	42.0501	0	0	0	0	0	0	0	200	903	0	0	0	0	0	0	0	603	903	0
10609	0	6.07529	25.7444	-21.6077	5220.33	-3633.56	-4601.62	31.84	58.4043	0	0	0	0	0	0	0	200	903	0	0	0	0	0	0	0	603	903	0
10609	1	5.00718	25.5918	-23.744	5403.44	-3389.42	-4372.74	57.2515	72.4289	0	0	0	0	0	0	0	200	903	0	0	0	0	0	0	0	603	903	0
10609	2	3.17612	25.4392	-23.4388	4945.68	-3328.38	-4235.41	57.9969	88.9961	0	0	0	0	0	0	0	200	903	0	0	0	0	0	0	0	603	903	0
10609	3	4.09165	25.134	-19.4715	4487.91	-3267.34	-4189.64	32.1986	69.5138	0	0	0	0	0	0	0	200	903	0	0	0	0	0	0	0	603	903	0
10609	4	3.78647	25.897	-17.3353	4945.68	-3328.38	-4235.41	7.99948	14.7044	0	0	0	0	0	0	0	200	903	0	0	0	0	0	0	0	603	903	0
10609	5	4.702	25.897	-19.4715	4671.02	-3450.45	-4418.52	22.7948	60.11	0	0	0	0	0	0	0	200	903	0	0	0	0	0	0	0	603	903	0
10609	6	4.702	24.2185	-21.3026	4487.91	-3023.2	-4235.41	58.0825	89.3251	0	0	0	0	0	0	0	200	903	0	0	0	0	0	0	0	603	903	0
10609	7	3.78647	25.5918	-22.2181	4579.46	-3389.42	-4235.41	47.4479	93.8857	0	0	0	0	0	0	0	200	903	0	0	0	0	0	0	0	603	903	0
10609	8	5.00718	25.4392	-19.7767	4945.68	-3267.34	-4555.85	34.7879	49.9238	0	0	0	0	0	0	0	200	903	0	0	0	0	0	0	0	603	903	0
10609	9	3.63389	25.4392	-20.9974	5128.78	-3206.31	-4235.41	47.2995	55.7418	0	0	0	0	0	0	0	200	903	0	0	0	0	0	0	0	603	903	0
10610	0	4.39683	24.6762	-20.387	5311.89	-3145.27	-4098.08	45.7217	39.4477	0	0	0	0	0	0	0	200	903	0	0	0	0	0	0	0	603	903	0
10610	1	4.39683	24.0659	-21.6077	4762.57	-3084.24	-4052.31	57.2622	79.5895	0	0	0	0	0	0	0	200	903	0	0	0	0	0	0	0	603	903	0
10610	2	3.4813	24.3711	-21.6077	4762.57	-3267.34	-4326.96	48.7881	79.5895	0	0	0	0	0	0	0	200	903	0	0	0	0	0	0	0	603	903	0
10610	3	4.702	23.9133	-22.2181	4854.12	-3511.49	-4235.41	41.9537	81.5237	0	0	0	0	0	0	0	200	903	0	0	0	0	0	0	0	603	903	0
10610	4	3.78647	23.9133	-19.7767	4121.7	-2962.17	-4098.08	50.219	91.5877	0	0	0	0	0	0	0	200	903	0	0	0	0	0	0	0	603	903	0
10610	5	4.54941	24.2185	-19.1663	4304.81	-2840.1	-4098.08	51.8183	75.3973	0	0	0	0	0	0	0	200	903	0	0	0	0	0	0	0	603	903	0
10610	6	5.00718	24.9814	-21.6077	4762.57	-2779.06	-4326.96	71.3857	79.5895	0	0	0	0	0	0	0	200	903	0	0	0	0	0	0	0	603	903	0
10610	7	4.39683	24.5237	-18.8611	4487.91	-3267.34	-4281.19	26.7685	62.0552	0	0	0	0	0	0	0	200	903	0	0	0	0	0	0	0	603	903	0
10610	8	3.4813	24.2185	-21.6077	4121.7	-3145.27	-4281.19	54.4375	109.249	0	0	0	0	0	0	0	200	903	0	0	0	0	0	0	0	603	903	0
10610	9	3.4813	21.1667	-19.4715	4304.81	-3023.2	-3640.32	44.7369	78.9175	0	0	0	0	0	0	0	200	903	0	0	0	0	0	0	0	603	903	0
10611	0	4.09165	23.7607	-19.7767	5311.89	-2779.06	-3777.65	59.4777	31.4065	0	0	0	0	0	0	0	200	903	0	0	0	0	0	0	0	603	903	0
10611	1	5.9227	24.2185	-21.3026	5037.23	-2901.13	-4052.31	63.8128	63.5387	0	0	0	0	0	0	0	200	903	0	0	0	0	0	0	0	603	903	0
10611	2	3.78647	24.2185	-21.3026	4762.57	-3023.2	-4235.41	58.0825	76.4319	0	0	0	0	0	0	0	200	903	0	0	0	0	0	0	0	603	903	0
10611	3	2.56577	22.9978	-19.4715	4671.02	-3206.31	-4143.86	35.3332	60.11	0	0	0	0	0	0	0	200	903	0	0	0	0	0	0	0	603	903	0
10611	4	2.87095	22.6926	-18.8611	4762.57	-2779.06	-4006.53	52.6567	47.493	0	0	0	0	0	0	0	200	903	0	0	0	0	0	0	0	603	903	0
10611	5	3.32871	22.9978	-19.4715	5037.23	-2962.17	-4143.86	47.8715	41.3024	0	0	0	0	0	0	0	200	903	0	0	0	0	0	0	0	603	903	0
10611	6	3.4813	22.9978	-17.9456	4304.81	-3023.2	-4143.86	31.5352	60.1193	0	0	0	0	0	0	0	200	903	0	0	0	0	0	0	0	603	903	0
10611	7	3.63389	22.2348	-20.6922	3938.6	-3511.49	-4006.53	30.2991	109.658	0	0	0	0	0	0	0	200	903	0	0	0	0	0	0	0	603	903	0
10611	8	2.56577	22.2348	-21.3026	4121.7	-2901.13	-3914.98	63.8128	106.516	0	0	0	0	0	0	0	200	903	0	0	0	0	0	0	0	603	903	0
10611	9	4.24424	22.8452	-19.4715	4121.7	-2718.03	-3960.75	60.4099	88.3213	0	0	0	0	0	0	0	200	903	0	0	0	0	0	0	0	603	903	0
10612	0	2.56577	22.6926	-17.9456	4213.25	-2656.99	-4098.08	51.9419	65.221	0	0	0	0	0	0	0	200	903	0	0	0	0	0	0	0	603	903	0
10612	1	3.4813	22.54	-18.556	4304.81	-3084.24	-4098.08	33.7872	68.0096	0	0	0	0	0	0	0	200	903	0	0	0	0	0	0	0	603	903	0
10612	2	3.93906	22.6926	-19.7767	3755.49	-2656.99	-3960.75	65.6501	110.105	0	0	0	0	0	0	0	200	903	0	0	0	0	0	0	0	603	903	0
10612	3	3.02354	22.6926	-19.7767	4671.02	-2901.13	-4052.31	53.3053	63.8118	0	0	0	0	0	0	0	200	903	0	0	0	0	0	0	0	603	903	0
10612	4	3.17612	20.0986	-19.4715	4579.46	-2840.1	-3594.54	54.1407	64.8119	0	0	0	0	0	0	0	200	903	0	0	0	0	0	0	0	603	903	0
10612	5	1.95542	21.6245	-17.0301	4579.46	-2962.17	-3502.99	26.0626	31.0957	0	0	0	0	0	0	0	200	903	0	0	0	0	0	0	0	603	903	0
10612	6	3.02354	22.3874	-17.9456	4487.91	-2962.17	-3548.77	34.9364	49.916	0	0	0	0	0	0	0	200	903	0	0	0	0	0	0	0	603	903	0
10612	7	3.4813	20.8616	-20.0818	4304.81	-2840.1	-3502.99	58.5738	85.6369	0	0	0	0	0	0	0	200	903	0	0	0	0	0	0	0	603	903	0
10612	8	3.63389	20.8616	-17.9456	3755.49	-2595.96	-3502.99	55.3431	90.7294	0	0	0	0	0	0	0	200	903	0	0	0	0	0	0	0	603	903	0
10612	9	2.10801	21.4719	-20.0818	4121.7	-2779.06	-4006.53	61.6132	94.7549	0	0	0	0	0	0	0	200	903	0	0	0	0	0	0	0	603	903	0
10613	0	2.10801	21.6245	-17.3353	3663.94	-2656.99	-3869.2	46.729	88.6426	0	0	0	0	0	0	0	200	903	0	0	0	0	0	0	0	603	903	0
10613	1	3.02354	21.6245	-18.2508	4213.25	-3023.2	-3960.75	34.3522	69.1468	0	0	0	0	0	0	0	200	903	0	0	0	0	0	0	0	603	903	0
10613	2	2.2606	21.0141	-18.2508	4854.12	-2595.96	-4143.86	57.7619	34.0322	0	0	0	0	0	0	0	200	903	0	0	0	0	0	0	0	603	903	0
10613	3	2.56577	21.0141	-17.6404	3938.6	-2656.99	-3960.75	49.3806	76.7292	0	0	0	0	0	0	0	200	903	0	0	0	0	0	0	0	603	903	0
10613	4	2.10801	20.2512	-17.9456	4304.81	-2656.99	-3869.2	51.9419	60.1193	0	0	0	0	0	0	0	200	903	0	0	0	0	0	0	0	603	903	0
10613	5	2.2606	20.0986	-17.9456	4213.25	-2779.06	-3686.1	45.1397	65.221	0	0	0	0	0	0	0	200	903	0	0	0	0	0	0	0	603	903	0
10613	6	3.17612	19.7934	-17.0301	3938.6	-3084.24	-3914.98	18.8947	68.7273	0	0	0	0	0	0	0	200	903	0	0	0	0	0	0	0	603	903	0
10613	7	3.32871	19.946	-19.1663	3389.28	-2779.06	-4052.31	55.0028	123.165	0	0	0	0	0	0	0	200	903	0	0	0	0	0	0	0	603	903	0
10613	8	2.10801	19.7934	-16.4197	3572.38	-2168.71	-3731.87	67.9205	82.4335	0	0	0	0	0	0	0	200	903	0	0	0	0	0	0	0	603	903	0
10613	9	1.65024	20.4038	-18.2508	4213.25	-2412.85	-3823.43	67.7947	69.1468	0	0	0	0	0	0	0	200	903	0	0	0	0	0	0	0	603	903	0
10614	0	1.80283	19.6408	-16.4197	3480.83	-2901.13	-3914.98	23.3142	88.0093	0	0	0	0	0	0	0	200	903	0	0	0	0	0	0	0	603	903	0
10614	1	2.2606	18.5727	-15.8094	3755.49	-3023.2	-3686.1	8.77156	62.4519	0	0	0	0	0	0	0	200	903	0	0	0	0	0	0	0	603	903	0
10614	2	2.71836	19.4883	-18.8611	4213.25	-2595.96	-3777.65	62.3648	76.6173	0	0	0	0	0	0	0	200	903	0	0	0	0	0	0	0	603	903	0
10614	3	3.17612	19.3357	-18.2508	4396.36	-2656.99	-3502.99	54.4177	59.1141	0	0	0	0	0	0	0	200	903	0	0	0	0	0	0	0	603	903	0
10614	4	1.80283	19.0305	-18.2508	4030.15	-2779.06	-3823.43	47.7292	79.1796	0	0	0	0	0	0	0	200	903	0	0	0	0	0	0	0	603	903	0
10614	5	1.65024	18.8779	-16.1146	3938.6	-2779.06	-3594.54	27.5433	55.5878	0	0	0	0	0	0	0	200	903	0	0	0	0	0	0	0	603	903	0
10614	6	1.95542	19.0305	-16.4197	3938.6	-2412.85	-3182.56	53.0518	60.1304	0	0	0	0	0	0	0	200	903	0	0	0	0	0	0	0	603	903	0
10614	7	2.87095	19.0305	-16.1146	3572.38	-2473.89	-3182.56	46.4813	78.3133	0	0	0	0	0	0	0	200	903	0	0	0	0	0	0	0	603	903	0
10614	8	2.2606	18.5727	-17.3353	3389.28	-2290.78	-3548.77	67.8543	104.486	0	0	0	0	0	0	0	200	903	0	0	0	0	0	0	0	603	903	0
10614	9	1.65024	18.7253	-17.9456	3663.94	-2901.13	-3319.89	38.3375	95.8311	0	0	0	0	0	0	0	200	903	0	0	0	0	0	0	0	603	903	0
10615	0	1.95542	19.1831	-16.4197	3389.28	-2534.92	-3182.56	45.6174	93.5851	0	0	0	0	0	0	0	200	903	0	0	0	0	0	0	0	603	903	0
10615	1	2.2606	16.8943	-15.5042	3297.73	-2595.96	-3457.21	32.5643	87.3012	0	0	0	0	0	0	0	200	903	0	0	0	0	0	0	0	603	903	0
10615	2	2.56577	18.7253	-16.1146	3480.83	-2595.96	-3731.87	38.9061	83.9946	0	0	0	0	0	0	0	200	903	0	0	0	0	0	0	0	603	903	0
10615	3	3.17612	18.8779	-17.3353	4213.25	-2534.92	-3914.98	53.7708	56.9548	0	0	0	0	0	0	0	200	903	0	0	0	0	0	0	0	603	903	0
10615	4	1.80283	16.1313	-17.9456	3755.49	-2595.96	-3594.54	55.3431	90.7294	0	0	0	0	0	0	0	200	903	0	0	0	0	0	0	0	603	903	0
10615	5	1.80283	18.4201	-15.8094	3938.6	-2718.03	-2953.67	28.075	50.8698	0	0	0	0	0	0	0	200	903	0	0	0	0	0	0	0	603	903	0
10615	6	1.65024	17.9624	-13.0628	3755.49	-2595.96	-3869.2	1.271	12.5051	0	0	0	0	0	0	0	200	903	0	0	0	0	0	0	0	603	903	0
10615	7	2.56577	16.2839	-16.7249	3847.04	-2595.96	-3136.78	44.785	69.9813	0	0	0	0	0	0	0	200	903	0	0	0	0	0	0	0	603	903	0
10615	8	3.02354	17.8098	-17.9456	3206.17	-2229.75	-3457.21	75.7498	121.339	0	0	0	0	0	0	0	200	903	0	0	0	0	0	0	0	603	903	0
10615	9	1.95542	16.7417	-17.3353	3297.73	-2595.96	-2907.9	50.2499	109.768	0	0	0	0	0	0	0	200	903	0	0	0	0	0	0	0	603	903	0
10616	0	3.78647	18.115	-16.7249	3663.94	-2412.85	-3274.11	55.7331	80.9294	0	0	0	0	0	0	0	200	903	0	0	0	0	0	0	0	603	903	0
10616	1	2.41318	18.2676	-12.7576	2656.86	-2168.71	-3502.99	30.0067	91.7436	0	0	0	0	0	0	0	200	903	0	0	0	0	0	0	0	603	903	0
10616	2	3.02354	17.0469	-16.4197	3297.73	-2046.64	-3502.99	75.3549	99.1609	0	0	0	0	0	0	0	200	903	0	0	0	0	0	0	0	603	903	0
10616	3	2.2606	18.115	-16.1146	3847.04	-2534.92	-3228.33	42.6937	61.2692	0	0	0	0	0	0	0	200	903	0	0	0	0	0	0	0	603	903	0
10616	4	1.34507	17.5046	-16.4197	3755.49	-2229.75	-3411.44	64.2033	71.282	0	0	0	0	0	0	0	200	903	0	0	0	0	0	0	0	603	903	0
10616	5	2.41318	17.0469	-16.1146	4213.25	-2351.82	-3411.44	54.0564	38.5437	0	0	0	0	0	0	0	200	903	0	0	0	0	0	0	0	603	903	0
10616	6	1.49766	16.8943	-15.8094	3480.83	-2290.78	-3411.44	55.0999	79.825	0	0	0	0	0	0	0	200	903	0	0	0	0	0	0	0	603	903	0
10616	7	2.56577	15.0632	-15.5042	3206.17	-2351.82	-3228.33	48.3111	93.2063	0	0	0	0	0	0	0	200	903	0	0	0	0	0	0	0	603	903	0
10616	8	1.95542	16.4365	-15.5042	2931.52	-2351.82	-3457.21	48.3111	110.921	0	0	0	0	0	0	0	200	903	0	0	0	0	0	0	0	603	903	0
10616	9	3.17612	17.0469	-16.1146	3206.17	-2412.85	-3365.66	50.2689	101.039	0	0	0	0	0	0	0	200	903	0	0	0	0	0	0	0	603	903	0
10617	0	1.49766	17.1994	-15.8094	3572.38	-2168.71	-3228.33	62.8213	74.034	0	0	0	0	0	0	0	200	903	0	0	0	0	0	0	0	603	903	0
10617	1	1.34507	16.7417	-14.8939	3663.94	-2229.75	-3274.11	50.2909	53.9968	0	0	0	0	0	0	0	200	903	0	0	0	0	0	0	0	603	903	0
10617	2	2.2606	16.5891	-13.6732	3114.62	-2412.85	-3228.33	23.5337	72.2091	0	0	0	0	0	0	0	200	903	0	0	0	0	0	0	0	603	903	0
10617	3	2.41318	16.8943	-16.7249	3023.07	-2595.96	-3274.11	44.785	119.248	0	0	0	0	0	0	0	200	903	0	0	0	0	0	0	0	603	903	0
10617	4	1.65024	17.0469	-14.2835	3389.28	-2290.78	-3457.21	39.6205	62.7138	0	0	0	0	0	0	0	200	903	0	0	0	0	0	0	0	603	903	0
10617	5	1.49766	16.2839	-17.0301	3389.28	-2168.71	-3045.23	72.6542	100.983	0	0	0	0	0	0	0	200	903	0	0	0	0	0	0	0	603	903	0
10617	6	1.80283	15.8262	-13.0628	3847.04	-2351.82	-3228.33	19.9608	5.4964	0	0	0	0	0	0	0	200	903	0	0	0	0	0	0	0	603	903	0
10617	7	2.87095	15.8262	-14.2835	3480.83	-2290.78	-3319.89	39.6205	56.3041	0	0	0	0	0	0	0	200	903	0	0	0	0	0	0	0	603	903	0
10617	8	2.87095	13.9951	-16.4197	3480.83	-2046.64	-3228.33	75.3549	88.0093	0	0	0	0	0	0	0	200	903	0	0	0	0	0	0	0	603	903	0
10617	9	2.10801	15.8262	-16.1146	3206.17	-1985.61	-3091	76.7819	101.039	0	0	0	0	0	0	0	200	903	0	0	0	0	0	0	0	603	903	0
10618	0	0.887305	15.521	-15.8094	2839.96	-1924.57	-3411.44	78.264	120.362	0	0	0	0	0	0	0	200	903	0	0	0	0	0	0	0	603	903	0
10618	1	1.03989	15.521	-14.2835	3114.62	-2229.75	-3274.11	43.8937	81.9428	0	0	0	0	0	0	0	200	903	0	0	0	0	0	0	0	603	903	0
10618	2	1.80283	15.8262	-14.5887	2656.86	-2351.82	-3182.56	38.7917	117.882	0	0	0	0	0	0	0	200	903	0	0	0	0	0	0	0	603	903	0
10618	3	1.80283	15.6736	-14.2835	2839.96	-2229.75	-2862.12	43.8937	101.172	0	0	0	0	0	0	0	200	903	0	0	0	0	0	0	0	603	903	0
10618	4	2.2606	14.1477	-15.8094	2839.96	-2168.71	-2999.45	62.8213	120.362	0	0	0	0	0	0	0	200	903	0	0	0	0	0	0	0	603	903	0
10618	5	1.19248	15.0632	-16.7249	3755.49	-2229.75	-3045.23	66.6812	75.4553	0	0	0	0	0	0	0	200	903	0	0	0	0	0	0	0	603	903	0
10618	6	2.10801	15.6736	-15.5042	3663.94	-2595.96	-2862.12	32.5643	63.6811	0	0	0	0	0	0	0	200	903	0	0	0	0	0	0	0	603	903	0
10618	7	0.734717	15.2158	-12.7576	4030.15	-1985.61	-3091	44.3593	-15.901	0	0	0	0	0	0	0	200	903	0	0	0	0	0	0	0	603	903	0
10618	8	2.10801	14.3003	-14.8939	3297.73	-1924.57	-2953.67	70.7809	78.5848	0	0	0	0	0	0	0	200	903	0	0	0	0	0	0	0	603	903	0
10618	9	1.80283	12.927	-15.5042	3480.83	-1924.57	-2999.45	75.8678	75.4912	0	0	0	0	0	0	0	200	903	0	0	0	0	0	0	0	603	903	0
10619	0	1.65024	14.758	-13.9783	2748.41	-2229.75	-2907.9	40.4855	103.381	0	0	0	0	0	0	0	200	903	0	0	0	0	0	0	0	603	903	0
10619	1	-0.0282228	14.3003	-16.1146	2565.3	-2351.82	-3228.33	54.0564	140.808	0	0	0	0	0	0	0	200	903	0	0	0	0	0	0	0	603	903	0
10619	2	1.03989	14.4529	-13.9783	2565.3	-2168.71	-2907.9	44.8519	116.48	0	0	0	0	0	0	0	200	903	0	0	0	0	0	0	0	603	903	0
10619	3	1.80283	15.2158	-14.5887	2931.52	-2107.68	-2953.67	55.5267	99.0555	0	0	0	0	0	0	0	200	903	0	0	0	0	0	0	0	603	903	0
10619	4	2.10801	15.2158	-15.5042	2656.86	-1863.54	-3091	79.8045	128.636	0	0	0	0	0	0	0	200	903	0	0	0	0	0	0	0	603	903	0
10619	5	1.65024	14.1477	-14.2835	2473.75	-2168.71	-2953.67	48.1668	126.811	0	0	0	0	0	0	0	200	903	0	0	0	0	0	0	0	603	903	0
10619	6	0.124365	14.6054	-15.199	2473.75	-2412.85	-2999.45	41.2497	137.243	0	0	0	0	0	0	0	200	903	0	0	0	0	0	0	0	603	903	0
10619	7	0.887305	15.6736	-13.6732	3389.28	-1741.47	-3091	72.6362	52.1217	0	0	0	0	0	0	0	200	903	0	0	0	0	0	0	0	603	903	0
10619	8	1.65024	13.8425	-13.9783	2931.52	-2107.68	-2862.12	49.2184	90.2814	0	0	0	0	0	0	0	200	903	0	0	0	0	0	0	0	603	903	0
10619	9	3.32871	13.8425	-15.8094	3389.28	-1924.57	-3045.23	78.264	85.616	0	0	0	0	0	0	0	200	903	0	0	0	0	0	0	0	603	903	0
10620	0	1.49766	13.8425	-14.8939	2931.52	-2229.75	-2907.9	50.2909	103.173	0	0	0	0	0	0	0	200	903	0	0	0	0	0	0	0	603	903	0
10620	1	1.19248	13.2322	-15.5042	2931.52	-2046.64	-2862.12	67.9945	110.921	0	0	0	0	0	0	0	200	903	0	0	0	0	0	0	0	603	903	0
10620	2	0.734717	13.5373	-13.368	2931.52	-1802.5	-2999.45	65.1628	80.7062	0	0	0	0	0	0	0	200	903	0	0	0	0	0	0	0	603	903	0
10620	3	1.03989	13.2322	-12.4525	2107.54	-1741.47	-2907.9	60.1508	130.753	0	0	0	0	0	0	0	200	903	0	0	0	0	0	0	0	603	903	0
10620	4	1.49766	13.2322	-15.199	2382.2	-1924.57	-2907.9	73.3755	143.266	0	0	0	0	0	0	0	200	903	0	0	0	0	0	0	0	603	903	0
10620	5	1.19248	14.1477	-14.5887	3206.17	-1924.57	-2953.67	68.0778	80.2287	0	0	0	0	0	0	0	200	903	0	0	0	0	0	0	0	603	903	0
10620	6	0.276953	13.3847	-15.199	2839.96	-2107.68	-2770.57	61.3283	113.148	0	0	0	0	0	0	0	200	903	0	0	0	0	0	0	0	603	903	0
10620	7	0.276953	13.6899	-12.7576	2290.65	-1924.57	-2907.9	49.1435	120.449	0	0	0	0	0	0	0	200	903	0	0	0	0	0	0	0	603	903	0
10620	8	0.429541	12.3166	-10.9266	2290.65	-1863.54	-2816.34	29.4492	90.3601	0	0	0	0	0	0	0	200	903	0	0	0	0	0	0	0	603	903	0
10620	9	1.49766	13.0796	-12.7576	2382.2	-1924.57	-2724.79	49.1435	113.273	0	0	0	0	0	0	0	200	903	0	0	0	0	0	0	0	603	903	0
10621	0	1.65024	13.0796	-14.2835	2565.3	-1924.57	-2907.9	65.2592	120.401	0	0	0	0	0	0	0	200	903	0	0	0	0	0	0	0	603	903	0
10621	1	0.124365	13.0796	-13.368	2656.86	-1863.54	-2587.46	60.597	101.252	0	0	0	0	0	0	0	200	903	0	0	0	0	0	0	0	603	903	0
10621	2	1.95542	12.164	-12.4525	3023.07	-1436.29	-2862.12	84.6581	57.2311	0	0	0	0	0	0	0	200	903	0	0	0	0	0	0	0	603	903	0
10621	3	-0.0282228	12.4692	-12.1473	3023.07	-1863.54	-2907.9	46.5882	51.132	0	0	0	0	0	0	0	200	903	0	0	0	0	0	0	0	603	903	0
10621	4	0.734717	12.164	-12.4525	2382.2	-1680.43	-2999.45	65.0522	108.696	0	0	0	0	0	0	0	200	903	0	0	0	0	0	0	0	603	903	0
10621	5	0.734717	12.3166	-14.2835	2748.41	-2107.68	-2770.57	52.4399	107.582	0	0	0	0	0	0	0	200	903	0	0	0	0	0	0	0	603	903	0
10621	6	0.429541	12.164	-13.9783	2473.75	-1802.5	-2770.57	71.0504	123.03	0	0	0	0	0	0	0	200	903	0	0	0	0	0	0	0	603	903	0
10621	7	0.734717	11.5537	-13.9783	2015.99	-1680.43	-2358.58	79.7832	155.778	0	0	0	0	0	0	0	200	903	0	0	0	0	0	0	0	603	903	0
10621	8	0.124365	11.5537	-12.4525	2107.54	-1558.36	-2679.02	74.8552	130.753	0	0	0	0	0	0	0	200	903	0	0	0	0	0	0	0	603	903	0
10621	9	0.887305	12.164	-11.2318	2382.2	-1558.36	-2404.36	61.254	87.9049	0	0	0	0	0	0	0	200	903	0	0	0	0	0	0	0	603	903	0
10622	0	1.19248	12.3166	-13.9783	2107.54	-1741.47	-2907.9	75.4168	149.228	0	0	0	0	0	0	0	200	903	0	0	0	0	0	0	0	603	903	0
10622	1	-0.180811	12.0115	-11.5369	2290.65	-1558.36	-2770.57	64.9241	101.451	0	0	0	0	0	0	0	200	903	0	0	0	0	0	0	0	603	903	0
10622	2	0.276953	12.3166	-13.6732	2199.09	-1802.5	-2724.79	68.1723	139.167	0	0	0	0	0	0	0	200	903	0	0	0	0	0	0	0	603	903	0
10622	3	-0.791162	12.0115	-12.1473	2656.86	-1802.5	-2404.36	51.6128	81.2796	0	0	0	0	0	0	0	200	903	0	0	0	0	0	0	0	603	903	0
10622	4	1.03989	11.7063	-11.5369	2107.54	-1741.47	-2679.02	49.0529	117.322	0	0	0	0	0	0	0	200	903	0	0	0	0	0	0	0	603	903	0
10622	5	0.734717	11.2485	-14.5887	2199.09	-1497.33	-2312.8	97.3639	149.26	0	0	0	0	0	0	0	200	903	0	0	0	0	0	0	0	603	903	0
10622	6	0.429541	10.4856	-12.4525	2290.65	-1192.15	-2404.36	104.264	116.049	0	0	0	0	0	0	0	200	903	0	0	0	0	0	0	0	603	903	0
10622	7	1.80283	10.9433	-11.8421	2015.99	-1436.29	-2267.03	78.7133	129.761	0	0	0	0	0	0	0	200	903	0	0	0	0	0	0	0	603	903	0
10622	8	0.582129	10.9433	-10.3162	2290.65	-1314.22	-2816.34	72.6065	77.9569	0	0	0	0	0	0	0	200	903	0	0	0	0	0	0	0	603	903	0
10622	9	0.734717	10.4856	-10.9266	2473.75	-1009.04	-2633.24	107.652	73.6022	0	0	0	0	0	0	0	200	903	0	0	0	0	0	0	0	603	903	0
10623	0	0.429541	10.6382	-12.7576	2565.3	-1436.29	-2541.69	87.4172	98.92	0	0	0	0	0	0	0	200	903	0	0	0	0	0	0	0	603	903	0
10623	1	-0.0282228	10.333	-13.0628	1741.33	-1436.29	-2175.48	90.0474	166.696	0	0	0	0	0	0	0	200	903	0	0	0	0	0	0	0	603	903	0
10623	2	0.429541	10.0278	-12.1473	2199.09	-1558.36	-2724.79	71.7112	118.964	0	0	0	0	0	0	0	200	903	0	0	0	0	0	0	0	603	903	0
10623	3	2.41318	10.6382	-11.5369	1832.88	-1741.47	-2038.15	49.0529	141.129	0	0	0	0	0	0	0	200	903	0	0	0	0	0	0	0	603	903	0
10623	4	0.734717	10.9433	-10.9266	1832.88	-1375.25	-2404.36	74.1367	132.255	0	0	0	0	0	0	0	200	903	0	0	0	0	0	0	0	603	903	0
10623	5	0.582129	10.6382	-13.0628	1283.57	-1680.43	-2083.92	71.3576	201.739	0	0	0	0	0	0	0	200	903	0	0	0	0	0	0	0	603	903	0
10623	6	0.124365	10.333	-13.9783	2015.99	-1558.36	-2495.91	88.516	155.778	0	0	0	0	0	0	0	200	903	0	0	0	0	0	0	0	603	903	0
10623	7	0.429541	10.7908	-11.2318	1741.33	-1314.22	-2129.7	82.9907	144.964	0	0	0	0	0	0	0	200	903	0	0	0	0	0	0	0	603	903	0
10623	8	0.276953	10.6382	-9.4007	2107.54	-1375.25	-2404.36	53.7071	75.8101	0	0	0	0	0	0	0	200	903	0	0	0	0	0	0	0	603	903	0
10623	9	0.582129	10.6382	-11.8421	2107.54	-1619.4	-2312.8	63.251	122.03	0	0	0	0	0	0	0	200	903	0	0	0	0	0	0	0	603	903	0
10624	0	1.34507	10.7908	-12.4525	2199.09	-1375.25	-2312.8	89.5595	123.401	0	0	0	0	0	0	0	200	903	0	0	0	0	0	0	0	603	903	0
10624	1	0.124365	9.72264	-12.1473	2748.41	-1558.36	-2175.48	71.7112	73.7427	0	0	0	0	0	0	0	200	903	0	0	0	0	0	0	0	603	903	0
10624	2	-0.180811	9.26487	-10.6214	2199.09	-1680.43	-2267.03	41.7882	92.9563	0	0	0	0	0	0	0	200	903	0	0	0	0	0	0	0	603	903	0
10624	3	0.734717	8.19676	-10.6214	2015.99	-1558.36	-1992.37	53.2811	110.196	0	0	0	0	0	0	0	200	903	0	0	0	0	0	0	0	603	903	0
10624	4	2.41318	9.72264	-11.2318	2015.99	-1375.25	-2083.92	77.5565	120.51	0	0	0	0	0	0	0	200	903	0	0	0	0	0	0	0	603	903	0
10624	5	1.03989	9.87522	-12.4525	1832.88	-1375.25	-2038.15	89.5595	152.809	0	0	0	0	0	0	0	200	903	0	0	0	0	0	0	0	603	903	0
10624	6	-0.180811	8.9597	-10.9266	1741.33	-1497.33	-2541.69	62.9648	140.633	0	0	0	0	0	0	0	200	903	0	0	0	0	0	0	0	603	903	0
10624	7	0.124365	10.333	-10.011	2290.65	-1253.18	-2221.25	74.8199	71.1881	0	0	0	0	0	0	0	200	903	0	0	0	0	0	0	0	603	903	0
10624	8	0.734717	10.1804	-10.3162	2107.54	-1253.18	-1992.37	78.523	95.7061	0	0	0	0	0	0	0	200	903	0	0	0	0	0	0	0	603	903	0
10624	9	2.41318	10.0278	-10.6214	2015.99	-1558.36	-2038.15	53.2811	110.196	0	0	0	0	0	0	0	200	903	0	0	0	0	0	0	0	603	903	0
10625	0	1.19248	9.87522	-9.09552	1741.33	-1558.36	-2175.48	28.6673	108.551	0	0	0	0	0	0	0	200	903	0	0	0	0	0	0	0	603	903	0
10625	1	-0.0282228	10.333	-12.7576	2015.99	-1314.22	-2083.92	96.9856	141.978	0	0	0	0	0	0	0	200	903	0	0	0	0	0	0	0	603	903	0
10625	2	-0.180811	9.72264	-9.70587	2199.09	-1131.11	-2221.25	83.4609	73.4264	0	0	0	0	0	0	0	200	903	0	0	0	0	0	0	0	603	903	0
10625	3	0.734717	8.50193	-11.5369	2107.54	-1497.33	-2312.8	70.2146	117.322	0	0	0	0	0	0	0	200	903	0	0	0	0	0	0	0	603	903	0
10625	4	1.19248	9.41746	-10.6214	2107.54	-1436.29	-2404.36	64.7739	101.576	0	0	0	0	0	0	0	200	903	0	0	0	0	0	0	0	603	903	0
10625	5	1.19248	9.57005	-11.2318	1832.88	-1253.18	-2267.03	88.4249	136.812	0	0	0	0	0	0	0	200	903	0	0	0	0	0	0	0	603	903	0
10625	6	1.80283	7.73899	-10.6214	2290.65	-1497.33	-2129.7	59.0275	84.3366	0	0	0	0	0	0	0	200	903	0	0	0	0	0	0	0	603	903	0
10625	7	0.276953	9.11228	-9.09552	1558.22	-1314.22	-2221.25	55.5091	128.682	0	0	0	0	0	0	0	200	903	0	0	0	0	0	0	0	603	903	0
10625	8	1.80283	8.50193	-10.3162	1649.78	-1558.36	-2083.92	48.9408	140.079	0	0	0	0	0	0	0	200	903	0	0	0	0	0	0	0	603	903	0
10625	9	1.34507	10.0278	-11.8421	1741.33	-1436.29	-2175.48	78.7133	152.954	0	0	0	0	0	0	0	200	903	0	0	0	0	0	0	0	603	903	0
10626	0	1.03989	9.41746	-11.8421	1832.88	-1131.11	-2038.15	104.484	145.223	0	0	0	0	0	0	0	200	903	0	0	0	0	0	0	0	603	903	0
10626	1	2.2606	9.57005	-10.6214	1558.22	-1619.4	-2358.58	47.5346	153.294	0	0	0	0	0	0	0	200	903	0	0	0	0	0	0	0	603	903	0
10626	2	0.734717	7.58641	-7.26447	1466.67	-1619.4	-2312.8	-22.9201	98.1032	0	0	0	0	0	0	0	200	903	0	0	0	0	0	0	0	603	903	0
10626	3	1.65024	10.0278	-9.70587	1466.67	-1497.33	-2175.48	45.73	148.888	0	0	0	0	0	0	0	200	903	0	0	0	0	0	0	0	603	903	0
10626	4	1.65024	9.72264	-10.9266	2199.09	-1497.33	-1855.04	62.9648	98.739	0	0	0	0	0	0	0	200	903	0	0	0	0	0	0	0	603	903	0
10626	5	0.429541	9.41746	-11.2318	1924.44	-1680.43	-1992.37	50.3857	128.661	0	0	0	0	0	0	0	200	903	0	0	0	0	0	0	0	603	903	0
10626	6	2.41318	8.65452	-10.6214	1649.78	-1497.33	-1717.71	59.0275	144.674	0	0	0	0	0	0	0	200	903	0	0	0	0	0	0	0	603	903	0
10626	7	0.276953	8.50193	-8.17999	1741.33	-1131.11	-2038.15	61.7219	87.1232	0	0	0	0	0	0	0	200	903	0	0	0	0	0	0	0	603	903	0
10626	8	1.49766	8.65452	-9.70587	1741.33	-1253.18	-1763.49	70.8839	120.59	0	0	0	0	0	0	0	200	903	0	0	0	0	0	0	0	603	903	0
10626	9	1.19248	7.12864	-11.2318	1649.78	-1619.4	-2129.7	55.8199	153.115	0	0	0	0	0	0	0	200	903	0	0	0	0	0	0	0	603	903	0
10627	0	0.734717	8.65452	-11.5369	1192.01	-1131.11	-2083.92	101.957	196.678	0	0	0	0	0	0	0	200	903	0	0	0	0	0	0	0	603	903	0
10627	1	2.41318	8.9597	-11.2318	1466.67	-1131.11	-2175.48	99.2932	169.417	0	0	0	0	0	0	0	200	903	0	0	0	0	0	0	0	603	903	0
10627	2	0.582129	9.11228	-7.56964	2199.09	-1436.29	-1946.59	10.2565	9.48505	0	0	0	0	0	0	0	200	903	0	0	0	0	0	0	0	603	903	0
10627	3	1.03989	8.9597	-9.70587	2107.54	-1497.33	-2038.15	45.73	82.8592	0	0	0	0	0	0	0	200	903	0	0	0	0	0	0	0	603	903	0
10627	4	1.49766	8.65452	-11.5369	1466.67	-1497.33	-1671.94	70.2146	172.872	0	0	0	0	0	0	0	200	903	0	0	0	0	0	0	0	603	903	0
10627	5	0.582129	9.57005	-10.9266	1375.12	-1070.08	-2038.15	102.066	174.149	0	0	0	0	0	0	0	200	903	0	0	0	0	0	0	0	603	903	0
10627	6	0.887305	6.51829	-10.011	1375.12	-1131.11	-1443.05	87.0135	162.64	0	0	0	0	0	0	0	200	903	0	0	0	0	0	0	0	603	903	0
10627	7	-0.0282228	8.9597	-9.4007	1649.78	-1497.33	-2083.92	40.7219	124.505	0	0	0	0	0	0	0	200	903	0	0	0	0	0	0	0	603	903	0
10627	8	1.95542	9.57005	-9.09552	2015.99	-1314.22	-2587.46	55.5091	78.3537	0	0	0	0	0	0	0	200	903	0	0	0	0	0	0	0	603	903	0
10627	9	1.65024	9.41746	-12.1473	1924.44	-1375.25	-2038.15	86.7849	141.575	0	0	0	0	0	0	0	200	903	0	0	0	0	0	0	0	603	903	0
10628	0	0.429541	8.9597	-10.6214	2199.09	-1314.22	-2038.15	76.2668	92.9563	0	0	0	0	0	0	0	200	903	0	0	0	0	0	0	0	603	903	0
10628	1	1.34507	8.34935	-9.09552	1832.88	-1253.18	-2083.92	62.2197	98.4851	0	0	0	0	0	0	0	200	903	0	0	0	0	0	0	0	603	903	0
10628	2	0.124365	8.65452	-7.87482	1924.44	-1497.33	-2038.15	9.85907	55.6215	0	0	0	0	0	0	0	200	903	0	0	0	0	0	0	0	603	903	0
10628	3	1.19248	7.12864	-10.3162	1741.33	-1436.29	-1992.37	60.7737	131.205	0	0	0	0	0	0	0	200	903	0	0	0	0	0	0	0	603	903	0
10628	4	1.65024	7.73899	-10.9266	1100.46	-1192.15	-1809.26	90.8946	199.286	0	0	0	0	0	0	0	200	903	0	0	0	0	0	0	0	603	903	0
10628	5	0.887305	8.19676	-10.9266	1192.01	-1314.22	-2083.92	79.7226	190.907	0	0	0	0	0	0	0	200	903	0	0	0	0	0	0	0	603	903	0
10628	6	2.41318	8.65452	-10.3162	1283.57	-1253.18	-2129.7	78.523	175.578	0	0	0	0	0	0	0	200	903	0	0	0	0	0	0	0	603	903	0
10628	7	1.34507	9.57005	-10.3162	1558.22	-1314.22	-1992.37	72.6065	148.954	0	0	0	0	0	0	0	200	903	0	0	0	0	0	0	0	603	903	0
10628	8	1.65024	10.1804	-10.011	1741.33	-1497.33	-1946.59	50.4327	126.059	0	0	0	0	0	0	0	200	903	0	0	0	0	0	0	0	603	903	0
10628	9	1.19248	8.04417	-10.011	1375.12	-1131.11	-2175.48	87.0135	162.64	0	0	0	0	0	0	0	200	903	0	0	0	0	0	0	0	603	903	0
10629	0	1.19248	9.72264	-10.9266	2107.54	-1497.33	-1946.59	62.9648	107.118	0	0	0	0	0	0	0	200	903	0	0	0	0	0	0	0	603	903	0
10629	1	2.10801	9.41746	-10.3162	1832.88	-1375.25	-1717.71	66.6901	122.33	0	0	0	0	0	0	0	200	903	0	0	0	0	0	0	0	603	903	0
10629	2	0.734717	9.41746	-10.6214	1924.44	-1375.25	-1671.94	70.5204	118.815	0	0	0	0	0	0	0	200	903	0	0	0	0	0	0	0	603	903	0
10629	3	1.65024	8.65452	-10.011	1832.88	-1131.11	-2129.7	87.0135	116.914	0	0	0	0	0	0	0	200	903	0	0	0	0	0	0	0	603	903	0
10629	4	2.2606	8.65452	-10.011	1924.44	-1131.11	-2038.15	87.0135	107.769	0	0	0	0	0	0	0	200	903	0	0	0	0	0	0	0	603	903	0
10629	5	0.429541	8.34935	-10.9266	2107.54	-1436.29	-1809.26	68.5508	107.118	0	0	0	0	0	0	0	200	903	0	0	0	0	0	0	0	603	903	0
10629	6	2.41318	8.9597	-10.6214	1741.33	-1863.54	-1992.37	24.5489	136.055	0	0	0	0	0	0	0	200	903	0	0	0	0	0	0	0	603	903	0
10629	7	0.276953	9.11228	-9.70587	1466.67	-1070.08	-2083.92	89.7494	148.888	0	0	0	0	0	0	0	200	903	0	0	0	0	0	0	0	603	903	0
10629	8	1.34507	8.50193	-10.011	1466.67	-1558.36	-1946.59	44.3359	153.495	0	0	0	0	0	0	0	200	903	0	0	0	0	0	0	0	603	903	0
10629	9	1.65024	8.80711	-11.2318	2015.99	-1558.36	-1992.37	61.254	120.51	0	0	0	0	0	0	0	200	903	0	0	0	0	0	0	0	603	903	0
10630	0	0.582129	8.65452	-10.6214	1283.57	-1436.29	-1809.26	64.7739	179.153	0	0	0	0	0	0	0	200	903	0	0	0	0	0	0	0	603	903	0
10630	1	1.65024	8.80711	-8.79034	1375.12	-1192.15	-1855.04	64.3797	143.565	0	0	0	0	0	0	0	200	903	0	0	0	0	0	0	0	603	903	0
10630	2	1.49766	8.19676	-9.4007	1192.01	-1375.25	-1946.59	53.7071	173.199	0	0	0	0	0	0	0	200	903	0	0	0	0	0	0	0	603	903	0
10630	3	1.19248	9.41746	-9.70587	2015.99	-1192.15	-1946.59	77.1724	92.2918	0	0	0	0	0	0	0	200	903	0	0	0	0	0	0	0	603	903	0
10630	4	1.49766	8.9597	-9.70587	2199.09	-1192.15	-1900.82	77.1724	73.4264	0	0	0	0	0	0	0	200	903	0	0	0	0	0	0	0	603	903	0
10630	5	0.429541	10.333	-11.5369	2199.09	-1253.18	-2129.7	91.3763	109.387	0	0	0	0	0	0	0	200	903	0	0	0	0	0	0	0	603	903	0
10630	6	2.10801	8.9597	-10.6214	2656.86	-1863.54	-1900.82	24.5489	49.858	0	0	0	0	0	0	0	200	903	0	0	0	0	0	0	0	603	903	0
10630	7	-0.333399	8.50193	-6.65411	1832.88	-1070.08	-1809.26	39.1854	24.5489	0	0	0	0	0	0	0	200	903	0	0	0	0	0	0	0	603	903	0
10630	8	1.19248	8.34935	-9.70587	1649.78	-1497.33	-1900.82	45.73	130.023	0	0	0	0	0	0	0	200	903	0	0	0	0	0	0	0	603	903	0
10630	9	1.34507	6.82347	-10.6214	1466.67	-1497.33	-2038.15	59.0275	161.913	0	0	0	0	0	0	0	200	903	0	0	0	0	0	0	0	603	903	0
10631	0	-0.180811	7.43382	-10.3162	1466.67	-1192.15	-2129.7	84.4394	157.829	0	0	0	0	0	0	0	200	903	0	0	0	0	0	0	0	603	903	0
10631	1	-0.333399	7.12864	-8.17999	1375.12	-1009.04	-1626.16	76.645	131.892	0	0	0	0	0	0	0	200	903	0	0	0	0	0	0	0	603	903	0
10631	2	0	0	0	0	0	0	200	300	0	0	0	0	0	0	0	200	903	0	0	0	0	0	0	0	603	903	0
10631	3	1.03989	7.73899	-7.87482	2015.99	-1741.47	-2129.7	-21.1436	43.9955	0	0	0	0	0	0	0	200	903	0	0	0	0	0	0	0	603	903	0
10631	4	0.124365	7.43382	-11.5369	1558.22	-1070.08	-1900.82	107.248	164.936	0	0	0	0	0	0	0	200	903	0	0	0	0	0	0	0	603	903	0
10631	5	-0.791162	7.58641	-10.3162	1283.57	-948.008	-2267.03	108.105	175.578	0	0	0	0	0	0	0	200	903	0	0	0	0	0	0	0	603	903	0
10631	6	-0.638574	7.28123	-8.48517	1100.46	-1314.22	-1763.49	45.1157	170.308	0	0	0	0	0	0	0	200	903	0	0	0	0	0	0	0	603	903	0
10631	7	1.19248	8.34935	-8.17999	1466.67	-1253.18	-1855.04	46.7989	120.7	0	0	0	0	0	0	0	200	903	0	0	0	0	0	0	0	603	903	0
10631	8	1.19248	6.97605	-7.87482	1741.33	-1009.04	-1946.59	71.8645	78.8735	0	0	0	0	0	0	0	200	903	0	0	0	0	0	0	0	603	903	0
10631	9	0.887305	8.19676	-10.9266	1649.78	-1009.04	-1946.59	107.652	149.012	0	0	0	0	0	0	0	200	903	0	0	0	0	0	0	0	603	903	0
10632	0	0.124365	7.12864	-10.011	1832.88	-1253.18	-1809.26	74.8199	116.914	0	0	0	0	0	0	0	200	903	0	0	0	0	0	0	0	603	903	0
10632	1	-0.485986	7.28123	-7.87482	1466.67	-886.973	-1900.82	87.3659	113.752	0	0	0	0	0	0	0	200	903	0	0	0	0	0	0	0	603	903	0
10632	2	0	0	0	0	0	0	200	300	0	0	0	0	0	0	0	200	903	0	0	0	0	0	0	0	603	903	0
10632	3	1.19248	6.3657	-8.48517	1375.12	-1314.22	-1809.26	45.1157	137.938	0	0	0	0	0	0	0	200	903	0	0	0	0	0	0	0	603	903	0
10632	4	1.03989	6.67088	-10.011	1466.67	-1375.25	-1626.16	62.6263	153.495	0	0	0	0	0	0	0	200	903	0	0	0	0	0	0	0	603	903	0
10632	5	0.582129	6.3657	-10.011	1008.91	-1009.04	-1900.82	99.207	199.221	0	0	0	0	0	0	0	200	903	0	0	0	0	0	0	0	603	903	0
10632	6	1.65024	7.43382	-8.17999	1741.33	-1070.08	-1992.37	69.1834	87.1232	0	0	0	0	0	0	0	200	903	0	0	0	0	0	0	0	603	903	0
10632	7	-0.0282228	7.12864	-8.17999	1375.12	-1192.15	-1626.16	54.2604	131.892	0	0	0	0	0	0	0	200	903	0	0	0	0	0	0	0	603	903	0
10632	8	1.19248	6.51829	-7.56964	1100.46	-886.973	-1534.61	82.8249	154.622	0	0	0	0	0	0	0	200	903	0	0	0	0	0	0	0	603	903	0
10632	9	0.582129	8.04417	-9.70587	1100.46	-1070.08	-1763.49	89.7494	186.619	0	0	0	0	0	0	0	200	903	0	0	0	0	0	0	0	603	903	0
10633	0	0.582129	7.28123	-8.17999	1924.44	-1192.15	-1809.26	54.2604	64.7387	0	0	0	0	0	0	0	200	903	0	0	0	0	0	0	0	603	903	0
10633	1	0.734717	6.67088	-10.9266	1741.33	-1131.11	-1763.49	96.4805	140.633	0	0	0	0	0	0	0	200	903	0	0	0	0	0	0	0	603	903	0
10633	2	0.124365	7.28123	-8.48517	1283.57	-1314.22	-1580.38	45.1157	148.728	0	0	0	0	0	0	0	200	903	0	0	0	0	0	0	0	603	903	0
10633	3	1.03989	6.82347	-9.09552	2015.99	-1009.04	-1809.26	89.0615	78.3537	0	0	0	0	0	0	0	200	903	0	0	0	0	0	0	0	603	903	0
10633	4	2.87095	6.51829	-8.48517	1283.57	-1009.04	-1763.49	81.0815	148.728	0	0	0	0	0	0	0	200	903	0	0	0	0	0	0	0	603	903	0
10633	5	1.80283	6.21311	-9.70587	1466.67	-948.008	-1488.83	102.326	148.888	0	0	0	0	0	0	0	200	903	0	0	0	0	0	0	0	603	903	0
10633	6	0.429541	6.97605	-9.09552	1008.91	-1070.08	-1351.5	82.3511	189.076	0	0	0	0	0	0	0	200	903	0	0	0	0	0	0	0	603	903	0
10633	7	0.582129	6.67088	-7.87482	1008.91	-948.008	-1488.83	79.6152	171.882	0	0	0	0	0	0	0	200	903	0	0	0	0	0	0	0	603	903	0
10633	8	0.276953	6.51829	-9.09552	1466.67	-1314.22	-1626.16	55.5091	138.748	0	0	0	0	0	0	0	200	903	0	0	0	0	0	0	0	603	903	0
10633	9	0	0	0	0	0	0	200	300	0	0	0	0	0	0	0	200	903	0	0	0	0	0	0	0	603	903	0
10634	0	1.34507	6.3657	-9.70587	1741.33	-1314.22	-1488.83	64.5954	120.59	0	0	0	0	0	0	0	200	903	0	0	0	0	0	0	0	603	903	0
10634	1	0.734717	7.12864	-9.4007	825.803	-1070.08	-1717.71	86.1703	212.155	0	0	0	0	0	0	0	200	903	0	0	0	0	0	0	0	603	903	0
10634	2	1.03989	6.06053	-8.48517	1100.46	-1009.04	-1717.71	81.0815	170.308	0	0	0	0	0	0	0	200	903	0	0	0	0	0	0	0	603	903	0
10634	3	0.887305	7.12864	-8.48517	1924.44	-886.973	-1488.83	95.4678	73.2	0	0	0	0	0	0	0	200	903	0	0	0	0	0	0	0	603	903	0
10634	4	0	0	0	0	0	0	200	300	0	0	0	0	0	0	0	200	903	0	0	0	0	0	0	0	603	903	0
10634	5	1.49766	6.67088	-10.011	1741.33	-886.973	-1763.49	111.401	126.059	0	0	0	0	0	0	0	200	903	0	0	0	0	0	0	0	603	903	0
10634	6	0.276953	6.82347	-10.3162	1832.88	-1253.18	-1580.38	78.523	122.33	0	0	0	0	0	0	0	200	903	0	0	0	0	0	0	0	603	903	0
10634	7	0.582129	6.21311	-8.48517	1832.88	-1070.08	-1397.28	73.8884	83.9898	0	0	0	0	0	0	0	200	903	0	0	0	0	0	0	0	603	903	0
10634	8	0	0	0	0	0	0	200	300	0	0	0	0	0	0	0	200	903	0	0	0	0	0	0	0	603	903	0
10634	9	0	0	0	0	0	0	200	300	0	0	0	0	0	0	0	200	903	0	0	0	0	0	0	0	603	903	0
10635	0	2.2606	4.99241	-9.4007	1466.67	-1131.11	-1488.83	79.6777	143.983	0	0	0	0	0	0	0	200	903	0	0	0	0	0	0	0	603	903	0
10635	1	0.429541	5.75535	-10.011	1008.91	-948.008	-1443.05	105.304	199.221	0	0	0	0	0	0	0	200	903	0	0	0	0	0	0	0	603	903	0
10635	2	0	0	0	0	0	0	200	300	0	0	0	0	0	0	0	200	903	0	0	0	0	0	0	0	603	903	0
10635	3	0	0	0	0	0	0	200	300	0	0	0	0	0	0	0	200	903	0	0	0	0	0	0	0	603	903	0
10635	4	1.49766	6.97605	-7.26447	1741.33	-1070.08	-1488.83	52.6969	60.2948	0	0	0	0	0	0	0	200	903	0	0	0	0	0	0	0	603	903	0
10635	5	0.887305	6.51829	-8.79034	1008.91	-948.008	-1305.72	92.1534	185.225	0	0	0	0	0	0	0	200	903	0	0	0	0	0	0	0	603	903	0
10635	6	-0.0282228	5.45018	-9.4007	825.803	-825.938	-847.961	112.141	212.155	0	0	0	0	0	0	0	200	903	0	0	0	0	0	0	0	603	903	0
10635	7	0	0	0	0	0	0	200	300	0	0	0	0	0	0	0	200	903	0	0	0	0	0	0	0	603	903	0
10635	8	0	0	0	0	0	0	200	300	0	0	0	0	0	0	0	200	903	0	0	0	0	0	0	0	603	903	0
10635	9	0	0	0	0	0	0	200	300	0	0	0	0	0	0	0	200	903	0	0	0	0	0	0	0	603	903	0
10636	0	0	0	0	0	0	0	200	300	0	0	0	0	0	0	0	200	903	0	0	0	0	0	0	0	603	903	0
10636	1	0	0	0	0	0	0	200	300	0	0	0	0	0	0	0	200	903	0	0	0	0	0	0	0	603	903	0
10636	2	0	0	0	0	0	0	200	300	0	0	0	0	0	0	0	200	903	0	0	0	0	0	0	0	603	903	0
10636	3	0	0	0	0	0	0	200	300	0	0	0	0	0	0	0	200	903	0	0	0	0	0	0	0	603	903	0
10636	4	0	0	0	0	0	0	200	300	0	0	0	0	0	0	0	200	903	0	0	0	0	0	0	0	603	903	0
10636	5	1.34507	4.68724	-9.09552	917.356	-886.973	-1259.95	102.482	199.142	0	0	0	0	0	0	0	200	903	0	0	0	0	0	0	0	603	903	0
10636	6	0	0	0	0	0	0	200	300	0	0	0	0	0	0	0	200	903	0	0	0	0	0	0	0	603	903	0
10636	7	0	0	0	0	0	0	200	300	0	0	0	0	0	0	0	200	903	0	0	0	0	0	0	0	603	903	0
10636	8	0	0	0	0	0	0	200	300	0	0	0	0	0	0	0	200	903	0	0	0	0	0	0	0	603	903	0
10636	9	0	0	0	0	0	0	200	300	0	0	0	0	0	0	0	200	903	0	0	0	0	0	0	0	603	903	0
10637	0	1.65024	5.90794	-8.79034	1100.46	-703.868	-1031.07	119.927	174.81	0	0	0	0	0	0	0	200	903	0	0	0	0	0	0	0	603	903	0
10637	1	0	0	0	0	0	0	200	300	0	0	0	0	0	0	0	200	903	0	0	0	0	0	0	0	603	903	0
10637	2	0.124365	5.145	-9.70587	1008.91	-1070.08	-710.631	89.7494	196.052	0	0	0	0	0	0	0	200	903	0	0	0	0	0	0	0	603	903	0
10637	3	0	0	0	0	0	0	200	300	0	0	0	0	0	0	0	200	903	0	0	0	0	0	0	0	603	903	0
10637	4	0	0	0	0	0	0	200	300	0	0	0	0	0	0	0	200	903	0	0	0	0	0	0	0	603	903	0
10637	5	0	0	0	0	0	0	200	300	0	0	0	0	0	0	0	200	903	0	0	0	0	0	0	0	603	903	0
10637	6	0	0	0	0	0	0	200	300	0	0	0	0	0	0	0	200	903	0	0	0	0	0	0	0	603	903	0
10637	7	0	0	0	0	0	0	200	300	0	0	0	0	0	0	0	200	903	0	0	0	0	0	0	0	603	903	0
10637	8	0	0	0	0	0	0	200	300	0	0	0	0	0	0	0	200	903	0	0	0	0	0	0	0	603	903	0
10637	9	0	0	0	0	0	0	200	300	0	0	0	0	0	0	0	200	903	0	0	0	0	0	0	0	603	903	0
10638	0	0	0	0	0	0	0	200	300	0	0	0	0	0	0	0	200	903	0	0	0	0	0	0	0	603	903	0
10638	1	0	0	0	0	0	0	200	300	0	0	0	0	0	0	0	200	903	0	0	0	0	0	0	0	603	903	0
10638	2	0	0	0	0	0	0	200	300	0	0	0	0	0	0	0	200	903	0	0	0	0	0	0	0	603	903	0
10638	3	0	0	0	0	0	0	200	300	0	0	0	0	0	0	0	200	903	0	0	0	0	0	0	0	603	903	0
10638	4	0	0	0	0	0	0	200	300	0	0	0	0	0	0	0	200	903	0	0	0	0	0	0	0	603	903	0
10638	5	0	0	0	0	0	0	200	300	0	0	0	0	0	0	0	200	903	0	0	0	0	0	0	0	603	903	0
10638	6	0	0	0	0	0	0	200	300	0	0	0	0	0	0	0	200	903	0	0	0	0	0	0	0	603	903	0
10638	7	0	0	0	0	0	0	200	300	0	0	0	0	0	0	0	200	903	0	0	0	0	0	0	0	603	903	0
10638	8	0	0	0	0	0	0	200	300	0	0	0	0	0	0	0	200	903	0	0	0	0	0	0	0	603	903	0
10638	9	0	0	0	0	0	0	200	300	0	0	0	0	0	0	0	200	903	0	0	0	0	0	0	0	603	903	0
10639	0	0	0	0	0	0	0	200	300	0	0	0	0	0	0	0	200	903	0	0	0	0	0	0	0	603	903	0
10639	1	0	0	0	0	0	0	200	300	0	0	0	0	0	0	0	200	903	0	0	0	0	0	0	0	603	903	0
10639	2	0	0	0	0	0	0	200	300	0	0	0	0	0	0	0	200	903	0	0	0	0	0	0	0	603	903	0
10639	3	0	0	0	0	0	0	200	300	0	0	0	0	0	0	0	200	903	0	0	0	0	0	0	0	603	903	0
10639	4	0	0	0	0	0	0	200	300	0	0	0	0	0	0	0	200	903	0	0	0	0	0	0	0	603	903	0
10639	5	0	0	0	0	0	0	200	300	0	0	0	0	0	0	0	200	903	0	0	0	0	0	0	0	603	903	0
10639	6	0	0	0	0	0	0	200	300	0	0	0	0	0	0	0	200	903	0	0	0	0	0	0	0	603	903	0
10639	7	0	0	0	0	0	0	200	300	0	0	0	0	0	0	0	200	903	0	0	0	0	0	0	0	603	903	0
10639	8	0	0	0	0	0	0	200	300	0	0	0	0	0	0	0	200	903	0	0	0	0	0	0	0	603	903	0
10639	9	0	0	0	0	0	0	200	300	0	0	0	0	0	0	0	200	903	0	0	0	0	0	0	0	603	903	0
10640	0	0	0	0	0	0	0	200	300	0	0	0	0	0	0	0	200	903	0	0	0	0	0	0	0	603	903	0
10640	1	0	0	0	0	0	0	200	300	0	0	0	0	0	0	0	200	903	0	0	0	0	0	0	0	603	903	0
10640	2	0	0	0	0	0	0	200	300	0	0	0	0	0	0	0	200	903	0	0	0	0	0	0	0	603	903	0
10640	3	0	0	0	0	0	0	200	300	0	0	0	0	0	0	0	200	903	0	0	0	0	0	0	0	603	903	0
10640	4	0	0	0	0	0	0	200	300	0	0	0	0	0	0	0	200	903	0	0	0	0	0	0	0	603	903	0
10640	5	0	0	0	0	0	0	200	300	0	0	0	0	0	0	0	200	903	0	0	0	0	0	0	0	603	903	0
10640	6	0	0	0	0	0	0	200	300	0	0	0	0	0	0	0	200	903	0	0	0	0	0	0	0	603	903	0
10640	7	0	0	0	0	0	0	200	300	0	0	0	0	0	0	0	200	903	0	0	0	0	0	0	0	603	903	0
10640	8	0	0	0	0	0	0	200	300	0	0	0	0	0	0	0	200	903	0	0	0	0	0	0	0	603	903	0
10640	9	0	0	0	0	0	0	200	300	0	0	0	0	0	0	0	200	903	0	0	0	0	0	0	0	603	903	0
10641	0	0	0	0	0	0	0	200	300	0	0	0	0	0	0	0	200	903	0	0	0	0	0	0	0	603	903	0
10641	1	0	0	0	0	0	0	200	300	0	0	0	0	0	0	0	200	903	0	0	0	0	0	0	0	603	903	0
10641	2	0	0	0	0	0	0	200	300	0	0	0	0	0	0	0	200	903	0	0	0	0	0	0	0	603	903	0
10641	3	0	0	0	0	0	0	200	300	0	0	0	0	0	0	0	200	903	0	0	0	0	0	0	0	603	903	0
10641	4	0	0	0	0	0	0	200	300	0	0	0	0	0	0	0	200	903	0	0	0	0	0	0	0	603	903	0
10641	5	0	0	0	0	0	0	200	300	0	0	0	0	0	0	0	200	903	0	0	0	0	0	0	0	603	903	0
10641	6	0	0	0	0	0	0	200	300	0	0	0	0	0	0	0	200	903	0	0	0	0	0	0	0	603	903	0
10641	7	0	0	0	0	0	0	200	300	0	0	0	0	0	0	0	200	903	0	0	0	0	0	0	0	603	903	0
10641	8	0	0	0	0	0	0	200	300	0	0	0	0	0	0	0	200	903	0	0	0	0	0	0	0	603	903	0
10641	9	0	0	0	0	0	0	200	300	0	0	0	0	0	0	0	200	903	0	0	0	0	0	0	0	603	903	0
10642	0	0	0	0	0	0	0	200	300	0	0	0	0	0	0	0	200	903	0	0	0	0	0	0	0	603	903	0
10642	1	0	0	0	0	0	0	200	300	0	0	0	0	0	0	0	200	903	0	0	0	0	0	0	0	603	903	0
10642	2	0	0	0	0	0	0	200	300	0	0	0	0	0	0	0	200	903	0	0	0	0	0	0	0	603	903	0
10642	3	0	0	0	0	0	0	200	300	0	0	0	0	0	0	0	200	903	0	0	0	0	0	0	0	603	903	0
10642	4	0	0	0	0	0	0	200	300	0	0	0	0	0	0	0	200	903	0	0	0	0	0	0	0	603	903	0
10642	5	0	0	0	0	0	0	200	300	0	0	0	0	0	0	0	200	903	0	0	0	0	0	0	0	603	903	0
10642	6	0	0	0	0	0	0	200	300	0	0	0	0	0	0	0	200	903	0	0	0	0	0	0	0	603	903	0
10642	7	0	0	0	0	0	0	200	300	0	0	0	0	0	0	0	200	903	0	0	0	0	0	0	0	603	903	0
10642	8	0	0	0	0	0	0	200	300	0	0	0	0	0	0	0	200	903	0	0	0	0	0	0	0	603	903	0
10642	9	0	0	0	0	0	0	200	300	0	0	0	0	0	0	0	200	903	0	0	0	0	0	0	0	603	903	0
10643	0	0	0	0	0	0	0	200	300	0	0	0	0	0	0	0	200	903	0	0	0	0	0	0	0	603	903	0
10643	1	0	0	0	0	0	0	200	300	0	0	0	0	0	0	0	200	903	0	0	0	0	0	0	0	603	903	0
10643	2	0	0	0	0	0	0	200	300	0	0	0	0	0	0	0	200	903	0	0	0	0	0	0	0	603	903	0
10643	3	0	0	0	0	0	0	200	300	0	0	0	0	0	0	0	200	903	0	0	0	0	0	0	0	603	903	0
10643	4	0	0	0	0	0	0	200	300	0	0	0	0	0	0	0	200	903	0	0	0	0	0	0	0	603	903	0
10643	5	0	0	0	0	0	0	200	300	0	0	0	0	0	0	0	200	903	0	0	0	0	0	0	0	603	903	0
10643	6	0	0	0	0	0	0	200	300	0	0	0	0	0	0	0	200	903	0	0	0	0	0	0	0	603	903	0
10643	7	0	0	0	0	0	0	200	300	0	0	0	0	0	0	0	200	903	0	0	0	0	0	0	0	603	903	0
10643	8	0	0	0	0	0	0	200	300	0	0	0	0	0	0	0	200	903	0	0	0	0	0	0	0	603	903	0
10643	9	0	0	0	0	0	0	200	300	0	0	0	0	0	0	0	200	903	0	0	0	0	0	0	0	603	903	0
10644	0	0	0	0	0	0	0	200	300	0	0	0	0	0	0	0	200	903	0	0	0	0	0	0	0	603	903	0
10644	1	0	0	0	0	0	0	200	300	0	0	0	0	0	0	0	200	903	0	0	0	0	0	0	0	603	903	0
10644	2	0	0	0	0	0	0	200	300	0	0	0	0	0	0	0	200	903	0	0	0	0	0	0	0	603	903	0
10644	3	0	0	0	0	0	0	200	300	0	0	0	0	0	0	0	200	903	0	0	0	0	0	0	0	603	903	0
10644	4	0	0	0	0	0	0	200	300	0	0	0	0	0	0	0	200	903	0	0	0	0	0	0	0	603	903	0
10644	5	0	0	0	0	0	0	200	300	0	0	0	0	0	0	0	200	903	0	0	0	0	0	0	0	603	903	0
10644	6	0	0	0	0	0	0	200	300	0	0	0	0	0	0	0	200	903	0	0	0	0	0	0	0	603	903	0
10644	7	0	0	0	0	0	0	200	300	0	0	0	0	0	0	0	200	903	0	0	0	0	0	0	0	603	903	0
10644	8	0	0	0	0	0	0	200	300	0	0	0	0	0	0	0	200	903	0	0	0	0	0	0	0	603	903	0
10644	9	0	0	0	0	0	0	200	300	0	0	0	0	0	0	0	200	903	0	0	0	0	0	0	0	603	903	0
10645	0	0	0	0	0	0	0	200	300	0	0	0	0	0	0	0	200	903	0	0	0	0	0	0	0	603	903	0
10645	1	0	0	0	0	0	0	200	300	0	0	0	0	0	0	0	200	903	0	0	0	0	0	0	0	603	903	0
10645	2	0	0	0	0	0	0	200	300	0	0	0	0	0	0	0	200	903	0	0	0	0	0	0	0	603	903	0
10645	3	0	0	0	0	0	0	200	300	0	0	0	0	0	0	0	200	903	0	0	0	0	0	0	0	603	903	0
10645	4	0	0	0	0	0	0	200	300	0	0	0	0	0	0	0	200	903	0	0	0	0	0	0	0	603	903	0
10645	5	0	0	0	0	0	0	200	300	0	0	0	0	0	0	0	200	903	0	0	0	0	0	0	0	603	903	0
10645	6	0	0	0	0	0	0	200	300	0	0	0	0	0	0	0	200	903	0	0	0	0	0	0	0	603	903	0
10645	7	0	0	0	0	0	0	200	300	0	0	0	0	0	0	0	200	903	0	0	0	0	0	0	0	603	903	0
10645	8	0	0	0	0	0	0	200	300	0	0	0	0	0	0	0	200	903	0	0	0	0	0	0	0	603	903	0
10645	9	0	0	0	0	0	0	200	300	0	0	0	0	0	0	0	200	903	0	0	0	0	0	0	0	603	903	0
10646	0	0	0	0	0	0	0	200	300	0	0	0	0	0	0	0	200	903	0	0	0	0	0	0	0	603	903	0
10646	1	0	0	0	0	0	0	200	300	0	0	0	0	0	0	0	200	903	0	0	0	0	0	0	0	603	903	0
10646	2	0	0	0	0	0	0	200	300	0	0	0	0	0	0	0	200	903	0	0	0	0	0	0	0	603	903	0
10646	3	0	0	0	0	0	0	200	300	0	0	0	0	0	0	0	200	903	0	0	0	0	0	0	0	603	903	0
10646	4	0	0	0	0	0	0	200	300	0	0	0	0	0	0	0	200	903	0	0	0	0	0	0	0	603	903	0
10646	5	0	0	0	0	0	0	200	300	0	0	0	0	0	0	0	200	903	0	0	0	0	0	0	0	603	903	0
10646	6	0	0	0	0	0	0	200	300	0	0	0	0	0	0	0	200	903	0	0	0	0	0	0	0	603	903	0
10646	7	0	0	0	0	0	0	200	300	0	0	0	0	0	0	0	200	903	0	0	0	0	0	0	0	603	903	0
10646	8	0	0	0	0	0	0	200	300	0	0	0	0	0	0	0	200	903	0	0	0	0	0	0	0	603	903	0
10646	9	0	0	0	0	0	0	200	300	0	0	0	0	0	0	0	200	903	0	0	0	0	0	0	0	603	903	0
10647	0	0	0	0	0	0	0	200	300	0	0	0	0	0	0	0	200	903	0	0	0	0	0	0	0	603	903	0
10647	1	0	0	0	0	0	0	200	300	0	0	0	0	0	0	0	200	903	0	0	0	0	0	0	0	603	903	0
10647	2	0	0	0	0	0	0	200	300	0	0	0	0	0	0	0	200	903	0	0	0	0	0	0	0	603	903	0
10647	3	0	0	0	0	0	0	200	300	0	0	0	0	0	0	0	200	903	0	0	0	0	0	0	0	603	903	0
10647	4	0	0	0	0	0	0	200	300	0	0	0	0	0	0	0	200	903	0	0	0	0	0	0	0	603	903	0
10647	5	0	0	0	0	0	0	200	300	0	0	0	0	0	0	0	200	903	0	0	0	0	0	0	0	603	903	0
10647	6	0	0	0	0	0	0	200	300	0	0	0	0	0	0	0	200	903	0	0	0	0	0	0	0	603	903	0
10647	7	0	0	0	0	0	0	200	300	0	0	0	0	0	0	0	200	903	0	0	0	0	0	0	0	603	903	0
10647	8	0	0	0	0	0	0	200	300	0	0	0	0	0	0	0	200	903	0	0	0	0	0	0	0	603	903	0
10647	9	0	0	0	0	0	0	200	300	0	0	0	0	0	0	0	200	903	0	0	0	0	0	0	0	603	903	0
10648	0	0	0	0	0	0	0	200	300	0	0	0	0	0	0	0	200	903	0	0	0	0	0	0	0	603	903	0
10648	1	0	0	0	0	0	0	200	300	0	0	0	0	0	0	0	200	903	0	0	0	0	0	0	0	603	903	0
10648	2	0	0	0	0	0	0	200	300	0	0	0	0	0	0	0	200	903	0	0	0	0	0	0	0	603	903	0
10648	3	0	0	0	0	0	0	200	300	0	0	0	0	0	0	0	200	903	0	0	0	0	0	0	0	603	903	0
10648	4	0	0	0	0	0	0	200	300	0	0	0	0	0	0	0	200	903	0	0	0	0	0	0	0	603	903	0
10648	5	0	0	0	0	0	0	200	300	0	0	0	0	0	0	0	200	903	0	0	0	0	0	0	0	603	903	0
10648	6	0	0	0	0	0	0	200	300	0	0	0	0	0	0	0	200	903	0	0	0	0	0	0	0	603	903	0
10648	7	0	0	0	0	0	0	200	300	0	0	0	0	0	0	0	200	903	0	0	0	0	0	0	0	603	903	0
10648	8	2.71836	10.1804	-22.5233	-822.147	-1192.15	-985.29	147.07	336.502	0	0	0	0	0	0	0	200	903	0	0	0	0	0	0	0	603	903	0
10648	9	0.734717	24.0659	-36.5613	-639.041	-1497.33	-1717.71	159.046	317.479	0	0	0	0	0	0	0	200	903	0	0	0	0	0	0	0	603	903	0
10649	0	-4.60586	17.5046	-27.1009	-1005.25	-1009.04	-893.737	162.767	337.093	0	0	0	0	0	0	0	200	903	0	0	0	0	0	0	0	603	903	0
10649	1	-6.13174	-1.1111	-10.6214	-913.7	-1009.04	204.896	104.999	386.024	0	0	0	0	0	0	0	200	903	0	0	0	0	0	0	0	603	903	0
10649	2	2.56577	4.53465	-9.4007	-547.489	-948.008	-1076.84	99.1555	358.239	0	0	0	0	0	0	0	200	903	0	0	0	0	0	0	0	603	903	0
10649	3	8.5167	22.54	-26.7957	-364.383	-520.762	-1122.62	180.565	313.599	0	0	0	0	0	0	0	200	903	0	0	0	0	0	0	0	603	903	0
10649	4	2.56577	18.4201	-37.4769	-89.7247	-1497.33	-664.855	160.047	302.394	0	0	0	0	0	0	0	200	903	0	0	0	0	0	0	0	603	903	0
10649	5	-11.7775	7.28123	-32.5941	1.82809	-1802.5	-847.961	144.699	299.944	0	0	0	0	0	0	0	200	903	0	0	0	0	0	0	0	603	903	0
10649	6	-13.3034	19.4883	-29.8475	-1188.36	-2107.68	-1763.49	129.385	339.814	0	0	0	0	0	0	0	200	903	0	0	0	0	0	0	0	603	903	0
10649	7	-0.333399	32.916	-41.7493	-913.7	-1924.57	-1626.16	153.902	321.885	0	0	0	0	0	0	0	200	903	0	0	0	0	0	0	0	603	903	0
10649	8	-1.24893	22.6926	-51.2098	-1005.25	-1680.43	-1305.72	167.185	319.63	0	0	0	0	0	0	0	200	903	0	0	0	0	0	0	0	603	903	0
10649	9	-9.79385	11.7063	-57.3133	-730.594	-2229.75	-1626.16	161.095	312.747	0	0	0	0	0	0	0	200	903	0	0	0	0	0	0	0	603	903	0
10650	0	-8.42056	22.2348	-60.9754	-1279.91	-3145.27	-1534.61	148.417	320.991	0	0	0	0	0	0	0	200	903	0	0	0	0	0	0	0	603	903	0
10650	1	-6.89468	27.5754	-71.6566	-2653.2	-3755.63	-939.513	147.589	337.027	0	0	0	0	0	0	0	200	903	0	0	0	0	0	0	0	603	903	0
10650	2	-11.1671	12.927	-85.6946	-1737.67	-3938.73	-664.855	154.038	320.278	0	0	0	0	0	0	0	200	903	0	0	0	0	0	0	0	603	903	0
10650	3	-11.3197	2.55101	-96.681	-1005.25	-4060.8	-710.631	157.998	310.398	0	0	0	0	0	0	0	200	903	0	0	0	0	0	0	0	603	903	0
10650	4	-2.92739	12.4692	-104.616	-2195.44	-4060.8	-344.421	161.184	320.986	0	0	0	0	0	0	0	200	903	0	0	0	0	0	0	0	603	903	0
10650	5	-2.7748	19.0305	-110.414	-2103.89	-4854.26	-756.408	156.036	319.055	0	0	0	0	0	0	0	200	903	0	0	0	0	0	0	0	603	903	0
10650	6	-13.3034	7.12864	-115.907	-2470.1	-5342.54	-802.184	153.907	321.311	0	0	0	0	0	0	0	200	903	0	0	0	0	0	0	0	603	903	0
10650	7	-12.0827	2.39842	-133.607	-2561.65	-6380.14	-161.315	152.247	319.173	0	0	0	0	0	0	0	200	903	0	0	0	0	0	0	0	603	903	0
10650	8	-4.1481	10.6382	-147.645	-3110.97	-6319.1	296.449	157.201	321.071	0	0	0	0	0	0	0	200	903	0	0	0	0	0	0	0	603	903	0
10650	9	-2.01187	9.11228	-156.495	-3568.73	-6319.1	-390.197	159.621	322.804	0	0	0	0	0	0	0	200	903	0	0	0	0	0	0	0	603	903	0
10651	0	-3.23257	-2.78957	-162.599	-3568.73	-6807.38	204.896	158.134	321.948	0	0	0	0	0	0	0	200	903	0	0	0	0	0	0	0	603	903	0
10651	1	-5.3688	-3.39992	-170.839	-3843.39	-7051.52	754.213	158.724	322.497	0	0	0	0	0	0	0	200	903	0	0	0	0	0	0	0	603	903	0
10651	2	-2.7748	6.51829	-185.792	-4484.26	-7417.73	342.225	160.075	324.136	0	0	0	0	0	0	0	200	903	0	0	0	0	0	0	0	603	903	0
10651	3	-1.09634	1.63548	-194.032	-4484.26	-7417.73	-161.315	161.771	323.111	0	0	0	0	0	0	0	200	903	0	0	0	0	0	0	0	603	903	0
10651	4	-2.31704	-6.45168	-198.915	-4026.49	-7844.98	616.883	160.561	320.242	0	0	0	0	0	0	0	200	903	0	0	0	0	0	0	0	603	903	0
10651	5	0.429541	-2.17922	-205.324	-4209.6	-7600.84	525.331	162.981	320.502	0	0	0	0	0	0	0	200	903	0	0	0	0	0	0	0	603	903	0
10651	6	1.65024	6.51829	-215.7	-4850.47	-8028.09	-23.9859	162.781	322.487	0	0	0	0	0	0	0	200	903	0	0	0	0	0	0	0	603	903	0
10651	7	1.19248	1.63548	-220.277	-4850.47	-8455.34	479.554	161.615	322.02	0	0	0	0	0	0	0	200	903	0	0	0	0	0	0	0	603	903	0
10651	8	-2.31704	0.109599	-226.686	-5216.68	-8821.55	525.331	161.085	323.013	0	0	0	0	0	0	0	200	903	0	0	0	0	0	0	0	603	903	0
10651	9	1.03989	7.58641	-232.484	-6040.65	-8333.27	21.7904	164.156	325.983	0	0	0	0	0	0	0	200	903	0	0	0	0	0	0	0	603	903	0
10652	0	5.15977	13.8425	-238.283	-6406.87	-8516.37	159.12	164.259	326.888	0	0	0	0	0	0	0	200	903	0	0	0	0	0	0	0	603	903	0
10652	1	3.63389	12.3166	-239.808	-6315.31	-8821.55	159.12	163.214	326.335	0	0	0	0	0	0	0	200	903	0	0	0	0	0	0	0	603	903	0
10652	2	1.80283	13.0796	-246.217	-6956.18	-9126.72	-435.973	162.932	328.252	0	0	0	0	0	0	0	200	903	0	0	0	0	0	0	0	603	903	0
10652	3	2.87095	21.6245	-257.814	-7597.05	-9492.93	-481.75	163.179	329.467	0	0	0	0	0	0	0	200	903	0	0	0	0	0	0	0	603	903	0
10652	4	2.87095	26.0495	-263.917	-8054.81	-9615	-23.9859	163.568	330.52	0	0	0	0	0	0	0	200	903	0	0	0	0	0	0	0	603	903	0
10652	5	2.41318	24.6762	-273.378	-7780.16	-10225.4	-69.7623	162.596	328.459	0	0	0	0	0	0	0	200	903	0	0	0	0	0	0	0	603	903	0
10652	6	4.39683	29.1013	-277.345	-8512.58	-10408.5	-802.184	162.471	330.693	0	0	0	0	0	0	0	200	903	0	0	0	0	0	0	0	603	903	0
10652	7	8.05894	38.2566	-283.449	-9336.55	-10286.4	-939.513	163.71	332.939	0	0	0	0	0	0	0	200	903	0	0	0	0	0	0	0	603	903	0
10652	8	6.68564	41.1557	-295.961	-9885.87	-10652.6	-985.29	164.007	333.403	0	0	0	0	0	0	0	200	903	0	0	0	0	0	0	0	603	903	0
10652	9	5.00718	40.8506	-300.538	-9977.42	-10835.7	-1946.59	163.946	333.198	0	0	0	0	0	0	0	200	903	0	0	0	0	0	0	0	603	903	0
10653	0	6.07529	47.5644	-309.999	-11350.7	-10774.7	-1671.94	165.243	336.615	0	0	0	0	0	0	0	200	903	0	0	0	0	0	0	0	603	903	0
10653	1	9.7374	54.2783	-315.797	-11808.5	-10957.8	-1900.82	165.301	337.393	0	0	0	0	0	0	0	200	903	0	0	0	0	0	0	0	603	903	0
10653	2	10.9581	55.499	-325.258	-11167.6	-11446.1	-2404.36	164.809	334.335	0	0	0	0	0	0	0	200	903	0	0	0	0	0	0	0	603	903	0
10653	3	9.7374	57.0249	-335.939	-12907.1	-11812.3	-2404.36	164.838	338.421	0	0	0	0	0	0	0	200	903	0	0	0	0	0	0	0	603	903	0
10653	4	9.58481	63.4336	-342.958	-13914.2	-11873.3	-2404.36	165.38	340.571	0	0	0	0	0	0	0	200	903	0	0	0	0	0	0	0	603	903	0
10653	5	11.8736	67.2483	-350.282	-15012.8	-12117.4	-2770.57	165.407	342.859	0	0	0	0	0	0	0	200	903	0	0	0	0	0	0	0	603	903	0
10653	6	11.721	66.6379	-356.996	-14463.5	-12483.7	-2862.12	165.031	340.514	0	0	0	0	0	0	0	200	903	0	0	0	0	0	0	0	603	903	0
10653	7	13.3995	66.3327	-364.625	-14921.3	-12239.5	-2724.79	166.433	340.922	0	0	0	0	0	0	0	200	903	0	0	0	0	0	0	0	603	903	0
10653	8	15.5357	69.9949	-372.865	-15653.7	-12605.7	-3274.11	166.192	341.982	0	0	0	0	0	0	0	200	903	0	0	0	0	0	0	0	603	903	0
10653	9	14.7728	71.3681	-379.884	-16203	-13277.1	-3594.54	165.05	342.652	0	0	0	0	0	0	0	200	903	0	0	0	0	0	0	0	603	903	0
10654	0	12.484	70.4526	-384.462	-17301.6	-13277.1	-3319.89	165.466	345.002	0	0	0	0	0	0	0	200	903	0	0	0	0	0	0	0	603	903	0
10654	1	14.1625	71.5207	-393.617	-17942.5	-13338.1	-3365.66	166.114	345.584	0	0	0	0	0	0	0	200	903	0	0	0	0	0	0	0	603	903	0
10654	2	17.3668	73.9621	-400.026	-17759.4	-13582.3	-4189.64	166.046	344.396	0	0	0	0	0	0	0	200	903	0	0	0	0	0	0	0	603	903	0
10654	3	17.5194	73.657	-407.045	-19315.8	-14314.7	-3914.98	164.833	347.454	0	0	0	0	0	0	0	200	903	0	0	0	0	0	0	0	603	903	0
10654	4	15.078	71.6733	-412.538	-19132.7	-14131.6	-3869.2	165.745	346.378	0	0	0	0	0	0	0	200	903	0	0	0	0	0	0	0	603	903	0
10654	5	16.7564	73.1992	-418.031	-19590.5	-14070.6	-4326.96	166.341	346.864	0	0	0	0	0	0	0	200	903	0	0	0	0	0	0	0	603	903	0
10654	6	14.315	75.3354	-422.914	-20322.9	-14497.8	-4464.29	165.719	348.054	0	0	0	0	0	0	0	200	903	0	0	0	0	0	0	0	603	903	0
10654	7	15.9935	73.8095	-426.271	-19773.6	-14986.1	-4464.29	164.844	346.387	0	0	0	0	0	0	0	200	903	0	0	0	0	0	0	0	603	903	0
10654	8	16.1461	72.5888	-432.069	-21146.9	-14619.9	-4647.4	166.163	348.943	0	0	0	0	0	0	0	200	903	0	0	0	0	0	0	0	603	903	0
10654	9	14.6202	73.9621	-437.257	-21604.6	-15047.1	-4738.95	165.587	349.409	0	0	0	0	0	0	0	200	903	0	0	0	0	0	0	0	603	903	0
10655	0	15.3832	75.6406	-440.004	-21970.8	-15230.2	-4555.85	165.386	349.933	0	0	0	0	0	0	0	200	903	0	0	0	0	0	0	0	603	903	0
10655	1	12.9417	74.8777	-439.699	-22977.9	-15901.6	-4738.95	163.835	352.258	0	0	0	0	0	0	0	200	903	0	0	0	0	0	0	0	603	903	0
10655	2	12.6366	74.8777	-444.581	-23252.6	-15535.4	-4510.07	165.056	352.302	0	0	0	0	0	0	0	200	903	0	0	0	0	0	0	0	603	903	0
10655	3	14.1625	77.7768	-448.854	-23435.7	-15352.3	-4647.4	165.797	352.212	0	0	0	0	0	0	0	200	903	0	0	0	0	0	0	0	603	903	0
10655	4	13.2469	78.9975	-451.906	-23985	-15230.2	-4830.5	166.298	353.075	0	0	0	0	0	0	0	200	903	0	0	0	0	0	0	0	603	903	0
10655	5	13.2469	78.3872	-451.295	-24168.1	-15718.5	-5105.16	165.17	353.553	0	0	0	0	0	0	0	200	903	0	0	0	0	0	0	0	603	903	0
10655	6	9.7374	79.7605	-449.769	-24717.4	-16084.7	-5013.61	164.238	354.956	0	0	0	0	0	0	0	200	903	0	0	0	0	0	0	0	603	903	0
10655	7	11.1107	81.2864	-454.652	-24168.1	-16145.8	-4922.06	164.488	353.157	0	0	0	0	0	0	0	200	903	0	0	0	0	0	0	0	603	903	0
10655	8	10.3478	78.9975	-458.314	-24717.4	-16206.8	-4738.95	164.638	353.931	0	0	0	0	0	0	0	200	903	0	0	0	0	0	0	0	603	903	0
10655	9	8.21152	79.6079	-458.925	-24900.5	-16267.8	-4876.28	164.552	354.258	0	0	0	0	0	0	0	200	903	0	0	0	0	0	0	0	603	903	0
10656	0	9.12705	80.3708	-459.23	-25266.7	-16023.7	-4510.07	165.107	355.02	0	0	0	0	0	0	0	200	903	0	0	0	0	0	0	0	603	903	0
10656	1	7.90635	81.7441	-459.84	-25358.3	-16817.2	-4418.52	163.428	355.146	0	0	0	0	0	0	0	200	903	0	0	0	0	0	0	0	603	903	0
10656	2	7.14341	81.5915	-460.451	-26182.3	-16573	-4418.52	164.007	356.862	0	0	0	0	0	0	0	200	903	0	0	0	0	0	0	0	603	903	0
10656	3	6.83823	81.8967	-462.892	-26548.5	-16389.9	-4601.62	164.592	357.354	0	0	0	0	0	0	0	200	903	0	0	0	0	0	0	0	603	903	0
10656	4	5.46494	83.5752	-464.418	-26640	-16634.1	-4418.52	164.183	357.362	0	0	0	0	0	0	0	200	903	0	0	0	0	0	0	0	603	903	0
10656	5	3.4813	84.1855	-463.197	-26548.5	-17122.3	-4418.52	163.034	357.316	0	0	0	0	0	0	0	200	903	0	0	0	0	0	0	0	603	903	0
10656	6	2.41318	82.6596	-465.333	-27280.9	-16878.2	-4510.07	163.729	358.627	0	0	0	0	0	0	0	200	903	0	0	0	0	0	0	0	603	903	0
10656	7	3.4813	82.5071	-467.775	-26823.1	-17244.4	-4281.19	163.135	357.342	0	0	0	0	0	0	0	200	903	0	0	0	0	0	0	0	603	903	0
10656	8	1.80283	84.0329	-469.301	-27097.8	-17000.3	-4235.41	163.775	357.741	0	0	0	0	0	0	0	200	903	0	0	0	0	0	0	0	603	903	0
10656	9	0.582129	81.4389	-477.54	-28471.1	-17366.5	-3823.43	163.634	359.62	0	0	0	0	0	0	0	200	903	0	0	0	0	0	0	0	603	903	0
10657	0	-2.46963	79.3027	-485.475	-30393.7	-18343	-3365.66	162.216	362.606	0	0	0	0	0	0	0	200	903	0	0	0	0	0	0	0	603	903	0
10657	1	-11.0146	83.1174	-486.39	-30027.5	-18526.1	-3091	161.911	361.735	0	0	0	0	0	0	0	200	903	0	0	0	0	0	0	0	603	903	0
10657	2	-17.4232	90.4416	-485.475	-31400.8	-18587.2	-2770.57	161.713	364.681	0	0	0	0	0	0	0	200	903	0	0	0	0	0	0	0	603	903	0
10657	3	-12.5404	89.3735	-480.897	-31675.4	-18526.1	-2450.13	161.476	365.867	0	0	0	0	0	0	0	200	903	0	0	0	0	0	0	0	603	903	0
10657	4	-15.4396	87.8476	-494.325	-32316.3	-18892.4	-2312.8	161.782	365.375	0	0	0	0	0	0	0	200	903	0	0	0	0	0	0	0	603	903	0
10657	5	-20.475	94.4089	-500.734	-32957.2	-18953.4	-1900.82	162.149	365.818	0	0	0	0	0	0	0	200	903	0	0	0	0	0	0	0	603	903	0
10657	6	-16.8129	99.7495	-500.734	-33414.9	-19441.7	-2999.45	161.174	366.732	0	0	0	0	0	0	0	200	903	0	0	0	0	0	0	0	603	903	0
10657	7	-16.5077	102.191	-501.039	-34330.5	-19441.7	-3091	161.197	368.519	0	0	0	0	0	0	0	200	903	0	0	0	0	0	0	0	603	903	0
10657	8	-20.0172	104.175	-505.311	-34147.4	-19258.6	-3274.11	161.888	367.577	0	0	0	0	0	0	0	200	903	0	0	0	0	0	0	0	603	903	0
10657	9	-12.3878	104.327	-510.805	-34605.1	-19807.9	-4143.86	161.222	367.746	0	0	0	0	0	0	0	200	903	0	0	0	0	0	0	0	603	903	0
10658	0	-9.48867	104.785	-510.499	-35062.9	-19075.5	-4189.64	162.634	368.684	0	0	0	0	0	0	0	200	903	0	0	0	0	0	0	0	603	903	0
10658	1	-11.0146	106.463	-512.636	-35154.4	-19441.7	-4098.08	162.075	368.576	0	0	0	0	0	0	0	200	903	0	0	0	0	0	0	0	603	903	0
10658	2	-11.3197	104.175	-518.434	-36802.4	-19624.8	-4876.28	162.146	370.988	0	0	0	0	0	0	0	200	903	0	0	0	0	0	0	0	603	903	0
10658	3	-7.96279	104.785	-522.401	-37992.6	-19868.9	-5334.04	161.966	372.727	0	0	0	0	0	0	0	200	903	0	0	0	0	0	0	0	603	903	0
10658	4	-6.13174	106.006	-523.927	-37809.5	-19136.5	-5379.82	163.475	372.166	0	0	0	0	0	0	0	200	903	0	0	0	0	0	0	0	603	903	0
10658	5	-1.5541	103.564	-524.843	-37443.3	-19258.6	-5562.93	163.306	371.342	0	0	0	0	0	0	0	200	903	0	0	0	0	0	0	0	603	903	0
10658	6	-0.638574	102.801	-526.368	-38816.5	-19624.8	-5746.03	162.717	373.744	0	0	0	0	0	0	0	200	903	0	0	0	0	0	0	0	603	903	0
10658	7	-4.45327	105.243	-530.031	-39091.2	-19258.6	-5654.48	163.665	373.753	0	0	0	0	0	0	0	200	903	0	0	0	0	0	0	0	603	903	0
10658	8	-4.75845	105.395	-532.472	-39640.5	-19075.5	-5791.81	164.176	374.446	0	0	0	0	0	0	0	200	903	0	0	0	0	0	0	0	603	903	0
10658	9	-2.46963	101.886	-532.472	-39091.2	-19502.7	-5425.6	163.373	373.415	0	0	0	0	0	0	0	200	903	0	0	0	0	0	0	0	603	903	0
10659	0	-3.23257	103.106	-533.998	-39274.3	-19502.7	-4830.5	163.478	373.548	0	0	0	0	0	0	0	200	903	0	0	0	0	0	0	0	603	903	0
10659	1	-5.52139	103.259	-534.303	-38999.6	-19624.8	-4967.83	163.27	372.992	0	0	0	0	0	0	0	200	903	0	0	0	0	0	0	0	603	903	0
10659	2	-6.89468	101.733	-540.712	-40189.8	-19746.8	-4693.18	163.48	374.328	0	0	0	0	0	0	0	200	903	0	0	0	0	0	0	0	603	903	0
10659	3	-10.7094	100.36	-541.322	-40739.2	-20113.1	-4372.74	162.845	375.259	0	0	0	0	0	0	0	200	903	0	0	0	0	0	0	0	603	903	0
10659	4	-12.693	102.496	-542.238	-42112.4	-19929.9	-4235.41	163.245	377.664	0	0	0	0	0	0	0	200	903	0	0	0	0	0	0	0	603	903	0
10659	5	-9.48867	102.954	-545.289	-42204	-20052	-4418.52	163.227	377.397	0	0	0	0	0	0	0	200	903	0	0	0	0	0	0	0	603	903	0
10659	6	-12.5404	102.343	-548.646	-41929.3	-19929.9	-3731.87	163.674	376.423	0	0	0	0	0	0	0	200	903	0	0	0	0	0	0	0	603	903	0
10659	7	-16.9655	103.869	-545.595	-42478.6	-20296.2	-3914.98	162.8	377.858	0	0	0	0	0	0	0	200	903	0	0	0	0	0	0	0	603	903	0
10659	8	-18.3388	101.733	-551.698	-43668.8	-20601.3	-3731.87	162.658	379.154	0	0	0	0	0	0	0	200	903	0	0	0	0	0	0	0	603	903	0
10659	9	-18.9491	102.954	-553.529	-42936.4	-20296.2	-3686.1	163.333	377.569	0	0	0	0	0	0	0	200	903	0	0	0	0	0	0	0	603	903	0
10660	0	-19.1017	103.259	-554.75	-43302.6	-20418.2	-3640.32	163.194	378.058	0	0	0	0	0	0	0	200	903	0	0	0	0	0	0	0	603	903	0
10660	1	-17.1181	102.496	-556.581	-43851.9	-20784.4	-3731.87	162.657	378.788	0	0	0	0	0	0	0	200	903	0	0	0	0	0	0	0	603	903	0
10660	2	-18.9491	103.106	-559.022	-43760.4	-20723.4	-3869.2	162.929	378.28	0	0	0	0	0	0	0	200	903	0	0	0	0	0	0	0	603	903	0
10660	3	-21.6957	103.106	-559.633	-44767.5	-20601.3	-3731.87	163.188	379.994	0	0	0	0	0	0	0	200	903	0	0	0	0	0	0	0	603	903	0
10660	4	-20.475	100.055	-559.938	-45408.3	-20601.3	-4098.08	163.208	381.095	0	0	0	0	0	0	0	200	903	0	0	0	0	0	0	0	603	903	0
10660	5	-17.5758	102.038	-561.159	-45957.6	-21089.6	-4281.19	162.418	381.898	0	0	0	0	0	0	0	200	903	0	0	0	0	0	0	0	603	903	0
10660	6	-17.4232	102.343	-565.736	-46323.9	-20662.4	-3960.75	163.477	381.882	0	0	0	0	0	0	0	200	903	0	0	0	0	0	0	0	603	903	0
10660	7	-17.881	102.343	-565.736	-46690.1	-20906.5	-4143.86	163.045	382.53	0	0	0	0	0	0	0	200	903	0	0	0	0	0	0	0	603	903	0
10660	8	-19.2543	102.038	-568.178	-46964.7	-20845.5	-4510.07	163.312	382.659	0	0	0	0	0	0	0	200	903	0	0	0	0	0	0	0	603	903	0
10660	9	-18.3388	101.886	-566.041	-47239.4	-20540.3	-4189.64	163.712	383.456	0	0	0	0	0	0	0	200	903	0	0	0	0	0	0	0	603	903	0
10661	0	-17.5758	100.512	-567.567	-47971.8	-20540.3	-4189.64	163.81	384.522	0	0	0	0	0	0	0	200	903	0	0	0	0	0	0	0	603	903	0
10661	1	-15.7448	100.512	-569.398	-46140.8	-20723.4	-4098.08	163.605	381.034	0	0	0	0	0	0	0	200	903	0	0	0	0	0	0	0	603	903	0
10661	2	-18.1862	100.207	-570.924	-47422.5	-20662.4	-4235.41	163.809	383.063	0	0	0	0	0	0	0	200	903	0	0	0	0	0	0	0	603	903	0
10661	3	-20.3224	99.9021	-571.229	-47514.1	-20662.4	-4189.64	163.828	383.179	0	0	0	0	0	0	0	200	903	0	0	0	0	0	0	0	603	903	0
10661	4	-20.9328	98.5288	-570.924	-47971.8	-20601.3	-4143.86	163.916	384.025	0	0	0	0	0	0	0	200	903	0	0	0	0	0	0	0	603	903	0
10661	5	-19.5595	98.071	-572.45	-47788.7	-21089.6	-3502.99	163.159	383.481	0	0	0	0	0	0	0	200	903	0	0	0	0	0	0	0	603	903	0
10661	6	-19.1017	97.0029	-574.586	-48338	-20784.4	-3823.43	163.827	384.127	0	0	0	0	0	0	0	200	903	0	0	0	0	0	0	0	603	903	0
10661	7	-20.9328	96.3926	-573.06	-49436.6	-20906.5	-3502.99	163.518	386.268	0	0	0	0	0	0	0	200	903	0	0	0	0	0	0	0	603	903	0
10661	8	-24.4423	97.0029	-576.417	-49894.4	-20784.4	-3319.89	163.942	386.56	0	0	0	0	0	0	0	200	903	0	0	0	0	0	0	0	603	903	0
10661	9	-24.7475	96.5451	-575.502	-49253.5	-21150.7	-3045.23	163.248	385.584	0	0	0	0	0	0	0	200	903	0	0	0	0	0	0	0	603	903	0
10662	0	-24.2897	95.7822	-577.333	-49986	-20540.3	-3457.21	164.422	386.581	0	0	0	0	0	0	0	200	903	0	0	0	0	0	0	0	603	903	0
10662	1	-24.9	94.8667	-577.028	-49711.3	-20845.5	-2816.34	163.874	386.151	0	0	0	0	0	0	0	200	903	0	0	0	0	0	0	0	603	903	0
10662	2	-26.4259	95.0193	-577.943	-49711.3	-20967.5	-3182.56	163.72	386.014	0	0	0	0	0	0	0	200	903	0	0	0	0	0	0	0	603	903	0
10662	3	-28.257	94.1037	-580.079	-49802.9	-21150.7	-3091	163.538	385.855	0	0	0	0	0	0	0	200	903	0	0	0	0	0	0	0	603	903	0
10662	4	-27.6466	93.4934	-578.248	-49619.8	-20662.4	-3045.23	164.267	385.81	0	0	0	0	0	0	0	200	903	0	0	0	0	0	0	0	603	903	0
10662	5	-27.3415	91.6623	-578.859	-50352.2	-21089.6	-2907.9	163.567	386.985	0	0	0	0	0	0	0	200	903	0	0	0	0	0	0	0	603	903	0
10662	6	-26.8837	89.6787	-581.3	-50626.9	-21211.7	-2999.45	163.51	387.092	0	0	0	0	0	0	0	200	903	0	0	0	0	0	0	0	603	903	0
10662	7	-28.1044	90.7468	-580.69	-51633.9	-21028.6	-2862.12	163.787	388.918	0	0	0	0	0	0	0	200	903	0	0	0	0	0	0	0	603	903	0
10662	8	-27.3415	89.9839	-578.554	-51725.5	-20601.3	-2679.02	164.392	389.405	0	0	0	0	0	0	0	200	903	0	0	0	0	0	0	0	603	903	0
10662	9	-28.7147	90.1365	-575.197	-50901.5	-20967.5	-2907.9	163.547	388.494	0	0	0	0	0	0	0	200	903	0	0	0	0	0	0	0	603	903	0
10663	0	-27.6466	89.0683	-579.774	-52091.7	-20784.4	-2862.12	164.151	389.848	0	0	0	0	0	0	0	200	903	0	0	0	0	0	0	0	603	903	0
10663	1	-27.9518	87.8476	-582.826	-52183.2	-20845.5	-2633.24	164.234	389.535	0	0	0	0	0	0	0	200	903	0	0	0	0	0	0	0	603	903	0
10663	2	-28.8673	88.1528	-583.742	-51450.8	-20784.4	-2862.12	164.394	388.14	0	0	0	0	0	0	0	200	903	0	0	0	0	0	0	0	603	903	0
10663	3	-28.7147	87.0847	-581.3	-51817	-20967.5	-2633.24	163.93	389.14	0	0	0	0	0	0	0	200	903	0	0	0	0	0	0	0	603	903	0
10663	4	-27.3415	86.0166	-582.521	-52274.8	-20845.5	-2679.02	164.215	389.739	0	0	0	0	0	0	0	200	903	0	0	0	0	0	0	0	603	903	0
10663	5	-27.7992	85.2536	-581.3	-51908.6	-20662.4	-2541.69	164.455	389.297	0	0	0	0	0	0	0	200	903	0	0	0	0	0	0	0	603	903	0
10663	6	-27.3415	84.7959	-585.267	-52457.9	-20723.4	-2404.36	164.592	389.631	0	0	0	0	0	0	0	200	903	0	0	0	0	0	0	0	603	903	0
10663	7	-29.3251	84.3381	-584.657	-52457.9	-20906.5	-2495.91	164.241	389.724	0	0	0	0	0	0	0	200	903	0	0	0	0	0	0	0	603	903	0
10663	8	-29.1725	83.5752	-584.352	-53831.2	-20357.2	-2587.46	165.163	392.121	0	0	0	0	0	0	0	200	903	0	0	0	0	0	0	0	603	903	0
10663	9	-27.7992	83.1174	-586.183	-54197.4	-20784.4	-2175.48	164.543	392.458	0	0	0	0	0	0	0	200	903	0	0	0	0	0	0	0	603	903	0
10664	0	-28.8673	82.5071	-584.047	-53922.8	-20662.4	-2312.8	164.622	392.326	0	0	0	0	0	0	0	200	903	0	0	0	0	0	0	0	603	903	0
10664	1	-28.257	81.7441	-588.014	-53648.1	-20601.3	-1717.71	164.965	391.236	0	0	0	0	0	0	0	200	903	0	0	0	0	0	0	0	603	903	0
10664	2	-29.6303	81.4389	-588.93	-54929.8	-20784.4	-2221.25	164.708	393.271	0	0	0	0	0	0	0	200	903	0	0	0	0	0	0	0	603	903	0
10664	3	-29.4777	79.9131	-587.404	-54929.8	-20845.5	-2221.25	164.513	393.513	0	0	0	0	0	0	0	200	903	0	0	0	0	0	0	0	603	903	0
10664	4	-28.8673	80.5234	-588.319	-54563.6	-20479.3	-2038.15	165.19	392.745	0	0	0	0	0	0	0	200	903	0	0	0	0	0	0	0	603	903	0
10664	5	-28.7147	79.4553	-589.54	-54655.2	-20540.3	-2083.92	165.159	392.708	0	0	0	0	0	0	0	200	903	0	0	0	0	0	0	0	603	903	0
10664	6	-28.4096	77.9294	-591.371	-55112.9	-20418.2	-2175.48	165.473	393.195	0	0	0	0	0	0	0	200	903	0	0	0	0	0	0	0	603	903	0
10664	7	-29.6303	77.6242	-591.371	-55021.4	-20845.5	-1855.04	164.751	393.04	0	0	0	0	0	0	0	200	903	0	0	0	0	0	0	0	603	903	0
10664	8	-29.3251	76.0984	-591.066	-55296	-20784.4	-1809.26	164.836	393.553	0	0	0	0	0	0	0	200	903	0	0	0	0	0	0	0	603	903	0
10664	9	-27.9518	76.251	-591.371	-56211.6	-20235.1	-1855.04	165.783	395.053	0	0	0	0	0	0	0	200	903	0	0	0	0	0	0	0	603	903	0
10665	0	-27.3415	75.488	-591.371	-56669.3	-20418.2	-1855.04	165.473	395.827	0	0	0	0	0	0	0	200	903	0	0	0	0	0	0	0	603	903	0
10665	1	-27.494	75.6406	-593.202	-56852.4	-20662.4	-1763.49	165.168	395.84	0	0	0	0	0	0	0	200	903	0	0	0	0	0	0	0	603	903	0
10665	2	-28.8673	74.7251	-593.812	-56760.9	-20296.2	-1671.94	165.821	395.587	0	0	0	0	0	0	0	200	903	0	0	0	0	0	0	0	603	903	0
10665	3	-29.0199	73.5044	-592.897	-56394.7	-20296.2	-1717.71	165.768	395.117	0	0	0	0	0	0	0	200	903	0	0	0	0	0	0	0	603	903	0
10665	4	-28.7147	73.657	-593.507	-56669.3	-20601.3	-1671.94	165.289	395.482	0	0	0	0	0	0	0	200	903	0	0	0	0	0	0	0	603	903	0
10665	5	-27.1889	71.8259	-591.981	-56760.9	-20235.1	-1534.61	165.818	395.883	0	0	0	0	0	0	0	200	903	0	0	0	0	0	0	0	603	903	0
10665	6	-27.7992	70.3	-595.949	-56944	-20174.1	-1443.05	166.148	395.552	0	0	0	0	0	0	0	200	903	0	0	0	0	0	0	0	603	903	0
10665	7	-27.1889	70.7578	-596.254	-57768	-20479.3	-1305.72	165.653	396.885	0	0	0	0	0	0	0	200	903	0	0	0	0	0	0	0	603	903	0
10665	8	-27.0363	70.3	-595.338	-58225.7	-20174.1	-1443.05	166.113	397.803	0	0	0	0	0	0	0	200	903	0	0	0	0	0	0	0	603	903	0
10665	9	-28.1044	69.9949	-591.981	-58317.3	-20296.2	-985.29	165.715	398.512	0	0	0	0	0	0	0	200	903	0	0	0	0	0	0	0	603	903	0
10666	0	-26.4259	67.8586	-596.864	-58408.8	-20235.1	-1397.28	166.098	397.86	0	0	0	0	0	0	0	200	903	0	0	0	0	0	0	0	603	903	0
10666	1	-26.7311	68.3164	-599	-57768	-20662.4	-1397.28	165.505	396.441	0	0	0	0	0	0	0	200	903	0	0	0	0	0	0	0	603	903	0
10666	2	-28.1044	67.4009	-600.221	-58134.2	-20174.1	-1305.72	166.389	396.855	0	0	0	0	0	0	0	200	903	0	0	0	0	0	0	0	603	903	0
10666	3	-25.8156	65.7224	-598.695	-58500.4	-20540.3	-847.961	165.692	397.713	0	0	0	0	0	0	0	200	903	0	0	0	0	0	0	0	603	903	0
10666	4	-27.494	65.2646	-597.474	-58958.1	-20357.2	-847.961	165.928	398.679	0	0	0	0	0	0	0	200	903	0	0	0	0	0	0	0	603	903	0
10666	5	-25.8156	65.112	-598.695	-59599	-19807.9	-1076.84	166.915	399.548	0	0	0	0	0	0	0	200	903	0	0	0	0	0	0	0	603	903	0
10666	6	-26.2733	64.6543	-601.442	-60239.9	-20052	-1305.72	166.66	400.159	0	0	0	0	0	0	0	200	903	0	0	0	0	0	0	0	603	903	0
10666	7	-27.3415	64.9594	-600.831	-60331.4	-20113.1	-1214.17	166.525	400.413	0	0	0	0	0	0	0	200	903	0	0	0	0	0	0	0	603	903	0
10666	8	-25.8156	64.8069	-600.526	-60606.1	-19868.9	-1122.62	166.914	400.922	0	0	0	0	0	0	0	200	903	0	0	0	0	0	0	0	603	903	0
10666	9	-27.3415	64.1965	-598.695	-59690.6	-19929.9	-1122.62	166.711	399.701	0	0	0	0	0	0	0	200	903	0	0	0	0	0	0	0	603	903	0
10667	0	-26.5785	63.7388	-600.831	-60148.3	-20174.1	-1214.17	166.423	400.109	0	0	0	0	0	0	0	200	903	0	0	0	0	0	0	0	603	903	0
10667	1	-26.4259	62.9758	-602.052	-59782.1	-20357.2	-1259.95	166.187	399.297	0	0	0	0	0	0	0	200	903	0	0	0	0	0	0	0	603	903	0
10667	2	-27.6466	62.6706	-602.662	-60697.7	-20174.1	-939.513	166.525	400.716	0	0	0	0	0	0	0	200	903	0	0	0	0	0	0	0	603	903	0
10667	3	-24.5949	62.518	-600.831	-61430.1	-19991	-1122.62	166.728	402.242	0	0	0	0	0	0	0	200	903	0	0	0	0	0	0	0	603	903	0
10667	4	-27.6466	62.518	-596.559	-62070.9	-19807.9	-1122.62	166.796	404.048	0	0	0	0	0	0	0	200	903	0	0	0	0	0	0	0	603	903	0
10667	5	-25.2052	62.8232	-599.916	-60697.7	-20235.1	-939.513	166.27	401.177	0	0	0	0	0	0	0	200	903	0	0	0	0	0	0	0	603	903	0
10667	6	-25.2052	62.6706	-602.357	-62345.6	-19685.8	-893.737	167.319	403.503	0	0	0	0	0	0	0	200	903	0	0	0	0	0	0	0	603	903	0
10667	7	-27.0363	62.2129	-601.442	-61247	-19929.9	-527.526	166.863	401.834	0	0	0	0	0	0	0	200	903	0	0	0	0	0	0	0	603	903	0
10667	8	-27.1889	61.9077	-599	-62162.5	-19746.8	-573.302	167.034	403.777	0	0	0	0	0	0	0	200	903	0	0	0	0	0	0	0	603	903	0
10667	9	-25.2052	60.9922	-599.916	-62254	-19563.7	-847.961	167.389	403.771	0	0	0	0	0	0	0	200	903	0	0	0	0	0	0	0	603	903	0
10668	0	-25.3578	60.5344	-600.831	-62528.7	-19502.7	-344.421	167.54	404.07	0	0	0	0	0	0	0	200	903	0	0	0	0	0	0	0	603	903	0
10668	1	-24.7475	60.3818	-600.526	-63535.8	-19746.8	-619.079	167.117	405.8	0	0	0	0	0	0	0	200	903	0	0	0	0	0	0	0	603	903	0
10668	2	-23.8319	60.2292	-596.864	-63902	-19868.9	-756.408	166.711	407.063	0	0	0	0	0	0	0	200	903	0	0	0	0	0	0	0	603	903	0
10668	3	-26.1208	60.8396	-592.592	-63902	-19258.6	-802.184	167.501	407.835	0	0	0	0	0	0	0	200	903	0	0	0	0	0	0	0	603	903	0
10668	4	-24.4423	60.9922	-597.169	-63902	-19502.7	-710.631	167.341	407.008	0	0	0	0	0	0	0	200	903	0	0	0	0	0	0	0	603	903	0
10668	5	-24.5949	60.0766	-598.695	-62711.8	-19502.7	-573.302	167.425	404.748	0	0	0	0	0	0	0	200	903	0	0	0	0	0	0	0	603	903	0
10668	6	-25.663	60.0766	-597.78	-63444.2	-19197.5	-847.961	167.885	406.133	0	0	0	0	0	0	0	200	903	0	0	0	0	0	0	0	603	903	0
10668	7	-25.3578	59.0085	-595.949	-63261.1	-19197.5	-390.197	167.787	406.152	0	0	0	0	0	0	0	200	903	0	0	0	0	0	0	0	603	903	0
10668	8	-24.2897	58.3982	-596.559	-64451.3	-19319.6	-435.973	167.615	408.038	0	0	0	0	0	0	0	200	903	0	0	0	0	0	0	0	603	903	0
10668	9	-22.7638	57.9404	-595.643	-65092.2	-19258.6	-573.302	167.668	409.281	0	0	0	0	0	0	0	200	903	0	0	0	0	0	0	0	603	903	0
10669	0	-26.1208	58.2456	-594.117	-65641.5	-19075.5	-435.973	167.893	410.486	0	0	0	0	0	0	0	200	903	0	0	0	0	0	0	0	603	903	0
10669	1	-23.6793	58.3982	-591.066	-65000.6	-19502.7	-481.75	167.004	409.972	0	0	0	0	0	0	0	200	903	0	0	0	0	0	0	0	603	903	0
10669	2	-24.4423	58.093	-589.54	-65916.2	-18953.4	-435.973	167.851	411.81	0	0	0	0	0	0	0	200	903	0	0	0	0	0	0	0	603	903	0
10669	3	-24.1371	55.9568	-591.371	-65824.6	-19258.6	-390.197	167.434	411.309	0	0	0	0	0	0	0	200	903	0	0	0	0	0	0	0	603	903	0
10669	4	-24.4423	57.0249	-592.286	-65550	-19197.5	-435.973	167.587	410.673	0	0	0	0	0	0	0	200	903	0	0	0	0	0	0	0	603	903	0
10669	5	-25.2052	56.1094	-592.286	-65916.2	-19075.5	-207.091	167.794	411.291	0	0	0	0	0	0	0	200	903	0	0	0	0	0	0	0	603	903	0
10669	6	-24.7475	55.499	-588.93	-65824.6	-19136.5	-161.315	167.506	411.77	0	0	0	0	0	0	0	200	903	0	0	0	0	0	0	0	603	903	0
10669	7	-23.9845	54.7361	-588.014	-66099.2	-19075.5	-161.315	167.56	412.411	0	0	0	0	0	0	0	200	903	0	0	0	0	0	0	0	603	903	0
10669	8	-22.0009	55.0412	-590.15	-66831.7	-19136.5	-298.644	167.574	413.245	0	0	0	0	0	0	0	200	903	0	0	0	0	0	0	0	603	903	0
10669	9	-24.1371	54.4309	-588.014	-66465.5	-19014.4	-161.315	167.663	413.034	0	0	0	0	0	0	0	200	903	0	0	0	0	0	0	0	603	903	0
10670	0	-24.9	54.1257	-588.014	-67472.5	-18892.4	-115.539	167.871	414.747	0	0	0	0	0	0	0	200	903	0	0	0	0	0	0	0	603	903	0
10670	1	-24.9	52.905	-586.183	-67564.1	-19197.5	67.5668	167.25	415.261	0	0	0	0	0	0	0	200	903	0	0	0	0	0	0	0	603	903	0
10670	2	-23.9845	53.8205	-585.878	-67014.8	-18709.2	-69.7623	168.066	414.384	0	0	0	0	0	0	0	200	903	0	0	0	0	0	0	0	603	903	0
10670	3	-23.5268	53.2102	-585.267	-68113.4	-18831.3	-23.9859	167.824	416.38	0	0	0	0	0	0	0	200	903	0	0	0	0	0	0	0	603	903	0
10670	4	-23.3742	52.1421	-585.267	-68113.4	-19136.5	342.225	167.303	416.38	0	0	0	0	0	0	0	200	903	0	0	0	0	0	0	0	603	903	0
10670	5	-22.6112	53.0576	-581.91	-67655.7	-18526.1	-23.9859	168.163	416.265	0	0	0	0	0	0	0	200	903	0	0	0	0	0	0	0	603	903	0
10670	6	-24.2897	51.9895	-579.164	-67930.3	-18465.1	21.7904	168.118	417.29	0	0	0	0	0	0	0	200	903	0	0	0	0	0	0	0	603	903	0
10670	7	-23.6793	51.9895	-580.995	-67930.3	-18892.4	21.7904	167.483	416.921	0	0	0	0	0	0	0	200	903	0	0	0	0	0	0	0	603	903	0
10670	8	-22.6112	51.8369	-583.131	-68296.5	-18709.2	67.5668	167.916	417.12	0	0	0	0	0	0	0	200	903	0	0	0	0	0	0	0	603	903	0
10670	9	-24.2897	51.3791	-581.605	-68296.5	-18526.1	21.7904	168.147	417.428	0	0	0	0	0	0	0	200	903	0	0	0	0	0	0	0	603	903	0
10671	0	-24.4423	48.9377	-579.774	-69120.5	-18404.1	-69.7623	168.256	419.22	0	0	0	0	0	0	0	200	903	0	0	0	0	0	0	0	603	903	0
10671	1	-22.4586	50.311	-578.554	-69761.4	-18709.2	113.343	167.662	420.579	0	0	0	0	0	0	0	200	903	0	0	0	0	0	0	0	603	903	0
10671	2	-20.6276	50.0058	-578.554	-70127.6	-18526.1	159.12	167.979	421.212	0	0	0	0	0	0	0	200	903	0	0	0	0	0	0	0	603	903	0
10671	3	-21.6957	50.1584	-574.281	-70036	-18098.9	113.343	168.484	421.954	0	0	0	0	0	0	0	200	903	0	0	0	0	0	0	0	603	903	0
10671	4	-23.2216	50.0058	-577.333	-70402.2	-18282	159.12	168.334	421.944	0	0	0	0	0	0	0	200	903	0	0	0	0	0	0	0	603	903	0
10671	5	-23.9845	50.0058	-575.197	-70493.8	-18343	21.7904	168.11	422.556	0	0	0	0	0	0	0	200	903	0	0	0	0	0	0	0	603	903	0
10671	6	-22.7638	48.3274	-574.891	-70493.8	-18221	204.896	168.305	422.621	0	0	0	0	0	0	0	200	903	0	0	0	0	0	0	0	603	903	0
10671	7	-22.0009	49.0903	-576.112	-70036	-18343	159.12	168.161	421.567	0	0	0	0	0	0	0	200	903	0	0	0	0	0	0	0	603	903	0
10671	8	-23.069	48.9377	-573.06	-70768.4	-18343	67.5668	167.991	423.492	0	0	0	0	0	0	0	200	903	0	0	0	0	0	0	0	603	903	0
10671	9	-24.1371	47.2593	-574.891	-70860	-18343	388.001	168.093	423.258	0	0	0	0	0	0	0	200	903	0	0	0	0	0	0	0	603	903	0
10672	0	-23.5268	47.2593	-572.145	-70768.4	-18221	159.12	168.153	423.69	0	0	0	0	0	0	0	200	903	0	0	0	0	0	0	0	603	903	0
10672	1	-22.0009	47.1067	-569.398	-71317.8	-17976.8	296.449	168.428	425.251	0	0	0	0	0	0	0	200	903	0	0	0	0	0	0	0	603	903	0
10672	2	-22.9164	47.2593	-571.229	-71409.3	-17732.7	113.343	168.957	425.01	0	0	0	0	0	0	0	200	903	0	0	0	0	0	0	0	603	903	0
10672	3	-22.9164	46.4963	-566.346	-71958.6	-17793.7	388.001	168.582	427.058	0	0	0	0	0	0	0	200	903	0	0	0	0	0	0	0	603	903	0
10672	4	-24.1371	46.4963	-569.398	-72324.8	-18159.9	342.225	168.107	427.02	0	0	0	0	0	0	0	200	903	0	0	0	0	0	0	0	603	903	0
10672	5	-24.2897	46.8015	-566.652	-71592.4	-17671.6	296.449	168.814	426.343	0	0	0	0	0	0	0	200	903	0	0	0	0	0	0	0	603	903	0
10672	6	-23.2216	47.2593	-565.736	-72416.4	-17671.6	296.449	168.763	428.004	0	0	0	0	0	0	0	200	903	0	0	0	0	0	0	0	603	903	0
10672	7	-23.8319	46.4963	-567.262	-72782.6	-18098.9	571.107	168.094	428.305	0	0	0	0	0	0	0	200	903	0	0	0	0	0	0	0	603	903	0
10672	8	-22.7638	46.4963	-562.99	-72874.2	-17854.8	571.107	168.286	429.441	0	0	0	0	0	0	0	200	903	0	0	0	0	0	0	0	603	903	0
10672	9	-24.1371	46.8015	-564.821	-72416.4	-17366.5	433.778	169.253	428.211	0	0	0	0	0	0	0	200	903	0	0	0	0	0	0	0	603	903	0
10673	0	-23.9845	46.3437	-562.684	-72599.5	-17488.5	388.001	168.919	429.023	0	0	0	0	0	0	0	200	903	0	0	0	0	0	0	0	603	903	0
10673	1	-22.4586	45.4282	-561.159	-72508	-17549.6	433.778	168.726	429.211	0	0	0	0	0	0	0	200	903	0	0	0	0	0	0	0	603	903	0
10673	2	-22.1535	46.0386	-561.769	-72874.2	-17366.5	388.001	169.086	429.723	0	0	0	0	0	0	0	200	903	0	0	0	0	0	0	0	603	903	0
10673	3	-22.4586	45.5808	-555.055	-73423.5	-17488.5	525.331	168.492	432.281	0	0	0	0	0	0	0	200	903	0	0	0	0	0	0	0	603	903	0
10673	4	-23.8319	45.4282	-559.938	-74064.3	-17671.6	525.331	168.44	432.272	0	0	0	0	0	0	0	200	903	0	0	0	0	0	0	0	603	903	0
10673	5	-23.5268	44.3601	-557.191	-74522.1	-17488.5	754.213	168.613	433.746	0	0	0	0	0	0	0	200	903	0	0	0	0	0	0	0	603	903	0
10673	6	-21.5431	45.123	-556.581	-73606.6	-17061.3	662.66	169.346	432.248	0	0	0	0	0	0	0	200	903	0	0	0	0	0	0	0	603	903	0
10673	7	-21.2379	45.5808	-557.191	-73972.8	-17305.4	525.331	168.942	432.76	0	0	0	0	0	0	0	200	903	0	0	0	0	0	0	0	603	903	0
10673	8	-22.7638	43.5971	-554.75	-74613.7	-17061.3	525.331	169.245	434.5	0	0	0	0	0	0	0	200	903	0	0	0	0	0	0	0	603	903	0
10673	9	-23.3742	44.5127	-554.445	-73881.3	-17122.3	525.331	169.118	433.253	0	0	0	0	0	0	0	200	903	0	0	0	0	0	0	0	603	903	0
10674	0	-22.9164	44.8179	-551.088	-74064.3	-17061.3	662.66	169.041	434.397	0	0	0	0	0	0	0	200	903	0	0	0	0	0	0	0	603	903	0
10674	1	-21.2379	44.8179	-550.477	-74247.5	-17183.4	616.883	168.785	434.878	0	0	0	0	0	0	0	200	903	0	0	0	0	0	0	0	603	903	0
10674	2	-21.0854	42.9868	-551.088	-73698.1	-16939.2	571.107	169.262	433.732	0	0	0	0	0	0	0	200	903	0	0	0	0	0	0	0	603	903	0
10674	3	-21.6957	42.8342	-549.867	-74796.8	-16817.2	754.213	169.416	436.027	0	0	0	0	0	0	0	200	903	0	0	0	0	0	0	0	603	903	0
10674	4	-20.7802	42.8342	-548.341	-75163	-16878.2	708.436	169.22	437.073	0	0	0	0	0	0	0	200	903	0	0	0	0	0	0	0	603	903	0
10674	5	-21.3905	42.6816	-545.9	-75163	-16634.1	891.542	169.529	437.686	0	0	0	0	0	0	0	200	903	0	0	0	0	0	0	0	603	903	0
10674	6	-20.7802	42.2239	-545.289	-75803.9	-16328.9	1166.2	170.055	439.016	0	0	0	0	0	0	0	200	903	0	0	0	0	0	0	0	603	903	0
10674	7	-21.0854	42.2239	-545.289	-74247.5	-16939.2	525.331	168.935	436.162	0	0	0	0	0	0	0	200	903	0	0	0	0	0	0	0	603	903	0
10674	8	-21.3905	41.7661	-545.595	-75803.9	-16695.1	388.001	169.4	438.938	0	0	0	0	0	0	0	200	903	0	0	0	0	0	0	0	603	903	0
10674	9	-18.6439	40.0876	-544.069	-76170.1	-16512	708.436	169.651	440.001	0	0	0	0	0	0	0	200	903	0	0	0	0	0	0	0	603	903	0
10675	0	-21.5431	41.3083	-542.238	-75529.2	-16450.9	845.765	169.661	439.292	0	0	0	0	0	0	0	200	903	0	0	0	0	0	0	0	603	903	0
10675	1	-20.0172	41.0032	-541.322	-75803.9	-16695.1	616.883	169.159	440.035	0	0	0	0	0	0	0	200	903	0	0	0	0	0	0	0	603	903	0
10675	2	-19.7121	42.0713	-542.238	-76444.7	-16206.8	616.883	170.111	440.98	0	0	0	0	0	0	0	200	903	0	0	0	0	0	0	0	603	903	0
10675	3	-20.3224	40.5454	-540.712	-76078.5	-16389.9	616.883	169.688	440.701	0	0	0	0	0	0	0	200	903	0	0	0	0	0	0	0	603	903	0
10675	4	-20.6276	40.0876	-540.101	-76261.6	-16328.9	708.436	169.767	441.199	0	0	0	0	0	0	0	200	903	0	0	0	0	0	0	0	603	903	0
10675	5	-20.6276	39.3247	-539.186	-76536.3	-16695.1	937.318	169.037	441.948	0	0	0	0	0	0	0	200	903	0	0	0	0	0	0	0	603	903	0
10675	6	-19.5595	39.935	-537.355	-77451.8	-16267.8	388.001	169.726	444.135	0	0	0	0	0	0	0	200	903	0	0	0	0	0	0	0	603	903	0
10675	7	-19.4069	39.6299	-539.186	-77451.8	-16267.8	708.436	169.829	443.646	0	0	0	0	0	0	0	200	903	0	0	0	0	0	0	0	603	903	0
10675	8	-18.9491	39.7825	-535.219	-77543.4	-16328.9	708.436	169.491	444.882	0	0	0	0	0	0	0	200	903	0	0	0	0	0	0	0	603	903	0
10675	9	-19.7121	39.7825	-537.66	-77909.6	-16023.7	616.883	170.197	444.905	0	0	0	0	0	0	0	200	903	0	0	0	0	0	0	0	603	903	0
10676	0	-19.5595	39.4773	-535.524	-78184.2	-16023.7	708.436	170.078	445.996	0	0	0	0	0	0	0	200	903	0	0	0	0	0	0	0	603	903	0
10676	1	-18.4914	39.7825	-534.608	-78642	-16389.9	433.778	169.342	447.102	0	0	0	0	0	0	0	200	903	0	0	0	0	0	0	0	603	903	0
10676	2	-16.5077	39.935	-534.608	-77543.4	-15779.6	525.331	170.484	445.047	0	0	0	0	0	0	0	200	903	0	0	0	0	0	0	0	603	903	0
10676	3	-18.6439	39.1721	-531.862	-77726.4	-15840.6	662.66	170.217	446.14	0	0	0	0	0	0	0	200	903	0	0	0	0	0	0	0	603	903	0
10676	4	-18.9491	38.8669	-533.998	-77268.7	-16023.7	571.107	169.993	444.699	0	0	0	0	0	0	0	200	903	0	0	0	0	0	0	0	603	903	0
10676	5	-18.6439	38.7143	-532.472	-78275.8	-15962.7	571.107	170.022	447.005	0	0	0	0	0	0	0	200	903	0	0	0	0	0	0	0	603	903	0
10676	6	-18.0336	37.341	-532.167	-78092.6	-15718.5	616.883	170.463	446.745	0	0	0	0	0	0	0	200	903	0	0	0	0	0	0	0	603	903	0
10676	7	-16.8129	37.7988	-533.082	-79008.2	-15657.5	662.66	170.628	448.21	0	0	0	0	0	0	0	200	903	0	0	0	0	0	0	0	603	903	0
10676	8	-17.4232	37.4936	-530.946	-79832.2	-15779.6	479.554	170.28	450.358	0	0	0	0	0	0	0	200	903	0	0	0	0	0	0	0	603	903	0
10676	9	-18.0336	38.5617	-532.472	-79374.4	-15718.5	342.225	170.48	449.068	0	0	0	0	0	0	0	200	903	0	0	0	0	0	0	0	603	903	0
10677	0	-18.0336	37.7988	-529.725	-79649	-15352.3	388.001	171.018	450.359	0	0	0	0	0	0	0	200	903	0	0	0	0	0	0	0	603	903	0
10677	1	-17.2707	37.341	-529.42	-79466	-15901.6	525.331	169.964	450.1	0	0	0	0	0	0	0	200	903	0	0	0	0	0	0	0	603	903	0
10677	2	-15.1344	37.7988	-528.2	-79740.6	-15535.4	433.778	170.588	450.967	0	0	0	0	0	0	0	200	903	0	0	0	0	0	0	0	603	903	0
10677	3	-16.8129	36.5781	-529.115	-79374.4	-15535.4	525.331	170.639	450.014	0	0	0	0	0	0	0	200	903	0	0	0	0	0	0	0	603	903	0
10677	4	-17.4232	36.5781	-528.81	-79557.5	-15779.6	662.66	170.16	450.446	0	0	0	0	0	0	0	200	903	0	0	0	0	0	0	0	603	903	0
10677	5	-16.8129	37.341	-526.063	-79649	-15474.4	525.331	170.585	451.406	0	0	0	0	0	0	0	200	903	0	0	0	0	0	0	0	603	903	0
10677	6	-16.05	35.8152	-524.232	-79191.3	-15291.3	525.331	170.831	451.061	0	0	0	0	0	0	0	200	903	0	0	0	0	0	0	0	603	903	0
10677	7	-15.7448	35.6626	-525.148	-79923.7	-15291.3	388.001	170.882	452.193	0	0	0	0	0	0	0	200	903	0	0	0	0	0	0	0	603	903	0
10677	8	-15.7448	33.8315	-526.368	-79649	-15535.4	388.001	170.486	451.318	0	0	0	0	0	0	0	200	903	0	0	0	0	0	0	0	603	903	0
10677	9	-17.2707	34.8996	-525.148	-81022.3	-15108.2	571.107	171.231	454.285	0	0	0	0	0	0	0	200	903	0	0	0	0	0	0	0	603	903	0
10678	0	-16.05	35.0522	-523.622	-81113.9	-15474.4	342.225	170.447	454.909	0	0	0	0	0	0	0	200	903	0	0	0	0	0	0	0	603	903	0
10678	1	-16.05	35.2048	-520.57	-80839.3	-15657.5	204.896	169.922	455.29	0	0	0	0	0	0	0	200	903	0	0	0	0	0	0	0	603	903	0
10678	2	-14.6767	35.0522	-522.401	-81480.1	-15352.3	479.554	170.612	455.972	0	0	0	0	0	0	0	200	903	0	0	0	0	0	0	0	603	903	0
10678	3	-14.9818	34.7471	-523.317	-81571.7	-14925.1	571.107	171.48	455.874	0	0	0	0	0	0	0	200	903	0	0	0	0	0	0	0	603	903	0
10678	4	-16.2025	34.5945	-522.096	-81388.5	-15108.2	388.001	171.062	455.888	0	0	0	0	0	0	0	200	903	0	0	0	0	0	0	0	603	903	0
10678	5	-15.1344	34.7471	-520.57	-81205.5	-15474.4	342.225	170.274	455.993	0	0	0	0	0	0	0	200	903	0	0	0	0	0	0	0	603	903	0
10678	6	-15.4396	34.2893	-516.908	-81205.5	-15413.3	250.672	170.182	457.099	0	0	0	0	0	0	0	200	903	0	0	0	0	0	0	0	603	903	0
10678	7	-14.5241	32.916	-518.129	-81754.8	-15291.3	159.12	170.488	457.789	0	0	0	0	0	0	0	200	903	0	0	0	0	0	0	0	603	903	0
10678	8	-14.5241	33.0686	-521.486	-81754.8	-15413.3	250.672	170.443	456.773	0	0	0	0	0	0	0	200	903	0	0	0	0	0	0	0	603	903	0
10678	9	-14.9818	33.5263	-520.57	-82212.5	-15291.3	159.12	170.626	457.928	0	0	0	0	0	0	0	200	903	0	0	0	0	0	0	0	603	903	0
10679	0	-15.1344	32.0005	-520.265	-81571.7	-14925.1	433.778	171.313	456.789	0	0	0	0	0	0	0	200	903	0	0	0	0	0	0	0	603	903	0
10679	1	-14.8292	32.0005	-516.603	-82853.4	-14864	342.225	171.227	460.381	0	0	0	0	0	0	0	200	903	0	0	0	0	0	0	0	603	903	0
10679	2	-13.6085	32.1531	-516.603	-83128.1	-15047.1	708.436	170.873	460.913	0	0	0	0	0	0	0	200	903	0	0	0	0	0	0	0	603	903	0
10679	3	-13.6085	32.6108	-517.518	-82395.7	-15108.2	296.449	170.807	459.213	0	0	0	0	0	0	0	200	903	0	0	0	0	0	0	0	603	903	0
10679	4	-13.456	32.4582	-515.382	-82670.3	-14680.9	479.554	171.515	460.406	0	0	0	0	0	0	0	200	903	0	0	0	0	0	0	0	603	903	0
10679	5	-14.5241	32.0005	-516.603	-83128.1	-15047.1	204.896	170.873	460.913	0	0	0	0	0	0	0	200	903	0	0	0	0	0	0	0	603	903	0
10679	6	-14.6767	31.8479	-515.687	-83036.5	-15413.3	388.001	170.111	461.021	0	0	0	0	0	0	0	200	903	0	0	0	0	0	0	0	603	903	0
10679	7	-12.9982	31.2375	-515.382	-82761.9	-14986.1	67.5668	170.922	460.583	0	0	0	0	0	0	0	200	903	0	0	0	0	0	0	0	603	903	0
10679	8	-11.1671	30.7798	-516.908	-82944.9	-14925.1	388.001	171.126	460.464	0	0	0	0	0	0	0	200	903	0	0	0	0	0	0	0	603	903	0
10679	9	-12.693	30.0168	-512.941	-82487.2	-14864	296.449	171.022	460.812	0	0	0	0	0	0	0	200	903	0	0	0	0	0	0	0	603	903	0
10680	0	-13.7611	30.0168	-515.382	-83585.8	-14986.1	250.672	170.922	462.182	0	0	0	0	0	0	0	200	903	0	0	0	0	0	0	0	603	903	0
10680	1	-13.6085	28.1858	-512.636	-83311.2	-14925.1	250.672	170.886	462.515	0	0	0	0	0	0	0	200	903	0	0	0	0	0	0	0	603	903	0
10680	2	-12.3878	29.7116	-513.246	-83585.8	-14619.9	67.5668	171.515	462.857	0	0	0	0	0	0	0	200	903	0	0	0	0	0	0	0	603	903	0
10680	3	-10.7094	28.9487	-513.551	-84318.2	-14986.1	204.896	170.819	464.187	0	0	0	0	0	0	0	200	903	0	0	0	0	0	0	0	603	903	0
10680	4	-12.5404	29.5591	-513.246	-83402.7	-14803	113.343	171.158	462.501	0	0	0	0	0	0	0	200	903	0	0	0	0	0	0	0	603	903	0
10680	5	-12.9982	29.1013	-512.941	-84959.1	-14680.9	296.449	171.379	465.631	0	0	0	0	0	0	0	200	903	0	0	0	0	0	0	0	603	903	0
10680	6	-13.3034	29.1013	-512.025	-84592.9	-14925.1	296.449	170.851	465.212	0	0	0	0	0	0	0	200	903	0	0	0	0	0	0	0	603	903	0
10680	7	-11.4723	28.9487	-511.72	-84318.2	-14803	204.896	171.072	464.774	0	0	0	0	0	0	0	200	903	0	0	0	0	0	0	0	603	903	0
10680	8	-11.6249	28.3384	-509.889	-84409.8	-14497.8	296.449	171.567	465.545	0	0	0	0	0	0	0	200	903	0	0	0	0	0	0	0	603	903	0
10680	9	-11.3197	28.0332	-511.415	-84501.4	-14680.9	204.896	171.294	465.231	0	0	0	0	0	0	0	200	903	0	0	0	0	0	0	0	603	903	0
10681	0	-12.3878	27.728	-511.415	-83585.8	-14742	67.5668	171.174	463.44	0	0	0	0	0	0	0	200	903	0	0	0	0	0	0	0	603	903	0
10681	1	-12.3878	25.897	-508.363	-84959.1	-15108.2	159.12	170.281	467.123	0	0	0	0	0	0	0	200	903	0	0	0	0	0	0	0	603	903	0
10681	2	-12.693	25.4392	-504.701	-84959.1	-14742	204.896	170.791	468.336	0	0	0	0	0	0	0	200	903	0	0	0	0	0	0	0	603	903	0
10681	3	-11.1671	26.3547	-508.363	-84867.6	-14803	250.672	170.881	466.943	0	0	0	0	0	0	0	200	903	0	0	0	0	0	0	0	603	903	0
10681	4	-11.1671	26.3547	-511.11	-85600	-14986.1	388.001	170.679	467.479	0	0	0	0	0	0	0	200	903	0	0	0	0	0	0	0	603	903	0
10681	5	-12.3878	26.8125	-509.889	-85874.6	-14436.8	204.896	171.686	468.418	0	0	0	0	0	0	0	200	903	0	0	0	0	0	0	0	603	903	0
10681	6	-11.1671	26.3547	-505.922	-86424	-14436.8	296.449	171.464	470.825	0	0	0	0	0	0	0	200	903	0	0	0	0	0	0	0	603	903	0
10681	7	-12.5404	26.8125	-507.142	-86240.8	-14497.8	250.672	171.413	470.053	0	0	0	0	0	0	0	200	903	0	0	0	0	0	0	0	603	903	0
10681	8	-11.1671	26.0495	-507.142	-86149.3	-14436.8	296.449	171.533	469.872	0	0	0	0	0	0	0	200	903	0	0	0	0	0	0	0	603	903	0
10681	9	-11.4723	24.6762	-507.448	-86698.6	-14803	342.225	170.829	470.852	0	0	0	0	0	0	0	200	903	0	0	0	0	0	0	0	603	903	0
10682	0	-12.0827	25.5918	-507.753	-86973.3	-14803	21.7904	170.846	471.291	0	0	0	0	0	0	0	200	903	0	0	0	0	0	0	0	603	903	0
10682	1	-9.94644	25.4392	-507.448	-86515.5	-14803	388.001	170.829	470.492	0	0	0	0	0	0	0	200	903	0	0	0	0	0	0	0	603	903	0
10682	2	-11.4723	24.9814	-505.617	-86424	-14436.8	342.225	171.447	470.928	0	0	0	0	0	0	0	200	903	0	0	0	0	0	0	0	603	903	0
10682	3	-10.5568	23.4555	-505.311	-86240.8	-14314.7	204.896	171.672	470.669	0	0	0	0	0	0	0	200	903	0	0	0	0	0	0	0	603	903	0
10682	4	-10.4042	24.0659	-506.227	-86881.7	-14864	296.449	170.638	471.626	0	0	0	0	0	0	0	200	903	0	0	0	0	0	0	0	603	903	0
10682	5	-10.099	22.3874	-504.701	-86515.5	-14314.7	159.12	171.637	471.419	0	0	0	0	0	0	0	200	903	0	0	0	0	0	0	0	603	903	0
10682	6	-11.3197	23.7607	-506.532	-87522.6	-14375.7	159.12	171.619	472.788	0	0	0	0	0	0	0	200	903	0	0	0	0	0	0	0	603	903	0
10682	7	-11.6249	22.6926	-505.006	-87705.7	-14742	204.896	170.808	473.673	0	0	0	0	0	0	0	200	903	0	0	0	0	0	0	0	603	903	0
10682	8	-11.1671	23.9133	-505.006	-87614.1	-14680.9	21.7904	170.929	473.491	0	0	0	0	0	0	0	200	903	0	0	0	0	0	0	0	603	903	0
10682	9	-9.33608	23.303	-505.922	-88621.2	-14497.8	342.225	171.344	475.168	0	0	0	0	0	0	0	200	903	0	0	0	0	0	0	0	603	903	0
10683	0	-10.4042	21.6245	-505.006	-88071.9	-14558.9	204.896	171.171	474.398	0	0	0	0	0	0	0	200	903	0	0	0	0	0	0	0	603	903	0
10683	1	-11.3197	22.3874	-505.006	-87705.7	-14314.7	-23.9859	171.654	473.673	0	0	0	0	0	0	0	200	903	0	0	0	0	0	0	0	603	903	0
10683	2	-11.3197	22.6926	-505.006	-87980.3	-14436.8	159.12	171.413	474.216	0	0	0	0	0	0	0	200	903	0	0	0	0	0	0	0	603	903	0
10683	3	-10.2516	21.7771	-504.396	-88529.7	-14497.8	525.331	171.257	475.516	0	0	0	0	0	0	0	200	903	0	0	0	0	0	0	0	603	903	0
10683	4	-8.87832	21.1667	-506.227	-87980.3	-14436.8	342.225	171.482	473.796	0	0	0	0	0	0	0	200	903	0	0	0	0	0	0	0	603	903	0
10683	5	-10.7094	20.8616	-505.617	-88621.2	-14558.9	342.225	171.206	475.274	0	0	0	0	0	0	0	200	903	0	0	0	0	0	0	0	603	903	0
10683	6	-11.9301	20.8616	-505.311	-88621.2	-14497.8	21.7904	171.309	475.379	0	0	0	0	0	0	0	200	903	0	0	0	0	0	0	0	603	903	0
10683	7	-11.7775	20.4038	-503.48	-89536.7	-14803	662.66	170.599	477.836	0	0	0	0	0	0	0	200	903	0	0	0	0	0	0	0	603	903	0
10683	8	-9.1835	20.8616	-505.006	-89628.3	-14680.9	845.765	170.929	477.48	0	0	0	0	0	0	0	200	903	0	0	0	0	0	0	0	603	903	0
10683	9	-8.87832	20.5564	-506.837	-89353.7	-14253.7	571.107	171.877	476.297	0	0	0	0	0	0	0	200	903	0	0	0	0	0	0	0	603	903	0
10684	0	-10.4042	20.2512	-504.701	-90177.6	-14314.7	204.896	171.637	478.675	0	0	0	0	0	0	0	200	903	0	0	0	0	0	0	0	603	903	0
10684	1	-11.9301	18.8779	-505.922	-89994.5	-14558.9	525.331	171.223	477.882	0	0	0	0	0	0	0	200	903	0	0	0	0	0	0	0	603	903	0
10684	2	-11.6249	20.0986	-503.48	-89536.7	-14497.8	433.778	171.205	477.836	0	0	0	0	0	0	0	200	903	0	0	0	0	0	0	0	603	903	0
10684	3	-10.5568	19.7934	-504.701	-89628.3	-14742	754.213	170.791	477.587	0	0	0	0	0	0	0	200	903	0	0	0	0	0	0	0	603	903	0
10684	4	-10.5568	18.8779	-505.922	-89903	-14619.9	891.542	171.102	477.701	0	0	0	0	0	0	0	200	903	0	0	0	0	0	0	0	603	903	0
10684	5	-10.4042	18.2676	-499.513	-90269.2	-14680.9	616.883	170.61	480.714	0	0	0	0	0	0	0	200	903	0	0	0	0	0	0	0	603	903	0
10684	6	-11.4723	18.7253	-506.227	-90727	-14497.8	296.449	171.361	479.222	0	0	0	0	0	0	0	200	903	0	0	0	0	0	0	0	603	903	0
10684	7	-11.1671	17.8098	-504.091	-90635.4	-14436.8	616.883	171.361	479.8	0	0	0	0	0	0	0	200	903	0	0	0	0	0	0	0	603	903	0
10684	8	-10.4042	17.6572	-504.091	-91550.9	-14619.9	433.778	170.997	481.616	0	0	0	0	0	0	0	200	903	0	0	0	0	0	0	0	603	903	0
10684	9	-10.7094	17.8098	-506.227	-91642.5	-14619.9	479.554	171.12	481.03	0	0	0	0	0	0	0	200	903	0	0	0	0	0	0	0	603	903	0
10685	0	-11.0146	17.8098	-505.922	-91459.4	-14314.7	296.449	171.706	480.778	0	0	0	0	0	0	0	200	903	0	0	0	0	0	0	0	603	903	0
10685	1	-11.9301	15.9787	-507.448	-91825.6	-14619.9	891.542	171.189	480.956	0	0	0	0	0	0	0	200	903	0	0	0	0	0	0	0	603	903	0
10685	2	-11.7775	16.8943	-505.311	-91459.4	-14803	388.001	170.705	480.996	0	0	0	0	0	0	0	200	903	0	0	0	0	0	0	0	603	903	0
10685	3	-10.5568	16.2839	-505.311	-91825.6	-14497.8	754.213	171.309	481.721	0	0	0	0	0	0	0	200	903	0	0	0	0	0	0	0	603	903	0
10685	4	-10.5568	16.1313	-509.279	-92008.7	-14375.7	937.318	171.772	480.665	0	0	0	0	0	0	0	200	903	0	0	0	0	0	0	0	603	903	0
10685	5	-11.4723	15.2158	-508.668	-92191.8	-14925.1	662.66	170.659	481.242	0	0	0	0	0	0	0	200	903	0	0	0	0	0	0	0	603	903	0
10685	6	-9.48867	13.5373	-506.837	-92466.4	-14742	479.554	170.914	482.438	0	0	0	0	0	0	0	200	903	0	0	0	0	0	0	0	603	903	0
10685	7	-11.1671	15.0632	-505.006	-92649.6	-14864	662.66	170.567	483.462	0	0	0	0	0	0	0	200	903	0	0	0	0	0	0	0	603	903	0
10685	8	-10.5568	14.758	-506.227	-92832.6	-14680.9	754.213	170.999	483.382	0	0	0	0	0	0	0	200	903	0	0	0	0	0	0	0	603	903	0
10685	9	-10.7094	14.3003	-508.363	-93290.4	-14803	479.554	170.881	483.511	0	0	0	0	0	0	0	200	903	0	0	0	0	0	0	0	603	903	0
10686	0	-11.3197	14.6054	-510.805	-92649.6	-14742	525.331	171.14	481.38	0	0	0	0	0	0	0	200	903	0	0	0	0	0	0	0	603	903	0
10686	1	-11.1671	13.6899	-508.363	-94205.9	-14680.9	845.765	171.121	485.312	0	0	0	0	0	0	0	200	903	0	0	0	0	0	0	0	603	903	0
10686	2	-10.099	12.6218	-510.805	-94022.9	-15108.2	891.542	170.423	484.068	0	0	0	0	0	0	0	200	903	0	0	0	0	0	0	0	603	903	0
10686	3	-7.96279	13.6899	-509.889	-94663.7	-14742	754.213	171.088	485.656	0	0	0	0	0	0	0	200	903	0	0	0	0	0	0	0	603	903	0
10686	4	-10.099	13.2322	-507.753	-93839.7	-14925.1	571.107	170.606	484.814	0	0	0	0	0	0	0	200	903	0	0	0	0	0	0	0	603	903	0
10686	5	-11.3197	10.7908	-511.415	-93656.6	-14864	616.883	170.936	483.132	0	0	0	0	0	0	0	200	903	0	0	0	0	0	0	0	603	903	0
10686	6	-11.1671	12.0115	-509.889	-93839.7	-14742	754.213	171.088	484.04	0	0	0	0	0	0	0	200	903	0	0	0	0	0	0	0	603	903	0
10686	7	-10.099	11.2485	-509.889	-94022.9	-14619.9	616.883	171.327	484.399	0	0	0	0	0	0	0	200	903	0	0	0	0	0	0	0	603	903	0
10686	8	-10.099	10.9433	-511.72	-94389.1	-14986.1	525.331	170.714	484.455	0	0	0	0	0	0	0	200	903	0	0	0	0	0	0	0	603	903	0
10686	9	-11.0146	11.2485	-512.33	-95670.8	-14803	799.989	171.107	486.737	0	0	0	0	0	0	0	200	903	0	0	0	0	0	0	0	603	903	0
10687	0	-11.3197	10.4856	-509.279	-95304.6	-14803	1028.87	170.933	487.136	0	0	0	0	0	0	0	200	903	0	0	0	0	0	0	0	603	903	0
10687	1	-10.862	10.9433	-511.415	-93656.6	-14803	799.989	171.055	483.132	0	0	0	0	0	0	0	200	903	0	0	0	0	0	0	0	603	903	0
10687	2	-9.79385	10.7908	-512.025	-95945.5	-14803	754.213	171.089	487.384	0	0	0	0	0	0	0	200	903	0	0	0	0	0	0	0	603	903	0
10687	3	-10.2516	10.1804	-512.941	-96128.5	-14986.1	754.213	170.784	487.407	0	0	0	0	0	0	0	200	903	0	0	0	0	0	0	0	603	903	0
10687	4	-11.1671	10.1804	-513.551	-95853.9	-14436.8	799.989	171.888	486.649	0	0	0	0	0	0	0	200	903	0	0	0	0	0	0	0	603	903	0
10687	5	-11.7775	9.57005	-512.33	-95487.7	-14803	891.542	171.107	486.379	0	0	0	0	0	0	0	200	903	0	0	0	0	0	0	0	603	903	0
10687	6	-11.9301	9.11228	-512.941	-96037	-15474.4	845.765	169.832	487.228	0	0	0	0	0	0	0	200	903	0	0	0	0	0	0	0	603	903	0
10687	7	-9.94644	7.58641	-512.941	-96311.7	-15047.1	1074.65	170.665	487.764	0	0	0	0	0	0	0	200	903	0	0	0	0	0	0	0	603	903	0
10687	8	-9.64126	7.58641	-516.298	-96220.1	-14925.1	1074.65	171.092	486.366	0	0	0	0	0	0	0	200	903	0	0	0	0	0	0	0	603	903	0
10687	9	-10.4042	7.12864	-515.992	-96403.2	-14864	891.542	171.193	486.831	0	0	0	0	0	0	0	200	903	0	0	0	0	0	0	0	603	903	0
10688	0	-9.1835	6.82347	-514.467	-96769.4	-15108.2	754.213	170.633	488.097	0	0	0	0	0	0	0	200	903	0	0	0	0	0	0	0	603	903	0
10688	1	-11.0146	6.21311	-515.382	-96586.3	-14742	937.318	171.396	487.407	0	0	0	0	0	0	0	200	903	0	0	0	0	0	0	0	603	903	0
10688	2	-10.099	6.3657	-515.992	-97227.2	-14864	1257.75	171.193	488.428	0	0	0	0	0	0	0	200	903	0	0	0	0	0	0	0	603	903	0
10688	3	-9.79385	5.45018	-518.739	-97776.5	-15169.2	1120.42	170.758	488.489	0	0	0	0	0	0	0	200	903	0	0	0	0	0	0	0	603	903	0
10688	4	-11.1671	4.99241	-519.655	-97868	-15169.2	754.213	170.809	488.333	0	0	0	0	0	0	0	200	903	0	0	0	0	0	0	0	603	903	0
10688	5	-9.33608	5.29759	-517.824	-97776.5	-15047.1	1166.2	170.942	488.822	0	0	0	0	0	0	0	200	903	0	0	0	0	0	0	0	603	903	0
10688	6	-10.5568	4.83982	-517.824	-98325.8	-15230.2	1486.63	170.588	489.883	0	0	0	0	0	0	0	200	903	0	0	0	0	0	0	0	603	903	0
10688	7	-9.94644	2.85618	-519.655	-98600.5	-15169.2	1166.2	170.809	489.742	0	0	0	0	0	0	0	200	903	0	0	0	0	0	0	0	603	903	0
10688	8	-9.94644	3.9243	-522.401	-98325.8	-14986.1	1669.74	171.313	488.219	0	0	0	0	0	0	0	200	903	0	0	0	0	0	0	0	603	903	0
10688	9	-11.1671	3.9243	-523.927	-98234.2	-15108.2	1669.74	171.164	487.496	0	0	0	0	0	0	0	200	903	0	0	0	0	0	0	0	603	903	0
10689	0	-9.33608	3.31394	-523.012	-98600.5	-15108.2	1303.53	171.113	488.525	0	0	0	0	0	0	0	200	903	0	0	0	0	0	0	0	603	903	0
10689	1	-10.7094	1.78807	-523.012	-98417.4	-15108.2	1395.08	171.113	488.174	0	0	0	0	0	0	0	200	903	0	0	0	0	0	0	0	603	903	0
10689	2	-9.94644	1.63548	-524.843	-98508.9	-15352.3	1211.98	170.749	487.692	0	0	0	0	0	0	0	200	903	0	0	0	0	0	0	0	603	903	0
10689	3	-9.79385	0.109599	-527.284	-99424.4	-15352.3	1257.75	170.884	488.56	0	0	0	0	0	0	0	200	903	0	0	0	0	0	0	0	603	903	0
10689	4	-10.2516	0.262187	-528.81	-100157	-15413.3	2035.95	170.853	489.401	0	0	0	0	0	0	0	200	903	0	0	0	0	0	0	0	603	903	0
10689	5	-10.5568	-0.65334	-527.284	-100157	-15047.1	2310.61	171.463	489.949	0	0	0	0	0	0	0	200	903	0	0	0	0	0	0	0	603	903	0
10689	6	-9.79385	-0.65334	-528.81	-100706	-15108.2	1532.41	171.43	490.439	0	0	0	0	0	0	0	200	903	0	0	0	0	0	0	0	603	903	0
10689	7	-8.26797	-0.65334	-530.031	-100615	-15657.5	1349.31	170.459	489.828	0	0	0	0	0	0	0	200	903	0	0	0	0	0	0	0	603	903	0
10689	8	-9.64126	-2.33181	-533.082	-100523	-15169.2	1623.96	171.544	488.57	0	0	0	0	0	0	0	200	903	0	0	0	0	0	0	0	603	903	0
10689	9	-10.7094	-2.17922	-534.608	-99607.6	-15291.3	1486.63	171.397	486.319	0	0	0	0	0	0	0	200	903	0	0	0	0	0	0	0	603	903	0
10690	0	-11.1671	-2.4844	-533.693	-100889	-15840.6	1715.52	170.319	489.04	0	0	0	0	0	0	0	200	903	0	0	0	0	0	0	0	603	903	0
10690	1	-9.94644	-3.24733	-534.303	-100798	-15657.5	1761.29	170.695	488.653	0	0	0	0	0	0	0	200	903	0	0	0	0	0	0	0	603	903	0
10690	2	-9.64126	-3.85769	-537.05	-100889	-15291.3	2219.06	171.527	487.858	0	0	0	0	0	0	0	200	903	0	0	0	0	0	0	0	603	903	0
10690	3	-9.94644	-4.62063	-532.472	-100523	-15535.4	2081.73	170.824	488.786	0	0	0	0	0	0	0	200	903	0	0	0	0	0	0	0	603	903	0
10690	4	-10.7094	-4.77321	-537.66	-101622	-15596.5	1944.4	170.992	489.007	0	0	0	0	0	0	0	200	903	0	0	0	0	0	0	0	603	903	0
10690	5	-10.7094	-5.07839	-537.355	-101530	-15291.3	1715.52	171.543	488.944	0	0	0	0	0	0	0	200	903	0	0	0	0	0	0	0	603	903	0
10690	6	-10.7094	-5.99392	-538.27	-101439	-15413.3	1990.17	171.365	488.453	0	0	0	0	0	0	0	200	903	0	0	0	0	0	0	0	603	903	0
10690	7	-10.5568	-7.21462	-542.238	-102903	-15840.6	2035.95	170.787	489.776	0	0	0	0	0	0	0	200	903	0	0	0	0	0	0	0	603	903	0
10690	8	-11.0146	-7.06203	-541.627	-103087	-15779.6	1852.85	170.866	490.328	0	0	0	0	0	0	0	200	903	0	0	0	0	0	0	0	603	903	0
10690	9	-11.1671	-7.21462	-544.069	-103087	-15413.3	2035.95	171.67	489.473	0	0	0	0	0	0	0	200	903	0	0	0	0	0	0	0	603	903	0
10691	0	-11.4723	-7.67238	-543.153	-103911	-15657.5	2402.16	171.173	491.31	0	0	0	0	0	0	0	200	903	0	0	0	0	0	0	0	603	903	0
10691	1	-10.4042	-8.13015	-542.238	-103727	-15779.6	2127.5	170.899	491.295	0	0	0	0	0	0	0	200	903	0	0	0	0	0	0	0	603	903	0
10691	2	-10.4042	-9.04567	-545.289	-103911	-15413.3	2127.5	171.734	490.56	0	0	0	0	0	0	0	200	903	0	0	0	0	0	0	0	603	903	0
10691	3	-11.9301	-9.35085	-546.51	-102995	-15657.5	2081.73	171.35	488.46	0	0	0	0	0	0	0	200	903	0	0	0	0	0	0	0	603	903	0
10691	4	-10.7094	-9.50344	-545.289	-103453	-15779.6	2447.94	171.062	489.721	0	0	0	0	0	0	0	200	903	0	0	0	0	0	0	0	603	903	0
10691	5	-11.6249	-11.0293	-544.374	-103087	-15779.6	2173.28	171.013	489.367	0	0	0	0	0	0	0	200	903	0	0	0	0	0	0	0	603	903	0
10691	6	-11.3197	-11.7923	-547.12	-104094	-15901.6	2219.06	170.936	490.257	0	0	0	0	0	0	0	200	903	0	0	0	0	0	0	0	603	903	0
10691	7	-11.1671	-13.1655	-550.477	-104368	-16084.7	2264.83	170.78	489.596	0	0	0	0	0	0	0	200	903	0	0	0	0	0	0	0	603	903	0
10691	8	-11.7775	-12.8604	-552.614	-104826	-16023.7	2631.04	171.004	489.691	0	0	0	0	0	0	0	200	903	0	0	0	0	0	0	0	603	903	0
10691	9	-11.7775	-13.013	-550.783	-105192	-15657.5	2676.82	171.572	490.987	0	0	0	0	0	0	0	200	903	0	0	0	0	0	0	0	603	903	0
10692	0	-13.1508	-14.2337	-549.562	-105833	-15962.7	2493.72	170.954	492.577	0	0	0	0	0	0	0	200	903	0	0	0	0	0	0	0	603	903	0
10692	1	-10.862	-13.7759	-550.783	-105192	-16023.7	2539.49	170.907	490.987	0	0	0	0	0	0	0	200	903	0	0	0	0	0	0	0	603	903	0
10692	2	-11.6249	-13.9285	-553.529	-105742	-15657.5	2768.37	171.713	491.032	0	0	0	0	0	0	0	200	903	0	0	0	0	0	0	0	603	903	0
10692	3	-12.9982	-16.8277	-555.971	-105833	-15962.7	2539.49	171.289	490.358	0	0	0	0	0	0	0	200	903	0	0	0	0	0	0	0	603	903	0
10692	4	-11.1671	-15.3018	-553.224	-105192	-16267.8	2676.82	170.594	490.144	0	0	0	0	0	0	0	200	903	0	0	0	0	0	0	0	603	903	0
10692	5	-13.456	-15.7595	-555.055	-105742	-16023.7	2722.6	171.131	490.507	0	0	0	0	0	0	0	200	903	0	0	0	0	0	0	0	603	903	0
10692	6	-12.2353	-18.0484	-556.276	-105650	-15779.6	3088.81	171.634	489.924	0	0	0	0	0	0	0	200	903	0	0	0	0	0	0	0	603	903	0
10692	7	-12.2353	-17.8958	-557.802	-106108	-15840.6	2859.93	171.602	490.225	0	0	0	0	0	0	0	200	903	0	0	0	0	0	0	0	603	903	0
10692	8	-13.3034	-18.5061	-558.412	-106749	-15840.6	2951.48	171.633	491.165	0	0	0	0	0	0	0	200	903	0	0	0	0	0	0	0	603	903	0
10692	9	-13.6085	-18.3535	-556.276	-106016	-15840.6	2905.7	171.524	490.582	0	0	0	0	0	0	0	200	903	0	0	0	0	0	0	0	603	903	0
10693	0	-13.7611	-19.5742	-559.327	-106932	-16023.7	3088.81	171.352	491.179	0	0	0	0	0	0	0	200	903	0	0	0	0	0	0	0	603	903	0
10693	1	-12.9982	-20.9475	-560.243	-107481	-16145.8	3134.58	171.181	491.847	0	0	0	0	0	0	0	200	903	0	0	0	0	0	0	0	603	903	0
10693	2	-13.9137	-19.7268	-561.769	-107023	-16573	2859.93	170.499	490.511	0	0	0	0	0	0	0	200	903	0	0	0	0	0	0	0	603	903	0
10693	3	-12.8456	-20.3372	-560.243	-108122	-16206.8	3088.81	171.072	492.991	0	0	0	0	0	0	0	200	903	0	0	0	0	0	0	0	603	903	0
10693	4	-13.7611	-22.4734	-564.515	-107939	-16328.9	3729.68	171.075	491.206	0	0	0	0	0	0	0	200	903	0	0	0	0	0	0	0	603	903	0
10693	5	-13.9137	-21.7105	-562.379	-107481	-16206.8	3271.91	171.182	491.119	0	0	0	0	0	0	0	200	903	0	0	0	0	0	0	0	603	903	0
10693	6	-14.0663	-21.7105	-562.99	-107847	-16023.7	3271.91	171.538	491.562	0	0	0	0	0	0	0	200	903	0	0	0	0	0	0	0	603	903	0
10693	7	-13.9137	-22.3208	-564.21	-108030	-16023.7	3363.47	171.6	491.472	0	0	0	0	0	0	0	200	903	0	0	0	0	0	0	0	603	903	0
10693	8	-13.9137	-23.8467	-566.346	-107573	-16145.8	3729.68	171.491	489.941	0	0	0	0	0	0	0	200	903	0	0	0	0	0	0	0	603	903	0
10693	9	-14.9818	-24.7622	-570.009	-108122	-16145.8	3775.45	171.675	489.685	0	0	0	0	0	0	0	200	903	0	0	0	0	0	0	0	603	903	0
10694	0	-15.1344	-25.22	-567.872	-108580	-16084.7	3271.91	171.675	491.204	0	0	0	0	0	0	0	200	903	0	0	0	0	0	0	0	603	903	0
10694	1	-13.9137	-27.5088	-568.788	-108854	-16267.8	3729.68	171.399	491.38	0	0	0	0	0	0	0	200	903	0	0	0	0	0	0	0	603	903	0
10694	2	-14.0663	-26.2881	-569.093	-108854	-16389.9	3867.01	171.2	491.277	0	0	0	0	0	0	0	200	903	0	0	0	0	0	0	0	603	903	0
10694	3	-14.5241	-26.5933	-569.703	-109953	-16084.7	3638.12	171.766	493	0	0	0	0	0	0	0	200	903	0	0	0	0	0	0	0	603	903	0
10694	4	-15.5922	-27.051	-572.145	-110319	-16084.7	3821.23	171.887	492.817	0	0	0	0	0	0	0	200	903	0	0	0	0	0	0	0	603	903	0
10694	5	-15.8974	-27.6614	-571.534	-110228	-16389.9	3775.45	171.323	492.863	0	0	0	0	0	0	0	200	903	0	0	0	0	0	0	0	603	903	0
10694	6	-14.8292	-27.2036	-571.84	-109678	-15962.7	3683.9	172.085	491.799	0	0	0	0	0	0	0	200	903	0	0	0	0	0	0	0	603	903	0
10694	7	-14.3715	-28.1192	-573.06	-110502	-16145.8	3867.01	171.825	492.828	0	0	0	0	0	0	0	200	903	0	0	0	0	0	0	0	603	903	0
10694	8	-15.4396	-31.3235	-575.502	-110685	-16695.1	4004.33	170.99	492.329	0	0	0	0	0	0	0	200	903	0	0	0	0	0	0	0	603	903	0
10694	9	-16.05	-29.7976	-575.197	-109953	-16573	4004.33	171.187	491.157	0	0	0	0	0	0	0	200	903	0	0	0	0	0	0	0	603	903	0
10695	0	-14.3715	-30.1028	-575.502	-110319	-16145.8	4233.22	171.945	491.692	0	0	0	0	0	0	0	200	903	0	0	0	0	0	0	0	603	903	0
10695	1	-16.2025	-31.1709	-574.891	-110502	-16328.9	4050.11	171.597	492.214	0	0	0	0	0	0	0	200	903	0	0	0	0	0	0	0	603	903	0
10695	2	-15.1344	-32.5442	-574.891	-110685	-16512	4095.89	171.278	492.533	0	0	0	0	0	0	0	200	903	0	0	0	0	0	0	0	603	903	0
10695	3	-15.287	-32.5442	-577.333	-111143	-16267.8	4050.11	171.822	492.512	0	0	0	0	0	0	0	200	903	0	0	0	0	0	0	0	603	903	0
10695	4	-16.6603	-33.1546	-579.164	-110777	-16023.7	4324.77	172.333	491.271	0	0	0	0	0	0	0	200	903	0	0	0	0	0	0	0	603	903	0
10695	5	-16.6603	-34.0701	-578.859	-111052	-16695.1	4324.77	171.159	491.846	0	0	0	0	0	0	0	200	903	0	0	0	0	0	0	0	603	903	0
10695	6	-16.8129	-34.9856	-578.554	-112059	-16817.2	4141.66	170.932	493.688	0	0	0	0	0	0	0	200	903	0	0	0	0	0	0	0	603	903	0
10695	7	-15.1344	-35.2908	-579.774	-112608	-16450.9	4370.55	171.625	494.227	0	0	0	0	0	0	0	200	903	0	0	0	0	0	0	0	603	903	0
10695	8	-14.8292	-35.7486	-583.742	-112608	-16328.9	4645.21	172.027	492.907	0	0	0	0	0	0	0	200	903	0	0	0	0	0	0	0	603	903	0
10695	9	-14.2189	-35.9011	-581.91	-112516	-16573	4416.32	171.52	493.357	0	0	0	0	0	0	0	200	903	0	0	0	0	0	0	0	603	903	0
10696	0	-16.8129	-36.8167	-584.352	-113249	-16512	4553.65	171.743	493.803	0	0	0	0	0	0	0	200	903	0	0	0	0	0	0	0	603	903	0
10696	1	-17.1181	-36.5115	-584.962	-112974	-16512	4553.65	171.773	493.131	0	0	0	0	0	0	0	200	903	0	0	0	0	0	0	0	603	903	0
10696	2	-15.8974	-36.9693	-584.352	-113157	-16389.9	4690.98	171.952	493.646	0	0	0	0	0	0	0	200	903	0	0	0	0	0	0	0	603	903	0
10696	3	-16.2025	-38.6477	-586.183	-112516	-16573	4507.87	171.727	491.948	0	0	0	0	0	0	0	200	903	0	0	0	0	0	0	0	603	903	0
10696	4	-16.8129	-38.9529	-587.098	-112974	-16634.1	4507.87	171.667	492.428	0	0	0	0	0	0	0	200	903	0	0	0	0	0	0	0	603	903	0
10696	5	-15.287	-40.6314	-584.962	-113432	-16695.1	4782.53	171.46	493.913	0	0	0	0	0	0	0	200	903	0	0	0	0	0	0	0	603	903	0
10696	6	-17.2707	-41.2417	-587.098	-113524	-16634.1	4828.31	171.667	493.364	0	0	0	0	0	0	0	200	903	0	0	0	0	0	0	0	603	903	0
10696	7	-16.2025	-42.0047	-587.098	-113524	-16450.9	4874.09	171.979	493.364	0	0	0	0	0	0	0	200	903	0	0	0	0	0	0	0	603	903	0
10696	8	-17.4232	-42.3098	-588.319	-113707	-16389.9	4782.53	172.141	493.274	0	0	0	0	0	0	0	200	903	0	0	0	0	0	0	0	603	903	0
10696	9	-16.3551	-42.9202	-585.267	-114348	-16512	4736.76	171.787	495.377	0	0	0	0	0	0	0	200	903	0	0	0	0	0	0	0	603	903	0
10697	0	-17.1181	-43.0728	-591.066	-114531	-16512	4919.86	172.064	493.77	0	0	0	0	0	0	0	200	903	0	0	0	0	0	0	0	603	903	0
10697	1	-17.2707	-43.6831	-590.15	-114805	-16328.9	4828.31	172.331	494.536	0	0	0	0	0	0	0	200	903	0	0	0	0	0	0	0	603	903	0
10697	2	-16.3551	-43.8357	-590.761	-115355	-16817.2	4965.64	171.533	495.265	0	0	0	0	0	0	0	200	903	0	0	0	0	0	0	0	603	903	0
10697	3	-14.3715	-45.6668	-591.676	-115446	-16573	5102.97	171.99	495.117	0	0	0	0	0	0	0	200	903	0	0	0	0	0	0	0	603	903	0
10697	4	-15.4396	-45.9719	-591.676	-114988	-16573	5240.3	171.99	494.344	0	0	0	0	0	0	0	200	903	0	0	0	0	0	0	0	603	903	0
10697	5	-16.9655	-47.1926	-593.202	-115172	-16145.8	5148.75	172.782	494.152	0	0	0	0	0	0	0	200	903	0	0	0	0	0	0	0	603	903	0
10697	6	-16.5077	-48.1082	-592.592	-115538	-16756.1	4965.64	171.724	494.97	0	0	0	0	0	0	0	200	903	0	0	0	0	0	0	0	603	903	0
10697	7	-16.3551	-48.1082	-593.507	-115355	-16512	5423.4	172.179	494.361	0	0	0	0	0	0	0	200	903	0	0	0	0	0	0	0	603	903	0
10697	8	-15.8974	-49.1763	-593.812	-115172	-16450.9	5331.85	172.296	493.953	0	0	0	0	0	0	0	200	903	0	0	0	0	0	0	0	603	903	0
10697	9	-15.4396	-50.5496	-597.474	-115538	-16695.1	5286.07	172.057	493.377	0	0	0	0	0	0	0	200	903	0	0	0	0	0	0	0	603	903	0
10698	0	-17.5758	-51.0073	-596.864	-116545	-16450.9	5011.42	172.438	495.262	0	0	0	0	0	0	0	200	903	0	0	0	0	0	0	0	603	903	0
10698	1	-16.5077	-51.4651	-594.728	-116453	-16389.9	5698.06	172.441	495.809	0	0	0	0	0	0	0	200	903	0	0	0	0	0	0	0	603	903	0
10698	2	-15.4396	-52.0755	-596.559	-117094	-16634.1	5560.73	172.117	496.283	0	0	0	0	0	0	0	200	903	0	0	0	0	0	0	0	603	903	0
10698	3	-14.9818	-52.5332	-595.033	-117003	-16695.1	5423.4	171.943	496.632	0	0	0	0	0	0	0	200	903	0	0	0	0	0	0	0	603	903	0
10698	4	-15.5922	-53.6013	-597.474	-117094	-16145.8	5469.18	172.977	495.982	0	0	0	0	0	0	0	200	903	0	0	0	0	0	0	0	603	903	0
10698	5	-16.2025	-54.0591	-597.474	-116545	-16389.9	5377.63	172.568	495.062	0	0	0	0	0	0	0	200	903	0	0	0	0	0	0	0	603	903	0
10698	6	-14.6767	-54.3643	-597.474	-116545	-16450.9	5377.63	172.466	495.062	0	0	0	0	0	0	0	200	903	0	0	0	0	0	0	0	603	903	0
10698	7	-16.2025	-56.3479	-596.254	-116270	-16878.2	5423.4	171.693	495.001	0	0	0	0	0	0	0	200	903	0	0	0	0	0	0	0	603	903	0
10698	8	-15.8974	-57.2634	-597.78	-116911	-16084.7	5377.63	173.093	495.575	0	0	0	0	0	0	0	200	903	0	0	0	0	0	0	0	603	903	0
10698	9	-14.8292	-59.7049	-599.611	-116911	-16573	5652.29	172.36	494.978	0	0	0	0	0	0	0	200	903	0	0	0	0	0	0	0	603	903	0
10699	0	-16.05	-58.6367	-600.221	-117918	-16450.9	5652.29	172.592	496.458	0	0	0	0	0	0	0	200	903	0	0	0	0	0	0	0	603	903	0
10699	1	-13.9137	-59.3997	-596.864	-118101	-16206.8	5514.96	172.847	497.87	0	0	0	0	0	0	0	200	903	0	0	0	0	0	0	0	603	903	0
10699	2	-15.7448	-59.3997	-597.169	-118193	-16084.7	5560.73	173.065	497.922	0	0	0	0	0	0	0	200	903	0	0	0	0	0	0	0	603	903	0
10699	3	-14.5241	-59.8574	-598.085	-118101	-16328.9	5560.73	172.698	497.466	0	0	0	0	0	0	0	200	903	0	0	0	0	0	0	0	603	903	0
10699	4	-14.8292	-60.1626	-601.137	-117643	-16206.8	5514.96	173.04	495.702	0	0	0	0	0	0	0	200	903	0	0	0	0	0	0	0	603	903	0
10699	5	-15.287	-61.2307	-600.526	-118101	-16206.8	5514.96	173.012	496.663	0	0	0	0	0	0	0	200	903	0	0	0	0	0	0	0	603	903	0
10699	6	-16.2025	-61.9937	-601.442	-117369	-16634.1	5514.96	172.343	495.146	0	0	0	0	0	0	0	200	903	0	0	0	0	0	0	0	603	903	0
10699	7	-15.4396	-62.7566	-600.526	-117918	-16450.9	5560.73	172.606	496.358	0	0	0	0	0	0	0	200	903	0	0	0	0	0	0	0	603	903	0
10699	8	-13.7611	-64.2825	-599.611	-118193	-16084.7	5835.39	173.175	497.116	0	0	0	0	0	0	0	200	903	0	0	0	0	0	0	0	603	903	0
10699	9	-12.2353	-64.7403	-599.916	-117735	-16328.9	5560.73	172.781	496.253	0	0	0	0	0	0	0	200	903	0	0	0	0	0	0	0	603	903	0
10700	0	-14.0663	-65.961	-597.78	-118101	-16267.8	5652.29	172.786	497.567	0	0	0	0	0	0	0	200	903	0	0	0	0	0	0	0	603	903	0
10700	1	-15.4396	-66.1135	-601.442	-118010	-15962.7	5560.73	173.459	496.211	0	0	0	0	0	0	0	200	903	0	0	0	0	0	0	0	603	903	0
10700	2	-14.8292	-66.4187	-599.611	-118467	-15779.6	5606.51	173.684	497.574	0	0	0	0	0	0	0	200	903	0	0	0	0	0	0	0	603	903	0
10700	3	-13.9137	-67.4868	-599.305	-118925	-16512	6018.5	172.448	498.438	0	0	0	0	0	0	0	200	903	0	0	0	0	0	0	0	603	903	0
10700	4	-12.9982	-67.792	-600.831	-118376	-16084.7	6384.71	173.229	497.02	0	0	0	0	0	0	0	200	903	0	0	0	0	0	0	0	603	903	0
10700	5	-13.7611	-68.2498	-599.611	-119017	-15962.7	5926.94	173.378	498.49	0	0	0	0	0	0	0	200	903	0	0	0	0	0	0	0	603	903	0
10700	6	-13.6085	-69.4705	-600.526	-119108	-16145.8	5606.51	173.114	498.34	0	0	0	0	0	0	0	200	903	0	0	0	0	0	0	0	603	903	0
10700	7	-14.3715	-69.4705	-597.78	-118834	-16023.7	5743.84	173.195	498.792	0	0	0	0	0	0	0	200	903	0	0	0	0	0	0	0	603	903	0
10700	8	-12.2353	-70.2334	-597.474	-118284	-15901.6	5652.29	173.385	497.974	0	0	0	0	0	0	0	200	903	0	0	0	0	0	0	0	603	903	0
10700	9	-12.9982	-71.4541	-601.747	-118376	-16328.9	5789.61	172.864	496.72	0	0	0	0	0	0	0	200	903	0	0	0	0	0	0	0	603	903	0
10701	0	-12.8456	-71.9119	-599.611	-117827	-15901.6	5652.29	173.48	496.505	0	0	0	0	0	0	0	200	903	0	0	0	0	0	0	0	603	903	0
10701	1	-13.6085	-72.98	-599.916	-118284	-15718.5	5835.39	173.799	497.168	0	0	0	0	0	0	0	200	903	0	0	0	0	0	0	0	603	903	0
10701	2	-14.3715	-73.1326	-596.864	-118101	-16023.7	6064.27	173.154	497.87	0	0	0	0	0	0	0	200	903	0	0	0	0	0	0	0	603	903	0
10701	3	-13.6085	-74.0481	-594.423	-118651	-15840.6	5835.39	173.351	499.606	0	0	0	0	0	0	0	200	903	0	0	0	0	0	0	0	603	903	0
10701	4	-12.3878	-74.5059	-597.169	-119383	-15596.5	5881.17	173.883	499.915	0	0	0	0	0	0	0	200	903	0	0	0	0	0	0	0	603	903	0
10701	5	-12.2353	-75.1162	-597.169	-119108	-15779.6	5881.17	173.576	499.455	0	0	0	0	0	0	0	200	903	0	0	0	0	0	0	0	603	903	0
10701	6	-13.1508	-75.7266	-595.949	-118559	-15962.7	5789.61	173.215	498.942	0	0	0	0	0	0	0	200	903	0	0	0	0	0	0	0	603	903	0
10701	7	-10.4042	-76.1843	-595.033	-119291	-15718.5	5652.29	173.584	500.479	0	0	0	0	0	0	0	200	903	0	0	0	0	0	0	0	603	903	0
10701	8	-13.456	-76.7947	-593.812	-118742	-15413.3	5789.61	174.043	499.966	0	0	0	0	0	0	0	200	903	0	0	0	0	0	0	0	603	903	0
10701	9	-12.5404	-77.4051	-594.728	-118376	-15657.5	6384.71	173.673	499.042	0	0	0	0	0	0	0	200	903	0	0	0	0	0	0	0	603	903	0
10702	0	-12.3878	-78.6258	-595.643	-118467	-15596.5	5881.17	173.816	498.89	0	0	0	0	0	0	0	200	903	0	0	0	0	0	0	0	603	903	0
10702	1	-12.8456	-79.2361	-595.338	-118467	-15535.4	5789.61	173.905	498.992	0	0	0	0	0	0	0	200	903	0	0	0	0	0	0	0	603	903	0
10702	2	-11.3197	-80.3042	-591.981	-117918	-15535.4	6018.5	173.757	499.192	0	0	0	0	0	0	0	200	903	0	0	0	0	0	0	0	603	903	0
10702	3	-13.1508	-79.8465	-591.066	-118284	-15535.4	6018.5	173.716	500.12	0	0	0	0	0	0	0	200	903	0	0	0	0	0	0	0	603	903	0
10702	4	-11.7775	-81.3723	-591.371	-118467	-15474.4	5835.39	173.833	500.327	0	0	0	0	0	0	0	200	903	0	0	0	0	0	0	0	603	903	0
10702	5	-12.0827	-81.3723	-591.981	-118101	-15779.6	5881.17	173.345	499.502	0	0	0	0	0	0	0	200	903	0	0	0	0	0	0	0	603	903	0
10702	6	-12.8456	-81.9827	-591.676	-118376	-15596.5	5698.06	173.64	500.069	0	0	0	0	0	0	0	200	903	0	0	0	0	0	0	0	603	903	0
10702	7	-11.3197	-83.2034	-589.845	-118284	-15291.3	5743.84	174.076	500.535	0	0	0	0	0	0	0	200	903	0	0	0	0	0	0	0	603	903	0
10702	8	-13.3034	-84.1189	-585.267	-118559	-15657.5	6110.05	173.247	502.572	0	0	0	0	0	0	0	200	903	0	0	0	0	0	0	0	603	903	0
10702	9	-11.3197	-83.6612	-588.014	-118376	-15291.3	6064.27	173.995	501.315	0	0	0	0	0	0	0	200	903	0	0	0	0	0	0	0	603	903	0
10703	0	-11.4723	-85.187	-588.93	-118376	-15413.3	5926.94	173.828	501.002	0	0	0	0	0	0	0	200	903	0	0	0	0	0	0	0	603	903	0
10703	1	-12.3878	-85.3396	-587.404	-118193	-15413.3	5972.72	173.76	501.212	0	0	0	0	0	0	0	200	903	0	0	0	0	0	0	0	603	903	0
10703	2	-10.5568	-86.5603	-584.352	-117277	-15169.2	5972.72	174.041	500.696	0	0	0	0	0	0	0	200	903	0	0	0	0	0	0	0	603	903	0
10703	3	-12.9982	-86.7129	-581.91	-117094	-14680.9	5698.06	174.771	501.224	0	0	0	0	0	0	0	200	903	0	0	0	0	0	0	0	603	903	0
10703	4	-11.6249	-87.3233	-583.131	-115538	-15291.3	5835.39	173.777	498.133	0	0	0	0	0	0	0	200	903	0	0	0	0	0	0	0	603	903	0
10703	5	-11.0146	-88.0862	-585.573	-116911	-15230.2	5926.94	173.991	499.652	0	0	0	0	0	0	0	200	903	0	0	0	0	0	0	0	603	903	0
10703	6	-12.8456	-89.9173	-584.047	-116362	-14925.1	5881.17	174.445	499.234	0	0	0	0	0	0	0	200	903	0	0	0	0	0	0	0	603	903	0
10703	7	-10.5568	-89.4595	-580.995	-117094	-15108.2	6064.27	173.996	501.541	0	0	0	0	0	0	0	200	903	0	0	0	0	0	0	0	603	903	0
10703	8	-11.9301	-89.6121	-578.248	-117003	-15108.2	6110.05	173.873	502.34	0	0	0	0	0	0	0	200	903	0	0	0	0	0	0	0	603	903	0
10703	9	-10.4042	-89.9173	-577.943	-117186	-14986.1	6155.83	174.07	502.763	0	0	0	0	0	0	0	200	903	0	0	0	0	0	0	0	603	903	0
10704	0	-11.3197	-90.9854	-577.638	-117003	-14864	6155.83	174.268	502.554	0	0	0	0	0	0	0	200	903	0	0	0	0	0	0	0	603	903	0
10704	1	-11.7775	-91.5957	-577.333	-117003	-15230.2	5743.84	173.62	502.661	0	0	0	0	0	0	0	200	903	0	0	0	0	0	0	0	603	903	0
10704	2	-12.693	-93.1216	-572.755	-116453	-14680.9	5835.39	174.368	503.321	0	0	0	0	0	0	0	200	903	0	0	0	0	0	0	0	603	903	0
10704	3	-12.0827	-92.8164	-573.976	-115263	-15108.2	5972.72	173.678	500.815	0	0	0	0	0	0	0	200	903	0	0	0	0	0	0	0	603	903	0
10704	4	-11.3197	-94.0371	-571.534	-115446	-14925.1	5743.84	173.886	501.993	0	0	0	0	0	0	0	200	903	0	0	0	0	0	0	0	603	903	0
10704	5	-11.0146	-94.4949	-572.45	-115446	-14680.9	5835.39	174.354	501.67	0	0	0	0	0	0	0	200	903	0	0	0	0	0	0	0	603	903	0
10704	6	-10.5568	-95.2578	-570.619	-114714	-14680.9	6018.5	174.272	501.034	0	0	0	0	0	0	0	200	903	0	0	0	0	0	0	0	603	903	0
10704	7	-11.9301	-95.4104	-566.041	-114805	-14619.9	5972.72	174.172	502.822	0	0	0	0	0	0	0	200	903	0	0	0	0	0	0	0	603	903	0
10704	8	-11.7775	-96.1734	-566.652	-114897	-14375.7	5972.72	174.63	502.765	0	0	0	0	0	0	0	200	903	0	0	0	0	0	0	0	603	903	0
10704	9	-11.0146	-96.7837	-565.736	-115263	-14375.7	5926.94	174.589	503.74	0	0	0	0	0	0	0	200	903	0	0	0	0	0	0	0	603	903	0
10705	0	-11.0146	-97.0889	-566.652	-114622	-14436.8	5835.39	174.523	502.28	0	0	0	0	0	0	0	200	903	0	0	0	0	0	0	0	603	903	0
10705	1	-11.1671	-97.8518	-564.821	-114622	-14253.7	5926.94	174.764	502.936	0	0	0	0	0	0	0	200	903	0	0	0	0	0	0	0	603	903	0
10705	2	-11.3197	-98.9199	-560.853	-114531	-14558.9	5926.94	174.042	504.208	0	0	0	0	0	0	0	200	903	0	0	0	0	0	0	0	603	903	0
10705	3	-11.6249	-99.2251	-559.022	-114348	-14314.7	5835.39	174.393	504.549	0	0	0	0	0	0	0	200	903	0	0	0	0	0	0	0	603	903	0
10705	4	-9.94644	-99.9881	-557.191	-113707	-13948.5	6064.27	174.966	504.071	0	0	0	0	0	0	0	200	903	0	0	0	0	0	0	0	603	903	0
10705	5	-9.94644	-100.141	-557.191	-112516	-13887.5	5881.17	175.076	501.935	0	0	0	0	0	0	0	200	903	0	0	0	0	0	0	0	603	903	0
10705	6	-10.5568	-100.751	-554.445	-112516	-13948.5	5743.84	174.842	502.935	0	4.85657	-0.982055	-37.348	-4340.88	2360.11	-1233.4	263.193	1019.23	0	0	0	0	0	0	0	603	903	0
10705	7	-10.4042	-101.819	-552.919	-111967	-13643.3	5789.61	175.325	502.502	0	11.723	-0.67688	-51.9964	-4798.65	3092.53	-1965.82	259.476	995.288	0	0	0	0	0	0	0	603	903	0
10705	8	-10.7094	-101.514	-550.477	-111876	-13826.4	5789.61	174.883	503.234	0	14.6222	-7.39075	-40.3997	-4066.22	2421.15	-2148.93	259.93	1003.65	0	0	0	0	0	0	0	603	903	0
10705	9	-9.1835	-102.429	-549.867	-111784	-14436.8	5835.39	173.745	503.293	0	-0.941772	-15.3253	-31.5496	-4707.09	1810.79	-1736.94	257.395	1052.2	0	0	0	0	0	0	0	603	903	0
10706	0	-10.2516	-104.413	-549.257	-111326	-13643.3	5926.94	175.16	502.685	0	-10.2496	-12.2736	-39.179	-4981.75	2848.39	-1416.5	272.702	1030.15	0	0	0	0	0	0	0	603	903	0
10706	1	-10.5568	-104.718	-546.205	-111967	-13765.4	5789.61	174.798	504.991	0	4.3988	-8.45886	-57.1844	-5347.96	3580.81	-1599.61	262.619	996.521	0	0	0	0	0	0	0	603	903	0
10706	2	-8.26797	-102.735	-543.763	-111601	-13887.5	5652.29	174.46	505.238	0	8.36609	-17.0038	-66.3397	-5988.83	4191.17	-2148.93	263.177	993.275	0	0	0	0	0	0	0	603	903	0
10706	3	-7.35244	-103.345	-543.153	-110685	-13277.1	5835.39	175.555	503.783	0	-2.00989	-21.1237	-68.7811	-8094.54	4130.13	-2332.03	260.048	1020.69	0	0	0	0	0	0	0	603	903	0
10706	4	-10.4042	-106.397	-538.881	-110228	-13277.1	5835.39	175.362	504.549	0	1.04187	-15.4779	-77.6312	-8186.1	4679.45	-2515.14	260.278	1008.45	0	0	0	0	0	0	0	603	903	0
10706	5	-8.42056	-106.549	-538.27	-110228	-13521.3	5377.63	174.88	504.781	0	14.317	-15.0201	-93.5003	-9193.18	5533.94	-2606.69	259.186	1001.32	0	0	0	0	0	0	0	603	903	0
10706	6	-7.50503	-104.413	-535.524	-109495	-13338.1	5423.4	175.093	504.464	0	7.75574	-18.3771	-99.909	-10474.9	6083.26	-2011.6	260.888	1007.84	0	0	0	0	0	0	0	603	903	0
10706	7	-8.72573	-105.023	-533.082	-108946	-13216.1	5698.06	175.208	504.37	0	-2.46765	-11.0529	-99.6038	-10749.6	5533.94	-2057.37	255.56	1010.92	0	0	0	0	0	0	0	603	903	0
10706	8	-10.099	-108.838	-530.946	-108214	-13338.1	5652.29	174.879	503.813	0	-0.178833	-8.15369	-109.675	-11756.7	6754.64	-2103.15	261.588	1010.2	0	0	0	0	0	0	0	603	903	0
10706	9	-7.35244	-108.228	-526.979	-108488	-13399.2	5423.4	174.574	505.868	0	7.45056	-10.2899	-123.408	-12306	7548.1	-1553.83	261.164	1002.72	0	0	0	0	0	0	0	603	903	0
10707	0	-5.21621	-106.397	-524.843	-106840	-12910.9	5331.85	175.4	503.566	0	5.7721	-6.01746	-127.07	-12946.8	6693.61	-1599.61	252.677	1004.89	0	0	0	0	0	0	0	603	903	0
10707	1	-7.65762	-108.228	-523.927	-106840	-12727.8	5606.51	175.707	503.922	0	-6.28235	-4.03381	-131.037	-13404.6	7120.85	-1599.61	254.342	1005.3	0	0	0	0	0	0	0	603	903	0
10707	2	-8.87832	-111.585	-519.655	-106199	-12971.9	5286.07	175.037	504.365	0	0.278931	-6.17004	-138.361	-14869.4	7853.28	-1004.52	256.759	1010.47	0	0	0	0	0	0	0	603	903	0
10707	3	-7.35244	-109.449	-517.518	-106016	-12727.8	5286.07	175.406	504.855	0	6.22986	-2.20276	-147.211	-15510.3	7853.28	-684.083	253.347	1008.36	0	0	0	0	0	0	0	603	903	0
10707	4	-4.75845	-107.16	-512.941	-106108	-12666.8	5286.07	175.306	506.862	0	-4.45129	2.52747	-151.179	-15418.8	8158.45	-1096.07	253.966	1004.99	0	0	0	0	0	0	0	603	903	0
10707	5	-5.97915	-110.059	-512.636	-105375	-12910.9	5148.75	174.815	505.556	0	-8.57117	2.68005	-155.146	-16975.2	8036.38	-500.977	251.799	1012.41	0	0	0	0	0	0	0	603	903	0
10707	6	-7.65762	-112.195	-510.194	-104918	-12361.6	5286.07	175.771	505.643	0	-0.941772	3.44299	-161.249	-16792.1	8219.49	-272.095	250.974	1007.14	0	0	0	0	0	0	0	603	903	0
10707	7	-6.13174	-109.906	-504.396	-104918	-12361.6	5148.75	175.492	508.007	0	-0.941772	9.6991	-167.658	-17616	8951.91	-134.766	253.394	1008.07	0	0	0	0	0	0	0	603	903	0
10707	8	-3.84292	-107.465	-500.123	-103636	-12605.7	5057.19	174.795	507.221	0	-9.79187	13.056	-170.71	-17982.2	8280.52	277.221	248.506	1008.34	0	0	0	0	0	0	0	603	903	0
10707	9	-4.60586	-111.585	-497.377	-103361	-12178.5	5102.97	175.515	507.813	0	-12.5385	11.9879	-173.151	-18623.1	8280.52	597.656	247.822	1010.55	0	0	0	0	0	0	0	603	903	0
10708	0	-5.3688	-112.653	-495.851	-101713	-12178.5	4874.09	175.439	505.129	0	-9.48669	14.7345	-182.612	-19996.4	8829.84	597.656	248.353	1012.5	0	0	0	0	0	0	0	603	903	0
10708	1	-4.75845	-108.991	-493.409	-101256	-12056.4	4828.31	175.565	505.216	0	-10.5548	22.8217	-189.631	-20545.7	9012.95	1467.41	247.529	1011.35	0	0	0	0	0	0	0	603	903	0
10708	2	-3.38516	-108.686	-487.611	-99607.6	-12361.6	4736.76	174.649	504.277	0	-15.4376	22.0587	-190.241	-20911.9	8829.84	1513.18	246.414	1012.92	0	0	0	0	0	0	0	603	903	0
10708	3	-3.38516	-112.348	-483.034	-99699.1	-11873.3	4462.1	175.419	506.402	0	-17.1161	20.3802	-198.786	-22285.2	8890.88	1604.74	244.726	1015.11	0	0	0	0	0	0	0	603	903	0
10708	4	-2.16445	-113.874	-482.728	-98875.2	-11568.1	4736.76	176.036	504.826	0	-16.3531	27.8571	-203.974	-22926.1	9440.19	2108.28	246.281	1015.4	0	0	0	0	0	0	0	603	903	0
10708	5	-2.46963	-110.059	-479.066	-97868	-11995.4	4462.1	174.961	504.289	0	-18.1842	32.8925	-209.772	-22926.1	9806.4	2520.26	246.748	1012.29	0	0	0	0	0	0	0	603	903	0
10708	6	-1.40151	-109.449	-472.658	-98325.8	-11568.1	4507.87	175.525	508.028	0	-21.6937	27.8571	-213.129	-23292.3	9501.23	2382.93	244.58	1012.29	0	0	0	0	0	0	0	603	903	0
10708	7	-3.23257	-113.111	-466.859	-97685	-11263	4187.44	175.875	509.239	0	-21.6937	31.6718	-221.979	-24390.9	9257.09	3069.58	241.702	1012.88	0	0	0	0	0	0	0	603	903	0
10708	8	-2.62222	-111.127	-464.113	-94480.6	-11446.1	4370.55	175.338	503.573	0	-20.7782	37.7753	-228.998	-26222	9928.47	3573.12	243.356	1017.51	0	0	0	0	0	0	0	603	903	0
10708	9	1.65024	-108.075	-461.366	-96128.5	-11201.9	3958.56	175.72	508.356	0	-21.0834	37.9279	-233.271	-26954.4	10294.7	3710.45	244.132	1018.55	0	0	0	0	0	0	0	603	903	0
10709	0	-0.485986	-110.517	-457.094	-95029.9	-11263	4278.99	175.36	507.9	0	-25.661	36.2494	-236.933	-26862.9	10172.6	3939.33	242.935	1016.38	0	0	0	0	0	0	0	603	903	0
10709	1	-1.70669	-112.043	-453.126	-94205.9	-11385	3729.68	174.874	507.902	0	-25.0507	40.9796	-244.562	-27961.5	10294.7	4030.88	242.094	1017.33	0	0	0	0	0	0	0	603	903	0
10709	2	-1.09634	-110.059	-447.023	-92558	-11201.9	4187.44	174.941	507.054	0	-24.4403	44.184	-251.581	-28236.1	10966.1	3802	243.589	1015.23	0	0	0	0	0	0	0	603	903	0
10709	3	0.887305	-108.228	-443.055	-92100.2	-11385	3683.9	174.303	507.875	0	-25.8136	42.6581	-255.854	-28877	11027.1	4488.65	243.099	1015.87	0	0	0	0	0	0	0	603	903	0
10709	4	0.734717	-109.754	-438.783	-90635.4	-10957.8	3729.68	175.027	506.561	0	-27.7972	43.1158	-265.619	-30708.1	10966.1	4625.98	241.285	1018.61	0	0	0	0	0	0	0	603	903	0
10709	5	0.429541	-110.517	-431.154	-90360.8	-11263	3958.56	173.877	509.579	0	-27.9498	46.4728	-273.859	-32264.5	11698.5	4534.42	242.717	1020.81	0	0	0	0	0	0	0	603	903	0
10709	6	1.80283	-108.991	-430.848	-88895.9	-10652.6	3821.23	175.275	506.328	0	-25.5084	48.3038	-281.489	-33363.1	12064.7	5312.62	242.86	1021.52	0	0	0	0	0	0	0	603	903	0
10709	7	2.71836	-106.855	-424.135	-88895.9	-10530.5	3088.81	175.172	509.594	0	-26.2714	48.9142	-291.865	-34827.9	12675.1	5633.06	243.428	1022.33	0	0	0	0	0	0	0	603	903	0
10709	8	2.71836	-109.143	-418.641	-87888.8	-11018.8	2997.26	173.68	509.938	0	-31.1542	51.5082	-302.241	-36109.7	13041.3	5404.18	243.149	1022.47	0	0	0	0	0	0	0	603	903	0
10709	9	2.56577	-108.838	-415.895	-86790.2	-10103.3	3134.58	175.707	508.683	0	-29.4757	53.4918	-310.785	-37116.8	13529.5	5907.72	243.533	1022.43	0	0	0	0	0	0	0	603	903	0
10710	0	4.702	-105.023	-406.129	-85325.4	-10225.4	2905.7	174.822	510.094	0	-26.5765	52.8815	-319.636	-38123.8	14078.9	6090.82	244.047	1022.27	0	0	0	0	0	0	0	603	903	0
10710	1	3.17612	-104.108	-406.434	-85325.4	-10225.4	2814.15	174.841	509.936	0	-29.3231	55.6281	-327.875	-40046.5	14872.3	5999.27	245.36	1025.14	0	0	0	0	0	0	0	603	903	0
10710	2	2.87095	-107.16	-398.5	-83952	-10408.5	2447.94	173.881	510.67	0	-32.2223	59.5953	-339.777	-41877.5	14872.3	6640.14	243.771	1026.25	0	0	0	0	0	0	0	603	903	0
10710	3	4.39683	-104.871	-394.227	-83036.5	-9798.11	2676.82	175.146	510.631	0	-30.2386	61.1212	-348.627	-43433.9	15116.5	6823.24	243.36	1027.59	0	0	0	0	0	0	0	603	903	0
10710	4	5.77012	-101.667	-391.176	-81113.9	-10042.3	2631.04	174.328	507.359	0	-29.7809	63.41	-355.341	-44074.8	15971	6685.91	244.945	1027.04	0	0	0	0	0	0	0	603	903	0
10710	5	5.9227	-101.514	-384.157	-80564.6	-10042.3	2264.83	173.859	509.718	0	-31.0016	65.6989	-364.496	-45631.2	16093	7555.67	244.151	1028.19	0	0	0	0	0	0	0	603	903	0
10710	6	3.78647	-104.108	-380.189	-79008.2	-9798.11	2356.39	174.228	507.813	0	-32.2223	66.767	-373.346	-47279.1	16154.1	7464.11	243.268	1029.64	0	0	0	0	0	0	0	603	903	0
10710	7	5.15977	-101.514	-373.17	-78550.4	-9615	2173.28	174.234	510.495	0	-31.1542	68.598	-380.671	-48194.6	17252.7	7418.34	245.322	1029.6	0	0	0	0	0	0	0	603	903	0
10710	8	7.296	-99.2251	-367.982	-77360.2	-9431.9	2219.06	174.369	510.228	0	-31.6119	73.0231	-386.774	-49659.5	17374.8	7921.88	244.922	1031.39	0	0	0	0	0	0	0	603	903	0
10710	9	6.68564	-99.5303	-364.625	-76536.3	-9615	1990.17	173.63	509.904	0	-32.6801	74.3964	-395.319	-50208.8	18107.2	7876.1	245.804	1030.01	0	0	0	0	0	0	0	603	903	0
10711	0	4.702	-99.5303	-358.217	-75803.9	-9248.79	1807.07	174.181	511.615	0	-29.4757	74.2438	-402.338	-51490.6	17618.9	8013.43	243.791	1030.98	0	0	0	0	0	0	0	603	903	0
10711	1	5.9227	-96.9363	-353.029	-74705.2	-9370.86	1807.07	173.456	511.612	0	-29.6283	76.2274	-408.442	-53138.5	18412.4	7921.88	245.08	1033.1	0	0	0	0	0	0	0	603	903	0
10711	2	6.68564	-94.0371	-345.704	-72691	-9431.9	1944.4	172.717	510.269	0	-31.0016	78.974	-412.409	-54237.1	18839.6	7876.1	245.682	1034.51	0	0	0	0	0	0	0	603	903	0
10711	3	7.44858	-94.6475	-340.211	-72233.3	-8943.62	1440.86	173.712	512.319	0	-30.0861	78.6688	-418.818	-54511.8	19144.8	8104.98	245.712	1033.16	0	0	0	0	0	0	0	603	903	0
10711	4	7.296	-94.3423	-335.023	-71226.2	-9370.86	1578.19	172.029	512.601	0	-27.6447	79.5844	-423.701	-55152.7	19327.9	7784.55	245.617	1033.17	0	0	0	0	0	0	0	603	903	0
10711	5	8.21152	-91.5957	-326.478	-69669.8	-9065.69	1440.86	172.232	513.398	0	-27.0343	81.7206	-428.888	-56709.1	20182.4	7784.55	247.057	1035.22	0	0	0	0	0	0	0	603	903	0
10711	6	8.05894	-90.375	-323.427	-68113.4	-8943.62	1303.53	172.347	510.599	0	-26.8817	83.399	-430.414	-57441.5	20426.5	7189.45	247.458	1036.46	0	0	0	0	0	0	0	603	903	0
10711	7	7.60117	-90.9854	-315.492	-67472.5	-8943.62	1532.41	171.652	513.865	0	-23.9825	82.4835	-438.044	-58173.9	20243.4	7464.11	246.213	1035.8	0	0	0	0	0	0	0	603	903	0
10711	8	7.90635	-90.0698	-308.473	-65641.5	-8638.44	1120.42	171.996	512.795	0	-24.2877	82.3309	-442.316	-58540.1	20670.7	7326.78	246.733	1035.35	0	0	0	0	0	0	0	603	903	0
10711	9	8.66929	-87.0181	-305.421	-64542.9	-8455.34	1120.42	172.316	511.324	0	-21.3885	86.2982	-446.589	-59455.6	20853.8	6869.02	246.696	1036.13	0	0	0	0	0	0	0	603	903	0
10712	0	8.36411	-85.3396	-298.707	-62894.9	-8699.48	1166.2	170.876	510.557	0	-19.2523	82.6361	-446.589	-60828.9	21464.1	6823.24	248.062	1039.21	0	0	0	0	0	0	0	603	903	0
10712	1	6.99082	-85.187	-288.331	-62803.4	-8455.34	708.436	170.675	517.817	0	-19.2523	83.8568	-453.913	-60645.8	21158.9	6731.69	246.615	1036.61	0	0	0	0	0	0	0	603	903	0
10712	2	8.05894	-83.2034	-285.585	-61613.2	-8760.51	1074.65	169.324	515.744	0	-18.1842	84.7723	-456.049	-61652.9	21769.3	6228.15	247.735	1038.19	0	0	0	0	0	0	0	603	903	0
10712	3	9.7374	-80.1516	-278.566	-60056.8	-8150.16	891.542	170.742	515.593	0	-14.3695	85.0775	-457.575	-62660	22257.6	5541.51	248.642	1039.94	0	0	0	0	0	0	0	603	903	0
10712	4	9.88999	-79.2361	-272.462	-59049.7	-7906.02	754.213	170.983	516.726	0	-10.2496	85.0775	-460.322	-62934.6	22440.7	5449.95	248.75	1039.72	0	0	0	0	0	0	0	603	903	0
10712	5	8.66929	-79.2361	-267.579	-57951.1	-7906.02	616.883	170.454	516.575	0	-10.5548	85.2301	-461.847	-63026.2	22623.8	4946.41	248.985	1039.47	0	0	0	0	0	0	0	603	903	0
10712	6	9.58481	-76.4895	-259.34	-56303.1	-7600.84	433.778	170.692	517.102	0	-11.0126	86.1456	-465.51	-64124.8	22684.8	4900.63	248.731	1040.75	0	0	0	0	0	0	0	603	903	0
10712	7	8.82187	-74.3533	-253.846	-54655.2	-7356.7	525.331	171.019	515.308	0	-8.41858	85.3827	-465.815	-64124.8	22990	4763.31	249.354	1040.66	0	0	0	0	0	0	0	603	903	0
10712	8	9.58481	-74.3533	-246.217	-53190.3	-7478.77	525.331	169.625	516.03	0	-4.29871	85.0775	-468.867	-64491	23356.2	4259.77	249.814	1040.55	0	0	0	0	0	0	0	603	903	0
10712	9	8.66929	-73.7429	-241.945	-51359.3	-7112.56	388.001	170.603	512.277	0	-2.31506	85.5353	-470.392	-64857.2	23295.2	4259.77	249.523	1040.88	0	0	0	0	0	0	0	603	903	0
10713	0	8.36411	-70.6912	-235.536	-50993.1	-7112.56	616.883	169.803	516.498	0	-3.53577	86.2982	-470.087	-65772.8	23722.4	3847.78	250.464	1042.92	0	0	0	0	0	0	0	603	903	0
10713	1	10.0426	-67.792	-227.296	-49619.8	-6929.45	433.778	169.514	518.304	0	-0.33142	85.993	-471.918	-66413.6	23905.5	3435.79	250.656	1043.73	0	0	0	0	0	0	0	603	903	0
10713	2	8.21152	-66.5713	-219.362	-48978.9	-6746.35	754.213	169.246	523.279	0	0.278931	87.6715	-474.36	-65955.9	23905.5	3252.69	250.395	1042.04	0	0	0	0	0	0	0	603	903	0
10713	3	7.90635	-64.5877	-214.479	-48063.4	-6624.28	433.778	169.115	524.094	0	1.04187	86.4508	-474.36	-65955.9	23905.5	3023.8	250.395	1042.04	0	0	0	0	0	0	0	603	903	0
10713	4	8.66929	-62.4514	-208.986	-46781.6	-6807.38	204.896	167.427	523.851	0	3.48328	85.6879	-476.191	-66779.8	24210.7	2703.37	250.842	1043.24	0	0	0	0	0	0	0	603	903	0
10713	5	8.05894	-59.0945	-205.324	-44859	-6258.07	113.343	169.521	518.48	0	5.92468	86.2982	-475.886	-67603.8	24088.6	2657.59	250.619	1045.06	0	0	0	0	0	0	0	603	903	0
10713	6	9.12705	-57.8738	-196.779	-43760.4	-6380.14	21.7904	167.577	522.384	0	5.46692	87.2137	-472.529	-67878.5	24515.9	2520.26	251.882	1046.65	0	0	0	0	0	0	0	603	903	0
10713	7	6.68564	-57.5686	-190.675	-42936.4	-6319.1	250.672	166.859	525.181	0	5.61951	87.3663	-477.411	-67329.2	24210.7	2291.38	250.712	1044.03	0	0	0	0	0	0	0	603	903	0
10713	8	8.5167	-54.5169	-186.097	-41471.6	-5952.89	296.449	168.012	522.849	0	7.45056	86.9086	-478.327	-67420.7	24699	2337.16	251.636	1043.95	0	0	0	0	0	0	0	603	903	0
10713	9	8.21152	-52.6858	-181.215	-40281.4	-5891.86	21.7904	167.487	522.285	0	8.06091	87.2137	-478.327	-68244.7	24515.9	2291.38	251.253	1045.67	0	0	0	0	0	0	0	603	903	0
10714	0	7.14341	-53.9065	-176.027	-38908.1	-5891.86	67.5668	166.529	521.035	0	7.60315	87.8241	-479.242	-67329.2	24576.9	1970.95	251.283	1043.49	0	0	0	0	0	0	0	603	903	0
10714	1	8.36411	-50.397	-169.618	-37901	-5464.61	67.5668	167.783	523.449	0	7.75574	86.9086	-478.327	-67878.5	24699	2108.28	251.636	1044.91	0	0	0	0	0	0	0	603	903	0
10714	2	6.07529	-48.1082	-163.514	-36710.8	-5342.54	-161.315	167.327	524.511	0	10.0446	87.0612	-479.548	-68061.6	25065.2	2382.93	252.268	1044.93	0	0	0	0	0	0	0	603	903	0
10714	3	6.53306	-48.1082	-158.937	-35795.3	-5342.54	-115.539	166.386	525.217	0	12.6385	88.7396	-479.853	-68427.8	24943.1	1925.17	251.981	1045.6	0	0	0	0	0	0	0	603	903	0
10714	4	6.53306	-44.4461	-155.58	-34422	-5220.47	-23.9859	166.445	521.25	0	11.1127	87.5189	-482.294	-69343.3	25004.2	2199.83	251.844	1046.78	0	0	0	0	0	0	0	603	903	0
10714	5	5.9227	-42.0047	-149.782	-34513.6	-5281.5	113.343	164.739	530.426	0	10.3497	87.0612	-482.599	-69343.3	25309.3	2154.05	252.444	1046.69	0	0	0	0	0	0	0	603	903	0
10714	6	5.9227	-39.4107	-146.73	-33506.5	-5159.43	113.343	164.837	528.355	0	9.58679	87.8241	-483.21	-69068.7	25614.5	2108.28	253.009	1045.94	0	0	0	0	0	0	0	603	903	0
10714	7	5.46494	-36.6641	-142.152	-32865.6	-4732.19	-23.9859	166.71	531.2	0	11.1127	88.1293	-482.294	-69434.9	25614.5	2291.38	253.11	1046.97	0	0	0	0	0	0	0	603	903	0
10714	8	6.68564	-33.7649	-136.964	-31767	-4304.94	-344.421	168.569	531.936	0	10.9601	87.5189	-482.905	-70167.3	25248.3	2337.16	252.284	1048.3	0	0	0	0	0	0	0	603	903	0
10714	9	6.99082	-31.6287	-132.997	-31034.5	-4304.94	-69.7623	167.631	533.348	0	9.28162	88.7396	-484.43	-69801.1	25431.4	2154.05	252.498	1047.09	0	0	0	0	0	0	0	603	903	0
10715	0	5.61753	-32.5442	-128.419	-30119	-4365.98	21.7904	166.002	534.537	0	9.73938	87.5189	-484.125	-70808.2	25736.6	2566.04	253.161	1049.26	0	0	0	0	0	0	0	603	903	0
10715	1	5.31235	-29.9502	-125.673	-28928.8	-3816.66	67.5668	169.63	530.192	0	11.2653	88.8922	-487.177	-70716.6	25553.5	2932.25	252.452	1048.16	0	0	0	0	0	0	0	603	903	0
10715	2	5.15977	-28.4243	-120.18	-27372.4	-3999.77	-344.421	166.718	527.763	0	10.8075	87.6715	-488.093	-70808.2	25492.4	2703.37	252.229	1048.07	0	0	0	0	0	0	0	603	903	0
10715	3	4.85459	-25.9829	-115.907	-26731.6	-3938.73	113.343	166.018	530.629	0	8.97644	87.8241	-492.365	-71815.3	25797.6	3115.36	252.395	1048.86	0	0	0	0	0	0	0	603	903	0
10715	4	4.702	-26.2881	-112.245	-26273.8	-3877.7	-161.315	165.453	534.076	0	6.53503	88.587	-496.332	-73737.9	26652.1	3435.79	253.698	1051.57	0	0	0	0	0	0	0	603	903	0
10715	5	4.85459	-23.3889	-108.888	-24992.1	-3816.66	-161.315	164.949	529.521	0	8.51868	90.4181	-497.248	-73646.3	26957.3	3206.91	254.213	1051.11	0	0	0	0	0	0	0	603	903	0
10715	6	3.78647	-20.6424	-106.752	-24259.6	-3572.52	-435.973	166.534	527.253	0	12.0282	91.0284	-498.163	-73646.3	26713.1	2840.7	253.623	1050.84	0	0	0	0	0	0	0	603	903	0
10715	7	3.93906	-19.7268	-101.259	-23435.7	-3572.52	-252.868	164.719	531.444	0	11.1127	92.2491	-499.384	-73554.8	26408	2978.03	252.881	1050.29	0	0	0	0	0	0	0	603	903	0
10715	8	3.63389	-19.4217	-94.8499	-22703.2	-3328.38	-298.644	164.909	539.36	0	10.3497	91.4862	-502.436	-74012.5	26469	2978.03	252.681	1050.31	0	0	0	0	0	0	0	603	903	0
10715	9	3.78647	-16.6751	-92.1033	-22428.6	-3084.24	-298.644	166.513	543.516	0	14.0118	91.944	-506.708	-75752	26957.3	2749.15	253.201	1052.5	0	0	0	0	0	0	0	603	903	0
10716	0	4.09165	-14.2337	-93.0189	-21879.3	-3450.45	-573.302	162.906	535.213	0	13.8593	94.0802	-507.319	-76118.3	27079.4	3023.8	253.377	1053.04	0	0	0	0	0	0	0	603	903	0
10716	1	3.02354	-14.6914	-89.9671	-21513.1	-2962.17	-344.421	167.075	539.122	0	13.5541	95.9113	-509.76	-76759.1	27506.6	3390.02	253.96	1053.58	0	0	0	0	0	0	0	603	903	0
10716	2	2.71836	-14.6914	-83.8636	-20506	-3450.45	159.12	158.856	544.516	0	11.723	97.132	-512.201	-76759.1	27384.5	3344.24	253.464	1052.86	0	0	0	0	0	0	0	603	903	0
10716	3	1.03989	-13.7759	-82.0325	-20322.9	-3328.38	21.7904	159.426	547.742	0	10.0446	98.2001	-513.727	-77857.7	27323.5	3664.67	253.187	1054.55	0	0	0	0	0	0	0	603	903	0
10716	4	3.93906	-13.013	-77.7601	-19407.4	-2901.13	-390.197	162.691	549.58	0	9.58679	98.6578	-516.169	-77857.7	27750.7	3893.56	253.763	1053.84	0	0	0	0	0	0	0	603	903	0
10716	5	3.02354	-13.3181	-77.7601	-18674.9	-2595.96	250.672	166.616	540.161	0	10.6549	98.3527	-516.779	-77033.8	27994.9	3710.45	254.172	1052.07	0	0	0	0	0	0	0	603	903	0
10716	6	0.887305	-13.7759	-74.7083	-17118.5	-2840.1	67.5668	161.984	529.138	0	10.0446	97.5897	-518.915	-78498.6	28117	3847.78	254.184	1054.27	0	0	0	0	0	0	0	603	903	0
10716	7	1.19248	-12.5552	-71.0462	-16477.7	-2473.89	67.5668	165.179	531.929	0	10.3497	98.3527	-521.662	-79414.2	27689.7	3939.33	253.08	1055.23	0	0	0	0	0	0	0	603	903	0
10716	8	1.65024	-11.4871	-66.4686	-16019.9	-2473.89	-115.539	162.781	541.015	0	12.0282	97.7423	-521.967	-79780.4	27811.8	3618.9	253.283	1055.85	0	0	0	0	0	0	0	603	903	0
10716	9	1.49766	-10.419	-65.2479	-15562.1	-2534.92	113.343	161.149	538.508	0	10.3497	96.5216	-523.798	-79871.9	28300.1	3618.9	254.029	1055.49	0	0	0	0	0	0	0	603	903	0
10717	0	2.2606	-11.3345	-64.9427	-15379	-2534.92	-161.315	160.967	536.809	0	11.2653	95.3009	-527.46	-80329.6	28605.2	3435.79	254.232	1055.3	0	0	0	0	0	0	0	603	903	0
10717	1	1.80283	-8.89309	-62.8065	-14921.3	-2351.82	-69.7623	162.555	537.576	0	12.1808	95.6061	-527.155	-80970.5	28300.1	3344.24	253.685	1056.6	0	0	0	0	0	0	0	603	903	0
10717	2	0.124365	-6.75686	-59.7547	-14646.6	-2290.78	113.343	161.664	545.112	0	11.2653	95.7587	-526.85	-81611.4	28483.2	3390.02	254.063	1057.9	0	0	0	0	0	0	0	603	903	0
10717	3	0.124365	-8.13015	-56.3978	-13822.6	-2046.64	-161.315	163.711	545.092	0	12.1808	95.4535	-532.343	-81336.8	28483.2	3344.24	253.505	1055.79	0	0	0	0	0	0	0	603	903	0
10717	4	1.03989	-8.13015	-54.5667	-13639.5	-2107.68	-207.091	161.374	549.961	0	14.0118	95.7587	-534.784	-81245.2	28544.2	2932.25	253.375	1054.92	0	0	0	0	0	0	0	603	903	0
10717	5	2.87095	-4.16286	-55.4822	-13181.8	-2107.68	-207.091	162.012	537.585	0	14.6222	94.2328	-536.616	-82435.4	28605.2	3161.13	253.307	1056.62	0	0	0	0	0	0	0	603	903	0
10717	6	1.80283	-3.39992	-54.2615	-12724	-1985.61	-252.868	163.407	534.494	0	15.08	93.4698	-537.836	-83900.2	29337.7	2978.03	254.548	1059	0	0	0	0	0	0	0	603	903	0
10717	7	0.429541	-5.84133	-51.8201	-12449.3	-1863.54	-435.973	164.038	540.242	0	14.9274	94.0802	-539.362	-83900.2	29459.7	2794.92	254.62	1058.55	0	0	0	0	0	0	0	603	903	0
10717	8	0.429541	-4.01027	-48.7684	-12357.8	-1863.54	204.896	161.788	553.398	0	14.9274	95.3009	-541.804	-83991.8	29459.7	2794.92	254.373	1058.02	0	0	0	0	0	0	0	603	903	0
10717	9	1.34507	-2.17922	-46.327	-11076.1	-1741.47	-390.197	162.409	539.084	0	16.6058	93.3173	-542.719	-84358	29520.8	2840.7	254.394	1058.44	0	0	0	0	0	0	0	603	903	0
10718	0	3.32871	-2.94216	-46.0218	-10252.1	-1497.33	-573.302	167.465	522.766	0	17.5214	95.6061	-546.381	-85090.4	29887	2749.15	254.7	1058.73	0	0	0	0	0	0	0	603	903	0
10718	1	0.887305	-4.01027	-40.8338	-9702.77	-1070.08	-23.9859	173.794	537.616	0	16.1481	95.3009	-548.517	-84907.3	29825.9	2199.83	254.376	1057.79	0	0	0	0	0	0	0	603	903	0
10718	2	-0.791162	-3.7051	-40.8338	-9611.21	-1558.36	159.12	161.837	535.374	0	17.5214	95.1483	-548.823	-85456.6	29764.9	2428.71	254.234	1058.71	0	0	0	0	0	0	0	603	903	0
10718	3	0.582129	-4.46804	-39.0027	-9245	-1375.25	-710.631	164.74	537.035	0	19.1998	94.538	-550.043	-84998.9	29703.9	2428.71	254.003	1057.53	0	0	0	0	0	0	0	603	903	0
10718	4	1.95542	-3.24733	-38.0872	-9245	-1497.33	-115.539	160.687	542.732	0	19.0472	95.1483	-551.874	-86829.9	30314.2	2474.49	254.93	1060.34	0	0	0	0	0	0	0	603	903	0
10718	5	0.429541	-3.55251	-38.0872	-8878.79	-1314.22	67.5668	165.494	533.117	0	18.2843	94.8431	-555.842	-87562.3	30741.5	2428.71	255.306	1060.53	0	0	0	0	0	0	0	603	903	0
10718	6	2.41318	-2.94216	-34.1199	-8878.79	-1131.11	21.7904	166.849	560.223	0	20.1154	93.775	-556.147	-87928.5	30436.3	2108.28	254.727	1061.1	0	0	0	0	0	0	0	603	903	0
10718	7	1.34507	-1.26369	-35.0355	-7871.71	-948.008	-619.079	172.941	524.678	0	17.8265	92.8595	-558.893	-87837	30558.4	2474.49	254.677	1060.16	0	0	0	0	0	0	0	603	903	0
10718	8	0.124365	-0.65334	-32.5941	-7963.26	-825.938	159.12	174.66	544.316	0	19.1998	93.775	-559.504	-88111.6	30802.5	2703.37	255.053	1060.48	0	0	0	0	0	0	0	603	903	0
10718	9	0.124365	-2.4844	-30.4578	-7963.26	-1009.04	-207.091	166.871	561.452	0	18.2843	93.9276	-560.419	-88569.4	30497.3	2520.26	254.419	1061.04	0	0	0	0	0	0	0	603	903	0
10719	0	-0.638574	-0.805928	-30.4578	-7413.95	-703.868	-161.315	176.89	543.417	0	18.1317	92.0966	-561.945	-88844.1	30436.3	2474.49	254.162	1061.1	0	0	0	0	0	0	0	603	903	0
10719	1	-1.09634	0.109599	-29.2371	-6864.63	-520.762	-161.315	182.188	534.792	0	18.8947	93.9276	-563.471	-88661	29948	2611.82	253.149	1060.35	0	0	0	0	0	0	0	603	903	0
10719	2	-0.94375	-0.958516	-29.5423	-6315.31	-1131.11	204.896	161.712	513.772	0	19.1998	92.0966	-564.692	-89027.2	30863.5	2245.6	254.656	1060.66	0	0	0	0	0	0	0	603	903	0
10719	3	-1.70669	-1.72146	-26.7957	-6315.31	-1009.04	67.5668	162.343	535.684	0	19.505	91.181	-563.776	-89576.5	30558.4	2199.83	254.203	1061.89	0	0	0	0	0	0	0	603	903	0
10719	4	-0.94375	-2.02663	-25.575	-6132.21	-520.762	-69.7623	179.638	539.773	0	18.7421	90.7233	-565.607	-90034.3	30802.5	2382.93	254.459	1062.18	0	0	0	0	0	0	0	603	903	0
10719	5	-0.485986	-0.500753	-25.8802	-6040.65	-825.938	-207.091	168.086	533.408	0	19.3524	91.0284	-565.607	-89484.9	31107.7	2016.72	254.999	1061.21	0	0	0	0	0	0	0	603	903	0
10719	6	-1.09634	-2.33181	-21.9129	-5491.34	-825.938	67.5668	162.308	550.598	0	21.1835	90.7233	-568.659	-88935.6	31290.8	1650.51	255.026	1059.4	0	0	0	0	0	0	0	603	903	0
10719	7	-1.85928	-1.26369	-23.1336	-5491.34	-948.008	21.7904	159.02	537.375	0	21.4886	88.7396	-567.743	-90308.9	30924.6	1787.84	254.469	1062.07	0	0	0	0	0	0	0	603	903	0
10719	8	-2.46963	-0.805928	-19.7767	-5216.68	-825.938	113.343	158.237	563.779	0	20.8783	88.2819	-569.88	-90766.7	30924.6	1604.74	254.265	1062.27	0	0	0	0	0	0	0	603	903	0
10719	9	-0.791162	0.414775	-19.7767	-3934.94	-764.903	159.12	161.323	498.969	0	23.7775	87.6715	-570.49	-91316	31229.7	1742.07	254.742	1063.07	0	0	0	0	0	0	0	603	903	0
10720	0	-0.791162	-0.195577	-20.9974	-4484.26	-581.797	204.896	172.292	513.563	0	23.3197	87.2137	-571.711	-91224.4	31534.9	1604.74	255.159	1062.56	0	0	0	0	0	0	0	603	903	0
10720	1	-0.791162	-0.65334	-15.8094	-4575.81	-337.657	113.343	178.642	589.436	0	22.7094	86.756	-573.542	-91407.6	31412.9	1421.63	254.77	1062.37	0	0	0	0	0	0	0	603	903	0
10720	2	-1.40151	0.109599	-18.2508	-4484.26	-703.868	296.449	161.434	545.702	0	22.8619	85.3827	-575.068	-91865.3	31534.9	1558.96	254.837	1062.75	0	0	0	0	0	0	0	603	903	0
10720	3	-1.5541	0.262187	-15.8094	-3660.28	-337.657	296.449	178.642	531.526	0	22.8619	85.3827	-575.068	-91956.9	31962.2	1375.85	255.58	1062.91	0	0	0	0	0	0	0	603	903	0
10720	4	-0.333399	-0.0429889	-14.2835	-3202.52	-215.586	-69.7623	184.907	524.211	0	23.0145	85.0775	-576.288	-92323.1	31840.1	1284.3	255.25	1063.2	0	0	0	0	0	0	0	603	903	0
10720	5	-1.24893	-0.65334	-14.8939	-2286.99	-581.797	525.331	160.937	453.553	0	23.7775	85.6879	-576.899	-91407.6	31107.7	1558.96	253.922	1061.45	0	0	0	0	0	0	0	603	903	0
10720	6	-0.94375	-0.195577	-14.2835	-2744.75	-459.727	433.778	167.814	492.163	0	23.9301	85.3827	-579.035	-92597.8	31412.9	1421.63	254.25	1062.92	0	0	0	0	0	0	0	603	903	0
10720	7	-2.16445	0.872538	-13.6732	-2561.65	-215.586	479.554	184.233	487.349	0	23.7775	83.8568	-580.561	-93330.2	30863.5	1558.96	253.162	1063.76	0	0	0	0	0	0	0	603	903	0
10720	8	-1.70669	-0.195577	-11.5369	-2744.75	-581.797	67.5668	149.571	537.91	0	25.4559	83.0939	-581.476	-93604.8	31718	1146.97	254.547	1063.98	0	0	0	0	0	0	0	603	903	0
10720	9	-1.24893	0.414775	-11.8421	-2744.75	-337.657	67.5668	171.487	531.779	0	23.4723	80.3473	-582.087	-93238.6	31168.7	963.867	253.547	1063.18	0	0	0	0	0	0	0	603	903	0
10721	0	0.887305	0.872538	-11.2318	-2653.2	89.5895	296.449	207.976	536.223	0	24.3878	81.8732	-582.392	-93238.6	32267.3	1101.2	255.405	1063.1	0	0	0	0	0	0	0	603	903	0
10721	1	0	0	0	0	0	0	200	300	0	24.693	82.4835	-583.002	-93696.4	32084.2	1192.75	255.033	1063.71	0	0	0	0	0	0	0	603	903	0
10721	2	-2.01187	1.94065	-10.9266	-2378.54	-276.621	-252.868	174.684	517.684	0	24.5404	81.8732	-584.528	-93513.2	31779.1	918.091	254.367	1062.98	0	0	0	0	0	0	0	603	903	0
10721	3	0	0	0	0	0	0	200	300	0	23.9301	80.6525	-585.138	-94154.1	31718	872.314	254.206	1063.91	0	0	0	0	0	0	0	603	903	0
10721	4	0	0	0	0	0	0	200	300	0	24.5404	79.2792	-586.664	-94062.6	32267.3	963.867	255.001	1063.33	0	0	0	0	0	0	0	603	903	0
10721	5	-0.638574	3.77171	-9.70587	-1371.46	-398.692	-115.539	158.923	441.302	0	25.3033	79.1266	-586.97	-93971	32450.4	1284.3	255.285	1063.1	0	0	0	0	0	0	0	603	903	0
10721	6	0	0	0	0	0	0	200	300	0	25.1508	78.6688	-586.97	-95161.2	31718	872.314	254.037	1065.12	0	0	0	0	0	0	0	603	903	0
10721	7	0	0	0	0	0	0	200	300	0	24.2352	78.2111	-587.58	-95069.7	31962.2	963.867	254.396	1064.8	0	0	0	0	0	0	0	603	903	0
10721	8	0	0	0	0	0	0	200	300	0	23.1671	77.6007	-588.801	-94703.5	32450.4	918.091	255.113	1063.84	0	0	0	0	0	0	0	603	903	0
10721	9	0	0	0	0	0	0	200	300	0	24.5404	76.5326	-586.97	-94154.1	32572.5	780.761	255.493	1063.41	0	0	0	0	0	0	0	603	903	0
10722	0	0	0	0	0	0	0	200	300	0	24.5404	75.9222	-591.242	-95527.4	32206.3	551.879	254.472	1064.57	0	0	0	0	0	0	0	603	903	0
10722	1	0	0	0	0	0	0	200	300	0	23.9301	75.0067	-590.632	-95619	32023.2	826.538	254.219	1064.89	0	0	0	0	0	0	0	603	903	0
10722	2	0	0	0	0	0	0	200	300	0	25.6085	75.1593	-592.158	-95802.1	31718	551.879	253.563	1064.78	0	0	0	0	0	0	0	603	903	0
10722	3	0	0	0	0	0	0	200	300	0	24.693	74.2438	-592.768	-95802.1	32694.6	826.538	255.156	1064.62	0	0	0	0	0	0	0	603	903	0
10722	4	0	0	0	0	0	0	200	300	0	24.5404	74.2438	-595.209	-96259.9	31840.1	918.091	253.494	1064.72	0	0	0	0	0	0	0	603	903	0
10722	5	0	0	0	0	0	0	200	300	0	24.3878	71.192	-592.768	-96626.1	32572.5	780.761	254.95	1066.01	0	0	0	0	0	0	0	603	903	0
10722	6	0	0	0	0	0	0	200	300	0	23.1671	71.6498	-597.04	-96259.9	32877.7	597.656	255.068	1064.23	0	0	0	0	0	0	0	603	903	0
10722	7	0	0	0	0	0	0	200	300	0	22.7094	70.8868	-596.43	-96626.1	32389.4	597.656	254.305	1065.01	0	0	0	0	0	0	0	603	903	0
10722	8	0	0	0	0	0	0	200	300	0	23.4723	70.8868	-596.43	-96626.1	32572.5	414.55	254.612	1065.01	0	0	0	0	0	0	0	603	903	0
10722	9	0	0	0	0	0	0	200	300	0	23.4723	70.1239	-598.261	-96534.5	32511.5	551.879	254.343	1064.36	0	0	0	0	0	0	0	603	903	0
10723	0	0	0	0	0	0	0	200	300	0	24.0826	69.6661	-600.092	-97358.5	32755.6	506.103	254.584	1065.24	0	0	0	0	0	0	0	603	903	0
10723	1	0	0	0	0	0	0	200	300	0	23.6249	68.9032	-599.177	-97358.5	32511.5	643.432	254.26	1065.49	0	0	0	0	0	0	0	603	903	0
10723	2	0	0	0	0	0	0	200	300	0	23.0145	67.8351	-601.618	-97816.2	32511.5	460.327	254.04	1065.59	0	0	0	0	0	0	0	603	903	0
10723	3	0	0	0	0	0	0	200	300	0	23.1671	67.3773	-598.261	-97358.5	32816.7	185.669	254.853	1065.74	0	0	0	0	0	0	0	603	903	0
10723	4	0	0	0	0	0	0	200	300	0	25.3033	66.4618	-600.397	-97358.5	33060.8	277.221	255.065	1065.16	0	0	0	0	0	0	0	603	903	0
10723	5	0	0	0	0	0	0	200	300	0	22.5568	66.9196	-600.397	-97175.4	32450.4	460.327	254.048	1064.85	0	0	0	0	0	0	0	603	903	0
10723	6	0	0	0	0	0	0	200	300	0	22.4042	66.1566	-601.313	-97633.1	32511.5	368.774	254.068	1065.37	0	0	0	0	0	0	0	603	903	0
10723	7	0	0	0	0	0	0	200	300	0	22.8619	64.4781	-599.787	-97450	32755.6	322.998	254.612	1065.47	0	0	0	0	0	0	0	603	903	0
10723	8	0	0	0	0	0	0	200	300	0	23.1671	63.5626	-602.534	-97816.2	32633.5	460.327	254.161	1065.34	0	0	0	0	0	0	0	603	903	0
10723	9	0	0	0	0	0	0	200	300	0	22.5568	62.7997	-601.313	-98090.9	32633.5	460.327	254.271	1066.13	0	0	0	0	0	0	0	603	903	0
10724	0	0	0	0	0	0	0	200	300	0	21.7938	63.2574	-601.008	-97999.4	32572.5	322.998	254.197	1066.06	0	0	0	0	0	0	0	603	903	0
10724	1	0	0	0	0	0	0	200	300	0	23.4723	61.1212	-600.397	-98365.6	32816.7	277.221	254.658	1066.83	0	0	0	0	0	0	0	603	903	0
10724	2	0	0	0	0	0	0	200	300	0	21.9464	61.7316	-602.228	-97724.7	32877.7	368.774	254.593	1065.27	0	0	0	0	0	0	0	603	903	0
10724	3	0	0	0	0	0	0	200	300	0	23.0145	60.3583	-601.923	-97450	31718	231.445	252.694	1064.9	0	0	0	0	0	0	0	603	903	0
10724	4	0	0	0	0	0	0	200	300	0	22.5568	60.5109	-601.313	-98548.7	32389.4	139.892	253.865	1066.89	0	0	0	0	0	0	0	603	903	0
10724	5	0	0	0	0	0	0	200	300	0	22.2516	59.2902	-601.008	-97724.7	32694.6	277.221	254.4	1065.6	0	0	0	0	0	0	0	603	903	0
10724	6	0	0	0	0	0	0	200	300	0	21.6412	60.2057	-601.313	-98365.6	32511.5	94.1158	254.068	1066.58	0	0	0	0	0	0	0	603	903	0
10724	7	0	0	0	0	0	0	200	300	0	23.7775	59.1376	-602.228	-98365.6	32694.6	2.56305	254.289	1066.34	0	0	0	0	0	0	0	603	903	0
10724	8	0	0	0	0	0	0	200	300	0	22.7094	58.5272	-602.228	-98274	32938.7	2.56305	254.695	1066.18	0	0	0	0	0	0	0	603	903	0
10724	9	0	0	0	0	0	0	200	300	0	22.5568	57.3065	-601.618	-98548.7	32816.7	-180.542	254.547	1066.81	0	0	0	0	0	0	0	603	903	0
10725	0	0	0	0	0	0	0	200	300	0	21.3361	56.6962	-600.702	-97999.4	32511.5	-180.542	254.122	1066.14	0	0	0	0	0	0	0	603	903	0
10725	1	0	0	0	0	0	0	200	300	0	21.0309	56.0858	-601.008	-98274	32389.4	185.669	253.892	1066.52	0	0	0	0	0	0	0	603	903	0
10725	2	0	0	0	0	0	0	200	300	0	22.5568	56.8488	-600.092	-98365.6	32877.7	-134.766	254.788	1066.92	0	0	0	0	0	0	0	603	903	0
10725	3	0	0	0	0	0	0	200	300	0	23.7775	56.2384	-601.618	-98274	32816.7	-180.542	254.547	1066.35	0	0	0	0	0	0	0	603	903	0
10725	4	0	0	0	0	0	0	200	300	0	22.7094	55.9332	-601.313	-99006.4	32511.5	-363.648	254.068	1067.65	0	0	0	0	0	0	0	603	903	0
10725	5	0	0	0	0	0	0	200	300	0	21.4886	53.6444	-601.008	-98731.8	32572.5	-272.095	254.197	1067.28	0	0	0	0	0	0	0	603	903	0
10725	6	0	0	0	0	0	0	200	300	0	21.6412	51.9659	-602.228	-98823.3	32816.7	-317.872	254.492	1067.1	0	0	0	0	0	0	0	603	903	0
10725	7	0	0	0	0	0	0	200	300	0	22.099	53.0341	-598.871	-98640.2	32938.7	-272.095	255.001	1067.71	0	0	0	0	0	0	0	603	903	0
10725	8	0	0	0	0	0	0	200	300	0	21.6412	53.4918	-599.482	-98823.3	32450.4	-500.977	254.131	1067.85	0	0	0	0	0	0	0	603	903	0
10725	9	0	0	0	0	0	0	200	300	0	20.7257	51.6608	-597.346	-98365.6	32328.4	-409.424	254.12	1067.67	0	0	0	0	0	0	0	603	903	0
10726	0	0	0	0	0	0	0	200	300	0	21.4886	52.5763	-598.566	-98731.8	32938.7	-409.424	255.029	1067.95	0	0	0	0	0	0	0	603	903	0
10726	1	0	0	0	0	0	0	200	300	0	22.7094	51.5082	-596.125	-98365.6	32694.6	-409.424	254.845	1068.01	0	0	0	0	0	0	0	603	903	0
10726	2	0	0	0	0	0	0	200	300	0	23.7775	50.7452	-598.566	-98548.7	32389.4	-500.977	254.112	1067.64	0	0	0	0	0	0	0	603	903	0
10726	3	0	0	0	0	0	0	200	300	0	21.7938	49.9823	-596.735	-99098	32328.4	-180.542	254.175	1069.07	0	0	0	0	0	0	0	603	903	0
10726	4	0	0	0	0	0	0	200	300	0	21.6412	50.4401	-594.904	-99281.1	32694.6	-317.872	254.958	1069.89	0	0	0	0	0	0	0	603	903	0
10726	5	0	0	0	0	0	0	200	300	0	20.4205	50.2875	-595.209	-99464.2	32694.6	-684.083	254.93	1070.11	0	0	0	0	0	0	0	603	903	0
10726	6	0	0	0	0	0	0	200	300	0	21.0309	49.8297	-595.514	-98548.7	32450.4	-409.424	254.491	1068.48	0	0	0	0	0	0	0	603	903	0
10726	7	0	0	0	0	0	0	200	300	0	23.3197	49.5245	-594.599	-98457.1	32389.4	-409.424	254.473	1068.59	0	0	0	0	0	0	0	603	903	0
10726	8	0	0	0	0	0	0	200	300	0	21.3361	48.4564	-593.683	-99281.1	32694.6	-500.977	255.071	1070.23	0	0	0	0	0	0	0	603	903	0
10726	9	0	0	0	0	0	0	200	300	0	20.7257	47.2357	-593.073	-99098	32511.5	-409.424	254.819	1070.09	0	0	0	0	0	0	0	603	903	0
10727	0	0	0	0	0	0	0	200	300	0	19.505	47.3883	-592.158	-98823.3	32084.2	-363.648	254.182	1069.89	0	0	0	0	0	0	0	603	903	0
10727	1	0	0	0	0	0	0	200	300	0	21.1835	47.3883	-588.19	-98548.7	32389.4	-88.9897	255.066	1070.55	0	0	0	0	0	0	0	603	903	0
10727	2	0	0	0	0	0	0	200	300	0	23.0145	47.6935	-589.716	-98823.3	32633.5	-455.201	255.338	1070.58	0	0	0	0	0	0	0	603	903	0
10727	3	0	0	0	0	0	0	200	300	0	20.8783	47.2357	-589.716	-99098	32328.4	-500.977	254.82	1071.04	0	0	0	0	0	0	0	603	903	0
10727	4	0	0	0	0	0	0	200	300	0	19.6576	46.3202	-588.801	-99555.8	32267.3	-592.53	254.802	1072.08	0	0	0	0	0	0	0	603	903	0
10727	5	0	0	0	0	0	0	200	300	0	19.9628	46.015	-588.495	-98731.8	32328.4	-134.766	254.934	1070.77	0	0	0	0	0	0	0	603	903	0
10727	6	0	0	0	0	0	0	200	300	0	21.0309	45.4047	-586.97	-98640.2	31596	-500.977	253.829	1071.05	0	0	0	0	0	0	0	603	903	0
10727	7	0	0	0	0	0	0	200	300	0	21.6412	44.7943	-586.054	-98640.2	32450.4	-592.53	255.371	1071.31	0	0	0	0	0	0	0	603	903	0
10727	8	0	0	0	0	0	0	200	300	0	20.5731	45.0995	-585.138	-98823.3	32206.3	-638.306	255.04	1071.89	0	0	0	0	0	0	0	603	903	0
10727	9	0	0	0	0	0	0	200	300	0	19.8102	42.9633	-584.223	-98274	32511.5	-729.859	255.649	1071.21	0	0	0	0	0	0	0	603	903	0
10728	0	0	0	0	0	0	0	200	300	0	20.8783	44.3365	-584.528	-99281.1	32511.5	-638.306	255.62	1072.85	0	0	0	0	0	0	0	603	903	0
10728	1	0	0	0	0	0	0	200	300	0	22.4042	43.1158	-580.561	-98640.2	31840.1	-638.306	254.844	1072.91	0	0	0	0	0	0	0	603	903	0
10728	2	0	0	0	0	0	0	200	300	0	20.1154	43.1158	-582.392	-98457.1	32023.2	-775.635	254.986	1072.06	0	0	0	0	0	0	0	603	903	0
10728	3	0	0	0	0	0	0	200	300	0	20.7257	42.9633	-580.561	-98914.9	32084.2	-729.859	255.264	1073.38	0	0	0	0	0	0	0	603	903	0
10728	4	0	0	0	0	0	0	200	300	0	19.505	42.8107	-580.561	-98823.3	32084.2	-684.083	255.264	1073.22	0	0	0	0	0	0	0	603	903	0
10728	5	0	0	0	0	0	0	200	300	0	19.9628	42.9633	-577.509	-98823.3	31473.9	-592.53	254.499	1074.12	0	0	0	0	0	0	0	603	903	0
10728	6	0	0	0	0	0	0	200	300	0	20.2679	42.2003	-578.425	-98548.7	31412.9	-821.412	254.308	1073.37	0	0	0	0	0	0	0	603	903	0
10728	7	0	0	0	0	0	0	200	300	0	20.2679	41.4374	-577.509	-98548.7	32389.4	-729.859	256.085	1073.64	0	0	0	0	0	0	0	603	903	0
10728	8	0	0	0	0	0	0	200	300	0	20.7257	40.6744	-575.983	-98823.3	31657	-775.635	254.962	1074.57	0	0	0	0	0	0	0	603	903	0
10728	9	0	0	0	0	0	0	200	300	0	19.6576	38.233	-574.152	-98731.8	31596	-775.635	255.031	1074.96	0	0	0	0	0	0	0	603	903	0
10729	0	0	0	0	0	0	0	200	300	0	19.1998	39.7589	-573.237	-98365.6	32023.2	-821.412	255.864	1074.6	0	0	0	0	0	0	0	603	903	0
10729	1	0	0	0	0	0	0	200	300	0	20.4205	39.9115	-572.016	-97724.7	31718	-684.083	255.45	1073.84	0	0	0	0	0	0	0	603	903	0
10729	2	0	0	0	0	0	0	200	300	0	19.6576	39.3011	-570.49	-98182.5	31290.8	-729.859	254.849	1075.1	0	0	0	0	0	0	0	603	903	0
10729	3	0	0	0	0	0	0	200	300	0	20.4205	38.6908	-570.795	-98640.2	31351.8	-775.635	254.927	1075.81	0	0	0	0	0	0	0	603	903	0
10729	4	0	0	0	0	0	0	200	300	0	18.7421	37.7753	-566.828	-98365.6	31534.9	-821.412	255.634	1076.54	0	0	0	0	0	0	0	603	903	0
10729	5	0	0	0	0	0	0	200	300	0	18.8947	36.8597	-567.438	-97816.2	31901.1	-592.53	256.22	1075.38	0	0	0	0	0	0	0	603	903	0
10729	6	0	0	0	0	0	0	200	300	0	19.8102	36.7072	-565.607	-96076.7	31534.9	-912.965	255.754	1072.86	0	0	0	0	0	0	0	603	903	0
10729	7	0	0	0	0	0	0	200	300	0	19.6576	36.5546	-563.166	-98182.5	31290.8	-867.188	255.562	1077.34	0	0	0	0	0	0	0	603	903	0
10729	8	0	0	0	0	0	0	200	300	0	18.2843	36.5546	-562.861	-98365.6	30985.6	-729.859	255.05	1077.76	0	0	0	0	0	0	0	603	903	0
10729	9	0	0	0	0	0	0	200	300	0	18.7421	34.8761	-562.25	-97999.4	31107.7	-1004.52	255.327	1077.3	0	0	0	0	0	0	0	603	903	0
10730	0	0	0	0	0	0	0	200	300	0	18.7421	35.7916	-561.945	-97541.6	30985.6	-958.741	255.14	1076.58	0	0	0	0	0	0	0	603	903	0
10730	1	0	0	0	0	0	0	200	300	0	19.8102	34.8761	-561.335	-97450	31290.8	-912.965	255.744	1076.6	0	0	0	0	0	0	0	603	903	0
10730	2	0	0	0	0	0	0	200	300	0	18.5895	33.6554	-560.724	-97633.1	31290.8	-1096.07	255.804	1077.12	0	0	0	0	0	0	0	603	903	0
10730	3	0	0	0	0	0	0	200	300	0	17.674	33.5028	-557.978	-97907.8	31046.6	-1096.07	255.641	1078.47	0	0	0	0	0	0	0	603	903	0
10730	4	0	0	0	0	0	0	200	300	0	18.2843	34.2657	-556.757	-98090.9	31046.6	-1004.52	255.763	1079.18	0	0	0	0	0	0	0	603	903	0
10730	5	0	0	0	0	0	0	200	300	0	17.8265	33.808	-554.621	-97175.4	31046.6	-775.635	255.978	1078.21	0	0	0	0	0	0	0	603	903	0
10730	6	0	0	0	0	0	0	200	300	0	18.4369	33.045	-554.621	-96259.9	31168.7	-1508.06	256.198	1076.56	0	0	0	0	0	0	0	603	903	0
10730	7	0	0	0	0	0	0	200	300	0	18.4369	31.6718	-552.18	-96809.1	30802.5	-1050.29	255.783	1078.32	0	0	0	0	0	0	0	603	903	0
10730	8	0	0	0	0	0	0	200	300	0	17.0636	32.1295	-552.18	-97358.5	30863.5	-958.741	255.894	1079.32	0	0	0	0	0	0	0	603	903	0
10730	9	0	0	0	0	0	0	200	300	0	18.8947	31.214	-550.043	-97358.5	30314.2	-958.741	255.112	1080	0	0	0	0	0	0	0	603	903	0
10731	0	0	0	0	0	0	0	200	300	0	16.6058	30.451	-548.517	-96992.3	30802.5	-912.965	256.156	1079.83	0	0	0	0	0	0	0	603	903	0
10731	1	0	0	0	0	0	0	200	300	0	17.2162	30.9088	-548.212	-96168.3	30680.4	-1141.85	255.965	1078.42	0	0	0	0	0	0	0	603	903	0
10731	2	0	0	0	0	0	0	200	300	0	19.505	30.6036	-547.602	-97266.9	31290.8	-912.965	257.142	1080.62	0	0	0	0	0	0	0	603	903	0
10731	3	0	0	0	0	0	0	200	300	0	17.8265	30.451	-546.686	-97175.4	30802.5	-912.965	256.344	1080.75	0	0	0	0	0	0	0	603	903	0
10731	4	0	0	0	0	0	0	200	300	0	16.4532	28.9252	-545.771	-97175.4	30680.4	-729.859	256.215	1081.05	0	0	0	0	0	0	0	603	903	0
10731	5	0	0	0	0	0	0	200	300	0	16.4532	26.6364	-547.297	-96809.1	30436.3	-958.741	255.612	1079.89	0	0	0	0	0	0	0	603	903	0
10731	6	0	0	0	0	0	0	200	300	0	17.674	27.8571	-542.414	-96626.1	30863.5	-958.741	256.9	1081.14	0	0	0	0	0	0	0	603	903	0
10731	7	0	0	0	0	0	0	200	300	0	17.8265	28.0096	-541.193	-96809.1	30924.6	-1004.52	257.142	1081.88	0	0	0	0	0	0	0	603	903	0
10731	8	0	0	0	0	0	0	200	300	0	16.7584	26.7889	-538.752	-97358.5	30558.4	-1141.85	256.721	1083.71	0	0	0	0	0	0	0	603	903	0
10731	9	0	0	0	0	0	0	200	300	0	15.6903	26.9415	-539.362	-96626.1	30497.3	-1050.29	256.543	1082.15	0	0	0	0	0	0	0	603	903	0
10732	0	0	0	0	0	0	0	200	300	0	15.3851	25.5682	-538.447	-96442.9	31107.7	-1004.52	257.773	1082.11	0	0	0	0	0	0	0	603	903	0
10732	1	0	0	0	0	0	0	200	300	0	16.7584	25.7208	-537.226	-95710.5	30741.5	-867.188	257.223	1081.16	0	0	0	0	0	0	0	603	903	0
10732	2	0	0	0	0	0	0	200	300	0	16.911	25.2631	-536.31	-96626.1	30131.1	-1187.62	256.182	1083.17	0	0	0	0	0	0	0	603	903	0
10732	3	0	0	0	0	0	0	200	300	0	16.1481	23.5846	-536.31	-97083.8	30314.2	-821.412	256.524	1084.02	0	0	0	0	0	0	0	603	903	0
10732	4	0	0	0	0	0	0	200	300	0	16.6058	24.9579	-534.479	-97175.4	30802.5	-1004.52	257.631	1084.81	0	0	0	0	0	0	0	603	903	0
10732	5	0	0	0	0	0	0	200	300	0	15.3851	23.432	-528.986	-96534.5	30924.6	-1050.29	258.46	1085.49	0	0	0	0	0	0	0	603	903	0
10732	6	0	0	0	0	0	0	200	300	0	16.6058	23.5846	-532.648	-96809.1	30497.3	-1141.85	257.256	1084.75	0	0	0	0	0	0	0	603	903	0
10732	7	0	0	0	0	0	0	200	300	0	15.8429	22.2113	-532.038	-95710.5	30741.5	-1141.85	257.781	1082.89	0	0	0	0	0	0	0	603	903	0
10732	8	0	0	0	0	0	0	200	300	0	14.317	20.0751	-530.512	-96900.7	31107.7	-958.741	258.637	1085.66	0	0	0	0	0	0	0	603	903	0
10732	9	0	0	0	0	0	0	200	300	0	17.5214	21.7535	-528.681	-96900.7	30009	-1462.28	256.762	1086.29	0	0	0	0	0	0	0	603	903	0
10733	0	0	0	0	0	0	0	200	300	0	15.08	21.9061	-527.765	-96351.4	30070.1	-1370.73	256.976	1085.56	0	0	0	0	0	0	0	603	903	0
10733	1	0	0	0	0	0	0	200	300	0	16.4532	20.838	-526.85	-96259.9	30680.4	-1324.95	258.234	1085.71	0	0	0	0	0	0	0	603	903	0
10733	2	0	0	0	0	0	0	200	300	0	16.1481	20.0751	-527.155	-96809.1	30680.4	-1096.07	258.2	1086.64	0	0	0	0	0	0	0	603	903	0
10733	3	0	0	0	0	0	0	200	300	0	15.5377	19.6173	-525.324	-96992.3	30253.2	-1324.95	257.59	1087.63	0	0	0	0	0	0	0	603	903	0
10733	4	0	0	0	0	0	0	200	300	0	14.7748	19.007	-525.324	-97266.9	30253.2	-1050.29	257.59	1088.16	0	0	0	0	0	0	0	603	903	0
10733	5	0	0	0	0	0	0	200	300	0	14.317	19.1595	-523.493	-96534.5	30558.4	-1462.28	258.374	1087.4	0	0	0	0	0	0	0	603	903	0
10733	6	0	0	0	0	0	0	200	300	0	15.8429	18.3966	-523.188	-96351.4	30924.6	-1508.06	259.108	1087.16	0	0	0	0	0	0	0	603	903	0
10733	7	0	0	0	0	0	0	200	300	0	17.674	17.9388	-522.577	-96809.1	30070.1	-1691.16	257.542	1088.25	0	0	0	0	0	0	0	603	903	0
10733	8	0	0	0	0	0	0	200	300	0	15.9955	17.9388	-522.272	-97083.8	30314.2	-1599.61	258.043	1088.89	0	0	0	0	0	0	0	603	903	0
10733	9	0	0	0	0	0	0	200	300	0	15.08	17.1759	-521.662	-96259.9	30436.3	-1462.28	258.345	1087.53	0	0	0	0	0	0	0	603	903	0
10734	0	0	0	0	0	0	0	200	300	0	15.2325	16.413	-520.746	-97358.5	30680.4	-1416.5	258.916	1089.96	0	0	0	0	0	0	0	603	903	0
10734	1	0	0	0	0	0	0	200	300	0	17.9791	15.8026	-519.526	-96809.1	29642.8	-1553.83	257.058	1089.34	0	0	0	0	0	0	0	603	903	0
10734	2	0	0	0	0	0	0	200	300	0	15.8429	15.4974	-514.948	-96992.3	30680.4	-1508.06	259.58	1091.35	0	0	0	0	0	0	0	603	903	0
10734	3	0	0	0	0	0	0	200	300	0	16.1481	15.3448	-516.474	-97358.5	30619.4	-1645.39	259.285	1091.51	0	0	0	0	0	0	0	603	903	0
10734	4	0	0	0	0	0	0	200	300	0	14.7748	15.0397	-515.558	-96442.9	30497.3	-1645.39	259.154	1090.06	0	0	0	0	0	0	0	603	903	0
10734	5	0	0	0	0	0	0	200	300	0	17.9791	13.5138	-516.169	-97266.9	30375.3	-1508.06	258.848	1091.44	0	0	0	0	0	0	0	603	903	0
10734	6	0	0	0	0	0	0	200	300	0	15.2325	14.5819	-516.169	-97266.9	30375.3	-1874.27	258.848	1091.44	0	0	0	0	0	0	0	603	903	0
10734	7	0	0	0	0	0	0	200	300	0	15.6903	13.3612	-514.643	-97358.5	30314.2	-1736.94	258.903	1092.18	0	0	0	0	0	0	0	603	903	0
10734	8	0	0	0	0	0	0	200	300	0	16.4532	13.2086	-514.338	-97633.1	30497.3	-1691.16	259.294	1092.82	0	0	0	0	0	0	0	603	903	0
10734	9	0	0	0	0	0	0	200	300	0	15.5377	12.9034	-512.507	-97541.6	30436.3	-1828.49	259.387	1093.32	0	0	0	0	0	0	0	603	903	0
10735	0	0	0	0	0	0	0	200	300	0	15.3851	13.056	-508.234	-96900.7	30192.1	-1920.04	259.406	1093.66	0	0	0	0	0	0	0	603	903	0
10735	1	0	0	0	0	0	0	200	300	0	16.1481	12.9034	-510.981	-96900.7	30497.3	-1920.04	259.684	1092.64	0	0	0	0	0	0	0	603	903	0
10735	2	0	0	0	0	0	0	200	300	0	15.8429	12.5983	-510.981	-96992.3	29948	-2011.6	258.609	1092.82	0	0	0	0	0	0	0	603	903	0
10735	3	0	0	0	0	0	0	200	300	0	16.911	12.7509	-508.539	-97541.6	30680.4	-2057.37	260.331	1094.81	0	0	0	0	0	0	0	603	903	0
10735	4	0	0	0	0	0	0	200	300	0	17.5214	12.2931	-508.845	-97816.2	30497.3	-1965.82	259.934	1095.23	0	0	0	0	0	0	0	603	903	0
10735	5	0	0	0	0	0	0	200	300	0	15.3851	11.3776	-507.319	-97633.1	30253.2	-2194.7	259.633	1095.45	0	0	0	0	0	0	0	603	903	0
10735	6	0	0	0	0	0	0	200	300	0	16.6058	11.3776	-507.013	-97907.8	30497.3	-1874.27	260.151	1096.11	0	0	0	0	0	0	0	603	903	0
10735	7	0	0	0	0	0	0	200	300	0	17.0636	11.3776	-504.877	-98274	30802.5	-2011.6	261.01	1097.65	0	0	0	0	0	0	0	603	903	0
10735	8	0	0	0	0	0	0	200	300	0	15.8429	10.0043	-503.962	-97633.1	30802.5	-2148.93	261.121	1096.73	0	0	0	0	0	0	0	603	903	0
10735	9	0	0	0	0	0	0	200	300	0	15.8429	11.225	-503.962	-97724.7	30558.4	-2194.7	260.636	1096.91	0	0	0	0	0	0	0	603	903	0
10736	0	0	0	0	0	0	0	200	300	0	16.6058	10.6146	-503.962	-97724.7	30314.2	-2148.93	260.152	1096.91	0	0	0	0	0	0	0	603	903	0
10736	1	0	0	0	0	0	0	200	300	0	18.5895	9.6991	-503.046	-97816.2	30741.5	-2057.37	261.111	1097.45	0	0	0	0	0	0	0	603	903	0
10736	2	0	0	0	0	0	0	200	300	0	16.7584	10.7672	-503.657	-98548.7	30497.3	-2057.37	260.552	1098.67	0	0	0	0	0	0	0	603	903	0
10736	3	0	0	0	0	0	0	200	300	0	15.6903	10.462	-501.826	-98823.3	29825.9	-2286.26	259.435	1099.93	0	0	0	0	0	0	0	603	903	0
10736	4	0	0	0	0	0	0	200	300	0	15.8429	8.78357	-500.91	-98182.5	31046.6	-2057.37	261.98	1099.01	0	0	0	0	0	0	0	603	903	0
10736	5	0	0	0	0	0	0	200	300	0	17.2162	9.39392	-500.3	-98640.2	30985.6	-1965.82	261.934	1100.16	0	0	0	0	0	0	0	603	903	0
[truncated: 1,344 more rows]
