# Supplementary material for: The Effects of an Extemporaneous Speech Dual-task on Older Adult Gait Control
Source: Research Square preprint supplement (doi:10.21203/rs.3.rs-7674245/v1), 2025-11-18
Supplement: Supplementary file 79 [file DT7Walk7.xlsx]

## Sheet: Sheet1
Trajectories
		07:LFHD			07:RFHD			07:LBHD			07:RBHD			07:C7			07:T10			07:CLAV			07:STRN			07:RBAK			07:LSHO			07:LUPA			07:LELB			07:LFRM			07:LWRA			07:LWRB			07:LFIN
Frame	Sub Frame	X	Y	Z	X	Y	Z	X	Y	Z	X	Y	Z	X	Y	Z	X	Y	Z	X	Y	Z	X	Y	Z	X	Y	Z	X	Y	Z	X	Y	Z	X	Y	Z	X	Y	Z	X	Y	Z	X	Y	Z	X	Y	Z
		mm	mm	mm	mm	mm	mm	mm	mm	mm	mm	mm	mm	mm	mm	mm	mm	mm	mm	mm	mm	mm	mm	mm	mm	mm	mm	mm	mm	mm	mm	mm	mm	mm	mm	mm	mm	mm	mm	mm	mm	mm	mm	mm	mm	mm	mm	mm	mm
7367	0	292.14	2042.42	1587.04	194.092	2031.89	1591.57	302.976	2194.17	1601.32	168.67	2200.2	1602.32	200.542	2254.29	1477.84	184.531	2331.31	1226.45	221.105	2141.66	1385.6	218.698	2079.1	1232.94	99.4892	2324.69	1292.44	373.643	2270	1414.47	401.489	2332.33	1237.18	389.193	2389.01	1101.22	435.33	2393.61	932.568	417.864	2381.58	848.735	426.424	2446.01	867.075	442.762	2428.15	775.518
7368	0	293.255	2029.65	1585.97	195.264	2019.03	1590.81	303.957	2181.53	1600.19	169.464	2187.29	1601.13	201.387	2241.64	1476.74	185.416	2318.09	1225.08	221.72	2128.72	1385.09	219.194	2066.19	1232.6	100.407	2311.49	1290.96	374.421	2257.29	1413.49	402.191	2319.8	1236.3	389.704	2376.38	1100.37	435.999	2382.15	932.026	418.531	2370.19	847.965	426.64	2434.5	866.727	443.217	2417.91	775.207
7369	0	294.539	2016.74	1585	196.238	2006.14	1589.76	305.02	2168.79	1599.07	170.548	2174.56	1600.28	202.261	2228.92	1475.72	186.424	2304.57	1223.81	222.837	2115.86	1384.18	220.968	2052.87	1232.29	101.592	2298.16	1289.71	375.337	2244.73	1412.46	402.98	2306.75	1235.45	390.379	2363.55	1099.56	436.833	2369.8	931.261	418.788	2358.13	846.995	427.311	2422.58	866.196	443.364	2406.33	774.254
7370	0	295.913	2004.36	1584.29	197.011	1992.99	1589.34	305.994	2156.43	1598.06	171.503	2161.65	1599.6	203.173	2216.24	1474.8	187.554	2290.87	1222.56	224.082	2102.82	1383.49	221.912	2038.82	1231.77	102.562	2284.62	1288.38	376.236	2231.9	1411.7	403.839	2293.73	1234.55	390.908	2350.01	1098.63	438.037	2357.19	930.588	420.177	2345.69	846.363	428.395	2410.03	865.66	444.09	2394.15	773.471
7371	0	296.863	1991.63	1584.37	198.238	1980.07	1589.34	306.7	2143.75	1597.46	172.232	2148.71	1599.07	203.978	2203.58	1474.06	188.524	2277.17	1221.41	225.076	2089.6	1383.32	223.653	2025.32	1231.61	103.478	2270.94	1287.09	377	2219.03	1411.12	404.832	2280.63	1233.88	392.152	2336.67	1097.82	439.261	2343.87	929.96	421.475	2332.22	845.419	429.537	2396.63	865.014	445.004	2381.03	772.657
7372	0	298.182	1978.87	1584.56	199.64	1967.03	1589.61	307.649	2130.96	1597.1	173.015	2135.63	1598.41	205.013	2190.88	1473.56	189.461	2263.25	1220.16	226.431	2076.64	1383.31	224.832	2011.21	1231.87	104.385	2257.28	1285.9	378.013	2206.5	1410.45	405.847	2267.14	1233.02	393.213	2322.76	1096.88	440.506	2329.95	928.827	422.398	2318.53	844.322	431.058	2382.9	864.082	446.548	2367.74	771.815
7373	0	299.706	1966.32	1584.94	201.045	1954.02	1589.85	308.537	2118.26	1596.96	174.2	2122.57	1598.25	205.914	2178.01	1473.38	190.345	2249.48	1219.35	227.659	2063.44	1383.62	226.528	1997.43	1232.24	105.207	2243.49	1284.94	378.949	2193.64	1409.86	407.062	2253.66	1232.17	394.786	2308.75	1095.89	442.184	2315.41	927.945	424.822	2303.87	843.803	433.01	2368.41	863.266	447.97	2353.01	770.704
7374	0	301	1953.58	1585.82	202.433	1940.8	1590.78	309.46	2105.84	1597.39	175.046	2109.48	1598.03	206.858	2165.18	1473.42	191.122	2235.57	1219.07	228.705	2050.47	1383.98	227.842	1983.76	1233.36	105.893	2229.6	1284.5	379.854	2180.83	1409.99	408.442	2239.79	1231.85	396.341	2294.19	1095.27	444.313	2300.76	927.58	426.692	2288.6	843.264	434.946	2353.16	862.641	449.983	2337.65	770.085
7375	0	302.183	1940.52	1587.11	203.674	1927.74	1591.44	310.122	2092.86	1598.25	175.735	2096.36	1598.3	207.621	2152.31	1474.02	191.677	2221.84	1219.22	229.371	2037.2	1384.82	229.22	1969.49	1234.41	106.475	2215.88	1284.56	380.841	2168.26	1410.38	409.81	2225.71	1231.7	398.006	2279.3	1094.83	446.217	2284.86	927.173	428.968	2272.66	843.158	437.402	2337.41	862.135	452.311	2321.45	769.589
7376	0	303.46	1927.69	1588.47	204.86	1914.62	1592.35	310.928	2079.92	1599.23	176.383	2083.26	1598.88	208.547	2139.43	1474.78	192.255	2208.35	1219.85	230.8	2024.35	1385.8	230.963	1955.94	1235.88	107.169	2202.14	1285.08	381.397	2155.72	1410.94	411.303	2211.69	1231.88	399.781	2264.18	1094.64	448.498	2268.73	927.11	431.718	2256.38	842.846	440.059	2320.98	861.841	455.406	2304.65	769.51
7377	0	304.605	1915.11	1589.76	206.033	1901.43	1592.99	311.49	2067.3	1600.6	177.019	2070.18	1599.64	209.188	2126.55	1475.74	192.507	2194.81	1220.85	231.746	2011.24	1387.29	232.057	1941.84	1237.51	107.559	2188.39	1285.89	382.252	2143.11	1411.93	412.536	2197.4	1232.33	401.522	2249.02	1094.7	450.844	2252.02	927.353	434.024	2238.66	843.082	442.711	2303.64	861.525	458.488	2286.68	769.454
7378	0	305.539	1902.27	1591.33	207.086	1888.19	1593.94	311.822	2054.55	1602.03	177.548	2056.87	1600.11	209.84	2113.72	1476.7	192.617	2181.37	1221.95	232.563	1998.38	1388.37	233.591	1928.3	1239.19	107.929	2174.98	1287.08	382.525	2130.49	1413.11	413.73	2183.08	1233.06	403.357	2233.73	1094.86	453.267	2234.6	927.585	436.444	2220.79	843.26	445.785	2285.83	861.457	461.623	2267.73	769.44
7379	0	306.103	1889.28	1592.58	208.033	1875.26	1594.9	312.251	2041.98	1603.34	177.977	2043.75	1600.91	210.344	2101.03	1477.88	192.765	2168.13	1222.86	233.273	1985.42	1389.74	235.051	1915.01	1240.77	108.117	2161.42	1288.04	383.005	2118.14	1414.01	414.995	2169.21	1233.65	405.282	2218.43	1094.93	456.693	2217.67	928.218	439.512	2202.12	843.602	449.128	2267.38	861.06	464.697	2247.53	769.023
7380	0	307.079	1876.64	1593.67	209.037	1862.3	1595.6	312.628	2029.44	1604.69	178.183	2030.63	1601.92	210.984	2088.52	1478.96	192.945	2154.69	1223.76	234.148	1972.96	1391	236.088	1902.02	1241.92	108.282	2148.22	1289.12	383.64	2105.52	1415.05	416.112	2155.13	1234.32	407.023	2202.81	1094.93	458.49	2198.28	927.884	443.368	2183.23	844.172	452.407	2248.37	860.514	468.564	2227.22	768.927
7381	0	308.292	1864.5	1594.99	209.821	1849.3	1596.66	312.812	2016.88	1606.15	178.242	2017.59	1602.82	211.56	2075.95	1480.22	193.139	2141.36	1224.85	234.364	1960.2	1392.41	236.855	1889.22	1243.3	108.4	2135.3	1290.46	384.086	2092.75	1416.2	417.266	2141.1	1235.15	409.166	2187.39	1095.06	461.37	2179.78	928.149	446.6	2163.41	844.711	456.345	2229.04	860.229	472.835	2206.11	769.051
7382	0	308.535	1851.63	1596.08	210.637	1836.47	1597.47	312.734	2004.37	1607.63	178.502	2004.46	1603.97	211.897	2063.48	1481.52	193.345	2128.38	1226.24	234.696	1947.75	1393.63	237.235	1876.8	1244.83	108.5	2122.57	1291.97	384.64	2080.11	1417.31	418.335	2127.3	1235.98	411.427	2172.01	1095.18	464.577	2161.22	928.635	449.79	2143.15	845.427	460.047	2209.07	859.822	477.091	2184.31	769.179
7383	0	309.067	1839.28	1596.9	211.19	1823.61	1598.45	312.688	1992.14	1609.04	178.344	1991.64	1605.34	212.418	2051.18	1482.79	193.734	2115.92	1227.63	234.446	1935.27	1395.09	237.269	1864.52	1246.14	108.857	2110.44	1293.33	384.931	2067.23	1418.42	419.331	2113.1	1236.78	413.44	2156.34	1095.29	467.681	2142.27	929.185	453.896	2122.67	846.62	464.352	2188.88	859.6	481.762	2162.26	769.536
7384	0	309.496	1826.71	1597.39	211.713	1810.78	1598.9	312.465	1979.73	1610.35	178.199	1978.75	1606.77	212.829	2038.92	1484.07	194.417	2103.67	1228.91	234.667	1923.16	1396.3	236.963	1852.75	1247.66	109.49	2098.57	1294.6	385.32	2054.41	1419.46	420.488	2098.84	1237.56	415.694	2140.53	1095.38	471.575	2123.41	930.116	457.583	2101.66	847.483	468.145	2168.29	859.103	486.812	2139.29	770.007
7385	0	309.735	1814.33	1598.38	212.326	1798.21	1599.78	312.308	1967.34	1611.89	178.197	1965.87	1608.1	213.046	2026.73	1485.43	195.244	2091.54	1230.31	234.722	1911.08	1397.49	236.076	1840.52	1248.41	109.964	2086.8	1295.89	386.014	2041.67	1420.82	421.757	2084.53	1238.63	418.237	2124.8	1095.83	474.342	2102.98	930.799	461.754	2080.16	848.847	472.176	2146.76	858.942	491.664	2115.61	770.968
7386	0	309.923	1801.89	1599.17	212.575	1785.61	1600.43	312.194	1954.93	1613.53	177.961	1953.22	1609.92	213.471	2014.66	1487.1	196.178	2079.7	1231.74	234.094	1899.04	1398.62	235.704	1828.56	1249.79	110.795	2075.22	1297.39	386.151	2028.65	1422.6	423.138	2069.89	1239.89	420.728	2108.99	1096.33	477.947	2082.94	932.266	465.385	2058.4	850.195	476.587	2125.24	859.305	496.979	2091.6	772.639
7387	0	309.953	1789.68	1599.83	212.643	1773.31	1601.13	311.912	1942.44	1615.03	177.702	1940.5	1611.72	213.569	2002.78	1488.56	197.328	2067.89	1233.11	233.863	1887.02	1399.7	235.189	1816.36	1251.28	112.178	2063.95	1298.64	386.477	2015.89	1423.93	424.6	2055.28	1241.07	423.053	2092.87	1096.87	481.294	2062.41	933.583	469.62	2036.31	852.036	481.079	2103.16	859.638	502.091	2067.12	774.278
7388	0	309.668	1777.36	1600.01	212.683	1760.99	1601.6	311.731	1930.23	1616.29	177.339	1928.08	1613.25	213.798	1990.87	1489.83	198.503	2056.32	1234.2	233.301	1875.08	1401.12	233.817	1804.36	1252.31	112.996	2052.83	1299.67	387.112	2003.13	1425.28	426.062	2040.73	1242.06	425.606	2076.32	1097.03	484.613	2041.95	934.786	473.181	2013.9	854.006	485.462	2080.64	860.122	507.245	2042.4	776.043
7389	0	309.544	1765.23	1600.3	212.472	1748.59	1601.93	311.388	1917.89	1617.64	177.116	1915.67	1614.93	213.918	1979.15	1491.06	199.7	2044.83	1235.47	233.111	1863.39	1402.32	232.965	1792.42	1253.87	113.934	2041.93	1300.65	387.263	1990.21	1426.65	427.583	2026.19	1243.11	428.344	2060.22	1097.62	487.919	2021.01	936.327	475.84	1990.88	855.457	489.975	2057.9	860.842	512.205	2016.86	778.143
7390	0	309.337	1753.2	1600.49	212.458	1736.59	1602.47	311.137	1905.81	1618.9	176.981	1903.42	1616.76	214.246	1967.69	1492.47	200.906	2033.57	1236.75	232.432	1851.82	1403.5	232.098	1780.86	1254.86	114.97	2030.98	1301.54	387.585	1977.64	1428.2	429.136	2011.48	1244.23	431.229	2044.27	1098.23	491.239	1999.99	938.215	479.445	1968.05	858.073	495.109	2035.18	862.047	517.384	1991.28	780.896
7391	0	308.597	1740.69	1600.74	212.003	1724.39	1603.19	310.885	1893.63	1620.17	176.435	1891.28	1618.41	214.327	1955.95	1493.84	202.076	2022.48	1238.16	231.698	1839.72	1404.77	231.22	1769.35	1255.93	115.796	2020.18	1302.63	387.695	1964.85	1429.78	429.428	1995.72	1245.08	434.059	2028.2	1098.98	494.493	1978.68	940.374	482.794	1944.9	861.165	499.319	2011.62	863.385	522.287	1965.46	784.038
7392	0	308.291	1728.69	1600.91	211.783	1712.23	1603.51	310.555	1881.42	1621.45	176.428	1879.04	1620.39	214.259	1944.38	1495.18	203.173	2011.39	1239.49	231.156	1828.14	1406.04	230.534	1758.08	1257.03	116.827	2009.68	1303.89	387.999	1952.42	1431.5	430.956	1980.93	1246.55	436.709	2011.73	1099.81	497.641	1957.04	942.916	486.135	1921.62	864.627	504.263	1988.18	865.295	527.012	1939.05	787.783
7393	0	307.771	1716.71	1601.09	211.236	1700.38	1604.02	310.216	1869.24	1622.72	175.923	1867.11	1622.14	214.428	1932.76	1496.53	204.314	2000.37	1240.84	230.937	1816.86	1406.88	229.869	1746.62	1258.13	117.838	1998.88	1304.82	388.006	1939.77	1433.28	432.612	1966.49	1248.08	439.639	1995.59	1100.78	500.913	1935.32	945.922	489.618	1898.13	868.801	508.761	1964.09	867.532	531.804	1912.57	791.953
7394	0	307.228	1704.84	1601.15	210.653	1688.5	1604.38	309.882	1857.14	1623.92	175.826	1855	1623.7	214.352	1921.4	1497.84	205.344	1989.24	1242.15	230.321	1805.5	1408.06	229.534	1735.55	1259.33	118.551	1988.39	1305.9	388.122	1927.21	1434.92	433.902	1951.9	1249.63	442.413	1979.3	1101.85	504.113	1913.63	949.255	492.738	1874.79	873.02	513.167	1939.84	870.058	536.124	1885.92	796.536
7395	0	306.5	1692.74	1601.46	210.085	1677.07	1604.62	309.532	1845.01	1625	175.331	1843.26	1625.25	214.317	1909.71	1499.03	206.294	1978.2	1243.43	229.783	1793.9	1409.4	229.185	1724.18	1260.49	119.686	1977.85	1306.95	388.298	1914.78	1436.71	435.638	1937.41	1251.21	445.257	1963.22	1103.06	506.916	1891.92	952.757	495.109	1851.15	877.269	518.239	1916.17	873.164	540.029	1858.97	801.383
7396	0	305.934	1680.86	1601.62	209.265	1665.18	1604.96	308.726	1832.46	1625.87	175.019	1831.34	1626.69	214.355	1898.21	1500.22	207.262	1967.21	1244.79	229.26	1782.54	1410.16	228.893	1713.07	1261.22	120.665	1967.31	1308.08	388.489	1902.23	1438.45	437.234	1922.85	1252.96	448.352	1947.02	1104.33	509.673	1869.88	956.306	497.745	1827.54	882.142	522.255	1891.29	876.471	543.702	1831.96	806.623
7397	0	305.137	1668.71	1601.97	208.513	1653.39	1605.24	308.859	1820.74	1627.27	174.601	1819.67	1628.05	214.544	1886.75	1501.33	208.148	1956.2	1246.01	229.075	1771.19	1411.02	228.757	1701.99	1261.99	121.383	1956.69	1308.91	388.853	1889.96	1440.16	438.677	1908.42	1254.62	451.303	1930.71	1105.52	512.552	1848.09	960.266	500.276	1804.08	887.103	526.257	1866.49	880.068	547.257	1805.04	812.39
7398	0	304.243	1656.78	1602.17	207.745	1641.76	1605.51	308.653	1808.7	1628.26	174.274	1807.83	1629.28	214.539	1875.26	1502.44	209.1	1945.35	1247.07	228.694	1759.9	1411.88	228.373	1691	1262.5	122.515	1946.04	1309.8	389.034	1877.56	1441.68	440.358	1894.18	1256.18	454.334	1914.56	1106.68	515.039	1826.1	964.351	502.397	1780.66	892.172	530.782	1842.28	884.144	550.617	1778.36	818.329
7399	0	303.422	1644.77	1602.47	207.015	1630.45	1605.44	307.581	1795.96	1628.94	174.05	1796.19	1630.11	214.532	1863.74	1503.31	209.94	1934.53	1248.14	228.44	1748.45	1412.47	228.086	1680.01	1263.07	123.276	1935.5	1310.62	389.227	1865.31	1442.99	441.73	1879.86	1257.8	457.031	1898.13	1107.48	517.519	1804.35	968.503	504.276	1757.31	897.221	534.596	1817.84	888.253	553.434	1751.49	824.438
7400	0	302.347	1632.73	1602.5	205.681	1618.49	1605.59	308.02	1784.42	1630.11	173.54	1784.62	1630.96	214.526	1852.37	1503.81	210.623	1923.69	1249.02	228.149	1737.2	1412.94	227.772	1669.12	1263.45	124.118	1924.79	1311.2	389.069	1852.84	1444.23	443.413	1865.61	1259.09	461.335	1882.87	1109.33	519.95	1783.06	972.729	506.199	1734.15	902.692	538.009	1793.34	892.323	556.071	1725.01	830.794
7401	0	301.363	1620.85	1602.51	204.753	1606.95	1605.49	306.896	1771.78	1630.4	173.297	1773.09	1631.31	214.555	1840.84	1504.37	211.331	1912.81	1249.57	227.782	1725.68	1413.37	227.5	1658.2	1263.68	124.766	1914.12	1311.48	389.112	1840.67	1445.35	444.873	1851.37	1260.17	463.087	1865.11	1109.7	522.114	1761.62	976.84	508.18	1711.05	908.366	541.279	1769.35	896.445	558.535	1698.87	837.175
7402	0	300.519	1608.98	1602.31	204.072	1595.93	1605.23	306.821	1759.93	1630.69	172.979	1761.83	1631.71	214.889	1829.42	1504.45	212.092	1901.99	1249.78	227.681	1714.56	1413.7	227.259	1647.15	1263.91	125.259	1903.28	1311.29	389.388	1828.7	1445.94	446.189	1837.58	1260.96	466.534	1849.54	1110.45	524.273	1740.43	980.7	509.923	1688.38	913.832	544.362	1745.65	900.358	560.943	1673.13	843.697
7403	0	299.487	1596.99	1601.99	202.908	1584.23	1604.84	307.094	1748.48	1631.18	172.835	1750.24	1631.81	214.869	1818.03	1504.74	212.751	1891.01	1249.96	227.429	1703.06	1413.54	227.105	1636.02	1263.89	126.176	1892.28	1311.43	389.457	1816.71	1446.5	447.8	1823.4	1261.72	469.639	1833.41	1111.1	526.369	1719.63	984.858	512.266	1666.11	919.62	547.198	1722.14	904.491	563.008	1647.55	850.309
7404	0	298.406	1584.91	1601.8	201.673	1572.79	1604.4	306.361	1735.95	1631.54	172.426	1738.92	1632.15	214.942	1806.39	1504.99	213.275	1879.74	1250.13	227.303	1691.48	1413.7	226.897	1624.7	1263.82	126.467	1881.33	1311.41	389.539	1804.62	1447.13	449.113	1809.14	1262.47	472.966	1817.73	1111.88	528.203	1698.76	989.162	513.562	1643.49	925.39	549.793	1698.74	908.932	564.706	1622.25	857.058
7405	0	297.387	1573.03	1601.42	200.642	1561.51	1603.87	305.829	1723.39	1632.07	172.355	1727.43	1632.38	215.019	1794.91	1505.09	213.688	1868.44	1250.3	227.119	1680.13	1413.59	226.635	1613.44	1263.68	127.154	1870.16	1311.56	389.596	1792.67	1447.52	450.129	1795.2	1263.29	474.28	1799.69	1112.42	529.881	1678.14	993.425	514.908	1621.29	931.301	552.042	1675.5	913.619	566.255	1597.42	864.061
7406	0	296.472	1560.99	1600.82	199.452	1550.01	1603.23	305.547	1711.21	1632.37	171.798	1715.86	1632.55	214.977	1783.23	1505.18	213.966	1857.05	1250.16	226.907	1668.53	1413.35	226.57	1601.98	1263.41	127.754	1858.81	1311.58	389.632	1780.82	1447.96	451.688	1781.2	1263.96	477.362	1783.7	1113.28	531.328	1657.77	997.638	516.038	1599.41	936.958	553.502	1652.16	917.922	567.695	1572.98	871.072
7407	0	295.232	1548.93	1600.37	198.301	1538.42	1602.53	305.194	1699.05	1632.18	171.4	1704.55	1632.49	215.105	1771.44	1504.72	214.115	1845.55	1249.88	226.733	1657.08	1412.74	226.347	1590.59	1262.76	128.01	1847.57	1311.1	389.63	1768.91	1447.92	452.464	1767.13	1264.37	479.597	1767.21	1113.59	532.835	1637.64	1001.8	517.246	1577.89	942.487	555.62	1629.82	922.448	568.648	1548.91	877.878
7408	0	294.249	1537	1599.84	197.391	1526.87	1601.86	304.858	1686.94	1631.94	171.498	1692.94	1632.1	214.738	1759.8	1504.4	214.245	1834.02	1249.46	226.507	1645.52	1412.1	226.179	1579.23	1262.1	128.127	1836.03	1310.49	389.536	1756.86	1447.8	453.499	1753.3	1264.66	481.616	1750.8	1113.93	533.802	1617.71	1005.57	518.015	1556.45	947.937	557.085	1607.63	926.748	569.597	1525.23	884.495
7409	0	293.337	1525.05	1599.18	196.301	1515.3	1601.16	304.507	1674.81	1631.35	170.851	1681.58	1631.87	214.659	1748.21	1503.64	214.216	1822.43	1248.78	226.48	1633.84	1411.61	226.234	1567.85	1261.46	128.111	1824.33	1309.63	389.391	1744.84	1447.27	454.567	1739.28	1264.62	483.471	1734.57	1113.96	534.905	1598.23	1009.24	518.604	1535.46	953.461	557.875	1585.47	930.752	570.242	1502.07	891.137
7410	0	292.227	1512.95	1598.39	195.272	1503.69	1600.29	304.12	1662.72	1630.44	170.69	1670.03	1630.57	214.469	1736.38	1502.86	213.994	1810.84	1248	226.232	1621.98	1410.78	226.256	1556.31	1260.76	128.161	1812.71	1308.59	389.133	1732.86	1446.54	455.142	1725.35	1264.34	485.205	1718.35	1113.96	535.558	1578.88	1012.83	519	1514.8	958.603	559.25	1564.19	934.87	570.507	1479.44	897.32
7411	0	291.302	1500.95	1597.59	194.145	1492.01	1599.47	304.002	1650.72	1629.41	170.28	1658.63	1629.58	214.243	1724.53	1501.84	213.666	1799.32	1247.25	226.046	1610.21	1409.81	226.152	1544.73	1259.53	127.824	1800.7	1307.56	389.146	1721.06	1445.9	455.584	1711.47	1263.92	486.624	1702.1	1113.7	536.149	1559.88	1016.18	519.053	1494.49	963.729	559.901	1542.88	938.643	570.555	1457.07	903.556
7412	0	290.514	1488.83	1596.65	193.09	1480.18	1598.69	303.409	1638.46	1628.31	169.817	1647.01	1628.3	214.073	1712.71	1500.83	213.074	1787.59	1246.35	225.742	1598.21	1408.78	225.908	1533.17	1258.23	127.588	1788.86	1306.36	388.691	1709.03	1444.98	455.976	1697.68	1263.54	487.933	1686.05	1113.54	536.513	1541.04	1019.57	518.934	1474.56	968.667	560.318	1521.98	942.421	570.466	1435.25	909.563
7413	0	289.467	1476.75	1595.91	192.226	1468.49	1597.93	303.106	1626.45	1627.31	169.379	1635.33	1627.12	213.736	1700.64	1499.53	212.379	1775.68	1245.4	225.57	1586.24	1407.42	226.016	1521.41	1257.15	127.036	1776.56	1305.02	388.193	1696.96	1444.03	456.441	1683.99	1263.06	488.597	1669.73	1113.1	536.6	1522.41	1022.71	518.663	1454.97	973.32	560.494	1501.32	946.205	570.023	1413.71	915.716
7414	0	288.617	1464.7	1595.13	191.586	1456.66	1596.92	302.278	1614.14	1626.2	168.933	1623.74	1625.92	213.044	1688.57	1498.48	211.636	1763.86	1244.46	225.114	1574.02	1406.1	226.074	1509.45	1255.67	126.671	1764.4	1303.89	387.856	1684.96	1443.09	456.492	1670.12	1262.56	490.033	1654.03	1113.08	536.438	1504.03	1025.8	518.177	1435.93	977.658	560.741	1481.24	950.024	569.275	1392.8	921.216
7415	0	287.751	1452.56	1594.31	190.564	1444.78	1595.74	301.982	1602.12	1625.28	168.266	1611.82	1624.7	212.422	1676.31	1497.24	210.727	1751.61	1243.36	224.766	1561.82	1404.63	226.128	1497.36	1254.13	125.812	1751.72	1302.63	387.374	1673	1441.98	456.674	1656.41	1262.08	490.89	1638.09	1112.84	536.282	1486.05	1028.94	517.333	1417.14	981.78	560.632	1461.27	953.697	568.349	1372.42	926.868
7416	0	286.972	1440.52	1593.3	189.668	1432.86	1594.67	301.239	1589.92	1624.01	167.764	1599.9	1623.4	211.769	1664.21	1495.89	210.064	1739.91	1242.14	224.333	1549.61	1403.17	226.129	1485.08	1252.86	125.008	1738.93	1301.39	386.665	1660.84	1440.78	456.596	1642.61	1261.37	491.648	1622.51	1112.64	535.692	1468.36	1031.53	516.388	1398.87	985.626	560.274	1441.87	957.095	567.142	1352.48	931.969
7417	0	286.214	1428.24	1592.08	188.823	1420.89	1593.66	300.531	1577.89	1622.52	167.091	1588.08	1621.79	210.997	1651.97	1494.51	208.768	1727.44	1240.61	224.312	1537.46	1401.93	226.143	1472.54	1251.43	124.112	1726.41	1299.87	385.823	1649	1439.28	456.383	1629.2	1260.4	491.722	1606.84	1111.93	535.018	1451.03	1033.87	515.056	1380.81	989.164	559.732	1423.08	959.996	565.769	1332.93	936.743
7418	0	285.288	1416.21	1590.89	187.963	1408.84	1592.32	299.691	1565.83	1620.83	166.172	1576.23	1620.02	210.008	1639.66	1492.79	207.292	1714.92	1238.91	223.568	1524.9	1400.27	226.004	1460.02	1249.95	122.716	1713.46	1297.8	385.036	1637.2	1437.83	455.524	1615.78	1259.34	491.944	1591.71	1111.13	534.079	1434.16	1036.06	513.715	1363.41	992.342	558.861	1404.74	962.59	564.067	1314.07	940.765
7419	0	284.358	1404.13	1589.7	187.15	1396.71	1590.99	298.835	1553.79	1619.12	165.699	1564.19	1618.31	208.843	1627.26	1490.94	206.146	1702.72	1237.44	222.838	1512.39	1398.79	226.169	1447.56	1248.34	121.51	1700.43	1296	384.051	1625.37	1436.26	455.324	1602.62	1258.13	491.65	1576.57	1110.21	533.121	1417.61	1037.8	512.334	1346.37	995.334	557.967	1386.84	964.947	562.537	1295.81	944.917
7420	0	283.697	1392.05	1588.52	186.38	1384.52	1589.98	298.057	1541.75	1617.69	164.717	1551.77	1616.34	207.767	1614.87	1489.34	204.232	1689.7	1235.61	222.51	1499.87	1397.48	226.239	1434.88	1246.82	119.564	1687.09	1293.71	382.958	1613.59	1434.56	454.551	1589.29	1257.01	491.572	1561.77	1109.47	531.928	1401.39	1039.6	510.751	1329.71	997.902	556.791	1369.41	967.19	560.682	1278.12	948.342
7421	0	282.991	1379.7	1587.22	185.54	1372.28	1588.82	297.14	1529.49	1616.21	163.87	1540	1615.49	206.495	1602.37	1487.7	202.681	1676.74	1233.83	221.55	1487.05	1395.83	226.113	1421.9	1245.67	118.066	1673.71	1291.8	381.622	1601.72	1432.9	453.642	1576.21	1255.82	491.316	1547.36	1108.71	530.64	1385.67	1041.01	509.095	1313.6	1000.09	555.509	1352.48	969.105	558.904	1260.87	951.638
7422	0	282.074	1367.53	1586.14	184.766	1359.95	1587.73	296.235	1517.29	1614.82	163.089	1527.47	1613.95	205.177	1589.56	1486.18	201.092	1663.66	1232.19	221.146	1474.37	1394.42	225.934	1408.83	1244.37	116.446	1660.29	1290	380.303	1589.8	1431.44	452.552	1563.16	1254.77	490.542	1532.96	1107.88	529.001	1370.2	1042.23	507.221	1297.9	1002.1	554.066	1336	970.806	556.742	1244.24	954.496
7423	0	281.152	1355.21	1585.27	183.744	1347.47	1586.57	295.374	1505.1	1613.68	162.488	1515.02	1612.52	203.678	1576.8	1484.69	199.322	1650.47	1230.52	220.016	1461.32	1392.91	225.713	1395.99	1243.03	114.795	1646.78	1288.52	378.806	1577.9	1429.81	451.426	1550.42	1253.66	489.696	1519.13	1107.05	527.366	1355.38	1043.15	505.272	1282.73	1003.86	552.373	1320.27	972.393	554.588	1228.33	956.965
7424	0	280.303	1342.77	1584.27	182.934	1335.03	1585.65	294.2	1492.81	1612.26	161.014	1502.62	1611.18	202.381	1563.94	1483.26	197.436	1637.1	1228.81	219.54	1448.6	1391.78	225.336	1382.96	1241.9	112.962	1633.22	1286.88	377.371	1565.81	1428.4	450.015	1537.55	1252.4	488.663	1505.57	1105.99	525.692	1341	1043.78	503.382	1268.1	1005.15	550.696	1304.92	973.392	552.468	1213.05	958.833
7425	0	279.459	1330.35	1583.35	182.103	1322.31	1584.78	293.227	1480.47	1610.88	159.993	1490.05	1610.05	200.725	1550.97	1481.67	195.529	1623.51	1227.26	218.56	1435.55	1390.42	225.039	1369.72	1240.82	111.098	1619.61	1285.26	375.963	1553.52	1427.01	448.513	1525.01	1251.13	487.459	1492.46	1104.94	524.005	1327.08	1044.3	501.392	1253.95	1006.18	548.824	1290.34	974.04	550.216	1198.16	960.553
7426	0	278.569	1317.86	1582.39	181.346	1309.74	1583.83	292.043	1468.01	1609.69	158.954	1477.45	1608.67	199.298	1537.88	1480.42	193.686	1609.87	1225.67	217.631	1422.51	1389.2	224.192	1356.45	1239.47	109.255	1605.82	1283.71	374.361	1541.03	1425.59	447.26	1512.5	1249.98	486.179	1479.78	1103.81	522.144	1313.47	1044.37	499.351	1240.21	1006.8	547.19	1276.31	974.645	548.125	1184.01	961.68
7427	0	277.69	1305.3	1581.56	180.313	1296.98	1583.21	290.889	1455.57	1608.32	157.672	1464.71	1607.25	197.486	1524.79	1478.96	191.756	1596.1	1224.16	216.295	1409.08	1388.07	223.372	1342.81	1238.56	107.331	1591.97	1282.29	372.685	1528.47	1424.24	445.582	1500.06	1248.58	484.599	1467.29	1102.45	520.338	1300.57	1044.08	497.376	1227.04	1007.11	545.181	1262.59	974.867	545.956	1170.41	962.435
7428	0	276.814	1292.84	1580.68	179.556	1284.28	1582.36	289.845	1443.23	1607.04	156.389	1451.96	1606.04	195.729	1512	1477.53	189.85	1582.27	1222.54	214.616	1395.8	1386.87	222.231	1328.89	1237.64	105.277	1578.04	1280.73	371.062	1515.83	1422.93	443.873	1487.64	1247.11	482.719	1455.15	1100.8	518.356	1288.16	1043.6	495.338	1214.46	1007.15	543.173	1249.75	974.434	543.6	1157.11	962.66
7429	0	275.85	1280.24	1580.07	178.679	1271.26	1581.91	288.385	1430.67	1606.01	155.236	1439.21	1605.53	194.109	1498.92	1476.58	188.041	1568.07	1220.96	213.239	1382.29	1386.04	220.75	1314.87	1237.11	103.284	1564.07	1279.25	369.35	1503.34	1421.4	441.749	1475.22	1245.58	480.925	1443.56	1099.12	516.487	1276.1	1042.73	493.284	1202.28	1006.64	541.007	1237.44	973.546	541.294	1144.73	962.213
7430	0	274.995	1267.54	1579.65	177.889	1258.4	1581.84	287.196	1418.19	1605.28	153.847	1426.09	1604.79	192.292	1485.72	1475.81	186.43	1553.95	1219.43	211.908	1368.98	1385.62	219.246	1300.63	1236.96	101.443	1549.62	1277.94	367.532	1490.65	1420.26	439.564	1463.26	1244.32	478.973	1432.29	1097.55	514.278	1264.5	1041.22	491.344	1190.45	1005.85	538.843	1225.55	972.206	539.221	1133.02	961.434
7431	0	274.103	1254.79	1579.49	176.969	1245.28	1581.84	285.939	1405.54	1605.09	152.688	1412.92	1605.07	190.624	1472.53	1475.35	184.669	1539.68	1218.42	210.7	1355.59	1385.7	217.753	1286.41	1237.37	99.4337	1535.9	1277.23	365.725	1478.16	1419.58	437.81	1451.43	1243.35	476.594	1420.78	1096.39	512.294	1253.38	1040.05	489.217	1179.21	1004.46	536.615	1214.51	970.871	537.207	1121.87	960.165
7432	0	273.3	1242.02	1579.66	176.184	1232.2	1582.2	284.687	1392.77	1605.39	151.255	1399.65	1605.54	188.776	1459.41	1475.47	183.031	1525.42	1217.84	208.997	1342.12	1386.04	216.136	1272.11	1238.19	97.7238	1521.54	1276.63	363.885	1465.43	1419.2	435.649	1439.84	1242.73	474.193	1409.97	1095.39	510.141	1242.69	1038.39	487.3	1168.65	1002.93	534.251	1204.07	969.167	535.057	1111.47	958.642
7433	0	272.449	1229.16	1580.2	175.456	1219.04	1582.79	283.372	1379.91	1605.96	149.892	1386.37	1606.55	187.223	1446.12	1476.01	181.59	1511.4	1217.58	207.629	1328.62	1386.97	214.419	1257.87	1239.37	96.1477	1507.89	1276.72	362.083	1452.71	1419.19	433.18	1428.38	1242.16	471.371	1399.35	1094.71	507.947	1232.56	1036.48	485.08	1158.48	1000.91	531.778	1194.44	966.914	533.042	1101.73	956.217
7434	0	271.504	1216.33	1580.78	174.668	1205.65	1583.93	281.936	1367.06	1606.76	148.38	1373.07	1607.63	185.607	1432.72	1476.78	180.378	1497.77	1217.8	205.9	1315.17	1388.08	212.83	1243.6	1241	94.8162	1494.03	1277.04	360.411	1439.84	1419.59	430.575	1417.19	1242.03	468.908	1389.7	1094.2	505.427	1223.17	1034.4	483.172	1149.14	998.475	529.045	1185.52	964.283	531.155	1092.96	953.408
7435	0	270.557	1203.54	1581.83	173.905	1192.42	1585.07	280.62	1354.49	1607.74	147.045	1359.69	1609.16	184.131	1419.37	1477.75	179.241	1484.14	1218.62	204.771	1301.92	1389.59	211.309	1229.41	1242.81	93.5784	1479.91	1277.76	358.746	1426.51	1420.54	428.145	1406.09	1242.23	465.795	1379.83	1094.17	502.997	1214.16	1032.12	481.046	1140.26	995.937	526.043	1177.35	961.35	529.105	1084.87	950.231
7436	0	269.689	1190.47	1583.01	172.967	1179.23	1586.41	279.385	1341.6	1608.87	145.686	1346.34	1610.69	182.732	1405.84	1479.07	178.206	1470.7	1219.86	203.04	1288.2	1390.94	210.094	1215.43	1244.59	92.4091	1466.35	1278.95	357.379	1413.33	1421.74	425.392	1395	1242.79	462.495	1370.06	1094.33	500.469	1205.53	1029.78	478.871	1132.04	993.028	523.391	1170.03	958.388	527.082	1077.58	946.415
7437	0	268.9	1177.53	1584.4	172.114	1165.99	1587.68	278.339	1328.95	1610.19	144.346	1332.85	1611.75	181.414	1392.44	1480.3	177.335	1457.5	1221.34	202.045	1274.92	1392.21	208.814	1201.75	1245.96	91.4429	1452.56	1280.32	356.367	1399.97	1423.39	423.413	1383.77	1243.56	459.233	1360.65	1094.72	497.836	1197.36	1027.35	476.57	1124.23	989.736	520.495	1163.36	955.188	525.057	1071.08	942.05
7438	0	268.004	1164.55	1586.05	171.478	1152.7	1589.26	277.164	1316.01	1611.63	143.244	1319.61	1612.98	180.284	1379.13	1481.76	176.566	1444.46	1223.06	201.061	1261.76	1393.34	207.701	1188.3	1247.07	90.4971	1439.22	1281.96	355.446	1386.67	1425.01	421.414	1372.54	1244.47	455.475	1351.14	1094.91	495.14	1189.81	1024.57	474.325	1117.07	985.965	517.304	1156.96	951.69	522.892	1065.23	937.051
7439	0	267.131	1151.52	1587.55	170.431	1139.46	1590.69	275.915	1302.81	1613.01	142.385	1306.35	1614.02	179.323	1366.02	1483.2	175.702	1431.82	1224.8	200.292	1248.67	1394.67	206.896	1175.36	1248.26	89.4129	1426.39	1283.72	354.449	1373.66	1426.55	419.407	1361.28	1245.44	452.695	1342.81	1095.62	492.544	1182.59	1021.69	471.965	1110.48	981.935	514.128	1151.34	947.757	520.461	1059.89	931.774
7440	0	266.296	1138.3	1589.05	169.589	1126.5	1591.96	274.936	1289.86	1614.52	141.149	1293.39	1615.14	178.22	1352.99	1484.76	174.631	1419.45	1226.72	199.601	1235.75	1395.9	206.183	1162.92	1249.1	88.2938	1413.54	1285.67	353.425	1360.84	1428.3	417.322	1350.23	1246.45	449.499	1334.18	1096.24	489.831	1175.57	1018.56	469.218	1104.18	977.57	511.144	1146.44	943.865	517.726	1055	925.892
7441	0	265.483	1125.36	1590.59	168.728	1113.35	1593.04	273.735	1276.88	1616.34	140.224	1280.23	1616.35	177.219	1340.12	1486.34	173.552	1407.2	1228.88	199.405	1223.2	1397.36	205.82	1150.75	1249.89	87.0285	1401	1287.86	352.644	1348.67	1430.07	415.78	1338.92	1247.81	446.408	1325.51	1097.08	487.089	1168.91	1015.27	466.561	1098.45	972.842	508.082	1142.28	939.734	514.839	1050.92	919.607
7442	0	264.686	1112.42	1592.12	168.142	1100.38	1594.32	273.003	1263.74	1618.06	139.48	1267.38	1617.5	176.287	1327.44	1488.01	172.432	1394.76	1231.03	198.97	1210.79	1398.7	205.832	1138.9	1251.15	85.7684	1388.44	1289.95	351.678	1336.4	1431.92	414.285	1328.06	1249.24	443.308	1316.6	1098.18	484.353	1162.65	1012	463.688	1093.25	967.768	504.538	1137.26	935.675	511.869	1047.24	912.861
7443	0	264.092	1099.41	1593.59	167.424	1087.53	1595.39	272.505	1251.03	1619.89	138.746	1254.34	1619.12	175.43	1314.66	1490.02	171.311	1382.7	1233.09	198.624	1198.49	1400.26	206.114	1127.35	1252.11	84.6864	1376	1291.94	350.956	1324.55	1433.84	412.825	1317.43	1250.61	440.423	1308.03	1099.23	481.624	1156.58	1008.69	460.839	1088.48	962.411	501.361	1133.44	931.36	508.856	1044.42	906.023
7444	0	263.501	1086.74	1594.83	166.854	1074.85	1596.33	271.627	1237.84	1621.65	138.157	1241.42	1620.71	174.58	1302.29	1491.79	170.074	1370.7	1235.01	198.382	1186.33	1401.58	206.266	1116.02	1252.96	83.405	1363.67	1293.94	350.133	1313.02	1435.58	411.339	1307.03	1252	437.715	1299.3	1100.45	478.917	1150.82	1005.26	457.776	1084.12	956.832	498.292	1130.25	927.119	505.31	1041.86	898.846
7445	0	262.914	1074.1	1596.06	166.271	1062.18	1597.33	271.17	1225.3	1623.41	137.456	1228.72	1622.28	173.696	1289.81	1493.55	168.795	1358.79	1237.01	198.116	1174.33	1403.17	206.693	1104.33	1254.75	82.2976	1351.52	1295.97	349.321	1301.68	1437.25	409.617	1296.91	1253.5	435.231	1291.26	1101.39	476.215	1145.51	1001.6	454.944	1080.48	951.223	495.111	1127.44	922.839	501.983	1040.24	891.301
7446	0	262.561	1061.67	1597.06	165.784	1049.59	1598.33	270.546	1212.52	1625.32	136.95	1215.95	1624.1	173.07	1277.63	1495.49	167.547	1347.15	1238.9	197.859	1162.51	1404.9	207.065	1092.97	1256.17	81.0864	1339.04	1297.93	348.584	1290.5	1439.05	408.372	1286.77	1254.94	432.553	1282.54	1102.82	473.479	1140.47	998.142	452.208	1077.27	945.783	491.971	1125.08	918.557	498.489	1038.98	883.855
7447	0	262.228	1049.2	1598.08	165.599	1037.09	1599.27	269.995	1200.05	1626.92	136.421	1203.3	1625.76	172.476	1265.54	1497.4	166.259	1335.43	1240.74	197.579	1150.72	1406.49	207.515	1081.49	1257.74	80.0237	1327.44	1299.85	347.726	1279.38	1440.55	406.857	1277	1256.13	430.083	1274.15	1104.04	470.951	1135.9	994.54	449.052	1074.17	939.953	488.916	1123.28	914.379	495.199	1038.6	876.336
7448	0	262.036	1036.91	1599.14	165.288	1024.72	1600.43	269.616	1187.68	1628.68	136.263	1190.87	1627.47	171.754	1253.42	1499	165.055	1323.95	1242.4	197.363	1139.03	1408.2	207.762	1070.33	1259.22	79.1194	1315.19	1301.65	347.158	1268.41	1442.19	405.487	1267.59	1257.38	427.676	1265.85	1105.26	468.514	1131.78	991.106	446.241	1071.9	934.138	485.86	1121.95	910.3	491.915	1039	868.758
7449	0	261.798	1024.69	1600.24	165.053	1012.51	1601.44	269.554	1175.83	1630.12	135.821	1178.37	1629.16	171.393	1241.52	1500.93	163.959	1312.58	1244.18	197.108	1127.5	1409.73	207.852	1059.19	1260.72	78.0581	1303.33	1303.51	346.488	1257.34	1443.65	404.079	1258.13	1258.65	425.308	1257.88	1106.54	466.023	1128	987.666	443.668	1070.1	928.83	482.947	1121.01	906.509	488.487	1039.85	861.296
7450	0	261.554	1012.59	1601.29	164.971	1000.33	1602.52	269.54	1163.62	1631.52	135.551	1166.2	1630.76	170.839	1229.81	1502.58	162.844	1301.06	1246.01	196.997	1116.03	1411.26	207.795	1048.08	1262.1	77.2487	1291.48	1305.43	345.9	1246.2	1445.27	402.745	1248.56	1260	422.953	1249.85	1107.89	463.707	1124.52	984.591	441.208	1068.74	923.851	480.591	1121.04	903.139	485.488	1041.25	854.323
7451	0	261.482	1000.61	1602.23	164.892	988.177	1603.45	269.187	1151.33	1633.2	135.662	1153.87	1632.06	170.261	1218.01	1503.96	161.728	1289.63	1247.67	196.682	1104.51	1412.62	207.521	1036.93	1263.38	76.3431	1279.87	1307.26	345.264	1235.03	1446.55	400.993	1239.02	1261.03	420.432	1241.9	1109.17	461.295	1121.24	981.633	438.633	1067.52	918.838	478.008	1120.93	900.026	482.335	1043.14	847.754
7452	0	261.48	988.699	1603.14	164.722	976.188	1604.59	268.746	1139.03	1634.31	135.342	1141.96	1633.72	170.104	1206.12	1505.54	160.833	1278.12	1249.22	195.985	1092.81	1413.54	207.115	1025.87	1264.46	75.5405	1268.05	1308.8	344.815	1223.71	1447.63	399.717	1229.36	1261.69	418.073	1234.33	1110.13	459.055	1118.47	978.708	436.352	1066.69	914.105	475.091	1120.56	896.968	479.531	1045.43	841.416
7453	0	261.424	976.9	1604.16	164.679	964.314	1605.58	268.614	1127.08	1635.28	135.098	1129.98	1634.71	169.559	1194.33	1506.76	159.929	1266.75	1250.55	195.691	1081.23	1414.77	206.574	1014.69	1265.51	74.7484	1256.45	1310.39	344.254	1212.31	1448.43	398.425	1219.66	1262.52	415.53	1226.85	1110.97	456.796	1115.87	975.971	434.135	1066.29	909.652	472.59	1120.91	894.259	476.875	1048.18	835.479
7454	0	261.504	965.117	1605.01	164.706	952.496	1606.48	268.588	1115.2	1636.18	135.198	1118.08	1635.65	169.257	1182.7	1507.67	159.243	1255.29	1251.71	195.416	1069.7	1415.74	206.023	1003.45	1266.31	74.1884	1244.84	1311.75	343.939	1200.81	1449.48	397.166	1210.04	1263.03	412.954	1219.37	1111.88	454.688	1113.56	973.18	432.053	1066.11	905.381	469.987	1121.32	891.774	474.752	1051.69	829.95
7455	0	261.423	953.315	1605.86	164.876	940.649	1607.45	268.19	1103.54	1636.83	135.035	1106.3	1636.43	169.049	1171.08	1508.58	158.469	1244.04	1252.84	195.014	1058.16	1416.54	205.332	992.268	1266.69	73.5593	1233.44	1313.01	343.583	1189.33	1449.87	395.763	1200.2	1263.36	410.285	1212.2	1112.43	452.593	1111.46	970.814	430.179	1066.2	901.116	467.487	1122.03	889.475	472.252	1054.59	824.942
7456	0	261.381	941.527	1606.53	164.816	928.862	1608.22	268.479	1091.88	1637.07	135.088	1094.59	1636.89	168.765	1159.38	1509.15	158.093	1233.11	1253.76	194.774	1046.66	1416.97	204.506	981.021	1266.92	73.0368	1221.94	1314.13	343.209	1177.79	1450.11	394.356	1190.47	1263.46	407.674	1205.1	1112.95	450.368	1109.45	968.278	428.146	1066.32	897.344	464.954	1122.85	887.245	469.976	1058.01	820.208
7457	0	261.445	929.845	1606.93	164.864	917.226	1609.02	268.339	1080.37	1637.08	135.006	1082.98	1637.41	168.648	1147.69	1509.72	157.264	1221.54	1254.2	194.47	1035.25	1417.3	203.589	969.774	1267.01	72.4759	1210.64	1314.87	342.836	1166.18	1450.24	393.064	1180.84	1263.42	404.967	1198.16	1113.31	448.019	1107.67	965.538	426.167	1066.65	893.508	462.483	1124.34	885.085	467.751	1061.49	815.824
7458	0	261.507	918.415	1607.18	164.824	905.532	1609.57	268.338	1068.81	1637.03	134.972	1071.31	1637.46	168.523	1136.09	1510.09	157.011	1210.6	1254.77	194.019	1023.66	1417.37	202.949	958.771	1266.88	72.1244	1199.3	1315.66	342.577	1154.6	1450.2	391.646	1171.29	1263.25	401.932	1191.03	1113.49	445.577	1105.96	963.211	424.061	1067.22	890.067	459.288	1124.76	883.246	465.65	1065.11	811.752
7459	0	261.563	906.624	1607.37	164.94	893.813	1609.92	268.309	1057.15	1636.99	135.048	1059.59	1637.61	168.653	1124.4	1510.39	156.585	1199.34	1255.14	193.618	1012.12	1417.36	202.27	947.534	1266.6	71.5414	1188.1	1316.35	342.363	1142.85	1450.29	390.386	1161.88	1263.06	399.359	1184.08	1114.07	443.486	1104.38	961.162	421.964	1067.55	886.801	456.418	1125.84	881.754	463.663	1068.57	808.343
7460	0	261.722	894.955	1607.5	165.142	882.073	1609.97	268.366	1045.73	1636.69	134.916	1047.84	1637.46	168.133	1112.79	1510.32	156.176	1188.08	1255.55	193.199	1000.49	1417.32	201.503	936.318	1266.24	70.7976	1176.98	1316.89	342.143	1131.21	1450.2	388.743	1152.7	1263.2	396.805	1176.93	1114.57	441.13	1102.58	959.375	419.702	1067.82	883.581	453.454	1126.92	880.506	461.323	1071.87	805.295
7461	0	261.911	883.31	1607.36	165.225	870.342	1610.09	268.141	1033.96	1636.23	134.944	1036.12	1637.29	168.259	1101.18	1510.3	155.746	1176.42	1255.52	192.728	988.998	1417.05	200.696	925.109	1265.83	70.8388	1165.66	1317.08	341.999	1119.5	1449.89	387.741	1143.47	1262.96	394.387	1169.93	1114.96	439.133	1101.1	957.745	418.165	1067.7	881.057	450.392	1127.86	879.425	459.046	1075.01	802.689
7462	0	261.942	871.77	1606.88	165.376	858.556	1610.07	268.347	1022.67	1635.46	134.831	1024.42	1637.11	167.81	1089.54	1509.97	155.75	1165.46	1255.43	192.246	977.378	1416.58	199.845	913.712	1265.22	70.5012	1154.51	1317.09	341.745	1107.69	1449.38	386.477	1134.48	1262.56	392.103	1162.91	1115.29	436.771	1099.23	955.835	415.314	1068.15	877.782	447.102	1128.66	878.477	456.552	1077.88	799.834
7463	0	262.044	860.09	1606.37	165.423	846.724	1609.75	268.385	1010.92	1634.68	134.781	1012.6	1636.48	167.947	1077.95	1509.53	155.595	1153.99	1255.1	191.879	965.775	1416.12	198.867	902.365	1264.66	70.2809	1143.25	1317.03	341.453	1095.99	1448.74	385.25	1125.49	1262.42	390.004	1155.69	1115.77	434.536	1097.54	954.138	413.21	1068.12	875.663	443.959	1129.19	877.857	454.194	1080.73	797.731
7464	0	262.136	848.336	1605.85	165.562	834.902	1609.35	268.379	999.465	1634.04	134.779	1000.82	1636.02	167.522	1066.27	1509.06	155.541	1142.78	1254.87	191.652	954.143	1415.53	198.31	891.056	1263.77	70.0289	1132.18	1316.73	341.376	1084.2	1448.4	383.951	1116.41	1262.24	387.914	1148.48	1116.25	432.365	1095.35	953.174	411.108	1067.95	874.078	440.805	1129.38	877.576	451.605	1083.34	796.13
7465	0	262.339	836.693	1605.16	165.803	823.083	1608.9	268.228	987.721	1633.07	134.678	988.994	1635.44	167.47	1054.66	1508.32	155.667	1131.26	1254.18	191.273	942.572	1414.92	197.6	879.853	1262.91	69.9624	1121.14	1316.32	341.237	1072.38	1447.65	382.809	1107.36	1261.96	385.898	1141.07	1116.65	430.536	1093.1	952.269	409.181	1068.19	872.469	437.815	1129.23	877.452	449.035	1085.6	794.669
7466	0	262.475	824.878	1604.37	166.046	811.155	1608.33	268.176	975.888	1632.08	134.738	977.022	1634.24	167.458	1042.96	1507.68	155.896	1119.98	1253.37	190.983	930.785	1414	196.838	868.444	1261.89	70.0627	1109.98	1315.64	341.245	1060.46	1446.93	381.858	1098.13	1261.7	384.077	1133.59	1116.94	428.803	1090.65	951.506	407.563	1067.17	871.226	435.07	1128.67	877.447	446.41	1087.22	793.486
7467	0	262.631	813.069	1603.52	166.355	799.17	1607.44	268.035	964.145	1630.76	134.572	965.326	1633.32	167.502	1031.2	1506.81	156.362	1108.65	1252.53	190.845	919.212	1413.08	196.296	856.982	1260.9	70.2047	1098.84	1314.99	341.215	1048.49	1446.08	381.01	1088.7	1261.42	382.618	1126.04	1117.45	427.231	1087.54	951.047	406.576	1065.41	870.366	432.551	1127.52	877.959	443.944	1088.65	792.492
7468	0	262.856	801.208	1602.75	166.482	787.27	1606.59	267.919	952.196	1629.63	134.594	953.158	1632.22	167.758	1019.47	1505.91	156.766	1097.39	1251.77	190.578	907.433	1412.27	195.638	845.52	1259.81	70.386	1087.57	1314.26	341.253	1036.56	1445.34	380.168	1079.16	1261.11	381.099	1118.28	1117.86	425.723	1084.31	950.677	404.718	1063.76	869.984	430.035	1125.96	878.403	441.351	1089.57	791.776
7469	0	263.066	789.407	1601.71	166.601	775.289	1605.48	268.046	940.45	1628.49	134.574	941.361	1630.94	167.635	1007.7	1504.82	157.19	1085.73	1250.73	190.447	895.834	1411.14	195.11	834.333	1258.37	70.706	1076.3	1313.35	341.35	1024.59	1444.28	379.609	1069.51	1260.75	379.643	1110.32	1118.17	424.485	1080.66	950.435	403.323	1061.62	869.223	428.054	1124.06	879.023	438.865	1089.97	791.077
7470	0	263.211	777.513	1600.38	166.792	763.387	1604.57	268.059	928.632	1626.97	134.651	929.271	1629.34	167.798	995.795	1503.48	157.615	1074.2	1249.57	190.422	883.935	1409.84	194.539	822.404	1257.25	71.1201	1065.06	1312.35	341.419	1012.47	1442.94	379.01	1059.46	1260.13	378.463	1102.31	1118.32	423.28	1076.4	949.96	402.365	1058.28	868.643	425.905	1121.35	879.396	436.584	1089.62	790.535
7471	0	263.478	765.61	1599.3	167.138	751.39	1603.34	268.091	916.763	1625.47	134.627	917.466	1627.98	168.044	983.994	1502.12	158.218	1062.33	1248.36	190.536	872.061	1408.49	194.105	810.755	1255.72	71.638	1053.74	1311.18	341.712	1000.24	1441.7	378.71	1049.39	1259.54	377.444	1094.05	1118.32	422.374	1071.88	949.724	401.664	1055.27	868.06	424.052	1118.02	879.968	434.066	1088.98	790.269
7472	0	263.841	753.63	1598.17	167.455	739.386	1602.08	268.261	905.019	1624.07	134.908	905.338	1626.34	168.563	972.1	1500.78	158.838	1050.5	1247.18	190.588	860.205	1407.13	193.844	799.403	1254.1	72.1293	1042.31	1310.09	342.077	988.001	1440.53	378.587	1038.96	1258.95	376.551	1085.39	1118.49	421.62	1066.84	949.62	400.976	1051.59	867.537	422.527	1114.26	880.535	432.164	1087.45	789.958
7473	0	263.997	741.716	1596.78	167.544	727.455	1600.57	268.514	892.996	1622.65	135.226	893.443	1624.58	168.961	960.279	1499.38	159.536	1038.89	1245.84	190.921	848.648	1405.6	193.535	787.521	1252.51	72.5717	1030.88	1308.85	342.534	975.774	1439.23	378.456	1028.4	1258.11	375.775	1076.52	1118.4	420.964	1061.39	949.347	400.511	1046.89	867.004	421.008	1109.71	881.125	430.433	1085.14	789.812
7474	0	264.138	729.721	1595.27	167.777	715.453	1599.09	268.857	881.202	1620.9	135.302	881.838	1623.03	169.475	948.456	1497.74	160.339	1027.11	1244.33	190.957	836.266	1404.11	193.196	775.578	1250.88	73.3211	1019.4	1307.46	343.098	963.423	1437.6	378.552	1017.6	1257.15	375.365	1067.54	1118.18	420.442	1055.34	948.897	400.112	1041.75	866.383	420.066	1104.83	881.4	428.918	1081.93	789.638
7475	0	264.393	717.767	1593.72	168.101	703.478	1597.4	269.121	869.101	1619.46	135.666	869.816	1621.43	170.287	936.55	1496.17	161.096	1015.18	1242.7	191.22	824.176	1402.38	192.831	763.49	1249.22	73.9699	1007.83	1305.94	343.644	951.063	1435.83	379.131	1007.08	1256.2	375.042	1058.15	1117.74	420.119	1048.79	948.414	400.276	1036.41	866.078	419.189	1099.21	881.676	427.839	1078.2	789.414
7476	0	264.776	705.701	1592.29	168.433	691.568	1595.84	269.385	856.974	1617.92	135.961	857.921	1619.6	170.897	924.626	1494.69	161.829	1003.2	1240.97	191.532	812.219	1400.73	192.974	751.859	1247.35	74.5355	996.37	1304.56	344.264	938.703	1434.26	379.106	995.72	1254.99	374.863	1048.44	1117.27	420.104	1041.73	947.892	400.259	1030.18	865.423	418.696	1093.08	882.081	426.954	1073.68	789.044
7477	0	265.196	693.705	1590.69	168.856	679.56	1594.33	269.213	844.844	1616.33	136.277	845.943	1617.98	171.547	912.678	1492.99	162.593	991.35	1239.44	191.856	800.12	1399.25	193.221	739.705	1245.72	75.4851	984.667	1302.78	345.012	926.402	1432.7	379.69	984.541	1253.86	374.957	1038.55	1116.54	419.893	1034.03	947.348	400.402	1023.45	864.669	418.387	1086.3	881.947	426.452	1068.26	788.675
7478	0	265.664	681.652	1589.12	169.148	667.591	1592.69	270.265	832.849	1614.94	136.987	833.865	1616.62	172.551	900.802	1491.37	163.628	979.299	1237.88	192.443	787.984	1397.64	193.344	727.094	1244.36	76.5112	972.703	1301.3	345.804	913.976	1431.09	380.641	973.665	1252.76	375.194	1028.13	1115.85	420.475	1026.01	946.737	400.851	1015.91	863.856	418.269	1078.79	881.868	426.357	1061.84	788.307
7479	0	266.181	669.53	1587.8	169.615	655.615	1591.25	270.995	820.656	1613.73	137.699	822.236	1615.02	173.38	888.974	1489.94	164.906	967.19	1236.29	193.067	775.942	1396.4	193.645	714.804	1243.06	77.5449	960.876	1299.78	346.686	901.692	1429.53	381.05	961.656	1251.49	375.851	1017.44	1115.14	421.228	1017.24	946.07	401.313	1007.74	863.047	418.766	1070.63	881.961	426.753	1054.88	788.144
7480	0	266.615	657.478	1586.38	170.194	643.663	1589.86	271.743	808.707	1612.37	138.523	810.327	1613.79	174.365	876.997	1488.51	166.131	954.926	1234.78	193.844	763.956	1395.04	193.875	702.519	1241.96	78.6891	949.103	1298.37	347.573	889.506	1428.06	381.978	950.094	1250.49	376.365	1006.32	1114.37	421.893	1007.7	945.403	402.192	998.946	862.195	419.112	1061.72	881.59	427.303	1046.88	787.745
7481	0	267.236	645.307	1585.13	170.662	631.736	1588.54	272.534	796.25	1611.4	139.183	798.435	1612.71	175.255	864.88	1487.32	167.236	942.419	1233.48	194.851	751.522	1394.1	194.698	690.429	1240.85	79.7663	936.98	1297.16	348.639	877.377	1426.92	383.138	938.564	1249.67	377.362	994.929	1113.72	422.872	997.508	944.789	403.438	989.375	861.423	420.046	1052.15	881.346	428.392	1038.06	787.536
7482	0	267.915	632.908	1584.15	171.384	619.73	1587.33	273.641	783.985	1610.39	140.269	786.367	1611.78	176.422	852.897	1486.26	168.299	929.951	1232.25	195.603	739.456	1393.16	195.527	678.22	1239.89	80.9911	924.772	1295.85	349.652	865.06	1425.82	384.182	926.502	1248.67	378.282	983.169	1112.92	424.177	986.946	944.364	404.851	979.086	860.806	421.147	1041.75	881.068	429.725	1028.26	787.228
7483	0	268.623	620.835	1583.08	172.077	607.862	1586.35	274.801	771.916	1609.4	141.672	774.611	1610.54	177.547	840.98	1485.14	169.503	917.465	1231.08	196.676	727.348	1392.29	196.585	665.463	1239.45	82.2253	912.562	1294.64	350.791	852.804	1424.92	385.374	914.254	1247.74	379.439	971.052	1112.1	425.915	975.565	943.699	406.479	968.052	860.289	422.618	1030.65	880.77	431.42	1017.57	786.658
7484	0	269.429	608.709	1582.15	172.748	595.891	1585.47	275.863	759.782	1608.41	142.667	762.714	1609.61	178.723	828.877	1484.1	170.858	904.83	1229.94	197.931	715.125	1391.76	197.493	652.922	1238.93	83.4926	900.183	1293.44	352.145	840.766	1424.09	386.479	901.809	1246.81	380.865	958.695	1111.23	427.68	963.782	943.156	408.487	956.281	859.58	424.24	1018.59	880.052	433.549	1006.08	786.062
7485	0	270.28	596.705	1581.08	173.659	584.085	1584.54	277.005	747.487	1607.49	143.86	750.96	1608.62	180.013	816.862	1483.16	172.243	892.02	1228.76	199.251	702.706	1391.09	199.161	640.955	1238.25	84.9317	887.463	1292.09	353.315	828.679	1423.13	388.291	889.802	1246.18	382.478	946.143	1110.37	429.585	951.087	942.255	410.438	943.503	858.717	426.273	1006.14	879.2	435.844	993.603	785.279
7486	0	270.966	584.699	1580.31	174.311	572.301	1583.66	278.422	735.589	1606.78	145.14	739.365	1607.78	181.439	804.999	1482.17	173.743	879.104	1227.57	200.437	690.772	1390.7	200.63	628.23	1237.95	86.1488	875.037	1291.05	354.686	816.349	1422.4	389.987	877.295	1245.42	384.211	933.235	1109.48	431.719	937.752	941.367	413.649	930.309	858.695	428.564	992.723	878.391	438.394	980.032	784.423
7487	0	271.782	572.734	1579.81	174.998	560.641	1583.14	279.538	723.526	1606.24	146.311	727.681	1607.46	182.887	793.097	1481.37	175.299	866.052	1226.39	201.931	678.441	1390.08	202.494	615.466	1237.8	87.8715	862.113	1289.9	356.257	804.141	1421.77	391.447	864.381	1244.6	386.303	920.067	1108.7	434.25	923.987	940.671	415.652	915.824	857.231	431.323	978.633	877.564	441.365	965.795	783.593
7488	0	272.704	560.613	1579.78	175.929	548.803	1582.95	280.898	711.273	1606.05	147.864	716.021	1606.96	184.432	781.24	1480.89	176.872	852.866	1225.32	203.511	665.994	1390.17	204.24	602.442	1237.85	89.3916	849.405	1288.91	357.994	791.876	1421.2	393.423	851.425	1243.88	388.575	906.619	1107.73	436.949	909.574	939.91	418.762	901.258	856.52	434.047	963.829	876.18	444.563	950.471	782.653
7489	0	273.749	548.369	1580.04	176.733	537.051	1583.08	282.524	699.228	1606.32	149.109	704.121	1607.39	186.053	769.365	1480.53	178.383	839.703	1224.6	205.063	653.739	1390.57	206.132	589.964	1238.09	90.8892	836.557	1288.28	359.595	779.442	1420.91	395.487	838.127	1243.42	391.143	892.854	1106.87	439.921	894.628	939.266	422.071	885.699	855.643	437.243	948.516	875.208	447.926	934.144	781.768
7490	0	274.525	536.276	1580.44	177.607	525.424	1583.23	283.835	686.88	1606.75	150.729	692.695	1607.65	187.61	757.262	1480.56	179.923	826.94	1224.45	206.815	641.304	1391.03	208.033	576.997	1238.91	92.2785	823.813	1287.73	361.326	767.131	1420.98	397.18	823.838	1243.05	393.833	878.61	1106.33	442.974	879.066	938.8	425.529	869.491	855.278	440.547	932.423	874.302	451.796	917.212	780.98
7491	0	275.549	524.205	1581.05	178.559	513.632	1583.88	285.412	674.934	1607.3	152.216	680.947	1607.93	189.344	745.528	1480.8	181.33	813.879	1224.56	208.263	628.879	1391.79	209.858	564.749	1239.73	93.8391	811.064	1287.43	363.011	754.851	1421.12	399.875	810.535	1242.88	396.381	864.104	1105.7	446.259	863.052	938.145	429.107	852.472	855.108	443.989	915.68	873.315	455.815	899.409	780.304
7492	0	276.57	512.142	1581.88	179.439	501.993	1584.72	287.082	662.885	1607.94	153.778	669.458	1608.7	190.88	733.468	1481.29	182.618	800.994	1224.53	209.737	616.597	1392.77	211.541	551.762	1240.96	95.1077	798.684	1287.61	364.521	742.272	1421.33	402.302	796.667	1242.92	399.142	849.313	1105.17	449.516	846.402	937.887	432.896	834.902	854.624	447.658	898.326	872.417	460.137	880.838	779.794
7493	0	277.57	500.116	1582.95	180.332	490.211	1585.58	288.561	650.729	1608.87	155.223	657.744	1609.48	192.372	721.356	1481.98	183.801	788.19	1225.27	211.371	604.196	1394.08	212.955	538.291	1242.63	96.5512	785.983	1288.15	366.184	729.984	1421.98	404.687	782.683	1243.02	401.795	833.91	1104.93	452.944	829.11	937.779	436.293	816.405	854.312	451.459	880.212	871.595	464.538	861.22	779.245
7494	0	278.722	487.867	1584.47	181.521	478.538	1586.84	290.18	639.016	1609.76	156.922	646.165	1609.99	193.862	709.423	1482.85	184.727	775.438	1226.06	212.826	591.958	1395.45	214.309	525.13	1244.43	97.4961	773.625	1289.24	367.71	717.655	1423	406.46	768.07	1243.24	404.582	818.47	1104.9	456.475	811.238	937.978	440.419	797.312	855.005	455.307	861.514	870.971	469.215	840.993	779.054
7495	0	279.796	475.939	1585.86	182.5	466.815	1588.23	291.465	626.834	1610.54	158.327	634.489	1611.22	195.182	697.31	1483.81	185.692	763.3	1227.59	214.054	579.658	1396.67	215.632	512.24	1246.2	98.5003	761.358	1290.25	369.126	705.161	1424.08	408.738	753.876	1243.94	407.393	802.973	1104.95	460.314	792.951	938.444	444.623	777.75	855.422	459.462	841.992	870.6	474.092	820.01	779.247
7496	0	280.925	464.099	1586.62	183.632	455.09	1589.61	293.104	615.143	1611.39	159.895	622.967	1612.14	196.576	685.313	1484.8	186.724	750.818	1228.76	215.193	567.5	1397.93	216.747	499.434	1247.76	99.6823	749.02	1291.88	370.366	692.596	1425.02	410.998	739.877	1244.57	410.193	787.304	1104.82	463.941	774.133	938.664	448.476	757.374	855.652	463.767	822.013	870.18	479.103	798.337	779.313
7497	0	282.027	452.209	1587.99	184.676	443.277	1591.17	294.216	603.276	1612.21	160.996	611.229	1613.04	197.876	673.451	1486.05	187.382	738.505	1229.99	216.528	555.267	1399.32	217.585	486.632	1249.41	100.61	736.961	1293.32	371.655	680.208	1425.95	413.142	725.69	1245.47	413.185	771.485	1104.88	467.665	754.807	939.198	452.671	736.733	856.591	468.139	801.523	869.632	484.478	775.753	779.732
7498	0	283.164	440.486	1589.31	185.777	431.637	1592.63	295.784	591.649	1613.06	162.47	599.591	1614.3	198.856	661.438	1487.1	188.14	726.221	1231.59	217.278	543.226	1400.73	218.335	474.964	1250.43	101.548	725.324	1294.89	372.906	667.673	1427.02	414.84	711.194	1246.12	416.131	755.582	1105.04	471.477	735.195	939.773	457.084	715.535	857.146	472.871	780.52	869.571	489.443	752.604	780.109
7499	0	284.241	428.679	1590.47	186.819	419.828	1594.06	296.95	579.79	1614.09	163.601	587.991	1615.51	200.161	649.602	1488.51	189.068	714.504	1233.14	218.082	531.262	1401.97	218.937	463.308	1251.45	102.284	713.653	1296.75	374.069	654.979	1428.2	417.17	697.038	1247.15	419.142	739.518	1105.16	475.291	715.125	940.522	461.677	694.226	858.611	477.539	759.019	869.37	494.656	728.835	780.844
7500	0	285.302	417.074	1591.83	188.02	408.212	1595.56	298.167	568.28	1614.83	164.814	576.323	1616.6	201.223	637.89	1489.6	189.935	703.011	1234.64	218.987	519.203	1403.17	219.281	451.839	1252.28	103.329	702.147	1298.34	375.267	642.538	1429.48	418.689	682.587	1247.79	422.333	723.651	1105.23	479.095	694.999	941.43	465.044	671.813	859.252	482.236	737.149	869.23	499.731	704.438	781.938
7501	0	286.357	405.564	1592.75	188.957	396.527	1596.92	298.884	556.604	1615.4	165.783	564.681	1617.65	202.266	626.059	1490.92	190.877	691.346	1236.36	219.559	507.385	1404.34	219.463	440.674	1253.17	104.208	690.893	1299.77	376.48	630.091	1430.49	420.603	668.281	1248.58	425.444	707.546	1105.35	482.901	674.466	942.434	469.334	649.676	860.79	487.051	714.911	869.289	504.969	679.709	783.059
7502	0	287.286	393.93	1593.86	189.865	384.992	1598.27	300.068	545.25	1616.33	166.746	553.137	1618.65	203.392	614.576	1491.91	192.078	680.009	1237.62	219.984	495.638	1405.5	219.511	429.427	1254.03	105.284	679.639	1301.34	377.489	617.527	1431.47	422.864	654.016	1249.66	428.517	691.449	1105.48	486.626	653.708	943.522	472.98	626.84	862.36	491.72	692.302	869.419	510.04	654.633	784.403
7503	0	287.947	382.382	1595.11	190.716	373.411	1599.36	300.778	533.767	1617	167.577	541.731	1619.53	204.221	602.937	1493.09	193.053	668.553	1238.73	220.357	484.031	1406.56	219.406	418.52	1254.66	106.508	668.684	1302.67	378.394	604.985	1432.46	424.558	639.675	1250.09	431.403	675.026	1105.26	490.161	632.801	944.608	477.049	604.287	864.046	496.407	669.437	869.837	515.162	629.144	786.083
7504	0	288.709	371.009	1595.96	191.655	361.921	1600.53	301.619	522.439	1617.77	168.427	530.084	1620.63	205.344	591.665	1494.16	194.495	657.448	1240.43	220.754	472.475	1407.88	219.156	406.902	1255.92	107.722	657.772	1304.11	379.444	592.802	1433.61	426.55	625.26	1251.08	434.656	658.722	1105.61	493.72	611.643	946.033	480.726	581.111	866.25	500.985	646.358	870.444	520.023	603.102	788.357
7505	0	289.675	359.629	1596.89	192.426	350.384	1601.69	302.659	511.055	1618.99	169.286	518.662	1621.67	205.985	580.107	1495.49	195.902	646.5	1241.91	221.298	460.866	1409.02	219.002	395.38	1257.05	108.821	646.888	1305.52	380.404	580.616	1434.79	428.449	610.771	1251.93	437.781	642.349	1105.92	497.175	590.464	947.887	484.336	558.185	868.718	505.635	623.08	871.545	524.932	577.079	791.112
7506	0	290.457	348.275	1597.96	193.132	338.911	1602.91	303.204	499.535	1620.03	169.755	507.103	1622.83	206.906	568.901	1496.58	197.031	635.428	1243.37	221.494	449.597	1410.45	218.925	383.637	1258.42	110.128	636.274	1306.97	381.4	568.307	1436.3	431.018	596.327	1253.4	441.133	626.118	1106.65	500.641	569.119	950.097	487.961	535.105	871.615	509.776	599.61	872.54	530.141	551.426	794.364
7507	0	291.099	337.099	1598.93	193.89	327.425	1603.99	303.889	488.201	1620.96	170.641	495.714	1623.91	207.579	557.456	1498.04	198.645	624.669	1245.05	222.089	438.212	1411.57	218.965	372.4	1259.59	111.374	625.677	1308.38	382.283	556.354	1437.83	432.649	581.791	1254.46	444.207	609.586	1107.27	503.852	547.734	952.433	491.716	512.248	874.992	514.022	576.208	874.118	534.619	525.1	798.453
7508	0	291.864	325.516	1600.01	194.438	316.003	1605.06	304.713	476.917	1622.39	171.002	484.177	1625.04	208.494	546.23	1499.41	200.084	614.022	1246.81	222.594	426.799	1412.85	219.11	361.14	1260.79	112.705	614.856	1310.09	383.043	544.31	1439.32	434.09	566.826	1255.87	447.244	593.05	1107.94	507.093	526.338	955.385	494.634	489.047	879.026	518.148	552.706	876.251	538.827	498.813	802.54
7509	0	292.448	314.273	1601.02	195.029	304.666	1606.01	304.695	465.248	1623.32	171.643	472.82	1626.27	209.152	534.8	1500.76	201.159	603.021	1248.11	223.11	415.486	1414.18	219.233	350.128	1262.04	113.957	604.344	1311.44	383.925	532.375	1441.09	435.938	552.554	1257.49	450.252	576.693	1108.95	509.917	505.046	958.322	497.483	465.864	882.914	522.121	529.158	878.767	542.828	472.568	807.114
7510	0	292.795	303.048	1601.9	195.559	293.292	1607.04	305.641	454.153	1624.56	172.031	461.433	1627.31	210.07	523.699	1501.99	202.582	592.413	1249.92	223.584	404.313	1415.46	219.938	339.374	1263.05	115.12	593.957	1312.85	384.75	520.546	1442.37	437.955	538.585	1258.83	453.262	560.418	1109.93	512.737	483.741	961.51	500.18	442.751	887.117	525.713	505.436	881.279	546.754	446.267	812.171
7511	0	293.387	291.724	1602.79	196.005	281.999	1607.87	306.001	442.589	1625.65	172.628	450.193	1628.09	210.769	512.3	1503.25	203.545	581.814	1250.94	224.177	393.18	1416.47	220.562	328.13	1264.3	116.278	583.193	1314.29	385.579	508.534	1443.94	439.539	524.213	1260.31	456.242	544.162	1111.05	515.476	462.574	964.833	502.94	419.646	891.464	529.391	481.807	884.313	550.259	420.372	817.41
7512	0	293.893	280.373	1603.82	196.531	270.837	1608.59	306.545	431.56	1626.45	173.073	438.92	1629.14	211.579	501.201	1504.24	204.268	570.801	1252.08	224.825	381.982	1417.44	221.288	317.349	1265.31	117.478	572.489	1315.61	386.695	496.787	1445.51	441.57	510.114	1261.84	459.137	528.105	1112.15	518.345	441.476	968.734	505.602	396.482	896.843	533.03	458.322	887.674	553.618	394.564	823.026
7513	0	294.326	269.292	1604.69	196.912	259.641	1609.28	306.96	420.195	1627.52	173.853	427.818	1629.84	212.569	490.009	1505.41	205.509	559.991	1253.54	225.592	370.75	1418.5	221.954	306.269	1266.29	118.576	562.025	1316.8	387.616	484.882	1446.98	443.512	496.165	1263.26	462.249	511.856	1113.65	520.962	420.587	972.718	508.087	374.226	901.995	536.436	434.805	891.295	556.563	368.792	828.878
7514	0	294.664	258.134	1605.2	197.207	248.455	1609.73	307.564	408.911	1628.45	174.146	416.669	1630.49	213.308	478.854	1506.08	206.6	549.573	1254.45	226.346	359.679	1419.32	222.637	295.456	1267.03	119.502	551.316	1317.62	388.522	473.273	1448.02	445.459	482.069	1264.69	465.161	496.404	1114.43	523.621	399.854	976.789	510.365	351.884	907.239	539.868	411.49	895.128	559.23	343.368	834.833
7515	0	295.014	246.891	1605.58	197.563	237.4	1610.04	307.963	397.505	1629.05	174.612	405.649	1630.71	214.282	467.838	1506.76	207.685	538.847	1255.55	226.669	348.779	1420.17	223.491	284.548	1267.53	120.587	540.536	1318.65	389.413	461.275	1449.18	447.306	468.226	1265.88	468.209	480.945	1115.58	526.115	379.426	980.846	512.43	329.373	912.726	543.553	388.841	899.219	561.748	318.146	840.877
7516	0	295.493	235.602	1606.26	197.892	226.273	1610.13	308.421	386.302	1629.5	175.269	394.615	1631.13	215.154	456.578	1507.45	208.682	527.953	1256.32	227.619	337.62	1420.59	224.331	273.585	1267.95	121.696	530.053	1319.09	390.457	449.71	1450.09	449.438	454.594	1267.1	471.274	465.174	1116.51	528.574	359.117	985.07	514.64	307.323	918.088	546.435	365.526	903.307	564.045	293.182	847.221
7517	0	295.843	224.514	1606.61	198.268	215.212	1610.38	309.238	375.079	1630.1	175.904	383.564	1631.26	216.128	445.515	1507.86	210.047	517.384	1257.29	228.397	326.543	1420.93	225.1	262.757	1268.24	122.965	519.395	1319.86	391.443	437.933	1451.12	451.416	440.881	1268.21	474.163	449.711	1117.25	530.985	339.013	989.233	516.577	285.778	923.551	549.383	342.895	907.531	566.244	268.706	853.562
7518	0	295.999	213.055	1607.02	198.625	204.229	1610.45	309.843	363.706	1630.44	176.534	372.655	1631.19	217.071	434.476	1507.97	211.207	506.799	1257.6	229.082	315.453	1420.98	225.773	252.04	1268.29	123.929	508.556	1320.2	392.479	426.352	1451.49	453.648	427.345	1269.01	477.438	434.261	1118.07	533.122	319.283	993.195	518.542	264.179	929.157	552.21	320.49	911.476	568.193	244.587	859.983
7519	0	296.607	201.931	1606.9	198.919	193.265	1610.23	310.536	352.589	1630.26	177.338	361.809	1631.07	217.937	423.338	1507.99	212.243	495.867	1257.53	229.193	303.846	1421.36	226.388	241.118	1268.33	124.94	497.789	1320.06	393.463	414.8	1451.61	455.57	413.951	1269.58	480.343	418.938	1118.35	535.307	299.768	997.029	520.251	242.989	934.461	554.852	298.394	915.458	570.019	220.679	866.216
7520	0	296.776	190.938	1606.6	199.18	182.232	1610.1	311.148	341.222	1630.15	177.973	350.881	1630.98	218.883	412.241	1507.85	213.098	484.842	1257.49	230.06	292.638	1421.24	227.09	230.427	1268.02	126.227	487.126	1319.95	394.309	403.25	1451.65	457.357	400.757	1269.79	483.421	403.564	1118.75	537.32	280.554	1000.49	521.911	222.352	939.723	557.174	276.694	919.138	571.549	197.397	872.495
7521	0	297.004	179.396	1606.5	199.463	171.262	1609.91	311.912	329.933	1629.77	178.737	339.805	1630.22	219.936	401.145	1507.37	214.373	474.23	1257.41	230.758	281.502	1420.84	227.702	219.688	1267.55	127.417	476.12	1319.89	395.245	391.901	1451.6	459.227	387.717	1269.84	486.203	388.269	1118.75	539.258	261.568	1004.1	523.312	201.95	944.936	559.371	255.304	922.865	573.108	174.597	878.677
7522	0	297.595	168.169	1606.14	199.826	160.261	1609.49	312.71	318.747	1629.21	179.662	328.875	1629.45	220.806	389.883	1507.1	215.436	463.457	1257.1	231.467	270.271	1420.2	228.32	208.778	1266.93	128.398	465.14	1319.45	396.133	380.335	1451.36	460.899	374.706	1269.84	489.071	373.073	1118.94	541.035	242.899	1007.57	524.484	181.94	949.853	561.341	234.355	926.462	574.463	152.107	884.48
7523	0	297.989	156.929	1605.7	200.355	149.135	1609	313.578	307.457	1628.63	180.488	318.013	1628.94	221.694	378.579	1506.56	216.074	452.256	1256.57	232.959	259.617	1419.16	229.101	197.795	1266.3	129.305	454.059	1318.94	396.96	368.689	1450.97	462.665	361.603	1270.05	491.761	357.834	1118.93	542.784	224.42	1011.13	526.058	162.362	954.685	563.42	213.876	930.321	575.794	130.329	890.665
7524	0	298.598	145.572	1605.45	200.647	138.068	1608.67	314.291	295.983	1627.92	181.311	306.971	1628.32	222.524	367.411	1505.88	217.008	441.142	1256.19	233.774	248.339	1418.67	230.036	186.815	1265.47	130.396	442.925	1318.51	397.944	357.337	1450.72	464.361	348.691	1270.19	494.406	342.903	1119.17	544.32	206.437	1014.41	527.38	143.18	959.468	565.304	193.67	934.154	576.874	108.933	896.923
7525	0	298.682	134.294	1604.75	201.037	126.928	1608.04	315.12	284.588	1627.09	182.178	295.852	1627.47	223.239	356.016	1505.17	218.007	430.201	1255.68	234.702	236.952	1417.78	230.925	175.641	1264.48	130.998	431.485	1317.67	398.825	345.877	1450.22	465.775	335.792	1270	496.712	327.901	1119.08	545.685	188.663	1017.36	528.311	124.403	963.792	566.892	174.042	937.673	578.013	88.6537	901.986
7526	0	299.349	122.493	1603.38	201.445	115.78	1607.3	316.024	273.301	1626.26	183.095	284.815	1626.55	223.994	344.61	1504.31	218.472	418.859	1254.88	235.48	225.512	1416.78	231.837	164.522	1263.43	131.829	420.125	1316.83	399.31	334.42	1449.22	466.895	322.901	1269.41	498.876	313.054	1118.91	546.944	171.353	1020.29	529.202	106.144	967.922	568.332	154.714	941.059	578.778	68.408	907.35
7527	0	299.852	111.202	1603.05	201.862	104.559	1606.6	316.903	261.633	1625.64	183.887	273.829	1625.72	224.813	333.235	1503.25	219.112	407.494	1254.06	236.404	214.006	1415.79	232.835	153.207	1262.56	132.554	408.443	1316.01	400.243	323.04	1448.48	468.333	309.865	1269.07	501.039	298.531	1118.8	548.131	154.271	1023.03	530.123	88.1101	972.137	569.743	135.926	944.276	579.533	48.7023	912.463
7528	0	300.454	99.6974	1602.37	202.398	93.2664	1605.88	317.576	250.134	1624.46	185.025	262.672	1625.13	225.454	321.619	1502.28	219.723	396.084	1252.87	237.294	202.547	1414.65	233.944	141.708	1261.42	133.159	396.709	1314.65	401.053	311.499	1447.55	469.653	297.089	1268.49	502.916	284.114	1118.27	549.164	137.71	1025.43	530.86	70.7164	975.801	570.971	117.645	947.179	580.299	29.6082	917.578
7529	0	300.911	88.2105	1601.51	202.875	81.9671	1605.2	318.378	238.774	1623.22	185.634	251.26	1623.73	226.189	310.016	1501.11	220.08	384.458	1251.73	238.148	190.922	1413.43	235.074	130.224	1260.09	133.867	385.004	1313.4	401.713	300.136	1446.55	470.712	284.317	1267.8	504.629	269.904	1117.73	550.317	121.49	1027.86	531.587	53.7505	979.179	572.031	99.8576	949.832	580.932	11.2713	921.789
7530	0	301.416	76.7892	1600.64	203.413	70.4847	1604.26	319.082	227.34	1621.96	186.512	239.85	1622.45	226.982	298.425	1499.87	220.577	373.03	1250.29	239.272	179.295	1412.02	236.173	118.577	1259.04	134.369	372.948	1311.95	402.405	288.642	1445.52	471.847	271.421	1266.97	506.185	255.793	1117.15	551.139	105.512	1029.8	532.257	37.1093	982.308	573.016	82.3891	952.176	581.416	-6.55272	925.831
7531	0	301.972	65.2109	1599.76	203.916	58.9256	1603.3	319.658	215.533	1620.93	187.074	228.569	1621.37	227.489	286.664	1498.53	220.886	361.007	1249.02	239.965	167.592	1410.82	237.231	106.72	1257.61	134.973	360.92	1310.44	403.1	277.135	1444.39	472.793	258.766	1266.01	507.323	241.859	1116.28	551.863	89.9351	1031.42	532.762	21.0364	985.193	574.028	65.5229	954.428	581.825	-24.0257	929.556
7532	0	302.424	53.5883	1598.95	204.381	47.4953	1602.53	320.294	204.068	1619.89	187.789	217.063	1620.47	228.114	274.924	1497.44	221.356	349.508	1247.58	240.424	155.845	1409.7	238.133	95.0477	1256.43	135.291	348.842	1309.17	403.65	265.6	1443.26	473.585	246.2	1265.06	508.833	228.154	1115.68	552.574	74.8032	1033.02	533.064	5.20459	987.387	574.769	49.0289	956.368	582.147	-40.8449	932.672
7533	0	303.029	41.9533	1598.31	204.864	35.9474	1601.8	321.006	192.642	1618.76	188.338	205.455	1619.03	228.572	263.048	1496.14	221.321	337.49	1245.96	241.298	143.928	1408.29	239.2	82.9391	1255.27	135.742	336.639	1307.79	404.102	254.164	1441.71	474.345	233.873	1263.96	509.958	214.559	1114.73	553.145	59.9457	1034.06	533.473	-10.2056	989.564	575.465	33.0849	957.938	582.409	-57.2242	935.55
7534	0	303.667	30.2702	1597.45	205.522	24.1653	1600.98	321.428	180.801	1617.65	188.932	193.859	1617.64	228.968	251.269	1494.82	221.975	325.731	1244.95	242.372	131.888	1407.1	240.183	70.8297	1253.85	136.096	324.432	1306.39	404.802	242.635	1440.47	475.146	221.459	1262.89	510.865	201.161	1113.77	553.744	45.4465	1034.93	533.886	-25.1976	991.163	576.053	17.621	959.241	582.645	-72.9376	937.847
7535	0	304.298	18.7386	1596.83	206.019	12.549	1600.06	321.935	169.176	1616.63	189.289	182.293	1616.71	229.502	239.423	1493.67	222.028	313.372	1243.85	243.03	119.866	1405.72	241.144	58.6998	1252.87	136.25	311.939	1305.08	405.27	231.049	1439.41	475.735	209.499	1261.81	511.43	187.814	1112.74	554.065	31.2479	1035.58	534.154	-39.716	992.394	576.511	2.69775	960.467	582.905	-88.1192	939.939
7536	0	304.81	6.91523	1595.94	206.526	0.75074	1599.11	322.489	157.518	1615.86	189.538	170.551	1615.87	229.88	227.425	1492.55	222.21	301.256	1242.7	243.312	107.923	1404.6	242.104	46.2681	1251.8	136.653	299.522	1303.78	405.609	219.554	1438.19	475.679	197.471	1260.76	512.49	175.139	1111.94	554.378	17.5256	1035.95	534.245	-53.712	993.308	576.788	-11.5976	960.88	582.995	-102.753	941.317
7537	0	305.139	-4.71477	1594.99	207.005	-11.1123	1598.32	322.561	145.618	1614.96	189.776	158.7	1615.31	230.166	215.488	1491.25	222.069	288.705	1241.13	244.283	95.7315	1403.58	242.976	33.7876	1250.73	136.652	286.921	1302.24	405.97	208.054	1436.86	476.361	185.352	1259.44	512.717	162.254	1110.71	554.544	4.14431	1035.64	534.395	-67.3319	993.608	576.967	-25.7377	961.115	583.071	-116.782	942.012
7538	0	305.793	-16.4583	1594.4	207.385	-22.884	1597.49	323.002	134.022	1614.1	190.128	146.765	1613.75	230.492	203.414	1490.17	222.283	276.203	1239.8	244.93	83.4701	1402.44	243.729	21.2119	1250.2	136.942	273.953	1300.88	406.146	196.291	1435.26	476.57	173.579	1257.91	512.734	149.646	1109.28	554.661	-8.85626	1035.2	534.558	-80.4658	993.575	576.953	-38.9236	960.606	583.106	-130.276	942.194
7539	0	306.21	-28.2265	1593.68	207.837	-34.8731	1596.62	323.109	122.339	1612.95	190.394	134.983	1612.76	230.851	191.439	1488.87	222.281	263.735	1238.16	245.441	71.3584	1401.48	244.582	8.55149	1249.44	137.128	261.333	1299.35	406.509	184.674	1434.12	476.628	161.854	1256.59	513.037	137.239	1108.12	554.722	-21.4904	1034.6	534.592	-93.2916	993.408	576.865	-51.7897	959.86	583.199	-143.208	942.087
7540	0	306.504	-39.9961	1592.94	208.272	-46.7606	1595.8	323.086	110.54	1611.89	190.685	123.104	1611.29	230.859	179.452	1487.56	222.162	250.624	1236.67	245.934	59.0467	1400.65	245.273	-4.00306	1248.85	137.169	248.507	1297.96	406.714	173.075	1432.9	476.574	150.108	1255.28	512.98	125.229	1106.71	554.785	-33.6442	1033.75	534.462	-105.533	992.559	576.696	-64.2629	958.911	583.055	-155.644	941.428
7541	0	306.359	-51.8927	1592.52	208.516	-58.5867	1594.91	323.443	98.9734	1611.06	190.814	111.216	1610.3	231.228	167.283	1486.46	221.968	237.568	1235.18	246.526	46.5326	1399.88	246	-16.7417	1248.19	137.07	235.486	1296.49	406.894	161.095	1431.64	476.627	138.289	1253.85	512.972	113.467	1105.33	554.699	-45.5881	1032.33	534.422	-117.474	991.419	576.523	-76.1819	957.505	582.924	-167.562	940.258
7542	0	306.882	-63.5353	1591.78	208.888	-70.5435	1593.93	323.498	86.9948	1610.32	191.009	99.3268	1609.11	231.294	155.118	1485.26	222.083	224.535	1233.74	246.644	34.1862	1398.73	246.233	-29.6806	1247.71	136.951	222.645	1294.99	407.026	149.102	1430.21	476.762	126.58	1252.49	512.795	101.961	1104.02	554.495	-57.0742	1030.94	534.119	-128.894	989.755	576.336	-87.5692	955.861	582.632	-178.988	938.526
7543	0	307.315	-75.3216	1591.12	209.157	-82.3643	1593.12	323.708	75.2954	1609.61	191.044	87.4977	1608.01	231.434	142.987	1483.95	221.959	211.619	1231.77	246.545	21.7606	1398.16	246.44	-42.6544	1246.87	136.907	209.677	1293.86	407.009	136.864	1428.72	477.026	114.933	1251.23	512.616	90.6861	1102.56	554.249	-68.2155	1029.03	533.918	-140.031	987.733	576.154	-98.5326	954.065	582.082	-190.102	935.955
7544	0	307.563	-87.1236	1590.65	209.367	-94.2573	1592.84	323.85	63.6522	1608.84	191.063	75.5922	1607.37	231.367	130.984	1482.78	221.581	198.116	1230.29	246.998	9.14832	1397.33	246.284	-55.6236	1246.45	136.529	196.736	1292.53	407.072	124.747	1427.57	476.779	103.219	1249.74	512.172	79.6088	1100.96	553.898	-79.0589	1026.57	533.657	-150.685	985.342	575.821	-109.097	951.917	581.423	-200.784	933.123
7545	0	308.074	-99.1252	1590.54	209.812	-106.341	1592.53	323.973	51.6768	1608.36	191.284	63.6108	1606.97	231.421	118.784	1481.72	221.495	184.641	1229.04	247.072	-3.33998	1396.61	246.313	-69.022	1246.14	136.378	183.545	1291.49	407.184	112.449	1426.45	475.829	91.4241	1248.09	511.581	68.5954	1099.14	553.655	-89.5996	1024.03	533.393	-161.003	982.349	575.437	-119.243	949.236	581.146	-210.481	929.585
7546	0	308.543	-111.058	1590.49	210.327	-118.387	1592.61	324.136	39.9358	1607.95	191.322	51.5605	1606.64	231.052	106.596	1480.87	221.794	171.313	1227.91	246.943	-15.9563	1396.34	246.046	-82.5633	1246.16	136.463	170.596	1290.27	407.215	100.237	1425.17	476.284	79.9452	1247	510.944	57.7334	1097.63	553.258	-99.6239	1021.23	533.038	-170.806	978.987	574.871	-128.674	946.007	580.828	-219.775	925.788
7547	0	308.821	-122.727	1590.49	210.723	-130.513	1593.1	324.259	28.0817	1607.72	191.493	39.3297	1606.5	231.546	94.2352	1480.63	222	157.957	1226.89	246.95	-28.6686	1396.34	245.637	-96.0915	1246.43	136.536	157.62	1289.23	407.151	87.9004	1424.2	475.34	68.3574	1245.59	510.079	47.0901	1096.19	552.675	-109.234	1018.09	532.652	-180.118	975.252	574.137	-137.515	942.492	580.555	-228.345	921.701
7548	0	309.548	-134.882	1591.01	211.112	-142.808	1593.83	324.218	16.0609	1607.61	191.591	27.1716	1606.82	231.283	81.7936	1480.25	222.306	144.425	1226.08	246.512	-41.4809	1396.71	245.225	-109.736	1246.97	136.573	144.389	1288.56	407.119	75.3362	1423.59	474.908	57.0031	1244.68	508.903	36.6157	1094.87	551.993	-118.47	1014.59	532.165	-188.938	971.354	573.084	-145.639	938.522	580.04	-236.248	916.925
7549	0	309.763	-147.074	1591.69	211.556	-155.192	1594.65	324.387	4.08974	1607.84	191.874	14.6946	1606.76	231.279	69.2806	1480.27	222.733	131.242	1225.52	246.079	-53.923	1397.15	244.692	-123.29	1247.88	137.138	131.54	1288.56	407.181	62.6347	1423.26	474.148	45.7061	1244.06	507.395	26.3157	1093.79	551.192	-127.279	1011.22	531.452	-197.258	966.798	571.806	-153.1	934.364	579.547	-243.387	911.855
7550	0	309.948	-159.287	1592.57	212.049	-167.707	1595.72	324.517	-8.18568	1608.38	192.034	2.21026	1607.49	231.72	56.5342	1480.86	223.778	118.381	1226.07	245.978	-66.7792	1398.01	244.24	-136.859	1249.14	137.891	118.497	1288.71	407.432	49.7564	1423.55	473.235	34.3887	1243.69	505.89	16.1928	1093.18	550.222	-135.563	1007.74	530.642	-204.886	962.163	570.428	-159.911	930.106	578.974	-249.63	906.566
7551	0	310.651	-171.542	1593.53	212.462	-180.11	1596.93	324.737	-20.1735	1608.88	192.123	-10.1536	1608.57	231.968	43.8335	1481.55	224.532	105.267	1226.71	245.972	-79.6394	1398.72	243.942	-150.305	1250.32	138.593	105.62	1288.97	407.724	36.5111	1424.13	472.849	23.3774	1243.77	504.102	6.24303	1092.9	549.106	-143.505	1004.2	529.809	-211.96	957.55	568.966	-166.121	925.954	578.154	-255.301	900.783
7552	0	311.163	-184.043	1594.7	212.985	-192.639	1598.15	324.813	-32.7028	1609.54	192.261	-22.6114	1608.9	232.695	31.0026	1482.37	225.737	92.6011	1227.36	246.087	-92.3905	1399.42	243.78	-163.597	1251.53	139.653	92.8502	1289.74	408.132	23.2586	1424.89	471.949	11.839	1243.8	502.448	-3.46862	1092.89	547.835	-150.875	1000.64	528.853	-218.462	952.423	567.422	-171.69	921.807	577.315	-260.077	894.971
7553	0	311.517	-196.363	1596.13	213.301	-205.114	1599.34	325.26	-44.924	1610.38	192.517	-35.0956	1609.77	233.173	18.1731	1483.07	226.742	80.1082	1228.95	246.342	-105.146	1400.17	243.663	-176.681	1252.39	140.503	80.0112	1290.53	408.779	9.99943	1425.99	471.41	0.321167	1244.5	500.828	-12.9969	1093.44	546.426	-158.006	997.219	527.552	-224.335	947.251	565.815	-176.5	917.96	575.997	-264.402	888.728
7554	0	311.979	-208.722	1597.29	213.651	-217.629	1600.24	325.627	-57.3369	1611.4	192.867	-47.5155	1610.31	233.79	5.34038	1484.01	227.544	67.7863	1229.9	246.768	-117.888	1400.79	243.721	-189.327	1253.06	141.439	67.427	1291.58	409.3	-3.15869	1427.06	471.242	-11.5923	1245.07	499.171	-22.5352	1093.85	544.931	-164.734	993.77	526.157	-229.809	942.108	564.087	-181.166	914.013	574.545	-268.035	882.326
7555	0	312.278	-221.302	1598.26	214.054	-229.973	1601.38	326.003	-69.9538	1612.1	193.235	-59.9087	1610.78	234.386	-7.29834	1484.79	228.55	55.4638	1231.07	247.408	-130.557	1401.61	244.215	-201.584	1253.31	142.331	54.9393	1292.6	410.07	-16.0614	1427.89	470.904	-23.6214	1245.45	497.43	-31.8601	1094.15	543.285	-171.085	989.985	524.43	-234.937	936.486	562.02	-185.268	909.466	572.777	-271.166	875.587
7556	0	312.97	-233.866	1599.4	214.356	-242.434	1602.26	326.629	-82.349	1612.87	193.89	-72.3589	1611.33	234.726	-19.8246	1485.5	228.987	43.1053	1231.63	248.263	-142.83	1402.23	245.005	-213.617	1253.65	142.994	42.4139	1293.39	410.722	-28.6802	1428.7	470.935	-35.1396	1245.72	495.732	-41.2721	1094.32	541.517	-177.263	985.802	522.678	-239.433	930.87	559.746	-189.031	904.999	570.673	-273.573	868.183
7557	0	313.324	-246.472	1600.72	214.816	-255.035	1602.99	327.241	-95.0778	1613.94	194.807	-84.7556	1611.99	235.914	-32.3766	1486.93	229.828	31.3429	1232.95	249.252	-155.144	1402.92	246.195	-225.553	1253.92	143.737	30.1159	1294.61	411.488	-40.8474	1429.81	470.784	-47.0076	1246.39	494.22	-50.663	1094.87	539.85	-183.181	982.082	520.562	-243.682	925.027	557.53	-192.322	900.556	568.31	-275.527	861.081
7558	0	313.717	-259.02	1601.92	215.497	-267.257	1604.13	328.12	-107.593	1615.23	195.551	-97.0339	1612.77	236.502	-44.822	1487.78	230.036	19.2934	1234.02	250.398	-167.335	1403.74	247.754	-237.116	1254.45	143.997	17.6472	1295.71	412.368	-52.7282	1431.01	470.925	-58.3749	1247.21	492.654	-60.1444	1095.33	537.979	-188.632	978.365	518.246	-247.233	919.37	555.13	-195.177	896.374	565.679	-276.92	853.981
7559	0	314.513	-271.415	1602.68	216.042	-279.671	1604.83	328.849	-120.284	1616.29	196.323	-109.355	1613.55	236.898	-57.1428	1488.63	230.506	7.21117	1235.25	251.637	-179.382	1404.48	249.43	-248.692	1254.96	144.605	5.54273	1297.22	413.116	-64.4859	1432.02	470.908	-69.4786	1247.82	491.422	-69.5217	1096.1	535.93	-194.051	974.585	515.827	-250.345	913.47	552.568	-197.626	892.192	562.759	-277.689	846.946
7560	0	314.546	-284.112	1603.83	216.612	-292.159	1605.38	329.743	-132.892	1617.5	197.402	-121.775	1614.73	237.717	-69.5115	1489.97	230.808	-4.54366	1236.49	252.948	-191.432	1405.19	251.334	-260.223	1255.74	144.554	-6.71671	1298.4	413.891	-75.9822	1432.88	470.81	-80.4201	1248.32	490.334	-78.9226	1097.03	533.717	-198.629	970.301	513.033	-252.579	907.783	549.971	-199.693	888.336	559.532	-277.974	839.956
7561	0	315.377	-296.678	1604.98	217.311	-304.476	1606.15	330.939	-145.308	1618.91	198.456	-134.21	1615.59	238.578	-81.6631	1491.29	230.759	-16.4555	1237.88	254.174	-203.42	1406.07	253.333	-271.953	1256.54	144.761	-18.7538	1299.85	414.764	-87.2751	1434.07	470.922	-90.9597	1249.12	489.313	-88.1637	1097.96	531.401	-203.306	966.633	510.184	-254.632	902.437	547.151	-201.451	884.868	556.071	-277.769	833.172
7562	0	316.325	-309.239	1606	218.546	-316.373	1607.25	331.938	-157.98	1620.3	199.551	-146.474	1616.94	239.663	-93.9139	1492.78	230.791	-28.3179	1240	255.554	-215.264	1407.21	255.296	-283.652	1257.31	144.905	-31.0796	1301.7	415.641	-98.4948	1435.37	471.416	-101.278	1250.23	488.269	-97.3981	1098.82	529.267	-207.656	963.712	507.215	-256.363	897.284	544.337	-202.71	881.532	552.256	-276.985	826.784
7563	0	317.736	-321.499	1606.84	219.447	-329.05	1608.07	333.091	-170.632	1621.84	200.666	-158.781	1618.29	240.327	-106.263	1493.84	231.003	-40.0479	1241.78	257.053	-227.158	1408.42	257.073	-295.265	1258.36	145.005	-43.3397	1303.19	416.554	-109.731	1436.47	471.563	-111.413	1251.19	487.39	-106.319	1099.95	527.154	-211.561	960.9	504.172	-257.169	891.932	541.807	-203.482	878.727	548.576	-275.814	820.857
7564	0	318.402	-334.077	1607.98	220.451	-341.545	1608.86	334.379	-182.989	1623.05	201.958	-171.165	1619.55	241.372	-118.411	1495.55	230.943	-51.8301	1243.21	258.396	-239.051	1409.58	258.602	-306.884	1259.57	145.086	-55.6357	1304.65	417.367	-120.94	1437.57	471.67	-121.532	1251.91	486.527	-115.048	1101.01	524.888	-215.232	958.183	501.611	-257.974	887.704	538.669	-204.523	876.092	544.562	-274.239	815.06
7565	0	319.847	-346.483	1608.77	221.596	-353.297	1609.81	335.7	-195.31	1624.3	203.223	-183.343	1620.78	242.485	-130.526	1497.07	231.181	-63.4705	1244.87	259.645	-250.944	1410.61	260.038	-318.217	1260.7	145.288	-67.2598	1306.44	418.293	-132.163	1438.58	471.601	-131.586	1252.59	485.298	-123.467	1101.72	522.464	-218.517	955.733	498.583	-258.875	884.219	535.679	-205.037	873.68	540.828	-271.722	809.688
7566	0	320.875	-358.874	1609.69	222.836	-365.323	1610.59	337.01	-207.769	1625.58	204.694	-195.74	1621.83	243.542	-142.748	1498.35	231.053	-75.1467	1246.11	260.883	-262.683	1411.68	261.34	-329.703	1261.57	145.7	-79.3423	1308.35	419.098	-143.464	1439.39	471.515	-141.665	1253.04	483.824	-131.595	1102.52	520.212	-221.716	953.632	495.831	-259.519	880.837	532.842	-205.552	872.001	536.986	-269.553	804.877
7567	0	322.345	-371.044	1610.32	224.115	-377.699	1611.18	338.133	-220.245	1626.38	206.023	-207.986	1622.7	244.569	-154.983	1499.6	231.105	-86.8716	1247.35	262.065	-274.545	1412.72	262.358	-341.05	1262.32	145.691	-91.5759	1309.79	419.96	-154.818	1440.26	471.273	-151.65	1253.48	482.294	-139.492	1103.31	517.995	-224.567	951.845	493.191	-260.194	877.852	530.088	-205.826	870.451	533.569	-267.058	800.625
7568	0	323.508	-383.35	1611.28	225.558	-389.817	1611.75	339.349	-232.531	1627.27	207.312	-220.262	1623.84	245.579	-167.068	1500.96	231.317	-98.4252	1248.72	263.326	-286.412	1413.69	263.141	-352.335	1263.11	146.396	-103.456	1311.77	420.695	-166.207	1440.93	470.77	-161.34	1253.86	480.368	-146.95	1104.01	515.723	-227.379	950.083	491.176	-260.648	875.028	527.243	-206.105	869.438	530.173	-264.422	796.988
7569	0	324.715	-395.588	1612.08	226.855	-402.164	1612.55	340.828	-244.646	1628.24	208.704	-232.574	1624.59	246.446	-179.181	1501.91	231.54	-110.133	1250.18	264.517	-298.258	1414.49	264.128	-363.959	1263.64	146.902	-115.419	1313.66	421.619	-177.571	1441.71	470.535	-170.991	1254.27	478.43	-154.089	1104.71	513.682	-229.938	949.164	488.347	-261.382	873.232	524.572	-206.325	868.719	526.948	-261.884	794.079
7570	0	326.262	-407.825	1612.62	228.24	-414.351	1613.31	342.156	-256.818	1628.85	209.903	-244.771	1625.15	247.316	-191.466	1502.67	231.68	-121.802	1251.55	265.532	-310.096	1415.15	264.669	-375.435	1264.13	146.847	-127.42	1314.85	422.392	-189.068	1442.15	470	-180.427	1254.42	476.262	-161.142	1105.31	511.345	-232.456	947.842	485.797	-261.892	871.288	521.758	-206.712	868.29	523.83	-259.36	791.473
7571	0	327.496	-419.894	1612.91	229.662	-426.491	1613.69	343.616	-268.895	1629.59	211.153	-256.945	1625.66	248.289	-203.649	1503.3	231.841	-133.494	1252.46	266.503	-321.969	1415.58	265.332	-387.102	1264.39	147.35	-139.4	1316.11	423.283	-200.683	1442.55	469.244	-189.681	1254.51	473.853	-168.251	1105.93	508.67	-235.167	946.377	483.291	-262.427	869.124	518.86	-206.827	867.98	520.745	-257.277	789.053
7572	0	328.686	-432.067	1613.17	231.002	-438.597	1613.83	344.735	-280.925	1629.79	212.26	-269.148	1625.98	249.157	-215.753	1504.11	231.883	-145.087	1253.2	267.396	-333.896	1415.95	265.928	-398.902	1264.73	147.53	-151.57	1317.1	424.055	-212.139	1442.73	468.203	-198.914	1254.28	471.744	-175.06	1106.59	505.926	-237.456	944.964	480.644	-263.07	866.056	516.009	-207.065	867.756	517.358	-255.288	786.534
7573	0	330.168	-444.15	1613.72	232.34	-450.762	1614.16	345.915	-292.983	1630.08	213.531	-281.404	1626	250.037	-227.902	1504.52	231.932	-157.211	1253.44	268.354	-345.877	1416.09	266.462	-410.731	1264.69	147.711	-163.621	1317.64	424.626	-223.702	1442.51	467.409	-207.583	1254.41	469.508	-181.978	1106.95	503.279	-240.015	943.902	477.384	-264.319	864.724	512.59	-207.477	867.601	514.3	-253.417	785.025
7574	0	331.624	-456.275	1613.82	233.762	-462.974	1614.15	346.996	-305.108	1630.07	214.701	-293.583	1625.95	250.907	-240.129	1504.84	232.299	-169.326	1253.74	269.399	-357.943	1416.05	266.975	-422.426	1264.47	148.207	-175.543	1318.34	425.389	-235.296	1442.44	466.645	-216.551	1253.98	467.219	-189.212	1107.13	500.625	-242.523	942.898	474.458	-265.011	863.461	508.992	-208.187	867.286	511.183	-251.698	783.555
7575	0	332.889	-468.319	1613.71	235.543	-475.283	1613.9	347.971	-317.262	1629.76	215.863	-305.882	1625.79	251.726	-252.498	1504.49	232.726	-181.372	1253.97	270.272	-370.065	1415.87	267.63	-433.887	1264.13	148.612	-187.618	1318.68	425.982	-247.012	1442.16	465.999	-225.447	1253.6	465.234	-196.492	1107.46	497.923	-245.365	941.842	471.569	-265.926	861.937	505.536	-208.804	866.986	507.783	-250.552	782.451
7576	0	334.08	-480.369	1613.56	236.51	-487.63	1613.82	348.941	-329.282	1629.38	216.858	-318.27	1625.49	252.583	-264.764	1504.77	232.844	-193.037	1253.97	271.053	-382.163	1415.47	267.979	-445.763	1263.92	148.669	-199.886	1318.73	426.649	-258.734	1441.64	465.192	-234.465	1253.2	463.497	-203.929	1107.89	495.092	-248.458	940.897	468.298	-267.19	860.896	501.872	-209.85	866.852	504.482	-249.696	781.375
7577	0	335.519	-492.44	1613.19	237.564	-499.86	1613.64	349.743	-341.549	1628.9	217.673	-330.529	1625.12	253.405	-277.144	1504.27	233.023	-205.178	1253.72	271.767	-394.326	1414.99	268.615	-457.522	1263.26	149.147	-211.842	1319.1	427.293	-270.62	1441.07	464.325	-243.697	1252.71	461.671	-211.653	1108.13	492.494	-251.704	940.017	464.996	-268.73	859.629	498.105	-211.25	866.811	500.942	-249.469	780.557
7578	0	336.526	-504.658	1612.65	238.694	-512.274	1613.12	350.742	-353.761	1628.26	218.696	-342.909	1624.39	254.287	-289.438	1504.2	233.563	-217.305	1253.42	272.521	-406.52	1414.51	268.967	-469.29	1262.11	149.6	-224.099	1318.86	427.983	-282.576	1440.21	464.069	-252.969	1252.47	459.898	-219.515	1108.15	489.851	-255.449	939.166	460.768	-269.794	859.069	494.594	-213.176	867.132	497.441	-249.519	779.788
7579	0	337.42	-517.058	1612.44	239.932	-524.687	1612.6	351.773	-365.921	1627.51	219.509	-355.277	1623.45	255.118	-301.842	1503.62	233.824	-229.683	1252.99	273.371	-418.849	1413.8	269.711	-481.04	1261.61	149.992	-236.248	1318.71	428.644	-294.639	1439.31	463.514	-262.649	1252.01	458.227	-227.467	1108.34	487.476	-259.385	938.708	458.001	-272.189	858.252	491.246	-215.47	867.387	493.937	-250.087	779.285
7580	0	338.756	-529.365	1611.86	240.92	-537.099	1612.12	352.766	-378.188	1626.64	220.572	-367.677	1622.64	255.866	-314.361	1502.84	234.412	-241.896	1252.53	274.067	-431.265	1412.89	270.247	-493.292	1260.67	150.254	-248.66	1318.07	429.608	-306.797	1438.53	463.159	-272.553	1251.55	456.768	-235.486	1108.68	485.248	-263.723	938.305	455.247	-275.176	857.525	488.18	-218.315	868.023	490.195	-250.512	779.258
7581	0	339.512	-541.955	1611.16	242.15	-549.384	1611.47	353.712	-390.491	1625.46	221.31	-380.056	1621.82	256.714	-326.894	1501.9	234.973	-254.152	1251.87	274.816	-443.659	1411.96	270.778	-505.467	1259.68	150.967	-260.882	1317.37	430.29	-319.17	1437.35	462.62	-282.766	1250.79	455.185	-243.805	1108.69	483.123	-268.416	937.774	453.587	-279.062	857.661	485.295	-221.713	868.384	486.487	-252.101	778.718
7582	0	340.403	-554.396	1610.13	242.67	-561.893	1611.01	354.586	-402.877	1624.02	222.255	-392.482	1620.35	257.662	-339.477	1500.99	235.679	-266.442	1250.88	275.464	-456.19	1410.79	271.217	-518.009	1258.39	151.684	-273.044	1316.54	431.106	-331.665	1436.16	462.426	-293.218	1250.03	453.743	-252.319	1108.49	481.183	-273.838	937.048	451.474	-283.389	857.174	482.512	-225.731	868.526	483.303	-254.134	778.08
7583	0	341.368	-566.961	1609.35	243.648	-574.53	1610.16	355.526	-415.347	1622.48	223.235	-405.102	1619.11	258.589	-352.145	1499.84	236.342	-278.745	1249.65	276.139	-468.779	1409.46	271.844	-530.312	1257.04	152.444	-285.329	1315.58	431.745	-344.465	1434.63	462.144	-303.941	1249.09	452.282	-261.259	1108.28	479.337	-279.615	936.504	449.389	-288.371	856.666	480.259	-230.165	869.259	480.07	-256.774	777.711
7584	0	342.147	-579.51	1607.93	244.488	-587.037	1609.21	356.473	-427.803	1620.7	224.235	-417.664	1617.7	259.45	-364.726	1498.47	237.37	-291.048	1248.68	276.81	-481.346	1408.16	272.263	-542.964	1255.7	153.182	-297.611	1314.8	432.638	-357.168	1433.39	462.06	-314.718	1248.17	451.243	-270.171	1108.18	477.827	-285.713	936.222	447.523	-293.833	856.124	477.784	-235.691	869.341	477.041	-260.069	777.257
7585	0	342.969	-592.078	1606.53	245.497	-599.689	1608.09	357.476	-440.391	1619.25	225.006	-430.107	1616.16	260.309	-377.517	1496.98	238.09	-303.306	1247.16	277.505	-493.906	1406.59	272.958	-555.399	1254.24	153.94	-309.982	1313.52	433.431	-369.986	1431.87	462.186	-325.606	1247.3	450.299	-279.524	1107.78	476.398	-292.513	935.676	446.254	-299.806	855.808	475.688	-241.511	869.627	474.103	-264.094	776.701
7586	0	344.038	-604.545	1605.23	246.498	-612.27	1606.98	358.131	-453.122	1617.09	225.901	-442.823	1614.85	261.07	-390.118	1495.76	239.273	-315.52	1246.16	278.265	-506.491	1405.07	273.505	-568.063	1252.46	154.843	-322.213	1312.24	434.492	-382.721	1430.76	462.319	-336.757	1246.39	449.553	-289.126	1107.41	474.664	-299.601	934.862	444.627	-306.604	855.042	473.817	-248.161	869.724	471.56	-269.006	776.375
7587	0	344.847	-617.083	1603.77	247.226	-624.935	1605.85	359.045	-465.612	1615.17	226.798	-455.456	1613.29	262.146	-402.793	1494.37	240.388	-327.739	1244.97	278.957	-519.166	1403.4	274.327	-580.55	1250.9	155.868	-334.473	1311.01	435.367	-395.527	1429.42	462.715	-347.976	1245.56	449.259	-298.983	1107.29	473.88	-307.525	934.572	443.538	-313.703	854.354	472.293	-255.286	869.603	469.36	-274.635	776.279
7588	0	345.779	-629.684	1602.15	247.966	-637.453	1604.69	359.94	-478.156	1613.29	227.515	-468.134	1612.29	262.778	-415.158	1492.85	241.616	-340.096	1243.41	279.559	-531.697	1401.87	274.861	-593.184	1249.16	156.887	-346.706	1309.4	436.344	-408.191	1428.03	463.029	-359.228	1244.55	448.833	-309.237	1106.9	473.099	-316.056	933.964	442.586	-321.787	853.91	471.066	-263.323	869.596	467.226	-281.048	775.775
7589	0	346.586	-642.296	1600.31	249.019	-650.098	1603.15	360.912	-490.756	1611.73	228.502	-480.689	1610.6	263.808	-427.608	1491.31	242.99	-352.628	1241.69	280.337	-544.217	1400.33	275.57	-605.826	1247.59	158.177	-358.94	1307.76	437.185	-420.932	1426.46	463.494	-370.634	1243.51	448.674	-319.776	1106.12	472.62	-324.944	933.152	442.199	-330.375	853.201	470.078	-271.636	869.231	465.619	-288.395	775.222
7590	0	347.477	-655.012	1598.57	249.97	-662.747	1601.71	361.804	-503.357	1609.94	229.403	-493.253	1609.39	264.739	-439.93	1489.6	244.569	-365.052	1240.05	281.193	-556.77	1398.98	276.408	-618.367	1246.13	159.467	-371.233	1306.11	438.195	-433.46	1425.01	464.067	-382.074	1242.48	448.748	-330.56	1105.31	472.493	-334.502	932.316	441.721	-339.62	852.08	469.522	-280.707	868.849	464.53	-296.479	774.492
7591	0	348.42	-667.589	1596.91	250.823	-675.329	1600.3	362.764	-515.968	1608.43	230.448	-505.73	1608.5	265.978	-452.16	1488.51	246.256	-377.715	1238.27	282.142	-569.246	1397.72	277.246	-630.993	1244.94	161.097	-383.338	1304.37	439.355	-446.015	1423.83	464.915	-393.326	1241.5	448.905	-341.803	1104.47	472.654	-344.537	931.443	442.112	-349.572	851.808	469.292	-290.475	868.29	463.814	-305.486	773.783
7592	0	349.446	-680.166	1595.37	251.615	-687.736	1598.92	363.641	-528.57	1606.91	231.53	-518.231	1607.32	267.111	-464.39	1487.14	248.141	-390.232	1236.54	283.221	-581.709	1396.65	278.303	-643.431	1244.04	162.81	-395.579	1302.76	440.613	-458.465	1422.7	465.67	-405.179	1240.39	449.543	-353.22	1103.91	473.08	-355.203	930.683	442.447	-360.108	851.094	469.311	-300.902	867.677	463.598	-315.342	773.209
7593	0	350.172	-692.664	1593.55	252.554	-700.314	1597.32	364.68	-541.154	1605.76	232.611	-530.699	1606.38	268.399	-476.713	1485.44	250.052	-403.014	1234.63	284.232	-594.144	1395.46	279.354	-656.132	1243.25	164.532	-408.232	1300.59	441.806	-471.109	1421.53	466.827	-417.181	1239.64	450.236	-365.064	1103.05	473.719	-366.481	929.812	444.9	-370.593	851.555	469.665	-312.009	867.05	463.892	-325.946	772.47
7594	0	350.822	-705.261	1592.19	252.949	-712.575	1595.94	365.775	-553.781	1604.89	233.642	-543.017	1605.38	269.809	-488.807	1484.63	252.052	-415.837	1232.85	285.421	-606.594	1394.63	280.504	-668.753	1242.44	166.769	-420.328	1299.18	443.366	-483.718	1420.72	468	-429.453	1238.74	451.14	-377.129	1102.42	474.897	-378.103	929.138	444.706	-383.014	850.019	470.459	-323.757	866.416	464.814	-337.56	771.847
7595	0	351.333	-717.731	1590.9	253.607	-724.905	1594.46	366.977	-566.414	1604.3	234.755	-555.35	1604.32	271.164	-501.011	1483.02	254.387	-428.618	1231.51	286.781	-619.009	1393.71	281.75	-681.65	1241.9	168.782	-432.818	1297.38	444.707	-496.41	1419.74	469.603	-441.952	1238.13	452.336	-389.484	1101.67	476.446	-390.581	928.622	446.782	-395.734	849.573	471.816	-336.152	865.929	466.034	-349.995	771.039
7596	0	351.921	-730.145	1590.04	254.046	-736.938	1592.92	368.023	-578.993	1603.55	235.816	-567.305	1603.48	272.703	-512.945	1481.99	256.651	-441.559	1230.1	288.102	-631.377	1392.77	283.465	-694.711	1241.59	170.891	-445.408	1295.59	446.404	-509.12	1418.97	471.327	-454.613	1237.35	453.865	-402.258	1100.87	478.21	-403.555	927.85	448.342	-408.983	848.403	473.28	-349.277	864.952	467.925	-363.255	770.223
7597	0	352.449	-742.72	1588.95	254.483	-749.095	1591.78	368.766	-591.51	1602.49	236.998	-579.371	1602.53	274.458	-525.034	1480.76	259.035	-454.651	1228.68	289.719	-643.795	1392.11	285.15	-707.905	1241.22	172.964	-458.075	1293.56	448.118	-521.719	1418.14	473.264	-467.464	1236.41	455.773	-415.248	1099.96	480.248	-416.956	926.821	450.479	-422.844	847.04	475.315	-362.954	863.88	470.199	-377.278	769.062
7598	0	353.009	-755.186	1588.56	254.859	-761.059	1591.15	370.121	-604.134	1602.49	238.227	-591.451	1601.62	276.105	-536.971	1479.66	261.321	-467.878	1227.05	291.324	-656.226	1391.81	287.145	-721.063	1240.82	175.149	-470.623	1291.98	449.946	-534.372	1417.35	475.822	-480.629	1236.16	457.8	-428.66	1098.75	482.862	-430.955	925.996	453.965	-437.318	846.626	477.719	-377.334	862.71	472.857	-392.099	767.767
7599	0	353.389	-767.84	1588.64	255.171	-773.122	1590.51	371.12	-616.765	1602.53	239.406	-603.473	1601.07	277.987	-548.906	1479.1	263.398	-481.169	1225.53	293.008	-668.562	1391.69	289.056	-734.45	1240.78	177.087	-483.336	1290.45	451.9	-546.908	1416.92	477.765	-493.783	1234.88	460.202	-442.409	1097.8	485.59	-445.577	924.95	456.408	-452.459	845.285	480.472	-392.264	861.145	476.089	-407.808	766.708
7600	0	353.621	-780.479	1588.92	255.519	-785.244	1590.27	372.516	-629.517	1603.03	240.729	-615.263	1600.85	279.514	-560.914	1478.75	265.681	-494.347	1224.81	294.46	-680.891	1391.85	290.867	-747.553	1241.26	179.119	-495.81	1289.45	453.651	-559.43	1416.49	479.833	-507.924	1234.5	462.776	-456.61	1096.69	488.776	-460.748	924.03	459.721	-468.613	844.082	483.798	-407.826	859.822	479.736	-424.417	765.464
7601	0	354.043	-793.046	1589.47	255.895	-797.314	1590.46	373.599	-642.292	1603.64	242.22	-627.122	1601.09	281.363	-572.919	1479.02	267.404	-507.445	1223.94	296.14	-693.171	1392.28	292.638	-760.784	1242.09	181.043	-508.277	1288.9	455.318	-571.816	1416.34	482.082	-521.909	1233.8	465.554	-471.045	1095.63	492.203	-476.563	923.104	463.855	-485.001	843.668	487.416	-424.215	858.871	483.953	-441.86	764.473
7602	0	354.445	-805.66	1590.21	256.22	-809.363	1591.04	374.887	-655.239	1604.84	243.571	-639.091	1601.38	282.891	-584.87	1479.36	269.05	-520.299	1223.99	297.737	-705.392	1393.21	294.502	-773.852	1243.23	183.012	-520.479	1289.15	457.063	-584.148	1416.82	484.551	-535.941	1233.86	468.709	-485.843	1095.33	496.008	-493.034	922.878	468.203	-502.201	843.485	491.477	-441.27	858.034	488.65	-459.858	763.741
7603	0	354.991	-818.261	1591.66	257.189	-821.104	1591.74	376.433	-667.756	1606.35	244.974	-650.996	1602.42	284.587	-596.946	1480.28	270.492	-533.167	1224.82	299.079	-717.588	1394.38	296.302	-786.436	1245.05	184.48	-533	1289.56	458.617	-596.348	1417.73	486.796	-550.184	1234.23	472.034	-500.916	1095.48	499.958	-509.973	923.054	472.478	-520.076	843.555	495.855	-459.023	857.495	493.822	-478.954	763.605
7604	0	355.538	-830.613	1593.2	257.732	-833.038	1592.93	377.549	-680.473	1607.74	246.301	-662.922	1603.84	285.926	-609.135	1481.39	271.785	-545.935	1225.78	300.503	-729.794	1395.73	297.654	-799.142	1246.81	185.839	-545.289	1290.52	460.053	-608.646	1419.02	489.013	-564.571	1234.94	475.027	-516.432	1095.7	504.133	-527.722	923.703	477.495	-538.719	844.142	500.572	-477.503	857.367	499.682	-498.811	764.106
7605	0	356.172	-842.922	1594.5	258.227	-845.003	1594.5	378.878	-692.977	1609.25	247.488	-674.908	1605.05	287.043	-621.226	1482.8	273.03	-558.476	1227.14	301.591	-741.954	1397.41	298.958	-811.948	1248.37	187.297	-557.378	1292.04	461.247	-621.025	1420.35	491.08	-578.907	1235.92	478.367	-531.928	1096.46	508.662	-545.945	924.649	481.519	-557.982	844.133	505.656	-496.678	857.54	505.754	-519.541	764.723
7606	0	356.771	-855.262	1595.98	258.677	-857.027	1596.24	380.141	-705.294	1610.88	248.756	-686.833	1607.06	288.242	-633.417	1484.2	274.132	-571.038	1228.6	302.499	-754.133	1399.17	300.131	-824.258	1250.35	188.286	-569.725	1293.27	462.27	-633.512	1421.96	493.092	-593.267	1237.24	481.481	-547.436	1096.79	513.322	-564.543	925.615	487.486	-577.923	845.974	510.902	-516.464	857.556	512.056	-540.814	765.428
7607	0	357.442	-867.389	1597.51	259.332	-868.808	1598.54	381.061	-717.535	1612.16	249.85	-698.607	1608.88	289.234	-645.531	1485.64	275.272	-583.123	1230.11	303.238	-766.197	1400.79	300.788	-836.448	1252.21	189.807	-581.464	1295.31	463.329	-646.187	1423.68	495.021	-607.599	1238.78	484.819	-562.982	1097.82	517.801	-583.538	927.061	492.361	-598.013	846.915	516.615	-536.587	858.228	518.686	-563	766.528
7608	0	358.196	-879.373	1599.28	260.444	-880.547	1600.07	382.256	-729.536	1613.63	250.985	-710.554	1610.37	290.265	-657.602	1487.26	276.484	-595.271	1231.73	304.287	-777.878	1402.24	301.211	-848.422	1253.72	191.011	-593.093	1297.13	464.341	-659.036	1425.3	496.912	-621.917	1240.3	488.309	-578.623	1098.79	522.716	-602.705	928.44	497.683	-618.599	848.334	522.255	-557.451	858.741	525.366	-585.822	767.863
7609	0	358.909	-891.269	1600.76	260.952	-892.512	1602.11	383.145	-741.694	1614.65	251.997	-722.16	1612.6	291.265	-669.564	1489.03	277.572	-607.023	1233.13	304.826	-789.918	1403.81	301.536	-859.908	1255.2	192.097	-604.781	1298.73	465.45	-672.054	1427.1	498.959	-636.268	1241.97	491.534	-594.362	1099.35	527.51	-622.266	930.173	503.08	-639.854	850.115	528.308	-578.536	859.581	532.246	-609.266	769.416
7610	0	359.582	-903.236	1602.2	261.711	-904.169	1604.13	384.128	-753.576	1616.12	253.061	-733.95	1614.2	292.219	-681.52	1490.48	279.067	-618.805	1235.41	305.048	-801.798	1405.42	301.366	-871.628	1256.55	193.658	-615.891	1300.9	466.557	-685.071	1429.08	501.3	-650.323	1243.7	495.489	-609.773	1101.01	532.982	-642.244	932.108	508.759	-661.218	852.3	534.365	-600.021	860.562	539.276	-633.179	771.512
7611	0	360.115	-915.073	1603.97	262.266	-915.819	1605.98	385.044	-765.576	1617.61	254.016	-745.598	1616.16	293.126	-693.278	1492.22	280.609	-630.403	1237	305.246	-813.635	1406.91	301.027	-883.097	1257.94	195.16	-626.982	1302.65	467.495	-698.172	1430.6	503.299	-665.103	1245.51	499.068	-625.363	1101.75	537.779	-662.301	934.008	514.46	-682.903	855.112	540.603	-621.721	861.645	546.185	-657.602	773.512
7612	0	360.46	-926.924	1605.38	262.645	-927.412	1607.74	385.308	-777.451	1618.13	254.715	-757.03	1617.78	293.937	-704.997	1493.79	282.512	-641.818	1239.38	304.974	-825.584	1408.4	300.393	-894.785	1259.02	196.799	-637.852	1304.44	468.538	-711.36	1432.31	505.462	-679.629	1247.09	503.11	-640.833	1103.03	542.802	-682.494	936.021	519.654	-704.865	857.219	546.937	-643.34	863.065	553.164	-682.436	776.051
7613	0	360.673	-938.736	1606.58	262.771	-938.938	1609.54	386.573	-789.091	1620.2	255.551	-768.511	1619.89	295.022	-716.557	1495.73	283.999	-653.5	1240.42	305.429	-837.34	1409.69	299.591	-906.555	1260.2	198.557	-648.669	1306.02	469.606	-724.477	1434.08	507.348	-694.287	1248.31	506.678	-656.36	1103.9	547.792	-702.803	938.542	523.468	-726.634	858.464	552.568	-665.834	863.543	560.49	-707.74	779.121
7614	0	361.071	-950.477	1608.53	263.104	-950.22	1611.35	387.246	-801.082	1621.72	256.282	-779.993	1621.39	295.885	-728.13	1497.27	286.121	-664.795	1242.46	305.204	-848.824	1411.28	299.048	-917.952	1261.76	200.147	-659.524	1307.29	470.58	-737.45	1436.01	510.015	-708.784	1250.38	510.654	-671.88	1105.33	552.8	-723.184	941.101	530.383	-749.514	861.818	558.604	-688.38	865.222	567.547	-732.996	782.475
7615	0	361.284	-962.156	1610.29	263.354	-961.666	1612.93	387.917	-812.829	1622.98	257.087	-791.286	1623.14	296.812	-739.676	1498.82	288.173	-675.823	1244.17	305.288	-860.303	1412.6	298.42	-929.494	1263.21	202.009	-670.076	1308.87	471.472	-750.375	1437.66	512.25	-723.283	1252.25	514.157	-687.382	1106.09	557.832	-743.471	944.035	536.186	-771.967	865.15	564.741	-710.939	867.222	574.598	-758.492	786.665
7616	0	361.263	-973.895	1611.55	263.549	-973.032	1614.6	388.55	-824.686	1624.73	257.818	-802.547	1624.74	297.493	-751.28	1499.97	289.965	-687.059	1245.54	305.291	-871.701	1413.98	297.773	-940.982	1264.48	203.76	-680.727	1310.07	472.423	-763.192	1439.42	514.518	-737.71	1253.94	518.212	-702.622	1107.64	562.664	-763.843	947.053	541.688	-794.413	868.937	570.858	-733.605	869.842	581.406	-784.055	791.004
7617	0	361.304	-985.584	1613.39	263.416	-984.328	1616.26	389.272	-836.312	1626.14	258.484	-813.831	1626.15	298.385	-762.674	1501.62	291.836	-698.201	1247.38	305.342	-883.136	1415.28	297.106	-952.579	1265.71	205.611	-691.118	1311.58	473.108	-775.944	1441.14	516.626	-751.983	1255.99	521.737	-718.002	1108.94	567.398	-784.165	950.4	546.873	-816.934	872.77	576.647	-756.272	872.469	588.023	-809.686	795.832
7618	0	361.251	-997.225	1615.03	263.447	-995.68	1617.54	389.889	-848.082	1627.95	258.961	-825.062	1627.45	298.977	-774.333	1502.64	293.629	-708.753	1248.84	305.409	-894.642	1416.47	296.681	-964.032	1267.29	207.237	-701.667	1312.88	473.852	-788.663	1442.96	518.784	-766.253	1257.97	525.599	-733.2	1110.79	572.086	-804.476	954.046	552.01	-839.357	877.362	582.449	-778.914	875.751	594.52	-835.342	801.222
7619	0	361.262	-1008.77	1616.57	263.43	-1007.09	1619.02	390.314	-859.851	1629.4	259.482	-836.409	1628.55	299.684	-785.922	1504.06	295.242	-719.439	1250.19	305.588	-906.037	1417.62	296.562	-975.736	1268.35	209.058	-712.138	1314.38	474.604	-801.358	1444.8	520.805	-780.148	1260.16	529.05	-748.232	1112.15	576.611	-824.621	958.019	557.835	-861.178	882.355	588.109	-801.61	879.172	600.839	-860.747	806.97
7620	0	361.318	-1020.38	1617.87	263.506	-1018.36	1620.42	390.694	-871.474	1630.45	259.979	-847.791	1629.66	300.338	-797.612	1505.07	296.645	-730.494	1251.64	305.901	-917.323	1418.64	296.612	-987.277	1269.45	210.531	-722.762	1315.61	475.253	-814.007	1446.46	522.868	-793.97	1262.14	532.673	-763.046	1113.8	580.999	-844.641	962.182	563.284	-883.389	889.014	593.554	-824.315	882.775	607.138	-885.832	813.752
7621	0	361.315	-1031.78	1618.94	263.441	-1029.53	1621.6	390.749	-883.141	1630.74	260.409	-858.803	1630.54	301.054	-809.264	1506.33	298.266	-741.49	1253.16	306.119	-928.656	1419.39	296.791	-998.699	1270.23	212.068	-733.366	1316.93	476.024	-826.611	1448.32	524.871	-807.481	1264.04	536.201	-777.719	1115.3	585.364	-864.628	966.693	568.004	-905.217	894.432	599.028	-846.906	887.043	612.953	-910.874	820.277
7622	0	361.225	-1043.36	1620.14	263.397	-1040.72	1622.69	390.772	-894.691	1630.89	260.779	-869.963	1631.18	301.72	-820.919	1507.16	299.325	-752.663	1253.83	306.403	-940.054	1419.99	297.018	-1009.86	1270.74	213.363	-744.08	1317.8	476.649	-839.079	1449.51	526.893	-820.879	1265.8	539.681	-792.255	1116.77	589.453	-884.568	971.218	572.258	-927.368	900.023	604.204	-869.616	890.984	618.307	-935.929	827.038
7623	0	361.091	-1054.88	1621.09	263.288	-1052.04	1623.4	391.628	-906.088	1631.94	261.137	-881.337	1631.39	302.588	-832.495	1507.94	300.567	-763.774	1255.08	306.696	-951.43	1420.27	297.323	-1020.95	1270.94	214.618	-754.716	1318.44	477.361	-851.618	1450.65	529.539	-833.986	1268.31	543.772	-806.313	1118.93	593.352	-904.373	975.537	576.486	-948.923	905.629	609.16	-892.189	894.92	623.323	-960.644	833.512
7624	0	361.044	-1066.57	1621.73	263.151	-1063.42	1624	391.821	-917.701	1632.3	261.424	-892.734	1631.5	303.252	-844.1	1508.28	301.55	-774.807	1255.87	306.965	-962.733	1420.38	297.586	-1032.1	1270.85	215.842	-765.45	1319.14	478.061	-864.08	1451.65	530.994	-847.325	1268.91	546.967	-820.577	1119.34	597.286	-923.857	980.258	580.4	-970.575	911.427	614.126	-914.576	899.471	627.925	-985.242	840.472
7625	0	360.999	-1078.05	1622.49	263.037	-1074.78	1624.53	391.657	-929.433	1632.24	261.671	-904.064	1631.37	303.976	-855.666	1508.59	302.514	-785.773	1256.42	307.321	-974.01	1420.39	297.846	-1043.18	1270.52	216.873	-776.258	1319.79	478.459	-876.529	1452.09	532.913	-860.274	1269.93	550.67	-834.715	1120.69	600.99	-943.196	984.791	584.134	-991.662	917.306	618.893	-936.751	904.024	632.326	-1009.37	847.68
7626	0	360.827	-1089.57	1622.55	262.964	-1086.11	1624.89	391.798	-941.159	1632.14	261.912	-915.247	1631.24	304.436	-867.286	1508.61	303.27	-796.786	1256.94	307.693	-985.293	1420.21	298.174	-1054.11	1270.15	217.959	-787.001	1320.05	479.347	-888.739	1452.81	535.027	-873.195	1271.25	554.167	-848.902	1121.41	604.429	-962.172	989.498	587.601	-1012.48	923.146	623.497	-958.601	908.812	636.343	-1033.15	854.726
7627	0	360.764	-1101.14	1622.72	263.005	-1097.45	1624.79	392.028	-952.677	1631.73	262.176	-926.491	1630.89	305.402	-878.86	1509.01	304.038	-807.722	1257.19	307.954	-996.61	1419.8	298.382	-1065.22	1269.53	218.848	-797.795	1320.14	479.955	-900.899	1453.12	536.978	-886.24	1271.83	557.71	-863.025	1121.88	607.873	-980.934	993.828	590.744	-1032.95	928.818	627.8	-980.159	913.185	639.95	-1056.67	861.701
7628	0	360.554	-1112.81	1622.58	262.893	-1108.93	1624.44	392.133	-964.367	1631.21	262.322	-937.976	1630.28	306.047	-890.486	1509	304.963	-818.506	1257.4	308.188	-1007.94	1419.08	298.509	-1075.77	1268.77	219.765	-808.552	1320.15	480.577	-912.976	1453.21	539.006	-899.191	1272.18	561.258	-877.272	1122.02	610.959	-999.445	997.829	593.775	-1053.08	934.259	631.748	-1001.48	917.4	643.328	-1079.38	868.526
7629	0	360.605	-1124.37	1622.33	262.66	-1120.39	1624.11	392.391	-975.87	1630.94	262.371	-949.351	1629.59	306.596	-902.081	1508.8	305.49	-829.428	1257.28	308.387	-1019.18	1418.4	298.678	-1086.85	1267.95	220.572	-819.477	1319.99	480.969	-924.941	1452.99	540.733	-912.077	1272.29	564.91	-891.323	1122.37	613.878	-1017.75	1001.71	596.495	-1072.73	939.754	635.513	-1022.24	921.734	646.398	-1101.74	875.201
7630	0	360.361	-1136.02	1621.96	262.47	-1131.74	1623.66	392.505	-987.61	1630.57	262.477	-960.805	1628.85	306.903	-913.655	1508.1	306.02	-840.279	1257.09	308.563	-1030.55	1417.47	298.86	-1098.12	1266.73	220.873	-830.703	1319.24	481.133	-936.841	1452.33	542.443	-924.813	1272.29	568.608	-905.574	1122.59	616.692	-1035.79	1005.37	598.892	-1092.24	944.739	638.769	-1042.74	925.645	649.035	-1123.62	881.781
7631	0	360.305	-1147.6	1621.01	262.571	-1143.52	1622.75	392.658	-999.3	1629.84	262.665	-972.102	1628.42	307.12	-925.29	1507.38	306.659	-851.134	1256.79	308.786	-1041.87	1416.6	299.079	-1109.42	1265.53	221.433	-841.817	1318.78	481.409	-948.633	1451.91	544.023	-937.561	1272.23	571.872	-919.882	1122.3	619.36	-1053.26	1008.98	601.381	-1110.93	949.611	642.045	-1062.67	929.787	651.656	-1144.85	887.99
7632	0	360.386	-1159.22	1620.68	262.493	-1154.99	1622.11	392.523	-1011	1628.98	262.843	-983.889	1627.46	307.209	-937.066	1506.65	306.754	-862.004	1256.03	308.996	-1053.33	1415.43	299.327	-1120.46	1264.52	221.862	-853.02	1318.22	481.609	-960.267	1451.37	545.965	-949.915	1272.41	575.159	-934.146	1122.39	621.833	-1070.44	1012.54	603.485	-1129.43	954.244	645.124	-1081.96	933.603	654.08	-1165.6	894.526
7633	0	360.205	-1170.86	1619.66	262.306	-1166.49	1621.22	392.435	-1022.72	1627.51	262.866	-995.401	1626.33	307.272	-948.745	1505.81	306.951	-873.03	1255.49	308.984	-1064.72	1414.4	299.385	-1131.52	1263.25	222.124	-864.2	1317.65	481.74	-971.968	1450.87	546.986	-962.882	1272.15	578.201	-948.372	1122.26	623.951	-1087.44	1015.62	605.384	-1147.56	958.729	647.528	-1101.16	936.994	656.224	-1185.48	900.411
7634	0	359.984	-1182.65	1618.67	262.111	-1178.29	1620.07	392.466	-1034.37	1626.91	262.612	-1006.97	1625.32	307.409	-960.418	1505.06	306.992	-884.077	1254.88	309.005	-1076.24	1412.95	299.528	-1142.73	1261.71	221.957	-875.661	1316.49	481.795	-983.494	1450.17	548.32	-975.522	1271.95	581.241	-962.499	1122.23	625.972	-1104.24	1018.55	607.294	-1165.22	963.011	649.857	-1119.92	940.451	658.076	-1204.99	905.834
7635	0	359.786	-1194.4	1617.42	261.936	-1189.95	1619.08	392.37	-1045.99	1625.83	262.483	-1018.59	1624.28	307.363	-972.192	1503.87	306.732	-895.131	1253.83	308.939	-1087.78	1411.76	299.503	-1153.3	1259.45	222.002	-887.173	1315.55	481.637	-995.139	1449.11	549.419	-988.141	1271.57	583.666	-976.64	1121.7	627.732	-1120.63	1021.06	608.646	-1182.86	966.431	652.294	-1137.73	943.568	659.641	-1223.91	910.615
7636	0	359.421	-1206.19	1616.35	261.668	-1201.53	1617.91	392.229	-1057.78	1624.36	262.33	-1030.36	1623.47	307.357	-983.956	1503.02	306.657	-906.306	1252.92	308.835	-1099.42	1410.29	299.675	-1165.04	1258.47	221.972	-898.634	1314.64	481.457	-1006.73	1448.04	550.232	-1000.82	1270.94	586.189	-990.784	1121.7	629.301	-1136.66	1023.27	609.986	-1199.82	969.968	654.141	-1155.25	946.454	661.085	-1242.15	915.125
7637	0	359.347	-1217.99	1615.07	261.555	-1213.4	1616.72	391.913	-1069.72	1623.47	262.003	-1042.3	1621.86	306.989	-995.84	1501.64	306.096	-917.566	1251.71	308.817	-1111.08	1408.88	299.727	-1176.28	1256.95	221.624	-910.231	1313.58	481.327	-1018.29	1447.15	551.059	-1013.48	1270.48	588.129	-1004.69	1121.07	630.777	-1152.31	1025.47	611.112	-1216.43	972.926	655.854	-1172.5	948.82	662.49	-1259.8	919.258
7638	0	359.236	-1229.7	1613.98	261.18	-1225.28	1615.41	391.634	-1081.51	1622.34	261.823	-1054.21	1620.84	306.699	-1007.64	1500.58	305.634	-928.943	1250.66	308.676	-1122.72	1407.52	299.914	-1187.02	1254.89	221.276	-921.97	1312.39	480.921	-1029.92	1446	551.95	-1026.09	1270.06	589.788	-1018.64	1120.58	632.171	-1167.61	1027.51	612.323	-1232.27	975.759	657.503	-1188.95	951.249	663.446	-1277	922.798
7639	0	358.875	-1241.62	1612.48	261.005	-1237.42	1614.23	391.177	-1093.52	1620.74	261.37	-1066.14	1619.17	306.277	-1019.65	1499.37	305.204	-940.392	1249.8	308.421	-1134.64	1405.95	300.198	-1198.4	1253.17	220.808	-933.785	1311.21	480.669	-1041.59	1445.3	552.4	-1038.84	1269.47	591.186	-1032.41	1120.16	633.058	-1182.75	1029.04	613.509	-1247.4	978.229	658.661	-1205.1	953.305	664.369	-1293.56	925.857
7640	0	358.464	-1253.49	1611.52	260.531	-1249.36	1613.06	390.608	-1105.59	1619.39	261	-1078.21	1618.05	305.813	-1031.59	1498.23	304.547	-951.939	1248.82	308.087	-1146.52	1404.56	299.855	-1209.91	1251.74	220.265	-945.602	1310.29	480.148	-1053.17	1444.26	552.648	-1051.66	1268.69	592.406	-1045.98	1119.8	633.671	-1197.38	1029.98	614.065	-1262.66	980.092	659.508	-1220.82	954.688	665.004	-1309.37	928.445
7641	0	357.921	-1265.55	1610.14	260.166	-1261.49	1611.61	390.201	-1117.32	1618.11	260.448	-1090.16	1616.66	305.19	-1043.7	1496.95	303.941	-963.473	1247.81	307.742	-1158.42	1403.25	299.722	-1221.89	1250.19	219.646	-957.574	1309.19	479.585	-1064.96	1443.13	552.691	-1064.32	1267.92	593.186	-1059.49	1119.13	634.134	-1211.88	1030.8	614.393	-1277.25	981.581	660.356	-1235.91	955.986	665.449	-1324.79	930.764
7642	0	357.355	-1277.51	1609.26	259.755	-1273.62	1610.54	389.629	-1129.37	1617.09	259.876	-1102.41	1615.3	304.617	-1055.71	1496.02	303.229	-975.065	1246.84	307.404	-1170.57	1401.83	299.636	-1233.75	1248.7	218.796	-969.68	1307.93	478.839	-1076.63	1441.89	552.649	-1077.04	1267.03	593.654	-1072.81	1118.31	634.381	-1225.95	1031	615.076	-1291.14	983.594	660.744	-1250.63	956.444	665.762	-1339.85	931.973
7643	0	356.999	-1289.52	1607.93	259.273	-1285.62	1609.59	388.873	-1141.38	1615.33	259.233	-1114.52	1614.02	303.679	-1067.84	1494.64	302.18	-986.875	1245.63	306.935	-1182.61	1400.7	299.079	-1246.78	1247.94	217.876	-981.827	1306.84	478.152	-1088.34	1440.88	552.356	-1089.56	1266.25	593.904	-1085.92	1117.6	634.729	-1239.5	1031.56	614.896	-1305.66	982.969	661.134	-1264.65	956.948	665.907	-1354.09	933.173
7644	0	356.585	-1301.65	1606.78	258.761	-1297.87	1608.3	388.359	-1153.22	1614.56	258.372	-1126.63	1612.76	302.746	-1079.96	1493.48	300.623	-998.94	1244.08	306.338	-1194.74	1399.4	299.194	-1257.79	1246.67	216.864	-994.182	1305.75	477.392	-1099.88	1439.92	551.909	-1101.91	1265.55	594.016	-1098.87	1117.05	634.793	-1252.8	1031.76	614.784	-1318.78	983.568	661.189	-1278.49	957.482	665.88	-1367.89	933.522
7645	0	355.99	-1313.69	1605.46	258.093	-1309.88	1607.27	387.58	-1165.04	1613.44	257.605	-1138.7	1612.09	301.705	-1092.02	1492.4	299.709	-1010.92	1243.3	305.672	-1207.02	1398.15	298.808	-1270.09	1245.32	215.836	-1006.62	1304.87	476.483	-1111.58	1438.83	551.337	-1114.18	1264.64	593.834	-1111.64	1116.22	634.516	-1265.77	1031.52	614.745	-1331.71	983.857	660.958	-1291.7	957.062	665.635	-1381.13	933.509
7646	0	355.431	-1325.63	1604.32	257.743	-1322.5	1605.82	386.539	-1177.1	1612	256.664	-1150.95	1610.89	300.688	-1104.17	1491.31	298.599	-1023.08	1242.39	304.9	-1219.13	1397.15	298.447	-1282.55	1244.17	214.508	-1019.17	1303.51	475.415	-1123.15	1437.86	550.462	-1126.51	1263.63	593.189	-1124.2	1115.28	633.84	-1278.5	1030.49	614.063	-1344.26	982.251	660.669	-1304.4	956.336	665.097	-1393.85	932.81
7647	0	354.908	-1337.46	1603.28	256.984	-1334.29	1604.95	385.588	-1188.84	1610.94	255.651	-1163.22	1609.68	299.376	-1116.25	1490	296.938	-1035.37	1241.02	304.087	-1231.44	1396.18	297.983	-1295.06	1243.26	212.931	-1031.91	1302.23	474.191	-1134.81	1436.7	549.412	-1138.23	1262.63	592.592	-1136.5	1114.84	633.145	-1290.7	1029.62	613.454	-1356.42	981.55	659.921	-1316.49	955.305	664.609	-1405.94	931.855
7648	0	354.331	-1349.44	1602.1	256.527	-1346.76	1603.74	384.785	-1200.57	1610.02	254.616	-1175.45	1608.82	298.023	-1128.56	1488.53	295.458	-1047.96	1239.84	303.282	-1243.82	1395.13	297.53	-1307.5	1242.33	211.252	-1044.92	1301.06	472.871	-1146.36	1435.52	548.425	-1150.22	1261.73	591.35	-1148.66	1113.59	632.104	-1302.7	1028.02	612.575	-1368.25	980.011	659.043	-1328.13	953.993	663.762	-1417.39	930.158
7649	0	353.936	-1361.25	1601.08	256.179	-1359.28	1602.6	383.489	-1212.51	1608.94	253.53	-1187.8	1607.77	296.687	-1140.85	1487.3	293.684	-1060.65	1238.36	302.392	-1256.31	1394.09	296.777	-1320.95	1241.77	209.562	-1057.68	1299.72	471.592	-1158.04	1434.57	547.081	-1161.58	1260.39	589.87	-1160.64	1112.31	630.978	-1314.22	1026.39	611.752	-1379.46	978.453	657.98	-1339.36	952.306	662.834	-1428.44	928.148
7650	0	353.389	-1373.12	1600.13	255.566	-1371.54	1601.93	382.307	-1224.38	1607.81	252.235	-1200.12	1606.49	295.335	-1152.98	1486.7	292.137	-1073.43	1237.09	301.428	-1268.72	1393.14	296.565	-1332.5	1240.58	208.118	-1070.46	1298.91	470.234	-1169.75	1433.2	545.447	-1173.21	1259.35	588.29	-1172.2	1111.18	629.824	-1325.19	1024.65	610.534	-1390.57	975.54	657.023	-1349.8	950.107	661.689	-1438.87	925.266
7651	0	352.925	-1385.05	1599.39	254.845	-1383.43	1601.45	381.145	-1236.13	1606.79	250.982	-1212.63	1605.86	293.898	-1165.3	1485.53	290.271	-1086.07	1235.43	300.273	-1281.18	1392.19	295.584	-1345.2	1239.7	206.254	-1083.29	1297.48	468.881	-1181.6	1432.12	544.017	-1184.66	1258.06	586.529	-1183.57	1109.92	628.481	-1335.96	1022.27	609.141	-1401.06	972.97	655.112	-1360.21	947.113	660.467	-1448.88	922.427
7652	0	352.109	-1397.29	1598.73	254.601	-1396.46	1600.27	379.817	-1247.95	1605.64	249.585	-1224.96	1604.6	292.495	-1177.56	1484.57	288.81	-1098.7	1234.54	299.054	-1293.85	1391.29	294.442	-1358.23	1238.85	204.331	-1096.2	1296.35	467.492	-1193.57	1430.87	542.378	-1195.83	1256.51	584.346	-1194.68	1108.35	626.555	-1346.52	1019.1	607.826	-1410.64	970.61	653.403	-1369.93	944.383	659.086	-1458.47	918.76
7653	0	351.471	-1409.38	1598.12	254.014	-1409.19	1599.73	378.667	-1259.81	1605.1	248.204	-1237.58	1603.99	290.935	-1189.93	1483.65	287.26	-1111.58	1233.62	297.816	-1306.34	1390.69	293.146	-1371.32	1238.03	202.638	-1108.92	1295.42	466.231	-1205.51	1429.86	540.329	-1206.95	1255.15	581.912	-1205.63	1106.7	624.421	-1356.78	1015.93	605.86	-1420.73	966.191	651.488	-1379.23	941.29	657.264	-1467.22	914.736
7654	0	351.161	-1421.3	1598.23	253.28	-1421.29	1599.92	378.251	-1271.22	1605.9	246.646	-1250.06	1603.87	289.587	-1202.34	1483.29	285.761	-1124.52	1232.69	296.591	-1318.95	1390.35	291.96	-1384.24	1237.78	201.25	-1121.57	1294.93	464.896	-1217.54	1428.95	539.012	-1218.21	1254.25	579.395	-1216.42	1105.33	622.655	-1366.09	1013.17	604.158	-1429.64	962.888	649.357	-1387.74	937.825	655.396	-1475.97	909.977
7655	0	350.555	-1433.55	1598.1	252.753	-1434.32	1599.88	376.629	-1283.45	1605.41	245.432	-1262.74	1603.54	288.093	-1214.73	1483.12	284.642	-1137.44	1232.19	295.29	-1331.63	1390.27	290.54	-1396.99	1238.03	199.817	-1134.43	1294.44	463.668	-1229.52	1428.35	536.399	-1229.13	1252.89	576.412	-1227.08	1103.99	620.465	-1375.17	1009.88	602.306	-1438.4	958.942	646.855	-1395.68	934.044	653.259	-1483.6	905.086
7656	0	349.81	-1445.71	1598.45	252.099	-1446.72	1600.21	376.289	-1295.05	1606.94	244.295	-1275.5	1604.1	286.337	-1227.21	1482.77	283.596	-1150.25	1232.07	293.891	-1344.28	1390.75	289.588	-1410.01	1238.53	198.31	-1147.31	1294.11	462.093	-1241.64	1427.78	533.699	-1239.96	1251.84	573.273	-1237.65	1102.96	617.911	-1383.97	1006.25	599.78	-1446.72	954.178	644.114	-1403.15	930.022	651.457	-1490.21	899.782
7657	0	348.93	-1458.22	1598.86	251.439	-1459.7	1600.58	373.373	-1308.5	1605.39	242.966	-1288.08	1604.38	285.038	-1239.74	1483.44	282.277	-1163.15	1231.7	292.526	-1357.06	1391.41	286.985	-1423.35	1239.28	197.208	-1160.17	1294.64	460.722	-1253.75	1427.56	530.736	-1250.94	1250.87	569.6	-1248.21	1101.81	615.162	-1392.65	1002.21	597.554	-1453.97	949.843	641.017	-1409.97	925.653	649.13	-1496.3	894.627
7658	0	348.185	-1470.69	1599.45	250.671	-1472.37	1601.33	373.82	-1319.64	1608.46	241.486	-1300.53	1606.47	283.881	-1252.22	1484.29	281.187	-1176.16	1232.24	291.125	-1369.78	1392.44	285.128	-1436.7	1240.7	195.689	-1173.04	1295.07	459.297	-1265.95	1427.79	528.006	-1261.96	1250.41	565.827	-1258.68	1101.21	612.134	-1400.58	998.661	594.82	-1461.19	944.848	637.587	-1416.07	921.644	646.527	-1501.88	889.049
7659	0	347.342	-1482.94	1600.55	249.917	-1484.9	1602.2	372.13	-1332.2	1609.09	240.348	-1313.26	1607.27	282.819	-1264.67	1485.64	279.937	-1189.13	1233.12	289.714	-1382.32	1393.76	283.11	-1449.79	1242.26	194.649	-1185.83	1295.91	457.923	-1278.14	1428.26	525.28	-1273.02	1250.48	561.852	-1268.94	1101.18	608.885	-1408.18	994.834	591.804	-1467.99	939.732	633.856	-1421.58	917.355	643.754	-1506.46	883.179
7660	0	346.491	-1495.31	1601.35	248.97	-1497.41	1603.25	371.526	-1344.3	1611.03	239.173	-1325.87	1608.49	281.667	-1277.14	1486.55	278.532	-1202.07	1233.56	288.501	-1394.97	1394.9	280.641	-1462.99	1243.62	193.55	-1198.73	1296.99	456.484	-1290.6	1428.92	522.589	-1284.32	1250.69	557.444	-1279.24	1100.85	605.342	-1415.21	991.161	588.898	-1473.54	935.737	629.841	-1426.5	913.214	640.673	-1510.56	877.201
7661	0	345.654	-1507.68	1602.24	248.112	-1509.9	1604.49	369.67	-1357.1	1610.87	238.26	-1338.47	1609.75	280.477	-1289.65	1487.63	277.839	-1214.74	1235.11	287.241	-1407.64	1396.16	280.355	-1475.72	1244.85	192.278	-1211.78	1297.88	455.49	-1303.1	1430	519.894	-1295.79	1250.72	552.835	-1289.37	1100.52	601.934	-1421.85	987.983	585.28	-1479.48	929.535	625.325	-1430.92	908.876	637.184	-1514.05	870.944
7662	0	344.649	-1520.02	1603.39	247.017	-1522.27	1605.54	368.722	-1369.33	1612.34	237.182	-1350.78	1611.01	279.192	-1302.11	1488.62	276.537	-1227.49	1235.99	286.069	-1420.25	1397.49	278.429	-1488.72	1246.31	191.246	-1224.65	1299.04	454.279	-1315.51	1430.91	517.328	-1307.35	1250.94	548.754	-1299.3	1100.87	597.861	-1428.37	984.213	581.374	-1484.23	924.947	620.743	-1434.97	904.7	633.384	-1516.68	864.787
7663	0	343.631	-1532.37	1604.45	246.002	-1534.44	1606.6	367.909	-1381.29	1613.76	236.138	-1362.89	1612.69	277.975	-1314.44	1489.78	275.354	-1240.18	1236.93	284.968	-1432.62	1398.87	277.14	-1501.53	1247.84	189.824	-1237.45	1300.07	453.064	-1327.78	1431.88	514.681	-1319.08	1251.26	544.367	-1309.07	1101.41	593.712	-1434.45	980.748	577.368	-1488.75	920.358	616.206	-1438.32	901.278	629.155	-1518.81	858.726
7664	0	342.473	-1544.66	1605.6	245.139	-1546.81	1607.78	367.657	-1393.45	1615.99	235.048	-1375.16	1613.92	276.465	-1326.9	1490.66	274.583	-1252.9	1239.03	283.995	-1444.93	1400.18	277.017	-1514.13	1249.31	188.848	-1250.5	1301.31	451.855	-1340	1433.06	512.17	-1330.66	1251.53	539.686	-1319.06	1101.62	589.129	-1440.35	976.971	572.94	-1492.75	915.642	610.966	-1441.63	897.428	624.367	-1520.53	852.297
7665	0	341.657	-1557.01	1606.8	244.145	-1559.13	1609.1	365.853	-1406.11	1615.84	234.017	-1387.07	1615.68	275.275	-1339.25	1491.85	273.068	-1265.42	1239.98	283.235	-1457.48	1401.25	276.476	-1526.54	1250.45	187.523	-1263.39	1302.48	450.707	-1351.93	1434.18	509.97	-1342.15	1252.32	535.577	-1328.8	1102.42	584.722	-1445.93	973.639	567.98	-1496.65	910.164	605.765	-1444.52	893.823	619.021	-1521.87	845.731
7666	0	340.717	-1569.36	1608.13	243.137	-1571.27	1610.56	366.002	-1418.03	1618.39	233.663	-1399.77	1616.16	273.895	-1351.58	1492.89	271.683	-1277.89	1241.29	282.621	-1469.71	1402.49	276.298	-1538.64	1251.68	185.953	-1276.14	1303.54	449.525	-1363.65	1435.44	507.592	-1353.45	1252.66	531.163	-1338.69	1102.88	579.986	-1451.24	970.639	562.87	-1500.21	905.29	600.081	-1447.05	890.612	613.585	-1522.7	839.786
7667	0	339.949	-1581.51	1609.5	242.44	-1583.39	1611.76	365.37	-1430.17	1619.74	232.9	-1411.93	1617.34	272.67	-1363.87	1493.84	269.997	-1290.29	1242.18	281.899	-1482.04	1403.66	276.884	-1549.34	1252.36	184.432	-1288.82	1304.6	448.352	-1375.17	1436.59	505.196	-1364.99	1253.52	527.137	-1348.3	1103.87	575.161	-1456.26	967.441	557.59	-1502.99	901.07	594.29	-1449.46	887.333	607.415	-1523.24	833.43
7668	0	339.205	-1593.53	1610.86	241.569	-1595.7	1613.11	364.515	-1442.45	1620.83	232.091	-1424.32	1618.17	271.498	-1376.19	1495.15	268.481	-1302.53	1243.37	281.27	-1494.16	1404.88	278.181	-1559.72	1253.07	182.718	-1301.42	1305.66	447.436	-1386.55	1437.75	502.567	-1376.18	1253.86	523.208	-1357.52	1104.64	570.031	-1461.24	964.448	551.819	-1505.85	896.164	588.169	-1451.48	884.182	601.164	-1523.16	827.788
7669	0	338.41	-1606.02	1611.97	240.952	-1607.94	1614.15	363.905	-1454.55	1622.04	231.248	-1436.35	1619.69	270.423	-1388.5	1496.28	266.973	-1314.81	1244.44	280.71	-1506.38	1405.84	279.194	-1570.17	1253.51	181.191	-1314.09	1306.79	446.386	-1397.91	1438.81	500.157	-1386.85	1254.15	519.577	-1366.93	1105.95	564.696	-1465.97	961.581	546.104	-1508.14	892.17	582.284	-1453.3	881.618	594.192	-1523.17	821.696
7670	0	337.731	-1618.28	1613.1	240.136	-1620.21	1615.75	363.064	-1466.57	1623.04	230.423	-1448.4	1620.9	269.286	-1400.8	1497.35	265.393	-1327	1245.61	280.192	-1518.73	1406.73	279.474	-1582.2	1254.33	179.595	-1326.61	1307.98	445.34	-1409.12	1439.69	498.079	-1397.08	1254.89	515.527	-1376.17	1106.69	559.623	-1470.1	959.002	540.03	-1510.54	888.307	575.882	-1455.15	878.909	587.25	-1522.39	816.997
7671	0	337.218	-1630.29	1614.48	239.605	-1632.59	1616.75	362.418	-1478.74	1624.43	229.669	-1460.89	1621.72	268.161	-1413.13	1498.42	263.914	-1339.07	1246.44	279.75	-1530.83	1407.69	279.807	-1594.22	1255.27	178.146	-1339.16	1309.08	444.333	-1420.37	1440.62	495.716	-1407.24	1255.74	510.884	-1385.49	1106.49	553.923	-1474.53	956.726	533.899	-1512.32	884.876	569.23	-1456.92	876.84	579.714	-1521.65	811.741
7672	0	336.795	-1642.47	1615.72	239.126	-1645.03	1617.99	360.289	-1491.68	1624	228.8	-1473.58	1622.13	267.113	-1425.45	1499.37	262.511	-1350.95	1247.95	280.155	-1541.62	1408.43	279.974	-1607.18	1256.79	176.722	-1351.46	1310.43	443.447	-1431.63	1441.57	493.45	-1417.16	1256.19	507.077	-1394.12	1107.42	548.704	-1478.55	954.853	527.297	-1515.21	881.067	562.982	-1458.27	875.165	572.393	-1520.92	807.562
7673	0	336.368	-1654.72	1616.68	238.752	-1657.24	1618.97	359.712	-1503.44	1624.89	227.91	-1485.8	1623.39	266.095	-1437.78	1500.57	261.116	-1362.9	1249.19	279.647	-1553.61	1409.44	278.804	-1620.71	1258.11	175.355	-1363.64	1311.68	442.482	-1442.88	1442.52	490.986	-1426.97	1256.57	503.318	-1402.17	1108.92	543.455	-1482.25	953.409	520.688	-1517.07	877.838	556.535	-1459.74	874.053	565.039	-1519.68	804.277
7674	0	336.068	-1666.79	1617.82	238.427	-1669.5	1619.92	359.74	-1515.14	1627.33	227.023	-1498.22	1624.46	265.153	-1450.08	1501.74	259.507	-1374.72	1250.18	279.109	-1565.77	1410.28	277.272	-1634.28	1259.17	173.965	-1375.92	1313.07	441.49	-1454.25	1443.51	488.943	-1436.21	1257.3	499.235	-1410.4	1109.71	537.992	-1485.89	952.136	514.54	-1518.85	875.926	550.217	-1460.91	873.178	557.145	-1519.01	800.356
7675	0	335.633	-1679.07	1618.63	238.032	-1682.08	1620.89	358.756	-1527.27	1628.1	225.806	-1510.02	1626.05	264.259	-1462.39	1502.66	258.362	-1386.57	1251.53	278.557	-1577.78	1411.16	277.106	-1645.93	1259.62	172.771	-1388.19	1314.22	440.632	-1465.63	1444.13	486.161	-1446.11	1257.63	494.75	-1418.31	1110.44	532.664	-1489.45	950.93	508.461	-1520.74	874.154	543.764	-1462.33	872.578	549.471	-1517.8	796.985
7676	0	335.208	-1691.45	1619.4	237.643	-1694.62	1621.43	358.068	-1539.37	1629.02	225.029	-1522.5	1626.78	263.546	-1474.76	1503.67	257.007	-1398.4	1252.59	278.121	-1589.61	1412.04	276.318	-1657.66	1260.17	171.64	-1400.36	1315.6	439.631	-1477	1444.56	483.634	-1455.41	1257.31	490.831	-1425.34	1111.47	527.449	-1492.88	949.941	502.829	-1522.49	872.655	537.45	-1463.79	872.146	542.153	-1516.78	794.561
7677	0	335.013	-1703.35	1620.18	237.431	-1706.91	1622.15	357.067	-1551.51	1629.53	224.246	-1534.98	1627.4	262.746	-1487.04	1504.51	255.852	-1410.18	1253.94	277.524	-1601.69	1412.68	276.057	-1669.23	1260.71	170.484	-1412.53	1316.86	438.733	-1488.46	1445.33	481.32	-1464.72	1258.1	486.62	-1432.51	1112.63	522.199	-1495.93	949.136	497.101	-1524.36	871.745	530.893	-1465.32	871.596	535.023	-1515.82	792.773
7678	0	334.454	-1715.79	1620.25	237.158	-1719.22	1622.88	356.615	-1563.35	1630.43	223.29	-1547.22	1628.04	262.07	-1499.23	1505.34	254.395	-1422.01	1254.56	276.913	-1613.9	1412.99	274.896	-1681	1260.92	169.283	-1424.56	1317.91	437.619	-1499.73	1445.94	478.619	-1473.69	1258.84	482.183	-1439.47	1113.54	517.221	-1498.94	948.595	491.623	-1526.31	870.947	524.712	-1466.76	871.803	528.194	-1514.94	791.096
7679	0	334.27	-1727.74	1620.84	236.829	-1731.55	1623.15	355.911	-1575.4	1630.94	222.761	-1559.6	1628.52	261.376	-1511.53	1505.95	253.082	-1433.77	1255.2	276.314	-1625.68	1413.47	274.259	-1692.63	1261.44	168.186	-1436.61	1318.74	436.68	-1511.37	1446.01	475.875	-1482.71	1258.6	477.507	-1446.36	1114.01	512.221	-1502.16	948.236	486.525	-1528.19	870.321	519.041	-1468.11	872.536	521.334	-1514.46	789.992
7680	0	333.874	-1739.78	1620.99	236.402	-1743.94	1623.24	355.062	-1587.49	1631.12	221.978	-1572.02	1628.87	260.71	-1523.68	1506.37	252.255	-1445.54	1256.57	275.495	-1637.79	1413.5	275.927	-1699.95	1260.18	166.913	-1448.53	1319.49	435.956	-1522.94	1446.04	473.219	-1491.66	1258.55	472.584	-1453.25	1114.03	507.233	-1505.43	947.804	481.282	-1530.45	869.749	512.643	-1470.16	872.547	514.652	-1514.24	788.821
7681	0	333.727	-1751.8	1620.82	236.067	-1756.18	1623.33	354.28	-1599.5	1631.05	221.208	-1584.32	1629.03	259.954	-1535.83	1506.64	250.854	-1457.38	1256.95	274.827	-1649.62	1413.8	274.69	-1711.65	1260.44	165.817	-1460.46	1320.27	434.991	-1534.57	1445.77	471.096	-1500.33	1259	468.747	-1459.51	1115.78	502.011	-1508.65	947.394	477.38	-1533.52	869.138	506.523	-1472.08	872.835	508.327	-1514.31	788.072
7682	0	332.941	-1764.14	1620.42	235.708	-1768.44	1623.26	353.575	-1611.51	1631	220.201	-1596.39	1628.76	259.194	-1547.99	1506.71	249.572	-1469.08	1257.31	273.985	-1661.63	1413.71	274.025	-1723.14	1260.17	164.562	-1472.43	1320.56	434.089	-1546.18	1445.82	468.268	-1508.86	1258.94	464.531	-1466.2	1116.62	497.317	-1512.04	947.188	472.339	-1534.32	871.007	500.499	-1474.07	873.159	501.344	-1514.75	787.519
7683	0	332.857	-1776.1	1620.31	235.269	-1780.61	1622.81	352.908	-1623.52	1630.76	219.616	-1608.66	1628.98	258.429	-1560.12	1506.72	248.395	-1480.8	1257.53	273.168	-1673.73	1413.29	273.137	-1734.64	1259.54	163.234	-1484.44	1321.02	433.076	-1557.78	1445.31	465.967	-1517.29	1259.17	460.576	-1472.89	1117.33	492.571	-1515.57	947.079	465.584	-1537.31	869.127	494.47	-1476.52	873.48	495.428	-1515.63	787.138
7684	0	332.417	-1787.97	1620.01	234.859	-1792.78	1622.71	352.244	-1635.56	1630.25	219.071	-1620.92	1628.94	257.673	-1572.21	1506.44	247.168	-1492.6	1257.39	272.434	-1685.49	1412.97	272.143	-1745.98	1259.27	162.143	-1496.33	1320.99	432.117	-1569.32	1444.53	463.594	-1525.78	1259.03	456.45	-1479.83	1117.92	488.13	-1519.19	946.975	461.146	-1540.12	868.931	488.872	-1478.79	873.986	489.452	-1516.98	786.639
7685	0	331.758	-1800.22	1619.39	234.35	-1804.92	1622.41	351.533	-1647.63	1629.62	218.297	-1633.29	1628.12	256.91	-1584.29	1506	245.94	-1504.36	1257.09	271.508	-1697.39	1412.49	271.106	-1757.41	1258.52	161.084	-1508.16	1320.94	431.055	-1580.73	1443.77	461.169	-1534.54	1258.91	452.771	-1486.89	1118.66	482.436	-1523.13	946.299	456.577	-1543.2	868.878	483.283	-1481.57	874.368	484.38	-1518.48	786.674
7686	0	331.192	-1812.33	1618.57	233.854	-1817.09	1621.75	350.981	-1659.53	1629.1	217.395	-1645.14	1627.92	256.055	-1596.4	1505.4	244.854	-1516.22	1256.65	270.444	-1709.61	1411.77	269.65	-1769.16	1257.61	159.938	-1520	1320.79	430.087	-1592.46	1443.1	459.115	-1543.42	1259	449.2	-1494.13	1119.2	478.145	-1527.17	946.195	451.828	-1546.77	868.698	477.914	-1484.58	874.836	478.774	-1520.44	786.571
7687	0	330.733	-1824.35	1617.63	233.557	-1829.22	1620.81	350.333	-1671.5	1628.32	216.753	-1657.4	1627.41	255.159	-1608.52	1504.64	243.707	-1528.18	1255.82	269.468	-1721.48	1410.99	268.222	-1780.99	1256.8	158.921	-1531.82	1320.2	428.92	-1604.13	1442.1	456.757	-1552.11	1258.42	445.531	-1501.77	1119.47	474.268	-1531.64	946.224	447.751	-1550.6	868.631	472.716	-1488.01	875.399	474.014	-1522.87	786.317
7688	0	330.197	-1836.4	1616.36	233.009	-1841.38	1620.35	349.626	-1683.45	1627.23	216.073	-1669.44	1626.68	254.286	-1620.54	1503.94	242.94	-1540.12	1254.97	268.814	-1733.23	1410.29	267.623	-1792.67	1256.09	157.861	-1543.68	1319.45	428.021	-1615.82	1441.44	455.236	-1561.25	1259.4	442.372	-1509.47	1120.25	470.509	-1536.47	945.951	444.236	-1554.52	868.477	467.907	-1491.72	876.1	469.481	-1525.37	786.623
7689	0	329.819	-1848.26	1615.9	232.512	-1853.41	1619.56	348.881	-1695.43	1626.01	215.248	-1681.74	1625.8	253.556	-1632.64	1503.31	242.243	-1552	1253.93	267.792	-1745.27	1409.55	266.797	-1804.51	1255.22	156.87	-1555.68	1318.6	427.006	-1627.63	1440.5	453.029	-1570.87	1258.52	438.815	-1517.78	1120.05	467.129	-1541.38	946.292	441.43	-1558.28	868.854	463.337	-1495.92	876.662	465.121	-1528.4	786.795
7690	0	329.322	-1860.36	1614.9	232.172	-1865.44	1618.92	348.258	-1707.32	1624.92	214.699	-1693.79	1624.87	252.658	-1644.78	1502.03	241.462	-1564.01	1252.75	266.838	-1757.45	1408.46	265.746	-1816.43	1253.99	156.045	-1567.57	1317.44	425.949	-1639.66	1439.26	450.772	-1581	1257.72	436.156	-1526.28	1120.93	463.929	-1546.97	946.414	438.458	-1563.77	869.016	459.183	-1500.57	877.385	461.219	-1531.73	786.904
7691	0	328.777	-1872.35	1613.58	231.677	-1877.65	1618.13	347.676	-1719.29	1623.69	214.072	-1706.09	1623.98	251.876	-1656.95	1501	240.777	-1576.05	1251.32	265.969	-1769.64	1407.23	263.811	-1828.56	1252.7	155.547	-1579.47	1316.87	424.936	-1651.77	1437.87	449.371	-1591.36	1258.23	433.771	-1535.18	1121.29	461.247	-1553.13	946.226	435.496	-1569.21	868.46	455.564	-1505.57	878.106	457.729	-1535.48	786.872
7692	0	328.37	-1884.46	1612.95	231.213	-1889.83	1617.43	346.987	-1731.2	1622.42	213.362	-1718.22	1622.85	251.118	-1669.14	1499.94	240.262	-1588.17	1250.25	265.172	-1781.79	1406.17	262.955	-1840.49	1251.56	154.873	-1591.32	1315.73	424.297	-1663.93	1437.35	447.823	-1601.83	1256.98	431.394	-1544.94	1121.58	458.735	-1559.47	946.204	433.28	-1575.01	868.607	452.213	-1511.16	878.962	454.575	-1539.54	787.188
7693	0	327.882	-1896.63	1611.99	230.773	-1901.91	1616.44	346.214	-1743.3	1620.9	212.519	-1730.13	1621.52	250.368	-1681.43	1498.65	240.013	-1600.2	1249.25	264.204	-1794.1	1405	262.508	-1852.35	1250.2	154.163	-1603.3	1314.48	423.676	-1676.22	1436.34	446.685	-1613.09	1256.97	429.482	-1554.9	1121.71	456.867	-1566.43	946.673	431.608	-1581.03	868.521	449.497	-1517.07	879.881	452.034	-1544.21	787.526
7694	0	327.438	-1908.77	1610.98	230.386	-1914.13	1615.33	345.563	-1755.23	1619.61	212.08	-1742.44	1620.25	249.791	-1693.66	1497.44	239.569	-1612.49	1247.79	263.469	-1806.51	1403.64	261.448	-1864.58	1248.75	153.776	-1615.41	1313.18	422.942	-1688.8	1435.28	445.504	-1624.57	1256.38	427.998	-1565.13	1121.82	455.154	-1573.92	946.696	430.056	-1587.8	868.436	447.245	-1523.74	880.95	449.485	-1549.31	787.489
7695	0	327.261	-1920.43	1610.17	230.054	-1926.17	1614.92	345.115	-1767.14	1618.33	211.341	-1754.55	1619.01	249.301	-1706.03	1496.16	239.495	-1624.87	1246.84	262.867	-1818.98	1402.09	260.682	-1876.69	1247.12	153.574	-1627.38	1312.04	422.473	-1701.5	1433.99	444.833	-1636.23	1255.53	426.754	-1576.15	1121.51	453.87	-1581.99	946.571	428.885	-1595.01	868.284	445.214	-1530.92	881.264	447.792	-1554.6	788.264
7696	0	326.662	-1932.65	1609.25	229.648	-1938.19	1613.98	344.316	-1779.21	1616.84	210.774	-1766.55	1617.73	248.937	-1718.23	1494.81	239.442	-1637.2	1245.53	262.145	-1831.57	1400.91	259.884	-1888.93	1245.78	153.188	-1639.41	1310.79	422.144	-1714.22	1433.17	444.626	-1648.16	1255.12	425.885	-1587.56	1121.33	452.9	-1590.78	946.362	428.08	-1602.7	867.849	443.935	-1538.72	881.824	446.42	-1560.79	788.322
7697	0	326.228	-1944.69	1608.4	229.203	-1950.31	1612.99	343.864	-1791.18	1615.59	210.215	-1778.74	1616.18	248.562	-1730.67	1493.45	239.461	-1649.77	1244.2	261.494	-1844.1	1399.64	258.982	-1901.77	1243.71	153.286	-1651.65	1309.48	421.799	-1727.07	1431.76	443.974	-1660.87	1254.12	425.287	-1599.35	1120.63	452.58	-1600.25	946.055	427.604	-1611.01	867.347	443.238	-1547.14	882.227	445.269	-1567.73	788.052
7698	0	325.984	-1956.52	1607.37	228.873	-1962.46	1611.93	343.463	-1803.19	1614.24	209.93	-1790.81	1614.74	248.378	-1743.12	1491.79	239.513	-1662.26	1242.71	261.165	-1856.18	1398.73	258.651	-1914.19	1243	153.281	-1663.81	1307.99	421.604	-1740.16	1430.6	443.831	-1673.69	1253.02	425.257	-1611.6	1119.81	452.676	-1610.27	945.585	427.827	-1619.95	866.771	443.171	-1556.28	882.715	444.968	-1575.13	788.081
7699	0	325.548	-1969.39	1606.31	228.391	-1974.54	1610.77	342.968	-1815.37	1612.74	209.424	-1802.89	1613.36	248.29	-1755.48	1490.51	239.805	-1674.98	1241.51	260.616	-1869.12	1397.11	258.069	-1926.77	1241.34	153.383	-1676.09	1306.55	421.557	-1753.22	1428.93	444.733	-1686.25	1252.69	425.38	-1624.41	1119.39	453.16	-1620.8	945.221	428.314	-1629.44	866.113	443.826	-1566	883.015	444.873	-1583.35	787.575
7700	0	325.075	-1981.12	1605.73	228.099	-1986.43	1609.99	342.806	-1827.36	1611.69	208.919	-1814.71	1611.83	248.428	-1767.75	1489.11	239.864	-1687.77	1239.5	260.198	-1882	1395.7	256.566	-1939.75	1239.99	153.796	-1688.44	1305.19	421.666	-1766.42	1427.93	444.546	-1699.81	1250.43	425.951	-1637.36	1118.27	453.98	-1631.95	944.46	429.205	-1639.57	865.112	444.852	-1576.38	882.722	445.415	-1592.24	787.169
7701	0	324.779	-1993.15	1604.87	227.651	-1998.41	1609.05	342.589	-1839.57	1610.47	208.827	-1826.82	1610.55	248.568	-1780.09	1487.69	240.213	-1700.87	1237.9	259.871	-1895.01	1394.48	255.751	-1952.84	1238.87	154.205	-1700.92	1303.67	422.088	-1779.51	1426.8	444.836	-1713.53	1248.78	426.89	-1650.48	1116.67	455.071	-1643.89	943.181	430.68	-1650.21	863.656	446.558	-1587.1	883.076	446.47	-1601.75	786.417
7702	0	324.299	-2005.7	1604.08	227.29	-2010.43	1608.12	342.454	-1851.84	1609.5	208.871	-1838.91	1608.97	248.916	-1792.69	1486.11	240.759	-1714	1236.57	259.652	-1907.55	1393.62	255.573	-1965.85	1238.27	154.775	-1713.52	1302.13	422.113	-1792.97	1424.96	445.562	-1726.99	1247.07	427.892	-1664.29	1115.3	456.822	-1656.43	942.117	432.264	-1661.78	862.762	448.581	-1598.97	882.226	448.281	-1612.19	785.712
[truncated: 69 more columns]

## Sheet: Sheet2
Devices
		025370 - Force			025370 - Moment			025370 - CoP			027571 - Force			027571 - Moment			027571 - CoP			037720 - Force			037720 - Moment			037720 - CoP
Frame	Sub Frame	Fx	Fy	Fz	Mx	My	Mz	Cx	Cy	Cz	Fx	Fy	Fz	Mx	My	Mz	Cx	Cy	Cz	Fx	Fy	Fz	Mx	My	Mz	Cx	Cy	Cz
		N	N	N	N.mm	N.mm	N.mm	mm	mm	mm	N	N	N	N.mm	N.mm	N.mm	mm	mm	mm	N	N	N	N.mm	N.mm	N.mm	mm	mm	mm
7367	0	0	0	0	0	0	0	200	300	0	0	0	0	0	0	0	200	903	0	0	0	0	0	0	0	603	903	0
7367	1	0	0	0	0	0	0	200	300	0	0	0	0	0	0	0	200	903	0	0	0	0	0	0	0	603	903	0
7367	2	0	0	0	0	0	0	200	300	0	0	0	0	0	0	0	200	903	0	0	0	0	0	0	0	603	903	0
7367	3	0	0	0	0	0	0	200	300	0	0	0	0	0	0	0	200	903	0	0	0	0	0	0	0	603	903	0
7367	4	0	0	0	0	0	0	200	300	0	0	0	0	0	0	0	200	903	0	0	0	0	0	0	0	603	903	0
7367	5	0	0	0	0	0	0	200	300	0	0	0	0	0	0	0	200	903	0	0	0	0	0	0	0	603	903	0
7367	6	0	0	0	0	0	0	200	300	0	0	0	0	0	0	0	200	903	0	0	0	0	0	0	0	603	903	0
7367	7	0	0	0	0	0	0	200	300	0	0	0	0	0	0	0	200	903	0	0	0	0	0	0	0	603	903	0
7367	8	0	0	0	0	0	0	200	300	0	0	0	0	0	0	0	200	903	0	0	0	0	0	0	0	603	903	0
7367	9	0	0	0	0	0	0	200	300	0	0	0	0	0	0	0	200	903	0	0	0	0	0	0	0	603	903	0
7368	0	0	0	0	0	0	0	200	300	0	0	0	0	0	0	0	200	903	0	0	0	0	0	0	0	603	903	0
7368	1	0	0	0	0	0	0	200	300	0	0	0	0	0	0	0	200	903	0	0	0	0	0	0	0	603	903	0
7368	2	0	0	0	0	0	0	200	300	0	0	0	0	0	0	0	200	903	0	0	0	0	0	0	0	603	903	0
7368	3	0	0	0	0	0	0	200	300	0	0	0	0	0	0	0	200	903	0	0	0	0	0	0	0	603	903	0
7368	4	0	0	0	0	0	0	200	300	0	0	0	0	0	0	0	200	903	0	0	0	0	0	0	0	603	903	0
7368	5	0	0	0	0	0	0	200	300	0	0	0	0	0	0	0	200	903	0	0	0	0	0	0	0	603	903	0
7368	6	0	0	0	0	0	0	200	300	0	0	0	0	0	0	0	200	903	0	0	0	0	0	0	0	603	903	0
7368	7	0	0	0	0	0	0	200	300	0	0	0	0	0	0	0	200	903	0	0	0	0	0	0	0	603	903	0
7368	8	0	0	0	0	0	0	200	300	0	0	0	0	0	0	0	200	903	0	0	0	0	0	0	0	603	903	0
7368	9	0	0	0	0	0	0	200	300	0	0	0	0	0	0	0	200	903	0	0	0	0	0	0	0	603	903	0
7369	0	0	0	0	0	0	0	200	300	0	0	0	0	0	0	0	200	903	0	0	0	0	0	0	0	603	903	0
7369	1	0	0	0	0	0	0	200	300	0	0	0	0	0	0	0	200	903	0	0	0	0	0	0	0	603	903	0
7369	2	0	0	0	0	0	0	200	300	0	0	0	0	0	0	0	200	903	0	0	0	0	0	0	0	603	903	0
7369	3	0	0	0	0	0	0	200	300	0	0	0	0	0	0	0	200	903	0	0	0	0	0	0	0	603	903	0
7369	4	0	0	0	0	0	0	200	300	0	0	0	0	0	0	0	200	903	0	0	0	0	0	0	0	603	903	0
7369	5	0	0	0	0	0	0	200	300	0	0	0	0	0	0	0	200	903	0	0	0	0	0	0	0	603	903	0
7369	6	0	0	0	0	0	0	200	300	0	0	0	0	0	0	0	200	903	0	0	0	0	0	0	0	603	903	0
7369	7	0	0	0	0	0	0	200	300	0	0	0	0	0	0	0	200	903	0	0	0	0	0	0	0	603	903	0
7369	8	0	0	0	0	0	0	200	300	0	0	0	0	0	0	0	200	903	0	0	0	0	0	0	0	603	903	0
7369	9	0	0	0	0	0	0	200	300	0	0	0	0	0	0	0	200	903	0	0	0	0	0	0	0	603	903	0
7370	0	0	0	0	0	0	0	200	300	0	0	0	0	0	0	0	200	903	0	0	0	0	0	0	0	603	903	0
7370	1	0	0	0	0	0	0	200	300	0	0	0	0	0	0	0	200	903	0	0	0	0	0	0	0	603	903	0
7370	2	0	0	0	0	0	0	200	300	0	0	0	0	0	0	0	200	903	0	0	0	0	0	0	0	603	903	0
7370	3	0	0	0	0	0	0	200	300	0	0	0	0	0	0	0	200	903	0	0	0	0	0	0	0	603	903	0
7370	4	0	0	0	0	0	0	200	300	0	0	0	0	0	0	0	200	903	0	0	0	0	0	0	0	603	903	0
7370	5	0	0	0	0	0	0	200	300	0	0	0	0	0	0	0	200	903	0	0	0	0	0	0	0	603	903	0
7370	6	0	0	0	0	0	0	200	300	0	0	0	0	0	0	0	200	903	0	0	0	0	0	0	0	603	903	0
7370	7	0	0	0	0	0	0	200	300	0	0	0	0	0	0	0	200	903	0	0	0	0	0	0	0	603	903	0
7370	8	0	0	0	0	0	0	200	300	0	0	0	0	0	0	0	200	903	0	0	0	0	0	0	0	603	903	0
7370	9	0	0	0	0	0	0	200	300	0	0	0	0	0	0	0	200	903	0	0	0	0	0	0	0	603	903	0
7371	0	0	0	0	0	0	0	200	300	0	0	0	0	0	0	0	200	903	0	0	0	0	0	0	0	603	903	0
7371	1	0	0	0	0	0	0	200	300	0	0	0	0	0	0	0	200	903	0	0	0	0	0	0	0	603	903	0
7371	2	0	0	0	0	0	0	200	300	0	0	0	0	0	0	0	200	903	0	0	0	0	0	0	0	603	903	0
7371	3	0	0	0	0	0	0	200	300	0	0	0	0	0	0	0	200	903	0	0	0	0	0	0	0	603	903	0
7371	4	0	0	0	0	0	0	200	300	0	0	0	0	0	0	0	200	903	0	0	0	0	0	0	0	603	903	0
7371	5	0	0	0	0	0	0	200	300	0	0	0	0	0	0	0	200	903	0	0	0	0	0	0	0	603	903	0
7371	6	0	0	0	0	0	0	200	300	0	0	0	0	0	0	0	200	903	0	0	0	0	0	0	0	603	903	0
7371	7	0	0	0	0	0	0	200	300	0	0	0	0	0	0	0	200	903	0	0	0	0	0	0	0	603	903	0
7371	8	0	0	0	0	0	0	200	300	0	0	0	0	0	0	0	200	903	0	0	0	0	0	0	0	603	903	0
7371	9	0	0	0	0	0	0	200	300	0	0	0	0	0	0	0	200	903	0	0	0	0	0	0	0	603	903	0
7372	0	0	0	0	0	0	0	200	300	0	0	0	0	0	0	0	200	903	0	0	0	0	0	0	0	603	903	0
7372	1	0	0	0	0	0	0	200	300	0	0	0	0	0	0	0	200	903	0	0	0	0	0	0	0	603	903	0
7372	2	0	0	0	0	0	0	200	300	0	0	0	0	0	0	0	200	903	0	0	0	0	0	0	0	603	903	0
7372	3	0	0	0	0	0	0	200	300	0	0	0	0	0	0	0	200	903	0	0	0	0	0	0	0	603	903	0
7372	4	0	0	0	0	0	0	200	300	0	0	0	0	0	0	0	200	903	0	0	0	0	0	0	0	603	903	0
7372	5	0	0	0	0	0	0	200	300	0	0	0	0	0	0	0	200	903	0	0	0	0	0	0	0	603	903	0
7372	6	0	0	0	0	0	0	200	300	0	0	0	0	0	0	0	200	903	0	0	0	0	0	0	0	603	903	0
7372	7	0	0	0	0	0	0	200	300	0	0	0	0	0	0	0	200	903	0	0	0	0	0	0	0	603	903	0
7372	8	0	0	0	0	0	0	200	300	0	0	0	0	0	0	0	200	903	0	0	0	0	0	0	0	603	903	0
7372	9	0	0	0	0	0	0	200	300	0	0	0	0	0	0	0	200	903	0	0	0	0	0	0	0	603	903	0
7373	0	0	0	0	0	0	0	200	300	0	0	0	0	0	0	0	200	903	0	0	0	0	0	0	0	603	903	0
7373	1	0	0	0	0	0	0	200	300	0	0	0	0	0	0	0	200	903	0	0	0	0	0	0	0	603	903	0
7373	2	0	0	0	0	0	0	200	300	0	0	0	0	0	0	0	200	903	0	0	0	0	0	0	0	603	903	0
7373	3	0	0	0	0	0	0	200	300	0	0	0	0	0	0	0	200	903	0	0	0	0	0	0	0	603	903	0
7373	4	0	0	0	0	0	0	200	300	0	0	0	0	0	0	0	200	903	0	0	0	0	0	0	0	603	903	0
7373	5	0	0	0	0	0	0	200	300	0	0	0	0	0	0	0	200	903	0	0	0	0	0	0	0	603	903	0
7373	6	0	0	0	0	0	0	200	300	0	0	0	0	0	0	0	200	903	0	0	0	0	0	0	0	603	903	0
7373	7	0	0	0	0	0	0	200	300	0	0	0	0	0	0	0	200	903	0	0	0	0	0	0	0	603	903	0
7373	8	0	0	0	0	0	0	200	300	0	0	0	0	0	0	0	200	903	0	0	0	0	0	0	0	603	903	0
7373	9	0	0	0	0	0	0	200	300	0	0	0	0	0	0	0	200	903	0	0	0	0	0	0	0	603	903	0
7374	0	0	0	0	0	0	0	200	300	0	0	0	0	0	0	0	200	903	0	0	0	0	0	0	0	603	903	0
7374	1	0	0	0	0	0	0	200	300	0	0	0	0	0	0	0	200	903	0	0	0	0	0	0	0	603	903	0
7374	2	0	0	0	0	0	0	200	300	0	0	0	0	0	0	0	200	903	0	0	0	0	0	0	0	603	903	0
7374	3	0	0	0	0	0	0	200	300	0	0	0	0	0	0	0	200	903	0	0	0	0	0	0	0	603	903	0
7374	4	0	0	0	0	0	0	200	300	0	0	0	0	0	0	0	200	903	0	0	0	0	0	0	0	603	903	0
7374	5	0	0	0	0	0	0	200	300	0	0	0	0	0	0	0	200	903	0	0	0	0	0	0	0	603	903	0
7374	6	0	0	0	0	0	0	200	300	0	0	0	0	0	0	0	200	903	0	0	0	0	0	0	0	603	903	0
7374	7	0	0	0	0	0	0	200	300	0	0	0	0	0	0	0	200	903	0	0	0	0	0	0	0	603	903	0
7374	8	0	0	0	0	0	0	200	300	0	0	0	0	0	0	0	200	903	0	0	0	0	0	0	0	603	903	0
7374	9	0	0	0	0	0	0	200	300	0	0	0	0	0	0	0	200	903	0	0	0	0	0	0	0	603	903	0
7375	0	0	0	0	0	0	0	200	300	0	0	0	0	0	0	0	200	903	0	0	0	0	0	0	0	603	903	0
7375	1	0	0	0	0	0	0	200	300	0	0	0	0	0	0	0	200	903	0	0	0	0	0	0	0	603	903	0
7375	2	0	0	0	0	0	0	200	300	0	0	0	0	0	0	0	200	903	0	0	0	0	0	0	0	603	903	0
7375	3	0	0	0	0	0	0	200	300	0	0	0	0	0	0	0	200	903	0	0	0	0	0	0	0	603	903	0
7375	4	0	0	0	0	0	0	200	300	0	0	0	0	0	0	0	200	903	0	0	0	0	0	0	0	603	903	0
7375	5	0	0	0	0	0	0	200	300	0	0	0	0	0	0	0	200	903	0	0	0	0	0	0	0	603	903	0
7375	6	0	0	0	0	0	0	200	300	0	0	0	0	0	0	0	200	903	0	0	0	0	0	0	0	603	903	0
7375	7	0	0	0	0	0	0	200	300	0	0	0	0	0	0	0	200	903	0	0	0	0	0	0	0	603	903	0
7375	8	0	0	0	0	0	0	200	300	0	0	0	0	0	0	0	200	903	0	0	0	0	0	0	0	603	903	0
7375	9	0	0	0	0	0	0	200	300	0	0	0	0	0	0	0	200	903	0	0	0	0	0	0	0	603	903	0
7376	0	0	0	0	0	0	0	200	300	0	0	0	0	0	0	0	200	903	0	0	0	0	0	0	0	603	903	0
7376	1	0	0	0	0	0	0	200	300	0	0	0	0	0	0	0	200	903	0	0	0	0	0	0	0	603	903	0
7376	2	0	0	0	0	0	0	200	300	0	0	0	0	0	0	0	200	903	0	0	0	0	0	0	0	603	903	0
7376	3	0	0	0	0	0	0	200	300	0	0	0	0	0	0	0	200	903	0	0	0	0	0	0	0	603	903	0
7376	4	0	0	0	0	0	0	200	300	0	0	0	0	0	0	0	200	903	0	0	0	0	0	0	0	603	903	0
7376	5	0	0	0	0	0	0	200	300	0	0	0	0	0	0	0	200	903	0	0	0	0	0	0	0	603	903	0
7376	6	0	0	0	0	0	0	200	300	0	0	0	0	0	0	0	200	903	0	0	0	0	0	0	0	603	903	0
7376	7	0	0	0	0	0	0	200	300	0	0	0	0	0	0	0	200	903	0	0	0	0	0	0	0	603	903	0
7376	8	0	0	0	0	0	0	200	300	0	0	0	0	0	0	0	200	903	0	0	0	0	0	0	0	603	903	0
7376	9	0	0	0	0	0	0	200	300	0	0	0	0	0	0	0	200	903	0	0	0	0	0	0	0	603	903	0
7377	0	0	0	0	0	0	0	200	300	0	0	0	0	0	0	0	200	903	0	0	0	0	0	0	0	603	903	0
7377	1	0	0	0	0	0	0	200	300	0	0	0	0	0	0	0	200	903	0	0	0	0	0	0	0	603	903	0
7377	2	0	0	0	0	0	0	200	300	0	0	0	0	0	0	0	200	903	0	0	0	0	0	0	0	603	903	0
7377	3	0	0	0	0	0	0	200	300	0	0	0	0	0	0	0	200	903	0	0	0	0	0	0	0	603	903	0
7377	4	0	0	0	0	0	0	200	300	0	0	0	0	0	0	0	200	903	0	0	0	0	0	0	0	603	903	0
7377	5	0	0	0	0	0	0	200	300	0	0	0	0	0	0	0	200	903	0	0	0	0	0	0	0	603	903	0
7377	6	0	0	0	0	0	0	200	300	0	0	0	0	0	0	0	200	903	0	0	0	0	0	0	0	603	903	0
7377	7	0	0	0	0	0	0	200	300	0	0	0	0	0	0	0	200	903	0	0	0	0	0	0	0	603	903	0
7377	8	0	0	0	0	0	0	200	300	0	0	0	0	0	0	0	200	903	0	0	0	0	0	0	0	603	903	0
7377	9	0	0	0	0	0	0	200	300	0	0	0	0	0	0	0	200	903	0	0	0	0	0	0	0	603	903	0
7378	0	0	0	0	0	0	0	200	300	0	0	0	0	0	0	0	200	903	0	0	0	0	0	0	0	603	903	0
7378	1	0	0	0	0	0	0	200	300	0	0	0	0	0	0	0	200	903	0	0	0	0	0	0	0	603	903	0
7378	2	0	0	0	0	0	0	200	300	0	0	0	0	0	0	0	200	903	0	0	0	0	0	0	0	603	903	0
7378	3	0	0	0	0	0	0	200	300	0	0	0	0	0	0	0	200	903	0	0	0	0	0	0	0	603	903	0
7378	4	0	0	0	0	0	0	200	300	0	0	0	0	0	0	0	200	903	0	0	0	0	0	0	0	603	903	0
7378	5	0	0	0	0	0	0	200	300	0	0	0	0	0	0	0	200	903	0	0	0	0	0	0	0	603	903	0
7378	6	0	0	0	0	0	0	200	300	0	0	0	0	0	0	0	200	903	0	0	0	0	0	0	0	603	903	0
7378	7	0	0	0	0	0	0	200	300	0	0	0	0	0	0	0	200	903	0	0	0	0	0	0	0	603	903	0
7378	8	0	0	0	0	0	0	200	300	0	0	0	0	0	0	0	200	903	0	0	0	0	0	0	0	603	903	0
7378	9	0	0	0	0	0	0	200	300	0	0	0	0	0	0	0	200	903	0	0	0	0	0	0	0	603	903	0
7379	0	0	0	0	0	0	0	200	300	0	0	0	0	0	0	0	200	903	0	0	0	0	0	0	0	603	903	0
7379	1	0	0	0	0	0	0	200	300	0	0	0	0	0	0	0	200	903	0	0	0	0	0	0	0	603	903	0
7379	2	0	0	0	0	0	0	200	300	0	0	0	0	0	0	0	200	903	0	0	0	0	0	0	0	603	903	0
7379	3	0	0	0	0	0	0	200	300	0	0	0	0	0	0	0	200	903	0	0	0	0	0	0	0	603	903	0
7379	4	0	0	0	0	0	0	200	300	0	0	0	0	0	0	0	200	903	0	0	0	0	0	0	0	603	903	0
7379	5	0	0	0	0	0	0	200	300	0	0	0	0	0	0	0	200	903	0	0	0	0	0	0	0	603	903	0
7379	6	0	0	0	0	0	0	200	300	0	0	0	0	0	0	0	200	903	0	0	0	0	0	0	0	603	903	0
7379	7	0	0	0	0	0	0	200	300	0	0	0	0	0	0	0	200	903	0	0	0	0	0	0	0	603	903	0
7379	8	0	0	0	0	0	0	200	300	0	0	0	0	0	0	0	200	903	0	0	0	0	0	0	0	603	903	0
7379	9	0	0	0	0	0	0	200	300	0	0	0	0	0	0	0	200	903	0	0	0	0	0	0	0	603	903	0
7380	0	0	0	0	0	0	0	200	300	0	0	0	0	0	0	0	200	903	0	0	0	0	0	0	0	603	903	0
7380	1	0	0	0	0	0	0	200	300	0	0	0	0	0	0	0	200	903	0	0	0	0	0	0	0	603	903	0
7380	2	0	0	0	0	0	0	200	300	0	0	0	0	0	0	0	200	903	0	0	0	0	0	0	0	603	903	0
7380	3	0	0	0	0	0	0	200	300	0	0	0	0	0	0	0	200	903	0	0	0	0	0	0	0	603	903	0
7380	4	0	0	0	0	0	0	200	300	0	0	0	0	0	0	0	200	903	0	0	0	0	0	0	0	603	903	0
7380	5	0	0	0	0	0	0	200	300	0	0	0	0	0	0	0	200	903	0	0	0	0	0	0	0	603	903	0
7380	6	0	0	0	0	0	0	200	300	0	0	0	0	0	0	0	200	903	0	0	0	0	0	0	0	603	903	0
7380	7	0	0	0	0	0	0	200	300	0	0	0	0	0	0	0	200	903	0	0	0	0	0	0	0	603	903	0
7380	8	0	0	0	0	0	0	200	300	0	0	0	0	0	0	0	200	903	0	0	0	0	0	0	0	603	903	0
7380	9	0	0	0	0	0	0	200	300	0	0	0	0	0	0	0	200	903	0	0	0	0	0	0	0	603	903	0
7381	0	0	0	0	0	0	0	200	300	0	0	0	0	0	0	0	200	903	0	0	0	0	0	0	0	603	903	0
7381	1	0	0	0	0	0	0	200	300	0	0	0	0	0	0	0	200	903	0	0	0	0	0	0	0	603	903	0
7381	2	0	0	0	0	0	0	200	300	0	0	0	0	0	0	0	200	903	0	0	0	0	0	0	0	603	903	0
7381	3	0	0	0	0	0	0	200	300	0	0	0	0	0	0	0	200	903	0	0	0	0	0	0	0	603	903	0
7381	4	0	0	0	0	0	0	200	300	0	0	0	0	0	0	0	200	903	0	0	0	0	0	0	0	603	903	0
7381	5	0	0	0	0	0	0	200	300	0	0	0	0	0	0	0	200	903	0	0	0	0	0	0	0	603	903	0
7381	6	0	0	0	0	0	0	200	300	0	0	0	0	0	0	0	200	903	0	0	0	0	0	0	0	603	903	0
7381	7	0	0	0	0	0	0	200	300	0	0	0	0	0	0	0	200	903	0	0	0	0	0	0	0	603	903	0
7381	8	0	0	0	0	0	0	200	300	0	0	0	0	0	0	0	200	903	0	0	0	0	0	0	0	603	903	0
7381	9	0	0	0	0	0	0	200	300	0	0	0	0	0	0	0	200	903	0	0	0	0	0	0	0	603	903	0
7382	0	0	0	0	0	0	0	200	300	0	0	0	0	0	0	0	200	903	0	0	0	0	0	0	0	603	903	0
7382	1	0	0	0	0	0	0	200	300	0	0	0	0	0	0	0	200	903	0	0	0	0	0	0	0	603	903	0
7382	2	0	0	0	0	0	0	200	300	0	0	0	0	0	0	0	200	903	0	0	0	0	0	0	0	603	903	0
7382	3	0	0	0	0	0	0	200	300	0	0	0	0	0	0	0	200	903	0	0	0	0	0	0	0	603	903	0
7382	4	0	0	0	0	0	0	200	300	0	0	0	0	0	0	0	200	903	0	0	0	0	0	0	0	603	903	0
7382	5	0	0	0	0	0	0	200	300	0	0	0	0	0	0	0	200	903	0	0	0	0	0	0	0	603	903	0
7382	6	0	0	0	0	0	0	200	300	0	0	0	0	0	0	0	200	903	0	0	0	0	0	0	0	603	903	0
7382	7	0	0	0	0	0	0	200	300	0	0	0	0	0	0	0	200	903	0	0	0	0	0	0	0	603	903	0
7382	8	0	0	0	0	0	0	200	300	0	0	0	0	0	0	0	200	903	0	0	0	0	0	0	0	603	903	0
7382	9	0	0	0	0	0	0	200	300	0	0	0	0	0	0	0	200	903	0	0	0	0	0	0	0	603	903	0
7383	0	0	0	0	0	0	0	200	300	0	0	0	0	0	0	0	200	903	0	0	0	0	0	0	0	603	903	0
7383	1	0	0	0	0	0	0	200	300	0	0	0	0	0	0	0	200	903	0	0	0	0	0	0	0	603	903	0
7383	2	0	0	0	0	0	0	200	300	0	0	0	0	0	0	0	200	903	0	0	0	0	0	0	0	603	903	0
7383	3	0	0	0	0	0	0	200	300	0	0	0	0	0	0	0	200	903	0	0	0	0	0	0	0	603	903	0
7383	4	0	0	0	0	0	0	200	300	0	0	0	0	0	0	0	200	903	0	0	0	0	0	0	0	603	903	0
7383	5	0	0	0	0	0	0	200	300	0	0	0	0	0	0	0	200	903	0	0	0	0	0	0	0	603	903	0
7383	6	0	0	0	0	0	0	200	300	0	0	0	0	0	0	0	200	903	0	0	0	0	0	0	0	603	903	0
7383	7	0	0	0	0	0	0	200	300	0	0	0	0	0	0	0	200	903	0	0	0	0	0	0	0	603	903	0
7383	8	0	0	0	0	0	0	200	300	0	0	0	0	0	0	0	200	903	0	0	0	0	0	0	0	603	903	0
7383	9	0	0	0	0	0	0	200	300	0	0	0	0	0	0	0	200	903	0	0	0	0	0	0	0	603	903	0
7384	0	0	0	0	0	0	0	200	300	0	0	0	0	0	0	0	200	903	0	0	0	0	0	0	0	603	903	0
7384	1	0	0	0	0	0	0	200	300	0	0	0	0	0	0	0	200	903	0	0	0	0	0	0	0	603	903	0
7384	2	0	0	0	0	0	0	200	300	0	0	0	0	0	0	0	200	903	0	0	0	0	0	0	0	603	903	0
7384	3	0	0	0	0	0	0	200	300	0	0	0	0	0	0	0	200	903	0	0	0	0	0	0	0	603	903	0
7384	4	0	0	0	0	0	0	200	300	0	0	0	0	0	0	0	200	903	0	0	0	0	0	0	0	603	903	0
7384	5	0	0	0	0	0	0	200	300	0	0	0	0	0	0	0	200	903	0	0	0	0	0	0	0	603	903	0
7384	6	0	0	0	0	0	0	200	300	0	0	0	0	0	0	0	200	903	0	0	0	0	0	0	0	603	903	0
7384	7	0	0	0	0	0	0	200	300	0	0	0	0	0	0	0	200	903	0	0	0	0	0	0	0	603	903	0
7384	8	0	0	0	0	0	0	200	300	0	0	0	0	0	0	0	200	903	0	0	0	0	0	0	0	603	903	0
7384	9	0	0	0	0	0	0	200	300	0	0	0	0	0	0	0	200	903	0	0	0	0	0	0	0	603	903	0
7385	0	0	0	0	0	0	0	200	300	0	0	0	0	0	0	0	200	903	0	0	0	0	0	0	0	603	903	0
7385	1	0	0	0	0	0	0	200	300	0	0	0	0	0	0	0	200	903	0	0	0	0	0	0	0	603	903	0
7385	2	0	0	0	0	0	0	200	300	0	0	0	0	0	0	0	200	903	0	0	0	0	0	0	0	603	903	0
7385	3	0	0	0	0	0	0	200	300	0	0	0	0	0	0	0	200	903	0	0	0	0	0	0	0	603	903	0
7385	4	0	0	0	0	0	0	200	300	0	0	0	0	0	0	0	200	903	0	0	0	0	0	0	0	603	903	0
7385	5	0	0	0	0	0	0	200	300	0	0	0	0	0	0	0	200	903	0	0	0	0	0	0	0	603	903	0
7385	6	0	0	0	0	0	0	200	300	0	0	0	0	0	0	0	200	903	0	0	0	0	0	0	0	603	903	0
7385	7	0	0	0	0	0	0	200	300	0	0	0	0	0	0	0	200	903	0	0	0	0	0	0	0	603	903	0
7385	8	0	0	0	0	0	0	200	300	0	0	0	0	0	0	0	200	903	0	0	0	0	0	0	0	603	903	0
7385	9	0	0	0	0	0	0	200	300	0	0	0	0	0	0	0	200	903	0	0	0	0	0	0	0	603	903	0
7386	0	0	0	0	0	0	0	200	300	0	0	0	0	0	0	0	200	903	0	0	0	0	0	0	0	603	903	0
7386	1	0	0	0	0	0	0	200	300	0	0	0	0	0	0	0	200	903	0	0	0	0	0	0	0	603	903	0
7386	2	0	0	0	0	0	0	200	300	0	0	0	0	0	0	0	200	903	0	0	0	0	0	0	0	603	903	0
7386	3	0	0	0	0	0	0	200	300	0	0	0	0	0	0	0	200	903	0	0	0	0	0	0	0	603	903	0
7386	4	0	0	0	0	0	0	200	300	0	0	0	0	0	0	0	200	903	0	0	0	0	0	0	0	603	903	0
7386	5	0	0	0	0	0	0	200	300	0	0	0	0	0	0	0	200	903	0	0	0	0	0	0	0	603	903	0
7386	6	0	0	0	0	0	0	200	300	0	0	0	0	0	0	0	200	903	0	0	0	0	0	0	0	603	903	0
7386	7	0	0	0	0	0	0	200	300	0	0	0	0	0	0	0	200	903	0	0	0	0	0	0	0	603	903	0
7386	8	0	0	0	0	0	0	200	300	0	0	0	0	0	0	0	200	903	0	0	0	0	0	0	0	603	903	0
7386	9	0	0	0	0	0	0	200	300	0	0	0	0	0	0	0	200	903	0	0	0	0	0	0	0	603	903	0
7387	0	0	0	0	0	0	0	200	300	0	0	0	0	0	0	0	200	903	0	0	0	0	0	0	0	603	903	0
7387	1	0	0	0	0	0	0	200	300	0	0	0	0	0	0	0	200	903	0	0	0	0	0	0	0	603	903	0
7387	2	0	0	0	0	0	0	200	300	0	0	0	0	0	0	0	200	903	0	0	0	0	0	0	0	603	903	0
7387	3	0	0	0	0	0	0	200	300	0	0	0	0	0	0	0	200	903	0	0	0	0	0	0	0	603	903	0
7387	4	0	0	0	0	0	0	200	300	0	0	0	0	0	0	0	200	903	0	0	0	0	0	0	0	603	903	0
7387	5	0	0	0	0	0	0	200	300	0	0	0	0	0	0	0	200	903	0	0	0	0	0	0	0	603	903	0
7387	6	0	0	0	0	0	0	200	300	0	0	0	0	0	0	0	200	903	0	0	0	0	0	0	0	603	903	0
7387	7	0	0	0	0	0	0	200	300	0	0	0	0	0	0	0	200	903	0	0	0	0	0	0	0	603	903	0
7387	8	0	0	0	0	0	0	200	300	0	0	0	0	0	0	0	200	903	0	0	0	0	0	0	0	603	903	0
7387	9	0	0	0	0	0	0	200	300	0	0	0	0	0	0	0	200	903	0	0	0	0	0	0	0	603	903	0
7388	0	0	0	0	0	0	0	200	300	0	0	0	0	0	0	0	200	903	0	0	0	0	0	0	0	603	903	0
7388	1	0	0	0	0	0	0	200	300	0	0	0	0	0	0	0	200	903	0	0	0	0	0	0	0	603	903	0
7388	2	0	0	0	0	0	0	200	300	0	0	0	0	0	0	0	200	903	0	0	0	0	0	0	0	603	903	0
7388	3	0	0	0	0	0	0	200	300	0	0	0	0	0	0	0	200	903	0	0	0	0	0	0	0	603	903	0
7388	4	0	0	0	0	0	0	200	300	0	0	0	0	0	0	0	200	903	0	0	0	0	0	0	0	603	903	0
7388	5	0	0	0	0	0	0	200	300	0	0	0	0	0	0	0	200	903	0	0	0	0	0	0	0	603	903	0
7388	6	0	0	0	0	0	0	200	300	0	0	0	0	0	0	0	200	903	0	0	0	0	0	0	0	603	903	0
7388	7	0	0	0	0	0	0	200	300	0	0	0	0	0	0	0	200	903	0	0	0	0	0	0	0	603	903	0
7388	8	0	0	0	0	0	0	200	300	0	0	0	0	0	0	0	200	903	0	0	0	0	0	0	0	603	903	0
7388	9	0	0	0	0	0	0	200	300	0	0	0	0	0	0	0	200	903	0	0	0	0	0	0	0	603	903	0
7389	0	0	0	0	0	0	0	200	300	0	0	0	0	0	0	0	200	903	0	0	0	0	0	0	0	603	903	0
7389	1	0	0	0	0	0	0	200	300	0	0	0	0	0	0	0	200	903	0	0	0	0	0	0	0	603	903	0
7389	2	0	0	0	0	0	0	200	300	0	0	0	0	0	0	0	200	903	0	0	0	0	0	0	0	603	903	0
7389	3	0	0	0	0	0	0	200	300	0	0	0	0	0	0	0	200	903	0	0	0	0	0	0	0	603	903	0
7389	4	0	0	0	0	0	0	200	300	0	0	0	0	0	0	0	200	903	0	0	0	0	0	0	0	603	903	0
7389	5	0	0	0	0	0	0	200	300	0	0	0	0	0	0	0	200	903	0	0	0	0	0	0	0	603	903	0
7389	6	0	0	0	0	0	0	200	300	0	0	0	0	0	0	0	200	903	0	0	0	0	0	0	0	603	903	0
7389	7	0	0	0	0	0	0	200	300	0	0	0	0	0	0	0	200	903	0	0	0	0	0	0	0	603	903	0
7389	8	0	0	0	0	0	0	200	300	0	0	0	0	0	0	0	200	903	0	0	0	0	0	0	0	603	903	0
7389	9	0	0	0	0	0	0	200	300	0	0	0	0	0	0	0	200	903	0	0	0	0	0	0	0	603	903	0
7390	0	0	0	0	0	0	0	200	300	0	0	0	0	0	0	0	200	903	0	0	0	0	0	0	0	603	903	0
7390	1	0	0	0	0	0	0	200	300	0	0	0	0	0	0	0	200	903	0	0	0	0	0	0	0	603	903	0
7390	2	0	0	0	0	0	0	200	300	0	0	0	0	0	0	0	200	903	0	0	0	0	0	0	0	603	903	0
7390	3	0	0	0	0	0	0	200	300	0	0	0	0	0	0	0	200	903	0	0	0	0	0	0	0	603	903	0
7390	4	0	0	0	0	0	0	200	300	0	0	0	0	0	0	0	200	903	0	0	0	0	0	0	0	603	903	0
7390	5	0	0	0	0	0	0	200	300	0	0	0	0	0	0	0	200	903	0	0	0	0	0	0	0	603	903	0
7390	6	0	0	0	0	0	0	200	300	0	0	0	0	0	0	0	200	903	0	0	0	0	0	0	0	603	903	0
7390	7	0	0	0	0	0	0	200	300	0	0	0	0	0	0	0	200	903	0	0	0	0	0	0	0	603	903	0
7390	8	0	0	0	0	0	0	200	300	0	0	0	0	0	0	0	200	903	0	0	0	0	0	0	0	603	903	0
7390	9	0	0	0	0	0	0	200	300	0	0	0	0	0	0	0	200	903	0	0	0	0	0	0	0	603	903	0
7391	0	0	0	0	0	0	0	200	300	0	0	0	0	0	0	0	200	903	0	0	0	0	0	0	0	603	903	0
7391	1	0	0	0	0	0	0	200	300	0	0	0	0	0	0	0	200	903	0	0	0	0	0	0	0	603	903	0
7391	2	0	0	0	0	0	0	200	300	0	0	0	0	0	0	0	200	903	0	0	0	0	0	0	0	603	903	0
7391	3	0	0	0	0	0	0	200	300	0	0	0	0	0	0	0	200	903	0	0	0	0	0	0	0	603	903	0
7391	4	0	0	0	0	0	0	200	300	0	0	0	0	0	0	0	200	903	0	0	0	0	0	0	0	603	903	0
7391	5	0	0	0	0	0	0	200	300	0	0	0	0	0	0	0	200	903	0	0	0	0	0	0	0	603	903	0
7391	6	0	0	0	0	0	0	200	300	0	0	0	0	0	0	0	200	903	0	0	0	0	0	0	0	603	903	0
7391	7	0	0	0	0	0	0	200	300	0	0	0	0	0	0	0	200	903	0	0	0	0	0	0	0	603	903	0
7391	8	0	0	0	0	0	0	200	300	0	0	0	0	0	0	0	200	903	0	0	0	0	0	0	0	603	903	0
7391	9	0	0	0	0	0	0	200	300	0	0	0	0	0	0	0	200	903	0	0	0	0	0	0	0	603	903	0
7392	0	0	0	0	0	0	0	200	300	0	0	0	0	0	0	0	200	903	0	0	0	0	0	0	0	603	903	0
7392	1	0	0	0	0	0	0	200	300	0	0	0	0	0	0	0	200	903	0	0	0	0	0	0	0	603	903	0
7392	2	0	0	0	0	0	0	200	300	0	0	0	0	0	0	0	200	903	0	0	0	0	0	0	0	603	903	0
7392	3	0	0	0	0	0	0	200	300	0	0	0	0	0	0	0	200	903	0	0	0	0	0	0	0	603	903	0
7392	4	0	0	0	0	0	0	200	300	0	0	0	0	0	0	0	200	903	0	0	0	0	0	0	0	603	903	0
7392	5	0	0	0	0	0	0	200	300	0	0	0	0	0	0	0	200	903	0	0	0	0	0	0	0	603	903	0
7392	6	0	0	0	0	0	0	200	300	0	0	0	0	0	0	0	200	903	0	0	0	0	0	0	0	603	903	0
7392	7	0	0	0	0	0	0	200	300	0	0	0	0	0	0	0	200	903	0	0	0	0	0	0	0	603	903	0
7392	8	0	0	0	0	0	0	200	300	0	0	0	0	0	0	0	200	903	0	0	0	0	0	0	0	603	903	0
7392	9	0	0	0	0	0	0	200	300	0	0	0	0	0	0	0	200	903	0	0	0	0	0	0	0	603	903	0
7393	0	0	0	0	0	0	0	200	300	0	0	0	0	0	0	0	200	903	0	0	0	0	0	0	0	603	903	0
7393	1	0	0	0	0	0	0	200	300	0	0	0	0	0	0	0	200	903	0	0	0	0	0	0	0	603	903	0
7393	2	0	0	0	0	0	0	200	300	0	0	0	0	0	0	0	200	903	0	0	0	0	0	0	0	603	903	0
7393	3	0	0	0	0	0	0	200	300	0	0	0	0	0	0	0	200	903	0	0	0	0	0	0	0	603	903	0
7393	4	0	0	0	0	0	0	200	300	0	0	0	0	0	0	0	200	903	0	0	0	0	0	0	0	603	903	0
7393	5	0	0	0	0	0	0	200	300	0	0	0	0	0	0	0	200	903	0	0	0	0	0	0	0	603	903	0
7393	6	0	0	0	0	0	0	200	300	0	0	0	0	0	0	0	200	903	0	0	0	0	0	0	0	603	903	0
7393	7	0	0	0	0	0	0	200	300	0	0	0	0	0	0	0	200	903	0	0	0	0	0	0	0	603	903	0
7393	8	0	0	0	0	0	0	200	300	0	0	0	0	0	0	0	200	903	0	0	0	0	0	0	0	603	903	0
7393	9	0	0	0	0	0	0	200	300	0	0	0	0	0	0	0	200	903	0	0	0	0	0	0	0	603	903	0
7394	0	0	0	0	0	0	0	200	300	0	0	0	0	0	0	0	200	903	0	0	0	0	0	0	0	603	903	0
7394	1	0	0	0	0	0	0	200	300	0	0	0	0	0	0	0	200	903	0	0	0	0	0	0	0	603	903	0
7394	2	0	0	0	0	0	0	200	300	0	0	0	0	0	0	0	200	903	0	0	0	0	0	0	0	603	903	0
7394	3	0	0	0	0	0	0	200	300	0	0	0	0	0	0	0	200	903	0	0	0	0	0	0	0	603	903	0
7394	4	0	0	0	0	0	0	200	300	0	0	0	0	0	0	0	200	903	0	0	0	0	0	0	0	603	903	0
7394	5	0	0	0	0	0	0	200	300	0	0	0	0	0	0	0	200	903	0	0	0	0	0	0	0	603	903	0
7394	6	0	0	0	0	0	0	200	300	0	0	0	0	0	0	0	200	903	0	0	0	0	0	0	0	603	903	0
7394	7	0	0	0	0	0	0	200	300	0	0	0	0	0	0	0	200	903	0	0	0	0	0	0	0	603	903	0
7394	8	0	0	0	0	0	0	200	300	0	0	0	0	0	0	0	200	903	0	0	0	0	0	0	0	603	903	0
7394	9	0	0	0	0	0	0	200	300	0	0	0	0	0	0	0	200	903	0	0	0	0	0	0	0	603	903	0
7395	0	0	0	0	0	0	0	200	300	0	0	0	0	0	0	0	200	903	0	0	0	0	0	0	0	603	903	0
7395	1	0	0	0	0	0	0	200	300	0	0	0	0	0	0	0	200	903	0	0	0	0	0	0	0	603	903	0
7395	2	0	0	0	0	0	0	200	300	0	0	0	0	0	0	0	200	903	0	0	0	0	0	0	0	603	903	0
7395	3	0	0	0	0	0	0	200	300	0	0	0	0	0	0	0	200	903	0	0	0	0	0	0	0	603	903	0
7395	4	0	0	0	0	0	0	200	300	0	0	0	0	0	0	0	200	903	0	0	0	0	0	0	0	603	903	0
7395	5	0	0	0	0	0	0	200	300	0	0	0	0	0	0	0	200	903	0	0	0	0	0	0	0	603	903	0
7395	6	0	0	0	0	0	0	200	300	0	0	0	0	0	0	0	200	903	0	0	0	0	0	0	0	603	903	0
7395	7	0	0	0	0	0	0	200	300	0	0	0	0	0	0	0	200	903	0	0	0	0	0	0	0	603	903	0
7395	8	0	0	0	0	0	0	200	300	0	0	0	0	0	0	0	200	903	0	0	0	0	0	0	0	603	903	0
7395	9	0	0	0	0	0	0	200	300	0	0	0	0	0	0	0	200	903	0	0	0	0	0	0	0	603	903	0
7396	0	0	0	0	0	0	0	200	300	0	0	0	0	0	0	0	200	903	0	0	0	0	0	0	0	603	903	0
7396	1	0	0	0	0	0	0	200	300	0	0	0	0	0	0	0	200	903	0	0	0	0	0	0	0	603	903	0
7396	2	0	0	0	0	0	0	200	300	0	0	0	0	0	0	0	200	903	0	0	0	0	0	0	0	603	903	0
7396	3	0	0	0	0	0	0	200	300	0	0	0	0	0	0	0	200	903	0	0	0	0	0	0	0	603	903	0
7396	4	0	0	0	0	0	0	200	300	0	0	0	0	0	0	0	200	903	0	0	0	0	0	0	0	603	903	0
7396	5	0	0	0	0	0	0	200	300	0	0	0	0	0	0	0	200	903	0	0	0	0	0	0	0	603	903	0
7396	6	0	0	0	0	0	0	200	300	0	0	0	0	0	0	0	200	903	0	0	0	0	0	0	0	603	903	0
7396	7	0	0	0	0	0	0	200	300	0	0	0	0	0	0	0	200	903	0	0	0	0	0	0	0	603	903	0
7396	8	0	0	0	0	0	0	200	300	0	0	0	0	0	0	0	200	903	0	0	0	0	0	0	0	603	903	0
7396	9	0	0	0	0	0	0	200	300	0	0	0	0	0	0	0	200	903	0	0	0	0	0	0	0	603	903	0
7397	0	0	0	0	0	0	0	200	300	0	0	0	0	0	0	0	200	903	0	0	0	0	0	0	0	603	903	0
7397	1	0	0	0	0	0	0	200	300	0	0	0	0	0	0	0	200	903	0	0	0	0	0	0	0	603	903	0
7397	2	0	0	0	0	0	0	200	300	0	0	0	0	0	0	0	200	903	0	0	0	0	0	0	0	603	903	0
7397	3	0	0	0	0	0	0	200	300	0	0	0	0	0	0	0	200	903	0	0	0	0	0	0	0	603	903	0
7397	4	0	0	0	0	0	0	200	300	0	0	0	0	0	0	0	200	903	0	0	0	0	0	0	0	603	903	0
7397	5	0	0	0	0	0	0	200	300	0	0	0	0	0	0	0	200	903	0	0	0	0	0	0	0	603	903	0
7397	6	0	0	0	0	0	0	200	300	0	0	0	0	0	0	0	200	903	0	0	0	0	0	0	0	603	903	0
7397	7	0	0	0	0	0	0	200	300	0	0	0	0	0	0	0	200	903	0	0	0	0	0	0	0	603	903	0
7397	8	0	0	0	0	0	0	200	300	0	0	0	0	0	0	0	200	903	0	0	0	0	0	0	0	603	903	0
7397	9	0	0	0	0	0	0	200	300	0	0	0	0	0	0	0	200	903	0	0	0	0	0	0	0	603	903	0
7398	0	0	0	0	0	0	0	200	300	0	0	0	0	0	0	0	200	903	0	0	0	0	0	0	0	603	903	0
7398	1	0	0	0	0	0	0	200	300	0	0	0	0	0	0	0	200	903	0	0	0	0	0	0	0	603	903	0
7398	2	0	0	0	0	0	0	200	300	0	0	0	0	0	0	0	200	903	0	0	0	0	0	0	0	603	903	0
7398	3	0	0	0	0	0	0	200	300	0	0	0	0	0	0	0	200	903	0	0	0	0	0	0	0	603	903	0
7398	4	0	0	0	0	0	0	200	300	0	0	0	0	0	0	0	200	903	0	0	0	0	0	0	0	603	903	0
7398	5	0	0	0	0	0	0	200	300	0	0	0	0	0	0	0	200	903	0	0	0	0	0	0	0	603	903	0
7398	6	0	0	0	0	0	0	200	300	0	0	0	0	0	0	0	200	903	0	0	0	0	0	0	0	603	903	0
7398	7	0	0	0	0	0	0	200	300	0	0	0	0	0	0	0	200	903	0	0	0	0	0	0	0	603	903	0
7398	8	0	0	0	0	0	0	200	300	0	0	0	0	0	0	0	200	903	0	0	0	0	0	0	0	603	903	0
7398	9	0	0	0	0	0	0	200	300	0	0	0	0	0	0	0	200	903	0	0	0	0	0	0	0	603	903	0
7399	0	0	0	0	0	0	0	200	300	0	0	0	0	0	0	0	200	903	0	0	0	0	0	0	0	603	903	0
7399	1	0	0	0	0	0	0	200	300	0	0	0	0	0	0	0	200	903	0	0	0	0	0	0	0	603	903	0
7399	2	0	0	0	0	0	0	200	300	0	0	0	0	0	0	0	200	903	0	0	0	0	0	0	0	603	903	0
7399	3	0	0	0	0	0	0	200	300	0	0	0	0	0	0	0	200	903	0	0	0	0	0	0	0	603	903	0
7399	4	0	0	0	0	0	0	200	300	0	0	0	0	0	0	0	200	903	0	0	0	0	0	0	0	603	903	0
7399	5	0	0	0	0	0	0	200	300	0	0	0	0	0	0	0	200	903	0	0	0	0	0	0	0	603	903	0
7399	6	0	0	0	0	0	0	200	300	0	0	0	0	0	0	0	200	903	0	0	0	0	0	0	0	603	903	0
7399	7	0	0	0	0	0	0	200	300	0	0	0	0	0	0	0	200	903	0	0	0	0	0	0	0	603	903	0
7399	8	0	0	0	0	0	0	200	300	0	0	0	0	0	0	0	200	903	0	0	0	0	0	0	0	603	903	0
7399	9	0	0	0	0	0	0	200	300	0	0	0	0	0	0	0	200	903	0	0	0	0	0	0	0	603	903	0
7400	0	0	0	0	0	0	0	200	300	0	0	0	0	0	0	0	200	903	0	0	0	0	0	0	0	603	903	0
7400	1	0	0	0	0	0	0	200	300	0	0	0	0	0	0	0	200	903	0	0	0	0	0	0	0	603	903	0
7400	2	0	0	0	0	0	0	200	300	0	0	0	0	0	0	0	200	903	0	0	0	0	0	0	0	603	903	0
7400	3	0	0	0	0	0	0	200	300	0	0	0	0	0	0	0	200	903	0	0	0	0	0	0	0	603	903	0
7400	4	0	0	0	0	0	0	200	300	0	0	0	0	0	0	0	200	903	0	0	0	0	0	0	0	603	903	0
7400	5	0	0	0	0	0	0	200	300	0	0	0	0	0	0	0	200	903	0	0	0	0	0	0	0	603	903	0
7400	6	0	0	0	0	0	0	200	300	0	0	0	0	0	0	0	200	903	0	0	0	0	0	0	0	603	903	0
7400	7	0	0	0	0	0	0	200	300	0	0	0	0	0	0	0	200	903	0	0	0	0	0	0	0	603	903	0
7400	8	0	0	0	0	0	0	200	300	0	0	0	0	0	0	0	200	903	0	0	0	0	0	0	0	603	903	0
7400	9	0	0	0	0	0	0	200	300	0	0	0	0	0	0	0	200	903	0	0	0	0	0	0	0	603	903	0
7401	0	0	0	0	0	0	0	200	300	0	0	0	0	0	0	0	200	903	0	0	0	0	0	0	0	603	903	0
7401	1	0	0	0	0	0	0	200	300	0	0	0	0	0	0	0	200	903	0	0	0	0	0	0	0	603	903	0
7401	2	0	0	0	0	0	0	200	300	0	0	0	0	0	0	0	200	903	0	0	0	0	0	0	0	603	903	0
7401	3	0	0	0	0	0	0	200	300	0	0	0	0	0	0	0	200	903	0	0	0	0	0	0	0	603	903	0
7401	4	0	0	0	0	0	0	200	300	0	0	0	0	0	0	0	200	903	0	0	0	0	0	0	0	603	903	0
7401	5	0	0	0	0	0	0	200	300	0	0	0	0	0	0	0	200	903	0	0	0	0	0	0	0	603	903	0
7401	6	0	0	0	0	0	0	200	300	0	0	0	0	0	0	0	200	903	0	0	0	0	0	0	0	603	903	0
7401	7	0	0	0	0	0	0	200	300	0	0	0	0	0	0	0	200	903	0	0	0	0	0	0	0	603	903	0
7401	8	0	0	0	0	0	0	200	300	0	0	0	0	0	0	0	200	903	0	0	0	0	0	0	0	603	903	0
7401	9	0	0	0	0	0	0	200	300	0	0	0	0	0	0	0	200	903	0	0	0	0	0	0	0	603	903	0
7402	0	0	0	0	0	0	0	200	300	0	0	0	0	0	0	0	200	903	0	0	0	0	0	0	0	603	903	0
7402	1	0	0	0	0	0	0	200	300	0	0	0	0	0	0	0	200	903	0	0	0	0	0	0	0	603	903	0
7402	2	0	0	0	0	0	0	200	300	0	0	0	0	0	0	0	200	903	0	0	0	0	0	0	0	603	903	0
7402	3	0	0	0	0	0	0	200	300	0	0	0	0	0	0	0	200	903	0	0	0	0	0	0	0	603	903	0
7402	4	0	0	0	0	0	0	200	300	0	0	0	0	0	0	0	200	903	0	0	0	0	0	0	0	603	903	0
7402	5	0	0	0	0	0	0	200	300	0	0	0	0	0	0	0	200	903	0	0	0	0	0	0	0	603	903	0
7402	6	0	0	0	0	0	0	200	300	0	0	0	0	0	0	0	200	903	0	0	0	0	0	0	0	603	903	0
7402	7	0	0	0	0	0	0	200	300	0	0	0	0	0	0	0	200	903	0	0	0	0	0	0	0	603	903	0
7402	8	0	0	0	0	0	0	200	300	0	0	0	0	0	0	0	200	903	0	0	0	0	0	0	0	603	903	0
7402	9	0	0	0	0	0	0	200	300	0	0	0	0	0	0	0	200	903	0	0	0	0	0	0	0	603	903	0
7403	0	0	0	0	0	0	0	200	300	0	0	0	0	0	0	0	200	903	0	0	0	0	0	0	0	603	903	0
7403	1	0	0	0	0	0	0	200	300	0	0	0	0	0	0	0	200	903	0	0	0	0	0	0	0	603	903	0
7403	2	0	0	0	0	0	0	200	300	0	0	0	0	0	0	0	200	903	0	0	0	0	0	0	0	603	903	0
7403	3	0	0	0	0	0	0	200	300	0	0	0	0	0	0	0	200	903	0	0	0	0	0	0	0	603	903	0
7403	4	0	0	0	0	0	0	200	300	0	0	0	0	0	0	0	200	903	0	0	0	0	0	0	0	603	903	0
7403	5	0	0	0	0	0	0	200	300	0	0	0	0	0	0	0	200	903	0	0	0	0	0	0	0	603	903	0
7403	6	0	0	0	0	0	0	200	300	0	0	0	0	0	0	0	200	903	0	0	0	0	0	0	0	603	903	0
7403	7	0	0	0	0	0	0	200	300	0	0	0	0	0	0	0	200	903	0	0	0	0	0	0	0	603	903	0
7403	8	0	0	0	0	0	0	200	300	0	0	0	0	0	0	0	200	903	0	0	0	0	0	0	0	603	903	0
7403	9	0	0	0	0	0	0	200	300	0	0	0	0	0	0	0	200	903	0	0	0	0	0	0	0	603	903	0
7404	0	0	0	0	0	0	0	200	300	0	0	0	0	0	0	0	200	903	0	0	0	0	0	0	0	603	903	0
7404	1	0	0	0	0	0	0	200	300	0	0	0	0	0	0	0	200	903	0	0	0	0	0	0	0	603	903	0
7404	2	0	0	0	0	0	0	200	300	0	0	0	0	0	0	0	200	903	0	0	0	0	0	0	0	603	903	0
7404	3	0	0	0	0	0	0	200	300	0	0	0	0	0	0	0	200	903	0	0	0	0	0	0	0	603	903	0
7404	4	0	0	0	0	0	0	200	300	0	0	0	0	0	0	0	200	903	0	0	0	0	0	0	0	603	903	0
7404	5	0	0	0	0	0	0	200	300	0	0	0	0	0	0	0	200	903	0	0	0	0	0	0	0	603	903	0
7404	6	0	0	0	0	0	0	200	300	0	0	0	0	0	0	0	200	903	0	0	0	0	0	0	0	603	903	0
7404	7	0	0	0	0	0	0	200	300	0	0	0	0	0	0	0	200	903	0	0	0	0	0	0	0	603	903	0
7404	8	0	0	0	0	0	0	200	300	0	0	0	0	0	0	0	200	903	0	0	0	0	0	0	0	603	903	0
7404	9	0	0	0	0	0	0	200	300	0	0	0	0	0	0	0	200	903	0	0	0	0	0	0	0	603	903	0
7405	0	0	0	0	0	0	0	200	300	0	0	0	0	0	0	0	200	903	0	0	0	0	0	0	0	603	903	0
7405	1	0	0	0	0	0	0	200	300	0	0	0	0	0	0	0	200	903	0	0	0	0	0	0	0	603	903	0
7405	2	0	0	0	0	0	0	200	300	0	0	0	0	0	0	0	200	903	0	0	0	0	0	0	0	603	903	0
7405	3	0	0	0	0	0	0	200	300	0	0	0	0	0	0	0	200	903	0	0	0	0	0	0	0	603	903	0
7405	4	0	0	0	0	0	0	200	300	0	0	0	0	0	0	0	200	903	0	0	0	0	0	0	0	603	903	0
7405	5	0	0	0	0	0	0	200	300	0	0	0	0	0	0	0	200	903	0	0	0	0	0	0	0	603	903	0
7405	6	0	0	0	0	0	0	200	300	0	0	0	0	0	0	0	200	903	0	0	0	0	0	0	0	603	903	0
7405	7	0	0	0	0	0	0	200	300	0	0	0	0	0	0	0	200	903	0	0	0	0	0	0	0	603	903	0
7405	8	0	0	0	0	0	0	200	300	0	0	0	0	0	0	0	200	903	0	0	0	0	0	0	0	603	903	0
7405	9	0	0	0	0	0	0	200	300	0	0	0	0	0	0	0	200	903	0	0	0	0	0	0	0	603	903	0
7406	0	0	0	0	0	0	0	200	300	0	0	0	0	0	0	0	200	903	0	0	0	0	0	0	0	603	903	0
7406	1	0	0	0	0	0	0	200	300	0	0	0	0	0	0	0	200	903	0	0	0	0	0	0	0	603	903	0
7406	2	0	0	0	0	0	0	200	300	0	0	0	0	0	0	0	200	903	0	0	0	0	0	0	0	603	903	0
7406	3	0	0	0	0	0	0	200	300	0	0	0	0	0	0	0	200	903	0	0	0	0	0	0	0	603	903	0
7406	4	0	0	0	0	0	0	200	300	0	0	0	0	0	0	0	200	903	0	0	0	0	0	0	0	603	903	0
7406	5	0	0	0	0	0	0	200	300	0	0	0	0	0	0	0	200	903	0	0	0	0	0	0	0	603	903	0
7406	6	0	0	0	0	0	0	200	300	0	0	0	0	0	0	0	200	903	0	0	0	0	0	0	0	603	903	0
7406	7	0	0	0	0	0	0	200	300	0	0	0	0	0	0	0	200	903	0	0	0	0	0	0	0	603	903	0
7406	8	0	0	0	0	0	0	200	300	0	0	0	0	0	0	0	200	903	0	0	0	0	0	0	0	603	903	0
7406	9	0	0	0	0	0	0	200	300	0	0	0	0	0	0	0	200	903	0	0	0	0	0	0	0	603	903	0
7407	0	0	0	0	0	0	0	200	300	0	0	0	0	0	0	0	200	903	0	0	0	0	0	0	0	603	903	0
7407	1	0	0	0	0	0	0	200	300	0	0	0	0	0	0	0	200	903	0	0	0	0	0	0	0	603	903	0
7407	2	0	0	0	0	0	0	200	300	0	0	0	0	0	0	0	200	903	0	0	0	0	0	0	0	603	903	0
7407	3	0	0	0	0	0	0	200	300	0	0	0	0	0	0	0	200	903	0	0	0	0	0	0	0	603	903	0
7407	4	0	0	0	0	0	0	200	300	0	0	0	0	0	0	0	200	903	0	0	0	0	0	0	0	603	903	0
7407	5	0	0	0	0	0	0	200	300	0	0	0	0	0	0	0	200	903	0	0	0	0	0	0	0	603	903	0
7407	6	0	0	0	0	0	0	200	300	0	0	0	0	0	0	0	200	903	0	0	0	0	0	0	0	603	903	0
7407	7	0	0	0	0	0	0	200	300	0	0	0	0	0	0	0	200	903	0	0	0	0	0	0	0	603	903	0
7407	8	0	0	0	0	0	0	200	300	0	0	0	0	0	0	0	200	903	0	0	0	0	0	0	0	603	903	0
7407	9	0	0	0	0	0	0	200	300	0	0	0	0	0	0	0	200	903	0	0	0	0	0	0	0	603	903	0
7408	0	0	0	0	0	0	0	200	300	0	0	0	0	0	0	0	200	903	0	0	0	0	0	0	0	603	903	0
7408	1	0	0	0	0	0	0	200	300	0	0	0	0	0	0	0	200	903	0	0	0	0	0	0	0	603	903	0
7408	2	0	0	0	0	0	0	200	300	0	0	0	0	0	0	0	200	903	0	0	0	0	0	0	0	603	903	0
7408	3	0	0	0	0	0	0	200	300	0	0	0	0	0	0	0	200	903	0	0	0	0	0	0	0	603	903	0
7408	4	0	0	0	0	0	0	200	300	0	0	0	0	0	0	0	200	903	0	0	0	0	0	0	0	603	903	0
7408	5	0	0	0	0	0	0	200	300	0	0	0	0	0	0	0	200	903	0	0	0	0	0	0	0	603	903	0
7408	6	0	0	0	0	0	0	200	300	0	0	0	0	0	0	0	200	903	0	0	0	0	0	0	0	603	903	0
7408	7	0	0	0	0	0	0	200	300	0	0	0	0	0	0	0	200	903	0	0	0	0	0	0	0	603	903	0
7408	8	0	0	0	0	0	0	200	300	0	0	0	0	0	0	0	200	903	0	0	0	0	0	0	0	603	903	0
7408	9	0	0	0	0	0	0	200	300	0	0	0	0	0	0	0	200	903	0	0	0	0	0	0	0	603	903	0
7409	0	0	0	0	0	0	0	200	300	0	0	0	0	0	0	0	200	903	0	0	0	0	0	0	0	603	903	0
7409	1	0	0	0	0	0	0	200	300	0	0	0	0	0	0	0	200	903	0	0	0	0	0	0	0	603	903	0
7409	2	0	0	0	0	0	0	200	300	0	0	0	0	0	0	0	200	903	0	0	0	0	0	0	0	603	903	0
7409	3	0	0	0	0	0	0	200	300	0	0	0	0	0	0	0	200	903	0	0	0	0	0	0	0	603	903	0
7409	4	0	0	0	0	0	0	200	300	0	0	0	0	0	0	0	200	903	0	0	0	0	0	0	0	603	903	0
7409	5	0	0	0	0	0	0	200	300	0	0	0	0	0	0	0	200	903	0	0	0	0	0	0	0	603	903	0
7409	6	0	0	0	0	0	0	200	300	0	0	0	0	0	0	0	200	903	0	0	0	0	0	0	0	603	903	0
7409	7	0	0	0	0	0	0	200	300	0	0	0	0	0	0	0	200	903	0	0	0	0	0	0	0	603	903	0
7409	8	0	0	0	0	0	0	200	300	0	0	0	0	0	0	0	200	903	0	0	0	0	0	0	0	603	903	0
7409	9	0	0	0	0	0	0	200	300	0	0	0	0	0	0	0	200	903	0	0	0	0	0	0	0	603	903	0
7410	0	0	0	0	0	0	0	200	300	0	0	0	0	0	0	0	200	903	0	0	0	0	0	0	0	603	903	0
7410	1	0	0	0	0	0	0	200	300	0	0	0	0	0	0	0	200	903	0	0	0	0	0	0	0	603	903	0
7410	2	0	0	0	0	0	0	200	300	0	0	0	0	0	0	0	200	903	0	0	0	0	0	0	0	603	903	0
7410	3	0	0	0	0	0	0	200	300	0	0	0	0	0	0	0	200	903	0	0	0	0	0	0	0	603	903	0
7410	4	0	0	0	0	0	0	200	300	0	0	0	0	0	0	0	200	903	0	0	0	0	0	0	0	603	903	0
7410	5	0	0	0	0	0	0	200	300	0	0	0	0	0	0	0	200	903	0	0	0	0	0	0	0	603	903	0
7410	6	0	0	0	0	0	0	200	300	0	0	0	0	0	0	0	200	903	0	0	0	0	0	0	0	603	903	0
7410	7	0	0	0	0	0	0	200	300	0	0	0	0	0	0	0	200	903	0	0	0	0	0	0	0	603	903	0
7410	8	0	0	0	0	0	0	200	300	0	0	0	0	0	0	0	200	903	0	0	0	0	0	0	0	603	903	0
7410	9	0	0	0	0	0	0	200	300	0	0	0	0	0	0	0	200	903	0	0	0	0	0	0	0	603	903	0
7411	0	0	0	0	0	0	0	200	300	0	0	0	0	0	0	0	200	903	0	0	0	0	0	0	0	603	903	0
7411	1	0	0	0	0	0	0	200	300	0	0	0	0	0	0	0	200	903	0	0	0	0	0	0	0	603	903	0
7411	2	0	0	0	0	0	0	200	300	0	0	0	0	0	0	0	200	903	0	0	0	0	0	0	0	603	903	0
7411	3	0	0	0	0	0	0	200	300	0	0	0	0	0	0	0	200	903	0	0	0	0	0	0	0	603	903	0
7411	4	0	0	0	0	0	0	200	300	0	0	0	0	0	0	0	200	903	0	0	0	0	0	0	0	603	903	0
7411	5	0	0	0	0	0	0	200	300	0	0	0	0	0	0	0	200	903	0	0	0	0	0	0	0	603	903	0
7411	6	0	0	0	0	0	0	200	300	0	0	0	0	0	0	0	200	903	0	0	0	0	0	0	0	603	903	0
7411	7	0	0	0	0	0	0	200	300	0	0	0	0	0	0	0	200	903	0	0	0	0	0	0	0	603	903	0
7411	8	0	0	0	0	0	0	200	300	0	0	0	0	0	0	0	200	903	0	0	0	0	0	0	0	603	903	0
7411	9	0	0	0	0	0	0	200	300	0	0	0	0	0	0	0	200	903	0	0	0	0	0	0	0	603	903	0
7412	0	0	0	0	0	0	0	200	300	0	0	0	0	0	0	0	200	903	0	0	0	0	0	0	0	603	903	0
7412	1	0	0	0	0	0	0	200	300	0	0	0	0	0	0	0	200	903	0	0	0	0	0	0	0	603	903	0
7412	2	0	0	0	0	0	0	200	300	0	0	0	0	0	0	0	200	903	0	0	0	0	0	0	0	603	903	0
7412	3	0	0	0	0	0	0	200	300	0	0	0	0	0	0	0	200	903	0	0	0	0	0	0	0	603	903	0
7412	4	0	0	0	0	0	0	200	300	0	0	0	0	0	0	0	200	903	0	0	0	0	0	0	0	603	903	0
7412	5	0	0	0	0	0	0	200	300	0	0	0	0	0	0	0	200	903	0	0	0	0	0	0	0	603	903	0
7412	6	0	0	0	0	0	0	200	300	0	0	0	0	0	0	0	200	903	0	0	0	0	0	0	0	603	903	0
7412	7	0	0	0	0	0	0	200	300	0	0	0	0	0	0	0	200	903	0	0	0	0	0	0	0	603	903	0
7412	8	0	0	0	0	0	0	200	300	0	0	0	0	0	0	0	200	903	0	0	0	0	0	0	0	603	903	0
7412	9	0	0	0	0	0	0	200	300	0	0	0	0	0	0	0	200	903	0	0	0	0	0	0	0	603	903	0
7413	0	0	0	0	0	0	0	200	300	0	0	0	0	0	0	0	200	903	0	0	0	0	0	0	0	603	903	0
7413	1	0	0	0	0	0	0	200	300	0	0	0	0	0	0	0	200	903	0	0	0	0	0	0	0	603	903	0
7413	2	0	0	0	0	0	0	200	300	0	0	0	0	0	0	0	200	903	0	0	0	0	0	0	0	603	903	0
7413	3	0	0	0	0	0	0	200	300	0	0	0	0	0	0	0	200	903	0	0	0	0	0	0	0	603	903	0
7413	4	0	0	0	0	0	0	200	300	0	0	0	0	0	0	0	200	903	0	0	0	0	0	0	0	603	903	0
7413	5	0	0	0	0	0	0	200	300	0	0	0	0	0	0	0	200	903	0	0	0	0	0	0	0	603	903	0
7413	6	0	0	0	0	0	0	200	300	0	0	0	0	0	0	0	200	903	0	0	0	0	0	0	0	603	903	0
7413	7	0	0	0	0	0	0	200	300	0	0	0	0	0	0	0	200	903	0	0	0	0	0	0	0	603	903	0
7413	8	0	0	0	0	0	0	200	300	0	0	0	0	0	0	0	200	903	0	0	0	0	0	0	0	603	903	0
7413	9	0	0	0	0	0	0	200	300	0	0	0	0	0	0	0	200	903	0	0	0	0	0	0	0	603	903	0
7414	0	0	0	0	0	0	0	200	300	0	0	0	0	0	0	0	200	903	0	0	0	0	0	0	0	603	903	0
7414	1	0	0	0	0	0	0	200	300	0	0	0	0	0	0	0	200	903	0	0	0	0	0	0	0	603	903	0
7414	2	0	0	0	0	0	0	200	300	0	0	0	0	0	0	0	200	903	0	0	0	0	0	0	0	603	903	0
7414	3	0	0	0	0	0	0	200	300	0	0	0	0	0	0	0	200	903	0	0	0	0	0	0	0	603	903	0
7414	4	0	0	0	0	0	0	200	300	0	0	0	0	0	0	0	200	903	0	0	0	0	0	0	0	603	903	0
7414	5	0	0	0	0	0	0	200	300	0	0	0	0	0	0	0	200	903	0	0	0	0	0	0	0	603	903	0
7414	6	0	0	0	0	0	0	200	300	0	0	0	0	0	0	0	200	903	0	0	0	0	0	0	0	603	903	0
7414	7	0	0	0	0	0	0	200	300	0	0	0	0	0	0	0	200	903	0	0	0	0	0	0	0	603	903	0
7414	8	0	0	0	0	0	0	200	300	0	0	0	0	0	0	0	200	903	0	0	0	0	0	0	0	603	903	0
7414	9	0	0	0	0	0	0	200	300	0	0	0	0	0	0	0	200	903	0	0	0	0	0	0	0	603	903	0
7415	0	0	0	0	0	0	0	200	300	0	0	0	0	0	0	0	200	903	0	0	0	0	0	0	0	603	903	0
7415	1	0	0	0	0	0	0	200	300	0	0	0	0	0	0	0	200	903	0	0	0	0	0	0	0	603	903	0
7415	2	0	0	0	0	0	0	200	300	0	0	0	0	0	0	0	200	903	0	0	0	0	0	0	0	603	903	0
7415	3	0	0	0	0	0	0	200	300	0	0	0	0	0	0	0	200	903	0	0	0	0	0	0	0	603	903	0
7415	4	0	0	0	0	0	0	200	300	0	0	0	0	0	0	0	200	903	0	0	0	0	0	0	0	603	903	0
7415	5	0	0	0	0	0	0	200	300	0	0	0	0	0	0	0	200	903	0	0	0	0	0	0	0	603	903	0
7415	6	0	0	0	0	0	0	200	300	0	0	0	0	0	0	0	200	903	0	0	0	0	0	0	0	603	903	0
7415	7	0	0	0	0	0	0	200	300	0	0	0	0	0	0	0	200	903	0	0	0	0	0	0	0	603	903	0
7415	8	0	0	0	0	0	0	200	300	0	0	0	0	0	0	0	200	903	0	0	0	0	0	0	0	603	903	0
7415	9	0	0	0	0	0	0	200	300	0	0	0	0	0	0	0	200	903	0	0	0	0	0	0	0	603	903	0
7416	0	0	0	0	0	0	0	200	300	0	0	0	0	0	0	0	200	903	0	0	0	0	0	0	0	603	903	0
7416	1	0	0	0	0	0	0	200	300	0	0	0	0	0	0	0	200	903	0	0	0	0	0	0	0	603	903	0
7416	2	0	0	0	0	0	0	200	300	0	0	0	0	0	0	0	200	903	0	0	0	0	0	0	0	603	903	0
7416	3	0	0	0	0	0	0	200	300	0	0	0	0	0	0	0	200	903	0	0	0	0	0	0	0	603	903	0
7416	4	0	0	0	0	0	0	200	300	0	0	0	0	0	0	0	200	903	0	0	0	0	0	0	0	603	903	0
7416	5	0	0	0	0	0	0	200	300	0	0	0	0	0	0	0	200	903	0	0	0	0	0	0	0	603	903	0
7416	6	0	0	0	0	0	0	200	300	0	0	0	0	0	0	0	200	903	0	0	0	0	0	0	0	603	903	0
7416	7	0	0	0	0	0	0	200	300	0	0	0	0	0	0	0	200	903	0	0	0	0	0	0	0	603	903	0
7416	8	0	0	0	0	0	0	200	300	0	0	0	0	0	0	0	200	903	0	0	0	0	0	0	0	603	903	0
7416	9	0	0	0	0	0	0	200	300	0	0	0	0	0	0	0	200	903	0	0	0	0	0	0	0	603	903	0
7417	0	0	0	0	0	0	0	200	300	0	0	0	0	0	0	0	200	903	0	0	0	0	0	0	0	603	903	0
7417	1	0	0	0	0	0	0	200	300	0	0	0	0	0	0	0	200	903	0	0	0	0	0	0	0	603	903	0
7417	2	0	0	0	0	0	0	200	300	0	0	0	0	0	0	0	200	903	0	0	0	0	0	0	0	603	903	0
7417	3	0	0	0	0	0	0	200	300	0	0	0	0	0	0	0	200	903	0	0	0	0	0	0	0	603	903	0
7417	4	0	0	0	0	0	0	200	300	0	0	0	0	0	0	0	200	903	0	0	0	0	0	0	0	603	903	0
7417	5	0	0	0	0	0	0	200	300	0	0	0	0	0	0	0	200	903	0	0	0	0	0	0	0	603	903	0
7417	6	0	0	0	0	0	0	200	300	0	0	0	0	0	0	0	200	903	0	0	0	0	0	0	0	603	903	0
7417	7	0	0	0	0	0	0	200	300	0	0	0	0	0	0	0	200	903	0	0	0	0	0	0	0	603	903	0
7417	8	0	0	0	0	0	0	200	300	0	0	0	0	0	0	0	200	903	0	0	0	0	0	0	0	603	903	0
7417	9	0	0	0	0	0	0	200	300	0	0	0	0	0	0	0	200	903	0	0	0	0	0	0	0	603	903	0
7418	0	0	0	0	0	0	0	200	300	0	0	0	0	0	0	0	200	903	0	0	0	0	0	0	0	603	903	0
7418	1	0	0	0	0	0	0	200	300	0	0	0	0	0	0	0	200	903	0	0	0	0	0	0	0	603	903	0
7418	2	0	0	0	0	0	0	200	300	0	0	0	0	0	0	0	200	903	0	0	0	0	0	0	0	603	903	0
7418	3	0	0	0	0	0	0	200	300	0	0	0	0	0	0	0	200	903	0	0	0	0	0	0	0	603	903	0
7418	4	0	0	0	0	0	0	200	300	0	0	0	0	0	0	0	200	903	0	0	0	0	0	0	0	603	903	0
7418	5	0	0	0	0	0	0	200	300	0	0	0	0	0	0	0	200	903	0	0	0	0	0	0	0	603	903	0
7418	6	0	0	0	0	0	0	200	300	0	0	0	0	0	0	0	200	903	0	0	0	0	0	0	0	603	903	0
7418	7	0	0	0	0	0	0	200	300	0	0	0	0	0	0	0	200	903	0	0	0	0	0	0	0	603	903	0
7418	8	0	0	0	0	0	0	200	300	0	0	0	0	0	0	0	200	903	0	0	0	0	0	0	0	603	903	0
7418	9	0	0	0	0	0	0	200	300	0	0	0	0	0	0	0	200	903	0	0	0	0	0	0	0	603	903	0
7419	0	0	0	0	0	0	0	200	300	0	0	0	0	0	0	0	200	903	0	0	0	0	0	0	0	603	903	0
7419	1	0	0	0	0	0	0	200	300	0	0	0	0	0	0	0	200	903	0	0	0	0	0	0	0	603	903	0
7419	2	0	0	0	0	0	0	200	300	0	0	0	0	0	0	0	200	903	0	0	0	0	0	0	0	603	903	0
7419	3	0	0	0	0	0	0	200	300	0	0	0	0	0	0	0	200	903	0	0	0	0	0	0	0	603	903	0
7419	4	0	0	0	0	0	0	200	300	0	0	0	0	0	0	0	200	903	0	0	0	0	0	0	0	603	903	0
7419	5	0	0	0	0	0	0	200	300	0	0	0	0	0	0	0	200	903	0	0	0	0	0	0	0	603	903	0
7419	6	0	0	0	0	0	0	200	300	0	0	0	0	0	0	0	200	903	0	0	0	0	0	0	0	603	903	0
7419	7	0	0	0	0	0	0	200	300	0	0	0	0	0	0	0	200	903	0	0	0	0	0	0	0	603	903	0
7419	8	0	0	0	0	0	0	200	300	0	0	0	0	0	0	0	200	903	0	0	0	0	0	0	0	603	903	0
7419	9	0	0	0	0	0	0	200	300	0	0	0	0	0	0	0	200	903	0	0	0	0	0	0	0	603	903	0
7420	0	0	0	0	0	0	0	200	300	0	0	0	0	0	0	0	200	903	0	0	0	0	0	0	0	603	903	0
7420	1	0	0	0	0	0	0	200	300	0	0	0	0	0	0	0	200	903	0	0	0	0	0	0	0	603	903	0
7420	2	0	0	0	0	0	0	200	300	0	0	0	0	0	0	0	200	903	0	0	0	0	0	0	0	603	903	0
7420	3	0	0	0	0	0	0	200	300	0	0	0	0	0	0	0	200	903	0	0	0	0	0	0	0	603	903	0
7420	4	0	0	0	0	0	0	200	300	0	0	0	0	0	0	0	200	903	0	0	0	0	0	0	0	603	903	0
7420	5	0	0	0	0	0	0	200	300	0	0	0	0	0	0	0	200	903	0	0	0	0	0	0	0	603	903	0
7420	6	0	0	0	0	0	0	200	300	0	0	0	0	0	0	0	200	903	0	0	0	0	0	0	0	603	903	0
7420	7	0	0	0	0	0	0	200	300	0	0	0	0	0	0	0	200	903	0	0	0	0	0	0	0	603	903	0
7420	8	0	0	0	0	0	0	200	300	0	0	0	0	0	0	0	200	903	0	0	0	0	0	0	0	603	903	0
7420	9	0	0	0	0	0	0	200	300	0	0	0	0	0	0	0	200	903	0	0	0	0	0	0	0	603	903	0
7421	0	0	0	0	0	0	0	200	300	0	0	0	0	0	0	0	200	903	0	0	0	0	0	0	0	603	903	0
7421	1	0	0	0	0	0	0	200	300	0	0	0	0	0	0	0	200	903	0	0	0	0	0	0	0	603	903	0
7421	2	0	0	0	0	0	0	200	300	0	0	0	0	0	0	0	200	903	0	0	0	0	0	0	0	603	903	0
7421	3	0	0	0	0	0	0	200	300	0	0	0	0	0	0	0	200	903	0	0	0	0	0	0	0	603	903	0
7421	4	0	0	0	0	0	0	200	300	0	0	0	0	0	0	0	200	903	0	0	0	0	0	0	0	603	903	0
7421	5	0	0	0	0	0	0	200	300	0	0	0	0	0	0	0	200	903	0	0	0	0	0	0	0	603	903	0
7421	6	0	0	0	0	0	0	200	300	0	0	0	0	0	0	0	200	903	0	0	0	0	0	0	0	603	903	0
7421	7	0	0	0	0	0	0	200	300	0	0	0	0	0	0	0	200	903	0	0	0	0	0	0	0	603	903	0
7421	8	0	0	0	0	0	0	200	300	0	0	0	0	0	0	0	200	903	0	0	0	0	0	0	0	603	903	0
7421	9	0	0	0	0	0	0	200	300	0	0	0	0	0	0	0	200	903	0	0	0	0	0	0	0	603	903	0
7422	0	0	0	0	0	0	0	200	300	0	0	0	0	0	0	0	200	903	0	0	0	0	0	0	0	603	903	0
7422	1	0	0	0	0	0	0	200	300	0	0	0	0	0	0	0	200	903	0	0	0	0	0	0	0	603	903	0
7422	2	0	0	0	0	0	0	200	300	0	0	0	0	0	0	0	200	903	0	0	0	0	0	0	0	603	903	0
7422	3	0	0	0	0	0	0	200	300	0	0	0	0	0	0	0	200	903	0	0	0	0	0	0	0	603	903	0
7422	4	0	0	0	0	0	0	200	300	0	0	0	0	0	0	0	200	903	0	0	0	0	0	0	0	603	903	0
7422	5	0	0	0	0	0	0	200	300	0	0	0	0	0	0	0	200	903	0	0	0	0	0	0	0	603	903	0
7422	6	0	0	0	0	0	0	200	300	0	0	0	0	0	0	0	200	903	0	0	0	0	0	0	0	603	903	0
7422	7	0	0	0	0	0	0	200	300	0	0	0	0	0	0	0	200	903	0	0	0	0	0	0	0	603	903	0
7422	8	0	0	0	0	0	0	200	300	0	0	0	0	0	0	0	200	903	0	0	0	0	0	0	0	603	903	0
7422	9	0	0	0	0	0	0	200	300	0	0	0	0	0	0	0	200	903	0	0	0	0	0	0	0	603	903	0
7423	0	0	0	0	0	0	0	200	300	0	0	0	0	0	0	0	200	903	0	0	0	0	0	0	0	603	903	0
7423	1	0	0	0	0	0	0	200	300	0	0	0	0	0	0	0	200	903	0	0	0	0	0	0	0	603	903	0
7423	2	0	0	0	0	0	0	200	300	0	0	0	0	0	0	0	200	903	0	0	0	0	0	0	0	603	903	0
7423	3	0	0	0	0	0	0	200	300	0	0	0	0	0	0	0	200	903	0	0	0	0	0	0	0	603	903	0
7423	4	0	0	0	0	0	0	200	300	0	0	0	0	0	0	0	200	903	0	0	0	0	0	0	0	603	903	0
7423	5	0	0	0	0	0	0	200	300	0	0	0	0	0	0	0	200	903	0	0	0	0	0	0	0	603	903	0
7423	6	0	0	0	0	0	0	200	300	0	0	0	0	0	0	0	200	903	0	0	0	0	0	0	0	603	903	0
7423	7	0	0	0	0	0	0	200	300	0	0	0	0	0	0	0	200	903	0	0	0	0	0	0	0	603	903	0
7423	8	0	0	0	0	0	0	200	300	0	0	0	0	0	0	0	200	903	0	0	0	0	0	0	0	603	903	0
7423	9	0	0	0	0	0	0	200	300	0	0	0	0	0	0	0	200	903	0	0	0	0	0	0	0	603	903	0
7424	0	0	0	0	0	0	0	200	300	0	0	0	0	0	0	0	200	903	0	0	0	0	0	0	0	603	903	0
7424	1	0	0	0	0	0	0	200	300	0	0	0	0	0	0	0	200	903	0	0	0	0	0	0	0	603	903	0
7424	2	0	0	0	0	0	0	200	300	0	0	0	0	0	0	0	200	903	0	0	0	0	0	0	0	603	903	0
7424	3	0	0	0	0	0	0	200	300	0	0	0	0	0	0	0	200	903	0	0	0	0	0	0	0	603	903	0
7424	4	0	0	0	0	0	0	200	300	0	0	0	0	0	0	0	200	903	0	0	0	0	0	0	0	603	903	0
7424	5	0	0	0	0	0	0	200	300	0	0	0	0	0	0	0	200	903	0	0	0	0	0	0	0	603	903	0
7424	6	0	0	0	0	0	0	200	300	0	0	0	0	0	0	0	200	903	0	0	0	0	0	0	0	603	903	0
7424	7	0	0	0	0	0	0	200	300	0	0	0	0	0	0	0	200	903	0	0	0	0	0	0	0	603	903	0
7424	8	0	0	0	0	0	0	200	300	0	0	0	0	0	0	0	200	903	0	0	0	0	0	0	0	603	903	0
7424	9	0	0	0	0	0	0	200	300	0	0	0	0	0	0	0	200	903	0	0	0	0	0	0	0	603	903	0
7425	0	0	0	0	0	0	0	200	300	0	0	0	0	0	0	0	200	903	0	0	0	0	0	0	0	603	903	0
7425	1	0	0	0	0	0	0	200	300	0	0	0	0	0	0	0	200	903	0	0	0	0	0	0	0	603	903	0
7425	2	0	0	0	0	0	0	200	300	0	0	0	0	0	0	0	200	903	0	0	0	0	0	0	0	603	903	0
7425	3	0	0	0	0	0	0	200	300	0	0	0	0	0	0	0	200	903	0	0	0	0	0	0	0	603	903	0
7425	4	0	0	0	0	0	0	200	300	0	0	0	0	0	0	0	200	903	0	0	0	0	0	0	0	603	903	0
7425	5	0	0	0	0	0	0	200	300	0	0	0	0	0	0	0	200	903	0	0	0	0	0	0	0	603	903	0
7425	6	0	0	0	0	0	0	200	300	0	0	0	0	0	0	0	200	903	0	0	0	0	0	0	0	603	903	0
7425	7	0	0	0	0	0	0	200	300	0	0	0	0	0	0	0	200	903	0	0	0	0	0	0	0	603	903	0
7425	8	0	0	0	0	0	0	200	300	0	0	0	0	0	0	0	200	903	0	0	0	0	0	0	0	603	903	0
7425	9	0	0	0	0	0	0	200	300	0	0	0	0	0	0	0	200	903	0	0	0	0	0	0	0	603	903	0
7426	0	0	0	0	0	0	0	200	300	0	0	0	0	0	0	0	200	903	0	0	0	0	0	0	0	603	903	0
7426	1	0	0	0	0	0	0	200	300	0	0	0	0	0	0	0	200	903	0	0	0	0	0	0	0	603	903	0
7426	2	0	0	0	0	0	0	200	300	0	0	0	0	0	0	0	200	903	0	0	0	0	0	0	0	603	903	0
7426	3	0	0	0	0	0	0	200	300	0	0	0	0	0	0	0	200	903	0	0	0	0	0	0	0	603	903	0
7426	4	0	0	0	0	0	0	200	300	0	0	0	0	0	0	0	200	903	0	0	0	0	0	0	0	603	903	0
7426	5	0	0	0	0	0	0	200	300	0	0	0	0	0	0	0	200	903	0	0	0	0	0	0	0	603	903	0
7426	6	0	0	0	0	0	0	200	300	0	0	0	0	0	0	0	200	903	0	0	0	0	0	0	0	603	903	0
7426	7	0	0	0	0	0	0	200	300	0	-8.26599	-3.42346	-35.5169	-10749.6	-1851.32	2154.05	147.875	1205.66	0	0	0	0	0	0	0	603	903	0
7426	8	0	0	0	0	0	0	200	300	0	-21.9989	-6.62781	-48.9446	-14320.1	-1240.96	5907.72	174.646	1195.58	0	0	0	0	0	0	0	603	903	0
7426	9	0	0	0	0	0	0	200	300	0	-18.1842	1.00159	-43.7566	-10108.7	-1302	4534.42	170.245	1134.02	0	0	0	0	0	0	0	603	903	0
7427	0	0	0	0	0	0	0	200	300	0	-4.29871	4.51111	-32.16	-8826.97	-2095.46	-134.766	134.843	1177.47	0	0	0	0	0	0	0	603	903	0
7427	1	0	0	0	0	0	0	200	300	0	-4.60388	0.238648	-38.8738	-11756.7	-1057.86	-226.319	172.787	1205.43	0	0	0	0	0	0	0	603	903	0
7427	2	0	0	0	0	0	0	200	300	0	1.49963	6.79993	-53.8274	-14411.7	-1973.39	48.3394	163.339	1170.74	0	0	0	0	0	0	0	603	903	0
7427	3	0	0	0	0	0	0	200	300	0	0.584107	13.2086	-67.8655	-17066.7	-3133.05	-1279.18	153.834	1154.48	0	0	0	0	0	0	0	603	903	0
7427	4	0	0	0	0	0	0	200	300	0	-13.1488	9.6991	-76.7156	-22102.1	-3133.05	1009.64	159.16	1191.1	0	0	0	0	0	0	0	603	903	0
7427	5	0	0	0	0	0	0	200	300	0	-9.18152	14.8871	-86.7864	-24116.3	-3865.48	2108.28	155.46	1180.88	0	0	0	0	0	0	0	603	903	0
7427	6	0	0	0	0	0	0	200	300	0	-2.62024	15.65	-95.9417	-26130.4	-4353.76	48.3394	154.621	1175.36	0	0	0	0	0	0	0	603	903	0
7427	7	0	0	0	0	0	0	200	300	0	-8.57117	6.64734	-109.064	-29334.8	-4292.72	963.867	160.64	1171.97	0	0	0	0	0	0	0	603	903	0
7427	8	0	0	0	0	0	0	200	300	0	-7.65564	4.05334	-113.947	-31532.1	-5269.28	1284.3	153.757	1179.73	0	0	0	0	0	0	0	603	903	0
7427	9	0	0	0	0	0	0	200	300	0	-0.484008	4.20593	-120.966	-33546.2	-5330.32	-958.741	155.935	1180.32	0	0	0	0	0	0	0	603	903	0
7428	0	0	0	0	0	0	0	200	300	0	-3.99353	0.238648	-131.037	-35560.4	-4842.04	643.432	163.048	1174.38	0	0	0	0	0	0	0	603	903	0
7428	1	0	0	0	0	0	0	200	300	0	-4.29871	-0.982055	-140.497	-36567.5	-6123.78	1558.96	156.414	1163.27	0	0	0	0	0	0	0	603	903	0
7428	2	0	0	0	0	0	0	200	300	0	-4.14612	-1.43982	-145.991	-38306.9	-6428.95	-1553.83	155.963	1165.39	0	0	0	0	0	0	0	603	903	0
7428	3	0	0	0	0	0	0	200	300	0	-3.68835	-2.50793	-153.01	-40412.7	-5879.64	-180.542	161.573	1167.12	0	0	0	0	0	0	0	603	903	0
7428	4	0	0	0	0	0	0	200	300	0	1.9574	-4.1864	-160.944	-41969.1	-6245.85	780.761	161.192	1163.77	0	0	0	0	0	0	0	603	903	0
7428	5	0	0	0	0	0	0	200	300	0	0.889283	-7.39075	-163.996	-44166.3	-6673.1	-1691.16	159.309	1172.31	0	0	0	0	0	0	0	603	903	0
7428	6	0	0	0	0	0	0	200	300	0	-4.14612	-10.2899	-168.879	-45814.3	-6306.88	-546.754	162.654	1174.29	0	0	0	0	0	0	0	603	903	0
7428	7	0	0	0	0	0	0	200	300	0	1.80481	-9.67957	-173.762	-45997.4	-6428.95	460.327	163.001	1167.72	0	0	0	0	0	0	0	603	903	0
7428	8	0	0	0	0	0	0	200	300	0	8.06091	-13.1891	-179.56	-47370.7	-6489.99	-2011.6	163.856	1166.82	0	0	0	0	0	0	0	603	903	0
7428	9	0	0	0	0	0	0	200	300	0	0.126343	-17.309	-178.95	-48744	-6917.24	-1324.95	161.345	1175.39	0	0	0	0	0	0	0	603	903	0
7429	0	0	0	0	0	0	0	200	300	0	3.33069	-18.8348	-187.189	-49476.4	-7039.31	-684.083	162.395	1167.31	0	0	0	0	0	0	0	603	903	0
7429	1	0	0	0	0	0	0	200	300	0	7.90833	-22.1918	-191.767	-49751.1	-6856.2	-2927.13	164.247	1162.44	0	0	0	0	0	0	0	603	903	0
7429	2	0	0	0	0	0	0	200	300	0	8.2135	-26.0065	-197.87	-51765.2	-6367.92	-2240.48	167.818	1164.61	0	0	0	0	0	0	0	603	903	0
7429	3	0	0	0	0	0	0	200	300	0	7.14539	-26.922	-201.838	-52863.8	-7588.62	-1050.29	162.402	1164.91	0	0	0	0	0	0	0	603	903	0
7429	4	0	0	0	0	0	0	200	300	0	9.28162	-30.8893	-207.941	-53504.7	-6795.17	-3659.55	167.322	1160.31	0	0	0	0	0	0	0	603	903	0
7429	5	0	0	0	0	0	0	200	300	0	13.4015	-33.4833	-212.824	-55152.7	-6612.06	-2698.24	168.932	1162.15	0	0	0	0	0	0	0	603	903	0
7429	6	0	0	0	0	0	0	200	300	0	14.317	-34.704	-218.317	-56526	-7466.55	-1920.04	165.8	1161.92	0	0	0	0	0	0	0	603	903	0
7429	7	0	0	0	0	0	0	200	300	0	11.5704	-39.892	-223.81	-57716.1	-7527.59	-4117.31	166.366	1160.88	0	0	0	0	0	0	0	603	903	0
7429	8	0	0	0	0	0	0	200	300	0	13.5541	-42.6385	-228.693	-58540.1	-7344.48	-3430.67	167.885	1158.98	0	0	0	0	0	0	0	603	903	0
7429	9	0	0	0	0	0	0	200	300	0	17.5214	-42.7911	-234.186	-59547.2	-7405.52	-2011.6	168.378	1157.27	0	0	0	0	0	0	0	603	903	0
7430	0	0	0	0	0	0	0	200	300	0	15.9955	-46.6058	-239.374	-62019.1	-7771.73	-4254.64	167.533	1162.09	0	0	0	0	0	0	0	603	903	0
7430	1	0	0	0	0	0	0	200	300	0	15.8429	-49.6576	-250.361	-63850.2	-8565.18	-3476.44	165.789	1158.03	0	0	0	0	0	0	0	603	903	0
7430	2	0	0	0	0	0	0	200	300	0	16.3007	-50.7257	-258.295	-65772.8	-8504.15	-1736.94	167.076	1157.64	0	0	0	0	0	0	0	603	903	0
7430	3	0	0	0	0	0	0	200	300	0	20.5731	-52.5568	-270.502	-68244.7	-8870.36	-3247.56	167.208	1155.29	0	0	0	0	0	0	0	603	903	0
7430	4	0	0	0	0	0	0	200	300	0	18.1317	-57.1344	-280.573	-70899.7	-9785.89	-3156.01	165.122	1155.7	0	0	0	0	0	0	0	603	903	0
7430	5	0	0	0	0	0	0	200	300	0	16.7584	-62.475	-291.559	-72913.9	-10030	-1691.16	165.599	1153.08	0	0	0	0	0	0	0	603	903	0
7430	6	0	0	0	0	0	0	200	300	0	18.4369	-63.6957	-303.156	-74653.4	-9968.99	-3247.56	167.116	1149.25	0	0	0	0	0	0	0	603	903	0
7430	7	0	0	0	0	0	0	200	300	0	21.1835	-64.6112	-314.448	-78040.9	-11006.6	-2835.57	164.997	1151.18	0	0	0	0	0	0	0	603	903	0
7430	8	0	0	0	0	0	0	200	300	0	19.505	-68.5785	-328.486	-80787.4	-11433.8	-1782.72	165.192	1148.94	0	0	0	0	0	0	0	603	903	0
7430	9	0	0	0	0	0	0	200	300	0	18.8947	-72.3932	-339.472	-82710.1	-11739	-3110.23	165.42	1146.64	0	0	0	0	0	0	0	603	903	0
7431	0	0	0	0	0	0	0	200	300	0	22.8619	-72.2406	-353.205	-84998.9	-12044.2	-2789.8	165.9	1143.65	0	0	0	0	0	0	0	603	903	0
7431	1	0	0	0	0	0	0	200	300	0	23.4723	-75.7501	-362.665	-88203.2	-12654.5	-1141.85	165.107	1146.21	0	0	0	0	0	0	0	603	903	0
7431	2	0	0	0	0	0	0	200	300	0	22.7094	-80.1752	-371.821	-90675.1	-13142.8	-2927.13	164.653	1146.87	0	0	0	0	0	0	0	603	903	0
7431	3	0	0	0	0	0	0	200	300	0	23.1671	-80.6329	-384.028	-91956.9	-13448	-2560.91	164.982	1142.45	0	0	0	0	0	0	0	603	903	0
7431	4	0	0	0	0	0	0	200	300	0	24.2352	-82.0062	-393.183	-94428.8	-13387	-1370.73	165.952	1143.17	0	0	0	0	0	0	0	603	903	0
7431	5	0	0	0	0	0	0	200	300	0	26.0663	-86.4313	-402.643	-96534.5	-14363.5	-2423.59	164.327	1142.75	0	0	0	0	0	0	0	603	903	0
7431	6	0	0	0	0	0	0	200	300	0	26.9818	-88.4149	-410.273	-98090.9	-14790.8	-2606.69	163.949	1142.09	0	0	0	0	0	0	0	603	903	0
7431	7	0	0	0	0	0	0	200	300	0	23.1671	-90.0934	-421.564	-99189.5	-14973.9	-1279.18	164.48	1138.29	0	0	0	0	0	0	0	603	903	0
7431	8	0	0	0	0	0	0	200	300	0	28.2025	-93.1451	-429.194	-101204	-15218	-2377.81	164.543	1138.8	0	0	0	0	0	0	0	603	903	0
7431	9	0	0	0	0	0	0	200	300	0	28.6603	-94.5184	-435.297	-102760	-16194.6	-1828.49	162.797	1139.07	0	0	0	0	0	0	0	603	903	0
7432	0	0	0	0	0	0	0	200	300	0	22.4042	-96.3495	-443.232	-103950	-15767.3	-546.754	164.426	1137.53	0	0	0	0	0	0	0	603	903	0
7432	1	0	0	0	0	0	0	200	300	0	23.1671	-98.1805	-449.03	-104408	-16438.7	-867.188	163.391	1135.52	0	0	0	0	0	0	0	603	903	0
7432	2	0	0	0	0	0	0	200	300	0	24.3878	-99.0961	-455.439	-105690	-17110.1	-912.965	162.432	1135.06	0	0	0	0	0	0	0	603	903	0
7432	3	0	0	0	0	0	0	200	300	0	20.7257	-100.317	-458.185	-106972	-17171.1	322.998	162.524	1136.47	0	0	0	0	0	0	0	603	903	0
7432	4	0	0	0	0	0	0	200	300	0	19.505	-101.232	-465.204	-107704	-17537.4	-592.53	162.302	1134.52	0	0	0	0	0	0	0	603	903	0
7432	5	0	0	0	0	0	0	200	300	0	19.6576	-101.995	-469.172	-107795	-17476.3	-180.542	162.751	1132.76	0	0	0	0	0	0	0	603	903	0
7432	6	0	0	0	0	0	0	200	300	0	18.4369	-103.369	-473.444	-109169	-18330.8	1330.08	161.282	1133.58	0	0	0	0	0	0	0	603	903	0
7432	7	0	0	0	0	0	0	200	300	0	19.0472	-102.148	-476.496	-109535	-18819.1	643.432	160.505	1132.88	0	0	0	0	0	0	0	603	903	0
7432	8	0	0	0	0	0	0	200	300	0	15.3851	-102.453	-476.801	-109901	-18819.1	918.091	160.531	1133.5	0	0	0	0	0	0	0	603	903	0
7432	9	0	0	0	0	0	0	200	300	0	13.8593	-105.963	-485.041	-110267	-18758.1	2611.82	161.327	1130.34	0	0	0	0	0	0	0	603	903	0
7433	0	0	0	0	0	0	0	200	300	0	12.1808	-105.352	-487.482	-110725	-19185.3	1879.39	160.644	1130.14	0	0	0	0	0	0	0	603	903	0
7433	1	0	0	0	0	0	0	200	300	0	11.1127	-103.063	-488.703	-111366	-19673.6	2062.5	159.743	1130.88	0	0	0	0	0	0	0	603	903	0
7433	2	0	0	0	0	0	0	200	300	0	8.36609	-105.505	-490.229	-111366	-19368.4	3115.36	160.491	1130.17	0	0	0	0	0	0	0	603	903	0
7433	3	0	0	0	0	0	0	200	300	0	7.29797	-105.047	-492.67	-111275	-19673.6	2703.37	160.067	1128.86	0	0	0	0	0	0	0	603	903	0
7433	4	0	0	0	0	0	0	200	300	0	5.7721	-104.437	-494.501	-111458	-20528.1	3527.34	158.487	1128.39	0	0	0	0	0	0	0	603	903	0
7433	5	0	0	0	0	0	0	200	300	0	3.1781	-104.131	-496.638	-112373	-20650.1	4259.77	158.42	1129.27	0	0	0	0	0	0	0	603	903	0
7433	6	0	0	0	0	0	0	200	300	0	2.26257	-106.42	-496.638	-111091	-20772.2	3756.23	158.174	1126.69	0	0	0	0	0	0	0	603	903	0
7433	7	0	0	0	0	0	0	200	300	0	0.736695	-105.047	-500.605	-111732	-20528.1	4168.21	158.993	1126.19	0	0	0	0	0	0	0	603	903	0
7433	8	0	0	0	0	0	0	200	300	0	-2.16248	-105.047	-498.469	-111458	-21077.4	5541.51	157.716	1126.6	0	0	0	0	0	0	0	603	903	0
7433	9	0	0	0	0	0	0	200	300	0	-3.38318	-105.505	-500.3	-112373	-20589.1	4809.08	158.846	1127.61	0	0	0	0	0	0	0	603	903	0
7434	0	0	0	0	0	0	0	200	300	0	-3.68835	-104.589	-501.215	-111366	-21260.5	5037.96	157.582	1125.19	0	0	0	0	0	0	0	603	903	0
7434	1	0	0	0	0	0	0	200	300	0	-6.74011	-103.369	-501.826	-111915	-21321.5	6136.6	157.512	1126.02	0	0	0	0	0	0	0	603	903	0
7434	2	0	0	0	0	0	0	200	300	0	-7.65564	-103.979	-503.351	-112282	-21443.6	5816.16	157.398	1126.07	0	0	0	0	0	0	0	603	903	0
7434	3	0	0	0	0	0	0	200	300	0	-8.41858	-104.894	-503.046	-112007	-21870.9	5999.27	156.523	1125.66	0	0	0	0	0	0	0	603	903	0
7434	4	0	0	0	0	0	0	200	300	0	-10.5548	-105.505	-504.877	-111549	-21870.9	7097.9	156.681	1123.94	0	0	0	0	0	0	0	603	903	0
7434	5	0	0	0	0	0	0	200	300	0	-10.4022	-103.521	-508.845	-112831	-22786.4	6914.8	155.219	1124.74	0	0	0	0	0	0	0	603	903	0
7434	6	0	0	0	0	0	0	200	300	0	-11.3177	-102.606	-516.169	-113289	-23824	6777.47	153.845	1122.48	0	0	0	0	0	0	0	603	903	0
7434	7	0	0	0	0	0	0	200	300	0	-19.7101	-102.758	-517.084	-112098	-23335.7	8791.63	154.871	1119.79	0	0	0	0	0	0	0	603	903	0
7434	8	0	0	0	0	0	0	200	300	0	-21.8463	-108.709	-514.643	-112007	-23457.8	9295.17	154.419	1120.64	0	0	0	0	0	0	0	603	903	0
7434	9	0	0	0	0	0	0	200	300	0	-23.9825	-109.167	-513.727	-112098	-23701.9	8608.52	153.863	1121.21	0	0	0	0	0	0	0	603	903	0
7435	0	0	0	0	0	0	0	200	300	0	-24.8981	-107.183	-520.136	-112465	-23885	10119.1	154.079	1119.22	0	0	0	0	0	0	0	603	903	0
7435	1	0	0	0	0	0	0	200	300	0	-26.7291	-111.761	-521.662	-111732	-23824	10348	154.331	1117.19	0	0	0	0	0	0	0	603	903	0
7435	2	0	0	0	0	0	0	200	300	0	-26.7291	-118.78	-521.662	-113380	-24495.4	9798.71	153.044	1120.34	0	0	0	0	0	0	0	603	903	0
7435	3	0	0	0	0	0	0	200	300	0	-26.2714	-117.559	-522.883	-113106	-24495.4	11034.7	153.153	1119.31	0	0	0	0	0	0	0	603	903	0
7435	4	0	0	0	0	0	0	200	300	0	-23.3722	-116.949	-523.188	-112556	-24312.3	11355.1	153.531	1118.14	0	0	0	0	0	0	0	603	903	0
7435	5	0	0	0	0	0	0	200	300	0	-21.236	-122.289	-526.85	-112373	-24495.4	10210.7	153.506	1116.29	0	0	0	0	0	0	0	603	903	0
7435	6	0	0	0	0	0	0	200	300	0	-22.1515	-124.426	-525.629	-112739	-24251.2	10668.5	153.862	1117.48	0	0	0	0	0	0	0	603	903	0
7435	7	0	0	0	0	0	0	200	300	0	-18.642	-119.848	-526.24	-112465	-24312.3	10943.1	153.8	1116.71	0	0	0	0	0	0	0	603	903	0
7435	8	0	0	0	0	0	0	200	300	0	-16.5057	-121.221	-525.019	-111549	-24861.6	9936.04	152.646	1115.47	0	0	0	0	0	0	0	603	903	0
7435	9	0	0	0	0	0	0	200	300	0	-16.8109	-121.984	-525.629	-111915	-24556.4	10439.6	153.282	1115.92	0	0	0	0	0	0	0	603	903	0
7436	0	0	0	0	0	0	0	200	300	0	-20.1678	-118.475	-527.155	-112098	-24922.6	10760	152.722	1115.65	0	0	0	0	0	0	0	603	903	0
7436	1	0	0	0	0	0	0	200	300	0	-13.6066	-116.644	-531.122	-112007	-25105.7	9981.81	152.731	1113.89	0	0	0	0	0	0	0	603	903	0
7436	2	0	0	0	0	0	0	200	300	0	-14.9799	-118.627	-531.733	-112098	-24800.5	10576.9	153.359	1113.82	0	0	0	0	0	0	0	603	903	0
7436	3	0	0	0	0	0	0	200	300	0	-16.5057	-116.033	-534.479	-112098	-24861.6	10668.5	153.485	1112.73	0	0	0	0	0	0	0	603	903	0
7436	4	0	0	0	0	0	0	200	300	0	-18.1842	-115.881	-538.141	-112739	-25533	9844.48	152.553	1112.5	0	0	0	0	0	0	0	603	903	0
7436	5	0	0	0	0	0	0	200	300	0	-13.9117	-117.712	-542.109	-112556	-25594	10668.5	152.788	1110.63	0	0	0	0	0	0	0	603	903	0
7436	6	0	0	0	0	0	0	200	300	0	-11.6229	-122.137	-540.888	-111732	-25349.9	10668.5	153.133	1109.57	0	0	0	0	0	0	0	603	903	0
7436	7	0	0	0	0	0	0	200	300	0	-15.5902	-122.137	-543.94	-112465	-25777.1	9707.15	152.61	1109.76	0	0	0	0	0	0	0	603	903	0
7436	8	0	0	0	0	0	0	200	300	0	-17.4213	-123.205	-547.602	-112922	-26265.4	10851.6	152.036	1109.21	0	0	0	0	0	0	0	603	903	0
7436	9	0	0	0	0	0	0	200	300	0	-14.6747	-127.02	-546.992	-112648	-26143.3	11172	152.205	1108.94	0	0	0	0	0	0	0	603	903	0
7437	0	0	0	0	0	0	0	200	300	0	-14.6747	-127.935	-545.16	-112648	-25960.2	10622.7	152.381	1109.63	0	0	0	0	0	0	0	603	903	0
7437	1	0	0	0	0	0	0	200	300	0	-20.1678	-126.104	-548.517	-113106	-26021.2	11080.4	152.561	1109.2	0	0	0	0	0	0	0	603	903	0
7437	2	0	0	0	0	0	0	200	300	0	-21.3885	-128.088	-550.348	-113106	-26509.5	11629.8	151.831	1108.52	0	0	0	0	0	0	0	603	903	0
7437	3	0	0	0	0	0	0	200	300	0	-20.3204	-128.851	-554.621	-113472	-26875.7	11400.9	151.542	1107.59	0	0	0	0	0	0	0	603	903	0
7437	4	0	0	0	0	0	0	200	300	0	-23.5248	-127.02	-557.062	-113289	-27180.9	11767.1	151.207	1106.37	0	0	0	0	0	0	0	603	903	0
7437	5	0	0	0	0	0	0	200	300	0	-27.1869	-125.189	-558.893	-113838	-27119.9	12270.6	151.476	1106.68	0	0	0	0	0	0	0	603	903	0
7437	6	0	0	0	0	0	0	200	300	0	-26.424	-128.088	-561.64	-113838	-27913.3	12316.4	150.3	1105.69	0	0	0	0	0	0	0	603	903	0
7437	7	0	0	0	0	0	0	200	300	0	-26.2714	-125.341	-562.555	-114204	-27974.4	12957.3	150.273	1106.01	0	0	0	0	0	0	0	603	903	0
7437	8	0	0	0	0	0	0	200	300	0	-28.255	-123.205	-565.912	-114570	-28096.4	13415	150.352	1105.45	0	0	0	0	0	0	0	603	903	0
7437	9	0	0	0	0	0	0	200	300	0	-31.6119	-124.883	-569.575	-115028	-28401.6	13140.4	150.135	1104.95	0	0	0	0	0	0	0	603	903	0
7438	0	0	0	0	0	0	0	200	300	0	-30.5438	-124.883	-570.795	-114845	-27974.4	13781.3	150.991	1104.2	0	0	0	0	0	0	0	603	903	0
7438	1	0	0	0	0	0	0	200	300	0	-29.9335	-122.9	-572.931	-115028	-28096.4	13964.4	150.96	1103.77	0	0	0	0	0	0	0	603	903	0
7438	2	0	0	0	0	0	0	200	300	0	-31.4594	-122.595	-571.406	-115028	-28523.7	13643.9	150.082	1104.31	0	0	0	0	0	0	0	603	903	0
7438	3	0	0	0	0	0	0	200	300	0	-32.6801	-125.036	-574.457	-115303	-28706.8	14055.9	150.028	1103.72	0	0	0	0	0	0	0	603	903	0
7438	4	0	0	0	0	0	0	200	300	0	-31.7645	-122.9	-576.288	-114753	-29012	14330.6	149.657	1102.13	0	0	0	0	0	0	0	603	903	0
7438	5	0	0	0	0	0	0	200	300	0	-30.849	-120.916	-576.594	-115303	-28645.8	13735.5	150.319	1102.97	0	0	0	0	0	0	0	603	903	0
7438	6	0	0	0	0	0	0	200	300	0	-30.3912	-122.289	-579.645	-115486	-29134	14284.8	149.738	1102.24	0	0	0	0	0	0	0	603	903	0
7438	7	0	0	0	0	0	0	200	300	0	-31.4594	-123.205	-580.866	-115303	-29317.1	14010.1	149.529	1101.5	0	0	0	0	0	0	0	603	903	0
7438	8	0	0	0	0	0	0	200	300	0	-31.0016	-120.611	-582.697	-115120	-29195.1	13827	149.897	1100.56	0	0	0	0	0	0	0	603	903	0
7438	9	0	0	0	0	0	0	200	300	0	-28.8654	-120.458	-581.782	-115394	-29073	13964.4	150.028	1101.35	0	0	0	0	0	0	0	603	903	0
7439	0	0	0	0	0	0	0	200	300	0	-31.9171	-123.663	-582.697	-115577	-29256.1	14284.8	149.792	1101.35	0	0	0	0	0	0	0	603	903	0
7439	1	0	0	0	0	0	0	200	300	0	-32.2223	-120.153	-583.613	-115761	-29378.2	13827	149.662	1101.35	0	0	0	0	0	0	0	603	903	0
7439	2	0	0	0	0	0	0	200	300	0	-30.5438	-118.475	-586.359	-114570	-29439.2	13964.4	149.793	1098.39	0	0	0	0	0	0	0	603	903	0
7439	3	0	0	0	0	0	0	200	300	0	-30.849	-120.153	-584.223	-114845	-29805.4	14193.2	148.983	1099.58	0	0	0	0	0	0	0	603	903	0
7439	4	0	0	0	0	0	0	200	300	0	-32.2223	-120.916	-589.106	-114937	-30232.7	14193.2	148.68	1098.1	0	0	0	0	0	0	0	603	903	0
7439	5	0	0	0	0	0	0	200	300	0	-32.9852	-119.543	-588.801	-114387	-29988.5	14239	149.068	1097.27	0	0	0	0	0	0	0	603	903	0
7439	6	0	0	0	0	0	0	200	300	0	-31.3068	-119.543	-590.021	-114296	-29744.4	14742.6	149.588	1096.71	0	0	0	0	0	0	0	603	903	0
7439	7	0	0	0	0	0	0	200	300	0	-30.6964	-119.39	-589.106	-114937	-29622.3	14330.6	149.716	1098.1	0	0	0	0	0	0	0	603	903	0
7439	8	0	0	0	0	0	0	200	300	0	-32.9852	-118.627	-591.242	-114479	-30232.7	14651	148.866	1096.62	0	0	0	0	0	0	0	603	903	0
7439	9	0	0	0	0	0	0	200	300	0	-34.0533	-117.712	-592.768	-115211	-30232.7	14834.1	148.997	1097.36	0	0	0	0	0	0	0	603	903	0
7440	0	0	0	0	0	0	0	200	300	0	-31.0016	-118.932	-592.158	-115120	-29866.5	14422.1	149.563	1097.41	0	0	0	0	0	0	0	603	903	0
7440	1	0	0	0	0	0	0	200	300	0	-32.3749	-116.644	-592.158	-115303	-30110.6	14651	149.151	1097.72	0	0	0	0	0	0	0	603	903	0
7440	2	0	0	0	0	0	0	200	300	0	-34.3585	-116.644	-593.378	-115394	-30476.8	14834.1	148.638	1097.47	0	0	0	0	0	0	0	603	903	0
7440	3	0	0	0	0	0	0	200	300	0	-33.443	-115.881	-594.904	-115120	-30598.9	14925.7	148.565	1096.51	0	0	0	0	0	0	0	603	903	0
7440	4	0	0	0	0	0	0	200	300	0	-32.3749	-114.507	-594.904	-115211	-30659.9	14559.5	148.462	1096.66	0	0	0	0	0	0	0	603	903	0
7440	5	0	0	0	0	0	0	200	300	0	-33.2904	-113.592	-597.04	-115669	-30476.8	14742.6	148.954	1096.74	0	0	0	0	0	0	0	603	903	0
7440	6	0	0	0	0	0	0	200	300	0	-34.2059	-113.897	-598.871	-115577	-30965.1	14651	148.294	1095.99	0	0	0	0	0	0	0	603	903	0
7440	7	0	0	0	0	0	0	200	300	0	-33.9008	-113.897	-598.566	-115120	-30904.1	14422.1	148.37	1095.33	0	0	0	0	0	0	0	603	903	0
7440	8	0	0	0	0	0	0	200	300	0	-33.2904	-112.524	-597.04	-115394	-30659.9	14422.1	148.647	1096.28	0	0	0	0	0	0	0	603	903	0
7440	9	0	0	0	0	0	0	200	300	0	-33.5956	-110.845	-597.651	-115303	-30537.8	14330.6	148.904	1095.93	0	0	0	0	0	0	0	603	903	0
7441	0	0	0	0	0	0	0	200	300	0	-34.6637	-110.845	-598.871	-114937	-30598.9	14467.9	148.906	1094.92	0	0	0	0	0	0	0	603	903	0
7441	1	0	0	0	0	0	0	200	300	0	-34.3585	-110.388	-601.008	-114662	-30782	14513.7	148.783	1093.78	0	0	0	0	0	0	0	603	903	0
7441	2	0	0	0	0	0	0	200	300	0	-33.443	-109.319	-598.261	-114937	-31087.2	14239	148.037	1095.12	0	0	0	0	0	0	0	603	903	0
7441	3	0	0	0	0	0	0	200	300	0	-33.1378	-109.319	-600.397	-115669	-31392.3	14467.9	147.714	1095.65	0	0	0	0	0	0	0	603	903	0
7441	4	0	0	0	0	0	0	200	300	0	-34.2059	-109.625	-600.092	-114937	-31270.3	14696.8	147.891	1094.53	0	0	0	0	0	0	0	603	903	0
7441	5	0	0	0	0	0	0	200	300	0	-34.2059	-108.709	-600.702	-114662	-30843	14467.9	148.655	1093.88	0	0	0	0	0	0	0	603	903	0
7441	6	0	0	0	0	0	0	200	300	0	-32.6801	-107.488	-601.313	-114662	-31087.2	14284.8	148.301	1093.69	0	0	0	0	0	0	0	603	903	0
7441	7	0	0	0	0	0	0	200	300	0	-33.443	-107.031	-600.702	-114845	-31514.4	14376.3	147.537	1094.18	0	0	0	0	0	0	0	603	903	0
7441	8	0	0	0	0	0	0	200	300	0	-33.9008	-106.268	-601.618	-114204	-31087.2	14376.3	148.327	1092.83	0	0	0	0	0	0	0	603	903	0
7441	9	0	0	0	0	0	0	200	300	0	-33.1378	-105.657	-601.008	-114021	-31209.2	14330.6	148.072	1092.72	0	0	0	0	0	0	0	603	903	0
7442	0	0	0	0	0	0	0	200	300	0	-32.0697	-105.505	-601.618	-113838	-31453.4	14467.9	147.719	1092.22	0	0	0	0	0	0	0	603	903	0
7442	1	0	0	0	0	0	0	200	300	0	-33.443	-105.505	-599.482	-114479	-31758.6	14193.2	147.023	1093.96	0	0	0	0	0	0	0	603	903	0
7442	2	0	0	0	0	0	0	200	300	0	-33.443	-103.216	-599.482	-114113	-31880.6	14147.5	146.82	1093.35	0	0	0	0	0	0	0	603	903	0
7442	3	0	0	0	0	0	0	200	300	0	-32.0697	-103.216	-600.397	-113106	-31087.2	14101.7	148.222	1091.38	0	0	0	0	0	0	0	603	903	0
7442	4	0	0	0	0	0	0	200	300	0	-32.2223	-102.758	-601.618	-114021	-31697.5	14010.1	147.313	1092.52	0	0	0	0	0	0	0	603	903	0
7442	5	0	0	0	0	0	0	200	300	0	-33.9008	-102.606	-599.482	-113472	-31636.5	13872.8	147.227	1092.28	0	0	0	0	0	0	0	603	903	0
7442	6	0	0	0	0	0	0	200	300	0	-33.9008	-102.3	-601.313	-113197	-31209.2	13964.4	148.098	1091.25	0	0	0	0	0	0	0	603	903	0
7442	7	0	0	0	0	0	0	200	300	0	-32.5275	-100.927	-598.566	-113106	-31331.3	13827	147.656	1091.96	0	0	0	0	0	0	0	603	903	0
7442	8	0	0	0	0	0	0	200	300	0	-31.6119	-100.012	-597.956	-113472	-31758.6	14147.5	146.888	1092.77	0	0	0	0	0	0	0	603	903	0
7442	9	0	0	0	0	0	0	200	300	0	-32.8326	-99.0961	-599.787	-113106	-31758.6	13964.4	147.05	1091.58	0	0	0	0	0	0	0	603	903	0
7443	0	0	0	0	0	0	0	200	300	0	-32.8326	-98.028	-600.702	-112465	-31453.4	14055.9	147.639	1090.22	0	0	0	0	0	0	0	603	903	0
7443	1	0	0	0	0	0	0	200	300	0	-31.7645	-98.6383	-599.787	-112739	-31453.4	13781.3	147.559	1090.97	0	0	0	0	0	0	0	603	903	0
7443	2	0	0	0	0	0	0	200	300	0	-31.7645	-98.028	-601.618	-113197	-31697.5	13872.8	147.313	1091.15	0	0	0	0	0	0	0	603	903	0
7443	3	0	0	0	0	0	0	200	300	0	-33.7482	-96.9598	-598.871	-112831	-31819.6	13735.5	146.867	1091.41	0	0	0	0	0	0	0	603	903	0
7443	4	0	0	0	0	0	0	200	300	0	-33.2904	-94.9762	-596.43	-112556	-31148.2	13415	147.776	1091.72	0	0	0	0	0	0	0	603	903	0
7443	5	0	0	0	0	0	0	200	300	0	-31.7645	-94.671	-598.566	-112282	-31697.5	13827	147.044	1090.58	0	0	0	0	0	0	0	603	903	0
7443	6	0	0	0	0	0	0	200	300	0	-32.8326	-93.9081	-601.618	-112922	-31941.7	13460.8	146.907	1090.7	0	0	0	0	0	0	0	603	903	0
7443	7	0	0	0	0	0	0	200	300	0	-32.0697	-93.9081	-598.261	-112648	-32185.8	13598.1	146.201	1091.29	0	0	0	0	0	0	0	603	903	0
7443	8	0	0	0	0	0	0	200	300	0	-32.3749	-93.4503	-600.702	-112282	-31514.4	13598.1	147.537	1089.92	0	0	0	0	0	0	0	603	903	0
7443	9	0	0	0	0	0	0	200	300	0	-31.3068	-92.3822	-599.787	-112465	-32063.7	13460.8	146.541	1090.51	0	0	0	0	0	0	0	603	903	0
7444	0	0	0	0	0	0	0	200	300	0	-33.1378	-90.246	-597.346	-112465	-31880.6	13369.3	146.63	1091.27	0	0	0	0	0	0	0	603	903	0
7444	1	0	0	0	0	0	0	200	300	0	-32.5275	-91.0089	-597.956	-112465	-31392.3	13415	147.501	1091.08	0	0	0	0	0	0	0	603	903	0
7444	2	0	0	0	0	0	0	200	300	0	-31.6119	-89.0253	-600.702	-111824	-31636.5	13231.9	147.334	1089.16	0	0	0	0	0	0	0	603	903	0
7444	3	0	0	0	0	0	0	200	300	0	-32.0697	-88.8727	-599.177	-111549	-31941.7	13186.2	146.691	1089.17	0	0	0	0	0	0	0	603	903	0
7444	4	0	0	0	0	0	0	200	300	0	-33.5956	-88.4149	-600.092	-112007	-31819.6	13048.8	146.976	1089.65	0	0	0	0	0	0	0	603	903	0
7444	5	0	0	0	0	0	0	200	300	0	-32.5275	-87.4994	-599.482	-111732	-31575.4	13003.1	147.329	1089.38	0	0	0	0	0	0	0	603	903	0
7444	6	0	0	0	0	0	0	200	300	0	-31.7645	-87.8046	-598.566	-111000	-31575.4	13094.6	147.248	1088.44	0	0	0	0	0	0	0	603	903	0
7444	7	0	0	0	0	0	0	200	300	0	-31.0016	-85.3632	-599.177	-111641	-32185.8	13094.6	146.283	1089.32	0	0	0	0	0	0	0	603	903	0
7444	8	0	0	0	0	0	0	200	300	0	-32.3749	-85.058	-600.397	-111091	-31697.5	12957.3	147.206	1088.03	0	0	0	0	0	0	0	603	903	0
7444	9	0	0	0	0	0	0	200	300	0	-31.6119	-84.4476	-599.482	-111091	-31209.2	13003.1	147.94	1088.31	0	0	0	0	0	0	0	603	903	0
7445	0	0	0	0	0	0	0	200	300	0	-30.2386	-83.9899	-599.177	-111275	-31514.4	12911.5	147.404	1088.71	0	0	0	0	0	0	0	603	903	0
7445	1	0	0	0	0	0	0	200	300	0	-30.849	-82.9218	-596.43	-111091	-31270.3	12774.2	147.571	1089.26	0	0	0	0	0	0	0	603	903	0
7445	2	0	0	0	0	0	0	200	300	0	-32.0697	-82.7692	-597.346	-111091	-31087.2	12820	147.958	1088.98	0	0	0	0	0	0	0	603	903	0
7445	3	0	0	0	0	0	0	200	300	0	-31.4594	-81.0907	-596.43	-110359	-31209.2	12728.4	147.673	1088.03	0	0	0	0	0	0	0	603	903	0
7445	4	0	0	0	0	0	0	200	300	0	-30.6964	-79.87	-596.735	-110634	-31636.5	12545.3	146.984	1088.4	0	0	0	0	0	0	0	603	903	0
7445	5	0	0	0	0	0	0	200	300	0	-29.9335	-79.1071	-596.43	-110908	-31819.6	12408	146.65	1088.95	0	0	0	0	0	0	0	603	903	0
7445	6	0	0	0	0	0	0	200	300	0	-30.6964	-78.8019	-596.735	-110451	-31148.2	12453.7	147.802	1088.09	0	0	0	0	0	0	0	603	903	0
7445	7	0	0	0	0	0	0	200	300	0	-30.849	-78.0389	-595.82	-110176	-30965.1	12545.3	148.029	1087.91	0	0	0	0	0	0	0	603	903	0
7445	8	0	0	0	0	0	0	200	300	0	-30.0861	-76.8182	-593.378	-110359	-31270.3	12179.1	147.301	1088.98	0	0	0	0	0	0	0	603	903	0
7445	9	0	0	0	0	0	0	200	300	0	-29.7809	-75.7501	-592.158	-110267	-31209.2	11950.2	147.296	1089.21	0	0	0	0	0	0	0	603	903	0
7446	0	0	0	0	0	0	0	200	300	0	-31.1542	-75.2924	-590.632	-110267	-30782	12133.3	147.883	1089.69	0	0	0	0	0	0	0	603	903	0
7446	1	0	0	0	0	0	0	200	300	0	-31.3068	-73.6139	-591.242	-109077	-30904.1	11950.2	147.73	1087.49	0	0	0	0	0	0	0	603	903	0
7446	2	0	0	0	0	0	0	200	300	0	-29.6283	-73.7665	-591.242	-108986	-31148.2	11812.9	147.317	1087.33	0	0	0	0	0	0	0	603	903	0
7446	3	0	0	0	0	0	0	200	300	0	-29.7809	-73.7665	-589.106	-109352	-31392.3	11904.4	146.712	1088.62	0	0	0	0	0	0	0	603	903	0
7446	4	0	0	0	0	0	0	200	300	0	-31.0016	-72.2406	-587.885	-108253	-30721	11950.2	147.743	1087.14	0	0	0	0	0	0	0	603	903	0
7446	5	0	0	0	0	0	0	200	300	0	-30.5438	-70.4095	-583.613	-109169	-30354.7	12041.8	147.988	1090.06	0	0	0	0	0	0	0	603	903	0
7446	6	0	0	0	0	0	0	200	300	0	-29.7809	-70.4095	-584.833	-107521	-30721	11675.5	147.471	1086.85	0	0	0	0	0	0	0	603	903	0
7446	7	0	0	0	0	0	0	200	300	0	-29.6283	-69.494	-584.528	-108803	-30354.7	11584	148.07	1089.14	0	0	0	0	0	0	0	603	903	0
7446	8	0	0	0	0	0	0	200	300	0	-31.1542	-69.3414	-581.782	-108162	-30354.7	11812.9	147.825	1088.91	0	0	0	0	0	0	0	603	903	0
7446	9	0	0	0	0	0	0	200	300	0	-31.1542	-68.7311	-581.782	-107338	-30659.9	11584	147.3	1087.5	0	0	0	0	0	0	0	603	903	0
7447	0	0	0	0	0	0	0	200	300	0	-29.6283	-66.7474	-579.34	-107155	-30843	11538.2	146.762	1087.96	0	0	0	0	0	0	0	603	903	0
7447	1	0	0	0	0	0	0	200	300	0	-29.6283	-67.3578	-578.425	-106880	-30232.7	11675.5	147.733	1087.78	0	0	0	0	0	0	0	603	903	0
7447	2	0	0	0	0	0	0	200	300	0	-30.849	-65.9845	-577.509	-106972	-30171.6	11538.2	147.756	1088.23	0	0	0	0	0	0	0	603	903	0
7447	3	0	0	0	0	0	0	200	300	0	-29.4757	-64.4586	-576.594	-106239	-30537.8	11538.2	147.037	1087.25	0	0	0	0	0	0	0	603	903	0
7447	4	0	0	0	0	0	0	200	300	0	-27.3395	-64.306	-574.763	-106514	-30659.9	11263.6	146.656	1088.32	0	0	0	0	0	0	0	603	903	0
7447	5	0	0	0	0	0	0	200	300	0	-30.6964	-64.1534	-573.237	-106422	-29744.4	11446.7	148.112	1088.65	0	0	0	0	0	0	0	603	903	0
7447	6	0	0	0	0	0	0	200	300	0	-30.849	-63.0853	-570.185	-105873	-29927.5	11309.3	147.513	1088.68	0	0	0	0	0	0	0	603	903	0
7447	7	0	0	0	0	0	0	200	300	0	-28.5602	-62.1698	-569.88	-105049	-30049.6	11217.8	147.27	1087.34	0	0	0	0	0	0	0	603	903	0
7447	8	0	0	0	0	0	0	200	300	0	-29.6283	-60.9491	-568.659	-105049	-29500.2	11126.2	148.123	1087.73	0	0	0	0	0	0	0	603	903	0
7447	9	0	0	0	0	0	0	200	300	0	-29.9335	-59.7284	-567.133	-104774	-29683.4	10897.3	147.661	1087.74	0	0	0	0	0	0	0	603	903	0
7448	0	0	0	0	0	0	0	200	300	0	-30.6964	-59.4232	-566.523	-104500	-29622.3	10851.6	147.712	1087.46	0	0	0	0	0	0	0	603	903	0
7448	1	0	0	0	0	0	0	200	300	0	-30.0861	-59.118	-565.302	-103859	-29866.5	10988.9	147.167	1086.72	0	0	0	0	0	0	0	603	903	0
7448	2	0	0	0	0	0	0	200	300	0	-29.3231	-58.8129	-562.861	-102852	-29317.1	10576.9	147.914	1085.73	0	0	0	0	0	0	0	603	903	0
7448	3	0	0	0	0	0	0	200	300	0	-29.4757	-58.9655	-560.724	-103859	-28828.9	10897.3	148.586	1088.22	0	0	0	0	0	0	0	603	903	0
7448	4	0	0	0	0	0	0	200	300	0	-30.3912	-57.287	-558.588	-103493	-28706.8	10851.6	148.608	1088.28	0	0	0	0	0	0	0	603	903	0
7448	5	0	0	0	0	0	0	200	300	0	-29.3231	-56.3715	-557.367	-103309	-29378.2	10576.9	147.291	1088.35	0	0	0	0	0	0	0	603	903	0
7448	6	0	0	0	0	0	0	200	300	0	-30.5438	-56.6766	-554.316	-102485	-28523.7	10210.7	148.543	1087.89	0	0	0	0	0	0	0	603	903	0
7448	7	0	0	0	0	0	0	200	300	0	-29.7809	-55.1508	-553.705	-102028	-28950.9	10531.1	147.714	1087.26	0	0	0	0	0	0	0	603	903	0
7448	8	0	0	0	0	0	0	200	300	0	-29.1705	-54.2352	-552.18	-102394	-28950.9	10439.6	147.57	1088.44	0	0	0	0	0	0	0	603	903	0
7448	9	0	0	0	0	0	0	200	300	0	-29.9335	-54.0826	-551.874	-102211	-28828.9	10348	147.762	1088.21	0	0	0	0	0	0	0	603	903	0
7449	0	0	0	0	0	0	0	200	300	0	-30.3912	-52.2516	-549.738	-101387	-28462.7	10485.4	148.225	1087.43	0	0	0	0	0	0	0	603	903	0
7449	1	0	0	0	0	0	0	200	300	0	-29.0179	-52.7094	-548.823	-101112	-28584.7	10393.8	147.916	1087.23	0	0	0	0	0	0	0	603	903	0
7449	2	0	0	0	0	0	0	200	300	0	-28.5602	-51.0309	-546.686	-100654	-28401.6	10073.4	148.048	1087.12	0	0	0	0	0	0	0	603	903	0
7449	3	0	0	0	0	0	0	200	300	0	-29.4757	-51.0309	-545.466	-101021	-28035.4	10119.1	148.603	1088.2	0	0	0	0	0	0	0	603	903	0
7449	4	0	0	0	0	0	0	200	300	0	-30.5438	-49.3524	-543.329	-100746	-28096.4	10256.5	148.288	1088.42	0	0	0	0	0	0	0	603	903	0
7449	5	0	0	0	0	0	0	200	300	0	-30.849	-49.1998	-541.804	-99555.8	-27913.3	9844.48	148.481	1086.75	0	0	0	0	0	0	0	603	903	0
7449	6	0	0	0	0	0	0	200	300	0	-29.1705	-48.8947	-540.583	-98823.3	-28218.5	9798.71	147.8	1085.81	0	0	0	0	0	0	0	603	903	0
7449	7	0	0	0	0	0	0	200	300	0	-28.8654	-47.674	-538.447	-99006.4	-27852.3	9661.38	148.273	1086.87	0	0	0	0	0	0	0	603	903	0
7449	8	0	0	0	0	0	0	200	300	0	-28.255	-47.3688	-537.836	-99555.8	-27669.2	9661.38	148.555	1088.1	0	0	0	0	0	0	0	603	903	0
7449	9	0	0	0	0	0	0	200	300	0	-30.0861	-47.3688	-537.836	-99281.1	-27913.3	9661.38	148.101	1087.59	0	0	0	0	0	0	0	603	903	0
7450	0	0	0	0	0	0	0	200	300	0	-29.7809	-47.3688	-535.09	-98274	-27730.2	9249.39	148.176	1086.66	0	0	0	0	0	0	0	603	903	0
7450	1	0	0	0	0	0	0	200	300	0	-29.3231	-45.5377	-532.648	-97266.9	-27303	9524.05	148.741	1085.61	0	0	0	0	0	0	0	603	903	0
7450	2	0	0	0	0	0	0	200	300	0	-28.8654	-44.4696	-530.817	-97724.7	-27180.9	9386.72	148.794	1087.1	0	0	0	0	0	0	0	603	903	0
7450	3	0	0	0	0	0	0	200	300	0	-30.3912	-44.0118	-530.512	-97633.1	-27119.9	9340.94	148.88	1087.04	0	0	0	0	0	0	0	603	903	0
7450	4	0	0	0	0	0	0	200	300	0	-28.4076	-43.2489	-530.512	-97633.1	-27303	9295.17	148.535	1087.04	0	0	0	0	0	0	0	603	903	0
7450	5	0	0	0	0	0	0	200	300	0	-29.4757	-42.3334	-528.376	-97083.8	-27058.8	9249.39	148.789	1086.74	0	0	0	0	0	0	0	603	903	0
7450	6	0	0	0	0	0	0	200	300	0	-28.5602	-42.7911	-528.681	-96626.1	-26814.7	8928.96	149.28	1085.77	0	0	0	0	0	0	0	603	903	0
7450	7	0	0	0	0	0	0	200	300	0	-28.255	-42.0282	-527.155	-96992.3	-26631.6	8883.18	149.481	1086.99	0	0	0	0	0	0	0	603	903	0
7450	8	0	0	0	0	0	0	200	300	0	-29.1705	-41.723	-524.103	-96626.1	-26936.8	9066.28	148.604	1087.36	0	0	0	0	0	0	0	603	903	0
7450	9	0	0	0	0	0	0	200	300	0	-28.7128	-40.6549	-520.136	-96900.7	-26448.5	8791.63	149.151	1089.3	0	0	0	0	0	0	0	603	903	0
7451	0	0	0	0	0	0	0	200	300	0	-27.7972	-39.5868	-521.052	-95619	-26936.8	8654.3	148.303	1086.51	0	0	0	0	0	0	0	603	903	0
7451	1	0	0	0	0	0	0	200	300	0	-25.8136	-39.2816	-522.272	-95161.2	-26509.5	8883.18	149.242	1085.21	0	0	0	0	0	0	0	603	903	0
7451	2	0	0	0	0	0	0	200	300	0	-27.1869	-38.9764	-522.883	-95527.4	-26265.4	8425.42	149.768	1085.69	0	0	0	0	0	0	0	603	903	0
7451	3	0	0	0	0	0	0	200	300	0	-29.1705	-38.3661	-519.831	-95252.8	-26509.5	8288.09	149.004	1086.24	0	0	0	0	0	0	0	603	903	0
7451	4	0	0	0	0	0	0	200	300	0	-28.7128	-38.8239	-520.136	-94795	-26570.6	8288.09	148.916	1085.25	0	0	0	0	0	0	0	603	903	0
7451	5	0	0	0	0	0	0	200	300	0	-27.3395	-36.9928	-515.864	-93330.2	-26326.4	8425.42	148.966	1083.92	0	0	0	0	0	0	0	603	903	0
7451	6	0	0	0	0	0	0	200	300	0	-26.8817	-36.535	-515.253	-94520.3	-25960.2	8288.09	149.617	1086.44	0	0	0	0	0	0	0	603	903	0
7451	7	0	0	0	0	0	0	200	300	0	-27.7972	-36.3824	-514.338	-94520.3	-25960.2	8059.2	149.527	1086.77	0	0	0	0	0	0	0	603	903	0
7451	8	0	0	0	0	0	0	200	300	0	-25.8136	-35.4669	-514.338	-94062.6	-26326.4	7921.88	148.815	1085.88	0	0	0	0	0	0	0	603	903	0
7451	9	0	0	0	0	0	0	200	300	0	-29.0179	-34.704	-514.033	-93421.7	-25777.1	7738.77	149.853	1084.74	0	0	0	0	0	0	0	603	903	0
7452	0	0	0	0	0	0	0	200	300	0	-26.1188	-35.1617	-513.422	-93238.6	-25533	7830.32	150.269	1084.6	0	0	0	0	0	0	0	603	903	0
7452	1	0	0	0	0	0	0	200	300	0	-26.7291	-34.0936	-513.727	-93604.8	-26082.3	7418.34	149.229	1085.21	0	0	0	0	0	0	0	603	903	0
7452	2	0	0	0	0	0	0	200	300	0	-26.8817	-33.7885	-510.065	-93421.7	-26082.3	7738.77	148.865	1086.16	0	0	0	0	0	0	0	603	903	0
7452	3	0	0	0	0	0	0	200	300	0	-26.8817	-33.1781	-510.065	-92597.8	-25594	7830.32	149.822	1084.54	0	0	0	0	0	0	0	603	903	0
7452	4	0	0	0	0	0	0	200	300	0	-25.661	-32.7203	-507.013	-92323.1	-25471.9	7555.67	149.761	1085.09	0	0	0	0	0	0	0	603	903	0
7452	5	0	0	0	0	0	0	200	300	0	-25.3558	-32.2626	-509.455	-92689.3	-25777.1	7418.34	149.403	1084.94	0	0	0	0	0	0	0	603	903	0
7452	6	0	0	0	0	0	0	200	300	0	-26.5765	-32.2626	-506.403	-92323.1	-25594	7235.23	149.459	1085.31	0	0	0	0	0	0	0	603	903	0
7452	7	0	0	0	0	0	0	200	300	0	-23.2196	-31.0419	-507.624	-92140	-25105.7	7281.01	150.543	1084.51	0	0	0	0	0	0	0	603	903	0
7452	8	0	0	0	0	0	0	200	300	0	-26.2714	-30.4315	-506.403	-91224.4	-25227.8	7052.13	150.182	1083.14	0	0	0	0	0	0	0	603	903	0
7452	9	0	0	0	0	0	0	200	300	0	-25.5084	-30.5841	-504.572	-91316	-25899.2	6869.02	148.671	1083.98	0	0	0	0	0	0	0	603	903	0
7453	0	0	0	0	0	0	0	200	300	0	-24.1351	-29.8212	-504.572	-91407.6	-25594	7052.13	149.276	1084.16	0	0	0	0	0	0	0	603	903	0
7453	1	0	0	0	0	0	0	200	300	0	-25.3558	-28.9056	-505.793	-90400.5	-25044.7	6914.8	150.484	1081.73	0	0	0	0	0	0	0	603	903	0
7453	2	0	0	0	0	0	0	200	300	0	-25.2032	-28.1427	-503.657	-91132.9	-25349.9	7143.68	149.668	1083.94	0	0	0	0	0	0	0	603	903	0
7453	3	0	0	0	0	0	0	200	300	0	-24.2877	-27.9901	-503.351	-90858.2	-25349.9	6640.14	149.638	1083.51	0	0	0	0	0	0	0	603	903	0
7453	4	0	0	0	0	0	0	200	300	0	-25.0507	-27.6849	-501.215	-90217.3	-25044.7	6365.48	150.032	1083	0	0	0	0	0	0	0	603	903	0
7453	5	0	0	0	0	0	0	200	300	0	-23.3722	-27.2272	-502.131	-90583.6	-24678.5	6457.03	150.853	1083.4	0	0	0	0	0	0	0	603	903	0
7453	6	0	0	0	0	0	0	200	300	0	-24.8981	-26.3116	-501.826	-89759.6	-25288.8	6640.14	149.606	1081.87	0	0	0	0	0	0	0	603	903	0
7453	7	0	0	0	0	0	0	200	300	0	-25.3558	-25.5487	-499.079	-90034.3	-25349.9	6182.37	149.207	1083.4	0	0	0	0	0	0	0	603	903	0
7453	8	0	0	0	0	0	0	200	300	0	-24.4403	-25.5487	-501.826	-89393.4	-25166.8	6273.93	149.85	1081.14	0	0	0	0	0	0	0	603	903	0
7453	9	0	0	0	0	0	0	200	300	0	-23.2196	-25.7013	-500.605	-89118.7	-24617.4	6136.6	150.825	1081.02	0	0	0	0	0	0	0	603	903	0
7454	0	0	0	0	0	0	0	200	300	0	-22.9144	-25.3961	-500.91	-89668.1	-25166.8	6090.82	149.758	1082.01	0	0	0	0	0	0	0	603	903	0
7454	1	0	0	0	0	0	0	200	300	0	-24.2877	-24.9384	-499.384	-88661	-24861.6	5816.16	150.216	1080.54	0	0	0	0	0	0	0	603	903	0
7454	2	0	0	0	0	0	0	200	300	0	-23.9825	-24.7858	-498.163	-89484.9	-24800.5	5816.16	150.216	1082.63	0	0	0	0	0	0	0	603	903	0
7454	3	0	0	0	0	0	0	200	300	0	-22.1515	-23.5651	-497.553	-88477.8	-24739.5	5907.72	150.278	1080.83	0	0	0	0	0	0	0	603	903	0
7454	4	0	0	0	0	0	0	200	300	0	-22.1515	-22.9547	-499.079	-88477.8	-25166.8	5907.72	149.574	1080.28	0	0	0	0	0	0	0	603	903	0
7454	5	0	0	0	0	0	0	200	300	0	-22.4567	-22.8021	-496.943	-88661	-24800.5	5678.83	150.094	1081.41	0	0	0	0	0	0	0	603	903	0
7454	6	0	0	0	0	0	0	200	300	0	-23.3722	-22.4969	-499.384	-88111.6	-24678.5	5770.39	150.582	1079.44	0	0	0	0	0	0	0	603	903	0
7454	7	0	0	0	0	0	0	200	300	0	-23.5248	-22.3444	-497.248	-87745.4	-24983.6	5678.83	149.756	1079.46	0	0	0	0	0	0	0	603	903	0
7454	8	0	0	0	0	0	0	200	300	0	-21.3885	-21.734	-495.722	-87379.2	-24922.6	5816.16	149.725	1079.27	0	0	0	0	0	0	0	603	903	0
7454	9	0	0	0	0	0	0	200	300	0	-22.3041	-21.2762	-496.332	-87745.4	-24678.5	5495.73	150.278	1079.79	0	0	0	0	0	0	0	603	903	0
7455	0	0	0	0	0	0	0	200	300	0	-23.3722	-20.8185	-494.806	-87653.9	-24800.5	5312.62	149.878	1080.15	0	0	0	0	0	0	0	603	903	0
7455	1	0	0	0	0	0	0	200	300	0	-21.236	-20.6659	-497.248	-87470.8	-24678.5	5587.28	150.37	1078.91	0	0	0	0	0	0	0	603	903	0
7455	2	0	0	0	0	0	0	200	300	0	-23.067	-19.903	-496.943	-86921.4	-24983.6	5404.18	149.725	1077.91	0	0	0	0	0	0	0	603	903	0
7455	3	0	0	0	0	0	0	200	300	0	-21.5411	-20.0555	-497.248	-86646.8	-24739.5	5037.96	150.247	1077.25	0	0	0	0	0	0	0	603	903	0
7455	4	0	0	0	0	0	0	200	300	0	-21.3885	-19.5978	-494.196	-86921.4	-24617.4	5221.07	150.187	1078.88	0	0	0	0	0	0	0	603	903	0
7455	5	0	0	0	0	0	0	200	300	0	-22.4567	-18.3771	-494.806	-86738.4	-24739.5	5266.85	150.002	1078.3	0	0	0	0	0	0	0	603	903	0
7455	6	0	0	0	0	0	0	200	300	0	-21.6937	-19.4452	-494.806	-86372.2	-25166.8	5175.29	149.138	1077.56	0	0	0	0	0	0	0	603	903	0
7455	7	0	0	0	0	0	0	200	300	0	-21.3885	-17.7667	-495.417	-85273.5	-24800.5	5037.96	149.94	1075.12	0	0	0	0	0	0	0	603	903	0
7455	8	0	0	0	0	0	0	200	300	0	-21.0834	-18.3771	-494.806	-85914.4	-24983.6	4946.41	149.508	1076.63	0	0	0	0	0	0	0	603	903	0
7455	9	0	0	0	0	0	0	200	300	0	-22.4567	-18.3771	-494.806	-86097.5	-24922.6	4900.63	149.632	1077	0	0	0	0	0	0	0	603	903	0
7456	0	0	0	0	0	0	0	200	300	0	-20.1678	-17.4615	-492.67	-85731.3	-24556.4	4992.19	150.157	1077.01	0	0	0	0	0	0	0	603	903	0
7456	1	0	0	0	0	0	0	200	300	0	-21.9989	-16.6986	-490.534	-85090.4	-24678.5	4763.31	149.691	1076.46	0	0	0	0	0	0	0	603	903	0
7456	2	0	0	0	0	0	0	200	300	0	-21.236	-16.546	-494.196	-84632.6	-24861.6	4900.63	149.693	1074.25	0	0	0	0	0	0	0	603	903	0
7456	3	0	0	0	0	0	0	200	300	0	-20.6256	-16.2408	-493.586	-85365.1	-25105.7	4809.08	149.136	1075.95	0	0	0	0	0	0	0	603	903	0
7456	4	0	0	0	0	0	0	200	300	0	-21.236	-16.0883	-491.755	-85273.5	-24861.6	4900.63	149.443	1076.41	0	0	0	0	0	0	0	603	903	0
7456	5	0	0	0	0	0	0	200	300	0	-21.8463	-16.0883	-492.975	-84541.1	-24617.4	4809.08	150.064	1074.49	0	0	0	0	0	0	0	603	903	0
7456	6	0	0	0	0	0	0	200	300	0	-20.6256	-15.9357	-491.755	-84174.9	-25044.7	4717.53	149.071	1074.17	0	0	0	0	0	0	0	603	903	0
7456	7	0	0	0	0	0	0	200	300	0	-20.1678	-15.4779	-492.06	-83900.2	-25044.7	4671.75	149.102	1073.51	0	0	0	0	0	0	0	603	903	0
7456	8	0	0	0	0	0	0	200	300	0	-21.6937	-14.5624	-491.144	-84174.9	-25105.7	4488.65	148.883	1074.39	0	0	0	0	0	0	0	603	903	0
7456	9	0	0	0	0	0	0	200	300	0	-21.236	-14.5624	-492.06	-83991.8	-24739.5	4763.31	149.723	1073.69	0	0	0	0	0	0	0	603	903	0
7457	0	0	0	0	0	0	0	200	300	0	-21.5411	-14.5624	-492.975	-83167.8	-24983.6	4488.65	149.321	1071.71	0	0	0	0	0	0	0	603	903	0
7457	1	0	0	0	0	0	0	200	300	0	-20.9308	-13.7994	-492.975	-82069.2	-24434.3	4397.09	150.435	1069.48	0	0	0	0	0	0	0	603	903	0
7457	2	0	0	0	0	0	0	200	300	0	-20.6256	-14.5624	-493.281	-82984.7	-24800.5	4442.87	149.723	1071.23	0	0	0	0	0	0	0	603	903	0
7457	3	0	0	0	0	0	0	200	300	0	-21.236	-13.6469	-492.06	-83259.3	-25410.9	4305.54	148.358	1072.21	0	0	0	0	0	0	0	603	903	0
7457	4	0	0	0	0	0	0	200	300	0	-20.0153	-15.0201	-490.839	-82984.7	-25105.7	4534.42	148.851	1072.07	0	0	0	0	0	0	0	603	903	0
7457	5	0	0	0	0	0	0	200	300	0	-21.8463	-12.8839	-491.45	-82343.8	-24922.6	4305.54	149.288	1070.55	0	0	0	0	0	0	0	603	903	0
7457	6	0	0	0	0	0	0	200	300	0	-21.5411	-12.5787	-491.144	-82069.2	-25044.7	4259.77	149.007	1070.1	0	0	0	0	0	0	0	603	903	0
7457	7	0	0	0	0	0	0	200	300	0	-20.7782	-12.4261	-492.67	-81703	-25533	4442.87	148.174	1068.84	0	0	0	0	0	0	0	603	903	0
7457	8	0	0	0	0	0	0	200	300	0	-21.8463	-12.5787	-492.365	-80970.5	-25533	4351.32	148.142	1067.45	0	0	0	0	0	0	0	603	903	0
7457	9	0	0	0	0	0	0	200	300	0	-21.9989	-12.7313	-491.45	-81977.6	-25349.9	4076.66	148.418	1069.81	0	0	0	0	0	0	0	603	903	0
7458	0	0	0	0	0	0	0	200	300	0	-20.473	-12.2736	-491.45	-81428.3	-25594	4305.54	147.921	1068.69	0	0	0	0	0	0	0	603	903	0
7458	1	0	0	0	0	0	0	200	300	0	-19.4049	-11.358	-489.924	-80970.5	-25899.2	4259.77	147.136	1068.27	0	0	0	0	0	0	0	603	903	0
7458	2	0	0	0	0	0	0	200	300	0	-20.1678	-11.5106	-490.534	-81611.4	-25838.1	4213.99	147.327	1069.37	0	0	0	0	0	0	0	603	903	0
7458	3	0	0	0	0	0	0	200	300	0	-21.236	-10.5951	-492.67	-81153.6	-25655	4397.09	147.927	1067.72	0	0	0	0	0	0	0	603	903	0
7458	4	0	0	0	0	0	0	200	300	0	-21.9989	-11.358	-492.06	-81245.2	-25838.1	4305.54	147.49	1068.11	0	0	0	0	0	0	0	603	903	0
7458	5	0	0	0	0	0	0	200	300	0	-20.473	-11.5106	-492.67	-80695.9	-25777.1	4305.54	147.679	1066.79	0	0	0	0	0	0	0	603	903	0
7458	6	0	0	0	0	0	0	200	300	0	-20.3204	-10.5951	-489.008	-80421.2	-25594	4076.66	147.661	1067.46	0	0	0	0	0	0	0	603	903	0
7458	7	0	0	0	0	0	0	200	300	0	-21.236	-10.7477	-491.45	-80421.2	-25594	4030.88	147.921	1066.64	0	0	0	0	0	0	0	603	903	0
7458	8	0	0	0	0	0	0	200	300	0	-21.236	-10.2899	-492.06	-79871.9	-26143.3	4168.21	146.87	1065.32	0	0	0	0	0	0	0	603	903	0
7458	9	0	0	0	0	0	0	200	300	0	-20.6256	-10.7477	-492.06	-78681.7	-25960.2	3893.56	147.242	1062.9	0	0	0	0	0	0	0	603	903	0
7459	0	0	0	0	0	0	0	200	300	0	-20.1678	-10.2899	-492.975	-79871.9	-25777.1	4305.54	147.711	1065.02	0	0	0	0	0	0	0	603	903	0
7459	1	0	0	0	0	0	0	200	300	0	-21.236	-9.83215	-493.586	-79780.4	-25838.1	4168.21	147.652	1064.63	0	0	0	0	0	0	0	603	903	0
7459	2	0	0	0	0	0	0	200	300	0	-19.8627	-10.2899	-493.281	-79597.2	-26265.4	3802	146.754	1064.36	0	0	0	0	0	0	0	603	903	0
7459	3	0	0	0	0	0	0	200	300	0	-21.8463	-9.83215	-491.45	-79139.5	-26265.4	3893.56	146.555	1064.03	0	0	0	0	0	0	0	603	903	0
7459	4	0	0	0	0	0	0	200	300	0	-21.236	-8.30627	-488.398	-78407.1	-26265.4	3756.23	146.221	1063.54	0	0	0	0	0	0	0	603	903	0
7459	5	0	0	0	0	0	0	200	300	0	-20.473	-8.61145	-492.365	-78956.4	-26204.4	3664.67	146.779	1063.36	0	0	0	0	0	0	0	603	903	0
7459	6	0	0	0	0	0	0	200	300	0	-21.5411	-8.76404	-495.112	-78498.6	-26631.6	3802	146.211	1061.55	0	0	0	0	0	0	0	603	903	0
7459	7	0	0	0	0	0	0	200	300	0	-21.5411	-8.0011	-493.891	-78407.1	-26021.2	3756.23	147.314	1061.75	0	0	0	0	0	0	0	603	903	0
7459	8	0	0	0	0	0	0	200	300	0	-19.7101	-8.76404	-494.806	-77949.3	-26143.3	3893.56	147.165	1060.53	0	0	0	0	0	0	0	603	903	0
7459	9	0	0	0	0	0	0	200	300	0	-20.7782	-8.15369	-492.975	-77949.3	-26692.6	3802	145.854	1061.12	0	0	0	0	0	0	0	603	903	0
7460	0	0	0	0	0	0	0	200	300	0	-19.8627	-8.76404	-492.975	-78315.5	-26753.7	3847.78	145.73	1061.86	0	0	0	0	0	0	0	603	903	0
7460	1	0	0	0	0	0	0	200	300	0	-22.4567	-8.15369	-494.196	-77949.3	-26143.3	3527.34	147.099	1060.73	0	0	0	0	0	0	0	603	903	0
7460	2	0	0	0	0	0	0	200	300	0	-21.3885	-8.15369	-493.586	-76850.7	-26204.4	3710.45	146.91	1058.7	0	0	0	0	0	0	0	603	903	0
7460	3	0	0	0	0	0	0	200	300	0	-20.473	-7.23816	-495.722	-77125.3	-26875.7	3710.45	145.785	1058.58	0	0	0	0	0	0	0	603	903	0
7460	4	0	0	0	0	0	0	200	300	0	-20.473	-6.62781	-491.45	-76667.5	-27119.9	3710.45	144.817	1059	0	0	0	0	0	0	0	603	903	0
7460	5	0	0	0	0	0	0	200	300	0	-20.473	-7.23816	-496.638	-77216.9	-26753.7	3618.9	146.13	1058.48	0	0	0	0	0	0	0	603	903	0
7460	6	0	0	0	0	0	0	200	300	0	-21.3885	-6.7804	-495.722	-77125.3	-26875.7	3756.23	145.785	1058.58	0	0	0	0	0	0	0	603	903	0
7460	7	0	0	0	0	0	0	200	300	0	-21.8463	-7.08557	-496.638	-75935.1	-27425.1	3618.9	144.779	1055.9	0	0	0	0	0	0	0	603	903	0
7460	8	0	0	0	0	0	0	200	300	0	-20.9308	-6.47522	-496.027	-75385.8	-26936.8	3756.23	145.695	1054.98	0	0	0	0	0	0	0	603	903	0
7460	9	0	0	0	0	0	0	200	300	0	-20.1678	-6.17004	-497.553	-76301.3	-26753.7	3847.78	146.23	1056.35	0	0	0	0	0	0	0	603	903	0
7461	0	0	0	0	0	0	0	200	300	0	-21.9989	-6.17004	-497.858	-76576	-27119.9	3893.56	145.527	1056.81	0	0	0	0	0	0	0	603	903	0
7461	1	0	0	0	0	0	0	200	300	0	-20.6256	-5.86487	-497.858	-76209.8	-27425.1	3573.12	144.914	1056.08	0	0	0	0	0	0	0	603	903	0
7461	2	0	0	0	0	0	0	200	300	0	-22.1515	-5.86487	-500.3	-75385.8	-27180.9	3481.57	145.671	1053.68	0	0	0	0	0	0	0	603	903	0
7461	3	0	0	0	0	0	0	200	300	0	-20.7782	-5.55969	-498.469	-75477.4	-27119.9	3573.12	145.594	1054.42	0	0	0	0	0	0	0	603	903	0
7461	4	0	0	0	0	0	0	200	300	0	-21.0834	-4.94934	-498.163	-75935.1	-27669.2	3527.34	144.458	1055.43	0	0	0	0	0	0	0	603	903	0
7461	5	0	0	0	0	0	0	200	300	0	-22.3041	-5.4071	-497.553	-74745	-27364	3618.9	145.003	1053.23	0	0	0	0	0	0	0	603	903	0
7461	6	0	0	0	0	0	0	200	300	0	-22.3041	-4.79675	-500.605	-76301.3	-27241.9	3435.79	145.582	1055.42	0	0	0	0	0	0	0	603	903	0
7461	7	0	0	0	0	0	0	200	300	0	-21.9989	-4.79675	-498.774	-74836.5	-27608.2	3435.79	144.648	1053.04	0	0	0	0	0	0	0	603	903	0
7461	8	0	0	0	0	0	0	200	300	0	-20.9308	-4.79675	-500.3	-75019.6	-27852.3	3435.79	144.329	1052.95	0	0	0	0	0	0	0	603	903	0
7461	9	0	0	0	0	0	0	200	300	0	-20.9308	-3.88123	-500.3	-75111.2	-27425.1	3390.02	145.183	1053.13	0	0	0	0	0	0	0	603	903	0
7462	0	0	0	0	0	0	0	200	300	0	-23.2196	-3.88123	-500.91	-74378.7	-27425.1	3527.34	145.25	1051.49	0	0	0	0	0	0	0	603	903	0
7462	1	0	0	0	0	0	0	200	300	0	-22.7618	-3.72864	-501.215	-74287.2	-28035.4	3115.36	144.065	1051.21	0	0	0	0	0	0	0	603	903	0
7462	2	0	0	0	0	0	0	200	300	0	-21.236	-3.42346	-502.131	-74104.1	-28157.5	3481.57	143.924	1050.58	0	0	0	0	0	0	0	603	903	0
7462	3	0	0	0	0	0	0	200	300	0	-21.5411	-3.57605	-503.657	-74561.8	-27852.3	3481.57	144.7	1051.04	0	0	0	0	0	0	0	603	903	0
7462	4	0	0	0	0	0	0	200	300	0	-23.5248	-3.72864	-503.962	-73829.4	-27913.3	3527.34	144.612	1049.5	0	0	0	0	0	0	0	603	903	0
7462	5	0	0	0	0	0	0	200	300	0	-22.7618	-4.03381	-502.741	-74470.3	-28157.5	3710.45	143.992	1051.13	0	0	0	0	0	0	0	603	903	0
7462	6	0	0	0	0	0	0	200	300	0	-23.5248	-2.9657	-503.046	-73463.2	-28523.7	3298.46	143.298	1049.04	0	0	0	0	0	0	0	603	903	0
7462	7	0	0	0	0	0	0	200	300	0	-22.3041	-1.13464	-500.3	-73371.6	-27852.3	3252.69	144.329	1049.66	0	0	0	0	0	0	0	603	903	0
7462	8	0	0	0	0	0	0	200	300	0	-22.6093	-2.50793	-503.657	-73097	-27974.4	3161.13	144.457	1048.13	0	0	0	0	0	0	0	603	903	0
7462	9	0	0	0	0	0	0	200	300	0	-22.9144	-2.50793	-505.793	-73463.2	-28401.6	3390.02	143.847	1048.24	0	0	0	0	0	0	0	603	903	0
7463	0	0	0	0	0	0	0	200	300	0	-22.9144	-1.28723	-505.488	-72822.4	-28828.9	3115.36	142.968	1047.06	0	0	0	0	0	0	0	603	903	0
7463	1	0	0	0	0	0	0	200	300	0	-21.9989	-2.35535	-506.098	-72547.7	-28096.4	3161.13	144.484	1046.35	0	0	0	0	0	0	0	603	903	0
7463	2	0	0	0	0	0	0	200	300	0	-20.0153	-2.20276	-506.403	-72456.1	-28096.4	3206.91	144.518	1046.08	0	0	0	0	0	0	0	603	903	0
7463	3	0	0	0	0	0	0	200	300	0	-23.2196	-1.89758	-507.013	-72730.8	-28645.8	3115.36	143.501	1046.45	0	0	0	0	0	0	0	603	903	0
7463	4	0	0	0	0	0	0	200	300	0	-23.83	-0.524292	-504.572	-73097	-28584.7	2932.25	143.349	1047.87	0	0	0	0	0	0	0	603	903	0
7463	5	0	0	0	0	0	0	200	300	0	-23.2196	-0.829468	-506.708	-71815.3	-28340.6	2886.48	144.069	1044.73	0	0	0	0	0	0	0	603	903	0
7463	6	0	0	0	0	0	0	200	300	0	-22.4567	-0.371704	-509.15	-71357.5	-28279.5	3023.8	144.457	1043.15	0	0	0	0	0	0	0	603	903	0
7463	7	0	0	0	0	0	0	200	300	0	-21.5411	-0.219116	-510.065	-71998.4	-28767.8	2932.25	143.6	1044.16	0	0	0	0	0	0	0	603	903	0
7463	8	0	0	0	0	0	0	200	300	0	-23.2196	0.238648	-510.065	-71632.1	-29073	2657.59	143.001	1043.44	0	0	0	0	0	0	0	603	903	0
7463	9	0	0	0	0	0	0	200	300	0	-23.067	-0.982055	-510.065	-71174.4	-28584.7	2886.48	143.959	1042.54	0	0	0	0	0	0	0	603	903	0
7464	0	0	0	0	0	0	0	200	300	0	-21.9989	-0.0665281	-509.76	-70258.9	-28462.7	2978.03	144.165	1040.83	0	0	0	0	0	0	0	603	903	0
7464	1	0	0	0	0	0	0	200	300	0	-21.9989	0.696411	-506.708	-70716.6	-29134	2794.92	142.503	1042.56	0	0	0	0	0	0	0	603	903	0
7464	2	0	0	0	0	0	0	200	300	0	-23.067	0.848999	-508.845	-70991.3	-29012	2566.04	142.985	1042.51	0	0	0	0	0	0	0	603	903	0
7464	3	0	0	0	0	0	0	200	300	0	-23.6774	1.30676	-510.981	-71082.8	-28950.9	2886.48	143.342	1042.11	0	0	0	0	0	0	0	603	903	0
7464	4	0	0	0	0	0	0	200	300	0	-21.8463	1.15418	-511.591	-70075.7	-28462.7	2611.82	144.364	1039.98	0	0	0	0	0	0	0	603	903	0
7464	5	0	0	0	0	0	0	200	300	0	-21.6937	1.00159	-513.117	-69892.7	-29256.1	2657.59	142.984	1039.21	0	0	0	0	0	0	0	603	903	0
7464	6	0	0	0	0	0	0	200	300	0	-21.8463	-0.219116	-513.727	-70625.1	-29561.3	2520.26	142.457	1040.48	0	0	0	0	0	0	0	603	903	0
7464	7	0	0	0	0	0	0	200	300	0	-22.4567	1.61194	-511.591	-70167.3	-29134	2611.82	143.052	1040.16	0	0	0	0	0	0	0	603	903	0
7464	8	0	0	0	0	0	0	200	300	0	-22.9144	1.91711	-512.507	-69801.1	-28950.9	2657.59	143.511	1039.2	0	0	0	0	0	0	0	603	903	0
7464	9	0	0	0	0	0	0	200	300	0	-21.0834	2.22229	-512.812	-69526.5	-29073	2657.59	143.307	1038.58	0	0	0	0	0	0	0	603	903	0
7465	0	0	0	0	0	0	0	200	300	0	-22.4567	2.98523	-514.338	-69434.9	-29012	2382.93	143.594	1038	0	0	0	0	0	0	0	603	903	0
7465	1	0	0	0	0	0	0	200	300	0	-21.8463	2.68005	-514.948	-69434.9	-29073	2291.38	143.542	1037.84	0	0	0	0	0	0	0	603	903	0
7465	2	0	0	0	0	0	0	200	300	0	-23.067	3.13782	-515.253	-69160.2	-29317.1	2245.6	143.102	1037.23	0	0	0	0	0	0	0	603	903	0
7465	3	0	0	0	0	0	0	200	300	0	-21.236	1.91711	-515.864	-69068.7	-29500.2	2291.38	142.814	1036.89	0	0	0	0	0	0	0	603	903	0
7465	4	0	0	0	0	0	0	200	300	0	-23.5248	3.13782	-514.338	-68427.8	-29378.2	2016.72	142.882	1036.04	0	0	0	0	0	0	0	603	903	0
7465	5	0	0	0	0	0	0	200	300	0	-21.9989	3.74817	-512.812	-68153.2	-29561.3	2062.5	142.355	1035.9	0	0	0	0	0	0	0	603	903	0
7465	6	0	0	0	0	0	0	200	300	0	-21.6937	4.51111	-516.169	-67786.9	-29805.4	2245.6	142.256	1034.33	0	0	0	0	0	0	0	603	903	0
7465	7	0	0	0	0	0	0	200	300	0	-22.6093	3.90076	-517.389	-68519.4	-29622.3	2108.28	142.747	1035.43	0	0	0	0	0	0	0	603	903	0
7465	8	0	0	0	0	0	0	200	300	0	-21.3885	4.20593	-517.389	-68427.8	-29439.2	2245.6	143.1	1035.26	0	0	0	0	0	0	0	603	903	0
7465	9	0	0	0	0	0	0	200	300	0	-23.067	3.74817	-517.389	-67512.3	-29500.2	2016.72	142.983	1033.49	0	0	0	0	0	0	0	603	903	0
7466	0	0	0	0	0	0	0	200	300	0	-22.4567	3.74817	-518	-67329.2	-29683.4	2245.6	142.696	1032.98	0	0	0	0	0	0	0	603	903	0
7466	1	0	0	0	0	0	0	200	300	0	-21.9989	4.81628	-517.389	-67512.3	-29988.5	1879.39	142.039	1033.49	0	0	0	0	0	0	0	603	903	0
7466	2	0	0	0	0	0	0	200	300	0	-23.2196	4.51111	-519.221	-67329.2	-29744.4	1696.29	142.713	1032.67	0	0	0	0	0	0	0	603	903	0
7466	3	0	0	0	0	0	0	200	300	0	-23.2196	5.42664	-519.526	-66596.8	-29622.3	1650.51	142.982	1031.19	0	0	0	0	0	0	0	603	903	0
7466	4	0	0	0	0	0	0	200	300	0	-22.1515	6.03699	-519.831	-65498.1	-29866.5	1650.51	142.546	1029	0	0	0	0	0	0	0	603	903	0
7466	5	0	0	0	0	0	0	200	300	0	-21.0834	5.57922	-520.746	-66505.2	-30232.7	1558.96	141.944	1030.71	0	0	0	0	0	0	0	603	903	0
7466	6	0	0	0	0	0	0	200	300	0	-22.9144	6.03699	-519.831	-65589.7	-29683.4	1513.18	142.898	1029.18	0	0	0	0	0	0	0	603	903	0
7466	7	0	0	0	0	0	0	200	300	0	-23.2196	5.12146	-520.441	-66230.6	-29988.5	1375.85	142.379	1030.26	0	0	0	0	0	0	0	603	903	0
7466	8	0	0	0	0	0	0	200	300	0	-21.8463	6.18958	-519.831	-65589.7	-29927.5	1421.63	142.428	1029.18	0	0	0	0	0	0	0	603	903	0
7466	9	0	0	0	0	0	0	200	300	0	-22.6093	7.56287	-518.61	-65406.6	-29927.5	1284.3	142.293	1029.12	0	0	0	0	0	0	0	603	903	0
7467	0	0	0	0	0	0	0	200	300	0	-22.3041	7.71545	-521.357	-65589.7	-29988.5	1146.97	142.48	1028.81	0	0	0	0	0	0	0	603	903	0
7467	1	0	0	0	0	0	0	200	300	0	-23.2196	7.41028	-522.577	-63941.7	-30476.8	1375.85	141.68	1025.36	0	0	0	0	0	0	0	603	903	0
7467	2	0	0	0	0	0	0	200	300	0	-21.236	8.17322	-522.577	-64857.2	-30598.9	1375.85	141.446	1027.11	0	0	0	0	0	0	0	603	903	0
7467	3	0	0	0	0	0	0	200	300	0	-22.1515	7.71545	-523.188	-64674.1	-30171.6	1330.08	142.331	1026.62	0	0	0	0	0	0	0	603	903	0
7467	4	0	0	0	0	0	0	200	300	0	-21.6937	7.25769	-523.493	-64307.9	-30232.7	1284.3	142.248	1025.84	0	0	0	0	0	0	0	603	903	0
7467	5	0	0	0	0	0	0	200	300	0	-21.8463	7.41028	-522.272	-64124.8	-30415.8	1009.64	141.763	1025.78	0	0	0	0	0	0	0	603	903	0
7467	6	0	0	0	0	0	0	200	300	0	-21.9989	7.56287	-521.967	-64216.4	-30537.8	918.091	141.495	1026.03	0	0	0	0	0	0	0	603	903	0
7467	7	0	0	0	0	0	0	200	300	0	-22.7618	9.85168	-523.798	-64033.3	-30598.9	918.091	141.583	1025.25	0	0	0	0	0	0	0	603	903	0
7467	8	0	0	0	0	0	0	200	300	0	-23.067	8.63098	-521.052	-63300.9	-30415.8	689.209	141.626	1024.49	0	0	0	0	0	0	0	603	903	0
7467	9	0	0	0	0	0	0	200	300	0	-21.5411	9.24133	-525.019	-62293.8	-30843	918.091	141.253	1021.65	0	0	0	0	0	0	0	603	903	0
7468	0	0	0	0	0	0	0	200	300	0	-20.6256	9.24133	-526.85	-62934.6	-30965.1	780.761	141.226	1022.45	0	0	0	0	0	0	0	603	903	0
7468	1	0	0	0	0	0	0	200	300	0	-21.6937	8.47839	-527.155	-63117.8	-30721	872.314	141.723	1022.73	0	0	0	0	0	0	0	603	903	0
7468	2	0	0	0	0	0	0	200	300	0	-22.3041	8.93616	-525.019	-62843.1	-30537.8	689.209	141.835	1022.7	0	0	0	0	0	0	0	603	903	0
7468	3	0	0	0	0	0	0	200	300	0	-22.9144	9.54651	-521.662	-62019.1	-30293.7	734.985	141.928	1021.89	0	0	0	0	0	0	0	603	903	0
7468	4	0	0	0	0	0	0	200	300	0	-21.8463	10.462	-525.934	-62293.8	-30232.7	643.432	142.516	1021.44	0	0	0	0	0	0	0	603	903	0
7468	5	0	0	0	0	0	0	200	300	0	-21.9989	11.0724	-527.765	-62293.8	-30721	414.55	141.791	1021.03	0	0	0	0	0	0	0	603	903	0
7468	6	0	0	0	0	0	0	200	300	0	-23.3722	11.225	-528.071	-61195.1	-30965.1	551.879	141.362	1018.88	0	0	0	0	0	0	0	603	903	0
7468	7	0	0	0	0	0	0	200	300	0	-23.2196	10.7672	-527.155	-61378.2	-30965.1	506.103	141.26	1019.43	0	0	0	0	0	0	0	603	903	0
7468	8	0	0	0	0	0	0	200	300	0	-22.1515	10.6146	-528.681	-60920.5	-30659.9	368.774	142.007	1018.23	0	0	0	0	0	0	0	603	903	0
7468	9	0	0	0	0	0	0	200	300	0	-22.1515	11.0724	-526.85	-61012	-31148.2	414.55	140.878	1018.81	0	0	0	0	0	0	0	603	903	0
7469	0	0	0	0	0	0	0	200	300	0	-23.2196	10.9198	-527.46	-61103.6	-31453.4	322.998	140.368	1018.84	0	0	0	0	0	0	0	603	903	0
7469	1	0	0	0	0	0	0	200	300	0	-22.7618	11.5302	-529.291	-60554.3	-31087.2	322.998	141.266	1017.41	0	0	0	0	0	0	0	603	903	0
7469	2	0	0	0	0	0	0	200	300	0	-21.8463	11.8353	-525.934	-60005	-31026.1	185.669	141.008	1017.09	0	0	0	0	0	0	0	603	903	0
7469	3	0	0	0	0	0	0	200	300	0	-21.9989	12.2931	-530.817	-59913.4	-31026.1	94.1158	141.55	1015.87	0	0	0	0	0	0	0	603	903	0
7469	4	0	0	0	0	0	0	200	300	0	-23.2196	12.2931	-530.512	-60188.1	-31392.3	322.998	140.826	1016.45	0	0	0	0	0	0	0	603	903	0
7469	5	0	0	0	0	0	0	200	300	0	-23.5248	12.2931	-529.902	-59638.8	-31392.3	94.1158	140.758	1015.55	0	0	0	0	0	0	0	603	903	0
7469	6	0	0	0	0	0	0	200	300	0	-23.2196	13.056	-530.207	-59455.6	-31514.4	48.3394	140.562	1015.14	0	0	0	0	0	0	0	603	903	0
7469	7	0	0	0	0	0	0	200	300	0	-22.4567	14.2767	-527.46	-58906.3	-31697.5	185.669	139.905	1014.68	0	0	0	0	0	0	0	603	903	0
7469	8	0	0	0	0	0	0	200	300	0	-20.473	13.9716	-531.733	-58357	-31392.3	185.669	140.962	1012.75	0	0	0	0	0	0	0	603	903	0
7469	9	0	0	0	0	0	0	200	300	0	-22.6093	14.4293	-532.648	-58997.9	-31819.6	506.103	140.262	1013.76	0	0	0	0	0	0	0	603	903	0
7470	0	0	0	0	0	0	0	200	300	0	-24.5929	14.1241	-533.259	-58173.9	-31270.3	2.56305	141.36	1012.09	0	0	0	0	0	0	0	603	903	0
7470	1	0	0	0	0	0	0	200	300	0	-24.5929	13.6664	-533.564	-58448.6	-31941.7	-226.319	140.135	1012.54	0	0	0	0	0	0	0	603	903	0
7470	2	0	0	0	0	0	0	200	300	0	-24.4403	13.9716	-533.564	-57807.7	-31758.6	-43.2133	140.478	1011.34	0	0	0	0	0	0	0	603	903	0
7470	3	0	0	0	0	0	0	200	300	0	-23.83	14.5819	-532.343	-57258.4	-31514.4	-88.9897	140.801	1010.56	0	0	0	0	0	0	0	603	903	0
7470	4	0	0	0	0	0	0	200	300	0	-24.1351	15.8026	-534.784	-57716.1	-31758.6	-134.766	140.614	1010.92	0	0	0	0	0	0	0	603	903	0
7470	5	0	0	0	0	0	0	200	300	0	-25.661	15.65	-536.005	-55793.5	-32307.9	2.56305	139.725	1007.09	0	0	0	0	0	0	0	603	903	0
7470	6	0	0	0	0	0	0	200	300	0	-25.9662	16.413	-536.921	-57258.4	-32429.9	-43.2133	139.6	1009.64	0	0	0	0	0	0	0	603	903	0
7470	7	0	0	0	0	0	0	200	300	0	-22.9144	16.2604	-537.226	-56617.5	-31819.6	322.998	140.771	1008.39	0	0	0	0	0	0	0	603	903	0
7470	8	0	0	0	0	0	0	200	300	0	-24.8981	15.8026	-537.226	-56983.7	-31819.6	2.56305	140.771	1009.07	0	0	0	0	0	0	0	603	903	0
7470	9	0	0	0	0	0	0	200	300	0	-25.3558	15.65	-537.836	-56892.2	-32552	-134.766	139.476	1008.78	0	0	0	0	0	0	0	603	903	0
7471	0	0	0	0	0	0	0	200	300	0	-26.7291	17.0233	-539.057	-56709.1	-32307.9	-43.2133	140.066	1008.2	0	0	0	0	0	0	0	603	903	0
7471	1	0	0	0	0	0	0	200	300	0	-26.424	16.5656	-539.057	-55061.1	-32124.8	-134.766	140.406	1005.14	0	0	0	0	0	0	0	603	903	0
7471	2	0	0	0	0	0	0	200	300	0	-25.3558	17.9388	-541.193	-55427.3	-32002.7	-226.319	140.866	1005.42	0	0	0	0	0	0	0	603	903	0
7471	3	0	0	0	0	0	0	200	300	0	-26.1188	17.1759	-539.057	-55702	-32368.9	-317.872	139.953	1006.33	0	0	0	0	0	0	0	603	903	0
7471	4	0	0	0	0	0	0	200	300	0	-27.1869	17.9388	-542.719	-55518.9	-32735.1	-180.542	139.683	1005.3	0	0	0	0	0	0	0	603	903	0
7471	5	0	0	0	0	0	0	200	300	0	-27.0343	18.244	-543.024	-56068.2	-32368.9	-88.9897	140.391	1006.25	0	0	0	0	0	0	0	603	903	0
7471	6	0	0	0	0	0	0	200	300	0	-26.424	19.4647	-542.719	-55427.3	-33101.3	-317.872	139.008	1005.13	0	0	0	0	0	0	0	603	903	0
7471	7	0	0	0	0	0	0	200	300	0	-25.0507	19.6173	-545.466	-55335.8	-32979.2	-272.095	139.539	1004.45	0	0	0	0	0	0	0	603	903	0
7471	8	0	0	0	0	0	0	200	300	0	-27.7972	19.7699	-542.719	-54878	-32613	-409.424	139.908	1004.12	0	0	0	0	0	0	0	603	903	0
7471	9	0	0	0	0	0	0	200	300	0	-27.6447	20.838	-546.381	-55610.4	-32918.2	-409.424	139.752	1004.78	0	0	0	0	0	0	0	603	903	0
7472	0	0	0	0	0	0	0	200	300	0	-27.9498	20.9906	-548.517	-54786.5	-33406.5	-317.872	139.097	1002.88	0	0	0	0	0	0	0	603	903	0
7472	1	0	0	0	0	0	0	200	300	0	-27.6447	21.7535	-550.654	-54603.3	-33528.6	-455.201	139.111	1002.16	0	0	0	0	0	0	0	603	903	0
7472	2	0	0	0	0	0	0	200	300	0	-27.1869	21.7535	-549.433	-55152.7	-33223.4	-455.201	139.532	1003.38	0	0	0	0	0	0	0	603	903	0
7472	3	0	0	0	0	0	0	200	300	0	-27.6447	21.9061	-550.959	-54420.2	-33284.4	-180.542	139.588	1001.77	0	0	0	0	0	0	0	603	903	0
7472	4	0	0	0	0	0	0	200	300	0	-27.9498	22.8217	-550.654	-54511.8	-33772.7	-317.872	138.668	1001.99	0	0	0	0	0	0	0	603	903	0
7472	5	0	0	0	0	0	0	200	300	0	-27.1869	22.6691	-551.264	-54603.3	-33650.6	-317.872	138.957	1002.05	0	0	0	0	0	0	0	603	903	0
7472	6	0	0	0	0	0	0	200	300	0	-25.3558	23.7372	-554.621	-54328.7	-33162.4	-409.424	140.207	1000.96	0	0	0	0	0	0	0	603	903	0
7472	7	0	0	0	0	0	0	200	300	0	-28.7128	23.7372	-554.011	-54878	-33406.5	-775.635	139.701	1002.06	0	0	0	0	0	0	0	603	903	0
7472	8	0	0	0	0	0	0	200	300	0	-26.5765	24.3475	-557.062	-54237.1	-33955.8	-775.635	139.045	1000.36	0	0	0	0	0	0	0	603	903	0
7472	9	0	0	0	0	0	0	200	300	0	-28.5602	24.0424	-557.367	-53504.7	-33589.6	-775.635	139.735	998.995	0	0	0	0	0	0	0	603	903	0
7473	0	0	0	0	0	0	0	200	300	0	-27.0343	24.6527	-557.673	-53779.4	-33589.6	-775.635	139.768	999.435	0	0	0	0	0	0	0	603	903	0
7473	1	0	0	0	0	0	0	200	300	0	-26.7291	26.1786	-558.588	-54328.7	-34077.9	-1096.07	138.993	1000.26	0	0	0	0	0	0	0	603	903	0
7473	2	0	0	0	0	0	0	200	300	0	-28.1024	26.026	-560.419	-54145.6	-34261	-1050.29	138.865	999.616	0	0	0	0	0	0	0	603	903	0
7473	3	0	0	0	0	0	0	200	300	0	-27.4921	25.8734	-562.555	-53504.7	-34322	-912.965	138.989	998.11	0	0	0	0	0	0	0	603	903	0
7473	4	0	0	0	0	0	0	200	300	0	-26.5765	26.4838	-563.471	-53870.9	-34138.9	-1141.85	139.413	998.605	0	0	0	0	0	0	0	603	903	0
7473	5	0	0	0	0	0	0	200	300	0	-24.5929	27.0941	-560.419	-53596.3	-33345.5	-1324.95	140.499	998.636	0	0	0	0	0	0	0	603	903	0
7473	6	0	0	0	0	0	0	200	300	0	-26.424	27.7045	-564.387	-53687.8	-34200	-1462.28	139.403	998.126	0	0	0	0	0	0	0	603	903	0
7473	7	0	0	0	0	0	0	200	300	0	-26.8817	28.7726	-565.607	-53779.4	-33833.7	-1416.5	140.182	998.083	0	0	0	0	0	0	0	603	903	0
7473	8	0	0	0	0	0	0	200	300	0	-26.424	28.3148	-568.049	-52497.6	-34261	-1691.16	139.687	995.418	0	0	0	0	0	0	0	603	903	0
7473	9	0	0	0	0	0	0	200	300	0	-25.3558	30.1459	-571.711	-53870.9	-35054.4	-2011.6	138.685	997.228	0	0	0	0	0	0	0	603	903	0
7474	0	0	0	0	0	0	0	200	300	0	-24.7455	29.9933	-573.542	-54054	-34749.3	-1828.49	139.413	997.246	0	0	0	0	0	0	0	603	903	0
7474	1	0	0	0	0	0	0	200	300	0	-25.2032	29.9933	-574.763	-54145.6	-34261	-1691.16	140.391	997.205	0	0	0	0	0	0	0	603	903	0
7474	2	0	0	0	0	0	0	200	300	0	-24.8981	31.3666	-575.068	-54420.2	-34566.2	-1920.04	139.892	997.633	0	0	0	0	0	0	0	603	903	0
7474	3	0	0	0	0	0	0	200	300	0	-24.8981	33.3502	-575.983	-53779.4	-34749.3	-2469.36	139.67	996.37	0	0	0	0	0	0	0	603	903	0
7474	4	0	0	0	0	0	0	200	300	0	-23.83	34.1132	-577.509	-54145.6	-35115.5	-2606.69	139.195	996.757	0	0	0	0	0	0	0	603	903	0
7474	5	0	0	0	0	0	0	200	300	0	-21.236	34.8761	-581.171	-53962.5	-34444.1	-2652.47	140.733	995.851	0	0	0	0	0	0	0	603	903	0
7474	6	0	0	0	0	0	0	200	300	0	-23.2196	35.3339	-579.951	-54511.8	-34871.3	-2744.02	139.872	996.994	0	0	0	0	0	0	0	603	903	0
7474	7	0	0	0	0	0	0	200	300	0	-24.5929	35.639	-583.918	-54786.5	-35359.6	-2972.9	139.444	996.826	0	0	0	0	0	0	0	603	903	0
7474	8	0	0	0	0	0	0	200	300	0	-23.5248	36.7072	-585.138	-54694.9	-35237.5	-2835.57	139.779	996.474	0	0	0	0	0	0	0	603	903	0
7474	9	0	0	0	0	0	0	200	300	0	-22.4567	36.402	-586.97	-54511.8	-35237.5	-2835.57	139.967	995.87	0	0	0	0	0	0	0	603	903	0
7475	0	0	0	0	0	0	0	200	300	0	-20.3204	38.5382	-586.664	-54420.2	-35115.5	-3064.45	140.144	995.762	0	0	0	0	0	0	0	603	903	0
7475	1	0	0	0	0	0	0	200	300	0	-22.6093	39.7589	-589.716	-55335.8	-34993.4	-3201.78	140.661	996.835	0	0	0	0	0	0	0	603	903	0
7475	2	0	0	0	0	0	0	200	300	0	-23.9825	40.2167	-590.632	-54878	-34932.4	-3293.34	140.856	995.914	0	0	0	0	0	0	0	603	903	0
7475	3	0	0	0	0	0	0	200	300	0	-23.3722	40.5219	-593.989	-54420.2	-34810.3	-3476.44	141.396	994.618	0	0	0	0	0	0	0	603	903	0
7475	4	0	0	0	0	0	0	200	300	0	-21.6937	40.3693	-594.599	-53413.2	-35725.8	-3384.89	139.916	992.831	0	0	0	0	0	0	0	603	903	0
7475	5	0	0	0	0	0	0	200	300	0	-22.3041	42.2003	-594.599	-54603.3	-35786.9	-3842.65	139.813	994.832	0	0	0	0	0	0	0	603	903	0
7475	6	0	0	0	0	0	0	200	300	0	-23.067	43.5736	-595.514	-54878	-35420.7	-3613.77	140.521	995.152	0	0	0	0	0	0	0	603	903	0
7475	7	0	0	0	0	0	0	200	300	0	-20.473	43.421	-597.956	-55061.1	-35481.7	-3293.34	140.662	995.082	0	0	0	0	0	0	0	603	903	0
7475	8	0	0	0	0	0	0	200	300	0	-22.7618	45.2521	-599.787	-54694.9	-35725.8	-3796.88	140.436	994.191	0	0	0	0	0	0	0	603	903	0
7475	9	0	0	0	0	0	0	200	300	0	-21.5411	44.6417	-601.313	-55152.7	-35908.9	-3842.65	140.282	994.72	0	0	0	0	0	0	0	603	903	0
7476	0	0	0	0	0	0	0	200	300	0	-21.9989	45.2521	-601.008	-55061.1	-35481.7	-3842.65	140.963	994.615	0	0	0	0	0	0	0	603	903	0
7476	1	0	0	0	0	0	0	200	300	0	-22.9144	46.6254	-602.534	-55061.1	-35603.8	-4025.76	140.91	994.383	0	0	0	0	0	0	0	603	903	0
7476	2	0	0	0	0	0	0	200	300	0	-22.4567	47.2357	-602.228	-53321.6	-36275.1	-4071.53	139.765	991.541	0	0	0	0	0	0	0	603	903	0
7476	3	0	0	0	0	0	0	200	300	0	-21.9989	48.4564	-604.975	-54786.5	-36214.1	-4254.64	140.139	993.56	0	0	0	0	0	0	0	603	903	0
7476	4	0	0	0	0	0	0	200	300	0	-21.0834	49.6771	-607.721	-54511.8	-35847.9	-4208.86	141.013	992.699	0	0	0	0	0	0	0	603	903	0
7476	5	0	0	0	0	0	0	200	300	0	-21.236	51.5082	-607.111	-55335.8	-36153.1	-4208.86	140.451	994.146	0	0	0	0	0	0	0	603	903	0
7476	6	0	0	0	0	0	0	200	300	0	-21.9989	49.9823	-609.553	-55427.3	-36458.2	-4117.31	140.189	993.931	0	0	0	0	0	0	0	603	903	0
7476	7	0	0	0	0	0	0	200	300	0	-22.6093	50.4401	-609.858	-55152.7	-36397.2	-4346.19	140.319	993.435	0	0	0	0	0	0	0	603	903	0
7476	8	0	0	0	0	0	0	200	300	0	-21.3885	51.9659	-608.942	-53870.9	-36397.2	-4529.3	140.229	991.466	0	0	0	0	0	0	0	603	903	0
7476	9	0	0	0	0	0	0	200	300	0	-21.0834	53.0341	-610.468	-54603.3	-36031	-4575.07	140.978	992.445	0	0	0	0	0	0	0	603	903	0
7477	0	0	0	0	0	0	0	200	300	0	-21.236	54.1022	-612.299	-55427.3	-36702.4	-4529.3	140.058	993.523	0	0	0	0	0	0	0	603	903	0
7477	1	0	0	0	0	0	0	200	300	0	-22.7618	54.1022	-614.13	-55335.8	-36214.1	-4666.63	141.032	993.104	0	0	0	0	0	0	0	603	903	0
7477	2	0	0	0	0	0	0	200	300	0	-23.3722	53.6444	-615.351	-55061.1	-36458.2	-4391.97	140.752	992.479	0	0	0	0	0	0	0	603	903	0
7477	3	0	0	0	0	0	0	200	300	0	-21.236	54.8651	-615.046	-55427.3	-36702.4	-4712.4	140.326	993.119	0	0	0	0	0	0	0	603	903	0
7477	4	0	0	0	0	0	0	200	300	0	-19.7101	55.1703	-611.994	-54969.6	-36946.5	-4803.96	139.629	992.82	0	0	0	0	0	0	0	603	903	0
7477	5	0	0	0	0	0	0	200	300	0	-22.6093	56.6962	-615.351	-55427.3	-36397.2	-4803.96	140.851	993.074	0	0	0	0	0	0	0	603	903	0
7477	6	0	0	0	0	0	0	200	300	0	-22.7618	57.1539	-617.792	-55152.7	-36397.2	-4849.73	141.085	992.274	0	0	0	0	0	0	0	603	903	0
7477	7	0	0	0	0	0	0	200	300	0	-22.7618	57.9169	-615.351	-54511.8	-36885.5	-4941.29	140.058	991.587	0	0	0	0	0	0	0	603	903	0
7477	8	0	0	0	0	0	0	200	300	0	-21.9989	58.5272	-618.708	-53413.2	-37068.6	-4895.51	140.087	989.33	0	0	0	0	0	0	0	603	903	0
7477	9	0	0	0	0	0	0	200	300	0	-22.7618	58.985	-619.013	-54511.8	-36885.5	-4758.18	140.412	991.062	0	0	0	0	0	0	0	603	903	0
7478	0	0	0	0	0	0	0	200	300	0	-21.8463	60.816	-618.097	-54511.8	-36763.4	-4758.18	140.522	991.193	0	0	0	0	0	0	0	603	903	0
7478	1	0	0	0	0	0	0	200	300	0	-23.5248	61.7316	-620.539	-54786.5	-37068.6	-4575.07	140.264	991.289	0	0	0	0	0	0	0	603	903	0
7478	2	0	0	0	0	0	0	200	300	0	-23.5248	61.7316	-622.37	-54969.6	-36702.4	-4849.73	141.028	991.323	0	0	0	0	0	0	0	603	903	0
7478	3	0	0	0	0	0	0	200	300	0	-23.3722	61.579	-621.454	-54328.7	-36885.5	-4803.96	140.646	990.422	0	0	0	0	0	0	0	603	903	0
7478	4	0	0	0	0	0	0	200	300	0	-21.5411	61.2738	-622.98	-54420.2	-36946.5	-4941.29	140.694	990.355	0	0	0	0	0	0	0	603	903	0
7478	5	0	0	0	0	0	0	200	300	0	-23.2196	63.2574	-622.675	-54786.5	-37312.7	-4712.4	140.077	990.986	0	0	0	0	0	0	0	603	903	0
7478	6	0	0	0	0	0	0	200	300	0	-24.7455	64.6307	-619.623	-54237.1	-36946.5	-5032.84	140.373	990.532	0	0	0	0	0	0	0	603	903	0
7478	7	0	0	0	0	0	0	200	300	0	-25.0507	64.6307	-623.591	-54054	-37068.6	-5078.62	140.556	989.682	0	0	0	0	0	0	0	603	903	0
7478	8	0	0	0	0	0	0	200	300	0	-24.4403	66.1566	-625.422	-53870.9	-37495.9	-4895.51	140.047	989.135	0	0	0	0	0	0	0	603	903	0
7478	9	0	0	0	0	0	0	200	300	0	-24.1351	66.3092	-623.285	-53962.5	-37740	-4712.4	139.45	989.577	0	0	0	0	0	0	0	603	903	0
7479	0	0	0	0	0	0	0	200	300	0	-24.8981	66.4618	-624.811	-54603.3	-37068.6	-4666.63	140.672	990.392	0	0	0	0	0	0	0	603	903	0
7479	1	0	0	0	0	0	0	200	300	0	-24.5929	66.9196	-623.896	-54054	-37129.6	-4849.73	140.487	989.64	0	0	0	0	0	0	0	603	903	0
7479	2	0	0	0	0	0	0	200	300	0	-25.9662	67.5299	-623.285	-53779.4	-37495.9	-4803.96	139.842	989.284	0	0	0	0	0	0	0	603	903	0
7479	3	0	0	0	0	0	0	200	300	0	-25.0507	69.361	-624.506	-52955.4	-37434.8	-4666.63	140.057	987.796	0	0	0	0	0	0	0	603	903	0
7479	4	0	0	0	0	0	0	200	300	0	-24.7455	69.361	-626.337	-53687.8	-37251.7	-4849.73	140.525	988.717	0	0	0	0	0	0	0	603	903	0
7479	5	0	0	0	0	0	0	200	300	0	-25.8136	69.2084	-626.642	-54054	-37312.7	-4758.18	140.456	989.26	0	0	0	0	0	0	0	603	903	0
7479	6	0	0	0	0	0	0	200	300	0	-26.8817	69.6661	-628.168	-53779.4	-37434.8	-4803.96	140.406	988.613	0	0	0	0	0	0	0	603	903	0
7479	7	0	0	0	0	0	0	200	300	0	-26.8817	71.0394	-625.727	-53321.6	-36946.5	-4895.51	140.954	988.216	0	0	0	0	0	0	0	603	903	0
7479	8	0	0	0	0	0	0	200	300	0	-25.2032	71.4972	-626.032	-52131.4	-37312.7	-4849.73	140.398	986.273	0	0	0	0	0	0	0	603	903	0
7479	9	0	0	0	0	0	0	200	300	0	-25.2032	72.5653	-626.032	-53321.6	-37434.8	-4712.4	140.203	988.174	0	0	0	0	0	0	0	603	903	0
7480	0	0	0	0	0	0	0	200	300	0	-26.1188	72.5653	-626.337	-53779.4	-37434.8	-4895.51	140.232	988.863	0	0	0	0	0	0	0	603	903	0
7480	1	0	0	0	0	0	0	200	300	0	-24.7455	73.4808	-626.337	-53596.3	-37068.6	-4941.29	140.817	988.571	0	0	0	0	0	0	0	603	903	0
7480	2	0	0	0	0	0	0	200	300	0	-26.7291	73.9386	-626.642	-52589.2	-37373.8	-5124.39	140.359	986.922	0	0	0	0	0	0	0	603	903	0
7480	3	0	0	0	0	0	0	200	300	0	-26.424	74.2438	-624.506	-52589.2	-37373.8	-5032.84	140.155	987.209	0	0	0	0	0	0	0	603	903	0
7480	4	0	0	0	0	0	0	200	300	0	-26.2714	75.1593	-625.117	-52863.8	-37617.9	-4941.29	139.823	987.566	0	0	0	0	0	0	0	603	903	0
7480	5	0	0	0	0	0	0	200	300	0	-27.3395	76.38	-624.506	-53047	-37251.7	-5078.62	140.35	987.942	0	0	0	0	0	0	0	603	903	0
7480	6	0	0	0	0	0	0	200	300	0	-26.7291	75.4645	-624.201	-52589.2	-37068.6	-4895.51	140.614	987.25	0	0	0	0	0	0	0	603	903	0
7480	7	0	0	0	0	0	0	200	300	0	-26.424	76.9904	-625.727	-52223	-37373.8	-4987.06	140.271	986.46	0	0	0	0	0	0	0	603	903	0
7480	8	0	0	0	0	0	0	200	300	0	-25.9662	76.6852	-625.117	-52131.4	-37190.7	-4987.06	140.506	986.395	0	0	0	0	0	0	0	603	903	0
7480	9	0	0	0	0	0	0	200	300	0	-25.9662	78.2111	-624.811	-52772.3	-36885.5	-4849.73	140.965	987.461	0	0	0	0	0	0	0	603	903	0
7481	0	0	0	0	0	0	0	200	300	0	-27.3395	78.2111	-622.37	-52589.2	-37312.7	-4758.18	140.047	987.498	0	0	0	0	0	0	0	603	903	0
7481	1	0	0	0	0	0	0	200	300	0	-28.1024	78.5162	-623.896	-51765.2	-37373.8	-4941.29	140.096	985.971	0	0	0	0	0	0	0	603	903	0
7481	2	0	0	0	0	0	0	200	300	0	-27.1869	80.1947	-622.065	-50941.2	-36885.5	-4941.29	140.705	984.891	0	0	0	0	0	0	0	603	903	0
7481	3	0	0	0	0	0	0	200	300	0	-26.424	80.9576	-622.98	-51673.7	-36885.5	-5032.84	140.792	985.946	0	0	0	0	0	0	0	603	903	0
7481	4	0	0	0	0	0	0	200	300	0	-27.3395	81.2628	-621.454	-51673.7	-37984.1	-5032.84	138.879	986.15	0	0	0	0	0	0	0	603	903	0
7481	5	0	0	0	0	0	0	200	300	0	-27.1869	81.1102	-622.98	-51765.2	-37251.7	-4987.06	140.204	986.093	0	0	0	0	0	0	0	603	903	0
7481	6	0	0	0	0	0	0	200	300	0	-27.3395	81.4154	-620.234	-50941.2	-36580.3	-4758.18	141.022	985.132	0	0	0	0	0	0	0	603	903	0
7481	7	0	0	0	0	0	0	200	300	0	-25.9662	82.9413	-619.318	-50117.3	-37251.7	-5032.84	139.85	983.923	0	0	0	0	0	0	0	603	903	0
7481	8	0	0	0	0	0	0	200	300	0	-26.5765	83.2465	-618.097	-51307.4	-37312.7	-5032.84	139.633	986.009	0	0	0	0	0	0	0	603	903	0
7481	9	0	0	0	0	0	0	200	300	0	-27.7972	84.3146	-619.318	-51032.8	-36580.3	-4712.4	140.935	985.402	0	0	0	0	0	0	0	603	903	0
7482	0	0	0	0	0	0	0	200	300	0	-26.2714	85.3827	-616.877	-50300.4	-36763.4	-4941.29	140.404	984.54	0	0	0	0	0	0	0	603	903	0
7482	1	0	0	0	0	0	0	200	300	0	-27.0343	84.7723	-617.182	-50575	-36824.5	-5078.62	140.335	984.945	0	0	0	0	0	0	0	603	903	0
7482	2	0	0	0	0	0	0	200	300	0	-26.2714	85.8405	-614.741	-50208.8	-37129.6	-5124.39	139.601	984.675	0	0	0	0	0	0	0	603	903	0
7482	3	0	0	0	0	0	0	200	300	0	-26.7291	84.7723	-613.52	-50117.3	-36214.1	-5078.62	140.973	984.688	0	0	0	0	0	0	0	603	903	0
7482	4	0	0	0	0	0	0	200	300	0	-27.0343	87.2137	-613.825	-49751.1	-36458.2	-5261.72	140.605	984.051	0	0	0	0	0	0	0	603	903	0
7482	5	0	0	0	0	0	0	200	300	0	-26.8817	88.587	-613.215	-50391.9	-36885.5	-5353.27	139.849	985.177	0	0	0	0	0	0	0	603	903	0
7482	6	0	0	0	0	0	0	200	300	0	-26.5765	88.587	-611.384	-49476.4	-36641.4	-5399.05	140.068	983.925	0	0	0	0	0	0	0	603	903	0
7482	7	0	0	0	0	0	0	200	300	0	-25.8136	88.587	-610.773	-49018.6	-36092	-5261.72	140.908	983.257	0	0	0	0	0	0	0	603	903	0
7482	8	0	0	0	0	0	0	200	300	0	-25.661	87.2137	-611.384	-49384.8	-36092	-5032.84	140.967	983.776	0	0	0	0	0	0	0	603	903	0
7482	9	0	0	0	0	0	0	200	300	0	-26.1188	89.9603	-607.721	-49751.1	-36214.1	-5490.6	140.41	984.865	0	0	0	0	0	0	0	603	903	0
7483	0	0	0	0	0	0	0	200	300	0	-27.1869	90.8759	-605.89	-48835.5	-35908.9	-5536.38	140.734	983.601	0	0	0	0	0	0	0	603	903	0
7483	1	0	0	0	0	0	0	200	300	0	-26.2714	89.6552	-605.585	-48377.7	-35481.7	-5627.93	141.409	982.886	0	0	0	0	0	0	0	603	903	0
7483	2	0	0	0	0	0	0	200	300	0	-24.5929	92.2491	-604.365	-48469.3	-36153.1	-5353.27	140.18	983.199	0	0	0	0	0	0	0	603	903	0
7483	3	0	0	0	0	0	0	200	300	0	-25.3558	92.0966	-600.397	-48927.1	-36153.1	-5399.05	139.785	984.491	0	0	0	0	0	0	0	603	903	0
7483	4	0	0	0	0	0	0	200	300	0	-25.661	92.2491	-601.008	-47828.4	-35359.6	-5353.27	141.166	982.58	0	0	0	0	0	0	0	603	903	0
7483	5	0	0	0	0	0	0	200	300	0	-25.8136	92.7069	-598.566	-48011.5	-35420.7	-5399.05	140.824	983.211	0	0	0	0	0	0	0	603	903	0
7483	6	0	0	0	0	0	0	200	300	0	-24.7455	92.5543	-596.735	-47462.2	-35542.7	-5490.6	140.438	982.537	0	0	0	0	0	0	0	603	903	0
7483	7	0	0	0	0	0	0	200	300	0	-24.1351	94.6906	-595.82	-47279.1	-35542.7	-5582.16	140.346	982.351	0	0	0	0	0	0	0	603	903	0
7483	8	0	0	0	0	0	0	200	300	0	-24.4403	95.4535	-596.43	-47279.1	-35115.5	-5353.27	141.124	982.27	0	0	0	0	0	0	0	603	903	0
7483	9	0	0	0	0	0	0	200	300	0	-24.2877	95.6061	-593.989	-47553.8	-34871.3	-5536.38	141.293	983.058	0	0	0	0	0	0	0	603	903	0
7484	0	0	0	0	0	0	0	200	300	0	-23.6774	95.4535	-591.852	-46546.7	-35359.6	-5627.93	140.256	981.646	0	0	0	0	0	0	0	603	903	0
7484	1	0	0	0	0	0	0	200	300	0	-22.6093	96.2164	-590.326	-46546.7	-35237.5	-5719.48	140.308	981.849	0	0	0	0	0	0	0	603	903	0
7484	2	0	0	0	0	0	0	200	300	0	-22.3041	96.369	-587.275	-45356.5	-34505.1	-5719.48	141.245	980.232	0	0	0	0	0	0	0	603	903	0
7484	3	0	0	0	0	0	0	200	300	0	-24.2877	97.7423	-584.833	-46546.7	-34322	-5948.37	141.313	982.59	0	0	0	0	0	0	0	603	903	0
7484	4	0	0	0	0	0	0	200	300	0	-22.4567	98.2001	-583.307	-46088.9	-34810.3	-5994.14	140.323	982.013	0	0	0	0	0	0	0	603	903	0
7484	5	0	0	0	0	0	0	200	300	0	-22.4567	99.1156	-582.392	-45539.6	-34871.3	-6085.7	140.124	981.194	0	0	0	0	0	0	0	603	903	0
7484	6	0	0	0	0	0	0	200	300	0	-21.8463	98.8104	-580.256	-44166.3	-33833.7	-6131.47	141.692	979.115	0	0	0	0	0	0	0	603	903	0
7484	7	0	0	0	0	0	0	200	300	0	-21.3885	98.8104	-577.204	-44532.5	-34383.1	-6223.02	140.432	980.152	0	0	0	0	0	0	0	603	903	0
7484	8	0	0	0	0	0	0	200	300	0	-20.6256	99.8785	-576.594	-45265	-33955.8	-6223.02	141.11	981.504	0	0	0	0	0	0	0	603	903	0
7484	9	0	0	0	0	0	0	200	300	0	-21.236	99.5734	-571.711	-45081.8	-33467.5	-6223.02	141.461	981.854	0	0	0	0	0	0	0	603	903	0
7485	0	0	0	0	0	0	0	200	300	0	-21.3885	99.4208	-569.88	-43891.7	-33406.5	-6085.7	141.38	980.019	0	0	0	0	0	0	0	603	903	0
7485	1	0	0	0	0	0	0	200	300	0	-20.1678	101.404	-567.438	-43800.1	-33467.5	-6131.47	141.02	980.189	0	0	0	0	0	0	0	603	903	0
7485	2	0	0	0	0	0	0	200	300	0	-18.9471	101.252	-565.302	-43891.7	-33406.5	-6223.02	140.905	980.643	0	0	0	0	0	0	0	603	903	0
7485	3	0.734717	-1.26369	-12.1473	-1920.78	577.871	-207.091	247.572	458.124	0	-19.4049	101.557	-563.166	-43983.2	-32796.1	-6451.91	141.765	981.1	0	0	0	0	0	0	0	603	903	0
7485	4	6.07529	-5.23098	-34.4251	-8421.02	2103.75	-2175.48	261.111	544.619	0	-20.0153	101.862	-561.03	-43617	-32552	-6360.35	141.978	980.745	0	0	0	0	0	0	0	603	903	0
7485	5	19.8082	-4.01027	-46.9373	-8787.24	2592.03	-4967.83	255.223	487.212	0	-19.4049	101.557	-557.367	-43525.5	-33101.3	-6406.13	140.611	981.091	0	0	0	0	0	0	0	603	903	0
7485	6	20.5711	7.58641	-43.2752	-5949.1	2103.75	-2999.45	248.613	437.471	0	-17.4213	101.862	-554.926	-42609.9	-33101.3	-6177.25	140.35	979.785	0	0	0	0	0	0	0	603	903	0
7485	7	3.78647	7.73899	-29.2371	-5857.55	1981.68	296.449	267.78	500.346	0	-17.7264	103.235	-553.705	-42243.7	-32307.9	-6497.68	141.652	979.293	0	0	0	0	0	0	0	603	903	0
7485	8	3.17612	6.82347	-27.4061	-7230.84	2042.71	-573.302	274.535	563.841	0	-18.0316	104.151	-552.18	-42701.5	-32063.7	-6497.68	141.932	980.333	0	0	0	0	0	0	0	603	903	0
7485	9	2.2606	16.8943	-42.97	-8146.37	1676.5	-573.302	239.016	489.583	0	-16.9635	104.761	-546.992	-41969.1	-32185.8	-6589.24	141.159	979.727	0	0	0	0	0	0	0	603	903	0
7486	0	-1.85928	19.1831	-59.1443	-11259.2	3202.38	754.213	254.145	490.367	0	-16.9635	104.609	-544.245	-41419.7	-32246.8	-6772.34	140.749	979.105	0	0	0	0	0	0	0	603	903	0
7486	1	12.1788	13.5373	-64.0272	-12357.8	3019.28	-1122.62	247.156	493.009	0	-16.6583	104.609	-541.193	-41145.1	-31331.3	-6635.01	142.107	979.027	0	0	0	0	0	0	0	603	903	0
7486	2	18.5875	15.9787	-68.2996	-15104.4	4362.05	-2679.02	263.866	521.149	0	-16.3531	104.151	-538.447	-40962	-31148.2	-6360.35	142.152	979.074	0	0	0	0	0	0	0	603	903	0
7486	3	14.7728	24.5237	-77.1497	-16203	5338.61	-1076.84	269.198	510.02	0	-16.3531	105.829	-536.005	-40321.1	-31453.4	-6818.12	141.319	978.225	0	0	0	0	0	0	0	603	903	0
7486	4	13.8573	20.8616	-89.3568	-16752.3	4850.33	-756.408	254.281	487.477	0	-14.5221	107.203	-533.259	-40870.4	-31331.3	-6909.67	141.246	979.643	0	0	0	0	0	0	0	603	903	0
7486	5	8.05894	9.72264	-96.3758	-19773.6	4484.12	-1580.38	246.527	505.171	0	-15.8954	105.982	-530.817	-39954.9	-30904.1	-6818.12	141.78	978.271	0	0	0	0	0	0	0	603	903	0
7486	6	2.41318	15.521	-103.395	-20597.5	5216.54	-481.75	250.453	499.212	0	-14.6747	104.304	-528.376	-39954.9	-30659.9	-6726.56	141.973	978.618	0	0	0	0	0	0	0	603	903	0
7486	7	10.9581	17.8098	-105.226	-22703.2	5704.82	-207.091	254.215	515.757	0	-14.2169	106.745	-522.883	-39588.7	-30354.7	-7092.78	141.947	978.712	0	0	0	0	0	0	0	603	903	0
7486	8	14.315	7.89158	-122.011	-24992.1	6681.39	-1397.28	254.761	504.835	0	-14.9799	106.898	-519.526	-39497.1	-30415.8	-6589.24	141.455	979.025	0	0	0	0	0	0	0	603	903	0
7486	9	5.61753	7.43382	-130.25	-25083.6	6132.07	-344.421	247.079	492.58	0	-14.6747	105.982	-516.474	-39039.4	-29866.5	-6726.56	142.172	978.588	0	0	0	0	0	0	0	603	903	0
7487	0	1.80283	10.7908	-135.743	-27464	6742.42	571.107	249.67	502.323	0	-12.8436	104.609	-514.338	-38215.4	-29439.2	-6909.67	142.763	977.3	0	0	0	0	0	0	0	603	903	0
7487	1	5.77012	8.9597	-145.509	-29844.4	6376.21	-344.421	243.82	505.103	0	-13.7592	108.423	-512.201	-38123.8	-30110.6	-6772.34	141.213	977.431	0	0	0	0	0	0	0	603	903	0
7487	2	0.276953	4.99241	-153.138	-30668.3	7108.63	-161.315	246.42	500.265	0	-12.691	106.592	-507.929	-38490.1	-29683.4	-7092.78	141.56	978.779	0	0	0	0	0	0	0	603	903	0
7487	3	-4.1481	-0.0429889	-161.989	-32499.4	7718.98	1349.31	247.651	500.628	0	-12.5385	103.235	-504.877	-37574.5	-29195.1	-7230.1	142.174	977.423	0	0	0	0	0	0	0	603	903	0
7487	4	4.54941	-1.56887	-169.008	-33964.3	7230.7	479.554	242.783	500.963	0	-13.6066	107.05	-500.3	-37299.9	-28889.9	-7138.55	142.255	977.555	0	0	0	0	0	0	0	603	903	0
7487	5	2.71836	-1.1111	-175.111	-34605.1	7718.98	-69.7623	244.081	497.618	0	-11.6229	107.355	-496.638	-36018.1	-29073	-6955.45	141.46	975.524	0	0	0	0	0	0	0	603	903	0
7487	6	-8.11538	-4.77321	-180.299	-35062.9	8024.16	1211.98	244.505	494.471	0	-10.4022	104.609	-492.67	-37116.8	-28279.5	-7504.76	142.599	978.338	0	0	0	0	0	0	0	603	903	0
7487	7	-5.21621	-10.7241	-189.149	-37168.6	7047.6	1303.53	237.259	496.504	0	-11.3177	107.05	-489.924	-36659	-28279.5	-7184.33	142.278	977.826	0	0	0	0	0	0	0	603	903	0
7487	8	-4.75845	-11.3345	-196.168	-38999.6	7902.09	754.213	240.282	498.807	0	-13.3014	107.508	-485.651	-36292.8	-28584.7	-6680.79	141.141	977.73	0	0	0	0	0	0	0	603	903	0
7487	9	-5.67397	-11.3345	-197.694	-39457.4	8573.48	1303.53	243.367	499.588	0	-11.3177	104.914	-482.599	-35377.3	-28157.5	-7504.76	141.655	976.306	0	0	0	0	0	0	0	603	903	0
7488	0	-6.13174	-17.438	-199.22	-40281.4	8634.51	1532.41	243.342	502.195	0	-9.94446	105.982	-478.022	-35194.2	-27547.1	-7230.1	142.373	976.625	0	0	0	0	0	0	0	603	903	0
7488	1	-6.5895	-20.6424	-206.239	-41013.8	8329.33	845.765	240.387	498.865	0	-10.7074	107.661	-474.36	-35194.2	-27364	-7047	142.314	977.193	0	0	0	0	0	0	0	603	903	0
7488	2	-12.693	-15.7595	-214.479	-41471.6	8390.37	1074.65	239.12	493.36	0	-11.3177	104.609	-468.561	-34461.7	-27486.1	-7047	141.339	976.548	0	0	0	0	0	0	0	603	903	0
7488	3	-12.2353	-20.1846	-218.751	-42570.2	8939.69	1532.41	240.867	494.606	0	-7.65564	106.135	-464.594	-34827.9	-27180.9	-6909.67	141.495	977.964	0	0	0	0	0	0	0	603	903	0
7488	4	-9.48867	-28.4243	-216.92	-43760.4	8817.62	1303.53	240.649	501.735	0	-9.94446	106.135	-462.458	-33729.3	-26814.7	-6772.34	142.017	975.935	0	0	0	0	0	0	0	603	903	0
7488	5	-13.456	-27.051	-224.244	-44126.6	8817.62	1532.41	239.321	496.779	0	-8.87634	103.693	-458.185	-32081.4	-26875.7	-7092.78	141.343	973.018	0	0	0	0	0	0	0	603	903	0
7488	6	-12.5404	-25.5252	-230.043	-45316.8	8878.65	1623.96	238.596	496.993	0	-8.57117	105.067	-450.251	-33180	-26204.4	-6909.67	141.801	976.692	0	0	0	0	0	0	0	603	903	0
7488	7	-10.099	-29.4925	-236.757	-45774.5	9122.79	1486.63	238.532	493.34	0	-9.33411	106.44	-445.673	-32722.2	-25777.1	-6314.58	142.161	976.422	0	0	0	0	0	0	0	603	903	0
7488	8	-15.287	-30.7132	-239.503	-46415.4	9672.11	1395.08	240.384	493.799	0	-9.33411	104.609	-441.706	-32264.5	-25533	-7047	142.195	976.045	0	0	0	0	0	0	0	603	903	0
7488	9	-16.8129	-30.408	-249.574	-47971.8	10038.3	1349.31	240.222	492.215	0	-9.48669	105.067	-438.349	-31440.5	-25655	-6909.67	141.473	974.725	0	0	0	0	0	0	0	603	903	0
7489	0	-10.4042	-31.6287	-256.288	-49162	9916.25	1257.75	238.692	491.823	0	-7.35046	104.151	-431.94	-30616.5	-25410.9	-6680.79	141.17	973.881	0	0	0	0	0	0	0	603	903	0
7489	1	-13.6085	-35.1382	-263.612	-50901.5	10953.8	1257.75	241.553	493.092	0	-6.58752	103.235	-429.499	-30891.2	-24800.5	-7092.78	142.257	974.924	0	0	0	0	0	0	0	603	903	0
7489	2	-16.5077	-37.1218	-274.904	-51725.5	11014.9	1028.87	240.068	488.159	0	-5.97717	103.846	-421.869	-30982.7	-24312.3	-6818.12	142.37	976.442	0	0	0	0	0	0	0	603	903	0
7489	3	-13.6085	-38.19	-280.702	-53098.8	11014.9	799.989	239.24	489.164	0	-8.57117	103.541	-416.987	-30525	-24373.3	-6589.24	141.549	976.204	0	0	0	0	0	0	0	603	903	0
7489	4	-14.8292	-38.3425	-290.162	-54472.1	11198	983.094	238.592	487.73	0	-7.96081	103.693	-409.052	-29609.4	-24007.1	-6772.34	141.31	975.386	0	0	0	0	0	0	0	603	903	0
7489	5	-17.2707	-41.6995	-298.402	-55479.1	11991.4	1211.98	240.186	485.921	0	-6.28235	103.693	-406.611	-29151.7	-23457.8	-6818.12	142.309	974.694	0	0	0	0	0	0	0	603	903	0
7489	6	-15.8974	-46.2771	-302.98	-57310.2	12662.8	571.107	241.794	489.155	0	-6.74011	102.015	-402.643	-29243.2	-23152.6	-6177.25	142.499	975.628	0	0	0	0	0	0	0	603	903	0
7489	7	-14.3715	-46.4297	-314.271	-59599	12662.8	616.883	240.293	489.642	0	-7.96081	99.1156	-395.319	-27503.7	-23335.7	-6543.46	140.97	972.574	0	0	0	0	0	0	0	603	903	0
7489	8	-18.9491	-45.5142	-326.478	-60423	12907	891.542	239.534	485.075	0	-7.96081	101.71	-389.216	-28236.1	-22664.3	-6543.46	141.769	975.546	0	0	0	0	0	0	0	603	903	0
7489	9	-20.3224	-52.0755	-334.718	-61063.9	13456.3	525.331	240.202	482.434	0	-4.45129	101.71	-384.333	-26954.4	-22603.3	-6131.47	141.188	973.133	0	0	0	0	0	0	0	603	903	0
7490	0	-19.1017	-56.3479	-342.042	-63169.6	13883.5	662.66	240.59	484.684	0	-5.36682	100.336	-379.755	-26679.7	-22359.1	-6360.35	141.122	973.255	0	0	0	0	0	0	0	603	903	0
7490	1	-22.1535	-54.6695	-351.503	-63718.9	14188.7	433.778	240.366	481.276	0	-5.51941	99.5734	-373.652	-26496.6	-21931.9	-6039.92	141.304	973.913	0	0	0	0	0	0	0	603	903	0
7490	2	-21.3905	-58.9419	-359.437	-66190.8	14310.8	296.449	239.814	484.151	0	-6.12976	98.963	-366.022	-26130.4	-21443.6	-6039.92	141.414	974.39	0	0	0	0	0	0	0	603	903	0
7490	3	-20.6276	-63.2144	-369.813	-66648.6	14432.9	891.542	239.027	480.222	0	-5.51941	97.5897	-362.36	-25306.5	-20955.3	-6085.7	142.17	972.838	0	0	0	0	0	0	0	603	903	0
7490	4	-24.5949	-63.5196	-377.443	-68479.6	14616	799.989	238.724	481.431	0	-4.75647	96.369	-354.731	-23933.2	-20833.2	-6268.8	141.27	970.469	0	0	0	0	0	0	0	603	903	0
7490	5	-24.1371	-64.5877	-385.988	-69120.5	14860.1	342.225	238.499	479.074	0	-5.06165	94.8431	-344.66	-24024.7	-20711.2	-5582.16	139.908	972.706	0	0	0	0	0	0	0	603	903	0
7490	6	-22.9164	-69.7757	-390.26	-69578.3	15714.6	-115.539	240.267	478.287	0	-4.60388	96.5216	-341.913	-24116.3	-20100.8	-5994.14	141.211	973.533	0	0	0	0	0	0	0	603	903	0
7490	7	-23.8319	-71.1489	-398.195	-70951.6	15897.7	662.66	239.924	478.183	0	-4.29871	94.8431	-338.251	-23567	-19917.7	-5994.14	141.116	972.673	0	0	0	0	0	0	0	603	903	0
7490	8	-25.5104	-71.1489	-406.74	-72416.4	16202.9	525.331	239.836	478.041	0	-4.29871	91.7914	-326.96	-22834.5	-19612.5	-5765.26	140.015	972.839	0	0	0	0	0	0	0	603	903	0
7490	9	-23.6793	-73.5904	-413.453	-74155.9	16447	-69.7623	239.78	479.357	0	-3.53577	92.7069	-325.129	-22193.7	-19368.4	-5536.38	140.428	971.261	0	0	0	0	0	0	0	603	903	0
7491	0	-25.8156	-74.6585	-420.472	-74705.2	16691.2	159.12	239.696	477.67	0	-2.16248	90.5707	-317.194	-21735.9	-18880.1	-5902.59	140.478	971.526	0	0	0	0	0	0	0	603	903	0
7491	1	-26.5785	-74.6585	-424.44	-74430.5	16935.3	250.672	239.9	475.362	0	-3.078	89.5026	-307.734	-21461.2	-18269.8	-5536.38	140.631	972.74	0	0	0	0	0	0	0	603	903	0
7491	2	-21.8483	-75.574	-431.154	-75620.7	17179.4	159.12	239.845	475.392	0	-3.078	88.8922	-304.682	-20728.8	-18269.8	-5353.27	140.037	971.034	0	0	0	0	0	0	0	603	903	0
7491	3	-22.0009	-76.7947	-437.867	-76353.1	17789.8	113.343	240.628	474.375	0	-3.99353	87.2137	-298.578	-19630.2	-18086.7	-5490.6	139.424	968.746	0	0	0	0	0	0	0	603	903	0
7491	4	-24.2897	-76.9473	-439.393	-77451.8	18095	204.896	241.182	476.27	0	-2.31506	84.3146	-292.17	-18897.8	-17049.1	-5353.27	141.647	967.681	0	0	0	0	0	0	0	603	903	0
7491	5	-22.7638	-76.1843	-447.938	-78367.3	17911.9	-344.421	239.987	474.951	0	-2.92541	83.7042	-286.677	-18623.1	-17171.1	-5215.94	140.103	967.962	0	0	0	0	0	0	0	603	903	0
7491	6	-20.6276	-74.8111	-449.769	-78642	18156	-115.539	240.367	474.85	0	-2.77283	81.1102	-278.132	-18714.7	-16804.9	-5170.17	139.579	970.287	0	0	0	0	0	0	0	603	903	0
7491	7	-20.475	-74.0481	-454.042	-79008.2	18827.4	-481.75	241.466	474.011	0	-2.46765	80.0421	-268.671	-17982.2	-16377.7	-4849.73	139.042	969.93	0	0	0	0	0	0	0	603	903	0
7491	8	-19.5595	-75.8792	-459.84	-78458.9	18827.4	-435.973	240.943	470.622	0	-2.62024	78.5162	-265.925	-17432.9	-15828.4	-4941.29	140.478	968.556	0	0	0	0	0	0	0	603	903	0
7491	9	-17.4232	-75.574	-456.788	-79466	18583.2	-985.29	240.682	473.967	0	-0.789184	76.8378	-259.211	-15968.1	-15523.2	-4803.96	140.114	964.603	0	0	0	0	0	0	0	603	903	0
7492	0	-18.9491	-75.4214	-465.028	-79740.6	18888.4	-390.197	240.618	471.475	0	-0.941772	74.549	-248.835	-15785	-15218	-4620.85	138.843	966.436	0	0	0	0	0	0	0	603	903	0
7492	1	-17.5758	-75.2688	-465.944	-80289.9	19315.7	-802.184	241.455	472.317	0	-1.39954	72.5653	-243.342	-15876.5	-14485.6	-4712.4	140.472	968.244	0	0	0	0	0	0	0	603	903	0
7492	2	-14.2189	-75.7266	-468.69	-80747.7	19437.7	-1259.95	241.472	472.284	0	0.126343	71.6498	-236.323	-15144.1	-14119.4	-4483.52	140.254	967.082	0	0	0	0	0	0	0	603	903	0
7492	3	-13.456	-74.6585	-472.352	-80747.7	19498.8	-847.961	241.28	470.948	0	-2.31506	69.6661	-230.524	-13862.4	-13936.3	-4483.52	139.545	963.134	0	0	0	0	0	0	0	603	903	0
7492	4	-13.3034	-74.3533	-475.404	-80289.9	19071.5	-1305.72	240.116	468.888	0	0.736695	67.9877	-222.895	-13770.8	-13570.1	-4346.19	139.119	964.782	0	0	0	0	0	0	0	603	903	0
7492	5	-11.1671	-76.9473	-477.54	-80289.9	19865	-1671.94	241.599	468.132	0	1.34705	66.1566	-218.317	-13221.5	-13081.8	-4208.86	140.079	963.561	0	0	0	0	0	0	0	603	903	0
7492	6	-12.2353	-78.0154	-478.761	-80106.8	19865	-1534.61	241.492	467.321	0	0.126343	62.7997	-210.688	-12672.2	-12776.6	-4208.86	139.358	963.147	0	0	0	0	0	0	0	603	903	0
7492	7	-10.099	-76.4895	-479.371	-81205.5	20231.2	-1671.94	242.204	469.4	0	2.26257	59.7479	-205.195	-12214.4	-12471.4	-3979.98	139.221	962.526	0	0	0	0	0	0	0	603	903	0
7492	8	-7.19985	-77.8628	-482.423	-81663.2	19926	-2221.25	241.304	469.277	0	-0.789184	58.5272	-196.955	-11756.7	-12166.3	-3979.98	138.228	962.692	0	0	0	0	0	0	0	603	903	0
7492	9	-7.81021	-79.6939	-482.118	-81205.5	20353.3	-2312.8	242.216	468.435	0	1.19446	57.3065	-190.851	-11390.4	-11555.9	-3796.88	139.451	962.682	0	0	0	0	0	0	0	603	903	0
7493	0	-7.50503	-78.3206	-484.865	-80564.6	20780.5	-2129.7	242.858	466.159	0	0.584107	55.6281	-185.053	-10932.7	-11494.9	-3705.32	137.883	962.079	0	0	0	0	0	0	0	603	903	0
7493	1	-5.67397	-78.9309	-485.17	-80015.3	20780.5	-2541.69	242.831	464.922	0	-0.484008	52.1185	-180.17	-9559.39	-11189.7	-3476.44	137.894	956.058	0	0	0	0	0	0	0	603	903	0
7493	2	-4.1481	-80.6094	-485.17	-80656.1	20536.4	-2724.79	242.328	466.243	0	-0.484008	49.8297	-174.067	-9650.94	-11067.6	-3293.34	136.417	958.444	0	0	0	0	0	0	0	603	903	0
7493	3	-1.85928	-80.3042	-487.001	-81205.5	20963.6	-2267.03	243.046	466.746	0	3.33069	47.0831	-170.099	-9101.62	-10823.5	-2972.9	136.37	956.508	0	0	0	0	0	0	0	603	903	0
7493	4	-2.01187	-80.4568	-490.358	-80473.1	20902.6	-2770.57	242.627	464.111	0	1.04187	44.0314	-163.386	-8735.41	-10152.1	-2927.13	137.864	956.465	0	0	0	0	0	0	0	603	903	0
7493	5	-2.7748	-80.4568	-490.358	-81388.5	21085.7	-3411.44	243.001	465.978	0	1.34705	41.8951	-159.113	-8735.41	-9907.96	-2606.69	137.73	957.901	0	0	0	0	0	0	0	603	903	0
7493	6	-2.46963	-81.0672	-489.747	-80747.7	20902.6	-3091	242.68	464.876	0	0.126343	40.2167	-152.094	-8277.65	-9114.5	-2744.02	140.073	957.425	0	0	0	0	0	0	0	603	903	0
7493	7	-0.180811	-82.2879	-492.494	-81113.9	20841.5	-3228.33	242.318	464.7	0	0.278931	38.0804	-146.601	-7545.23	-8992.43	-2606.69	138.66	954.468	0	0	0	0	0	0	0	603	903	0
7493	8	0.429541	-81.2197	-498.903	-81297	21757.1	-3457.21	243.61	462.952	0	1.04187	36.402	-142.328	-6721.25	-8809.32	-2469.36	138.106	950.224	0	0	0	0	0	0	0	603	903	0
7493	9	1.19248	-79.2361	-510.805	-82212.5	22550.5	-3686.1	244.147	460.947	0	2.41516	32.8925	-136.835	-6080.39	-8504.15	-2286.26	137.851	947.436	0	0	0	0	0	0	0	603	903	0
7494	0	7.60117	-82.1353	-512.941	-80747.7	22794.7	-4647.4	244.439	457.421	0	1.34705	31.8243	-132.258	-6355.04	-8198.97	-2011.6	138.008	951.051	0	0	0	0	0	0	0	603	903	0
7494	1	12.9417	-88.8491	-509.889	-81846.3	23038.8	-4967.83	245.184	460.518	0	0.278931	30.1459	-128.29	-6446.6	-8198.97	-2194.7	136.09	953.25	0	0	0	0	0	0	0	603	903	0
7494	2	10.9581	-87.4759	-506.227	-81022.3	23221.9	-4555.85	245.873	460.051	0	0.431519	29.5355	-124.018	-5622.62	-7893.8	-2148.93	136.35	948.337	0	0	0	0	0	0	0	603	903	0
7494	3	13.3995	-86.1026	-515.382	-80839.3	23282.9	-5425.6	245.176	456.853	0	1.80481	28.9252	-119.745	-5347.96	-7954.83	-1874.27	133.569	947.661	0	0	0	0	0	0	0	603	903	0
7494	4	13.8573	-90.5276	-522.706	-82395.7	23405	-6249.57	244.777	457.633	0	2.41516	28.7726	-116.388	-5439.52	-7039.31	-2011.6	139.519	949.736	0	0	0	0	0	0	0	603	903	0
7494	5	10.9581	-94.9527	-524.537	-82304.1	23405	-5746.03	244.62	456.908	0	2.10999	26.6364	-113.032	-5622.62	-7100.34	-2194.7	137.183	952.744	0	0	0	0	0	0	0	603	903	0
7494	6	11.5685	-96.326	-523.317	-82304.1	23710.2	-5883.36	245.308	457.274	0	1.19446	23.1268	-110.285	-5073.31	-7161.38	-2148.93	135.065	949.002	0	0	0	0	0	0	0	603	903	0
7494	7	12.7892	-97.2415	-526.674	-83036.5	23893.3	-6341.13	245.366	457.662	0	0.431519	21.7535	-106.928	-4249.33	-6917.24	-1828.49	135.309	942.74	0	0	0	0	0	0	0	603	903	0
7494	8	9.43223	-97.6992	-528.505	-82121	24076.4	-6158.02	245.556	455.384	0	1.49963	22.3639	-103.266	-4340.88	-6856.2	-1553.83	133.606	945.036	0	0	0	0	0	0	0	603	903	0
7494	9	4.85459	-100.598	-530.946	-81480.1	23893.3	-5791.81	245.001	453.462	0	1.19446	21.7535	-101.13	-4249.33	-7100.34	-2194.7	129.79	945.019	0	0	0	0	0	0	0	603	903	0
7495	0	8.66929	-99.6829	-529.115	-82029.5	23649.2	-5929.14	244.696	455.031	0	0.584107	19.007	-98.6883	-4066.22	-6489.99	-1645.39	134.238	944.203	0	0	0	0	0	0	0	603	903	0
7495	1	5.77012	-96.4785	-533.693	-82487.2	24076.4	-5883.36	245.113	454.559	0	1.19446	17.4811	-98.0779	-4523.99	-5818.6	-1370.73	140.674	949.126	0	0	0	0	0	0	0	603	903	0
7495	2	3.78647	-96.4785	-534.608	-82670.3	24198.5	-5425.6	245.264	454.637	0	1.9574	17.7863	-92.5848	-3700.01	-5574.46	-1782.72	139.791	942.964	0	0	0	0	0	0	0	603	903	0
7495	3	5.00718	-98.6148	-537.05	-82944.9	24015.4	-5883.36	244.717	454.446	0	3.1781	18.0914	-88.3123	-3700.01	-5757.57	-1462.28	134.805	944.897	0	0	0	0	0	0	0	603	903	0
7495	4	4.24424	-94.0371	-540.407	-82304.1	24137.4	-5562.93	244.665	452.3	0	0.584107	16.5656	-83.7347	-3700.01	-5452.39	-1324.95	134.885	947.187	0	0	0	0	0	0	0	603	903	0
7495	5	3.78647	-90.5276	-543.763	-82578.7	24442.6	-5746.03	244.951	451.865	0	0.278931	16.2604	-83.1243	-3516.91	-4781	-1508.06	142.484	945.309	0	0	0	0	0	0	0	603	903	0
7495	6	3.63389	-92.8164	-546.815	-82944.9	24503.7	-5883.36	244.812	451.687	0	-0.178833	16.8707	-80.6829	-3059.14	-5086.18	-1279.18	136.961	940.916	0	0	0	0	0	0	0	603	903	0
7495	7	3.63389	-94.9527	-549.257	-83311.2	24198.5	-5929.14	244.057	451.68	0	1.80481	14.1241	-76.7156	-2967.59	-5025.14	-1233.4	134.496	941.683	0	0	0	0	0	0	0	603	903	0
7495	8	4.09165	-91.5957	-549.562	-82944.9	24442.6	-5654.48	244.477	450.929	0	2.26257	11.6827	-75.1898	-2967.59	-4903.07	-1324.95	134.791	942.468	0	0	0	0	0	0	0	603	903	0
7495	9	5.77012	-93.4268	-552.614	-83219.6	24503.7	-5929.14	244.341	450.593	0	0.278931	14.5819	-70.6121	-3333.8	-4353.76	-1096.07	138.343	950.213	0	0	0	0	0	0	0	603	903	0
7496	0	4.702	-96.4785	-556.581	-82578.7	24503.7	-6386.9	244.025	448.368	0	2.41516	14.1241	-67.2552	-2876.04	-3987.55	-1004.52	140.71	945.763	0	0	0	0	0	0	0	603	903	0
7496	1	3.78647	-97.2415	-558.412	-82853.4	24930.9	-6203.8	244.646	448.373	0	1.34705	11.225	-64.8138	-2784.49	-4231.69	-1370.73	134.71	945.961	0	0	0	0	0	0	0	603	903	0
7496	2	6.68564	-97.8518	-558.412	-82853.4	24747.8	-5883.36	244.318	448.373	0	1.34705	12.9034	-62.0672	-2418.28	-4353.76	-1233.4	129.854	941.962	0	0	0	0	0	0	0	603	903	0
7496	3	10.1952	-98.157	-558.717	-83769	24869.9	-6432.68	244.512	449.931	0	1.34705	12.4457	-58.4051	-2509.83	-3499.26	-1096.07	140.086	945.973	0	0	0	0	0	0	0	603	903	0
7496	4	9.58481	-99.2251	-562.99	-83677.4	25602.3	-6890.44	245.476	448.63	0	1.65222	10.7672	-56.574	-2143.62	-2949.95	-958.741	147.857	940.891	0	0	0	0	0	0	0	603	903	0
7496	5	11.2633	-98.3096	-564.515	-83769	25541.3	-6386.9	245.245	448.391	0	0.889283	9.85168	-54.743	-1960.51	-3743.41	-1508.06	131.619	938.813	0	0	0	0	0	0	0	603	903	0
7496	6	14.1625	-97.2415	-566.652	-82944.9	25358.2	-7027.77	244.751	446.377	0	1.49963	10.1569	-52.3016	-1685.85	-3010.98	-1141.85	142.43	935.233	0	0	0	0	0	0	0	603	903	0
7496	7	15.078	-96.9363	-567.262	-82944.9	25602.3	-6844.67	245.133	446.22	0	2.26257	9.39392	-50.1653	-1777.41	-2705.81	-1096.07	146.062	938.431	0	0	0	0	0	0	0	603	903	0
7496	8	17.672	-98.6148	-567.872	-82670.3	26090.6	-7256.65	245.944	445.579	0	2.56775	7.41028	-48.6395	-1960.51	-2827.88	-1050.29	141.86	943.307	0	0	0	0	0	0	0	603	903	0
7496	9	21.3341	-97.5467	-570.924	-83402.7	26090.6	-7348.21	245.699	446.084	0	3.1781	8.93616	-45.5877	-2418.28	-2705.81	-958.741	140.646	956.047	0	0	0	0	0	0	0	603	903	0
7497	0	20.4186	-96.4785	-575.197	-82670.3	26212.6	-7439.76	245.572	443.725	0	1.19446	7.86804	-44.0618	-1411.2	-2400.63	-1096.07	145.517	935.028	0	0	0	0	0	0	0	603	903	0
7497	1	19.1979	-97.0889	-575.502	-83769	25907.5	-7577.09	245.017	445.558	0	3.48328	5.27405	-44.367	-1319.64	-1973.39	-912.965	155.521	932.744	0	0	0	0	0	0	0	603	903	0
7497	2	22.2496	-96.9363	-575.197	-82853.4	26334.7	-7577.09	245.784	444.044	0	2.41516	6.03699	-40.0945	-1594.3	-2583.74	-729.859	135.559	942.764	0	0	0	0	0	0	0	603	903	0
7497	3	22.5548	-96.4785	-576.417	-82029.5	26762	-8080.63	246.428	442.309	0	1.04187	7.86804	-39.179	-1136.54	-2339.6	-1279.18	140.284	932.009	0	0	0	0	0	0	0	603	903	0
7497	4	22.86	-95.7156	-578.248	-82304.1	26823	-8263.73	246.387	442.334	0	1.80481	4.96887	-38.5687	-1777.41	-2034.42	-912.965	147.252	949.084	0	0	0	0	0	0	0	603	903	0
7497	5	21.6393	-96.4785	-579.164	-83494.3	26395.8	-8309.51	245.576	444.164	0	3.33069	6.18958	-37.6531	-1685.85	-1851.32	-638.306	150.832	947.773	0	0	0	0	0	0	0	603	903	0
7497	6	20.5711	-95.7156	-580.079	-83128.1	26090.6	-8217.96	244.978	443.305	0	3.48328	5.73181	-34.2962	-1502.75	-2095.46	-958.741	138.901	946.817	0	0	0	0	0	0	0	603	903	0
7497	7	20.5711	-93.8845	-581.3	-83128.1	26823	-8309.51	246.143	443.004	0	1.9574	5.57922	-33.3807	-1685.85	-1668.21	-912.965	150.025	953.504	0	0	0	0	0	0	0	603	903	0
7497	8	21.4867	-94.9527	-580.69	-82487.2	26823	-8309.51	246.192	442.05	0	1.34705	4.96887	-29.4134	-1411.2	-1607.18	-1004.52	145.359	950.978	0	0	0	0	0	0	0	603	903	0
7497	9	21.1815	-96.1734	-583.131	-82487.2	26334.7	-8217.96	245.161	441.456	0	1.65222	5.57922	-30.6341	-1228.09	-1546.14	-912.965	149.529	943.089	0	0	0	0	0	0	0	603	903	0
7498	0	20.7237	-93.2742	-580.385	-82212.5	26700.9	-8217.96	246.006	441.652	0	1.9574	5.42664	-28.4979	-1228.09	-1790.28	-912.965	137.178	946.094	0	0	0	0	0	0	0	603	903	0
7498	1	19.8082	-92.0535	-584.352	-82853.4	26823	-8401.06	245.902	441.787	0	1.19446	4.96887	-27.5823	-1319.64	-1546.14	-867.188	143.945	950.844	0	0	0	0	0	0	0	603	903	0
7498	2	20.266	-91.5957	-582.216	-82670.3	26639.9	-8538.39	245.756	441.993	0	1.9574	3.74817	-23.9202	-1044.98	-1546.14	-729.859	135.363	946.686	0	0	0	0	0	0	0	603	903	0
7498	3	19.9608	-91.5957	-583.742	-82944.9	26945.1	-8309.51	246.159	442.092	0	1.49963	4.51111	-25.7513	-1319.64	-1485.1	-638.306	142.329	954.246	0	0	0	0	0	0	0	603	903	0
7498	4	23.3177	-90.8328	-587.098	-82121	26578.9	-8263.73	245.272	439.876	0	1.80481	4.20593	-22.3943	-1319.64	-1302	-546.754	141.86	961.928	0	0	0	0	0	0	0	603	903	0
7498	5	22.5548	-90.5276	-588.624	-82761.9	26823	-8584.17	245.569	440.602	0	2.72034	2.52747	-19.6478	-1228.09	-1057.86	-729.859	146.159	965.505	0	0	0	0	0	0	0	603	903	0
7498	6	21.0289	-90.375	-589.845	-82395.7	27006.1	-8172.18	245.785	439.69	0	2.87293	2.52747	-19.0374	-1044.98	-874.754	-684.083	154.051	957.891	0	0	0	0	0	0	0	603	903	0
7498	7	21.4867	-90.5276	-588.014	-82944.9	27067.1	-8217.96	246.031	441.06	0	1.04187	3.44299	-20.2581	-1136.54	-813.718	-272.095	159.832	959.103	0	0	0	0	0	0	0	603	903	0
7498	8	24.2333	-88.6966	-589.54	-82578.7	27067.1	-8446.84	245.912	440.073	0	0	0	0	0	0	0	200	903	0	0	0	0	0	0	0	603	903	0
7498	9	25.6065	-88.6966	-592.286	-82761.9	27067.1	-8492.62	245.699	439.733	0	0	0	0	0	0	0	200	903	0	0	0	0	0	0	0	603	903	0
7499	0	24.3858	-87.781	-592.286	-82029.5	27311.3	-8721.5	246.112	438.496	0	0	0	0	0	0	0	200	903	0	0	0	0	0	0	0	603	903	0
7499	1	23.6229	-88.3914	-594.423	-82304.1	27128.2	-8904.6	245.638	438.461	0	0	0	0	0	0	0	200	903	0	0	0	0	0	0	0	603	903	0
7499	2	23.9281	-86.4077	-592.592	-81937.9	27128.2	-8721.5	245.779	438.27	0	0	0	0	0	0	0	200	903	0	0	0	0	0	0	0	603	903	0
7499	3	24.691	-86.7129	-593.507	-82670.3	27372.3	-8584.17	246.12	439.291	0	0	0	0	0	0	0	200	903	0	0	0	0	0	0	0	603	903	0
7499	4	26.9798	-86.7129	-594.423	-82487.2	27189.2	-8629.94	245.741	438.769	0	0	0	0	0	0	0	200	903	0	0	0	0	0	0	0	603	903	0
7499	5	25.6065	-85.3396	-595.033	-82944.9	27372.3	-8675.72	246.001	439.396	0	0	0	0	0	0	0	200	903	0	0	0	0	0	0	0	603	903	0
7499	6	24.9962	-84.2715	-595.949	-82121	27494.4	-8538.39	246.135	437.799	0	0	0	0	0	0	0	200	903	0	0	0	0	0	0	0	603	903	0
7499	7	24.9962	-84.2715	-594.728	-82121	27433.3	-8538.39	246.128	438.082	0	0	0	0	0	0	0	200	903	0	0	0	0	0	0	0	603	903	0
7499	8	26.0643	-84.5767	-594.728	-81846.3	27189.2	-8721.5	245.717	437.62	0	0	0	0	0	0	0	200	903	0	0	0	0	0	0	0	603	903	0
7499	9	25.454	-83.2034	-595.643	-82395.7	27555.4	-8767.27	246.262	438.331	0	0	0	0	0	0	0	200	903	0	0	0	0	0	0	0	603	903	0
7500	0	26.3695	-81.5249	-598.695	-80564.6	27494.4	-8629.94	245.924	434.567	0	0	0	0	0	0	0	200	903	0	0	0	0	0	0	0	603	903	0
7500	1	24.9962	-81.6775	-599	-82212.5	27372.3	-8492.62	245.697	437.25	0	0	0	0	0	0	0	200	903	0	0	0	0	0	0	0	603	903	0
7500	2	23.9281	-81.2197	-597.78	-81571.7	26762	-8446.84	244.769	436.458	0	0	0	0	0	0	0	200	903	0	0	0	0	0	0	0	603	903	0
7500	3	25.454	-80.1516	-597.169	-81937.9	27189.2	-8950.38	245.53	437.211	0	0	0	0	0	0	0	200	903	0	0	0	0	0	0	0	603	903	0
7500	4	25.7591	-79.8465	-599.611	-81571.7	27372.3	-8355.29	245.65	436.041	0	0	0	0	0	0	0	200	903	0	0	0	0	0	0	0	603	903	0
7500	5	25.1488	-78.9309	-601.137	-82212.5	27494.4	-8126.4	245.737	436.762	0	0	0	0	0	0	0	200	903	0	0	0	0	0	0	0	603	903	0
7500	6	24.9962	-78.4732	-600.221	-81846.3	27372.3	-8629.94	245.604	436.36	0	0	0	0	0	0	0	200	903	0	0	0	0	0	0	0	603	903	0
7500	7	25.9117	-79.5413	-599.611	-82029.5	27311.3	-8858.83	245.548	436.805	0	0	0	0	0	0	0	200	903	0	0	0	0	0	0	0	603	903	0
7500	8	23.7755	-76.1843	-600.526	-81113.9	27982.7	-8401.06	246.597	435.071	0	0	0	0	0	0	0	200	903	0	0	0	0	0	0	0	603	903	0
7500	9	25.1488	-77.4051	-601.747	-81297	27555.4	-8401.06	245.792	435.102	0	0	0	0	0	0	0	200	903	0	0	0	0	0	0	0	603	903	0
7501	0	24.9962	-77.8628	-604.493	-81297	27067.1	-8492.62	244.777	434.488	0	0	0	0	0	0	0	200	903	0	0	0	0	0	0	0	603	903	0
7501	1	24.8436	-76.0318	-605.714	-82487.2	27433.3	-8401.06	245.291	436.182	0	0	0	0	0	0	0	200	903	0	0	0	0	0	0	0	603	903	0
7501	2	25.9117	-74.9636	-606.325	-82304.1	28104.7	-8126.4	246.353	435.743	0	0	0	0	0	0	0	200	903	0	0	0	0	0	0	0	603	903	0
7501	3	24.0807	-74.3533	-606.019	-82029.5	27860.6	-8309.51	245.973	435.358	0	0	0	0	0	0	0	200	903	0	0	0	0	0	0	0	603	903	0
7501	4	24.8436	-74.2007	-606.019	-81480.1	27128.2	-8263.73	244.765	434.451	0	0	0	0	0	0	0	200	903	0	0	0	0	0	0	0	603	903	0
7501	5	24.9962	-73.4378	-609.376	-81480.1	27494.4	-8172.18	245.119	433.711	0	0	0	0	0	0	0	200	903	0	0	0	0	0	0	0	603	903	0
7501	6	24.0807	-73.2852	-608.766	-81205.5	27677.5	-8401.06	245.465	433.394	0	0	0	0	0	0	0	200	903	0	0	0	0	0	0	0	603	903	0
7501	7	23.9281	-73.7429	-612.123	-82121	27860.6	-8080.63	245.515	434.158	0	0	0	0	0	0	0	200	903	0	0	0	0	0	0	0	603	903	0
7501	8	23.1651	-72.2171	-609.376	-82212.5	27555.4	-8080.63	245.219	434.913	0	0	0	0	0	0	0	200	903	0	0	0	0	0	0	0	603	903	0
7501	9	24.3858	-70.6912	-609.681	-82029.5	27555.4	-8263.73	245.196	434.545	0	0	0	0	0	0	0	200	903	0	0	0	0	0	0	0	603	903	0
7502	0	24.3858	-70.5386	-613.344	-81480.1	27677.5	-7897.52	245.126	432.846	0	0	0	0	0	0	0	200	903	0	0	0	0	0	0	0	603	903	0
7502	1	24.2333	-70.2334	-610.292	-81205.5	27860.6	-7897.52	245.651	433.06	0	0	0	0	0	0	0	200	903	0	0	0	0	0	0	0	603	903	0
7502	2	23.3177	-69.3179	-613.038	-81297	27433.3	-7943.3	244.75	432.613	0	0	0	0	0	0	0	200	903	0	0	0	0	0	0	0	603	903	0
7502	3	22.7074	-69.0127	-612.733	-81663.2	27921.6	-8126.4	245.569	433.277	0	0	0	0	0	0	0	200	903	0	0	0	0	0	0	0	603	903	0
7502	4	23.4703	-67.1817	-613.649	-81480.1	27677.5	-7989.08	245.103	432.78	0	0	0	0	0	0	0	200	903	0	0	0	0	0	0	0	603	903	0
7502	5	23.7755	-67.3343	-617.006	-81571.7	27738.5	-7851.75	244.957	432.206	0	0	0	0	0	0	0	200	903	0	0	0	0	0	0	0	603	903	0
7502	6	23.1651	-66.5713	-614.564	-81022.3	27555.4	-7668.64	244.837	431.837	0	0	0	0	0	0	0	200	903	0	0	0	0	0	0	0	603	903	0
7502	7	22.097	-67.1817	-618.226	-81205.5	27921.6	-7943.3	245.164	431.352	0	0	0	0	0	0	0	200	903	0	0	0	0	0	0	0	603	903	0
7502	8	22.2496	-67.1817	-616.701	-80656.1	27433.3	-7668.64	244.484	430.787	0	0	0	0	0	0	0	200	903	0	0	0	0	0	0	0	603	903	0
7502	9	23.0125	-65.961	-617.311	-81297	27799.6	-7485.54	245.033	431.695	0	0	0	0	0	0	0	200	903	0	0	0	0	0	0	0	603	903	0
7503	0	22.86	-64.7403	-617.921	-80839.3	27555.4	-7027.77	244.594	430.825	0	0	0	0	0	0	0	200	903	0	0	0	0	0	0	0	603	903	0
7503	1	22.097	-64.4351	-616.09	-81022.3	28043.7	-7439.76	245.519	431.511	0	0	0	0	0	0	0	200	903	0	0	0	0	0	0	0	603	903	0
7503	2	21.4867	-63.6721	-620.363	-80106.8	28104.7	-7302.43	245.304	429.129	0	0	0	0	0	0	0	200	903	0	0	0	0	0	0	0	603	903	0
7503	3	20.7237	-64.2825	-619.142	-80930.8	27555.4	-7577.09	244.506	430.714	0	0	0	0	0	0	0	200	903	0	0	0	0	0	0	0	603	903	0
7503	4	21.0289	-63.5196	-619.447	-80381.5	27677.5	-7577.09	244.681	429.763	0	0	0	0	0	0	0	200	903	0	0	0	0	0	0	0	603	903	0
7503	5	23.4703	-63.8247	-621.888	-81022.3	28104.7	-7256.65	245.193	430.284	0	0	0	0	0	0	0	200	903	0	0	0	0	0	0	0	603	903	0
7503	6	21.3341	-62.2988	-621.888	-80381.5	27738.5	-7393.98	244.604	429.254	0	0	0	0	0	0	0	200	903	0	0	0	0	0	0	0	603	903	0
7503	7	20.8763	-62.1463	-621.888	-80839.3	28165.8	-7256.65	245.291	429.99	0	0	0	0	0	0	0	200	903	0	0	0	0	0	0	0	603	903	0
7503	8	19.9608	-61.5359	-620.363	-80015.3	27555.4	-7256.65	244.418	428.981	0	0	0	0	0	0	0	200	903	0	0	0	0	0	0	0	603	903	0
7503	9	21.6393	-61.8411	-620.363	-79740.6	27677.5	-7256.65	244.615	428.539	0	0	0	0	0	0	0	200	903	0	0	0	0	0	0	0	603	903	0
7504	0	20.8763	-61.6885	-618.226	-79557.5	28104.7	-7393.98	245.46	428.687	0	0	0	0	0	0	0	200	903	0	0	0	0	0	0	0	603	903	0
7504	1	20.8763	-61.5359	-620.973	-80106.8	28043.7	-7302.43	245.161	429.002	0	0	0	0	0	0	0	200	903	0	0	0	0	0	0	0	603	903	0
7504	2	19.3504	-60.1626	-622.499	-79008.2	27616.5	-7119.32	244.364	426.921	0	0	0	0	0	0	0	200	903	0	0	0	0	0	0	0	603	903	0
7504	3	19.503	-60.9256	-620.057	-79557.5	27250.2	-6982	243.948	428.307	0	0	0	0	0	0	0	200	903	0	0	0	0	0	0	0	603	903	0
7504	4	19.3504	-59.3997	-618.226	-78550.4	27555.4	-7027.77	244.572	427.058	0	0	0	0	0	0	0	200	903	0	0	0	0	0	0	0	603	903	0
7504	5	20.5711	-59.5523	-618.226	-77726.4	27860.6	-7119.32	245.065	425.725	0	0	0	0	0	0	0	200	903	0	0	0	0	0	0	0	603	903	0
7504	6	19.9608	-61.0781	-620.668	-78458.9	27738.5	-6753.11	244.691	426.41	0	0	0	0	0	0	0	200	903	0	0	0	0	0	0	0	603	903	0
7504	7	19.3504	-58.179	-620.363	-78367.3	27555.4	-6661.56	244.418	426.325	0	0	0	0	0	0	0	200	903	0	0	0	0	0	0	0	603	903	0
7504	8	20.1134	-57.416	-616.09	-77543.4	27738.5	-7073.55	245.023	425.864	0	0	0	0	0	0	0	200	903	0	0	0	0	0	0	0	603	903	0
7504	9	18.5875	-58.179	-616.395	-78001.1	27738.5	-7073.55	245.001	426.544	0	0	0	0	0	0	0	200	903	0	0	0	0	0	0	0	603	903	0
7505	0	18.8927	-56.9583	-616.701	-76994	27677.5	-7165.1	244.88	424.848	0	0	0	0	0	0	0	200	903	0	0	0	0	0	0	0	603	903	0
7505	1	19.3504	-57.416	-618.226	-76627.8	27433.3	-6203.8	244.374	423.948	0	0	0	0	0	0	0	200	903	0	0	0	0	0	0	0	603	903	0
7505	2	18.4349	-58.7893	-616.701	-76627.8	27738.5	-6798.89	244.979	424.255	0	0	0	0	0	0	0	200	903	0	0	0	0	0	0	0	603	903	0
7505	3	19.8082	-56.9583	-613.954	-77085.6	27433.3	-6798.89	244.683	425.556	0	0	0	0	0	0	0	200	903	0	0	0	0	0	0	0	603	903	0
7505	4	18.8927	-55.7376	-614.869	-76170.1	27677.5	-6753.11	245.014	423.88	0	0	0	0	0	0	0	200	903	0	0	0	0	0	0	0	603	903	0
7505	5	19.6556	-56.5005	-614.869	-75986.9	27738.5	-6707.34	245.113	423.582	0	0	0	0	0	0	0	200	903	0	0	0	0	0	0	0	603	903	0
7505	6	19.503	-55.2798	-615.48	-75254.5	27555.4	-6798.89	244.771	422.27	0	0	0	0	0	0	0	200	903	0	0	0	0	0	0	0	603	903	0
7505	7	18.4349	-55.1272	-613.649	-74979.9	27555.4	-6844.67	244.904	422.187	0	0	0	0	0	0	0	200	903	0	0	0	0	0	0	0	603	903	0
7505	8	20.1134	-55.7376	-613.038	-74888.3	27616.5	-6570.01	245.049	422.159	0	0	0	0	0	0	0	200	903	0	0	0	0	0	0	0	603	903	0
7505	9	18.4349	-54.2117	-610.597	-75163	27128.2	-6570.01	244.429	423.098	0	0	0	0	0	0	0	200	903	0	0	0	0	0	0	0	603	903	0
7506	0	19.1979	-52.5332	-611.513	-75071.4	27494.4	-6798.89	244.961	422.764	0	0	0	0	0	0	0	200	903	0	0	0	0	0	0	0	603	903	0
7506	1	18.8927	-54.0591	-610.902	-73972.8	27311.3	-6661.56	244.706	421.088	0	0	0	0	0	0	0	200	903	0	0	0	0	0	0	0	603	903	0
7506	2	18.1297	-51.7703	-609.681	-73423.5	27250.2	-6524.23	244.696	420.429	0	0	0	0	0	0	0	200	903	0	0	0	0	0	0	0	603	903	0
7506	3	17.672	-51.7703	-603.883	-73057.2	27738.5	-5929.14	245.934	420.979	0	0	0	0	0	0	0	200	903	0	0	0	0	0	0	0	603	903	0
7506	4	18.1297	-52.8384	-606.325	-72965.7	27433.3	-6341.13	245.245	420.341	0	0	0	0	0	0	0	200	903	0	0	0	0	0	0	0	603	903	0
7506	5	18.7401	-50.8548	-604.493	-73057.2	26823	-6570.01	244.373	420.857	0	0	0	0	0	0	0	200	903	0	0	0	0	0	0	0	603	903	0
7506	6	18.8927	-49.0237	-606.935	-72965.7	27006.1	-6432.68	244.496	420.22	0	0	0	0	0	0	0	200	903	0	0	0	0	0	0	0	603	903	0
7506	7	17.9771	-50.5496	-601.442	-72233.3	27006.1	-6203.8	244.902	420.1	0	0	0	0	0	0	0	200	903	0	0	0	0	0	0	0	603	903	0
7506	8	17.5194	-49.0237	-603.883	-71775.5	27372.3	-6203.8	245.327	418.857	0	0	0	0	0	0	0	200	903	0	0	0	0	0	0	0	603	903	0
7506	9	17.9771	-49.3289	-600.831	-70310.7	27128.2	-6158.02	245.151	417.022	0	0	0	0	0	0	0	200	903	0	0	0	0	0	0	0	603	903	0
7507	0	18.7401	-49.6341	-599.916	-70585.4	26945.1	-6066.47	244.915	417.659	0	0	0	0	0	0	0	200	903	0	0	0	0	0	0	0	603	903	0
7507	1	18.8927	-47.9556	-601.747	-71043.1	27250.2	-6020.69	245.285	418.061	0	0	0	0	0	0	0	200	903	0	0	0	0	0	0	0	603	903	0
7507	2	18.1297	-46.8875	-596.559	-70036	27189.2	-6066.47	245.577	417.4	0	0	0	0	0	0	0	200	903	0	0	0	0	0	0	0	603	903	0
7507	3	17.3668	-47.9556	-596.864	-70493.8	26456.8	-6203.8	244.326	418.107	0	0	0	0	0	0	0	200	903	0	0	0	0	0	0	0	603	903	0
7507	4	17.672	-45.3616	-595.643	-69395.1	27311.3	-5974.92	245.852	416.505	0	0	0	0	0	0	0	200	903	0	0	0	0	0	0	0	603	903	0
7507	5	17.8246	-45.6668	-593.812	-67747.2	26884	-5700.26	245.274	414.089	0	0	0	0	0	0	0	200	903	0	0	0	0	0	0	0	603	903	0
7507	6	19.3504	-45.5142	-594.117	-68662.7	26884	-5837.59	245.25	415.571	0	0	0	0	0	0	0	200	903	0	0	0	0	0	0	0	603	903	0
7507	7	18.1297	-45.0564	-590.761	-68937.4	26945.1	-5929.14	245.611	416.693	0	0	0	0	0	0	0	200	903	0	0	0	0	0	0	0	603	903	0
7507	8	17.3668	-43.2254	-592.592	-67564.1	27067.1	-5471.37	245.676	414.015	0	0	0	0	0	0	0	200	903	0	0	0	0	0	0	0	603	903	0
7507	9	17.8246	-44.7512	-589.54	-68388.1	26823	-5242.49	245.498	416.003	0	0	0	0	0	0	0	200	903	0	0	0	0	0	0	0	603	903	0
7508	0	18.1297	-42.615	-588.93	-67289.5	26639.9	-5654.48	245.234	414.257	0	0	0	0	0	0	0	200	903	0	0	0	0	0	0	0	603	903	0
7508	1	19.9608	-42.4624	-588.014	-66099.2	26884	-5654.48	245.72	412.411	0	0	0	0	0	0	0	200	903	0	0	0	0	0	0	0	603	903	0
7508	2	18.7401	-43.3779	-587.098	-66373.9	27067.1	-5562.93	246.103	413.054	0	0	0	0	0	0	0	200	903	0	0	0	0	0	0	0	603	903	0
7508	3	17.3668	-41.5469	-586.488	-66373.9	26639.9	-5654.48	245.423	413.172	0	0	0	0	0	0	0	200	903	0	0	0	0	0	0	0	603	903	0
7508	4	17.0616	-40.784	-583.436	-65000.6	26273.7	-5288.27	245.033	411.41	0	0	0	0	0	0	0	200	903	0	0	0	0	0	0	0	603	903	0
7508	5	18.2823	-40.021	-582.216	-65916.2	26639.9	-5608.7	245.756	413.216	0	0	0	0	0	0	0	200	903	0	0	0	0	0	0	0	603	903	0
7508	6	20.266	-39.2581	-582.216	-64909.1	26151.6	-5334.04	244.917	411.486	0	0	0	0	0	0	0	200	903	0	0	0	0	0	0	0	603	903	0
7508	7	18.7401	-39.7158	-580.079	-65183.7	26884	-5288.27	246.345	412.37	0	0	0	0	0	0	0	200	903	0	0	0	0	0	0	0	603	903	0
7508	8	17.3668	-38.6477	-580.69	-64542.9	26456.8	-5150.94	245.561	411.149	0	0	0	0	0	0	0	200	903	0	0	0	0	0	0	0	603	903	0
7508	9	17.8246	-38.0374	-576.417	-64634.4	26578.9	-5105.16	246.11	412.131	0	0	0	0	0	0	0	200	903	0	0	0	0	0	0	0	603	903	0
7509	0	18.5875	-37.8848	-574.586	-63993.6	26945.1	-5150.94	246.895	411.373	0	0	0	0	0	0	0	200	903	0	0	0	0	0	0	0	603	903	0
7509	1	18.5875	-37.1218	-575.197	-63718.9	26639.9	-5471.37	246.314	410.778	0	0	0	0	0	0	0	200	903	0	0	0	0	0	0	0	603	903	0
7509	2	17.9771	-36.2063	-572.45	-62528.7	26395.8	-5242.49	246.11	409.23	0	0	0	0	0	0	0	200	903	0	0	0	0	0	0	0	603	903	0
7509	3	17.672	-36.8167	-572.145	-61063.9	26090.6	-5242.49	245.601	406.728	0	0	0	0	0	0	0	200	903	0	0	0	0	0	0	0	603	903	0
7509	4	17.9771	-37.427	-569.093	-61796.3	26578.9	-5334.04	246.704	408.587	0	0	0	0	0	0	0	200	903	0	0	0	0	0	0	0	603	903	0
7509	5	18.1297	-36.6641	-568.178	-62162.5	26578.9	-5105.16	246.779	409.407	0	0	0	0	0	0	0	200	903	0	0	0	0	0	0	0	603	903	0
7509	6	19.9608	-36.0537	-568.178	-60972.3	26578.9	-5059.39	246.779	407.312	0	0	0	0	0	0	0	200	903	0	0	0	0	0	0	0	603	903	0
7509	7	18.8927	-37.2744	-562.99	-61338.5	26456.8	-5059.39	246.993	408.951	0	0	0	0	0	0	0	200	903	0	0	0	0	0	0	0	603	903	0
7509	8	18.1297	-35.1382	-565.736	-59965.2	25724.4	-5105.16	245.471	405.995	0	0	0	0	0	0	0	200	903	0	0	0	0	0	0	0	603	903	0
7509	9	17.3668	-34.9856	-561.159	-59415.9	26456.8	-5196.72	247.147	405.881	0	0	0	0	0	0	0	200	903	0	0	0	0	0	0	0	603	903	0
7510	0	18.2823	-34.9856	-559.327	-59141.3	26151.6	-4830.5	246.755	405.736	0	0	0	0	0	0	0	200	903	0	0	0	0	0	0	0	603	903	0
7510	1	18.8927	-34.833	-559.633	-59141.3	25968.5	-5013.61	246.403	405.679	0	0	0	0	0	0	0	200	903	0	0	0	0	0	0	0	603	903	0
7510	2	18.1297	-33.6123	-555.971	-58958.1	25785.4	-4967.83	246.379	406.046	0	0	0	0	0	0	0	200	903	0	0	0	0	0	0	0	603	903	0
7510	3	17.3668	-33.9175	-556.276	-58042.6	25968.5	-5013.61	246.683	404.341	0	0	0	0	0	0	0	200	903	0	0	0	0	0	0	0	603	903	0
7510	4	17.5194	-33.1546	-552.003	-57859.5	25480.2	-4693.18	246.16	404.817	0	0	0	0	0	0	0	200	903	0	0	0	0	0	0	0	603	903	0
7510	5	18.5875	-33.6123	-551.088	-57310.2	26090.6	-4784.73	247.344	403.995	0	0	0	0	0	0	0	200	903	0	0	0	0	0	0	0	603	903	0
7510	6	18.4349	-33.002	-551.393	-57310.2	26212.6	-4876.28	247.539	403.937	0	0	0	0	0	0	0	200	903	0	0	0	0	0	0	0	603	903	0
7510	7	17.8246	-32.239	-543.153	-56486.2	25602.3	-4830.5	247.136	403.997	0	0	0	0	0	0	0	200	903	0	0	0	0	0	0	0	603	903	0
7510	8	17.0616	-33.3071	-548.646	-56669.3	26029.5	-4738.95	247.443	403.289	0	0	0	0	0	0	0	200	903	0	0	0	0	0	0	0	603	903	0
7510	9	16.7564	-31.1709	-544.374	-55479.1	25846.4	-4601.62	247.479	401.914	0	0	0	0	0	0	0	200	903	0	0	0	0	0	0	0	603	903	0
7511	0	17.5194	-31.7813	-543.763	-55021.4	25785.4	-4601.62	247.42	401.186	0	0	0	0	0	0	0	200	903	0	0	0	0	0	0	0	603	903	0
7511	1	17.8246	-31.6287	-542.543	-55021.4	25297.1	-4555.85	246.627	401.414	0	0	0	0	0	0	0	200	903	0	0	0	0	0	0	0	603	903	0
7511	2	17.8246	-30.7132	-537.965	-55112.9	25236.1	-4235.41	246.91	402.447	0	0	0	0	0	0	0	200	903	0	0	0	0	0	0	0	603	903	0
7511	3	17.9771	-29.3399	-540.712	-54655.2	25785.4	-3823.43	247.688	401.08	0	0	0	0	0	0	0	200	903	0	0	0	0	0	0	0	603	903	0
7511	4	17.0616	-28.8821	-536.439	-53190.3	25541.3	-4052.31	247.613	399.154	0	0	0	0	0	0	0	200	903	0	0	0	0	0	0	0	603	903	0
7511	5	17.8246	-29.4925	-535.219	-52183.2	25785.4	-4052.31	248.177	397.499	0	0	0	0	0	0	0	200	903	0	0	0	0	0	0	0	603	903	0
7511	6	19.0453	-29.1873	-534.303	-52549.4	25236.1	-4372.74	247.232	398.351	0	0	0	0	0	0	0	200	903	0	0	0	0	0	0	0	603	903	0
7511	7	17.2142	-27.9666	-533.998	-52641	25236.1	-4143.86	247.259	398.579	0	0	0	0	0	0	0	200	903	0	0	0	0	0	0	0	603	903	0
7511	8	16.909	-26.8985	-533.082	-52091.7	25663.3	-4052.31	248.141	397.718	0	0	0	0	0	0	0	200	903	0	0	0	0	0	0	0	603	903	0
7511	9	16.2987	-27.5088	-530.031	-52274.8	25358.2	-4235.41	247.843	398.626	0	0	0	0	0	0	0	200	903	0	0	0	0	0	0	0	603	903	0
7512	0	17.2142	-26.1355	-528.81	-51450.8	25114	-4052.31	247.492	397.296	0	0	0	0	0	0	0	200	903	0	0	0	0	0	0	0	603	903	0
7512	1	17.3668	-26.4407	-528.81	-51176.2	25053	-3869.2	247.376	396.776	0	0	0	0	0	0	0	200	903	0	0	0	0	0	0	0	603	903	0
7512	2	17.2142	-26.2881	-528.81	-50718.4	25480.2	-3869.2	248.184	395.91	0	0	0	0	0	0	0	200	903	0	0	0	0	0	0	0	603	903	0
7512	3	15.9935	-25.6778	-526.674	-50901.5	25480.2	-3960.75	248.38	396.647	0	0	0	0	0	0	0	200	903	0	0	0	0	0	0	0	603	903	0
7512	4	17.2142	-24.7622	-525.148	-50535.3	24991.9	-4143.86	247.59	396.231	0	0	0	0	0	0	0	200	903	0	0	0	0	0	0	0	603	903	0
7512	5	16.4513	-23.6941	-523.012	-49345.1	24808.8	-3777.65	247.435	394.348	0	0	0	0	0	0	0	200	903	0	0	0	0	0	0	0	603	903	0
7512	6	17.0616	-25.3726	-523.012	-49894.4	25358.2	-3823.43	248.485	395.398	0	0	0	0	0	0	0	200	903	0	0	0	0	0	0	0	603	903	0
7512	7	16.1461	-24.3045	-523.317	-48978.9	25175	-3960.75	248.107	393.593	0	0	0	0	0	0	0	200	903	0	0	0	0	0	0	0	603	903	0
7512	8	16.909	-24.3045	-520.265	-49619.8	25358.2	-3823.43	248.741	395.374	0	0	0	0	0	0	0	200	903	0	0	0	0	0	0	0	603	903	0
7512	9	15.8409	-22.9312	-520.57	-48795.8	25175	-3457.21	248.361	393.735	0	0	0	0	0	0	0	200	903	0	0	0	0	0	0	0	603	903	0
7513	0	15.6883	-22.7786	-517.824	-48338	25236.1	-3640.32	248.735	393.348	0	0	0	0	0	0	0	200	903	0	0	0	0	0	0	0	603	903	0
7513	1	16.7564	-22.7786	-517.824	-47880.3	25419.2	-3869.2	249.089	392.464	0	0	0	0	0	0	0	200	903	0	0	0	0	0	0	0	603	903	0
7513	2	15.8409	-22.9312	-513.551	-47514.1	25358.2	-3731.87	249.378	392.521	0	0	0	0	0	0	0	200	903	0	0	0	0	0	0	0	603	903	0
7513	3	16.4513	-22.0156	-516.908	-47514.1	25236.1	-3640.32	248.821	391.92	0	0	0	0	0	0	0	200	903	0	0	0	0	0	0	0	603	903	0
7513	4	15.6883	-22.0156	-517.518	-47147.8	24808.8	-3274.11	247.938	391.104	0	0	0	0	0	0	0	200	903	0	0	0	0	0	0	0	603	903	0
7513	5	16.7564	-22.626	-513.856	-46781.6	24808.8	-3502.99	248.28	391.04	0	0	0	0	0	0	0	200	903	0	0	0	0	0	0	0	603	903	0
7513	6	15.5357	-21.4053	-509.279	-46415.4	25297.1	-3228.33	249.672	391.14	0	0	0	0	0	0	0	200	903	0	0	0	0	0	0	0	603	903	0
7513	7	16.2987	-22.1682	-512.025	-45774.5	25175	-3502.99	249.168	389.399	0	0	0	0	0	0	0	200	903	0	0	0	0	0	0	0	603	903	0
7513	8	16.7564	-21.4053	-512.025	-45133.7	24869.9	-3274.11	248.572	388.147	0	0	0	0	0	0	0	200	903	0	0	0	0	0	0	0	603	903	0
7513	9	17.8246	-21.5579	-509.279	-46049.2	25053	-3502.99	249.193	390.421	0	0	0	0	0	0	0	200	903	0	0	0	0	0	0	0	603	903	0
7514	0	15.2306	-20.3372	-510.499	-45774.5	25175	-3640.32	249.315	389.666	0	0	0	0	0	0	0	200	903	0	0	0	0	0	0	0	603	903	0
7514	1	15.6883	-20.1846	-507.753	-44584.4	25541.3	-3548.77	250.303	387.807	0	0	0	0	0	0	0	200	903	0	0	0	0	0	0	0	603	903	0
7514	2	16.1461	-20.4898	-507.142	-44309.7	24869.9	-3274.11	249.039	387.371	0	0	0	0	0	0	0	200	903	0	0	0	0	0	0	0	603	903	0
7514	3	17.672	-20.7949	-507.753	-43851.9	24869.9	-3365.66	248.98	386.365	0	0	0	0	0	0	0	200	903	0	0	0	0	0	0	0	603	903	0
7514	4	16.1461	-19.7268	-506.532	-44309.7	24930.9	-3365.66	249.219	387.477	0	0	0	0	0	0	0	200	903	0	0	0	0	0	0	0	603	903	0
7514	5	15.5357	-18.9639	-506.837	-43119.5	25053	-3228.33	249.43	385.076	0	0	0	0	0	0	0	200	903	0	0	0	0	0	0	0	603	903	0
7514	6	15.6883	-19.7268	-503.48	-43760.4	25053	-3136.78	249.76	386.916	0	0	0	0	0	0	0	200	903	0	0	0	0	0	0	0	603	903	0
7514	7	16.6039	-17.8958	-501.039	-42936.4	24869.9	-2862.12	249.637	385.695	0	0	0	0	0	0	0	200	903	0	0	0	0	0	0	0	603	903	0
7514	8	16.4513	-18.2009	-502.565	-42387.1	25114	-3182.56	249.972	384.342	0	0	0	0	0	0	0	200	903	0	0	0	0	0	0	0	603	903	0
7514	9	16.4513	-18.3535	-502.87	-42844.9	25358.2	-2907.9	250.427	385.201	0	0	0	0	0	0	0	200	903	0	0	0	0	0	0	0	603	903	0
7515	0	15.078	-17.2854	-503.48	-41013.8	25175	-2770.57	250.002	381.461	0	0	0	0	0	0	0	200	903	0	0	0	0	0	0	0	603	903	0
7515	1	16.6039	-18.0484	-500.734	-42387.1	24686.8	-2679.02	249.301	384.65	0	0	0	0	0	0	0	200	903	0	0	0	0	0	0	0	603	903	0
7515	2	15.078	-16.9802	-497.987	-41105.4	24869.9	-2953.67	249.941	382.543	0	0	0	0	0	0	0	200	903	0	0	0	0	0	0	0	603	903	0
7515	3	15.8409	-17.5906	-499.208	-40922.3	25114	-2862.12	250.308	381.974	0	0	0	0	0	0	0	200	903	0	0	0	0	0	0	0	603	903	0
7515	4	16.7564	-17.1328	-499.208	-41471.6	24747.8	-2770.57	249.574	383.075	0	0	0	0	0	0	0	200	903	0	0	0	0	0	0	0	603	903	0
7515	5	15.5357	-16.8277	-499.208	-41654.7	24869.9	-2862.12	249.819	383.442	0	0	0	0	0	0	0	200	903	0	0	0	0	0	0	0	603	903	0
7515	6	15.6883	-15.607	-497.377	-41013.8	25053	-3411.44	250.37	382.46	0	0	0	0	0	0	0	200	903	0	0	0	0	0	0	0	603	903	0
7515	7	16.7564	-15.7595	-495.851	-39823.6	24747.8	-2953.67	249.91	380.314	0	0	0	0	0	0	0	200	903	0	0	0	0	0	0	0	603	903	0
7515	8	15.3832	-16.3699	-494.935	-39091.2	25053	-2724.79	250.619	378.982	0	0	0	0	0	0	0	200	903	0	0	0	0	0	0	0	603	903	0
7515	9	15.8409	-16.5225	-496.766	-39457.4	25053	-2862.12	250.432	379.429	0	0	0	0	0	0	0	200	903	0	0	0	0	0	0	0	603	903	0
7516	0	15.078	-16.0647	-497.987	-39915.2	24930.9	-2816.34	250.063	380.153	0	0	0	0	0	0	0	200	903	0	0	0	0	0	0	0	603	903	0
7516	1	15.6883	-14.844	-495.851	-38999.6	25419.2	-2358.58	251.264	378.652	0	0	0	0	0	0	0	200	903	0	0	0	0	0	0	0	603	903	0
7516	2	15.078	-15.9121	-493.715	-39549	24747.8	-2679.02	250.126	380.105	0	0	0	0	0	0	0	200	903	0	0	0	0	0	0	0	603	903	0
7516	3	15.5357	-14.2337	-494.02	-38541.9	25053	-2541.69	250.713	378.017	0	0	0	0	0	0	0	200	903	0	0	0	0	0	0	0	603	903	0
7516	4	16.2987	-14.9966	-495.546	-38084.1	24930.9	-2724.79	250.31	376.853	0	0	0	0	0	0	0	200	903	0	0	0	0	0	0	0	603	903	0
7516	5	15.2306	-15.1492	-494.63	-38450.3	24869.9	-2816.34	250.28	377.736	0	0	0	0	0	0	0	200	903	0	0	0	0	0	0	0	603	903	0
7516	6	14.4676	-14.5388	-494.02	-38358.8	24930.9	-2587.46	250.465	377.646	0	0	0	0	0	0	0	200	903	0	0	0	0	0	0	0	603	903	0
7516	7	15.3832	-13.4707	-491.273	-38084.1	24564.7	-2724.79	250.002	377.521	0	0	0	0	0	0	0	200	903	0	0	0	0	0	0	0	603	903	0
7516	8	16.1461	-13.4707	-492.494	-36985.5	24747.8	-2495.91	250.25	375.098	0	0	0	0	0	0	0	200	903	0	0	0	0	0	0	0	603	903	0
7516	9	15.2306	-13.9285	-492.494	-36985.5	24991.9	-2679.02	250.746	375.098	0	0	0	0	0	0	0	200	903	0	0	0	0	0	0	0	603	903	0
7517	0	15.8409	-14.0811	-491.884	-36893.9	24869.9	-2679.02	250.56	375.005	0	0	0	0	0	0	0	200	903	0	0	0	0	0	0	0	603	903	0
7517	1	15.2306	-13.7759	-491.578	-37351.7	25114	-2404.36	251.089	375.983	0	0	0	0	0	0	0	200	903	0	0	0	0	0	0	0	603	903	0
7517	2	15.2306	-12.8604	-490.968	-36619.3	25236.1	-2495.91	251.401	374.586	0	0	0	0	0	0	0	200	903	0	0	0	0	0	0	0	603	903	0
7517	3	15.6883	-14.5388	-490.358	-36710.8	24869.9	-2358.58	250.718	374.865	0	0	0	0	0	0	0	200	903	0	0	0	0	0	0	0	603	903	0
7517	4	15.9935	-12.8604	-490.053	-35703.7	24625.7	-2450.13	250.251	372.857	0	0	0	0	0	0	0	200	903	0	0	0	0	0	0	0	603	903	0
7517	5	15.9935	-12.5552	-489.137	-35703.7	24991.9	-2175.48	251.094	372.993	0	0	0	0	0	0	0	200	903	0	0	0	0	0	0	0	603	903	0
7517	6	15.3832	-13.3181	-491.884	-34696.7	24564.7	-2679.02	249.94	370.538	0	0	0	0	0	0	0	200	903	0	0	0	0	0	0	0	603	903	0
7517	7	14.315	-12.8604	-489.137	-35429.1	24747.8	-2267.03	250.595	372.432	0	0	0	0	0	0	0	200	903	0	0	0	0	0	0	0	603	903	0
7517	8	15.8409	-12.7078	-488.527	-35246	24564.7	-2358.58	250.283	372.148	0	0	0	0	0	0	0	200	903	0	0	0	0	0	0	0	603	903	0
7517	9	15.6883	-12.0974	-488.832	-33781.1	24686.8	-1992.37	250.502	369.106	0	0	0	0	0	0	0	200	903	0	0	0	0	0	0	0	603	903	0
7518	0	16.2987	-11.9448	-489.442	-34147.4	25053	-2267.03	251.187	369.768	0	0	0	0	0	0	0	200	903	0	0	0	0	0	0	0	603	903	0
7518	1	14.9254	-12.5552	-490.053	-33964.3	24686.8	-2358.58	250.376	369.307	0	0	0	0	0	0	0	200	903	0	0	0	0	0	0	0	603	903	0
7518	2	17.5194	-12.0974	-488.832	-34513.6	24503.7	-2495.91	250.127	370.604	0	0	0	0	0	0	0	200	903	0	0	0	0	0	0	0	603	903	0
7518	3	15.078	-11.4871	-487.306	-34422	24747.8	-2312.8	250.785	370.637	0	0	0	0	0	0	0	200	903	0	0	0	0	0	0	0	603	903	0
7518	4	15.3832	-11.4871	-487.916	-33414.9	24503.7	-2267.03	250.221	368.485	0	0	0	0	0	0	0	200	903	0	0	0	0	0	0	0	603	903	0
7518	5	14.9254	-11.1819	-489.747	-33140.3	24808.8	-2404.36	250.656	367.668	0	0	0	0	0	0	0	200	903	0	0	0	0	0	0	0	603	903	0
7518	6	14.7728	-12.0974	-490.968	-33231.8	24564.7	-2312.8	250.033	367.686	0	0	0	0	0	0	0	200	903	0	0	0	0	0	0	0	603	903	0
7518	7	16.1461	-11.7923	-489.442	-32499.4	24442.6	-2221.25	249.94	366.401	0	0	0	0	0	0	0	200	903	0	0	0	0	0	0	0	603	903	0
7518	8	14.9254	-11.6397	-485.78	-33048.7	24625.7	-2129.7	250.693	368.032	0	0	0	0	0	0	0	200	903	0	0	0	0	0	0	0	603	903	0
7518	9	15.8409	-10.5716	-490.053	-33140.3	24503.7	-2450.13	250.002	367.626	0	0	0	0	0	0	0	200	903	0	0	0	0	0	0	0	603	903	0
7519	0	15.8409	-10.2664	-490.663	-32774.1	24747.8	-1763.49	250.437	366.795	0	0	0	0	0	0	0	200	903	0	0	0	0	0	0	0	603	903	0
7519	1	14.9254	-9.80861	-491.578	-32224.7	24808.8	-2129.7	250.468	365.554	0	0	0	0	0	0	0	200	903	0	0	0	0	0	0	0	603	903	0
7519	2	16.1461	-10.5716	-490.053	-31492.3	24381.6	-1900.82	249.753	364.263	0	0	0	0	0	0	0	200	903	0	0	0	0	0	0	0	603	903	0
7519	3	14.315	-10.419	-489.747	-31675.4	24442.6	-1992.37	249.909	364.677	0	0	0	0	0	0	0	200	903	0	0	0	0	0	0	0	603	903	0
7519	4	15.5357	-9.80861	-490.358	-32499.4	23954.3	-2175.48	248.851	366.277	0	0	0	0	0	0	0	200	903	0	0	0	0	0	0	0	603	903	0
7519	5	15.3832	-8.89309	-493.104	-31217.7	24564.7	-1946.59	249.816	363.308	0	0	0	0	0	0	0	200	903	0	0	0	0	0	0	0	603	903	0
7519	6	14.6202	-9.19826	-492.799	-31400.8	24686.8	-1809.26	250.095	363.719	0	0	0	0	0	0	0	200	903	0	0	0	0	0	0	0	603	903	0
7519	7	16.1461	-9.04567	-490.053	-31034.5	24259.5	-1855.04	249.504	363.329	0	0	0	0	0	0	0	200	903	0	0	0	0	0	0	0	603	903	0
7519	8	14.7728	-9.35085	-490.663	-30759.9	24503.7	-2038.15	249.94	362.691	0	0	0	0	0	0	0	200	903	0	0	0	0	0	0	0	603	903	0
7519	9	15.078	-8.7405	-491.884	-31034.5	24137.4	-1900.82	249.071	363.093	0	0	0	0	0	0	0	200	903	0	0	0	0	0	0	0	603	903	0
7520	0	15.078	-8.89309	-493.715	-30759.9	24381.6	-1671.94	249.384	362.303	0	0	0	0	0	0	0	200	903	0	0	0	0	0	0	0	603	903	0
7520	1	14.4676	-7.67238	-494.02	-30576.8	24991.9	-1671.94	250.589	361.894	0	0	0	0	0	0	0	200	903	0	0	0	0	0	0	0	603	903	0
7520	2	15.5357	-7.5198	-492.494	-29935.9	23954.3	-1717.71	248.639	360.784	0	0	0	0	0	0	0	200	903	0	0	0	0	0	0	0	603	903	0
7520	3	13.0943	-8.7405	-494.935	-29752.8	24259.5	-1717.71	249.016	360.115	0	0	0	0	0	0	0	200	903	0	0	0	0	0	0	0	603	903	0
7520	4	14.4676	-7.97756	-494.935	-29386.6	24686.8	-1351.5	249.879	359.375	0	0	0	0	0	0	0	200	903	0	0	0	0	0	0	0	603	903	0
7520	5	14.1625	-7.36721	-497.072	-30576.8	24015.4	-1626.16	248.314	361.514	0	0	0	0	0	0	0	200	903	0	0	0	0	0	0	0	603	903	0
7520	6	12.9417	-6.90944	-496.461	-29295	24442.6	-1534.61	249.234	359.008	0	0	0	0	0	0	0	200	903	0	0	0	0	0	0	0	603	903	0
7520	7	13.3995	-7.36721	-495.851	-29844.4	24442.6	-1488.83	249.294	360.188	0	0	0	0	0	0	0	200	903	0	0	0	0	0	0	0	603	903	0
7520	8	13.2469	-6.75686	-495.851	-28562.6	24259.5	-1488.83	248.925	357.603	0	0	0	0	0	0	0	200	903	0	0	0	0	0	0	0	603	903	0
7520	9	13.3995	-7.06203	-493.715	-28745.7	24808.8	-1488.83	250.249	358.223	0	0	0	0	0	0	0	200	903	0	0	0	0	0	0	0	603	903	0
7521	0	12.6366	-8.28273	-498.597	-28471.1	24320.5	-1443.05	248.778	357.102	0	0	0	0	0	0	0	200	903	0	0	0	0	0	0	0	603	903	0
7521	1	12.7892	-6.45168	-500.429	-29111.9	24015.4	-1351.5	247.99	358.174	0	0	0	0	0	0	0	200	903	0	0	0	0	0	0	0	603	903	0
7521	2	12.0262	-6.1465	-497.987	-29111.9	23954.3	-756.408	248.102	358.459	0	0	0	0	0	0	0	200	903	0	0	0	0	0	0	0	603	903	0
7521	3	12.6366	-5.99392	-499.208	-29203.5	24137.4	-1214.17	248.352	358.5	0	0	0	0	0	0	0	200	903	0	0	0	0	0	0	0	603	903	0
7521	4	13.5521	-5.38356	-501.039	-28288	24320.5	-1076.84	248.54	356.459	0	0	0	0	0	0	0	200	903	0	0	0	0	0	0	0	603	903	0
7521	5	13.5521	-5.99392	-499.818	-28013.3	24381.6	-1168.4	248.781	356.047	0	0	0	0	0	0	0	200	903	0	0	0	0	0	0	0	603	903	0
7521	6	11.4159	-5.38356	-502.87	-28196.4	24015.4	-1305.72	247.757	356.071	0	0	0	0	0	0	0	200	903	0	0	0	0	0	0	0	603	903	0
7521	7	11.2633	-4.62063	-502.565	-28379.5	24015.4	-1168.4	247.786	356.469	0	0	0	0	0	0	0	200	903	0	0	0	0	0	0	0	603	903	0
7521	8	11.721	-3.85769	-503.175	-28013.3	23954.3	-939.513	247.606	355.673	0	0	0	0	0	0	0	200	903	0	0	0	0	0	0	0	603	903	0
7521	9	11.4159	-4.16286	-505.311	-27280.9	24259.5	-893.737	248.009	353.988	0	0	0	0	0	0	0	200	903	0	0	0	0	0	0	0	603	903	0
7522	0	10.3478	-5.07839	-506.227	-27280.9	24320.5	-802.184	248.043	353.891	0	0	0	0	0	0	0	200	903	0	0	0	0	0	0	0	603	903	0
7522	1	10.3478	-4.77321	-506.227	-27555.5	23954.3	-1122.62	247.319	354.433	0	0	0	0	0	0	0	200	903	0	0	0	0	0	0	0	603	903	0
7522	2	10.9581	-4.46804	-506.227	-27921.8	24076.4	-802.184	247.561	355.157	0	0	0	0	0	0	0	200	903	0	0	0	0	0	0	0	603	903	0
7522	3	10.6529	-2.94216	-506.837	-27280.9	24320.5	-619.079	247.985	353.826	0	0	0	0	0	0	0	200	903	0	0	0	0	0	0	0	603	903	0
7522	4	10.3478	-2.4844	-508.973	-26823.1	24137.4	-847.961	247.424	352.7	0	0	0	0	0	0	0	200	903	0	0	0	0	0	0	0	603	903	0
7522	5	9.7374	-2.94216	-511.11	-26823.1	24320.5	-847.961	247.584	352.48	0	0	0	0	0	0	0	200	903	0	0	0	0	0	0	0	603	903	0
7522	6	10.9581	-3.09475	-508.668	-26090.7	23832.3	-756.408	246.852	351.292	0	0	0	0	0	0	0	200	903	0	0	0	0	0	0	0	603	903	0
7522	7	9.7374	-2.63698	-508.058	-26823.1	23893.3	-664.855	247.029	352.795	0	0	0	0	0	0	0	200	903	0	0	0	0	0	0	0	603	903	0
7522	8	10.0426	-2.4844	-510.194	-26365.4	23832.3	-481.75	246.712	351.677	0	0	0	0	0	0	0	200	903	0	0	0	0	0	0	0	603	903	0
7522	9	9.88999	-3.24733	-512.636	-26914.7	24015.4	-573.302	246.847	352.503	0	0	0	0	0	0	0	200	903	0	0	0	0	0	0	0	603	903	0
7523	0	9.27964	-2.02663	-513.856	-25999.1	24198.5	-161.315	247.092	350.596	0	0	0	0	0	0	0	200	903	0	0	0	0	0	0	0	603	903	0
7523	1	9.27964	-1.72146	-513.246	-25724.5	24137.4	-390.197	247.029	350.121	0	0	0	0	0	0	0	200	903	0	0	0	0	0	0	0	603	903	0
7523	2	8.66929	-2.02663	-513.551	-25541.4	23832.3	-527.526	246.407	349.735	0	0	0	0	0	0	0	200	903	0	0	0	0	0	0	0	603	903	0
7523	3	10.1952	-0.958516	-517.518	-26090.7	24015.4	-527.526	246.405	350.415	0	0	0	0	0	0	0	200	903	0	0	0	0	0	0	0	603	903	0
7523	4	8.97446	-0.195577	-514.772	-25816	23710.2	-573.302	246.06	350.15	0	0	0	0	0	0	0	200	903	0	0	0	0	0	0	0	603	903	0
7523	5	8.36411	-0.500753	-518.434	-24992.1	24076.4	-344.421	246.441	348.207	0	0	0	0	0	0	0	200	903	0	0	0	0	0	0	0	603	903	0
7523	6	8.05894	-1.41628	-516.908	-25175.2	23771.2	-207.091	245.987	348.703	0	0	0	0	0	0	0	200	903	0	0	0	0	0	0	0	603	903	0
7523	7	9.58481	-1.26369	-518.129	-25358.3	23771.2	-390.197	245.879	348.942	0	0	0	0	0	0	0	200	903	0	0	0	0	0	0	0	603	903	0
7523	8	9.58481	-0.195577	-520.57	-25632.9	24076.4	-161.315	246.25	349.24	0	0	0	0	0	0	0	200	903	0	0	0	0	0	0	0	603	903	0
7523	9	8.5167	1.63548	-519.655	-24534.3	24015.4	-207.091	246.214	347.213	0	0	0	0	0	0	0	200	903	0	0	0	0	0	0	0	603	903	0
7524	0	7.296	-1.26369	-522.401	-24992.1	24015.4	-481.75	245.971	347.841	0	0	0	0	0	0	0	200	903	0	0	0	0	0	0	0	603	903	0
7524	1	6.83823	1.02513	-521.486	-24351.2	23588.1	-481.75	245.233	346.696	0	0	0	0	0	0	0	200	903	0	0	0	0	0	0	0	603	903	0
7524	2	8.5167	0.567363	-522.706	-23161	23893.3	-207.091	245.711	344.31	0	0	0	0	0	0	0	200	903	0	0	0	0	0	0	0	603	903	0
7524	3	8.82187	0.567363	-525.148	-23801.9	23527.1	-207.091	244.801	345.324	0	0	0	0	0	0	0	200	903	0	0	0	0	0	0	0	603	903	0
7524	4	7.44858	0.872538	-523.622	-24809	23893.3	-390.197	245.631	347.38	0	0	0	0	0	0	0	200	903	0	0	0	0	0	0	0	603	903	0
7524	5	6.99082	1.94065	-526.063	-24534.3	24015.4	-161.315	245.651	346.638	0	0	0	0	0	0	0	200	903	0	0	0	0	0	0	0	603	903	0
7524	6	7.44858	1.17771	-526.063	-24625.9	24076.4	-298.644	245.767	346.812	0	0	0	0	0	0	0	200	903	0	0	0	0	0	0	0	603	903	0
7524	7	7.90635	3.16136	-526.674	-23710.3	23832.3	159.12	245.251	345.019	0	0	0	0	0	0	0	200	903	0	0	0	0	0	0	0	603	903	0
7524	8	7.90635	2.09324	-528.505	-23252.6	24076.4	21.7904	245.556	343.997	0	0	0	0	0	0	0	200	903	0	0	0	0	0	0	0	603	903	0
7524	9	7.44858	1.02513	-525.453	-23801.9	24381.6	67.5668	246.401	345.298	0	0	0	0	0	0	0	200	903	0	0	0	0	0	0	0	603	903	0
7525	0	7.14341	3.31394	-532.167	-23985	24198.5	21.7904	245.472	345.07	0	0	0	0	0	0	0	200	903	0	0	0	0	0	0	0	603	903	0
7525	1	6.07529	4.68724	-530.641	-23985	23649.2	-69.7623	244.567	345.2	0	0	0	0	0	0	0	200	903	0	0	0	0	0	0	0	603	903	0
7525	2	7.296	3.77171	-532.167	-23893.4	23344	-161.315	243.866	344.898	0	0	0	0	0	0	0	200	903	0	0	0	0	0	0	0	603	903	0
7525	3	7.44858	4.83982	-534.608	-23252.6	23405	67.5668	243.78	343.495	0	0	0	0	0	0	0	200	903	0	0	0	0	0	0	0	603	903	0
7525	4	5.9227	4.38206	-536.439	-23069.5	24015.4	250.672	244.768	343.005	0	0	0	0	0	0	0	200	903	0	0	0	0	0	0	0	603	903	0
7525	5	6.38047	4.53465	-533.388	-22703.2	24076.4	250.672	245.139	342.564	0	0	0	0	0	0	0	200	903	0	0	0	0	0	0	0	603	903	0
7525	6	5.9227	4.68724	-535.829	-24076.5	23893.3	250.672	244.591	344.933	0	0	0	0	0	0	0	200	903	0	0	0	0	0	0	0	603	903	0
7525	7	7.44858	6.21311	-537.66	-23252.6	23954.3	-69.7623	244.553	343.248	0	0	0	0	0	0	0	200	903	0	0	0	0	0	0	0	603	903	0
7525	8	6.53306	6.51829	-538.881	-23344.1	24503.7	159.12	245.471	343.32	0	0	0	0	0	0	0	200	903	0	0	0	0	0	0	0	603	903	0
7525	9	6.22788	6.82347	-541.017	-22611.7	24259.5	342.225	244.841	341.795	0	0	0	0	0	0	0	200	903	0	0	0	0	0	0	0	603	903	0
7526	0	7.90635	6.67088	-540.407	-22703.2	23588.1	-69.7623	243.649	342.011	0	0	0	0	0	0	0	200	903	0	0	0	0	0	0	0	603	903	0
7526	1	6.83823	7.12864	-540.712	-22703.2	23771.2	67.5668	243.963	341.988	0	0	0	0	0	0	0	200	903	0	0	0	0	0	0	0	603	903	0
7526	2	5.9227	7.73899	-542.238	-22886.4	24381.6	296.449	244.965	342.207	0	0	0	0	0	0	0	200	903	0	0	0	0	0	0	0	603	903	0
7526	3	6.68564	8.34935	-544.679	-22611.7	24442.6	388.001	244.875	341.514	0	0	0	0	0	0	0	200	903	0	0	0	0	0	0	0	603	903	0
7526	4	6.07529	8.19676	-546.51	-22977.9	24076.4	342.225	244.055	342.045	0	0	0	0	0	0	0	200	903	0	0	0	0	0	0	0	603	903	0
7526	5	7.44858	8.50193	-544.069	-21970.8	24015.4	159.12	244.14	340.382	0	0	0	0	0	0	0	200	903	0	0	0	0	0	0	0	603	903	0
7526	6	6.07529	9.11228	-546.51	-21879.3	24625.7	433.778	245.06	340.035	0	0	0	0	0	0	0	200	903	0	0	0	0	0	0	0	603	903	0
7526	7	6.38047	8.9597	-546.815	-22428.6	24259.5	-23.9859	244.365	341.017	0	0	0	0	0	0	0	200	903	0	0	0	0	0	0	0	603	903	0
7526	8	6.38047	9.11228	-550.172	-22520.1	23771.2	571.107	243.207	340.933	0	0	0	0	0	0	0	200	903	0	0	0	0	0	0	0	603	903	0
7526	9	6.07529	10.6382	-552.919	-22428.6	23527.1	433.778	242.551	340.564	0	0	0	0	0	0	0	200	903	0	0	0	0	0	0	0	603	903	0
7527	0	7.14341	10.7908	-550.477	-21421.5	24137.4	433.778	243.848	338.914	0	0	0	0	0	0	0	200	903	0	0	0	0	0	0	0	603	903	0
7527	1	5.61753	10.4856	-551.698	-21787.7	24076.4	388.001	243.641	339.492	0	0	0	0	0	0	0	200	903	0	0	0	0	0	0	0	603	903	0
7527	2	6.83823	10.1804	-552.919	-21513.1	24442.6	616.883	244.207	338.908	0	0	0	0	0	0	0	200	903	0	0	0	0	0	0	0	603	903	0
7527	3	6.99082	11.4011	-556.276	-21787.7	23954.3	479.554	243.062	339.167	0	0	0	0	0	0	0	200	903	0	0	0	0	0	0	0	603	903	0
7527	4	6.53306	12.164	-557.191	-20780.6	24198.5	433.778	243.429	337.295	0	0	0	0	0	0	0	200	903	0	0	0	0	0	0	0	603	903	0
7527	5	7.44858	10.7908	-555.055	-21604.6	23771.2	616.883	242.827	338.923	0	0	0	0	0	0	0	200	903	0	0	0	0	0	0	0	603	903	0
7527	6	5.77012	13.3847	-554.75	-21146.9	24381.6	616.883	243.951	338.12	0	0	0	0	0	0	0	200	903	0	0	0	0	0	0	0	603	903	0
7527	7	6.53306	12.7744	-557.496	-20872.2	24076.4	708.436	243.187	337.439	0	0	0	0	0	0	0	200	903	0	0	0	0	0	0	0	603	903	0
7527	8	6.68564	13.6899	-559.938	-20963.7	24259.5	708.436	243.325	337.439	0	0	0	0	0	0	0	200	903	0	0	0	0	0	0	0	603	903	0
7527	9	5.9227	13.5373	-560.853	-21513.1	24625.7	754.213	243.908	338.358	0	0	0	0	0	0	0	200	903	0	0	0	0	0	0	0	603	903	0
7528	0	6.83823	15.2158	-561.464	-20322.9	24381.6	662.66	243.425	336.196	0	0	0	0	0	0	0	200	903	0	0	0	0	0	0	0	603	903	0
7528	1	6.22788	14.6054	-562.379	-21146.9	24686.8	937.318	243.897	337.603	0	0	0	0	0	0	0	200	903	0	0	0	0	0	0	0	603	903	0
7528	2	6.53306	17.0469	-562.379	-20689.1	24198.5	983.094	243.029	336.789	0	0	0	0	0	0	0	200	903	0	0	0	0	0	0	0	603	903	0
7528	3	5.9227	16.7417	-565.126	-19773.6	24320.5	616.883	243.036	334.99	0	0	0	0	0	0	0	200	903	0	0	0	0	0	0	0	603	903	0
7528	4	5.9227	16.8943	-565.431	-20322.9	24808.8	799.989	243.876	335.942	0	0	0	0	0	0	0	200	903	0	0	0	0	0	0	0	603	903	0
7528	5	5.46494	17.0469	-562.684	-20963.7	24320.5	1166.2	243.222	337.257	0	0	0	0	0	0	0	200	903	0	0	0	0	0	0	0	603	903	0
7528	6	4.85459	18.2676	-565.736	-20139.8	24442.6	799.989	243.205	335.599	0	0	0	0	0	0	0	200	903	0	0	0	0	0	0	0	603	903	0
7528	7	6.07529	16.2839	-567.262	-20780.6	24259.5	754.213	242.766	336.633	0	0	0	0	0	0	0	200	903	0	0	0	0	0	0	0	603	903	0
7528	8	5.9227	19.0305	-570.314	-20231.3	24564.7	845.765	243.072	335.474	0	0	0	0	0	0	0	200	903	0	0	0	0	0	0	0	603	903	0
7528	9	6.07529	18.7253	-571.534	-19682	24930.9	1395.08	243.621	334.437	0	0	0	0	0	0	0	200	903	0	0	0	0	0	0	0	603	903	0
7529	0	6.38047	19.6408	-572.45	-20414.4	24808.8	799.989	243.338	335.661	0	0	0	0	0	0	0	200	903	0	0	0	0	0	0	0	603	903	0
7529	1	4.54941	20.4038	-573.366	-20780.6	24381.6	799.989	242.524	336.243	0	0	0	0	0	0	0	200	903	0	0	0	0	0	0	0	603	903	0
7529	2	5.15977	22.2348	-574.281	-20139.8	24503.7	1166.2	242.668	335.07	0	0	0	0	0	0	0	200	903	0	0	0	0	0	0	0	603	903	0
7529	3	4.85459	21.7771	-577.333	-20597.5	24747.8	1166.2	242.866	335.677	0	0	0	0	0	0	0	200	903	0	0	0	0	0	0	0	603	903	0
7529	4	3.78647	23.4555	-578.248	-20048.2	24686.8	1166.2	242.692	334.671	0	0	0	0	0	0	0	200	903	0	0	0	0	0	0	0	603	903	0
7529	5	4.702	23.1504	-574.891	-20506	24869.9	1349.31	243.26	335.669	0	0	0	0	0	0	0	200	903	0	0	0	0	0	0	0	603	903	0
7529	6	2.87095	22.0823	-578.248	-20506	24808.8	1257.75	242.903	335.462	0	0	0	0	0	0	0	200	903	0	0	0	0	0	0	0	603	903	0
7529	7	4.54941	24.2185	-579.164	-20780.6	24564.7	1395.08	242.414	335.88	0	0	0	0	0	0	0	200	903	0	0	0	0	0	0	0	603	903	0
7529	8	4.24424	25.7444	-583.436	-21055.3	24747.8	1395.08	242.417	336.088	0	0	0	0	0	0	0	200	903	0	0	0	0	0	0	0	603	903	0
7529	9	3.63389	23.9133	-582.826	-20780.6	25053	1211.98	242.985	335.655	0	0	0	0	0	0	0	200	903	0	0	0	0	0	0	0	603	903	0
7530	0	4.39683	27.1177	-582.826	-20048.2	24808.8	1486.63	242.566	334.398	0	0	0	0	0	0	0	200	903	0	0	0	0	0	0	0	603	903	0
7530	1	2.87095	26.8125	-579.469	-20048.2	24625.7	1852.85	242.497	334.598	0	0	0	0	0	0	0	200	903	0	0	0	0	0	0	0	603	903	0
7530	2	3.17612	25.134	-584.962	-20139.8	24808.8	1303.53	242.411	334.429	0	0	0	0	0	0	0	200	903	0	0	0	0	0	0	0	603	903	0
7530	3	4.09165	27.5754	-587.404	-20414.4	24747.8	1898.62	242.131	334.754	0	0	0	0	0	0	0	200	903	0	0	0	0	0	0	0	603	903	0
7530	4	2.56577	28.4909	-589.54	-20322.9	24930.9	1395.08	242.289	334.472	0	0	0	0	0	0	0	200	903	0	0	0	0	0	0	0	603	903	0
7530	5	2.71836	29.5591	-587.404	-20597.5	24625.7	1852.85	241.923	335.065	0	0	0	0	0	0	0	200	903	0	0	0	0	0	0	0	603	903	0
7530	6	3.17612	29.8642	-587.098	-20231.3	24686.8	1623.96	242.049	334.46	0	0	0	0	0	0	0	200	903	0	0	0	0	0	0	0	603	903	0
7530	7	4.702	30.322	-590.15	-19682	25114	1623.96	242.555	333.351	0	0	0	0	0	0	0	200	903	0	0	0	0	0	0	0	603	903	0
7530	8	3.17612	31.3901	-588.624	-19773.6	25236.1	1898.62	242.873	333.593	0	0	0	0	0	0	0	200	903	0	0	0	0	0	0	0	603	903	0
7530	9	2.41318	31.8479	-591.676	-20139.8	24991.9	1944.4	242.239	334.039	0	0	0	0	0	0	0	200	903	0	0	0	0	0	0	0	603	903	0
7531	0	1.65024	33.2212	-591.066	-20322.9	24869.9	1715.52	242.076	334.383	0	0	0	0	0	0	0	200	903	0	0	0	0	0	0	0	603	903	0
7531	1	2.87095	33.8315	-592.286	-19773.6	24625.7	1715.52	241.577	333.385	0	0	0	0	0	0	0	200	903	0	0	0	0	0	0	0	603	903	0
7531	2	2.2606	33.8315	-595.033	-19865.1	25053	1898.62	242.104	333.385	0	0	0	0	0	0	0	200	903	0	0	0	0	0	0	0	603	903	0
7531	3	1.95542	34.2893	-595.643	-19590.5	25053	2035.95	242.06	332.89	0	0	0	0	0	0	0	200	903	0	0	0	0	0	0	0	603	903	0
7531	4	1.49766	33.0686	-592.592	-19865.1	24564.7	2035.95	241.453	333.522	0	0	0	0	0	0	0	200	903	0	0	0	0	0	0	0	603	903	0
7531	5	1.95542	34.7471	-597.474	-20322.9	24930.9	1944.4	241.727	334.015	0	0	0	0	0	0	0	200	903	0	0	0	0	0	0	0	603	903	0
7531	6	2.56577	36.5781	-595.949	-20139.8	25358.2	1761.29	242.551	333.794	0	0	0	0	0	0	0	200	903	0	0	0	0	0	0	0	603	903	0
7531	7	2.41318	34.1367	-597.474	-19773.6	25236.1	2264.83	242.238	333.095	0	0	0	0	0	0	0	200	903	0	0	0	0	0	0	0	603	903	0
7531	8	1.49766	37.0359	-600.221	-19407.4	24686.8	2173.28	241.129	332.334	0	0	0	0	0	0	0	200	903	0	0	0	0	0	0	0	603	903	0
7531	9	1.03989	37.1885	-598.695	-18674.9	24808.8	2310.61	241.438	331.193	0	0	0	0	0	0	0	200	903	0	0	0	0	0	0	0	603	903	0
7532	0	1.80283	37.1885	-601.442	-19498.9	24930.9	2493.72	241.452	332.42	0	0	0	0	0	0	0	200	903	0	0	0	0	0	0	0	603	903	0
7532	1	2.41318	37.7988	-601.747	-19865.1	25236.1	2127.5	241.938	333.012	0	0	0	0	0	0	0	200	903	0	0	0	0	0	0	0	603	903	0
7532	2	1.95542	39.3247	-599.305	-19590.5	25114	2310.61	241.905	332.689	0	0	0	0	0	0	0	200	903	0	0	0	0	0	0	0	603	903	0
7532	3	1.34507	38.5617	-603.273	-19865.1	25053	2402.16	241.528	332.929	0	0	0	0	0	0	0	200	903	0	0	0	0	0	0	0	603	903	0
7532	4	0.582129	41.0032	-602.052	-18949.6	24991.9	2356.39	241.511	331.475	0	0	0	0	0	0	0	200	903	0	0	0	0	0	0	0	603	903	0
7532	5	1.65024	41.0032	-602.662	-18858	25236.1	2356.39	241.874	331.291	0	0	0	0	0	0	0	200	903	0	0	0	0	0	0	0	603	903	0
7532	6	1.03989	41.0032	-604.493	-19498.9	25175	2493.72	241.647	332.257	0	0	0	0	0	0	0	200	903	0	0	0	0	0	0	0	603	903	0
7532	7	0.734717	42.529	-604.188	-19315.8	25175	2402.16	241.668	331.97	0	0	0	0	0	0	0	200	903	0	0	0	0	0	0	0	603	903	0
7532	8	0.582129	42.9868	-606.019	-19407.4	25053	2356.39	241.34	332.024	0	0	0	0	0	0	0	200	903	0	0	0	0	0	0	0	603	903	0
7532	9	-0.333399	42.3764	-605.409	-19590.5	24930.9	2539.49	241.18	332.359	0	0	0	0	0	0	0	200	903	0	0	0	0	0	0	0	603	903	0
7533	0	1.34507	44.2075	-606.63	-19041.1	25297.1	3043.03	241.701	331.388	0	0	0	0	0	0	0	200	903	0	0	0	0	0	0	0	603	903	0
7533	1	1.80283	44.3601	-608.156	-18858	25053	2997.26	241.195	331.009	0	0	0	0	0	0	0	200	903	0	0	0	0	0	0	0	603	903	0
7533	2	0.734717	42.9868	-608.461	-18858	25419.2	2493.72	241.776	330.993	0	0	0	0	0	0	0	200	903	0	0	0	0	0	0	0	603	903	0
7533	3	0.429541	45.2756	-606.63	-19590.5	25053	2631.04	241.299	332.294	0	0	0	0	0	0	0	200	903	0	0	0	0	0	0	0	603	903	0
7533	4	0.582129	46.4963	-606.63	-19682	25114	2539.49	241.399	332.445	0	0	0	0	0	0	0	200	903	0	0	0	0	0	0	0	603	903	0
7533	5	0.582129	48.0222	-607.85	-18674.9	25724.4	2539.49	242.32	330.723	0	0	0	0	0	0	0	200	903	0	0	0	0	0	0	0	603	903	0
7533	6	1.34507	47.1067	-610.292	-18217.2	25419.2	2631.04	241.651	329.85	0	0	0	0	0	0	0	200	903	0	0	0	0	0	0	0	603	903	0
7533	7	-0.791162	47.717	-609.681	-18308.7	24991.9	2676.82	240.992	330.03	0	0	0	0	0	0	0	200	903	0	0	0	0	0	0	0	603	903	0
7533	8	0.124365	48.3274	-609.071	-18766.5	24747.8	2722.6	240.632	330.812	0	0	0	0	0	0	0	200	903	0	0	0	0	0	0	0	603	903	0
7533	9	1.19248	48.9377	-608.766	-18766.5	25236.1	2722.6	241.455	330.827	0	0	0	0	0	0	0	200	903	0	0	0	0	0	0	0	603	903	0
7534	0	3.17612	50.1584	-613.038	-18766.5	25541.3	2585.27	241.663	330.612	0	0	0	0	0	0	0	200	903	0	0	0	0	0	0	0	603	903	0
7534	1	0.582129	50.6162	-611.207	-19041.1	25297.1	2859.93	241.389	331.153	0	0	0	0	0	0	0	200	903	0	0	0	0	0	0	0	603	903	0
7534	2	-0.0282228	51.8369	-612.123	-18308.7	25114	2722.6	241.028	329.91	0	0	0	0	0	0	0	200	903	0	0	0	0	0	0	0	603	903	0
7534	3	-0.0282228	51.8369	-610.292	-18034.1	25724.4	2585.27	242.151	329.55	0	0	0	0	0	0	0	200	903	0	0	0	0	0	0	0	603	903	0
7534	4	0.887305	51.6843	-610.597	-17667.8	25602.3	2905.7	241.93	328.935	0	0	0	0	0	0	0	200	903	0	0	0	0	0	0	0	603	903	0
7534	5	1.03989	52.5998	-612.428	-18491.8	24808.8	2722.6	240.509	330.194	0	0	0	0	0	0	0	200	903	0	0	0	0	0	0	0	603	903	0
7534	6	1.65024	54.2783	-610.902	-18034.1	25236.1	2768.37	241.31	329.52	0	0	0	0	0	0	0	200	903	0	0	0	0	0	0	0	603	903	0
7534	7	0.124365	52.7524	-613.344	-18400.3	25053	2951.48	240.847	330	0	0	0	0	0	0	0	200	903	0	0	0	0	0	0	0	603	903	0
7534	8	0.276953	55.499	-610.292	-17484.7	25236.1	2859.93	241.351	328.65	0	0	0	0	0	0	0	200	903	0	0	0	0	0	0	0	603	903	0
7534	9	0.887305	55.3464	-610.292	-17759.4	25480.2	2905.7	241.751	329.1	0	0	0	0	0	0	0	200	903	0	0	0	0	0	0	0	603	903	0
7535	0	0.582129	56.1094	-612.123	-17851	25480.2	2447.94	241.626	329.162	0	0	0	0	0	0	0	200	903	0	0	0	0	0	0	0	603	903	0
7535	1	-0.180811	57.1775	-611.818	-17759.4	25114	2768.37	241.048	329.027	0	0	0	0	0	0	0	200	903	0	0	0	0	0	0	0	603	903	0
7535	2	1.34507	57.7878	-612.428	-17759.4	25297.1	3043.03	241.306	328.998	0	0	0	0	0	0	0	200	903	0	0	0	0	0	0	0	603	903	0
7535	3	-0.333399	58.2456	-610.902	-17851	24869.9	2905.7	240.71	329.221	0	0	0	0	0	0	0	200	903	0	0	0	0	0	0	0	603	903	0
7535	4	1.34507	59.1611	-611.207	-17301.6	25480.2	2722.6	241.688	328.307	0	0	0	0	0	0	0	200	903	0	0	0	0	0	0	0	603	903	0
7535	5	1.65024	59.1611	-613.344	-17210.1	25236.1	3043.03	241.145	328.059	0	0	0	0	0	0	0	200	903	0	0	0	0	0	0	0	603	903	0
7535	6	0.276953	57.9404	-611.207	-17210.1	25114	2859.93	241.089	328.158	0	0	0	0	0	0	0	200	903	0	0	0	0	0	0	0	603	903	0
7535	7	1.80283	60.3818	-610.292	-17851	24930.9	2997.26	240.851	329.25	0	0	0	0	0	0	0	200	903	0	0	0	0	0	0	0	603	903	0
7535	8	-0.180811	61.4499	-609.071	-17301.6	24991.9	2859.93	241.033	328.407	0	0	0	0	0	0	0	200	903	0	0	0	0	0	0	0	603	903	0
7535	9	0.887305	60.9922	-610.597	-16843.9	24991.9	2997.26	240.93	327.586	0	0	0	0	0	0	0	200	903	0	0	0	0	0	0	0	603	903	0
7536	0	0.276953	62.518	-611.818	-16386.1	25236.1	3088.81	241.248	326.783	0	0	0	0	0	0	0	200	903	0	0	0	0	0	0	0	603	903	0
7536	1	-0.791162	62.518	-610.597	-16569.2	24686.8	2905.7	240.431	327.136	0	0	0	0	0	0	0	200	903	0	0	0	0	0	0	0	603	903	0
7536	2	-0.180811	61.1448	-608.156	-16569.2	24747.8	3134.58	240.693	327.245	0	0	0	0	0	0	0	200	903	0	0	0	0	0	0	0	603	903	0
7536	3	0.276953	63.4336	-610.597	-16843.9	25114	3317.69	241.13	327.586	0	0	0	0	0	0	0	200	903	0	0	0	0	0	0	0	603	903	0
7536	4	2.56577	65.2646	-609.681	-16294.6	25297.1	3134.58	241.492	326.726	0	0	0	0	0	0	0	200	903	0	0	0	0	0	0	0	603	903	0
7536	5	0.887305	65.112	-605.714	-16752.3	24808.8	3546.57	240.958	327.657	0	0	0	0	0	0	0	200	903	0	0	0	0	0	0	0	603	903	0
7536	6	-0.485986	66.7905	-609.376	-16477.7	24381.6	3363.47	240.011	327.04	0	0	0	0	0	0	0	200	903	0	0	0	0	0	0	0	603	903	0
7536	7	-0.94375	67.0957	-608.156	-15195.9	24747.8	3317.69	240.693	324.987	0	0	0	0	0	0	0	200	903	0	0	0	0	0	0	0	603	903	0
7536	8	0.582129	65.112	-607.85	-16019.9	24869.9	3317.69	240.914	326.355	0	0	0	0	0	0	0	200	903	0	0	0	0	0	0	0	603	903	0
7536	9	-0.0282228	67.4009	-608.156	-16477.7	24503.7	3363.47	240.292	327.094	0	0	0	0	0	0	0	200	903	0	0	0	0	0	0	0	603	903	0
7537	0	0.429541	69.0793	-604.493	-16569.2	24564.7	3226.14	240.637	327.41	0	0	0	0	0	0	0	200	903	0	0	0	0	0	0	0	603	903	0
7537	1	-1.09634	69.5371	-605.714	-16203	24564.7	3455.02	240.555	326.75	0	0	0	0	0	0	0	200	903	0	0	0	0	0	0	0	603	903	0
7537	2	-0.94375	70.3	-604.188	-15928.4	24930.9	3317.69	241.263	326.363	0	0	0	0	0	0	0	200	903	0	0	0	0	0	0	0	603	903	0
7537	3	-0.485986	70.4526	-603.883	-15379	24442.6	3134.58	240.476	325.467	0	0	0	0	0	0	0	200	903	0	0	0	0	0	0	0	603	903	0
7537	4	-0.333399	71.063	-605.104	-15104.4	24747.8	3455.02	240.898	324.962	0	0	0	0	0	0	0	200	903	0	0	0	0	0	0	0	603	903	0
7537	5	-1.85928	71.6733	-606.019	-15104.4	24625.7	3546.57	240.635	324.924	0	0	0	0	0	0	0	200	903	0	0	0	0	0	0	0	603	903	0
7537	6	-2.01187	72.2837	-603.273	-15836.8	24320.5	3363.47	240.314	326.251	0	0	0	0	0	0	0	200	903	0	0	0	0	0	0	0	603	903	0
7537	7	-1.24893	73.1992	-601.137	-14097.3	24381.6	3317.69	240.559	323.451	0	0	0	0	0	0	0	200	903	0	0	0	0	0	0	0	603	903	0
7537	8	-1.40151	73.657	-599.916	-15012.8	24320.5	3958.56	240.54	325.025	0	0	0	0	0	0	0	200	903	0	0	0	0	0	0	0	603	903	0
7537	9	-0.94375	73.657	-602.357	-14738.2	24259.5	3729.68	240.274	324.467	0	0	0	0	0	0	0	200	903	0	0	0	0	0	0	0	603	903	0
7538	0	-2.62222	73.657	-600.831	-14738.2	24259.5	3638.12	240.377	324.53	0	0	0	0	0	0	0	200	903	0	0	0	0	0	0	0	603	903	0
7538	1	-2.46963	74.8777	-598.39	-15470.6	24137.4	3546.57	240.337	325.854	0	0	0	0	0	0	0	200	903	0	0	0	0	0	0	0	603	903	0
7538	2	-1.70669	75.7932	-597.474	-14646.6	23710.2	3683.9	239.684	324.514	0	0	0	0	0	0	0	200	903	0	0	0	0	0	0	0	603	903	0
7538	3	-1.70669	76.8613	-598.39	-14097.3	24381.6	3729.68	240.745	323.559	0	0	0	0	0	0	0	200	903	0	0	0	0	0	0	0	603	903	0
7538	4	-1.85928	76.251	-594.423	-13822.6	24015.4	3683.9	240.401	323.254	0	0	0	0	0	0	0	200	903	0	0	0	0	0	0	0	603	903	0
7538	5	-3.69033	76.251	-596.559	-14280.4	23588.1	3500.8	239.54	323.938	0	0	0	0	0	0	0	200	903	0	0	0	0	0	0	0	603	903	0
7538	6	-3.23257	76.5561	-594.423	-14829.7	24076.4	3821.23	240.504	324.948	0	0	0	0	0	0	0	200	903	0	0	0	0	0	0	0	603	903	0
7538	7	-2.31704	78.082	-594.117	-13273.3	23954.3	3958.56	240.319	322.341	0	0	0	0	0	0	0	200	903	0	0	0	0	0	0	0	603	903	0
7538	8	-2.01187	77.0139	-593.812	-14188.8	23771.2	3775.45	240.032	323.895	0	0	0	0	0	0	0	200	903	0	0	0	0	0	0	0	603	903	0
7538	9	-0.94375	79.4553	-591.981	-14005.7	23649.2	3729.68	239.949	323.659	0	0	0	0	0	0	0	200	903	0	0	0	0	0	0	0	603	903	0
7539	0	-3.69033	79.7605	-592.897	-13273.3	23710.2	4233.22	239.99	322.387	0	0	0	0	0	0	0	200	903	0	0	0	0	0	0	0	603	903	0
7539	1	-3.99551	78.8449	-588.624	-13273.3	24015.4	3912.78	240.799	322.55	0	0	0	0	0	0	0	200	903	0	0	0	0	0	0	0	603	903	0
7539	2	-3.07998	80.0657	-588.319	-13822.6	23344	3958.56	239.679	323.495	0	0	0	0	0	0	0	200	903	0	0	0	0	0	0	0	603	903	0
7539	3	-3.38516	81.2864	-589.845	-13731.1	23221.9	3821.23	239.37	323.279	0	0	0	0	0	0	0	200	903	0	0	0	0	0	0	0	603	903	0
7539	4	-4.45327	81.7441	-588.319	-13181.8	23282.9	3775.45	239.575	322.406	0	0	0	0	0	0	0	200	903	0	0	0	0	0	0	0	603	903	0
7539	5	-4.30068	82.0493	-585.267	-13181.8	23221.9	4004.33	239.677	322.523	0	0	0	0	0	0	0	200	903	0	0	0	0	0	0	0	603	903	0
7539	6	-3.53774	82.3545	-585.267	-13090.2	23466.1	4004.33	240.095	322.366	0	0	0	0	0	0	0	200	903	0	0	0	0	0	0	0	603	903	0
7539	7	-3.69033	82.6596	-581.3	-13273.3	23160.9	3775.45	239.843	322.834	0	0	0	0	0	0	0	200	903	0	0	0	0	0	0	0	603	903	0
7539	8	-3.53774	82.9648	-583.436	-13090.2	23160.9	3775.45	239.697	322.436	0	0	0	0	0	0	0	200	903	0	0	0	0	0	0	0	603	903	0
7539	9	-4.75845	84.1855	-581.605	-13273.3	23405	4050.11	240.242	322.822	0	0	0	0	0	0	0	200	903	0	0	0	0	0	0	0	603	903	0
7540	0	-5.21621	84.4907	-578.859	-11991.6	23221.9	4004.33	240.117	320.716	0	0	0	0	0	0	0	200	903	0	0	0	0	0	0	0	603	903	0
7540	1	-3.23257	84.7959	-577.333	-12724	22977.8	3821.23	239.8	322.039	0	0	0	0	0	0	0	200	903	0	0	0	0	0	0	0	603	903	0
7540	2	-3.38516	85.1011	-578.554	-12083.1	22855.7	3958.56	239.505	320.885	0	0	0	0	0	0	0	200	903	0	0	0	0	0	0	0	603	903	0
7540	3	-3.53774	85.864	-576.417	-12449.3	23160.9	3958.56	240.181	321.598	0	0	0	0	0	0	0	200	903	0	0	0	0	0	0	0	603	903	0
7540	4	-4.60586	86.1692	-574.281	-12083.1	22794.7	4187.44	239.693	321.04	0	0	0	0	0	0	0	200	903	0	0	0	0	0	0	0	603	903	0
7540	5	-4.91104	86.6269	-572.145	-12724	22428.5	3775.45	239.201	322.239	0	0	0	0	0	0	0	200	903	0	0	0	0	0	0	0	603	903	0
7540	6	-3.69033	87.8476	-569.703	-11716.9	22672.6	3775.45	239.797	320.567	0	0	0	0	0	0	0	200	903	0	0	0	0	0	0	0	603	903	0
7540	7	-3.69033	87.3899	-570.314	-11716.9	23038.8	3867.01	240.397	320.545	0	0	0	0	0	0	0	200	903	0	0	0	0	0	0	0	603	903	0
7540	8	-4.75845	88.0002	-569.093	-11533.8	22550.5	3729.68	239.625	320.267	0	0	0	0	0	0	0	200	903	0	0	0	0	0	0	0	603	903	0
7540	9	-4.1481	88.458	-563.295	-12174.7	22794.7	4004.33	240.467	321.613	0	0	0	0	0	0	0	200	903	0	0	0	0	0	0	0	603	903	0
7541	0	-5.06362	90.1365	-561.769	-11076.1	22428.5	4187.44	239.925	319.716	0	0	0	0	0	0	0	200	903	0	0	0	0	0	0	0	603	903	0
7541	1	-4.30068	90.1365	-562.074	-11625.4	22245.4	4050.11	239.577	320.683	0	0	0	0	0	0	0	200	903	0	0	0	0	0	0	0	603	903	0
7541	2	-4.30068	90.289	-563.295	-11076.1	22367.4	4050.11	239.708	319.663	0	0	0	0	0	0	0	200	903	0	0	0	0	0	0	0	603	903	0
7541	3	-5.21621	90.289	-561.159	-10709.8	22306.4	4141.66	239.751	319.085	0	0	0	0	0	0	0	200	903	0	0	0	0	0	0	0	603	903	0
7541	4	-5.21621	90.7468	-556.581	-11076.1	22123.3	4050.11	239.749	319.9	0	0	0	0	0	0	0	200	903	0	0	0	0	0	0	0	603	903	0
7541	5	-4.60586	91.2046	-554.139	-11533.8	22062.2	3958.56	239.814	320.814	0	0	0	0	0	0	0	200	903	0	0	0	0	0	0	0	603	903	0
7541	6	-4.45327	92.4253	-550.172	-11076.1	22184.3	4004.33	240.322	320.132	0	0	0	0	0	0	0	200	903	0	0	0	0	0	0	0	603	903	0
7541	7	-4.45327	92.5779	-554.445	-11076.1	22245.4	4187.44	240.122	319.977	0	0	0	0	0	0	0	200	903	0	0	0	0	0	0	0	603	903	0
7541	8	-5.3688	92.883	-552.308	-9977.42	21818.1	4187.44	239.503	318.065	0	0	0	0	0	0	0	200	903	0	0	0	0	0	0	0	603	903	0
7541	9	-5.97915	92.7304	-548.341	-10069	21574	4050.11	239.344	318.363	0	0	0	0	0	0	0	200	903	0	0	0	0	0	0	0	603	903	0
7542	0	-4.60586	93.3408	-546.205	-10526.7	21696	4050.11	239.721	319.273	0	0	0	0	0	0	0	200	903	0	0	0	0	0	0	0	603	903	0
7542	1	-4.75845	93.4934	-546.205	-10984.5	21207.8	3912.78	238.827	320.111	0	0	0	0	0	0	0	200	903	0	0	0	0	0	0	0	603	903	0
7542	2	-4.1481	94.4089	-540.712	-10160.5	21818.1	3821.23	240.351	318.791	0	0	0	0	0	0	0	200	903	0	0	0	0	0	0	0	603	903	0
7542	3	-5.52139	93.3408	-540.712	-10709.8	21329.8	3867.01	239.448	319.807	0	0	0	0	0	0	0	200	903	0	0	0	0	0	0	0	603	903	0
7542	4	-6.28433	95.0193	-536.744	-9611.21	21635	3683.9	240.308	317.906	0	0	0	0	0	0	0	200	903	0	0	0	0	0	0	0	603	903	0
7542	5	-5.06362	95.3244	-534.913	-8878.79	21635	3958.56	240.446	316.599	0	0	0	0	0	0	0	200	903	0	0	0	0	0	0	0	603	903	0
7542	6	-4.1481	95.9348	-535.219	-9153.45	21268.8	4004.33	239.739	317.102	0	0	0	0	0	0	0	200	903	0	0	0	0	0	0	0	603	903	0
7542	7	-5.3688	95.477	-531.251	-9977.42	21146.7	3958.56	239.806	318.781	0	0	0	0	0	0	0	200	903	0	0	0	0	0	0	0	603	903	0
7542	8	-5.97915	96.3926	-530.946	-9611.21	20841.5	3958.56	239.254	318.102	0	0	0	0	0	0	0	200	903	0	0	0	0	0	0	0	603	903	0
7542	9	-6.74209	96.8503	-528.505	-9702.77	21024.6	4004.33	239.781	318.359	0	0	0	0	0	0	0	200	903	0	0	0	0	0	0	0	603	903	0
7543	0	-5.06362	97.3081	-524.232	-9153.45	20963.6	4141.66	239.989	317.461	0	0	0	0	0	0	0	200	903	0	0	0	0	0	0	0	603	903	0
7543	1	-5.67397	98.071	-523.622	-8421.02	20841.5	3912.78	239.803	316.082	0	0	0	0	0	0	0	200	903	0	0	0	0	0	0	0	603	903	0
7543	2	-5.06362	96.5451	-514.467	-8878.79	20536.4	3729.68	239.918	317.258	0	0	0	0	0	0	0	200	903	0	0	0	0	0	0	0	603	903	0
7543	3	-5.82656	98.834	-519.349	-9336.55	20719.5	4050.11	239.895	317.977	0	0	0	0	0	0	0	200	903	0	0	0	0	0	0	0	603	903	0
7543	4	-6.28433	99.2917	-515.687	-8695.69	20719.5	3821.23	240.178	316.862	0	0	0	0	0	0	0	200	903	0	0	0	0	0	0	0	603	903	0
7543	5	-5.21621	99.4443	-512.941	-9061.9	20719.5	3775.45	240.394	317.667	0	0	0	0	0	0	0	200	903	0	0	0	0	0	0	0	603	903	0
7543	6	-6.28433	99.9021	-510.805	-8054.81	20048.1	3821.23	239.248	315.769	0	0	0	0	0	0	0	200	903	0	0	0	0	0	0	0	603	903	0
7543	7	-6.28433	99.7495	-505.311	-8146.37	20292.2	3912.78	240.158	316.122	0	0	0	0	0	0	0	200	903	0	0	0	0	0	0	0	603	903	0
7543	8	-5.97915	97.6133	-506.532	-8329.47	20475.3	4095.89	240.423	316.444	0	0	0	0	0	0	0	200	903	0	0	0	0	0	0	0	603	903	0
7543	9	-6.28433	100.36	-502.565	-8695.69	20292.2	4187.44	240.377	317.303	0	0	0	0	0	0	0	200	903	0	0	0	0	0	0	0	603	903	0
7544	0	-5.82656	100.512	-498.903	-7688.6	20048.1	3958.56	240.184	315.411	0	0	0	0	0	0	0	200	903	0	0	0	0	0	0	0	603	903	0
7544	1	-5.3688	98.6814	-497.682	-8146.37	19926	3958.56	240.038	316.369	0	0	0	0	0	0	0	200	903	0	0	0	0	0	0	0	603	903	0
7544	2	-5.67397	101.275	-490.053	-7230.84	19742.9	4050.11	240.287	314.755	0	0	0	0	0	0	0	200	903	0	0	0	0	0	0	0	603	903	0
7544	3	-7.04727	100.512	-490.053	-7413.95	19865	3638.12	240.536	315.129	0	0	0	0	0	0	0	200	903	0	0	0	0	0	0	0	603	903	0
7544	4	-7.50503	100.818	-486.39	-7688.6	19437.7	4004.33	239.963	315.807	0	0	0	0	0	0	0	200	903	0	0	0	0	0	0	0	603	903	0
7544	5	-6.5895	100.818	-483.949	-7780.16	19376.7	4004.33	240.039	316.076	0	0	0	0	0	0	0	200	903	0	0	0	0	0	0	0	603	903	0
7544	6	-6.13174	100.97	-481.508	-7413.95	19193.6	4050.11	239.861	315.397	0	0	0	0	0	0	0	200	903	0	0	0	0	0	0	0	603	903	0
7544	7	-6.74209	99.4443	-476.32	-7780.16	19620.8	3821.23	241.193	316.334	0	0	0	0	0	0	0	200	903	0	0	0	0	0	0	0	603	903	0
7544	8	-7.35244	101.275	-473.878	-6956.18	18766.3	3775.45	239.602	314.679	0	0	0	0	0	0	0	200	903	0	0	0	0	0	0	0	603	903	0
7544	9	-7.65762	100.818	-468.385	-6498.42	19254.6	3958.56	241.109	313.874	0	0	0	0	0	0	0	200	903	0	0	0	0	0	0	0	603	903	0
7545	0	-6.5895	100.207	-464.113	-6498.42	18644.3	3821.23	240.172	314.002	0	0	0	0	0	0	0	200	903	0	0	0	0	0	0	0	603	903	0
7545	1	-7.19985	99.7495	-461.366	-7230.84	18522.2	3592.35	240.146	315.673	0	0	0	0	0	0	0	200	903	0	0	0	0	0	0	0	603	903	0
7545	2	-8.11538	100.207	-457.704	-6406.87	18644.3	4004.33	240.734	313.998	0	0	0	0	0	0	0	200	903	0	0	0	0	0	0	0	603	903	0
7545	3	-6.13174	100.207	-453.126	-6498.42	18522.2	3912.78	240.876	314.341	0	0	0	0	0	0	0	200	903	0	0	0	0	0	0	0	603	903	0
7545	4	-7.96279	99.4443	-447.938	-6132.21	18033.9	3912.78	240.26	313.69	0	0	0	0	0	0	0	200	903	0	0	0	0	0	0	0	603	903	0
7545	5	-7.50503	99.2917	-443.666	-5674.44	18033.9	3729.68	240.648	312.79	0	0	0	0	0	0	0	200	903	0	0	0	0	0	0	0	603	903	0
7545	6	-7.04727	99.9021	-441.835	-5857.55	18278.1	3546.57	241.369	313.257	0	0	0	0	0	0	0	200	903	0	0	0	0	0	0	0	603	903	0
7545	7	-8.57314	98.6814	-438.783	-6040.65	17728.8	3729.68	240.404	313.767	0	0	0	0	0	0	0	200	903	0	0	0	0	0	0	0	603	903	0
7545	8	-7.96279	98.9865	-430.543	-5949.1	17850.8	3729.68	241.461	313.818	0	0	0	0	0	0	0	200	903	0	0	0	0	0	0	0	603	903	0
7545	9	-8.87832	98.834	-423.829	-6040.65	17484.6	3729.68	241.254	314.253	0	0	0	0	0	0	0	200	903	0	0	0	0	0	0	0	603	903	0
7546	0	-8.11538	98.2236	-423.829	-5308.23	17179.4	3546.57	240.534	312.524	0	0	0	0	0	0	0	200	903	0	0	0	0	0	0	0	603	903	0
7546	1	-8.42056	96.8503	-421.083	-4942.02	17362.5	3821.23	241.233	311.736	0	0	0	0	0	0	0	200	903	0	0	0	0	0	0	0	603	903	0
7546	2	-9.48867	95.9348	-414.369	-5308.23	17301.5	3638.12	241.754	312.81	0	0	0	0	0	0	0	200	903	0	0	0	0	0	0	0	603	903	0
7546	3	-9.79385	95.6296	-407.655	-5491.34	16874.3	3729.68	241.393	313.471	0	0	0	0	0	0	0	200	903	0	0	0	0	0	0	0	603	903	0
7546	4	-8.72573	94.5615	-405.214	-5308.23	16080.8	3683.9	239.685	313.1	0	0	0	0	0	0	0	200	903	0	0	0	0	0	0	0	603	903	0
7546	5	-8.57314	95.1719	-399.721	-4942.02	16569.1	3638.12	241.452	312.364	0	0	0	0	0	0	0	200	903	0	0	0	0	0	0	0	603	903	0
7546	6	-9.1835	94.2563	-395.448	-4667.36	16630.1	3546.57	242.054	311.803	0	0	0	0	0	0	0	200	903	0	0	0	0	0	0	0	603	903	0
7546	7	-10.099	92.7304	-390.26	-4118.05	16569.1	3409.24	242.457	310.552	0	0	0	0	0	0	0	200	903	0	0	0	0	0	0	0	603	903	0
7546	8	-11.6249	93.0356	-382.631	-4026.49	15836.7	3317.69	241.389	310.523	0	0	0	0	0	0	0	200	903	0	0	0	0	0	0	0	603	903	0
7546	9	-10.2516	91.052	-380.8	-4484.26	15714.6	3134.58	241.267	311.776	0	0	0	0	0	0	0	200	903	0	0	0	0	0	0	0	603	903	0
7547	0	-10.862	90.7468	-372.56	-3934.94	15165.3	3500.8	240.706	310.562	0	0	0	0	0	0	0	200	903	0	0	0	0	0	0	0	603	903	0
7547	1	-10.099	88.9157	-370.424	-4301.15	15836.7	3317.69	242.753	311.611	0	0	0	0	0	0	0	200	903	0	0	0	0	0	0	0	603	903	0
7547	2	-11.1671	89.2209	-365.236	-3660.28	15592.5	3363.47	242.692	310.022	0	0	0	0	0	0	0	200	903	0	0	0	0	0	0	0	603	903	0
7547	3	-11.7775	87.695	-356.691	-2470.1	14982.2	3317.69	242.003	306.925	0	0	0	0	0	0	0	200	903	0	0	0	0	0	0	0	603	903	0
7547	4	-10.2516	86.7795	-351.503	-3385.62	14677	3226.14	241.755	309.632	0	0	0	0	0	0	0	200	903	0	0	0	0	0	0	0	603	903	0
7547	5	-11.7775	85.5588	-346.01	-3934.94	14616	2951.48	242.242	311.372	0	0	0	0	0	0	0	200	903	0	0	0	0	0	0	0	603	903	0
7547	6	-11.7775	85.4062	-342.653	-3385.62	14554.9	3180.36	242.477	309.881	0	0	0	0	0	0	0	200	903	0	0	0	0	0	0	0	603	903	0
7547	7	-12.9982	82.2019	-336.854	-3294.07	14005.6	3088.81	241.578	309.779	0	0	0	0	0	0	0	200	903	0	0	0	0	0	0	0	603	903	0
7547	8	-13.1508	83.1174	-329.225	-2927.86	13212.1	3088.81	240.131	308.893	0	0	0	0	0	0	0	200	903	0	0	0	0	0	0	0	603	903	0
7547	9	-13.6085	81.1338	-319.764	-2836.31	13761.5	3088.81	243.036	308.87	0	0	0	0	0	0	0	200	903	0	0	0	0	0	0	0	603	903	0
7548	0	-12.2353	78.8449	-318.239	-2653.2	13639.4	3271.91	242.859	308.337	0	0	0	0	0	0	0	200	903	0	0	0	0	0	0	0	603	903	0
7548	1	-12.5404	79.1501	-314.271	-2744.75	13578.4	3043.03	243.206	308.734	0	0	0	0	0	0	0	200	903	0	0	0	0	0	0	0	603	903	0
7548	2	-13.7611	78.5398	-306.947	-2561.65	13029	2905.7	242.447	308.346	0	0	0	0	0	0	0	200	903	0	0	0	0	0	0	0	603	903	0
7548	3	-11.9301	76.251	-301.149	-2744.75	12723.9	2814.15	242.251	309.114	0	0	0	0	0	0	0	200	903	0	0	0	0	0	0	0	603	903	0
7548	4	-12.9982	75.3354	-292.909	-1646.12	13090.1	2676.82	244.69	305.62	0	0	0	0	0	0	0	200	903	0	0	0	0	0	0	0	603	903	0
7548	5	-12.5404	73.3518	-288.637	-1005.25	12601.8	2722.6	243.66	303.483	0	0	0	0	0	0	0	200	903	0	0	0	0	0	0	0	603	903	0
7548	6	-13.1508	71.5207	-282.228	-1829.23	11930.4	2768.37	242.272	306.481	0	0	0	0	0	0	0	200	903	0	0	0	0	0	0	0	603	903	0
7548	7	-13.1508	70.4526	-277.04	-1829.23	11991.4	2539.49	243.284	306.603	0	0	0	0	0	0	0	200	903	0	0	0	0	0	0	0	603	903	0
7548	8	-11.9301	69.3845	-268.19	-364.383	11991.4	2814.15	244.713	301.359	0	0	0	0	0	0	0	200	903	0	0	0	0	0	0	0	603	903	0
7548	9	-12.8456	68.469	-261.781	-1554.57	11869.4	2493.72	245.341	305.938	0	0	0	0	0	0	0	200	903	0	0	0	0	0	0	0	603	903	0
7549	0	-11.4723	66.9431	-255.372	-1829.23	11014.9	2219.06	243.133	307.163	0	0	0	0	0	0	0	200	903	0	0	0	0	0	0	0	603	903	0
7549	1	-11.1671	65.112	-249.879	-639.041	11381.1	2173.28	245.546	302.557	0	0	0	0	0	0	0	200	903	0	0	0	0	0	0	0	603	903	0
7549	2	-12.0827	63.4336	-244.081	-455.936	10953.8	2264.83	244.878	301.868	0	0	0	0	0	0	0	200	903	0	0	0	0	0	0	0	603	903	0
7549	3	-11.1671	61.4499	-237.672	-272.83	10892.8	2127.5	245.831	301.148	0	0	0	0	0	0	0	200	903	0	0	0	0	0	0	0	603	903	0
7549	4	-12.693	59.6189	-230.958	-730.594	10587.6	1944.4	245.842	303.163	0	0	0	0	0	0	0	200	903	0	0	0	0	0	0	0	603	903	0
7549	5	-10.5568	57.7878	-223.939	-639.041	10221.4	1852.85	245.644	302.854	0	0	0	0	0	0	0	200	903	0	0	0	0	0	0	0	603	903	0
7549	6	-10.7094	55.499	-221.193	-913.7	10038.3	2173.28	245.383	304.131	0	0	0	0	0	0	0	200	903	0	0	0	0	0	0	0	603	903	0
7549	7	-11.7775	54.2783	-213.868	184.934	10282.5	2081.73	248.078	299.135	0	0	0	0	0	0	0	200	903	0	0	0	0	0	0	0	603	903	0
7549	8	-11.6249	53.0576	-208.68	-181.277	9794.18	1669.74	246.934	300.869	0	0	0	0	0	0	0	200	903	0	0	0	0	0	0	0	603	903	0
7549	9	-11.6249	50.311	-201.356	734.25	9122.79	1898.62	245.307	296.353	0	0	0	0	0	0	0	200	903	0	0	0	0	0	0	0	603	903	0
7550	0	-11.1671	47.8696	-197.084	-89.7247	9427.97	1669.74	247.837	300.455	0	0	0	0	0	0	0	200	903	0	0	0	0	0	0	0	603	903	0
7550	1	-10.7094	46.8015	-194.642	93.3808	8878.65	1715.52	245.615	299.52	0	0	0	0	0	0	0	200	903	0	0	0	0	0	0	0	603	903	0
7550	2	-10.4042	45.123	-189.76	93.3808	8695.55	1349.31	245.824	299.508	0	0	0	0	0	0	0	200	903	0	0	0	0	0	0	0	603	903	0
7550	3	-11.0146	42.2239	-183.961	642.697	8634.51	1349.31	246.937	296.506	0	0	0	0	0	0	0	200	903	0	0	0	0	0	0	0	603	903	0
7550	4	-11.7775	39.1721	-178.163	642.697	8207.26	1440.86	246.066	296.393	0	0	0	0	0	0	0	200	903	0	0	0	0	0	0	0	603	903	0
7550	5	-9.48867	37.1885	-173.28	184.934	8085.2	1349.31	246.66	298.933	0	0	0	0	0	0	0	200	903	0	0	0	0	0	0	0	603	903	0
7550	6	-9.79385	35.51	-172.059	1.82809	8512.44	1166.2	249.474	299.989	0	0	0	0	0	0	0	200	903	0	0	0	0	0	0	0	603	903	0
7550	7	-10.862	33.6789	-166.566	368.039	8146.23	891.542	248.907	297.79	0	0	0	0	0	0	0	200	903	0	0	0	0	0	0	0	603	903	0
7550	8	-10.5568	32.0005	-161.989	276.486	7780.02	1028.87	248.028	298.293	0	0	0	0	0	0	0	200	903	0	0	0	0	0	0	0	603	903	0
7550	9	-10.4042	31.2375	-155.275	1192.01	7474.84	983.094	248.139	292.323	0	0	0	0	0	0	0	200	903	0	0	0	0	0	0	0	603	903	0
7551	0	-9.48867	29.2539	-149.476	1192.01	7291.74	708.436	248.782	292.025	0	0	0	0	0	0	0	200	903	0	0	0	0	0	0	0	603	903	0
7551	1	-9.1835	27.4228	-147.34	642.697	7169.67	983.094	248.661	295.638	0	0	0	0	0	0	0	200	903	0	0	0	0	0	0	0	603	903	0
7551	2	-8.26797	27.1177	-143.373	917.356	6681.39	937.318	246.601	293.602	0	0	0	0	0	0	0	200	903	0	0	0	0	0	0	0	603	903	0
7551	3	-8.87832	26.2021	-133.912	917.356	6559.32	799.989	248.982	293.15	0	0	0	0	0	0	0	200	903	0	0	0	0	0	0	0	603	903	0
7551	4	-8.42056	23.4555	-131.471	642.697	6559.32	662.66	249.892	295.112	0	0	0	0	0	0	0	200	903	0	0	0	0	0	0	0	603	903	0
7551	5	-6.89468	22.6926	-125.978	1283.57	6315.18	662.66	250.129	289.811	0	0	0	0	0	0	0	200	903	0	0	0	0	0	0	0	603	903	0
7551	6	-6.5895	21.1667	-124.147	1649.78	5399.65	571.107	243.494	286.711	0	0	0	0	0	0	0	200	903	0	0	0	0	0	0	0	603	903	0
7551	7	-7.50503	17.6572	-118.348	1466.67	5277.58	342.225	244.594	287.607	0	0	0	0	0	0	0	200	903	0	0	0	0	0	0	0	603	903	0
7551	8	-8.57314	16.7417	-115.297	1375.12	5216.54	754.213	245.245	288.073	0	0	0	0	0	0	0	200	903	0	0	0	0	0	0	0	603	903	0
7551	9	-8.26797	17.0469	-110.109	2015.99	5704.82	204.896	251.811	281.691	0	0	0	0	0	0	0	200	903	0	0	0	0	0	0	0	603	903	0
7552	0	-7.19985	16.2839	-106.752	1100.46	5338.61	433.778	250.01	289.691	0	0	0	0	0	0	0	200	903	0	0	0	0	0	0	0	603	903	0
7552	1	-7.50503	14.4529	-103.7	1466.67	4911.37	479.554	247.361	285.857	0	0	0	0	0	0	0	200	903	0	0	0	0	0	0	0	603	903	0
7552	2	-8.42056	12.4692	-100.648	1649.78	4850.33	616.883	248.191	283.608	0	0	0	0	0	0	0	200	903	0	0	0	0	0	0	0	603	903	0
7552	3	-6.5895	12.6218	-93.9344	1558.22	4850.33	250.672	251.635	283.412	0	0	0	0	0	0	0	200	903	0	0	0	0	0	0	0	603	903	0
7552	4	-8.11538	12.164	-89.9671	1558.22	4789.3	204.896	253.234	282.68	0	0	0	0	0	0	0	200	903	0	0	0	0	0	0	0	603	903	0
7552	5	-6.89468	10.4856	-86.9153	1192.01	4178.94	159.12	248.081	286.285	0	0	0	0	0	0	0	200	903	0	0	0	0	0	0	0	603	903	0
7552	6	-6.13174	9.72264	-85.6946	1100.46	4178.94	113.343	248.766	287.158	0	0	0	0	0	0	0	200	903	0	0	0	0	0	0	0	603	903	0
7552	7	-6.74209	10.1804	-85.3895	1558.22	4178.94	250.672	248.94	281.752	0	0	0	0	0	0	0	200	903	0	0	0	0	0	0	0	603	903	0
7552	8	-6.13174	8.9597	-79.8963	1649.78	4178.94	113.343	252.305	279.351	0	0	0	0	0	0	0	200	903	0	0	0	0	0	0	0	603	903	0
7552	9	-5.67397	6.21311	-78.0652	2382.2	3629.63	113.343	246.495	269.485	0	0	0	0	0	0	0	200	903	0	0	0	0	0	0	0	603	903	0
7553	0	-4.30068	5.29759	-75.929	1649.78	3629.63	250.672	247.803	278.272	0	0	0	0	0	0	0	200	903	0	0	0	0	0	0	0	603	903	0
7553	1	-3.53774	5.60276	-75.0135	1100.46	3995.84	-115.539	253.268	285.33	0	0	0	0	0	0	0	200	903	0	0	0	0	0	0	0	603	903	0
7553	2	-5.06362	5.29759	-73.1824	1558.22	3934.81	21.7904	253.767	278.708	0	0	0	0	0	0	0	200	903	0	0	0	0	0	0	0	603	903	0
7553	3	-5.67397	4.68724	-68.2996	1649.78	3080.31	-298.644	245.1	275.845	0	0	0	0	0	0	0	200	903	0	0	0	0	0	0	0	603	903	0
7553	4	-5.06362	4.99241	-64.3323	1649.78	3263.42	-115.539	250.728	274.355	0	0	0	0	0	0	0	200	903	0	0	0	0	0	0	0	603	903	0
7553	5	-3.53774	3.16136	-64.3323	2199.09	3385.49	-69.7623	252.625	265.817	0	0	0	0	0	0	0	200	903	0	0	0	0	0	0	0	603	903	0
7553	6	-3.99551	1.94065	-64.6375	1283.57	3141.35	-298.644	248.599	280.142	0	0	0	0	0	0	0	200	903	0	0	0	0	0	0	0	603	903	0
7553	7	-4.60586	-0.195577	-62.5013	368.039	2775.14	-252.868	244.401	294.112	0	0	0	0	0	0	0	200	903	0	0	0	0	0	0	0	603	903	0
7553	8	-3.69033	-0.348165	-59.1443	1008.91	2592.03	-69.7623	243.826	282.942	0	0	0	0	0	0	0	200	903	0	0	0	0	0	0	0	603	903	0
7553	9	-3.07998	1.63548	-55.7874	1283.57	3202.38	-207.091	257.403	276.992	0	0	0	0	0	0	0	200	903	0	0	0	0	0	0	0	603	903	0
7554	0	-3.38516	0.719951	-55.1771	1192.01	2653.07	-435.973	248.083	278.397	0	0	0	0	0	0	0	200	903	0	0	0	0	0	0	0	603	903	0
7554	1	-3.07998	-1.87404	-53.9564	2107.54	2775.14	-573.302	251.433	260.94	0	0	0	0	0	0	0	200	903	0	0	0	0	0	0	0	603	903	0
7554	2	-3.23257	-3.09475	-53.0408	1008.91	2408.93	-252.868	245.416	280.979	0	0	0	0	0	0	0	200	903	0	0	0	0	0	0	0	603	903	0
7554	3	-3.07998	-0.805928	-49.0735	1100.46	2225.82	-298.644	245.357	277.575	0	0	0	0	0	0	0	200	903	0	0	0	0	0	0	0	603	903	0
7554	4	-3.23257	-1.72146	-47.2425	459.592	2164.78	-527.526	245.823	290.272	0	0	0	0	0	0	0	200	903	0	0	0	0	0	0	0	603	903	0
7554	5	-2.62222	-2.63698	-44.4959	459.592	2164.78	-435.973	248.651	289.671	0	0	0	0	0	0	0	200	903	0	0	0	0	0	0	0	603	903	0
7554	6	-2.62222	-1.41628	-45.7166	1008.91	1737.54	-298.644	238.007	277.931	0	0	0	0	0	0	0	200	903	0	0	0	0	0	0	0	603	903	0
7554	7	-2.92739	-1.87404	-42.6649	1100.46	1676.5	-115.539	239.295	274.207	0	0	0	0	0	0	0	200	903	0	0	0	0	0	0	0	603	903	0
7554	8	-3.53774	-2.33181	-37.4769	459.592	1859.61	-344.421	249.62	287.737	0	0	0	0	0	0	0	200	903	0	0	0	0	0	0	0	603	903	0
7554	9	-2.62222	-1.72146	-36.5613	459.592	1798.57	-69.7623	249.193	287.43	0	0	0	0	0	0	0	200	903	0	0	0	0	0	0	0	603	903	0
7555	0	-1.24893	-0.0429889	-33.8148	642.697	1615.47	-435.973	247.774	280.994	0	0	0	0	0	0	0	200	903	0	0	0	0	0	0	0	603	903	0
7555	1	-1.40151	-0.805928	-34.7303	184.934	1432.36	113.343	241.242	294.675	0	0	0	0	0	0	0	200	903	0	0	0	0	0	0	0	603	903	0
7555	2	-3.23257	-1.26369	-33.5096	1008.91	1310.29	-344.421	239.102	269.892	0	0	0	0	0	0	0	200	903	0	0	0	0	0	0	0	603	903	0
7555	3	-2.46963	-2.02663	-29.8475	734.25	1188.22	-252.868	239.81	275.4	0	0	0	0	0	0	0	200	903	0	0	0	0	0	0	0	603	903	0
7555	4	-1.40151	-2.94216	-28.3216	917.356	1310.29	-298.644	246.265	267.609	0	0	0	0	0	0	0	200	903	0	0	0	0	0	0	0	603	903	0
7555	5	-0.94375	-2.63698	-27.4061	184.934	1066.15	-115.539	238.902	293.252	0	0	0	0	0	0	0	200	903	0	0	0	0	0	0	0	603	903	0
7555	6	-1.09634	-2.17922	-28.6268	93.3808	1005.12	-298.644	235.111	296.738	0	0	0	0	0	0	0	200	903	0	0	0	0	0	0	0	603	903	0
7555	7	-0.94375	-2.63698	-25.8802	276.486	1371.33	-527.526	252.988	289.317	0	0	0	0	0	0	0	200	903	0	0	0	0	0	0	0	603	903	0
7555	8	0.276953	-2.4844	-24.3543	825.803	1493.4	-435.973	261.32	266.092	0	0	0	0	0	0	0	200	903	0	0	0	0	0	0	0	603	903	0
7555	9	-1.24893	-2.63698	-20.0818	276.486	333.73	-252.868	216.619	286.232	0	0	0	0	0	0	0	200	903	0	0	0	0	0	0	0	603	903	0
7556	0	-0.485986	-3.24733	-21.3026	642.697	760.976	342.225	235.722	269.83	0	0	0	0	0	0	0	200	903	0	0	0	0	0	0	0	603	903	0
7556	1	-0.333399	-3.7051	-21.3026	276.486	394.765	-664.855	218.531	287.021	0	0	0	0	0	0	0	200	903	0	0	0	0	0	0	0	603	903	0
7556	2	-0.180811	-2.33181	-20.9974	-89.7247	944.082	-344.421	244.962	304.273	0	0	0	0	0	0	0	200	903	0	0	0	0	0	0	0	603	903	0
7556	3	0.887305	-3.24733	-18.2508	276.486	760.976	-23.9859	241.696	284.851	0	0	0	0	0	0	0	200	903	0	0	0	0	0	0	0	603	903	0
7556	4	-0.638574	-5.38356	-15.8094	184.934	699.941	-161.315	244.274	288.302	0	0	0	0	0	0	0	200	903	0	0	0	0	0	0	0	603	903	0
7556	5	1.19248	-3.85769	-15.8094	276.486	577.871	-344.421	236.552	282.511	0	0	0	0	0	0	0	200	903	0	0	0	0	0	0	0	603	903	0
7556	6	1.19248	-3.85769	-15.8094	-181.277	822.012	-435.973	251.995	311.466	0	0	0	0	0	0	0	200	903	0	0	0	0	0	0	0	603	903	0
7556	7	0.429541	-3.7051	-14.5887	184.934	577.871	-207.091	239.611	287.324	0	0	0	0	0	0	0	200	903	0	0	0	0	0	0	0	603	903	0
7556	8	-1.09634	-5.07839	-11.2318	-272.83	272.695	-390.197	224.279	324.291	0	0	0	0	0	0	0	200	903	0	0	0	0	0	0	0	603	903	0
7556	9	-0.485986	-3.85769	-10.9266	459.592	-215.586	-481.75	180.27	257.938	0	0	0	0	0	0	0	200	903	0	0	0	0	0	0	0	603	903	0
7557	0	0.887305	-5.07839	-10.3162	276.486	211.66	-481.75	220.517	273.199	0	0	0	0	0	0	0	200	903	0	0	0	0	0	0	0	603	903	0
7557	1	1.19248	-5.68874	-10.3162	-272.83	394.765	-344.421	238.266	326.447	0	0	0	0	0	0	0	200	903	0	0	0	0	0	0	0	603	903	0
7557	2	0.124365	-4.46804	-9.70587	-639.041	211.66	-298.644	221.807	365.841	0	0	0	0	0	0	0	200	903	0	0	0	0	0	0	0	603	903	0
7557	3	0	0	0	0	0	0	200	300	0	0	0	0	0	0	0	200	903	0	0	0	0	0	0	0	603	903	0
7557	4	0	0	0	0	0	0	200	300	0	0	0	0	0	0	0	200	903	0	0	0	0	0	0	0	603	903	0
7557	5	0	0	0	0	0	0	200	300	0	0	0	0	0	0	0	200	903	0	0	0	0	0	0	0	603	903	0
7557	6	0	0	0	0	0	0	200	300	0	0	0	0	0	0	0	200	903	0	0	0	0	0	0	0	603	903	0
7557	7	0	0	0	0	0	0	200	300	0	0	0	0	0	0	0	200	903	0	0	0	0	0	0	0	603	903	0
7557	8	0	0	0	0	0	0	200	300	0	0	0	0	0	0	0	200	903	0	0	0	0	0	0	0	603	903	0
7557	9	0	0	0	0	0	0	200	300	0	0	0	0	0	0	0	200	903	0	0	0	0	0	0	0	603	903	0
7558	0	0	0	0	0	0	0	200	300	0	0	0	0	0	0	0	200	903	0	0	0	0	0	0	0	603	903	0
7558	1	0	0	0	0	0	0	200	300	0	0	0	0	0	0	0	200	903	0	0	0	0	0	0	0	603	903	0
7558	2	0	0	0	0	0	0	200	300	0	0	0	0	0	0	0	200	903	0	0	0	0	0	0	0	603	903	0
7558	3	0	0	0	0	0	0	200	300	0	0	0	0	0	0	0	200	903	0	0	0	0	0	0	0	603	903	0
7558	4	0	0	0	0	0	0	200	300	0	0	0	0	0	0	0	200	903	0	0	0	0	0	0	0	603	903	0
7558	5	0	0	0	0	0	0	200	300	0	0	0	0	0	0	0	200	903	0	0	0	0	0	0	0	603	903	0
7558	6	0	0	0	0	0	0	200	300	0	0	0	0	0	0	0	200	903	0	0	0	0	0	0	0	603	903	0
7558	7	0	0	0	0	0	0	200	300	0	0	0	0	0	0	0	200	903	0	0	0	0	0	0	0	603	903	0
7558	8	0	0	0	0	0	0	200	300	0	0	0	0	0	0	0	200	903	0	0	0	0	0	0	0	603	903	0
7558	9	0	0	0	0	0	0	200	300	0	0	0	0	0	0	0	200	903	0	0	0	0	0	0	0	603	903	0
7559	0	0	0	0	0	0	0	200	300	0	0	0	0	0	0	0	200	903	0	0	0	0	0	0	0	603	903	0
7559	1	0	0	0	0	0	0	200	300	0	0	0	0	0	0	0	200	903	0	0	0	0	0	0	0	603	903	0
7559	2	0	0	0	0	0	0	200	300	0	0	0	0	0	0	0	200	903	0	0	0	0	0	0	0	603	903	0
7559	3	0	0	0	0	0	0	200	300	0	0	0	0	0	0	0	200	903	0	0	0	0	0	0	0	603	903	0
7559	4	0	0	0	0	0	0	200	300	0	0	0	0	0	0	0	200	903	0	0	0	0	0	0	0	603	903	0
7559	5	0	0	0	0	0	0	200	300	0	0	0	0	0	0	0	200	903	0	0	0	0	0	0	0	603	903	0
7559	6	0	0	0	0	0	0	200	300	0	0	0	0	0	0	0	200	903	0	0	0	0	0	0	0	603	903	0
7559	7	0	0	0	0	0	0	200	300	0	0	0	0	0	0	0	200	903	0	0	0	0	0	0	0	603	903	0
7559	8	0	0	0	0	0	0	200	300	0	0	0	0	0	0	0	200	903	0	0	0	0	0	0	0	603	903	0
7559	9	0	0	0	0	0	0	200	300	0	0	0	0	0	0	0	200	903	0	0	0	0	0	0	0	603	903	0
7560	0	0	0	0	0	0	0	200	300	0	0	0	0	0	0	0	200	903	0	0	0	0	0	0	0	603	903	0
7560	1	0	0	0	0	0	0	200	300	0	0	0	0	0	0	0	200	903	0	0	0	0	0	0	0	603	903	0
7560	2	0	0	0	0	0	0	200	300	0	0	0	0	0	0	0	200	903	0	0	0	0	0	0	0	603	903	0
7560	3	0	0	0	0	0	0	200	300	0	0	0	0	0	0	0	200	903	0	0	0	0	0	0	0	603	903	0
7560	4	0	0	0	0	0	0	200	300	0	0	0	0	0	0	0	200	903	0	0	0	0	0	0	0	603	903	0
7560	5	0	0	0	0	0	0	200	300	0	0	0	0	0	0	0	200	903	0	0	0	0	0	0	0	603	903	0
7560	6	0	0	0	0	0	0	200	300	0	0	0	0	0	0	0	200	903	0	0	0	0	0	0	0	603	903	0
7560	7	0	0	0	0	0	0	200	300	0	0	0	0	0	0	0	200	903	0	0	0	0	0	0	0	603	903	0
7560	8	0	0	0	0	0	0	200	300	0	0	0	0	0	0	0	200	903	0	0	0	0	0	0	0	603	903	0
7560	9	0	0	0	0	0	0	200	300	0	0	0	0	0	0	0	200	903	0	0	0	0	0	0	0	603	903	0
7561	0	0	0	0	0	0	0	200	300	0	0	0	0	0	0	0	200	903	0	0	0	0	0	0	0	603	903	0
7561	1	0	0	0	0	0	0	200	300	0	0	0	0	0	0	0	200	903	0	0	0	0	0	0	0	603	903	0
7561	2	0	0	0	0	0	0	200	300	0	0	0	0	0	0	0	200	903	0	0	0	0	0	0	0	603	903	0
7561	3	0	0	0	0	0	0	200	300	0	0	0	0	0	0	0	200	903	0	0	0	0	0	0	0	603	903	0
7561	4	0	0	0	0	0	0	200	300	0	0	0	0	0	0	0	200	903	0	0	0	0	0	0	0	603	903	0
7561	5	0	0	0	0	0	0	200	300	0	0	0	0	0	0	0	200	903	0	0	0	0	0	0	0	603	903	0
7561	6	0	0	0	0	0	0	200	300	0	0	0	0	0	0	0	200	903	0	0	0	0	0	0	0	603	903	0
7561	7	0	0	0	0	0	0	200	300	0	0	0	0	0	0	0	200	903	0	0	0	0	0	0	0	603	903	0
7561	8	0	0	0	0	0	0	200	300	0	0	0	0	0	0	0	200	903	0	0	0	0	0	0	0	603	903	0
7561	9	0	0	0	0	0	0	200	300	0	0	0	0	0	0	0	200	903	0	0	0	0	0	0	0	603	903	0
7562	0	0	0	0	0	0	0	200	300	0	0	0	0	0	0	0	200	903	0	0	0	0	0	0	0	603	903	0
7562	1	0	0	0	0	0	0	200	300	0	0	0	0	0	0	0	200	903	0	0	0	0	0	0	0	603	903	0
7562	2	0	0	0	0	0	0	200	300	0	0	0	0	0	0	0	200	903	0	0	0	0	0	0	0	603	903	0
7562	3	0	0	0	0	0	0	200	300	0	0	0	0	0	0	0	200	903	0	0	0	0	0	0	0	603	903	0
7562	4	0	0	0	0	0	0	200	300	0	0	0	0	0	0	0	200	903	0	0	0	0	0	0	0	603	903	0
7562	5	0	0	0	0	0	0	200	300	0	0	0	0	0	0	0	200	903	0	0	0	0	0	0	0	603	903	0
7562	6	0	0	0	0	0	0	200	300	0	0	0	0	0	0	0	200	903	0	0	0	0	0	0	0	603	903	0
7562	7	0	0	0	0	0	0	200	300	0	0	0	0	0	0	0	200	903	0	0	0	0	0	0	0	603	903	0
7562	8	0	0	0	0	0	0	200	300	0	0	0	0	0	0	0	200	903	0	0	0	0	0	0	0	603	903	0
7562	9	0	0	0	0	0	0	200	300	0	0	0	0	0	0	0	200	903	0	0	0	0	0	0	0	603	903	0
7563	0	0	0	0	0	0	0	200	300	0	0	0	0	0	0	0	200	903	0	0	0	0	0	0	0	603	903	0
7563	1	0	0	0	0	0	0	200	300	0	0	0	0	0	0	0	200	903	0	0	0	0	0	0	0	603	903	0
7563	2	0	0	0	0	0	0	200	300	0	0	0	0	0	0	0	200	903	0	0	0	0	0	0	0	603	903	0
7563	3	0	0	0	0	0	0	200	300	0	0	0	0	0	0	0	200	903	0	0	0	0	0	0	0	603	903	0
7563	4	0	0	0	0	0	0	200	300	0	0	0	0	0	0	0	200	903	0	0	0	0	0	0	0	603	903	0
7563	5	0	0	0	0	0	0	200	300	0	0	0	0	0	0	0	200	903	0	0	0	0	0	0	0	603	903	0
7563	6	0	0	0	0	0	0	200	300	0	0	0	0	0	0	0	200	903	0	0	0	0	0	0	0	603	903	0
7563	7	0	0	0	0	0	0	200	300	0	0	0	0	0	0	0	200	903	0	0	0	0	0	0	0	603	903	0
7563	8	0	0	0	0	0	0	200	300	0	0	0	0	0	0	0	200	903	0	0	0	0	0	0	0	603	903	0
7563	9	0	0	0	0	0	0	200	300	0	0	0	0	0	0	0	200	903	0	0	0	0	0	0	0	603	903	0
7564	0	0	0	0	0	0	0	200	300	0	0	0	0	0	0	0	200	903	0	0	0	0	0	0	0	603	903	0
7564	1	0	0	0	0	0	0	200	300	0	0	0	0	0	0	0	200	903	0	0	0	0	0	0	0	603	903	0
7564	2	0	0	0	0	0	0	200	300	0	0	0	0	0	0	0	200	903	0	0	0	0	0	0	0	603	903	0
7564	3	0	0	0	0	0	0	200	300	0	0	0	0	0	0	0	200	903	0	0	0	0	0	0	0	603	903	0
7564	4	0	0	0	0	0	0	200	300	0	0	0	0	0	0	0	200	903	0	0	0	0	0	0	0	603	903	0
7564	5	0	0	0	0	0	0	200	300	0	0	0	0	0	0	0	200	903	0	0	0	0	0	0	0	603	903	0
7564	6	0	0	0	0	0	0	200	300	0	0	0	0	0	0	0	200	903	0	0	0	0	0	0	0	603	903	0
7564	7	0	0	0	0	0	0	200	300	0	0	0	0	0	0	0	200	903	0	0	0	0	0	0	0	603	903	0
7564	8	0	0	0	0	0	0	200	300	0	0	0	0	0	0	0	200	903	0	0	0	0	0	0	0	603	903	0
7564	9	0	0	0	0	0	0	200	300	0	0	0	0	0	0	0	200	903	0	0	0	0	0	0	0	603	903	0
7565	0	0	0	0	0	0	0	200	300	0	0	0	0	0	0	0	200	903	0	0	0	0	0	0	0	603	903	0
7565	1	0	0	0	0	0	0	200	300	0	0	0	0	0	0	0	200	903	0	0	0	0	0	0	0	603	903	0
7565	2	0	0	0	0	0	0	200	300	0	0	0	0	0	0	0	200	903	0	0	0	0	0	0	0	603	903	0
7565	3	0	0	0	0	0	0	200	300	0	0	0	0	0	0	0	200	903	0	0	0	0	0	0	0	603	903	0
7565	4	0	0	0	0	0	0	200	300	0	0	0	0	0	0	0	200	903	0	0	0	0	0	0	0	603	903	0
7565	5	0	0	0	0	0	0	200	300	0	0	0	0	0	0	0	200	903	0	0	0	0	0	0	0	603	903	0
7565	6	0	0	0	0	0	0	200	300	0	0	0	0	0	0	0	200	903	0	0	0	0	0	0	0	603	903	0
7565	7	0	0	0	0	0	0	200	300	0	0	0	0	0	0	0	200	903	0	0	0	0	0	0	0	603	903	0
7565	8	0	0	0	0	0	0	200	300	0	0	0	0	0	0	0	200	903	0	0	0	0	0	0	0	603	903	0
7565	9	0	0	0	0	0	0	200	300	0	0	0	0	0	0	0	200	903	0	0	0	0	0	0	0	603	903	0
7566	0	0	0	0	0	0	0	200	300	0	0	0	0	0	0	0	200	903	0	0	0	0	0	0	0	603	903	0
7566	1	0	0	0	0	0	0	200	300	0	0	0	0	0	0	0	200	903	0	0	0	0	0	0	0	603	903	0
7566	2	0	0	0	0	0	0	200	300	0	0	0	0	0	0	0	200	903	0	0	0	0	0	0	0	603	903	0
7566	3	0	0	0	0	0	0	200	300	0	0	0	0	0	0	0	200	903	0	0	0	0	0	0	0	603	903	0
7566	4	0	0	0	0	0	0	200	300	0	0	0	0	0	0	0	200	903	0	0	0	0	0	0	0	603	903	0
7566	5	0	0	0	0	0	0	200	300	0	0	0	0	0	0	0	200	903	0	0	0	0	0	0	0	603	903	0
[truncated: 1,364 more rows]
