# Supplementary material for: The Effects of an Extemporaneous Speech Dual-task on Older Adult Gait Control
Source: Research Square preprint supplement (doi:10.21203/rs.3.rs-7674245/v1), 2025-11-18
Supplement: Supplementary file 81 [file DT7Walk9.xlsx]

## Sheet: Sheet1
Trajectories
		07:LFHD			07:RFHD			07:LBHD			07:RBHD			07:C7			07:T10			07:CLAV			07:STRN			07:RBAK			07:LSHO			07:LUPA			07:LELB			07:LFRM			07:LWRA			07:LWRB			07:LFIN
Frame	Sub Frame	X	Y	Z	X	Y	Z	X	Y	Z	X	Y	Z	X	Y	Z	X	Y	Z	X	Y	Z	X	Y	Z	X	Y	Z	X	Y	Z	X	Y	Z	X	Y	Z	X	Y	Z	X	Y	Z	X	Y	Z	X	Y	Z
		mm	mm	mm	mm	mm	mm	mm	mm	mm	mm	mm	mm	mm	mm	mm	mm	mm	mm	mm	mm	mm	mm	mm	mm	mm	mm	mm	mm	mm	mm	mm	mm	mm	mm	mm	mm	mm	mm	mm	mm	mm	mm	mm	mm	mm	mm	mm	mm
9314	0	394.773	2612.05	1618.18	293.137	2611.15	1620.58	419.063	2760.71	1603.02	286.868	2780.39	1597.73	325.433	2819.16	1488.72	317.412	2895.94	1242.22	340.296	2700.66	1403.26	339.186	2638.8	1250.25	231.07	2892.21	1303.41	501.549	2810.86	1437.5	576.04	2783.98	1262.68	615.663	2758.13	1116.17	659.343	2608.36	1028.15	639.767	2541.16	977.766	683.865	2585.54	951.669	690.489	2496.57	924.162
9315	0	394.412	2600.59	1617.31	293.037	2599.24	1619.7	418.09	2749.23	1602	285.85	2768.36	1596.47	324.495	2807.21	1487.92	316.314	2883.55	1241.42	339.681	2688.54	1402.4	338.984	2626.72	1249.37	229.978	2879.96	1302.82	500.748	2799.2	1436.62	575.253	2773.17	1261.77	615.06	2747.66	1115.29	658.655	2597.39	1027.77	639.195	2530.04	977.699	683.334	2574.25	951.577	689.789	2485.1	924.325
9316	0	393.939	2588.97	1616.7	293.017	2587.44	1618.86	417.122	2737.8	1601.2	284.788	2756.37	1595.6	323.611	2795.23	1487.24	315.249	2871.29	1240.72	338.446	2676.26	1401.82	338.139	2614.29	1248.95	228.919	2867.71	1302.28	499.687	2787.27	1436.09	574.419	2762.46	1260.93	614.31	2737.45	1114.47	657.86	2586.66	1027.48	638.341	2519.32	977.569	681.911	2562.76	951.233	688.847	2473.96	924.503
9317	0	393.689	2577.49	1616.03	292.518	2575.53	1618.42	416.463	2726.68	1600	283.85	2744.37	1594.73	322.61	2783.34	1486.47	314.33	2858.98	1239.74	338.973	2664.37	1401.28	337.496	2601.88	1248.46	227.745	2855.42	1301.35	498.688	2775.44	1435.22	573.299	2751.79	1259.96	613.344	2727.5	1113.2	656.996	2576.35	1026.54	637.688	2508.96	977.002	681.53	2552.61	950.481	688.211	2463.56	924.084
9318	0	393.138	2565.79	1615.64	292.439	2563.47	1617.97	415.071	2714.92	1599.46	282.656	2732.29	1593.82	321.561	2771.36	1485.71	313.431	2846.52	1238.79	337.139	2651.87	1400.95	336.163	2589.05	1248.28	226.708	2843.13	1300.36	497.681	2763.5	1434.45	572.139	2741.19	1258.98	612.259	2717.84	1111.94	656.073	2566.62	1025.58	636.596	2498.87	976.053	680.419	2542.69	949.392	687.27	2453.52	923.347
9319	0	392.818	2554.19	1615.28	291.582	2551.22	1617.42	414.089	2703.42	1598.82	281.493	2720.12	1593.2	320.494	2759.51	1485.2	312.793	2833.93	1237.88	336.211	2639.63	1400.77	335.126	2576.11	1248.27	225.858	2830.78	1299.5	496.811	2751.65	1433.76	571.012	2730.63	1257.9	611.063	2708.41	1110.76	654.886	2557.1	1023.93	635.707	2489.5	974.693	679.212	2533.37	947.841	686.497	2444.1	921.869
9320	0	392.473	2542.59	1615.19	291.26	2539.19	1617.62	413.39	2692.22	1598.47	280.406	2708	1593.05	319.548	2747.66	1484.8	312.207	2821.43	1237.16	335.53	2627.59	1400.76	333.913	2563.29	1248.43	225.074	2818.47	1298.93	495.863	2739.75	1433.35	569.754	2720.31	1256.97	609.56	2698.95	1109.6	654.048	2548.39	1022.33	634.986	2480.43	973.146	677.864	2524.71	945.961	685.592	2435.44	920.319
9321	0	391.805	2530.66	1615.22	291.587	2527.06	1617.86	411.887	2680.27	1598.35	279.35	2695.72	1593.19	318.527	2735.69	1484.67	311.754	2808.92	1236.84	334.977	2615.28	1401.07	332.815	2550.41	1249	224.14	2806.12	1298.41	494.991	2727.63	1433.09	567.867	2709.78	1256.49	608.014	2689.83	1108.7	653.073	2539.83	1020.47	634.293	2472.01	971.661	676.504	2516.63	943.895	684.889	2427.48	918.462
9322	0	391.375	2518.55	1615.83	291.015	2514.76	1618.22	410.723	2668.52	1598.92	278.108	2683.22	1593.39	317.231	2723.63	1485.31	311.234	2796.56	1237.03	333.003	2602.83	1401.8	331.604	2537.53	1250.25	223.326	2793.86	1298.37	493.944	2715.31	1433.46	566.762	2699.45	1256.39	606.104	2680.76	1108.27	651.137	2531.4	1018.68	633.439	2464.24	969.732	674.715	2509.07	941.831	683.753	2419.97	916.273
9323	0	390.638	2506.56	1616.56	290.738	2502.49	1618.99	410.138	2656.96	1599.68	276.917	2670.81	1594.23	316.523	2711.59	1486.05	310.858	2783.99	1237.59	331.78	2590.4	1402.92	330.136	2524.42	1251.75	222.896	2781.85	1299.12	493.052	2702.72	1434.19	565.161	2688.94	1256.57	603.917	2671.53	1108.14	649.723	2523.72	1016.73	631.832	2456.71	967.286	672.698	2502.11	939.557	682.606	2413.21	913.801
9324	0	389.951	2494.42	1617.4	289.815	2489.97	1619.84	408.861	2644.86	1600.81	275.685	2658.44	1595.47	315.767	2699.44	1487.1	310.573	2771.61	1238.63	330.712	2578.1	1404.4	328.704	2511.53	1253.49	222.369	2769.79	1300.06	492.31	2690.38	1435.31	563.625	2678.45	1257.19	601.697	2662.66	1108.43	648.023	2516.38	1014.82	630.114	2449.78	964.478	670.59	2495.86	937.2	681.678	2407.9	910.89
9325	0	389.438	2482.37	1618.32	288.919	2477.68	1621	407.896	2632.85	1602.17	274.622	2646.07	1597.09	315.325	2687.31	1488.65	310.511	2759.3	1240.03	330.009	2565.99	1405.89	327.671	2498.76	1255.08	222.212	2757.71	1301.37	491.505	2677.58	1436.7	562.184	2667.87	1258.12	599.599	2653.91	1109.1	646.164	2509.28	1012.96	628.535	2443.37	961.659	668.373	2490.3	934.778	680.322	2402.5	907.727
9326	0	388.439	2470.2	1619.37	288.295	2465.24	1621.58	406.881	2620.74	1603.76	273.517	2633.83	1598.63	314.487	2674.98	1489.94	310.429	2746.92	1241.53	328.713	2553.69	1407.36	326.335	2486.01	1257.22	222.024	2745.54	1302.71	490.939	2664.77	1438.11	560.5	2656.84	1259.41	597.147	2645.12	1110.08	643.823	2502.41	1010.77	626.655	2437.36	958.738	665.706	2485.03	932.277	679.019	2397.93	904.396
9327	0	387.421	2457.83	1620.39	287.823	2453.15	1622.68	405.325	2608.16	1605.31	272.519	2621.6	1599.92	314.173	2663.01	1491.25	310.499	2734.75	1242.89	327.824	2541.62	1409.15	325.059	2473.52	1259.18	222.154	2733.68	1304.05	490.641	2652.4	1439.78	559.265	2645.88	1260.42	594.82	2636.4	1110.97	641.691	2495.94	1008.68	624.546	2431.9	955.308	663.027	2480.35	929.553	676.988	2393.79	900.496
9328	0	386.704	2445.59	1621.36	286.894	2440.95	1623.6	404.486	2596.08	1606.72	271.73	2609.66	1601.26	313.588	2651.06	1492.55	310.576	2722.78	1243.97	326.95	2529.6	1410.74	324.014	2461.26	1261.06	222.136	2721.64	1305.05	490.066	2639.72	1441.23	557.958	2634.85	1261.43	592.441	2627.77	1111.8	639.504	2490.07	1006.24	621.999	2426.75	951.693	660.283	2476.14	926.589	674.909	2390.19	896.174
9329	0	385.674	2433.65	1622.1	285.299	2428.67	1624.65	404.267	2584.44	1608.06	270.976	2597.69	1602.68	313.286	2639.36	1493.69	310.593	2710.77	1245.03	326.511	2517.74	1412.26	323.185	2449.12	1262.57	222.244	2709.85	1305.95	489.651	2627.37	1442.59	556.908	2623.73	1262.4	589.852	2618.98	1112.58	637.114	2483.93	1003.66	619.794	2421.77	947.944	657.379	2472.07	923.467	672.601	2387.05	891.295
9330	0	384.734	2421.29	1623.26	284.667	2416.61	1625.11	403.718	2572.3	1609.7	270.367	2585.74	1603.93	312.892	2627.4	1494.83	310.566	2698.78	1246.3	325.879	2505.65	1413.74	322.386	2437.03	1264.38	222.138	2697.84	1307.02	489.167	2615.08	1444.13	555.23	2612.04	1263.43	587.794	2610.39	1113.63	634.594	2478.16	1001.21	617.382	2417.31	944.003	654.682	2468.37	920.655	670.143	2384.23	886.329
9331	0	384.051	2409.23	1624.35	283.85	2404.82	1626.15	402.557	2559.62	1611.43	269.829	2573.76	1605.24	312.653	2615.6	1496.24	310.605	2686.96	1247.69	325.358	2493.64	1415.36	322.044	2425.1	1265.97	222.223	2686.05	1308.37	488.982	2603.19	1445.74	554.824	2601.16	1264.84	585.364	2601.4	1114.78	632.155	2472.23	998.769	614.577	2413.12	939.997	651.951	2464.93	918	667.376	2381.59	881.372
9332	0	383.127	2396.99	1625.59	282.884	2392.94	1626.79	402.581	2547.57	1613.15	269.592	2562.07	1606.81	312.374	2603.88	1497.82	310.416	2675.12	1249.04	325.029	2481.78	1416.69	321.662	2413.22	1267.06	222.179	2674.21	1309.75	488.829	2591.18	1447.33	553.992	2590.22	1266.09	583.273	2592.58	1115.94	629.734	2466.75	996.567	611.733	2409.23	935.891	649.007	2461.51	915.279	664.315	2379.43	876.061
9333	0	382.221	2384.72	1626.78	281.913	2380.88	1627.85	402.286	2535.19	1614.74	269.25	2550.13	1608.11	312.045	2591.85	1498.94	310.277	2663.47	1250.31	324.995	2469.98	1417.68	321.839	2401.6	1268.07	221.998	2662.37	1310.92	488.499	2579.19	1448.69	553.087	2579.16	1267.2	581.183	2583.54	1116.99	627.01	2461.15	993.762	609.161	2405.74	931.377	646.087	2458.47	912.331	661.013	2377.7	870.413
9334	0	381.294	2372.34	1627.87	282.042	2369.54	1628.24	401.498	2522.6	1616.18	268.984	2538.25	1609.11	311.683	2579.95	1500.33	309.911	2651.76	1251.62	324.649	2458.07	1418.56	322.338	2389.69	1269.14	221.696	2650.54	1312.13	488.301	2567.54	1450.08	552.154	2568.42	1268.13	579.051	2574.62	1117.87	624.569	2455.94	991.101	606.218	2402.51	927.019	643.16	2455.92	909.51	657.67	2376.47	864.771
9335	0	380.545	2360.05	1629.12	281.468	2357.99	1629.52	401.806	2510.79	1617.48	268.904	2526.5	1610.06	311.336	2567.87	1501.4	309.589	2640.19	1252.9	324.93	2446.34	1419.55	322.587	2378.04	1270.23	221.421	2638.74	1313.34	488.144	2555.86	1451.29	551.304	2557.84	1268.96	577.038	2565.82	1118.74	621.972	2451.19	988.269	603.167	2399.66	922.765	640.101	2453.46	906.625	654.25	2375.76	859.11
9336	0	380.163	2347.93	1630.14	280.068	2345.44	1630.19	401.092	2498.23	1618.66	268.874	2514.61	1610.93	311.157	2555.97	1502.4	308.998	2628.52	1253.97	324.972	2434.53	1420.58	323.019	2366.78	1270.9	220.903	2626.86	1314.35	487.988	2544.3	1452.34	550.461	2547.48	1269.64	575.008	2556.93	1119.48	619.473	2446.46	985.338	600.227	2396.95	918.457	636.973	2451.44	903.718	650.59	2375.32	853.413
9337	0	379.465	2335.68	1631.05	280.392	2334.02	1630.95	401.6	2486.43	1619.74	268.882	2502.69	1611.74	311.172	2544.09	1503.17	308.437	2617.09	1255.15	325.054	2422.73	1421.34	323.769	2355.44	1271.52	220.373	2615.03	1315.42	487.92	2533	1453.23	549.674	2537.36	1270.23	573.038	2548.14	1120.17	616.913	2442.01	982.71	596.994	2394.61	914.351	633.8	2449.52	900.905	647.254	2375.37	847.887
9338	0	379.3	2323.78	1632.07	279.884	2321.93	1631.86	401.551	2474.06	1620.78	268.958	2490.86	1612.63	310.736	2532.06	1504.44	307.723	2605.61	1256.37	325.274	2410.97	1422.03	324.077	2344.26	1271.87	219.717	2603.11	1316.63	487.68	2521.43	1453.68	548.738	2527.1	1270.64	571.008	2539.25	1120.81	614.118	2437.82	979.916	594.172	2392.56	910.129	630.551	2447.93	898.282	643.547	2375.63	842.469
9339	0	379.168	2311.64	1632.98	279.315	2309.68	1632.79	401.69	2461.9	1621.77	268.907	2478.84	1613.17	310.669	2519.78	1505.39	306.948	2594.25	1257.53	325.205	2399.32	1422.43	324.72	2333	1271.99	218.946	2591.16	1317.91	487.883	2510.37	1454.43	547.844	2517.11	1271.09	568.987	2530.59	1121.38	611.608	2433.86	977.35	591.311	2390.84	906.388	627.389	2446.57	895.856	640.114	2376.37	837.459
9340	0	378.687	2299.22	1634.04	279.189	2297.87	1633.45	401.746	2449.71	1622.95	269.109	2466.84	1614.12	310.285	2507.75	1506.51	305.933	2582.9	1258.83	325.751	2387.52	1422.92	324.799	2321.97	1272.48	218.331	2579.4	1319.49	487.503	2498.84	1455.21	546.836	2506.97	1271.47	567.071	2522.18	1122.03	608.87	2430.04	975.044	588.434	2389.15	903.014	623.932	2445.09	893.8	636.394	2377.2	832.839
9341	0	378.76	2286.74	1634.92	278.462	2285.45	1633.77	401.746	2437.31	1624.07	269.246	2454.79	1614.9	310.406	2495.53	1507.51	304.86	2571.43	1260.23	325.603	2375.93	1423.23	325.188	2310.57	1272.37	217.242	2567.39	1320.88	487.261	2487.33	1455.79	545.663	2496.77	1271.87	564.531	2513.17	1123	606.194	2426.12	973.059	585.302	2387.47	899.906	621.07	2443.99	892.408	632.869	2378.09	828.785
9342	0	378.363	2274.4	1635.51	278.91	2273.89	1634.25	401.969	2424.89	1625.04	269.516	2442.77	1615.91	310.165	2483.32	1508.43	303.844	2560.07	1261.33	325.758	2364.17	1423.38	325.211	2299.18	1272.55	216.456	2555.39	1322.31	487.164	2476.15	1456.1	544.548	2486.72	1271.98	562.683	2505.67	1123.3	603.729	2422.54	971.288	582.534	2386.08	896.829	617.779	2442.54	890.819	629.448	2379.03	824.731
9343	0	378.25	2262.14	1635.92	278.387	2261.3	1634.52	402.172	2412.7	1625.62	269.353	2430.7	1616.52	309.802	2471.23	1509.13	302.836	2548.73	1262.24	325.855	2352.59	1423.33	325.4	2287.96	1272.24	215.597	2543.49	1323.49	486.856	2464.63	1456.29	543.482	2476.88	1271.98	560.257	2497.75	1123.48	601.196	2419.14	969.396	579.013	2384.57	893.486	615.217	2441.49	889.719	626.134	2380.21	821.138
9344	0	378.413	2250.1	1635.97	278.679	2249.43	1634.74	402.31	2400.65	1626.2	269.771	2418.64	1616.94	309.76	2459.16	1509.57	301.776	2537.3	1263.02	325.593	2340.74	1423.41	325.254	2276.74	1272.11	214.789	2531.73	1324.58	486.703	2453.72	1456.01	542.16	2467.19	1271.69	557.746	2490.19	1123.57	598.622	2415.75	967.83	576.25	2383.1	890.943	612.307	2440.19	888.596	622.933	2381.05	817.806
9345	0	378.359	2237.87	1635.93	279.041	2237.64	1634.5	402.404	2388.56	1626.55	269.703	2406.75	1617.25	309.522	2447.24	1509.74	300.774	2526.02	1263.56	325.703	2329.06	1423.16	324.909	2265.27	1271.5	213.947	2520.02	1325.5	486.441	2442.37	1455.71	540.75	2457.78	1271.22	555.187	2482.96	1123.52	595.934	2412.3	966.058	573.306	2381.46	888.319	609.372	2438.86	887.525	619.244	2381.85	814.427
9346	0	378.544	2225.84	1635.51	279.22	2225.48	1634.45	402.552	2376.54	1626.48	269.987	2394.7	1617.56	308.984	2435.4	1509.98	299.584	2514.64	1263.74	325.181	2317.29	1422.92	325.118	2254.4	1271.72	212.646	2508.16	1325.73	485.796	2431.41	1454.98	539.285	2448.73	1270.41	552.32	2475.79	1123.19	593.394	2409.12	964.477	570.989	2379.86	886.495	606.479	2437.51	886.425	616.388	2382.69	811.711
9347	0	378.502	2213.71	1634.79	279.261	2213.47	1633.95	402.702	2364.56	1626.11	270.063	2382.77	1617.7	309.034	2423.6	1509.81	298.64	2503.31	1263.87	325.506	2305.64	1422.57	324.517	2243.23	1270.88	211.744	2496.45	1326.06	485.429	2420.38	1454.24	537.801	2440	1269.8	549.709	2468.92	1122.84	591.05	2405.92	962.799	568.351	2378.31	884.126	603.494	2436.04	885.37	613.598	2383.25	809.065
9348	0	379.012	2201.87	1633.87	279.322	2201.2	1633.38	402.812	2352.65	1625.73	270.188	2370.75	1617.68	308.553	2411.76	1509.53	297.614	2491.8	1263.78	325.061	2294.07	1422.21	324.2	2232.44	1270.11	210.86	2484.67	1326.27	484.89	2409.24	1453.53	536.109	2431.13	1268.75	547.105	2462.18	1122.49	588.357	2402.64	961.295	565.968	2376.43	882.318	600.325	2434.36	884.335	610.686	2383.66	807.015
9349	0	379.148	2189.82	1633.05	279.795	2189.2	1632.84	402.989	2340.79	1625.37	270.087	2358.59	1617.72	308.203	2400.04	1509.33	296.59	2480.36	1263.84	325.28	2281.98	1421.92	323.469	2221.22	1269.61	209.892	2472.89	1326.51	484.535	2398.1	1452.83	534.396	2422.54	1268.24	544.208	2455.26	1122.43	585.787	2399.27	960.203	563.112	2374.61	880.556	597.467	2432.86	884.068	607.917	2383.72	805.426
9350	0	379.661	2177.58	1632.13	280.103	2177.18	1632.18	403.003	2328.74	1625	270.149	2346.5	1617.86	307.805	2388.17	1509.16	295.674	2468.77	1263.73	324.725	2270.59	1421.38	323.14	2210.01	1269.1	209.081	2461.16	1326.59	483.956	2386.71	1452.31	532.76	2414.19	1267.78	541.585	2448.48	1122.5	583.237	2395.92	959.226	560.745	2372.59	879.123	594.215	2431.03	883.686	605.316	2383.61	804.176
9351	0	379.814	2166	1630.7	279.926	2164.6	1631.48	402.978	2316.89	1624.3	270.114	2334.45	1618.04	307.287	2376.47	1508.87	294.938	2457.24	1263.53	324.524	2259.02	1420.52	322.261	2198.77	1268.38	208.371	2449.44	1326.64	483.539	2375.47	1451.58	531.142	2405.79	1267.29	539.155	2442.02	1122.47	580.611	2392.48	958.311	558.041	2370.46	877.637	591.177	2429.21	883.45	602.606	2383.17	803.184
9352	0	380.096	2153.97	1629.5	280.641	2152.48	1630.6	403.124	2305.16	1623.55	269.947	2322.18	1617.76	307.129	2364.59	1508.31	294.253	2445.77	1263.2	324.077	2247.32	1419.87	322.081	2187.32	1267.88	207.499	2437.79	1326.31	483.065	2364.09	1450.63	529.437	2397.38	1266.91	536.31	2435	1122.57	578.185	2389.14	957.504	556.42	2367.82	876.748	587.341	2426.81	883.034	599.963	2382.35	802.29
9353	0	380.366	2141.96	1628.31	280.923	2140.55	1629.57	402.926	2293.32	1622.58	269.777	2310.05	1617.44	306.513	2352.83	1507.77	293.592	2434.05	1262.6	323.277	2235.4	1419.1	321.02	2175.95	1266.73	206.846	2426.32	1325.81	482.403	2352.5	1449.83	527.773	2389.01	1266.43	533.599	2428.18	1122.63	575.655	2385.48	956.86	553.424	2365.2	875.48	583.934	2424.64	882.849	597.241	2381.44	801.479
9354	0	380.686	2129.91	1626.99	281.617	2128.31	1628.59	402.627	2281.39	1621.62	269.547	2297.95	1616.78	306.321	2341.09	1506.91	293.237	2422.56	1261.9	322.881	2223.79	1418.16	320.191	2164.06	1266	206.269	2414.69	1325.27	482.003	2341.09	1448.89	526.129	2380.44	1266.01	531.592	2422.21	1122.92	572.852	2381.9	956.003	551.009	2362.21	874.518	580.276	2422.01	882.69	594.387	2379.97	800.581
9355	0	381.137	2118.24	1625.26	281.966	2115.9	1627.49	402.652	2269.78	1620.28	269.359	2285.63	1615.96	305.72	2329.19	1505.74	292.993	2410.81	1260.87	322.389	2211.98	1417.28	319.61	2152.46	1265.19	206.002	2403.35	1324.44	481.568	2329.47	1447.53	524.66	2371.64	1265.42	529.084	2415.05	1122.74	570.575	2377.91	955.281	549.213	2359.2	873.999	577.04	2419.41	882.544	591.727	2378.59	799.998
9356	0	381.385	2106.62	1623.46	282.45	2103.9	1626.1	402.32	2258.04	1618.98	268.941	2273.37	1615.2	305.423	2317.44	1504.59	292.829	2399.19	1259.86	321.965	2199.93	1416.19	318.925	2140.65	1264	205.597	2391.63	1323.42	481.146	2317.71	1446.33	523.134	2362.66	1264.84	526.766	2408.06	1122.7	568.402	2373.93	954.617	546.949	2355.62	873.33	573.551	2416.2	882.391	589.025	2376.74	799.328
9357	0	381.689	2094.89	1621.83	282.863	2091.69	1624.79	401.999	2246.3	1617.8	268.661	2261.1	1614.33	305.39	2305.51	1503.36	292.777	2387.34	1258.84	321.413	2188.2	1414.97	318.186	2129.21	1262.24	205.451	2380.12	1322.62	480.769	2305.68	1445.3	521.622	2353.55	1264.61	524.242	2400.51	1122.88	566.129	2369.4	954.362	544.738	2351.63	872.847	570.444	2412.89	882.578	586.062	2374.1	798.726
9358	0	382.137	2083.33	1620.08	283.171	2079.32	1623.34	401.694	2234.58	1616.66	268.28	2248.92	1613.56	305.036	2293.56	1502.26	292.694	2375.48	1257.82	321.109	2176.26	1413.56	317.393	2117.52	1261.36	205.347	2368.42	1321.64	480.385	2293.47	1444.12	520.544	2343.89	1264.02	522.042	2392.81	1123.03	564.254	2364.73	954.2	542.897	2347.38	872.224	567.265	2408.86	882.797	583.832	2371.94	798.643
9359	0	382.333	2071.42	1618.59	283.103	2066.7	1621.99	401.371	2222.79	1615.59	267.889	2236.48	1612.76	304.955	2281.53	1501.15	292.724	2363.56	1256.75	320.262	2163.93	1412.52	316.893	2105.71	1259.94	205.387	2356.73	1320.79	480.076	2281.22	1442.92	519.38	2333.97	1263.75	519.835	2384.52	1123.25	562.424	2359.45	954.008	541.114	2342.66	871.801	564.345	2404.57	883.141	581.368	2368.79	798.381
9360	0	382.676	2059.53	1616.75	283.637	2054.46	1620.56	401.098	2211.04	1614.42	267.174	2224.09	1612.04	304.836	2269.45	1499.74	293.021	2351.63	1255.55	320.254	2151.93	1411.03	316.117	2093.95	1258.42	205.551	2344.95	1319.68	480.095	2269.07	1441.75	518.574	2323.69	1263.28	518.007	2375.98	1123.43	560.826	2353.8	953.982	540.137	2338.08	871.435	561.865	2399.78	883.431	576.829	2359.2	796.645
9361	0	383.023	2047.66	1615.1	284.315	2042.14	1618.77	400.776	2199.31	1613.22	267.053	2211.68	1611.29	304.632	2257.41	1498.27	293.258	2339.42	1254.21	319.857	2139.9	1409.43	315.691	2081.81	1256.96	205.679	2333.21	1318.49	479.991	2256.55	1440.58	517.848	2313.24	1262.76	516.486	2367.24	1123.41	559.407	2347.77	953.718	538.875	2332.12	870.868	559.354	2394.48	883.662	574.539	2355.24	796.542
9362	0	383.235	2035.81	1613.34	284.755	2029.9	1616.99	400.311	2187.55	1611.85	266.551	2199.38	1610.16	304.675	2245.38	1496.95	293.561	2327.43	1252.79	319.531	2127.6	1407.99	314.949	2069.35	1255.38	205.982	2321.45	1317	479.779	2243.91	1439.2	517.108	2302.58	1262.03	514.932	2357.74	1123.26	557.857	2341.14	953.397	537.124	2326.45	870.766	557.253	2388.76	883.749	572.504	2351.16	796.032
9363	0	383.699	2023.99	1611.51	284.778	2017.39	1615.62	399.973	2175.82	1610.4	266.114	2186.94	1608.93	304.601	2233.28	1495.28	293.99	2315.22	1251.13	319.529	2115.33	1406.68	314.501	2056.9	1253.87	205.986	2309.39	1315.13	479.943	2231.66	1437.6	516.727	2291.6	1261	513.856	2348.03	1122.94	556.648	2334.05	952.842	536.981	2319.9	870.177	555.039	2382.55	883.812	570.393	2346.28	795.169
9364	0	384.192	2012.16	1609.49	285.527	2005.15	1614.04	399.698	2164.17	1608.95	265.832	2174.56	1607.62	304.628	2221.32	1493.6	294.524	2302.91	1249.41	319.117	2103.04	1405.31	314.422	2044.44	1252.72	206.271	2297.54	1313.36	479.938	2219.34	1436.07	516.292	2280.35	1259.96	512.88	2337.76	1122.55	555.655	2326.49	952.193	535.203	2313.38	869.703	553.686	2375.92	883.832	568.706	2341.48	794.639
9365	0	384.733	2000.66	1607.71	286.135	1992.64	1612.33	399.458	2152.52	1607.48	265.376	2162.22	1606.37	304.654	2209.31	1491.99	295.199	2290.52	1247.56	319.175	2090.78	1403.9	314.238	2031.97	1251.44	206.846	2285.53	1311.6	480.176	2206.9	1434.52	516.109	2268.73	1258.9	512.2	2327.18	1121.95	554.818	2318.39	951.655	534.118	2305.99	868.911	552.331	2368.68	883.833	567.31	2335.71	793.93
9366	0	385.565	1988.84	1605.94	286.73	1980.38	1610.62	399.369	2140.86	1606.04	265.578	2149.81	1605.28	304.832	2197.26	1490.33	295.909	2277.85	1245.64	319.134	2078.53	1402.54	313.889	2019.37	1249.92	207.397	2273.36	1309.67	480.404	2194.39	1433.13	516.085	2256.88	1257.71	511.707	2316.01	1121.34	554.386	2309.69	951.024	534.211	2298.16	868.302	551.193	2360.74	883.834	565.861	2329.31	793.216
9367	0	385.966	1976.54	1604.52	287.292	1967.8	1609.26	399.271	2128.85	1604.96	265.13	2137.28	1603.97	305.013	2185.18	1488.9	296.751	2265.32	1243.99	319.218	2066.23	1401.5	314.036	2006.69	1249.26	208.119	2261.2	1307.98	480.775	2181.92	1432.14	516.226	2244.59	1256.98	511.328	2304.31	1120.9	554.067	2300.24	950.6	533.704	2289.81	867.809	550.709	2352.25	884.061	564.301	2322.45	792.768
9368	0	386.55	1964.56	1603.44	287.94	1955.6	1608.16	399.221	2116.84	1603.91	265.155	2124.75	1602.94	305.448	2173.03	1487.61	297.538	2252.46	1242.43	319.468	2053.68	1400.46	313.982	1994.05	1248.25	208.875	2248.81	1306.38	481.077	2168.92	1431.17	516.498	2232.02	1256.18	511.314	2292.24	1120.33	554.055	2290.09	950.35	533.693	2280.64	867.176	550.686	2342.98	884.375	564.632	2318.94	793.738
9369	0	387.244	1952.68	1602.3	288.979	1943.48	1606.95	399.374	2104.8	1602.88	265.173	2112.31	1602.03	305.873	2160.72	1486.43	298.459	2239.47	1240.82	319.748	2041.29	1399.31	314.178	1981.24	1247.61	209.779	2236.42	1304.71	481.647	2156.27	1430.1	517.03	2219.41	1255.2	511.586	2279.73	1119.72	554.407	2279.4	949.692	533.999	2271.09	866.227	551.073	2333.05	884.547	565.245	2311.6	794.008
9370	0	387.837	1940.62	1601.47	289.851	1930.91	1605.96	399.528	2092.81	1601.97	265.301	2099.85	1601.04	306.381	2148.58	1485.3	299.205	2226.57	1239.39	320.089	2028.68	1398.48	313.69	1967.63	1246.65	210.633	2223.86	1303.32	482.452	2143.95	1429.13	517.585	2206.44	1254.14	512.168	2267.01	1118.93	555.017	2268.28	949.224	530.001	2259.36	863.086	551.391	2322.47	884.206	565.054	2302.29	793.484
9371	0	388.571	1928.53	1600.67	290.311	1918.37	1604.86	399.806	2080.92	1600.92	265.389	2087.37	1599.85	306.973	2136.15	1483.97	300.04	2213.58	1237.94	320.486	2016.09	1397.43	314.021	1954.56	1245.88	211.345	2211.05	1301.64	482.735	2130.81	1427.98	518.396	2193.53	1253.03	512.743	2253.82	1117.96	553.761	2251.09	947.168	534.955	2249.88	864.619	552.526	2311.22	884.234	565.083	2292.34	792.602
9372	0	389.571	1916.57	1599.63	291.107	1906.27	1603.97	400.025	2069.11	1599.82	265.853	2075.28	1598.55	307.666	2123.82	1482.69	300.826	2200.4	1236.37	321.244	2003.54	1396.5	314.857	1941.44	1245.38	212.195	2198.09	1300.03	483.635	2118.38	1426.93	519.126	2180.32	1251.64	513.721	2240.54	1116.66	556.858	2244.19	947.295	532.607	2237.29	862.132	553.865	2299.41	883.586	564.9	2281.14	791.036
9373	0	390.347	1905.01	1598.8	291.68	1894.06	1603.28	400.437	2057.41	1598.61	266.056	2063.09	1597.27	308.349	2111.62	1481.26	301.524	2187.13	1234.59	321.918	1990.66	1395.97	315.478	1928.13	1244.7	212.859	2185.26	1298.18	484.208	2105.7	1425.33	520.035	2167.16	1250.08	514.783	2226.94	1115.18	556.519	2227.12	944.78	534.136	2225.26	861.35	555.362	2286.99	882.758	565.834	2269.79	789.67
9374	0	391.222	1893.06	1598.28	292.713	1882.19	1602.8	400.845	2045.5	1597.64	266.756	2050.8	1596.15	309.04	2099.44	1480.04	302.393	2173.84	1232.83	322.458	1978.02	1395.26	316.103	1914.55	1244.31	213.62	2172.47	1296.37	485.198	2093.17	1424.09	521.086	2153.67	1248.4	516.321	2213.18	1113.57	558.143	2214.81	943.261	535.788	2212.58	859.983	557.429	2273.9	881.746	567.811	2258.18	788.588
9375	0	391.886	1880.74	1598.37	292.836	1869.31	1602.75	401.574	2033.43	1597.42	267.481	2038.52	1595.79	310.175	2087.42	1479.38	303.146	2160.51	1231.48	323.03	1965.32	1394.94	317.249	1900.72	1244.34	214.378	2159.45	1294.99	485.952	2080.68	1422.91	522.323	2140.14	1247.02	517.927	2198.95	1112.1	559.943	2201.29	942.027	539.224	2199.84	859.703	560.035	2260.19	880.908	568.738	2244.23	786.869
9376	0	392.191	1868.19	1599.07	293.345	1857.15	1602.81	402.293	2020.74	1597.98	268.08	2026.4	1595.95	311.035	2075.14	1479.2	303.776	2147.28	1230.89	323.687	1952.57	1395.23	318.041	1887.45	1244.73	215.067	2146.46	1294.46	487.038	2068.27	1422.92	523.585	2126.08	1246.17	519.5	2184.28	1111.01	561.947	2186.59	941.34	539.881	2184.94	858.015	562.373	2245.65	880.113	571.068	2230.15	786.229
9377	0	392.695	1855.79	1599.88	293.777	1845.03	1603.65	403.238	2008.27	1598.82	268.854	2014.2	1596.7	311.789	2062.86	1479.44	304.244	2133.85	1230.71	324.476	1940.08	1395.52	318.804	1874.05	1245.44	215.782	2133.62	1294.39	487.965	2055.89	1422.84	524.955	2111.84	1245.69	521.359	2169.51	1110.21	564.189	2171.28	940.75	542.207	2169.84	857.153	564.903	2230.32	879.311	573.911	2215.03	785.791
9378	0	393.103	1843.23	1601.05	294.088	1832.75	1604.28	404.291	1995.79	1599.85	270.061	2002.07	1597.63	312.591	2050.48	1480.19	304.481	2120.63	1230.78	325.167	1927.53	1396.29	319.458	1860.73	1246.46	216.252	2120.87	1294.73	488.624	2043.39	1423.19	526.494	2097.76	1245.33	523.221	2154.5	1109.53	566.529	2155.69	940.618	544.944	2154.03	856.68	568.631	2214.53	879.109	576.877	2198.62	785.412
9379	0	393.595	1830.71	1602.03	294.741	1820.73	1605.29	405.177	1983.05	1601.06	271.003	1989.95	1598.55	313.438	2038.24	1480.93	304.721	2107.6	1231.28	325.716	1915.29	1397.33	320.274	1847.45	1248.09	216.546	2107.99	1295.31	489.331	2031.43	1423.53	527.754	2083.67	1245.28	524.989	2139.32	1109.06	569.063	2139.27	940.366	547.9	2137.4	856.273	571.582	2197.74	878.585	580.385	2181.5	784.948
9380	0	394.046	1818.34	1602.94	294.795	1808.6	1606.29	406.237	1970.42	1602.16	272.103	1978.28	1599.93	313.94	2026.14	1481.78	304.713	2094.87	1231.89	325.847	1902.74	1398.75	320.618	1834.74	1249.79	216.818	2095.41	1296.16	489.757	2019.33	1424.27	528.924	2069.61	1245.33	526.636	2124.16	1108.81	571.558	2122.68	940.343	551.67	2119.97	856.85	574.17	2179.89	877.822	582.526	2161.8	783.828
9381	0	394.273	1805.89	1603.82	295.171	1796.72	1607.61	407.175	1958.09	1603.05	273.036	1966.28	1601.15	314.371	2014.11	1482.71	304.845	2082	1232.64	326.375	1890.49	1400.21	320.787	1822.06	1251.28	217.029	2082.96	1297.11	490.074	2007.12	1424.87	529.933	2055.67	1245.67	528.511	2109.06	1108.7	574.295	2105.37	940.255	554.059	2101.15	856.565	577.63	2161.57	877.502	586.425	2142.68	783.42
9382	0	394.568	1793.57	1604.47	295.577	1784.82	1608.97	408.202	1945.91	1603.99	274.254	1954.49	1602.69	314.565	2001.83	1484	304.798	2069.4	1233.46	326.298	1878.41	1401.51	320.719	1809.75	1253.08	216.985	2070.59	1298.19	490.438	1994.85	1425.69	528.857	2040.43	1245.56	530.333	2093.85	1108.64	576.952	2087.67	940.277	557.903	2082.04	856.888	581.42	2142.67	877.246	590.038	2122.16	783.006
9383	0	395.016	1781.49	1605.45	295.49	1772.75	1610.51	409.077	1933.45	1605.08	275.038	1942.91	1604.69	315.286	1989.99	1485.23	304.941	2057.2	1234.65	325.708	1865.69	1402.99	320.474	1797.67	1254.64	217.279	2058.67	1299.59	490.639	1982.24	1426.84	529.761	2026.6	1246.23	532.238	2078.55	1108.9	579.939	2069.28	940.757	560.915	2062.3	857.334	584.469	2123.12	876.454	594.177	2101.09	783.076
9384	0	395.104	1769.2	1606.36	295.608	1761.01	1612.16	409.849	1920.92	1606.22	275.722	1930.96	1606.58	315.625	1978.03	1486.69	305.001	2045	1236.28	325.498	1853.63	1404.52	319.863	1785.86	1256.2	217.538	2046.72	1301.45	490.493	1969.4	1427.79	530.759	2012.83	1247.48	534.37	2063.25	1109.24	582.845	2050.63	941.559	565.011	2042.14	858.55	587.869	2102.89	875.855	598.177	2078.77	783.219
9385	0	393.786	1755.52	1607.45	295.685	1749.15	1613.61	410.54	1908.56	1607.46	276.754	1919.02	1608.6	315.939	1965.98	1488.36	305.323	2033.13	1238.25	325.053	1841.77	1405.97	318.957	1774.15	1257.31	218.065	2035.13	1303.59	491.059	1957.03	1429.55	532.94	1999.6	1249.26	536.394	2047.72	1109.76	585.899	2031.45	942.561	567.954	2020.97	859.101	591.375	2082.02	875.641	602.507	2055.96	783.971
9386	0	393.74	1743.26	1608.65	295.688	1737.47	1615.19	411.079	1896.17	1608.93	277.01	1907.35	1611.11	316.322	1954.09	1490.28	305.746	2021.42	1240.28	325.605	1830.44	1407.56	317.797	1762.64	1258.5	218.441	2023.68	1305.73	491.232	1944.14	1431.12	533.158	1984.77	1250.43	538.362	2031.91	1110.54	588.87	2011.81	943.805	571.536	1999.6	860.359	595.247	2061.1	875.88	606.628	2032.13	784.821
9387	0	393.637	1730.96	1609.83	295.06	1725.11	1617.05	411.549	1883.91	1610.25	277.607	1895.45	1613.55	316.344	1942.18	1492.07	306.271	2009.73	1242.11	324.425	1818.32	1408.88	316.773	1751.02	1260.06	219.098	2012.44	1307.68	491.655	1931.17	1432.94	534.931	1971.2	1252.11	540.717	2016.23	1111.2	591.973	1991.89	945.099	574.987	1977.57	861.603	598.781	2039.5	875.878	611.171	2008.38	786.068
9388	0	393.098	1719.01	1610.61	294.698	1713.27	1618.32	411.818	1871.75	1611.35	277.841	1883.96	1615.44	316.701	1930.55	1493.79	306.967	1998.22	1243.69	323.758	1806.53	1410.38	315.375	1739.38	1261.46	219.902	2001.47	1309.51	491.281	1918.24	1434.01	535.29	1956.31	1253.08	542.705	2000.27	1111.57	594.801	1971.67	946.136	578.759	1955.35	863.028	602.3	2017.42	875.941	615.3	1983.58	787.224
9389	0	391.931	1706.88	1611.16	294.657	1701.7	1619.79	412.021	1859.83	1612.4	278.027	1872.34	1617.11	316.537	1919	1495.32	307.761	1986.94	1245.04	322.984	1795.04	1411.76	314.218	1727.89	1262.93	220.543	1990.64	1310.63	491.468	1905.83	1435.52	536.012	1941.78	1253.94	544.765	1984.28	1112.03	597.712	1951.43	947.554	582.216	1932.59	864.877	605.729	1995.19	876.112	619.492	1958.7	788.553
9390	0	392.117	1694.89	1612.26	294.28	1690.18	1621.11	411.778	1847.89	1613.55	278.152	1860.78	1618.68	316.723	1907.79	1496.61	308.524	1975.7	1246.5	322.354	1783.51	1413.22	312.903	1716.33	1264.41	221.061	1979.86	1311.86	489.929	1891.96	1436.45	536.598	1927.24	1254.98	546.89	1968.24	1112.56	600.52	1930.8	948.967	584.805	1909.05	866.818	609.142	1972.53	876.422	623.449	1933.28	790.187
9391	0	391.678	1683.24	1613.05	293.973	1678.74	1622.39	411.576	1836.28	1614.67	277.934	1849.37	1620.35	316.804	1896.47	1498.13	309.348	1964.51	1247.89	321.665	1772.13	1414.83	311.829	1704.94	1265.86	221.839	1969.26	1313.02	490.184	1879.73	1438.12	537.851	1912.59	1256.12	549.126	1952.09	1113.03	603.25	1910.01	950.744	587.935	1885.76	869.166	612.464	1949.44	876.919	627.439	1907.65	792.206
9392	0	390.614	1671.34	1614.12	293.604	1667.39	1623.12	411.274	1824.61	1616.03	277.456	1837.68	1622.19	316.705	1885.21	1499.57	310.284	1953.44	1249.3	320.982	1760.71	1416.36	310.93	1693.64	1267.53	222.759	1958.57	1314.11	489.998	1867.51	1439.75	538.472	1898.07	1257.09	551.251	1935.65	1113.74	605.778	1888.68	952.573	590.85	1862.34	871.716	615.67	1925.99	877.796	631.265	1881.7	794.934
9393	0	390.365	1659.9	1614.84	293.012	1655.73	1624.17	410.558	1812.72	1617.68	277.438	1826.16	1624.68	316.669	1873.92	1501.14	311.185	1942.28	1250.88	320.337	1749.48	1417.72	310.157	1682.37	1269.17	223.524	1947.86	1315.65	489.949	1855.24	1441.63	539.85	1883.3	1259.07	553.484	1919.16	1114.8	608.343	1867.29	955.084	593.888	1838.78	875.265	618.779	1902.18	879.263	634.654	1854.88	798.066
9394	0	389.957	1648.33	1615.64	292.678	1644.39	1624.87	410.262	1801.3	1619.81	276.853	1814.38	1626.45	316.562	1862.57	1502.8	312.004	1931.18	1252.5	319.846	1738.34	1419.36	309.716	1671.17	1270.71	224.386	1937.2	1317.17	489.941	1843.08	1443.75	540.73	1868.56	1261.05	555.776	1902.67	1116.04	610.586	1845.39	957.958	596.299	1815.11	878.737	621.978	1878.14	881.152	638.045	1828.35	801.936
9395	0	389.493	1636.91	1616.52	291.98	1632.71	1625.49	409.635	1789.74	1621.86	275.968	1802.86	1628.36	316.47	1851.26	1504.35	312.755	1920.16	1254.19	319.515	1727.05	1420.74	309.207	1660.09	1271.98	225.193	1926.51	1318.63	489.921	1830.97	1445.87	542.09	1853.87	1262.99	558.042	1885.96	1117.3	612.889	1823.62	961.041	598.331	1791.27	882.351	625.079	1853.8	883.427	641.06	1801.63	805.972
9396	0	388.972	1625.48	1617.31	291.613	1621.5	1626.11	408.906	1778.22	1623.65	275.402	1791.36	1630.11	316.295	1840.09	1505.73	313.553	1909.17	1255.62	319.001	1715.96	1421.85	308.925	1649.03	1273.02	225.919	1915.97	1319.89	489.906	1818.74	1447.65	543.068	1839.32	1264.66	560.245	1869.15	1118.42	615.044	1801.75	964.068	600.34	1767.28	886.235	628.473	1829.97	885.838	643.737	1774.53	810.051
9397	0	388.159	1614.04	1617.93	290.906	1609.84	1626.37	407.798	1766.75	1624.8	274.416	1779.72	1631.19	316.401	1828.83	1507.09	314.32	1898.26	1256.71	318.708	1704.85	1422.8	308.944	1638.06	1274.1	226.641	1905.3	1320.62	489.949	1806.94	1449.11	544.34	1824.96	1266.23	562.375	1852.44	1119.22	616.933	1779.72	967.062	601.979	1743.38	890.067	631.128	1805.01	888.203	646.124	1747.72	814.176
9398	0	387.512	1602.84	1618.57	290.013	1598.3	1626.58	406.958	1755.49	1626.21	273.677	1768.48	1631.96	316.221	1817.76	1507.95	314.953	1887.46	1257.61	318.327	1693.77	1423.73	308.949	1627.11	1274.78	227.18	1894.82	1321.3	489.926	1795.13	1450.54	545.274	1810.62	1267.52	564	1834.84	1120.05	618.698	1757.78	970.003	603.647	1719.67	894.518	633.768	1780.6	890.608	648.304	1720.84	818.646
9399	0	386.805	1591.53	1618.96	289.076	1586.78	1626.63	405.633	1743.65	1627.17	273.095	1757.2	1632.33	316.322	1806.59	1508.58	315.613	1876.65	1258.37	318.399	1682.84	1424.44	308.984	1616.28	1275.43	227.673	1884.23	1321.71	490.04	1783.47	1451.59	546.403	1796.37	1268.62	566.851	1818.68	1121.04	620.412	1735.89	973.081	605.067	1695.81	898.879	636.434	1756.11	893.267	650.14	1694.17	823.098
9400	0	385.858	1580.25	1619.33	288.493	1575.7	1626.38	404.996	1732.27	1628.21	272.122	1745.91	1632.72	316.177	1795.52	1509.05	316.142	1865.86	1258.82	318.079	1671.73	1424.94	309.384	1605.4	1276.24	228.174	1873.58	1321.97	489.789	1771.61	1452.57	547.531	1782.26	1269.66	570.125	1802.96	1121.76	622.029	1714.02	976.329	606.25	1672.06	903.59	638.864	1731.53	895.896	651.678	1667.39	827.805
9401	0	385.184	1568.75	1619.62	287.661	1564.44	1626.25	404.244	1720.69	1629.26	271.554	1734.52	1632.91	316.525	1784.47	1509.51	316.78	1854.98	1259.59	318.122	1660.77	1425.13	309.175	1594.67	1276.16	228.761	1863	1322.43	490.134	1760.07	1453.67	548.469	1768.17	1270.85	572.381	1786.2	1122.47	623.656	1692.35	979.614	607.375	1648.58	907.854	641.427	1707.21	899.136	653.22	1641	832.865
9402	0	384.58	1557.48	1619.82	287.02	1553.41	1625.88	403.793	1709.22	1630.24	270.876	1723.46	1633.35	316.507	1773.35	1510.15	317.151	1844.16	1259.98	318.085	1649.87	1425.49	309.471	1583.62	1276.42	229.21	1852.18	1322.89	490.248	1748.53	1454.52	550.028	1754.09	1271.99	574.032	1768.42	1123.08	625.218	1670.67	983.367	608.278	1625.38	912.412	643.822	1683.03	902.593	654.642	1614.71	838.403
9403	0	383.773	1545.94	1620.07	285.966	1542.21	1625.38	403.34	1697.62	1631.24	270.42	1712.07	1633.58	316.562	1762.17	1510.47	317.396	1833.26	1260.62	317.949	1638.76	1425.48	309.397	1572.95	1276.34	229.754	1841.42	1323.38	490.085	1736.93	1455.45	551.19	1739.9	1273.05	576.423	1751.62	1123.87	626.473	1649.06	986.919	609.287	1602.42	916.992	645.328	1658.34	905.955	655.705	1588.52	843.98
9404	0	382.719	1534.33	1620.03	284.955	1531.08	1624.71	402.884	1685.91	1631.83	270.057	1701.16	1634.09	316.666	1751.04	1510.64	317.554	1822.45	1260.81	317.966	1627.72	1425.37	309.38	1561.94	1276.12	229.99	1830.58	1323.57	490.174	1725.51	1455.83	552.331	1725.93	1273.73	578.496	1734.91	1124.39	627.811	1627.84	990.39	610.529	1580.11	921.875	647.795	1634.9	909.701	656.536	1562.7	849.475
9405	0	382.066	1522.89	1619.85	284.179	1520.08	1624.05	402.727	1674.22	1632.11	269.849	1689.77	1633.83	316.504	1739.97	1510.56	317.72	1811.58	1260.72	317.797	1616.71	1425.06	309.403	1551.02	1275.75	230.282	1819.65	1323.22	490.173	1714.34	1456.01	553.445	1712.15	1274.23	581.177	1718.38	1124.83	628.917	1606.78	993.837	611.033	1557.27	926.366	649.223	1611.08	912.948	657.339	1537.56	854.776
9406	0	380.584	1511.44	1619.28	283.231	1508.97	1623.45	402.384	1662.6	1631.96	269.567	1679.13	1633.24	316.446	1728.87	1510.19	317.717	1800.61	1260.36	317.956	1605.66	1424.68	309.627	1540.24	1275.47	230.383	1808.68	1322.8	490.39	1703.29	1455.82	554.44	1698.4	1274.33	582.698	1701.44	1124.66	630.081	1585.98	997.168	611.522	1535.06	930.895	651.042	1588.06	916.304	658.021	1512.76	860.139
9407	0	379.739	1499.75	1618.74	282.314	1497.72	1622.76	402.17	1650.85	1631.57	269.584	1668.2	1632.77	316.064	1717.66	1509.58	317.641	1789.69	1259.72	317.925	1594.51	1424.27	309.622	1529.31	1274.96	230.263	1797.62	1322.17	490.129	1692.15	1455.09	555.43	1684.95	1274.26	585.255	1685.44	1124.64	631.014	1565.67	1000.07	612.202	1513.24	935.591	652.347	1565.19	919.399	658.537	1488.45	865.439
9408	0	379.189	1488.34	1617.95	281.548	1486.62	1621.98	402.057	1639.28	1631.27	269.776	1657.18	1632.06	316	1706.49	1508.81	317.366	1778.72	1259.06	317.726	1583.45	1423.6	309.594	1518.3	1274.29	229.928	1786.32	1321.17	489.961	1680.94	1454.57	556.117	1671.3	1273.97	586.573	1668.69	1124.24	631.815	1545.5	1003.13	612.633	1491.63	940.186	653.139	1542.65	922.311	659.049	1464.64	870.755
9409	0	377.987	1476.56	1617.15	280.615	1475.4	1621.07	401.783	1627.4	1630.37	269.528	1646.33	1631.47	316.026	1695.48	1508	317.036	1767.73	1258.31	317.867	1572.21	1422.96	309.741	1507.37	1273.44	229.752	1775.09	1320.31	489.968	1669.94	1453.84	556.754	1657.94	1273.72	588.584	1652.49	1124.31	632.578	1525.76	1006.06	612.945	1470.43	944.528	654.503	1520.8	925.724	659.181	1441.18	875.991
9410	0	377.67	1464.92	1616.01	279.827	1464.27	1619.98	401.88	1615.57	1629.71	269.993	1635.21	1630.84	315.689	1683.95	1507.33	316.625	1756.58	1257.54	317.916	1560.93	1422.13	310.169	1496.71	1272.39	229.475	1763.77	1319.53	489.733	1658.93	1453.07	557.458	1644.51	1273.47	590.037	1636.2	1124.09	633.299	1506.34	1009.29	613.27	1449.75	948.972	655.682	1499.29	929.198	659.457	1418.34	881.23
9411	0	376.345	1453.06	1615.2	279.05	1453.17	1619.06	401.849	1603.56	1629.06	270.201	1623.94	1630.19	315.779	1672.86	1506.51	316.07	1745.29	1256.9	317.827	1549.62	1421.14	310.219	1485.58	1271.31	229.163	1752.07	1318.98	489.544	1647.74	1452.29	557.942	1631.03	1273.38	591.711	1619.93	1124.42	633.618	1487	1012.4	613.532	1429.26	953.215	656.301	1477.79	932.641	659.613	1395.99	886.715
9412	0	375.853	1441.41	1614.18	278.184	1441.94	1618.14	402.059	1591.6	1628.39	270.21	1612.44	1629.73	315.27	1661.1	1505.85	315.374	1733.9	1256.36	317.785	1538.28	1420.14	310.55	1474.4	1270.33	228.609	1740.27	1318.27	489.658	1636.71	1451.89	558.437	1617.68	1273.25	593.051	1603.77	1124.7	634.144	1468.16	1015.67	613.55	1409.29	957.363	657.132	1457.05	936.379	659.608	1374.16	892.116
9413	0	374.863	1429.76	1613.06	277.515	1430.78	1617.04	402.169	1579.62	1627.63	270.262	1601.39	1628.72	315.151	1649.7	1504.89	314.502	1722.37	1255.48	317.92	1526.85	1419.03	310.476	1462.76	1269.15	228.055	1728.44	1317.44	489.391	1625.7	1451.21	558.842	1604.31	1273.05	594.111	1587.94	1124.74	634.436	1449.57	1018.8	613.801	1389.9	961.663	657.308	1436.35	939.767	659.39	1352.76	897.133
9414	0	374.367	1417.8	1611.91	276.827	1419.45	1615.68	402.126	1567.62	1626.36	270.515	1590.09	1627.55	314.4	1637.84	1503.72	313.652	1710.9	1254.13	317.762	1515.2	1417.79	310.685	1451.28	1267.83	227.229	1716.49	1316.04	489.143	1614.38	1450.08	559.09	1591.15	1272.44	595.121	1572.43	1124.52	634.577	1431.5	1021.33	613.579	1370.76	965.34	658.053	1416.7	942.93	659.224	1332.09	901.876
9415	0	373.34	1406	1610.58	275.956	1408.11	1614.54	402.132	1555.69	1624.99	270.532	1578.76	1626.15	314.089	1626.52	1502.36	312.82	1699.35	1252.67	317.67	1503.62	1416.48	310.581	1439.76	1266.7	226.528	1704.47	1314.72	488.518	1603.19	1448.47	558.853	1578.08	1271.48	595.753	1557.06	1124.01	634.622	1413.82	1023.95	613.313	1352.02	969.08	657.747	1396.97	945.604	658.905	1311.89	906.421
9416	0	372.445	1394.27	1609.37	275.3	1396.66	1613.54	402.061	1543.79	1623.44	270.432	1567.47	1624.64	313.745	1614.83	1500.86	311.837	1687.65	1251.13	317.514	1491.92	1414.95	310.876	1427.97	1265.21	225.507	1692.27	1313.08	488.071	1592.13	1447.03	558.931	1565.17	1270.55	596.049	1541.88	1123.31	634.51	1396.53	1026.08	613.054	1333.86	972.572	658.228	1378.47	948.246	658.545	1292.47	910.466
9417	0	371.746	1382.32	1608.24	274.429	1385.13	1612.44	401.846	1531.92	1621.96	270.731	1556.14	1623.38	313.09	1603.08	1499.34	310.758	1675.83	1249.65	317.543	1480.11	1413.74	311.109	1416.29	1263.77	224.433	1680.05	1311.41	487.753	1581.06	1445.59	558.67	1552.26	1269.6	596.456	1527.23	1122.72	634.287	1379.78	1028.18	612.698	1316.24	976.065	657.644	1359.73	950.557	658.147	1273.46	914.589
9418	0	371.228	1370.55	1607.03	273.661	1373.65	1611.08	401.621	1519.98	1620.49	270.671	1544.6	1621.73	312.212	1591.27	1497.94	309.608	1664.12	1248.25	317.273	1468.18	1412.31	311.189	1404.35	1262.47	223.308	1667.56	1309.83	487.159	1569.82	1444.03	558.091	1539.6	1268.74	596.577	1512.43	1122.04	634.087	1363.24	1030.3	612.106	1298.92	978.937	657.978	1342.23	953.143	657.714	1255.08	918.479
9419	0	370.373	1358.65	1605.51	273.057	1362.09	1609.84	401.356	1508.06	1619.05	270.335	1533.08	1620.34	311.791	1579.44	1496.53	308.321	1652.08	1246.68	317.043	1456.34	1410.92	311.482	1392.23	1261.16	222.123	1655.15	1308.13	486.612	1558.54	1442.64	558.052	1526.91	1267.63	596.501	1497.99	1121.42	633.736	1347.31	1032.23	611.651	1282.21	981.705	657.32	1324.6	955.136	656.964	1237.22	922
9420	0	369.637	1346.79	1604.49	272.295	1350.35	1608.66	400.922	1496.06	1617.9	269.821	1521.17	1619.24	310.859	1567.34	1494.92	306.929	1639.94	1245.37	316.531	1444.41	1409.6	311.524	1380.04	1259.71	220.904	1642.52	1306.9	485.835	1547.31	1441.49	557.38	1514.3	1266.92	596.368	1483.84	1120.9	633.201	1331.72	1033.94	610.969	1266.05	984.258	657.376	1308.01	957.771	656.195	1219.83	925.38
9421	0	368.896	1334.97	1603.15	271.672	1338.62	1607.5	400.461	1484.07	1616.75	269.696	1509.34	1618.22	309.801	1555.48	1493.69	305.608	1627.73	1244.12	316.238	1432.36	1408.24	311.493	1367.67	1258.63	219.859	1629.79	1305.82	485.163	1536.06	1440.24	556.857	1501.63	1266.02	596.278	1470.11	1120.51	632.541	1316.46	1035.56	610.266	1250.36	986.495	656.866	1291.62	959.839	655.327	1203.14	928.719
9422	0	368.355	1322.97	1601.6	270.894	1326.77	1605.95	399.848	1472.19	1615.56	268.952	1497.71	1616.82	309.127	1543.53	1492.46	304.146	1615.34	1242.78	315.607	1420.22	1406.88	311.352	1355.03	1257.6	218.319	1616.97	1304.22	484.16	1524.54	1438.84	556.267	1489.38	1265.14	595.777	1456.69	1119.77	631.82	1301.83	1036.86	609.438	1235.12	988.607	656.083	1275.85	961.525	654.407	1186.94	931.367
9423	0	367.556	1311.2	1600.49	270.089	1314.87	1604.73	399.033	1460.37	1614.19	268.238	1485.82	1615.49	307.954	1531.42	1490.8	302.703	1602.76	1241	315.064	1408.11	1405.61	311.179	1342.54	1256.44	216.971	1604.06	1302.53	482.973	1513.44	1437.28	555.403	1477.22	1263.89	595.254	1443.71	1118.81	631.146	1287.71	1037.74	608.584	1220.43	990.387	655.68	1260.96	962.894	653.459	1171.51	933.559
9424	0	366.836	1299.2	1599.35	269.49	1302.89	1603.59	398.191	1448.66	1612.76	267.413	1473.74	1614.27	306.642	1519.5	1489.26	301.059	1589.89	1239.14	314.394	1395.93	1404.36	310.868	1329.84	1255.56	215.275	1591.12	1300.48	481.779	1502.1	1435.71	554.476	1465.41	1262.54	594.373	1430.98	1117.53	630.319	1274.09	1038.31	607.728	1206.31	991.763	654.725	1246.36	963.722	652.467	1156.68	935.627
9425	0	366.189	1287.52	1598.17	268.747	1290.94	1602.41	397.205	1436.91	1611.38	266.568	1461.79	1612.84	305.397	1507.45	1487.71	299.571	1577.1	1237.32	313.644	1383.69	1403.23	310.418	1317.26	1254.53	213.78	1578.24	1298.72	480.567	1490.69	1434.19	553.378	1453.59	1261.14	593.522	1418.88	1116.24	629.447	1261.01	1038.79	606.873	1192.71	992.982	653.755	1232.36	964.278	651.701	1142.59	937.249
9426	0	365.393	1275.65	1596.91	268.001	1278.74	1601.09	396.058	1425.12	1610.07	265.168	1449.78	1611.49	303.898	1495.23	1486.08	297.914	1564.07	1235.41	312.575	1371.3	1402.11	309.684	1304.6	1253.51	211.936	1565.24	1296.78	479.239	1479.09	1432.68	552.006	1442.05	1259.79	592.67	1407.22	1114.85	628.601	1248.32	1038.85	605.875	1179.57	993.934	652.83	1219.08	964.593	650.627	1128.97	938.423
9427	0	364.533	1263.7	1595.81	267.072	1266.65	1600.19	394.962	1413.51	1608.69	264.034	1437.67	1610.14	302.598	1483.1	1484.51	296.23	1550.99	1233.64	311.484	1358.81	1400.95	308.645	1291.95	1252.51	210.526	1552.27	1295.27	477.666	1467.13	1431.05	550.941	1430.51	1258.15	591.487	1395.57	1113.36	627.498	1236.01	1038.61	604.93	1166.95	994.358	651.76	1206.28	964.608	649.749	1115.92	939.236
9428	0	363.905	1252.04	1594.67	266.348	1254.54	1599.28	393.682	1401.67	1607.36	262.744	1425.43	1609.01	300.988	1470.72	1483.2	294.698	1537.97	1232.16	310.177	1346.31	1399.81	307.603	1279.12	1251.59	208.609	1539.21	1293.58	476.337	1455.26	1429.65	549.697	1419.03	1256.77	590.415	1384.55	1111.86	626.572	1224.29	1038.33	603.961	1154.75	994.613	650.763	1193.86	964.542	648.747	1103.35	939.817
9429	0	363.08	1240.01	1593.92	265.657	1242.32	1598.45	392.285	1389.81	1606.2	261.316	1413.15	1607.65	299.417	1458.55	1481.99	292.908	1524.54	1230.43	308.801	1333.81	1398.78	306.274	1265.94	1250.67	207.028	1526.19	1292.11	474.925	1443.34	1428.14	548.243	1407.6	1255.21	589.15	1373.5	1110.33	625.541	1212.94	1037.63	603.021	1143.08	994.407	649.859	1182.1	964.222	647.625	1091.2	939.867
9430	0	362.203	1228.04	1593.24	264.596	1229.83	1597.96	390.922	1377.86	1605.51	259.798	1400.83	1607.02	297.533	1446.15	1480.94	291.395	1511.38	1229.12	307.295	1321.2	1397.95	304.685	1252.68	1250.02	205.26	1513.11	1290.66	473.333	1431.16	1426.9	546.682	1396.23	1253.82	587.686	1362.76	1108.81	624.401	1201.98	1036.74	602.059	1131.87	993.756	649.319	1171.55	963.616	646.641	1079.84	939.561
9431	0	361.266	1215.91	1593.06	263.835	1217.48	1597.77	389.688	1366	1604.98	258.224	1388.34	1606.49	295.913	1433.89	1480.08	289.788	1497.84	1227.82	305.713	1308.53	1397.67	303.01	1239.12	1249.79	203.655	1499.92	1289.44	471.611	1419.08	1425.86	544.981	1385.24	1252.5	586.003	1352.36	1107.21	623.29	1191.55	1035.55	601.135	1121.07	992.908	648.006	1160.51	962.524	645.636	1069.01	938.825
9432	0	360.652	1203.76	1592.94	263.044	1204.89	1597.98	388.124	1354.01	1604.62	256.468	1375.71	1606.43	294.022	1421.5	1479.42	288.489	1484.63	1226.71	304.153	1295.85	1397.35	301.35	1225.5	1250.02	201.918	1486.72	1288.1	469.912	1407.11	1424.9	543.065	1374.41	1251.22	584.117	1342.26	1105.65	621.966	1181.49	1033.89	600.174	1111.02	991.612	646.583	1150.97	960.75	644.668	1059.11	937.308
9433	0	359.692	1191.74	1593.17	262.09	1192.24	1598.41	386.436	1342.28	1604.39	254.967	1363.31	1606.48	292.305	1409.27	1479.08	286.952	1470.98	1225.68	302.448	1283.16	1397.65	299.531	1211.86	1250.78	200.201	1473.45	1286.85	468.157	1394.92	1424.11	540.85	1363.93	1249.9	581.829	1332.39	1104.12	620.492	1172.16	1031.67	599.088	1101.3	989.912	644.63	1141.52	958.463	643.758	1049.93	935.355
9434	0	358.738	1179.55	1593.89	261.217	1179.61	1599.2	384.744	1330.2	1604.64	253.192	1350.48	1606.99	290.464	1396.73	1479.09	285.16	1457.56	1224.84	300.747	1270.49	1398.17	297.799	1198.31	1251.76	198.563	1460.43	1286.23	466.21	1382.23	1424.17	538.534	1353.45	1249.19	579.295	1322.86	1103.1	619.007	1163.23	1029.92	597.863	1092.37	987.842	642.77	1133.18	956.055	642.921	1041.58	933.115
9435	0	357.912	1167.17	1595.04	260.187	1166.71	1600.39	383.142	1317.95	1605.57	251.472	1337.75	1608.03	288.822	1384.15	1479.75	283.977	1444.27	1225.11	298.98	1257.87	1399.27	296.161	1184.97	1253.1	197.216	1447.26	1286.46	464.547	1369.77	1424.69	535.669	1342.96	1249.15	576.359	1313.32	1102.5	617.183	1154.79	1027.78	596.71	1083.99	985.504	640.791	1125.55	953.468	642.035	1034.02	930.488
9436	0	357.191	1154.8	1596.26	259.402	1153.92	1601.73	381.405	1305.82	1606.79	249.72	1324.82	1609.08	287.259	1371.51	1480.82	282.933	1431.12	1226.15	297.368	1245.22	1400.53	294.493	1171.85	1254.7	195.983	1434.18	1287.08	462.876	1357.13	1425.73	533.414	1332.41	1249.41	573.404	1304.31	1102.48	615.363	1146.99	1025.65	595.472	1076.32	983.019	638.456	1118.83	950.781	640.983	1027.4	927.533
9437	0	356.238	1142.51	1597.66	258.393	1141	1603.42	379.488	1293.55	1608.1	247.84	1311.83	1610.8	285.569	1358.63	1482.17	281.938	1418.06	1227.32	295.797	1232.66	1401.85	293.045	1158.78	1256.36	194.937	1421.15	1288.09	461.294	1344.53	1427.08	530.669	1321.72	1250.03	570.461	1295.7	1102.84	613.201	1139.4	1023.41	593.907	1069.11	980.119	636.039	1112.57	947.94	639.901	1021.51	924.06
9438	0	355.191	1130	1599.35	257.332	1128.35	1604.84	378.111	1281.29	1609.63	246.034	1298.92	1612.31	284.156	1345.91	1483.61	281.007	1405.17	1228.82	294.335	1220.19	1403.04	291.754	1145.92	1257.96	193.876	1408.11	1289.23	459.815	1331.7	1428.61	528.373	1310.97	1250.99	567.223	1286.84	1103.58	610.791	1132.49	1020.97	592.369	1062.43	976.943	633.559	1107.14	945.043	638.588	1016.33	920.056
9439	0	353.779	1117.78	1600.86	256.21	1115.53	1606.51	376.495	1268.91	1611.47	244.277	1286.28	1613.8	282.428	1333.17	1485.11	280.01	1392.53	1230.55	292.837	1207.64	1404.56	290.465	1133.19	1259.3	192.765	1395.24	1290.83	458.426	1319.11	1430.46	526.407	1299.88	1252.21	563.864	1278.24	1104.32	608.609	1125.82	1018.91	590.564	1056.36	973.628	630.893	1101.98	942.325	636.942	1011.82	915.636
9440	0	353.189	1105.28	1602.66	255.157	1103.02	1607.99	374.969	1256.49	1613.32	242.624	1273.49	1615.34	281.158	1320.46	1486.67	279.075	1379.92	1232.08	291.711	1195.29	1405.91	289.428	1120.79	1260.71	191.857	1382.46	1292.08	457.076	1306.48	1432.16	524.352	1288.94	1253.37	560.52	1269.45	1105.21	606.389	1119.31	1016.67	588.688	1050.69	969.987	628.107	1097.18	939.187	635.15	1007.66	910.899
9441	0	351.72	1092.91	1604.41	254.228	1090.17	1609.61	373.698	1244.19	1615.1	241.412	1260.78	1616.8	279.785	1307.91	1488.17	278.251	1367.54	1233.76	290.692	1182.97	1407.15	288.582	1108.6	1261.77	190.954	1369.75	1293.33	455.925	1294.24	1433.87	522.264	1277.98	1254.38	556.927	1260.92	1105.59	603.799	1113.3	1013.59	586.613	1045.39	965.93	625.278	1092.88	935.932	633.017	1004.22	905.415
9442	0	350.984	1080.45	1606.11	253.079	1077.59	1610.9	372.35	1231.73	1616.8	239.94	1248.17	1618.06	278.393	1295.31	1489.71	277.317	1355.35	1235.18	289.761	1170.83	1408.41	288.013	1096.53	1262.67	189.903	1357.12	1294.58	454.675	1282.31	1435.4	520.432	1267.16	1255.53	553.668	1252.69	1106.27	601.087	1107.45	1010.63	584.123	1040.48	961.506	621.73	1088.73	932.051	630.576	1001.18	899.763
9443	0	350.025	1068.05	1607.81	252.225	1065.1	1612.49	371.126	1219.41	1618.43	238.69	1235.78	1619.5	277.125	1282.94	1491.21	276.172	1343.2	1236.49	288.944	1158.71	1409.49	287.778	1084.56	1263.63	188.786	1344.22	1295.71	453.451	1270.53	1437.03	518.548	1256.61	1256.57	550.451	1244.29	1106.98	598.442	1101.96	1007.49	581.536	1036.15	956.965	618.998	1085.62	928.409	627.904	998.761	893.741
9444	0	348.511	1055.5	1609.81	251.088	1052.62	1613.93	369.953	1207.01	1620.32	237.58	1223.35	1620.89	275.991	1270.48	1492.53	275.108	1331.01	1238.13	288.325	1146.63	1410.75	287.908	1072.69	1264.69	187.59	1331.66	1297.08	452.255	1258.93	1438.56	516.755	1246.04	1257.7	547.659	1236.29	1107.83	595.648	1096.56	1004.34	578.648	1032.07	951.94	615.623	1082.41	924.613	624.859	996.86	887.339
9445	0	347.856	1043.29	1611.24	250.024	1040.23	1615.16	368.945	1194.6	1622.08	236.752	1210.89	1622.28	274.849	1258.02	1494.12	273.969	1319.03	1239.53	287.893	1134.64	1411.85	288.274	1060.72	1265.73	186.499	1319.21	1298.27	451.163	1247.55	1440.19	515.132	1236.02	1258.75	544.885	1227.86	1108.86	592.713	1091.41	1001.14	575.57	1028.48	946.98	612.271	1079.58	920.818	621.484	995.25	880.867
9446	0	347.109	1030.79	1612.81	249.268	1027.84	1616.42	368.056	1182.12	1624.02	235.593	1198.3	1623.74	273.848	1245.71	1495.56	272.729	1306.9	1241.03	287.393	1122.67	1412.87	288.794	1048.97	1266.85	185.323	1306.74	1299.69	450.213	1236.27	1441.58	513.443	1225.95	1259.77	542.036	1219.26	1109.9	589.676	1086.36	997.764	572.165	1025.31	941.487	608.935	1077.18	917.035	617.767	994.29	874.216
9447	0	346.269	1018.47	1614.53	248.352	1015.48	1618	367.262	1169.71	1625.79	234.849	1186.11	1625.25	272.687	1233.26	1497.23	271.453	1294.96	1242.6	287.233	1110.77	1413.91	289.357	1037.19	1267.93	184.029	1294.52	1301.06	449.398	1225.09	1443.1	511.977	1216.24	1260.94	539.163	1210.71	1110.83	586.63	1081.75	994.483	568.622	1022.35	936.073	605.518	1075.17	913.386	613.906	993.834	867.519
9448	0	345.447	1006.14	1616.03	247.476	1003.06	1619.27	366.405	1157.27	1627.55	234.1	1173.71	1626.76	271.891	1220.92	1498.55	270.022	1283.16	1244	286.827	1098.99	1415.05	289.882	1025.59	1268.93	182.649	1282.38	1302.64	448.533	1213.96	1444.35	510.383	1206.57	1261.79	536.406	1202.7	1111.2	583.429	1077.49	991.006	564.885	1020	930.372	602.02	1073.52	909.702	609.883	993.857	860.882
9449	0	344.719	993.55	1617.43	246.695	990.738	1620.33	365.732	1144.92	1629.19	233.233	1161.19	1628.1	271.319	1208.55	1500.17	268.774	1271.27	1245.47	286.735	1087.19	1416.09	290.26	1014.05	1269.71	181.478	1270.27	1304.1	447.796	1202.87	1445.63	508.84	1197.02	1262.61	533.413	1194.29	1112.02	580.35	1073.44	987.582	561.415	1018.21	925.04	598.387	1072.21	906.121	605.654	994.485	853.859
9450	0	344.052	981.251	1618.85	246.057	978.481	1621.67	365.038	1132.39	1630.93	232.812	1148.94	1629.67	270.518	1196.18	1501.64	267.357	1259.53	1246.92	286.498	1075.32	1417.18	290.398	1002.68	1270.42	180.449	1258.42	1305.76	447.127	1191.95	1446.69	506.84	1187.58	1263.48	530.817	1186.12	1112.94	577.192	1069.8	984.475	558.008	1016.81	919.955	594.848	1071.38	902.745	601.572	995.534	847.624
9451	0	343.007	968.935	1620.17	245.355	966.189	1622.81	364.539	1119.98	1632.27	232.145	1136.8	1630.9	269.969	1183.87	1502.98	266.108	1247.81	1248.52	286.215	1063.57	1418.22	290.383	991.669	1270.75	179.353	1246.55	1307.47	446.535	1180.64	1447.93	505.391	1177.9	1263.97	527.966	1178.09	1113.51	574.088	1066.48	981.287	554.585	1015.62	915.008	591.537	1071.41	899.515	597.539	997.406	841.224
9452	0	342.43	956.482	1621.13	244.902	953.844	1623.75	364.007	1107.59	1633.45	231.477	1124.28	1631.65	269.452	1171.77	1504.12	264.806	1236.29	1249.88	285.93	1051.74	1419.01	290.333	980.192	1271.54	178.112	1234.63	1308.77	445.853	1169.29	1448.59	503.622	1168.23	1264.31	525.098	1170.35	1113.97	571.139	1063.73	977.722	551.166	1014.57	910.274	587.525	1070.82	896.299	593.627	999.473	835.208
9453	0	341.862	944.018	1622.12	244.198	941.555	1624.42	363.488	1095.29	1634.43	231.072	1111.95	1632.24	268.896	1159.55	1505.24	263.554	1224.74	1251.23	285.465	1039.93	1419.81	289.948	968.964	1271.98	177.179	1222.78	1310.41	445.239	1157.98	1449.24	501.899	1158.44	1264.5	522.025	1162.46	1114.32	567.879	1060.83	974.876	547.81	1014.01	905.779	583.671	1070.84	893.285	589.665	1002.06	829.272
9454	0	341.686	931.857	1622.75	243.675	929.316	1625.02	363.075	1083.08	1635.1	230.982	1099.84	1633.22	268.421	1147.39	1506.17	262.34	1213.2	1252.33	285.081	1028.15	1420.28	289.217	957.484	1272.29	176.038	1211.04	1311.75	444.698	1146.5	1449.84	499.887	1148.85	1264.5	518.594	1154.69	1114.42	564.874	1058.34	971.941	544.482	1013.6	901.547	579.841	1071.03	890.54	585.809	1004.97	823.83
9455	0	341.133	919.627	1623.25	243.242	917.164	1625.49	362.658	1070.61	1635.74	230.767	1087.73	1633.95	267.993	1135.19	1507.26	261.117	1201.62	1253.55	284.842	1016.5	1420.88	288.606	946.188	1272.72	174.93	1199.01	1313.01	443.998	1134.84	1450.14	498.146	1139.02	1264.44	515.756	1147.53	1114.66	561.602	1055.68	969.349	541.418	1013.3	897.445	575.972	1071.24	888.034	581.863	1007.93	818.888
9456	0	340.784	907.383	1623.51	242.774	904.893	1625.73	362.32	1058.28	1636.18	230.415	1075.42	1634.44	267.581	1123.16	1507.82	259.9	1190.22	1254.52	284.193	1004.58	1421.18	287.747	934.769	1272.57	173.857	1187.26	1314.35	443.403	1123.15	1450.25	496.716	1129.2	1264.34	512.638	1140.07	1114.81	558.312	1053.26	966.577	538.188	1013.08	893.582	572.179	1071.53	885.809	578.008	1010.93	814.207
9457	0	340.482	895.111	1623.72	242.601	892.684	1625.95	362.029	1046.14	1636.52	229.942	1063.08	1634.86	267.142	1111.08	1508.26	258.754	1178.61	1255.59	283.526	992.623	1421.4	286.788	923.186	1272.49	172.826	1175.43	1315.53	442.841	1111.42	1450.43	494.948	1119.46	1264.31	509.458	1132.63	1115.03	555.172	1050.92	964.536	534.909	1013.11	889.894	568.654	1072.39	884.075	574.058	1013.94	810.061
9458	0	340.197	882.921	1623.73	242.412	880.399	1626	361.841	1033.88	1636.76	229.482	1050.76	1635.08	266.685	1098.92	1508.77	257.754	1167.68	1256.34	282.913	980.742	1421.51	286.215	911.953	1272.26	171.713	1163.6	1316.58	442.246	1099.58	1450.48	492.954	1109.76	1264.09	506.22	1125.24	1115.13	552.029	1048.82	962.299	531.705	1013.07	886.737	564.426	1072.18	882.513	570.255	1017.18	806.428
9459	0	339.86	870.767	1623.41	242.318	868.146	1625.91	361.569	1021.68	1636.51	229.535	1038.6	1635.48	266.09	1086.82	1508.98	256.729	1156.15	1256.77	282.457	968.858	1421.36	285.277	900.462	1271.82	170.683	1151.79	1317.48	441.669	1087.87	1450.23	491.511	1100.16	1263.53	503.167	1118.19	1115	548.562	1046.67	959.704	528.556	1012.92	883.351	560.438	1072.43	880.902	566.463	1020.33	802.937
9460	0	340.137	858.601	1622.94	242.284	855.8	1625.62	361.316	1009.62	1635.94	229.119	1026.32	1635.2	265.621	1074.65	1508.99	255.637	1144.67	1256.92	281.707	956.988	1420.99	284.197	888.975	1271.2	169.708	1140.05	1317.81	441.071	1076.12	1449.76	489.685	1090.58	1262.87	500.071	1111.1	1114.83	545.364	1044.52	957.643	525.058	1012.91	880.507	556.481	1072.76	879.35	562.523	1023.24	799.798
9461	0	340.19	846.563	1622.26	242.165	843.571	1625.45	360.982	997.689	1635.32	228.838	1014.05	1634.96	265.059	1062.56	1508.83	254.706	1133.18	1257.02	281.227	945.13	1420.75	283.195	877.578	1270.58	168.631	1128.29	1318.09	440.381	1064.36	1449.34	487.948	1081.19	1262.21	496.977	1104.08	1114.68	542.046	1042.27	955.816	521.465	1012.58	877.686	552.404	1072.8	878.207	558.194	1025.71	796.628
9462	0	339.707	834.299	1621.74	242.12	831.257	1625.05	360.758	985.526	1634.55	228.701	1001.78	1634.85	264.529	1050.43	1508.61	253.686	1121.47	1256.76	280.248	932.962	1420.28	282.048	866.134	1269.9	167.678	1116.61	1318.17	439.627	1052.51	1448.58	485.809	1071.91	1261.41	493.828	1096.85	1114.69	538.738	1039.97	954.037	518.01	1011.94	875.278	548.357	1072.71	877.109	554.43	1027.92	794.257
9463	0	339.752	822.275	1620.78	242.152	818.953	1624.54	360.473	973.555	1633.69	228.285	989.332	1634.39	264	1038.33	1508.11	252.839	1109.73	1256.26	279.826	921.049	1419.69	280.948	854.742	1269.02	166.883	1104.83	1318.17	438.93	1040.68	1447.77	484.225	1062.66	1260.66	490.774	1089.95	1114.21	535.517	1037.6	952.419	514.299	1011.41	872.867	544.318	1072.41	876.264	550.16	1030.02	791.497
9464	0	340.215	810.373	1619.68	242.19	806.637	1624.01	360.226	961.642	1632.82	227.885	976.866	1634.03	263.348	1026.17	1507.63	251.897	1097.86	1255.91	278.886	908.841	1418.98	279.816	843.351	1268.02	166.055	1093.1	1317.92	438.278	1028.83	1447	482.441	1053.44	1260.02	487.836	1082.85	1114.26	532.364	1035.06	950.985	510.993	1010.34	870.955	540.337	1071.81	875.82	546.297	1031.82	790.023
9465	0	339.999	798.299	1618.89	242.458	794.224	1623.41	360.055	949.578	1632.05	227.439	964.423	1633.6	262.7	1014.03	1506.94	250.997	1085.94	1255.6	278.418	896.864	1418.36	278.814	831.712	1266.96	165.311	1081.2	1317.69	437.525	1016.88	1446.3	480.652	1044.29	1259.53	484.969	1075.72	1114.38	529.48	1032.33	950.248	507.922	1009.36	869.467	536.47	1070.91	875.789	542.456	1033.25	788.891
9466	0	340.629	786.324	1617.65	242.614	781.907	1622.67	359.742	937.593	1631.31	227.215	951.827	1632.91	262.092	1001.67	1506.3	250.343	1074.05	1255.1	277.725	884.581	1417.58	277.746	820.075	1265.82	164.422	1069.36	1317.5	436.789	1004.78	1445.46	478.932	1035.23	1259.27	482.169	1068.54	1114.61	526.312	1029.29	949.091	505.066	1008.48	867.867	532.54	1069.63	875.835	538.57	1033.99	787.924
9467	0	340.622	774.143	1616.67	242.755	769.575	1621.72	359.422	925.62	1630.27	226.834	939.592	1632.36	261.489	989.301	1505.58	249.754	1061.96	1254.46	276.897	872.2	1416.55	276.814	808.658	1264.44	163.754	1057.39	1317.06	436.14	992.688	1444.56	477.04	1026.13	1258.79	479.326	1061	1114.62	523.469	1025.95	948.348	502.029	1006.53	866.678	528.78	1067.96	876.064	534.819	1034.52	787.175
9468	0	340.806	762.229	1615.48	242.991	757.231	1620.65	359.138	913.619	1629.14	226.46	927.285	1631.42	260.93	976.888	1504.57	249.169	1049.96	1253.61	276.337	859.863	1415.44	276	796.97	1262.83	163.056	1045.46	1316.36	435.427	980.488	1443.51	475.208	1016.83	1258.25	476.861	1053.5	1115.1	520.797	1022.51	947.641	499.369	1004.23	865.821	525.492	1066.02	876.463	531.244	1034.57	786.475
9469	0	340.675	750.141	1614.34	243.177	744.856	1619.88	358.812	901.832	1627.68	226.102	914.879	1630.33	260.225	964.441	1503.3	248.704	1037.83	1252.49	275.798	847.459	1414.34	275.02	784.924	1261.57	162.501	1033.41	1315.59	434.751	968.216	1442.25	473.451	1007.45	1257.4	474.295	1046.15	1114.62	518.413	1018.81	947.05	497.168	1001.48	864.998	521.922	1063.47	876.545	527.817	1034.22	785.959
9470	0	341.19	738.158	1613.05	243.312	732.547	1618.74	358.343	890.131	1626.05	225.782	902.433	1629.02	259.808	951.979	1502.14	248.006	1026.23	1251.41	275.058	835.043	1413.05	274.015	772.817	1260.11	161.726	1021.54	1314.71	434.16	955.831	1440.85	471.814	997.901	1256.63	471.807	1038.27	1114.48	516.187	1014.85	946.534	495.284	998.394	864.506	518.566	1060.52	876.708	524.58	1033.33	785.491
9471	0	341.194	726.106	1611.75	243.559	720.15	1617.7	358.17	878.315	1624.29	225.362	890.045	1627.45	259.464	939.546	1500.73	247.548	1014.14	1250.05	274.305	822.386	1411.61	272.962	760.138	1258.74	161.207	1009.38	1313.76	433.608	943.352	1439.39	470.316	987.92	1255.82	469.696	1030.38	1114.31	514.108	1010.18	945.972	493.43	994.754	864.117	515.629	1057.17	876.865	521.558	1031.79	785.067
9472	0	341.289	714.085	1610.54	243.74	707.724	1616.28	358.037	866.402	1622.85	224.962	877.538	1626.19	259.098	927.032	1499.25	246.975	1001.96	1248.62	273.878	809.75	1409.97	271.98	747.799	1257.07	160.584	997.312	1312.71	433.07	930.843	1437.82	468.939	977.729	1254.99	467.391	1021.89	1114.03	512.058	1005.03	945.517	491.518	990.89	863.69	512.911	1053.31	877.273	518.334	1029.95	784.873
9473	0	341.45	702.056	1609.1	243.852	695.426	1615.06	357.648	854.449	1621.1	224.578	865.237	1624.5	258.62	914.635	1497.72	246.601	989.786	1247.13	272.884	797.576	1408.43	271.229	735.609	1255.26	160.052	985.201	1311.51	432.714	918.19	1436.4	467.844	967.31	1254.16	465.651	1013.29	1113.95	510.648	999.702	945.304	489.824	985.973	863.041	510.251	1048.54	877.487	515.603	1027.02	784.804
9474	0	341.743	689.96	1607.58	243.908	683.078	1613.8	357.253	842.478	1619.47	224.253	852.785	1622.88	258.46	902.094	1496.36	246.392	977.458	1245.69	272.633	785.103	1406.8	270.421	723.01	1253.6	159.636	973.023	1310.38	432.242	905.468	1434.74	466.828	956.613	1253.13	464.065	1004.36	1113.62	508.928	993.434	944.754	488.631	980.768	862.183	508.207	1043.49	877.913	513.257	1023.37	784.671
9475	0	341.824	677.816	1606.12	244.147	670.717	1612.29	357.359	830.354	1617.86	224.055	840.476	1621.47	258.148	889.696	1494.58	246.301	965.171	1244.56	272.274	772.742	1405.02	269.665	710.478	1251.95	159.446	960.83	1309.28	432.08	892.721	1433.14	466.054	945.586	1252.28	462.564	994.946	1113.29	507.801	986.793	944.38	487.536	974.927	861.526	506.434	1037.9	878.078	511.145	1019.16	784.58
9476	0	341.89	665.616	1604.7	244.281	658.461	1610.89	357.155	818.315	1616.34	223.802	828.109	1619.91	258.116	877.401	1493.15	246.321	952.894	1243.16	271.842	760.276	1403.58	269.005	698.417	1249.97	159.496	948.597	1308.06	432.055	880.156	1431.59	465.585	934.378	1251.3	461.4	985.264	1112.85	506.752	979.917	944.072	487.082	968.572	861.306	504.397	1031.43	878.253	509.252	1014.1	784.465
9477	0	341.982	653.475	1603.16	244.312	646.21	1609.42	356.855	806.01	1614.51	223.667	815.733	1618.19	258.149	865.055	1491.48	246.186	940.275	1241.22	271.697	747.829	1402.12	268.474	686.06	1248.4	159.158	936.316	1306.26	431.962	867.493	1429.85	465.116	922.996	1250.08	460.456	975.126	1112.21	505.556	972.051	943.346	486.496	961.603	860.385	502.649	1024.47	878.184	507.752	1008.48	784.168
9478	0	342.002	641.323	1601.58	244.412	633.886	1608.03	356.63	793.938	1612.94	223.662	803.617	1616.73	258.227	852.838	1489.71	246.442	927.655	1239.42	271.66	735.327	1400.85	267.754	673.101	1247.44	159.425	924.112	1304.66	432.015	854.896	1428.19	465.18	911.696	1248.9	459.68	964.628	1111.36	505.252	964.152	942.746	485.803	953.991	859.888	501.837	1017.12	877.991	506.7	1002.05	783.784
9479	0	342.044	629.048	1600.25	244.432	621.569	1606.69	356.49	781.677	1611.57	223.807	791.325	1614.99	258.396	840.619	1488.26	246.827	914.831	1237.73	271.628	722.841	1399.5	267.446	661.005	1245.95	159.785	911.523	1302.77	432.222	842.29	1426.64	464.634	899.499	1247.58	459.221	953.782	1110.86	504.339	954.882	942.016	485.501	945.67	859.187	500.587	1008.64	877.935	505.703	994.804	783.376
9480	0	342.016	616.707	1599	244.236	609.33	1605.54	356.876	769.17	1610.29	223.877	779.034	1613.77	258.716	828.312	1486.86	247.3	901.911	1236.26	271.687	710.421	1398.23	267.065	647.865	1245.25	160.218	899.142	1301.18	432.348	829.803	1425.47	464.724	887.424	1246.53	458.819	942.47	1110.28	504.593	945.701	941.786	485.323	936.511	858.687	499.841	999.456	877.805	505.168	986.482	783.262
9481	0	342.089	604.386	1597.93	244.135	597.101	1604.53	357.07	756.914	1609.08	224.043	767.033	1612.58	259.115	816.04	1485.62	247.851	888.994	1234.87	271.921	697.988	1397.42	266.867	635.121	1244.51	160.843	886.652	1299.81	432.749	817.142	1424.05	464.872	875.172	1245.57	458.743	930.812	1109.56	504.059	935.025	941.162	485.189	926.561	857.887	499.711	989.553	877.804	504.959	977.349	783.006
9482	0	341.977	591.971	1596.98	244.103	584.958	1603.34	357.218	744.639	1607.88	224.089	754.721	1611.39	259.619	803.939	1484.4	248.437	876.079	1233.52	272.194	685.417	1396.46	266.871	622.534	1243.69	161.435	874.124	1298.45	433.21	804.415	1422.99	465.468	862.988	1244.79	458.768	918.769	1108.91	504.579	924.205	940.692	485.702	916.075	857.355	499.613	978.777	877.476	505.145	967.291	782.652
9483	0	341.274	579.468	1596.5	243.828	572.836	1602.23	357.452	732.195	1607.16	224.226	742.578	1610.16	260.136	791.735	1483.21	249.062	863.169	1232.26	272.416	672.961	1395.46	267.02	609.453	1243.03	162.161	861.415	1296.98	433.613	791.735	1422.06	466.097	850.515	1244.13	459.095	906.45	1108.22	504.966	912.332	940.179	486.22	904.561	856.62	500.206	967.404	877.235	505.779	956.445	782.545
9484	0	341.409	567.243	1595.48	243.439	560.88	1601.39	357.882	719.795	1606.38	224.452	730.671	1609.03	260.696	779.627	1482.16	249.7	850.114	1230.94	272.802	660.493	1394.64	267.873	597.694	1241.81	162.855	848.732	1295.63	434.238	778.998	1421.27	466.746	837.807	1243.46	459.627	893.794	1107.52	506.096	900.271	939.67	487.344	892.427	855.937	501.141	955.184	876.833	506.533	944.575	781.969
9485	0	341.152	554.813	1594.98	243.115	548.846	1600.7	358.087	707.423	1605.57	224.985	718.908	1608.49	261.285	767.482	1481.11	250.456	836.931	1229.56	273.341	647.938	1394.16	268.434	584.603	1241.57	163.525	836.118	1294.2	434.75	766.218	1420.25	467.496	824.893	1242.59	460.601	880.929	1106.74	507.15	887.289	938.878	488.819	879.699	855.332	502.291	942.237	876.051	507.753	931.917	781.158
9486	0	340.826	542.426	1594.74	242.84	536.814	1600.36	358.328	694.714	1605.33	225.434	706.935	1607.88	261.886	755.492	1480.5	251.095	823.75	1228.11	273.794	635.557	1394.01	268.988	571.234	1241.46	164.266	823.437	1292.84	435.537	753.466	1419.54	468.333	811.754	1241.61	461.6	867.615	1105.68	508.543	873.755	937.889	490.093	865.882	854.175	503.803	928.543	874.931	509.136	918.272	780.058
9487	0	340.273	529.995	1594.91	242.571	524.893	1600.24	358.588	682.153	1605.32	225.646	694.93	1607.69	262.551	743.567	1480.15	251.766	810.596	1227.18	274.31	623.175	1394.09	269.327	557.455	1242.1	164.852	810.824	1291.87	436.155	741.157	1418.93	469.386	798.596	1240.9	462.945	853.961	1104.84	510.314	859.791	937.225	492.032	851.612	853.934	506.072	914.109	874.181	511.06	903.704	779.222
9488	0	340.221	517.625	1595.16	242.248	512.948	1600.46	358.945	669.729	1605.71	226.298	683.156	1607.88	263.204	731.642	1480.05	252.157	797.559	1226.71	274.775	610.762	1394.5	270.066	544.5	1242.85	165.322	798.366	1291.11	436.826	728.853	1418.77	470.52	784.954	1240.34	464.306	839.875	1104.15	511.959	844.695	936.501	494.147	836.404	853.447	508.226	899.19	873.526	513.325	888.157	778.423
9489	0	340.028	505.192	1595.65	241.919	500.982	1600.82	359.69	657.425	1606.57	226.911	671.411	1608.14	263.648	719.573	1480.4	252.466	784.567	1226.55	275.182	598.543	1395.2	270.482	531.01	1244.3	165.762	785.847	1290.75	437.347	716.695	1418.94	471.653	771.204	1240.08	465.803	825.461	1103.5	514.196	829.271	936.096	496.091	820.216	852.557	510.341	883.268	872.781	515.963	871.76	777.749
9490	0	339.505	492.79	1596.56	241.588	489.051	1601.53	360.141	644.992	1607.42	227.255	659.487	1609.2	264.084	707.624	1481.06	252.603	771.769	1226.58	275.575	586.333	1396.23	270.71	517.823	1245.88	166.134	773.443	1291.19	437.704	704.54	1419.41	472.868	757.489	1240.24	467.432	810.642	1103.31	516.279	812.929	935.885	499	803.699	852.843	512.779	866.505	872.009	519.015	854.28	777.528
9491	0	339.608	480.581	1597.38	241.386	477.184	1602.37	360.309	632.434	1608.72	227.54	647.478	1610.55	264.583	695.786	1482	252.549	759.03	1227.39	275.958	574.23	1397.66	271.404	505.929	1247.12	166.146	761.086	1291.78	438.036	692.523	1420.42	474.208	743.797	1240.61	469.112	795.717	1103.26	518.643	796.125	936.141	502.115	786.284	853.103	515.623	849.1	871.573	522.401	835.942	777.254
9492	0	339.26	468.389	1598.48	241.349	465.216	1603.46	360.522	620.056	1609.79	227.943	635.828	1611.91	264.959	683.887	1483.16	252.397	746.396	1228.25	276.094	562.218	1399.23	271.623	492.745	1249.32	166.295	748.823	1292.87	438.309	680.401	1421.31	474.967	729.745	1241.25	470.66	780.496	1103.32	521.329	778.933	936.54	504.1	767.551	852.92	518.81	830.96	871.423	526.004	816.629	777.165
9493	0	339.512	456.574	1599.43	241.261	453.384	1604.7	360.633	608.042	1611.1	228.106	623.781	1613.27	265.009	671.918	1484.45	252.208	733.852	1229.31	276.001	550.239	1400.62	271.815	480.596	1250.89	166.434	736.516	1293.96	438.357	668.429	1422.52	475.766	715.99	1241.97	472.35	765.28	1103.66	523.911	760.982	937.019	507.404	748.521	853.66	521.804	811.932	871.052	529.909	796.252	777.396
9494	0	339.593	444.657	1600.57	241.437	441.527	1606.01	361.032	596.399	1612.37	228.099	611.941	1615.02	265.11	660.094	1485.81	251.938	721.506	1230.53	275.962	538.32	1402.17	270.447	466.593	1253.38	166.344	724.551	1295.56	438.355	656.135	1423.7	476.662	702.185	1243.18	474.017	749.849	1103.9	526.671	742.546	937.576	510.502	728.832	854.344	525.374	792.569	870.931	533.978	775.099	777.435
9495	0	339.399	432.987	1601.73	241.632	429.626	1607.6	360.835	584.815	1613.36	227.892	599.93	1616.59	265.162	648.384	1487.16	251.777	709.299	1231.99	275.671	526.464	1403.83	270.035	454.3	1255.29	166.385	712.796	1297.18	438.239	643.857	1424.98	477.16	688.362	1244.03	476.054	734.239	1104.95	529.457	723.714	938.294	514.454	708.422	855.099	528.958	772.339	870.7	538.062	753.06	777.647
9496	0	339.981	421.43	1602.81	241.817	417.768	1609.25	360.368	573.085	1614.3	227.658	588.014	1618.38	265.162	636.783	1488.57	251.542	697.433	1233.39	275.093	514.767	1405.3	269.327	443.067	1256.61	166.155	701.183	1298.7	438.077	631.459	1426.3	477.454	674.283	1244.96	477.569	718.813	1104.5	532.216	704.546	938.942	517.437	687.729	855.993	532.732	751.911	870.551	542.698	730.303	777.883
9497	0	340.214	410.128	1603.77	242.131	406.02	1610.78	360.172	561.906	1615.33	227.178	576.224	1619.83	264.836	625.19	1489.84	251.401	685.676	1234.84	274.428	503.045	1406.55	269.419	433.36	1256.77	166.051	689.777	1300.21	437.866	619.116	1427.45	478.129	660.541	1245.9	479.197	703.162	1104.56	535.13	684.947	939.667	520.908	666.486	857.288	536.256	730.73	870.128	546.853	706.849	778.202
9498	0	340.34	398.785	1605.07	242.538	394.152	1612.16	359.783	550.93	1616.51	226.88	564.278	1621.71	264.627	613.534	1491.45	251.341	674.145	1236.25	273.736	491.428	1407.89	268.16	421.835	1258.14	166.142	678.61	1301.55	437.725	606.712	1428.93	478.892	646.45	1247.2	481.036	687.326	1104.84	538.02	664.958	940.784	524.019	644.633	858.558	540.267	709.295	870.338	551.434	682.958	779.154
9499	0	340.673	387.747	1606.18	242.926	382.427	1613.84	358.892	539.551	1617.77	226.164	552.454	1623.4	264.501	602.162	1492.88	251.529	662.574	1238.25	272.976	479.882	1409.36	266.691	410.443	1259.59	166.157	667.43	1303.41	437.392	594.363	1430.18	479.286	632.245	1248.14	483.159	671.545	1105.61	540.887	644.714	942.095	527.129	622.331	859.792	543.98	687.281	870.562	555.965	658.288	780.392
9500	0	341.091	376.605	1607.11	243.164	370.767	1615.18	358.199	528.747	1618.85	225.323	540.713	1625.04	264.048	590.921	1494.33	251.543	650.861	1239.37	272.008	468.467	1410.72	265.231	399.088	1260.85	166.269	656.471	1304.42	437.037	582.022	1431.66	480.196	617.998	1249.39	485.062	655.56	1105.9	543.62	624.229	943.284	530.174	599.592	861.392	547.887	664.954	870.932	560.581	633.237	781.837
9501	0	341.263	365.733	1608.15	243.642	359.113	1616.43	357.439	517.969	1620.16	224.483	528.728	1626.67	263.416	579.492	1495.6	251.907	639.765	1240.64	271.063	457.074	1412.08	263.599	387.483	1262.37	166.272	645.292	1305.76	436.576	569.927	1432.96	480.972	603.861	1250.41	486.956	639.562	1106.37	546.297	603.376	944.776	533.413	576.978	863.427	551.423	642.284	871.244	565.01	607.752	783.411
9502	0	341.446	354.961	1609.22	243.948	347.468	1617.77	356.505	507.299	1621.51	223.341	516.987	1628.22	263.008	568.23	1497.05	251.992	628.259	1241.94	270.061	445.823	1413.33	262.171	375.932	1263.83	166.49	634.396	1306.8	436.035	557.73	1434.46	481.18	589.113	1251.54	488.816	623.331	1106.7	548.997	582.449	946.576	536.334	554.012	865.764	555.243	619.466	872.116	569.536	582.083	785.675
9503	0	341.315	344.139	1610.58	243.999	335.988	1618.95	355.264	496.419	1622.88	222.254	505.368	1629.94	262.438	557.041	1498.41	252.445	617.235	1243.04	269.148	434.526	1414.63	260.771	364.527	1265.4	166.635	623.504	1307.94	435.365	545.926	1435.82	481.937	574.84	1252.8	490.796	607.101	1107.43	551.577	561.264	948.536	539.494	530.836	868.64	558.849	596.235	873.176	573.836	555.918	788.2
9504	0	341.493	333.471	1611.43	244.1	324.622	1620.13	354.489	485.802	1624.28	221.284	493.658	1631.21	261.685	545.82	1499.65	252.73	605.89	1244.23	268.436	423.285	1415.99	259.631	353.125	1266.87	166.772	612.654	1308.64	434.851	534.209	1437.32	482.27	559.999	1254.18	492.65	590.863	1107.88	554.18	540.248	950.445	542.449	507.723	871.464	562.468	572.771	874.503	578.16	529.765	791.043
9505	0	341.211	322.987	1612.41	244.027	313.152	1621.17	353.063	475.105	1625.63	220.335	482.177	1632.71	261.031	534.493	1501.11	252.964	595.02	1245.23	267.613	412.114	1417.31	258.738	341.681	1268.17	166.993	601.75	1309.75	434.289	522.563	1438.97	482.722	545.83	1255.27	494.626	574.513	1108.6	556.431	518.559	953.016	545.106	484.314	874.657	565.562	549.017	875.767	582.095	503.472	794.459
9506	0	340.849	312.127	1613.8	243.841	301.858	1622.31	352.047	464.061	1627.16	219.274	470.764	1633.92	260.454	523.31	1502.1	253.215	583.677	1246.7	266.899	401.04	1418.5	257.986	330.607	1269.42	167.073	590.837	1310.52	433.799	510.641	1440.36	483.385	531.657	1256.78	496.468	558.161	1109.44	558.807	497.22	955.719	547.558	461.063	878.63	568.89	525.212	877.719	585.752	476.782	798.731
9507	0	340.323	301.214	1614.9	243.321	290.614	1623.42	350.997	453.391	1628.61	218.127	459.419	1635	259.762	512.009	1503.38	253.351	572.779	1247.58	266.263	389.914	1419.61	257.457	319.256	1270.65	167.152	579.995	1311.45	433.19	499.165	1441.8	483.794	517.799	1258.23	498.393	541.848	1110.35	561.008	475.544	959.049	549.983	437.366	883.146	572.26	501.312	880.146	589.045	450.056	802.808
9508	0	339.645	290.377	1616.11	242.664	279.534	1624.29	349.971	442.408	1629.52	217.098	448.211	1635.91	259.136	500.776	1504.36	253.401	561.749	1248.73	265.732	378.729	1420.45	257.322	308.241	1271.44	167.104	569.033	1312.31	432.511	487.834	1443.22	484.537	504.057	1259.52	500.319	525.684	1111.27	563.022	453.874	962.206	551.786	413.711	887.313	575.468	477.487	882.768	592.054	423.328	807.191
9509	0	338.807	279.308	1617.13	241.748	268.413	1625.03	349.303	431.481	1630.95	216.289	437.145	1636.68	258.537	489.645	1505.14	253.404	550.908	1249.63	265.349	367.684	1421.17	257.376	297.226	1272.08	167.136	558.199	1312.98	432.005	476.426	1444.59	485.146	490.247	1260.99	502.243	509.348	1112.31	564.958	432.18	965.683	553.864	390.164	891.765	578.345	453.28	885.624	595.036	396.625	812.25
9510	0	337.987	268.25	1618.33	240.794	257.393	1625.77	348.319	420.37	1631.94	215.241	426.101	1637.09	257.807	478.338	1505.9	253.455	539.758	1250.62	264.908	356.553	1421.79	257.459	286.213	1272.66	166.852	547.134	1313.81	431.674	465.036	1445.99	486.076	476.661	1262.46	504.114	493.244	1113.27	566.998	410.8	969.29	555.66	366.818	896.482	581.361	429.157	888.988	597.683	370.181	817.462
9511	0	336.902	257.098	1619.39	239.708	246.375	1626.48	347.295	408.853	1632.86	214.426	415.139	1637.45	257.462	467.165	1506.64	253.484	528.953	1251.57	264.501	345.517	1422.11	257.658	275.456	1272.9	166.883	536.231	1314.33	431.475	453.442	1447.11	486.5	463.098	1263.7	506.157	477.124	1114.2	568.744	389.303	973.191	557.504	343.561	901.662	584.175	405.078	892.388	599.726	343.764	822.863
9512	0	335.81	245.791	1620.16	238.475	235.405	1626.79	346.687	397.757	1633.35	213.639	404.215	1637.51	257.066	455.916	1506.92	253.314	517.937	1251.77	264.201	334.249	1422.42	257.86	264.569	1272.98	166.666	525.086	1314.52	431.197	441.992	1447.95	487.441	449.61	1264.75	508.098	461.084	1114.91	570.399	368.073	976.743	558.865	320.43	906.627	586.83	381.156	895.846	601.704	317.695	828.131
9513	0	334.511	234.443	1620.83	237.175	224.427	1627.25	345.864	386.523	1633.46	212.874	393.31	1637.4	256.627	444.56	1507.11	253.273	507.138	1252.24	263.792	322.94	1422.51	258.006	253.585	1272.96	166.74	514.237	1314.47	430.85	430.729	1448.42	488.272	436.235	1265.42	510.036	445.068	1115.39	572.126	347.016	980.624	560.206	297.633	911.603	589.329	357.444	899.378	603.463	291.865	833.61
9514	0	333.115	222.976	1621.46	235.877	213.496	1627.56	345.095	375.099	1633.71	212.41	382.546	1637.25	256.326	433.383	1507.07	253.04	496.147	1252.34	263.602	311.77	1422.55	258.22	242.502	1272.86	166.607	503.095	1314.42	430.516	419.217	1449.09	488.647	422.845	1266.04	512.019	429.077	1115.85	573.705	326.257	984.371	561.457	274.996	916.86	591.899	334.45	902.892	605.07	266.469	839.265
9515	0	332.098	211.684	1621.73	234.621	202.504	1627.55	344.697	363.935	1633.76	211.697	371.699	1636.98	255.873	422.027	1507.14	253.205	485.372	1252.18	263.482	300.498	1422.36	258.457	231.6	1272.48	166.721	492.199	1314.21	430.346	407.85	1449.35	489.761	409.413	1266.67	514.017	412.996	1116.2	575.019	305.637	987.918	562.347	252.888	922.05	593.667	310.866	906.524	606.406	241.078	844.895
9516	0	330.968	200.189	1621.89	233.294	191.505	1627.49	343.935	352.264	1633.77	211.188	360.826	1636.59	255.538	410.742	1506.84	253.167	474.001	1252.29	263.1	289.287	1422.04	258.432	220.556	1271.84	166.807	480.933	1314.39	429.953	396.256	1449.46	490.563	395.887	1267.12	515.978	397.123	1116.74	576.296	285.321	991.534	563.321	230.563	926.863	595.51	288.024	910.202	607.531	216.246	850.859
9517	0	329.533	188.794	1622.16	232.11	180.463	1627.36	343.672	340.991	1633.82	210.603	349.912	1636.16	255.077	399.381	1506.44	253.281	463.168	1252.14	263.067	278.077	1421.42	258.492	209.486	1271.15	166.861	469.884	1313.92	429.777	384.908	1449.57	491.458	382.449	1267.67	517.953	381.125	1117.11	577.346	265.093	995.266	564.019	209.016	932.011	597.255	265.384	914.166	608.414	191.889	856.597
9518	0	328.703	177.505	1621.88	230.988	169.35	1627.01	343.21	329.505	1633.49	210.011	338.904	1635.29	254.756	387.987	1506.05	252.88	452.064	1251.64	262.962	266.94	1420.73	258.455	198.351	1270.59	166.631	458.528	1313.25	429.432	373.459	1449.49	492.118	369.034	1267.8	519.802	365.115	1117.37	578.309	245.393	998.774	564.71	187.832	937.016	598.65	243.164	917.868	609.243	167.963	862.496
9519	0	327.641	166.114	1621.46	229.977	158.235	1626.58	342.532	318.085	1633.1	209.5	327.905	1634.61	254.408	376.591	1505.47	252.722	441.196	1251.16	262.546	255.527	1420.18	258.388	187.098	1269.75	166.66	447.362	1312.56	429.281	362.01	1449.29	492.783	355.502	1267.86	521.544	349.357	1117.53	579.106	225.767	1002.15	565.231	167.01	941.981	599.954	221.311	921.503	609.727	144.438	868.323
9520	0	326.656	154.774	1621.12	228.951	147.07	1626.05	341.866	306.626	1632.5	208.971	316.77	1633.88	253.999	365.047	1504.8	252.346	429.88	1250.46	262.295	243.983	1419.52	258.159	176.015	1268.82	166.202	435.715	1311.75	428.797	350.407	1448.73	493.399	341.955	1267.9	523.166	333.516	1117.62	579.877	206.524	1005.58	565.45	146.298	946.72	600.954	199.733	925.187	610.16	121.54	873.986
9521	0	325.829	143.247	1620.65	228.037	135.929	1625.53	341.591	295.156	1632.19	208.466	305.749	1633.17	253.605	353.581	1503.92	252.2	418.764	1249.69	261.933	232.419	1418.64	258.014	164.685	1268.08	166.187	424.333	1310.94	428.515	338.945	1448.3	493.77	328.496	1267.69	524.653	317.873	1117.74	580.393	187.529	1008.95	565.661	126.054	951.441	601.849	178.796	928.689	610.391	99.1612	879.672
9522	0	325.05	131.831	1619.92	227.056	124.742	1624.72	341.04	283.781	1631.29	207.885	294.538	1632.17	253.082	341.9	1502.99	251.688	407.069	1248.79	261.458	220.911	1417.71	257.897	153.24	1267.04	165.878	412.578	1309.84	427.847	327.34	1447.36	494.198	315.065	1267.4	525.855	302.378	1117.51	580.771	169.062	1012.09	565.78	106.374	955.961	602.411	158.22	931.862	610.387	77.2916	885.043
9523	0	324.194	120.577	1619.05	226.308	113.343	1623.78	340.351	272.295	1630.29	207.462	283.44	1631.15	252.672	330.292	1501.96	251.362	395.652	1247.79	261.04	209.141	1416.96	257.645	141.868	1265.81	165.458	400.747	1308.76	427.475	315.603	1446.52	494.409	301.384	1266.93	526.825	286.989	1117.18	580.959	150.788	1014.87	565.507	86.9474	960.237	602.95	137.984	935.34	610.218	55.9527	890.172
9524	0	323.416	109.09	1618.22	225.442	102.086	1622.88	339.797	260.871	1629.47	206.755	272.125	1630.38	251.923	318.504	1500.91	250.598	383.876	1246.84	260.615	197.336	1415.86	257.458	130.156	1264.77	164.995	389.011	1307.84	427.027	303.799	1445.88	494.613	287.797	1266.79	527.767	271.76	1117.31	580.833	132.901	1017.8	565.223	68.1372	964.415	603.204	118.26	938.836	609.978	35.2564	895.333
9525	0	322.646	97.452	1617.53	224.61	90.7054	1622	339.046	249.114	1628.84	206.073	260.795	1629.61	251.325	306.709	1500.06	250.04	372.213	1246.13	259.963	185.676	1414.72	257.143	118.414	1263.6	164.392	376.861	1307.14	426.385	291.784	1445.19	494.7	274.295	1266.58	528.538	256.7	1117.29	580.703	115.491	1020.75	564.756	49.7397	968.604	603.297	99.062	942.196	609.298	15.0443	900.325
9526	0	321.915	85.9488	1616.71	223.772	79.3045	1621.1	338.631	237.694	1628.01	205.567	249.249	1628.56	250.71	294.867	1498.92	249.466	360.571	1245.05	259.609	173.547	1413.94	256.804	106.682	1262.65	163.668	364.621	1306.13	425.894	279.953	1444.4	494.632	260.753	1266.14	529.016	241.803	1117.04	580.303	98.2264	1023.3	563.96	31.8616	972.235	603.184	80.1217	945.29	608.375	-4.53977	904.879
9527	0	321.211	74.3423	1615.74	222.99	67.7291	1620.23	337.883	225.92	1626.99	205.055	237.818	1627.49	250.033	282.862	1497.7	248.598	348.317	1243.94	259.155	161.455	1412.72	256.612	94.6409	1261.31	163.005	352.356	1304.92	425.275	267.894	1443.51	494.509	247.411	1265.45	529.023	227.008	1116.35	579.857	81.4961	1025.58	563.28	14.2297	975.515	602.835	61.826	948.032	607.685	-23.7019	909.329
9528	0	319.885	62.4865	1615.31	222.114	56.0555	1619.35	337.369	214.354	1625.9	204.348	226.295	1626.38	249.27	270.871	1496.58	247.887	336.267	1242.84	258.522	149.363	1411.74	256.169	82.6442	1260.33	162.413	340.274	1303.42	424.744	255.896	1442.63	494.135	233.965	1264.83	529.351	212.649	1115.95	579.175	65.1532	1027.58	562.22	-2.76974	978.833	602.403	44.0049	950.694	606.641	-42.213	912.995
9529	0	319.008	50.6893	1614.77	221.234	44.4151	1618.92	336.509	202.389	1624.8	203.734	214.474	1624.97	248.437	258.842	1495.46	247.051	324.315	1241.73	257.958	137.217	1410.8	255.864	70.362	1259.21	161.459	327.734	1302.34	423.978	243.978	1441.47	493.812	220.722	1264.25	529.218	198.374	1115.44	578.381	49.2428	1029.54	561.023	-19.3019	981.662	601.65	26.6479	952.932	605.33	-60.0801	916.822
9530	0	318.133	38.7787	1614.09	220.497	32.5656	1618.22	335.919	190.615	1623.74	203.041	202.768	1623.6	247.522	246.617	1494.36	245.811	312.189	1240.43	257.282	124.944	1409.6	255.224	58.1417	1258.23	160.512	315.193	1301.15	423.021	231.934	1440.29	493.11	207.664	1263.36	529.049	184.284	1114.88	577.361	33.5443	1031.04	559.644	-35.4056	984.155	600.628	9.90174	954.668	603.885	-77.3243	919.916
9531	0	317.338	26.8367	1613.51	219.573	20.6972	1617.63	335.024	178.775	1622.33	202.14	191.069	1622.51	246.502	234.412	1493.22	244.315	299.77	1239.05	256.659	112.678	1408.66	254.982	45.5654	1257.31	159.041	302.41	1299.91	422.03	220.042	1439.16	492.366	194.711	1262.48	528.586	170.383	1114.19	576.207	18.3377	1032.28	558.061	-51.3539	986.387	599.582	-6.34961	956.226	602.31	-94.0438	922.625
9532	0	316.538	15.0827	1613.01	218.763	8.83241	1617.11	334.105	166.744	1621.34	201.414	179.162	1621.29	245.334	222.136	1492.1	242.896	287.307	1238.05	255.955	100.239	1407.66	254.399	33.064	1256.35	157.735	289.697	1298.88	421.101	208.161	1438.34	491.534	181.906	1261.73	528.057	156.84	1113.65	575.119	3.6751	1033.54	556.721	-66.2296	988.228	598.711	-21.912	957.989	600.648	-110.184	925.069
9533	0	316.044	3.15278	1612.54	217.974	-3.1456	1616.61	333.415	155.066	1620.57	200.456	167.144	1620.13	244.194	209.883	1491.28	241.473	274.692	1237.36	255.073	87.9736	1406.78	254.091	20.3903	1255.76	156.028	276.845	1297.67	419.988	196.326	1437.6	490.771	169.216	1261.36	527.108	143.415	1113.1	573.711	-10.8105	1034.45	555.249	-80.9819	989.621	597.368	-37.0303	959.261	598.815	-125.663	927.167
9534	0	314.961	-8.73998	1612.21	217.25	-15.1797	1616.01	332.434	143.042	1619.81	199.47	155.139	1619.29	242.686	197.558	1490.22	239.628	261.836	1236.59	254.401	75.4872	1406.03	253.566	7.49464	1255	154.447	263.779	1296.86	418.654	184.578	1436.52	489.583	156.827	1260.71	526.553	130.492	1112.86	572.234	-24.6819	1035.1	553.482	-95.1533	990.807	595.662	-51.744	960.222	596.963	-140.51	928.921
9535	0	314.653	-20.7321	1611.48	216.546	-27.2816	1615.7	331.4	131.291	1618.72	198.44	143.087	1618.42	241.255	185.155	1489.27	237.768	248.947	1235.82	253.464	62.9418	1405.12	252.968	-5.12609	1254.37	152.434	250.665	1295.85	417.244	172.871	1435.48	488.38	144.643	1260.03	525.415	117.778	1112.22	570.608	-38.1693	1035.55	551.655	-108.849	991.71	593.856	-66.0851	960.723	595.018	-154.822	930.174
9536	0	314.001	-32.4731	1610.91	215.831	-39.2936	1615.28	330.242	119.511	1617.52	197.317	130.92	1617.21	239.863	172.717	1488.21	235.497	235.818	1234.21	252.363	50.4285	1404.4	252.381	-18.1704	1253.93	150.609	237.591	1294.7	415.731	161.178	1434.45	487.034	132.58	1258.95	523.879	105.481	1111.06	569.024	-51.2246	1035.73	549.949	-122.045	992.223	591.979	-79.9426	960.73	593.069	-168.43	930.809
9537	0	313.307	-44.2106	1610.2	215.238	-51.4824	1614.89	328.996	107.6	1616.44	196.273	118.757	1616.29	238.433	160.359	1487.31	233.344	222.644	1232.55	251.242	37.8569	1403.75	251.454	-31.0632	1253.29	148.62	224.402	1293.82	414.177	149.433	1433.09	485.576	120.802	1257.66	522.694	93.6105	1109.85	567.383	-63.6581	1035.39	548.194	-134.738	992.755	590.702	-92.4422	960.931	591.087	-181.492	931.156
9538	0	312.715	-56.1067	1609.7	214.72	-63.6782	1614.49	327.909	96.0486	1615.1	195.066	106.535	1615.21	237.065	147.849	1486.33	231.409	209.397	1231.66	250.143	25.2293	1402.8	250.297	-43.9303	1252.89	146.528	211.11	1292.52	412.533	137.534	1431.75	483.837	109.06	1256.31	521.192	81.9916	1108.69	565.86	-75.8044	1035.28	546.372	-147.012	992.561	588.978	-105.041	960.559	588.934	-194.174	930.931
9539	0	312.117	-67.8575	1609.04	214.095	-75.8336	1614.1	326.529	84.1649	1613.91	193.868	94.334	1614.24	235.47	135.329	1484.96	229.275	196.152	1230.34	248.777	12.6544	1402.1	249.139	-57.0015	1252.43	144.49	197.692	1291.61	410.986	125.378	1430.42	482.128	97.4565	1254.84	519.6	70.7456	1107.36	563.946	-87.5246	1034.08	544.578	-159.035	992.27	587.167	-117.033	959.818	586.87	-206.449	930.68
9540	0	311.721	-79.7211	1608.41	213.611	-88.0585	1613.73	325.451	72.5483	1612.92	192.691	81.9764	1613.36	233.714	123.005	1483.93	227.145	182.793	1229.03	247.351	-0.256297	1401.36	247.353	-70.1298	1251.96	142.299	184.451	1290.64	409.476	113.235	1429.11	480.847	86.183	1253.58	517.658	59.762	1105.66	562.413	-98.7734	1033.24	542.861	-170.542	991.387	585.385	-128.66	959.005	584.721	-218.007	929.36
9541	0	311.19	-91.5315	1608.11	213.156	-100.377	1613.66	324.177	60.8296	1611.94	191.272	69.5717	1612.65	232.142	110.593	1483.09	225.019	169.138	1227.7	245.78	-13.0045	1400.71	245.587	-83.6631	1251.58	140.171	171.219	1289.52	407.725	100.901	1427.63	478.426	74.8173	1251.73	515.66	49.0693	1103.91	560.461	-109.664	1031.5	541.122	-181.426	990.271	583.632	-139.636	957.593	582.676	-228.839	927.67
9542	0	310.655	-103.541	1608.02	212.693	-112.717	1613.88	322.84	48.8252	1611.33	189.976	57.0593	1612.29	230.518	98.2063	1482.32	223.114	155.511	1226.48	244.182	-25.6825	1400.69	243.635	-97.1993	1251.54	138.162	157.703	1288.68	405.887	88.564	1426.33	476.316	63.5601	1250.2	513.476	38.6551	1102	558.551	-120.071	1029.74	539.306	-191.972	988.449	581.595	-150.102	955.984	580.689	-239.284	925.805
9543	0	310.227	-115.43	1608.13	212.287	-125.188	1614.15	321.705	37.1082	1611.02	188.71	44.429	1612.34	228.755	85.7727	1481.98	221.581	142.061	1225.58	242.663	-38.5895	1400.79	241.572	-110.624	1251.91	136.175	144.352	1287.82	404.089	76.3868	1425.43	474.119	52.6809	1248.89	510.841	28.3735	1100.5	556.719	-130.03	1027.86	537.554	-202.054	986.509	579.577	-159.909	954.001	578.687	-249.046	923.512
9544	0	309.709	-127.437	1608.3	211.823	-137.636	1614.49	320.191	24.9856	1610.8	187.465	31.8747	1612.51	227.134	73.1302	1481.85	219.929	128.491	1225.11	241.005	-51.3861	1400.97	239.529	-124.314	1252.43	134.473	131.116	1287.37	402.34	64.0872	1424.68	471.727	41.9762	1247.83	508.189	18.3306	1099.12	554.615	-139.393	1025.55	535.872	-211.537	984.166	577.228	-168.939	951.459	576.92	-257.939	920.872
9545	0	309.138	-139.444	1608.53	211.207	-150.185	1615.04	319.123	13.0749	1610.79	186.269	19.2013	1612.91	225.514	60.5593	1481.89	218.51	114.745	1224.71	238.569	-63.8197	1401.4	237.346	-137.784	1253.38	132.856	117.858	1287.04	400.535	51.6351	1423.93	469.329	31.874	1246.63	505.096	8.569	1097.51	552.427	-148.494	1022.86	533.994	-220.325	981.323	574.728	-177.265	948.343	575.028	-266.196	917.649
9546	0	308.365	-151.634	1609.04	210.69	-162.807	1616.02	317.904	1.04523	1610.92	184.976	6.63827	1613.7	224.063	47.8214	1482.1	217.03	101.388	1224.3	237.012	-76.8783	1402.22	235.263	-151.407	1254.71	131.329	104.616	1287.06	398.912	39.1298	1423.8	466.642	21.1836	1245.77	501.781	-1.02879	1096.32	550.126	-156.889	1020.25	532.348	-228.447	978.119	571.951	-184.911	945.091	573.234	-273.753	914.021
9547	0	307.326	-164.059	1610.05	209.93	-175.348	1616.98	316.427	-11.3853	1611.42	183.826	-6.01557	1614.6	222.589	35.082	1482.83	215.556	88.2533	1224.26	235.325	-89.6131	1403.26	233.337	-165.175	1255.95	130.094	91.4083	1287.68	397.335	26.5418	1423.93	463.984	10.6835	1245.4	498.343	-10.3508	1095.6	547.661	-164.899	1017.28	530.053	-236.486	974.841	569.103	-191.785	941.678	571.305	-280.396	910.136
9548	0	306.543	-176.257	1610.62	209.114	-187.89	1618.19	315.397	-23.5558	1612.1	182.559	-18.6049	1615.61	221.331	22.2804	1483.53	214.399	75.2588	1224.81	233.725	-102.492	1404.26	231.58	-178.59	1257.26	128.903	78.2589	1288.35	395.841	13.8085	1424.4	460.699	-0.107711	1244.89	494.678	-19.5369	1095.03	545.043	-172.393	1014.5	527.931	-243.73	971.118	565.892	-198.006	937.915	569.32	-286.322	905.609
9549	0	305.748	-188.835	1611.37	208.339	-200.392	1619.16	314.318	-35.9092	1612.72	181.447	-31.1784	1616.58	219.968	9.5325	1484.24	213.602	62.2799	1225.88	232.315	-115.217	1405.23	229.946	-191.94	1258.58	127.581	65.1335	1288.97	394.466	0.987874	1425.06	458.084	-11.0532	1245	490.877	-28.5571	1094.66	542.178	-179.534	1011.2	525.667	-250.314	967.14	562.842	-203.847	934.283	567.081	-291.611	900.893
9550	0	304.908	-201.188	1612.38	207.376	-213.083	1620.11	313.298	-48.53	1613.57	180.491	-43.9694	1617.21	218.679	-3.20927	1484.96	212.614	49.5562	1227.02	231.156	-128.134	1406.05	228.639	-205.061	1259.59	126.596	52.0968	1289.92	393.261	-11.813	1426.06	455.567	-21.9806	1245.07	487.073	-37.2982	1094.3	539.464	-186.385	1008.29	523.23	-256.47	963.124	559.497	-208.954	930.523	564.682	-296.268	895.684
9551	0	303.973	-213.762	1613.52	206.444	-225.542	1621.37	312.347	-61.1271	1614.46	179.687	-56.2974	1618.21	217.5	-15.7891	1485.98	211.402	36.6559	1228.51	230.093	-140.689	1406.92	227.397	-217.655	1260.39	125.475	39.2481	1291.06	392.203	-24.3925	1426.97	453.274	-33.0543	1245.45	483.269	-46.0591	1094.51	536.367	-192.842	1004.97	520.649	-262.211	958.464	555.999	-213.752	926.609	562.04	-300.193	890.46
9552	0	303.084	-226.436	1614.69	205.402	-238.094	1622.35	311.456	-73.629	1615.25	178.768	-68.9984	1618.86	216.48	-28.4996	1487.08	210.493	24.4167	1230.07	229.252	-153.291	1407.84	226.586	-229.994	1261.02	124.52	26.4376	1292.15	391.219	-36.7477	1428.06	451.33	-44.0825	1245.84	479.403	-54.7477	1094.57	533.38	-199.089	1001.71	517.863	-267.567	953.517	552.44	-218.143	922.634	559.082	-303.713	884.323
9553	0	301.831	-239.097	1615.52	204.243	-250.636	1623.25	310.465	-86.509	1616.17	177.778	-81.2487	1620.03	215.33	-41.0943	1487.97	209.409	12.1254	1231.17	228.676	-165.851	1408.67	226.268	-242.027	1261.59	123.384	13.6543	1293.36	390.143	-48.9338	1429.03	449.403	-55.0845	1246.47	475.816	-63.3939	1095	530.04	-205.061	997.898	514.809	-272.62	948.335	548.9	-221.998	918.469	555.87	-306.582	878.006
9554	0	300.867	-251.809	1616.56	203.173	-263.166	1624.03	309.908	-99.2402	1617.64	177.113	-93.77	1620.55	214.35	-53.6826	1489.07	208.238	-0.186073	1232.36	228.071	-177.99	1409.34	226.091	-253.941	1262.07	122.145	0.996456	1294.46	389.166	-60.8103	1429.91	447.289	-65.781	1246.87	472.122	-72.0986	1095.17	526.835	-210.792	994.155	511.451	-276.968	942.977	545.141	-225.46	914.06	552.493	-308.841	871.67
9555	0	299.752	-264.601	1617.77	201.946	-275.708	1624.84	309.34	-111.867	1618.69	176.433	-106.056	1621.32	213.355	-66.0826	1490.04	206.999	-12.2481	1233.35	227.764	-190.331	1410.13	226.395	-265.811	1262.77	120.872	-11.5428	1295.38	388.248	-72.3456	1431.01	445.751	-76.2372	1247.3	468.518	-80.8802	1095.54	523.5	-216.178	990.225	508.167	-281.077	937.284	541.078	-228.583	909.646	548.878	-310.571	864.915
9556	0	298.396	-277.271	1618.78	200.875	-288.073	1625.62	308.404	-124.913	1619.54	176.067	-118.47	1622.2	212.507	-78.5802	1490.91	205.67	-24.2652	1234.17	227.597	-202.439	1410.88	226.952	-277.714	1263.37	119.996	-24.035	1296.69	387.527	-83.7118	1431.85	443.776	-86.7312	1247.79	464.969	-89.6596	1095.66	519.884	-221.291	985.763	504.743	-284.634	931.645	536.82	-231.229	904.809	544.938	-311.803	857.833
9557	0	297.537	-290.017	1619.62	199.723	-300.653	1626.15	307.97	-137.569	1620.63	175.501	-130.862	1622.8	211.341	-90.7677	1491.89	204.381	-36.3295	1235.51	227.519	-214.313	1411.35	227.636	-289.509	1264.01	118.389	-36.2863	1297.75	386.716	-94.9385	1432.86	441.796	-96.9179	1248.05	461.661	-98.4743	1095.93	516.542	-226.109	981.698	501.202	-287.923	925.674	532.751	-233.514	900.276	540.926	-312.429	850.684
9558	0	296.652	-302.846	1620.61	198.582	-313.115	1626.95	307.647	-150.398	1622.15	175.121	-143.166	1623.62	211.064	-103.189	1493.1	202.899	-48.2042	1236.27	227.841	-226.192	1412.08	228.349	-301.394	1264.8	116.943	-48.8168	1298.81	386.006	-105.922	1433.7	440.321	-106.543	1248.82	458.49	-107.041	1096.31	513.16	-230.633	977.788	497.52	-290.653	919.651	528.596	-235.291	895.88	536.752	-312.468	843.659
9559	0	295.716	-315.571	1621.5	197.601	-325.462	1627.67	306.989	-163.471	1623.35	174.825	-155.489	1624.81	209.817	-115.248	1494.19	201.586	-60.0551	1237.51	227.775	-238.194	1412.87	229.195	-313.145	1265.46	115.631	-61.0854	1300.16	385.293	-116.902	1434.72	438.781	-116.284	1249.54	455.396	-115.879	1096.94	509.825	-234.94	973.963	494.029	-292.861	913.994	524.522	-236.386	891.882	532.363	-311.815	836.721
9560	0	294.785	-328.321	1622.71	196.631	-337.997	1628.33	307.02	-176.024	1624.72	174.551	-167.815	1625.67	209.225	-127.524	1495.46	200.08	-71.9442	1238.87	227.76	-250.017	1413.77	229.74	-324.56	1266.31	114.176	-73.5404	1301.1	384.485	-127.672	1435.54	436.832	-125.957	1250.02	452.481	-124.718	1097.7	506.395	-238.769	970.199	490.09	-295.234	908.049	520.008	-237.617	887.846	527.812	-310.809	829.872
9561	0	293.968	-341.175	1623.69	195.758	-350.376	1629.01	306.633	-189.114	1626.24	174.146	-180.047	1626.93	208.839	-139.579	1496.73	198.719	-83.5621	1240.3	227.847	-262.005	1414.76	230.378	-335.917	1267.07	112.564	-86.0336	1302.27	383.94	-138.49	1436.6	435.405	-135.422	1250.86	449.692	-133.368	1098.81	502.984	-242.389	966.718	486.258	-296.514	902.686	515.806	-238.136	884.471	523.212	-308.87	823.287
9562	0	293.321	-353.958	1624.59	195.028	-362.794	1629.58	306.606	-201.626	1627.43	174.11	-192.368	1627.61	208.012	-151.745	1497.79	197.317	-95.1954	1241.62	227.776	-273.794	1415.69	230.656	-347.268	1267.73	111.388	-98.0243	1304.1	383.22	-149.394	1437.63	433.389	-145.367	1251.46	446.883	-142.049	1099.83	499.684	-245.543	963.497	482.831	-296.997	897.561	511.345	-238.362	881.119	518.676	-306.526	817.338
9563	0	292.58	-366.597	1625.38	194.093	-375.106	1630.11	306.252	-214.665	1628.51	173.824	-204.539	1628.68	207.652	-163.785	1498.88	195.922	-106.814	1242.81	227.718	-285.678	1416.68	230.707	-358.49	1268.56	110.173	-109.682	1305.49	382.484	-160.434	1438.35	431.591	-155.21	1251.77	443.919	-150.65	1100.6	496.372	-248.47	960.611	478.977	-298.301	892.884	506.849	-238.244	878.184	514.08	-303.802	811.691
9564	0	291.367	-379.22	1626.09	193.313	-387.397	1630.6	306.306	-227.281	1629.52	173.694	-216.75	1629.39	207.177	-175.83	1500.04	194.514	-118.567	1243.94	227.647	-297.559	1417.64	230.609	-369.937	1269.33	108.684	-121.836	1306.91	381.868	-171.559	1438.97	429.987	-165.004	1252.09	440.902	-159.061	1101.31	492.908	-251.073	957.735	475.617	-298.828	888.285	502.337	-237.95	875.383	509.595	-300.549	806.479
9565	0	291.173	-391.767	1626.55	192.601	-399.775	1631.06	306.013	-240.136	1630.34	173.824	-229.003	1630.04	206.771	-187.855	1500.99	193.379	-130.151	1245.54	227.412	-309.284	1418.45	230.141	-381.311	1270.12	107.616	-133.847	1308.34	381.272	-182.849	1439.7	428.483	-174.821	1252.41	437.898	-167.289	1101.88	489.421	-253.656	954.871	472.16	-298.46	884.397	497.875	-237.479	873.146	504.778	-297.344	801.326
9566	0	290.268	-404.548	1627.26	192.123	-412.132	1631.42	306.062	-252.355	1630.81	173.962	-241.272	1630.47	206.395	-199.853	1502.02	192.045	-141.986	1246.4	227.255	-321.071	1419.23	229.688	-392.941	1270.77	106.78	-145.838	1309.83	380.734	-194.181	1440.17	426.52	-185.505	1252.89	434.883	-175.314	1102.64	486.017	-256.093	953.021	468.487	-298.845	881.06	493.417	-237.028	871.442	500.291	-293.715	797.149
9567	0	289.934	-417.018	1627.59	191.63	-424.224	1631.92	305.588	-265.232	1631.43	173.782	-253.598	1631.27	206.473	-211.774	1503.17	190.789	-153.601	1247.19	226.961	-332.91	1419.8	229.042	-404.494	1271.31	105.562	-157.868	1311.01	380.203	-205.689	1440.79	424.934	-195.531	1253.14	431.7	-183.265	1102.98	482.138	-258.252	950.281	464.925	-299.009	877.61	489.201	-236.403	870.102	495.718	-290.305	793.706
9568	0	289.529	-429.308	1627.72	191.495	-435.924	1632.06	305.672	-277.517	1631.81	173.656	-265.626	1631.63	205.746	-223.759	1503.53	189.739	-165.283	1248.08	226.724	-344.827	1420.27	228.424	-416.162	1271.62	104.748	-169.745	1312.14	379.549	-217.261	1440.9	423.229	-205.595	1252.93	428.594	-190.941	1103.65	478.537	-260.626	948.626	461.243	-298.825	874.267	484.958	-236.227	869.112	490.801	-287.097	789.666
9569	0	289.119	-441.503	1627.96	191.064	-447.922	1632.28	305.748	-289.771	1632.27	173.403	-277.7	1632.2	205.303	-235.834	1504.04	188.764	-177.015	1249.17	225.789	-356.922	1420.7	227.589	-427.761	1271.62	103.673	-181.728	1313.54	378.932	-228.982	1441.11	421.627	-215.505	1253.17	425.436	-198.538	1104.26	475.002	-263.107	947.273	457.081	-300.072	871.372	480.901	-235.854	868.743	486.153	-283.842	787.144
9570	0	288.816	-453.779	1627.9	190.746	-460.052	1632.48	305.449	-302.221	1632.22	173.339	-290.043	1632.17	204.851	-248.077	1504.28	187.719	-188.719	1249.68	225.183	-368.872	1420.71	226.674	-439.443	1271.48	102.945	-193.63	1314.35	378.147	-240.761	1440.87	419.955	-225.351	1253.11	422.271	-205.975	1104.78	471.471	-265.592	945.856	453.175	-300.261	868.543	476.462	-235.965	868.101	481.44	-280.952	784.823
9571	0	288.77	-466.045	1627.75	190.944	-472.218	1632.23	305.363	-314.301	1631.78	173.091	-302.302	1631.77	204.411	-260.185	1504.39	186.708	-200.463	1250.07	225.069	-380.791	1420.57	225.696	-450.954	1271.36	101.825	-205.552	1314.8	377.555	-252.68	1440.56	418.275	-235.003	1252.81	419.121	-213.259	1105.2	467.637	-267.93	944.518	449.205	-299.65	865.999	472.078	-236.107	867.634	476.68	-278.268	782.756
9572	0	288.712	-478.198	1627.78	190.557	-484.539	1632.48	305.288	-326.289	1631.2	172.819	-314.281	1631.81	203.797	-272.407	1504.05	185.763	-212.304	1250.39	224.615	-393.082	1420.5	224.765	-462.745	1270.94	101.106	-217.541	1315.14	376.906	-264.796	1440.15	416.661	-244.418	1252.45	416.371	-220.354	1105.49	464.034	-270.54	943.246	444.441	-303.058	864.686	467.901	-236.432	867.423	472.089	-275.938	781.045
9573	0	288.727	-490.336	1627.32	190.673	-496.791	1632.4	304.91	-338.462	1630.4	172.529	-326.684	1631.16	203.386	-284.711	1503.79	184.819	-224.119	1249.99	223.977	-405.387	1420.04	223.803	-474.547	1270.11	100.335	-229.413	1315.49	376.519	-276.884	1439.77	414.836	-253.882	1251.99	413.591	-227.405	1105.98	460.527	-273.13	942.193	441.017	-300.848	862.269	463.439	-237.098	867.134	467.34	-274.067	779.842
9574	0	288.732	-502.402	1626.9	190.759	-509.07	1632.32	304.434	-350.519	1629.2	172.355	-338.931	1630.55	202.904	-297.056	1503.51	184.033	-236.116	1249.9	223.236	-417.574	1419.41	222.87	-486.466	1269.51	99.329	-241.581	1315.16	376.099	-289.17	1439.28	413.33	-262.761	1251.55	410.653	-234.464	1105.97	456.826	-275.938	941.24	436.401	-301.957	860.893	459.015	-238.29	866.975	462.456	-272.717	778.846
9575	0	288.7	-514.255	1626.43	190.833	-521.315	1632.27	304.154	-362.294	1627.8	172.116	-351.378	1629.7	202.423	-309.454	1502.82	183.466	-248.041	1249.4	222.501	-429.906	1418.76	221.862	-498.221	1268.31	98.9034	-253.342	1314.9	375.39	-301.631	1438.3	411.706	-272.043	1251.24	407.877	-241.584	1106.21	453.214	-278.962	940.257	433.811	-303.638	860.635	454.7	-239.627	867.152	457.828	-271.891	777.88
9576	0	288.934	-526.229	1625.85	191.303	-533.557	1631.79	303.862	-374.09	1626.4	171.597	-363.766	1628.76	201.81	-322.012	1501.83	182.845	-260.032	1248.79	221.42	-442.472	1417.95	220.969	-510.309	1267.31	98.0034	-265.561	1314.54	374.828	-314.102	1437.39	409.894	-281.357	1250.76	405.143	-248.802	1106.35	449.644	-282.117	939.516	430.543	-304.169	862.618	450.51	-241.2	867.347	452.402	-271.208	776.999
9577	0	289.256	-538.288	1625.22	191.133	-546.425	1631.78	303.382	-386.189	1625.09	171.14	-376.167	1627.52	201.344	-334.539	1501.17	182.196	-272.252	1248.03	220.678	-454.949	1416.98	220.03	-522.245	1265.82	97.551	-277.507	1313.93	374.431	-326.647	1436.82	408.057	-290.813	1250.38	402.705	-255.953	1106.91	446.371	-285.615	939.153	425.302	-306.609	859.354	446.455	-243.186	867.773	447.693	-271.229	776.645
9578	0	289.573	-550.294	1624.37	191.691	-558.554	1631.11	302.753	-398.188	1623.46	170.591	-388.595	1626.29	200.873	-347.301	1500.17	181.811	-284.303	1247.2	220.047	-467.495	1415.8	219.057	-534.208	1264.55	97.1578	-289.511	1313.3	373.837	-339.351	1435.71	406.383	-300.429	1250.2	400.316	-263.173	1107.4	443.4	-289.29	939.002	421.777	-308.82	858.982	442.756	-245.343	868.733	443.285	-271.832	776.78
9579	0	289.736	-562.232	1623.54	191.868	-571.285	1630.41	302.345	-410.011	1621.88	170.043	-401.086	1625.08	200.278	-359.992	1498.92	181.738	-296.522	1246.5	219.374	-480.031	1414.39	218.17	-546.129	1263.07	96.568	-301.557	1312.54	373.394	-352.02	1434.9	404.856	-310.163	1250.08	397.718	-270.689	1107.72	440.458	-293.503	938.862	418.219	-311.136	858.873	438.866	-248.366	869.208	439.309	-272.759	777.207
9580	0	290.03	-574.216	1622.81	192.228	-583.471	1629.71	302.041	-421.75	1620.36	169.741	-413.488	1623.33	199.884	-372.716	1497.87	181.746	-308.825	1245.68	218.713	-492.668	1412.88	217.39	-558.445	1261.2	96.268	-313.72	1311.54	372.801	-364.905	1433.8	403.374	-320.1	1249.87	395.303	-278.509	1108.53	437.744	-297.727	939.033	417.411	-314.655	859.192	435.535	-251.514	870.234	435.341	-274.279	777.556
9581	0	290.118	-586.322	1621.66	192.309	-596.04	1629.08	301.562	-433.866	1618.72	169.069	-426.202	1621.95	199.302	-385.541	1496.34	181.751	-321.183	1244.39	218.082	-505.415	1411.42	216.609	-570.719	1259.56	96.0432	-325.614	1310.36	372.474	-377.649	1432.7	402.018	-330.228	1249.57	392.971	-286.463	1108.68	435.507	-302.274	939.337	415.156	-318.192	860.097	432.144	-255.121	871.213	431.837	-276.224	777.921
9582	0	290.175	-598.389	1620.62	192.385	-608.461	1628.09	300.831	-446.077	1616.74	168.519	-438.794	1620.03	198.926	-398.411	1494.91	181.87	-333.604	1243.19	217.561	-518.009	1409.76	215.908	-583.052	1257.81	95.9025	-337.889	1309.15	372.019	-390.568	1431.3	400.684	-340.61	1248.89	390.76	-294.803	1108.93	432.571	-306.875	939.143	411.555	-322.749	857.626	428.893	-259.156	872.005	428.481	-278.758	778.123
9583	0	290.192	-610.497	1619.5	192.485	-620.926	1626.91	300.426	-458.153	1615	168.323	-451.29	1618.08	198.622	-411.234	1493.32	181.932	-345.839	1241.78	217.18	-530.795	1408.07	215.329	-595.515	1255.94	95.4574	-350.351	1307.49	371.668	-403.517	1429.77	399.502	-351.322	1248.19	388.786	-303.419	1109	430.443	-312.428	939.001	411.603	-327.422	859.049	425.483	-263.639	872.099	425.345	-281.71	778.041
9584	0	290.096	-622.604	1618.18	192.481	-633.198	1625.76	300.225	-470.23	1613.38	167.777	-463.712	1616.24	198.45	-423.859	1491.83	182.061	-358.267	1240.2	216.882	-543.434	1406.39	214.834	-608.094	1254.05	95.8188	-362.285	1306.46	371.635	-416.324	1428.57	398.565	-362.125	1247.67	387.518	-312.308	1109.51	428.923	-318.091	939.163	409.908	-332.481	858.588	422.722	-268.673	872.755	422.412	-285.361	778.277
9585	0	290.178	-634.869	1616.8	192.232	-645.834	1624.43	299.698	-482.505	1611.62	167.446	-476.337	1614.46	198.291	-436.602	1490.27	182.465	-370.547	1238.86	216.516	-556.156	1404.64	214.633	-620.62	1252.38	95.9197	-374.651	1304.88	371.55	-429.235	1427.3	397.746	-373.187	1246.93	385.83	-321.805	1109.32	426.882	-324.736	938.574	408.314	-338.195	858.13	420.072	-274.337	873.304	419.992	-289.763	778.511
9586	0	289.726	-647.315	1615.61	191.978	-657.927	1622.88	299.158	-494.971	1610.15	167.15	-488.713	1612.65	198.225	-449.237	1488.7	182.906	-382.886	1237.41	216.52	-568.801	1403.18	214.472	-633.327	1250.69	96.0669	-386.983	1303.34	371.541	-442.042	1425.9	397.218	-384.417	1246.06	384.982	-331.81	1109.73	425.577	-331.764	938.557	407.603	-344.616	858.197	417.916	-280.559	873.913	417.755	-294.804	778.81
9587	0	289.626	-659.649	1614.38	191.707	-670.353	1621.26	298.902	-507.461	1608.77	166.865	-501.161	1611.24	198.268	-461.763	1487.32	183.764	-395.416	1236.4	216.439	-581.423	1401.62	214.304	-646.066	1249.1	96.4542	-399.406	1301.93	371.713	-454.815	1424.69	396.914	-395.959	1245.5	384.015	-342.221	1109.66	424.977	-339.352	938.88	407.073	-351.53	858.323	416.024	-287.638	874.493	416.013	-300.509	779.47
9588	0	289.233	-672.156	1613.12	191.201	-682.657	1620.11	299.005	-519.772	1607.88	166.544	-513.471	1609.74	198.365	-474.295	1485.6	184.368	-408.074	1234.93	216.456	-594	1400.24	214.586	-658.621	1247.9	96.828	-411.882	1300.23	371.856	-467.565	1423.71	396.859	-407.559	1245.04	383.527	-352.971	1109.86	424.323	-347.755	939.197	406.745	-359.22	858.013	414.603	-295.367	875.22	414.645	-307.054	780.117
9589	0	288.951	-684.724	1612.02	191.103	-694.76	1618.27	299.016	-532.331	1607.09	166.45	-525.78	1608.61	198.498	-486.758	1484.2	185.227	-420.924	1233.58	216.65	-606.696	1398.95	214.713	-671.537	1246.58	97.4739	-424.365	1298.49	372.139	-480.303	1422.7	396.976	-419.594	1244.53	383.128	-364.24	1109.58	423.718	-356.831	939.233	406.11	-367.745	857.464	413.656	-303.872	875.731	413.61	-314.409	780.675
9590	0	288.424	-697.331	1610.93	190.704	-707.162	1617.07	298.95	-545.035	1606.21	166.312	-538.13	1607.54	198.741	-499.215	1482.84	186.073	-433.969	1231.96	216.96	-619.262	1397.8	215.249	-684.208	1245.74	98.2631	-436.925	1296.91	372.456	-493.085	1421.7	397.208	-431.835	1243.72	383.136	-375.886	1109.25	423.768	-366.632	939.04	406.387	-376.907	857.252	413.35	-313.127	876.328	413.271	-322.472	780.962
9591	0	288.064	-709.925	1609.84	190.193	-719.579	1615.8	298.766	-557.915	1605.25	166.448	-550.459	1606.5	199.117	-511.764	1481.54	186.868	-447.091	1230.36	217.374	-631.9	1396.71	215.716	-696.86	1244.82	99.0179	-449.628	1295.02	372.968	-505.74	1420.81	397.684	-444.384	1243.08	383.511	-387.828	1108.8	424.129	-377.183	938.872	406.579	-387.061	856.948	413.338	-323.245	876.45	413.03	-331.541	781.054
9592	0	287.791	-722.598	1608.82	189.937	-731.991	1614.69	299.142	-570.301	1604.5	166.667	-562.702	1605.52	199.505	-524.221	1480.39	187.822	-460.11	1229	217.796	-644.634	1395.82	216.355	-709.735	1244.19	99.7454	-462.503	1293.29	373.387	-518.476	1419.99	398.242	-456.916	1242.31	384.045	-400.188	1108.3	425.217	-388.065	938.742	407.184	-397.817	856.383	413.868	-334.151	876.38	413.437	-341.565	781.007
9593	0	287.417	-735.299	1607.69	190.045	-744.187	1613.32	299.369	-583.034	1603.58	167.078	-574.86	1604.62	199.88	-536.765	1478.91	188.691	-473.303	1227.49	218.263	-657.212	1394.81	217.053	-722.901	1243.32	100.633	-475.408	1291.74	374.043	-531.331	1419.16	399.125	-469.713	1241.59	384.816	-413	1107.68	425.779	-400.426	937.876	408.763	-409.223	855.865	414.909	-345.812	876.018	414.005	-352.461	780.613
9594	0	287.356	-747.859	1606.86	189.974	-756.523	1612.33	299.774	-595.524	1602.77	167.515	-587.245	1603.44	200.649	-549.252	1478.06	189.331	-486.859	1225.52	218.785	-669.888	1394.11	217.933	-736.298	1242.8	101.359	-488.563	1289.93	374.695	-544.246	1418.37	400.091	-482.707	1240.84	386.174	-425.944	1107.4	427.036	-413.05	936.987	410.96	-421.563	855.218	416.817	-358.317	876.068	415.146	-364.337	780.003
9595	0	287.337	-760.397	1605.81	190.067	-768.82	1611.42	300.042	-608.168	1601.83	167.912	-599.373	1602.63	201.15	-561.774	1476.68	190.412	-500.206	1224.07	219.382	-682.701	1393.18	218.952	-749.788	1242.52	102.38	-501.82	1288.4	375.269	-557.109	1417.53	401.102	-496.012	1239.99	388.344	-439.103	1107.93	428.864	-426.406	936.433	412.189	-434.526	854.316	418.953	-371.593	875.5	417.055	-377.057	779.473
9596	0	287.875	-772.735	1605.23	189.845	-781.007	1610.73	300.421	-620.736	1601.43	168.317	-611.606	1602.09	201.778	-574.125	1475.68	191.257	-513.701	1222.39	220.044	-695.311	1392.57	220.094	-763.483	1242.21	103.285	-515.016	1286.62	376.034	-570.031	1416.82	402.307	-509.354	1239.42	389.698	-452.634	1106.48	431.627	-440.052	936.278	414.31	-448.585	853.771	421.458	-385.513	874.613	419.36	-390.71	778.883
9597	0	288.013	-785.28	1604.99	189.895	-793.361	1610.5	300.722	-633.491	1601.2	168.793	-624.044	1601.85	202.448	-586.452	1474.87	192.367	-527.297	1221.19	220.705	-708.143	1392.24	221.16	-777.264	1242.15	104.209	-528.367	1284.92	376.862	-582.922	1416.37	403.737	-523.163	1238.92	391.482	-466.612	1105.31	434.045	-454.697	935.593	416.663	-463.16	852.863	424.328	-400.161	873.691	422.302	-405.41	778.418
9598	0	288.298	-797.73	1605.07	190.257	-805.755	1610.58	301.375	-646.129	1601.56	169.082	-636.357	1601.99	203.1	-598.866	1474.37	193.362	-541.069	1220.18	221.302	-721.002	1392.29	222.189	-791.03	1242.51	105.218	-541.487	1283.73	377.541	-595.749	1415.91	405.325	-536.917	1238.2	393.542	-480.903	1104.32	436.423	-470.048	934.634	419.445	-478.408	851.933	427.667	-415.663	872.857	425.642	-421.103	777.708
9599	0	288.59	-810.181	1605.46	190.542	-818.082	1610.87	301.758	-658.581	1601.78	169.636	-648.649	1602.36	203.728	-611.313	1474.24	194.423	-554.772	1219.38	221.926	-733.688	1392.66	223.181	-804.667	1243.45	106.207	-554.809	1282.65	378.426	-608.52	1415.9	407.094	-550.993	1237.83	395.866	-495.611	1103.63	439.264	-486.398	933.911	422.303	-494.658	850.983	431.123	-431.843	871.846	429.53	-437.672	776.767
9600	0	288.576	-822.811	1606.35	190.979	-830.558	1611.33	302.165	-670.98	1602.13	170.138	-661.105	1603.03	204.439	-623.765	1474.46	195.195	-568.123	1218.52	222.576	-746.367	1393.26	223.984	-818.192	1244.49	107.146	-567.74	1281.96	379.081	-621.196	1416.04	408.728	-565.299	1237.34	398.19	-510.619	1102.51	442.492	-502.486	933.425	425.99	-511.599	850.937	435.128	-448.678	870.891	433.718	-455.24	775.738
9601	0	289.004	-835.303	1607.19	191.339	-842.968	1612.15	302.57	-683.325	1602.81	170.801	-673.426	1603.88	204.944	-636.282	1474.81	196.069	-581.325	1218.34	223.196	-759.091	1394.12	224.797	-831.856	1245.84	107.919	-580.73	1281.77	379.695	-633.762	1416.45	410.365	-579.903	1237.24	400.691	-525.857	1101.81	445.82	-519.628	932.807	430.164	-529.557	850.366	439.19	-466.37	870.211	438.314	-473.817	774.713
9602	0	289.438	-847.762	1607.97	191.762	-855.233	1613.18	303.273	-695.801	1603.96	171.154	-685.853	1604.97	205.432	-648.851	1475.58	196.461	-594.574	1218.91	223.692	-771.716	1395.11	225.527	-845.258	1247.35	108.591	-593.669	1281.98	380.147	-646.412	1417.19	411.979	-594.268	1237.42	403.458	-541.446	1101.92	449.476	-537.367	932.677	433.705	-547.726	850.613	443.596	-484.691	869.533	443.395	-493.376	774.198
9603	0	289.886	-860.185	1609.03	192.185	-867.572	1614.46	303.557	-708.139	1605	171.626	-698.326	1605.9	205.823	-661.41	1476.48	196.852	-607.474	1219.71	224.062	-784.37	1396.26	226.251	-858.59	1249.05	109.105	-606.464	1283.06	380.568	-659.11	1418.28	413.671	-608.705	1237.96	405.749	-557.317	1101.59	453.778	-555.333	933.127	438.603	-567.45	850.631	448.243	-503.808	869.079	448.962	-513.865	773.741
9604	0	290.377	-872.563	1610.45	192.794	-880.179	1615.54	303.852	-720.359	1606.02	171.981	-710.634	1607.38	206.206	-673.928	1477.45	196.799	-620.509	1220.14	224.304	-796.991	1397.41	226.559	-871.792	1250.49	109.4	-618.914	1283.95	380.86	-671.816	1419.12	414.962	-623.346	1238.57	408.557	-573.081	1101.71	457.838	-574.044	933.731	442.929	-587.334	851.26	452.811	-523.585	868.312	454.84	-535.214	773.364
9605	0	290.923	-884.775	1611.85	193.221	-892.458	1617.17	304.24	-732.652	1607.43	172.039	-723.056	1608.74	206.503	-686.454	1478.49	197.185	-632.914	1221.76	224.415	-809.387	1398.46	226.607	-884.466	1251.71	109.878	-631.362	1285.3	381.18	-684.69	1420.11	416.333	-637.894	1239.51	411.21	-589.104	1101.91	461.367	-593.504	933.927	447.65	-607.814	851.501	457.955	-543.899	868.131	460.937	-557.405	773.537
9606	0	291.175	-896.996	1612.92	193.705	-904.894	1618.48	304.38	-744.913	1608.41	172.208	-735.338	1610.01	206.893	-698.759	1479.7	197.475	-645.353	1223.36	224.431	-821.781	1399.65	226.505	-896.635	1252.82	109.938	-643.641	1286.85	381.645	-697.767	1421.51	417.816	-652.289	1240.61	413.812	-605.26	1101.85	465.977	-613.049	934.858	451.909	-629.002	852.293	463.228	-564.863	867.824	467.128	-580.641	773.673
9607	0	291.492	-909.297	1614.12	194.058	-917.372	1619.92	304.405	-757.291	1609.45	172.277	-747.919	1611.32	207.239	-711.045	1481.25	197.814	-657.456	1225.18	224.219	-834.084	1400.8	226.106	-908.595	1253.8	110.308	-655.513	1288.44	382.016	-710.881	1422.87	418.866	-667.068	1241.52	416.724	-621.4	1102.34	470.44	-633.38	935.56	456.938	-650.981	853.582	468.481	-586.313	867.5	473.649	-604.206	774.081
9608	0	291.845	-921.482	1615.39	194.396	-929.796	1621.5	304.373	-769.494	1610.54	172.257	-760.302	1612.76	207.533	-723.237	1482.61	198.088	-669.418	1226.69	223.941	-846.162	1401.97	225.351	-920.513	1254.52	110.703	-667.201	1290.26	382.277	-724.075	1423.97	420.385	-681.692	1242.47	419.55	-637.83	1102.45	474.829	-653.872	936.406	461.191	-672.177	855.206	473.979	-608.269	867.262	480.04	-628.735	774.239
9609	0	292.008	-933.557	1616.49	194.542	-942.004	1622.93	304.39	-781.636	1611.54	172.152	-772.694	1614.36	207.747	-735.363	1483.87	198.471	-681.285	1227.95	223.604	-858.245	1403.07	224.327	-932.152	1255.46	111.091	-678.864	1291.59	382.646	-737.167	1425.13	421.781	-696.547	1243.25	422.62	-654.235	1102.57	478.972	-674.76	936.833	462.952	-694.244	853.359	479.741	-630.809	867.528	486.546	-653.833	774.746
9610	0	292.048	-945.74	1617.47	194.569	-954.166	1624.14	304.117	-793.821	1612.51	172.089	-785.028	1615.46	207.989	-747.39	1485.19	198.934	-692.974	1229.16	223.086	-870.313	1404.28	223.126	-944.044	1256.3	111.742	-690.353	1292.97	382.92	-750.195	1426.32	423.14	-711.481	1244.04	425.811	-670.808	1102.87	483.547	-695.754	938.142	471.165	-718.584	857.097	484.99	-653.597	867.047	492.962	-679.309	775.356
9611	0	291.945	-957.76	1618.71	194.503	-966.281	1625.46	303.958	-805.816	1613.69	171.838	-797.204	1617.1	208.078	-759.313	1486.48	199.683	-704.62	1230.57	222.541	-882.243	1405.41	221.879	-956.01	1257.41	112.543	-701.558	1294.59	383.173	-763.122	1427.75	424.648	-726.401	1245	428.858	-687.601	1103.03	487.78	-717.259	939.268	472.978	-740.815	856.831	490.622	-676.879	867.524	499.253	-705.519	776.385
9612	0	291.766	-969.833	1619.6	194.55	-978.606	1626.25	303.427	-817.672	1614.4	171.732	-809.278	1618.72	208.522	-771.101	1488.15	200.626	-716.218	1231.96	222.019	-894.238	1406.47	220.783	-967.888	1258.69	113.283	-712.764	1295.63	383.209	-776.01	1428.9	426.128	-741.384	1245.89	432.048	-704.522	1103.42	491.733	-739.272	940.564	479.604	-765.274	859.522	495.851	-700.563	867.689	506.208	-731.994	778.227
9613	0	291.556	-981.719	1620.41	194.319	-990.667	1627.66	303.589	-829.583	1616.22	171.476	-821.204	1620.19	208.449	-782.816	1489.28	201.366	-727.705	1233.2	221.579	-906.031	1407.7	219.682	-980.008	1259.94	114.23	-723.483	1297.34	383.264	-788.688	1430.25	427.772	-756.558	1247.27	434.393	-721.708	1102.9	496.136	-761.116	942.547	484.242	-789.081	861.768	500.948	-724.228	867.94	512.53	-758.894	780.435
9614	0	291.315	-993.737	1621.37	194.077	-1002.62	1628.73	303.215	-841.465	1617.37	171.074	-833.107	1621.73	208.125	-794.524	1490.38	202.239	-739.272	1234.71	220.993	-917.749	1409.06	218.607	-992.049	1261.39	114.971	-734.627	1298.39	383.284	-801.107	1431.72	429.28	-771.447	1248.34	437.599	-738.667	1103.44	499.977	-783.393	944.647	489.133	-813.44	864.792	506.338	-748.377	869.284	518.737	-785.968	782.997
9615	0	290.99	-1005.63	1622.54	193.811	-1014.49	1629.77	303.114	-853.212	1619.34	170.699	-845.03	1623.39	208.051	-806.176	1491.78	203.101	-750.344	1235.94	220.515	-929.344	1410.35	217.721	-1003.99	1262.7	115.516	-746.014	1299.35	383.319	-813.395	1433.28	431.064	-786.341	1249.9	440.712	-755.922	1104.14	504.13	-805.683	947.041	492.939	-837.618	867.564	511.443	-772.919	870.663	524.652	-813.376	786.081
9616	0	290.522	-1017.46	1623.13	193.516	-1026.43	1630.7	303.14	-864.702	1621.03	170.138	-856.948	1625.15	208.179	-817.842	1493.16	203.711	-761.74	1237.02	220.084	-941.022	1411.57	217.142	-1015.53	1264.07	116.14	-757.22	1300.38	383.181	-825.574	1434.55	432.333	-801.383	1250.96	443.961	-773.162	1105.01	507.831	-828.24	949.506	497.142	-861.929	870.774	516.526	-797.446	872.508	530.26	-840.972	789.389
9617	0	290.285	-1029.23	1624.14	193.125	-1038.37	1631.7	301.958	-876.812	1621.59	169.699	-868.816	1626.55	207.851	-829.449	1494.14	204.482	-773.407	1238.41	219.822	-952.611	1412.69	216.894	-1027.06	1264.96	116.781	-768.308	1301.36	383.271	-837.695	1436.25	433.848	-816.221	1252.57	446.918	-790.395	1105.59	511.16	-850.836	952.095	500.89	-886.317	874.14	521.265	-822.415	874.446	535.645	-868.637	793.231
9618	0	289.924	-1041.02	1625.44	192.611	-1050.07	1632.81	301.456	-888.647	1622.94	169.204	-880.624	1628.03	207.832	-841.068	1495.5	205.296	-784.649	1239.68	219.635	-963.982	1413.93	216.831	-1038.34	1266.11	117.42	-779.384	1302.01	383.302	-849.727	1437.62	435.311	-830.874	1253.78	449.891	-807.834	1106.65	514.788	-873.281	955.293	504.37	-910.736	878.026	526.023	-847.195	876.976	540.716	-896.332	797.515
9619	0	289.48	-1052.8	1626.37	192.018	-1061.9	1633.5	300.68	-900.52	1624.04	168.765	-892.604	1628.66	207.856	-852.66	1496.51	205.75	-795.849	1239.99	219.434	-975.546	1414.92	216.815	-1049.74	1266.99	118.139	-790.418	1303.12	383.519	-861.817	1439.35	436.725	-845.389	1255.5	452.866	-825.073	1107.47	517.962	-895.851	958.571	507.675	-935.404	882.526	530.644	-872.1	880.101	545.449	-923.845	802.164
9620	0	288.928	-1064.5	1627.22	191.485	-1073.67	1634.26	300.073	-912.313	1625.04	168.313	-904.243	1629.85	208.331	-864.295	1497.7	206.622	-806.458	1241.63	219.375	-987.08	1415.77	217.087	-1060.99	1267.59	118.823	-801.51	1304.2	383.59	-873.955	1440.7	437.931	-860.224	1256.72	455.616	-842.487	1108.51	521.222	-918.536	962.244	511.229	-959.704	887.422	534.792	-897.231	882.71	550.007	-951.459	807.483
9621	0	288.346	-1076.26	1628.1	190.996	-1085.47	1634.7	300.269	-923.802	1626.79	167.866	-916.036	1630.56	208.048	-875.899	1498.31	207.252	-817.525	1242.6	219.365	-998.615	1416.46	217.327	-1072.31	1268.07	119.602	-812.544	1304.86	383.884	-886.123	1442.05	439.423	-874.6	1258.35	458.959	-859.59	1110.19	524.177	-941.137	966.036	514.281	-984.225	892.549	539.3	-922.256	886.658	554.095	-978.924	812.752
9622	0	287.758	-1088.13	1628.85	190.302	-1097.01	1635.27	299.613	-935.68	1627.56	167.38	-927.583	1630.82	208.477	-887.525	1499.08	207.989	-828.515	1243.44	219.803	-1009.96	1416.78	217.468	-1083.7	1268.5	120.355	-823.546	1305.39	384.128	-898.243	1443.43	440.884	-889.205	1259.92	461.45	-876.781	1110.83	526.847	-963.428	969.959	517.267	-1008.3	897.743	543.273	-947.228	890.378	557.845	-1006.28	818.573
9623	0	287.124	-1099.9	1629.82	189.671	-1108.61	1635.65	299.212	-947.496	1628.29	167.031	-939.094	1631.18	208.349	-899.109	1499.42	208.886	-839.648	1244.37	220.037	-1021.47	1417.17	217.842	-1095	1268.65	121.205	-834.627	1305.87	384.497	-910.423	1444.4	442.486	-903.617	1261.11	464.477	-893.912	1112.04	529.682	-985.956	973.967	520.093	-1032.2	903.244	546.979	-972.185	894.079	561.266	-1033.4	824.092
9624	0	286.588	-1111.72	1630.41	187.242	-1119.42	1637.43	298.555	-959.379	1628.61	166.503	-950.521	1631.39	208.607	-910.791	1499.88	209.468	-851.171	1245.08	220.243	-1033.13	1417.4	218.158	-1106.38	1268.76	121.93	-845.728	1306.38	384.882	-922.62	1445.18	444.04	-918.098	1262.3	467.689	-910.847	1113.29	532.104	-1008.11	978.12	522.581	-1056.06	908.416	550.665	-996.828	897.992	564.309	-1060.39	830.117
9625	0	285.904	-1123.58	1630.86	188.483	-1131.85	1635.86	298.747	-971.306	1629.93	166.534	-962.245	1631.07	208.896	-922.466	1500.16	210.475	-862.466	1245.56	220.406	-1044.84	1417.51	218.441	-1117.85	1268.81	122.801	-856.805	1306.48	385.262	-934.778	1446.03	445.758	-932.528	1263.46	470.483	-927.991	1114.1	534.635	-1029.92	982.254	524.777	-1079.75	913.839	553.904	-1021.45	901.937	567.112	-1086.78	835.997
9626	0	285.26	-1135.46	1631.42	187.293	-1142.87	1636.38	298.283	-983.292	1630.05	166.455	-973.836	1630.52	209.337	-934.074	1500.26	211.231	-873.841	1245.36	220.65	-1056.52	1417.47	218.787	-1129.12	1268.76	123.548	-868.017	1306.53	385.771	-946.968	1446.45	447.209	-947.039	1263.8	473.319	-944.952	1114.66	537.049	-1051.55	986.29	526.732	-1103.16	919.396	557.029	-1045.61	905.562	569.864	-1113.13	842.562
9627	0	284.629	-1147.42	1631.65	186.577	-1154.43	1636.31	297.894	-995.362	1629.76	166.246	-985.216	1630.37	209.808	-945.796	1500.18	211.781	-885.342	1244.95	220.834	-1068.27	1417.23	218.957	-1140.74	1268.3	124.412	-879.258	1306.26	386.13	-959.107	1446.51	448.676	-961.549	1264.09	476.092	-961.814	1114.85	539.016	-1073.06	989.563	528.499	-1126.5	924.805	559.565	-1069.76	909.058	571.902	-1139.04	848.001
9628	0	283.935	-1159.36	1631.82	185.958	-1166.26	1636.02	297.828	-1007.26	1629.62	166.14	-996.777	1630.14	210.614	-957.561	1500.05	212.163	-896.803	1244.57	221.089	-1080.01	1416.87	219.248	-1152.17	1267.75	125.155	-890.656	1306.05	386.503	-971.268	1446.47	450.421	-975.74	1264.67	478.832	-978.886	1115.24	540.951	-1094.24	993.247	530.023	-1149.16	929.96	562.148	-1093.41	912.948	573.898	-1164.48	854.021
9629	0	283.362	-1171.3	1632.03	185.347	-1178.05	1635.45	297.879	-1019.33	1629.91	166.468	-1008.44	1629.2	210.603	-969.407	1499.82	212.795	-908.297	1244.65	221.387	-1091.72	1416.42	219.491	-1163.64	1267.2	125.801	-902.111	1305.79	386.939	-983.228	1446.39	452.096	-990.072	1265.17	481.493	-995.814	1115.63	542.847	-1115.13	997.118	531.402	-1171.66	935.136	564.619	-1116.68	916.967	575.733	-1189.69	859.94
9630	0	282.783	-1183.25	1632.1	184.781	-1189.64	1634.78	298.021	-1031.4	1629.59	166.544	-1019.78	1628.26	211.315	-981.175	1499.49	213.049	-919.796	1244.52	221.65	-1103.34	1415.88	219.74	-1175.15	1266.56	126.273	-913.677	1305.28	387.256	-995.223	1446.04	453.474	-1004.22	1265.34	484.047	-1012.68	1115.92	544.465	-1135.67	1000.85	532.733	-1193.53	940.512	566.508	-1139.79	920.625	577.274	-1214.18	865.983
9631	0	282.174	-1195.31	1631.92	184.171	-1201.21	1634.48	298.107	-1043.57	1629.17	166.904	-1031.45	1627.32	211.592	-993.052	1498.85	213.342	-931.18	1244.11	221.751	-1115.05	1415.25	219.998	-1186.6	1265.75	126.739	-925.342	1304.74	387.615	-1007.22	1445.74	454.669	-1018.5	1265.21	486.345	-1029.48	1116.25	545.863	-1155.98	1004.21	533.742	-1215.28	945.214	568.466	-1162.07	924.6	578.646	-1238.26	872.004
9632	0	281.556	-1207.47	1631.55	183.685	-1213	1633.63	298.307	-1055.98	1628.5	167.057	-1042.96	1626.59	211.983	-1004.94	1498.16	213.434	-942.831	1243.56	222.343	-1126.91	1414.51	220.171	-1198.45	1264.75	127.123	-937.205	1304.02	387.954	-1019.15	1445.08	456.099	-1032.55	1265.39	488.611	-1046.2	1116.65	547.205	-1175.91	1007.62	534.848	-1236.39	949.93	570.044	-1184.17	928.138	579.807	-1261.83	877.717
9633	0	280.938	-1219.77	1631.2	182.938	-1224.42	1632.96	298.562	-1068.33	1628.18	167.371	-1054.51	1625.29	212.202	-1016.9	1497.33	213.496	-954.677	1243.15	222.361	-1138.81	1413.65	220.512	-1209.95	1263.89	127.323	-949.194	1303.14	388.032	-1031	1444.19	457.196	-1046.68	1265.1	490.733	-1062.79	1116.84	548.291	-1195.47	1011	535.368	-1257.19	954.894	571.393	-1205.98	931.819	580.683	-1284.85	883.694
9634	0	280.276	-1232	1630.88	182.486	-1236.21	1632.12	298.979	-1080.69	1627.65	167.771	-1066.02	1624	212.403	-1028.92	1496.36	213.361	-966.742	1242.51	222.629	-1150.81	1412.7	220.827	-1221.91	1262.85	127.373	-961.3	1302.26	388.211	-1042.95	1443.3	457.926	-1060.85	1264.61	492.461	-1079.28	1116.86	548.977	-1214.97	1013.79	535.912	-1277.75	959.249	572.728	-1227.02	935.344	581.299	-1307.65	889.107
9635	0	279.651	-1244.34	1630.33	181.791	-1247.99	1631.4	300.359	-1092.43	1627.98	168.239	-1077.65	1622.53	212.141	-1041.01	1495.28	212.914	-978.909	1241.25	223.084	-1162.84	1411.61	221.211	-1233.97	1261.61	127.424	-973.709	1301.33	388.493	-1054.69	1442.54	458.762	-1074.79	1264.13	493.985	-1095.99	1116.47	549.842	-1233.8	1016.76	535.995	-1298.21	963.226	573.761	-1247.84	938.928	581.719	-1329.47	893.974
9636	0	279.179	-1256.45	1630.01	181.116	-1259.68	1630.71	299.588	-1105.49	1625.72	168.773	-1089.21	1621.48	212.755	-1053.16	1494.45	212.401	-991.048	1239.95	223.366	-1175.05	1410.62	221.762	-1245.73	1260.63	127.334	-986.085	1300.18	388.609	-1066.6	1441.45	459.241	-1088.77	1263.36	495.545	-1111.84	1116.64	550.582	-1252.42	1019.77	536.328	-1317.61	967.294	574.37	-1268.31	941.847	582.075	-1350.74	899.293
9637	0	278.546	-1268.67	1629.63	180.5	-1271.33	1629.87	299.753	-1118.13	1623.93	169.151	-1100.69	1620.36	212.895	-1065.31	1493.38	211.986	-1003.19	1238.93	223.524	-1187.34	1409.57	222.266	-1257.86	1259.38	127.078	-998.695	1299.04	388.627	-1078.38	1440.06	459.479	-1102.87	1262.55	496.877	-1127.76	1116.52	550.945	-1270.56	1022.23	536.476	-1336.59	971.185	574.967	-1288.08	944.854	582.068	-1371.74	903.801
9638	0	277.884	-1280.98	1629.04	179.751	-1282.95	1629.35	300.15	-1130.61	1622.95	169.722	-1112.53	1618.34	212.928	-1077.53	1492.36	211.252	-1015.38	1237.57	223.92	-1199.63	1408.37	222.745	-1270.43	1258.36	126.65	-1011.44	1297.64	388.578	-1090.24	1438.69	459.802	-1116.65	1261.93	497.671	-1143.72	1116.04	550.935	-1288.53	1024.31	536.332	-1355.29	974.723	575.355	-1307.49	947.439	581.962	-1391.79	908.122
9639	0	277.275	-1293.5	1628.39	179.427	-1295.16	1628.32	300.589	-1143	1622.27	170.008	-1124.2	1617.36	212.823	-1089.87	1491.13	210.728	-1027.7	1236.47	223.98	-1211.98	1407.46	223.232	-1282.62	1257.09	126.179	-1024.4	1296.5	388.352	-1102.09	1437.28	459.852	-1130.48	1261.19	498.089	-1159.41	1115.27	550.89	-1306.02	1026.29	536.117	-1373.37	978.149	575.062	-1326.9	949.522	581.612	-1411.65	912.151
9640	0	276.737	-1305.77	1628.05	178.68	-1306.86	1627.75	300.848	-1155.41	1620.83	170.361	-1136.19	1615.56	212.258	-1102.26	1489.85	209.895	-1040.08	1235.27	224.231	-1224.44	1406.39	223.78	-1295.22	1255.84	125.295	-1037.48	1295.29	388.201	-1113.86	1436.12	460.09	-1143.73	1260.59	498.877	-1174.68	1115.23	550.813	-1323.11	1028.47	535.603	-1391.05	981.269	574.976	-1345.19	952.145	581.129	-1430.56	916.272
9641	0	276.279	-1318.05	1627.56	178.297	-1318.78	1627.35	301.05	-1168.05	1619.81	170.626	-1148.02	1613.92	212.091	-1114.72	1488.7	208.775	-1052.74	1233.7	224.354	-1236.96	1405.27	224.429	-1307.64	1255.14	124.383	-1050.88	1294.07	387.853	-1125.75	1434.93	460.039	-1156.92	1259.9	499.177	-1189.92	1115.16	550.45	-1339.91	1030.54	534.952	-1408.35	983.964	574.872	-1363.12	954.778	580.419	-1449.14	919.499
9642	0	275.825	-1330.28	1626.8	177.803	-1330.58	1626.51	301.148	-1180.46	1618.37	170.519	-1159.87	1612.85	211.394	-1127.33	1487.24	207.788	-1065.4	1232.91	224.367	-1249.67	1404.17	224.78	-1320.58	1253.98	123.713	-1064	1293.17	387.521	-1137.57	1433.64	459.582	-1170.1	1258.8	499.024	-1204.87	1114.24	549.975	-1356.16	1031.95	534.153	-1425.13	986.425	574.374	-1380.61	956.522	579.637	-1467.1	922.78
9643	0	275.449	-1342.58	1625.92	177.252	-1342.73	1625.9	301.03	-1192.79	1617.21	170.448	-1172.14	1611	210.872	-1139.85	1485.94	206.499	-1078.36	1231.69	224.39	-1262.31	1403.09	225.193	-1333.59	1253	122.782	-1077.2	1292.01	386.967	-1149.53	1432.15	459.192	-1183.04	1257.67	498.895	-1219.3	1113.5	549.197	-1371.97	1033.3	533.171	-1441.42	988.51	573.674	-1397.4	958.268	578.661	-1484.39	925.592
9644	0	275.228	-1354.84	1625.27	176.939	-1354.88	1625.11	300.769	-1205.12	1615.33	170.303	-1184.25	1610.35	210.567	-1152.46	1485.13	205.37	-1091.37	1230.46	224.172	-1274.96	1402.27	225.545	-1346.38	1252.29	121.4	-1090.49	1290.43	386.379	-1161.46	1430.89	458.827	-1195.95	1256.64	498.653	-1233.34	1112.8	548.41	-1387.19	1034.41	532.088	-1457.35	990.257	572.927	-1413.66	959.818	577.518	-1501.08	927.978
9645	0	274.863	-1367.14	1624.06	176.943	-1367.32	1624.18	300.704	-1217.33	1614.42	170.151	-1196.6	1609.04	209.622	-1165.09	1483.71	204.001	-1104.75	1228.83	224.019	-1287.72	1401.46	225.522	-1359.9	1251.26	120.204	-1104.02	1289.15	385.825	-1173.56	1429.48	458.125	-1208.7	1255.65	498.217	-1247.06	1111.96	547.297	-1402.31	1034.96	530.906	-1472.52	991.927	571.942	-1429.57	960.56	576.311	-1517.24	930.172
9646	0	274.891	-1379.12	1623.23	176.708	-1379.51	1623.48	300.477	-1229.31	1613.08	169.679	-1208.66	1608.53	208.97	-1177.72	1482.44	203.028	-1118.04	1227.63	223.644	-1300.64	1400.5	225.638	-1372.59	1250.8	119.233	-1117.25	1288.23	385.14	-1185.69	1428.24	457.12	-1221.52	1254	497.524	-1260.62	1111.09	546.181	-1416.84	1035.54	529.652	-1487.35	993.108	570.819	-1444.78	961.384	574.992	-1532.8	931.806
[truncated: 69 more columns]

## Sheet: Sheet2
Devices
		025370 - Force			025370 - Moment			025370 - CoP			027571 - Force			027571 - Moment			027571 - CoP			037720 - Force			037720 - Moment			037720 - CoP
Frame	Sub Frame	Fx	Fy	Fz	Mx	My	Mz	Cx	Cy	Cz	Fx	Fy	Fz	Mx	My	Mz	Cx	Cy	Cz	Fx	Fy	Fz	Mx	My	Mz	Cx	Cy	Cz
		N	N	N	N.mm	N.mm	N.mm	mm	mm	mm	N	N	N	N.mm	N.mm	N.mm	mm	mm	mm	N	N	N	N.mm	N.mm	N.mm	mm	mm	mm
9314	0	0	0	0	0	0	0	200	300	0	0	0	0	0	0	0	200	903	0	0	0	0	0	0	0	603	903	0
9314	1	0	0	0	0	0	0	200	300	0	0	0	0	0	0	0	200	903	0	0	0	0	0	0	0	603	903	0
9314	2	0	0	0	0	0	0	200	300	0	0	0	0	0	0	0	200	903	0	0	0	0	0	0	0	603	903	0
9314	3	0	0	0	0	0	0	200	300	0	0	0	0	0	0	0	200	903	0	0	0	0	0	0	0	603	903	0
9314	4	0	0	0	0	0	0	200	300	0	0	0	0	0	0	0	200	903	0	0	0	0	0	0	0	603	903	0
9314	5	0	0	0	0	0	0	200	300	0	0	0	0	0	0	0	200	903	0	0	0	0	0	0	0	603	903	0
9314	6	0	0	0	0	0	0	200	300	0	0	0	0	0	0	0	200	903	0	0	0	0	0	0	0	603	903	0
9314	7	0	0	0	0	0	0	200	300	0	0	0	0	0	0	0	200	903	0	0	0	0	0	0	0	603	903	0
9314	8	0	0	0	0	0	0	200	300	0	0	0	0	0	0	0	200	903	0	0	0	0	0	0	0	603	903	0
9314	9	0	0	0	0	0	0	200	300	0	0	0	0	0	0	0	200	903	0	0	0	0	0	0	0	603	903	0
9315	0	0	0	0	0	0	0	200	300	0	0	0	0	0	0	0	200	903	0	0	0	0	0	0	0	603	903	0
9315	1	0	0	0	0	0	0	200	300	0	0	0	0	0	0	0	200	903	0	0	0	0	0	0	0	603	903	0
9315	2	0	0	0	0	0	0	200	300	0	0	0	0	0	0	0	200	903	0	0	0	0	0	0	0	603	903	0
9315	3	0	0	0	0	0	0	200	300	0	0	0	0	0	0	0	200	903	0	0	0	0	0	0	0	603	903	0
9315	4	0	0	0	0	0	0	200	300	0	0	0	0	0	0	0	200	903	0	0	0	0	0	0	0	603	903	0
9315	5	0	0	0	0	0	0	200	300	0	0	0	0	0	0	0	200	903	0	0	0	0	0	0	0	603	903	0
9315	6	0	0	0	0	0	0	200	300	0	0	0	0	0	0	0	200	903	0	0	0	0	0	0	0	603	903	0
9315	7	0	0	0	0	0	0	200	300	0	0	0	0	0	0	0	200	903	0	0	0	0	0	0	0	603	903	0
9315	8	0	0	0	0	0	0	200	300	0	0	0	0	0	0	0	200	903	0	0	0	0	0	0	0	603	903	0
9315	9	0	0	0	0	0	0	200	300	0	0	0	0	0	0	0	200	903	0	0	0	0	0	0	0	603	903	0
9316	0	0	0	0	0	0	0	200	300	0	0	0	0	0	0	0	200	903	0	0	0	0	0	0	0	603	903	0
9316	1	0	0	0	0	0	0	200	300	0	0	0	0	0	0	0	200	903	0	0	0	0	0	0	0	603	903	0
9316	2	0	0	0	0	0	0	200	300	0	0	0	0	0	0	0	200	903	0	0	0	0	0	0	0	603	903	0
9316	3	0	0	0	0	0	0	200	300	0	0	0	0	0	0	0	200	903	0	0	0	0	0	0	0	603	903	0
9316	4	0	0	0	0	0	0	200	300	0	0	0	0	0	0	0	200	903	0	0	0	0	0	0	0	603	903	0
9316	5	0	0	0	0	0	0	200	300	0	0	0	0	0	0	0	200	903	0	0	0	0	0	0	0	603	903	0
9316	6	0	0	0	0	0	0	200	300	0	0	0	0	0	0	0	200	903	0	0	0	0	0	0	0	603	903	0
9316	7	0	0	0	0	0	0	200	300	0	0	0	0	0	0	0	200	903	0	0	0	0	0	0	0	603	903	0
9316	8	0	0	0	0	0	0	200	300	0	0	0	0	0	0	0	200	903	0	0	0	0	0	0	0	603	903	0
9316	9	0	0	0	0	0	0	200	300	0	0	0	0	0	0	0	200	903	0	0	0	0	0	0	0	603	903	0
9317	0	0	0	0	0	0	0	200	300	0	0	0	0	0	0	0	200	903	0	0	0	0	0	0	0	603	903	0
9317	1	0	0	0	0	0	0	200	300	0	0	0	0	0	0	0	200	903	0	0	0	0	0	0	0	603	903	0
9317	2	0	0	0	0	0	0	200	300	0	0	0	0	0	0	0	200	903	0	0	0	0	0	0	0	603	903	0
9317	3	0	0	0	0	0	0	200	300	0	0	0	0	0	0	0	200	903	0	0	0	0	0	0	0	603	903	0
9317	4	0	0	0	0	0	0	200	300	0	0	0	0	0	0	0	200	903	0	0	0	0	0	0	0	603	903	0
9317	5	0	0	0	0	0	0	200	300	0	0	0	0	0	0	0	200	903	0	0	0	0	0	0	0	603	903	0
9317	6	0	0	0	0	0	0	200	300	0	0	0	0	0	0	0	200	903	0	0	0	0	0	0	0	603	903	0
9317	7	0	0	0	0	0	0	200	300	0	0	0	0	0	0	0	200	903	0	0	0	0	0	0	0	603	903	0
9317	8	0	0	0	0	0	0	200	300	0	0	0	0	0	0	0	200	903	0	0	0	0	0	0	0	603	903	0
9317	9	0	0	0	0	0	0	200	300	0	0	0	0	0	0	0	200	903	0	0	0	0	0	0	0	603	903	0
9318	0	0	0	0	0	0	0	200	300	0	0	0	0	0	0	0	200	903	0	0	0	0	0	0	0	603	903	0
9318	1	0	0	0	0	0	0	200	300	0	0	0	0	0	0	0	200	903	0	0	0	0	0	0	0	603	903	0
9318	2	0	0	0	0	0	0	200	300	0	0	0	0	0	0	0	200	903	0	0	0	0	0	0	0	603	903	0
9318	3	0	0	0	0	0	0	200	300	0	0	0	0	0	0	0	200	903	0	0	0	0	0	0	0	603	903	0
9318	4	0	0	0	0	0	0	200	300	0	0	0	0	0	0	0	200	903	0	0	0	0	0	0	0	603	903	0
9318	5	0	0	0	0	0	0	200	300	0	0	0	0	0	0	0	200	903	0	0	0	0	0	0	0	603	903	0
9318	6	0	0	0	0	0	0	200	300	0	0	0	0	0	0	0	200	903	0	0	0	0	0	0	0	603	903	0
9318	7	0	0	0	0	0	0	200	300	0	0	0	0	0	0	0	200	903	0	0	0	0	0	0	0	603	903	0
9318	8	0	0	0	0	0	0	200	300	0	0	0	0	0	0	0	200	903	0	0	0	0	0	0	0	603	903	0
9318	9	0	0	0	0	0	0	200	300	0	0	0	0	0	0	0	200	903	0	0	0	0	0	0	0	603	903	0
9319	0	0	0	0	0	0	0	200	300	0	0	0	0	0	0	0	200	903	0	0	0	0	0	0	0	603	903	0
9319	1	0	0	0	0	0	0	200	300	0	0	0	0	0	0	0	200	903	0	0	0	0	0	0	0	603	903	0
9319	2	0	0	0	0	0	0	200	300	0	0	0	0	0	0	0	200	903	0	0	0	0	0	0	0	603	903	0
9319	3	0	0	0	0	0	0	200	300	0	0	0	0	0	0	0	200	903	0	0	0	0	0	0	0	603	903	0
9319	4	0	0	0	0	0	0	200	300	0	0	0	0	0	0	0	200	903	0	0	0	0	0	0	0	603	903	0
9319	5	0	0	0	0	0	0	200	300	0	0	0	0	0	0	0	200	903	0	0	0	0	0	0	0	603	903	0
9319	6	0	0	0	0	0	0	200	300	0	0	0	0	0	0	0	200	903	0	0	0	0	0	0	0	603	903	0
9319	7	0	0	0	0	0	0	200	300	0	0	0	0	0	0	0	200	903	0	0	0	0	0	0	0	603	903	0
9319	8	0	0	0	0	0	0	200	300	0	0	0	0	0	0	0	200	903	0	0	0	0	0	0	0	603	903	0
9319	9	0	0	0	0	0	0	200	300	0	0	0	0	0	0	0	200	903	0	0	0	0	0	0	0	603	903	0
9320	0	0	0	0	0	0	0	200	300	0	0	0	0	0	0	0	200	903	0	0	0	0	0	0	0	603	903	0
9320	1	0	0	0	0	0	0	200	300	0	0	0	0	0	0	0	200	903	0	0	0	0	0	0	0	603	903	0
9320	2	0	0	0	0	0	0	200	300	0	0	0	0	0	0	0	200	903	0	0	0	0	0	0	0	603	903	0
9320	3	0	0	0	0	0	0	200	300	0	0	0	0	0	0	0	200	903	0	0	0	0	0	0	0	603	903	0
9320	4	0	0	0	0	0	0	200	300	0	0	0	0	0	0	0	200	903	0	0	0	0	0	0	0	603	903	0
9320	5	0	0	0	0	0	0	200	300	0	0	0	0	0	0	0	200	903	0	0	0	0	0	0	0	603	903	0
9320	6	0	0	0	0	0	0	200	300	0	0	0	0	0	0	0	200	903	0	0	0	0	0	0	0	603	903	0
9320	7	0	0	0	0	0	0	200	300	0	0	0	0	0	0	0	200	903	0	0	0	0	0	0	0	603	903	0
9320	8	0	0	0	0	0	0	200	300	0	0	0	0	0	0	0	200	903	0	0	0	0	0	0	0	603	903	0
9320	9	0	0	0	0	0	0	200	300	0	0	0	0	0	0	0	200	903	0	0	0	0	0	0	0	603	903	0
9321	0	0	0	0	0	0	0	200	300	0	0	0	0	0	0	0	200	903	0	0	0	0	0	0	0	603	903	0
9321	1	0	0	0	0	0	0	200	300	0	0	0	0	0	0	0	200	903	0	0	0	0	0	0	0	603	903	0
9321	2	0	0	0	0	0	0	200	300	0	0	0	0	0	0	0	200	903	0	0	0	0	0	0	0	603	903	0
9321	3	0	0	0	0	0	0	200	300	0	0	0	0	0	0	0	200	903	0	0	0	0	0	0	0	603	903	0
9321	4	0	0	0	0	0	0	200	300	0	0	0	0	0	0	0	200	903	0	0	0	0	0	0	0	603	903	0
9321	5	0	0	0	0	0	0	200	300	0	0	0	0	0	0	0	200	903	0	0	0	0	0	0	0	603	903	0
9321	6	0	0	0	0	0	0	200	300	0	0	0	0	0	0	0	200	903	0	0	0	0	0	0	0	603	903	0
9321	7	0	0	0	0	0	0	200	300	0	0	0	0	0	0	0	200	903	0	0	0	0	0	0	0	603	903	0
9321	8	0	0	0	0	0	0	200	300	0	0	0	0	0	0	0	200	903	0	0	0	0	0	0	0	603	903	0
9321	9	0	0	0	0	0	0	200	300	0	0	0	0	0	0	0	200	903	0	0	0	0	0	0	0	603	903	0
9322	0	0	0	0	0	0	0	200	300	0	0	0	0	0	0	0	200	903	0	0	0	0	0	0	0	603	903	0
9322	1	0	0	0	0	0	0	200	300	0	0	0	0	0	0	0	200	903	0	0	0	0	0	0	0	603	903	0
9322	2	0	0	0	0	0	0	200	300	0	0	0	0	0	0	0	200	903	0	0	0	0	0	0	0	603	903	0
9322	3	0	0	0	0	0	0	200	300	0	0	0	0	0	0	0	200	903	0	0	0	0	0	0	0	603	903	0
9322	4	0	0	0	0	0	0	200	300	0	0	0	0	0	0	0	200	903	0	0	0	0	0	0	0	603	903	0
9322	5	0	0	0	0	0	0	200	300	0	0	0	0	0	0	0	200	903	0	0	0	0	0	0	0	603	903	0
9322	6	0	0	0	0	0	0	200	300	0	0	0	0	0	0	0	200	903	0	0	0	0	0	0	0	603	903	0
9322	7	0	0	0	0	0	0	200	300	0	0	0	0	0	0	0	200	903	0	0	0	0	0	0	0	603	903	0
9322	8	0	0	0	0	0	0	200	300	0	0	0	0	0	0	0	200	903	0	0	0	0	0	0	0	603	903	0
9322	9	0	0	0	0	0	0	200	300	0	0	0	0	0	0	0	200	903	0	0	0	0	0	0	0	603	903	0
9323	0	0	0	0	0	0	0	200	300	0	0	0	0	0	0	0	200	903	0	0	0	0	0	0	0	603	903	0
9323	1	0	0	0	0	0	0	200	300	0	0	0	0	0	0	0	200	903	0	0	0	0	0	0	0	603	903	0
9323	2	0	0	0	0	0	0	200	300	0	0	0	0	0	0	0	200	903	0	0	0	0	0	0	0	603	903	0
9323	3	0	0	0	0	0	0	200	300	0	0	0	0	0	0	0	200	903	0	0	0	0	0	0	0	603	903	0
9323	4	0	0	0	0	0	0	200	300	0	0	0	0	0	0	0	200	903	0	0	0	0	0	0	0	603	903	0
9323	5	0	0	0	0	0	0	200	300	0	0	0	0	0	0	0	200	903	0	0	0	0	0	0	0	603	903	0
9323	6	0	0	0	0	0	0	200	300	0	0	0	0	0	0	0	200	903	0	0	0	0	0	0	0	603	903	0
9323	7	0	0	0	0	0	0	200	300	0	0	0	0	0	0	0	200	903	0	0	0	0	0	0	0	603	903	0
9323	8	0	0	0	0	0	0	200	300	0	0	0	0	0	0	0	200	903	0	0	0	0	0	0	0	603	903	0
9323	9	0	0	0	0	0	0	200	300	0	0	0	0	0	0	0	200	903	0	0	0	0	0	0	0	603	903	0
9324	0	0	0	0	0	0	0	200	300	0	0	0	0	0	0	0	200	903	0	0	0	0	0	0	0	603	903	0
9324	1	0	0	0	0	0	0	200	300	0	0	0	0	0	0	0	200	903	0	0	0	0	0	0	0	603	903	0
9324	2	0	0	0	0	0	0	200	300	0	0	0	0	0	0	0	200	903	0	0	0	0	0	0	0	603	903	0
9324	3	0	0	0	0	0	0	200	300	0	0	0	0	0	0	0	200	903	0	0	0	0	0	0	0	603	903	0
9324	4	0	0	0	0	0	0	200	300	0	0	0	0	0	0	0	200	903	0	0	0	0	0	0	0	603	903	0
9324	5	0	0	0	0	0	0	200	300	0	0	0	0	0	0	0	200	903	0	0	0	0	0	0	0	603	903	0
9324	6	0	0	0	0	0	0	200	300	0	0	0	0	0	0	0	200	903	0	0	0	0	0	0	0	603	903	0
9324	7	0	0	0	0	0	0	200	300	0	0	0	0	0	0	0	200	903	0	0	0	0	0	0	0	603	903	0
9324	8	0	0	0	0	0	0	200	300	0	0	0	0	0	0	0	200	903	0	0	0	0	0	0	0	603	903	0
9324	9	0	0	0	0	0	0	200	300	0	0	0	0	0	0	0	200	903	0	0	0	0	0	0	0	603	903	0
9325	0	0	0	0	0	0	0	200	300	0	0	0	0	0	0	0	200	903	0	0	0	0	0	0	0	603	903	0
9325	1	0	0	0	0	0	0	200	300	0	0	0	0	0	0	0	200	903	0	0	0	0	0	0	0	603	903	0
9325	2	0	0	0	0	0	0	200	300	0	0	0	0	0	0	0	200	903	0	0	0	0	0	0	0	603	903	0
9325	3	0	0	0	0	0	0	200	300	0	0	0	0	0	0	0	200	903	0	0	0	0	0	0	0	603	903	0
9325	4	0	0	0	0	0	0	200	300	0	0	0	0	0	0	0	200	903	0	0	0	0	0	0	0	603	903	0
9325	5	0	0	0	0	0	0	200	300	0	0	0	0	0	0	0	200	903	0	0	0	0	0	0	0	603	903	0
9325	6	0	0	0	0	0	0	200	300	0	0	0	0	0	0	0	200	903	0	0	0	0	0	0	0	603	903	0
9325	7	0	0	0	0	0	0	200	300	0	0	0	0	0	0	0	200	903	0	0	0	0	0	0	0	603	903	0
9325	8	0	0	0	0	0	0	200	300	0	0	0	0	0	0	0	200	903	0	0	0	0	0	0	0	603	903	0
9325	9	0	0	0	0	0	0	200	300	0	0	0	0	0	0	0	200	903	0	0	0	0	0	0	0	603	903	0
9326	0	0	0	0	0	0	0	200	300	0	0	0	0	0	0	0	200	903	0	0	0	0	0	0	0	603	903	0
9326	1	0	0	0	0	0	0	200	300	0	0	0	0	0	0	0	200	903	0	0	0	0	0	0	0	603	903	0
9326	2	0	0	0	0	0	0	200	300	0	0	0	0	0	0	0	200	903	0	0	0	0	0	0	0	603	903	0
9326	3	0	0	0	0	0	0	200	300	0	0	0	0	0	0	0	200	903	0	0	0	0	0	0	0	603	903	0
9326	4	0	0	0	0	0	0	200	300	0	0	0	0	0	0	0	200	903	0	0	0	0	0	0	0	603	903	0
9326	5	0	0	0	0	0	0	200	300	0	0	0	0	0	0	0	200	903	0	0	0	0	0	0	0	603	903	0
9326	6	0	0	0	0	0	0	200	300	0	0	0	0	0	0	0	200	903	0	0	0	0	0	0	0	603	903	0
9326	7	0	0	0	0	0	0	200	300	0	0	0	0	0	0	0	200	903	0	0	0	0	0	0	0	603	903	0
9326	8	0	0	0	0	0	0	200	300	0	0	0	0	0	0	0	200	903	0	0	0	0	0	0	0	603	903	0
9326	9	0	0	0	0	0	0	200	300	0	0	0	0	0	0	0	200	903	0	0	0	0	0	0	0	603	903	0
9327	0	0	0	0	0	0	0	200	300	0	0	0	0	0	0	0	200	903	0	0	0	0	0	0	0	603	903	0
9327	1	0	0	0	0	0	0	200	300	0	0	0	0	0	0	0	200	903	0	0	0	0	0	0	0	603	903	0
9327	2	0	0	0	0	0	0	200	300	0	0	0	0	0	0	0	200	903	0	0	0	0	0	0	0	603	903	0
9327	3	0	0	0	0	0	0	200	300	0	0	0	0	0	0	0	200	903	0	0	0	0	0	0	0	603	903	0
9327	4	0	0	0	0	0	0	200	300	0	0	0	0	0	0	0	200	903	0	0	0	0	0	0	0	603	903	0
9327	5	0	0	0	0	0	0	200	300	0	0	0	0	0	0	0	200	903	0	0	0	0	0	0	0	603	903	0
9327	6	0	0	0	0	0	0	200	300	0	0	0	0	0	0	0	200	903	0	0	0	0	0	0	0	603	903	0
9327	7	0	0	0	0	0	0	200	300	0	0	0	0	0	0	0	200	903	0	0	0	0	0	0	0	603	903	0
9327	8	0	0	0	0	0	0	200	300	0	0	0	0	0	0	0	200	903	0	0	0	0	0	0	0	603	903	0
9327	9	0	0	0	0	0	0	200	300	0	0	0	0	0	0	0	200	903	0	0	0	0	0	0	0	603	903	0
9328	0	0	0	0	0	0	0	200	300	0	0	0	0	0	0	0	200	903	0	0	0	0	0	0	0	603	903	0
9328	1	0	0	0	0	0	0	200	300	0	0	0	0	0	0	0	200	903	0	0	0	0	0	0	0	603	903	0
9328	2	0	0	0	0	0	0	200	300	0	0	0	0	0	0	0	200	903	0	0	0	0	0	0	0	603	903	0
9328	3	0	0	0	0	0	0	200	300	0	0	0	0	0	0	0	200	903	0	0	0	0	0	0	0	603	903	0
9328	4	0	0	0	0	0	0	200	300	0	0	0	0	0	0	0	200	903	0	0	0	0	0	0	0	603	903	0
9328	5	0	0	0	0	0	0	200	300	0	0	0	0	0	0	0	200	903	0	0	0	0	0	0	0	603	903	0
9328	6	0	0	0	0	0	0	200	300	0	0	0	0	0	0	0	200	903	0	0	0	0	0	0	0	603	903	0
9328	7	0	0	0	0	0	0	200	300	0	0	0	0	0	0	0	200	903	0	0	0	0	0	0	0	603	903	0
9328	8	0	0	0	0	0	0	200	300	0	0	0	0	0	0	0	200	903	0	0	0	0	0	0	0	603	903	0
9328	9	0	0	0	0	0	0	200	300	0	0	0	0	0	0	0	200	903	0	0	0	0	0	0	0	603	903	0
9329	0	0	0	0	0	0	0	200	300	0	0	0	0	0	0	0	200	903	0	0	0	0	0	0	0	603	903	0
9329	1	0	0	0	0	0	0	200	300	0	0	0	0	0	0	0	200	903	0	0	0	0	0	0	0	603	903	0
9329	2	0	0	0	0	0	0	200	300	0	0	0	0	0	0	0	200	903	0	0	0	0	0	0	0	603	903	0
9329	3	0	0	0	0	0	0	200	300	0	0	0	0	0	0	0	200	903	0	0	0	0	0	0	0	603	903	0
9329	4	0	0	0	0	0	0	200	300	0	0	0	0	0	0	0	200	903	0	0	0	0	0	0	0	603	903	0
9329	5	0	0	0	0	0	0	200	300	0	0	0	0	0	0	0	200	903	0	0	0	0	0	0	0	603	903	0
9329	6	0	0	0	0	0	0	200	300	0	0	0	0	0	0	0	200	903	0	0	0	0	0	0	0	603	903	0
9329	7	0	0	0	0	0	0	200	300	0	0	0	0	0	0	0	200	903	0	0	0	0	0	0	0	603	903	0
9329	8	0	0	0	0	0	0	200	300	0	0	0	0	0	0	0	200	903	0	0	0	0	0	0	0	603	903	0
9329	9	0	0	0	0	0	0	200	300	0	0	0	0	0	0	0	200	903	0	0	0	0	0	0	0	603	903	0
9330	0	0	0	0	0	0	0	200	300	0	0	0	0	0	0	0	200	903	0	0	0	0	0	0	0	603	903	0
9330	1	0	0	0	0	0	0	200	300	0	0	0	0	0	0	0	200	903	0	0	0	0	0	0	0	603	903	0
9330	2	0	0	0	0	0	0	200	300	0	0	0	0	0	0	0	200	903	0	0	0	0	0	0	0	603	903	0
9330	3	0	0	0	0	0	0	200	300	0	0	0	0	0	0	0	200	903	0	0	0	0	0	0	0	603	903	0
9330	4	0	0	0	0	0	0	200	300	0	0	0	0	0	0	0	200	903	0	0	0	0	0	0	0	603	903	0
9330	5	0	0	0	0	0	0	200	300	0	0	0	0	0	0	0	200	903	0	0	0	0	0	0	0	603	903	0
9330	6	0	0	0	0	0	0	200	300	0	0	0	0	0	0	0	200	903	0	0	0	0	0	0	0	603	903	0
9330	7	0	0	0	0	0	0	200	300	0	0	0	0	0	0	0	200	903	0	0	0	0	0	0	0	603	903	0
9330	8	0	0	0	0	0	0	200	300	0	0	0	0	0	0	0	200	903	0	0	0	0	0	0	0	603	903	0
9330	9	0	0	0	0	0	0	200	300	0	0	0	0	0	0	0	200	903	0	0	0	0	0	0	0	603	903	0
9331	0	0	0	0	0	0	0	200	300	0	0	0	0	0	0	0	200	903	0	0	0	0	0	0	0	603	903	0
9331	1	0	0	0	0	0	0	200	300	0	0	0	0	0	0	0	200	903	0	0	0	0	0	0	0	603	903	0
9331	2	0	0	0	0	0	0	200	300	0	0	0	0	0	0	0	200	903	0	0	0	0	0	0	0	603	903	0
9331	3	0	0	0	0	0	0	200	300	0	0	0	0	0	0	0	200	903	0	0	0	0	0	0	0	603	903	0
9331	4	0	0	0	0	0	0	200	300	0	0	0	0	0	0	0	200	903	0	0	0	0	0	0	0	603	903	0
9331	5	0	0	0	0	0	0	200	300	0	0	0	0	0	0	0	200	903	0	0	0	0	0	0	0	603	903	0
9331	6	0	0	0	0	0	0	200	300	0	0	0	0	0	0	0	200	903	0	0	0	0	0	0	0	603	903	0
9331	7	0	0	0	0	0	0	200	300	0	0	0	0	0	0	0	200	903	0	0	0	0	0	0	0	603	903	0
9331	8	0	0	0	0	0	0	200	300	0	0	0	0	0	0	0	200	903	0	0	0	0	0	0	0	603	903	0
9331	9	0	0	0	0	0	0	200	300	0	0	0	0	0	0	0	200	903	0	0	0	0	0	0	0	603	903	0
9332	0	0	0	0	0	0	0	200	300	0	0	0	0	0	0	0	200	903	0	0	0	0	0	0	0	603	903	0
9332	1	0	0	0	0	0	0	200	300	0	0	0	0	0	0	0	200	903	0	0	0	0	0	0	0	603	903	0
9332	2	0	0	0	0	0	0	200	300	0	0	0	0	0	0	0	200	903	0	0	0	0	0	0	0	603	903	0
9332	3	0	0	0	0	0	0	200	300	0	0	0	0	0	0	0	200	903	0	0	0	0	0	0	0	603	903	0
9332	4	0	0	0	0	0	0	200	300	0	0	0	0	0	0	0	200	903	0	0	0	0	0	0	0	603	903	0
9332	5	0	0	0	0	0	0	200	300	0	0	0	0	0	0	0	200	903	0	0	0	0	0	0	0	603	903	0
9332	6	0	0	0	0	0	0	200	300	0	0	0	0	0	0	0	200	903	0	0	0	0	0	0	0	603	903	0
9332	7	0	0	0	0	0	0	200	300	0	0	0	0	0	0	0	200	903	0	0	0	0	0	0	0	603	903	0
9332	8	0	0	0	0	0	0	200	300	0	0	0	0	0	0	0	200	903	0	0	0	0	0	0	0	603	903	0
9332	9	0	0	0	0	0	0	200	300	0	0	0	0	0	0	0	200	903	0	0	0	0	0	0	0	603	903	0
9333	0	0	0	0	0	0	0	200	300	0	0	0	0	0	0	0	200	903	0	0	0	0	0	0	0	603	903	0
9333	1	0	0	0	0	0	0	200	300	0	0	0	0	0	0	0	200	903	0	0	0	0	0	0	0	603	903	0
9333	2	0	0	0	0	0	0	200	300	0	0	0	0	0	0	0	200	903	0	0	0	0	0	0	0	603	903	0
9333	3	0	0	0	0	0	0	200	300	0	0	0	0	0	0	0	200	903	0	0	0	0	0	0	0	603	903	0
9333	4	0	0	0	0	0	0	200	300	0	0	0	0	0	0	0	200	903	0	0	0	0	0	0	0	603	903	0
9333	5	0	0	0	0	0	0	200	300	0	0	0	0	0	0	0	200	903	0	0	0	0	0	0	0	603	903	0
9333	6	0	0	0	0	0	0	200	300	0	0	0	0	0	0	0	200	903	0	0	0	0	0	0	0	603	903	0
9333	7	0	0	0	0	0	0	200	300	0	0	0	0	0	0	0	200	903	0	0	0	0	0	0	0	603	903	0
9333	8	0	0	0	0	0	0	200	300	0	0	0	0	0	0	0	200	903	0	0	0	0	0	0	0	603	903	0
9333	9	0	0	0	0	0	0	200	300	0	0	0	0	0	0	0	200	903	0	0	0	0	0	0	0	603	903	0
9334	0	0	0	0	0	0	0	200	300	0	0	0	0	0	0	0	200	903	0	0	0	0	0	0	0	603	903	0
9334	1	0	0	0	0	0	0	200	300	0	0	0	0	0	0	0	200	903	0	0	0	0	0	0	0	603	903	0
9334	2	0	0	0	0	0	0	200	300	0	0	0	0	0	0	0	200	903	0	0	0	0	0	0	0	603	903	0
9334	3	0	0	0	0	0	0	200	300	0	0	0	0	0	0	0	200	903	0	0	0	0	0	0	0	603	903	0
9334	4	0	0	0	0	0	0	200	300	0	0	0	0	0	0	0	200	903	0	0	0	0	0	0	0	603	903	0
9334	5	0	0	0	0	0	0	200	300	0	0	0	0	0	0	0	200	903	0	0	0	0	0	0	0	603	903	0
9334	6	0	0	0	0	0	0	200	300	0	0	0	0	0	0	0	200	903	0	0	0	0	0	0	0	603	903	0
9334	7	0	0	0	0	0	0	200	300	0	0	0	0	0	0	0	200	903	0	0	0	0	0	0	0	603	903	0
9334	8	0	0	0	0	0	0	200	300	0	0	0	0	0	0	0	200	903	0	0	0	0	0	0	0	603	903	0
9334	9	0	0	0	0	0	0	200	300	0	0	0	0	0	0	0	200	903	0	0	0	0	0	0	0	603	903	0
9335	0	0	0	0	0	0	0	200	300	0	0	0	0	0	0	0	200	903	0	0	0	0	0	0	0	603	903	0
9335	1	0	0	0	0	0	0	200	300	0	0	0	0	0	0	0	200	903	0	0	0	0	0	0	0	603	903	0
9335	2	0	0	0	0	0	0	200	300	0	0	0	0	0	0	0	200	903	0	0	0	0	0	0	0	603	903	0
9335	3	0	0	0	0	0	0	200	300	0	0	0	0	0	0	0	200	903	0	0	0	0	0	0	0	603	903	0
9335	4	0	0	0	0	0	0	200	300	0	0	0	0	0	0	0	200	903	0	0	0	0	0	0	0	603	903	0
9335	5	0	0	0	0	0	0	200	300	0	0	0	0	0	0	0	200	903	0	0	0	0	0	0	0	603	903	0
9335	6	0	0	0	0	0	0	200	300	0	0	0	0	0	0	0	200	903	0	0	0	0	0	0	0	603	903	0
9335	7	0	0	0	0	0	0	200	300	0	0	0	0	0	0	0	200	903	0	0	0	0	0	0	0	603	903	0
9335	8	0	0	0	0	0	0	200	300	0	0	0	0	0	0	0	200	903	0	0	0	0	0	0	0	603	903	0
9335	9	0	0	0	0	0	0	200	300	0	0	0	0	0	0	0	200	903	0	0	0	0	0	0	0	603	903	0
9336	0	0	0	0	0	0	0	200	300	0	0	0	0	0	0	0	200	903	0	0	0	0	0	0	0	603	903	0
9336	1	0	0	0	0	0	0	200	300	0	0	0	0	0	0	0	200	903	0	0	0	0	0	0	0	603	903	0
9336	2	0	0	0	0	0	0	200	300	0	0	0	0	0	0	0	200	903	0	0	0	0	0	0	0	603	903	0
9336	3	0	0	0	0	0	0	200	300	0	0	0	0	0	0	0	200	903	0	0	0	0	0	0	0	603	903	0
9336	4	0	0	0	0	0	0	200	300	0	0	0	0	0	0	0	200	903	0	0	0	0	0	0	0	603	903	0
9336	5	0	0	0	0	0	0	200	300	0	0	0	0	0	0	0	200	903	0	0	0	0	0	0	0	603	903	0
9336	6	0	0	0	0	0	0	200	300	0	0	0	0	0	0	0	200	903	0	0	0	0	0	0	0	603	903	0
9336	7	0	0	0	0	0	0	200	300	0	0	0	0	0	0	0	200	903	0	0	0	0	0	0	0	603	903	0
9336	8	0	0	0	0	0	0	200	300	0	0	0	0	0	0	0	200	903	0	0	0	0	0	0	0	603	903	0
9336	9	0	0	0	0	0	0	200	300	0	0	0	0	0	0	0	200	903	0	0	0	0	0	0	0	603	903	0
9337	0	0	0	0	0	0	0	200	300	0	0	0	0	0	0	0	200	903	0	0	0	0	0	0	0	603	903	0
9337	1	0	0	0	0	0	0	200	300	0	0	0	0	0	0	0	200	903	0	0	0	0	0	0	0	603	903	0
9337	2	0	0	0	0	0	0	200	300	0	0	0	0	0	0	0	200	903	0	0	0	0	0	0	0	603	903	0
9337	3	0	0	0	0	0	0	200	300	0	0	0	0	0	0	0	200	903	0	0	0	0	0	0	0	603	903	0
9337	4	0	0	0	0	0	0	200	300	0	0	0	0	0	0	0	200	903	0	0	0	0	0	0	0	603	903	0
9337	5	0	0	0	0	0	0	200	300	0	0	0	0	0	0	0	200	903	0	0	0	0	0	0	0	603	903	0
9337	6	0	0	0	0	0	0	200	300	0	0	0	0	0	0	0	200	903	0	0	0	0	0	0	0	603	903	0
9337	7	0	0	0	0	0	0	200	300	0	0	0	0	0	0	0	200	903	0	0	0	0	0	0	0	603	903	0
9337	8	0	0	0	0	0	0	200	300	0	0	0	0	0	0	0	200	903	0	0	0	0	0	0	0	603	903	0
9337	9	0	0	0	0	0	0	200	300	0	0	0	0	0	0	0	200	903	0	0	0	0	0	0	0	603	903	0
9338	0	0	0	0	0	0	0	200	300	0	0	0	0	0	0	0	200	903	0	0	0	0	0	0	0	603	903	0
9338	1	0	0	0	0	0	0	200	300	0	0	0	0	0	0	0	200	903	0	0	0	0	0	0	0	603	903	0
9338	2	0	0	0	0	0	0	200	300	0	0	0	0	0	0	0	200	903	0	0	0	0	0	0	0	603	903	0
9338	3	0	0	0	0	0	0	200	300	0	0	0	0	0	0	0	200	903	0	0	0	0	0	0	0	603	903	0
9338	4	0	0	0	0	0	0	200	300	0	0	0	0	0	0	0	200	903	0	0	0	0	0	0	0	603	903	0
9338	5	0	0	0	0	0	0	200	300	0	0	0	0	0	0	0	200	903	0	0	0	0	0	0	0	603	903	0
9338	6	0	0	0	0	0	0	200	300	0	0	0	0	0	0	0	200	903	0	0	0	0	0	0	0	603	903	0
9338	7	0	0	0	0	0	0	200	300	0	0	0	0	0	0	0	200	903	0	0	0	0	0	0	0	603	903	0
9338	8	0	0	0	0	0	0	200	300	0	0	0	0	0	0	0	200	903	0	0	0	0	0	0	0	603	903	0
9338	9	0	0	0	0	0	0	200	300	0	0	0	0	0	0	0	200	903	0	0	0	0	0	0	0	603	903	0
9339	0	0	0	0	0	0	0	200	300	0	0	0	0	0	0	0	200	903	0	0	0	0	0	0	0	603	903	0
9339	1	0	0	0	0	0	0	200	300	0	0	0	0	0	0	0	200	903	0	0	0	0	0	0	0	603	903	0
9339	2	0	0	0	0	0	0	200	300	0	0	0	0	0	0	0	200	903	0	0	0	0	0	0	0	603	903	0
9339	3	0	0	0	0	0	0	200	300	0	0	0	0	0	0	0	200	903	0	0	0	0	0	0	0	603	903	0
9339	4	0	0	0	0	0	0	200	300	0	0	0	0	0	0	0	200	903	0	0	0	0	0	0	0	603	903	0
9339	5	0	0	0	0	0	0	200	300	0	0	0	0	0	0	0	200	903	0	0	0	0	0	0	0	603	903	0
9339	6	0	0	0	0	0	0	200	300	0	0	0	0	0	0	0	200	903	0	0	0	0	0	0	0	603	903	0
9339	7	0	0	0	0	0	0	200	300	0	0	0	0	0	0	0	200	903	0	0	0	0	0	0	0	603	903	0
9339	8	0	0	0	0	0	0	200	300	0	0	0	0	0	0	0	200	903	0	0	0	0	0	0	0	603	903	0
9339	9	0	0	0	0	0	0	200	300	0	0	0	0	0	0	0	200	903	0	0	0	0	0	0	0	603	903	0
9340	0	0	0	0	0	0	0	200	300	0	0	0	0	0	0	0	200	903	0	0	0	0	0	0	0	603	903	0
9340	1	0	0	0	0	0	0	200	300	0	0	0	0	0	0	0	200	903	0	0	0	0	0	0	0	603	903	0
9340	2	0	0	0	0	0	0	200	300	0	0	0	0	0	0	0	200	903	0	0	0	0	0	0	0	603	903	0
9340	3	0	0	0	0	0	0	200	300	0	0	0	0	0	0	0	200	903	0	0	0	0	0	0	0	603	903	0
9340	4	0	0	0	0	0	0	200	300	0	0	0	0	0	0	0	200	903	0	0	0	0	0	0	0	603	903	0
9340	5	0	0	0	0	0	0	200	300	0	0	0	0	0	0	0	200	903	0	0	0	0	0	0	0	603	903	0
9340	6	0	0	0	0	0	0	200	300	0	0	0	0	0	0	0	200	903	0	0	0	0	0	0	0	603	903	0
9340	7	0	0	0	0	0	0	200	300	0	0	0	0	0	0	0	200	903	0	0	0	0	0	0	0	603	903	0
9340	8	0	0	0	0	0	0	200	300	0	0	0	0	0	0	0	200	903	0	0	0	0	0	0	0	603	903	0
9340	9	0	0	0	0	0	0	200	300	0	0	0	0	0	0	0	200	903	0	0	0	0	0	0	0	603	903	0
9341	0	0	0	0	0	0	0	200	300	0	0	0	0	0	0	0	200	903	0	0	0	0	0	0	0	603	903	0
9341	1	0	0	0	0	0	0	200	300	0	0	0	0	0	0	0	200	903	0	0	0	0	0	0	0	603	903	0
9341	2	0	0	0	0	0	0	200	300	0	0	0	0	0	0	0	200	903	0	0	0	0	0	0	0	603	903	0
9341	3	0	0	0	0	0	0	200	300	0	0	0	0	0	0	0	200	903	0	0	0	0	0	0	0	603	903	0
9341	4	0	0	0	0	0	0	200	300	0	0	0	0	0	0	0	200	903	0	0	0	0	0	0	0	603	903	0
9341	5	0	0	0	0	0	0	200	300	0	0	0	0	0	0	0	200	903	0	0	0	0	0	0	0	603	903	0
9341	6	0	0	0	0	0	0	200	300	0	0	0	0	0	0	0	200	903	0	0	0	0	0	0	0	603	903	0
9341	7	0	0	0	0	0	0	200	300	0	0	0	0	0	0	0	200	903	0	0	0	0	0	0	0	603	903	0
9341	8	0	0	0	0	0	0	200	300	0	0	0	0	0	0	0	200	903	0	0	0	0	0	0	0	603	903	0
9341	9	0	0	0	0	0	0	200	300	0	0	0	0	0	0	0	200	903	0	0	0	0	0	0	0	603	903	0
9342	0	0	0	0	0	0	0	200	300	0	0	0	0	0	0	0	200	903	0	0	0	0	0	0	0	603	903	0
9342	1	0	0	0	0	0	0	200	300	0	0	0	0	0	0	0	200	903	0	0	0	0	0	0	0	603	903	0
9342	2	0	0	0	0	0	0	200	300	0	0	0	0	0	0	0	200	903	0	0	0	0	0	0	0	603	903	0
9342	3	0	0	0	0	0	0	200	300	0	0	0	0	0	0	0	200	903	0	0	0	0	0	0	0	603	903	0
9342	4	0	0	0	0	0	0	200	300	0	0	0	0	0	0	0	200	903	0	0	0	0	0	0	0	603	903	0
9342	5	0	0	0	0	0	0	200	300	0	0	0	0	0	0	0	200	903	0	0	0	0	0	0	0	603	903	0
9342	6	0	0	0	0	0	0	200	300	0	0	0	0	0	0	0	200	903	0	0	0	0	0	0	0	603	903	0
9342	7	0	0	0	0	0	0	200	300	0	0	0	0	0	0	0	200	903	0	0	0	0	0	0	0	603	903	0
9342	8	0	0	0	0	0	0	200	300	0	0	0	0	0	0	0	200	903	0	0	0	0	0	0	0	603	903	0
9342	9	0	0	0	0	0	0	200	300	0	0	0	0	0	0	0	200	903	0	0	0	0	0	0	0	603	903	0
9343	0	0	0	0	0	0	0	200	300	0	0	0	0	0	0	0	200	903	0	0	0	0	0	0	0	603	903	0
9343	1	0	0	0	0	0	0	200	300	0	0	0	0	0	0	0	200	903	0	0	0	0	0	0	0	603	903	0
9343	2	0	0	0	0	0	0	200	300	0	0	0	0	0	0	0	200	903	0	0	0	0	0	0	0	603	903	0
9343	3	0	0	0	0	0	0	200	300	0	0	0	0	0	0	0	200	903	0	0	0	0	0	0	0	603	903	0
9343	4	0	0	0	0	0	0	200	300	0	0	0	0	0	0	0	200	903	0	0	0	0	0	0	0	603	903	0
9343	5	0	0	0	0	0	0	200	300	0	0	0	0	0	0	0	200	903	0	0	0	0	0	0	0	603	903	0
9343	6	0	0	0	0	0	0	200	300	0	0	0	0	0	0	0	200	903	0	0	0	0	0	0	0	603	903	0
9343	7	0	0	0	0	0	0	200	300	0	0	0	0	0	0	0	200	903	0	0	0	0	0	0	0	603	903	0
9343	8	0	0	0	0	0	0	200	300	0	0	0	0	0	0	0	200	903	0	0	0	0	0	0	0	603	903	0
9343	9	0	0	0	0	0	0	200	300	0	0	0	0	0	0	0	200	903	0	0	0	0	0	0	0	603	903	0
9344	0	0	0	0	0	0	0	200	300	0	0	0	0	0	0	0	200	903	0	0	0	0	0	0	0	603	903	0
9344	1	0	0	0	0	0	0	200	300	0	0	0	0	0	0	0	200	903	0	0	0	0	0	0	0	603	903	0
9344	2	0	0	0	0	0	0	200	300	0	0	0	0	0	0	0	200	903	0	0	0	0	0	0	0	603	903	0
9344	3	0	0	0	0	0	0	200	300	0	0	0	0	0	0	0	200	903	0	0	0	0	0	0	0	603	903	0
9344	4	0	0	0	0	0	0	200	300	0	0	0	0	0	0	0	200	903	0	0	0	0	0	0	0	603	903	0
9344	5	0	0	0	0	0	0	200	300	0	0	0	0	0	0	0	200	903	0	0	0	0	0	0	0	603	903	0
9344	6	0	0	0	0	0	0	200	300	0	0	0	0	0	0	0	200	903	0	0	0	0	0	0	0	603	903	0
9344	7	0	0	0	0	0	0	200	300	0	0	0	0	0	0	0	200	903	0	0	0	0	0	0	0	603	903	0
9344	8	0	0	0	0	0	0	200	300	0	0	0	0	0	0	0	200	903	0	0	0	0	0	0	0	603	903	0
9344	9	0	0	0	0	0	0	200	300	0	0	0	0	0	0	0	200	903	0	0	0	0	0	0	0	603	903	0
9345	0	0	0	0	0	0	0	200	300	0	0	0	0	0	0	0	200	903	0	0	0	0	0	0	0	603	903	0
9345	1	0	0	0	0	0	0	200	300	0	0	0	0	0	0	0	200	903	0	0	0	0	0	0	0	603	903	0
9345	2	0	0	0	0	0	0	200	300	0	0	0	0	0	0	0	200	903	0	0	0	0	0	0	0	603	903	0
9345	3	0	0	0	0	0	0	200	300	0	0	0	0	0	0	0	200	903	0	0	0	0	0	0	0	603	903	0
9345	4	0	0	0	0	0	0	200	300	0	0	0	0	0	0	0	200	903	0	0	0	0	0	0	0	603	903	0
9345	5	0	0	0	0	0	0	200	300	0	0	0	0	0	0	0	200	903	0	0	0	0	0	0	0	603	903	0
9345	6	0	0	0	0	0	0	200	300	0	0	0	0	0	0	0	200	903	0	0	0	0	0	0	0	603	903	0
9345	7	0	0	0	0	0	0	200	300	0	0	0	0	0	0	0	200	903	0	0	0	0	0	0	0	603	903	0
9345	8	0	0	0	0	0	0	200	300	0	0	0	0	0	0	0	200	903	0	0	0	0	0	0	0	603	903	0
9345	9	0	0	0	0	0	0	200	300	0	0	0	0	0	0	0	200	903	0	0	0	0	0	0	0	603	903	0
9346	0	0	0	0	0	0	0	200	300	0	0	0	0	0	0	0	200	903	0	0	0	0	0	0	0	603	903	0
9346	1	0	0	0	0	0	0	200	300	0	0	0	0	0	0	0	200	903	0	0	0	0	0	0	0	603	903	0
9346	2	0	0	0	0	0	0	200	300	0	0	0	0	0	0	0	200	903	0	0	0	0	0	0	0	603	903	0
9346	3	0	0	0	0	0	0	200	300	0	0	0	0	0	0	0	200	903	0	0	0	0	0	0	0	603	903	0
9346	4	0	0	0	0	0	0	200	300	0	0	0	0	0	0	0	200	903	0	0	0	0	0	0	0	603	903	0
9346	5	0	0	0	0	0	0	200	300	0	0	0	0	0	0	0	200	903	0	0	0	0	0	0	0	603	903	0
9346	6	0	0	0	0	0	0	200	300	0	0	0	0	0	0	0	200	903	0	0	0	0	0	0	0	603	903	0
9346	7	0	0	0	0	0	0	200	300	0	0	0	0	0	0	0	200	903	0	0	0	0	0	0	0	603	903	0
9346	8	0	0	0	0	0	0	200	300	0	0	0	0	0	0	0	200	903	0	0	0	0	0	0	0	603	903	0
9346	9	0	0	0	0	0	0	200	300	0	0	0	0	0	0	0	200	903	0	0	0	0	0	0	0	603	903	0
9347	0	0	0	0	0	0	0	200	300	0	0	0	0	0	0	0	200	903	0	0	0	0	0	0	0	603	903	0
9347	1	0	0	0	0	0	0	200	300	0	0	0	0	0	0	0	200	903	0	0	0	0	0	0	0	603	903	0
9347	2	0	0	0	0	0	0	200	300	0	0	0	0	0	0	0	200	903	0	0	0	0	0	0	0	603	903	0
9347	3	0	0	0	0	0	0	200	300	0	0	0	0	0	0	0	200	903	0	0	0	0	0	0	0	603	903	0
9347	4	0	0	0	0	0	0	200	300	0	0	0	0	0	0	0	200	903	0	0	0	0	0	0	0	603	903	0
9347	5	0	0	0	0	0	0	200	300	0	0	0	0	0	0	0	200	903	0	0	0	0	0	0	0	603	903	0
9347	6	0	0	0	0	0	0	200	300	0	0	0	0	0	0	0	200	903	0	0	0	0	0	0	0	603	903	0
9347	7	0	0	0	0	0	0	200	300	0	0	0	0	0	0	0	200	903	0	0	0	0	0	0	0	603	903	0
9347	8	0	0	0	0	0	0	200	300	0	0	0	0	0	0	0	200	903	0	0	0	0	0	0	0	603	903	0
9347	9	0	0	0	0	0	0	200	300	0	0	0	0	0	0	0	200	903	0	0	0	0	0	0	0	603	903	0
9348	0	0	0	0	0	0	0	200	300	0	0	0	0	0	0	0	200	903	0	0	0	0	0	0	0	603	903	0
9348	1	0	0	0	0	0	0	200	300	0	0	0	0	0	0	0	200	903	0	0	0	0	0	0	0	603	903	0
9348	2	0	0	0	0	0	0	200	300	0	0	0	0	0	0	0	200	903	0	0	0	0	0	0	0	603	903	0
9348	3	0	0	0	0	0	0	200	300	0	0	0	0	0	0	0	200	903	0	0	0	0	0	0	0	603	903	0
9348	4	0	0	0	0	0	0	200	300	0	0	0	0	0	0	0	200	903	0	0	0	0	0	0	0	603	903	0
9348	5	0	0	0	0	0	0	200	300	0	0	0	0	0	0	0	200	903	0	0	0	0	0	0	0	603	903	0
9348	6	0	0	0	0	0	0	200	300	0	0	0	0	0	0	0	200	903	0	0	0	0	0	0	0	603	903	0
9348	7	0	0	0	0	0	0	200	300	0	0	0	0	0	0	0	200	903	0	0	0	0	0	0	0	603	903	0
9348	8	0	0	0	0	0	0	200	300	0	0	0	0	0	0	0	200	903	0	0	0	0	0	0	0	603	903	0
9348	9	0	0	0	0	0	0	200	300	0	0	0	0	0	0	0	200	903	0	0	0	0	0	0	0	603	903	0
9349	0	0	0	0	0	0	0	200	300	0	0	0	0	0	0	0	200	903	0	0	0	0	0	0	0	603	903	0
9349	1	0	0	0	0	0	0	200	300	0	0	0	0	0	0	0	200	903	0	0	0	0	0	0	0	603	903	0
9349	2	0	0	0	0	0	0	200	300	0	0	0	0	0	0	0	200	903	0	0	0	0	0	0	0	603	903	0
9349	3	0	0	0	0	0	0	200	300	0	0	0	0	0	0	0	200	903	0	0	0	0	0	0	0	603	903	0
9349	4	0	0	0	0	0	0	200	300	0	0	0	0	0	0	0	200	903	0	0	0	0	0	0	0	603	903	0
9349	5	0	0	0	0	0	0	200	300	0	0	0	0	0	0	0	200	903	0	0	0	0	0	0	0	603	903	0
9349	6	0	0	0	0	0	0	200	300	0	0	0	0	0	0	0	200	903	0	0	0	0	0	0	0	603	903	0
9349	7	0	0	0	0	0	0	200	300	0	0	0	0	0	0	0	200	903	0	0	0	0	0	0	0	603	903	0
9349	8	0	0	0	0	0	0	200	300	0	0	0	0	0	0	0	200	903	0	0	0	0	0	0	0	603	903	0
9349	9	0	0	0	0	0	0	200	300	0	0	0	0	0	0	0	200	903	0	0	0	0	0	0	0	603	903	0
9350	0	0	0	0	0	0	0	200	300	0	0	0	0	0	0	0	200	903	0	0	0	0	0	0	0	603	903	0
9350	1	0	0	0	0	0	0	200	300	0	0	0	0	0	0	0	200	903	0	0	0	0	0	0	0	603	903	0
9350	2	0	0	0	0	0	0	200	300	0	0	0	0	0	0	0	200	903	0	0	0	0	0	0	0	603	903	0
9350	3	0	0	0	0	0	0	200	300	0	0	0	0	0	0	0	200	903	0	0	0	0	0	0	0	603	903	0
9350	4	0	0	0	0	0	0	200	300	0	0	0	0	0	0	0	200	903	0	0	0	0	0	0	0	603	903	0
9350	5	0	0	0	0	0	0	200	300	0	0	0	0	0	0	0	200	903	0	0	0	0	0	0	0	603	903	0
9350	6	0	0	0	0	0	0	200	300	0	0	0	0	0	0	0	200	903	0	0	0	0	0	0	0	603	903	0
9350	7	0	0	0	0	0	0	200	300	0	0	0	0	0	0	0	200	903	0	0	0	0	0	0	0	603	903	0
9350	8	0	0	0	0	0	0	200	300	0	0	0	0	0	0	0	200	903	0	0	0	0	0	0	0	603	903	0
9350	9	0	0	0	0	0	0	200	300	0	0	0	0	0	0	0	200	903	0	0	0	0	0	0	0	603	903	0
9351	0	0	0	0	0	0	0	200	300	0	0	0	0	0	0	0	200	903	0	0	0	0	0	0	0	603	903	0
9351	1	0	0	0	0	0	0	200	300	0	0	0	0	0	0	0	200	903	0	0	0	0	0	0	0	603	903	0
9351	2	0	0	0	0	0	0	200	300	0	0	0	0	0	0	0	200	903	0	0	0	0	0	0	0	603	903	0
9351	3	0	0	0	0	0	0	200	300	0	0	0	0	0	0	0	200	903	0	0	0	0	0	0	0	603	903	0
9351	4	0	0	0	0	0	0	200	300	0	0	0	0	0	0	0	200	903	0	0	0	0	0	0	0	603	903	0
9351	5	0	0	0	0	0	0	200	300	0	0	0	0	0	0	0	200	903	0	0	0	0	0	0	0	603	903	0
9351	6	0	0	0	0	0	0	200	300	0	0	0	0	0	0	0	200	903	0	0	0	0	0	0	0	603	903	0
9351	7	0	0	0	0	0	0	200	300	0	0	0	0	0	0	0	200	903	0	0	0	0	0	0	0	603	903	0
9351	8	0	0	0	0	0	0	200	300	0	0	0	0	0	0	0	200	903	0	0	0	0	0	0	0	603	903	0
9351	9	0	0	0	0	0	0	200	300	0	0	0	0	0	0	0	200	903	0	0	0	0	0	0	0	603	903	0
9352	0	0	0	0	0	0	0	200	300	0	0	0	0	0	0	0	200	903	0	0	0	0	0	0	0	603	903	0
9352	1	0	0	0	0	0	0	200	300	0	0	0	0	0	0	0	200	903	0	0	0	0	0	0	0	603	903	0
9352	2	0	0	0	0	0	0	200	300	0	0	0	0	0	0	0	200	903	0	0	0	0	0	0	0	603	903	0
9352	3	0	0	0	0	0	0	200	300	0	0	0	0	0	0	0	200	903	0	0	0	0	0	0	0	603	903	0
9352	4	0	0	0	0	0	0	200	300	0	0	0	0	0	0	0	200	903	0	0	0	0	0	0	0	603	903	0
9352	5	0	0	0	0	0	0	200	300	0	0	0	0	0	0	0	200	903	0	0	0	0	0	0	0	603	903	0
9352	6	0	0	0	0	0	0	200	300	0	0	0	0	0	0	0	200	903	0	0	0	0	0	0	0	603	903	0
9352	7	0	0	0	0	0	0	200	300	0	0	0	0	0	0	0	200	903	0	0	0	0	0	0	0	603	903	0
9352	8	0	0	0	0	0	0	200	300	0	0	0	0	0	0	0	200	903	0	0	0	0	0	0	0	603	903	0
9352	9	0	0	0	0	0	0	200	300	0	0	0	0	0	0	0	200	903	0	0	0	0	0	0	0	603	903	0
9353	0	0	0	0	0	0	0	200	300	0	0	0	0	0	0	0	200	903	0	0	0	0	0	0	0	603	903	0
9353	1	0	0	0	0	0	0	200	300	0	0	0	0	0	0	0	200	903	0	0	0	0	0	0	0	603	903	0
9353	2	0	0	0	0	0	0	200	300	0	0	0	0	0	0	0	200	903	0	0	0	0	0	0	0	603	903	0
9353	3	0	0	0	0	0	0	200	300	0	0	0	0	0	0	0	200	903	0	0	0	0	0	0	0	603	903	0
9353	4	0	0	0	0	0	0	200	300	0	0	0	0	0	0	0	200	903	0	0	0	0	0	0	0	603	903	0
9353	5	0	0	0	0	0	0	200	300	0	0	0	0	0	0	0	200	903	0	0	0	0	0	0	0	603	903	0
9353	6	0	0	0	0	0	0	200	300	0	0	0	0	0	0	0	200	903	0	0	0	0	0	0	0	603	903	0
9353	7	0	0	0	0	0	0	200	300	0	0	0	0	0	0	0	200	903	0	0	0	0	0	0	0	603	903	0
9353	8	0	0	0	0	0	0	200	300	0	0	0	0	0	0	0	200	903	0	0	0	0	0	0	0	603	903	0
9353	9	0	0	0	0	0	0	200	300	0	0	0	0	0	0	0	200	903	0	0	0	0	0	0	0	603	903	0
9354	0	0	0	0	0	0	0	200	300	0	0	0	0	0	0	0	200	903	0	0	0	0	0	0	0	603	903	0
9354	1	0	0	0	0	0	0	200	300	0	0	0	0	0	0	0	200	903	0	0	0	0	0	0	0	603	903	0
9354	2	0	0	0	0	0	0	200	300	0	0	0	0	0	0	0	200	903	0	0	0	0	0	0	0	603	903	0
9354	3	0	0	0	0	0	0	200	300	0	0	0	0	0	0	0	200	903	0	0	0	0	0	0	0	603	903	0
9354	4	0	0	0	0	0	0	200	300	0	0	0	0	0	0	0	200	903	0	0	0	0	0	0	0	603	903	0
9354	5	0	0	0	0	0	0	200	300	0	0	0	0	0	0	0	200	903	0	0	0	0	0	0	0	603	903	0
9354	6	0	0	0	0	0	0	200	300	0	0	0	0	0	0	0	200	903	0	0	0	0	0	0	0	603	903	0
9354	7	0	0	0	0	0	0	200	300	0	0	0	0	0	0	0	200	903	0	0	0	0	0	0	0	603	903	0
9354	8	0	0	0	0	0	0	200	300	0	0	0	0	0	0	0	200	903	0	0	0	0	0	0	0	603	903	0
9354	9	0	0	0	0	0	0	200	300	0	0	0	0	0	0	0	200	903	0	0	0	0	0	0	0	603	903	0
9355	0	0	0	0	0	0	0	200	300	0	0	0	0	0	0	0	200	903	0	0	0	0	0	0	0	603	903	0
9355	1	0	0	0	0	0	0	200	300	0	0	0	0	0	0	0	200	903	0	0	0	0	0	0	0	603	903	0
9355	2	0	0	0	0	0	0	200	300	0	0	0	0	0	0	0	200	903	0	0	0	0	0	0	0	603	903	0
9355	3	0	0	0	0	0	0	200	300	0	0	0	0	0	0	0	200	903	0	0	0	0	0	0	0	603	903	0
9355	4	0	0	0	0	0	0	200	300	0	0	0	0	0	0	0	200	903	0	0	0	0	0	0	0	603	903	0
9355	5	0	0	0	0	0	0	200	300	0	0	0	0	0	0	0	200	903	0	0	0	0	0	0	0	603	903	0
9355	6	0	0	0	0	0	0	200	300	0	0	0	0	0	0	0	200	903	0	0	0	0	0	0	0	603	903	0
9355	7	0	0	0	0	0	0	200	300	0	0	0	0	0	0	0	200	903	0	0	0	0	0	0	0	603	903	0
9355	8	0	0	0	0	0	0	200	300	0	0	0	0	0	0	0	200	903	0	0	0	0	0	0	0	603	903	0
9355	9	0	0	0	0	0	0	200	300	0	0	0	0	0	0	0	200	903	0	0	0	0	0	0	0	603	903	0
9356	0	0	0	0	0	0	0	200	300	0	0	0	0	0	0	0	200	903	0	0	0	0	0	0	0	603	903	0
9356	1	0	0	0	0	0	0	200	300	0	0	0	0	0	0	0	200	903	0	0	0	0	0	0	0	603	903	0
9356	2	0	0	0	0	0	0	200	300	0	0	0	0	0	0	0	200	903	0	0	0	0	0	0	0	603	903	0
9356	3	0	0	0	0	0	0	200	300	0	0	0	0	0	0	0	200	903	0	0	0	0	0	0	0	603	903	0
9356	4	0	0	0	0	0	0	200	300	0	0	0	0	0	0	0	200	903	0	0	0	0	0	0	0	603	903	0
9356	5	0	0	0	0	0	0	200	300	0	0	0	0	0	0	0	200	903	0	0	0	0	0	0	0	603	903	0
9356	6	0	0	0	0	0	0	200	300	0	0	0	0	0	0	0	200	903	0	0	0	0	0	0	0	603	903	0
9356	7	0	0	0	0	0	0	200	300	0	0	0	0	0	0	0	200	903	0	0	0	0	0	0	0	603	903	0
9356	8	0	0	0	0	0	0	200	300	0	0	0	0	0	0	0	200	903	0	0	0	0	0	0	0	603	903	0
9356	9	0	0	0	0	0	0	200	300	0	0	0	0	0	0	0	200	903	0	0	0	0	0	0	0	603	903	0
9357	0	0	0	0	0	0	0	200	300	0	0	0	0	0	0	0	200	903	0	0	0	0	0	0	0	603	903	0
9357	1	0	0	0	0	0	0	200	300	0	0	0	0	0	0	0	200	903	0	0	0	0	0	0	0	603	903	0
9357	2	0	0	0	0	0	0	200	300	0	0	0	0	0	0	0	200	903	0	0	0	0	0	0	0	603	903	0
9357	3	0	0	0	0	0	0	200	300	0	0	0	0	0	0	0	200	903	0	0	0	0	0	0	0	603	903	0
9357	4	0	0	0	0	0	0	200	300	0	0	0	0	0	0	0	200	903	0	0	0	0	0	0	0	603	903	0
9357	5	0	0	0	0	0	0	200	300	0	0	0	0	0	0	0	200	903	0	0	0	0	0	0	0	603	903	0
9357	6	0	0	0	0	0	0	200	300	0	0	0	0	0	0	0	200	903	0	0	0	0	0	0	0	603	903	0
9357	7	0	0	0	0	0	0	200	300	0	0	0	0	0	0	0	200	903	0	0	0	0	0	0	0	603	903	0
9357	8	0	0	0	0	0	0	200	300	0	0	0	0	0	0	0	200	903	0	0	0	0	0	0	0	603	903	0
9357	9	0	0	0	0	0	0	200	300	0	0	0	0	0	0	0	200	903	0	0	0	0	0	0	0	603	903	0
9358	0	0	0	0	0	0	0	200	300	0	0	0	0	0	0	0	200	903	0	0	0	0	0	0	0	603	903	0
9358	1	0	0	0	0	0	0	200	300	0	0	0	0	0	0	0	200	903	0	0	0	0	0	0	0	603	903	0
9358	2	0	0	0	0	0	0	200	300	0	0	0	0	0	0	0	200	903	0	0	0	0	0	0	0	603	903	0
9358	3	0	0	0	0	0	0	200	300	0	0	0	0	0	0	0	200	903	0	0	0	0	0	0	0	603	903	0
9358	4	0	0	0	0	0	0	200	300	0	0	0	0	0	0	0	200	903	0	0	0	0	0	0	0	603	903	0
9358	5	0	0	0	0	0	0	200	300	0	0	0	0	0	0	0	200	903	0	0	0	0	0	0	0	603	903	0
9358	6	0	0	0	0	0	0	200	300	0	0	0	0	0	0	0	200	903	0	0	0	0	0	0	0	603	903	0
9358	7	0	0	0	0	0	0	200	300	0	0	0	0	0	0	0	200	903	0	0	0	0	0	0	0	603	903	0
9358	8	0	0	0	0	0	0	200	300	0	0	0	0	0	0	0	200	903	0	0	0	0	0	0	0	603	903	0
9358	9	0	0	0	0	0	0	200	300	0	0	0	0	0	0	0	200	903	0	0	0	0	0	0	0	603	903	0
9359	0	0	0	0	0	0	0	200	300	0	0	0	0	0	0	0	200	903	0	0	0	0	0	0	0	603	903	0
9359	1	0	0	0	0	0	0	200	300	0	0	0	0	0	0	0	200	903	0	0	0	0	0	0	0	603	903	0
9359	2	0	0	0	0	0	0	200	300	0	0	0	0	0	0	0	200	903	0	0	0	0	0	0	0	603	903	0
9359	3	0	0	0	0	0	0	200	300	0	0	0	0	0	0	0	200	903	0	0	0	0	0	0	0	603	903	0
9359	4	0	0	0	0	0	0	200	300	0	0	0	0	0	0	0	200	903	0	0	0	0	0	0	0	603	903	0
9359	5	0	0	0	0	0	0	200	300	0	0	0	0	0	0	0	200	903	0	0	0	0	0	0	0	603	903	0
9359	6	0	0	0	0	0	0	200	300	0	0	0	0	0	0	0	200	903	0	0	0	0	0	0	0	603	903	0
9359	7	0	0	0	0	0	0	200	300	0	0	0	0	0	0	0	200	903	0	0	0	0	0	0	0	603	903	0
9359	8	0	0	0	0	0	0	200	300	0	0	0	0	0	0	0	200	903	0	0	0	0	0	0	0	603	903	0
9359	9	0	0	0	0	0	0	200	300	0	0	0	0	0	0	0	200	903	0	0	0	0	0	0	0	603	903	0
9360	0	0	0	0	0	0	0	200	300	0	0	0	0	0	0	0	200	903	0	0	0	0	0	0	0	603	903	0
9360	1	0	0	0	0	0	0	200	300	0	0	0	0	0	0	0	200	903	0	0	0	0	0	0	0	603	903	0
9360	2	0	0	0	0	0	0	200	300	0	0	0	0	0	0	0	200	903	0	0	0	0	0	0	0	603	903	0
9360	3	0	0	0	0	0	0	200	300	0	0	0	0	0	0	0	200	903	0	0	0	0	0	0	0	603	903	0
9360	4	0	0	0	0	0	0	200	300	0	0	0	0	0	0	0	200	903	0	0	0	0	0	0	0	603	903	0
9360	5	0	0	0	0	0	0	200	300	0	0	0	0	0	0	0	200	903	0	0	0	0	0	0	0	603	903	0
9360	6	0	0	0	0	0	0	200	300	0	0	0	0	0	0	0	200	903	0	0	0	0	0	0	0	603	903	0
9360	7	0	0	0	0	0	0	200	300	0	0	0	0	0	0	0	200	903	0	0	0	0	0	0	0	603	903	0
9360	8	0	0	0	0	0	0	200	300	0	0	0	0	0	0	0	200	903	0	0	0	0	0	0	0	603	903	0
9360	9	0	0	0	0	0	0	200	300	0	0	0	0	0	0	0	200	903	0	0	0	0	0	0	0	603	903	0
9361	0	0	0	0	0	0	0	200	300	0	0	0	0	0	0	0	200	903	0	0	0	0	0	0	0	603	903	0
9361	1	0	0	0	0	0	0	200	300	0	0	0	0	0	0	0	200	903	0	0	0	0	0	0	0	603	903	0
9361	2	0	0	0	0	0	0	200	300	0	0	0	0	0	0	0	200	903	0	0	0	0	0	0	0	603	903	0
9361	3	0	0	0	0	0	0	200	300	0	0	0	0	0	0	0	200	903	0	0	0	0	0	0	0	603	903	0
9361	4	0	0	0	0	0	0	200	300	0	0	0	0	0	0	0	200	903	0	0	0	0	0	0	0	603	903	0
9361	5	0	0	0	0	0	0	200	300	0	0	0	0	0	0	0	200	903	0	0	0	0	0	0	0	603	903	0
9361	6	0	0	0	0	0	0	200	300	0	0	0	0	0	0	0	200	903	0	0	0	0	0	0	0	603	903	0
9361	7	0	0	0	0	0	0	200	300	0	0	0	0	0	0	0	200	903	0	0	0	0	0	0	0	603	903	0
9361	8	0	0	0	0	0	0	200	300	0	0	0	0	0	0	0	200	903	0	0	0	0	0	0	0	603	903	0
9361	9	0	0	0	0	0	0	200	300	0	0	0	0	0	0	0	200	903	0	0	0	0	0	0	0	603	903	0
9362	0	0	0	0	0	0	0	200	300	0	0	0	0	0	0	0	200	903	0	0	0	0	0	0	0	603	903	0
9362	1	0	0	0	0	0	0	200	300	0	0	0	0	0	0	0	200	903	0	0	0	0	0	0	0	603	903	0
9362	2	0	0	0	0	0	0	200	300	0	0	0	0	0	0	0	200	903	0	0	0	0	0	0	0	603	903	0
9362	3	0	0	0	0	0	0	200	300	0	0	0	0	0	0	0	200	903	0	0	0	0	0	0	0	603	903	0
9362	4	0	0	0	0	0	0	200	300	0	0	0	0	0	0	0	200	903	0	0	0	0	0	0	0	603	903	0
9362	5	0	0	0	0	0	0	200	300	0	0	0	0	0	0	0	200	903	0	0	0	0	0	0	0	603	903	0
9362	6	0	0	0	0	0	0	200	300	0	0	0	0	0	0	0	200	903	0	0	0	0	0	0	0	603	903	0
9362	7	0	0	0	0	0	0	200	300	0	0	0	0	0	0	0	200	903	0	0	0	0	0	0	0	603	903	0
9362	8	0	0	0	0	0	0	200	300	0	0	0	0	0	0	0	200	903	0	0	0	0	0	0	0	603	903	0
9362	9	0	0	0	0	0	0	200	300	0	0	0	0	0	0	0	200	903	0	0	0	0	0	0	0	603	903	0
9363	0	0	0	0	0	0	0	200	300	0	0	0	0	0	0	0	200	903	0	0	0	0	0	0	0	603	903	0
9363	1	0	0	0	0	0	0	200	300	0	0	0	0	0	0	0	200	903	0	0	0	0	0	0	0	603	903	0
9363	2	0	0	0	0	0	0	200	300	0	0	0	0	0	0	0	200	903	0	0	0	0	0	0	0	603	903	0
9363	3	0	0	0	0	0	0	200	300	0	0	0	0	0	0	0	200	903	0	0	0	0	0	0	0	603	903	0
9363	4	0	0	0	0	0	0	200	300	0	0	0	0	0	0	0	200	903	0	0	0	0	0	0	0	603	903	0
9363	5	0	0	0	0	0	0	200	300	0	0	0	0	0	0	0	200	903	0	0	0	0	0	0	0	603	903	0
9363	6	0	0	0	0	0	0	200	300	0	0	0	0	0	0	0	200	903	0	0	0	0	0	0	0	603	903	0
9363	7	0	0	0	0	0	0	200	300	0	0	0	0	0	0	0	200	903	0	0	0	0	0	0	0	603	903	0
9363	8	0	0	0	0	0	0	200	300	0	0	0	0	0	0	0	200	903	0	0	0	0	0	0	0	603	903	0
9363	9	0	0	0	0	0	0	200	300	0	0	0	0	0	0	0	200	903	0	0	0	0	0	0	0	603	903	0
9364	0	0	0	0	0	0	0	200	300	0	0	0	0	0	0	0	200	903	0	0	0	0	0	0	0	603	903	0
9364	1	0	0	0	0	0	0	200	300	0	0	0	0	0	0	0	200	903	0	0	0	0	0	0	0	603	903	0
9364	2	0	0	0	0	0	0	200	300	0	0	0	0	0	0	0	200	903	0	0	0	0	0	0	0	603	903	0
9364	3	0	0	0	0	0	0	200	300	0	0	0	0	0	0	0	200	903	0	0	0	0	0	0	0	603	903	0
9364	4	0	0	0	0	0	0	200	300	0	0	0	0	0	0	0	200	903	0	0	0	0	0	0	0	603	903	0
9364	5	0	0	0	0	0	0	200	300	0	0	0	0	0	0	0	200	903	0	0	0	0	0	0	0	603	903	0
9364	6	0	0	0	0	0	0	200	300	0	0	0	0	0	0	0	200	903	0	0	0	0	0	0	0	603	903	0
9364	7	0	0	0	0	0	0	200	300	0	0	0	0	0	0	0	200	903	0	0	0	0	0	0	0	603	903	0
9364	8	0	0	0	0	0	0	200	300	0	0	0	0	0	0	0	200	903	0	0	0	0	0	0	0	603	903	0
9364	9	0	0	0	0	0	0	200	300	0	0	0	0	0	0	0	200	903	0	0	0	0	0	0	0	603	903	0
9365	0	0	0	0	0	0	0	200	300	0	0	0	0	0	0	0	200	903	0	0	0	0	0	0	0	603	903	0
9365	1	0	0	0	0	0	0	200	300	0	0	0	0	0	0	0	200	903	0	0	0	0	0	0	0	603	903	0
9365	2	0	0	0	0	0	0	200	300	0	0	0	0	0	0	0	200	903	0	0	0	0	0	0	0	603	903	0
9365	3	0	0	0	0	0	0	200	300	0	0	0	0	0	0	0	200	903	0	0	0	0	0	0	0	603	903	0
9365	4	0	0	0	0	0	0	200	300	0	0	0	0	0	0	0	200	903	0	0	0	0	0	0	0	603	903	0
9365	5	0	0	0	0	0	0	200	300	0	0	0	0	0	0	0	200	903	0	0	0	0	0	0	0	603	903	0
9365	6	0	0	0	0	0	0	200	300	0	0	0	0	0	0	0	200	903	0	0	0	0	0	0	0	603	903	0
9365	7	0	0	0	0	0	0	200	300	0	0	0	0	0	0	0	200	903	0	0	0	0	0	0	0	603	903	0
9365	8	0	0	0	0	0	0	200	300	0	0	0	0	0	0	0	200	903	0	0	0	0	0	0	0	603	903	0
9365	9	0	0	0	0	0	0	200	300	0	0	0	0	0	0	0	200	903	0	0	0	0	0	0	0	603	903	0
9366	0	0	0	0	0	0	0	200	300	0	0	0	0	0	0	0	200	903	0	0	0	0	0	0	0	603	903	0
9366	1	0	0	0	0	0	0	200	300	0	0	0	0	0	0	0	200	903	0	0	0	0	0	0	0	603	903	0
9366	2	0	0	0	0	0	0	200	300	0	0	0	0	0	0	0	200	903	0	0	0	0	0	0	0	603	903	0
9366	3	0	0	0	0	0	0	200	300	0	0	0	0	0	0	0	200	903	0	0	0	0	0	0	0	603	903	0
9366	4	0	0	0	0	0	0	200	300	0	0	0	0	0	0	0	200	903	0	0	0	0	0	0	0	603	903	0
9366	5	0	0	0	0	0	0	200	300	0	0	0	0	0	0	0	200	903	0	0	0	0	0	0	0	603	903	0
9366	6	0	0	0	0	0	0	200	300	0	0	0	0	0	0	0	200	903	0	0	0	0	0	0	0	603	903	0
9366	7	0	0	0	0	0	0	200	300	0	0	0	0	0	0	0	200	903	0	0	0	0	0	0	0	603	903	0
9366	8	0	0	0	0	0	0	200	300	0	0	0	0	0	0	0	200	903	0	0	0	0	0	0	0	603	903	0
9366	9	0	0	0	0	0	0	200	300	0	0	0	0	0	0	0	200	903	0	0	0	0	0	0	0	603	903	0
9367	0	0	0	0	0	0	0	200	300	0	0	0	0	0	0	0	200	903	0	0	0	0	0	0	0	603	903	0
9367	1	0	0	0	0	0	0	200	300	0	0	0	0	0	0	0	200	903	0	0	0	0	0	0	0	603	903	0
9367	2	0	0	0	0	0	0	200	300	0	0	0	0	0	0	0	200	903	0	0	0	0	0	0	0	603	903	0
9367	3	0	0	0	0	0	0	200	300	0	0	0	0	0	0	0	200	903	0	0	0	0	0	0	0	603	903	0
9367	4	0	0	0	0	0	0	200	300	0	0	0	0	0	0	0	200	903	0	0	0	0	0	0	0	603	903	0
9367	5	0	0	0	0	0	0	200	300	0	0	0	0	0	0	0	200	903	0	0	0	0	0	0	0	603	903	0
9367	6	0	0	0	0	0	0	200	300	0	0	0	0	0	0	0	200	903	0	0	0	0	0	0	0	603	903	0
9367	7	0	0	0	0	0	0	200	300	0	0	0	0	0	0	0	200	903	0	0	0	0	0	0	0	603	903	0
9367	8	0	0	0	0	0	0	200	300	0	0	0	0	0	0	0	200	903	0	0	0	0	0	0	0	603	903	0
9367	9	0	0	0	0	0	0	200	300	0	0	0	0	0	0	0	200	903	0	0	0	0	0	0	0	603	903	0
9368	0	0	0	0	0	0	0	200	300	0	0	0	0	0	0	0	200	903	0	0	0	0	0	0	0	603	903	0
9368	1	0	0	0	0	0	0	200	300	0	0	0	0	0	0	0	200	903	0	0	0	0	0	0	0	603	903	0
9368	2	0	0	0	0	0	0	200	300	0	0	0	0	0	0	0	200	903	0	0	0	0	0	0	0	603	903	0
9368	3	0	0	0	0	0	0	200	300	0	0	0	0	0	0	0	200	903	0	0	0	0	0	0	0	603	903	0
9368	4	0	0	0	0	0	0	200	300	0	0	0	0	0	0	0	200	903	0	0	0	0	0	0	0	603	903	0
9368	5	0	0	0	0	0	0	200	300	0	0	0	0	0	0	0	200	903	0	0	0	0	0	0	0	603	903	0
9368	6	0	0	0	0	0	0	200	300	0	0	0	0	0	0	0	200	903	0	0	0	0	0	0	0	603	903	0
9368	7	0	0	0	0	0	0	200	300	0	0	0	0	0	0	0	200	903	0	0	0	0	0	0	0	603	903	0
9368	8	0	0	0	0	0	0	200	300	0	0	0	0	0	0	0	200	903	0	0	0	0	0	0	0	603	903	0
9368	9	0	0	0	0	0	0	200	300	0	0	0	0	0	0	0	200	903	0	0	0	0	0	0	0	603	903	0
9369	0	0	0	0	0	0	0	200	300	0	0	0	0	0	0	0	200	903	0	0	0	0	0	0	0	603	903	0
9369	1	0	0	0	0	0	0	200	300	0	0	0	0	0	0	0	200	903	0	0	0	0	0	0	0	603	903	0
9369	2	0	0	0	0	0	0	200	300	0	0	0	0	0	0	0	200	903	0	0	0	0	0	0	0	603	903	0
9369	3	0	0	0	0	0	0	200	300	0	0	0	0	0	0	0	200	903	0	0	0	0	0	0	0	603	903	0
9369	4	0	0	0	0	0	0	200	300	0	0	0	0	0	0	0	200	903	0	0	0	0	0	0	0	603	903	0
9369	5	0	0	0	0	0	0	200	300	0	0	0	0	0	0	0	200	903	0	0	0	0	0	0	0	603	903	0
9369	6	0	0	0	0	0	0	200	300	0	0	0	0	0	0	0	200	903	0	0	0	0	0	0	0	603	903	0
9369	7	0	0	0	0	0	0	200	300	0	0	0	0	0	0	0	200	903	0	0	0	0	0	0	0	603	903	0
9369	8	0	0	0	0	0	0	200	300	0	0	0	0	0	0	0	200	903	0	0	0	0	0	0	0	603	903	0
9369	9	0	0	0	0	0	0	200	300	0	0	0	0	0	0	0	200	903	0	0	0	0	0	0	0	603	903	0
9370	0	0	0	0	0	0	0	200	300	0	0	0	0	0	0	0	200	903	0	0	0	0	0	0	0	603	903	0
9370	1	0	0	0	0	0	0	200	300	0	0	0	0	0	0	0	200	903	0	0	0	0	0	0	0	603	903	0
9370	2	0	0	0	0	0	0	200	300	0	0	0	0	0	0	0	200	903	0	0	0	0	0	0	0	603	903	0
9370	3	0	0	0	0	0	0	200	300	0	0	0	0	0	0	0	200	903	0	0	0	0	0	0	0	603	903	0
9370	4	0	0	0	0	0	0	200	300	0	0	0	0	0	0	0	200	903	0	0	0	0	0	0	0	603	903	0
9370	5	0	0	0	0	0	0	200	300	0	0	0	0	0	0	0	200	903	0	0	0	0	0	0	0	603	903	0
9370	6	0	0	0	0	0	0	200	300	0	0	0	0	0	0	0	200	903	0	0	0	0	0	0	0	603	903	0
9370	7	0	0	0	0	0	0	200	300	0	0	0	0	0	0	0	200	903	0	0	0	0	0	0	0	603	903	0
9370	8	0	0	0	0	0	0	200	300	0	0	0	0	0	0	0	200	903	0	0	0	0	0	0	0	603	903	0
9370	9	0	0	0	0	0	0	200	300	0	0	0	0	0	0	0	200	903	0	0	0	0	0	0	0	603	903	0
9371	0	0	0	0	0	0	0	200	300	0	0	0	0	0	0	0	200	903	0	0	0	0	0	0	0	603	903	0
9371	1	0	0	0	0	0	0	200	300	0	0	0	0	0	0	0	200	903	0	0	0	0	0	0	0	603	903	0
9371	2	0	0	0	0	0	0	200	300	0	0	0	0	0	0	0	200	903	0	0	0	0	0	0	0	603	903	0
9371	3	0	0	0	0	0	0	200	300	0	0	0	0	0	0	0	200	903	0	0	0	0	0	0	0	603	903	0
9371	4	0	0	0	0	0	0	200	300	0	0	0	0	0	0	0	200	903	0	0	0	0	0	0	0	603	903	0
9371	5	0	0	0	0	0	0	200	300	0	0	0	0	0	0	0	200	903	0	0	0	0	0	0	0	603	903	0
9371	6	0	0	0	0	0	0	200	300	0	0	0	0	0	0	0	200	903	0	0	0	0	0	0	0	603	903	0
9371	7	0	0	0	0	0	0	200	300	0	0	0	0	0	0	0	200	903	0	0	0	0	0	0	0	603	903	0
9371	8	0	0	0	0	0	0	200	300	0	0	0	0	0	0	0	200	903	0	0	0	0	0	0	0	603	903	0
9371	9	0	0	0	0	0	0	200	300	0	0	0	0	0	0	0	200	903	0	0	0	0	0	0	0	603	903	0
9372	0	0	0	0	0	0	0	200	300	0	0	0	0	0	0	0	200	903	0	0	0	0	0	0	0	603	903	0
9372	1	0	0	0	0	0	0	200	300	0	0	0	0	0	0	0	200	903	0	0	0	0	0	0	0	603	903	0
9372	2	0	0	0	0	0	0	200	300	0	0	0	0	0	0	0	200	903	0	0	0	0	0	0	0	603	903	0
9372	3	0	0	0	0	0	0	200	300	0	0	0	0	0	0	0	200	903	0	0	0	0	0	0	0	603	903	0
9372	4	0	0	0	0	0	0	200	300	0	0	0	0	0	0	0	200	903	0	0	0	0	0	0	0	603	903	0
9372	5	0	0	0	0	0	0	200	300	0	0	0	0	0	0	0	200	903	0	0	0	0	0	0	0	603	903	0
9372	6	0	0	0	0	0	0	200	300	0	0	0	0	0	0	0	200	903	0	0	0	0	0	0	0	603	903	0
9372	7	0	0	0	0	0	0	200	300	0	0	0	0	0	0	0	200	903	0	0	0	0	0	0	0	603	903	0
9372	8	0	0	0	0	0	0	200	300	0	0	0	0	0	0	0	200	903	0	0	0	0	0	0	0	603	903	0
9372	9	0	0	0	0	0	0	200	300	0	0	0	0	0	0	0	200	903	0	0	0	0	0	0	0	603	903	0
9373	0	0	0	0	0	0	0	200	300	0	0	0	0	0	0	0	200	903	0	0	0	0	0	0	0	603	903	0
9373	1	0	0	0	0	0	0	200	300	0	0	0	0	0	0	0	200	903	0	0	0	0	0	0	0	603	903	0
9373	2	0	0	0	0	0	0	200	300	0	0	0	0	0	0	0	200	903	0	0	0	0	0	0	0	603	903	0
9373	3	0	0	0	0	0	0	200	300	0	0	0	0	0	0	0	200	903	0	0	0	0	0	0	0	603	903	0
9373	4	0	0	0	0	0	0	200	300	0	0	0	0	0	0	0	200	903	0	0	0	0	0	0	0	603	903	0
9373	5	0	0	0	0	0	0	200	300	0	0	0	0	0	0	0	200	903	0	0	0	0	0	0	0	603	903	0
9373	6	0	0	0	0	0	0	200	300	0	0	0	0	0	0	0	200	903	0	0	0	0	0	0	0	603	903	0
9373	7	0	0	0	0	0	0	200	300	0	0	0	0	0	0	0	200	903	0	0	0	0	0	0	0	603	903	0
9373	8	0	0	0	0	0	0	200	300	0	0	0	0	0	0	0	200	903	0	0	0	0	0	0	0	603	903	0
9373	9	0	0	0	0	0	0	200	300	0	0	0	0	0	0	0	200	903	0	0	0	0	0	0	0	603	903	0
9374	0	0	0	0	0	0	0	200	300	0	0	0	0	0	0	0	200	903	0	0	0	0	0	0	0	603	903	0
9374	1	0	0	0	0	0	0	200	300	0	0	0	0	0	0	0	200	903	0	0	0	0	0	0	0	603	903	0
9374	2	0	0	0	0	0	0	200	300	0	0	0	0	0	0	0	200	903	0	0	0	0	0	0	0	603	903	0
9374	3	0	0	0	0	0	0	200	300	0	0	0	0	0	0	0	200	903	0	0	0	0	0	0	0	603	903	0
9374	4	0	0	0	0	0	0	200	300	0	0	0	0	0	0	0	200	903	0	0	0	0	0	0	0	603	903	0
9374	5	0	0	0	0	0	0	200	300	0	0	0	0	0	0	0	200	903	0	0	0	0	0	0	0	603	903	0
9374	6	0	0	0	0	0	0	200	300	0	0	0	0	0	0	0	200	903	0	0	0	0	0	0	0	603	903	0
9374	7	0	0	0	0	0	0	200	300	0	0	0	0	0	0	0	200	903	0	0	0	0	0	0	0	603	903	0
9374	8	0	0	0	0	0	0	200	300	0	0	0	0	0	0	0	200	903	0	0	0	0	0	0	0	603	903	0
9374	9	0	0	0	0	0	0	200	300	0	0	0	0	0	0	0	200	903	0	0	0	0	0	0	0	603	903	0
9375	0	0	0	0	0	0	0	200	300	0	0	0	0	0	0	0	200	903	0	0	0	0	0	0	0	603	903	0
9375	1	0	0	0	0	0	0	200	300	0	0	0	0	0	0	0	200	903	0	0	0	0	0	0	0	603	903	0
9375	2	0	0	0	0	0	0	200	300	0	0	0	0	0	0	0	200	903	0	0	0	0	0	0	0	603	903	0
9375	3	0	0	0	0	0	0	200	300	0	0	0	0	0	0	0	200	903	0	0	0	0	0	0	0	603	903	0
9375	4	0	0	0	0	0	0	200	300	0	0	0	0	0	0	0	200	903	0	0	0	0	0	0	0	603	903	0
9375	5	0	0	0	0	0	0	200	300	0	0	0	0	0	0	0	200	903	0	0	0	0	0	0	0	603	903	0
9375	6	0	0	0	0	0	0	200	300	0	0	0	0	0	0	0	200	903	0	0	0	0	0	0	0	603	903	0
9375	7	0	0	0	0	0	0	200	300	0	0	0	0	0	0	0	200	903	0	0	0	0	0	0	0	603	903	0
9375	8	0	0	0	0	0	0	200	300	0	0	0	0	0	0	0	200	903	0	0	0	0	0	0	0	603	903	0
9375	9	0	0	0	0	0	0	200	300	0	0	0	0	0	0	0	200	903	0	0	0	0	0	0	0	603	903	0
9376	0	0	0	0	0	0	0	200	300	0	0	0	0	0	0	0	200	903	0	0	0	0	0	0	0	603	903	0
9376	1	0	0	0	0	0	0	200	300	0	0	0	0	0	0	0	200	903	0	0	0	0	0	0	0	603	903	0
9376	2	0	0	0	0	0	0	200	300	0	0	0	0	0	0	0	200	903	0	0	0	0	0	0	0	603	903	0
9376	3	0	0	0	0	0	0	200	300	0	0	0	0	0	0	0	200	903	0	0	0	0	0	0	0	603	903	0
9376	4	0	0	0	0	0	0	200	300	0	0	0	0	0	0	0	200	903	0	0	0	0	0	0	0	603	903	0
9376	5	0	0	0	0	0	0	200	300	0	0	0	0	0	0	0	200	903	0	0	0	0	0	0	0	603	903	0
9376	6	0	0	0	0	0	0	200	300	0	0	0	0	0	0	0	200	903	0	0	0	0	0	0	0	603	903	0
9376	7	0	0	0	0	0	0	200	300	0	0	0	0	0	0	0	200	903	0	0	0	0	0	0	0	603	903	0
9376	8	0	0	0	0	0	0	200	300	0	0	0	0	0	0	0	200	903	0	0	0	0	0	0	0	603	903	0
9376	9	0	0	0	0	0	0	200	300	0	0	0	0	0	0	0	200	903	0	0	0	0	0	0	0	603	903	0
9377	0	0	0	0	0	0	0	200	300	0	0	0	0	0	0	0	200	903	0	0	0	0	0	0	0	603	903	0
9377	1	0	0	0	0	0	0	200	300	0	0	0	0	0	0	0	200	903	0	0	0	0	0	0	0	603	903	0
9377	2	0	0	0	0	0	0	200	300	0	0	0	0	0	0	0	200	903	0	0	0	0	0	0	0	603	903	0
9377	3	0	0	0	0	0	0	200	300	0	0	0	0	0	0	0	200	903	0	0	0	0	0	0	0	603	903	0
9377	4	0	0	0	0	0	0	200	300	0	0	0	0	0	0	0	200	903	0	0	0	0	0	0	0	603	903	0
9377	5	0	0	0	0	0	0	200	300	0	0	0	0	0	0	0	200	903	0	0	0	0	0	0	0	603	903	0
9377	6	0	0	0	0	0	0	200	300	0	0	0	0	0	0	0	200	903	0	0	0	0	0	0	0	603	903	0
9377	7	0	0	0	0	0	0	200	300	0	0	0	0	0	0	0	200	903	0	0	0	0	0	0	0	603	903	0
9377	8	0	0	0	0	0	0	200	300	0	0	0	0	0	0	0	200	903	0	0	0	0	0	0	0	603	903	0
9377	9	0	0	0	0	0	0	200	300	0	0	0	0	0	0	0	200	903	0	0	0	0	0	0	0	603	903	0
9378	0	0	0	0	0	0	0	200	300	0	0	0	0	0	0	0	200	903	0	0	0	0	0	0	0	603	903	0
9378	1	0	0	0	0	0	0	200	300	0	0	0	0	0	0	0	200	903	0	0	0	0	0	0	0	603	903	0
9378	2	0	0	0	0	0	0	200	300	0	0	0	0	0	0	0	200	903	0	0	0	0	0	0	0	603	903	0
9378	3	0	0	0	0	0	0	200	300	0	0	0	0	0	0	0	200	903	0	0	0	0	0	0	0	603	903	0
9378	4	0	0	0	0	0	0	200	300	0	0	0	0	0	0	0	200	903	0	0	0	0	0	0	0	603	903	0
9378	5	0	0	0	0	0	0	200	300	0	0	0	0	0	0	0	200	903	0	0	0	0	0	0	0	603	903	0
9378	6	0	0	0	0	0	0	200	300	0	0	0	0	0	0	0	200	903	0	0	0	0	0	0	0	603	903	0
9378	7	0	0	0	0	0	0	200	300	0	0	0	0	0	0	0	200	903	0	0	0	0	0	0	0	603	903	0
9378	8	0	0	0	0	0	0	200	300	0	0	0	0	0	0	0	200	903	0	0	0	0	0	0	0	603	903	0
9378	9	0	0	0	0	0	0	200	300	0	0	0	0	0	0	0	200	903	0	0	0	0	0	0	0	603	903	0
9379	0	0	0	0	0	0	0	200	300	0	0	0	0	0	0	0	200	903	0	0	0	0	0	0	0	603	903	0
9379	1	0	0	0	0	0	0	200	300	0	0	0	0	0	0	0	200	903	0	0	0	0	0	0	0	603	903	0
9379	2	0	0	0	0	0	0	200	300	0	0	0	0	0	0	0	200	903	0	0	0	0	0	0	0	603	903	0
9379	3	0	0	0	0	0	0	200	300	0	0	0	0	0	0	0	200	903	0	0	0	0	0	0	0	603	903	0
9379	4	0	0	0	0	0	0	200	300	0	0	0	0	0	0	0	200	903	0	0	0	0	0	0	0	603	903	0
9379	5	0	0	0	0	0	0	200	300	0	0	0	0	0	0	0	200	903	0	0	0	0	0	0	0	603	903	0
9379	6	0	0	0	0	0	0	200	300	0	0	0	0	0	0	0	200	903	0	0	0	0	0	0	0	603	903	0
9379	7	0	0	0	0	0	0	200	300	0	0	0	0	0	0	0	200	903	0	0	0	0	0	0	0	603	903	0
9379	8	0	0	0	0	0	0	200	300	0	0	0	0	0	0	0	200	903	0	0	0	0	0	0	0	603	903	0
9379	9	0	0	0	0	0	0	200	300	0	0	0	0	0	0	0	200	903	0	0	0	0	0	0	0	603	903	0
9380	0	0	0	0	0	0	0	200	300	0	0	0	0	0	0	0	200	903	0	0	0	0	0	0	0	603	903	0
9380	1	0	0	0	0	0	0	200	300	0	0	0	0	0	0	0	200	903	0	0	0	0	0	0	0	603	903	0
9380	2	0	0	0	0	0	0	200	300	0	0	0	0	0	0	0	200	903	0	0	0	0	0	0	0	603	903	0
9380	3	0	0	0	0	0	0	200	300	0	0	0	0	0	0	0	200	903	0	0	0	0	0	0	0	603	903	0
9380	4	0	0	0	0	0	0	200	300	0	0	0	0	0	0	0	200	903	0	0	0	0	0	0	0	603	903	0
9380	5	0	0	0	0	0	0	200	300	0	0	0	0	0	0	0	200	903	0	0	0	0	0	0	0	603	903	0
9380	6	0	0	0	0	0	0	200	300	0	0	0	0	0	0	0	200	903	0	0	0	0	0	0	0	603	903	0
9380	7	0	0	0	0	0	0	200	300	0	0	0	0	0	0	0	200	903	0	0	0	0	0	0	0	603	903	0
9380	8	0	0	0	0	0	0	200	300	0	0	0	0	0	0	0	200	903	0	0	0	0	0	0	0	603	903	0
9380	9	0	0	0	0	0	0	200	300	0	0	0	0	0	0	0	200	903	0	0	0	0	0	0	0	603	903	0
9381	0	0	0	0	0	0	0	200	300	0	0	0	0	0	0	0	200	903	0	0	0	0	0	0	0	603	903	0
9381	1	0	0	0	0	0	0	200	300	0	0	0	0	0	0	0	200	903	0	0	0	0	0	0	0	603	903	0
9381	2	0	0	0	0	0	0	200	300	0	0	0	0	0	0	0	200	903	0	0	0	0	0	0	0	603	903	0
9381	3	0	0	0	0	0	0	200	300	0	0	0	0	0	0	0	200	903	0	0	0	0	0	0	0	603	903	0
9381	4	0	0	0	0	0	0	200	300	0	0	0	0	0	0	0	200	903	0	0	0	0	0	0	0	603	903	0
9381	5	0	0	0	0	0	0	200	300	0	0	0	0	0	0	0	200	903	0	0	0	0	0	0	0	603	903	0
9381	6	0	0	0	0	0	0	200	300	0	0	0	0	0	0	0	200	903	0	0	0	0	0	0	0	603	903	0
9381	7	0	0	0	0	0	0	200	300	0	0	0	0	0	0	0	200	903	0	0	0	0	0	0	0	603	903	0
9381	8	0	0	0	0	0	0	200	300	0	0	0	0	0	0	0	200	903	0	0	0	0	0	0	0	603	903	0
9381	9	0	0	0	0	0	0	200	300	0	0	0	0	0	0	0	200	903	0	0	0	0	0	0	0	603	903	0
9382	0	0	0	0	0	0	0	200	300	0	0	0	0	0	0	0	200	903	0	0	0	0	0	0	0	603	903	0
9382	1	0	0	0	0	0	0	200	300	0	0	0	0	0	0	0	200	903	0	0	0	0	0	0	0	603	903	0
9382	2	0	0	0	0	0	0	200	300	0	0	0	0	0	0	0	200	903	0	0	0	0	0	0	0	603	903	0
9382	3	0	0	0	0	0	0	200	300	0	0	0	0	0	0	0	200	903	0	0	0	0	0	0	0	603	903	0
9382	4	0	0	0	0	0	0	200	300	0	0	0	0	0	0	0	200	903	0	0	0	0	0	0	0	603	903	0
9382	5	0	0	0	0	0	0	200	300	0	0	0	0	0	0	0	200	903	0	0	0	0	0	0	0	603	903	0
9382	6	0	0	0	0	0	0	200	300	0	0	0	0	0	0	0	200	903	0	0	0	0	0	0	0	603	903	0
9382	7	0	0	0	0	0	0	200	300	0	0	0	0	0	0	0	200	903	0	0	0	0	0	0	0	603	903	0
9382	8	0	0	0	0	0	0	200	300	0	0	0	0	0	0	0	200	903	0	0	0	0	0	0	0	603	903	0
9382	9	0	0	0	0	0	0	200	300	0	0	0	0	0	0	0	200	903	0	0	0	0	0	0	0	603	903	0
9383	0	0	0	0	0	0	0	200	300	0	0	0	0	0	0	0	200	903	0	0	0	0	0	0	0	603	903	0
9383	1	0	0	0	0	0	0	200	300	0	0	0	0	0	0	0	200	903	0	0	0	0	0	0	0	603	903	0
9383	2	0	0	0	0	0	0	200	300	0	0	0	0	0	0	0	200	903	0	0	0	0	0	0	0	603	903	0
9383	3	0	0	0	0	0	0	200	300	0	0	0	0	0	0	0	200	903	0	0	0	0	0	0	0	603	903	0
9383	4	0	0	0	0	0	0	200	300	0	0	0	0	0	0	0	200	903	0	0	0	0	0	0	0	603	903	0
9383	5	0	0	0	0	0	0	200	300	0	0	0	0	0	0	0	200	903	0	0	0	0	0	0	0	603	903	0
9383	6	0	0	0	0	0	0	200	300	0	0	0	0	0	0	0	200	903	0	0	0	0	0	0	0	603	903	0
9383	7	0	0	0	0	0	0	200	300	0	0	0	0	0	0	0	200	903	0	0	0	0	0	0	0	603	903	0
9383	8	0	0	0	0	0	0	200	300	0	0	0	0	0	0	0	200	903	0	0	0	0	0	0	0	603	903	0
9383	9	0	0	0	0	0	0	200	300	0	0	0	0	0	0	0	200	903	0	0	0	0	0	0	0	603	903	0
9384	0	0	0	0	0	0	0	200	300	0	0	0	0	0	0	0	200	903	0	0	0	0	0	0	0	603	903	0
9384	1	0	0	0	0	0	0	200	300	0	0	0	0	0	0	0	200	903	0	0	0	0	0	0	0	603	903	0
9384	2	0	0	0	0	0	0	200	300	0	0	0	0	0	0	0	200	903	0	0	0	0	0	0	0	603	903	0
9384	3	0	0	0	0	0	0	200	300	0	0	0	0	0	0	0	200	903	0	0	0	0	0	0	0	603	903	0
9384	4	0	0	0	0	0	0	200	300	0	0	0	0	0	0	0	200	903	0	0	0	0	0	0	0	603	903	0
9384	5	0	0	0	0	0	0	200	300	0	0	0	0	0	0	0	200	903	0	0	0	0	0	0	0	603	903	0
9384	6	0	0	0	0	0	0	200	300	0	0	0	0	0	0	0	200	903	0	0	0	0	0	0	0	603	903	0
9384	7	0	0	0	0	0	0	200	300	0	0	0	0	0	0	0	200	903	0	0	0	0	0	0	0	603	903	0
9384	8	0	0	0	0	0	0	200	300	0	0	0	0	0	0	0	200	903	0	0	0	0	0	0	0	603	903	0
9384	9	0	0	0	0	0	0	200	300	0	0	0	0	0	0	0	200	903	0	0	0	0	0	0	0	603	903	0
9385	0	0	0	0	0	0	0	200	300	0	0	0	0	0	0	0	200	903	0	0	0	0	0	0	0	603	903	0
9385	1	0	0	0	0	0	0	200	300	0	0	0	0	0	0	0	200	903	0	0	0	0	0	0	0	603	903	0
9385	2	0	0	0	0	0	0	200	300	0	0	0	0	0	0	0	200	903	0	0	0	0	0	0	0	603	903	0
9385	3	0	0	0	0	0	0	200	300	0	0	0	0	0	0	0	200	903	0	0	0	0	0	0	0	603	903	0
9385	4	0	0	0	0	0	0	200	300	0	0	0	0	0	0	0	200	903	0	0	0	0	0	0	0	603	903	0
9385	5	0	0	0	0	0	0	200	300	0	0	0	0	0	0	0	200	903	0	0	0	0	0	0	0	603	903	0
9385	6	0	0	0	0	0	0	200	300	0	0	0	0	0	0	0	200	903	0	0	0	0	0	0	0	603	903	0
9385	7	0	0	0	0	0	0	200	300	0	0	0	0	0	0	0	200	903	0	0	0	0	0	0	0	603	903	0
9385	8	0	0	0	0	0	0	200	300	0	0	0	0	0	0	0	200	903	0	0	0	0	0	0	0	603	903	0
9385	9	0	0	0	0	0	0	200	300	0	0	0	0	0	0	0	200	903	0	0	0	0	0	0	0	603	903	0
9386	0	0	0	0	0	0	0	200	300	0	0	0	0	0	0	0	200	903	0	0	0	0	0	0	0	603	903	0
9386	1	0	0	0	0	0	0	200	300	0	0	0	0	0	0	0	200	903	0	0	0	0	0	0	0	603	903	0
9386	2	0	0	0	0	0	0	200	300	0	0	0	0	0	0	0	200	903	0	0	0	0	0	0	0	603	903	0
9386	3	0	0	0	0	0	0	200	300	0	0	0	0	0	0	0	200	903	0	0	0	0	0	0	0	603	903	0
9386	4	0	0	0	0	0	0	200	300	0	0	0	0	0	0	0	200	903	0	0	0	0	0	0	0	603	903	0
9386	5	0	0	0	0	0	0	200	300	0	0	0	0	0	0	0	200	903	0	0	0	0	0	0	0	603	903	0
9386	6	0	0	0	0	0	0	200	300	0	0	0	0	0	0	0	200	903	0	0	0	0	0	0	0	603	903	0
9386	7	0	0	0	0	0	0	200	300	0	0	0	0	0	0	0	200	903	0	0	0	0	0	0	0	603	903	0
9386	8	0	0	0	0	0	0	200	300	0	0	0	0	0	0	0	200	903	0	0	0	0	0	0	0	603	903	0
9386	9	0	0	0	0	0	0	200	300	0	0	0	0	0	0	0	200	903	0	0	0	0	0	0	0	603	903	0
9387	0	0	0	0	0	0	0	200	300	0	0	0	0	0	0	0	200	903	0	0	0	0	0	0	0	603	903	0
9387	1	0	0	0	0	0	0	200	300	0	0	0	0	0	0	0	200	903	0	0	0	0	0	0	0	603	903	0
9387	2	0	0	0	0	0	0	200	300	0	0	0	0	0	0	0	200	903	0	0	0	0	0	0	0	603	903	0
9387	3	0	0	0	0	0	0	200	300	0	0	0	0	0	0	0	200	903	0	0	0	0	0	0	0	603	903	0
9387	4	0	0	0	0	0	0	200	300	0	0	0	0	0	0	0	200	903	0	0	0	0	0	0	0	603	903	0
9387	5	0	0	0	0	0	0	200	300	0	0	0	0	0	0	0	200	903	0	0	0	0	0	0	0	603	903	0
9387	6	0	0	0	0	0	0	200	300	0	0	0	0	0	0	0	200	903	0	0	0	0	0	0	0	603	903	0
9387	7	0	0	0	0	0	0	200	300	0	0	0	0	0	0	0	200	903	0	0	0	0	0	0	0	603	903	0
9387	8	0	0	0	0	0	0	200	300	0	0	0	0	0	0	0	200	903	0	0	0	0	0	0	0	603	903	0
9387	9	0	0	0	0	0	0	200	300	0	0	0	0	0	0	0	200	903	0	0	0	0	0	0	0	603	903	0
9388	0	0	0	0	0	0	0	200	300	0	0	0	0	0	0	0	200	903	0	0	0	0	0	0	0	603	903	0
9388	1	0	0	0	0	0	0	200	300	0	0	0	0	0	0	0	200	903	0	0	0	0	0	0	0	603	903	0
9388	2	0	0	0	0	0	0	200	300	0	0	0	0	0	0	0	200	903	0	0	0	0	0	0	0	603	903	0
9388	3	0	0	0	0	0	0	200	300	0	0	0	0	0	0	0	200	903	0	0	0	0	0	0	0	603	903	0
9388	4	0	0	0	0	0	0	200	300	0	0	0	0	0	0	0	200	903	0	0	0	0	0	0	0	603	903	0
9388	5	0	0	0	0	0	0	200	300	0	0	0	0	0	0	0	200	903	0	0	0	0	0	0	0	603	903	0
9388	6	0	0	0	0	0	0	200	300	0	0	0	0	0	0	0	200	903	0	0	0	0	0	0	0	603	903	0
9388	7	0	0	0	0	0	0	200	300	0	0	0	0	0	0	0	200	903	0	0	0	0	0	0	0	603	903	0
9388	8	0	0	0	0	0	0	200	300	0	0	0	0	0	0	0	200	903	0	0	0	0	0	0	0	603	903	0
9388	9	0	0	0	0	0	0	200	300	0	0	0	0	0	0	0	200	903	0	0	0	0	0	0	0	603	903	0
9389	0	0	0	0	0	0	0	200	300	0	0	0	0	0	0	0	200	903	0	0	0	0	0	0	0	603	903	0
9389	1	0	0	0	0	0	0	200	300	0	0	0	0	0	0	0	200	903	0	0	0	0	0	0	0	603	903	0
9389	2	0	0	0	0	0	0	200	300	0	0	0	0	0	0	0	200	903	0	0	0	0	0	0	0	603	903	0
9389	3	0	0	0	0	0	0	200	300	0	0	0	0	0	0	0	200	903	0	0	0	0	0	0	0	603	903	0
9389	4	0	0	0	0	0	0	200	300	0	0	0	0	0	0	0	200	903	0	0	0	0	0	0	0	603	903	0
9389	5	0	0	0	0	0	0	200	300	0	0	0	0	0	0	0	200	903	0	0	0	0	0	0	0	603	903	0
9389	6	0	0	0	0	0	0	200	300	0	0	0	0	0	0	0	200	903	0	0	0	0	0	0	0	603	903	0
9389	7	0	0	0	0	0	0	200	300	0	0	0	0	0	0	0	200	903	0	0	0	0	0	0	0	603	903	0
9389	8	0	0	0	0	0	0	200	300	0	0	0	0	0	0	0	200	903	0	0	0	0	0	0	0	603	903	0
9389	9	0	0	0	0	0	0	200	300	0	0	0	0	0	0	0	200	903	0	0	0	0	0	0	0	603	903	0
9390	0	0	0	0	0	0	0	200	300	0	0	0	0	0	0	0	200	903	0	0	0	0	0	0	0	603	903	0
9390	1	0	0	0	0	0	0	200	300	0	0	0	0	0	0	0	200	903	0	0	0	0	0	0	0	603	903	0
9390	2	0	0	0	0	0	0	200	300	0	0	0	0	0	0	0	200	903	0	0	0	0	0	0	0	603	903	0
9390	3	0	0	0	0	0	0	200	300	0	0	0	0	0	0	0	200	903	0	0	0	0	0	0	0	603	903	0
9390	4	0	0	0	0	0	0	200	300	0	0	0	0	0	0	0	200	903	0	0	0	0	0	0	0	603	903	0
9390	5	0	0	0	0	0	0	200	300	0	0	0	0	0	0	0	200	903	0	0	0	0	0	0	0	603	903	0
9390	6	0	0	0	0	0	0	200	300	0	0	0	0	0	0	0	200	903	0	0	0	0	0	0	0	603	903	0
9390	7	0	0	0	0	0	0	200	300	0	0	0	0	0	0	0	200	903	0	0	0	0	0	0	0	603	903	0
9390	8	0	0	0	0	0	0	200	300	0	0	0	0	0	0	0	200	903	0	0	0	0	0	0	0	603	903	0
9390	9	0	0	0	0	0	0	200	300	0	0	0	0	0	0	0	200	903	0	0	0	0	0	0	0	603	903	0
9391	0	0	0	0	0	0	0	200	300	0	0	0	0	0	0	0	200	903	0	0	0	0	0	0	0	603	903	0
9391	1	0	0	0	0	0	0	200	300	0	0	0	0	0	0	0	200	903	0	0	0	0	0	0	0	603	903	0
9391	2	0	0	0	0	0	0	200	300	0	0	0	0	0	0	0	200	903	0	0	0	0	0	0	0	603	903	0
9391	3	0	0	0	0	0	0	200	300	0	0	0	0	0	0	0	200	903	0	0	0	0	0	0	0	603	903	0
9391	4	0	0	0	0	0	0	200	300	0	0	0	0	0	0	0	200	903	0	0	0	0	0	0	0	603	903	0
9391	5	0	0	0	0	0	0	200	300	0	0	0	0	0	0	0	200	903	0	0	0	0	0	0	0	603	903	0
9391	6	0	0	0	0	0	0	200	300	0	0	0	0	0	0	0	200	903	0	0	0	0	0	0	0	603	903	0
9391	7	0	0	0	0	0	0	200	300	0	0	0	0	0	0	0	200	903	0	0	0	0	0	0	0	603	903	0
9391	8	0	0	0	0	0	0	200	300	0	0	0	0	0	0	0	200	903	0	0	0	0	0	0	0	603	903	0
9391	9	0	0	0	0	0	0	200	300	0	0	0	0	0	0	0	200	903	0	0	0	0	0	0	0	603	903	0
9392	0	0	0	0	0	0	0	200	300	0	0	0	0	0	0	0	200	903	0	0	0	0	0	0	0	603	903	0
9392	1	0	0	0	0	0	0	200	300	0	0	0	0	0	0	0	200	903	0	0	0	0	0	0	0	603	903	0
9392	2	0	0	0	0	0	0	200	300	0	0	0	0	0	0	0	200	903	0	0	0	0	0	0	0	603	903	0
9392	3	0	0	0	0	0	0	200	300	0	0	0	0	0	0	0	200	903	0	0	0	0	0	0	0	603	903	0
9392	4	0	0	0	0	0	0	200	300	0	0	0	0	0	0	0	200	903	0	0	0	0	0	0	0	603	903	0
9392	5	0	0	0	0	0	0	200	300	0	0	0	0	0	0	0	200	903	0	0	0	0	0	0	0	603	903	0
9392	6	0	0	0	0	0	0	200	300	0	0	0	0	0	0	0	200	903	0	0	0	0	0	0	0	603	903	0
9392	7	0	0	0	0	0	0	200	300	0	0	0	0	0	0	0	200	903	0	0	0	0	0	0	0	603	903	0
9392	8	0	0	0	0	0	0	200	300	0	0	0	0	0	0	0	200	903	0	0	0	0	0	0	0	603	903	0
9392	9	0	0	0	0	0	0	200	300	0	0	0	0	0	0	0	200	903	0	0	0	0	0	0	0	603	903	0
9393	0	0	0	0	0	0	0	200	300	0	0	0	0	0	0	0	200	903	0	0	0	0	0	0	0	603	903	0
9393	1	0	0	0	0	0	0	200	300	0	0	0	0	0	0	0	200	903	0	0	0	0	0	0	0	603	903	0
9393	2	0	0	0	0	0	0	200	300	0	0	0	0	0	0	0	200	903	0	0	0	0	0	0	0	603	903	0
9393	3	0	0	0	0	0	0	200	300	0	0	0	0	0	0	0	200	903	0	0	0	0	0	0	0	603	903	0
9393	4	0	0	0	0	0	0	200	300	0	0	0	0	0	0	0	200	903	0	0	0	0	0	0	0	603	903	0
9393	5	0	0	0	0	0	0	200	300	0	0	0	0	0	0	0	200	903	0	0	0	0	0	0	0	603	903	0
9393	6	0	0	0	0	0	0	200	300	0	0	0	0	0	0	0	200	903	0	0	0	0	0	0	0	603	903	0
9393	7	0	0	0	0	0	0	200	300	0	0	0	0	0	0	0	200	903	0	0	0	0	0	0	0	603	903	0
9393	8	0	0	0	0	0	0	200	300	0	0	0	0	0	0	0	200	903	0	0	0	0	0	0	0	603	903	0
9393	9	0	0	0	0	0	0	200	300	0	0	0	0	0	0	0	200	903	0	0	0	0	0	0	0	603	903	0
9394	0	0	0	0	0	0	0	200	300	0	0	0	0	0	0	0	200	903	0	0	0	0	0	0	0	603	903	0
9394	1	0	0	0	0	0	0	200	300	0	0	0	0	0	0	0	200	903	0	0	0	0	0	0	0	603	903	0
9394	2	0	0	0	0	0	0	200	300	0	0	0	0	0	0	0	200	903	0	0	0	0	0	0	0	603	903	0
9394	3	0	0	0	0	0	0	200	300	0	0	0	0	0	0	0	200	903	0	0	0	0	0	0	0	603	903	0
9394	4	0	0	0	0	0	0	200	300	0	0	0	0	0	0	0	200	903	0	0	0	0	0	0	0	603	903	0
9394	5	0	0	0	0	0	0	200	300	0	0	0	0	0	0	0	200	903	0	0	0	0	0	0	0	603	903	0
9394	6	0	0	0	0	0	0	200	300	0	0	0	0	0	0	0	200	903	0	0	0	0	0	0	0	603	903	0
9394	7	0	0	0	0	0	0	200	300	0	0	0	0	0	0	0	200	903	0	0	0	0	0	0	0	603	903	0
9394	8	0	0	0	0	0	0	200	300	0	0	0	0	0	0	0	200	903	0	0	0	0	0	0	0	603	903	0
9394	9	0	0	0	0	0	0	200	300	0	0	0	0	0	0	0	200	903	0	0	0	0	0	0	0	603	903	0
9395	0	0	0	0	0	0	0	200	300	0	0	0	0	0	0	0	200	903	0	0	0	0	0	0	0	603	903	0
9395	1	0	0	0	0	0	0	200	300	0	0	0	0	0	0	0	200	903	0	0	0	0	0	0	0	603	903	0
9395	2	0	0	0	0	0	0	200	300	0	0	0	0	0	0	0	200	903	0	0	0	0	0	0	0	603	903	0
9395	3	0	0	0	0	0	0	200	300	0	0	0	0	0	0	0	200	903	0	0	0	0	0	0	0	603	903	0
9395	4	0	0	0	0	0	0	200	300	0	0	0	0	0	0	0	200	903	0	0	0	0	0	0	0	603	903	0
9395	5	0	0	0	0	0	0	200	300	0	0	0	0	0	0	0	200	903	0	0	0	0	0	0	0	603	903	0
9395	6	0	0	0	0	0	0	200	300	0	0	0	0	0	0	0	200	903	0	0	0	0	0	0	0	603	903	0
9395	7	0	0	0	0	0	0	200	300	0	0	0	0	0	0	0	200	903	0	0	0	0	0	0	0	603	903	0
9395	8	0	0	0	0	0	0	200	300	0	0	0	0	0	0	0	200	903	0	0	0	0	0	0	0	603	903	0
9395	9	0	0	0	0	0	0	200	300	0	0	0	0	0	0	0	200	903	0	0	0	0	0	0	0	603	903	0
9396	0	0	0	0	0	0	0	200	300	0	0	0	0	0	0	0	200	903	0	0	0	0	0	0	0	603	903	0
9396	1	0	0	0	0	0	0	200	300	0	0	0	0	0	0	0	200	903	0	0	0	0	0	0	0	603	903	0
9396	2	0	0	0	0	0	0	200	300	0	0	0	0	0	0	0	200	903	0	0	0	0	0	0	0	603	903	0
9396	3	0	0	0	0	0	0	200	300	0	0	0	0	0	0	0	200	903	0	0	0	0	0	0	0	603	903	0
9396	4	0	0	0	0	0	0	200	300	0	0	0	0	0	0	0	200	903	0	0	0	0	0	0	0	603	903	0
9396	5	0	0	0	0	0	0	200	300	0	0	0	0	0	0	0	200	903	0	0	0	0	0	0	0	603	903	0
9396	6	0	0	0	0	0	0	200	300	0	0	0	0	0	0	0	200	903	0	0	0	0	0	0	0	603	903	0
9396	7	0	0	0	0	0	0	200	300	0	0	0	0	0	0	0	200	903	0	0	0	0	0	0	0	603	903	0
9396	8	0	0	0	0	0	0	200	300	0	0	0	0	0	0	0	200	903	0	0	0	0	0	0	0	603	903	0
9396	9	0	0	0	0	0	0	200	300	0	0	0	0	0	0	0	200	903	0	0	0	0	0	0	0	603	903	0
9397	0	0	0	0	0	0	0	200	300	0	0	0	0	0	0	0	200	903	0	0	0	0	0	0	0	603	903	0
9397	1	0	0	0	0	0	0	200	300	0	0	0	0	0	0	0	200	903	0	0	0	0	0	0	0	603	903	0
9397	2	0	0	0	0	0	0	200	300	0	0	0	0	0	0	0	200	903	0	0	0	0	0	0	0	603	903	0
9397	3	0	0	0	0	0	0	200	300	0	0	0	0	0	0	0	200	903	0	0	0	0	0	0	0	603	903	0
9397	4	0	0	0	0	0	0	200	300	0	0	0	0	0	0	0	200	903	0	0	0	0	0	0	0	603	903	0
9397	5	0	0	0	0	0	0	200	300	0	0	0	0	0	0	0	200	903	0	0	0	0	0	0	0	603	903	0
9397	6	0	0	0	0	0	0	200	300	0	0	0	0	0	0	0	200	903	0	0	0	0	0	0	0	603	903	0
9397	7	0	0	0	0	0	0	200	300	0	0	0	0	0	0	0	200	903	0	0	0	0	0	0	0	603	903	0
9397	8	0	0	0	0	0	0	200	300	0	0	0	0	0	0	0	200	903	0	0	0	0	0	0	0	603	903	0
9397	9	0	0	0	0	0	0	200	300	0	0	0	0	0	0	0	200	903	0	0	0	0	0	0	0	603	903	0
9398	0	0	0	0	0	0	0	200	300	0	0	0	0	0	0	0	200	903	0	0	0	0	0	0	0	603	903	0
9398	1	0	0	0	0	0	0	200	300	0	0	0	0	0	0	0	200	903	0	0	0	0	0	0	0	603	903	0
9398	2	0	0	0	0	0	0	200	300	0	0	0	0	0	0	0	200	903	0	0	0	0	0	0	0	603	903	0
9398	3	0	0	0	0	0	0	200	300	0	0	0	0	0	0	0	200	903	0	0	0	0	0	0	0	603	903	0
9398	4	0	0	0	0	0	0	200	300	0	0	0	0	0	0	0	200	903	0	0	0	0	0	0	0	603	903	0
9398	5	0	0	0	0	0	0	200	300	0	0	0	0	0	0	0	200	903	0	0	0	0	0	0	0	603	903	0
9398	6	0	0	0	0	0	0	200	300	0	0	0	0	0	0	0	200	903	0	0	0	0	0	0	0	603	903	0
9398	7	0	0	0	0	0	0	200	300	0	0	0	0	0	0	0	200	903	0	0	0	0	0	0	0	603	903	0
9398	8	0	0	0	0	0	0	200	300	0	0	0	0	0	0	0	200	903	0	0	0	0	0	0	0	603	903	0
9398	9	0	0	0	0	0	0	200	300	0	0	0	0	0	0	0	200	903	0	0	0	0	0	0	0	603	903	0
9399	0	0	0	0	0	0	0	200	300	0	0	0	0	0	0	0	200	903	0	0	0	0	0	0	0	603	903	0
9399	1	0	0	0	0	0	0	200	300	0	0	0	0	0	0	0	200	903	0	0	0	0	0	0	0	603	903	0
9399	2	0	0	0	0	0	0	200	300	0	0	0	0	0	0	0	200	903	0	0	0	0	0	0	0	603	903	0
9399	3	0	0	0	0	0	0	200	300	0	0	0	0	0	0	0	200	903	0	0	0	0	0	0	0	603	903	0
9399	4	0	0	0	0	0	0	200	300	0	0	0	0	0	0	0	200	903	0	0	0	0	0	0	0	603	903	0
9399	5	0	0	0	0	0	0	200	300	0	0	0	0	0	0	0	200	903	0	0	0	0	0	0	0	603	903	0
9399	6	0	0	0	0	0	0	200	300	0	0	0	0	0	0	0	200	903	0	0	0	0	0	0	0	603	903	0
9399	7	0	0	0	0	0	0	200	300	0	0	0	0	0	0	0	200	903	0	0	0	0	0	0	0	603	903	0
9399	8	0	0	0	0	0	0	200	300	0	0	0	0	0	0	0	200	903	0	0	0	0	0	0	0	603	903	0
9399	9	0	0	0	0	0	0	200	300	0	0	0	0	0	0	0	200	903	0	0	0	0	0	0	0	603	903	0
9400	0	0	0	0	0	0	0	200	300	0	0	0	0	0	0	0	200	903	0	0	0	0	0	0	0	603	903	0
9400	1	0	0	0	0	0	0	200	300	0	0	0	0	0	0	0	200	903	0	0	0	0	0	0	0	603	903	0
9400	2	0	0	0	0	0	0	200	300	0	0	0	0	0	0	0	200	903	0	0	0	0	0	0	0	603	903	0
9400	3	0	0	0	0	0	0	200	300	0	0	0	0	0	0	0	200	903	0	0	0	0	0	0	0	603	903	0
9400	4	0	0	0	0	0	0	200	300	0	0	0	0	0	0	0	200	903	0	0	0	0	0	0	0	603	903	0
9400	5	0	0	0	0	0	0	200	300	0	0	0	0	0	0	0	200	903	0	0	0	0	0	0	0	603	903	0
9400	6	0	0	0	0	0	0	200	300	0	0	0	0	0	0	0	200	903	0	0	0	0	0	0	0	603	903	0
9400	7	0	0	0	0	0	0	200	300	0	0	0	0	0	0	0	200	903	0	0	0	0	0	0	0	603	903	0
9400	8	0	0	0	0	0	0	200	300	0	0	0	0	0	0	0	200	903	0	0	0	0	0	0	0	603	903	0
9400	9	0	0	0	0	0	0	200	300	0	0	0	0	0	0	0	200	903	0	0	0	0	0	0	0	603	903	0
9401	0	0	0	0	0	0	0	200	300	0	0	0	0	0	0	0	200	903	0	0	0	0	0	0	0	603	903	0
9401	1	0	0	0	0	0	0	200	300	0	0	0	0	0	0	0	200	903	0	0	0	0	0	0	0	603	903	0
9401	2	0	0	0	0	0	0	200	300	0	0	0	0	0	0	0	200	903	0	0	0	0	0	0	0	603	903	0
9401	3	0	0	0	0	0	0	200	300	0	0	0	0	0	0	0	200	903	0	0	0	0	0	0	0	603	903	0
9401	4	0	0	0	0	0	0	200	300	0	0	0	0	0	0	0	200	903	0	0	0	0	0	0	0	603	903	0
9401	5	0	0	0	0	0	0	200	300	0	0	0	0	0	0	0	200	903	0	0	0	0	0	0	0	603	903	0
9401	6	0	0	0	0	0	0	200	300	0	0	0	0	0	0	0	200	903	0	0	0	0	0	0	0	603	903	0
9401	7	0	0	0	0	0	0	200	300	0	0	0	0	0	0	0	200	903	0	0	0	0	0	0	0	603	903	0
9401	8	0	0	0	0	0	0	200	300	0	0	0	0	0	0	0	200	903	0	0	0	0	0	0	0	603	903	0
9401	9	0	0	0	0	0	0	200	300	0	0	0	0	0	0	0	200	903	0	0	0	0	0	0	0	603	903	0
9402	0	0	0	0	0	0	0	200	300	0	0	0	0	0	0	0	200	903	0	0	0	0	0	0	0	603	903	0
9402	1	0	0	0	0	0	0	200	300	0	0	0	0	0	0	0	200	903	0	0	0	0	0	0	0	603	903	0
9402	2	0	0	0	0	0	0	200	300	0	0	0	0	0	0	0	200	903	0	0	0	0	0	0	0	603	903	0
9402	3	0	0	0	0	0	0	200	300	0	0	0	0	0	0	0	200	903	0	0	0	0	0	0	0	603	903	0
9402	4	0	0	0	0	0	0	200	300	0	0	0	0	0	0	0	200	903	0	0	0	0	0	0	0	603	903	0
9402	5	0	0	0	0	0	0	200	300	0	0	0	0	0	0	0	200	903	0	0	0	0	0	0	0	603	903	0
9402	6	0	0	0	0	0	0	200	300	0	0	0	0	0	0	0	200	903	0	0	0	0	0	0	0	603	903	0
9402	7	0	0	0	0	0	0	200	300	0	0	0	0	0	0	0	200	903	0	0	0	0	0	0	0	603	903	0
9402	8	0	0	0	0	0	0	200	300	0	0	0	0	0	0	0	200	903	0	0	0	0	0	0	0	603	903	0
9402	9	0	0	0	0	0	0	200	300	0	0	0	0	0	0	0	200	903	0	0	0	0	0	0	0	603	903	0
9403	0	0	0	0	0	0	0	200	300	0	0	0	0	0	0	0	200	903	0	0	0	0	0	0	0	603	903	0
9403	1	0	0	0	0	0	0	200	300	0	0	0	0	0	0	0	200	903	0	0	0	0	0	0	0	603	903	0
9403	2	0	0	0	0	0	0	200	300	0	0	0	0	0	0	0	200	903	0	0	0	0	0	0	0	603	903	0
9403	3	0	0	0	0	0	0	200	300	0	0	0	0	0	0	0	200	903	0	0	0	0	0	0	0	603	903	0
9403	4	0	0	0	0	0	0	200	300	0	0	0	0	0	0	0	200	903	0	0	0	0	0	0	0	603	903	0
9403	5	0	0	0	0	0	0	200	300	0	0	0	0	0	0	0	200	903	0	0	0	0	0	0	0	603	903	0
9403	6	0	0	0	0	0	0	200	300	0	0	0	0	0	0	0	200	903	0	0	0	0	0	0	0	603	903	0
9403	7	0	0	0	0	0	0	200	300	0	0	0	0	0	0	0	200	903	0	0	0	0	0	0	0	603	903	0
9403	8	0	0	0	0	0	0	200	300	0	0	0	0	0	0	0	200	903	0	0	0	0	0	0	0	603	903	0
9403	9	0	0	0	0	0	0	200	300	0	0	0	0	0	0	0	200	903	0	0	0	0	0	0	0	603	903	0
9404	0	0	0	0	0	0	0	200	300	0	0	0	0	0	0	0	200	903	0	0	0	0	0	0	0	603	903	0
9404	1	0	0	0	0	0	0	200	300	0	0	0	0	0	0	0	200	903	0	0	0	0	0	0	0	603	903	0
9404	2	0	0	0	0	0	0	200	300	0	0	0	0	0	0	0	200	903	0	0	0	0	0	0	0	603	903	0
9404	3	0	0	0	0	0	0	200	300	0	0	0	0	0	0	0	200	903	0	0	0	0	0	0	0	603	903	0
9404	4	0	0	0	0	0	0	200	300	0	0	0	0	0	0	0	200	903	0	0	0	0	0	0	0	603	903	0
9404	5	0	0	0	0	0	0	200	300	0	0	0	0	0	0	0	200	903	0	0	0	0	0	0	0	603	903	0
9404	6	0	0	0	0	0	0	200	300	0	0	0	0	0	0	0	200	903	0	0	0	0	0	0	0	603	903	0
9404	7	0	0	0	0	0	0	200	300	0	0	0	0	0	0	0	200	903	0	0	0	0	0	0	0	603	903	0
9404	8	0	0	0	0	0	0	200	300	0	0	0	0	0	0	0	200	903	0	0	0	0	0	0	0	603	903	0
9404	9	0	0	0	0	0	0	200	300	0	0	0	0	0	0	0	200	903	0	0	0	0	0	0	0	603	903	0
9405	0	0	0	0	0	0	0	200	300	0	0	0	0	0	0	0	200	903	0	0	0	0	0	0	0	603	903	0
9405	1	0	0	0	0	0	0	200	300	0	0	0	0	0	0	0	200	903	0	0	0	0	0	0	0	603	903	0
9405	2	0	0	0	0	0	0	200	300	0	0	0	0	0	0	0	200	903	0	0	0	0	0	0	0	603	903	0
9405	3	0	0	0	0	0	0	200	300	0	0	0	0	0	0	0	200	903	0	0	0	0	0	0	0	603	903	0
9405	4	0	0	0	0	0	0	200	300	0	0	0	0	0	0	0	200	903	0	0	0	0	0	0	0	603	903	0
9405	5	0	0	0	0	0	0	200	300	0	0	0	0	0	0	0	200	903	0	0	0	0	0	0	0	603	903	0
9405	6	0	0	0	0	0	0	200	300	0	0	0	0	0	0	0	200	903	0	0	0	0	0	0	0	603	903	0
9405	7	0	0	0	0	0	0	200	300	0	0	0	0	0	0	0	200	903	0	0	0	0	0	0	0	603	903	0
9405	8	0	0	0	0	0	0	200	300	0	0	0	0	0	0	0	200	903	0	0	0	0	0	0	0	603	903	0
9405	9	0	0	0	0	0	0	200	300	0	0	0	0	0	0	0	200	903	0	0	0	0	0	0	0	603	903	0
9406	0	0	0	0	0	0	0	200	300	0	0	0	0	0	0	0	200	903	0	0	0	0	0	0	0	603	903	0
9406	1	0	0	0	0	0	0	200	300	0	0	0	0	0	0	0	200	903	0	0	0	0	0	0	0	603	903	0
9406	2	0	0	0	0	0	0	200	300	0	0	0	0	0	0	0	200	903	0	0	0	0	0	0	0	603	903	0
9406	3	0	0	0	0	0	0	200	300	0	0	0	0	0	0	0	200	903	0	0	0	0	0	0	0	603	903	0
9406	4	0	0	0	0	0	0	200	300	0	0	0	0	0	0	0	200	903	0	0	0	0	0	0	0	603	903	0
9406	5	0	0	0	0	0	0	200	300	0	0	0	0	0	0	0	200	903	0	0	0	0	0	0	0	603	903	0
9406	6	0	0	0	0	0	0	200	300	0	0	0	0	0	0	0	200	903	0	0	0	0	0	0	0	603	903	0
9406	7	0	0	0	0	0	0	200	300	0	0	0	0	0	0	0	200	903	0	0	0	0	0	0	0	603	903	0
9406	8	0	0	0	0	0	0	200	300	0	0	0	0	0	0	0	200	903	0	0	0	0	0	0	0	603	903	0
9406	9	0	0	0	0	0	0	200	300	0	0	0	0	0	0	0	200	903	0	0	0	0	0	0	0	603	903	0
9407	0	0	0	0	0	0	0	200	300	0	0	0	0	0	0	0	200	903	0	0	0	0	0	0	0	603	903	0
9407	1	0	0	0	0	0	0	200	300	0	0	0	0	0	0	0	200	903	0	0	0	0	0	0	0	603	903	0
9407	2	0	0	0	0	0	0	200	300	0	0	0	0	0	0	0	200	903	0	0	0	0	0	0	0	603	903	0
9407	3	0	0	0	0	0	0	200	300	0	0	0	0	0	0	0	200	903	0	0	0	0	0	0	0	603	903	0
9407	4	0	0	0	0	0	0	200	300	0	0	0	0	0	0	0	200	903	0	0	0	0	0	0	0	603	903	0
9407	5	0	0	0	0	0	0	200	300	0	0	0	0	0	0	0	200	903	0	0	0	0	0	0	0	603	903	0
9407	6	0	0	0	0	0	0	200	300	0	0	0	0	0	0	0	200	903	0	0	0	0	0	0	0	603	903	0
9407	7	0	0	0	0	0	0	200	300	0	0	0	0	0	0	0	200	903	0	0	0	0	0	0	0	603	903	0
9407	8	0	0	0	0	0	0	200	300	0	0	0	0	0	0	0	200	903	0	0	0	0	0	0	0	603	903	0
9407	9	0	0	0	0	0	0	200	300	0	0	0	0	0	0	0	200	903	0	0	0	0	0	0	0	603	903	0
9408	0	0	0	0	0	0	0	200	300	0	0	0	0	0	0	0	200	903	0	0	0	0	0	0	0	603	903	0
9408	1	0	0	0	0	0	0	200	300	0	0	0	0	0	0	0	200	903	0	0	0	0	0	0	0	603	903	0
9408	2	0	0	0	0	0	0	200	300	0	0	0	0	0	0	0	200	903	0	0	0	0	0	0	0	603	903	0
9408	3	0	0	0	0	0	0	200	300	0	0	0	0	0	0	0	200	903	0	0	0	0	0	0	0	603	903	0
9408	4	0	0	0	0	0	0	200	300	0	0	0	0	0	0	0	200	903	0	0	0	0	0	0	0	603	903	0
9408	5	0	0	0	0	0	0	200	300	0	0	0	0	0	0	0	200	903	0	0	0	0	0	0	0	603	903	0
9408	6	0	0	0	0	0	0	200	300	0	0	0	0	0	0	0	200	903	0	0	0	0	0	0	0	603	903	0
9408	7	0	0	0	0	0	0	200	300	0	0	0	0	0	0	0	200	903	0	0	0	0	0	0	0	603	903	0
9408	8	0	0	0	0	0	0	200	300	0	0	0	0	0	0	0	200	903	0	0	0	0	0	0	0	603	903	0
9408	9	0	0	0	0	0	0	200	300	0	0	0	0	0	0	0	200	903	0	0	0	0	0	0	0	603	903	0
9409	0	0	0	0	0	0	0	200	300	0	0	0	0	0	0	0	200	903	0	0	0	0	0	0	0	603	903	0
9409	1	0	0	0	0	0	0	200	300	0	0	0	0	0	0	0	200	903	0	0	0	0	0	0	0	603	903	0
9409	2	0	0	0	0	0	0	200	300	0	0	0	0	0	0	0	200	903	0	0	0	0	0	0	0	603	903	0
9409	3	0	0	0	0	0	0	200	300	0	0	0	0	0	0	0	200	903	0	0	0	0	0	0	0	603	903	0
9409	4	0	0	0	0	0	0	200	300	0	0	0	0	0	0	0	200	903	0	0	0	0	0	0	0	603	903	0
9409	5	0	0	0	0	0	0	200	300	0	0	0	0	0	0	0	200	903	0	0	0	0	0	0	0	603	903	0
9409	6	0	0	0	0	0	0	200	300	0	0	0	0	0	0	0	200	903	0	0	0	0	0	0	0	603	903	0
9409	7	0	0	0	0	0	0	200	300	0	0	0	0	0	0	0	200	903	0	0	0	0	0	0	0	603	903	0
9409	8	0	0	0	0	0	0	200	300	0	0	0	0	0	0	0	200	903	0	0	0	0	0	0	0	603	903	0
9409	9	0	0	0	0	0	0	200	300	0	0	0	0	0	0	0	200	903	0	0	0	0	0	0	0	603	903	0
9410	0	0	0	0	0	0	0	200	300	0	0	0	0	0	0	0	200	903	0	0	0	0	0	0	0	603	903	0
9410	1	0	0	0	0	0	0	200	300	0	0	0	0	0	0	0	200	903	0	0	0	0	0	0	0	603	903	0
9410	2	0	0	0	0	0	0	200	300	0	0	0	0	0	0	0	200	903	0	0	0	0	0	0	0	603	903	0
9410	3	0	0	0	0	0	0	200	300	0	0	0	0	0	0	0	200	903	0	0	0	0	0	0	0	603	903	0
9410	4	0	0	0	0	0	0	200	300	0	0	0	0	0	0	0	200	903	0	0	0	0	0	0	0	603	903	0
9410	5	0	0	0	0	0	0	200	300	0	0	0	0	0	0	0	200	903	0	0	0	0	0	0	0	603	903	0
9410	6	0	0	0	0	0	0	200	300	0	0	0	0	0	0	0	200	903	0	0	0	0	0	0	0	603	903	0
9410	7	0	0	0	0	0	0	200	300	0	0	0	0	0	0	0	200	903	0	0	0	0	0	0	0	603	903	0
9410	8	0	0	0	0	0	0	200	300	0	0	0	0	0	0	0	200	903	0	0	0	0	0	0	0	603	903	0
9410	9	0	0	0	0	0	0	200	300	0	0	0	0	0	0	0	200	903	0	0	0	0	0	0	0	603	903	0
9411	0	0	0	0	0	0	0	200	300	0	0	0	0	0	0	0	200	903	0	0	0	0	0	0	0	603	903	0
9411	1	0	0	0	0	0	0	200	300	0	0	0	0	0	0	0	200	903	0	0	0	0	0	0	0	603	903	0
9411	2	0	0	0	0	0	0	200	300	0	0	0	0	0	0	0	200	903	0	0	0	0	0	0	0	603	903	0
9411	3	0	0	0	0	0	0	200	300	0	0	0	0	0	0	0	200	903	0	0	0	0	0	0	0	603	903	0
9411	4	0	0	0	0	0	0	200	300	0	0	0	0	0	0	0	200	903	0	0	0	0	0	0	0	603	903	0
9411	5	0	0	0	0	0	0	200	300	0	0	0	0	0	0	0	200	903	0	0	0	0	0	0	0	603	903	0
9411	6	0	0	0	0	0	0	200	300	0	0	0	0	0	0	0	200	903	0	0	0	0	0	0	0	603	903	0
9411	7	0	0	0	0	0	0	200	300	0	0	0	0	0	0	0	200	903	0	0	0	0	0	0	0	603	903	0
9411	8	0	0	0	0	0	0	200	300	0	0	0	0	0	0	0	200	903	0	0	0	0	0	0	0	603	903	0
9411	9	0	0	0	0	0	0	200	300	0	0	0	0	0	0	0	200	903	0	0	0	0	0	0	0	603	903	0
9412	0	0	0	0	0	0	0	200	300	0	0	0	0	0	0	0	200	903	0	0	0	0	0	0	0	603	903	0
9412	1	0	0	0	0	0	0	200	300	0	0	0	0	0	0	0	200	903	0	0	0	0	0	0	0	603	903	0
9412	2	0	0	0	0	0	0	200	300	0	0	0	0	0	0	0	200	903	0	0	0	0	0	0	0	603	903	0
9412	3	0	0	0	0	0	0	200	300	0	0	0	0	0	0	0	200	903	0	0	0	0	0	0	0	603	903	0
9412	4	0	0	0	0	0	0	200	300	0	0	0	0	0	0	0	200	903	0	0	0	0	0	0	0	603	903	0
9412	5	0	0	0	0	0	0	200	300	0	0	0	0	0	0	0	200	903	0	0	0	0	0	0	0	603	903	0
9412	6	0	0	0	0	0	0	200	300	0	0	0	0	0	0	0	200	903	0	0	0	0	0	0	0	603	903	0
9412	7	0	0	0	0	0	0	200	300	0	0	0	0	0	0	0	200	903	0	0	0	0	0	0	0	603	903	0
9412	8	0	0	0	0	0	0	200	300	0	0	0	0	0	0	0	200	903	0	0	0	0	0	0	0	603	903	0
9412	9	0	0	0	0	0	0	200	300	0	0	0	0	0	0	0	200	903	0	0	0	0	0	0	0	603	903	0
9413	0	0	0	0	0	0	0	200	300	0	0	0	0	0	0	0	200	903	0	0	0	0	0	0	0	603	903	0
9413	1	0	0	0	0	0	0	200	300	0	0	0	0	0	0	0	200	903	0	0	0	0	0	0	0	603	903	0
9413	2	0	0	0	0	0	0	200	300	0	0	0	0	0	0	0	200	903	0	0	0	0	0	0	0	603	903	0
9413	3	0	0	0	0	0	0	200	300	0	0	0	0	0	0	0	200	903	0	0	0	0	0	0	0	603	903	0
9413	4	0	0	0	0	0	0	200	300	0	0	0	0	0	0	0	200	903	0	0	0	0	0	0	0	603	903	0
9413	5	0	0	0	0	0	0	200	300	0	0	0	0	0	0	0	200	903	0	0	0	0	0	0	0	603	903	0
9413	6	0	0	0	0	0	0	200	300	0	0	0	0	0	0	0	200	903	0	0	0	0	0	0	0	603	903	0
9413	7	0	0	0	0	0	0	200	300	0	0	0	0	0	0	0	200	903	0	0	0	0	0	0	0	603	903	0
9413	8	0	0	0	0	0	0	200	300	0	0	0	0	0	0	0	200	903	0	0	0	0	0	0	0	603	903	0
9413	9	0	0	0	0	0	0	200	300	0	0	0	0	0	0	0	200	903	0	0	0	0	0	0	0	603	903	0
9414	0	0	0	0	0	0	0	200	300	0	0	0	0	0	0	0	200	903	0	0	0	0	0	0	0	603	903	0
9414	1	0	0	0	0	0	0	200	300	0	0	0	0	0	0	0	200	903	0	0	0	0	0	0	0	603	903	0
9414	2	0	0	0	0	0	0	200	300	0	0	0	0	0	0	0	200	903	0	0	0	0	0	0	0	603	903	0
9414	3	0	0	0	0	0	0	200	300	0	0	0	0	0	0	0	200	903	0	0	0	0	0	0	0	603	903	0
9414	4	0	0	0	0	0	0	200	300	0	0	0	0	0	0	0	200	903	0	0	0	0	0	0	0	603	903	0
9414	5	0	0	0	0	0	0	200	300	0	0	0	0	0	0	0	200	903	0	0	0	0	0	0	0	603	903	0
9414	6	0	0	0	0	0	0	200	300	0	0	0	0	0	0	0	200	903	0	0	0	0	0	0	0	603	903	0
9414	7	0	0	0	0	0	0	200	300	0	0	0	0	0	0	0	200	903	0	0	0	0	0	0	0	603	903	0
9414	8	0	0	0	0	0	0	200	300	0	0	0	0	0	0	0	200	903	0	0	0	0	0	0	0	603	903	0
9414	9	0	0	0	0	0	0	200	300	0	0	0	0	0	0	0	200	903	0	0	0	0	0	0	0	603	903	0
9415	0	0	0	0	0	0	0	200	300	0	0	0	0	0	0	0	200	903	0	0	0	0	0	0	0	603	903	0
9415	1	0	0	0	0	0	0	200	300	0	0	0	0	0	0	0	200	903	0	0	0	0	0	0	0	603	903	0
9415	2	0	0	0	0	0	0	200	300	0	0	0	0	0	0	0	200	903	0	0	0	0	0	0	0	603	903	0
9415	3	0	0	0	0	0	0	200	300	0	0	0	0	0	0	0	200	903	0	0	0	0	0	0	0	603	903	0
9415	4	0	0	0	0	0	0	200	300	0	0	0	0	0	0	0	200	903	0	0	0	0	0	0	0	603	903	0
9415	5	0	0	0	0	0	0	200	300	0	0	0	0	0	0	0	200	903	0	0	0	0	0	0	0	603	903	0
9415	6	0	0	0	0	0	0	200	300	0	0	0	0	0	0	0	200	903	0	0	0	0	0	0	0	603	903	0
9415	7	0	0	0	0	0	0	200	300	0	0	0	0	0	0	0	200	903	0	0	0	0	0	0	0	603	903	0
9415	8	0	0	0	0	0	0	200	300	0	0	0	0	0	0	0	200	903	0	0	0	0	0	0	0	603	903	0
9415	9	0	0	0	0	0	0	200	300	0	0	0	0	0	0	0	200	903	0	0	0	0	0	0	0	603	903	0
9416	0	0	0	0	0	0	0	200	300	0	0	0	0	0	0	0	200	903	0	0	0	0	0	0	0	603	903	0
9416	1	0	0	0	0	0	0	200	300	0	0	0	0	0	0	0	200	903	0	0	0	0	0	0	0	603	903	0
9416	2	0	0	0	0	0	0	200	300	0	0	0	0	0	0	0	200	903	0	0	0	0	0	0	0	603	903	0
9416	3	0	0	0	0	0	0	200	300	0	0	0	0	0	0	0	200	903	0	0	0	0	0	0	0	603	903	0
9416	4	0	0	0	0	0	0	200	300	0	0	0	0	0	0	0	200	903	0	0	0	0	0	0	0	603	903	0
9416	5	0	0	0	0	0	0	200	300	0	0	0	0	0	0	0	200	903	0	0	0	0	0	0	0	603	903	0
9416	6	0	0	0	0	0	0	200	300	0	0	0	0	0	0	0	200	903	0	0	0	0	0	0	0	603	903	0
9416	7	0	0	0	0	0	0	200	300	0	0	0	0	0	0	0	200	903	0	0	0	0	0	0	0	603	903	0
9416	8	0	0	0	0	0	0	200	300	0	0	0	0	0	0	0	200	903	0	0	0	0	0	0	0	603	903	0
9416	9	0	0	0	0	0	0	200	300	0	0	0	0	0	0	0	200	903	0	0	0	0	0	0	0	603	903	0
9417	0	0	0	0	0	0	0	200	300	0	0	0	0	0	0	0	200	903	0	0	0	0	0	0	0	603	903	0
9417	1	0	0	0	0	0	0	200	300	0	0	0	0	0	0	0	200	903	0	0	0	0	0	0	0	603	903	0
9417	2	0	0	0	0	0	0	200	300	0	0	0	0	0	0	0	200	903	0	0	0	0	0	0	0	603	903	0
9417	3	0	0	0	0	0	0	200	300	0	0	0	0	0	0	0	200	903	0	0	0	0	0	0	0	603	903	0
9417	4	0	0	0	0	0	0	200	300	0	0	0	0	0	0	0	200	903	0	0	0	0	0	0	0	603	903	0
9417	5	0	0	0	0	0	0	200	300	0	0	0	0	0	0	0	200	903	0	0	0	0	0	0	0	603	903	0
9417	6	0	0	0	0	0	0	200	300	0	0	0	0	0	0	0	200	903	0	0	0	0	0	0	0	603	903	0
9417	7	0	0	0	0	0	0	200	300	0	0	0	0	0	0	0	200	903	0	0	0	0	0	0	0	603	903	0
9417	8	0	0	0	0	0	0	200	300	0	0	0	0	0	0	0	200	903	0	0	0	0	0	0	0	603	903	0
9417	9	0	0	0	0	0	0	200	300	0	0	0	0	0	0	0	200	903	0	0	0	0	0	0	0	603	903	0
9418	0	0	0	0	0	0	0	200	300	0	0	0	0	0	0	0	200	903	0	0	0	0	0	0	0	603	903	0
9418	1	0	0	0	0	0	0	200	300	0	0	0	0	0	0	0	200	903	0	0	0	0	0	0	0	603	903	0
9418	2	0	0	0	0	0	0	200	300	0	0	0	0	0	0	0	200	903	0	0	0	0	0	0	0	603	903	0
9418	3	0	0	0	0	0	0	200	300	0	0	0	0	0	0	0	200	903	0	0	0	0	0	0	0	603	903	0
9418	4	0	0	0	0	0	0	200	300	0	0	0	0	0	0	0	200	903	0	0	0	0	0	0	0	603	903	0
9418	5	0	0	0	0	0	0	200	300	0	0	0	0	0	0	0	200	903	0	0	0	0	0	0	0	603	903	0
9418	6	0	0	0	0	0	0	200	300	0	0	0	0	0	0	0	200	903	0	0	0	0	0	0	0	603	903	0
9418	7	0	0	0	0	0	0	200	300	0	0	0	0	0	0	0	200	903	0	0	0	0	0	0	0	603	903	0
9418	8	0	0	0	0	0	0	200	300	0	0	0	0	0	0	0	200	903	0	0	0	0	0	0	0	603	903	0
9418	9	0	0	0	0	0	0	200	300	0	0	0	0	0	0	0	200	903	0	0	0	0	0	0	0	603	903	0
9419	0	0	0	0	0	0	0	200	300	0	0	0	0	0	0	0	200	903	0	0	0	0	0	0	0	603	903	0
9419	1	0	0	0	0	0	0	200	300	0	0	0	0	0	0	0	200	903	0	0	0	0	0	0	0	603	903	0
9419	2	0	0	0	0	0	0	200	300	0	0	0	0	0	0	0	200	903	0	0	0	0	0	0	0	603	903	0
9419	3	0	0	0	0	0	0	200	300	0	0	0	0	0	0	0	200	903	0	0	0	0	0	0	0	603	903	0
9419	4	0	0	0	0	0	0	200	300	0	0	0	0	0	0	0	200	903	0	0	0	0	0	0	0	603	903	0
9419	5	0	0	0	0	0	0	200	300	0	0	0	0	0	0	0	200	903	0	0	0	0	0	0	0	603	903	0
9419	6	0	0	0	0	0	0	200	300	0	0	0	0	0	0	0	200	903	0	0	0	0	0	0	0	603	903	0
9419	7	0	0	0	0	0	0	200	300	0	0	0	0	0	0	0	200	903	0	0	0	0	0	0	0	603	903	0
9419	8	0	0	0	0	0	0	200	300	0	0	0	0	0	0	0	200	903	0	0	0	0	0	0	0	603	903	0
9419	9	0	0	0	0	0	0	200	300	0	0	0	0	0	0	0	200	903	0	0	0	0	0	0	0	603	903	0
9420	0	0	0	0	0	0	0	200	300	0	0	0	0	0	0	0	200	903	0	0	0	0	0	0	0	603	903	0
9420	1	0	0	0	0	0	0	200	300	0	0	0	0	0	0	0	200	903	0	0	0	0	0	0	0	603	903	0
9420	2	0	0	0	0	0	0	200	300	0	0	0	0	0	0	0	200	903	0	0	0	0	0	0	0	603	903	0
9420	3	0	0	0	0	0	0	200	300	0	0	0	0	0	0	0	200	903	0	0	0	0	0	0	0	603	903	0
9420	4	0	0	0	0	0	0	200	300	0	0	0	0	0	0	0	200	903	0	0	0	0	0	0	0	603	903	0
9420	5	0	0	0	0	0	0	200	300	0	0	0	0	0	0	0	200	903	0	0	0	0	0	0	0	603	903	0
9420	6	0	0	0	0	0	0	200	300	0	0	0	0	0	0	0	200	903	0	0	0	0	0	0	0	603	903	0
9420	7	0	0	0	0	0	0	200	300	0	0	0	0	0	0	0	200	903	0	0	0	0	0	0	0	603	903	0
9420	8	0	0	0	0	0	0	200	300	0	0	0	0	0	0	0	200	903	0	0	0	0	0	0	0	603	903	0
9420	9	0	0	0	0	0	0	200	300	0	0	0	0	0	0	0	200	903	0	0	0	0	0	0	0	603	903	0
9421	0	0	0	0	0	0	0	200	300	0	0	0	0	0	0	0	200	903	0	0	0	0	0	0	0	603	903	0
9421	1	0	0	0	0	0	0	200	300	0	0	0	0	0	0	0	200	903	0	0	0	0	0	0	0	603	903	0
9421	2	0	0	0	0	0	0	200	300	0	0	0	0	0	0	0	200	903	0	0	0	0	0	0	0	603	903	0
9421	3	0	0	0	0	0	0	200	300	0	0	0	0	0	0	0	200	903	0	0	0	0	0	0	0	603	903	0
9421	4	0	0	0	0	0	0	200	300	0	0	0	0	0	0	0	200	903	0	0	0	0	0	0	0	603	903	0
9421	5	0	0	0	0	0	0	200	300	0	0	0	0	0	0	0	200	903	0	0	0	0	0	0	0	603	903	0
9421	6	0	0	0	0	0	0	200	300	0	0	0	0	0	0	0	200	903	0	0	0	0	0	0	0	603	903	0
9421	7	0	0	0	0	0	0	200	300	0	0	0	0	0	0	0	200	903	0	0	0	0	0	0	0	603	903	0
9421	8	0	0	0	0	0	0	200	300	0	0	0	0	0	0	0	200	903	0	0	0	0	0	0	0	603	903	0
9421	9	0	0	0	0	0	0	200	300	0	0	0	0	0	0	0	200	903	0	0	0	0	0	0	0	603	903	0
9422	0	0	0	0	0	0	0	200	300	0	0	0	0	0	0	0	200	903	0	0	0	0	0	0	0	603	903	0
9422	1	0	0	0	0	0	0	200	300	0	0	0	0	0	0	0	200	903	0	0	0	0	0	0	0	603	903	0
9422	2	0	0	0	0	0	0	200	300	0	0	0	0	0	0	0	200	903	0	0	0	0	0	0	0	603	903	0
9422	3	0	0	0	0	0	0	200	300	0	0	0	0	0	0	0	200	903	0	0	0	0	0	0	0	603	903	0
9422	4	0	0	0	0	0	0	200	300	0	0	0	0	0	0	0	200	903	0	0	0	0	0	0	0	603	903	0
9422	5	0	0	0	0	0	0	200	300	0	0	0	0	0	0	0	200	903	0	0	0	0	0	0	0	603	903	0
9422	6	0	0	0	0	0	0	200	300	0	0	0	0	0	0	0	200	903	0	0	0	0	0	0	0	603	903	0
9422	7	0	0	0	0	0	0	200	300	0	0	0	0	0	0	0	200	903	0	0	0	0	0	0	0	603	903	0
9422	8	0	0	0	0	0	0	200	300	0	0	0	0	0	0	0	200	903	0	0	0	0	0	0	0	603	903	0
9422	9	0	0	0	0	0	0	200	300	0	0	0	0	0	0	0	200	903	0	0	0	0	0	0	0	603	903	0
9423	0	0	0	0	0	0	0	200	300	0	0	0	0	0	0	0	200	903	0	0	0	0	0	0	0	603	903	0
9423	1	0	0	0	0	0	0	200	300	0	0	0	0	0	0	0	200	903	0	0	0	0	0	0	0	603	903	0
9423	2	0	0	0	0	0	0	200	300	0	0	0	0	0	0	0	200	903	0	0	0	0	0	0	0	603	903	0
9423	3	0	0	0	0	0	0	200	300	0	0	0	0	0	0	0	200	903	0	0	0	0	0	0	0	603	903	0
9423	4	0	0	0	0	0	0	200	300	0	0	0	0	0	0	0	200	903	0	0	0	0	0	0	0	603	903	0
9423	5	0	0	0	0	0	0	200	300	0	0	0	0	0	0	0	200	903	0	0	0	0	0	0	0	603	903	0
9423	6	0	0	0	0	0	0	200	300	0	0	0	0	0	0	0	200	903	0	0	0	0	0	0	0	603	903	0
9423	7	0	0	0	0	0	0	200	300	0	0	0	0	0	0	0	200	903	0	0	0	0	0	0	0	603	903	0
9423	8	0	0	0	0	0	0	200	300	0	0	0	0	0	0	0	200	903	0	0	0	0	0	0	0	603	903	0
9423	9	0	0	0	0	0	0	200	300	0	0	0	0	0	0	0	200	903	0	0	0	0	0	0	0	603	903	0
9424	0	0	0	0	0	0	0	200	300	0	0	0	0	0	0	0	200	903	0	0	0	0	0	0	0	603	903	0
9424	1	0	0	0	0	0	0	200	300	0	0	0	0	0	0	0	200	903	0	0	0	0	0	0	0	603	903	0
9424	2	0	0	0	0	0	0	200	300	0	0	0	0	0	0	0	200	903	0	0	0	0	0	0	0	603	903	0
9424	3	0	0	0	0	0	0	200	300	0	0	0	0	0	0	0	200	903	0	0	0	0	0	0	0	603	903	0
9424	4	0	0	0	0	0	0	200	300	0	0	0	0	0	0	0	200	903	0	0	0	0	0	0	0	603	903	0
9424	5	0	0	0	0	0	0	200	300	0	0	0	0	0	0	0	200	903	0	0	0	0	0	0	0	603	903	0
9424	6	0	0	0	0	0	0	200	300	0	0	0	0	0	0	0	200	903	0	0	0	0	0	0	0	603	903	0
9424	7	0	0	0	0	0	0	200	300	0	0	0	0	0	0	0	200	903	0	0	0	0	0	0	0	603	903	0
9424	8	0	0	0	0	0	0	200	300	0	0	0	0	0	0	0	200	903	0	0	0	0	0	0	0	603	903	0
9424	9	0	0	0	0	0	0	200	300	0	0	0	0	0	0	0	200	903	0	0	0	0	0	0	0	603	903	0
9425	0	0	0	0	0	0	0	200	300	0	0	0	0	0	0	0	200	903	0	0	0	0	0	0	0	603	903	0
9425	1	0	0	0	0	0	0	200	300	0	0	0	0	0	0	0	200	903	0	0	0	0	0	0	0	603	903	0
9425	2	0	0	0	0	0	0	200	300	0	0	0	0	0	0	0	200	903	0	0	0	0	0	0	0	603	903	0
9425	3	0	0	0	0	0	0	200	300	0	0	0	0	0	0	0	200	903	0	0	0	0	0	0	0	603	903	0
9425	4	0	0	0	0	0	0	200	300	0	0	0	0	0	0	0	200	903	0	0	0	0	0	0	0	603	903	0
9425	5	0	0	0	0	0	0	200	300	0	0	0	0	0	0	0	200	903	0	0	0	0	0	0	0	603	903	0
9425	6	0	0	0	0	0	0	200	300	0	0	0	0	0	0	0	200	903	0	0	0	0	0	0	0	603	903	0
9425	7	0	0	0	0	0	0	200	300	0	0	0	0	0	0	0	200	903	0	0	0	0	0	0	0	603	903	0
9425	8	0	0	0	0	0	0	200	300	0	0	0	0	0	0	0	200	903	0	0	0	0	0	0	0	603	903	0
9425	9	0	0	0	0	0	0	200	300	0	0	0	0	0	0	0	200	903	0	0	0	0	0	0	0	603	903	0
9426	0	0	0	0	0	0	0	200	300	0	0	0	0	0	0	0	200	903	0	0	0	0	0	0	0	603	903	0
9426	1	0	0	0	0	0	0	200	300	0	0	0	0	0	0	0	200	903	0	0	0	0	0	0	0	603	903	0
9426	2	0	0	0	0	0	0	200	300	0	0	0	0	0	0	0	200	903	0	0	0	0	0	0	0	603	903	0
9426	3	0	0	0	0	0	0	200	300	0	0	0	0	0	0	0	200	903	0	0	0	0	0	0	0	603	903	0
9426	4	0	0	0	0	0	0	200	300	0	0	0	0	0	0	0	200	903	0	0	0	0	0	0	0	603	903	0
9426	5	0	0	0	0	0	0	200	300	0	0	0	0	0	0	0	200	903	0	0	0	0	0	0	0	603	903	0
9426	6	0	0	0	0	0	0	200	300	0	0	0	0	0	0	0	200	903	0	0	0	0	0	0	0	603	903	0
9426	7	0	0	0	0	0	0	200	300	0	0	0	0	0	0	0	200	903	0	0	0	0	0	0	0	603	903	0
9426	8	0	0	0	0	0	0	200	300	0	0	0	0	0	0	0	200	903	0	0	0	0	0	0	0	603	903	0
9426	9	0	0	0	0	0	0	200	300	0	0	0	0	0	0	0	200	903	0	0	0	0	0	0	0	603	903	0
9427	0	0	0	0	0	0	0	200	300	0	0	0	0	0	0	0	200	903	0	0	0	0	0	0	0	603	903	0
9427	1	0	0	0	0	0	0	200	300	0	0	0	0	0	0	0	200	903	0	0	0	0	0	0	0	603	903	0
9427	2	0	0	0	0	0	0	200	300	0	0	0	0	0	0	0	200	903	0	0	0	0	0	0	0	603	903	0
9427	3	0	0	0	0	0	0	200	300	0	0	0	0	0	0	0	200	903	0	0	0	0	0	0	0	603	903	0
9427	4	0	0	0	0	0	0	200	300	0	0	0	0	0	0	0	200	903	0	0	0	0	0	0	0	603	903	0
9427	5	0	0	0	0	0	0	200	300	0	0	0	0	0	0	0	200	903	0	0	0	0	0	0	0	603	903	0
9427	6	0	0	0	0	0	0	200	300	0	-1.70471	-2.50793	-23.3099	-6263.49	773.196	-88.9897	233.17	1171.71	0	0	0	0	0	0	0	603	903	0
9427	7	0	0	0	0	0	0	200	300	0	-8.26599	-5.55969	-41.0101	-10108.7	2604.25	918.091	263.503	1149.49	0	0	0	0	0	0	0	603	903	0
9427	8	0	0	0	0	0	0	200	300	0	-7.80823	1.00159	-42.2308	-8826.97	2360.11	2016.72	255.886	1112.02	0	0	0	0	0	0	0	603	903	0
9427	9	0	0	0	0	0	0	200	300	0	-6.28235	3.74817	-30.9393	-7270.57	1078.37	1558.96	234.854	1137.99	0	0	0	0	0	0	0	603	903	0
9428	0	0	0	0	0	0	0	200	300	0	-9.94446	-0.0665281	-30.0237	-8643.86	1993.9	322.998	266.411	1190.9	0	0	0	0	0	0	0	603	903	0
9428	1	0	0	0	0	0	0	200	300	0	0.584107	6.18958	-42.5359	-10932.7	2543.22	322.998	259.79	1160.02	0	0	0	0	0	0	0	603	903	0
9428	2	0	0	0	0	0	0	200	300	0	5.7721	14.7345	-53.2171	-11207.3	2299.08	231.445	243.202	1113.6	0	0	0	0	0	0	0	603	903	0
9428	3	0	0	0	0	0	0	200	300	0	-7.96081	11.3776	-60.5413	-15052.6	3214.6	231.445	253.098	1151.63	0	0	0	0	0	0	0	603	903	0
9428	4	0	0	0	0	0	0	200	300	0	-8.26599	14.5819	-67.2552	-16242.7	3580.81	2016.72	253.242	1144.51	0	0	0	0	0	0	0	603	903	0
9428	5	0	0	0	0	0	0	200	300	0	-0.636596	20.6854	-75.4949	-18256.9	3947.03	1742.07	252.282	1144.83	0	0	0	0	0	0	0	603	903	0
9428	6	0	0	0	0	0	0	200	300	0	-6.12976	16.8707	-90.4485	-21186.6	4862.55	1284.3	253.76	1137.24	0	0	0	0	0	0	0	603	903	0
9428	7	0	0	0	0	0	0	200	300	0	-8.1134	13.5138	-92.5848	-22285.2	4801.52	1742.07	251.861	1143.7	0	0	0	0	0	0	0	603	903	0
9428	8	0	0	0	0	0	0	200	300	0	-5.97717	13.6664	-95.3314	-23017.6	5228.76	1055.42	254.848	1144.45	0	0	0	0	0	0	0	603	903	0
9428	9	0	0	0	0	0	0	200	300	0	-2.92541	11.5302	-106.928	-25489.6	6327.4	414.55	259.174	1141.38	0	0	0	0	0	0	0	603	903	0
9429	0	0	0	0	0	0	0	200	300	0	-1.70471	10.3094	-114.252	-26222	6022.22	1192.75	252.71	1132.51	0	0	0	0	0	0	0	603	903	0
9429	1	0	0	0	0	0	0	200	300	0	-5.21423	8.47839	-118.525	-27961.5	6083.26	551.879	251.325	1138.91	0	0	0	0	0	0	0	603	903	0
9429	2	0	0	0	0	0	0	200	300	0	-6.12976	6.95251	-125.239	-29334.8	6876.71	-409.424	254.909	1137.23	0	0	0	0	0	0	0	603	903	0
9429	3	0	0	0	0	0	0	200	300	0	3.33069	8.02063	-131.037	-30341.9	7303.96	185.669	255.74	1134.55	0	0	0	0	0	0	0	603	903	0
9429	4	0	0	0	0	0	0	200	300	0	3.94104	5.8844	-137.751	-32264.5	7914.31	-546.754	257.454	1137.22	0	0	0	0	0	0	0	603	903	0
9429	5	0	0	0	0	0	0	200	300	0	-3.84094	2.37488	-141.718	-33088.5	9073.98	-1736.94	264.028	1136.48	0	0	0	0	0	0	0	603	903	0
9429	6	0	0	0	0	0	0	200	300	0	1.34705	2.0697	-147.822	-34278.6	9257.09	-958.741	262.623	1134.89	0	0	0	0	0	0	0	603	903	0
9429	7	0	0	0	0	0	0	200	300	0	8.06091	1.15418	-155.451	-34644.8	9501.23	-1965.82	261.12	1125.87	0	0	0	0	0	0	0	603	903	0
9429	8	0	0	0	0	0	0	200	300	0	4.3988	-5.10193	-160.944	-36842.1	10233.6	-2835.57	263.585	1131.91	0	0	0	0	0	0	0	603	903	0
9429	9	0	0	0	0	0	0	200	300	0	3.94104	-8.0011	-165.827	-37574.5	10721.9	-2286.26	264.657	1129.59	0	0	0	0	0	0	0	603	903	0
9430	0	0	0	0	0	0	0	200	300	0	7.14539	-9.67957	-171.32	-39771.8	11271.2	-3384.89	265.791	1135.15	0	0	0	0	0	0	0	603	903	0
9430	1	0	0	0	0	0	0	200	300	0	11.723	-12.8839	-175.898	-41053.5	12003.7	-4254.64	268.242	1136.39	0	0	0	0	0	0	0	603	903	0
9430	2	0	0	0	0	0	0	200	300	0	15.5377	-13.6469	-185.053	-41694.4	12430.9	-3751.1	267.175	1128.31	0	0	0	0	0	0	0	603	903	0
9430	3	0	0	0	0	0	0	200	300	0	13.5541	-18.0719	-192.377	-43983.2	13590.6	-5811.04	270.646	1131.63	0	0	0	0	0	0	0	603	903	0
9430	4	0	0	0	0	0	0	200	300	0	19.505	-22.0392	-197.26	-45631.2	14323	-6543.46	272.61	1134.33	0	0	0	0	0	0	0	603	903	0
9430	5	0	0	0	0	0	0	200	300	0	21.9464	-22.8021	-204.889	-46180.5	14262	-6451.91	269.608	1128.39	0	0	0	0	0	0	0	603	903	0
9430	6	0	0	0	0	0	0	200	300	0	20.7257	-27.2272	-210.993	-46912.9	15116.5	-7458.99	271.644	1125.34	0	0	0	0	0	0	0	603	903	0
9430	7	0	0	0	0	0	0	200	300	0	22.7094	-32.7203	-216.791	-49293.3	16093	-8511.84	274.233	1130.38	0	0	0	0	0	0	0	603	903	0
9430	8	0	0	0	0	0	0	200	300	0	27.287	-32.2626	-225.641	-50941.2	16398.2	-8099.85	272.674	1128.76	0	0	0	0	0	0	0	603	903	0
9430	9	0	0	0	0	0	0	200	300	0	27.1344	-35.1617	-233.576	-51765.2	16886.5	-9427.37	272.295	1124.62	0	0	0	0	0	0	0	603	903	0
9431	0	0	0	0	0	0	0	200	300	0	27.7448	-39.5868	-240.29	-52955.4	17374.8	-10022.5	272.308	1123.38	0	0	0	0	0	0	0	603	903	0
9431	1	0	0	0	0	0	0	200	300	0	30.9491	-42.0282	-246.088	-54054	18290.3	-9656.25	274.324	1122.65	0	0	0	0	0	0	0	603	903	0
9431	2	0	0	0	0	0	0	200	300	0	31.4069	-43.8593	-251.276	-56251.3	18900.6	-10388.7	275.219	1126.86	0	0	0	0	0	0	0	603	903	0
9431	3	0	0	0	0	0	0	200	300	0	31.712	-45.5377	-258.906	-57166.8	18595.5	-10709.1	271.823	1123.8	0	0	0	0	0	0	0	603	903	0
9431	4	0	0	0	0	0	0	200	300	0	32.6276	-48.4369	-267.756	-57807.7	19694.1	-10571.8	273.553	1118.9	0	0	0	0	0	0	0	603	903	0
9431	5	0	0	0	0	0	0	200	300	0	36.5948	-50.2679	-279.658	-60096.5	20792.7	-11487.3	274.351	1117.89	0	0	0	0	0	0	0	603	903	0
9431	6	0	0	0	0	0	0	200	300	0	37.663	-50.8783	-289.118	-62660	21097.9	-11762	272.973	1119.73	0	0	0	0	0	0	0	603	903	0
9431	7	0	0	0	0	0	0	200	300	0	38.4259	-55.4559	-298.884	-64399.5	21586.2	-11578.9	272.223	1118.47	0	0	0	0	0	0	0	603	903	0
9431	8	0	0	0	0	0	0	200	300	0	34.4586	-58.8129	-308.344	-65406.6	22990	-11899.3	274.56	1115.12	0	0	0	0	0	0	0	603	903	0
9431	9	0	0	0	0	0	0	200	300	0	37.9681	-59.5758	-316.584	-67329.2	23600.4	-12219.7	274.547	1115.67	0	0	0	0	0	0	0	603	903	0
9432	0	0	0	0	0	0	0	200	300	0	40.1044	-60.4913	-326.349	-69984.2	23966.6	-11807.7	273.438	1117.45	0	0	0	0	0	0	0	603	903	0
9432	1	0	0	0	0	0	0	200	300	0	38.1207	-64.306	-337.946	-71449.1	24637.9	-12540.2	272.905	1114.42	0	0	0	0	0	0	0	603	903	0
9432	2	0	0	0	0	0	0	200	300	0	38.7311	-65.6793	-348.932	-72547.7	25492.4	-12814.8	273.058	1110.91	0	0	0	0	0	0	0	603	903	0
9432	3	0	0	0	0	0	0	200	300	0	41.0199	-67.5104	-358.698	-74287.2	26163.8	-12357.1	272.941	1110.1	0	0	0	0	0	0	0	603	903	0
9432	4	0	0	0	0	0	0	200	300	0	41.4777	-69.6466	-367.548	-76667.5	26346.9	-12677.5	271.683	1111.59	0	0	0	0	0	0	0	603	903	0
9432	5	0	0	0	0	0	0	200	300	0	41.0199	-73.3087	-376.093	-78223.9	26957.3	-13318.4	271.677	1110.99	0	0	0	0	0	0	0	603	903	0
9432	6	0	0	0	0	0	0	200	300	0	40.1044	-74.5294	-385.554	-78956.4	27750.7	-12814.8	271.976	1107.79	0	0	0	0	0	0	0	603	903	0
9432	7	0	0	0	0	0	0	200	300	0	41.4777	-76.6656	-392.878	-79780.4	28605.2	-13364.1	272.81	1106.07	0	0	0	0	0	0	0	603	903	0
9432	8	0	0	0	0	0	0	200	300	0	42.851	-79.87	-403.254	-82160.7	28544.2	-13455.7	270.785	1106.74	0	0	0	0	0	0	0	603	903	0
9432	9	0	0	0	0	0	0	200	300	0	39.494	-81.8536	-410.273	-83900.2	29215.6	-12814.8	271.21	1107.5	0	0	0	0	0	0	0	603	903	0
9433	0	0	0	0	0	0	0	200	300	0	38.7311	-84.295	-414.24	-84541.1	29459.7	-13364.1	271.118	1107.09	0	0	0	0	0	0	0	603	903	0
9433	1	0	0	0	0	0	0	200	300	0	39.6466	-86.889	-423.395	-85273.5	30314.2	-13638.8	271.598	1104.4	0	0	0	0	0	0	0	603	903	0
9433	2	0	0	0	0	0	0	200	300	0	40.257	-87.4994	-431.025	-86463.7	29154.6	-13135.3	267.64	1103.6	0	0	0	0	0	0	0	603	903	0
9433	3	0	0	0	0	0	0	200	300	0	37.3578	-89.6356	-438.044	-88111.6	30741.5	-13181	270.179	1104.15	0	0	0	0	0	0	0	603	903	0
9433	4	0	0	0	0	0	0	200	300	0	37.9681	-91.9244	-446.284	-88752.5	30985.6	-13089.5	269.43	1101.87	0	0	0	0	0	0	0	603	903	0
9433	5	0	0	0	0	0	0	200	300	0	35.2216	-94.0607	-449.03	-89027.2	30802.5	-12769	268.598	1101.27	0	0	0	0	0	0	0	603	903	0
9433	6	0	0	0	0	0	0	200	300	0	33.6957	-94.0607	-451.777	-89851.1	31046.6	-12860.6	268.721	1101.88	0	0	0	0	0	0	0	603	903	0
9433	7	0	0	0	0	0	0	200	300	0	33.0853	-94.0607	-457.27	-90583.6	31534.9	-12860.6	268.964	1101.1	0	0	0	0	0	0	0	603	903	0
9433	8	0	0	0	0	0	0	200	300	0	30.1862	-95.7391	-461.542	-90858.2	31840.1	-12128.2	268.986	1099.86	0	0	0	0	0	0	0	603	903	0
9433	9	0	0	0	0	0	0	200	300	0	28.0499	-95.2814	-466.12	-90034.3	31351.8	-12265.5	267.261	1096.16	0	0	0	0	0	0	0	603	903	0
9434	0	0	0	0	0	0	0	200	300	0	27.4396	-94.671	-464.594	-90217.3	31229.7	-12082.4	267.219	1097.19	0	0	0	0	0	0	0	603	903	0
9434	1	0	0	0	0	0	0	200	300	0	24.8456	-96.8073	-471.003	-91956.9	31962.2	-11212.7	267.86	1098.24	0	0	0	0	0	0	0	603	903	0
9434	2	0	0	0	0	0	0	200	300	0	22.5568	-96.8073	-473.139	-92414.6	31718	-10663.3	267.037	1098.32	0	0	0	0	0	0	0	603	903	0
9434	3	0	0	0	0	0	0	200	300	0	22.4042	-94.0607	-470.698	-92506.2	31412.9	-10846.4	266.737	1099.53	0	0	0	0	0	0	0	603	903	0
9434	4	0	0	0	0	0	0	200	300	0	18.2843	-95.2814	-475.58	-92689.3	31290.8	-10205.6	265.795	1097.9	0	0	0	0	0	0	0	603	903	0
9434	5	0	0	0	0	0	0	200	300	0	17.3688	-95.7391	-478.632	-92231.5	31596	-10068.2	266.013	1095.7	0	0	0	0	0	0	0	603	903	0
9434	6	0	0	0	0	0	0	200	300	0	15.3851	-94.9762	-478.937	-92323.1	31412.9	-9839.36	265.589	1095.77	0	0	0	0	0	0	0	603	903	0
9434	7	0	0	0	0	0	0	200	300	0	10.9601	-94.9762	-480.463	-91956.9	30985.6	-9061.16	264.491	1094.39	0	0	0	0	0	0	0	603	903	0
9434	8	0	0	0	0	0	0	200	300	0	9.58679	-94.5184	-480.158	-92506.2	31046.6	-8923.83	264.659	1095.66	0	0	0	0	0	0	0	603	903	0
9434	9	0	0	0	0	0	0	200	300	0	11.1127	-94.5184	-480.768	-91956.9	30985.6	-8420.29	264.45	1094.27	0	0	0	0	0	0	0	603	903	0
9435	0	0	0	0	0	0	0	200	300	0	7.14539	-93.4503	-481.074	-91865.3	30558.4	-7870.97	263.521	1093.96	0	0	0	0	0	0	0	603	903	0
9435	1	0	0	0	0	0	0	200	300	0	4.70398	-93.4503	-481.684	-92414.6	30680.4	-7550.54	263.694	1094.86	0	0	0	0	0	0	0	603	903	0
9435	2	0	0	0	0	0	0	200	300	0	2.41516	-92.9926	-481.684	-92506.2	30802.5	-7321.66	263.948	1095.05	0	0	0	0	0	0	0	603	903	0
9435	3	0	0	0	0	0	0	200	300	0	0.126343	-93.7555	-481.074	-91590.7	30741.5	-6955.45	263.902	1093.39	0	0	0	0	0	0	0	603	903	0
9435	4	0	0	0	0	0	0	200	300	0	-0.33142	-93.4503	-479.853	-91132.9	30314.2	-6635.01	263.174	1092.92	0	0	0	0	0	0	0	603	903	0
9435	5	0	0	0	0	0	0	200	300	0	0.584107	-93.9081	-479.853	-90949.8	29825.9	-6726.56	262.156	1092.54	0	0	0	0	0	0	0	603	903	0
9435	6	0	0	0	0	0	0	200	300	0	-3.23059	-93.1451	-478.327	-91499.1	30070.1	-6085.7	262.865	1094.29	0	0	0	0	0	0	0	603	903	0
9435	7	0	0	0	0	0	0	200	300	0	-4.14612	-92.077	-478.022	-90858.2	29887	-5994.14	262.522	1093.07	0	0	0	0	0	0	0	603	903	0
9435	8	0	0	0	0	0	0	200	300	0	-5.36682	-92.2296	-478.937	-90583.6	29459.7	-5856.81	261.511	1092.13	0	0	0	0	0	0	0	603	903	0
9435	9	0	0	0	0	0	0	200	300	0	-5.36682	-93.4503	-477.411	-90217.3	29581.8	-5261.72	261.963	1091.97	0	0	0	0	0	0	0	603	903	0
9436	0	0	0	0	0	0	0	200	300	0	-6.8927	-91.1615	-476.191	-90308.9	29154.6	-5124.39	261.225	1092.65	0	0	0	0	0	0	0	603	903	0
9436	1	0	0	0	0	0	0	200	300	0	-9.18152	-93.2977	-474.97	-89301.9	29154.6	-5032.84	261.382	1091.02	0	0	0	0	0	0	0	603	903	0
9436	2	0	0	0	0	0	0	200	300	0	-9.18152	-92.2296	-474.665	-90034.3	29215.6	-4758.18	261.55	1092.68	0	0	0	0	0	0	0	603	903	0
9436	3	0	0	0	0	0	0	200	300	0	-7.96081	-91.7719	-483.21	-89576.5	29276.6	-4575.07	260.588	1088.38	0	0	0	0	0	0	0	603	903	0
9436	4	0	0	0	0	0	0	200	300	0	-10.7074	-91.4667	-485.956	-89301.9	29154.6	-4437.74	259.994	1086.77	0	0	0	0	0	0	0	603	903	0
9436	5	0	0	0	0	0	0	200	300	0	-14.8273	-94.671	-483.82	-89484.9	28605.2	-3751.1	259.124	1087.95	0	0	0	0	0	0	0	603	903	0
9436	6	0	0	0	0	0	0	200	300	0	-17.879	-97.8754	-480.768	-88477.8	28361.1	-3567.99	258.991	1087.03	0	0	0	0	0	0	0	603	903	0
9436	7	0	0	0	0	0	0	200	300	0	-16.2006	-96.1969	-482.294	-89301.9	28849.4	-3384.89	259.817	1088.16	0	0	0	0	0	0	0	603	903	0
9436	8	0	0	0	0	0	0	200	300	0	-13.7592	-96.6547	-484.125	-89027.2	28910.4	-2972.9	259.717	1086.89	0	0	0	0	0	0	0	603	903	0
9436	9	0	0	0	0	0	0	200	300	0	-18.0316	-99.859	-483.515	-88752.5	28605.2	-3018.68	259.161	1086.56	0	0	0	0	0	0	0	603	903	0
9437	0	0	0	0	0	0	0	200	300	0	-16.9635	-101.08	-486.567	-89210.3	28727.3	-3522.22	259.041	1086.35	0	0	0	0	0	0	0	603	903	0
9437	1	0	0	0	0	0	0	200	300	0	-15.285	-100.164	-487.177	-89027.2	28727.3	-2972.9	258.967	1085.74	0	0	0	0	0	0	0	603	903	0
9437	2	0	0	0	0	0	0	200	300	0	-14.0643	-103.674	-488.398	-88477.8	28727.3	-3430.67	258.819	1084.16	0	0	0	0	0	0	0	603	903	0
9437	3	0	0	0	0	0	0	200	300	0	-13.6066	-105.2	-486.567	-88386.3	27872.8	-3430.67	257.285	1084.65	0	0	0	0	0	0	0	603	903	0
9437	4	0	0	0	0	0	0	200	300	0	-12.3859	-102.453	-485.956	-88569.4	28788.3	-3384.89	259.241	1085.26	0	0	0	0	0	0	0	603	903	0
9437	5	0	0	0	0	0	0	200	300	0	-10.4022	-102.3	-488.398	-88386.3	28483.2	-3339.11	258.32	1083.97	0	0	0	0	0	0	0	603	903	0
9437	6	0	0	0	0	0	0	200	300	0	-10.7074	-103.063	-489.313	-89027.2	28605.2	-3659.55	258.46	1084.94	0	0	0	0	0	0	0	603	903	0
9437	7	0	0	0	0	0	0	200	300	0	-11.3177	-103.063	-489.618	-87196.1	28849.4	-3339.11	258.922	1081.09	0	0	0	0	0	0	0	603	903	0
9437	8	0	0	0	0	0	0	200	300	0	-10.097	-100.164	-492.67	-88661	29276.6	-3247.56	259.424	1082.96	0	0	0	0	0	0	0	603	903	0
9437	9	0	0	0	0	0	0	200	300	0	-9.18152	-100.469	-492.975	-89027.2	29337.7	-3613.77	259.511	1083.59	0	0	0	0	0	0	0	603	903	0
9438	0	0	0	0	0	0	0	200	300	0	-8.41858	-100.164	-494.501	-88661	28910.4	-3339.11	258.464	1082.29	0	0	0	0	0	0	0	603	903	0
9438	1	0	0	0	0	0	0	200	300	0	-12.0807	-100.012	-496.638	-88111.6	28910.4	-3018.68	258.212	1080.42	0	0	0	0	0	0	0	603	903	0
9438	2	0	0	0	0	0	0	200	300	0	-9.33411	-98.4857	-496.332	-88661	29093.5	-2972.9	258.617	1081.63	0	0	0	0	0	0	0	603	903	0
9438	3	0	0	0	0	0	0	200	300	0	-7.35046	-100.622	-500.605	-89484.9	29276.6	-2744.02	258.483	1081.75	0	0	0	0	0	0	0	603	903	0
9438	4	0	0	0	0	0	0	200	300	0	-11.0126	-100.469	-502.131	-89576.5	28971.4	-2927.13	257.697	1081.39	0	0	0	0	0	0	0	603	903	0
9438	5	0	0	0	0	0	0	200	300	0	-12.3859	-101.995	-507.624	-89393.4	29703.9	-2927.13	258.516	1079.1	0	0	0	0	0	0	0	603	903	0
9438	6	0	0	0	0	0	0	200	300	0	-8.72375	-100.469	-511.286	-89118.7	29825.9	-2744.02	258.335	1077.3	0	0	0	0	0	0	0	603	903	0
9438	7	0	0	0	0	0	0	200	300	0	-7.35046	-101.69	-514.948	-89759.6	29764.9	-2927.13	257.802	1077.31	0	0	0	0	0	0	0	603	903	0
9438	8	0	0	0	0	0	0	200	300	0	-10.4022	-103.979	-516.474	-88935.6	29948	-3156.01	257.986	1075.2	0	0	0	0	0	0	0	603	903	0
9438	9	0	0	0	0	0	0	200	300	0	-12.691	-105.657	-519.526	-91132.9	30192.1	-2789.8	258.115	1078.42	0	0	0	0	0	0	0	603	903	0
9439	0	0	0	0	0	0	0	200	300	0	-9.63928	-105.2	-522.577	-89851.1	30619.4	-3064.45	258.593	1074.94	0	0	0	0	0	0	0	603	903	0
9439	1	0	0	0	0	0	0	200	300	0	-8.72375	-107.488	-523.493	-91956.9	30009	-3339.11	257.325	1078.66	0	0	0	0	0	0	0	603	903	0
9439	2	0	0	0	0	0	0	200	300	0	-13.7592	-106.573	-526.24	-90858.2	30314.2	-2698.24	257.605	1075.66	0	0	0	0	0	0	0	603	903	0
9439	3	0	0	0	0	0	0	200	300	0	-14.6747	-106.573	-528.681	-91773.8	30802.5	-2560.91	258.263	1076.59	0	0	0	0	0	0	0	603	903	0
9439	4	0	0	0	0	0	0	200	300	0	-11.3177	-105.81	-531.122	-92414.6	30863.5	-2881.35	258.11	1077	0	0	0	0	0	0	0	603	903	0
9439	5	0	0	0	0	0	0	200	300	0	-12.8436	-106.725	-533.564	-92414.6	30436.3	-2469.36	257.043	1076.2	0	0	0	0	0	0	0	603	903	0
9439	6	0	0	0	0	0	0	200	300	0	-17.4213	-105.047	-535.395	-92689.3	31046.6	-2286.26	257.988	1076.12	0	0	0	0	0	0	0	603	903	0
9439	7	0	0	0	0	0	0	200	300	0	-15.8954	-105.352	-539.057	-92689.3	30863.5	-2423.59	257.255	1074.95	0	0	0	0	0	0	0	603	903	0
9439	8	0	0	0	0	0	0	200	300	0	-16.8109	-103.063	-542.109	-93421.7	30863.5	-1874.27	256.932	1075.33	0	0	0	0	0	0	0	603	903	0
9439	9	0	0	0	0	0	0	200	300	0	-16.6583	-101.69	-545.466	-93330.2	30924.6	-1553.83	256.694	1074.1	0	0	0	0	0	0	0	603	903	0
9440	0	0	0	0	0	0	0	200	300	0	-18.9471	-100.622	-546.381	-93971	31107.7	-1691.16	256.934	1074.99	0	0	0	0	0	0	0	603	903	0
9440	1	0	0	0	0	0	0	200	300	0	-18.7946	-102.3	-549.433	-93879.5	31412.9	-1370.73	257.173	1073.87	0	0	0	0	0	0	0	603	903	0
9440	2	0	0	0	0	0	0	200	300	0	-17.879	-101.995	-549.433	-94154.1	31107.7	-1096.07	256.618	1074.37	0	0	0	0	0	0	0	603	903	0
9440	3	0	0	0	0	0	0	200	300	0	-18.1842	-100.927	-550.959	-93879.5	30924.6	-1599.61	256.129	1073.39	0	0	0	0	0	0	0	603	903	0
9440	4	0	0	0	0	0	0	200	300	0	-19.7101	-99.859	-551.569	-94245.7	31596	-729.859	257.284	1073.87	0	0	0	0	0	0	0	603	903	0
9440	5	0	0	0	0	0	0	200	300	0	-19.4049	-100.012	-554.621	-93604.8	31473.9	-775.635	256.749	1071.77	0	0	0	0	0	0	0	603	903	0
9440	6	0	0	0	0	0	0	200	300	0	-18.1842	-98.1805	-551.569	-94886.6	31351.8	-1096.07	256.841	1075.03	0	0	0	0	0	0	0	603	903	0
9440	7	0	0	0	0	0	0	200	300	0	-17.879	-98.3331	-556.452	-94611.9	31107.7	-867.188	255.904	1073.03	0	0	0	0	0	0	0	603	903	0
9440	8	0	0	0	0	0	0	200	300	0	-18.1842	-98.9435	-556.757	-94245.7	31412.9	-638.306	256.421	1072.28	0	0	0	0	0	0	0	603	903	0
9440	9	0	0	0	0	0	0	200	300	0	-18.0316	-97.8754	-558.588	-94428.8	31290.8	-729.859	256.018	1072.05	0	0	0	0	0	0	0	603	903	0
9441	0	0	0	0	0	0	0	200	300	0	-18.3368	-96.1969	-558.588	-94886.6	31412.9	-546.754	256.236	1072.87	0	0	0	0	0	0	0	603	903	0
9441	1	0	0	0	0	0	0	200	300	0	-17.879	-96.5021	-560.419	-94520.3	31718	-317.872	256.597	1071.66	0	0	0	0	0	0	0	603	903	0
9441	2	0	0	0	0	0	0	200	300	0	-15.7428	-96.5021	-560.724	-94703.5	31840.1	-546.754	256.784	1071.89	0	0	0	0	0	0	0	603	903	0
9441	3	0	0	0	0	0	0	200	300	0	-18.4894	-95.7391	-561.945	-94611.9	31596	-180.542	256.226	1071.36	0	0	0	0	0	0	0	603	903	0
9441	4	0	0	0	0	0	0	200	300	0	-18.9471	-94.0607	-564.692	-94978.1	31351.8	-409.424	255.52	1071.19	0	0	0	0	0	0	0	603	903	0
9441	5	0	0	0	0	0	0	200	300	0	-18.4894	-94.9762	-562.555	-94611.9	31657	-684.083	256.274	1071.18	0	0	0	0	0	0	0	603	903	0
9441	6	0	0	0	0	0	0	200	300	0	-17.7264	-93.6029	-564.081	-94520.3	32023.2	-180.542	256.771	1070.57	0	0	0	0	0	0	0	603	903	0
9441	7	0	0	0	0	0	0	200	300	0	-17.879	-93.7555	-565.302	-95161.2	31596	48.3394	255.892	1071.34	0	0	0	0	0	0	0	603	903	0
9441	8	0	0	0	0	0	0	200	300	0	-18.9471	-92.84	-567.438	-95619	31596	-272.095	255.682	1071.51	0	0	0	0	0	0	0	603	903	0
9441	9	0	0	0	0	0	0	200	300	0	-19.7101	-93.9081	-565.302	-94520.3	32023.2	139.892	256.648	1070.2	0	0	0	0	0	0	0	603	903	0
9442	0	0	0	0	0	0	0	200	300	0	-18.642	-92.3822	-568.659	-94978.1	32267.3	322.998	256.743	1070.02	0	0	0	0	0	0	0	603	903	0
9442	1	0	0	0	0	0	0	200	300	0	-18.0316	-91.0089	-568.964	-94795	31779.1	-317.872	255.854	1069.61	0	0	0	0	0	0	0	603	903	0
9442	2	0	0	0	0	0	0	200	300	0	-18.3368	-90.8563	-569.269	-95893.6	31840.1	94.1158	255.932	1071.45	0	0	0	0	0	0	0	603	903	0
9442	3	0	0	0	0	0	0	200	300	0	-18.9471	-89.3304	-570.49	-95619	31596	231.445	255.384	1070.61	0	0	0	0	0	0	0	603	903	0
9442	4	0	0	0	0	0	0	200	300	0	-19.2523	-89.9408	-572.321	-95435.9	31596	-43.2133	255.207	1069.75	0	0	0	0	0	0	0	603	903	0
9442	5	0	0	0	0	0	0	200	300	0	-18.642	-87.8046	-573.847	-95527.4	31779.1	506.103	255.379	1069.47	0	0	0	0	0	0	0	603	903	0
9442	6	0	0	0	0	0	0	200	300	0	-19.0997	-88.1097	-571.406	-96259.9	32328.4	414.55	256.577	1071.46	0	0	0	0	0	0	0	603	903	0
9442	7	0	0	0	0	0	0	200	300	0	-18.9471	-87.652	-576.288	-96442.9	32389.4	460.327	256.203	1070.35	0	0	0	0	0	0	0	603	903	0
9442	8	0	0	0	0	0	0	200	300	0	-20.3204	-85.6683	-575.068	-95893.6	32328.4	689.209	256.217	1069.75	0	0	0	0	0	0	0	603	903	0
9442	9	0	0	0	0	0	0	200	300	0	-19.8627	-85.5157	-575.983	-95985.2	32328.4	826.538	256.127	1069.65	0	0	0	0	0	0	0	603	903	0
9443	0	0	0	0	0	0	0	200	300	0	-19.5575	-83.8373	-577.509	-96900.7	32633.5	643.432	256.507	1070.79	0	0	0	0	0	0	0	603	903	0
9443	1	0	0	0	0	0	0	200	300	0	-21.3885	-82.7692	-577.204	-96351.4	32755.6	551.879	256.749	1069.93	0	0	0	0	0	0	0	603	903	0
9443	2	0	0	0	0	0	0	200	300	0	-20.7782	-82.7692	-580.256	-95710.5	32328.4	826.538	255.714	1067.95	0	0	0	0	0	0	0	603	903	0
9443	3	0	0	0	0	0	0	200	300	0	-19.2523	-81.5485	-581.476	-96626.1	32389.4	734.985	255.702	1069.17	0	0	0	0	0	0	0	603	903	0
9443	4	0	0	0	0	0	0	200	300	0	-19.2523	-82.0062	-583.002	-97266.9	32938.7	734.985	256.498	1069.84	0	0	0	0	0	0	0	603	903	0
9443	5	0	0	0	0	0	0	200	300	0	-20.473	-80.9381	-583.002	-96626.1	32938.7	1009.64	256.498	1068.74	0	0	0	0	0	0	0	603	903	0
9443	6	0	0	0	0	0	0	200	300	0	-21.236	-79.87	-583.613	-96900.7	32816.7	826.538	256.23	1069.04	0	0	0	0	0	0	0	603	903	0
9443	7	0	0	0	0	0	0	200	300	0	-19.5575	-78.6493	-582.087	-97358.5	33060.8	826.538	256.797	1070.26	0	0	0	0	0	0	0	603	903	0
9443	8	0	0	0	0	0	0	200	300	0	-19.0997	-77.8864	-584.528	-97083.8	33121.8	1192.75	256.664	1069.09	0	0	0	0	0	0	0	603	903	0
9443	9	0	0	0	0	0	0	200	300	0	-20.3204	-77.276	-586.054	-97175.4	32816.7	780.761	255.996	1068.81	0	0	0	0	0	0	0	603	903	0
9444	0	0	0	0	0	0	0	200	300	0	-19.7101	-77.1234	-586.359	-97724.7	32328.4	1009.64	255.134	1069.66	0	0	0	0	0	0	0	603	903	0
9444	1	0	0	0	0	0	0	200	300	0	-19.4049	-75.5975	-584.833	-97266.9	33182.9	1192.75	256.739	1069.32	0	0	0	0	0	0	0	603	903	0
9444	2	0	0	0	0	0	0	200	300	0	-18.1842	-75.5975	-586.054	-97724.7	33304.9	826.538	256.829	1069.75	0	0	0	0	0	0	0	603	903	0
9444	3	0	0	0	0	0	0	200	300	0	-18.0316	-74.3768	-587.58	-97541.6	33121.8	1421.63	256.37	1069.01	0	0	0	0	0	0	0	603	903	0
9444	4	0	0	0	0	0	0	200	300	0	-19.5575	-72.5458	-586.054	-97999.4	33243.9	1238.52	256.725	1070.22	0	0	0	0	0	0	0	603	903	0
9444	5	0	0	0	0	0	0	200	300	0	-17.5739	-72.5458	-588.495	-98365.6	32877.7	963.867	255.867	1070.15	0	0	0	0	0	0	0	603	903	0
9444	6	0	0	0	0	0	0	200	300	0	-18.3368	-72.088	-590.021	-97816.2	32755.6	963.867	255.516	1068.78	0	0	0	0	0	0	0	603	903	0
9444	7	0	0	0	0	0	0	200	300	0	-18.1842	-71.7828	-590.326	-97633.1	33488	1009.64	256.728	1068.39	0	0	0	0	0	0	0	603	903	0
9444	8	0	0	0	0	0	0	200	300	0	-17.5739	-70.7147	-589.716	-98457.1	33976.3	872.314	257.615	1069.96	0	0	0	0	0	0	0	603	903	0
9444	9	0	0	0	0	0	0	200	300	0	-18.0316	-69.1888	-587.885	-98365.6	33488	1146.97	256.964	1070.32	0	0	0	0	0	0	0	603	903	0
9445	0	0	0	0	0	0	0	200	300	0	-18.1842	-68.7311	-590.632	-98274	33427	1101.2	256.595	1069.39	0	0	0	0	0	0	0	603	903	0
9445	1	0	0	0	0	0	0	200	300	0	-16.8109	-68.2733	-593.073	-98274	33304.9	963.867	256.157	1068.7	0	0	0	0	0	0	0	603	903	0
9445	2	0	0	0	0	0	0	200	300	0	-17.1161	-67.0526	-591.242	-98823.3	34098.4	963.867	257.672	1070.15	0	0	0	0	0	0	0	603	903	0
9445	3	0	0	0	0	0	0	200	300	0	-17.879	-66.4423	-591.852	-98914.9	34098.4	1101.2	257.613	1070.13	0	0	0	0	0	0	0	603	903	0
9445	4	0	0	0	0	0	0	200	300	0	-17.7264	-64.7638	-590.937	-98182.5	33854.2	734.985	257.289	1069.15	0	0	0	0	0	0	0	603	903	0
9445	5	0	0	0	0	0	0	200	300	0	-16.5057	-64.4586	-591.242	-97999.4	33976.3	918.091	257.466	1068.75	0	0	0	0	0	0	0	603	903	0
9445	6	0	0	0	0	0	0	200	300	0	-16.048	-63.8483	-593.073	-98823.3	34159.4	1055.42	257.597	1069.63	0	0	0	0	0	0	0	603	903	0
9445	7	0	0	0	0	0	0	200	300	0	-16.9635	-61.8646	-593.073	-98457.1	33732.2	780.761	256.877	1069.01	0	0	0	0	0	0	0	603	903	0
9445	8	0	0	0	0	0	0	200	300	0	-16.048	-61.5594	-593.683	-99830.4	33915.3	918.091	257.127	1071.15	0	0	0	0	0	0	0	603	903	0
9445	9	0	0	0	0	0	0	200	300	0	-15.8954	-61.4069	-594.294	-98274	34098.4	1238.52	257.376	1068.36	0	0	0	0	0	0	0	603	903	0
9446	0	0	0	0	0	0	0	200	300	0	-15.285	-60.6439	-592.768	-99189.5	33915.3	1055.42	257.215	1070.33	0	0	0	0	0	0	0	603	903	0
9446	1	0	0	0	0	0	0	200	300	0	-16.3531	-59.4232	-592.768	-99189.5	33854.2	963.867	257.112	1070.33	0	0	0	0	0	0	0	603	903	0
9446	2	0	0	0	0	0	0	200	300	0	-16.6583	-58.3551	-592.768	-98914.9	34037.4	963.867	257.421	1069.87	0	0	0	0	0	0	0	603	903	0
9446	3	0	0	0	0	0	0	200	300	0	-15.4376	-57.4396	-592.463	-98457.1	34647.7	963.867	258.481	1069.18	0	0	0	0	0	0	0	603	903	0
9446	4	0	0	0	0	0	0	200	300	0	-15.1324	-56.6766	-594.294	-99281.1	34403.6	918.091	257.89	1070.06	0	0	0	0	0	0	0	603	903	0
9446	5	0	0	0	0	0	0	200	300	0	-15.8954	-55.4559	-593.073	-99281.1	33793.2	1009.64	256.98	1070.4	0	0	0	0	0	0	0	603	903	0
9446	6	0	0	0	0	0	0	200	300	0	-15.8954	-55.9137	-593.378	-98914.9	34220.5	826.538	257.671	1069.7	0	0	0	0	0	0	0	603	903	0
9446	7	0	0	0	0	0	0	200	300	0	-14.8273	-54.5404	-591.547	-98823.3	34647.7	1284.3	258.571	1070.06	0	0	0	0	0	0	0	603	903	0
9446	8	0	0	0	0	0	0	200	300	0	-15.285	-53.0145	-587.885	-99189.5	34525.6	1375.85	258.729	1071.72	0	0	0	0	0	0	0	603	903	0
9446	9	0	0	0	0	0	0	200	300	0	-16.048	-52.2516	-589.411	-99372.6	33976.3	918.091	257.645	1071.6	0	0	0	0	0	0	0	603	903	0
9447	0	0	0	0	0	0	0	200	300	0	-15.8954	-51.1835	-590.021	-98457.1	34342.5	1146.97	258.206	1069.87	0	0	0	0	0	0	0	603	903	0
9447	1	0	0	0	0	0	0	200	300	0	-15.285	-51.0309	-586.359	-97999.4	34464.6	1238.52	258.777	1070.13	0	0	0	0	0	0	0	603	903	0
9447	2	0	0	0	0	0	0	200	300	0	-14.9799	-50.5731	-589.716	-98457.1	33793.2	1146.97	257.304	1069.96	0	0	0	0	0	0	0	603	903	0
9447	3	0	0	0	0	0	0	200	300	0	-16.048	-49.505	-588.19	-97816.2	33671.1	1009.64	257.245	1069.3	0	0	0	0	0	0	0	603	903	0
9447	4	0	0	0	0	0	0	200	300	0	-15.8954	-48.4369	-583.613	-99006.4	34220.5	1650.51	258.636	1072.64	0	0	0	0	0	0	0	603	903	0
9447	5	0	0	0	0	0	0	200	300	0	-14.8273	-47.8265	-585.749	-96717.6	34220.5	1330.08	258.422	1068.12	0	0	0	0	0	0	0	603	903	0
9447	6	0	0	0	0	0	0	200	300	0	-14.8273	-47.5214	-585.138	-97724.7	33854.2	1192.75	257.857	1070.01	0	0	0	0	0	0	0	603	903	0
9447	7	0	0	0	0	0	0	200	300	0	-16.2006	-46.1481	-583.918	-97541.6	33732.2	1192.75	257.769	1070.05	0	0	0	0	0	0	0	603	903	0
9447	8	0	0	0	0	0	0	200	300	0	-16.5057	-45.8429	-583.002	-97633.1	33671.1	1192.75	257.755	1070.47	0	0	0	0	0	0	0	603	903	0
9447	9	0	0	0	0	0	0	200	300	0	-15.4376	-45.3851	-581.171	-95802.1	33854.2	1238.52	258.252	1067.84	0	0	0	0	0	0	0	603	903	0
9448	0	0	0	0	0	0	0	200	300	0	-15.1324	-44.4696	-580.561	-96809.1	33671.1	1330.08	257.998	1069.75	0	0	0	0	0	0	0	603	903	0
9448	1	0	0	0	0	0	0	200	300	0	-16.6583	-43.5541	-579.951	-95619	33793.2	1284.3	258.269	1067.87	0	0	0	0	0	0	0	603	903	0
9448	2	0	0	0	0	0	0	200	300	0	-16.5057	-43.0963	-576.899	-96992.3	33732.2	1284.3	258.472	1071.13	0	0	0	0	0	0	0	603	903	0
9448	3	0	0	0	0	0	0	200	300	0	-15.5902	-43.0963	-579.035	-95619	33549.1	1650.51	257.94	1068.14	0	0	0	0	0	0	0	603	903	0
9448	4	0	0	0	0	0	0	200	300	0	-15.1324	-42.6385	-576.899	-96259.9	33732.2	1558.96	258.472	1069.86	0	0	0	0	0	0	0	603	903	0
9448	5	0	0	0	0	0	0	200	300	0	-16.9635	-41.8756	-575.068	-95161.2	33304.9	1650.51	257.915	1068.48	0	0	0	0	0	0	0	603	903	0
9448	6	0	0	0	0	0	0	200	300	0	-18.0316	-41.2653	-572.626	-95893.6	33976.3	1421.63	259.334	1070.46	0	0	0	0	0	0	0	603	903	0
9448	7	0	0	0	0	0	0	200	300	0	-16.048	-39.892	-572.016	-95252.8	32755.6	1375.85	257.264	1069.52	0	0	0	0	0	0	0	603	903	0
9448	8	0	0	0	0	0	0	200	300	0	-15.8954	-39.2816	-571.406	-95252.8	33610.1	1330.08	258.82	1069.7	0	0	0	0	0	0	0	603	903	0
9448	9	0	0	0	0	0	0	200	300	0	-15.8954	-38.6713	-570.795	-95344.3	33366	1330.08	258.455	1070.04	0	0	0	0	0	0	0	603	903	0
9449	0	0	0	0	0	0	0	200	300	0	-14.5221	-39.129	-569.269	-95344.3	32877.7	1513.18	257.754	1070.49	0	0	0	0	0	0	0	603	903	0
9449	1	0	0	0	0	0	0	200	300	0	-17.4213	-38.2135	-565.302	-94611.9	32938.7	1558.96	258.267	1070.37	0	0	0	0	0	0	0	603	903	0
9449	2	0	0	0	0	0	0	200	300	0	-15.4376	-38.3661	-565.607	-94154.1	33549.1	1604.74	259.315	1069.47	0	0	0	0	0	0	0	603	903	0
9449	3	0	0	0	0	0	0	200	300	0	-16.048	-37.4506	-564.387	-94520.3	33182.9	1558.96	258.795	1070.47	0	0	0	0	0	0	0	603	903	0
9449	4	0	0	0	0	0	0	200	300	0	-17.7264	-36.9928	-562.555	-94245.7	32694.6	1513.18	258.118	1070.53	0	0	0	0	0	0	0	603	903	0
9449	5	0	0	0	0	0	0	200	300	0	-17.7264	-35.9247	-563.471	-93513.2	32816.7	1650.51	258.24	1068.96	0	0	0	0	0	0	0	603	903	0
9449	6	0	0	0	0	0	0	200	300	0	-16.5057	-35.3143	-562.555	-92414.6	32938.7	1513.18	258.552	1067.28	0	0	0	0	0	0	0	603	903	0
9449	7	0	0	0	0	0	0	200	300	0	-16.5057	-35.3143	-559.504	-92872.4	32816.7	1467.41	258.653	1068.99	0	0	0	0	0	0	0	603	903	0
9449	8	0	0	0	0	0	0	200	300	0	-17.7264	-35.3143	-558.588	-93055.5	32450.4	1787.84	258.094	1069.59	0	0	0	0	0	0	0	603	903	0
9449	9	0	0	0	0	0	0	200	300	0	-16.5057	-34.2462	-557.062	-92689.3	32694.6	1833.62	258.691	1069.39	0	0	0	0	0	0	0	603	903	0
9450	0	0	0	0	0	0	0	200	300	0	-17.4213	-34.704	-555.231	-91865.3	32694.6	1833.62	258.885	1068.45	0	0	0	0	0	0	0	603	903	0
9450	1	0	0	0	0	0	0	200	300	0	-16.5057	-33.7885	-555.842	-91956.9	32084.2	1696.29	257.722	1068.44	0	0	0	0	0	0	0	603	903	0
9450	2	0	0	0	0	0	0	200	300	0	-17.5739	-33.7885	-552.485	-91865.3	32084.2	1650.51	258.073	1069.28	0	0	0	0	0	0	0	603	903	0
9450	3	0	0	0	0	0	0	200	300	0	-16.8109	-32.8729	-552.18	-91590.7	32755.6	1833.62	259.321	1068.87	0	0	0	0	0	0	0	603	903	0
9450	4	0	0	0	0	0	0	200	300	0	-17.879	-32.5677	-549.738	-90858.2	32267.3	1787.84	258.696	1068.28	0	0	0	0	0	0	0	603	903	0
9450	5	0	0	0	0	0	0	200	300	0	-17.7264	-33.6359	-547.907	-90675.1	31901.1	1696.29	258.224	1068.49	0	0	0	0	0	0	0	603	903	0
9450	6	0	0	0	0	0	0	200	300	0	-17.1161	-31.8048	-547.297	-90583.6	31473.9	2062.5	257.508	1068.51	0	0	0	0	0	0	0	603	903	0
9450	7	0	0	0	0	0	0	200	300	0	-18.3368	-30.5841	-547.297	-90675.1	31962.2	2199.83	258.4	1068.68	0	0	0	0	0	0	0	603	903	0
9450	8	0	0	0	0	0	0	200	300	0	-18.4894	-31.0419	-544.855	-90492	31840.1	1970.95	258.438	1069.08	0	0	0	0	0	0	0	603	903	0
9450	9	0	0	0	0	0	0	200	300	0	-17.2687	-30.1263	-543.329	-89484.9	30985.6	1970.95	257.029	1067.7	0	0	0	0	0	0	0	603	903	0
9451	0	0	0	0	0	0	0	200	300	0	-18.3368	-29.9738	-540.888	-89210.3	31779.1	2016.72	258.754	1067.93	0	0	0	0	0	0	0	603	903	0
9451	1	0	0	0	0	0	0	200	300	0	-18.9471	-29.3634	-539.667	-89027.2	32023.2	2245.6	259.339	1067.97	0	0	0	0	0	0	0	603	903	0
9451	2	0	0	0	0	0	0	200	300	0	-16.8109	-28.1427	-538.447	-88844.1	31229.7	1879.39	258	1068	0	0	0	0	0	0	0	603	903	0
9451	3	0	0	0	0	0	0	200	300	0	-17.879	-27.9901	-539.057	-88477.8	31107.7	1833.62	257.708	1067.13	0	0	0	0	0	0	0	603	903	0
9451	4	0	0	0	0	0	0	200	300	0	-17.879	-27.3798	-538.447	-88020.1	31412.9	2062.5	258.34	1066.47	0	0	0	0	0	0	0	603	903	0
9451	5	0	0	0	0	0	0	200	300	0	-17.879	-27.0746	-536.921	-88203.2	31046.6	2062.5	257.824	1067.28	0	0	0	0	0	0	0	603	903	0
9451	6	0	0	0	0	0	0	200	300	0	-18.9471	-27.8375	-534.784	-87928.5	30985.6	2016.72	257.94	1067.42	0	0	0	0	0	0	0	603	903	0
9451	7	0	0	0	0	0	0	200	300	0	-18.9471	-25.5487	-532.038	-87470.8	30741.5	2199.83	257.781	1067.41	0	0	0	0	0	0	0	603	903	0
9451	8	0	0	0	0	0	0	200	300	0	-18.1842	-25.5487	-531.122	-86921.4	30619.4	1833.62	257.65	1066.66	0	0	0	0	0	0	0	603	903	0
9451	9	0	0	0	0	0	0	200	300	0	-17.2687	-24.9384	-529.291	-87104.6	31351.8	1925.17	259.234	1067.57	0	0	0	0	0	0	0	603	903	0
9452	0	0	0	0	0	0	0	200	300	0	-16.9635	-24.328	-528.986	-86829.9	30802.5	2154.05	258.229	1067.14	0	0	0	0	0	0	0	603	903	0
9452	1	0	0	0	0	0	0	200	300	0	-17.5739	-23.5651	-525.324	-86463.7	30924.6	2016.72	258.868	1067.59	0	0	0	0	0	0	0	603	903	0
9452	2	0	0	0	0	0	0	200	300	0	-18.642	-23.4125	-527.765	-85639.7	30863.5	1970.95	258.48	1065.27	0	0	0	0	0	0	0	603	903	0
9452	3	0	0	0	0	0	0	200	300	0	-17.1161	-22.3444	-524.714	-85731.3	30497.3	2154.05	258.122	1066.39	0	0	0	0	0	0	0	603	903	0
9452	4	0	0	0	0	0	0	200	300	0	-16.9635	-22.6495	-524.714	-85639.7	30497.3	2245.6	258.122	1066.21	0	0	0	0	0	0	0	603	903	0
9452	5	0	0	0	0	0	0	200	300	0	-18.4894	-21.4288	-522.883	-85273.5	30924.6	2291.38	259.142	1066.08	0	0	0	0	0	0	0	603	903	0
9452	6	0	0	0	0	0	0	200	300	0	-18.1842	-21.1237	-523.493	-84724.2	30802.5	2199.83	258.84	1064.84	0	0	0	0	0	0	0	603	903	0
9452	7	0	0	0	0	0	0	200	300	0	-16.9635	-20.8185	-520.441	-83534	30497.3	2199.83	258.599	1063.51	0	0	0	0	0	0	0	603	903	0
9452	8	0	0	0	0	0	0	200	300	0	-17.1161	-20.0555	-520.441	-84358	30741.5	2154.05	259.068	1065.09	0	0	0	0	0	0	0	603	903	0
9452	9	0	0	0	0	0	0	200	300	0	-18.3368	-19.5978	-518.61	-83442.5	30436.3	2062.5	258.688	1063.9	0	0	0	0	0	0	0	603	903	0
9453	0	0	0	0	0	0	0	200	300	0	-17.5739	-18.9874	-518.61	-84083.3	30009	2108.28	257.864	1065.13	0	0	0	0	0	0	0	603	903	0
9453	1	0	0	0	0	0	0	200	300	0	-16.3531	-18.5297	-516.779	-83808.7	30131.1	2199.83	258.306	1065.18	0	0	0	0	0	0	0	603	903	0
9453	2	0	0	0	0	0	0	200	300	0	-16.2006	-18.9874	-515.558	-83717.1	30314.2	2199.83	258.799	1065.38	0	0	0	0	0	0	0	603	903	0
9453	3	0	0	0	0	0	0	200	300	0	-16.9635	-17.9193	-516.474	-83808.7	30619.4	2245.6	259.285	1065.27	0	0	0	0	0	0	0	603	903	0
9453	4	0	0	0	0	0	0	200	300	0	-14.9799	-18.2245	-514.643	-83350.9	30314.2	2199.83	258.903	1064.96	0	0	0	0	0	0	0	603	903	0
9453	5	0	0	0	0	0	0	200	300	0	-14.9799	-17.9193	-514.338	-82801.6	30009	2108.28	258.345	1063.99	0	0	0	0	0	0	0	603	903	0
9453	6	0	0	0	0	0	0	200	300	0	-13.7592	-16.546	-511.896	-82435.4	30070.1	2245.6	258.743	1064.04	0	0	0	0	0	0	0	603	903	0
9453	7	0	0	0	0	0	0	200	300	0	-16.6583	-16.0883	-510.981	-82618.5	30314.2	2245.6	259.326	1064.69	0	0	0	0	0	0	0	603	903	0
9453	8	0	0	0	0	0	0	200	300	0	-16.048	-16.0883	-510.676	-82069.2	29948	2062.5	258.644	1063.71	0	0	0	0	0	0	0	603	903	0
9453	9	0	0	0	0	0	0	200	300	0	-14.8273	-14.2572	-510.37	-81611.4	30131.1	1879.39	259.038	1062.91	0	0	0	0	0	0	0	603	903	0
9454	0	0	0	0	0	0	0	200	300	0	-12.8436	-14.2572	-507.319	-81428.3	29276.6	1879.39	257.709	1063.51	0	0	0	0	0	0	0	603	903	0
9454	1	0	0	0	0	0	0	200	300	0	-14.3695	-14.1046	-508.539	-81519.8	29520.8	1879.39	258.05	1063.3	0	0	0	0	0	0	0	603	903	0
9454	2	0	0	0	0	0	0	200	300	0	-13.7592	-13.952	-506.708	-81611.4	29825.9	1742.07	258.862	1064.06	0	0	0	0	0	0	0	603	903	0
9454	3	0	0	0	0	0	0	200	300	0	-13.3014	-13.1891	-505.182	-80970.5	29825.9	1970.95	259.04	1063.28	0	0	0	0	0	0	0	603	903	0
9454	4	0	0	0	0	0	0	200	300	0	-13.7592	-11.9684	-504.572	-80421.2	29948	1421.63	259.353	1062.39	0	0	0	0	0	0	0	603	903	0
9454	5	0	0	0	0	0	0	200	300	0	-14.5221	-12.121	-505.793	-80787.4	29520.8	1742.07	258.365	1062.72	0	0	0	0	0	0	0	603	903	0
9454	6	0	0	0	0	0	0	200	300	0	-14.6747	-11.0529	-504.877	-80512.8	29398.7	1742.07	258.229	1062.47	0	0	0	0	0	0	0	603	903	0
9454	7	0	0	0	0	0	0	200	300	0	-14.6747	-11.5106	-504.572	-79597.2	29825.9	1742.07	259.111	1060.75	0	0	0	0	0	0	0	603	903	0
9454	8	0	0	0	0	0	0	200	300	0	-12.691	-11.6632	-500.91	-79322.6	29703.9	1604.74	259.3	1061.36	0	0	0	0	0	0	0	603	903	0
9454	9	0	0	0	0	0	0	200	300	0	-13.9117	-10.7477	-501.826	-79688.8	29398.7	1925.17	258.584	1061.8	0	0	0	0	0	0	0	603	903	0
9455	0	0	0	0	0	0	0	200	300	0	-14.2169	-10.5951	-501.52	-79688.8	29459.7	1833.62	258.741	1061.89	0	0	0	0	0	0	0	603	903	0
9455	1	0	0	0	0	0	0	200	300	0	-13.454	-10.1373	-500.91	-79139.5	29764.9	1970.95	259.422	1060.99	0	0	0	0	0	0	0	603	903	0
9455	2	0	0	0	0	0	0	200	300	0	-12.9962	-9.06921	-501.52	-78681.7	29459.7	1650.51	258.741	1059.89	0	0	0	0	0	0	0	603	903	0
9455	3	0	0	0	0	0	0	200	300	0	-12.9962	-9.06921	-500.605	-79047.9	29398.7	1696.29	258.726	1060.91	0	0	0	0	0	0	0	603	903	0
9455	4	0	0	0	0	0	0	200	300	0	-13.6066	-8.91663	-500.91	-78498.6	29154.6	2062.5	258.203	1059.71	0	0	0	0	0	0	0	603	903	0
9455	5	0	0	0	0	0	0	200	300	0	-13.6066	-7.69592	-498.469	-78223.9	29520.8	1787.84	259.223	1059.93	0	0	0	0	0	0	0	603	903	0
9455	6	0	0	0	0	0	0	200	300	0	-12.2333	-7.69592	-497.858	-78223.9	29337.7	1879.39	258.928	1060.12	0	0	0	0	0	0	0	603	903	0
9455	7	0	0	0	0	0	0	200	300	0	-12.0807	-7.54333	-497.858	-77949.3	28788.3	1925.17	257.824	1059.57	0	0	0	0	0	0	0	603	903	0
9455	8	0	0	0	0	0	0	200	300	0	-13.454	-7.08557	-498.774	-77766.2	29459.7	1833.62	259.064	1058.91	0	0	0	0	0	0	0	603	903	0
9455	9	0	0	0	0	0	0	200	300	0	-12.8436	-6.17004	-498.163	-77308.4	29459.7	1696.29	259.137	1058.19	0	0	0	0	0	0	0	603	903	0
9456	0	0	0	0	0	0	0	200	300	0	-12.691	-6.32263	-497.248	-76209.8	28849.4	1696.29	258.018	1056.26	0	0	0	0	0	0	0	603	903	0
9456	1	0	0	0	0	0	0	200	300	0	-12.8436	-6.32263	-496.332	-77216.9	28910.4	1787.84	258.248	1058.58	0	0	0	0	0	0	0	603	903	0
9456	2	0	0	0	0	0	0	200	300	0	-13.3014	-6.32263	-495.417	-76667.5	29154.6	1696.29	258.849	1057.75	0	0	0	0	0	0	0	603	903	0
9456	3	0	0	0	0	0	0	200	300	0	-10.86	-4.94934	-495.112	-76850.7	29215.6	1604.74	259.008	1058.22	0	0	0	0	0	0	0	603	903	0
9456	4	0	0	0	0	0	0	200	300	0	-12.0807	-4.94934	-495.417	-76026.7	28544.2	1650.51	257.617	1056.46	0	0	0	0	0	0	0	603	903	0
9456	5	0	0	0	0	0	0	200	300	0	-12.3859	-5.4071	-496.638	-75568.9	28849.4	1650.51	258.089	1055.16	0	0	0	0	0	0	0	603	903	0
9456	6	0	0	0	0	0	0	200	300	0	-11.1652	-5.55969	-496.638	-76209.8	29032.5	1879.39	258.458	1056.45	0	0	0	0	0	0	0	603	903	0
9456	7	0	0	0	0	0	0	200	300	0	-12.9962	-5.86487	-495.417	-76026.7	28849.4	1742.07	258.233	1056.46	0	0	0	0	0	0	0	603	903	0
9456	8	0	0	0	0	0	0	200	300	0	-12.9962	-5.25452	-493.586	-75202.7	27872.8	1513.18	256.47	1055.36	0	0	0	0	0	0	0	603	903	0
9456	9	0	0	0	0	0	0	200	300	0	-12.0807	-4.64417	-493.586	-74745	29093.5	1604.74	258.943	1054.43	0	0	0	0	0	0	0	603	903	0
9457	0	0	0	0	0	0	0	200	300	0	-11.4703	-4.64417	-493.586	-74836.5	28788.3	1604.74	258.325	1054.62	0	0	0	0	0	0	0	603	903	0
9457	1	0	0	0	0	0	0	200	300	0	-12.691	-3.72864	-494.196	-75111.2	28300.1	1513.18	257.265	1054.99	0	0	0	0	0	0	0	603	903	0
9457	2	0	0	0	0	0	0	200	300	0	-12.3859	-4.33899	-494.196	-74104.1	28239	1558.96	257.141	1052.95	0	0	0	0	0	0	0	603	903	0
9457	3	0	0	0	0	0	0	200	300	0	-11.1652	-4.1864	-493.586	-73097	28788.3	1650.51	258.325	1051.09	0	0	0	0	0	0	0	603	903	0
9457	4	0	0	0	0	0	0	200	300	0	-11.6229	-4.1864	-491.755	-73646.3	28605.2	1696.29	258.17	1052.76	0	0	0	0	0	0	0	603	903	0
9457	5	0	0	0	0	0	0	200	300	0	-9.94446	-5.10193	-491.45	-74195.6	28300.1	1558.96	257.585	1053.97	0	0	0	0	0	0	0	603	903	0
9457	6	0	0	0	0	0	0	200	300	0	-12.2333	-3.72864	-490.839	-73554.8	28361.1	1513.18	257.781	1052.86	0	0	0	0	0	0	0	603	903	0
9457	7	0	0	0	0	0	0	200	300	0	-12.5385	-3.27087	-491.45	-72822.4	28178	1879.39	257.336	1051.18	0	0	0	0	0	0	0	603	903	0
9457	8	0	0	0	0	0	0	200	300	0	-11.3177	-2.9657	-492.06	-72181.5	28117	1467.41	257.141	1049.69	0	0	0	0	0	0	0	603	903	0
9457	9	0	0	0	0	0	0	200	300	0	-11.7755	-2.81311	-492.365	-72730.8	28361.1	1467.41	257.602	1050.72	0	0	0	0	0	0	0	603	903	0
9458	0	0	0	0	0	0	0	200	300	0	-12.0807	-3.88123	-491.45	-71906.8	28361.1	1650.51	257.709	1049.32	0	0	0	0	0	0	0	603	903	0
9458	1	0	0	0	0	0	0	200	300	0	-12.0807	-3.11829	-491.144	-72364.6	28483.2	1558.96	257.993	1050.34	0	0	0	0	0	0	0	603	903	0
9458	2	0	0	0	0	0	0	200	300	0	-10.4022	-2.81311	-490.534	-71632.1	28117	1925.17	257.319	1049.03	0	0	0	0	0	0	0	603	903	0
9458	3	0	0	0	0	0	0	200	300	0	-11.1652	-3.72864	-491.755	-71723.7	27933.8	1421.63	256.804	1048.85	0	0	0	0	0	0	0	603	903	0
9458	4	0	0	0	0	0	0	200	300	0	-12.0807	-2.9657	-490.229	-71815.3	28361.1	1330.08	257.853	1049.49	0	0	0	0	0	0	0	603	903	0
9458	5	0	0	0	0	0	0	200	300	0	-12.5385	-2.66052	-491.144	-71449.1	28422.1	1421.63	257.869	1048.47	0	0	0	0	0	0	0	603	903	0
9458	6	0	0	0	0	0	0	200	300	0	-10.86	-2.9657	-490.229	-70442	27872.8	1284.3	256.857	1046.69	0	0	0	0	0	0	0	603	903	0
9458	7	0	0	0	0	0	0	200	300	0	-9.94446	-2.50793	-490.534	-70899.7	27811.8	1330.08	256.697	1047.54	0	0	0	0	0	0	0	603	903	0
9458	8	0	0	0	0	0	0	200	300	0	-11.6229	-1.74499	-490.534	-70991.3	27994.9	1330.08	257.07	1047.72	0	0	0	0	0	0	0	603	903	0
9458	9	0	0	0	0	0	0	200	300	0	-9.18152	-1.59241	-490.534	-70533.5	28239	1284.3	257.568	1046.79	0	0	0	0	0	0	0	603	903	0
9459	0	0	0	0	0	0	0	200	300	0	-12.0807	-1.74499	-491.45	-69801.1	27994.9	1375.85	256.964	1045.03	0	0	0	0	0	0	0	603	903	0
9459	1	0	0	0	0	0	0	200	300	0	-9.48669	-1.43982	-487.177	-70625.1	27628.7	1330.08	256.712	1047.97	0	0	0	0	0	0	0	603	903	0
9459	2	0	0	0	0	0	0	200	300	0	-11.9281	-1.89758	-490.839	-69892.7	27506.6	1146.97	256.04	1045.39	0	0	0	0	0	0	0	603	903	0
9459	3	0	0	0	0	0	0	200	300	0	-10.097	-1.43982	-490.534	-69892.7	27811.8	1421.63	256.697	1045.48	0	0	0	0	0	0	0	603	903	0
9459	4	0	0	0	0	0	0	200	300	0	-9.18152	-2.50793	-487.787	-68794	27445.6	1192.75	256.265	1044.03	0	0	0	0	0	0	0	603	903	0
9459	5	0	0	0	0	0	0	200	300	0	-8.57117	-0.524292	-490.534	-68794	28117	1330.08	257.319	1043.24	0	0	0	0	0	0	0	603	903	0
9459	6	0	0	0	0	0	0	200	300	0	-10.7074	-0.524292	-491.755	-68977.1	27628.7	1284.3	256.184	1043.27	0	0	0	0	0	0	0	603	903	0
9459	7	0	0	0	0	0	0	200	300	0	-9.33411	-1.28723	-491.144	-68885.6	27445.6	1238.52	255.881	1043.26	0	0	0	0	0	0	0	603	903	0
9459	8	0	0	0	0	0	0	200	300	0	-9.02893	-0.982055	-492.67	-68244.7	27445.6	1375.85	255.708	1041.52	0	0	0	0	0	0	0	603	903	0
9459	9	0	0	0	0	0	0	200	300	0	-8.57117	-0.0665281	-491.45	-68153.2	27750.7	1146.97	256.467	1041.68	0	0	0	0	0	0	0	603	903	0
9460	0	0	0	0	0	0	0	200	300	0	-12.2333	-0.219116	-492.06	-68061.6	27872.8	1101.2	256.645	1041.32	0	0	0	0	0	0	0	603	903	0
9460	1	0	0	0	0	0	0	200	300	0	-11.7755	0.543823	-492.67	-67786.9	27567.6	1284.3	255.956	1040.59	0	0	0	0	0	0	0	603	903	0
9460	2	0	0	0	0	0	0	200	300	0	-9.02893	-0.0665281	-491.755	-66963	27323.5	1192.75	255.563	1039.17	0	0	0	0	0	0	0	603	903	0
9460	3	0	0	0	0	0	0	200	300	0	-9.18152	0.848999	-493.586	-67146.1	27750.7	1146.97	256.223	1039.04	0	0	0	0	0	0	0	603	903	0
9460	4	0	0	0	0	0	0	200	300	0	-11.4703	0.848999	-495.112	-67054.5	27567.6	1421.63	255.68	1038.43	0	0	0	0	0	0	0	603	903	0
9460	5	0	0	0	0	0	0	200	300	0	-8.87634	1.00159	-495.112	-66871.4	27384.5	1146.97	255.31	1038.06	0	0	0	0	0	0	0	603	903	0
9460	6	0	0	0	0	0	0	200	300	0	-9.48669	1.00159	-493.281	-66688.3	27018.3	1421.63	254.773	1038.19	0	0	0	0	0	0	0	603	903	0
9460	7	0	0	0	0	0	0	200	300	0	-10.7074	0.238648	-495.417	-66047.4	27262.5	1238.52	255.029	1036.32	0	0	0	0	0	0	0	603	903	0
9460	8	0	0	0	0	0	0	200	300	0	-10.2496	1.45935	-495.417	-66779.8	26835.2	1284.3	254.167	1037.8	0	0	0	0	0	0	0	603	903	0
9460	9	0	0	0	0	0	0	200	300	0	-11.4703	1.76453	-495.722	-66413.6	27384.5	1238.52	255.242	1036.97	0	0	0	0	0	0	0	603	903	0
9461	0	0	0	0	0	0	0	200	300	0	-11.4703	2.52747	-495.722	-65406.6	27567.6	1101.2	255.611	1034.94	0	0	0	0	0	0	0	603	903	0
9461	1	0	0	0	0	0	0	200	300	0	-10.2496	2.37488	-497.858	-65406.6	27567.6	1101.2	255.372	1034.38	0	0	0	0	0	0	0	603	903	0
9461	2	0	0	0	0	0	0	200	300	0	-10.097	1.91711	-496.943	-65498.1	27079.4	1330.08	254.492	1034.8	0	0	0	0	0	0	0	603	903	0
9461	3	0	0	0	0	0	0	200	300	0	-11.0126	2.83264	-497.553	-64948.8	27323.5	1146.97	254.916	1033.54	0	0	0	0	0	0	0	603	903	0
9461	4	0	0	0	0	0	0	200	300	0	-10.5548	3.13782	-498.469	-64857.2	27323.5	1055.42	254.815	1033.11	0	0	0	0	0	0	0	603	903	0
9461	5	0	0	0	0	0	0	200	300	0	-9.79187	2.68005	-497.553	-64582.6	27323.5	1101.2	254.916	1032.8	0	0	0	0	0	0	0	603	903	0
9461	6	0	0	0	0	0	0	200	300	0	-10.097	2.68005	-499.384	-64765.7	27140.4	1146.97	254.348	1032.69	0	0	0	0	0	0	0	603	903	0
9461	7	0	0	0	0	0	0	200	300	0	-11.1652	3.90076	-499.384	-64307.9	26957.3	1101.2	253.981	1031.77	0	0	0	0	0	0	0	603	903	0
9461	8	0	0	0	0	0	0	200	300	0	-9.48669	3.59558	-499.689	-64399.5	27506.6	1146.97	255.047	1031.88	0	0	0	0	0	0	0	603	903	0
9461	9	0	0	0	0	0	0	200	300	0	-11.0126	2.52747	-502.436	-63667.1	27262.5	963.867	254.261	1029.72	0	0	0	0	0	0	0	603	903	0
9462	0	0	0	0	0	0	0	200	300	0	-10.7074	3.74817	-500.3	-63300.9	26835.2	1009.64	253.638	1029.53	0	0	0	0	0	0	0	603	903	0
9462	1	0	0	0	0	0	0	200	300	0	-9.79187	4.35852	-498.163	-63941.7	27140.4	1009.64	254.481	1031.35	0	0	0	0	0	0	0	603	903	0
9462	2	0	0	0	0	0	0	200	300	0	-10.86	4.96887	-501.52	-63667.1	26469	1055.42	252.778	1029.95	0	0	0	0	0	0	0	603	903	0
9462	3	0	0	0	0	0	0	200	300	0	-11.1652	5.12146	-503.351	-62934.6	26591.1	1375.85	252.828	1028.03	0	0	0	0	0	0	0	603	903	0
9462	4	0	0	0	0	0	0	200	300	0	-10.2496	4.35852	-504.267	-63026.2	26530	1330.08	252.611	1027.99	0	0	0	0	0	0	0	603	903	0
9462	5	0	0	0	0	0	0	200	300	0	-10.2496	4.20593	-504.267	-62476.9	27323.5	1101.2	254.185	1026.9	0	0	0	0	0	0	0	603	903	0
9462	6	0	0	0	0	0	0	200	300	0	-11.7755	4.20593	-503.046	-62660	27079.4	1192.75	253.831	1027.56	0	0	0	0	0	0	0	603	903	0
9462	7	0	0	0	0	0	0	200	300	0	-11.6229	5.12146	-503.962	-61836	26774.2	1146.97	253.127	1025.7	0	0	0	0	0	0	0	603	903	0
9462	8	0	0	0	0	0	0	200	300	0	-10.86	5.42664	-502.741	-60920.5	26896.2	1101.2	253.499	1024.18	0	0	0	0	0	0	0	603	903	0
9462	9	0	0	0	0	0	0	200	300	0	-10.2496	6.03699	-505.793	-61469.8	26896.2	1375.85	253.176	1024.53	0	0	0	0	0	0	0	603	903	0
9463	0	0	0	0	0	0	0	200	300	0	-11.4703	6.34216	-505.488	-60920.5	26285.9	1238.52	252.001	1023.52	0	0	0	0	0	0	0	603	903	0
9463	1	0	0	0	0	0	0	200	300	0	-11.6229	5.73181	-505.793	-61561.4	26408	963.867	252.211	1024.71	0	0	0	0	0	0	0	603	903	0
9463	2	0	0	0	0	0	0	200	300	0	-10.7074	5.57922	-507.624	-60920.5	26469	1284.3	252.143	1023.01	0	0	0	0	0	0	0	603	903	0
9463	3	0	0	0	0	0	0	200	300	0	-8.87634	4.35852	-508.845	-60462.7	26896.2	1055.42	252.858	1021.82	0	0	0	0	0	0	0	603	903	0
9463	4	0	0	0	0	0	0	200	300	0	-11.7755	5.73181	-507.319	-61103.6	26652.1	1055.42	252.535	1023.44	0	0	0	0	0	0	0	603	903	0
9463	5	0	0	0	0	0	0	200	300	0	-10.097	5.42664	-504.572	-60371.2	26346.9	1009.64	252.216	1022.65	0	0	0	0	0	0	0	603	903	0
9463	6	0	0	0	0	0	0	200	300	0	-12.3859	6.49475	-508.539	-59455.6	26346.9	1101.2	251.809	1019.91	0	0	0	0	0	0	0	603	903	0
9463	7	0	0	0	0	0	0	200	300	0	-10.4022	6.64734	-510.981	-59455.6	26652.1	1009.64	252.159	1019.36	0	0	0	0	0	0	0	603	903	0
9463	8	0	0	0	0	0	0	200	300	0	-10.5548	6.95251	-511.896	-59547.2	26285.9	1101.2	251.35	1019.33	0	0	0	0	0	0	0	603	903	0
9463	9	0	0	0	0	0	0	200	300	0	-12.5385	6.34216	-511.896	-59364.1	26102.8	963.867	250.992	1018.97	0	0	0	0	0	0	0	603	903	0
9464	0	0	0	0	0	0	0	200	300	0	-12.2333	6.34216	-512.507	-58997.9	26102.8	1192.75	250.932	1018.12	0	0	0	0	0	0	0	603	903	0
9464	1	0	0	0	0	0	0	200	300	0	-11.3177	6.64734	-510.981	-58448.6	26285.9	1192.75	251.442	1017.39	0	0	0	0	0	0	0	603	903	0
9464	2	0	0	0	0	0	0	200	300	0	-11.4703	6.64734	-510.065	-58448.6	26224.9	1284.3	251.415	1017.59	0	0	0	0	0	0	0	603	903	0
9464	3	0	0	0	0	0	0	200	300	0	-12.3859	7.25769	-511.896	-58173.9	25431.4	918.091	249.681	1016.64	0	0	0	0	0	0	0	603	903	0
9464	4	0	0	0	0	0	0	200	300	0	-12.2333	6.49475	-511.286	-57899.2	26346.9	1009.64	251.531	1016.24	0	0	0	0	0	0	0	603	903	0
9464	5	0	0	0	0	0	0	200	300	0	-11.4703	7.56287	-514.033	-57349.9	26346.9	963.867	251.255	1014.57	0	0	0	0	0	0	0	603	903	0
9464	6	0	0	0	0	0	0	200	300	0	-11.9281	7.1051	-515.558	-57075.3	25736.6	826.538	249.92	1013.71	0	0	0	0	0	0	0	603	903	0
9464	7	0	0	0	0	0	0	200	300	0	-12.3859	6.79993	-515.253	-57258.4	25797.6	963.867	250.068	1014.13	0	0	0	0	0	0	0	603	903	0
9464	8	0	0	0	0	0	0	200	300	0	-9.48669	5.42664	-516.474	-57166.8	26102.8	1101.2	250.54	1013.69	0	0	0	0	0	0	0	603	903	0
9464	9	0	0	0	0	0	0	200	300	0	-10.5548	7.25769	-515.253	-56434.4	26346.9	1101.2	251.134	1012.53	0	0	0	0	0	0	0	603	903	0
9465	0	0	0	0	0	0	0	200	300	0	-10.86	7.25769	-514.948	-56342.9	25797.6	1192.75	250.098	1012.41	0	0	0	0	0	0	0	603	903	0
9465	1	0	0	0	0	0	0	200	300	0	-12.0807	7.25769	-515.864	-56251.3	25492.4	826.538	249.417	1012.04	0	0	0	0	0	0	0	603	903	0
9465	2	0	0	0	0	0	0	200	300	0	-11.7755	8.02063	-516.779	-56068.2	26224.9	918.091	250.747	1011.5	0	0	0	0	0	0	0	603	903	0
9465	3	0	0	0	0	0	0	200	300	0	-12.2333	8.17322	-515.558	-55335.8	25797.6	872.314	250.038	1010.33	0	0	0	0	0	0	0	603	903	0
9465	4	0	0	0	0	0	0	200	300	0	-11.6229	7.86804	-517.389	-55152.7	24882.1	734.985	248.092	1009.6	0	0	0	0	0	0	0	603	903	0
9465	5	0	0	0	0	0	0	200	300	0	-11.0126	8.02063	-518.61	-55335.8	25858.7	872.314	249.861	1009.7	0	0	0	0	0	0	0	603	903	0
9465	6	0	0	0	0	0	0	200	300	0	-11.7755	8.02063	-518.61	-54969.6	25980.7	872.314	250.097	1008.99	0	0	0	0	0	0	0	603	903	0
9465	7	0	0	0	0	0	0	200	300	0	-11.7755	8.32581	-518.305	-54237.1	25614.5	1467.41	249.42	1007.64	0	0	0	0	0	0	0	603	903	0
9465	8	0	0	0	0	0	0	200	300	0	-11.0126	8.32581	-519.526	-53596.3	25431.4	826.538	248.951	1006.16	0	0	0	0	0	0	0	603	903	0
9465	9	0	0	0	0	0	0	200	300	0	-11.1652	8.93616	-520.746	-53687.8	25919.7	689.209	249.774	1006.1	0	0	0	0	0	0	0	603	903	0
9466	0	0	0	0	0	0	0	200	300	0	-11.9281	9.24133	-521.052	-53870.9	26041.8	826.538	249.979	1006.39	0	0	0	0	0	0	0	603	903	0
9466	1	0	0	0	0	0	0	200	300	0	-10.7074	9.54651	-521.052	-53687.8	25431.4	689.209	248.808	1006.04	0	0	0	0	0	0	0	603	903	0
9466	2	0	0	0	0	0	0	200	300	0	-12.0807	7.41028	-520.441	-52955.4	25614.5	780.761	249.217	1004.75	0	0	0	0	0	0	0	603	903	0
9466	3	0	0	0	0	0	0	200	300	0	-10.097	9.08875	-521.967	-52223	25248.3	1055.42	248.371	1003.05	0	0	0	0	0	0	0	603	903	0
9466	4	0	0	0	0	0	0	200	300	0	-10.86	10.1569	-521.052	-52955.4	25309.3	1009.64	248.574	1004.63	0	0	0	0	0	0	0	603	903	0
9466	5	0	0	0	0	0	0	200	300	0	-11.1652	9.85168	-522.272	-52680.7	25309.3	460.327	248.46	1003.87	0	0	0	0	0	0	0	603	903	0
9466	6	0	0	0	0	0	0	200	300	0	-12.2333	10.0043	-524.409	-51856.8	25553.5	780.761	248.728	1001.89	0	0	0	0	0	0	0	603	903	0
9466	7	0	0	0	0	0	0	200	300	0	-10.86	10.9198	-523.493	-51399	25492.4	551.879	248.697	1001.18	0	0	0	0	0	0	0	603	903	0
9466	8	0	0	0	0	0	0	200	300	0	-11.0126	10.9198	-524.714	-51673.7	25187.3	780.761	248.002	1001.48	0	0	0	0	0	0	0	603	903	0
9466	9	0	0	0	0	0	0	200	300	0	-11.6229	10.7672	-524.103	-51399	25004.2	780.761	247.708	1001.07	0	0	0	0	0	0	0	603	903	0
9467	0	0	0	0	0	0	0	200	300	0	-12.3859	10.7672	-522.577	-50575	25370.4	689.209	248.549	999.78	0	0	0	0	0	0	0	603	903	0
9467	1	0	0	0	0	0	0	200	300	0	-11.3177	9.85168	-523.798	-49110.2	24943.1	643.432	247.62	996.758	0	0	0	0	0	0	0	603	903	0
9467	2	0	0	0	0	0	0	200	300	0	-10.86	11.6827	-525.324	-50300.4	24760	597.656	247.133	998.751	0	0	0	0	0	0	0	603	903	0
9467	3	0	0	0	0	0	0	200	300	0	-11.9281	11.8353	-521.662	-50483.5	25004.2	734.985	247.932	999.774	0	0	0	0	0	0	0	603	903	0
9467	4	0	0	0	0	0	0	200	300	0	-10.097	12.2931	-526.545	-50025.7	25248.3	780.761	247.951	998.008	0	0	0	0	0	0	0	603	903	0
9467	5	0	0	0	0	0	0	200	300	0	-10.4022	11.8353	-526.24	-49018.6	24943.1	506.103	247.399	996.149	0	0	0	0	0	0	0	603	903	0
9467	6	0	0	0	0	0	0	200	300	0	-9.79187	12.4457	-526.545	-48927.1	24882.1	734.985	247.255	995.921	0	0	0	0	0	0	0	603	903	0
9467	7	0	0	0	0	0	0	200	300	0	-10.5548	12.5983	-525.629	-48927.1	25126.2	689.209	247.802	996.083	0	0	0	0	0	0	0	603	903	0
9467	8	0	0	0	0	0	0	200	300	0	-12.0807	13.056	-524.409	-48560.9	25126.2	322.998	247.913	995.601	0	0	0	0	0	0	0	603	903	0
9467	9	0	0	0	0	0	0	200	300	0	-12.5385	13.2086	-526.85	-47553.8	24393.8	414.55	246.301	993.261	0	0	0	0	0	0	0	603	903	0
9468	0	0	0	0	0	0	0	200	300	0	-11.3177	13.9716	-527.46	-47645.3	24393.8	506.103	246.248	993.33	0	0	0	0	0	0	0	603	903	0
9468	1	0	0	0	0	0	0	200	300	0	-10.5548	13.5138	-527.765	-46180.5	24699	551.879	246.799	990.502	0	0	0	0	0	0	0	603	903	0
9468	2	0	0	0	0	0	0	200	300	0	-12.0807	13.056	-528.986	-46638.3	24943.1	277.221	247.153	991.165	0	0	0	0	0	0	0	603	903	0
9468	3	0	0	0	0	0	0	200	300	0	-11.7755	13.2086	-527.46	-46638.3	24576.9	231.445	246.595	991.42	0	0	0	0	0	0	0	603	903	0
9468	4	0	0	0	0	0	0	200	300	0	-11.0126	13.819	-527.155	-45814.3	24576.9	322.998	246.622	989.909	0	0	0	0	0	0	0	603	903	0
9468	5	0	0	0	0	0	0	200	300	0	-10.86	14.7345	-526.24	-45448.1	24699	460.327	246.935	989.364	0	0	0	0	0	0	0	603	903	0
9468	6	0	0	0	0	0	0	200	300	0	-12.2333	13.6664	-526.545	-45814.3	24210.7	368.774	245.98	990.009	0	0	0	0	0	0	0	603	903	0
9468	7	0	0	0	0	0	0	200	300	0	-10.4022	15.0397	-528.986	-45356.5	23966.6	414.55	245.307	988.742	0	0	0	0	0	0	0	603	903	0
9468	8	0	0	0	0	0	0	200	300	0	-12.8436	14.5819	-528.376	-44532.5	24393.8	460.327	246.168	987.282	0	0	0	0	0	0	0	603	903	0
9468	9	0	0	0	0	0	0	200	300	0	-10.86	13.6664	-529.596	-44715.6	24332.8	460.327	245.946	987.433	0	0	0	0	0	0	0	603	903	0
9469	0	0	0	0	0	0	0	200	300	0	-12.2333	15.0397	-529.902	-44624.1	23844.5	277.221	244.998	987.212	0	0	0	0	0	0	0	603	903	0
9469	1	0	0	0	0	0	0	200	300	0	-11.7755	15.1923	-527.765	-44257.9	24332.8	506.103	246.105	986.859	0	0	0	0	0	0	0	603	903	0
9469	2	0	0	0	0	0	0	200	300	0	-12.2333	16.2604	-528.986	-43342.4	24332.8	460.327	245.999	984.935	0	0	0	0	0	0	0	603	903	0
9469	3	0	0	0	0	0	0	200	300	0	-11.6229	16.8707	-529.596	-41694.4	23966.6	643.432	245.254	981.729	0	0	0	0	0	0	0	603	903	0
9469	4	0	0	0	0	0	0	200	300	0	-11.9281	16.2604	-529.291	-42701.5	23905.5	231.445	245.165	983.677	0	0	0	0	0	0	0	603	903	0
9469	5	0	0	0	0	0	0	200	300	0	-12.9962	15.65	-530.817	-42426.8	23722.4	368.774	244.69	982.927	0	0	0	0	0	0	0	603	903	0
9469	6	0	0	0	0	0	0	200	300	0	-11.3177	16.2604	-530.207	-42335.3	23905.5	368.774	245.087	982.847	0	0	0	0	0	0	0	603	903	0
9469	7	0	0	0	0	0	0	200	300	0	-12.0807	16.5656	-530.512	-41785.9	23661.4	414.55	244.601	981.765	0	0	0	0	0	0	0	603	903	0
9469	8	0	0	0	0	0	0	200	300	0	-12.691	17.4811	-531.428	-41328.2	22684.8	368.774	242.687	980.768	0	0	0	0	0	0	0	603	903	0
9469	9	0	0	0	0	0	0	200	300	0	-12.3859	16.2604	-531.733	-41328.2	22990	277.221	243.236	980.724	0	0	0	0	0	0	0	603	903	0
9470	0	0	0	0	0	0	0	200	300	0	-13.9117	17.4811	-532.953	-41145.1	23905.5	551.879	244.855	980.202	0	0	0	0	0	0	0	603	903	0
9470	1	0	0	0	0	0	0	200	300	0	-14.3695	17.1759	-530.817	-40321.1	23112.1	139.892	243.541	978.961	0	0	0	0	0	0	0	603	903	0
9470	2	0	0	0	0	0	0	200	300	0	-13.454	17.1759	-532.343	-39954.9	23234.1	322.998	243.645	978.055	0	0	0	0	0	0	0	603	903	0
9470	3	0	0	0	0	0	0	200	300	0	-13.6066	17.4811	-532.648	-39863.4	23417.2	322.998	243.964	977.84	0	0	0	0	0	0	0	603	903	0
9470	4	0	0	0	0	0	0	200	300	0	-14.8273	18.0914	-532.953	-39497.1	23417.2	322.998	243.939	977.11	0	0	0	0	0	0	0	603	903	0
9470	5	0	0	0	0	0	0	200	300	0	-14.3695	18.8544	-533.259	-39222.5	23112.1	231.445	243.341	976.552	0	0	0	0	0	0	0	603	903	0
9470	6	0	0	0	0	0	0	200	300	0	-13.9117	18.8544	-535.09	-38764.7	22990	414.55	242.965	975.445	0	0	0	0	0	0	0	603	903	0
9470	7	0	0	0	0	0	0	200	300	0	-14.2169	18.3966	-532.038	-38398.5	23417.2	322.998	244.014	975.173	0	0	0	0	0	0	0	603	903	0
9470	8	0	0	0	0	0	0	200	300	0	-15.1324	18.7018	-534.784	-38673.2	23478.3	139.892	243.902	975.315	0	0	0	0	0	0	0	603	903	0
9470	9	0	0	0	0	0	0	200	300	0	-14.3695	19.6173	-535.09	-38215.4	22379.6	231.445	241.824	974.419	0	0	0	0	0	0	0	603	903	0
9471	0	0	0	0	0	0	0	200	300	0	-15.8954	20.2277	-535.09	-37666.1	23295.2	94.1158	243.535	973.392	0	0	0	0	0	0	0	603	903	0
9471	1	0	0	0	0	0	0	200	300	0	-14.9799	20.9906	-538.752	-37299.9	23112.1	368.774	242.899	972.234	0	0	0	0	0	0	0	603	903	0
9471	2	0	0	0	0	0	0	200	300	0	-15.4376	21.7535	-538.447	-37757.6	22623.8	414.55	242.017	973.123	0	0	0	0	0	0	0	603	903	0
9471	3	0	0	0	0	0	0	200	300	0	-16.3531	19.3121	-536.005	-37574.5	22867.9	460.327	242.664	973.101	0	0	0	0	0	0	0	603	903	0
9471	4	0	0	0	0	0	0	200	300	0	-17.2687	21.2958	-540.583	-36933.7	23051	506.103	242.641	971.322	0	0	0	0	0	0	0	603	903	0
9471	5	0	0	0	0	0	0	200	300	0	-16.5057	21.4484	-540.583	-36567.5	23173.1	689.209	242.867	970.645	0	0	0	0	0	0	0	603	903	0
9471	6	0	0	0	0	0	0	200	300	0	-15.7428	21.4484	-541.193	-36842.1	22806.9	551.879	242.142	971.076	0	0	0	0	0	0	0	603	903	0
9471	7	0	0	0	0	0	0	200	300	0	-17.2687	23.2794	-542.414	-36384.4	22562.8	368.774	241.597	970.079	0	0	0	0	0	0	0	603	903	0
9471	8	0	0	0	0	0	0	200	300	0	-18.0316	23.432	-544.55	-35835	23112.1	551.879	242.443	968.807	0	0	0	0	0	0	0	603	903	0
9471	9	0	0	0	0	0	0	200	300	0	-16.6583	22.6691	-545.16	-35285.7	22929	872.314	242.059	967.725	0	0	0	0	0	0	0	603	903	0
9472	0	0	0	0	0	0	0	200	300	0	-16.3531	23.2794	-546.686	-35560.4	22562.8	506.103	241.272	968.047	0	0	0	0	0	0	0	603	903	0
9472	1	0	0	0	0	0	0	200	300	0	-18.3368	23.432	-545.771	-35926.6	22562.8	643.432	241.341	968.827	0	0	0	0	0	0	0	603	903	0
9472	2	0	0	0	0	0	0	200	300	0	-16.3531	23.432	-546.381	-35560.4	22684.8	551.879	241.518	968.083	0	0	0	0	0	0	0	603	903	0
9472	3	0	0	0	0	0	0	200	300	0	-17.4213	24.1949	-547.297	-34736.4	22623.8	460.327	241.337	966.469	0	0	0	0	0	0	0	603	903	0
9472	4	0	0	0	0	0	0	200	300	0	-16.6583	24.0424	-547.907	-34553.3	22745.9	597.656	241.514	966.064	0	0	0	0	0	0	0	603	903	0
9472	5	0	0	0	0	0	0	200	300	0	-16.5057	26.026	-550.348	-34736.4	23051	506.103	241.884	966.117	0	0	0	0	0	0	0	603	903	0
9472	6	0	0	0	0	0	0	200	300	0	-18.642	25.2631	-553.4	-34553.3	23051	94.1158	241.653	965.438	0	0	0	0	0	0	0	603	903	0
9472	7	0	0	0	0	0	0	200	300	0	-18.1842	25.8734	-552.485	-33637.8	22623.8	231.445	240.949	963.885	0	0	0	0	0	0	0	603	903	0
9472	8	0	0	0	0	0	0	200	300	0	-16.9635	26.3312	-552.485	-34004	22745.9	368.774	241.17	964.547	0	0	0	0	0	0	0	603	903	0
9472	9	0	0	0	0	0	0	200	300	0	-15.5902	25.7208	-553.705	-34278.6	23234.1	414.55	241.961	964.908	0	0	0	0	0	0	0	603	903	0
9473	0	0	0	0	0	0	0	200	300	0	-16.8109	27.7045	-554.621	-34461.7	23112.1	231.445	241.672	965.136	0	0	0	0	0	0	0	603	903	0
9473	1	0	0	0	0	0	0	200	300	0	-18.0316	27.2467	-557.367	-33729.3	22990	277.221	241.247	963.515	0	0	0	0	0	0	0	603	903	0
9473	2	0	0	0	0	0	0	200	300	0	-17.7264	28.0096	-558.283	-33363.1	22929	185.669	241.071	962.76	0	0	0	0	0	0	0	603	903	0
9473	3	0	0	0	0	0	0	200	300	0	-16.3531	28.62	-559.504	-32630.7	23173.1	231.445	241.417	961.321	0	0	0	0	0	0	0	603	903	0
9473	4	0	0	0	0	0	0	200	300	0	-16.5057	28.1622	-562.555	-33637.8	23356.2	-317.872	241.518	962.795	0	0	0	0	0	0	0	603	903	0
9473	5	0	0	0	0	0	0	200	300	0	-16.9635	29.3829	-562.861	-33088.5	23112.1	2.56305	241.062	961.786	0	0	0	0	0	0	0	603	903	0
9473	6	0	0	0	0	0	0	200	300	0	-13.6066	31.214	-563.776	-33546.2	23173.1	-134.766	241.103	962.503	0	0	0	0	0	0	0	603	903	0
9473	7	0	0	0	0	0	0	200	300	0	-15.8954	32.1295	-566.523	-33546.2	23417.2	48.3394	241.335	962.214	0	0	0	0	0	0	0	603	903	0
9473	8	0	0	0	0	0	0	200	300	0	-15.1324	32.7399	-570.49	-33180	23722.4	-43.2133	241.583	961.161	0	0	0	0	0	0	0	603	903	0
9473	9	0	0	0	0	0	0	200	300	0	-13.9117	32.8925	-570.185	-33820.9	23539.3	-88.9897	241.284	962.316	0	0	0	0	0	0	0	603	903	0
9474	0	0	0	0	0	0	0	200	300	0	-14.6747	34.1132	-573.542	-34004	23478.3	-180.542	240.936	962.288	0	0	0	0	0	0	0	603	903	0
9474	1	0	0	0	0	0	0	200	300	0	-14.6747	34.7235	-573.542	-33363.1	23600.4	-317.872	241.148	961.17	0	0	0	0	0	0	0	603	903	0
9474	2	0	0	0	0	0	0	200	300	0	-13.6066	34.5709	-576.288	-33546.2	24088.6	-409.424	241.8	961.211	0	0	0	0	0	0	0	603	903	0
9474	3	0	0	0	0	0	0	200	300	0	-13.7592	36.8597	-578.119	-33637.8	23722.4	-180.542	241.034	961.185	0	0	0	0	0	0	0	603	903	0
9474	4	0	0	0	0	0	0	200	300	0	-14.5221	37.4701	-576.899	-34187.1	23722.4	-500.977	241.121	962.26	0	0	0	0	0	0	0	603	903	0
9474	5	0	0	0	0	0	0	200	300	0	-13.6066	38.0804	-582.392	-33820.9	24027.6	-272.095	241.257	961.072	0	0	0	0	0	0	0	603	903	0
9474	6	0	0	0	0	0	0	200	300	0	-12.691	37.7753	-584.223	-32905.4	24210.7	-500.977	241.441	959.323	0	0	0	0	0	0	0	603	903	0
9474	7	0	0	0	0	0	0	200	300	0	-12.5385	37.7753	-585.444	-33546.2	24332.8	-546.754	241.563	960.3	0	0	0	0	0	0	0	603	903	0
9474	8	0	0	0	0	0	0	200	300	0	-13.1488	39.3011	-585.444	-34004	24393.8	-546.754	241.667	961.082	0	0	0	0	0	0	0	603	903	0
9474	9	0	0	0	0	0	0	200	300	0	-12.5385	40.0641	-583.307	-33912.4	24637.9	-958.741	242.238	961.138	0	0	0	0	0	0	0	603	903	0
9475	0	0	0	0	0	0	0	200	300	0	-13.1488	41.7426	-588.801	-33820.9	24760	-684.083	242.052	960.44	0	0	0	0	0	0	0	603	903	0
9475	1	0	0	0	0	0	0	200	300	0	-11.4703	42.8107	-590.632	-32996.9	24515.9	-638.306	241.508	958.867	0	0	0	0	0	0	0	603	903	0
9475	2	0	0	0	0	0	0	200	300	0	-11.4703	43.5736	-592.463	-34095.5	24271.7	-729.859	240.968	960.549	0	0	0	0	0	0	0	603	903	0
9475	3	0	0	0	0	0	0	200	300	0	-11.7755	43.8788	-593.989	-33088.5	23966.6	-729.859	240.349	958.706	0	0	0	0	0	0	0	603	903	0
9475	4	0	0	0	0	0	0	200	300	0	-12.691	44.184	-593.989	-33637.8	24149.7	-729.859	240.657	959.63	0	0	0	0	0	0	0	603	903	0
9475	5	0	0	0	0	0	0	200	300	0	-11.0126	44.7943	-596.43	-33729.3	24760	-729.859	241.514	959.552	0	0	0	0	0	0	0	603	903	0
9475	6	0	0	0	0	0	0	200	300	0	-9.02893	46.015	-597.346	-33729.3	25126.2	-775.635	242.063	959.465	0	0	0	0	0	0	0	603	903	0
9475	7	0	0	0	0	0	0	200	300	0	-11.0126	47.0831	-598.566	-34004	25248.3	-775.635	242.181	959.809	0	0	0	0	0	0	0	603	903	0
9475	8	0	0	0	0	0	0	200	300	0	-12.2333	47.9987	-600.702	-34004	25126.2	-1096.07	241.828	959.607	0	0	0	0	0	0	0	603	903	0
9475	9	0	0	0	0	0	0	200	300	0	-11.6229	47.6935	-601.923	-32905.4	25004.2	-912.965	241.54	957.667	0	0	0	0	0	0	0	603	903	0
9476	0	0	0	0	0	0	0	200	300	0	-10.097	48.1512	-602.839	-33637.8	25187.3	-1004.52	241.781	958.799	0	0	0	0	0	0	0	603	903	0
9476	1	0	0	0	0	0	0	200	300	0	-10.4022	49.8297	-603.144	-33637.8	25187.3	-821.412	241.76	958.771	0	0	0	0	0	0	0	603	903	0
9476	2	0	0	0	0	0	0	200	300	0	-11.1652	51.203	-604.059	-32905.4	25065.2	-912.965	241.495	957.474	0	0	0	0	0	0	0	603	903	0
9476	3	0	0	0	0	0	0	200	300	0	-10.5548	51.3556	-605.585	-33546.2	25370.4	-684.083	241.894	958.395	0	0	0	0	0	0	0	603	903	0
9476	4	0	0	0	0	0	0	200	300	0	-9.63928	52.4237	-607.416	-33271.6	25187.3	-912.965	241.466	957.776	0	0	0	0	0	0	0	603	903	0
9476	5	0	0	0	0	0	0	200	300	0	-9.63928	52.4237	-608.332	-33271.6	25187.3	-1004.52	241.404	957.693	0	0	0	0	0	0	0	603	903	0
9476	6	0	0	0	0	0	0	200	300	0	-10.7074	52.7289	-610.773	-33546.2	25553.5	-912.965	241.838	957.924	0	0	0	0	0	0	0	603	903	0
9476	7	0	0	0	0	0	0	200	300	0	-7.80823	52.2711	-606.806	-33271.6	25614.5	-1004.52	242.212	957.831	0	0	0	0	0	0	0	603	903	0
9476	8	0	0	0	0	0	0	200	300	0	-10.2496	54.7125	-610.163	-33271.6	25919.7	-867.188	242.48	957.529	0	0	0	0	0	0	0	603	903	0
9476	9	0	0	0	0	0	0	200	300	0	-8.72375	56.0858	-611.689	-32722.2	25309.3	-821.412	241.376	956.495	0	0	0	0	0	0	0	603	903	0
9477	0	0	0	0	0	0	0	200	300	0	-9.94446	56.5436	-613.215	-33180	25553.5	-729.859	241.671	957.108	0	0	0	0	0	0	0	603	903	0
9477	1	0	0	0	0	0	0	200	300	0	-9.48669	57.6117	-614.435	-33546.2	25919.7	-729.859	242.185	957.597	0	0	0	0	0	0	0	603	903	0
9477	2	0	0	0	0	0	0	200	300	0	-9.48669	57.1539	-612.299	-32813.8	25614.5	-821.412	241.833	956.591	0	0	0	0	0	0	0	603	903	0
9477	3	0	0	0	0	0	0	200	300	0	-8.72375	57.4591	-616.266	-32722.2	25370.4	-821.412	241.168	956.098	0	0	0	0	0	0	0	603	903	0
9477	4	0	0	0	0	0	0	200	300	0	-8.87634	58.8324	-615.656	-32996.9	25736.6	-638.306	241.804	956.596	0	0	0	0	0	0	0	603	903	0
9477	5	0	0	0	0	0	0	200	300	0	-10.097	59.5953	-616.266	-32996.9	25797.6	-821.412	241.861	956.543	0	0	0	0	0	0	0	603	903	0
9477	6	0	0	0	0	0	0	200	300	0	-9.94446	60.9686	-616.266	-32447.6	25858.7	-1050.29	241.96	955.652	0	0	0	0	0	0	0	603	903	0
9477	7	0	0	0	0	0	0	200	300	0	-9.02893	61.7316	-618.708	-32081.4	25431.4	-821.412	241.104	954.852	0	0	0	0	0	0	0	603	903	0
9477	8	0	0	0	0	0	0	200	300	0	-8.87634	62.7997	-619.929	-32722.2	25614.5	-958.741	241.319	955.784	0	0	0	0	0	0	0	603	903	0
9477	9	0	0	0	0	0	0	200	300	0	-9.63928	62.7997	-618.708	-32356	26041.8	-729.859	242.091	955.296	0	0	0	0	0	0	0	603	903	0
9478	0	0	0	0	0	0	0	200	300	0	-10.097	62.6471	-620.539	-32447.6	25675.5	-500.977	241.376	955.289	0	0	0	0	0	0	0	603	903	0
9478	1	0	0	0	0	0	0	200	300	0	-9.02893	64.0204	-619.318	-32264.5	25553.5	-500.977	241.261	955.097	0	0	0	0	0	0	0	603	903	0
9478	2	0	0	0	0	0	0	200	300	0	-9.18152	65.3937	-619.013	-32264.5	26102.8	-729.859	242.168	955.122	0	0	0	0	0	0	0	603	903	0
9478	3	0	0	0	0	0	0	200	300	0	-10.7074	66.767	-617.792	-32447.6	26041.8	-592.53	242.153	955.522	0	0	0	0	0	0	0	603	903	0
9478	4	0	0	0	0	0	0	200	300	0	-10.097	67.2247	-620.539	-32539.1	25736.6	-638.306	241.475	955.437	0	0	0	0	0	0	0	603	903	0
9478	5	0	0	0	0	0	0	200	300	0	-9.48669	67.9877	-620.844	-31348.9	25797.6	-592.53	241.553	953.494	0	0	0	0	0	0	0	603	903	0
9478	6	0	0	0	0	0	0	200	300	0	-9.02893	68.1403	-621.454	-31989.8	26163.8	-409.424	242.101	954.476	0	0	0	0	0	0	0	603	903	0
9478	7	0	0	0	0	0	0	200	300	0	-9.48669	68.4454	-621.149	-32172.9	25919.7	-363.648	241.729	954.796	0	0	0	0	0	0	0	603	903	0
9478	8	0	0	0	0	0	0	200	300	0	-8.26599	68.9032	-620.539	-31989.8	25797.6	-226.319	241.573	954.552	0	0	0	0	0	0	0	603	903	0
9478	9	0	0	0	0	0	0	200	300	0	-10.097	70.4291	-618.403	-31165.8	26102.8	-226.319	242.21	953.397	0	0	0	0	0	0	0	603	903	0
9479	0	0	0	0	0	0	0	200	300	0	-9.33411	71.6498	-620.844	-31440.5	25431.4	-272.095	240.963	953.642	0	0	0	0	0	0	0	603	903	0
9479	1	0	0	0	0	0	0	200	300	0	-9.94446	72.1075	-621.454	-31806.7	25797.6	-180.542	241.512	954.181	0	0	0	0	0	0	0	603	903	0
9479	2	0	0	0	0	0	0	200	300	0	-10.7074	72.7179	-620.539	-30525	25797.6	-134.766	241.573	952.191	0	0	0	0	0	0	0	603	903	0
9479	3	0	0	0	0	0	0	200	300	0	-11.4703	72.7179	-620.234	-31165.8	26285.9	-363.648	242.381	953.249	0	0	0	0	0	0	0	603	903	0
9479	4	0	0	0	0	0	0	200	300	0	-9.63928	72.1075	-621.454	-31165.8	26346.9	-134.766	242.396	953.15	0	0	0	0	0	0	0	603	903	0
9479	5	0	0	0	0	0	0	200	300	0	-8.26599	74.3964	-620.539	-30891.2	25553.5	-180.542	241.179	952.781	0	0	0	0	0	0	0	603	903	0
9479	6	0	0	0	0	0	0	200	300	0	-8.87634	76.0748	-617.487	-31348.9	25797.6	94.1158	241.778	953.769	0	0	0	0	0	0	0	603	903	0
9479	7	0	0	0	0	0	0	200	300	0	-7.65564	76.5326	-619.929	-31165.8	26041.8	231.445	242.008	953.273	0	0	0	0	0	0	0	603	903	0
9479	8	0	0	0	0	0	0	200	300	0	-9.94446	76.9904	-619.623	-30525	26102.8	185.669	242.127	952.264	0	0	0	0	0	0	0	603	903	0
9479	9	0	0	0	0	0	0	200	300	0	-10.7074	78.5162	-619.013	-30616.5	25736.6	48.3394	241.577	952.46	0	0	0	0	0	0	0	603	903	0
9480	0	0	0	0	0	0	0	200	300	0	-9.94446	78.5162	-618.708	-30616.5	25736.6	94.1158	241.597	952.485	0	0	0	0	0	0	0	603	903	0
9480	1	0	0	0	0	0	0	200	300	0	-10.86	78.2111	-618.403	-30433.4	26224.9	506.103	242.407	952.213	0	0	0	0	0	0	0	603	903	0
9480	2	0	0	0	0	0	0	200	300	0	-10.5548	79.8895	-618.403	-30067.2	25919.7	185.669	241.914	951.621	0	0	0	0	0	0	0	603	903	0
9480	3	0	0	0	0	0	0	200	300	0	-10.097	78.974	-615.351	-30067.2	25370.4	185.669	241.229	951.862	0	0	0	0	0	0	0	603	903	0
9480	4	0	0	0	0	0	0	200	300	0	-9.79187	81.8732	-616.877	-30708.1	25492.4	414.55	241.325	952.78	0	0	0	0	0	0	0	603	903	0
9480	5	0	0	0	0	0	0	200	300	0	-11.1652	82.0258	-616.877	-30341.9	25675.5	597.656	241.622	952.186	0	0	0	0	0	0	0	603	903	0
9480	6	0	0	0	0	0	0	200	300	0	-11.0126	82.3309	-615.351	-29884.1	25736.6	551.879	241.824	951.564	0	0	0	0	0	0	0	603	903	0
9480	7	0	0	0	0	0	0	200	300	0	-9.79187	82.4835	-615.046	-29884.1	25431.4	506.103	241.349	951.588	0	0	0	0	0	0	0	603	903	0
9480	8	0	0	0	0	0	0	200	300	0	-10.2496	83.5516	-613.215	-29609.4	25431.4	460.327	241.472	951.286	0	0	0	0	0	0	0	603	903	0
9480	9	0	0	0	0	0	0	200	300	0	-11.7755	84.0094	-612.909	-28510.8	25614.5	506.103	241.792	949.517	0	0	0	0	0	0	0	603	903	0
9481	0	0	0	0	0	0	0	200	300	0	-10.86	85.8405	-611.078	-29243.2	25187.3	780.761	241.218	950.855	0	0	0	0	0	0	0	603	903	0
9481	1	0	0	0	0	0	0	200	300	0	-10.86	85.6879	-610.773	-29060.1	25065.2	597.656	241.038	950.579	0	0	0	0	0	0	0	603	903	0
9481	2	0	0	0	0	0	0	200	300	0	-9.02893	87.2137	-610.468	-28968.6	25431.4	826.538	241.659	950.453	0	0	0	0	0	0	0	603	903	0
9481	3	0	0	0	0	0	0	200	300	0	-10.7074	87.3663	-608.942	-29151.7	25492.4	963.867	241.863	950.873	0	0	0	0	0	0	0	603	903	0
9481	4	0	0	0	0	0	0	200	300	0	-9.63928	87.8241	-608.332	-28968.6	25004.2	780.761	241.103	950.62	0	0	0	0	0	0	0	603	903	0
9481	5	0	0	0	0	0	0	200	300	0	-10.86	88.8922	-607.111	-28785.5	25004.2	872.314	241.185	950.414	0	0	0	0	0	0	0	603	903	0
9481	6	0	0	0	0	0	0	200	300	0	-9.94446	89.1974	-604.365	-28510.8	25248.3	1146.97	241.777	950.175	0	0	0	0	0	0	0	603	903	0
9481	7	0	0	0	0	0	0	200	300	0	-10.7074	90.8759	-603.449	-28327.7	25492.4	963.867	242.245	949.943	0	0	0	0	0	0	0	603	903	0
9481	8	0	0	0	0	0	0	200	300	0	-9.79187	91.944	-601.923	-28236.1	24637.9	1192.75	240.932	949.91	0	0	0	0	0	0	0	603	903	0
9481	9	0	0	0	0	0	0	200	300	0	-11.9281	92.8595	-602.228	-27686.8	24454.8	1009.64	240.607	948.974	0	0	0	0	0	0	0	603	903	0
9482	0	0	0	0	0	0	0	200	300	0	-9.18152	94.0802	-598.261	-27686.8	24943.1	1146.97	241.693	949.279	0	0	0	0	0	0	0	603	903	0
9482	1	0	0	0	0	0	0	200	300	0	-10.7074	93.6224	-599.482	-27778.4	24821.1	1330.08	241.404	949.337	0	0	0	0	0	0	0	603	903	0
9482	2	0	0	0	0	0	0	200	300	0	-10.2496	93.9276	-596.735	-27869.9	24821.1	1375.85	241.595	949.704	0	0	0	0	0	0	0	603	903	0
9482	3	0	0	0	0	0	0	200	300	0	-10.86	95.3009	-595.514	-27320.6	24454.8	1467.41	241.065	948.877	0	0	0	0	0	0	0	603	903	0
9482	4	0	0	0	0	0	0	200	300	0	-10.5548	95.4535	-593.073	-26954.4	24699	1421.63	241.646	948.449	0	0	0	0	0	0	0	603	903	0
9482	5	0	0	0	0	0	0	200	300	0	-10.097	96.5216	-593.073	-27503.7	24943.1	1467.41	242.057	949.375	0	0	0	0	0	0	0	603	903	0
9482	6	0	0	0	0	0	0	200	300	0	-11.3177	97.4371	-590.021	-26771.3	24149.7	1696.29	240.93	948.373	0	0	0	0	0	0	0	603	903	0
9482	7	0	0	0	0	0	0	200	300	0	-11.0126	97.132	-588.495	-26313.5	24027.6	1742.07	240.829	947.713	0	0	0	0	0	0	0	603	903	0
9482	8	0	0	0	0	0	0	200	300	0	-9.94446	95.4535	-587.275	-26130.4	24271.7	1558.96	241.329	947.494	0	0	0	0	0	0	0	603	903	0
9482	9	0	0	0	0	0	0	200	300	0	-9.79187	98.963	-584.223	-26496.6	24210.7	1879.39	241.441	948.354	0	0	0	0	0	0	0	603	903	0
9483	0	0	0	0	0	0	0	200	300	0	-10.4022	100.031	-581.476	-26313.5	23844.5	1833.62	241.007	948.253	0	0	0	0	0	0	0	603	903	0
9483	1	2.71836	-9.04567	-26.7957	-5399.79	2836.17	-1946.59	305.844	501.517	0	-10.7074	100.641	-579.951	-25947.3	23661.4	1833.62	240.799	947.741	0	0	0	0	0	0	0	603	903	0
9483	2	8.05894	-23.6941	-36.8665	-7780.16	3934.81	-5608.7	306.731	511.036	0	-9.33411	100.947	-578.425	-25672.7	23966.6	1742.07	241.434	947.384	0	0	0	0	0	0	0	603	903	0
9483	3	18.7401	-18.8113	-32.8992	-3751.83	2653.07	-5059.39	280.642	414.04	0	-8.72375	100.794	-573.542	-26038.9	24027.6	1604.74	241.893	948.4	0	0	0	0	0	0	0	603	903	0
9483	4	11.1107	-7.67238	-21.6077	-3385.62	2653.07	-664.855	322.783	456.686	0	-9.79187	101.252	-573.847	-25581.1	23173.1	1879.39	240.382	947.578	0	0	0	0	0	0	0	603	903	0
9483	5	4.85459	-6.90944	-17.0301	-5674.44	2653.07	-2541.69	355.787	633.201	0	-10.5548	102.625	-571.1	-24665.6	23783.5	1650.51	241.645	946.19	0	0	0	0	0	0	0	603	903	0
9483	6	2.71836	-4.9258	-28.3216	-5399.79	2225.82	-4189.64	278.591	490.66	0	-8.72375	102.93	-568.659	-24940.2	23417.2	1970.95	241.18	946.858	0	0	0	0	0	0	0	603	903	0
9483	7	-4.1481	-1.41628	-42.97	-6589.97	3934.81	-207.091	291.571	453.362	0	-8.41858	104.609	-565.607	-24482.5	23173.1	2016.72	240.97	946.285	0	0	0	0	0	0	0	603	903	0
9483	8	9.27964	1.78807	-48.4632	-6864.63	4850.33	-207.091	300.083	441.646	0	-9.33411	102.015	-563.776	-25031.8	22990	1696.29	240.779	947.4	0	0	0	0	0	0	0	603	903	0
9483	9	21.9444	3.31394	-52.1253	-8787.24	6010	-3960.75	315.299	468.579	0	-8.1134	105.524	-563.166	-24848.7	23417.2	2154.05	241.581	947.123	0	0	0	0	0	0	0	603	903	0
9484	0	13.7047	8.34935	-60.3651	-11900	7657.95	-1443.05	326.861	497.134	0	-7.65564	104.456	-559.504	-24116.3	23417.2	2245.6	241.854	946.103	0	0	0	0	0	0	0	603	903	0
9484	1	14.7728	10.6382	-73.7928	-12449.3	7291.74	-298.644	298.814	468.707	0	-6.28235	105.219	-556.147	-24024.7	22929	1833.62	241.228	946.199	0	0	0	0	0	0	0	603	903	0
9484	2	17.0616	7.12864	-87.8309	-15653.7	8451.41	-2953.67	296.224	478.225	0	-7.50305	106.592	-551.569	-24024.7	22867.9	2108.28	241.46	946.557	0	0	0	0	0	0	0	603	903	0
9484	3	9.88999	8.9597	-90.8826	-17027	9977.28	-2541.69	309.782	487.351	0	-9.02893	106.44	-551.569	-23933.2	22867.9	2291.38	241.46	946.391	0	0	0	0	0	0	0	603	903	0
9484	4	13.7047	12.3166	-92.1033	-17118.5	10404.5	21.7904	312.966	485.862	0	-7.80823	106.745	-547.907	-23292.3	22440.7	2016.72	240.957	945.511	0	0	0	0	0	0	0	603	903	0
9484	5	19.3504	6.51829	-105.226	-19865.1	11442.1	-1900.82	308.739	488.785	0	-7.04529	108.423	-545.16	-22926.1	21891.4	2108.28	240.156	945.054	0	0	0	0	0	0	0	603	903	0
9484	6	12.484	7.28123	-116.212	-20231.3	12479.7	-2770.57	307.387	474.09	0	-7.04529	107.05	-539.362	-23567	22440.7	2520.26	241.606	946.694	0	0	0	0	0	0	0	603	903	0
9484	7	8.97446	11.5537	-123.231	-20689.1	13273.2	159.12	307.71	467.888	0	-7.65564	106.135	-539.057	-23292.3	22318.6	2108.28	241.403	946.209	0	0	0	0	0	0	0	603	903	0
9484	8	10.1952	8.80711	-125.367	-24076.5	13029	-344.421	303.927	492.048	0	-5.82458	107.508	-536.005	-22743	21830.3	2382.93	240.728	945.431	0	0	0	0	0	0	0	603	903	0
9484	9	10.6529	10.6382	-135.743	-24900.5	13944.6	-1900.82	302.727	483.438	0	-7.80823	109.034	-531.428	-22468.3	21708.3	2474.49	240.849	945.279	0	0	0	0	0	0	0	603	903	0
9485	0	5.15977	12.0115	-147.951	-25541.4	15592.5	479.554	305.39	472.635	0	-6.12976	108.118	-526.85	-22010.6	21952.4	1970.95	241.667	944.778	0	0	0	0	0	0	0	603	903	0
9485	1	11.721	6.82347	-152.528	-27464	15714.6	937.318	303.027	480.059	0	-5.36682	108.881	-525.934	-22102.1	21891.4	2566.04	241.624	945.024	0	0	0	0	0	0	0	603	903	0
9485	2	9.88999	6.97605	-162.294	-29295	16019.8	-710.631	298.708	480.506	0	-7.65564	109.339	-522.883	-21552.8	21281	2794.92	240.699	944.219	0	0	0	0	0	0	0	603	903	0
9485	3	-2.92739	10.0278	-167.177	-30302.1	16874.3	479.554	300.937	481.258	0	-6.43494	107.966	-519.526	-21186.6	21036.9	2291.38	240.492	943.781	0	0	0	0	0	0	0	603	903	0
9485	4	0.734717	5.60276	-173.28	-31767	17179.4	1669.74	299.143	483.327	0	-4.29871	107.813	-513.727	-20911.9	21158.9	2474.49	241.187	943.706	0	0	0	0	0	0	0	603	903	0
9485	5	4.39683	0.414775	-181.52	-32499.4	17179.4	296.449	294.642	479.04	0	-5.51941	109.644	-510.065	-21003.5	21403.1	2566.04	241.961	944.178	0	0	0	0	0	0	0	603	903	0
9485	6	-3.69033	1.94065	-189.454	-33598	18339.1	-23.9859	296.8	477.341	0	-6.28235	109.186	-505.488	-20911.9	20731.7	2611.82	241.013	944.37	0	0	0	0	0	0	0	603	903	0
9485	7	-1.40151	-0.958516	-195.253	-34513.6	18888.4	1669.74	296.738	476.764	0	-5.06165	108.576	-502.741	-20545.7	20731.7	2382.93	241.237	943.867	0	0	0	0	0	0	0	603	903	0
9485	8	0.887305	-9.04567	-198.915	-36344.6	19010.5	799.989	295.571	482.715	0	-4.14612	109.186	-496.943	-20271.1	20609.6	2611.82	241.473	943.792	0	0	0	0	0	0	0	603	903	0
9485	9	-9.03091	-7.5198	-201.967	-36069.9	19559.8	-69.7623	296.847	478.594	0	-5.36682	109.492	-494.196	-20179.5	20487.6	2611.82	241.456	943.833	0	0	0	0	0	0	0	603	903	0
9486	0	-8.42056	-8.43532	-209.291	-36893.9	19803.9	937.318	294.624	476.281	0	-4.45129	108.118	-489.313	-19813.3	19511	2337.16	239.874	943.492	0	0	0	0	0	0	0	603	903	0
9486	1	-2.7748	-14.3863	-215.394	-37992.6	19926	983.094	292.509	476.386	0	-4.75647	109.034	-484.736	-19721.7	20060.3	2749.15	241.384	943.686	0	0	0	0	0	0	0	603	903	0
9486	2	-9.48867	-17.8958	-220.888	-37077	20841.5	-161.315	294.354	467.855	0	-3.53577	109.949	-480.158	-18806.2	19694.1	2611.82	241.016	942.167	0	0	0	0	0	0	0	603	903	0
9486	3	-11.9301	-18.3535	-224.244	-38725	21329.8	296.449	295.119	472.691	0	-3.078	107.508	-475.58	-19630.2	19266.9	2611.82	240.512	944.276	0	0	0	0	0	0	0	603	903	0
9486	4	-8.72573	-22.1682	-231.263	-40556.1	21818.1	479.554	294.343	475.367	0	-3.078	109.339	-472.529	-18714.7	19022.7	3161.13	240.257	942.605	0	0	0	0	0	0	0	603	903	0
9486	5	-9.64126	-24.9148	-241.639	-41196.9	22428.5	204.896	292.818	470.489	0	-3.53577	109.034	-468.561	-18714.7	19144.8	2840.7	240.859	942.941	0	0	0	0	0	0	0	603	903	0
9486	6	-14.9818	-25.22	-251.1	-43028	23282.9	-69.7623	292.724	471.358	0	-1.70471	108.576	-462.153	-18348.4	18900.6	2291.38	240.897	942.702	0	0	0	0	0	0	0	603	903	0
9486	7	-11.3197	-31.7813	-258.119	-44035.1	24137.4	250.672	293.513	470.6	0	-0.0262447	108.118	-457.575	-18073.8	18412.4	2840.7	240.239	942.499	0	0	0	0	0	0	0	603	903	0
9486	8	-12.5404	-36.2063	-266.359	-44035.1	24625.7	-298.644	292.453	465.322	0	-3.078	108.729	-449.946	-17616	18229.2	2611.82	240.514	942.152	0	0	0	0	0	0	0	603	903	0
9486	9	-19.2543	-36.3589	-272.767	-46232.3	25419.2	-1031.07	293.19	469.494	0	-0.636596	109.339	-446.894	-17799.1	18351.3	2566.04	241.064	942.829	0	0	0	0	0	0	0	603	903	0
9487	0	-15.4396	-39.2581	-281.312	-47514.1	26090.6	-710.631	292.746	468.901	0	-2.16248	108.576	-442.316	-17066.7	17679.9	2794.92	239.971	941.585	0	0	0	0	0	0	0	603	903	0
9487	1	-14.3715	-45.5142	-292.909	-48795.8	26823	-802.184	291.575	466.59	0	-1.24695	107.355	-435.297	-17066.7	17557.9	2749.15	240.335	942.207	0	0	0	0	0	0	0	603	903	0
9487	2	-18.6439	-45.209	-299.013	-49070.4	28104.7	-1855.04	293.992	464.108	0	-0.484008	107.813	-430.72	-16883.6	16886.5	2749.15	239.205	942.199	0	0	0	0	0	0	0	603	903	0
9487	3	-19.4069	-47.0401	-310.609	-50260.6	28348.9	-1397.28	291.269	461.813	0	-1.39954	106.745	-424.311	-16792.1	17374.8	2932.25	240.948	942.575	0	0	0	0	0	0	0	603	903	0
9487	4	-17.5758	-52.0755	-319.154	-52000.1	29142.3	-1076.84	291.311	462.931	0	-1.55212	106.898	-419.123	-15968.1	17130.6	2978.03	240.873	941.099	0	0	0	0	0	0	0	603	903	0
9487	5	-20.7802	-54.6695	-327.699	-52366.3	30057.9	-1671.94	291.724	459.8	0	-0.33142	106.592	-413.935	-15235.7	16703.4	2703.37	240.353	939.807	0	0	0	0	0	0	0	603	903	0
9487	6	-22.6112	-55.4324	-340.516	-54014.3	30912.4	-2221.25	290.781	458.625	0	-0.178833	106.898	-409.357	-15693.4	16337.2	3023.8	239.909	941.337	0	0	0	0	0	0	0	603	903	0
9487	7	-17.7284	-60.1626	-345.094	-55387.6	31644.8	-1626.16	291.699	460.5	0	-0.33142	105.219	-401.117	-15327.2	16215.1	2840.7	240.425	941.211	0	0	0	0	0	0	0	603	903	0
9487	8	-21.6957	-60.6204	-357.606	-57035.5	32621.3	-1809.26	291.221	459.493	0	1.34705	104.914	-396.845	-14961	15971	2291.38	240.245	940.7	0	0	0	0	0	0	0	603	903	0
9487	9	-25.9682	-62.1463	-363.71	-57859.5	33597.9	-2724.79	292.376	459.082	0	1.19446	104.609	-390.436	-14686.3	15665.8	2794.92	240.124	940.615	0	0	0	0	0	0	0	603	903	0
9488	0	-22.3061	-65.0454	-373.781	-59415.9	33903.1	-2450.13	290.703	458.959	0	2.26257	104.761	-381.891	-14503.2	15177.5	2886.48	239.743	940.977	0	0	0	0	0	0	0	603	903	0
9488	1	-23.3742	-65.5032	-384.462	-60148.3	34513.4	-1855.04	289.771	456.448	0	2.56775	103.846	-378.229	-14777.9	14994.4	2520.26	239.644	942.071	0	0	0	0	0	0	0	603	903	0
9488	2	-27.3415	-65.8084	-394.533	-61338.5	35306.9	-2129.7	289.49	455.471	0	3.48328	101.862	-373.041	-14411.7	15116.5	2978.03	240.522	941.633	0	0	0	0	0	0	0	603	903	0
9488	3	-26.2733	-72.6748	-401.246	-62803.4	36588.6	-2404.36	291.187	456.521	0	1.04187	102.32	-366.022	-13770.8	14567.1	2749.15	239.799	940.623	0	0	0	0	0	0	0	603	903	0
9488	4	-26.2733	-71.6067	-409.486	-63718.9	36100.3	-2038.15	288.16	455.607	0	4.3988	100.947	-359.919	-13313	14139.9	2657.59	239.286	939.989	0	0	0	0	0	0	0	603	903	0
9488	5	-28.1044	-70.8438	-415.895	-63810.4	38114.5	-2999.45	291.645	453.429	0	3.33069	99.5734	-352.9	-13404.6	13956.8	2657.59	239.549	940.984	0	0	0	0	0	0	0	603	903	0
9488	6	-26.8837	-73.4378	-423.524	-65000.6	38358.6	-3502.99	290.57	453.476	0	3.48328	98.6578	-347.101	-12672.2	13712.7	2749.15	239.506	939.509	0	0	0	0	0	0	0	603	903	0
9488	7	-25.3578	-76.7947	-430.543	-65183.7	38908	-3228.33	290.369	451.399	0	3.48328	98.6578	-340.388	-12122.9	13285.4	2337.16	239.03	938.615	0	0	0	0	0	0	0	603	903	0
9488	8	-27.6466	-76.1843	-438.478	-66373.9	39884.5	-3365.66	290.961	451.373	0	4.70398	97.7423	-333.674	-12122.9	12736.1	2703.37	238.169	939.332	0	0	0	0	0	0	0	603	903	0
9488	9	-26.1208	-77.7102	-442.14	-67106.3	40616.9	-4052.31	291.864	451.776	0	4.55139	95.9113	-326.044	-12122.9	12858.2	2703.37	239.437	940.182	0	0	0	0	0	0	0	603	903	0
9489	0	-25.663	-77.7102	-449.769	-68845.9	40922.1	-3777.65	290.985	453.069	0	4.09363	94.3854	-320.246	-11665.1	12736.1	2611.82	239.77	939.426	0	0	0	0	0	0	0	603	903	0
9489	1	-25.663	-79.2361	-454.347	-69120.5	41471.4	-3640.32	291.277	452.132	0	3.1781	92.5543	-311.396	-10932.7	12186.8	2749.15	239.136	938.109	0	0	0	0	0	0	0	603	903	0
9489	2	-23.9845	-79.0835	-461.366	-69578.3	42020.8	-4418.52	291.079	450.809	0	4.85657	91.181	-303.766	-10383.4	11820.6	2703.37	238.913	937.182	0	0	0	0	0	0	0	603	903	0
9489	3	-22.6112	-79.5413	-466.859	-69578.3	42875.2	-4510.07	291.838	449.035	0	6.22986	91.181	-297.358	-10474.9	11393.3	2428.71	238.315	938.227	0	0	0	0	0	0	0	603	903	0
9489	4	-23.9845	-79.3887	-470.521	-70676.9	43241.5	-3960.75	291.901	450.21	0	5.16174	89.35	-291.865	-9559.39	11332.3	2474.49	238.827	935.753	0	0	0	0	0	0	0	603	903	0
9489	5	-24.4423	-81.0672	-472.352	-70676.9	43180.4	-4372.74	291.416	449.628	0	5.00916	87.3663	-284.235	-9834.05	10844	2382.93	238.152	937.598	0	0	0	0	0	0	0	603	903	0
9489	6	-22.6112	-80.3042	-475.404	-71684	43729.7	-4784.73	291.984	450.785	0	5.00916	85.3827	-276.301	-9193.18	9989.51	2337.16	236.155	936.272	0	0	0	0	0	0	0	603	903	0
9489	7	-21.2379	-79.999	-480.287	-70493.8	44340.1	-4464.29	292.32	446.774	0	6.07727	81.568	-269.282	-9193.18	10172.6	2474.49	237.777	937.14	0	0	0	0	0	0	0	603	903	0
9489	8	-22.1535	-79.8465	-484.865	-70768.4	44706.3	-4784.73	292.204	445.955	0	6.38245	80.8051	-261.652	-8643.86	9989.51	2840.7	238.179	936.036	0	0	0	0	0	0	0	603	903	0
9489	9	-20.7802	-81.5249	-486.39	-71500.9	43729.7	-4738.95	289.907	447.003	0	5.31433	80.3473	-252.802	-8277.65	9501.23	2062.5	237.584	935.744	0	0	0	0	0	0	0	603	903	0
9490	0	-18.1862	-81.6775	-488.221	-71409.3	45072.5	-4738.95	292.32	446.264	0	8.2135	76.8378	-244.257	-8002.99	9196.05	2016.72	237.649	935.765	0	0	0	0	0	0	0	603	903	0
9490	1	-19.2543	-80.6094	-490.663	-71500.9	45438.7	-4601.62	292.607	445.723	0	6.07727	75.1593	-238.154	-7270.57	9196.05	1879.39	238.614	933.529	0	0	0	0	0	0	0	603	903	0
9490	2	-17.5758	-81.5249	-492.494	-72508	45499.8	-5471.37	292.386	447.226	0	6.9928	72.4127	-231.745	-6904.36	8829.84	1696.29	238.102	932.793	0	0	0	0	0	0	0	603	903	0
9490	3	-16.3551	-81.9827	-496.461	-72508	45866	-5425.6	292.386	446.05	0	7.45056	70.1239	-224.421	-6538.15	7975.35	1787.84	235.537	932.133	0	0	0	0	0	0	0	603	903	0
9490	4	-14.3715	-80.762	-497.682	-72508	46232.2	-5288.27	292.895	445.691	0	6.07727	68.1403	-216.181	-6171.94	7548.1	1742.07	234.916	931.55	0	0	0	0	0	0	0	603	903	0
9490	5	-14.9818	-82.1353	-500.429	-72141.8	46659.4	-5929.14	293.239	444.16	0	6.53503	66.6144	-208.552	-6080.39	7792.24	1558.96	237.364	932.155	0	0	0	0	0	0	0	603	903	0
9490	6	-14.2189	-82.2879	-499.818	-72508	46354.2	-6203.8	292.742	445.069	0	6.68762	64.7833	-203.364	-5531.07	7426.03	1833.62	236.516	930.198	0	0	0	0	0	0	0	603	903	0
9490	7	-12.5404	-82.1353	-502.26	-71867.1	46720.5	-5700.26	293.021	443.088	0	7.29797	61.579	-194.513	-5531.07	6815.68	1650.51	235.04	931.435	0	0	0	0	0	0	0	603	903	0
9490	8	-11.4723	-81.9827	-512.941	-72141.8	48124.3	-6158.02	293.82	440.643	0	7.60315	58.3746	-187.8	-5347.96	6876.71	1375.85	236.617	931.477	0	0	0	0	0	0	0	603	903	0
9490	9	-11.0146	-81.3723	-520.265	-72965.7	49222.9	-6341.13	294.611	440.247	0	6.22986	56.5436	-179.56	-4981.75	6327.4	1650.51	235.238	930.744	0	0	0	0	0	0	0	603	903	0
9491	0	-3.07998	-82.8982	-528.2	-72233.3	49528.1	-6524.23	293.768	436.754	0	5.7721	54.2548	-174.677	-4615.54	6693.61	1421.63	238.32	929.423	0	0	0	0	0	0	0	603	903	0
9491	1	5.00718	-91.2906	-523.622	-72233.3	49406	-7805.97	294.354	437.949	0	7.75574	52.5763	-168.879	-4157.78	5594.98	1284.3	233.13	927.62	0	0	0	0	0	0	0	603	903	0
9491	2	1.95542	-92.2061	-522.096	-72324.8	50016.4	-8263.73	295.799	438.528	0	6.68762	49.5245	-163.996	-4066.22	5656.01	1467.41	234.489	927.795	0	0	0	0	0	0	0	603	903	0
9491	3	3.02354	-88.2388	-529.42	-73057.2	50138.4	-8355.29	294.704	437.995	0	7.45056	46.778	-157.892	-3883.12	5717.05	1375.85	236.209	927.593	0	0	0	0	0	0	0	603	903	0
9491	4	6.07529	-92.5113	-535.829	-73972.8	50748.8	-9316.59	294.711	438.053	0	5.7721	43.8788	-152.704	-3791.57	5167.73	1330.08	233.841	927.83	0	0	0	0	0	0	0	603	903	0
9491	5	2.56577	-101.819	-543.153	-73606.6	51054	-9545.47	293.996	435.517	0	5.16174	40.5219	-144.465	-3516.91	4923.59	1467.41	234.082	927.344	0	0	0	0	0	0	0	603	903	0
9491	6	0.276953	-104.108	-540.101	-72965.7	51542.2	-9545.47	295.431	435.096	0	5.16174	36.7072	-139.582	-2784.49	4984.62	1284.3	235.711	922.949	0	0	0	0	0	0	0	603	903	0
9491	7	5.15977	-102.887	-540.101	-73606.6	51969.5	-10277.9	296.222	436.283	0	6.9928	35.639	-134.089	-2601.38	4618.41	872.314	234.443	922.4	0	0	0	0	0	0	0	603	903	0
9491	8	3.17612	-103.803	-545.595	-73057.2	51725.3	-10369.4	294.806	433.904	0	4.09363	34.2657	-129.511	-2326.72	4313.24	963.867	233.304	920.966	0	0	0	0	0	0	0	603	903	0
9491	9	-4.30068	-107.77	-545.289	-72233.3	51969.5	-9911.68	295.306	432.468	0	3.63586	30.7562	-124.628	-2418.28	4069.1	826.538	232.65	922.404	0	0	0	0	0	0	0	603	903	0
9492	0	-5.3688	-108.686	-549.257	-72416.4	51908.4	-10140.6	294.507	431.844	0	3.33069	28.62	-119.44	-2052.06	3580.81	780.761	229.98	920.181	0	0	0	0	0	0	0	603	903	0
9492	1	-4.1481	-103.04	-548.951	-72508	52213.6	-9865.91	295.115	432.085	0	3.63586	28.4674	-114.863	-1411.2	3702.88	551.879	232.238	915.286	0	0	0	0	0	0	0	603	903	0
9492	2	-6.74209	-101.819	-552.003	-72874.2	52701.9	-9774.35	295.474	432.018	0	4.55139	26.7889	-109.064	-1411.2	3397.71	780.761	231.153	915.939	0	0	0	0	0	0	0	603	903	0
9492	3	-7.35244	-107.007	-555.971	-73606.6	52335.7	-8813.05	294.134	432.393	0	3.63586	25.4156	-104.181	-1502.75	3336.67	689.209	232.028	917.424	0	0	0	0	0	0	0	603	903	0
9492	4	-7.81021	-105.329	-558.717	-72965.7	52518.8	-9637.02	293.999	430.595	0	4.09363	22.6691	-100.519	-1777.41	3214.6	506.103	231.98	920.682	0	0	0	0	0	0	0	603	903	0
9492	5	-12.693	-98.4622	-559.938	-73240.4	52274.7	-9591.25	293.358	430.801	0	1.9574	23.2794	-99.2986	-1411.2	2970.46	414.55	229.914	917.212	0	0	0	0	0	0	0	603	903	0
9492	6	-11.6249	-99.3777	-559.022	-72965.7	52274.7	-9728.58	293.511	430.524	0	3.02551	21.4484	-95.9417	-678.773	2787.36	231.445	229.053	910.075	0	0	0	0	0	0	0	603	903	0
9492	7	-9.79385	-104.261	-559.938	-73148.8	52946	-9865.91	294.557	430.637	0	3.94104	19.007	-93.8055	-953.431	2726.32	506.103	229.064	913.164	0	0	0	0	0	0	0	603	903	0
9492	8	-8.42056	-102.124	-563.295	-72416.4	53434.3	-9774.35	294.86	428.559	0	1.80481	17.6337	-87.702	-953.431	2421.15	414.55	227.607	913.871	0	0	0	0	0	0	0	603	903	0
9492	9	-6.13174	-99.2251	-566.041	-71684	53678.5	-10003.2	294.831	426.641	0	2.10999	16.5656	-84.9554	-678.773	2482.18	460.327	229.217	910.99	0	0	0	0	0	0	0	603	903	0
9493	0	-6.89468	-102.277	-565.736	-72324.8	53495.4	-10369.4	294.559	427.842	0	3.63586	15.4974	-82.2088	-404.114	2421.15	689.209	229.451	907.916	0	0	0	0	0	0	0	603	903	0
9493	1	-8.26797	-104.108	-565.126	-71867.1	53373.3	-10232.1	294.445	427.17	0	3.94104	12.7509	-79.7674	-770.326	2360.11	231.445	229.587	912.657	0	0	0	0	0	0	0	603	903	0
9493	2	-4.60586	-102.124	-570.619	-71775.5	54288.8	-10323.7	295.14	425.785	0	2.72034	13.819	-77.326	-1044.98	2360.11	231.445	230.522	916.514	0	0	0	0	0	0	0	603	903	0
9493	3	1.80283	-103.04	-571.84	-71684	54716.1	-10735.7	295.684	425.357	0	1.65222	13.9716	-73.6639	-587.22	2238.04	48.3394	230.382	910.972	0	0	0	0	0	0	0	603	903	0
9493	4	3.32871	-103.65	-573.671	-72508	54777.1	-11101.9	295.485	426.393	0	1.49963	12.2931	-72.138	-404.114	1993.9	277.221	227.64	908.602	0	0	0	0	0	0	0	603	903	0
9493	5	4.09165	-104.871	-574.586	-72050.2	54960.2	-10918.8	295.652	425.395	0	3.1781	10.9198	-68.4759	-129.456	1749.76	48.3394	225.553	904.891	0	0	0	0	0	0	0	603	903	0
9493	6	6.38047	-103.65	-579.164	-72324.8	55753.7	-11147.6	296.266	424.878	0	1.9574	10.6146	-66.6448	-37.9035	1688.72	48.3394	225.339	903.569	0	0	0	0	0	0	0	603	903	0
9493	7	7.44858	-102.582	-578.859	-71134.6	55753.7	-11651.2	296.317	422.888	0	1.19446	10.6146	-62.6775	-861.878	1749.76	139.892	227.917	916.751	0	0	0	0	0	0	0	603	903	0
9493	8	6.83823	-103.803	-576.112	-71867.1	55753.7	-12154.7	296.776	424.745	0	5.00916	9.24133	-61.762	-953.431	1871.83	368.774	230.307	918.437	0	0	0	0	0	0	0	603	903	0
9493	9	10.9581	-105.634	-580.385	-71500.9	55997.8	-11880.1	296.484	423.196	0	2.10999	9.24133	-58.7103	-404.114	1749.76	-43.2133	229.803	909.883	0	0	0	0	0	0	0	603	903	0
9494	0	12.7892	-103.345	-584.657	-70585.4	55692.6	-12063.2	295.257	420.73	0	2.87293	9.24133	-55.6585	-587.22	1749.76	48.3394	231.437	913.55	0	0	0	0	0	0	0	603	903	0
9494	1	11.5685	-103.65	-585.878	-70493.8	56486.1	-12383.6	296.413	420.322	0	2.56775	7.71545	-52.9119	-678.773	1017.34	-88.9897	219.227	915.828	0	0	0	0	0	0	0	603	903	0
9494	2	11.1107	-105.481	-585.267	-71226.2	56547.1	-12841.4	296.618	421.699	0	1.80481	8.63098	-48.6395	-312.562	1383.55	48.3394	228.445	909.426	0	0	0	0	0	0	0	603	903	0
9494	3	12.3314	-106.244	-584.047	-70768.4	56791.3	-12704	297.238	421.169	0	1.04187	8.93616	-47.4188	-404.114	1261.48	185.669	226.603	911.522	0	0	0	0	0	0	0	603	903	0
9494	4	12.0262	-103.955	-587.709	-70402.2	57340.6	-12246.3	297.566	419.791	0	2.41516	7.86804	-45.5877	-312.562	1261.48	-226.319	227.671	909.856	0	0	0	0	0	0	0	603	903	0
9494	5	12.0262	-104.261	-589.54	-69578.3	56974.4	-13024.5	296.642	418.021	0	3.94104	6.18958	-43.1463	-587.22	956.302	2.56305	222.164	916.61	0	0	0	0	0	0	0	603	903	0
9494	6	12.3314	-105.634	-587.098	-70493.8	56852.3	-12749.8	296.836	420.071	0	3.1781	6.95251	-38.8738	-770.326	956.302	185.669	224.6	922.816	0	0	0	0	0	0	0	603	903	0
9494	7	10.9581	-103.803	-590.455	-70310.7	57035.4	-12566.7	296.596	419.079	0	1.80481	6.18958	-39.4842	-404.114	1566.65	-88.9897	239.678	913.235	0	0	0	0	0	0	0	603	903	0
9494	8	12.1788	-102.735	-590.15	-70402.2	57462.6	-12566.7	297.37	419.295	0	2.26257	4.81628	-36.7376	-404.114	1383.55	185.669	237.66	914	0	0	0	0	0	0	0	603	903	0
9494	9	12.484	-104.108	-589.54	-70127.6	57035.4	-13436.5	296.746	418.953	0	3.1781	4.05334	-34.9066	-312.562	1200.44	139.892	234.39	911.954	0	0	0	0	0	0	0	603	903	0
9495	0	12.9417	-103.65	-591.981	-70219.1	57340.6	-13390.7	296.862	418.617	0	5.16174	4.96887	-33.0755	-221.009	1261.48	-88.9897	238.139	909.682	0	0	0	0	0	0	0	603	903	0
9495	1	13.7047	-102.124	-593.202	-70219.1	57340.6	-13116	296.663	418.373	0	2.72034	3.13782	-32.4651	-404.114	1078.37	-43.2133	233.216	915.448	0	0	0	0	0	0	0	603	903	0
9495	2	14.7728	-101.972	-594.423	-69028.9	57706.8	-13344.9	297.08	416.128	0	1.65222	3.44299	-32.4651	-678.773	956.302	-88.9897	229.456	923.908	0	0	0	0	0	0	0	603	903	0
9495	3	14.0099	-102.429	-596.254	-69120.5	57889.9	-13436.5	297.089	415.925	0	1.80481	3.44299	-31.2444	-404.114	651.126	-134.766	220.84	915.934	0	0	0	0	0	0	0	603	903	0
9495	4	14.1625	-103.345	-595.338	-68754.3	58378.2	-13161.8	298.059	415.488	0	3.1781	3.59558	-30.3289	-221.009	773.196	48.3394	225.494	910.287	0	0	0	0	0	0	0	603	903	0
9495	5	16.1461	-101.514	-597.169	-68021.9	58256.1	-13528	297.554	413.907	0	2.87293	2.98523	-26.6668	-404.114	956.302	231.445	235.861	918.154	0	0	0	0	0	0	0	603	903	0
9495	6	18.4349	-101.972	-598.39	-68662.7	58134	-13619.6	297.151	414.746	0	2.56775	3.13782	-23.615	-1136.54	1139.41	-226.319	248.249	951.128	0	0	0	0	0	0	0	603	903	0
9495	7	17.0616	-103.04	-599.305	-68845.9	58317.1	-13711.1	297.308	414.876	0	2.10999	4.35852	-24.2254	-404.114	834.231	-363.648	234.436	919.682	0	0	0	0	0	0	0	603	903	0
9495	8	18.7401	-101.819	-599.611	-68754.3	58622.3	-14260.4	297.767	414.665	0	1.80481	3.44299	-24.2254	-861.878	956.302	-43.2133	239.475	938.577	0	0	0	0	0	0	0	603	903	0
9495	9	20.8763	-100.904	-599	-69578.3	58927.5	-13940	298.376	416.157	0	3.1781	3.13782	-23.3099	-312.562	834.231	-88.9897	235.789	916.409	0	0	0	0	0	0	0	603	903	0
9496	0	20.5711	-100.293	-599.916	-69303.6	58927.5	-14031.6	298.226	415.522	0	2.41516	3.13782	-22.6995	-312.562	712.161	-592.53	231.373	916.77	0	0	0	0	0	0	0	603	903	0
9496	1	21.4867	-100.141	-598.695	-68296.5	58988.5	-14443.5	298.529	414.076	0	2.72034	2.0697	-22.0892	-404.114	284.915	-88.9897	212.898	921.295	0	0	0	0	0	0	0	603	903	0
9496	2	21.9444	-99.0725	-603.273	-68937.4	59354.7	-14397.8	298.388	414.272	0	1.9574	2.52747	-18.7322	-37.9035	712.161	-180.542	238.018	905.023	0	0	0	0	0	0	0	603	903	0
9496	3	21.6393	-98.3096	-603.578	-68754.3	59110.6	-14077.3	297.934	413.911	0	0	0	0	0	0	0	200	903	0	0	0	0	0	0	0	603	903	0
9496	4	22.7074	-97.6992	-602.357	-67472.5	59171.6	-14168.9	298.233	412.014	0	0	0	0	0	0	0	200	903	0	0	0	0	0	0	0	603	903	0
9496	5	22.4022	-97.3941	-602.052	-67930.3	58866.5	-14260.4	297.776	412.831	0	0	0	0	0	0	0	200	903	0	0	0	0	0	0	0	603	903	0
9496	6	23.1651	-96.7837	-602.662	-68113.4	59415.8	-14214.7	298.589	413.021	0	0	0	0	0	0	0	200	903	0	0	0	0	0	0	0	603	903	0
9496	7	24.2333	-94.9527	-603.883	-68296.5	59476.8	-14077.3	298.491	413.096	0	0	0	0	0	0	0	200	903	0	0	0	0	0	0	0	603	903	0
9496	8	23.9281	-94.3423	-598.085	-67381	59354.7	-14168.9	299.241	412.661	0	0	0	0	0	0	0	200	903	0	0	0	0	0	0	0	603	903	0
9496	9	23.1651	-94.4949	-602.662	-67472.5	59232.7	-13802.7	298.285	411.957	0	0	0	0	0	0	0	200	903	0	0	0	0	0	0	0	603	903	0
9497	0	22.7074	-92.2061	-602.052	-68205	59476.8	-14123.1	298.79	413.287	0	0	0	0	0	0	0	200	903	0	0	0	0	0	0	0	603	903	0
9497	1	24.3858	-91.138	-602.662	-67838.7	59354.7	-13894.2	298.488	412.565	0	0	0	0	0	0	0	200	903	0	0	0	0	0	0	0	603	903	0
9497	2	24.9962	-90.6802	-603.578	-67197.9	59415.8	-13940	298.439	411.333	0	0	0	0	0	0	0	200	903	0	0	0	0	0	0	0	603	903	0
9497	3	24.3858	-89.4595	-601.747	-67655.7	59232.7	-13894.2	298.435	412.432	0	0	0	0	0	0	0	200	903	0	0	0	0	0	0	0	603	903	0
9497	4	24.9962	-88.8491	-603.883	-67838.7	59537.8	-14123.1	298.592	412.338	0	0	0	0	0	0	0	200	903	0	0	0	0	0	0	0	603	903	0
9497	5	24.8436	-87.6284	-603.273	-67381	59782	-13711.1	299.096	411.692	0	0	0	0	0	0	0	200	903	0	0	0	0	0	0	0	603	903	0
9497	6	25.3014	-87.1707	-601.747	-66648.6	59415.8	-13802.7	298.739	410.759	0	0	0	0	0	0	0	200	903	0	0	0	0	0	0	0	603	903	0
9497	7	27.4376	-86.5603	-602.662	-66648.6	59476.8	-14077.3	298.69	410.59	0	0	0	0	0	0	0	200	903	0	0	0	0	0	0	0	603	903	0
9497	8	25.7591	-85.95	-603.883	-66007.7	59843	-14031.6	299.097	409.305	0	0	0	0	0	0	0	200	903	0	0	0	0	0	0	0	603	903	0
9497	9	25.9117	-84.7293	-603.578	-66190.8	59965.1	-13711.1	299.349	409.664	0	0	0	0	0	0	0	200	903	0	0	0	0	0	0	0	603	903	0
9498	0	26.2169	-86.1026	-602.968	-65916.2	59537.8	-13528	298.741	409.32	0	0	0	0	0	0	0	200	903	0	0	0	0	0	0	0	603	903	0
9498	1	26.9798	-83.356	-601.442	-67014.8	59232.7	-13894.2	298.484	411.424	0	0	0	0	0	0	0	200	903	0	0	0	0	0	0	0	603	903	0
9498	2	26.9798	-82.7456	-600.831	-66831.7	59720.9	-13711.1	299.397	411.232	0	0	0	0	0	0	0	200	903	0	0	0	0	0	0	0	603	903	0
9498	3	27.7428	-82.593	-602.968	-66831.7	59659.9	-13390.7	298.944	410.838	0	0	0	0	0	0	0	200	903	0	0	0	0	0	0	0	603	903	0
9498	4	26.9798	-81.0672	-602.357	-66007.7	59476.8	-12887.1	298.74	409.582	0	0	0	0	0	0	0	200	903	0	0	0	0	0	0	0	603	903	0
9498	5	27.8954	-79.999	-598.085	-66923.2	59659.9	-13436.5	299.752	411.896	0	0	0	0	0	0	0	200	903	0	0	0	0	0	0	0	603	903	0
9498	6	27.4376	-80.9146	-600.526	-66282.4	59659.9	-13161.8	299.346	410.374	0	0	0	0	0	0	0	200	903	0	0	0	0	0	0	0	603	903	0
9498	7	28.0479	-78.168	-599.611	-65366.8	59720.9	-13344.9	299.6	409.015	0	0	0	0	0	0	0	200	903	0	0	0	0	0	0	0	603	903	0
9498	8	28.0479	-77.8628	-601.747	-65092.2	58622.3	-13024.5	297.42	408.172	0	0	0	0	0	0	0	200	903	0	0	0	0	0	0	0	603	903	0
9498	9	27.7428	-77.8628	-597.169	-65183.7	59476.8	-13024.5	299.598	409.155	0	0	0	0	0	0	0	200	903	0	0	0	0	0	0	0	603	903	0
9499	0	27.8954	-76.9473	-602.052	-65092.2	59354.7	-13161.8	298.587	408.117	0	0	0	0	0	0	0	200	903	0	0	0	0	0	0	0	603	903	0
9499	1	27.1324	-75.7266	-600.221	-65000.6	59354.7	-12932.9	298.888	408.294	0	0	0	0	0	0	0	200	903	0	0	0	0	0	0	0	603	903	0
9499	2	27.8954	-76.3369	-600.221	-65183.7	59598.9	-12932.9	299.295	408.6	0	0	0	0	0	0	0	200	903	0	0	0	0	0	0	0	603	903	0
9499	3	28.9635	-73.5904	-599.611	-66099.2	59659.9	-12978.7	299.498	410.237	0	0	0	0	0	0	0	200	903	0	0	0	0	0	0	0	603	903	0
9499	4	28.0479	-73.1326	-600.526	-65733	59720.9	-13070.3	299.448	409.459	0	0	0	0	0	0	0	200	903	0	0	0	0	0	0	0	603	903	0
9499	5	27.285	-72.5222	-602.357	-65366.8	59598.9	-12841.4	298.943	408.518	0	0	0	0	0	0	0	200	903	0	0	0	0	0	0	0	603	903	0
9499	6	26.8272	-70.8438	-599	-64909.1	59415.8	-12749.8	299.192	408.362	0	0	0	0	0	0	0	200	903	0	0	0	0	0	0	0	603	903	0
9499	7	28.5057	-70.2334	-599	-65366.8	59659.9	-12658.3	299.599	409.127	0	0	0	0	0	0	0	200	903	0	0	0	0	0	0	0	603	903	0
9499	8	29.4212	-70.5386	-599.916	-65275.3	59537.8	-12704	299.244	408.807	0	0	0	0	0	0	0	200	903	0	0	0	0	0	0	0	603	903	0
9499	9	28.3531	-69.4705	-601.747	-64176.7	59598.9	-12520.9	299.043	406.651	0	0	0	0	0	0	0	200	903	0	0	0	0	0	0	0	603	903	0
9500	0	27.7428	-68.4024	-602.357	-64542.9	59476.8	-12475.2	298.74	407.151	0	0	0	0	0	0	0	200	903	0	0	0	0	0	0	0	603	903	0
9500	1	29.2687	-68.4024	-599.916	-64451.3	59537.8	-12200.5	299.244	407.434	0	0	0	0	0	0	0	200	903	0	0	0	0	0	0	0	603	903	0
9500	2	28.3531	-67.3343	-595.949	-64085.1	59843	-12658.3	300.416	407.535	0	0	0	0	0	0	0	200	903	0	0	0	0	0	0	0	603	903	0
9500	3	28.5057	-66.8765	-599.305	-63993.6	59476.8	-12292.1	299.243	406.78	0	0	0	0	0	0	0	200	903	0	0	0	0	0	0	0	603	903	0
9500	4	28.5057	-67.3343	-599.916	-63993.6	59293.7	-12108.9	298.837	406.671	0	0	0	0	0	0	0	200	903	0	0	0	0	0	0	0	603	903	0
9500	5	28.3531	-65.198	-599.305	-64542.9	58927.5	-11971.6	298.326	407.696	0	0	0	0	0	0	0	200	903	0	0	0	0	0	0	0	603	903	0
9500	6	28.2005	-64.8928	-600.831	-64085.1	59354.7	-12108.9	298.788	406.661	0	0	0	0	0	0	0	200	903	0	0	0	0	0	0	0	603	903	0
9500	7	28.3531	-63.5196	-598.39	-63810.4	58683.4	-11971.6	298.069	406.637	0	0	0	0	0	0	0	200	903	0	0	0	0	0	0	0	603	903	0
9500	8	29.1161	-62.9092	-596.864	-63627.3	59232.7	-11651.2	299.24	406.603	0	0	0	0	0	0	0	200	903	0	0	0	0	0	0	0	603	903	0
9500	9	27.8954	-62.604	-599.305	-64451.3	59293.7	-11605.4	298.937	407.543	0	0	0	0	0	0	0	200	903	0	0	0	0	0	0	0	603	903	0
9501	0	27.5902	-61.3833	-598.39	-63078	59171.6	-11742.7	298.885	405.413	0	0	0	0	0	0	0	200	903	0	0	0	0	0	0	0	603	903	0
9501	1	27.1324	-60.9256	-599	-62894.9	59293.7	-11513.9	298.988	405	0	0	0	0	0	0	0	200	903	0	0	0	0	0	0	0	603	903	0
9501	2	27.1324	-61.0781	-595.338	-63261.1	59049.6	-11285	299.187	406.261	0	0	0	0	0	0	0	200	903	0	0	0	0	0	0	0	603	903	0
9501	3	27.5902	-59.5523	-595.338	-62620.3	58927.5	-11193.4	298.982	405.184	0	0	0	0	0	0	0	200	903	0	0	0	0	0	0	0	603	903	0
9501	4	28.3531	-58.9419	-597.474	-62528.7	58927.5	-11285	298.628	404.655	0	0	0	0	0	0	0	200	903	0	0	0	0	0	0	0	603	903	0
9501	5	27.4376	-58.9419	-592.592	-62620.3	58805.4	-11010.3	299.234	405.672	0	0	0	0	0	0	0	200	903	0	0	0	0	0	0	0	603	903	0
9501	6	27.1324	-58.7893	-594.423	-62894.9	58805.4	-10827.2	298.929	405.808	0	0	0	0	0	0	0	200	903	0	0	0	0	0	0	0	603	903	0
9501	7	26.2169	-57.7212	-591.981	-62894.9	58866.5	-10598.3	299.44	406.245	0	0	0	0	0	0	0	200	903	0	0	0	0	0	0	0	603	903	0
9501	8	26.9798	-56.3479	-591.981	-61704.7	58500.2	-11056.1	298.821	404.234	0	0	0	0	0	0	0	200	903	0	0	0	0	0	0	0	603	903	0
9501	9	26.5221	-55.7376	-591.981	-62254	58500.2	-10232.1	298.821	405.162	0	0	0	0	0	0	0	200	903	0	0	0	0	0	0	0	603	903	0
9502	0	26.6747	-57.2634	-591.066	-61796.3	58012	-10598.3	298.148	404.551	0	0	0	0	0	0	0	200	903	0	0	0	0	0	0	0	603	903	0
9502	1	25.6065	-54.3643	-591.676	-60697.7	58317.1	-10369.4	298.563	402.586	0	0	0	0	0	0	0	200	903	0	0	0	0	0	0	0	603	903	0
9502	2	26.8272	-53.6013	-587.709	-60606.1	57767.8	-10094.8	298.293	403.123	0	0	0	0	0	0	0	200	903	0	0	0	0	0	0	0	603	903	0
9502	3	24.691	-53.6013	-588.319	-59782.1	58134	-10323.7	298.814	401.615	0	0	0	0	0	0	0	200	903	0	0	0	0	0	0	0	603	903	0
9502	4	25.3014	-53.6013	-587.404	-60697.7	57706.8	-10094.8	298.24	403.332	0	0	0	0	0	0	0	200	903	0	0	0	0	0	0	0	603	903	0
9502	5	25.9117	-52.5332	-589.235	-60331.4	57645.8	-10003.2	297.832	402.39	0	0	0	0	0	0	0	200	903	0	0	0	0	0	0	0	603	903	0
9502	6	26.2169	-52.0755	-581.605	-60514.5	57645.8	-9820.13	299.115	404.047	0	0	0	0	0	0	0	200	903	0	0	0	0	0	0	0	603	903	0
9502	7	24.691	-51.3125	-585.878	-60514.5	57645.8	-9865.91	298.392	403.289	0	0	0	0	0	0	0	200	903	0	0	0	0	0	0	0	603	903	0
9502	8	24.8436	-49.6341	-581.91	-58775	57645.8	-9774.35	299.063	401.004	0	0	0	0	0	0	0	200	903	0	0	0	0	0	0	0	603	903	0
9502	9	25.9117	-48.5659	-582.826	-60148.3	57340.6	-9545.47	298.384	403.201	0	0	0	0	0	0	0	200	903	0	0	0	0	0	0	0	603	903	0
9503	0	24.8436	-48.4133	-580.079	-59599	57279.5	-9270.81	298.744	402.743	0	0	0	0	0	0	0	200	903	0	0	0	0	0	0	0	603	903	0
9503	1	24.691	-48.1082	-583.436	-58775	57279.5	-9499.7	298.176	400.739	0	0	0	0	0	0	0	200	903	0	0	0	0	0	0	0	603	903	0
9503	2	24.3858	-48.4133	-581.91	-58683.5	56913.3	-9408.14	297.804	400.846	0	0	0	0	0	0	0	200	903	0	0	0	0	0	0	0	603	903	0
9503	3	24.0807	-46.8875	-578.248	-58500.4	56547.1	-9225.04	297.79	401.168	0	0	0	0	0	0	0	200	903	0	0	0	0	0	0	0	603	903	0
9503	4	26.2169	-46.7349	-577.333	-58134.2	56913.3	-8355.29	298.58	400.694	0	0	0	0	0	0	0	200	903	0	0	0	0	0	0	0	603	903	0
9503	5	24.8436	-46.2771	-577.333	-58500.4	56303	-8813.05	297.523	401.329	0	0	0	0	0	0	0	200	903	0	0	0	0	0	0	0	603	903	0
9503	6	24.8436	-45.3616	-576.417	-58225.7	56486.1	-8721.5	297.995	401.013	0	0	0	0	0	0	0	200	903	0	0	0	0	0	0	0	603	903	0
9503	7	23.7755	-44.4461	-576.722	-58134.2	56425	-8904.6	297.837	400.801	0	0	0	0	0	0	0	200	903	0	0	0	0	0	0	0	603	903	0
9503	8	24.8436	-43.6831	-573.06	-57584.9	56241.9	-8401.06	298.143	400.487	0	0	0	0	0	0	0	200	903	0	0	0	0	0	0	0	603	903	0
9503	9	23.3177	-42.615	-571.534	-57493.3	56180.9	-8538.39	298.298	400.595	0	0	0	0	0	0	0	200	903	0	0	0	0	0	0	0	603	903	0
9504	0	24.5384	-42.7676	-570.009	-57218.6	55875.7	-8584.17	298.026	400.382	0	0	0	0	0	0	0	200	903	0	0	0	0	0	0	0	603	903	0
9504	1	24.3858	-42.3098	-571.84	-56486.2	55997.8	-8538.39	297.926	398.78	0	0	0	0	0	0	0	200	903	0	0	0	0	0	0	0	603	903	0
9504	2	25.7591	-41.5469	-569.703	-55753.8	55936.8	-8172.18	298.186	397.865	0	0	0	0	0	0	0	200	903	0	0	0	0	0	0	0	603	903	0
9504	3	23.0125	-41.5469	-569.398	-55753.8	55631.6	-8263.73	297.702	397.917	0	0	0	0	0	0	0	200	903	0	0	0	0	0	0	0	603	903	0
9504	4	23.0125	-40.6314	-564.821	-55387.6	55448.5	-8355.29	298.17	398.062	0	0	0	0	0	0	0	200	903	0	0	0	0	0	0	0	603	903	0
9504	5	23.6229	-40.4788	-564.515	-55387.6	55448.5	-8263.73	298.223	398.115	0	0	0	0	0	0	0	200	903	0	0	0	0	0	0	0	603	903	0
9504	6	23.0125	-39.7158	-564.21	-55387.6	55448.5	-7989.08	298.276	398.168	0	0	0	0	0	0	0	200	903	0	0	0	0	0	0	0	603	903	0
9504	7	23.1651	-40.021	-563.6	-55479.1	55265.4	-8080.63	298.058	398.437	0	0	0	0	0	0	0	200	903	0	0	0	0	0	0	0	603	903	0
9504	8	22.097	-38.6477	-563.295	-54929.8	54594	-7897.52	296.919	397.515	0	0	0	0	0	0	0	200	903	0	0	0	0	0	0	0	603	903	0
9504	9	22.097	-37.8848	-559.633	-54563.6	54899.2	-7760.19	298.099	397.499	0	0	0	0	0	0	0	200	903	0	0	0	0	0	0	0	603	903	0
9505	0	22.7074	-38.19	-555.971	-54655.2	54838.1	-7622.86	298.635	398.306	0	0	0	0	0	0	0	200	903	0	0	0	0	0	0	0	603	903	0
9505	1	23.3177	-37.1218	-557.802	-53556.5	54655	-7531.31	297.983	396.014	0	0	0	0	0	0	0	200	903	0	0	0	0	0	0	0	603	903	0
9505	2	23.4703	-36.6641	-556.886	-53098.8	54105.7	-7622.86	297.158	395.349	0	0	0	0	0	0	0	200	903	0	0	0	0	0	0	0	603	903	0
9505	3	23.0125	-36.3589	-556.581	-52641	54227.8	-7577.09	297.43	394.579	0	0	0	0	0	0	0	200	903	0	0	0	0	0	0	0	603	903	0
9505	4	23.3177	-37.7322	-553.529	-52000.1	54166.8	-7348.21	297.857	393.943	0	0	0	0	0	0	0	200	903	0	0	0	0	0	0	0	603	903	0
9505	5	22.4022	-35.9011	-551.393	-53007.2	53983.6	-7302.43	297.904	396.133	0	0	0	0	0	0	0	200	903	0	0	0	0	0	0	0	603	903	0
9505	6	23.6229	-34.833	-551.698	-52274.8	53495.4	-7302.43	296.965	394.753	0	0	0	0	0	0	0	200	903	0	0	0	0	0	0	0	603	903	0
9505	7	23.7755	-34.0701	-551.088	-51359.3	53495.4	-7393.98	297.072	393.196	0	0	0	0	0	0	0	200	903	0	0	0	0	0	0	0	603	903	0
9505	8	22.2496	-34.0701	-550.477	-51908.6	52762.9	-6753.11	295.849	394.297	0	0	0	0	0	0	0	200	903	0	0	0	0	0	0	0	603	903	0
9505	9	22.7074	-34.3753	-548.951	-51542.4	52885	-7073.55	296.338	393.892	0	0	0	0	0	0	0	200	903	0	0	0	0	0	0	0	603	903	0
9506	0	23.3177	-32.3916	-545.289	-50535.3	53007.1	-7302.43	297.209	392.676	0	0	0	0	0	0	0	200	903	0	0	0	0	0	0	0	603	903	0
9506	1	23.4703	-32.0864	-544.374	-50169.1	53129.1	-6982	297.597	392.159	0	0	0	0	0	0	0	200	903	0	0	0	0	0	0	0	603	903	0
9506	2	24.2333	-32.6968	-543.458	-49528.2	53129.1	-6936.22	297.761	391.135	0	0	0	0	0	0	0	200	903	0	0	0	0	0	0	0	603	903	0
9506	3	23.6229	-32.3916	-541.322	-49345.1	52579.8	-6936.22	297.132	391.157	0	0	0	0	0	0	0	200	903	0	0	0	0	0	0	0	603	903	0
9506	4	22.097	-31.6287	-541.017	-48978.9	52335.7	-6982	296.736	390.531	0	0	0	0	0	0	0	200	903	0	0	0	0	0	0	0	603	903	0
9506	5	22.86	-31.7813	-538.27	-49253.5	52457.8	-6798.89	297.456	391.503	0	0	0	0	0	0	0	200	903	0	0	0	0	0	0	0	603	903	0
9506	6	23.6229	-31.7813	-537.355	-49436.6	52152.6	-6524.23	297.054	392	0	0	0	0	0	0	0	200	903	0	0	0	0	0	0	0	603	903	0
9506	7	24.691	-31.4761	-536.744	-48887.3	51908.4	-6570.01	296.71	391.081	0	0	0	0	0	0	0	200	903	0	0	0	0	0	0	0	603	903	0
9506	8	23.6229	-30.408	-536.439	-47514.1	51786.4	-6753.11	296.537	388.573	0	0	0	0	0	0	0	200	903	0	0	0	0	0	0	0	603	903	0
9506	9	22.7074	-29.3399	-535.524	-47971.8	51969.5	-6158.02	297.044	389.579	0	0	0	0	0	0	0	200	903	0	0	0	0	0	0	0	603	903	0
9507	0	22.4022	-29.7976	-531.251	-46964.7	51481.2	-6707.34	296.906	388.404	0	0	0	0	0	0	0	200	903	0	0	0	0	0	0	0	603	903	0
9507	1	23.0125	-29.3399	-530.031	-47147.8	51298.1	-6203.8	296.783	388.953	0	0	0	0	0	0	0	200	903	0	0	0	0	0	0	0	603	903	0
9507	2	23.0125	-29.7976	-530.031	-46415.4	50931.9	-6158.02	296.092	387.571	0	0	0	0	0	0	0	200	903	0	0	0	0	0	0	0	603	903	0
9507	3	22.7074	-30.1028	-530.641	-45957.6	51176	-5929.14	296.442	386.608	0	0	0	0	0	0	0	200	903	0	0	0	0	0	0	0	603	903	0
9507	4	21.7918	-29.3399	-528.2	-46781.6	50992.9	-6158.02	296.541	388.568	0	0	0	0	0	0	0	200	903	0	0	0	0	0	0	0	603	903	0
9507	5	22.86	-29.0347	-525.758	-46323.9	50199.5	-5746.03	295.48	388.109	0	0	0	0	0	0	0	200	903	0	0	0	0	0	0	0	603	903	0
9507	6	22.86	-27.814	-520.875	-45866.1	50870.9	-5974.92	297.664	388.056	0	0	0	0	0	0	0	200	903	0	0	0	0	0	0	0	603	903	0
9507	7	22.5548	-28.4243	-523.012	-45316.8	50870.9	-5379.82	297.265	386.646	0	0	0	0	0	0	0	200	903	0	0	0	0	0	0	0	603	903	0
9507	8	22.5548	-26.7459	-523.317	-44492.8	50260.5	-6203.8	296.042	385.021	0	0	0	0	0	0	0	200	903	0	0	0	0	0	0	0	603	903	0
9507	9	22.097	-27.051	-521.486	-44218.2	50138.4	-5425.6	296.145	384.793	0	0	0	0	0	0	0	200	903	0	0	0	0	0	0	0	603	903	0
9508	0	21.7918	-27.051	-520.875	-43211.1	50260.5	-5974.92	296.492	382.959	0	0	0	0	0	0	0	200	903	0	0	0	0	0	0	0	603	903	0
9508	1	21.6393	-28.8821	-518.739	-43394.2	49833.2	-5883.36	296.066	383.653	0	0	0	0	0	0	0	200	903	0	0	0	0	0	0	0	603	903	0
9508	2	21.9444	-26.8985	-517.518	-43851.9	49345	-5608.7	295.349	384.735	0	0	0	0	0	0	0	200	903	0	0	0	0	0	0	0	603	903	0
9508	3	21.9444	-25.9829	-516.908	-43028	49467	-5654.48	295.698	383.241	0	0	0	0	0	0	0	200	903	0	0	0	0	0	0	0	603	903	0
9508	4	21.7918	-25.3726	-517.824	-43302.6	49406	-5562.93	295.411	383.624	0	0	0	0	0	0	0	200	903	0	0	0	0	0	0	0	603	903	0
9508	5	20.8763	-25.5252	-514.772	-43302.6	49589.1	-5150.94	296.332	384.12	0	0	0	0	0	0	0	200	903	0	0	0	0	0	0	0	603	903	0
9508	6	21.1815	-24.6096	-511.11	-42112.4	49222.9	-5608.7	296.306	382.394	0	0	0	0	0	0	0	200	903	0	0	0	0	0	0	0	603	903	0
9508	7	21.4867	-25.22	-511.11	-40922.3	48734.6	-5150.94	295.351	380.066	0	0	0	0	0	0	0	200	903	0	0	0	0	0	0	0	603	903	0
9508	8	21.9444	-24.4571	-510.499	-41013.8	49161.9	-5288.27	296.302	380.341	0	0	0	0	0	0	0	200	903	0	0	0	0	0	0	0	603	903	0
9508	9	21.9444	-24.9148	-512.941	-41837.8	48978.8	-5288.27	295.486	381.565	0	0	0	0	0	0	0	200	903	0	0	0	0	0	0	0	603	903	0
9509	0	19.8082	-24.4571	-511.72	-41746.2	48307.4	-5105.16	294.402	381.58	0	0	0	0	0	0	0	200	903	0	0	0	0	0	0	0	603	903	0
9509	1	21.7918	-23.2363	-508.363	-40647.6	48551.5	-4922.06	295.506	379.958	0	0	0	0	0	0	0	200	903	0	0	0	0	0	0	0	603	903	0
9509	2	21.1815	-22.4734	-505.006	-41471.6	48490.5	-4693.18	296.02	382.121	0	0	0	0	0	0	0	200	903	0	0	0	0	0	0	0	603	903	0
9509	3	21.4867	-22.1682	-506.227	-40281.4	48429.4	-4922.06	295.668	379.572	0	0	0	0	0	0	0	200	903	0	0	0	0	0	0	0	603	903	0
9509	4	20.8763	-22.0156	-506.227	-40006.7	47452.9	-4876.28	293.738	379.029	0	0	0	0	0	0	0	200	903	0	0	0	0	0	0	0	603	903	0
9509	5	20.5711	-22.0156	-506.837	-39549	47941.2	-4784.73	294.589	378.031	0	0	0	0	0	0	0	200	903	0	0	0	0	0	0	0	603	903	0
9509	6	20.8763	-23.0838	-502.87	-39274.3	48307.4	-4601.62	296.063	378.1	0	0	0	0	0	0	0	200	903	0	0	0	0	0	0	0	603	903	0
9509	7	19.8082	-21.8631	-504.396	-39732.1	47758.1	-4693.18	294.684	378.772	0	0	0	0	0	0	0	200	903	0	0	0	0	0	0	0	603	903	0
9509	8	19.8082	-21.1001	-502.26	-39457.4	47819.1	-4693.18	295.208	378.56	0	0	0	0	0	0	0	200	903	0	0	0	0	0	0	0	603	903	0
9509	9	20.1134	-21.4053	-503.48	-39732.1	47880.1	-4464.29	295.098	378.915	0	0	0	0	0	0	0	200	903	0	0	0	0	0	0	0	603	903	0
9510	0	20.4186	-21.7105	-500.123	-38999.6	47880.1	-4510.07	295.737	377.98	0	0	0	0	0	0	0	200	903	0	0	0	0	0	0	0	603	903	0
9510	1	19.8082	-20.032	-501.649	-38175.7	47575	-4510.07	294.837	376.1	0	0	0	0	0	0	0	200	903	0	0	0	0	0	0	0	603	903	0
9510	2	19.503	-20.4898	-500.429	-38725	47575	-4189.64	295.068	377.384	0	0	0	0	0	0	0	200	903	0	0	0	0	0	0	0	603	903	0
9510	3	20.1134	-20.032	-499.513	-37717.9	47269.8	-4372.74	294.632	375.509	0	0	0	0	0	0	0	200	903	0	0	0	0	0	0	0	603	903	0
9510	4	21.4867	-19.7268	-501.039	-37717.9	47269.8	-4189.64	294.344	375.279	0	0	0	0	0	0	0	200	903	0	0	0	0	0	0	0	603	903	0
9510	5	19.503	-19.8794	-500.123	-37809.5	47147.7	-4143.86	294.272	375.6	0	0	0	0	0	0	0	200	903	0	0	0	0	0	0	0	603	903	0
9510	6	18.7401	-18.8113	-499.818	-36527.7	47208.7	-4326.96	294.452	373.082	0	0	0	0	0	0	0	200	903	0	0	0	0	0	0	0	603	903	0
9510	7	19.3504	-18.9639	-497.987	-37168.6	47208.7	-4052.31	294.799	374.638	0	0	0	0	0	0	0	200	903	0	0	0	0	0	0	0	603	903	0
9510	8	19.8082	-18.8113	-497.682	-37077	46720.5	-3823.43	293.876	374.5	0	0	0	0	0	0	0	200	903	0	0	0	0	0	0	0	603	903	0
9510	9	19.1979	-18.8113	-496.156	-36253.1	47025.6	-3686.1	294.78	373.068	0	0	0	0	0	0	0	200	903	0	0	0	0	0	0	0	603	903	0
9511	0	19.9608	-17.5906	-497.377	-36344.6	46110.1	-3548.77	292.707	373.073	0	0	0	0	0	0	0	200	903	0	0	0	0	0	0	0	603	903	0
9511	1	18.4349	-17.8958	-496.766	-35520.6	46171.1	-3365.66	292.943	371.504	0	0	0	0	0	0	0	200	903	0	0	0	0	0	0	0	603	903	0
9511	2	20.266	-18.5061	-494.935	-35429.1	46598.4	-3594.54	294.15	371.583	0	0	0	0	0	0	0	200	903	0	0	0	0	0	0	0	603	903	0
9511	3	18.7401	-17.7432	-491.578	-34879.8	46842.5	-3869.2	295.29	370.955	0	0	0	0	0	0	0	200	903	0	0	0	0	0	0	0	603	903	0
9511	4	18.8927	-17.5906	-494.935	-35795.3	46476.3	-4006.53	293.904	372.323	0	0	0	0	0	0	0	200	903	0	0	0	0	0	0	0	603	903	0
9511	5	19.1979	-17.438	-495.546	-35429.1	46293.2	-3686.1	293.419	371.495	0	0	0	0	0	0	0	200	903	0	0	0	0	0	0	0	603	903	0
9511	6	18.2823	-16.6751	-495.241	-35246	46293.2	-3228.33	293.476	371.169	0	0	0	0	0	0	0	200	903	0	0	0	0	0	0	0	603	903	0
9511	7	18.4349	-16.3699	-494.325	-34788.2	46598.4	-3548.77	294.267	370.375	0	0	0	0	0	0	0	200	903	0	0	0	0	0	0	0	603	903	0
9511	8	17.8246	-16.3699	-493.104	-35246	46415.3	-3640.32	294.129	371.478	0	0	0	0	0	0	0	200	903	0	0	0	0	0	0	0	603	903	0
9511	9	18.5875	-15.9121	-491.884	-33964.3	45560.8	-3411.44	292.625	369.049	0	0	0	0	0	0	0	200	903	0	0	0	0	0	0	0	603	903	0
9512	0	18.4349	-16.3699	-493.104	-33506.5	46232.2	-3274.11	293.757	367.95	0	0	0	0	0	0	0	200	903	0	0	0	0	0	0	0	603	903	0
9512	1	18.2823	-16.2173	-493.715	-33048.7	45866	-3411.44	292.9	366.939	0	0	0	0	0	0	0	200	903	0	0	0	0	0	0	0	603	903	0
9512	2	16.7564	-15.9121	-494.02	-33323.4	45743.9	-3502.99	292.595	367.454	0	0	0	0	0	0	0	200	903	0	0	0	0	0	0	0	603	903	0
9512	3	16.909	-15.3018	-492.799	-32957.2	45804.9	-3136.78	292.949	366.878	0	0	0	0	0	0	0	200	903	0	0	0	0	0	0	0	603	903	0
9512	4	18.4349	-14.9966	-493.715	-33231.8	45988	-2999.45	293.147	367.31	0	0	0	0	0	0	0	200	903	0	0	0	0	0	0	0	603	903	0
9512	5	18.4349	-14.2337	-490.358	-33414.9	45927	-3045.23	293.66	368.144	0	0	0	0	0	0	0	200	903	0	0	0	0	0	0	0	603	903	0
9512	6	18.1297	-13.3181	-493.409	-33506.5	45804.9	-3136.78	292.833	367.908	0	0	0	0	0	0	0	200	903	0	0	0	0	0	0	0	603	903	0
9512	7	16.6039	-13.4707	-491.884	-32774.1	45316.6	-2953.67	292.129	366.63	0	0	0	0	0	0	0	200	903	0	0	0	0	0	0	0	603	903	0
9512	8	16.1461	-13.013	-489.442	-32865.6	46049.1	-2816.34	294.085	367.149	0	0	0	0	0	0	0	200	903	0	0	0	0	0	0	0	603	903	0
9512	9	16.1461	-13.013	-491.273	-32407.8	45438.7	-2816.34	292.492	365.967	0	0	0	0	0	0	0	200	903	0	0	0	0	0	0	0	603	903	0
9513	0	17.2142	-12.5552	-490.663	-31950.1	45438.7	-2404.36	292.607	365.116	0	0	0	0	0	0	0	200	903	0	0	0	0	0	0	0	603	903	0
9513	1	18.5875	-11.7923	-491.884	-31492.3	45743.9	-2770.57	292.997	364.024	0	0	0	0	0	0	0	200	903	0	0	0	0	0	0	0	603	903	0
9513	2	16.7564	-12.4026	-492.494	-31492.3	45682.9	-2221.25	292.758	363.945	0	0	0	0	0	0	0	200	903	0	0	0	0	0	0	0	603	903	0
9513	3	16.4513	-12.4026	-491.273	-31492.3	44889.4	-2587.46	291.374	364.103	0	0	0	0	0	0	0	200	903	0	0	0	0	0	0	0	603	903	0
9513	4	16.1461	-13.3181	-491.273	-31309.2	45682.9	-2541.69	292.989	363.731	0	0	0	0	0	0	0	200	903	0	0	0	0	0	0	0	603	903	0
9513	5	16.1461	-11.4871	-487.001	-31309.2	45621.8	-2724.79	293.679	364.29	0	0	0	0	0	0	0	200	903	0	0	0	0	0	0	0	603	903	0
[truncated: 1,334 more rows]
