# Supplementary material for: The Effects of an Extemporaneous Speech Dual-task on Older Adult Gait Control
Source: Research Square preprint supplement (doi:10.21203/rs.3.rs-7674245/v1), 2025-11-18
Supplement: Supplementary file 83 [file DT8Walk1.xlsx]

## Sheet: Sheet1
Trajectories
		08:LFHD			08:RFHD			08:LBHD			08:RBHD			08:C7			08:T10			08:CLAV			08:STRN			08:RBAK			08:LSHO			08:LUPA			08:LELB			08:LFRM			08:LWRA			08:LWRB			08:LFIN
Frame	Sub Frame	X	Y	Z	X	Y	Z	X	Y	Z	X	Y	Z	X	Y	Z	X	Y	Z	X	Y	Z	X	Y	Z	X	Y	Z	X	Y	Z	X	Y	Z	X	Y	Z	X	Y	Z	X	Y	Z	X	Y	Z	X	Y	Z
		mm	mm	mm	mm	mm	mm	mm	mm	mm	mm	mm	mm	mm	mm	mm	mm	mm	mm	mm	mm	mm	mm	mm	mm	mm	mm	mm	mm	mm	mm	mm	mm	mm	mm	mm	mm	mm	mm	mm	mm	mm	mm	mm	mm	mm	mm	mm	mm
866	0	236.235	2223.96	1664.84	153.966	2251.04	1650.22	283.303	2414.32	1676.07	172.1	2424.16	1656.33	237.082	2460.94	1525.46	261.921	2548.14	1263.78	247.683	2315.81	1434.42	236.995	2258.38	1231.72	171.595	2547.27	1317.37	428.568	2380.18	1481.7	506.133	2386.08	1286.56	508.455	2392.3	1129.77	524.331	2297.95	984.253	473.663	2254.04	901.309	531.066	2296.98	883.535	523.352	2238.82	835.768
867	0	234.004	2213.09	1666.87	151.954	2240.53	1652.09	284.206	2403.2	1677.98	170.953	2413.53	1657.97	236.777	2450.05	1527.46	260.83	2536.98	1265.48	247.765	2305.76	1436.05	236.704	2247.4	1233.63	170.139	2535.97	1319.66	427.944	2369.26	1483.69	502.582	2368.82	1287.43	507.708	2382.99	1131.93	524.416	2290.53	985.658	473.867	2249.97	900.775	532.634	2291.24	885.3	523.444	2235.07	834.618
868	0	232.143	2202.48	1668.84	150.554	2230.21	1653.78	283.164	2392	1679.82	170.188	2403	1659.81	235.358	2438.65	1530.05	259.217	2525.92	1267.77	247.239	2293.92	1438	236.894	2236.91	1235.17	168.795	2524.85	1322.08	428.678	2359.35	1484.87	504.942	2366.49	1290.63	507.332	2374.22	1133.9	524.322	2283.13	986.974	474.021	2245.23	900.633	533.859	2285.03	886.738	523.602	2231	834.215
869	0	230.783	2191.8	1671.32	149.236	2219.94	1656	282.695	2381.38	1681.93	169.602	2392.56	1661.78	235.229	2428.17	1531.9	257.694	2515.13	1270.01	246.848	2283.02	1440.06	236.734	2226.28	1237.04	167.565	2513.9	1324.48	428.241	2348.74	1487.15	501.848	2350.12	1291.94	506.967	2365.73	1136.49	525.099	2276.58	988.74	474.26	2240.53	901.124	535.498	2279.09	888.992	523.876	2226.56	834.211
870	0	229.894	2181.12	1674.24	148.099	2209.57	1658.53	282.016	2370.79	1684.14	169.385	2382.39	1663.79	234.784	2417.17	1533.93	256.257	2504.07	1272.07	246.324	2271.9	1442.17	236.553	2215.67	1238.97	166.178	2502.79	1326.91	426.91	2337.75	1489.78	504.031	2348.65	1294.86	507.055	2357.85	1139.08	525.203	2269.66	990.449	474.378	2235.51	902.19	536.458	2273	890.968	524.416	2222.3	835.141
871	0	229.54	2170.78	1676.58	147.651	2199.27	1661.21	282.213	2360.06	1686.02	169.386	2372.04	1666	233.969	2406.29	1536.4	255.092	2493.49	1274.25	246.593	2262.04	1444.07	236.656	2205.21	1241.04	165.215	2492.07	1329	426.771	2327.58	1491.61	501.632	2333.65	1296.13	507.177	2350.27	1141.22	525.701	2263.14	992.252	474.563	2230.26	903.742	537.519	2266.86	893.071	524.198	2217.14	835.885
872	0	229.171	2160.27	1679.12	147.58	2189.03	1663.9	282.405	2349.46	1687.95	169.671	2361.77	1668.18	233.823	2395.93	1538.33	254	2482.73	1276.39	245.819	2250.31	1446.51	236.84	2194.71	1242.73	164.281	2481.09	1331.27	426.788	2317.6	1493.45	501.855	2326.11	1298.24	507.211	2342.99	1143.74	525.977	2256.33	993.863	475.095	2225.23	906.241	538.646	2261.16	895.478	524.925	2211.86	837.816
873	0	228.864	2149.75	1681.92	147.473	2178.73	1667.01	281.268	2339.38	1690.53	169.867	2351.16	1670.75	232.834	2384.83	1540.87	252.789	2471.98	1278.75	245.686	2240.11	1448.38	236.554	2183.91	1244.77	163.62	2470.76	1333.67	425.557	2306.84	1496.36	504.063	2325	1301.43	507.499	2335.94	1146.48	527.034	2250.74	995.821	475.555	2219.55	907.294	539.161	2255.03	897.571	525.651	2206.75	839.922
874	0	229.124	2139.12	1684.69	147.425	2168.17	1670.22	281.535	2328.89	1692.72	170.438	2341.05	1673.39	232.611	2374.15	1543.19	251.733	2461.37	1281.07	245.643	2230.05	1450.75	236.344	2173.01	1247.26	162.916	2459.83	1336.11	425.167	2296.66	1498.71	502.055	2311.36	1303.16	507.832	2329.15	1149.11	526.983	2244.31	997.725	476.354	2213.95	909.865	539.815	2249.39	899.878	525.929	2200.89	841.926
875	0	229.756	2128.68	1687.1	147.871	2157.61	1673.14	284.327	2317.83	1694.75	170.848	2330.47	1676.27	232.314	2363.67	1545.87	250.683	2450.7	1283.76	245.741	2219.66	1453.06	236.609	2162.49	1249.74	162.19	2449.33	1339	424.858	2286.57	1500.91	503.764	2309.44	1306.76	508.151	2322.29	1151.83	527.645	2238.23	1000.31	476.898	2207.61	912.465	540.228	2243.58	902.36	527.065	2195.25	844.718
876	0	230.19	2118.21	1689.52	148.385	2147.11	1676	284.853	2307.11	1697.06	171.368	2319.77	1679.44	231.226	2352.58	1548.63	249.469	2440.26	1286.68	245.342	2208.83	1455.68	236.475	2151.87	1252.04	161.407	2438.56	1341.64	425.338	2276.83	1502.92	501.606	2295.05	1309.03	508.769	2315.74	1154.88	528.99	2232.9	1003.04	477.912	2201.24	914.995	540.783	2238.11	904.772	527.691	2188.97	847.445
877	0	230.975	2107.5	1692.13	149.111	2136.49	1679.12	285.315	2296.57	1699.24	171.996	2309.18	1682.26	231.386	2342.14	1550.87	248.469	2429.58	1289.13	245.223	2198.31	1458.25	236.287	2141.3	1254.48	160.506	2427.68	1344.28	424.188	2266.32	1505.97	503.641	2294.19	1312.75	509.118	2309.31	1157.93	529.128	2226.58	1005.51	478.95	2194.82	917.771	541.098	2232.7	907.486	528.582	2183.02	849.795
878	0	232.164	2096.86	1694.52	150.034	2125.73	1681.98	286.548	2286.04	1701.39	172.723	2298.45	1685.03	230.667	2331.46	1553.26	247.247	2419.03	1291.64	245.038	2187.09	1460.74	236.262	2130.86	1256.74	159.842	2417.13	1346.78	423.9	2256.3	1508.29	503.421	2286.54	1315.35	509.361	2302.8	1160.66	529.932	2220.88	1008.02	480.206	2187.78	920.572	541.226	2227.51	909.79	530.086	2176.62	853.392
879	0	233.252	2086.28	1696.24	150.986	2114.81	1684.56	287.646	2275.39	1703.3	173.417	2287.65	1687.8	230.515	2320.68	1555.26	246.569	2408.56	1293.76	245.079	2177	1462.46	235.941	2120.2	1258.5	158.967	2406.13	1349.13	423.476	2246.21	1510.49	501.276	2272.36	1317.06	509.395	2296.13	1163.55	530.769	2215.32	1010.43	481.403	2180.35	923.291	541.152	2222.18	911.934	531.779	2170.37	856.635
880	0	234.257	2075.4	1698.2	152.02	2103.91	1687.15	287.965	2264.82	1705.22	174.031	2276.8	1690.4	230.225	2310.11	1557.35	245.638	2398.22	1296.02	243.867	2164.97	1464.76	236.26	2110.22	1260.93	158.356	2395.45	1351.28	423.01	2236.03	1512.91	501.37	2265.49	1319.86	509.483	2289.66	1166.4	531.14	2209.29	1013.04	482.815	2172.31	925.586	541.262	2217.08	914.053	533.266	2163.9	859.849
881	0	235.635	2064.63	1699.99	153.136	2092.96	1689.6	286.625	2254.31	1706.94	174.8	2266	1692.81	230.003	2299.61	1559.22	244.686	2387.56	1297.99	244.999	2155.53	1467.16	236.623	2100.25	1263.15	157.611	2384.66	1353.54	422.525	2225.88	1515.21	500.955	2257.32	1322.15	509.811	2283.15	1169.2	531.832	2203.53	1015.36	483.829	2166.1	927.73	540.675	2211.72	916.613	534.934	2157.41	863.038
882	0	237.37	2053.75	1701.39	154.494	2081.76	1691.63	289.458	2243.3	1708.31	175.491	2254.94	1695.26	229.786	2288.97	1561.16	243.498	2377.06	1300.11	245.494	2145.27	1469.13	238.703	2091.41	1264.56	156.75	2373.81	1355.63	422.645	2216.11	1517.06	502.63	2255.41	1325.34	509.513	2276.24	1171.42	532.345	2197.34	1017.65	485.245	2157.71	930.701	540.134	2206.05	918.512	536.629	2150.77	865.993
883	0	238.658	2042.89	1702.43	155.679	2070.56	1693.24	290.479	2232.57	1710.05	176.104	2243.8	1697.57	229.197	2278.01	1562.9	242.747	2366.63	1302.12	245.6	2134.78	1470.33	238.355	2081.14	1265.16	156.103	2363.07	1357.62	422.471	2205.92	1518.8	500.672	2241.29	1326.85	509.608	2269.52	1174.08	532.9	2191.02	1019.83	486.379	2150.65	932.968	539.586	2199.95	920.502	538.227	2143.89	869.153
884	0	239.797	2031.84	1703.43	156.966	2059.38	1694.82	289.29	2222.03	1711.45	176.791	2232.64	1699.59	229.263	2267.51	1564.44	241.88	2356.27	1304.04	245.739	2124.17	1472.07	238.921	2071.05	1267.11	155.469	2352.18	1359.47	422.316	2195.67	1520.67	501.523	2237.8	1329.52	509.457	2262.51	1176.36	533.441	2184.5	1022.01	487.985	2141.85	935.662	539.465	2193.81	922.983	539.946	2137.02	871.994
885	0	241.556	2020.97	1704.11	158.364	2048.14	1696.14	291.958	2211.13	1712.13	177.516	2221.45	1701.39	229.333	2256.99	1565.46	240.81	2345.53	1305.35	245.894	2113.36	1473.29	238.38	2059.67	1268.92	154.78	2341.38	1360.8	422.32	2185.61	1522	502.321	2230.73	1331.88	509.38	2255.38	1178.25	533.902	2177.69	1023.91	489.351	2133.81	937.729	539.129	2187.13	924.371	541.478	2129.82	874.379
886	0	243.263	2010.15	1704.22	159.852	2036.83	1696.84	292.653	2200.15	1712.56	178.255	2210.11	1702.81	229.306	2246.05	1566.31	239.969	2334.96	1306.57	246.098	2102.6	1474	239.073	2049.22	1269.74	154.33	2330.46	1361.91	422.506	2175.57	1522.9	500.586	2216.57	1332.8	509.249	2248.24	1179.65	534.444	2170.67	1025.41	490.331	2125.82	939.728	538.72	2179.93	925.97	542.806	2122.32	876.206
887	0	244.803	1998.96	1704.54	161.243	2025.4	1697.64	293.266	2189.19	1713.2	179.116	2199.03	1703.46	229.232	2235.21	1566.8	239.395	2324.5	1307.43	246.287	2091.51	1474.66	240	2039.01	1270.19	153.802	2319.65	1362.8	422.433	2165.31	1523.79	501.362	2212.47	1334.24	508.758	2240.75	1181.12	534.746	2163.36	1026.58	491.747	2116.74	941.363	538.453	2172.59	927.426	544.031	2114.57	878.116
888	0	246.189	1987.8	1704.68	162.684	2014.05	1698.13	292.388	2178.65	1713.6	179.863	2187.78	1704.05	229.349	2224.38	1567.19	238.99	2313.88	1307.74	246.663	2080.8	1475.04	240.797	2028.69	1270.65	153.167	2308.65	1363.26	422.665	2155.28	1524.34	502.25	2205.5	1335.81	508.527	2233.2	1182.23	535.195	2155.8	1027.71	492.775	2108.03	942.793	538.17	2164.75	928.103	544.858	2106.8	879.302
889	0	248.035	1976.8	1704.21	164.325	2002.64	1698.07	293.706	2167.78	1713.03	180.545	2176.29	1704.25	229.197	2213.39	1567.23	238.281	2303.14	1307.87	247.154	2069.52	1474.57	241.543	2017.9	1270.54	152.953	2297.63	1363.21	422.597	2144.79	1524.36	502.086	2196.65	1336.24	508.342	2225.53	1182.47	535.663	2147.99	1028.23	493.924	2099.22	943.591	538.126	2156.66	928.508	546.022	2098.54	879.942
890	0	249.663	1965.7	1703.43	165.72	1991.09	1697.74	295.979	2156.56	1712.17	181.311	2164.8	1704.13	229.308	2202.22	1566.93	238.011	2292.27	1307.75	247.312	2058.24	1474.01	242.576	2007.48	1269.86	152.501	2286.57	1363.33	423.034	2134.58	1523.99	504.464	2189.8	1334.69	508.336	2217.43	1182.59	536.334	2139.83	1028.82	494.955	2090.12	943.997	538.28	2148.25	928.709	547.018	2090.05	880.412
891	0	251.099	1954.5	1702.76	167.11	1979.6	1697.37	295.43	2145.63	1711.42	182.099	2153.42	1703.6	230.412	2191.68	1565.99	237.883	2281.59	1307.63	247.826	2047.75	1473.34	243.387	1996.78	1269.09	152.523	2275.54	1362.92	423.78	2124.47	1523.77	501.428	2177.41	1336.13	508.064	2208.96	1182.75	536.681	2131.23	1028.61	495.975	2080.94	944.434	538.436	2139.34	929.01	547.871	2081.15	880.879
892	0	252.788	1943.23	1701.93	168.736	1968.08	1696.75	295.979	2134.59	1710.36	182.887	2141.95	1702.86	232.63	2180.96	1564.72	237.722	2270.82	1307.1	248.541	2036.8	1472.48	244.326	1986.1	1268.22	152.472	2264.24	1362.15	423.77	2113.45	1523.03	501.17	2168.81	1334.56	508.022	2200.43	1182.29	537.089	2122.51	1028.29	496.802	2071.66	944.195	538.882	2130.57	928.607	548.726	2072.25	880.786
893	0	254.88	1932.1	1700.61	169.885	1956.31	1695.48	298.199	2123.24	1708.54	183.593	2130.23	1701.85	230.508	2168.63	1564.08	237.672	2259.71	1306.06	249.225	2025.62	1471.03	245.048	1974.92	1266.67	152.65	2252.94	1361.2	424.253	2102.68	1521.58	500.969	2159.85	1333.24	508.196	2191.65	1180.93	537.508	2113.61	1027.37	497.443	2062.19	943.256	539.166	2121.47	927.538	549.476	2062.99	880.018
894	0	256.295	1920.7	1699.08	171.28	1944.66	1694.21	299.245	2112.13	1706.83	184.648	2118.67	1700.42	233.087	2157.73	1562.04	238.108	2248.65	1304.68	249.735	2014.21	1469.04	246.08	1964.08	1264.66	152.878	2241.68	1359.94	424.964	2091.87	1520.04	501.409	2150.14	1332.63	507.845	2182.23	1180.03	538.038	2104.34	1026.23	498.323	2052.65	942.28	539.512	2112.02	926.384	550.375	2053.68	878.917
895	0	257.4	1909.12	1697.5	172.768	1933.03	1692.73	298.534	2101.07	1705.17	185.557	2107.05	1698.66	232.79	2145.98	1560.8	238.511	2237.69	1303.24	250.635	2003.02	1467.07	247.073	1952.91	1262.8	153.41	2230.37	1358.27	425.435	2080.77	1518.48	501.486	2140.26	1331.57	508.105	2172.91	1178.67	538.557	2094.85	1024.74	499.166	2042.87	940.995	540.133	2102.57	925.16	551.05	2044.12	877.619
896	0	259.38	1897.75	1695.75	174.308	1921.29	1690.96	299.552	2089.55	1702.96	186.716	2095.44	1696.66	233.365	2134.17	1558.93	239.038	2226.45	1301.41	251.527	1991.58	1465.02	248.038	1941.63	1260.6	154.13	2219	1356.51	424.802	2068.54	1515.85	501.927	2130.33	1329.68	508.478	2163.13	1176.8	539.217	2085.27	1022.97	500.027	2033.08	939.237	540.561	2092.76	923.217	551.942	2034.49	875.882
897	0	261.125	1886.36	1693.47	175.949	1909.45	1689.2	301.022	2078.18	1700.49	187.805	2083.69	1694.74	233.905	2122.33	1556.91	239.563	2215.04	1299.6	252.286	1979.75	1462.63	248.395	1930.06	1258.18	154.785	2207.61	1354.74	426.369	2057.96	1513.67	502.18	2119.63	1327.62	508.903	2153.3	1174.67	539.738	2075.26	1020.87	500.623	2023.05	937.071	541.456	2083.01	921.176	552.532	2024.45	873.986
898	0	262.692	1874.74	1691.46	177.467	1897.63	1687.08	301.964	2066.68	1698.27	189.122	2071.92	1692.37	234.425	2110.3	1554.91	240.612	2203.87	1297.67	253.496	1968.26	1460.24	249.553	1918.81	1255.45	155.481	2196.1	1352.91	426.62	2046.23	1511.2	502.717	2109.15	1325.69	509.045	2142.93	1172.57	540.549	2065.19	1018.61	501.631	2012.85	934.935	541.979	2072.9	919.005	553.64	2014.77	871.879
899	0	263.838	1862.75	1689.27	179.175	1885.91	1684.97	303.342	2055.08	1695.59	190.458	2060.19	1690	236.055	2098.6	1552.57	241.571	2192.58	1295.59	254.719	1956.6	1457.74	250.692	1907.46	1252.97	156.501	2184.6	1350.81	427.671	2034.51	1508.68	503.337	2098.02	1323.04	509.68	2132.45	1170.38	541.184	2054.99	1016.11	502.507	2002.66	932.146	542.842	2062.83	916.644	554.336	2004.62	869.016
900	0	265.088	1850.86	1686.41	180.991	1874.22	1682.62	304.81	2043.35	1692.83	191.934	2048.44	1687.32	237.145	2086.59	1550.32	242.508	2181.08	1293.15	256.05	1944.88	1454.99	251.693	1895.89	1250.05	157.504	2173.12	1348.61	428.997	2023.07	1505.55	504.268	2087.08	1320.43	509.989	2121.6	1167.59	542.003	2044.64	1013.27	503.388	1992.33	929.224	543.512	2052.58	913.822	555.365	1994.77	866.212
901	0	267.177	1839.18	1684.06	182.665	1862.24	1679.97	306.359	2031.59	1690.15	193.695	2036.58	1684.6	238.245	2074.66	1547.89	243.616	2169.43	1290.61	257.337	1933.06	1451.85	252.666	1884.27	1246.99	159.026	2161.56	1346.1	430.398	2010.81	1503.19	505.325	2075.82	1317.64	510.793	2110.52	1164.81	542.769	2033.95	1010.28	504.428	1981.65	926.062	544.292	2042.26	910.612	556.265	1984.49	862.808
902	0	268.787	1827.01	1681.91	184.477	1850.3	1677.62	307.86	2019.71	1687.69	195.632	2024.93	1681.76	239.921	2062.91	1545.44	245.099	2157.84	1288.1	258.763	1921.39	1449.28	253.514	1872.58	1244.21	160.416	2149.92	1343.83	432.11	1999.24	1500.07	506.401	2063.86	1314.8	511.515	2099.31	1162.13	543.956	2023.42	1007.31	505.553	1971.02	922.951	545.056	2031.78	907.519	557.269	1974.21	859.69
903	0	270.768	1815.31	1679.22	186.367	1838.5	1675.14	309.83	2007.88	1684.92	197.539	2012.99	1679.31	241.301	2050.84	1543	246.376	2146.03	1285.21	260.21	1909.6	1446.62	254.209	1860.77	1241.8	161.687	2138.26	1341.35	433.626	1987.22	1497.04	507.685	2052.01	1311.61	512.124	2087.42	1159.12	544.64	2012.25	1003.71	506.372	1960.28	919.197	545.914	2021.29	904.385	558.292	1964.07	856.184
904	0	272.864	1803.54	1676.36	188.63	1826.69	1672.81	312.058	1995.83	1681.79	199.701	2001.03	1676.81	243.011	2038.75	1540.47	247.452	2134.13	1282.93	261.685	1897.61	1444.04	255.027	1848.86	1239.46	163.283	2126.41	1338.89	435.266	1974.96	1494.09	509.134	2039.72	1308.61	513.066	2075.36	1155.87	545.724	2001.07	1000.21	507.373	1949.39	915.291	546.623	2010.5	901.029	559.245	1953.48	852.356
905	0	274.679	1791.36	1673.91	190.801	1814.78	1670.45	314.12	1983.9	1679.32	201.977	1989.1	1674.55	245.095	2027	1537.84	248.745	2122.15	1280.3	263.271	1885.59	1441.23	256.077	1837.04	1236.53	165.117	2114.4	1336.37	437.131	1963.19	1490.91	510.83	2027.26	1305.3	513.897	2062.97	1152.93	546.705	1989.55	996.833	508.52	1938.35	911.522	547.856	1999.57	897.508	560.343	1942.91	848.296
906	0	277.042	1779.23	1672	193.247	1802.88	1668.5	316.742	1971.89	1676.17	204.432	1977.33	1671.85	246.852	2014.94	1535.29	249.926	2109.95	1277.44	265.104	1873.57	1438.84	257.255	1825.05	1233.93	166.714	2102.28	1333.7	439.146	1951.19	1488.24	512.356	2014.68	1302.14	514.917	2050.25	1149.6	547.881	1977.87	993.141	509.749	1927.12	907.668	548.996	1988.57	893.862	561.429	1932.07	844.513
907	0	279.703	1767.54	1669.35	195.773	1791.04	1666.33	319.067	1959.95	1673.62	207.107	1965.44	1669.47	248.742	2002.83	1532.73	251.313	2097.77	1275.03	267.124	1861.41	1436.5	258.582	1812.86	1231.59	168.404	2090.13	1331.22	441.175	1939.26	1484.99	514.013	2001.67	1298.71	516.036	2037.27	1146.08	549.024	1965.96	989.247	511.052	1915.82	903.464	550.193	1977.28	890.111	562.516	1921.17	840.122
908	0	282.404	1755.54	1667.3	198.451	1779.14	1664.42	322.102	1948.06	1670.51	209.866	1953.55	1666.93	251.239	1990.96	1529.94	252.649	2085.37	1272.28	269.027	1848.95	1434.17	259.927	1800.43	1229.17	170.096	2077.79	1328.74	443.243	1927.42	1481.9	515.988	1989.68	1295.05	517.38	2024.15	1142.67	550.284	1953.83	985.308	512.24	1904.24	899.274	551.635	1965.86	886.173	563.684	1909.99	835.975
909	0	284.908	1743.44	1665.67	201.38	1767.22	1663.18	324.677	1936.03	1667.89	212.878	1941.77	1664.62	253.111	1978.69	1527.91	254.15	2072.81	1269.65	271.188	1836.72	1431.78	261.589	1787.95	1226.91	171.777	2065.42	1326.35	445.486	1915.66	1479.05	517.615	1976.36	1292.01	518.729	2010.85	1139.45	551.58	1941.35	981.783	513.569	1892.54	895.277	552.978	1954.01	882.653	564.891	1898.71	831.698
910	0	288.147	1731.57	1664.23	204.276	1755.31	1661.99	328.461	1924.34	1665.18	215.84	1929.79	1662.74	254.996	1966.25	1525.86	255.543	2060.25	1267.54	273.101	1824.32	1430.2	263.436	1775.23	1225.09	173.337	2052.92	1324.18	447.614	1903.63	1476.31	519.243	1963.52	1288.33	520.215	1997.25	1136.26	552.929	1928.63	978.215	514.555	1880.5	891.177	554.508	1942	879.094	566.061	1887.11	827.72
911	0	291.319	1719.5	1663.17	207.349	1743.22	1661.01	331.116	1912.12	1662.69	219.001	1917.72	1660.84	257.559	1953.82	1523.9	256.809	2047.61	1265.63	275.394	1811.71	1428.42	265.463	1762.16	1223.3	175.188	2040.32	1322.33	450.019	1891.69	1473.65	521.046	1950.41	1285.05	521.635	1983.54	1132.82	554.103	1915.69	974.584	515.743	1868.42	886.931	555.958	1929.85	875.589	567.175	1875.23	823.51
912	0	294.586	1707.43	1662.32	210.772	1731.14	1660.98	334.365	1900.31	1660.64	222.137	1905.53	1659.33	259.985	1941.39	1522.39	258.144	2034.77	1263.82	277.948	1798.9	1426.66	267.619	1748.98	1221.49	177.084	2027.63	1320.8	452.688	1879.9	1471.3	522.922	1937.57	1281.72	523.164	1969.59	1129.95	555.425	1902.46	971.483	517.358	1856.01	883.258	557.841	1917.31	872.626	568.455	1863.18	819.754
913	0	297.528	1695.06	1662.41	214.027	1719.01	1661.27	337.749	1887.9	1658.29	225.509	1893.37	1658.06	261.89	1928.45	1521.22	259.617	2021.8	1262.34	280.417	1786.38	1425.31	270.11	1735.69	1220.31	178.947	2015.15	1319.5	455.232	1867.69	1469.37	524.684	1924.29	1279.19	524.425	1955.39	1127.43	556.773	1889.11	968.588	518.092	1843.69	880.185	559.458	1904.51	869.67	569.648	1850.94	816.346
914	0	301.012	1683.01	1662.56	217.459	1706.84	1661.85	341.143	1875.85	1656.43	228.891	1881.16	1657.08	264.87	1915.99	1520.3	261.078	2008.84	1261.16	282.83	1773.73	1424.37	272.419	1722.09	1219.94	180.611	2002.48	1318.55	457.696	1855.98	1467.61	526.286	1911.36	1276.67	525.86	1941.07	1125.07	557.964	1875.56	965.832	518.924	1831.07	877.045	561.002	1891.69	867.022	570.611	1838.39	813.815
915	0	304.808	1670.94	1662.99	221.176	1694.74	1663.09	345.02	1863.62	1654.4	232.572	1868.93	1656.4	267.616	1903.6	1519.62	262.58	1996.02	1260.33	285.488	1761.11	1423.95	275.017	1708.54	1219.89	182.593	1989.91	1317.99	460.198	1843.81	1466.3	528.085	1898.08	1274.7	527.402	1926.54	1123.01	559.222	1861.79	963.776	519.711	1818.16	874.445	562.573	1878.61	864.898	571.398	1825.57	810.871
916	0	308.463	1658.76	1664.1	224.769	1682.61	1664.83	348.254	1851.48	1653.18	235.992	1856.71	1656.18	269.403	1890.72	1519.66	263.968	1982.99	1259.81	287.886	1748.51	1423.91	277.414	1695.01	1219.69	184.468	1977.3	1317.67	462.716	1831.48	1465.59	529.96	1884.87	1273.25	528.283	1911.81	1121.45	560.495	1847.83	962.113	520.427	1805.05	872.533	564.041	1865.09	863.433	572.324	1812.51	808.713
917	0	312.291	1646.68	1665.69	228.43	1670.43	1667.01	351.606	1839.24	1652.14	239.582	1844.55	1656.26	271.98	1878.36	1519.89	265.784	1970.43	1260.13	290.105	1735.82	1424.04	279.861	1681.68	1220.18	186.714	1964.87	1317.77	465.177	1819.07	1465.3	531.813	1871.49	1272.23	530.493	1897.25	1120.72	561.642	1833.71	961.082	521.135	1791.95	871.246	565.438	1851.31	862.519	573.157	1799.15	807.262
918	0	316.22	1634.74	1667.4	232.137	1658.31	1669.43	355.193	1827.02	1651.43	243.113	1832.25	1657.06	275.057	1866.19	1520.23	267.663	1957.75	1260.4	292.083	1723.36	1425.04	282.115	1668.31	1221.06	188.624	1952.48	1318.41	467.603	1806.61	1465.28	533.581	1857.99	1271.38	532.219	1882.37	1120.28	562.84	1819.2	960.426	521.87	1778.37	870.46	566.747	1837.1	861.846	573.652	1785.27	806.287
919	0	319.709	1622.78	1669.44	235.604	1646.31	1672	358.517	1814.92	1651.16	246.448	1820.26	1657.76	276.956	1853.57	1521.66	269.569	1945.49	1261.45	294.479	1710.72	1426.02	284.189	1655.25	1222.3	190.904	1940.34	1319.53	469.82	1793.77	1466.02	535.595	1844.41	1271.32	534.121	1867.64	1120.39	563.976	1804.41	960.602	522.418	1764.39	870.346	568.178	1822.56	862.093	573.992	1770.96	805.839
920	0	323.02	1611.04	1671.19	239.122	1634.62	1674.59	361.485	1802.94	1651.22	249.576	1808.32	1658.76	279.452	1841.41	1522.73	271.863	1933.27	1262.65	296.51	1698.43	1427.51	286.378	1642.62	1223.99	193.145	1928.42	1320.86	472.109	1781.13	1467.1	537.664	1830.55	1271.97	536.068	1852.87	1120.98	565.223	1789.58	960.969	522.793	1750.35	870.921	569.546	1807.76	862.606	574.485	1756.53	806.031
921	0	326.291	1599.31	1673.32	242.231	1622.95	1676.8	364.469	1791.2	1651.55	252.431	1796.45	1660.07	281.769	1829.37	1524.15	274.377	1921.06	1263.91	298.321	1686.16	1429.18	288.13	1630.08	1226.08	195.106	1916.67	1322.52	474.274	1768.3	1468.15	539.81	1816.72	1272.72	538.086	1838.14	1121.68	566.305	1774.5	961.724	523.224	1735.75	871.468	570.956	1792.71	863.307	574.976	1741.66	806.417
922	0	329.136	1587.96	1675.04	245.236	1611.41	1679.09	367.029	1779.62	1652.05	255.14	1784.91	1661.12	284.363	1817.76	1525.62	277.075	1909.01	1265.21	299.672	1674.22	1431.19	289.477	1617.7	1227.79	197.296	1905.25	1323.97	476.301	1755.33	1469.43	541.995	1802.69	1273.57	540.224	1823.62	1122.53	567.477	1759.16	962.893	523.266	1721.56	873.093	572.186	1777.07	864.452	575.132	1726.15	807.311
923	0	331.648	1576.55	1677.13	247.607	1599.97	1681.13	369.145	1768.22	1653.3	257.363	1773.45	1662.49	286.522	1806.31	1527.21	279.769	1897.24	1266.56	301.332	1662.38	1432.41	290.764	1605.73	1229.29	199.645	1893.99	1325.65	478.509	1742.4	1471.2	544.494	1788.24	1274.96	541.955	1808.75	1123.69	568.773	1743.67	964.294	523.744	1706.45	874.801	573.457	1761.21	865.923	575.03	1710.07	808.656
924	0	333.885	1565.39	1679.41	249.749	1588.8	1683.3	371.016	1757.03	1654.65	259.241	1762.26	1664.11	289.008	1795.17	1528.84	282.576	1885.7	1268.14	302.74	1650.72	1434.22	291.737	1594.02	1231.3	202.264	1883	1327.35	480.418	1729.42	1472.92	547.115	1773.89	1276.66	544.885	1794.18	1125.48	569.869	1727.83	966.108	523.99	1690.99	876.773	574.612	1744.92	867.525	575.054	1693.65	810.333
925	0	335.692	1554.47	1681.41	251.654	1577.63	1685.45	372.681	1746.03	1656.16	260.826	1751.15	1665.84	291.473	1784.11	1530.37	285.337	1874.41	1269.63	303.898	1639.33	1436.31	292.416	1582.42	1233.47	204.914	1872.12	1329.08	482.247	1716.63	1474.62	549.577	1759.33	1278.33	547.022	1779.24	1126.91	571.102	1712.01	967.89	524.22	1675.39	878.841	575.776	1728.29	869.262	575.048	1677.01	812.105
926	0	337.245	1543.81	1683.58	253.376	1566.77	1687.4	374.073	1735.28	1658.19	262.276	1740.26	1667.34	293.305	1773.08	1532.34	288.329	1863.22	1271.14	305.162	1628.39	1438.14	293.047	1571.23	1235.63	208.062	1861.43	1330.59	483.901	1703.79	1476.71	552.226	1744.62	1279.96	549.629	1764.43	1128.58	572.211	1695.88	969.838	524.457	1659.42	881.226	576.84	1711.35	871.148	574.92	1659.71	814.14
927	0	338.55	1533.14	1685.96	254.587	1556.02	1689.25	375.006	1724.73	1660.52	263.157	1729.47	1669.02	295.369	1762.37	1534.22	291.268	1852.03	1272.85	306.194	1617.55	1440.13	293.36	1560.37	1237.63	211.023	1850.93	1332.13	485.77	1691.23	1478.82	554.844	1729.87	1281.83	552.384	1749.69	1130.13	573.264	1679.5	971.962	524.554	1643.11	883.677	577.886	1694.21	873.129	574.862	1642.25	816.398
928	0	339.596	1522.74	1688.33	255.464	1545.43	1690.92	375.02	1714.18	1663.11	263.747	1718.85	1670.94	297.77	1751.86	1536.09	293.947	1841.06	1274.61	307.231	1606.99	1442.13	293.598	1549.73	1239.58	214.06	1840.49	1333.52	487.377	1678.97	1480.7	557.475	1715.26	1283.53	555.059	1734.9	1131.68	574.336	1663.14	974.028	524.961	1626.91	886.279	578.918	1676.85	874.986	574.758	1624.42	818.875
929	0	340.428	1512.48	1690.81	256.231	1534.94	1692.72	375.314	1703.83	1665.61	264.054	1708.41	1672.38	299.498	1741.36	1538	296.824	1830.26	1276.12	308.252	1596.4	1444.3	293.577	1539.09	1241.68	217.06	1830.18	1335.12	488.796	1666.93	1482.51	559.946	1700.6	1285.21	558.026	1720.13	1133.32	575.355	1646.57	976.031	524.84	1610.03	889.05	579.684	1659.21	876.876	574.642	1606.34	821.426
930	0	340.704	1502.13	1693.45	256.617	1524.42	1694.64	375.492	1693.77	1668.44	264.066	1697.99	1674.1	301.307	1730.95	1539.94	299.422	1819.57	1277.98	309.069	1586.03	1446.33	293.424	1528.65	1243.68	220.138	1820.05	1336.44	490.294	1655.16	1484.57	562.334	1685.93	1287.07	560.717	1705.29	1134.78	576.319	1629.81	978.185	525.411	1593.27	892.067	580.641	1641.31	878.731	574.618	1587.93	824.078
931	0	341.081	1492.23	1696.11	256.593	1514.08	1696.26	375.394	1683.8	1671.45	263.819	1687.52	1675.84	303.191	1720.8	1542.07	301.977	1808.86	1279.75	310.124	1575.84	1448.7	293.319	1518.2	1245.96	222.778	1809.74	1338.12	491.709	1643.68	1486.8	564.5	1671.43	1289.1	563.178	1690.36	1136.32	577.302	1613.02	980.662	525.57	1576.49	895.05	581.497	1623.34	880.998	574.593	1569.3	827.133
932	0	340.95	1482	1699.26	256.586	1503.67	1698.31	374.995	1673.87	1674.64	262.993	1677.1	1677.75	304.922	1710.68	1544.26	304.45	1798.13	1281.77	310.808	1565.61	1451.26	293.213	1507.53	1248.59	225.478	1799.76	1340.01	492.959	1632.44	1489.03	566.376	1657.19	1290.95	565.528	1675.34	1137.92	577.981	1595.93	983.188	525.614	1559.36	898.136	582.368	1604.92	883.509	574.443	1550.43	830.459
933	0	340.913	1471.87	1702.28	256.435	1493.53	1700.04	374.497	1663.94	1677.91	262.462	1666.73	1679.57	306.544	1700.54	1546.35	306.635	1787.54	1283.85	312.166	1555.63	1453.47	293.687	1497.14	1251.03	228.219	1789.58	1341.76	494.152	1621.24	1491.55	568.098	1643.03	1293.38	567.769	1660.26	1139.77	578.727	1578.83	985.899	525.484	1541.96	901.495	583.248	1586.59	886.182	574.651	1531.44	834.279
934	0	340.653	1462.07	1704.99	256.077	1483.22	1701.67	373.665	1653.97	1681.31	261.711	1656.55	1681.53	308.096	1690.45	1548.71	308.865	1776.94	1285.94	312.981	1545.48	1455.9	294.023	1486.67	1253.56	230.324	1779.46	1343.89	495.517	1610.33	1494.11	569.898	1629.64	1295.73	569.991	1645.22	1141.98	579.56	1561.8	989.135	525.721	1524.83	904.724	584.106	1568	889.322	574.878	1512.54	838.29
935	0	339.855	1452.19	1707.8	255.496	1473.04	1703.39	373.131	1644.02	1684.65	260.986	1646.43	1683.22	309.625	1680.41	1550.76	310.934	1766.38	1287.94	313.951	1535.44	1458.24	294.976	1476.43	1256.26	232.479	1769.74	1346.04	496.608	1599.65	1496.72	571.039	1616.26	1298.35	571.88	1630.09	1144.17	580.097	1544.6	992.375	525.721	1507.48	908.543	584.874	1549.65	892.437	574.744	1493.24	842.461
936	0	339.14	1442.39	1710.5	254.856	1462.96	1704.68	372.174	1634.15	1687.8	260.441	1636.38	1684.76	310.736	1670.42	1552.85	312.65	1755.62	1289.76	314.773	1525.34	1461.03	295.537	1465.86	1259.23	234.408	1759.69	1348.01	497.706	1589.22	1498.89	572.312	1603.58	1300.56	573.745	1615.23	1146.33	580.547	1527.4	995.724	525.795	1489.99	912.532	585.217	1531	895.893	574.865	1474.2	846.715
937	0	338.376	1432.48	1713.14	254.194	1452.84	1706.09	371.286	1624.35	1691.12	259.754	1626.45	1685.89	312.447	1660.75	1554.75	314.616	1745.37	1291.49	315.871	1515.43	1463.39	296.527	1455.53	1261.55	236.337	1749.82	1349.96	498.788	1578.64	1501.35	573.333	1591.15	1302.92	575.659	1600.67	1148.61	581.166	1510.48	999.193	526.051	1472.5	917.176	585.998	1512.64	898.96	574.831	1455.03	851.247
938	0	337.614	1422.52	1715.61	253.324	1442.69	1707.17	370.113	1614.52	1694.28	258.87	1616.3	1687.48	313.576	1650.83	1556.76	316.514	1735.09	1293.3	316.56	1505.38	1465.69	297.128	1445.04	1264.19	237.97	1740.04	1351.8	499.972	1568.27	1503.75	574.373	1579.21	1305.43	577.17	1586.23	1150.7	581.962	1493.72	1002.8	526.272	1455.25	921.219	586.431	1494.07	902.85	574.927	1435.95	855.971
939	0	336.856	1412.73	1717.68	252.472	1432.62	1707.92	369.104	1604.76	1697.2	257.893	1606.23	1688.64	314.471	1640.83	1558.83	317.965	1724.41	1294.78	317.399	1495.41	1467.77	298.031	1435.03	1266.39	239.565	1730.01	1353.49	500.789	1557.8	1506.07	575.142	1567.41	1307.68	578.711	1571.82	1152.82	582.569	1477.11	1006.3	526.441	1437.81	925.529	586.863	1475.85	906.285	574.996	1417.03	860.74
940	0	335.799	1402.54	1719.79	251.854	1422.47	1708.86	367.801	1594.94	1700.09	257.034	1596.09	1689.89	315.867	1631.09	1560.23	319.708	1714.17	1296.4	318.044	1485.42	1469.91	298.423	1424.89	1268.61	241.247	1720.08	1355.2	501.651	1547.33	1507.98	576.121	1556.01	1309.66	580.252	1557.73	1154.92	583.243	1460.54	1009.81	526.494	1420.08	929.918	587.252	1457.58	909.848	574.849	1397.79	865.499
941	0	334.913	1392.61	1721.26	251.021	1412.27	1709.28	366.835	1585.06	1702.78	256.132	1586.05	1690.95	316.884	1621.2	1561.66	321.48	1704.19	1298.26	318.64	1475.55	1471.43	299.049	1415.3	1270.12	242.527	1709.85	1356.52	502.325	1536.5	1510.18	576.853	1544.52	1311.86	581.558	1543.65	1156.91	583.738	1444	1013.4	526.789	1402.57	934.161	587.505	1439.37	913.62	574.886	1378.9	870.375
942	0	333.992	1382.52	1722.7	250.222	1402.13	1709.7	366.141	1575.06	1705.04	255.293	1575.9	1692.14	317.794	1611.3	1563.14	322.969	1693.51	1299.47	319.212	1465.59	1472.98	299.306	1405.42	1271.71	244.062	1699.8	1357.73	502.957	1525.77	1512	577.66	1533.4	1313.69	583.153	1529.89	1158.78	584.322	1427.75	1016.82	526.84	1384.95	938.496	587.831	1421.49	917.067	574.835	1360.04	875.362
943	0	333.158	1372.29	1723.72	249.538	1391.88	1709.76	365.043	1565	1707.09	254.467	1565.78	1693.05	318.593	1601.36	1564.11	324.634	1683.52	1300.45	319.559	1455.67	1474.53	299.584	1395.84	1273.54	245.481	1689.7	1358.91	503.502	1515.11	1513.45	578.182	1522.25	1315.03	584.373	1516.18	1160.25	584.742	1411.5	1019.93	526.857	1367.44	943.282	587.59	1403.51	920.354	574.597	1341.28	880.036
944	0	332.374	1362	1724.52	248.945	1381.67	1709.8	364.301	1554.79	1708.95	253.81	1555.52	1693.93	319.454	1591.38	1565.23	326.2	1673.38	1301.58	319.779	1445.7	1475.44	299.595	1386.02	1274.27	246.653	1679.54	1359.71	504.045	1504.26	1514.71	579	1511.02	1316.43	585.598	1502.44	1161.73	585.328	1395.52	1022.99	527.097	1350.1	947.571	587.61	1385.89	923.562	574.555	1322.63	884.695
945	0	331.792	1351.76	1724.61	248.277	1371.39	1709.62	363.537	1544.54	1710.25	253.2	1545.46	1694.46	320.191	1581.51	1565.62	327.444	1662.77	1302.2	320.159	1435.84	1476.15	299.655	1376.38	1274.91	247.969	1669.49	1360.3	504.454	1493.51	1515.89	579.518	1499.59	1317.44	586.869	1489.21	1162.68	585.887	1379.83	1025.91	527.144	1332.79	951.206	587.539	1368.21	926.708	574.57	1304.28	889.498
946	0	331.179	1341.4	1724.59	247.779	1361.04	1709.24	363.116	1534.24	1711.64	252.854	1535.27	1695.21	320.71	1571.38	1566.27	328.442	1651.96	1302.56	320.218	1425.94	1476.63	299.475	1366.52	1275.53	249.284	1659.53	1360.68	504.681	1482.66	1516.58	580.151	1488.07	1318.39	588.024	1475.96	1163.54	586.394	1364	1028.78	527.272	1315.61	955.245	586.953	1350.91	929.698	574.263	1285.96	893.929
947	0	330.473	1330.79	1724.24	247.305	1350.67	1708.63	362.663	1523.82	1712.44	252.386	1524.82	1695.79	321.071	1561.33	1566.34	330.374	1643.42	1303.14	320.143	1415.84	1476.93	299.608	1357.15	1275.55	250.208	1649.34	1360.92	504.903	1471.95	1516.91	580.54	1476.37	1318.94	589.145	1462.61	1164.25	586.752	1348.46	1031.28	527.205	1298.57	959.372	586.673	1333.51	932.269	574.094	1267.9	898.172
948	0	330.035	1320.22	1723.4	246.774	1340.28	1707.83	362.521	1513.36	1713.11	252.353	1514.68	1696.13	321.653	1551.32	1566.44	331.553	1633.18	1303.28	320.209	1405.91	1476.89	299.351	1347.28	1275.4	251.282	1639.33	1360.93	504.883	1460.95	1517.26	581.071	1464.61	1319.33	590.072	1449.49	1164.53	587.059	1333.09	1033.59	527.433	1281.85	962.88	586.248	1316.45	934.777	573.84	1249.96	902.378
949	0	329.45	1309.5	1722.14	246.42	1329.85	1706.68	362.266	1502.69	1713.53	252.107	1504.34	1696.37	321.959	1541.26	1565.95	332.414	1622.64	1302.9	319.954	1395.85	1476.4	299.14	1337.43	1275.08	252.111	1629.15	1360.49	504.944	1450.26	1517.4	581.494	1452.7	1319.56	590.999	1436.58	1164.61	587.274	1317.98	1035.5	527.274	1265.11	966.361	585.766	1299.69	937.079	573.753	1232.44	906.346
950	0	329.106	1298.69	1720.65	245.944	1319.33	1705.08	362.356	1491.98	1713.57	252.073	1493.88	1696.37	321.955	1530.94	1565.49	333.076	1612.03	1301.97	320.008	1385.9	1476.05	298.703	1327.43	1274.75	252.707	1618.97	1360.01	504.853	1439.41	1516.9	581.7	1440.69	1319.32	591.762	1423.73	1164.34	587.354	1302.88	1037.29	527.286	1248.65	969.825	585.44	1283.68	938.778	573.474	1215.09	909.884
951	0	328.56	1287.8	1718.35	245.647	1308.76	1703.56	362.322	1481.07	1713.53	252.11	1483.4	1696.23	322.104	1520.68	1564.68	333.756	1601.91	1301.35	319.547	1375.67	1474.89	298.254	1317.35	1273.61	253.137	1608.68	1359.1	504.681	1428.51	1516.21	581.966	1428.68	1318.87	592.427	1410.86	1163.8	587.533	1288.06	1038.78	527.09	1232.18	972.773	584.785	1267.47	940.825	573.209	1197.89	913.348
952	0	328.156	1276.75	1716.29	245.11	1298.07	1701.48	362.347	1469.96	1713.1	252.291	1472.84	1696.06	322.068	1510.38	1563.65	334.185	1591.27	1300.25	319.248	1365.48	1473.78	297.809	1307.36	1272.54	253.058	1597.91	1358.29	504.428	1417.53	1515.41	582.272	1416.59	1318.41	593.107	1398.05	1163.23	587.498	1273.27	1040.13	527.073	1216.12	975.046	583.709	1250.34	942.705	573.004	1181.11	916.693
953	0	327.454	1265.59	1713.72	244.596	1287.36	1699.44	362.416	1458.76	1712.41	252.21	1462.05	1695.85	322.031	1499.97	1562.36	334.585	1581.09	1299.3	318.566	1355.18	1472.3	297.171	1297.18	1270.93	253.829	1588.21	1357.14	504.116	1406.48	1514.34	582.388	1404.68	1317.59	593.693	1385.41	1162.26	587.334	1258.66	1041.11	526.785	1200.32	977.491	582.823	1234.18	944.05	572.537	1164.48	919.55
954	0	326.882	1254.44	1710.84	244.036	1276.58	1697.01	362.519	1447.42	1711.33	252.407	1451.27	1695.07	321.764	1489.44	1560.8	334.748	1570.49	1297.7	317.727	1344.74	1470.85	296.454	1286.97	1269.69	253.912	1577.96	1356.03	503.51	1395.41	1512.82	582.15	1392.68	1316.42	594.246	1372.88	1161.04	587.126	1244.31	1041.73	526.724	1184.99	980.221	582.213	1218.53	945.047	572.135	1148.18	922.151
955	0	326.148	1243.13	1707.85	243.32	1265.71	1694.43	362.584	1435.9	1709.99	252.39	1440.35	1694.19	321.999	1478.94	1559.18	334.768	1560.21	1296.12	317.401	1334.4	1469.07	295.789	1276.79	1267.7	254.26	1567.96	1354.6	503.067	1384.26	1511.13	582.024	1380.81	1314.76	594.446	1360.37	1159.46	586.92	1230.08	1042.18	526.34	1169.82	982.079	581.594	1202.72	945.956	571.692	1132.24	924.375
956	0	325.471	1231.73	1704.64	242.93	1254.91	1691.67	362.716	1424.35	1708.51	252.506	1429.47	1692.92	321.427	1468.26	1557.42	334.73	1549.52	1294.08	316.635	1323.99	1466.77	295.016	1266.64	1265.2	254.214	1557.76	1352.38	502.531	1373.06	1509.38	581.962	1369.1	1313.21	594.518	1347.82	1157.76	586.665	1216.12	1042.06	525.528	1154.51	982.764	580.497	1187.61	946.264	571.437	1116.52	926.034
957	0	324.57	1220.36	1701.04	242.189	1243.95	1688.6	362.504	1412.55	1706.56	252.451	1418.38	1691.44	321.055	1457.66	1555	334.418	1539.05	1291.93	315.253	1313.12	1464.13	294.251	1256.49	1262.72	253.979	1547.31	1350.27	501.693	1361.78	1507.21	581.448	1357.19	1311.14	594.628	1335.44	1155.66	586.127	1202.29	1041.73	525.02	1139.68	983.837	579.387	1172.37	946.383	570.594	1101.21	927.726
958	0	323.658	1208.77	1697.34	241.316	1232.88	1685.34	362.322	1400.83	1704.53	252.214	1407.2	1689.94	320.516	1446.93	1552.63	334.191	1528.43	1289.72	314.284	1302.52	1461.8	293.19	1246.14	1260.2	253.701	1536.66	1348.22	500.919	1350.54	1504.6	580.964	1345.4	1308.84	594.47	1323.04	1153.57	585.664	1188.64	1041.1	524.425	1125.35	983.92	578.724	1157.38	946.259	569.863	1086	928.638
959	0	322.713	1197.26	1693.32	240.377	1221.69	1681.95	362.053	1389.01	1702.34	251.956	1396.03	1688	319.934	1436.23	1550.23	333.773	1517.72	1287.2	313.709	1291.99	1459.23	292.201	1235.87	1257.29	253.315	1526.04	1345.66	499.987	1339.29	1502.08	580.432	1333.79	1306.49	594.193	1310.67	1151.17	584.86	1174.99	1040.2	523.75	1111.22	984.288	577.827	1142.93	945.701	569.245	1071.32	929.325
960	0	321.508	1185.57	1689.33	239.328	1210.46	1678.29	361.562	1377.17	1700.11	251.618	1384.73	1685.95	319.19	1425.49	1547.44	333.355	1507.27	1284.42	312.601	1281.3	1456.26	291.201	1225.63	1254.28	252.466	1515.06	1342.22	498.966	1327.99	1499.36	579.559	1322.17	1303.69	593.827	1298.69	1148.48	584.227	1161.84	1038.99	522.765	1097.23	983.587	576.801	1128.65	944.876	568.366	1056.84	929.28
961	0	320.308	1173.89	1685.16	238.082	1199.17	1674.52	361.146	1365.38	1697.47	251.292	1373.43	1683.83	318.492	1414.67	1544.29	332.576	1496.46	1281.38	311.468	1270.41	1453.45	290.107	1215.23	1251.37	251.956	1504.32	1339.57	497.781	1316.65	1496.5	578.711	1310.6	1300.84	592.958	1286.47	1145.36	583.489	1148.77	1037.3	521.838	1083.61	983.017	575.569	1114.67	943.36	567.588	1042.88	929.197
962	0	319.069	1162.12	1680.94	236.747	1187.81	1670.71	360.609	1353.41	1694.96	250.596	1361.93	1681.6	317.324	1403.67	1541.54	331.642	1485.35	1278.28	310.168	1259.29	1450.25	289.149	1204.84	1247.83	250.887	1492.98	1336.41	496.784	1305.49	1493.34	577.514	1298.91	1297.75	592.164	1274.5	1142.35	582.639	1135.94	1035.13	521.065	1070.31	981.472	574.704	1101.13	941.607	566.717	1029.1	928.147
963	0	317.524	1150.26	1676.66	235.41	1176.41	1666.89	359.954	1341.23	1692.58	249.993	1350.45	1679.45	316.348	1392.62	1538.5	330.698	1474.27	1275.14	309.038	1248.25	1447.18	287.991	1194.1	1244.65	249.925	1481.91	1333.04	495.601	1294.13	1490.42	576.568	1287.71	1294.88	591.161	1262.54	1139.55	581.681	1123.28	1033.04	520.232	1057.21	979.769	573.816	1088.09	939.945	565.869	1015.81	927.034
964	0	315.956	1138.5	1672.55	233.375	1164.92	1663.32	359.002	1328.9	1690.08	249.22	1338.87	1677.35	314.944	1381.3	1535.7	329.554	1462.74	1272.05	307.739	1237.02	1444.16	286.801	1183.19	1241.5	248.787	1470.74	1329.81	494.375	1283.01	1487.27	575.054	1276.15	1292	590.05	1250.74	1136.63	580.611	1110.93	1030.7	519.009	1044.58	977.986	572.673	1074.99	937.855	564.899	1002.81	925.638
965	0	314.285	1126.62	1668.59	232.175	1153.45	1659.7	358.135	1316.72	1687.74	248.386	1327.21	1675.18	313.683	1369.9	1532.73	328.458	1451.43	1269.42	306.32	1225.65	1441.59	285.613	1171.72	1238.98	247.373	1459.19	1327.04	492.938	1271.51	1484.27	573.394	1264.79	1288.95	588.524	1238.78	1133.93	579.485	1098.79	1028.18	518.031	1032.09	975.806	571.406	1062.8	935.401	564.037	990.455	923.502
966	0	312.418	1114.6	1664.84	230.208	1141.78	1656.02	357.218	1304.5	1685.42	247.2	1315.4	1673	312.078	1358.25	1529.99	327.262	1439.68	1266.59	304.967	1214	1438.56	284.316	1159.92	1235.74	246.529	1447.9	1324.43	491.533	1260.11	1481.16	571.869	1253.32	1286.23	587.079	1227.21	1131.16	578.307	1086.99	1025.34	517.218	1020.19	972.943	570.453	1050.66	933.034	563.213	978.467	921.235
967	0	310.459	1102.56	1661.34	228.47	1130.19	1652.69	355.717	1292.11	1682.98	245.945	1303.52	1670.75	310.718	1346.66	1527.09	325.959	1427.8	1263.9	303.27	1202.12	1435.61	282.818	1147.76	1233.04	244.805	1436.02	1321.32	490.13	1248.51	1478.45	570.035	1242.07	1283.57	585.399	1215.79	1128.45	577.048	1075.49	1022.73	516.1	1008.46	969.961	569.584	1039.5	929.966	562.298	967.055	918.332
968	0	308.402	1090.52	1657.94	226.472	1118.39	1649.51	354.274	1279.83	1680.74	244.624	1291.72	1668.48	309.294	1334.75	1524.38	324.605	1415.88	1260.99	301.852	1190.22	1433.15	281.351	1135.43	1230.64	244.011	1424.51	1318.58	488.459	1236.57	1475.71	567.987	1230.65	1280.74	583.35	1204.47	1125.6	575.672	1064.32	1019.69	514.834	997.196	966.756	568.149	1028.73	926.931	561.585	956.331	915.178
969	0	306.216	1078.37	1654.76	224.34	1106.54	1646.64	352.652	1267.5	1678.42	242.865	1279.76	1666.41	307.448	1322.47	1521.9	323.244	1403.61	1258.29	300.099	1178.07	1430.78	279.909	1123.11	1228.1	242.782	1412.45	1315.86	486.776	1224.56	1473.12	565.874	1219.42	1277.83	581.325	1193.31	1123.06	574.182	1053.55	1016.53	513.848	986.457	963.491	566.911	1018.38	923.723	560.736	945.905	911.444
970	0	303.842	1066.08	1652	222.229	1094.58	1643.85	350.689	1254.92	1676.3	241.13	1267.58	1664.19	305.628	1310.29	1519.49	321.91	1391.11	1255.89	298.331	1165.8	1428.09	278.305	1110.79	1225.52	241.295	1400.19	1313.37	484.996	1212.2	1470.91	563.795	1208.07	1275.49	579.113	1182.21	1120.64	572.832	1043.13	1013.25	512.89	975.871	959.536	565.712	1008.45	920.25	559.971	936.111	907.565
971	0	301.35	1053.61	1649.49	219.688	1082.43	1641.26	348.825	1242.56	1674.45	239.175	1255.39	1662.35	303.587	1297.91	1517.4	320.3	1378.58	1253.76	296.3	1153.51	1426.03	276.594	1098.33	1223.07	239.868	1387.83	1311.09	482.972	1199.8	1468.83	561.492	1196.62	1273.37	576.791	1171.32	1118.55	571.314	1032.96	1010.05	511.724	965.931	955.653	564.337	998.996	916.577	559.19	926.877	903.46
972	0	298.965	1041.16	1647.49	217.302	1070.31	1639.54	346.55	1229.79	1672.61	236.948	1242.93	1660.66	301.322	1285.39	1515.55	318.789	1365.76	1252.14	294.151	1140.89	1424.12	274.759	1085.69	1221.51	238.071	1374.97	1309.26	480.856	1187.13	1467.15	559.164	1184.96	1271.67	574.377	1160.43	1116.79	569.8	1023.3	1006.83	510.772	956.466	951.817	563.232	990.15	913.089	558.287	918.083	899.019
973	0	296.478	1028.65	1645.75	215.028	1057.9	1637.61	344.474	1217.33	1671.16	234.692	1230.63	1659.41	299.001	1272.64	1514.05	317.218	1352.96	1250.84	292.198	1128.31	1422.25	272.75	1072.92	1219.43	236.378	1362.2	1307.74	478.677	1174.45	1465.62	556.96	1172.94	1270.27	571.955	1149.66	1115.31	568.178	1013.73	1003.52	509.549	947.323	947.535	562.134	981.613	909.477	557.434	909.768	894.638
974	0	293.764	1015.91	1644.89	212.266	1045.31	1636.56	342.068	1204.43	1670.09	232.191	1218.03	1658.2	296.819	1259.86	1512.64	315.414	1339.91	1249.2	289.796	1115.39	1420.77	270.612	1059.82	1218.07	234.578	1349.47	1306.09	476.515	1161.62	1464.69	554.777	1161.15	1269.31	569.421	1139.12	1113.85	566.629	1004.68	1000.24	508.471	938.603	943.114	560.952	973.863	905.828	556.642	902.144	889.816
975	0	290.823	1003.15	1644.25	209.511	1032.73	1635.71	339.592	1191.59	1668.97	230.159	1205.32	1656.62	294.267	1246.7	1511.89	313.584	1326.82	1248.33	287.551	1102.32	1419.85	268.492	1046.86	1217.15	232.48	1336.43	1305.21	474.066	1148.66	1463.74	552.354	1148.83	1268.24	566.669	1128.54	1112.7	564.952	995.922	997.112	507.359	930.576	938.926	559.634	966.55	902.043	555.827	895.072	884.992
976	0	287.979	990.219	1643.96	206.739	1020.05	1635.22	337.201	1178.8	1668.26	227.89	1192.67	1655.83	291.725	1233.38	1511.46	311.835	1313.57	1247.87	285.504	1089.34	1419.62	266.517	1033.68	1216.83	230.46	1323.39	1304.8	471.678	1135.53	1463.03	550.091	1136.36	1267.7	564.016	1118.13	1111.9	563.371	987.58	993.862	506.238	923.103	935.089	558.47	959.792	898.241	554.985	888.631	879.577
977	0	285.041	977.252	1644.08	203.862	1007.33	1635.3	334.663	1165.84	1667.86	225.389	1179.95	1655.21	289.323	1220.02	1511.18	309.973	1300.35	1247.63	283.003	1075.88	1419.06	264.447	1020.27	1216.19	228.399	1310.44	1304.16	469.49	1122.52	1462.79	547.941	1123.87	1267.62	561.292	1107.75	1111.45	561.874	979.528	991.186	505.015	915.727	930.409	557.386	953.347	894.984	554.207	882.544	874.92
978	0	282.179	964.442	1644.55	201.069	994.621	1635.44	332.295	1152.94	1667.79	222.601	1167.32	1655.24	286.939	1206.68	1511.42	307.961	1287.21	1247.82	280.825	1062.72	1418.92	262.37	1007.16	1215.96	226.087	1297.34	1304.37	467.158	1109.29	1462.94	545.681	1111.08	1268.02	558.584	1097.55	1111.57	559.909	971.62	988.537	503.906	909.022	926.232	556.053	947.544	891.979	553.282	877.128	870.275
979	0	279.292	951.522	1645.2	198.327	981.78	1635.87	329.89	1140.06	1668.06	220.127	1154.63	1655.45	284.468	1193.43	1511.93	305.91	1274.03	1248.59	278.591	1049.56	1419.23	260.353	993.913	1216.17	223.959	1284.14	1305.43	464.797	1096.21	1463.51	543.481	1098.44	1268.69	555.926	1087.19	1112.12	557.999	963.756	986.364	502.853	902.726	922.635	555.394	941.974	889.296	552.432	872.11	865.678
980	0	276.687	938.573	1646.09	195.603	969.055	1636.87	327.369	1127.01	1668.55	217.517	1141.86	1656.33	281.864	1180.2	1512.97	303.641	1260.93	1249.58	276.285	1036.39	1419.65	258.636	981.177	1216.48	221.309	1271.04	1306.37	462.39	1083.13	1464.25	541.486	1085.88	1269.53	553.359	1076.98	1113.03	557.049	956.879	984.977	501.727	896.847	918.854	554.51	936.877	887.389	551.614	867.575	861.501
981	0	274.029	925.838	1647.26	193.15	956.493	1638.14	325.392	1114.33	1669.44	215.748	1129.11	1656.64	279.411	1167.2	1514.03	301.288	1248.04	1250.88	274.127	1023.43	1420.41	256.669	968.265	1217.2	218.855	1258.23	1307.43	460.135	1070.34	1465.39	539.504	1073.4	1271.1	550.87	1066.97	1114.35	555.129	949.439	983.662	500.73	891.468	915.38	554.037	931.992	885.572	550.754	863.43	857.843
982	0	271.64	913.208	1648.62	190.71	943.783	1639.21	323.241	1101.52	1670.53	213.331	1116.62	1657.87	277.094	1154.47	1515.3	298.638	1235.22	1251.87	272.094	1010.74	1421.67	254.826	955.472	1218.38	216.004	1245.61	1308.61	457.865	1057.98	1466.65	537.364	1061.19	1272.5	548.28	1057.04	1115.86	553.303	942.389	982.64	499.501	886.349	912.744	553.752	927.961	883.841	549.787	859.571	854.179
983	0	269.419	900.594	1650.28	188.608	931.281	1641.1	321.342	1089.05	1671.74	211.162	1104.06	1659.38	274.733	1141.76	1516.66	296.01	1222.39	1253.45	270.416	998.071	1423.35	253.203	942.589	1220.29	213.183	1233.03	1310.22	455.694	1045.88	1468.09	535.524	1049.48	1274	545.922	1047.36	1117.65	551.777	935.622	982.015	498.412	881.658	910.582	553.228	923.736	882.809	549.301	856.092	850.637
984	0	267.526	888.131	1652.12	186.565	918.743	1642.77	319.249	1076.54	1672.96	209.356	1091.72	1660.79	272.474	1129.43	1518.18	293.399	1209.93	1254.89	268.484	985.422	1424.69	251.721	930.025	1221.56	210.419	1220.6	1312.14	453.828	1033.93	1470.07	533.695	1037.89	1276.07	543.567	1037.68	1119.67	550.386	929.093	982.013	497.307	877.161	907.771	553.072	919.189	882.111	547.911	852.593	847.788
985	0	265.84	875.966	1654.34	184.902	906.536	1645.14	317.786	1064.56	1674.49	207.546	1079.42	1662.31	270.129	1117.01	1519.91	290.813	1197.57	1256.68	266.906	973.103	1426.61	250.214	917.402	1223.51	207.562	1208.39	1313.61	452.047	1022.43	1471.95	531.996	1026.69	1278.37	541.469	1028.54	1121.9	548.935	922.517	982.317	496.173	873.083	905.836	552.36	913.972	882.548	546.83	849.36	845.722
986	0	264.246	863.839	1656.8	183.353	894.419	1647.63	316.07	1052.67	1675.71	205.951	1067.36	1663.89	268.198	1104.91	1521.66	288.036	1185.44	1258.37	265.487	960.956	1428.54	248.92	904.752	1225.51	204.851	1196.2	1315.73	450.276	1010.97	1474.05	530.26	1016.19	1280.46	539.338	1019.42	1124.22	547.443	916.118	982.787	494.564	868.177	905.224	552.141	909.65	882.967	545.439	846.09	843.538
987	0	263.008	852.091	1659.32	182.041	882.435	1650.31	314.656	1040.87	1677.14	204.347	1055.56	1665.7	266.071	1092.68	1523.68	285.339	1173.26	1260.33	264.242	948.835	1430.74	247.984	892.395	1227.72	202.199	1183.9	1317.83	448.624	999.772	1475.91	528.685	1006.09	1282.47	537.57	1010.72	1126.48	546.123	909.986	983.201	492.921	864.169	903.31	551.721	905.36	883.556	544.176	843.144	841.799
988	0	262.012	840.475	1662.08	180.886	870.608	1653.18	313.487	1029.49	1678.57	203.2	1043.91	1667.42	264.174	1080.77	1525.74	282.838	1161.52	1262.37	262.961	936.932	1432.47	246.996	880.037	1229.55	199.69	1171.79	1320.1	447.257	988.686	1478.16	527.222	996.22	1284.96	535.976	1002.32	1128.91	544.828	903.781	984.344	491.97	860.819	902.616	551.648	900.734	884.382	542.746	839.964	840.463
989	0	261.1	829.081	1665.08	180.005	859.046	1656.27	312.249	1018.22	1680.07	201.89	1032.43	1669.21	262.251	1068.92	1527.92	280.035	1149.77	1264.44	261.795	925.142	1434.36	246.191	867.983	1231.66	197.163	1159.85	1322.25	445.749	977.845	1480.4	525.701	986.937	1287.38	534.508	994.177	1131.62	543.709	897.825	985.517	490.754	857.292	902.113	551.315	896.151	885.754	541.342	836.635	839.897
990	0	260.477	817.895	1668.16	179.16	847.579	1659.41	311.39	1007.22	1681.69	200.73	1021.16	1671.28	260.454	1057.15	1530.02	277.707	1138.11	1266.78	260.849	913.511	1436.5	245.657	856.136	1233.75	194.63	1147.87	1324.47	444.431	967.177	1482.47	524.406	978.219	1289.47	533.264	986.444	1133.95	542.531	892.022	986.62	489.867	854.358	901.717	551.017	891.596	887.046	540.05	833.438	839.436
991	0	259.993	806.814	1671.34	178.608	836.358	1662.71	310.534	996.474	1682.97	199.792	1010.05	1673.15	258.743	1045.6	1532.29	275.194	1126.78	1268.9	260.009	901.978	1438.7	245.215	844.659	1235.6	192.352	1136.13	1327.1	443.27	956.633	1484.66	523.322	969.911	1291.77	532.097	979.071	1136.35	541.712	886.406	988.038	488.778	850.466	902.187	550.656	886.823	888.576	538.766	829.922	839.677
992	0	259.614	795.978	1674.42	178.211	825.337	1665.96	309.906	985.848	1684.83	199.136	998.987	1675.03	257.379	1034.2	1534.58	272.95	1115.55	1271.26	259.202	890.632	1440.79	244.872	833.291	1237.83	190.182	1124.44	1329.23	442.142	946.38	1486.94	522.283	961.789	1294.11	530.991	971.987	1138.83	540.848	880.851	989.681	487.999	846.795	903.173	550.31	882.199	890.34	537.56	826.547	840.082
993	0	259.335	785.264	1677.6	177.839	814.393	1669.34	309.124	975.242	1686.52	198.282	988.08	1677.14	255.618	1023.06	1536.95	270.814	1104.44	1273.6	258.397	879.421	1443.15	244.467	822.112	1240.05	187.93	1112.94	1331.62	440.989	936.188	1489.3	521.194	953.951	1296.58	529.93	965.134	1141.47	539.989	875.42	991.323	486.764	842.561	904.814	549.632	877.752	892.405	535.86	823.051	840.454
994	0	259.274	774.529	1680.77	177.673	803.458	1672.74	308.382	964.697	1688.51	197.284	977.261	1679.7	254.247	1011.91	1539.61	268.85	1093.37	1276.37	257.852	868.372	1445.72	244.34	811.019	1242.49	185.931	1101.55	1334.54	440.062	926.154	1491.69	520.243	946.309	1299.11	528.944	958.43	1144.26	539.257	870.142	993.094	485.927	838.318	906.155	549.188	872.845	894.289	535.123	819.409	841.587
995	0	259.417	764.021	1683.89	177.421	792.542	1675.91	307.784	954.331	1690.69	196.715	966.456	1682.07	252.919	1001.07	1542.14	266.798	1082.46	1278.7	257.318	857.491	1447.99	244.281	800.106	1244.8	184.08	1090.3	1337.05	439.335	916.332	1494.4	519.502	938.831	1301.82	527.952	951.992	1146.96	538.752	864.98	995.353	485.298	833.839	908.035	548.639	868.65	896.765	534.236	815.617	843.24
996	0	259.367	753.625	1686.89	177.388	781.719	1679.14	307.177	944.202	1692.92	195.999	955.733	1684.45	251.709	990.301	1544.63	265.014	1071.78	1281.41	256.702	846.688	1450.62	244.321	789.276	1247.43	182.304	1079.2	1339.49	438.449	906.53	1497.07	518.596	931.569	1304.91	527.037	945.811	1149.98	538.077	859.832	997.757	484.693	829.087	910.231	548.128	864.14	899.118	533.553	811.596	845.226
997	0	259.483	743.135	1689.88	177.743	770.96	1682.12	306.593	933.9	1695.24	195.252	945.034	1687.21	250.474	979.613	1547.25	263.234	1060.84	1284.06	256.263	835.985	1453.52	244.232	778.346	1250.49	180.562	1068.07	1342.11	437.556	897.012	1499.6	517.659	924.299	1307.5	525.923	939.507	1152.97	537.565	854.767	1000.06	484.181	824.199	912.369	547.068	859.872	901.466	532.993	807.758	847.102
998	0	259.739	732.813	1692.86	177.531	760.284	1685.32	305.997	923.73	1697.74	194.562	934.437	1689.95	249.04	968.942	1549.9	261.799	1050.28	1286.77	255.84	825.281	1456.26	244.247	767.656	1253.09	178.979	1056.85	1344.81	436.769	887.465	1502.13	516.807	917.041	1310.52	524.999	933.424	1156.09	537.095	849.773	1002.48	484.076	819.197	914.758	546.532	855.586	903.808	532.844	803.575	849.235
999	0	260	722.568	1695.6	177.735	749.693	1688.44	305.516	913.843	1700.02	194.001	923.872	1692.59	248.161	958.494	1552.54	260.278	1039.58	1289.34	255.332	814.67	1459.02	244.364	756.962	1256.12	177.511	1045.84	1347.31	436.094	878.072	1505.05	516.041	909.869	1313.68	524.026	927.353	1159.27	536.801	844.709	1005.3	484.15	814.061	917.393	545.938	851.387	906.548	532.873	799.4	851.918
1000	0	260.308	712.356	1698.28	178.138	738.974	1690.7	304.688	903.68	1702.61	193.331	913.382	1695.34	247.108	948.139	1555.01	258.218	1028.61	1291.49	254.932	804.133	1461.91	244.229	746.481	1258.69	175.966	1034.87	1349.76	435.314	868.646	1507.69	515.185	902.655	1316.82	522.954	921.274	1162.58	536.357	839.582	1008	483.897	808.12	920.401	545.547	847.691	909.376	532.858	794.899	854.505
1001	0	260.659	702.26	1700.76	178.073	728.467	1693.84	304.201	893.952	1705.07	192.592	902.852	1697.82	246.166	937.778	1557.11	257.161	1018.29	1294.05	254.514	793.572	1464.62	244.127	736.219	1261.21	174.467	1023.82	1352.18	434.567	859.147	1510.26	514.325	895.474	1319.57	521.86	915.241	1165.56	536.131	834.498	1010.74	484.124	802.4	923.185	544.773	843.34	911.835	533.098	790.205	857.011
1002	0	261.009	691.999	1703.29	178.68	717.828	1696.09	303.045	883.891	1706.95	191.925	892.325	1700.38	245.178	927.417	1559.18	254.953	1007.14	1295.78	254.207	783.089	1467.1	244.181	725.683	1263.71	173.099	1012.82	1354.4	433.985	849.589	1512.73	513.53	888.185	1322.54	520.865	909.128	1168.34	536.044	829.057	1013.25	484.734	796.375	925.733	544.226	838.604	914.028	533.42	785.46	859.455
1003	0	261.301	681.936	1705.46	178.634	707.23	1698.53	302.428	874.172	1709.05	191.438	881.878	1702.33	244.161	917	1561.27	254.25	996.899	1298.38	253.828	772.558	1469.36	243.97	714.487	1266.51	171.591	1001.88	1356.38	433.324	840.201	1515.03	512.721	880.857	1325.24	519.784	902.919	1171.32	535.614	823.78	1015.4	485.106	790.168	928.458	542.893	833.314	916.74	533.887	780.51	862.011
1004	0	261.645	671.757	1707.64	179.066	696.767	1700.49	301.721	864.14	1711.03	190.708	871.495	1704.44	243.169	906.468	1563.26	252.865	986.124	1300.51	253.475	762.054	1471.61	243.747	703.98	1268.52	170.304	990.946	1358.2	432.561	830.437	1516.98	511.847	873.289	1327.84	518.89	896.652	1174.04	535.449	818.276	1017.7	485.322	783.339	931.063	542.121	828.398	919.263	534.607	775.6	864.333
1005	0	261.96	661.726	1709.39	179.12	686.113	1702.51	301.212	854.323	1712.53	189.936	860.985	1706.36	242.767	895.972	1564.84	251.626	975.447	1302.34	253.242	751.435	1473.58	243.422	693.216	1270.39	169.092	980.092	1359.92	431.995	820.52	1518.81	511.158	865.763	1330.07	517.897	890.111	1176.63	535.402	812.508	1019.83	486.182	777.102	932.955	541.53	823.297	921.273	534.957	769.792	866.515
1006	0	262.276	651.525	1711.03	179.371	675.684	1704.14	300.589	844.311	1713.88	189.181	850.472	1707.76	241.633	885.334	1566.13	250.427	964.802	1303.85	252.934	740.87	1474.87	243.391	682.659	1271.89	168.016	969.26	1361.3	431.419	810.45	1520.63	510.43	857.957	1332.38	516.973	883.509	1178.73	535.518	806.668	1021.86	486.73	769.773	935.682	540.959	817.713	923.265	535.717	764.069	868.754
1007	0	262.46	641.278	1712.39	179.369	665.022	1705.59	300	834.206	1715.03	188.682	839.974	1708.76	240.968	874.585	1567.43	249.12	954.111	1305.11	252.653	730.099	1476.2	243.816	672.329	1273.21	166.808	958.318	1362.64	430.848	800.476	1522	509.679	850.076	1334.3	515.997	876.669	1180.79	535.598	800.624	1023.73	486.969	761.443	938.001	540.338	811.917	924.99	536.309	757.905	870.696
1008	0	262.821	630.935	1713.56	179.582	654.337	1706.68	299.733	824.244	1715.84	187.977	829.375	1709.62	240.251	863.819	1568.24	247.961	943.23	1306.33	252.427	719.398	1477.3	243.974	661.671	1274.24	165.625	947.201	1363.24	430.704	790.87	1523.08	508.938	842.128	1335.73	515.263	869.549	1182.5	535.513	794.12	1025.04	487.342	752.917	939.852	540.065	805.983	926.379	537.08	751.573	872.029
1009	0	263.131	620.709	1714.24	179.813	643.54	1707.52	299.113	813.959	1716.13	187.388	818.645	1710.25	239.634	852.991	1568.85	247.007	932.649	1307.02	252.389	708.342	1477.9	244.025	652.429	1273.4	164.522	936.044	1364.21	430.293	780.59	1523.94	508.344	833.644	1337.34	514.356	862.145	1184	535.721	787.443	1026.26	487.723	745.155	940.247	539.625	799.502	927.447	537.933	744.957	873.66
1010	0	263.322	610.267	1714.62	180.024	632.943	1708.03	298.711	803.803	1716.35	186.821	807.903	1710.52	238.872	842.059	1569.09	246.193	921.996	1307.81	251.944	697.547	1478.23	244.068	640.506	1274.53	163.573	925.005	1364.52	429.811	770.265	1524.61	507.48	825.166	1338.34	513.632	854.483	1185.25	535.845	780.516	1027.41	488.686	737.607	941.438	539.477	792.849	928.548	538.826	738.105	874.676
1011	0	263.526	599.855	1714.54	180.024	621.808	1708.27	298.013	793.349	1716.12	186.516	797.038	1710.17	238.171	831.073	1569.04	245.097	911.19	1307.64	251.783	686.624	1478.3	244.289	630.416	1274.16	162.845	913.716	1365.06	429.327	759.933	1524.7	506.812	816.531	1338.95	512.725	846.647	1185.94	535.813	773.115	1027.9	489.433	729.619	941.724	539.178	785.835	929.068	539.634	730.924	875.283
1012	0	263.916	589.107	1714.34	180.255	610.933	1708.2	297.707	782.978	1715.49	185.773	786.088	1709.92	237.321	819.927	1568.7	244.294	900.323	1307.38	251.684	675.617	1477.99	244.677	619.413	1274.01	162.147	902.628	1364.68	428.912	749.418	1524.37	506.155	807.491	1339	512.026	838.618	1186.01	536.025	765.736	1027.78	490.167	721.482	941.949	539.096	778.477	929.167	540.653	723.54	875.608
1013	0	264.321	578.28	1713.87	180.23	599.691	1707.69	297.213	772.204	1714.68	185.317	775.026	1709.25	237.185	808.732	1568.21	243.993	889.623	1307.25	251.411	664.539	1477.05	244.808	609.362	1272.61	161.649	891.741	1364.43	428.592	738.591	1524.15	505.632	798.208	1339.05	511.384	830.05	1186.21	536.301	757.775	1027.97	491.263	713.194	942.287	539.078	770.826	929.146	541.707	715.87	875.754
1014	0	264.713	567.975	1712.82	180.564	588.823	1706.97	297.009	761.405	1713.77	185.118	763.899	1708.08	236.751	797.5	1567.44	243.489	878.768	1306.62	251.127	653.425	1475.94	244.902	598.589	1271.64	161.128	880.662	1363.72	428.262	727.759	1523.72	505.102	788.567	1339.13	510.878	821.172	1186.31	536.537	749.552	1027.92	492.133	704.652	942.035	539.281	762.907	929.046	542.632	707.767	875.686
1015	0	264.802	557.001	1711.53	180.76	577.497	1705.79	296.823	750.58	1712.32	184.851	752.61	1706.81	236.321	786.057	1566.4	243.363	867.864	1305.9	250.951	642.234	1474.71	245.047	587.978	1270.1	160.733	869.515	1362.89	427.913	716.698	1522.75	504.698	778.682	1338.4	510.42	812.019	1185.94	536.664	741.005	1027.19	492.674	695.885	940.881	539.599	754.737	928.624	543.47	699.85	874.939
1016	0	265.29	545.985	1710.19	181.027	565.925	1704.64	296.755	739.301	1710.81	184.586	741.289	1705.95	236.297	774.633	1565.07	243.318	856.896	1304.98	251.087	631.022	1473.25	245.134	576.881	1268.23	160.416	858.314	1362.14	427.743	705.421	1521.49	504.202	768.606	1337.69	510.006	802.397	1185.22	536.906	732.081	1026.13	493.522	687.083	939.754	539.922	746.294	927.633	544.333	691.227	873.462
1017	0	265.666	534.536	1708.78	181.271	554.486	1703.28	296.74	728.367	1708.72	184.807	729.826	1703.9	236.077	763.164	1563.61	243.322	845.866	1303.49	250.818	619.609	1471.08	245.273	566.261	1266.29	160.285	847.189	1360.39	427.787	694.071	1519.98	503.983	758.02	1336.54	509.947	792.759	1184.41	537.412	723.065	1025.15	494.451	677.706	938.598	540.288	737.503	926.538	545.472	682.569	872.629
1018	0	266.073	523.26	1707.03	181.685	543.179	1701.62	296.717	716.977	1706.81	184.773	718.298	1701.7	236.1	751.467	1561.79	243.393	834.755	1301.67	250.946	608.23	1469.07	245.399	555.612	1264.15	160.283	835.956	1358.5	427.702	682.587	1518.39	503.949	747.264	1335.05	509.685	782.712	1183.05	537.78	713.74	1023.66	495.353	668.398	937.039	540.738	728.574	925.029	546.552	673.809	871.214
1019	0	266.658	511.812	1705.11	182.234	531.617	1699.89	297.049	705.601	1704.37	184.852	706.623	1699.73	235.993	739.696	1560.02	243.726	823.481	1300.01	251.048	596.664	1466.87	245.471	544.692	1261.71	160.567	824.615	1356.84	427.777	670.835	1516.45	503.718	736.227	1333.3	509.614	772.257	1181.46	538.209	703.94	1021.75	496.242	658.749	934.797	541.293	719.307	923.274	547.719	664.731	869.283
1020	0	267.248	500.2	1702.88	182.526	519.657	1698.09	297.507	694.009	1701.85	185.29	694.971	1697.57	236.183	727.99	1557.92	244.232	812.212	1298	251.107	584.964	1464.39	245.471	533.641	1258.88	160.949	813.137	1355.19	428.039	658.929	1514.36	503.884	724.794	1331.34	509.428	761.263	1179.53	538.773	693.993	1019.71	497.154	648.905	932.518	542.007	709.837	921.29	548.78	655.229	867.285
1021	0	267.797	488.466	1700.69	183.379	508.132	1696.01	297.967	682.175	1699.37	185.851	683.118	1694.92	236.709	716.169	1555.61	244.895	800.876	1295.93	251.273	573.193	1461.79	245.456	522.55	1256.37	161.383	801.838	1352.95	428.24	646.828	1512.24	504.114	713.01	1329.22	509.911	750.574	1177.83	539.411	683.736	1017.51	498.198	638.848	930.247	542.678	699.902	919.247	549.883	645.579	865.094
1022	0	268.56	476.719	1698.39	183.801	496.049	1694.1	298.614	670.557	1696.44	186.47	671.221	1692.67	237.285	704.105	1553.34	245.426	789.271	1293.5	251.608	561.497	1459.19	245.417	511.33	1253.51	161.986	790.442	1350.73	428.568	634.6	1509.77	504.346	701.043	1326.96	509.674	738.63	1175.57	539.96	673.077	1015.02	498.935	628.37	927.229	543.453	689.823	916.836	550.965	635.848	862.299
1023	0	269.739	464.838	1696.05	184.847	484.118	1691.79	299.396	658.556	1693.42	187.345	659.316	1690.05	237.946	692.176	1551.04	246.318	777.747	1291.17	251.966	549.513	1456.42	245.633	500.042	1250.45	162.831	779.007	1348.28	429.097	622.136	1507.23	504.938	688.711	1324.19	510.313	727.023	1173.17	540.676	662.094	1012.41	500.005	617.816	924.175	544.315	679.436	914.221	552.237	625.854	859.452
1024	0	270.705	452.796	1693.42	186.009	472.214	1689.34	300.554	646.73	1690.63	188.155	647.199	1687.18	238.901	680.189	1548.21	247.216	765.963	1288.83	252.248	537.439	1453.39	245.652	488.426	1247.79	163.77	767.509	1346.13	429.819	609.603	1504.56	505.52	676.123	1321.73	510.444	714.38	1170.67	541.588	650.799	1009.79	501.123	607.024	921.307	545.343	668.624	911.635	553.358	615.407	856.645
1025	0	271.844	440.768	1690.89	187.145	460.172	1686.9	301.461	634.689	1687.71	189.373	635.114	1684.89	239.646	668.049	1546.06	248.116	754.224	1286.43	252.713	525.413	1450.65	245.51	476.731	1244.94	164.806	755.911	1343.75	430.441	596.84	1501.96	506.311	663.36	1319.05	511.027	701.735	1168.17	542.328	639.204	1006.86	502.14	595.948	918.163	546.597	658.116	908.81	554.528	604.824	853.67
1026	0	273.217	428.714	1688.19	188.216	447.897	1684.8	302.83	622.579	1684.78	190.631	622.954	1682.12	241.009	655.943	1543.33	249.087	742.263	1283.88	253.422	513.308	1448.03	245.392	464.918	1241.77	165.878	744.132	1341.21	431.237	584.037	1498.87	507.035	650.126	1315.73	511.761	688.85	1165.21	543.192	627.219	1003.58	502.928	584.421	914.288	547.51	646.581	905.744	555.426	593.612	850.021
1027	0	274.675	416.428	1685.43	189.759	435.5	1682.11	304.165	610.317	1681.7	192.004	610.625	1679.64	241.987	643.538	1540.59	249.859	730.206	1281.08	253.997	501.052	1445.06	245.511	452.915	1238.8	167.114	732.286	1338.47	432.106	571.123	1495.72	507.681	636.974	1312.88	512.689	675.886	1162.13	544.082	615.02	1000.06	503.969	572.611	910.582	548.655	635.022	902.406	556.718	582.573	846.343
1028	0	276.425	404.329	1682.67	191.408	423.269	1679.77	305.646	598.233	1678.83	193.545	598.303	1676.55	243.235	631.174	1538.11	250.857	718.251	1278.09	254.742	488.531	1442.3	245.625	440.712	1236.27	168.353	720.146	1335.98	433.146	558.049	1492.73	508.742	623.228	1309.29	513.674	662.624	1158.9	545.088	602.449	996.842	505.182	560.717	907.263	549.742	622.968	899.124	557.728	570.906	842.866
1029	0	278.214	391.894	1680.04	193.227	410.883	1677.03	307.255	585.942	1675.77	195.099	585.835	1674.26	244.522	618.777	1535.33	251.838	706.086	1275.62	255.596	476.074	1439.46	245.693	428.573	1233.36	169.603	708.131	1333.51	434.308	545.044	1489.73	509.868	609.485	1305.98	514.622	648.895	1155.82	546.076	589.542	993.321	505.954	548.27	903.499	550.979	610.701	895.757	558.745	559.028	838.981
1030	0	280.141	379.465	1677.2	195.042	398.292	1674.8	309.139	573.513	1672.92	196.859	573.383	1671.46	245.923	606.112	1532.88	252.817	693.78	1273.15	256.667	463.776	1436.51	245.964	416.325	1230.21	170.818	695.724	1331.13	435.553	532.015	1486.55	510.756	595.497	1302.48	515.615	634.889	1152.37	547.112	576.428	989.774	506.953	535.778	899.585	552.34	597.9	892.409	559.822	546.629	835.328
1031	0	282.142	367.03	1674.38	196.944	385.758	1672.54	310.931	560.959	1669.98	198.725	560.724	1669.22	247.756	593.398	1530.27	253.833	681.489	1270.72	257.783	450.9	1433.64	246.409	404.008	1227.24	171.948	683.53	1329.24	436.998	518.949	1483.57	512.261	581.257	1299.01	516.735	620.777	1149.31	548.068	562.59	986.397	507.843	522.771	895.881	553.731	584.932	889.019	560.823	533.93	831.527
1032	0	284.251	354.382	1671.99	199.21	373.17	1669.85	313.032	548.493	1667.49	200.679	548.068	1666.44	249.383	580.663	1528.03	255.026	669.001	1268.59	259.148	438.413	1430.85	246.986	391.617	1224.48	173.122	671.109	1327.02	438.453	505.893	1480.61	513.461	567.12	1295.57	517.876	606.602	1145.94	549.458	549.322	982.915	510.074	514.153	889.967	554.994	571.344	885.867	561.944	520.88	827.833
1033	0	286.5	341.599	1669.59	201.558	360.391	1667.88	315.074	535.7	1664.85	202.733	535.213	1664.45	251.065	567.85	1525.82	256.021	656.384	1266.55	260.722	425.635	1428.59	247.669	379.253	1221.57	174.464	658.709	1325.22	440.099	492.878	1477.44	514.699	552.961	1292.12	518.955	592.251	1142.48	550.272	535.07	979.3	510.689	500.648	885.818	556.179	557.602	882.332	562.744	507.284	824.003
1034	0	288.911	328.647	1667.41	203.812	347.308	1666.13	317.356	522.908	1662.57	204.912	522.323	1662.82	252.915	554.948	1523.83	257.024	643.672	1264.4	262.215	412.77	1426.07	248.905	366.629	1219.48	175.797	646.066	1323.52	441.879	479.852	1474.62	515.981	538.74	1288.54	520.168	577.768	1139.26	551.336	520.909	975.761	511.663	486.903	882.249	557.505	543.463	879.045	563.51	493.146	820.387
1035	0	291.502	315.722	1665.71	206.184	334.271	1664.83	319.572	509.99	1660.58	207.33	509.247	1661.39	254.696	541.906	1522.33	257.985	631.046	1262.61	263.578	400.069	1423.98	250.043	353.841	1217.69	177.149	633.344	1321.82	443.672	466.905	1472.13	517.451	524.852	1285.33	520.824	562.667	1135.75	552.201	506.065	972.909	512.483	472.72	879.449	558.68	529.105	875.826	564.566	479.18	817.358
1036	0	293.977	302.761	1664.15	208.802	321.151	1663.48	322.127	497.065	1659.1	209.613	496.117	1659.87	256.454	529.002	1520.94	258.856	618.149	1261.12	265.135	387.421	1422.54	251.231	340.868	1216.24	178.479	620.493	1320.27	445.494	454.17	1469.96	518.725	510.761	1282.6	522.327	548.457	1132.92	553.168	491.621	970.047	513.041	458.35	876.555	559.777	514.352	872.892	565.282	464.425	814.354
1037	0	296.732	289.743	1662.55	211.342	307.931	1662.77	324.514	483.922	1657.52	212.161	482.918	1659.11	258.043	515.929	1520	260.669	606.265	1260.38	267.018	374.379	1421.54	252.641	327.538	1215.16	179.784	607.534	1319.32	447.153	441.485	1467.75	519.842	496.73	1279.77	523.237	533.498	1130.04	553.69	476.206	967.097	513.51	443.669	873.351	560.887	499.245	870.172	565.797	449.319	811.243
1038	0	299.385	276.832	1661.27	214.153	294.568	1662.23	327.094	470.886	1656.76	214.6	469.599	1658.77	259.829	503.053	1519.28	261.21	593.12	1259.38	268.54	361.462	1420.96	254.133	314.014	1214.5	181.015	594.515	1318.81	448.994	428.981	1465.98	521.115	482.985	1277.37	523.805	518.321	1127.3	554.488	461.036	964.684	514.02	428.654	871.028	561.699	483.7	867.805	566.291	433.822	808.865
1039	0	302.329	263.648	1660.77	217.015	281.319	1662.09	329.66	457.799	1656.23	217.264	456.412	1659.09	261.351	490.419	1518.98	261.618	579.794	1258.96	270.187	348.68	1420.71	255.618	300.5	1214.48	182.198	581.728	1318.16	450.701	416.584	1465.1	522.295	469.217	1275.81	524.802	503.363	1125.34	555.242	445.676	963.175	514.45	413.205	869.583	562.45	467.943	866.14	566.82	418.051	807.266
1040	0	305.291	250.543	1660.51	220.05	268.037	1662.36	332.242	444.781	1656.42	219.67	443.046	1659.88	263.082	477.596	1519.03	262.124	566.887	1258.82	271.905	335.94	1421.12	257.127	287.058	1214.96	183.185	568.798	1318.37	452.483	404.248	1464.51	523.44	455.58	1274.6	526.035	488.583	1124.17	555.787	430.003	961.881	514.58	397.511	868.351	563.169	451.952	864.831	567.056	401.759	806.061
1041	0	308.324	237.583	1660.31	223.122	254.802	1662.65	334.477	431.78	1656.39	222.217	429.871	1660.82	264.696	464.894	1519.67	263.108	554.355	1259.21	273.457	323.308	1421.67	258.696	273.75	1215.66	184.395	556.382	1318.77	453.993	391.958	1464.17	524.595	442.132	1273.56	526.573	473.024	1122.99	556.201	413.999	960.944	514.802	381.584	867.573	563.637	435.456	863.894	567.217	385.315	805.283
1042	0	311.376	224.643	1660.6	226.04	241.605	1663.5	336.976	419.07	1657.13	224.571	416.654	1662.12	266.207	452.431	1520.44	263.865	541.672	1260.17	275.025	310.774	1422.66	260.123	260.594	1216.83	185.123	543.574	1319.21	455.628	379.716	1464.49	525.726	428.757	1273.01	527.475	457.874	1122.22	556.594	397.86	960.673	514.814	365.219	867.597	563.891	418.718	863.422	567.204	368.233	805.165
1043	0	314.197	211.944	1660.96	229.026	228.656	1664.5	339.079	406.404	1657.8	226.796	403.578	1663.54	267.404	439.915	1521.33	264.626	528.993	1260.66	276.51	298.317	1424.06	261.558	247.53	1218.4	185.846	530.984	1320.19	457.162	367.589	1465.2	526.66	415.206	1272.87	528.41	442.772	1122.05	556.817	381.544	960.756	514.486	348.566	868.082	564.141	401.851	863.349	566.981	351.021	805.284
1044	0	316.912	199.451	1661.36	231.664	215.699	1665.72	341.045	394.106	1658.55	228.955	390.78	1665.12	268.914	427.767	1522.5	265.505	516.287	1261.48	277.944	285.953	1425.6	262.925	234.712	1219.67	186.58	518.752	1321.32	458.343	355.403	1465.84	527.672	401.878	1272.73	529.353	427.673	1121.93	556.869	364.932	960.936	514.075	331.761	868.429	564.1	384.635	863.473	566.325	333.177	805.675
1045	0	319.548	187.097	1662.12	234.05	202.811	1667.16	342.805	381.717	1659.54	230.815	378.043	1666.94	270.249	415.826	1523.74	266.885	504.249	1262.54	279.145	273.786	1426.92	264.398	222.112	1221.53	187.444	506.513	1322.66	459.66	343.006	1467.03	528.723	388.556	1273.13	530.445	412.511	1122.29	557	348.302	961.591	513.607	314.468	869.77	563.938	366.936	864.136	566.214	315.707	806.588
1046	0	322.085	174.961	1663.34	236.447	190.389	1668.63	344.664	369.78	1661.19	232.611	365.662	1668.74	271.881	404.028	1525.38	268.239	492.073	1264.19	280.332	261.982	1428.59	265.527	209.812	1223.64	188.324	494.427	1324.21	460.91	330.716	1468.55	529.886	375.081	1274.21	531.661	397.359	1123	557.125	331.507	963.135	513.122	297.173	871.936	563.694	349.145	865.143	565.488	297.271	808.375
1047	0	324.114	163.045	1664.61	238.663	178.418	1670.23	346.212	357.862	1662.96	234.083	353.312	1670.91	272.971	392.475	1527.14	269.977	480.368	1265.77	281.139	250.076	1430.42	266.329	197.67	1225.76	189.392	482.668	1326.05	462.056	318.239	1470.33	530.933	361.37	1275.6	532.916	382.126	1124.13	557.014	314.263	964.661	515.841	275.074	883.267	563.365	331.125	866.387	564.146	278.06	810.385
1048	0	325.938	151.115	1665.96	240.315	166.134	1672	347.405	346.104	1664.69	235.518	341.358	1673.03	274.546	380.936	1528.92	271.461	468.569	1267.58	282.042	238.33	1432.53	266.856	185.762	1227.58	190.539	471.089	1327.86	462.894	305.947	1471.96	531.823	347.397	1276.73	534.293	366.784	1125.34	556.772	296.929	966.138	511.003	261.8	875.736	562.628	312.077	868.175	562.831	258.76	812.273
1049	0	327.659	139.757	1667.31	241.962	154.31	1673.74	348.584	334.707	1666.64	236.638	329.444	1675.13	275.732	369.619	1530.81	273.014	456.968	1269.33	282.681	226.756	1434.63	267.153	174.157	1229.77	191.83	459.723	1329.63	463.843	293.758	1473.85	532.932	333.394	1278.39	535.679	351.456	1126.55	556.406	279.339	968.127	509.723	243.749	878.296	562.038	293.508	869.72	561.595	239.286	815.131
1050	0	329.12	128.283	1669.42	243.415	142.778	1675.84	349.406	323.389	1668.65	237.528	317.812	1677.39	276.549	358.413	1532.81	274.732	445.862	1271.26	283.205	215.606	1436.55	267.28	162.792	1232.18	193.335	448.595	1331.48	464.615	281.744	1476.09	534.136	319.286	1280.14	536.839	336.023	1127.89	556.179	262.027	970.266	508.857	224.586	882.224	561.261	274.481	871.795	560.004	219.918	817.844
1051	0	330.364	117.164	1671.15	244.627	131.307	1677.8	350.053	312.259	1670.57	238.31	306.376	1679.46	277.517	347.2	1534.87	276.04	434.228	1273.11	283.67	205.211	1437.93	267.164	151.558	1234.38	194.886	437.544	1333.1	465.227	269.849	1477.91	535.229	305.128	1281.78	537.695	320.354	1128.74	555.652	244.183	972.48	507.514	206.836	885.371	560.444	255.508	873.574	558.239	200.147	820.628
1052	0	331.466	106.13	1673.17	245.755	120.113	1679.78	350.491	301.368	1672.41	238.72	294.993	1681.43	278.018	336.303	1536.73	277.27	423.008	1274.79	284.065	193.99	1440.31	266.897	140.517	1236.67	196.148	426.429	1334.76	465.59	258.294	1480.02	536.386	290.757	1283.55	539.242	305.13	1130.12	555.151	226.42	974.693	506.04	188.907	888.458	559.54	236.027	875.552	556.442	180.31	823.528
1053	0	332.293	95.2716	1675.51	246.371	108.833	1682.31	350.606	290.503	1674.73	239.149	284.009	1683.77	278.619	325.324	1539.01	278.955	412.205	1277.1	284.421	182.996	1442.75	266.408	129.542	1239.05	197.681	415.633	1336.62	466.116	246.849	1482.41	537.354	276.489	1285.78	540.12	289.43	1131.63	554.604	208.562	977.493	504.529	170.658	892.134	558.8	216.694	878.229	554.367	160.186	827.04
1054	0	332.764	84.5202	1678.04	247.165	98.109	1684.28	350.636	279.88	1677.22	239.072	272.921	1686.01	279.253	314.423	1541.46	280.225	401.375	1279.7	284.531	172.19	1445.03	265.642	118.608	1241.57	198.852	404.865	1338.87	466.459	235.396	1484.81	538.232	262.174	1288.2	541.275	274.059	1133.64	553.771	190.395	980.543	502.718	152.321	895.852	558.015	197.138	881.177	552.291	139.935	831.172
1055	0	333.176	73.8823	1680.48	247.281	87.0241	1687.16	350.667	269.217	1679.96	238.904	262.072	1688.5	279.672	303.614	1543.91	281.314	390.195	1282.03	284.626	161.175	1447.43	264.998	107.738	1243.73	199.925	394.219	1341.16	466.589	224.191	1487.4	538.829	247.968	1290.76	542.265	258.735	1135.8	552.811	172.281	983.936	500.883	133.875	899.595	557.15	177.411	884.746	550.233	119.553	835.406
1056	0	333.427	63.301	1683.24	247.519	76.3643	1689.28	350.346	258.556	1682.77	238.697	251.27	1691.2	280.089	292.705	1546.3	282.505	379.321	1284.68	284.876	150.33	1450.14	264.623	96.9147	1246.5	200.74	383.334	1343.68	466.915	212.919	1490.28	539.491	234.017	1293.41	543.223	243.407	1138.39	552.025	154.293	987.577	499.419	115.653	904.039	556.33	157.916	888.527	548.189	99.2834	840.188
1057	0	333.416	52.7623	1686.21	247.269	65.5412	1691.87	349.998	248.204	1685.46	238.278	240.541	1693.2	280.413	282.106	1548.56	283.912	368.786	1287.53	284.877	139.401	1453.03	264.117	86.2378	1249.31	201.812	372.706	1345.96	467.219	201.832	1493.49	540.025	220.488	1296.62	544.013	228.293	1141.02	551.365	136.509	991.998	497.615	97.4402	909.005	555.492	138.513	892.518	546.227	79.2232	845.436
1058	0	333.083	42.3569	1688.9	247.025	55.0652	1694.23	349.41	237.731	1687.98	237.762	230.025	1695.44	280.611	271.517	1551.09	284.999	357.997	1289.53	284.847	128.626	1455.71	263.582	75.5814	1251.84	202.818	361.994	1348.19	467.291	190.678	1495.93	540.18	207.104	1299.35	544.77	213.661	1143.52	550.375	119.17	995.98	495.767	79.2729	913.657	554.136	119.212	896.339	544.115	59.2556	850.495
1059	0	332.583	31.9764	1691.35	246.654	44.7123	1696.3	348.619	227.306	1690.16	236.995	219.473	1697.2	280.821	260.783	1553.15	285.999	347.152	1291.59	284.766	117.877	1457.98	263.468	65.1952	1254.08	203.771	351.413	1350.08	467.156	179.478	1498.34	540.259	194.172	1301.61	545.02	198.803	1145.62	549.252	101.934	999.512	494.136	61.1712	918.272	552.572	100.096	900.104	542.049	39.4728	855.517
1060	0	332.043	21.5528	1694.07	246.043	34.3034	1698.79	348.152	216.992	1692.65	236.438	209.124	1699.11	281.099	250.334	1555.19	286.553	335.969	1293.26	284.689	107.205	1460.52	263.386	54.8163	1256.51	204.483	340.787	1352.21	467.077	168.381	1501.07	540.453	181.583	1304.18	545.393	184.088	1147.97	548.215	84.7258	1003.62	492.33	43.136	923.577	551.136	81.2489	903.951	540.074	19.9548	860.996
1061	0	331.359	11.1686	1696.79	245.246	24.0341	1700.79	347.314	206.594	1694.85	235.744	198.729	1700.89	281.061	239.913	1557.47	287.832	325.823	1295.46	284.417	96.5369	1462.95	263.461	44.6396	1259.08	205.137	330.364	1354	467.008	157.194	1503.89	540.529	169.247	1306.86	545.858	169.741	1150.57	547.212	67.9709	1007.76	490.616	25.2729	928.965	549.683	62.584	908.424	538.195	0.625069	866.627
1062	0	330.397	0.813347	1698.94	244.444	13.7099	1702.8	346.572	196.15	1697.03	234.869	188.374	1702.58	281.215	229.377	1559.13	288.921	315.372	1297.45	284.077	85.8348	1465.08	263.301	34.4702	1261.16	205.772	320.026	1356.28	466.749	145.849	1506.47	540.498	156.831	1309.28	546.126	155.698	1152.77	545.868	51.0561	1011.73	489.345	7.73524	933.878	547.926	44.0546	912.543	536.061	-18.7522	872.332
1063	0	329.514	-9.70611	1701.13	243.343	3.31825	1704.57	345.973	185.749	1699.06	234.252	178.115	1704.17	281.118	218.926	1561.13	289.933	305.061	1299.71	283.754	75.3067	1466.82	263.142	24.2831	1262.97	206.276	309.866	1358.39	466.518	134.515	1508.97	540.554	144.771	1311.74	546.601	141.58	1155.18	545.062	34.439	1015.96	487.227	-10.1391	939.21	546.177	26.075	917.014	534.061	-37.8763	878.172
1064	0	328.388	-20.057	1703.01	242.408	-6.92251	1706.18	345.194	175.306	1701.03	233.469	167.811	1705.69	281.062	208.361	1562.8	290.612	294.529	1301.63	283.402	64.5891	1468.88	262.927	14.127	1264.86	206.608	299.638	1360.18	466.231	123.212	1511.53	540.49	132.455	1314.33	546.969	127.417	1157.8	544.078	18.146	1020.1	485.423	-27.6743	944.466	544.446	7.89763	921.576	532.003	-56.7685	884.044
1065	0	327.167	-30.5542	1704.62	241.249	-17.1075	1707.48	344.339	164.813	1702.38	232.662	157.528	1706.81	281.018	197.934	1564.34	291.232	283.98	1303.42	282.804	54.0861	1470.32	262.417	3.82408	1266.23	207.1	289.273	1361.68	465.792	111.821	1513.57	540.391	120.151	1316.17	547.296	113.237	1160.08	543.158	2.07837	1023.88	483.641	-45.105	949.511	542.72	-10.209	925.408	529.761	-75.5296	889.606
1066	0	325.947	-40.9861	1705.69	240.08	-27.4296	1708.36	343.637	154.376	1703.59	231.794	147.343	1707.85	280.975	187.441	1565.29	291.837	273.463	1304.64	282.22	43.4801	1471.4	262.062	-6.36261	1267.35	207.436	278.967	1362.76	465.17	100.435	1514.93	540.167	107.931	1317.54	547.474	99.4519	1161.51	541.78	-14.3537	1027.18	481.728	-62.5942	954.385	540.836	-28.0378	928.993	527.583	-94.0481	894.754
1067	0	324.801	-51.5989	1706.91	238.785	-37.8062	1709.07	342.886	143.782	1704.57	231.195	137.045	1708.23	280.408	176.883	1565.93	292.469	263.035	1305.28	281.566	32.8305	1472.38	261.51	-16.6381	1268.29	207.903	268.535	1363.15	464.685	89.1473	1516.42	540.283	95.9242	1319.2	547.655	85.7343	1162.65	540.693	-30.334	1030.41	480.026	-79.7763	959.237	538.489	-45.6415	932.493	525.297	-112.575	899.649
1068	0	323.653	-61.9635	1707.67	237.582	-48.0597	1709.57	342.135	133.231	1705.21	230.358	126.75	1708.42	280.439	166.508	1566.57	293.131	252.68	1305.98	281.078	22.2724	1473.48	260.951	-26.9436	1269.19	208.428	258.382	1363.81	464.177	77.8707	1517.66	540.241	83.7502	1320.5	547.754	72.2341	1163.66	539.554	-46.0765	1033.81	478.15	-96.6847	964.248	536.544	-63.2795	935.848	523.088	-130.451	904.758
1069	0	322.167	-72.619	1707.86	236.404	-58.3542	1709.83	341.409	122.656	1705.52	229.556	116.385	1708.63	280.019	155.959	1566.83	293.718	242.439	1306.41	280.194	11.656	1473.77	260.209	-37.2091	1269.47	208.746	248.224	1364.02	463.369	66.4218	1518.34	539.991	71.2227	1321.39	547.972	58.7918	1164.29	538.263	-61.769	1036.69	476.22	-113.537	968.586	534.898	-80.9309	939.24	520.66	-148.609	909.487
1070	0	320.868	-83.2775	1707.88	234.843	-68.888	1709.68	340.584	111.879	1705.67	228.844	106.083	1708.56	279.599	145.315	1566.97	294.279	232.198	1306.78	279.441	1.08202	1473.67	259.33	-47.6288	1269.28	209.032	237.878	1364.2	462.701	55.0886	1518.9	539.945	58.9091	1321.9	548.167	45.4703	1164.94	537.449	-77.3953	1039.29	474.342	-130.178	972.619	532.988	-98.3767	942.56	518.278	-166.439	914.013
1071	0	319.585	-94.0091	1707.75	233.67	-79.2652	1709.44	339.894	101.138	1705.74	228.051	95.5876	1708.47	279.128	134.704	1566.93	294.848	222.007	1307.19	278.721	-9.58165	1473.67	258.684	-57.9213	1269.2	209.123	227.6	1364.33	462.078	43.6849	1519.51	539.773	46.2915	1322.84	548.544	32.3567	1165.66	536.356	-92.8861	1042.28	472.418	-146.583	976.996	531.056	-115.492	946.044	515.903	-184.282	918.938
1072	0	318.239	-104.737	1707.37	232.284	-89.7744	1708.8	339.077	90.3652	1705.35	227.09	85.0587	1707.98	278.733	124.284	1566.49	295.039	211.629	1307.21	277.732	-20.1307	1473.24	257.613	-68.395	1268.78	209.029	217.357	1364.14	461.248	32.2636	1519.73	539.682	33.8817	1323.28	548.778	19.3965	1166.08	535.003	-108.228	1044.84	470.411	-162.714	980.869	529.61	-132.845	949.346	513.312	-201.98	923.629
1073	0	316.71	-115.562	1706.1	230.963	-100.383	1707.9	338.234	79.4149	1704.68	226.281	74.5206	1707.06	277.926	113.42	1565.7	295.073	201.318	1306.68	276.85	-30.7777	1472.22	256.767	-78.8341	1267.7	209.033	207.266	1363.63	460.383	21.0386	1519.14	539.35	21.3799	1322.9	548.92	6.28277	1165.8	533.739	-123.495	1046.86	468.379	-178.887	984.887	527.492	-150.046	952.036	510.681	-219.412	927.628
1074	0	315.548	-126.476	1705.25	229.633	-111.17	1706.66	337.252	68.4768	1703.27	225.349	63.8204	1705.77	277.037	102.735	1564.7	294.789	190.882	1305.64	276.028	-41.3544	1471.28	255.919	-89.3034	1266.75	208.927	196.917	1362.54	459.427	9.83628	1517.83	539.059	9.10499	1322.51	549.038	-6.54369	1165.06	532.426	-138.464	1048.7	466.575	-194.348	988.247	525.718	-166.875	954.371	508.138	-236.388	931.382
1075	0	314.114	-137.426	1703.94	228.213	-121.848	1705.39	336.314	57.5031	1701.92	224.469	53.0272	1704.42	276.349	92.0612	1563.57	294.428	180.47	1304.19	274.943	-52.0662	1470.14	255.077	-99.7263	1265.63	208.6	186.519	1361.05	458.502	-1.42691	1517.37	538.789	-3.05603	1321.92	548.907	-19.3631	1164.14	531.179	-153.198	1050.51	464.517	-209.748	991.374	524.104	-183.372	956.83	505.929	-253.341	935.533
1076	0	312.748	-148.456	1702.2	226.952	-132.717	1703.52	335.215	46.337	1700.09	223.423	42.2196	1702.52	275.265	81.1527	1561.88	294.191	170.283	1302.83	274.134	-62.2133	1468.62	254.048	-110.311	1264.05	208.151	175.94	1359.39	457.468	-12.588	1516.17	538.232	-15.2093	1320.72	548.758	-32.1233	1162.76	529.65	-167.911	1051.85	462.32	-225.053	993.976	521.569	-199.653	958.698	503.356	-269.903	939.06
1077	0	311.104	-159.668	1699.98	225.486	-143.779	1701.51	334.346	35.2839	1698.28	222.403	31.274	1700.73	274.514	70.4455	1560.26	293.433	159.795	1301.14	272.722	-73.4152	1466.47	252.866	-121.211	1261.84	207.547	165.602	1357.67	456.248	-23.728	1514.38	537.552	-27.3279	1319.04	548.563	-44.6837	1161.05	527.691	-182.407	1052.55	460.269	-240.07	996.423	520.102	-216.056	960.287	500.82	-286.448	942.199
1078	0	309.848	-170.913	1697.9	224.245	-154.866	1699.31	333.031	24.1031	1696.15	221.017	20.0651	1698.43	273.506	59.6273	1558.28	292.646	149.336	1299.47	271.623	-84.2662	1464.44	252.004	-131.804	1259.84	206.768	155.127	1355.74	454.951	-34.8891	1512.55	536.945	-39.0954	1317.5	548.174	-57.3613	1159.47	526.349	-196.672	1053.45	458.346	-254.89	998.618	518.118	-231.795	961.749	498.353	-302.551	945.16
1079	0	308.468	-182.032	1695.59	222.794	-165.96	1696.8	331.812	12.9328	1694.2	219.866	8.99898	1696.26	272.198	48.9248	1556.17	291.632	138.699	1297.4	270.345	-94.8193	1462.44	250.895	-142.705	1257.88	205.871	144.462	1353.67	453.82	-45.9404	1510.9	536.113	-50.9232	1315.91	548.107	-69.7316	1157.98	524.881	-210.705	1054.15	456.533	-269.306	1000.45	516.221	-247.478	963.226	496.079	-318.303	948.046
1080	0	306.897	-193.376	1692.95	221.078	-177.382	1694.21	330.518	1.7868	1691.88	218.33	-2.30246	1694.03	270.504	37.7011	1553.76	290.61	128.256	1295.19	268.894	-106.173	1459.88	249.79	-153.67	1255.31	204.678	133.635	1351.27	452.396	-57.0433	1508.61	535.274	-62.3278	1313.86	548.069	-81.8084	1156.18	523.249	-224.655	1054.23	454.277	-283.814	1001.92	514.191	-262.813	964.027	493.831	-333.764	950.267
1081	0	305.349	-204.714	1689.92	219.603	-188.598	1691.34	328.818	-9.60122	1689.14	216.823	-13.5716	1691.36	269.629	26.8693	1551.24	289.453	117.587	1292.93	267.406	-117.099	1457.15	248.538	-164.623	1252.64	203.498	122.796	1348.84	450.948	-68.1419	1506.1	534.111	-73.8723	1311.61	546.908	-94.2515	1153.83	521.731	-238.3	1053.99	452.406	-298.022	1002.91	512.24	-277.797	964.507	491.537	-348.936	951.695
1082	0	303.685	-215.981	1686.97	217.934	-200.015	1688.15	327.196	-20.8477	1686.31	215.028	-24.9786	1688.3	267.763	15.8554	1548.55	287.952	106.512	1289.96	266.059	-127.902	1454.65	247.209	-176.019	1250.06	202.178	111.811	1345.81	449.321	-79.2296	1503.52	532.934	-85.083	1308.99	546.012	-106.462	1151.37	520.293	-251.658	1053.68	450.537	-311.994	1003.83	510.486	-292.61	964.958	489.551	-363.712	953.297
1083	0	301.863	-227.31	1683.66	216.003	-211.352	1685	325.311	-32.2332	1683.39	213.169	-36.2644	1685.39	265.879	4.90179	1545.52	286.679	95.7185	1286.84	264.348	-139.349	1451.7	245.924	-187.054	1247.36	200.55	100.604	1342.54	447.681	-90.1873	1500.9	531.544	-96.1933	1306.27	544.903	-118.49	1148.68	518.783	-264.946	1053.22	448.786	-325.715	1004.2	508.69	-307.002	964.952	487.47	-378.178	954.577
1084	0	299.833	-238.79	1680.41	214.218	-222.699	1681.57	323.399	-43.5434	1680.44	211.175	-47.7236	1682.32	263.943	-6.18411	1542.38	285.014	84.5726	1283.59	262.063	-149.701	1447.71	244.999	-197.695	1243.81	198.964	89.3438	1339.23	445.8	-101.157	1497.64	529.968	-106.989	1303.33	543.505	-130.395	1145.63	517.229	-277.902	1051.96	447.108	-339.1	1004.38	506.118	-320.78	964.692	485.613	-392.352	955.463
1085	0	297.93	-250.116	1677.31	212.028	-234.285	1678.25	321.294	-55.2057	1677.35	209.276	-59.0453	1679.22	262.299	-17.3401	1539.29	283.344	73.2448	1280.13	260.552	-160.774	1444.89	243.98	-208.875	1241.02	197.108	77.9351	1335.71	444.105	-112.055	1494.85	528.323	-117.943	1300.55	542.068	-142.143	1142.49	515.725	-290.545	1050.81	445.447	-352.401	1004.01	504.757	-334.655	963.918	483.841	-406.278	955.622
1086	0	295.795	-261.437	1674.21	209.797	-245.522	1675.03	319.03	-66.5411	1674.58	206.908	-70.4943	1676.42	259.836	-28.2312	1536.12	281.447	61.5491	1276.89	258.6	-172.019	1442.37	242.455	-220.671	1238.67	195.115	66.4004	1332.44	442.141	-122.913	1492.33	526.438	-128.686	1297.94	540.569	-153.849	1140.09	514.244	-303.054	1049.63	443.792	-365.319	1003.38	503.054	-347.928	963.059	482.347	-419.552	955.893
1087	0	293.276	-272.889	1670.98	207.224	-257.036	1671.63	316.663	-77.9381	1672.03	204.449	-81.8604	1673.52	257.822	-39.5069	1533.11	279.83	50.0704	1273.75	256.595	-183.61	1439.49	240.842	-232.69	1235.63	192.945	54.8239	1329.02	440.034	-133.831	1489.09	524.259	-139.978	1295.26	539.014	-165.311	1137.65	512.598	-315.314	1047.9	442.182	-378.028	1002.35	501.384	-360.922	962.003	480.794	-432.483	955.191
1088	0	290.643	-284.338	1667.76	204.799	-268.424	1668.31	314.281	-89.3915	1669.64	201.91	-93.3844	1670.71	255.567	-50.9568	1530.16	277.791	38.1926	1270.74	254.561	-195.27	1436.47	239.382	-244.585	1232.56	190.637	42.8862	1325.62	437.817	-145.007	1486.39	522.005	-150.932	1292.46	537.084	-176.832	1135.43	510.983	-327.337	1045.78	440.726	-390.403	1001.25	499.806	-373.47	960.719	479.551	-445.103	954.444
1089	0	288.028	-295.869	1665.33	201.97	-279.973	1665.61	311.726	-100.799	1667.16	199.198	-104.858	1667.7	252.576	-62.313	1527.11	275.919	26.3467	1267.84	252.371	-206.926	1434.1	237.81	-256.665	1230.2	188.483	31.115	1322.4	435.673	-156.049	1484.13	519.773	-161.64	1289.95	535.21	-187.927	1132.97	509.464	-339.012	1044.03	439.385	-402.559	999.439	498.392	-385.435	959.006	478.4	-457.243	953.093
1090	0	285.222	-307.319	1662.79	199.183	-291.399	1662.98	308.725	-112.229	1664.27	196.386	-116.221	1664.88	250.159	-74.0837	1524.05	273.902	14.2524	1264.59	250.66	-219.643	1432.68	235.988	-269.261	1227.79	186.209	19.1913	1319.16	433.384	-167.328	1481.61	517.424	-171.877	1287.52	533.017	-199.041	1130.72	507.877	-350.343	1042.15	437.971	-414.273	997.412	497.125	-396.977	957.247	477.244	-468.816	951.241
1091	0	282.148	-318.874	1660.36	196.279	-302.898	1660.42	305.256	-123.676	1661.63	193.322	-127.776	1661.83	247.281	-85.9556	1520.98	271.795	1.87502	1261.44	248.412	-231.823	1430.02	234.149	-281.662	1225.25	184.031	7.051	1315.97	430.834	-178.969	1479.22	514.843	-182.719	1284.89	530.722	-209.926	1128.03	506.284	-361.578	1039.84	436.642	-425.601	995.192	495.674	-408.286	954.68	476.288	-480.2	949.391
1092	0	279.143	-330.412	1658.22	193.131	-314.593	1657.87	302.264	-135.149	1658.99	190.176	-139.419	1659.09	244.781	-97.7034	1518.44	269.726	-10.5746	1258.71	245.756	-243.998	1427.44	232.077	-294.366	1222.53	181.766	-5.23346	1312.84	428.153	-190.743	1476.74	512.127	-193.565	1282.39	528.255	-220.825	1125.66	504.716	-372.468	1037.44	435.409	-436.853	992.545	494.418	-419.025	951.97	475.36	-491.037	946.693
1093	0	275.945	-342.173	1656.6	190.018	-326.227	1655.86	298.919	-146.817	1656.57	186.955	-151.056	1656.41	241.849	-109.926	1516.04	267.662	-22.9703	1256.08	242.959	-256.282	1425.26	229.816	-307.196	1220.55	179.704	-17.5941	1309.86	425.338	-202.897	1474.84	509.531	-204.269	1280.39	525.733	-231.56	1123.58	503.215	-383.005	1034.98	434.331	-447.64	989.683	493.261	-429.252	949.277	474.578	-501.427	943.752
1094	0	272.512	-353.992	1655.24	186.603	-338.11	1654.19	295.404	-158.615	1654.55	183.478	-162.882	1653.72	238.617	-122.311	1513.8	265.274	-35.6637	1253.82	239.889	-268.561	1423.3	227.456	-319.941	1218.36	177.454	-30.1414	1307.33	422.452	-215.171	1473.22	506.711	-215.457	1278.71	523.095	-242.315	1121.93	501.589	-393.392	1032.07	433.144	-458.044	986.484	492.116	-439.062	946.298	474.037	-511.348	940.228
1095	0	268.96	-365.93	1654.11	183.162	-350.078	1652.74	291.889	-170.51	1652.86	179.867	-174.902	1651.76	235.423	-134.698	1512.17	263.024	-48.5595	1251.78	237.1	-281.171	1421.51	225.005	-332.99	1216.47	175.248	-42.8863	1305.08	419.438	-227.649	1471.66	504.02	-226.88	1277.2	520.449	-252.934	1120.36	500.024	-403.627	1029.25	432.226	-468.181	983.169	491.014	-448.589	942.917	473.447	-520.919	936.737
1096	0	265.486	-377.947	1653.68	179.757	-361.911	1651.59	288.065	-182.541	1651.66	176.189	-186.929	1650.2	232.383	-147.296	1510.5	260.879	-61.6138	1250.46	234.414	-294.038	1420.14	222.401	-346.17	1215.37	172.865	-55.7795	1303.13	416.585	-240.143	1470.62	501.349	-238.439	1276.45	517.816	-263.731	1119.58	498.662	-413.423	1026.46	431.344	-478.034	979.287	490.611	-457.54	939.795	473.214	-529.953	933.02
1097	0	261.731	-389.968	1653.3	175.734	-374.188	1650.98	284.492	-194.616	1650.95	172.334	-199.047	1648.87	228.896	-159.835	1509.61	258.844	-75.0131	1249.06	231.381	-306.698	1419.23	219.609	-359.586	1214.75	170.525	-68.785	1301.61	413.518	-252.814	1470.1	498.773	-250.322	1276.21	515.068	-274.447	1118.91	497.262	-423.021	1023.78	430.432	-487.401	975.219	489.476	-466.041	936.456	472.82	-538.443	928.486
1098	0	257.636	-402.319	1653.1	172.206	-386.156	1649.92	280.344	-206.921	1650.39	168.477	-211.274	1647.85	225.618	-172.864	1508.7	256.87	-88.4173	1248.35	228.254	-319.473	1418.49	216.786	-373.214	1214	168.315	-81.7818	1300.51	410.327	-265.616	1469.57	495.984	-262.903	1276.08	512.66	-285.058	1118.91	496.094	-432.457	1020.83	429.29	-496.77	970.812	488.669	-474.041	932.884	472.691	-546.479	923.977
1099	0	253.566	-414.65	1653.15	168.153	-398.477	1649.8	276.481	-219.261	1650.56	164.558	-223.644	1647.19	222.562	-185.243	1508.34	254.757	-102.11	1247.66	225.174	-332.277	1418.31	213.876	-387.103	1214.04	165.899	-94.8698	1299.57	407.252	-278.163	1469.53	493.281	-275.579	1276.34	509.673	-296.155	1118.93	494.624	-441.674	1018.03	428.559	-505.129	965.87	487.789	-481.595	929.091	472.459	-553.809	918.503
1100	0	249.591	-427.052	1653.95	163.906	-410.953	1650.09	272.405	-231.712	1651.07	160.604	-235.894	1647.24	219.473	-197.735	1508	252.579	-115.418	1247.34	222.125	-345.032	1418.87	211.31	-400.749	1214.98	163.694	-107.961	1298.85	404.253	-290.399	1469.94	490.802	-288.369	1277.28	506.395	-307.284	1119.03	493.23	-450.652	1015.36	427.853	-513.36	961.464	487.301	-488.589	925.403	472.39	-560.466	912.935
1101	0	245.413	-439.506	1655.01	159.799	-423.308	1650.67	268.297	-244.105	1651.95	156.766	-248.281	1647.47	215.835	-209.945	1508.44	250.193	-128.8	1247.36	219.128	-357.751	1419.7	208.741	-414.535	1216.16	161.222	-121.094	1298.63	401.236	-302.461	1470.71	488.197	-301.346	1278.59	503.916	-318.383	1120.24	491.977	-459.279	1012.93	427.294	-521.049	957.054	486.213	-494.753	921.892	472.456	-566.736	907.925
1102	0	241.146	-452.018	1656.18	155.776	-435.675	1651.31	264.554	-256.575	1653.86	152.774	-260.663	1648.32	212.644	-222.6	1509.21	247.618	-141.956	1248.19	216.289	-370.375	1421.01	205.986	-428.626	1217.71	158.602	-134.364	1299.2	398.187	-314.329	1471.72	485.467	-314.511	1280.1	500.605	-329.827	1121.48	490.292	-467.85	1010.54	426.802	-528.42	952.558	486.618	-501.084	918.796	472.486	-572.562	902.498
1103	0	237.139	-464.585	1658.09	151.923	-447.929	1652.41	260.811	-269.059	1655.97	148.985	-273.06	1649.69	209.558	-235.09	1510.8	245.121	-155.089	1249.63	213.55	-382.972	1422.95	203.556	-442.481	1219.77	155.78	-147.562	1300.17	395.35	-326.062	1473.48	482.89	-327.417	1282.39	498.269	-341.032	1123.74	489.078	-476.192	1008.88	426.402	-535.223	948.324	485.856	-506.531	915.77	472.692	-577.652	897.566
1104	0	233.25	-476.884	1659.91	148.233	-460.01	1653.8	256.918	-281.458	1658.15	145.276	-285.323	1651.47	206.236	-247.485	1512.65	242.089	-168.061	1251.14	210.94	-395.436	1425.27	201.359	-456.09	1222.27	152.728	-160.954	1301.47	392.605	-337.364	1475.84	480.478	-339.917	1285.22	495.662	-352.329	1126.73	488.236	-484.087	1007.83	426.242	-541.158	944.242	485.874	-511.685	913.629	472.879	-582.229	892.958
1105	0	229.252	-489.358	1661.95	144.46	-472.248	1655.22	253.337	-293.776	1660.74	141.572	-297.529	1653.24	202.748	-259.948	1514.62	239.031	-180.729	1253.16	208.406	-407.904	1427.35	199.426	-469.485	1224.75	149.279	-174.054	1303.18	389.755	-348.52	1478.24	477.841	-352.312	1288.02	492.975	-363.646	1129.75	486.975	-491.828	1006.94	425.86	-546.896	940.478	486.331	-516.75	911.9	472.694	-586.447	888.392
1106	0	225.505	-501.687	1664.08	140.873	-484.411	1656.89	249.792	-306.019	1663.42	138.057	-309.819	1655.07	199.422	-272.084	1516.39	235.853	-192.844	1255.41	206.095	-420.298	1429.67	197.176	-483.635	1227.46	145.775	-187.138	1304.88	386.91	-359.504	1480.53	475.233	-364.286	1290.83	490.577	-374.614	1132.84	485.736	-499.309	1006.55	425.617	-552.237	937.222	486.506	-521.227	910.756	472.889	-590.191	884.123
1107	0	222.285	-513.72	1666.84	137.57	-496.346	1659.16	246.531	-318.073	1666.15	134.826	-321.748	1657.21	196.299	-284.134	1518.47	232.396	-205.701	1257.14	204.099	-432.438	1432.38	196.021	-496.192	1230.54	142.068	-200.056	1306.85	384.399	-370.163	1483.4	472.989	-375.353	1294.16	488.112	-385.269	1136.23	484.857	-506.557	1007.22	425.566	-557.003	935.049	487.669	-526.017	910.267	473.348	-593.431	880.555
1108	0	218.968	-525.656	1669.33	134.405	-508.189	1661.24	243.32	-329.897	1668.54	131.768	-333.556	1659.16	193.134	-296.178	1520.68	229.085	-217.582	1259.39	202.303	-444.538	1435	194.818	-508.776	1233.38	138.042	-212.92	1309	381.948	-380.664	1486.33	470.722	-386.291	1297.25	485.824	-395.418	1139.48	483.877	-513.433	1007.79	425.575	-561.495	933.151	488.142	-530.461	910.371	473.552	-596.678	877.742
1109	0	216.036	-537.421	1671.7	131.479	-520.02	1663.26	240.303	-341.619	1670.94	128.79	-345.467	1661.01	190.141	-308.078	1522.81	225.541	-229.796	1261.3	200.321	-456.591	1437.24	193.704	-521.083	1235.74	134.201	-225.51	1311.18	379.426	-391.211	1488.84	468.403	-396.772	1299.88	483.755	-405.128	1142.67	482.824	-520.571	1008.7	424.99	-565.884	931.518	489.503	-535.386	910.631	473.651	-599.855	874.823
1110	0	213.337	-549.091	1674.21	128.995	-531.693	1665.61	237.618	-353.197	1673.64	126.154	-357.103	1663.32	187.075	-319.739	1524.81	222.33	-241.534	1263.7	198.773	-468.429	1439.53	192.862	-533.129	1238.08	130.229	-237.95	1313.65	377.25	-401.622	1491.39	466.359	-406.747	1302.41	481.822	-414.194	1145.65	481.753	-526.883	1009.28	425.09	-570.018	930.479	490.138	-540.077	911.619	473.457	-602.894	872.553
1111	0	211.102	-560.618	1677.12	126.614	-543.139	1668	235.106	-364.612	1676.21	123.639	-368.615	1665.55	184.926	-331.423	1527.56	219.067	-253.073	1266.06	197.394	-480.046	1442.17	192.28	-544.773	1240.75	126.611	-250.242	1316.11	375.175	-411.966	1494.13	464.673	-416	1305.28	480.262	-422.715	1148.63	481.436	-533.098	1010.76	425.079	-573.861	930.196	491.747	-545.069	913.258	473.448	-605.878	871.115
1112	0	208.97	-571.85	1679.77	124.518	-554.609	1670.56	232.702	-375.848	1678.52	121.38	-379.963	1667.79	182.278	-343.233	1530.3	216.059	-264.442	1268.59	195.992	-491.494	1444.47	191.539	-556.158	1243.11	123.027	-262.174	1318.8	373.27	-422.396	1496.78	462.919	-424.947	1307.95	479.02	-430.623	1151.58	481.034	-539.25	1012.45	425.028	-577.63	930.157	492.749	-550.006	914.871	473.286	-608.799	870.069
1113	0	207.026	-583.157	1682.19	122.672	-565.952	1672.76	230.634	-387.001	1681.21	119.214	-391.456	1670.14	179.845	-354.573	1532.61	213.143	-275.774	1271.13	194.631	-502.962	1446.73	190.873	-567.351	1245.14	119.749	-273.923	1321.21	371.384	-432.734	1499.24	461.393	-433.487	1310.26	477.732	-438.087	1154.46	480.519	-545.173	1013.69	424.925	-581.461	930.304	493.749	-554.88	916.275	473.331	-611.799	869.155
1114	0	205.49	-594.435	1685.02	121.117	-577.138	1675.36	228.779	-398.004	1683.87	117.388	-402.598	1672.63	177.78	-365.874	1534.99	210.562	-286.809	1273.37	193.41	-514.122	1449.05	190.471	-578.201	1247.41	116.815	-285.526	1324.15	369.867	-442.96	1501.7	460.202	-441.471	1312.93	476.811	-445.167	1157.18	480.586	-550.724	1015.35	425.016	-585.241	930.798	494.686	-559.513	918.354	473.3	-614.762	868.908
1115	0	204.15	-605.194	1687.39	119.655	-588.27	1677.99	227.072	-408.985	1686.38	115.697	-413.594	1675.26	175.784	-377.06	1537.48	207.856	-297.872	1276	192.117	-525.104	1451.42	189.918	-588.969	1249.67	113.989	-296.889	1326.42	368.204	-453.07	1504.14	459.181	-449.062	1315.53	475.843	-451.988	1159.75	480.177	-555.916	1016.77	425.004	-589.686	931.813	495.397	-563.992	920.27	473.393	-617.993	869.427
1116	0	202.798	-616.212	1689.7	118.47	-599.291	1680.45	225.483	-419.841	1688.66	114.163	-424.724	1677.68	174.049	-388.023	1539.88	205.377	-308.846	1278.15	190.865	-536.105	1453.69	189.201	-599.718	1251.77	111.561	-308.168	1328.99	366.6	-463.242	1506.35	457.619	-456.671	1317.65	475.024	-458.447	1162.36	480.046	-561.098	1018.18	424.686	-593.525	931.967	495.664	-568.477	921.86	473.475	-621.167	869.805
1117	0	201.738	-627.245	1692.08	117.421	-610.36	1682.87	224.294	-430.623	1691.38	112.923	-435.806	1680.08	172.421	-398.777	1542.18	203.128	-319.683	1280.41	189.691	-546.777	1455.8	188.549	-610.398	1253.96	109.343	-319.33	1331.54	365.062	-473.164	1508.48	456.42	-463.855	1319.93	474.126	-464.744	1164.93	480.435	-565.958	1019.81	425.556	-597.491	932.815	496.154	-572.364	923.285	474.094	-624.355	870.497
1118	0	201.07	-637.906	1694.68	116.612	-621.121	1685.64	223.062	-441.329	1693.62	111.868	-446.637	1683.02	170.59	-409.642	1544.46	200.825	-330.556	1282.39	188.429	-557.58	1458.31	187.957	-621.029	1256.7	107.195	-330.45	1333.63	363.887	-482.972	1511.1	455.688	-470.668	1322.7	473.205	-471.021	1167.38	480.84	-570.341	1021.81	425.89	-601.389	934.481	496.666	-575.812	924.947	475.023	-627.417	871.857
1119	0	200.452	-648.689	1697.07	115.817	-631.936	1688.26	222.078	-451.922	1695.96	110.721	-457.366	1685.58	168.741	-420.146	1546.96	198.658	-341.164	1284.88	187.526	-567.972	1460.99	187.006	-631.812	1259.2	105.375	-341.467	1336.08	362.533	-492.71	1513.4	454.496	-477.589	1325.23	472.388	-477.142	1170.09	480.809	-574.94	1023.69	426.809	-605.685	936.233	496.964	-579.463	927.016	475.704	-631.71	873.592
1120	0	199.876	-659.355	1699.08	115.219	-642.666	1690.4	221.127	-462.473	1698.19	109.817	-468.125	1688.22	167.633	-430.773	1549.04	196.622	-351.862	1286.88	186.373	-578.507	1463.13	185.957	-642.658	1261.48	103.517	-352.485	1338.34	361.047	-502.487	1515.53	453.063	-484.662	1327.56	471.506	-482.996	1172.89	481.324	-579.345	1025.3	427.054	-610.014	937.345	497.333	-582.749	928.515	476.874	-634.442	874.413
1121	0	199.446	-669.934	1701.1	114.866	-653.37	1693.01	220.551	-472.879	1700.56	109.182	-478.819	1690.97	166.057	-441.134	1551.41	194.524	-362.325	1289.3	185.321	-589.055	1465.5	184.962	-653.353	1263.77	101.556	-363.365	1340.68	359.81	-512.161	1517.7	451.804	-491.692	1330.05	470.599	-488.94	1175.68	481.314	-583.72	1027	427.826	-614.607	939.104	497.77	-585.488	930.247	478.302	-637.738	875.811
1122	0	199.344	-680.232	1703.25	114.639	-663.863	1695.41	219.919	-483.317	1702.62	108.537	-489.287	1693.54	164.443	-451.58	1553.41	192.484	-372.737	1291.22	184.33	-599.478	1467.98	183.965	-663.941	1266.29	99.7949	-374.212	1342.79	358.568	-521.891	1520.2	450.668	-498.599	1332.64	469.647	-494.681	1178.58	482.183	-587.667	1029.12	428.951	-619.191	941.027	498.213	-588.466	932.121	479.847	-641.315	878.131
1123	0	199.223	-690.667	1705.13	114.418	-674.356	1697.91	219.408	-493.52	1704.74	108.044	-499.825	1696.08	163.041	-461.822	1555.62	190.619	-382.948	1293.55	183.262	-609.74	1470.01	182.905	-674.36	1268.54	97.7937	-384.95	1344.78	357.393	-531.591	1522.12	449.345	-505.791	1334.9	468.587	-500.484	1181.05	482.344	-592.272	1031.05	429.874	-624.187	942.788	497.77	-591.177	933.864	481.382	-644.99	879.838
1124	0	198.96	-701.157	1707.05	114.437	-684.91	1699.92	218.978	-503.794	1706.65	107.387	-510.369	1698.5	161.628	-472.022	1557.29	188.717	-393.575	1295.23	182.32	-620.108	1472.05	181.801	-684.802	1270.54	96.1356	-395.716	1346.96	356.077	-541.292	1524.01	448.061	-513.1	1337.1	467.442	-506.278	1183.57	482.736	-596.6	1032.66	431.143	-629.191	944.214	497.882	-594.338	935.678	483.004	-648.75	881.425
1125	0	199.253	-711.196	1708.92	114.347	-695.286	1702.25	218.487	-513.927	1707.97	107.169	-520.867	1700.56	160.606	-482.271	1559.37	186.917	-403.92	1296.86	181.473	-630.389	1474.11	180.897	-694.934	1272.61	94.37	-406.247	1348.63	355.131	-550.872	1525.89	446.932	-520.26	1339.33	466.31	-512.109	1185.76	483.275	-600.821	1034.53	432.426	-634.477	946.237	497.766	-597.61	936.945	484.926	-652.589	883.551
1126	0	199.337	-721.309	1710.55	114.244	-705.598	1704.19	218.139	-524.008	1709.59	106.691	-531.154	1702.42	159.472	-492.651	1561.48	185.185	-414.256	1298.63	180.607	-640.691	1476.03	179.996	-705.065	1274.47	92.6653	-416.894	1350.4	354.084	-560.578	1527.46	445.691	-527.75	1341.32	464.992	-518.061	1187.93	483.515	-605.355	1036.12	434.142	-639.924	947.834	497.597	-600.846	938.211	486.737	-656.675	885.696
1127	0	199.299	-731.665	1712.02	114.342	-716.14	1706.11	217.688	-534.149	1710.76	106.335	-541.567	1704.12	158.486	-502.843	1562.58	183.469	-424.702	1299.81	179.655	-651.017	1477.35	179.099	-715.131	1275.74	91.1152	-427.379	1352.13	353.032	-570.553	1528.74	444.378	-535.346	1342.86	463.608	-524.018	1189.79	483.634	-610.005	1037.21	435.219	-645.691	948.971	497.239	-604.571	939.396	488.081	-660.984	886.83
1128	0	199.432	-742.021	1713.58	114.433	-726.446	1707.71	217.516	-544.238	1712.12	105.954	-552.033	1705.69	157.682	-513.03	1564.07	181.767	-435.04	1301.48	179.05	-661.381	1478.88	178.399	-725.213	1277.1	89.7316	-437.791	1353.82	352.219	-580.449	1530	443.277	-543.005	1344.56	462.332	-530.177	1191.53	483.887	-614.861	1038.6	436.475	-651.629	950.283	496.801	-608.519	940.538	489.642	-665.153	888.035
1129	0	199.883	-752.107	1714.95	114.708	-736.82	1709.64	217.193	-554.36	1712.9	105.667	-562.389	1707.07	156.819	-523.563	1565.4	180.228	-445.384	1302.55	178.463	-671.697	1480.32	177.782	-735.303	1278.55	88.2385	-448.268	1355.22	351.609	-590.273	1531.46	442.288	-550.716	1346.23	460.913	-536.516	1193.36	484.136	-619.815	1040.1	437.849	-657.573	951.841	496.185	-612.664	941.627	491.046	-669.464	889.554
1130	0	199.969	-762.203	1715.99	114.7	-747.148	1710.95	216.806	-564.486	1713.62	105.373	-572.784	1708.12	155.902	-533.825	1566.27	178.605	-455.735	1303.69	177.848	-682.034	1481.36	177.158	-745.417	1279.57	86.7118	-458.653	1356.32	350.809	-600.231	1532.31	441.03	-558.577	1347.54	459.466	-543.046	1194.79	484.109	-625.145	1041.17	438.831	-663.816	952.792	495.606	-617.138	942.398	492.321	-673.984	890.474
[truncated: 69 more columns]

## Sheet: Sheet2
Devices
		025370 - Force			025370 - Moment			025370 - CoP			027571 - Force			027571 - Moment			027571 - CoP			037720 - Force			037720 - Moment			037720 - CoP
Frame	Sub Frame	Fx	Fy	Fz	Mx	My	Mz	Cx	Cy	Cz	Fx	Fy	Fz	Mx	My	Mz	Cx	Cy	Cz	Fx	Fy	Fz	Mx	My	Mz	Cx	Cy	Cz
		N	N	N	N.mm	N.mm	N.mm	mm	mm	mm	N	N	N	N.mm	N.mm	N.mm	mm	mm	mm	N	N	N	N.mm	N.mm	N.mm	mm	mm	mm
866	0	0	0	0	0	0	0	200	300	0	0	0	0	0	0	0	200	903	0	0	0	0	0	0	0	603	903	0
866	1	0	0	0	0	0	0	200	300	0	0	0	0	0	0	0	200	903	0	0	0	0	0	0	0	603	903	0
866	2	0	0	0	0	0	0	200	300	0	0	0	0	0	0	0	200	903	0	0	0	0	0	0	0	603	903	0
866	3	0	0	0	0	0	0	200	300	0	0	0	0	0	0	0	200	903	0	0	0	0	0	0	0	603	903	0
866	4	0	0	0	0	0	0	200	300	0	0	0	0	0	0	0	200	903	0	0	0	0	0	0	0	603	903	0
866	5	0	0	0	0	0	0	200	300	0	0	0	0	0	0	0	200	903	0	0	0	0	0	0	0	603	903	0
866	6	0	0	0	0	0	0	200	300	0	0	0	0	0	0	0	200	903	0	0	0	0	0	0	0	603	903	0
866	7	0	0	0	0	0	0	200	300	0	0	0	0	0	0	0	200	903	0	0	0	0	0	0	0	603	903	0
866	8	0	0	0	0	0	0	200	300	0	0	0	0	0	0	0	200	903	0	0	0	0	0	0	0	603	903	0
866	9	0	0	0	0	0	0	200	300	0	0	0	0	0	0	0	200	903	0	0	0	0	0	0	0	603	903	0
867	0	0	0	0	0	0	0	200	300	0	0	0	0	0	0	0	200	903	0	0	0	0	0	0	0	603	903	0
867	1	0	0	0	0	0	0	200	300	0	0	0	0	0	0	0	200	903	0	0	0	0	0	0	0	603	903	0
867	2	0	0	0	0	0	0	200	300	0	0	0	0	0	0	0	200	903	0	0	0	0	0	0	0	603	903	0
867	3	0	0	0	0	0	0	200	300	0	0	0	0	0	0	0	200	903	0	0	0	0	0	0	0	603	903	0
867	4	0	0	0	0	0	0	200	300	0	0	0	0	0	0	0	200	903	0	0	0	0	0	0	0	603	903	0
867	5	0	0	0	0	0	0	200	300	0	0	0	0	0	0	0	200	903	0	0	0	0	0	0	0	603	903	0
867	6	0	0	0	0	0	0	200	300	0	0	0	0	0	0	0	200	903	0	0	0	0	0	0	0	603	903	0
867	7	0	0	0	0	0	0	200	300	0	0	0	0	0	0	0	200	903	0	0	0	0	0	0	0	603	903	0
867	8	0	0	0	0	0	0	200	300	0	0	0	0	0	0	0	200	903	0	0	0	0	0	0	0	603	903	0
867	9	0	0	0	0	0	0	200	300	0	0	0	0	0	0	0	200	903	0	0	0	0	0	0	0	603	903	0
868	0	0	0	0	0	0	0	200	300	0	0	0	0	0	0	0	200	903	0	0	0	0	0	0	0	603	903	0
868	1	0	0	0	0	0	0	200	300	0	0	0	0	0	0	0	200	903	0	0	0	0	0	0	0	603	903	0
868	2	0	0	0	0	0	0	200	300	0	0	0	0	0	0	0	200	903	0	0	0	0	0	0	0	603	903	0
868	3	0	0	0	0	0	0	200	300	0	0	0	0	0	0	0	200	903	0	0	0	0	0	0	0	603	903	0
868	4	0	0	0	0	0	0	200	300	0	0	0	0	0	0	0	200	903	0	0	0	0	0	0	0	603	903	0
868	5	0	0	0	0	0	0	200	300	0	0	0	0	0	0	0	200	903	0	0	0	0	0	0	0	603	903	0
868	6	0	0	0	0	0	0	200	300	0	0	0	0	0	0	0	200	903	0	0	0	0	0	0	0	603	903	0
868	7	0	0	0	0	0	0	200	300	0	0	0	0	0	0	0	200	903	0	0	0	0	0	0	0	603	903	0
868	8	0	0	0	0	0	0	200	300	0	0	0	0	0	0	0	200	903	0	0	0	0	0	0	0	603	903	0
868	9	0	0	0	0	0	0	200	300	0	0	0	0	0	0	0	200	903	0	0	0	0	0	0	0	603	903	0
869	0	0	0	0	0	0	0	200	300	0	0	0	0	0	0	0	200	903	0	0	0	0	0	0	0	603	903	0
869	1	0	0	0	0	0	0	200	300	0	0	0	0	0	0	0	200	903	0	0	0	0	0	0	0	603	903	0
869	2	0	0	0	0	0	0	200	300	0	0	0	0	0	0	0	200	903	0	0	0	0	0	0	0	603	903	0
869	3	0	0	0	0	0	0	200	300	0	0	0	0	0	0	0	200	903	0	0	0	0	0	0	0	603	903	0
869	4	0	0	0	0	0	0	200	300	0	0	0	0	0	0	0	200	903	0	0	0	0	0	0	0	603	903	0
869	5	0	0	0	0	0	0	200	300	0	0	0	0	0	0	0	200	903	0	0	0	0	0	0	0	603	903	0
869	6	0	0	0	0	0	0	200	300	0	0	0	0	0	0	0	200	903	0	0	0	0	0	0	0	603	903	0
869	7	0	0	0	0	0	0	200	300	0	0	0	0	0	0	0	200	903	0	0	0	0	0	0	0	603	903	0
869	8	0	0	0	0	0	0	200	300	0	0	0	0	0	0	0	200	903	0	0	0	0	0	0	0	603	903	0
869	9	0	0	0	0	0	0	200	300	0	0	0	0	0	0	0	200	903	0	0	0	0	0	0	0	603	903	0
870	0	0	0	0	0	0	0	200	300	0	0	0	0	0	0	0	200	903	0	0	0	0	0	0	0	603	903	0
870	1	0	0	0	0	0	0	200	300	0	0	0	0	0	0	0	200	903	0	0	0	0	0	0	0	603	903	0
870	2	0	0	0	0	0	0	200	300	0	0	0	0	0	0	0	200	903	0	0	0	0	0	0	0	603	903	0
870	3	0	0	0	0	0	0	200	300	0	0	0	0	0	0	0	200	903	0	0	0	0	0	0	0	603	903	0
870	4	0	0	0	0	0	0	200	300	0	0	0	0	0	0	0	200	903	0	0	0	0	0	0	0	603	903	0
870	5	0	0	0	0	0	0	200	300	0	0	0	0	0	0	0	200	903	0	0	0	0	0	0	0	603	903	0
870	6	0	0	0	0	0	0	200	300	0	0	0	0	0	0	0	200	903	0	0	0	0	0	0	0	603	903	0
870	7	0	0	0	0	0	0	200	300	0	0	0	0	0	0	0	200	903	0	0	0	0	0	0	0	603	903	0
870	8	0	0	0	0	0	0	200	300	0	0	0	0	0	0	0	200	903	0	0	0	0	0	0	0	603	903	0
870	9	0	0	0	0	0	0	200	300	0	0	0	0	0	0	0	200	903	0	0	0	0	0	0	0	603	903	0
871	0	0	0	0	0	0	0	200	300	0	0	0	0	0	0	0	200	903	0	0	0	0	0	0	0	603	903	0
871	1	0	0	0	0	0	0	200	300	0	0	0	0	0	0	0	200	903	0	0	0	0	0	0	0	603	903	0
871	2	0	0	0	0	0	0	200	300	0	0	0	0	0	0	0	200	903	0	0	0	0	0	0	0	603	903	0
871	3	0	0	0	0	0	0	200	300	0	0	0	0	0	0	0	200	903	0	0	0	0	0	0	0	603	903	0
871	4	0	0	0	0	0	0	200	300	0	0	0	0	0	0	0	200	903	0	0	0	0	0	0	0	603	903	0
871	5	0	0	0	0	0	0	200	300	0	0	0	0	0	0	0	200	903	0	0	0	0	0	0	0	603	903	0
871	6	0	0	0	0	0	0	200	300	0	0	0	0	0	0	0	200	903	0	0	0	0	0	0	0	603	903	0
871	7	0	0	0	0	0	0	200	300	0	0	0	0	0	0	0	200	903	0	0	0	0	0	0	0	603	903	0
871	8	0	0	0	0	0	0	200	300	0	0	0	0	0	0	0	200	903	0	0	0	0	0	0	0	603	903	0
871	9	0	0	0	0	0	0	200	300	0	0	0	0	0	0	0	200	903	0	0	0	0	0	0	0	603	903	0
872	0	0	0	0	0	0	0	200	300	0	0	0	0	0	0	0	200	903	0	0	0	0	0	0	0	603	903	0
872	1	0	0	0	0	0	0	200	300	0	0	0	0	0	0	0	200	903	0	0	0	0	0	0	0	603	903	0
872	2	0	0	0	0	0	0	200	300	0	0	0	0	0	0	0	200	903	0	0	0	0	0	0	0	603	903	0
872	3	0	0	0	0	0	0	200	300	0	0	0	0	0	0	0	200	903	0	0	0	0	0	0	0	603	903	0
872	4	0	0	0	0	0	0	200	300	0	0	0	0	0	0	0	200	903	0	0	0	0	0	0	0	603	903	0
872	5	0	0	0	0	0	0	200	300	0	0	0	0	0	0	0	200	903	0	0	0	0	0	0	0	603	903	0
872	6	0	0	0	0	0	0	200	300	0	0	0	0	0	0	0	200	903	0	0	0	0	0	0	0	603	903	0
872	7	0	0	0	0	0	0	200	300	0	0	0	0	0	0	0	200	903	0	0	0	0	0	0	0	603	903	0
872	8	0	0	0	0	0	0	200	300	0	0	0	0	0	0	0	200	903	0	0	0	0	0	0	0	603	903	0
872	9	0	0	0	0	0	0	200	300	0	0	0	0	0	0	0	200	903	0	0	0	0	0	0	0	603	903	0
873	0	0	0	0	0	0	0	200	300	0	0	0	0	0	0	0	200	903	0	0	0	0	0	0	0	603	903	0
873	1	0	0	0	0	0	0	200	300	0	0	0	0	0	0	0	200	903	0	0	0	0	0	0	0	603	903	0
873	2	0	0	0	0	0	0	200	300	0	0	0	0	0	0	0	200	903	0	0	0	0	0	0	0	603	903	0
873	3	0	0	0	0	0	0	200	300	0	0	0	0	0	0	0	200	903	0	0	0	0	0	0	0	603	903	0
873	4	0	0	0	0	0	0	200	300	0	0	0	0	0	0	0	200	903	0	0	0	0	0	0	0	603	903	0
873	5	0	0	0	0	0	0	200	300	0	0	0	0	0	0	0	200	903	0	0	0	0	0	0	0	603	903	0
873	6	0	0	0	0	0	0	200	300	0	0	0	0	0	0	0	200	903	0	0	0	0	0	0	0	603	903	0
873	7	0	0	0	0	0	0	200	300	0	0	0	0	0	0	0	200	903	0	0	0	0	0	0	0	603	903	0
873	8	0	0	0	0	0	0	200	300	0	0	0	0	0	0	0	200	903	0	0	0	0	0	0	0	603	903	0
873	9	0	0	0	0	0	0	200	300	0	0	0	0	0	0	0	200	903	0	0	0	0	0	0	0	603	903	0
874	0	0	0	0	0	0	0	200	300	0	0	0	0	0	0	0	200	903	0	0	0	0	0	0	0	603	903	0
874	1	0	0	0	0	0	0	200	300	0	0	0	0	0	0	0	200	903	0	0	0	0	0	0	0	603	903	0
874	2	0	0	0	0	0	0	200	300	0	0	0	0	0	0	0	200	903	0	0	0	0	0	0	0	603	903	0
874	3	0	0	0	0	0	0	200	300	0	0	0	0	0	0	0	200	903	0	0	0	0	0	0	0	603	903	0
874	4	0	0	0	0	0	0	200	300	0	0	0	0	0	0	0	200	903	0	0	0	0	0	0	0	603	903	0
874	5	0	0	0	0	0	0	200	300	0	0	0	0	0	0	0	200	903	0	0	0	0	0	0	0	603	903	0
874	6	0	0	0	0	0	0	200	300	0	0	0	0	0	0	0	200	903	0	0	0	0	0	0	0	603	903	0
874	7	0	0	0	0	0	0	200	300	0	0	0	0	0	0	0	200	903	0	0	0	0	0	0	0	603	903	0
874	8	0	0	0	0	0	0	200	300	0	0	0	0	0	0	0	200	903	0	0	0	0	0	0	0	603	903	0
874	9	0	0	0	0	0	0	200	300	0	0	0	0	0	0	0	200	903	0	0	0	0	0	0	0	603	903	0
875	0	0	0	0	0	0	0	200	300	0	0	0	0	0	0	0	200	903	0	0	0	0	0	0	0	603	903	0
875	1	0	0	0	0	0	0	200	300	0	0	0	0	0	0	0	200	903	0	0	0	0	0	0	0	603	903	0
875	2	0	0	0	0	0	0	200	300	0	0	0	0	0	0	0	200	903	0	0	0	0	0	0	0	603	903	0
875	3	0	0	0	0	0	0	200	300	0	0	0	0	0	0	0	200	903	0	0	0	0	0	0	0	603	903	0
875	4	0	0	0	0	0	0	200	300	0	0	0	0	0	0	0	200	903	0	0	0	0	0	0	0	603	903	0
875	5	0	0	0	0	0	0	200	300	0	0	0	0	0	0	0	200	903	0	0	0	0	0	0	0	603	903	0
875	6	0	0	0	0	0	0	200	300	0	0	0	0	0	0	0	200	903	0	0	0	0	0	0	0	603	903	0
875	7	0	0	0	0	0	0	200	300	0	0	0	0	0	0	0	200	903	0	0	0	0	0	0	0	603	903	0
875	8	0	0	0	0	0	0	200	300	0	0	0	0	0	0	0	200	903	0	0	0	0	0	0	0	603	903	0
875	9	0	0	0	0	0	0	200	300	0	0	0	0	0	0	0	200	903	0	0	0	0	0	0	0	603	903	0
876	0	0	0	0	0	0	0	200	300	0	0	0	0	0	0	0	200	903	0	0	0	0	0	0	0	603	903	0
876	1	0	0	0	0	0	0	200	300	0	0	0	0	0	0	0	200	903	0	0	0	0	0	0	0	603	903	0
876	2	0	0	0	0	0	0	200	300	0	0	0	0	0	0	0	200	903	0	0	0	0	0	0	0	603	903	0
876	3	0	0	0	0	0	0	200	300	0	0	0	0	0	0	0	200	903	0	0	0	0	0	0	0	603	903	0
876	4	0	0	0	0	0	0	200	300	0	0	0	0	0	0	0	200	903	0	0	0	0	0	0	0	603	903	0
876	5	0	0	0	0	0	0	200	300	0	0	0	0	0	0	0	200	903	0	0	0	0	0	0	0	603	903	0
876	6	0	0	0	0	0	0	200	300	0	0	0	0	0	0	0	200	903	0	0	0	0	0	0	0	603	903	0
876	7	0	0	0	0	0	0	200	300	0	0	0	0	0	0	0	200	903	0	0	0	0	0	0	0	603	903	0
876	8	0	0	0	0	0	0	200	300	0	0	0	0	0	0	0	200	903	0	0	0	0	0	0	0	603	903	0
876	9	0	0	0	0	0	0	200	300	0	0	0	0	0	0	0	200	903	0	0	0	0	0	0	0	603	903	0
877	0	0	0	0	0	0	0	200	300	0	0	0	0	0	0	0	200	903	0	0	0	0	0	0	0	603	903	0
877	1	0	0	0	0	0	0	200	300	0	0	0	0	0	0	0	200	903	0	0	0	0	0	0	0	603	903	0
877	2	0	0	0	0	0	0	200	300	0	0	0	0	0	0	0	200	903	0	0	0	0	0	0	0	603	903	0
877	3	0	0	0	0	0	0	200	300	0	0	0	0	0	0	0	200	903	0	0	0	0	0	0	0	603	903	0
877	4	0	0	0	0	0	0	200	300	0	0	0	0	0	0	0	200	903	0	0	0	0	0	0	0	603	903	0
877	5	0	0	0	0	0	0	200	300	0	0	0	0	0	0	0	200	903	0	0	0	0	0	0	0	603	903	0
877	6	0	0	0	0	0	0	200	300	0	0	0	0	0	0	0	200	903	0	0	0	0	0	0	0	603	903	0
877	7	0	0	0	0	0	0	200	300	0	0	0	0	0	0	0	200	903	0	0	0	0	0	0	0	603	903	0
877	8	0	0	0	0	0	0	200	300	0	0	0	0	0	0	0	200	903	0	0	0	0	0	0	0	603	903	0
877	9	0	0	0	0	0	0	200	300	0	0	0	0	0	0	0	200	903	0	0	0	0	0	0	0	603	903	0
878	0	0	0	0	0	0	0	200	300	0	0	0	0	0	0	0	200	903	0	0	0	0	0	0	0	603	903	0
878	1	0	0	0	0	0	0	200	300	0	0	0	0	0	0	0	200	903	0	0	0	0	0	0	0	603	903	0
878	2	0	0	0	0	0	0	200	300	0	0	0	0	0	0	0	200	903	0	0	0	0	0	0	0	603	903	0
878	3	0	0	0	0	0	0	200	300	0	0	0	0	0	0	0	200	903	0	0	0	0	0	0	0	603	903	0
878	4	0	0	0	0	0	0	200	300	0	0	0	0	0	0	0	200	903	0	0	0	0	0	0	0	603	903	0
878	5	0	0	0	0	0	0	200	300	0	0	0	0	0	0	0	200	903	0	0	0	0	0	0	0	603	903	0
878	6	0	0	0	0	0	0	200	300	0	0	0	0	0	0	0	200	903	0	0	0	0	0	0	0	603	903	0
878	7	0	0	0	0	0	0	200	300	0	0	0	0	0	0	0	200	903	0	0	0	0	0	0	0	603	903	0
878	8	0	0	0	0	0	0	200	300	0	0	0	0	0	0	0	200	903	0	0	0	0	0	0	0	603	903	0
878	9	0	0	0	0	0	0	200	300	0	0	0	0	0	0	0	200	903	0	0	0	0	0	0	0	603	903	0
879	0	0	0	0	0	0	0	200	300	0	0	0	0	0	0	0	200	903	0	0	0	0	0	0	0	603	903	0
879	1	0	0	0	0	0	0	200	300	0	0	0	0	0	0	0	200	903	0	0	0	0	0	0	0	603	903	0
879	2	0	0	0	0	0	0	200	300	0	0	0	0	0	0	0	200	903	0	0	0	0	0	0	0	603	903	0
879	3	0	0	0	0	0	0	200	300	0	0	0	0	0	0	0	200	903	0	0	0	0	0	0	0	603	903	0
879	4	0	0	0	0	0	0	200	300	0	0	0	0	0	0	0	200	903	0	0	0	0	0	0	0	603	903	0
879	5	0	0	0	0	0	0	200	300	0	0	0	0	0	0	0	200	903	0	0	0	0	0	0	0	603	903	0
879	6	0	0	0	0	0	0	200	300	0	0	0	0	0	0	0	200	903	0	0	0	0	0	0	0	603	903	0
879	7	0	0	0	0	0	0	200	300	0	0	0	0	0	0	0	200	903	0	0	0	0	0	0	0	603	903	0
879	8	0	0	0	0	0	0	200	300	0	0	0	0	0	0	0	200	903	0	0	0	0	0	0	0	603	903	0
879	9	0	0	0	0	0	0	200	300	0	0	0	0	0	0	0	200	903	0	0	0	0	0	0	0	603	903	0
880	0	0	0	0	0	0	0	200	300	0	0	0	0	0	0	0	200	903	0	0	0	0	0	0	0	603	903	0
880	1	0	0	0	0	0	0	200	300	0	0	0	0	0	0	0	200	903	0	0	0	0	0	0	0	603	903	0
880	2	0	0	0	0	0	0	200	300	0	0	0	0	0	0	0	200	903	0	0	0	0	0	0	0	603	903	0
880	3	0	0	0	0	0	0	200	300	0	0	0	0	0	0	0	200	903	0	0	0	0	0	0	0	603	903	0
880	4	0	0	0	0	0	0	200	300	0	0	0	0	0	0	0	200	903	0	0	0	0	0	0	0	603	903	0
880	5	0	0	0	0	0	0	200	300	0	0	0	0	0	0	0	200	903	0	0	0	0	0	0	0	603	903	0
880	6	0	0	0	0	0	0	200	300	0	0	0	0	0	0	0	200	903	0	0	0	0	0	0	0	603	903	0
880	7	0	0	0	0	0	0	200	300	0	0	0	0	0	0	0	200	903	0	0	0	0	0	0	0	603	903	0
880	8	0	0	0	0	0	0	200	300	0	0	0	0	0	0	0	200	903	0	0	0	0	0	0	0	603	903	0
880	9	0	0	0	0	0	0	200	300	0	0	0	0	0	0	0	200	903	0	0	0	0	0	0	0	603	903	0
881	0	0	0	0	0	0	0	200	300	0	0	0	0	0	0	0	200	903	0	0	0	0	0	0	0	603	903	0
881	1	0	0	0	0	0	0	200	300	0	0	0	0	0	0	0	200	903	0	0	0	0	0	0	0	603	903	0
881	2	0	0	0	0	0	0	200	300	0	0	0	0	0	0	0	200	903	0	0	0	0	0	0	0	603	903	0
881	3	0	0	0	0	0	0	200	300	0	0	0	0	0	0	0	200	903	0	0	0	0	0	0	0	603	903	0
881	4	0	0	0	0	0	0	200	300	0	0	0	0	0	0	0	200	903	0	0	0	0	0	0	0	603	903	0
881	5	0	0	0	0	0	0	200	300	0	0	0	0	0	0	0	200	903	0	0	0	0	0	0	0	603	903	0
881	6	0	0	0	0	0	0	200	300	0	0	0	0	0	0	0	200	903	0	0	0	0	0	0	0	603	903	0
881	7	0	0	0	0	0	0	200	300	0	0	0	0	0	0	0	200	903	0	0	0	0	0	0	0	603	903	0
881	8	0	0	0	0	0	0	200	300	0	0	0	0	0	0	0	200	903	0	0	0	0	0	0	0	603	903	0
881	9	0	0	0	0	0	0	200	300	0	0	0	0	0	0	0	200	903	0	0	0	0	0	0	0	603	903	0
882	0	0	0	0	0	0	0	200	300	0	0	0	0	0	0	0	200	903	0	0	0	0	0	0	0	603	903	0
882	1	0	0	0	0	0	0	200	300	0	0	0	0	0	0	0	200	903	0	0	0	0	0	0	0	603	903	0
882	2	0	0	0	0	0	0	200	300	0	0	0	0	0	0	0	200	903	0	0	0	0	0	0	0	603	903	0
882	3	0	0	0	0	0	0	200	300	0	0	0	0	0	0	0	200	903	0	0	0	0	0	0	0	603	903	0
882	4	0	0	0	0	0	0	200	300	0	0	0	0	0	0	0	200	903	0	0	0	0	0	0	0	603	903	0
882	5	0	0	0	0	0	0	200	300	0	0	0	0	0	0	0	200	903	0	0	0	0	0	0	0	603	903	0
882	6	0	0	0	0	0	0	200	300	0	0	0	0	0	0	0	200	903	0	0	0	0	0	0	0	603	903	0
882	7	0	0	0	0	0	0	200	300	0	0	0	0	0	0	0	200	903	0	0	0	0	0	0	0	603	903	0
882	8	0	0	0	0	0	0	200	300	0	0	0	0	0	0	0	200	903	0	0	0	0	0	0	0	603	903	0
882	9	0	0	0	0	0	0	200	300	0	0	0	0	0	0	0	200	903	0	0	0	0	0	0	0	603	903	0
883	0	0	0	0	0	0	0	200	300	0	0	0	0	0	0	0	200	903	0	0	0	0	0	0	0	603	903	0
883	1	0	0	0	0	0	0	200	300	0	0	0	0	0	0	0	200	903	0	0	0	0	0	0	0	603	903	0
883	2	0	0	0	0	0	0	200	300	0	0	0	0	0	0	0	200	903	0	0	0	0	0	0	0	603	903	0
883	3	0	0	0	0	0	0	200	300	0	0	0	0	0	0	0	200	903	0	0	0	0	0	0	0	603	903	0
883	4	0	0	0	0	0	0	200	300	0	0	0	0	0	0	0	200	903	0	0	0	0	0	0	0	603	903	0
883	5	0	0	0	0	0	0	200	300	0	0	0	0	0	0	0	200	903	0	0	0	0	0	0	0	603	903	0
883	6	0	0	0	0	0	0	200	300	0	0	0	0	0	0	0	200	903	0	0	0	0	0	0	0	603	903	0
883	7	0	0	0	0	0	0	200	300	0	0	0	0	0	0	0	200	903	0	0	0	0	0	0	0	603	903	0
883	8	0	0	0	0	0	0	200	300	0	0	0	0	0	0	0	200	903	0	0	0	0	0	0	0	603	903	0
883	9	0	0	0	0	0	0	200	300	0	0	0	0	0	0	0	200	903	0	0	0	0	0	0	0	603	903	0
884	0	0	0	0	0	0	0	200	300	0	0	0	0	0	0	0	200	903	0	0	0	0	0	0	0	603	903	0
884	1	0	0	0	0	0	0	200	300	0	0	0	0	0	0	0	200	903	0	0	0	0	0	0	0	603	903	0
884	2	0	0	0	0	0	0	200	300	0	0	0	0	0	0	0	200	903	0	0	0	0	0	0	0	603	903	0
884	3	0	0	0	0	0	0	200	300	0	0	0	0	0	0	0	200	903	0	0	0	0	0	0	0	603	903	0
884	4	0	0	0	0	0	0	200	300	0	0	0	0	0	0	0	200	903	0	0	0	0	0	0	0	603	903	0
884	5	0	0	0	0	0	0	200	300	0	0	0	0	0	0	0	200	903	0	0	0	0	0	0	0	603	903	0
884	6	0	0	0	0	0	0	200	300	0	0	0	0	0	0	0	200	903	0	0	0	0	0	0	0	603	903	0
884	7	0	0	0	0	0	0	200	300	0	0	0	0	0	0	0	200	903	0	0	0	0	0	0	0	603	903	0
884	8	0	0	0	0	0	0	200	300	0	0	0	0	0	0	0	200	903	0	0	0	0	0	0	0	603	903	0
884	9	0	0	0	0	0	0	200	300	0	0	0	0	0	0	0	200	903	0	0	0	0	0	0	0	603	903	0
885	0	0	0	0	0	0	0	200	300	0	0	0	0	0	0	0	200	903	0	0	0	0	0	0	0	603	903	0
885	1	0	0	0	0	0	0	200	300	0	0	0	0	0	0	0	200	903	0	0	0	0	0	0	0	603	903	0
885	2	0	0	0	0	0	0	200	300	0	0	0	0	0	0	0	200	903	0	0	0	0	0	0	0	603	903	0
885	3	0	0	0	0	0	0	200	300	0	0	0	0	0	0	0	200	903	0	0	0	0	0	0	0	603	903	0
885	4	0	0	0	0	0	0	200	300	0	0	0	0	0	0	0	200	903	0	0	0	0	0	0	0	603	903	0
885	5	0	0	0	0	0	0	200	300	0	0	0	0	0	0	0	200	903	0	0	0	0	0	0	0	603	903	0
885	6	0	0	0	0	0	0	200	300	0	0	0	0	0	0	0	200	903	0	0	0	0	0	0	0	603	903	0
885	7	0	0	0	0	0	0	200	300	0	0	0	0	0	0	0	200	903	0	0	0	0	0	0	0	603	903	0
885	8	0	0	0	0	0	0	200	300	0	0	0	0	0	0	0	200	903	0	0	0	0	0	0	0	603	903	0
885	9	0	0	0	0	0	0	200	300	0	0	0	0	0	0	0	200	903	0	0	0	0	0	0	0	603	903	0
886	0	0	0	0	0	0	0	200	300	0	0	0	0	0	0	0	200	903	0	0	0	0	0	0	0	603	903	0
886	1	0	0	0	0	0	0	200	300	0	0	0	0	0	0	0	200	903	0	0	0	0	0	0	0	603	903	0
886	2	0	0	0	0	0	0	200	300	0	0	0	0	0	0	0	200	903	0	0	0	0	0	0	0	603	903	0
886	3	0	0	0	0	0	0	200	300	0	0	0	0	0	0	0	200	903	0	0	0	0	0	0	0	603	903	0
886	4	0	0	0	0	0	0	200	300	0	0	0	0	0	0	0	200	903	0	0	0	0	0	0	0	603	903	0
886	5	0	0	0	0	0	0	200	300	0	0	0	0	0	0	0	200	903	0	0	0	0	0	0	0	603	903	0
886	6	0	0	0	0	0	0	200	300	0	0	0	0	0	0	0	200	903	0	0	0	0	0	0	0	603	903	0
886	7	0	0	0	0	0	0	200	300	0	0	0	0	0	0	0	200	903	0	0	0	0	0	0	0	603	903	0
886	8	0	0	0	0	0	0	200	300	0	0	0	0	0	0	0	200	903	0	0	0	0	0	0	0	603	903	0
886	9	0	0	0	0	0	0	200	300	0	0	0	0	0	0	0	200	903	0	0	0	0	0	0	0	603	903	0
887	0	0	0	0	0	0	0	200	300	0	0	0	0	0	0	0	200	903	0	0	0	0	0	0	0	603	903	0
887	1	0	0	0	0	0	0	200	300	0	0	0	0	0	0	0	200	903	0	0	0	0	0	0	0	603	903	0
887	2	0	0	0	0	0	0	200	300	0	0	0	0	0	0	0	200	903	0	0	0	0	0	0	0	603	903	0
887	3	0	0	0	0	0	0	200	300	0	0	0	0	0	0	0	200	903	0	0	0	0	0	0	0	603	903	0
887	4	0	0	0	0	0	0	200	300	0	0	0	0	0	0	0	200	903	0	0	0	0	0	0	0	603	903	0
887	5	0	0	0	0	0	0	200	300	0	0	0	0	0	0	0	200	903	0	0	0	0	0	0	0	603	903	0
887	6	0	0	0	0	0	0	200	300	0	0	0	0	0	0	0	200	903	0	0	0	0	0	0	0	603	903	0
887	7	0	0	0	0	0	0	200	300	0	0	0	0	0	0	0	200	903	0	0	0	0	0	0	0	603	903	0
887	8	0	0	0	0	0	0	200	300	0	0	0	0	0	0	0	200	903	0	0	0	0	0	0	0	603	903	0
887	9	0	0	0	0	0	0	200	300	0	0	0	0	0	0	0	200	903	0	0	0	0	0	0	0	603	903	0
888	0	0	0	0	0	0	0	200	300	0	0	0	0	0	0	0	200	903	0	0	0	0	0	0	0	603	903	0
888	1	0	0	0	0	0	0	200	300	0	0	0	0	0	0	0	200	903	0	0	0	0	0	0	0	603	903	0
888	2	0	0	0	0	0	0	200	300	0	0	0	0	0	0	0	200	903	0	0	0	0	0	0	0	603	903	0
888	3	0	0	0	0	0	0	200	300	0	0	0	0	0	0	0	200	903	0	0	0	0	0	0	0	603	903	0
888	4	0	0	0	0	0	0	200	300	0	0	0	0	0	0	0	200	903	0	0	0	0	0	0	0	603	903	0
888	5	0	0	0	0	0	0	200	300	0	0	0	0	0	0	0	200	903	0	0	0	0	0	0	0	603	903	0
888	6	0	0	0	0	0	0	200	300	0	0	0	0	0	0	0	200	903	0	0	0	0	0	0	0	603	903	0
888	7	0	0	0	0	0	0	200	300	0	0	0	0	0	0	0	200	903	0	0	0	0	0	0	0	603	903	0
888	8	0	0	0	0	0	0	200	300	0	0	0	0	0	0	0	200	903	0	0	0	0	0	0	0	603	903	0
888	9	0	0	0	0	0	0	200	300	0	0	0	0	0	0	0	200	903	0	0	0	0	0	0	0	603	903	0
889	0	0	0	0	0	0	0	200	300	0	0	0	0	0	0	0	200	903	0	0	0	0	0	0	0	603	903	0
889	1	0	0	0	0	0	0	200	300	0	0	0	0	0	0	0	200	903	0	0	0	0	0	0	0	603	903	0
889	2	0	0	0	0	0	0	200	300	0	0	0	0	0	0	0	200	903	0	0	0	0	0	0	0	603	903	0
889	3	0	0	0	0	0	0	200	300	0	0	0	0	0	0	0	200	903	0	0	0	0	0	0	0	603	903	0
889	4	0	0	0	0	0	0	200	300	0	0	0	0	0	0	0	200	903	0	0	0	0	0	0	0	603	903	0
889	5	0	0	0	0	0	0	200	300	0	0	0	0	0	0	0	200	903	0	0	0	0	0	0	0	603	903	0
889	6	0	0	0	0	0	0	200	300	0	0	0	0	0	0	0	200	903	0	0	0	0	0	0	0	603	903	0
889	7	0	0	0	0	0	0	200	300	0	0	0	0	0	0	0	200	903	0	0	0	0	0	0	0	603	903	0
889	8	0	0	0	0	0	0	200	300	0	0	0	0	0	0	0	200	903	0	0	0	0	0	0	0	603	903	0
889	9	0	0	0	0	0	0	200	300	0	0	0	0	0	0	0	200	903	0	0	0	0	0	0	0	603	903	0
890	0	0	0	0	0	0	0	200	300	0	0	0	0	0	0	0	200	903	0	0	0	0	0	0	0	603	903	0
890	1	0	0	0	0	0	0	200	300	0	0	0	0	0	0	0	200	903	0	0	0	0	0	0	0	603	903	0
890	2	0	0	0	0	0	0	200	300	0	0	0	0	0	0	0	200	903	0	0	0	0	0	0	0	603	903	0
890	3	0	0	0	0	0	0	200	300	0	0	0	0	0	0	0	200	903	0	0	0	0	0	0	0	603	903	0
890	4	0	0	0	0	0	0	200	300	0	0	0	0	0	0	0	200	903	0	0	0	0	0	0	0	603	903	0
890	5	0	0	0	0	0	0	200	300	0	0	0	0	0	0	0	200	903	0	0	0	0	0	0	0	603	903	0
890	6	0	0	0	0	0	0	200	300	0	0	0	0	0	0	0	200	903	0	0	0	0	0	0	0	603	903	0
890	7	0	0	0	0	0	0	200	300	0	0	0	0	0	0	0	200	903	0	0	0	0	0	0	0	603	903	0
890	8	0	0	0	0	0	0	200	300	0	0	0	0	0	0	0	200	903	0	0	0	0	0	0	0	603	903	0
890	9	0	0	0	0	0	0	200	300	0	0	0	0	0	0	0	200	903	0	0	0	0	0	0	0	603	903	0
891	0	0	0	0	0	0	0	200	300	0	0	0	0	0	0	0	200	903	0	0	0	0	0	0	0	603	903	0
891	1	0	0	0	0	0	0	200	300	0	0	0	0	0	0	0	200	903	0	0	0	0	0	0	0	603	903	0
891	2	0	0	0	0	0	0	200	300	0	0	0	0	0	0	0	200	903	0	0	0	0	0	0	0	603	903	0
891	3	0	0	0	0	0	0	200	300	0	0	0	0	0	0	0	200	903	0	0	0	0	0	0	0	603	903	0
891	4	0	0	0	0	0	0	200	300	0	0	0	0	0	0	0	200	903	0	0	0	0	0	0	0	603	903	0
891	5	0	0	0	0	0	0	200	300	0	0	0	0	0	0	0	200	903	0	0	0	0	0	0	0	603	903	0
891	6	0	0	0	0	0	0	200	300	0	0	0	0	0	0	0	200	903	0	0	0	0	0	0	0	603	903	0
891	7	0	0	0	0	0	0	200	300	0	0	0	0	0	0	0	200	903	0	0	0	0	0	0	0	603	903	0
891	8	0	0	0	0	0	0	200	300	0	0	0	0	0	0	0	200	903	0	0	0	0	0	0	0	603	903	0
891	9	0	0	0	0	0	0	200	300	0	0	0	0	0	0	0	200	903	0	0	0	0	0	0	0	603	903	0
892	0	0	0	0	0	0	0	200	300	0	0	0	0	0	0	0	200	903	0	0	0	0	0	0	0	603	903	0
892	1	0	0	0	0	0	0	200	300	0	0	0	0	0	0	0	200	903	0	0	0	0	0	0	0	603	903	0
892	2	0	0	0	0	0	0	200	300	0	0	0	0	0	0	0	200	903	0	0	0	0	0	0	0	603	903	0
892	3	0	0	0	0	0	0	200	300	0	0	0	0	0	0	0	200	903	0	0	0	0	0	0	0	603	903	0
892	4	0	0	0	0	0	0	200	300	0	0	0	0	0	0	0	200	903	0	0	0	0	0	0	0	603	903	0
892	5	0	0	0	0	0	0	200	300	0	0	0	0	0	0	0	200	903	0	0	0	0	0	0	0	603	903	0
892	6	0	0	0	0	0	0	200	300	0	0	0	0	0	0	0	200	903	0	0	0	0	0	0	0	603	903	0
892	7	0	0	0	0	0	0	200	300	0	0	0	0	0	0	0	200	903	0	0	0	0	0	0	0	603	903	0
892	8	0	0	0	0	0	0	200	300	0	0	0	0	0	0	0	200	903	0	0	0	0	0	0	0	603	903	0
892	9	0	0	0	0	0	0	200	300	0	0	0	0	0	0	0	200	903	0	0	0	0	0	0	0	603	903	0
893	0	0	0	0	0	0	0	200	300	0	0	0	0	0	0	0	200	903	0	0	0	0	0	0	0	603	903	0
893	1	0	0	0	0	0	0	200	300	0	0	0	0	0	0	0	200	903	0	0	0	0	0	0	0	603	903	0
893	2	0	0	0	0	0	0	200	300	0	0	0	0	0	0	0	200	903	0	0	0	0	0	0	0	603	903	0
893	3	0	0	0	0	0	0	200	300	0	0	0	0	0	0	0	200	903	0	0	0	0	0	0	0	603	903	0
893	4	0	0	0	0	0	0	200	300	0	0	0	0	0	0	0	200	903	0	0	0	0	0	0	0	603	903	0
893	5	0	0	0	0	0	0	200	300	0	0	0	0	0	0	0	200	903	0	0	0	0	0	0	0	603	903	0
893	6	0	0	0	0	0	0	200	300	0	0	0	0	0	0	0	200	903	0	0	0	0	0	0	0	603	903	0
893	7	0	0	0	0	0	0	200	300	0	0	0	0	0	0	0	200	903	0	0	0	0	0	0	0	603	903	0
893	8	0	0	0	0	0	0	200	300	0	0	0	0	0	0	0	200	903	0	0	0	0	0	0	0	603	903	0
893	9	0	0	0	0	0	0	200	300	0	0	0	0	0	0	0	200	903	0	0	0	0	0	0	0	603	903	0
894	0	0	0	0	0	0	0	200	300	0	0	0	0	0	0	0	200	903	0	0	0	0	0	0	0	603	903	0
894	1	0	0	0	0	0	0	200	300	0	0	0	0	0	0	0	200	903	0	0	0	0	0	0	0	603	903	0
894	2	0	0	0	0	0	0	200	300	0	0	0	0	0	0	0	200	903	0	0	0	0	0	0	0	603	903	0
894	3	0	0	0	0	0	0	200	300	0	0	0	0	0	0	0	200	903	0	0	0	0	0	0	0	603	903	0
894	4	0	0	0	0	0	0	200	300	0	0	0	0	0	0	0	200	903	0	0	0	0	0	0	0	603	903	0
894	5	0	0	0	0	0	0	200	300	0	0	0	0	0	0	0	200	903	0	0	0	0	0	0	0	603	903	0
894	6	0	0	0	0	0	0	200	300	0	0	0	0	0	0	0	200	903	0	0	0	0	0	0	0	603	903	0
894	7	0	0	0	0	0	0	200	300	0	0	0	0	0	0	0	200	903	0	0	0	0	0	0	0	603	903	0
894	8	0	0	0	0	0	0	200	300	0	0	0	0	0	0	0	200	903	0	0	0	0	0	0	0	603	903	0
894	9	0	0	0	0	0	0	200	300	0	0	0	0	0	0	0	200	903	0	0	0	0	0	0	0	603	903	0
895	0	0	0	0	0	0	0	200	300	0	0	0	0	0	0	0	200	903	0	0	0	0	0	0	0	603	903	0
895	1	0	0	0	0	0	0	200	300	0	0	0	0	0	0	0	200	903	0	0	0	0	0	0	0	603	903	0
895	2	0	0	0	0	0	0	200	300	0	0	0	0	0	0	0	200	903	0	0	0	0	0	0	0	603	903	0
895	3	0	0	0	0	0	0	200	300	0	0	0	0	0	0	0	200	903	0	0	0	0	0	0	0	603	903	0
895	4	0	0	0	0	0	0	200	300	0	0	0	0	0	0	0	200	903	0	0	0	0	0	0	0	603	903	0
895	5	0	0	0	0	0	0	200	300	0	0	0	0	0	0	0	200	903	0	0	0	0	0	0	0	603	903	0
895	6	0	0	0	0	0	0	200	300	0	0	0	0	0	0	0	200	903	0	0	0	0	0	0	0	603	903	0
895	7	0	0	0	0	0	0	200	300	0	0	0	0	0	0	0	200	903	0	0	0	0	0	0	0	603	903	0
895	8	0	0	0	0	0	0	200	300	0	0	0	0	0	0	0	200	903	0	0	0	0	0	0	0	603	903	0
895	9	0	0	0	0	0	0	200	300	0	0	0	0	0	0	0	200	903	0	0	0	0	0	0	0	603	903	0
896	0	0	0	0	0	0	0	200	300	0	0	0	0	0	0	0	200	903	0	0	0	0	0	0	0	603	903	0
896	1	0	0	0	0	0	0	200	300	0	0	0	0	0	0	0	200	903	0	0	0	0	0	0	0	603	903	0
896	2	0	0	0	0	0	0	200	300	0	0	0	0	0	0	0	200	903	0	0	0	0	0	0	0	603	903	0
896	3	0	0	0	0	0	0	200	300	0	0	0	0	0	0	0	200	903	0	0	0	0	0	0	0	603	903	0
896	4	0	0	0	0	0	0	200	300	0	0	0	0	0	0	0	200	903	0	0	0	0	0	0	0	603	903	0
896	5	0	0	0	0	0	0	200	300	0	0	0	0	0	0	0	200	903	0	0	0	0	0	0	0	603	903	0
896	6	0	0	0	0	0	0	200	300	0	0	0	0	0	0	0	200	903	0	0	0	0	0	0	0	603	903	0
896	7	0	0	0	0	0	0	200	300	0	0	0	0	0	0	0	200	903	0	0	0	0	0	0	0	603	903	0
896	8	0	0	0	0	0	0	200	300	0	0	0	0	0	0	0	200	903	0	0	0	0	0	0	0	603	903	0
896	9	0	0	0	0	0	0	200	300	0	0	0	0	0	0	0	200	903	0	0	0	0	0	0	0	603	903	0
897	0	0	0	0	0	0	0	200	300	0	0	0	0	0	0	0	200	903	0	0	0	0	0	0	0	603	903	0
897	1	0	0	0	0	0	0	200	300	0	0	0	0	0	0	0	200	903	0	0	0	0	0	0	0	603	903	0
897	2	0	0	0	0	0	0	200	300	0	0	0	0	0	0	0	200	903	0	0	0	0	0	0	0	603	903	0
897	3	0	0	0	0	0	0	200	300	0	0	0	0	0	0	0	200	903	0	0	0	0	0	0	0	603	903	0
897	4	0	0	0	0	0	0	200	300	0	0	0	0	0	0	0	200	903	0	0	0	0	0	0	0	603	903	0
897	5	0	0	0	0	0	0	200	300	0	0	0	0	0	0	0	200	903	0	0	0	0	0	0	0	603	903	0
897	6	0	0	0	0	0	0	200	300	0	0	0	0	0	0	0	200	903	0	0	0	0	0	0	0	603	903	0
897	7	0	0	0	0	0	0	200	300	0	0	0	0	0	0	0	200	903	0	0	0	0	0	0	0	603	903	0
897	8	0	0	0	0	0	0	200	300	0	0	0	0	0	0	0	200	903	0	0	0	0	0	0	0	603	903	0
897	9	0	0	0	0	0	0	200	300	0	0	0	0	0	0	0	200	903	0	0	0	0	0	0	0	603	903	0
898	0	0	0	0	0	0	0	200	300	0	0	0	0	0	0	0	200	903	0	0	0	0	0	0	0	603	903	0
898	1	0	0	0	0	0	0	200	300	0	0	0	0	0	0	0	200	903	0	0	0	0	0	0	0	603	903	0
898	2	0	0	0	0	0	0	200	300	0	0	0	0	0	0	0	200	903	0	0	0	0	0	0	0	603	903	0
898	3	0	0	0	0	0	0	200	300	0	0	0	0	0	0	0	200	903	0	0	0	0	0	0	0	603	903	0
898	4	0	0	0	0	0	0	200	300	0	0	0	0	0	0	0	200	903	0	0	0	0	0	0	0	603	903	0
898	5	0	0	0	0	0	0	200	300	0	0	0	0	0	0	0	200	903	0	0	0	0	0	0	0	603	903	0
898	6	0	0	0	0	0	0	200	300	0	0	0	0	0	0	0	200	903	0	0	0	0	0	0	0	603	903	0
898	7	0	0	0	0	0	0	200	300	0	0	0	0	0	0	0	200	903	0	0	0	0	0	0	0	603	903	0
898	8	0	0	0	0	0	0	200	300	0	0	0	0	0	0	0	200	903	0	0	0	0	0	0	0	603	903	0
898	9	0	0	0	0	0	0	200	300	0	0	0	0	0	0	0	200	903	0	0	0	0	0	0	0	603	903	0
899	0	0	0	0	0	0	0	200	300	0	0	0	0	0	0	0	200	903	0	0	0	0	0	0	0	603	903	0
899	1	0	0	0	0	0	0	200	300	0	0	0	0	0	0	0	200	903	0	0	0	0	0	0	0	603	903	0
899	2	0	0	0	0	0	0	200	300	0	0	0	0	0	0	0	200	903	0	0	0	0	0	0	0	603	903	0
899	3	0	0	0	0	0	0	200	300	0	0	0	0	0	0	0	200	903	0	0	0	0	0	0	0	603	903	0
899	4	0	0	0	0	0	0	200	300	0	0	0	0	0	0	0	200	903	0	0	0	0	0	0	0	603	903	0
899	5	0	0	0	0	0	0	200	300	0	0	0	0	0	0	0	200	903	0	0	0	0	0	0	0	603	903	0
899	6	0	0	0	0	0	0	200	300	0	0	0	0	0	0	0	200	903	0	0	0	0	0	0	0	603	903	0
899	7	0	0	0	0	0	0	200	300	0	0	0	0	0	0	0	200	903	0	0	0	0	0	0	0	603	903	0
899	8	0	0	0	0	0	0	200	300	0	0	0	0	0	0	0	200	903	0	0	0	0	0	0	0	603	903	0
899	9	0	0	0	0	0	0	200	300	0	0	0	0	0	0	0	200	903	0	0	0	0	0	0	0	603	903	0
900	0	0	0	0	0	0	0	200	300	0	0	0	0	0	0	0	200	903	0	0	0	0	0	0	0	603	903	0
900	1	0	0	0	0	0	0	200	300	0	0	0	0	0	0	0	200	903	0	0	0	0	0	0	0	603	903	0
900	2	0	0	0	0	0	0	200	300	0	0	0	0	0	0	0	200	903	0	0	0	0	0	0	0	603	903	0
900	3	0	0	0	0	0	0	200	300	0	0	0	0	0	0	0	200	903	0	0	0	0	0	0	0	603	903	0
900	4	0	0	0	0	0	0	200	300	0	0	0	0	0	0	0	200	903	0	0	0	0	0	0	0	603	903	0
900	5	0	0	0	0	0	0	200	300	0	0	0	0	0	0	0	200	903	0	0	0	0	0	0	0	603	903	0
900	6	0	0	0	0	0	0	200	300	0	0	0	0	0	0	0	200	903	0	0	0	0	0	0	0	603	903	0
900	7	0	0	0	0	0	0	200	300	0	0	0	0	0	0	0	200	903	0	0	0	0	0	0	0	603	903	0
900	8	0	0	0	0	0	0	200	300	0	0	0	0	0	0	0	200	903	0	0	0	0	0	0	0	603	903	0
900	9	0	0	0	0	0	0	200	300	0	0	0	0	0	0	0	200	903	0	0	0	0	0	0	0	603	903	0
901	0	0	0	0	0	0	0	200	300	0	0	0	0	0	0	0	200	903	0	0	0	0	0	0	0	603	903	0
901	1	0	0	0	0	0	0	200	300	0	0	0	0	0	0	0	200	903	0	0	0	0	0	0	0	603	903	0
901	2	0	0	0	0	0	0	200	300	0	0	0	0	0	0	0	200	903	0	0	0	0	0	0	0	603	903	0
901	3	0	0	0	0	0	0	200	300	0	0	0	0	0	0	0	200	903	0	0	0	0	0	0	0	603	903	0
901	4	0	0	0	0	0	0	200	300	0	0	0	0	0	0	0	200	903	0	0	0	0	0	0	0	603	903	0
901	5	0	0	0	0	0	0	200	300	0	0	0	0	0	0	0	200	903	0	0	0	0	0	0	0	603	903	0
901	6	0	0	0	0	0	0	200	300	0	0	0	0	0	0	0	200	903	0	0	0	0	0	0	0	603	903	0
901	7	0	0	0	0	0	0	200	300	0	0	0	0	0	0	0	200	903	0	0	0	0	0	0	0	603	903	0
901	8	0	0	0	0	0	0	200	300	0	0	0	0	0	0	0	200	903	0	0	0	0	0	0	0	603	903	0
901	9	0	0	0	0	0	0	200	300	0	0	0	0	0	0	0	200	903	0	0	0	0	0	0	0	603	903	0
902	0	0	0	0	0	0	0	200	300	0	0	0	0	0	0	0	200	903	0	0	0	0	0	0	0	603	903	0
902	1	0	0	0	0	0	0	200	300	0	0	0	0	0	0	0	200	903	0	0	0	0	0	0	0	603	903	0
902	2	0	0	0	0	0	0	200	300	0	0	0	0	0	0	0	200	903	0	0	0	0	0	0	0	603	903	0
902	3	0	0	0	0	0	0	200	300	0	0	0	0	0	0	0	200	903	0	0	0	0	0	0	0	603	903	0
902	4	0	0	0	0	0	0	200	300	0	0	0	0	0	0	0	200	903	0	0	0	0	0	0	0	603	903	0
902	5	0	0	0	0	0	0	200	300	0	0	0	0	0	0	0	200	903	0	0	0	0	0	0	0	603	903	0
902	6	0	0	0	0	0	0	200	300	0	0	0	0	0	0	0	200	903	0	0	0	0	0	0	0	603	903	0
902	7	0	0	0	0	0	0	200	300	0	0	0	0	0	0	0	200	903	0	0	0	0	0	0	0	603	903	0
902	8	0	0	0	0	0	0	200	300	0	0	0	0	0	0	0	200	903	0	0	0	0	0	0	0	603	903	0
902	9	0	0	0	0	0	0	200	300	0	0	0	0	0	0	0	200	903	0	0	0	0	0	0	0	603	903	0
903	0	0	0	0	0	0	0	200	300	0	0	0	0	0	0	0	200	903	0	0	0	0	0	0	0	603	903	0
903	1	0	0	0	0	0	0	200	300	0	0	0	0	0	0	0	200	903	0	0	0	0	0	0	0	603	903	0
903	2	0	0	0	0	0	0	200	300	0	0	0	0	0	0	0	200	903	0	0	0	0	0	0	0	603	903	0
903	3	0	0	0	0	0	0	200	300	0	0	0	0	0	0	0	200	903	0	0	0	0	0	0	0	603	903	0
903	4	0	0	0	0	0	0	200	300	0	0	0	0	0	0	0	200	903	0	0	0	0	0	0	0	603	903	0
903	5	0	0	0	0	0	0	200	300	0	0	0	0	0	0	0	200	903	0	0	0	0	0	0	0	603	903	0
903	6	0	0	0	0	0	0	200	300	0	0	0	0	0	0	0	200	903	0	0	0	0	0	0	0	603	903	0
903	7	0	0	0	0	0	0	200	300	0	0	0	0	0	0	0	200	903	0	0	0	0	0	0	0	603	903	0
903	8	0	0	0	0	0	0	200	300	0	0	0	0	0	0	0	200	903	0	0	0	0	0	0	0	603	903	0
903	9	0	0	0	0	0	0	200	300	0	0	0	0	0	0	0	200	903	0	0	0	0	0	0	0	603	903	0
904	0	0	0	0	0	0	0	200	300	0	0	0	0	0	0	0	200	903	0	0	0	0	0	0	0	603	903	0
904	1	0	0	0	0	0	0	200	300	0	0	0	0	0	0	0	200	903	0	0	0	0	0	0	0	603	903	0
904	2	0	0	0	0	0	0	200	300	0	0	0	0	0	0	0	200	903	0	0	0	0	0	0	0	603	903	0
904	3	0	0	0	0	0	0	200	300	0	0	0	0	0	0	0	200	903	0	0	0	0	0	0	0	603	903	0
904	4	0	0	0	0	0	0	200	300	0	0	0	0	0	0	0	200	903	0	0	0	0	0	0	0	603	903	0
904	5	0	0	0	0	0	0	200	300	0	0	0	0	0	0	0	200	903	0	0	0	0	0	0	0	603	903	0
904	6	0	0	0	0	0	0	200	300	0	0	0	0	0	0	0	200	903	0	0	0	0	0	0	0	603	903	0
904	7	0	0	0	0	0	0	200	300	0	0	0	0	0	0	0	200	903	0	0	0	0	0	0	0	603	903	0
904	8	0	0	0	0	0	0	200	300	0	0	0	0	0	0	0	200	903	0	0	0	0	0	0	0	603	903	0
904	9	0	0	0	0	0	0	200	300	0	0	0	0	0	0	0	200	903	0	0	0	0	0	0	0	603	903	0
905	0	0	0	0	0	0	0	200	300	0	0	0	0	0	0	0	200	903	0	0	0	0	0	0	0	603	903	0
905	1	0	0	0	0	0	0	200	300	0	0	0	0	0	0	0	200	903	0	0	0	0	0	0	0	603	903	0
905	2	0	0	0	0	0	0	200	300	0	0	0	0	0	0	0	200	903	0	0	0	0	0	0	0	603	903	0
905	3	0	0	0	0	0	0	200	300	0	0	0	0	0	0	0	200	903	0	0	0	0	0	0	0	603	903	0
905	4	0	0	0	0	0	0	200	300	0	0	0	0	0	0	0	200	903	0	0	0	0	0	0	0	603	903	0
905	5	0	0	0	0	0	0	200	300	0	0	0	0	0	0	0	200	903	0	0	0	0	0	0	0	603	903	0
905	6	0	0	0	0	0	0	200	300	0	0	0	0	0	0	0	200	903	0	0	0	0	0	0	0	603	903	0
905	7	0	0	0	0	0	0	200	300	0	0	0	0	0	0	0	200	903	0	0	0	0	0	0	0	603	903	0
905	8	0	0	0	0	0	0	200	300	0	0	0	0	0	0	0	200	903	0	0	0	0	0	0	0	603	903	0
905	9	0	0	0	0	0	0	200	300	0	0	0	0	0	0	0	200	903	0	0	0	0	0	0	0	603	903	0
906	0	0	0	0	0	0	0	200	300	0	0	0	0	0	0	0	200	903	0	0	0	0	0	0	0	603	903	0
906	1	0	0	0	0	0	0	200	300	0	0	0	0	0	0	0	200	903	0	0	0	0	0	0	0	603	903	0
906	2	0	0	0	0	0	0	200	300	0	0	0	0	0	0	0	200	903	0	0	0	0	0	0	0	603	903	0
906	3	0	0	0	0	0	0	200	300	0	0	0	0	0	0	0	200	903	0	0	0	0	0	0	0	603	903	0
906	4	0	0	0	0	0	0	200	300	0	0	0	0	0	0	0	200	903	0	0	0	0	0	0	0	603	903	0
906	5	0	0	0	0	0	0	200	300	0	0	0	0	0	0	0	200	903	0	0	0	0	0	0	0	603	903	0
906	6	0	0	0	0	0	0	200	300	0	0	0	0	0	0	0	200	903	0	0	0	0	0	0	0	603	903	0
906	7	0	0	0	0	0	0	200	300	0	0	0	0	0	0	0	200	903	0	0	0	0	0	0	0	603	903	0
906	8	0	0	0	0	0	0	200	300	0	0	0	0	0	0	0	200	903	0	0	0	0	0	0	0	603	903	0
906	9	0	0	0	0	0	0	200	300	0	0	0	0	0	0	0	200	903	0	0	0	0	0	0	0	603	903	0
907	0	0	0	0	0	0	0	200	300	0	0	0	0	0	0	0	200	903	0	0	0	0	0	0	0	603	903	0
907	1	0	0	0	0	0	0	200	300	0	0	0	0	0	0	0	200	903	0	0	0	0	0	0	0	603	903	0
907	2	0	0	0	0	0	0	200	300	0	0	0	0	0	0	0	200	903	0	0	0	0	0	0	0	603	903	0
907	3	0	0	0	0	0	0	200	300	0	0	0	0	0	0	0	200	903	0	0	0	0	0	0	0	603	903	0
907	4	0	0	0	0	0	0	200	300	0	0	0	0	0	0	0	200	903	0	0	0	0	0	0	0	603	903	0
907	5	0	0	0	0	0	0	200	300	0	0	0	0	0	0	0	200	903	0	0	0	0	0	0	0	603	903	0
907	6	0	0	0	0	0	0	200	300	0	0	0	0	0	0	0	200	903	0	0	0	0	0	0	0	603	903	0
907	7	0	0	0	0	0	0	200	300	0	0	0	0	0	0	0	200	903	0	0	0	0	0	0	0	603	903	0
907	8	0	0	0	0	0	0	200	300	0	0	0	0	0	0	0	200	903	0	0	0	0	0	0	0	603	903	0
907	9	0	0	0	0	0	0	200	300	0	0	0	0	0	0	0	200	903	0	0	0	0	0	0	0	603	903	0
908	0	0	0	0	0	0	0	200	300	0	0	0	0	0	0	0	200	903	0	0	0	0	0	0	0	603	903	0
908	1	0	0	0	0	0	0	200	300	0	0	0	0	0	0	0	200	903	0	0	0	0	0	0	0	603	903	0
908	2	0	0	0	0	0	0	200	300	0	0	0	0	0	0	0	200	903	0	0	0	0	0	0	0	603	903	0
908	3	0	0	0	0	0	0	200	300	0	0	0	0	0	0	0	200	903	0	0	0	0	0	0	0	603	903	0
908	4	0	0	0	0	0	0	200	300	0	0	0	0	0	0	0	200	903	0	0	0	0	0	0	0	603	903	0
908	5	0	0	0	0	0	0	200	300	0	0	0	0	0	0	0	200	903	0	0	0	0	0	0	0	603	903	0
908	6	0	0	0	0	0	0	200	300	0	0	0	0	0	0	0	200	903	0	0	0	0	0	0	0	603	903	0
908	7	0	0	0	0	0	0	200	300	0	0	0	0	0	0	0	200	903	0	0	0	0	0	0	0	603	903	0
908	8	0	0	0	0	0	0	200	300	0	0	0	0	0	0	0	200	903	0	0	0	0	0	0	0	603	903	0
908	9	0	0	0	0	0	0	200	300	0	0	0	0	0	0	0	200	903	0	0	0	0	0	0	0	603	903	0
909	0	0	0	0	0	0	0	200	300	0	0	0	0	0	0	0	200	903	0	0	0	0	0	0	0	603	903	0
909	1	0	0	0	0	0	0	200	300	0	0	0	0	0	0	0	200	903	0	0	0	0	0	0	0	603	903	0
909	2	0	0	0	0	0	0	200	300	0	0	0	0	0	0	0	200	903	0	0	0	0	0	0	0	603	903	0
909	3	0	0	0	0	0	0	200	300	0	0	0	0	0	0	0	200	903	0	0	0	0	0	0	0	603	903	0
909	4	0	0	0	0	0	0	200	300	0	0	0	0	0	0	0	200	903	0	0	0	0	0	0	0	603	903	0
909	5	0	0	0	0	0	0	200	300	0	0	0	0	0	0	0	200	903	0	0	0	0	0	0	0	603	903	0
909	6	0	0	0	0	0	0	200	300	0	0	0	0	0	0	0	200	903	0	0	0	0	0	0	0	603	903	0
909	7	0	0	0	0	0	0	200	300	0	0	0	0	0	0	0	200	903	0	0	0	0	0	0	0	603	903	0
909	8	0	0	0	0	0	0	200	300	0	0	0	0	0	0	0	200	903	0	0	0	0	0	0	0	603	903	0
909	9	0	0	0	0	0	0	200	300	0	0	0	0	0	0	0	200	903	0	0	0	0	0	0	0	603	903	0
910	0	0	0	0	0	0	0	200	300	0	0	0	0	0	0	0	200	903	0	0	0	0	0	0	0	603	903	0
910	1	0	0	0	0	0	0	200	300	0	0	0	0	0	0	0	200	903	0	0	0	0	0	0	0	603	903	0
910	2	0	0	0	0	0	0	200	300	0	0	0	0	0	0	0	200	903	0	0	0	0	0	0	0	603	903	0
910	3	0	0	0	0	0	0	200	300	0	0	0	0	0	0	0	200	903	0	0	0	0	0	0	0	603	903	0
910	4	0	0	0	0	0	0	200	300	0	0	0	0	0	0	0	200	903	0	0	0	0	0	0	0	603	903	0
910	5	0	0	0	0	0	0	200	300	0	0	0	0	0	0	0	200	903	0	0	0	0	0	0	0	603	903	0
910	6	0	0	0	0	0	0	200	300	0	0	0	0	0	0	0	200	903	0	0	0	0	0	0	0	603	903	0
910	7	0	0	0	0	0	0	200	300	0	0	0	0	0	0	0	200	903	0	0	0	0	0	0	0	603	903	0
910	8	0	0	0	0	0	0	200	300	0	0	0	0	0	0	0	200	903	0	0	0	0	0	0	0	603	903	0
910	9	0	0	0	0	0	0	200	300	0	0	0	0	0	0	0	200	903	0	0	0	0	0	0	0	603	903	0
911	0	0	0	0	0	0	0	200	300	0	0	0	0	0	0	0	200	903	0	0	0	0	0	0	0	603	903	0
911	1	0	0	0	0	0	0	200	300	0	0	0	0	0	0	0	200	903	0	0	0	0	0	0	0	603	903	0
911	2	0	0	0	0	0	0	200	300	0	0	0	0	0	0	0	200	903	0	0	0	0	0	0	0	603	903	0
911	3	0	0	0	0	0	0	200	300	0	0	0	0	0	0	0	200	903	0	0	0	0	0	0	0	603	903	0
911	4	0	0	0	0	0	0	200	300	0	0	0	0	0	0	0	200	903	0	0	0	0	0	0	0	603	903	0
911	5	0	0	0	0	0	0	200	300	0	0	0	0	0	0	0	200	903	0	0	0	0	0	0	0	603	903	0
911	6	0	0	0	0	0	0	200	300	0	0	0	0	0	0	0	200	903	0	0	0	0	0	0	0	603	903	0
911	7	0	0	0	0	0	0	200	300	0	0	0	0	0	0	0	200	903	0	0	0	0	0	0	0	603	903	0
911	8	0	0	0	0	0	0	200	300	0	0	0	0	0	0	0	200	903	0	0	0	0	0	0	0	603	903	0
911	9	0	0	0	0	0	0	200	300	0	0	0	0	0	0	0	200	903	0	0	0	0	0	0	0	603	903	0
912	0	0	0	0	0	0	0	200	300	0	0	0	0	0	0	0	200	903	0	0	0	0	0	0	0	603	903	0
912	1	0	0	0	0	0	0	200	300	0	0	0	0	0	0	0	200	903	0	0	0	0	0	0	0	603	903	0
912	2	0	0	0	0	0	0	200	300	0	0	0	0	0	0	0	200	903	0	0	0	0	0	0	0	603	903	0
912	3	0	0	0	0	0	0	200	300	0	0	0	0	0	0	0	200	903	0	0	0	0	0	0	0	603	903	0
912	4	0	0	0	0	0	0	200	300	0	0	0	0	0	0	0	200	903	0	0	0	0	0	0	0	603	903	0
912	5	0	0	0	0	0	0	200	300	0	0	0	0	0	0	0	200	903	0	0	0	0	0	0	0	603	903	0
912	6	0	0	0	0	0	0	200	300	0	0	0	0	0	0	0	200	903	0	0	0	0	0	0	0	603	903	0
912	7	0	0	0	0	0	0	200	300	0	0	0	0	0	0	0	200	903	0	0	0	0	0	0	0	603	903	0
912	8	0	0	0	0	0	0	200	300	0	0	0	0	0	0	0	200	903	0	0	0	0	0	0	0	603	903	0
912	9	0	0	0	0	0	0	200	300	0	0	0	0	0	0	0	200	903	0	0	0	0	0	0	0	603	903	0
913	0	0	0	0	0	0	0	200	300	0	0	0	0	0	0	0	200	903	0	0	0	0	0	0	0	603	903	0
913	1	0	0	0	0	0	0	200	300	0	0	0	0	0	0	0	200	903	0	0	0	0	0	0	0	603	903	0
913	2	0	0	0	0	0	0	200	300	0	0	0	0	0	0	0	200	903	0	0	0	0	0	0	0	603	903	0
913	3	0	0	0	0	0	0	200	300	0	0	0	0	0	0	0	200	903	0	0	0	0	0	0	0	603	903	0
913	4	0	0	0	0	0	0	200	300	0	0	0	0	0	0	0	200	903	0	0	0	0	0	0	0	603	903	0
913	5	0	0	0	0	0	0	200	300	0	0	0	0	0	0	0	200	903	0	0	0	0	0	0	0	603	903	0
913	6	0	0	0	0	0	0	200	300	0	0	0	0	0	0	0	200	903	0	0	0	0	0	0	0	603	903	0
913	7	0	0	0	0	0	0	200	300	0	0	0	0	0	0	0	200	903	0	0	0	0	0	0	0	603	903	0
913	8	0	0	0	0	0	0	200	300	0	0	0	0	0	0	0	200	903	0	0	0	0	0	0	0	603	903	0
913	9	0	0	0	0	0	0	200	300	0	0	0	0	0	0	0	200	903	0	0	0	0	0	0	0	603	903	0
914	0	0	0	0	0	0	0	200	300	0	0	0	0	0	0	0	200	903	0	0	0	0	0	0	0	603	903	0
914	1	0	0	0	0	0	0	200	300	0	0	0	0	0	0	0	200	903	0	0	0	0	0	0	0	603	903	0
914	2	0	0	0	0	0	0	200	300	0	0	0	0	0	0	0	200	903	0	0	0	0	0	0	0	603	903	0
914	3	0	0	0	0	0	0	200	300	0	0	0	0	0	0	0	200	903	0	0	0	0	0	0	0	603	903	0
914	4	0	0	0	0	0	0	200	300	0	0	0	0	0	0	0	200	903	0	0	0	0	0	0	0	603	903	0
914	5	0	0	0	0	0	0	200	300	0	0	0	0	0	0	0	200	903	0	0	0	0	0	0	0	603	903	0
914	6	0	0	0	0	0	0	200	300	0	0	0	0	0	0	0	200	903	0	0	0	0	0	0	0	603	903	0
914	7	0	0	0	0	0	0	200	300	0	0	0	0	0	0	0	200	903	0	0	0	0	0	0	0	603	903	0
914	8	0	0	0	0	0	0	200	300	0	0	0	0	0	0	0	200	903	0	0	0	0	0	0	0	603	903	0
914	9	0	0	0	0	0	0	200	300	0	0	0	0	0	0	0	200	903	0	0	0	0	0	0	0	603	903	0
915	0	0	0	0	0	0	0	200	300	0	0	0	0	0	0	0	200	903	0	0	0	0	0	0	0	603	903	0
915	1	0	0	0	0	0	0	200	300	0	0	0	0	0	0	0	200	903	0	0	0	0	0	0	0	603	903	0
915	2	0	0	0	0	0	0	200	300	0	0	0	0	0	0	0	200	903	0	0	0	0	0	0	0	603	903	0
915	3	0	0	0	0	0	0	200	300	0	0	0	0	0	0	0	200	903	0	0	0	0	0	0	0	603	903	0
915	4	0	0	0	0	0	0	200	300	0	0	0	0	0	0	0	200	903	0	0	0	0	0	0	0	603	903	0
915	5	0	0	0	0	0	0	200	300	0	0	0	0	0	0	0	200	903	0	0	0	0	0	0	0	603	903	0
915	6	0	0	0	0	0	0	200	300	0	0	0	0	0	0	0	200	903	0	0	0	0	0	0	0	603	903	0
915	7	0	0	0	0	0	0	200	300	0	0	0	0	0	0	0	200	903	0	0	0	0	0	0	0	603	903	0
915	8	0	0	0	0	0	0	200	300	0	0	0	0	0	0	0	200	903	0	0	0	0	0	0	0	603	903	0
915	9	0	0	0	0	0	0	200	300	0	0	0	0	0	0	0	200	903	0	0	0	0	0	0	0	603	903	0
916	0	0	0	0	0	0	0	200	300	0	0	0	0	0	0	0	200	903	0	0	0	0	0	0	0	603	903	0
916	1	0	0	0	0	0	0	200	300	0	0	0	0	0	0	0	200	903	0	0	0	0	0	0	0	603	903	0
916	2	0	0	0	0	0	0	200	300	0	0	0	0	0	0	0	200	903	0	0	0	0	0	0	0	603	903	0
916	3	0	0	0	0	0	0	200	300	0	0	0	0	0	0	0	200	903	0	0	0	0	0	0	0	603	903	0
916	4	0	0	0	0	0	0	200	300	0	0	0	0	0	0	0	200	903	0	0	0	0	0	0	0	603	903	0
916	5	0	0	0	0	0	0	200	300	0	0	0	0	0	0	0	200	903	0	0	0	0	0	0	0	603	903	0
916	6	0	0	0	0	0	0	200	300	0	0	0	0	0	0	0	200	903	0	0	0	0	0	0	0	603	903	0
916	7	0	0	0	0	0	0	200	300	0	0	0	0	0	0	0	200	903	0	0	0	0	0	0	0	603	903	0
916	8	0	0	0	0	0	0	200	300	0	0	0	0	0	0	0	200	903	0	0	0	0	0	0	0	603	903	0
916	9	0	0	0	0	0	0	200	300	0	0	0	0	0	0	0	200	903	0	0	0	0	0	0	0	603	903	0
917	0	0	0	0	0	0	0	200	300	0	0	0	0	0	0	0	200	903	0	0	0	0	0	0	0	603	903	0
917	1	0	0	0	0	0	0	200	300	0	0	0	0	0	0	0	200	903	0	0	0	0	0	0	0	603	903	0
917	2	0	0	0	0	0	0	200	300	0	0	0	0	0	0	0	200	903	0	0	0	0	0	0	0	603	903	0
917	3	0	0	0	0	0	0	200	300	0	0	0	0	0	0	0	200	903	0	0	0	0	0	0	0	603	903	0
917	4	0	0	0	0	0	0	200	300	0	0	0	0	0	0	0	200	903	0	0	0	0	0	0	0	603	903	0
917	5	0	0	0	0	0	0	200	300	0	0	0	0	0	0	0	200	903	0	0	0	0	0	0	0	603	903	0
917	6	0	0	0	0	0	0	200	300	0	0	0	0	0	0	0	200	903	0	0	0	0	0	0	0	603	903	0
917	7	0	0	0	0	0	0	200	300	0	0	0	0	0	0	0	200	903	0	0	0	0	0	0	0	603	903	0
917	8	0	0	0	0	0	0	200	300	0	0	0	0	0	0	0	200	903	0	0	0	0	0	0	0	603	903	0
917	9	0	0	0	0	0	0	200	300	0	0	0	0	0	0	0	200	903	0	0	0	0	0	0	0	603	903	0
918	0	0	0	0	0	0	0	200	300	0	0	0	0	0	0	0	200	903	0	0	0	0	0	0	0	603	903	0
918	1	0	0	0	0	0	0	200	300	0	0	0	0	0	0	0	200	903	0	0	0	0	0	0	0	603	903	0
918	2	0	0	0	0	0	0	200	300	0	0	0	0	0	0	0	200	903	0	0	0	0	0	0	0	603	903	0
918	3	0	0	0	0	0	0	200	300	0	0	0	0	0	0	0	200	903	0	0	0	0	0	0	0	603	903	0
918	4	0	0	0	0	0	0	200	300	0	0	0	0	0	0	0	200	903	0	0	0	0	0	0	0	603	903	0
918	5	0	0	0	0	0	0	200	300	0	0	0	0	0	0	0	200	903	0	0	0	0	0	0	0	603	903	0
918	6	0	0	0	0	0	0	200	300	0	0	0	0	0	0	0	200	903	0	0	0	0	0	0	0	603	903	0
918	7	0	0	0	0	0	0	200	300	0	0	0	0	0	0	0	200	903	0	0	0	0	0	0	0	603	903	0
918	8	0	0	0	0	0	0	200	300	0	0	0	0	0	0	0	200	903	0	0	0	0	0	0	0	603	903	0
918	9	0	0	0	0	0	0	200	300	0	0	0	0	0	0	0	200	903	0	0	0	0	0	0	0	603	903	0
919	0	0	0	0	0	0	0	200	300	0	0	0	0	0	0	0	200	903	0	0	0	0	0	0	0	603	903	0
919	1	0	0	0	0	0	0	200	300	0	0	0	0	0	0	0	200	903	0	0	0	0	0	0	0	603	903	0
919	2	0	0	0	0	0	0	200	300	0	0	0	0	0	0	0	200	903	0	0	0	0	0	0	0	603	903	0
919	3	0	0	0	0	0	0	200	300	0	0	0	0	0	0	0	200	903	0	0	0	0	0	0	0	603	903	0
919	4	0	0	0	0	0	0	200	300	0	0	0	0	0	0	0	200	903	0	0	0	0	0	0	0	603	903	0
919	5	0	0	0	0	0	0	200	300	0	0	0	0	0	0	0	200	903	0	0	0	0	0	0	0	603	903	0
919	6	0	0	0	0	0	0	200	300	0	0	0	0	0	0	0	200	903	0	0	0	0	0	0	0	603	903	0
919	7	0	0	0	0	0	0	200	300	0	0	0	0	0	0	0	200	903	0	0	0	0	0	0	0	603	903	0
919	8	0	0	0	0	0	0	200	300	0	0	0	0	0	0	0	200	903	0	0	0	0	0	0	0	603	903	0
919	9	0	0	0	0	0	0	200	300	0	0	0	0	0	0	0	200	903	0	0	0	0	0	0	0	603	903	0
920	0	0	0	0	0	0	0	200	300	0	0	0	0	0	0	0	200	903	0	0	0	0	0	0	0	603	903	0
920	1	0	0	0	0	0	0	200	300	0	0	0	0	0	0	0	200	903	0	0	0	0	0	0	0	603	903	0
920	2	0	0	0	0	0	0	200	300	0	0	0	0	0	0	0	200	903	0	0	0	0	0	0	0	603	903	0
920	3	0	0	0	0	0	0	200	300	0	0	0	0	0	0	0	200	903	0	0	0	0	0	0	0	603	903	0
920	4	0	0	0	0	0	0	200	300	0	0	0	0	0	0	0	200	903	0	0	0	0	0	0	0	603	903	0
920	5	0	0	0	0	0	0	200	300	0	0	0	0	0	0	0	200	903	0	0	0	0	0	0	0	603	903	0
920	6	0	0	0	0	0	0	200	300	0	0	0	0	0	0	0	200	903	0	0	0	0	0	0	0	603	903	0
920	7	0	0	0	0	0	0	200	300	0	0	0	0	0	0	0	200	903	0	0	0	0	0	0	0	603	903	0
920	8	0	0	0	0	0	0	200	300	0	0	0	0	0	0	0	200	903	0	0	0	0	0	0	0	603	903	0
920	9	0	0	0	0	0	0	200	300	0	0	0	0	0	0	0	200	903	0	0	0	0	0	0	0	603	903	0
921	0	0	0	0	0	0	0	200	300	0	0	0	0	0	0	0	200	903	0	0	0	0	0	0	0	603	903	0
921	1	0	0	0	0	0	0	200	300	0	0	0	0	0	0	0	200	903	0	0	0	0	0	0	0	603	903	0
921	2	0	0	0	0	0	0	200	300	0	0	0	0	0	0	0	200	903	0	0	0	0	0	0	0	603	903	0
921	3	0	0	0	0	0	0	200	300	0	0	0	0	0	0	0	200	903	0	0	0	0	0	0	0	603	903	0
921	4	0	0	0	0	0	0	200	300	0	0	0	0	0	0	0	200	903	0	0	0	0	0	0	0	603	903	0
921	5	0	0	0	0	0	0	200	300	0	0	0	0	0	0	0	200	903	0	0	0	0	0	0	0	603	903	0
921	6	0	0	0	0	0	0	200	300	0	0	0	0	0	0	0	200	903	0	0	0	0	0	0	0	603	903	0
921	7	0	0	0	0	0	0	200	300	0	0	0	0	0	0	0	200	903	0	0	0	0	0	0	0	603	903	0
921	8	0	0	0	0	0	0	200	300	0	0	0	0	0	0	0	200	903	0	0	0	0	0	0	0	603	903	0
921	9	0	0	0	0	0	0	200	300	0	0	0	0	0	0	0	200	903	0	0	0	0	0	0	0	603	903	0
922	0	0	0	0	0	0	0	200	300	0	0	0	0	0	0	0	200	903	0	0	0	0	0	0	0	603	903	0
922	1	0	0	0	0	0	0	200	300	0	0	0	0	0	0	0	200	903	0	0	0	0	0	0	0	603	903	0
922	2	0	0	0	0	0	0	200	300	0	0	0	0	0	0	0	200	903	0	0	0	0	0	0	0	603	903	0
922	3	0	0	0	0	0	0	200	300	0	0	0	0	0	0	0	200	903	0	0	0	0	0	0	0	603	903	0
922	4	0	0	0	0	0	0	200	300	0	0	0	0	0	0	0	200	903	0	0	0	0	0	0	0	603	903	0
922	5	0	0	0	0	0	0	200	300	0	0	0	0	0	0	0	200	903	0	0	0	0	0	0	0	603	903	0
922	6	0	0	0	0	0	0	200	300	0	0	0	0	0	0	0	200	903	0	0	0	0	0	0	0	603	903	0
922	7	0	0	0	0	0	0	200	300	0	0	0	0	0	0	0	200	903	0	0	0	0	0	0	0	603	903	0
922	8	0	0	0	0	0	0	200	300	0	0	0	0	0	0	0	200	903	0	0	0	0	0	0	0	603	903	0
922	9	0	0	0	0	0	0	200	300	0	0	0	0	0	0	0	200	903	0	0	0	0	0	0	0	603	903	0
923	0	0	0	0	0	0	0	200	300	0	0	0	0	0	0	0	200	903	0	0	0	0	0	0	0	603	903	0
923	1	0	0	0	0	0	0	200	300	0	0	0	0	0	0	0	200	903	0	0	0	0	0	0	0	603	903	0
923	2	0	0	0	0	0	0	200	300	0	0	0	0	0	0	0	200	903	0	0	0	0	0	0	0	603	903	0
923	3	0	0	0	0	0	0	200	300	0	0	0	0	0	0	0	200	903	0	0	0	0	0	0	0	603	903	0
923	4	0	0	0	0	0	0	200	300	0	0	0	0	0	0	0	200	903	0	0	0	0	0	0	0	603	903	0
923	5	0	0	0	0	0	0	200	300	0	0	0	0	0	0	0	200	903	0	0	0	0	0	0	0	603	903	0
923	6	0	0	0	0	0	0	200	300	0	0	0	0	0	0	0	200	903	0	0	0	0	0	0	0	603	903	0
923	7	0	0	0	0	0	0	200	300	0	0	0	0	0	0	0	200	903	0	0	0	0	0	0	0	603	903	0
923	8	0	0	0	0	0	0	200	300	0	0	0	0	0	0	0	200	903	0	0	0	0	0	0	0	603	903	0
923	9	0	0	0	0	0	0	200	300	0	0	0	0	0	0	0	200	903	0	0	0	0	0	0	0	603	903	0
924	0	0	0	0	0	0	0	200	300	0	0	0	0	0	0	0	200	903	0	0	0	0	0	0	0	603	903	0
924	1	0	0	0	0	0	0	200	300	0	0	0	0	0	0	0	200	903	0	0	0	0	0	0	0	603	903	0
924	2	0	0	0	0	0	0	200	300	0	0	0	0	0	0	0	200	903	0	0	0	0	0	0	0	603	903	0
924	3	0	0	0	0	0	0	200	300	0	0	0	0	0	0	0	200	903	0	0	0	0	0	0	0	603	903	0
924	4	0	0	0	0	0	0	200	300	0	0	0	0	0	0	0	200	903	0	0	0	0	0	0	0	603	903	0
924	5	0	0	0	0	0	0	200	300	0	0	0	0	0	0	0	200	903	0	0	0	0	0	0	0	603	903	0
924	6	0	0	0	0	0	0	200	300	0	0	0	0	0	0	0	200	903	0	0	0	0	0	0	0	603	903	0
924	7	0	0	0	0	0	0	200	300	0	0	0	0	0	0	0	200	903	0	0	0	0	0	0	0	603	903	0
924	8	0	0	0	0	0	0	200	300	0	0	0	0	0	0	0	200	903	0	0	0	0	0	0	0	603	903	0
924	9	0	0	0	0	0	0	200	300	0	0	0	0	0	0	0	200	903	0	0	0	0	0	0	0	603	903	0
925	0	0	0	0	0	0	0	200	300	0	0	0	0	0	0	0	200	903	0	0	0	0	0	0	0	603	903	0
925	1	0	0	0	0	0	0	200	300	0	0	0	0	0	0	0	200	903	0	0	0	0	0	0	0	603	903	0
925	2	0	0	0	0	0	0	200	300	0	0	0	0	0	0	0	200	903	0	0	0	0	0	0	0	603	903	0
925	3	0	0	0	0	0	0	200	300	0	0	0	0	0	0	0	200	903	0	0	0	0	0	0	0	603	903	0
925	4	0	0	0	0	0	0	200	300	0	0	0	0	0	0	0	200	903	0	0	0	0	0	0	0	603	903	0
925	5	0	0	0	0	0	0	200	300	0	0	0	0	0	0	0	200	903	0	0	0	0	0	0	0	603	903	0
925	6	0	0	0	0	0	0	200	300	0	0	0	0	0	0	0	200	903	0	0	0	0	0	0	0	603	903	0
925	7	0	0	0	0	0	0	200	300	0	0	0	0	0	0	0	200	903	0	0	0	0	0	0	0	603	903	0
925	8	0	0	0	0	0	0	200	300	0	0	0	0	0	0	0	200	903	0	0	0	0	0	0	0	603	903	0
925	9	0	0	0	0	0	0	200	300	0	0	0	0	0	0	0	200	903	0	0	0	0	0	0	0	603	903	0
926	0	0	0	0	0	0	0	200	300	0	0	0	0	0	0	0	200	903	0	0	0	0	0	0	0	603	903	0
926	1	0	0	0	0	0	0	200	300	0	0	0	0	0	0	0	200	903	0	0	0	0	0	0	0	603	903	0
926	2	0	0	0	0	0	0	200	300	0	0	0	0	0	0	0	200	903	0	0	0	0	0	0	0	603	903	0
926	3	0	0	0	0	0	0	200	300	0	0	0	0	0	0	0	200	903	0	0	0	0	0	0	0	603	903	0
926	4	0	0	0	0	0	0	200	300	0	0	0	0	0	0	0	200	903	0	0	0	0	0	0	0	603	903	0
926	5	0	0	0	0	0	0	200	300	0	0	0	0	0	0	0	200	903	0	0	0	0	0	0	0	603	903	0
926	6	0	0	0	0	0	0	200	300	0	0	0	0	0	0	0	200	903	0	0	0	0	0	0	0	603	903	0
926	7	0	0	0	0	0	0	200	300	0	0	0	0	0	0	0	200	903	0	0	0	0	0	0	0	603	903	0
926	8	0	0	0	0	0	0	200	300	0	0	0	0	0	0	0	200	903	0	0	0	0	0	0	0	603	903	0
926	9	0	0	0	0	0	0	200	300	0	0	0	0	0	0	0	200	903	0	0	0	0	0	0	0	603	903	0
927	0	0	0	0	0	0	0	200	300	0	0	0	0	0	0	0	200	903	0	0	0	0	0	0	0	603	903	0
927	1	0	0	0	0	0	0	200	300	0	0	0	0	0	0	0	200	903	0	0	0	0	0	0	0	603	903	0
927	2	0	0	0	0	0	0	200	300	0	0	0	0	0	0	0	200	903	0	0	0	0	0	0	0	603	903	0
927	3	0	0	0	0	0	0	200	300	0	0	0	0	0	0	0	200	903	0	0	0	0	0	0	0	603	903	0
927	4	0	0	0	0	0	0	200	300	0	0	0	0	0	0	0	200	903	0	0	0	0	0	0	0	603	903	0
927	5	0	0	0	0	0	0	200	300	0	0	0	0	0	0	0	200	903	0	0	0	0	0	0	0	603	903	0
927	6	0	0	0	0	0	0	200	300	0	0	0	0	0	0	0	200	903	0	0	0	0	0	0	0	603	903	0
927	7	0	0	0	0	0	0	200	300	0	0	0	0	0	0	0	200	903	0	0	0	0	0	0	0	603	903	0
927	8	0	0	0	0	0	0	200	300	0	0	0	0	0	0	0	200	903	0	0	0	0	0	0	0	603	903	0
927	9	0	0	0	0	0	0	200	300	0	0	0	0	0	0	0	200	903	0	0	0	0	0	0	0	603	903	0
928	0	0	0	0	0	0	0	200	300	0	0	0	0	0	0	0	200	903	0	0	0	0	0	0	0	603	903	0
928	1	0	0	0	0	0	0	200	300	0	0	0	0	0	0	0	200	903	0	0	0	0	0	0	0	603	903	0
928	2	0	0	0	0	0	0	200	300	0	0	0	0	0	0	0	200	903	0	0	0	0	0	0	0	603	903	0
928	3	0	0	0	0	0	0	200	300	0	0	0	0	0	0	0	200	903	0	0	0	0	0	0	0	603	903	0
928	4	0	0	0	0	0	0	200	300	0	0	0	0	0	0	0	200	903	0	0	0	0	0	0	0	603	903	0
928	5	0	0	0	0	0	0	200	300	0	0	0	0	0	0	0	200	903	0	0	0	0	0	0	0	603	903	0
928	6	0	0	0	0	0	0	200	300	0	0	0	0	0	0	0	200	903	0	0	0	0	0	0	0	603	903	0
928	7	0	0	0	0	0	0	200	300	0	0	0	0	0	0	0	200	903	0	0	0	0	0	0	0	603	903	0
928	8	0	0	0	0	0	0	200	300	0	0	0	0	0	0	0	200	903	0	0	0	0	0	0	0	603	903	0
928	9	0	0	0	0	0	0	200	300	0	0	0	0	0	0	0	200	903	0	0	0	0	0	0	0	603	903	0
929	0	0	0	0	0	0	0	200	300	0	0	0	0	0	0	0	200	903	0	0	0	0	0	0	0	603	903	0
929	1	0	0	0	0	0	0	200	300	0	0	0	0	0	0	0	200	903	0	0	0	0	0	0	0	603	903	0
929	2	0	0	0	0	0	0	200	300	0	0	0	0	0	0	0	200	903	0	0	0	0	0	0	0	603	903	0
929	3	0	0	0	0	0	0	200	300	0	0	0	0	0	0	0	200	903	0	0	0	0	0	0	0	603	903	0
929	4	0	0	0	0	0	0	200	300	0	0	0	0	0	0	0	200	903	0	0	0	0	0	0	0	603	903	0
929	5	0	0	0	0	0	0	200	300	0	0	0	0	0	0	0	200	903	0	0	0	0	0	0	0	603	903	0
929	6	0	0	0	0	0	0	200	300	0	0	0	0	0	0	0	200	903	0	0	0	0	0	0	0	603	903	0
929	7	0	0	0	0	0	0	200	300	0	0	0	0	0	0	0	200	903	0	0	0	0	0	0	0	603	903	0
929	8	0	0	0	0	0	0	200	300	0	0	0	0	0	0	0	200	903	0	0	0	0	0	0	0	603	903	0
929	9	0	0	0	0	0	0	200	300	0	0	0	0	0	0	0	200	903	0	0	0	0	0	0	0	603	903	0
930	0	0	0	0	0	0	0	200	300	0	0	0	0	0	0	0	200	903	0	0	0	0	0	0	0	603	903	0
930	1	0	0	0	0	0	0	200	300	0	0	0	0	0	0	0	200	903	0	0	0	0	0	0	0	603	903	0
930	2	0	0	0	0	0	0	200	300	0	0	0	0	0	0	0	200	903	0	0	0	0	0	0	0	603	903	0
930	3	0	0	0	0	0	0	200	300	0	0	0	0	0	0	0	200	903	0	0	0	0	0	0	0	603	903	0
930	4	0	0	0	0	0	0	200	300	0	0	0	0	0	0	0	200	903	0	0	0	0	0	0	0	603	903	0
930	5	0	0	0	0	0	0	200	300	0	0	0	0	0	0	0	200	903	0	0	0	0	0	0	0	603	903	0
930	6	0	0	0	0	0	0	200	300	0	0	0	0	0	0	0	200	903	0	0	0	0	0	0	0	603	903	0
930	7	0	0	0	0	0	0	200	300	0	0	0	0	0	0	0	200	903	0	0	0	0	0	0	0	603	903	0
930	8	0	0	0	0	0	0	200	300	0	0	0	0	0	0	0	200	903	0	0	0	0	0	0	0	603	903	0
930	9	0	0	0	0	0	0	200	300	0	0	0	0	0	0	0	200	903	0	0	0	0	0	0	0	603	903	0
931	0	0	0	0	0	0	0	200	300	0	0	0	0	0	0	0	200	903	0	0	0	0	0	0	0	603	903	0
931	1	0	0	0	0	0	0	200	300	0	0	0	0	0	0	0	200	903	0	0	0	0	0	0	0	603	903	0
931	2	0	0	0	0	0	0	200	300	0	0	0	0	0	0	0	200	903	0	0	0	0	0	0	0	603	903	0
931	3	0	0	0	0	0	0	200	300	0	0	0	0	0	0	0	200	903	0	0	0	0	0	0	0	603	903	0
931	4	0	0	0	0	0	0	200	300	0	0	0	0	0	0	0	200	903	0	0	0	0	0	0	0	603	903	0
931	5	0	0	0	0	0	0	200	300	0	0	0	0	0	0	0	200	903	0	0	0	0	0	0	0	603	903	0
931	6	0	0	0	0	0	0	200	300	0	0	0	0	0	0	0	200	903	0	0	0	0	0	0	0	603	903	0
931	7	0	0	0	0	0	0	200	300	0	0	0	0	0	0	0	200	903	0	0	0	0	0	0	0	603	903	0
931	8	0	0	0	0	0	0	200	300	0	0	0	0	0	0	0	200	903	0	0	0	0	0	0	0	603	903	0
931	9	0	0	0	0	0	0	200	300	0	0	0	0	0	0	0	200	903	0	0	0	0	0	0	0	603	903	0
932	0	0	0	0	0	0	0	200	300	0	0	0	0	0	0	0	200	903	0	0	0	0	0	0	0	603	903	0
932	1	0	0	0	0	0	0	200	300	0	0	0	0	0	0	0	200	903	0	0	0	0	0	0	0	603	903	0
932	2	0	0	0	0	0	0	200	300	0	0	0	0	0	0	0	200	903	0	0	0	0	0	0	0	603	903	0
932	3	0	0	0	0	0	0	200	300	0	0	0	0	0	0	0	200	903	0	0	0	0	0	0	0	603	903	0
932	4	0	0	0	0	0	0	200	300	0	0	0	0	0	0	0	200	903	0	0	0	0	0	0	0	603	903	0
932	5	0	0	0	0	0	0	200	300	0	0	0	0	0	0	0	200	903	0	0	0	0	0	0	0	603	903	0
932	6	0	0	0	0	0	0	200	300	0	0	0	0	0	0	0	200	903	0	0	0	0	0	0	0	603	903	0
932	7	0	0	0	0	0	0	200	300	0	0	0	0	0	0	0	200	903	0	0	0	0	0	0	0	603	903	0
932	8	0	0	0	0	0	0	200	300	0	0	0	0	0	0	0	200	903	0	0	0	0	0	0	0	603	903	0
932	9	0	0	0	0	0	0	200	300	0	0	0	0	0	0	0	200	903	0	0	0	0	0	0	0	603	903	0
933	0	0	0	0	0	0	0	200	300	0	0	0	0	0	0	0	200	903	0	0	0	0	0	0	0	603	903	0
933	1	0	0	0	0	0	0	200	300	0	0	0	0	0	0	0	200	903	0	0	0	0	0	0	0	603	903	0
933	2	0	0	0	0	0	0	200	300	0	0	0	0	0	0	0	200	903	0	0	0	0	0	0	0	603	903	0
933	3	0	0	0	0	0	0	200	300	0	0	0	0	0	0	0	200	903	0	0	0	0	0	0	0	603	903	0
933	4	0	0	0	0	0	0	200	300	0	0	0	0	0	0	0	200	903	0	0	0	0	0	0	0	603	903	0
933	5	0	0	0	0	0	0	200	300	0	0	0	0	0	0	0	200	903	0	0	0	0	0	0	0	603	903	0
933	6	0	0	0	0	0	0	200	300	0	0	0	0	0	0	0	200	903	0	0	0	0	0	0	0	603	903	0
933	7	0	0	0	0	0	0	200	300	0	0	0	0	0	0	0	200	903	0	0	0	0	0	0	0	603	903	0
933	8	0	0	0	0	0	0	200	300	0	0	0	0	0	0	0	200	903	0	0	0	0	0	0	0	603	903	0
933	9	0	0	0	0	0	0	200	300	0	0	0	0	0	0	0	200	903	0	0	0	0	0	0	0	603	903	0
934	0	0	0	0	0	0	0	200	300	0	0	0	0	0	0	0	200	903	0	0	0	0	0	0	0	603	903	0
934	1	0	0	0	0	0	0	200	300	0	0	0	0	0	0	0	200	903	0	0	0	0	0	0	0	603	903	0
934	2	0	0	0	0	0	0	200	300	0	0	0	0	0	0	0	200	903	0	0	0	0	0	0	0	603	903	0
934	3	0	0	0	0	0	0	200	300	0	0	0	0	0	0	0	200	903	0	0	0	0	0	0	0	603	903	0
934	4	0	0	0	0	0	0	200	300	0	0	0	0	0	0	0	200	903	0	0	0	0	0	0	0	603	903	0
934	5	0	0	0	0	0	0	200	300	0	0	0	0	0	0	0	200	903	0	0	0	0	0	0	0	603	903	0
934	6	0	0	0	0	0	0	200	300	0	0	0	0	0	0	0	200	903	0	0	0	0	0	0	0	603	903	0
934	7	0	0	0	0	0	0	200	300	0	0	0	0	0	0	0	200	903	0	0	0	0	0	0	0	603	903	0
934	8	0	0	0	0	0	0	200	300	0	0	0	0	0	0	0	200	903	0	0	0	0	0	0	0	603	903	0
934	9	0	0	0	0	0	0	200	300	0	0	0	0	0	0	0	200	903	0	0	0	0	0	0	0	603	903	0
935	0	0	0	0	0	0	0	200	300	0	0	0	0	0	0	0	200	903	0	0	0	0	0	0	0	603	903	0
935	1	0	0	0	0	0	0	200	300	0	0	0	0	0	0	0	200	903	0	0	0	0	0	0	0	603	903	0
935	2	0	0	0	0	0	0	200	300	0	0	0	0	0	0	0	200	903	0	0	0	0	0	0	0	603	903	0
935	3	0	0	0	0	0	0	200	300	0	0	0	0	0	0	0	200	903	0	0	0	0	0	0	0	603	903	0
935	4	0	0	0	0	0	0	200	300	0	0	0	0	0	0	0	200	903	0	0	0	0	0	0	0	603	903	0
935	5	0	0	0	0	0	0	200	300	0	0	0	0	0	0	0	200	903	0	0	0	0	0	0	0	603	903	0
935	6	0	0	0	0	0	0	200	300	0	0	0	0	0	0	0	200	903	0	0	0	0	0	0	0	603	903	0
935	7	0	0	0	0	0	0	200	300	0	0	0	0	0	0	0	200	903	0	0	0	0	0	0	0	603	903	0
935	8	0	0	0	0	0	0	200	300	0	0	0	0	0	0	0	200	903	0	0	0	0	0	0	0	603	903	0
935	9	0	0	0	0	0	0	200	300	0	0	0	0	0	0	0	200	903	0	0	0	0	0	0	0	603	903	0
936	0	0	0	0	0	0	0	200	300	0	0	0	0	0	0	0	200	903	0	0	0	0	0	0	0	603	903	0
936	1	0	0	0	0	0	0	200	300	0	0	0	0	0	0	0	200	903	0	0	0	0	0	0	0	603	903	0
936	2	0	0	0	0	0	0	200	300	0	0	0	0	0	0	0	200	903	0	0	0	0	0	0	0	603	903	0
936	3	0	0	0	0	0	0	200	300	0	0	0	0	0	0	0	200	903	0	0	0	0	0	0	0	603	903	0
936	4	0	0	0	0	0	0	200	300	0	0	0	0	0	0	0	200	903	0	0	0	0	0	0	0	603	903	0
936	5	0	0	0	0	0	0	200	300	0	0	0	0	0	0	0	200	903	0	0	0	0	0	0	0	603	903	0
936	6	0	0	0	0	0	0	200	300	0	0	0	0	0	0	0	200	903	0	0	0	0	0	0	0	603	903	0
936	7	0	0	0	0	0	0	200	300	0	0	0	0	0	0	0	200	903	0	0	0	0	0	0	0	603	903	0
936	8	0	0	0	0	0	0	200	300	0	0	0	0	0	0	0	200	903	0	0	0	0	0	0	0	603	903	0
936	9	0	0	0	0	0	0	200	300	0	0	0	0	0	0	0	200	903	0	0	0	0	0	0	0	603	903	0
937	0	0	0	0	0	0	0	200	300	0	0	0	0	0	0	0	200	903	0	0	0	0	0	0	0	603	903	0
937	1	0	0	0	0	0	0	200	300	0	0	0	0	0	0	0	200	903	0	0	0	0	0	0	0	603	903	0
937	2	0	0	0	0	0	0	200	300	0	0	0	0	0	0	0	200	903	0	0	0	0	0	0	0	603	903	0
937	3	0	0	0	0	0	0	200	300	0	0	0	0	0	0	0	200	903	0	0	0	0	0	0	0	603	903	0
937	4	0	0	0	0	0	0	200	300	0	0	0	0	0	0	0	200	903	0	0	0	0	0	0	0	603	903	0
937	5	0	0	0	0	0	0	200	300	0	0	0	0	0	0	0	200	903	0	0	0	0	0	0	0	603	903	0
937	6	0	0	0	0	0	0	200	300	0	0	0	0	0	0	0	200	903	0	0	0	0	0	0	0	603	903	0
937	7	0	0	0	0	0	0	200	300	0	0	0	0	0	0	0	200	903	0	0	0	0	0	0	0	603	903	0
937	8	0	0	0	0	0	0	200	300	0	0	0	0	0	0	0	200	903	0	0	0	0	0	0	0	603	903	0
937	9	0	0	0	0	0	0	200	300	0	0	0	0	0	0	0	200	903	0	0	0	0	0	0	0	603	903	0
938	0	0	0	0	0	0	0	200	300	0	0	0	0	0	0	0	200	903	0	0	0	0	0	0	0	603	903	0
938	1	0	0	0	0	0	0	200	300	0	0	0	0	0	0	0	200	903	0	0	0	0	0	0	0	603	903	0
938	2	0	0	0	0	0	0	200	300	0	0	0	0	0	0	0	200	903	0	0	0	0	0	0	0	603	903	0
938	3	0	0	0	0	0	0	200	300	0	0	0	0	0	0	0	200	903	0	0	0	0	0	0	0	603	903	0
938	4	0	0	0	0	0	0	200	300	0	0	0	0	0	0	0	200	903	0	0	0	0	0	0	0	603	903	0
938	5	0	0	0	0	0	0	200	300	0	0	0	0	0	0	0	200	903	0	0	0	0	0	0	0	603	903	0
938	6	0	0	0	0	0	0	200	300	0	0	0	0	0	0	0	200	903	0	0	0	0	0	0	0	603	903	0
938	7	0	0	0	0	0	0	200	300	0	0	0	0	0	0	0	200	903	0	0	0	0	0	0	0	603	903	0
938	8	0	0	0	0	0	0	200	300	0	0	0	0	0	0	0	200	903	0	0	0	0	0	0	0	603	903	0
938	9	0	0	0	0	0	0	200	300	0	0	0	0	0	0	0	200	903	0	0	0	0	0	0	0	603	903	0
939	0	0	0	0	0	0	0	200	300	0	0	0	0	0	0	0	200	903	0	0	0	0	0	0	0	603	903	0
939	1	0	0	0	0	0	0	200	300	0	0	0	0	0	0	0	200	903	0	0	0	0	0	0	0	603	903	0
939	2	0	0	0	0	0	0	200	300	0	0	0	0	0	0	0	200	903	0	0	0	0	0	0	0	603	903	0
939	3	0	0	0	0	0	0	200	300	0	0	0	0	0	0	0	200	903	0	0	0	0	0	0	0	603	903	0
939	4	0	0	0	0	0	0	200	300	0	0	0	0	0	0	0	200	903	0	0	0	0	0	0	0	603	903	0
939	5	0	0	0	0	0	0	200	300	0	0	0	0	0	0	0	200	903	0	0	0	0	0	0	0	603	903	0
939	6	0	0	0	0	0	0	200	300	0	0	0	0	0	0	0	200	903	0	0	0	0	0	0	0	603	903	0
939	7	0	0	0	0	0	0	200	300	0	0	0	0	0	0	0	200	903	0	0	0	0	0	0	0	603	903	0
939	8	0	0	0	0	0	0	200	300	0	0	0	0	0	0	0	200	903	0	0	0	0	0	0	0	603	903	0
939	9	0	0	0	0	0	0	200	300	0	0	0	0	0	0	0	200	903	0	0	0	0	0	0	0	603	903	0
940	0	0	0	0	0	0	0	200	300	0	0	0	0	0	0	0	200	903	0	0	0	0	0	0	0	603	903	0
940	1	0	0	0	0	0	0	200	300	0	0	0	0	0	0	0	200	903	0	0	0	0	0	0	0	603	903	0
940	2	0	0	0	0	0	0	200	300	0	0	0	0	0	0	0	200	903	0	0	0	0	0	0	0	603	903	0
940	3	0	0	0	0	0	0	200	300	0	0	0	0	0	0	0	200	903	0	0	0	0	0	0	0	603	903	0
940	4	0	0	0	0	0	0	200	300	0	0	0	0	0	0	0	200	903	0	0	0	0	0	0	0	603	903	0
940	5	0	0	0	0	0	0	200	300	0	0	0	0	0	0	0	200	903	0	0	0	0	0	0	0	603	903	0
940	6	0	0	0	0	0	0	200	300	0	0	0	0	0	0	0	200	903	0	0	0	0	0	0	0	603	903	0
940	7	0	0	0	0	0	0	200	300	0	0	0	0	0	0	0	200	903	0	0	0	0	0	0	0	603	903	0
940	8	0	0	0	0	0	0	200	300	0	0	0	0	0	0	0	200	903	0	0	0	0	0	0	0	603	903	0
940	9	0	0	0	0	0	0	200	300	0	0	0	0	0	0	0	200	903	0	0	0	0	0	0	0	603	903	0
941	0	0	0	0	0	0	0	200	300	0	0	0	0	0	0	0	200	903	0	0	0	0	0	0	0	603	903	0
941	1	0	0	0	0	0	0	200	300	0	0	0	0	0	0	0	200	903	0	0	0	0	0	0	0	603	903	0
941	2	0	0	0	0	0	0	200	300	0	0	0	0	0	0	0	200	903	0	0	0	0	0	0	0	603	903	0
941	3	0	0	0	0	0	0	200	300	0	0	0	0	0	0	0	200	903	0	0	0	0	0	0	0	603	903	0
941	4	0	0	0	0	0	0	200	300	0	0	0	0	0	0	0	200	903	0	0	0	0	0	0	0	603	903	0
941	5	0	0	0	0	0	0	200	300	0	0	0	0	0	0	0	200	903	0	0	0	0	0	0	0	603	903	0
941	6	0	0	0	0	0	0	200	300	0	0	0	0	0	0	0	200	903	0	0	0	0	0	0	0	603	903	0
941	7	0	0	0	0	0	0	200	300	0	0	0	0	0	0	0	200	903	0	0	0	0	0	0	0	603	903	0
941	8	0	0	0	0	0	0	200	300	0	0	0	0	0	0	0	200	903	0	0	0	0	0	0	0	603	903	0
941	9	0	0	0	0	0	0	200	300	0	0	0	0	0	0	0	200	903	0	0	0	0	0	0	0	603	903	0
942	0	0	0	0	0	0	0	200	300	0	0	0	0	0	0	0	200	903	0	0	0	0	0	0	0	603	903	0
942	1	0	0	0	0	0	0	200	300	0	0	0	0	0	0	0	200	903	0	0	0	0	0	0	0	603	903	0
942	2	0	0	0	0	0	0	200	300	0	0	0	0	0	0	0	200	903	0	0	0	0	0	0	0	603	903	0
942	3	0	0	0	0	0	0	200	300	0	0	0	0	0	0	0	200	903	0	0	0	0	0	0	0	603	903	0
942	4	0	0	0	0	0	0	200	300	0	0	0	0	0	0	0	200	903	0	0	0	0	0	0	0	603	903	0
942	5	0	0	0	0	0	0	200	300	0	0	0	0	0	0	0	200	903	0	0	0	0	0	0	0	603	903	0
942	6	0	0	0	0	0	0	200	300	0	0	0	0	0	0	0	200	903	0	0	0	0	0	0	0	603	903	0
942	7	0	0	0	0	0	0	200	300	0	0	0	0	0	0	0	200	903	0	0	0	0	0	0	0	603	903	0
942	8	0	0	0	0	0	0	200	300	0	0	0	0	0	0	0	200	903	0	0	0	0	0	0	0	603	903	0
942	9	0	0	0	0	0	0	200	300	0	0	0	0	0	0	0	200	903	0	0	0	0	0	0	0	603	903	0
943	0	0	0	0	0	0	0	200	300	0	0	0	0	0	0	0	200	903	0	0	0	0	0	0	0	603	903	0
943	1	0	0	0	0	0	0	200	300	0	0	0	0	0	0	0	200	903	0	0	0	0	0	0	0	603	903	0
943	2	0	0	0	0	0	0	200	300	0	0	0	0	0	0	0	200	903	0	0	0	0	0	0	0	603	903	0
943	3	0	0	0	0	0	0	200	300	0	0	0	0	0	0	0	200	903	0	0	0	0	0	0	0	603	903	0
943	4	0	0	0	0	0	0	200	300	0	0	0	0	0	0	0	200	903	0	0	0	0	0	0	0	603	903	0
943	5	0	0	0	0	0	0	200	300	0	0	0	0	0	0	0	200	903	0	0	0	0	0	0	0	603	903	0
943	6	0	0	0	0	0	0	200	300	0	0	0	0	0	0	0	200	903	0	0	0	0	0	0	0	603	903	0
943	7	0	0	0	0	0	0	200	300	0	0	0	0	0	0	0	200	903	0	0	0	0	0	0	0	603	903	0
943	8	0	0	0	0	0	0	200	300	0	0	0	0	0	0	0	200	903	0	0	0	0	0	0	0	603	903	0
943	9	0	0	0	0	0	0	200	300	0	0	0	0	0	0	0	200	903	0	0	0	0	0	0	0	603	903	0
944	0	0	0	0	0	0	0	200	300	0	0	0	0	0	0	0	200	903	0	0	0	0	0	0	0	603	903	0
944	1	0	0	0	0	0	0	200	300	0	0	0	0	0	0	0	200	903	0	0	0	0	0	0	0	603	903	0
944	2	0	0	0	0	0	0	200	300	0	0	0	0	0	0	0	200	903	0	0	0	0	0	0	0	603	903	0
944	3	0	0	0	0	0	0	200	300	0	0	0	0	0	0	0	200	903	0	0	0	0	0	0	0	603	903	0
944	4	0	0	0	0	0	0	200	300	0	0	0	0	0	0	0	200	903	0	0	0	0	0	0	0	603	903	0
944	5	0	0	0	0	0	0	200	300	0	0	0	0	0	0	0	200	903	0	0	0	0	0	0	0	603	903	0
944	6	0	0	0	0	0	0	200	300	0	0	0	0	0	0	0	200	903	0	0	0	0	0	0	0	603	903	0
944	7	0	0	0	0	0	0	200	300	0	0	0	0	0	0	0	200	903	0	0	0	0	0	0	0	603	903	0
944	8	0	0	0	0	0	0	200	300	0	0	0	0	0	0	0	200	903	0	0	0	0	0	0	0	603	903	0
944	9	0	0	0	0	0	0	200	300	0	0	0	0	0	0	0	200	903	0	0	0	0	0	0	0	603	903	0
945	0	0	0	0	0	0	0	200	300	0	0	0	0	0	0	0	200	903	0	0	0	0	0	0	0	603	903	0
945	1	0	0	0	0	0	0	200	300	0	0	0	0	0	0	0	200	903	0	0	0	0	0	0	0	603	903	0
945	2	0	0	0	0	0	0	200	300	0	0	0	0	0	0	0	200	903	0	0	0	0	0	0	0	603	903	0
945	3	0	0	0	0	0	0	200	300	0	0	0	0	0	0	0	200	903	0	0	0	0	0	0	0	603	903	0
945	4	0	0	0	0	0	0	200	300	0	0	0	0	0	0	0	200	903	0	0	0	0	0	0	0	603	903	0
945	5	0	0	0	0	0	0	200	300	0	0	0	0	0	0	0	200	903	0	0	0	0	0	0	0	603	903	0
945	6	0	0	0	0	0	0	200	300	0	0	0	0	0	0	0	200	903	0	0	0	0	0	0	0	603	903	0
945	7	0	0	0	0	0	0	200	300	0	0	0	0	0	0	0	200	903	0	0	0	0	0	0	0	603	903	0
945	8	0	0	0	0	0	0	200	300	0	0	0	0	0	0	0	200	903	0	0	0	0	0	0	0	603	903	0
945	9	0	0	0	0	0	0	200	300	0	0	0	0	0	0	0	200	903	0	0	0	0	0	0	0	603	903	0
946	0	0	0	0	0	0	0	200	300	0	0	0	0	0	0	0	200	903	0	0	0	0	0	0	0	603	903	0
946	1	0	0	0	0	0	0	200	300	0	0	0	0	0	0	0	200	903	0	0	0	0	0	0	0	603	903	0
946	2	0	0	0	0	0	0	200	300	0	0	0	0	0	0	0	200	903	0	0	0	0	0	0	0	603	903	0
946	3	0	0	0	0	0	0	200	300	0	0	0	0	0	0	0	200	903	0	0	0	0	0	0	0	603	903	0
946	4	0	0	0	0	0	0	200	300	0	0	0	0	0	0	0	200	903	0	0	0	0	0	0	0	603	903	0
946	5	0	0	0	0	0	0	200	300	0	0	0	0	0	0	0	200	903	0	0	0	0	0	0	0	603	903	0
946	6	0	0	0	0	0	0	200	300	0	0	0	0	0	0	0	200	903	0	0	0	0	0	0	0	603	903	0
946	7	0	0	0	0	0	0	200	300	0	0	0	0	0	0	0	200	903	0	0	0	0	0	0	0	603	903	0
946	8	0	0	0	0	0	0	200	300	0	0	0	0	0	0	0	200	903	0	0	0	0	0	0	0	603	903	0
946	9	0	0	0	0	0	0	200	300	0	0	0	0	0	0	0	200	903	0	0	0	0	0	0	0	603	903	0
947	0	0	0	0	0	0	0	200	300	0	0	0	0	0	0	0	200	903	0	0	0	0	0	0	0	603	903	0
947	1	0	0	0	0	0	0	200	300	0	0	0	0	0	0	0	200	903	0	0	0	0	0	0	0	603	903	0
947	2	0	0	0	0	0	0	200	300	0	0	0	0	0	0	0	200	903	0	0	0	0	0	0	0	603	903	0
947	3	0	0	0	0	0	0	200	300	0	0	0	0	0	0	0	200	903	0	0	0	0	0	0	0	603	903	0
947	4	0	0	0	0	0	0	200	300	0	0	0	0	0	0	0	200	903	0	0	0	0	0	0	0	603	903	0
947	5	0	0	0	0	0	0	200	300	0	0	0	0	0	0	0	200	903	0	0	0	0	0	0	0	603	903	0
947	6	0	0	0	0	0	0	200	300	0	0	0	0	0	0	0	200	903	0	0	0	0	0	0	0	603	903	0
947	7	0	0	0	0	0	0	200	300	0	0	0	0	0	0	0	200	903	0	0	0	0	0	0	0	603	903	0
947	8	0	0	0	0	0	0	200	300	0	0	0	0	0	0	0	200	903	0	0	0	0	0	0	0	603	903	0
947	9	0	0	0	0	0	0	200	300	0	0	0	0	0	0	0	200	903	0	0	0	0	0	0	0	603	903	0
948	0	0	0	0	0	0	0	200	300	0	0	0	0	0	0	0	200	903	0	0	0	0	0	0	0	603	903	0
948	1	0	0	0	0	0	0	200	300	0	0	0	0	0	0	0	200	903	0	0	0	0	0	0	0	603	903	0
948	2	0	0	0	0	0	0	200	300	0	0	0	0	0	0	0	200	903	0	0	0	0	0	0	0	603	903	0
948	3	0	0	0	0	0	0	200	300	0	0	0	0	0	0	0	200	903	0	0	0	0	0	0	0	603	903	0
948	4	0	0	0	0	0	0	200	300	0	0	0	0	0	0	0	200	903	0	0	0	0	0	0	0	603	903	0
948	5	0	0	0	0	0	0	200	300	0	0	0	0	0	0	0	200	903	0	0	0	0	0	0	0	603	903	0
948	6	0	0	0	0	0	0	200	300	0	0	0	0	0	0	0	200	903	0	0	0	0	0	0	0	603	903	0
948	7	0	0	0	0	0	0	200	300	0	0	0	0	0	0	0	200	903	0	0	0	0	0	0	0	603	903	0
948	8	0	0	0	0	0	0	200	300	0	0	0	0	0	0	0	200	903	0	0	0	0	0	0	0	603	903	0
948	9	0	0	0	0	0	0	200	300	0	0	0	0	0	0	0	200	903	0	0	0	0	0	0	0	603	903	0
949	0	0	0	0	0	0	0	200	300	0	0	0	0	0	0	0	200	903	0	0	0	0	0	0	0	603	903	0
949	1	0	0	0	0	0	0	200	300	0	0	0	0	0	0	0	200	903	0	0	0	0	0	0	0	603	903	0
949	2	0	0	0	0	0	0	200	300	0	0	0	0	0	0	0	200	903	0	0	0	0	0	0	0	603	903	0
949	3	0	0	0	0	0	0	200	300	0	0	0	0	0	0	0	200	903	0	0	0	0	0	0	0	603	903	0
949	4	0	0	0	0	0	0	200	300	0	0	0	0	0	0	0	200	903	0	0	0	0	0	0	0	603	903	0
949	5	0	0	0	0	0	0	200	300	0	0	0	0	0	0	0	200	903	0	0	0	0	0	0	0	603	903	0
949	6	0	0	0	0	0	0	200	300	0	0	0	0	0	0	0	200	903	0	0	0	0	0	0	0	603	903	0
949	7	0	0	0	0	0	0	200	300	0	0	0	0	0	0	0	200	903	0	0	0	0	0	0	0	603	903	0
949	8	0	0	0	0	0	0	200	300	0	0	0	0	0	0	0	200	903	0	0	0	0	0	0	0	603	903	0
949	9	0	0	0	0	0	0	200	300	0	0	0	0	0	0	0	200	903	0	0	0	0	0	0	0	603	903	0
950	0	0	0	0	0	0	0	200	300	0	0	0	0	0	0	0	200	903	0	0	0	0	0	0	0	603	903	0
950	1	0	0	0	0	0	0	200	300	0	0	0	0	0	0	0	200	903	0	0	0	0	0	0	0	603	903	0
950	2	0	0	0	0	0	0	200	300	0	0	0	0	0	0	0	200	903	0	0	0	0	0	0	0	603	903	0
950	3	0	0	0	0	0	0	200	300	0	0	0	0	0	0	0	200	903	0	0	0	0	0	0	0	603	903	0
950	4	0	0	0	0	0	0	200	300	0	0	0	0	0	0	0	200	903	0	0	0	0	0	0	0	603	903	0
950	5	0	0	0	0	0	0	200	300	0	0	0	0	0	0	0	200	903	0	0	0	0	0	0	0	603	903	0
950	6	0	0	0	0	0	0	200	300	0	0	0	0	0	0	0	200	903	0	0	0	0	0	0	0	603	903	0
950	7	0	0	0	0	0	0	200	300	0	0	0	0	0	0	0	200	903	0	0	0	0	0	0	0	603	903	0
950	8	0	0	0	0	0	0	200	300	0	0	0	0	0	0	0	200	903	0	0	0	0	0	0	0	603	903	0
950	9	0	0	0	0	0	0	200	300	0	0	0	0	0	0	0	200	903	0	0	0	0	0	0	0	603	903	0
951	0	0	0	0	0	0	0	200	300	0	0	0	0	0	0	0	200	903	0	0	0	0	0	0	0	603	903	0
951	1	0	0	0	0	0	0	200	300	0	0	0	0	0	0	0	200	903	0	0	0	0	0	0	0	603	903	0
951	2	0	0	0	0	0	0	200	300	0	0	0	0	0	0	0	200	903	0	0	0	0	0	0	0	603	903	0
951	3	0	0	0	0	0	0	200	300	0	0	0	0	0	0	0	200	903	0	0	0	0	0	0	0	603	903	0
951	4	0	0	0	0	0	0	200	300	0	0	0	0	0	0	0	200	903	0	0	0	0	0	0	0	603	903	0
951	5	0	0	0	0	0	0	200	300	0	0	0	0	0	0	0	200	903	0	0	0	0	0	0	0	603	903	0
951	6	0	0	0	0	0	0	200	300	0	0	0	0	0	0	0	200	903	0	0	0	0	0	0	0	603	903	0
951	7	0	0	0	0	0	0	200	300	0	0	0	0	0	0	0	200	903	0	0	0	0	0	0	0	603	903	0
951	8	0	0	0	0	0	0	200	300	0	0	0	0	0	0	0	200	903	0	0	0	0	0	0	0	603	903	0
951	9	0	0	0	0	0	0	200	300	0	0	0	0	0	0	0	200	903	0	0	0	0	0	0	0	603	903	0
952	0	0	0	0	0	0	0	200	300	0	0	0	0	0	0	0	200	903	0	0	0	0	0	0	0	603	903	0
952	1	0	0	0	0	0	0	200	300	0	0	0	0	0	0	0	200	903	0	0	0	0	0	0	0	603	903	0
952	2	0	0	0	0	0	0	200	300	0	0	0	0	0	0	0	200	903	0	0	0	0	0	0	0	603	903	0
952	3	0	0	0	0	0	0	200	300	0	0	0	0	0	0	0	200	903	0	0	0	0	0	0	0	603	903	0
952	4	0	0	0	0	0	0	200	300	0	0	0	0	0	0	0	200	903	0	0	0	0	0	0	0	603	903	0
952	5	0	0	0	0	0	0	200	300	0	0	0	0	0	0	0	200	903	0	0	0	0	0	0	0	603	903	0
952	6	0	0	0	0	0	0	200	300	0	0	0	0	0	0	0	200	903	0	0	0	0	0	0	0	603	903	0
952	7	0	0	0	0	0	0	200	300	0	0	0	0	0	0	0	200	903	0	0	0	0	0	0	0	603	903	0
952	8	0	0	0	0	0	0	200	300	0	0	0	0	0	0	0	200	903	0	0	0	0	0	0	0	603	903	0
952	9	0	0	0	0	0	0	200	300	0	0	0	0	0	0	0	200	903	0	0	0	0	0	0	0	603	903	0
953	0	0	0	0	0	0	0	200	300	0	0	0	0	0	0	0	200	903	0	0	0	0	0	0	0	603	903	0
953	1	0	0	0	0	0	0	200	300	0	0	0	0	0	0	0	200	903	0	0	0	0	0	0	0	603	903	0
953	2	0	0	0	0	0	0	200	300	0	0	0	0	0	0	0	200	903	0	0	0	0	0	0	0	603	903	0
953	3	0	0	0	0	0	0	200	300	0	0	0	0	0	0	0	200	903	0	0	0	0	0	0	0	603	903	0
953	4	0	0	0	0	0	0	200	300	0	0	0	0	0	0	0	200	903	0	0	0	0	0	0	0	603	903	0
953	5	0	0	0	0	0	0	200	300	0	0	0	0	0	0	0	200	903	0	0	0	0	0	0	0	603	903	0
953	6	0	0	0	0	0	0	200	300	0	0	0	0	0	0	0	200	903	0	0	0	0	0	0	0	603	903	0
953	7	0	0	0	0	0	0	200	300	0	0	0	0	0	0	0	200	903	0	0	0	0	0	0	0	603	903	0
953	8	0	0	0	0	0	0	200	300	0	0	0	0	0	0	0	200	903	0	0	0	0	0	0	0	603	903	0
953	9	0	0	0	0	0	0	200	300	0	0	0	0	0	0	0	200	903	0	0	0	0	0	0	0	603	903	0
954	0	0	0	0	0	0	0	200	300	0	0	0	0	0	0	0	200	903	0	0	0	0	0	0	0	603	903	0
954	1	0	0	0	0	0	0	200	300	0	0	0	0	0	0	0	200	903	0	0	0	0	0	0	0	603	903	0
954	2	0	0	0	0	0	0	200	300	0	0	0	0	0	0	0	200	903	0	0	0	0	0	0	0	603	903	0
954	3	0	0	0	0	0	0	200	300	0	0	0	0	0	0	0	200	903	0	0	0	0	0	0	0	603	903	0
954	4	0	0	0	0	0	0	200	300	0	0	0	0	0	0	0	200	903	0	0	0	0	0	0	0	603	903	0
954	5	0	0	0	0	0	0	200	300	0	0	0	0	0	0	0	200	903	0	0	0	0	0	0	0	603	903	0
954	6	0	0	0	0	0	0	200	300	0	0	0	0	0	0	0	200	903	0	0	0	0	0	0	0	603	903	0
954	7	0	0	0	0	0	0	200	300	0	0	0	0	0	0	0	200	903	0	0	0	0	0	0	0	603	903	0
954	8	0	0	0	0	0	0	200	300	0	0	0	0	0	0	0	200	903	0	0	0	0	0	0	0	603	903	0
954	9	0	0	0	0	0	0	200	300	0	0	0	0	0	0	0	200	903	0	0	0	0	0	0	0	603	903	0
955	0	0	0	0	0	0	0	200	300	0	0	0	0	0	0	0	200	903	0	0	0	0	0	0	0	603	903	0
955	1	0	0	0	0	0	0	200	300	0	0	0	0	0	0	0	200	903	0	0	0	0	0	0	0	603	903	0
955	2	0	0	0	0	0	0	200	300	0	0	0	0	0	0	0	200	903	0	0	0	0	0	0	0	603	903	0
955	3	0	0	0	0	0	0	200	300	0	0	0	0	0	0	0	200	903	0	0	0	0	0	0	0	603	903	0
955	4	0	0	0	0	0	0	200	300	0	0	0	0	0	0	0	200	903	0	0	0	0	0	0	0	603	903	0
955	5	0	0	0	0	0	0	200	300	0	0	0	0	0	0	0	200	903	0	0	0	0	0	0	0	603	903	0
955	6	0	0	0	0	0	0	200	300	0	0	0	0	0	0	0	200	903	0	0	0	0	0	0	0	603	903	0
955	7	0	0	0	0	0	0	200	300	0	0	0	0	0	0	0	200	903	0	0	0	0	0	0	0	603	903	0
955	8	0	0	0	0	0	0	200	300	0	0	0	0	0	0	0	200	903	0	0	0	0	0	0	0	603	903	0
955	9	0	0	0	0	0	0	200	300	0	0	0	0	0	0	0	200	903	0	0	0	0	0	0	0	603	903	0
956	0	0	0	0	0	0	0	200	300	0	0	0	0	0	0	0	200	903	0	0	0	0	0	0	0	603	903	0
956	1	0	0	0	0	0	0	200	300	0	0	0	0	0	0	0	200	903	0	0	0	0	0	0	0	603	903	0
956	2	0	0	0	0	0	0	200	300	0	0	0	0	0	0	0	200	903	0	0	0	0	0	0	0	603	903	0
956	3	0	0	0	0	0	0	200	300	0	0	0	0	0	0	0	200	903	0	0	0	0	0	0	0	603	903	0
956	4	0	0	0	0	0	0	200	300	0	0	0	0	0	0	0	200	903	0	0	0	0	0	0	0	603	903	0
956	5	0	0	0	0	0	0	200	300	0	0	0	0	0	0	0	200	903	0	0	0	0	0	0	0	603	903	0
956	6	0	0	0	0	0	0	200	300	0	0	0	0	0	0	0	200	903	0	0	0	0	0	0	0	603	903	0
956	7	0	0	0	0	0	0	200	300	0	0	0	0	0	0	0	200	903	0	0	0	0	0	0	0	603	903	0
956	8	0	0	0	0	0	0	200	300	0	0	0	0	0	0	0	200	903	0	0	0	0	0	0	0	603	903	0
956	9	0	0	0	0	0	0	200	300	0	0	0	0	0	0	0	200	903	0	0	0	0	0	0	0	603	903	0
957	0	0	0	0	0	0	0	200	300	0	0	0	0	0	0	0	200	903	0	0	0	0	0	0	0	603	903	0
957	1	0	0	0	0	0	0	200	300	0	0	0	0	0	0	0	200	903	0	0	0	0	0	0	0	603	903	0
957	2	0	0	0	0	0	0	200	300	0	0	0	0	0	0	0	200	903	0	0	0	0	0	0	0	603	903	0
957	3	0	0	0	0	0	0	200	300	0	0	0	0	0	0	0	200	903	0	0	0	0	0	0	0	603	903	0
957	4	0	0	0	0	0	0	200	300	0	0	0	0	0	0	0	200	903	0	0	0	0	0	0	0	603	903	0
957	5	0	0	0	0	0	0	200	300	0	0	0	0	0	0	0	200	903	0	0	0	0	0	0	0	603	903	0
957	6	0	0	0	0	0	0	200	300	0	0	0	0	0	0	0	200	903	0	0	0	0	0	0	0	603	903	0
957	7	0	0	0	0	0	0	200	300	0	0	0	0	0	0	0	200	903	0	0	0	0	0	0	0	603	903	0
957	8	0	0	0	0	0	0	200	300	0	0	0	0	0	0	0	200	903	0	0	0	0	0	0	0	603	903	0
957	9	0	0	0	0	0	0	200	300	0	0	0	0	0	0	0	200	903	0	0	0	0	0	0	0	603	903	0
958	0	0	0	0	0	0	0	200	300	0	0	0	0	0	0	0	200	903	0	0	0	0	0	0	0	603	903	0
958	1	0	0	0	0	0	0	200	300	0	0	0	0	0	0	0	200	903	0	0	0	0	0	0	0	603	903	0
958	2	0	0	0	0	0	0	200	300	0	0	0	0	0	0	0	200	903	0	0	0	0	0	0	0	603	903	0
958	3	0	0	0	0	0	0	200	300	0	0	0	0	0	0	0	200	903	0	0	0	0	0	0	0	603	903	0
958	4	0	0	0	0	0	0	200	300	0	0	0	0	0	0	0	200	903	0	0	0	0	0	0	0	603	903	0
958	5	0	0	0	0	0	0	200	300	0	0	0	0	0	0	0	200	903	0	0	0	0	0	0	0	603	903	0
958	6	0	0	0	0	0	0	200	300	0	0	0	0	0	0	0	200	903	0	0	0	0	0	0	0	603	903	0
958	7	0	0	0	0	0	0	200	300	0	0	0	0	0	0	0	200	903	0	0	0	0	0	0	0	603	903	0
958	8	0	0	0	0	0	0	200	300	0	0	0	0	0	0	0	200	903	0	0	0	0	0	0	0	603	903	0
958	9	0	0	0	0	0	0	200	300	0	0	0	0	0	0	0	200	903	0	0	0	0	0	0	0	603	903	0
959	0	0	0	0	0	0	0	200	300	0	0	0	0	0	0	0	200	903	0	0	0	0	0	0	0	603	903	0
959	1	0	0	0	0	0	0	200	300	0	0	0	0	0	0	0	200	903	0	0	0	0	0	0	0	603	903	0
959	2	0	0	0	0	0	0	200	300	0	0	0	0	0	0	0	200	903	0	0	0	0	0	0	0	603	903	0
959	3	0	0	0	0	0	0	200	300	0	0	0	0	0	0	0	200	903	0	0	0	0	0	0	0	603	903	0
959	4	0	0	0	0	0	0	200	300	0	0	0	0	0	0	0	200	903	0	0	0	0	0	0	0	603	903	0
959	5	0	0	0	0	0	0	200	300	0	0	0	0	0	0	0	200	903	0	0	0	0	0	0	0	603	903	0
959	6	0	0	0	0	0	0	200	300	0	0	0	0	0	0	0	200	903	0	0	0	0	0	0	0	603	903	0
959	7	0	0	0	0	0	0	200	300	0	0	0	0	0	0	0	200	903	0	0	0	0	0	0	0	603	903	0
959	8	0	0	0	0	0	0	200	300	0	0	0	0	0	0	0	200	903	0	0	0	0	0	0	0	603	903	0
959	9	0	0	0	0	0	0	200	300	0	0	0	0	0	0	0	200	903	0	0	0	0	0	0	0	603	903	0
960	0	0	0	0	0	0	0	200	300	0	0	0	0	0	0	0	200	903	0	0	0	0	0	0	0	603	903	0
960	1	0	0	0	0	0	0	200	300	0	0	0	0	0	0	0	200	903	0	0	0	0	0	0	0	603	903	0
960	2	0	0	0	0	0	0	200	300	0	0	0	0	0	0	0	200	903	0	0	0	0	0	0	0	603	903	0
960	3	0	0	0	0	0	0	200	300	0	0	0	0	0	0	0	200	903	0	0	0	0	0	0	0	603	903	0
960	4	0	0	0	0	0	0	200	300	0	0	0	0	0	0	0	200	903	0	0	0	0	0	0	0	603	903	0
960	5	0	0	0	0	0	0	200	300	0	0	0	0	0	0	0	200	903	0	0	0	0	0	0	0	603	903	0
960	6	0	0	0	0	0	0	200	300	0	0	0	0	0	0	0	200	903	0	0	0	0	0	0	0	603	903	0
960	7	0	0	0	0	0	0	200	300	0	0	0	0	0	0	0	200	903	0	0	0	0	0	0	0	603	903	0
960	8	0	0	0	0	0	0	200	300	0	0	0	0	0	0	0	200	903	0	0	0	0	0	0	0	603	903	0
960	9	0	0	0	0	0	0	200	300	0	0	0	0	0	0	0	200	903	0	0	0	0	0	0	0	603	903	0
961	0	0	0	0	0	0	0	200	300	0	0	0	0	0	0	0	200	903	0	0	0	0	0	0	0	603	903	0
961	1	0	0	0	0	0	0	200	300	0	0	0	0	0	0	0	200	903	0	0	0	0	0	0	0	603	903	0
961	2	0	0	0	0	0	0	200	300	0	0	0	0	0	0	0	200	903	0	0	0	0	0	0	0	603	903	0
961	3	0	0	0	0	0	0	200	300	0	0	0	0	0	0	0	200	903	0	0	0	0	0	0	0	603	903	0
961	4	0	0	0	0	0	0	200	300	0	0	0	0	0	0	0	200	903	0	0	0	0	0	0	0	603	903	0
961	5	0	0	0	0	0	0	200	300	0	0	0	0	0	0	0	200	903	0	0	0	0	0	0	0	603	903	0
961	6	0	0	0	0	0	0	200	300	0	0	0	0	0	0	0	200	903	0	0	0	0	0	0	0	603	903	0
961	7	0	0	0	0	0	0	200	300	0	0	0	0	0	0	0	200	903	0	0	0	0	0	0	0	603	903	0
961	8	0	0	0	0	0	0	200	300	0	0	0	0	0	0	0	200	903	0	0	0	0	0	0	0	603	903	0
961	9	0	0	0	0	0	0	200	300	0	0	0	0	0	0	0	200	903	0	0	0	0	0	0	0	603	903	0
962	0	0	0	0	0	0	0	200	300	0	0	0	0	0	0	0	200	903	0	0	0	0	0	0	0	603	903	0
962	1	0	0	0	0	0	0	200	300	0	0	0	0	0	0	0	200	903	0	0	0	0	0	0	0	603	903	0
962	2	0	0	0	0	0	0	200	300	0	0	0	0	0	0	0	200	903	0	0	0	0	0	0	0	603	903	0
962	3	0	0	0	0	0	0	200	300	0	0	0	0	0	0	0	200	903	0	0	0	0	0	0	0	603	903	0
962	4	0	0	0	0	0	0	200	300	0	0	0	0	0	0	0	200	903	0	0	0	0	0	0	0	603	903	0
962	5	0	0	0	0	0	0	200	300	0	0	0	0	0	0	0	200	903	0	0	0	0	0	0	0	603	903	0
962	6	0	0	0	0	0	0	200	300	0	0	0	0	0	0	0	200	903	0	0	0	0	0	0	0	603	903	0
962	7	0	0	0	0	0	0	200	300	0	0	0	0	0	0	0	200	903	0	0	0	0	0	0	0	603	903	0
962	8	0	0	0	0	0	0	200	300	0	0	0	0	0	0	0	200	903	0	0	0	0	0	0	0	603	903	0
962	9	0	0	0	0	0	0	200	300	0	0	0	0	0	0	0	200	903	0	0	0	0	0	0	0	603	903	0
963	0	0	0	0	0	0	0	200	300	0	0	0	0	0	0	0	200	903	0	0	0	0	0	0	0	603	903	0
963	1	0	0	0	0	0	0	200	300	0	0	0	0	0	0	0	200	903	0	0	0	0	0	0	0	603	903	0
963	2	0	0	0	0	0	0	200	300	0	0	0	0	0	0	0	200	903	0	0	0	0	0	0	0	603	903	0
963	3	0	0	0	0	0	0	200	300	0	0	0	0	0	0	0	200	903	0	0	0	0	0	0	0	603	903	0
963	4	0	0	0	0	0	0	200	300	0	0	0	0	0	0	0	200	903	0	0	0	0	0	0	0	603	903	0
963	5	0	0	0	0	0	0	200	300	0	0	0	0	0	0	0	200	903	0	0	0	0	0	0	0	603	903	0
963	6	0	0	0	0	0	0	200	300	0	0	0	0	0	0	0	200	903	0	0	0	0	0	0	0	603	903	0
963	7	0	0	0	0	0	0	200	300	0	0	0	0	0	0	0	200	903	0	0	0	0	0	0	0	603	903	0
963	8	0	0	0	0	0	0	200	300	0	0	0	0	0	0	0	200	903	0	0	0	0	0	0	0	603	903	0
963	9	0	0	0	0	0	0	200	300	0	0	0	0	0	0	0	200	903	0	0	0	0	0	0	0	603	903	0
964	0	0	0	0	0	0	0	200	300	0	0	0	0	0	0	0	200	903	0	0	0	0	0	0	0	603	903	0
964	1	0	0	0	0	0	0	200	300	0	0	0	0	0	0	0	200	903	0	0	0	0	0	0	0	603	903	0
964	2	0	0	0	0	0	0	200	300	0	0	0	0	0	0	0	200	903	0	0	0	0	0	0	0	603	903	0
964	3	0	0	0	0	0	0	200	300	0	0	0	0	0	0	0	200	903	0	0	0	0	0	0	0	603	903	0
964	4	0	0	0	0	0	0	200	300	0	0	0	0	0	0	0	200	903	0	0	0	0	0	0	0	603	903	0
964	5	0	0	0	0	0	0	200	300	0	0	0	0	0	0	0	200	903	0	0	0	0	0	0	0	603	903	0
964	6	0	0	0	0	0	0	200	300	0	0	0	0	0	0	0	200	903	0	0	0	0	0	0	0	603	903	0
964	7	0	0	0	0	0	0	200	300	0	0	0	0	0	0	0	200	903	0	0	0	0	0	0	0	603	903	0
964	8	0	0	0	0	0	0	200	300	0	0	0	0	0	0	0	200	903	0	0	0	0	0	0	0	603	903	0
964	9	0	0	0	0	0	0	200	300	0	0	0	0	0	0	0	200	903	0	0	0	0	0	0	0	603	903	0
965	0	0	0	0	0	0	0	200	300	0	0	0	0	0	0	0	200	903	0	0	0	0	0	0	0	603	903	0
965	1	0	0	0	0	0	0	200	300	0	0	0	0	0	0	0	200	903	0	0	0	0	0	0	0	603	903	0
965	2	0	0	0	0	0	0	200	300	0	0	0	0	0	0	0	200	903	0	0	0	0	0	0	0	603	903	0
965	3	0	0	0	0	0	0	200	300	0	0	0	0	0	0	0	200	903	0	0	0	0	0	0	0	603	903	0
965	4	0	0	0	0	0	0	200	300	0	0	0	0	0	0	0	200	903	0	0	0	0	0	0	0	603	903	0
965	5	0	0	0	0	0	0	200	300	0	0	0	0	0	0	0	200	903	0	0	0	0	0	0	0	603	903	0
965	6	0	0	0	0	0	0	200	300	0	0	0	0	0	0	0	200	903	0	0	0	0	0	0	0	603	903	0
965	7	0	0	0	0	0	0	200	300	0	0	0	0	0	0	0	200	903	0	0	0	0	0	0	0	603	903	0
965	8	0	0	0	0	0	0	200	300	0	0	0	0	0	0	0	200	903	0	0	0	0	0	0	0	603	903	0
965	9	0	0	0	0	0	0	200	300	0	0	0	0	0	0	0	200	903	0	0	0	0	0	0	0	603	903	0
966	0	0	0	0	0	0	0	200	300	0	0	0	0	0	0	0	200	903	0	0	0	0	0	0	0	603	903	0
966	1	0	0	0	0	0	0	200	300	0	0	0	0	0	0	0	200	903	0	0	0	0	0	0	0	603	903	0
966	2	0	0	0	0	0	0	200	300	0	0	0	0	0	0	0	200	903	0	0	0	0	0	0	0	603	903	0
966	3	0	0	0	0	0	0	200	300	0	0	0	0	0	0	0	200	903	0	0	0	0	0	0	0	603	903	0
966	4	0	0	0	0	0	0	200	300	0	0	0	0	0	0	0	200	903	0	0	0	0	0	0	0	603	903	0
966	5	0	0	0	0	0	0	200	300	0	0	0	0	0	0	0	200	903	0	0	0	0	0	0	0	603	903	0
966	6	0	0	0	0	0	0	200	300	0	0	0	0	0	0	0	200	903	0	0	0	0	0	0	0	603	903	0
966	7	0	0	0	0	0	0	200	300	0	0	0	0	0	0	0	200	903	0	0	0	0	0	0	0	603	903	0
966	8	0	0	0	0	0	0	200	300	0	0	0	0	0	0	0	200	903	0	0	0	0	0	0	0	603	903	0
966	9	0	0	0	0	0	0	200	300	0	0	0	0	0	0	0	200	903	0	0	0	0	0	0	0	603	903	0
967	0	0	0	0	0	0	0	200	300	0	0	0	0	0	0	0	200	903	0	0	0	0	0	0	0	603	903	0
967	1	0	0	0	0	0	0	200	300	0	0	0	0	0	0	0	200	903	0	0	0	0	0	0	0	603	903	0
967	2	0	0	0	0	0	0	200	300	0	0	0	0	0	0	0	200	903	0	0	0	0	0	0	0	603	903	0
967	3	0	0	0	0	0	0	200	300	0	0	0	0	0	0	0	200	903	0	0	0	0	0	0	0	603	903	0
967	4	0	0	0	0	0	0	200	300	0	0	0	0	0	0	0	200	903	0	0	0	0	0	0	0	603	903	0
967	5	0	0	0	0	0	0	200	300	0	0	0	0	0	0	0	200	903	0	0	0	0	0	0	0	603	903	0
967	6	0	0	0	0	0	0	200	300	0	0	0	0	0	0	0	200	903	0	0	0	0	0	0	0	603	903	0
967	7	0	0	0	0	0	0	200	300	0	0	0	0	0	0	0	200	903	0	0	0	0	0	0	0	603	903	0
967	8	0	0	0	0	0	0	200	300	0	0	0	0	0	0	0	200	903	0	0	0	0	0	0	0	603	903	0
967	9	0	0	0	0	0	0	200	300	0	0	0	0	0	0	0	200	903	0	0	0	0	0	0	0	603	903	0
968	0	0	0	0	0	0	0	200	300	0	0	0	0	0	0	0	200	903	0	0	0	0	0	0	0	603	903	0
968	1	0	0	0	0	0	0	200	300	0	0	0	0	0	0	0	200	903	0	0	0	0	0	0	0	603	903	0
968	2	0	0	0	0	0	0	200	300	0	0	0	0	0	0	0	200	903	0	0	0	0	0	0	0	603	903	0
968	3	0	0	0	0	0	0	200	300	0	0	0	0	0	0	0	200	903	0	0	0	0	0	0	0	603	903	0
968	4	0	0	0	0	0	0	200	300	0	0	0	0	0	0	0	200	903	0	0	0	0	0	0	0	603	903	0
968	5	0	0	0	0	0	0	200	300	0	0	0	0	0	0	0	200	903	0	0	0	0	0	0	0	603	903	0
968	6	0	0	0	0	0	0	200	300	0	0	0	0	0	0	0	200	903	0	0	0	0	0	0	0	603	903	0
968	7	0	0	0	0	0	0	200	300	0	0	0	0	0	0	0	200	903	0	0	0	0	0	0	0	603	903	0
968	8	0	0	0	0	0	0	200	300	0	0	0	0	0	0	0	200	903	0	0	0	0	0	0	0	603	903	0
968	9	0	0	0	0	0	0	200	300	0	0	0	0	0	0	0	200	903	0	0	0	0	0	0	0	603	903	0
969	0	0	0	0	0	0	0	200	300	0	0	0	0	0	0	0	200	903	0	0	0	0	0	0	0	603	903	0
969	1	0	0	0	0	0	0	200	300	0	0	0	0	0	0	0	200	903	0	0	0	0	0	0	0	603	903	0
969	2	0	0	0	0	0	0	200	300	0	0	0	0	0	0	0	200	903	0	0	0	0	0	0	0	603	903	0
969	3	0	0	0	0	0	0	200	300	0	0	0	0	0	0	0	200	903	0	0	0	0	0	0	0	603	903	0
969	4	0	0	0	0	0	0	200	300	0	3.4166	-8.9795	-17.1465	-819.782	121.539	-14.877	207.088	950.81	0	0	0	0	0	0	0	603	903	0
969	5	0	0	0	0	0	0	200	300	0	0.0596623	-8.52173	-17.4517	-362.018	243.609	76.6757	213.959	923.744	0	0	0	0	0	0	0	603	903	0
969	6	0	0	0	0	0	0	200	300	0	-0.245513	-9.58985	-22.9449	-819.782	-366.742	351.334	184.016	938.728	0	0	0	0	0	0	0	603	903	0
969	7	0	0	0	0	0	0	200	300	0	0.517426	-11.2683	-22.0293	-1094.44	304.645	76.6757	213.829	952.681	0	0	0	0	0	0	0	603	903	0
969	8	0	0	0	0	0	0	200	300	0	-0.0929256	-12.489	-25.6915	-1185.99	304.645	-106.43	211.858	949.163	0	0	0	0	0	0	0	603	903	0
969	9	0	0	0	0	0	0	200	300	0	1.28037	-13.0994	-29.9639	-1277.55	121.539	30.8993	204.056	945.636	0	0	0	0	0	0	0	603	903	0
970	0	0	0	0	0	0	0	200	300	0	-1.46622	-15.6934	-31.795	-453.571	609.821	-60.6534	219.18	917.266	0	0	0	0	0	0	0	603	903	0
970	1	0	0	0	0	0	0	200	300	0	-1.16104	-16.1511	-35.4571	-1277.55	121.539	259.781	203.428	939.031	0	0	0	0	0	0	0	603	903	0
970	2	0	0	0	0	0	0	200	300	0	-2.53433	-16.4563	-38.2037	-1460.65	121.539	122.452	203.181	941.233	0	0	0	0	0	0	0	603	903	0
970	3	0	0	0	0	0	0	200	300	0	-3.14468	-17.8296	-41.2554	-1552.2	426.715	168.228	210.343	940.624	0	0	0	0	0	0	0	603	903	0
970	4	0	0	0	0	0	0	200	300	0	-3.44986	-19.5081	-43.6968	-1918.41	365.68	168.228	208.369	946.903	0	0	0	0	0	0	0	603	903	0
970	5	0	0	0	0	0	0	200	300	0	-5.28091	-20.7288	-46.4434	-1918.41	426.715	30.8993	209.188	944.307	0	0	0	0	0	0	0	603	903	0
970	6	0	0	0	0	0	0	200	300	0	-3.75503	-21.3391	-48.5796	-1552.2	731.891	259.781	215.066	934.952	0	0	0	0	0	0	0	603	903	0
970	7	0	0	0	0	0	0	200	300	0	-3.44986	-21.7969	-52.5469	-2101.52	609.821	-14.877	211.605	942.993	0	0	0	0	0	0	0	603	903	0
970	8	0	0	0	0	0	0	200	300	0	-3.75503	-22.4072	-54.9883	-1918.41	609.821	-14.877	211.09	937.888	0	0	0	0	0	0	0	603	903	0
970	9	0	0	0	0	0	0	200	300	0	-3.44986	-20.8814	-58.6504	-2009.97	1098.1	-14.877	218.723	937.27	0	0	0	0	0	0	0	603	903	0
971	0	0	0	0	0	0	0	200	300	0	-2.22916	-18.8977	-61.0918	-2742.39	914.996	30.8993	214.977	947.89	0	0	0	0	0	0	0	603	903	0
971	1	0	0	0	0	0	0	200	300	0	-1.92398	-17.8296	-66.8902	-2467.73	609.821	168.228	209.117	939.892	0	0	0	0	0	0	0	603	903	0
971	2	0	0	0	0	0	0	200	300	0	-0.550689	-16.1511	-72.0782	-2284.62	914.996	-152.206	212.695	934.696	0	0	0	0	0	0	0	603	903	0
971	3	0	0	0	0	0	0	200	300	0	0.97519	-14.0149	-78.792	-2101.52	1037.07	-14.877	213.162	929.672	0	0	0	0	0	0	0	603	903	0
971	4	0	0	0	0	0	0	200	300	0	1.58554	-12.0313	-82.7593	-2650.84	1159.14	-609.97	214.006	935.031	0	0	0	0	0	0	0	603	903	0
971	5	0	0	0	0	0	0	200	300	0	3.87436	-10.5054	-88.8628	-2925.49	1098.1	-106.43	212.357	935.922	0	0	0	0	0	0	0	603	903	0
971	6	0	0	0	0	0	0	200	300	0	4.17954	-9.58985	-94.9664	-3017.05	1769.49	-243.759	218.633	934.77	0	0	0	0	0	0	0	603	903	0
971	7	0	0	0	0	0	0	200	300	0	5.24765	-7.14844	-101.07	-2925.49	1403.28	-60.6534	213.884	931.945	0	0	0	0	0	0	0	603	903	0
971	8	0	0	0	0	0	0	200	300	0	7.53647	-5.77515	-107.784	-3291.71	1525.35	-289.535	214.152	933.54	0	0	0	0	0	0	0	603	903	0
971	9	0	0	0	0	0	0	200	300	0	8.29941	-4.85962	-112.972	-3291.71	1952.59	-60.6534	217.284	932.138	0	0	0	0	0	0	0	603	903	0
972	0	0	0	0	0	0	0	200	300	0	8.452	-3.79151	-120.296	-4024.13	2074.66	-381.088	217.246	936.452	0	0	0	0	0	0	0	603	903	0
972	1	0	0	0	0	0	0	200	300	0	10.5882	-2.11304	-126.399	-3474.81	2257.77	-884.628	217.862	930.491	0	0	0	0	0	0	0	603	903	0
972	2	0	0	0	0	0	0	200	300	0	13.4874	-1.80786	-134.334	-4024.13	2623.98	-426.864	219.533	932.956	0	0	0	0	0	0	0	603	903	0
972	3	0	0	0	0	0	0	200	300	0	13.3348	-2.41822	-140.438	-4207.23	2501.91	-609.97	217.815	932.958	0	0	0	0	0	0	0	603	903	0
972	4	0	0	0	0	0	0	200	300	0	14.2503	-1.50269	-148.982	-4115.68	2868.12	-609.97	219.251	930.625	0	0	0	0	0	0	0	603	903	0
972	5	0	0	0	0	0	0	200	300	0	17.9124	-3.79151	-153.865	-4024.13	3234.33	-472.641	221.021	929.154	0	0	0	0	0	0	0	603	903	0
972	6	0	0	0	0	0	0	200	300	0	17.1495	-2.87598	-161.189	-4298.79	3173.3	-655.746	219.687	929.669	0	0	0	0	0	0	0	603	903	0
972	7	0	0	0	0	0	0	200	300	0	17.1495	-4.70703	-167.293	-4207.23	3417.44	-701.523	220.428	928.149	0	0	0	0	0	0	0	603	903	0
972	8	0	0	0	0	0	0	200	300	0	19.1331	-5.31739	-172.176	-4390.34	3661.58	-793.076	221.267	928.499	0	0	0	0	0	0	0	603	903	0
972	9	0	0	0	0	0	0	200	300	0	18.2176	-7.91138	-179.805	-4848.1	3966.76	-793.076	222.061	929.963	0	0	0	0	0	0	0	603	903	0
973	0	0	0	0	0	0	0	200	300	0	19.7435	-9.58985	-184.688	-4481.89	3905.72	-609.97	221.148	927.267	0	0	0	0	0	0	0	603	903	0
973	1	0	0	0	0	0	0	200	300	0	20.2013	-11.8787	-189.266	-4848.1	3783.65	-793.076	219.991	928.615	0	0	0	0	0	0	0	603	903	0
973	2	0	0	0	0	0	0	200	300	0	18.9806	-14.6252	-195.064	-4481.89	4699.18	-747.299	224.09	925.977	0	0	0	0	0	0	0	603	903	0
973	3	0	0	0	0	0	0	200	300	0	20.5064	-17.3718	-199.031	-4573.44	4394	-793.076	222.077	925.979	0	0	0	0	0	0	0	603	903	0
973	4	0	0	0	0	0	0	200	300	0	21.422	-19.8132	-204.524	-4481.89	4516.07	-930.405	222.081	924.914	0	0	0	0	0	0	0	603	903	0
973	5	0	0	0	0	0	0	200	300	0	20.5064	-23.3228	-210.628	-4665	4821.25	-884.628	222.89	925.148	0	0	0	0	0	0	0	603	903	0
973	6	0	0	0	0	0	0	200	300	0	22.1849	-25.6116	-212.154	-4573.44	5004.35	-838.852	223.588	924.557	0	0	0	0	0	0	0	603	903	0
973	7	0	0	0	0	0	0	200	300	0	21.8797	-28.2056	-216.121	-4481.89	5126.42	-1021.96	223.72	923.738	0	0	0	0	0	0	0	603	903	0
973	8	0	0	0	0	0	0	200	300	0	20.9642	-29.884	-220.699	-4848.1	5248.49	-976.181	223.781	924.967	0	0	0	0	0	0	0	603	903	0
973	9	0	0	0	0	0	0	200	300	0	19.5909	-32.7832	-224.361	-4665	5248.49	-1159.29	223.393	923.792	0	0	0	0	0	0	0	603	903	0
974	0	0	0	0	0	0	0	200	300	0	20.659	-34.7668	-226.192	-4756.55	5248.49	-976.181	223.204	924.029	0	0	0	0	0	0	0	603	903	0
974	1	0	0	0	0	0	0	200	300	0	19.2857	-35.9876	-230.464	-4848.1	5675.74	-930.405	224.627	924.036	0	0	0	0	0	0	0	603	903	0
974	2	0	0	0	0	0	0	200	300	0	18.828	-37.5134	-234.127	-4665	5492.63	-976.181	223.46	922.925	0	0	0	0	0	0	0	603	903	0
974	3	0	0	0	0	0	0	200	300	0	18.828	-37.9712	-240.535	-4390.34	5248.49	-426.864	221.82	921.252	0	0	0	0	0	0	0	603	903	0
974	4	0	0	0	0	0	0	200	300	0	16.6917	-37.666	-246.028	-4481.89	5736.77	-930.405	223.318	921.217	0	0	0	0	0	0	0	603	903	0
974	5	0	0	0	0	0	0	200	300	0	18.3702	-38.5815	-255.489	-4115.68	5980.91	-747.299	223.41	919.109	0	0	0	0	0	0	0	603	903	0
974	6	0	0	0	0	0	0	200	300	0	22.4901	-38.8867	-261.287	-4390.34	5980.91	-701.523	222.89	919.803	0	0	0	0	0	0	0	603	903	0
974	7	0	0	0	0	0	0	200	300	0	20.2013	-40.5652	-265.254	-3932.58	5797.81	-564.193	221.858	917.826	0	0	0	0	0	0	0	603	903	0
974	8	0	0	0	0	0	0	200	300	0	17.4547	-41.9385	-274.41	-3291.71	6286.09	-701.523	222.908	914.996	0	0	0	0	0	0	0	603	903	0
974	9	0	0	0	0	0	0	200	300	0	19.2857	-42.854	-280.513	-3566.36	5919.88	-793.076	221.104	915.714	0	0	0	0	0	0	0	603	903	0
975	0	0	0	0	0	0	0	200	300	0	20.0487	-44.5325	-286.312	-4115.68	6225.06	-609.97	221.742	917.375	0	0	0	0	0	0	0	603	903	0
975	1	0	0	0	0	0	0	200	300	0	17.4547	-45.2954	-291.194	-3932.58	6408.16	-609.97	222.006	916.505	0	0	0	0	0	0	0	603	903	0
975	2	0	0	0	0	0	0	200	300	0	17.9124	-46.0584	-294.857	-3566.36	6225.06	-472.641	221.112	915.095	0	0	0	0	0	0	0	603	903	0
975	3	0	0	0	0	0	0	200	300	0	17.4547	-47.8894	-300.96	-3291.71	6530.23	-472.641	221.698	913.937	0	0	0	0	0	0	0	603	903	0
975	4	0	0	0	0	0	0	200	300	0	16.8443	-49.4153	-303.096	-3200.15	6774.37	76.6757	222.351	913.558	0	0	0	0	0	0	0	603	903	0
975	5	0	0	0	0	0	0	200	300	0	15.9288	-49.8731	-308.589	-2559.28	6652.3	-518.417	221.557	911.294	0	0	0	0	0	0	0	603	903	0
975	6	0	0	0	0	0	0	200	300	0	14.2503	-51.8567	-312.862	-2559.28	6286.09	-197.982	220.092	911.18	0	0	0	0	0	0	0	603	903	0
975	7	0	0	0	0	0	0	200	300	0	13.64	-53.6877	-311.946	-3017.05	6835.41	-335.312	221.912	912.672	0	0	0	0	0	0	0	603	903	0
975	8	0	0	0	0	0	0	200	300	0	14.0977	-54.4507	-321.407	-2376.18	6896.44	-289.535	221.457	910.393	0	0	0	0	0	0	0	603	903	0
975	9	0	0	0	0	0	0	200	300	0	12.5719	-57.1973	-324.764	-2376.18	6896.44	-197.982	221.235	910.317	0	0	0	0	0	0	0	603	903	0
976	0	0	0	0	0	0	0	200	300	0	10.5882	-57.9602	-326.9	-1918.41	6286.09	-381.088	219.229	908.869	0	0	0	0	0	0	0	603	903	0
976	1	0	0	0	0	0	0	200	300	0	10.8934	-59.4861	-334.224	-1735.31	6835.41	-335.312	220.452	908.192	0	0	0	0	0	0	0	603	903	0
976	2	0	0	0	0	0	0	200	300	0	9.6727	-60.8594	-336.36	-2009.97	6774.37	-152.206	220.14	908.976	0	0	0	0	0	0	0	603	903	0
976	3	0	0	0	0	0	0	200	300	0	7.68906	-60.7068	-341.548	-1735.31	6957.48	-335.312	220.37	908.081	0	0	0	0	0	0	0	603	903	0
976	4	0	0	0	0	0	0	200	300	0	7.68906	-62.9956	-341.854	-1002.89	6713.34	-426.864	219.638	905.934	0	0	0	0	0	0	0	603	903	0
976	5	0	0	0	0	0	0	200	300	0	7.23129	-63.1482	-348.567	-1002.89	6774.37	-518.417	219.435	905.877	0	0	0	0	0	0	0	603	903	0
976	6	0	0	0	0	0	0	200	300	0	4.48471	-62.0801	-351.009	-1094.44	6713.34	-335.312	219.126	906.118	0	0	0	0	0	0	0	603	903	0
976	7	0	0	0	0	0	0	200	300	0	4.78989	-64.0637	-355.892	-819.782	7018.51	-518.417	219.721	905.304	0	0	0	0	0	0	0	603	903	0
976	8	0	0	0	0	0	0	200	300	0	3.72177	-64.8267	-357.723	-911.334	6408.16	-564.193	217.914	905.548	0	0	0	0	0	0	0	603	903	0
976	9	0	0	0	0	0	0	200	300	0	4.02695	-64.0637	-361.995	-453.571	6896.44	-472.641	219.051	904.253	0	0	0	0	0	0	0	603	903	0
977	0	0	0	0	0	0	0	200	300	0	1.28037	-64.3689	-365.962	187.299	6957.48	-518.417	219.011	902.488	0	0	0	0	0	0	0	603	903	0
977	1	0	0	0	0	0	0	200	300	0	0.517426	-64.6741	-369.625	95.7459	7018.51	-564.193	218.988	902.741	0	0	0	0	0	0	0	603	903	0
977	2	0	0	0	0	0	0	200	300	0	0.822602	-65.2844	-373.592	553.51	6835.41	-747.299	218.296	901.518	0	0	0	0	0	0	0	603	903	0
977	3	0	0	0	0	0	0	200	300	0	-0.550689	-66.0474	-376.949	553.51	6957.48	-609.97	218.457	901.532	0	0	0	0	0	0	0	603	903	0
977	4	0	0	0	0	0	0	200	300	0	-2.22916	-65.437	-380.306	1011.27	6957.48	-655.746	218.294	900.341	0	0	0	0	0	0	0	603	903	0
977	5	0	0	0	0	0	0	200	300	0	-3.75503	-66.2	-384.883	1377.48	6591.27	-930.405	217.125	899.421	0	0	0	0	0	0	0	603	903	0
977	6	0	0	0	0	0	0	200	300	0	-3.44986	-68.6414	-388.851	2109.91	6469.2	-655.746	216.637	897.574	0	0	0	0	0	0	0	603	903	0
977	7	0	0	0	0	0	0	200	300	0	-5.89127	-69.2517	-392.513	2201.46	6530.23	-747.299	216.637	897.391	0	0	0	0	0	0	0	603	903	0
977	8	0	0	0	0	0	0	200	300	0	-7.72232	-69.8621	-393.428	2201.46	6347.13	-838.852	216.133	897.404	0	0	0	0	0	0	0	603	903	0
977	9	0	0	0	0	0	0	200	300	0	-7.56973	-70.7776	-398.006	3208.54	6408.16	-976.181	216.101	894.939	0	0	0	0	0	0	0	603	903	0
978	0	0	0	0	0	0	0	200	300	0	-9.2482	-72.1509	-401.668	3116.99	6469.2	-976.181	216.106	895.24	0	0	0	0	0	0	0	603	903	0
978	1	0	0	0	0	0	0	200	300	0	-8.79044	-72.9138	-404.415	3574.75	6591.27	-701.523	216.298	894.161	0	0	0	0	0	0	0	603	903	0
978	2	0	0	0	0	0	0	200	300	0	-10.9267	-74.2871	-406.856	4032.52	6286.09	-793.076	215.45	893.089	0	0	0	0	0	0	0	603	903	0
978	3	0	0	0	0	0	0	200	300	0	-10.6215	-74.7449	-410.213	4032.52	6225.06	-1067.73	215.175	893.17	0	0	0	0	0	0	0	603	903	0
978	4	0	0	0	0	0	0	200	300	0	-12.6051	-77.0337	-414.791	4398.73	6102.98	-976.181	214.713	892.395	0	0	0	0	0	0	0	603	903	0
978	5	0	0	0	0	0	0	200	300	0	-14.131	-78.8647	-417.537	4948.04	5797.81	-838.852	213.886	891.15	0	0	0	0	0	0	0	603	903	0
978	6	0	0	0	0	0	0	200	300	0	-13.3681	-79.7803	-419.979	5131.15	6102.98	-1021.96	214.532	890.782	0	0	0	0	0	0	0	603	903	0
978	7	0	0	0	0	0	0	200	300	0	-14.2836	-82.5269	-423.03	5405.81	6102.98	-793.076	214.427	890.221	0	0	0	0	0	0	0	603	903	0
978	8	0	0	0	0	0	0	200	300	0	-15.1991	-82.5269	-425.472	6046.68	5797.81	-609.97	213.627	888.788	0	0	0	0	0	0	0	603	903	0
978	9	0	0	0	0	0	0	200	300	0	-14.5888	-83.7476	-430.965	6412.89	5797.81	-838.852	213.453	888.12	0	0	0	0	0	0	0	603	903	0
979	0	0	0	0	0	0	0	200	300	0	-16.2672	-86.6467	-433.711	6504.44	6225.06	-518.417	214.353	888.003	0	0	0	0	0	0	0	603	903	0
979	1	0	0	0	0	0	0	200	300	0	-13.8258	-86.4941	-435.543	6870.65	5858.84	-518.417	213.452	887.225	0	0	0	0	0	0	0	603	903	0
979	2	0	0	0	0	0	0	200	300	0	-15.5043	-87.8674	-440.12	7328.41	5858.84	-609.97	213.312	886.349	0	0	0	0	0	0	0	603	903	0
979	3	0	0	0	0	0	0	200	300	0	-16.725	-88.3252	-444.698	7786.18	5431.6	-472.641	212.214	885.491	0	0	0	0	0	0	0	603	903	0
979	4	0	0	0	0	0	0	200	300	0	-16.1147	-89.8511	-445.613	7877.73	5492.63	-564.193	212.326	885.322	0	0	0	0	0	0	0	603	903	0
979	5	0	0	0	0	0	0	200	300	0	-15.9621	-91.0718	-450.801	8427.04	5492.63	-197.982	212.184	884.307	0	0	0	0	0	0	0	603	903	0
979	6	0	0	0	0	0	0	200	300	0	-17.1828	-92.2925	-452.938	8243.94	5675.74	-289.535	212.531	884.799	0	0	0	0	0	0	0	603	903	0
979	7	0	0	0	0	0	0	200	300	0	-17.7931	-92.9028	-455.379	8793.26	5065.39	-335.312	211.123	883.69	0	0	0	0	0	0	0	603	903	0
979	8	0	0	0	0	0	0	200	300	0	-16.725	-94.8865	-460.567	9525.68	5492.63	-243.759	211.926	882.318	0	0	0	0	0	0	0	603	903	0
979	9	0	0	0	0	0	0	200	300	0	-18.2509	-96.5649	-466.365	9434.13	5797.81	-60.6534	212.432	882.771	0	0	0	0	0	0	0	603	903	0
980	0	0	0	0	0	0	0	200	300	0	-15.8095	-97.0227	-470.638	9983.45	5370.56	-14.877	211.411	881.787	0	0	0	0	0	0	0	603	903	0
980	1	0	0	0	0	0	0	200	300	0	-18.2509	-98.396	-474.91	9983.45	5492.63	122.452	211.566	881.978	0	0	0	0	0	0	0	603	903	0
980	2	0	0	0	0	0	0	200	300	0	-18.2509	-98.396	-478.878	10624.3	5370.56	76.6757	211.215	880.814	0	0	0	0	0	0	0	603	903	0
980	3	0	0	0	0	0	0	200	300	0	-19.319	-99.4641	-484.981	10990.5	5370.56	122.452	211.074	880.338	0	0	0	0	0	0	0	603	903	0
980	4	0	0	0	0	0	0	200	300	0	-20.3871	-101.753	-489.559	10990.5	5248.49	30.8993	210.721	880.55	0	0	0	0	0	0	0	603	903	0
980	5	0	0	0	0	0	0	200	300	0	-18.7086	-103.126	-492.305	11722.9	5248.49	351.334	210.661	879.188	0	0	0	0	0	0	0	603	903	0
980	6	0	0	0	0	0	0	200	300	0	-20.5397	-103.126	-499.324	11997.6	5248.49	259.781	210.511	878.972	0	0	0	0	0	0	0	603	903	0
980	7	0	0	0	0	0	0	200	300	0	-21.3026	-104.5	-504.512	12546.9	5004.35	-14.877	209.919	878.131	0	0	0	0	0	0	0	603	903	0
980	8	0	0	0	0	0	0	200	300	0	-22.6759	-104.5	-505.428	12821.6	5187.46	76.6757	210.264	877.632	0	0	0	0	0	0	0	603	903	0
980	9	0	0	0	0	0	0	200	300	0	-22.5233	-105.568	-516.109	13737.1	5126.42	122.452	209.933	876.383	0	0	0	0	0	0	0	603	903	0
981	0	0	0	0	0	0	0	200	300	0	-22.9811	-106.941	-522.212	13828.7	4699.18	30.8993	208.999	876.519	0	0	0	0	0	0	0	603	903	0
981	1	0	0	0	0	0	0	200	300	0	-24.2018	-107.246	-526.79	14561.1	4760.21	-152.206	209.036	875.359	0	0	0	0	0	0	0	603	903	0
981	2	0	0	0	0	0	0	200	300	0	-26.4906	-108.009	-532.588	15751.3	4332.96	122.452	208.136	873.425	0	0	0	0	0	0	0	603	903	0
981	3	0	0	0	0	0	0	200	300	0	-28.0165	-108.009	-539.913	15476.6	4394	-289.535	208.138	874.335	0	0	0	0	0	0	0	603	903	0
981	4	0	0	0	0	0	0	200	300	0	-30.6105	-108.772	-545.711	16300.6	4394	-60.6534	208.052	873.13	0	0	0	0	0	0	0	603	903	0
981	5	0	0	0	0	0	0	200	300	0	-28.1691	-109.84	-552.73	16941.4	4149.86	-564.193	207.508	872.349	0	0	0	0	0	0	0	603	903	0
981	6	0	0	0	0	0	0	200	300	0	-34.2726	-111.671	-560.665	18406.3	3783.65	-884.628	206.749	870.171	0	0	0	0	0	0	0	603	903	0
981	7	0	0	0	0	0	0	200	300	0	-37.3244	-112.739	-566.463	18314.7	3539.51	-793.076	206.248	870.668	0	0	0	0	0	0	0	603	903	0
981	8	0	0	0	0	0	0	200	300	0	-38.2399	-113.197	-569.515	18955.6	3966.76	-1021.96	206.965	869.716	0	0	0	0	0	0	0	603	903	0
981	9	0	0	0	0	0	0	200	300	0	-37.9347	-115.791	-576.229	19047.2	3966.76	-884.628	206.884	869.945	0	0	0	0	0	0	0	603	903	0
982	0	0	0	0	0	0	0	200	300	0	-40.071	-116.249	-580.196	19230.3	3722.61	-1021.96	206.416	869.856	0	0	0	0	0	0	0	603	903	0
982	1	0	0	0	0	0	0	200	300	0	-40.2235	-118.385	-585.994	19871.1	4027.79	-976.181	206.873	869.09	0	0	0	0	0	0	0	603	903	0
982	2	0	0	0	0	0	0	200	300	0	-36.2563	-119.148	-589.351	19962.7	3844.68	-701.523	206.524	869.128	0	0	0	0	0	0	0	603	903	0
982	3	0	0	0	0	0	0	200	300	0	-38.5451	-117.622	-592.098	19779.6	3844.68	-793.076	206.493	869.594	0	0	0	0	0	0	0	603	903	0
982	4	0	0	0	0	0	0	200	300	0	-38.3925	-119.301	-597.591	20786.7	3722.61	-472.641	206.229	868.216	0	0	0	0	0	0	0	603	903	0
982	5	0	0	0	0	0	0	200	300	0	-37.0192	-119.148	-600.032	21061.3	4088.82	-518.417	206.814	867.9	0	0	0	0	0	0	0	603	903	0
982	6	0	0	0	0	0	0	200	300	0	-36.8666	-117.622	-604.61	20786.7	3783.65	-564.193	206.258	868.62	0	0	0	0	0	0	0	603	903	0
982	7	0	0	0	0	0	0	200	300	0	-35.0356	-117.927	-607.357	21793.7	4027.79	30.8993	206.632	867.117	0	0	0	0	0	0	0	603	903	0
982	8	0	0	0	0	0	0	200	300	0	-33.0519	-117.927	-611.629	21976.8	3966.76	-197.982	206.486	867.068	0	0	0	0	0	0	0	603	903	0
982	9	0	0	0	0	0	0	200	300	0	-32.8993	-116.401	-616.512	22160	3844.68	-14.877	206.236	867.056	0	0	0	0	0	0	0	603	903	0
983	0	0	0	0	0	0	0	200	300	0	-31.6786	-117.469	-619.564	22617.7	4027.79	-152.206	206.501	866.494	0	0	0	0	0	0	0	603	903	0
983	1	0	0	0	0	0	0	200	300	0	-30.9157	-115.638	-622.92	23167	4210.89	-14.877	206.76	865.809	0	0	0	0	0	0	0	603	903	0
983	2	0	0	0	0	0	0	200	300	0	-30.7631	-116.096	-628.108	24082.6	4394	30.8993	206.996	864.659	0	0	0	0	0	0	0	603	903	0
983	3	0	0	0	0	0	0	200	300	0	-32.1364	-116.707	-632.686	23716.3	3600.54	168.228	205.691	865.515	0	0	0	0	0	0	0	603	903	0
983	4	0	0	0	0	0	0	200	300	0	-31.9838	-116.859	-636.348	24540.3	4149.86	305.558	206.521	864.436	0	0	0	0	0	0	0	603	903	0
983	5	0	0	0	0	0	0	200	300	0	-31.0683	-116.554	-639.4	25089.6	4027.79	76.6757	206.299	863.761	0	0	0	0	0	0	0	603	903	0
983	6	0	0	0	0	0	0	200	300	0	-30.7631	-118.843	-646.724	25089.6	3905.72	30.8993	206.039	864.205	0	0	0	0	0	0	0	603	903	0
983	7	0	0	0	0	0	0	200	300	0	-32.5941	-118.995	-650.081	25822.1	3966.76	-60.6534	206.102	863.279	0	0	0	0	0	0	0	603	903	0
983	8	0	0	0	0	0	0	200	300	0	-31.6786	-120.369	-656.185	26279.8	4149.86	30.8993	206.324	862.951	0	0	0	0	0	0	0	603	903	0
983	9	0	0	0	0	0	0	200	300	0	-31.6786	-121.284	-659.542	26829.1	3600.54	168.228	205.459	862.322	0	0	0	0	0	0	0	603	903	0
984	0	0	0	0	0	0	0	200	300	0	-32.1364	-120.674	-665.95	26829.1	4088.82	-152.206	206.14	862.713	0	0	0	0	0	0	0	603	903	0
984	1	0	0	0	0	0	0	200	300	0	-32.1364	-122.657	-669.307	27012.2	3783.65	-60.6534	205.653	862.642	0	0	0	0	0	0	0	603	903	0
984	2	0	0	0	0	0	0	200	300	0	-33.2045	-122.81	-672.664	27836.2	3905.72	-60.6534	205.806	861.618	0	0	0	0	0	0	0	603	903	0
984	3	0	0	0	0	0	0	200	300	0	-34.4252	-121.742	-678.462	27286.9	3905.72	-197.982	205.757	862.781	0	0	0	0	0	0	0	603	903	0
984	4	0	0	0	0	0	0	200	300	0	-34.2726	-120.979	-679.988	28385.5	4088.82	-152.206	206.013	861.256	0	0	0	0	0	0	0	603	903	0
984	5	0	0	0	0	0	0	200	300	0	-33.6623	-122.2	-683.345	28660.2	4149.86	-152.206	206.073	861.059	0	0	0	0	0	0	0	603	903	0
984	6	0	0	0	0	0	0	200	300	0	-33.8148	-121.284	-687.313	28568.6	3417.44	-60.6534	204.972	861.434	0	0	0	0	0	0	0	603	903	0
984	7	0	0	0	0	0	0	200	300	0	-31.9838	-121.132	-689.449	29118	4088.82	-335.312	205.931	860.766	0	0	0	0	0	0	0	603	903	0
984	8	0	0	0	0	0	0	200	300	0	-34.2726	-120.063	-692.806	30216.6	4332.96	-106.43	206.254	859.385	0	0	0	0	0	0	0	603	903	0
984	9	0	0	0	0	0	0	200	300	0	-33.9674	-119.301	-692.501	29575.7	3722.61	-426.864	205.376	860.291	0	0	0	0	0	0	0	603	903	0
985	0	0	0	0	0	0	0	200	300	0	-35.9511	-119.911	-699.214	29667.3	3844.68	-243.759	205.499	860.571	0	0	0	0	0	0	0	603	903	0
985	1	0	0	0	0	0	0	200	300	0	-35.0356	-118.538	-702.266	30674.4	4027.79	-106.43	205.735	859.321	0	0	0	0	0	0	0	603	903	0
985	2	0	0	0	0	0	0	200	300	0	-34.7304	-118.538	-706.539	30765.9	3722.61	-197.982	205.269	859.455	0	0	0	0	0	0	0	603	903	0
985	3	0	0	0	0	0	0	200	300	0	-36.714	-118.232	-709.59	30582.8	4027.79	-152.206	205.676	859.901	0	0	0	0	0	0	0	603	903	0
985	4	0	0	0	0	0	0	200	300	0	-35.9511	-115.486	-712.337	31223.7	3722.61	-60.6534	205.226	859.167	0	0	0	0	0	0	0	603	903	0
985	5	0	0	0	0	0	0	200	300	0	-35.4933	-118.08	-716.609	31406.8	3844.68	-14.877	205.365	859.173	0	0	0	0	0	0	0	603	903	0
985	6	0	0	0	0	0	0	200	300	0	-34.2726	-118.69	-719.051	31956.1	3539.51	-152.206	204.922	858.558	0	0	0	0	0	0	0	603	903	0
985	7	0	0	0	0	0	0	200	300	0	-36.8666	-116.554	-723.323	31773	3844.68	-152.206	205.315	859.074	0	0	0	0	0	0	0	603	903	0
985	8	0	0	0	0	0	0	200	300	0	-36.4088	-117.775	-726.375	33237.9	3783.65	-243.759	205.209	857.242	0	0	0	0	0	0	0	603	903	0
985	9	0	0	0	0	0	0	200	300	0	-36.4088	-117.164	-729.427	32322.3	3478.47	-381.088	204.769	858.688	0	0	0	0	0	0	0	603	903	0
986	0	0	0	0	0	0	0	200	300	0	-35.6459	-116.707	-733.394	32871.6	3783.65	-243.759	205.159	858.179	0	0	0	0	0	0	0	603	903	0
986	1	0	0	0	0	0	0	200	300	0	-36.8666	-117.469	-736.751	32963.2	3783.65	-106.43	205.136	858.259	0	0	0	0	0	0	0	603	903	0
986	2	0	0	0	0	0	0	200	300	0	-37.3244	-116.859	-738.887	33329.4	3783.65	-106.43	205.121	857.893	0	0	0	0	0	0	0	603	903	0
986	3	0	0	0	0	0	0	200	300	0	-37.9347	-117.775	-741.939	33787.2	3661.58	-243.759	204.935	857.461	0	0	0	0	0	0	0	603	903	0
986	4	0	0	0	0	0	0	200	300	0	-37.9347	-117.469	-744.991	34153.4	3844.68	-197.982	205.161	857.156	0	0	0	0	0	0	0	603	903	0
986	5	0	0	0	0	0	0	200	300	0	-38.0873	-116.401	-749.263	34611.1	3722.61	-472.641	204.968	856.807	0	0	0	0	0	0	0	603	903	0
986	6	0	0	0	0	0	0	200	300	0	-38.0873	-117.622	-752.01	34611.1	3600.54	-60.6534	204.788	856.975	0	0	0	0	0	0	0	603	903	0
986	7	0	0	0	0	0	0	200	300	0	-38.8503	-116.554	-754.146	35068.9	3600.54	-60.6534	204.774	856.499	0	0	0	0	0	0	0	603	903	0
986	8	0	0	0	0	0	0	200	300	0	-37.1718	-116.249	-757.808	35343.5	3234.33	-106.43	204.268	856.361	0	0	0	0	0	0	0	603	903	0
986	9	0	0	0	0	0	0	200	300	0	-38.0873	-116.249	-760.25	35526.7	3295.37	-60.6534	204.335	856.27	0	0	0	0	0	0	0	603	903	0
987	0	0	0	0	0	0	0	200	300	0	-39.0028	-115.486	-762.386	35343.5	3539.51	-106.43	204.643	856.641	0	0	0	0	0	0	0	603	903	0
987	1	0	0	0	0	0	0	200	300	0	-37.6295	-116.249	-766.353	35801.3	3417.44	-106.43	204.459	856.284	0	0	0	0	0	0	0	603	903	0
987	2	0	0	0	0	0	0	200	300	0	-37.7821	-115.181	-766.353	35892.9	3417.44	-60.6534	204.459	856.164	0	0	0	0	0	0	0	603	903	0
987	3	0	0	0	0	0	0	200	300	0	-37.9347	-114.418	-771.846	36350.6	3356.4	-60.6534	204.349	855.904	0	0	0	0	0	0	0	603	903	0
987	4	0	0	0	0	0	0	200	300	0	-36.4088	-114.418	-776.119	36900	3417.44	-197.982	204.403	855.456	0	0	0	0	0	0	0	603	903	0
987	5	0	0	0	0	0	0	200	300	0	-37.0192	-113.807	-775.814	37449.3	3295.37	-60.6534	204.248	854.729	0	0	0	0	0	0	0	603	903	0
987	6	0	0	0	0	0	0	200	300	0	-38.2399	-113.96	-774.593	37174.6	3600.54	76.6757	204.648	855.008	0	0	0	0	0	0	0	603	903	0
987	7	0	0	0	0	0	0	200	300	0	-38.3925	-114.113	-780.696	38090.1	3478.47	-14.877	204.456	854.21	0	0	0	0	0	0	0	603	903	0
987	8	0	0	0	0	0	0	200	300	0	-35.1881	-111.824	-782.222	37907	3112.26	214.005	203.979	854.539	0	0	0	0	0	0	0	603	903	0
987	9	0	0	0	0	0	0	200	300	0	-38.8503	-112.739	-785.579	38090.1	3417.44	-14.877	204.35	854.513	0	0	0	0	0	0	0	603	903	0
988	0	0	0	0	0	0	0	200	300	0	-38.3925	-111.976	-782.833	38822.6	3234.33	305.558	204.132	853.408	0	0	0	0	0	0	0	603	903	0
988	1	0	0	0	0	0	0	200	300	0	-38.0873	-111.671	-790.157	38914.1	3051.23	122.452	203.862	853.751	0	0	0	0	0	0	0	603	903	0
988	2	0	0	0	0	0	0	200	300	0	-39.4606	-110.756	-789.241	38914.1	3295.37	214.005	204.175	853.694	0	0	0	0	0	0	0	603	903	0
988	3	0	0	0	0	0	0	200	300	0	-39.1554	-111.061	-793.819	39280.3	3356.4	76.6757	204.228	853.517	0	0	0	0	0	0	0	603	903	0
988	4	0	0	0	0	0	0	200	300	0	-38.5451	-111.366	-794.429	40287.4	3112.26	76.6757	203.918	852.288	0	0	0	0	0	0	0	603	903	0
988	5	0	0	0	0	0	0	200	300	0	-38.3925	-111.213	-796.871	39738.1	3051.23	122.452	203.829	853.132	0	0	0	0	0	0	0	603	903	0
988	6	0	0	0	0	0	0	200	300	0	-40.071	-109.688	-799.007	39921.2	2990.19	-60.6534	203.742	853.036	0	0	0	0	0	0	0	603	903	0
988	7	0	0	0	0	0	0	200	300	0	-38.2399	-111.213	-802.059	40928.3	2990.19	76.6757	203.728	851.971	0	0	0	0	0	0	0	603	903	0
988	8	0	0	0	0	0	0	200	300	0	-39.308	-109.688	-802.059	41294.5	3112.26	-60.6534	203.88	851.514	0	0	0	0	0	0	0	603	903	0
988	9	0	0	0	0	0	0	200	300	0	-40.2235	-109.535	-806.331	41019.8	2990.19	-60.6534	203.708	852.128	0	0	0	0	0	0	0	603	903	0
989	0	0	0	0	0	0	0	200	300	0	-40.9865	-109.84	-806.636	42026.9	3173.3	259.781	203.934	850.899	0	0	0	0	0	0	0	603	903	0
989	1	0	0	0	0	0	0	200	300	0	-37.7821	-109.382	-808.162	41935.3	2685.02	-14.877	203.322	851.11	0	0	0	0	0	0	0	603	903	0
989	2	0	0	0	0	0	0	200	300	0	-41.4442	-110.145	-807.857	42301.6	2868.12	351.334	203.55	850.637	0	0	0	0	0	0	0	603	903	0
989	3	0	0	0	0	0	0	200	300	0	-41.7494	-109.535	-809.993	43034	3112.26	-14.877	203.842	849.871	0	0	0	0	0	0	0	603	903	0
989	4	0	0	0	0	0	0	200	300	0	-40.3761	-107.399	-810.604	42484.7	2746.05	-60.6534	203.388	850.589	0	0	0	0	0	0	0	603	903	0
989	5	0	0	0	0	0	0	200	300	0	-41.1391	-108.772	-812.435	42942.4	2562.95	-152.206	203.155	850.144	0	0	0	0	0	0	0	603	903	0
989	6	0	0	0	0	0	0	200	300	0	-41.5968	-107.856	-813.35	43217.1	2623.98	-60.6534	203.226	849.865	0	0	0	0	0	0	0	603	903	0
989	7	0	0	0	0	0	0	200	300	0	-40.5287	-107.094	-814.266	43217.1	2440.88	-14.877	202.998	849.925	0	0	0	0	0	0	0	603	903	0
989	8	0	0	0	0	0	0	200	300	0	-40.8339	-107.399	-815.792	43949.5	2379.84	76.6757	202.917	849.127	0	0	0	0	0	0	0	603	903	0
989	9	0	0	0	0	0	0	200	300	0	-41.7494	-106.178	-814.266	43766.4	2501.91	-106.43	203.073	849.251	0	0	0	0	0	0	0	603	903	0
990	0	0	0	0	0	0	0	200	300	0	-42.0546	-105.873	-818.233	44590.4	2501.91	76.6757	203.058	848.504	0	0	0	0	0	0	0	603	903	0
990	1	0	0	0	0	0	0	200	300	0	-38.8503	-104.042	-818.538	44865	2379.84	30.8993	202.907	848.189	0	0	0	0	0	0	0	603	903	0
990	2	0	0	0	0	0	0	200	300	0	-41.7494	-105.262	-819.148	44956.6	2318.8	-197.982	202.831	848.118	0	0	0	0	0	0	0	603	903	0
990	3	0	0	0	0	0	0	200	300	0	-42.2072	-105.11	-821.59	44956.6	2379.84	-14.877	202.897	848.281	0	0	0	0	0	0	0	603	903	0
990	4	0	0	0	0	0	0	200	300	0	-41.4442	-104.805	-820.369	45414.3	1830.52	-14.877	202.231	847.642	0	0	0	0	0	0	0	603	903	0
990	5	0	0	0	0	0	0	200	300	0	-41.5968	-102.821	-821.285	45414.3	2074.66	259.781	202.526	847.703	0	0	0	0	0	0	0	603	903	0
990	6	0	0	0	0	0	0	200	300	0	-43.2753	-103.889	-822.2	45780.6	2135.7	-60.6534	202.598	847.319	0	0	0	0	0	0	0	603	903	0
990	7	0	0	0	0	0	0	200	300	0	-43.1227	-102.516	-823.726	46604.6	1647.42	-60.6534	202	846.422	0	0	0	0	0	0	0	603	903	0
990	8	0	0	0	0	0	0	200	300	0	-41.7494	-100.685	-822.811	46970.8	1952.59	-106.43	202.373	845.914	0	0	0	0	0	0	0	603	903	0
990	9	0	0	0	0	0	0	200	300	0	-43.4279	-102.211	-824.642	46696.1	1769.49	-60.6534	202.146	846.374	0	0	0	0	0	0	0	603	903	0
991	0	0	0	0	0	0	0	200	300	0	-43.2753	-101.753	-825.557	47153.9	1525.35	122.452	201.848	845.882	0	0	0	0	0	0	0	603	903	0
991	1	0	0	0	0	0	0	200	300	0	-41.2917	-99.7693	-826.473	47611.6	1647.42	-197.982	201.993	845.392	0	0	0	0	0	0	0	603	903	0
991	2	0	0	0	0	0	0	200	300	0	-42.9701	-100.227	-827.693	47520.1	1342.24	-197.982	201.622	845.587	0	0	0	0	0	0	0	603	903	0
991	3	0	0	0	0	0	0	200	300	0	-43.2753	-99.0063	-827.388	48069.4	1281.21	-106.43	201.549	844.902	0	0	0	0	0	0	0	603	903	0
991	4	0	0	0	0	0	0	200	300	0	-42.6649	-98.396	-828.609	48344	1220.17	-197.982	201.473	844.656	0	0	0	0	0	0	0	603	903	0
991	5	0	0	0	0	0	0	200	300	0	-43.2753	-99.0063	-826.778	48252.5	1342.24	-197.982	201.623	844.638	0	0	0	0	0	0	0	603	903	0
991	6	0	0	0	0	0	0	200	300	0	-44.1908	-98.0908	-828.304	48069.4	1159.14	-106.43	201.399	844.966	0	0	0	0	0	0	0	603	903	0
991	7	0	0	0	0	0	0	200	300	0	-42.8175	-98.2434	-826.168	48893.4	976.032	-197.982	201.181	843.819	0	0	0	0	0	0	0	603	903	0
991	8	0	0	0	0	0	0	200	300	0	-42.9701	-97.1753	-828.609	48801.8	1220.17	-472.641	201.473	844.104	0	0	0	0	0	0	0	603	903	0
991	9	0	0	0	0	0	0	200	300	0	-41.902	-95.4968	-826.778	49259.6	792.926	-152.206	200.959	843.42	0	0	0	0	0	0	0	603	903	0
992	0	0	0	0	0	0	0	200	300	0	-43.2753	-96.2598	-829.83	48710.2	853.961	-335.312	201.029	844.301	0	0	0	0	0	0	0	603	903	0
992	1	0	0	0	0	0	0	200	300	0	-43.7331	-95.0391	-827.693	49717.3	609.821	-152.206	200.737	842.933	0	0	0	0	0	0	0	603	903	0
992	2	0	0	0	0	0	0	200	300	0	-42.9701	-94.8865	-829.219	49717.3	670.856	-106.43	200.809	843.043	0	0	0	0	0	0	0	603	903	0
992	3	0	0	0	0	0	0	200	300	0	-43.5805	-93.0554	-828.914	50358.2	548.786	-243.759	200.662	842.248	0	0	0	0	0	0	0	603	903	0
992	4	0	0	0	0	0	0	200	300	0	-44.496	-93.3606	-827.999	50632.9	670.856	-14.877	200.81	841.849	0	0	0	0	0	0	0	603	903	0
992	5	0	0	0	0	0	0	200	300	0	-45.4115	-92.7502	-825.557	49717.3	487.75	168.228	200.591	842.777	0	0	0	0	0	0	0	603	903	0
992	6	0	0	0	0	0	0	200	300	0	-44.8012	-93.0554	-827.083	50907.5	-61.5664	-197.982	199.926	841.449	0	0	0	0	0	0	0	603	903	0
992	7	0	0	0	0	0	0	200	300	0	-44.496	-91.6821	-828.609	50724.4	243.609	-243.759	200.294	841.784	0	0	0	0	0	0	0	603	903	0
992	8	0	0	0	0	0	0	200	300	0	-45.7167	-91.8347	-828.304	50541.3	121.539	-426.864	200.147	841.982	0	0	0	0	0	0	0	603	903	0
992	9	0	0	0	0	0	0	200	300	0	-45.5641	-90.614	-826.778	50816	-305.707	-243.759	199.63	841.537	0	0	0	0	0	0	0	603	903	0
993	0	0	0	0	0	0	0	200	300	0	-44.9538	-90.4614	-827.693	51182.2	60.5039	-243.759	200.073	841.163	0	0	0	0	0	0	0	603	903	0
993	1	0	0	0	0	0	0	200	300	0	-45.5641	-90.9192	-826.168	50907.5	-61.5664	-197.982	199.925	841.381	0	0	0	0	0	0	0	603	903	0
993	2	0	0	0	0	0	0	200	300	0	-45.7167	-89.5459	-824.031	51273.7	-366.742	-243.759	199.555	840.777	0	0	0	0	0	0	0	603	903	0
993	3	0	0	0	0	0	0	200	300	0	-44.6486	-87.7148	-824.947	51731.5	-305.707	-243.759	199.629	840.291	0	0	0	0	0	0	0	603	903	0
993	4	0	0	0	0	0	0	200	300	0	-45.2589	-88.9355	-822.505	51823	-305.707	-106.43	199.628	839.994	0	0	0	0	0	0	0	603	903	0
993	5	0	0	0	0	0	0	200	300	0	-45.7167	-87.5623	-821.59	51639.9	-549.848	-381.088	199.331	840.146	0	0	0	0	0	0	0	603	903	0
993	6	0	0	0	0	0	0	200	300	0	-44.496	-88.1726	-821.285	52647	-488.813	-609.97	199.405	838.897	0	0	0	0	0	0	0	603	903	0
993	7	0	0	0	0	0	0	200	300	0	-45.5641	-87.1045	-820.064	53013.2	-488.813	-197.982	199.404	838.355	0	0	0	0	0	0	0	603	903	0
993	8	0	0	0	0	0	0	200	300	0	-45.7167	-84.6631	-815.792	52463.9	-855.024	-335.312	198.952	838.69	0	0	0	0	0	0	0	603	903	0
993	9	0	0	0	0	0	0	200	300	0	-46.9374	-86.3416	-819.148	52647	-855.024	-197.982	198.956	838.73	0	0	0	0	0	0	0	603	903	0
994	0	0	0	0	0	0	0	200	300	0	-46.1745	-85.426	-817.012	53196.4	-366.742	-289.535	199.551	837.889	0	0	0	0	0	0	0	603	903	0
994	1	0	0	0	0	0	0	200	300	0	-46.6322	-84.0527	-817.623	52830.1	-916.059	-243.759	198.88	838.386	0	0	0	0	0	0	0	603	903	0
994	2	0	0	0	0	0	0	200	300	0	-47.2426	-84.8157	-815.792	53471	-916.059	-335.312	198.877	837.455	0	0	0	0	0	0	0	603	903	0
994	3	0	0	0	0	0	0	200	300	0	-46.0219	-83.7476	-813.045	53013.2	-1282.27	-289.535	198.423	837.797	0	0	0	0	0	0	0	603	903	0
994	4	0	0	0	0	0	0	200	300	0	-46.0219	-82.9846	-813.045	53104.8	-1160.2	-289.535	198.573	837.684	0	0	0	0	0	0	0	603	903	0
994	5	0	0	0	0	0	0	200	300	0	-47.2426	-82.2217	-812.129	52921.7	-1160.2	-289.535	198.571	837.836	0	0	0	0	0	0	0	603	903	0
994	6	0	0	0	0	0	0	200	300	0	-46.3271	-81.6113	-809.383	53379.5	-977.094	-289.535	198.793	837.049	0	0	0	0	0	0	0	603	903	0
994	7	0	0	0	0	0	0	200	300	0	-46.4796	-79.9329	-809.383	53471	-1099.16	-335.312	198.642	836.936	0	0	0	0	0	0	0	603	903	0
994	8	0	0	0	0	0	0	200	300	0	-46.7848	-81.001	-806.331	53654.1	-1465.38	-197.982	198.183	836.459	0	0	0	0	0	0	0	603	903	0
994	9	0	0	0	0	0	0	200	300	0	-45.8693	-79.3225	-805.721	54478.1	-1160.2	-426.864	198.56	835.386	0	0	0	0	0	0	0	603	903	0
995	0	0	0	0	0	0	0	200	300	0	-46.6322	-79.9329	-805.416	53562.6	-1160.2	-152.206	198.56	836.497	0	0	0	0	0	0	0	603	903	0
995	1	0	0	0	0	0	0	200	300	0	-47.7003	-79.3225	-801.448	53837.2	-1160.2	-197.982	198.552	835.825	0	0	0	0	0	0	0	603	903	0
995	2	0	0	0	0	0	0	200	300	0	-45.1064	-77.644	-801.143	54203.4	-1160.2	-381.088	198.552	835.342	0	0	0	0	0	0	0	603	903	0
995	3	0	0	0	0	0	0	200	300	0	-46.3271	-78.5596	-799.617	55210.5	-1038.13	-472.641	198.702	833.954	0	0	0	0	0	0	0	603	903	0
995	4	0	0	0	0	0	0	200	300	0	-47.3952	-76.7285	-797.176	54295	-1709.52	-518.417	197.856	834.891	0	0	0	0	0	0	0	603	903	0
995	5	0	0	0	0	0	0	200	300	0	-46.3271	-75.813	-796.26	54844.3	-1587.45	-518.417	198.006	834.123	0	0	0	0	0	0	0	603	903	0
995	6	0	0	0	0	0	0	200	300	0	-46.6322	-76.2708	-793.209	54295	-1404.34	-335.312	198.23	834.55	0	0	0	0	0	0	0	603	903	0
995	7	0	0	0	0	0	0	200	300	0	-47.3952	-74.7449	-791.683	53928.8	-1709.52	-609.97	197.841	834.881	0	0	0	0	0	0	0	603	903	0
995	8	0	0	0	0	0	0	200	300	0	-45.5641	-75.2026	-791.378	55027.4	-1587.45	-518.417	197.994	833.466	0	0	0	0	0	0	0	603	903	0
995	9	0	0	0	0	0	0	200	300	0	-45.8693	-74.5923	-788.021	55210.5	-1892.62	-564.193	197.598	832.938	0	0	0	0	0	0	0	603	903	0
996	0	0	0	0	0	0	0	200	300	0	-47.2426	-73.219	-786.495	54295	-2136.76	-426.864	197.283	833.966	0	0	0	0	0	0	0	603	903	0
996	1	0	0	0	0	0	0	200	300	0	-47.3952	-73.3716	-785.884	55393.6	-1892.62	-655.746	197.592	832.514	0	0	0	0	0	0	0	603	903	0
996	2	0	0	0	0	0	0	200	300	0	-44.6486	-71.9983	-782.527	54844.3	-1953.66	-701.523	197.503	832.914	0	0	0	0	0	0	0	603	903	0
996	3	0	0	0	0	0	0	200	300	0	-47.2426	-71.3879	-781.917	55302	-2258.83	-655.746	197.111	832.274	0	0	0	0	0	0	0	603	903	0
996	4	0	0	0	0	0	0	200	300	0	-47.09	-70.3198	-779.476	55210.5	-2380.9	-655.746	196.946	832.17	0	0	0	0	0	0	0	603	903	0
996	5	0	0	0	0	0	0	200	300	0	-46.0219	-70.3198	-776.119	55485.1	-2258.83	-564.193	197.09	831.509	0	0	0	0	0	0	0	603	903	0
996	6	0	0	0	0	0	0	200	300	0	-46.7848	-70.4724	-773.677	54844.3	-2197.8	-701.523	197.159	832.112	0	0	0	0	0	0	0	603	903	0
996	7	0	0	0	0	0	0	200	300	0	-46.4796	-69.0991	-772.151	54844.3	-2380.9	-426.864	196.917	831.972	0	0	0	0	0	0	0	603	903	0
996	8	0	0	0	0	0	0	200	300	0	-45.7167	-68.9465	-770.32	55576.7	-2136.76	-747.299	197.226	830.853	0	0	0	0	0	0	0	603	903	0
996	9	0	0	0	0	0	0	200	300	0	-45.2589	-68.1836	-769.405	55393.6	-1892.62	-793.076	197.54	831.005	0	0	0	0	0	0	0	603	903	0
997	0	0	0	0	0	0	0	200	300	0	-44.496	-67.4207	-765.743	55393.6	-2625.04	-838.852	196.572	830.66	0	0	0	0	0	0	0	603	903	0
997	1	0	0	0	0	0	0	200	300	0	-45.8693	-66.2	-764.217	55576.7	-2136.76	-609.97	197.204	830.276	0	0	0	0	0	0	0	603	903	0
997	2	0	0	0	0	0	0	200	300	0	-45.4115	-66.6577	-762.386	55118.9	-2380.9	-701.523	196.877	830.702	0	0	0	0	0	0	0	603	903	0
997	3	0	0	0	0	0	0	200	300	0	-46.4796	-66.5051	-759.029	55210.5	-2808.15	-747.299	196.3	830.262	0	0	0	0	0	0	0	603	903	0
997	4	0	0	0	0	0	0	200	300	0	-46.4796	-64.3689	-759.029	55668.3	-2136.76	-838.852	197.185	829.659	0	0	0	0	0	0	0	603	903	0
997	5	0	0	0	0	0	0	200	300	0	-44.8012	-64.6741	-756.587	55668.3	-2625.04	-884.628	196.53	829.422	0	0	0	0	0	0	0	603	903	0
997	6	0	0	0	0	0	0	200	300	0	-45.8693	-63.1482	-751.399	55576.7	-2930.22	-518.417	196.1	829.036	0	0	0	0	0	0	0	603	903	0
997	7	0	0	0	0	0	0	200	300	0	-45.8693	-62.6904	-752.315	55210.5	-2564.01	-655.746	196.592	829.613	0	0	0	0	0	0	0	603	903	0
997	8	0	0	0	0	0	0	200	300	0	-44.496	-62.0801	-749.874	55302	-2625.04	-838.852	196.499	829.252	0	0	0	0	0	0	0	603	903	0
997	9	0	0	0	0	0	0	200	300	0	-44.9538	-61.3171	-747.432	55668.3	-2564.01	-930.405	196.57	828.521	0	0	0	0	0	0	0	603	903	0
998	0	0	0	0	0	0	0	200	300	0	-42.3598	-60.8594	-746.517	55668.3	-2930.22	-655.746	196.075	828.429	0	0	0	0	0	0	0	603	903	0
998	1	0	0	0	0	0	0	200	300	0	-44.496	-60.7068	-743.465	55210.5	-2380.9	-793.076	196.798	828.739	0	0	0	0	0	0	0	603	903	0
998	2	0	0	0	0	0	0	200	300	0	-44.6486	-59.3335	-741.329	55668.3	-3113.33	-472.641	195.8	827.908	0	0	0	0	0	0	0	603	903	0
998	3	0	0	0	0	0	0	200	300	0	-43.5805	-59.1809	-741.634	55485.1	-3357.47	-793.076	195.473	828.185	0	0	0	0	0	0	0	603	903	0
998	4	0	0	0	0	0	0	200	300	0	-44.6486	-58.7231	-737.361	56217.6	-2869.18	-1067.73	196.109	826.758	0	0	0	0	0	0	0	603	903	0
998	5	0	0	0	0	0	0	200	300	0	-43.7331	-57.5024	-736.141	55393.6	-3052.29	-930.405	195.854	827.751	0	0	0	0	0	0	0	603	903	0
998	6	0	0	0	0	0	0	200	300	0	-44.9538	-57.9602	-734.31	55576.7	-3113.33	-1021.96	195.76	827.314	0	0	0	0	0	0	0	603	903	0
998	7	0	0	0	0	0	0	200	300	0	-45.7167	-56.7395	-730.037	56217.6	-2991.26	-838.852	195.903	825.994	0	0	0	0	0	0	0	603	903	0
998	8	0	0	0	0	0	0	200	300	0	-43.7331	-55.824	-729.427	56126	-3052.29	-884.628	195.816	826.055	0	0	0	0	0	0	0	603	903	0
998	9	0	0	0	0	0	0	200	300	0	-44.496	-55.061	-727.291	55576.7	-3479.54	-1021.96	195.216	826.584	0	0	0	0	0	0	0	603	903	0
999	0	0	0	0	0	0	0	200	300	0	-44.1908	-54.7559	-724.544	55942.9	-3601.61	-930.405	195.029	825.789	0	0	0	0	0	0	0	603	903	0
999	1	0	0	0	0	0	0	200	300	0	-42.9701	-54.2981	-724.544	55942.9	-2930.22	-701.523	195.956	825.789	0	0	0	0	0	0	0	603	903	0
999	2	0	0	0	0	0	0	200	300	0	-44.3434	-54.1455	-720.577	55118.9	-3174.36	-884.628	195.595	826.507	0	0	0	0	0	0	0	603	903	0
999	3	0	0	0	0	0	0	200	300	0	-43.5805	-52.7722	-719.661	56034.5	-3357.47	-1021.96	195.335	825.138	0	0	0	0	0	0	0	603	903	0
999	4	0	0	0	0	0	0	200	300	0	-41.902	-52.467	-715.694	55942.9	-3235.4	-930.405	195.479	824.834	0	0	0	0	0	0	0	603	903	0
999	5	0	0	0	0	0	0	200	300	0	-43.5805	-52.1619	-715.389	55851.4	-3418.5	-930.405	195.221	824.929	0	0	0	0	0	0	0	603	903	0
999	6	0	0	0	0	0	0	200	300	0	-43.5805	-50.9412	-711.421	55302	-3540.57	-976.181	195.023	825.265	0	0	0	0	0	0	0	603	903	0
999	7	0	0	0	0	0	0	200	300	0	-41.5968	-50.7886	-712.032	56217.6	-3418.5	-930.405	195.199	824.046	0	0	0	0	0	0	0	603	903	0
999	8	0	0	0	0	0	0	200	300	0	-41.4442	-50.636	-708.675	55302	-3357.47	-1021.96	195.262	824.964	0	0	0	0	0	0	0	603	903	0
999	9	0	0	0	0	0	0	200	300	0	-39.6132	-49.2627	-707.454	55485.1	-3845.75	-1021.96	194.564	824.571	0	0	0	0	0	0	0	603	903	0
1000	0	0	0	0	0	0	0	200	300	0	-41.1391	-49.2627	-705.623	56309.1	-3174.36	-930.405	195.501	823.199	0	0	0	0	0	0	0	603	903	0
1000	1	0	0	0	0	0	0	200	300	0	-40.6813	-47.7368	-702.571	56034.5	-3296.43	-1159.29	195.308	823.244	0	0	0	0	0	0	0	603	903	0
1000	2	0	0	0	0	0	0	200	300	0	-41.7494	-47.8894	-702.266	55118.9	-3601.61	-1021.96	194.871	824.513	0	0	0	0	0	0	0	603	903	0
1000	3	0	0	0	0	0	0	200	300	0	-42.0546	-47.7368	-698.299	55759.8	-3906.78	-930.405	194.405	823.149	0	0	0	0	0	0	0	603	903	0
1000	4	0	0	0	0	0	0	200	300	0	-40.071	-47.1265	-695.857	55393.6	-3723.68	-884.628	194.649	823.395	0	0	0	0	0	0	0	603	903	0
1000	5	0	0	0	0	0	0	200	300	0	-41.902	-46.6687	-692.501	55118.9	-3479.54	-930.405	194.975	823.406	0	0	0	0	0	0	0	603	903	0
1000	6	0	0	0	0	0	0	200	300	0	-40.9865	-45.9058	-691.89	55393.6	-3784.71	-976.181	194.53	822.939	0	0	0	0	0	0	0	603	903	0
1000	7	0	0	0	0	0	0	200	300	0	-40.2235	-44.8377	-689.754	55210.5	-3967.82	-1067.73	194.247	822.956	0	0	0	0	0	0	0	603	903	0
1000	8	0	0	0	0	0	0	200	300	0	-41.2917	-44.8377	-688.533	54935.8	-3784.71	-1021.96	194.503	823.213	0	0	0	0	0	0	0	603	903	0
1000	9	0	0	0	0	0	0	200	300	0	-40.3761	-43.6169	-681.514	55210.5	-3662.64	-1067.73	194.626	821.989	0	0	0	0	0	0	0	603	903	0
1001	0	0	0	0	0	0	0	200	300	0	-39.9184	-43.7695	-683.956	55302	-3540.57	-1250.84	194.823	822.144	0	0	0	0	0	0	0	603	903	0
1001	1	0	0	0	0	0	0	200	300	0	-40.2235	-42.2437	-678.462	54661.2	-3784.71	-930.405	194.422	822.434	0	0	0	0	0	0	0	603	903	0
1001	2	0	0	0	0	0	0	200	300	0	-39.9184	-41.9385	-678.462	54295	-3784.71	-930.405	194.422	822.974	0	0	0	0	0	0	0	603	903	0
1001	3	0	0	0	0	0	0	200	300	0	-39.4606	-42.2437	-674.8	54752.7	-3479.54	-1159.29	194.844	821.861	0	0	0	0	0	0	0	603	903	0
1001	4	0	0	0	0	0	0	200	300	0	-39.0028	-41.6333	-673.885	54295	-3784.71	-1113.51	194.384	822.43	0	0	0	0	0	0	0	603	903	0
1001	5	0	0	0	0	0	0	200	300	0	-39.6132	-39.9548	-669.918	54295	-3601.61	-1113.51	194.624	821.953	0	0	0	0	0	0	0	603	903	0
1001	6	0	0	0	0	0	0	200	300	0	-37.7821	-40.5652	-669.612	54752.7	-3784.71	-1067.73	194.348	821.232	0	0	0	0	0	0	0	603	903	0
1001	7	0	0	0	0	0	0	200	300	0	-38.0873	-40.4126	-668.086	54295	-3540.57	-1159.29	194.7	821.731	0	0	0	0	0	0	0	603	903	0
1001	8	0	0	0	0	0	0	200	300	0	-36.4088	-39.4971	-667.171	54295	-3662.64	-1159.29	194.51	821.619	0	0	0	0	0	0	0	603	903	0
1001	9	0	0	0	0	0	0	200	300	0	-37.3244	-39.0393	-663.204	54478.1	-3296.43	-1067.73	195.03	820.856	0	0	0	0	0	0	0	603	903	0
1002	0	0	0	0	0	0	0	200	300	0	-37.477	-38.429	-659.542	53928.8	-3296.43	-1250.84	195.002	821.233	0	0	0	0	0	0	0	603	903	0
1002	1	0	0	0	0	0	0	200	300	0	-37.6295	-37.3608	-658.931	53562.6	-3601.61	-701.523	194.534	821.713	0	0	0	0	0	0	0	603	903	0
1002	2	0	0	0	0	0	0	200	300	0	-37.1718	-36.7505	-656.49	53928.8	-3357.47	-1205.06	194.886	820.853	0	0	0	0	0	0	0	603	903	0
1002	3	0	0	0	0	0	0	200	300	0	-34.883	-36.9031	-654.048	54111.9	-3296.43	-701.523	194.96	820.266	0	0	0	0	0	0	0	603	903	0
1002	4	0	0	0	0	0	0	200	300	0	-37.477	-35.3772	-651.607	53928.8	-3357.47	-1113.51	194.847	820.237	0	0	0	0	0	0	0	603	903	0
1002	5	0	0	0	0	0	0	200	300	0	-37.6295	-34.9194	-650.691	53654.1	-3357.47	-1250.84	194.84	820.543	0	0	0	0	0	0	0	603	903	0
1002	6	0	0	0	0	0	0	200	300	0	-35.7985	-34.4617	-647.945	53928.8	-3357.47	-1021.96	194.818	819.77	0	0	0	0	0	0	0	603	903	0
1002	7	0	0	0	0	0	0	200	300	0	-35.7985	-34.4617	-644.893	53287.9	-3418.5	-1113.51	194.699	820.37	0	0	0	0	0	0	0	603	903	0
1002	8	0	0	0	0	0	0	200	300	0	-35.1881	-33.8513	-643.367	52830.1	-3174.36	-1113.51	195.066	820.885	0	0	0	0	0	0	0	603	903	0
1002	9	0	0	0	0	0	0	200	300	0	-35.3407	-33.0884	-640.621	52921.7	-2991.26	-930.405	195.331	820.39	0	0	0	0	0	0	0	603	903	0
1003	0	0	0	0	0	0	0	200	300	0	-34.7304	-31.8677	-638.79	52555.5	-3357.47	-1205.06	194.744	820.727	0	0	0	0	0	0	0	603	903	0
1003	1	0	0	0	0	0	0	200	300	0	-35.7985	-31.2573	-635.433	52921.7	-3052.29	-976.181	195.197	819.716	0	0	0	0	0	0	0	603	903	0
1003	2	0	0	0	0	0	0	200	300	0	-35.0356	-30.3418	-634.517	52921.7	-2991.26	-1250.84	195.286	819.595	0	0	0	0	0	0	0	603	903	0
1003	3	0	0	0	0	0	0	200	300	0	-33.0519	-30.4944	-632.076	52372.4	-3540.57	-1388.17	194.399	820.142	0	0	0	0	0	0	0	603	903	0
1003	4	0	0	0	0	0	0	200	300	0	-35.1881	-28.3582	-625.667	52738.6	-2869.18	-1205.06	195.414	818.708	0	0	0	0	0	0	0	603	903	0
1003	5	0	0	0	0	0	0	200	300	0	-33.5097	-28.053	-628.108	52372.4	-3174.36	-1159.29	194.946	819.619	0	0	0	0	0	0	0	603	903	0
1003	6	0	0	0	0	0	0	200	300	0	-33.8148	-27.7478	-625.972	52189.2	-2991.26	-1067.73	195.221	819.627	0	0	0	0	0	0	0	603	903	0
1003	7	0	0	0	0	0	0	200	300	0	-32.7467	-27.1375	-622.615	52097.7	-3235.4	-1250.84	194.804	819.324	0	0	0	0	0	0	0	603	903	0
1003	8	0	0	0	0	0	0	200	300	0	-32.8993	-26.2219	-621.7	51548.4	-2991.26	-1159.29	195.189	820.085	0	0	0	0	0	0	0	603	903	0
1003	9	0	0	0	0	0	0	200	300	0	-31.9838	-26.9849	-618.038	52097.7	-3174.36	-1342.39	194.864	818.705	0	0	0	0	0	0	0	603	903	0
1004	0	0	0	0	0	0	0	200	300	0	-32.7467	-26.0693	-616.817	51090.6	-3052.29	-1388.17	195.052	820.171	0	0	0	0	0	0	0	603	903	0
1004	1	0	0	0	0	0	0	200	300	0	-30.4579	-24.8486	-616.817	52006.1	-3113.33	-1571.27	194.953	818.686	0	0	0	0	0	0	0	603	903	0
1004	2	0	0	0	0	0	0	200	300	0	-31.9838	-23.7805	-613.765	51639.9	-3479.54	-1479.72	194.331	818.864	0	0	0	0	0	0	0	603	903	0
1004	3	0	0	0	0	0	0	200	300	0	-32.5941	-23.3228	-611.019	51548.4	-3052.29	-1433.95	195.005	818.635	0	0	0	0	0	0	0	603	903	0
1004	4	0	0	0	0	0	0	200	300	0	-32.4416	-23.4753	-610.103	51639.9	-3113.33	-1205.06	194.897	818.359	0	0	0	0	0	0	0	603	903	0
1004	5	0	0	0	0	0	0	200	300	0	-29.695	-22.865	-607.051	51273.7	-3418.5	-1205.06	194.369	818.536	0	0	0	0	0	0	0	603	903	0
1004	6	0	0	0	0	0	0	200	300	0	-32.289	-21.6443	-605.525	51365.3	-2991.26	-1342.39	195.06	818.172	0	0	0	0	0	0	0	603	903	0
1004	7	0	0	0	0	0	0	200	300	0	-32.1364	-22.1021	-603.694	51273.7	-2686.08	-1433.95	195.551	818.067	0	0	0	0	0	0	0	603	903	0
1004	8	0	0	0	0	0	0	200	300	0	-30.4579	-20.8814	-600.948	51182.2	-3235.4	-1525.5	194.616	817.831	0	0	0	0	0	0	0	603	903	0
1004	9	0	0	0	0	0	0	200	300	0	-29.8476	-20.271	-599.727	50083.6	-3052.29	-1479.72	194.911	819.49	0	0	0	0	0	0	0	603	903	0
1005	0	0	0	0	0	0	0	200	300	0	-29.2372	-20.271	-596.981	50816	-3052.29	-1342.39	194.887	817.878	0	0	0	0	0	0	0	603	903	0
1005	1	0	0	0	0	0	0	200	300	0	-29.5424	-19.3555	-594.844	50083.6	-3235.4	-1479.72	194.561	818.804	0	0	0	0	0	0	0	603	903	0
1005	2	0	0	0	0	0	0	200	300	0	-29.695	-18.8977	-594.844	50541.3	-2869.18	-1250.84	195.177	818.034	0	0	0	0	0	0	0	603	903	0
1005	3	0	0	0	0	0	0	200	300	0	-30.3053	-18.1348	-591.793	50175.1	-2686.08	-1388.17	195.461	818.215	0	0	0	0	0	0	0	603	903	0
1005	4	0	0	0	0	0	0	200	300	0	-29.8476	-17.8296	-590.877	50449.8	-3235.4	-1433.95	194.524	817.619	0	0	0	0	0	0	0	603	903	0
1005	5	0	0	0	0	0	0	200	300	0	-28.6269	-17.677	-589.351	50724.4	-3113.33	-1021.96	194.717	816.932	0	0	0	0	0	0	0	603	903	0
1005	6	0	0	0	0	0	0	200	300	0	-29.8476	-16.7615	-582.942	49625.8	-3052.29	-1388.17	194.764	817.87	0	0	0	0	0	0	0	603	903	0
1005	7	0	0	0	0	0	0	200	300	0	-30.0002	-16.1511	-585.689	50358.2	-2869.18	-1021.96	195.101	817.019	0	0	0	0	0	0	0	603	903	0
1005	8	0	0	0	0	0	0	200	300	0	-26.7958	-16.6089	-585.384	50541.3	-2991.26	-1433.95	194.89	816.661	0	0	0	0	0	0	0	603	903	0
1005	9	0	0	0	0	0	0	200	300	0	-29.2372	-14.7778	-581.111	50175.1	-3052.29	-1708.6	194.748	816.657	0	0	0	0	0	0	0	603	903	0
1006	0	0	0	0	0	0	0	200	300	0	-28.7794	-15.6934	-577.144	50175.1	-3418.5	-1342.39	194.077	816.063	0	0	0	0	0	0	0	603	903	0
1006	1	0	0	0	0	0	0	200	300	0	-27.4062	-14.6252	-578.365	49808.9	-3052.29	-1342.39	194.723	816.88	0	0	0	0	0	0	0	603	903	0
1006	2	0	0	0	0	0	0	200	300	0	-28.3217	-14.1675	-575.313	49717.3	-2869.18	-1388.17	195.013	816.582	0	0	0	0	0	0	0	603	903	0
1006	3	0	0	0	0	0	0	200	300	0	-28.0165	-13.0994	-576.839	49259.6	-2991.26	-1479.72	194.814	817.604	0	0	0	0	0	0	0	603	903	0
1006	4	0	0	0	0	0	0	200	300	0	-26.9484	-12.489	-572.566	49076.5	-2869.18	-1617.05	194.989	817.287	0	0	0	0	0	0	0	603	903	0
1006	5	0	0	0	0	0	0	200	300	0	-27.2536	-12.489	-572.872	49076.5	-3052.29	-1479.72	194.672	817.333	0	0	0	0	0	0	0	603	903	0
1006	6	0	0	0	0	0	0	200	300	0	-25.7277	-12.6416	-571.651	49259.6	-2930.22	-1342.39	194.874	816.829	0	0	0	0	0	0	0	603	903	0
1006	7	0	0	0	0	0	0	200	300	0	-26.4906	-11.5735	-569.21	49259.6	-3235.4	-1479.72	194.316	816.46	0	0	0	0	0	0	0	603	903	0
1006	8	0	0	0	0	0	0	200	300	0	-26.7958	-10.3528	-567.378	49259.6	-2991.26	-1479.72	194.728	816.18	0	0	0	0	0	0	0	603	903	0
1006	9	0	0	0	0	0	0	200	300	0	-27.5587	-9.89502	-565.547	48893.4	-2991.26	-1708.6	194.711	816.547	0	0	0	0	0	0	0	603	903	0
1007	0	0	0	0	0	0	0	200	300	0	-26.7958	-10.2002	-564.327	49442.7	-3113.33	-1205.06	194.483	815.387	0	0	0	0	0	0	0	603	903	0
1007	1	0	0	0	0	0	0	200	300	0	-26.7958	-9.28467	-563.411	48801.8	-2991.26	-1571.27	194.691	816.382	0	0	0	0	0	0	0	603	903	0
1007	2	0	0	0	0	0	0	200	300	0	-26.7958	-9.28467	-561.58	48893.4	-3235.4	-1479.72	194.239	815.936	0	0	0	0	0	0	0	603	903	0
1007	3	0	0	0	0	0	0	200	300	0	-24.507	-8.21656	-560.97	49076.5	-3052.29	-1479.72	194.559	815.515	0	0	0	0	0	0	0	603	903	0
1007	4	0	0	0	0	0	0	200	300	0	-26.1855	-7.6062	-560.054	49442.7	-3235.4	-2029.04	194.223	814.718	0	0	0	0	0	0	0	603	903	0
1007	5	0	0	0	0	0	0	200	300	0	-27.2536	-6.84326	-557.613	48618.7	-3174.36	-1662.83	194.307	815.809	0	0	0	0	0	0	0	603	903	0
1007	6	0	0	0	0	0	0	200	300	0	-26.1855	-6.84326	-556.087	49168	-3235.4	-1662.83	194.182	814.582	0	0	0	0	0	0	0	603	903	0
1007	7	0	0	0	0	0	0	200	300	0	-25.4225	-6.84326	-553.951	49351.1	-3357.47	-1571.27	193.939	813.911	0	0	0	0	0	0	0	603	903	0
1007	8	0	0	0	0	0	0	200	300	0	-27.2536	-6.53809	-555.171	48710.2	-3235.4	-1571.27	194.172	815.261	0	0	0	0	0	0	0	603	903	0
1007	9	0	0	0	0	0	0	200	300	0	-24.0492	-5.77515	-553.34	48893.4	-3662.64	-1525.5	193.381	814.64	0	0	0	0	0	0	0	603	903	0
1008	0	0	0	0	0	0	0	200	300	0	-25.4225	-6.23291	-552.425	48984.9	-3052.29	-1754.38	194.475	814.327	0	0	0	0	0	0	0	603	903	0
1008	1	0	0	0	0	0	0	200	300	0	-27.2536	-4.55445	-552.425	48344	-2869.18	-1845.93	194.806	815.488	0	0	0	0	0	0	0	603	903	0
1008	2	0	0	0	0	0	0	200	300	0	-27.2536	-4.70703	-550.594	48435.6	-3723.68	-1708.6	193.237	815.03	0	0	0	0	0	0	0	603	903	0
1008	3	0	0	0	0	0	0	200	300	0	-25.4225	-3.94409	-549.678	48893.4	-3235.4	-1617.05	194.114	814.051	0	0	0	0	0	0	0	603	903	0
1008	4	0	0	0	0	0	0	200	300	0	-26.4906	-3.94409	-549.678	48435.6	-3418.5	-1800.16	193.781	814.884	0	0	0	0	0	0	0	603	903	0
1008	5	0	0	0	0	0	0	200	300	0	-26.0329	-2.41822	-547.237	48527.1	-3601.61	-1800.16	193.419	814.323	0	0	0	0	0	0	0	603	903	0
1008	6	0	0	0	0	0	0	200	300	0	-25.8803	-2.41822	-547.847	49076.5	-3113.33	-1754.38	194.317	813.419	0	0	0	0	0	0	0	603	903	0
1008	7	0	0	0	0	0	0	200	300	0	-26.7958	-2.72339	-545.101	47977.8	-3357.47	-1617.05	193.841	814.984	0	0	0	0	0	0	0	603	903	0
1008	8	0	0	0	0	0	0	200	300	0	-26.338	-1.65528	-542.964	48984.9	-3357.47	-1845.93	193.816	812.783	0	0	0	0	0	0	0	603	903	0
1008	9	0	0	0	0	0	0	200	300	0	-24.507	-1.96045	-545.406	48893.4	-3662.64	-1296.62	193.285	813.354	0	0	0	0	0	0	0	603	903	0
1009	0	0	0	0	0	0	0	200	300	0	-26.7958	-1.19751	-541.439	48435.6	-3052.29	-2074.81	194.363	813.543	0	0	0	0	0	0	0	603	903	0
1009	1	0	0	0	0	0	0	200	300	0	-26.9484	-0.739749	-542.049	48893.4	-3601.61	-1754.38	193.356	812.799	0	0	0	0	0	0	0	603	903	0
1009	2	0	0	0	0	0	0	200	300	0	-25.5751	-0.739749	-540.828	48984.9	-3723.68	-1983.26	193.115	812.426	0	0	0	0	0	0	0	603	903	0
1009	3	0	0	0	0	0	0	200	300	0	-26.0329	-0.129397	-540.218	48160.9	-3113.33	-2074.81	194.237	813.849	0	0	0	0	0	0	0	603	903	0
1009	4	0	0	0	0	0	0	200	300	0	-24.3544	0.328366	-541.133	48801.8	-3418.5	-1845.93	193.683	812.816	0	0	0	0	0	0	0	603	903	0
1009	5	0	0	0	0	0	0	200	300	0	-25.7277	0.328366	-540.523	49442.7	-3906.78	-2212.14	192.772	811.528	0	0	0	0	0	0	0	603	903	0
1009	6	0	0	0	0	0	0	200	300	0	-25.8803	0.938718	-539.302	49442.7	-3601.61	-1983.26	193.322	811.321	0	0	0	0	0	0	0	603	903	0
1009	7	0	0	0	0	0	0	200	300	0	-27.4062	1.24389	-539.607	48984.9	-3784.71	-2074.81	192.986	812.221	0	0	0	0	0	0	0	603	903	0
1009	8	0	0	0	0	0	0	200	300	0	-26.6432	1.70166	-537.471	49168	-3967.82	-2257.92	192.618	811.52	0	0	0	0	0	0	0	603	903	0
1009	9	0	0	0	0	0	0	200	300	0	-25.8803	2.61718	-537.166	49717.3	-3845.75	-2395.25	192.841	810.445	0	0	0	0	0	0	0	603	903	0
1010	0	0	0	0	0	0	0	200	300	0	-26.6432	2.92236	-538.387	49168	-4089.89	-2303.7	192.403	811.675	0	0	0	0	0	0	0	603	903	0
1010	1	0	0	0	0	0	0	200	300	0	-26.6432	2.92236	-536.556	48984.9	-3845.75	-2441.02	192.833	811.705	0	0	0	0	0	0	0	603	903	0
1010	2	0	0	0	0	0	0	200	300	0	-25.4225	3.99048	-538.082	50358.2	-3662.64	-2395.25	193.193	809.412	0	0	0	0	0	0	0	603	903	0
1010	3	0	0	0	0	0	0	200	300	0	-25.8803	3.99048	-537.166	49351.1	-4089.89	-2395.25	192.386	811.127	0	0	0	0	0	0	0	603	903	0
1010	4	0	0	0	0	0	0	200	300	0	-26.7958	4.44824	-536.556	49168	-3906.78	-2257.92	192.719	811.364	0	0	0	0	0	0	0	603	903	0
1010	5	0	0	0	0	0	0	200	300	0	-25.7277	4.906	-537.166	49992	-3662.64	-2486.8	193.182	809.934	0	0	0	0	0	0	0	603	903	0
1010	6	0	0	0	0	0	0	200	300	0	-25.5751	5.21118	-535.335	49992	-3906.78	-2761.46	192.702	809.616	0	0	0	0	0	0	0	603	903	0
1010	7	0	0	0	0	0	0	200	300	0	-24.507	5.51635	-536.251	50266.7	-4150.92	-2715.68	192.259	809.263	0	0	0	0	0	0	0	603	903	0
1010	8	0	0	0	0	0	0	200	300	0	-25.5751	5.51635	-535.03	49808.9	-3967.82	-2441.02	192.584	809.905	0	0	0	0	0	0	0	603	903	0
1010	9	0	0	0	0	0	0	200	300	0	-25.5751	6.88965	-536.251	50083.6	-4028.85	-2761.46	192.487	809.604	0	0	0	0	0	0	0	603	903	0
1011	0	0	0	0	0	0	0	200	300	0	-24.9648	7.04223	-537.471	50449.8	-4211.96	-2761.46	192.163	809.135	0	0	0	0	0	0	0	603	903	0
1011	1	0	0	0	0	0	0	200	300	0	-25.5751	7.34741	-537.166	50632.9	-4334.03	-2715.68	191.932	808.741	0	0	0	0	0	0	0	603	903	0
1011	2	0	0	0	0	0	0	200	300	0	-25.7277	7.95776	-535.945	50449.8	-4272.99	-2669.91	192.027	808.868	0	0	0	0	0	0	0	603	903	0
1011	3	0	0	0	0	0	0	200	300	0	-23.8966	8.11035	-537.166	50724.4	-4395.06	-2853.01	191.818	808.57	0	0	0	0	0	0	0	603	903	0
1011	4	0	0	0	0	0	0	200	300	0	-25.5751	8.11035	-537.776	51273.7	-4456.1	-2944.56	191.714	807.656	0	0	0	0	0	0	0	603	903	0
1011	5	0	0	0	0	0	0	200	300	0	-26.7958	8.41552	-536.861	51273.7	-4150.92	-2532.58	192.268	807.494	0	0	0	0	0	0	0	603	903	0
1011	6	0	0	0	0	0	0	200	300	0	-26.9484	7.80517	-536.251	50999.1	-4639.21	-3036.12	191.349	807.897	0	0	0	0	0	0	0	603	903	0
1011	7	0	0	0	0	0	0	200	300	0	-26.0329	9.78882	-538.082	51273.7	-4517.14	-3127.67	191.605	807.71	0	0	0	0	0	0	0	603	903	0
1011	8	0	0	0	0	0	0	200	300	0	-25.5751	9.48364	-538.387	51548.4	-4700.24	-2990.34	191.27	807.254	0	0	0	0	0	0	0	603	903	0
1011	9	0	0	0	0	0	0	200	300	0	-27.2536	10.094	-539.302	51182.2	-4883.35	-2761.46	190.945	808.096	0	0	0	0	0	0	0	603	903	0
1012	0	0	0	0	0	0	0	200	300	0	-26.338	10.8569	-537.776	51914.6	-4761.28	-3081.89	191.146	806.464	0	0	0	0	0	0	0	603	903	0
1012	1	0	0	0	0	0	0	200	300	0	-24.2018	11.6199	-540.828	52006.1	-4944.38	-3127.67	190.858	806.84	0	0	0	0	0	0	0	603	903	0
1012	2	0	0	0	0	0	0	200	300	0	-26.7958	10.5518	-541.744	51914.6	-4944.38	-3448.1	190.873	807.171	0	0	0	0	0	0	0	603	903	0
1012	3	0	0	0	0	0	0	200	300	0	-26.6432	12.3828	-541.744	52280.8	-5127.49	-3219.22	190.535	806.495	0	0	0	0	0	0	0	603	903	0
1012	4	0	0	0	0	0	0	200	300	0	-26.0329	12.8406	-539.302	52372.4	-4700.24	-3448.1	191.285	805.889	0	0	0	0	0	0	0	603	903	0
1012	5	0	0	0	0	0	0	200	300	0	-25.8803	12.688	-541.439	52280.8	-4883.35	-3265	190.981	806.441	0	0	0	0	0	0	0	603	903	0
1012	6	0	0	0	0	0	0	200	300	0	-27.2536	12.9932	-542.964	52555.5	-5127.49	-3173.45	190.557	806.206	0	0	0	0	0	0	0	603	903	0
1012	7	0	0	0	0	0	0	200	300	0	-26.4906	13.9087	-543.575	52647	-5066.45	-3356.55	190.679	806.147	0	0	0	0	0	0	0	603	903	0
1012	8	0	0	0	0	0	0	200	300	0	-24.3544	13.9087	-543.88	53013.2	-5127.49	-3356.55	190.572	805.528	0	0	0	0	0	0	0	603	903	0
1012	9	0	0	0	0	0	0	200	300	0	-26.9484	14.519	-546.321	53013.2	-5310.59	-3448.1	190.279	805.963	0	0	0	0	0	0	0	603	903	0
1013	0	0	0	0	0	0	0	200	300	0	-26.1855	14.6716	-546.016	53013.2	-5493.7	-3493.88	189.939	805.909	0	0	0	0	0	0	0	603	903	0
1013	1	0	0	0	0	0	0	200	300	0	-26.1855	15.282	-547.847	53379.5	-5310.59	-3356.55	190.306	805.565	0	0	0	0	0	0	0	603	903	0
1013	2	0	0	0	0	0	0	200	300	0	-26.0329	15.8923	-548.152	53287.9	-5615.77	-3585.43	189.755	805.786	0	0	0	0	0	0	0	603	903	0
1013	3	0	0	0	0	0	0	200	300	0	-27.2536	14.6716	-549.678	53562.6	-5554.73	-3539.66	189.895	805.557	0	0	0	0	0	0	0	603	903	0
1013	4	0	0	0	0	0	0	200	300	0	-26.9484	16.8079	-549.373	53928.8	-5249.56	-3539.66	190.444	804.836	0	0	0	0	0	0	0	603	903	0
1013	5	0	0	0	0	0	0	200	300	0	-26.1855	17.5708	-550.289	54111.9	-5798.87	-3585.43	189.462	804.666	0	0	0	0	0	0	0	603	903	0
1013	6	0	0	0	0	0	0	200	300	0	-27.5587	17.113	-551.509	54203.4	-5554.73	-3356.55	189.928	804.718	0	0	0	0	0	0	0	603	903	0
1013	7	0	0	0	0	0	0	200	300	0	-27.5587	17.876	-552.73	54752.7	-5554.73	-3631.21	189.95	803.941	0	0	0	0	0	0	0	603	903	0
1013	8	0	0	0	0	0	0	200	300	0	-24.507	17.876	-553.951	54478.1	-5920.94	-3997.42	189.311	804.655	0	0	0	0	0	0	0	603	903	0
1013	9	0	0	0	0	0	0	200	300	0	-28.0165	18.3337	-554.561	55027.4	-5798.87	-3814.32	189.543	803.773	0	0	0	0	0	0	0	603	903	0
1014	0	0	0	0	0	0	0	200	300	0	-27.5587	19.0967	-555.782	54569.6	-5554.73	-3676.99	190.006	804.815	0	0	0	0	0	0	0	603	903	0
1014	1	0	0	0	0	0	0	200	300	0	-26.6432	19.707	-557.003	55393.6	-5493.7	-3951.65	190.137	803.551	0	0	0	0	0	0	0	603	903	0
1014	2	0	0	0	0	0	0	200	300	0	-27.2536	19.8596	-557.003	55027.4	-6043.01	-3860.09	189.151	804.208	0	0	0	0	0	0	0	603	903	0
1014	3	0	0	0	0	0	0	200	300	0	-28.6269	20.1648	-559.139	54752.7	-5798.87	-3814.32	189.629	805.077	0	0	0	0	0	0	0	603	903	0
1014	4	0	0	0	0	0	0	200	300	0	-27.7113	20.3174	-560.97	55393.6	-5798.87	-3951.65	189.663	804.254	0	0	0	0	0	0	0	603	903	0
1014	5	0	0	0	0	0	0	200	300	0	-27.2536	21.2329	-560.665	55576.7	-6226.12	-3905.87	188.895	803.874	0	0	0	0	0	0	0	603	903	0
1014	6	0	0	0	0	0	0	200	300	0	-27.4062	21.0803	-563.716	55759.8	-6714.4	-4134.75	188.089	804.085	0	0	0	0	0	0	0	603	903	0
1014	7	0	0	0	0	0	0	200	300	0	-27.101	21.5381	-562.801	56400.7	-5737.84	-3951.65	189.805	802.786	0	0	0	0	0	0	0	603	903	0
1014	8	0	0	0	0	0	0	200	300	0	-27.101	22.9114	-565.547	56766.9	-6165.08	-3997.42	189.099	802.625	0	0	0	0	0	0	0	603	903	0
1014	9	0	0	0	0	0	0	200	300	0	-28.932	22.6062	-567.989	56492.2	-6226.12	-4043.2	189.038	803.54	0	0	0	0	0	0	0	603	903	0
1015	0	0	0	0	0	0	0	200	300	0	-28.3217	23.2165	-567.378	57041.6	-6165.08	-4134.75	189.134	802.465	0	0	0	0	0	0	0	603	903	0
1015	1	0	0	0	0	0	0	200	300	0	-27.4062	24.2847	-569.82	57499.3	-6531.3	-4363.63	188.538	802.092	0	0	0	0	0	0	0	603	903	0
1015	2	0	0	0	0	0	0	200	300	0	-29.2372	23.8269	-570.125	57590.9	-6531.3	-4226.31	188.544	801.986	0	0	0	0	0	0	0	603	903	0
1015	3	0	0	0	0	0	0	200	300	0	-28.932	25.0476	-571.041	57041.6	-6287.15	-4500.96	188.99	803.109	0	0	0	0	0	0	0	603	903	0
1015	4	0	0	0	0	0	0	200	300	0	-27.7113	24.7424	-571.041	58048.6	-6531.3	-4134.75	188.562	801.346	0	0	0	0	0	0	0	603	903	0
1015	5	0	0	0	0	0	0	200	300	0	-28.1691	25.5054	-574.703	58231.7	-6653.37	-4409.41	188.423	801.675	0	0	0	0	0	0	0	603	903	0
1015	6	0	0	0	0	0	0	200	300	0	-28.7794	25.3528	-574.703	58140.2	-6470.26	-4409.41	188.742	801.834	0	0	0	0	0	0	0	603	903	0
1015	7	0	0	0	0	0	0	200	300	0	-29.8476	26.2683	-576.839	58872.6	-6470.26	-4363.63	188.783	800.939	0	0	0	0	0	0	0	603	903	0
1015	8	0	0	0	0	0	0	200	300	0	-27.8639	27.6416	-577.754	59238.8	-7080.61	-4684.07	187.745	800.467	0	0	0	0	0	0	0	603	903	0
1015	9	0	0	0	0	0	0	200	300	0	-29.8476	28.0994	-581.111	59147.3	-6592.33	-4638.29	188.656	801.217	0	0	0	0	0	0	0	603	903	0
1016	0	0	0	0	0	0	0	200	300	0	-29.5424	27.6416	-581.722	59696.6	-6592.33	-4592.52	188.668	800.38	0	0	0	0	0	0	0	603	903	0
1016	1	0	0	0	0	0	0	200	300	0	-28.932	29.6252	-582.942	59788.1	-7202.68	-4912.95	187.644	800.437	0	0	0	0	0	0	0	603	903	0
1016	2	0	0	0	0	0	0	200	300	0	-30.1527	29.3201	-583.858	59605	-7019.58	-4729.85	187.977	800.912	0	0	0	0	0	0	0	603	903	0
1016	3	0	0	0	0	0	0	200	300	0	-29.5424	29.6252	-586.299	60245.9	-7019.58	-4867.17	188.027	800.244	0	0	0	0	0	0	0	603	903	0
1016	4	0	0	0	0	0	0	200	300	0	-27.5587	30.3882	-586.91	60612.1	-7324.75	-4546.74	187.52	799.727	0	0	0	0	0	0	0	603	903	0
1016	5	0	0	0	0	0	0	200	300	0	-30.3053	30.9985	-589.656	61069.9	-7385.79	-4958.73	187.474	799.431	0	0	0	0	0	0	0	603	903	0
1016	6	0	0	0	0	0	0	200	300	0	-30.4579	31.7615	-590.572	60703.7	-7263.72	-5233.39	187.701	800.212	0	0	0	0	0	0	0	603	903	0
1016	7	0	0	0	0	0	0	200	300	0	-29.5424	32.8296	-592.098	61802.3	-7446.82	-5141.83	187.423	798.621	0	0	0	0	0	0	0	603	903	0
1016	8	0	0	0	0	0	0	200	300	0	-30.3053	32.8296	-594.539	61527.6	-7507.86	-5279.16	187.372	799.512	0	0	0	0	0	0	0	603	903	0
1016	9	0	0	0	0	0	0	200	300	0	-28.3217	33.1348	-594.844	61802.3	-7568.89	-5370.71	187.276	799.103	0	0	0	0	0	0	0	603	903	0
1017	0	0	0	0	0	0	0	200	300	0	-29.3898	34.2029	-598.201	62260.1	-7629.93	-5279.16	187.245	798.921	0	0	0	0	0	0	0	603	903	0
1017	1	0	0	0	0	0	0	200	300	0	-29.8476	32.9822	-598.812	61985.4	-7874.07	-5370.71	186.851	799.486	0	0	0	0	0	0	0	603	903	0
1017	2	0	0	0	0	0	0	200	300	0	-31.3734	34.6606	-600.948	62626.3	-7507.86	-5691.15	187.507	798.788	0	0	0	0	0	0	0	603	903	0
1017	3	0	0	0	0	0	0	200	300	0	-31.2209	35.7288	-601.558	63084	-8057.17	-5553.82	186.606	798.132	0	0	0	0	0	0	0	603	903	0
1017	4	0	0	0	0	0	0	200	300	0	-30.1527	35.5762	-603.389	63724.9	-8057.17	-5736.93	186.647	797.388	0	0	0	0	0	0	0	603	903	0
1017	5	0	0	0	0	0	0	200	300	0	-31.6786	36.0339	-605.525	63724.9	-7752	-5645.37	187.198	797.761	0	0	0	0	0	0	0	603	903	0
1017	6	0	0	0	0	0	0	200	300	0	-31.8312	37.102	-607.051	63724.9	-7813.03	-5599.6	187.13	798.026	0	0	0	0	0	0	0	603	903	0
1017	7	0	0	0	0	0	0	200	300	0	-30.6105	38.1702	-607.967	64548.9	-8484.42	-5920.03	186.045	796.828	0	0	0	0	0	0	0	603	903	0
1017	8	0	0	0	0	0	0	200	300	0	-30.9157	38.6279	-612.239	64365.8	-7996.14	-5645.37	186.94	797.868	0	0	0	0	0	0	0	603	903	0
1017	9	0	0	0	0	0	0	200	300	0	-31.9838	38.9331	-612.85	65098.2	-8301.31	-5782.7	186.455	796.778	0	0	0	0	0	0	0	603	903	0
1018	0	0	0	0	0	0	0	200	300	0	-32.289	39.2383	-614.986	65556	-8240.28	-5691.15	186.601	796.403	0	0	0	0	0	0	0	603	903	0
1018	1	0	0	0	0	0	0	200	300	0	-31.0683	39.2383	-614.986	65647.5	-8362.35	-5828.48	186.402	796.254	0	0	0	0	0	0	0	603	903	0
1018	2	0	0	0	0	0	0	200	300	0	-31.3734	40.3064	-618.648	66288.4	-8606.49	-5874.25	186.088	795.85	0	0	0	0	0	0	0	603	903	0
1018	3	0	0	0	0	0	0	200	300	0	-33.0519	40.0012	-619.869	66013.8	-8911.66	-5920.03	185.623	796.504	0	0	0	0	0	0	0	603	903	0
1018	4	0	0	0	0	0	0	200	300	0	-31.2209	41.8323	-622.005	66837.7	-8728.56	-6332.02	185.967	795.545	0	0	0	0	0	0	0	603	903	0
1018	5	0	0	0	0	0	0	200	300	0	-31.3734	41.8323	-623.836	66837.7	-8850.63	-6148.91	185.813	795.86	0	0	0	0	0	0	0	603	903	0
1018	6	0	0	0	0	0	0	200	300	0	-33.0519	43.2056	-625.667	67387	-8850.63	-6103.14	185.854	795.296	0	0	0	0	0	0	0	603	903	0
1018	7	0	0	0	0	0	0	200	300	0	-32.1364	43.053	-628.108	68027.9	-9155.81	-6332.02	185.423	794.694	0	0	0	0	0	0	0	603	903	0
1018	8	0	0	0	0	0	0	200	300	0	-30.1527	44.2737	-630.245	68577.2	-8911.66	-6377.79	185.86	794.19	0	0	0	0	0	0	0	603	903	0
1018	9	0	0	0	0	0	0	200	300	0	-33.3571	45.0366	-632.991	68851.9	-9522.02	-6698.23	184.957	794.228	0	0	0	0	0	0	0	603	903	0
1019	0	0	0	0	0	0	0	200	300	0	-34.12	44.7314	-634.517	69218.1	-9583.06	-6698.23	184.897	793.912	0	0	0	0	0	0	0	603	903	0
1019	1	0	0	0	0	0	0	200	300	0	-32.5941	45.647	-635.738	70042.1	-9705.13	-6698.23	184.734	792.826	0	0	0	0	0	0	0	603	903	0
1019	2	0	0	0	0	0	0	200	300	0	-33.3571	45.9521	-635.738	69675.9	-10071.3	-6789.78	184.158	793.402	0	0	0	0	0	0	0	603	903	0
1019	3	0	0	0	0	0	0	200	300	0	-34.7304	46.7151	-639.4	70225.1	-10132.4	-6789.78	184.153	793.17	0	0	0	0	0	0	0	603	903	0
1019	4	0	0	0	0	0	0	200	300	0	-32.5941	46.2573	-641.536	70774.5	-10254.4	-6652.45	184.016	792.68	0	0	0	0	0	0	0	603	903	0
1019	5	0	0	0	0	0	0	200	300	0	-33.5097	47.9358	-644.588	70682.9	-10132.4	-6835.56	184.281	793.344	0	0	0	0	0	0	0	603	903	0
1019	6	0	0	0	0	0	0	200	300	0	-35.0356	46.8677	-644.893	71415.3	-10315.5	-6606.68	184.004	792.26	0	0	0	0	0	0	0	603	903	0
1019	7	0	0	0	0	0	0	200	300	0	-34.5778	49.3091	-647.945	72056.2	-10193.4	-7110.22	184.268	791.793	0	0	0	0	0	0	0	603	903	0
1019	8	0	0	0	0	0	0	200	300	0	-35.1881	47.6306	-649.776	72697.1	-10437.5	-6881.33	183.937	791.12	0	0	0	0	0	0	0	603	903	0
1019	9	0	0	0	0	0	0	200	300	0	-35.4933	50.6824	-651.912	72330.9	-10559.6	-7110.22	183.802	792.048	0	0	0	0	0	0	0	603	903	0
1020	0	0	0	0	0	0	0	200	300	0	-35.6459	51.1401	-654.964	72697.1	-10437.5	-7384.87	184.064	792.006	0	0	0	0	0	0	0	603	903	0
1020	1	0	0	0	0	0	0	200	300	0	-35.0356	50.6824	-655.269	74161.9	-10620.7	-7155.99	183.792	789.822	0	0	0	0	0	0	0	603	903	0
1020	2	0	0	0	0	0	0	200	300	0	-36.4088	50.3772	-656.49	73429.5	-11108.9	-7201.77	183.078	791.148	0	0	0	0	0	0	0	603	903	0
1020	3	0	0	0	0	0	0	200	300	0	-36.1037	52.0557	-659.847	74345	-10925.8	-7384.87	183.442	790.33	0	0	0	0	0	0	0	603	903	0
1020	4	0	0	0	0	0	0	200	300	0	-35.6459	52.2082	-660.152	75260.6	-10986.9	-7476.43	183.357	788.995	0	0	0	0	0	0	0	603	903	0
1020	5	0	0	0	0	0	0	200	300	0	-37.0192	54.1919	-663.814	74711.2	-11597.2	-7842.64	182.529	790.452	0	0	0	0	0	0	0	603	903	0
1020	6	0	0	0	0	0	0	200	300	0	-36.2563	53.7341	-667.171	75626.8	-11170	-7339.1	183.258	789.646	0	0	0	0	0	0	0	603	903	0
1020	7	0	0	0	0	0	0	200	300	0	-37.0192	55.1074	-667.781	76542.3	-11108.9	-7888.41	183.364	788.378	0	0	0	0	0	0	0	603	903	0
1020	8	0	0	0	0	0	0	200	300	0	-37.1718	55.8704	-669.002	76176.1	-11902.4	-7842.64	182.209	789.135	0	0	0	0	0	0	0	603	903	0
1020	9	0	0	0	0	0	0	200	300	0	-37.477	55.4126	-670.528	77091.6	-11780.3	-7796.86	182.431	788.029	0	0	0	0	0	0	0	603	903	0
1021	0	0	0	0	0	0	0	200	300	0	-37.1718	56.9385	-672.664	77640.9	-12024.5	-7522.2	182.124	787.577	0	0	0	0	0	0	0	603	903	0
1021	1	0	0	0	0	0	0	200	300	0	-38.3925	56.7859	-671.443	77274.7	-12024.5	-7796.86	182.092	787.913	0	0	0	0	0	0	0	603	903	0
1021	2	0	0	0	0	0	0	200	300	0	-39.0028	56.9385	-676.021	78373.3	-12024.5	-8117.3	182.213	787.067	0	0	0	0	0	0	0	603	903	0
1021	3	0	0	0	0	0	0	200	300	0	-37.1718	57.5488	-676.937	78556.5	-11902.4	-8163.08	182.417	786.953	0	0	0	0	0	0	0	603	903	0
1021	4	0	0	0	0	0	0	200	300	0	-38.8503	58.3118	-680.294	78556.5	-12390.7	-8391.95	181.786	787.526	0	0	0	0	0	0	0	603	903	0
1021	5	0	0	0	0	0	0	200	300	0	-38.5451	58.6169	-681.819	78831.1	-12512.7	-8300.4	181.648	787.381	0	0	0	0	0	0	0	603	903	0
1021	6	0	0	0	0	0	0	200	300	0	-38.5451	59.6851	-684.261	79014.2	-12451.7	-8300.4	181.803	787.526	0	0	0	0	0	0	0	603	903	0
1021	7	0	0	0	0	0	0	200	300	0	-38.8503	59.8376	-685.176	79838.2	-12634.8	-8391.95	181.56	786.478	0	0	0	0	0	0	0	603	903	0
1021	8	0	0	0	0	0	0	200	300	0	-39.4606	60.448	-685.176	80296	-12817.9	-8254.62	181.293	785.81	0	0	0	0	0	0	0	603	903	0
1021	9	0	0	0	0	0	0	200	300	0	-40.071	61.5161	-687.618	81120	-12512.7	-8529.28	181.803	785.028	0	0	0	0	0	0	0	603	903	0
1022	0	0	0	0	0	0	0	200	300	0	-38.5451	60.9058	-688.228	81486.2	-13001	-8803.94	181.109	784.6	0	0	0	0	0	0	0	603	903	0
1022	1	0	0	0	0	0	0	200	300	0	-40.071	62.1265	-689.144	82127	-13001	-8803.94	181.135	783.827	0	0	0	0	0	0	0	603	903	0
1022	2	0	0	0	0	0	0	200	300	0	-40.5287	61.9739	-693.416	82676.3	-12879	-8849.72	181.427	783.77	0	0	0	0	0	0	0	603	903	0
1022	3	0	0	0	0	0	0	200	300	0	-39.7658	62.279	-691.89	82859.5	-13123.1	-8987.04	181.033	783.242	0	0	0	0	0	0	0	603	903	0
1022	4	0	0	0	0	0	0	200	300	0	-39.6132	63.3472	-691.28	82767.9	-13367.2	-9078.6	180.663	783.269	0	0	0	0	0	0	0	603	903	0
1022	5	0	0	0	0	0	0	200	300	0	-40.8339	63.1946	-695.247	83317.2	-13733.4	-8803.94	180.247	783.162	0	0	0	0	0	0	0	603	903	0
1022	6	0	0	0	0	0	0	200	300	0	-40.5287	63.3472	-694.332	83774.9	-13428.3	-9215.93	180.66	782.345	0	0	0	0	0	0	0	603	903	0
1022	7	0	0	0	0	0	0	200	300	0	-40.8339	64.7205	-698.604	84415.9	-14099.7	-9124.37	179.817	782.165	0	0	0	0	0	0	0	603	903	0
1022	8	0	0	0	0	0	0	200	300	0	-41.5968	63.1946	-699.52	84873.6	-13916.6	-9399.03	180.106	781.669	0	0	0	0	0	0	0	603	903	0
1022	9	0	0	0	0	0	0	200	300	0	-40.5287	65.636	-699.214	85606	-13794.5	-9582.14	180.271	780.568	0	0	0	0	0	0	0	603	903	0
1023	0	0	0	0	0	0	0	200	300	0	-40.071	65.1782	-697.689	86155.4	-14282.8	-9170.15	179.528	779.513	0	0	0	0	0	0	0	603	903	0
1023	1	0	0	0	0	0	0	200	300	0	-42.2072	66.2463	-701.045	86704.6	-14404.8	-9627.91	179.452	779.321	0	0	0	0	0	0	0	603	903	0
1023	2	0	0	0	0	0	0	200	300	0	-42.8175	67.467	-703.487	87162.4	-14221.7	-9582.14	179.784	779.1	0	0	0	0	0	0	0	603	903	0
1023	3	0	0	0	0	0	0	200	300	0	-41.7494	67.0093	-704.402	88078	-14099.7	-9490.58	179.984	777.961	0	0	0	0	0	0	0	603	903	0
1023	4	0	0	0	0	0	0	200	300	0	-42.8175	66.8567	-700.74	87437.1	-14710	-9811.02	179.008	778.222	0	0	0	0	0	0	0	603	903	0
1023	5	0	0	0	0	0	0	200	300	0	-43.8857	68.23	-705.928	88535.7	-14649	-9719.47	179.249	777.583	0	0	0	0	0	0	0	603	903	0
1023	6	0	0	0	0	0	0	200	300	0	-42.5124	67.1619	-708.37	88993.5	-14710	-10085.7	179.234	777.369	0	0	0	0	0	0	0	603	903	0
1023	7	0	0	0	0	0	0	200	300	0	-42.9701	69.1455	-707.454	89085	-15015.2	-10085.7	178.776	777.077	0	0	0	0	0	0	0	603	903	0
1023	8	0	0	0	0	0	0	200	300	0	-41.2917	68.8403	-705.928	89725.9	-14893.1	-10131.5	178.903	775.897	0	0	0	0	0	0	0	603	903	0
1023	9	0	0	0	0	0	0	200	300	0	-42.9701	69.7559	-709.285	90366.7	-15137.3	-10131.5	178.658	775.595	0	0	0	0	0	0	0	603	903	0
1024	0	0	0	0	0	0	0	200	300	0	-43.2753	68.6877	-710.811	90549.9	-15137.3	-10406.1	178.704	775.611	0	0	0	0	0	0	0	603	903	0
1024	1	0	0	0	0	0	0	200	300	0	-43.7331	70.2136	-712.642	90824.5	-16174.8	-10223	177.303	775.552	0	0	0	0	0	0	0	603	903	0
1024	2	0	0	0	0	0	0	200	300	0	-43.1227	70.824	-711.421	91648.5	-15625.5	-10314.6	178.036	774.176	0	0	0	0	0	0	0	603	903	0
1024	3	0	0	0	0	0	0	200	300	0	-43.5805	71.5869	-713.558	91831.6	-16052.8	-10314.6	177.503	774.305	0	0	0	0	0	0	0	603	903	0
1024	4	0	0	0	0	0	0	200	300	0	-44.496	71.4343	-714.168	92289.4	-16113.8	-10451.9	177.437	773.774	0	0	0	0	0	0	0	603	903	0
1024	5	0	0	0	0	0	0	200	300	0	-45.4115	72.0447	-713.863	93296.4	-15625.5	-10406.1	178.111	772.308	0	0	0	0	0	0	0	603	903	0
1024	6	0	0	0	0	0	0	200	300	0	-43.5805	72.8076	-716.304	94120.4	-16296.9	-10863.9	177.249	771.603	0	0	0	0	0	0	0	603	903	0
1024	7	0	0	0	0	0	0	200	300	0	-44.6486	72.0447	-715.389	94120.4	-16419	-10818.1	177.049	771.435	0	0	0	0	0	0	0	603	903	0
1024	8	0	0	0	0	0	0	200	300	0	-44.0382	72.9602	-716.609	94578.2	-16296.9	-11047	177.258	771.02	0	0	0	0	0	0	0	603	903	0
1024	9	0	0	0	0	0	0	200	300	0	-43.4279	72.9602	-718.135	95036	-16358	-10955.4	177.222	770.663	0	0	0	0	0	0	0	603	903	0
1025	0	0	0	0	0	0	0	200	300	0	-45.4115	73.418	-717.83	95493.7	-16846.2	-11138.5	176.532	769.969	0	0	0	0	0	0	0	603	903	0
1025	1	0	0	0	0	0	0	200	300	0	-45.4115	74.1809	-719.356	96317.7	-16480	-11047	177.091	769.106	0	0	0	0	0	0	0	603	903	0
1025	2	0	0	0	0	0	0	200	300	0	-44.3434	73.5706	-719.966	96958.5	-16968.3	-11047	176.432	768.329	0	0	0	0	0	0	0	603	903	0
1025	3	0	0	0	0	0	0	200	300	0	-45.4115	74.3335	-718.135	97324.8	-17334.5	-11138.5	175.862	767.476	0	0	0	0	0	0	0	603	903	0
1025	4	0	0	0	0	0	0	200	300	0	-45.7167	75.249	-721.187	97782.5	-16907.3	-11230.1	176.556	767.414	0	0	0	0	0	0	0	603	903	0
1025	5	0	0	0	0	0	0	200	300	0	-43.1227	74.3335	-721.187	98423.4	-17212.4	-11504.7	176.133	766.526	0	0	0	0	0	0	0	603	903	0
1025	6	0	0	0	0	0	0	200	300	0	-45.5641	75.7068	-722.408	98057.2	-17334.5	-11459	176.005	767.263	0	0	0	0	0	0	0	603	903	0
1025	7	0	0	0	0	0	0	200	300	0	-45.4115	75.4016	-721.797	99613.6	-17395.6	-11550.5	175.9	764.992	0	0	0	0	0	0	0	603	903	0
1025	8	0	0	0	0	0	0	200	300	0	-44.1908	75.0964	-724.239	99888.2	-17700.7	-11596.3	175.56	765.078	0	0	0	0	0	0	0	603	903	0
1025	9	0	0	0	0	0	0	200	300	0	-45.7167	73.8757	-724.239	100254	-18250	-11504.7	174.801	764.573	0	0	0	0	0	0	0	603	903	0
1026	0	0	0	0	0	0	0	200	300	0	-45.4115	75.8594	-726.07	100895	-17761.8	-11642.1	175.537	764.039	0	0	0	0	0	0	0	603	903	0
1026	1	0	0	0	0	0	0	200	300	0	-46.0219	76.1646	-726.375	101536	-17700.7	-11275.9	175.631	763.215	0	0	0	0	0	0	0	603	903	0
1026	2	0	0	0	0	0	0	200	300	0	-45.8693	76.6223	-726.985	101536	-18433.1	-11825.2	174.644	763.333	0	0	0	0	0	0	0	603	903	0
1026	3	0	0	0	0	0	0	200	300	0	-46.3271	76.4697	-728.816	102635	-18372.1	-11779.4	174.792	762.176	0	0	0	0	0	0	0	603	903	0
1026	4	0	0	0	0	0	0	200	300	0	-45.8693	77.2327	-727.901	103367	-18250	-11871	174.928	760.993	0	0	0	0	0	0	0	603	903	0
1026	5	0	0	0	0	0	0	200	300	0	-46.1745	77.2327	-729.732	103093	-19165.6	-12099.8	173.736	761.725	0	0	0	0	0	0	0	603	903	0
1026	6	0	0	0	0	0	0	200	300	0	-47.3952	77.2327	-729.427	103642	-18677.3	-12008.3	174.395	760.913	0	0	0	0	0	0	0	603	903	0
1026	7	0	0	0	0	0	0	200	300	0	-45.8693	78.606	-729.122	104649	-18677.3	-12008.3	174.384	759.473	0	0	0	0	0	0	0	603	903	0
1026	8	0	0	0	0	0	0	200	300	0	-46.9374	77.3853	-728.816	104466	-18982.5	-12008.3	173.954	759.664	0	0	0	0	0	0	0	603	903	0
1026	9	0	0	0	0	0	0	200	300	0	-47.09	77.3853	-730.342	105473	-19348.7	-11962.5	173.507	758.584	0	0	0	0	0	0	0	603	903	0
1027	0	0	0	0	0	0	0	200	300	0	-46.4796	77.3853	-730.342	105931	-19226.6	-12008.3	173.675	757.957	0	0	0	0	0	0	0	603	903	0
1027	1	0	0	0	0	0	0	200	300	0	-47.2426	78.1482	-732.479	106663	-19287.6	-12054.1	173.668	757.381	0	0	0	0	0	0	0	603	903	0
1027	2	0	0	0	0	0	0	200	300	0	-47.7003	78.1482	-730.648	106846	-19653.9	-12191.4	173.101	756.765	0	0	0	0	0	0	0	603	903	0
1027	3	0	0	0	0	0	0	200	300	0	-46.3271	78.9111	-732.784	107029	-19531.8	-12099.8	173.346	756.941	0	0	0	0	0	0	0	603	903	0
1027	4	0	0	0	0	0	0	200	300	0	-47.2426	78.7585	-732.784	108128	-19714.9	-12191.4	173.096	755.442	0	0	0	0	0	0	0	603	903	0
1027	5	0	0	0	0	0	0	200	300	0	-47.5478	79.5215	-729.122	108586	-20081.1	-12145.6	172.459	754.073	0	0	0	0	0	0	0	603	903	0
1027	6	0	0	0	0	0	0	200	300	0	-44.496	79.5215	-733.394	109227	-19531.8	-12282.9	173.368	754.067	0	0	0	0	0	0	0	603	903	0
1027	7	0	0	0	0	0	0	200	300	0	-47.5478	77.9956	-735.836	108769	-20142.1	-11962.5	172.627	755.183	0	0	0	0	0	0	0	603	903	0
1027	8	0	0	0	0	0	0	200	300	0	-47.8529	80.8948	-733.699	109959	-20569.4	-12420.3	171.965	753.131	0	0	0	0	0	0	0	603	903	0
1027	9	0	0	0	0	0	0	200	300	0	-46.4796	80.5896	-734.92	110600	-20203.2	-12511.8	172.51	752.508	0	0	0	0	0	0	0	603	903	0
1028	0	0	0	0	0	0	0	200	300	0	-48.0055	80.2844	-734.615	110600	-20325.2	-12557.6	172.332	752.445	0	0	0	0	0	0	0	603	903	0
1028	1	0	0	0	0	0	0	200	300	0	-47.8529	78.7585	-735.836	111607	-20935.6	-12649.2	171.549	751.326	0	0	0	0	0	0	0	603	903	0
1028	2	0	0	0	0	0	0	200	300	0	-47.09	80.8948	-737.361	111699	-20813.5	-12649.2	171.773	751.516	0	0	0	0	0	0	0	603	903	0
1028	3	0	0	0	0	0	0	200	300	0	-47.3952	81.8103	-737.361	111699	-20813.5	-12649.2	171.773	751.516	0	0	0	0	0	0	0	603	903	0
1028	4	0	0	0	0	0	0	200	300	0	-48.0055	82.2681	-739.192	111882	-21362.8	-12466	171.1	751.643	0	0	0	0	0	0	0	603	903	0
1028	5	0	0	0	0	0	0	200	300	0	-47.3952	80.1318	-738.887	111607	-20996.6	-12145.6	171.583	751.953	0	0	0	0	0	0	0	603	903	0
1028	6	0	0	0	0	0	0	200	300	0	-47.09	82.8784	-738.887	113438	-21607	-12603.4	170.757	749.475	0	0	0	0	0	0	0	603	903	0
1028	7	0	0	0	0	0	0	200	300	0	-48.3107	82.7258	-737.972	113804	-21851.1	-12694.9	170.39	748.788	0	0	0	0	0	0	0	603	903	0
1028	8	0	0	0	0	0	0	200	300	0	-47.3952	83.031	-741.329	114537	-21484.9	-13015.4	171.018	748.498	0	0	0	0	0	0	0	603	903	0
1028	9	0	0	0	0	0	0	200	300	0	-47.3952	81.2	-738.887	114354	-21607	-12649.2	170.757	748.235	0	0	0	0	0	0	0	603	903	0
1029	0	0	0	0	0	0	0	200	300	0	-48.6159	82.7258	-743.465	115086	-21973.2	-13061.1	170.445	748.203	0	0	0	0	0	0	0	603	903	0
1029	1	0	0	0	0	0	0	200	300	0	-46.4796	85.1672	-743.465	115635	-22278.4	-12923.8	170.034	747.464	0	0	0	0	0	0	0	603	903	0
1029	2	0	0	0	0	0	0	200	300	0	-47.5478	85.625	-745.296	115361	-21851.1	-12740.7	170.681	748.215	0	0	0	0	0	0	0	603	903	0
1029	3	0	0	0	0	0	0	200	300	0	-47.7003	85.1672	-744.38	116459	-22522.5	-12694.9	169.743	746.549	0	0	0	0	0	0	0	603	903	0
1029	4	0	0	0	0	0	0	200	300	0	-47.2426	86.8457	-744.38	116917	-22461.5	-12694.9	169.825	745.934	0	0	0	0	0	0	0	603	903	0
1029	5	0	0	0	0	0	0	200	300	0	-47.2426	87.3035	-746.211	117466	-22034.2	-12694.9	170.472	745.583	0	0	0	0	0	0	0	603	903	0
1029	6	0	0	0	0	0	0	200	300	0	-47.7003	86.6931	-746.211	117009	-22705.6	-12786.5	169.572	746.196	0	0	0	0	0	0	0	603	903	0
1029	7	0	0	0	0	0	0	200	300	0	-47.8529	88.219	-747.737	118382	-22766.6	-13061.1	169.553	744.68	0	0	0	0	0	0	0	603	903	0
1029	8	0	0	0	0	0	0	200	300	0	-46.3271	88.5242	-747.127	118931	-22461.5	-12969.6	169.936	743.815	0	0	0	0	0	0	0	603	903	0
1029	9	0	0	0	0	0	0	200	300	0	-47.5478	89.5923	-746.517	119206	-22827.7	-12923.8	169.421	743.317	0	0	0	0	0	0	0	603	903	0
1030	0	0	0	0	0	0	0	200	300	0	-47.8529	89.4397	-749.874	119847	-22888.7	-13061.1	169.477	743.177	0	0	0	0	0	0	0	603	903	0
1030	1	0	0	0	0	0	0	200	300	0	-47.2426	87.9138	-747.432	120121	-22644.6	-12923.8	169.704	742.288	0	0	0	0	0	0	0	603	903	0
1030	2	0	0	0	0	0	0	200	300	0	-49.2262	91.5759	-748.958	120121	-22827.7	-13015.4	169.521	742.615	0	0	0	0	0	0	0	603	903	0
1030	3	0	0	0	0	0	0	200	300	0	-47.2426	89.1345	-747.127	120762	-23193.9	-12740.7	168.956	741.365	0	0	0	0	0	0	0	603	903	0
1030	4	0	0	0	0	0	0	200	300	0	-47.09	90.813	-749.874	121128	-23010.8	-13198.5	169.314	741.468	0	0	0	0	0	0	0	603	903	0
1030	5	-2.51527	-3.96774	-9.23645	843.842	995.106	-324.876	307.737	208.64	0	-47.5478	90.9656	-751.399	121403	-23010.8	-13061.1	169.376	741.431	0	0	0	0	0	0	0	603	903	0
1030	6	-4.6515	-10.3764	-16.2555	-71.6857	1727.53	-1057.3	306.274	304.41	0	-45.4115	91.7285	-752.315	121586	-23621.1	-13198.5	168.602	741.384	0	0	0	0	0	0	0	603	903	0
1030	7	0.078721	-12.3601	-21.1383	660.737	2704.09	-1103.07	327.924	268.742	0	-46.3271	91.7285	-750.789	121586	-23377	-13381.6	168.863	741.055	0	0	0	0	0	0	0	603	903	0
1030	8	2.36754	-12.3601	-20.2228	843.842	2398.91	-553.758	318.624	258.273	0	-46.3271	93.1018	-752.62	122593	-23438	-12832.3	168.858	740.111	0	0	0	0	0	0	0	603	903	0
1030	9	-1.90492	-9.15573	-18.0865	569.184	2643.06	-1377.73	346.134	268.53	0	-47.09	94.7803	-752.315	122776	-23254.9	-13335.8	169.089	739.802	0	0	0	0	0	0	0	603	903	0
1031	0	-6.02479	-11.4446	-21.1383	843.842	2887.2	-1835.5	336.586	260.08	0	-43.7331	95.3906	-753.231	123509	-23377	-13290	168.964	739.028	0	0	0	0	0	0	0	603	903	0
1031	1	-5.56703	-16.3274	-24.1901	477.631	2765.13	-1377.73	314.308	280.255	0	-45.7167	95.6958	-752.925	123600	-23560.1	-13290	168.709	738.84	0	0	0	0	0	0	0	603	903	0
1031	2	-1.44716	-16.1748	-28.7677	1210.05	3680.65	-1057.3	327.944	257.937	0	-46.6322	95.6958	-754.451	123600	-23926.3	-13290	168.286	739.172	0	0	0	0	0	0	0	603	903	0
1031	3	-1.44716	-15.8696	-27.8522	1484.71	3314.44	-2064.38	319.001	246.693	0	-45.8693	96.7639	-754.756	124608	-23621.1	-12740.7	168.704	737.904	0	0	0	0	0	0	0	603	903	0
1031	4	-2.36269	-17.2429	-29.6832	752.289	4046.86	-2064.38	336.335	274.656	0	-46.0219	97.0691	-756.282	124791	-23621.1	-13381.6	168.767	737.995	0	0	0	0	0	0	0	603	903	0
1031	5	-4.04115	-18.0058	-38.2281	1667.82	5023.43	-1560.84	331.406	256.372	0	-45.8693	96.6113	-755.672	124882	-24109.4	-13473.1	168.095	737.74	0	0	0	0	0	0	0	603	903	0
1031	6	-4.80409	-17.3955	-43.7213	1118.5	5267.57	-2064.38	320.481	274.418	0	-45.1064	99.0527	-755.977	124974	-24048.4	-13518.9	168.189	737.686	0	0	0	0	0	0	0	603	903	0
1031	7	-2.2101	-12.5127	-47.0782	1667.82	6183.1	-1606.61	331.337	264.574	0	-44.9538	96.6113	-757.503	125523	-23316	-13473.1	169.22	737.294	0	0	0	0	0	0	0	603	903	0
1031	8	-0.836806	-11.5971	-50.13	2400.24	6854.48	-507.981	336.734	252.12	0	-45.1064	100.273	-756.282	125981	-24109.4	-13152.7	168.121	736.421	0	0	0	0	0	0	0	603	903	0
1031	9	-3.73598	-8.69797	-57.7594	2400.24	7525.87	-736.863	330.297	258.444	0	-44.6486	100.121	-755.062	125615	-24231.5	-13610.5	167.908	736.637	0	0	0	0	0	0	0	603	903	0
1032	0	-3.27821	-5.18845	-67.8302	3498.87	8807.61	87.1114	329.848	248.417	0	-44.0382	100.121	-756.282	126530	-24109.4	-13381.6	168.121	735.695	0	0	0	0	0	0	0	603	903	0
1032	1	-4.04115	-2.13669	-72.713	2766.45	9173.82	499.099	326.165	261.954	0	-44.6486	101.799	-755.977	126713	-24231.5	-13335.8	167.947	735.385	0	0	0	0	0	0	0	603	903	0
1032	2	-6.32997	0.457305	-76.3751	3773.53	10333.5	453.323	335.299	250.592	0	-44.6486	102.104	-757.198	126439	-24414.6	-13381.6	167.757	736.018	0	0	0	0	0	0	0	603	903	0
1032	3	-5.10927	0.457305	-82.7838	4231.29	11249	590.651	335.884	248.887	0	-43.8857	103.478	-754.146	127079	-23987.3	-13335.8	168.193	734.492	0	0	0	0	0	0	0	603	903	0
1032	4	-4.95668	5.18753	-92.2443	4231.29	12713.9	1323.07	337.828	254.129	0	-42.8175	104.851	-756.587	126622	-24475.6	-13381.6	167.65	735.641	0	0	0	0	0	0	0	603	903	0
1032	5	-6.78773	8.54446	-100.484	5055.27	13263.2	1872.39	331.993	249.691	0	-42.6649	104.241	-752.925	127263	-24475.6	-13198.5	167.493	733.976	0	0	0	0	0	0	0	603	903	0
1032	6	-10.755	12.5117	-103.231	5238.37	14239.7	2055.5	337.941	249.256	0	-42.6649	105.919	-755.062	127903	-23987.3	-13473.1	168.231	733.605	0	0	0	0	0	0	0	603	903	0
1032	7	-11.518	16.0213	-112.081	5696.14	15277.3	2833.69	336.307	249.178	0	-42.3598	105.919	-753.841	127903	-23987.3	-13518.9	168.18	733.331	0	0	0	0	0	0	0	603	903	0
1032	8	-10.2973	17.8523	-119.405	5696.14	15704.6	3154.13	331.524	252.296	0	-43.1227	107.292	-754.756	127812	-24475.6	-13564.7	167.572	733.658	0	0	0	0	0	0	0	603	903	0
1032	9	-12.4335	19.2256	-125.508	6337.01	16986.3	2879.47	335.34	249.509	0	-42.3598	107.292	-755.062	128361	-24048.4	-13610.5	168.15	732.999	0	0	0	0	0	0	0	603	903	0
1033	0	-12.2809	18.1575	-129.781	6611.66	17535.6	3062.58	335.117	249.055	0	-38.8503	108.055	-753.536	128636	-24048.4	-13335.8	168.086	732.29	0	0	0	0	0	0	0	603	903	0
1033	1	-12.7387	22.2774	-134.664	6611.66	17962.9	3474.56	333.391	250.902	0	-42.6649	109.429	-753.536	128819	-24414.6	-13427.4	167.6	732.047	0	0	0	0	0	0	0	603	903	0
1033	2	-14.112	21.5144	-140.462	6977.88	18634.3	3062.58	332.664	250.322	0	-41.7494	110.649	-753.231	128453	-24475.6	-13290	167.506	732.464	0	0	0	0	0	0	0	603	903	0
1033	3	-13.6542	22.5825	-145.345	7527.19	19427.7	3062.58	333.666	248.212	0	-40.3761	111.107	-751.705	129002	-24048.4	-13335.8	168.008	731.387	0	0	0	0	0	0	0	603	903	0
1033	4	-11.8231	20.7515	-152.059	7527.19	20160.1	3337.23	332.581	250.498	0	-40.5287	111.87	-752.315	128544	-24353.6	-13381.6	167.629	732.135	0	0	0	0	0	0	0	603	903	0
1033	5	-11.9757	19.836	-156.026	8076.51	20465.3	3108.35	331.166	248.236	0	-41.4442	113.091	-751.399	129460	-24536.7	-13518.9	167.345	730.708	0	0	0	0	0	0	0	603	903	0
1033	6	-13.6542	19.3782	-160.298	8534.28	21014.6	2696.37	331.097	246.76	0	-39.6132	112.786	-749.568	129185	-23926.3	-13427.4	168.08	730.654	0	0	0	0	0	0	0	603	903	0
1033	7	-14.2645	15.1057	-163.655	8351.17	21564	2650.59	331.764	248.971	0	-40.071	114.312	-748.348	128819	-24475.6	-13198.5	167.294	730.862	0	0	0	0	0	0	0	603	903	0
1033	8	-14.112	14.648	-167.012	8808.93	22052.2	2650.59	332.04	247.256	0	-39.7658	114.312	-748.043	129460	-24231.5	-13518.9	167.607	729.935	0	0	0	0	0	0	0	603	903	0
1033	9	-13.6542	11.9014	-170.98	9266.7	22540.5	1780.84	331.832	245.802	0	-38.6977	114.617	-746.211	129277	-23682.2	-13518.9	168.263	729.756	0	0	0	0	0	0	0	603	903	0
1034	0	-11.8231	9.3074	-172.2	9266.7	23089.8	1506.18	334.087	246.187	0	-39.308	115.685	-746.822	128636	-23865.3	-13427.4	168.044	730.756	0	0	0	0	0	0	0	603	903	0
1034	1	-11.6705	5.95047	-174.642	10090.7	23150.9	1506.18	332.562	242.221	0	-39.1554	115.227	-745.601	129185	-24353.6	-13152.7	167.337	729.737	0	0	0	0	0	0	0	603	903	0
1034	2	-12.7387	2.28836	-177.999	9358.25	23700.2	956.862	333.148	247.425	0	-37.9347	116.753	-739.498	129185	-23865.3	-13244.2	167.728	728.307	0	0	0	0	0	0	0	603	903	0
1034	3	-12.8912	0.304717	-183.187	10456.9	23822.3	178.664	330.044	242.917	0	-37.477	116.906	-742.244	128910	-23865.3	-13152.7	167.847	729.323	0	0	0	0	0	0	0	603	903	0
1034	4	-12.2809	-3.2048	-186.238	10090.7	24493.6	-187.547	331.518	245.819	0	-38.5451	114.922	-743.16	128910	-24048.4	-13381.6	167.64	729.537	0	0	0	0	0	0	0	603	903	0
1034	5	-12.7387	-7.17209	-188.069	10731.5	24432.6	-645.311	329.913	242.938	0	-36.4088	118.279	-738.582	129277	-24292.5	-13381.6	167.109	727.966	0	0	0	0	0	0	0	603	903	0
1034	6	-11.8231	-9.6135	-192.952	11372.4	25043	-1011.52	329.788	241.061	0	-36.8666	117.821	-737.972	128636	-23621.1	-13381.6	167.992	728.69	0	0	0	0	0	0	0	603	903	0
1034	7	-11.6705	-11.4446	-194.783	11830.2	25775.4	-919.969	332.328	239.265	0	-37.7821	118.126	-733.699	129002	-24170.5	-13015.4	167.057	727.176	0	0	0	0	0	0	0	603	903	0
1034	8	-11.6705	-13.4282	-195.089	11647.1	25348.1	-1835.5	329.931	240.299	0	-36.2563	119.5	-732.784	128636	-23865.3	-13015.4	167.432	727.456	0	0	0	0	0	0	0	603	903	0
1034	9	-9.99208	-16.1748	-201.192	11647.1	26446.8	-2064.38	331.45	242.11	0	-36.2563	119.805	-731.868	128544	-23621.1	-13061.1	167.725	727.362	0	0	0	0	0	0	0	603	903	0
1035	0	-11.8231	-17.7007	-204.244	11921.7	26690.9	-2247.48	330.682	241.63	0	-36.714	120.415	-727.901	128086	-24231.5	-13061.1	166.71	727.033	0	0	0	0	0	0	0	603	903	0
1035	1	-11.2128	-19.9895	-209.127	12928.8	27789.5	-2384.81	332.884	238.177	0	-35.6459	120.873	-727.596	127812	-23987.3	-13015.4	167.032	727.337	0	0	0	0	0	0	0	603	903	0
1035	2	-10.6024	-20.5998	-211.873	12745.7	28094.7	-2476.36	332.602	239.843	0	-35.3407	120.72	-725.154	127903	-23560.1	-12832.3	167.51	726.619	0	0	0	0	0	0	0	603	903	0
1035	3	-11.2128	-22.4309	-215.23	13478.1	28460.9	-2567.92	332.235	237.378	0	-35.9511	122.246	-722.408	127446	-23438	-12969.6	167.556	726.582	0	0	0	0	0	0	0	603	903	0
1035	4	-10.2973	-21.9731	-216.756	13478.1	29193.4	-2888.35	334.683	237.819	0	-34.7304	122.856	-719.661	127995	-23560.1	-12603.4	167.262	725.146	0	0	0	0	0	0	0	603	903	0
1035	5	-9.38173	-21.8205	-224.996	14302.1	29620.6	-3254.56	331.65	236.434	0	-31.8312	122.551	-716.609	127720	-23438	-12923.8	167.293	724.771	0	0	0	0	0	0	0	603	903	0
1035	6	-10.2973	-22.7361	-231.71	13752.8	30841.3	-3208.79	333.103	240.646	0	-35.1881	123.314	-714.778	127079	-23254.9	-12878	167.466	725.211	0	0	0	0	0	0	0	603	903	0
1035	7	-12.1283	-24.1093	-237.203	15309.2	31146.5	-3117.23	331.307	235.46	0	-34.7304	122.856	-712.947	126896	-23804.2	-12603.4	166.612	725.012	0	0	0	0	0	0	0	603	903	0
1035	8	-13.0438	-23.6516	-243.917	15950	32001	-3620.77	331.196	234.609	0	-33.2045	123.162	-708.98	126622	-23254.9	-12649.2	167.199	724.403	0	0	0	0	0	0	0	603	903	0
1035	9	-12.7387	-22.5835	-252.767	16224.7	32855.5	-3895.43	329.983	235.812	0	-33.6623	123.925	-707.759	126164	-23132.9	-12282.9	167.315	724.742	0	0	0	0	0	0	0	603	903	0
1036	0	-15.1801	-22.8886	-258.565	17323.3	33587.9	-3575	329.901	233.002	0	-32.7467	123.467	-705.013	125798	-23438	-12557.6	166.755	724.567	0	0	0	0	0	0	0	603	903	0
1036	1	-13.349	-24.2619	-264.363	17048.7	34625.5	-3986.99	330.977	235.51	0	-32.8993	124.84	-698.909	125889	-23193.9	-12878	166.814	722.878	0	0	0	0	0	0	0	603	903	0
1036	2	-13.6542	-25.33	-269.857	18147.3	34991.7	-4124.32	329.668	232.752	0	-32.289	124.23	-699.825	125340	-23010.8	-12420.3	167.119	723.898	0	0	0	0	0	0	0	603	903	0
1036	3	-15.3327	-23.9568	-276.876	18788.2	36090.3	-4261.65	330.349	232.142	0	-33.3571	122.856	-694.637	124882	-23071.8	-12374.5	166.786	723.22	0	0	0	0	0	0	0	603	903	0
1036	4	-15.1801	-24.1093	-283.284	20069.9	36883.8	-4444.75	330.201	229.153	0	-32.289	125.603	-691.89	124974	-23010.8	-12282.9	166.742	722.373	0	0	0	0	0	0	0	603	903	0
1036	5	-14.4171	-25.4826	-289.083	20253	37982.4	-4719.41	331.389	229.94	0	-31.526	125.45	-688.838	124516	-22461.5	-12237.2	167.392	722.238	0	0	0	0	0	0	0	603	903	0
1036	6	-14.7223	-27.0085	-294.271	20710.8	38653.8	-4765.19	331.355	229.62	0	-31.526	125.45	-684.871	123600	-22827.7	-12237.2	166.669	722.528	0	0	0	0	0	0	0	603	903	0
1036	7	-12.4335	-28.9922	-301.595	21260.1	39813.5	-5039.84	332.01	229.508	0	-31.9838	126.519	-681.514	123234	-22644.6	-11733.6	166.773	722.176	0	0	0	0	0	0	0	603	903	0
1036	8	-12.2809	-30.2129	-308.004	22358.7	40668	-5314.5	332.037	227.408	0	-30.3053	125.145	-674.8	122868	-22034.2	-11962.5	167.347	720.92	0	0	0	0	0	0	0	603	903	0
1036	9	-12.4335	-31.281	-313.192	22267.2	41217.3	-5680.71	331.604	228.902	0	-28.7794	126.519	-673.885	122044	-22339.4	-11825.2	166.85	721.895	0	0	0	0	0	0	0	603	903	0
1037	0	-11.9757	-33.875	-320.516	23274.3	41949.7	-5451.83	330.882	227.385	0	-30.6105	125.145	-669.918	121769	-22095.3	-12008.3	167.018	721.232	0	0	0	0	0	0	0	603	903	0
1037	1	-11.518	-37.2319	-324.788	23457.4	42682.1	-6275.81	331.415	227.776	0	-28.7794	127.434	-667.781	121128	-21912.2	-11871	167.187	721.611	0	0	0	0	0	0	0	603	903	0
1037	2	-9.6869	-36.6216	-329.976	24281.4	43658.7	-6138.48	332.309	226.415	0	-28.0165	126.976	-658.931	120396	-21729	-11779.4	167.024	720.286	0	0	0	0	0	0	0	603	903	0
1037	3	-6.94032	-39.5207	-333.028	25196.9	44635.2	-6413.14	334.029	224.34	0	-27.2536	128.044	-658.321	120121	-22095.3	-11916.7	166.437	720.534	0	0	0	0	0	0	0	603	903	0
1037	4	-7.85585	-41.8095	-339.742	25563.1	45123.5	-6504.69	332.817	224.757	0	-27.2536	127.281	-654.964	120121	-21668	-11687.9	166.917	719.598	0	0	0	0	0	0	0	603	903	0
1037	5	-9.07655	-43.1828	-347.676	26204	45917	-6916.68	332.068	224.631	0	-27.7113	127.739	-648.555	118840	-21607	-11459	166.684	719.763	0	0	0	0	0	0	0	603	903	0
1037	6	-9.6869	-45.0139	-352.559	27211	46710.5	-7145.56	332.49	222.819	0	-28.3217	127.892	-646.724	118290	-21729	-11504.7	166.401	720.093	0	0	0	0	0	0	0	603	903	0
1037	7	-8.4662	-46.5398	-359.578	27760.4	47931.2	-7465.99	333.298	222.797	0	-27.101	127.434	-641.841	118199	-21607	-11367.4	166.336	718.844	0	0	0	0	0	0	0	603	903	0
1037	8	-8.00844	-48.5234	-362.63	28675.9	48724.6	-7557.54	334.365	220.923	0	-27.2536	128.35	-636.959	117009	-20813.5	-11504.7	167.324	719.301	0	0	0	0	0	0	0	603	903	0
1037	9	-5.56703	-51.1174	-372.396	29133.6	49457	-7740.65	332.808	221.767	0	-27.5587	127.281	-632.076	116185	-21301.8	-11321.6	166.299	719.186	0	0	0	0	0	0	0	603	903	0
1038	0	-4.49892	-52.4907	-379.109	29866.1	50555.7	-7557.54	333.354	221.22	0	-26.6432	127.434	-627.193	116185	-20935.6	-11367.4	166.62	717.755	0	0	0	0	0	0	0	603	903	0
1038	1	-5.41444	-53.4062	-384.297	30873.1	51105	-8244.19	332.983	219.663	0	-25.2699	127.434	-622.615	115544	-20630.4	-11184.3	166.865	717.422	0	0	0	0	0	0	0	603	903	0
1038	2	-3.12562	-53.7114	-390.096	31239.4	51837.4	-8106.86	332.884	219.919	0	-26.6432	126.976	-616.817	114354	-20630.4	-10955.4	166.553	717.607	0	0	0	0	0	0	0	603	903	0
1038	3	-3.73598	-54.3217	-396.81	32521.1	53180.2	-8335.75	334.019	218.044	0	-26.7958	127.434	-610.713	113896	-20630.4	-10863.9	166.219	716.504	0	0	0	0	0	0	0	603	903	0
1038	4	-2.82045	-57.6787	-408.101	33894.4	54400.9	-8335.75	333.302	216.946	0	-24.3544	127.587	-607.357	113072	-20203.2	-10772.3	166.736	716.83	0	0	0	0	0	0	0	603	903	0
1038	5	-3.88856	-58.1364	-415.425	34535.2	55743.7	-8930.84	334.185	216.868	0	-25.4225	126.366	-599.422	112248	-20142.1	-10818.1	166.397	715.74	0	0	0	0	0	0	0	603	903	0
1038	6	-2.2101	-61.3408	-422.75	35908.6	56109.9	-8885.06	332.726	215.06	0	-23.4389	126.976	-594.539	111882	-20203.2	-10406.1	166.019	714.818	0	0	0	0	0	0	0	603	903	0
1038	7	-3.58339	-60.7304	-427.938	36091.7	57574.7	-9022.39	334.54	215.661	0	-23.2863	126.519	-588.741	111332	-19531.8	-10589.2	166.824	713.897	0	0	0	0	0	0	0	603	903	0
1038	8	-3.4308	-60.5779	-439.229	37190.3	58734.4	-9480.15	333.722	215.328	0	-24.2018	126.061	-585.994	109776	-19287.6	-10543.4	167.086	715.667	0	0	0	0	0	0	0	603	903	0
1038	9	-0.684218	-65.1555	-447.469	39204.5	60016.1	-9480.15	334.124	212.386	0	-22.8285	124.84	-578.365	109593	-19287.6	-9948.35	166.651	713.513	0	0	0	0	0	0	0	603	903	0
1039	0	0.689073	-65.6133	-452.962	39479.1	61419.9	-9571.71	335.596	212.842	0	-22.5233	124.993	-574.398	108677	-18982.5	-10223	166.952	713.798	0	0	0	0	0	0	0	603	903	0
1039	1	1.45201	-67.5969	-460.897	41767.9	62152.4	-9571.71	334.851	209.377	0	-22.6759	124.84	-568.599	106938	-18921.4	-10039.9	166.723	714.928	0	0	0	0	0	0	0	603	903	0
1039	2	2.36754	-68.2072	-467.916	42134.1	63495.1	-10121	335.698	209.954	0	-22.2182	125.756	-562.496	107029	-19226.6	-9856.8	165.819	712.724	0	0	0	0	0	0	0	603	903	0
1039	3	3.74083	-70.8012	-477.376	43324.3	63983.4	-9754.81	334.031	209.245	0	-20.6923	123.619	-557.003	106297	-18372.1	-9765.24	167.016	712.162	0	0	0	0	0	0	0	603	903	0
1039	4	3.89342	-72.4797	-482.869	44697.6	65326.2	-10258.4	335.287	207.433	0	-21.913	124.23	-549.373	105015	-18189	-9856.8	166.891	711.846	0	0	0	0	0	0	0	603	903	0
1039	5	4.35118	-72.4797	-488.973	45979.4	66363.8	-10258.4	335.721	205.967	0	-21.913	123.925	-544.185	103917	-18494.2	-9765.24	166.015	712.042	0	0	0	0	0	0	0	603	903	0
1039	6	7.25035	-74.6159	-493.245	47078	67218.3	-10258.4	336.278	204.555	0	-19.9294	121.941	-537.166	103184	-18372.1	-9673.69	165.798	710.91	0	0	0	0	0	0	0	603	903	0
1039	7	8.01329	-77.9729	-500.569	47261.1	68683.1	-10395.7	337.21	205.585	0	-18.8612	120.873	-529.842	101902	-17578.7	-9490.58	166.823	710.674	0	0	0	0	0	0	0	603	903	0
1039	8	9.69176	-78.8884	-507.589	48451.3	69293.5	-10624.6	336.515	204.546	0	-19.6242	120.568	-525.875	100712	-17761.8	-8941.27	166.224	711.486	0	0	0	0	0	0	0	603	903	0
1039	9	9.99693	-80.2617	-511.861	49549.9	69903.8	-10670.3	336.568	203.197	0	-18.8612	120.11	-517.94	99339	-17700.7	-9124.37	165.825	711.204	0	0	0	0	0	0	0	603	903	0
1040	0	10.1495	-80.5669	-517.964	50007.7	71063.5	-10716.1	337.198	203.453	0	-17.9457	119.805	-510.921	98606.5	-17212.4	-9124.37	166.311	710.002	0	0	0	0	0	0	0	603	903	0
1040	1	12.4383	-82.3979	-520.101	51655.6	71979	-11173.9	338.394	200.681	0	-19.0138	116.448	-501.155	97782.5	-17212.4	-8941.27	165.654	707.886	0	0	0	0	0	0	0	603	903	0
1040	2	12.8961	-84.6867	-527.12	52113.4	72711.4	-11219.7	337.941	201.136	0	-17.9457	118.279	-497.493	97141.7	-16968.3	-8895.49	165.892	707.738	0	0	0	0	0	0	0	603	903	0
1040	3	14.1168	-84.0764	-531.087	52479.6	72894.5	-10945	337.255	201.185	0	-16.2672	116.6	-492	95859.9	-16846.2	-8346.18	165.76	708.163	0	0	0	0	0	0	0	603	903	0
1040	4	14.422	-85.7549	-535.665	54310.6	74115.2	-11311.2	338.361	198.611	0	-16.725	115.99	-483.455	94028.9	-16663.1	-8483.5	165.533	708.507	0	0	0	0	0	0	0	603	903	0
1040	5	15.7953	-87.4333	-540.853	54493.7	74603.5	-11631.6	337.937	199.245	0	-16.725	116.143	-477.046	93662.6	-16358	-8391.95	165.71	706.661	0	0	0	0	0	0	0	603	903	0
1040	6	17.4737	-90.3325	-545.735	55775.5	75335.9	-11494.3	338.045	197.798	0	-15.1991	114.159	-470.638	92838.7	-16174.8	-8346.18	165.632	705.739	0	0	0	0	0	0	0	603	903	0
1040	7	19.3048	-89.7221	-550.313	56416.4	76129.4	-11402.8	338.338	197.483	0	-14.5888	113.854	-463.924	91740.1	-16174.8	-8208.85	165.135	705.252	0	0	0	0	0	0	0	603	903	0
1040	8	18.3893	-89.8747	-552.449	56782.6	76007.3	-11311.2	337.582	197.217	0	-12.9103	113.091	-456.294	90549.9	-16052.8	-8117.3	164.819	704.554	0	0	0	0	0	0	0	603	903	0
1040	9	17.9315	-90.0273	-556.722	57881.2	76922.8	-12043.6	338.171	196.032	0	-13.2155	111.565	-449.886	90183.7	-15198.3	-7796.86	166.217	702.541	0	0	0	0	0	0	0	603	903	0
1041	0	19.1522	-92.4687	-560.384	58247.4	77106	-11906.3	337.595	196.058	0	-12.7577	110.192	-442.562	88627.2	-15503.5	-7659.53	164.969	702.74	0	0	0	0	0	0	0	603	903	0
1041	1	19.3048	-92.1635	-562.52	58705.2	77899.4	-11906.3	338.483	195.639	0	-13.6732	108.361	-436.153	86430	-15320.4	-7659.53	164.874	704.836	0	0	0	0	0	0	0	603	903	0
1041	2	19.9151	-92.6213	-563.13	59803.8	78082.5	-12089.4	338.658	193.801	0	-13.3681	106.682	-428.218	86155.4	-14771	-7430.65	165.506	701.805	0	0	0	0	0	0	0	603	903	0
1041	3	20.6781	-93.9946	-567.098	59712.3	78448.7	-11997.9	338.334	194.706	0	-10.7741	106.072	-421.81	84965.1	-15198.3	-7293.32	163.969	701.57	0	0	0	0	0	0	0	603	903	0
1041	4	20.6781	-94.2998	-570.76	60994	79059.1	-12181	338.516	193.135	0	-11.2318	103.63	-414.791	83408.7	-14587.9	-7155.99	164.831	701.914	0	0	0	0	0	0	0	603	903	0
1041	5	20.3729	-94.7575	-571.981	61634.9	79120.1	-12364.1	338.327	192.243	0	-10.7741	104.088	-405.33	82493.2	-14160.7	-7247.55	165.064	699.479	0	0	0	0	0	0	0	603	903	0
1041	6	21.1358	-94.1472	-574.422	61268.6	79303.2	-12364.1	338.057	193.339	0	-8.18008	104.088	-399.532	81760.8	-14038.6	-7064.44	164.862	698.358	0	0	0	0	0	0	0	603	903	0
1041	7	21.441	-95.6731	-577.169	62825.1	79791.5	-12272.5	338.246	191.15	0	-9.70596	102.104	-391.902	80204.4	-14038.6	-7064.44	164.178	698.346	0	0	0	0	0	0	0	603	903	0
1041	8	21.5936	-96.7412	-576.558	62367.3	80401.9	-12684.5	339.451	191.828	0	-10.1637	102.257	-384.273	78739.5	-13611.4	-6744.01	164.579	698.095	0	0	0	0	0	0	0	603	903	0
1041	9	23.8824	-96.436	-577.474	63099.7	80462.9	-12638.7	339.336	190.731	0	-9.85855	99.8157	-378.169	77640.9	-13245.2	-6560.9	164.976	697.693	0	0	0	0	0	0	0	603	903	0
1042	0	23.1195	-96.7412	-580.831	64106.8	80523.9	-12684.5	338.636	189.629	0	-8.63785	99.0527	-370.235	76908.5	-13306.2	-6103.14	164.06	695.271	0	0	0	0	0	0	0	603	903	0
1042	1	23.4247	-98.7248	-581.746	64106.8	80768.1	-12821.8	338.837	189.803	0	-8.33267	97.9846	-364.437	75077.4	-12817.9	-6377.79	164.828	696.99	0	0	0	0	0	0	0	603	903	0
1042	2	23.8824	-99.1826	-585.103	65297	81195.3	-12821.8	338.771	188.401	0	-8.94302	94.1699	-357.112	74436.6	-12451.7	-6011.58	165.132	694.56	0	0	0	0	0	0	0	603	903	0
1042	3	24.3402	-98.7248	-586.324	66212.5	81927.7	-12364.1	339.731	187.072	0	-7.41714	94.9329	-348.873	72788.6	-13001	-6194.69	162.734	694.36	0	0	0	0	0	0	0	603	903	0
1042	4	25.2557	-99.3352	-586.934	66120.9	81744.6	-12821.8	339.274	187.345	0	-7.11197	92.1863	-343.074	70866	-12329.6	-5874.25	164.061	696.438	0	0	0	0	0	0	0	603	903	0
1042	5	26.9342	-102.082	-592.733	67585.8	82782.2	-12821.8	339.662	185.976	0	-5.28091	90.3552	-333.919	69767.4	-12085.5	-5599.6	163.807	694.065	0	0	0	0	0	0	0	603	903	0
1042	6	27.0868	-102.234	-597.31	67311.1	83392.6	-13096.5	339.614	187.31	0	-6.6542	90.6604	-326.9	69584.3	-12512.7	-5736.93	161.723	690.139	0	0	0	0	0	0	0	603	903	0
1042	7	28.4601	-101.777	-600.057	68501.3	83636.7	-12959.2	339.381	185.842	0	-6.6542	89.5923	-321.407	67112.4	-11841.4	-5691.15	163.158	694.192	0	0	0	0	0	0	0	603	903	0
1042	8	28.4601	-103.76	-603.414	69691.5	84430.2	-13371.1	339.921	184.505	0	-6.80679	88.219	-312.557	65830.6	-11597.2	-5553.82	162.896	692.38	0	0	0	0	0	0	0	603	903	0
1042	9	28.9178	-104.523	-607.991	69508.4	84796.4	-13050.7	339.47	185.675	0	-6.80679	87.6086	-306.758	64640.4	-11414.1	-5324.94	162.791	692.279	0	0	0	0	0	0	0	603	903	0
1043	0	29.3756	-105.591	-613.79	71156.4	85589.9	-13233.8	339.445	184.07	0	-3.29727	86.2354	-299.739	64091.1	-11414.1	-5279.16	161.92	689.177	0	0	0	0	0	0	0	603	903	0
1043	1	30.5963	-107.117	-618.062	71614.1	86200.2	-13462.7	339.469	184.131	0	-5.89127	85.625	-292.415	61985.4	-10986.9	-5324.94	162.427	691.023	0	0	0	0	0	0	0	603	903	0
1043	2	30.7489	-108.033	-622.945	72529.6	86749.5	-13004.9	339.257	183.57	0	-5.73868	84.5569	-286.006	61253	-10925.8	-5187.61	161.799	688.834	0	0	0	0	0	0	0	603	903	0
1043	3	30.7489	-109.253	-625.997	73994.5	87359.9	-13188	339.553	181.797	0	-4.06021	82.4207	-278.682	59696.6	-10681.7	-4821.4	161.671	688.79	0	0	0	0	0	0	0	603	903	0
1043	4	31.9696	-109.101	-632.711	73994.5	88153.4	-13645.8	339.327	183.052	0	-4.82315	81.8103	-271.968	57865.5	-10132.4	-5096.06	162.744	690.234	0	0	0	0	0	0	0	603	903	0
1043	5	32.1222	-110.322	-635.762	76283.3	88885.8	-13783.1	339.81	180.013	0	-3.60245	78.606	-266.78	56675.4	-9888.23	-4867.17	162.935	690.558	0	0	0	0	0	0	0	603	903	0
1043	6	32.5799	-111.695	-637.593	76191.8	89374.1	-13737.4	340.174	180.501	0	-4.36539	77.3853	-257.625	55942.9	-10193.4	-4638.29	160.433	685.851	0	0	0	0	0	0	0	603	903	0
1043	7	31.9696	-111.847	-646.138	77198.8	90350.6	-14012	339.832	180.523	0	-4.82315	76.9275	-251.522	54295	-9705.13	-4546.74	161.414	687.134	0	0	0	0	0	0	0	603	903	0
1043	8	32.4274	-112.61	-652.547	78755.3	91083	-13737.4	339.581	179.311	0	-5.89127	74.0283	-244.808	53013.2	-9522.02	-4546.74	161.104	686.449	0	0	0	0	0	0	0	603	903	0
1043	9	32.8851	-112.763	-657.735	79213	91815.5	-13645.8	339.593	179.567	0	-4.67056	73.2654	-234.737	51639.9	-9644.09	-4638.29	158.915	683.009	0	0	0	0	0	0	0	603	903	0
1044	0	33.4955	-113.373	-662.313	80677.9	92670	-13920.5	339.919	178.188	0	-4.06021	71.2817	-232.601	49808.9	-9033.74	-4317.86	161.162	688.861	0	0	0	0	0	0	0	603	903	0
1044	1	35.0213	-114.747	-666.89	80494.7	93768.6	-13828.9	340.606	179.298	0	-5.28091	68.9929	-222.835	48710.2	-8850.63	-4043.2	160.282	684.407	0	0	0	0	0	0	0	603	903	0
1044	2	36.8524	-114.594	-672.689	82417.4	94439.9	-14057.8	340.392	177.481	0	-3.60245	68.3826	-218.257	47977.8	-9033.74	-4363.63	158.61	683.178	0	0	0	0	0	0	0	603	903	0
1044	3	35.6317	-115.509	-678.487	83973.8	95233.4	-13325.4	340.361	176.234	0	-1.92398	66.3989	-211.849	47062.3	-8606.49	-3951.65	159.374	680.849	0	0	0	0	0	0	0	603	903	0
1044	4	36.3946	-115.357	-684.896	83790.6	96210	-14195.1	340.474	177.659	0	-5.28091	66.0938	-204.524	45322.8	-8423.38	-4088.97	158.815	681.399	0	0	0	0	0	0	0	603	903	0
1044	5	38.0731	-116.578	-689.168	86171	97186.6	-13645.8	341.02	174.964	0	-4.82315	63.042	-199.336	44407.3	-8118.21	-3951.65	159.274	680.225	0	0	0	0	0	0	0	603	903	0
1044	6	38.0731	-118.103	-691.304	86262.5	97613.8	-14149.3	341.202	175.218	0	-3.90762	63.042	-195.064	42393.1	-7813.03	-3905.87	159.946	685.671	0	0	0	0	0	0	0	603	903	0
1044	7	39.1412	-118.866	-700.154	88185.1	98407.3	-14012	340.551	174.049	0	-3.60245	61.5161	-188.35	41752.2	-7813.03	-3860.09	158.519	681.327	0	0	0	0	0	0	0	603	903	0
1044	8	38.836	-120.545	-705.037	88917.6	98834.5	-14240.9	340.183	173.882	0	-4.36539	59.2273	-183.773	40562.1	-7507.86	-3860.09	159.146	682.281	0	0	0	0	0	0	0	603	903	0
1044	9	38.3783	-120.545	-709.31	89009.2	99750	-14424	340.63	174.513	0	-3.90762	56.3281	-177.669	39646.5	-7629.93	-3676.99	157.055	679.852	0	0	0	0	0	0	0	603	903	0
1045	0	38.9886	-120.697	-713.277	90931.8	100543	-14149.3	340.96	172.516	0	-3.75503	55.8704	-171.565	38547.9	-7202.68	-3539.66	158.018	678.317	0	0	0	0	0	0	0	603	903	0
1045	1	39.4464	-121.308	-716.634	90931.8	101154	-14561.3	341.151	173.113	0	-5.28091	53.429	-166.377	36991.5	-6775.44	-3402.33	159.277	680.665	0	0	0	0	0	0	0	603	903	0
1045	2	40.5145	-121.766	-722.432	92488.1	101276	-14378.2	340.187	171.977	0	-4.82315	50.6824	-159.969	35892.9	-7019.58	-3265	156.119	678.626	0	0	0	0	0	0	0	603	903	0
1045	3	38.5309	-122.223	-726.4	92579.7	102069	-14652.9	340.514	172.55	0	-3.75503	48.0884	-154.17	35160.4	-6592.33	-3493.88	157.24	674.938	0	0	0	0	0	0	0	603	903	0
1045	4	37.9205	-121.46	-729.146	92762.8	102191	-14469.8	340.152	172.779	0	-4.82315	47.1728	-149.898	33878.7	-6409.23	-3310.78	157.243	676.988	0	0	0	0	0	0	0	603	903	0
1045	5	38.6835	-121.003	-733.113	94044.5	102924	-14607.1	340.393	171.719	0	-5.12833	45.7996	-142.269	31773	-6775.44	-3310.78	152.376	679.669	0	0	0	0	0	0	0	603	903	0
1045	6	37.6153	-121.613	-736.47	94136.1	103290	-14469.8	340.25	172.179	0	-4.36539	45.1892	-137.996	31406.8	-5859.91	-3127.67	157.536	675.408	0	0	0	0	0	0	0	603	903	0
1045	7	38.0731	-120.85	-736.47	95601	103107	-14561.3	340.002	170.19	0	-3.60245	43.5107	-132.808	30125	-5859.91	-3127.67	155.877	676.169	0	0	0	0	0	0	0	603	903	0
1045	8	38.6835	-120.087	-742.269	95784	104633	-14424	340.964	170.958	0	-5.89127	42.9004	-127.925	29209.5	-6043.01	-3127.67	152.761	674.668	0	0	0	0	0	0	0	603	903	0
1045	9	38.2257	-119.172	-746.541	96516.4	104755	-14332.4	340.32	170.715	0	-3.75503	40.9167	-123.348	27836.2	-5127.49	-2715.68	158.431	677.327	0	0	0	0	0	0	0	603	903	0
1046	0	38.9886	-119.782	-748.677	97615.1	105365	-14240.9	340.735	169.617	0	-3.75503	38.7805	-117.855	27103.8	-5249.56	-2669.91	155.457	673.023	0	0	0	0	0	0	0	603	903	0
1046	1	38.3783	-119.477	-752.95	97981.3	105915	-14424	340.666	169.87	0	-4.06021	37.865	-114.803	26096.7	-5127.49	-2669.91	155.337	675.682	0	0	0	0	0	0	0	603	903	0
1046	2	39.1412	-120.087	-755.086	99171.5	105731	-13920.5	340.026	168.662	0	-4.36539	34.8132	-110.53	25364.3	-5005.42	-2303.7	154.715	673.522	0	0	0	0	0	0	0	603	903	0
1046	3	39.7516	-119.782	-756.307	99720.8	107074	-14195.1	341.575	168.148	0	-3.90762	32.9822	-106.563	24906.5	-4639.21	-2715.68	156.465	669.274	0	0	0	0	0	0	0	603	903	0
1046	4	40.2093	-120.545	-761.19	101094	107318	-14240.9	340.988	167.189	0	-5.58609	32.3718	-102.291	23533.2	-4700.24	-2441.02	154.05	672.937	0	0	0	0	0	0	0	603	903	0
1046	5	40.0567	-120.85	-764.852	102284	107257	-14103.6	340.233	166.269	0	-5.12833	30.8459	-98.0181	22892.4	-4456.1	-2669.91	154.538	669.448	0	0	0	0	0	0	0	603	903	0
1046	6	40.2093	-121.308	-768.209	101735	108356	-14149.3	341.05	167.569	0	-4.36539	27.6416	-93.1353	21793.7	-4334.03	-2395.25	153.465	668.999	0	0	0	0	0	0	0	603	903	0
1046	7	40.8197	-121.46	-770.955	102834	109027	-13966.2	341.419	166.615	0	-4.67056	26.1157	-90.0835	20878.2	-3967.82	-2395.25	155.954	671.235	0	0	0	0	0	0	0	603	903	0
1046	8	40.8197	-121.308	-773.702	103566	109333	-13920.5	341.311	166.142	0	-3.75503	24.895	-85.5059	19688	-4150.92	-2166.37	151.455	672.747	0	0	0	0	0	0	0	603	903	0
1046	9	40.8197	-121.918	-776.448	104573	109699	-13554.3	341.283	165.319	0	-5.28091	23.5217	-81.2335	19962.7	-3540.57	-2257.92	156.415	657.255	0	0	0	0	0	0	0	603	903	0
1047	0	40.8197	-121.613	-777.059	104482	110248	-14103.6	341.879	165.542	0	-3.90762	22.1484	-76.961	19413.4	-3540.57	-2303.7	153.995	650.75	0	0	0	0	0	0	0	603	903	0
1047	1	41.43	-121.46	-780.11	105031	110370	-13737.4	341.48	165.364	0	-5.12833	20.0122	-74.8248	17399.2	-3906.78	-2074.81	147.788	670.467	0	0	0	0	0	0	0	603	903	0
1047	2	42.193	-121.918	-784.383	106404	111286	-13966.2	341.877	164.347	0	-5.89127	18.3337	-71.1627	17033	-3235.4	-2074.81	154.535	663.647	0	0	0	0	0	0	0	603	903	0
1047	3	41.5826	-120.85	-787.13	106496	111164	-13966.2	341.227	164.704	0	-3.44986	17.876	-67.8057	15659.7	-3235.4	-2029.04	152.284	672.05	0	0	0	0	0	0	0	603	903	0
1047	4	42.3456	-120.545	-788.961	107594	111713	-13874.7	341.595	163.625	0	-4.97574	16.8079	-63.2281	15018.8	-3357.47	-1983.26	146.899	665.466	0	0	0	0	0	0	0	603	903	0
1047	5	42.3456	-121.155	-792.012	108327	112323	-13737.4	341.82	163.226	0	-4.67056	16.8079	-62.0074	14469.5	-2930.22	-1754.38	152.744	669.648	0	0	0	0	0	0	0	603	903	0
1047	6	43.2611	-119.172	-794.454	108144	112262	-13600	341.307	163.877	0	-3.90762	14.519	-57.7349	13737.1	-2625.04	-1891.71	154.533	665.066	0	0	0	0	0	0	0	603	903	0
1047	7	42.9559	-119.629	-795.98	110066	113422	-13279.6	342.493	161.722	0	-3.60245	13.4509	-54.0728	12730	-2686.08	-1800.16	150.325	667.576	0	0	0	0	0	0	0	603	903	0
1047	8	42.3456	-119.019	-798.421	109334	113239	-13462.7	341.828	163.062	0	-3.60245	13.1457	-51.6314	11814.5	-2564.01	-1662.83	150.34	674.176	0	0	0	0	0	0	0	603	903	0
1047	9	43.1085	-117.646	-802.388	110158	113788	-13462.7	341.812	162.713	0	-3.90762	12.0776	-48.5796	12180.7	-2014.69	-1708.6	158.528	652.263	0	0	0	0	0	0	0	603	903	0
1048	0	43.1085	-118.409	-804.525	111714	114093	-13416.9	341.815	161.143	0	-3.60245	10.2466	-45.8331	11356.7	-2319.87	-1525.5	149.384	655.215	0	0	0	0	0	0	0	603	903	0
1048	1	43.4137	-117.646	-806.356	111531	114459	-13325.4	341.947	161.685	0	-3.44986	9.33105	-40.6451	10532.8	-2380.9	-1708.6	141.422	643.86	0	0	0	0	0	0	0	603	903	0
1048	2	43.2611	-116.883	-809.102	112996	115009	-13233.8	342.144	160.344	0	-3.29727	9.17846	-40.9502	10166.6	-1831.59	-1342.39	155.273	654.734	0	0	0	0	0	0	0	603	903	0
1048	3	43.1085	-117.646	-811.849	112538	115131	-13004.9	341.813	161.38	0	-2.83951	8.87329	-38.5088	9800.34	-1709.52	-1250.84	155.607	648.504	0	0	0	0	0	0	0	603	903	0
1048	4	42.9559	-117.951	-811.238	113545	115863	-13050.7	342.823	160.035	0	-3.90762	7.04223	-36.3726	8518.6	-2014.69	-1296.62	144.61	668.796	0	0	0	0	0	0	0	603	903	0
1048	5	42.6507	-117.646	-814.595	114552	116107	-13233.8	342.534	159.375	0	-3.75503	6.73706	-33.9312	7969.28	-1343.3	-1205.06	160.411	668.134	0	0	0	0	0	0	0	603	903	0
1048	6	43.1085	-116.425	-817.037	114735	115924	-12730.3	341.884	159.571	0	-0.703277	6.27929	-31.1846	7694.63	-1526.41	-1205.06	151.052	656.256	0	0	0	0	0	0	0	603	903	0
1048	7	43.8714	-116.272	-819.173	116017	116779	-13096.5	342.557	158.373	0	-3.29727	4.60083	-27.8277	7236.86	-1465.38	-930.405	147.341	642.94	0	0	0	0	0	0	0	603	903	0
1048	8	44.3292	-116.578	-820.699	116292	116779	-12867.6	342.292	158.301	0	-3.14468	3.99048	-25.6915	6687.55	-1343.3	-884.628	147.714	642.698	0	0	0	0	0	0	0	603	903	0
1048	9	44.1766	-115.204	-822.225	116292	117328	-12547.2	342.696	158.564	0	-1.16104	3.38012	-25.3863	6138.23	-1221.23	-1021.96	151.894	661.207	0	0	0	0	0	0	0	603	903	0
1049	0	44.024	-115.509	-819.478	117024	117328	-12638.7	343.174	157.197	0	-3.90762	1.85425	-21.7242	5772.02	-671.918	-655.746	169.07	637.304	0	0	0	0	0	0	0	603	903	0
1049	1	46.0077	-115.052	-824.361	117482	117572	-12501.4	342.622	157.487	0	-2.38174	1.09131	-21.419	5222.7	-855.024	-701.523	160.081	659.165	0	0	0	0	0	0	0	603	903	0
1049	2	45.8551	-113.984	-824.971	117757	118061	-12318.3	343.109	157.26	0	-1.77139	-0.587161	-19.8931	4673.39	-977.094	-747.299	150.883	668.075	0	0	0	0	0	0	0	603	903	0
1049	3	45.7025	-113.984	-826.497	118672	118183	-11631.6	342.992	156.415	0	0	0	0	0	0	0	200	903	0	0	0	0	0	0	0	603	903	0
1049	4	46.3129	-113.221	-827.718	119130	118549	-12318.3	343.224	156.074	0	0	0	0	0	0	0	200	903	0	0	0	0	0	0	0	603	903	0
1049	5	46.4654	-113.221	-830.77	119771	118610	-11906.3	342.771	155.831	0	0	0	0	0	0	0	200	903	0	0	0	0	0	0	0	603	903	0
1049	6	46.3129	-113.831	-829.549	120503	118976	-11997.9	343.423	154.736	0	0	0	0	0	0	0	200	903	0	0	0	0	0	0	0	603	903	0
1049	7	47.8387	-112.153	-832.296	120412	119342	-11769	343.389	155.326	0	0	0	0	0	0	0	200	903	0	0	0	0	0	0	0	603	903	0
1049	8	48.2965	-111.847	-831.38	121693	119342	-11769	343.547	153.625	0	0	0	0	0	0	0	200	903	0	0	0	0	0	0	0	603	903	0
1049	9	47.2284	-111.847	-834.432	121419	119586	-11585.9	343.315	154.489	0	0	0	0	0	0	0	200	903	0	0	0	0	0	0	0	603	903	0
1050	0	47.9913	-112.305	-835.347	121602	119831	-11585.9	343.45	154.429	0	0	0	0	0	0	0	200	903	0	0	0	0	0	0	0	603	903	0
1050	1	48.2965	-111.237	-835.042	122151	119953	-11631.6	343.649	153.719	0	0	0	0	0	0	0	200	903	0	0	0	0	0	0	0	603	903	0
1050	2	48.6017	-110.474	-836.263	122426	119831	-11219.7	343.293	153.604	0	0	0	0	0	0	0	200	903	0	0	0	0	0	0	0	603	903	0
1050	3	49.0594	-109.711	-837.178	123067	120075	-11219.7	343.428	152.998	0	0	0	0	0	0	0	200	903	0	0	0	0	0	0	0	603	903	0
1050	4	49.6698	-109.711	-840.23	124257	120563	-11082.3	343.488	152.116	0	0	0	0	0	0	0	200	903	0	0	0	0	0	0	0	603	903	0
1050	5	49.3646	-108.643	-840.535	123708	120258	-11128.1	343.073	152.823	0	0	0	0	0	0	0	200	903	0	0	0	0	0	0	0	603	903	0
1050	6	49.3646	-108.643	-840.535	125081	120624	-10578.8	343.509	151.189	0	0	0	0	0	0	0	200	903	0	0	0	0	0	0	0	603	903	0
1050	7	50.1275	-108.49	-841.146	124440	120502	-10899.2	343.259	152.059	0	0	0	0	0	0	0	200	903	0	0	0	0	0	0	0	603	903	0
1050	8	50.4327	-108.948	-840.23	124989	120929	-10624.6	343.924	151.244	0	0	0	0	0	0	0	200	903	0	0	0	0	0	0	0	603	903	0
1050	9	50.1275	-108.185	-840.84	125813	120807	-10487.2	343.674	150.372	0	0	0	0	0	0	0	200	903	0	0	0	0	0	0	0	603	903	0
1051	0	50.4327	-107.422	-838.704	125996	120990	-10304.1	344.259	149.772	0	0	0	0	0	0	0	200	903	0	0	0	0	0	0	0	603	903	0
1051	1	50.4327	-107.422	-841.451	126637	121112	-10258.4	343.933	149.501	0	0	0	0	0	0	0	200	903	0	0	0	0	0	0	0	603	903	0
1051	2	50.7379	-106.659	-841.451	127004	121112	-10166.8	343.933	149.066	0	0	0	0	0	0	0	200	903	0	0	0	0	0	0	0	603	903	0
1051	3	50.8905	-106.202	-840.535	127278	120441	-9937.92	343.291	148.575	0	0	0	0	0	0	0	200	903	0	0	0	0	0	0	0	603	903	0
1051	4	50.4327	-106.202	-841.451	127095	121295	-10258.4	344.15	148.957	0	0	0	0	0	0	0	200	903	0	0	0	0	0	0	0	603	903	0
1051	5	50.8905	-105.134	-840.23	127461	121112	-9800.59	344.142	148.302	0	0	0	0	0	0	0	200	903	0	0	0	0	0	0	0	603	903	0
1051	6	50.8905	-104.828	-841.756	128377	120502	-9434.38	343.156	147.489	0	0	0	0	0	0	0	200	903	0	0	0	0	0	0	0	603	903	0
1051	7	51.806	-104.981	-841.451	128285	121234	-9434.38	344.078	147.543	0	0	0	0	0	0	0	200	903	0	0	0	0	0	0	0	603	903	0
1051	8	51.806	-103.76	-839.009	128468	121540	-9388.6	344.861	146.881	0	0	0	0	0	0	0	200	903	0	0	0	0	0	0	0	603	903	0
1051	9	51.3483	-102.997	-838.704	129018	120685	-9159.72	343.895	146.17	0	0	0	0	0	0	0	200	903	0	0	0	0	0	0	0	603	903	0
1052	0	51.806	-102.54	-839.009	128743	121417	-9297.05	344.715	146.554	0	0	0	0	0	0	0	200	903	0	0	0	0	0	0	0	603	903	0
1052	1	51.9586	-102.997	-838.094	128743	121295	-9022.39	344.728	146.386	0	0	0	0	0	0	0	200	903	0	0	0	0	0	0	0	603	903	0
1052	2	51.0431	-101.319	-837.484	129384	121234	-9113.94	344.76	145.509	0	0	0	0	0	0	0	200	903	0	0	0	0	0	0	0	603	903	0
1052	3	51.806	-101.624	-833.211	129659	120929	-8564.63	345.136	144.387	0	0	0	0	0	0	0	200	903	0	0	0	0	0	0	0	603	903	0
1052	4	53.0267	-100.403	-835.958	130208	121417	-8793.51	345.244	144.241	0	0	0	0	0	0	0	200	903	0	0	0	0	0	0	0	603	903	0
1052	5	52.1112	-100.403	-835.958	130483	121417	-8427.3	345.244	143.912	0	0	0	0	0	0	0	200	903	0	0	0	0	0	0	0	603	903	0
1052	6	52.569	-98.8774	-836.568	129750	121479	-8656.18	345.211	144.902	0	0	0	0	0	0	0	200	903	0	0	0	0	0	0	0	603	903	0
1052	7	51.5008	-98.8774	-835.042	130574	121051	-8518.85	344.964	143.632	0	0	0	0	0	0	0	200	903	0	0	0	0	0	0	0	603	903	0
1052	8	52.569	-97.9619	-835.347	130391	121112	-7832.2	344.984	143.908	0	0	0	0	0	0	0	200	903	0	0	0	0	0	0	0	603	903	0
1052	9	52.2638	-97.3515	-834.737	130666	120990	-8015.31	344.944	143.465	0	0	0	0	0	0	0	200	903	0	0	0	0	0	0	0	603	903	0
1053	0	52.7215	-97.1989	-835.347	131490	121051	-7832.2	344.911	142.593	0	0	0	0	0	0	0	200	903	0	0	0	0	0	0	0	603	903	0
1053	1	52.2638	-96.5886	-834.432	130940	120868	-7832.2	344.851	143.079	0	0	0	0	0	0	0	200	903	0	0	0	0	0	0	0	603	903	0
1053	2	52.1112	-95.2153	-833.516	131490	120868	-7603.32	345.01	142.247	0	0	0	0	0	0	0	200	903	0	0	0	0	0	0	0	603	903	0
1053	3	52.8741	-94.9101	-832.601	131490	120807	-7511.77	345.096	142.074	0	0	0	0	0	0	0	200	903	0	0	0	0	0	0	0	603	903	0
1053	4	52.4164	-93.5368	-825.887	131032	120746	-7328.66	346.202	141.344	0	0	0	0	0	0	0	200	903	0	0	0	0	0	0	0	603	903	0
1053	5	52.4164	-93.5368	-831.075	132131	120502	-7420.22	344.995	141.012	0	0	0	0	0	0	0	200	903	0	0	0	0	0	0	0	603	903	0
1053	6	52.2638	-93.0791	-830.159	131764	119831	-7054	344.347	141.278	0	0	0	0	0	0	0	200	903	0	0	0	0	0	0	0	603	903	0
1053	7	52.1112	-92.3161	-829.244	131581	120441	-7099.78	345.242	141.324	0	0	0	0	0	0	0	200	903	0	0	0	0	0	0	0	603	903	0
1053	8	53.0267	-92.1635	-827.718	132039	120014	-6367.36	344.993	140.478	0	0	0	0	0	0	0	200	903	0	0	0	0	0	0	0	603	903	0
1053	9	52.7215	-91.248	-826.497	131856	120319	-6504.69	345.577	140.464	0	0	0	0	0	0	0	200	903	0	0	0	0	0	0	0	603	903	0
1054	0	54.2474	-90.6377	-822.53	132222	119892	-6550.46	345.76	139.25	0	0	0	0	0	0	0	200	903	0	0	0	0	0	0	0	603	903	0
1054	1	53.4845	-90.1799	-822.53	132954	119770	-6642.02	345.611	138.359	0	0	0	0	0	0	0	200	903	0	0	0	0	0	0	0	603	903	0
1054	2	53.0267	-89.1118	-820.089	132131	119831	-6367.36	346.119	138.883	0	0	0	0	0	0	0	200	903	0	0	0	0	0	0	0	603	903	0
1054	3	53.9422	-89.8747	-819.173	132588	119281	-6184.25	345.612	138.144	0	0	0	0	0	0	0	200	903	0	0	0	0	0	0	0	603	903	0
1054	4	53.4845	-88.1963	-817.952	131947	119464	-6092.7	346.053	138.686	0	0	0	0	0	0	0	200	903	0	0	0	0	0	0	0	603	903	0
1054	5	53.7897	-88.8066	-812.459	131856	118976	-6001.15	346.44	137.708	0	0	0	0	0	0	0	200	903	0	0	0	0	0	0	0	603	903	0
1054	6	55.0104	-87.7385	-812.764	132497	118793	-5955.37	346.159	136.98	0	0	0	0	0	0	0	200	903	0	0	0	0	0	0	0	603	903	0
1054	7	54.5526	-86.9756	-812.459	132222	118549	-5589.16	345.914	137.257	0	0	0	0	0	0	0	200	903	0	0	0	0	0	0	0	603	903	0
1054	8	54.0948	-85.9074	-810.018	132588	117694	-5726.49	345.299	136.314	0	0	0	0	0	0	0	200	903	0	0	0	0	0	0	0	603	903	0
1054	9	54.4	-85.4497	-809.102	131581	118244	-5451.83	346.142	137.374	0	0	0	0	0	0	0	200	903	0	0	0	0	0	0	0	603	903	0
1055	0	54.2474	-84.5341	-805.745	131947	118183	-5543.38	346.675	136.242	0	0	0	0	0	0	0	200	903	0	0	0	0	0	0	0	603	903	0
1055	1	53.7897	-84.0764	-806.966	132039	117877	-5039.84	346.075	136.376	0	0	0	0	0	0	0	200	903	0	0	0	0	0	0	0	603	903	0
1055	2	54.4	-83.7712	-802.999	131947	117267	-5222.95	346.036	135.682	0	0	0	0	0	0	0	200	903	0	0	0	0	0	0	0	603	903	0
1055	3	54.2474	-82.3979	-801.168	131856	117328	-4902.52	346.446	135.42	0	0	0	0	0	0	0	200	903	0	0	0	0	0	0	0	603	903	0
1055	4	54.5526	-82.0927	-801.168	132131	117023	-4810.96	346.066	135.078	0	0	0	0	0	0	0	200	903	0	0	0	0	0	0	0	603	903	0
1055	5	54.5526	-81.4824	-797.811	131306	116901	-4765.19	346.527	135.416	0	0	0	0	0	0	0	200	903	0	0	0	0	0	0	0	603	903	0
1055	6	54.7052	-80.872	-794.149	132039	116352	-4398.98	346.511	133.735	0	0	0	0	0	0	0	200	903	0	0	0	0	0	0	0	603	903	0
1055	7	54.4	-80.2617	-793.233	132039	115985	-4536.3	346.219	133.543	0	0	0	0	0	0	0	200	903	0	0	0	0	0	0	0	603	903	0
1055	8	54.2474	-79.1936	-790.486	131398	116046	-4398.98	346.804	133.776	0	0	0	0	0	0	0	200	903	0	0	0	0	0	0	0	603	903	0
1055	9	54.7052	-79.041	-789.876	131764	115741	-4353.2	346.531	133.184	0	0	0	0	0	0	0	200	903	0	0	0	0	0	0	0	603	903	0
1056	0	53.7897	-79.041	-786.824	131306	115680	-3575	347.022	133.118	0	0	0	0	0	0	0	200	903	0	0	0	0	0	0	0	603	903	0
1056	1	54.4	-77.0573	-785.298	131215	115131	-4170.09	346.608	132.911	0	0	0	0	0	0	0	200	903	0	0	0	0	0	0	0	603	903	0
1056	2	55.4681	-78.8884	-782.552	131490	114948	-3941.21	346.888	131.973	0	0	0	0	0	0	0	200	903	0	0	0	0	0	0	0	603	903	0
1056	3	54.0948	-76.2944	-779.5	130666	114521	-3941.21	346.915	132.373	0	0	0	0	0	0	0	200	903	0	0	0	0	0	0	0	603	903	0
1056	4	54.0948	-75.9892	-777.059	130757	114582	-3712.33	347.455	131.728	0	0	0	0	0	0	0	200	903	0	0	0	0	0	0	0	603	903	0
1056	5	53.7897	-74.6159	-775.228	130666	114154	-3529.22	347.253	131.449	0	0	0	0	0	0	0	200	903	0	0	0	0	0	0	0	603	903	0
1056	6	53.0267	-73.7004	-771.566	130940	113910	-3758.1	347.635	130.293	0	0	0	0	0	0	0	200	903	0	0	0	0	0	0	0	603	903	0
1056	7	53.7897	-74.0056	-770.955	131123	113483	-3300.34	347.198	129.921	0	0	0	0	0	0	0	200	903	0	0	0	0	0	0	0	603	903	0
1056	8	54.2474	-72.6323	-768.514	130483	113239	-3437.67	347.348	130.214	0	0	0	0	0	0	0	200	903	0	0	0	0	0	0	0	603	903	0
1056	9	53.9422	-72.4797	-766.378	130849	113117	-3117.23	347.599	129.263	0	0	0	0	0	0	0	200	903	0	0	0	0	0	0	0	603	903	0
1057	0	53.7897	-71.4116	-765.157	130025	112506	-2888.35	347.037	130.068	0	0	0	0	0	0	0	200	903	0	0	0	0	0	0	0	603	903	0
1057	1	53.0267	-71.1064	-763.326	129933	112445	-2888.35	347.31	129.78	0	0	0	0	0	0	0	200	903	0	0	0	0	0	0	0	603	903	0
1057	2	52.8741	-70.1909	-760.274	130666	112079	-2934.13	347.419	128.134	0	0	0	0	0	0	0	200	903	0	0	0	0	0	0	0	603	903	0
1057	3	53.1793	-68.665	-759.969	130208	112079	-2705.25	347.479	128.667	0	0	0	0	0	0	0	200	903	0	0	0	0	0	0	0	603	903	0
1057	4	52.8741	-68.2072	-757.222	130391	111408	-2659.47	347.127	127.804	0	0	0	0	0	0	0	200	903	0	0	0	0	0	0	0	603	903	0
1057	5	52.7215	-68.8176	-756.307	130208	111164	-2476.36	346.982	127.837	0	0	0	0	0	0	0	200	903	0	0	0	0	0	0	0	603	903	0
1057	6	52.569	-66.834	-753.56	129384	110980	-2613.69	347.275	128.303	0	0	0	0	0	0	0	200	903	0	0	0	0	0	0	0	603	903	0
1057	7	52.569	-66.2236	-752.339	129842	110309	-2751.02	346.621	127.416	0	0	0	0	0	0	0	200	903	0	0	0	0	0	0	0	603	903	0
1057	8	52.4164	-65.4607	-747.457	128835	110675	-2155.93	348.069	127.636	0	0	0	0	0	0	0	200	903	0	0	0	0	0	0	0	603	903	0
1057	9	51.806	-66.2236	-744.1	128926	109821	-2293.26	347.589	126.735	0	0	0	0	0	0	0	200	903	0	0	0	0	0	0	0	603	903	0
1058	0	51.806	-64.0874	-747.151	129384	109821	-1927.05	346.986	126.83	0	0	0	0	0	0	0	200	903	0	0	0	0	0	0	0	603	903	0
1058	1	51.806	-63.6296	-744.405	128743	109272	-1927.05	346.79	127.052	0	0	0	0	0	0	0	200	903	0	0	0	0	0	0	0	603	903	0
1058	2	50.2801	-62.7141	-742.574	129109	109149	-1606.61	346.988	126.133	0	0	0	0	0	0	0	200	903	0	0	0	0	0	0	0	603	903	0
1058	3	50.4327	-62.1037	-741.353	128926	109027	-1743.94	347.065	126.094	0	0	0	0	0	0	0	200	903	0	0	0	0	0	0	0	603	903	0
1058	4	50.1275	-61.646	-737.996	128468	108539	-1606.61	347.073	125.923	0	0	0	0	0	0	0	200	903	0	0	0	0	0	0	0	603	903	0
1058	5	50.4327	-60.4253	-735.86	128560	108356	-1743.94	347.251	125.293	0	0	0	0	0	0	0	200	903	0	0	0	0	0	0	0	603	903	0
1058	6	50.4327	-60.5779	-733.419	128377	107685	-1560.84	346.826	124.961	0	0	0	0	0	0	0	200	903	0	0	0	0	0	0	0	603	903	0
1058	7	49.3646	-60.5779	-730.977	128285	107807	-1515.06	347.483	124.502	0	0	0	0	0	0	0	200	903	0	0	0	0	0	0	0	603	903	0
1058	8	49.5172	-58.289	-729.146	128468	107379	-1377.73	347.267	123.81	0	0	0	0	0	0	0	200	903	0	0	0	0	0	0	0	603	903	0
1058	9	48.9068	-58.1364	-726.705	127461	107013	-1240.4	347.258	124.604	0	0	0	0	0	0	0	200	903	0	0	0	0	0	0	0	603	903	0
1059	0	49.3646	-57.6787	-724.263	127919	106647	-1240.4	347.249	123.38	0	0	0	0	0	0	0	200	903	0	0	0	0	0	0	0	603	903	0
1059	1	49.3646	-56.9157	-723.043	128560	106281	-1103.07	346.991	122.196	0	0	0	0	0	0	0	200	903	0	0	0	0	0	0	0	603	903	0
1059	2	48.7543	-56.1528	-720.906	126729	106342	-1194.63	347.511	124.209	0	0	0	0	0	0	0	200	903	0	0	0	0	0	0	0	603	903	0
1059	3	48.2965	-54.9321	-719.38	128011	105854	-1011.52	347.145	122.054	0	0	0	0	0	0	0	200	903	0	0	0	0	0	0	0	603	903	0
1059	4	48.4491	-55.0847	-716.329	127004	105365	-1011.52	347.091	122.702	0	0	0	0	0	0	0	200	903	0	0	0	0	0	0	0	603	903	0
1059	5	47.8387	-54.0166	-716.329	126729	105182	-874.193	346.835	123.086	0	0	0	0	0	0	0	200	903	0	0	0	0	0	0	0	603	903	0
1059	6	47.6861	-53.7114	-715.108	126546	104511	-691.087	346.147	123.04	0	0	0	0	0	0	0	200	903	0	0	0	0	0	0	0	603	903	0
1059	7	46.9232	-53.864	-711.751	126546	104511	-874.193	346.836	122.205	0	0	0	0	0	0	0	200	903	0	0	0	0	0	0	0	603	903	0
1059	8	46.9232	-52.0329	-710.53	127278	104145	-874.193	346.573	120.869	0	0	0	0	0	0	0	200	903	0	0	0	0	0	0	0	603	903	0
1059	9	46.4654	-52.9485	-708.699	126820	103839	-828.416	346.521	121.052	0	0	0	0	0	0	0	200	903	0	0	0	0	0	0	0	603	903	0
1060	0	45.3973	-51.7278	-705.648	125905	103595	-507.981	346.809	121.575	0	0	0	0	0	0	0	200	903	0	0	0	0	0	0	0	603	903	0
1060	1	45.5499	-51.1174	-704.122	126546	103168	-645.311	346.52	120.279	0	0	0	0	0	0	0	200	903	0	0	0	0	0	0	0	603	903	0
1060	2	44.6344	-50.8122	-701.375	126637	103351	-416.429	347.355	119.444	0	0	0	0	0	0	0	200	903	0	0	0	0	0	0	0	603	903	0
1060	3	44.9396	-49.8967	-698.629	125539	102497	-507.981	346.711	120.307	0	0	0	0	0	0	0	200	903	0	0	0	0	0	0	0	603	903	0
1060	4	44.4818	-50.0493	-697.713	124532	101947	-416.429	346.116	121.515	0	0	0	0	0	0	0	200	903	0	0	0	0	0	0	0	603	903	0
1060	5	44.4818	-49.7441	-693.441	125081	102191	-553.758	347.369	119.623	0	0	0	0	0	0	0	200	903	0	0	0	0	0	0	0	603	903	0
1060	6	43.7189	-48.3708	-692.83	124257	101581	-324.876	346.618	120.653	0	0	0	0	0	0	0	200	903	0	0	0	0	0	0	0	603	903	0
1060	7	43.1085	-48.3708	-688.863	125447	101520	-233.323	347.373	117.892	0	0	0	0	0	0	0	200	903	0	0	0	0	0	0	0	603	903	0
1060	8	43.2611	-47.6079	-687.337	124257	100666	-370.652	346.457	119.22	0	0	0	0	0	0	0	200	903	0	0	0	0	0	0	0	603	903	0
1060	9	42.6507	-46.9975	-684.896	125172	100788	178.664	347.158	117.239	0	0	0	0	0	0	0	200	903	0	0	0	0	0	0	0	603	903	0
1061	0	42.3456	-47.6079	-681.234	124257	100605	41.3351	347.68	117.6	0	0	0	0	0	0	0	200	903	0	0	0	0	0	0	0	603	903	0
1061	1	41.8878	-47.4553	-680.928	123891	99994.2	87.1114	346.85	118.056	0	0	0	0	0	0	0	200	903	0	0	0	0	0	0	0	603	903	0
1061	2	41.8878	-45.7768	-678.487	124257	100116	-95.9941	347.558	116.862	0	0	0	0	0	0	0	200	903	0	0	0	0	0	0	0	603	903	0
1061	3	41.7352	-46.3872	-676.046	123525	99078.6	-4.44129	346.556	117.284	0	0	0	0	0	0	0	200	903	0	0	0	0	0	0	0	603	903	0
1061	4	41.43	-44.2509	-674.825	124074	99322.8	-4.44129	347.183	116.139	0	0	0	0	0	0	0	200	903	0	0	0	0	0	0	0	603	903	0
1061	5	40.3619	-45.7768	-671.773	123982	98651.4	87.1114	346.852	115.44	0	0	0	0	0	0	0	200	903	0	0	0	0	0	0	0	603	903	0
1061	6	41.2775	-42.7251	-672.689	122792	98590.3	132.888	346.562	117.461	0	0	0	0	0	0	0	200	903	0	0	0	0	0	0	0	603	903	0
1061	7	40.8197	-44.7087	-668.416	123891	98529.3	178.664	347.407	114.65	0	0	0	0	0	0	0	200	903	0	0	0	0	0	0	0	603	903	0
1061	8	39.9042	-43.488	-668.111	122426	97369.6	270.217	345.739	116.758	0	0	0	0	0	0	0	200	903	0	0	0	0	0	0	0	603	903	0
1061	9	39.7516	-42.7251	-666.28	122701	97613.8	178.664	346.506	115.842	0	0	0	0	0	0	0	200	903	0	0	0	0	0	0	0	603	903	0
1062	0	39.599	-42.5725	-662.923	122701	97064.5	407.546	346.419	114.91	0	0	0	0	0	0	0	200	903	0	0	0	0	0	0	0	603	903	0
1062	1	39.599	-41.9621	-658.04	122151	96820.3	224.441	347.134	114.371	0	0	0	0	0	0	0	200	903	0	0	0	0	0	0	0	603	903	0
1062	2	38.5309	-40.4362	-659.871	122609	96759.3	590.651	346.634	114.193	0	0	0	0	0	0	0	200	903	0	0	0	0	0	0	0	603	903	0
1062	3	38.0731	-40.7414	-656.514	122243	96271	270.217	346.64	113.8	0	0	0	0	0	0	0	200	903	0	0	0	0	0	0	0	603	903	0
1062	4	37.6153	-39.2155	-654.683	121877	96210	361.77	346.957	113.839	0	0	0	0	0	0	0	200	903	0	0	0	0	0	0	0	603	903	0
1062	5	37.6153	-39.2155	-652.547	122243	95965.9	590.651	347.064	112.668	0	0	0	0	0	0	0	200	903	0	0	0	0	0	0	0	603	903	0
1062	6	37.4628	-39.2155	-648.885	121144	95660.6	270.217	347.423	113.304	0	0	0	0	0	0	0	200	903	0	0	0	0	0	0	0	603	903	0
1062	7	38.5309	-38.9104	-647.054	121510	95050.3	590.651	346.897	112.21	0	0	0	0	0	0	0	200	903	0	0	0	0	0	0	0	603	903	0
1062	8	36.8524	-38.3	-644.307	121510	94806.2	636.428	347.144	111.409	0	0	0	0	0	0	0	200	903	0	0	0	0	0	0	0	603	903	0
1062	9	36.2421	-37.0793	-642.781	120686	94684.1	636.428	347.304	112.244	0	0	0	0	0	0	0	200	903	0	0	0	0	0	0	0	603	903	0
1063	0	36.8524	-36.1638	-640.035	121053	93646.5	544.875	346.315	110.866	0	0	0	0	0	0	0	200	903	0	0	0	0	0	0	0	603	903	0
1063	1	36.6998	-36.3164	-638.204	120686	94256.9	865.31	347.691	110.897	0	0	0	0	0	0	0	200	903	0	0	0	0	0	0	0	603	903	0
1063	2	35.9369	-35.2483	-633.321	120412	93707.5	956.862	347.962	109.872	0	0	0	0	0	0	0	200	903	0	0	0	0	0	0	0	603	903	0
1063	3	37.1576	-35.706	-635.457	120595	93646.5	819.533	347.369	110.223	0	0	0	0	0	0	0	200	903	0	0	0	0	0	0	0	603	903	0
1063	4	35.6317	-35.2483	-632.1	119954	93646.5	727.981	348.151	110.23	0	0	0	0	0	0	0	200	903	0	0	0	0	0	0	0	603	903	0
1063	5	36.0895	-35.4008	-631.185	119771	93097.2	1048.42	347.496	110.244	0	0	0	0	0	0	0	200	903	0	0	0	0	0	0	0	603	903	0
1063	6	35.3265	-34.4853	-628.133	120229	92731	1002.64	347.63	108.594	0	0	0	0	0	0	0	200	903	0	0	0	0	0	0	0	603	903	0
1063	7	35.9369	-34.1801	-627.217	119771	92547.9	1277.3	347.553	109.044	0	0	0	0	0	0	0	200	903	0	0	0	0	0	0	0	603	903	0
1063	8	35.3265	-32.0439	-622.64	120137	92364.8	1185.74	348.344	107.052	0	0	0	0	0	0	0	200	903	0	0	0	0	0	0	0	603	903	0
1063	9	36.5472	-33.5698	-623.86	119679	92486.8	911.086	348.249	108.163	0	0	0	0	0	0	0	200	903	0	0	0	0	0	0	0	603	903	0
1064	0	36.2421	-31.8913	-623.25	119496	91815.5	1414.63	347.317	108.269	0	0	0	0	0	0	0	200	903	0	0	0	0	0	0	0	603	903	0
1064	1	35.3265	-32.1965	-621.419	119862	91510.2	1139.97	347.26	107.115	0	0	0	0	0	0	0	200	903	0	0	0	0	0	0	0	603	903	0
1064	2	34.8688	-31.4336	-618.978	118947	91327.2	1414.63	347.545	107.833	0	0	0	0	0	0	0	200	903	0	0	0	0	0	0	0	603	903	0
1064	3	34.7162	-30.0603	-617.147	118672	91205.1	1460.4	347.785	107.708	0	0	0	0	0	0	0	200	903	0	0	0	0	0	0	0	603	903	0
1064	4	34.2584	-30.9758	-615.926	119222	90961	1780.84	347.682	106.435	0	0	0	0	0	0	0	200	903	0	0	0	0	0	0	0	603	903	0
1064	5	34.1058	-29.1447	-611.348	118672	90655.8	1689.28	348.288	105.884	0	0	0	0	0	0	0	200	903	0	0	0	0	0	0	0	603	903	0
1064	6	34.2584	-28.9922	-612.569	119130	90411.6	1643.51	347.594	105.524	0	0	0	0	0	0	0	200	903	0	0	0	0	0	0	0	603	903	0
1064	7	33.9532	-28.9922	-611.653	118398	90228.5	1643.51	347.516	106.43	0	0	0	0	0	0	0	200	903	0	0	0	0	0	0	0	603	903	0
1064	8	33.9532	-27.924	-609.517	118764	89862.3	1826.61	347.432	105.151	0	0	0	0	0	0	0	200	903	0	0	0	0	0	0	0	603	903	0
1064	9	33.4955	-28.5344	-607.686	118581	89557.1	1826.61	347.374	104.865	0	0	0	0	0	0	0	200	903	0	0	0	0	0	0	0	603	903	0
1065	0	33.6481	-28.0766	-604.329	118031	89435.1	1826.61	347.991	104.69	0	0	0	0	0	0	0	200	903	0	0	0	0	0	0	0	603	903	0
1065	1	33.4955	-27.0085	-602.803	118398	89557.1	1826.61	348.568	103.588	0	0	0	0	0	0	0	200	903	0	0	0	0	0	0	0	603	903	0
1065	2	33.3429	-28.687	-600.972	118398	88458.5	1689.28	347.192	102.99	0	0	0	0	0	0	0	200	903	0	0	0	0	0	0	0	603	903	0
1065	3	33.6481	-26.2456	-600.057	117665	89129.9	2284.38	348.536	103.91	0	0	0	0	0	0	0	200	903	0	0	0	0	0	0	0	603	903	0
1065	4	33.3429	-25.6352	-598.226	118398	88580.6	2147.05	348.072	102.085	0	0	0	0	0	0	0	200	903	0	0	0	0	0	0	0	603	903	0
1065	5	33.1903	-26.093	-594.564	117940	88397.5	1963.94	348.676	101.636	0	0	0	0	0	0	0	200	903	0	0	0	0	0	0	0	603	903	0
[truncated: 654 more rows]
