# Supplementary material for: The Effects of an Extemporaneous Speech Dual-task on Older Adult Gait Control
Source: Research Square preprint supplement (doi:10.21203/rs.3.rs-7674245/v1), 2025-11-18
Supplement: Supplementary file 85 [file DT8Walk2.xlsx]

## Sheet: Sheet1
Trajectories
		08:LFHD			08:RFHD			08:LBHD			08:RBHD			08:C7			08:T10			08:CLAV			08:STRN			08:RBAK			08:LSHO			08:LUPA			08:LELB			08:LFRM			08:LWRA			08:LWRB			08:LFIN
Frame	Sub Frame	X	Y	Z	X	Y	Z	X	Y	Z	X	Y	Z	X	Y	Z	X	Y	Z	X	Y	Z	X	Y	Z	X	Y	Z	X	Y	Z	X	Y	Z	X	Y	Z	X	Y	Z	X	Y	Z	X	Y	Z	X	Y	Z
		mm	mm	mm	mm	mm	mm	mm	mm	mm	mm	mm	mm	mm	mm	mm	mm	mm	mm	mm	mm	mm	mm	mm	mm	mm	mm	mm	mm	mm	mm	mm	mm	mm	mm	mm	mm	mm	mm	mm	mm	mm	mm	mm	mm	mm	mm	mm	mm
2223	0	126.776	-390.945	1668.75	212.033	-403.393	1672.52	111.407	-587.316	1663.91	221.822	-578.171	1668.97	181.843	-615.599	1525.36	181.459	-697.628	1262.57	175.229	-468.897	1433.6	191.435	-412.278	1230.93	265.881	-698.367	1321.92	-6.77992	-539.935	1472.51	-74.034	-585.434	1280.2	-72.6682	-610.508	1126.89	-101.988	-539.54	969.582	-58.2837	-497.204	882.455	-105.782	-552.816	870.726	-108.226	-499.142	816.602
2224	0	125.796	-379.712	1670.15	211.204	-392.372	1673.94	110.392	-576.085	1665.47	220.918	-567.209	1670.75	180.242	-604.444	1526.84	179.528	-686.059	1264.02	174.31	-457.526	1435.12	190.795	-401.219	1232.24	264.05	-687.541	1323.37	-7.91289	-527.512	1474.14	-75.9507	-571.059	1281.72	-75.0232	-595.29	1128.13	-103.066	-523.065	971.361	-58.6093	-480.979	884.304	-106.972	-535.671	872.083	-108.62	-481.645	818.508
2225	0	125.192	-368.842	1671.38	210.455	-381.517	1674.98	109.273	-565.015	1667.12	220.01	-556.27	1672.36	178.639	-593.631	1528.07	177.377	-674.507	1265.21	173.559	-446.531	1436.69	190.295	-390.074	1233.86	261.964	-676.833	1324.61	-9.06814	-515.096	1475.85	-77.9495	-556.626	1283.14	-77.4334	-579.938	1129.47	-104.213	-506.47	973.156	-58.9329	-464.578	886.27	-108.237	-518.275	873.769	-109.361	-463.591	820.799
2226	0	124.729	-357.91	1672.85	210.11	-370.807	1676.28	108.231	-554.21	1668.9	218.668	-545.748	1673.41	177.098	-582.953	1529.43	175.356	-663.351	1266.2	172.861	-435.757	1438.05	189.949	-378.961	1235.62	259.826	-666.42	1325.72	-10.1196	-503.197	1477.62	-79.8514	-542.296	1284.41	-79.879	-564.593	1130.64	-105.252	-489.689	974.865	-59.1984	-447.995	888.335	-109.5	-500.682	875.423	-109.65	-445.578	822.903
2227	0	124.518	-347.184	1674.36	210.014	-360.338	1677.73	107.583	-543.331	1670.64	218.126	-535.294	1675.03	175.732	-572.529	1530.86	173.352	-652.35	1267.27	172.299	-425.302	1439.63	189.801	-368.428	1237.32	257.557	-656.124	1326.8	-11.0406	-491.217	1479.26	-81.5956	-527.971	1285.93	-82.1614	-549.153	1131.89	-106.152	-472.7	976.727	-59.1086	-431.346	890.598	-110.822	-482.851	877.194	-109.58	-427.407	825.19
2228	0	124.675	-336.461	1675.56	210.001	-350.004	1678.67	106.84	-532.636	1672.88	217.519	-524.932	1676.73	174.395	-562.262	1532.3	171.525	-641.342	1268.57	171.799	-415.091	1441.18	189.705	-358.044	1238.94	255.39	-645.917	1327.97	-11.9642	-479.529	1480.99	-83.3776	-513.653	1287.46	-84.627	-533.533	1133.32	-106.971	-455.45	978.606	-59.1319	-414.481	892.668	-112.001	-464.748	879.167	-109.344	-409.051	827.333
2229	0	124.823	-325.945	1677.04	210.031	-339.811	1679.6	106.216	-522.097	1675.07	217.105	-514.762	1678.48	173.112	-552.18	1533.67	169.656	-630.617	1269.92	171.285	-404.898	1442.62	189.723	-347.545	1240.73	253.31	-635.829	1329.15	-12.7582	-468.157	1482.87	-85.0268	-499.402	1288.99	-86.8665	-517.866	1134.69	-107.871	-438.047	980.746	-59.2178	-397.591	894.916	-113.063	-446.497	881.168	-109.448	-390.433	829.734
2230	0	125.272	-315.663	1678.97	210.34	-329.803	1681.21	105.585	-512.026	1677.56	216.72	-504.842	1680.22	171.957	-542.214	1535.37	167.891	-620.161	1271.24	170.951	-394.912	1444.48	189.745	-337.416	1242.63	251.26	-625.826	1330.31	-13.3921	-457.09	1484.65	-86.5337	-485.349	1290.49	-89.0165	-502.291	1136.19	-108.516	-420.704	982.847	-59.2049	-380.584	897.366	-114.301	-428.034	883.361	-109.259	-371.734	832.552
2231	0	125.685	-305.353	1680.71	210.717	-319.908	1682.76	105.479	-501.345	1679.54	216.619	-494.842	1682.13	171.061	-532.3	1537.13	166.236	-609.667	1272.93	170.545	-384.991	1446.4	190.006	-327.93	1244.21	249.214	-615.843	1331.75	-14.1621	-446.157	1486.62	-87.893	-471.391	1292.26	-91.192	-486.552	1137.9	-109.113	-403.195	985.415	-59.0099	-363.438	899.821	-115.388	-409.402	885.864	-109.042	-352.779	835.439
2232	0	126.161	-295.181	1682.55	211.149	-310.095	1684.26	105.058	-491.417	1682.24	216.561	-485.065	1684.16	169.993	-522.46	1538.82	164.733	-599.175	1274.63	170.061	-375.11	1448.32	190.172	-317.212	1246.86	247.31	-605.997	1333.2	-14.737	-435.361	1488.83	-89.1629	-457.652	1293.96	-93.1587	-470.859	1139.64	-109.646	-385.666	987.954	-58.8292	-346.221	902.871	-116.425	-390.688	888.453	-108.968	-333.792	838.449
2233	0	126.698	-285.28	1684.71	211.629	-300.33	1685.97	104.851	-481.43	1684.37	216.239	-475.383	1685.61	169.104	-512.716	1540.56	163.154	-589.077	1275.96	169.89	-365.273	1450.6	190.259	-307.743	1249.01	245.429	-596.228	1334.44	-15.3604	-424.799	1490.87	-90.4768	-444.11	1295.81	-94.9697	-455.377	1141.14	-110.086	-368.274	990.521	-58.7115	-329.04	906.012	-117.262	-372.075	890.906	-108.568	-314.69	841.908
2234	0	127.327	-275.508	1686.86	212.271	-290.749	1687.76	104.846	-471.421	1686.65	216.317	-465.846	1687.53	168.317	-502.973	1542.47	162.638	-577.844	1276.98	169.652	-355.52	1452.64	190.342	-297.191	1251.3	243.756	-586.432	1335.85	-15.9627	-414.392	1492.91	-91.3829	-430.752	1297.74	-96.6932	-439.949	1143.04	-110.389	-350.811	993.614	-58.3629	-311.835	909.155	-117.917	-353.341	893.843	-108.228	-295.725	845.53
2235	0	128.018	-265.603	1688.87	213.021	-281.268	1689.82	104.771	-461.61	1689.11	217.04	-456.013	1689.59	167.398	-493.332	1544.44	160.577	-568.458	1279.31	169.486	-345.718	1454.71	190.155	-287.457	1253.65	242.361	-576.669	1337.62	-16.3679	-403.981	1495.26	-92.2014	-417.667	1299.61	-98.1802	-424.431	1144.91	-110.586	-333.38	996.571	-58.074	-294.469	912.55	-118.521	-334.635	897.116	-107.844	-276.526	849.325
2236	0	128.64	-255.819	1691.05	213.575	-271.783	1691.36	104.892	-451.658	1691.41	217.168	-446.554	1691.53	166.702	-483.622	1546.16	159.256	-558.354	1281.02	169.162	-336.024	1456.76	189.627	-277.574	1255.12	240.972	-566.9	1339.34	-16.785	-393.49	1497.5	-92.9571	-404.714	1301.7	-99.6875	-409.214	1147.08	-110.762	-316.112	999.919	-57.6465	-277.261	915.764	-119.018	-315.896	900.457	-107.366	-257.48	853.421
2237	0	129.357	-246.177	1693.27	214.202	-262.393	1693.22	104.899	-441.946	1693.51	216.942	-437.213	1692.99	166.018	-473.958	1548.04	157.845	-548.281	1282.73	168.979	-326.328	1458.73	190.002	-267.943	1257.94	239.534	-557.221	1340.93	-17.1881	-383.213	1499.55	-93.623	-392.171	1303.6	-100.917	-394.349	1149.03	-110.843	-299.016	1003.19	-57.264	-259.851	919.801	-119.252	-297.301	903.878	-106.73	-238.408	857.408
2238	0	130.05	-236.471	1695.26	214.972	-253.046	1695.3	104.93	-431.976	1695.1	216.791	-428.083	1694.68	165.278	-464.38	1549.61	156.32	-538.746	1284.56	168.827	-316.724	1460.64	189.915	-258.419	1259.95	238.297	-547.52	1342.43	-17.4288	-372.866	1501.72	-94.2627	-379.784	1305.67	-102.204	-379.499	1151.09	-110.872	-282.074	1006.8	-56.7075	-242.507	923.787	-119.427	-278.798	907.28	-106.114	-219.481	861.767
2239	0	130.689	-226.747	1697.35	215.46	-243.635	1696.88	104.857	-422.486	1697.22	216.754	-418.74	1696.15	164.704	-454.649	1551.19	155.107	-528.74	1286.19	168.673	-307.078	1462.36	189.797	-248.87	1261.67	237.235	-537.848	1343.88	-17.8069	-362.431	1503.61	-94.7943	-367.497	1307.48	-103.069	-364.778	1153.84	-110.828	-265.177	1009.99	-56.4155	-225.166	927.576	-119.546	-260.369	910.971	-105.343	-200.226	866.411
2240	0	131.465	-217.12	1699.07	216.005	-234.264	1698.23	105.133	-412.659	1698.81	216.973	-409.325	1697.51	164.11	-444.95	1552.83	153.975	-518.805	1287.57	168.369	-297.52	1464.05	189.869	-239.343	1263.51	236.051	-528.138	1345.28	-18.0371	-351.922	1505.49	-95.2157	-355.423	1309.57	-103.797	-350.393	1155.78	-110.883	-248.59	1013.69	-55.8092	-207.744	931.729	-119.346	-242.146	914.468	-104.545	-181.469	870.847
2241	0	132.073	-207.385	1700.88	216.77	-224.76	1700.02	105.388	-402.66	1700.01	217.096	-399.992	1698.92	163.689	-435.139	1554.25	154.077	-507.477	1288.25	168.368	-287.868	1465.48	189.803	-229.876	1264.96	235.109	-518.408	1346.74	-18.0941	-341.523	1507.32	-95.5415	-343.386	1311.27	-104.793	-336.363	1157.52	-110.636	-232.2	1017.03	-55.1818	-190.576	935.728	-118.874	-224.101	918.039	-103.979	-162.741	875.685
2242	0	132.72	-197.655	1702.32	217.258	-215.247	1701.24	105.09	-393.208	1701.84	217.326	-390.255	1700.11	163.166	-425.393	1555.38	152.941	-497.507	1289.77	168.512	-278.148	1466.64	189.916	-220.351	1266.24	234.14	-508.649	1348.04	-18.1769	-330.872	1508.9	-95.7164	-331.496	1312.9	-105.634	-322.393	1159.33	-110.437	-215.935	1020.29	-54.6129	-173.017	940.243	-118.415	-206.199	921.701	-102.961	-144.156	880.365
2243	0	133.341	-187.881	1703.49	217.737	-205.644	1702.11	105.474	-382.908	1702.64	217.315	-380.762	1701.07	162.705	-415.535	1556.52	150.965	-488.63	1291.66	168.546	-268.312	1467.7	190.264	-210.669	1267.63	233.121	-498.96	1349.22	-18.2702	-320.186	1510.48	-96.042	-319.619	1314.43	-106.215	-308.689	1160.78	-110.206	-199.93	1023.68	-53.6852	-155.851	944.317	-117.858	-188.456	925.256	-102.02	-125.806	885.072
2244	0	133.938	-178.029	1704.76	218.299	-196.006	1703.26	105.297	-373.21	1703.54	217.139	-371.188	1701.56	162.253	-405.581	1557.47	149.858	-478.894	1292.25	168.379	-258.521	1468.63	190.455	-201.093	1268.45	232.117	-489.263	1350	-18.3129	-309.606	1511.56	-96.3495	-307.793	1315.8	-106.99	-295.163	1162.33	-109.785	-184.183	1026.79	-52.7878	-138.842	948.261	-116.952	-171.062	928.261	-101.019	-107.523	889.614
2245	0	134.52	-168.056	1705.63	218.919	-186.231	1704.24	105.21	-363.271	1704.22	216.46	-361.376	1701.6	161.96	-395.626	1558.3	149.079	-469.027	1293.01	168.484	-248.579	1469.44	190.239	-191.737	1268.67	231.162	-479.509	1350.88	-18.3741	-298.99	1512.5	-96.5295	-296.163	1316.89	-107.524	-281.885	1163.08	-109.445	-168.551	1029.54	-51.9241	-122.035	952.319	-115.835	-153.779	931.581	-99.8905	-89.4421	894.357
2246	0	135	-157.96	1706.14	219.392	-176.381	1704.54	105.421	-352.801	1704.75	216.699	-351.469	1702.28	161.654	-385.58	1558.84	148.369	-459.042	1294.09	168.841	-238.623	1469.81	190.451	-182.111	1269.07	230.436	-469.745	1351.63	-18.2095	-288.241	1513.47	-96.6849	-284.502	1317.88	-108.007	-268.743	1163.98	-108.952	-153.002	1032.55	-50.7664	-105.059	956.575	-114.703	-136.466	934.639	-98.5611	-71.4992	898.856
2247	0	135.367	-147.613	1706.47	219.814	-166.343	1704.89	105.334	-342.724	1705.18	216.791	-341.427	1702.43	161.469	-375.443	1559.16	147.626	-449.367	1294.58	169.014	-228.686	1470.02	190.589	-172.598	1269.03	229.793	-460.091	1352.28	-18.1262	-277.558	1513.96	-96.7728	-272.94	1318.6	-108.62	-255.775	1164.69	-108.213	-137.69	1035.08	-49.6105	-88.5478	960.489	-113.353	-119.428	937.652	-97.0374	-53.6578	903.427
2248	0	135.928	-137.33	1706.82	220.195	-156.213	1705.03	105.325	-332.364	1704.99	216.538	-331.275	1702.13	161.257	-365.273	1559.45	147.039	-439.631	1294.85	169.129	-218.691	1469.98	190.971	-163.105	1268.93	229.108	-450.256	1352.53	-18.0245	-266.867	1514.21	-97.0805	-261.302	1319.25	-108.762	-242.914	1164.91	-107.627	-122.53	1037.46	-48.3112	-72.1754	964.196	-111.979	-102.357	940.604	-95.3251	-36.029	907.722
2249	0	136.263	-126.977	1706.74	220.644	-145.914	1704.96	105.387	-321.813	1704.67	216.676	-320.962	1701.95	161.189	-355.018	1559.44	146.591	-429.888	1295.22	169.066	-208.754	1469.73	191.194	-153.52	1268.37	228.686	-440.527	1352.8	-17.8861	-256.192	1514.24	-97.0028	-249.797	1319.33	-109.276	-230.322	1165.12	-106.824	-107.567	1039.69	-46.788	-55.9652	967.93	-110.808	-85.3763	943.511	-93.5652	-18.5409	912.18
2250	0	136.615	-116.39	1706.28	220.861	-135.505	1704.41	105.595	-310.872	1704	216.657	-310.563	1701.32	161.199	-344.696	1559.41	146.184	-420.259	1295.31	169.57	-198.74	1469.03	191.489	-144.231	1267.62	228.361	-430.796	1352.9	-17.6873	-245.559	1514.03	-97.1031	-238.257	1319.24	-109.631	-217.804	1164.92	-105.52	-92.6525	1041.89	-45.191	-39.9269	971.36	-108.605	-68.3671	946.108	-91.6508	-1.20358	916.288
2251	0	136.863	-105.719	1705.74	221.126	-124.998	1703.91	105.674	-300.143	1702.88	216.64	-300.044	1700.37	161.308	-334.242	1559.09	145.958	-410.513	1295	169.716	-188.733	1468.26	192.021	-135.122	1266.61	228.083	-421.09	1352.65	-17.5549	-235	1513.54	-97.1212	-226.886	1318.72	-109.675	-205.487	1164.36	-104.528	-78.0148	1043.8	-43.4389	-24.163	974.671	-107.051	-52.3678	948.206	-89.4798	15.9643	920.272
2252	0	137.384	-94.8803	1705.37	221.501	-114.388	1703.43	105.725	-289.551	1702.14	216.818	-289.262	1699.31	161.473	-323.813	1558.62	145.981	-400.917	1294.56	169.972	-178.754	1467.33	192.443	-125.48	1265.49	228.173	-411.177	1352.44	-17.2206	-224.432	1512.69	-97.0267	-215.787	1318.18	-109.868	-193.373	1163.64	-103.314	-63.2547	1045.49	-41.5937	-8.57596	977.903	-105.248	-35.741	950.725	-87.4977	32.8773	924.259
2253	0	137.728	-83.9287	1704.23	221.75	-103.556	1702.48	105.827	-278.669	1700.83	217.16	-278.38	1698.1	161.606	-313.368	1557.83	146.108	-391.221	1294.34	170.391	-168.651	1466.2	193.029	-116.346	1264.22	228.324	-401.344	1352.01	-16.869	-213.827	1511.79	-96.8466	-204.735	1317.35	-109.822	-181.233	1162.81	-102.106	-48.8721	1047.06	-39.6632	6.73296	980.931	-103.352	-19.5809	953.049	-84.8014	49.4237	928.181
2254	0	137.79	-73.0262	1703.18	222.278	-92.4596	1701.62	106.035	-267.572	1699	217.371	-267.51	1696.77	161.859	-302.901	1556.95	146.541	-381.317	1293.51	170.719	-158.481	1464.88	193.412	-106.921	1262.65	228.492	-391.501	1351.35	-16.5184	-203.341	1510.48	-96.6415	-193.722	1316.12	-109.649	-169.172	1161.59	-100.671	-34.7654	1048.48	-37.5841	21.8243	983.716	-101.325	-3.51916	955.055	-82.6953	65.797	931.585
2255	0	138.064	-62.1053	1701.95	222.312	-81.5325	1700.09	106.393	-256.53	1697.36	217.387	-256.563	1694.95	162.175	-292.376	1555.77	146.901	-371.586	1292.42	170.904	-148.366	1463.46	194.078	-97.0132	1261.05	228.799	-381.648	1350.25	-16.0582	-192.811	1509.07	-96.3832	-182.803	1314.98	-109.483	-157.397	1160.1	-98.9296	-20.8796	1049.59	-35.5334	36.5828	986.165	-99.0443	12.0083	956.664	-80.0447	81.6849	934.922
2256	0	138.494	-50.8573	1700.2	222.556	-70.4721	1698.46	106.708	-245.409	1695.25	217.742	-245.444	1692.98	162.439	-281.796	1554.45	147.324	-361.951	1291.06	171.528	-138.014	1461.63	194.637	-87.4229	1259.27	229.257	-371.693	1349.05	-15.5534	-182.319	1507.26	-95.8514	-171.979	1313.13	-109.1	-145.514	1158.5	-97.4845	-7.07106	1050.42	-33.1493	51.2184	988.508	-96.7501	27.4147	958.077	-77.1919	97.4579	938.156
2257	0	138.836	-39.9004	1698.29	223.018	-59.2127	1696.58	107.198	-234.376	1693.08	218.419	-234.16	1691.11	162.925	-271.566	1552.4	148.362	-351.978	1289.81	172.169	-127.739	1459.78	195.278	-78.2514	1257.27	229.945	-361.689	1347.91	-14.9896	-171.884	1505.33	-95.2443	-161.455	1311.39	-108.781	-133.861	1156.81	-95.9386	6.41698	1050.93	-30.9204	65.4845	990.409	-94.4125	42.5017	959.563	-74.512	112.622	940.778
2258	0	139.087	-28.9854	1696.17	223.409	-48.0228	1694.58	107.93	-223.293	1690.54	219.143	-223.045	1688.81	163.942	-260.974	1550.93	149.066	-342.115	1288.23	172.804	-117.447	1457.79	196.072	-68.4528	1255.17	230.788	-351.62	1346.35	-14.4023	-161.565	1503.31	-94.6292	-151.028	1309.37	-108.213	-122.266	1154.78	-94.2177	19.7336	1051.15	-28.4393	79.5341	992.318	-91.9636	57.3028	960.76	-71.8324	127.603	943.238
2259	0	139.707	-17.8122	1693.74	223.781	-36.9186	1692.19	108.666	-212.336	1688.22	219.883	-211.865	1686.42	164.274	-250.634	1548.87	149.939	-332.235	1286.33	173.613	-106.928	1455.65	196.926	-57.994	1253	231.686	-341.448	1344.39	-13.6026	-151.199	1501.21	-93.6571	-140.557	1307.29	-107.547	-110.758	1152.72	-92.4449	32.7117	1051.49	-26.1087	93.247	993.757	-89.5356	71.8465	961.506	-69.2042	142.352	945.696
2260	0	140.196	-6.93464	1691.12	224.505	-25.6904	1689.5	109.751	-201.309	1685.48	221.032	-200.652	1683.94	165.363	-239.941	1546.31	151.06	-322.108	1284.35	174.406	-96.4533	1453.3	197.683	-47.9179	1250.71	232.684	-331.148	1342.31	-12.6956	-140.756	1498.85	-92.5125	-130.185	1304.94	-106.913	-99.3748	1150.71	-90.6194	45.5718	1051.35	-23.7794	106.647	995.165	-87.0044	85.9026	962.128	-66.4033	156.688	947.749
2261	0	141.078	4.00006	1688.38	225.259	-14.5904	1686.8	110.878	-190.488	1682.65	222.07	-189.523	1681.09	166.369	-229.783	1544.11	152.036	-312.199	1281.8	174.989	-86.0289	1450.87	198.321	-38.0358	1248	233.83	-320.705	1339.86	-11.7801	-130.392	1496.45	-91.5936	-119.928	1302.52	-105.922	-88.0247	1148.16	-88.7322	58.1545	1051.08	-21.369	119.757	996.144	-84.3471	99.697	962.517	-63.6654	170.623	949.399
2262	0	141.819	14.8881	1685.46	226.375	-3.36756	1684.13	112.098	-179.486	1680.04	223.635	-178.544	1678.44	167.584	-219.47	1541.63	152.994	-302.004	1279.05	175.944	-75.4759	1448.45	199.073	-27.5483	1245.76	234.927	-310.183	1336.96	-10.7787	-120.234	1494.06	-90.5827	-109.705	1300.04	-105.032	-76.9191	1145.75	-86.7304	70.5484	1050.69	-18.893	132.648	996.898	-81.774	113.291	962.641	-60.8255	184.259	950.823
2263	0	143	25.6427	1682.72	227.244	7.48016	1681.09	113.743	-168.676	1677.25	225.167	-167.495	1675.77	168.824	-209.024	1538.68	154.405	-291.543	1276.39	176.932	-64.7975	1445.86	199.792	-16.9461	1243.07	236.467	-299.621	1334.28	-9.54606	-109.82	1491.56	-89.0958	-99.4358	1297.53	-103.762	-65.7024	1143.38	-84.7293	82.7517	1049.93	-16.542	145.188	997.385	-79.0887	126.519	962.41	-58.1371	197.48	951.629
2264	0	144.111	36.5408	1679.83	228.635	18.6247	1678.15	115.437	-157.918	1674.79	227.036	-156.36	1673.09	170.571	-198.432	1535.94	155.614	-281.081	1274.03	177.933	-54.137	1443.23	200.519	-6.21653	1240.31	238.134	-288.9	1331.58	-8.04953	-99.6581	1489.3	-87.6683	-89.3628	1294.82	-102.781	-54.6687	1141.11	-82.7116	94.8377	1049.01	-14.0496	157.509	997.493	-76.4334	139.331	961.988	-55.1758	210.452	952.298
2265	0	145.355	47.324	1677.12	229.861	29.4391	1675.02	117.416	-147.312	1672.01	228.751	-145.446	1670.37	172.17	-187.729	1533.54	156.844	-270.512	1271.11	179.204	-43.2333	1440.72	201.15	4.50232	1237.57	239.708	-278.217	1328.72	-6.85762	-89.4306	1487.01	-86.1579	-79.2248	1292.19	-101.476	-43.6605	1138.62	-80.5786	106.677	1048.03	-11.5861	169.48	997.371	-74.031	151.856	961.562	-52.4679	223.003	952.656
2266	0	146.899	58.0599	1674.45	231.511	40.5056	1672.33	119.225	-136.628	1669.38	230.446	-134.679	1667.33	173.561	-177.078	1530.58	158.152	-259.757	1268.24	180.504	-32.2751	1438.12	201.986	15.5363	1234.99	241.229	-267.457	1325.68	-5.35199	-78.9403	1484.32	-84.6076	-68.7645	1289.79	-100.05	-32.8696	1136.05	-78.6155	118.099	1046.61	-9.11337	181.177	996.872	-71.2302	163.936	960.501	-49.7834	235.169	952.559
2267	0	148.561	68.8531	1672.07	233.104	51.3445	1669.68	121.369	-125.885	1667.1	232.577	-123.687	1664.66	175.384	-166.274	1527.93	159.64	-248.883	1265.47	181.964	-21.1188	1435.67	202.765	26.5614	1232.3	242.977	-256.559	1322.82	-3.81541	-68.3096	1482.1	-82.7772	-58.841	1287.2	-98.4398	-22.0204	1133.62	-76.6459	129.339	1045.39	-6.64092	192.484	996.132	-69.0381	175.903	959.455	-47.0621	247.044	952.129
2268	0	150.134	79.5774	1669.63	234.852	62.3235	1667.02	123.42	-115.158	1664.51	234.806	-112.596	1662.26	177.461	-155.137	1525.32	161.035	-237.916	1263.09	183.361	-9.94534	1433.35	203.75	37.884	1229.86	244.66	-245.446	1320.14	-2.12898	-57.5599	1480.02	-81.0509	-48.3553	1284.83	-97.0018	-11.3757	1131.49	-73.9408	140.614	1044	-4.28508	203.59	995.006	-66.5277	187.454	958.483	-44.3913	258.525	951.353
2269	0	152.147	90.4774	1667.35	236.767	73.4125	1664.76	125.718	-104.366	1662.35	236.567	-101.514	1659.33	179.235	-143.97	1523.04	162.6	-226.803	1260.62	185.079	1.57584	1431.09	204.746	49.1601	1227.34	246.372	-234.35	1317.58	-0.318811	-46.6213	1477.94	-79.5344	-38.0452	1282.79	-95.1941	-0.685781	1129.17	-72.1734	151.536	1042.25	-1.93948	214.409	993.689	-64.297	198.591	956.814	-41.9054	269.623	950.082
2270	0	153.858	101.321	1665.43	238.459	84.307	1662.36	128.219	-93.4433	1660.04	239.324	-90.5151	1657.16	181.693	-132.498	1520.99	164.027	-215.581	1258.36	186.816	13.111	1429.03	206.007	60.8092	1225.14	248.011	-223.04	1315.11	1.59656	-35.3942	1476.12	-77.5723	-27.4369	1280.61	-93.6051	9.78586	1127.2	-70.214	162.12	1040.42	0.349219	224.899	991.893	-62.327	209.434	955.378	-39.4303	280.351	948.589
2271	0	155.859	112.305	1663.64	240.728	95.7145	1660.63	130.64	-82.5804	1657.99	241.881	-79.2615	1655	184.013	-121.127	1518.82	165.576	-204.235	1256.49	188.65	24.73	1427	207.395	72.3142	1222.98	249.801	-211.626	1312.98	3.52253	-24.0878	1474.49	-75.8468	-16.8468	1279.15	-91.6272	20.3523	1125.26	-67.9776	172.612	1038.54	2.63243	235.116	989.931	-60.0158	220.008	953.342	-37.0891	290.783	946.751
2272	0	158.199	123.495	1662.13	242.899	107.077	1658.93	133.274	-71.5056	1656.08	243.977	-67.9115	1652.5	186.195	-109.551	1517.12	166.984	-192.797	1254.69	190.639	36.5527	1425.23	208.764	83.9434	1220.67	251.464	-200.06	1310.83	5.36834	-12.7036	1472.95	-73.9368	-5.86352	1277.41	-89.7826	30.655	1123.62	-65.8399	182.816	1036.57	4.61673	245.105	987.631	-58.0765	229.947	951.255	-34.8363	300.819	944.462
2273	0	160.287	134.612	1661.06	245.149	118.304	1657.58	136.066	-60.3269	1654.34	246.937	-56.6855	1650.9	188.407	-97.9381	1515.39	168.525	-181.331	1252.94	192.702	48.4041	1423.71	210.257	95.6107	1218.9	253.197	-188.501	1308.95	7.67255	-0.977521	1471.7	-72.1914	5.01179	1276.49	-87.5809	41.0604	1122.05	-63.9056	192.838	1034.22	6.71403	254.687	985.058	-56.2769	239.883	949.279	-32.8458	310.37	941.978
2274	0	162.598	145.884	1660.1	247.477	129.776	1656.4	139.005	-49.035	1653.14	249.851	-45.0373	1649.5	191.076	-86.1569	1514.25	170.073	-169.774	1251.88	194.952	60.2367	1422.63	211.715	107.315	1217.48	255.185	-176.953	1307.74	10.0008	10.563	1470.72	-69.9428	16.2839	1275.76	-85.5676	51.2862	1121	-62.1649	202.623	1032.3	8.55427	264.053	982.256	-54.7628	249.022	946.731	-30.955	319.492	939.016
2275	0	165.084	157.292	1659.31	249.92	141.39	1655.42	141.761	-37.7277	1652.3	252.966	-33.358	1648.63	194.054	-74.1863	1513.56	171.619	-158.024	1251.57	197.198	72.1454	1421.65	213.468	119.465	1216.5	257.296	-165.215	1306.97	12.4355	22.3164	1470.37	-67.9702	27.6951	1275.57	-83.2086	61.8062	1120.37	-60.2891	212.211	1029.9	10.3984	273.086	979.104	-53.093	257.764	943.913	-29.3283	328.184	935.692
2276	0	167.628	168.767	1658.75	252.459	153.102	1654.62	144.759	-26.2952	1651.74	255.48	-21.6152	1647.37	196.288	-62.6231	1512.94	173.082	-146.255	1250.92	199.449	83.9854	1421.04	215.054	130.923	1215.64	259.342	-153.421	1306.16	14.9124	33.9498	1470.15	-66.0441	39.2787	1275.71	-81.1419	71.9896	1120.02	-58.5701	221.336	1027.8	11.9595	281.756	975.947	-51.6906	266.052	941.232	-27.9618	336.329	932.149
2277	0	170.352	180.275	1658.52	255.068	164.852	1654.08	147.877	-14.8667	1651.32	258.727	-10.0337	1646.85	199.005	-50.9203	1512.55	174.659	-134.489	1250.33	201.857	95.8676	1420.76	216.761	142.777	1215.17	261.587	-141.574	1305.31	17.4027	45.4909	1470.11	-63.9488	51.1011	1276.11	-78.6348	82.3169	1119.87	-56.5017	230.366	1025.79	13.4627	289.99	972.621	-50.4764	273.885	938.616	-26.6484	344.01	928.366
2278	0	172.904	191.815	1658.47	257.761	176.646	1653.89	150.838	-3.3117	1651.36	261.781	1.78093	1646.65	201.915	-39.4555	1512.5	176.502	-122.781	1250.27	204.335	107.644	1420.86	218.532	154.738	1215.34	263.775	-130.146	1305.16	20.1315	56.9521	1470.52	-61.7182	63.2325	1276.95	-76.3265	92.3533	1120.44	-55.0158	239.139	1023.75	14.7005	297.994	969.254	-49.3897	281.176	935.926	-25.7052	351.144	924.404
2279	0	175.455	203.324	1658.67	260.452	188.28	1653.92	153.98	8.15145	1651.94	264.965	13.5497	1646.81	204.984	-27.7957	1512.85	178.315	-111.142	1250.72	206.684	119.274	1421.33	220.396	166.836	1216.02	266.529	-117.674	1305.24	22.6596	68.1452	1471.28	-59.436	75.2857	1278.09	-73.7392	102.617	1121.19	-53.5218	247.615	1022.02	15.6534	305.568	965.925	-48.5374	288.244	933.194	-24.7945	357.891	920.349
2280	0	178.16	214.702	1659.4	263.01	199.907	1654.15	157.065	19.5455	1652.83	267.711	25.0682	1646.87	207.717	-16.5679	1513.52	180.345	-99.4297	1251.24	208.929	130.816	1422.35	222.101	178.897	1216.85	269.234	-105.817	1305.47	25.0478	79.1088	1472.59	-57.4262	87.0949	1279.75	-71.4582	112.485	1122.25	-52.4351	255.718	1020.21	16.5158	312.777	962.769	-48.1545	294.892	930.884	-24.2781	364.275	916.269
2281	0	180.702	226.077	1660.25	265.782	211.381	1654.75	160.022	30.8938	1654.07	271.081	36.7169	1648.17	210.608	-5.33547	1514.23	182.354	-87.7734	1251.97	211.024	142.189	1423.34	223.73	191.03	1218.17	272.059	-94.1986	1305.97	27.5534	90.062	1474.16	-55.3683	98.7437	1281.61	-68.843	122.453	1123.57	-51.143	263.445	1018.93	17.2513	319.84	959.711	-47.832	301.154	928.737	-23.995	370.133	912.094
2282	0	183.493	237.398	1661.02	268.415	222.76	1655.22	163.133	42.2349	1655.75	273.992	48.2274	1649.27	213.161	5.81075	1515.31	184.485	-76.2685	1253.1	213.194	153.678	1424.93	225.336	203.136	1219.77	274.938	-82.1404	1307.1	29.7958	100.719	1476.03	-53.2073	110.308	1283.44	-66.265	132.05	1125.37	-50.0813	270.935	1017.45	17.5263	326.242	956.31	-47.9126	306.9	926.784	-24.1578	375.549	908.024
2283	0	186.121	248.649	1662.08	270.994	234.098	1655.94	166.032	53.4567	1657.49	276.828	59.4727	1650.59	215.593	16.8619	1516.59	186.622	-64.8075	1254.2	214.928	164.89	1426.75	226.859	215.21	1221.59	277.502	-70.9706	1307.96	31.8857	111.367	1477.67	-51.3148	121.305	1285.44	-63.8346	141.598	1127.12	-49.1721	278.185	1016.42	17.6121	332.527	953.32	-47.5949	312.163	924.325	-24.187	380.65	904.08
2284	0	188.861	259.745	1663.55	273.655	245.323	1656.77	168.732	64.4269	1659.52	279.079	70.5613	1651.56	217.697	27.6333	1517.82	188.793	-53.4441	1255.06	216.769	176.093	1428.68	228.342	227.185	1223.54	280.134	-59.4117	1309.03	33.7863	121.857	1479.81	-49.4475	132.047	1287.46	-61.2185	150.947	1128.99	-47.9292	285.25	1015.35	17.698	338.235	950.245	-47.966	317.364	922.961	-24.3127	385.109	900.214
2285	0	191.582	270.499	1665.19	276.108	256.136	1657.87	171.342	75.2434	1661.64	282.073	81.5272	1653.15	220.186	38.6145	1519.54	190.984	-42.2247	1256.48	218.579	187.221	1430.78	229.608	239.075	1225.78	282.582	-48.3089	1310.72	35.7379	132.216	1481.76	-47.8316	142.257	1289.67	-58.9481	160.042	1131.18	-47.2197	291.87	1014.63	17.3896	343.479	947.295	-48.231	321.92	921.171	-24.8211	389.146	896.334
2286	0	193.887	281.148	1666.78	278.563	266.573	1659.38	173.852	85.9811	1663.83	284.597	92.1194	1655.02	221.944	49.4028	1521.11	193.025	-31.1766	1258.5	219.964	198.192	1432.92	230.89	250.935	1228.25	284.916	-37.123	1312.4	37.3318	142.521	1484.37	-46.1193	152.399	1292.07	-56.8777	168.951	1133.81	-46.8671	298.302	1013.99	17.1954	348.557	944.766	-48.8416	326.368	920.58	-25.6393	392.692	892.814
2287	0	196.316	291.747	1668.82	281.012	277.108	1661.05	175.997	96.3854	1666.05	286.79	102.555	1656.65	223.686	59.9839	1522.84	194.545	-20.3431	1260.68	221.264	209.172	1435.33	231.796	262.539	1230.82	287.025	-25.9454	1314.09	38.7506	153.146	1486.7	-44.7556	162.082	1294.23	-54.9387	177.642	1136.02	-46.0179	304.384	1013.93	16.8767	353.118	942.639	-49.5855	330.349	919.43	-26.7195	396.025	889.72
2288	0	198.506	301.839	1671.04	283.082	287.145	1662.69	178.059	106.686	1668.3	288.346	112.726	1657.89	225.309	70.3846	1524.6	196.792	-9.40636	1261.53	222.312	219.933	1437.58	232.786	274.051	1233.48	288.792	-14.8713	1315.7	40.0468	163.284	1489.13	-43.5867	171.378	1296.72	-53.0975	186.149	1138.31	-45.786	310.362	1013.77	16.2402	357.663	940.625	-50.4045	334.287	918.923	-27.6464	399.237	887.077
2289	0	200.62	312.074	1673.27	285.35	297.385	1664.65	180.007	116.846	1670.49	290.465	122.675	1660.03	226.745	80.8721	1526.44	198.229	1.02016	1263.86	223.301	230.564	1440.02	233.529	285.236	1235.98	290.449	-4.07653	1317.62	41.2444	173.2	1491.73	-42.3043	180.556	1298.76	-51.5828	194.459	1140.69	-45.7906	315.937	1013.74	15.2837	361.503	938.997	-51.2338	337.895	918.275	-28.8588	401.993	884.544
2290	0	202.237	321.897	1675.58	287.205	307.223	1666.65	181.548	126.8	1672.77	291.863	132.618	1661.6	227.933	91.1086	1528.5	200.149	11.5781	1265.62	224.216	241.216	1442.37	234.248	296.316	1238.17	292.28	6.86425	1319.37	42.1925	183.287	1494.02	-41.3381	189.593	1301.1	-50.104	202.551	1142.98	-45.8638	321.414	1013.71	14.6212	365.6	937.511	-51.6345	340.957	917.06	-29.9948	404.632	881.867
2291	0	204.047	331.868	1677.67	288.762	316.926	1668.55	182.927	136.671	1675	293.492	142.174	1663.7	229.127	101.312	1530.38	201.77	21.7767	1267.52	224.935	251.645	1444.6	234.698	306.971	1240.44	293.899	17.7252	1321.42	43.1134	193.268	1495.99	-40.379	198.483	1302.88	-48.7351	210.444	1145.12	-46.1001	326.778	1013.86	13.782	369.52	936.053	-52.6788	344.534	916.797	-31.3763	407.111	879.615
2292	0	205.744	341.563	1679.83	290.123	326.563	1670.37	184.21	146.43	1677.13	294.768	151.895	1665.66	230.202	111.373	1532.38	203.614	31.8439	1269.39	225.461	261.828	1446.74	234.927	317.361	1242.55	295.598	28.3192	1323.49	44.0326	202.947	1498.3	-39.5667	207.158	1305.12	-47.7342	217.922	1147.58	-46.462	331.949	1014.1	12.7675	373.403	934.95	-53.7931	347.836	916.792	-32.4829	409.47	877.875
2293	0	206.805	351.163	1682.03	291.428	336.261	1672.46	185.329	156.124	1679.47	295.894	161.421	1667.73	231.193	121.42	1534.47	205.245	41.8775	1271.51	225.984	272.004	1448.75	235.17	327.599	1244.72	297.173	38.7597	1325.49	44.962	212.189	1500.59	-38.8646	215.724	1307.03	-46.9115	225.074	1149.98	-46.9366	336.993	1014.65	11.7027	377.292	934.517	-54.8376	351.39	917.047	-33.7198	411.983	876.419
2294	0	207.659	360.674	1684.31	292.166	345.517	1674.49	186.038	165.692	1681.65	296.574	170.884	1669.73	231.985	131.124	1537.11	206.777	51.8408	1273.51	226.438	282.15	1451.27	235.287	337.636	1246.88	298.601	49.0711	1327.63	45.3289	221.856	1503.07	-38.3604	223.909	1309.55	-46.0039	232.177	1152.18	-47.5477	341.949	1015.42	10.2918	381.088	934.064	-56.3125	354.823	917.717	-35.5124	414.417	875.175
2295	0	208.436	370.193	1686.85	292.86	354.89	1676.85	186.659	175.217	1683.81	297.068	180.405	1671.7	232.818	140.937	1539.13	208.253	61.6086	1275.47	226.746	292.11	1453.61	235.48	347.442	1249.48	299.988	59.1744	1329.74	45.8708	231.159	1505.28	-38.0437	231.752	1311.57	-45.587	238.798	1154.71	-48.3511	346.749	1016.6	8.92969	384.827	934.235	-57.701	358.349	918.609	-36.8893	417.024	874.627
2296	0	209.114	379.648	1689.43	293.505	364.288	1679.44	187.192	184.669	1686.01	297.775	189.685	1674.16	233.663	150.652	1541.32	209.792	71.2473	1277.86	227.086	302.018	1456.11	235.301	357.039	1251.71	301.551	69.3009	1332.06	46.4243	240.301	1508.05	-37.7013	239.598	1314.22	-45.0317	245.462	1157.07	-49.206	351.45	1017.98	7.51534	388.614	934.792	-59.2687	361.709	919.942	-38.5165	419.606	874.483
2297	0	209.328	389.105	1691.74	293.852	373.671	1682.12	187.491	194.127	1688.19	297.774	199.256	1676.33	234.3	160.313	1543.57	211.256	80.8637	1280.26	227.319	311.727	1458.7	235.327	366.589	1254.22	302.813	79.1837	1334.68	46.921	249.301	1510.65	-37.4404	247.189	1316.79	-44.9034	251.851	1159.81	-50.1989	356.185	1019.47	6.1696	392.534	935.771	-60.6269	365.229	921.342	-40.386	422.208	874.727
2298	0	209.474	398.455	1694.43	293.986	382.949	1684.81	187.631	203.447	1690.39	297.769	208.664	1678.56	235.051	169.88	1546.1	212.532	90.4937	1282.51	227.423	321.39	1461.51	235.05	375.982	1256.66	304.015	88.8878	1337.07	47.2894	258.132	1512.96	-37.3815	254.472	1319.4	-45.0159	257.944	1162.4	-51.1679	360.784	1021.08	4.56082	396.252	936.801	-62.4064	368.524	922.896	-42.2276	425.05	875.297
2299	0	209.319	407.719	1696.86	294.003	392.351	1687.35	187.733	212.784	1692.5	297.854	218.087	1680.78	235.758	179.384	1548.33	213.879	99.9182	1284.81	227.743	330.981	1463.92	234.767	385.387	1259.05	305.415	98.4834	1339.69	47.7194	266.934	1515.68	-37.2268	261.718	1321.99	-44.9218	263.967	1165.04	-52.3574	365.192	1022.74	3.08265	400.257	937.958	-63.7515	372.119	924.271	-44.0816	427.998	876.1
2300	0	209.154	417.023	1698.83	293.783	401.839	1689.63	187.682	222.042	1694.62	298.409	227.169	1683.94	236.418	188.855	1550.68	215.128	109.355	1287.04	227.822	340.431	1466.34	234.471	394.798	1261.34	306.693	108.155	1342.16	47.986	275.66	1518.11	-37.1595	268.619	1324.31	-44.9889	269.816	1167.83	-53.6067	369.573	1024.48	1.2745	404.158	938.979	-65.367	375.299	926.296	-46.0599	430.909	876.96
2301	0	208.715	426.284	1701.08	293.329	411.196	1691.91	187.599	231.292	1696.79	297.8	236.716	1685.81	237.002	198.228	1553.04	216.362	118.735	1289.4	227.818	350.034	1468.61	234.241	404.218	1263.84	307.829	117.699	1344.74	48.272	284.229	1520.34	-37.2077	275.406	1327.02	-45.2073	275.568	1170.41	-54.6706	374.062	1026.34	-0.400797	408.236	940.325	-66.7018	378.878	928.153	-48.0736	434.052	878.422
2302	0	208.297	435.452	1702.81	292.9	420.631	1694.18	187.432	240.464	1698.91	297.653	246.162	1688.06	237.678	207.636	1555.11	217.659	128.17	1291.6	227.825	359.444	1470.99	233.954	413.673	1265.97	309.051	127.372	1346.9	48.5487	292.776	1522.67	-37.0377	282.132	1329.18	-45.4854	281.09	1173.23	-56.203	378.327	1028.02	-2.16227	412.455	942.014	-68.3319	382.288	929.852	-50.2656	437.522	879.75
2303	0	207.696	444.631	1704.78	292.456	430.003	1696.36	187.217	249.645	1700.66	297.916	255.332	1690.8	238.319	217.027	1557.2	218.875	137.468	1293.73	227.78	368.773	1473.27	233.802	423.212	1268.35	310.446	137.082	1349.37	48.9787	301.308	1524.72	-37.2058	288.522	1331.84	-45.9113	286.478	1175.75	-57.768	382.609	1029.96	-4.09782	416.814	943.699	-69.7502	385.845	931.811	-52.5027	440.943	881.496
2304	0	207.048	453.845	1706.68	291.891	439.363	1698.68	186.945	258.762	1702.54	297.796	264.542	1693.44	238.895	226.345	1559.23	220.086	146.836	1295.94	227.725	378.185	1475.66	233.524	432.76	1270.86	311.487	146.679	1351.5	49.2927	309.91	1527.18	-37.3917	294.961	1334.4	-46.3445	291.745	1178.43	-59.0301	387.036	1032.2	-5.92903	421.304	945.555	-71.5106	389.567	933.978	-54.8712	444.711	883.287
2305	0	206.248	462.985	1708.34	291.319	448.751	1700.76	186.605	268.013	1704.2	297.473	273.866	1695.57	239.258	235.656	1560.97	220.91	156.097	1297.91	227.539	387.536	1477.78	233.176	442.277	1272.97	312.438	156.307	1353.36	49.2822	318.429	1529.08	-37.3804	301.319	1336.76	-46.7928	296.968	1180.85	-60.756	391.39	1034.04	-8.08015	425.851	947.526	-72.8239	393.228	935.779	-57.0994	448.566	885.037
2306	0	205.57	472.257	1709.99	290.626	458.059	1702.73	186.315	277.196	1705.72	297.169	283.318	1697.27	239.693	245.106	1562.57	221.765	165.46	1299.35	227.429	396.97	1480.01	232.934	451.847	1275.1	313.395	165.846	1355.09	49.3925	326.903	1531.16	-37.4881	307.463	1338.73	-47.377	301.937	1182.94	-62.1987	395.882	1035.75	-10.1409	430.788	949.255	-74.6411	397.101	937.629	-59.4794	452.521	886.932
2307	0	204.761	481.475	1711.45	289.95	467.457	1704.39	185.998	286.366	1706.87	296.299	292.855	1698.38	240.084	254.489	1563.95	222.726	174.687	1300.94	227.153	406.36	1481.66	232.646	461.398	1276.85	314.376	175.446	1356.83	49.443	335.409	1532.66	-37.7065	313.526	1340.88	-47.8696	307.079	1184.98	-63.8021	400.355	1037.6	-12.1449	436.112	951.487	-75.9783	401.225	939.301	-61.826	456.784	888.589
2308	0	204.081	490.742	1712.77	289.262	476.77	1706.07	185.517	295.587	1708.04	296.44	301.965	1700.61	240.475	263.891	1565.41	223.659	184.06	1302.6	226.9	415.768	1483.25	231.871	470.464	1277.72	315.118	185.079	1358.34	49.4224	343.943	1534.02	-37.7533	319.791	1342.55	-48.3612	312.273	1187.09	-65.5092	404.819	1039.22	-14.3744	441.227	953.145	-77.5146	405.016	940.931	-64.3757	460.98	890.169
2309	0	203.276	500.007	1713.98	288.406	486.209	1707.32	185.055	304.759	1708.89	295.851	311.328	1701.67	240.61	273.332	1566.45	224.29	193.346	1303.75	226.581	425.257	1484.59	231.567	479.868	1278.99	315.874	194.693	1359.64	49.4798	352.714	1535.12	-37.8081	326.058	1344.13	-48.6937	317.538	1188.51	-67.1509	409.456	1040.44	-16.8181	446.597	954.35	-78.7031	409.317	941.989	-66.7965	465.553	891.425
2310	0	202.462	509.239	1714.88	287.615	495.544	1708.42	184.483	313.969	1709.28	295.488	320.734	1702.54	240.844	282.938	1567.35	224.91	202.596	1304.56	226.282	434.725	1485.46	231.187	489.35	1279.91	316.51	204.265	1360.86	49.433	361.469	1536.03	-37.8402	332.2	1345.35	-49.1291	322.872	1189.77	-68.7141	414.179	1041.36	-19.0547	452.107	955.323	-80.0887	413.472	943.051	-69.3555	470.203	892.774
2311	0	201.726	518.524	1715.52	286.788	505.011	1709.29	183.942	323.261	1709.51	294.9	330.242	1702.96	240.847	292.53	1567.99	225.609	211.981	1305.56	225.844	444.165	1486.09	230.764	498.804	1280.61	317.083	213.915	1361.69	49.2671	370.35	1536.53	-37.757	338.627	1346.21	-49.527	328.385	1190.92	-70.3718	418.965	1042.19	-21.3378	458.029	956.312	-80.9606	417.556	943.557	-72.0321	474.925	893.768
2312	0	200.789	527.902	1715.94	285.957	514.537	1709.9	183.398	332.56	1709.57	294.36	339.793	1703.24	240.858	302.241	1568.43	226.036	221.307	1306.14	225.388	453.757	1486.43	230.818	508.674	1281.49	317.593	223.627	1362.52	49.1067	379.234	1536.85	-37.7204	345.189	1346.82	-49.9786	334.001	1191.95	-72.042	423.825	1042.9	-23.6134	464.147	956.944	-82.143	422.088	944.09	-74.5782	479.83	894.337
2313	0	199.994	537.246	1716.21	285.176	524.02	1710.3	182.887	341.987	1709.46	293.87	349.267	1703.38	240.943	311.996	1568.7	226.522	230.668	1306.53	224.871	463.398	1486.65	230.445	518.155	1281.52	318.027	233.301	1362.86	48.941	388.205	1536.97	-38.0381	351.478	1346.75	-50.4075	339.721	1192.65	-73.56	428.912	1043.19	-25.6942	470.28	957.346	-83.2032	426.79	944.22	-77.3631	484.729	895.046
2314	0	199.056	546.7	1716.35	284.391	533.659	1710.49	182.418	351.37	1709.13	293.405	358.802	1703.38	240.92	321.737	1568.68	227.017	240.08	1306.71	224.497	473.105	1486.77	229.839	527.673	1281.63	318.512	243.051	1363.05	48.5903	397.335	1537	-37.8089	358.819	1347.78	-50.7848	345.652	1193.2	-74.9731	434.239	1043.3	-27.9655	476.326	957.721	-84.5431	431.495	944.231	-79.7539	489.843	895.723
2315	0	198.232	556.228	1716.24	283.546	543.341	1710.48	181.714	360.875	1708.49	292.774	368.508	1703.07	240.69	331.494	1568.54	227.183	249.485	1306.76	223.942	482.934	1486.51	229.341	537.284	1281.5	318.808	252.784	1363.18	48.3714	406.452	1536.68	-38.1364	365.741	1348.15	-51.0171	351.942	1193.42	-76.2828	439.681	1043.15	-30.2777	482.748	957.974	-85.5828	436.387	944.33	-82.3223	495.077	895.966
2316	0	197.25	565.841	1715.88	282.636	553.114	1710.18	181.112	370.514	1707.82	291.979	378.282	1702.32	240.374	341.399	1568.1	227.196	259.04	1306.45	223.341	492.851	1486.11	228.777	546.785	1280.84	318.862	262.607	1362.97	47.8475	415.843	1536.08	-38.2859	373.129	1348.06	-51.3209	358.352	1193.18	-77.8173	445.066	1043.05	-32.3963	488.802	957.487	-86.7218	441.445	943.899	-85.0345	500.301	895.76
2317	0	196.265	575.464	1715.35	281.725	562.842	1709.81	180.467	380.137	1706.81	291.498	388.003	1701.91	240.08	351.354	1567.56	227.305	268.573	1305.78	222.764	502.698	1485.72	227.98	556.317	1280.27	319.002	272.389	1362.57	47.2907	425.221	1535.66	-38.5662	380.968	1348.16	-51.612	364.884	1192.97	-79.0636	450.869	1042.66	-34.5499	495.321	957.319	-87.6931	446.729	943.048	-87.5922	505.837	896.017
2318	0	195.218	585.231	1714.55	280.81	572.653	1709.14	179.784	389.979	1705.84	290.669	397.824	1700.99	239.644	361.39	1566.84	227.071	278.263	1305.06	222.062	512.719	1484.63	227.272	565.846	1279.26	318.943	282.224	1361.84	46.833	434.708	1534.73	-38.735	388.805	1347.44	-51.7351	371.876	1192.59	-80.4816	456.862	1041.74	-36.717	501.823	956.5	-88.8027	452.206	942.447	-89.882	511.328	894.907
2319	0	194.312	595.043	1713.55	279.802	582.512	1708.28	178.951	399.806	1704.63	289.852	407.973	1699.71	239.122	371.408	1565.87	226.854	287.91	1304.44	221.334	522.712	1483.37	226.641	575.445	1277.92	318.541	291.956	1361.15	46.224	444.348	1533.36	-39.015	396.97	1346.48	-52.0719	379.016	1192.04	-81.604	463.187	1040.8	-38.648	508.483	955.469	-89.9237	458.014	941.259	-92.2371	517.154	894.018
2320	0	193.166	604.974	1712.28	278.61	592.546	1706.9	178.033	409.791	1703.12	288.931	417.935	1698.52	238.463	381.606	1564.52	226.347	297.705	1303.25	220.446	532.736	1482.02	225.821	585.157	1276.5	318.087	301.794	1360.21	45.3848	454.13	1532.15	-39.4671	405.508	1345.48	-52.3382	386.481	1191.08	-82.7935	469.717	1039.46	-40.4885	515.409	953.994	-90.9734	463.933	940.272	-94.4723	523.049	892.64
2321	0	192.105	615.049	1710.66	277.678	602.705	1705.55	177.066	419.816	1701.57	287.818	428.089	1696.86	237.743	391.785	1563.18	225.863	307.517	1301.95	219.812	542.808	1480.62	225.051	594.833	1274.74	317.449	311.78	1358.87	44.6298	464.075	1530.51	-39.9045	414.434	1344.14	-52.4658	394.213	1189.94	-84.0592	476.413	1037.84	-42.2606	522.413	952.238	-92.2659	470.021	938.798	-96.583	529.051	890.715
2322	0	191.057	625.237	1708.82	276.519	612.884	1703.89	175.912	429.942	1699.96	286.675	438.161	1695.4	236.786	401.911	1561.67	225.027	317.441	1300.52	218.802	553.083	1478.86	224.376	604.882	1272.93	316.688	321.758	1357.52	43.7792	474.168	1528.92	-40.5459	423.524	1342.9	-52.7061	402.095	1188.65	-85.194	483.341	1036.56	-44.2633	529.42	950.482	-93.3341	476.49	937.155	-98.3757	535.442	889.4
2323	0	189.808	635.437	1707.06	275.374	623.074	1702.3	174.621	440.099	1698.07	285.416	448.233	1693.94	235.772	412.228	1559.82	224.049	327.385	1298.76	217.902	563.336	1476.92	223.601	614.992	1271.21	315.823	331.843	1355.94	42.8989	484.4	1527.15	-41.1629	432.901	1341.28	-53.0209	410.345	1187.25	-86.4857	490.573	1034.64	-45.9976	537.057	948.565	-94.3928	483.26	935.448	-100.328	542.025	887.711
2324	0	188.408	645.586	1705.02	273.921	633.205	1700.33	173.264	450.342	1696.14	284.093	458.53	1692.04	234.817	422.343	1557.96	223.176	337.538	1296.89	216.718	573.568	1475.08	222.677	624.982	1269.32	314.97	342	1354.24	41.916	494.597	1525.14	-42.0698	442.511	1339.77	-53.3431	418.811	1185.51	-87.6721	498.097	1032.81	-47.8792	544.626	946.419	-95.8744	489.96	933.524	-102.155	548.663	885.447
2325	0	187.029	655.959	1703	272.473	643.442	1698.32	171.785	460.627	1694	282.647	468.813	1690.2	233.797	432.574	1556.01	222.227	347.556	1294.86	215.712	583.76	1473.17	221.732	635.064	1267.4	313.908	352.078	1352.25	40.7341	504.758	1523.16	-42.8085	452.235	1338.04	-53.6799	427.626	1183.55	-88.8832	505.75	1030.43	-49.2327	552.219	944.002	-97.0083	497.025	931.244	-104.123	555.384	883.092
2326	0	185.597	666.479	1700.77	271.153	653.853	1696.52	170.096	471.094	1691.94	281.127	479.151	1688.4	232.493	442.789	1553.88	221.146	357.756	1292.86	214.653	594.068	1470.94	220.837	645.368	1265.28	312.822	362.435	1350.21	39.609	514.999	1520.99	-43.8311	462.206	1335.87	-54.1858	436.807	1181.71	-90.0456	513.904	1028.19	-50.9802	559.856	941.291	-98.5873	504.39	929.126	-105.864	562.395	880.485
2327	0	183.902	676.955	1698.4	269.458	664.43	1694.21	168.382	481.637	1689.63	279.302	489.586	1686.29	231.134	453.038	1551.69	220.069	368.019	1290.33	213.399	604.569	1468.77	219.96	655.797	1262.82	311.61	372.672	1347.87	38.3233	525.322	1518.55	-44.733	472.428	1333.37	-54.7264	446.128	1179.45	-91.4167	522.18	1025.71	-52.6861	568.009	938.303	-99.8563	512.092	926.414	-107.548	569.808	877.295
2328	0	182.074	687.423	1695.96	267.64	674.939	1691.74	166.72	492.186	1687.41	277.398	500.142	1683.94	229.742	463.33	1549.19	219.072	378.361	1287.65	212.097	614.906	1466.32	218.773	666.038	1260.43	310.566	383.178	1345.54	37.1295	535.678	1515.85	-45.8147	482.668	1330.62	-55.2447	455.818	1177.01	-92.6055	530.478	1022.78	-54.47	576.119	935.16	-101.263	519.751	923.769	-109.415	577.144	874.289
2329	0	180.27	698.12	1693.34	265.691	685.443	1689.56	164.759	502.794	1685.03	275.559	510.665	1681.85	228.353	473.634	1546.89	218.057	388.791	1285.26	210.633	625.39	1463.8	217.692	676.438	1258.05	309.369	393.685	1343.18	35.675	546.007	1513.06	-46.9751	492.98	1327.87	-55.9225	465.856	1174.49	-94.0429	539.324	1019.82	-55.9342	584.258	931.505	-102.646	527.993	921.008	-111.091	585.051	870.999
2330	0	178.369	708.833	1690.94	263.762	696.217	1687.25	162.767	513.463	1682.74	273.529	521.407	1679.66	226.85	484.132	1544.75	216.997	399.344	1282.99	209.192	635.979	1461.25	216.685	687.149	1255.6	308	404.242	1340.79	34.076	556.259	1510.34	-48.2188	503.437	1325.12	-56.7331	476.12	1171.82	-95.3636	548.464	1016.92	-57.513	592.939	927.922	-104.031	536.539	918.075	-112.496	593.214	867.225
2331	0	176.227	719.417	1688.67	261.731	706.94	1684.97	160.565	524.048	1680.33	271.422	532.092	1677.47	225.223	494.849	1542.17	215.948	409.958	1280.62	207.613	646.662	1458.84	215.234	697.679	1253.16	306.74	414.906	1338.49	32.5099	566.657	1507.69	-49.3271	514.047	1322.29	-57.6709	486.455	1169.07	-96.6597	557.961	1013.82	-59.016	601.859	924.497	-105.519	545.13	914.976	-114.155	601.1	863.58
2332	0	173.923	730.114	1686.36	259.525	717.562	1682.78	158.323	534.732	1678.02	269.247	542.681	1675.41	223.509	505.373	1540.04	214.894	420.669	1278.25	205.782	657.244	1456.47	213.985	708.369	1250.94	305.417	425.69	1336.39	30.7732	577.243	1505.14	-50.5947	524.566	1319.37	-58.5831	497.228	1166.27	-97.9492	567.496	1010.74	-60.6811	610.665	920.954	-107.029	554.021	911.804	-115.634	609.579	860.197
2333	0	171.693	740.925	1684.06	257.253	728.104	1680.84	156.046	545.525	1675.63	266.876	553.388	1673.27	221.622	516.165	1537.76	213.708	431.55	1275.88	203.844	668.09	1454.15	212.51	719.347	1248.74	303.908	436.427	1334.14	28.9362	587.832	1502.45	-52.1582	535.246	1316.6	-59.5841	508.081	1163.22	-99.4159	577.29	1007.62	-62.2917	620.006	917.469	-108.592	563.241	908.865	-117.094	618.41	856.504
2334	0	169.207	751.754	1681.73	254.926	738.942	1678.78	153.534	556.283	1673.2	264.398	564.144	1671.15	219.698	527.008	1535.23	212.539	442.53	1273.5	201.941	678.999	1451.86	210.96	730.303	1246.49	302.447	447.384	1332.09	26.871	598.42	1499.84	-53.566	546.082	1313.71	-60.6647	519.024	1160.42	-100.57	587.445	1004.53	-63.8885	629.672	914.122	-110.152	572.831	905.751	-118.705	627.623	853.207
2335	0	166.659	762.464	1679.7	252.499	749.899	1676.61	151.133	567.149	1671.14	261.984	574.915	1669.29	217.614	537.734	1533.35	211.44	453.613	1271.17	199.852	689.825	1449.69	209.33	741.451	1244.26	300.933	458.408	1330.02	24.7066	608.996	1497.36	-55.0404	556.947	1310.72	-61.752	530.184	1157.25	-101.846	597.94	1001.32	-65.3735	639.549	910.845	-111.459	582.707	902.584	-120.098	636.946	849.591
2336	0	164.083	773.377	1677.81	249.883	760.714	1674.82	148.519	578.054	1669.08	259.325	585.773	1667.4	215.554	548.768	1531.15	210.312	464.742	1269.12	197.645	700.733	1447.63	207.667	752.764	1242.22	299.37	469.427	1327.96	22.6763	619.682	1494.44	-56.5854	567.858	1307.51	-63.0378	541.362	1154.39	-103.267	608.312	998.092	-66.6982	649.505	907.351	-112.84	592.849	899.403	-121.498	646.626	846.106
2337	0	161.521	784.413	1675.78	247.154	771.457	1673.19	145.721	588.937	1667.31	256.611	596.653	1665.87	213.242	559.639	1529.3	209.018	475.86	1267.26	195.382	711.678	1445.42	205.724	764.09	1240.24	297.544	480.626	1326.12	20.3998	630.623	1491.95	-58.1799	579.001	1304.38	-64.2896	552.818	1151.53	-104.596	618.838	995.37	-67.9781	659.996	903.966	-114.333	603.278	896.573	-122.812	656.696	842.892
2338	0	158.755	795.354	1673.95	244.275	782.395	1671.62	142.825	599.855	1665.58	253.724	607.57	1664.38	210.909	570.746	1527.46	207.587	487.095	1265.33	193.142	722.813	1443.49	203.86	775.621	1238.53	295.687	491.821	1324.43	17.993	641.458	1489.36	-59.8385	590.187	1301.3	-65.6175	564.208	1148.7	-105.768	629.871	992.156	-69.1569	670.758	900.657	-115.676	613.793	893.712	-123.923	667.305	839.599
2339	0	155.915	806.323	1672.49	241.59	793.54	1670.26	139.953	610.803	1664.21	250.839	618.588	1663.13	208.541	581.835	1526.5	206.062	498.446	1263.54	190.542	733.484	1441.72	201.681	787.19	1237.06	293.711	502.94	1322.9	15.5855	652.211	1487.03	-61.5845	601.435	1298.59	-66.8271	575.997	1146.22	-107.039	640.962	989.345	-70.443	681.512	897.574	-116.666	624.802	891.011	-125.09	677.941	836.318
2340	0	152.977	817.451	1671.11	238.711	804.569	1669.17	137.023	621.87	1663.22	247.848	629.562	1662.3	206.079	592.924	1525.16	204.632	509.761	1262.39	188.321	744.73	1440.95	199.611	799.023	1235.9	291.672	513.96	1321.87	13.0359	663.095	1485.23	-63.2792	612.879	1295.98	-68.3399	587.725	1143.82	-108.172	652.405	986.905	-71.2996	692.797	895.055	-117.88	635.964	888.464	-126.086	688.985	833.508
2341	0	150.252	828.595	1670.35	235.864	815.494	1668.73	134.133	633.072	1662.65	244.996	640.565	1662.08	203.582	604.068	1524.24	203.056	521.189	1261.38	185.907	755.875	1439.97	197.456	810.784	1235.4	289.672	525.078	1320.92	10.5108	674.01	1483.67	-65.0469	624.262	1294.13	-69.6585	599.812	1141.79	-109.254	664.018	984.82	-72.5482	704.337	893.133	-118.81	647.613	886.247	-126.831	700.243	831.339
2342	0	147.464	839.677	1669.73	232.986	826.484	1668.31	131.212	644.275	1662.29	242	651.53	1662.13	201.166	615.073	1523.88	201.512	532.427	1260.69	183.462	767.017	1439.81	195.374	822.772	1235.17	287.642	536.037	1320.33	8.0276	684.899	1482.54	-66.4043	635.643	1292.21	-71.176	612.047	1140.17	-110.416	675.827	983.096	-73.6945	716.086	891.476	-119.709	659.294	884.434	-127.52	711.958	829.533
2343	0	144.745	850.976	1669.67	230.431	837.699	1668.31	128.241	655.529	1662.38	238.95	662.51	1662.59	198.54	626.048	1523.87	199.746	543.593	1260.5	181.021	778.121	1439.81	193.218	834.519	1235.62	285.451	546.894	1320.26	5.46467	695.742	1481.71	-68.7447	647.329	1291.14	-72.6581	624.378	1138.71	-111.417	688.115	981.561	-74.2632	728.257	890.179	-120.643	671.441	882.983	-128.196	723.904	827.838
2344	0	142.316	862.314	1669.59	227.379	848.73	1668.4	125.142	666.792	1662.83	236.077	673.651	1663.23	196.057	637.03	1524.23	197.87	554.507	1260.68	178.733	788.597	1439.82	191.201	846.376	1235.92	283.305	557.798	1320.62	2.91709	706.651	1481.28	-70.629	659.156	1290.2	-74.0582	636.944	1137.86	-112.281	700.741	980.642	-74.6269	740.721	889.217	-121.49	684.098	881.986	-128.778	736.209	827.012
2345	0	139.659	873.492	1669.52	225.041	859.721	1668.69	122.274	677.954	1663.51	233.091	684.672	1664.02	193.323	647.936	1524.58	195.939	565.467	1261.12	176.524	799.504	1440.31	189.198	857.976	1236.44	281.088	568.477	1321.4	0.442445	717.5	1481.22	-72.7251	670.941	1289.84	-75.697	649.32	1137.27	-113.179	713.524	980.228	-74.987	753.247	888.691	-122.072	696.846	881.284	-128.939	749.123	826.325
2346	0	137.247	884.637	1669.84	222.725	870.737	1669.27	119.545	689.109	1664.31	230.417	695.66	1664.89	190.964	658.584	1525.4	193.983	576.162	1261.68	174.422	810.151	1440.91	187.231	869.449	1237.38	279.168	578.837	1322.55	-1.72079	728.453	1481.44	-74.6851	682.753	1289.57	-77.3369	661.836	1137.14	-113.979	726.571	980.042	-75.2477	766.067	888.619	-122.503	709.664	881.06	-128.907	762.173	825.861
2347	0	135.028	895.787	1670.16	220.457	881.792	1669.91	116.936	700.245	1665.21	227.967	706.559	1666.2	188.494	669.228	1526.14	191.8	586.858	1262.85	172.312	820.638	1441.71	185.266	880.479	1238.49	276.891	589.297	1323.37	-3.89785	739.35	1482.07	-76.7532	694.598	1289.77	-78.5881	673.838	1136.54	-114.698	739.781	980.124	-75.3897	779.094	889.031	-123.109	723.137	880.921	-128.804	775.806	825.894
2348	0	132.94	906.798	1670.67	218.224	892.398	1670.49	114.287	711.455	1666.25	225.456	717.316	1667.42	186.081	679.349	1527.13	189.625	597.412	1264.01	170.445	831.075	1442.83	183.699	891.54	1239.68	274.91	599.209	1324.67	-6.12143	750.237	1482.92	-78.619	706.649	1290.2	-80.432	686.582	1137.27	-115.425	753.275	980.539	-75.3891	792.552	889.424	-123.703	736.991	881.733	-128.789	789.659	826.391
2349	0	131.068	917.728	1671.27	216.22	903.113	1671.17	111.924	722.399	1667.41	223.005	728.034	1668.71	183.436	689.261	1528.21	187.153	607.666	1264.75	168.64	841.371	1443.94	182.118	902.175	1240.88	272.515	608.993	1325.86	-8.23572	761.062	1483.87	-80.9778	718.573	1290.79	-82.3373	699.183	1137.64	-116.179	767.066	981.36	-75.4886	805.881	890.508	-124.248	751.193	882.265	-128.317	804.145	826.972
2350	0	129.261	928.535	1671.83	214.563	913.827	1671.94	109.664	733.13	1668.91	220.828	738.578	1670.14	181.17	699.324	1529.14	184.656	617.703	1265.66	167.151	851.416	1445.32	180.696	912.348	1242.39	270.138	618.588	1327.1	-10.1639	771.924	1484.99	-83.0337	730.634	1291.64	-84.3648	711.832	1138.02	-117.079	781.013	982.571	-75.0178	819.642	891.712	-124.752	765.845	882.691	-128.001	818.939	828.25
2351	0	127.693	939.156	1672.68	212.729	924.106	1672.78	107.548	743.845	1670.34	218.794	748.911	1671.86	179.115	709.107	1530.55	182.226	627.676	1266.9	165.722	861.322	1446.76	179.71	922.495	1244.04	267.663	628.138	1328.42	-11.9557	782.703	1486.11	-85.1447	742.81	1292.48	-86.4582	724.653	1138.92	-117.641	795.377	983.467	-74.4649	833.607	892.914	-125.313	780.642	883.933	-127.347	834.197	829.432
2352	0	126.405	949.754	1673.51	211.3	934.354	1673.57	105.752	754.367	1671.88	216.98	759.22	1673.37	176.922	718.798	1531.83	179.919	637.391	1268.08	164.283	871.002	1448.11	178.955	932.389	1245.89	265.233	637.437	1329.59	-13.7442	793.286	1487.38	-87.2891	754.974	1293.44	-88.5279	737.401	1139.88	-118.176	809.76	984.442	-74.0965	847.735	894.469	-125.697	795.959	885.126	-126.687	849.762	830.916
2353	0	125.241	960.096	1674.3	210.115	944.678	1674.49	104.169	764.812	1673.68	215.366	769.371	1674.94	174.964	728.343	1532.99	177.384	647.036	1269.16	163.142	880.633	1449.43	178.23	941.919	1247.32	262.538	646.59	1330.71	-15.2721	803.821	1488.46	-89.4388	767.074	1294.39	-90.8403	750.422	1140.66	-118.692	824.224	985.593	-73.5575	862.376	896.018	-126.1	811.373	886.165	-125.795	865.674	832.258
2354	0	124.221	970.394	1675.36	209.013	954.567	1675.51	102.615	775.108	1675.35	213.693	779.458	1676.31	173.213	737.79	1534.28	175.136	656.625	1270.54	162.017	889.972	1450.72	177.866	951.303	1248.8	259.995	655.6	1331.8	-16.7177	814.384	1489.8	-91.02	779.549	1295.36	-93.0263	763.43	1141.39	-119.057	838.986	986.858	-72.8965	877.083	897.81	-126.4	827.057	887.251	-124.818	881.832	833.771
2355	0	123.205	980.434	1676.33	208.076	964.304	1676.68	101.159	785.21	1677.02	212.396	789.292	1678.2	171.264	746.893	1535.89	172.77	666.111	1272.05	161.196	899.304	1452.44	177.165	960.174	1249.77	257.575	664.699	1333.2	-18.1499	824.755	1491.31	-93.2222	791.903	1296.42	-95.2614	776.56	1142.45	-119.417	853.905	988.18	-72.4555	891.934	899.9	-126.69	843.21	888.878	-124.038	898.297	835.846
2356	0	122.411	990.305	1677.61	207.321	974.175	1677.87	100.101	795.01	1679.11	211.174	798.885	1679.93	169.699	755.805	1537.52	170.501	675.525	1273.21	160.406	908.466	1454.13	177.087	969.314	1251.63	255.113	673.635	1334.36	-19.4979	834.921	1492.73	-95.4159	804.052	1297.83	-97.443	789.702	1143.51	-119.772	869.083	990.026	-71.6095	906.955	902.002	-126.936	859.307	890.515	-123.202	914.849	838.051
2357	0	121.8	1000.19	1679.08	206.659	983.877	1679.17	99.1756	804.804	1680.94	210.062	808.609	1681.49	168.126	764.885	1538.78	168.436	684.796	1274.73	159.734	917.581	1455.82	177.107	978.443	1253.32	252.963	682.654	1335.69	-20.5758	845.046	1494.46	-96.8771	816.447	1299.15	-99.3592	802.995	1144.75	-119.962	884.208	991.825	-70.8912	922.337	904.404	-127.044	875.596	892.245	-122.082	931.706	840.319
2358	0	121.224	1009.77	1680.65	205.965	993.163	1681.02	98.2905	814.535	1683.04	209.454	818.02	1684.02	166.878	773.959	1540.65	166.588	693.946	1276.49	159.228	926.659	1458.05	177.3	987.592	1255.51	250.713	691.454	1337.09	-21.5128	854.914	1496.19	-98.5126	828.512	1300.53	-101.407	816.504	1145.96	-120.006	899.492	993.862	-70.1462	937.356	906.825	-127.167	891.934	893.955	-121.025	948.692	842.955
2359	0	120.653	1018.93	1682.43	205.458	1002.53	1682.64	97.6237	824.124	1684.93	208.816	827.486	1685.95	165.454	782.822	1542.39	164.728	703.279	1278.2	158.689	935.707	1459.97	177.223	996.386	1257.62	248.641	700.252	1338.6	-22.5269	864.81	1498.16	-99.743	840.777	1301.97	-103.237	830.005	1147.4	-119.968	914.286	995.659	-69.2539	952.721	909.66	-127.641	908.716	896.488	-119.942	965.62	845.976
2360	0	120.31	1028.57	1684.24	205.217	1011.91	1684.35	97.0171	833.489	1687.08	208.083	836.766	1687.75	164.307	791.88	1544.24	162.825	712.493	1279.78	158.123	944.607	1462.03	177.014	1005.05	1259.55	246.847	708.781	1340.66	-23.4604	874.524	1499.98	-100.998	852.906	1303.58	-105.017	843.456	1148.81	-119.814	929.73	997.933	-68.6598	967.851	912.569	-127.683	925.329	898.925	-119.353	982.641	849.458
2361	0	120.099	1037.84	1686.25	204.946	1021.1	1686.23	96.3775	842.779	1689.14	207.567	845.88	1689.75	163.113	800.859	1546.02	161.157	721.873	1281.64	157.744	953.496	1464.16	176.558	1013.45	1261.62	245.014	717.526	1342.5	-24.1909	884.233	1502.02	-102.094	864.889	1305.51	-106.605	856.916	1150.61	-119.701	945.122	1000.52	-67.7325	983.131	915.32	-127.02	941.609	900.912	-118.061	999.69	852.757
2362	0	119.839	1046.78	1688.33	204.695	1029.96	1688.26	96.0293	851.95	1691.34	207.086	854.807	1691.58	162.049	809.788	1547.77	159.533	730.9	1283.58	157.15	962.36	1466.08	176.166	1022.1	1263.27	243.377	726.294	1344.25	-24.9174	894.016	1504.11	-103.023	876.743	1307.23	-108.135	870.395	1152.44	-119.519	960.516	1003.31	-66.6731	998.593	918.701	-127.363	958.37	903.992	-116.998	1016.58	856.168
2363	0	119.855	1055.78	1690.62	204.674	1038.83	1690.3	95.4698	861.008	1693.07	206.762	863.801	1693.33	161.15	818.683	1549.98	157.973	740.238	1285.23	156.906	971.335	1468.31	176.377	1031.29	1265.72	241.754	734.994	1345.92	-25.4898	903.672	1506.24	-103.866	888.427	1309.21	-109.583	883.815	1154.51	-119.238	975.875	1006.24	-65.8816	1014.03	921.93	-127.549	975.659	907.68	-115.732	1033.71	859.945
2364	0	119.813	1064.55	1692.68	204.703	1047.73	1692.3	95.2602	870.094	1694.97	206.414	872.628	1694.95	160.122	827.499	1551.55	156.394	749.297	1287.03	156.441	980.183	1470.1	176.107	1039.94	1267.64	240.285	743.705	1347.77	-26.1715	913.357	1508.24	-104.648	900.004	1311.2	-110.772	897.125	1156.36	-118.955	991.162	1009.21	-65.1853	1029.73	925.924	-126.239	991.729	909.786	-114.607	1050.72	863.771
2365	0	120.078	1073.99	1694.94	204.763	1056.62	1694.32	94.8746	879.084	1696.56	206.024	881.287	1696.53	159.283	836.404	1553.16	154.941	758.225	1288.81	156.373	989.099	1472.12	175.659	1048.34	1269.03	238.899	752.509	1349.4	-26.5671	923.181	1510.22	-105.27	911.419	1313.32	-111.866	910.452	1158.26	-118.727	1006.24	1011.98	-64.3004	1044.69	929.163	-126.659	1008.57	913.512	-113.477	1067.65	867.784
2366	0	119.954	1082.35	1696.81	204.869	1065.28	1696.37	94.6779	888.106	1698.09	205.766	889.958	1698.07	158.503	845.299	1554.83	153.439	767.038	1290.7	156.175	998.073	1473.69	175.616	1057.12	1270.86	237.515	761.347	1350.9	-27.0074	933.01	1512.21	-105.783	922.799	1315.08	-113.057	923.679	1160.01	-118.276	1021.49	1015.06	-63.5634	1060.07	932.492	-126.061	1025.09	916.521	-112.163	1084.68	871.486
2367	0	120.284	1091.29	1698.93	204.958	1073.81	1698.2	94.3021	896.995	1699.68	205.074	898.702	1699.09	157.708	854.152	1556.59	151.964	776.17	1292.02	156.162	1006.98	1475.19	175.565	1065.8	1272.57	236.176	770.138	1352.69	-27.2733	942.88	1513.99	-106.407	934.13	1317.15	-114.085	936.75	1161.66	-118.043	1036.53	1018.12	-62.4986	1075.68	936.423	-125.956	1041.83	920.06	-111.055	1101.46	875.582
2368	0	120.476	1100.36	1700.63	205.103	1082.33	1700.11	94.0917	905.915	1700.79	205.143	907.306	1700.68	156.96	862.935	1557.73	150.514	785.053	1293.6	156.175	1015.77	1476.76	175.646	1074.46	1273.93	234.892	778.996	1354.08	-27.4567	952.758	1515.84	-106.871	945.324	1318.96	-114.83	949.751	1163.25	-117.692	1051.54	1021.34	-61.7252	1091.18	940.064	-125.504	1058.19	923.235	-109.478	1118.39	879.53
2369	0	120.674	1109.2	1702.44	205.398	1091.07	1701.67	93.8453	914.844	1701.82	204.977	916	1701.71	156.433	871.902	1559.03	149.19	793.61	1295.31	156.273	1024.57	1478.09	175.947	1083.29	1275.25	233.811	787.89	1354.8	-27.4721	962.529	1517.16	-107.084	956.425	1320.33	-115.605	962.768	1165.03	-117.254	1066.38	1024.09	-60.5375	1106.76	943.729	-124.33	1074.12	925.386	-108.398	1135	883.325
2370	0	121.025	1118.38	1703.7	205.655	1099.88	1702.97	93.6907	923.754	1702.87	204.857	924.758	1702.75	156.07	880.876	1560.08	147.832	802.892	1296.35	156.328	1033.41	1479.01	176.067	1092.01	1276.36	232.561	796.699	1355.79	-27.4785	972.442	1518.42	-107.482	967.788	1321.7	-116.328	975.623	1166.35	-116.868	1081.17	1026.7	-59.4938	1122.2	947.067	-122.476	1090.01	927.666	-106.885	1151.77	887.032
2371	0	121.205	1127.05	1704.86	205.882	1108.59	1704.21	93.5854	932.722	1703.57	204.619	933.436	1703.51	155.562	889.792	1560.91	146.641	812.073	1297.22	156.702	1042.35	1480.03	176.609	1100.89	1277.4	231.483	805.558	1356.73	-27.5426	982.249	1519.6	-107.811	979.116	1323.01	-116.947	988.416	1167.46	-116.265	1095.85	1029.26	-58.596	1137.58	950.269	-122.884	1106.73	931.308	-105.622	1168.25	891.047
2372	0	121.37	1135.95	1705.7	206.051	1117.26	1705.16	93.5104	941.724	1704.15	204.623	942.217	1704.23	155.197	898.725	1561.66	145.487	821.077	1298.12	156.943	1051.19	1480.74	177.382	1109.96	1278.28	230.467	814.406	1357.42	-27.5106	992.099	1520.5	-108.022	990.372	1324.01	-117.511	1001.28	1168.51	-115.878	1110.71	1032.18	-57.3063	1152.97	953.704	-121.134	1122.44	933.726	-104.051	1184.85	894.561
2373	0	121.694	1144.95	1706.43	206.391	1126.22	1705.76	93.462	950.705	1704.55	204.54	950.99	1704.72	154.841	907.66	1562.21	144.495	829.804	1298.98	157.249	1060.16	1481.39	177.787	1118.71	1278.74	229.44	823.243	1357.81	-27.4075	1001.92	1521.28	-108.226	1001.66	1324.96	-118.199	1013.85	1169.35	-115.14	1125.05	1034.38	-56.1713	1168.22	956.745	-119.476	1137.67	935.412	-102.599	1201.25	898.331
2374	0	121.859	1153.98	1706.83	206.611	1135.13	1706.03	93.5208	959.801	1704.87	204.313	960.055	1704.68	154.517	916.61	1562.34	143.548	839.219	1299.08	157.623	1069.16	1481.72	178.681	1127.78	1279.09	228.658	832.084	1358.1	-27.2144	1011.64	1521.88	-108.416	1013	1325.56	-118.561	1026.43	1169.99	-114.331	1139.36	1036.55	-54.8169	1183.38	959.771	-118.508	1153.54	937.739	-101.09	1217.55	901.746
2375	0	122.332	1163.1	1706.73	206.902	1144.02	1706.06	93.5496	968.945	1704.84	204.688	968.876	1705.12	154.552	925.693	1562.55	142.764	848.063	1299.39	157.886	1078.1	1481.63	178.9	1136.26	1279.01	227.817	840.872	1358.13	-26.9663	1021.37	1521.84	-108.341	1024.25	1325.81	-118.382	1039.05	1170.39	-113.689	1153.65	1038.41	-53.7457	1198.35	962.408	-117.138	1169.18	939.877	-99.4525	1233.81	904.971
2376	0	122.802	1172.23	1706.29	207.508	1153.26	1705.91	93.6891	978.119	1704.77	204.874	977.921	1705.16	154.356	934.775	1562.13	142.154	857.225	1299.27	158.249	1087.22	1481.3	179.668	1145.27	1278.79	227.154	849.713	1357.87	-26.7151	1031.1	1521.68	-108.272	1035.51	1325.98	-119.013	1051.39	1170.76	-113.593	1167.7	1039.55	-52.3623	1213.4	965.529	-116.011	1184.97	941.986	-98.0237	1249.7	908
2377	0	123.173	1181.5	1705.65	207.819	1162.15	1705.41	93.8407	987.422	1704.53	204.98	987.066	1705.01	154.207	943.923	1561.57	141.454	866.517	1298.96	158.801	1096.41	1481.09	180.244	1154.16	1278.46	226.526	858.57	1357.43	-26.4294	1040.86	1521.44	-108.143	1046.77	1325.88	-119.152	1063.74	1170.57	-111.985	1181.95	1041.63	-51.0558	1228.25	968.001	-114.997	1200.48	943.835	-96.2335	1265.71	910.774
2378	0	123.822	1190.81	1704.85	208.39	1171.35	1704.44	94.1213	996.844	1704.27	205.221	996.157	1704.73	154.301	953.133	1561.27	141.143	875.8	1298.71	159.248	1105.54	1480.75	181.02	1163.08	1278.13	226.069	867.531	1357.2	-26.1398	1050.51	1520.96	-108.084	1057.92	1325.77	-119.041	1076.12	1170.74	-110.781	1195.94	1043.13	-49.6757	1242.83	970.086	-112.701	1215.49	945.662	-94.6496	1281.5	914.073
2379	0	124.318	1200.14	1703.71	209.013	1180.51	1703.42	94.3261	1006.26	1703.62	205.667	1005.35	1704.26	154.522	962.493	1560.29	140.831	885.012	1297.89	159.831	1114.72	1479.94	181.828	1172.27	1277.23	225.604	876.417	1356.36	-25.8099	1060.3	1520.22	-107.874	1069	1325.32	-119.134	1087.99	1169.56	-109.841	1209.76	1044.35	-48.1951	1257.42	972.144	-112.762	1231.26	947.974	-93.0045	1297.16	917.172
2380	0	125.051	1209.82	1702.1	209.813	1189.99	1701.99	94.7787	1015.87	1702.77	206.042	1014.66	1703.52	154.49	971.812	1559.04	140.623	894.41	1296.6	160.381	1124.04	1478.87	182.686	1181.4	1276.32	225.452	885.537	1355.02	-25.4407	1070.04	1519.01	-107.491	1079.87	1324.32	-119.145	1100.07	1168.97	-108.854	1223.35	1045.01	-46.7106	1271.78	973.902	-111.253	1246.27	949.04	-91.208	1312.55	919.05
2381	0	125.814	1219.4	1700.35	210.462	1199.2	1700.23	95.0976	1025.41	1702.02	206.143	1024.21	1702.24	154.826	981.234	1557.96	140.464	903.82	1295.45	161.037	1133.4	1477.5	183.416	1190.63	1274.81	225.23	894.608	1353.91	-24.8479	1079.87	1517.47	-106.937	1090.71	1323.13	-119.031	1111.99	1167.93	-107.829	1236.83	1045.46	-45.1289	1285.94	975.254	-109.581	1261.12	949.669	-89.4637	1327.62	920.866
2382	0	126.761	1229.02	1698.2	211.319	1208.84	1698.06	95.6132	1035.14	1700.76	206.727	1033.71	1701.04	155.031	990.713	1556.2	140.442	913.209	1293.98	161.731	1142.82	1475.9	184.202	1199.82	1273.26	225.122	903.772	1352.37	-24.3446	1089.72	1515.78	-106.544	1101.53	1321.78	-118.507	1123.95	1166.44	-106.599	1250.27	1045.71	-43.5649	1300.02	976.362	-107.876	1275.71	950.247	-87.5512	1342.54	922.522
2383	0	127.553	1238.44	1695.98	212.345	1218.47	1695.93	96.2771	1044.88	1699.34	207.733	1043.19	1699.77	155.467	1000.22	1554.77	140.569	922.702	1292.29	162.462	1152.25	1474.18	185.083	1209.22	1271.51	225.098	912.99	1350.66	-23.7755	1099.65	1514.14	-105.95	1112.05	1320.25	-118.469	1135.75	1165.25	-105.285	1263.54	1045.78	-41.8362	1313.88	977.428	-106.251	1290.07	950.709	-85.8972	1357.35	924.159
2384	0	128.695	1248.31	1693.52	213.146	1227.95	1693.57	97.0674	1054.7	1697.94	208.128	1053.04	1697.67	155.882	1009.79	1552.53	140.572	932.076	1290.23	163.257	1161.88	1472.31	186.368	1218.92	1269.95	225.252	922.381	1348.7	-23.2121	1109.65	1512.25	-105.421	1122.3	1317.74	-118.066	1147.49	1163.42	-104.079	1276.55	1045.56	-40.2449	1327.61	978.161	-104.558	1304.27	950.819	-83.8688	1371.93	925.228
2385	0	129.581	1257.93	1691.16	214.147	1237.68	1690.83	97.6236	1064.62	1696.02	209.395	1062.59	1696.12	156.491	1019.45	1550.56	140.99	941.707	1288.3	164.121	1171.47	1470.15	187.019	1228.17	1267.69	225.476	931.879	1346.68	-22.4664	1119.67	1510.03	-104.749	1132.77	1315.65	-117.319	1159.18	1161.22	-102.816	1289.45	1045.09	-38.7071	1341	978.325	-102.944	1318.31	950.798	-82.0529	1386.37	926.37
2386	0	130.882	1267.76	1688.47	215.408	1247.64	1687.95	98.7076	1074.64	1693.84	210.422	1072.53	1693.74	157.051	1029.1	1548.11	141.333	951.297	1285.79	165.067	1181.14	1467.64	188.098	1237.9	1265.15	225.751	941.379	1344.13	-21.5594	1129.79	1507.59	-103.811	1143.2	1313.43	-116.935	1170.71	1159.22	-101.41	1302.37	1044.39	-36.904	1354.4	978.416	-101.008	1332.13	950.278	-79.7326	1400.05	926.476
2387	0	132.148	1277.76	1685.68	216.705	1257.55	1685.21	100.011	1084.51	1691.64	211.397	1082.62	1691.11	157.844	1038.89	1545.44	141.888	961.032	1283.11	166.18	1190.94	1465.36	189.19	1247.57	1262.61	226.3	951.004	1341.26	-20.7357	1139.87	1505.08	-102.691	1153.5	1310.71	-116.287	1182.21	1156.82	-99.9113	1314.89	1043.15	-34.987	1367.6	978.321	-99.2363	1345.81	949.544	-77.8302	1413.83	926.836
2388	0	133.407	1287.82	1682.92	218.139	1267.55	1682.42	101.232	1094.63	1689.24	212.921	1092.55	1688.73	158.671	1048.75	1542.81	142.508	970.897	1280.43	167.283	1200.8	1462.72	190.203	1257.25	1260.06	226.9	960.86	1338.66	-19.765	1150.04	1502.53	-101.677	1163.9	1308.04	-115.451	1193.73	1154.18	-98.5603	1327.4	1041.85	-33.1094	1380.62	977.555	-96.8985	1358.81	947.723	-75.7933	1427.42	927.039
2389	0	134.871	1297.94	1680.19	219.6	1277.71	1679.67	102.586	1104.83	1686.71	214.06	1102.73	1686	159.521	1058.64	1540.01	143.293	980.9	1277.91	168.514	1210.77	1460.22	191.29	1267.25	1257.41	227.667	970.682	1336.16	-18.6403	1160.34	1500.06	-100.753	1174.37	1305.5	-114.451	1205.06	1151.39	-96.911	1339.63	1040.43	-31.2622	1393.3	977.046	-95.0815	1372	946.762	-73.6888	1440.68	926.582
2390	0	136.483	1308.27	1677.38	221.235	1288.02	1676.89	104.156	1115.17	1684.43	215.779	1112.87	1683.64	160.742	1068.73	1537.46	144.245	991.043	1275.13	169.759	1220.8	1457.39	192.585	1277.41	1254.55	228.574	980.741	1333.41	-17.4309	1170.69	1497.34	-99.5452	1184.76	1302.63	-113.182	1216.39	1148.89	-95.3965	1351.67	1038.61	-29.4548	1405.59	975.34	-91.7777	1384.27	944.421	-71.6336	1453.64	925.909
2391	0	138.116	1318.68	1674.77	222.956	1298.48	1673.8	105.77	1125.55	1682	217.494	1123.34	1680.96	162.093	1079.01	1535.01	145.408	1001.52	1272.18	171.058	1231.02	1454.46	193.993	1287.63	1251.63	229.471	990.803	1330.29	-16.1667	1181.03	1494.3	-97.964	1195.04	1299.2	-111.879	1227.68	1146.12	-93.7039	1363.65	1036.42	-27.5106	1417.99	973.923	-90.7981	1397.03	943.226	-69.7445	1466.2	924.698
2392	0	139.931	1329.24	1672.12	224.626	1309.01	1670.98	107.552	1136.12	1679.44	219.251	1133.84	1678.35	163.361	1089.36	1532.57	146.432	1011.97	1269.51	172.502	1241.32	1451.51	195.272	1298.07	1248.82	230.423	1001.15	1327.54	-14.8096	1191.57	1491.66	-96.3822	1205.42	1296.14	-110.4	1238.87	1143.4	-92.0453	1375.26	1034.25	-25.5368	1429.93	972.358	-88.7736	1409.1	941.208	-67.8432	1478.39	923.565
2393	0	141.909	1339.84	1669.58	226.517	1319.45	1668.51	109.455	1146.78	1677.15	220.898	1144.61	1675.43	164.932	1100.03	1530.07	147.606	1022.6	1267.1	174.101	1251.78	1448.77	196.711	1308.52	1246.2	231.491	1011.53	1325.03	-13.3705	1202.27	1489.15	-94.6049	1215.89	1293.52	-108.685	1249.9	1140.68	-90.1556	1386.68	1031.99	-23.6108	1441.61	970.233	-86.9785	1420.84	939.252	-65.8794	1490.13	921.61
2394	0	144.211	1350.62	1667.25	228.82	1330.18	1666.15	111.583	1157.52	1675.07	223.312	1155.21	1673.36	166.437	1110.75	1527.78	148.834	1033.35	1264.74	175.893	1262.39	1446.65	198.251	1319.03	1243.71	232.475	1021.94	1322.54	-11.7951	1213	1486.87	-92.6032	1226.35	1291.13	-106.88	1260.74	1138.25	-88.2855	1397.82	1029.83	-21.8429	1452.72	968.075	-85.0214	1432.24	937.209	-64.1894	1501.44	919.819
2395	0	146.35	1361.42	1665.25	231.115	1341.11	1663.64	113.794	1168.4	1672.79	225.459	1165.89	1671.36	168.243	1121.58	1525.92	149.929	1044.26	1262.64	177.72	1273.25	1444.53	199.779	1329.68	1241.25	233.696	1032.63	1320.36	-10.0507	1224.09	1484.88	-90.4289	1236.86	1288.93	-104.72	1271.66	1136.1	-86.5003	1408.56	1027.52	-19.8237	1463.79	966.153	-83.3164	1443.12	935.16	-62.8119	1512.22	917.709
2396	0	148.81	1372.32	1662.91	233.518	1352.02	1661.17	116.288	1179.27	1671.24	227.879	1176.81	1669.09	170.097	1132.46	1523.64	151.036	1055.27	1260.75	179.713	1284.08	1442.37	201.35	1340.38	1238.91	234.946	1043.5	1318.31	-8.21056	1235.26	1483	-88.5139	1247.44	1287.2	-102.106	1282.45	1134.04	-84.6032	1419.07	1025.34	-18.1077	1474.45	964.226	-81.6775	1453.53	933.151	-60.9396	1522.65	915.574
2397	0	151.398	1383.28	1660.85	236.21	1362.81	1659.01	118.965	1190.32	1669.28	230.493	1187.77	1666.89	172.037	1143.55	1521.76	152.391	1066.63	1258.71	181.928	1294.95	1440.5	203.299	1351.21	1237.15	236.301	1054.57	1315.94	-6.06649	1246.59	1481.34	-86.1653	1258.19	1285.82	-99.9199	1292.82	1132.14	-82.5328	1429.35	1023.12	-16.3356	1484.58	961.895	-79.5526	1463.35	930.485	-59.1359	1532.58	913.132
2398	0	154.278	1394.3	1659.01	239.051	1374.02	1656.69	121.705	1201.26	1668.01	233.35	1198.83	1665.02	174.366	1154.61	1519.84	153.666	1077.87	1256.68	184.149	1305.97	1438.71	205.242	1362.6	1235.35	237.667	1065.71	1313.52	-3.70456	1257.94	1479.85	-83.7112	1269.24	1284.13	-97.3682	1303.25	1130.66	-80.4361	1439.29	1020.88	-14.5457	1494.56	959.297	-77.9132	1473.06	928.393	-57.6772	1542.02	910.311
2399	0	157.077	1405.43	1657.11	241.898	1385.07	1654.68	124.746	1212.46	1666.84	236.32	1209.86	1663.49	176.693	1165.57	1518.08	155.2	1089.27	1254.96	186.436	1317.12	1436.81	207.281	1373.94	1233.52	239.219	1077.02	1311.46	-1.32566	1269.33	1478.56	-81.3286	1280.39	1283.55	-94.4269	1313.7	1129.21	-78.3778	1449.02	1018.48	-12.78	1504.07	956.309	-74.3719	1481.54	924.651	-56.1696	1551.02	907.385
2400	0	160.238	1416.6	1655.78	245.224	1396.46	1652.97	127.979	1223.7	1665.94	239.322	1221.39	1661.72	179.049	1176.51	1516.74	156.73	1100.66	1253.83	189.009	1328.41	1435.4	209.276	1385.38	1232.4	240.923	1088.5	1310.09	1.18062	1280.81	1477.73	-78.9167	1292.17	1282.67	-91.8564	1323.67	1128.13	-76.3742	1458.4	1016.27	-11.0983	1513.16	953.676	-74.0581	1490.72	923.315	-54.6	1559.72	904.29
2401	0	163.684	1427.97	1654.53	248.271	1407.62	1651.4	131.313	1234.86	1665.33	242.916	1232.51	1660.89	181.876	1187.85	1515.7	158.452	1112.26	1252.42	191.393	1339.61	1434.28	211.456	1397.39	1231.14	242.775	1100.07	1308.39	3.83338	1292.22	1476.97	-76.6502	1303.93	1282.18	-88.9495	1333.72	1127.27	-74.4039	1467.44	1014.19	-9.23856	1521.98	950.998	-72.0401	1498.69	920.396	-53.2659	1567.71	901.06
2402	0	167.112	1439.27	1653.5	251.942	1419.11	1649.84	134.861	1246.25	1664.77	246.388	1243.89	1659.73	184.664	1199.35	1514.56	160.1	1123.98	1251.15	193.722	1351.08	1433.25	213.41	1409.39	1230.41	244.81	1111.82	1306.84	6.41549	1303.54	1476.51	-74.3389	1316.05	1281.88	-86.1318	1343.69	1126.63	-72.223	1476.35	1012.09	-7.69377	1530.5	948.233	-70.3054	1506.61	918.048	-51.7882	1575.56	897.927
2403	0	170.517	1450.53	1652.74	255.248	1430.32	1648.97	138.363	1257.62	1664.65	249.947	1255.18	1659.02	187.403	1210.75	1513.92	161.87	1135.86	1250.42	196.297	1362.49	1432.65	215.62	1421.65	1229.99	246.841	1123.61	1305.8	8.92286	1314.84	1476.28	-72.176	1328.1	1282.13	-83.2853	1353.52	1126.29	-70.3312	1484.98	1010.26	-6.20902	1538.53	945.331	-68.7177	1514.17	915.736	-50.3448	1582.85	894.579
2404	0	174.313	1462.08	1652.33	259.019	1441.72	1648.03	142.01	1269.08	1664.97	253.302	1266.72	1658.29	190.333	1222.21	1513.51	163.92	1147.76	1249.91	198.759	1373.88	1432.52	217.404	1433.84	1229.81	249.05	1135.38	1305	11.577	1326.1	1476.4	-70.0934	1339.99	1282.62	-80.4473	1363.28	1126.03	-68.4334	1493.4	1008.55	-4.68044	1546.28	942.603	-67.5892	1521.46	914.191	-49.1715	1589.77	891.498
2405	0	178.21	1473.57	1652.11	262.874	1453	1647.43	145.673	1280.59	1665.72	257.224	1278.03	1658.38	193.173	1233.52	1513.28	166.08	1159.49	1249.69	201.294	1385.38	1432.35	219.426	1446.22	1229.77	251.496	1147.21	1304.48	14.1808	1337.24	1476.65	-67.7445	1351.84	1283.13	-77.7205	1373.08	1126.29	-66.2548	1501.9	1007.02	-3.04375	1553.86	939.994	-66.2378	1528.36	912.048	-47.7442	1596.38	888.353
2406	0	182.021	1485.01	1652.13	266.52	1464.47	1646.94	149.297	1292.13	1666.58	260.85	1289.48	1658.59	196.096	1245.06	1513.4	168.311	1171.3	1250.12	203.689	1396.73	1432.69	221.175	1458.19	1230.19	253.952	1159	1304.68	16.6562	1348.29	1477.19	-65.6859	1363.23	1284.09	-75.0595	1382.73	1126.67	-64.1944	1509.62	1005.53	-1.75392	1560.61	937.145	-65.1014	1535.03	910.305	-46.3532	1602.54	885
2407	0	185.925	1496.61	1652.42	270.543	1475.93	1646.81	152.88	1303.78	1667.66	264.442	1300.87	1659.26	198.923	1256.51	1513.83	170.446	1182.91	1250.59	206.123	1408.15	1433.26	222.956	1470.5	1230.89	256.52	1170.65	1305.03	19.2535	1359.25	1478.1	-63.5292	1374.6	1285.5	-72.407	1392.26	1127.32	-62.3844	1517.42	1004.35	-0.262102	1567.37	934.495	-62.2062	1541.01	908.27	-45.0763	1608.45	882.111
2408	0	189.879	1508.18	1652.93	274.315	1487.25	1646.86	156.525	1315.36	1668.98	267.818	1312.6	1659.3	202.091	1267.89	1514.84	172.838	1194.51	1251.06	208.522	1419.5	1433.93	224.708	1482.28	1232.07	259.199	1182.34	1305.31	21.8026	1370.07	1479.12	-61.1281	1385.39	1286.72	-69.8745	1401.65	1128.35	-60.7139	1524.86	1003.69	1.11789	1573.61	932.617	-62.6206	1547.48	907.72	-43.9495	1614.1	879.726
2409	0	193.652	1519.73	1653.44	277.999	1498.68	1647.1	159.999	1326.98	1670.38	271.375	1324.05	1660.33	205.083	1279.33	1515.7	175.373	1206.01	1252.04	210.904	1430.73	1435.08	226.627	1494.43	1233.35	261.917	1193.91	1305.95	24.3891	1380.84	1480.43	-58.8804	1395.63	1287.86	-67.4324	1410.99	1129.93	-58.8262	1532.48	1003.28	2.33743	1579.72	930.63	-61.7412	1553.54	906.916	-42.8097	1619.38	877.504
2410	0	197.466	1531.23	1653.93	281.805	1510.08	1647.38	163.327	1338.59	1672.13	274.884	1335.08	1661.95	207.844	1290.48	1516.77	177.967	1217.39	1253.3	213.281	1441.89	1436.46	228.21	1506.13	1234.6	264.69	1205.46	1307.04	26.9517	1391.55	1482.04	-56.8192	1405.69	1289.83	-65.2485	1420.01	1131.33	-56.8859	1539.62	1002.91	3.64065	1585.41	929.089	-60.802	1559.28	906.511	-41.6409	1624.49	875.581
2411	0	200.937	1542.64	1654.76	284.487	1521.07	1647.84	166.603	1350.06	1673.99	278.231	1346.45	1663.07	210.816	1301.47	1518.45	180.72	1228.5	1254.77	215.541	1452.98	1437.59	230.106	1517.34	1235.83	267.646	1216.9	1308.36	29.4552	1401.99	1483.83	-54.7204	1415.46	1291.72	-62.7558	1428.91	1133.33	-55.3548	1546.56	1003.21	5.00654	1590.98	927.706	-59.9327	1564.65	906.294	-40.5742	1629.11	873.326
2412	0	204.505	1553.91	1655.82	288.275	1532.36	1648.48	169.81	1361.55	1675.62	281.168	1357.83	1664.13	213.673	1312.33	1519.76	183.269	1239.44	1255.99	217.713	1463.88	1439.17	231.906	1528.79	1237.71	270.616	1228.24	1309.53	31.948	1412.17	1485.8	-52.5209	1424.85	1293.88	-61.2283	1437.4	1135.62	-53.8336	1553.36	1003.81	6.27315	1596.06	927.193	-59.2188	1570.17	906.564	-39.2818	1633.76	872.057
2413	0	207.678	1565.03	1656.83	291.37	1543.13	1649.5	172.715	1372.68	1677.71	284.468	1368.67	1665.94	216.518	1323.09	1521.24	185.831	1250.26	1257.36	219.841	1474.75	1440.76	233.434	1539.97	1239.21	273.769	1239.5	1310.95	34.2802	1422.17	1487.92	-50.4442	1433.92	1295.8	-59.5827	1445.76	1138.01	-52.6254	1560.02	1004.77	7.58536	1601.37	926.872	-58.8497	1575.67	907.373	-38.2404	1638.23	870.942
2414	0	210.746	1575.94	1658.16	294.344	1554.06	1650.6	175.567	1383.83	1679.32	287.256	1379.59	1667.42	219.194	1333.6	1522.64	188.811	1261.07	1259.1	221.718	1485.35	1442.26	234.816	1550.79	1241.14	276.991	1250.66	1312.39	36.5703	1431.95	1490.1	-48.806	1442.55	1298.19	-58.0698	1453.7	1140.13	-51.2738	1566.57	1005.95	8.67418	1605.81	926.86	-58.3785	1581.15	908.417	-36.7466	1643.07	870.42
2415	0	213.602	1586.72	1659.6	297.12	1564.76	1651.65	178.323	1394.6	1681.14	290.139	1390.45	1668.52	221.83	1344.04	1524.16	191.175	1271.28	1260.44	223.66	1495.83	1444.21	236.081	1561.36	1242.96	279.866	1261.4	1313.92	38.6926	1441.6	1492.19	-46.9673	1451.07	1300.29	-56.8425	1461.46	1142.63	-50.1457	1572.95	1007.33	9.93074	1610.71	926.847	-57.9313	1586.61	909.461	-35.5557	1647.37	870.422
2416	0	216.308	1597.38	1660.89	299.435	1575.06	1653.1	180.747	1405.26	1682.99	292.383	1401.21	1669.71	224.386	1354.38	1526.13	193.794	1281.42	1262.01	225.221	1506.26	1445.55	237.062	1571.71	1244.99	283.003	1272.23	1315.36	40.7892	1451	1493.98	-45.5229	1459.26	1302.42	-55.5643	1468.51	1144.54	-49.0022	1579.15	1008.34	10.706	1615.37	927.37	-57.5249	1592	910.63	-34.127	1652.07	870.175
2417	0	218.54	1607.74	1662.48	301.655	1585.33	1654.43	182.822	1415.6	1684.86	294.581	1411.08	1672.07	226.768	1364.66	1527.65	196.368	1291.46	1264.02	226.659	1516.34	1447.23	238.032	1582.34	1246.79	285.983	1282.77	1317.3	42.6442	1460.4	1496.22	-44.1479	1467.32	1304.73	-54.5788	1475.84	1146.54	-48.2345	1585.26	1009.7	11.3565	1620.42	928.121	-57.408	1597.7	912.305	-33.0067	1656.32	869.973
2418	0	220.641	1617.95	1664.02	304.04	1595.59	1655.94	184.949	1425.83	1686.77	296.368	1421.56	1673.28	229.057	1374.68	1529.5	198.936	1301.23	1266	227.947	1526.36	1448.87	239.038	1592.38	1248.48	288.826	1293.1	1319.46	44.4155	1469.47	1498.17	-43.163	1475.01	1306.71	-53.7866	1482.99	1149.07	-47.5719	1591.24	1011	12.1132	1625.7	928.768	-57.4235	1603.15	913.916	-32.049	1660.82	870.121
2419	0	222.601	1628.03	1665.72	305.972	1605.65	1657.62	186.892	1435.81	1688.3	298.643	1431.35	1675.3	231.274	1384.62	1531.18	201.625	1311.11	1267.18	229.194	1536.26	1450.31	239.938	1602.31	1249.39	291.801	1303.39	1320.85	46.1132	1478.41	1499.93	-42.0712	1482.41	1308.83	-53.0951	1489.54	1151.07	-46.8566	1597	1012.12	13.1708	1630.4	929.12	-56.7503	1608.39	914.812	-31.1714	1665.44	870.443
2420	0	224.206	1637.88	1667.32	307.174	1615.53	1659.21	188.612	1445.64	1689.93	300.25	1441.23	1676.89	233.281	1394.34	1532.9	204.159	1320.74	1268.95	230.757	1546.31	1452.05	240.458	1612.02	1250.98	294.525	1313.42	1322.64	47.721	1487.23	1501.75	-40.7729	1489.88	1310.38	-52.3271	1496	1152.92	-46.3647	1602.69	1013.46	13.5337	1635.36	929.999	-56.5137	1613.56	915.894	-30.6741	1669.77	870.92
2421	0	225.572	1647.53	1669.17	309.259	1625.5	1661.01	190.164	1455.34	1691.72	301.643	1450.97	1678.82	235.296	1403.96	1534.85	206.451	1330.16	1271	231.622	1555.66	1453.66	241.25	1621.82	1252.89	297.091	1323.44	1324.57	49.2768	1495.84	1503.55	-39.9654	1496.77	1312.52	-51.5249	1502.3	1154.82	-46.0736	1608.11	1014.77	13.8635	1640.41	931.062	-56.4295	1618.66	917.248	-30.2718	1674.36	871.593
2422	0	226.572	1657.17	1671.02	309.831	1635.29	1663.09	191.498	1464.8	1693.58	303.074	1460.64	1680.79	237.286	1413.36	1536.78	208.839	1339.64	1272.79	232.654	1565.07	1455.49	241.727	1631.27	1254.61	299.775	1333.29	1326.46	50.4911	1504.24	1505.54	-38.9163	1503.73	1314.32	-50.7302	1508.39	1156.78	-45.8172	1613.48	1015.98	13.9878	1645.37	932.176	-56.2034	1623.4	918.734	-29.9235	1678.91	872.328
2423	0	227.412	1666.58	1673.14	311.165	1644.84	1665.18	192.649	1474.15	1695.27	304.326	1470.22	1682.75	238.933	1422.61	1538.71	211.441	1349.1	1274.6	234.085	1574.69	1457.38	242.247	1640.69	1256.37	302.056	1342.99	1328.34	51.9182	1512.62	1507.31	-37.6687	1510.51	1316.55	-49.9238	1514.37	1158.7	-45.6265	1618.6	1017.46	14.0678	1650.43	933.583	-55.9124	1628.01	920.078	-30.1469	1683.47	873.332
2424	0	227.954	1675.97	1675.04	311.282	1654.1	1667.53	193.725	1483.45	1697.29	305.45	1479.8	1684.91	240.559	1431.86	1540.4	213.304	1358.17	1276.83	235.053	1583.9	1459.48	242.963	1650.12	1258.53	304.453	1352.71	1330.34	53.0922	1520.88	1509.4	-36.6727	1516.94	1318.11	-49.0625	1520.35	1160.8	-45.4065	1623.8	1019	13.9272	1655.66	935.109	-55.9582	1632.43	921.204	-30.5759	1688.07	874.428
2425	0	228.593	1685.24	1677.2	312.084	1663.84	1669.59	194.68	1492.61	1699.09	305.319	1489.41	1686.38	242.256	1440.98	1542.73	214.833	1366.99	1278.93	236.062	1592.94	1461.53	243.292	1659.32	1260.39	306.604	1362.24	1332.6	54.3919	1529.09	1511.11	-35.587	1523.43	1320.32	-48.1273	1526.13	1162.92	-45.4204	1628.79	1020.41	13.7758	1660.97	936.432	-55.8878	1636.8	922.752	-31.0755	1692.62	875.824
2426	0	228.784	1694.4	1679.17	312.09	1673.24	1672.15	195.163	1501.54	1700.94	306.65	1498.63	1689.15	243.745	1450.02	1544.53	217.014	1376.19	1280.48	237.062	1602.04	1463.68	244.096	1668.72	1262.74	308.686	1371.57	1334.48	55.6372	1537.28	1513.16	-34.1752	1530.03	1322.3	-47.0458	1531.9	1165.16	-45.4559	1633.78	1022.14	13.5954	1666.11	937.681	-55.6705	1640.97	924.076	-31.5628	1697.16	877.205
2427	0	228.67	1703.36	1681.46	312.138	1682.51	1674.52	195.779	1510.5	1702.69	307.231	1507.87	1691.53	245.191	1459	1546.84	218.914	1385.26	1282.68	237.561	1610.75	1465.95	244.662	1677.81	1264.91	310.651	1380.95	1336.57	56.7656	1545.43	1515.06	-33.0932	1536.14	1324.33	-46.0819	1537.54	1167.17	-45.5623	1638.68	1023.94	12.9122	1671.65	939.923	-55.7341	1645.2	925.665	-32.5971	1701.79	879.027
2428	0	228.281	1712.19	1683.69	312.239	1691.99	1677.01	196.236	1519.21	1704.93	307.782	1517.2	1693.95	246.739	1467.97	1549	220.616	1394.17	1285.55	238.526	1619.56	1468.44	245.492	1686.91	1267.38	312.777	1390.27	1338.74	57.801	1553.65	1517.36	-32.0773	1542.44	1326.74	-45.1274	1543.1	1169.57	-45.5507	1643.5	1025.62	12.5293	1676.77	941.471	-56.0354	1649.47	927.601	-33.6953	1706.35	880.832
2429	0	228.123	1721.27	1685.58	312.555	1701.4	1679.3	196.868	1527.99	1706.51	308.422	1526.55	1696.29	247.978	1476.78	1550.96	222.429	1402.99	1287.62	239.469	1628.55	1470.35	246.293	1696.11	1269.5	314.562	1399.51	1341.2	58.9432	1561.76	1519.36	-30.7766	1548.85	1328.75	-44.0825	1548.7	1171.77	-45.6219	1648.42	1027.41	11.7481	1682.47	943.07	-56.291	1653.82	929.578	-34.6164	1710.83	882.089
2430	0	227.779	1730.12	1687.46	312.619	1710.98	1681.29	197.37	1536.61	1708.35	308.954	1535.83	1698.41	249.481	1485.57	1553.1	224.416	1411.97	1289.23	240.454	1637.36	1472.54	247.244	1704.71	1271.54	316.854	1408.67	1342.67	60.1632	1569.94	1521.06	-29.5579	1555.14	1330.66	-42.87	1554.3	1173.83	-45.8754	1653.4	1029.06	11.2089	1687.9	944.628	-55.693	1657.8	930.093	-35.6301	1715.39	883.566
2431	0	227.283	1738.94	1689.37	311.908	1719.87	1683.8	197.857	1545.3	1709.88	309.462	1545.12	1700.69	250.694	1494.38	1555.02	226.292	1420.91	1290.95	241.338	1646.24	1474.26	248.294	1713.56	1273.44	318.631	1417.72	1344.52	61.1478	1577.94	1522.81	-28.1051	1561.51	1332.25	-41.7623	1559.89	1175.9	-46.169	1658.38	1030.57	10.6279	1693.59	946.251	-55.8219	1662.16	931.739	-36.9516	1720.14	885.086
2432	0	226.374	1747.47	1691.15	311.489	1729.4	1685.94	198.139	1553.95	1711.46	309.819	1554.36	1702.76	251.905	1503.11	1556.77	227.863	1429.73	1292.99	242.261	1654.95	1476.35	249.178	1722.2	1275.36	320.686	1426.94	1346.3	61.8591	1586.04	1524.62	-27.0597	1567.97	1334.3	-40.567	1565.67	1177.93	-46.2729	1663.47	1032.16	9.7926	1699.25	947.849	-55.9759	1666.68	933.455	-38.1905	1724.88	886.634
2433	0	225.982	1756.33	1692.99	311.039	1738.42	1687.9	198.543	1562.6	1713.09	310.134	1563.67	1704.65	253.195	1511.97	1558.68	229.508	1438.56	1294.58	243.073	1663.69	1477.94	250.338	1730.9	1277.21	322.41	1435.98	1348.23	62.7438	1594.25	1526.27	-25.8968	1574.48	1336.06	-39.45	1571.46	1179.84	-46.5181	1668.44	1033.72	8.85175	1705.24	949.4	-56.4303	1671.38	935.046	-39.1922	1729.77	888.111
2434	0	225.338	1765.05	1694.39	310.65	1747.85	1689.82	198.858	1571.29	1714.16	310.457	1572.79	1706.77	254.251	1520.7	1560.29	231.184	1447.46	1296.16	243.986	1672.41	1479.84	251.112	1739.32	1278.78	323.928	1445	1349.95	63.7433	1602.56	1527.72	-24.6941	1581.1	1337.79	-38.3318	1577.31	1181.46	-46.4058	1673.79	1035.14	8.01927	1710.97	950.758	-56.3932	1676.03	936.225	-40.3259	1734.8	889.305
2435	0	224.685	1773.91	1695.68	310.033	1756.84	1691.72	199.103	1579.94	1715.71	310.788	1582.04	1708.54	255.459	1529.53	1561.98	232.423	1456.17	1298.04	244.794	1681.12	1481.33	252.294	1748.23	1280.32	325.593	1454.07	1351.73	64.6094	1610.81	1529.23	-23.6944	1587.86	1339.29	-37.1996	1583.34	1183.03	-46.7823	1679.1	1036.39	7.30097	1717.17	951.93	-56.5972	1681.05	937.762	-41.6413	1739.68	890.577
2436	0	224.078	1782.74	1697.06	309.721	1766.25	1693.17	199.543	1588.65	1716.86	311.104	1591.31	1710.05	255.816	1538.22	1562.88	234.051	1465.06	1299.06	245.464	1689.79	1482.67	252.966	1756.87	1281.99	327.245	1463.06	1352.84	65.4978	1619.03	1530.5	-22.707	1594.7	1340.9	-36.0734	1589.43	1184.52	-47.2156	1684.43	1038.06	6.45142	1723.11	953.028	-56.3529	1685.81	938.476	-42.7302	1744.88	891.618
2437	0	223.55	1791.57	1698.18	309.313	1775.4	1694.33	199.873	1597.4	1717.58	311.428	1600.52	1711.44	256.811	1547.08	1563.95	235.75	1474.03	1300	246.193	1698.6	1484.01	253.815	1765.64	1283.14	328.697	1471.96	1354.17	66.4637	1627.28	1531.46	-21.5134	1601.61	1342	-35.0614	1595.71	1185.79	-47.4508	1689.92	1038.97	5.66427	1729.52	954.046	-55.0993	1690.44	938.47	-43.7755	1750.17	892.445
2438	0	222.951	1800.42	1698.96	308.876	1784.71	1695.5	200.284	1606.34	1718.09	311.768	1609.87	1712.65	257.874	1556.05	1564.84	236.923	1482.72	1301.11	246.871	1707.54	1484.95	254.417	1774.1	1284.03	330.206	1481.11	1355.29	67.2681	1635.55	1532.19	-20.3675	1608.87	1342.74	-34.0631	1602.17	1186.61	-47.6042	1695.87	1039.72	5.13168	1735.74	954.681	-55.1245	1695.9	939.055	-44.8395	1755.52	893.022
2439	0	222.522	1809.41	1699.32	308.477	1794.1	1696.32	200.395	1615.26	1718.76	311.968	1619.31	1713.4	258.638	1564.92	1565.53	238.113	1491.56	1302.08	247.278	1716.33	1485.71	255.069	1782.83	1284.45	331.865	1490.43	1355.86	67.9352	1643.91	1532.88	-19.5953	1616.05	1343.4	-33.1138	1608.74	1187.45	-47.6693	1701.9	1040.26	3.96102	1742.08	955.082	-55.247	1701.45	939.663	-45.6529	1761.31	893.254
2440	0	222.164	1818.54	1699.43	307.981	1803.55	1696.77	200.725	1624.26	1719.14	312.304	1628.79	1714.11	259.614	1573.96	1566.23	239.486	1500.55	1302.6	247.896	1725.36	1485.95	255.47	1791.51	1284.81	333.219	1499.63	1356.48	68.5357	1652.27	1533.08	-18.7966	1623.36	1343.81	-32.1863	1615.43	1188.12	-47.6936	1708.06	1040.4	3.3099	1748.56	955.046	-55.185	1707.22	940.005	-46.7092	1767.01	893.24
2441	0	221.918	1827.67	1699.23	307.731	1812.88	1696.87	201.216	1633.28	1719.22	312.607	1638.34	1714.39	260.426	1583.04	1566.57	240.573	1509.37	1302.9	248.412	1734.32	1486.08	256.131	1800.56	1284.92	334.424	1508.63	1357.27	69.2534	1660.74	1533.01	-17.9328	1630.93	1343.91	-31.2868	1622.32	1188.28	-47.7643	1714.37	1040.21	2.7065	1755.43	954.797	-55.3322	1713.11	939.973	-47.3982	1773.09	893.165
2442	0	221.57	1836.77	1698.82	307.392	1822.35	1696.89	201.379	1642.34	1719.26	312.723	1647.76	1714.56	261.192	1592.19	1566.52	241.756	1518.33	1302.93	248.809	1743.38	1485.99	256.621	1809.25	1284.82	335.547	1517.98	1357.3	69.8724	1669.2	1532.65	-16.9	1638.56	1343.84	-30.4226	1629.27	1188.19	-47.7764	1720.93	1040.08	2.3544	1762.51	954.76	-55.5751	1719.24	939.695	-48.1826	1779.25	892.793
2443	0	221.281	1846.1	1698.51	307.125	1831.97	1696.64	202.275	1651.58	1718.68	313.056	1657.39	1714.66	261.796	1601.44	1566.21	242.66	1527.13	1302.91	249.065	1752.43	1485.82	256.897	1818.2	1284.63	336.435	1527.01	1357.35	70.4104	1677.8	1532.26	-16.2764	1646.17	1343.67	-29.5812	1636.51	1187.99	-47.91	1727.6	1039.59	1.80622	1769.59	954.176	-55.631	1725.68	939.398	-48.7906	1785.46	892.144
2444	0	220.852	1855.46	1698	307.178	1841.58	1696.15	202.42	1660.86	1718.32	313.202	1667.01	1714.55	262.32	1610.62	1566.13	243.483	1536.11	1302.65	249.507	1761.57	1485.53	257.068	1827.66	1284.58	337.483	1536.33	1357.17	70.814	1686.48	1532.1	-15.7875	1653.88	1343.5	-28.8897	1643.74	1187.81	-48.0404	1734.36	1039.29	1.1712	1776.62	954.031	-55.768	1732.18	938.766	-49.6408	1791.99	891.773
2445	0	220.514	1864.72	1696.97	306.808	1851.07	1695.28	202.697	1670.3	1717.7	313.51	1676.46	1714.08	262.965	1619.97	1565.47	244.138	1545.19	1302.31	249.864	1770.72	1485.12	257.209	1836.67	1284.27	338.086	1545.51	1356.94	71.1307	1695.25	1531.5	-14.9116	1661.91	1342.76	-28.2575	1651.16	1187.28	-48.1668	1741.36	1038.88	0.778141	1783.78	953.245	-55.9314	1738.94	938.137	-50.3312	1798.71	891.186
2446	0	220.222	1874.18	1695.72	306.601	1860.78	1694.23	202.633	1679.83	1717.06	313.752	1686.37	1713.57	263.402	1629.55	1565.21	244.766	1554.44	1301.54	249.906	1779.93	1484.14	257.436	1845.99	1283.18	338.781	1554.82	1356.3	71.3935	1704.3	1530.74	-14.9463	1669.78	1342.49	-27.7081	1658.67	1186.52	-48.4421	1748.44	1038.07	0.469705	1791.31	952.504	-56.0595	1745.77	937.251	-51.14	1805.7	890.667
2447	0	219.819	1883.81	1694.22	306.169	1870.66	1692.76	202.966	1689.46	1716.51	313.54	1696.03	1713.08	263.907	1639.08	1563.6	244.931	1563.36	1301.03	250.185	1789.26	1483.32	257.718	1855.12	1282.1	339.119	1564.03	1355.74	71.6681	1713.35	1529.6	-14.0291	1678.03	1341.02	-26.985	1666.47	1185.61	-48.4846	1755.67	1036.83	-0.431736	1798.18	950.729	-56.0661	1752.73	935.915	-51.6482	1812.63	889.43
2448	0	219.522	1893.61	1692.21	305.925	1880.46	1691.37	202.874	1699.08	1715.32	313.728	1706.18	1712.09	264.284	1648.55	1563.19	245.36	1572.64	1299.61	250.287	1798.87	1481.83	257.838	1864.24	1280.61	339.915	1573.7	1354.41	72.0141	1722.51	1528.13	-13.7276	1686.2	1339.92	-26.4956	1674.34	1184.33	-48.4321	1763.06	1035.31	-0.701566	1805.8	949.242	-56.4746	1760.04	934.886	-51.9582	1819.74	887.596
2449	0	219.476	1903.53	1690.15	305.6	1890.6	1689.66	202.743	1709.04	1714.29	313.445	1716.02	1711.07	264.46	1658.2	1561.57	245.401	1581.99	1298.56	250.554	1808.43	1480.21	258.064	1873.83	1279.19	340.044	1583.07	1353.3	72.3516	1731.86	1526.56	-13.1978	1694.86	1338.35	-26.0703	1682.37	1183.13	-48.4169	1770.67	1033.56	-1.09123	1813.4	947.581	-56.5309	1767.35	933.512	-52.5149	1826.96	885.902
2450	0	219.06	1913.3	1688.32	305.208	1900.49	1687.67	202.396	1718.79	1712.69	313.297	1726.22	1709.62	264.75	1668.13	1560.32	245.375	1591.31	1297.61	250.433	1818.07	1478.73	257.98	1883.24	1277.56	340.181	1592.54	1352.2	72.7191	1741.38	1524.75	-13.0323	1703.42	1336.99	-25.5188	1690.71	1181.69	-48.4971	1778.6	1031.95	-1.57387	1821.28	945.824	-56.7523	1774.96	931.994	-53.1334	1834.5	884.253
2451	0	218.754	1923.34	1686.23	305.017	1910.67	1685.83	202.311	1728.95	1711.25	313.043	1736.33	1708.06	264.624	1677.73	1558.88	245.184	1600.66	1296.38	250.447	1827.93	1476.87	258.006	1892.55	1275.63	340.136	1602.11	1350.45	72.7108	1751.01	1523.22	-12.8602	1712.46	1335.61	-25.1993	1699.04	1180.2	-48.5777	1786.55	1030.25	-2.05026	1829.16	943.848	-56.8075	1782.53	930.11	-53.5025	1842.01	882.267
2452	0	218.513	1933.49	1683.95	304.936	1920.67	1683.74	201.81	1739.02	1709.54	312.517	1746.23	1706.67	264.522	1687.63	1557.17	245.152	1610.36	1294.57	250.379	1837.73	1475.21	258.081	1902.16	1273.74	340.095	1611.82	1348.75	72.6731	1760.6	1521.49	-12.6416	1721.43	1333.79	-24.7488	1707.77	1178.48	-48.8146	1794.56	1028.44	-2.43644	1837.18	941.927	-56.8939	1790.41	928.214	-54.0153	1849.81	880.288
2453	0	218.1	1943.56	1681.73	304.584	1930.88	1681.71	201.442	1749.47	1707.52	312.108	1756.33	1705.16	264.425	1697.69	1555.14	244.901	1620.14	1292.72	250.214	1847.65	1473.29	258.042	1911.55	1271.58	340.048	1621.44	1347.24	72.4906	1770.51	1519.64	-12.7161	1730.53	1331.96	-24.4798	1716.56	1176.74	-49.0141	1803.06	1026.46	-2.88215	1845.33	939.688	-56.8685	1798.41	926.38	-54.5723	1857.57	878.26
2454	0	217.876	1953.82	1679.26	304.357	1941	1679.47	200.769	1759.6	1705.7	311.694	1766.63	1703.38	264.344	1707.74	1553.26	244.44	1629.84	1290.86	250.075	1857.63	1471.29	257.924	1921.2	1269.67	339.577	1631.21	1345.53	72.2209	1780.4	1517.8	-12.7371	1740.09	1330.02	-24.3446	1725.57	1174.73	-49.2868	1811.38	1024.43	-3.02827	1854.01	937.544	-57.1583	1806.52	924.204	-54.98	1865.73	876.075
2455	0	217.53	1964.21	1677.09	304.019	1951.32	1677.33	200.129	1770.1	1703.97	310.802	1776.87	1701.48	263.821	1717.99	1551.3	243.824	1639.66	1288.91	249.768	1867.78	1469.41	257.792	1930.98	1267.6	339.038	1641.02	1343.55	71.9346	1790.5	1515.68	-12.5665	1749.67	1327.99	-24.144	1734.86	1172.63	-49.4319	1820.2	1022.2	-3.57172	1862.47	935.274	-57.4113	1814.93	921.883	-55.4392	1873.91	873.674
2456	0	217.173	1974.6	1674.71	304.009	1961.73	1674.86	199.127	1780.62	1701.81	310.005	1787.18	1699.69	263.243	1728.15	1549.39	243.06	1649.69	1287.11	249.445	1877.94	1467.19	257.607	1941.19	1265.49	338.444	1651.1	1341.81	71.3887	1800.76	1513.68	-12.9543	1759.59	1325.94	-24.2284	1744.44	1170.55	-49.8263	1828.99	1019.93	-3.87552	1871.36	932.644	-57.6775	1823.62	919.616	-55.8657	1882.45	871.183
2457	0	216.648	1985.18	1672.37	303.715	1972.08	1672.5	198.054	1791.15	1699.73	308.86	1797.25	1698	262.463	1738.42	1547.67	242.363	1659.91	1285.25	248.699	1888.11	1465.12	257.247	1951.38	1263.43	337.785	1661.23	1339.74	70.664	1811.21	1511.55	-13.7068	1769.79	1323.98	-24.6058	1754.25	1168.84	-50.1699	1838.24	1017.45	-4.54308	1880.21	930.003	-57.9593	1832.3	917.052	-56.2962	1891.05	868.536
2458	0	216.307	1995.76	1669.88	302.825	1982.59	1670.54	197.109	1802.02	1697.58	307.881	1807.76	1695.87	261.853	1748.72	1545.53	241.745	1670.16	1283.1	248.148	1898.53	1462.87	256.867	1961.91	1261.2	336.859	1671.2	1338.11	70.0608	1821.55	1509.11	-14.0674	1780.05	1321.52	-24.3919	1764.02	1166.23	-50.3462	1847.55	1014.64	-5.01091	1889.72	927.263	-58.2197	1841.31	914.602	-56.7372	1899.88	865.649
2459	0	215.668	2006.36	1667.54	302.072	1992.77	1668.46	195.74	1812.67	1695.55	306.478	1817.9	1694.15	260.883	1759.01	1543.75	241.253	1680.59	1280.71	247.496	1909.02	1460.77	256.39	1972.28	1259.1	335.855	1681.43	1336.05	69.322	1832.23	1506.7	-14.5005	1790.55	1318.95	-24.6803	1774.21	1163.78	-50.6773	1857.1	1011.92	-5.54704	1899.05	924.492	-58.5948	1850.42	911.911	-57.1014	1908.93	862.508
2460	0	215.172	2017.1	1665.25	301.37	2003.19	1666.4	194.221	1823.45	1693.75	305.065	1828.27	1692.35	260.246	1769.69	1541.19	240.7	1691.38	1279.33	246.734	1919.4	1458.77	255.924	1982.77	1256.89	334.818	1691.89	1334.16	68.3942	1842.8	1504.38	-15.1807	1801.38	1316.44	-25.0741	1784.82	1161.69	-51.1343	1866.93	1009.28	-6.02229	1908.76	921.77	-59.1089	1859.86	909.403	-57.4483	1918.24	859.539
2461	0	214.428	2027.79	1663.19	300.908	2013.73	1664.17	192.709	1834.34	1691.97	303.443	1838.66	1690.35	259.175	1780.21	1539.23	239.95	1701.79	1277.35	245.883	1930.06	1456.72	255.263	1993.29	1254.98	333.701	1702.13	1332.46	67.174	1853.47	1502.38	-16.0157	1812.09	1313.97	-25.4818	1795.46	1159.27	-51.6478	1877.07	1006.88	-6.59464	1918.66	918.956	-59.5349	1869.64	906.915	-57.9816	1927.54	856.928
2462	0	213.855	2038.51	1661.13	300.014	2023.92	1662.3	190.919	1845.19	1689.85	301.735	1848.85	1688.62	257.988	1790.95	1537.55	239.347	1712.58	1275.39	244.827	1940.69	1455.04	254.608	2003.76	1252.99	332.618	1712.86	1330.23	66.1277	1864.3	1500.37	-16.9737	1823.05	1311.72	-25.9378	1806.56	1157.12	-52.1795	1887.36	1004.27	-7.2197	1928.9	916.42	-60.005	1879.57	904.234	-58.638	1937.18	854.237
2463	0	212.979	2049.33	1659.13	299.217	2034.19	1660.47	189.064	1856.23	1687.9	299.975	1859.18	1687	256.453	1801.52	1535.61	238.657	1723.4	1273.2	243.573	1951.33	1453.32	253.63	2014.5	1251.28	331.518	1723.31	1328.79	64.7403	1874.89	1498.27	-18.0873	1834.14	1309.36	-26.6379	1817.65	1154.49	-52.7889	1897.84	1001.61	-7.8142	1939.17	914.019	-60.5512	1889.8	901.425	-59.3313	1947.12	851.514
2464	0	212.06	2060.23	1657.34	298.425	2044.37	1658.39	187.306	1867.32	1685.95	298.146	1869.46	1685.48	254.757	1812.12	1533.69	238.093	1734.42	1271.22	242.216	1962.11	1451.58	252.62	2025.18	1249.62	330.532	1733.98	1327	63.1779	1885.75	1496.17	-19.0771	1845.44	1307.19	-27.2979	1828.95	1152.21	-53.3732	1908.75	999.297	-8.30274	1948.69	911.273	-61.2371	1900.26	898.934	-59.7316	1957.48	848.56
2465	0	210.802	2071	1656	298.273	2054.78	1656.09	185.303	1878.27	1684.32	296.351	1880.48	1683.13	253.073	1822.77	1532	237.285	1745.45	1269.19	240.761	1972.93	1449.87	251.639	2036.13	1247.78	329.318	1744.95	1324.9	61.6114	1896.68	1493.99	-19.9122	1856.87	1304.3	-27.8531	1840.3	1149.52	-53.9401	1919.7	996.599	-8.92314	1959.48	908.409	-61.868	1910.89	896.333	-60.709	1967.59	846.261
2466	0	209.835	2081.98	1654.25	296.845	2065.26	1655.05	183.135	1889.38	1683.03	294.023	1890.34	1682.53	251.161	1833.66	1530.3	236.45	1756.65	1267.46	239.181	1983.88	1448.11	250.598	2047.41	1246.18	327.718	1755.71	1323.46	59.9879	1907.74	1491.64	-21.3723	1868.21	1301.79	-28.493	1852.07	1147.17	-54.4617	1931.02	993.744	-9.33239	1970.06	905.562	-62.4352	1921.87	893.754	-61.1482	1978.18	843.351
2467	0	208.713	2093.04	1652.78	294.824	2075.94	1653.97	180.912	1900.62	1681.78	291.738	1900.84	1681.26	248.898	1844.44	1528.95	235.685	1767.99	1266.11	237.749	1994.83	1446.68	249.517	2059.02	1245.01	326.001	1766.61	1322.21	58.1452	1918.95	1489.54	-22.3931	1879.97	1299.26	-29.4117	1863.85	1144.96	-55.1355	1942.3	991.083	-9.87101	1980.99	902.765	-63.2723	1932.91	891.243	-61.552	1989.16	840.423
2468	0	207.352	2104.05	1651.42	293.475	2086.59	1652.8	178.599	1911.83	1680.4	289.536	1911.48	1680.14	246.856	1855.54	1527.56	235.008	1779.31	1264.89	236.086	2005.82	1445.47	248.438	2070.8	1244	324.137	1777.46	1321.09	56.2657	1930.18	1487.63	-23.5976	1891.75	1297.04	-29.9534	1875.96	1142.7	-55.7034	1954.02	988.98	-10.3402	1992.39	900.053	-63.8976	1944.3	889.334	-61.8943	2000.45	837.655
2469	0	205.893	2115.17	1650.54	291.302	2096.29	1651.97	176.29	1922.81	1679.52	287.318	1922.32	1679.1	244.991	1866.51	1526.68	233.999	1790.58	1263.35	234.451	2016.86	1444.45	247.185	2082.49	1243.1	322.326	1788.5	1319.5	54.3008	1941.35	1485.81	-24.9356	1903.37	1294.9	-31.1246	1888.08	1140.91	-56.2613	1965.75	986.608	-10.8132	2004	897.654	-64.3721	1955.75	886.715	-62.3396	2011.76	835.221
2470	0	204.222	2126.13	1649.78	290.108	2107.68	1651.3	173.904	1933.99	1678.55	284.996	1932.68	1678.89	242.879	1877.48	1526.01	233.256	1802.34	1262.02	232.848	2027.97	1443.76	246.133	2094.36	1242.79	320.432	1799.48	1318.6	52.3493	1952.74	1484.29	-26.18	1915.38	1292.91	-31.7976	1900.39	1138.55	-56.9472	1977.56	984.452	-11.3159	2015.57	895.851	-64.9651	1967.55	884.559	-62.849	2023.3	833.235
2471	0	202.57	2137.14	1649.43	287.811	2117.68	1651.33	171.634	1945.22	1678.11	282.665	1943.65	1678.32	240.65	1888.47	1525.44	231.812	1813.59	1261.41	231.015	2039.02	1443.55	245.094	2106.2	1242.62	318.641	1810.33	1318.13	50.39	1964.18	1483.14	-27.5505	1927.41	1291.27	-32.8556	1912.6	1136.85	-57.6262	1989.72	982.767	-11.7361	2027.69	894.218	-65.5547	1979.48	882.887	-63.3032	2035.14	831.376
2472	0	200.556	2148.16	1649.45	285.992	2128.55	1651.52	169.29	1956.39	1677.63	280.219	1954.48	1678.28	238.476	1899.48	1524.88	230.587	1824.72	1261.05	229.515	2050.07	1443.42	244.144	2117.72	1242.83	316.722	1821.14	1317.8	48.5216	1975.79	1482.61	-29.0546	1939.71	1290.06	-33.8798	1925.15	1135.06	-58.212	2002.15	981.534	-12.2927	2039.87	893.041	-66.0252	1991.69	881.433	-63.7936	2047.1	830
2473	0	198.653	2159.3	1649.84	284.198	2139.66	1651.9	166.915	1967.49	1677.96	277.906	1965.06	1679.22	236.967	1910.71	1525.22	228.816	1835.42	1261.38	227.974	2061.08	1443.63	243.26	2129.22	1243.13	314.749	1832.04	1317.65	46.4124	1987.06	1482	-30.6911	1952.02	1289.04	-34.6724	1938	1134.1	-58.8729	2014.58	980.697	-12.5159	2052.08	891.673	-66.5652	2004.08	880.419	-63.9847	2059.49	828.813
2474	0	196.753	2170.37	1650.46	282.177	2150.56	1652.66	164.746	1978.63	1678.24	275.825	1976.41	1679.68	234.498	1921.67	1525.71	227.338	1846.45	1261.88	226.449	2072.06	1444.19	242.502	2140.67	1243.81	312.451	1842.78	1318.38	44.582	1998.41	1481.79	-31.7177	1964.75	1288.4	-35.5428	1950.92	1133.5	-59.3652	2027.35	980.003	-12.9629	2064.31	890.999	-67.0602	2016.74	879.636	-64.3974	2071.97	828.009
2475	0	195.096	2181.38	1651.03	279.678	2161.34	1653.89	162.652	1989.77	1678.48	273.643	1987.42	1680.24	232.424	1932.78	1526.45	225.883	1857.05	1262.5	224.969	2083.01	1444.97	241.6	2151.94	1244.6	310.367	1853.33	1319.19	42.9166	2009.93	1481.87	-33.0171	1977.13	1288.26	-36.492	1963.75	1133.17	-59.7853	2040.49	979.5	-13.2047	2077.01	890.862	-67.522	2029.73	879.467	-64.4871	2084.75	827.445
2476	0	192.83	2192.49	1651.59	277.523	2172.38	1654.68	161.216	2000.93	1679.15	272.706	1999.27	1681.24	230.673	1943.94	1527.36	224.339	1867.73	1263.24	223.558	2094.04	1445.67	240.647	2162.98	1245.4	308.782	1863.94	1320.36	41.4733	2021.57	1482.12	-34.2118	1989.78	1287.89	-37.1946	1977.03	1133.36	-60.1499	2053.82	979.786	-13.3808	2090.18	890.721	-68.0208	2043.03	879.665	-64.5219	2097.87	827.522
2477	0	190.616	2203.36	1652.16	275.23	2183.23	1655.79	159.222	2011.81	1679.75	270.662	2010.3	1682.05	229.015	1954.86	1528.66	222.662	1878.28	1264.32	222.255	2104.92	1446.44	239.663	2173.85	1246.3	307.172	1874.36	1321.48	39.8755	2032.82	1482.79	-35.2056	2002.76	1288.22	-38.024	1990.19	1133.94	-60.5095	2067.29	980.105	-13.3808	2103.43	891.314	-68.5186	2056.49	880.25	-64.3364	2111.12	827.432
2478	0	188.698	2214.19	1652.82	273.197	2194.21	1656.96	157.478	2022.52	1680.42	268.77	2020.98	1683.52	227.277	1965.53	1529.89	221.062	1888.66	1265.73	221.107	2115.59	1447.41	238.768	2184.31	1247.3	305.701	1884.88	1323.09	38.6579	2044.31	1483.97	-36.612	2015.38	1289.14	-39.0259	2003.2	1134.55	-60.9044	2080.9	981.021	-13.5582	2116.72	892.692	-69.0682	2070.42	881.458	-64.4096	2125.01	828.457
2479	0	186.785	2224.81	1653.73	271.291	2204.98	1658.07	156.085	2033.05	1681.39	267.42	2031.96	1684.74	225.77	1976.05	1530.91	219.34	1898.73	1267.37	219.95	2126.16	1448.39	238.031	2194.55	1248.24	304.393	1895.07	1324.63	37.2548	2055.62	1485.29	-37.9745	2027.96	1290.31	-39.9895	2017.1	1133.89	-61.3523	2094.6	982.711	-13.507	2130.37	893.699	-69.5583	2084.58	882.597	-64.1744	2139.26	829.88
2480	0	184.713	2235.35	1654.95	269.441	2215.73	1659.26	154.603	2043.63	1682.24	265.818	2042.73	1686.15	224.18	1986.3	1532.04	217.835	1908.89	1268.59	218.91	2136.52	1449.68	237.249	2204.47	1249.46	303.143	1905.15	1325.86	36.0916	2066.61	1486.73	-39.1781	2040.65	1291.59	-41.0753	2030.26	1134.74	-61.8803	2108.47	984.364	-13.706	2143.79	895.404	-70.16	2099.1	884.277	-64.1456	2153.72	831.628
2481	0	182.961	2245.69	1655.86	267.698	2226.35	1660.45	153.413	2053.91	1683.09	264.64	2053.39	1687.21	222.826	1996.56	1533.52	216.432	1918.88	1269.97	218.072	2146.66	1450.87	236.582	2214.23	1250.5	302.497	1915.22	1327.04	35.0343	2077.58	1488.31	-40.3211	2053.09	1292.78	-42.2512	2042.2	1138.04	-62.2626	2122.43	985.986	-11.8886	2163.24	900.065	-70.3259	2113.88	885.588	-63.943	2168.47	833.347
2482	0	181.599	2256	1656.73	265.923	2236.82	1661.54	152.35	2064.15	1684.24	263.622	2064.1	1688.48	221.808	2006.71	1534.86	216.39	1929.37	1270.39	217.181	2156.8	1451.99	235.907	2223.53	1251.44	301.078	1924.81	1328.43	34.0919	2088.42	1489.67	-41.8259	2065.33	1294.18	-43.2852	2055.32	1139.16	-62.6614	2136.8	987.789	-11.9532	2177.15	901.998	-70.7899	2128.76	887.349	-63.7426	2183.6	835.311
2483	0	179.905	2266.23	1657.91	264.464	2247.13	1662.9	151.675	2074.23	1685.39	262.621	2074.4	1689.79	220.577	2016.65	1536.14	214.97	1939.12	1271.85	216.47	2166.82	1453.06	235.306	2232.97	1252.43	299.957	1934.5	1329.84	33.3751	2099.26	1491.28	-42.9609	2077.93	1295.49	-44.6889	2068.23	1140.39	-63.1282	2151.07	989.656	-13.5404	2187.54	901.747	-71.02	2143.89	889.202	-63.0032	2199.24	837.153
2484	0	178.621	2276.31	1658.97	263.18	2257.48	1663.98	150.889	2084.25	1686.92	262.034	2084.92	1691.09	219.783	2026.64	1537.45	213.618	1948.69	1273.4	215.924	2176.57	1454.21	235.092	2242.27	1253.36	298.554	1943.96	1331.38	32.6235	2109.83	1492.81	-44.0588	2090.07	1296.85	-46.1675	2081.03	1141.69	-63.4436	2165.35	991.554	-12.6921	2201.9	903.716	-70.9924	2159.18	891.047	-62.6278	2214.97	839.477
2485	0	177.482	2286.3	1660.27	262.265	2268.01	1665.01	150.328	2094.05	1688.16	261.401	2095.13	1692.43	218.968	2036.39	1539.61	212.399	1958.34	1274.99	215.486	2186.24	1455.33	234.736	2251.33	1254.51	296.82	1952.9	1332.99	32.0533	2120.13	1494.16	-45.2027	2102.04	1298.34	-47.5214	2093.98	1143.1	-63.604	2180.05	993.534	-12.4071	2216.52	906.02	-70.8752	2174.64	893.103	-62.1461	2230.94	841.942
2486	0	176.471	2296.08	1661.44	261.14	2278.04	1666.3	150.311	2103.89	1689.51	261.036	2105.25	1693.78	218.067	2046.23	1540.51	211.253	1967.67	1276.41	214.959	2195.91	1456.46	234.365	2260.53	1255.58	295.607	1962.53	1334.15	31.5768	2130.33	1495.61	-46.1324	2114.25	1299.71	-48.789	2107.01	1144.22	-64.0155	2194.53	995.578	-12.3425	2231.42	908.489	-71.9952	2190.52	895.082	-61.8599	2247.04	844.52
2487	0	175.462	2305.87	1662.82	260.196	2287.99	1667.53	149.94	2113.49	1691.24	260.898	2115.34	1695.05	217.232	2055.67	1542.14	210.213	1977.11	1278	214.61	2205.4	1457.78	234.249	2269.81	1256.73	294.428	1971.74	1335.7	30.9228	2140.2	1497.29	-47.2778	2125.67	1301.11	-50.0195	2119.97	1145.56	-64.1671	2209.21	997.74	-12.0353	2246.52	911.154	-72.0251	2206.42	897.27	-61.3987	2263.42	847.298
2488	0	174.876	2315.55	1664.29	259.951	2298.36	1668.82	149.812	2123.09	1692.86	260.725	2125.15	1696.63	217.04	2065.49	1543.8	209.124	1986.4	1279.62	214.528	2215.11	1459.14	234.026	2279	1258.08	292.906	1980.92	1337.06	30.4993	2149.95	1498.81	-47.9635	2137.55	1302.66	-51.4275	2132.71	1146.92	-64.3886	2223.79	1000.02	-11.5942	2261.8	914.151	-72.2219	2222.35	899.443	-61.086	2279.88	850.672
2489	0	174.329	2325.09	1666.16	259.057	2307.68	1670.56	149.86	2132.51	1694.7	260.67	2135.1	1698.11	216.186	2074.88	1545.56	208.266	1995.78	1281.27	214.073	2224.39	1460.7	233.751	2288.17	1259.63	292.164	1990.5	1338.75	29.9331	2159.66	1500.57	-48.9649	2148.64	1304.34	-52.8326	2145.34	1148.64	-64.4027	2238.71	1002.7	-11.2956	2276.79	917.156	-74.1682	2238.88	903.334	-60.5005	2296.53	854.119
2490	0	173.73	2334.54	1667.84	258.94	2317.68	1671.92	150.152	2141.96	1696.59	260.885	2144.79	1699.76	215.589	2084.51	1547.09	207.424	2005.18	1283.34	213.44	2233.6	1462.34	233.445	2297.39	1261.23	291.222	1999.72	1340.48	29.3733	2169.24	1502.49	-49.6858	2160.12	1306.34	-54.0189	2157.98	1150.22	-64.5147	2253.47	1005.51	-10.7795	2291.91	920.583	-74.3724	2255.05	906.268	-59.9117	2313.2	858.099
2491	0	173.469	2344.01	1669.58	258.452	2326.76	1673.6	150.316	2151.37	1698.48	261.225	2154.52	1701.26	215.223	2093.81	1548.89	206.54	2014.48	1285.04	212.974	2243.01	1463.96	233.29	2306.48	1262.86	290.254	2008.95	1342.11	28.9269	2178.71	1504.25	-50.2234	2171.16	1307.92	-55.2217	2170.61	1151.81	-64.1743	2268.24	1008.23	-10.1939	2307.38	924.063	-72.3112	2270.76	908.186	-59.1906	2329.88	861.816
2492	0	173.543	2353.36	1671.25	258.746	2336.74	1674.61	150.487	2160.8	1700.28	261.418	2164	1702.64	214.882	2103.4	1550.46	205.576	2023.82	1286.44	212.454	2252.15	1465.52	232.773	2315.49	1264.47	289.35	2018.35	1343.71	28.4877	2188.19	1505.83	-50.8902	2181.77	1309.49	-56.5912	2182.64	1153.48	-64.2976	2282.69	1011.21	-9.44962	2322.49	927.883	-74.4313	2287.61	912.981	-58.4411	2346.7	866.189
2493	0	173.527	2362.7	1672.7	258.629	2346.16	1675.97	150.75	2170.16	1702.09	261.934	2173.73	1703.79	214.305	2112.77	1552.13	204.691	2033.08	1287.97	212.077	2261.58	1467.05	232.153	2324.54	1265.88	288.477	2027.42	1345.37	27.928	2197.66	1507.51	-51.4246	2192.21	1311.25	-57.7456	2194.83	1155.26	-64.0339	2297.41	1014.46	-8.81713	2337.66	931.651	-71.8392	2303.33	914.734	-57.4974	2363.54	870.608
2494	0	173.755	2372.13	1674.3	258.747	2355.51	1677.09	151.017	2179.5	1704.08	261.911	2183.01	1705.02	213.433	2122.05	1553.4	203.934	2042.23	1289.71	211.654	2270.96	1468.44	231.671	2333.49	1267.18	287.765	2036.78	1346.99	27.4302	2207.16	1509.38	-52.0149	2202.54	1313.24	-59.0953	2206.67	1156.94	-64.0632	2311.66	1017.76	-8.07227	2353	935.904	-73.7197	2319.92	919.826	-56.4432	2380.3	875.346
2495	0	173.657	2381.47	1675.99	258.87	2364.81	1678.32	151.232	2188.82	1705.78	262.231	2192.23	1706.37	213.393	2131.46	1555.07	203.211	2051.38	1291.55	211.212	2280.21	1469.81	230.945	2342.22	1268.6	287.133	2046.12	1348.57	27.2939	2216.89	1511.26	-52.5204	2212.72	1315.04	-60.173	2218.39	1158.76	-63.8963	2325.95	1021.22	-7.02655	2368.18	940.251	-73.1536	2336.07	923.418	-55.2907	2397	880.358
2496	0	173.75	2390.78	1677.44	260.141	2375.76	1679.19	151.536	2198.13	1707.28	262.52	2201.48	1707.68	213.239	2140.76	1556.65	202.286	2060.54	1292.69	210.96	2289.56	1470.97	230.37	2351.18	1269.83	286.26	2055.03	1350	26.8201	2226.33	1512.67	-52.964	2222.69	1316.64	-61.3289	2229.83	1160.22	-63.9504	2339.88	1024.61	-6.27876	2383.25	944.776	-72.5726	2352.01	927.359	-54.1743	2413.73	885.373
2497	0	173.926	2400.17	1678.75	259.089	2383.27	1680.63	151.643	2207.32	1708.71	262.804	2210.91	1708.45	212.712	2150.21	1557.68	201.785	2069.8	1294.21	210.518	2298.53	1471.81	229.91	2360.23	1270.86	285.665	2064.39	1351.34	26.5062	2235.9	1514.22	-53.5083	2232.65	1318.27	-62.3676	2241.28	1161.84	-63.7599	2353.84	1027.96	-5.50008	2398.13	949.286	-71.967	2367.85	931.035	-52.9184	2430.23	890.408
2498	0	174.129	2409.41	1680.15	260.064	2393.69	1681.45	151.853	2216.68	1709.79	262.967	2220.06	1709.45	212.605	2159.71	1558.77	201.09	2078.93	1295.35	210.317	2307.69	1472.72	229.41	2369.03	1271.94	285.441	2073.9	1352.6	26.3013	2245.48	1515.65	-53.9224	2242.2	1319.88	-63.4962	2252.32	1163.33	-63.6197	2367.73	1031.38	-4.81834	2413.3	954.269	-71.0499	2383.55	934.754	-51.6689	2446.68	895.781
2499	0	174.289	2418.79	1681.3	260.496	2403.15	1682.23	152.005	2226.04	1710.87	263.14	2229.49	1710.06	211.884	2168.85	1559.84	200.425	2088.11	1296.59	210.038	2317.08	1473.74	229.15	2378.06	1272.74	284.54	2082.72	1353.57	26.0388	2255.08	1516.87	-54.4109	2251.79	1321.07	-64.378	2263.66	1164.71	-63.6239	2381.15	1034.68	-3.77679	2427.99	958.753	-70.2687	2398.93	938.543	-50.3867	2462.9	900.977
2500	0	174.212	2428.16	1682.28	260.971	2413.11	1682.6	152.086	2235.32	1711.73	263.04	2238.61	1710.81	211.77	2178.44	1560.69	199.762	2097.34	1297.53	209.757	2326.43	1474.54	228.798	2387.22	1273.43	283.447	2091.75	1354.5	25.9991	2265.01	1518.18	-55.2341	2261.38	1322.23	-65.5423	2274.62	1165.89	-63.5507	2394.52	1037.88	-3.10509	2442.76	963.48	-69.4382	2414.21	941.936	-49.1149	2479.11	906.393
2501	0	174.149	2437.49	1683.04	261.9	2422.54	1682.43	152.261	2244.69	1712.6	263.057	2247.89	1711.38	211.269	2187.74	1561.04	199.232	2106.53	1298.71	209.614	2335.59	1474.99	228.631	2396.31	1273.77	282.925	2101.03	1355.14	25.813	2274.72	1519.19	-55.9498	2271.11	1323.41	-66.5625	2285.34	1166.9	-63.1388	2407.91	1040.69	-2.33062	2457.4	968.197	-68.4175	2429.29	945.592	-48.0238	2495.03	911.736
2502	0	174.159	2446.92	1683.43	262.161	2431.75	1682.82	152.303	2254.1	1713.01	263.254	2257.45	1711.57	211.271	2197.24	1561.78	198.357	2115.64	1299.1	209.471	2344.97	1475.17	228.396	2405.2	1274.23	282.396	2109.98	1355.7	25.7857	2284.49	1519.73	-56.4609	2280.94	1324.15	-67.425	2296.3	1167.52	-62.8477	2421.2	1043.62	-1.25849	2471.95	972.474	-67.281	2444.27	948.766	-46.5674	2510.91	916.881
2503	0	174.162	2456.4	1683.49	261.292	2441.27	1683.48	152.324	2263.59	1713.15	263.526	2267.15	1711.53	211.182	2206.89	1561.99	197.635	2124.75	1299.12	209.442	2354.28	1475.27	228.364	2414.35	1274.29	281.717	2119.04	1356.8	25.6849	2294.21	1520.01	-56.5841	2290.81	1324.34	-68.2804	2307.08	1167.75	-62.4392	2434.17	1046.22	-0.402915	2486.04	976.688	-66.0092	2459.2	951.976	-45.6462	2526.57	922.41
2504	0	174.086	2465.93	1683.48	261.268	2450.56	1683.44	152.318	2273.09	1713.07	263.495	2276.76	1711.33	210.929	2216.28	1562.11	197.288	2133.96	1299.34	209.272	2363.74	1475.49	228.295	2423.56	1274.03	281.849	2128.79	1356.76	25.5455	2303.94	1520.08	-57.0813	2300.57	1324.56	-69.1643	2317.63	1168.2	-62.1207	2447.03	1048.63	0.567876	2500.2	980.766	-64.7227	2473.89	954.864	-44.4533	2541.95	927.443
2505	0	173.993	2475.51	1683.16	261.18	2460.36	1682.47	152.382	2282.71	1713.02	263.522	2286.3	1711.26	210.612	2225.65	1562.1	197.102	2143.22	1299.49	209.388	2373.07	1474.87	228.414	2432.63	1273.63	281.237	2137.76	1356.8	25.4624	2313.68	1519.89	-57.5803	2310.52	1325.01	-69.8704	2328.37	1168.04	-61.7159	2459.78	1051.02	1.36981	2514.06	984.494	-63.417	2488.37	957.721	-43.3987	2556.93	932.208
2506	0	173.977	2485.1	1682.77	260.997	2469.53	1682.33	152.275	2292.4	1712.66	263.325	2295.92	1710.95	210.669	2235.63	1561.45	196.793	2152.42	1299.39	209.436	2382.44	1474.37	228.433	2441.57	1273.2	280.45	2146.79	1357.16	25.4059	2323.4	1519.57	-58.001	2320.57	1325.02	-70.5013	2339.08	1167.98	-61.2057	2472.37	1053.1	2.78468	2527.95	988.194	-62.0896	2502.85	960.208	-41.9039	2572.17	937.046
2507	0	173.967	2494.92	1682	261.036	2479.67	1681.66	152.231	2302.15	1712.11	263.316	2305.66	1710.65	209.839	2244.68	1561.49	196.435	2161.53	1299.08	209.414	2391.96	1474.05	228.525	2450.72	1272.71	280.341	2156.08	1356.5	25.3383	2333.16	1519.07	-58.1229	2330.96	1324.7	-71.2345	2349.71	1167.57	-60.6664	2485.03	1055.11	3.76358	2541.4	991.9	-60.7106	2517.07	962.907	-40.8307	2586.91	942.014
2508	0	173.736	2504.66	1680.93	261.031	2489.12	1680.69	152.112	2311.91	1711.28	263.36	2315.73	1709.84	209.847	2254.4	1560.2	196.594	2170.86	1298.64	209.529	2401.3	1472.9	228.784	2460.08	1271.75	279.483	2164.93	1355.6	25.3881	2342.86	1518.21	-58.4275	2341.27	1324.2	-71.8786	2360.1	1166.87	-59.856	2497.53	1056.65	4.94462	2554.89	995.029	-59.2526	2531.16	965.177	-39.3692	2601.71	946.483
2509	0	173.503	2514.56	1679.61	260.602	2499.22	1679.47	152.009	2321.92	1710.06	263.166	2325.73	1708.96	209.896	2263.92	1559.71	196.406	2180.13	1297.54	209.87	2410.63	1471.78	229.303	2469.4	1270.7	279.22	2174.06	1354.78	25.431	2352.49	1516.99	-58.5265	2351.37	1323.35	-72.2024	2370.73	1165.8	-59.1634	2510.02	1058.14	6.17667	2568.44	998.339	-57.6744	2545.21	967.18	-38.3825	2615.99	950.878
2510	0	173.173	2524.4	1677.8	260.505	2509.09	1678.29	151.889	2332	1708.93	263.564	2336.22	1707.57	210.251	2273.87	1558.5	196.567	2189.52	1296.53	210.069	2419.98	1470.61	229.7	2478.55	1269.3	279.426	2183.61	1354.52	25.6437	2362.2	1515.72	-58.4923	2361.18	1321.78	-72.4974	2381.24	1164.57	-58.4519	2522.3	1059.45	7.29499	2581.23	1001.05	-56.1193	2559.11	969.167	-36.7184	2630.34	954.711
2511	0	173.003	2534.49	1675.88	260.057	2519.25	1676.46	151.669	2342.09	1707.43	263.537	2346.64	1706.32	210.08	2283.28	1557.53	196.224	2198.5	1294.93	210.238	2429.41	1469.12	230.176	2487.81	1267.92	279.855	2193.09	1353.32	25.7639	2371.88	1514.2	-58.6982	2371.1	1320.22	-72.9491	2391.72	1163.21	-57.6134	2534.43	1060.43	8.61506	2594.17	1003.61	-54.484	2572.92	971.002	-35.7204	2644.2	958.672
2512	0	172.756	2544.47	1673.62	259.605	2529.35	1674.82	151.596	2352.33	1705.75	262.801	2356.38	1705.32	210.189	2292.9	1555.91	197.313	2208.18	1294.47	210.638	2438.73	1467.52	230.635	2497.17	1266.43	280.27	2202.51	1352.08	26.0856	2381.65	1512.52	-58.4164	2381.63	1319.14	-72.9612	2402.3	1161.58	-56.5832	2546.47	1061.16	9.84993	2606.89	1005.6	-52.9182	2586.46	972.548	-34.3569	2657.84	962.031
2513	0	172.549	2554.79	1671.17	259.24	2539.6	1672.71	151.693	2362.6	1703.86	263.258	2367.18	1703.49	210.48	2302.67	1554.26	197.609	2217.64	1292.64	211.151	2448.15	1465.83	231.372	2506.46	1264.61	279.93	2211.61	1350.76	26.5799	2391.38	1510.58	-58.1583	2391.52	1317.22	-73.0029	2412.81	1159.86	-55.557	2558.51	1061.72	11.2855	2619.56	1007.53	-50.872	2599.85	973.987	-32.8037	2671.37	965.128
2514	0	172.187	2564.78	1668.31	258.778	2549.97	1670.57	151.561	2372.66	1701.83	263.071	2377.64	1702.02	210.907	2312.14	1552.62	198.039	2227.25	1290.48	211.669	2457.68	1463.95	232.168	2515.78	1262.75	280.827	2221.21	1348.51	27.0915	2401.02	1508.41	-57.6935	2401.16	1315.07	-73.0033	2423.24	1158.11	-54.4049	2570.66	1062.04	12.8957	2632.1	1009.24	-49.2877	2613.08	974.807	-31.12	2684.87	967.796
2515	0	171.82	2574.9	1665.28	258.491	2560.21	1668.04	151.646	2382.84	1699.57	263.765	2388.59	1699.89	211.32	2321.53	1550.82	198.344	2236.6	1288.03	212.366	2467.06	1461.71	232.794	2525.37	1260.84	281.848	2231.04	1346.62	27.6729	2410.64	1506.4	-57.3509	2410.81	1313.09	-72.7765	2433.84	1155.98	-53.4443	2582.41	1062.27	14.1715	2644.39	1010.73	-47.8055	2626.03	975.587	-29.5326	2698.06	970.244
2516	0	171.733	2584.76	1662.3	258.306	2570.53	1665.18	151.899	2393.07	1697.22	264.056	2399.08	1697.77	212.12	2331.27	1548.41	199.721	2246.46	1286.36	213.011	2476.7	1459.82	233.655	2535.06	1258.9	281.846	2240.31	1344.55	28.3923	2420.19	1504.24	-56.6417	2420.71	1310.94	-72.5184	2444.38	1154	-52.2344	2594.15	1062.11	15.6991	2656.45	1011.64	-46.608	2639.09	976.442	-28.2951	2710.46	972.248
2517	0	171.569	2594.96	1659.47	257.875	2580.79	1663.24	152.197	2402.95	1694.59	264.236	2409.48	1696.03	212.492	2340.69	1546.15	200.277	2256.17	1283.79	213.772	2486.16	1457.37	234.603	2544.65	1256.8	282.378	2249.81	1341.55	29.0591	2429.73	1501.99	-55.8871	2430.65	1308.69	-72.0764	2454.97	1151.75	-51.0746	2605.93	1061.72	17.1918	2668.37	1012.35	-44.7189	2651.54	976.387	-26.7462	2723.29	973.967
2518	0	171.5	2604.66	1656.22	258.342	2591.11	1659.85	152.683	2413.01	1692.07	264.879	2419.89	1693.74	212.917	2349.94	1543.77	202.037	2266.56	1281.67	214.619	2495.71	1455.06	235.245	2554.58	1254.89	283.942	2260.02	1339.33	29.8188	2439.13	1499.71	-54.96	2440.44	1306.26	-71.4448	2465.61	1149.69	-50.2643	2617.1	1061.23	18.6025	2680.23	1012.67	-43.3145	2664.05	976.611	-25.3846	2735.47	975.069
2519	0	171.489	2614.77	1653.58	268.822	2591.92	1662.89	153.483	2423.04	1689.52	265.891	2430.39	1690.92	214.556	2359.81	1540.93	202.767	2276.36	1278.91	215.561	2505.58	1452.72	236.294	2564.67	1252.48	286.243	2270.61	1336.85	30.7542	2448.69	1497.3	-54.1323	2449.97	1303.86	-70.8327	2476.08	1147.23	-49.0135	2627.91	1060.06	19.8373	2691.87	1012.79	-41.8599	2676.21	976.215	-23.9302	2747.38	975.525
2520	0	171.924	2624.61	1650.56	269.041	2602.08	1660.43	154.32	2432.94	1686.9	266.27	2440.43	1689.11	215.655	2369.57	1538.45	203.303	2286.35	1275.55	216.604	2515.32	1450.21	237.244	2574.89	1250.27	286.283	2280.22	1333.74	31.9227	2458.34	1494.7	-52.8868	2459.62	1300.96	-69.7191	2486.7	1145	-47.6929	2639.4	1058.99	21.4801	2703.32	1012.16	-40.4769	2688.1	975.549	-22.5426	2758.88	975.392
2521	0	172.288	2634.5	1648.15	267.239	2614.77	1656.57	155.517	2442.58	1684.22	267.419	2450.61	1686.75	216.916	2378.75	1535.86	204.557	2296.81	1272.91	217.913	2525.19	1447.78	238.331	2585.4	1248.04	287.355	2290.46	1331.13	33.1336	2468.07	1492.17	-51.3409	2469.45	1298.16	-68.8564	2497.16	1142.63	-46.4117	2650.44	1057.61	22.7419	2714.64	1011.24	-38.9931	2699.8	974.564	-20.9557	2770.88	975.173
2522	0	173.063	2644.15	1645.66	265.759	2627.12	1652.42	156.688	2452.22	1681.89	268.596	2460.63	1684.46	217.584	2388.78	1533.73	205.941	2307.45	1270.61	219.02	2535.25	1445.66	239.348	2595.74	1245.97	289.232	2301.04	1328.23	34.3188	2477.9	1489.96	-50.0429	2479.34	1295.95	-67.5775	2507.73	1140.29	-45.2396	2661.36	1056.07	24.2629	2725.71	1010.25	-37.6354	2711.16	973.448	-19.8069	2781.82	974.458
2523	0	173.82	2653.74	1643.99	264.32	2639.57	1648.65	158.125	2461.89	1679.95	270.347	2470.66	1682.12	219.921	2399.32	1531.15	207.013	2318.02	1268.32	220.499	2545.39	1443.34	240.452	2606.31	1243.74	290.509	2311.34	1325.6	35.5319	2487.96	1487.9	-48.8686	2488.92	1293.94	-66.3003	2518.12	1138.09	-43.699	2672.27	1054.24	25.5316	2736.77	1008.99	-36.2872	2722.2	971.916	-18.4185	2792.95	973.459
2524	0	174.972	2663.55	1642.24	263.233	2652	1645.29	160.06	2471.16	1677.35	272.199	2480.53	1679.69	220.653	2409.1	1528.68	207.882	2328.8	1265.54	221.867	2555.68	1441.42	241.696	2617.08	1241.76	291.485	2321.8	1322.79	37.0574	2498.25	1485.65	-47.0325	2498.73	1291.87	-64.8068	2528.58	1135.88	-42.58	2682.6	1052.51	26.9208	2747.34	1007.22	-35.0291	2732.86	970.156	-17.2599	2803.45	971.664
2525	0	176.372	2673.12	1640.87	263.495	2661.79	1645.19	162.121	2480.61	1675.03	274.037	2490.4	1677.52	222.456	2419.06	1526.8	208.717	2339.65	1263.19	223.59	2566.42	1439.39	242.993	2627.78	1239.59	292.571	2332.44	1320.23	38.533	2508.53	1483.48	-45.0349	2508.86	1289.71	-63.1062	2538.81	1133.77	-41.1982	2693.42	1050.43	28.0957	2757.91	1004.98	-33.8581	2743.45	968.206	-16.084	2814.05	969.71
2526	0	177.706	2682.78	1639.96	265.042	2671.68	1644.03	164.325	2489.91	1672.82	276.094	2500.01	1675.25	223.487	2429.62	1524.25	209.647	2350.51	1261.13	225.206	2577.04	1437.42	244.462	2639.09	1237.52	293.684	2343.17	1317.82	40.321	2519.49	1481.54	-43.3928	2518.9	1288.05	-60.763	2548.78	1131.21	-39.7504	2703.49	1048.1	29.3079	2768.23	1002.59	-32.6928	2753.53	965.823	-15.0075	2824.06	967.229
2527	0	179.531	2692.18	1639.37	266.986	2681.76	1643	166.794	2499.6	1671.1	278.656	2509.8	1672.98	226.128	2440.43	1522.25	210.677	2361.5	1259.11	227.015	2587.69	1435.51	245.906	2649.95	1235.74	295.303	2354.53	1315.1	42.0827	2530.34	1479.86	-41.4711	2529.58	1286.34	-59.2651	2559.18	1129.69	-38.4396	2713.23	1045.76	30.4303	2777.98	999.905	-31.6799	2763.32	963.396	-13.7158	2833.89	964.68
2528	0	181.433	2701.89	1639.56	268.842	2691.35	1642.57	169.237	2508.55	1669.45	281.329	2519.54	1670.99	227.094	2450.9	1520.97	211.657	2372.64	1257.26	228.864	2598.41	1433.96	247.738	2661.33	1234.23	296.391	2365.45	1313.14	43.7923	2541.33	1478.7	-39.7241	2539.83	1284.94	-57.337	2569.37	1128.24	-37.0323	2723.1	1043.43	31.6615	2787.7	997.211	-31.2832	2772.86	960.999	-12.8866	2843.2	961.461
2529	0	185.487	2713.78	1640.61	271.812	2701.78	1641.17	172.152	2518.36	1668.18	284.114	2529.26	1669.34	229.029	2461.88	1518.71	212.617	2383.81	1255.88	230.849	2609.48	1432.86	249.197	2672.64	1233.05	297.652	2376.53	1311.48	45.5856	2552.56	1477.79	-37.8544	2550.96	1284.33	-54.7216	2579.29	1126.63	-35.6426	2732.71	1040.94	32.5216	2797.08	994.025	-29.4913	2780.9	957.457	-12.2209	2852.16	958.077
2530	0	187.363	2723.27	1641.38	273.792	2711.94	1641.5	175.2	2527.89	1667.31	287.011	2539.12	1668.03	230.926	2472.62	1518.07	213.549	2395.09	1254.58	232.586	2620.46	1431.69	250.782	2684.19	1231.99	298.783	2387.78	1309.98	47.4485	2563.9	1477.16	-36.109	2562.47	1283.52	-52.7004	2589.62	1125.77	-34.3444	2742.1	1038.4	33.6911	2806.52	990.952	-29.1116	2789.81	954.581	-11.6923	2860.76	954.348
2531	0	190.205	2733.46	1641.98	276.642	2722.2	1640.77	178.239	2537.35	1666.4	291.091	2549.16	1665.41	233.301	2484.01	1516.94	214.565	2406.67	1253.37	234.35	2631.41	1430.79	252.405	2695.64	1231.39	299.807	2399.02	1308.26	49.2801	2575.07	1476.4	-34.189	2574.11	1283.13	-50.4675	2599.86	1124.95	-32.9099	2751.48	1035.65	34.5397	2815.4	987.402	-27.6986	2797.57	951.165	-11.0736	2868.91	949.867
2532	0	192.601	2743.14	1642.89	279.031	2732.07	1641.46	181.242	2546.7	1665.83	293.444	2558.8	1664.59	234.7	2494.35	1516.23	215.654	2418.13	1252.23	236.253	2642.84	1430.43	253.77	2707.03	1230.7	300.992	2410.19	1307.27	51.1796	2586.16	1475.92	-32.2789	2585.83	1282.73	-48.0523	2610.02	1124.5	-31.6807	2760.46	1032.94	35.6087	2824.33	983.113	-26.6672	2805.39	947.446	-10.6226	2876.81	945.196
2533	0	195.672	2753.45	1643.79	282.044	2742.22	1641.68	184.154	2556.34	1665.69	296.658	2568.8	1663.51	236.789	2505.52	1516.01	217.022	2429.46	1252.11	237.793	2653.63	1429.92	255.348	2718.69	1230.24	302.495	2421.56	1306.7	52.9653	2597.37	1475.83	-30.6345	2597.8	1282.79	-45.5737	2620.41	1123.98	-30.3802	2769.18	1029.99	36.4376	2832.93	978.872	-22.9877	2812.2	942.473	-10.296	2884.19	940.055
2534	0	198.516	2763.34	1644.88	284.45	2751.6	1642.53	187.43	2566.34	1666.29	299.772	2578.67	1663.11	238.539	2516.42	1516.08	218.338	2440.58	1252.5	239.685	2664.94	1430.05	256.53	2730.13	1230.34	304.215	2432.83	1306.5	54.8564	2608.63	1476.26	-29.0225	2609.67	1283.08	-43.0884	2630.71	1124.32	-29.1828	2777.59	1027.17	37.2616	2841.17	974.799	-25.8535	2819.99	940.414	-10.0996	2891.01	934.888
2535	0	201.638	2773.72	1646.72	287.335	2761.62	1643.58	190.48	2576.15	1667.26	302.61	2588.66	1662.83	241.425	2527.47	1516.62	219.925	2452.06	1252.58	241.225	2676.07	1430.81	257.658	2741.6	1231.06	305.831	2444.33	1306.71	56.4999	2619.29	1476.83	-27.2709	2621.83	1284.16	-40.5251	2641.15	1124.84	-27.8695	2786.18	1024.52	37.7784	2848.85	970.387	-24.5941	2826.18	936.494	-9.63646	2897.96	929.552
2536	0	204.502	2783.61	1648.75	290.533	2772.01	1644.41	193.499	2586.34	1668.39	305.543	2598.49	1662.98	242.415	2538.01	1517.51	221.533	2463.49	1252.87	242.489	2686.91	1431.86	258.595	2752.98	1232.31	307.441	2455.65	1307.1	58.0118	2629.72	1477.75	-25.5666	2633.74	1285.54	-37.791	2651.59	1125.67	-26.7765	2794.3	1022.17	38.1619	2856.2	966.31	-24.2374	2832.25	933.137	-9.68464	2903.79	924.24
2537	0	207.595	2793.92	1651.39	293.574	2781.58	1645.11	196.413	2596.16	1670.12	308.911	2608.66	1662.75	244.637	2548.91	1518.33	223.148	2474.64	1253.8	243.737	2697.48	1433.21	259.214	2764.05	1233.89	309.365	2467.1	1307.75	59.4849	2640.23	1479.35	-24.3173	2645.57	1287.6	-35.1359	2661.95	1126.68	-25.8671	2802.13	1019.96	38.4788	2863.16	962.199	-24.1975	2838.18	930.073	-9.53275	2909.47	918.858
2538	0	210.484	2803.94	1654.25	297.525	2791.9	1646.47	199.285	2606.31	1671.98	311.704	2618.56	1663.7	245.513	2558.97	1520.26	225.051	2485.85	1254.75	245.073	2708.39	1435.02	260.186	2775.63	1235.61	311.188	2478.39	1308.77	60.9267	2650.33	1480.99	-22.5041	2656.69	1289.02	-32.5476	2672.61	1128.32	-24.8197	2809.95	1018.17	38.6512	2869.71	958.182	-24.3182	2843.47	927.174	-9.74177	2914.34	913.467
2539	0	213.869	2814.08	1655.74	299.799	2801.95	1647.78	202.112	2616.35	1674.26	314.269	2628.29	1664.68	247.325	2570.11	1521.18	227.169	2496.88	1256.08	246.093	2719.15	1436.84	260.823	2786.81	1237.75	313.125	2489.58	1310.28	62.2403	2659.9	1482.75	-20.9634	2667.85	1291.06	-29.9573	2682.91	1130.25	-24.0582	2817.42	1016.61	38.6814	2875.76	954.293	-25.3182	2848.57	924.695	-9.95724	2919	908.147
2540	0	216.646	2823.94	1658.49	301.372	2811.4	1649.53	204.618	2626.23	1676.55	316.718	2637.97	1666.03	249.051	2580	1522.92	229.378	2507.76	1258.08	247.021	2729.73	1438.99	261.334	2797.89	1239.91	315.486	2500.79	1311.99	63.4393	2669.68	1484.73	-19.2908	2678.78	1293.07	-27.7381	2693.16	1132.27	-23.1751	2824.47	1015.24	38.6288	2881.59	950.46	-24.8526	2852.99	922.126	-10.1557	2923.18	902.986
2541	0	219.76	2834.19	1661.02	303.232	2820.91	1650.88	207.127	2636.28	1678.85	319.158	2647.65	1667.09	250.346	2590.12	1524.23	231.612	2518.39	1260.02	247.748	2739.99	1441.1	261.541	2808.77	1242.1	317.736	2512.02	1313.47	64.7004	2679.48	1487.05	-17.5816	2689.25	1294.91	-25.4714	2703.15	1134.51	-22.5518	2831.46	1014.48	38.5854	2886.93	947.158	-25.9904	2857.5	920.205	-10.3919	2926.97	897.948
2542	0	222.629	2844.1	1664.24	304.816	2830.24	1652.91	209.652	2646.02	1681.18	321.224	2657.13	1668.27	252.397	2600.58	1526.37	233.797	2529.06	1261.22	248.404	2750.44	1443.23	261.786	2819.59	1244.6	319.914	2523.36	1315.19	65.7617	2688.14	1488.68	-16.0958	2699.28	1296.99	-23.2066	2713.07	1136.78	-21.9733	2838.26	1013.7	38.5204	2892.16	943.923	-25.7801	2861.27	918.54	-10.7474	2930.32	893.49
2543	0	225.127	2853.74	1666.84	306.117	2839.26	1654.93	211.549	2655.55	1683.41	323.045	2666.3	1670.05	254.382	2610.86	1527.72	236.046	2539.69	1263.3	248.86	2760.69	1445.55	261.883	2830.24	1246.82	322.008	2534.26	1317.19	66.729	2697.32	1490.79	-15.0634	2708.9	1298.92	-21.2309	2722.39	1139.34	-21.527	2844.64	1013.59	38.228	2896.8	941.549	-26.6374	2865.53	917.572	-10.9904	2933.71	889.302
2544	0	227.626	2863.11	1669.93	307.284	2848.28	1657.08	213.185	2665.11	1685.35	324.719	2675.56	1671.15	254.466	2620.7	1529.58	238.241	2549.86	1265.27	249.327	2770.84	1447.64	261.958	2840.61	1249.22	324.433	2544.99	1319.32	67.4703	2706.39	1492.94	-13.5142	2718.07	1300.9	-19.4225	2731.08	1141.29	-20.9234	2850.99	1013.69	37.9383	2901.38	939.445	-27.3748	2869.68	917.017	-11.625	2936.29	885.705
2545	0	229.933	2872.75	1673.25	308.257	2857.15	1659.12	214.798	2674.35	1687.62	326.178	2684.45	1672.03	256.397	2630.85	1531.64	240.359	2559.86	1267.26	249.684	2780.8	1449.83	261.818	2850.64	1251.58	326.835	2555.83	1321.27	68.201	2715.43	1495.09	-12.4783	2726.86	1302.48	-18.0996	2739.82	1143.89	-20.513	2856.95	1014.08	37.4313	2905.58	937.949	-25.7461	2873.22	915.68	-11.8252	2939.21	882.337
2546	0	232.198	2881.93	1676.63	309.291	2866	1661.67	216.295	2683.62	1689.44	328.117	2693.39	1673.15	257.468	2640.78	1533.39	242.635	2569.93	1269.01	249.9	2790.48	1451.85	261.926	2860.84	1253.72	329.068	2566.39	1323.48	68.5878	2724.49	1497.15	-11.4907	2735.29	1304.44	-16.869	2747.81	1145.99	-20.3681	2862.8	1014.52	37.2562	2909.93	936.773	-26.7183	2877.3	915.609	-12.1762	2941.89	879.818
2547	0	233.952	2890.93	1679.89	309.781	2874.71	1664.14	217.802	2692.59	1691.22	329.261	2702.25	1674.33	256.218	2650.82	1535.71	244.55	2579.81	1270.93	250.231	2800.5	1453.81	261.782	2870.61	1255.77	331.054	2576.7	1325.72	69.4172	2733.33	1499.09	-10.8881	2743.72	1306.33	-16.1175	2755.28	1147.98	-20.3538	2868.35	1015.06	36.7743	2913.87	935.949	-27.654	2881.56	915.986	-12.1604	2944.86	877.569
2548	0	235.743	2900.01	1682.76	310.378	2883.47	1666.38	219.202	2701.86	1692.76	330.359	2711.03	1675.47	258.596	2660.26	1537.07	246.309	2589.39	1272.53	250.383	2809.91	1455.81	261.601	2880.11	1257.72	333.011	2587.08	1327.67	69.885	2742.32	1500.83	-10.0223	2751.3	1307.47	-15.2838	2762.34	1149.42	-20.558	2873.5	1015.48	36.1462	2917.65	935.308	-28.5078	2885.68	916.512	-12.2974	2947.71	875.564
2549	0	237.292	2908.91	1685.56	310.516	2891.75	1668.2	220.017	2710.39	1694.47	330.825	2719.48	1676.17	260.16	2669.75	1539.43	248.156	2599.06	1274.33	250.676	2819.67	1457.33	261.737	2889.94	1259.11	334.7	2597.05	1329.59	70.5617	2751.22	1502.45	-9.42072	2758.44	1308.75	-14.4672	2769.27	1151.16	-20.7782	2878.51	1015.95	35.9603	2921.44	934.44	-29.3877	2889.74	917.19	-12.795	2950.49	874.23
2550	0	238.595	2917.68	1688.14	312.797	2900.09	1670.64	221.008	2719.34	1695.99	331.639	2728.05	1677.69	260.086	2679.33	1541.17	249.806	2608.64	1276.06	250.94	2829.03	1458.95	261.671	2899.3	1260.62	336.23	2606.99	1331.45	71.0394	2759.97	1504.08	-9.18355	2766.01	1310.66	-14.1967	2775.66	1152.89	-20.8961	2883.45	1016.42	35.9186	2925.38	934.054	-30.122	2893.72	917.703	-12.5846	2953.28	872.977
[truncated: 69 more columns]

## Sheet: Sheet2
Devices
		025370 - Force			025370 - Moment			025370 - CoP			027571 - Force			027571 - Moment			027571 - CoP			037720 - Force			037720 - Moment			037720 - CoP
Frame	Sub Frame	Fx	Fy	Fz	Mx	My	Mz	Cx	Cy	Cz	Fx	Fy	Fz	Mx	My	Mz	Cx	Cy	Cz	Fx	Fy	Fz	Mx	My	Mz	Cx	Cy	Cz
		N	N	N	N.mm	N.mm	N.mm	mm	mm	mm	N	N	N	N.mm	N.mm	N.mm	mm	mm	mm	N	N	N	N.mm	N.mm	N.mm	mm	mm	mm
2223	0	0	0	0	0	0	0	200	300	0	0	0	0	0	0	0	200	903	0	0	0	0	0	0	0	603	903	0
2223	1	0	0	0	0	0	0	200	300	0	0	0	0	0	0	0	200	903	0	0	0	0	0	0	0	603	903	0
2223	2	0	0	0	0	0	0	200	300	0	0	0	0	0	0	0	200	903	0	0	0	0	0	0	0	603	903	0
2223	3	0	0	0	0	0	0	200	300	0	0	0	0	0	0	0	200	903	0	0	0	0	0	0	0	603	903	0
2223	4	0	0	0	0	0	0	200	300	0	0	0	0	0	0	0	200	903	0	0	0	0	0	0	0	603	903	0
2223	5	0	0	0	0	0	0	200	300	0	0	0	0	0	0	0	200	903	0	0	0	0	0	0	0	603	903	0
2223	6	0	0	0	0	0	0	200	300	0	0	0	0	0	0	0	200	903	0	0	0	0	0	0	0	603	903	0
2223	7	0	0	0	0	0	0	200	300	0	0	0	0	0	0	0	200	903	0	0	0	0	0	0	0	603	903	0
2223	8	0	0	0	0	0	0	200	300	0	0	0	0	0	0	0	200	903	0	0	0	0	0	0	0	603	903	0
2223	9	0	0	0	0	0	0	200	300	0	0	0	0	0	0	0	200	903	0	0	0	0	0	0	0	603	903	0
2224	0	0	0	0	0	0	0	200	300	0	0	0	0	0	0	0	200	903	0	0	0	0	0	0	0	603	903	0
2224	1	0	0	0	0	0	0	200	300	0	0	0	0	0	0	0	200	903	0	0	0	0	0	0	0	603	903	0
2224	2	0	0	0	0	0	0	200	300	0	0	0	0	0	0	0	200	903	0	0	0	0	0	0	0	603	903	0
2224	3	0	0	0	0	0	0	200	300	0	0	0	0	0	0	0	200	903	0	0	0	0	0	0	0	603	903	0
2224	4	0	0	0	0	0	0	200	300	0	0	0	0	0	0	0	200	903	0	0	0	0	0	0	0	603	903	0
2224	5	0	0	0	0	0	0	200	300	0	0	0	0	0	0	0	200	903	0	0	0	0	0	0	0	603	903	0
2224	6	0	0	0	0	0	0	200	300	0	0	0	0	0	0	0	200	903	0	0	0	0	0	0	0	603	903	0
2224	7	0	0	0	0	0	0	200	300	0	0	0	0	0	0	0	200	903	0	0	0	0	0	0	0	603	903	0
2224	8	0	0	0	0	0	0	200	300	0	0	0	0	0	0	0	200	903	0	0	0	0	0	0	0	603	903	0
2224	9	0	0	0	0	0	0	200	300	0	0	0	0	0	0	0	200	903	0	0	0	0	0	0	0	603	903	0
2225	0	0	0	0	0	0	0	200	300	0	0	0	0	0	0	0	200	903	0	0	0	0	0	0	0	603	903	0
2225	1	0	0	0	0	0	0	200	300	0	0	0	0	0	0	0	200	903	0	0	0	0	0	0	0	603	903	0
2225	2	0	0	0	0	0	0	200	300	0	0	0	0	0	0	0	200	903	0	0	0	0	0	0	0	603	903	0
2225	3	0	0	0	0	0	0	200	300	0	0	0	0	0	0	0	200	903	0	0	0	0	0	0	0	603	903	0
2225	4	0	0	0	0	0	0	200	300	0	0	0	0	0	0	0	200	903	0	0	0	0	0	0	0	603	903	0
2225	5	0	0	0	0	0	0	200	300	0	0	0	0	0	0	0	200	903	0	0	0	0	0	0	0	603	903	0
2225	6	0	0	0	0	0	0	200	300	0	0	0	0	0	0	0	200	903	0	0	0	0	0	0	0	603	903	0
2225	7	0	0	0	0	0	0	200	300	0	0	0	0	0	0	0	200	903	0	0	0	0	0	0	0	603	903	0
2225	8	0	0	0	0	0	0	200	300	0	0	0	0	0	0	0	200	903	0	0	0	0	0	0	0	603	903	0
2225	9	0	0	0	0	0	0	200	300	0	0	0	0	0	0	0	200	903	0	0	0	0	0	0	0	603	903	0
2226	0	0	0	0	0	0	0	200	300	0	0	0	0	0	0	0	200	903	0	0	0	0	0	0	0	603	903	0
2226	1	0	0	0	0	0	0	200	300	0	0	0	0	0	0	0	200	903	0	0	0	0	0	0	0	603	903	0
2226	2	0	0	0	0	0	0	200	300	0	0	0	0	0	0	0	200	903	0	0	0	0	0	0	0	603	903	0
2226	3	0	0	0	0	0	0	200	300	0	0	0	0	0	0	0	200	903	0	0	0	0	0	0	0	603	903	0
2226	4	0	0	0	0	0	0	200	300	0	0	0	0	0	0	0	200	903	0	0	0	0	0	0	0	603	903	0
2226	5	0	0	0	0	0	0	200	300	0	0	0	0	0	0	0	200	903	0	0	0	0	0	0	0	603	903	0
2226	6	0	0	0	0	0	0	200	300	0	0	0	0	0	0	0	200	903	0	0	0	0	0	0	0	603	903	0
2226	7	0	0	0	0	0	0	200	300	0	0	0	0	0	0	0	200	903	0	0	0	0	0	0	0	603	903	0
2226	8	0	0	0	0	0	0	200	300	0	0	0	0	0	0	0	200	903	0	0	0	0	0	0	0	603	903	0
2226	9	0	0	0	0	0	0	200	300	0	0	0	0	0	0	0	200	903	0	0	0	0	0	0	0	603	903	0
2227	0	0	0	0	0	0	0	200	300	0	0	0	0	0	0	0	200	903	0	0	0	0	0	0	0	603	903	0
2227	1	0	0	0	0	0	0	200	300	0	0	0	0	0	0	0	200	903	0	0	0	0	0	0	0	603	903	0
2227	2	0	0	0	0	0	0	200	300	0	0	0	0	0	0	0	200	903	0	0	0	0	0	0	0	603	903	0
2227	3	0	0	0	0	0	0	200	300	0	0	0	0	0	0	0	200	903	0	0	0	0	0	0	0	603	903	0
2227	4	0	0	0	0	0	0	200	300	0	0	0	0	0	0	0	200	903	0	0	0	0	0	0	0	603	903	0
2227	5	0	0	0	0	0	0	200	300	0	0	0	0	0	0	0	200	903	0	0	0	0	0	0	0	603	903	0
2227	6	0	0	0	0	0	0	200	300	0	0	0	0	0	0	0	200	903	0	0	0	0	0	0	0	603	903	0
2227	7	0	0	0	0	0	0	200	300	0	0	0	0	0	0	0	200	903	0	0	0	0	0	0	0	603	903	0
2227	8	0	0	0	0	0	0	200	300	0	0	0	0	0	0	0	200	903	0	0	0	0	0	0	0	603	903	0
2227	9	0	0	0	0	0	0	200	300	0	0	0	0	0	0	0	200	903	0	0	0	0	0	0	0	603	903	0
2228	0	0	0	0	0	0	0	200	300	0	0	0	0	0	0	0	200	903	0	0	0	0	0	0	0	603	903	0
2228	1	0	0	0	0	0	0	200	300	0	0	0	0	0	0	0	200	903	0	0	0	0	0	0	0	603	903	0
2228	2	0	0	0	0	0	0	200	300	0	0	0	0	0	0	0	200	903	0	0	0	0	0	0	0	603	903	0
2228	3	0	0	0	0	0	0	200	300	0	0	0	0	0	0	0	200	903	0	0	0	0	0	0	0	603	903	0
2228	4	0	0	0	0	0	0	200	300	0	0	0	0	0	0	0	200	903	0	0	0	0	0	0	0	603	903	0
2228	5	0	0	0	0	0	0	200	300	0	0	0	0	0	0	0	200	903	0	0	0	0	0	0	0	603	903	0
2228	6	0	0	0	0	0	0	200	300	0	0	0	0	0	0	0	200	903	0	0	0	0	0	0	0	603	903	0
2228	7	0	0	0	0	0	0	200	300	0	0	0	0	0	0	0	200	903	0	0	0	0	0	0	0	603	903	0
2228	8	0	0	0	0	0	0	200	300	0	0	0	0	0	0	0	200	903	0	0	0	0	0	0	0	603	903	0
2228	9	0	0	0	0	0	0	200	300	0	0	0	0	0	0	0	200	903	0	0	0	0	0	0	0	603	903	0
2229	0	0	0	0	0	0	0	200	300	0	0	0	0	0	0	0	200	903	0	0	0	0	0	0	0	603	903	0
2229	1	0	0	0	0	0	0	200	300	0	0	0	0	0	0	0	200	903	0	0	0	0	0	0	0	603	903	0
2229	2	0	0	0	0	0	0	200	300	0	0	0	0	0	0	0	200	903	0	0	0	0	0	0	0	603	903	0
2229	3	0	0	0	0	0	0	200	300	0	0	0	0	0	0	0	200	903	0	0	0	0	0	0	0	603	903	0
2229	4	0	0	0	0	0	0	200	300	0	0	0	0	0	0	0	200	903	0	0	0	0	0	0	0	603	903	0
2229	5	0	0	0	0	0	0	200	300	0	0	0	0	0	0	0	200	903	0	0	0	0	0	0	0	603	903	0
2229	6	0	0	0	0	0	0	200	300	0	0	0	0	0	0	0	200	903	0	0	0	0	0	0	0	603	903	0
2229	7	0	0	0	0	0	0	200	300	0	0	0	0	0	0	0	200	903	0	0	0	0	0	0	0	603	903	0
2229	8	0	0	0	0	0	0	200	300	0	0	0	0	0	0	0	200	903	0	0	0	0	0	0	0	603	903	0
2229	9	0	0	0	0	0	0	200	300	0	0	0	0	0	0	0	200	903	0	0	0	0	0	0	0	603	903	0
2230	0	0	0	0	0	0	0	200	300	0	0	0	0	0	0	0	200	903	0	0	0	0	0	0	0	603	903	0
2230	1	0	0	0	0	0	0	200	300	0	0	0	0	0	0	0	200	903	0	0	0	0	0	0	0	603	903	0
2230	2	0	0	0	0	0	0	200	300	0	0	0	0	0	0	0	200	903	0	0	0	0	0	0	0	603	903	0
2230	3	0	0	0	0	0	0	200	300	0	0	0	0	0	0	0	200	903	0	0	0	0	0	0	0	603	903	0
2230	4	0	0	0	0	0	0	200	300	0	0	0	0	0	0	0	200	903	0	0	0	0	0	0	0	603	903	0
2230	5	0	0	0	0	0	0	200	300	0	0	0	0	0	0	0	200	903	0	0	0	0	0	0	0	603	903	0
2230	6	0	0	0	0	0	0	200	300	0	0	0	0	0	0	0	200	903	0	0	0	0	0	0	0	603	903	0
2230	7	0	0	0	0	0	0	200	300	0	0	0	0	0	0	0	200	903	0	0	0	0	0	0	0	603	903	0
2230	8	0	0	0	0	0	0	200	300	0	0	0	0	0	0	0	200	903	0	0	0	0	0	0	0	603	903	0
2230	9	0	0	0	0	0	0	200	300	0	0	0	0	0	0	0	200	903	0	0	0	0	0	0	0	603	903	0
2231	0	0	0	0	0	0	0	200	300	0	0	0	0	0	0	0	200	903	0	0	0	0	0	0	0	603	903	0
2231	1	0	0	0	0	0	0	200	300	0	0	0	0	0	0	0	200	903	0	0	0	0	0	0	0	603	903	0
2231	2	0	0	0	0	0	0	200	300	0	0	0	0	0	0	0	200	903	0	0	0	0	0	0	0	603	903	0
2231	3	0	0	0	0	0	0	200	300	0	0	0	0	0	0	0	200	903	0	0	0	0	0	0	0	603	903	0
2231	4	0	0	0	0	0	0	200	300	0	0	0	0	0	0	0	200	903	0	0	0	0	0	0	0	603	903	0
2231	5	0	0	0	0	0	0	200	300	0	0	0	0	0	0	0	200	903	0	0	0	0	0	0	0	603	903	0
2231	6	0	0	0	0	0	0	200	300	0	0	0	0	0	0	0	200	903	0	0	0	0	0	0	0	603	903	0
2231	7	0	0	0	0	0	0	200	300	0	0	0	0	0	0	0	200	903	0	0	0	0	0	0	0	603	903	0
2231	8	0	0	0	0	0	0	200	300	0	0	0	0	0	0	0	200	903	0	0	0	0	0	0	0	603	903	0
2231	9	0	0	0	0	0	0	200	300	0	0	0	0	0	0	0	200	903	0	0	0	0	0	0	0	603	903	0
2232	0	0	0	0	0	0	0	200	300	0	0	0	0	0	0	0	200	903	0	0	0	0	0	0	0	603	903	0
2232	1	0	0	0	0	0	0	200	300	0	0	0	0	0	0	0	200	903	0	0	0	0	0	0	0	603	903	0
2232	2	0	0	0	0	0	0	200	300	0	0	0	0	0	0	0	200	903	0	0	0	0	0	0	0	603	903	0
2232	3	0	0	0	0	0	0	200	300	0	0	0	0	0	0	0	200	903	0	0	0	0	0	0	0	603	903	0
2232	4	0	0	0	0	0	0	200	300	0	0	0	0	0	0	0	200	903	0	0	0	0	0	0	0	603	903	0
2232	5	0	0	0	0	0	0	200	300	0	0	0	0	0	0	0	200	903	0	0	0	0	0	0	0	603	903	0
2232	6	0	0	0	0	0	0	200	300	0	0	0	0	0	0	0	200	903	0	0	0	0	0	0	0	603	903	0
2232	7	0	0	0	0	0	0	200	300	0	0	0	0	0	0	0	200	903	0	0	0	0	0	0	0	603	903	0
2232	8	0	0	0	0	0	0	200	300	0	0	0	0	0	0	0	200	903	0	0	0	0	0	0	0	603	903	0
2232	9	0	0	0	0	0	0	200	300	0	0	0	0	0	0	0	200	903	0	0	0	0	0	0	0	603	903	0
2233	0	0	0	0	0	0	0	200	300	0	0	0	0	0	0	0	200	903	0	0	0	0	0	0	0	603	903	0
2233	1	0	0	0	0	0	0	200	300	0	0	0	0	0	0	0	200	903	0	0	0	0	0	0	0	603	903	0
2233	2	0	0	0	0	0	0	200	300	0	0	0	0	0	0	0	200	903	0	0	0	0	0	0	0	603	903	0
2233	3	0	0	0	0	0	0	200	300	0	0	0	0	0	0	0	200	903	0	0	0	0	0	0	0	603	903	0
2233	4	0	0	0	0	0	0	200	300	0	0	0	0	0	0	0	200	903	0	0	0	0	0	0	0	603	903	0
2233	5	0	0	0	0	0	0	200	300	0	0	0	0	0	0	0	200	903	0	0	0	0	0	0	0	603	903	0
2233	6	0	0	0	0	0	0	200	300	0	0	0	0	0	0	0	200	903	0	0	0	0	0	0	0	603	903	0
2233	7	0	0	0	0	0	0	200	300	0	0	0	0	0	0	0	200	903	0	0	0	0	0	0	0	603	903	0
2233	8	0	0	0	0	0	0	200	300	0	0	0	0	0	0	0	200	903	0	0	0	0	0	0	0	603	903	0
2233	9	0	0	0	0	0	0	200	300	0	0	0	0	0	0	0	200	903	0	0	0	0	0	0	0	603	903	0
2234	0	0	0	0	0	0	0	200	300	0	0	0	0	0	0	0	200	903	0	0	0	0	0	0	0	603	903	0
2234	1	0	0	0	0	0	0	200	300	0	0	0	0	0	0	0	200	903	0	0	0	0	0	0	0	603	903	0
2234	2	0	0	0	0	0	0	200	300	0	0	0	0	0	0	0	200	903	0	0	0	0	0	0	0	603	903	0
2234	3	0	0	0	0	0	0	200	300	0	0	0	0	0	0	0	200	903	0	0	0	0	0	0	0	603	903	0
2234	4	0	0	0	0	0	0	200	300	0	0	0	0	0	0	0	200	903	0	0	0	0	0	0	0	603	903	0
2234	5	0	0	0	0	0	0	200	300	0	0	0	0	0	0	0	200	903	0	0	0	0	0	0	0	603	903	0
2234	6	0	0	0	0	0	0	200	300	0	0	0	0	0	0	0	200	903	0	0	0	0	0	0	0	603	903	0
2234	7	0	0	0	0	0	0	200	300	0	0	0	0	0	0	0	200	903	0	0	0	0	0	0	0	603	903	0
2234	8	0	0	0	0	0	0	200	300	0	0	0	0	0	0	0	200	903	0	0	0	0	0	0	0	603	903	0
2234	9	0	0	0	0	0	0	200	300	0	0	0	0	0	0	0	200	903	0	0	0	0	0	0	0	603	903	0
2235	0	0	0	0	0	0	0	200	300	0	0	0	0	0	0	0	200	903	0	0	0	0	0	0	0	603	903	0
2235	1	0	0	0	0	0	0	200	300	0	0	0	0	0	0	0	200	903	0	0	0	0	0	0	0	603	903	0
2235	2	0	0	0	0	0	0	200	300	0	0	0	0	0	0	0	200	903	0	0	0	0	0	0	0	603	903	0
2235	3	0	0	0	0	0	0	200	300	0	0	0	0	0	0	0	200	903	0	0	0	0	0	0	0	603	903	0
2235	4	0	0	0	0	0	0	200	300	0	0	0	0	0	0	0	200	903	0	0	0	0	0	0	0	603	903	0
2235	5	0	0	0	0	0	0	200	300	0	0	0	0	0	0	0	200	903	0	0	0	0	0	0	0	603	903	0
2235	6	0	0	0	0	0	0	200	300	0	0	0	0	0	0	0	200	903	0	0	0	0	0	0	0	603	903	0
2235	7	0	0	0	0	0	0	200	300	0	0	0	0	0	0	0	200	903	0	0	0	0	0	0	0	603	903	0
2235	8	0	0	0	0	0	0	200	300	0	0	0	0	0	0	0	200	903	0	0	0	0	0	0	0	603	903	0
2235	9	0	0	0	0	0	0	200	300	0	0	0	0	0	0	0	200	903	0	0	0	0	0	0	0	603	903	0
2236	0	0	0	0	0	0	0	200	300	0	0	0	0	0	0	0	200	903	0	0	0	0	0	0	0	603	903	0
2236	1	0	0	0	0	0	0	200	300	0	0	0	0	0	0	0	200	903	0	0	0	0	0	0	0	603	903	0
2236	2	0	0	0	0	0	0	200	300	0	0	0	0	0	0	0	200	903	0	0	0	0	0	0	0	603	903	0
2236	3	0	0	0	0	0	0	200	300	0	0	0	0	0	0	0	200	903	0	0	0	0	0	0	0	603	903	0
2236	4	0	0	0	0	0	0	200	300	0	0	0	0	0	0	0	200	903	0	0	0	0	0	0	0	603	903	0
2236	5	0	0	0	0	0	0	200	300	0	0	0	0	0	0	0	200	903	0	0	0	0	0	0	0	603	903	0
2236	6	0	0	0	0	0	0	200	300	0	0	0	0	0	0	0	200	903	0	0	0	0	0	0	0	603	903	0
2236	7	0	0	0	0	0	0	200	300	0	0	0	0	0	0	0	200	903	0	0	0	0	0	0	0	603	903	0
2236	8	0	0	0	0	0	0	200	300	0	0	0	0	0	0	0	200	903	0	0	0	0	0	0	0	603	903	0
2236	9	0	0	0	0	0	0	200	300	0	0	0	0	0	0	0	200	903	0	0	0	0	0	0	0	603	903	0
2237	0	0	0	0	0	0	0	200	300	0	0	0	0	0	0	0	200	903	0	0	0	0	0	0	0	603	903	0
2237	1	0	0	0	0	0	0	200	300	0	0	0	0	0	0	0	200	903	0	0	0	0	0	0	0	603	903	0
2237	2	0	0	0	0	0	0	200	300	0	0	0	0	0	0	0	200	903	0	0	0	0	0	0	0	603	903	0
2237	3	0	0	0	0	0	0	200	300	0	0	0	0	0	0	0	200	903	0	0	0	0	0	0	0	603	903	0
2237	4	0	0	0	0	0	0	200	300	0	0	0	0	0	0	0	200	903	0	0	0	0	0	0	0	603	903	0
2237	5	0	0	0	0	0	0	200	300	0	0	0	0	0	0	0	200	903	0	0	0	0	0	0	0	603	903	0
2237	6	0	0	0	0	0	0	200	300	0	0	0	0	0	0	0	200	903	0	0	0	0	0	0	0	603	903	0
2237	7	0	0	0	0	0	0	200	300	0	0	0	0	0	0	0	200	903	0	0	0	0	0	0	0	603	903	0
2237	8	0	0	0	0	0	0	200	300	0	0	0	0	0	0	0	200	903	0	0	0	0	0	0	0	603	903	0
2237	9	0	0	0	0	0	0	200	300	0	0	0	0	0	0	0	200	903	0	0	0	0	0	0	0	603	903	0
2238	0	0	0	0	0	0	0	200	300	0	0	0	0	0	0	0	200	903	0	0	0	0	0	0	0	603	903	0
2238	1	0	0	0	0	0	0	200	300	0	0	0	0	0	0	0	200	903	0	0	0	0	0	0	0	603	903	0
2238	2	0	0	0	0	0	0	200	300	0	0	0	0	0	0	0	200	903	0	0	0	0	0	0	0	603	903	0
2238	3	0	0	0	0	0	0	200	300	0	0	0	0	0	0	0	200	903	0	0	0	0	0	0	0	603	903	0
2238	4	0	0	0	0	0	0	200	300	0	0	0	0	0	0	0	200	903	0	0	0	0	0	0	0	603	903	0
2238	5	0	0	0	0	0	0	200	300	0	0	0	0	0	0	0	200	903	0	0	0	0	0	0	0	603	903	0
2238	6	0	0	0	0	0	0	200	300	0	0	0	0	0	0	0	200	903	0	0	0	0	0	0	0	603	903	0
2238	7	0	0	0	0	0	0	200	300	0	0	0	0	0	0	0	200	903	0	0	0	0	0	0	0	603	903	0
2238	8	0	0	0	0	0	0	200	300	0	0	0	0	0	0	0	200	903	0	0	0	0	0	0	0	603	903	0
2238	9	0	0	0	0	0	0	200	300	0	0	0	0	0	0	0	200	903	0	0	0	0	0	0	0	603	903	0
2239	0	0	0	0	0	0	0	200	300	0	0	0	0	0	0	0	200	903	0	0	0	0	0	0	0	603	903	0
2239	1	0	0	0	0	0	0	200	300	0	0	0	0	0	0	0	200	903	0	0	0	0	0	0	0	603	903	0
2239	2	0	0	0	0	0	0	200	300	0	0	0	0	0	0	0	200	903	0	0	0	0	0	0	0	603	903	0
2239	3	0	0	0	0	0	0	200	300	0	0	0	0	0	0	0	200	903	0	0	0	0	0	0	0	603	903	0
2239	4	0	0	0	0	0	0	200	300	0	0	0	0	0	0	0	200	903	0	0	0	0	0	0	0	603	903	0
2239	5	0	0	0	0	0	0	200	300	0	0	0	0	0	0	0	200	903	0	0	0	0	0	0	0	603	903	0
2239	6	0	0	0	0	0	0	200	300	0	0	0	0	0	0	0	200	903	0	0	0	0	0	0	0	603	903	0
2239	7	0	0	0	0	0	0	200	300	0	0	0	0	0	0	0	200	903	0	0	0	0	0	0	0	603	903	0
2239	8	0	0	0	0	0	0	200	300	0	0	0	0	0	0	0	200	903	0	0	0	0	0	0	0	603	903	0
2239	9	0	0	0	0	0	0	200	300	0	0	0	0	0	0	0	200	903	0	0	0	0	0	0	0	603	903	0
2240	0	0	0	0	0	0	0	200	300	0	0	0	0	0	0	0	200	903	0	0	0	0	0	0	0	603	903	0
2240	1	0	0	0	0	0	0	200	300	0	0	0	0	0	0	0	200	903	0	0	0	0	0	0	0	603	903	0
2240	2	0	0	0	0	0	0	200	300	0	0	0	0	0	0	0	200	903	0	0	0	0	0	0	0	603	903	0
2240	3	0	0	0	0	0	0	200	300	0	0	0	0	0	0	0	200	903	0	0	0	0	0	0	0	603	903	0
2240	4	0	0	0	0	0	0	200	300	0	0	0	0	0	0	0	200	903	0	0	0	0	0	0	0	603	903	0
2240	5	0	0	0	0	0	0	200	300	0	0	0	0	0	0	0	200	903	0	0	0	0	0	0	0	603	903	0
2240	6	0	0	0	0	0	0	200	300	0	0	0	0	0	0	0	200	903	0	0	0	0	0	0	0	603	903	0
2240	7	0	0	0	0	0	0	200	300	0	0	0	0	0	0	0	200	903	0	0	0	0	0	0	0	603	903	0
2240	8	0	0	0	0	0	0	200	300	0	0	0	0	0	0	0	200	903	0	0	0	0	0	0	0	603	903	0
2240	9	0	0	0	0	0	0	200	300	0	0	0	0	0	0	0	200	903	0	0	0	0	0	0	0	603	903	0
2241	0	0	0	0	0	0	0	200	300	0	0	0	0	0	0	0	200	903	0	0	0	0	0	0	0	603	903	0
2241	1	0	0	0	0	0	0	200	300	0	0	0	0	0	0	0	200	903	0	0	0	0	0	0	0	603	903	0
2241	2	0	0	0	0	0	0	200	300	0	0	0	0	0	0	0	200	903	0	0	0	0	0	0	0	603	903	0
2241	3	0	0	0	0	0	0	200	300	0	0	0	0	0	0	0	200	903	0	0	0	0	0	0	0	603	903	0
2241	4	0	0	0	0	0	0	200	300	0	0	0	0	0	0	0	200	903	0	0	0	0	0	0	0	603	903	0
2241	5	0	0	0	0	0	0	200	300	0	0	0	0	0	0	0	200	903	0	0	0	0	0	0	0	603	903	0
2241	6	0	0	0	0	0	0	200	300	0	0	0	0	0	0	0	200	903	0	0	0	0	0	0	0	603	903	0
2241	7	0	0	0	0	0	0	200	300	0	0	0	0	0	0	0	200	903	0	0	0	0	0	0	0	603	903	0
2241	8	0	0	0	0	0	0	200	300	0	0	0	0	0	0	0	200	903	0	0	0	0	0	0	0	603	903	0
2241	9	0	0	0	0	0	0	200	300	0	0	0	0	0	0	0	200	903	0	0	0	0	0	0	0	603	903	0
2242	0	0	0	0	0	0	0	200	300	0	0	0	0	0	0	0	200	903	0	0	0	0	0	0	0	603	903	0
2242	1	0	0	0	0	0	0	200	300	0	0	0	0	0	0	0	200	903	0	0	0	0	0	0	0	603	903	0
2242	2	0	0	0	0	0	0	200	300	0	0	0	0	0	0	0	200	903	0	0	0	0	0	0	0	603	903	0
2242	3	0	0	0	0	0	0	200	300	0	0	0	0	0	0	0	200	903	0	0	0	0	0	0	0	603	903	0
2242	4	0	0	0	0	0	0	200	300	0	0	0	0	0	0	0	200	903	0	0	0	0	0	0	0	603	903	0
2242	5	0	0	0	0	0	0	200	300	0	0	0	0	0	0	0	200	903	0	0	0	0	0	0	0	603	903	0
2242	6	0	0	0	0	0	0	200	300	0	0	0	0	0	0	0	200	903	0	0	0	0	0	0	0	603	903	0
2242	7	0	0	0	0	0	0	200	300	0	0	0	0	0	0	0	200	903	0	0	0	0	0	0	0	603	903	0
2242	8	0	0	0	0	0	0	200	300	0	0	0	0	0	0	0	200	903	0	0	0	0	0	0	0	603	903	0
2242	9	0	0	0	0	0	0	200	300	0	0	0	0	0	0	0	200	903	0	0	0	0	0	0	0	603	903	0
2243	0	0	0	0	0	0	0	200	300	0	0	0	0	0	0	0	200	903	0	0	0	0	0	0	0	603	903	0
2243	1	0	0	0	0	0	0	200	300	0	0	0	0	0	0	0	200	903	0	0	0	0	0	0	0	603	903	0
2243	2	0	0	0	0	0	0	200	300	0	0	0	0	0	0	0	200	903	0	0	0	0	0	0	0	603	903	0
2243	3	0	0	0	0	0	0	200	300	0	0	0	0	0	0	0	200	903	0	0	0	0	0	0	0	603	903	0
2243	4	0	0	0	0	0	0	200	300	0	0	0	0	0	0	0	200	903	0	0	0	0	0	0	0	603	903	0
2243	5	0	0	0	0	0	0	200	300	0	0	0	0	0	0	0	200	903	0	0	0	0	0	0	0	603	903	0
2243	6	0	0	0	0	0	0	200	300	0	0	0	0	0	0	0	200	903	0	0	0	0	0	0	0	603	903	0
2243	7	0	0	0	0	0	0	200	300	0	0	0	0	0	0	0	200	903	0	0	0	0	0	0	0	603	903	0
2243	8	0	0	0	0	0	0	200	300	0	0	0	0	0	0	0	200	903	0	0	0	0	0	0	0	603	903	0
2243	9	0	0	0	0	0	0	200	300	0	0	0	0	0	0	0	200	903	0	0	0	0	0	0	0	603	903	0
2244	0	0	0	0	0	0	0	200	300	0	0	0	0	0	0	0	200	903	0	0	0	0	0	0	0	603	903	0
2244	1	0	0	0	0	0	0	200	300	0	0	0	0	0	0	0	200	903	0	0	0	0	0	0	0	603	903	0
2244	2	0	0	0	0	0	0	200	300	0	0	0	0	0	0	0	200	903	0	0	0	0	0	0	0	603	903	0
2244	3	0	0	0	0	0	0	200	300	0	0	0	0	0	0	0	200	903	0	0	0	0	0	0	0	603	903	0
2244	4	0	0	0	0	0	0	200	300	0	0	0	0	0	0	0	200	903	0	0	0	0	0	0	0	603	903	0
2244	5	0	0	0	0	0	0	200	300	0	0	0	0	0	0	0	200	903	0	0	0	0	0	0	0	603	903	0
2244	6	0	0	0	0	0	0	200	300	0	0	0	0	0	0	0	200	903	0	0	0	0	0	0	0	603	903	0
2244	7	0	0	0	0	0	0	200	300	0	0	0	0	0	0	0	200	903	0	0	0	0	0	0	0	603	903	0
2244	8	0	0	0	0	0	0	200	300	0	0	0	0	0	0	0	200	903	0	0	0	0	0	0	0	603	903	0
2244	9	0	0	0	0	0	0	200	300	0	0	0	0	0	0	0	200	903	0	0	0	0	0	0	0	603	903	0
2245	0	0	0	0	0	0	0	200	300	0	0	0	0	0	0	0	200	903	0	0	0	0	0	0	0	603	903	0
2245	1	0	0	0	0	0	0	200	300	0	0	0	0	0	0	0	200	903	0	0	0	0	0	0	0	603	903	0
2245	2	0	0	0	0	0	0	200	300	0	0	0	0	0	0	0	200	903	0	0	0	0	0	0	0	603	903	0
2245	3	0	0	0	0	0	0	200	300	0	0	0	0	0	0	0	200	903	0	0	0	0	0	0	0	603	903	0
2245	4	0	0	0	0	0	0	200	300	0	0	0	0	0	0	0	200	903	0	0	0	0	0	0	0	603	903	0
2245	5	0	0	0	0	0	0	200	300	0	0	0	0	0	0	0	200	903	0	0	0	0	0	0	0	603	903	0
2245	6	0	0	0	0	0	0	200	300	0	0	0	0	0	0	0	200	903	0	0	0	0	0	0	0	603	903	0
2245	7	0	0	0	0	0	0	200	300	0	0	0	0	0	0	0	200	903	0	0	0	0	0	0	0	603	903	0
2245	8	0	0	0	0	0	0	200	300	0	0	0	0	0	0	0	200	903	0	0	0	0	0	0	0	603	903	0
2245	9	0	0	0	0	0	0	200	300	0	0	0	0	0	0	0	200	903	0	0	0	0	0	0	0	603	903	0
2246	0	0	0	0	0	0	0	200	300	0	0	0	0	0	0	0	200	903	0	0	0	0	0	0	0	603	903	0
2246	1	0	0	0	0	0	0	200	300	0	0	0	0	0	0	0	200	903	0	0	0	0	0	0	0	603	903	0
2246	2	0	0	0	0	0	0	200	300	0	0	0	0	0	0	0	200	903	0	0	0	0	0	0	0	603	903	0
2246	3	0	0	0	0	0	0	200	300	0	0	0	0	0	0	0	200	903	0	0	0	0	0	0	0	603	903	0
2246	4	0	0	0	0	0	0	200	300	0	0	0	0	0	0	0	200	903	0	0	0	0	0	0	0	603	903	0
2246	5	0	0	0	0	0	0	200	300	0	0	0	0	0	0	0	200	903	0	0	0	0	0	0	0	603	903	0
2246	6	0	0	0	0	0	0	200	300	0	0	0	0	0	0	0	200	903	0	0	0	0	0	0	0	603	903	0
2246	7	0	0	0	0	0	0	200	300	0	0	0	0	0	0	0	200	903	0	0	0	0	0	0	0	603	903	0
2246	8	0	0	0	0	0	0	200	300	0	0	0	0	0	0	0	200	903	0	0	0	0	0	0	0	603	903	0
2246	9	0	0	0	0	0	0	200	300	0	0	0	0	0	0	0	200	903	0	0	0	0	0	0	0	603	903	0
2247	0	0	0	0	0	0	0	200	300	0	0	0	0	0	0	0	200	903	0	0	0	0	0	0	0	603	903	0
2247	1	0	0	0	0	0	0	200	300	0	0	0	0	0	0	0	200	903	0	0	0	0	0	0	0	603	903	0
2247	2	0	0	0	0	0	0	200	300	0	0	0	0	0	0	0	200	903	0	0	0	0	0	0	0	603	903	0
2247	3	0	0	0	0	0	0	200	300	0	0	0	0	0	0	0	200	903	0	0	0	0	0	0	0	603	903	0
2247	4	0	0	0	0	0	0	200	300	0	0	0	0	0	0	0	200	903	0	0	0	0	0	0	0	603	903	0
2247	5	0	0	0	0	0	0	200	300	0	0	0	0	0	0	0	200	903	0	0	0	0	0	0	0	603	903	0
2247	6	0	0	0	0	0	0	200	300	0	0	0	0	0	0	0	200	903	0	0	0	0	0	0	0	603	903	0
2247	7	0	0	0	0	0	0	200	300	0	0	0	0	0	0	0	200	903	0	0	0	0	0	0	0	603	903	0
2247	8	0	0	0	0	0	0	200	300	0	0	0	0	0	0	0	200	903	0	0	0	0	0	0	0	603	903	0
2247	9	0	0	0	0	0	0	200	300	0	0	0	0	0	0	0	200	903	0	0	0	0	0	0	0	603	903	0
2248	0	0	0	0	0	0	0	200	300	0	0	0	0	0	0	0	200	903	0	0	0	0	0	0	0	603	903	0
2248	1	0	0	0	0	0	0	200	300	0	0	0	0	0	0	0	200	903	0	0	0	0	0	0	0	603	903	0
2248	2	0	0	0	0	0	0	200	300	0	0	0	0	0	0	0	200	903	0	0	0	0	0	0	0	603	903	0
2248	3	0	0	0	0	0	0	200	300	0	0	0	0	0	0	0	200	903	0	0	0	0	0	0	0	603	903	0
2248	4	0	0	0	0	0	0	200	300	0	0	0	0	0	0	0	200	903	0	0	0	0	0	0	0	603	903	0
2248	5	0	0	0	0	0	0	200	300	0	0	0	0	0	0	0	200	903	0	0	0	0	0	0	0	603	903	0
2248	6	0	0	0	0	0	0	200	300	0	0	0	0	0	0	0	200	903	0	0	0	0	0	0	0	603	903	0
2248	7	0	0	0	0	0	0	200	300	0	0	0	0	0	0	0	200	903	0	0	0	0	0	0	0	603	903	0
2248	8	0	0	0	0	0	0	200	300	0	0	0	0	0	0	0	200	903	0	0	0	0	0	0	0	603	903	0
2248	9	0	0	0	0	0	0	200	300	0	0	0	0	0	0	0	200	903	0	0	0	0	0	0	0	603	903	0
2249	0	0	0	0	0	0	0	200	300	0	0	0	0	0	0	0	200	903	0	0	0	0	0	0	0	603	903	0
2249	1	0	0	0	0	0	0	200	300	0	0	0	0	0	0	0	200	903	0	0	0	0	0	0	0	603	903	0
2249	2	0	0	0	0	0	0	200	300	0	0	0	0	0	0	0	200	903	0	0	0	0	0	0	0	603	903	0
2249	3	0	0	0	0	0	0	200	300	0	0	0	0	0	0	0	200	903	0	0	0	0	0	0	0	603	903	0
2249	4	0	0	0	0	0	0	200	300	0	0	0	0	0	0	0	200	903	0	0	0	0	0	0	0	603	903	0
2249	5	0	0	0	0	0	0	200	300	0	0	0	0	0	0	0	200	903	0	0	0	0	0	0	0	603	903	0
2249	6	0	0	0	0	0	0	200	300	0	0	0	0	0	0	0	200	903	0	0	0	0	0	0	0	603	903	0
2249	7	0	0	0	0	0	0	200	300	0	0	0	0	0	0	0	200	903	0	0	0	0	0	0	0	603	903	0
2249	8	0	0	0	0	0	0	200	300	0	0	0	0	0	0	0	200	903	0	0	0	0	0	0	0	603	903	0
2249	9	0	0	0	0	0	0	200	300	0	0	0	0	0	0	0	200	903	0	0	0	0	0	0	0	603	903	0
2250	0	0	0	0	0	0	0	200	300	0	0	0	0	0	0	0	200	903	0	0	0	0	0	0	0	603	903	0
2250	1	0	0	0	0	0	0	200	300	0	0	0	0	0	0	0	200	903	0	0	0	0	0	0	0	603	903	0
2250	2	0	0	0	0	0	0	200	300	0	0	0	0	0	0	0	200	903	0	0	0	0	0	0	0	603	903	0
2250	3	0	0	0	0	0	0	200	300	0	0	0	0	0	0	0	200	903	0	0	0	0	0	0	0	603	903	0
2250	4	0	0	0	0	0	0	200	300	0	0	0	0	0	0	0	200	903	0	0	0	0	0	0	0	603	903	0
2250	5	0	0	0	0	0	0	200	300	0	0	0	0	0	0	0	200	903	0	0	0	0	0	0	0	603	903	0
2250	6	0	0	0	0	0	0	200	300	0	0	0	0	0	0	0	200	903	0	0	0	0	0	0	0	603	903	0
2250	7	0	0	0	0	0	0	200	300	0	0	0	0	0	0	0	200	903	0	0	0	0	0	0	0	603	903	0
2250	8	0	0	0	0	0	0	200	300	0	0	0	0	0	0	0	200	903	0	0	0	0	0	0	0	603	903	0
2250	9	0	0	0	0	0	0	200	300	0	0	0	0	0	0	0	200	903	0	0	0	0	0	0	0	603	903	0
2251	0	0	0	0	0	0	0	200	300	0	0	0	0	0	0	0	200	903	0	0	0	0	0	0	0	603	903	0
2251	1	0	0	0	0	0	0	200	300	0	0	0	0	0	0	0	200	903	0	0	0	0	0	0	0	603	903	0
2251	2	0	0	0	0	0	0	200	300	0	0	0	0	0	0	0	200	903	0	0	0	0	0	0	0	603	903	0
2251	3	0	0	0	0	0	0	200	300	0	0	0	0	0	0	0	200	903	0	0	0	0	0	0	0	603	903	0
2251	4	0	0	0	0	0	0	200	300	0	0	0	0	0	0	0	200	903	0	0	0	0	0	0	0	603	903	0
2251	5	0	0	0	0	0	0	200	300	0	0	0	0	0	0	0	200	903	0	0	0	0	0	0	0	603	903	0
2251	6	0	0	0	0	0	0	200	300	0	0	0	0	0	0	0	200	903	0	0	0	0	0	0	0	603	903	0
2251	7	0	0	0	0	0	0	200	300	0	0	0	0	0	0	0	200	903	0	0	0	0	0	0	0	603	903	0
2251	8	0	0	0	0	0	0	200	300	0	0	0	0	0	0	0	200	903	0	0	0	0	0	0	0	603	903	0
2251	9	0	0	0	0	0	0	200	300	0	0	0	0	0	0	0	200	903	0	0	0	0	0	0	0	603	903	0
2252	0	0	0	0	0	0	0	200	300	0	0	0	0	0	0	0	200	903	0	0	0	0	0	0	0	603	903	0
2252	1	0	0	0	0	0	0	200	300	0	0	0	0	0	0	0	200	903	0	0	0	0	0	0	0	603	903	0
2252	2	0	0	0	0	0	0	200	300	0	0	0	0	0	0	0	200	903	0	0	0	0	0	0	0	603	903	0
2252	3	0	0	0	0	0	0	200	300	0	0	0	0	0	0	0	200	903	0	0	0	0	0	0	0	603	903	0
2252	4	0	0	0	0	0	0	200	300	0	0	0	0	0	0	0	200	903	0	0	0	0	0	0	0	603	903	0
2252	5	0	0	0	0	0	0	200	300	0	0	0	0	0	0	0	200	903	0	0	0	0	0	0	0	603	903	0
2252	6	0	0	0	0	0	0	200	300	0	0	0	0	0	0	0	200	903	0	0	0	0	0	0	0	603	903	0
2252	7	0	0	0	0	0	0	200	300	0	0	0	0	0	0	0	200	903	0	0	0	0	0	0	0	603	903	0
2252	8	0	0	0	0	0	0	200	300	0	0	0	0	0	0	0	200	903	0	0	0	0	0	0	0	603	903	0
2252	9	0	0	0	0	0	0	200	300	0	0	0	0	0	0	0	200	903	0	0	0	0	0	0	0	603	903	0
2253	0	0	0	0	0	0	0	200	300	0	0	0	0	0	0	0	200	903	0	0	0	0	0	0	0	603	903	0
2253	1	0	0	0	0	0	0	200	300	0	0	0	0	0	0	0	200	903	0	0	0	0	0	0	0	603	903	0
2253	2	0	0	0	0	0	0	200	300	0	0	0	0	0	0	0	200	903	0	0	0	0	0	0	0	603	903	0
2253	3	0	0	0	0	0	0	200	300	0	0	0	0	0	0	0	200	903	0	0	0	0	0	0	0	603	903	0
2253	4	0	0	0	0	0	0	200	300	0	0	0	0	0	0	0	200	903	0	0	0	0	0	0	0	603	903	0
2253	5	0	0	0	0	0	0	200	300	0	0	0	0	0	0	0	200	903	0	0	0	0	0	0	0	603	903	0
2253	6	0	0	0	0	0	0	200	300	0	0	0	0	0	0	0	200	903	0	0	0	0	0	0	0	603	903	0
2253	7	0	0	0	0	0	0	200	300	0	0	0	0	0	0	0	200	903	0	0	0	0	0	0	0	603	903	0
2253	8	0	0	0	0	0	0	200	300	0	0	0	0	0	0	0	200	903	0	0	0	0	0	0	0	603	903	0
2253	9	0	0	0	0	0	0	200	300	0	0	0	0	0	0	0	200	903	0	0	0	0	0	0	0	603	903	0
2254	0	0	0	0	0	0	0	200	300	0	0	0	0	0	0	0	200	903	0	0	0	0	0	0	0	603	903	0
2254	1	0	0	0	0	0	0	200	300	0	0	0	0	0	0	0	200	903	0	0	0	0	0	0	0	603	903	0
2254	2	0	0	0	0	0	0	200	300	0	0	0	0	0	0	0	200	903	0	0	0	0	0	0	0	603	903	0
2254	3	0	0	0	0	0	0	200	300	0	0	0	0	0	0	0	200	903	0	0	0	0	0	0	0	603	903	0
2254	4	0	0	0	0	0	0	200	300	0	0	0	0	0	0	0	200	903	0	0	0	0	0	0	0	603	903	0
2254	5	0	0	0	0	0	0	200	300	0	0	0	0	0	0	0	200	903	0	0	0	0	0	0	0	603	903	0
2254	6	0	0	0	0	0	0	200	300	0	0	0	0	0	0	0	200	903	0	0	0	0	0	0	0	603	903	0
2254	7	0	0	0	0	0	0	200	300	0	0	0	0	0	0	0	200	903	0	0	0	0	0	0	0	603	903	0
2254	8	0	0	0	0	0	0	200	300	0	0	0	0	0	0	0	200	903	0	0	0	0	0	0	0	603	903	0
2254	9	0	0	0	0	0	0	200	300	0	0	0	0	0	0	0	200	903	0	0	0	0	0	0	0	603	903	0
2255	0	0	0	0	0	0	0	200	300	0	0	0	0	0	0	0	200	903	0	0	0	0	0	0	0	603	903	0
2255	1	0	0	0	0	0	0	200	300	0	0	0	0	0	0	0	200	903	0	0	0	0	0	0	0	603	903	0
2255	2	0	0	0	0	0	0	200	300	0	0	0	0	0	0	0	200	903	0	0	0	0	0	0	0	603	903	0
2255	3	0	0	0	0	0	0	200	300	0	0	0	0	0	0	0	200	903	0	0	0	0	0	0	0	603	903	0
2255	4	0	0	0	0	0	0	200	300	0	0	0	0	0	0	0	200	903	0	0	0	0	0	0	0	603	903	0
2255	5	0	0	0	0	0	0	200	300	0	0	0	0	0	0	0	200	903	0	0	0	0	0	0	0	603	903	0
2255	6	0	0	0	0	0	0	200	300	0	0	0	0	0	0	0	200	903	0	0	0	0	0	0	0	603	903	0
2255	7	0	0	0	0	0	0	200	300	0	0	0	0	0	0	0	200	903	0	0	0	0	0	0	0	603	903	0
2255	8	0	0	0	0	0	0	200	300	0	0	0	0	0	0	0	200	903	0	0	0	0	0	0	0	603	903	0
2255	9	0	0	0	0	0	0	200	300	0	0	0	0	0	0	0	200	903	0	0	0	0	0	0	0	603	903	0
2256	0	0	0	0	0	0	0	200	300	0	0	0	0	0	0	0	200	903	0	0	0	0	0	0	0	603	903	0
2256	1	0	0	0	0	0	0	200	300	0	0	0	0	0	0	0	200	903	0	0	0	0	0	0	0	603	903	0
2256	2	0	0	0	0	0	0	200	300	0	0	0	0	0	0	0	200	903	0	0	0	0	0	0	0	603	903	0
2256	3	0	0	0	0	0	0	200	300	0	0	0	0	0	0	0	200	903	0	0	0	0	0	0	0	603	903	0
2256	4	0	0	0	0	0	0	200	300	0	0	0	0	0	0	0	200	903	0	0	0	0	0	0	0	603	903	0
2256	5	0	0	0	0	0	0	200	300	0	0	0	0	0	0	0	200	903	0	0	0	0	0	0	0	603	903	0
2256	6	0	0	0	0	0	0	200	300	0	0	0	0	0	0	0	200	903	0	0	0	0	0	0	0	603	903	0
2256	7	0	0	0	0	0	0	200	300	0	0	0	0	0	0	0	200	903	0	0	0	0	0	0	0	603	903	0
2256	8	0	0	0	0	0	0	200	300	0	0	0	0	0	0	0	200	903	0	0	0	0	0	0	0	603	903	0
2256	9	0	0	0	0	0	0	200	300	0	0	0	0	0	0	0	200	903	0	0	0	0	0	0	0	603	903	0
2257	0	0	0	0	0	0	0	200	300	0	0	0	0	0	0	0	200	903	0	0	0	0	0	0	0	603	903	0
2257	1	0	0	0	0	0	0	200	300	0	0	0	0	0	0	0	200	903	0	0	0	0	0	0	0	603	903	0
2257	2	0	0	0	0	0	0	200	300	0	0	0	0	0	0	0	200	903	0	0	0	0	0	0	0	603	903	0
2257	3	0	0	0	0	0	0	200	300	0	0	0	0	0	0	0	200	903	0	0	0	0	0	0	0	603	903	0
2257	4	0	0	0	0	0	0	200	300	0	0	0	0	0	0	0	200	903	0	0	0	0	0	0	0	603	903	0
2257	5	0	0	0	0	0	0	200	300	0	0	0	0	0	0	0	200	903	0	0	0	0	0	0	0	603	903	0
2257	6	0	0	0	0	0	0	200	300	0	0	0	0	0	0	0	200	903	0	0	0	0	0	0	0	603	903	0
2257	7	0	0	0	0	0	0	200	300	0	0	0	0	0	0	0	200	903	0	0	0	0	0	0	0	603	903	0
2257	8	0	0	0	0	0	0	200	300	0	0	0	0	0	0	0	200	903	0	0	0	0	0	0	0	603	903	0
2257	9	0	0	0	0	0	0	200	300	0	0	0	0	0	0	0	200	903	0	0	0	0	0	0	0	603	903	0
2258	0	0	0	0	0	0	0	200	300	0	0	0	0	0	0	0	200	903	0	0	0	0	0	0	0	603	903	0
2258	1	0	0	0	0	0	0	200	300	0	0	0	0	0	0	0	200	903	0	0	0	0	0	0	0	603	903	0
2258	2	0	0	0	0	0	0	200	300	0	0	0	0	0	0	0	200	903	0	0	0	0	0	0	0	603	903	0
2258	3	0	0	0	0	0	0	200	300	0	0	0	0	0	0	0	200	903	0	0	0	0	0	0	0	603	903	0
2258	4	0	0	0	0	0	0	200	300	0	0	0	0	0	0	0	200	903	0	0	0	0	0	0	0	603	903	0
2258	5	0	0	0	0	0	0	200	300	0	0	0	0	0	0	0	200	903	0	0	0	0	0	0	0	603	903	0
2258	6	0	0	0	0	0	0	200	300	0	0	0	0	0	0	0	200	903	0	0	0	0	0	0	0	603	903	0
2258	7	0	0	0	0	0	0	200	300	0	0	0	0	0	0	0	200	903	0	0	0	0	0	0	0	603	903	0
2258	8	0	0	0	0	0	0	200	300	0	0	0	0	0	0	0	200	903	0	0	0	0	0	0	0	603	903	0
2258	9	0	0	0	0	0	0	200	300	0	0	0	0	0	0	0	200	903	0	0	0	0	0	0	0	603	903	0
2259	0	0	0	0	0	0	0	200	300	0	0	0	0	0	0	0	200	903	0	0	0	0	0	0	0	603	903	0
2259	1	0	0	0	0	0	0	200	300	0	0	0	0	0	0	0	200	903	0	0	0	0	0	0	0	603	903	0
2259	2	0	0	0	0	0	0	200	300	0	0	0	0	0	0	0	200	903	0	0	0	0	0	0	0	603	903	0
2259	3	0	0	0	0	0	0	200	300	0	0	0	0	0	0	0	200	903	0	0	0	0	0	0	0	603	903	0
2259	4	0	0	0	0	0	0	200	300	0	0	0	0	0	0	0	200	903	0	0	0	0	0	0	0	603	903	0
2259	5	0	0	0	0	0	0	200	300	0	0	0	0	0	0	0	200	903	0	0	0	0	0	0	0	603	903	0
2259	6	0	0	0	0	0	0	200	300	0	0	0	0	0	0	0	200	903	0	0	0	0	0	0	0	603	903	0
2259	7	0	0	0	0	0	0	200	300	0	0	0	0	0	0	0	200	903	0	0	0	0	0	0	0	603	903	0
2259	8	0	0	0	0	0	0	200	300	0	0	0	0	0	0	0	200	903	0	0	0	0	0	0	0	603	903	0
2259	9	0	0	0	0	0	0	200	300	0	0	0	0	0	0	0	200	903	0	0	0	0	0	0	0	603	903	0
2260	0	0	0	0	0	0	0	200	300	0	0	0	0	0	0	0	200	903	0	0	0	0	0	0	0	603	903	0
2260	1	0	0	0	0	0	0	200	300	0	0	0	0	0	0	0	200	903	0	0	0	0	0	0	0	603	903	0
2260	2	0	0	0	0	0	0	200	300	0	0	0	0	0	0	0	200	903	0	0	0	0	0	0	0	603	903	0
2260	3	0	0	0	0	0	0	200	300	0	0	0	0	0	0	0	200	903	0	0	0	0	0	0	0	603	903	0
2260	4	0	0	0	0	0	0	200	300	0	0	0	0	0	0	0	200	903	0	0	0	0	0	0	0	603	903	0
2260	5	0	0	0	0	0	0	200	300	0	0	0	0	0	0	0	200	903	0	0	0	0	0	0	0	603	903	0
2260	6	0	0	0	0	0	0	200	300	0	0	0	0	0	0	0	200	903	0	0	0	0	0	0	0	603	903	0
2260	7	0	0	0	0	0	0	200	300	0	0	0	0	0	0	0	200	903	0	0	0	0	0	0	0	603	903	0
2260	8	0	0	0	0	0	0	200	300	0	0	0	0	0	0	0	200	903	0	0	0	0	0	0	0	603	903	0
2260	9	0	0	0	0	0	0	200	300	0	0	0	0	0	0	0	200	903	0	0	0	0	0	0	0	603	903	0
2261	0	0	0	0	0	0	0	200	300	0	0	0	0	0	0	0	200	903	0	0	0	0	0	0	0	603	903	0
2261	1	0	0	0	0	0	0	200	300	0	0	0	0	0	0	0	200	903	0	0	0	0	0	0	0	603	903	0
2261	2	0	0	0	0	0	0	200	300	0	0	0	0	0	0	0	200	903	0	0	0	0	0	0	0	603	903	0
2261	3	0	0	0	0	0	0	200	300	0	0	0	0	0	0	0	200	903	0	0	0	0	0	0	0	603	903	0
2261	4	0	0	0	0	0	0	200	300	0	0	0	0	0	0	0	200	903	0	0	0	0	0	0	0	603	903	0
2261	5	0	0	0	0	0	0	200	300	0	0	0	0	0	0	0	200	903	0	0	0	0	0	0	0	603	903	0
2261	6	0	0	0	0	0	0	200	300	0	0	0	0	0	0	0	200	903	0	0	0	0	0	0	0	603	903	0
2261	7	0	0	0	0	0	0	200	300	0	0	0	0	0	0	0	200	903	0	0	0	0	0	0	0	603	903	0
2261	8	0	0	0	0	0	0	200	300	0	0	0	0	0	0	0	200	903	0	0	0	0	0	0	0	603	903	0
2261	9	0	0	0	0	0	0	200	300	0	0	0	0	0	0	0	200	903	0	0	0	0	0	0	0	603	903	0
2262	0	0	0	0	0	0	0	200	300	0	0	0	0	0	0	0	200	903	0	0	0	0	0	0	0	603	903	0
2262	1	0	0	0	0	0	0	200	300	0	0	0	0	0	0	0	200	903	0	0	0	0	0	0	0	603	903	0
2262	2	0	0	0	0	0	0	200	300	0	0	0	0	0	0	0	200	903	0	0	0	0	0	0	0	603	903	0
2262	3	0	0	0	0	0	0	200	300	0	0	0	0	0	0	0	200	903	0	0	0	0	0	0	0	603	903	0
2262	4	0	0	0	0	0	0	200	300	0	0	0	0	0	0	0	200	903	0	0	0	0	0	0	0	603	903	0
2262	5	0	0	0	0	0	0	200	300	0	0	0	0	0	0	0	200	903	0	0	0	0	0	0	0	603	903	0
2262	6	0	0	0	0	0	0	200	300	0	0	0	0	0	0	0	200	903	0	0	0	0	0	0	0	603	903	0
2262	7	0	0	0	0	0	0	200	300	0	0	0	0	0	0	0	200	903	0	0	0	0	0	0	0	603	903	0
2262	8	0	0	0	0	0	0	200	300	0	0	0	0	0	0	0	200	903	0	0	0	0	0	0	0	603	903	0
2262	9	0	0	0	0	0	0	200	300	0	0	0	0	0	0	0	200	903	0	0	0	0	0	0	0	603	903	0
2263	0	0	0	0	0	0	0	200	300	0	0	0	0	0	0	0	200	903	0	0	0	0	0	0	0	603	903	0
2263	1	0	0	0	0	0	0	200	300	0	0	0	0	0	0	0	200	903	0	0	0	0	0	0	0	603	903	0
2263	2	0	0	0	0	0	0	200	300	0	0	0	0	0	0	0	200	903	0	0	0	0	0	0	0	603	903	0
2263	3	0	0	0	0	0	0	200	300	0	0	0	0	0	0	0	200	903	0	0	0	0	0	0	0	603	903	0
2263	4	0	0	0	0	0	0	200	300	0	0	0	0	0	0	0	200	903	0	0	0	0	0	0	0	603	903	0
2263	5	0	0	0	0	0	0	200	300	0	0	0	0	0	0	0	200	903	0	0	0	0	0	0	0	603	903	0
2263	6	0	0	0	0	0	0	200	300	0	0	0	0	0	0	0	200	903	0	0	0	0	0	0	0	603	903	0
2263	7	0	0	0	0	0	0	200	300	0	0	0	0	0	0	0	200	903	0	0	0	0	0	0	0	603	903	0
2263	8	0	0	0	0	0	0	200	300	0	0	0	0	0	0	0	200	903	0	0	0	0	0	0	0	603	903	0
2263	9	0	0	0	0	0	0	200	300	0	0	0	0	0	0	0	200	903	0	0	0	0	0	0	0	603	903	0
2264	0	0	0	0	0	0	0	200	300	0	0	0	0	0	0	0	200	903	0	0	0	0	0	0	0	603	903	0
2264	1	0	0	0	0	0	0	200	300	0	0	0	0	0	0	0	200	903	0	0	0	0	0	0	0	603	903	0
2264	2	0	0	0	0	0	0	200	300	0	0	0	0	0	0	0	200	903	0	0	0	0	0	0	0	603	903	0
2264	3	0	0	0	0	0	0	200	300	0	0	0	0	0	0	0	200	903	0	0	0	0	0	0	0	603	903	0
2264	4	0	0	0	0	0	0	200	300	0	0	0	0	0	0	0	200	903	0	0	0	0	0	0	0	603	903	0
2264	5	0	0	0	0	0	0	200	300	0	0	0	0	0	0	0	200	903	0	0	0	0	0	0	0	603	903	0
2264	6	0	0	0	0	0	0	200	300	0	0	0	0	0	0	0	200	903	0	0	0	0	0	0	0	603	903	0
2264	7	0	0	0	0	0	0	200	300	0	0	0	0	0	0	0	200	903	0	0	0	0	0	0	0	603	903	0
2264	8	0	0	0	0	0	0	200	300	0	0	0	0	0	0	0	200	903	0	0	0	0	0	0	0	603	903	0
2264	9	0	0	0	0	0	0	200	300	0	0	0	0	0	0	0	200	903	0	0	0	0	0	0	0	603	903	0
2265	0	0	0	0	0	0	0	200	300	0	0	0	0	0	0	0	200	903	0	0	0	0	0	0	0	603	903	0
2265	1	0	0	0	0	0	0	200	300	0	0	0	0	0	0	0	200	903	0	0	0	0	0	0	0	603	903	0
2265	2	0	0	0	0	0	0	200	300	0	0	0	0	0	0	0	200	903	0	0	0	0	0	0	0	603	903	0
2265	3	0	0	0	0	0	0	200	300	0	0	0	0	0	0	0	200	903	0	0	0	0	0	0	0	603	903	0
2265	4	0	0	0	0	0	0	200	300	0	0	0	0	0	0	0	200	903	0	0	0	0	0	0	0	603	903	0
2265	5	0	0	0	0	0	0	200	300	0	0	0	0	0	0	0	200	903	0	0	0	0	0	0	0	603	903	0
2265	6	0	0	0	0	0	0	200	300	0	0	0	0	0	0	0	200	903	0	0	0	0	0	0	0	603	903	0
2265	7	0	0	0	0	0	0	200	300	0	0	0	0	0	0	0	200	903	0	0	0	0	0	0	0	603	903	0
2265	8	0	0	0	0	0	0	200	300	0	0	0	0	0	0	0	200	903	0	0	0	0	0	0	0	603	903	0
2265	9	0	0	0	0	0	0	200	300	0	0	0	0	0	0	0	200	903	0	0	0	0	0	0	0	603	903	0
2266	0	0	0	0	0	0	0	200	300	0	0	0	0	0	0	0	200	903	0	0	0	0	0	0	0	603	903	0
2266	1	0	0	0	0	0	0	200	300	0	0	0	0	0	0	0	200	903	0	0	0	0	0	0	0	603	903	0
2266	2	0	0	0	0	0	0	200	300	0	0	0	0	0	0	0	200	903	0	0	0	0	0	0	0	603	903	0
2266	3	0	0	0	0	0	0	200	300	0	0	0	0	0	0	0	200	903	0	0	0	0	0	0	0	603	903	0
2266	4	0	0	0	0	0	0	200	300	0	0	0	0	0	0	0	200	903	0	0	0	0	0	0	0	603	903	0
2266	5	0	0	0	0	0	0	200	300	0	0	0	0	0	0	0	200	903	0	0	0	0	0	0	0	603	903	0
2266	6	0	0	0	0	0	0	200	300	0	0	0	0	0	0	0	200	903	0	0	0	0	0	0	0	603	903	0
2266	7	0	0	0	0	0	0	200	300	0	0	0	0	0	0	0	200	903	0	0	0	0	0	0	0	603	903	0
2266	8	0	0	0	0	0	0	200	300	0	0	0	0	0	0	0	200	903	0	0	0	0	0	0	0	603	903	0
2266	9	0	0	0	0	0	0	200	300	0	0	0	0	0	0	0	200	903	0	0	0	0	0	0	0	603	903	0
2267	0	0	0	0	0	0	0	200	300	0	0	0	0	0	0	0	200	903	0	0	0	0	0	0	0	603	903	0
2267	1	0	0	0	0	0	0	200	300	0	0	0	0	0	0	0	200	903	0	0	0	0	0	0	0	603	903	0
2267	2	0	0	0	0	0	0	200	300	0	0	0	0	0	0	0	200	903	0	0	0	0	0	0	0	603	903	0
2267	3	0	0	0	0	0	0	200	300	0	0	0	0	0	0	0	200	903	0	0	0	0	0	0	0	603	903	0
2267	4	0	0	0	0	0	0	200	300	0	0	0	0	0	0	0	200	903	0	0	0	0	0	0	0	603	903	0
2267	5	0	0	0	0	0	0	200	300	0	0	0	0	0	0	0	200	903	0	0	0	0	0	0	0	603	903	0
2267	6	0	0	0	0	0	0	200	300	0	0	0	0	0	0	0	200	903	0	0	0	0	0	0	0	603	903	0
2267	7	0	0	0	0	0	0	200	300	0	0	0	0	0	0	0	200	903	0	0	0	0	0	0	0	603	903	0
2267	8	0	0	0	0	0	0	200	300	0	0	0	0	0	0	0	200	903	0	0	0	0	0	0	0	603	903	0
2267	9	-2.2101	4.272	-9.8468	386.078	750.966	224.441	276.265	260.792	0	0	0	0	0	0	0	200	903	0	0	0	0	0	0	0	603	903	0
2268	0	0.383897	5.03494	-13.2037	843.842	873.036	453.323	266.12	236.091	0	0	0	0	0	0	0	200	903	0	0	0	0	0	0	0	603	903	0
2268	1	-0.379043	4.42459	-12.2882	2125.58	995.106	361.77	280.981	127.023	0	0	0	0	0	0	0	200	903	0	0	0	0	0	0	0	603	903	0
2268	2	-2.51527	4.88235	-12.8986	752.289	1178.21	453.323	291.344	241.676	0	0	0	0	0	0	0	200	903	0	0	0	0	0	0	0	603	903	0
2268	3	-2.97304	7.93411	-14.7296	1026.95	1300.28	819.533	288.277	230.28	0	0	0	0	0	0	0	200	903	0	0	0	0	0	0	0	603	903	0
2268	4	-1.44716	6.866	-15.34	935.395	1117.18	499.099	272.828	239.022	0	0	0	0	0	0	0	200	903	0	0	0	0	0	0	0	603	903	0
2268	5	-0.836806	6.56082	-18.3917	1667.82	1361.32	773.757	274.018	209.317	0	0	0	0	0	0	0	200	903	0	0	0	0	0	0	0	603	903	0
2268	6	-1.59975	8.39188	-19.6124	935.395	1605.46	865.31	281.859	252.306	0	0	0	0	0	0	0	200	903	0	0	0	0	0	0	0	603	903	0
2268	7	-1.14198	10.2229	-21.1383	1850.92	1727.53	682.204	281.725	212.438	0	0	0	0	0	0	0	200	903	0	0	0	0	0	0	0	603	903	0
2268	8	0.383897	10.8333	-25.4108	1667.82	1910.63	956.862	275.19	234.366	0	0	0	0	0	0	0	200	903	0	0	0	0	0	0	0	603	903	0
2268	9	-2.51527	11.5962	-27.8522	1576.26	2032.7	1139.97	272.982	243.406	0	0	0	0	0	0	0	200	903	0	0	0	0	0	0	0	603	903	0
2269	0	-1.14198	10.5281	-29.378	1942.48	2337.88	1185.74	279.579	233.88	0	0	0	0	0	0	0	200	903	0	0	0	0	0	0	0	603	903	0
2269	1	0.994248	13.7325	-30.5988	2674.9	2459.95	1231.52	280.394	212.581	0	0	0	0	0	0	0	200	903	0	0	0	0	0	0	0	603	903	0
2269	2	-1.90492	14.9532	-30.9039	2034.03	2826.16	1277.3	291.45	234.182	0	0	0	0	0	0	0	200	903	0	0	0	0	0	0	0	603	903	0
2269	3	-0.531631	14.8006	-36.3971	1850.92	3131.34	1506.18	286.033	249.146	0	0	0	0	0	0	0	200	903	0	0	0	0	0	0	0	603	903	0
2269	4	-0.0738669	16.1739	-39.1437	2583.34	3436.51	1551.96	287.792	234.004	0	0	0	0	0	0	0	200	903	0	0	0	0	0	0	0	603	903	0
2269	5	0.078721	16.6316	-40.9747	2858	3497.55	2009.72	285.359	230.25	0	0	0	0	0	0	0	200	903	0	0	0	0	0	0	0	603	903	0
2269	6	1.90978	19.3782	-42.1954	3315.77	3680.65	1963.94	287.229	221.419	0	0	0	0	0	0	0	200	903	0	0	0	0	0	0	0	603	903	0
2269	7	1.14684	18.9204	-43.111	2400.24	3497.55	2009.72	281.129	244.324	0	0	0	0	0	0	0	200	903	0	0	0	0	0	0	0	603	903	0
2269	8	0.84166	20.5989	-45.5524	2949.56	4352.04	2101.27	295.539	235.249	0	0	0	0	0	0	0	200	903	0	0	0	0	0	0	0	603	903	0
2269	9	1.14684	22.43	-47.3834	2308.69	4107.9	2101.27	286.695	251.277	0	0	0	0	0	0	0	200	903	0	0	0	0	0	0	0	603	903	0
2270	0	2.21495	22.5825	-47.0782	2949.56	4229.97	2147.05	289.85	237.348	0	0	0	0	0	0	0	200	903	0	0	0	0	0	0	0	603	903	0
2270	1	1.45201	21.5144	-52.2662	3224.21	4657.22	2330.15	289.106	238.312	0	0	0	0	0	0	0	200	903	0	0	0	0	0	0	0	603	903	0
2270	2	1.45201	21.5144	-55.0128	3407.32	4779.29	1918.17	286.876	238.063	0	0	0	0	0	0	0	200	903	0	0	0	0	0	0	0	603	903	0
2270	3	1.45201	20.1411	-59.5905	3865.08	5145.5	1826.61	286.348	235.139	0	0	0	0	0	0	0	200	903	0	0	0	0	0	0	0	603	903	0
2270	4	1.29942	17.3946	-63.2526	3956.64	5328.6	1231.52	284.243	237.447	0	0	0	0	0	0	0	200	903	0	0	0	0	0	0	0	603	903	0
2270	5	-1.75233	14.4954	-69.9664	4505.95	6122.06	1231.52	287.5	235.598	0	0	0	0	0	0	0	200	903	0	0	0	0	0	0	0	603	903	0
2270	6	-1.75233	11.7488	-74.5441	4048.19	6427.24	1002.64	286.221	245.694	0	0	0	0	0	0	0	200	903	0	0	0	0	0	0	0	603	903	0
2270	7	-2.82045	10.0703	-81.5631	4597.5	6793.45	590.651	283.291	243.633	0	0	0	0	0	0	0	200	903	0	0	0	0	0	0	0	603	903	0
2270	8	-3.58339	7.17117	-83.3942	5696.14	7220.69	499.099	286.585	231.696	0	0	0	0	0	0	0	200	903	0	0	0	0	0	0	0	603	903	0
2270	9	-6.17738	5.18753	-90.4132	5238.37	7647.94	132.888	284.589	242.062	0	0	0	0	0	0	0	200	903	0	0	0	0	0	0	0	603	903	0
2271	0	-6.48256	5.34012	-96.2115	5604.58	8319.33	-50.2177	286.469	241.747	0	0	0	0	0	0	0	200	903	0	0	0	0	0	0	0	603	903	0
2271	1	-8.4662	3.96683	-101.705	6245.45	8380.36	-187.547	282.399	238.592	0	0	0	0	0	0	0	200	903	0	0	0	0	0	0	0	603	903	0
2271	2	-9.07655	-1.52634	-104.146	6153.9	8929.68	-416.429	285.742	240.911	0	0	0	0	0	0	0	200	903	0	0	0	0	0	0	0	603	903	0
2271	3	-9.07655	-0.610811	-109.944	6886.32	9662.1	-599.534	287.882	237.365	0	0	0	0	0	0	0	200	903	0	0	0	0	0	0	0	603	903	0
2271	4	-10.755	-1.06857	-113.912	6794.77	9478.99	-507.981	283.214	240.351	0	0	0	0	0	0	0	200	903	0	0	0	0	0	0	0	603	903	0
2271	5	-11.3654	-2.74704	-120.32	7435.64	10089.3	-1057.3	283.854	238.201	0	0	0	0	0	0	0	200	903	0	0	0	0	0	0	0	603	903	0
2271	6	-12.5861	-5.03586	-122.762	7344.09	10516.6	-1103.07	285.667	240.176	0	0	0	0	0	0	0	200	903	0	0	0	0	0	0	0	603	903	0
2271	7	-12.5861	-4.88327	-131.002	7527.19	10821.8	-1240.4	282.608	242.541	0	0	0	0	0	0	0	200	903	0	0	0	0	0	0	0	603	903	0
2271	8	-13.0438	-5.34104	-134.969	8259.62	11310	-1240.4	283.797	238.804	0	0	0	0	0	0	0	200	903	0	0	0	0	0	0	0	603	903	0
2271	9	-14.112	-6.10397	-140.462	7527.19	11432.1	-1423.51	281.389	246.411	0	0	0	0	0	0	0	200	903	0	0	0	0	0	0	0	603	903	0
2272	0	-14.7223	-5.49362	-146.26	8625.83	12164.5	-1286.18	283.17	241.024	0	0	0	0	0	0	0	200	903	0	0	0	0	0	0	0	603	903	0
2272	1	-15.4852	-4.12033	-150.838	9449.8	12286.6	-1377.73	281.456	237.351	0	0	0	0	0	0	0	200	903	0	0	0	0	0	0	0	603	903	0
2272	2	-14.112	-2.59445	-155.11	8351.17	12408.7	-1103.07	279.999	246.16	0	0	0	0	0	0	0	200	903	0	0	0	0	0	0	0	603	903	0
2272	3	-13.6542	-0.458223	-155.416	8900.49	13019	-828.416	283.769	242.731	0	0	0	0	0	0	0	200	903	0	0	0	0	0	0	0	603	903	0
2272	4	-16.5534	0.304717	-162.13	9083.59	12958	-782.64	279.924	243.973	0	0	0	0	0	0	0	200	903	0	0	0	0	0	0	0	603	903	0
2272	5	-15.3327	2.28836	-165.181	9266.7	13629.4	-645.311	282.512	243.9	0	0	0	0	0	0	0	200	903	0	0	0	0	0	0	0	603	903	0
2272	6	-16.5534	5.03494	-169.454	9083.59	14056.6	-553.758	282.953	246.395	0	0	0	0	0	0	0	200	903	0	0	0	0	0	0	0	603	903	0
2272	7	-14.5697	6.71341	-173.421	9449.8	14178.7	-233.323	281.759	245.509	0	0	0	0	0	0	0	200	903	0	0	0	0	0	0	0	603	903	0
2272	8	-16.5534	8.23929	-174.031	9816.01	14544.9	41.3351	283.576	243.596	0	0	0	0	0	0	0	200	903	0	0	0	0	0	0	0	603	903	0
2272	9	-16.7059	10.6807	-177.999	9907.57	14239.7	178.664	279.999	244.339	0	0	0	0	0	0	0	200	903	0	0	0	0	0	0	0	603	903	0
2273	0	-16.4008	13.885	-181.05	9816.01	14972.2	270.217	282.696	245.783	0	0	0	0	0	0	0	200	903	0	0	0	0	0	0	0	603	903	0
2273	1	-16.0956	14.1902	-184.102	10090.7	14361.8	361.77	278.01	245.19	0	0	0	0	0	0	0	200	903	0	0	0	0	0	0	0	603	903	0
2273	2	-15.6378	15.4109	-187.459	9724.46	15155.3	636.428	280.846	248.125	0	0	0	0	0	0	0	200	903	0	0	0	0	0	0	0	603	903	0
2273	3	-14.5697	18.6153	-193.563	9541.36	15399.4	1094.19	279.558	250.707	0	0	0	0	0	0	0	200	903	0	0	0	0	0	0	0	603	903	0
2273	4	-15.7904	19.6834	-195.394	10365.3	15399.4	1002.64	278.812	246.952	0	0	0	0	0	0	0	200	903	0	0	0	0	0	0	0	603	903	0
2273	5	-16.0956	20.2937	-199.361	9724.46	16009.8	1414.63	280.305	251.222	0	0	0	0	0	0	0	200	903	0	0	0	0	0	0	0	603	903	0
2273	6	-17.1637	22.7351	-199.971	9632.91	15643.5	1139.97	278.229	251.829	0	0	0	0	0	0	0	200	903	0	0	0	0	0	0	0	603	903	0
2273	7	-16.8585	22.2774	-203.328	10456.9	15948.7	1139.97	278.438	248.571	0	0	0	0	0	0	0	200	903	0	0	0	0	0	0	0	603	903	0
2273	8	-17.3163	24.4136	-206.075	9724.46	16070.8	1323.07	277.985	252.811	0	0	0	0	0	0	0	200	903	0	0	0	0	0	0	0	603	903	0
2273	9	-17.7741	25.6343	-208.211	9724.46	16437	1780.84	278.944	253.295	0	0	0	0	0	0	0	200	903	0	0	0	0	0	0	0	603	903	0
2274	0	-16.4008	25.7869	-208.821	10273.8	16925.3	1460.4	281.051	250.801	0	0	0	0	0	0	0	200	903	0	0	0	0	0	0	0	603	903	0
2274	1	-17.6215	26.0921	-210.652	10640	16925.3	1597.73	280.347	249.49	0	0	0	0	0	0	0	200	903	0	0	0	0	0	0	0	603	903	0
2274	2	-17.6215	25.6343	-213.704	10182.2	16559.1	1506.18	277.486	252.354	0	0	0	0	0	0	0	200	903	0	0	0	0	0	0	0	603	903	0
2274	3	-16.7059	27.0076	-217.061	10273.8	17352.5	1689.28	279.943	252.669	0	0	0	0	0	0	0	200	903	0	0	0	0	0	0	0	603	903	0
2274	4	-15.4852	26.3972	-220.113	10731.5	17657.7	1643.51	280.221	251.245	0	0	0	0	0	0	0	200	903	0	0	0	0	0	0	0	603	903	0
2274	5	-14.7223	26.3972	-225.301	10182.2	18268.1	1780.84	281.083	254.806	0	0	0	0	0	0	0	200	903	0	0	0	0	0	0	0	603	903	0
2274	6	-10.2973	25.1765	-228.353	10640	18634.3	1918.17	281.603	253.405	0	0	0	0	0	0	0	200	903	0	0	0	0	0	0	0	603	903	0
2274	7	-11.8231	26.5498	-233.846	11189.3	18634.3	1872.39	279.686	252.151	0	0	0	0	0	0	0	200	903	0	0	0	0	0	0	0	603	903	0
2274	8	-12.1283	26.7024	-239.339	10640	19427.7	1872.39	281.172	255.544	0	0	0	0	0	0	0	200	903	0	0	0	0	0	0	0	603	903	0
2274	9	-11.9757	28.0757	-243.001	10731.5	19671.9	1872.39	280.954	255.837	0	0	0	0	0	0	0	200	903	0	0	0	0	0	0	0	603	903	0
2275	0	-12.2809	27.6179	-250.325	10731.5	20404.3	1826.61	281.511	257.13	0	0	0	0	0	0	0	200	903	0	0	0	0	0	0	0	603	903	0
2275	1	-11.0602	29.2964	-253.377	10823.1	20709.5	2421.71	281.734	257.285	0	0	0	0	0	0	0	200	903	0	0	0	0	0	0	0	603	903	0
2275	2	-11.518	31.7378	-257.344	10823.1	21075.7	2101.27	281.897	257.943	0	0	0	0	0	0	0	200	903	0	0	0	0	0	0	0	603	903	0
2275	3	-8.00844	31.8904	-259.175	10548.4	21319.8	2009.72	282.26	259.3	0	0	0	0	0	0	0	200	903	0	0	0	0	0	0	0	603	903	0
2275	4	-8.4662	31.7378	-263.753	10914.6	21625	2604.81	281.99	258.618	0	0	0	0	0	0	0	200	903	0	0	0	0	0	0	0	603	903	0
2275	5	-9.07655	33.5689	-266.805	10456.9	22052.2	2650.59	282.653	260.807	0	0	0	0	0	0	0	200	903	0	0	0	0	0	0	0	603	903	0
2275	6	-8.16103	36.6206	-271.077	10273.8	22296.4	2742.14	282.251	262.1	0	0	0	0	0	0	0	200	903	0	0	0	0	0	0	0	603	903	0
2275	7	-6.94032	36.6206	-273.824	10823.1	22296.4	2787.92	281.426	260.474	0	0	0	0	0	0	0	200	903	0	0	0	0	0	0	0	603	903	0
2275	8	-6.63515	37.5362	-276.265	10365.3	22845.7	3016.8	282.695	262.48	0	0	0	0	0	0	0	200	903	0	0	0	0	0	0	0	603	903	0
2275	9	-3.58339	39.6724	-280.233	10365.3	22845.7	3108.35	281.524	263.012	0	0	0	0	0	0	0	200	903	0	0	0	0	0	0	0	603	903	0
2276	0	-3.27821	41.5034	-282.064	10548.4	23456	2925.25	283.159	262.603	0	0	0	0	0	0	0	200	903	0	0	0	0	0	0	0	603	903	0
2276	1	-2.97304	40.5879	-285.726	10548.4	23639.1	3337.23	282.734	263.082	0	0	0	0	0	0	0	200	903	0	0	0	0	0	0	0	603	903	0
2276	2	-1.75233	42.419	-289.388	10090.7	23761.2	3199.91	282.109	265.131	0	0	0	0	0	0	0	200	903	0	0	0	0	0	0	0	603	903	0
2276	3	-0.836806	44.5552	-291.219	10365.3	23944.3	3199.91	282.221	264.407	0	0	0	0	0	0	0	200	903	0	0	0	0	0	0	0	603	903	0
2276	4	1.29942	44.8604	-297.628	10456.9	24249.5	3291.46	281.476	264.866	0	0	0	0	0	0	0	200	903	0	0	0	0	0	0	0	603	903	0
2276	5	0.994248	45.4707	-299.459	10090.7	24798.8	3428.79	282.812	266.304	0	0	0	0	0	0	0	200	903	0	0	0	0	0	0	0	603	903	0
2276	6	1.75719	46.5388	-304.036	9632.91	25287.1	3520.34	283.171	268.317	0	0	0	0	0	0	0	200	903	0	0	0	0	0	0	0	603	903	0
2276	7	2.8253	46.844	-306.172	10090.7	25165	3520.34	282.192	267.043	0	0	0	0	0	0	0	200	903	0	0	0	0	0	0	0	603	903	0
2276	8	3.74083	47.4544	-308.919	9907.57	26019.5	3383.01	284.228	267.928	0	0	0	0	0	0	0	200	903	0	0	0	0	0	0	0	603	903	0
2276	9	4.35118	48.3699	-313.192	9816.01	25836.4	3474.56	282.494	268.658	0	0	0	0	0	0	0	200	903	0	0	0	0	0	0	0	603	903	0
2277	0	5.57189	48.0647	-314.717	10090.7	26202.6	3611.89	283.258	267.937	0	0	0	0	0	0	0	200	903	0	0	0	0	0	0	0	603	903	0
2277	1	6.64	48.8277	-319.295	10182.2	26324.7	3611.89	282.446	268.11	0	0	0	0	0	0	0	200	903	0	0	0	0	0	0	0	603	903	0
2277	2	7.40294	49.438	-320.516	9083.59	26690.9	3703.45	283.275	271.659	0	0	0	0	0	0	0	200	903	0	0	0	0	0	0	0	603	903	0
2277	3	8.16588	49.5906	-321.736	9816.01	27423.3	3749.22	285.235	269.491	0	0	0	0	0	0	0	200	903	0	0	0	0	0	0	0	603	903	0
2277	4	10.1495	49.5906	-323.568	9541.36	27484.4	3840.77	284.942	270.512	0	0	0	0	0	0	0	200	903	0	0	0	0	0	0	0	603	903	0
2277	5	10.6073	49.438	-326.314	9175.15	27728.5	3749.22	284.975	271.883	0	0	0	0	0	0	0	200	903	0	0	0	0	0	0	0	603	903	0
2277	6	11.2176	51.7268	-329.366	9816.01	27789.5	3886.55	284.373	270.197	0	0	0	0	0	0	0	200	903	0	0	0	0	0	0	0	603	903	0
2277	7	11.6754	50.8113	-330.587	9083.59	27850.6	3886.55	284.246	272.523	0	0	0	0	0	0	0	200	903	0	0	0	0	0	0	0	603	903	0
2277	8	14.5746	51.8794	-333.028	9083.59	28460.9	4206.98	285.461	272.724	0	0	0	0	0	0	0	200	903	0	0	0	0	0	0	0	603	903	0
2277	9	13.2013	52.9475	-337.911	9175.15	28705.1	3886.55	284.949	272.847	0	0	0	0	0	0	0	200	903	0	0	0	0	0	0	0	603	903	0
2278	0	13.5065	55.0838	-341.573	9358.25	29376.5	4206.98	286.004	272.603	0	0	0	0	0	0	0	200	903	0	0	0	0	0	0	0	603	903	0
2278	1	14.422	56.7622	-346.761	8351.17	29681.6	4298.54	285.597	275.917	0	0	0	0	0	0	0	200	903	0	0	0	0	0	0	0	603	903	0
2278	2	15.7953	59.2036	-350.423	8351.17	29986.8	4618.97	285.573	276.168	0	0	0	0	0	0	0	200	903	0	0	0	0	0	0	0	603	903	0
2278	3	16.8634	60.4243	-357.747	8534.28	30963.4	4710.52	286.551	276.144	0	0	0	0	0	0	0	200	903	0	0	0	0	0	0	0	603	903	0
2278	4	15.4901	62.1028	-361.409	7344.09	31085.4	4664.75	286.012	279.679	0	0	0	0	0	0	0	200	903	0	0	0	0	0	0	0	603	903	0
2278	5	17.1686	64.0865	-367.208	7435.64	31695.8	5305.62	286.316	279.751	0	0	0	0	0	0	0	200	903	0	0	0	0	0	0	0	603	903	0
2278	6	17.6263	65.9175	-371.175	7710.3	31939.9	5397.17	286.051	279.227	0	0	0	0	0	0	0	200	903	0	0	0	0	0	0	0	603	903	0
2278	7	16.8634	67.2908	-375.753	8442.72	32306.1	5580.28	285.977	277.531	0	0	0	0	0	0	0	200	903	0	0	0	0	0	0	0	603	903	0
2278	8	17.6263	69.427	-380.635	7069.43	32977.5	5626.05	286.638	281.427	0	0	0	0	0	0	0	200	903	0	0	0	0	0	0	0	603	903	0
2278	9	17.3212	71.2581	-385.823	6977.88	33282.7	5809.16	286.264	281.914	0	0	0	0	0	0	0	200	903	0	0	0	0	0	0	0	603	903	0
2279	0	17.1686	72.4788	-387.96	6977.88	33893.1	6175.37	287.362	282.014	0	0	0	0	0	0	0	200	903	0	0	0	0	0	0	0	603	903	0
2279	1	17.9315	75.0728	-394.979	6703.22	34259.3	6358.47	286.737	283.029	0	0	0	0	0	0	0	200	903	0	0	0	0	0	0	0	603	903	0
2279	2	17.9315	77.0564	-399.556	5970.79	35174.8	6495.8	288.035	285.056	0	0	0	0	0	0	0	200	903	0	0	0	0	0	0	0	603	903	0
2279	3	18.2367	77.3616	-406.575	6794.77	35296.9	6724.68	286.815	283.288	0	0	0	0	0	0	0	200	903	0	0	0	0	0	0	0	603	903	0
2279	4	19.3048	78.7349	-411.458	5329.93	35907.2	6587.36	287.268	287.046	0	0	0	0	0	0	0	200	903	0	0	0	0	0	0	0	603	903	0
2279	5	19.3048	80.4134	-416.036	5970.79	36517.6	6907.79	287.775	285.648	0	0	0	0	0	0	0	200	903	0	0	0	0	0	0	0	603	903	0
2279	6	19.3048	81.0237	-420.613	5513.03	36273.4	7136.67	286.239	286.893	0	0	0	0	0	0	0	200	903	0	0	0	0	0	0	0	603	903	0
2279	7	19.61	81.6341	-422.75	6062.35	37738.3	7274	289.269	285.66	0	0	0	0	0	0	0	200	903	0	0	0	0	0	0	0	603	903	0
2279	8	19.9151	83.3125	-433.126	5238.37	37677.2	7502.88	286.989	287.906	0	0	0	0	0	0	0	200	903	0	0	0	0	0	0	0	603	903	0
2279	9	20.0677	83.7703	-437.398	5146.82	38348.6	7411.33	287.674	288.233	0	0	0	0	0	0	0	200	903	0	0	0	0	0	0	0	603	903	0
2280	0	20.3729	84.0755	-441.976	5513.03	39020	7640.21	288.285	287.526	0	0	0	0	0	0	0	200	903	0	0	0	0	0	0	0	603	903	0
2280	1	20.2203	84.8384	-445.638	4231.29	39264.1	7594.44	288.108	290.505	0	0	0	0	0	0	0	200	903	0	0	0	0	0	0	0	603	903	0
2280	2	20.5255	86.5169	-450.521	4505.95	40118.6	7777.54	289.049	289.998	0	0	0	0	0	0	0	200	903	0	0	0	0	0	0	0	603	903	0
2280	3	20.5255	85.7539	-454.488	4414.4	40179.7	7777.54	288.407	290.287	0	0	0	0	0	0	0	200	903	0	0	0	0	0	0	0	603	903	0
2280	4	22.9669	86.6695	-458.76	3681.98	40606.9	7777.54	288.514	291.974	0	0	0	0	0	0	0	200	903	0	0	0	0	0	0	0	603	903	0
2280	5	22.0514	87.8902	-462.117	4231.29	41156.2	7914.87	289.06	290.844	0	0	0	0	0	0	0	200	903	0	0	0	0	0	0	0	603	903	0
2280	6	21.8988	87.7376	-466.695	3956.64	41461.4	8097.98	288.841	291.522	0	0	0	0	0	0	0	200	903	0	0	0	0	0	0	0	603	903	0
2280	7	23.4247	88.6531	-474.324	3224.21	42499	8143.75	289.599	293.203	0	0	0	0	0	0	0	200	903	0	0	0	0	0	0	0	603	903	0
2280	8	22.9669	89.8738	-476.155	3224.21	42499	8418.41	289.255	293.229	0	0	0	0	0	0	0	200	903	0	0	0	0	0	0	0	603	903	0
2280	9	24.3402	91.0945	-480.733	2766.45	43048.3	8235.3	289.547	294.245	0	0	0	0	0	0	0	200	903	0	0	0	0	0	0	0	603	903	0
2281	0	25.1031	89.8738	-486.837	3041.11	43414.5	8189.53	289.177	293.753	0	0	0	0	0	0	0	200	903	0	0	0	0	0	0	0	603	903	0
2281	1	24.6454	92.1626	-492.635	2766.45	43719.7	8281.08	288.747	294.384	0	0	0	0	0	0	0	200	903	0	0	0	0	0	0	0	603	903	0
2281	2	25.7135	93.3833	-498.128	2491.79	44879.4	8464.19	290.096	294.998	0	0	0	0	0	0	0	200	903	0	0	0	0	0	0	0	603	903	0
2281	3	25.8661	92.773	-503.011	2125.58	45367.7	8281.08	290.192	295.774	0	0	0	0	0	0	0	200	903	0	0	0	0	0	0	0	603	903	0
2281	4	26.629	93.5359	-508.504	1301.61	45672.8	8464.19	289.818	297.44	0	0	0	0	0	0	0	200	903	0	0	0	0	0	0	0	603	903	0
2281	5	28.1549	93.5359	-513.387	1301.61	46405.3	8555.74	290.391	297.465	0	0	0	0	0	0	0	200	903	0	0	0	0	0	0	0	603	903	0
2281	6	28.7652	95.5196	-519.49	1393.16	46893.6	8509.96	290.268	297.318	0	0	0	0	0	0	0	200	903	0	0	0	0	0	0	0	603	903	0
2281	7	29.6808	95.9773	-520.711	843.842	47931.2	8555.74	292.049	298.379	0	0	0	0	0	0	0	200	903	0	0	0	0	0	0	0	603	903	0
2281	8	30.9015	97.0454	-527.73	386.078	48114.3	8509.96	291.172	299.268	0	0	0	0	0	0	0	200	903	0	0	0	0	0	0	0	603	903	0
2281	9	31.817	97.6558	-536.885	-254.791	49151.9	8921.95	291.55	300.475	0	0	0	0	0	0	0	200	903	0	0	0	0	0	0	0	603	903	0
2282	0	32.2748	98.1136	-544.82	-163.238	50128.4	8509.96	292.009	300.3	0	0	0	0	0	0	0	200	903	0	0	0	0	0	0	0	603	903	0
2282	1	38.3783	99.3343	-548.482	-712.555	50494.6	8555.74	292.063	301.299	0	0	0	0	0	0	0	200	903	0	0	0	0	0	0	0	603	903	0
2282	2	38.6835	101.47	-553.975	-1536.53	51349.1	9059.28	292.692	302.774	0	0	0	0	0	0	0	200	903	0	0	0	0	0	0	0	603	903	0
2282	3	37.1576	102.691	-556.417	-1170.32	51593.3	9059.28	292.724	302.103	0	0	0	0	0	0	0	200	903	0	0	0	0	0	0	0	603	903	0
2282	4	37.6153	104.217	-561.299	-1719.64	51715.3	9242.38	292.135	303.064	0	0	0	0	0	0	0	200	903	0	0	0	0	0	0	0	603	903	0
2282	5	37.6153	105.438	-570.15	-2452.06	52386.7	9837.48	291.882	304.301	0	0	0	0	0	0	0	200	903	0	0	0	0	0	0	0	603	903	0
2282	6	36.8524	107.116	-572.591	-1719.64	52569.8	9883.25	291.81	303.003	0	0	0	0	0	0	0	200	903	0	0	0	0	0	0	0	603	903	0
2282	7	36.0895	106.353	-575.338	-2360.5	52875	9791.7	291.903	304.103	0	0	0	0	0	0	0	200	903	0	0	0	0	0	0	0	603	903	0
2282	8	37.6153	107.116	-577.474	-2635.16	53119.1	10295.2	291.985	304.563	0	0	0	0	0	0	0	200	903	0	0	0	0	0	0	0	603	903	0
2282	9	32.8851	107.727	-583.272	-2268.95	53241.2	10341	291.28	303.89	0	0	0	0	0	0	0	200	903	0	0	0	0	0	0	0	603	903	0
2283	0	31.5118	107.269	-585.714	-2543.61	53790.5	10203.7	291.838	304.343	0	0	0	0	0	0	0	200	903	0	0	0	0	0	0	0	603	903	0
2283	1	30.7489	107.269	-587.545	-3184.48	53790.5	10341	291.551	305.42	0	0	0	0	0	0	0	200	903	0	0	0	0	0	0	0	603	903	0
2283	2	30.4437	107.116	-589.986	-3550.69	54156.7	10524.1	291.793	306.018	0	0	0	0	0	0	0	200	903	0	0	0	0	0	0	0	603	903	0
2283	3	30.2911	106.658	-593.953	-3184.48	54461.9	10615.7	291.694	305.362	0	0	0	0	0	0	0	200	903	0	0	0	0	0	0	0	603	903	0
2283	4	28.7652	106.048	-595.479	-3642.24	54889.2	10249.5	292.176	306.116	0	0	0	0	0	0	0	200	903	0	0	0	0	0	0	0	603	903	0
2283	5	28.1549	106.964	-598.836	-4191.56	55133.3	10844.6	292.067	307	0	0	0	0	0	0	0	200	903	0	0	0	0	0	0	0	603	903	0
2283	6	30.5963	106.964	-601.277	-3916.9	55194.3	10341	291.795	306.514	0	0	0	0	0	0	0	200	903	0	0	0	0	0	0	0	603	903	0
2283	7	29.223	105.896	-606.771	-4374.66	55804.7	10615.7	291.97	307.21	0	0	0	0	0	0	0	200	903	0	0	0	0	0	0	0	603	903	0
2283	8	29.8334	106.506	-611.043	-5015.53	56293	10798.8	292.126	308.208	0	0	0	0	0	0	0	200	903	0	0	0	0	0	0	0	603	903	0
2283	9	29.9859	106.201	-614.705	-5473.3	56537.1	10981.9	291.974	308.904	0	0	0	0	0	0	0	200	903	0	0	0	0	0	0	0	603	903	0
2284	0	31.2066	108.184	-619.283	-5564.85	56415	10661.5	291.097	308.986	0	0	0	0	0	0	0	200	903	0	0	0	0	0	0	0	603	903	0
2284	1	30.5963	108.337	-623.555	-5839.51	57269.5	11439.7	291.844	309.365	0	0	0	0	0	0	0	200	903	0	0	0	0	0	0	0	603	903	0
2284	2	31.5118	110.168	-628.133	-6480.38	57757.8	10524.1	291.952	310.317	0	0	0	0	0	0	0	200	903	0	0	0	0	0	0	0	603	903	0
2284	3	32.7325	110.473	-629.964	-6205.72	58246.1	11210.8	292.459	309.851	0	0	0	0	0	0	0	200	903	0	0	0	0	0	0	0	603	903	0
2284	4	32.7325	110.626	-634.542	-6663.48	58368.2	11165	291.985	310.501	0	0	0	0	0	0	0	200	903	0	0	0	0	0	0	0	603	903	0
2284	5	32.2748	112.152	-639.73	-6755.04	58917.5	11119.2	292.097	310.559	0	0	0	0	0	0	0	200	903	0	0	0	0	0	0	0	603	903	0
2284	6	32.1222	112.152	-643.087	-6846.59	59161.6	10981.9	291.996	310.646	0	0	0	0	0	0	0	200	903	0	0	0	0	0	0	0	603	903	0
2284	7	33.9532	112.304	-645.223	-7304.35	59710.9	10798.8	292.543	311.321	0	0	0	0	0	0	0	200	903	0	0	0	0	0	0	0	603	903	0
2284	8	34.1058	112.457	-648.275	-7853.67	60138.2	11165	292.767	312.115	0	0	0	0	0	0	0	200	903	0	0	0	0	0	0	0	603	903	0
2284	9	33.9532	111.846	-651.937	-8311.43	59833	10981.9	291.777	312.749	0	0	0	0	0	0	0	200	903	0	0	0	0	0	0	0	603	903	0
2285	0	34.7162	112.609	-655.599	-7121.25	60748.5	10936.1	292.661	310.862	0	0	0	0	0	0	0	200	903	0	0	0	0	0	0	0	603	903	0
2285	1	34.5636	112.152	-657.43	-8128.33	60931.6	10981.9	292.682	312.364	0	0	0	0	0	0	0	200	903	0	0	0	0	0	0	0	603	903	0
2285	2	35.3265	112.609	-661.397	-8677.64	61236.8	11073.4	292.587	313.12	0	0	0	0	0	0	0	200	903	0	0	0	0	0	0	0	603	903	0
2285	3	34.5636	112.152	-664.754	-8311.43	61481	10707.2	292.487	312.503	0	0	0	0	0	0	0	200	903	0	0	0	0	0	0	0	603	903	0
2285	4	36.3946	111.541	-668.416	-8494.54	61908.2	11119.2	292.619	312.708	0	0	0	0	0	0	0	200	903	0	0	0	0	0	0	0	603	903	0
2285	5	36.0895	112.609	-671.773	-9135.41	62457.5	11119.2	292.974	313.599	0	0	0	0	0	0	0	200	903	0	0	0	0	0	0	0	603	903	0
2285	6	35.6317	111.846	-674.825	-8860.75	62335.5	10753	292.373	313.13	0	0	0	0	0	0	0	200	903	0	0	0	0	0	0	0	603	903	0
2285	7	35.7843	111.541	-678.182	-9135.41	62396.5	11027.7	292.006	313.47	0	0	0	0	0	0	0	200	903	0	0	0	0	0	0	0	603	903	0
2285	8	35.9369	112.457	-680.928	-9318.51	63189.9	11256.5	292.8	313.685	0	0	0	0	0	0	0	200	903	0	0	0	0	0	0	0	603	903	0
2285	9	36.5472	111.846	-683.065	-9318.51	63373.1	11302.3	292.778	313.642	0	0	0	0	0	0	0	200	903	0	0	0	0	0	0	0	603	903	0
2286	0	37.4628	111.541	-684.896	-9684.72	63800.3	11210.8	293.153	314.14	0	0	0	0	0	0	0	200	903	0	0	0	0	0	0	0	603	903	0
2286	1	36.0895	111.694	-687.947	-10508.7	63739.3	11256.5	292.651	315.275	0	0	0	0	0	0	0	200	903	0	0	0	0	0	0	0	603	903	0
2286	2	36.8524	111.999	-691.609	-10966.5	64227.5	11119.2	292.867	315.856	0	0	0	0	0	0	0	200	903	0	0	0	0	0	0	0	603	903	0
2286	3	36.6998	111.999	-695.272	-10600.2	64776.8	11210.8	293.168	315.246	0	0	0	0	0	0	0	200	903	0	0	0	0	0	0	0	603	903	0
2286	4	38.836	111.846	-697.103	-11241.1	64960	11348.1	293.186	316.126	0	0	0	0	0	0	0	200	903	0	0	0	0	0	0	0	603	903	0
2286	5	37.3102	112.915	-701.375	-11241.1	65631.3	11302.3	293.575	316.027	0	0	0	0	0	0	0	200	903	0	0	0	0	0	0	0	603	903	0
2286	6	37.005	112.457	-704.427	-11332.7	65509.3	11073.4	292.997	316.088	0	0	0	0	0	0	0	200	903	0	0	0	0	0	0	0	603	903	0
2286	7	38.3783	110.778	-708.699	-11515.8	65753.4	11531.2	292.78	316.249	0	0	0	0	0	0	0	200	903	0	0	0	0	0	0	0	603	903	0
2286	8	39.1412	113.22	-712.667	-11607.3	66180.7	11348.1	292.863	316.287	0	0	0	0	0	0	0	200	903	0	0	0	0	0	0	0	603	903	0
2286	9	38.5309	113.067	-715.108	-11790.4	66607.9	11348.1	293.144	316.488	0	0	0	0	0	0	0	200	903	0	0	0	0	0	0	0	603	903	0
2287	0	37.9205	113.372	-717.549	-11973.5	66913.1	11348.1	293.252	316.687	0	0	0	0	0	0	0	200	903	0	0	0	0	0	0	0	603	903	0
2287	1	37.7679	113.067	-720.601	-12980.6	67157.2	11348.1	293.196	318.014	0	0	0	0	0	0	0	200	903	0	0	0	0	0	0	0	603	903	0
2287	2	38.0731	113.22	-719.686	-13072.2	67584.5	11531.2	293.908	318.164	0	0	0	0	0	0	0	200	903	0	0	0	0	0	0	0	603	903	0
2287	3	37.005	112.915	-727.62	-12889.1	67767.6	11577	293.136	317.714	0	0	0	0	0	0	0	200	903	0	0	0	0	0	0	0	603	903	0
2287	4	37.4628	113.372	-729.756	-13255.3	68072.8	11577	293.281	318.164	0	0	0	0	0	0	0	200	903	0	0	0	0	0	0	0	603	903	0
2287	5	37.3102	113.678	-734.334	-13438.4	68133.8	11622.8	292.783	318.3	0	0	0	0	0	0	0	200	903	0	0	0	0	0	0	0	603	903	0
2287	6	36.3946	113.22	-733.724	-13529.9	68744.1	11393.9	293.692	318.44	0	0	0	0	0	0	0	200	903	0	0	0	0	0	0	0	603	903	0
2287	7	38.5309	113.067	-737.081	-13804.6	69049.3	11851.6	293.679	318.729	0	0	0	0	0	0	0	200	903	0	0	0	0	0	0	0	603	903	0
2287	8	36.8524	113.372	-739.217	-14537	69171.4	11348.1	293.574	319.665	0	0	0	0	0	0	0	200	903	0	0	0	0	0	0	0	603	903	0
2287	9	37.3102	113.678	-742.574	-14170.8	68805.2	11393.9	292.658	319.083	0	0	0	0	0	0	0	200	903	0	0	0	0	0	0	0	603	903	0
2288	0	37.1576	112.762	-740.743	-14445.5	69537.6	11943.2	293.876	319.501	0	0	0	0	0	0	0	200	903	0	0	0	0	0	0	0	603	903	0
2288	1	37.9205	112.152	-747.457	-15086.3	70148	11210.8	293.849	320.184	0	0	0	0	0	0	0	200	903	0	0	0	0	0	0	0	603	903	0
2288	2	37.9205	112.762	-748.677	-14903.2	70148	11668.5	293.696	319.906	0	0	0	0	0	0	0	200	903	0	0	0	0	0	0	0	603	903	0
2288	3	37.7679	112.457	-750.814	-15452.5	70331	11714.3	293.673	320.581	0	0	0	0	0	0	0	200	903	0	0	0	0	0	0	0	603	903	0
2288	4	38.9886	112.457	-757.833	-15727.2	71124.5	11622.8	293.853	320.753	0	0	0	0	0	0	0	200	903	0	0	0	0	0	0	0	603	903	0
2288	5	38.6835	113.22	-758.138	-16185	70819.3	11668.5	293.412	321.348	0	0	0	0	0	0	0	200	903	0	0	0	0	0	0	0	603	903	0
2288	6	38.5309	111.999	-760.274	-16001.9	71246.6	11531.2	293.712	321.048	0	0	0	0	0	0	0	200	903	0	0	0	0	0	0	0	603	903	0
2288	7	38.5309	111.999	-761.8	-16368.1	71246.6	11622.8	293.524	321.486	0	0	0	0	0	0	0	200	903	0	0	0	0	0	0	0	603	903	0
2288	8	38.3783	112.609	-761.8	-16825.8	71795.9	11622.8	294.245	322.087	0	0	0	0	0	0	0	200	903	0	0	0	0	0	0	0	603	903	0
2288	9	38.2257	113.067	-766.378	-16734.3	72223.1	11622.8	294.24	321.836	0	0	0	0	0	0	0	200	903	0	0	0	0	0	0	0	603	903	0
2289	0	38.3783	110.473	-768.514	-17100.5	72101.1	11577	293.819	322.251	0	0	0	0	0	0	0	200	903	0	0	0	0	0	0	0	603	903	0
2289	1	38.836	112.457	-770.65	-17466.7	72528.3	11531.2	294.113	322.665	0	0	0	0	0	0	0	200	903	0	0	0	0	0	0	0	603	903	0
2289	2	38.3783	111.999	-770.955	-17558.3	72467.3	11577	293.997	322.775	0	0	0	0	0	0	0	200	903	0	0	0	0	0	0	0	603	903	0
2289	3	38.836	111.084	-772.786	-17466.7	72467.3	11622.8	293.774	322.602	0	0	0	0	0	0	0	200	903	0	0	0	0	0	0	0	603	903	0
2289	4	38.836	111.694	-774.922	-18840	73260.7	11622.8	294.539	324.312	0	0	0	0	0	0	0	200	903	0	0	0	0	0	0	0	603	903	0
2289	5	39.1412	110.931	-775.533	-18840	73016.6	11439.7	294.15	324.293	0	0	0	0	0	0	0	200	903	0	0	0	0	0	0	0	603	903	0
2289	6	39.599	111.541	-776.754	-18107.6	73565.9	11668.5	294.709	323.312	0	0	0	0	0	0	0	200	903	0	0	0	0	0	0	0	603	903	0
2289	7	40.6671	111.389	-779.5	-19480.9	73443.8	11348.1	294.219	324.991	0	0	0	0	0	0	0	200	903	0	0	0	0	0	0	0	603	903	0
2289	8	40.0567	111.999	-781.942	-19664	73932.1	11577	294.549	325.148	0	0	0	0	0	0	0	200	903	0	0	0	0	0	0	0	603	903	0
2289	9	40.3619	110.931	-782.552	-19572.4	74237.3	11210.8	294.866	325.011	0	0	0	0	0	0	0	200	903	0	0	0	0	0	0	0	603	903	0
2290	0	40.8197	110.626	-783.162	-19755.5	74115.2	11760.1	294.636	325.225	0	0	0	0	0	0	0	200	903	0	0	0	0	0	0	0	603	903	0
2290	1	40.5145	111.084	-787.13	-20579.5	74664.5	11531.2	294.857	326.145	0	0	0	0	0	0	0	200	903	0	0	0	0	0	0	0	603	903	0
2290	2	40.6671	110.626	-788.045	-20579.5	74481.4	11577	294.514	326.115	0	0	0	0	0	0	0	200	903	0	0	0	0	0	0	0	603	903	0
2290	3	40.3619	110.321	-790.486	-20487.9	75152.8	11439.7	295.072	325.918	0	0	0	0	0	0	0	200	903	0	0	0	0	0	0	0	603	903	0
2290	4	41.2775	108.642	-787.13	-21403.5	75091.8	11577	295.4	327.192	0	0	0	0	0	0	0	200	903	0	0	0	0	0	0	0	603	903	0
2290	5	40.9723	110.626	-792.623	-20579.5	75030.8	11531.2	294.661	325.964	0	0	0	0	0	0	0	200	903	0	0	0	0	0	0	0	603	903	0
2290	6	41.2775	109.863	-793.843	-21311.9	75458	11439.7	295.054	326.846	0	0	0	0	0	0	0	200	903	0	0	0	0	0	0	0	603	903	0
2290	7	41.1249	109.1	-794.149	-22502.1	75458	11393.9	295.018	328.335	0	0	0	0	0	0	0	200	903	0	0	0	0	0	0	0	603	903	0
2290	8	42.193	109.863	-794.454	-22502.1	75641.1	11485.4	295.211	328.324	0	0	0	0	0	0	0	200	903	0	0	0	0	0	0	0	603	903	0
2290	9	41.5826	109.558	-796.285	-22319	75946.3	11714.3	295.376	328.029	0	0	0	0	0	0	0	200	903	0	0	0	0	0	0	0	603	903	0
2291	0	42.193	108.337	-797.505	-22959.9	75702.1	11439.7	294.924	328.79	0	0	0	0	0	0	0	200	903	0	0	0	0	0	0	0	603	903	0
2291	1	43.5663	108.337	-797.505	-23326.1	76373.5	11165	295.766	329.249	0	0	0	0	0	0	0	200	903	0	0	0	0	0	0	0	603	903	0
2291	2	42.9559	107.727	-798.726	-23417.6	76068.4	11210.8	295.237	329.319	0	0	0	0	0	0	0	200	903	0	0	0	0	0	0	0	603	903	0
2291	3	43.4137	107.421	-799.642	-23326.1	76556.6	11256.5	295.739	329.171	0	0	0	0	0	0	0	200	903	0	0	0	0	0	0	0	603	903	0
2291	4	43.5663	107.269	-801.168	-24241.6	76312.5	11119.2	295.252	330.258	0	0	0	0	0	0	0	200	903	0	0	0	0	0	0	0	603	903	0
2291	5	45.2447	106.658	-805.44	-23783.8	76373.5	11256.5	294.822	329.529	0	0	0	0	0	0	0	200	903	0	0	0	0	0	0	0	603	903	0
2291	6	43.7189	105.59	-804.525	-24150.1	76861.8	11348.1	295.537	330.018	0	0	0	0	0	0	0	200	903	0	0	0	0	0	0	0	603	903	0
2291	7	44.024	106.048	-805.135	-24974	76922.8	11393.9	295.54	331.018	0	0	0	0	0	0	0	200	903	0	0	0	0	0	0	0	603	903	0
2291	8	44.787	106.201	-806.05	-25157.1	77228	11256.5	295.81	331.21	0	0	0	0	0	0	0	200	903	0	0	0	0	0	0	0	603	903	0
2291	9	45.0921	104.217	-806.05	-25248.7	76922.8	11348.1	295.432	331.324	0	0	0	0	0	0	0	200	903	0	0	0	0	0	0	0	603	903	0
2292	0	44.6344	104.98	-807.576	-25248.7	77533.2	11165	296.007	331.265	0	0	0	0	0	0	0	200	903	0	0	0	0	0	0	0	603	903	0
2292	1	44.4818	105.133	-808.492	-26164.2	77533.2	11165	295.899	332.362	0	0	0	0	0	0	0	200	903	0	0	0	0	0	0	0	603	903	0
2292	2	44.787	105.285	-809.407	-25798	77228	10890.3	295.413	331.873	0	0	0	0	0	0	0	200	903	0	0	0	0	0	0	0	603	903	0
2292	3	45.5499	103.149	-808.797	-25889.6	77716.3	10798.8	296.089	332.01	0	0	0	0	0	0	0	200	903	0	0	0	0	0	0	0	603	903	0
2292	4	45.3973	104.37	-808.492	-25889.6	77533.2	10936.1	295.899	332.022	0	0	0	0	0	0	0	200	903	0	0	0	0	0	0	0	603	903	0
2292	5	45.0921	103.912	-810.018	-26530.4	77716.3	10981.9	295.944	332.753	0	0	0	0	0	0	0	200	903	0	0	0	0	0	0	0	603	903	0
2292	6	45.5499	102.233	-809.102	-26805.1	78021.5	10890.3	296.43	333.129	0	0	0	0	0	0	0	200	903	0	0	0	0	0	0	0	603	903	0
2292	7	45.3973	102.996	-807.576	-27079.8	77594.2	10753	296.083	333.532	0	0	0	0	0	0	0	200	903	0	0	0	0	0	0	0	603	903	0
2292	8	46.1603	101.623	-810.323	-27446	78143.5	10798.8	296.435	333.87	0	0	0	0	0	0	0	200	903	0	0	0	0	0	0	0	603	903	0
2292	9	46.618	101.623	-811.544	-26988.2	78143.5	10798.8	296.29	333.255	0	0	0	0	0	0	0	200	903	0	0	0	0	0	0	0	603	903	0
2293	0	46.1603	101.623	-811.849	-28178.4	78326.7	10661.5	296.479	334.709	0	0	0	0	0	0	0	200	903	0	0	0	0	0	0	0	603	903	0
2293	1	46.9232	101.165	-810.628	-28453	78265.6	10707.2	296.549	335.1	0	0	0	0	0	0	0	200	903	0	0	0	0	0	0	0	603	903	0
2293	2	47.9913	101.165	-815.206	-27903.7	78387.7	10707.2	296.157	334.229	0	0	0	0	0	0	0	200	903	0	0	0	0	0	0	0	603	903	0
2293	3	46.7706	100.25	-814.595	-28910.8	78509.8	10341	296.379	335.491	0	0	0	0	0	0	0	200	903	0	0	0	0	0	0	0	603	903	0
2293	4	47.381	100.86	-814.29	-29277	78509.8	10661.5	296.415	335.954	0	0	0	0	0	0	0	200	903	0	0	0	0	0	0	0	603	903	0
2293	5	46.9232	100.097	-814.901	-28636.1	78814.9	10569.9	296.717	335.141	0	0	0	0	0	0	0	200	903	0	0	0	0	0	0	0	603	903	0
2293	6	46.7706	99.3343	-815.816	-29002.4	78509.8	10386.8	296.235	335.55	0	0	0	0	0	0	0	200	903	0	0	0	0	0	0	0	603	903	0
2293	7	46.9232	99.3343	-811.849	-29826.3	78570.8	10341	296.78	336.739	0	0	0	0	0	0	0	200	903	0	0	0	0	0	0	0	603	903	0
2293	8	46.0077	98.1136	-816.121	-29917.9	78692.9	10341	296.423	336.659	0	0	0	0	0	0	0	200	903	0	0	0	0	0	0	0	603	903	0
2293	9	46.7706	98.5713	-816.426	-29185.5	78265.6	10295.2	295.864	335.748	0	0	0	0	0	0	0	200	903	0	0	0	0	0	0	0	603	903	0
2294	0	46.618	97.961	-815.511	-30284.1	79242.2	10112.1	297.169	337.135	0	0	0	0	0	0	0	200	903	0	0	0	0	0	0	0	603	903	0
2294	1	46.4654	97.5032	-815.511	-30375.7	78692.9	10020.6	296.495	337.247	0	0	0	0	0	0	0	200	903	0	0	0	0	0	0	0	603	903	0
2294	2	47.381	97.5032	-812.459	-29917.9	78998	10020.6	297.233	336.824	0	0	0	0	0	0	0	200	903	0	0	0	0	0	0	0	603	903	0
2294	3	46.7706	95.0618	-812.154	-30192.5	79059.1	9929.03	297.345	337.176	0	0	0	0	0	0	0	200	903	0	0	0	0	0	0	0	603	903	0
2294	4	47.2284	96.5877	-812.764	-30284.1	78998	10295.2	297.197	337.261	0	0	0	0	0	0	0	200	903	0	0	0	0	0	0	0	603	903	0
2294	5	47.2284	96.1299	-812.459	-30741.9	79364.2	9837.48	297.684	337.838	0	0	0	0	0	0	0	200	903	0	0	0	0	0	0	0	603	903	0
2294	6	47.2284	95.6721	-810.323	-30650.3	78876	9929.03	297.339	337.825	0	0	0	0	0	0	0	200	903	0	0	0	0	0	0	0	603	903	0
2294	7	47.5336	95.2144	-813.68	-31748.9	79059.1	9745.92	297.162	339.019	0	0	0	0	0	0	0	200	903	0	0	0	0	0	0	0	603	903	0
2294	8	47.8387	94.2989	-811.544	-32206.7	78998	9608.6	297.343	339.686	0	0	0	0	0	0	0	200	903	0	0	0	0	0	0	0	603	903	0
2294	9	48.4491	93.9937	-810.933	-31016.5	78937	9608.6	297.341	338.248	0	0	0	0	0	0	0	200	903	0	0	0	0	0	0	0	603	903	0
2295	0	48.4491	93.3833	-810.933	-32572.9	79120.1	9608.6	297.567	340.167	0	0	0	0	0	0	0	200	903	0	0	0	0	0	0	0	603	903	0
2295	1	48.7543	93.8411	-812.459	-32298.2	78937	9562.82	297.158	339.754	0	0	0	0	0	0	0	200	903	0	0	0	0	0	0	0	603	903	0
2295	2	48.2965	92.773	-810.933	-32023.6	79059.1	9425.49	297.491	339.49	0	0	0	0	0	0	0	200	903	0	0	0	0	0	0	0	603	903	0
2295	3	48.2965	92.1626	-809.713	-32389.8	78876	9196.61	297.412	340.002	0	0	0	0	0	0	0	200	903	0	0	0	0	0	0	0	603	903	0
2295	4	48.4491	92.01	-809.102	-32389.8	79181.2	9425.49	297.863	340.032	0	0	0	0	0	0	0	200	903	0	0	0	0	0	0	0	603	903	0
2295	5	48.9068	91.5523	-807.271	-32756	79303.2	8967.73	298.236	340.576	0	0	0	0	0	0	0	200	903	0	0	0	0	0	0	0	603	903	0
2295	6	47.9913	91.0945	-807.576	-32572.9	78998	9288.16	297.821	340.334	0	0	0	0	0	0	0	200	903	0	0	0	0	0	0	0	603	903	0
2295	7	47.6861	89.416	-806.966	-33488.4	78692.9	9150.83	297.517	341.499	0	0	0	0	0	0	0	200	903	0	0	0	0	0	0	0	603	903	0
2295	8	47.8387	90.0264	-806.05	-33396.9	78753.9	9059.28	297.703	341.433	0	0	0	0	0	0	0	200	903	0	0	0	0	0	0	0	603	903	0
2295	9	48.1439	89.2635	-802.388	-32481.4	78876	9059.28	298.301	340.481	0	0	0	0	0	0	0	200	903	0	0	0	0	0	0	0	603	903	0
2296	0	47.8387	89.1109	-802.388	-34037.8	78326.7	8921.95	297.617	342.421	0	0	0	0	0	0	0	200	903	0	0	0	0	0	0	0	603	903	0
2296	1	48.1439	89.416	-802.693	-34220.9	78814.9	8876.17	298.188	342.633	0	0	0	0	0	0	0	200	903	0	0	0	0	0	0	0	603	903	0
2296	2	47.8387	88.0428	-800.557	-33671.5	78570.8	8738.84	298.145	342.06	0	0	0	0	0	0	0	200	903	0	0	0	0	0	0	0	603	903	0
2296	3	49.975	85.7539	-799.031	-33763.1	78204.6	8830.4	297.874	342.255	0	0	0	0	0	0	0	200	903	0	0	0	0	0	0	0	603	903	0
2296	4	48.9068	87.4324	-797.811	-33854.6	78509.8	8555.74	298.407	342.434	0	0	0	0	0	0	0	200	903	0	0	0	0	0	0	0	603	903	0
2296	5	48.6017	86.6695	-797.811	-34312.4	78143.5	8693.07	297.948	343.008	0	0	0	0	0	0	0	200	903	0	0	0	0	0	0	0	603	903	0
2296	6	49.0594	86.3643	-795.98	-34037.8	78326.7	8509.96	298.403	342.762	0	0	0	0	0	0	0	200	903	0	0	0	0	0	0	0	603	903	0
2296	7	50.2801	85.2962	-797.2	-34770.2	78448.7	8464.19	298.405	343.615	0	0	0	0	0	0	0	200	903	0	0	0	0	0	0	0	603	903	0
2296	8	49.6698	85.1436	-795.98	-35044.8	78265.6	8509.96	298.326	344.027	0	0	0	0	0	0	0	200	903	0	0	0	0	0	0	0	603	903	0
2296	9	48.9068	83.6177	-793.843	-34678.6	78265.6	8418.41	298.591	343.685	0	0	0	0	0	0	0	200	903	0	0	0	0	0	0	0	603	903	0
2297	0	48.6017	83.7703	-792.318	-34861.7	78204.6	8143.75	298.704	344	0	0	0	0	0	0	0	200	903	0	0	0	0	0	0	0	603	903	0
2297	1	48.6017	83.9229	-786.214	-34770.2	77777.3	8372.63	298.926	344.225	0	0	0	0	0	0	0	200	903	0	0	0	0	0	0	0	603	903	0
2297	2	48.1439	83.0074	-788.961	-34861.7	77899.4	8281.08	298.737	344.187	0	0	0	0	0	0	0	200	903	0	0	0	0	0	0	0	603	903	0
2297	3	48.1439	82.7022	-789.876	-34953.3	77716.3	8281.08	298.391	344.252	0	0	0	0	0	0	0	200	903	0	0	0	0	0	0	0	603	903	0
2297	4	48.2965	81.7867	-787.13	-36051.9	77838.4	8052.2	298.889	345.802	0	0	0	0	0	0	0	200	903	0	0	0	0	0	0	0	603	903	0
2297	5	47.6861	79.9556	-783.162	-35777.3	78021.5	7777.54	299.624	345.683	0	0	0	0	0	0	0	200	903	0	0	0	0	0	0	0	603	903	0
2297	6	48.4491	80.7185	-784.383	-35777.3	77472.2	7914.87	298.768	345.612	0	0	0	0	0	0	0	200	903	0	0	0	0	0	0	0	603	903	0
2297	7	47.9913	80.1082	-781.636	-35685.7	77411.1	7777.54	299.037	345.655	0	0	0	0	0	0	0	200	903	0	0	0	0	0	0	0	603	903	0
2297	8	48.6017	80.2608	-781.331	-36509.7	77350.1	7777.54	298.998	346.728	0	0	0	0	0	0	0	200	903	0	0	0	0	0	0	0	603	903	0
2297	9	47.5336	79.3452	-777.669	-36509.7	77350.1	7457.11	299.464	346.948	0	0	0	0	0	0	0	200	903	0	0	0	0	0	0	0	603	903	0
2298	0	48.4491	78.4297	-777.669	-35777.3	77044.9	7640.21	299.072	346.006	0	0	0	0	0	0	0	200	903	0	0	0	0	0	0	0	603	903	0
2298	1	47.9913	78.4297	-776.448	-36875.9	76922.8	7502.88	299.07	347.493	0	0	0	0	0	0	0	200	903	0	0	0	0	0	0	0	603	903	0
2298	2	47.9913	76.5987	-774.312	-36601.2	77044.9	7594.44	299.501	347.269	0	0	0	0	0	0	0	200	903	0	0	0	0	0	0	0	603	903	0
2298	3	49.212	77.0564	-776.143	-35411.1	76739.8	7319.78	298.873	345.624	0	0	0	0	0	0	0	200	903	0	0	0	0	0	0	0	603	903	0
2298	4	47.9913	76.2935	-774.312	-37516.8	76800.8	7228.22	299.186	348.452	0	0	0	0	0	0	0	200	903	0	0	0	0	0	0	0	603	903	0
2298	5	48.1439	76.7513	-771.566	-37059	76556.6	6862.01	299.223	348.031	0	0	0	0	0	0	0	200	903	0	0	0	0	0	0	0	603	903	0
2298	6	47.0758	75.5305	-771.26	-36692.8	76617.7	6678.91	299.341	347.575	0	0	0	0	0	0	0	200	903	0	0	0	0	0	0	0	603	903	0
2298	7	47.2284	74.4624	-768.514	-36418.1	76373.5	6953.57	299.378	347.388	0	0	0	0	0	0	0	200	903	0	0	0	0	0	0	0	603	903	0
2298	8	47.8387	74.615	-767.598	-37425.2	76190.4	7182.45	299.258	348.756	0	0	0	0	0	0	0	200	903	0	0	0	0	0	0	0	603	903	0
2298	9	47.381	74.615	-766.072	-37242.1	76312.5	7045.12	299.615	348.614	0	0	0	0	0	0	0	200	903	0	0	0	0	0	0	0	603	903	0
2299	0	46.7706	73.0891	-765.767	-37242.1	76068.4	6953.57	299.336	348.634	0	0	0	0	0	0	0	200	903	0	0	0	0	0	0	0	603	903	0
2299	1	47.8387	71.2581	-761.8	-37608.3	76068.4	6862.01	299.853	349.368	0	0	0	0	0	0	0	200	903	0	0	0	0	0	0	0	603	903	0
2299	2	47.0758	72.1736	-759.359	-37699.9	75824.2	6907.79	299.853	349.647	0	0	0	0	0	0	0	200	903	0	0	0	0	0	0	0	603	903	0
2299	3	46.7706	71.1055	-759.664	-36692.8	75641.1	6770.46	299.572	348.301	0	0	0	0	0	0	0	200	903	0	0	0	0	0	0	0	603	903	0
2299	4	47.0758	70.4951	-754.781	-38523.8	75580.1	6450.03	300.135	351.04	0	0	0	0	0	0	0	200	903	0	0	0	0	0	0	0	603	903	0
2299	5	47.2284	71.1055	-754.781	-38249.2	75397	6862.01	299.893	350.676	0	0	0	0	0	0	0	200	903	0	0	0	0	0	0	0	603	903	0
2299	6	47.0758	69.427	-753.56	-37791.4	75213.9	6404.25	299.811	350.151	0	0	0	0	0	0	0	200	903	0	0	0	0	0	0	0	603	903	0
2299	7	47.381	69.2744	-752.645	-37608.3	75091.8	6633.13	299.771	349.968	0	0	0	0	0	0	0	200	903	0	0	0	0	0	0	0	603	903	0
2299	8	46.9232	69.5796	-750.508	-37699.9	74969.7	6450.03	299.892	350.232	0	0	0	0	0	0	0	200	903	0	0	0	0	0	0	0	603	903	0
2299	9	46.9232	68.6641	-749.288	-38157.6	75152.8	6404.25	300.299	350.925	0	0	0	0	0	0	0	200	903	0	0	0	0	0	0	0	603	903	0
2300	0	47.381	67.596	-747.457	-38157.6	74664.5	6266.92	299.892	351.05	0	0	0	0	0	0	0	200	903	0	0	0	0	0	0	0	603	903	0
2300	1	47.381	66.2227	-747.151	-38981.6	74176.3	6129.59	299.279	352.174	0	0	0	0	0	0	0	200	903	0	0	0	0	0	0	0	603	903	0
2300	2	47.2284	66.2227	-745.626	-38981.6	74359.4	6221.14	299.728	352.28	0	0	0	0	0	0	0	200	903	0	0	0	0	0	0	0	603	903	0
2300	3	46.1603	65.9175	-742.879	-37516.8	74542.5	6083.82	300.343	350.502	0	0	0	0	0	0	0	200	903	0	0	0	0	0	0	0	603	903	0
2300	4	46.3129	64.239	-741.964	-38798.5	73749	5946.49	299.397	352.292	0	0	0	0	0	0	0	200	903	0	0	0	0	0	0	0	603	903	0
2300	5	47.2284	65.1546	-741.048	-38340.7	73932.1	5992.26	299.767	351.739	0	0	0	0	0	0	0	200	903	0	0	0	0	0	0	0	603	903	0
2300	6	46.4654	64.0865	-737.386	-38432.3	73993.2	5763.38	300.345	352.12	0	0	0	0	0	0	0	200	903	0	0	0	0	0	0	0	603	903	0
2300	7	46.1603	63.0183	-734.639	-38523.8	73199.7	5992.26	299.64	352.439	0	0	0	0	0	0	0	200	903	0	0	0	0	0	0	0	603	903	0
2300	8	45.8551	61.7976	-734.944	-39256.3	73810.1	5763.38	300.429	353.414	0	0	0	0	0	0	0	200	903	0	0	0	0	0	0	0	603	903	0
2300	9	45.5499	63.1709	-733.724	-38798.5	73321.8	5763.38	299.931	352.879	0	0	0	0	0	0	0	200	903	0	0	0	0	0	0	0	603	903	0
2301	0	46.0077	61.4925	-731.893	-38523.8	73199.7	5580.28	300.014	352.636	0	0	0	0	0	0	0	200	903	0	0	0	0	0	0	0	603	903	0
2301	1	45.8551	60.5769	-730.367	-39805.6	73199.7	5534.5	300.223	354.501	0	0	0	0	0	0	0	200	903	0	0	0	0	0	0	0	603	903	0
2301	2	44.787	58.8985	-726.094	-39256.3	72955.6	5397.17	300.477	354.065	0	0	0	0	0	0	0	200	903	0	0	0	0	0	0	0	603	903	0
2301	3	46.9232	59.3562	-724.568	-38249.2	72955.6	5351.39	300.688	352.789	0	0	0	0	0	0	0	200	903	0	0	0	0	0	0	0	603	903	0
2301	4	44.6344	58.8985	-723.958	-39256.3	72467.3	5305.62	300.099	354.225	0	0	0	0	0	0	0	200	903	0	0	0	0	0	0	0	603	903	0
2301	5	45.2447	58.5933	-721.212	-39530.9	72345.2	5168.29	300.311	354.812	0	0	0	0	0	0	0	200	903	0	0	0	0	0	0	0	603	903	0
2301	6	45.3973	57.5252	-719.686	-39256.3	72406.2	5671.83	300.608	354.546	0	0	0	0	0	0	0	200	903	0	0	0	0	0	0	0	603	903	0
2301	7	44.6344	57.0674	-718.16	-39439.4	72040	5030.96	300.312	354.917	0	0	0	0	0	0	0	200	903	0	0	0	0	0	0	0	603	903	0
2301	8	44.9396	56.9148	-713.277	-39805.6	72345.2	5076.74	301.427	355.807	0	0	0	0	0	0	0	200	903	0	0	0	0	0	0	0	603	903	0
2301	9	45.2447	56.7622	-715.108	-38890.1	71979	4847.85	300.655	354.383	0	0	0	0	0	0	0	200	903	0	0	0	0	0	0	0	603	903	0
2302	0	44.787	55.3889	-712.972	-39530.9	71429.7	4893.63	300.186	355.445	0	0	0	0	0	0	0	200	903	0	0	0	0	0	0	0	603	903	0
2302	1	45.0921	55.3889	-710.836	-39805.6	71429.7	4802.08	300.487	355.998	0	0	0	0	0	0	0	200	903	0	0	0	0	0	0	0	603	903	0
2302	2	44.1766	55.3889	-710.225	-38890.1	71307.6	4664.75	300.401	354.757	0	0	0	0	0	0	0	200	903	0	0	0	0	0	0	0	603	903	0
2302	3	44.4818	53.1001	-707.784	-39073.2	71246.6	4481.64	300.661	355.205	0	0	0	0	0	0	0	200	903	0	0	0	0	0	0	0	603	903	0
2302	4	46.3129	53.2527	-709.005	-38249.2	70575.2	4802.08	299.541	353.948	0	0	0	0	0	0	0	200	903	0	0	0	0	0	0	0	603	903	0
2302	5	45.2447	52.795	-706.258	-38981.6	70941.4	4573.2	300.447	355.195	0	0	0	0	0	0	0	200	903	0	0	0	0	0	0	0	603	903	0
2302	6	44.787	51.7268	-704.427	-39073.2	70514.2	4344.31	300.102	355.468	0	0	0	0	0	0	0	200	903	0	0	0	0	0	0	0	603	903	0
2302	7	44.3292	51.4217	-702.291	-39714	70758.3	4435.87	300.754	356.549	0	0	0	0	0	0	0	200	903	0	0	0	0	0	0	0	603	903	0
2302	8	43.8714	50.201	-699.544	-39714	70209	4481.64	300.364	356.771	0	0	0	0	0	0	0	200	903	0	0	0	0	0	0	0	603	903	0
2302	9	43.8714	50.6587	-698.934	-38615.4	70148	4206.98	300.364	355.249	0	0	0	0	0	0	0	200	903	0	0	0	0	0	0	0	603	903	0
2303	0	43.7189	48.9803	-697.103	-39530.9	69354.5	4298.54	299.49	356.707	0	0	0	0	0	0	0	200	903	0	0	0	0	0	0	0	603	903	0
2303	1	43.7189	49.1328	-692.22	-39622.5	69903.8	4298.54	300.985	357.24	0	0	0	0	0	0	0	200	903	0	0	0	0	0	0	0	603	903	0
2303	2	43.1085	49.7432	-693.135	-38981.6	69964.8	4252.76	300.94	356.24	0	0	0	0	0	0	0	200	903	0	0	0	0	0	0	0	603	903	0
2303	3	43.1085	47.4544	-692.22	-38981.6	69354.5	4023.88	300.191	356.314	0	0	0	0	0	0	0	200	903	0	0	0	0	0	0	0	603	903	0
2303	4	43.2611	47.607	-690.694	-39439.4	69598.6	4069.66	300.766	357.101	0	0	0	0	0	0	0	200	903	0	0	0	0	0	0	0	603	903	0
2303	5	42.3456	46.9966	-688.253	-38981.6	69598.6	3520.34	301.124	356.639	0	0	0	0	0	0	0	200	903	0	0	0	0	0	0	0	603	903	0
2303	6	43.1085	45.013	-687.032	-38706.9	68988.3	3795	300.415	356.339	0	0	0	0	0	0	0	200	903	0	0	0	0	0	0	0	603	903	0
2303	7	42.4982	46.3863	-684.285	-37974.5	69232.4	3566.12	301.175	355.495	0	0	0	0	0	0	0	200	903	0	0	0	0	0	0	0	603	903	0
2303	8	43.1085	45.6233	-680.623	-38615.4	68683.1	3611.89	300.912	356.735	0	0	0	0	0	0	0	200	903	0	0	0	0	0	0	0	603	903	0
2303	9	42.6507	44.7078	-680.928	-38981.6	68255.9	3383.01	300.239	357.248	0	0	0	0	0	0	0	200	903	0	0	0	0	0	0	0	603	903	0
2304	0	41.5826	44.7078	-677.877	-39256.3	68316.9	3199.91	300.781	357.911	0	0	0	0	0	0	0	200	903	0	0	0	0	0	0	0	603	903	0
2304	1	41.8878	43.6397	-676.961	-38615.4	68500	3291.46	301.188	357.042	0	0	0	0	0	0	0	200	903	0	0	0	0	0	0	0	603	903	0
2304	2	41.8878	42.7242	-674.825	-39073.2	68194.8	3016.8	301.056	357.901	0	0	0	0	0	0	0	200	903	0	0	0	0	0	0	0	603	903	0
2304	3	41.8878	41.8086	-671.773	-38981.6	67889.6	3520.34	301.06	358.028	0	0	0	0	0	0	0	200	903	0	0	0	0	0	0	0	603	903	0
2304	4	41.1249	41.0457	-672.383	-39347.8	67828.6	3199.91	300.878	358.52	0	0	0	0	0	0	0	200	903	0	0	0	0	0	0	0	603	903	0
2304	5	41.1249	41.0457	-670.552	-38157.6	67584.5	3062.58	300.789	356.905	0	0	0	0	0	0	0	200	903	0	0	0	0	0	0	0	603	903	0
2304	6	41.7352	40.5879	-667.501	-39256.3	67523.4	3062.58	301.159	358.811	0	0	0	0	0	0	0	200	903	0	0	0	0	0	0	0	603	903	0
2304	7	42.0404	41.0457	-666.89	-39622.5	67157.2	2833.69	300.702	359.414	0	0	0	0	0	0	0	200	903	0	0	0	0	0	0	0	603	903	0
2304	8	41.43	40.1302	-665.059	-38432.3	67096.2	2925.25	300.888	357.788	0	0	0	0	0	0	0	200	903	0	0	0	0	0	0	0	603	903	0
2304	9	40.8197	38.2991	-664.144	-38340.7	67157.2	2833.69	301.119	357.73	0	0	0	0	0	0	0	200	903	0	0	0	0	0	0	0	603	903	0
2305	0	40.3619	39.062	-662.313	-39164.7	66791	2742.14	300.845	359.133	0	0	0	0	0	0	0	200	903	0	0	0	0	0	0	0	603	903	0
2305	1	42.8033	38.1465	-659.566	-38249.2	66668.9	2650.59	301.08	357.991	0	0	0	0	0	0	0	200	903	0	0	0	0	0	0	0	603	903	0
2305	2	39.599	36.9258	-658.345	-37242.1	66302.7	2696.37	300.711	356.569	0	0	0	0	0	0	0	200	903	0	0	0	0	0	0	0	603	903	0
2305	3	39.9042	36.9258	-657.43	-39164.7	66668.9	2833.69	301.408	359.572	0	0	0	0	0	0	0	200	903	0	0	0	0	0	0	0	603	903	0
2305	4	39.2938	36.0103	-654.988	-38615.4	66363.8	2421.71	301.321	358.956	0	0	0	0	0	0	0	200	903	0	0	0	0	0	0	0	603	903	0
2305	5	39.2938	36.1629	-651.326	-38340.7	65936.5	2421.71	301.234	358.866	0	0	0	0	0	0	0	200	903	0	0	0	0	0	0	0	603	903	0
2305	6	39.9042	35.3999	-649.19	-37974.5	65753.4	2421.71	301.285	358.495	0	0	0	0	0	0	0	200	903	0	0	0	0	0	0	0	603	903	0
2305	7	38.836	34.1792	-648.58	-39073.2	65631.3	2284.38	301.192	360.244	0	0	0	0	0	0	0	200	903	0	0	0	0	0	0	0	603	903	0
2305	8	38.9886	34.7896	-646.749	-38615.4	65692.4	2101.27	301.573	359.707	0	0	0	0	0	0	0	200	903	0	0	0	0	0	0	0	603	903	0
2305	9	38.3783	33.4163	-642.171	-37791.4	65448.2	1872.39	301.917	358.849	0	0	0	0	0	0	0	200	903	0	0	0	0	0	0	0	603	903	0
2306	0	38.836	32.9585	-644.918	-37974.5	65082	1963.94	300.915	358.883	0	0	0	0	0	0	0	200	903	0	0	0	0	0	0	0	603	903	0
2306	1	38.5309	32.5008	-642.171	-38706.9	64837.9	2101.27	300.967	360.275	0	0	0	0	0	0	0	200	903	0	0	0	0	0	0	0	603	903	0
2306	2	37.9205	31.8904	-640.645	-38615.4	64837.9	1918.17	301.207	360.276	0	0	0	0	0	0	0	200	903	0	0	0	0	0	0	0	603	903	0
2306	3	38.0731	31.1275	-639.424	-38066.1	64960	1735.06	301.591	359.532	0	0	0	0	0	0	0	200	903	0	0	0	0	0	0	0	603	903	0
2306	4	38.9886	30.5171	-640.95	-38890.1	64471.7	1597.73	300.588	360.676	0	0	0	0	0	0	0	200	903	0	0	0	0	0	0	0	603	903	0
2306	5	38.9886	30.9749	-637.288	-38615.4	64532.7	2192.83	301.261	360.593	0	0	0	0	0	0	0	200	903	0	0	0	0	0	0	0	603	903	0
2306	6	37.9205	30.2119	-635.152	-37974.5	64471.7	1872.39	301.506	359.788	0	0	0	0	0	0	0	200	903	0	0	0	0	0	0	0	603	903	0
2306	7	38.2257	28.6861	-634.847	-37974.5	64044.4	1551.96	300.882	359.817	0	0	0	0	0	0	0	200	903	0	0	0	0	0	0	0	603	903	0
2306	8	37.9205	29.7542	-630.574	-37333.6	63678.2	1551.96	300.984	359.206	0	0	0	0	0	0	0	200	903	0	0	0	0	0	0	0	603	903	0
2306	9	36.5472	28.3809	-630.88	-37974.5	63739.3	1460.4	301.032	360.193	0	0	0	0	0	0	0	200	903	0	0	0	0	0	0	0	603	903	0
2307	0	36.8524	27.6179	-630.269	-37516.8	63922.4	1551.96	301.421	359.525	0	0	0	0	0	0	0	200	903	0	0	0	0	0	0	0	603	903	0
2307	1	37.005	27.3128	-628.438	-38890.1	63739.3	1231.52	301.425	361.884	0	0	0	0	0	0	0	200	903	0	0	0	0	0	0	0	603	903	0
2307	2	36.0895	27.3128	-624.776	-38249.2	63251	1551.96	301.238	361.221	0	0	0	0	0	0	0	200	903	0	0	0	0	0	0	0	603	903	0
2307	3	37.4628	26.855	-625.081	-37608.3	63373.1	1323.07	301.384	360.165	0	0	0	0	0	0	0	200	903	0	0	0	0	0	0	0	603	903	0
2307	4	36.5472	25.4817	-622.945	-38157.6	63128.9	1551.96	301.339	361.254	0	0	0	0	0	0	0	200	903	0	0	0	0	0	0	0	603	903	0
2307	5	37.4628	26.3972	-622.64	-38157.6	63373.1	1323.07	301.781	361.284	0	0	0	0	0	0	0	200	903	0	0	0	0	0	0	0	603	903	0
2307	6	36.6998	25.6343	-618.672	-37974.5	63189.9	1139.97	302.138	361.381	0	0	0	0	0	0	0	200	903	0	0	0	0	0	0	0	603	903	0
2307	7	36.8524	24.8714	-620.504	-37699.9	62884.8	956.862	301.345	360.757	0	0	0	0	0	0	0	200	903	0	0	0	0	0	0	0	603	903	0
2307	8	36.6998	24.4136	-619.283	-38340.7	62823.7	865.31	301.446	361.911	0	0	0	0	0	0	0	200	903	0	0	0	0	0	0	0	603	903	0
2307	9	37.1576	24.5662	-617.757	-37516.8	62457.5	956.862	301.104	360.731	0	0	0	0	0	0	0	200	903	0	0	0	0	0	0	0	603	903	0
2308	0	36.8524	23.3455	-615.316	-37425.2	62518.6	865.31	301.604	360.823	0	0	0	0	0	0	0	200	903	0	0	0	0	0	0	0	603	903	0
2308	1	36.0895	22.7351	-615.621	-38615.4	62335.5	636.428	301.256	362.726	0	0	0	0	0	0	0	200	903	0	0	0	0	0	0	0	603	903	0
2308	2	36.6998	21.9722	-615.01	-37974.5	62396.5	819.533	301.456	361.746	0	0	0	0	0	0	0	200	903	0	0	0	0	0	0	0	603	903	0
2308	3	36.3946	21.5144	-615.621	-37059	62335.5	636.428	301.256	360.198	0	0	0	0	0	0	0	200	903	0	0	0	0	0	0	0	603	903	0
2308	4	36.5472	21.3618	-614.4	-37974.5	62213.4	773.757	301.259	361.808	0	0	0	0	0	0	0	200	903	0	0	0	0	0	0	0	603	903	0
2308	5	35.9369	21.2093	-613.179	-38157.6	62091.3	727.981	301.261	362.229	0	0	0	0	0	0	0	200	903	0	0	0	0	0	0	0	603	903	0
2308	6	34.5636	21.3618	-609.822	-37791.4	61908.2	544.875	301.518	361.971	0	0	0	0	0	0	0	200	903	0	0	0	0	0	0	0	603	903	0
2308	7	35.9369	19.9886	-611.043	-37608.3	61969.2	727.981	301.415	361.548	0	0	0	0	0	0	0	200	903	0	0	0	0	0	0	0	603	903	0
2308	8	35.4791	19.5308	-610.433	-38249.2	61908.2	499.099	301.417	362.659	0	0	0	0	0	0	0	200	903	0	0	0	0	0	0	0	603	903	0
2308	9	35.1739	19.6834	-611.043	-37699.9	61664.1	453.323	300.916	361.698	0	0	0	0	0	0	0	200	903	0	0	0	0	0	0	0	603	903	0
2309	0	34.7162	17.3946	-606.16	-37699.9	61664.1	132.888	301.729	362.195	0	0	0	0	0	0	0	200	903	0	0	0	0	0	0	0	603	903	0
2309	1	35.9369	18.3101	-607.076	-37242.1	61481	224.441	301.274	361.347	0	0	0	0	0	0	0	200	903	0	0	0	0	0	0	0	603	903	0
2309	2	35.1739	18.4627	-605.855	-37425.2	61664.1	224.441	301.78	361.773	0	0	0	0	0	0	0	200	903	0	0	0	0	0	0	0	603	903	0
2309	3	34.5636	17.0894	-605.245	-37516.8	61481	178.664	301.58	361.986	0	0	0	0	0	0	0	200	903	0	0	0	0	0	0	0	603	903	0
2309	4	34.7162	17.3946	-604.329	-38157.6	61175.8	224.441	301.229	363.141	0	0	0	0	0	0	0	200	903	0	0	0	0	0	0	0	603	903	0
2309	5	33.8006	16.479	-605.855	-37608.3	61053.7	-50.2177	300.773	362.075	0	0	0	0	0	0	0	200	903	0	0	0	0	0	0	0	603	903	0
2309	6	34.411	15.2583	-603.719	-37699.9	61236.8	-141.77	301.433	362.446	0	0	0	0	0	0	0	200	903	0	0	0	0	0	0	0	603	903	0
2309	7	35.0213	14.9532	-602.498	-37883	61236.8	87.1114	301.638	362.876	0	0	0	0	0	0	0	200	903	0	0	0	0	0	0	0	603	903	0
2309	8	34.8688	15.5635	-602.193	-38157.6	61175.8	-95.9941	301.588	363.365	0	0	0	0	0	0	0	200	903	0	0	0	0	0	0	0	603	903	0
2309	9	35.6317	14.648	-604.94	-37242.1	60931.6	-233.323	300.724	361.563	0	0	0	0	0	0	0	200	903	0	0	0	0	0	0	0	603	903	0
2310	0	34.8688	13.885	-603.414	-38432.3	60931.6	-233.323	300.978	363.691	0	0	0	0	0	0	0	200	903	0	0	0	0	0	0	0	603	903	0
2310	1	34.1058	13.2747	-603.109	-38249.2	60931.6	-233.323	301.029	363.42	0	0	0	0	0	0	0	200	903	0	0	0	0	0	0	0	603	903	0
2310	2	34.1058	13.2747	-602.498	-36509.7	60870.6	-279.099	301.03	360.597	0	0	0	0	0	0	0	200	903	0	0	0	0	0	0	0	603	903	0
2310	3	34.411	12.9695	-599.446	-38249.2	60931.6	-324.876	301.647	363.807	0	0	0	0	0	0	0	200	903	0	0	0	0	0	0	0	603	903	0
2310	4	33.3429	13.7325	-601.888	-38157.6	60809.6	-599.534	301.031	363.397	0	0	0	0	0	0	0	200	903	0	0	0	0	0	0	0	603	903	0
2310	5	33.0377	12.2066	-599.752	-38066.1	60870.6	-370.652	301.493	363.47	0	0	0	0	0	0	0	200	903	0	0	0	0	0	0	0	603	903	0
2310	6	33.3429	12.5117	-600.057	-38157.6	60748.5	-370.652	301.238	363.59	0	0	0	0	0	0	0	200	903	0	0	0	0	0	0	0	603	903	0
2310	7	32.5799	11.291	-597.005	-38523.8	60748.5	-782.64	301.756	364.529	0	0	0	0	0	0	0	200	903	0	0	0	0	0	0	0	603	903	0
2310	8	33.4955	11.4436	-598.226	-37791.4	60504.4	-736.863	301.14	363.173	0	0	0	0	0	0	0	200	903	0	0	0	0	0	0	0	603	903	0
2310	9	32.7325	9.45999	-598.226	-37608.3	60687.5	-782.64	301.446	362.866	0	0	0	0	0	0	0	200	903	0	0	0	0	0	0	0	603	903	0
2311	0	33.0377	11.1385	-596.395	-37608.3	60443.4	-965.745	301.348	363.059	0	0	0	0	0	0	0	200	903	0	0	0	0	0	0	0	603	903	0
2311	1	33.0377	10.3755	-596.089	-37608.3	60138.2	-874.193	300.888	363.092	0	0	0	0	0	0	0	200	903	0	0	0	0	0	0	0	603	903	0
2311	2	33.4955	9.00223	-597.005	-37242.1	60565.4	-1103.07	301.449	362.382	0	0	0	0	0	0	0	200	903	0	0	0	0	0	0	0	603	903	0
2311	3	33.6481	9.00223	-597.005	-37974.5	60626.5	-919.969	301.551	363.608	0	0	0	0	0	0	0	200	903	0	0	0	0	0	0	0	603	903	0
2311	4	33.1903	8.39188	-597.31	-38066.1	60382.3	-1240.4	301.09	363.729	0	0	0	0	0	0	0	200	903	0	0	0	0	0	0	0	603	903	0
2311	5	33.4955	7.93411	-596.089	-37883	60504.4	-1011.52	301.502	363.553	0	0	0	0	0	0	0	200	903	0	0	0	0	0	0	0	603	903	0
2311	6	33.9532	7.93411	-598.226	-37974.5	60443.4	-1331.96	301.038	363.479	0	0	0	0	0	0	0	200	903	0	0	0	0	0	0	0	603	903	0
2311	7	32.8851	7.47635	-597.921	-38340.7	60260.3	-1331.96	300.783	364.124	0	0	0	0	0	0	0	200	903	0	0	0	0	0	0	0	603	903	0
2311	8	33.1903	7.62894	-597.921	-37699.9	60260.3	-1240.4	300.783	363.052	0	0	0	0	0	0	0	200	903	0	0	0	0	0	0	0	603	903	0
2311	9	32.8851	6.56082	-597.921	-37425.2	60626.5	-1423.51	301.396	362.592	0	0	0	0	0	0	0	200	903	0	0	0	0	0	0	0	603	903	0
2312	0	32.4274	6.40823	-597.005	-38157.6	60382.3	-1469.29	301.142	363.915	0	0	0	0	0	0	0	200	903	0	0	0	0	0	0	0	603	903	0
2312	1	32.7325	6.25564	-597.005	-37699.9	60382.3	-1469.29	301.142	363.148	0	0	0	0	0	0	0	200	903	0	0	0	0	0	0	0	603	903	0
2312	2	32.7325	5.4927	-595.479	-37608.3	60565.4	-1743.94	301.709	363.156	0	0	0	0	0	0	0	200	903	0	0	0	0	0	0	0	603	903	0
2312	3	32.4274	4.88235	-597.615	-38249.2	60443.4	-1606.61	301.141	364.003	0	0	0	0	0	0	0	200	903	0	0	0	0	0	0	0	603	903	0
2312	4	32.1222	5.4927	-597.615	-37791.4	60687.5	-1789.72	301.549	363.237	0	0	0	0	0	0	0	200	903	0	0	0	0	0	0	0	603	903	0
2312	5	32.5799	3.66165	-596.7	-37516.8	60321.3	-1743.94	301.092	362.874	0	0	0	0	0	0	0	200	903	0	0	0	0	0	0	0	603	903	0
2312	6	33.0377	3.66165	-597.31	-38249.2	60382.3	-1789.72	301.09	364.036	0	0	0	0	0	0	0	200	903	0	0	0	0	0	0	0	603	903	0
2312	7	31.6644	3.50906	-597.31	-38523.8	60687.5	-1927.05	301.601	364.496	0	0	0	0	0	0	0	200	903	0	0	0	0	0	0	0	603	903	0
2312	8	33.3429	3.35647	-594.869	-37516.8	60382.3	-1789.72	301.505	363.067	0	0	0	0	0	0	0	200	903	0	0	0	0	0	0	0	603	903	0
2312	9	32.2748	2.89871	-596.395	-38798.5	60687.5	-1927.05	301.757	365.055	0	0	0	0	0	0	0	200	903	0	0	0	0	0	0	0	603	903	0
2313	0	32.2748	3.0513	-596.7	-38432.3	59955.1	-2018.6	300.478	364.408	0	0	0	0	0	0	0	200	903	0	0	0	0	0	0	0	603	903	0
2313	1	32.2748	2.59353	-596.395	-37699.9	60504.4	-2155.93	301.45	363.213	0	0	0	0	0	0	0	200	903	0	0	0	0	0	0	0	603	903	0
2313	2	31.817	0.457305	-597.921	-37883	60931.6	-2110.15	301.906	363.358	0	0	0	0	0	0	0	200	903	0	0	0	0	0	0	0	603	903	0
2313	3	33.4955	2.13577	-596.7	-37059	60504.4	-2110.15	301.398	362.107	0	0	0	0	0	0	0	200	903	0	0	0	0	0	0	0	603	903	0
2313	4	32.5799	1.52542	-598.226	-38066.1	60992.7	-2339.04	301.956	363.632	0	0	0	0	0	0	0	200	903	0	0	0	0	0	0	0	603	903	0
2313	5	32.8851	1.22024	-597.921	-37608.3	61175.8	-2476.36	302.314	362.899	0	0	0	0	0	0	0	200	903	0	0	0	0	0	0	0	603	903	0
2313	6	33.3429	-0.000459142	-598.836	-38615.4	60626.5	-2522.14	301.241	364.484	0	0	0	0	0	0	0	200	903	0	0	0	0	0	0	0	603	903	0
2313	7	32.1222	-0.763399	-597.615	-38706.9	60992.7	-2796.8	302.06	364.769	0	0	0	0	0	0	0	200	903	0	0	0	0	0	0	0	603	903	0
2313	8	33.1903	-1.06857	-600.667	-37242.1	60992.7	-2705.25	301.542	362.001	0	0	0	0	0	0	0	200	903	0	0	0	0	0	0	0	603	903	0
2313	9	32.5799	-1.9841	-600.667	-38706.9	61114.8	-2796.8	301.745	364.44	0	0	0	0	0	0	0	200	903	0	0	0	0	0	0	0	603	903	0
2314	0	32.7325	-0.458223	-601.277	-38615.4	61297.9	-2751.02	301.946	364.222	0	0	0	0	0	0	0	200	903	0	0	0	0	0	0	0	603	903	0
2314	1	32.5799	-1.52634	-601.888	-37974.5	60992.7	-2934.13	301.336	363.092	0	0	0	0	0	0	0	200	903	0	0	0	0	0	0	0	603	903	0
2314	2	32.5799	-3.50998	-601.277	-38157.6	61297.9	-2842.58	301.946	363.461	0	0	0	0	0	0	0	200	903	0	0	0	0	0	0	0	603	903	0
2314	3	32.5799	-2.44187	-598.226	-38066.1	60992.7	-2979.91	301.956	363.632	0	0	0	0	0	0	0	200	903	0	0	0	0	0	0	0	603	903	0
2314	4	31.6644	-2.89963	-602.193	-38249.2	61236.8	-3163.01	301.69	363.517	0	0	0	0	0	0	0	200	903	0	0	0	0	0	0	0	603	903	0
2314	5	31.9696	-3.2048	-603.414	-38249.2	61603	-3346.12	302.091	363.388	0	0	0	0	0	0	0	200	903	0	0	0	0	0	0	0	603	903	0
2314	6	32.2748	-4.27292	-604.024	-38798.5	61358.9	-3208.79	301.584	364.233	0	0	0	0	0	0	0	200	903	0	0	0	0	0	0	0	603	903	0
2314	7	32.2748	-5.34104	-604.634	-39073.2	61603	-3391.89	301.885	364.623	0	0	0	0	0	0	0	200	903	0	0	0	0	0	0	0	603	903	0
2314	8	32.4274	-5.03586	-603.414	-38706.9	61358.9	-3346.12	301.686	364.147	0	0	0	0	0	0	0	200	903	0	0	0	0	0	0	0	603	903	0
2314	9	31.9696	-5.03586	-603.414	-39256.3	61664.1	-3575	302.192	365.057	0	0	0	0	0	0	0	200	903	0	0	0	0	0	0	0	603	903	0
2315	0	32.7325	-4.42551	-605.245	-39073.2	61786.1	-3620.77	302.085	364.558	0	0	0	0	0	0	0	200	903	0	0	0	0	0	0	0	603	903	0
2315	1	32.2748	-5.49362	-604.634	-38706.9	61175.8	-3849.66	301.178	364.017	0	0	0	0	0	0	0	200	903	0	0	0	0	0	0	0	603	903	0
2315	2	32.2748	-8.39279	-606.16	-38432.3	62152.4	-3437.67	302.535	363.403	0	0	0	0	0	0	0	200	903	0	0	0	0	0	0	0	603	903	0
2315	3	32.2748	-6.56174	-606.465	-38340.7	61969.2	-3437.67	302.181	363.22	0	0	0	0	0	0	0	200	903	0	0	0	0	0	0	0	603	903	0
2315	4	32.5799	-7.17209	-604.94	-38523.8	61847.2	-3712.33	302.237	363.682	0	0	0	0	0	0	0	200	903	0	0	0	0	0	0	0	603	903	0
2315	5	33.1903	-7.93503	-607.381	-38706.9	62030.3	-3758.1	302.127	363.728	0	0	0	0	0	0	0	200	903	0	0	0	0	0	0	0	603	903	0
2315	6	32.7325	-8.2402	-608.907	-39530.9	62213.4	-3986.99	302.172	364.921	0	0	0	0	0	0	0	200	903	0	0	0	0	0	0	0	603	903	0
2315	7	33.6481	-10.0713	-609.822	-39530.9	62091.3	-4215.87	301.819	364.824	0	0	0	0	0	0	0	200	903	0	0	0	0	0	0	0	603	903	0
2315	8	33.4955	-9.46091	-609.822	-39164.7	62457.5	-4261.65	302.419	364.223	0	0	0	0	0	0	0	200	903	0	0	0	0	0	0	0	603	903	0
2315	9	33.6481	-9.46091	-611.348	-39622.5	62152.4	-4398.98	301.664	364.812	0	0	0	0	0	0	0	200	903	0	0	0	0	0	0	0	603	903	0
2316	0	33.4955	-9.91867	-611.653	-39988.7	62274.4	-4307.42	301.813	365.378	0	0	0	0	0	0	0	200	903	0	0	0	0	0	0	0	603	903	0
2316	1	34.5636	-10.529	-612.874	-39256.3	62579.6	-4490.53	302.108	364.053	0	0	0	0	0	0	0	200	903	0	0	0	0	0	0	0	603	903	0
2316	2	33.9532	-10.9868	-614.095	-39714	62945.8	-4536.3	302.502	364.671	0	0	0	0	0	0	0	200	903	0	0	0	0	0	0	0	603	903	0
2316	3	33.1903	-10.529	-614.705	-40171.8	62701.7	-4627.86	302.003	365.351	0	0	0	0	0	0	0	200	903	0	0	0	0	0	0	0	603	903	0
2316	4	33.4955	-10.9868	-617.147	-39256.3	62640.6	-4536.3	301.5	363.609	0	0	0	0	0	0	0	200	903	0	0	0	0	0	0	0	603	903	0
2316	5	33.6481	-12.5127	-617.757	-39714	63006.8	-4536.3	301.993	364.287	0	0	0	0	0	0	0	200	903	0	0	0	0	0	0	0	603	903	0
2316	6	34.2584	-13.4282	-616.841	-40263.3	63189.9	-4719.41	302.441	365.273	0	0	0	0	0	0	0	200	903	0	0	0	0	0	0	0	603	903	0
2316	7	33.4955	-11.5971	-613.79	-39714	62762.7	-4673.63	302.254	364.703	0	0	0	0	0	0	0	200	903	0	0	0	0	0	0	0	603	903	0
2316	8	33.0377	-13.4282	-619.588	-39714	63189.9	-4856.74	301.987	364.097	0	0	0	0	0	0	0	200	903	0	0	0	0	0	0	0	603	903	0
2316	9	34.1058	-13.886	-619.588	-40446.4	63617.2	-4902.52	302.677	365.28	0	0	0	0	0	0	0	200	903	0	0	0	0	0	0	0	603	903	0
2317	0	33.8006	-14.3437	-621.114	-40995.8	63373.1	-5085.62	302.031	366.004	0	0	0	0	0	0	0	200	903	0	0	0	0	0	0	0	603	903	0
2317	1	33.9532	-13.7334	-621.724	-39714	63556.2	-4902.52	302.226	363.877	0	0	0	0	0	0	0	200	903	0	0	0	0	0	0	0	603	903	0
2317	2	33.4955	-15.4118	-622.335	-40171.8	63739.3	-5222.95	302.42	364.55	0	0	0	0	0	0	0	200	903	0	0	0	0	0	0	0	603	903	0
2317	3	34.1058	-14.9541	-623.555	-40904.2	63861.3	-5406.06	302.415	365.598	0	0	0	0	0	0	0	200	903	0	0	0	0	0	0	0	603	903	0
2317	4	33.0377	-15.5644	-622.945	-40171.8	63922.4	-5222.95	302.613	364.487	0	0	0	0	0	0	0	200	903	0	0	0	0	0	0	0	603	903	0
2317	5	35.0213	-17.0903	-622.945	-40354.9	63556.2	-5406.06	302.025	364.781	0	0	0	0	0	0	0	200	903	0	0	0	0	0	0	0	603	903	0
2317	6	34.411	-17.3955	-624.776	-40812.7	64166.5	-5268.73	302.703	365.324	0	0	0	0	0	0	0	200	903	0	0	0	0	0	0	0	603	903	0
2317	7	34.1058	-17.0903	-624.776	-40904.2	63739.3	-5268.73	302.019	365.47	0	0	0	0	0	0	0	200	903	0	0	0	0	0	0	0	603	903	0
2317	8	34.411	-18.0058	-624.776	-40446.4	64105.5	-5726.49	302.606	364.738	0	0	0	0	0	0	0	200	903	0	0	0	0	0	0	0	603	903	0
2317	9	34.7162	-18.4636	-626.912	-40904.2	63861.3	-5451.83	301.866	365.247	0	0	0	0	0	0	0	200	903	0	0	0	0	0	0	0	603	903	0
2318	0	34.2584	-19.9895	-623.555	-41270.4	63983.4	-5909.6	302.611	366.186	0	0	0	0	0	0	0	200	903	0	0	0	0	0	0	0	603	903	0
2318	1	36.3946	-19.3791	-629.048	-39805.6	64349.6	-5818.04	302.297	363.279	0	0	0	0	0	0	0	200	903	0	0	0	0	0	0	0	603	903	0
2318	2	35.4791	-19.9895	-628.133	-41636.6	64349.6	-5863.82	302.446	366.286	0	0	0	0	0	0	0	200	903	0	0	0	0	0	0	0	603	903	0
2318	3	35.1739	-19.9895	-629.048	-41362	64654.8	-6092.7	302.782	365.753	0	0	0	0	0	0	0	200	903	0	0	0	0	0	0	0	603	903	0
2318	4	35.0213	-23.0412	-629.659	-40721.1	64471.7	-6138.48	302.391	364.672	0	0	0	0	0	0	0	200	903	0	0	0	0	0	0	0	603	903	0
2318	5	35.7843	-22.2783	-629.659	-41087.3	64837.9	-6275.81	302.973	365.253	0	0	0	0	0	0	0	200	903	0	0	0	0	0	0	0	603	903	0
2318	6	35.4791	-21.2102	-631.49	-41636.6	65021	-6001.15	302.964	365.934	0	0	0	0	0	0	0	200	903	0	0	0	0	0	0	0	603	903	0
2318	7	35.1739	-22.1257	-628.438	-40995.8	64776.8	-6413.14	303.076	365.234	0	0	0	0	0	0	0	200	903	0	0	0	0	0	0	0	603	903	0
2318	8	36.6998	-22.8886	-633.321	-41178.9	65204.1	-6321.58	302.956	365.021	0	0	0	0	0	0	0	200	903	0	0	0	0	0	0	0	603	903	0
2318	9	36.5472	-23.1938	-635.152	-40538	64349.6	-6687.79	301.314	363.824	0	0	0	0	0	0	0	200	903	0	0	0	0	0	0	0	603	903	0
2319	0	35.7843	-23.499	-634.847	-41453.5	65265.1	-6687.79	302.805	365.297	0	0	0	0	0	0	0	200	903	0	0	0	0	0	0	0	603	903	0
2319	1	35.9369	-23.9568	-637.288	-41453.5	65204.1	-6825.12	302.315	365.047	0	0	0	0	0	0	0	200	903	0	0	0	0	0	0	0	603	903	0
2319	2	36.2421	-25.4826	-636.068	-42552.2	65326.2	-6779.35	302.703	366.899	0	0	0	0	0	0	0	200	903	0	0	0	0	0	0	0	603	903	0
2319	3	36.3946	-24.7197	-639.119	-41087.3	65692.4	-6550.46	302.786	364.287	0	0	0	0	0	0	0	200	903	0	0	0	0	0	0	0	603	903	0
2319	4	37.3102	-26.2456	-638.204	-41453.5	65021	-6687.79	301.881	364.953	0	0	0	0	0	0	0	200	903	0	0	0	0	0	0	0	603	903	0
2319	5	36.0895	-26.3982	-639.424	-42552.2	65753.4	-7054	302.832	366.548	0	0	0	0	0	0	0	200	903	0	0	0	0	0	0	0	603	903	0
2319	6	35.9369	-25.6352	-640.95	-42552.2	65753.4	-7191.33	302.587	366.389	0	0	0	0	0	0	0	200	903	0	0	0	0	0	0	0	603	903	0
2319	7	36.2421	-27.7715	-640.95	-41270.4	65875.5	-7328.66	302.778	364.389	0	0	0	0	0	0	0	200	903	0	0	0	0	0	0	0	603	903	0
2319	8	36.2421	-27.3137	-642.476	-42643.7	66241.7	-7099.78	303.104	366.374	0	0	0	0	0	0	0	200	903	0	0	0	0	0	0	0	603	903	0
2319	9	36.0895	-27.7715	-644.002	-42826.8	65692.4	-7603.32	302.006	366.501	0	0	0	0	0	0	0	200	903	0	0	0	0	0	0	0	603	903	0
2320	0	37.005	-28.2292	-643.697	-42277.5	66119.6	-7374.44	302.719	365.679	0	0	0	0	0	0	0	200	903	0	0	0	0	0	0	0	603	903	0
2320	1	37.4628	-29.7551	-643.392	-42277.5	66302.7	-7694.87	303.052	365.71	0	0	0	0	0	0	0	200	903	0	0	0	0	0	0	0	603	903	0
2320	2	36.5472	-29.6025	-643.697	-42552.2	66424.8	-7694.87	303.193	366.106	0	0	0	0	0	0	0	200	903	0	0	0	0	0	0	0	603	903	0
2320	3	36.0895	-29.4499	-644.918	-42552.2	66424.8	-7969.53	302.997	365.981	0	0	0	0	0	0	0	200	903	0	0	0	0	0	0	0	603	903	0
2320	4	36.5472	-30.518	-645.528	-42552.2	66241.7	-7786.43	302.616	365.918	0	0	0	0	0	0	0	200	903	0	0	0	0	0	0	0	603	903	0
2320	5	36.6998	-31.1284	-644.612	-43467.7	66668.9	-8061.09	303.425	367.432	0	0	0	0	0	0	0	200	903	0	0	0	0	0	0	0	603	903	0
2320	6	37.1576	-30.9758	-646.749	-43650.8	66302.7	-8106.86	302.517	367.493	0	0	0	0	0	0	0	200	903	0	0	0	0	0	0	0	603	903	0
2320	7	37.9205	-32.3491	-648.58	-42918.4	66791	-8198.42	302.98	366.173	0	0	0	0	0	0	0	200	903	0	0	0	0	0	0	0	603	903	0
2320	8	37.7679	-33.2646	-649.19	-43101.5	66913.1	-8061.09	303.072	366.393	0	0	0	0	0	0	0	200	903	0	0	0	0	0	0	0	603	903	0
2320	9	37.1576	-32.1965	-649.8	-43193	67462.4	-8656.18	303.82	366.471	0	0	0	0	0	0	0	200	903	0	0	0	0	0	0	0	603	903	0
2321	0	37.9205	-32.8069	-651.021	-43284.6	67523.4	-8518.85	303.719	366.487	0	0	0	0	0	0	0	200	903	0	0	0	0	0	0	0	603	903	0
2321	1	37.9205	-34.1801	-651.326	-43467.7	67157.2	-8793.51	303.108	366.737	0	0	0	0	0	0	0	200	903	0	0	0	0	0	0	0	603	903	0
2321	2	39.1412	-35.5534	-653.768	-44108.6	66974.1	-8335.75	302.443	367.468	0	0	0	0	0	0	0	200	903	0	0	0	0	0	0	0	603	903	0
2321	3	39.1412	-34.6379	-654.378	-43284.6	67462.4	-8564.63	303.094	366.146	0	0	0	0	0	0	0	200	903	0	0	0	0	0	0	0	603	903	0
2321	4	38.2257	-35.5534	-655.904	-43833.9	67767.6	-8976.61	303.319	366.83	0	0	0	0	0	0	0	200	903	0	0	0	0	0	0	0	603	903	0
2321	5	38.9886	-36.9267	-656.514	-44566.3	67706.5	-8930.84	303.13	367.883	0	0	0	0	0	0	0	200	903	0	0	0	0	0	0	0	603	903	0
2321	6	38.836	-37.0793	-656.819	-44657.9	68011.7	-9159.72	303.547	367.991	0	0	0	0	0	0	0	200	903	0	0	0	0	0	0	0	603	903	0
2321	7	38.9886	-36.7741	-657.735	-42735.3	67523.4	-9022.39	302.661	364.973	0	0	0	0	0	0	0	200	903	0	0	0	0	0	0	0	603	903	0
2321	8	40.8197	-37.8423	-657.735	-44749.4	67889.6	-9251.27	303.217	368.036	0	0	0	0	0	0	0	200	903	0	0	0	0	0	0	0	603	903	0
2321	9	38.5309	-37.9948	-659.871	-45207.2	68744.1	-9434.38	304.178	368.509	0	0	0	0	0	0	0	200	903	0	0	0	0	0	0	0	603	903	0
2322	0	38.9886	-38.1474	-660.176	-44291.7	68561	-9480.15	303.853	367.091	0	0	0	0	0	0	0	200	903	0	0	0	0	0	0	0	603	903	0
2322	1	38.836	-39.2155	-660.176	-44841	68316.9	-9480.15	303.483	367.923	0	0	0	0	0	0	0	200	903	0	0	0	0	0	0	0	603	903	0
2322	2	40.2093	-38.7578	-658.345	-44841	68805.2	-9754.81	304.512	368.112	0	0	0	0	0	0	0	200	903	0	0	0	0	0	0	0	603	903	0
2322	3	40.2093	-39.8259	-660.787	-45024.1	68561	-9251.27	303.757	368.137	0	0	0	0	0	0	0	200	903	0	0	0	0	0	0	0	603	903	0
2322	4	39.7516	-40.5888	-660.787	-45207.2	68805.2	-9434.38	304.126	368.414	0	0	0	0	0	0	0	200	903	0	0	0	0	0	0	0	603	903	0
2322	5	39.9042	-40.894	-661.702	-46031.2	68927.2	-9663.26	304.167	369.565	0	0	0	0	0	0	0	200	903	0	0	0	0	0	0	0	603	903	0
2322	6	39.7516	-42.5725	-659.566	-46031.2	68805.2	-9846.37	304.319	369.79	0	0	0	0	0	0	0	200	903	0	0	0	0	0	0	0	603	903	0
2322	7	40.8197	-42.1147	-664.144	-45848.1	69537.6	-10029.5	304.703	369.033	0	0	0	0	0	0	0	200	903	0	0	0	0	0	0	0	603	903	0
2322	8	40.0567	-43.1828	-663.839	-46488.9	68561	-10487.2	303.28	370.03	0	0	0	0	0	0	0	200	903	0	0	0	0	0	0	0	603	903	0
2322	9	40.8197	-42.8777	-665.364	-46397.4	69415.5	-10395.7	304.327	369.732	0	0	0	0	0	0	0	200	903	0	0	0	0	0	0	0	603	903	0
2323	0	41.1249	-43.6406	-665.059	-45939.6	69171.4	-10533	304.008	369.076	0	0	0	0	0	0	0	200	903	0	0	0	0	0	0	0	603	903	0
2323	1	42.193	-45.0139	-669.332	-46397.4	69537.6	-10761.9	303.891	369.319	0	0	0	0	0	0	0	200	903	0	0	0	0	0	0	0	603	903	0
2323	2	41.2775	-44.2509	-668.111	-46397.4	70086.9	-10899.2	304.903	369.446	0	0	0	0	0	0	0	200	903	0	0	0	0	0	0	0	603	903	0
2323	3	40.8197	-44.8613	-668.721	-46763.6	69598.6	-10899.2	304.077	369.93	0	0	0	0	0	0	0	200	903	0	0	0	0	0	0	0	603	903	0
2323	4	41.2775	-45.7768	-668.721	-46672	69781.7	-11082.3	304.351	369.793	0	0	0	0	0	0	0	200	903	0	0	0	0	0	0	0	603	903	0
2323	5	41.8878	-46.5398	-667.501	-47496	69781.7	-10899.2	304.542	371.155	0	0	0	0	0	0	0	200	903	0	0	0	0	0	0	0	603	903	0
2323	6	41.1249	-47.9131	-671.163	-47953.8	70148	-11128.1	304.517	371.449	0	0	0	0	0	0	0	200	903	0	0	0	0	0	0	0	603	903	0
2323	7	41.5826	-47.4553	-672.383	-47679.1	70575.2	-11402.8	304.963	370.911	0	0	0	0	0	0	0	200	903	0	0	0	0	0	0	0	603	903	0
2323	8	41.8878	-48.0656	-672.078	-48228.4	70209	-11723.2	304.466	371.76	0	0	0	0	0	0	0	200	903	0	0	0	0	0	0	0	603	903	0
2323	9	42.0404	-48.0656	-670.552	-48411.5	70575.2	-11540.1	305.249	372.197	0	0	0	0	0	0	0	200	903	0	0	0	0	0	0	0	603	903	0
2324	0	42.3456	-48.8286	-671.773	-48228.4	70453.1	-11860.5	304.876	371.793	0	0	0	0	0	0	0	200	903	0	0	0	0	0	0	0	603	903	0
2324	1	42.4982	-50.8122	-672.994	-48045.3	70880.4	-11540.1	305.321	371.39	0	0	0	0	0	0	0	200	903	0	0	0	0	0	0	0	603	903	0
2324	2	42.8033	-49.5915	-674.52	-48960.9	71063.5	-11769	305.354	372.586	0	0	0	0	0	0	0	200	903	0	0	0	0	0	0	0	603	903	0
2324	3	43.2611	-50.6596	-672.994	-48777.8	70819.3	-12181	305.23	372.479	0	0	0	0	0	0	0	200	903	0	0	0	0	0	0	0	603	903	0
2324	4	44.4818	-51.8803	-676.046	-49144	71246.6	-12043.6	305.387	372.693	0	0	0	0	0	0	0	200	903	0	0	0	0	0	0	0	603	903	0
2324	5	44.4818	-51.1174	-676.351	-50242.6	71185.5	-12455.6	305.249	374.285	0	0	0	0	0	0	0	200	903	0	0	0	0	0	0	0	603	903	0
2324	6	44.9396	-51.7278	-676.961	-48960.9	71673.8	-12318.3	305.876	372.324	0	0	0	0	0	0	0	200	903	0	0	0	0	0	0	0	603	903	0
2324	7	44.9396	-53.5588	-677.571	-49601.7	71673.8	-12592.9	305.78	373.205	0	0	0	0	0	0	0	200	903	0	0	0	0	0	0	0	603	903	0
2324	8	46.1603	-54.1692	-679.097	-50700.4	71795.9	-12455.6	305.723	374.659	0	0	0	0	0	0	0	200	903	0	0	0	0	0	0	0	603	903	0
2324	9	45.2447	-54.7795	-680.318	-50517.3	72162.1	-12684.5	306.071	374.255	0	0	0	0	0	0	0	200	903	0	0	0	0	0	0	0	603	903	0
2325	0	45.8551	-54.7795	-681.844	-49693.3	71918	-12318.3	305.476	372.881	0	0	0	0	0	0	0	200	903	0	0	0	0	0	0	0	603	903	0
2325	1	45.8551	-55.0847	-681.539	-51341.2	71918	-12501.4	305.523	375.331	0	0	0	0	0	0	0	200	903	0	0	0	0	0	0	0	603	903	0
2325	2	46.0077	-55.2373	-680.318	-51707.4	72223.1	-12913.4	306.161	376.005	0	0	0	0	0	0	0	200	903	0	0	0	0	0	0	0	603	903	0
2325	3	46.618	-56.1528	-683.675	-50883.5	72589.4	-13096.5	306.175	374.426	0	0	0	0	0	0	0	200	903	0	0	0	0	0	0	0	603	903	0
2325	4	46.1603	-56.6106	-685.201	-51982.1	72406.2	-13096.5	305.672	375.864	0	0	0	0	0	0	0	200	903	0	0	0	0	0	0	0	603	903	0
2325	5	46.9232	-56.6106	-684.896	-52989.2	72711.4	-13508.5	306.164	377.368	0	0	0	0	0	0	0	200	903	0	0	0	0	0	0	0	603	903	0
2325	6	46.7706	-57.8313	-685.811	-52531.4	73321.8	-13371.1	306.913	376.598	0	0	0	0	0	0	0	200	903	0	0	0	0	0	0	0	603	903	0
2325	7	46.9232	-58.8994	-687.032	-53172.3	72955.6	-13600	306.19	377.394	0	0	0	0	0	0	0	200	903	0	0	0	0	0	0	0	603	903	0
2325	8	47.8387	-58.7468	-686.727	-53813.2	72772.5	-13371.1	305.97	378.362	0	0	0	0	0	0	0	200	903	0	0	0	0	0	0	0	603	903	0
2325	9	47.6861	-59.5097	-688.558	-52348.3	73565.9	-13828.9	306.841	376.026	0	0	0	0	0	0	0	200	903	0	0	0	0	0	0	0	603	903	0
2326	0	47.5336	-60.2727	-689.778	-54637.1	73626.9	-13325.4	306.74	379.21	0	0	0	0	0	0	0	200	903	0	0	0	0	0	0	0	603	903	0
2326	1	47.9913	-61.7986	-689.778	-54270.9	73932.1	-13874.7	307.182	378.679	0	0	0	0	0	0	0	200	903	0	0	0	0	0	0	0	603	903	0
2326	2	47.6861	-61.3408	-690.084	-54179.4	73932.1	-14103.6	307.135	378.511	0	0	0	0	0	0	0	200	903	0	0	0	0	0	0	0	603	903	0
2326	3	47.9913	-61.7986	-689.778	-55278	74176.3	-14103.6	307.536	380.139	0	0	0	0	0	0	0	200	903	0	0	0	0	0	0	0	603	903	0
2326	4	49.212	-62.4089	-692.22	-55461.1	73810.1	-14012	306.628	380.121	0	0	0	0	0	0	0	200	903	0	0	0	0	0	0	0	603	903	0
2326	5	48.4491	-62.4089	-692.525	-54637.1	74420.4	-14240.9	307.462	378.896	0	0	0	0	0	0	0	200	903	0	0	0	0	0	0	0	603	903	0
2326	6	48.9068	-62.8667	-694.051	-56285.1	74481.4	-14149.3	307.314	381.096	0	0	0	0	0	0	0	200	903	0	0	0	0	0	0	0	603	903	0
2326	7	48.9068	-63.0193	-693.746	-56742.8	74664.5	-14561.3	307.625	381.792	0	0	0	0	0	0	0	200	903	0	0	0	0	0	0	0	603	903	0
2326	8	49.3646	-63.9348	-697.103	-56559.7	74908.7	-14378.2	307.457	381.135	0	0	0	0	0	0	0	200	903	0	0	0	0	0	0	0	603	903	0
2326	9	49.8224	-64.5451	-696.492	-57200.6	74969.7	-14744.4	307.639	382.127	0	0	0	0	0	0	0	200	903	0	0	0	0	0	0	0	603	903	0
2327	0	49.8224	-64.24	-699.849	-58024.6	75519	-14790.2	307.908	382.91	0	0	0	0	0	0	0	200	903	0	0	0	0	0	0	0	603	903	0
2327	1	50.4327	-64.6977	-701.07	-57292.2	74908.7	-14790.2	306.849	381.721	0	0	0	0	0	0	0	200	903	0	0	0	0	0	0	0	603	903	0
2327	2	49.6698	-65.9184	-701.375	-58390.8	75763.2	-14881.8	308.021	383.252	0	0	0	0	0	0	0	200	903	0	0	0	0	0	0	0	603	903	0
2327	3	49.6698	-65.4607	-702.596	-59306.3	75641.1	-14927.5	307.66	384.41	0	0	0	0	0	0	0	200	903	0	0	0	0	0	0	0	603	903	0
2327	4	49.8224	-65.4607	-702.596	-59214.8	75946.3	-14607.1	308.094	384.28	0	0	0	0	0	0	0	200	903	0	0	0	0	0	0	0	603	903	0
2327	5	49.975	-66.5288	-701.68	-58573.9	76373.5	-14927.5	308.844	383.477	0	0	0	0	0	0	0	200	903	0	0	0	0	0	0	0	603	903	0
2327	6	49.8224	-67.1391	-703.511	-60405	75885.2	-14378.2	307.866	385.862	0	0	0	0	0	0	0	200	903	0	0	0	0	0	0	0	603	903	0
2327	7	49.5172	-66.5288	-704.732	-60862.7	76617.7	-14744.4	308.719	386.363	0	0	0	0	0	0	0	200	903	0	0	0	0	0	0	0	603	903	0
2327	8	49.8224	-66.6814	-706.563	-60679.6	76495.6	-15019.1	308.264	385.88	0	0	0	0	0	0	0	200	903	0	0	0	0	0	0	0	603	903	0
2327	9	49.6698	-68.3598	-706.258	-60588.1	77044.9	-15522.6	309.089	385.787	0	0	0	0	0	0	0	200	903	0	0	0	0	0	0	0	603	903	0
2328	0	50.1275	-67.1391	-708.699	-60862.7	77228	-15385.3	308.972	385.879	0	0	0	0	0	0	0	200	903	0	0	0	0	0	0	0	603	903	0
2328	1	51.3483	-67.5969	-707.173	-61869.8	76983.9	-15614.2	308.861	387.489	0	0	0	0	0	0	0	200	903	0	0	0	0	0	0	0	603	903	0
2328	2	51.1957	-68.3598	-706.868	-62327.6	76739.8	-15476.9	308.563	388.174	0	0	0	0	0	0	0	200	903	0	0	0	0	0	0	0	603	903	0
2328	3	50.7379	-68.2072	-708.699	-63700.9	77472.2	-15797.3	309.316	389.884	0	0	0	0	0	0	0	200	903	0	0	0	0	0	0	0	603	903	0
2328	4	50.5853	-68.2072	-709.31	-64158.6	77777.3	-15568.4	309.652	390.452	0	0	0	0	0	0	0	200	903	0	0	0	0	0	0	0	603	903	0
2328	5	50.5853	-68.665	-709.615	-63792.4	78021.5	-15888.8	309.949	389.897	0	0	0	0	0	0	0	200	903	0	0	0	0	0	0	0	603	903	0
2328	6	50.7379	-68.8176	-708.089	-64616.4	77594.2	-15614.2	309.583	391.255	0	0	0	0	0	0	0	200	903	0	0	0	0	0	0	0	603	903	0
2328	7	51.0431	-68.3598	-711.446	-64707.9	78448.7	-15843.1	310.267	390.953	0	0	0	0	0	0	0	200	903	0	0	0	0	0	0	0	603	903	0
2328	8	51.3483	-67.9021	-711.751	-65165.7	77777.3	-15843.1	309.276	391.557	0	0	0	0	0	0	0	200	903	0	0	0	0	0	0	0	603	903	0
2328	9	51.6534	-69.5805	-713.582	-65989.7	78387.7	-16026.2	309.851	392.477	0	0	0	0	0	0	0	200	903	0	0	0	0	0	0	0	603	903	0
2329	0	51.5008	-69.1228	-714.803	-67088.3	78692.9	-16255.1	310.09	393.856	0	0	0	0	0	0	0	200	903	0	0	0	0	0	0	0	603	903	0
2329	1	52.1112	-68.665	-718.77	-67454.5	78326.7	-16117.7	308.973	393.847	0	0	0	0	0	0	0	200	903	0	0	0	0	0	0	0	603	903	0
2329	2	52.569	-69.1228	-716.634	-67546.1	79120.1	-16071.9	310.405	394.255	0	0	0	0	0	0	0	200	903	0	0	0	0	0	0	0	603	903	0
2329	3	52.2638	-70.8012	-717.855	-67912.3	79181.2	-15888.8	310.302	394.604	0	0	0	0	0	0	0	200	903	0	0	0	0	0	0	0	603	903	0
2329	4	52.569	-69.1228	-717.855	-69285.6	78937	-16209.3	309.962	396.518	0	0	0	0	0	0	0	200	903	0	0	0	0	0	0	0	603	903	0
2329	5	52.8741	-68.8176	-719.38	-69010.9	79303.2	-16071.9	310.238	395.931	0	0	0	0	0	0	0	200	903	0	0	0	0	0	0	0	603	903	0
2329	6	52.7215	-69.8857	-716.939	-69651.8	79852.5	-16392.4	311.38	397.152	0	0	0	0	0	0	0	200	903	0	0	0	0	0	0	0	603	903	0
2329	7	52.7215	-70.0383	-719.991	-70567.3	79791.5	-16163.5	310.823	398.011	0	0	0	0	0	0	0	200	903	0	0	0	0	0	0	0	603	903	0
2329	8	52.2638	-68.3598	-721.822	-71299.7	80279.8	-16255.1	311.218	398.777	0	0	0	0	0	0	0	200	903	0	0	0	0	0	0	0	603	903	0
2329	9	53.1793	-70.0383	-721.212	-70384.2	80157.7	-16346.6	311.143	397.592	0	0	0	0	0	0	0	200	903	0	0	0	0	0	0	0	603	903	0
2330	0	53.4845	-69.4279	-722.127	-72306.8	80340.8	-16438.2	311.256	400.13	0	0	0	0	0	0	0	200	903	0	0	0	0	0	0	0	603	903	0
2330	1	53.7897	-68.8176	-722.737	-72856.1	80340.8	-16483.9	311.162	400.806	0	0	0	0	0	0	0	200	903	0	0	0	0	0	0	0	603	903	0
2330	2	55.3155	-68.665	-722.432	-72764.6	80829.1	-16392.4	311.885	400.722	0	0	0	0	0	0	0	200	903	0	0	0	0	0	0	0	603	903	0
2330	3	53.9422	-69.7331	-722.737	-73497	81317.4	-16483.9	312.513	401.693	0	0	0	0	0	0	0	200	903	0	0	0	0	0	0	0	603	903	0
2330	4	54.0948	-68.5124	-723.043	-74412.5	81439.4	-16529.7	312.634	402.916	0	0	0	0	0	0	0	200	903	0	0	0	0	0	0	0	603	903	0
2330	5	54.5526	-68.9702	-723.958	-75328	81317.4	-16255.1	312.323	404.05	0	0	0	0	0	0	0	200	903	0	0	0	0	0	0	0	603	903	0
2330	6	55.0104	-69.4279	-722.432	-74961.8	81744.6	-16758.6	313.152	403.763	0	0	0	0	0	0	0	200	903	0	0	0	0	0	0	0	603	903	0
2330	7	55.9259	-69.2754	-724.568	-76243.6	80951.2	-16529.7	311.723	405.226	0	0	0	0	0	0	0	200	903	0	0	0	0	0	0	0	603	903	0
2330	8	55.6207	-68.665	-724.568	-76976	82171.9	-16392.4	313.408	406.237	0	0	0	0	0	0	0	200	903	0	0	0	0	0	0	0	603	903	0
2330	9	56.0785	-68.8176	-725.484	-76792.9	81744.6	-16117.7	312.676	405.851	0	0	0	0	0	0	0	200	903	0	0	0	0	0	0	0	603	903	0
2331	0	57.6044	-69.7331	-726.705	-76976	82355	-16804.4	313.327	405.925	0	0	0	0	0	0	0	200	903	0	0	0	0	0	0	0	603	903	0
2331	1	56.6888	-67.9021	-727.315	-77800	82538.1	-16804.4	313.483	406.969	0	0	0	0	0	0	0	200	903	0	0	0	0	0	0	0	603	903	0
2331	2	56.8414	-68.665	-727.62	-78623.9	82355	-16712.8	313.184	408.056	0	0	0	0	0	0	0	200	903	0	0	0	0	0	0	0	603	903	0
2331	3	56.3837	-69.1228	-727.315	-78990.1	82171.9	-16255.1	312.98	408.605	0	0	0	0	0	0	0	200	903	0	0	0	0	0	0	0	603	903	0
2331	4	57.4518	-68.9702	-723.958	-79722.6	82293.9	-16117.7	313.672	410.12	0	0	0	0	0	0	0	200	903	0	0	0	0	0	0	0	603	903	0
2331	5	56.994	-69.7331	-729.146	-80546.5	82965.3	-16209.3	313.784	410.467	0	0	0	0	0	0	0	200	903	0	0	0	0	0	0	0	603	903	0
2331	6	56.6888	-68.665	-728.841	-79631	83148.4	-16758.6	314.083	409.257	0	0	0	0	0	0	0	200	903	0	0	0	0	0	0	0	603	903	0
2331	7	57.4518	-68.9702	-729.146	-81462.1	83148.4	-16163.5	314.035	411.723	0	0	0	0	0	0	0	200	903	0	0	0	0	0	0	0	603	903	0
2331	8	57.7569	-67.9021	-729.146	-82377.6	83209.5	-16438.2	314.119	412.978	0	0	0	0	0	0	0	200	903	0	0	0	0	0	0	0	603	903	0
2331	9	58.2147	-67.7495	-730.062	-82194.5	83575.7	-16438.2	314.478	412.586	0	0	0	0	0	0	0	200	903	0	0	0	0	0	0	0	603	903	0
2332	0	58.9776	-68.8176	-726.4	-82652.2	83575.7	-16575.5	315.055	413.783	0	0	0	0	0	0	0	200	903	0	0	0	0	0	0	0	603	903	0
2332	1	58.5199	-67.5969	-727.925	-84391.8	83880.9	-16758.6	315.233	415.935	0	0	0	0	0	0	0	200	903	0	0	0	0	0	0	0	603	903	0
2332	2	58.6725	-67.9021	-727.62	-83293.1	83880.9	-16941.7	315.281	414.473	0	0	0	0	0	0	0	200	903	0	0	0	0	0	0	0	603	903	0
2332	3	58.6725	-68.8176	-728.231	-84574.9	84002.9	-16941.7	315.352	416.137	0	0	0	0	0	0	0	200	903	0	0	0	0	0	0	0	603	903	0
2332	4	60.5035	-67.9021	-727.925	-85215.7	84369.2	-17170.6	315.904	417.067	0	0	0	0	0	0	0	200	903	0	0	0	0	0	0	0	603	903	0
2332	5	59.7406	-69.2754	-728.231	-85948.1	84369.2	-16987.5	315.855	418.023	0	0	0	0	0	0	0	200	903	0	0	0	0	0	0	0	603	903	0
2332	6	60.0458	-68.3598	-728.536	-86222.8	84186	-17307.9	315.555	418.351	0	0	0	0	0	0	0	200	903	0	0	0	0	0	0	0	603	903	0
2332	7	60.3509	-68.0547	-728.231	-86497.5	84186	-16987.5	315.604	418.778	0	0	0	0	0	0	0	200	903	0	0	0	0	0	0	0	603	903	0
2332	8	59.7406	-67.5969	-730.062	-87779.2	84491.2	-17262.1	315.732	420.235	0	0	0	0	0	0	0	200	903	0	0	0	0	0	0	0	603	903	0
2332	9	60.5035	-67.1391	-729.146	-87321.5	84613.3	-16987.5	316.044	419.759	0	0	0	0	0	0	0	200	903	0	0	0	0	0	0	0	603	903	0
2333	0	60.1983	-68.0547	-729.756	-87962.4	84613.3	-17170.6	315.947	420.537	0	0	0	0	0	0	0	200	903	0	0	0	0	0	0	0	603	903	0
2333	1	60.1983	-66.834	-729.756	-89244	84674.3	-16987.5	316.031	422.293	0	5.858	9.02588	-15.9258	645.062	-1465.38	-426.864	107.988	862.496	0	0	0	0	0	0	0	603	903	0
2333	2	61.1139	-67.5969	-729.756	-88694.8	84796.4	-16621.3	316.198	421.54	0	3.4166	9.48364	-18.0621	1285.93	-1404.34	-60.6534	122.249	831.805	0	0	0	0	0	0	0	603	903	0
2333	3	60.3509	-67.4443	-724.874	-89610.3	84857.5	-17079	317.065	423.622	0	2.95883	8.11035	-22.9449	919.721	-1465.38	-243.759	136.135	862.916	0	0	0	0	0	0	0	603	903	0
2333	4	60.1983	-66.834	-728.841	-90342.7	85162.6	-16987.5	316.847	423.954	0	3.72177	9.02588	-21.419	1469.04	-1648.48	-243.759	123.037	834.414	0	0	0	0	0	0	0	603	903	0
2333	5	60.1983	-67.1391	-729.451	-90983.6	85284.7	-17399.5	316.916	424.729	0	3.11142	12.0776	-22.3345	1011.27	-1770.55	-243.759	120.726	857.721	0	0	0	0	0	0	0	603	903	0
2333	6	60.6561	-67.4443	-729.756	-90892	85223.7	-17216.4	316.784	424.551	0	2.50107	13.4509	-26.9122	1743.7	-1770.55	-472.641	134.21	838.208	0	0	0	0	0	0	0	603	903	0
2333	7	59.8932	-68.5124	-727.925	-91532.9	85528.8	-17399.5	317.497	425.745	0	0.670014	11.4673	-32.4053	1835.25	-2441.94	-472.641	124.644	846.366	0	0	0	0	0	0	0	603	903	0
2333	8	60.6561	-67.9021	-727.315	-92448.4	85284.7	-17536.8	317.26	427.109	0	-0.703277	13.2983	-31.1846	1469.04	-2319.87	-838.852	125.609	855.892	0	0	0	0	0	0	0	603	903	0
2333	9	60.3509	-68.0547	-727.925	-92631.5	85711.9	-17674.1	317.748	427.254	0	0.21225	14.0613	-35.1519	2018.35	-2319.87	-655.746	134.004	845.582	0	0	0	0	0	0	0	603	903	0
2334	0	60.5035	-69.1228	-729.146	-93364	85589.9	-17582.6	317.384	428.046	0	0.670014	7.95776	-40.6451	1743.7	-3479.54	168.228	114.392	860.1	0	0	0	0	0	0	0	603	903	0
2334	1	60.8087	-68.2072	-727.925	-93913.2	85284.7	-17170.6	317.161	429.015	0	-0.245513	4.906	-45.5279	1926.8	-3296.43	-197.982	127.595	860.679	0	0	0	0	0	0	0	603	903	0
2334	2	60.3509	-68.8176	-723.958	-93547	85895	-17307.9	318.646	429.216	0	0.0596623	4.14306	-51.3262	2933.88	-3662.64	305.558	128.64	845.839	0	0	0	0	0	0	0	603	903	0
2334	3	61.2665	-70.3435	-728.536	-94004.8	85650.9	-17765.7	317.566	429.033	0	2.34848	1.39648	-54.378	2659.22	-4150.92	534.44	123.665	854.097	0	0	0	0	0	0	0	603	903	0
2334	4	60.5035	-68.2072	-728.841	-94004.8	85956.1	-17765.7	317.935	428.978	0	4.78989	-3.02857	-59.8711	2933.88	-4334.03	671.769	127.611	853.997	0	0	0	0	0	0	0	603	903	0
2334	5	60.1983	-69.5805	-728.231	-94920.4	86017.1	-17994.6	318.118	430.344	0	3.87436	-4.85962	-64.754	4215.62	-4639.21	946.427	128.356	837.898	0	0	0	0	0	0	0	603	903	0
2334	6	60.8087	-70.0383	-728.536	-95195	85406.7	-17765.7	317.231	430.666	0	4.02695	-7.45362	-67.1954	3208.54	-5310.59	1083.76	120.968	855.251	0	0	0	0	0	0	0	603	903	0
2334	7	60.0458	-69.5805	-728.841	-96202.1	86078.2	-17948.8	318.103	431.993	0	6.31577	-10.5054	-74.8248	3940.96	-5493.7	1587.3	126.579	850.331	0	0	0	0	0	0	0	603	903	0
2334	8	59.2828	-70.8012	-730.062	-97026.1	85956.1	-17857.2	317.738	432.901	0	7.53647	-12.9468	-78.792	3666.3	-5493.7	1953.51	130.276	856.469	0	0	0	0	0	0	0	603	903	0
2334	9	59.7406	-71.7168	-730.672	-96293.6	86383.3	-18177.7	318.224	431.788	0	7.38388	-13.5571	-83.3697	4398.73	-5859.91	2045.06	129.712	850.238	0	0	0	0	0	0	0	603	903	0
2335	0	59.4354	-72.4797	-729.451	-97392.3	86200.2	-18040.3	318.171	433.514	0	7.68906	-16.9141	-88.8628	4490.28	-6348.19	1999.28	128.562	852.47	0	0	0	0	0	0	0	603	903	0
2335	1	59.7406	-72.9375	-728.536	-97575.4	86322.3	-18086.1	318.487	433.934	0	10.1305	-21.3391	-95.2715	4856.49	-6714.4	2640.15	129.524	852.025	0	0	0	0	0	0	0	603	903	0
2335	2	58.9776	-73.3952	-727.925	-97117.6	86139.2	-18223.4	318.335	433.417	0	11.9615	-21.9495	-98.3233	4856.49	-6897.51	2685.93	129.849	853.607	0	0	0	0	0	0	0	603	903	0
2335	3	59.2828	-73.5478	-727.925	-98033.1	86261.2	-18269.2	318.503	434.675	0	13.0296	-21.6443	-103.206	4581.83	-7263.72	2731.7	129.619	858.605	0	0	0	0	0	0	0	603	903	0
2335	4	59.1302	-72.9375	-728.536	-98399.3	86444.4	-18452.3	318.655	435.065	0	11.9615	-24.2383	-107.173	5497.36	-7446.82	3189.47	130.516	851.706	0	0	0	0	0	0	0	603	903	0
2335	5	58.8251	-74.0056	-726.705	-98216.3	86017.1	-18452.3	318.366	435.153	0	13.64	-24.8486	-113.277	5497.36	-7813.03	2869.03	131.027	854.47	0	0	0	0	0	0	0	603	903	0
2335	6	59.588	-74.4633	-725.179	-98948.7	86139.2	-18406.5	318.783	436.447	0	12.2667	-23.9331	-117.244	5039.6	-7874.07	2685.93	132.84	860.016	0	0	0	0	0	0	0	603	903	0
2335	7	58.6725	-74.0056	-725.179	-99498	86200.2	-18452.3	318.868	437.205	0	13.3348	-22.4072	-118.16	5680.47	-8301.31	3097.92	129.745	854.926	0	0	0	0	0	0	0	603	903	0
2335	8	58.3673	-75.2263	-724.568	-99314.9	86139.2	-19001.6	318.883	437.068	0	13.7926	-22.5598	-120.906	5955.12	-8362.35	2685.93	130.836	853.746	0	0	0	0	0	0	0	603	903	0
2335	9	58.5199	-75.9892	-721.822	-99223.3	86383.3	-18635.4	319.674	437.462	0	11.5038	-20.8814	-125.789	6412.89	-8362.35	2640.15	133.521	852.019	0	0	0	0	0	0	0	603	903	0
2336	0	59.2828	-76.2944	-721.822	-100139	85895	-18864.3	318.998	438.731	0	11.8089	-18.1348	-128.231	6138.23	-9338.92	2731.7	127.171	855.131	0	0	0	0	0	0	0	603	903	0
2336	1	58.6725	-77.0573	-723.348	-99864.2	86017.1	-18818.5	318.915	438.058	0	13.0296	-17.677	-129.756	5680.47	-8972.7	2548.6	130.85	859.222	0	0	0	0	0	0	0	603	903	0
2336	2	57.6044	-77.3625	-721.822	-100139	86200.2	-19001.6	319.42	438.731	0	13.0296	-15.3882	-131.893	5680.47	-9033.74	2228.16	131.507	859.931	0	0	0	0	0	0	0	603	903	0
2336	3	57.6044	-78.7358	-722.432	-100505	85589.9	-18864.3	318.475	439.12	0	11.6563	-11.7261	-134.944	6046.68	-9460.99	2228.16	129.89	858.191	0	0	0	0	0	0	0	603	903	0
2336	4	57.4518	-78.4306	-721.822	-100871	86261.2	-18910.1	319.505	439.745	0	11.8089	-9.74243	-140.132	6504.44	-9522.02	1816.18	132.05	856.584	0	0	0	0	0	0	0	603	903	0
2336	5	57.1466	-78.4306	-718.16	-100505	85650.9	-19139	319.264	439.948	0	12.1141	-8.21656	-140.132	5863.57	-9705.13	1724.63	130.743	861.157	0	0	0	0	0	0	0	603	903	0
2336	6	56.8414	-81.1772	-719.38	-100597	85956.1	-19230.5	319.486	439.838	0	13.3348	-4.09668	-142.879	5772.02	-9827.2	1633.07	131.22	862.602	0	0	0	0	0	0	0	603	903	0
2336	7	56.6888	-80.1091	-721.517	-100505	85895	-19093.2	319.048	439.297	0	11.3512	-2.41822	-144.71	6321.33	-9888.23	1495.74	131.669	859.317	0	0	0	0	0	0	0	603	903	0
2336	8	55.4681	-79.9565	-719.991	-100780	85711.9	-19276.3	319.046	439.974	0	11.6563	-0.281985	-146.541	6046.68	-10010.3	1404.19	131.689	861.737	0	0	0	0	0	0	0	603	903	0
2336	9	55.7733	-81.4824	-719.075	-101054	85589.9	-19139	319.028	440.534	0	11.3512	2.4646	-151.729	6138.23	-10010.3	1129.53	134.025	862.545	0	0	0	0	0	0	0	603	903	0
2337	0	55.4681	-82.2453	-718.465	-101604	85284.7	-19322.1	318.704	441.418	0	11.9615	4.906	-150.814	6229.78	-10742.7	717.545	128.768	861.692	0	0	0	0	0	0	0	603	903	0
2337	1	55.3155	-81.7876	-717.549	-101970	85406.7	-18955.9	319.026	442.109	0	11.5038	6.73706	-156.002	5863.57	-10559.6	488.663	132.311	865.413	0	0	0	0	0	0	0	603	903	0
2337	2	54.7052	-83.0083	-713.582	-101421	84857.5	-19322.1	318.918	442.129	0	11.5038	7.19482	-159.969	6138.23	-10925.8	580.216	131.7	864.629	0	0	0	0	0	0	0	603	903	0
2337	3	54.2474	-83.7712	-715.108	-101878	85040.5	-18681.2	318.92	442.466	0	10.7408	9.9414	-163.936	6504.44	-11353.1	305.558	130.747	863.323	0	0	0	0	0	0	0	603	903	0
2337	4	53.1793	-84.6867	-713.887	-101970	84796.4	-19322.1	318.781	442.838	0	11.046	11.6199	-167.903	6138.23	-11047.9	259.781	134.201	866.442	0	0	0	0	0	0	0	603	903	0
2337	5	53.3319	-84.9919	-711.751	-101329	83819.8	-19413.6	317.766	442.366	0	11.1986	11.4673	-171.871	6138.23	-11597.2	259.781	132.524	867.286	0	0	0	0	0	0	0	603	903	0
2337	6	52.8741	-85.9074	-710.225	-101329	84613.3	-19734.1	319.136	442.672	0	9.52011	12.2302	-174.007	6870.65	-12085.5	168.228	130.546	863.515	0	0	0	0	0	0	0	603	903	0
2337	7	52.2638	-86.5178	-709.005	-102061	83941.9	-19871.4	318.394	443.95	0	10.2831	13.9087	-178.279	6321.33	-12451.7	-106.43	130.156	867.543	0	0	0	0	0	0	0	603	903	0
2337	8	51.3483	-87.8911	-703.511	-101146	84735.4	-19917.2	320.446	443.773	0	9.82529	12.5354	-181.331	6870.65	-12390.7	-14.877	131.668	865.11	0	0	0	0	0	0	0	603	903	0
2337	9	51.0431	-88.9592	-705.342	-101329	84186	-19688.3	319.355	443.659	0	9.82529	14.2139	-186.214	6504.44	-13001	76.6757	130.182	868.07	0	0	0	0	0	0	0	603	903	0
2338	0	51.5008	-89.2644	-702.291	-102061	82965.3	-19917.2	318.135	445.327	0	11.5038	15.8923	-189.266	6779.1	-13367.2	-197.982	129.373	867.182	0	0	0	0	0	0	0	603	903	0
2338	1	50.5853	-90.1799	-701.68	-101787	83331.5	-19917.2	318.76	445.062	0	8.60458	14.519	-194.454	6870.65	-13428.3	122.452	130.944	867.667	0	0	0	0	0	0	0	603	903	0
2338	2	49.8224	-90.0273	-699.544	-101329	83148.4	-20237.6	318.861	444.85	0	8.75717	14.2139	-199.031	6687.55	-13794.5	-152.206	130.692	869.4	0	0	0	0	0	0	0	603	903	0
2338	3	50.1275	-92.4687	-697.713	-100505	82843.3	-19962.9	318.735	444.049	0	11.3512	14.519	-206.661	7145.31	-14099.7	-14.877	131.774	868.425	0	0	0	0	0	0	0	603	903	0
2338	4	49.212	-92.1635	-690.999	-100780	82721.2	-20329.1	319.712	445.846	0	11.6563	15.1294	-210.628	7236.86	-14221.7	-152.206	132.479	868.641	0	0	0	0	0	0	0	603	903	0
2338	5	49.0594	-92.1635	-693.441	-100688	81561.5	-20237.6	317.619	445.201	0	12.2667	15.282	-217.037	7053.76	-14649	168.228	132.505	870.5	0	0	0	0	0	0	0	603	903	0
2338	6	48.4491	-93.3842	-690.084	-100597	82355	-20283.4	319.341	445.775	0	13.64	16.0449	-222.53	7145.31	-14954.1	-243.759	132.799	870.891	0	0	0	0	0	0	0	603	903	0
2338	7	48.6017	-94.1472	-689.778	-101421	81683.6	-20237.6	318.42	447.034	0	12.2667	17.876	-227.107	7145.31	-15320.4	-426.864	132.541	871.538	0	0	0	0	0	0	0	603	903	0
2338	8	47.9913	-94.7575	-686.116	-100963	81622.6	-20283.4	318.963	447.151	0	12.5719	18.1811	-235.042	7511.52	-15625.5	-518.417	133.52	871.042	0	0	0	0	0	0	0	603	903	0
2338	9	47.9913	-95.2153	-682.759	-100505	81317.4	-20329.1	319.101	447.204	0	13.4874	17.876	-244.502	7236.86	-16785.2	-472.641	131.35	873.402	0	0	0	0	0	0	0	603	903	0
2339	0	47.6861	-95.6731	-682.454	-100871	80768.1	-20191.8	318.349	447.807	0	11.1986	20.47	-246.334	7053.76	-16968.3	-335.312	131.117	874.365	0	0	0	0	0	0	0	603	903	0
2339	1	46.3129	-95.6731	-679.708	-100597	80646	-20603.8	318.648	448	0	9.82529	21.8433	-253.658	6687.55	-17273.5	-793.076	131.902	876.636	0	0	0	0	0	0	0	603	903	0
2339	2	45.8551	-97.0464	-677.571	-100139	80157.7	-20420.7	318.302	447.791	0	11.5038	22.7588	-260.982	6870.65	-18066.9	-747.299	130.773	876.674	0	0	0	0	0	0	0	603	903	0
2339	3	45.7025	-97.8093	-673.909	-99955.8	79791.5	-20420.7	318.401	448.322	0	10.7408	24.5898	-265.865	7053.76	-18494.2	-976.181	130.438	876.469	0	0	0	0	0	0	0	603	903	0
2339	4	44.9396	-97.6567	-667.501	-99955.8	79486.3	-20420.7	319.081	449.746	0	7.84164	26.5735	-272.273	6870.65	-19287.6	-1296.62	129.161	877.766	0	0	0	0	0	0	0	603	903	0
2339	5	45.3973	-98.4196	-667.806	-99314.9	78998	-20603.8	318.295	448.718	0	7.84164	27.6416	-278.377	6870.65	-19653.9	-1205.06	129.398	878.319	0	0	0	0	0	0	0	603	903	0
2339	6	43.7189	-100.556	-665.975	-99223.3	78082.5	-20466.5	317.246	448.99	0	7.53647	30.2356	-283.87	7053.76	-19959	-1525.5	129.69	878.152	0	0	0	0	0	0	0	603	903	0
2339	7	43.2611	-98.7248	-662.618	-97666.9	78326.7	-20878.5	318.208	447.396	0	4.94247	32.2192	-289.363	6595.99	-20264.2	-1617.05	129.97	880.205	0	0	0	0	0	0	0	603	903	0
2339	8	43.5663	-99.9455	-659.871	-98399.3	77899.4	-20283.4	318.052	449.119	0	5.24765	33.1348	-293.941	7419.97	-20630.4	-1617.05	129.814	877.757	0	0	0	0	0	0	0	603	903	0
2339	9	42.193	-100.708	-655.904	-97941.6	77716.3	-20649.6	318.487	449.323	0	4.94247	35.5762	-301.265	6412.89	-21729	-1433.95	127.874	881.714	0	0	0	0	0	0	0	603	903	0
2340	0	42.6507	-101.624	-651.937	-98307.8	77044.9	-20146	318.179	450.793	0	4.33212	36.3391	-309.505	6595.99	-21607	-1845.93	130.189	881.689	0	0	0	0	0	0	0	603	903	0
2340	1	42.193	-101.624	-647.359	-98490.9	76678.7	-19962.9	318.449	452.143	0	3.72177	38.6279	-313.777	6687.55	-22217.3	-1754.38	129.194	881.687	0	0	0	0	0	0	0	603	903	0
2340	2	41.1249	-101.929	-644.918	-97026.1	76312.5	-20283.4	318.329	450.447	0	2.65366	40.7642	-321.407	7145.31	-23316	-2120.59	127.457	880.769	0	0	0	0	0	0	0	603	903	0
2340	3	40.2093	-102.54	-641.561	-97300.7	75885.2	-20512.3	318.282	451.663	0	0.97519	41.2219	-326.9	6229.78	-23865.3	-1617.05	126.995	883.943	0	0	0	0	0	0	0	603	903	0
2340	4	40.2093	-103.455	-636.983	-96842.9	75397	-20558	318.366	452.034	0	-0.0929256	43.8159	-334.835	6046.68	-23926.3	-2166.37	128.543	884.941	0	0	0	0	0	0	0	603	903	0
2340	5	41.2775	-102.997	-634.847	-96385.2	75030.8	-20832.7	318.187	451.824	0	2.19589	44.2737	-340.023	5955.12	-24658.7	-1937.49	127.479	885.486	0	0	0	0	0	0	0	603	903	0
2340	6	39.599	-104.065	-629.354	-95195	74115.2	-20466.5	317.764	451.258	0	-1.46622	45.4944	-346.431	5772.02	-25330.1	-2120.59	126.883	886.339	0	0	0	0	0	0	0	603	903	0
2340	7	38.836	-103.76	-626.302	-95835.8	73993.2	-20466.5	318.143	453.019	0	-2.22916	45.3418	-353.145	5863.57	-25635.3	-2395.25	127.409	886.396	0	0	0	0	0	0	0	603	903	0
2340	8	38.2257	-104.065	-622.335	-94828.8	73626.9	-20603.8	318.308	452.376	0	-1.77139	48.3936	-359.859	5680.47	-26550.8	-2349.47	126.219	887.215	0	0	0	0	0	0	0	603	903	0
2340	9	38.0731	-105.439	-618.672	-94462.6	73138.7	-20146	318.219	452.686	0	-5.12833	49.0039	-365.962	5314.25	-27039.1	-2395.25	126.115	888.479	0	0	0	0	0	0	0	603	903	0
2341	0	38.9886	-104.828	-616.231	-94828.8	72528.3	-20008.7	317.697	453.885	0	-4.51797	51.7505	-375.728	5131.15	-27161.2	-2349.47	127.711	889.344	0	0	0	0	0	0	0	603	903	0
2341	1	38.2257	-104.981	-610.433	-92814.6	71734.9	-20054.5	317.515	452.047	0	-2.53433	52.666	-383.052	4673.39	-27954.6	-2441.02	127.021	890.8	0	0	0	0	0	0	0	603	903	0
2341	2	36.6998	-105.286	-605.855	-92906.2	71490.7	-20054.5	318	453.347	0	-3.60245	54.4971	-388.545	4398.73	-28870.2	-2441.02	125.697	891.679	0	0	0	0	0	0	0	603	903	0
2341	3	35.1739	-105.744	-602.803	-93455.5	71185.5	-20786.9	318.091	455.035	0	-6.95938	56.3281	-401.058	4215.62	-29358.4	-2669.91	126.797	892.489	0	0	0	0	0	0	0	603	903	0
2341	4	35.3265	-105.439	-598.226	-92631.5	70453.1	-19596.7	317.77	454.844	0	-7.56973	56.3281	-408.992	4124.07	-29968.8	-2715.68	126.725	892.917	0	0	0	0	0	0	0	603	903	0
2341	5	33.8006	-105.591	-589.681	-90983.6	69842.8	-19642.5	318.442	454.293	0	-9.09561	59.9902	-416.316	3208.54	-31067.4	-3036.12	125.375	895.293	0	0	0	0	0	0	0	603	903	0
2341	6	33.4955	-105.591	-589.376	-91624.5	69354.5	-19825.6	317.675	455.46	0	-7.56973	61.0583	-424.861	2933.88	-31983	-2761.46	124.721	896.094	0	0	0	0	0	0	0	603	903	0
2341	7	32.7325	-105.439	-585.408	-91258.2	68377.9	-19459.4	316.804	455.888	0	-10.6215	62.5842	-431.88	3025.43	-31921.9	-3310.78	126.086	895.995	0	0	0	0	0	0	0	603	903	0
2341	8	31.3592	-105.439	-579.305	-90068.1	68255.9	-19367.9	317.824	455.476	0	-11.537	65.636	-439.205	2201.46	-33264.7	-3493.88	124.261	897.988	0	0	0	0	0	0	0	603	903	0
2341	9	31.817	-105.896	-573.812	-89884.9	66974.1	-19459.4	316.718	456.645	0	-13.6732	65.9412	-446.224	1835.25	-33753	-3310.78	124.359	898.887	0	0	0	0	0	0	0	603	903	0
2342	0	30.4437	-105.286	-564.962	-89244	66974.1	-19276.3	318.546	457.965	0	-14.7414	68.0774	-454.769	1652.14	-34058.2	-3219.22	125.109	899.367	0	0	0	0	0	0	0	603	903	0
2342	1	31.3592	-104.676	-562.215	-87779.2	66424.8	-18864.3	318.148	456.131	0	-14.2836	68.23	-461.482	1285.93	-35462	-3722.76	123.156	900.214	0	0	0	0	0	0	0	603	903	0
2342	2	29.3756	-106.049	-557.332	-87138.4	65570.3	-19184.8	317.65	456.349	0	-16.8776	71.5869	-469.722	828.168	-35828.2	-3448.1	123.725	901.237	0	0	0	0	0	0	0	603	903	0
2342	3	28.1549	-104.676	-551.534	-87046.8	65265.1	-19322.1	318.334	457.827	0	-16.725	73.5706	-475.215	95.7459	-35828.2	-4409.41	124.606	902.799	0	0	0	0	0	0	0	603	903	0
2342	4	27.8497	-105.591	-545.43	-85948.1	64105.5	-19184.8	317.532	457.579	0	-16.725	75.7068	-482.54	187.299	-36377.5	-4134.75	124.612	902.612	0	0	0	0	0	0	0	603	903	0
2342	5	27.392	-105.439	-538.106	-85398.9	63678.2	-19093.2	318.338	458.703	0	-17.6405	76.1646	-486.507	-362.018	-36926.8	-4455.19	124.098	903.744	0	0	0	0	0	0	0	603	903	0
2342	6	26.7816	-104.371	-533.834	-85307.3	63128.9	-18864.3	318.256	459.801	0	-19.0138	78.4534	-490.779	-453.571	-37232	-4592.52	124.137	903.924	0	0	0	0	0	0	0	603	903	0
2342	7	25.7135	-104.371	-527.73	-84758	61786.1	-18955.9	317.079	460.609	0	-18.2509	79.0637	-496.578	-87.3596	-37537.2	-4684.07	124.408	903.176	0	0	0	0	0	0	0	603	903	0
2342	8	24.6454	-103.76	-521.321	-83750.9	61725.1	-18406.5	318.401	460.651	0	-18.7086	81.3525	-501.155	-1369.1	-38574.8	-4867.17	123.028	905.732	0	0	0	0	0	0	0	603	903	0
2342	9	23.8824	-104.218	-515.218	-83018.5	60931.6	-18681.2	318.264	461.133	0	-18.4035	82.1155	-504.207	-1460.65	-38025.5	-5004.5	124.584	905.897	0	0	0	0	0	0	0	603	903	0
2343	0	24.6454	-103.608	-511.861	-82377.6	60382.3	-18543.9	317.966	460.937	0	-19.1664	82.7258	-508.785	-1552.2	-38513.7	-5141.83	124.303	906.051	0	0	0	0	0	0	0	603	903	0
2343	1	22.6617	-103.608	-504.232	-80912.8	59772	-18040.3	318.541	460.467	0	-19.4716	83.4888	-512.447	-2009.97	-39551.3	-5141.83	122.819	906.922	0	0	0	0	0	0	0	603	903	0
2343	2	21.5936	-103.302	-498.128	-80912.8	58246.1	-18040.3	316.93	462.434	0	-20.6923	85.4724	-517.33	-3017.05	-40161.7	-5141.83	122.367	908.832	0	0	0	0	0	0	0	603	903	0
2343	3	21.7462	-102.082	-491.719	-80271.9	58246.1	-17811.5	318.454	463.247	0	-21.7604	85.3198	-520.076	-2925.49	-39673.4	-5782.7	123.716	908.625	0	0	0	0	0	0	0	603	903	0
2343	4	22.0514	-101.624	-485.005	-78166.2	57025.4	-17674.1	317.577	461.166	0	-19.6242	85.7776	-522.212	-2650.84	-40466.9	-5599.6	122.509	908.076	0	0	0	0	0	0	0	603	903	0
2343	5	19.1522	-102.692	-479.207	-77983.1	56598.2	-17628.4	318.108	462.734	0	-21.7604	86.0828	-522.823	-4207.23	-40588.9	-5691.15	122.366	911.047	0	0	0	0	0	0	0	603	903	0
2343	6	18.847	-101.166	-473.104	-77067.5	56109.9	-17582.6	318.6	462.898	0	-22.0656	87.7612	-528.011	-3474.81	-39917.5	-5645.37	124.4	909.581	0	0	0	0	0	0	0	603	903	0
2343	7	17.4737	-100.251	-465.169	-75602.7	54645	-17124.8	317.474	462.527	0	-20.2345	88.219	-531.368	-4024.13	-41138.2	-5874.25	122.58	910.573	0	0	0	0	0	0	0	603	903	0
2343	8	17.1686	-99.3352	-460.286	-75694.2	54217.8	-16941.7	317.791	464.45	0	-22.3708	89.2871	-533.504	-4573.44	-41382.4	-5965.81	122.433	911.573	0	0	0	0	0	0	0	603	903	0
2343	9	18.0841	-99.1826	-451.131	-75328	53241.2	-16621.3	318.017	466.976	0	-22.0656	89.8975	-536.251	-5031.21	-41565.5	-6194.69	122.489	912.382	0	0	0	0	0	0	0	603	903	0
2344	0	15.9479	-98.4196	-444.722	-74412.5	52569.8	-16758.6	318.208	467.324	0	-21.7604	90.9656	-538.692	-5214.31	-41748.6	-6240.47	122.5	912.68	0	0	0	0	0	0	0	603	903	0
2344	1	15.0323	-96.5886	-438.008	-72581.5	52020.5	-16346.6	318.766	465.708	0	-22.6759	91.4233	-541.133	-5305.87	-41809.6	-6469.35	122.737	912.805	0	0	0	0	0	0	0	603	903	0
2344	2	14.422	-96.1308	-430.684	-72306.8	51105	-16300.8	318.66	467.888	0	-23.4389	92.0337	-541.439	-5763.63	-41992.7	-6560.9	122.442	913.645	0	0	0	0	0	0	0	603	903	0
2344	3	14.5746	-95.0627	-421.834	-71665.9	50616.7	-15797.3	319.992	469.891	0	-24.2018	93.407	-543.575	-6221.4	-41687.6	-6423.57	123.309	914.445	0	0	0	0	0	0	0	603	903	0
2344	4	14.422	-93.9946	-417.256	-70292.6	49151.9	-15705.7	317.798	468.464	0	-21.1501	92.644	-544.49	-6312.95	-42664.1	-6515.12	121.644	914.594	0	0	0	0	0	0	0	603	903	0
2344	5	13.5065	-94.6049	-411.153	-69194	48236.3	-15385.3	317.32	468.293	0	-24.8122	93.7122	-549.373	-6404.5	-42786.2	-6652.45	122.118	914.658	0	0	0	0	0	0	0	603	903	0
2344	6	12.7435	-92.4687	-404.134	-69194	48297.4	-15293.8	319.508	471.216	0	-25.8803	93.8647	-549.983	-6496.05	-42725.2	-6698.23	122.316	914.811	0	0	0	0	0	0	0	603	903	0
2344	7	12.1332	-91.8584	-397.42	-67271.4	46832.5	-15156.4	317.841	469.27	0	-25.1173	95.6958	-555.171	-7045.37	-43335.5	-6927.11	121.942	915.69	0	0	0	0	0	0	0	603	903	0
2344	8	13.3539	-91.5532	-391.622	-65806.5	46649.4	-15064.9	319.119	468.036	0	-26.7958	95.8484	-555.782	-7869.34	-43213.4	-6835.56	122.247	917.159	0	0	0	0	0	0	0	603	903	0
2344	9	11.3702	-91.0954	-383.992	-66172.8	45550.8	-14607.1	318.624	472.328	0	-29.0846	98.1372	-559.444	-7960.9	-43579.7	-6881.33	122.102	917.23	0	0	0	0	0	0	0	603	903	0
2345	0	11.2176	-88.8066	-377.889	-64982.6	44513.2	-14561.3	317.794	471.962	0	-28.4743	97.6794	-562.496	-8144	-44312.1	-6698.23	121.222	917.478	0	0	0	0	0	0	0	603	903	0
2345	1	11.065	-86.6704	-370.87	-63700.9	44085.9	-13966.2	318.872	471.761	0	-30.4579	97.832	-563.106	-8327.11	-44556.2	-6927.11	120.874	917.788	0	0	0	0	0	0	0	603	903	0
2345	2	10.3021	-87.5859	-361.104	-62602.2	42926.3	-14240.9	318.875	473.363	0	-30.7631	100.273	-567.684	-8418.66	-44251	-6744.01	122.05	917.83	0	0	0	0	0	0	0	603	903	0
2345	3	9.99693	-85.2971	-355.306	-61778.2	42376.9	-13554.3	319.269	473.873	0	-31.3734	100.579	-571.651	-9242.63	-45166.6	-6972.89	120.989	919.168	0	0	0	0	0	0	0	603	903	0
2345	4	9.84435	-83.466	-348.592	-61320.5	41339.3	-13645.8	318.59	475.909	0	-31.526	101.647	-572.566	-9425.74	-45715.9	-7064.44	120.156	919.462	0	0	0	0	0	0	0	603	903	0
2345	5	9.53917	-82.5505	-341.573	-59855.6	40729	-13554.3	319.24	475.235	0	-33.6623	102.562	-576.839	-9883.5	-45532.8	-7247.55	121.065	920.134	0	0	0	0	0	0	0	603	903	0
2345	6	8.92882	-82.3979	-335.164	-59672.5	40240.7	-13325.4	320.063	478.04	0	-33.6623	103.02	-579.891	-9608.84	-45960	-7110.22	120.744	919.57	0	0	0	0	0	0	0	603	903	0
2345	7	10.3021	-81.635	-327.535	-58024.6	38836.9	-12913.4	318.573	477.156	0	-33.5097	104.241	-583.553	-10707.5	-46692.4	-7384.87	119.986	921.349	0	0	0	0	0	0	0	603	903	0
2345	8	8.16588	-80.1091	-320.821	-56742.8	38592.8	-12272.5	320.294	476.868	0	-34.2726	103.63	-583.858	-11256.8	-46570.4	-7155.99	120.237	922.28	0	0	0	0	0	0	0	603	903	0
2345	9	8.31847	-79.3462	-314.412	-57017.5	37799.3	-12592.9	320.222	481.346	0	-35.3407	104.851	-589.961	-11073.7	-46936.6	-7155.99	120.441	921.77	0	0	0	0	0	0	0	603	903	0
2346	0	8.16588	-78.1255	-307.088	-55369.5	37127.9	-11814.7	320.903	480.305	0	-35.6459	106.682	-593.318	-11989.2	-48096.3	-7339.1	118.937	923.207	0	0	0	0	0	0	0	603	903	0
2346	1	9.23399	-78.4306	-300.984	-54087.8	36517.6	-11265.4	321.327	479.703	0	-38.2399	106.377	-599.422	-12447	-47424.9	-7110.22	120.882	923.765	0	0	0	0	0	0	0	603	903	0
2346	2	8.92882	-74.4633	-293.355	-52348.3	35235.8	-11906.3	320.113	478.447	0	-38.2399	106.682	-602.169	-12538.5	-48462.5	-7567.98	119.52	923.822	0	0	0	0	0	0	0	603	903	0
2346	3	8.92882	-72.6323	-286.641	-52348.3	34747.5	-11585.9	321.223	482.627	0	-37.3244	107.903	-607.967	-12721.6	-49011.8	-7339.1	119.384	923.925	0	0	0	0	0	0	0	603	903	0
2346	4	7.8607	-72.7849	-278.707	-51066.6	33587.9	-11585.9	320.513	483.227	0	-39.308	108.361	-611.629	-13545.6	-49500.1	-7567.98	119.068	925.147	0	0	0	0	0	0	0	603	903	0
2346	5	9.53917	-72.6323	-275.35	-49601.7	33038.6	-11082.3	319.988	480.141	0	-40.2235	110.039	-614.376	-13911.8	-49439	-7659.53	119.53	925.644	0	0	0	0	0	0	0	603	903	0
2346	6	8.62364	-68.2072	-268.941	-48411.5	32306.1	-11128.1	320.124	480.008	0	-39.4606	110.955	-620.479	-13637.2	-50110.4	-7705.31	119.239	924.979	0	0	0	0	0	0	0	603	903	0
2346	7	8.47106	-67.2917	-261.617	-47587.6	31451.7	-10670.3	320.22	481.898	0	-39.7658	109.429	-624.446	-14827.4	-50781.8	-7751.09	118.677	926.745	0	0	0	0	0	0	0	603	903	0
2346	8	7.8607	-68.0547	-255.513	-46763.6	30780.3	-10533	320.464	483.018	0	-41.1391	112.328	-628.719	-15102	-50720.8	-7888.41	119.327	927.02	0	0	0	0	0	0	0	603	903	0
2346	9	8.47106	-67.4443	-246.968	-46672	30047.8	-10670.3	321.667	488.98	0	-40.6813	114.312	-632.381	-15193.6	-51575.3	-7934.19	118.443	927.026	0	0	0	0	0	0	0	603	903	0
2347	0	8.92882	-64.8503	-241.78	-44657.9	29559.6	-10441.5	322.258	484.704	0	-38.3925	114.006	-638.179	-15285.1	-51880.4	-8163.08	118.706	926.951	0	0	0	0	0	0	0	603	903	0
2347	1	7.09776	-66.071	-235.982	-43559.2	28766.1	-9663.26	321.9	484.587	0	-41.1391	113.396	-640.926	-15468.2	-51514.2	-8163.08	119.625	927.134	0	0	0	0	0	0	0	603	903	0
2347	2	7.40294	-65.1555	-229.573	-43101.5	27667.5	-9892.14	320.517	487.746	0	-41.1391	114.464	-646.419	-16383.7	-52185.6	-8117.3	119.27	928.345	0	0	0	0	0	0	0	603	903	0
2347	3	7.09776	-61.4934	-223.775	-41728.2	27362.3	-9937.92	322.276	486.474	0	-40.9865	114.769	-650.691	-16750	-52857	-8071.52	118.768	928.742	0	0	0	0	0	0	0	603	903	0
2347	4	6.94518	-60.883	-217.366	-40721.1	25714.3	-9434.38	318.3	487.339	0	-41.7494	116.295	-656.185	-17573.9	-52857	-8254.62	119.448	929.782	0	0	0	0	0	0	0	603	903	0
2347	5	6.33482	-60.1201	-208.211	-39347.8	25775.4	-9342.83	323.794	488.98	0	-41.2917	115.99	-660.762	-17757	-53528.4	-8300.4	118.99	929.874	0	0	0	0	0	0	0	603	903	0
2347	6	7.55553	-58.1364	-202.413	-38981.6	24798.8	-9297.05	322.516	492.585	0	-40.6813	115.837	-663.204	-18123.2	-53955.6	-8437.73	118.644	930.327	0	0	0	0	0	0	0	603	903	0
2347	7	7.09776	-55.0847	-196.309	-37059	24066.4	-9068.17	322.594	488.779	0	-41.4442	117.516	-668.392	-18581	-54138.7	-8529.28	119.001	930.8	0	0	0	0	0	0	0	603	903	0
2347	8	6.94518	-54.1692	-189.901	-35777.3	23456	-9068.17	323.518	488.4	0	-41.4442	117.058	-672.664	-18397.9	-54443.9	-8346.18	119.062	930.351	0	0	0	0	0	0	0	603	903	0
2347	9	6.02965	-53.4062	-183.187	-36418.1	22296.4	-8518.85	321.714	498.803	0	-40.6813	118.126	-675.411	-18214.8	-55237.4	-8620.83	118.217	929.969	0	0	0	0	0	0	0	603	903	0
2348	0	6.64	-52.3381	-176.168	-34312.4	22357.4	-8335.75	326.91	494.771	0	-40.8339	118.431	-680.294	-19496.5	-55115.3	-8208.85	118.983	931.659	0	0	0	0	0	0	0	603	903	0
2348	1	7.70812	-50.6596	-173.421	-32939.1	21136.7	-8427.3	321.881	489.937	0	-38.5451	118.279	-683.04	-19862.8	-55542.5	-8483.5	118.683	932.08	0	0	0	0	0	0	0	603	903	0
2348	2	8.31847	-49.2863	-166.707	-32664.5	20465.3	-7740.65	322.762	495.939	0	-40.3761	118.584	-686.702	-19862.8	-56580.1	-8529.28	117.606	931.925	0	0	0	0	0	0	0	603	903	0
2348	3	7.09776	-48.5234	-160.604	-31474.3	20343.2	-7923.76	326.667	495.975	0	-41.1391	118.126	-693.111	-20229	-56519.1	-8483.5	118.456	932.186	0	0	0	0	0	0	0	603	903	0
2348	4	7.40294	-47.9131	-155.11	-30284.1	19305.7	-7557.54	324.464	495.242	0	-42.5124	118.279	-694.637	-20778.3	-56275	-8529.28	118.986	932.912	0	0	0	0	0	0	0	603	903	0
2348	5	7.55553	-46.6924	-150.228	-29277	18817.4	-7328.66	325.259	494.884	0	-41.7494	118.584	-698.604	-20595.2	-57068.4	-8391.95	118.311	932.481	0	0	0	0	0	0	0	603	903	0
2348	6	7.09776	-42.8777	-144.124	-28544.6	18084.9	-7191.33	325.482	498.056	0	-39.308	117.668	-704.097	-20961.4	-57495.7	-8391.95	118.341	932.771	0	0	0	0	0	0	0	603	903	0
2348	7	7.70812	-42.1147	-141.683	-27079.8	17657.7	-6916.68	324.629	491.13	0	-43.1227	118.126	-705.928	-21052.9	-57678.8	-8208.85	118.294	932.823	0	0	0	0	0	0	0	603	903	0
2348	8	7.25035	-40.5888	-136.8	-26347.3	17352.5	-6458.91	326.846	492.598	0	-43.1227	118.584	-710.201	-21602.3	-58411.2	-8300.4	117.754	933.417	0	0	0	0	0	0	0	603	903	0
2348	9	7.09776	-37.9948	-131.307	-26255.8	16253.9	-6687.79	323.786	499.958	0	-42.6649	117.821	-712.947	-22151.6	-58655.3	-8254.62	117.728	934.07	0	0	0	0	0	0	0	603	903	0
2349	0	7.40294	-35.8586	-125.508	-24974	15948.7	-6092.7	327.073	498.983	0	-43.4279	118.126	-716.915	-22426.2	-58289.1	-8254.62	118.694	934.282	0	0	0	0	0	0	0	603	903	0
2349	1	7.09776	-35.8586	-120.931	-23051.4	15033.2	-6092.7	324.312	490.617	0	-42.8175	117.668	-721.797	-22700.9	-58838.4	-7934.19	118.483	934.451	0	0	0	0	0	0	0	603	903	0
2349	2	7.25035	-33.4172	-114.522	-23143	14605.9	-5589.16	327.538	502.083	0	-44.1908	116.753	-722.713	-22700.9	-59754	-7979.97	117.32	934.411	0	0	0	0	0	0	0	603	903	0
2349	3	6.64	-31.7387	-112.081	-22593.7	14361.8	-5451.83	328.138	501.584	0	-45.1064	117.211	-725.154	-22884	-59631.9	-7934.19	117.767	934.557	0	0	0	0	0	0	0	603	903	0
2349	4	5.87706	-31.4336	-107.198	-21311.9	13141.1	-5314.5	322.587	498.809	0	-46.1745	117.668	-730.342	-23158.7	-59692.9	-7888.41	118.267	934.709	0	0	0	0	0	0	0	603	903	0
2349	5	6.02965	-31.8913	-103.231	-20213.3	13263.2	-5085.62	328.481	495.807	0	-46.6322	116.6	-731.258	-23250.2	-60364.3	-7613.76	117.451	934.795	0	0	0	0	0	0	0	603	903	0
2349	6	6.02965	-27.6189	-100.179	-19480.9	12530.8	-4856.74	325.084	494.461	0	-45.2589	117.974	-736.751	-23708	-61157.8	-7888.41	116.99	935.179	0	0	0	0	0	0	0	603	903	0
2349	7	8.31847	-25.7878	-94.0753	-18290.7	11920.4	-4856.74	326.711	494.426	0	-45.7167	116.753	-739.498	-24348.8	-60547.4	-7888.41	118.124	935.926	0	0	0	0	0	0	0	603	903	0
2349	8	6.02965	-25.33	-90.4132	-18473.8	11981.4	-4444.75	332.519	504.326	0	-44.8012	117.668	-742.244	-24531.9	-61218.8	-7888.41	117.522	936.051	0	0	0	0	0	0	0	603	903	0
2349	9	4.80895	-23.9568	-87.0563	-17924.5	11065.9	-4307.42	327.112	505.895	0	-46.3271	117.058	-745.296	-24715	-61524	-8208.85	117.45	936.161	0	0	0	0	0	0	0	603	903	0
2350	0	6.18224	-21.3628	-84.0045	-17100.5	10943.8	-4215.87	330.277	503.566	0	-46.3271	114.312	-744.38	-24165.7	-61401.9	-7888.41	117.513	935.464	0	0	0	0	0	0	0	603	903	0
2350	1	5.4193	-19.3791	-79.7321	-16093.4	10333.5	-3941.21	329.603	501.844	0	-47.2426	116.753	-748.958	-25539	-61890.2	-7796.86	117.365	937.099	0	0	0	0	0	0	0	603	903	0
2350	2	5.87706	-19.5317	-75.1544	-15452.5	9784.17	-3758.1	330.188	505.611	0	-47.09	116.295	-752.62	-25355.9	-62500.6	-7293.32	116.956	936.69	0	0	0	0	0	0	0	603	903	0
2350	3	6.18224	-18.1584	-73.3234	-15727.2	9662.1	-3758.1	331.774	514.491	0	-46.3271	115.227	-755.367	-25905.2	-62012.3	-7842.64	117.904	937.295	0	0	0	0	0	0	0	603	903	0
2350	4	6.18224	-16.48	-70.5768	-14903.2	9051.75	-3620.77	328.254	511.163	0	-47.8529	114.617	-756.893	-26271.4	-62317.4	-8117.3	117.667	937.71	0	0	0	0	0	0	0	603	903	0
2350	5	6.79259	-14.9541	-66.6095	-13163.7	8563.47	-3025.68	328.562	497.625	0	-47.3952	114.769	-760.25	-25630.6	-62744.7	-7705.31	117.468	936.713	0	0	0	0	0	0	0	603	903	0
2350	6	5.72447	-13.886	-64.1681	-13713	8380.36	-3163.01	330.6	513.705	0	-46.4796	114.617	-762.081	-26179.9	-62683.7	-7751.09	117.747	937.353	0	0	0	0	0	0	0	603	903	0
2350	7	5.87706	-12.0549	-62.6422	-12706	7831.04	-2842.58	325.012	502.834	0	-48.1581	115.074	-765.438	-25905.2	-62988.8	-7659.53	117.709	936.844	0	0	0	0	0	0	0	603	903	0
2350	8	5.57189	-10.6816	-59.2853	-11973.5	7708.97	-2751.02	330.032	501.965	0	-48.1581	114.159	-767.269	-26546.1	-63660.2	-7613.76	117.03	937.598	0	0	0	0	0	0	0	603	903	0
2350	9	5.87706	-10.6816	-57.7594	-11149.6	7403.8	-2339.04	328.184	493.035	0	-45.8693	114.769	-768.794	-26729.2	-63599.2	-7384.87	117.274	937.768	0	0	0	0	0	0	0	603	903	0
2351	0	6.33482	-11.1394	-53.4869	-10966.5	6793.45	-2110.15	327.011	505.031	0	-48.6159	113.396	-772.762	-26546.1	-63721.3	-7201.77	117.541	937.352	0	0	0	0	0	0	0	603	903	0
2351	1	5.57189	-9.6135	-49.2145	-10508.7	6366.2	-2522.14	329.356	513.529	0	-48.1581	113.091	-773.372	-27370.1	-64453.7	-6927.11	116.659	938.391	0	0	0	0	0	0	0	603	903	0
2351	2	5.72447	-8.08762	-47.9938	-9593.17	5999.99	-2247.48	325.016	499.884	0	-47.8529	112.938	-776.729	-27553.2	-64514.7	-7293.32	116.941	938.473	0	0	0	0	0	0	0	603	903	0
2351	3	4.80895	-9.15573	-43.7213	-9410.06	5816.88	-2247.48	333.045	515.228	0	-49.2262	112.48	-777.645	-27736.3	-64392.7	-7384.87	117.195	938.667	0	0	0	0	0	0	0	603	903	0
2351	4	4.04601	-7.93503	-43.4161	-8860.75	5816.88	-2110.15	333.98	504.089	0	-49.2262	112.48	-781.002	-27827.8	-65003	-7476.43	116.77	938.631	0	0	0	0	0	0	0	603	903	0
2351	5	4.35118	-5.95139	-40.0592	-8769.2	4962.39	-1743.94	323.876	518.906	0	-48.4633	110.192	-781.917	-27736.3	-65186.1	-7064.44	116.633	938.472	0	0	0	0	0	0	0	603	903	0
2351	6	5.57189	-5.64621	-39.1437	-7212.8	4474.11	-1835.5	314.3	484.265	0	-49.2262	111.87	-784.664	-28651.8	-65369.2	-6881.33	116.691	939.515	0	0	0	0	0	0	0	603	903	0
2351	7	4.96153	-5.7988	-36.7023	-7487.46	4657.22	-1652.39	326.892	504.005	0	-49.9892	111.107	-786.495	-28743.4	-65674.4	-6972.89	116.497	939.546	0	0	0	0	0	0	0	603	903	0
2351	8	4.04601	-5.18845	-33.3453	-7487.46	4168.94	-1515.06	325.023	524.543	0	-48.6159	111.26	-789.241	-28743.4	-66101.6	-7201.77	116.247	939.419	0	0	0	0	0	0	0	603	903	0
2351	9	4.04601	-4.73068	-30.2936	-6114.17	4229.97	-1606.61	339.633	501.83	0	-49.5314	110.344	-791.683	-29384.2	-65552.3	-7018.66	117.199	940.116	0	0	0	0	0	0	0	603	903	0
2352	0	3.43565	-4.73068	-28.4625	-5747.96	3680.65	-1606.61	329.316	501.948	0	-49.8366	109.581	-791.683	-29658.9	-66101.6	-6972.89	116.505	940.463	0	0	0	0	0	0	0	603	903	0
2352	1	3.13048	-3.66257	-25.7159	-6205.72	3192.37	-1377.73	324.14	541.318	0	-48.7685	110.192	-795.345	-29109.6	-66406.8	-7155.99	116.506	939.6	0	0	0	0	0	0	0	603	903	0
2352	2	4.50377	-2.44187	-26.0211	-5564.85	3131.34	-1377.73	320.338	513.859	0	-49.0736	107.598	-797.786	-29842	-66162.6	-6789.78	117.067	940.406	0	0	0	0	0	0	0	603	903	0
2352	3	3.74083	-2.89963	-23.2745	-4008.45	2948.23	-1194.63	326.672	472.225	0	-49.684	108.666	-796.871	-30391.3	-66712	-6881.33	116.283	941.138	0	0	0	0	0	0	0	603	903	0
2352	4	3.28307	-1.83151	-20.528	-4649.32	2887.2	-919.969	340.647	526.487	0	-49.5314	107.75	-797.176	-30025.1	-66895.1	-7110.22	116.085	940.664	0	0	0	0	0	0	0	603	903	0
2352	5	3.58824	-1.22116	-19.6124	-4374.66	2154.77	-919.969	309.868	523.056	0	-48.0055	106.987	-800.838	-30025.1	-66712	-6606.68	116.697	940.492	0	0	0	0	0	0	0	603	903	0
2352	6	3.13048	-0.610811	-18.0865	-3459.14	2276.84	-645.311	325.886	491.255	0	-49.5314	105.309	-800.838	-30299.8	-66895.1	-6927.11	116.469	940.835	0	0	0	0	0	0	0	603	903	0
2352	7	4.19859	-0.458223	-16.5607	-3276.03	1910.63	-736.863	315.372	497.82	0	-50.1418	106.53	-806.026	-30666	-66834.1	-6744.01	117.082	941.046	0	0	0	0	0	0	0	603	903	0
2352	8	3.43565	-0.000459142	-15.9503	-3367.59	1727.53	-507.981	308.307	511.13	0	-48.3107	106.987	-804.805	-31032.2	-67139.2	-6652.45	116.577	941.559	0	0	0	0	0	0	0	603	903	0
2352	9	2.52013	0.915068	-13.8141	-2818.27	1666.49	-874.193	320.637	504.014	0	-49.5314	107.14	-807.857	-31215.3	-67261.3	-6423.57	116.741	941.64	0	0	0	0	0	0	0	603	903	0
2353	0	2.06236	1.06766	-12.5934	-1994.29	1422.35	-95.9941	312.944	458.361	0	-49.3788	105.156	-807.552	-31123.7	-68176.8	-6560.9	115.576	941.541	0	0	0	0	0	0	0	603	903	0
2353	1	2.21495	1.67801	-11.6779	-2452.06	1300.28	-141.77	311.346	509.975	0	-49.3788	105.614	-807.857	-31489.9	-68359.9	-6606.68	115.381	941.98	0	0	0	0	0	0	0	603	903	0
2353	2	0	0	0	0	0	0	200	300	0	-49.8366	105.156	-811.214	-32222.4	-67566.5	-6606.68	116.709	942.721	0	0	0	0	0	0	0	603	903	0
2353	3	0	0	0	0	0	0	200	300	0	-49.9892	104.698	-810.298	-31856.2	-68543.1	-6560.9	115.41	942.314	0	0	0	0	0	0	0	603	903	0
2353	4	0	0	0	0	0	0	200	300	0	-48.9211	103.63	-811.519	-32039.3	-68359.9	-6560.9	115.763	942.481	0	0	0	0	0	0	0	603	903	0
2353	5	0	0	0	0	0	0	200	300	0	-49.3788	103.325	-813.045	-32680.1	-68604	-6423.57	115.621	943.195	0	0	0	0	0	0	0	603	903	0
2353	6	0	0	0	0	0	0	200	300	0	-50.5995	103.325	-813.961	-32497	-68970.3	-6423.57	115.266	942.925	0	0	0	0	0	0	0	603	903	0
2353	7	0	0	0	0	0	0	200	300	0	-49.5314	103.325	-815.181	-32588.6	-68848.2	-6377.79	115.542	942.977	0	0	0	0	0	0	0	603	903	0
2353	8	0	0	0	0	0	0	200	300	0	-49.2262	101.647	-815.181	-33595.7	-68665.1	-6148.91	115.767	944.213	0	0	0	0	0	0	0	603	903	0
2353	9	0	0	0	0	0	0	200	300	0	-49.5314	103.02	-816.097	-33504.1	-68787.2	-6332.02	115.712	944.054	0	0	0	0	0	0	0	603	903	0
2354	0	0	0	0	0	0	0	200	300	0	-49.2262	101.799	-818.233	-33504.1	-69519.6	-5828.48	115.037	943.947	0	0	0	0	0	0	0	603	903	0
2354	1	0	0	0	0	0	0	200	300	0	-49.3788	101.342	-816.402	-34053.4	-69824.8	-6377.79	114.473	944.712	0	0	0	0	0	0	0	603	903	0
2354	2	0	0	0	0	0	0	200	300	0	-51.0573	101.799	-817.928	-34145	-68970.3	-6103.14	115.677	944.746	0	0	0	0	0	0	0	603	903	0
2354	3	0	0	0	0	0	0	200	300	0	-49.2262	101.189	-819.148	-33778.8	-69702.7	-6011.58	114.908	944.237	0	0	0	0	0	0	0	603	903	0
2354	4	0	0	0	0	0	0	200	300	0	-49.684	100.121	-819.454	-34145	-69763.8	-5828.48	114.866	944.668	0	0	0	0	0	0	0	603	903	0
2354	5	0	0	0	0	0	0	200	300	0	-50.1418	101.036	-820.674	-34602.8	-69702.7	-5828.48	115.067	945.164	0	0	0	0	0	0	0	603	903	0
2354	6	0	0	0	0	0	0	200	300	0	-51.2099	99.6631	-818.843	-34969	-69885.8	-6057.36	114.653	945.705	0	0	0	0	0	0	0	603	903	0
2354	7	0	0	0	0	0	0	200	300	0	-48.1581	98.9001	-818.843	-34602.8	-69824.8	-5920.03	114.728	945.258	0	0	0	0	0	0	0	603	903	0
2354	8	0	0	0	0	0	0	200	300	0	-50.4469	98.9001	-819.454	-34877.4	-69824.8	-5599.6	114.791	945.562	0	0	0	0	0	0	0	603	903	0
2354	9	0	0	0	0	0	0	200	300	0	-51.515	97.3743	-819.148	-34969	-69763.8	-5828.48	114.834	945.689	0	0	0	0	0	0	0	603	903	0
2355	0	0	0	0	0	0	0	200	300	0	-49.5314	98.4424	-819.454	-35335.2	-70618.2	-5141.83	113.823	946.12	0	0	0	0	0	0	0	603	903	0
2355	1	0	0	0	0	0	0	200	300	0	-51.6676	97.2217	-820.064	-35609.8	-70740.3	-5462.27	113.738	946.423	0	0	0	0	0	0	0	603	903	0
2355	2	0	0	0	0	0	0	200	300	0	-51.9728	96.4587	-819.759	-35609.8	-69885.8	-5141.83	114.748	946.439	0	0	0	0	0	0	0	603	903	0
2355	3	0	0	0	0	0	0	200	300	0	-49.8366	96.7639	-819.454	-35976	-70557.2	-5553.82	113.897	946.903	0	0	0	0	0	0	0	603	903	0
2355	4	0	0	0	0	0	0	200	300	0	-51.9728	95.0854	-818.538	-36159.1	-70374.1	-5324.94	114.025	947.175	0	0	0	0	0	0	0	603	903	0
2355	5	0	0	0	0	0	0	200	300	0	-51.2099	95.5432	-819.148	-36067.6	-70007.9	-5553.82	114.536	947.031	0	0	0	0	0	0	0	603	903	0
2355	6	0	0	0	0	0	0	200	300	0	-51.0573	94.9329	-820.369	-36342.2	-70801.3	-5370.71	113.696	947.3	0	0	0	0	0	0	0	603	903	0
2355	7	0	0	0	0	0	0	200	300	0	-52.1254	94.1699	-820.674	-36891.6	-70679.2	-5462.27	113.877	947.953	0	0	0	0	0	0	0	603	903	0
2355	8	0	0	0	0	0	0	200	300	0	-51.8202	92.7966	-818.233	-37257.8	-70557.2	-5416.49	113.769	948.534	0	0	0	0	0	0	0	603	903	0
2355	9	0	0	0	0	0	0	200	300	0	-51.3625	93.407	-820.674	-36616.9	-70313	-5233.39	114.323	947.618	0	0	0	0	0	0	0	603	903	0
2356	0	0	0	0	0	0	0	200	300	0	-51.0573	91.1182	-821.285	-37440.9	-70679.2	-5187.61	113.941	948.588	0	0	0	0	0	0	0	603	903	0
2356	1	0	0	0	0	0	0	200	300	0	-50.4469	93.2544	-820.064	-37166.2	-70496.2	-5141.83	114.036	948.321	0	0	0	0	0	0	0	603	903	0
2356	2	0	0	0	0	0	0	200	300	0	-51.9728	92.644	-819.454	-37166.2	-70313	-5279.16	114.195	948.355	0	0	0	0	0	0	0	603	903	0
2356	3	0	0	0	0	0	0	200	300	0	-51.0573	91.7285	-818.233	-37532.4	-71228.6	-5004.5	112.948	948.87	0	0	0	0	0	0	0	603	903	0
2356	4	0	0	0	0	0	0	200	300	0	-51.9728	91.4233	-819.148	-37807.1	-71350.7	-5096.06	112.897	949.154	0	0	0	0	0	0	0	603	903	0
2356	5	0	0	0	0	0	0	200	300	0	-52.7357	90.6604	-819.148	-37898.7	-70618.2	-5050.28	113.791	949.266	0	0	0	0	0	0	0	603	903	0
2356	6	0	0	0	0	0	0	200	300	0	-51.3625	89.1345	-818.233	-37440.9	-70984.5	-4684.07	113.247	948.758	0	0	0	0	0	0	0	603	903	0
2356	7	0	0	0	0	0	0	200	300	0	-52.7357	90.05	-817.317	-37807.1	-70984.5	-4867.17	113.149	949.258	0	0	0	0	0	0	0	603	903	0
2356	8	0	0	0	0	0	0	200	300	0	-52.4306	88.9819	-816.707	-37715.6	-70801.3	-4821.4	113.309	949.18	0	0	0	0	0	0	0	603	903	0
2356	9	0	0	0	0	0	0	200	300	0	-51.9728	88.8293	-815.486	-38081.8	-71228.6	-4775.62	112.655	949.698	0	0	0	0	0	0	0	603	903	0
2357	0	0	0	0	0	0	0	200	300	0	-53.3461	88.9819	-816.097	-38448	-71045.5	-4958.73	112.945	950.112	0	0	0	0	0	0	0	603	903	0
2357	1	0	0	0	0	0	0	200	300	0	-53.0409	87.1509	-815.181	-38173.3	-70374.1	-4546.74	113.671	949.828	0	0	0	0	0	0	0	603	903	0
2357	2	0	0	0	0	0	0	200	300	0	-50.4469	87.6086	-813.35	-38448	-70923.4	-4500.96	112.801	950.271	0	0	0	0	0	0	0	603	903	0
2357	3	0	0	0	0	0	0	200	300	0	-53.1935	86.0828	-814.571	-39088.8	-71167.5	-4272.08	112.632	950.987	0	0	0	0	0	0	0	603	903	0
2357	4	0	0	0	0	0	0	200	300	0	-52.8883	85.625	-811.824	-38631.1	-70496.2	-4363.63	113.163	950.586	0	0	0	0	0	0	0	603	903	0
2357	5	0	0	0	0	0	0	200	300	0	-51.8202	86.5405	-812.74	-38905.7	-70496.2	-4546.74	113.261	950.87	0	0	0	0	0	0	0	603	903	0
2357	6	0	0	0	0	0	0	200	300	0	-52.5832	84.5569	-812.435	-39363.5	-70618.2	-4409.41	113.078	951.451	0	0	0	0	0	0	0	603	903	0
2357	7	0	0	0	0	0	0	200	300	0	-52.8883	84.8621	-809.993	-38997.3	-70435.1	-4272.08	113.042	951.145	0	0	0	0	0	0	0	603	903	0
2357	8	0	0	0	0	0	0	200	300	0	-51.3625	84.0991	-810.298	-38905.7	-70618.2	-4226.31	112.849	951.014	0	0	0	0	0	0	0	603	903	0
2357	9	0	0	0	0	0	0	200	300	0	-53.1935	83.1836	-809.078	-38722.6	-70862.4	-4272.08	112.416	950.86	0	0	0	0	0	0	0	603	903	0
2358	0	0	0	0	0	0	0	200	300	0	-53.1935	83.3362	-807.552	-39271.9	-70740.3	-4272.08	112.402	951.631	0	0	0	0	0	0	0	603	903	0
2358	1	0	0	0	0	0	0	200	300	0	-51.6676	81.6577	-804.805	-39088.8	-70435.1	-3814.32	112.482	951.569	0	0	0	0	0	0	0	603	903	0
2358	2	0	0	0	0	0	0	200	300	0	-51.2099	80.8948	-804.5	-39729.7	-70679.2	-4088.97	112.145	952.384	0	0	0	0	0	0	0	603	903	0
2358	3	0	0	0	0	0	0	200	300	0	-51.2099	79.3689	-803.585	-39638.1	-70679.2	-4226.31	112.045	952.327	0	0	0	0	0	0	0	603	903	0
2358	4	0	0	0	0	0	0	200	300	0	-50.5995	79.8267	-802.059	-39729.7	-70130	-3951.65	112.563	952.535	0	0	0	0	0	0	0	603	903	0
2358	5	0	0	0	0	0	0	200	300	0	-51.515	80.1318	-800.228	-40004.4	-70191	-4043.2	112.286	952.991	0	0	0	0	0	0	0	603	903	0
2358	6	0	0	0	0	0	0	200	300	0	-52.5832	79.6741	-800.838	-39638.1	-70252	-3860.09	112.277	952.496	0	0	0	0	0	0	0	603	903	0
2358	7	0	0	0	0	0	0	200	300	0	-51.2099	76.3171	-799.922	-39638.1	-70435.1	-3722.76	111.948	952.553	0	0	0	0	0	0	0	603	903	0
2358	8	0	0	0	0	0	0	200	300	0	-49.3788	77.9956	-796.871	-39546.6	-69275.5	-3722.76	113.066	952.627	0	0	0	0	0	0	0	603	903	0
2358	9	0	0	0	0	0	0	200	300	0	-51.8202	76.9275	-793.514	-40095.9	-70130	-3539.66	111.621	953.53	0	0	0	0	0	0	0	603	903	0
2359	0	0	0	0	0	0	0	200	300	0	-52.4306	77.2327	-793.819	-39729.7	-69946.8	-3997.42	111.886	953.049	0	0	0	0	0	0	0	603	903	0
2359	1	0	0	0	0	0	0	200	300	0	-50.7521	74.7913	-789.852	-39729.7	-69397.5	-3448.1	112.139	953.3	0	0	0	0	0	0	0	603	903	0
2359	2	0	0	0	0	0	0	200	300	0	-51.515	75.5542	-791.072	-40279	-69397.5	-3539.66	112.274	953.917	0	0	0	0	0	0	0	603	903	0
2359	3	0	0	0	0	0	0	200	300	0	-51.9728	75.249	-788.631	-40004.4	-69214.4	-3402.33	112.235	953.726	0	0	0	0	0	0	0	603	903	0
2359	4	0	0	0	0	0	0	200	300	0	-50.2943	75.5542	-788.021	-38905.7	-69092.3	-3402.33	112.322	952.371	0	0	0	0	0	0	0	603	903	0
2359	5	0	0	0	0	0	0	200	300	0	-50.4469	74.1809	-786.8	-40462.1	-69031.3	-3585.43	112.263	954.426	0	0	0	0	0	0	0	603	903	0
2359	6	0	0	0	0	0	0	200	300	0	-51.515	74.6387	-783.138	-40004.4	-69397.5	-3219.22	111.385	954.082	0	0	0	0	0	0	0	603	903	0
2359	7	0	0	0	0	0	0	200	300	0	-50.5995	73.2654	-782.222	-39821.2	-69336.5	-3356.55	111.36	953.908	0	0	0	0	0	0	0	603	903	0
2359	8	0	0	0	0	0	0	200	300	0	-49.3788	72.5024	-780.391	-39912.8	-68482	-3081.89	112.247	954.145	0	0	0	0	0	0	0	603	903	0
2359	9	0	0	0	0	0	0	200	300	0	-50.1418	72.5024	-777.645	-40370.6	-69092.3	-3036.12	111.152	954.914	0	0	0	0	0	0	0	603	903	0
2360	0	0	0	0	0	0	0	200	300	0	-50.5995	70.061	-773.372	-39912.8	-68726.1	-2853.01	111.134	954.609	0	0	0	0	0	0	0	603	903	0
2360	1	0	0	0	0	0	0	200	300	0	-49.5314	70.2136	-775.203	-39546.6	-68482	-2944.56	111.659	954.015	0	0	0	0	0	0	0	603	903	0
2360	2	0	0	0	0	0	0	200	300	0	-50.5995	68.5352	-771.541	-40095.9	-68604	-2990.34	111.082	954.969	0	0	0	0	0	0	0	603	903	0
2360	3	0	0	0	0	0	0	200	300	0	-50.5995	68.9929	-771.846	-40004.4	-68482	-2898.79	111.275	954.829	0	0	0	0	0	0	0	603	903	0
2360	4	0	0	0	0	0	0	200	300	0	-47.3952	69.1455	-766.963	-40004.4	-67810.6	-2669.91	111.586	955.159	0	0	0	0	0	0	0	603	903	0
2360	5	0	0	0	0	0	0	200	300	0	-49.9892	68.23	-768.489	-40004.4	-67749.6	-2807.24	111.841	955.056	0	0	0	0	0	0	0	603	903	0
2360	6	0	0	0	0	0	0	200	300	0	-49.8366	67.467	-765.438	-39821.2	-67566.5	-2669.91	111.728	955.024	0	0	0	0	0	0	0	603	903	0
2360	7	0	0	0	0	0	0	200	300	0	-48.3107	67.467	-764.217	-40095.9	-67383.3	-2624.13	111.827	955.467	0	0	0	0	0	0	0	603	903	0
2360	8	0	0	0	0	0	0	200	300	0	-49.9892	67.6196	-762.691	-40279	-67017.1	-2715.68	112.131	955.812	0	0	0	0	0	0	0	603	903	0
2360	9	0	0	0	0	0	0	200	300	0	-49.0736	65.4834	-760.555	-39912.8	-67444.4	-2807.24	111.322	955.479	0	0	0	0	0	0	0	603	903	0
2361	0	0	0	0	0	0	0	200	300	0	-48.1581	63.9575	-760.25	-40095.9	-67444.4	-2578.35	111.286	955.741	0	0	0	0	0	0	0	603	903	0
2361	1	0	0	0	0	0	0	200	300	0	-48.6159	63.6523	-757.808	-39546.6	-66345.8	-2624.13	112.45	955.186	0	0	0	0	0	0	0	603	903	0
2361	2	0	0	0	0	0	0	200	300	0	-48.1581	64.1101	-754.756	-39912.8	-66895.1	-2441.02	111.369	955.882	0	0	0	0	0	0	0	603	903	0
2361	3	0	0	0	0	0	0	200	300	0	-47.2426	63.4998	-754.451	-39912.8	-66712	-2303.7	111.575	955.903	0	0	0	0	0	0	0	603	903	0
2361	4	0	0	0	0	0	0	200	300	0	-48.1581	62.7368	-752.925	-39912.8	-66650.9	-2349.47	111.477	956.01	0	0	0	0	0	0	0	603	903	0
2361	5	0	0	0	0	0	0	200	300	0	-48.6159	62.1265	-750.179	-40095.9	-66528.9	-2303.7	111.316	956.449	0	0	0	0	0	0	0	603	903	0
2361	6	0	0	0	0	0	0	200	300	0	-47.3952	61.5161	-747.737	-40095.9	-66284.7	-2257.92	111.353	956.623	0	0	0	0	0	0	0	603	903	0
2361	7	0	0	0	0	0	0	200	300	0	-47.7003	61.2109	-746.517	-40462.1	-65735.4	-2257.92	111.944	957.201	0	0	0	0	0	0	0	603	903	0
2361	8	0	0	0	0	0	0	200	300	0	-48.0055	60.2954	-744.686	-39912.8	-65613.4	-2212.14	111.891	956.597	0	0	0	0	0	0	0	603	903	0
2361	9	0	0	0	0	0	0	200	300	0	-46.6322	59.2273	-741.939	-39821.2	-65735.4	-2212.14	111.4	956.672	0	0	0	0	0	0	0	603	903	0
2362	0	0	0	0	0	0	0	200	300	0	-47.3952	58.0066	-741.634	-40095.9	-65430.3	-2029.04	111.776	957.064	0	0	0	0	0	0	0	603	903	0
2362	1	0	0	0	0	0	0	200	300	0	-47.3952	56.1755	-737.667	-40004.4	-65247.2	-2120.59	111.549	957.231	0	0	0	0	0	0	0	603	903	0
2362	2	0	0	0	0	0	0	200	300	0	-46.3271	56.9385	-737.972	-39912.8	-65613.4	-2029.04	111.09	957.085	0	0	0	0	0	0	0	603	903	0
2362	3	0	0	0	0	0	0	200	300	0	-46.3271	56.0229	-736.141	-40370.6	-65308.2	-1662.83	111.283	957.841	0	0	0	0	0	0	0	603	903	0
2362	4	0	0	0	0	0	0	200	300	0	-45.7167	56.1755	-734.004	-40187.5	-64514.7	-1983.26	112.106	957.751	0	0	0	0	0	0	0	603	903	0
2362	5	0	0	0	0	0	0	200	300	0	-45.5641	54.6497	-732.784	-39912.8	-65125.1	-1708.6	111.126	957.467	0	0	0	0	0	0	0	603	903	0
2362	6	0	0	0	0	0	0	200	300	0	-45.5641	54.9548	-729.732	-40553.7	-65003	-1754.38	110.922	958.573	0	0	0	0	0	0	0	603	903	0
2362	7	0	0	0	0	0	0	200	300	0	-46.1745	54.1919	-729.122	-40370.6	-64331.6	-1479.72	111.768	958.369	0	0	0	0	0	0	0	603	903	0
2362	8	0	0	0	0	0	0	200	300	0	-45.1064	51.2927	-729.122	-40370.6	-64148.5	-1662.83	112.019	958.369	0	0	0	0	0	0	0	603	903	0
2362	9	0	0	0	0	0	0	200	300	0	-44.6486	53.2764	-724.239	-40553.7	-64758.9	-1937.49	110.584	958.995	0	0	0	0	0	0	0	603	903	0
2363	0	0	0	0	0	0	0	200	300	0	-46.1745	52.8186	-724.239	-40462.1	-64087.5	-1479.72	111.511	958.869	0	0	0	0	0	0	0	603	903	0
2363	1	0	0	0	0	0	0	200	300	0	-44.6486	51.1401	-721.492	-40095.9	-63843.3	-1296.62	111.512	958.574	0	0	0	0	0	0	0	603	903	0
2363	2	0	0	0	0	0	0	200	300	0	-44.1908	51.1401	-719.051	-40462.1	-63477.1	-1525.5	111.721	959.272	0	0	0	0	0	0	0	603	903	0
2363	3	0	0	0	0	0	0	200	300	0	-45.5641	50.5298	-719.051	-40553.7	-63477.1	-1433.95	111.721	959.399	0	0	0	0	0	0	0	603	903	0
2363	4	0	0	0	0	0	0	200	300	0	-45.1064	49.9194	-715.389	-40004.4	-63538.1	-1479.72	111.184	958.92	0	0	0	0	0	0	0	603	903	0
2363	5	0	0	0	0	0	0	200	300	0	-42.8175	49.9194	-715.694	-40095.9	-63843.3	-1342.39	110.795	959.024	0	0	0	0	0	0	0	603	903	0
2363	6	0	0	0	0	0	0	200	300	0	-44.6486	48.8513	-712.947	-39729.7	-63171.9	-1296.62	111.393	958.726	0	0	0	0	0	0	0	603	903	0
2363	7	0	0	0	0	0	0	200	300	0	-44.8012	48.6987	-708.98	-40279	-62866.8	-1067.73	111.328	959.813	0	0	0	0	0	0	0	603	903	0
2363	8	0	0	0	0	0	0	200	300	0	-42.9701	48.0884	-711.116	-40095.9	-63049.9	-1250.84	111.337	959.385	0	0	0	0	0	0	0	603	903	0
2363	9	0	0	0	0	0	0	200	300	0	-43.7331	46.5625	-708.98	-40645.2	-63599.2	-1159.29	110.295	960.329	0	0	0	0	0	0	0	603	903	0
2364	0	0	0	0	0	0	0	200	300	0	-43.8857	46.8677	-706.233	-40645.2	-62622.6	-1113.51	111.329	960.552	0	0	0	0	0	0	0	603	903	0
2364	1	0	0	0	0	0	0	200	300	0	-42.3598	46.7151	-705.318	-40553.7	-62988.8	-1067.73	110.694	960.497	0	0	0	0	0	0	0	603	903	0
2364	2	0	0	0	0	0	0	200	300	0	-42.6649	45.7996	-702.571	-40645.2	-62683.7	-1113.51	110.78	960.852	0	0	0	0	0	0	0	603	903	0
2364	3	0	0	0	0	0	0	200	300	0	-40.8339	45.647	-701.045	-40828.3	-61768.1	-884.628	111.891	961.239	0	0	0	0	0	0	0	603	903	0
2364	4	0	0	0	0	0	0	200	300	0	-42.6649	43.8159	-700.74	-40279	-62622.6	-838.852	110.634	960.481	0	0	0	0	0	0	0	603	903	0
2364	5	0	0	0	0	0	0	200	300	0	-42.3598	43.2056	-697.994	-40828.3	-61951.2	-518.417	111.244	961.494	0	0	0	0	0	0	0	603	903	0
2364	6	0	0	0	0	0	0	200	300	0	-42.0546	43.6633	-695.552	-40919.9	-61768.1	-838.852	111.196	961.831	0	0	0	0	0	0	0	603	903	0
2364	7	0	0	0	0	0	0	200	300	0	-41.902	42.1374	-690.059	-40370.6	-62134.3	-747.299	109.958	961.503	0	0	0	0	0	0	0	603	903	0
2364	8	0	0	0	0	0	0	200	300	0	-41.4442	41.9849	-693.416	-41194.6	-61951.2	-655.746	110.658	962.408	0	0	0	0	0	0	0	603	903	0
2364	9	0	0	0	0	0	0	200	300	0	-42.5124	41.0693	-690.975	-41011.5	-61585	-518.417	110.872	962.353	0	0	0	0	0	0	0	603	903	0
2365	0	0	0	0	0	0	0	200	300	0	-42.6649	40.9167	-690.364	-40279	-61524	-426.864	110.882	961.345	0	0	0	0	0	0	0	603	903	0
2365	1	0	0	0	0	0	0	200	300	0	-41.4442	40.459	-687.923	-40919.9	-61279.8	-472.641	110.92	962.483	0	0	0	0	0	0	0	603	903	0
2365	2	0	0	0	0	0	0	200	300	0	-42.2072	40.1538	-685.787	-40645.2	-60791.6	-472.641	111.355	962.268	0	0	0	0	0	0	0	603	903	0
2365	3	0	0	0	0	0	0	200	300	0	-41.7494	39.8486	-686.397	-40553.7	-60608.5	-426.864	111.701	962.082	0	0	0	0	0	0	0	603	903	0
2365	4	0	0	0	0	0	0	200	300	0	-38.8503	38.7805	-683.65	-40462.1	-61157.8	-289.535	110.542	962.185	0	0	0	0	0	0	0	603	903	0
2365	5	0	0	0	0	0	0	200	300	0	-42.0546	38.4753	-679.073	-40462.1	-60669.5	-60.6534	110.658	962.584	0	0	0	0	0	0	0	603	903	0
2365	6	0	0	0	0	0	0	200	300	0	-41.1391	37.865	-681.514	-41103	-60425.4	-381.088	111.337	963.311	0	0	0	0	0	0	0	603	903	0
2365	7	0	0	0	0	0	0	200	300	0	-40.9865	36.4917	-678.768	-40645.2	-60486.4	-243.759	110.888	962.881	0	0	0	0	0	0	0	603	903	0
2365	8	0	0	0	0	0	0	200	300	0	-40.8339	37.2546	-678.462	-40919.9	-60242.2	-60.6534	111.208	963.313	0	0	0	0	0	0	0	603	903	0
2365	9	0	0	0	0	0	0	200	300	0	-40.8339	35.8813	-677.547	-40736.8	-60242.2	76.6757	111.088	963.124	0	0	0	0	0	0	0	603	903	0
2366	0	0	0	0	0	0	0	200	300	0	-39.7658	36.0339	-674.8	-40828.3	-60608.5	122.452	110.183	963.504	0	0	0	0	0	0	0	603	903	0
2366	1	0	0	0	0	0	0	200	300	0	-40.6813	35.8813	-674.8	-40736.8	-60242.2	-14.877	110.726	963.369	0	0	0	0	0	0	0	603	903	0
2366	2	0	0	0	0	0	0	200	300	0	-40.3761	32.8296	-674.495	-40828.3	-59754	30.8993	111.409	963.532	0	0	0	0	0	0	0	603	903	0
2366	3	0	0	0	0	0	0	200	300	0	-36.8666	34.6606	-670.528	-41011.5	-60120.2	76.6757	110.339	964.163	0	0	0	0	0	0	0	603	903	0
2366	4	0	0	0	0	0	0	200	300	0	-39.9184	34.0503	-669.612	-40645.2	-59937.1	168.228	110.49	963.7	0	0	0	0	0	0	0	603	903	0
2366	5	0	0	0	0	0	0	200	300	0	-39.308	33.2873	-666.866	-40919.9	-59082.6	168.228	111.403	964.362	0	0	0	0	0	0	0	603	903	0
2366	6	0	0	0	0	0	0	200	300	0	-37.7821	32.9822	-665.34	-41011.5	-59387.8	168.228	110.741	964.64	0	0	0	0	0	0	0	603	903	0
2366	7	0	0	0	0	0	0	200	300	0	-39.1554	32.0666	-661.983	-41103	-59570.9	580.216	110.011	965.091	0	0	0	0	0	0	0	603	903	0
2366	8	0	0	0	0	0	0	200	300	0	-38.3925	31.7615	-662.593	-41469.2	-59021.5	305.558	110.923	965.586	0	0	0	0	0	0	0	603	903	0
2366	9	0	0	0	0	0	0	200	300	0	-37.3244	31.6089	-661.678	-41377.7	-58960.5	442.887	110.892	965.534	0	0	0	0	0	0	0	603	903	0
2367	0	0	0	0	0	0	0	200	300	0	-37.1718	31.1511	-661.678	-41560.8	-58228.1	397.11	111.999	965.811	0	0	0	0	0	0	0	603	903	0
2367	1	0	0	0	0	0	0	200	300	0	-38.3925	30.8459	-658.931	-41927	-59021.5	351.334	110.428	966.629	0	0	0	0	0	0	0	603	903	0
2367	2	0	0	0	0	0	0	200	300	0	-36.5614	29.7778	-655.269	-40462.1	-58533.3	671.769	110.673	964.749	0	0	0	0	0	0	0	603	903	0
2367	3	0	0	0	0	0	0	200	300	0	-36.4088	29.1675	-655.574	-41927	-59082.6	442.887	109.877	966.955	0	0	0	0	0	0	0	603	903	0
2367	4	0	0	0	0	0	0	200	300	0	-37.7821	28.4045	-653.133	-41927	-59021.5	671.769	109.633	967.194	0	0	0	0	0	0	0	603	903	0
2367	5	0	0	0	0	0	0	200	300	0	-35.7985	29.0149	-652.828	-41743.9	-58350.2	488.663	110.619	966.943	0	0	0	0	0	0	0	603	903	0
2367	6	0	0	0	0	0	0	200	300	0	-35.9511	28.0994	-650.691	-41560.8	-58594.3	671.769	109.951	966.872	0	0	0	0	0	0	0	603	903	0
2367	7	0	0	0	0	0	0	200	300	0	-36.2563	27.7942	-649.471	-42110.1	-58777.4	809.098	109.5	967.838	0	0	0	0	0	0	0	603	903	0
2367	8	0	0	0	0	0	0	200	300	0	-36.4088	27.3364	-648.86	-42018.5	-57922.9	580.216	110.731	967.757	0	0	0	0	0	0	0	603	903	0
2367	9	0	0	0	0	0	0	200	300	0	-35.6459	26.8787	-647.64	-42201.6	-58472.2	900.651	109.715	968.162	0	0	0	0	0	0	0	603	903	0
2368	0	0	0	0	0	0	0	200	300	0	-36.5614	27.1838	-645.198	-42476.3	-58167.1	900.651	109.846	968.835	0	0	0	0	0	0	0	603	903	0
2368	1	0	0	0	0	0	0	200	300	0	-36.2563	26.5735	-643.978	-41469.2	-57495.7	809.098	110.718	967.395	0	0	0	0	0	0	0	603	903	0
2368	2	0	0	0	0	0	0	200	300	0	-34.883	26.4209	-642.452	-41743.9	-58289.1	946.427	109.271	967.976	0	0	0	0	0	0	0	603	903	0
2368	3	0	0	0	0	0	0	200	300	0	-36.1037	24.5898	-640.926	-42842.5	-58167.1	763.322	109.245	969.845	0	0	0	0	0	0	0	603	903	0
2368	4	0	0	0	0	0	0	200	300	0	-35.7985	25.3528	-642.452	-41835.4	-57312.6	854.874	110.791	968.118	0	0	0	0	0	0	0	603	903	0
2368	5	0	0	0	0	0	0	200	300	0	-33.8148	23.6743	-638.179	-42018.5	-57922.9	900.651	109.237	968.841	0	0	0	0	0	0	0	603	903	0
2368	6	0	0	0	0	0	0	200	300	0	-35.3407	25.0476	-638.79	-42110.1	-57556.7	946.427	109.897	968.922	0	0	0	0	0	0	0	603	903	0
2368	7	0	0	0	0	0	0	200	300	0	-34.883	24.4373	-637.264	-41835.4	-57312.6	1037.98	110.065	968.649	0	0	0	0	0	0	0	603	903	0
2368	8	0	0	0	0	0	0	200	300	0	-33.3571	23.5217	-634.517	-42110.1	-57007.4	1221.09	110.156	969.366	0	0	0	0	0	0	0	603	903	0
2368	9	0	0	0	0	0	0	200	300	0	-33.0519	23.8269	-634.822	-42659.4	-56946.4	1175.31	110.296	970.199	0	0	0	0	0	0	0	603	903	0
2369	0	0	0	0	0	0	0	200	300	0	-34.12	21.8433	-632.991	-42110.1	-56946.4	1037.98	110.036	969.526	0	0	0	0	0	0	0	603	903	0
2369	1	0	0	0	0	0	0	200	300	0	-33.5097	22.4536	-632.991	-42110.1	-56763.2	1129.53	110.325	969.526	0	0	0	0	0	0	0	603	903	0
2369	2	0	0	0	0	0	0	200	300	0	-32.1364	22.6062	-632.686	-42659.4	-57678.8	1037.98	108.835	970.426	0	0	0	0	0	0	0	603	903	0
2369	3	0	0	0	0	0	0	200	300	0	-33.6623	20.1648	-632.076	-43025.6	-56458.1	1129.53	110.678	971.07	0	0	0	0	0	0	0	603	903	0
2369	4	0	0	0	0	0	0	200	300	0	-32.5941	21.6907	-629.024	-42476.3	-56519.1	1221.09	110.148	970.527	0	0	0	0	0	0	0	603	903	0
2369	5	0	0	0	0	0	0	200	300	0	-32.1364	21.0803	-625.057	-43117.1	-57129.5	1404.19	108.601	971.981	0	0	0	0	0	0	0	603	903	0
2369	6	0	0	0	0	0	0	200	300	0	-31.526	20.6226	-627.193	-42934	-56763.2	1587.3	109.496	971.454	0	0	0	0	0	0	0	603	903	0
2369	7	0	0	0	0	0	0	200	300	0	-32.1364	20.7751	-625.362	-42659.4	-55847.7	1221.09	110.695	971.216	0	0	0	0	0	0	0	603	903	0
2369	8	0	0	0	0	0	0	200	300	0	-32.1364	19.4019	-625.667	-41194.6	-56519.1	1358.41	109.666	968.841	0	0	0	0	0	0	0	603	903	0
2369	9	0	0	0	0	0	0	200	300	0	-33.0519	19.0967	-622.615	-43117.1	-56458.1	1495.74	109.321	972.252	0	0	0	0	0	0	0	603	903	0
2370	0	0	0	0	0	0	0	200	300	0	-32.4416	18.3337	-620.479	-42384.7	-56091.9	1633.07	109.599	971.31	0	0	0	0	0	0	0	603	903	0
2370	1	0	0	0	0	0	0	200	300	0	-31.9838	17.876	-621.395	-42750.9	-56336	1724.63	109.339	971.798	0	0	0	0	0	0	0	603	903	0
2370	2	0	0	0	0	0	0	200	300	0	-32.7467	18.1811	-618.953	-42476.3	-56275	1633.07	109.08	971.626	0	0	0	0	0	0	0	603	903	0
2370	3	0	0	0	0	0	0	200	300	0	-31.9838	18.1811	-618.648	-43025.6	-55664.6	1861.95	110.022	972.548	0	0	0	0	0	0	0	603	903	0
2370	4	0	0	0	0	0	0	200	300	0	-30.7631	17.876	-617.427	-42934	-55603.6	1541.52	109.943	972.537	0	0	0	0	0	0	0	603	903	0
2370	5	0	0	0	0	0	0	200	300	0	-32.4416	16.9604	-615.291	-42384.7	-56275	1724.63	108.539	971.886	0	0	0	0	0	0	0	603	903	0
2370	6	0	0	0	0	0	0	200	300	0	-32.1364	16.8079	-617.122	-42567.8	-55481.5	1770.4	110.096	971.978	0	0	0	0	0	0	0	603	903	0
2370	7	0	0	0	0	0	0	200	300	0	-31.2209	15.8923	-615.291	-43117.1	-55786.7	1816.18	109.333	973.076	0	0	0	0	0	0	0	603	903	0
2370	8	0	0	0	0	0	0	200	300	0	-32.5941	15.8923	-613.46	-42659.4	-55969.8	1953.51	108.764	972.539	0	0	0	0	0	0	0	603	903	0
2370	9	0	0	0	0	0	0	200	300	0	-31.6786	15.4346	-614.376	-43208.7	-55237.4	2045.06	110.092	973.329	0	0	0	0	0	0	0	603	903	0
2371	0	0	0	0	0	0	0	200	300	0	-30.9157	13.4509	-614.07	-42934	-55054.3	1770.4	110.345	972.917	0	0	0	0	0	0	0	603	903	0
2371	1	0	0	0	0	0	0	200	300	0	-31.0683	14.9768	-611.324	-43300.2	-55481.5	1953.51	109.244	973.83	0	0	0	0	0	0	0	603	903	0
2371	2	0	0	0	0	0	0	200	300	0	-32.1364	14.519	-610.408	-43574.9	-55115.3	1953.51	109.707	974.387	0	0	0	0	0	0	0	603	903	0
2371	3	0	0	0	0	0	0	200	300	0	-30.6105	13.1457	-609.188	-42934	-55054.3	2045.06	109.627	973.478	0	0	0	0	0	0	0	603	903	0
2371	4	0	0	0	0	0	0	200	300	0	-30.9157	13.2983	-608.272	-43758	-54688.1	2090.84	110.093	974.938	0	0	0	0	0	0	0	603	903	0
2371	5	0	0	0	0	0	0	200	300	0	-32.1364	13.1457	-605.831	-43483.4	-54871.2	2090.84	109.428	974.775	0	0	0	0	0	0	0	603	903	0
2371	6	0	0	0	0	0	0	200	300	0	-30.1527	12.8406	-607.357	-43208.7	-54871.2	2090.84	109.656	974.142	0	0	0	0	0	0	0	603	903	0
2371	7	0	0	0	0	0	0	200	300	0	-30.6105	12.688	-606.136	-44032.7	-54993.2	2090.84	109.272	975.645	0	0	0	0	0	0	0	603	903	0
2371	8	0	0	0	0	0	0	200	300	0	-31.3734	12.2302	-602.474	-43666.5	-55176.3	2228.16	108.417	975.479	0	0	0	0	0	0	0	603	903	0
2371	9	0	0	0	0	0	0	200	300	0	-30.1527	11.3147	-604	-42476.3	-54993.2	2273.94	108.952	973.325	0	0	0	0	0	0	0	603	903	0
2372	0	0	0	0	0	0	0	200	300	0	-29.695	10.8569	-604.915	-43666.5	-54932.2	2273.94	109.19	975.186	0	0	0	0	0	0	0	603	903	0
2372	1	0	0	0	0	0	0	200	300	0	-30.3053	10.8569	-604	-43849.6	-55237.4	2228.16	108.547	975.599	0	0	0	0	0	0	0	603	903	0
2372	2	0	0	0	0	0	0	200	300	0	-30.0002	10.094	-603.084	-43574.9	-54199.8	2502.82	110.129	975.254	0	0	0	0	0	0	0	603	903	0
2372	3	0	0	0	0	0	0	200	300	0	-29.8476	9.63623	-602.474	-43574.9	-54810.1	2640.15	109.025	975.327	0	0	0	0	0	0	0	603	903	0
2372	4	0	0	0	0	0	0	200	300	0	-30.7631	9.48364	-603.084	-44215.8	-54993.2	2411.27	108.813	976.316	0	0	0	0	0	0	0	603	903	0
2372	5	0	0	0	0	0	0	200	300	0	-30.9157	9.17846	-601.558	-43758	-54504.9	2502.82	109.394	975.741	0	0	0	0	0	0	0	603	903	0
2372	6	0	0	0	0	0	0	200	300	0	-30.0002	7.5	-599.422	-43849.6	-54932.2	2502.82	108.358	976.153	0	0	0	0	0	0	0	603	903	0
2372	7	0	0	0	0	0	0	200	300	0	-30.3053	7.80517	-600.032	-44398.9	-54627	2548.6	108.96	976.994	0	0	0	0	0	0	0	603	903	0
2372	8	0	0	0	0	0	0	200	300	0	-31.0683	7.5	-599.117	-44215.8	-54382.9	2685.93	109.228	976.802	0	0	0	0	0	0	0	603	903	0
2372	9	0	0	0	0	0	0	200	300	0	-30.0002	7.5	-600.032	-43758	-54566	2685.93	109.062	975.926	0	0	0	0	0	0	0	603	903	0
2373	0	0	0	0	0	0	0	200	300	0	-30.0002	6.73706	-599.727	-44582	-54382.9	2823.26	109.321	977.337	0	0	0	0	0	0	0	603	903	0
2373	1	0	0	0	0	0	0	200	300	0	-30.3053	6.43188	-597.591	-44307.4	-54504.9	2777.48	108.792	977.143	0	0	0	0	0	0	0	603	903	0
2373	2	0	0	0	0	0	0	200	300	0	-30.3053	6.43188	-598.506	-44673.6	-54077.7	2869.03	109.646	977.642	0	0	0	0	0	0	0	603	903	0
2373	3	0	0	0	0	0	0	200	300	0	-27.101	5.97412	-597.591	-44398.9	-54871.2	2777.48	108.179	977.296	0	0	0	0	0	0	0	603	903	0
2373	4	0	0	0	0	0	0	200	300	0	-30.3053	5.36377	-596.981	-43849.6	-54321.8	2457.05	109.006	976.452	0	0	0	0	0	0	0	603	903	0
2373	5	0	0	0	0	0	0	200	300	0	-30.1527	5.82153	-596.981	-44582	-54016.7	2960.59	109.517	977.679	0	0	0	0	0	0	0	603	903	0
2373	6	0	0	0	0	0	0	200	300	0	-29.0846	5.05859	-595.76	-44490.5	-54566	2869.03	108.409	977.679	0	0	0	0	0	0	0	603	903	0
2373	7	0	0	0	0	0	0	200	300	0	-29.695	3.07495	-595.455	-45222.9	-54504.9	2914.81	108.465	978.947	0	0	0	0	0	0	0	603	903	0
2373	8	0	0	0	0	0	0	200	300	0	-30.1527	4.14306	-595.149	-44948.2	-53894.6	3006.36	109.444	978.524	0	0	0	0	0	0	0	603	903	0
2373	9	0	0	0	0	0	0	200	300	0	-28.932	3.6853	-595.149	-43666.5	-54688.1	2823.26	108.11	976.371	0	0	0	0	0	0	0	603	903	0
2374	0	0	0	0	0	0	0	200	300	0	-29.0846	3.6853	-593.624	-45222.9	-54504.9	3006.36	108.183	979.181	0	0	0	0	0	0	0	603	903	0
2374	1	0	0	0	0	0	0	200	300	0	-28.0165	3.38012	-593.929	-45131.3	-54016.7	3097.92	109.052	978.988	0	0	0	0	0	0	0	603	903	0
2374	2	0	0	0	0	0	0	200	300	0	-28.6269	1.85425	-594.539	-44307.4	-54504.9	3189.47	108.324	977.524	0	0	0	0	0	0	0	603	903	0
2374	3	0	0	0	0	0	0	200	300	0	-28.4743	2.4646	-592.403	-45497.5	-54810.1	3326.8	107.478	979.802	0	0	0	0	0	0	0	603	903	0
2374	4	0	0	0	0	0	0	200	300	0	-29.5424	2.15942	-592.403	-45314.4	-54138.7	3326.8	108.612	979.493	0	0	0	0	0	0	0	603	903	0
2374	5	0	0	0	0	0	0	200	300	0	-27.8639	0.78613	-593.013	-44765.1	-53894.6	3097.92	109.117	978.488	0	0	0	0	0	0	0	603	903	0
2374	6	0	0	0	0	0	0	200	300	0	-27.8639	1.85425	-591.487	-45222.9	-54016.7	3418.35	108.677	979.456	0	0	0	0	0	0	0	603	903	0
2374	7	0	0	0	0	0	0	200	300	0	-29.5424	1.39648	-592.098	-45589.1	-53894.6	3372.57	108.977	979.996	0	0	0	0	0	0	0	603	903	0
2374	8	0	0	0	0	0	0	200	300	0	-26.0329	-0.129397	-592.403	-45406	-54138.7	3143.69	108.612	979.647	0	0	0	0	0	0	0	603	903	0
2374	9	0	0	0	0	0	0	200	300	0	-28.4743	0.328366	-590.267	-45039.8	-54077.7	3464.13	108.384	979.304	0	0	0	0	0	0	0	603	903	0
2375	0	0	0	0	0	0	0	200	300	0	-28.6269	0.328366	-591.182	-45680.6	-53894.6	3509.9	108.836	980.27	0	0	0	0	0	0	0	603	903	0
2375	1	0	0	0	0	0	0	200	300	0	-28.3217	-0.892337	-590.572	-45314.4	-54138.7	3784.56	108.328	979.73	0	0	0	0	0	0	0	603	903	0
2375	2	0	0	0	0	0	0	200	300	0	-28.1691	-0.892337	-590.572	-45039.8	-54688.1	3601.46	107.398	979.265	0	0	0	0	0	0	0	603	903	0
2375	3	0	0	0	0	0	0	200	300	0	-28.7794	-0.434573	-590.572	-46229.9	-53955.6	3784.56	108.638	981.28	0	0	0	0	0	0	0	603	903	0
2375	4	0	0	0	0	0	0	200	300	0	-29.0846	-1.96045	-589.046	-45314.4	-53955.6	3647.23	108.402	979.928	0	0	0	0	0	0	0	603	903	0
2375	5	0	0	0	0	0	0	200	300	0	-27.4062	-1.80786	-589.961	-45589.1	-54566	3647.23	107.509	980.275	0	0	0	0	0	0	0	603	903	0
2375	6	0	0	0	0	0	0	200	300	0	-28.7794	-2.11304	-589.656	-45222.9	-54688.1	4059.22	107.254	979.694	0	0	0	0	0	0	0	603	903	0
2375	7	0	0	0	0	0	0	200	300	0	-29.3898	-2.5708	-588.741	-45772.2	-53833.6	3830.34	108.562	980.746	0	0	0	0	0	0	0	603	903	0
2375	8	0	0	0	0	0	0	200	300	0	-27.5587	-2.5708	-588.13	-45955.3	-54382.9	3784.56	107.533	981.138	0	0	0	0	0	0	0	603	903	0
2375	9	0	0	0	0	0	0	200	300	0	-28.7794	-3.79151	-588.741	-46229.9	-54443.9	4013.44	107.525	981.523	0	0	0	0	0	0	0	603	903	0
2376	0	0	0	0	0	0	0	200	300	0	-28.3217	-3.79151	-588.436	-46138.4	-54260.8	3876.11	107.788	981.409	0	0	0	0	0	0	0	603	903	0
2376	1	0	0	0	0	0	0	200	300	0	-27.4062	-3.94409	-588.436	-46046.8	-53833.6	3967.67	108.514	981.253	0	0	0	0	0	0	0	603	903	0
2376	2	0	0	0	0	0	0	200	300	0	-27.4062	-3.63892	-589.046	-46413	-54566	4013.44	107.366	981.794	0	0	0	0	0	0	0	603	903	0
2376	3	0	0	0	0	0	0	200	300	0	-28.6269	-4.70703	-587.215	-46596.1	-54199.8	3967.67	107.7	982.351	0	0	0	0	0	0	0	603	903	0
2376	4	0	0	0	0	0	0	200	300	0	-27.4062	-5.01221	-587.825	-45497.5	-54321.8	4333.88	107.588	980.4	0	0	0	0	0	0	0	603	903	0
2376	5	0	0	0	0	0	0	200	300	0	-27.4062	-5.1648	-589.351	-46962.4	-54749.1	4196.55	107.103	982.685	0	0	0	0	0	0	0	603	903	0
2376	6	0	0	0	0	0	0	200	300	0	-26.6432	-5.77515	-588.436	-46870.8	-54138.7	4333.88	107.995	982.653	0	0	0	0	0	0	0	603	903	0
2376	7	0	0	0	0	0	0	200	300	0	-27.4062	-5.92774	-587.215	-46321.5	-54260.8	4288.1	107.596	981.883	0	0	0	0	0	0	0	603	903	0
2376	8	0	0	0	0	0	0	200	300	0	-27.4062	-7.6062	-585.384	-46962.4	-54321.8	4608.54	107.203	983.225	0	0	0	0	0	0	0	603	903	0
2376	9	0	0	0	0	0	0	200	300	0	-26.1855	-7.30103	-587.825	-46962.4	-54443.9	4562.76	107.381	982.892	0	0	0	0	0	0	0	603	903	0
2377	0	0	0	0	0	0	0	200	300	0	-27.101	-7.30103	-587.215	-46046.8	-54627	4379.65	106.973	981.416	0	0	0	0	0	0	0	603	903	0
2377	1	0	0	0	0	0	0	200	300	0	-27.7113	-6.69068	-589.656	-47145.5	-54566	4379.65	107.461	982.954	0	0	0	0	0	0	0	603	903	0
2377	2	0	0	0	0	0	0	200	300	0	-28.0165	-7.6062	-587.215	-47511.7	-54382.9	4608.54	107.388	983.91	0	0	0	0	0	0	0	603	903	0
2377	3	0	0	0	0	0	0	200	300	0	-27.8639	-8.36914	-586.299	-46779.3	-54443.9	4562.76	107.14	982.787	0	0	0	0	0	0	0	603	903	0
2377	4	0	0	0	0	0	0	200	300	0	-27.5587	-8.21656	-588.741	-47603.2	-54993.2	4837.42	106.592	983.856	0	0	0	0	0	0	0	603	903	0
2377	5	0	0	0	0	0	0	200	300	0	-26.7958	-8.36914	-586.605	-47694.8	-54566	4837.42	106.98	984.307	0	0	0	0	0	0	0	603	903	0
2377	6	0	0	0	0	0	0	200	300	0	-27.8639	-8.9795	-589.656	-47511.7	-54749.1	4791.64	107.151	983.575	0	0	0	0	0	0	0	603	903	0
2377	7	0	0	0	0	0	0	200	300	0	-27.2536	-9.28467	-588.13	-48244.1	-54993.2	4883.19	106.495	985.03	0	0	0	0	0	0	0	603	903	0
2377	8	0	0	0	0	0	0	200	300	0	-28.932	-8.9795	-584.468	-47786.4	-55054.3	4837.42	105.805	984.76	0	0	0	0	0	0	0	603	903	0
2377	9	0	0	0	0	0	0	200	300	0	-28.3217	-9.58985	-589.656	-47328.6	-54810.1	5020.52	107.047	983.265	0	0	0	0	0	0	0	603	903	0
2378	0	0	0	0	0	0	0	200	300	0	-27.4062	-10.5054	-587.825	-47969.5	-55176.3	5157.85	106.135	984.605	0	0	0	0	0	0	0	603	903	0
2378	1	0	0	0	0	0	0	200	300	0	-29.0846	-10.3528	-585.689	-47053.9	-54810.1	5066.3	106.418	983.34	0	0	0	0	0	0	0	603	903	0
2378	2	0	0	0	0	0	0	200	300	0	-28.1691	-10.658	-588.436	-47877.9	-54627	4974.75	107.166	984.365	0	0	0	0	0	0	0	603	903	0
2378	3	0	0	0	0	0	0	200	300	0	-28.0165	-12.7942	-589.046	-47786.4	-54993.2	4974.75	106.64	984.125	0	0	0	0	0	0	0	603	903	0
2378	4	0	0	0	0	0	0	200	300	0	-27.8639	-11.2683	-587.52	-48152.6	-55603.6	5157.85	105.359	984.959	0	0	0	0	0	0	0	603	903	0
2378	5	0	0	0	0	0	0	200	300	0	-28.7794	-12.1838	-588.741	-48152.6	-55237.4	5340.96	106.177	984.789	0	0	0	0	0	0	0	603	903	0
2378	6	0	0	0	0	0	0	200	300	0	-28.0165	-12.3364	-588.741	-47237	-55176.3	5340.96	106.281	983.234	0	0	0	0	0	0	0	603	903	0
2378	7	0	0	0	0	0	0	200	300	0	-27.7113	-12.3364	-588.13	-48610.3	-55542.5	5340.96	105.561	985.652	0	0	0	0	0	0	0	603	903	0
2378	8	0	0	0	0	0	0	200	300	0	-29.0846	-12.489	-589.656	-48335.7	-55054.3	5524.06	106.633	984.973	0	0	0	0	0	0	0	603	903	0
2378	9	0	0	0	0	0	0	200	300	0	-28.1691	-12.7942	-588.741	-48244.1	-54749.1	5249.41	107.006	984.945	0	0	0	0	0	0	0	603	903	0
2379	0	0	0	0	0	0	0	200	300	0	-28.1691	-13.252	-588.13	-48518.8	-55420.5	5569.84	105.768	985.497	0	0	0	0	0	0	0	603	903	0
2379	1	0	0	0	0	0	0	200	300	0	-29.2372	-13.5571	-589.656	-48885	-54993.2	5478.29	106.737	985.904	0	0	0	0	0	0	0	603	903	0
2379	2	0	0	0	0	0	0	200	300	0	-29.0846	-14.3201	-589.351	-48427.2	-55359.4	5661.39	106.067	985.17	0	0	0	0	0	0	0	603	903	0
2379	3	0	0	0	0	0	0	200	300	0	-28.4743	-14.7778	-589.046	-48885	-55420.5	5524.06	105.915	985.99	0	0	0	0	0	0	0	603	903	0
2379	4	0	0	0	0	0	0	200	300	0	-29.695	-14.9304	-589.046	-49159.6	-55176.3	5569.84	106.329	986.456	0	0	0	0	0	0	0	603	903	0
2379	5	0	0	0	0	0	0	200	300	0	-28.6269	-15.2356	-591.182	-48518.8	-55420.5	5707.17	106.255	985.071	0	0	0	0	0	0	0	603	903	0
2379	6	0	0	0	0	0	0	200	300	0	-29.2372	-15.9985	-588.741	-49068.1	-56030.8	5752.95	104.829	986.344	0	0	0	0	0	0	0	603	903	0
2379	7	0	0	0	0	0	0	200	300	0	-30.4579	-16.6089	-589.656	-48976.5	-55481.5	5798.72	105.909	986.06	0	0	0	0	0	0	0	603	903	0
2379	8	0	0	0	0	0	0	200	300	0	-30.0002	-16.9141	-591.182	-49068.1	-55420.5	5890.27	106.255	986	0	0	0	0	0	0	0	603	903	0
2379	9	0	0	0	0	0	0	200	300	0	-27.2536	-16.3037	-589.656	-49068.1	-55847.7	5890.27	105.288	986.215	0	0	0	0	0	0	0	603	903	0
2380	0	0	0	0	0	0	0	200	300	0	-30.0002	-17.677	-590.267	-48610.3	-55908.8	6027.6	105.282	985.353	0	0	0	0	0	0	0	603	903	0
2380	1	0	0	0	0	0	0	200	300	0	-30.6105	-17.677	-591.182	-49068.1	-55542.5	5981.83	106.048	986	0	0	0	0	0	0	0	603	903	0
2380	2	0	0	0	0	0	0	200	300	0	-30.3053	-17.8296	-590.572	-49068.1	-56152.9	6256.49	104.918	986.086	0	0	0	0	0	0	0	603	903	0
2380	3	0	0	0	0	0	0	200	300	0	-30.4579	-18.1348	-590.877	-50075.2	-56213.9	6210.71	104.864	987.747	0	0	0	0	0	0	0	603	903	0
2380	4	0	0	0	0	0	0	200	300	0	-31.2209	-18.7451	-591.487	-49983.6	-56030.8	5890.27	105.271	987.505	0	0	0	0	0	0	0	603	903	0
2380	5	0	0	0	0	0	0	200	300	0	-30.3053	-19.3555	-590.572	-49342.7	-56580.1	6485.37	104.194	986.551	0	0	0	0	0	0	0	603	903	0
2380	6	0	0	0	0	0	0	200	300	0	-30.3053	-19.6606	-591.182	-50258.3	-56336	6576.92	104.706	988.013	0	0	0	0	0	0	0	603	903	0
2380	7	0	0	0	0	0	0	200	300	0	-30.6105	-19.8132	-592.403	-50166.7	-55847.7	6302.26	105.727	987.684	0	0	0	0	0	0	0	603	903	0
2380	8	0	0	0	0	0	0	200	300	0	-30.7631	-19.9658	-591.487	-50166.7	-56336	6485.37	104.755	987.815	0	0	0	0	0	0	0	603	903	0
2380	9	0	0	0	0	0	0	200	300	0	-31.2209	-20.4236	-592.098	-50899.1	-56702.2	6714.25	104.235	988.964	0	0	0	0	0	0	0	603	903	0
2381	0	0	0	0	0	0	0	200	300	0	-32.1364	-21.3391	-590.267	-50441.4	-56397	6576.92	104.455	988.455	0	0	0	0	0	0	0	603	903	0
2381	1	0	0	0	0	0	0	200	300	0	-32.4416	-22.1021	-592.098	-50624.5	-56275	6714.25	104.957	988.5	0	0	0	0	0	0	0	603	903	0
2381	2	0	0	0	0	0	0	200	300	0	-29.2372	-21.9495	-592.403	-50716	-56824.3	6851.58	104.078	988.611	0	0	0	0	0	0	0	603	903	0
2381	3	0	0	0	0	0	0	200	300	0	-32.7467	-21.3391	-591.793	-49892	-56641.2	6897.35	104.289	987.307	0	0	0	0	0	0	0	603	903	0
2381	4	0	0	0	0	0	0	200	300	0	-32.8993	-22.7124	-592.403	-50899.1	-56641.2	6851.58	104.387	988.92	0	0	0	0	0	0	0	603	903	0
2381	5	0	0	0	0	0	0	200	300	0	-31.9838	-23.0176	-592.708	-50807.6	-57190.5	7080.46	103.51	988.721	0	0	0	0	0	0	0	603	903	0
2381	6	0	0	0	0	0	0	200	300	0	-33.0519	-23.3228	-593.929	-51723.1	-57190.5	7126.24	103.708	990.086	0	0	0	0	0	0	0	603	903	0
2381	7	0	0	0	0	0	0	200	300	0	-33.6623	-23.3228	-594.539	-51631.6	-56763.2	7263.57	104.526	989.843	0	0	0	0	0	0	0	603	903	0
2381	8	0	0	0	0	0	0	200	300	0	-32.4416	-24.2383	-594.234	-51356.9	-57495.7	7355.12	103.244	989.425	0	0	0	0	0	0	0	603	903	0
2381	9	0	0	0	0	0	0	200	300	0	-32.5941	-24.696	-596.675	-52089.3	-57373.6	7355.12	103.845	990.299	0	0	0	0	0	0	0	603	903	0
2382	0	0	0	0	0	0	0	200	300	0	-32.7467	-25.7642	-598.201	-52180.9	-57129.5	7492.45	104.498	990.23	0	0	0	0	0	0	0	603	903	0
2382	1	0	0	0	0	0	0	200	300	0	-32.8993	-25.0012	-595.76	-51448.5	-57190.5	7538.23	104.004	989.358	0	0	0	0	0	0	0	603	903	0
2382	2	0	0	0	0	0	0	200	300	0	-33.3571	-26.0693	-597.591	-52455.5	-57495.7	7584	103.788	990.778	0	0	0	0	0	0	0	603	903	0
2382	3	0	0	0	0	0	0	200	300	0	-34.4252	-26.5271	-597.286	-52730.2	-57556.7	7400.9	103.636	991.283	0	0	0	0	0	0	0	603	903	0
2382	4	0	0	0	0	0	0	200	300	0	-34.7304	-27.29	-598.506	-52547.1	-57373.6	7767.11	104.139	990.797	0	0	0	0	0	0	0	603	903	0
2382	5	0	0	0	0	0	0	200	300	0	-32.289	-27.29	-599.117	-52821.7	-57739.8	7904.44	103.625	991.166	0	0	0	0	0	0	0	603	903	0
2382	6	0	0	0	0	0	0	200	300	0	-34.883	-28.2056	-599.117	-53371.1	-57617.7	8087.54	103.829	992.083	0	0	0	0	0	0	0	603	903	0
2382	7	0	0	0	0	0	0	200	300	0	-35.0356	-28.5107	-600.643	-53462.6	-57678.8	7995.99	103.972	992.009	0	0	0	0	0	0	0	603	903	0
2382	8	0	0	0	0	0	0	200	300	0	-33.8148	-28.6633	-600.948	-53004.8	-58533.3	7904.44	102.598	991.202	0	0	0	0	0	0	0	603	903	0
2382	9	0	0	0	0	0	0	200	300	0	-34.2726	-30.3418	-604.915	-53462.6	-58899.5	8316.43	102.632	991.38	0	0	0	0	0	0	0	603	903	0
2383	0	0	0	0	0	0	0	200	300	0	-33.3571	-30.1892	-602.169	-54103.5	-58228.1	8179.09	103.303	992.848	0	0	0	0	0	0	0	603	903	0
2383	1	0	0	0	0	0	0	200	300	0	-34.5778	-30.1892	-603.389	-53554.2	-58655.3	8316.43	102.79	991.756	0	0	0	0	0	0	0	603	903	0
2383	2	0	0	0	0	0	0	200	300	0	-34.883	-30.9522	-604.305	-54103.5	-58899.5	8728.41	102.533	992.53	0	0	0	0	0	0	0	603	903	0
2383	3	0	0	0	0	0	0	200	300	0	-35.9511	-31.7151	-604.305	-54744.4	-58777.4	8636.86	102.736	993.591	0	0	0	0	0	0	0	603	903	0
2383	4	0	0	0	0	0	0	200	300	0	-36.2563	-32.1729	-604.915	-54195	-59082.6	8636.86	102.329	992.591	0	0	0	0	0	0	0	603	903	0
2383	5	0	0	0	0	0	0	200	300	0	-33.5097	-32.478	-606.441	-54744.4	-59448.8	8682.64	101.971	993.272	0	0	0	0	0	0	0	603	903	0
2383	6	0	0	0	0	0	0	200	300	0	-36.5614	-33.3936	-607.967	-54195	-59021.5	8819.97	102.92	992.141	0	0	0	0	0	0	0	603	903	0
2383	7	0	0	0	0	0	0	200	300	0	-36.2563	-33.8513	-611.019	-55019	-59631.9	8819.97	102.406	993.045	0	0	0	0	0	0	0	603	903	0
2383	8	0	0	0	0	0	0	200	300	0	-35.6459	-34.6143	-610.713	-55385.2	-59998.1	8865.74	101.757	993.689	0	0	0	0	0	0	0	603	903	0
2383	9	0	0	0	0	0	0	200	300	0	-37.0192	-33.5461	-608.272	-55751.4	-59692.9	9094.62	101.865	994.655	0	0	0	0	0	0	0	603	903	0
2384	0	0	0	0	0	0	0	200	300	0	-37.1718	-35.2246	-613.155	-55934.5	-59631.9	9460.84	102.746	994.224	0	0	0	0	0	0	0	603	903	0
2384	1	0	0	0	0	0	0	200	300	0	-36.714	-36.9031	-613.765	-56117.6	-59692.9	9506.61	102.743	994.432	0	0	0	0	0	0	0	603	903	0
2384	2	0	0	0	0	0	0	200	300	0	-37.477	-36.5979	-616.207	-56758.5	-60120.2	9277.73	102.435	995.11	0	0	0	0	0	0	0	603	903	0
2384	3	0	0	0	0	0	0	200	300	0	-38.0873	-37.2083	-617.427	-56209.2	-60120.2	9643.94	102.628	994.038	0	0	0	0	0	0	0	603	903	0
2384	4	0	0	0	0	0	0	200	300	0	-35.0356	-39.0393	-618.038	-56666.9	-60730.5	9598.17	101.737	994.689	0	0	0	0	0	0	0	603	903	0
2384	5	0	0	0	0	0	0	200	300	0	-37.9347	-37.666	-619.869	-56850.1	-60120.2	9552.39	103.011	994.713	0	0	0	0	0	0	0	603	903	0
2384	6	0	0	0	0	0	0	200	300	0	-38.6977	-38.7341	-620.479	-57307.8	-60608.5	10147.5	102.32	995.361	0	0	0	0	0	0	0	603	903	0
2384	7	0	0	0	0	0	0	200	300	0	-36.4088	-39.3445	-622.615	-57948.7	-61585	9918.6	101.087	996.073	0	0	0	0	0	0	0	603	903	0
2384	8	0	0	0	0	0	0	200	300	0	-38.8503	-39.8022	-624.446	-57948.7	-61951.2	10284.8	100.79	995.8	0	0	0	0	0	0	0	603	903	0
2384	9	0	0	0	0	0	0	200	300	0	-39.308	-40.5652	-625.667	-57857.2	-61157.8	10239	102.252	995.473	0	0	0	0	0	0	0	603	903	0
2385	0	0	0	0	0	0	0	200	300	0	-36.2563	-41.1755	-626.583	-58406.5	-61951.2	10239	101.128	996.214	0	0	0	0	0	0	0	603	903	0
2385	1	0	0	0	0	0	0	200	300	0	-39.7658	-42.3962	-628.108	-57582.5	-62195.4	10559.5	100.98	994.676	0	0	0	0	0	0	0	603	903	0
2385	2	0	0	0	0	0	0	200	300	0	-39.9184	-42.2437	-629.329	-59138.9	-62317.4	10193.3	100.978	996.971	0	0	0	0	0	0	0	603	903	0
2385	3	0	0	0	0	0	0	200	300	0	-37.6295	-44.8377	-630.855	-59322	-62683.7	10742.6	100.637	997.034	0	0	0	0	0	0	0	603	903	0
2385	4	0	0	0	0	0	0	200	300	0	-40.5287	-43.0066	-632.686	-58955.8	-62805.7	10834.1	100.732	996.183	0	0	0	0	0	0	0	603	903	0
2385	5	0	0	0	0	0	0	200	300	0	-40.9865	-44.0747	-634.212	-59962.8	-62622.6	10788.4	101.259	997.547	0	0	0	0	0	0	0	603	903	0
2385	6	0	0	0	0	0	0	200	300	0	-38.2399	-44.5325	-632.686	-59962.8	-62744.7	11154.6	100.828	997.775	0	0	0	0	0	0	0	603	903	0
2385	7	0	0	0	0	0	0	200	300	0	-41.7494	-44.8377	-637.569	-60146	-63416.1	10971.5	100.535	997.336	0	0	0	0	0	0	0	603	903	0
2385	8	0	0	0	0	0	0	200	300	0	-42.0546	-46.5161	-640.315	-60603.7	-63171.9	11200.3	101.342	997.647	0	0	0	0	0	0	0	603	903	0
2385	9	0	0	0	0	0	0	200	300	0	-40.2235	-46.3635	-640.01	-61244.6	-63599.2	11291.9	100.628	998.693	0	0	0	0	0	0	0	603	903	0
2386	0	0	0	0	0	0	0	200	300	0	-42.2072	-46.5161	-642.147	-62068.6	-63904.4	11383.4	100.483	999.658	0	0	0	0	0	0	0	603	903	0
2386	1	0	0	0	0	0	0	200	300	0	-42.2072	-48.3472	-644.588	-61610.8	-64026.4	11887	100.671	998.582	0	0	0	0	0	0	0	603	903	0
2386	2	0	0	0	0	0	0	200	300	0	-41.902	-47.4316	-645.503	-61885.5	-64453.7	11566.5	100.15	998.872	0	0	0	0	0	0	0	603	903	0
2386	3	0	0	0	0	0	0	200	300	0	-42.6649	-48.1946	-648.86	-62801	-64819.9	11795.4	100.102	999.787	0	0	0	0	0	0	0	603	903	0
2386	4	0	0	0	0	0	0	200	300	0	-43.2753	-48.4998	-646.419	-63167.2	-64819.9	11749.7	99.7246	1000.72	0	0	0	0	0	0	0	603	903	0
2386	5	0	0	0	0	0	0	200	300	0	-42.8175	-49.1101	-650.997	-62617.9	-64636.8	11612.3	100.711	999.188	0	0	0	0	0	0	0	603	903	0
2386	6	0	0	0	0	0	0	200	300	0	-42.8175	-50.1782	-654.354	-63808.1	-65491.3	12253.2	99.9145	1000.51	0	0	0	0	0	0	0	603	903	0
2386	7	0	0	0	0	0	0	200	300	0	-43.5805	-50.9412	-654.964	-64082.8	-65735.4	12253.2	99.635	1000.84	0	0	0	0	0	0	0	603	903	0
2386	8	0	0	0	0	0	0	200	300	0	-44.3434	-51.3989	-658.016	-64082.8	-65918.5	12253.2	99.8223	1000.39	0	0	0	0	0	0	0	603	903	0
2386	9	0	0	0	0	0	0	200	300	0	-43.8857	-51.5515	-658.321	-64906.7	-66223.7	12482.1	99.4051	1001.59	0	0	0	0	0	0	0	603	903	0
2387	0	0	0	0	0	0	0	200	300	0	-45.5641	-52.9248	-661.983	-65639.2	-66528.9	12390.5	99.5007	1002.16	0	0	0	0	0	0	0	603	903	0
2387	1	0	0	0	0	0	0	200	300	0	-44.496	-52.7722	-663.204	-65364.5	-66467.9	12756.7	99.7776	1001.56	0	0	0	0	0	0	0	603	903	0
2387	2	0	0	0	0	0	0	200	300	0	-43.2753	-52.1619	-664.73	-65639.2	-66834.1	12665.2	99.4568	1001.75	0	0	0	0	0	0	0	603	903	0
2387	3	0	0	0	0	0	0	200	300	0	-45.8693	-54.9085	-668.086	-65364.5	-67017.1	12527.9	99.6879	1000.84	0	0	0	0	0	0	0	603	903	0
2387	4	0	0	0	0	0	0	200	300	0	-45.7167	-54.9085	-669.307	-66737.8	-67139.2	13031.4	99.6885	1002.71	0	0	0	0	0	0	0	603	903	0
2387	5	0	0	0	0	0	0	200	300	0	-45.5641	-54.7559	-672.664	-66737.8	-67383.3	13031.4	99.8262	1002.21	0	0	0	0	0	0	0	603	903	0
2387	6	0	0	0	0	0	0	200	300	0	-44.3434	-56.5869	-674.19	-67470.2	-68482	13214.5	98.4233	1003.08	0	0	0	0	0	0	0	603	903	0
2387	7	0	0	0	0	0	0	200	300	0	-46.6322	-56.5869	-677.242	-68019.5	-68176.8	13122.9	99.3316	1003.44	0	0	0	0	0	0	0	603	903	0
2387	8	0	0	0	0	0	0	200	300	0	-46.3271	-57.1973	-680.599	-68019.5	-68176.8	13306.1	99.8281	1002.94	0	0	0	0	0	0	0	603	903	0
2387	9	0	0	0	0	0	0	200	300	0	-46.1745	-58.1128	-681.209	-68843.5	-69214.4	13306.1	98.3948	1004.06	0	0	0	0	0	0	0	603	903	0
2388	0	0	0	0	0	0	0	200	300	0	-46.6322	-58.2654	-684.261	-69118.1	-69336.5	13260.3	98.6695	1004.01	0	0	0	0	0	0	0	603	903	0
2388	1	0	0	0	0	0	0	200	300	0	-46.7848	-58.8757	-687.313	-68111.1	-69336.5	13718	99.1194	1002.1	0	0	0	0	0	0	0	603	903	0
2388	2	0	0	0	0	0	0	200	300	0	-47.2426	-60.249	-689.449	-70399.9	-70252	13855.4	98.1041	1005.11	0	0	0	0	0	0	0	603	903	0
2388	3	0	0	0	0	0	0	200	300	0	-46.0219	-60.249	-691.89	-70674.6	-70313	13855.4	98.3755	1005.15	0	0	0	0	0	0	0	603	903	0
2388	4	0	0	0	0	0	0	200	300	0	-47.5478	-61.3171	-694.332	-70949.2	-70740.3	14130	98.1174	1005.18	0	0	0	0	0	0	0	603	903	0
2388	5	0	0	0	0	0	0	200	300	0	-48.3107	-62.843	-696.773	-71590	-70923.4	13946.9	98.2116	1005.75	0	0	0	0	0	0	0	603	903	0
2388	6	0	0	0	0	0	0	200	300	0	-47.5478	-61.4697	-698.604	-72139.4	-71472.7	14038.5	97.6921	1006.26	0	0	0	0	0	0	0	603	903	0
2388	7	0	0	0	0	0	0	200	300	0	-48.9211	-62.0801	-702.266	-72231	-71106.5	14130	98.747	1005.85	0	0	0	0	0	0	0	603	903	0
2388	8	0	0	0	0	0	0	200	300	0	-49.2262	-63.9111	-704.708	-73238	-71411.7	14313.1	98.6648	1006.93	0	0	0	0	0	0	0	603	903	0
2388	9	0	0	0	0	0	0	200	300	0	-50.1418	-63.4534	-706.233	-73787.3	-72144.1	14587.8	97.8467	1007.48	0	0	0	0	0	0	0	603	903	0
2389	0	0	0	0	0	0	0	200	300	0	-49.9892	-64.3689	-710.201	-74062	-71961	14542	98.6751	1007.28	0	0	0	0	0	0	0	603	903	0
2389	1	0	0	0	0	0	0	200	300	0	-49.8366	-65.1318	-715.084	-74611.3	-72571.4	14542	98.5134	1007.34	0	0	0	0	0	0	0	603	903	0
2389	2	0	0	0	0	0	0	200	300	0	-51.2099	-65.1318	-715.389	-75160.6	-73059.7	14633.6	97.8742	1008.06	0	0	0	0	0	0	0	603	903	0
2389	3	0	0	0	0	0	0	200	300	0	-50.2943	-65.437	-718.44	-75252.1	-73792.1	14450.5	97.2885	1007.74	0	0	0	0	0	0	0	603	903	0
2389	4	0	0	0	0	0	0	200	300	0	-50.5995	-66.6577	-722.713	-76167.7	-73547.9	14908.2	98.2336	1008.39	0	0	0	0	0	0	0	603	903	0
2389	5	0	0	0	0	0	0	200	300	0	-52.1254	-67.1155	-723.018	-76533.9	-74097.2	14908.2	97.5168	1008.85	0	0	0	0	0	0	0	603	903	0
2389	6	0	0	0	0	0	0	200	300	0	-51.0573	-66.5051	-725.765	-76900.1	-74524.5	14679.3	97.3159	1008.96	0	0	0	0	0	0	0	603	903	0
2389	7	0	0	0	0	0	0	200	300	0	-51.6676	-67.5732	-728.206	-77632.6	-73975.1	15182.9	98.4146	1009.61	0	0	0	0	0	0	0	603	903	0
2389	8	0	0	0	0	0	0	200	300	0	-53.1935	-67.7258	-730.342	-77266.4	-74951.7	14999.8	97.3746	1008.79	0	0	0	0	0	0	0	603	903	0
2389	9	0	0	0	0	0	0	200	300	0	-52.5832	-68.6414	-733.699	-78365	-75623.1	15228.7	96.929	1009.81	0	0	0	0	0	0	0	603	903	0
2390	0	0	0	0	0	0	0	200	300	0	-50.4469	-68.1836	-735.225	-78731.2	-75440	15411.8	97.392	1010.08	0	0	0	0	0	0	0	603	903	0
2390	1	0	0	0	0	0	0	200	300	0	-53.1935	-69.2517	-737.667	-79097.4	-75806.2	15228.7	97.2352	1010.23	0	0	0	0	0	0	0	603	903	0
2390	2	0	0	0	0	0	0	200	300	0	-53.6513	-70.3198	-741.939	-79738.2	-76355.6	15686.4	97.0865	1010.47	0	0	0	0	0	0	0	603	903	0
2390	3	0	0	0	0	0	0	200	300	0	-53.1935	-70.3198	-742.549	-80562.2	-76355.6	15549.1	97.1711	1011.49	0	0	0	0	0	0	0	603	903	0
2390	4	0	0	0	0	0	0	200	300	0	-54.109	-70.9302	-744.991	-81020	-76782.8	15869.5	96.9346	1011.75	0	0	0	0	0	0	0	603	903	0
2390	5	0	0	0	0	0	0	200	300	0	-54.7194	-71.6931	-748.348	-81660.9	-77088	15640.6	96.9891	1012.12	0	0	0	0	0	0	0	603	903	0
2390	6	0	0	0	0	0	0	200	300	0	-53.9565	-71.3879	-747.432	-82301.7	-77271	15640.6	96.618	1013.11	0	0	0	0	0	0	0	603	903	0
2390	7	0	0	0	0	0	0	200	300	0	-53.8039	-72.4561	-753.536	-82759.5	-77637.2	15961.1	96.9694	1012.83	0	0	0	0	0	0	0	603	903	0
2390	8	0	0	0	0	0	0	200	300	0	-54.872	-72.6086	-755.977	-83400.3	-78247.6	16006.9	96.4948	1013.32	0	0	0	0	0	0	0	603	903	0
2390	9	0	0	0	0	0	0	200	300	0	-54.7194	-73.9819	-756.587	-83583.5	-78491.7	16281.5	96.2556	1013.47	0	0	0	0	0	0	0	603	903	0
2391	0	0	0	0	0	0	0	200	300	0	-55.7875	-73.5242	-759.334	-84041.2	-78491.7	16327.3	96.6308	1013.68	0	0	0	0	0	0	0	603	903	0
2391	1	0	0	0	0	0	0	200	300	0	-56.0927	-73.6768	-762.081	-85139.8	-79163.2	16144.2	96.1223	1014.72	0	0	0	0	0	0	0	603	903	0
2391	2	0	0	0	0	0	0	200	300	0	-56.5504	-75.6604	-763.912	-85139.8	-79346.2	16510.4	96.1317	1014.45	0	0	0	0	0	0	0	603	903	0
2391	3	0	0	0	0	0	0	200	300	0	-56.8556	-75.05	-765.743	-85872.3	-79163.2	16418.8	96.6191	1015.14	0	0	0	0	0	0	0	603	903	0
2391	4	0	0	0	0	0	0	200	300	0	-57.1608	-75.5078	-768.489	-86513.2	-79163.2	16510.4	96.9886	1015.58	0	0	0	0	0	0	0	603	903	0
2391	5	0	0	0	0	0	0	200	300	0	-57.1608	-76.4233	-770.626	-87245.6	-80383.9	16510.4	95.6901	1016.21	0	0	0	0	0	0	0	603	903	0
2391	6	0	0	0	0	0	0	200	300	0	-57.0082	-76.1182	-773.067	-86604.7	-80139.7	16556.2	96.3353	1015.03	0	0	0	0	0	0	0	603	903	0
2391	7	0	0	0	0	0	0	200	300	0	-57.0082	-75.9656	-770.015	-88161.1	-80444.9	16922.4	95.5282	1017.49	0	0	0	0	0	0	0	603	903	0
2391	8	0	0	0	0	0	0	200	300	0	-56.2453	-78.1018	-776.424	-89076.7	-81360.4	16968.2	95.2113	1017.73	0	0	0	0	0	0	0	603	903	0
2391	9	0	0	0	0	0	0	200	300	0	-57.3134	-77.644	-779.17	-89076.7	-80750.1	16922.4	96.364	1017.32	0	0	0	0	0	0	0	603	903	0
2392	0	0	0	0	0	0	0	200	300	0	-57.3134	-78.1018	-777.645	-89992.1	-81238.4	16968.2	95.5328	1018.72	0	0	0	0	0	0	0	603	903	0
2392	1	0	0	0	0	0	0	200	300	0	-58.0763	-79.1699	-782.222	-90449.9	-81604.6	16693.5	95.676	1018.63	0	0	0	0	0	0	0	603	903	0
2392	2	0	0	0	0	0	0	200	300	0	-57.9237	-79.0173	-784.358	-89992.1	-82153.9	17059.7	95.2598	1017.73	0	0	0	0	0	0	0	603	903	0
2392	3	0	0	0	0	0	0	200	300	0	-58.3815	-79.4751	-786.19	-91457	-81604.6	17151.3	96.2024	1019.33	0	0	0	0	0	0	0	603	903	0
2392	4	0	0	0	0	0	0	200	300	0	-58.2289	-80.3906	-788.326	-91548.6	-82398	17380.2	95.4772	1019.13	0	0	0	0	0	0	0	603	903	0
2392	5	0	0	0	0	0	0	200	300	0	-58.0763	-79.9329	-789.852	-90999.2	-82886.3	17288.6	95.061	1018.21	0	0	0	0	0	0	0	603	903	0
2392	6	0	0	0	0	0	0	200	300	0	-58.5341	-79.9329	-791.988	-93013.4	-83008.3	17334.4	95.1899	1020.44	0	0	0	0	0	0	0	603	903	0
2392	7	0	0	0	0	0	0	200	300	0	-57.466	-81.6113	-793.819	-92921.8	-83435.6	17425.9	94.8934	1020.06	0	0	0	0	0	0	0	603	903	0
2392	8	0	0	0	0	0	0	200	300	0	-59.4496	-80.8484	-794.429	-92830.3	-83923.9	17288.6	94.3595	1019.85	0	0	0	0	0	0	0	603	903	0
2392	9	0	0	0	0	0	0	200	300	0	-59.9074	-81.6113	-798.091	-94844.5	-83130.4	17517.5	95.8385	1021.84	0	0	0	0	0	0	0	603	903	0
2393	0	0	0	0	0	0	0	200	300	0	-57.7711	-81.3062	-797.176	-94936	-83435.6	17517.5	95.336	1022.09	0	0	0	0	0	0	0	603	903	0
2393	1	0	0	0	0	0	0	200	300	0	-60.3651	-82.2217	-797.481	-95576.9	-84107	17746.4	94.5342	1022.85	0	0	0	0	0	0	0	603	903	0
2393	2	0	0	0	0	0	0	200	300	0	-60.6703	-82.3743	-799.617	-95760	-83984.9	17746.4	94.9686	1022.76	0	0	0	0	0	0	0	603	903	0
2393	3	0	0	0	0	0	0	200	300	0	-62.1962	-82.832	-803.585	-96675.5	-84290.1	17883.7	95.1073	1023.31	0	0	0	0	0	0	0	603	903	0
2393	4	0	0	0	0	0	0	200	300	0	-62.9591	-83.2898	-802.364	-96583.9	-84595.3	17700.6	94.5675	1023.37	0	0	0	0	0	0	0	603	903	0
2393	5	0	0	0	0	0	0	200	300	0	-61.2807	-83.595	-803.279	-96675.5	-84595.3	17837.9	94.6876	1023.35	0	0	0	0	0	0	0	603	903	0
2393	6	0	0	0	0	0	0	200	300	0	-62.9591	-82.9846	-803.89	-98231.9	-84778.4	17929.5	94.5398	1025.2	0	0	0	0	0	0	0	603	903	0
2393	7	0	0	0	0	0	0	200	300	0	-61.891	-83.9001	-803.89	-97682.6	-84656.3	17975.2	94.6916	1024.51	0	0	0	0	0	0	0	603	903	0
2393	8	0	0	0	0	0	0	200	300	0	-61.891	-84.3579	-805.721	-99239	-85266.7	18204.1	94.1734	1026.17	0	0	0	0	0	0	0	603	903	0
2393	9	0	0	0	0	0	0	200	300	0	-63.7221	-86.6467	-808.467	-99696.8	-85022.5	17654.8	94.8349	1026.32	0	0	0	0	0	0	0	603	903	0
2394	0	0	0	0	0	0	0	200	300	0	-62.5014	-84.5105	-804.5	-99605.2	-85938	18066.8	93.1783	1026.81	0	0	0	0	0	0	0	603	903	0
2394	1	0	0	0	0	0	0	200	300	0	-62.654	-84.8157	-808.773	-100704	-85266.7	18112.6	94.5727	1027.51	0	0	0	0	0	0	0	603	903	0
2394	2	0	0	0	0	0	0	200	300	0	-64.1798	-86.3416	-809.078	-100795	-85755	18204.1	94.009	1027.58	0	0	0	0	0	0	0	603	903	0
2394	3	0	0	0	0	0	0	200	300	0	-61.7384	-84.8157	-806.026	-101253	-86304.2	18204.1	92.9262	1028.62	0	0	0	0	0	0	0	603	903	0
2394	4	0	0	0	0	0	0	200	300	0	-64.6376	-85.7312	-810.298	-100887	-85999.1	18204.1	93.8674	1027.51	0	0	0	0	0	0	0	603	903	0
2394	5	0	0	0	0	0	0	200	300	0	-64.7902	-86.7993	-809.688	-102626	-86243.2	18478.8	93.4858	1029.75	0	0	0	0	0	0	0	603	903	0
2394	6	0	0	0	0	0	0	200	300	0	-64.3324	-86.7993	-806.331	-102901	-86670.5	18570.3	92.5126	1030.62	0	0	0	0	0	0	0	603	903	0
2394	7	0	0	0	0	0	0	200	300	0	-64.485	-86.189	-810.298	-103267	-86609.5	18753.4	93.1141	1030.44	0	0	0	0	0	0	0	603	903	0
2394	8	0	0	0	0	0	0	200	300	0	-65.4005	-87.5623	-811.519	-102718	-86304.2	18616.1	93.651	1029.57	0	0	0	0	0	0	0	603	903	0
2394	9	0	0	0	0	0	0	200	300	0	-65.7057	-87.5623	-808.162	-104000	-86670.5	18249.9	92.7561	1031.69	0	0	0	0	0	0	0	603	903	0
2395	0	0	0	0	0	0	0	200	300	0	-64.9428	-87.7148	-810.909	-104366	-87036.7	18661.9	92.6677	1031.7	0	0	0	0	0	0	0	603	903	0
2395	1	0	0	0	0	0	0	200	300	0	-66.1635	-88.02	-811.824	-105190	-86365.3	18982.3	93.6157	1032.57	0	0	0	0	0	0	0	603	903	0
2395	2	0	0	0	0	0	0	200	300	0	-66.3161	-88.02	-807.247	-105922	-87036.7	19028.1	92.1808	1034.21	0	0	0	0	0	0	0	603	903	0
2395	3	0	0	0	0	0	0	200	300	0	-66.1635	-88.3252	-811.214	-105922	-87219.8	18982.3	92.4824	1033.57	0	0	0	0	0	0	0	603	903	0
2395	4	0	0	0	0	0	0	200	300	0	-66.3161	-88.3252	-811.824	-106472	-86426.3	18845	93.5406	1034.15	0	0	0	0	0	0	0	603	903	0
2395	5	0	0	0	0	0	0	200	300	0	-66.0109	-87.1045	-805.11	-107021	-87280.8	18753.4	91.5915	1035.93	0	0	0	0	0	0	0	603	903	0
2395	6	0	0	0	0	0	0	200	300	0	-66.0109	-89.0881	-810.909	-105739	-87219.8	18936.5	92.4419	1033.4	0	0	0	0	0	0	0	603	903	0
2395	7	0	0	0	0	0	0	200	300	0	-65.5531	-89.2407	-809.688	-108120	-86731.5	18936.5	92.8828	1036.53	0	0	0	0	0	0	0	603	903	0
2395	8	0	0	0	0	0	0	200	300	0	-65.8583	-87.8674	-808.773	-108120	-87219.8	19073.9	92.1578	1036.68	0	0	0	0	0	0	0	603	903	0
2395	9	0	0	0	0	0	0	200	300	0	-66.1635	-89.2407	-809.688	-107296	-87464	18845	91.9782	1035.51	0	0	0	0	0	0	0	603	903	0
2396	0	0	0	0	0	0	0	200	300	0	-66.0109	-90.614	-808.467	-109035	-87341.9	19257	91.9661	1037.87	0	0	0	0	0	0	0	603	903	0
2396	1	0	0	0	0	0	0	200	300	0	-65.7057	-90.3088	-807.857	-109493	-87464	19165.4	91.7334	1038.54	0	0	0	0	0	0	0	603	903	0
2396	2	0	0	0	0	0	0	200	300	0	-66.4687	-89.0881	-807.247	-109493	-87341.9	19119.7	91.8027	1038.64	0	0	0	0	0	0	0	603	903	0
2396	3	0	0	0	0	0	0	200	300	0	-66.7738	-90.4614	-806.636	-110042	-86975.7	19211.2	92.1749	1039.42	0	0	0	0	0	0	0	603	903	0
2396	4	0	0	0	0	0	0	200	300	0	-67.6894	-90.614	-805.416	-110775	-86853.6	19073.9	92.163	1040.54	0	0	0	0	0	0	0	603	903	0
2396	5	0	0	0	0	0	0	200	300	0	-66.7738	-89.3933	-805.721	-109676	-87219.8	19440.1	91.7493	1039.12	0	0	0	0	0	0	0	603	903	0
2396	6	0	0	0	0	0	0	200	300	0	-66.7738	-90.9192	-803.89	-111232	-86731.5	19394.3	92.1102	1041.37	0	0	0	0	0	0	0	603	903	0
2396	7	0	0	0	0	0	0	200	300	0	-65.5531	-90.614	-802.059	-111965	-86792.5	19531.6	91.7878	1042.6	0	0	0	0	0	0	0	603	903	0
2396	8	0	0	0	0	0	0	200	300	0	-67.2316	-89.0881	-802.059	-110775	-87158.7	19348.5	91.3312	1041.11	0	0	0	0	0	0	0	603	903	0
2396	9	0	0	0	0	0	0	200	300	0	-66.1635	-90.3088	-799.922	-112331	-86670.5	19440.1	91.6514	1043.43	0	0	0	0	0	0	0	603	903	0
2397	0	0	0	0	0	0	0	200	300	0	-66.4687	-90.7666	-798.091	-112331	-86670.5	19485.9	91.4028	1043.75	0	0	0	0	0	0	0	603	903	0
2397	1	0	0	0	0	0	0	200	300	0	-67.079	-90.1562	-799.312	-111690	-87097.7	19485.9	91.0341	1042.73	0	0	0	0	0	0	0	603	903	0
2397	2	0	0	0	0	0	0	200	300	0	-66.7738	-90.3088	-798.397	-113521	-86487.4	19623.2	91.6737	1045.19	0	0	0	0	0	0	0	603	903	0
2397	3	0	0	0	0	0	0	200	300	0	-65.7057	-90.7666	-794.734	-113338	-86304.2	19348.5	91.4049	1045.61	0	0	0	0	0	0	0	603	903	0
2397	4	0	0	0	0	0	0	200	300	0	-65.248	-90.1562	-795.345	-112606	-86853.6	19760.5	90.7976	1044.58	0	0	0	0	0	0	0	603	903	0
2397	5	0	0	0	0	0	0	200	300	0	-65.4005	-90.7666	-794.124	-113979	-86121.2	19806.3	91.552	1046.53	0	0	0	0	0	0	0	603	903	0
2397	6	0	0	0	0	0	0	200	300	0	-64.6376	-90.9192	-788.631	-114254	-85999.1	19897.8	90.9514	1047.88	0	0	0	0	0	0	0	603	903	0
2397	7	0	0	0	0	0	0	200	300	0	-65.0954	-90.3088	-790.462	-113887	-86426.3	19531.6	90.6635	1047.08	0	0	0	0	0	0	0	603	903	0
2397	8	0	0	0	0	0	0	200	300	0	-64.9428	-91.9873	-790.157	-114528	-86121.2	19897.8	91.0075	1047.94	0	0	0	0	0	0	0	603	903	0
2397	9	0	0	0	0	0	0	200	300	0	-64.7902	-90.3088	-786.19	-115169	-85510.8	20035.2	91.2338	1049.49	0	0	0	0	0	0	0	603	903	0
2398	0	0	0	0	0	0	0	200	300	0	-65.0954	-90.7666	-786.19	-114528	-85938	20035.2	90.6904	1048.68	0	0	0	0	0	0	0	603	903	0
2398	1	0	0	0	0	0	0	200	300	0	-64.9428	-91.5295	-782.222	-115535	-85816	19806.3	90.2921	1050.7	0	0	0	0	0	0	0	603	903	0
2398	2	0	0	0	0	0	0	200	300	0	-62.654	-90.614	-781.002	-115535	-85510.8	19623.2	90.5113	1050.93	0	0	0	0	0	0	0	603	903	0
2398	3	0	0	0	0	0	0	200	300	0	-63.5695	-91.0718	-778.56	-115078	-85266.7	20035.2	90.4816	1050.81	0	0	0	0	0	0	0	603	903	0
2398	4	0	0	0	0	0	0	200	300	0	-63.5695	-91.9873	-776.729	-115902	-85388.8	19714.7	90.0662	1052.22	0	0	0	0	0	0	0	603	903	0
2398	5	0	0	0	0	0	0	200	300	0	-64.485	-91.377	-775.203	-115993	-84656.3	19714.7	90.7947	1052.63	0	0	0	0	0	0	0	603	903	0
2398	6	0	0	0	0	0	0	200	300	0	-63.7221	-91.2244	-773.372	-115993	-84534.3	19943.6	90.6939	1052.98	0	0	0	0	0	0	0	603	903	0
2398	7	0	0	0	0	0	0	200	300	0	-63.4169	-91.8347	-770.931	-115902	-84839.4	19760.5	89.952	1053.34	0	0	0	0	0	0	0	603	903	0
2398	8	0	0	0	0	0	0	200	300	0	-62.654	-90.4614	-768.184	-116542	-84290.1	20035.2	90.2736	1054.71	0	0	0	0	0	0	0	603	903	0
2398	9	0	0	0	0	0	0	200	300	0	-62.654	-91.2244	-768.184	-116176	-83618.7	19714.7	91.1476	1054.23	0	0	0	0	0	0	0	603	903	0
2399	0	0	0	0	0	0	0	200	300	0	-61.7384	-91.5295	-764.217	-116268	-83862.8	19806.3	90.263	1055.14	0	0	0	0	0	0	0	603	903	0
2399	1	0	0	0	0	0	0	200	300	0	-62.1962	-91.0718	-762.691	-116359	-83313.6	19714.7	90.7637	1055.56	0	0	0	0	0	0	0	603	903	0
2399	2	0	0	0	0	0	0	200	300	0	-62.5014	-91.8347	-760.555	-116542	-83130.4	19577.4	90.6977	1056.23	0	0	0	0	0	0	0	603	903	0
2399	3	0	0	0	0	0	0	200	300	0	-60.6703	-90.7666	-757.198	-116634	-83557.7	19989.4	89.6488	1057.03	0	0	0	0	0	0	0	603	903	0
2399	4	0	0	0	0	0	0	200	300	0	-60.8229	-90.7666	-755.672	-117000	-82703.2	19897.8	90.5567	1057.83	0	0	0	0	0	0	0	603	903	0
2399	5	0	0	0	0	0	0	200	300	0	-61.4333	-91.377	-753.536	-117092	-82337	19897.8	90.7325	1058.39	0	0	0	0	0	0	0	603	903	0
2399	6	0	0	0	0	0	0	200	300	0	-58.8393	-90.7666	-749.568	-116909	-82886.3	19714.7	89.4213	1058.97	0	0	0	0	0	0	0	603	903	0
2399	7	0	0	0	0	0	0	200	300	0	-58.8393	-90.614	-749.263	-117183	-82031.8	19760.5	90.5167	1059.4	0	0	0	0	0	0	0	603	903	0
2399	8	0	0	0	0	0	0	200	300	0	-58.9919	-90.7666	-748.348	-117183	-82153.9	19760.5	90.2197	1059.59	0	0	0	0	0	0	0	603	903	0
2399	9	0	0	0	0	0	0	200	300	0	-58.2289	-91.0718	-744.38	-117550	-81909.7	19714.7	89.9626	1060.92	0	0	0	0	0	0	0	603	903	0
2400	0	0	0	0	0	0	0	200	300	0	-57.9237	-91.377	-742.855	-117641	-81055.2	19897.8	90.8868	1061.36	0	0	0	0	0	0	0	603	903	0
2400	1	0	0	0	0	0	0	200	300	0	-57.1608	-92.9028	-740.108	-117641	-81787.6	19852.1	89.4923	1061.95	0	0	0	0	0	0	0	603	903	0
2400	2	0	0	0	0	0	0	200	300	0	-56.3979	-92.9028	-738.887	-116176	-81177.3	19897.8	90.1358	1060.23	0	0	0	0	0	0	0	603	903	0
2400	3	0	0	0	0	0	0	200	300	0	-55.7875	-92.7502	-736.141	-117092	-80689	19577.4	90.3891	1062.06	0	0	0	0	0	0	0	603	903	0
2400	4	0	0	0	0	0	0	200	300	0	-56.2453	-94.1235	-734.615	-117275	-80811.1	19943.6	89.9953	1062.64	0	0	0	0	0	0	0	603	903	0
2400	5	0	0	0	0	0	0	200	300	0	-54.872	-93.3606	-731.563	-116817	-80383.9	19714.7	90.1204	1062.68	0	0	0	0	0	0	0	603	903	0
2400	6	0	0	0	0	0	0	200	300	0	-54.4142	-93.5132	-729.427	-115993	-80383.9	19577.4	89.7986	1062.02	0	0	0	0	0	0	0	603	903	0
2400	7	0	0	0	0	0	0	200	300	0	-55.3297	-95.1917	-727.596	-117092	-79895.6	19897.8	90.1923	1063.93	0	0	0	0	0	0	0	603	903	0
2400	8	0	0	0	0	0	0	200	300	0	-54.7194	-94.4287	-726.375	-116634	-79773.5	19211.2	90.1759	1063.57	0	0	0	0	0	0	0	603	903	0
2400	9	0	0	0	0	0	0	200	300	0	-52.5832	-95.4968	-723.323	-116634	-79224.2	19852.1	90.472	1064.25	0	0	0	0	0	0	0	603	903	0
2401	0	0	0	0	0	0	0	200	300	0	-53.3461	-95.9546	-721.187	-117092	-79102.1	19623.2	90.3168	1065.36	0	0	0	0	0	0	0	603	903	0
2401	1	0	0	0	0	0	0	200	300	0	-53.3461	-95.802	-719.051	-116451	-79041.1	19806.3	90.0758	1064.95	0	0	0	0	0	0	0	603	903	0
2401	2	0	0	0	0	0	0	200	300	0	-51.0573	-96.4124	-718.44	-116176	-77820.4	19485.9	91.6815	1064.71	0	0	0	0	0	0	0	603	903	0
2401	3	0	0	0	0	0	0	200	300	0	-51.6676	-96.1072	-715.084	-116451	-77515.2	19669	91.5998	1065.85	0	0	0	0	0	0	0	603	903	0
2401	4	0	0	0	0	0	0	200	300	0	-50.4469	-95.3442	-712.642	-116176	-77637.2	19897.8	91.0572	1066.02	0	0	0	0	0	0	0	603	903	0
2401	5	0	0	0	0	0	0	200	300	0	-48.9211	-97.9382	-710.811	-115902	-76965.9	19623.2	91.721	1066.06	0	0	0	0	0	0	0	603	903	0
2401	6	0	0	0	0	0	0	200	300	0	-49.5314	-98.0908	-707.149	-115902	-76782.8	19806.3	91.4193	1066.9	0	0	0	0	0	0	0	603	903	0
2401	7	0	0	0	0	0	0	200	300	0	-48.6159	-95.9546	-706.233	-115718	-76721.8	19714.7	91.3649	1066.85	0	0	0	0	0	0	0	603	903	0
2401	8	0	0	0	0	0	0	200	300	0	-47.8529	-97.7856	-702.877	-115444	-76294.5	19073.9	91.4539	1067.24	0	0	0	0	0	0	0	603	903	0
2401	9	0	0	0	0	0	0	200	300	0	-48.3107	-99.4641	-699.52	-115444	-75806.2	19531.6	91.6311	1068.03	0	0	0	0	0	0	0	603	903	0
2402	0	0	0	0	0	0	0	200	300	0	-47.8529	-97.3279	-698.299	-115078	-75317.9	19531.6	92.1409	1067.8	0	0	0	0	0	0	0	603	903	0
2402	1	0	0	0	0	0	0	200	300	0	-46.3271	-98.0908	-694.637	-114711	-75073.8	19806.3	91.9237	1068.14	0	0	0	0	0	0	0	603	903	0
2402	2	0	0	0	0	0	0	200	300	0	-45.8693	-97.1753	-690.059	-114711	-74768.6	19531.6	91.6489	1069.23	0	0	0	0	0	0	0	603	903	0
2402	3	0	0	0	0	0	0	200	300	0	-46.0219	-97.4805	-689.449	-114620	-74951.7	19760.5	91.2875	1069.25	0	0	0	0	0	0	0	603	903	0
2402	4	0	0	0	0	0	0	200	300	0	-44.0382	-98.0908	-685.482	-113979	-73975.1	19165.4	92.0829	1069.28	0	0	0	0	0	0	0	603	903	0
2402	5	0	0	0	0	0	0	200	300	0	-43.5805	-97.0227	-679.988	-114254	-73547.9	19211.2	91.8394	1071.02	0	0	0	0	0	0	0	603	903	0
2402	6	0	0	0	0	0	0	200	300	0	-44.3434	-97.6331	-679.683	-113796	-73425.9	19211.2	91.9705	1070.43	0	0	0	0	0	0	0	603	903	0
2402	7	0	0	0	0	0	0	200	300	0	-42.3598	-98.8538	-676.631	-113430	-72815.5	18890.8	92.3853	1070.64	0	0	0	0	0	0	0	603	903	0
2402	8	0	0	0	0	0	0	200	300	0	-42.0546	-97.4805	-671.443	-113704	-72388.2	19348.5	92.1901	1072.34	0	0	0	0	0	0	0	603	903	0
2402	9	0	0	0	0	0	0	200	300	0	-42.6649	-97.7856	-669.918	-113063	-72266.2	19440.1	92.1268	1071.77	0	0	0	0	0	0	0	603	903	0
2403	0	0	0	0	0	0	0	200	300	0	-40.9865	-97.1753	-665.95	-112056	-72327.2	19211.2	91.3924	1071.27	0	0	0	0	0	0	0	603	903	0
2403	1	0	0	0	0	0	0	200	300	0	-40.8339	-98.7012	-661.678	-112789	-70862.4	18890.8	92.905	1073.46	0	0	0	0	0	0	0	603	903	0
2403	2	0	0	0	0	0	0	200	300	0	-40.071	-98.2434	-658.931	-112239	-71228.6	18845	91.9028	1073.34	0	0	0	0	0	0	0	603	903	0
2403	3	0	0	0	0	0	0	200	300	0	-40.071	-99.0063	-654.659	-111782	-71167.5	18936.5	91.2906	1073.75	0	0	0	0	0	0	0	603	903	0
2403	4	0	0	0	0	0	0	200	300	0	-39.6132	-99.0063	-650.997	-111324	-69885.8	19028.1	92.6479	1074.01	0	0	0	0	0	0	0	603	903	0
2403	5	0	0	0	0	0	0	200	300	0	-40.5287	-98.0908	-648.86	-111141	-69885.8	19165.4	92.2945	1074.29	0	0	0	0	0	0	0	603	903	0
2403	6	0	0	0	0	0	0	200	300	0	-40.8339	-100.074	-643.978	-110317	-69275.5	18936.5	92.4257	1074.31	0	0	0	0	0	0	0	603	903	0
2403	7	0	0	0	0	0	0	200	300	0	-38.5451	-99.3115	-640.621	-109951	-68848.2	18982.3	92.5289	1074.63	0	0	0	0	0	0	0	603	903	0
2403	8	0	0	0	0	0	0	200	300	0	-39.1554	-100.38	-635.433	-109127	-68359.9	18845	92.4199	1074.74	0	0	0	0	0	0	0	603	903	0
2403	9	0	0	0	0	0	0	200	300	0	-39.0028	-100.074	-631.465	-109035	-68115.8	18799.2	92.1306	1075.67	0	0	0	0	0	0	0	603	903	0
2404	0	0	0	0	0	0	0	200	300	0	-36.714	-99.6167	-628.108	-108760	-67383.3	18661.9	92.7202	1076.16	0	0	0	0	0	0	0	603	903	0
2404	1	0	0	0	0	0	0	200	300	0	-39.0028	-100.38	-625.362	-108577	-66650.9	18570.3	93.4202	1076.62	0	0	0	0	0	0	0	603	903	0
2404	2	0	0	0	0	0	0	200	300	0	-37.6295	-100.227	-620.174	-107662	-66589.9	18661.9	92.627	1076.6	0	0	0	0	0	0	0	603	903	0
2404	3	0	0	0	0	0	0	200	300	0	-36.4088	-99.4641	-617.427	-107204	-65918.5	18478.8	93.2368	1076.63	0	0	0	0	0	0	0	603	903	0
2404	4	0	0	0	0	0	0	200	300	0	-37.3244	-101.143	-613.765	-107112	-65369.2	18616.1	93.4947	1077.52	0	0	0	0	0	0	0	603	903	0
2404	5	0	0	0	0	0	0	200	300	0	-36.714	-99.4641	-605.22	-106289	-65613.4	18387.2	91.5876	1078.62	0	0	0	0	0	0	0	603	903	0
2404	6	0	0	0	0	0	0	200	300	0	-35.7985	-99.3115	-605.22	-106197	-64392.7	18341.4	93.6046	1078.47	0	0	0	0	0	0	0	603	903	0
2404	7	0	0	0	0	0	0	200	300	0	-34.2726	-99.9219	-599.422	-105922	-64087.5	18158.3	93.0845	1079.71	0	0	0	0	0	0	0	603	903	0
2404	8	0	0	0	0	0	0	200	300	0	-36.1037	-99.6167	-595.76	-105190	-63782.3	18295.7	92.9396	1079.56	0	0	0	0	0	0	0	603	903	0
2404	9	0	0	0	0	0	0	200	300	0	-34.4252	-99.1589	-591.182	-104458	-62927.8	18341.4	93.556	1079.69	0	0	0	0	0	0	0	603	903	0
2405	0	0	0	0	0	0	0	200	300	0	-33.8148	-99.9219	-586.299	-103817	-62500.6	18249.9	93.3982	1080.07	0	0	0	0	0	0	0	603	903	0
2405	1	0	0	0	0	0	0	200	300	0	-34.883	-99.4641	-581.417	-104091	-62378.5	18112.6	92.7129	1082.03	0	0	0	0	0	0	0	603	903	0
2405	2	0	0	0	0	0	0	200	300	0	-33.2045	-99.4641	-575.618	-102626	-62073.3	17929.5	92.1624	1081.29	0	0	0	0	0	0	0	603	903	0
2405	3	0	0	0	0	0	0	200	300	0	-33.6623	-100.227	-573.482	-102443	-60852.6	18021	93.8893	1081.63	0	0	0	0	0	0	0	603	903	0
2405	4	0	0	0	0	0	0	200	300	0	-33.8148	-99.9219	-567.073	-101345	-60852.6	17929.5	92.6901	1081.72	0	0	0	0	0	0	0	603	903	0
2405	5	0	0	0	0	0	0	200	300	0	-32.289	-99.9219	-564.327	-100978	-60242.2	17609	93.2494	1081.94	0	0	0	0	0	0	0	603	903	0
2405	6	0	0	0	0	0	0	200	300	0	-33.3571	-99.4641	-558.223	-100795	-59509.8	17792.1	93.3942	1083.56	0	0	0	0	0	0	0	603	903	0
2405	7	0	0	0	0	0	0	200	300	0	-32.5941	-97.7856	-554.866	-100154	-59204.7	17792.1	93.2993	1083.5	0	0	0	0	0	0	0	603	903	0
2405	8	0	0	0	0	0	0	200	300	0	-31.526	-100.227	-549.678	-98872.8	-58777.4	17746.4	93.0695	1082.87	0	0	0	0	0	0	0	603	903	0
2405	9	0	0	0	0	0	0	200	300	0	-30.4579	-99.4641	-544.49	-98689.6	-57739.8	17609	93.9562	1084.25	0	0	0	0	0	0	0	603	903	0
2406	0	0	0	0	0	0	0	200	300	0	-31.2209	-98.7012	-538.387	-97957.2	-57556.7	17425.9	93.0941	1084.95	0	0	0	0	0	0	0	603	903	0
2406	1	0	0	0	0	0	0	200	300	0	-29.695	-98.396	-535.64	-97133.3	-57190.5	17059.7	93.2297	1084.34	0	0	0	0	0	0	0	603	903	0
2406	2	0	0	0	0	0	0	200	300	0	-29.3898	-98.2434	-528.011	-96400.9	-56336	17334.4	93.3052	1085.57	0	0	0	0	0	0	0	603	903	0
2406	3	0	0	0	0	0	0	200	300	0	-31.0683	-98.2434	-524.349	-96034.7	-55542.5	17288.6	94.0733	1086.15	0	0	0	0	0	0	0	603	903	0
2406	4	0	0	0	0	0	0	200	300	0	-29.3898	-98.5486	-519.771	-95302.2	-55481.5	17380.2	93.2578	1086.35	0	0	0	0	0	0	0	603	903	0
2406	5	0	0	0	0	0	0	200	300	0	-29.0846	-97.4805	-513.973	-94752.9	-54382.9	17197	94.1911	1087.35	0	0	0	0	0	0	0	603	903	0
2406	6	0	0	0	0	0	0	200	300	0	-27.4062	-96.4124	-509.7	-94020.5	-53894.6	16876.6	94.2622	1087.46	0	0	0	0	0	0	0	603	903	0
2406	7	0	0	0	0	0	0	200	300	0	-28.1691	-96.8701	-505.733	-93013.4	-53406.3	16968.2	94.3982	1086.92	0	0	0	0	0	0	0	603	903	0
2406	8	0	0	0	0	0	0	200	300	0	-27.7113	-96.4124	-498.714	-92464.1	-52673.9	16830.8	94.3806	1088.41	0	0	0	0	0	0	0	603	903	0
2406	9	0	0	0	0	0	0	200	300	0	-29.0846	-96.2598	-494.747	-91823.2	-52429.8	16739.3	94.0271	1088.6	0	0	0	0	0	0	0	603	903	0
2407	0	0	0	0	0	0	0	200	300	0	-29.2372	-96.8701	-488.948	-90449.9	-52002.5	16785	93.6442	1087.99	0	0	0	0	0	0	0	603	903	0
2407	1	0	0	0	0	0	0	200	300	0	-26.4906	-95.3442	-483.15	-90083.7	-51392.2	16785	93.6311	1089.45	0	0	0	0	0	0	0	603	903	0
2407	2	0	0	0	0	0	0	200	300	0	-27.2536	-95.4968	-476.741	-89259.7	-50903.9	16556.2	93.2254	1090.23	0	0	0	0	0	0	0	603	903	0
2407	3	0	0	0	0	0	0	200	300	0	-27.101	-95.3442	-472.774	-88069.5	-50232.5	16556.2	93.7495	1089.28	0	0	0	0	0	0	0	603	903	0
2407	4	0	0	0	0	0	0	200	300	0	-25.2699	-94.5813	-466.67	-87611.8	-49683.2	16052.6	93.5369	1090.74	0	0	0	0	0	0	0	603	903	0
2407	5	0	0	0	0	0	0	200	300	0	-25.8803	-95.3442	-460.872	-86696.2	-48767.6	16190	94.184	1091.11	0	0	0	0	0	0	0	603	903	0
2407	6	0	0	0	0	0	0	200	300	0	-25.5751	-94.1235	-454.769	-86055.4	-48645.6	15732.2	93.0323	1092.23	0	0	0	0	0	0	0	603	903	0
2407	7	0	0	0	0	0	0	200	300	0	-24.0492	-91.5295	-448.36	-84865.2	-47913.1	15778	93.1369	1092.28	0	0	0	0	0	0	0	603	903	0
2407	8	0	0	0	0	0	0	200	300	0	-23.4389	-93.0554	-444.393	-84407.4	-47058.7	15961.1	94.1057	1092.94	0	0	0	0	0	0	0	603	903	0
2407	9	0	0	0	0	0	0	200	300	0	-22.5233	-93.0554	-439.205	-83491.9	-46509.3	15869.5	94.1055	1093.1	0	0	0	0	0	0	0	603	903	0
2408	0	0	0	0	0	0	0	200	300	0	-22.8285	-91.6821	-434.322	-82393.3	-45471.7	15549.1	95.304	1092.71	0	0	0	0	0	0	0	603	903	0
2408	1	0	0	0	0	0	0	200	300	0	-22.9811	-91.377	-426.998	-81752.4	-45166.6	15411.8	94.2229	1094.46	0	0	0	0	0	0	0	603	903	0
2408	2	0	0	0	0	0	0	200	300	0	-24.0492	-92.7502	-422.115	-80928.5	-44495.2	15274.4	94.5899	1094.72	0	0	0	0	0	0	0	603	903	0
2408	3	0	0	0	0	0	0	200	300	0	-21.7604	-90.3088	-416.927	-79738.2	-44495.2	15137.1	93.2782	1094.25	0	0	0	0	0	0	0	603	903	0
2408	4	0	0	0	0	0	0	200	300	0	-21.4552	-89.8511	-412.044	-78639.6	-44006.9	14816.7	93.1986	1093.85	0	0	0	0	0	0	0	603	903	0
2408	5	0	0	0	0	0	0	200	300	0	-21.7604	-91.377	-404.415	-77998.8	-42664.1	14862.4	94.504	1095.87	0	0	0	0	0	0	0	603	903	0
2408	6	0	0	0	0	0	0	200	300	0	-20.9975	-88.783	-399.532	-77083.2	-42481	14542	93.673	1095.93	0	0	0	0	0	0	0	603	903	0
2408	7	0	0	0	0	0	0	200	300	0	-20.6923	-87.8674	-394.039	-76533.9	-41870.7	14313.1	93.7397	1097.23	0	0	0	0	0	0	0	603	903	0
2408	8	0	0	0	0	0	0	200	300	0	-20.8449	-85.8838	-383.357	-75435.3	-40772	14313.1	93.6449	1099.78	0	0	0	0	0	0	0	603	903	0
2408	9	0	0	0	0	0	0	200	300	0	-20.9975	-86.3416	-382.137	-73970.5	-40405.8	13992.7	94.2635	1096.57	0	0	0	0	0	0	0	603	903	0
2409	0	0	0	0	0	0	0	200	300	0	-18.8612	-87.2571	-375.118	-72963.4	-40161.7	13901.1	92.9358	1097.51	0	0	0	0	0	0	0	603	903	0
2409	1	0	0	0	0	0	0	200	300	0	-19.9294	-84.8157	-367.183	-72505.6	-38696.8	13626.5	94.6116	1100.46	0	0	0	0	0	0	0	603	903	0
2409	2	0	0	0	0	0	0	200	300	0	-19.7768	-84.3579	-364.131	-72139.4	-38208.6	13672.3	95.0693	1101.11	0	0	0	0	0	0	0	603	903	0
2409	3	0	0	0	0	0	0	200	300	0	-17.7931	-82.832	-356.807	-70308.3	-37903.4	13626.5	93.7707	1100.05	0	0	0	0	0	0	0	603	903	0
2409	4	0	0	0	0	0	0	200	300	0	-17.1828	-83.1372	-351.314	-69484.3	-36987.9	12985.6	94.7157	1100.78	0	0	0	0	0	0	0	603	903	0
2409	5	0	0	0	0	0	0	200	300	0	-14.5888	-82.2217	-346.431	-68385.7	-36316.5	13260.3	95.1698	1100.4	0	0	0	0	0	0	0	603	903	0
2409	6	0	0	0	0	0	0	200	300	0	-16.1147	-82.3743	-339.107	-67470.2	-36133.4	13214.5	93.4455	1101.96	0	0	0	0	0	0	0	603	903	0
2409	7	0	0	0	0	0	0	200	300	0	-15.9621	-80.238	-333.309	-66280	-34912.7	12619.4	95.2543	1101.85	0	0	0	0	0	0	0	603	903	0
2409	8	0	0	0	0	0	0	200	300	0	-16.1147	-79.6277	-327.205	-64357.4	-34790.6	12482.1	93.6735	1099.69	0	0	0	0	0	0	0	603	903	0
2409	9	0	0	0	0	0	0	200	300	0	-16.2672	-79.6277	-320.796	-63991.2	-34119.2	12390.5	93.6422	1102.48	0	0	0	0	0	0	0	603	903	0
2410	0	0	0	0	0	0	0	200	300	0	-14.4362	-77.4915	-314.693	-62709.4	-33692	11978.5	92.937	1102.27	0	0	0	0	0	0	0	603	903	0
2410	1	0	0	0	0	0	0	200	300	0	-14.2836	-77.1863	-310.42	-62251.7	-32715.4	11978.5	94.6095	1103.54	0	0	0	0	0	0	0	603	903	0
2410	2	0	0	0	0	0	0	200	300	0	-13.6732	-76.1182	-302.791	-61336.2	-31738.8	11566.5	95.1792	1105.57	0	0	0	0	0	0	0	603	903	0
2410	3	0	0	0	0	0	0	200	300	0	-13.3681	-74.7449	-296.382	-59779.7	-31677.8	11612.3	93.1186	1104.7	0	0	0	0	0	0	0	603	903	0
2410	4	0	0	0	0	0	0	200	300	0	-13.6732	-73.8293	-290.584	-58955.8	-30762.2	11383.4	94.1365	1105.89	0	0	0	0	0	0	0	603	903	0
2410	5	0	0	0	0	0	0	200	300	0	-13.9784	-72.6086	-285.091	-58131.8	-30212.9	11017.2	94.0235	1106.91	0	0	0	0	0	0	0	603	903	0
2410	6	0	0	0	0	0	0	200	300	0	-12.9103	-71.9983	-281.734	-56941.6	-29907.8	10925.7	93.844	1105.11	0	0	0	0	0	0	0	603	903	0
2410	7	0	0	0	0	0	0	200	300	0	-12.6051	-70.7776	-275.02	-55843	-28870.2	10696.8	95.0253	1106.05	0	0	0	0	0	0	0	603	903	0
2410	8	0	0	0	0	0	0	200	300	0	-13.0629	-69.7095	-266.17	-54469.7	-28565	10651	92.6814	1107.64	0	0	0	0	0	0	0	603	903	0
2410	9	0	0	0	0	0	0	200	300	0	-12.9103	-67.7258	-263.423	-53828.8	-28198.8	10330.6	92.9527	1107.34	0	0	0	0	0	0	0	603	903	0
2411	0	0	0	0	0	0	0	200	300	0	-11.6896	-65.7422	-257.015	-53004.8	-27649.5	9827.05	92.4207	1109.23	0	0	0	0	0	0	0	603	903	0
2411	1	0	0	0	0	0	0	200	300	0	-10.9267	-65.1318	-252.132	-52455.5	-26306.7	9781.27	95.663	1111.05	0	0	0	0	0	0	0	603	903	0
2411	2	0	0	0	0	0	0	200	300	0	-10.6215	-62.3853	-246.334	-51265.4	-26245.6	9598.17	93.4548	1111.11	0	0	0	0	0	0	0	603	903	0
2411	3	0	0	0	0	0	0	200	300	0	-10.3163	-61.7749	-238.399	-49434.3	-25818.4	9369.28	91.7009	1110.36	0	0	0	0	0	0	0	603	903	0
2411	4	0	0	0	0	0	0	200	300	0	-10.7741	-60.7068	-234.432	-48976.5	-24719.8	9003.07	94.5545	1111.92	0	0	0	0	0	0	0	603	903	0
2411	5	0	0	0	0	0	0	200	300	0	-11.0793	-59.3335	-228.939	-48152.6	-24597.7	8957.3	92.5576	1113.33	0	0	0	0	0	0	0	603	903	0
2411	6	0	0	0	0	0	0	200	300	0	-9.70596	-59.9439	-222.225	-46504.6	-23804.2	9094.62	92.8821	1112.27	0	0	0	0	0	0	0	603	903	0
2411	7	0	0	0	0	0	0	200	300	0	-9.85855	-58.418	-215.816	-45589.1	-22888.7	8682.64	93.9434	1114.24	0	0	0	0	0	0	0	603	903	0
2411	8	0	0	0	0	0	0	200	300	0	-10.7741	-57.8076	-210.933	-43941.1	-22400.4	8591.08	93.8032	1111.32	0	0	0	0	0	0	0	603	903	0
2411	9	0	0	0	0	0	0	200	300	0	-10.6215	-58.5706	-205.44	-43391.8	-22278.4	8453.76	91.5578	1114.21	0	0	0	0	0	0	0	603	903	0
2412	0	0	0	0	0	0	0	200	300	0	-9.70596	-55.9766	-200.252	-42750.9	-21301.8	7995.99	93.625	1116.49	0	0	0	0	0	0	0	603	903	0
2412	1	0	0	0	0	0	0	200	300	0	-8.79044	-55.5188	-195.369	-41652.3	-20691.4	7904.44	94.0905	1116.2	0	0	0	0	0	0	0	603	903	0
2412	2	0	0	0	0	0	0	200	300	0	-9.85855	-53.23	-189.571	-40645.2	-20203.2	7858.66	93.4268	1117.41	0	0	0	0	0	0	0	603	903	0
2412	3	0	0	0	0	0	0	200	300	0	-8.63785	-52.1619	-185.909	-38081.8	-19348.7	7629.78	95.9238	1107.84	0	0	0	0	0	0	0	603	903	0
2412	4	0	0	0	0	0	0	200	300	0	-7.87491	-50.0256	-177.364	-38722.6	-18982.5	7538.23	92.9744	1121.32	0	0	0	0	0	0	0	603	903	0
2412	5	0	0	0	0	0	0	200	300	0	-9.40079	-48.6523	-173.702	-37715.6	-18860.4	7172.01	91.4208	1120.13	0	0	0	0	0	0	0	603	903	0
2412	6	0	0	0	0	0	0	200	300	0	-8.94302	-47.4316	-170.345	-35518.3	-18555.2	6851.58	91.0726	1111.51	0	0	0	0	0	0	0	603	903	0
2412	7	0	0	0	0	0	0	200	300	0	-5.12833	-46.2109	-163.631	-34969	-17334.5	6805.8	94.0633	1116.71	0	0	0	0	0	0	0	603	903	0
2412	8	0	0	0	0	0	0	200	300	0	-9.40079	-44.2273	-159.053	-33961.9	-17212.4	6714.25	91.7819	1116.53	0	0	0	0	0	0	0	603	903	0
2412	9	0	0	0	0	0	0	200	300	0	-8.94302	-42.3962	-153.865	-33870.3	-16907.3	6576.92	90.1164	1123.13	0	0	0	0	0	0	0	603	903	0
2413	0	0	0	0	0	0	0	200	300	0	-8.48526	-42.854	-148.982	-32313.9	-16052.8	6439.59	92.2506	1119.9	0	0	0	0	0	0	0	603	903	0
2413	1	0	0	0	0	0	0	200	300	0	-7.72232	-40.7178	-145.015	-31489.9	-15930.7	6348.04	90.1445	1120.15	0	0	0	0	0	0	0	603	903	0
2413	2	0	0	0	0	0	0	200	300	0	-6.19644	-38.2764	-140.438	-30849.1	-15320.4	6073.38	90.9098	1122.66	0	0	0	0	0	0	0	603	903	0
2413	3	0	0	0	0	0	0	200	300	0	-7.87491	-38.429	-136.165	-29018	-14404.8	5844.5	94.2105	1116.11	0	0	0	0	0	0	0	603	903	0
2413	4	0	0	0	0	0	0	200	300	0	-7.26456	-37.0557	-132.808	-29109.6	-14526.9	5752.95	90.6174	1122.19	0	0	0	0	0	0	0	603	903	0
2413	5	0	0	0	0	0	0	200	300	0	-6.95938	-35.3772	-126.399	-28743.4	-13977.6	5524.06	89.4174	1130.4	0	0	0	0	0	0	0	603	903	0
2413	6	0	0	0	0	0	0	200	300	0	-7.56973	-33.6987	-123.653	-26820.8	-13733.4	5569.84	88.9355	1119.9	0	0	0	0	0	0	0	603	903	0
2413	7	0	0	0	0	0	0	200	300	0	-6.95938	-32.1729	-119.075	-26912.3	-13306.2	5112.08	88.2539	1129.01	0	0	0	0	0	0	0	603	903	0
2413	8	0	0	0	0	0	0	200	300	0	-8.18008	-30.9522	-115.413	-25905.2	-12756.9	5066.3	89.4677	1127.46	0	0	0	0	0	0	0	603	903	0
2413	9	0	0	0	0	0	0	200	300	0	-6.80679	-28.8159	-111.751	-24806.6	-12451.7	4516.98	88.5764	1124.98	0	0	0	0	0	0	0	603	903	0
2414	0	0	0	0	0	0	0	200	300	0	-6.6542	-28.5107	-106.563	-24074.2	-11780.3	4654.31	89.4521	1128.91	0	0	0	0	0	0	0	603	903	0
2414	1	0	0	0	0	0	0	200	300	0	-7.56973	-27.4426	-104.122	-23158.7	-11353.1	4425.43	90.9634	1125.42	0	0	0	0	0	0	0	603	903	0
2414	2	0	0	0	0	0	0	200	300	0	-6.80679	-26.9849	-98.9336	-22243.1	-10925.8	4288.1	89.5641	1127.83	0	0	0	0	0	0	0	603	903	0
2414	3	0	0	0	0	0	0	200	300	0	-6.04385	-26.3745	-94.9664	-21419.1	-10254.4	4333.88	92.0203	1128.54	0	0	0	0	0	0	0	603	903	0
2414	4	0	0	0	0	0	0	200	300	0	-7.26456	-26.0693	-92.8301	-20320.5	-10132.4	4059.22	90.8504	1121.9	0	0	0	0	0	0	0	603	903	0
2414	5	0	0	0	0	0	0	200	300	0	-6.95938	-26.0693	-88.2525	-19862.8	-9522.02	4105	92.1048	1128.07	0	0	0	0	0	0	0	603	903	0
2414	6	0	0	0	0	0	0	200	300	0	-6.04385	-24.0857	-86.1163	-19313.4	-9155.81	4059.22	93.6808	1127.27	0	0	0	0	0	0	0	603	903	0
2414	7	0	0	0	0	0	0	200	300	0	-6.19644	-22.7124	-83.0645	-18581	-9338.92	3830.34	87.5703	1126.69	0	0	0	0	0	0	0	603	903	0
2414	8	0	0	0	0	0	0	200	300	0	-7.26456	-22.5598	-74.8248	-17757	-8240.28	3555.68	89.8723	1140.32	0	0	0	0	0	0	0	603	903	0
2414	9	0	0	0	0	0	0	200	300	0	-5.12833	-20.5762	-76.0455	-17024.6	-8362.35	3418.35	90.0349	1126.87	0	0	0	0	0	0	0	603	903	0
2415	0	0	0	0	0	0	0	200	300	0	-5.12833	-19.5081	-72.9937	-16841.5	-8301.31	3326.8	86.2736	1133.73	0	0	0	0	0	0	0	603	903	0
2415	1	0	0	0	0	0	0	200	300	0	-6.50162	-17.3718	-68.4161	-16109.1	-7507.86	3189.47	90.2618	1138.46	0	0	0	0	0	0	0	603	903	0
2415	2	0	0	0	0	0	0	200	300	0	-4.97574	-16.7615	-67.1954	-14461.1	-7263.72	3235.24	91.9015	1118.21	0	0	0	0	0	0	0	603	903	0
2415	3	0	0	0	0	0	0	200	300	0	-4.2128	-16.7615	-62.6177	-14918.9	-7019.58	2960.59	87.8979	1141.25	0	0	0	0	0	0	0	603	903	0
2415	4	0	0	0	0	0	0	200	300	0	-5.4335	-15.9985	-60.1763	-14369.6	-6836.47	2869.03	86.3927	1141.79	0	0	0	0	0	0	0	603	903	0
2415	5	0	0	0	0	0	0	200	300	0	-5.4335	-14.9304	-57.1246	-13271	-5737.84	2869.03	99.5557	1135.32	0	0	0	0	0	0	0	603	903	0
2415	6	0	0	0	0	0	0	200	300	0	-4.82315	-14.6252	-53.7676	-13637.2	-6104.05	2914.81	86.4735	1156.63	0	0	0	0	0	0	0	603	903	0
2415	7	0	0	0	0	0	0	200	300	0	-5.73868	-13.5571	-51.6314	-11989.2	-5676.8	2502.82	90.0513	1135.21	0	0	0	0	0	0	0	603	903	0
2415	8	0	0	0	0	0	0	200	300	0	-5.58609	-12.3364	-50.4107	-11714.6	-5432.66	2685.93	92.2319	1135.38	0	0	0	0	0	0	0	603	903	0
2415	9	0	0	0	0	0	0	200	300	0	-4.06021	-11.8787	-45.8331	-10799	-5554.73	2457.05	78.8051	1138.62	0	0	0	0	0	0	0	603	903	0
2416	0	0	0	0	0	0	0	200	300	0	-5.28091	-10.5054	-46.1382	-10432.8	-5066.45	2228.16	90.1897	1129.12	0	0	0	0	0	0	0	603	903	0
2416	1	0	0	0	0	0	0	200	300	0	-5.4335	-9.28467	-43.6968	-10341.3	-4578.17	2273.94	95.2288	1139.66	0	0	0	0	0	0	0	603	903	0
2416	2	0	0	0	0	0	0	200	300	0	-4.97574	-7.75879	-38.2037	-9334.19	-4761.28	2136.61	75.3712	1147.33	0	0	0	0	0	0	0	603	903	0
2416	3	0	0	0	0	0	0	200	300	0	-4.67056	-7.6062	-40.3399	-9334.19	-4395.06	1999.28	91.0492	1134.39	0	0	0	0	0	0	0	603	903	0
2416	4	0	0	0	0	0	0	200	300	0	-3.29727	-7.91138	-36.6778	-8510.21	-3906.78	2090.84	93.4837	1135.03	0	0	0	0	0	0	0	603	903	0
2416	5	0	0	0	0	0	0	200	300	0	-5.28091	-7.14844	-33.9312	-7777.79	-3479.54	2045.06	97.4532	1132.22	0	0	0	0	0	0	0	603	903	0
2416	6	0	0	0	0	0	0	200	300	0	-4.67056	-6.84326	-32.4053	-8144	-3845.75	1999.28	81.3236	1154.32	0	0	0	0	0	0	0	603	903	0
2416	7	0	0	0	0	0	0	200	300	0	-5.73868	-7.45362	-29.3536	-6862.26	-2991.26	2045.06	98.0957	1136.78	0	0	0	0	0	0	0	603	903	0
2416	8	0	0	0	0	0	0	200	300	0	-4.82315	-6.69068	-27.5225	-6953.82	-2930.22	1816.18	93.5337	1155.66	0	0	0	0	0	0	0	603	903	0
2416	9	0	0	0	0	0	0	200	300	0	-4.2128	-5.92774	-27.2173	-5763.63	-3174.36	1816.18	83.3699	1114.76	0	0	0	0	0	0	0	603	903	0
2417	0	0	0	0	0	0	0	200	300	0	-5.12833	-5.31739	-24.4708	-5672.08	-2747.11	1724.63	87.7389	1134.79	0	0	0	0	0	0	0	603	903	0
2417	1	0	0	0	0	0	0	200	300	0	-5.4335	-2.87598	-22.9449	-5580.52	-2197.8	1587.3	104.214	1146.21	0	0	0	0	0	0	0	603	903	0
2417	2	0	0	0	0	0	0	200	300	0	-2.68692	-3.79151	-21.419	-4848.1	-2258.83	1404.19	94.5407	1129.35	0	0	0	0	0	0	0	603	903	0
2417	3	0	0	0	0	0	0	200	300	0	-4.2128	-3.94409	-18.9776	-4573.44	-2258.83	1358.41	80.9737	1143.99	0	0	0	0	0	0	0	603	903	0
2417	4	0	0	0	0	0	0	200	300	0	-4.51797	-2.5708	-19.2828	-4115.68	-1953.66	1495.74	98.6838	1116.44	0	0	0	0	0	0	0	603	903	0
2417	5	0	0	0	0	0	0	200	300	0	0	0	0	0	0	0	200	903	0	0	0	0	0	0	0	603	903	0
2417	6	0	0	0	0	0	0	200	300	0	0	0	0	0	0	0	200	903	0	0	0	0	0	0	0	603	903	0
2417	7	0	0	0	0	0	0	200	300	0	0	0	0	0	0	0	200	903	0	0	0	0	0	0	0	603	903	0
2417	8	0	0	0	0	0	0	200	300	0	0	0	0	0	0	0	200	903	0	0	0	0	0	0	0	603	903	0
2417	9	0	0	0	0	0	0	200	300	0	0	0	0	0	0	0	200	903	0	0	0	0	0	0	0	603	903	0
2418	0	0	0	0	0	0	0	200	300	0	0	0	0	0	0	0	200	903	0	0	0	0	0	0	0	603	903	0
2418	1	0	0	0	0	0	0	200	300	0	0	0	0	0	0	0	200	903	0	0	0	0	0	0	0	603	903	0
2418	2	0	0	0	0	0	0	200	300	0	0	0	0	0	0	0	200	903	0	0	0	0	0	0	0	603	903	0
2418	3	0	0	0	0	0	0	200	300	0	0	0	0	0	0	0	200	903	0	0	0	0	0	0	0	603	903	0
2418	4	0	0	0	0	0	0	200	300	0	0	0	0	0	0	0	200	903	0	0	0	0	0	0	0	603	903	0
2418	5	0	0	0	0	0	0	200	300	0	0	0	0	0	0	0	200	903	0	0	0	0	0	0	0	603	903	0
2418	6	0	0	0	0	0	0	200	300	0	0	0	0	0	0	0	200	903	0	0	0	0	0	0	0	603	903	0
2418	7	0	0	0	0	0	0	200	300	0	0	0	0	0	0	0	200	903	0	0	0	0	0	0	0	603	903	0
2418	8	0	0	0	0	0	0	200	300	0	0	0	0	0	0	0	200	903	0	0	0	0	0	0	0	603	903	0
2418	9	0	0	0	0	0	0	200	300	0	0	0	0	0	0	0	200	903	0	0	0	0	0	0	0	603	903	0
2419	0	0	0	0	0	0	0	200	300	0	0	0	0	0	0	0	200	903	0	0	0	0	0	0	0	603	903	0
2419	1	0	0	0	0	0	0	200	300	0	0	0	0	0	0	0	200	903	0	0	0	0	0	0	0	603	903	0
2419	2	0	0	0	0	0	0	200	300	0	0	0	0	0	0	0	200	903	0	0	0	0	0	0	0	603	903	0
2419	3	0	0	0	0	0	0	200	300	0	0	0	0	0	0	0	200	903	0	0	0	0	0	0	0	603	903	0
2419	4	0	0	0	0	0	0	200	300	0	0	0	0	0	0	0	200	903	0	0	0	0	0	0	0	603	903	0
2419	5	0	0	0	0	0	0	200	300	0	0	0	0	0	0	0	200	903	0	0	0	0	0	0	0	603	903	0
2419	6	0	0	0	0	0	0	200	300	0	0	0	0	0	0	0	200	903	0	0	0	0	0	0	0	603	903	0
2419	7	0	0	0	0	0	0	200	300	0	0	0	0	0	0	0	200	903	0	0	0	0	0	0	0	603	903	0
2419	8	0	0	0	0	0	0	200	300	0	0	0	0	0	0	0	200	903	0	0	0	0	0	0	0	603	903	0
2419	9	0	0	0	0	0	0	200	300	0	0	0	0	0	0	0	200	903	0	0	0	0	0	0	0	603	903	0
2420	0	0	0	0	0	0	0	200	300	0	0	0	0	0	0	0	200	903	0	0	0	0	0	0	0	603	903	0
2420	1	0	0	0	0	0	0	200	300	0	0	0	0	0	0	0	200	903	0	0	0	0	0	0	0	603	903	0
2420	2	0	0	0	0	0	0	200	300	0	0	0	0	0	0	0	200	903	0	0	0	0	0	0	0	603	903	0
2420	3	0	0	0	0	0	0	200	300	0	0	0	0	0	0	0	200	903	0	0	0	0	0	0	0	603	903	0
2420	4	0	0	0	0	0	0	200	300	0	0	0	0	0	0	0	200	903	0	0	0	0	0	0	0	603	903	0
2420	5	0	0	0	0	0	0	200	300	0	0	0	0	0	0	0	200	903	0	0	0	0	0	0	0	603	903	0
2420	6	0	0	0	0	0	0	200	300	0	0	0	0	0	0	0	200	903	0	0	0	0	0	0	0	603	903	0
2420	7	0	0	0	0	0	0	200	300	0	0	0	0	0	0	0	200	903	0	0	0	0	0	0	0	603	903	0
2420	8	0	0	0	0	0	0	200	300	0	0	0	0	0	0	0	200	903	0	0	0	0	0	0	0	603	903	0
2420	9	0	0	0	0	0	0	200	300	0	0	0	0	0	0	0	200	903	0	0	0	0	0	0	0	603	903	0
2421	0	0	0	0	0	0	0	200	300	0	0	0	0	0	0	0	200	903	0	0	0	0	0	0	0	603	903	0
2421	1	0	0	0	0	0	0	200	300	0	0	0	0	0	0	0	200	903	0	0	0	0	0	0	0	603	903	0
2421	2	0	0	0	0	0	0	200	300	0	0	0	0	0	0	0	200	903	0	0	0	0	0	0	0	603	903	0
2421	3	0	0	0	0	0	0	200	300	0	0	0	0	0	0	0	200	903	0	0	0	0	0	0	0	603	903	0
2421	4	0	0	0	0	0	0	200	300	0	0	0	0	0	0	0	200	903	0	0	0	0	0	0	0	603	903	0
2421	5	0	0	0	0	0	0	200	300	0	0	0	0	0	0	0	200	903	0	0	0	0	0	0	0	603	903	0
2421	6	0	0	0	0	0	0	200	300	0	0	0	0	0	0	0	200	903	0	0	0	0	0	0	0	603	903	0
2421	7	0	0	0	0	0	0	200	300	0	0	0	0	0	0	0	200	903	0	0	0	0	0	0	0	603	903	0
2421	8	0	0	0	0	0	0	200	300	0	0	0	0	0	0	0	200	903	0	0	0	0	0	0	0	603	903	0
2421	9	0	0	0	0	0	0	200	300	0	0	0	0	0	0	0	200	903	0	0	0	0	0	0	0	603	903	0
2422	0	0	0	0	0	0	0	200	300	0	0	0	0	0	0	0	200	903	0	0	0	0	0	0	0	603	903	0
2422	1	0	0	0	0	0	0	200	300	0	0	0	0	0	0	0	200	903	0	0	0	0	0	0	0	603	903	0
2422	2	0	0	0	0	0	0	200	300	0	0	0	0	0	0	0	200	903	0	0	0	0	0	0	0	603	903	0
2422	3	0	0	0	0	0	0	200	300	0	0	0	0	0	0	0	200	903	0	0	0	0	0	0	0	603	903	0
2422	4	0	0	0	0	0	0	200	300	0	0	0	0	0	0	0	200	903	0	0	0	0	0	0	0	603	903	0
2422	5	0	0	0	0	0	0	200	300	0	0	0	0	0	0	0	200	903	0	0	0	0	0	0	0	603	903	0
[truncated: 1,284 more rows]
