# Supplementary material for: The Effects of an Extemporaneous Speech Dual-task on Older Adult Gait Control
Source: Research Square preprint supplement (doi:10.21203/rs.3.rs-7674245/v1), 2025-11-18
Supplement: Supplementary file 87 [file DT8Walk3.xlsx]

## Sheet: Sheet1
Trajectories
		08:LFHD			08:RFHD			08:LBHD			08:RBHD			08:C7			08:T10			08:CLAV			08:STRN			08:RBAK			08:LSHO			08:LUPA			08:LELB			08:LFRM			08:LWRA			08:LWRB			08:LFIN
Frame	Sub Frame	X	Y	Z	X	Y	Z	X	Y	Z	X	Y	Z	X	Y	Z	X	Y	Z	X	Y	Z	X	Y	Z	X	Y	Z	X	Y	Z	X	Y	Z	X	Y	Z	X	Y	Z	X	Y	Z	X	Y	Z	X	Y	Z
		mm	mm	mm	mm	mm	mm	mm	mm	mm	mm	mm	mm	mm	mm	mm	mm	mm	mm	mm	mm	mm	mm	mm	mm	mm	mm	mm	mm	mm	mm	mm	mm	mm	mm	mm	mm	mm	mm	mm	mm	mm	mm	mm	mm	mm	mm	mm	mm
3026	0	288.501	2559.78	1641.2	202.53	2575.24	1642.11	311.726	2750.65	1675.9	198.413	2745.71	1672.97	242.956	2803.17	1524.22	244.249	2889.31	1262.15	257.639	2662.38	1430.48	242.9	2600.51	1229.83	158.55	2884.96	1320.5	436.384	2736.71	1472.74	505.269	2796.65	1284.45	502.906	2827.89	1135.07	537.784	2776.31	972.471	497.382	2743.3	877.647	540.019	2802.12	872.212	547.743	2756.48	812.994
3027	0	291.445	2549.32	1641.81	205.594	2564.97	1643.06	315.078	2740.14	1676.4	203.911	2739.09	1674.92	246.094	2792.63	1524.48	246.779	2878.82	1262.6	260.351	2651.71	1431.09	245.1	2589.6	1230.5	161.227	2874.4	1321.46	439.414	2726.11	1472.6	508.082	2784.52	1284.22	506.045	2815.11	1134.55	540.075	2762.41	972.019	500.163	2729.54	877.796	542.445	2787.56	871.314	549.89	2741.92	812.168
3028	0	294.498	2538.81	1642.73	208.585	2554.74	1643.9	318.186	2729.8	1677.12	204.993	2725.24	1674.44	248.793	2782.11	1525.3	249.062	2868.4	1263.48	263.239	2641.1	1432.07	247.343	2578.75	1231.59	163.813	2864.07	1322.38	442.435	2715.65	1472.65	510.852	2772.54	1283.7	508.42	2801.64	1133.89	542.31	2748.34	971.545	500.332	2714.64	876.583	544.282	2772.62	870.879	551.737	2726.79	811.918
3029	0	297.616	2528.46	1643.7	211.598	2544.48	1644.86	321.574	2719.43	1677.86	208.157	2714.98	1675.34	251.742	2771.38	1526.25	251.563	2857.94	1264.31	266.021	2630.53	1433.03	245.812	2563.67	1230.27	166.099	2853.56	1323.76	445.117	2705.05	1473.2	513.788	2760.43	1283.07	511.511	2788.55	1133.41	544.403	2733.75	971.546	503.609	2700.12	878.062	547.097	2757.44	870.896	553.149	2710.88	812.094
3030	0	300.402	2518.08	1644.77	214.332	2533.93	1646.13	324.612	2709.11	1678.71	213.125	2707.86	1677.63	254.901	2761.57	1527.61	253.788	2847.38	1265.54	268.79	2620.21	1434.32	248.408	2552.88	1230.89	168.248	2843.53	1325.23	447.944	2694.56	1473.62	516.218	2748.06	1283.53	514.598	2775.27	1133.41	546.638	2718.98	971.787	503.745	2684.36	878.134	549.22	2741.69	871.241	554.902	2694.76	812.905
3031	0	303.352	2507.84	1645.77	217.181	2523.74	1647.53	327.629	2698.89	1679.61	214.158	2694.38	1677.64	257.769	2751.64	1529.13	255.969	2837.15	1266.79	271.397	2609.96	1435.58	254.195	2547.26	1234.75	170.437	2833.75	1326.72	450.413	2683.97	1474.72	519.462	2736.08	1284.04	517.525	2761.58	1133.53	548.806	2704.04	972.24	505.219	2668.76	878.951	551.085	2725.41	871.182	555.77	2677.35	813.273
3032	0	306.166	2497.55	1646.67	220.236	2513.64	1648.58	330.468	2688.52	1680.47	217.057	2684.2	1678.94	260.923	2742.14	1530.43	258.324	2826.98	1267.78	273.589	2599.7	1436.62	256.275	2537.19	1235.63	172.7	2824.15	1328.07	453.273	2673.61	1474.92	522.35	2723.9	1284.14	520.52	2747.85	1133.5	550.743	2688.35	972.802	506.696	2652.85	879.826	553.484	2708.93	871.476	557.858	2660.61	814.47
3033	0	308.924	2487.42	1647.36	223.149	2503.62	1649.52	333.235	2678.44	1681.83	219.867	2674.06	1680.26	263.491	2732.08	1531.79	260.608	2817.2	1269.14	276.065	2589.95	1437.69	258.131	2527.36	1236.26	174.984	2814.49	1329.64	455.847	2663.04	1475.98	525.209	2711.49	1284.13	524.002	2734.5	1133.48	552.826	2672.79	973.363	508.177	2636.86	880.778	555.084	2692.1	871.797	558.768	2642.6	815.38
3034	0	311.422	2477.33	1648.64	225.554	2493.41	1650.71	335.808	2668.38	1683.03	222.547	2664	1681.52	266.34	2722.46	1532.73	263.179	2807.44	1270.25	277.945	2579.94	1439.23	260.043	2517.63	1237.99	177.716	2805.43	1330.83	457.863	2652.58	1477.52	527.405	2699.23	1284.91	527.182	2720.58	1133.91	554.745	2656.78	974.284	510.398	2620.42	883.507	557.345	2674.7	872.923	559.887	2624.66	817.113
3035	0	313.845	2467.41	1649.45	227.85	2483.49	1652.14	338.309	2658.43	1684.25	225.031	2654.06	1682.9	268.788	2712.46	1533.77	265.609	2797.87	1271.58	280.122	2570.28	1440.92	261.661	2508.14	1239.42	180.167	2796.29	1332.15	459.833	2642.24	1478.64	529.836	2686.63	1285.34	530.471	2706.71	1134.22	556.495	2640.51	975.202	510.237	2603.25	884.365	559.198	2657.2	873.848	561.12	2606.36	818.736
3036	0	316.476	2457.56	1650.44	230.458	2473.8	1653.31	340.967	2648.57	1685.35	227.349	2644.12	1684.53	270.999	2702.76	1535.36	268.034	2788.3	1272.96	282.539	2560.93	1442.21	263.664	2498.73	1241.48	182.714	2787.01	1333.69	462.32	2632.19	1479.6	532.553	2675.83	1283.26	533.474	2692.42	1134.85	558.159	2624.12	976.464	510.96	2586.48	885.834	560.896	2639.38	874.639	561.78	2587.42	820.368
3037	0	318.591	2447.84	1651.1	232.625	2463.94	1654.25	343.291	2638.69	1686.83	229.557	2634.55	1686.38	273.552	2693.73	1537.22	270.472	2779.23	1274.55	283.948	2551.44	1443.29	265.013	2489.67	1242.45	185.309	2777.93	1335.3	464.483	2622.23	1480.42	535.764	2662.01	1286.61	537.217	2678.75	1135.06	560.068	2607.48	978.036	511.72	2569.84	887.578	562.576	2621.23	875.646	563.511	2569.06	823.405
3038	0	320.528	2438.22	1652.21	234.662	2454.31	1655.36	345.371	2628.93	1688.24	231.667	2624.99	1688.06	275.437	2684.13	1538.44	272.756	2769.9	1276.04	285.489	2541.95	1444.81	266.037	2480.72	1243.59	187.919	2769.03	1336.6	466.517	2612.23	1482.06	538.336	2649.27	1287.94	540.086	2664.27	1136.01	561.583	2590.65	979.568	512.767	2552.14	890.271	564.705	2603.01	877.257	563.713	2549.42	825.423
3039	0	322.332	2428.65	1653.19	236.801	2444.96	1656.49	347.136	2619.39	1689.76	233.571	2615.42	1689.44	277.668	2675.37	1540.09	275.105	2760.85	1277.22	287.22	2532.93	1446.42	267.258	2471.85	1245.2	190.44	2760.39	1337.84	467.949	2602.44	1483.68	539.679	2636.74	1288.65	542.873	2649.95	1136.73	562.87	2573.75	981.18	513.452	2534.86	892.74	566.105	2584.37	878.779	564.476	2530.27	828.004
3040	0	324.381	2419.44	1654.26	238.604	2435.61	1657.58	348.687	2610.04	1691.26	235.424	2606.13	1690.86	279.862	2666.32	1541.3	277.481	2752.18	1278.62	288.835	2523.78	1447.72	268.333	2463.25	1246.45	193.016	2751.71	1339.13	469.928	2593.03	1484.77	542.977	2624.49	1289.72	545.782	2635.64	1137.24	564.615	2557.03	983.125	514.086	2517.33	895.137	567.79	2565.74	880.659	565.548	2511.32	830.774
3041	0	326.191	2410.21	1655.58	240.129	2426.2	1658.82	350.552	2600.84	1692.73	237.101	2596.89	1692.32	281.428	2657.16	1542.81	279.534	2743.2	1280.01	290.324	2514.81	1449.31	269.272	2454.81	1247.96	195.445	2742.91	1340.29	471.46	2583.61	1485.97	543.848	2611.62	1290.44	548.672	2621.3	1138.09	565.971	2540.12	985.13	514.563	2499.88	897.758	569.204	2547.11	882.544	565.494	2491.32	833.462
3042	0	327.609	2400.89	1656.96	241.733	2417.02	1660.36	351.911	2591.59	1694.44	238.492	2587.64	1693.83	283.491	2648.59	1544.33	281.839	2734.47	1281.48	291.918	2506.09	1451.1	270.238	2446.41	1249.72	197.782	2734.45	1341.69	472.676	2574.3	1487.81	545.536	2599.4	1292.05	546.894	2606.76	1135.57	567.138	2523.16	987.286	514.932	2482.39	900.64	570.674	2528.28	884.574	566.02	2471.95	836.819
3043	0	329.18	2391.83	1658.53	243.277	2408.02	1661.62	353.179	2582.32	1696.09	239.76	2578.43	1695.31	284.672	2639.44	1545.27	283.928	2725.66	1283.08	293.159	2497.22	1452.55	271.231	2438.08	1251.16	199.915	2726.01	1343.11	474.005	2564.84	1489.51	547.313	2586.94	1293.34	550.594	2592.44	1137.26	568.102	2506.05	989.694	515.083	2464.77	903.73	574.535	2509.74	889.339	565.867	2452.01	839.981
3044	0	330.402	2382.79	1659.83	244.578	2398.83	1662.8	354.443	2573.38	1697.61	241.126	2569.55	1696.98	286.966	2631.31	1547.48	285.98	2717.04	1284.77	294.585	2488.59	1454.22	272.277	2429.85	1252.54	201.985	2717.63	1344.76	475.895	2555.97	1491.11	549.194	2575	1294.64	556.079	2578.03	1140.86	568.988	2488.98	992.17	515.306	2446.75	906.855	572.606	2490.88	889.703	566.406	2432.79	843.967
3045	0	331.563	2373.98	1661.2	245.772	2389.89	1664.25	355.365	2564.55	1699.47	242.234	2560.79	1698.66	288.339	2622.32	1549.31	288.055	2708.22	1286.41	295.732	2480	1455.6	273.264	2421.58	1254.28	204.036	2709.08	1346.43	477.841	2547	1492.29	551.352	2563.55	1295.77	558.552	2563.69	1142.21	570.023	2472.17	994.951	515.652	2430.06	910.369	573.377	2472.16	892.405	567.284	2414.06	848.477
3046	0	332.723	2365.06	1662.77	246.896	2381.21	1665.49	356.757	2555.4	1700.8	243.193	2551.82	1699.98	289.85	2613.81	1550.86	290.087	2699.66	1288.1	297.175	2471.61	1457.17	274.475	2413.38	1255.94	206.066	2700.81	1347.95	479.303	2537.88	1494.22	553.803	2552.61	1297.2	557.27	2549.1	1141.24	570.665	2455.24	997.967	515.572	2412.43	914.477	574.63	2453.58	895.458	566.755	2394.45	852.655
3047	0	333.597	2356.27	1664.26	247.818	2372.31	1666.85	357.651	2546.76	1702.49	244.152	2543.09	1701.4	291.791	2605.33	1552.31	292.024	2690.71	1289.65	298.725	2463.11	1459.02	275.746	2405.26	1257.54	208.012	2692.5	1349.61	480.702	2528.9	1495.88	553.706	2540.37	1299.01	559.479	2534.8	1143.01	571.083	2438.42	1001.4	515.313	2394.24	918.087	574.522	2435.21	898.336	566.547	2375.31	857.083
3048	0	334.621	2347.57	1665.76	248.733	2363.54	1668.04	358.285	2538.12	1704.17	245.019	2534.46	1702.66	293.193	2596.88	1553.72	293.819	2682.15	1289.77	299.821	2454.45	1460.62	276.849	2397.15	1259.08	210.057	2684.27	1350.73	481.911	2519.74	1497.76	555.472	2529.26	1300.28	564.715	2520.69	1147.09	571.823	2422.01	1004.34	515.265	2377.97	921.922	576.281	2416.56	903.233	566.299	2356.42	861.6
3049	0	335.387	2338.88	1666.99	249.698	2355.12	1669.03	359.068	2529.28	1705.52	245.872	2525.87	1703.6	294.681	2588.21	1555	295.721	2673.84	1291.03	301.045	2446.06	1461.96	277.912	2389.05	1260.52	212.045	2676.21	1352.02	483.121	2510.74	1499.42	556.759	2518.09	1301.56	566.578	2506.74	1148.77	572.19	2405.61	1007.48	515.186	2361.51	926.071	576.895	2398.2	906.575	565.851	2337.53	866.01
3050	0	336.3	2330.35	1668.28	250.489	2346.35	1670.1	359.693	2520.8	1706.9	246.583	2517.29	1704.63	296.442	2580.01	1556.33	297.367	2665.28	1292.04	302.059	2437.63	1463.17	279.15	2381.03	1261.89	213.775	2667.9	1353.07	484.023	2501.33	1501.11	558.057	2507.05	1302.94	564.857	2492.91	1147.7	572.545	2389.37	1010.83	515.19	2343.58	929.908	576.898	2380.28	909.752	564.884	2318.67	870.778
3051	0	337.024	2321.67	1669.48	251.123	2337.87	1670.8	360.183	2512.13	1708.34	247.274	2508.78	1705.47	297.7	2571.52	1557.43	299.169	2656.72	1293.45	303.254	2429.26	1464.74	280.177	2372.88	1263.28	215.55	2659.69	1354.39	485.019	2492.19	1502.97	559	2495.8	1304.7	569.839	2479.29	1151.97	573.051	2373.46	1014.13	514.715	2327.97	934.07	574.982	2362.9	912.012	563.918	2299.82	875.285
3052	0	337.569	2313.24	1670.59	251.798	2329.38	1671.93	360.994	2503.65	1709.44	247.869	2500.12	1706.5	299.427	2563.33	1558.28	301.067	2648.44	1294.47	303.991	2420.91	1465.9	281.123	2364.71	1264.48	216.739	2650.62	1355.5	486.426	2483.23	1504.33	559.922	2484.55	1306.18	571.336	2465.75	1153.75	573.266	2357.53	1017.65	514.737	2311.58	939.873	577.008	2344.78	917.127	563.366	2281.78	880.336
3053	0	338.362	2304.67	1671.68	252.492	2320.82	1672.57	361.654	2495.1	1710.55	248.458	2491.74	1707.4	300.776	2554.77	1559.54	302.93	2640.17	1295.71	305.384	2412.42	1467.38	282.193	2356.45	1266.15	219.598	2644.13	1356.8	488.066	2474.44	1505.26	561.02	2473.54	1307.82	569.325	2452.41	1152.83	573.539	2341.98	1021.23	514.626	2295.95	942.674	576.622	2327.59	920.533	562.721	2263.96	885.235
3054	0	339.024	2296.16	1672.49	252.94	2312.3	1673.14	362.1	2486.52	1711.48	249.023	2483.2	1707.94	302.042	2546.86	1560.68	304.778	2632.04	1296.28	306.389	2404.03	1468.33	283.055	2348.08	1266.98	221.329	2636.01	1357.6	489.249	2465.31	1506.51	562.314	2462.66	1308.61	570.657	2439.31	1154.2	573.729	2326.69	1024.41	514.491	2279.96	947.391	575.092	2310.64	922.915	561.872	2246.33	889.936
3055	0	339.46	2287.58	1673.1	253.54	2303.87	1673.54	362.703	2478.03	1712.23	249.505	2474.83	1708.4	303.267	2538.14	1561.27	306.493	2623.88	1297.24	306.845	2395.35	1469.11	283.635	2339.69	1267.5	222.998	2627.78	1358.22	490.233	2456.21	1507.58	563.35	2451.59	1309.78	571.872	2426.31	1155.57	573.879	2311.6	1027.67	513.886	2263.66	951.721	576.021	2293.42	927.692	561.017	2229.04	894.859
3056	0	339.777	2279.04	1673.74	254.098	2295.48	1673.85	363.068	2469.41	1712.9	250.051	2466.34	1708.61	304.803	2530.07	1561.72	308.038	2615.48	1297.88	307.769	2386.95	1470.09	284.351	2331.34	1268.19	224.598	2619.61	1358.75	491.034	2447.05	1508.74	564.115	2440.34	1311.49	572.922	2413.62	1156.88	573.846	2296.57	1030.74	514.7	2248.61	955.886	575.295	2277.12	931.248	560.198	2212.03	899.729
3057	0	340.123	2270.53	1674.03	254.355	2286.94	1674.13	363.437	2460.89	1713.31	250.53	2457.83	1708.65	305.907	2521.6	1562.05	309.46	2607.13	1298.09	308.232	2377.76	1470.59	285.13	2323	1268.72	226.001	2611.32	1359.16	491.518	2437.7	1509.83	564.761	2429.18	1312.49	574.093	2400.96	1158.07	573.57	2281.82	1033.71	512.084	2231.73	960.901	574.357	2260.83	934.324	558.967	2195.11	904.023
3058	0	340.714	2261.84	1674.37	254.821	2278.37	1674.3	363.864	2452.24	1713.5	251.071	2449.42	1708.65	306.985	2513.34	1562.48	310.826	2598.78	1298.31	309.101	2369.29	1471	285.772	2314.6	1269.12	227.283	2603.04	1359.07	492.413	2428.71	1510.23	565.642	2418.38	1313.19	574.829	2388.57	1158.93	573.657	2267.71	1036.41	511.739	2216.45	964.869	574.023	2244.9	937.785	558.021	2178.81	908.553
3059	0	340.925	2253.19	1674.36	255.102	2269.73	1674.12	364.303	2443.65	1713.57	251.5	2440.81	1708.37	308.199	2504.63	1562.48	312.266	2590.63	1298.32	309.472	2360.3	1471.41	286.416	2306.26	1269.36	228.736	2594.89	1359.01	492.637	2419.18	1511.05	566.398	2407.34	1314	575.477	2376.5	1159.68	573.363	2253.4	1039.13	511.215	2201.31	968.518	573.517	2229.39	941.32	556.799	2162.57	912.906
3060	0	341.157	2244.58	1674.39	255.299	2261.19	1673.74	364.712	2434.91	1713.52	251.978	2432.29	1708.14	309.09	2496.13	1562.48	313.513	2582.31	1298.68	309.752	2351.27	1471.34	286.914	2298.01	1269.23	229.951	2586.64	1359.24	493.523	2410.12	1511.31	567.249	2396.67	1314.74	576.395	2364.54	1160.31	573.229	2239.6	1041.88	510.457	2186.38	972.586	572.558	2213.72	944.27	556.033	2147.01	917.372
3061	0	341.284	2235.74	1674.1	255.653	2252.58	1673.33	364.888	2426.04	1713.38	252.196	2423.59	1707.81	309.643	2487.45	1562.53	314.816	2574.16	1298.68	310.347	2342.83	1471.21	287.384	2289.52	1268.94	231.213	2578.57	1359.39	493.653	2400.49	1511.82	568.115	2386.22	1315.11	577.253	2352.74	1160.94	572.755	2225.86	1044.23	509.453	2171.87	976.167	571.649	2198.68	947.201	554.617	2131.25	921.422
3062	0	341.361	2226.92	1673.56	255.699	2243.9	1672.76	365.445	2417.29	1712.94	252.622	2414.98	1707.46	310.95	2478.92	1562.29	316.026	2565.68	1298.56	310.723	2333.86	1470.84	287.765	2280.98	1268.55	232.544	2570.52	1359.41	494.532	2391.51	1511.64	568.856	2375.73	1315.43	578.143	2341.23	1161.14	572.342	2212.45	1046.56	508.518	2157.31	979.772	570.595	2183.8	949.945	553.647	2116	925.185
3063	0	341.564	2218.22	1673	255.74	2235.21	1672.1	365.923	2408.33	1712.46	252.991	2406.35	1706.96	311.438	2469.93	1561.98	316.898	2557.11	1298.89	310.912	2324.86	1470.61	288.134	2272.36	1268.1	233.749	2562.39	1359.38	495.941	2382.7	1511.14	569.422	2365.56	1315.46	578.72	2329.88	1161.33	570.823	2198.48	1048.79	507.982	2143.6	983.207	569.36	2169.2	952.437	552.052	2100.91	929.182
3064	0	341.545	2209.4	1672.27	255.771	2226.54	1671.46	366.215	2399.39	1711.83	253.252	2397.5	1706.05	312.111	2461.28	1561.54	317.952	2548.71	1297.93	311.339	2315.75	1470.43	288.614	2263.65	1267.78	234.593	2553.92	1358.98	494.681	2372.33	1511.84	569.841	2355.25	1315.48	581.874	2318.96	1163.56	570.338	2185.74	1050.66	506.517	2129.89	986.336	567.867	2155.09	954.89	550.898	2086.21	933.354
3065	0	341.454	2200.32	1671.37	255.753	2217.74	1670.57	366.174	2390.42	1711.1	253.421	2388.74	1705.21	312.529	2452.57	1560.83	318.784	2540.32	1297.32	311.94	2308.22	1469.58	288.936	2254.92	1267.1	235.279	2545.38	1358.19	495.713	2363.45	1511	570.258	2345.19	1315.32	579.354	2307.77	1161.02	569.551	2173.1	1052.25	505.322	2116.33	989.431	566.674	2140.97	957.518	549.549	2071.93	936.988
3066	0	341.338	2191.39	1670.23	255.761	2208.98	1669.33	366.28	2381.36	1710.25	253.681	2380	1704.18	312.631	2443.53	1560.23	319.683	2532.01	1296.62	312.042	2299.34	1468.41	288.995	2246.04	1266.01	236.06	2536.74	1357.22	496.406	2354.44	1510.03	570.72	2335.45	1314.71	579.719	2297.18	1160.67	569.059	2160.94	1053.65	503.917	2103.25	992.397	565.427	2127.43	959.461	548.138	2058.15	940.32
3067	0	340.994	2182.38	1668.99	255.436	2199.98	1667.97	366.432	2372.26	1709.12	253.834	2371.11	1703.09	313.245	2434.73	1559.05	320.394	2523.3	1295.72	312.494	2290.7	1467.32	289.126	2237.02	1265.15	236.79	2528.2	1356.26	496.373	2344.97	1509.59	571.092	2325.59	1314.19	581.418	2286.31	1161.63	568.161	2148.92	1054.91	502.773	2090.52	994.945	563.982	2114.21	961.595	546.456	2044.61	943.548
3068	0	340.616	2173.23	1667.5	255.279	2191.08	1666.52	366.487	2363.04	1708	253.986	2362.3	1701.77	313.851	2425.82	1557.87	320.907	2514.46	1294.6	312.348	2281.27	1466.7	289.172	2227.9	1264.14	237.499	2519.87	1355.16	496.105	2335.47	1508.95	571.068	2315.79	1313.59	581.281	2275.81	1160.96	567.458	2137.24	1056.32	501.442	2078.25	997.372	562.281	2101.36	963.256	544.735	2031.4	946.387
3069	0	340.459	2164.12	1666.24	255.074	2182.16	1665.3	366.468	2353.78	1706.84	253.944	2353.04	1700.42	314.09	2416.86	1556.75	321.54	2505.83	1293.52	312.131	2271.85	1465.88	289.324	2218.67	1263.44	237.903	2511.08	1354.06	496.128	2326.09	1508.13	571.138	2306.28	1312.91	581.474	2265.52	1160.56	565.573	2125.76	1056.69	499.871	2065.94	999.949	560.947	2088.76	964.766	542.754	2018.58	949.117
3070	0	340.078	2154.99	1664.67	254.582	2173.15	1663.5	366.514	2344.55	1705.55	253.86	2344.03	1699.15	314.245	2407.78	1555.35	322.118	2497.05	1292.38	311.998	2262.58	1464.73	289.356	2209.34	1262.39	238.18	2501.97	1352.87	496.011	2316.79	1507.3	571.11	2296.5	1312.02	581.557	2255.54	1159.95	565.286	2114.36	1058.23	498.618	2054.16	1001.73	559.415	2076.42	966.284	541.21	2006.19	951.634
3071	0	339.579	2145.72	1662.8	254.104	2164.07	1661.75	366.41	2335.09	1704.04	253.714	2335	1697.68	314.217	2398.74	1554.22	322.671	2487.86	1291.1	311.886	2253.32	1463.64	289.378	2199.95	1261.21	238.503	2493.11	1351.28	495.883	2307.3	1506.33	571.031	2287.27	1311.14	581.3	2245.5	1158.86	564.235	2103.31	1058.84	497.207	2042.83	1003.53	557.767	2064.52	967.193	539.52	1994.07	953.808
3072	0	338.983	2136.48	1660.95	253.589	2154.99	1659.83	366.254	2325.68	1702.54	253.499	2325.74	1696.06	313.662	2389.46	1552.8	323.181	2479.16	1290.05	311.948	2244.19	1462.24	289.085	2190.46	1259.89	238.682	2484.3	1349.91	496	2298.22	1505.08	570.961	2277.82	1310.17	582.415	2236.42	1158.64	563.531	2092.56	1059.37	496.071	2031.6	1005.08	556.282	2052.77	968.389	537.696	1982.22	955.608
3073	0	338.22	2127.09	1659.07	252.996	2145.79	1657.84	365.806	2316.2	1701.12	253.255	2316.63	1694.47	313.962	2380.51	1550.73	322.855	2469.45	1287.98	311.835	2234.87	1460.91	288.878	2180.91	1258.61	238.566	2474.83	1348.3	495.321	2288.36	1504.24	570.863	2268.85	1308.97	581.334	2226.1	1156.82	562.686	2081.9	1059.74	494.788	2020.39	1006.3	554.869	2041.2	969.307	535.907	1970.55	957.014
3074	0	337.593	2117.66	1657.13	252.446	2136.63	1655.93	365.544	2306.8	1699.38	252.905	2307.23	1692.77	313.422	2371.06	1549.32	322.314	2459.84	1286.48	311.507	2225.17	1459.6	288.74	2171.29	1257.35	237.899	2465.26	1346.69	494.981	2278.81	1503.08	570.574	2259.61	1307.56	581.291	2216.53	1155.46	561.695	2071.35	1059.56	493.61	2009.71	1007.2	553.52	2030.01	969.952	534.167	1959.16	958.037
3075	0	337.164	2108.36	1655.4	251.697	2127.24	1654.12	364.901	2297.27	1697.61	252.309	2297.83	1690.84	313.313	2361.74	1547.21	323.305	2449.7	1284.34	311.082	2215.35	1458.37	288.627	2161.66	1256.07	238.68	2455.92	1344.35	494.499	2269.15	1501.74	570.143	2250.45	1305.93	581.496	2206.93	1154.16	560.92	2060.94	1059.24	492.369	1998.96	1007.7	552.243	2018.91	969.722	532.513	1948.09	958.605
3076	0	336.458	2098.8	1653.76	250.918	2117.81	1652.38	364.242	2287.73	1695.61	251.717	2288.45	1688.78	312.74	2352.25	1545.58	322.717	2439.85	1282.6	310.565	2205.56	1457.06	288.124	2151.86	1254.51	237.991	2446.29	1342.53	493.85	2259.3	1500.26	569.903	2241.72	1304.25	581.354	2197.1	1152.72	560.339	2050.65	1058.83	491.398	1988.35	1008.22	550.801	2007.93	969.515	531.112	1937.25	958.618
3077	0	335.3	2089.27	1651.79	250.055	2108.37	1650.27	363.558	2278.22	1693.77	251.135	2279.16	1686.76	312.568	2342.67	1543.25	322.607	2430.44	1280.53	310.189	2195.85	1454.91	287.574	2142.11	1252.49	237.888	2437.03	1340.62	493.451	2249.45	1498.52	569.505	2232.32	1302.43	581.643	2187.5	1151.07	559.699	2040.3	1058.1	490.434	1978.08	1008.08	549.628	1997.17	969.107	529.353	1926.27	958.892
3078	0	334.375	2079.63	1650.03	249.315	2098.81	1648.5	362.737	2268.64	1691.63	250.379	2269.65	1684.55	311.632	2332.73	1541.47	322.374	2420.44	1278.74	309.303	2185.53	1452.97	287.111	2132.01	1250.86	237.451	2427.17	1338.62	492.746	2239.28	1496.92	569.143	2223.24	1300.71	582.325	2178.17	1149.86	559.169	2030.11	1057.06	489.375	1967.84	1007.41	548.647	1986.57	968.268	527.976	1915.73	958.394
3079	0	333.454	2069.89	1648.33	248.215	2089.13	1646.6	361.984	2258.98	1689.55	249.555	2260.03	1682.45	311.255	2322.8	1539.27	322.056	2409.9	1276.48	308.652	2175.26	1451.49	286.156	2121.52	1249.02	237.1	2417.13	1336.4	492.215	2229.23	1495.14	568.528	2213.65	1298.74	581.851	2167.91	1147.79	558.548	2019.95	1055.83	488.51	1957.92	1006.65	547.82	1976.12	966.901	526.65	1905.27	957.525
3080	0	332.468	2060.1	1646.82	247.327	2079.32	1645.17	360.937	2249.3	1687.52	248.606	2250.41	1680.2	310.296	2312.58	1537.24	321.677	2399.34	1274.47	308.028	2165	1449.94	285.127	2110.71	1247.32	236.531	2406.61	1334.22	491.202	2218.51	1493.45	568.248	2204.58	1296.89	581.955	2157.87	1146.29	557.487	2010.16	1053.72	487.604	1948.05	1005.54	547.203	1965.77	965.931	525.382	1895.08	956.488
3081	0	331.452	2050.06	1645.35	246.182	2069.37	1643.27	359.97	2239.4	1685.43	247.546	2240.51	1678.12	308.971	2301.97	1535.48	321.773	2389.33	1272.97	307.066	2154.57	1447.99	284.489	2100.3	1245.3	236.234	2396.62	1332.24	490.774	2208.2	1491.63	567.425	2194.5	1294.89	582.111	2148.13	1144.41	557.445	1999.95	1052.81	486.804	1938.11	1003.94	546.542	1955.51	964.739	524.356	1885.09	954.858
3082	0	330.223	2040.06	1643.72	245.148	2059.34	1641.75	358.737	2229.34	1683.3	246.313	2230.67	1675.92	308.726	2291.8	1533.1	321.016	2378.22	1270.38	306.072	2143.75	1446.12	283.653	2089.58	1243.16	235.657	2386.02	1329.98	489.424	2197.01	1490.05	566.971	2184.92	1293.11	582.04	2138.03	1142.87	557.179	1990.06	1051.18	486.201	1928.73	1002.05	545.953	1945.79	962.481	523.359	1875.31	952.948
3083	0	328.984	2029.72	1642.2	243.751	2049.06	1640.08	357.547	2219.26	1681.32	245.212	2220.53	1673.74	307.772	2281.1	1531.1	320.661	2367.37	1268.38	304.876	2132.85	1444.19	282.248	2078.25	1241.17	235.18	2375.43	1327.88	488.655	2186.2	1488.19	565.084	2173.6	1290.98	581.976	2128.13	1141.33	556.089	1980.3	1048.55	485.587	1919.26	999.75	545.852	1935.93	960.519	522.675	1865.69	950.962
3084	0	327.47	2019.34	1640.69	242.188	2038.66	1638.29	356.162	2209.01	1679.17	243.859	2210.27	1671.52	306.625	2270.2	1529.08	320.576	2356.8	1266.56	303.765	2122.08	1442.07	281.284	2067.45	1238.94	234.853	2364.94	1325.79	487.498	2175.02	1486.58	565.53	2164.17	1289.81	581.849	2117.98	1139.67	556.246	1970.35	1047.04	485.253	1910.03	996.948	545.611	1926.54	958.276	522.18	1856.33	948.13
3085	0	326.048	2008.86	1639.14	240.943	2028.16	1636.96	354.77	2198.61	1677.04	242.453	2199.86	1669.46	305.47	2259.26	1527.12	320.204	2345.41	1264.45	302.253	2110.68	1440.16	280.254	2056.53	1236.73	234.325	2353.97	1323.49	486.424	2163.9	1484.7	563.998	2153.06	1287.79	581.698	2107.8	1138.06	555.837	1960.69	1044.47	484.979	1900.92	993.993	545.358	1917.25	955.57	521.747	1847.29	945.069
3086	0	324.643	1998.19	1637.73	239.091	2017.36	1635.12	353.092	2188.07	1675.11	240.839	2189.25	1667.3	304.419	2248.24	1525.02	319.619	2333.9	1262.27	301.326	2099.73	1438.66	279.333	2045.38	1235	233.582	2342.61	1321.13	485.276	2152.74	1482.95	563.935	2142.93	1286.89	581.419	2097.5	1136.47	555.906	1951.11	1042.22	484.539	1891.94	990.758	545.691	1908.26	952.785	521.602	1838.53	941.502
3087	0	323.188	1987.33	1636.53	237.492	2006.5	1633.85	351.308	2177.23	1673.43	239.224	2178.57	1665.3	302.821	2236.85	1523.19	319.072	2322.39	1260.5	299.381	2087.97	1436.73	278.323	2034.25	1233.06	232.865	2331.47	1319.19	483.525	2140.94	1481.64	561.979	2130.79	1285.15	581.044	2087.27	1135.07	555.138	1941.73	1039.08	484.445	1882.87	987.064	545.823	1899.54	950.165	521.634	1829.85	937.906
3088	0	321.29	1976.26	1635.44	235.66	1995.42	1632.56	349.604	2166.3	1671.98	237.472	2167.64	1663.75	301.566	2225.76	1521.66	318.326	2310.91	1258.74	297.632	2076.29	1434.64	277.41	2022.96	1230.89	232.072	2320.09	1317.39	481.946	2129.13	1480.4	561.23	2119.13	1284.5	580.471	2076.81	1133.77	555.26	1932.19	1036.46	484.276	1874.45	983.291	546.504	1890.91	946.648	521.746	1821.36	934.313
3089	0	319.261	1964.94	1634.58	233.79	1984.21	1631.19	347.651	2154.88	1670.79	235.573	2156.33	1662.4	300.03	2214.19	1520.06	317.625	2299.64	1257.43	296.207	2064.8	1432.97	276.35	2011.26	1229	231.214	2308.74	1316	480.724	2117.61	1479.25	560.79	2107.83	1283.94	580.012	2066.45	1133.01	555.161	1923.01	1033.61	484.695	1866.34	978.71	546.745	1882.96	942.377	522.239	1813.93	928.709
3090	0	317.357	1953.62	1633.66	231.803	1972.93	1630.18	346.039	2143.73	1669.8	233.703	2145.1	1661.04	298.512	2202.55	1518.92	316.845	2287.67	1256.2	294.614	2052.86	1431.88	275.212	1999.41	1227.75	230.25	2296.99	1314.55	479.219	2105.64	1478.25	559.885	2095.8	1283.47	579.308	2056.29	1132.03	555.033	1914.07	1030.41	485.121	1858	974.572	547.439	1875.13	938.718	522.832	1806.27	923.605
3091	0	315.346	1942.18	1633.11	229.697	1961.46	1629.43	343.95	2132.03	1668.96	231.946	2133.68	1659.93	297.39	2190.71	1517.96	316.751	2275.75	1255.21	293.13	2041.08	1430.87	274.178	1987.58	1226.66	229.964	2285.37	1313.28	477.689	2093.59	1477.73	558.811	2083.56	1282.72	578.364	2046	1131.05	555.227	1905.23	1027.59	485.639	1850.04	970.275	548.407	1867.5	935.307	523.851	1799.05	918.943
3092	0	313.24	1930.47	1632.75	227.64	1949.99	1628.62	342.175	2120.54	1668.39	230.028	2122.31	1659.13	295.748	2178.79	1517.37	315.307	2263.91	1254.57	291.747	2029.2	1430.16	273.215	1975.59	1225.96	228.368	2273.36	1312.48	476.402	2081.56	1477.12	557.717	2071.11	1282.7	577.304	2036.09	1130.56	554.952	1896.75	1024.25	486.466	1842.48	966.094	549.442	1860.35	931.794	525.055	1792.21	914.449
3093	0	311.277	1918.76	1632.46	225.486	1938.44	1628.18	340.199	2108.69	1668.26	228.221	2110.72	1658.57	294.412	2166.87	1516.92	314.146	2251.92	1254.02	290.189	2017.2	1429.59	271.612	1963.3	1225.79	227.136	2261.46	1311.87	474.654	2069.1	1477.14	556.687	2058.31	1283.13	576.022	2026.12	1130.02	555.387	1888.6	1021.65	487.239	1835.09	961.523	550.585	1853.59	928.161	526.432	1785.62	909.791
3094	0	308.778	1906.9	1632.36	223.213	1926.8	1627.76	338.185	2096.75	1668.49	226.326	2099.07	1658.2	293.267	2155.15	1516.69	313.969	2239.97	1253.71	288.725	2005.23	1429.26	270.423	1951.17	1225.37	226.766	2249.85	1311.28	473.465	2057	1476.94	555.665	2046.11	1283.3	574.487	2016.28	1129.82	555.979	1880.53	1018.79	488.356	1827.93	957.099	551.957	1847.35	924.778	528.143	1779.63	904.835
3095	0	306.567	1895.19	1632.31	221.154	1915.09	1627.6	336.31	2084.79	1668.74	224.591	2087.57	1658.24	291.734	2143.11	1516.85	313.416	2228.19	1253.97	287.177	1993.36	1429.25	269.378	1939.12	1225.36	225.973	2238.16	1311.21	471.344	2044.04	1477	554.536	2034.23	1283.74	573.074	2006.79	1129.91	556.05	1873.14	1015.98	489.621	1821.24	952.531	552.945	1841.67	921.524	530.156	1774.22	900.054
3096	0	304.228	1883.22	1632.66	218.911	1903.47	1627.72	334.657	2072.89	1669.48	222.774	2075.91	1658.58	290.767	2131.56	1517.38	312.899	2216.44	1254.47	285.76	1981.64	1429.66	268.098	1926.94	1226.04	225.424	2226.59	1311.73	470.076	2032	1477.74	553.446	2022.71	1284.95	571.337	1997.18	1130.13	556.692	1865.82	1013.63	491.029	1815.06	948.204	554.849	1836.18	918.84	532.652	1769.43	894.853
3097	0	302.103	1871.26	1633.28	216.638	1891.78	1627.94	332.582	2060.57	1670.7	221.006	2064.07	1659.39	289.267	2119.71	1518.26	312.58	2204.81	1255.55	284.394	1970.03	1430.64	266.739	1914.79	1227.1	224.825	2215.08	1312.45	468.533	2019.78	1478.73	552.035	2010.76	1285.91	569.567	1987.79	1131.09	557.085	1858.94	1011.65	492.273	1808.93	944.283	556.313	1831.51	915.643	534.979	1765.12	890.126
3098	0	300.188	1859.39	1634.16	214.54	1880.08	1628.49	330.844	2048.56	1671.99	219.199	2052.25	1660.45	288.145	2108.13	1519.35	311.764	2193.01	1256.57	282.999	1958.52	1431.71	265.353	1902.77	1228.37	223.976	2203.28	1313.48	467.166	2007.84	1479.81	550.969	1999.05	1287.37	567.756	1978.51	1132.15	556.934	1852.61	1009.12	493.234	1802.81	940.693	557.971	1827.21	913.284	537.409	1761.17	885.69
3099	0	297.382	1847.34	1634.96	212.801	1868.62	1629.52	329.209	2036.76	1673.64	217.297	2040.18	1662.02	287.068	2096.68	1520.61	311.279	2181.44	1257.7	281.65	1946.99	1432.68	263.977	1890.82	1229.51	223.362	2191.8	1314.42	466.098	1996.43	1481.3	549.813	1987.44	1289.1	565.891	1969.42	1133.75	557.397	1846.49	1007.44	495.231	1797.62	937.597	559.5	1823.22	911.147	540.075	1757.86	882.2
3100	0	294.937	1835.57	1636.1	210.73	1857.02	1630.3	327.41	2024.73	1675.36	215.759	2028.9	1663.29	285.624	2085.17	1522.25	309.375	2170.41	1259.34	280.637	1935.85	1434.08	262.857	1879.19	1231.21	221.394	2180.27	1316.08	464.842	1984.9	1483.15	548.861	1976.4	1291.09	563.992	1960.46	1135.58	558.167	1840.38	1006.85	496.836	1792.84	934.246	561.159	1819.92	909.177	542.685	1754.87	878.404
3101	0	292.9	1823.94	1637.27	208.841	1845.73	1631.36	325.663	2012.85	1676.77	214.281	2017.49	1664.73	284.412	2073.86	1523.72	308.974	2158.98	1260.94	279.409	1924.47	1435.76	261.854	1867.76	1233	220.823	2169.03	1317.51	463.533	1973.54	1484.93	547.671	1965.35	1292.83	562.158	1951.88	1137.3	558.454	1834.82	1005.88	498.403	1788.34	931.732	562.663	1816.77	907.682	545.403	1752.36	874.932
3102	0	291.22	1812.55	1638.81	207.131	1834.58	1632.86	324.347	2001.62	1678.84	212.772	2006.28	1666.27	283.507	2063.04	1525.58	308.385	2147.83	1262.65	278.453	1913.46	1437.65	260.829	1856.28	1234.84	220.123	2157.95	1319.1	462.521	1962.81	1486.67	546.691	1955.02	1294.93	560.402	1943.38	1139.17	558.76	1829.45	1005.52	500.096	1784.56	929.975	564.099	1813.83	906.694	547.842	1750	871.782
3103	0	289.384	1801.31	1640.61	205.666	1823.66	1634.14	322.757	1990.04	1681.05	211.525	1995.25	1668.13	282.128	2051.88	1527.39	306.783	2137.13	1264.66	277.593	1902.56	1439.51	260.015	1845.3	1236.87	218.43	2146.88	1321.14	461.391	1952.02	1488.97	545.68	1944.88	1297.14	558.777	1935.16	1141.57	559.041	1824.17	1005.4	501.515	1780.59	928.139	565.647	1810.92	906.215	550.178	1747.91	869.452
3104	0	287.622	1790.29	1642	204.142	1812.89	1635.85	321.564	1979.03	1682.87	210.287	1984.39	1670	280.956	2041.2	1529.4	305.094	2126.59	1266.65	276.946	1891.89	1441.49	259.287	1834.31	1239.15	216.688	2135.93	1323.19	460.459	1941.68	1491.05	544.738	1935.34	1299.21	557.391	1927.32	1143.64	559.389	1819.08	1005.57	502.986	1776.92	926.773	566.998	1808	906.05	552.325	1745.98	867.449
3105	0	286.224	1779.53	1643.8	202.844	1802.18	1637.64	320.446	1968.39	1684.81	209.093	1973.65	1671.81	279.968	2030.7	1531.27	304.916	2118.94	1270.63	276.301	1881.31	1443.48	259.055	1823.8	1241.13	216.39	2128.61	1327.5	459.461	1931.37	1493.11	543.96	1926.1	1301.33	556.063	1919.6	1145.81	559.69	1814.12	1006.01	504.361	1773.45	925.772	568.333	1805.15	906.22	554.484	1744.16	865.72
3106	0	285.175	1768.9	1645.79	201.706	1791.85	1639.3	319.379	1957.63	1687.11	208.216	1963.34	1673.8	279.016	2020.29	1533.39	303.294	2108.4	1272.46	275.612	1870.87	1445.18	258.578	1813.22	1242.73	214.795	2117.49	1329.47	458.711	1921.25	1495.43	543.082	1917.49	1303.11	555.044	1912.35	1148.06	560.101	1809.26	1006.59	505.598	1770.04	924.918	569.755	1802.07	907.006	555.972	1741.82	864.579
3107	0	284.141	1758.65	1647.87	200.725	1781.5	1641.16	318.322	1947.05	1689.25	207.198	1953	1675.88	277.669	2009.87	1535.44	301.899	2098.25	1274.56	274.992	1860.62	1447.1	258.318	1803.09	1244.73	213.251	2106.78	1331.5	458.029	1911.56	1497.57	542.607	1908.98	1305.48	554.198	1905.39	1150.35	560.453	1804.43	1007.49	506.517	1766.53	924.68	571.085	1798.98	907.861	557.507	1739.86	863.762
3108	0	282.795	1748.12	1649.96	199.78	1771.42	1643.23	317.428	1936.74	1691.23	206.41	1942.8	1677.99	276.869	1999.74	1537.69	299.941	2088.33	1276.8	274.517	1850.58	1449.39	257.957	1792.88	1246.87	211.391	2096.43	1334.04	457.33	1901.96	1499.44	541.904	1900.8	1307.4	553.545	1898.86	1152.44	560.969	1799.85	1008.4	507.423	1762.91	924.186	572.22	1795.75	908.675	558.716	1737.52	863.025
3109	0	281.999	1738.31	1651.73	198.914	1761.47	1645.1	316.723	1926.69	1693.15	205.705	1932.83	1680.05	276.396	1989.96	1539.53	298.658	2077.93	1278.25	273.944	1840.65	1451.49	257.796	1783.03	1249.15	210.179	2086.01	1335.64	456.673	1892.4	1501.68	541.295	1893.37	1309.07	553.013	1892.5	1154.41	561.453	1795.2	1009.55	508.328	1759.62	924.824	573.431	1792.45	909.805	559.968	1735.23	862.911
3110	0	281.249	1728.33	1653.77	198.371	1751.61	1647.16	315.984	1916.83	1695.3	205.041	1923.04	1682.03	275.14	1980	1541.88	297.669	2068.32	1280.52	273.416	1830.89	1453.37	257.357	1773.11	1250.79	208.95	2075.83	1337.62	456.005	1883.01	1503.49	541.177	1885.84	1311.6	552.738	1886.59	1156.6	562.041	1790.8	1010.77	509.198	1756.08	925.072	574.407	1788.9	911.214	560.831	1732.68	862.906
3111	0	280.65	1718.66	1655.68	197.703	1741.91	1649.35	315.573	1907.4	1697.79	204.454	1913.32	1684.07	274.285	1970.28	1543.76	294.985	2056.84	1281.13	272.483	1821.15	1455.64	256.966	1763.44	1252.8	206.461	2064.01	1338.42	455.44	1873.78	1505.62	540.863	1878.81	1313.42	552.527	1880.65	1158.86	562.665	1786.45	1011.84	509.92	1752.68	925.823	575.227	1785.41	912.541	561.552	1729.98	863.164
3112	0	280.16	1708.92	1658	197.128	1732.25	1651.65	315.026	1897.65	1699.52	203.911	1903.63	1686.37	274.063	1961.09	1545.58	294.899	2048.38	1283.75	271.915	1811.6	1457.55	256.692	1753.95	1254.68	206.469	2055.77	1341.48	454.9	1864.73	1507.44	540.502	1872.27	1315.15	552.518	1874.92	1160.94	563.188	1782.11	1013.24	510.718	1749.29	926.653	576.496	1782.65	914.078	562.114	1727.12	863.936
3113	0	279.452	1699.26	1660.45	196.829	1722.74	1653.95	314.804	1888.48	1701.75	203.561	1894.19	1688.53	273.143	1951.6	1548.04	293.964	2039	1286.03	271.458	1802.25	1459.73	256.185	1744.36	1256.88	205.375	2046	1343.58	454.412	1855.91	1509.44	540.335	1865.55	1317.26	552.552	1869.41	1163.2	563.877	1777.91	1014.75	511.295	1745.63	927.634	576.734	1778.49	915.489	562.699	1724.31	864.727
3114	0	278.991	1689.83	1662.56	196.463	1713.25	1656.19	314.341	1878.93	1703.62	203.111	1884.79	1690.66	272.157	1942.29	1549.99	291.977	2028.48	1287.12	270.764	1792.79	1462	255.694	1734.91	1259.32	203.382	2035.25	1344.61	453.762	1847.07	1511.46	540.109	1859.13	1319.38	552.668	1863.87	1165.4	564.033	1773.26	1016.19	511.604	1741.88	929.326	577.025	1774.87	916.927	563.141	1721.14	865.821
3115	0	278.836	1680.5	1664.94	196.047	1703.83	1658.57	313.931	1869.7	1705.88	202.652	1875.25	1692.89	271.328	1932.96	1552.01	290.83	2018.94	1289.04	270.351	1783.61	1464.49	255.075	1725.52	1261.65	202.142	2025.59	1346.47	453.235	1838.52	1513.19	539.816	1852.8	1321.52	552.793	1858.65	1167.52	564.24	1769.38	1017.16	512.14	1738.07	930.722	577.334	1771.45	918.408	563.407	1717.85	867.002
3116	0	278.622	1671.32	1666.96	195.922	1694.51	1660.98	313.475	1860.38	1707.42	202.326	1866.02	1695.01	270.504	1923.75	1554.03	290.766	2010.46	1291.69	269.788	1774.35	1466.48	254.608	1716.17	1263.51	201.921	2017.07	1349.1	452.663	1830.34	1515.13	539.536	1846.58	1323.63	552.74	1853.35	1169.85	564.567	1765.17	1018.89	512.669	1734.19	931.779	577.572	1767.99	920.167	563.829	1714.59	868.232
3117	0	278.782	1662.21	1669.32	195.798	1685.19	1663.23	313.443	1851.64	1709.38	202.005	1856.73	1697.25	269.891	1914.79	1555.94	289.526	2001.32	1293.49	269.154	1765.18	1468.39	253.885	1706.9	1265.55	200.758	2007.78	1351.14	452.107	1821.81	1516.97	539.259	1840.3	1325.75	552.742	1847.94	1172.15	564.807	1760.63	1020.75	512.846	1729.89	933.576	577.46	1764.43	921.966	564.281	1711.02	869.87
3118	0	278.644	1653.07	1671.34	195.724	1675.94	1665.66	313.222	1842.33	1710.95	201.847	1847.6	1699.23	268.86	1905.77	1557.55	288.148	1992.08	1295.16	268.515	1755.98	1470.37	253.318	1697.71	1267.53	199.37	1998.35	1352.96	451.421	1813.27	1518.97	538.897	1834.09	1327.97	552.734	1842.79	1174.32	565.07	1756.44	1022.39	513.32	1725.53	935.035	577.675	1760.52	923.578	564.559	1707.36	871.397
3119	0	278.54	1643.96	1673.44	195.716	1666.73	1667.92	313.03	1833.64	1712.37	201.426	1838.35	1701.18	267.762	1896.65	1559.47	286.996	1982.85	1297.02	267.851	1746.92	1472.49	252.684	1688.68	1269.72	198.098	1988.91	1354.73	450.693	1804.85	1520.55	538.392	1827.95	1329.78	552.566	1837.75	1176.49	565.255	1752.03	1024.11	513.654	1720.82	937.081	577.581	1756.66	925.198	564.898	1703.35	873.155
3120	0	278.526	1634.98	1675.24	195.607	1657.43	1670.14	312.793	1824.66	1713.99	201.309	1829.31	1703.06	266.729	1887.76	1561.17	285.777	1973.66	1298.59	267.329	1737.98	1474.45	252.152	1679.61	1271.38	196.788	1979.46	1356.27	449.992	1796.47	1522.26	537.769	1821.6	1332.1	552.338	1832.5	1178.63	565.474	1747.57	1025.92	513.877	1715.42	939.415	577.517	1752.75	927.09	565.286	1699.37	874.868
3121	0	278.795	1625.89	1677.36	195.848	1648.22	1672.12	312.542	1815.77	1715.21	201.003	1820.16	1704.85	265.881	1878.86	1562.64	284.75	1964.27	1299.86	266.536	1728.87	1476.15	251.655	1670.7	1273.4	195.732	1970.05	1357.58	449.252	1788.04	1523.93	537.288	1815.33	1333.96	551.946	1827.15	1180.83	565.6	1742.9	1027.67	514.139	1710.91	940.238	577.333	1748.5	928.845	565.602	1695.09	876.544
3122	0	278.8	1616.87	1678.92	195.795	1639.05	1674.18	312.349	1807.24	1716.61	200.704	1811	1706.17	264.89	1869.83	1563.97	283.565	1955.35	1301.23	265.88	1719.95	1477.5	251.2	1661.59	1274.77	194.498	1960.83	1358.99	448.497	1779.72	1525.26	536.578	1808.89	1335.72	551.482	1821.81	1182.78	565.668	1738.28	1029.14	514.615	1705.94	941.825	577.233	1744.37	930.434	566.017	1690.71	878.205
3123	0	279.166	1607.9	1680.5	195.934	1629.76	1675.97	312.187	1798.16	1717.32	200.32	1801.79	1707.74	263.77	1860.85	1565.18	282.273	1946.43	1302.5	265.235	1711.08	1478.74	250.767	1652.57	1276.05	193.166	1951.47	1360.33	447.437	1771.54	1526.4	535.869	1802.46	1337.45	550.924	1816.39	1184.45	565.777	1733.47	1030.85	515.007	1700.68	943.39	576.969	1740	931.891	566.398	1686.22	879.556
3124	0	279.293	1598.94	1681.7	196.05	1620.45	1677.44	312.041	1789.51	1718.17	199.957	1792.62	1708.9	262.886	1852.12	1566.45	281.477	1937.46	1303.56	264.485	1702.12	1479.85	250.236	1643.24	1277.42	192.259	1942.4	1361.28	446.676	1763.11	1527.71	535.203	1795.82	1339.28	550.194	1810.66	1186.31	565.735	1728.53	1032.17	515.276	1695.14	944.795	576.526	1735.65	933.359	566.649	1681.41	881.033
3125	0	279.476	1589.78	1683.32	196.263	1611.09	1678.95	311.497	1780.47	1718.96	199.775	1783.33	1709.9	261.997	1843.33	1566.98	280.466	1928.29	1304.11	263.855	1693.23	1480.98	250.016	1634.1	1278.76	191.202	1933.24	1361.89	445.778	1754.85	1528.76	534.276	1789.09	1340.55	549.369	1804.98	1187.69	565.624	1723.43	1033.3	515.576	1689.58	946.092	576.077	1730.9	934.386	567.117	1676.72	882.198
3126	0	279.792	1580.73	1684.28	196.282	1601.73	1680.14	311.398	1771.72	1719.29	199.376	1773.96	1710.63	260.568	1834.25	1567.85	279.636	1919.26	1305.12	263.101	1684.27	1482.06	249.745	1624.93	1280.03	190.154	1923.91	1362.7	444.967	1746.41	1529.58	533.53	1782.44	1341.67	548.567	1799	1189.05	565.479	1718.17	1034.3	515.991	1683.64	947.44	575.622	1726.18	935.364	567.312	1671.39	882.981
3127	0	280.033	1571.53	1684.95	196.745	1592.23	1681.31	311.112	1762.68	1719.61	199.073	1764.57	1711.48	260.112	1825.49	1568.37	278.762	1910.1	1305.4	262.71	1675.4	1482.71	249.366	1615.62	1280.69	189.274	1914.67	1363.03	444.26	1738.11	1530.53	532.738	1775.28	1343.14	547.645	1792.82	1190.1	565.477	1712.6	1035.37	516.443	1677.64	948.214	575.453	1721.07	936.383	567.59	1666.23	883.639
3128	0	280.494	1562.46	1685.08	197.012	1582.67	1681.74	310.631	1753.56	1720.02	198.644	1755.01	1712.16	259.241	1816.47	1568.8	278.213	1901.07	1305.78	261.922	1666.36	1482.95	249.067	1606.26	1281.01	188.615	1905.48	1363.31	443.532	1729.45	1531.25	531.879	1768.03	1344.19	546.631	1786.46	1191.38	565.322	1706.88	1036.23	516.624	1671.31	949.008	574.935	1715.61	937.219	568.078	1660.81	884.409
3129	0	280.969	1553.09	1685.52	197.102	1573.07	1682.01	310.477	1744.68	1720.05	198.193	1745.37	1712.45	258.127	1807.3	1569.02	277.715	1892.04	1306.09	261.41	1657.36	1483.33	248.87	1597.01	1281.51	187.862	1896.25	1363.32	442.806	1720.97	1531.73	530.989	1760.84	1344.89	545.541	1779.89	1192.04	565.068	1700.89	1036.78	516.972	1664.8	949.363	574.434	1710.16	937.792	568.728	1655.51	884.872
3130	0	281.234	1543.9	1685.34	197.505	1563.38	1682.49	310.276	1735.41	1720.06	197.85	1735.73	1712.59	257.231	1798.2	1568.93	277.014	1882.84	1306.14	260.896	1648.33	1483.67	248.493	1587.67	1281.81	187.063	1886.92	1363.37	442.086	1712.29	1531.99	530.112	1753.34	1345.5	544.468	1773.1	1192.82	564.694	1694.56	1037.17	517.287	1658.17	949.839	574.067	1704.28	938.155	568.872	1649.53	885.199
3131	0	281.558	1534.41	1685.15	197.906	1553.61	1682.37	309.152	1725.96	1719.88	197.346	1725.93	1712.74	256.432	1789.18	1568.86	275.957	1873.59	1306.11	260.259	1639.07	1483.64	248.259	1578.34	1281.86	186.064	1877.39	1363.59	441.365	1703.4	1532.27	529.253	1745.63	1345.89	543.418	1766.05	1193.11	564.446	1688.07	1037.45	517.469	1651.2	950.25	573.656	1698.12	938.559	569.044	1643.2	885.415
3132	0	282.08	1525	1684.58	198.278	1543.76	1682.02	309.37	1716.88	1719.34	196.823	1716.1	1712.39	255.569	1779.88	1568.4	275.867	1864.67	1305.7	259.858	1629.96	1482.84	248.037	1569.06	1281.59	185.711	1868.16	1362.84	440.66	1694.12	1533.1	528.367	1737.7	1346.38	542.141	1758.63	1193.33	564.141	1681.31	1037.5	517.505	1644.02	949.985	573.17	1691.73	938.649	569.401	1636.98	885.413
3133	0	282.707	1515.52	1684.07	198.637	1533.89	1681.66	308.914	1707.43	1718.62	196.56	1706.29	1711.96	254.446	1770.3	1568.22	275.516	1855.45	1305.45	259.372	1620.66	1482.35	247.748	1559.78	1281.24	185.014	1858.64	1362.04	440.083	1685.2	1532.74	527.291	1729.7	1346.39	541.116	1751.11	1193.43	563.947	1674.43	1037.32	517.745	1636.75	949.672	572.765	1685.2	938.263	569.555	1630.32	885.115
3134	0	283.292	1505.94	1683.16	199.159	1523.92	1680.98	307.99	1697.94	1717.79	196.278	1696.1	1711.67	253.823	1760.9	1567.51	275.108	1846.16	1304.71	259.064	1611.3	1481.58	247.597	1550.63	1280.41	184.446	1849.21	1361.11	439.53	1676.04	1532.24	526.583	1721.51	1346.07	540.131	1743.32	1193.23	563.657	1667.22	1036.8	517.977	1629.16	949.459	572.376	1678.24	937.875	569.8	1623.59	884.673
3135	0	283.815	1496.32	1682.03	199.658	1513.84	1680.23	308.367	1688.66	1716.83	195.829	1686.21	1710.8	253.641	1751.6	1566.76	274.575	1836.49	1303.88	258.457	1601.73	1480.9	247.313	1541.34	1279.43	184.026	1839.62	1360.58	438.934	1666.54	1531.67	525.886	1712.95	1345.84	539.138	1735.33	1192.94	563.265	1659.66	1036.46	517.422	1621.44	948.423	571.986	1671.05	937.607	569.804	1616.42	884.119
3136	0	284.269	1486.64	1680.96	200.144	1503.81	1679.2	308.076	1678.95	1715.86	195.728	1676.1	1710.14	252.371	1741.78	1566.17	274.226	1827.35	1303.64	258.084	1592.15	1480.01	247.136	1532.3	1278.52	183.396	1829.91	1360.03	438.399	1657.11	1531.16	525.136	1704.26	1345.28	538.413	1727.09	1192.5	562.861	1651.85	1035.76	517.278	1613.56	947.56	571.669	1663.54	936.872	569.721	1608.89	883.204
3137	0	285.021	1476.73	1679.87	200.834	1493.62	1678.3	307.014	1668.99	1714.86	195.596	1665.7	1709.53	252.065	1732.05	1565.1	274.233	1817.71	1302.64	257.867	1582.63	1479.27	246.969	1523.07	1277.8	183.241	1820.39	1358.85	438.07	1647.51	1530.4	524.575	1695.42	1344.55	537.881	1718.62	1191.87	562.617	1643.78	1035.16	517.217	1605.48	946.871	571.388	1655.75	936.228	569.757	1601.22	882.497
3138	0	285.763	1467.06	1677.94	201.518	1483.31	1677.17	307.06	1659.27	1713.29	195.55	1655.43	1708.42	251.779	1722.36	1563.72	273.759	1808.04	1301.33	257.359	1572.75	1477.79	246.712	1513.77	1276.17	182.815	1810.7	1357.74	437.775	1637.71	1529.39	524.238	1686.22	1343.67	537.248	1709.84	1191.08	562.409	1635.41	1034.16	517.196	1597.14	945.85	571.015	1647.59	935.13	569.766	1593.21	881.463
3139	0	286.535	1457.01	1676.43	201.995	1473.03	1675.64	307.089	1649.39	1711.91	195.465	1645.13	1706.98	251.305	1712.44	1562.62	274.145	1798.55	1300.39	257.251	1563.01	1476.42	246.576	1504.39	1274.41	182.95	1800.99	1356.48	437.441	1627.64	1527.99	523.976	1676.68	1342.93	536.819	1700.99	1189.93	562.234	1626.88	1032.92	517.157	1588.52	944.612	570.902	1639.15	934.055	569.796	1585.02	880.206
3140	0	287.247	1446.95	1674.51	202.629	1462.67	1674	307.1	1639.25	1710.21	195.599	1634.6	1705.62	251.263	1702.53	1561.17	273.995	1788.78	1298.91	256.872	1553.09	1474.8	246.402	1494.93	1272.99	182.783	1791.33	1355.04	437.254	1617.71	1526.68	523.811	1667.07	1341.55	536.368	1691.9	1188.65	561.978	1617.87	1031.47	517.194	1579.75	943.059	570.704	1630.55	932.671	569.711	1576.43	878.754
3141	0	288.002	1436.79	1672.74	203.496	1452.17	1672.43	307.222	1629.19	1708.23	195.911	1624.12	1704.22	250.986	1692.47	1559.65	274.364	1778.95	1297.45	256.816	1543.1	1473.29	246.159	1485.22	1271.41	182.892	1781.58	1353.21	437.038	1607.57	1525.24	523.635	1657.13	1340.31	536.018	1682.5	1187.42	562.111	1608.96	1030.1	517.079	1570.61	941.611	570.767	1621.71	931.156	569.641	1567.4	877.028
3142	0	288.851	1426.65	1670.51	204.338	1441.66	1670.64	307.694	1619.07	1706.42	196.207	1613.64	1702.64	250.871	1682.33	1558.07	274.623	1769.05	1296	256.659	1533.31	1471.82	246.049	1475.26	1269.62	183.038	1771.67	1351.66	436.937	1597.67	1523.02	523.659	1647.12	1338.9	535.837	1672.9	1185.78	562.087	1599.6	1028.49	517.148	1561.37	939.955	570.649	1612.29	929.83	569.137	1558.15	875.172
3143	0	289.751	1416.3	1668.33	205.24	1431.16	1668.68	308.013	1608.82	1704.37	196.579	1603.17	1700.87	250.927	1672.28	1556.31	274.823	1759.8	1294.73	256.546	1523.19	1469.99	245.983	1465.31	1267.72	183.168	1762.63	1350.46	436.902	1587.37	1521.06	523.774	1636.81	1337.33	535.603	1663.14	1184.06	562.168	1589.96	1026.73	517.246	1551.63	938.247	570.734	1602.76	928.074	569.259	1548.72	873.267
3144	0	290.816	1406.01	1665.95	206.29	1420.58	1666.83	308.554	1598.45	1702.45	197.157	1592.34	1699.36	251.19	1662.18	1554.49	275.074	1749.82	1292.79	256.637	1513.1	1467.68	245.809	1455.01	1265.61	183.401	1752.47	1348.54	436.985	1577.08	1519.2	524.01	1626.48	1335.5	535.702	1653.04	1182.33	562.32	1579.95	1025.05	517.591	1541.8	936.484	570.832	1592.93	926.094	569.436	1539.08	871.316
3145	0	291.824	1395.55	1663.64	207.298	1409.92	1664.56	309.023	1588	1700.18	197.73	1581.7	1697.39	251.588	1652.07	1552.41	275.354	1739.5	1290.81	256.926	1502.93	1465.65	245.781	1444.77	1263.48	183.593	1742.15	1346.71	437.308	1566.77	1517.17	524.343	1615.89	1333.48	535.645	1642.85	1180.26	562.526	1569.81	1022.89	517.818	1531.63	934.366	571.128	1582.73	924.119	569.721	1529.08	869.207
3146	0	293.029	1385.14	1661.35	208.443	1399.29	1662.47	309.926	1577.65	1698.41	198.587	1571.09	1695.65	251.796	1641.73	1550.57	275.041	1729.05	1289.2	257.147	1492.61	1463.57	245.661	1434.44	1261.68	183.78	1731.74	1344.86	437.547	1556.35	1515.24	524.568	1605.17	1331.55	535.802	1632.26	1178.28	562.772	1559.29	1020.84	518.177	1521.15	932.133	571.504	1572.37	921.999	570.037	1518.74	867.139
3147	0	294.23	1374.81	1658.81	209.555	1388.65	1660.3	310.634	1567.22	1696.1	199.272	1560.18	1694.08	252.172	1631.38	1548.43	275.454	1718.33	1286.99	257.415	1482.22	1461.67	245.638	1423.92	1259.7	184.006	1721.34	1342.68	437.967	1545.91	1512.99	524.784	1594.54	1329.36	536.081	1621.69	1176.05	563.121	1548.6	1018.71	518.448	1510.44	929.972	572.063	1561.73	919.958	570.312	1507.93	864.808
3148	0	295.364	1364.28	1656.59	210.824	1377.94	1658.39	311.565	1556.7	1694.18	200.201	1549.63	1692.14	252.667	1620.85	1546.65	275.805	1707.55	1284.74	257.99	1471.77	1459.76	245.827	1413.47	1258.02	184.52	1710.6	1340.46	438.413	1535.46	1510.78	525.182	1583.71	1326.82	536.424	1610.91	1173.51	563.464	1537.74	1016.33	518.904	1499.51	927.518	572.531	1550.77	917.606	570.651	1496.96	862.291
3149	0	296.716	1353.72	1654.49	212.118	1367.36	1656.26	312.336	1546.05	1692.04	201.312	1538.85	1690.4	253.389	1610.4	1544.43	276.132	1696.84	1282.41	258.583	1461.1	1457.6	246.034	1402.92	1255.83	184.911	1700.14	1338.59	439.072	1525.06	1508.36	525.627	1572.89	1324.33	536.749	1599.89	1170.86	563.93	1526.68	1013.76	519.432	1488.29	925.106	572.92	1539.58	915.097	571.124	1485.68	859.952
3150	0	297.975	1343.33	1652.09	213.318	1356.69	1654.31	313.65	1535.74	1689.91	202.392	1528.21	1688.11	254.242	1599.8	1542.1	276.385	1685.95	1280.25	259.252	1450.36	1455.39	246.223	1392.09	1253.55	185.387	1689.37	1336.37	439.872	1514.46	1505.98	526.103	1562.2	1321.75	536.981	1588.63	1168.34	564.496	1515.3	1011.37	519.934	1476.77	922.664	573.461	1528.09	912.55	571.78	1474.2	857.553
3151	0	299.258	1332.73	1650.39	214.616	1346.04	1652.67	314.528	1525.2	1687.57	203.538	1517.66	1685.97	254.953	1588.93	1540.07	276.691	1674.88	1277.9	260.133	1439.5	1453.39	246.718	1381.34	1251.45	185.798	1678.43	1334.31	440.74	1503.99	1503.48	526.617	1551.36	1319.1	537.497	1577.57	1165.51	564.906	1503.74	1008.71	520.465	1465.1	920.224	574.655	1516.85	909.908	572.44	1462.49	855.049
3152	0	300.568	1322.05	1648.71	215.876	1335.41	1650.72	315.796	1514.66	1685.54	204.699	1507.02	1683.99	255.876	1577.96	1537.89	277.08	1663.58	1275.59	261.148	1428.47	1451.48	247.247	1370.43	1249.44	186.289	1667.34	1332.24	441.67	1493.21	1501.05	527.076	1540.32	1316.33	538.007	1566.32	1162.6	565.477	1492.13	1006.07	520.993	1453.16	917.618	575.241	1504.95	907.169	573.026	1450.42	852.641
3153	0	301.868	1311.43	1647.01	217.216	1324.72	1649.11	317.036	1504.15	1683.44	206.197	1496.47	1682.11	256.833	1566.78	1535.97	277.536	1652.45	1273.5	262.226	1417.31	1449.47	247.785	1359.26	1247.6	186.772	1656.07	1330.34	442.855	1482.48	1498.53	527.603	1529.2	1313.6	538.464	1554.68	1159.94	566.087	1480.27	1003.43	521.585	1441.02	914.911	575.342	1492.52	904.659	573.689	1438.15	850.131
3154	0	303.23	1300.72	1645.56	218.589	1313.96	1647.76	318.315	1493.54	1681.44	207.572	1485.94	1680.07	257.906	1555.6	1533.93	277.999	1641.02	1271.42	263.407	1405.98	1447.54	248.624	1348.03	1245.68	187.332	1644.57	1328.5	444.069	1471.61	1496.12	528.291	1518.17	1310.77	539.05	1543.01	1157.23	566.605	1468.14	1000.8	522.244	1428.74	912.575	575.895	1480.23	902.05	574.426	1425.62	847.703
3155	0	304.643	1290.01	1644.15	219.958	1303.25	1646.28	319.645	1482.89	1679.69	208.914	1475.26	1678.06	259.498	1544.38	1532.04	278.47	1629.22	1269.23	264.587	1394.57	1445.51	249.679	1336.83	1243.56	188.016	1632.95	1326.48	445.359	1460.56	1493.76	529.102	1507.09	1307.95	539.669	1531.24	1154.4	567.279	1456.03	998.141	523.081	1416.2	909.918	576.456	1467.77	899.369	575.242	1412.99	845.413
3156	0	306.078	1279.21	1642.97	221.428	1292.38	1644.9	320.998	1472.21	1678.06	210.18	1464.44	1676.38	261.069	1533.16	1530.22	279.005	1617.4	1267.21	265.972	1383.16	1443.73	250.498	1325.07	1241.69	188.671	1621.15	1324.69	446.734	1449.42	1491.28	529.923	1495.68	1305.29	540.244	1519.27	1151.62	567.973	1443.73	995.644	523.834	1403.55	907.62	577.022	1455.25	896.751	576.052	1400.21	843.145
3157	0	307.519	1268.07	1642.45	222.841	1281.46	1643.89	322.344	1461.33	1676.71	211.667	1453.72	1674.89	262.333	1521.66	1528.59	279.807	1605.58	1265.47	267.392	1371.7	1442.12	251.679	1313.57	1240.07	189.56	1609.32	1323.15	448.238	1438.1	1489.06	530.752	1484.13	1302.78	540.975	1507.17	1149.04	568.592	1431.16	993.239	524.328	1390.46	905.336	577.477	1442.36	894.432	576.869	1387.22	841.088
3158	0	308.927	1257.09	1641.95	224.216	1270.37	1643.22	323.577	1450.3	1675.82	212.959	1442.56	1673.9	263.776	1510.12	1527.29	280.559	1593.72	1264.11	268.902	1360.09	1440.97	252.772	1301.54	1238.84	190.56	1597.34	1321.98	449.62	1426.77	1486.97	531.661	1472.53	1300.31	541.655	1494.86	1146.6	569.237	1418.61	990.854	524.921	1377.49	903.118	577.787	1429.39	892.015	577.524	1374.06	838.806
3159	0	310.413	1245.97	1641.75	225.8	1259.27	1642.87	325.102	1439.28	1675.21	214.364	1431.54	1673.08	265.238	1498.4	1526.49	281.217	1581.84	1263.14	270.437	1348.42	1440.06	253.807	1289.32	1238.13	191.816	1585.4	1321.14	451.158	1415.34	1485.31	532.535	1460.66	1297.87	542.377	1482.27	1144.21	569.762	1405.73	988.733	525.451	1364.27	901.088	578.097	1416.31	889.813	577.963	1360.69	836.994
3160	0	311.982	1235.06	1641.42	227.393	1248.09	1642.66	326.629	1428.29	1674.86	215.735	1420.49	1672.59	266.731	1486.58	1526	281.823	1570.1	1262.71	271.904	1336.8	1439.3	255.001	1276.97	1237.28	193.038	1573.74	1320.62	452.709	1404.01	1483.94	533.552	1448.68	1296.1	543.074	1469.52	1142.36	570.295	1392.76	986.894	525.958	1350.94	899.428	578.418	1403.11	887.846	578.468	1347.28	835.495
3161	0	313.599	1223.72	1641.89	228.918	1236.89	1642.97	328.035	1417.23	1674.85	217.421	1409.39	1672.37	268.021	1474.74	1526.03	282.294	1558.09	1262.34	273.312	1325.14	1438.84	256.282	1264.53	1237.08	194.209	1561.9	1320.36	454.372	1392.73	1482.77	534.615	1436.48	1294.61	543.622	1456.28	1140.83	570.798	1379.57	985.257	526.325	1337.5	898.08	578.729	1389.77	886.354	579.043	1333.86	834.123
3162	0	315.149	1212.65	1642.21	230.409	1225.67	1643.32	329.515	1406.08	1675.2	218.892	1398.14	1672.72	269.458	1463.15	1525.96	282.832	1546.16	1261.97	274.825	1313.64	1438.85	257.559	1252.14	1237.25	195.169	1550.49	1320.32	455.973	1381.56	1482.05	535.523	1424.06	1293.27	544.321	1443.07	1139.4	571.178	1366.18	984.051	526.817	1324.09	896.992	578.857	1376.15	884.957	579.414	1320.37	832.955
3163	0	316.559	1201.41	1643.08	232.049	1214.55	1644.04	330.935	1394.89	1675.71	220.358	1387.05	1673.23	270.839	1451.55	1526.43	283.343	1534.5	1262.38	276.305	1302.23	1439.14	258.984	1240	1237.81	196.082	1539.02	1320.94	457.479	1370.48	1481.72	536.508	1411.6	1292.33	545.096	1429.73	1138.37	571.515	1352.57	983.278	526.85	1310.43	896.274	579.234	1362.5	884.129	579.477	1306.43	832.136
3164	0	318.145	1190.42	1643.87	233.603	1203.53	1645.18	332.635	1383.87	1676.49	221.874	1375.96	1674.25	272.227	1440.16	1527.16	284.003	1522.81	1263.04	277.808	1291.21	1439.76	260.287	1228	1238.9	197.142	1527.68	1321.93	458.989	1359.38	1481.85	537.515	1398.92	1291.82	545.678	1416.01	1138.03	571.621	1338.52	982.948	526.834	1296.64	895.945	579.507	1348.55	883.703	579.576	1292.49	831.798
3165	0	319.606	1179.42	1645.07	234.966	1192.57	1646.13	334.306	1373.05	1677.78	223.493	1365.01	1675.53	273.823	1429.03	1527.88	284.496	1511.05	1263.83	279.454	1280.11	1441.04	261.389	1216.09	1240.21	197.82	1516.3	1322.68	460.398	1348.42	1482.36	538.472	1386.3	1291.65	546.503	1402.19	1138.13	571.875	1324.43	983.107	526.562	1282.69	895.792	579.551	1334.28	883.905	579.53	1278.41	831.848
3166	0	321.016	1168.61	1646.27	236.457	1181.81	1647.57	335.697	1362.04	1678.81	225.195	1354.33	1676.76	275.16	1417.93	1529.08	285.345	1499.36	1264.66	280.795	1268.89	1442.04	262.545	1204.56	1241.48	198.925	1505.32	1324.1	461.881	1337.45	1482.88	539.449	1373.39	1291.79	547.176	1388.32	1138.18	571.936	1310.21	983.326	526.374	1268.79	896.313	579.739	1319.81	884.208	579.24	1264.05	832.173
3167	0	322.343	1157.85	1647.59	237.862	1171.31	1648.96	337.458	1351.52	1680.08	226.741	1343.7	1678.16	276.743	1407.06	1530.1	286.505	1487.84	1265.64	282.04	1258.09	1443.29	263.521	1193.25	1242.67	200.141	1494.36	1325.29	463.262	1326.28	1483.81	540.596	1360.74	1292.08	548.03	1374.37	1138.62	572.019	1295.68	983.961	526.004	1254.68	896.821	579.732	1305.13	884.71	578.772	1249.29	832.758
3168	0	323.68	1147.58	1648.88	239.055	1160.97	1650.57	339.055	1341.06	1681.29	228.328	1333.41	1679.6	278.336	1396.45	1531.23	287.753	1476.47	1266.41	283.154	1247.24	1444.8	264.375	1182.31	1244.13	201.514	1483.47	1326.48	464.662	1315.21	1484.83	541.63	1348.07	1292.48	548.92	1360.43	1139.26	571.979	1281.13	984.866	525.626	1240.53	897.792	579.935	1290.3	885.456	578.176	1234.46	833.544
3169	0	324.76	1137.24	1650.5	240.315	1150.81	1652.38	340.512	1330.76	1682.44	229.911	1323.38	1681.16	279.928	1385.9	1532.25	288.967	1465.23	1267.36	284.243	1236.53	1446.31	265.164	1171.68	1245.81	203.301	1473.2	1327.47	465.762	1303.97	1485.85	542.682	1335.43	1293.04	549.704	1346.58	1139.76	571.88	1266.5	985.65	524.866	1226.25	898.935	579.771	1275.31	886.276	577.204	1219.34	834.439
3170	0	325.957	1127.18	1652.05	241.515	1140.85	1654.28	342.271	1320.78	1683.7	231.5	1313.52	1682.61	281.26	1375.42	1533.61	290.595	1454.31	1268.34	284.953	1226.03	1447.88	265.665	1160.81	1247.49	204.968	1462.69	1328.5	466.848	1292.76	1486.99	543.918	1322.86	1293.71	550.983	1332.61	1140.64	571.756	1251.81	986.718	523.824	1211.61	900.142	579.706	1260.06	887.336	576.198	1204.06	835.564
3171	0	327.083	1117.21	1653.93	242.597	1131.07	1655.97	343.734	1310.84	1684.92	233.053	1303.86	1684.15	282.826	1365.25	1534.85	292.235	1443.49	1269.53	285.994	1215.69	1449.3	266.135	1150.24	1249.05	206.822	1452.41	1329.72	467.926	1281.38	1488.31	545.01	1310	1294.84	552.123	1318.64	1141.51	571.685	1236.94	987.965	522.896	1197.07	901.757	579.504	1244.5	888.729	575.028	1188.43	837.007
3172	0	328.167	1107.36	1655.78	243.724	1121.52	1658.13	345.13	1301.01	1686.22	234.58	1294.38	1685.7	284.052	1355.07	1536.37	293.814	1432.87	1270.82	286.271	1205.51	1450.79	266.441	1139.76	1250.4	208.616	1442.15	1331.01	468.781	1270.1	1489.79	546.16	1296.93	1295.95	553.354	1304.66	1142.66	571.436	1221.89	989.561	522.101	1182.53	903.551	579.141	1228.74	890.138	573.744	1172.6	838.608
3173	0	329.222	1097.81	1657.57	244.686	1112.01	1660.21	346.545	1291.68	1687.42	235.835	1284.97	1687.28	285.466	1345.14	1537.41	295.574	1422.75	1272.11	286.73	1195.44	1452.24	266.22	1129.04	1252.29	209.996	1431.72	1331.96	469.646	1258.96	1491.22	547.243	1283.91	1297.14	554.572	1290.58	1143.77	571.124	1206.78	991.029	521.021	1167.9	905.295	578.825	1212.96	891.793	572.284	1156.52	840.528
3174	0	330.141	1088.43	1659.42	245.649	1102.7	1662.16	347.903	1282.16	1688.88	237.052	1275.6	1689.24	286.65	1335.28	1538.97	296.99	1412.13	1273.55	287.023	1185.51	1453.79	266.272	1118.87	1253.78	212.263	1422.25	1333.58	470.316	1247.88	1492.78	548.432	1270.95	1298.42	555.873	1276.45	1145.07	570.754	1191.37	992.949	519.746	1152.98	907.164	578.527	1197	893.456	570.712	1140.26	842.606
3175	0	330.984	1079.11	1661.23	246.48	1093.56	1664.28	348.961	1272.87	1689.96	238.279	1266.59	1690.71	287.541	1325.59	1540.26	295.482	1401.9	1272.18	287.387	1175.71	1455.37	266.009	1108.78	1255.47	213.899	1412.51	1334.69	470.977	1237.19	1494.11	549.52	1257.83	1299.79	557.28	1262.4	1146.27	570.293	1176.1	994.551	518.186	1137.81	909.482	577.797	1180.5	895.21	569.034	1123.89	844.749
3176	0	331.778	1069.98	1663.18	247.275	1084.41	1666.58	350.006	1263.89	1691.1	239.242	1257.57	1692.2	288.593	1316.2	1541.57	300.08	1392.76	1276.23	287.723	1166.09	1456.66	265.636	1098.79	1257.19	215.458	1402.85	1335.63	471.383	1226.51	1495.49	550.458	1244.9	1300.65	558.539	1248.48	1147.32	569.659	1160.66	996.389	516.812	1123.09	911.462	577.157	1164.33	896.75	567.24	1107.53	846.835
3177	0	332.386	1060.79	1665.35	247.992	1075.43	1668.75	350.889	1255.1	1692.21	240.045	1248.63	1693.78	289.401	1306.78	1542.69	301.114	1382.95	1276.6	287.899	1156.73	1458.16	265.089	1089	1259	217.003	1393.32	1336.44	471.919	1216.22	1496.78	551.273	1231.82	1301.85	559.726	1234.34	1148.49	568.99	1145.35	998.053	515.268	1108.1	913.694	576.469	1148.02	898.473	565.39	1090.89	849.088
3178	0	332.987	1052.02	1667.09	248.423	1066.51	1670.67	351.463	1246.02	1693.5	240.78	1239.94	1695.14	290.297	1297.63	1544.02	302.234	1373.19	1277.83	288.047	1147.44	1459.49	264.983	1079.52	1260.42	218.431	1384.02	1337.14	472.317	1205.94	1498.29	552.137	1218.78	1303.08	560.702	1220.35	1149.24	568.309	1129.97	999.91	513.786	1093.19	916.035	575.774	1131.44	900.151	563.7	1074.33	851.948
3179	0	333.224	1043.05	1669.31	248.803	1057.77	1672.95	351.94	1237.18	1694.73	241.389	1231.29	1696.56	291.353	1288.59	1545.37	303.356	1363.63	1278.87	287.606	1138.21	1461.02	264.678	1070.17	1262.12	219.346	1374.21	1337.81	472.814	1195.93	1499.72	552.911	1206.1	1304.41	561.689	1206.38	1150.5	567.425	1114.61	1001.76	512.086	1078.19	918.237	574.894	1114.91	902.117	561.771	1057.74	854.647
3180	0	333.321	1034.26	1671.5	248.864	1049.06	1675.04	352.276	1228.48	1696.19	241.69	1222.7	1697.87	292.078	1279.49	1546.61	304.501	1353.96	1280.28	287.853	1129.07	1462.58	264.418	1060.96	1263.82	221.231	1365.29	1339.14	473.302	1186.08	1501.29	553.492	1193.49	1305.74	562.64	1192.41	1151.92	566.425	1099.12	1004.02	509.989	1062.6	921.24	573.668	1098.45	904.43	559.711	1040.91	857.622
3181	0	333.246	1025.56	1673.68	248.772	1040.49	1677.03	352.72	1219.93	1697.84	241.875	1214.16	1699.56	292.905	1270.48	1548.07	305.78	1344.47	1281.43	288.477	1120.24	1464.41	264.421	1052	1265.75	222.28	1355.58	1340.61	473.745	1176.29	1502.86	554.081	1181	1307.12	563.423	1178.45	1153.42	565.402	1083.64	1006.54	507.966	1048.39	923.364	572.717	1082.05	906.907	557.6	1024.21	860.955
3182	0	332.916	1016.94	1675.9	248.617	1032.04	1679.12	352.796	1211.24	1699.45	242.016	1205.8	1700.65	293.845	1261.49	1549.44	306.972	1335.01	1283.26	288.597	1111.24	1465.76	264.492	1043.06	1267.61	224.048	1346.73	1342.19	474.333	1166.53	1504.64	554.717	1168.91	1308.92	564.154	1164.86	1154.94	564.278	1068.51	1008.95	505.702	1032.63	926.852	571.669	1065.37	909.445	555.388	1007.61	864.274
3183	0	332.444	1008.3	1678.39	248.216	1023.74	1680.96	352.701	1202.65	1700.93	241.899	1197.56	1701.66	294.652	1252.61	1550.91	308.068	1325.62	1284.41	288.779	1102.12	1467.5	264.599	1034.06	1269.14	224.859	1337.14	1343.01	475.024	1157.09	1506.24	555.136	1157.12	1310.28	564.745	1151.29	1156.51	563.184	1053.25	1011.74	504.527	1017.83	930.036	570.403	1048.86	912.192	552.852	991.238	867.022
3184	0	331.818	999.795	1680.82	247.643	1015.47	1682.89	352.691	1194.27	1702.3	241.814	1189.51	1702.2	295.482	1243.67	1552.04	309.02	1316.25	1285.52	289.213	1093.06	1468.87	265.085	1025.23	1270.56	226.628	1328.49	1344.01	475.48	1147.64	1507.64	555.504	1145.58	1311.76	565.164	1138.03	1157.88	562.048	1038.36	1014.02	503.015	1003.33	933.042	569.081	1032.64	914.685	550.826	974.637	870.738
3185	0	331.071	991.233	1683.39	246.889	1007.29	1684.84	352.609	1186	1703.54	241.736	1181.52	1702.83	296.33	1234.92	1553.22	309.888	1306.97	1286.11	289.701	1084.18	1470.47	265.471	1016.25	1272.14	227.241	1318.91	1344.77	476.04	1138.19	1509.02	556.02	1134.3	1312.99	565.605	1124.97	1159.29	560.346	1023.67	1016.27	501.827	988.689	935.91	567.73	1016.44	917.387	548.591	958.319	874.133
3186	0	330.107	982.965	1685.77	245.993	999.165	1686.6	352.574	1177.8	1704.69	241.343	1173.59	1703.34	297.114	1226.16	1554.17	310.8	1297.69	1287.32	290.285	1075.35	1471.97	266.008	1007.35	1273.6	228.439	1310.11	1345.5	476.568	1128.88	1510.43	556.24	1123.24	1314.17	565.741	1111.99	1160.59	559.136	1008.98	1018.92	499.757	974.444	938.758	566.129	1000.29	920.143	546.301	941.915	877.823
3187	0	329.131	974.607	1688.49	245.065	991.19	1688.37	352.182	1169.35	1705.95	241.165	1165.7	1703.98	297.975	1217.38	1555.16	311.587	1288.45	1288.32	290.852	1066.47	1473.35	266.332	998.297	1275.22	229.839	1301.31	1346.91	477.01	1119.44	1511.72	556.446	1112.34	1315.48	565.959	1099.36	1161.83	558.482	994.621	1021.66	498.069	959.736	942.32	564.559	984.427	922.906	543.679	925.844	881.085
3188	0	328.053	966.196	1691.28	244.059	983.265	1689.98	351.869	1161.02	1706.89	240.808	1157.91	1703.95	298.961	1208.6	1556.06	312.392	1279.12	1289.32	291.114	1057.45	1474.41	266.82	989.299	1276.29	230.798	1292.34	1347.76	477.475	1110.15	1512.89	556.651	1101.65	1316.74	566.044	1086.86	1163.1	556.925	980.338	1023.98	496.314	944.656	945.767	562.997	968.739	925.683	541.501	909.794	884.813
3189	0	326.937	957.973	1693.68	243.077	975.382	1691.75	351.075	1152.58	1707.56	240.392	1150.09	1703.62	299.478	1199.71	1556.83	313.041	1269.89	1290.14	291.204	1048.4	1475.16	267.146	980.35	1276.98	231.2	1282.84	1348.77	478.088	1100.68	1514.04	557.065	1091.21	1317.64	566.207	1074.62	1164.29	555.82	966.091	1026.57	494.682	929.836	948.99	561.367	953.16	928.53	539.37	893.772	888.482
3190	0	325.832	949.674	1696.25	241.942	967.573	1693.22	351.281	1144.57	1708.22	239.889	1142.34	1703.41	300.133	1190.74	1557.73	313.816	1260.64	1290.9	291.729	1039.54	1476.05	267.351	971.312	1277.99	232.525	1274.25	1349.6	478.538	1091.25	1514.89	557.421	1081.31	1318.42	566.243	1062.54	1165.13	555.232	952.081	1029.5	493.078	914.986	952.158	559.682	937.682	931.266	537.158	877.822	892.261
3191	0	324.506	941.45	1698.52	240.806	959.697	1694.68	350.99	1136.42	1708.78	239.596	1134.65	1702.99	300.889	1181.79	1558.21	314.379	1251.58	1291.29	291.673	1030.39	1476.63	267.476	962.29	1278.58	233.345	1265.31	1350.13	478.842	1081.79	1515.4	557.548	1071.01	1318.92	566.205	1050.63	1165.92	553.889	938.238	1031.77	491.291	900.249	955.71	557.847	922.499	933.765	535.231	861.862	896.549
3192	0	323.209	933.219	1700.78	239.546	951.833	1696.09	350.755	1128.13	1709.11	239.525	1126.9	1702.47	301.619	1172.86	1558.64	315.062	1242.4	1291.65	292.089	1021.45	1477.3	267.516	953.329	1279.48	234.123	1256.29	1350.34	479.266	1072.37	1515.98	557.634	1060.88	1319.15	566.086	1038.91	1166.24	552.683	924.589	1033.82	489.37	885.359	959.203	555.886	907.393	936.069	533.005	846.274	900.01
3193	0	322.027	925.062	1702.73	238.364	943.989	1697.29	350.246	1119.78	1709.21	239.277	1119.08	1701.92	302.157	1163.83	1558.97	315.615	1233.23	1292.01	292.227	1012.49	1477.53	267.508	944.294	1279.9	234.87	1247.27	1350.59	479.56	1062.93	1516.06	557.534	1050.28	1319.84	566.204	1027.54	1166.57	551.98	910.672	1036.48	487.706	870.978	962.49	553.931	892.451	938.452	530.852	830.677	903.701
3194	0	320.705	916.742	1704.64	237.23	936.044	1698.29	349.868	1111.39	1709.03	239.016	1111.2	1701.02	302.792	1154.71	1559.04	316.15	1224.04	1291.98	292.59	1003.56	1477.76	267.547	935.312	1279.96	235.665	1238.28	1350.69	479.942	1053.44	1516.14	557.526	1040.1	1319.83	566.014	1016.28	1166.49	550.962	897.52	1038.49	486.122	856.483	965.564	551.895	877.496	940.637	528.646	815.292	907.159
3195	0	319.436	908.475	1706.38	236.124	928.19	1699.39	349.537	1102.91	1708.75	238.637	1103.3	1700.01	303.218	1145.6	1559.06	316.638	1214.96	1292.1	292.777	994.575	1477.79	267.353	926.233	1279.84	236.34	1229.18	1350.93	480.131	1043.98	1515.91	557.648	1030.2	1319.55	565.903	1004.99	1166.54	549.885	884.501	1040.27	484.102	841.983	968.553	549.558	863.065	943.111	526.586	800.124	910.889
3196	0	318.027	900.112	1707.68	234.88	920.177	1700.22	349.298	1094.4	1708.47	238.412	1095.27	1699.16	303.709	1136.43	1558.86	317.105	1205.74	1292.13	292.675	985.529	1477.64	266.936	917.094	1279.83	236.943	1220.06	1351.17	480.371	1034.4	1515.87	557.516	1020.01	1319.61	565.816	994.004	1166.37	548.771	871.573	1042.18	482.35	827.745	971.86	547.674	848.374	945.273	524.006	784.878	914.373
3197	0	316.843	891.793	1708.76	233.742	912.164	1700.76	349.197	1085.98	1707.85	238.282	1087.14	1698.2	304.159	1127.29	1558.77	317.53	1196.51	1292.24	292.308	976.126	1477.41	266.439	907.879	1279.68	237.081	1210.62	1350.83	480.48	1024.87	1515.49	557.438	1010.04	1319.23	565.748	983.027	1166.13	547.529	858.853	1043.59	480.252	813.586	974.999	545.641	834.097	947.498	521.64	769.874	917.82
3198	0	315.526	883.2	1709.87	232.586	903.954	1701.25	348.947	1077.25	1707.12	238.18	1078.94	1697.11	304.412	1117.94	1558.42	317.728	1187.33	1291.91	292.124	966.856	1477.2	266.146	898.835	1279.43	237.858	1201.77	1350.76	480.421	1015.36	1514.71	557.153	999.957	1318.58	565.513	972.23	1165.57	546.383	846.134	1044.99	478.319	799.785	977.964	543.474	819.942	949.184	519.266	755.235	921.16
3199	0	314.311	874.693	1710.43	231.364	895.776	1701.46	348.666	1068.32	1706.11	238.09	1070.73	1696.09	304.486	1108.56	1557.89	317.925	1178.12	1291.32	292.244	957.839	1476.73	265.6	889.639	1278.89	238.34	1192.61	1350.37	480.386	1005.71	1513.87	557.009	990.216	1317.55	565.285	961.421	1164.82	545.152	833.553	1046.43	476.589	786.172	980.773	541.076	805.86	950.873	517.081	740.719	924.315
3200	0	313.064	866.094	1710.47	230.314	887.553	1701.47	348.432	1059.38	1705.1	238.158	1062.37	1694.68	304.664	1099.21	1557.2	317.908	1168.98	1290.47	291.456	948.389	1475.73	265.021	880.492	1277.99	238.814	1183.75	1349.53	480.445	996.246	1513.1	556.815	980.362	1316.71	565.013	950.786	1163.81	543.354	821.246	1047.28	475.314	772.397	983.393	538.958	792.156	952.577	514.494	726.589	926.849
3201	0	311.924	857.243	1710.67	229.251	879.145	1701.22	348.398	1050.46	1703.82	238.181	1053.99	1693.3	304.516	1089.66	1556.38	317.799	1159.62	1289.59	291.497	939.09	1475.09	264.354	871.311	1276.98	238.768	1174.38	1348.72	480.185	986.595	1511.88	556.453	970.5	1315.73	564.872	940.483	1162.58	541.929	808.801	1048.4	473.108	759.109	985.484	536.697	778.666	953.683	512.133	712.43	929.757
3202	0	310.765	848.344	1710.32	228.161	870.634	1700.79	348.327	1041.43	1702.41	238	1045.39	1691.95	304.584	1080.22	1555.34	317.82	1150.36	1288.94	290.63	929.469	1473.92	263.695	862.115	1275.96	238.834	1165.06	1348	479.836	976.94	1510.56	555.936	960.713	1314.37	564.533	929.997	1161.49	540.577	796.647	1049.14	471.203	745.909	988.13	534.388	764.988	954.873	509.835	698.435	932.238
3203	0	309.66	839.435	1709.76	227.08	862.007	1700.23	348.113	1032	1701.05	237.769	1036.59	1690.48	304.272	1070.64	1554.28	317.71	1140.91	1288.23	290.214	919.905	1472.83	262.908	852.896	1274.83	238.605	1155.61	1347.19	479.409	967.153	1509.33	555.547	950.915	1313.24	564.258	919.423	1160.16	539.136	784.474	1049.65	469.533	732.759	990.434	532.36	751.743	956.275	507.535	684.783	934.562
3204	0	308.659	830.443	1708.82	226.202	853.347	1699.36	347.912	1022.71	1699.26	237.607	1027.76	1688.89	304.004	1061.1	1552.96	317.377	1131.56	1287.03	289.46	910.458	1471.24	262.317	843.742	1273	238.394	1146.2	1345.91	478.871	957.281	1507.8	554.911	941.118	1311.75	563.739	908.807	1158.56	537.889	772.575	1050.17	467.797	719.941	991.948	530.107	738.269	957.296	505.337	671.315	936.888
3205	0	307.71	821.245	1707.71	225.376	844.592	1698.13	347.788	1013.5	1697.19	237.434	1018.98	1687.23	303.531	1051.54	1551.23	316.801	1122.21	1285.35	288.638	900.645	1469.76	261.558	834.404	1271.39	238.014	1136.78	1344.32	478.233	947.35	1506.2	554.217	931.43	1310.04	563.12	898.101	1157.01	536.483	760.601	1050.26	465.811	707.172	993.311	528.099	725.545	957.701	503.17	657.934	938.679
3206	0	306.726	811.964	1706.16	224.432	835.665	1696.92	347.568	1003.92	1695.11	237.332	1010.03	1685.25	302.791	1041.81	1549.42	316.127	1112.59	1283.54	288.327	891.145	1468.24	260.597	824.811	1269.61	237.471	1127.18	1342.63	477.419	937.332	1504.38	553.365	921.635	1308.18	562.366	887.181	1155.33	535.205	748.763	1050.36	464.269	694.566	994.601	526.314	712.851	957.584	501.387	644.759	940.332
3207	0	305.853	802.728	1704.43	223.459	826.543	1695.47	347.265	994.347	1692.92	237.106	1000.76	1683.35	302.101	1032.14	1547.62	315.37	1102.92	1281.6	287.214	881.181	1466.22	259.74	815.392	1267.42	236.69	1117.48	1340.68	476.653	927.405	1502.51	552.56	911.911	1306.34	561.624	876.592	1153.46	533.941	737.136	1049.98	462.689	682.143	995.323	523.848	700.325	958.094	499.472	631.839	941.674
3208	0	304.749	793.21	1702.44	222.582	817.399	1693.85	346.972	984.904	1690.47	236.617	991.53	1681.31	301.116	1022.24	1545.6	314.566	1093.26	1279.68	285.952	871.216	1464.1	258.859	805.754	1265.24	235.889	1107.74	1338.68	475.615	917.354	1500.49	551.636	902.08	1304.28	560.871	866.193	1151.37	532.813	725.558	1049.75	461.16	669.95	996.217	521.985	687.753	958.1	497.607	619.103	942.557
3209	0	303.862	783.655	1700.52	221.666	808.027	1692.02	346.488	975.011	1687.87	236.242	982.218	1679.17	300.059	1012.38	1543.44	313.422	1083.44	1277.41	285.197	861.388	1462.03	257.951	796.044	1263.09	234.877	1097.8	1336.65	474.386	907.243	1498.26	550.345	892.01	1301.99	559.909	855.563	1149.25	531.32	713.998	1048.9	459.598	657.78	997.095	520.468	675.097	957.696	495.737	606.423	942.994
3210	0	303.027	773.951	1698.39	220.835	798.579	1690.03	346.031	965.37	1685.48	235.58	972.642	1677.13	298.928	1002.42	1541.15	312.395	1073.5	1275.27	284.379	851.597	1459.72	256.985	786.356	1260.57	233.785	1087.84	1334.47	473.171	897.152	1496.01	549.218	881.969	1299.73	559.017	845.072	1147.16	529.989	702.55	1047.93	458.224	645.806	997.171	518.872	662.956	957.147	494.119	594.042	943.301
3211	0	302.158	764.247	1695.94	219.973	789.02	1687.76	345.361	955.508	1682.81	234.949	963.093	1674.83	297.798	992.387	1538.86	311.263	1063.51	1273.03	283.097	841.474	1457	255.848	776.332	1257.85	232.618	1077.82	1332.02	472.122	887.138	1493.74	548.106	871.857	1297.56	558.013	834.618	1144.8	528.772	691.116	1047.05	456.857	633.843	996.36	517.476	650.833	956.722	492.623	581.819	943.422
3212	0	301.267	754.336	1693.57	219.06	779.184	1685.59	344.564	945.466	1680.19	234.019	953.269	1672.7	296.476	982.335	1536.27	309.985	1053.42	1270.55	281.895	831.285	1454.55	254.801	766.223	1255.2	231.455	1067.71	1329.61	470.897	876.998	1491.43	546.974	861.854	1295.02	556.925	824.013	1142.43	527.666	679.902	1045.73	455.624	622.146	995.985	516.054	638.841	955.767	491.092	569.644	943.196
3213	0	300.318	744.367	1691.09	218.114	769.302	1683.3	343.773	935.518	1677.67	232.784	943.514	1670.79	295.063	971.983	1533.78	308.571	1043.3	1267.89	280.068	820.677	1451.86	253.654	755.936	1252.62	229.971	1057.42	1327.06	469.45	866.684	1488.9	545.606	851.474	1292.39	555.749	813.528	1140.04	526.229	668.622	1044.09	454.367	610.495	994.961	514.69	627.142	954.365	489.912	557.776	942.315
3214	0	299.278	734.297	1688.51	216.966	759.156	1681.02	342.722	925.411	1675.1	231.582	933.42	1668.54	293.646	961.6	1531.25	307.041	1032.89	1265.38	279.133	810.457	1449.56	252.5	745.548	1250.13	228.592	1047.11	1324.42	468.042	856.328	1486.41	544.138	841.183	1289.71	554.34	802.939	1137.54	525.116	657.637	1042.17	453.302	599.11	993.755	513.237	615.353	953.469	488.674	546.146	941.356
3215	0	298.206	724.091	1686.15	215.911	748.969	1678.79	341.411	915.12	1672.56	230.846	923.133	1665.86	292.054	951.156	1528.64	305.386	1022.33	1262.8	277.685	799.851	1447.19	251.171	734.954	1247.47	227.167	1036.71	1321.7	466.538	845.778	1483.96	542.613	830.806	1286.98	552.817	792.427	1134.84	523.914	646.625	1040.24	452.221	587.847	992.156	511.988	604.051	951.472	487.748	534.697	939.906
3216	0	296.997	713.778	1683.78	214.712	738.548	1676.54	340.182	905.025	1670.09	229.169	912.931	1663.92	290.291	940.52	1526.33	303.836	1011.64	1260.39	276.177	789.124	1444.79	249.882	724.199	1245.03	225.856	1026.21	1319.12	464.988	835.14	1481.57	540.888	820.335	1284.46	551.203	781.946	1132.31	522.833	635.917	1038.17	451.283	576.659	989.992	510.769	593.354	949.709	486.985	523.479	938.392
3217	0	295.717	703.413	1681.52	213.391	728.06	1674.64	338.624	894.634	1667.55	227.32	902.393	1662.07	288.645	929.663	1524.26	302.4	1000.73	1258.28	274.619	778.375	1442.35	248.442	713.456	1242.41	224.41	1015.37	1316.91	463.344	824.368	1479.1	539.2	809.97	1282.17	549.505	771.418	1129.96	521.741	625.25	1035.62	450.433	565.725	987.628	509.999	582.49	947.296	486.533	512.703	936.208
3218	0	294.413	692.965	1679.54	212.011	717.529	1672.7	336.924	884.115	1665.11	225.611	891.776	1659.9	286.759	918.73	1521.96	301.213	989.949	1256.41	272.79	767.306	1440.07	246.884	702.581	1239.96	222.977	1004.42	1314.79	461.697	813.49	1477.06	537.43	799.582	1280.08	547.725	760.777	1127.91	520.654	614.9	1032.93	449.589	554.922	984.82	509.619	572.564	944.566	486.28	502.387	933.755
3219	0	292.947	682.398	1677.61	210.386	706.791	1670.88	335.322	873.755	1663.03	224.136	880.982	1657.39	284.906	907.792	1519.88	299.482	978.617	1254.3	270.893	756.182	1437.93	245.405	691.582	1237.72	221.473	993.288	1312.51	459.812	802.559	1475.03	535.3	788.962	1278.05	545.887	750.436	1125.85	519.529	604.555	1030.41	448.915	544.509	981.776	508.779	562.647	941.703	486.029	492.203	930.998
3220	0	291.194	671.732	1675.85	208.609	695.943	1669.32	333.299	863.224	1661.01	221.794	870.433	1655.88	282.736	896.707	1517.96	298.154	967.61	1252.6	269.019	745.037	1436.08	243.795	680.5	1235.64	219.857	981.948	1310.18	457.709	791.409	1473.25	533.309	778.503	1276.05	543.822	739.9	1124	518.551	594.493	1027.85	448.415	534.295	979.104	508.277	553.239	937.782	486.038	482.446	927.842
3221	0	289.439	661.035	1674.54	206.863	685.072	1668.11	331.188	852.704	1659.2	219.619	859.609	1654.12	280.387	885.59	1516.22	296.101	955.892	1250.54	267.03	733.771	1434.35	242.277	669.318	1233.98	218.085	970.426	1308.39	455.523	780.225	1471.77	531.213	767.876	1274.55	541.622	729.526	1122.3	517.489	584.651	1024.77	447.889	524.348	975.986	507.412	543.645	934.841	486.052	473.147	924.138
3222	0	287.571	650.243	1673.55	204.905	674.223	1666.86	328.815	841.93	1657.81	217.27	848.7	1652.8	278.083	874.368	1514.77	294.815	944.788	1249.24	265.066	722.538	1432.88	240.532	657.818	1232.39	216.02	958.81	1306.71	453.399	769.003	1470.7	529.058	756.803	1273.65	539.369	719.173	1120.93	516.446	575.019	1021.93	447.572	514.654	971.899	507.181	534.919	931.917	486.359	464.326	920.375
3223	0	285.465	639.424	1672.64	202.778	663.261	1666	326.293	831.07	1656.76	214.797	837.683	1651.51	275.476	862.948	1513.88	292.812	933.187	1247.94	262.755	710.943	1431.59	238.779	645.96	1231.39	214.083	947.191	1305.17	451.3	757.816	1470.25	526.848	745.435	1273.02	537.026	708.821	1119.9	515.624	565.722	1019.25	447.249	505.334	968.467	506.882	526.664	928.549	486.757	455.919	916.678
3224	0	283.201	628.545	1672.11	200.407	652.166	1665.34	323.724	820.243	1656.02	212.144	826.597	1650.65	273.132	851.468	1513.12	291.138	921.57	1247.25	260.852	699.554	1430.86	237.083	633.871	1230.75	212.051	935.359	1304.32	449.06	746.636	1469.48	524.477	733.913	1272.66	534.639	698.569	1119.27	515.136	556.537	1016.96	447.1	496.388	964.872	506.608	518.673	925.422	487.118	448.028	912.38
3225	0	280.815	617.604	1671.92	198.038	641.074	1664.87	321.105	809.37	1655.63	209.377	815.456	1650.27	270.696	839.947	1512.48	289.321	909.739	1246.64	258.891	688.067	1430.67	235.454	621.766	1230.52	209.998	923.58	1303.56	446.806	735.334	1469.36	522.334	722.119	1272.68	532.297	688.321	1119.11	514.275	547.789	1014.62	447.039	487.906	961.112	506.421	511.351	921.981	487.769	440.7	908.422
3226	0	278.153	606.474	1671.97	195.552	630.012	1664.65	318.395	798.395	1655.74	206.607	804.386	1650	268.309	828.492	1512.25	287.584	898.022	1246.56	256.844	676.42	1430.51	233.819	609.584	1230.53	207.897	911.827	1303.05	444.635	724.16	1469.52	520.214	710.471	1273.17	529.713	678.153	1119.23	512.984	539.41	1011.98	447.073	479.835	957.337	506.486	504.373	919.207	488.425	433.632	904.125
3227	0	275.494	595.453	1672.4	192.896	618.902	1664.76	315.718	787.43	1656.11	203.863	793.207	1649.86	265.958	817.119	1512.33	285.787	886.123	1246.52	254.886	664.895	1430.82	232.383	597.43	1230.95	205.902	900.084	1302.89	442.505	712.911	1470.17	518.147	698.764	1273.58	527.201	668.262	1119.51	512.724	531.089	1010.12	447.2	472.174	953.586	506.683	497.655	916.225	489.739	427.388	900.109
3228	0	272.654	584.313	1673.16	190.12	607.828	1665.09	313.009	776.364	1656.85	201.069	782.115	1650.22	263.486	805.848	1512.68	283.936	874.25	1246.82	253.023	653.557	1431.34	230.884	585.384	1231.79	203.847	888.339	1303.12	440.561	701.819	1470.98	516.333	687.297	1274.85	524.809	658.518	1120.29	511.773	523.478	1007.64	447.431	464.874	949.718	506.811	491.537	914.073	490.838	421.482	896.134
3229	0	269.755	573.267	1674.11	187.22	596.748	1665.59	310.453	765.258	1658.09	198.449	771.072	1650.83	261.429	794.516	1513.49	282.304	862.521	1247.53	251.132	642.105	1432.13	229.516	573.495	1232.71	201.874	876.604	1303.61	438.709	690.669	1472.28	514.613	675.871	1276.3	522.39	648.82	1121.35	511.232	515.872	1006.14	447.812	458.021	946.14	507.615	486.018	911.663	491.975	416.134	892.266
3230	0	266.653	562.129	1675.2	184.297	585.781	1666.36	307.776	754.034	1659.52	196.012	760.064	1651.49	259.401	783.26	1514.42	280.654	850.781	1248.49	249.541	630.869	1433.43	228.218	561.796	1234.13	200	864.941	1304.42	436.719	679.501	1473.73	512.814	664.465	1277.86	519.928	639.291	1122.77	510.377	508.766	1004.67	448.411	451.681	943.066	507.921	480.634	909.675	492.768	411.27	887.843
3231	0	263.465	551.015	1676.58	181.303	574.874	1667.2	305.12	742.805	1661.18	193.766	748.977	1652	257.342	772.115	1515.54	278.88	839.051	1249.72	247.811	619.531	1435.08	226.835	550.26	1235.78	197.959	853.228	1305.33	434.865	668.647	1475.35	511.123	653.35	1279.63	517.629	630.081	1124.41	510.186	501.844	1003.76	448.828	445.609	940.612	508.232	475.981	908.384	493.878	406.71	884.398
3232	0	260.306	540.012	1678.14	178.27	564.102	1668.14	302.675	731.66	1663.13	191.195	738.258	1653.35	255.406	761.095	1516.96	276.985	827.572	1250.78	246.431	608.469	1436.86	225.731	538.89	1237.58	195.944	841.685	1306.26	433.255	657.935	1477.29	509.722	642.499	1281.66	515.483	621.077	1126.24	509.818	495.231	1003.16	449.527	440.219	937.779	508.98	471.315	907.073	495.136	402.62	881.17
3233	0	257.285	529.021	1679.82	175.346	553.449	1669.12	300.222	720.645	1665.16	189.013	727.532	1654.46	253.593	750.164	1518.38	274.195	815.765	1251.58	244.912	597.349	1438.38	224.571	527.675	1239.37	193.972	830.199	1307.54	431.719	647.287	1479.36	508.435	631.863	1283.97	513.524	612.307	1128.25	509.686	488.892	1002.91	450.34	435.117	935.197	509.794	466.999	906.044	496.433	398.892	878.484
3234	0	254.237	518.211	1681.45	172.417	543.014	1670.33	297.9	709.663	1667.27	186.792	716.882	1655.81	251.849	739.386	1519.86	273.095	805.325	1253.54	243.735	586.313	1440.48	223.651	516.518	1241.42	191.904	818.836	1309.16	430.284	636.994	1481.32	507.233	621.622	1286.22	511.657	603.867	1130.26	509.483	482.848	1002.92	451.141	430.306	932.913	510.928	462.626	905.381	497.702	395.517	875.605
3235	0	251.347	507.545	1683.32	169.673	532.486	1671.63	295.701	698.787	1669.38	184.663	706.327	1656.94	250.29	728.74	1521.62	271.116	794.292	1255.31	242.662	575.526	1442.28	222.753	505.402	1243.42	189.716	807.644	1310.68	429.165	627.008	1483.53	506.022	611.481	1288.51	510.114	595.541	1132.62	509.406	476.871	1003.1	451.973	425.796	931.326	511.911	458.677	905.019	498.916	392.134	873.365
3236	0	248.508	496.925	1685.31	166.902	522.111	1673.05	293.749	688.043	1671.52	182.881	696.001	1658.6	248.693	718.05	1523.43	269.308	783.666	1257.33	241.764	564.798	1444.23	221.92	494.314	1245.49	187.594	796.557	1312.55	427.979	616.885	1485.66	505.057	601.911	1290.73	508.772	587.489	1134.8	509.458	471.206	1003.47	452.809	421.552	929.956	512.973	454.622	905.133	500.073	388.902	871.499
3237	0	245.901	486.458	1687.3	164.526	511.885	1674.69	291.919	677.408	1673.57	181.197	685.758	1660.02	247.197	707.496	1525.35	267.251	773.15	1259.17	241.038	554.155	1446.21	221.401	483.358	1247.59	185.444	785.608	1314.36	426.893	607.052	1487.9	504.052	592.632	1292.81	507.741	579.739	1137.12	509.954	465.727	1003.95	453.561	417.038	929.088	514.039	450.644	905.378	501.126	385.724	869.82
3238	0	243.514	476.105	1689.57	162.327	501.833	1676.46	290.148	666.8	1675.8	179.658	675.519	1661.24	245.534	696.984	1527.47	265.194	762.796	1261.08	240.413	543.628	1448.36	220.893	472.653	1249.7	183.196	774.784	1316.43	425.778	597.26	1489.91	503.133	583.916	1294.79	506.873	572.138	1139.41	509.977	460.026	1004.7	453.819	412.961	927.178	515.103	446.652	905.8	502.059	382.56	868.415
3239	0	241.432	465.846	1691.88	160.446	492.039	1678.1	288.689	656.418	1677.96	178.129	665.363	1662.97	244.345	686.635	1529.39	263.188	752.563	1263.21	239.724	533.313	1450.03	220.499	461.969	1251.52	181.003	764.219	1318.59	424.938	587.654	1492.14	502.519	575.794	1296.74	506.371	565.037	1141.37	510.042	454.644	1005.23	454.575	408.865	926.734	516.083	442.958	906.646	503.039	379.421	867.409
3240	0	239.623	455.79	1694.14	158.588	481.921	1680.19	287.495	646.315	1679.71	177.087	655.5	1664.5	243.202	676.279	1531.49	261.117	742.419	1265.35	239.189	523.012	1451.89	220.344	451.606	1253.46	178.81	753.661	1320.63	424.209	578.332	1494.02	501.874	567.952	1298.64	505.88	558.152	1143.44	510.647	449.576	1006.16	455.46	404.986	926.654	517.145	438.921	907.428	503.804	376.392	866.406
3241	0	237.847	445.702	1696.51	157.304	472.356	1682.05	286.137	636.062	1681.72	175.89	645.468	1666.04	241.868	666.07	1533.51	259.116	732.514	1267.32	238.6	512.727	1453.8	220.186	441.312	1255.23	176.822	743.417	1322.81	423.375	569.06	1495.95	501.195	560.591	1300.39	505.632	551.662	1145.39	511.09	444.624	1007	456.158	401.05	926.581	518.275	435.063	908.198	504.486	373.19	865.927
3242	0	236.427	435.794	1698.71	155.888	462.535	1684.19	285.263	626.31	1683.54	175.142	635.744	1667.68	240.768	656.034	1535.68	257.143	722.579	1269.29	238.219	502.82	1455.69	220.2	431.264	1257.35	174.947	733.087	1324.81	422.626	560.014	1497.74	500.666	553.525	1302.11	505.407	545.598	1147.08	511.233	439.725	1007.59	456.727	397.057	927.118	519.443	430.912	908.988	505.264	369.982	865.688
3243	0	235.53	426.124	1701.02	155.049	452.953	1686.45	284.434	616.373	1685.35	174.269	625.917	1669.58	239.649	645.974	1537.78	255.368	712.876	1271.35	237.853	492.828	1457.63	220.23	421.265	1259.05	172.981	722.838	1326.91	421.945	550.879	1499.66	500.367	546.906	1303.87	505.392	539.909	1148.91	512.111	435.022	1008.85	457.736	393.416	927.32	520.569	426.945	910.067	506.071	366.667	865.827
3244	0	234.94	416.556	1703.27	154.34	443.287	1688.95	283.923	606.766	1687.23	173.742	616.3	1671.46	238.58	636.148	1539.82	253.631	703.366	1273.52	237.404	482.999	1459.49	220.409	411.301	1260.95	171.573	712.924	1329.46	421.394	541.866	1501.62	500.03	540.401	1305.82	505.303	534.393	1150.87	512.858	430.508	1010.06	458.602	389.289	928.351	521.479	423.069	911.317	507.053	363.311	866.377
3245	0	234.46	406.853	1705.74	153.809	433.622	1691.34	283.47	597.151	1689.25	173.206	606.579	1673.72	237.596	626.279	1541.97	252.143	693.946	1275.77	237.083	473.393	1461.39	220.401	401.605	1262.89	170.221	703.327	1331.55	420.848	533.021	1503.59	499.74	534.113	1307.68	505.294	529.134	1152.87	513.553	426.169	1011.35	459.526	385.399	929.193	522.269	419.273	912.562	507.931	360.02	867.016
3246	0	234.319	397.394	1708.1	153.523	424.076	1693.86	282.979	587.541	1691.14	172.805	596.961	1676.02	236.694	616.611	1544.32	250.628	684.452	1278.1	236.767	463.749	1463.52	220.385	391.982	1264.86	168.756	693.292	1334.41	420.307	524.437	1505.81	499.535	528.056	1309.86	505.254	524.033	1155.01	514.456	422.137	1012.78	460.504	381.309	930.48	523.297	415.805	913.967	508.947	356.723	868.05
3247	0	234.345	387.874	1710.27	153.627	414.543	1696.44	282.913	578.055	1693.15	172.631	587.465	1678.45	235.763	606.892	1546.64	249.199	675.041	1280.63	236.467	454.235	1465.61	220.604	382.477	1266.82	167.48	683.389	1337.15	419.855	515.775	1507.79	499.2	521.927	1311.96	505.321	519.183	1157.02	515.238	418.055	1014.42	461.693	377.356	931.635	523.869	412.508	915.654	510.299	353.462	869.2
3248	0	234.568	378.403	1712.27	153.724	404.919	1699.1	282.9	568.714	1695.05	172.279	577.803	1681.04	234.859	597.311	1548.83	247.961	665.763	1283.24	236.22	444.664	1467.7	220.589	373.509	1268.39	165.912	673.66	1339.06	419.325	507.173	1509.82	498.837	516.023	1314.16	505.082	514.085	1159.34	516.071	414.161	1015.82	463.126	373.767	932.546	524.516	409.32	917.194	511.567	350.12	870.383
3249	0	235.063	368.926	1714.37	154.056	395.276	1701.49	282.919	559.313	1697.07	172.101	568.18	1683.34	233.688	587.986	1550.84	246.466	656.504	1285.18	235.939	435.199	1470.03	220.634	363.971	1270.62	164.691	664.084	1341.57	418.688	498.682	1511.95	498.471	510.151	1316.13	505.015	509.44	1161.57	516.753	410.288	1017.37	464.197	369.281	934.284	525.118	406.171	918.735	512.844	346.843	871.888
3250	0	235.819	359.538	1716.33	154.574	385.618	1703.95	282.928	549.969	1698.75	172.219	558.654	1685.82	232.696	578.545	1552.97	244.945	647.312	1287.08	235.672	425.792	1471.93	220.581	354.348	1272.8	163.43	654.667	1343.61	418.214	490.318	1513.8	498.111	504.231	1318.37	504.835	504.872	1163.59	517.77	406.57	1019.13	465.695	365.009	936.098	525.914	402.987	920.097	514.593	343.853	873.229
3251	0	236.703	350.138	1718.05	155.239	375.941	1706.31	282.975	540.715	1700.32	172.386	549.133	1688.24	232.102	569.134	1554.77	243.609	638.083	1288.96	235.439	416.439	1473.86	220.612	345.114	1274.61	162.038	644.763	1345.79	417.866	481.888	1515.66	497.838	498.355	1320.48	504.464	500.196	1165.61	518.801	403.015	1020.72	467.382	360.585	937.844	526.406	400.105	921.632	516.398	340.613	874.82
3252	0	237.6	340.72	1719.65	155.932	366.312	1708.42	283.067	531.543	1701.77	172.509	539.477	1690.35	231.486	559.823	1556.67	242.254	628.844	1290.93	235.173	407.123	1475.73	220.586	336.434	1276.11	160.75	635.463	1347.63	417.303	473.439	1517.5	497.285	492.617	1322.43	504.098	495.655	1167.58	519.589	399.207	1022.29	469.001	356.456	939.169	527.13	397.056	922.985	518.263	337.324	876.144
3253	0	238.572	331.28	1721.09	156.799	356.631	1710.44	283.466	522.279	1703.4	172.504	529.867	1692.73	230.591	550.378	1558.44	240.963	619.716	1292.73	234.965	397.817	1477.51	220.5	326.764	1278.12	159.684	626.069	1349.56	416.727	464.932	1519.05	496.761	486.594	1324.31	503.739	490.978	1169.74	520.389	395.439	1023.71	470.401	351.526	941.004	527.503	393.93	924.427	519.857	334	877.515
3254	0	239.819	321.984	1722.27	157.707	346.913	1712.33	283.879	513.025	1704.86	172.893	520.288	1694.89	230.005	541.015	1560.14	240.034	610.788	1294.65	235.066	388.58	1479.28	220.594	318.404	1278.85	158.443	616.641	1351.61	416.354	456.452	1520.84	496.239	480.428	1326.35	503.267	486.153	1171.73	521.303	391.6	1025.27	472.108	346.933	942.554	528.169	390.692	925.979	521.877	330.636	879.1
3255	0	240.903	312.439	1723.38	158.701	337.104	1713.97	284.236	503.793	1706.07	173.239	510.662	1696.66	229.294	531.623	1561.73	239.018	601.783	1296.78	234.839	379.288	1480.43	220.723	309.332	1280.21	157.359	607.392	1353.72	416.105	447.72	1522.61	495.834	474.248	1328.37	502.974	481.273	1173.91	522.042	387.225	1026.94	474.003	342.205	943.918	528.555	387.422	927.646	523.955	327.303	880.682
3256	0	242.066	303.004	1724.27	159.778	327.392	1715.3	284.783	494.422	1707.23	173.465	500.906	1698.57	228.623	522.26	1563.04	238.039	592.722	1298.55	234.641	369.911	1481.58	220.802	300.298	1281.4	156.155	597.721	1355.13	415.782	439.175	1523.92	495.332	467.925	1330.15	502.368	476.193	1175.74	522.52	383.486	1027.76	475.554	337.372	945.355	529.004	384.075	928.895	525.73	323.665	881.845
3257	0	243.317	293.522	1725.1	160.853	317.6	1716.73	285.137	485.098	1707.97	173.772	491.205	1700.06	228.174	512.784	1564.01	237.294	583.859	1299.72	234.615	360.532	1482.66	221.085	291.115	1282.53	155.423	588.412	1356.6	415.508	430.506	1525.05	494.918	461.626	1331.62	501.806	470.963	1177.2	523.338	379.456	1028.86	477.342	332.446	946.411	529.413	380.616	929.696	527.617	320.131	882.961
3258	0	244.514	283.783	1725.81	161.91	307.783	1717.81	285.638	475.807	1708.35	174.208	481.359	1701.06	227.722	503.334	1565.03	236.403	574.808	1300.7	234.635	351.201	1483.33	221.461	282.739	1282.79	154.531	578.904	1357.6	415.281	421.761	1525.94	494.449	454.967	1333	501.3	465.794	1178.39	524.077	375.168	1029.71	479.048	327.45	947.383	529.859	376.99	930.468	529.572	316.541	883.721
3259	0	245.624	274.321	1726.02	162.912	297.879	1718.55	286.025	466.438	1708.63	174.577	471.582	1701.8	227.385	493.789	1565.74	235.489	565.728	1301.17	234.68	341.738	1484.02	221.705	273.988	1282.98	153.744	569.59	1358.35	414.983	413.026	1526.43	494.009	448.2	1333.86	500.679	460.3	1179.28	524.775	370.876	1030.11	480.61	322.378	947.795	530.505	373.622	930.724	531.201	312.684	884.077
3260	0	246.798	264.725	1726.27	164.007	287.946	1719.2	286.425	456.945	1708.68	175.116	461.767	1702.28	226.924	484.359	1566.25	234.714	556.578	1301.86	234.852	332.33	1484.43	221.999	265.039	1283.04	152.944	560.225	1358.96	414.754	404.173	1526.81	493.552	441.308	1334.57	500.49	454.792	1180.28	525.354	366.206	1030.34	482.068	317.06	948.309	530.556	369.251	931.16	532.843	308.701	884.248
3261	0	247.951	255.1	1726.13	165.08	277.979	1719.57	286.913	447.412	1708.53	175.536	451.858	1702.61	226.777	474.701	1566.48	234.201	547.548	1302.36	235.012	322.849	1484.44	222.665	256.286	1283	152.39	550.758	1359.55	414.792	395.273	1527.25	493.374	434.2	1335.39	499.979	448.791	1181.11	526.113	361.382	1030.68	483.766	311.723	948.503	530.978	364.907	931.382	534.646	304.643	884.519
3262	0	249.142	245.264	1726.12	166.081	268.047	1719.75	287.347	437.695	1708.25	175.765	441.846	1702.74	226.438	465.141	1566.62	233.888	538.457	1302.79	235.171	313.251	1484.19	223.258	247.355	1282.83	151.82	541.568	1360.01	414.866	386.189	1527.44	493.325	426.811	1335.92	499.54	442.533	1181.56	526.852	356.346	1030.96	485.282	305.954	948.841	531.626	360.462	931.453	536.314	300.253	884.541
3263	0	250.222	235.839	1725.61	167.043	258.044	1719.73	287.889	428.068	1707.86	176.102	431.844	1702.79	226.4	455.426	1566.52	233.829	529.337	1303.33	235.276	304.115	1483.44	223.66	238.356	1282.25	151.261	532.307	1360.33	414.878	377.039	1527.43	493.165	419.323	1336.15	499.23	436.251	1182.11	527.623	351.13	1031.04	486.568	300.401	948.301	532.299	355.735	931.607	537.811	295.682	884.193
3264	0	251.266	226.229	1724.93	167.998	247.986	1719.47	288.404	418.29	1707.15	176.658	421.728	1702.4	226.424	445.613	1566.25	234.123	520.451	1303.99	235.784	294.222	1483.12	223.782	228.29	1281.45	150.922	522.87	1360.48	415.013	367.87	1527.03	492.983	411.638	1336.44	498.87	429.503	1182.36	528.266	345.391	1030.65	488.137	294.679	947.767	532.947	350.78	931.386	539.443	291.072	883.941
3265	0	252.325	216.383	1724.23	168.964	237.918	1719	289.009	408.422	1706.23	177.092	411.674	1701.63	226.441	435.728	1565.9	234.273	511.436	1303.93	236.154	284.456	1482.17	224.542	219.177	1280.31	150.863	513.323	1360.21	415.326	358.6	1526.37	492.975	403.787	1336.03	498.623	422.599	1182.07	528.964	339.871	1029.87	489.286	287.776	947.204	533.65	345.567	930.812	540.984	286.229	882.888
3266	0	253.307	206.326	1723.54	169.833	227.741	1718.28	289.493	398.556	1705.02	177.824	401.598	1700.61	226.438	425.621	1565.16	233.792	501.403	1302.49	236.66	274.75	1481.03	225.531	210.899	1278.85	150.863	503.817	1359.55	415.628	349.172	1525.51	492.925	395.844	1335.46	498.305	415.635	1181.42	529.619	333.846	1028.92	489.461	279.167	946.328	534.421	340.328	929.893	542.264	281.078	881.591
3267	0	254.338	196.342	1722.69	170.835	217.459	1717.27	289.944	388.641	1703.53	178.441	391.448	1699.28	226.939	415.542	1564.22	233.997	491.961	1301.28	237.268	264.769	1479.91	226.105	201.421	1277.61	151.165	494.126	1358.55	416.126	339.768	1524.15	493.004	387.557	1334.34	497.977	408.354	1180.53	530.448	327.803	1027.66	490.196	272.569	944.244	535.112	334.762	928.468	543.673	275.957	880.133
3268	0	255.363	186.234	1721.64	171.858	207.312	1716.41	290.587	378.624	1701.87	178.95	381.222	1697.68	227.55	405.29	1563.07	234.433	482.416	1300.24	237.861	254.781	1478.34	226.876	191.875	1276.19	150.837	484.076	1356.6	416.725	330.168	1522.73	493.162	379.27	1333.37	497.666	401.068	1179.01	531.29	321.48	1026.38	491.527	266.241	942.882	535.892	328.984	927.003	545.215	270.626	878.519
3269	0	256.371	176.287	1720.22	172.767	197.125	1715.07	291.394	368.419	1700.3	179.785	370.951	1696.19	227.909	395.013	1561.71	235.079	472.901	1299.29	238.426	244.682	1476.63	227.466	182.39	1274.4	151.487	474.377	1355.84	417.402	320.326	1521.4	493.446	370.577	1332.37	497.499	393.033	1178.05	532.127	314.833	1025.03	492.846	259.694	941.159	536.825	322.962	925.765	546.491	264.971	876.634
3270	0	257.305	166.026	1718.7	173.743	186.806	1713.72	292.447	358.393	1698.85	180.743	360.639	1694.89	229.025	384.498	1560.46	236.103	463.316	1298.36	239.276	234.516	1474.98	227.991	172.748	1272.43	152.196	464.681	1354.96	418.105	310.254	1519.7	493.837	361.653	1331.16	497.771	385.111	1177.24	532.896	307.924	1023.49	494.197	253.108	938.881	537.879	316.751	924.434	547.954	259.138	874.878
3271	0	258.455	155.6	1717.26	174.876	176.52	1712.15	293.423	348.052	1696.97	181.718	350.244	1693.02	229.746	374.025	1559.12	237.349	453.877	1297.58	240.322	224.423	1473.09	228.786	163.13	1270.34	153.345	455.101	1354.74	418.882	299.932	1518.02	494.29	352.692	1329.83	498.139	377.166	1176.15	533.924	301.004	1021.63	495.487	246.163	936.69	538.975	310.331	922.905	549.139	252.908	872.637
3272	0	259.735	145.453	1715.34	176.072	166.217	1710.33	294.57	337.824	1694.81	182.769	339.845	1691.06	230.678	363.479	1557.22	238.444	444.27	1296.18	241.073	213.88	1470.88	229.624	153.499	1268.17	154.276	445.186	1353.3	419.84	289.51	1516.2	494.941	343.39	1328.29	498.349	368.788	1174.75	535.026	293.879	1019.96	497.727	240.028	934.852	540.041	303.717	921.122	550.587	246.737	870.357
3273	0	261.245	135.128	1713.44	177.615	155.842	1708.36	295.744	327.54	1692.55	183.649	329.373	1688.48	231.613	353.101	1555.56	239.703	434.605	1294.53	242.093	203.507	1468.69	230.401	143.672	1265.84	155.145	435.169	1351.54	420.835	278.901	1514.22	495.699	334.126	1326.54	498.723	360.167	1173.05	536.127	286.622	1017.94	499.171	232.66	932.705	541.014	296.912	919.086	552.219	240.517	867.979
3274	0	262.644	124.651	1711.39	179.106	145.346	1706.2	297.088	317.173	1690.35	185.316	318.83	1686.58	232.913	342.3	1553.62	240.57	424.405	1292.51	242.949	193.447	1466.12	231.181	133.793	1263.32	156.212	425.14	1349.84	421.822	268.2	1511.8	496.253	324.696	1324.62	499.191	351.346	1171.14	537.164	278.909	1015.55	500.805	225.524	929.898	542.137	290.057	916.587	553.811	234.045	865.501
3275	0	264.084	114.077	1709.1	180.848	134.803	1704.05	298.565	306.614	1688.08	186.748	308.259	1684.37	234.213	331.621	1551.6	241.777	414.264	1290.76	244.025	182.922	1463.82	231.981	123.814	1260.6	157.21	415	1348.11	422.968	257.482	1509.43	497.095	314.723	1322.43	499.809	342.356	1169.07	538.345	271.149	1013.03	502.268	217.78	927.068	543.362	282.857	914.415	555.424	227.214	862.506
3276	0	265.965	103.558	1706.87	182.663	124.125	1701.98	300.295	296.06	1685.74	188.435	297.577	1682.09	235.644	320.99	1549.61	243.38	404.548	1289.02	245.134	172.292	1461.49	232.768	113.693	1258.1	158.425	404.729	1346.11	424.247	246.55	1506.97	498.223	304.378	1320.06	500.51	332.97	1166.85	539.536	262.89	1010.42	505.777	214.828	922.06	544.794	275.683	911.864	556.953	220.114	859.883
3277	0	267.846	92.772	1704.78	184.199	113.318	1699.79	301.962	285.382	1683.3	189.87	286.829	1679.61	237.225	310.52	1547.43	243.31	393.202	1285.64	246.418	161.709	1459.1	233.566	103.558	1255.61	159.828	394.501	1344.14	425.705	235.698	1504.55	499.688	294.142	1317.85	501.319	323.322	1164.61	540.871	254.546	1007.89	505.932	202.285	921.117	545.947	267.932	909.336	558.51	212.753	856.865
3278	0	270.007	81.9367	1702.5	186.142	102.492	1697.9	303.859	274.745	1681.07	191.875	276.07	1677.54	238.839	299.785	1545.4	244.307	382.747	1283.56	247.715	151.043	1456.88	234.492	93.2851	1253.31	161.007	384.073	1342.27	427.269	224.817	1501.92	500.393	283.516	1315.04	502.301	313.368	1162.34	542.261	245.952	1005.34	507.563	193.999	918.287	547.273	259.9	906.7	560.181	205.145	854.001
3279	0	272.234	71.19	1700.12	188.319	91.6817	1695.76	306.042	264	1679.07	194.19	265.277	1675.75	240.645	289.063	1543.26	246.394	373.121	1282.26	249.284	140.389	1454.55	235.589	82.8216	1250.9	162.478	373.599	1340.5	428.955	213.972	1499.59	502.405	272.74	1312.95	503.545	303.24	1160.12	543.779	236.992	1002.78	509.444	185.721	915.407	548.826	251.538	904.083	562.305	197.716	850.784
3280	0	274.571	60.4427	1697.82	190.71	80.8901	1693.44	308.401	253.264	1676.85	196.455	254.46	1673.7	242.464	278.311	1541.19	247.701	362.541	1280.58	250.884	129.778	1452.17	236.562	72.3091	1248.67	163.845	362.94	1338.69	430.716	203.042	1497.21	504.042	261.719	1310.48	504.756	292.681	1158.05	545.566	227.948	999.949	512.42	181.274	910.276	550.524	242.911	901.82	563.774	189.282	848.065
3281	0	276.823	49.8111	1695.17	193.201	69.9453	1691.16	310.741	242.536	1674.65	198.689	243.569	1671.48	244.523	267.578	1539.23	248.84	351.82	1278.35	252.583	119.052	1449.84	237.763	61.6993	1246.32	165.296	352.207	1336.62	432.489	192.131	1494.54	505.52	250.753	1307.98	506.038	281.972	1155.51	546.846	218.2	997.141	512.88	168.509	908.374	552.014	233.967	899.234	565.225	180.587	844.83
3282	0	279.528	38.8036	1692.82	195.815	59.0059	1688.93	313.232	231.624	1672.2	201.139	232.651	1669.27	246.174	256.653	1536.81	250.121	340.909	1276.3	254.579	108.787	1447.11	239.025	50.8372	1243.85	166.872	341.297	1334.49	434.263	181.386	1491.7	506.764	239.633	1304.68	507.39	271.168	1152.83	548.463	208.485	994.068	514.602	159.311	905.054	553.692	224.697	896.313	567.02	171.985	841.454
3283	0	282.422	27.9594	1690.48	198.666	48.0915	1686.76	315.746	220.733	1669.64	203.701	221.695	1666.96	248.8	245.891	1534.46	251.197	329.762	1273.52	256.608	97.9335	1444.78	240.609	39.9286	1241.91	168.36	330.231	1332.33	436.387	170.565	1489.01	508.771	228.584	1302.03	508.914	260.2	1149.88	550.016	198.277	991.148	517.212	153.321	900.43	555.344	215.149	893.157	568.738	162.917	838.232
3284	0	285.48	17.0132	1688.2	201.553	37.1383	1684.56	318.563	209.82	1667.47	206.409	210.679	1664.77	250.812	234.926	1532.32	251.641	317.751	1270.34	258.743	86.963	1442.61	242.271	28.7705	1239.89	169.952	318.994	1330.03	438.557	159.618	1486.3	509.962	217.455	1298.83	510.376	249.03	1147.12	551.538	187.635	988.321	518.841	143.505	897.201	557.03	205.295	890.259	570.357	153.391	835.047
3285	0	288.184	6.19958	1685.98	204.434	26.1248	1682.78	321.484	198.822	1665.19	209.428	199.783	1662.9	253.153	223.938	1529.99	254.57	307.619	1269.52	260.892	75.8464	1440.52	243.895	17.3049	1237.84	171.611	307.615	1327.95	440.819	148.678	1483.62	511.743	206.349	1295.9	512.101	237.777	1144.32	553.252	177.259	985.197	520.3	133.308	894.037	558.701	195.114	887.426	572.039	143.647	831.799
3286	0	291.264	-4.85906	1684.08	207.527	15.1006	1681.02	324.593	187.885	1663.11	212.436	188.765	1661.17	255.803	212.915	1528.16	255.56	295.784	1266.79	263.123	64.7041	1438.43	245.679	5.84252	1235.86	173.374	296.31	1326.19	443.202	137.675	1480.85	513.94	195.136	1292.99	513.865	226.213	1141.62	554.764	166.138	982.154	521.952	122.882	890.637	560.505	184.694	884.464	573.632	133.332	828.649
3287	0	294.4	-15.8145	1682.25	210.641	4.12519	1679.31	327.638	176.779	1661.11	215.462	177.699	1659.28	258.303	201.913	1526.16	257.26	284.471	1264.84	265.534	53.4358	1436.59	247.661	-5.89073	1234.1	175.349	284.827	1324.32	445.735	126.459	1478.25	516.112	183.979	1290.26	515.742	214.72	1138.91	556.362	154.871	979.335	523.338	112.132	887.336	561.99	173.829	881.634	574.951	122.557	825.547
3288	0	297.567	-26.8845	1680.59	213.776	-7.05437	1677.96	330.573	165.638	1659.23	218.44	166.55	1657.62	261.053	190.533	1524.29	258.845	272.809	1262.9	267.863	41.9518	1434.95	249.541	-17.903	1232.63	177.541	273.534	1322.57	448.353	115.468	1475.63	517.662	172.609	1287.1	517.644	203.096	1136.11	557.793	143.598	976.209	524.787	101.13	884.178	563.507	162.825	878.706	576.491	111.693	822.5
3289	0	300.737	-38.0355	1679.49	216.869	-18.1435	1676.84	333.63	154.516	1657.36	221.546	155.496	1656.35	263.569	179.235	1522.69	260.885	261.185	1261	270.445	30.7499	1433.46	251.506	-30.0704	1231.41	179.817	262.162	1320.97	451.025	104.092	1473.15	520.1	161.33	1284.53	519.551	191.119	1133.29	559.526	132.047	973.195	526.065	89.8613	881.414	564.92	151.425	875.927	578.082	100.814	819.23
3290	0	304.001	-49.025	1678.27	220.111	-29.1532	1676	337.011	143.478	1656.13	224.794	144.539	1655.23	266.697	167.873	1521.5	263.307	249.768	1259.92	273.124	19.2677	1432.32	253.823	-42.2152	1230.61	182.194	250.971	1319.55	453.909	92.9631	1471.03	522.112	149.89	1281.89	521.601	179.033	1130.7	561.225	120.542	970.624	527.456	78.1535	878.927	566.276	139.595	873.114	579.493	89.3296	816.575
3291	0	306.98	-60.2292	1677.63	222.981	-40.2751	1675.45	340.081	132.311	1655.07	227.86	133.378	1654.47	269.54	156.533	1520.75	265.563	238.21	1258.62	275.703	7.95742	1431.4	255.941	-54.3228	1229.89	184.735	239.713	1318.71	456.803	81.6256	1469.27	524.041	138.071	1279.56	523.556	166.358	1128.27	562.727	108.246	968.229	528.63	66.3914	876.442	567.636	127.657	870.668	580.564	77.3656	814.131
3292	0	309.862	-71.401	1677.2	225.941	-51.3984	1675.27	343.112	121.076	1654.6	230.982	122.203	1653.97	272.332	145.17	1519.93	267.983	226.849	1258.06	278.209	-3.47472	1430.71	257.946	-66.5151	1229.4	187.677	228.615	1318.16	459.485	70.1727	1467.64	526.208	126.108	1277.45	525.542	153.545	1126.45	564.127	95.7533	965.898	529.468	54.1809	874.172	568.908	115.216	868.701	581.334	64.8663	811.793
3293	0	312.613	-82.5976	1677.32	228.84	-62.4241	1675.29	345.948	109.701	1654.15	233.894	111.066	1653.77	275.272	133.6	1519.92	269.064	214.287	1256.82	280.875	-14.9305	1430.58	260.062	-78.5111	1229.31	190.464	217.642	1318.15	462.374	58.6049	1466.58	528.49	113.685	1275.84	527.489	140.491	1124.76	565.279	82.5028	964.146	530.173	41.7128	872.223	570.064	102.564	866.716	582.082	51.9108	810.058
3294	0	315.391	-93.7524	1677.7	231.52	-73.453	1675.79	349.036	98.4519	1654.36	236.986	100.025	1653.99	278.395	122.145	1520.52	271.523	203.32	1257.42	283.554	-26.2345	1430.71	262.12	-90.2965	1229.74	193.525	206.864	1318.78	465.192	47.0066	1465.98	531.248	101.725	1274.97	529.396	127.01	1123.42	566.53	69.3997	962.941	530.88	28.91	871.08	571.135	89.2571	865.639	582.895	38.9781	808.752
3295	0	317.889	-104.857	1678.25	234.108	-84.5269	1676.39	352.019	87.3113	1654.76	239.796	89.0379	1654.47	282.13	110.623	1521.21	274	192.453	1258.3	286.145	-37.4758	1431.46	264.195	-101.832	1230.55	196.374	196.22	1319.71	468.06	35.3513	1466.05	533.311	88.5709	1273.93	531.855	113.925	1123.11	567.705	55.4552	962.469	531.475	15.9101	870.578	572.216	75.7527	864.856	583.31	25.5458	807.947
3296	0	320.263	-116.015	1679.04	236.471	-95.4634	1677.11	354.735	76.1211	1655.48	242.545	78.1093	1655.07	284.668	99.5762	1521.94	276.518	181.774	1259.18	288.584	-48.6526	1432.33	266.206	-112.966	1231.38	198.965	185.668	1320.87	470.648	23.6748	1466.4	536.066	76.0569	1274.18	534.409	100.648	1123.15	568.814	41.6339	962.37	531.642	2.38862	870.525	573.336	61.8788	864.612	583.39	11.3588	807.63
3297	0	322.455	-127.011	1679.52	238.658	-106.296	1677.58	357.486	65.0983	1656.18	245.137	67.197	1655.89	287.488	88.8082	1522.91	279.107	171.099	1260.17	290.834	-59.6556	1433.07	268.024	-123.817	1232.09	201.576	175.383	1322.12	473.259	11.9638	1466.96	538.279	62.5925	1273.78	536.554	86.6582	1123.23	569.779	27.4012	962.309	531.868	-11.3465	870.508	574.366	47.507	864.687	583.427	-3.07423	807.521
3298	0	324.328	-138.048	1680.29	240.693	-117.004	1678.43	359.846	54.0208	1657.25	247.699	56.4929	1657.03	290.225	78.2901	1523.96	283.254	162.171	1262.94	292.885	-70.3653	1434.04	269.672	-134.261	1232.9	204.129	165.317	1323.46	475.622	0.216129	1467.92	540.671	49.4199	1274.18	538.854	72.7177	1123.45	570.744	12.8018	962.644	531.886	-25.3746	870.954	575.431	32.8055	865.271	583.358	-18.163	807.681
3299	0	325.94	-148.959	1680.96	242.513	-127.644	1679.27	362.147	43.0952	1658.63	250.006	45.9717	1658.2	293.092	68.1944	1525.21	285.945	151.931	1263.75	294.702	-80.7105	1435.09	271.104	-144.362	1234.04	206.621	155.453	1324.74	477.686	-11.5649	1468.91	543.35	36.0252	1274.8	541.106	58.6992	1124.11	571.539	-2.34313	963.253	531.646	-39.7776	871.861	576.283	17.5315	865.808	583.008	-33.4838	808.236
3300	0	327.567	-159.58	1681.78	244.151	-138.091	1680	364.208	32.3653	1659.98	252.204	35.6502	1659.83	295.428	58.2354	1526.19	288.656	141.912	1264.93	296.413	-90.8598	1436.29	272.433	-154.09	1235.25	209.21	145.774	1325.95	479.684	-22.886	1470.14	545.648	22.544	1275.32	543.579	44.7379	1124.8	572.458	-17.4367	964.2	531.303	-54.648	873.088	577.225	1.77719	866.592	582.536	-49.389	809.029
3301	0	329.039	-170.032	1682.87	245.451	-148.354	1681.07	366.203	21.8626	1661.7	254.126	25.4813	1661.32	297.946	48.6654	1527.53	291.209	132.114	1266.15	298.088	-100.661	1437.81	273.627	-163.523	1236.71	211.701	136.289	1327.33	481.671	-34.2102	1471.84	548.254	8.7324	1276.49	546.193	30.562	1125.72	573.394	-32.8958	965.467	531.117	-69.6868	874.712	578.447	-14.1868	867.556	582.05	-65.8583	810.244
3302	0	330.034	-180.372	1683.77	246.7	-158.352	1682.11	368.158	11.5601	1663.7	255.899	15.475	1663.12	300.616	39.1108	1528.82	293.783	122.535	1267.51	299.385	-110.091	1439.34	274.646	-172.786	1238.35	214.291	126.973	1328.57	483.299	-45.2174	1473.33	550.697	-4.95316	1277.62	548.828	16.2918	1126.87	574.181	-48.6846	966.789	530.654	-85.0254	876.392	579.024	-30.9386	868.826	581.325	-82.7774	811.608
3303	0	330.884	-190.471	1684.89	247.568	-168.142	1683.19	369.819	1.50146	1665.58	257.436	5.68027	1664.8	302.215	29.7176	1530.49	296.298	113.033	1268.89	300.462	-119.415	1440.78	275.31	-182.019	1239.78	216.879	117.846	1329.76	484.698	-55.8151	1474.94	552.976	-18.5484	1278.87	551.407	2.0714	1127.74	574.69	-65.0244	968.248	529.868	-100.688	878.043	579.966	-47.8851	870.223	580.243	-100.267	812.985
3304	0	331.579	-200.398	1686.04	248.423	-177.789	1684.38	371.158	-8.46737	1667.56	259.036	-3.81603	1666.94	303.915	20.6915	1531.76	298.71	103.549	1270.17	301.658	-128.574	1442.41	275.937	-191.032	1241.23	219.383	108.867	1330.97	486.121	-66.2177	1476.64	555.251	-32.0692	1280.22	553.919	-12.3509	1128.88	575.182	-81.4164	969.763	529.045	-116.588	879.935	580.807	-65.4032	871.655	579.222	-118.271	814.721
3305	0	332.113	-210.069	1687.62	249.069	-187.181	1685.81	372.043	-18.2655	1669.41	260.456	-13.2248	1668.89	305.617	11.5559	1533.87	301.021	94.2705	1271.52	302.755	-137.54	1444.18	276.525	-199.929	1243.21	221.981	99.9447	1332.05	487.403	-76.2523	1478.55	557.391	-45.4732	1281.67	556.617	-26.6625	1130.09	575.718	-97.9947	971.657	528.265	-132.567	882.408	581.555	-82.9946	873.238	578.281	-136.19	816.988
3306	0	332.447	-219.492	1689.35	249.4	-196.508	1687.42	373.029	-27.7172	1671.8	261.023	-22.4778	1670.78	307.031	2.63088	1535.38	303.257	85.0457	1273.19	303.418	-145.94	1446.28	276.977	-208.935	1245.38	224.401	91.008	1333.3	488.605	-85.9066	1480.61	559.341	-58.6391	1283.38	558.653	-41.2306	1131.11	575.947	-114.75	973.823	527.302	-148.812	885.138	582.292	-101.001	875.23	576.997	-154.799	819.535
3307	0	332.629	-228.867	1691.5	249.708	-205.462	1689.38	373.871	-36.9908	1674.17	261.625	-31.5712	1672.85	308.315	-6.02581	1537.11	305.314	75.9096	1274.81	304.212	-154.696	1448.44	277.385	-217.765	1247.63	226.731	82.1802	1334.58	489.714	-95.313	1482.65	561.018	-71.4751	1285.23	561.327	-55.6073	1132.6	576.216	-131.606	976.135	526.202	-165.248	887.932	582.911	-119.277	877.466	575.914	-173.594	822.592
3308	0	332.667	-237.921	1693.49	249.749	-214.422	1691.26	374.101	-46.2889	1676.3	262.28	-40.4589	1675.02	309.345	-14.7692	1539.05	307.129	66.638	1276.14	305.012	-163.365	1450.56	277.765	-226.733	1250.02	228.85	73.4022	1336.18	490.786	-104.58	1484.92	562.674	-84.2129	1287.28	563.628	-70.0447	1134.36	576.22	-148.548	978.732	524.992	-181.788	891.051	582.793	-138.101	879.68	574.621	-192.583	826.021
3309	0	332.576	-246.898	1695.78	249.628	-223.219	1693.32	374.485	-55.3589	1678.95	262.642	-49.2656	1677.21	310.632	-23.2194	1540.94	308.913	57.5648	1278.12	305.73	-171.839	1452.78	278.163	-235.738	1252.45	230.757	64.833	1337.73	491.655	-113.644	1487.29	564.016	-96.5442	1289.49	565.897	-84.444	1136.24	576.037	-165.595	981.679	523.678	-198.459	894.319	583.034	-156.831	882.526	573.296	-211.684	829.728
3310	0	332.389	-255.658	1698.02	249.492	-231.923	1695.26	374.527	-64.3002	1681.34	262.69	-57.9929	1679.36	311.71	-31.794	1543.32	310.664	48.4325	1279.81	306.593	-180.574	1454.95	278.607	-244.723	1254.92	232.566	56.0043	1339.44	492.446	-122.533	1489.68	565.094	-108.597	1291.8	567.981	-98.69	1138.48	575.706	-182.516	984.82	522.572	-215.197	898.53	583.079	-175.492	885.807	571.696	-230.859	834.023
3311	0	332.254	-264.327	1700.47	249.369	-240.535	1697.43	374.736	-73.0449	1684	262.615	-66.6391	1681.45	312.326	-40.3196	1544.96	312.111	39.328	1281.51	307.058	-188.906	1457.5	279.32	-253.543	1257.53	234.056	47.3122	1341.14	493.247	-131.371	1492.25	566.212	-120.076	1294.16	569.702	-112.961	1140.57	575.438	-199.339	988.482	521.178	-231.672	902.675	582.95	-194.243	889.374	570.198	-249.938	838.658
3312	0	331.957	-273.042	1702.93	249.142	-248.975	1699.43	374.767	-81.6966	1686.48	262.967	-75.2358	1683.47	313.12	-48.6698	1546.9	313.627	30.2438	1283.47	307.764	-197.41	1460.09	280.122	-262.339	1260.28	235.551	38.5762	1342.8	493.974	-140.15	1495.02	567.225	-131.041	1296.83	571.755	-126.769	1143.09	575.168	-215.913	992.398	519.629	-248.224	907.396	582.675	-212.729	893.339	568.714	-268.969	843.745
3313	0	331.677	-281.555	1704.94	248.818	-257.555	1701.4	374.682	-90.2852	1688.82	262.582	-83.6487	1685.64	313.549	-57.1819	1548.88	315.025	21.2323	1285.24	308.393	-206.164	1462.34	280.781	-271.041	1262.79	236.882	29.4946	1344.4	494.53	-149.064	1497.5	568.111	-141.747	1299.24	573.138	-140.781	1145.39	574.806	-232.255	996.344	518.041	-264.831	912.185	582.471	-231.416	897.223	566.525	-287.886	848.595
3314	0	331.348	-290.146	1707.1	248.703	-265.99	1703.11	374.486	-98.7466	1691.28	262.752	-92.2323	1687.72	314.271	-65.4466	1550.76	316.339	12.2907	1286.99	308.601	-214.752	1464.48	281.289	-279.764	1265.14	238.142	21.0471	1346.04	494.824	-158.035	1499.83	568.728	-152.323	1301.74	575.262	-154.17	1148.31	574.251	-248.62	1000.45	516.547	-281.495	916.88	581.699	-249.409	901.644	564.635	-306.807	853.922
3315	0	331.046	-298.664	1708.77	248.401	-274.552	1704.7	374.177	-107.317	1693.16	262.567	-100.813	1689.59	314.786	-73.8374	1552.36	317.637	3.42869	1288.69	308.655	-223.083	1466.68	281.815	-288.311	1266.99	239.137	12.3549	1347.67	495.001	-167.123	1502.3	569.25	-162.758	1304.1	576.49	-167.777	1150.63	573.904	-265.15	1004.75	515.348	-298.161	921.698	581.203	-267.813	905.745	562.899	-325.707	859.418
3316	0	330.93	-307.27	1710.48	248.247	-283.236	1706.19	374.068	-115.478	1695.59	262.066	-109.4	1691.19	315.173	-82.2178	1554.1	318.842	-5.38753	1290.26	309.26	-231.779	1468.63	282.215	-296.796	1269.1	240.169	3.66387	1348.95	495.192	-176.079	1504.57	569.851	-172.882	1306.39	577.736	-180.98	1152.83	573.721	-280.75	1008.75	514.171	-314.697	926.855	580.345	-285.873	909.942	561.148	-344.352	865.309
3317	0	330.831	-315.868	1711.97	248.206	-291.882	1707.52	373.694	-124.266	1697.04	261.664	-117.951	1692.89	315.716	-90.7159	1555.34	319.886	-14.3227	1291.4	309.281	-240.259	1470.45	282.466	-305.205	1270.98	241.063	-4.93628	1350.35	495.328	-185.177	1506.77	570.366	-183.066	1308.63	578.987	-193.965	1155.16	573.351	-296.433	1013.23	512.964	-331.255	932.132	579.379	-303.476	914.182	559.751	-362.544	871.225
3318	0	330.823	-324.462	1713.13	248.153	-300.538	1708.73	373.709	-132.891	1698.92	261.426	-126.672	1694.37	315.805	-99.2343	1556.85	321.06	-23.2776	1292.71	309.075	-248.749	1471.95	282.563	-313.719	1272.59	241.842	-14.0166	1351.23	495.303	-194.416	1508.72	570.605	-193.197	1310.75	580.23	-206.73	1157.12	573.066	-311.669	1017.05	511.983	-347.886	937.144	578.4	-320.857	918.302	558.139	-380.935	877.097
3319	0	330.733	-333.251	1714.13	247.91	-309.332	1709.68	373.33	-141.497	1700.28	261.204	-135.428	1695.85	315.766	-107.767	1557.88	322.187	-32.0402	1293.84	309.166	-257.192	1473.3	282.657	-322.081	1273.88	242.63	-22.4295	1352.19	495.28	-203.443	1510.39	571.113	-203.378	1312.78	581.214	-219.432	1159.18	572.181	-327.065	1021.16	510.971	-364.375	942.414	577.347	-338.049	922.543	556.57	-399.024	882.884
3320	0	330.646	-341.928	1714.63	247.811	-318.227	1710.31	373.041	-150.147	1701.65	261.224	-144.256	1697.23	315.947	-116.252	1558.92	323.031	-40.9192	1294.9	308.895	-265.715	1474.4	282.397	-330.692	1274.86	243.276	-31.2343	1353.22	495.164	-212.689	1512.06	571.342	-213.857	1314.54	582.408	-231.988	1161.34	571.673	-342.157	1024.87	509.859	-380.788	947.464	575.886	-354.644	926.673	555.064	-416.782	888.538
3321	0	330.418	-350.915	1714.83	247.733	-327.113	1710.6	372.984	-158.858	1703.12	260.667	-153.138	1698.53	315.875	-124.803	1559.67	324.319	-48.9742	1295.89	308.596	-274.36	1475.2	282.193	-339.201	1275.78	243.888	-40.1341	1353.92	494.792	-221.86	1513.36	571.402	-224.516	1316.07	583.407	-244.133	1163.1	571.26	-357.097	1028.28	508.683	-397.108	952.555	574.977	-371.584	930.419	553.586	-434.382	893.989
3322	0	330.385	-359.759	1714.68	247.754	-336.151	1710.72	372.704	-167.638	1703.93	260.213	-162.005	1699.32	316.077	-133.448	1560.39	324.86	-58.628	1296.43	308.458	-282.998	1475.86	281.965	-347.798	1276.46	244.318	-48.6728	1354.39	494.626	-230.882	1514.45	571.669	-235.113	1317.49	584.005	-256.711	1164.52	570.854	-371.747	1031.62	507.742	-413.382	957.386	573.731	-388.101	934.009	552.316	-451.574	899.125
3323	0	330.387	-368.804	1714.71	247.554	-345.16	1710.7	372.347	-176.518	1704.44	260.212	-171.005	1699.89	316.008	-141.995	1560.51	325.729	-67.2971	1296.51	307.929	-291.383	1476.5	281.703	-356.316	1276.98	244.85	-57.3103	1354.35	494.422	-240.022	1515.55	571.904	-245.63	1318.5	584.73	-268.939	1165.57	570.529	-386.347	1035.14	506.99	-429.406	961.944	572.264	-404.276	937.706	550.89	-468.776	904.685
3324	0	330.106	-377.913	1714.18	247.193	-354.25	1710.32	371.617	-185.486	1704.79	259.505	-180.062	1700.15	315.773	-150.564	1560.62	326.33	-76.1246	1296.29	307.481	-300.06	1476.65	281.113	-364.975	1277.23	245.209	-65.974	1354.11	494.063	-249.061	1515.82	572.119	-256.291	1319.33	585.154	-281.035	1166.38	569.994	-400.686	1038.16	505.925	-445.238	966.376	570.62	-419.874	940.799	549.872	-485.685	909.822
3325	0	329.707	-387.195	1713.43	247.026	-363.429	1709.53	371.281	-194.705	1704.81	259.237	-189.299	1700.23	315.512	-159.288	1560.26	326.844	-85.1004	1295.95	307.098	-308.791	1476.39	280.549	-373.712	1276.99	245.533	-74.5379	1353.83	493.55	-258.202	1515.76	571.98	-267.233	1319.54	585.575	-292.996	1166.56	569.329	-415.011	1040.52	504.961	-460.98	970.247	569.389	-436.14	943.487	548.55	-502.291	914.248
3326	0	329.315	-396.492	1712.25	246.65	-372.737	1708.62	370.893	-203.928	1704.6	258.867	-198.524	1700.06	315.532	-167.975	1559.69	327.245	-93.9136	1295.37	306.666	-317.472	1475.87	279.904	-382.497	1276.58	245.836	-83.2136	1353.23	493.123	-267.297	1515.47	572.042	-277.952	1319.6	585.74	-305.008	1166.64	568.748	-429.08	1043	504.544	-476.605	974.057	567.596	-451.508	946.194	547.145	-518.655	918.502
3327	0	328.872	-405.898	1711.07	246.275	-382.102	1707.65	370.312	-213.278	1704.15	258.754	-207.821	1699.85	315.172	-176.639	1558.89	327.691	-102.552	1294.8	306.055	-326.201	1475.13	279.096	-391.405	1276.1	245.817	-91.8357	1352.36	492.714	-276.483	1515.11	571.956	-288.756	1319.58	585.909	-316.758	1166.69	568.099	-443.107	1045.26	503.164	-491.869	977.738	566.558	-467.353	948.802	545.777	-534.814	922.514
3328	0	328.313	-415.391	1709.66	245.663	-391.606	1706.28	369.79	-222.731	1703.46	257.849	-217.204	1699.2	315.425	-185.762	1558.16	327.79	-111.229	1294.18	305.615	-335.084	1474.25	278.398	-400.352	1275.28	245.866	-100.618	1351.6	492.194	-285.693	1514.46	571.797	-299.385	1319.25	585.87	-328.416	1166.38	567.38	-456.705	1047.02	502.052	-507.016	980.962	564.911	-482.594	951.112	544.477	-550.737	926.482
3329	0	327.862	-424.892	1708.24	245.225	-401.026	1704.82	369.258	-232.24	1702.69	257.334	-226.728	1698.62	314.511	-194.773	1557.2	327.881	-120.066	1293.18	304.853	-343.984	1473.14	277.59	-409.299	1274.29	245.872	-109.336	1350.54	491.668	-295.002	1513.52	571.561	-309.92	1318.39	585.727	-339.985	1165.64	566.71	-470.219	1048.38	501.081	-521.895	983.835	563.595	-497.822	953.057	542.985	-566.505	929.73
3330	0	327.264	-434.423	1706.49	244.39	-410.668	1703.24	368.655	-241.822	1701.91	256.859	-236.343	1697.8	314.07	-203.817	1556.06	327.919	-128.612	1292.24	304.163	-352.886	1471.83	276.61	-418.304	1273.04	245.874	-118.172	1349.41	491.048	-304.418	1512.21	571.242	-320.441	1317.39	585.5	-351.41	1164.89	565.885	-483.591	1049.53	500.005	-536.434	986.523	562.15	-512.633	954.452	541.913	-581.644	932.805
3331	0	326.478	-444.178	1704.49	243.724	-420.319	1701.39	367.632	-251.543	1700.55	255.721	-245.986	1696.36	313.448	-212.981	1554.5	327.574	-137.813	1290.78	303.148	-362.026	1470.35	275.571	-427.412	1271.38	245.794	-127.05	1347.98	490.149	-313.859	1510.3	570.591	-330.788	1316.12	584.906	-362.916	1163.57	564.956	-496.669	1050.18	498.862	-550.682	988.42	560.38	-526.91	955.959	540.551	-596.773	935.463
3332	0	325.586	-453.884	1702.31	242.84	-430.1	1699.22	366.549	-261.182	1698.84	255.269	-255.687	1695.11	312.636	-222.327	1553.06	327.37	-146.951	1289.08	302.264	-371.144	1468.5	274.442	-436.434	1269.64	245.569	-136.042	1346.31	489.347	-323.525	1508.84	569.733	-341.083	1314.27	584.213	-374.118	1161.83	563.803	-509.779	1050.76	498.064	-564.845	989.938	559.749	-541.531	956.924	539.317	-611.659	938.102
3333	0	324.716	-463.682	1700.09	241.983	-439.944	1697.2	365.46	-270.952	1697.09	253.739	-265.53	1693.03	311.889	-231.691	1551.18	327.155	-155.981	1287.41	301.083	-380.446	1466.51	273.212	-445.617	1267.71	245.201	-145.109	1344.45	488.379	-333.179	1506.77	568.927	-351.208	1312.34	583.141	-385.449	1159.78	562.804	-522.485	1050.8	496.809	-578.932	991.997	558.357	-555.5	957.439	538.082	-625.974	939.836
3334	0	323.77	-473.463	1697.88	240.93	-449.665	1694.89	364.37	-280.662	1695.15	252.6	-275.272	1691.24	310.974	-241.211	1549.61	326.725	-165.201	1285.38	300.116	-389.756	1464.74	272.747	-453.53	1265.44	244.72	-154.264	1342.42	487.538	-342.839	1504.89	567.892	-361.016	1310.47	582.035	-396.453	1157.84	561.75	-534.855	1050.77	495.797	-592.101	992.873	556.884	-569.082	957.971	537.075	-639.71	941.281
3335	0	322.609	-483.48	1695.89	239.798	-459.566	1692.72	363.176	-290.502	1693.21	251.53	-285.148	1689.19	309.823	-250.749	1547.22	325.931	-174.443	1283.28	298.82	-399.204	1462.56	271.36	-462.805	1263.29	244.132	-163.535	1340.23	486.384	-352.577	1502.75	566.589	-371.024	1308.18	580.828	-407.465	1155.67	560.573	-547.041	1050.35	494.578	-605.16	993.371	555.512	-582.439	957.884	535.898	-653.356	942.519
3336	0	321.397	-493.196	1693.08	238.508	-469.508	1690.01	361.844	-300.388	1690.99	250.459	-294.904	1687.09	308.398	-260.268	1544.8	325.248	-184.08	1281.09	297.345	-408.814	1460.14	270.14	-472.007	1260.69	243.408	-172.947	1338.04	485.11	-362.514	1500.41	565.166	-380.9	1305.65	579.502	-418.385	1153.55	559.206	-559.157	1049.44	493.309	-618.018	993.399	553.822	-595.377	957.431	534.734	-666.555	942.939
3337	0	320.017	-503.106	1690.41	237.175	-479.416	1687.26	360.321	-310.201	1688.64	248.655	-304.817	1684.78	307.239	-269.998	1542.63	324.398	-193.564	1278.9	295.982	-418.473	1457.67	268.686	-481.563	1258.11	242.545	-182.399	1335.69	483.704	-372.298	1497.97	563.434	-390.873	1303.12	577.85	-429.097	1151.3	557.813	-570.929	1048.14	492.061	-630.539	993.001	552.294	-607.966	956.648	533.633	-679.424	943.13
3338	0	318.656	-513.078	1687.95	235.766	-489.381	1684.86	359.004	-320.11	1686.68	247.13	-314.796	1682.29	305.987	-279.809	1540.6	323.282	-202.724	1276.82	294.436	-428.205	1455.17	267.423	-491.136	1255.6	241.559	-192.05	1333.3	482.291	-382.107	1495.21	561.628	-400.765	1300.54	576.11	-439.764	1149.09	556.482	-582.451	1046.82	490.882	-642.746	992.337	550.867	-620.172	955.593	532.718	-691.713	942.928
3339	0	317.095	-523.034	1685.38	234.108	-499.495	1682.17	357.272	-330.087	1684.23	245.743	-324.806	1680.2	304.486	-289.781	1538.3	322.046	-212.591	1274.43	292.925	-438.031	1452.64	265.828	-501.061	1253.17	240.41	-201.905	1330.82	480.881	-392.166	1493.21	559.654	-410.543	1297.88	574.129	-450.371	1146.63	554.996	-593.569	1045.13	489.608	-654.675	991.294	549.445	-631.848	954.23	531.788	-703.635	942.117
3340	0	315.433	-533.127	1682.96	232.434	-509.538	1679.62	355.425	-340.089	1681.64	243.974	-334.935	1677.43	302.782	-299.727	1535.44	320.769	-222.916	1271.71	291.358	-447.989	1450.16	264.357	-511.061	1250.6	239.072	-211.782	1328.18	479.296	-402.136	1490.6	557.716	-420.32	1295.07	571.988	-460.763	1143.97	553.603	-604.576	1043.38	488.442	-666.339	989.854	548.015	-643.185	952.461	530.773	-715.254	940.919
3341	0	313.706	-543.222	1680.57	230.687	-519.675	1677.35	353.449	-350.176	1678.98	241.67	-345.049	1674.64	301.004	-309.869	1533.24	319.437	-232.788	1269.26	289.537	-457.977	1447.68	262.74	-521.11	1248.04	237.683	-221.781	1325.38	477.559	-412.183	1487.97	555.443	-430.205	1292.2	569.675	-471.118	1141.27	552.093	-615.147	1041.13	487.367	-677.576	988.053	546.638	-654.171	950.566	530.057	-726.223	939.344
3342	0	311.771	-553.353	1678.17	228.624	-530.005	1674.94	351.403	-360.371	1676.42	239.623	-355.264	1671.91	299.028	-320.124	1530.72	317.953	-242.993	1266.55	287.573	-468.184	1445.07	261.041	-531.339	1245.25	236.197	-231.957	1322.9	475.726	-422.448	1485.65	553.062	-440.05	1289.17	567.257	-481.238	1138.6	550.523	-625.612	1038.54	486.142	-688.485	985.884	544.451	-664.524	947.958	529.289	-736.971	937.177
3343	0	309.662	-563.652	1675.79	226.634	-540.308	1672.42	348.975	-370.647	1673.57	237.404	-365.591	1669.26	297.414	-330.44	1528.22	316.556	-253.328	1264.27	285.483	-478.605	1442.37	259.167	-541.751	1242.56	234.584	-242.216	1320.41	473.62	-432.956	1482.92	550.496	-449.928	1286.28	564.547	-491.318	1135.72	548.847	-635.819	1035.81	484.842	-699.243	983.116	542.852	-674.772	945.051	528.664	-747.288	934.915
3344	0	307.471	-574.047	1673.54	224.487	-550.764	1670.41	346.827	-380.927	1671.28	235.095	-376.023	1666.93	294.792	-341.081	1525.67	315.067	-263.744	1261.95	283.35	-489.04	1439.86	257.414	-551.962	1239.94	232.923	-252.54	1318	471.542	-443.506	1480.65	547.937	-459.917	1283.7	561.92	-501.342	1133.37	547.179	-645.606	1032.76	483.646	-709.454	980.343	541.295	-684.441	942.087	527.819	-757.114	932.034
3345	0	305.316	-584.333	1671.79	222.099	-561.197	1668.36	344.341	-391.227	1668.89	232.511	-386.394	1664.15	292.572	-351.89	1523.87	313.495	-274.475	1259.81	281.216	-499.576	1437.65	255.583	-562.212	1237.56	231.216	-262.985	1315.75	469.404	-454.427	1478.67	545.439	-469.753	1281.59	559.182	-511.262	1131.16	545.554	-655.189	1030.08	482.555	-719.358	977.144	539.734	-693.372	939.217	527.194	-766.349	928.796
3346	0	302.838	-594.782	1669.75	219.525	-571.727	1666.07	341.663	-401.73	1666.36	229.818	-396.892	1661.81	290.869	-362.728	1521.91	311.838	-285.23	1257.88	278.831	-510.346	1435.3	253.477	-572.776	1234.91	229.339	-273.571	1313.69	466.991	-465.421	1476.78	542.745	-480.004	1279.65	556.352	-521.096	1129.04	543.855	-664.556	1026.95	481.267	-728.828	973.747	538.28	-702.237	935.961	526.37	-775.094	925.233
3347	0	300.156	-605.327	1667.82	216.847	-582.345	1664.21	338.852	-412.236	1664.08	226.918	-407.391	1659.53	287.882	-373.597	1519.38	310.155	-296.191	1256.03	276.252	-521.145	1432.84	251.154	-583.44	1232.43	227.493	-284.242	1311.59	464.346	-476.563	1474.4	540.114	-490.294	1277.86	553.436	-530.73	1126.96	542.306	-673.485	1023.76	480.098	-737.953	969.845	537.021	-710.593	932.393	525.664	-783.319	920.831
3348	0	297.364	-615.817	1666.13	214.069	-592.952	1662.2	336.096	-422.767	1662.16	224.247	-418.19	1657.11	285.228	-384.545	1517.88	308.177	-307.093	1254.05	273.608	-532.18	1430.63	248.964	-594.063	1230.05	225.395	-295.149	1309.47	461.674	-487.737	1472.88	537.454	-500.914	1276.22	550.424	-540.348	1124.99	540.551	-682.252	1020.48	478.77	-746.715	965.909	535.524	-718.285	928.616	524.668	-791.205	916.557
3349	0	294.348	-626.642	1664.66	211.12	-603.74	1660.6	332.972	-433.344	1660.13	221.016	-428.842	1654.93	282.516	-395.49	1515.81	306.385	-318.313	1252.12	270.906	-543.174	1428.51	246.746	-604.888	1227.97	223.159	-306.217	1307.4	458.745	-499.164	1471.13	534.865	-511.766	1274.77	547.427	-549.914	1123.3	538.644	-690.71	1016.96	477.249	-755.387	961.644	533.919	-725.721	924.714	523.843	-798.601	911.93
3350	0	291.327	-637.265	1663.35	208.107	-614.499	1659.08	329.689	-444.019	1658.46	217.791	-439.625	1652.75	279.536	-406.642	1514.22	304.419	-329.463	1250.32	268.176	-554.29	1426.65	244.348	-616.141	1226.04	220.71	-317.519	1305.56	455.797	-510.34	1469.82	532.256	-523.07	1273.59	544.258	-559.484	1121.62	536.8	-698.861	1013.42	476.056	-763.03	956.734	532.456	-732.592	920.747	522.955	-805.451	906.846
3351	0	288.216	-647.903	1662.43	204.855	-625.316	1657.89	326.397	-454.774	1657.23	214.528	-450.438	1651.15	276.498	-417.88	1512.82	302.393	-340.848	1249.18	265.473	-565.625	1425.33	242.048	-627.42	1224.64	218.197	-328.903	1304.05	453.15	-521.734	1469.1	529.845	-534.409	1272.87	541.193	-568.871	1120.29	534.704	-706.728	1010.22	474.87	-770.398	952.237	531.1	-739.139	916.544	522.187	-811.669	901.784
3352	0	284.91	-658.712	1661.98	201.68	-636.017	1656.59	323.048	-465.504	1656.22	210.997	-461.313	1649.59	273.401	-429.302	1511.97	300.413	-352.292	1248.14	262.834	-576.933	1424.19	239.725	-639.004	1223.63	215.522	-340.394	1302.75	450.415	-533.042	1468.43	527.305	-545.96	1272.55	538.165	-578.115	1119.38	533.047	-714.24	1007.04	474.027	-777.181	947.597	530.187	-745.25	913.068	521.534	-817.617	896.8
3353	0	281.251	-669.762	1661.32	197.994	-647.016	1655.79	319.398	-476.447	1655.02	207.935	-472.217	1648.46	270.51	-440.802	1511.03	298.123	-363.794	1246.96	260.047	-588.347	1422.98	237.335	-650.781	1222.46	212.925	-351.997	1301.48	447.287	-544.244	1467.46	524.79	-557.658	1272.16	535.115	-587.285	1118.53	531.371	-721.694	1004.14	472.836	-783.805	942.883	529.062	-750.972	909.449	520.402	-823.113	891.507
3354	0	277.638	-680.642	1660.98	194.377	-658.023	1654.82	315.867	-487.307	1654.59	204.049	-483.236	1646.96	267.535	-452.306	1510.42	296.053	-375.372	1246.51	257.335	-599.898	1422.13	235.027	-662.66	1221.42	210.486	-363.659	1300.59	444.459	-555.85	1467.3	522.153	-569.532	1271.95	531.964	-596.502	1117.87	529.493	-728.754	1000.95	471.628	-790.023	938.238	528.053	-756.371	905.875	519.447	-828.231	886.256
3355	0	273.932	-691.613	1661.04	190.746	-668.969	1654.27	312.173	-498.291	1654.41	200.308	-494.133	1646.11	264.267	-463.704	1509.75	293.747	-386.972	1246.04	254.621	-611.446	1421.64	232.901	-674.357	1221.1	207.739	-375.302	1299.93	441.698	-567.142	1467.12	519.822	-580.958	1272.23	528.94	-605.575	1117.47	527.937	-735.605	998.477	470.628	-795.73	933.963	527.352	-761.502	902.671	518.622	-832.902	881.341
3356	0	270.032	-702.59	1661.34	186.891	-679.954	1654.08	308.552	-509.42	1654.43	196.658	-505.126	1645.27	261.421	-475.288	1509.72	291.194	-398.568	1245.83	252.039	-622.951	1421.55	230.785	-686.077	1220.96	205.069	-387.029	1299.75	438.934	-578.524	1467.54	517.316	-592.452	1272.99	526.084	-614.549	1117.64	526.333	-742.203	996.168	469.628	-800.98	929.886	526.594	-766.293	899.832	517.91	-837.072	876.412
3357	0	266.124	-713.729	1661.85	183.182	-690.779	1653.62	304.7	-520.496	1654.54	193.03	-516.176	1644.86	258.189	-486.659	1509.89	288.713	-410.174	1245.99	249.41	-634.289	1421.4	228.503	-697.973	1221.1	202.252	-398.687	1299.61	436.099	-589.715	1467.68	514.958	-603.552	1273.62	523.447	-623.203	1118.11	524.712	-748.498	994.12	468.496	-805.918	925.889	526.033	-770.626	897.342	517.132	-840.911	871.838
3358	0	262.002	-724.94	1662.69	179.096	-701.985	1653.56	300.954	-531.658	1655.29	189.91	-527.519	1644.47	255.265	-498.264	1510.34	286.125	-421.66	1246.3	246.748	-645.735	1421.7	226.39	-709.731	1221.41	199.564	-410.346	1299.9	433.282	-600.966	1468.33	512.421	-614.524	1274.61	520.744	-631.922	1118.89	523.137	-754.707	992.536	467.521	-810.441	922.171	525.668	-774.904	895.031	516.311	-844.438	867.574
3359	0	257.815	-736.075	1663.32	175.167	-712.724	1653.58	297.34	-542.776	1656.41	186.268	-538.592	1644.41	252.567	-509.548	1511.02	283.371	-433.158	1246.87	244.279	-657.039	1422.24	224.247	-721.569	1222.13	196.748	-421.928	1300.36	430.393	-611.888	1469.24	510.174	-625.098	1275.86	518.009	-640.45	1119.95	521.653	-760.501	991.113	466.504	-814.627	918.965	525.48	-778.825	893.512	515.645	-847.606	863.558
3360	0	253.654	-747.275	1664.21	171.087	-723.804	1653.93	293.728	-554.07	1657.72	183.212	-549.572	1644.77	249.364	-520.913	1511.73	280.63	-444.471	1247.76	242.008	-668.165	1422.93	222.24	-733.342	1223.09	193.717	-433.636	1301.18	427.926	-622.844	1470.7	507.756	-635.422	1277.29	515.446	-648.772	1121.26	520.207	-766.483	990.415	465.584	-818.431	916.132	525.375	-782.755	892.459	514.85	-850.481	860.143
3361	0	249.315	-758.395	1665.3	166.932	-734.67	1654.13	290.194	-565.329	1659.18	179.59	-560.47	1645.06	246.328	-532.056	1512.96	277.983	-455.698	1248.95	239.822	-679.383	1423.88	220.355	-745.122	1224.16	190.504	-445.239	1302.2	425.5	-633.613	1472.65	505.616	-645.345	1278.87	512.927	-656.919	1122.84	518.801	-771.863	989.877	464.631	-821.963	913.721	525.418	-786.41	891.661	514.049	-853.087	857.095
3362	0	245.108	-769.483	1666.46	162.904	-745.455	1654.59	286.76	-576.565	1660.64	176.402	-571.365	1645.55	243.381	-543.22	1513.86	275.139	-466.675	1250.04	237.909	-690.37	1425.04	218.919	-756.497	1225.59	187.095	-456.826	1303.39	423.265	-643.926	1474.59	503.711	-654.825	1280.78	510.649	-664.812	1124.89	517.533	-776.944	989.614	463.78	-825.277	911.9	525.138	-789.924	891.446	513.498	-855.489	854.667
3363	0	240.76	-780.625	1667.73	158.855	-756.157	1654.87	283.384	-587.832	1662.26	173.133	-582.158	1645.64	240.806	-554.248	1515.62	272.443	-477.601	1251.54	236.272	-701.203	1426.26	217.354	-768.053	1227.25	183.75	-468.17	1304.89	421.117	-654.028	1476.29	501.797	-663.923	1282.73	508.621	-672.504	1126.88	516.442	-782.073	989.851	462.954	-828.381	910.645	525.331	-793.429	891.551	512.895	-857.616	852.581
3364	0	236.432	-791.852	1668.77	155.004	-766.662	1654.59	280.024	-599.111	1663.83	170.428	-592.936	1646.23	238.185	-565.197	1517.11	269.565	-488.267	1252.79	234.875	-712.068	1427.21	216.032	-779.366	1228.62	180.234	-479.383	1306.51	418.9	-664.137	1478.18	499.85	-672.775	1284.43	506.764	-679.783	1129.01	515.165	-787.178	990.175	462.043	-831.494	909.359	525.112	-796.892	891.756	512.199	-859.871	850.674
3365	0	232.235	-802.915	1669.79	151.162	-777.347	1655.05	276.906	-610.308	1665.72	167.324	-603.663	1646.64	235.734	-576.042	1518.76	266.789	-498.684	1254.3	233.587	-722.816	1428.33	214.921	-790.425	1229.95	176.632	-490.359	1308.08	417.097	-674.026	1480.48	498.079	-681.146	1286.35	505.192	-686.975	1131.11	514.045	-792.27	990.708	461.088	-834.564	908.689	524.644	-800.18	892.247	511.468	-862.163	849.373
3366	0	228.105	-813.966	1671.08	147.362	-787.887	1655.22	273.809	-621.463	1667.09	164.574	-614.319	1647.04	233.246	-586.713	1520.53	263.976	-509.003	1255.93	232.56	-733.443	1429.54	214.113	-801.096	1231.53	173.112	-501.293	1310.03	415.279	-683.538	1482.48	496.753	-689.022	1288.41	503.78	-693.896	1133.31	513.198	-796.984	991.367	459.998	-837.628	908.456	524.43	-803.688	893.226	510.316	-864.315	848.181
3367	0	224.478	-824.921	1672.17	143.886	-798.384	1655.68	270.896	-632.722	1668.95	161.852	-624.956	1647.87	231.64	-597.322	1522.26	261.271	-519.119	1257.57	231.673	-743.824	1430.81	213.549	-811.387	1233.09	169.622	-512.099	1311.98	413.879	-692.943	1484.63	495.767	-696.403	1290.44	502.873	-700.258	1135.48	512.131	-801.946	992.36	459.631	-840.668	908.337	524.953	-807.132	894.388	509.694	-866.557	847.422
3368	0	220.871	-836.1	1673.33	140.677	-808.913	1656.13	268.335	-643.714	1671.24	159.417	-635.637	1648.97	229.125	-607.672	1523.96	258.636	-529.11	1259.29	230.801	-754.182	1432.14	213.222	-821.34	1234.51	166.171	-522.783	1313.65	412.385	-702.117	1486.36	494.69	-703.662	1292.12	501.97	-706.475	1137.3	511.632	-806.54	993.261	458.305	-844.81	908.616	524.789	-810.715	895.123	508.75	-869.076	846.853
3369	0	217.737	-846.868	1674.24	137.749	-819.471	1656.68	265.938	-654.722	1673.43	157.142	-646.192	1650.26	227.016	-617.825	1525.59	255.856	-539.024	1260.82	229.904	-764.414	1433.63	212.981	-831.029	1235.67	163.145	-533.352	1315.77	410.953	-711.324	1487.98	493.512	-710.935	1293.92	500.991	-712.402	1138.98	510.99	-811.111	994.038	457.367	-848.045	908.431	524.27	-814.542	895.866	507.833	-871.684	846.416
3370	0	215.116	-857.756	1675.01	135.378	-829.901	1657.35	263.565	-665.618	1675.05	155.113	-656.707	1652.04	225.82	-628.13	1527.53	253.191	-548.787	1262.58	228.888	-774.496	1435.16	212.722	-840.591	1237.09	160.253	-543.831	1317.67	409.638	-720.366	1489.69	492.633	-717.837	1295.7	500.089	-717.858	1140.37	510.569	-815.566	994.93	456.887	-851.635	909.033	524.009	-818.389	897.169	507.05	-874.542	846.295
3371	0	212.925	-868.629	1676.1	133.479	-840.39	1658.26	261.877	-676.263	1677.43	153.351	-667.174	1653.84	223.315	-637.924	1529.1	250.577	-558.485	1264.25	227.781	-784.426	1436.71	212.247	-850.332	1238.32	157.548	-554.061	1319.4	408.288	-729.41	1491.23	491.823	-724.487	1297.26	499.424	-723.08	1142.04	510.194	-819.855	995.757	456.349	-855.479	909.741	523.863	-822.231	898.027	506.092	-877.909	846.312
3372	0	211.181	-879.255	1677.16	131.789	-850.834	1659.41	260.38	-686.87	1679.69	151.824	-677.607	1656.2	222.058	-648.177	1531.2	248.101	-568.101	1265.89	226.649	-794.369	1438.48	211.919	-860.006	1239.68	155.189	-564.32	1321.48	407.045	-738.344	1492.67	490.898	-730.958	1298.81	498.672	-728.106	1143.61	509.942	-823.982	996.675	456.03	-859.332	910.369	523.489	-825.927	899.029	505.619	-880.09	845.997
3373	0	210.107	-889.807	1678.5	130.432	-861.24	1661.27	258.975	-697.368	1681.58	150.528	-688.005	1658.58	220.271	-657.897	1533.54	245.849	-577.687	1268.21	225.595	-804.153	1440.53	211.431	-869.813	1241.55	152.903	-574.447	1323.64	405.918	-747.08	1494.38	490.227	-737.07	1300.84	497.978	-732.914	1145.31	509.915	-827.739	997.747	456.033	-863.263	911.766	523.022	-829.21	899.964	505.397	-883.32	847.005
3374	0	209.353	-900.226	1680.15	129.68	-871.537	1663.24	258.275	-707.718	1684	149.52	-698.396	1661.17	218.58	-667.614	1535.53	243.518	-587.171	1270.29	224.46	-813.762	1442.67	210.749	-879.673	1243.6	150.807	-584.362	1325.59	404.803	-755.789	1496.17	489.391	-743.029	1302.86	497.167	-737.825	1147.17	509.832	-831.526	999.325	456.026	-867.153	913.167	522.71	-832.451	901.437	505.379	-886.524	848.407
3375	0	208.902	-910.6	1681.62	129.095	-881.938	1665.3	257.581	-717.921	1686.3	148.581	-708.576	1664.27	217.165	-677.485	1537.89	241.335	-596.659	1272.59	223.22	-823.423	1444.73	210.086	-889.607	1245.65	148.82	-594.043	1328.04	403.671	-764.577	1498	488.253	-749.101	1304.73	496.292	-742.714	1149.25	509.534	-835.288	1000.59	456.432	-871.22	914.476	521.909	-835.379	902.648	505.465	-889.622	849.549
3376	0	208.756	-920.863	1683.21	128.735	-892.261	1667.65	257.168	-728.046	1688.76	148.093	-718.813	1667.48	215.461	-686.942	1540.01	239.2	-606.168	1275.04	222.108	-833.035	1446.88	209.347	-899.435	1247.56	146.935	-603.79	1330.36	402.344	-773.295	1499.84	486.752	-755.32	1306.56	495.168	-747.438	1151.47	509.258	-839.074	1002	456.46	-875.376	915.921	521.093	-838.022	904.218	505.656	-892.821	850.797
3377	0	208.966	-931.112	1685.23	128.953	-902.471	1670.07	257.023	-738.053	1691.2	147.693	-728.965	1670.63	214.496	-696.705	1542.62	237.203	-615.604	1277.63	221.27	-842.581	1449.36	208.531	-909.149	1249.98	145.091	-613.355	1332.58	401.332	-781.769	1501.92	485.633	-761.196	1308.89	494.244	-752.155	1154.04	509.053	-842.688	1003.95	456.633	-879.575	917.761	520.364	-840.905	906.186	506.055	-896.188	852.92
3378	0	209.544	-941.021	1687.02	129.282	-912.546	1672.6	256.783	-747.945	1693.22	147.621	-739.138	1673.59	212.717	-706.192	1544.88	235.083	-625.025	1279.88	220.312	-851.995	1451.86	207.751	-918.521	1252.51	143.283	-622.964	1334.81	400.243	-790.243	1503.88	484.365	-767.232	1311.19	493.154	-756.864	1156.3	508.761	-846.344	1005.78	456.931	-883.795	919.716	519.472	-843.751	907.645	506.647	-899.425	854.804
3379	0	210.258	-951.037	1688.95	129.637	-922.842	1675.49	256.914	-757.736	1695.63	147.592	-749.276	1676.76	211.807	-715.684	1547.08	233	-634.211	1281.9	219.021	-861.232	1454.39	206.758	-927.948	1254.99	141.461	-632.488	1337.17	398.99	-798.595	1505.6	483.3	-773.142	1313.59	491.787	-761.57	1158.63	508.38	-849.979	1007.69	457.303	-888.12	921.773	518.581	-846.517	909.321	507.475	-902.87	857.393
3380	0	211.126	-960.714	1690.75	130.333	-932.961	1678.12	257.01	-767.4	1697.82	147.325	-759.351	1680.11	210.139	-725.077	1549.33	230.985	-643.768	1284.36	218.513	-870.863	1456.9	205.922	-937.072	1257.44	139.752	-642.153	1339.27	398.196	-807.078	1508.06	482.053	-779.127	1315.9	490.344	-766.531	1161.05	508.082	-853.697	1009.6	457.702	-892.565	923.931	517.798	-849.61	911.204	508.116	-906.298	859.547
3381	0	212.243	-970.378	1692.48	131.062	-942.999	1680.69	257.274	-776.99	1700.05	147.275	-769.401	1683.2	208.993	-734.531	1551.75	229.08	-653.151	1286.81	217.427	-880.144	1459.32	205.012	-946.258	1259.71	138.078	-651.741	1341.8	397.263	-815.535	1510.21	480.791	-785.328	1318.32	489.026	-771.378	1163.64	507.726	-857.651	1011.81	458.14	-897.217	926.044	516.875	-852.828	913.194	508.638	-909.843	861.722
3382	0	212.812	-980.235	1694.35	131.884	-953.147	1683.2	257.503	-786.616	1702.16	147.466	-779.43	1686.39	207.759	-743.986	1553.95	227.103	-662.508	1288.89	217.056	-889.732	1461.58	204.272	-955.338	1261.78	136.514	-661.544	1344.31	396.317	-824.116	1512.05	479.5	-791.628	1320.59	487.544	-776.398	1166.16	507.31	-861.651	1013.66	458.487	-901.965	927.872	516.129	-856.144	915.203	509.222	-913.686	863.704
3383	0	213.991	-990.371	1695.94	132.881	-963.252	1685.36	257.658	-796.097	1704.05	147.516	-789.408	1689.28	206.533	-753.29	1555.9	225.257	-671.833	1291.18	216.28	-899.174	1463.65	203.571	-964.461	1263.68	134.891	-671.035	1346.34	395.351	-832.689	1513.81	478.211	-798.019	1322.9	486.079	-781.554	1168.68	506.83	-866.002	1015.74	458.969	-906.971	929.751	515.177	-859.625	917.074	509.783	-917.471	865.797
3384	0	215.417	-999.82	1697.26	133.802	-973.23	1687.83	258.128	-805.63	1706.15	147.187	-799.366	1692.12	205.759	-762.797	1558.05	223.494	-681.047	1293.26	215.788	-908.591	1465.9	202.972	-973.399	1265.73	133.349	-680.626	1348.74	394.707	-841.115	1516.01	477.182	-804.252	1325.38	484.588	-786.794	1170.99	506.607	-870.266	1017.85	459.777	-912.174	931.949	514.376	-863.37	919.12	510.596	-921.145	867.935
3385	0	216.714	-1009.6	1698.59	134.858	-983.231	1689.81	258.249	-815.096	1707.52	147.222	-809.304	1694.94	204.628	-772.143	1559.8	221.798	-690.454	1295.44	215.286	-917.99	1467.96	202.556	-982.433	1267.74	131.918	-690.291	1350.88	393.906	-849.72	1517.75	476.101	-810.639	1327.53	483.054	-792.224	1173.18	506.326	-874.522	1019.7	460.227	-917.324	933.899	513.496	-867.385	920.775	511.353	-925.324	869.812
3386	0	217.777	-1019.4	1699.42	135.805	-993.37	1691.69	258.597	-824.555	1709.14	147.26	-819.193	1697.54	203.668	-781.642	1561.32	220.048	-699.726	1297.11	214.671	-927.489	1469.55	202.014	-991.569	1269.14	130.474	-699.826	1352.56	393.126	-858.291	1519.08	474.905	-817.341	1329.47	481.672	-797.877	1175.15	505.853	-879.375	1021.18	460.53	-922.688	935.344	512.711	-871.51	922.44	511.748	-929.556	871.454
3387	0	218.527	-1029.29	1700.32	136.867	-1003.47	1693.08	258.978	-834.051	1710.42	147.328	-829.22	1699.65	202.815	-791.075	1562.51	218.352	-708.943	1298.43	213.751	-937.029	1471.2	201.897	-1000.66	1270.44	128.952	-709.43	1354.03	392.376	-867.087	1520.45	473.654	-824.153	1331.16	480.08	-803.871	1176.79	505.464	-884.387	1022.59	460.947	-928.371	936.71	511.893	-876.012	923.786	512.176	-934.09	872.785
3388	0	219.824	-1039.11	1700.78	138.119	-1013.53	1694.46	259.142	-843.593	1711.03	147.486	-839.437	1701.51	201.892	-800.378	1563.72	216.893	-718.375	1299.85	213.351	-946.568	1472.51	201.779	-1009.85	1271.57	127.715	-719.016	1355.4	391.768	-875.654	1521.35	472.715	-831.069	1332.58	478.754	-809.872	1178.23	505.198	-889.472	1023.84	461.51	-934.105	937.976	511.18	-880.878	924.819	512.67	-938.735	873.768
3389	0	221.173	-1048.9	1700.98	139.221	-1023.81	1695.59	259.581	-853.038	1711.74	147.822	-849.54	1703.06	200.929	-809.919	1564.42	215.41	-727.61	1300.86	212.86	-955.922	1473.32	201.684	-1019.14	1272.41	126.515	-728.591	1356.35	391.073	-884.427	1522.26	471.106	-837.948	1333.8	477.303	-816.24	1179.26	504.916	-894.909	1024.58	461.953	-940.053	938.851	510.644	-885.96	925.835	513.055	-943.728	874.668
3390	0	222.514	-1058.72	1700.95	140.526	-1033.94	1696.47	259.667	-862.576	1711.71	148.17	-859.76	1704.44	200.23	-819.513	1565.06	214.116	-736.999	1301.54	212.445	-965.47	1474.04	201.697	-1028.45	1273.16	125.311	-738.063	1357.08	390.432	-893.213	1522.62	470.135	-845.384	1334.7	476.322	-822.497	1180.47	504.76	-900.672	1025.4	462.585	-946.111	939.633	510.043	-891.286	926.45	513.478	-948.841	875.246
3391	0	223.839	-1068.55	1700.66	141.655	-1044.22	1696.92	260.255	-872.13	1712.02	148.209	-870.035	1705.44	199.29	-828.928	1565.19	212.931	-746.337	1302.21	212.191	-975.044	1474.58	201.832	-1037.79	1273.47	124.333	-747.57	1357.61	390.003	-901.971	1523.24	469.291	-852.87	1335.44	475.496	-829.029	1181.46	504.581	-906.563	1026.11	462.986	-952.514	940.24	509.746	-896.995	927.018	513.896	-954.368	875.74
3392	0	225.222	-1078.42	1700.09	143.042	-1054.41	1697.05	260.426	-881.751	1711.44	148.442	-880.289	1706.19	198.818	-838.705	1565.37	211.919	-755.626	1302.47	211.886	-984.511	1474.54	201.873	-1047.2	1273.57	123.41	-757.062	1357.67	389.507	-910.826	1523.24	468.297	-860.527	1335.93	474.502	-835.772	1181.95	504.444	-912.845	1026.53	463.376	-959.058	940.469	509.656	-902.918	927.411	514.178	-960.111	875.946
3393	0	226.591	-1088.49	1699.13	144.304	-1064.91	1697.13	260.831	-891.321	1711.02	148.864	-890.765	1706.51	197.886	-848.362	1564.9	210.918	-765.128	1302.57	211.416	-994.297	1474.14	201.92	-1056.79	1273.11	122.655	-766.611	1357.66	388.835	-919.958	1523.01	467.495	-868.249	1336.07	473.806	-842.717	1182.34	504.256	-919.486	1026.39	463.707	-965.805	940.115	509.441	-909.081	927.68	514.46	-966.209	875.711
3394	0	227.983	-1098.58	1698.03	145.573	-1075.46	1696.75	261.195	-901.096	1710.26	149.076	-901.283	1706.66	197.374	-858.146	1564.62	210.25	-774.484	1302.11	211.102	-1004.02	1473.7	202.088	-1066.38	1272.37	121.956	-776.171	1357.55	388.466	-929.122	1522.66	466.777	-876.247	1335.96	472.929	-849.999	1182.35	504.151	-926.173	1026.22	464.08	-972.644	939.885	509.373	-915.563	927.477	514.626	-972.509	875.376
3395	0	229.542	-1108.6	1696.89	147.212	-1085.89	1696.4	261.442	-910.92	1708.9	149.502	-911.792	1706.66	196.914	-868.038	1563.95	209.62	-784.024	1301.56	211.041	-1013.71	1472.98	202.309	-1075.87	1271.79	121.547	-785.681	1356.58	388.25	-938.287	1522.02	466.221	-884.379	1335.67	472.348	-857.392	1182.12	504.179	-933.197	1026.05	464.556	-979.648	939.596	509.424	-922.255	927.181	515.276	-979.001	875.063
3396	0	231.104	-1118.74	1695.54	148.543	-1096.6	1695.76	261.77	-920.8	1707.35	149.842	-922.425	1706.06	196.561	-877.978	1562.92	209.178	-793.592	1300.75	210.803	-1023.37	1471.89	202.256	-1085.49	1270.92	121.136	-795.27	1355.89	387.854	-947.514	1521.22	465.726	-892.664	1335.06	471.875	-865.027	1181.47	504.398	-940.067	1025.43	465.011	-986.762	938.93	509.421	-929.229	926.355	515.716	-985.697	874.309
[truncated: 69 more columns]

## Sheet: Sheet2
Devices
		025370 - Force			025370 - Moment			025370 - CoP			027571 - Force			027571 - Moment			027571 - CoP			037720 - Force			037720 - Moment			037720 - CoP
Frame	Sub Frame	Fx	Fy	Fz	Mx	My	Mz	Cx	Cy	Cz	Fx	Fy	Fz	Mx	My	Mz	Cx	Cy	Cz	Fx	Fy	Fz	Mx	My	Mz	Cx	Cy	Cz
		N	N	N	N.mm	N.mm	N.mm	mm	mm	mm	N	N	N	N.mm	N.mm	N.mm	mm	mm	mm	N	N	N	N.mm	N.mm	N.mm	mm	mm	mm
3026	0	0	0	0	0	0	0	200	300	0	0	0	0	0	0	0	200	903	0	0	0	0	0	0	0	603	903	0
3026	1	0	0	0	0	0	0	200	300	0	0	0	0	0	0	0	200	903	0	0	0	0	0	0	0	603	903	0
3026	2	0	0	0	0	0	0	200	300	0	0	0	0	0	0	0	200	903	0	0	0	0	0	0	0	603	903	0
3026	3	0	0	0	0	0	0	200	300	0	0	0	0	0	0	0	200	903	0	0	0	0	0	0	0	603	903	0
3026	4	0	0	0	0	0	0	200	300	0	0	0	0	0	0	0	200	903	0	0	0	0	0	0	0	603	903	0
3026	5	0	0	0	0	0	0	200	300	0	0	0	0	0	0	0	200	903	0	0	0	0	0	0	0	603	903	0
3026	6	0	0	0	0	0	0	200	300	0	0	0	0	0	0	0	200	903	0	0	0	0	0	0	0	603	903	0
3026	7	0	0	0	0	0	0	200	300	0	0	0	0	0	0	0	200	903	0	0	0	0	0	0	0	603	903	0
3026	8	0	0	0	0	0	0	200	300	0	0	0	0	0	0	0	200	903	0	0	0	0	0	0	0	603	903	0
3026	9	0	0	0	0	0	0	200	300	0	0	0	0	0	0	0	200	903	0	0	0	0	0	0	0	603	903	0
3027	0	0	0	0	0	0	0	200	300	0	0	0	0	0	0	0	200	903	0	0	0	0	0	0	0	603	903	0
3027	1	0	0	0	0	0	0	200	300	0	0	0	0	0	0	0	200	903	0	0	0	0	0	0	0	603	903	0
3027	2	0	0	0	0	0	0	200	300	0	0	0	0	0	0	0	200	903	0	0	0	0	0	0	0	603	903	0
3027	3	0	0	0	0	0	0	200	300	0	0	0	0	0	0	0	200	903	0	0	0	0	0	0	0	603	903	0
3027	4	0	0	0	0	0	0	200	300	0	0	0	0	0	0	0	200	903	0	0	0	0	0	0	0	603	903	0
3027	5	0	0	0	0	0	0	200	300	0	0	0	0	0	0	0	200	903	0	0	0	0	0	0	0	603	903	0
3027	6	0	0	0	0	0	0	200	300	0	0	0	0	0	0	0	200	903	0	0	0	0	0	0	0	603	903	0
3027	7	0	0	0	0	0	0	200	300	0	0	0	0	0	0	0	200	903	0	0	0	0	0	0	0	603	903	0
3027	8	0	0	0	0	0	0	200	300	0	0	0	0	0	0	0	200	903	0	0	0	0	0	0	0	603	903	0
3027	9	0	0	0	0	0	0	200	300	0	0	0	0	0	0	0	200	903	0	0	0	0	0	0	0	603	903	0
3028	0	0	0	0	0	0	0	200	300	0	0	0	0	0	0	0	200	903	0	0	0	0	0	0	0	603	903	0
3028	1	0	0	0	0	0	0	200	300	0	0	0	0	0	0	0	200	903	0	0	0	0	0	0	0	603	903	0
3028	2	0	0	0	0	0	0	200	300	0	0	0	0	0	0	0	200	903	0	0	0	0	0	0	0	603	903	0
3028	3	0	0	0	0	0	0	200	300	0	0	0	0	0	0	0	200	903	0	0	0	0	0	0	0	603	903	0
3028	4	0	0	0	0	0	0	200	300	0	0	0	0	0	0	0	200	903	0	0	0	0	0	0	0	603	903	0
3028	5	0	0	0	0	0	0	200	300	0	0	0	0	0	0	0	200	903	0	0	0	0	0	0	0	603	903	0
3028	6	0	0	0	0	0	0	200	300	0	0	0	0	0	0	0	200	903	0	0	0	0	0	0	0	603	903	0
3028	7	0	0	0	0	0	0	200	300	0	0	0	0	0	0	0	200	903	0	0	0	0	0	0	0	603	903	0
3028	8	0	0	0	0	0	0	200	300	0	0	0	0	0	0	0	200	903	0	0	0	0	0	0	0	603	903	0
3028	9	0	0	0	0	0	0	200	300	0	0	0	0	0	0	0	200	903	0	0	0	0	0	0	0	603	903	0
3029	0	0	0	0	0	0	0	200	300	0	0	0	0	0	0	0	200	903	0	0	0	0	0	0	0	603	903	0
3029	1	0	0	0	0	0	0	200	300	0	0	0	0	0	0	0	200	903	0	0	0	0	0	0	0	603	903	0
3029	2	0	0	0	0	0	0	200	300	0	0	0	0	0	0	0	200	903	0	0	0	0	0	0	0	603	903	0
3029	3	0	0	0	0	0	0	200	300	0	0	0	0	0	0	0	200	903	0	0	0	0	0	0	0	603	903	0
3029	4	0	0	0	0	0	0	200	300	0	0	0	0	0	0	0	200	903	0	0	0	0	0	0	0	603	903	0
3029	5	0	0	0	0	0	0	200	300	0	0	0	0	0	0	0	200	903	0	0	0	0	0	0	0	603	903	0
3029	6	0	0	0	0	0	0	200	300	0	0	0	0	0	0	0	200	903	0	0	0	0	0	0	0	603	903	0
3029	7	0	0	0	0	0	0	200	300	0	0	0	0	0	0	0	200	903	0	0	0	0	0	0	0	603	903	0
3029	8	0	0	0	0	0	0	200	300	0	0	0	0	0	0	0	200	903	0	0	0	0	0	0	0	603	903	0
3029	9	0	0	0	0	0	0	200	300	0	0	0	0	0	0	0	200	903	0	0	0	0	0	0	0	603	903	0
3030	0	0	0	0	0	0	0	200	300	0	0	0	0	0	0	0	200	903	0	0	0	0	0	0	0	603	903	0
3030	1	0	0	0	0	0	0	200	300	0	0	0	0	0	0	0	200	903	0	0	0	0	0	0	0	603	903	0
3030	2	0	0	0	0	0	0	200	300	0	0	0	0	0	0	0	200	903	0	0	0	0	0	0	0	603	903	0
3030	3	0	0	0	0	0	0	200	300	0	0	0	0	0	0	0	200	903	0	0	0	0	0	0	0	603	903	0
3030	4	0	0	0	0	0	0	200	300	0	0	0	0	0	0	0	200	903	0	0	0	0	0	0	0	603	903	0
3030	5	0	0	0	0	0	0	200	300	0	0	0	0	0	0	0	200	903	0	0	0	0	0	0	0	603	903	0
3030	6	0	0	0	0	0	0	200	300	0	0	0	0	0	0	0	200	903	0	0	0	0	0	0	0	603	903	0
3030	7	0	0	0	0	0	0	200	300	0	0	0	0	0	0	0	200	903	0	0	0	0	0	0	0	603	903	0
3030	8	0	0	0	0	0	0	200	300	0	0	0	0	0	0	0	200	903	0	0	0	0	0	0	0	603	903	0
3030	9	0	0	0	0	0	0	200	300	0	0	0	0	0	0	0	200	903	0	0	0	0	0	0	0	603	903	0
3031	0	0	0	0	0	0	0	200	300	0	0	0	0	0	0	0	200	903	0	0	0	0	0	0	0	603	903	0
3031	1	0	0	0	0	0	0	200	300	0	0	0	0	0	0	0	200	903	0	0	0	0	0	0	0	603	903	0
3031	2	0	0	0	0	0	0	200	300	0	0	0	0	0	0	0	200	903	0	0	0	0	0	0	0	603	903	0
3031	3	0	0	0	0	0	0	200	300	0	0	0	0	0	0	0	200	903	0	0	0	0	0	0	0	603	903	0
3031	4	0	0	0	0	0	0	200	300	0	0	0	0	0	0	0	200	903	0	0	0	0	0	0	0	603	903	0
3031	5	0	0	0	0	0	0	200	300	0	0	0	0	0	0	0	200	903	0	0	0	0	0	0	0	603	903	0
3031	6	0	0	0	0	0	0	200	300	0	0	0	0	0	0	0	200	903	0	0	0	0	0	0	0	603	903	0
3031	7	0	0	0	0	0	0	200	300	0	0	0	0	0	0	0	200	903	0	0	0	0	0	0	0	603	903	0
3031	8	0	0	0	0	0	0	200	300	0	0	0	0	0	0	0	200	903	0	0	0	0	0	0	0	603	903	0
3031	9	0	0	0	0	0	0	200	300	0	0	0	0	0	0	0	200	903	0	0	0	0	0	0	0	603	903	0
3032	0	0	0	0	0	0	0	200	300	0	0	0	0	0	0	0	200	903	0	0	0	0	0	0	0	603	903	0
3032	1	0	0	0	0	0	0	200	300	0	0	0	0	0	0	0	200	903	0	0	0	0	0	0	0	603	903	0
3032	2	0	0	0	0	0	0	200	300	0	0	0	0	0	0	0	200	903	0	0	0	0	0	0	0	603	903	0
3032	3	0	0	0	0	0	0	200	300	0	0	0	0	0	0	0	200	903	0	0	0	0	0	0	0	603	903	0
3032	4	0	0	0	0	0	0	200	300	0	0	0	0	0	0	0	200	903	0	0	0	0	0	0	0	603	903	0
3032	5	0	0	0	0	0	0	200	300	0	0	0	0	0	0	0	200	903	0	0	0	0	0	0	0	603	903	0
3032	6	0	0	0	0	0	0	200	300	0	0	0	0	0	0	0	200	903	0	0	0	0	0	0	0	603	903	0
3032	7	0	0	0	0	0	0	200	300	0	0	0	0	0	0	0	200	903	0	0	0	0	0	0	0	603	903	0
3032	8	0	0	0	0	0	0	200	300	0	0	0	0	0	0	0	200	903	0	0	0	0	0	0	0	603	903	0
3032	9	0	0	0	0	0	0	200	300	0	0	0	0	0	0	0	200	903	0	0	0	0	0	0	0	603	903	0
3033	0	0	0	0	0	0	0	200	300	0	0	0	0	0	0	0	200	903	0	0	0	0	0	0	0	603	903	0
3033	1	0	0	0	0	0	0	200	300	0	0	0	0	0	0	0	200	903	0	0	0	0	0	0	0	603	903	0
3033	2	0	0	0	0	0	0	200	300	0	0	0	0	0	0	0	200	903	0	0	0	0	0	0	0	603	903	0
3033	3	0	0	0	0	0	0	200	300	0	0	0	0	0	0	0	200	903	0	0	0	0	0	0	0	603	903	0
3033	4	0	0	0	0	0	0	200	300	0	0	0	0	0	0	0	200	903	0	0	0	0	0	0	0	603	903	0
3033	5	0	0	0	0	0	0	200	300	0	0	0	0	0	0	0	200	903	0	0	0	0	0	0	0	603	903	0
3033	6	0	0	0	0	0	0	200	300	0	0	0	0	0	0	0	200	903	0	0	0	0	0	0	0	603	903	0
3033	7	0	0	0	0	0	0	200	300	0	0	0	0	0	0	0	200	903	0	0	0	0	0	0	0	603	903	0
3033	8	0	0	0	0	0	0	200	300	0	0	0	0	0	0	0	200	903	0	0	0	0	0	0	0	603	903	0
3033	9	0	0	0	0	0	0	200	300	0	0	0	0	0	0	0	200	903	0	0	0	0	0	0	0	603	903	0
3034	0	0	0	0	0	0	0	200	300	0	0	0	0	0	0	0	200	903	0	0	0	0	0	0	0	603	903	0
3034	1	0	0	0	0	0	0	200	300	0	0	0	0	0	0	0	200	903	0	0	0	0	0	0	0	603	903	0
3034	2	0	0	0	0	0	0	200	300	0	0	0	0	0	0	0	200	903	0	0	0	0	0	0	0	603	903	0
3034	3	0	0	0	0	0	0	200	300	0	0	0	0	0	0	0	200	903	0	0	0	0	0	0	0	603	903	0
3034	4	0	0	0	0	0	0	200	300	0	0	0	0	0	0	0	200	903	0	0	0	0	0	0	0	603	903	0
3034	5	0	0	0	0	0	0	200	300	0	0	0	0	0	0	0	200	903	0	0	0	0	0	0	0	603	903	0
3034	6	0	0	0	0	0	0	200	300	0	0	0	0	0	0	0	200	903	0	0	0	0	0	0	0	603	903	0
3034	7	0	0	0	0	0	0	200	300	0	0	0	0	0	0	0	200	903	0	0	0	0	0	0	0	603	903	0
3034	8	0	0	0	0	0	0	200	300	0	0	0	0	0	0	0	200	903	0	0	0	0	0	0	0	603	903	0
3034	9	0	0	0	0	0	0	200	300	0	0	0	0	0	0	0	200	903	0	0	0	0	0	0	0	603	903	0
3035	0	0	0	0	0	0	0	200	300	0	0	0	0	0	0	0	200	903	0	0	0	0	0	0	0	603	903	0
3035	1	0	0	0	0	0	0	200	300	0	0	0	0	0	0	0	200	903	0	0	0	0	0	0	0	603	903	0
3035	2	0	0	0	0	0	0	200	300	0	0	0	0	0	0	0	200	903	0	0	0	0	0	0	0	603	903	0
3035	3	0	0	0	0	0	0	200	300	0	0	0	0	0	0	0	200	903	0	0	0	0	0	0	0	603	903	0
3035	4	0	0	0	0	0	0	200	300	0	0	0	0	0	0	0	200	903	0	0	0	0	0	0	0	603	903	0
3035	5	0	0	0	0	0	0	200	300	0	0	0	0	0	0	0	200	903	0	0	0	0	0	0	0	603	903	0
3035	6	0	0	0	0	0	0	200	300	0	0	0	0	0	0	0	200	903	0	0	0	0	0	0	0	603	903	0
3035	7	0	0	0	0	0	0	200	300	0	0	0	0	0	0	0	200	903	0	0	0	0	0	0	0	603	903	0
3035	8	0	0	0	0	0	0	200	300	0	0	0	0	0	0	0	200	903	0	0	0	0	0	0	0	603	903	0
3035	9	0	0	0	0	0	0	200	300	0	0	0	0	0	0	0	200	903	0	0	0	0	0	0	0	603	903	0
3036	0	0	0	0	0	0	0	200	300	0	0	0	0	0	0	0	200	903	0	0	0	0	0	0	0	603	903	0
3036	1	0	0	0	0	0	0	200	300	0	0	0	0	0	0	0	200	903	0	0	0	0	0	0	0	603	903	0
3036	2	0	0	0	0	0	0	200	300	0	0	0	0	0	0	0	200	903	0	0	0	0	0	0	0	603	903	0
3036	3	0	0	0	0	0	0	200	300	0	0	0	0	0	0	0	200	903	0	0	0	0	0	0	0	603	903	0
3036	4	0	0	0	0	0	0	200	300	0	0	0	0	0	0	0	200	903	0	0	0	0	0	0	0	603	903	0
3036	5	0	0	0	0	0	0	200	300	0	0	0	0	0	0	0	200	903	0	0	0	0	0	0	0	603	903	0
3036	6	0	0	0	0	0	0	200	300	0	0	0	0	0	0	0	200	903	0	0	0	0	0	0	0	603	903	0
3036	7	0	0	0	0	0	0	200	300	0	0	0	0	0	0	0	200	903	0	0	0	0	0	0	0	603	903	0
3036	8	0	0	0	0	0	0	200	300	0	0	0	0	0	0	0	200	903	0	0	0	0	0	0	0	603	903	0
3036	9	0	0	0	0	0	0	200	300	0	0	0	0	0	0	0	200	903	0	0	0	0	0	0	0	603	903	0
3037	0	0	0	0	0	0	0	200	300	0	0	0	0	0	0	0	200	903	0	0	0	0	0	0	0	603	903	0
3037	1	0	0	0	0	0	0	200	300	0	0	0	0	0	0	0	200	903	0	0	0	0	0	0	0	603	903	0
3037	2	0	0	0	0	0	0	200	300	0	0	0	0	0	0	0	200	903	0	0	0	0	0	0	0	603	903	0
3037	3	0	0	0	0	0	0	200	300	0	0	0	0	0	0	0	200	903	0	0	0	0	0	0	0	603	903	0
3037	4	0	0	0	0	0	0	200	300	0	0	0	0	0	0	0	200	903	0	0	0	0	0	0	0	603	903	0
3037	5	0	0	0	0	0	0	200	300	0	0	0	0	0	0	0	200	903	0	0	0	0	0	0	0	603	903	0
3037	6	0	0	0	0	0	0	200	300	0	0	0	0	0	0	0	200	903	0	0	0	0	0	0	0	603	903	0
3037	7	0	0	0	0	0	0	200	300	0	0	0	0	0	0	0	200	903	0	0	0	0	0	0	0	603	903	0
3037	8	0	0	0	0	0	0	200	300	0	0	0	0	0	0	0	200	903	0	0	0	0	0	0	0	603	903	0
3037	9	0	0	0	0	0	0	200	300	0	0	0	0	0	0	0	200	903	0	0	0	0	0	0	0	603	903	0
3038	0	0	0	0	0	0	0	200	300	0	0	0	0	0	0	0	200	903	0	0	0	0	0	0	0	603	903	0
3038	1	0	0	0	0	0	0	200	300	0	0	0	0	0	0	0	200	903	0	0	0	0	0	0	0	603	903	0
3038	2	0	0	0	0	0	0	200	300	0	0	0	0	0	0	0	200	903	0	0	0	0	0	0	0	603	903	0
3038	3	0	0	0	0	0	0	200	300	0	0	0	0	0	0	0	200	903	0	0	0	0	0	0	0	603	903	0
3038	4	0	0	0	0	0	0	200	300	0	0	0	0	0	0	0	200	903	0	0	0	0	0	0	0	603	903	0
3038	5	0	0	0	0	0	0	200	300	0	0	0	0	0	0	0	200	903	0	0	0	0	0	0	0	603	903	0
3038	6	0	0	0	0	0	0	200	300	0	0	0	0	0	0	0	200	903	0	0	0	0	0	0	0	603	903	0
3038	7	0	0	0	0	0	0	200	300	0	0	0	0	0	0	0	200	903	0	0	0	0	0	0	0	603	903	0
3038	8	0	0	0	0	0	0	200	300	0	0	0	0	0	0	0	200	903	0	0	0	0	0	0	0	603	903	0
3038	9	0	0	0	0	0	0	200	300	0	0	0	0	0	0	0	200	903	0	0	0	0	0	0	0	603	903	0
3039	0	0	0	0	0	0	0	200	300	0	0	0	0	0	0	0	200	903	0	0	0	0	0	0	0	603	903	0
3039	1	0	0	0	0	0	0	200	300	0	0	0	0	0	0	0	200	903	0	0	0	0	0	0	0	603	903	0
3039	2	0	0	0	0	0	0	200	300	0	0	0	0	0	0	0	200	903	0	0	0	0	0	0	0	603	903	0
3039	3	0	0	0	0	0	0	200	300	0	0	0	0	0	0	0	200	903	0	0	0	0	0	0	0	603	903	0
3039	4	0	0	0	0	0	0	200	300	0	0	0	0	0	0	0	200	903	0	0	0	0	0	0	0	603	903	0
3039	5	0	0	0	0	0	0	200	300	0	0	0	0	0	0	0	200	903	0	0	0	0	0	0	0	603	903	0
3039	6	0	0	0	0	0	0	200	300	0	0	0	0	0	0	0	200	903	0	0	0	0	0	0	0	603	903	0
3039	7	0	0	0	0	0	0	200	300	0	0	0	0	0	0	0	200	903	0	0	0	0	0	0	0	603	903	0
3039	8	0	0	0	0	0	0	200	300	0	0	0	0	0	0	0	200	903	0	0	0	0	0	0	0	603	903	0
3039	9	0	0	0	0	0	0	200	300	0	0	0	0	0	0	0	200	903	0	0	0	0	0	0	0	603	903	0
3040	0	0	0	0	0	0	0	200	300	0	0	0	0	0	0	0	200	903	0	0	0	0	0	0	0	603	903	0
3040	1	0	0	0	0	0	0	200	300	0	0	0	0	0	0	0	200	903	0	0	0	0	0	0	0	603	903	0
3040	2	0	0	0	0	0	0	200	300	0	0	0	0	0	0	0	200	903	0	0	0	0	0	0	0	603	903	0
3040	3	0	0	0	0	0	0	200	300	0	0	0	0	0	0	0	200	903	0	0	0	0	0	0	0	603	903	0
3040	4	0	0	0	0	0	0	200	300	0	0	0	0	0	0	0	200	903	0	0	0	0	0	0	0	603	903	0
3040	5	0	0	0	0	0	0	200	300	0	0	0	0	0	0	0	200	903	0	0	0	0	0	0	0	603	903	0
3040	6	0	0	0	0	0	0	200	300	0	0	0	0	0	0	0	200	903	0	0	0	0	0	0	0	603	903	0
3040	7	0	0	0	0	0	0	200	300	0	0	0	0	0	0	0	200	903	0	0	0	0	0	0	0	603	903	0
3040	8	0	0	0	0	0	0	200	300	0	0	0	0	0	0	0	200	903	0	0	0	0	0	0	0	603	903	0
3040	9	0	0	0	0	0	0	200	300	0	0	0	0	0	0	0	200	903	0	0	0	0	0	0	0	603	903	0
3041	0	0	0	0	0	0	0	200	300	0	0	0	0	0	0	0	200	903	0	0	0	0	0	0	0	603	903	0
3041	1	0	0	0	0	0	0	200	300	0	0	0	0	0	0	0	200	903	0	0	0	0	0	0	0	603	903	0
3041	2	0	0	0	0	0	0	200	300	0	0	0	0	0	0	0	200	903	0	0	0	0	0	0	0	603	903	0
3041	3	0	0	0	0	0	0	200	300	0	0	0	0	0	0	0	200	903	0	0	0	0	0	0	0	603	903	0
3041	4	0	0	0	0	0	0	200	300	0	0	0	0	0	0	0	200	903	0	0	0	0	0	0	0	603	903	0
3041	5	0	0	0	0	0	0	200	300	0	0	0	0	0	0	0	200	903	0	0	0	0	0	0	0	603	903	0
3041	6	0	0	0	0	0	0	200	300	0	0	0	0	0	0	0	200	903	0	0	0	0	0	0	0	603	903	0
3041	7	0	0	0	0	0	0	200	300	0	0	0	0	0	0	0	200	903	0	0	0	0	0	0	0	603	903	0
3041	8	0	0	0	0	0	0	200	300	0	0	0	0	0	0	0	200	903	0	0	0	0	0	0	0	603	903	0
3041	9	0	0	0	0	0	0	200	300	0	0	0	0	0	0	0	200	903	0	0	0	0	0	0	0	603	903	0
3042	0	0	0	0	0	0	0	200	300	0	0	0	0	0	0	0	200	903	0	0	0	0	0	0	0	603	903	0
3042	1	0	0	0	0	0	0	200	300	0	0	0	0	0	0	0	200	903	0	0	0	0	0	0	0	603	903	0
3042	2	0	0	0	0	0	0	200	300	0	0	0	0	0	0	0	200	903	0	0	0	0	0	0	0	603	903	0
3042	3	0	0	0	0	0	0	200	300	0	0	0	0	0	0	0	200	903	0	0	0	0	0	0	0	603	903	0
3042	4	0	0	0	0	0	0	200	300	0	0	0	0	0	0	0	200	903	0	0	0	0	0	0	0	603	903	0
3042	5	0	0	0	0	0	0	200	300	0	0	0	0	0	0	0	200	903	0	0	0	0	0	0	0	603	903	0
3042	6	0	0	0	0	0	0	200	300	0	0	0	0	0	0	0	200	903	0	0	0	0	0	0	0	603	903	0
3042	7	0	0	0	0	0	0	200	300	0	0	0	0	0	0	0	200	903	0	0	0	0	0	0	0	603	903	0
3042	8	0	0	0	0	0	0	200	300	0	0	0	0	0	0	0	200	903	0	0	0	0	0	0	0	603	903	0
3042	9	0	0	0	0	0	0	200	300	0	0	0	0	0	0	0	200	903	0	0	0	0	0	0	0	603	903	0
3043	0	0	0	0	0	0	0	200	300	0	0	0	0	0	0	0	200	903	0	0	0	0	0	0	0	603	903	0
3043	1	0	0	0	0	0	0	200	300	0	0	0	0	0	0	0	200	903	0	0	0	0	0	0	0	603	903	0
3043	2	0	0	0	0	0	0	200	300	0	0	0	0	0	0	0	200	903	0	0	0	0	0	0	0	603	903	0
3043	3	0	0	0	0	0	0	200	300	0	0	0	0	0	0	0	200	903	0	0	0	0	0	0	0	603	903	0
3043	4	0	0	0	0	0	0	200	300	0	0	0	0	0	0	0	200	903	0	0	0	0	0	0	0	603	903	0
3043	5	0	0	0	0	0	0	200	300	0	0	0	0	0	0	0	200	903	0	0	0	0	0	0	0	603	903	0
3043	6	0	0	0	0	0	0	200	300	0	0	0	0	0	0	0	200	903	0	0	0	0	0	0	0	603	903	0
3043	7	0	0	0	0	0	0	200	300	0	0	0	0	0	0	0	200	903	0	0	0	0	0	0	0	603	903	0
3043	8	0	0	0	0	0	0	200	300	0	0	0	0	0	0	0	200	903	0	0	0	0	0	0	0	603	903	0
3043	9	0	0	0	0	0	0	200	300	0	0	0	0	0	0	0	200	903	0	0	0	0	0	0	0	603	903	0
3044	0	0	0	0	0	0	0	200	300	0	0	0	0	0	0	0	200	903	0	0	0	0	0	0	0	603	903	0
3044	1	0	0	0	0	0	0	200	300	0	0	0	0	0	0	0	200	903	0	0	0	0	0	0	0	603	903	0
3044	2	0	0	0	0	0	0	200	300	0	0	0	0	0	0	0	200	903	0	0	0	0	0	0	0	603	903	0
3044	3	0	0	0	0	0	0	200	300	0	0	0	0	0	0	0	200	903	0	0	0	0	0	0	0	603	903	0
3044	4	0	0	0	0	0	0	200	300	0	0	0	0	0	0	0	200	903	0	0	0	0	0	0	0	603	903	0
3044	5	0	0	0	0	0	0	200	300	0	0	0	0	0	0	0	200	903	0	0	0	0	0	0	0	603	903	0
3044	6	0	0	0	0	0	0	200	300	0	0	0	0	0	0	0	200	903	0	0	0	0	0	0	0	603	903	0
3044	7	0	0	0	0	0	0	200	300	0	0	0	0	0	0	0	200	903	0	0	0	0	0	0	0	603	903	0
3044	8	0	0	0	0	0	0	200	300	0	0	0	0	0	0	0	200	903	0	0	0	0	0	0	0	603	903	0
3044	9	0	0	0	0	0	0	200	300	0	0	0	0	0	0	0	200	903	0	0	0	0	0	0	0	603	903	0
3045	0	0	0	0	0	0	0	200	300	0	0	0	0	0	0	0	200	903	0	0	0	0	0	0	0	603	903	0
3045	1	0	0	0	0	0	0	200	300	0	0	0	0	0	0	0	200	903	0	0	0	0	0	0	0	603	903	0
3045	2	0	0	0	0	0	0	200	300	0	0	0	0	0	0	0	200	903	0	0	0	0	0	0	0	603	903	0
3045	3	0	0	0	0	0	0	200	300	0	0	0	0	0	0	0	200	903	0	0	0	0	0	0	0	603	903	0
3045	4	0	0	0	0	0	0	200	300	0	0	0	0	0	0	0	200	903	0	0	0	0	0	0	0	603	903	0
3045	5	0	0	0	0	0	0	200	300	0	0	0	0	0	0	0	200	903	0	0	0	0	0	0	0	603	903	0
3045	6	0	0	0	0	0	0	200	300	0	0	0	0	0	0	0	200	903	0	0	0	0	0	0	0	603	903	0
3045	7	0	0	0	0	0	0	200	300	0	0	0	0	0	0	0	200	903	0	0	0	0	0	0	0	603	903	0
3045	8	0	0	0	0	0	0	200	300	0	0	0	0	0	0	0	200	903	0	0	0	0	0	0	0	603	903	0
3045	9	0	0	0	0	0	0	200	300	0	0	0	0	0	0	0	200	903	0	0	0	0	0	0	0	603	903	0
3046	0	0	0	0	0	0	0	200	300	0	0	0	0	0	0	0	200	903	0	0	0	0	0	0	0	603	903	0
3046	1	0	0	0	0	0	0	200	300	0	0	0	0	0	0	0	200	903	0	0	0	0	0	0	0	603	903	0
3046	2	0	0	0	0	0	0	200	300	0	0	0	0	0	0	0	200	903	0	0	0	0	0	0	0	603	903	0
3046	3	0	0	0	0	0	0	200	300	0	0	0	0	0	0	0	200	903	0	0	0	0	0	0	0	603	903	0
3046	4	0	0	0	0	0	0	200	300	0	0	0	0	0	0	0	200	903	0	0	0	0	0	0	0	603	903	0
3046	5	0	0	0	0	0	0	200	300	0	0	0	0	0	0	0	200	903	0	0	0	0	0	0	0	603	903	0
3046	6	0	0	0	0	0	0	200	300	0	0	0	0	0	0	0	200	903	0	0	0	0	0	0	0	603	903	0
3046	7	0	0	0	0	0	0	200	300	0	0	0	0	0	0	0	200	903	0	0	0	0	0	0	0	603	903	0
3046	8	0	0	0	0	0	0	200	300	0	0	0	0	0	0	0	200	903	0	0	0	0	0	0	0	603	903	0
3046	9	0	0	0	0	0	0	200	300	0	0	0	0	0	0	0	200	903	0	0	0	0	0	0	0	603	903	0
3047	0	0	0	0	0	0	0	200	300	0	0	0	0	0	0	0	200	903	0	0	0	0	0	0	0	603	903	0
3047	1	0	0	0	0	0	0	200	300	0	0	0	0	0	0	0	200	903	0	0	0	0	0	0	0	603	903	0
3047	2	0	0	0	0	0	0	200	300	0	0	0	0	0	0	0	200	903	0	0	0	0	0	0	0	603	903	0
3047	3	0	0	0	0	0	0	200	300	0	0	0	0	0	0	0	200	903	0	0	0	0	0	0	0	603	903	0
3047	4	0	0	0	0	0	0	200	300	0	0	0	0	0	0	0	200	903	0	0	0	0	0	0	0	603	903	0
3047	5	0	0	0	0	0	0	200	300	0	0	0	0	0	0	0	200	903	0	0	0	0	0	0	0	603	903	0
3047	6	0	0	0	0	0	0	200	300	0	0	0	0	0	0	0	200	903	0	0	0	0	0	0	0	603	903	0
3047	7	0	0	0	0	0	0	200	300	0	0	0	0	0	0	0	200	903	0	0	0	0	0	0	0	603	903	0
3047	8	0	0	0	0	0	0	200	300	0	0	0	0	0	0	0	200	903	0	0	0	0	0	0	0	603	903	0
3047	9	0	0	0	0	0	0	200	300	0	0	0	0	0	0	0	200	903	0	0	0	0	0	0	0	603	903	0
3048	0	0	0	0	0	0	0	200	300	0	0	0	0	0	0	0	200	903	0	0	0	0	0	0	0	603	903	0
3048	1	0	0	0	0	0	0	200	300	0	0	0	0	0	0	0	200	903	0	0	0	0	0	0	0	603	903	0
3048	2	0	0	0	0	0	0	200	300	0	0	0	0	0	0	0	200	903	0	0	0	0	0	0	0	603	903	0
3048	3	0	0	0	0	0	0	200	300	0	0	0	0	0	0	0	200	903	0	0	0	0	0	0	0	603	903	0
3048	4	0	0	0	0	0	0	200	300	0	0	0	0	0	0	0	200	903	0	0	0	0	0	0	0	603	903	0
3048	5	0	0	0	0	0	0	200	300	0	0	0	0	0	0	0	200	903	0	0	0	0	0	0	0	603	903	0
3048	6	0	0	0	0	0	0	200	300	0	0	0	0	0	0	0	200	903	0	0	0	0	0	0	0	603	903	0
3048	7	0	0	0	0	0	0	200	300	0	0	0	0	0	0	0	200	903	0	0	0	0	0	0	0	603	903	0
3048	8	0	0	0	0	0	0	200	300	0	0	0	0	0	0	0	200	903	0	0	0	0	0	0	0	603	903	0
3048	9	0	0	0	0	0	0	200	300	0	0	0	0	0	0	0	200	903	0	0	0	0	0	0	0	603	903	0
3049	0	0	0	0	0	0	0	200	300	0	0	0	0	0	0	0	200	903	0	0	0	0	0	0	0	603	903	0
3049	1	0	0	0	0	0	0	200	300	0	0	0	0	0	0	0	200	903	0	0	0	0	0	0	0	603	903	0
3049	2	0	0	0	0	0	0	200	300	0	0	0	0	0	0	0	200	903	0	0	0	0	0	0	0	603	903	0
3049	3	0	0	0	0	0	0	200	300	0	0	0	0	0	0	0	200	903	0	0	0	0	0	0	0	603	903	0
3049	4	0	0	0	0	0	0	200	300	0	0	0	0	0	0	0	200	903	0	0	0	0	0	0	0	603	903	0
3049	5	0	0	0	0	0	0	200	300	0	0	0	0	0	0	0	200	903	0	0	0	0	0	0	0	603	903	0
3049	6	0	0	0	0	0	0	200	300	0	0	0	0	0	0	0	200	903	0	0	0	0	0	0	0	603	903	0
3049	7	0	0	0	0	0	0	200	300	0	0	0	0	0	0	0	200	903	0	0	0	0	0	0	0	603	903	0
3049	8	0	0	0	0	0	0	200	300	0	0	0	0	0	0	0	200	903	0	0	0	0	0	0	0	603	903	0
3049	9	0	0	0	0	0	0	200	300	0	0	0	0	0	0	0	200	903	0	0	0	0	0	0	0	603	903	0
3050	0	0	0	0	0	0	0	200	300	0	0	0	0	0	0	0	200	903	0	0	0	0	0	0	0	603	903	0
3050	1	0	0	0	0	0	0	200	300	0	0	0	0	0	0	0	200	903	0	0	0	0	0	0	0	603	903	0
3050	2	0	0	0	0	0	0	200	300	0	0	0	0	0	0	0	200	903	0	0	0	0	0	0	0	603	903	0
3050	3	0	0	0	0	0	0	200	300	0	0	0	0	0	0	0	200	903	0	0	0	0	0	0	0	603	903	0
3050	4	0	0	0	0	0	0	200	300	0	0	0	0	0	0	0	200	903	0	0	0	0	0	0	0	603	903	0
3050	5	0	0	0	0	0	0	200	300	0	0	0	0	0	0	0	200	903	0	0	0	0	0	0	0	603	903	0
3050	6	0	0	0	0	0	0	200	300	0	0	0	0	0	0	0	200	903	0	0	0	0	0	0	0	603	903	0
3050	7	0	0	0	0	0	0	200	300	0	0	0	0	0	0	0	200	903	0	0	0	0	0	0	0	603	903	0
3050	8	0	0	0	0	0	0	200	300	0	0	0	0	0	0	0	200	903	0	0	0	0	0	0	0	603	903	0
3050	9	0	0	0	0	0	0	200	300	0	0	0	0	0	0	0	200	903	0	0	0	0	0	0	0	603	903	0
3051	0	0	0	0	0	0	0	200	300	0	0	0	0	0	0	0	200	903	0	0	0	0	0	0	0	603	903	0
3051	1	0	0	0	0	0	0	200	300	0	0	0	0	0	0	0	200	903	0	0	0	0	0	0	0	603	903	0
3051	2	0	0	0	0	0	0	200	300	0	0	0	0	0	0	0	200	903	0	0	0	0	0	0	0	603	903	0
3051	3	0	0	0	0	0	0	200	300	0	0	0	0	0	0	0	200	903	0	0	0	0	0	0	0	603	903	0
3051	4	0	0	0	0	0	0	200	300	0	0	0	0	0	0	0	200	903	0	0	0	0	0	0	0	603	903	0
3051	5	0	0	0	0	0	0	200	300	0	0	0	0	0	0	0	200	903	0	0	0	0	0	0	0	603	903	0
3051	6	0	0	0	0	0	0	200	300	0	0	0	0	0	0	0	200	903	0	0	0	0	0	0	0	603	903	0
3051	7	0	0	0	0	0	0	200	300	0	0	0	0	0	0	0	200	903	0	0	0	0	0	0	0	603	903	0
3051	8	0	0	0	0	0	0	200	300	0	0	0	0	0	0	0	200	903	0	0	0	0	0	0	0	603	903	0
3051	9	0	0	0	0	0	0	200	300	0	0	0	0	0	0	0	200	903	0	0	0	0	0	0	0	603	903	0
3052	0	0	0	0	0	0	0	200	300	0	0	0	0	0	0	0	200	903	0	0	0	0	0	0	0	603	903	0
3052	1	0	0	0	0	0	0	200	300	0	0	0	0	0	0	0	200	903	0	0	0	0	0	0	0	603	903	0
3052	2	0	0	0	0	0	0	200	300	0	0	0	0	0	0	0	200	903	0	0	0	0	0	0	0	603	903	0
3052	3	0	0	0	0	0	0	200	300	0	0	0	0	0	0	0	200	903	0	0	0	0	0	0	0	603	903	0
3052	4	0	0	0	0	0	0	200	300	0	0	0	0	0	0	0	200	903	0	0	0	0	0	0	0	603	903	0
3052	5	0	0	0	0	0	0	200	300	0	0	0	0	0	0	0	200	903	0	0	0	0	0	0	0	603	903	0
3052	6	0	0	0	0	0	0	200	300	0	0	0	0	0	0	0	200	903	0	0	0	0	0	0	0	603	903	0
3052	7	0	0	0	0	0	0	200	300	0	0	0	0	0	0	0	200	903	0	0	0	0	0	0	0	603	903	0
3052	8	0	0	0	0	0	0	200	300	0	0	0	0	0	0	0	200	903	0	0	0	0	0	0	0	603	903	0
3052	9	0	0	0	0	0	0	200	300	0	0	0	0	0	0	0	200	903	0	0	0	0	0	0	0	603	903	0
3053	0	0	0	0	0	0	0	200	300	0	0	0	0	0	0	0	200	903	0	0	0	0	0	0	0	603	903	0
3053	1	0	0	0	0	0	0	200	300	0	0	0	0	0	0	0	200	903	0	0	0	0	0	0	0	603	903	0
3053	2	0	0	0	0	0	0	200	300	0	0	0	0	0	0	0	200	903	0	0	0	0	0	0	0	603	903	0
3053	3	0	0	0	0	0	0	200	300	0	0	0	0	0	0	0	200	903	0	0	0	0	0	0	0	603	903	0
3053	4	0	0	0	0	0	0	200	300	0	0	0	0	0	0	0	200	903	0	0	0	0	0	0	0	603	903	0
3053	5	0	0	0	0	0	0	200	300	0	0	0	0	0	0	0	200	903	0	0	0	0	0	0	0	603	903	0
3053	6	0	0	0	0	0	0	200	300	0	0	0	0	0	0	0	200	903	0	0	0	0	0	0	0	603	903	0
3053	7	0	0	0	0	0	0	200	300	0	0	0	0	0	0	0	200	903	0	0	0	0	0	0	0	603	903	0
3053	8	0	0	0	0	0	0	200	300	0	0	0	0	0	0	0	200	903	0	0	0	0	0	0	0	603	903	0
3053	9	0	0	0	0	0	0	200	300	0	0	0	0	0	0	0	200	903	0	0	0	0	0	0	0	603	903	0
3054	0	0	0	0	0	0	0	200	300	0	0	0	0	0	0	0	200	903	0	0	0	0	0	0	0	603	903	0
3054	1	0	0	0	0	0	0	200	300	0	0	0	0	0	0	0	200	903	0	0	0	0	0	0	0	603	903	0
3054	2	0	0	0	0	0	0	200	300	0	0	0	0	0	0	0	200	903	0	0	0	0	0	0	0	603	903	0
3054	3	0	0	0	0	0	0	200	300	0	0	0	0	0	0	0	200	903	0	0	0	0	0	0	0	603	903	0
3054	4	0	0	0	0	0	0	200	300	0	0	0	0	0	0	0	200	903	0	0	0	0	0	0	0	603	903	0
3054	5	0	0	0	0	0	0	200	300	0	0	0	0	0	0	0	200	903	0	0	0	0	0	0	0	603	903	0
3054	6	0	0	0	0	0	0	200	300	0	0	0	0	0	0	0	200	903	0	0	0	0	0	0	0	603	903	0
3054	7	0	0	0	0	0	0	200	300	0	0	0	0	0	0	0	200	903	0	0	0	0	0	0	0	603	903	0
3054	8	0	0	0	0	0	0	200	300	0	0	0	0	0	0	0	200	903	0	0	0	0	0	0	0	603	903	0
3054	9	0	0	0	0	0	0	200	300	0	0	0	0	0	0	0	200	903	0	0	0	0	0	0	0	603	903	0
3055	0	0	0	0	0	0	0	200	300	0	0	0	0	0	0	0	200	903	0	0	0	0	0	0	0	603	903	0
3055	1	0	0	0	0	0	0	200	300	0	0	0	0	0	0	0	200	903	0	0	0	0	0	0	0	603	903	0
3055	2	0	0	0	0	0	0	200	300	0	0	0	0	0	0	0	200	903	0	0	0	0	0	0	0	603	903	0
3055	3	0	0	0	0	0	0	200	300	0	0	0	0	0	0	0	200	903	0	0	0	0	0	0	0	603	903	0
3055	4	0	0	0	0	0	0	200	300	0	0	0	0	0	0	0	200	903	0	0	0	0	0	0	0	603	903	0
3055	5	0	0	0	0	0	0	200	300	0	0	0	0	0	0	0	200	903	0	0	0	0	0	0	0	603	903	0
3055	6	0	0	0	0	0	0	200	300	0	0	0	0	0	0	0	200	903	0	0	0	0	0	0	0	603	903	0
3055	7	0	0	0	0	0	0	200	300	0	0	0	0	0	0	0	200	903	0	0	0	0	0	0	0	603	903	0
3055	8	0	0	0	0	0	0	200	300	0	0	0	0	0	0	0	200	903	0	0	0	0	0	0	0	603	903	0
3055	9	0	0	0	0	0	0	200	300	0	0	0	0	0	0	0	200	903	0	0	0	0	0	0	0	603	903	0
3056	0	0	0	0	0	0	0	200	300	0	0	0	0	0	0	0	200	903	0	0	0	0	0	0	0	603	903	0
3056	1	0	0	0	0	0	0	200	300	0	0	0	0	0	0	0	200	903	0	0	0	0	0	0	0	603	903	0
3056	2	0	0	0	0	0	0	200	300	0	0	0	0	0	0	0	200	903	0	0	0	0	0	0	0	603	903	0
3056	3	0	0	0	0	0	0	200	300	0	0	0	0	0	0	0	200	903	0	0	0	0	0	0	0	603	903	0
3056	4	0	0	0	0	0	0	200	300	0	0	0	0	0	0	0	200	903	0	0	0	0	0	0	0	603	903	0
3056	5	0	0	0	0	0	0	200	300	0	0	0	0	0	0	0	200	903	0	0	0	0	0	0	0	603	903	0
3056	6	0	0	0	0	0	0	200	300	0	0	0	0	0	0	0	200	903	0	0	0	0	0	0	0	603	903	0
3056	7	0	0	0	0	0	0	200	300	0	0	0	0	0	0	0	200	903	0	0	0	0	0	0	0	603	903	0
3056	8	0	0	0	0	0	0	200	300	0	0	0	0	0	0	0	200	903	0	0	0	0	0	0	0	603	903	0
3056	9	0	0	0	0	0	0	200	300	0	0	0	0	0	0	0	200	903	0	0	0	0	0	0	0	603	903	0
3057	0	0	0	0	0	0	0	200	300	0	0	0	0	0	0	0	200	903	0	0	0	0	0	0	0	603	903	0
3057	1	0	0	0	0	0	0	200	300	0	0	0	0	0	0	0	200	903	0	0	0	0	0	0	0	603	903	0
3057	2	0	0	0	0	0	0	200	300	0	0	0	0	0	0	0	200	903	0	0	0	0	0	0	0	603	903	0
3057	3	0	0	0	0	0	0	200	300	0	0	0	0	0	0	0	200	903	0	0	0	0	0	0	0	603	903	0
3057	4	0	0	0	0	0	0	200	300	0	0	0	0	0	0	0	200	903	0	0	0	0	0	0	0	603	903	0
3057	5	0	0	0	0	0	0	200	300	0	0	0	0	0	0	0	200	903	0	0	0	0	0	0	0	603	903	0
3057	6	0	0	0	0	0	0	200	300	0	0	0	0	0	0	0	200	903	0	0	0	0	0	0	0	603	903	0
3057	7	0	0	0	0	0	0	200	300	0	0	0	0	0	0	0	200	903	0	0	0	0	0	0	0	603	903	0
3057	8	0	0	0	0	0	0	200	300	0	0	0	0	0	0	0	200	903	0	0	0	0	0	0	0	603	903	0
3057	9	0	0	0	0	0	0	200	300	0	0	0	0	0	0	0	200	903	0	0	0	0	0	0	0	603	903	0
3058	0	0	0	0	0	0	0	200	300	0	0	0	0	0	0	0	200	903	0	0	0	0	0	0	0	603	903	0
3058	1	0	0	0	0	0	0	200	300	0	0	0	0	0	0	0	200	903	0	0	0	0	0	0	0	603	903	0
3058	2	0	0	0	0	0	0	200	300	0	0	0	0	0	0	0	200	903	0	0	0	0	0	0	0	603	903	0
3058	3	0	0	0	0	0	0	200	300	0	0	0	0	0	0	0	200	903	0	0	0	0	0	0	0	603	903	0
3058	4	0	0	0	0	0	0	200	300	0	0	0	0	0	0	0	200	903	0	0	0	0	0	0	0	603	903	0
3058	5	0	0	0	0	0	0	200	300	0	0	0	0	0	0	0	200	903	0	0	0	0	0	0	0	603	903	0
3058	6	0	0	0	0	0	0	200	300	0	0	0	0	0	0	0	200	903	0	0	0	0	0	0	0	603	903	0
3058	7	0	0	0	0	0	0	200	300	0	0	0	0	0	0	0	200	903	0	0	0	0	0	0	0	603	903	0
3058	8	0	0	0	0	0	0	200	300	0	0	0	0	0	0	0	200	903	0	0	0	0	0	0	0	603	903	0
3058	9	0	0	0	0	0	0	200	300	0	0	0	0	0	0	0	200	903	0	0	0	0	0	0	0	603	903	0
3059	0	0	0	0	0	0	0	200	300	0	0	0	0	0	0	0	200	903	0	0	0	0	0	0	0	603	903	0
3059	1	0	0	0	0	0	0	200	300	0	0	0	0	0	0	0	200	903	0	0	0	0	0	0	0	603	903	0
3059	2	0	0	0	0	0	0	200	300	0	0	0	0	0	0	0	200	903	0	0	0	0	0	0	0	603	903	0
3059	3	0	0	0	0	0	0	200	300	0	0	0	0	0	0	0	200	903	0	0	0	0	0	0	0	603	903	0
3059	4	0	0	0	0	0	0	200	300	0	0	0	0	0	0	0	200	903	0	0	0	0	0	0	0	603	903	0
3059	5	0	0	0	0	0	0	200	300	0	0	0	0	0	0	0	200	903	0	0	0	0	0	0	0	603	903	0
3059	6	0	0	0	0	0	0	200	300	0	0	0	0	0	0	0	200	903	0	0	0	0	0	0	0	603	903	0
3059	7	0	0	0	0	0	0	200	300	0	0	0	0	0	0	0	200	903	0	0	0	0	0	0	0	603	903	0
3059	8	0	0	0	0	0	0	200	300	0	0	0	0	0	0	0	200	903	0	0	0	0	0	0	0	603	903	0
3059	9	0	0	0	0	0	0	200	300	0	0	0	0	0	0	0	200	903	0	0	0	0	0	0	0	603	903	0
3060	0	0	0	0	0	0	0	200	300	0	0	0	0	0	0	0	200	903	0	0	0	0	0	0	0	603	903	0
3060	1	0	0	0	0	0	0	200	300	0	0	0	0	0	0	0	200	903	0	0	0	0	0	0	0	603	903	0
3060	2	0	0	0	0	0	0	200	300	0	0	0	0	0	0	0	200	903	0	0	0	0	0	0	0	603	903	0
3060	3	0	0	0	0	0	0	200	300	0	0	0	0	0	0	0	200	903	0	0	0	0	0	0	0	603	903	0
3060	4	0	0	0	0	0	0	200	300	0	0	0	0	0	0	0	200	903	0	0	0	0	0	0	0	603	903	0
3060	5	0	0	0	0	0	0	200	300	0	0	0	0	0	0	0	200	903	0	0	0	0	0	0	0	603	903	0
3060	6	0	0	0	0	0	0	200	300	0	0	0	0	0	0	0	200	903	0	0	0	0	0	0	0	603	903	0
3060	7	0	0	0	0	0	0	200	300	0	0	0	0	0	0	0	200	903	0	0	0	0	0	0	0	603	903	0
3060	8	0	0	0	0	0	0	200	300	0	0	0	0	0	0	0	200	903	0	0	0	0	0	0	0	603	903	0
3060	9	0	0	0	0	0	0	200	300	0	0	0	0	0	0	0	200	903	0	0	0	0	0	0	0	603	903	0
3061	0	0	0	0	0	0	0	200	300	0	0	0	0	0	0	0	200	903	0	0	0	0	0	0	0	603	903	0
3061	1	0	0	0	0	0	0	200	300	0	0	0	0	0	0	0	200	903	0	0	0	0	0	0	0	603	903	0
3061	2	0	0	0	0	0	0	200	300	0	0	0	0	0	0	0	200	903	0	0	0	0	0	0	0	603	903	0
3061	3	0	0	0	0	0	0	200	300	0	0	0	0	0	0	0	200	903	0	0	0	0	0	0	0	603	903	0
3061	4	0	0	0	0	0	0	200	300	0	0	0	0	0	0	0	200	903	0	0	0	0	0	0	0	603	903	0
3061	5	0	0	0	0	0	0	200	300	0	0	0	0	0	0	0	200	903	0	0	0	0	0	0	0	603	903	0
3061	6	0	0	0	0	0	0	200	300	0	0	0	0	0	0	0	200	903	0	0	0	0	0	0	0	603	903	0
3061	7	0	0	0	0	0	0	200	300	0	0	0	0	0	0	0	200	903	0	0	0	0	0	0	0	603	903	0
3061	8	0	0	0	0	0	0	200	300	0	0	0	0	0	0	0	200	903	0	0	0	0	0	0	0	603	903	0
3061	9	0	0	0	0	0	0	200	300	0	0	0	0	0	0	0	200	903	0	0	0	0	0	0	0	603	903	0
3062	0	0	0	0	0	0	0	200	300	0	0	0	0	0	0	0	200	903	0	0	0	0	0	0	0	603	903	0
3062	1	0	0	0	0	0	0	200	300	0	0	0	0	0	0	0	200	903	0	0	0	0	0	0	0	603	903	0
3062	2	0	0	0	0	0	0	200	300	0	0	0	0	0	0	0	200	903	0	0	0	0	0	0	0	603	903	0
3062	3	0	0	0	0	0	0	200	300	0	0	0	0	0	0	0	200	903	0	0	0	0	0	0	0	603	903	0
3062	4	0	0	0	0	0	0	200	300	0	0	0	0	0	0	0	200	903	0	0	0	0	0	0	0	603	903	0
3062	5	0	0	0	0	0	0	200	300	0	0	0	0	0	0	0	200	903	0	0	0	0	0	0	0	603	903	0
3062	6	0	0	0	0	0	0	200	300	0	0	0	0	0	0	0	200	903	0	0	0	0	0	0	0	603	903	0
3062	7	0	0	0	0	0	0	200	300	0	0	0	0	0	0	0	200	903	0	0	0	0	0	0	0	603	903	0
3062	8	0	0	0	0	0	0	200	300	0	0	0	0	0	0	0	200	903	0	0	0	0	0	0	0	603	903	0
3062	9	0	0	0	0	0	0	200	300	0	0	0	0	0	0	0	200	903	0	0	0	0	0	0	0	603	903	0
3063	0	0	0	0	0	0	0	200	300	0	0	0	0	0	0	0	200	903	0	0	0	0	0	0	0	603	903	0
3063	1	0	0	0	0	0	0	200	300	0	0	0	0	0	0	0	200	903	0	0	0	0	0	0	0	603	903	0
3063	2	0	0	0	0	0	0	200	300	0	0	0	0	0	0	0	200	903	0	0	0	0	0	0	0	603	903	0
3063	3	0	0	0	0	0	0	200	300	0	0	0	0	0	0	0	200	903	0	0	0	0	0	0	0	603	903	0
3063	4	0	0	0	0	0	0	200	300	0	0	0	0	0	0	0	200	903	0	0	0	0	0	0	0	603	903	0
3063	5	0	0	0	0	0	0	200	300	0	0	0	0	0	0	0	200	903	0	0	0	0	0	0	0	603	903	0
3063	6	0	0	0	0	0	0	200	300	0	0	0	0	0	0	0	200	903	0	0	0	0	0	0	0	603	903	0
3063	7	0	0	0	0	0	0	200	300	0	0	0	0	0	0	0	200	903	0	0	0	0	0	0	0	603	903	0
3063	8	0	0	0	0	0	0	200	300	0	0	0	0	0	0	0	200	903	0	0	0	0	0	0	0	603	903	0
3063	9	0	0	0	0	0	0	200	300	0	0	0	0	0	0	0	200	903	0	0	0	0	0	0	0	603	903	0
3064	0	0	0	0	0	0	0	200	300	0	0	0	0	0	0	0	200	903	0	0	0	0	0	0	0	603	903	0
3064	1	0	0	0	0	0	0	200	300	0	0	0	0	0	0	0	200	903	0	0	0	0	0	0	0	603	903	0
3064	2	0	0	0	0	0	0	200	300	0	0	0	0	0	0	0	200	903	0	0	0	0	0	0	0	603	903	0
3064	3	0	0	0	0	0	0	200	300	0	0	0	0	0	0	0	200	903	0	0	0	0	0	0	0	603	903	0
3064	4	0	0	0	0	0	0	200	300	0	0	0	0	0	0	0	200	903	0	0	0	0	0	0	0	603	903	0
3064	5	0	0	0	0	0	0	200	300	0	0	0	0	0	0	0	200	903	0	0	0	0	0	0	0	603	903	0
3064	6	0	0	0	0	0	0	200	300	0	0	0	0	0	0	0	200	903	0	0	0	0	0	0	0	603	903	0
3064	7	0	0	0	0	0	0	200	300	0	0	0	0	0	0	0	200	903	0	0	0	0	0	0	0	603	903	0
3064	8	0	0	0	0	0	0	200	300	0	0	0	0	0	0	0	200	903	0	0	0	0	0	0	0	603	903	0
3064	9	0	0	0	0	0	0	200	300	0	0	0	0	0	0	0	200	903	0	0	0	0	0	0	0	603	903	0
3065	0	0	0	0	0	0	0	200	300	0	0	0	0	0	0	0	200	903	0	0	0	0	0	0	0	603	903	0
3065	1	0	0	0	0	0	0	200	300	0	0	0	0	0	0	0	200	903	0	0	0	0	0	0	0	603	903	0
3065	2	0	0	0	0	0	0	200	300	0	0	0	0	0	0	0	200	903	0	0	0	0	0	0	0	603	903	0
3065	3	0	0	0	0	0	0	200	300	0	0	0	0	0	0	0	200	903	0	0	0	0	0	0	0	603	903	0
3065	4	0	0	0	0	0	0	200	300	0	0	0	0	0	0	0	200	903	0	0	0	0	0	0	0	603	903	0
3065	5	0	0	0	0	0	0	200	300	0	0	0	0	0	0	0	200	903	0	0	0	0	0	0	0	603	903	0
3065	6	0	0	0	0	0	0	200	300	0	0	0	0	0	0	0	200	903	0	0	0	0	0	0	0	603	903	0
3065	7	0	0	0	0	0	0	200	300	0	0	0	0	0	0	0	200	903	0	0	0	0	0	0	0	603	903	0
3065	8	0	0	0	0	0	0	200	300	0	0	0	0	0	0	0	200	903	0	0	0	0	0	0	0	603	903	0
3065	9	0	0	0	0	0	0	200	300	0	0	0	0	0	0	0	200	903	0	0	0	0	0	0	0	603	903	0
3066	0	0	0	0	0	0	0	200	300	0	0	0	0	0	0	0	200	903	0	0	0	0	0	0	0	603	903	0
3066	1	0	0	0	0	0	0	200	300	0	0	0	0	0	0	0	200	903	0	0	0	0	0	0	0	603	903	0
3066	2	0	0	0	0	0	0	200	300	0	0	0	0	0	0	0	200	903	0	0	0	0	0	0	0	603	903	0
3066	3	0	0	0	0	0	0	200	300	0	0	0	0	0	0	0	200	903	0	0	0	0	0	0	0	603	903	0
3066	4	0	0	0	0	0	0	200	300	0	0	0	0	0	0	0	200	903	0	0	0	0	0	0	0	603	903	0
3066	5	0	0	0	0	0	0	200	300	0	0	0	0	0	0	0	200	903	0	0	0	0	0	0	0	603	903	0
3066	6	0	0	0	0	0	0	200	300	0	0	0	0	0	0	0	200	903	0	0	0	0	0	0	0	603	903	0
3066	7	0	0	0	0	0	0	200	300	0	0	0	0	0	0	0	200	903	0	0	0	0	0	0	0	603	903	0
3066	8	0	0	0	0	0	0	200	300	0	0	0	0	0	0	0	200	903	0	0	0	0	0	0	0	603	903	0
3066	9	0	0	0	0	0	0	200	300	0	0	0	0	0	0	0	200	903	0	0	0	0	0	0	0	603	903	0
3067	0	0	0	0	0	0	0	200	300	0	0	0	0	0	0	0	200	903	0	0	0	0	0	0	0	603	903	0
3067	1	0	0	0	0	0	0	200	300	0	0	0	0	0	0	0	200	903	0	0	0	0	0	0	0	603	903	0
3067	2	0	0	0	0	0	0	200	300	0	0	0	0	0	0	0	200	903	0	0	0	0	0	0	0	603	903	0
3067	3	0	0	0	0	0	0	200	300	0	0	0	0	0	0	0	200	903	0	0	0	0	0	0	0	603	903	0
3067	4	0	0	0	0	0	0	200	300	0	0	0	0	0	0	0	200	903	0	0	0	0	0	0	0	603	903	0
3067	5	0	0	0	0	0	0	200	300	0	0	0	0	0	0	0	200	903	0	0	0	0	0	0	0	603	903	0
3067	6	0	0	0	0	0	0	200	300	0	0	0	0	0	0	0	200	903	0	0	0	0	0	0	0	603	903	0
3067	7	0	0	0	0	0	0	200	300	0	0	0	0	0	0	0	200	903	0	0	0	0	0	0	0	603	903	0
3067	8	0	0	0	0	0	0	200	300	0	0	0	0	0	0	0	200	903	0	0	0	0	0	0	0	603	903	0
3067	9	0	0	0	0	0	0	200	300	0	0	0	0	0	0	0	200	903	0	0	0	0	0	0	0	603	903	0
3068	0	0	0	0	0	0	0	200	300	0	0	0	0	0	0	0	200	903	0	0	0	0	0	0	0	603	903	0
3068	1	0	0	0	0	0	0	200	300	0	0	0	0	0	0	0	200	903	0	0	0	0	0	0	0	603	903	0
3068	2	0	0	0	0	0	0	200	300	0	0	0	0	0	0	0	200	903	0	0	0	0	0	0	0	603	903	0
3068	3	0	0	0	0	0	0	200	300	0	0	0	0	0	0	0	200	903	0	0	0	0	0	0	0	603	903	0
3068	4	0	0	0	0	0	0	200	300	0	0	0	0	0	0	0	200	903	0	0	0	0	0	0	0	603	903	0
3068	5	0	0	0	0	0	0	200	300	0	0	0	0	0	0	0	200	903	0	0	0	0	0	0	0	603	903	0
3068	6	0	0	0	0	0	0	200	300	0	0	0	0	0	0	0	200	903	0	0	0	0	0	0	0	603	903	0
3068	7	0	0	0	0	0	0	200	300	0	0	0	0	0	0	0	200	903	0	0	0	0	0	0	0	603	903	0
3068	8	0	0	0	0	0	0	200	300	0	0	0	0	0	0	0	200	903	0	0	0	0	0	0	0	603	903	0
3068	9	0	0	0	0	0	0	200	300	0	0	0	0	0	0	0	200	903	0	0	0	0	0	0	0	603	903	0
3069	0	0	0	0	0	0	0	200	300	0	0	0	0	0	0	0	200	903	0	0	0	0	0	0	0	603	903	0
3069	1	0	0	0	0	0	0	200	300	0	0	0	0	0	0	0	200	903	0	0	0	0	0	0	0	603	903	0
3069	2	0	0	0	0	0	0	200	300	0	0	0	0	0	0	0	200	903	0	0	0	0	0	0	0	603	903	0
3069	3	0	0	0	0	0	0	200	300	0	0	0	0	0	0	0	200	903	0	0	0	0	0	0	0	603	903	0
3069	4	0	0	0	0	0	0	200	300	0	0	0	0	0	0	0	200	903	0	0	0	0	0	0	0	603	903	0
3069	5	0	0	0	0	0	0	200	300	0	0	0	0	0	0	0	200	903	0	0	0	0	0	0	0	603	903	0
3069	6	0	0	0	0	0	0	200	300	0	0	0	0	0	0	0	200	903	0	0	0	0	0	0	0	603	903	0
3069	7	0	0	0	0	0	0	200	300	0	0	0	0	0	0	0	200	903	0	0	0	0	0	0	0	603	903	0
3069	8	0	0	0	0	0	0	200	300	0	0	0	0	0	0	0	200	903	0	0	0	0	0	0	0	603	903	0
3069	9	0	0	0	0	0	0	200	300	0	0	0	0	0	0	0	200	903	0	0	0	0	0	0	0	603	903	0
3070	0	0	0	0	0	0	0	200	300	0	0	0	0	0	0	0	200	903	0	0	0	0	0	0	0	603	903	0
3070	1	0	0	0	0	0	0	200	300	0	0	0	0	0	0	0	200	903	0	0	0	0	0	0	0	603	903	0
3070	2	0	0	0	0	0	0	200	300	0	0	0	0	0	0	0	200	903	0	0	0	0	0	0	0	603	903	0
3070	3	0	0	0	0	0	0	200	300	0	0	0	0	0	0	0	200	903	0	0	0	0	0	0	0	603	903	0
3070	4	0	0	0	0	0	0	200	300	0	0	0	0	0	0	0	200	903	0	0	0	0	0	0	0	603	903	0
3070	5	0	0	0	0	0	0	200	300	0	0	0	0	0	0	0	200	903	0	0	0	0	0	0	0	603	903	0
3070	6	0	0	0	0	0	0	200	300	0	0	0	0	0	0	0	200	903	0	0	0	0	0	0	0	603	903	0
3070	7	0	0	0	0	0	0	200	300	0	0	0	0	0	0	0	200	903	0	0	0	0	0	0	0	603	903	0
3070	8	0	0	0	0	0	0	200	300	0	0	0	0	0	0	0	200	903	0	0	0	0	0	0	0	603	903	0
3070	9	0	0	0	0	0	0	200	300	0	0	0	0	0	0	0	200	903	0	0	0	0	0	0	0	603	903	0
3071	0	0	0	0	0	0	0	200	300	0	0	0	0	0	0	0	200	903	0	0	0	0	0	0	0	603	903	0
3071	1	0	0	0	0	0	0	200	300	0	0	0	0	0	0	0	200	903	0	0	0	0	0	0	0	603	903	0
3071	2	0	0	0	0	0	0	200	300	0	0	0	0	0	0	0	200	903	0	0	0	0	0	0	0	603	903	0
3071	3	0	0	0	0	0	0	200	300	0	0	0	0	0	0	0	200	903	0	0	0	0	0	0	0	603	903	0
3071	4	0	0	0	0	0	0	200	300	0	0	0	0	0	0	0	200	903	0	0	0	0	0	0	0	603	903	0
3071	5	0	0	0	0	0	0	200	300	0	0	0	0	0	0	0	200	903	0	0	0	0	0	0	0	603	903	0
3071	6	0	0	0	0	0	0	200	300	0	0	0	0	0	0	0	200	903	0	0	0	0	0	0	0	603	903	0
3071	7	0	0	0	0	0	0	200	300	0	0	0	0	0	0	0	200	903	0	0	0	0	0	0	0	603	903	0
3071	8	0	0	0	0	0	0	200	300	0	0	0	0	0	0	0	200	903	0	0	0	0	0	0	0	603	903	0
3071	9	0	0	0	0	0	0	200	300	0	0	0	0	0	0	0	200	903	0	0	0	0	0	0	0	603	903	0
3072	0	0	0	0	0	0	0	200	300	0	0	0	0	0	0	0	200	903	0	0	0	0	0	0	0	603	903	0
3072	1	0	0	0	0	0	0	200	300	0	0	0	0	0	0	0	200	903	0	0	0	0	0	0	0	603	903	0
3072	2	0	0	0	0	0	0	200	300	0	0	0	0	0	0	0	200	903	0	0	0	0	0	0	0	603	903	0
3072	3	0	0	0	0	0	0	200	300	0	0	0	0	0	0	0	200	903	0	0	0	0	0	0	0	603	903	0
3072	4	0	0	0	0	0	0	200	300	0	0	0	0	0	0	0	200	903	0	0	0	0	0	0	0	603	903	0
3072	5	0	0	0	0	0	0	200	300	0	0	0	0	0	0	0	200	903	0	0	0	0	0	0	0	603	903	0
3072	6	0	0	0	0	0	0	200	300	0	0	0	0	0	0	0	200	903	0	0	0	0	0	0	0	603	903	0
3072	7	0	0	0	0	0	0	200	300	0	0	0	0	0	0	0	200	903	0	0	0	0	0	0	0	603	903	0
3072	8	0	0	0	0	0	0	200	300	0	0	0	0	0	0	0	200	903	0	0	0	0	0	0	0	603	903	0
3072	9	0	0	0	0	0	0	200	300	0	0	0	0	0	0	0	200	903	0	0	0	0	0	0	0	603	903	0
3073	0	0	0	0	0	0	0	200	300	0	0	0	0	0	0	0	200	903	0	0	0	0	0	0	0	603	903	0
3073	1	0	0	0	0	0	0	200	300	0	0	0	0	0	0	0	200	903	0	0	0	0	0	0	0	603	903	0
3073	2	0	0	0	0	0	0	200	300	0	0	0	0	0	0	0	200	903	0	0	0	0	0	0	0	603	903	0
3073	3	0	0	0	0	0	0	200	300	0	0	0	0	0	0	0	200	903	0	0	0	0	0	0	0	603	903	0
3073	4	0	0	0	0	0	0	200	300	0	0	0	0	0	0	0	200	903	0	0	0	0	0	0	0	603	903	0
3073	5	0	0	0	0	0	0	200	300	0	0	0	0	0	0	0	200	903	0	0	0	0	0	0	0	603	903	0
3073	6	0	0	0	0	0	0	200	300	0	0	0	0	0	0	0	200	903	0	0	0	0	0	0	0	603	903	0
3073	7	0	0	0	0	0	0	200	300	0	0	0	0	0	0	0	200	903	0	0	0	0	0	0	0	603	903	0
3073	8	0	0	0	0	0	0	200	300	0	0	0	0	0	0	0	200	903	0	0	0	0	0	0	0	603	903	0
3073	9	0	0	0	0	0	0	200	300	0	0	0	0	0	0	0	200	903	0	0	0	0	0	0	0	603	903	0
3074	0	0	0	0	0	0	0	200	300	0	0	0	0	0	0	0	200	903	0	0	0	0	0	0	0	603	903	0
3074	1	0	0	0	0	0	0	200	300	0	0	0	0	0	0	0	200	903	0	0	0	0	0	0	0	603	903	0
3074	2	0	0	0	0	0	0	200	300	0	0	0	0	0	0	0	200	903	0	0	0	0	0	0	0	603	903	0
3074	3	0	0	0	0	0	0	200	300	0	0	0	0	0	0	0	200	903	0	0	0	0	0	0	0	603	903	0
3074	4	0	0	0	0	0	0	200	300	0	0	0	0	0	0	0	200	903	0	0	0	0	0	0	0	603	903	0
3074	5	0	0	0	0	0	0	200	300	0	0	0	0	0	0	0	200	903	0	0	0	0	0	0	0	603	903	0
3074	6	0	0	0	0	0	0	200	300	0	0	0	0	0	0	0	200	903	0	0	0	0	0	0	0	603	903	0
3074	7	0	0	0	0	0	0	200	300	0	0	0	0	0	0	0	200	903	0	0	0	0	0	0	0	603	903	0
3074	8	0	0	0	0	0	0	200	300	0	0	0	0	0	0	0	200	903	0	0	0	0	0	0	0	603	903	0
3074	9	0	0	0	0	0	0	200	300	0	0	0	0	0	0	0	200	903	0	0	0	0	0	0	0	603	903	0
3075	0	0	0	0	0	0	0	200	300	0	0	0	0	0	0	0	200	903	0	0	0	0	0	0	0	603	903	0
3075	1	0	0	0	0	0	0	200	300	0	0	0	0	0	0	0	200	903	0	0	0	0	0	0	0	603	903	0
3075	2	0	0	0	0	0	0	200	300	0	0	0	0	0	0	0	200	903	0	0	0	0	0	0	0	603	903	0
3075	3	0	0	0	0	0	0	200	300	0	0	0	0	0	0	0	200	903	0	0	0	0	0	0	0	603	903	0
3075	4	0	0	0	0	0	0	200	300	0	0	0	0	0	0	0	200	903	0	0	0	0	0	0	0	603	903	0
3075	5	0	0	0	0	0	0	200	300	0	0	0	0	0	0	0	200	903	0	0	0	0	0	0	0	603	903	0
3075	6	0	0	0	0	0	0	200	300	0	0	0	0	0	0	0	200	903	0	0	0	0	0	0	0	603	903	0
3075	7	0	0	0	0	0	0	200	300	0	0	0	0	0	0	0	200	903	0	0	0	0	0	0	0	603	903	0
3075	8	0	0	0	0	0	0	200	300	0	0	0	0	0	0	0	200	903	0	0	0	0	0	0	0	603	903	0
3075	9	0	0	0	0	0	0	200	300	0	0	0	0	0	0	0	200	903	0	0	0	0	0	0	0	603	903	0
3076	0	0	0	0	0	0	0	200	300	0	0	0	0	0	0	0	200	903	0	0	0	0	0	0	0	603	903	0
3076	1	0	0	0	0	0	0	200	300	0	0	0	0	0	0	0	200	903	0	0	0	0	0	0	0	603	903	0
3076	2	0	0	0	0	0	0	200	300	0	0	0	0	0	0	0	200	903	0	0	0	0	0	0	0	603	903	0
3076	3	0	0	0	0	0	0	200	300	0	0	0	0	0	0	0	200	903	0	0	0	0	0	0	0	603	903	0
3076	4	0	0	0	0	0	0	200	300	0	0	0	0	0	0	0	200	903	0	0	0	0	0	0	0	603	903	0
3076	5	0	0	0	0	0	0	200	300	0	0	0	0	0	0	0	200	903	0	0	0	0	0	0	0	603	903	0
3076	6	0	0	0	0	0	0	200	300	0	0	0	0	0	0	0	200	903	0	0	0	0	0	0	0	603	903	0
3076	7	0	0	0	0	0	0	200	300	0	0	0	0	0	0	0	200	903	0	0	0	0	0	0	0	603	903	0
3076	8	0	0	0	0	0	0	200	300	0	0	0	0	0	0	0	200	903	0	0	0	0	0	0	0	603	903	0
3076	9	0	0	0	0	0	0	200	300	0	0	0	0	0	0	0	200	903	0	0	0	0	0	0	0	603	903	0
3077	0	0	0	0	0	0	0	200	300	0	0	0	0	0	0	0	200	903	0	0	0	0	0	0	0	603	903	0
3077	1	0	0	0	0	0	0	200	300	0	0	0	0	0	0	0	200	903	0	0	0	0	0	0	0	603	903	0
3077	2	0	0	0	0	0	0	200	300	0	0	0	0	0	0	0	200	903	0	0	0	0	0	0	0	603	903	0
3077	3	0	0	0	0	0	0	200	300	0	0	0	0	0	0	0	200	903	0	0	0	0	0	0	0	603	903	0
3077	4	0	0	0	0	0	0	200	300	0	0	0	0	0	0	0	200	903	0	0	0	0	0	0	0	603	903	0
3077	5	0	0	0	0	0	0	200	300	0	0	0	0	0	0	0	200	903	0	0	0	0	0	0	0	603	903	0
3077	6	0	0	0	0	0	0	200	300	0	0	0	0	0	0	0	200	903	0	0	0	0	0	0	0	603	903	0
3077	7	0	0	0	0	0	0	200	300	0	0	0	0	0	0	0	200	903	0	0	0	0	0	0	0	603	903	0
3077	8	0	0	0	0	0	0	200	300	0	0	0	0	0	0	0	200	903	0	0	0	0	0	0	0	603	903	0
3077	9	0	0	0	0	0	0	200	300	0	0	0	0	0	0	0	200	903	0	0	0	0	0	0	0	603	903	0
3078	0	0	0	0	0	0	0	200	300	0	0	0	0	0	0	0	200	903	0	0	0	0	0	0	0	603	903	0
3078	1	0	0	0	0	0	0	200	300	0	0	0	0	0	0	0	200	903	0	0	0	0	0	0	0	603	903	0
3078	2	0	0	0	0	0	0	200	300	0	0	0	0	0	0	0	200	903	0	0	0	0	0	0	0	603	903	0
3078	3	0	0	0	0	0	0	200	300	0	0	0	0	0	0	0	200	903	0	0	0	0	0	0	0	603	903	0
3078	4	0	0	0	0	0	0	200	300	0	0	0	0	0	0	0	200	903	0	0	0	0	0	0	0	603	903	0
3078	5	0	0	0	0	0	0	200	300	0	0	0	0	0	0	0	200	903	0	0	0	0	0	0	0	603	903	0
3078	6	0	0	0	0	0	0	200	300	0	0	0	0	0	0	0	200	903	0	0	0	0	0	0	0	603	903	0
3078	7	0	0	0	0	0	0	200	300	0	0	0	0	0	0	0	200	903	0	0	0	0	0	0	0	603	903	0
3078	8	0	0	0	0	0	0	200	300	0	0	0	0	0	0	0	200	903	0	0	0	0	0	0	0	603	903	0
3078	9	0	0	0	0	0	0	200	300	0	0	0	0	0	0	0	200	903	0	0	0	0	0	0	0	603	903	0
3079	0	0	0	0	0	0	0	200	300	0	0	0	0	0	0	0	200	903	0	0	0	0	0	0	0	603	903	0
3079	1	0	0	0	0	0	0	200	300	0	0	0	0	0	0	0	200	903	0	0	0	0	0	0	0	603	903	0
3079	2	0	0	0	0	0	0	200	300	0	0	0	0	0	0	0	200	903	0	0	0	0	0	0	0	603	903	0
3079	3	0	0	0	0	0	0	200	300	0	0	0	0	0	0	0	200	903	0	0	0	0	0	0	0	603	903	0
3079	4	0	0	0	0	0	0	200	300	0	0	0	0	0	0	0	200	903	0	0	0	0	0	0	0	603	903	0
3079	5	0	0	0	0	0	0	200	300	0	0	0	0	0	0	0	200	903	0	0	0	0	0	0	0	603	903	0
3079	6	0	0	0	0	0	0	200	300	0	0	0	0	0	0	0	200	903	0	0	0	0	0	0	0	603	903	0
3079	7	0	0	0	0	0	0	200	300	0	0	0	0	0	0	0	200	903	0	0	0	0	0	0	0	603	903	0
3079	8	0	0	0	0	0	0	200	300	0	0	0	0	0	0	0	200	903	0	0	0	0	0	0	0	603	903	0
3079	9	0	0	0	0	0	0	200	300	0	0	0	0	0	0	0	200	903	0	0	0	0	0	0	0	603	903	0
3080	0	0	0	0	0	0	0	200	300	0	0	0	0	0	0	0	200	903	0	0	0	0	0	0	0	603	903	0
3080	1	0	0	0	0	0	0	200	300	0	0	0	0	0	0	0	200	903	0	0	0	0	0	0	0	603	903	0
3080	2	0	0	0	0	0	0	200	300	0	0	0	0	0	0	0	200	903	0	0	0	0	0	0	0	603	903	0
3080	3	0	0	0	0	0	0	200	300	0	0	0	0	0	0	0	200	903	0	0	0	0	0	0	0	603	903	0
3080	4	0	0	0	0	0	0	200	300	0	0	0	0	0	0	0	200	903	0	0	0	0	0	0	0	603	903	0
3080	5	0	0	0	0	0	0	200	300	0	0	0	0	0	0	0	200	903	0	0	0	0	0	0	0	603	903	0
3080	6	0	0	0	0	0	0	200	300	0	0	0	0	0	0	0	200	903	0	0	0	0	0	0	0	603	903	0
3080	7	0	0	0	0	0	0	200	300	0	0	0	0	0	0	0	200	903	0	0	0	0	0	0	0	603	903	0
3080	8	0	0	0	0	0	0	200	300	0	0	0	0	0	0	0	200	903	0	0	0	0	0	0	0	603	903	0
3080	9	0	0	0	0	0	0	200	300	0	0	0	0	0	0	0	200	903	0	0	0	0	0	0	0	603	903	0
3081	0	0	0	0	0	0	0	200	300	0	0	0	0	0	0	0	200	903	0	0	0	0	0	0	0	603	903	0
3081	1	0	0	0	0	0	0	200	300	0	0	0	0	0	0	0	200	903	0	0	0	0	0	0	0	603	903	0
3081	2	0	0	0	0	0	0	200	300	0	0	0	0	0	0	0	200	903	0	0	0	0	0	0	0	603	903	0
3081	3	0	0	0	0	0	0	200	300	0	0	0	0	0	0	0	200	903	0	0	0	0	0	0	0	603	903	0
3081	4	0	0	0	0	0	0	200	300	0	0	0	0	0	0	0	200	903	0	0	0	0	0	0	0	603	903	0
3081	5	0	0	0	0	0	0	200	300	0	0	0	0	0	0	0	200	903	0	0	0	0	0	0	0	603	903	0
3081	6	0	0	0	0	0	0	200	300	0	0	0	0	0	0	0	200	903	0	0	0	0	0	0	0	603	903	0
3081	7	0	0	0	0	0	0	200	300	0	0	0	0	0	0	0	200	903	0	0	0	0	0	0	0	603	903	0
3081	8	0	0	0	0	0	0	200	300	0	0	0	0	0	0	0	200	903	0	0	0	0	0	0	0	603	903	0
3081	9	0	0	0	0	0	0	200	300	0	0	0	0	0	0	0	200	903	0	0	0	0	0	0	0	603	903	0
3082	0	0	0	0	0	0	0	200	300	0	0	0	0	0	0	0	200	903	0	0	0	0	0	0	0	603	903	0
3082	1	0	0	0	0	0	0	200	300	0	0	0	0	0	0	0	200	903	0	0	0	0	0	0	0	603	903	0
3082	2	0	0	0	0	0	0	200	300	0	0	0	0	0	0	0	200	903	0	0	0	0	0	0	0	603	903	0
3082	3	0	0	0	0	0	0	200	300	0	0	0	0	0	0	0	200	903	0	0	0	0	0	0	0	603	903	0
3082	4	0	0	0	0	0	0	200	300	0	0	0	0	0	0	0	200	903	0	0	0	0	0	0	0	603	903	0
3082	5	0	0	0	0	0	0	200	300	0	0	0	0	0	0	0	200	903	0	0	0	0	0	0	0	603	903	0
3082	6	0	0	0	0	0	0	200	300	0	0	0	0	0	0	0	200	903	0	0	0	0	0	0	0	603	903	0
3082	7	0	0	0	0	0	0	200	300	0	0	0	0	0	0	0	200	903	0	0	0	0	0	0	0	603	903	0
3082	8	0	0	0	0	0	0	200	300	0	0	0	0	0	0	0	200	903	0	0	0	0	0	0	0	603	903	0
3082	9	0	0	0	0	0	0	200	300	0	0	0	0	0	0	0	200	903	0	0	0	0	0	0	0	603	903	0
3083	0	0	0	0	0	0	0	200	300	0	0	0	0	0	0	0	200	903	0	0	0	0	0	0	0	603	903	0
3083	1	0	0	0	0	0	0	200	300	0	0	0	0	0	0	0	200	903	0	0	0	0	0	0	0	603	903	0
3083	2	0	0	0	0	0	0	200	300	0	0	0	0	0	0	0	200	903	0	0	0	0	0	0	0	603	903	0
3083	3	0	0	0	0	0	0	200	300	0	0	0	0	0	0	0	200	903	0	0	0	0	0	0	0	603	903	0
3083	4	0	0	0	0	0	0	200	300	0	0	0	0	0	0	0	200	903	0	0	0	0	0	0	0	603	903	0
3083	5	0	0	0	0	0	0	200	300	0	0	0	0	0	0	0	200	903	0	0	0	0	0	0	0	603	903	0
3083	6	0	0	0	0	0	0	200	300	0	0	0	0	0	0	0	200	903	0	0	0	0	0	0	0	603	903	0
3083	7	0	0	0	0	0	0	200	300	0	0	0	0	0	0	0	200	903	0	0	0	0	0	0	0	603	903	0
3083	8	0	0	0	0	0	0	200	300	0	0	0	0	0	0	0	200	903	0	0	0	0	0	0	0	603	903	0
3083	9	0	0	0	0	0	0	200	300	0	0	0	0	0	0	0	200	903	0	0	0	0	0	0	0	603	903	0
3084	0	0	0	0	0	0	0	200	300	0	0	0	0	0	0	0	200	903	0	0	0	0	0	0	0	603	903	0
3084	1	0	0	0	0	0	0	200	300	0	0	0	0	0	0	0	200	903	0	0	0	0	0	0	0	603	903	0
3084	2	0	0	0	0	0	0	200	300	0	0	0	0	0	0	0	200	903	0	0	0	0	0	0	0	603	903	0
3084	3	0	0	0	0	0	0	200	300	0	0	0	0	0	0	0	200	903	0	0	0	0	0	0	0	603	903	0
3084	4	0	0	0	0	0	0	200	300	0	0	0	0	0	0	0	200	903	0	0	0	0	0	0	0	603	903	0
3084	5	0	0	0	0	0	0	200	300	0	0	0	0	0	0	0	200	903	0	0	0	0	0	0	0	603	903	0
3084	6	0	0	0	0	0	0	200	300	0	0	0	0	0	0	0	200	903	0	0	0	0	0	0	0	603	903	0
3084	7	0	0	0	0	0	0	200	300	0	0	0	0	0	0	0	200	903	0	0	0	0	0	0	0	603	903	0
3084	8	0	0	0	0	0	0	200	300	0	0	0	0	0	0	0	200	903	0	0	0	0	0	0	0	603	903	0
3084	9	0	0	0	0	0	0	200	300	0	0	0	0	0	0	0	200	903	0	0	0	0	0	0	0	603	903	0
3085	0	0	0	0	0	0	0	200	300	0	0	0	0	0	0	0	200	903	0	0	0	0	0	0	0	603	903	0
3085	1	0	0	0	0	0	0	200	300	0	0	0	0	0	0	0	200	903	0	0	0	0	0	0	0	603	903	0
3085	2	0	0	0	0	0	0	200	300	0	0	0	0	0	0	0	200	903	0	0	0	0	0	0	0	603	903	0
3085	3	0	0	0	0	0	0	200	300	0	0	0	0	0	0	0	200	903	0	0	0	0	0	0	0	603	903	0
3085	4	0	0	0	0	0	0	200	300	0	0	0	0	0	0	0	200	903	0	0	0	0	0	0	0	603	903	0
3085	5	0	0	0	0	0	0	200	300	0	0	0	0	0	0	0	200	903	0	0	0	0	0	0	0	603	903	0
3085	6	0	0	0	0	0	0	200	300	0	0	0	0	0	0	0	200	903	0	0	0	0	0	0	0	603	903	0
3085	7	0	0	0	0	0	0	200	300	0	0	0	0	0	0	0	200	903	0	0	0	0	0	0	0	603	903	0
3085	8	0	0	0	0	0	0	200	300	0	0	0	0	0	0	0	200	903	0	0	0	0	0	0	0	603	903	0
3085	9	0	0	0	0	0	0	200	300	0	0	0	0	0	0	0	200	903	0	0	0	0	0	0	0	603	903	0
3086	0	0	0	0	0	0	0	200	300	0	0	0	0	0	0	0	200	903	0	0	0	0	0	0	0	603	903	0
3086	1	0	0	0	0	0	0	200	300	0	0	0	0	0	0	0	200	903	0	0	0	0	0	0	0	603	903	0
3086	2	0	0	0	0	0	0	200	300	0	0	0	0	0	0	0	200	903	0	0	0	0	0	0	0	603	903	0
3086	3	0	0	0	0	0	0	200	300	0	0	0	0	0	0	0	200	903	0	0	0	0	0	0	0	603	903	0
3086	4	0	0	0	0	0	0	200	300	0	0	0	0	0	0	0	200	903	0	0	0	0	0	0	0	603	903	0
3086	5	0	0	0	0	0	0	200	300	0	0	0	0	0	0	0	200	903	0	0	0	0	0	0	0	603	903	0
3086	6	0	0	0	0	0	0	200	300	0	0	0	0	0	0	0	200	903	0	0	0	0	0	0	0	603	903	0
3086	7	0	0	0	0	0	0	200	300	0	0	0	0	0	0	0	200	903	0	0	0	0	0	0	0	603	903	0
3086	8	0	0	0	0	0	0	200	300	0	0	0	0	0	0	0	200	903	0	0	0	0	0	0	0	603	903	0
3086	9	0	0	0	0	0	0	200	300	0	0	0	0	0	0	0	200	903	0	0	0	0	0	0	0	603	903	0
3087	0	0	0	0	0	0	0	200	300	0	0	0	0	0	0	0	200	903	0	0	0	0	0	0	0	603	903	0
3087	1	0	0	0	0	0	0	200	300	0	0	0	0	0	0	0	200	903	0	0	0	0	0	0	0	603	903	0
3087	2	0	0	0	0	0	0	200	300	0	0	0	0	0	0	0	200	903	0	0	0	0	0	0	0	603	903	0
3087	3	0	0	0	0	0	0	200	300	0	0	0	0	0	0	0	200	903	0	0	0	0	0	0	0	603	903	0
3087	4	0	0	0	0	0	0	200	300	0	0	0	0	0	0	0	200	903	0	0	0	0	0	0	0	603	903	0
3087	5	0	0	0	0	0	0	200	300	0	0	0	0	0	0	0	200	903	0	0	0	0	0	0	0	603	903	0
3087	6	0	0	0	0	0	0	200	300	0	0	0	0	0	0	0	200	903	0	0	0	0	0	0	0	603	903	0
3087	7	0	0	0	0	0	0	200	300	0	0	0	0	0	0	0	200	903	0	0	0	0	0	0	0	603	903	0
3087	8	0	0	0	0	0	0	200	300	0	0	0	0	0	0	0	200	903	0	0	0	0	0	0	0	603	903	0
3087	9	0	0	0	0	0	0	200	300	0	0	0	0	0	0	0	200	903	0	0	0	0	0	0	0	603	903	0
3088	0	0	0	0	0	0	0	200	300	0	0	0	0	0	0	0	200	903	0	0	0	0	0	0	0	603	903	0
3088	1	0	0	0	0	0	0	200	300	0	0	0	0	0	0	0	200	903	0	0	0	0	0	0	0	603	903	0
3088	2	0	0	0	0	0	0	200	300	0	0	0	0	0	0	0	200	903	0	0	0	0	0	0	0	603	903	0
3088	3	0	0	0	0	0	0	200	300	0	0	0	0	0	0	0	200	903	0	0	0	0	0	0	0	603	903	0
3088	4	0	0	0	0	0	0	200	300	0	0	0	0	0	0	0	200	903	0	0	0	0	0	0	0	603	903	0
3088	5	0	0	0	0	0	0	200	300	0	0	0	0	0	0	0	200	903	0	0	0	0	0	0	0	603	903	0
3088	6	0	0	0	0	0	0	200	300	0	0	0	0	0	0	0	200	903	0	0	0	0	0	0	0	603	903	0
3088	7	0	0	0	0	0	0	200	300	0	0	0	0	0	0	0	200	903	0	0	0	0	0	0	0	603	903	0
3088	8	0	0	0	0	0	0	200	300	0	0	0	0	0	0	0	200	903	0	0	0	0	0	0	0	603	903	0
3088	9	0	0	0	0	0	0	200	300	0	0	0	0	0	0	0	200	903	0	0	0	0	0	0	0	603	903	0
3089	0	0	0	0	0	0	0	200	300	0	0	0	0	0	0	0	200	903	0	0	0	0	0	0	0	603	903	0
3089	1	0	0	0	0	0	0	200	300	0	0	0	0	0	0	0	200	903	0	0	0	0	0	0	0	603	903	0
3089	2	0	0	0	0	0	0	200	300	0	0	0	0	0	0	0	200	903	0	0	0	0	0	0	0	603	903	0
3089	3	0	0	0	0	0	0	200	300	0	0	0	0	0	0	0	200	903	0	0	0	0	0	0	0	603	903	0
3089	4	0	0	0	0	0	0	200	300	0	0	0	0	0	0	0	200	903	0	0	0	0	0	0	0	603	903	0
3089	5	0	0	0	0	0	0	200	300	0	0	0	0	0	0	0	200	903	0	0	0	0	0	0	0	603	903	0
3089	6	0	0	0	0	0	0	200	300	0	0	0	0	0	0	0	200	903	0	0	0	0	0	0	0	603	903	0
3089	7	0	0	0	0	0	0	200	300	0	0	0	0	0	0	0	200	903	0	0	0	0	0	0	0	603	903	0
3089	8	0	0	0	0	0	0	200	300	0	0	0	0	0	0	0	200	903	0	0	0	0	0	0	0	603	903	0
3089	9	0	0	0	0	0	0	200	300	0	0	0	0	0	0	0	200	903	0	0	0	0	0	0	0	603	903	0
3090	0	0	0	0	0	0	0	200	300	0	0	0	0	0	0	0	200	903	0	0	0	0	0	0	0	603	903	0
3090	1	0	0	0	0	0	0	200	300	0	0	0	0	0	0	0	200	903	0	0	0	0	0	0	0	603	903	0
3090	2	0	0	0	0	0	0	200	300	0	0	0	0	0	0	0	200	903	0	0	0	0	0	0	0	603	903	0
3090	3	0	0	0	0	0	0	200	300	0	0	0	0	0	0	0	200	903	0	0	0	0	0	0	0	603	903	0
3090	4	0	0	0	0	0	0	200	300	0	0	0	0	0	0	0	200	903	0	0	0	0	0	0	0	603	903	0
3090	5	0	0	0	0	0	0	200	300	0	0	0	0	0	0	0	200	903	0	0	0	0	0	0	0	603	903	0
3090	6	0	0	0	0	0	0	200	300	0	0	0	0	0	0	0	200	903	0	0	0	0	0	0	0	603	903	0
3090	7	0	0	0	0	0	0	200	300	0	0	0	0	0	0	0	200	903	0	0	0	0	0	0	0	603	903	0
3090	8	0	0	0	0	0	0	200	300	0	0	0	0	0	0	0	200	903	0	0	0	0	0	0	0	603	903	0
3090	9	0	0	0	0	0	0	200	300	0	0	0	0	0	0	0	200	903	0	0	0	0	0	0	0	603	903	0
3091	0	0	0	0	0	0	0	200	300	0	0	0	0	0	0	0	200	903	0	0	0	0	0	0	0	603	903	0
3091	1	0	0	0	0	0	0	200	300	0	0	0	0	0	0	0	200	903	0	0	0	0	0	0	0	603	903	0
3091	2	0	0	0	0	0	0	200	300	0	0	0	0	0	0	0	200	903	0	0	0	0	0	0	0	603	903	0
3091	3	0	0	0	0	0	0	200	300	0	0	0	0	0	0	0	200	903	0	0	0	0	0	0	0	603	903	0
3091	4	0	0	0	0	0	0	200	300	0	0	0	0	0	0	0	200	903	0	0	0	0	0	0	0	603	903	0
3091	5	0	0	0	0	0	0	200	300	0	0	0	0	0	0	0	200	903	0	0	0	0	0	0	0	603	903	0
3091	6	0	0	0	0	0	0	200	300	0	0	0	0	0	0	0	200	903	0	0	0	0	0	0	0	603	903	0
3091	7	0	0	0	0	0	0	200	300	0	0	0	0	0	0	0	200	903	0	0	0	0	0	0	0	603	903	0
3091	8	0	0	0	0	0	0	200	300	0	0	0	0	0	0	0	200	903	0	0	0	0	0	0	0	603	903	0
3091	9	0	0	0	0	0	0	200	300	0	0	0	0	0	0	0	200	903	0	0	0	0	0	0	0	603	903	0
3092	0	0	0	0	0	0	0	200	300	0	0	0	0	0	0	0	200	903	0	0	0	0	0	0	0	603	903	0
3092	1	0	0	0	0	0	0	200	300	0	0	0	0	0	0	0	200	903	0	0	0	0	0	0	0	603	903	0
3092	2	0	0	0	0	0	0	200	300	0	0	0	0	0	0	0	200	903	0	0	0	0	0	0	0	603	903	0
3092	3	0	0	0	0	0	0	200	300	0	0	0	0	0	0	0	200	903	0	0	0	0	0	0	0	603	903	0
3092	4	0	0	0	0	0	0	200	300	0	0	0	0	0	0	0	200	903	0	0	0	0	0	0	0	603	903	0
3092	5	0	0	0	0	0	0	200	300	0	0	0	0	0	0	0	200	903	0	0	0	0	0	0	0	603	903	0
3092	6	0	0	0	0	0	0	200	300	0	0	0	0	0	0	0	200	903	0	0	0	0	0	0	0	603	903	0
3092	7	0	0	0	0	0	0	200	300	0	0	0	0	0	0	0	200	903	0	0	0	0	0	0	0	603	903	0
3092	8	0	0	0	0	0	0	200	300	0	0	0	0	0	0	0	200	903	0	0	0	0	0	0	0	603	903	0
3092	9	0	0	0	0	0	0	200	300	0	0	0	0	0	0	0	200	903	0	0	0	0	0	0	0	603	903	0
3093	0	0	0	0	0	0	0	200	300	0	0	0	0	0	0	0	200	903	0	0	0	0	0	0	0	603	903	0
3093	1	0	0	0	0	0	0	200	300	0	0	0	0	0	0	0	200	903	0	0	0	0	0	0	0	603	903	0
3093	2	0	0	0	0	0	0	200	300	0	0	0	0	0	0	0	200	903	0	0	0	0	0	0	0	603	903	0
3093	3	0	0	0	0	0	0	200	300	0	0	0	0	0	0	0	200	903	0	0	0	0	0	0	0	603	903	0
3093	4	0	0	0	0	0	0	200	300	0	0	0	0	0	0	0	200	903	0	0	0	0	0	0	0	603	903	0
3093	5	0	0	0	0	0	0	200	300	0	0	0	0	0	0	0	200	903	0	0	0	0	0	0	0	603	903	0
3093	6	0	0	0	0	0	0	200	300	0	0	0	0	0	0	0	200	903	0	0	0	0	0	0	0	603	903	0
3093	7	0	0	0	0	0	0	200	300	0	0	0	0	0	0	0	200	903	0	0	0	0	0	0	0	603	903	0
3093	8	0	0	0	0	0	0	200	300	0	0	0	0	0	0	0	200	903	0	0	0	0	0	0	0	603	903	0
3093	9	0	0	0	0	0	0	200	300	0	0	0	0	0	0	0	200	903	0	0	0	0	0	0	0	603	903	0
3094	0	0	0	0	0	0	0	200	300	0	0	0	0	0	0	0	200	903	0	0	0	0	0	0	0	603	903	0
3094	1	0	0	0	0	0	0	200	300	0	0	0	0	0	0	0	200	903	0	0	0	0	0	0	0	603	903	0
3094	2	0	0	0	0	0	0	200	300	0	0	0	0	0	0	0	200	903	0	0	0	0	0	0	0	603	903	0
3094	3	0	0	0	0	0	0	200	300	0	0	0	0	0	0	0	200	903	0	0	0	0	0	0	0	603	903	0
3094	4	0	0	0	0	0	0	200	300	0	0	0	0	0	0	0	200	903	0	0	0	0	0	0	0	603	903	0
3094	5	0	0	0	0	0	0	200	300	0	0	0	0	0	0	0	200	903	0	0	0	0	0	0	0	603	903	0
3094	6	0	0	0	0	0	0	200	300	0	0	0	0	0	0	0	200	903	0	0	0	0	0	0	0	603	903	0
3094	7	0	0	0	0	0	0	200	300	0	0	0	0	0	0	0	200	903	0	0	0	0	0	0	0	603	903	0
3094	8	0	0	0	0	0	0	200	300	0	0	0	0	0	0	0	200	903	0	0	0	0	0	0	0	603	903	0
3094	9	0	0	0	0	0	0	200	300	0	0	0	0	0	0	0	200	903	0	0	0	0	0	0	0	603	903	0
3095	0	0	0	0	0	0	0	200	300	0	0	0	0	0	0	0	200	903	0	0	0	0	0	0	0	603	903	0
3095	1	0	0	0	0	0	0	200	300	0	0	0	0	0	0	0	200	903	0	0	0	0	0	0	0	603	903	0
3095	2	0	0	0	0	0	0	200	300	0	0	0	0	0	0	0	200	903	0	0	0	0	0	0	0	603	903	0
3095	3	0	0	0	0	0	0	200	300	0	0	0	0	0	0	0	200	903	0	0	0	0	0	0	0	603	903	0
3095	4	0	0	0	0	0	0	200	300	0	0	0	0	0	0	0	200	903	0	0	0	0	0	0	0	603	903	0
3095	5	0	0	0	0	0	0	200	300	0	0	0	0	0	0	0	200	903	0	0	0	0	0	0	0	603	903	0
3095	6	0	0	0	0	0	0	200	300	0	0	0	0	0	0	0	200	903	0	0	0	0	0	0	0	603	903	0
3095	7	0	0	0	0	0	0	200	300	0	0	0	0	0	0	0	200	903	0	0	0	0	0	0	0	603	903	0
3095	8	0	0	0	0	0	0	200	300	0	0	0	0	0	0	0	200	903	0	0	0	0	0	0	0	603	903	0
3095	9	0	0	0	0	0	0	200	300	0	0	0	0	0	0	0	200	903	0	0	0	0	0	0	0	603	903	0
3096	0	0	0	0	0	0	0	200	300	0	0	0	0	0	0	0	200	903	0	0	0	0	0	0	0	603	903	0
3096	1	0	0	0	0	0	0	200	300	0	0	0	0	0	0	0	200	903	0	0	0	0	0	0	0	603	903	0
3096	2	0	0	0	0	0	0	200	300	0	0	0	0	0	0	0	200	903	0	0	0	0	0	0	0	603	903	0
3096	3	0	0	0	0	0	0	200	300	0	0	0	0	0	0	0	200	903	0	0	0	0	0	0	0	603	903	0
3096	4	0	0	0	0	0	0	200	300	0	0	0	0	0	0	0	200	903	0	0	0	0	0	0	0	603	903	0
3096	5	0	0	0	0	0	0	200	300	0	0	0	0	0	0	0	200	903	0	0	0	0	0	0	0	603	903	0
3096	6	0	0	0	0	0	0	200	300	0	0	0	0	0	0	0	200	903	0	0	0	0	0	0	0	603	903	0
3096	7	0	0	0	0	0	0	200	300	0	0	0	0	0	0	0	200	903	0	0	0	0	0	0	0	603	903	0
3096	8	0	0	0	0	0	0	200	300	0	0	0	0	0	0	0	200	903	0	0	0	0	0	0	0	603	903	0
3096	9	0	0	0	0	0	0	200	300	0	0	0	0	0	0	0	200	903	0	0	0	0	0	0	0	603	903	0
3097	0	0	0	0	0	0	0	200	300	0	0	0	0	0	0	0	200	903	0	0	0	0	0	0	0	603	903	0
3097	1	0	0	0	0	0	0	200	300	0	0	0	0	0	0	0	200	903	0	0	0	0	0	0	0	603	903	0
3097	2	0	0	0	0	0	0	200	300	0	0	0	0	0	0	0	200	903	0	0	0	0	0	0	0	603	903	0
3097	3	0	0	0	0	0	0	200	300	0	0	0	0	0	0	0	200	903	0	0	0	0	0	0	0	603	903	0
3097	4	0	0	0	0	0	0	200	300	0	0	0	0	0	0	0	200	903	0	0	0	0	0	0	0	603	903	0
3097	5	0	0	0	0	0	0	200	300	0	0	0	0	0	0	0	200	903	0	0	0	0	0	0	0	603	903	0
3097	6	0	0	0	0	0	0	200	300	0	0	0	0	0	0	0	200	903	0	0	0	0	0	0	0	603	903	0
3097	7	0	0	0	0	0	0	200	300	0	0	0	0	0	0	0	200	903	0	0	0	0	0	0	0	603	903	0
3097	8	0	0	0	0	0	0	200	300	0	0	0	0	0	0	0	200	903	0	0	0	0	0	0	0	603	903	0
3097	9	0	0	0	0	0	0	200	300	0	0	0	0	0	0	0	200	903	0	0	0	0	0	0	0	603	903	0
3098	0	0	0	0	0	0	0	200	300	0	0	0	0	0	0	0	200	903	0	0	0	0	0	0	0	603	903	0
3098	1	0	0	0	0	0	0	200	300	0	0	0	0	0	0	0	200	903	0	0	0	0	0	0	0	603	903	0
3098	2	0	0	0	0	0	0	200	300	0	0	0	0	0	0	0	200	903	0	0	0	0	0	0	0	603	903	0
3098	3	0	0	0	0	0	0	200	300	0	0	0	0	0	0	0	200	903	0	0	0	0	0	0	0	603	903	0
3098	4	0	0	0	0	0	0	200	300	0	0	0	0	0	0	0	200	903	0	0	0	0	0	0	0	603	903	0
3098	5	0	0	0	0	0	0	200	300	0	0	0	0	0	0	0	200	903	0	0	0	0	0	0	0	603	903	0
3098	6	0	0	0	0	0	0	200	300	0	0	0	0	0	0	0	200	903	0	0	0	0	0	0	0	603	903	0
3098	7	0	0	0	0	0	0	200	300	0	0	0	0	0	0	0	200	903	0	0	0	0	0	0	0	603	903	0
3098	8	0	0	0	0	0	0	200	300	0	0	0	0	0	0	0	200	903	0	0	0	0	0	0	0	603	903	0
3098	9	0	0	0	0	0	0	200	300	0	0	0	0	0	0	0	200	903	0	0	0	0	0	0	0	603	903	0
3099	0	0	0	0	0	0	0	200	300	0	0	0	0	0	0	0	200	903	0	0	0	0	0	0	0	603	903	0
3099	1	0	0	0	0	0	0	200	300	0	0	0	0	0	0	0	200	903	0	0	0	0	0	0	0	603	903	0
3099	2	0	0	0	0	0	0	200	300	0	0	0	0	0	0	0	200	903	0	0	0	0	0	0	0	603	903	0
3099	3	0	0	0	0	0	0	200	300	0	0	0	0	0	0	0	200	903	0	0	0	0	0	0	0	603	903	0
3099	4	0	0	0	0	0	0	200	300	0	0	0	0	0	0	0	200	903	0	0	0	0	0	0	0	603	903	0
3099	5	0	0	0	0	0	0	200	300	0	0	0	0	0	0	0	200	903	0	0	0	0	0	0	0	603	903	0
3099	6	0	0	0	0	0	0	200	300	0	0	0	0	0	0	0	200	903	0	0	0	0	0	0	0	603	903	0
3099	7	0	0	0	0	0	0	200	300	0	0	0	0	0	0	0	200	903	0	0	0	0	0	0	0	603	903	0
3099	8	0	0	0	0	0	0	200	300	0	0	0	0	0	0	0	200	903	0	0	0	0	0	0	0	603	903	0
3099	9	0	0	0	0	0	0	200	300	0	0	0	0	0	0	0	200	903	0	0	0	0	0	0	0	603	903	0
3100	0	0	0	0	0	0	0	200	300	0	0	0	0	0	0	0	200	903	0	0	0	0	0	0	0	603	903	0
3100	1	0	0	0	0	0	0	200	300	0	0	0	0	0	0	0	200	903	0	0	0	0	0	0	0	603	903	0
3100	2	0	0	0	0	0	0	200	300	0	0	0	0	0	0	0	200	903	0	0	0	0	0	0	0	603	903	0
3100	3	0	0	0	0	0	0	200	300	0	0	0	0	0	0	0	200	903	0	0	0	0	0	0	0	603	903	0
3100	4	0	0	0	0	0	0	200	300	0	0	0	0	0	0	0	200	903	0	0	0	0	0	0	0	603	903	0
3100	5	0	0	0	0	0	0	200	300	0	0	0	0	0	0	0	200	903	0	0	0	0	0	0	0	603	903	0
3100	6	0	0	0	0	0	0	200	300	0	0	0	0	0	0	0	200	903	0	0	0	0	0	0	0	603	903	0
3100	7	0	0	0	0	0	0	200	300	0	0	0	0	0	0	0	200	903	0	0	0	0	0	0	0	603	903	0
3100	8	0	0	0	0	0	0	200	300	0	0	0	0	0	0	0	200	903	0	0	0	0	0	0	0	603	903	0
3100	9	0	0	0	0	0	0	200	300	0	0	0	0	0	0	0	200	903	0	0	0	0	0	0	0	603	903	0
3101	0	0	0	0	0	0	0	200	300	0	0	0	0	0	0	0	200	903	0	0	0	0	0	0	0	603	903	0
3101	1	0	0	0	0	0	0	200	300	0	0	0	0	0	0	0	200	903	0	0	0	0	0	0	0	603	903	0
3101	2	0	0	0	0	0	0	200	300	0	0	0	0	0	0	0	200	903	0	0	0	0	0	0	0	603	903	0
3101	3	0	0	0	0	0	0	200	300	0	0	0	0	0	0	0	200	903	0	0	0	0	0	0	0	603	903	0
3101	4	0	0	0	0	0	0	200	300	0	0	0	0	0	0	0	200	903	0	0	0	0	0	0	0	603	903	0
3101	5	0	0	0	0	0	0	200	300	0	0	0	0	0	0	0	200	903	0	0	0	0	0	0	0	603	903	0
3101	6	0	0	0	0	0	0	200	300	0	0	0	0	0	0	0	200	903	0	0	0	0	0	0	0	603	903	0
3101	7	0	0	0	0	0	0	200	300	0	0	0	0	0	0	0	200	903	0	0	0	0	0	0	0	603	903	0
3101	8	0	0	0	0	0	0	200	300	0	0	0	0	0	0	0	200	903	0	0	0	0	0	0	0	603	903	0
3101	9	0	0	0	0	0	0	200	300	0	0	0	0	0	0	0	200	903	0	0	0	0	0	0	0	603	903	0
3102	0	0	0	0	0	0	0	200	300	0	0	0	0	0	0	0	200	903	0	0	0	0	0	0	0	603	903	0
3102	1	0	0	0	0	0	0	200	300	0	0	0	0	0	0	0	200	903	0	0	0	0	0	0	0	603	903	0
3102	2	0	0	0	0	0	0	200	300	0	0	0	0	0	0	0	200	903	0	0	0	0	0	0	0	603	903	0
3102	3	0	0	0	0	0	0	200	300	0	0	0	0	0	0	0	200	903	0	0	0	0	0	0	0	603	903	0
3102	4	0	0	0	0	0	0	200	300	0	0	0	0	0	0	0	200	903	0	0	0	0	0	0	0	603	903	0
3102	5	0	0	0	0	0	0	200	300	0	0	0	0	0	0	0	200	903	0	0	0	0	0	0	0	603	903	0
3102	6	0	0	0	0	0	0	200	300	0	0	0	0	0	0	0	200	903	0	0	0	0	0	0	0	603	903	0
3102	7	0	0	0	0	0	0	200	300	0	0	0	0	0	0	0	200	903	0	0	0	0	0	0	0	603	903	0
3102	8	0	0	0	0	0	0	200	300	0	0	0	0	0	0	0	200	903	0	0	0	0	0	0	0	603	903	0
3102	9	0	0	0	0	0	0	200	300	0	0	0	0	0	0	0	200	903	0	0	0	0	0	0	0	603	903	0
3103	0	0	0	0	0	0	0	200	300	0	0	0	0	0	0	0	200	903	0	0	0	0	0	0	0	603	903	0
3103	1	0	0	0	0	0	0	200	300	0	0	0	0	0	0	0	200	903	0	0	0	0	0	0	0	603	903	0
3103	2	0	0	0	0	0	0	200	300	0	0	0	0	0	0	0	200	903	0	0	0	0	0	0	0	603	903	0
3103	3	0	0	0	0	0	0	200	300	0	0	0	0	0	0	0	200	903	0	0	0	0	0	0	0	603	903	0
3103	4	0	0	0	0	0	0	200	300	0	0	0	0	0	0	0	200	903	0	0	0	0	0	0	0	603	903	0
3103	5	0	0	0	0	0	0	200	300	0	0	0	0	0	0	0	200	903	0	0	0	0	0	0	0	603	903	0
3103	6	0	0	0	0	0	0	200	300	0	0	0	0	0	0	0	200	903	0	0	0	0	0	0	0	603	903	0
3103	7	0	0	0	0	0	0	200	300	0	0	0	0	0	0	0	200	903	0	0	0	0	0	0	0	603	903	0
3103	8	0	0	0	0	0	0	200	300	0	0	0	0	0	0	0	200	903	0	0	0	0	0	0	0	603	903	0
3103	9	0	0	0	0	0	0	200	300	0	0	0	0	0	0	0	200	903	0	0	0	0	0	0	0	603	903	0
3104	0	0	0	0	0	0	0	200	300	0	0	0	0	0	0	0	200	903	0	0	0	0	0	0	0	603	903	0
3104	1	0	0	0	0	0	0	200	300	0	0	0	0	0	0	0	200	903	0	0	0	0	0	0	0	603	903	0
3104	2	0	0	0	0	0	0	200	300	0	0	0	0	0	0	0	200	903	0	0	0	0	0	0	0	603	903	0
3104	3	0	0	0	0	0	0	200	300	0	0	0	0	0	0	0	200	903	0	0	0	0	0	0	0	603	903	0
3104	4	0	0	0	0	0	0	200	300	0	0	0	0	0	0	0	200	903	0	0	0	0	0	0	0	603	903	0
3104	5	0	0	0	0	0	0	200	300	0	0	0	0	0	0	0	200	903	0	0	0	0	0	0	0	603	903	0
3104	6	0	0	0	0	0	0	200	300	0	0	0	0	0	0	0	200	903	0	0	0	0	0	0	0	603	903	0
3104	7	0	0	0	0	0	0	200	300	0	0	0	0	0	0	0	200	903	0	0	0	0	0	0	0	603	903	0
3104	8	0	0	0	0	0	0	200	300	0	0	0	0	0	0	0	200	903	0	0	0	0	0	0	0	603	903	0
3104	9	0	0	0	0	0	0	200	300	0	0	0	0	0	0	0	200	903	0	0	0	0	0	0	0	603	903	0
3105	0	0	0	0	0	0	0	200	300	0	0	0	0	0	0	0	200	903	0	0	0	0	0	0	0	603	903	0
3105	1	0	0	0	0	0	0	200	300	0	0	0	0	0	0	0	200	903	0	0	0	0	0	0	0	603	903	0
3105	2	0	0	0	0	0	0	200	300	0	0	0	0	0	0	0	200	903	0	0	0	0	0	0	0	603	903	0
3105	3	0	0	0	0	0	0	200	300	0	0	0	0	0	0	0	200	903	0	0	0	0	0	0	0	603	903	0
3105	4	0	0	0	0	0	0	200	300	0	0	0	0	0	0	0	200	903	0	0	0	0	0	0	0	603	903	0
3105	5	0	0	0	0	0	0	200	300	0	0	0	0	0	0	0	200	903	0	0	0	0	0	0	0	603	903	0
3105	6	0	0	0	0	0	0	200	300	0	0	0	0	0	0	0	200	903	0	0	0	0	0	0	0	603	903	0
3105	7	0	0	0	0	0	0	200	300	0	0	0	0	0	0	0	200	903	0	0	0	0	0	0	0	603	903	0
3105	8	0	0	0	0	0	0	200	300	0	0	0	0	0	0	0	200	903	0	0	0	0	0	0	0	603	903	0
3105	9	0	0	0	0	0	0	200	300	0	0	0	0	0	0	0	200	903	0	0	0	0	0	0	0	603	903	0
3106	0	0	0	0	0	0	0	200	300	0	0	0	0	0	0	0	200	903	0	0	0	0	0	0	0	603	903	0
3106	1	0	0	0	0	0	0	200	300	0	0	0	0	0	0	0	200	903	0	0	0	0	0	0	0	603	903	0
3106	2	0	0	0	0	0	0	200	300	0	0	0	0	0	0	0	200	903	0	0	0	0	0	0	0	603	903	0
3106	3	0	0	0	0	0	0	200	300	0	0	0	0	0	0	0	200	903	0	0	0	0	0	0	0	603	903	0
3106	4	0	0	0	0	0	0	200	300	0	0	0	0	0	0	0	200	903	0	0	0	0	0	0	0	603	903	0
3106	5	0	0	0	0	0	0	200	300	0	0	0	0	0	0	0	200	903	0	0	0	0	0	0	0	603	903	0
3106	6	0	0	0	0	0	0	200	300	0	0	0	0	0	0	0	200	903	0	0	0	0	0	0	0	603	903	0
3106	7	0	0	0	0	0	0	200	300	0	0	0	0	0	0	0	200	903	0	0	0	0	0	0	0	603	903	0
3106	8	0	0	0	0	0	0	200	300	0	0	0	0	0	0	0	200	903	0	0	0	0	0	0	0	603	903	0
3106	9	0	0	0	0	0	0	200	300	0	0	0	0	0	0	0	200	903	0	0	0	0	0	0	0	603	903	0
3107	0	0	0	0	0	0	0	200	300	0	0	0	0	0	0	0	200	903	0	0	0	0	0	0	0	603	903	0
3107	1	0	0	0	0	0	0	200	300	0	0	0	0	0	0	0	200	903	0	0	0	0	0	0	0	603	903	0
3107	2	0	0	0	0	0	0	200	300	0	0	0	0	0	0	0	200	903	0	0	0	0	0	0	0	603	903	0
3107	3	0	0	0	0	0	0	200	300	0	0	0	0	0	0	0	200	903	0	0	0	0	0	0	0	603	903	0
3107	4	0	0	0	0	0	0	200	300	0	0	0	0	0	0	0	200	903	0	0	0	0	0	0	0	603	903	0
3107	5	0	0	0	0	0	0	200	300	0	0	0	0	0	0	0	200	903	0	0	0	0	0	0	0	603	903	0
3107	6	0	0	0	0	0	0	200	300	0	0	0	0	0	0	0	200	903	0	0	0	0	0	0	0	603	903	0
3107	7	0	0	0	0	0	0	200	300	0	0	0	0	0	0	0	200	903	0	0	0	0	0	0	0	603	903	0
3107	8	0	0	0	0	0	0	200	300	0	0	0	0	0	0	0	200	903	0	0	0	0	0	0	0	603	903	0
3107	9	0	0	0	0	0	0	200	300	0	0	0	0	0	0	0	200	903	0	0	0	0	0	0	0	603	903	0
3108	0	0	0	0	0	0	0	200	300	0	0	0	0	0	0	0	200	903	0	0	0	0	0	0	0	603	903	0
3108	1	0	0	0	0	0	0	200	300	0	0	0	0	0	0	0	200	903	0	0	0	0	0	0	0	603	903	0
3108	2	0	0	0	0	0	0	200	300	0	0	0	0	0	0	0	200	903	0	0	0	0	0	0	0	603	903	0
3108	3	0	0	0	0	0	0	200	300	0	0	0	0	0	0	0	200	903	0	0	0	0	0	0	0	603	903	0
3108	4	0	0	0	0	0	0	200	300	0	0	0	0	0	0	0	200	903	0	0	0	0	0	0	0	603	903	0
3108	5	0	0	0	0	0	0	200	300	0	0	0	0	0	0	0	200	903	0	0	0	0	0	0	0	603	903	0
3108	6	0	0	0	0	0	0	200	300	0	0	0	0	0	0	0	200	903	0	0	0	0	0	0	0	603	903	0
3108	7	0	0	0	0	0	0	200	300	0	0	0	0	0	0	0	200	903	0	0	0	0	0	0	0	603	903	0
3108	8	0	0	0	0	0	0	200	300	0	0	0	0	0	0	0	200	903	0	0	0	0	0	0	0	603	903	0
3108	9	0	0	0	0	0	0	200	300	0	0	0	0	0	0	0	200	903	0	0	0	0	0	0	0	603	903	0
3109	0	0	0	0	0	0	0	200	300	0	0	0	0	0	0	0	200	903	0	0	0	0	0	0	0	603	903	0
3109	1	0	0	0	0	0	0	200	300	0	0	0	0	0	0	0	200	903	0	0	0	0	0	0	0	603	903	0
3109	2	0	0	0	0	0	0	200	300	0	0	0	0	0	0	0	200	903	0	0	0	0	0	0	0	603	903	0
3109	3	0	0	0	0	0	0	200	300	0	0	0	0	0	0	0	200	903	0	0	0	0	0	0	0	603	903	0
3109	4	0	0	0	0	0	0	200	300	0	0	0	0	0	0	0	200	903	0	0	0	0	0	0	0	603	903	0
3109	5	0	0	0	0	0	0	200	300	0	0	0	0	0	0	0	200	903	0	0	0	0	0	0	0	603	903	0
3109	6	0	0	0	0	0	0	200	300	0	0	0	0	0	0	0	200	903	0	0	0	0	0	0	0	603	903	0
3109	7	0	0	0	0	0	0	200	300	0	0	0	0	0	0	0	200	903	0	0	0	0	0	0	0	603	903	0
3109	8	0	0	0	0	0	0	200	300	0	0	0	0	0	0	0	200	903	0	0	0	0	0	0	0	603	903	0
3109	9	0	0	0	0	0	0	200	300	0	0	0	0	0	0	0	200	903	0	0	0	0	0	0	0	603	903	0
3110	0	0	0	0	0	0	0	200	300	0	0	0	0	0	0	0	200	903	0	0	0	0	0	0	0	603	903	0
3110	1	0	0	0	0	0	0	200	300	0	0	0	0	0	0	0	200	903	0	0	0	0	0	0	0	603	903	0
3110	2	0	0	0	0	0	0	200	300	0	0	0	0	0	0	0	200	903	0	0	0	0	0	0	0	603	903	0
3110	3	0	0	0	0	0	0	200	300	0	0	0	0	0	0	0	200	903	0	0	0	0	0	0	0	603	903	0
3110	4	0	0	0	0	0	0	200	300	0	0	0	0	0	0	0	200	903	0	0	0	0	0	0	0	603	903	0
3110	5	0	0	0	0	0	0	200	300	0	0	0	0	0	0	0	200	903	0	0	0	0	0	0	0	603	903	0
3110	6	0	0	0	0	0	0	200	300	0	0	0	0	0	0	0	200	903	0	0	0	0	0	0	0	603	903	0
3110	7	0	0	0	0	0	0	200	300	0	0	0	0	0	0	0	200	903	0	0	0	0	0	0	0	603	903	0
3110	8	0	0	0	0	0	0	200	300	0	0	0	0	0	0	0	200	903	0	0	0	0	0	0	0	603	903	0
3110	9	0	0	0	0	0	0	200	300	0	0	0	0	0	0	0	200	903	0	0	0	0	0	0	0	603	903	0
3111	0	0	0	0	0	0	0	200	300	0	0	0	0	0	0	0	200	903	0	0	0	0	0	0	0	603	903	0
3111	1	0	0	0	0	0	0	200	300	0	0	0	0	0	0	0	200	903	0	0	0	0	0	0	0	603	903	0
3111	2	0	0	0	0	0	0	200	300	0	0	0	0	0	0	0	200	903	0	0	0	0	0	0	0	603	903	0
3111	3	0	0	0	0	0	0	200	300	0	0	0	0	0	0	0	200	903	0	0	0	0	0	0	0	603	903	0
3111	4	0	0	0	0	0	0	200	300	0	0	0	0	0	0	0	200	903	0	0	0	0	0	0	0	603	903	0
3111	5	0	0	0	0	0	0	200	300	0	0	0	0	0	0	0	200	903	0	0	0	0	0	0	0	603	903	0
3111	6	0	0	0	0	0	0	200	300	0	0	0	0	0	0	0	200	903	0	0	0	0	0	0	0	603	903	0
3111	7	0	0	0	0	0	0	200	300	0	0	0	0	0	0	0	200	903	0	0	0	0	0	0	0	603	903	0
3111	8	0	0	0	0	0	0	200	300	0	0	0	0	0	0	0	200	903	0	0	0	0	0	0	0	603	903	0
3111	9	0	0	0	0	0	0	200	300	0	0	0	0	0	0	0	200	903	0	0	0	0	0	0	0	603	903	0
3112	0	0	0	0	0	0	0	200	300	0	0	0	0	0	0	0	200	903	0	0	0	0	0	0	0	603	903	0
3112	1	0	0	0	0	0	0	200	300	0	0	0	0	0	0	0	200	903	0	0	0	0	0	0	0	603	903	0
3112	2	0	0	0	0	0	0	200	300	0	0	0	0	0	0	0	200	903	0	0	0	0	0	0	0	603	903	0
3112	3	0	0	0	0	0	0	200	300	0	0	0	0	0	0	0	200	903	0	0	0	0	0	0	0	603	903	0
3112	4	0	0	0	0	0	0	200	300	0	0	0	0	0	0	0	200	903	0	0	0	0	0	0	0	603	903	0
3112	5	0	0	0	0	0	0	200	300	0	0	0	0	0	0	0	200	903	0	0	0	0	0	0	0	603	903	0
3112	6	0	0	0	0	0	0	200	300	0	0	0	0	0	0	0	200	903	0	0	0	0	0	0	0	603	903	0
3112	7	0	0	0	0	0	0	200	300	0	0	0	0	0	0	0	200	903	0	0	0	0	0	0	0	603	903	0
3112	8	0	0	0	0	0	0	200	300	0	0	0	0	0	0	0	200	903	0	0	0	0	0	0	0	603	903	0
3112	9	0	0	0	0	0	0	200	300	0	0	0	0	0	0	0	200	903	0	0	0	0	0	0	0	603	903	0
3113	0	0	0	0	0	0	0	200	300	0	0	0	0	0	0	0	200	903	0	0	0	0	0	0	0	603	903	0
3113	1	0	0	0	0	0	0	200	300	0	0	0	0	0	0	0	200	903	0	0	0	0	0	0	0	603	903	0
3113	2	0	0	0	0	0	0	200	300	0	0	0	0	0	0	0	200	903	0	0	0	0	0	0	0	603	903	0
3113	3	0	0	0	0	0	0	200	300	0	0	0	0	0	0	0	200	903	0	0	0	0	0	0	0	603	903	0
3113	4	0	0	0	0	0	0	200	300	0	0	0	0	0	0	0	200	903	0	0	0	0	0	0	0	603	903	0
3113	5	0	0	0	0	0	0	200	300	0	0	0	0	0	0	0	200	903	0	0	0	0	0	0	0	603	903	0
3113	6	0	0	0	0	0	0	200	300	0	0	0	0	0	0	0	200	903	0	0	0	0	0	0	0	603	903	0
3113	7	0	0	0	0	0	0	200	300	0	0	0	0	0	0	0	200	903	0	0	0	0	0	0	0	603	903	0
3113	8	0	0	0	0	0	0	200	300	0	0	0	0	0	0	0	200	903	0	0	0	0	0	0	0	603	903	0
3113	9	0	0	0	0	0	0	200	300	0	0	0	0	0	0	0	200	903	0	0	0	0	0	0	0	603	903	0
3114	0	0	0	0	0	0	0	200	300	0	0	0	0	0	0	0	200	903	0	0	0	0	0	0	0	603	903	0
3114	1	0	0	0	0	0	0	200	300	0	0	0	0	0	0	0	200	903	0	0	0	0	0	0	0	603	903	0
3114	2	0	0	0	0	0	0	200	300	0	0	0	0	0	0	0	200	903	0	0	0	0	0	0	0	603	903	0
3114	3	0	0	0	0	0	0	200	300	0	0	0	0	0	0	0	200	903	0	0	0	0	0	0	0	603	903	0
3114	4	0	0	0	0	0	0	200	300	0	0	0	0	0	0	0	200	903	0	0	0	0	0	0	0	603	903	0
3114	5	0	0	0	0	0	0	200	300	0	0	0	0	0	0	0	200	903	0	0	0	0	0	0	0	603	903	0
3114	6	0	0	0	0	0	0	200	300	0	0	0	0	0	0	0	200	903	0	0	0	0	0	0	0	603	903	0
3114	7	0	0	0	0	0	0	200	300	0	0	0	0	0	0	0	200	903	0	0	0	0	0	0	0	603	903	0
3114	8	0	0	0	0	0	0	200	300	0	0	0	0	0	0	0	200	903	0	0	0	0	0	0	0	603	903	0
3114	9	0	0	0	0	0	0	200	300	0	0	0	0	0	0	0	200	903	0	0	0	0	0	0	0	603	903	0
3115	0	0	0	0	0	0	0	200	300	0	0	0	0	0	0	0	200	903	0	0	0	0	0	0	0	603	903	0
3115	1	0	0	0	0	0	0	200	300	0	0	0	0	0	0	0	200	903	0	0	0	0	0	0	0	603	903	0
3115	2	0	0	0	0	0	0	200	300	0	0	0	0	0	0	0	200	903	0	0	0	0	0	0	0	603	903	0
3115	3	0	0	0	0	0	0	200	300	0	0	0	0	0	0	0	200	903	0	0	0	0	0	0	0	603	903	0
3115	4	0	0	0	0	0	0	200	300	0	0	0	0	0	0	0	200	903	0	0	0	0	0	0	0	603	903	0
3115	5	0	0	0	0	0	0	200	300	0	0	0	0	0	0	0	200	903	0	0	0	0	0	0	0	603	903	0
3115	6	0	0	0	0	0	0	200	300	0	0	0	0	0	0	0	200	903	0	0	0	0	0	0	0	603	903	0
3115	7	0	0	0	0	0	0	200	300	0	0	0	0	0	0	0	200	903	0	0	0	0	0	0	0	603	903	0
3115	8	0	0	0	0	0	0	200	300	0	0	0	0	0	0	0	200	903	0	0	0	0	0	0	0	603	903	0
3115	9	0	0	0	0	0	0	200	300	0	0	0	0	0	0	0	200	903	0	0	0	0	0	0	0	603	903	0
3116	0	0	0	0	0	0	0	200	300	0	0	0	0	0	0	0	200	903	0	0	0	0	0	0	0	603	903	0
3116	1	0	0	0	0	0	0	200	300	0	0	0	0	0	0	0	200	903	0	0	0	0	0	0	0	603	903	0
3116	2	0	0	0	0	0	0	200	300	0	0	0	0	0	0	0	200	903	0	0	0	0	0	0	0	603	903	0
3116	3	0	0	0	0	0	0	200	300	0	0	0	0	0	0	0	200	903	0	0	0	0	0	0	0	603	903	0
3116	4	0	0	0	0	0	0	200	300	0	0	0	0	0	0	0	200	903	0	0	0	0	0	0	0	603	903	0
3116	5	0	0	0	0	0	0	200	300	0	0	0	0	0	0	0	200	903	0	0	0	0	0	0	0	603	903	0
3116	6	0	0	0	0	0	0	200	300	0	0	0	0	0	0	0	200	903	0	0	0	0	0	0	0	603	903	0
3116	7	0	0	0	0	0	0	200	300	0	0	0	0	0	0	0	200	903	0	0	0	0	0	0	0	603	903	0
3116	8	0	0	0	0	0	0	200	300	0	0	0	0	0	0	0	200	903	0	0	0	0	0	0	0	603	903	0
3116	9	0	0	0	0	0	0	200	300	0	0	0	0	0	0	0	200	903	0	0	0	0	0	0	0	603	903	0
3117	0	0	0	0	0	0	0	200	300	0	0	0	0	0	0	0	200	903	0	0	0	0	0	0	0	603	903	0
3117	1	0	0	0	0	0	0	200	300	0	0	0	0	0	0	0	200	903	0	0	0	0	0	0	0	603	903	0
3117	2	0	0	0	0	0	0	200	300	0	0	0	0	0	0	0	200	903	0	0	0	0	0	0	0	603	903	0
3117	3	0	0	0	0	0	0	200	300	0	0	0	0	0	0	0	200	903	0	0	0	0	0	0	0	603	903	0
3117	4	0	0	0	0	0	0	200	300	0	0	0	0	0	0	0	200	903	0	0	0	0	0	0	0	603	903	0
3117	5	0	0	0	0	0	0	200	300	0	0	0	0	0	0	0	200	903	0	0	0	0	0	0	0	603	903	0
3117	6	0	0	0	0	0	0	200	300	0	0	0	0	0	0	0	200	903	0	0	0	0	0	0	0	603	903	0
3117	7	0	0	0	0	0	0	200	300	0	0	0	0	0	0	0	200	903	0	0	0	0	0	0	0	603	903	0
3117	8	0	0	0	0	0	0	200	300	0	0	0	0	0	0	0	200	903	0	0	0	0	0	0	0	603	903	0
3117	9	0	0	0	0	0	0	200	300	0	0	0	0	0	0	0	200	903	0	0	0	0	0	0	0	603	903	0
3118	0	0	0	0	0	0	0	200	300	0	0	0	0	0	0	0	200	903	0	0	0	0	0	0	0	603	903	0
3118	1	0	0	0	0	0	0	200	300	0	0	0	0	0	0	0	200	903	0	0	0	0	0	0	0	603	903	0
3118	2	0	0	0	0	0	0	200	300	0	0	0	0	0	0	0	200	903	0	0	0	0	0	0	0	603	903	0
3118	3	0	0	0	0	0	0	200	300	0	0	0	0	0	0	0	200	903	0	0	0	0	0	0	0	603	903	0
3118	4	0	0	0	0	0	0	200	300	0	0	0	0	0	0	0	200	903	0	0	0	0	0	0	0	603	903	0
3118	5	0	0	0	0	0	0	200	300	0	0	0	0	0	0	0	200	903	0	0	0	0	0	0	0	603	903	0
3118	6	0	0	0	0	0	0	200	300	0	0	0	0	0	0	0	200	903	0	0	0	0	0	0	0	603	903	0
3118	7	0	0	0	0	0	0	200	300	0	0	0	0	0	0	0	200	903	0	0	0	0	0	0	0	603	903	0
3118	8	0	0	0	0	0	0	200	300	0	0	0	0	0	0	0	200	903	0	0	0	0	0	0	0	603	903	0
3118	9	0	0	0	0	0	0	200	300	0	0	0	0	0	0	0	200	903	0	0	0	0	0	0	0	603	903	0
3119	0	0	0	0	0	0	0	200	300	0	0	0	0	0	0	0	200	903	0	0	0	0	0	0	0	603	903	0
3119	1	0	0	0	0	0	0	200	300	0	0	0	0	0	0	0	200	903	0	0	0	0	0	0	0	603	903	0
3119	2	0	0	0	0	0	0	200	300	0	0	0	0	0	0	0	200	903	0	0	0	0	0	0	0	603	903	0
3119	3	0	0	0	0	0	0	200	300	0	0	0	0	0	0	0	200	903	0	0	0	0	0	0	0	603	903	0
3119	4	0	0	0	0	0	0	200	300	0	0	0	0	0	0	0	200	903	0	0	0	0	0	0	0	603	903	0
3119	5	0	0	0	0	0	0	200	300	0	0	0	0	0	0	0	200	903	0	0	0	0	0	0	0	603	903	0
3119	6	0	0	0	0	0	0	200	300	0	0	0	0	0	0	0	200	903	0	0	0	0	0	0	0	603	903	0
3119	7	0	0	0	0	0	0	200	300	0	0	0	0	0	0	0	200	903	0	0	0	0	0	0	0	603	903	0
3119	8	0	0	0	0	0	0	200	300	0	0	0	0	0	0	0	200	903	0	0	0	0	0	0	0	603	903	0
3119	9	0	0	0	0	0	0	200	300	0	0	0	0	0	0	0	200	903	0	0	0	0	0	0	0	603	903	0
3120	0	0	0	0	0	0	0	200	300	0	0	0	0	0	0	0	200	903	0	0	0	0	0	0	0	603	903	0
3120	1	0	0	0	0	0	0	200	300	0	0	0	0	0	0	0	200	903	0	0	0	0	0	0	0	603	903	0
3120	2	0	0	0	0	0	0	200	300	0	0	0	0	0	0	0	200	903	0	0	0	0	0	0	0	603	903	0
3120	3	0	0	0	0	0	0	200	300	0	0	0	0	0	0	0	200	903	0	0	0	0	0	0	0	603	903	0
3120	4	0	0	0	0	0	0	200	300	0	0	0	0	0	0	0	200	903	0	0	0	0	0	0	0	603	903	0
3120	5	0	0	0	0	0	0	200	300	0	0	0	0	0	0	0	200	903	0	0	0	0	0	0	0	603	903	0
3120	6	0	0	0	0	0	0	200	300	0	0	0	0	0	0	0	200	903	0	0	0	0	0	0	0	603	903	0
3120	7	0	0	0	0	0	0	200	300	0	0	0	0	0	0	0	200	903	0	0	0	0	0	0	0	603	903	0
3120	8	0	0	0	0	0	0	200	300	0	0	0	0	0	0	0	200	903	0	0	0	0	0	0	0	603	903	0
3120	9	0	0	0	0	0	0	200	300	0	0	0	0	0	0	0	200	903	0	0	0	0	0	0	0	603	903	0
3121	0	0	0	0	0	0	0	200	300	0	0	0	0	0	0	0	200	903	0	0	0	0	0	0	0	603	903	0
3121	1	0	0	0	0	0	0	200	300	0	0	0	0	0	0	0	200	903	0	0	0	0	0	0	0	603	903	0
3121	2	0	0	0	0	0	0	200	300	0	0	0	0	0	0	0	200	903	0	0	0	0	0	0	0	603	903	0
3121	3	0	0	0	0	0	0	200	300	0	0	0	0	0	0	0	200	903	0	0	0	0	0	0	0	603	903	0
3121	4	0	0	0	0	0	0	200	300	0	0	0	0	0	0	0	200	903	0	0	0	0	0	0	0	603	903	0
3121	5	0	0	0	0	0	0	200	300	0	0	0	0	0	0	0	200	903	0	0	0	0	0	0	0	603	903	0
3121	6	0	0	0	0	0	0	200	300	0	0	0	0	0	0	0	200	903	0	0	0	0	0	0	0	603	903	0
3121	7	0	0	0	0	0	0	200	300	0	0	0	0	0	0	0	200	903	0	0	0	0	0	0	0	603	903	0
3121	8	0	0	0	0	0	0	200	300	0	0	0	0	0	0	0	200	903	0	0	0	0	0	0	0	603	903	0
3121	9	0	0	0	0	0	0	200	300	0	0	0	0	0	0	0	200	903	0	0	0	0	0	0	0	603	903	0
3122	0	0	0	0	0	0	0	200	300	0	0	0	0	0	0	0	200	903	0	0	0	0	0	0	0	603	903	0
3122	1	0	0	0	0	0	0	200	300	0	0	0	0	0	0	0	200	903	0	0	0	0	0	0	0	603	903	0
3122	2	0	0	0	0	0	0	200	300	0	0	0	0	0	0	0	200	903	0	0	0	0	0	0	0	603	903	0
3122	3	0	0	0	0	0	0	200	300	0	0	0	0	0	0	0	200	903	0	0	0	0	0	0	0	603	903	0
3122	4	0	0	0	0	0	0	200	300	0	0	0	0	0	0	0	200	903	0	0	0	0	0	0	0	603	903	0
3122	5	0	0	0	0	0	0	200	300	0	0	0	0	0	0	0	200	903	0	0	0	0	0	0	0	603	903	0
3122	6	0	0	0	0	0	0	200	300	0	0	0	0	0	0	0	200	903	0	0	0	0	0	0	0	603	903	0
3122	7	0	0	0	0	0	0	200	300	0	0	0	0	0	0	0	200	903	0	0	0	0	0	0	0	603	903	0
3122	8	0	0	0	0	0	0	200	300	0	0	0	0	0	0	0	200	903	0	0	0	0	0	0	0	603	903	0
3122	9	0	0	0	0	0	0	200	300	0	0	0	0	0	0	0	200	903	0	0	0	0	0	0	0	603	903	0
3123	0	0	0	0	0	0	0	200	300	0	0	0	0	0	0	0	200	903	0	0	0	0	0	0	0	603	903	0
3123	1	0	0	0	0	0	0	200	300	0	0	0	0	0	0	0	200	903	0	0	0	0	0	0	0	603	903	0
3123	2	0	0	0	0	0	0	200	300	0	0	0	0	0	0	0	200	903	0	0	0	0	0	0	0	603	903	0
3123	3	0	0	0	0	0	0	200	300	0	0	0	0	0	0	0	200	903	0	0	0	0	0	0	0	603	903	0
3123	4	0	0	0	0	0	0	200	300	0	0	0	0	0	0	0	200	903	0	0	0	0	0	0	0	603	903	0
3123	5	0	0	0	0	0	0	200	300	0	0	0	0	0	0	0	200	903	0	0	0	0	0	0	0	603	903	0
3123	6	0	0	0	0	0	0	200	300	0	0	0	0	0	0	0	200	903	0	0	0	0	0	0	0	603	903	0
3123	7	0	0	0	0	0	0	200	300	0	0	0	0	0	0	0	200	903	0	0	0	0	0	0	0	603	903	0
3123	8	0	0	0	0	0	0	200	300	0	0	0	0	0	0	0	200	903	0	0	0	0	0	0	0	603	903	0
3123	9	0	0	0	0	0	0	200	300	0	0	0	0	0	0	0	200	903	0	0	0	0	0	0	0	603	903	0
3124	0	0	0	0	0	0	0	200	300	0	0	0	0	0	0	0	200	903	0	0	0	0	0	0	0	603	903	0
3124	1	0	0	0	0	0	0	200	300	0	0	0	0	0	0	0	200	903	0	0	0	0	0	0	0	603	903	0
3124	2	0	0	0	0	0	0	200	300	0	0	0	0	0	0	0	200	903	0	0	0	0	0	0	0	603	903	0
3124	3	0	0	0	0	0	0	200	300	0	0	0	0	0	0	0	200	903	0	0	0	0	0	0	0	603	903	0
3124	4	0	0	0	0	0	0	200	300	0	0	0	0	0	0	0	200	903	0	0	0	0	0	0	0	603	903	0
3124	5	0	0	0	0	0	0	200	300	0	0	0	0	0	0	0	200	903	0	0	0	0	0	0	0	603	903	0
3124	6	0	0	0	0	0	0	200	300	0	0	0	0	0	0	0	200	903	0	0	0	0	0	0	0	603	903	0
3124	7	0	0	0	0	0	0	200	300	0	0	0	0	0	0	0	200	903	0	0	0	0	0	0	0	603	903	0
3124	8	0	0	0	0	0	0	200	300	0	0	0	0	0	0	0	200	903	0	0	0	0	0	0	0	603	903	0
3124	9	0	0	0	0	0	0	200	300	0	0	0	0	0	0	0	200	903	0	0	0	0	0	0	0	603	903	0
3125	0	0	0	0	0	0	0	200	300	0	0	0	0	0	0	0	200	903	0	0	0	0	0	0	0	603	903	0
3125	1	0	0	0	0	0	0	200	300	0	0	0	0	0	0	0	200	903	0	0	0	0	0	0	0	603	903	0
3125	2	0	0	0	0	0	0	200	300	0	0	0	0	0	0	0	200	903	0	0	0	0	0	0	0	603	903	0
3125	3	0	0	0	0	0	0	200	300	0	0	0	0	0	0	0	200	903	0	0	0	0	0	0	0	603	903	0
3125	4	0	0	0	0	0	0	200	300	0	0	0	0	0	0	0	200	903	0	0	0	0	0	0	0	603	903	0
3125	5	0	0	0	0	0	0	200	300	0	0	0	0	0	0	0	200	903	0	0	0	0	0	0	0	603	903	0
3125	6	0	0	0	0	0	0	200	300	0	0	0	0	0	0	0	200	903	0	0	0	0	0	0	0	603	903	0
3125	7	0	0	0	0	0	0	200	300	0	0	0	0	0	0	0	200	903	0	0	0	0	0	0	0	603	903	0
3125	8	0	0	0	0	0	0	200	300	0	0	0	0	0	0	0	200	903	0	0	0	0	0	0	0	603	903	0
3125	9	0	0	0	0	0	0	200	300	0	0	0	0	0	0	0	200	903	0	0	0	0	0	0	0	603	903	0
3126	0	0	0	0	0	0	0	200	300	0	0	0	0	0	0	0	200	903	0	0	0	0	0	0	0	603	903	0
3126	1	0	0	0	0	0	0	200	300	0	0	0	0	0	0	0	200	903	0	0	0	0	0	0	0	603	903	0
3126	2	0	0	0	0	0	0	200	300	0	0	0	0	0	0	0	200	903	0	0	0	0	0	0	0	603	903	0
3126	3	0	0	0	0	0	0	200	300	0	0	0	0	0	0	0	200	903	0	0	0	0	0	0	0	603	903	0
3126	4	0	0	0	0	0	0	200	300	0	0	0	0	0	0	0	200	903	0	0	0	0	0	0	0	603	903	0
3126	5	0	0	0	0	0	0	200	300	0	0	0	0	0	0	0	200	903	0	0	0	0	0	0	0	603	903	0
3126	6	0	0	0	0	0	0	200	300	0	0	0	0	0	0	0	200	903	0	0	0	0	0	0	0	603	903	0
3126	7	0	0	0	0	0	0	200	300	0	0	0	0	0	0	0	200	903	0	0	0	0	0	0	0	603	903	0
3126	8	0	0	0	0	0	0	200	300	0	0	0	0	0	0	0	200	903	0	0	0	0	0	0	0	603	903	0
3126	9	0	0	0	0	0	0	200	300	0	0	0	0	0	0	0	200	903	0	0	0	0	0	0	0	603	903	0
3127	0	0	0	0	0	0	0	200	300	0	0	0	0	0	0	0	200	903	0	0	0	0	0	0	0	603	903	0
3127	1	0	0	0	0	0	0	200	300	0	0	0	0	0	0	0	200	903	0	0	0	0	0	0	0	603	903	0
3127	2	0	0	0	0	0	0	200	300	0	0	0	0	0	0	0	200	903	0	0	0	0	0	0	0	603	903	0
3127	3	0	0	0	0	0	0	200	300	0	0	0	0	0	0	0	200	903	0	0	0	0	0	0	0	603	903	0
3127	4	0	0	0	0	0	0	200	300	0	0	0	0	0	0	0	200	903	0	0	0	0	0	0	0	603	903	0
3127	5	0	0	0	0	0	0	200	300	0	0	0	0	0	0	0	200	903	0	0	0	0	0	0	0	603	903	0
3127	6	0	0	0	0	0	0	200	300	0	0	0	0	0	0	0	200	903	0	0	0	0	0	0	0	603	903	0
3127	7	0	0	0	0	0	0	200	300	0	0	0	0	0	0	0	200	903	0	0	0	0	0	0	0	603	903	0
3127	8	0	0	0	0	0	0	200	300	0	0	0	0	0	0	0	200	903	0	0	0	0	0	0	0	603	903	0
3127	9	0	0	0	0	0	0	200	300	0	0	0	0	0	0	0	200	903	0	0	0	0	0	0	0	603	903	0
3128	0	0	0	0	0	0	0	200	300	0	0	0	0	0	0	0	200	903	0	0	0	0	0	0	0	603	903	0
3128	1	0	0	0	0	0	0	200	300	0	0	0	0	0	0	0	200	903	0	0	0	0	0	0	0	603	903	0
3128	2	0	0	0	0	0	0	200	300	0	0	0	0	0	0	0	200	903	0	0	0	0	0	0	0	603	903	0
3128	3	0	0	0	0	0	0	200	300	0	0	0	0	0	0	0	200	903	0	0	0	0	0	0	0	603	903	0
3128	4	0	0	0	0	0	0	200	300	0	0	0	0	0	0	0	200	903	0	0	0	0	0	0	0	603	903	0
3128	5	0	0	0	0	0	0	200	300	0	0	0	0	0	0	0	200	903	0	0	0	0	0	0	0	603	903	0
3128	6	0	0	0	0	0	0	200	300	0	0	0	0	0	0	0	200	903	0	0	0	0	0	0	0	603	903	0
3128	7	0	0	0	0	0	0	200	300	0	0	0	0	0	0	0	200	903	0	0	0	0	0	0	0	603	903	0
3128	8	0	0	0	0	0	0	200	300	0	0	0	0	0	0	0	200	903	0	0	0	0	0	0	0	603	903	0
3128	9	0	0	0	0	0	0	200	300	0	0	0	0	0	0	0	200	903	0	0	0	0	0	0	0	603	903	0
3129	0	0	0	0	0	0	0	200	300	0	0	0	0	0	0	0	200	903	0	0	0	0	0	0	0	603	903	0
3129	1	0	0	0	0	0	0	200	300	0	0	0	0	0	0	0	200	903	0	0	0	0	0	0	0	603	903	0
3129	2	0	0	0	0	0	0	200	300	0	0	0	0	0	0	0	200	903	0	0	0	0	0	0	0	603	903	0
3129	3	0	0	0	0	0	0	200	300	0	0	0	0	0	0	0	200	903	0	0	0	0	0	0	0	603	903	0
3129	4	0	0	0	0	0	0	200	300	0	0	0	0	0	0	0	200	903	0	0	0	0	0	0	0	603	903	0
3129	5	0	0	0	0	0	0	200	300	0	0	0	0	0	0	0	200	903	0	0	0	0	0	0	0	603	903	0
3129	6	0	0	0	0	0	0	200	300	0	0	0	0	0	0	0	200	903	0	0	0	0	0	0	0	603	903	0
3129	7	0	0	0	0	0	0	200	300	0	0	0	0	0	0	0	200	903	0	0	0	0	0	0	0	603	903	0
3129	8	0	0	0	0	0	0	200	300	0	0	0	0	0	0	0	200	903	0	0	0	0	0	0	0	603	903	0
3129	9	0	0	0	0	0	0	200	300	0	0	0	0	0	0	0	200	903	0	0	0	0	0	0	0	603	903	0
3130	0	0	0	0	0	0	0	200	300	0	0	0	0	0	0	0	200	903	0	0	0	0	0	0	0	603	903	0
3130	1	0	0	0	0	0	0	200	300	0	0	0	0	0	0	0	200	903	0	0	0	0	0	0	0	603	903	0
3130	2	0	0	0	0	0	0	200	300	0	0	0	0	0	0	0	200	903	0	0	0	0	0	0	0	603	903	0
3130	3	0	0	0	0	0	0	200	300	0	0	0	0	0	0	0	200	903	0	0	0	0	0	0	0	603	903	0
3130	4	0	0	0	0	0	0	200	300	0	0	0	0	0	0	0	200	903	0	0	0	0	0	0	0	603	903	0
3130	5	0	0	0	0	0	0	200	300	0	0	0	0	0	0	0	200	903	0	0	0	0	0	0	0	603	903	0
3130	6	0	0	0	0	0	0	200	300	0	0	0	0	0	0	0	200	903	0	0	0	0	0	0	0	603	903	0
3130	7	0	0	0	0	0	0	200	300	0	0	0	0	0	0	0	200	903	0	0	0	0	0	0	0	603	903	0
3130	8	0	0	0	0	0	0	200	300	0	0	0	0	0	0	0	200	903	0	0	0	0	0	0	0	603	903	0
3130	9	0	0	0	0	0	0	200	300	0	0	0	0	0	0	0	200	903	0	0	0	0	0	0	0	603	903	0
3131	0	0	0	0	0	0	0	200	300	0	0	0	0	0	0	0	200	903	0	0	0	0	0	0	0	603	903	0
3131	1	0	0	0	0	0	0	200	300	0	0	0	0	0	0	0	200	903	0	0	0	0	0	0	0	603	903	0
3131	2	0	0	0	0	0	0	200	300	0	0	0	0	0	0	0	200	903	0	0	0	0	0	0	0	603	903	0
3131	3	0	0	0	0	0	0	200	300	0	0	0	0	0	0	0	200	903	0	0	0	0	0	0	0	603	903	0
3131	4	0	0	0	0	0	0	200	300	0	0	0	0	0	0	0	200	903	0	0	0	0	0	0	0	603	903	0
3131	5	0	0	0	0	0	0	200	300	0	0	0	0	0	0	0	200	903	0	0	0	0	0	0	0	603	903	0
3131	6	0	0	0	0	0	0	200	300	0	0	0	0	0	0	0	200	903	0	0	0	0	0	0	0	603	903	0
3131	7	0	0	0	0	0	0	200	300	0	0	0	0	0	0	0	200	903	0	0	0	0	0	0	0	603	903	0
3131	8	0	0	0	0	0	0	200	300	0	0	0	0	0	0	0	200	903	0	0	0	0	0	0	0	603	903	0
3131	9	0	0	0	0	0	0	200	300	0	0	0	0	0	0	0	200	903	0	0	0	0	0	0	0	603	903	0
3132	0	0	0	0	0	0	0	200	300	0	0	0	0	0	0	0	200	903	0	0	0	0	0	0	0	603	903	0
3132	1	0	0	0	0	0	0	200	300	0	0	0	0	0	0	0	200	903	0	0	0	0	0	0	0	603	903	0
3132	2	0	0	0	0	0	0	200	300	0	0	0	0	0	0	0	200	903	0	0	0	0	0	0	0	603	903	0
3132	3	0	0	0	0	0	0	200	300	0	0	0	0	0	0	0	200	903	0	0	0	0	0	0	0	603	903	0
3132	4	0	0	0	0	0	0	200	300	0	0	0	0	0	0	0	200	903	0	0	0	0	0	0	0	603	903	0
3132	5	0	0	0	0	0	0	200	300	0	0	0	0	0	0	0	200	903	0	0	0	0	0	0	0	603	903	0
3132	6	0	0	0	0	0	0	200	300	0	0	0	0	0	0	0	200	903	0	0	0	0	0	0	0	603	903	0
3132	7	0	0	0	0	0	0	200	300	0	0	0	0	0	0	0	200	903	0	0	0	0	0	0	0	603	903	0
3132	8	0	0	0	0	0	0	200	300	0	0	0	0	0	0	0	200	903	0	0	0	0	0	0	0	603	903	0
3132	9	0	0	0	0	0	0	200	300	0	0	0	0	0	0	0	200	903	0	0	0	0	0	0	0	603	903	0
3133	0	0	0	0	0	0	0	200	300	0	0	0	0	0	0	0	200	903	0	0	0	0	0	0	0	603	903	0
3133	1	0	0	0	0	0	0	200	300	0	0	0	0	0	0	0	200	903	0	0	0	0	0	0	0	603	903	0
3133	2	0	0	0	0	0	0	200	300	0	0	0	0	0	0	0	200	903	0	0	0	0	0	0	0	603	903	0
3133	3	0	0	0	0	0	0	200	300	0	0	0	0	0	0	0	200	903	0	0	0	0	0	0	0	603	903	0
3133	4	0	0	0	0	0	0	200	300	0	0	0	0	0	0	0	200	903	0	0	0	0	0	0	0	603	903	0
3133	5	0	0	0	0	0	0	200	300	0	0	0	0	0	0	0	200	903	0	0	0	0	0	0	0	603	903	0
3133	6	0	0	0	0	0	0	200	300	0	0	0	0	0	0	0	200	903	0	0	0	0	0	0	0	603	903	0
3133	7	0	0	0	0	0	0	200	300	0	0	0	0	0	0	0	200	903	0	0	0	0	0	0	0	603	903	0
3133	8	0	0	0	0	0	0	200	300	0	0	0	0	0	0	0	200	903	0	0	0	0	0	0	0	603	903	0
3133	9	0	0	0	0	0	0	200	300	0	0	0	0	0	0	0	200	903	0	0	0	0	0	0	0	603	903	0
3134	0	0	0	0	0	0	0	200	300	0	0	0	0	0	0	0	200	903	0	0	0	0	0	0	0	603	903	0
3134	1	0	0	0	0	0	0	200	300	0	0	0	0	0	0	0	200	903	0	0	0	0	0	0	0	603	903	0
3134	2	0	0	0	0	0	0	200	300	0	0	0	0	0	0	0	200	903	0	0	0	0	0	0	0	603	903	0
3134	3	0	0	0	0	0	0	200	300	0	0	0	0	0	0	0	200	903	0	0	0	0	0	0	0	603	903	0
3134	4	0	0	0	0	0	0	200	300	0	0	0	0	0	0	0	200	903	0	0	0	0	0	0	0	603	903	0
3134	5	0	0	0	0	0	0	200	300	0	0	0	0	0	0	0	200	903	0	0	0	0	0	0	0	603	903	0
3134	6	0	0	0	0	0	0	200	300	0	0	0	0	0	0	0	200	903	0	0	0	0	0	0	0	603	903	0
3134	7	0	0	0	0	0	0	200	300	0	0	0	0	0	0	0	200	903	0	0	0	0	0	0	0	603	903	0
3134	8	0	0	0	0	0	0	200	300	0	0	0	0	0	0	0	200	903	0	0	0	0	0	0	0	603	903	0
3134	9	0	0	0	0	0	0	200	300	0	0	0	0	0	0	0	200	903	0	0	0	0	0	0	0	603	903	0
3135	0	0	0	0	0	0	0	200	300	0	0	0	0	0	0	0	200	903	0	0	0	0	0	0	0	603	903	0
3135	1	0	0	0	0	0	0	200	300	0	0	0	0	0	0	0	200	903	0	0	0	0	0	0	0	603	903	0
3135	2	0	0	0	0	0	0	200	300	0	0	0	0	0	0	0	200	903	0	0	0	0	0	0	0	603	903	0
3135	3	0	0	0	0	0	0	200	300	0	0	0	0	0	0	0	200	903	0	0	0	0	0	0	0	603	903	0
3135	4	0	0	0	0	0	0	200	300	0	0	0	0	0	0	0	200	903	0	0	0	0	0	0	0	603	903	0
3135	5	0	0	0	0	0	0	200	300	0	0	0	0	0	0	0	200	903	0	0	0	0	0	0	0	603	903	0
3135	6	0	0	0	0	0	0	200	300	0	0	0	0	0	0	0	200	903	0	0	0	0	0	0	0	603	903	0
3135	7	0	0	0	0	0	0	200	300	0	0	0	0	0	0	0	200	903	0	0	0	0	0	0	0	603	903	0
3135	8	0	0	0	0	0	0	200	300	0	0	0	0	0	0	0	200	903	0	0	0	0	0	0	0	603	903	0
3135	9	0	0	0	0	0	0	200	300	0	0	0	0	0	0	0	200	903	0	0	0	0	0	0	0	603	903	0
3136	0	0	0	0	0	0	0	200	300	0	0	0	0	0	0	0	200	903	0	0	0	0	0	0	0	603	903	0
3136	1	0	0	0	0	0	0	200	300	0	0	0	0	0	0	0	200	903	0	0	0	0	0	0	0	603	903	0
3136	2	0	0	0	0	0	0	200	300	0	0	0	0	0	0	0	200	903	0	0	0	0	0	0	0	603	903	0
3136	3	0	0	0	0	0	0	200	300	0	0	0	0	0	0	0	200	903	0	0	0	0	0	0	0	603	903	0
3136	4	0	0	0	0	0	0	200	300	0	0	0	0	0	0	0	200	903	0	0	0	0	0	0	0	603	903	0
3136	5	0	0	0	0	0	0	200	300	0	0	0	0	0	0	0	200	903	0	0	0	0	0	0	0	603	903	0
3136	6	0	0	0	0	0	0	200	300	0	0	0	0	0	0	0	200	903	0	0	0	0	0	0	0	603	903	0
3136	7	0	0	0	0	0	0	200	300	0	0	0	0	0	0	0	200	903	0	0	0	0	0	0	0	603	903	0
3136	8	0	0	0	0	0	0	200	300	0	0	0	0	0	0	0	200	903	0	0	0	0	0	0	0	603	903	0
3136	9	0	0	0	0	0	0	200	300	0	0	0	0	0	0	0	200	903	0	0	0	0	0	0	0	603	903	0
3137	0	0	0	0	0	0	0	200	300	0	0	0	0	0	0	0	200	903	0	0	0	0	0	0	0	603	903	0
3137	1	0	0	0	0	0	0	200	300	0	0	0	0	0	0	0	200	903	0	0	0	0	0	0	0	603	903	0
3137	2	0	0	0	0	0	0	200	300	0	0	0	0	0	0	0	200	903	0	0	0	0	0	0	0	603	903	0
3137	3	0	0	0	0	0	0	200	300	0	0	0	0	0	0	0	200	903	0	0	0	0	0	0	0	603	903	0
3137	4	0	0	0	0	0	0	200	300	0	0	0	0	0	0	0	200	903	0	0	0	0	0	0	0	603	903	0
3137	5	0	0	0	0	0	0	200	300	0	0	0	0	0	0	0	200	903	0	0	0	0	0	0	0	603	903	0
3137	6	0	0	0	0	0	0	200	300	0	0	0	0	0	0	0	200	903	0	0	0	0	0	0	0	603	903	0
3137	7	0	0	0	0	0	0	200	300	0	0	0	0	0	0	0	200	903	0	0	0	0	0	0	0	603	903	0
3137	8	0	0	0	0	0	0	200	300	0	0	0	0	0	0	0	200	903	0	0	0	0	0	0	0	603	903	0
3137	9	0	0	0	0	0	0	200	300	0	0	0	0	0	0	0	200	903	0	0	0	0	0	0	0	603	903	0
3138	0	0	0	0	0	0	0	200	300	0	0	0	0	0	0	0	200	903	0	0	0	0	0	0	0	603	903	0
3138	1	0	0	0	0	0	0	200	300	0	0	0	0	0	0	0	200	903	0	0	0	0	0	0	0	603	903	0
3138	2	0	0	0	0	0	0	200	300	0	0	0	0	0	0	0	200	903	0	0	0	0	0	0	0	603	903	0
3138	3	0	0	0	0	0	0	200	300	0	0	0	0	0	0	0	200	903	0	0	0	0	0	0	0	603	903	0
3138	4	0	0	0	0	0	0	200	300	0	0	0	0	0	0	0	200	903	0	0	0	0	0	0	0	603	903	0
3138	5	0	0	0	0	0	0	200	300	0	0	0	0	0	0	0	200	903	0	0	0	0	0	0	0	603	903	0
3138	6	0	0	0	0	0	0	200	300	0	0	0	0	0	0	0	200	903	0	0	0	0	0	0	0	603	903	0
3138	7	0	0	0	0	0	0	200	300	0	0	0	0	0	0	0	200	903	0	0	0	0	0	0	0	603	903	0
3138	8	0	0	0	0	0	0	200	300	0	0	0	0	0	0	0	200	903	0	0	0	0	0	0	0	603	903	0
3138	9	0	0	0	0	0	0	200	300	0	0	0	0	0	0	0	200	903	0	0	0	0	0	0	0	603	903	0
3139	0	0	0	0	0	0	0	200	300	0	0	0	0	0	0	0	200	903	0	0	0	0	0	0	0	603	903	0
3139	1	0	0	0	0	0	0	200	300	0	0	0	0	0	0	0	200	903	0	0	0	0	0	0	0	603	903	0
3139	2	0	0	0	0	0	0	200	300	0	0	0	0	0	0	0	200	903	0	0	0	0	0	0	0	603	903	0
3139	3	0	0	0	0	0	0	200	300	0	0	0	0	0	0	0	200	903	0	0	0	0	0	0	0	603	903	0
3139	4	0	0	0	0	0	0	200	300	0	0	0	0	0	0	0	200	903	0	0	0	0	0	0	0	603	903	0
3139	5	0	0	0	0	0	0	200	300	0	0	0	0	0	0	0	200	903	0	0	0	0	0	0	0	603	903	0
3139	6	0	0	0	0	0	0	200	300	0	0	0	0	0	0	0	200	903	0	0	0	0	0	0	0	603	903	0
3139	7	0	0	0	0	0	0	200	300	0	0	0	0	0	0	0	200	903	0	0	0	0	0	0	0	603	903	0
3139	8	0	0	0	0	0	0	200	300	0	0	0	0	0	0	0	200	903	0	0	0	0	0	0	0	603	903	0
3139	9	0	0	0	0	0	0	200	300	0	0	0	0	0	0	0	200	903	0	0	0	0	0	0	0	603	903	0
3140	0	0	0	0	0	0	0	200	300	0	0	0	0	0	0	0	200	903	0	0	0	0	0	0	0	603	903	0
3140	1	0	0	0	0	0	0	200	300	0	0	0	0	0	0	0	200	903	0	0	0	0	0	0	0	603	903	0
3140	2	0	0	0	0	0	0	200	300	0	0	0	0	0	0	0	200	903	0	0	0	0	0	0	0	603	903	0
3140	3	0	0	0	0	0	0	200	300	0	0	0	0	0	0	0	200	903	0	0	0	0	0	0	0	603	903	0
3140	4	0	0	0	0	0	0	200	300	0	0	0	0	0	0	0	200	903	0	0	0	0	0	0	0	603	903	0
3140	5	0	0	0	0	0	0	200	300	0	0	0	0	0	0	0	200	903	0	0	0	0	0	0	0	603	903	0
3140	6	0	0	0	0	0	0	200	300	0	0	0	0	0	0	0	200	903	0	0	0	0	0	0	0	603	903	0
3140	7	0	0	0	0	0	0	200	300	0	0	0	0	0	0	0	200	903	0	0	0	0	0	0	0	603	903	0
3140	8	0	0	0	0	0	0	200	300	0	0	0	0	0	0	0	200	903	0	0	0	0	0	0	0	603	903	0
3140	9	0	0	0	0	0	0	200	300	0	0	0	0	0	0	0	200	903	0	0	0	0	0	0	0	603	903	0
3141	0	0	0	0	0	0	0	200	300	0	0	0	0	0	0	0	200	903	0	0	0	0	0	0	0	603	903	0
3141	1	0	0	0	0	0	0	200	300	0	0	0	0	0	0	0	200	903	0	0	0	0	0	0	0	603	903	0
3141	2	0	0	0	0	0	0	200	300	0	0	0	0	0	0	0	200	903	0	0	0	0	0	0	0	603	903	0
3141	3	0	0	0	0	0	0	200	300	0	0	0	0	0	0	0	200	903	0	0	0	0	0	0	0	603	903	0
3141	4	0	0	0	0	0	0	200	300	0	0	0	0	0	0	0	200	903	0	0	0	0	0	0	0	603	903	0
3141	5	0	0	0	0	0	0	200	300	0	0	0	0	0	0	0	200	903	0	0	0	0	0	0	0	603	903	0
3141	6	0	0	0	0	0	0	200	300	0	0	0	0	0	0	0	200	903	0	0	0	0	0	0	0	603	903	0
3141	7	0	0	0	0	0	0	200	300	0	0	0	0	0	0	0	200	903	0	0	0	0	0	0	0	603	903	0
3141	8	0	0	0	0	0	0	200	300	0	0	0	0	0	0	0	200	903	0	0	0	0	0	0	0	603	903	0
3141	9	0	0	0	0	0	0	200	300	0	0	0	0	0	0	0	200	903	0	0	0	0	0	0	0	603	903	0
3142	0	0	0	0	0	0	0	200	300	0	0	0	0	0	0	0	200	903	0	0	0	0	0	0	0	603	903	0
3142	1	0	0	0	0	0	0	200	300	0	0	0	0	0	0	0	200	903	0	0	0	0	0	0	0	603	903	0
3142	2	0	0	0	0	0	0	200	300	0	0	0	0	0	0	0	200	903	0	0	0	0	0	0	0	603	903	0
3142	3	0	0	0	0	0	0	200	300	0	0	0	0	0	0	0	200	903	0	0	0	0	0	0	0	603	903	0
3142	4	0	0	0	0	0	0	200	300	0	0	0	0	0	0	0	200	903	0	0	0	0	0	0	0	603	903	0
3142	5	0	0	0	0	0	0	200	300	0	0	0	0	0	0	0	200	903	0	0	0	0	0	0	0	603	903	0
3142	6	0	0	0	0	0	0	200	300	0	0	0	0	0	0	0	200	903	0	0	0	0	0	0	0	603	903	0
3142	7	0	0	0	0	0	0	200	300	0	0	0	0	0	0	0	200	903	0	0	0	0	0	0	0	603	903	0
3142	8	0	0	0	0	0	0	200	300	0	0	0	0	0	0	0	200	903	0	0	0	0	0	0	0	603	903	0
3142	9	0	0	0	0	0	0	200	300	0	0	0	0	0	0	0	200	903	0	0	0	0	0	0	0	603	903	0
3143	0	0	0	0	0	0	0	200	300	0	0	0	0	0	0	0	200	903	0	0	0	0	0	0	0	603	903	0
3143	1	0	0	0	0	0	0	200	300	0	0	0	0	0	0	0	200	903	0	0	0	0	0	0	0	603	903	0
3143	2	0	0	0	0	0	0	200	300	0	0	0	0	0	0	0	200	903	0	0	0	0	0	0	0	603	903	0
3143	3	0	0	0	0	0	0	200	300	0	0	0	0	0	0	0	200	903	0	0	0	0	0	0	0	603	903	0
3143	4	0	0	0	0	0	0	200	300	0	0	0	0	0	0	0	200	903	0	0	0	0	0	0	0	603	903	0
3143	5	0	0	0	0	0	0	200	300	0	0	0	0	0	0	0	200	903	0	0	0	0	0	0	0	603	903	0
3143	6	0	0	0	0	0	0	200	300	0	0	0	0	0	0	0	200	903	0	0	0	0	0	0	0	603	903	0
3143	7	0	0	0	0	0	0	200	300	0	0	0	0	0	0	0	200	903	0	0	0	0	0	0	0	603	903	0
3143	8	0	0	0	0	0	0	200	300	0	0	0	0	0	0	0	200	903	0	0	0	0	0	0	0	603	903	0
3143	9	0	0	0	0	0	0	200	300	0	0	0	0	0	0	0	200	903	0	0	0	0	0	0	0	603	903	0
3144	0	0	0	0	0	0	0	200	300	0	0	0	0	0	0	0	200	903	0	0	0	0	0	0	0	603	903	0
3144	1	0	0	0	0	0	0	200	300	0	0	0	0	0	0	0	200	903	0	0	0	0	0	0	0	603	903	0
3144	2	0	0	0	0	0	0	200	300	0	0	0	0	0	0	0	200	903	0	0	0	0	0	0	0	603	903	0
3144	3	0	0	0	0	0	0	200	300	0	0	0	0	0	0	0	200	903	0	0	0	0	0	0	0	603	903	0
3144	4	0	0	0	0	0	0	200	300	0	0	0	0	0	0	0	200	903	0	0	0	0	0	0	0	603	903	0
3144	5	0	0	0	0	0	0	200	300	0	0	0	0	0	0	0	200	903	0	0	0	0	0	0	0	603	903	0
3144	6	0	0	0	0	0	0	200	300	0	0	0	0	0	0	0	200	903	0	0	0	0	0	0	0	603	903	0
3144	7	0	0	0	0	0	0	200	300	0	0	0	0	0	0	0	200	903	0	0	0	0	0	0	0	603	903	0
3144	8	0	0	0	0	0	0	200	300	0	0	0	0	0	0	0	200	903	0	0	0	0	0	0	0	603	903	0
3144	9	0	0	0	0	0	0	200	300	0	0	0	0	0	0	0	200	903	0	0	0	0	0	0	0	603	903	0
3145	0	0	0	0	0	0	0	200	300	0	0	0	0	0	0	0	200	903	0	0	0	0	0	0	0	603	903	0
3145	1	0	0	0	0	0	0	200	300	0	0	0	0	0	0	0	200	903	0	0	0	0	0	0	0	603	903	0
3145	2	0	0	0	0	0	0	200	300	0	0	0	0	0	0	0	200	903	0	0	0	0	0	0	0	603	903	0
3145	3	0	0	0	0	0	0	200	300	0	0	0	0	0	0	0	200	903	0	0	0	0	0	0	0	603	903	0
3145	4	0	0	0	0	0	0	200	300	0	0	0	0	0	0	0	200	903	0	0	0	0	0	0	0	603	903	0
3145	5	0	0	0	0	0	0	200	300	0	0	0	0	0	0	0	200	903	0	0	0	0	0	0	0	603	903	0
3145	6	0	0	0	0	0	0	200	300	0	0	0	0	0	0	0	200	903	0	0	0	0	0	0	0	603	903	0
3145	7	0	0	0	0	0	0	200	300	0	0	0	0	0	0	0	200	903	0	0	0	0	0	0	0	603	903	0
3145	8	0	0	0	0	0	0	200	300	0	0	0	0	0	0	0	200	903	0	0	0	0	0	0	0	603	903	0
3145	9	0	0	0	0	0	0	200	300	0	0	0	0	0	0	0	200	903	0	0	0	0	0	0	0	603	903	0
3146	0	0	0	0	0	0	0	200	300	0	0	0	0	0	0	0	200	903	0	0	0	0	0	0	0	603	903	0
3146	1	0	0	0	0	0	0	200	300	0	0	0	0	0	0	0	200	903	0	0	0	0	0	0	0	603	903	0
3146	2	0	0	0	0	0	0	200	300	0	0	0	0	0	0	0	200	903	0	0	0	0	0	0	0	603	903	0
3146	3	0	0	0	0	0	0	200	300	0	0	0	0	0	0	0	200	903	0	0	0	0	0	0	0	603	903	0
3146	4	0	0	0	0	0	0	200	300	0	0	0	0	0	0	0	200	903	0	0	0	0	0	0	0	603	903	0
3146	5	0	0	0	0	0	0	200	300	0	0	0	0	0	0	0	200	903	0	0	0	0	0	0	0	603	903	0
3146	6	0	0	0	0	0	0	200	300	0	0	0	0	0	0	0	200	903	0	0	0	0	0	0	0	603	903	0
3146	7	0	0	0	0	0	0	200	300	0	0	0	0	0	0	0	200	903	0	0	0	0	0	0	0	603	903	0
3146	8	0	0	0	0	0	0	200	300	0	0	0	0	0	0	0	200	903	0	0	0	0	0	0	0	603	903	0
3146	9	0	0	0	0	0	0	200	300	0	0	0	0	0	0	0	200	903	0	0	0	0	0	0	0	603	903	0
3147	0	0	0	0	0	0	0	200	300	0	0	0	0	0	0	0	200	903	0	0	0	0	0	0	0	603	903	0
3147	1	0	0	0	0	0	0	200	300	0	0	0	0	0	0	0	200	903	0	0	0	0	0	0	0	603	903	0
3147	2	0	0	0	0	0	0	200	300	0	0	0	0	0	0	0	200	903	0	0	0	0	0	0	0	603	903	0
3147	3	0	0	0	0	0	0	200	300	0	0	0	0	0	0	0	200	903	0	0	0	0	0	0	0	603	903	0
3147	4	0	0	0	0	0	0	200	300	0	0	0	0	0	0	0	200	903	0	0	0	0	0	0	0	603	903	0
3147	5	0	0	0	0	0	0	200	300	0	0	0	0	0	0	0	200	903	0	0	0	0	0	0	0	603	903	0
3147	6	0	0	0	0	0	0	200	300	0	0	0	0	0	0	0	200	903	0	0	0	0	0	0	0	603	903	0
3147	7	0	0	0	0	0	0	200	300	0	0	0	0	0	0	0	200	903	0	0	0	0	0	0	0	603	903	0
3147	8	0	0	0	0	0	0	200	300	0	0	0	0	0	0	0	200	903	0	0	0	0	0	0	0	603	903	0
3147	9	0	0	0	0	0	0	200	300	0	0	0	0	0	0	0	200	903	0	0	0	0	0	0	0	603	903	0
3148	0	0	0	0	0	0	0	200	300	0	0	0	0	0	0	0	200	903	0	0	0	0	0	0	0	603	903	0
3148	1	0	0	0	0	0	0	200	300	0	0	0	0	0	0	0	200	903	0	0	0	0	0	0	0	603	903	0
3148	2	0	0	0	0	0	0	200	300	0	0	0	0	0	0	0	200	903	0	0	0	0	0	0	0	603	903	0
3148	3	0	0	0	0	0	0	200	300	0	0	0	0	0	0	0	200	903	0	0	0	0	0	0	0	603	903	0
3148	4	0	0	0	0	0	0	200	300	0	0	0	0	0	0	0	200	903	0	0	0	0	0	0	0	603	903	0
3148	5	0	0	0	0	0	0	200	300	0	0	0	0	0	0	0	200	903	0	0	0	0	0	0	0	603	903	0
3148	6	0	0	0	0	0	0	200	300	0	0	0	0	0	0	0	200	903	0	0	0	0	0	0	0	603	903	0
3148	7	0	0	0	0	0	0	200	300	0	0	0	0	0	0	0	200	903	0	0	0	0	0	0	0	603	903	0
3148	8	0	0	0	0	0	0	200	300	0	0	0	0	0	0	0	200	903	0	0	0	0	0	0	0	603	903	0
3148	9	0	0	0	0	0	0	200	300	0	0	0	0	0	0	0	200	903	0	0	0	0	0	0	0	603	903	0
3149	0	0	0	0	0	0	0	200	300	0	0	0	0	0	0	0	200	903	0	0	0	0	0	0	0	603	903	0
3149	1	0	0	0	0	0	0	200	300	0	0	0	0	0	0	0	200	903	0	0	0	0	0	0	0	603	903	0
3149	2	0	0	0	0	0	0	200	300	0	0	0	0	0	0	0	200	903	0	0	0	0	0	0	0	603	903	0
3149	3	0	0	0	0	0	0	200	300	0	0	0	0	0	0	0	200	903	0	0	0	0	0	0	0	603	903	0
3149	4	0	0	0	0	0	0	200	300	0	0	0	0	0	0	0	200	903	0	0	0	0	0	0	0	603	903	0
3149	5	0	0	0	0	0	0	200	300	0	0	0	0	0	0	0	200	903	0	0	0	0	0	0	0	603	903	0
3149	6	0	0	0	0	0	0	200	300	0	0	0	0	0	0	0	200	903	0	0	0	0	0	0	0	603	903	0
3149	7	0	0	0	0	0	0	200	300	0	0	0	0	0	0	0	200	903	0	0	0	0	0	0	0	603	903	0
3149	8	0	0	0	0	0	0	200	300	0	0	0	0	0	0	0	200	903	0	0	0	0	0	0	0	603	903	0
3149	9	0	0	0	0	0	0	200	300	0	0	0	0	0	0	0	200	903	0	0	0	0	0	0	0	603	903	0
3150	0	0	0	0	0	0	0	200	300	0	0	0	0	0	0	0	200	903	0	0	0	0	0	0	0	603	903	0
3150	1	0	0	0	0	0	0	200	300	0	0	0	0	0	0	0	200	903	0	0	0	0	0	0	0	603	903	0
3150	2	0	0	0	0	0	0	200	300	0	0	0	0	0	0	0	200	903	0	0	0	0	0	0	0	603	903	0
3150	3	0	0	0	0	0	0	200	300	0	0	0	0	0	0	0	200	903	0	0	0	0	0	0	0	603	903	0
3150	4	0	0	0	0	0	0	200	300	0	0	0	0	0	0	0	200	903	0	0	0	0	0	0	0	603	903	0
3150	5	0	0	0	0	0	0	200	300	0	0	0	0	0	0	0	200	903	0	0	0	0	0	0	0	603	903	0
3150	6	0	0	0	0	0	0	200	300	0	0	0	0	0	0	0	200	903	0	0	0	0	0	0	0	603	903	0
3150	7	0	0	0	0	0	0	200	300	0	0	0	0	0	0	0	200	903	0	0	0	0	0	0	0	603	903	0
3150	8	0	0	0	0	0	0	200	300	0	0	0	0	0	0	0	200	903	0	0	0	0	0	0	0	603	903	0
3150	9	0	0	0	0	0	0	200	300	0	0	0	0	0	0	0	200	903	0	0	0	0	0	0	0	603	903	0
3151	0	0	0	0	0	0	0	200	300	0	0	0	0	0	0	0	200	903	0	0	0	0	0	0	0	603	903	0
3151	1	0	0	0	0	0	0	200	300	0	0	0	0	0	0	0	200	903	0	0	0	0	0	0	0	603	903	0
3151	2	0	0	0	0	0	0	200	300	0	0	0	0	0	0	0	200	903	0	0	0	0	0	0	0	603	903	0
3151	3	0	0	0	0	0	0	200	300	0	0	0	0	0	0	0	200	903	0	0	0	0	0	0	0	603	903	0
3151	4	0	0	0	0	0	0	200	300	0	0	0	0	0	0	0	200	903	0	0	0	0	0	0	0	603	903	0
3151	5	0	0	0	0	0	0	200	300	0	0	0	0	0	0	0	200	903	0	0	0	0	0	0	0	603	903	0
3151	6	0	0	0	0	0	0	200	300	0	0	0	0	0	0	0	200	903	0	0	0	0	0	0	0	603	903	0
3151	7	0	0	0	0	0	0	200	300	0	0	0	0	0	0	0	200	903	0	0	0	0	0	0	0	603	903	0
3151	8	0	0	0	0	0	0	200	300	0	0	0	0	0	0	0	200	903	0	0	0	0	0	0	0	603	903	0
3151	9	0	0	0	0	0	0	200	300	0	0	0	0	0	0	0	200	903	0	0	0	0	0	0	0	603	903	0
3152	0	0	0	0	0	0	0	200	300	0	0	0	0	0	0	0	200	903	0	0	0	0	0	0	0	603	903	0
3152	1	0	0	0	0	0	0	200	300	0	0	0	0	0	0	0	200	903	0	0	0	0	0	0	0	603	903	0
3152	2	0	0	0	0	0	0	200	300	0	0	0	0	0	0	0	200	903	0	0	0	0	0	0	0	603	903	0
3152	3	0	0	0	0	0	0	200	300	0	0	0	0	0	0	0	200	903	0	0	0	0	0	0	0	603	903	0
3152	4	0	0	0	0	0	0	200	300	0	0	0	0	0	0	0	200	903	0	0	0	0	0	0	0	603	903	0
3152	5	0	0	0	0	0	0	200	300	0	0	0	0	0	0	0	200	903	0	0	0	0	0	0	0	603	903	0
3152	6	0	0	0	0	0	0	200	300	0	0	0	0	0	0	0	200	903	0	0	0	0	0	0	0	603	903	0
3152	7	0	0	0	0	0	0	200	300	0	0	0	0	0	0	0	200	903	0	0	0	0	0	0	0	603	903	0
3152	8	0	0	0	0	0	0	200	300	0	0	0	0	0	0	0	200	903	0	0	0	0	0	0	0	603	903	0
3152	9	0	0	0	0	0	0	200	300	0	0	0	0	0	0	0	200	903	0	0	0	0	0	0	0	603	903	0
3153	0	0	0	0	0	0	0	200	300	0	0	0	0	0	0	0	200	903	0	0	0	0	0	0	0	603	903	0
3153	1	0	0	0	0	0	0	200	300	0	0	0	0	0	0	0	200	903	0	0	0	0	0	0	0	603	903	0
3153	2	0	0	0	0	0	0	200	300	0	0	0	0	0	0	0	200	903	0	0	0	0	0	0	0	603	903	0
3153	3	0	0	0	0	0	0	200	300	0	0	0	0	0	0	0	200	903	0	0	0	0	0	0	0	603	903	0
3153	4	0	0	0	0	0	0	200	300	0	0	0	0	0	0	0	200	903	0	0	0	0	0	0	0	603	903	0
3153	5	0	0	0	0	0	0	200	300	0	0	0	0	0	0	0	200	903	0	0	0	0	0	0	0	603	903	0
3153	6	0	0	0	0	0	0	200	300	0	0	0	0	0	0	0	200	903	0	0	0	0	0	0	0	603	903	0
3153	7	0	0	0	0	0	0	200	300	0	0	0	0	0	0	0	200	903	0	0	0	0	0	0	0	603	903	0
3153	8	0	0	0	0	0	0	200	300	0	0	0	0	0	0	0	200	903	0	0	0	0	0	0	0	603	903	0
3153	9	0	0	0	0	0	0	200	300	0	0	0	0	0	0	0	200	903	0	0	0	0	0	0	0	603	903	0
3154	0	0	0	0	0	0	0	200	300	0	0	0	0	0	0	0	200	903	0	0	0	0	0	0	0	603	903	0
3154	1	0	0	0	0	0	0	200	300	0	0	0	0	0	0	0	200	903	0	0	0	0	0	0	0	603	903	0
3154	2	0	0	0	0	0	0	200	300	0	0	0	0	0	0	0	200	903	0	0	0	0	0	0	0	603	903	0
3154	3	0	0	0	0	0	0	200	300	0	0	0	0	0	0	0	200	903	0	0	0	0	0	0	0	603	903	0
3154	4	0	0	0	0	0	0	200	300	0	0	0	0	0	0	0	200	903	0	0	0	0	0	0	0	603	903	0
3154	5	0	0	0	0	0	0	200	300	0	0	0	0	0	0	0	200	903	0	0	0	0	0	0	0	603	903	0
3154	6	0	0	0	0	0	0	200	300	0	0	0	0	0	0	0	200	903	0	0	0	0	0	0	0	603	903	0
3154	7	0	0	0	0	0	0	200	300	0	0	0	0	0	0	0	200	903	0	0	0	0	0	0	0	603	903	0
3154	8	0	0	0	0	0	0	200	300	0	0	0	0	0	0	0	200	903	0	0	0	0	0	0	0	603	903	0
3154	9	0	0	0	0	0	0	200	300	0	0	0	0	0	0	0	200	903	0	0	0	0	0	0	0	603	903	0
3155	0	0	0	0	0	0	0	200	300	0	0	0	0	0	0	0	200	903	0	0	0	0	0	0	0	603	903	0
3155	1	0	0	0	0	0	0	200	300	0	0	0	0	0	0	0	200	903	0	0	0	0	0	0	0	603	903	0
3155	2	0	0	0	0	0	0	200	300	0	0	0	0	0	0	0	200	903	0	0	0	0	0	0	0	603	903	0
3155	3	0	0	0	0	0	0	200	300	0	0	0	0	0	0	0	200	903	0	0	0	0	0	0	0	603	903	0
3155	4	0	0	0	0	0	0	200	300	0	0	0	0	0	0	0	200	903	0	0	0	0	0	0	0	603	903	0
3155	5	0	0	0	0	0	0	200	300	0	0	0	0	0	0	0	200	903	0	0	0	0	0	0	0	603	903	0
3155	6	0	0	0	0	0	0	200	300	0	-0.550689	-4.24927	-19.5879	-6312.95	3112.26	-564.193	358.887	1225.29	0	0	0	0	0	0	0	603	903	0
3155	7	0	0	0	0	0	0	200	300	0	0.822602	-4.09668	-33.626	-10341.3	4088.82	-289.535	321.597	1210.54	0	0	0	0	0	0	0	603	903	0
3155	8	0	0	0	0	0	0	200	300	0	-1.31363	-3.02857	-44.6124	-13911.8	5980.91	-197.982	334.064	1214.84	0	0	0	0	0	0	0	603	903	0
3155	9	0	0	0	0	0	0	200	300	0	-2.83951	-3.94409	-57.1246	-17024.6	6957.48	351.334	321.795	1201.03	0	0	0	0	0	0	0	603	903	0
3156	0	0	0	0	0	0	0	200	300	0	-4.97574	-5.1648	-64.1436	-20412.1	8239.21	854.874	328.45	1221.22	0	0	0	0	0	0	0	603	903	0
3156	1	0	0	0	0	0	0	200	300	0	-4.2128	-4.70703	-79.0972	-23708	9337.85	854.874	318.055	1202.73	0	0	0	0	0	0	0	603	903	0
3156	2	0	0	0	0	0	0	200	300	0	-5.4335	-3.79151	-88.8628	-25996.8	10375.4	1358.41	316.758	1195.55	0	0	0	0	0	0	0	603	903	0
3156	3	0	0	0	0	0	0	200	300	0	-6.80679	-5.31739	-96.7974	-29567.3	11229.9	1404.19	316.015	1208.46	0	0	0	0	0	0	0	603	903	0
3156	4	0	0	0	0	0	0	200	300	0	-10.9267	-7.45362	-106.868	-32222.4	13000	1587.3	321.645	1204.52	0	0	0	0	0	0	0	603	903	0
3156	5	0	0	0	0	0	0	200	300	0	-9.09561	-7.75879	-115.718	-34236.6	13366.2	1770.4	315.506	1198.86	0	0	0	0	0	0	0	603	903	0
3156	6	0	0	0	0	0	0	200	300	0	-8.79044	-8.21656	-125.789	-37074.7	14464.8	1678.85	314.993	1197.74	0	0	0	0	0	0	0	603	903	0
3156	7	0	0	0	0	0	0	200	300	0	-12.1474	-11.1157	-135.555	-40279	15868.6	1770.4	317.064	1200.14	0	0	0	0	0	0	0	603	903	0
3156	8	0	0	0	0	0	0	200	300	0	-13.5207	-11.8787	-141.353	-42384.7	16540	1953.51	317.012	1202.85	0	0	0	0	0	0	0	603	903	0
3156	9	0	0	0	0	0	0	200	300	0	-10.9267	-11.4209	-151.729	-44490.5	17516.6	1770.4	315.446	1196.22	0	0	0	0	0	0	0	603	903	0
3157	0	0	0	0	0	0	0	200	300	0	-13.3681	-14.1675	-156.307	-46687.7	19164.5	2090.84	322.608	1201.69	0	0	0	0	0	0	0	603	903	0
3157	1	0	0	0	0	0	0	200	300	0	-14.894	-13.7097	-166.072	-49342.7	19469.7	2411.27	317.236	1200.12	0	0	0	0	0	0	0	603	903	0
3157	2	0	0	0	0	0	0	200	300	0	-16.4198	-14.1675	-174.312	-51448.5	20385.2	2502.82	316.947	1198.15	0	0	0	0	0	0	0	603	903	0
3157	3	0	0	0	0	0	0	200	300	0	-16.8776	-15.5408	-181.636	-54378.2	21728	2777.48	319.624	1202.38	0	0	0	0	0	0	0	603	903	0
3157	4	0	0	0	0	0	0	200	300	0	-16.4198	-15.9985	-187.74	-56026.1	22338.3	2548.6	318.986	1201.42	0	0	0	0	0	0	0	603	903	0
3157	5	0	0	0	0	0	0	200	300	0	-16.4198	-17.3718	-195.98	-57582.5	23131.8	2502.82	318.032	1196.82	0	0	0	0	0	0	0	603	903	0
3157	6	0	0	0	0	0	0	200	300	0	-18.5561	-17.8296	-200.252	-60146	24413.5	2090.84	321.914	1203.35	0	0	0	0	0	0	0	603	903	0
3157	7	0	0	0	0	0	0	200	300	0	-18.2509	-19.3555	-210.933	-61610.8	24718.7	2365.49	317.187	1195.09	0	0	0	0	0	0	0	603	903	0
3157	8	0	0	0	0	0	0	200	300	0	-17.6405	-20.5762	-215.206	-63808.1	25695.3	2319.72	319.399	1199.5	0	0	0	0	0	0	0	603	903	0
3157	9	0	0	0	0	0	0	200	300	0	-19.9294	-21.6443	-221.004	-65913.8	26549.8	2365.49	320.133	1201.25	0	0	0	0	0	0	0	603	903	0
3158	0	0	0	0	0	0	0	200	300	0	-19.6242	-22.4072	-229.549	-67378.7	27038	2502.82	317.788	1196.53	0	0	0	0	0	0	0	603	903	0
3158	1	0	0	0	0	0	0	200	300	0	-18.2509	-24.0857	-236.263	-69667.5	27892.5	2869.03	318.057	1197.87	0	0	0	0	0	0	0	603	903	0
3158	2	0	0	0	0	0	0	200	300	0	-21.1501	-24.2383	-243.587	-71773.2	28625	2777.48	317.514	1197.65	0	0	0	0	0	0	0	603	903	0
3158	3	0	0	0	0	0	0	200	300	0	-21.7604	-26.5271	-248.775	-73146.4	29479.5	2548.6	318.499	1197.03	0	0	0	0	0	0	0	603	903	0
3158	4	0	0	0	0	0	0	200	300	0	-21.1501	-27.9004	-256.099	-75526.9	30456	2319.72	318.923	1197.91	0	0	0	0	0	0	0	603	903	0
3158	5	0	0	0	0	0	0	200	300	0	-20.9975	-29.4263	-264.034	-77632.6	31310.5	2640.15	318.585	1197.03	0	0	0	0	0	0	0	603	903	0
3158	6	0	0	0	0	0	0	200	300	0	-21.913	-28.6633	-270.748	-79189	31920.9	2548.6	317.899	1195.48	0	0	0	0	0	0	0	603	903	0
3158	7	0	0	0	0	0	0	200	300	0	-21.6078	-30.0366	-275.936	-79372	32714.3	2502.82	318.558	1190.65	0	0	0	0	0	0	0	603	903	0
3158	8	0	0	0	0	0	0	200	300	0	-20.3871	-30.647	-280.513	-82118.6	33751.9	2136.61	320.322	1195.74	0	0	0	0	0	0	0	603	903	0
3158	9	0	0	0	0	0	0	200	300	0	-18.8612	-32.7832	-286.006	-83583.5	34057.1	1953.51	319.078	1195.24	0	0	0	0	0	0	0	603	903	0
3159	0	0	0	0	0	0	0	200	300	0	-19.0138	-33.241	-289.974	-84132.8	34484.3	1449.97	318.922	1193.14	0	0	0	0	0	0	0	603	903	0
3159	1	0	0	0	0	0	0	200	300	0	-18.2509	-34.4617	-295.772	-85323	35460.9	1037.98	319.893	1191.48	0	0	0	0	0	0	0	603	903	0
3159	2	0	0	0	0	0	0	200	300	0	-18.5561	-36.1401	-298.824	-86879.4	35888.1	854.874	320.098	1193.74	0	0	0	0	0	0	0	603	903	0
3159	3	0	0	0	0	0	0	200	300	0	-17.3354	-37.5134	-304.317	-88069.5	35766.1	214.005	317.529	1192.4	0	0	0	0	0	0	0	603	903	0
3159	4	0	0	0	0	0	0	200	300	0	-14.7414	-39.0393	-311.946	-90175.3	37536.1	30.8993	320.329	1192.07	0	0	0	0	0	0	0	603	903	0
3159	5	0	0	0	0	0	0	200	300	0	-17.6405	-41.6333	-318.05	-91823.2	38329.5	30.8993	320.514	1191.71	0	0	0	0	0	0	0	603	903	0
3159	6	0	0	0	0	0	0	200	300	0	-16.2672	-42.3962	-325.069	-93471.2	38085.4	-472.641	317.161	1190.54	0	0	0	0	0	0	0	603	903	0
3159	7	0	0	0	0	0	0	200	300	0	-14.5888	-45.2954	-333.003	-94752.9	39916.5	-1021.96	319.868	1187.54	0	0	0	0	0	0	0	603	903	0
3159	8	0	0	0	0	0	0	200	300	0	-12.9103	-45.448	-337.886	-96675.5	40954.1	-1800.16	321.207	1189.12	0	0	0	0	0	0	0	603	903	0
3159	9	0	0	0	0	0	0	200	300	0	-11.6896	-46.5161	-343.99	-98231.9	41259.2	-1800.16	319.943	1188.57	0	0	0	0	0	0	0	603	903	0
3160	0	0	0	0	0	0	0	200	300	0	-11.2318	-49.8731	-349.483	-98872.8	42174.8	-2761.46	320.678	1185.91	0	0	0	0	0	0	0	603	903	0
3160	1	0	0	0	0	0	0	200	300	0	-10.1637	-50.4834	-355.892	-100429	43029.3	-3173.45	320.906	1185.19	0	0	0	0	0	0	0	603	903	0
3160	2	0	0	0	0	0	0	200	300	0	-8.94302	-52.467	-361.995	-101528	43273.4	-3310.78	319.541	1183.47	0	0	0	0	0	0	0	603	903	0
3160	3	0	0	0	0	0	0	200	300	0	-9.55338	-53.9929	-366.573	-103084	44433.1	-3814.32	321.212	1184.21	0	0	0	0	0	0	0	603	903	0
3160	4	0	0	0	0	0	0	200	300	0	-7.87491	-54.4507	-372.676	-104641	45409.6	-4363.63	321.847	1183.78	0	0	0	0	0	0	0	603	903	0
3160	5	0	0	0	0	0	0	200	300	0	-7.41714	-55.5188	-379.39	-105922	46142	-4729.85	321.622	1182.19	0	0	0	0	0	0	0	603	903	0
3160	6	0	0	0	0	0	0	200	300	0	-5.73868	-57.1973	-385.189	-107204	46203.1	-5462.27	319.949	1181.32	0	0	0	0	0	0	0	603	903	0
3160	7	0	0	0	0	0	0	200	300	0	-4.06021	-59.3335	-389.766	-107845	47606.9	-5645.37	322.142	1179.69	0	0	0	0	0	0	0	603	903	0
3160	8	0	0	0	0	0	0	200	300	0	-4.51797	-60.249	-395.259	-109768	48339.3	-5965.81	322.298	1180.71	0	0	0	0	0	0	0	603	903	0
3160	9	0	0	0	0	0	0	200	300	0	-1.77139	-61.7749	-400.447	-111324	48766.6	-6560.9	321.78	1181	0	0	0	0	0	0	0	603	903	0
3161	0	0	0	0	0	0	0	200	300	0	-2.38174	-62.5378	-405.635	-111416	49315.9	-6744.01	321.577	1177.67	0	0	0	0	0	0	0	603	903	0
3161	1	0	0	0	0	0	0	200	300	0	-1.16104	-64.3689	-408.687	-112331	49804.2	-7064.44	321.864	1177.86	0	0	0	0	0	0	0	603	903	0
3161	2	0	0	0	0	0	0	200	300	0	-2.83951	-65.2844	-412.349	-113521	49987.3	-7293.32	321.226	1178.3	0	0	0	0	0	0	0	603	903	0
3161	3	0	0	0	0	0	0	200	300	0	-1.6188	-66.5051	-415.706	-113521	50780.7	-7751.09	322.155	1176.08	0	0	0	0	0	0	0	603	903	0
3161	4	0	0	0	0	0	0	200	300	0	0.517426	-65.8948	-419.979	-114895	51513.1	-8117.3	322.657	1176.57	0	0	0	0	0	0	0	603	903	0
3161	5	0	0	0	0	0	0	200	300	0	-1.16104	-69.0991	-425.777	-115993	52123.5	-8620.83	322.42	1175.43	0	0	0	0	0	0	0	603	903	0
3161	6	0	0	0	0	0	0	200	300	0	0.0596623	-70.625	-428.829	-116542	52611.8	-8712.39	322.687	1174.77	0	0	0	0	0	0	0	603	903	0
3161	7	0	0	0	0	0	0	200	300	0	0.670014	-71.2354	-431.88	-116542	53039	-8849.72	322.81	1172.85	0	0	0	0	0	0	0	603	903	0
3161	8	0	0	0	0	0	0	200	300	0	-0.245513	-72.1509	-435.848	-117458	53710.4	-8941.27	323.232	1172.49	0	0	0	0	0	0	0	603	903	0
3161	9	0	0	0	0	0	0	200	300	0	0.822602	-72.1509	-438.594	-118557	53649.4	-9536.36	322.321	1173.31	0	0	0	0	0	0	0	603	903	0
3162	0	0	0	0	0	0	0	200	300	0	0.822602	-73.219	-442.562	-118374	54687	-9811.02	323.569	1170.47	0	0	0	0	0	0	0	603	903	0
3162	1	0	0	0	0	0	0	200	300	0	0.670014	-75.05	-444.393	-119106	54809	-10177.2	323.335	1171.02	0	0	0	0	0	0	0	603	903	0
3162	2	0	0	0	0	0	0	200	300	0	1.12778	-75.2026	-447.444	-119106	54076.6	-10223	320.857	1169.19	0	0	0	0	0	0	0	603	903	0
3162	3	0	0	0	0	0	0	200	300	0	1.28037	-76.4233	-449.886	-119747	55480.4	-10406.1	323.321	1169.17	0	0	0	0	0	0	0	603	903	0
3162	4	0	0	0	0	0	0	200	300	0	1.73813	-77.3389	-450.801	-120479	55724.6	-10589.2	323.612	1170.26	0	0	0	0	0	0	0	603	903	0
3162	5	0	0	0	0	0	0	200	300	0	2.80624	-76.7285	-454.158	-121029	55724.6	-10680.8	322.699	1169.49	0	0	0	0	0	0	0	603	903	0
3162	6	0	0	0	0	0	0	200	300	0	0.822602	-78.407	-457.21	-121486	55968.7	-10818.1	322.414	1168.71	0	0	0	0	0	0	0	603	903	0
3162	7	0	0	0	0	0	0	200	300	0	2.0433	-79.3225	-457.515	-120754	56334.9	-10863.9	323.132	1166.93	0	0	0	0	0	0	0	603	903	0
3162	8	0	0	0	0	0	0	200	300	0	2.80624	-79.3225	-460.567	-121853	56579.1	-11550.5	322.847	1167.57	0	0	0	0	0	0	0	603	903	0
3162	9	0	0	0	0	0	0	200	300	0	2.0433	-80.0854	-465.755	-122768	57067.3	-11413.2	322.527	1166.59	0	0	0	0	0	0	0	603	903	0
3163	0	0	0	0	0	0	0	200	300	0	2.50107	-81.1536	-464.839	-122127	57555.6	-12008.3	323.818	1165.73	0	0	0	0	0	0	0	603	903	0
3163	1	0	0	0	0	0	0	200	300	0	5.40024	-81.4587	-467.891	-122493	57494.6	-12282.9	322.88	1164.8	0	0	0	0	0	0	0	603	903	0
3163	2	0	0	0	0	0	0	200	300	0	6.16318	-82.832	-469.722	-123500	58043.9	-12191.4	323.571	1165.92	0	0	0	0	0	0	0	603	903	0
3163	3	0	0	0	0	0	0	200	300	0	4.94247	-83.4424	-474.3	-124233	58837.4	-12420.3	324.051	1164.93	0	0	0	0	0	0	0	603	903	0
3163	4	0	0	0	0	0	0	200	300	0	6.92612	-84.6631	-476.436	-124141	59081.5	-13198.5	324.007	1163.56	0	0	0	0	0	0	0	603	903	0
3163	5	0	0	0	0	0	0	200	300	0	6.92612	-84.8157	-475.215	-124508	59142.5	-13610.5	324.454	1165	0	0	0	0	0	0	0	603	903	0
3163	6	0	0	0	0	0	0	200	300	0	9.21494	-85.426	-481.319	-124874	59936	-14068.2	324.525	1162.44	0	0	0	0	0	0	0	603	903	0
3163	7	0	0	0	0	0	0	200	300	0	10.2831	-87.1045	-487.117	-124965	60241.2	-14251.3	323.669	1159.54	0	0	0	0	0	0	0	603	903	0
3163	8	0	0	0	0	0	0	200	300	0	9.97787	-87.7148	-488.643	-126155	60485.3	-14571.8	323.782	1161.18	0	0	0	0	0	0	0	603	903	0
3163	9	0	0	0	0	0	0	200	300	0	10.1305	-88.6304	-491.085	-126888	60851.5	-14846.4	323.913	1161.38	0	0	0	0	0	0	0	603	903	0
3164	0	0	0	0	0	0	0	200	300	0	11.046	-90.4614	-493.831	-126979	61706	-15212.6	324.954	1160.13	0	0	0	0	0	0	0	603	903	0
3164	1	0	0	0	0	0	0	200	300	0	15.1659	-91.0718	-498.409	-127620	61950.2	-15533.1	324.296	1159.06	0	0	0	0	0	0	0	603	903	0
3164	2	0	0	0	0	0	0	200	300	0	13.4874	-93.8184	-502.986	-127895	62743.6	-16036.6	324.742	1157.27	0	0	0	0	0	0	0	603	903	0
3164	3	0	0	0	0	0	0	200	300	0	15.471	-93.6658	-507.869	-128902	63720.2	-16585.9	325.466	1156.81	0	0	0	0	0	0	0	603	903	0
3164	4	0	0	0	0	0	0	200	300	0	16.5392	-93.208	-511.531	-130092	64147.4	-16769	325.403	1157.32	0	0	0	0	0	0	0	603	903	0
3164	5	0	0	0	0	0	0	200	300	0	16.5392	-96.8701	-515.804	-130825	64330.5	-17364.1	324.719	1156.63	0	0	0	0	0	0	0	603	903	0
3164	6	0	0	0	0	0	0	200	300	0	18.3702	-96.4124	-520.381	-131832	65612.3	-17684.6	326.085	1156.34	0	0	0	0	0	0	0	603	903	0
3164	7	0	0	0	0	0	0	200	300	0	20.2013	-98.5486	-526.79	-132473	66344.7	-17959.2	325.941	1154.47	0	0	0	0	0	0	0	603	903	0
3164	8	0	0	0	0	0	0	200	300	0	20.659	-100.685	-529.537	-133663	66466.8	-18371.2	325.519	1155.41	0	0	0	0	0	0	0	603	903	0
3164	9	0	0	0	0	0	0	200	300	0	22.4901	-100.38	-533.809	-134395	67077.1	-18920.5	325.658	1154.77	0	0	0	0	0	0	0	603	903	0
3165	0	0	0	0	0	0	0	200	300	0	21.7271	-103.279	-538.692	-134853	67870.6	-19195.2	325.992	1153.33	0	0	0	0	0	0	0	603	903	0
3165	1	0	0	0	0	0	0	200	300	0	22.3375	-104.194	-542.354	-135585	67748.5	-19378.3	324.916	1152.99	0	0	0	0	0	0	0	603	903	0
3165	2	0	0	0	0	0	0	200	300	0	21.1168	-103.584	-546.321	-136867	68419.9	-19424.1	325.237	1153.53	0	0	0	0	0	0	0	603	903	0
3165	3	0	0	0	0	0	0	200	300	0	19.2857	-106.025	-550.899	-136867	69396.4	-19241	325.969	1151.44	0	0	0	0	0	0	0	603	903	0
3165	4	0	0	0	0	0	0	200	300	0	22.7953	-104.347	-554.256	-137783	69640.6	-19378.3	325.647	1151.59	0	0	0	0	0	0	0	603	903	0
3165	5	0	0	0	0	0	0	200	300	0	19.7435	-103.737	-558.834	-138698	70006.8	-18737.4	325.273	1151.19	0	0	0	0	0	0	0	603	903	0
3165	6	0	0	0	0	0	0	200	300	0	18.2176	-104.957	-562.496	-139064	70678.2	-19057.8	325.651	1150.23	0	0	0	0	0	0	0	603	903	0
3165	7	0	0	0	0	0	0	200	300	0	18.6754	-103.126	-565.853	-139980	71044.4	-19057.8	325.553	1150.38	0	0	0	0	0	0	0	603	903	0
3165	8	0	0	0	0	0	0	200	300	0	19.4383	-104.5	-571.346	-141262	71532.7	-19149.4	325.2	1150.24	0	0	0	0	0	0	0	603	903	0
3165	9	0	0	0	0	0	0	200	300	0	18.065	-104.347	-571.956	-142360	71776.9	-18920.5	325.494	1151.9	0	0	0	0	0	0	0	603	903	0
3166	0	0	0	0	0	0	0	200	300	0	18.5228	-103.737	-578.06	-141170	72265.1	-18829	325.013	1147.21	0	0	0	0	0	0	0	603	903	0
3166	1	0	0	0	0	0	0	200	300	0	18.3702	-103.279	-583.553	-143550	72936.5	-18966.3	324.987	1148.99	0	0	0	0	0	0	0	603	903	0
3166	2	0	0	0	0	0	0	200	300	0	19.1331	-103.431	-586.299	-144283	73424.8	-18783.2	325.234	1149.09	0	0	0	0	0	0	0	603	903	0
3166	3	0	0	0	0	0	0	200	300	0	19.1331	-104.194	-590.267	-145107	74462.4	-18554.3	326.15	1148.83	0	0	0	0	0	0	0	603	903	0
3166	4	0	0	0	0	0	0	200	300	0	18.3702	-104.805	-596.37	-146480	75072.8	-19195.2	325.883	1148.62	0	0	0	0	0	0	0	603	903	0
3166	5	0	0	0	0	0	0	200	300	0	17.3021	-103.889	-599.727	-146755	75194.8	-19241	325.382	1147.7	0	0	0	0	0	0	0	603	903	0
3166	6	0	0	0	0	0	0	200	300	0	18.828	-105.568	-606.746	-147670	76110.3	-19241	325.44	1146.38	0	0	0	0	0	0	0	603	903	0
3166	7	0	0	0	0	0	0	200	300	0	19.1331	-106.788	-610.408	-148403	76598.6	-19195.2	325.487	1146.12	0	0	0	0	0	0	0	603	903	0
3166	8	0	0	0	0	0	0	200	300	0	17.7599	-106.178	-616.207	-149593	76659.7	-19286.7	324.406	1145.76	0	0	0	0	0	0	0	603	903	0
3166	9	0	0	0	0	0	0	200	300	0	17.6073	-107.704	-620.174	-150600	77636.2	-19378.3	325.185	1145.84	0	0	0	0	0	0	0	603	903	0
3167	0	0	0	0	0	0	0	200	300	0	19.8961	-107.704	-622.615	-150966	78429.6	-19469.8	325.968	1145.47	0	0	0	0	0	0	0	603	903	0
3167	1	0	0	0	0	0	0	200	300	0	18.2176	-108.467	-629.634	-152431	78551.7	-19515.6	324.758	1145.09	0	0	0	0	0	0	0	603	903	0
3167	2	0	0	0	0	0	0	200	300	0	18.2176	-108.925	-632.991	-152980	79101.1	-19195.2	324.964	1144.68	0	0	0	0	0	0	0	603	903	0
3167	3	0	0	0	0	0	0	200	300	0	18.5228	-109.382	-637.569	-153621	79223.1	-19652.9	324.258	1143.95	0	0	0	0	0	0	0	603	903	0
3167	4	0	0	0	0	0	0	200	300	0	18.5228	-108.925	-642.757	-154720	80016.6	-19469.8	324.49	1143.71	0	0	0	0	0	0	0	603	903	0
3167	5	0	0	0	0	0	0	200	300	0	19.4383	-109.688	-646.114	-155452	80688	-19561.4	324.882	1143.6	0	0	0	0	0	0	0	603	903	0
3167	6	0	0	0	0	0	0	200	300	0	18.065	-108.467	-650.691	-155819	81603.5	-19424.1	325.41	1142.47	0	0	0	0	0	0	0	603	903	0
3167	7	0	0	0	0	0	0	200	300	0	18.065	-108.314	-652.828	-156917	81908.7	-19607.2	325.468	1143.37	0	0	0	0	0	0	0	603	903	0
3167	8	0	0	0	0	0	0	200	300	0	16.6917	-109.382	-658.931	-157283	82274.9	-19469.8	324.861	1141.69	0	0	0	0	0	0	0	603	903	0
3167	9	0	0	0	0	0	0	200	300	0	16.5392	-108.925	-661.678	-158107	83129.4	-18920.5	325.634	1141.95	0	0	0	0	0	0	0	603	903	0
3168	0	0	0	0	0	0	0	200	300	0	18.828	-109.84	-665.645	-158657	83312.5	-19424.1	325.16	1141.35	0	0	0	0	0	0	0	603	903	0
3168	1	0	0	0	0	0	0	200	300	0	15.7762	-109.688	-669.307	-158840	83617.7	-19149.4	324.932	1140.32	0	0	0	0	0	0	0	603	903	0
3168	2	0	0	0	0	0	0	200	300	0	15.7762	-109.077	-673.274	-159847	83678.7	-18737.4	324.286	1140.42	0	0	0	0	0	0	0	603	903	0
3168	3	0	0	0	0	0	0	200	300	0	17.1495	-109.535	-676.326	-160579	84594.2	-18920.5	325.079	1140.43	0	0	0	0	0	0	0	603	903	0
3168	4	0	0	0	0	0	0	200	300	0	15.3185	-108.772	-677.242	-160946	84655.2	-19103.6	325	1140.65	0	0	0	0	0	0	0	603	903	0
3168	5	0	0	0	0	0	0	200	300	0	15.9288	-108.467	-681.819	-161495	85082.5	-19195.2	324.788	1139.86	0	0	0	0	0	0	0	603	903	0
3168	6	0	0	0	0	0	0	200	300	0	16.9969	-109.077	-685.482	-162136	85692.9	-19103.6	325.011	1139.53	0	0	0	0	0	0	0	603	903	0
3168	7	0	0	0	0	0	0	200	300	0	16.0814	-108.009	-685.482	-162685	85692.9	-19241	325.011	1140.33	0	0	0	0	0	0	0	603	903	0
3168	8	0	0	0	0	0	0	200	300	0	16.234	-107.856	-690.364	-162685	86181.1	-18920.5	324.834	1138.65	0	0	0	0	0	0	0	603	903	0
3168	9	0	0	0	0	0	0	200	300	0	17.3021	-108.009	-692.195	-163418	86303.2	-19012.1	324.68	1139.09	0	0	0	0	0	0	0	603	903	0
3169	0	0	0	0	0	0	0	200	300	0	18.065	-107.246	-695.552	-163967	86913.6	-19103.6	324.956	1138.74	0	0	0	0	0	0	0	603	903	0
3169	1	0	0	0	0	0	0	200	300	0	19.8961	-108.009	-698.299	-164333	87462.8	-19149.4	325.251	1138.33	0	0	0	0	0	0	0	603	903	0
3169	2	0	0	0	0	0	0	200	300	0	18.828	-107.856	-700.74	-164425	87951.1	-19424.1	325.512	1137.64	0	0	0	0	0	0	0	603	903	0
3169	3	0	0	0	0	0	0	200	300	0	18.6754	-108.619	-703.487	-164516	88439.4	-19195.2	325.716	1136.86	0	0	0	0	0	0	0	603	903	0
3169	4	0	0	0	0	0	0	200	300	0	17.9124	-108.467	-705.928	-165340	87890.1	-19424.1	324.503	1137.22	0	0	0	0	0	0	0	603	903	0
3169	5	0	0	0	0	0	0	200	300	0	18.5228	-108.162	-708.98	-165340	88988.8	-19286.7	325.517	1136.21	0	0	0	0	0	0	0	603	903	0
3169	6	0	0	0	0	0	0	200	300	0	19.7435	-107.399	-712.642	-165798	89538	-19149.4	325.642	1135.65	0	0	0	0	0	0	0	603	903	0
3169	7	0	0	0	0	0	0	200	300	0	19.5909	-108.162	-714.168	-166347	89538	-18920.5	325.374	1135.92	0	0	0	0	0	0	0	603	903	0
3169	8	0	0	0	0	0	0	200	300	0	18.3702	-108.162	-715.694	-166530	90087.4	-19149.4	325.874	1135.68	0	0	0	0	0	0	0	603	903	0
3169	9	0	0	0	0	0	0	200	300	0	19.1331	-107.399	-718.44	-166073	90331.5	-19424.1	325.733	1134.16	0	0	0	0	0	0	0	603	903	0
3170	0	0	0	0	0	0	0	200	300	0	19.1331	-107.551	-719.356	-167263	90331.5	-19515.6	325.573	1135.52	0	0	0	0	0	0	0	603	903	0
3170	1	0	0	0	0	0	0	200	300	0	18.3702	-107.856	-722.408	-167263	91064	-19378.3	326.056	1134.54	0	0	0	0	0	0	0	603	903	0
3170	2	0	0	0	0	0	0	200	300	0	19.2857	-107.551	-724.544	-167171	91125	-19607.2	325.769	1133.73	0	0	0	0	0	0	0	603	903	0
3170	3	0	0	0	0	0	0	200	300	0	21.422	-108.009	-725.765	-167629	91186	-19424.1	325.641	1133.97	0	0	0	0	0	0	0	603	903	0
3170	4	0	0	0	0	0	0	200	300	0	19.4383	-106.636	-727.901	-167720	91064	-18966.3	325.105	1133.42	0	0	0	0	0	0	0	603	903	0
3170	5	0	0	0	0	0	0	200	300	0	19.4383	-105.72	-730.953	-168728	91918.5	-19515.6	325.752	1133.83	0	0	0	0	0	0	0	603	903	0
3170	6	0	0	0	0	0	0	200	300	0	20.2013	-105.11	-731.563	-167995	91979.4	-19790.3	325.73	1132.64	0	0	0	0	0	0	0	603	903	0
3170	7	0	0	0	0	0	0	200	300	0	21.2694	-105.262	-729.732	-168453	92223.6	-19836.1	326.38	1133.84	0	0	0	0	0	0	0	603	903	0
3170	8	0	0	0	0	0	0	200	300	0	20.9642	-106.025	-734.31	-168728	92711.9	-19469.8	326.257	1132.78	0	0	0	0	0	0	0	603	903	0
3170	9	0	0	0	0	0	0	200	300	0	22.3375	-104.957	-737.056	-168270	92772.9	-19790.3	325.87	1131.3	0	0	0	0	0	0	0	603	903	0
3171	0	0	0	0	0	0	0	200	300	0	22.7953	-105.72	-739.803	-168819	93383.3	-19927.6	326.227	1131.19	0	0	0	0	0	0	0	603	903	0
3171	1	0	0	0	0	0	0	200	300	0	21.8797	-104.652	-741.023	-169185	94115.7	-19927.6	327.008	1131.31	0	0	0	0	0	0	0	603	903	0
3171	2	0	0	0	0	0	0	200	300	0	24.016	-104.042	-742.855	-168453	93505.4	-20019.2	325.873	1129.76	0	0	0	0	0	0	0	603	903	0
3171	3	0	0	0	0	0	0	200	300	0	23.8634	-105.11	-744.075	-169552	94115.7	-20248	326.487	1130.87	0	0	0	0	0	0	0	603	903	0
3171	4	0	0	0	0	0	0	200	300	0	25.5418	-103.889	-745.601	-169643	94481.9	-20019.2	326.719	1130.53	0	0	0	0	0	0	0	603	903	0
3171	5	0	0	0	0	0	0	200	300	0	24.9315	-104.347	-747.127	-169185	94176.7	-20476.9	326.052	1129.45	0	0	0	0	0	0	0	603	903	0
3171	6	0	0	0	0	0	0	200	300	0	24.7789	-104.194	-748.043	-169643	95214.4	-20385.4	327.285	1129.78	0	0	0	0	0	0	0	603	903	0
3171	7	0	0	0	0	0	0	200	300	0	26.3048	-102.821	-751.094	-169460	95153.3	-20431.1	326.686	1128.62	0	0	0	0	0	0	0	603	903	0
3171	8	0	0	0	0	0	0	200	300	0	26.4574	-102.211	-753.841	-169918	95275.3	-20431.1	326.387	1128.4	0	0	0	0	0	0	0	603	903	0
3171	9	0	0	0	0	0	0	200	300	0	26.1522	-102.821	-753.536	-169643	95519.5	-20476.9	326.762	1128.13	0	0	0	0	0	0	0	603	903	0
3172	0	0	0	0	0	0	0	200	300	0	25.847	-102.974	-754.451	-170101	96129.8	-20568.5	327.417	1128.46	0	0	0	0	0	0	0	603	903	0
3172	1	0	0	0	0	0	0	200	300	0	27.9832	-102.821	-756.893	-169735	96068.8	-20476.9	326.925	1127.25	0	0	0	0	0	0	0	603	903	0
3172	2	0	0	0	0	0	0	200	300	0	27.5255	-102.058	-759.029	-169277	95885.7	-20705.8	326.327	1126.02	0	0	0	0	0	0	0	603	903	0
3172	3	0	0	0	0	0	0	200	300	0	25.847	-102.821	-759.334	-169918	96618.1	-20660	327.241	1126.77	0	0	0	0	0	0	0	603	903	0
3172	4	0	0	0	0	0	0	200	300	0	26.61	-101.906	-760.555	-169460	96435.1	-20751.6	326.796	1125.81	0	0	0	0	0	0	0	603	903	0
3172	5	0	0	0	0	0	0	200	300	0	26.9151	-101.295	-763.607	-169826	96862.3	-20888.9	326.848	1125.4	0	0	0	0	0	0	0	603	903	0
3172	6	0	0	0	0	0	0	200	300	0	26.3048	-101.906	-763.912	-169368	97533.7	-20660	327.677	1124.71	0	0	0	0	0	0	0	603	903	0
3172	7	0	0	0	0	0	0	200	300	0	27.3729	-100.99	-764.522	-169826	96984.3	-20660	326.856	1125.13	0	0	0	0	0	0	0	603	903	0
3172	8	0	0	0	0	0	0	200	300	0	29.2039	-102.058	-766.963	-169918	97350.5	-20614.2	326.93	1124.55	0	0	0	0	0	0	0	603	903	0
3172	9	0	0	0	0	0	0	200	300	0	27.0677	-101.906	-766.658	-169368	97777.8	-20797.3	327.538	1123.92	0	0	0	0	0	0	0	603	903	0
3173	0	0	0	0	0	0	0	200	300	0	27.2203	-100.685	-768.489	-169735	97533.7	-20751.6	326.916	1123.87	0	0	0	0	0	0	0	603	903	0
3173	1	0	0	0	0	0	0	200	300	0	27.6781	-102.058	-769.1	-169460	97777.8	-20797.3	327.133	1123.34	0	0	0	0	0	0	0	603	903	0
3173	2	0	0	0	0	0	0	200	300	0	28.8988	-100.38	-769.1	-169735	98083	-20568.5	327.53	1123.69	0	0	0	0	0	0	0	603	903	0
3173	3	0	0	0	0	0	0	200	300	0	26.9151	-100.227	-770.931	-169735	97960.9	-20431.1	327.068	1123.17	0	0	0	0	0	0	0	603	903	0
3173	4	0	0	0	0	0	0	200	300	0	27.8307	-101.143	-770.626	-169185	97899.9	-20522.7	327.04	1122.54	0	0	0	0	0	0	0	603	903	0
3173	5	0	0	0	0	0	0	200	300	0	28.2884	-99.9219	-771.541	-169185	98571.2	-20339.6	327.759	1122.28	0	0	0	0	0	0	0	603	903	0
3173	6	0	0	0	0	0	0	200	300	0	29.8143	-100.227	-773.372	-169185	98510.2	-20431.1	327.378	1121.76	0	0	0	0	0	0	0	603	903	0
3173	7	0	0	0	0	0	0	200	300	0	27.5255	-99.9219	-773.067	-168453	98022	-20339.6	326.796	1120.9	0	0	0	0	0	0	0	603	903	0
3173	8	0	0	0	0	0	0	200	300	0	27.6781	-98.8538	-774.593	-167812	99059.5	-20385.4	327.886	1119.65	0	0	0	0	0	0	0	603	903	0
3173	9	0	0	0	0	0	0	200	300	0	26.7625	-99.9219	-775.814	-168544	98632.3	-20110.7	327.134	1120.25	0	0	0	0	0	0	0	603	903	0
3174	0	0	0	0	0	0	0	200	300	0	26.3048	-98.396	-774.288	-168178	98937.5	-19836.1	327.779	1120.2	0	0	0	0	0	0	0	603	903	0
3174	1	0	0	0	0	0	0	200	300	0	27.9832	-98.0908	-775.814	-167812	99303.7	-19744.5	327.999	1119.3	0	0	0	0	0	0	0	603	903	0
3174	2	0	0	0	0	0	0	200	300	0	25.6944	-98.396	-776.424	-168361	98876.5	-19607.2	327.349	1119.84	0	0	0	0	0	0	0	603	903	0
3174	3	0	0	0	0	0	0	200	300	0	25.847	-97.4805	-776.729	-168911	99120.6	-19881.8	327.613	1120.46	0	0	0	0	0	0	0	603	903	0
3174	4	0	0	0	0	0	0	200	300	0	26.1522	-98.396	-778.255	-167171	99425.7	-19607.2	327.755	1117.8	0	0	0	0	0	0	0	603	903	0
3174	5	0	0	0	0	0	0	200	300	0	25.9996	-97.4805	-777.339	-167446	99303.7	-19515.6	327.748	1118.41	0	0	0	0	0	0	0	603	903	0
3174	6	0	0	0	0	0	0	200	300	0	27.2203	-96.8701	-780.391	-167446	99486.8	-19469.8	327.483	1117.57	0	0	0	0	0	0	0	603	903	0
3174	7	0	0	0	0	0	0	200	300	0	25.9996	-97.3279	-780.696	-167263	99791.9	-19195.2	327.824	1117.25	0	0	0	0	0	0	0	603	903	0
3174	8	0	0	0	0	0	0	200	300	0	25.6944	-95.802	-779.781	-165889	99669.9	-19149.4	327.818	1115.74	0	0	0	0	0	0	0	603	903	0
3174	9	0	0	0	0	0	0	200	300	0	25.0841	-96.2598	-781.612	-166622	99608.9	-19149.4	327.44	1116.18	0	0	0	0	0	0	0	603	903	0
3175	0	0	0	0	0	0	0	200	300	0	25.3893	-95.802	-780.696	-166347	100280	-19241	328.45	1116.08	0	0	0	0	0	0	0	603	903	0
3175	1	0	0	0	0	0	0	200	300	0	25.6944	-95.6494	-780.086	-165798	99731	-19241	327.846	1115.54	0	0	0	0	0	0	0	603	903	0
3175	2	0	0	0	0	0	0	200	300	0	24.3211	-95.802	-782.833	-166164	99975.1	-19103.6	327.709	1115.26	0	0	0	0	0	0	0	603	903	0
3175	3	0	0	0	0	0	0	200	300	0	24.6263	-95.3442	-781.917	-165615	100463	-19103.6	328.483	1114.81	0	0	0	0	0	0	0	603	903	0
3175	4	0	0	0	0	0	0	200	300	0	27.9832	-94.5813	-782.527	-165432	100463	-18920.5	328.383	1114.41	0	0	0	0	0	0	0	603	903	0
3175	5	0	0	0	0	0	0	200	300	0	25.0841	-94.8865	-783.138	-165706	100402	-19012.1	328.205	1114.59	0	0	0	0	0	0	0	603	903	0
3175	6	0	0	0	0	0	0	200	300	0	25.2367	-93.9709	-782.527	-163784	100585	-19149.4	328.539	1112.3	0	0	0	0	0	0	0	603	903	0
3175	7	0	0	0	0	0	0	200	300	0	27.3729	-93.6658	-784.053	-164150	100891	-18600.1	328.678	1112.36	0	0	0	0	0	0	0	603	903	0
3175	8	0	0	0	0	0	0	200	300	0	25.9996	-93.8184	-782.833	-164516	99975.1	-19424.1	327.709	1113.16	0	0	0	0	0	0	0	603	903	0
3175	9	0	0	0	0	0	0	200	300	0	25.847	-93.0554	-782.527	-164241	100830	-19103.6	328.851	1112.89	0	0	0	0	0	0	0	603	903	0
3176	0	0	0	0	0	0	0	200	300	0	26.9151	-93.208	-784.053	-163784	100952	-19103.6	328.756	1111.89	0	0	0	0	0	0	0	603	903	0
3176	1	0	0	0	0	0	0	200	300	0	27.2203	-92.5977	-781.917	-163234	100952	-19012.1	329.108	1111.76	0	0	0	0	0	0	0	603	903	0
3176	2	0	0	0	0	0	0	200	300	0	27.8307	-92.5977	-782.222	-163143	100952	-19195.2	329.058	1111.56	0	0	0	0	0	0	0	603	903	0
3176	3	0	0	0	0	0	0	200	300	0	27.0677	-90.4614	-781.307	-162593	101074	-19469.8	329.365	1111.1	0	0	0	0	0	0	0	603	903	0
3176	4	0	0	0	0	0	0	200	300	0	27.6781	-91.9873	-781.917	-162502	100585	-19057.8	328.64	1110.83	0	0	0	0	0	0	0	603	903	0
3176	5	0	0	0	0	0	0	200	300	0	26.7625	-91.2244	-777.645	-161953	101135	-19515.6	330.053	1111.26	0	0	0	0	0	0	0	603	903	0
3176	6	0	0	0	0	0	0	200	300	0	27.9832	-92.5977	-781.307	-161037	101257	-19286.7	329.599	1109.11	0	0	0	0	0	0	0	603	903	0
3176	7	0	0	0	0	0	0	200	300	0	28.441	-90.7666	-780.391	-161037	101135	-19241	329.595	1109.35	0	0	0	0	0	0	0	603	903	0
3176	8	0	0	0	0	0	0	200	300	0	27.8307	-91.5295	-781.307	-160579	100830	-18874.7	329.053	1108.53	0	0	0	0	0	0	0	603	903	0
3176	9	0	0	0	0	0	0	200	300	0	28.1358	-90.9192	-779.17	-160030	101562	-19195.2	330.346	1108.39	0	0	0	0	0	0	0	603	903	0
3177	0	0	0	0	0	0	0	200	300	0	28.8988	-90.4614	-780.391	-158748	101257	-19424.1	329.751	1106.42	0	0	0	0	0	0	0	603	903	0
3177	1	0	0	0	0	0	0	200	300	0	29.5091	-90.4614	-779.17	-159298	100769	-19378.3	329.328	1107.45	0	0	0	0	0	0	0	603	903	0
3177	2	0	0	0	0	0	0	200	300	0	29.9669	-90.4614	-777.95	-158748	101562	-19332.5	330.551	1107.06	0	0	0	0	0	0	0	603	903	0
3177	3	0	0	0	0	0	0	200	300	0	30.1195	-89.0881	-773.982	-158199	100952	-19561.4	330.431	1107.4	0	0	0	0	0	0	0	603	903	0
3177	4	0	0	0	0	0	0	200	300	0	29.5091	-90.9192	-777.95	-157375	101074	-19195.2	329.923	1105.29	0	0	0	0	0	0	0	603	903	0
3177	5	0	0	0	0	0	0	200	300	0	28.5936	-89.6985	-776.729	-157466	101501	-18829	330.677	1105.73	0	0	0	0	0	0	0	603	903	0
3177	6	0	0	0	0	0	0	200	300	0	30.1195	-89.8511	-776.119	-156459	100891	-19149.4	329.994	1104.59	0	0	0	0	0	0	0	603	903	0
3177	7	0	0	0	0	0	0	200	300	0	31.9505	-88.783	-773.982	-156276	101135	-19149.4	330.668	1104.91	0	0	0	0	0	0	0	603	903	0
3177	8	0	0	0	0	0	0	200	300	0	29.6617	-87.8674	-775.203	-156276	101440	-19515.6	330.856	1104.59	0	0	0	0	0	0	0	603	903	0
3177	9	0	0	0	0	0	0	200	300	0	29.8143	-89.6985	-773.982	-155178	101074	-19103.6	330.589	1103.49	0	0	0	0	0	0	0	603	903	0
3178	0	0	0	0	0	0	0	200	300	0	30.2721	-88.9355	-772.151	-154537	101074	-19103.6	330.899	1103.14	0	0	0	0	0	0	0	603	903	0
3178	1	0	0	0	0	0	0	200	300	0	30.5772	-88.3252	-771.846	-154812	100219	-18966.3	329.844	1103.57	0	0	0	0	0	0	0	603	903	0
3178	2	0	0	0	0	0	0	200	300	0	29.5091	-87.8674	-770.015	-154171	101013	-18371.2	331.183	1103.22	0	0	0	0	0	0	0	603	903	0
3178	3	0	0	0	0	0	0	200	300	0	29.2039	-86.9519	-770.626	-153347	100891	-19012.1	330.92	1101.99	0	0	0	0	0	0	0	603	903	0
3178	4	0	0	0	0	0	0	200	300	0	30.5772	-85.7312	-770.931	-152614	100952	-19195.2	330.948	1100.96	0	0	0	0	0	0	0	603	903	0
3178	5	0	0	0	0	0	0	200	300	0	29.3565	-86.3416	-767.879	-152340	100891	-19057.8	331.389	1101.39	0	0	0	0	0	0	0	603	903	0
3178	6	0	0	0	0	0	0	200	300	0	29.9669	-86.4941	-765.438	-151882	100463	-18874.7	331.25	1101.42	0	0	0	0	0	0	0	603	903	0
3178	7	0	0	0	0	0	0	200	300	0	30.7298	-86.189	-767.269	-151332	100830	-18829	331.414	1100.24	0	0	0	0	0	0	0	603	903	0
3178	8	0	0	0	0	0	0	200	300	0	30.1195	-83.9001	-766.353	-151332	100524	-18737.4	331.172	1100.47	0	0	0	0	0	0	0	603	903	0
3178	9	0	0	0	0	0	0	200	300	0	31.4928	-85.5786	-765.132	-150966	100708	-18325.4	331.621	1100.31	0	0	0	0	0	0	0	603	903	0
3179	0	0	0	0	0	0	0	200	300	0	30.4247	-84.8157	-763.301	-149959	100830	-18645.9	332.097	1099.46	0	0	0	0	0	0	0	603	903	0
3179	1	0	0	0	0	0	0	200	300	0	30.7298	-84.5105	-763.301	-149959	100402	-18462.8	331.537	1099.46	0	0	0	0	0	0	0	603	903	0
3179	2	0	0	0	0	0	0	200	300	0	29.8143	-84.9683	-762.691	-149135	100585	-18554.3	331.882	1098.54	0	0	0	0	0	0	0	603	903	0
3179	3	0	0	0	0	0	0	200	300	0	30.4247	-83.1372	-759.334	-148037	100585	-18600.1	332.465	1097.96	0	0	0	0	0	0	0	603	903	0
3179	4	0	0	0	0	0	0	200	300	0	32.1031	-83.7476	-760.86	-147304	100341	-18417	331.879	1096.6	0	0	0	0	0	0	0	603	903	0
3179	5	0	0	0	0	0	0	200	300	0	29.8143	-82.832	-759.029	-146480	100463	-18142.3	332.358	1095.98	0	0	0	0	0	0	0	603	903	0
3179	6	0	0	0	0	0	0	200	300	0	30.5772	-82.5269	-758.113	-147121	100402	-18050.8	332.437	1097.06	0	0	0	0	0	0	0	603	903	0
3179	7	0	0	0	0	0	0	200	300	0	30.4247	-83.4424	-757.808	-146480	100341	-18096.6	332.41	1096.29	0	0	0	0	0	0	0	603	903	0
3179	8	0	0	0	0	0	0	200	300	0	30.1195	-81.9165	-755.367	-146022	100341	-18096.6	332.838	1096.31	0	0	0	0	0	0	0	603	903	0
3179	9	0	0	0	0	0	0	200	300	0	29.8143	-80.6958	-755.367	-145473	100524	-18096.6	333.08	1095.59	0	0	0	0	0	0	0	603	903	0
3180	0	0	0	0	0	0	0	200	300	0	30.4247	-81.9165	-754.146	-144924	100219	-18005	332.891	1095.17	0	0	0	0	0	0	0	603	903	0
3180	1	0	0	0	0	0	0	200	300	0	31.035	-81.6113	-752.62	-144375	100036	-17821.9	332.917	1094.83	0	0	0	0	0	0	0	603	903	0
3180	2	0	0	0	0	0	0	200	300	0	29.6617	-81.001	-753.231	-143825	100585	-17638.8	333.539	1093.94	0	0	0	0	0	0	0	603	903	0
3180	3	0	0	0	0	0	0	200	300	0	30.8824	-80.8484	-751.094	-143184	100463	-17638.8	333.756	1093.63	0	0	0	0	0	0	0	603	903	0
3180	4	0	0	0	0	0	0	200	300	0	30.8824	-80.0854	-749.568	-143550	100036	-17501.4	333.458	1094.51	0	0	0	0	0	0	0	603	903	0
3180	5	0	0	0	0	0	0	200	300	0	30.8824	-79.1699	-746.517	-142635	100280	-17547.2	334.331	1094.07	0	0	0	0	0	0	0	603	903	0
3180	6	0	0	0	0	0	0	200	300	0	31.3402	-79.1699	-747.127	-141903	99914	-17501.4	333.731	1092.93	0	0	0	0	0	0	0	603	903	0
3180	7	0	0	0	0	0	0	200	300	0	30.8824	-79.9329	-747.737	-140896	99303.7	-17409.9	332.806	1091.43	0	0	0	0	0	0	0	603	903	0
3180	8	0	0	0	0	0	0	200	300	0	30.2721	-78.2544	-744.075	-140529	99547.8	-17089.5	333.787	1091.86	0	0	0	0	0	0	0	603	903	0
3180	9	0	0	0	0	0	0	200	300	0	29.8143	-78.2544	-744.991	-140438	99669.9	-17181	333.787	1091.51	0	0	0	0	0	0	0	603	903	0
3181	0	0	0	0	0	0	0	200	300	0	29.9669	-78.2544	-744.38	-139614	99364.7	-17272.6	333.487	1090.56	0	0	0	0	0	0	0	603	903	0
3181	1	0	0	0	0	0	0	200	300	0	31.1876	-77.4915	-740.413	-139339	99791.9	-16860.6	334.779	1091.19	0	0	0	0	0	0	0	603	903	0
3181	2	0	0	0	0	0	0	200	300	0	32.2557	-76.5759	-740.413	-138607	99547.8	-17181	334.449	1090.2	0	0	0	0	0	0	0	603	903	0
3181	3	0	0	0	0	0	0	200	300	0	30.1195	-76.8811	-739.192	-137966	99059.5	-16769	334.01	1089.64	0	0	0	0	0	0	0	603	903	0
3181	4	0	0	0	0	0	0	200	300	0	30.1195	-76.1182	-737.972	-137233	99181.6	-16540.2	334.398	1088.96	0	0	0	0	0	0	0	603	903	0
3181	5	0	0	0	0	0	0	200	300	0	29.0514	-76.5759	-737.361	-137416	99608.9	-16631.7	335.088	1089.36	0	0	0	0	0	0	0	603	903	0
3181	6	0	0	0	0	0	0	200	300	0	30.1195	-75.2026	-732.173	-136592	98693.3	-16677.5	334.795	1089.56	0	0	0	0	0	0	0	603	903	0
3181	7	0	0	0	0	0	0	200	300	0	30.2721	-75.3552	-734.92	-136318	98815.4	-16631.7	334.457	1088.49	0	0	0	0	0	0	0	603	903	0
3181	8	0	0	0	0	0	0	200	300	0	29.0514	-75.2026	-732.784	-135585	98754.4	-16540.2	334.766	1088.03	0	0	0	0	0	0	0	603	903	0
3181	9	0	0	0	0	0	0	200	300	0	28.8988	-75.05	-731.258	-134578	98632.3	-16219.7	334.88	1087.04	0	0	0	0	0	0	0	603	903	0
3182	0	0	0	0	0	0	0	200	300	0	28.8988	-75.2026	-728.511	-134487	98510.2	-16265.5	335.221	1087.6	0	0	0	0	0	0	0	603	903	0
3182	1	0	0	0	0	0	0	200	300	0	29.8143	-74.7449	-729.427	-134487	98510.2	-16036.6	335.052	1087.37	0	0	0	0	0	0	0	603	903	0
3182	2	0	0	0	0	0	0	200	300	0	29.9669	-73.0664	-723.934	-133571	98510.2	-15990.8	336.076	1087.51	0	0	0	0	0	0	0	603	903	0
3182	3	0	0	0	0	0	0	200	300	0	29.5091	-74.2871	-727.291	-133205	97960.9	-15578.8	334.693	1086.15	0	0	0	0	0	0	0	603	903	0
3182	4	0	0	0	0	0	0	200	300	0	29.0514	-72.9138	-722.713	-132656	98266.1	-15761.9	335.968	1086.55	0	0	0	0	0	0	0	603	903	0
3182	5	0	0	0	0	0	0	200	300	0	27.6781	-73.0664	-726.375	-132839	98388.2	-15624.6	335.451	1085.88	0	0	0	0	0	0	0	603	903	0
3182	6	0	0	0	0	0	0	200	300	0	29.2039	-71.8457	-724.239	-131832	97350.5	-14846.4	334.418	1085.03	0	0	0	0	0	0	0	603	903	0
3182	7	0	0	0	0	0	0	200	300	0	28.1358	-72.3035	-721.797	-131191	98205	-15441.5	336.056	1084.76	0	0	0	0	0	0	0	603	903	0
3182	8	0	0	0	0	0	0	200	300	0	27.9832	-71.9983	-719.966	-130642	97960.9	-15441.5	336.063	1084.46	0	0	0	0	0	0	0	603	903	0
3182	9	0	0	0	0	0	0	200	300	0	27.8307	-71.8457	-719.051	-129634	97594.7	-15212.6	335.727	1083.29	0	0	0	0	0	0	0	603	903	0
3183	0	0	0	0	0	0	0	200	300	0	28.1358	-70.4724	-719.051	-129909	97533.7	-15395.7	335.642	1083.67	0	0	0	0	0	0	0	603	903	0
3183	1	0	0	0	0	0	0	200	300	0	28.7462	-70.9302	-717.22	-129909	97777.8	-14983.7	336.329	1084.13	0	0	0	0	0	0	0	603	903	0
3183	2	0	0	0	0	0	0	200	300	0	27.2203	-70.0146	-713.863	-129085	97350.5	-14754.9	336.372	1083.83	0	0	0	0	0	0	0	603	903	0
3183	3	0	0	0	0	0	0	200	300	0	27.0677	-69.2517	-717.22	-128353	97167.5	-14571.8	335.478	1081.96	0	0	0	0	0	0	0	603	903	0
3183	4	0	0	0	0	0	0	200	300	0	28.1358	-69.7095	-715.084	-128444	97350.5	-15166.9	336.139	1082.62	0	0	0	0	0	0	0	603	903	0
3183	5	0	0	0	0	0	0	200	300	0	27.3729	-68.3362	-713.253	-127620	97289.5	-14938	336.403	1081.93	0	0	0	0	0	0	0	603	903	0
3183	6	0	0	0	0	0	0	200	300	0	27.6781	-68.7939	-712.337	-127437	96862.3	-14846.4	335.978	1081.9	0	0	0	0	0	0	0	603	903	0
3183	7	0	0	0	0	0	0	200	300	0	29.2039	-69.0991	-710.506	-126705	96923.3	-14709.1	336.415	1081.33	0	0	0	0	0	0	0	603	903	0
3183	8	0	0	0	0	0	0	200	300	0	27.8307	-67.2681	-711.421	-126888	96862.3	-14342.9	336.153	1081.36	0	0	0	0	0	0	0	603	903	0
3183	9	0	0	0	0	0	0	200	300	0	27.5255	-67.7258	-709.285	-125332	96862.3	-14571.8	336.563	1079.7	0	0	0	0	0	0	0	603	903	0
3184	0	0	0	0	0	0	0	200	300	0	28.5936	-66.5051	-708.37	-125698	97167.5	-14571.8	337.171	1080.45	0	0	0	0	0	0	0	603	903	0
3184	1	0	0	0	0	0	0	200	300	0	28.5936	-66.2	-707.454	-125698	96557.1	-14297.1	336.485	1080.68	0	0	0	0	0	0	0	603	903	0
3184	2	0	0	0	0	0	0	200	300	0	29.6617	-66.2	-705.623	-125148	96618.1	-14434.4	336.926	1080.36	0	0	0	0	0	0	0	603	903	0
3184	3	0	0	0	0	0	0	200	300	0	28.7462	-65.5896	-704.402	-124324	96496	-14159.8	336.99	1079.5	0	0	0	0	0	0	0	603	903	0
3184	4	0	0	0	0	0	0	200	300	0	28.7462	-65.1318	-704.402	-124782	96740.2	-14068.2	337.337	1080.15	0	0	0	0	0	0	0	603	903	0
3184	5	0	0	0	0	0	0	200	300	0	27.5255	-64.6741	-702.877	-124324	96618.1	-13976.7	337.461	1079.88	0	0	0	0	0	0	0	603	903	0
3184	6	0	0	0	0	0	0	200	300	0	28.7462	-63.9111	-701.656	-123684	96190.9	-14114	337.091	1079.27	0	0	0	0	0	0	0	603	903	0
3184	7	0	0	0	0	0	0	200	300	0	27.9832	-62.3853	-701.045	-122493	96740.2	-13564.7	337.994	1077.73	0	0	0	0	0	0	0	603	903	0
3184	8	0	0	0	0	0	0	200	300	0	27.5255	-62.6904	-699.825	-122860	96068.8	-13885.1	337.276	1078.56	0	0	0	0	0	0	0	603	903	0
3184	9	0	0	0	0	0	0	200	300	0	27.2203	-61.7749	-699.52	-122402	96313	-13656.2	337.684	1077.98	0	0	0	0	0	0	0	603	903	0
3185	0	0	0	0	0	0	0	200	300	0	29.6617	-62.843	-697.689	-121944	96129.8	-13610.5	337.783	1077.78	0	0	0	0	0	0	0	603	903	0
3185	1	0	0	0	0	0	0	200	300	0	27.6781	-60.8594	-694.637	-121853	95763.6	-13518.9	337.861	1078.42	0	0	0	0	0	0	0	603	903	0
3185	2	0	0	0	0	0	0	200	300	0	27.5255	-62.2327	-696.468	-120296	96068.8	-13518.9	337.937	1075.72	0	0	0	0	0	0	0	603	903	0
3185	3	0	0	0	0	0	0	200	300	0	28.7462	-61.012	-692.806	-120662	95580.6	-13518.9	337.962	1077.16	0	0	0	0	0	0	0	603	903	0
3185	4	0	0	0	0	0	0	200	300	0	27.8307	-61.012	-694.942	-120754	95580.6	-13335.8	337.538	1076.76	0	0	0	0	0	0	0	603	903	0
3185	5	0	0	0	0	0	0	200	300	0	28.8988	-60.8594	-693.416	-120296	96129.8	-13427.4	338.632	1076.48	0	0	0	0	0	0	0	603	903	0
3185	6	0	0	0	0	0	0	200	300	0	27.8307	-60.0964	-690.975	-119564	95580.6	-13244.2	338.327	1076.04	0	0	0	0	0	0	0	603	903	0
3185	7	0	0	0	0	0	0	200	300	0	27.5255	-60.0964	-691.89	-119838	95397.4	-13290	337.879	1076.2	0	0	0	0	0	0	0	603	903	0
3185	8	0	0	0	0	0	0	200	300	0	27.0677	-60.249	-688.838	-119381	95153.3	-12832.3	338.136	1076.31	0	0	0	0	0	0	0	603	903	0
3185	9	0	0	0	0	0	0	200	300	0	26.9151	-59.1809	-689.754	-118557	95336.4	-13244.2	338.218	1074.88	0	0	0	0	0	0	0	603	903	0
3186	0	0	0	0	0	0	0	200	300	0	28.2884	-58.8757	-688.838	-118190	94542.9	-13061.1	337.25	1074.58	0	0	0	0	0	0	0	603	903	0
3186	1	0	0	0	0	0	0	200	300	0	26.61	-58.2654	-686.702	-118099	95275.3	-12878	338.743	1074.98	0	0	0	0	0	0	0	603	903	0
3186	2	0	0	0	0	0	0	200	300	0	26.3048	-57.9602	-686.092	-117458	95336.4	-12832.3	338.956	1074.2	0	0	0	0	0	0	0	603	903	0
3186	3	0	0	0	0	0	0	200	300	0	27.8307	-58.1128	-684.566	-117092	94726.1	-12603.4	338.374	1074.05	0	0	0	0	0	0	0	603	903	0
3186	4	0	0	0	0	0	0	200	300	0	26.61	-57.8076	-683.04	-117092	94970.2	-12832.3	339.04	1074.43	0	0	0	0	0	0	0	603	903	0
3186	5	0	0	0	0	0	0	200	300	0	25.9996	-56.8921	-684.261	-116542	94848.1	-12328.7	338.614	1073.32	0	0	0	0	0	0	0	603	903	0
3186	6	0	0	0	0	0	0	200	300	0	27.0677	-57.8076	-682.43	-116085	94481.9	-12603.4	338.449	1073.1	0	0	0	0	0	0	0	603	903	0
3186	7	0	0	0	0	0	0	200	300	0	26.3048	-55.824	-681.514	-115902	94848.1	-12557.6	339.173	1073.06	0	0	0	0	0	0	0	603	903	0
3186	8	0	0	0	0	0	0	200	300	0	26.3048	-56.1292	-678.768	-114711	94481.9	-12282.9	339.196	1072	0	0	0	0	0	0	0	603	903	0
3186	9	0	0	0	0	0	0	200	300	0	27.5255	-55.3662	-678.462	-115169	94176.7	-12511.8	338.809	1072.75	0	0	0	0	0	0	0	603	903	0
3187	0	0	0	0	0	0	0	200	300	0	27.2203	-55.9766	-676.631	-115352	94604	-12374.5	339.816	1073.48	0	0	0	0	0	0	0	603	903	0
3187	1	0	0	0	0	0	0	200	300	0	26.9151	-55.3662	-676.631	-115261	94237.8	-12145.6	339.275	1073.35	0	0	0	0	0	0	0	603	903	0
3187	2	0	0	0	0	0	0	200	300	0	27.3729	-54.6033	-676.021	-114254	94054.6	-12374.5	339.13	1072.01	0	0	0	0	0	0	0	603	903	0
3187	3	0	0	0	0	0	0	200	300	0	27.0677	-54.7559	-675.716	-114254	94359.9	-11687.9	339.644	1072.09	0	0	0	0	0	0	0	603	903	0
3187	4	0	0	0	0	0	0	200	300	0	26.4574	-53.6877	-673.885	-113704	94176.7	-11962.5	339.752	1071.73	0	0	0	0	0	0	0	603	903	0
3187	5	0	0	0	0	0	0	200	300	0	26.61	-53.3826	-673.885	-113613	93871.6	-11871	339.299	1071.59	0	0	0	0	0	0	0	603	903	0
3187	6	0	0	0	0	0	0	200	300	0	26.9151	-52.7722	-672.054	-113521	94054.6	-11504.7	339.951	1071.92	0	0	0	0	0	0	0	603	903	0
3187	7	0	0	0	0	0	0	200	300	0	25.9996	-53.0774	-672.054	-113247	94115.7	-11962.5	340.042	1071.51	0	0	0	0	0	0	0	603	903	0
3187	8	0	0	0	0	0	0	200	300	0	27.0677	-52.6196	-672.054	-112606	92833.9	-11321.6	338.135	1070.55	0	0	0	0	0	0	0	603	903	0
3187	9	0	0	0	0	0	0	200	300	0	26.9151	-52.7722	-670.528	-112880	93749.5	-11596.3	339.814	1071.35	0	0	0	0	0	0	0	603	903	0
3188	0	0	0	0	0	0	0	200	300	0	25.6944	-51.3989	-671.138	-112148	93993.6	-11321.6	340.051	1070.1	0	0	0	0	0	0	0	603	903	0
3188	1	0	0	0	0	0	0	200	300	0	26.61	-52.1619	-669.918	-112331	93322.2	-11321.6	339.304	1070.68	0	0	0	0	0	0	0	603	903	0
3188	2	0	0	0	0	0	0	200	300	0	26.3048	-50.4834	-667.781	-111782	93322.2	-11413.2	339.75	1070.39	0	0	0	0	0	0	0	603	903	0
3188	3	0	0	0	0	0	0	200	300	0	27.0677	-49.5679	-667.781	-111690	93383.3	-11047	339.841	1070.26	0	0	0	0	0	0	0	603	903	0
3188	4	0	0	0	0	0	0	200	300	0	26.4574	-50.4834	-667.781	-110958	93139.2	-11275.9	339.476	1069.16	0	0	0	0	0	0	0	603	903	0
3188	5	0	0	0	0	0	0	200	300	0	25.847	-49.8731	-666.866	-111416	93322.2	-10909.7	339.942	1070.07	0	0	0	0	0	0	0	603	903	0
3188	6	0	0	0	0	0	0	200	300	0	25.3893	-49.2627	-665.645	-111049	93383.3	-11047	340.29	1069.83	0	0	0	0	0	0	0	603	903	0
3188	7	0	0	0	0	0	0	200	300	0	25.847	-48.4998	-662.593	-110775	93017.1	-11047	340.383	1070.18	0	0	0	0	0	0	0	603	903	0
3188	8	0	0	0	0	0	0	200	300	0	25.847	-47.8894	-665.645	-110134	92589.8	-10497.7	339.098	1068.45	0	0	0	0	0	0	0	603	903	0
3188	9	0	0	0	0	0	0	200	300	0	24.6263	-47.8894	-661.983	-110500	93322.2	-10818.1	340.974	1069.92	0	0	0	0	0	0	0	603	903	0
3189	0	0	0	0	0	0	0	200	300	0	25.847	-47.5842	-663.509	-109859	92711.9	-10360.3	339.73	1068.57	0	0	0	0	0	0	0	603	903	0
3189	1	0	0	0	0	0	0	200	300	0	25.0841	-47.7368	-663.814	-109676	92956	-10635	340.033	1068.22	0	0	0	0	0	0	0	603	903	0
3189	2	0	0	0	0	0	0	200	300	0	24.1685	-46.9739	-661.983	-109951	92650.9	-10680.8	339.96	1069.09	0	0	0	0	0	0	0	603	903	0
3189	3	0	0	0	0	0	0	200	300	0	25.2367	-46.3635	-662.898	-109127	92711.9	-10360.3	339.858	1067.62	0	0	0	0	0	0	0	603	903	0
3189	4	0	0	0	0	0	0	200	300	0	25.6944	-45.7532	-661.373	-109127	92650.9	-10360.3	340.089	1068	0	0	0	0	0	0	0	603	903	0
3189	5	0	0	0	0	0	0	200	300	0	24.1685	-44.9902	-660.762	-108303	92101.5	-10314.6	339.387	1066.91	0	0	0	0	0	0	0	603	903	0
3189	6	0	0	0	0	0	0	200	300	0	23.8634	-44.6851	-660.762	-108669	92528.8	-10360.3	340.033	1067.46	0	0	0	0	0	0	0	603	903	0
3189	7	0	0	0	0	0	0	200	300	0	25.6944	-44.2273	-658.931	-108394	92589.8	-10314.6	340.515	1067.5	0	0	0	0	0	0	0	603	903	0
3189	8	0	0	0	0	0	0	200	300	0	24.1685	-44.0747	-658.016	-108028	92284.7	-9353.26	340.247	1067.17	0	0	0	0	0	0	0	603	903	0
3189	9	0	0	0	0	0	0	200	300	0	23.7108	-43.4644	-656.185	-107845	92345.7	-10131.5	340.731	1067.35	0	0	0	0	0	0	0	603	903	0
3190	0	0	0	0	0	0	0	200	300	0	24.9315	-43.1592	-656.795	-107753	92345.7	-9673.69	340.6	1067.06	0	0	0	0	0	0	0	603	903	0
3190	1	0	0	0	0	0	0	200	300	0	23.253	-42.3962	-655.574	-108028	92223.6	-9673.69	340.676	1067.78	0	0	0	0	0	0	0	603	903	0
3190	2	0	0	0	0	0	0	200	300	0	23.8634	-42.0911	-657.1	-108486	92162.6	-9811.02	340.257	1068.1	0	0	0	0	0	0	0	603	903	0
3190	3	0	0	0	0	0	0	200	300	0	24.016	-42.7014	-656.49	-107296	92223.6	-9170.15	340.48	1066.44	0	0	0	0	0	0	0	603	903	0
3190	4	0	0	0	0	0	0	200	300	0	24.3211	-41.3281	-656.185	-107570	92162.6	-9582.14	340.452	1066.93	0	0	0	0	0	0	0	603	903	0
3190	5	0	0	0	0	0	0	200	300	0	23.4056	-42.2437	-656.49	-106929	92162.6	-8987.04	340.387	1065.88	0	0	0	0	0	0	0	603	903	0
3190	6	0	0	0	0	0	0	200	300	0	24.1685	-40.4126	-654.048	-106746	92040.5	-8803.94	340.724	1066.21	0	0	0	0	0	0	0	603	903	0
3190	7	0	0	0	0	0	0	200	300	0	22.9478	-39.0393	-654.354	-107112	92650.9	-9124.37	341.591	1066.69	0	0	0	0	0	0	0	603	903	0
3190	8	0	0	0	0	0	0	200	300	0	22.3375	-39.9548	-653.133	-106655	91979.4	-8849.72	340.828	1066.3	0	0	0	0	0	0	0	603	903	0
3190	9	0	0	0	0	0	0	200	300	0	23.7108	-39.1919	-653.743	-106838	91857.4	-8987.04	340.51	1066.42	0	0	0	0	0	0	0	603	903	0
3191	0	0	0	0	0	0	0	200	300	0	23.4056	-38.7341	-653.743	-106472	92101.5	-8803.94	340.883	1065.86	0	0	0	0	0	0	0	603	903	0
3191	1	0	0	0	0	0	0	200	300	0	25.3893	-37.5134	-648.25	-106289	91979.4	-8712.39	341.889	1066.96	0	0	0	0	0	0	0	603	903	0
3191	2	0	0	0	0	0	0	200	300	0	23.253	-37.666	-653.743	-106014	91918.5	-8529.28	340.603	1065.16	0	0	0	0	0	0	0	603	903	0
3191	3	0	0	0	0	0	0	200	300	0	22.9478	-37.2083	-651.302	-106197	92284.7	-8346.18	341.693	1066.05	0	0	0	0	0	0	0	603	903	0
3191	4	0	0	0	0	0	0	200	300	0	22.9478	-36.4453	-651.302	-106289	91796.4	-8391.95	340.943	1066.19	0	0	0	0	0	0	0	603	903	0
3191	5	0	0	0	0	0	0	200	300	0	23.253	-36.4453	-653.133	-105739	91918.5	-8208.85	340.735	1064.9	0	0	0	0	0	0	0	603	903	0
3191	6	0	0	0	0	0	0	200	300	0	21.8797	-34.0039	-647.64	-105831	92406.7	-7751.09	342.682	1066.41	0	0	0	0	0	0	0	603	903	0
3191	7	0	0	0	0	0	0	200	300	0	21.422	-34.3091	-652.217	-106014	91735.3	-8117.3	340.651	1065.54	0	0	0	0	0	0	0	603	903	0
3191	8	0	0	0	0	0	0	200	300	0	22.4901	-34.3091	-650.691	-105373	92162.6	-7888.41	341.638	1064.94	0	0	0	0	0	0	0	603	903	0
3191	9	0	0	0	0	0	0	200	300	0	22.6427	-33.6987	-650.997	-105098	92040.5	-7705.31	341.384	1064.44	0	0	0	0	0	0	0	603	903	0
3192	0	0	0	0	0	0	0	200	300	0	21.2694	-33.3936	-650.997	-105556	91613.2	-7567.98	340.728	1065.15	0	0	0	0	0	0	0	603	903	0
3192	1	0	0	0	0	0	0	200	300	0	21.2694	-34.0039	-650.386	-105190	92162.6	-7705.31	341.704	1064.73	0	0	0	0	0	0	0	603	903	0
3192	2	0	0	0	0	0	0	200	300	0	22.1849	-32.3254	-650.997	-105098	92101.5	-7659.53	341.478	1064.44	0	0	0	0	0	0	0	603	903	0
3192	3	0	0	0	0	0	0	200	300	0	21.1168	-31.8677	-650.997	-105190	91125	-7430.65	339.978	1064.58	0	0	0	0	0	0	0	603	903	0
3192	4	0	0	0	0	0	0	200	300	0	21.422	-31.2573	-650.386	-104824	91979.4	-7247.55	341.423	1064.17	0	0	0	0	0	0	0	603	903	0
3192	5	0	0	0	0	0	0	200	300	0	24.016	-31.7151	-652.523	-104732	91979.4	-7201.77	340.96	1063.5	0	0	0	0	0	0	0	603	903	0
3192	6	0	0	0	0	0	0	200	300	0	20.8116	-30.647	-649.776	-104732	91186	-7201.77	340.335	1064.18	0	0	0	0	0	0	0	603	903	0
3192	7	0	0	0	0	0	0	200	300	0	20.659	-29.5789	-650.081	-105190	92162.6	-7155.99	341.771	1064.81	0	0	0	0	0	0	0	603	903	0
3192	8	0	0	0	0	0	0	200	300	0	21.7271	-29.7314	-650.997	-104458	92162.6	-7064.44	341.572	1063.46	0	0	0	0	0	0	0	603	903	0
3192	9	0	0	0	0	0	0	200	300	0	22.1849	-28.6633	-649.166	-104824	91735.3	-6972.89	341.313	1064.47	0	0	0	0	0	0	0	603	903	0
3193	0	0	0	0	0	0	0	200	300	0	20.3539	-27.9004	-650.386	-104549	91979.4	-6698.23	341.423	1063.75	0	0	0	0	0	0	0	603	903	0
3193	1	0	0	0	0	0	0	200	300	0	21.1168	-27.7478	-649.776	-104274	92101.5	-6789.78	341.744	1063.48	0	0	0	0	0	0	0	603	903	0
3193	2	0	0	0	0	0	0	200	300	0	21.422	-27.29	-649.776	-104732	91918.5	-6515.12	341.462	1064.18	0	0	0	0	0	0	0	603	903	0
3193	3	0	0	0	0	0	0	200	300	0	22.9478	-26.5271	-650.386	-104000	92284.7	-6469.35	341.892	1062.9	0	0	0	0	0	0	0	603	903	0
3193	4	0	0	0	0	0	0	200	300	0	21.5746	-25.9168	-649.471	-104274	91735.3	-6332.02	341.246	1063.55	0	0	0	0	0	0	0	603	903	0
3193	5	0	0	0	0	0	0	200	300	0	21.5746	-25.1538	-650.081	-102810	91796.4	-6423.57	341.208	1061.15	0	0	0	0	0	0	0	603	903	0
3193	6	0	0	0	0	0	0	200	300	0	20.8116	-25.9168	-650.691	-104183	92223.6	-6103.14	341.732	1063.11	0	0	0	0	0	0	0	603	903	0
3193	7	0	0	0	0	0	0	200	300	0	20.2013	-23.7805	-648.86	-104091	91857.4	-6286.24	341.567	1063.42	0	0	0	0	0	0	0	603	903	0
3193	8	0	0	0	0	0	0	200	300	0	23.1004	-23.1702	-649.166	-103450	91918.5	-5920.03	341.595	1062.36	0	0	0	0	0	0	0	603	903	0
3193	9	0	0	0	0	0	0	200	300	0	20.659	-23.7805	-648.25	-103450	91430.2	-5920.03	341.042	1062.58	0	0	0	0	0	0	0	603	903	0
3194	0	0	0	0	0	0	0	200	300	0	20.0487	-23.0176	-647.945	-103176	91918.5	-5645.37	341.862	1062.24	0	0	0	0	0	0	0	603	903	0
3194	1	0	0	0	0	0	0	200	300	0	23.253	-22.2546	-649.471	-103176	91918.5	-5920.03	341.528	1061.86	0	0	0	0	0	0	0	603	903	0
3194	2	0	0	0	0	0	0	200	300	0	20.0487	-21.6443	-648.555	-102901	91430.2	-5691.15	340.975	1061.66	0	0	0	0	0	0	0	603	903	0
3194	3	0	0	0	0	0	0	200	300	0	19.5909	-21.3391	-648.555	-102993	92162.6	-5508.04	342.104	1061.8	0	0	0	0	0	0	0	603	903	0
3194	4	0	0	0	0	0	0	200	300	0	22.1849	-20.8814	-649.776	-102901	92040.5	-5553.82	341.65	1061.36	0	0	0	0	0	0	0	603	903	0
3194	5	0	0	0	0	0	0	200	300	0	19.7435	-20.271	-647.64	-102901	91796.4	-5508.04	341.74	1061.89	0	0	0	0	0	0	0	603	903	0
3194	6	0	0	0	0	0	0	200	300	0	19.5909	-19.6606	-649.471	-102993	92345.7	-5050.28	342.186	1061.58	0	0	0	0	0	0	0	603	903	0
3194	7	0	0	0	0	0	0	200	300	0	22.3375	-19.3555	-648.25	-103267	92162.6	-5279.16	342.171	1062.3	0	0	0	0	0	0	0	603	903	0
3194	8	0	0	0	0	0	0	200	300	0	19.8961	-19.6606	-647.64	-102535	92772.9	-5279.16	343.248	1061.32	0	0	0	0	0	0	0	603	903	0
3194	9	0	0	0	0	0	0	200	300	0	20.0487	-18.2874	-649.471	-102535	92284.7	-4867.17	342.092	1060.87	0	0	0	0	0	0	0	603	903	0
3195	0	0	0	0	0	0	0	200	300	0	21.7271	-17.5244	-646.419	-102718	92223.6	-5050.28	342.668	1061.9	0	0	0	0	0	0	0	603	903	0
3195	1	0	0	0	0	0	0	200	300	0	19.7435	-17.677	-649.166	-102443	92711.9	-4912.95	342.817	1060.81	0	0	0	0	0	0	0	603	903	0
3195	2	0	0	0	0	0	0	200	300	0	19.8961	-17.5244	-648.555	-102626	92162.6	-4912.95	342.104	1061.24	0	0	0	0	0	0	0	603	903	0
3195	3	0	0	0	0	0	0	200	300	0	22.0323	-16.7615	-647.029	-102535	92528.8	-4867.17	343.006	1061.47	0	0	0	0	0	0	0	603	903	0
3195	4	0	0	0	0	0	0	200	300	0	20.2013	-16.4563	-645.809	-102993	92833.9	-4684.07	343.748	1062.48	0	0	0	0	0	0	0	603	903	0
3195	5	0	0	0	0	0	0	200	300	0	20.0487	-16.1511	-647.029	-102260	92284.7	-4912.95	342.628	1061.05	0	0	0	0	0	0	0	603	903	0
3195	6	0	0	0	0	0	0	200	300	0	20.9642	-15.3882	-648.555	-101802	92711.9	-4546.74	342.951	1059.97	0	0	0	0	0	0	0	603	903	0
3195	7	0	0	0	0	0	0	200	300	0	20.0487	-15.083	-648.555	-102626	92772.9	-4638.29	343.046	1061.24	0	0	0	0	0	0	0	603	903	0
3195	8	0	0	0	0	0	0	200	300	0	20.5064	-14.3201	-647.335	-101711	92650.9	-4592.52	343.127	1060.12	0	0	0	0	0	0	0	603	903	0
3195	9	0	0	0	0	0	0	200	300	0	21.2694	-13.8623	-648.555	-102443	92772.9	-4546.74	343.046	1060.96	0	0	0	0	0	0	0	603	903	0
3196	0	0	0	0	0	0	0	200	300	0	20.2013	-13.5571	-646.114	-101345	93017.1	-4180.53	343.964	1059.85	0	0	0	0	0	0	0	603	903	0
3196	1	0	0	0	0	0	0	200	300	0	20.0487	-13.0994	-647.335	-101436	92711.9	-3951.65	343.221	1059.7	0	0	0	0	0	0	0	603	903	0
3196	2	0	0	0	0	0	0	200	300	0	21.1168	-13.0994	-648.25	-101436	92833.9	-4317.86	343.207	1059.48	0	0	0	0	0	0	0	603	903	0
3196	3	0	0	0	0	0	0	200	300	0	20.2013	-12.489	-647.64	-101802	93383.3	-3951.65	344.19	1060.19	0	0	0	0	0	0	0	603	903	0
3196	4	0	0	0	0	0	0	200	300	0	20.8116	-11.4209	-647.64	-101345	92895	-4134.75	343.436	1059.48	0	0	0	0	0	0	0	603	903	0
3196	5	0	0	0	0	0	0	200	300	0	21.5746	-12.9468	-647.335	-100978	92589.8	-4134.75	343.032	1058.99	0	0	0	0	0	0	0	603	903	0
3196	6	0	0	0	0	0	0	200	300	0	20.3539	-11.2683	-647.029	-101711	93261.2	-3905.87	344.138	1060.2	0	0	0	0	0	0	0	603	903	0
3196	7	0	0	0	0	0	0	200	300	0	20.5064	-10.2002	-647.64	-101345	92956	-3951.65	343.53	1059.48	0	0	0	0	0	0	0	603	903	0
3196	8	0	0	0	0	0	0	200	300	0	21.7271	-10.2002	-646.419	-100704	92895	-3814.32	343.707	1058.79	0	0	0	0	0	0	0	603	903	0
3196	9	0	0	0	0	0	0	200	300	0	20.2013	-11.4209	-647.945	-101070	93261.2	-3951.65	343.934	1058.99	0	0	0	0	0	0	0	603	903	0
3197	0	0	0	0	0	0	0	200	300	0	21.1168	-9.58985	-646.724	-100612	93139.2	-3768.54	344.017	1058.57	0	0	0	0	0	0	0	603	903	0
3197	1	0	0	0	0	0	0	200	300	0	21.2694	-10.0476	-645.503	-100795	92956	-3814.32	344.005	1059.15	0	0	0	0	0	0	0	603	903	0
3197	2	0	0	0	0	0	0	200	300	0	21.8797	-8.52173	-647.029	-100887	93383.3	-3631.21	344.326	1058.92	0	0	0	0	0	0	0	603	903	0
3197	3	0	0	0	0	0	0	200	300	0	20.5064	-9.28467	-649.166	-100612	93444.3	-3585.43	343.945	1057.99	0	0	0	0	0	0	0	603	903	0
3197	4	0	0	0	0	0	0	200	300	0	21.422	-7.75879	-646.114	-99330.6	93200.1	-3493.88	344.247	1056.74	0	0	0	0	0	0	0	603	903	0
3197	5	0	0	0	0	0	0	200	300	0	21.7271	-7.30103	-645.198	-100521	93139.2	-3722.76	344.357	1058.8	0	0	0	0	0	0	0	603	903	0
3197	6	0	0	0	0	0	0	200	300	0	22.4901	-7.14844	-646.419	-100521	93383.3	-3493.88	344.462	1058.5	0	0	0	0	0	0	0	603	903	0
3197	7	0	0	0	0	0	0	200	300	0	22.0323	-6.3855	-647.335	-99422.1	93261.2	-3356.55	344.07	1056.59	0	0	0	0	0	0	0	603	903	0
3197	8	0	0	0	0	0	0	200	300	0	21.5746	-6.08033	-646.419	-100063	93322.2	-3310.78	344.368	1057.8	0	0	0	0	0	0	0	603	903	0
3197	9	0	0	0	0	0	0	200	300	0	20.2013	-5.62256	-646.724	-100154	93688.4	-3265	344.866	1057.86	0	0	0	0	0	0	0	603	903	0
3198	0	0	0	0	0	0	0	200	300	0	22.3375	-5.31739	-646.724	-99513.6	93322.2	-3081.89	344.3	1056.87	0	0	0	0	0	0	0	603	903	0
3198	1	0	0	0	0	0	0	200	300	0	21.7271	-5.77515	-645.198	-99605.2	93322.2	-3219.22	344.641	1057.38	0	0	0	0	0	0	0	603	903	0
3198	2	0	0	0	0	0	0	200	300	0	20.5064	-6.3855	-645.198	-99879.8	93627.4	-3173.45	345.114	1057.8	0	0	0	0	0	0	0	603	903	0
3198	3	0	0	0	0	0	0	200	300	0	20.659	-4.55445	-646.724	-99422.1	93322.2	-3127.67	344.3	1056.73	0	0	0	0	0	0	0	603	903	0
3198	4	0	0	0	0	0	0	200	300	0	21.422	-5.62256	-646.419	-99239	93810.5	-3036.12	345.123	1056.52	0	0	0	0	0	0	0	603	903	0
3198	5	0	0	0	0	0	0	200	300	0	21.2694	-3.79151	-645.809	-98781.2	93810.5	-2853.01	345.26	1055.96	0	0	0	0	0	0	0	603	903	0
3198	6	0	0	0	0	0	0	200	300	0	20.8116	-4.55445	-645.809	-99147.4	93810.5	-2807.24	345.26	1056.52	0	0	0	0	0	0	0	603	903	0
3198	7	0	0	0	0	0	0	200	300	0	23.8634	-3.02857	-644.283	-98872.8	93749.5	-2715.68	345.51	1056.46	0	0	0	0	0	0	0	603	903	0
3198	8	0	0	0	0	0	0	200	300	0	20.8116	-1.80786	-645.809	-98689.6	93810.5	-2761.46	345.26	1055.82	0	0	0	0	0	0	0	603	903	0
3198	9	0	0	0	0	0	0	200	300	0	20.9642	-2.5708	-645.809	-98964.4	94176.7	-2624.13	345.828	1056.24	0	0	0	0	0	0	0	603	903	0
3199	0	0	0	0	0	0	0	200	300	0	23.253	-2.26563	-645.198	-98598.1	93383.3	-2578.35	344.736	1055.82	0	0	0	0	0	0	0	603	903	0
3199	1	0	0	0	0	0	0	200	300	0	21.7271	-1.65528	-644.283	-99055.9	94115.7	-2624.13	346.078	1056.75	0	0	0	0	0	0	0	603	903	0
3199	2	0	0	0	0	0	0	200	300	0	20.9642	-1.19751	-643.978	-98598.1	93871.6	-2349.47	345.768	1056.11	0	0	0	0	0	0	0	603	903	0
3199	3	0	0	0	0	0	0	200	300	0	22.1849	-0.281985	-645.809	-98598.1	93749.5	-2303.7	345.166	1055.67	0	0	0	0	0	0	0	603	903	0
3199	4	0	0	0	0	0	0	200	300	0	21.1168	-1.50269	-645.198	-98598.1	93871.6	-2029.04	345.493	1055.82	0	0	0	0	0	0	0	603	903	0
3199	5	0	0	0	0	0	0	200	300	0	21.422	0.328366	-644.588	-98048.8	94237.8	-2441.02	346.198	1055.11	0	0	0	0	0	0	0	603	903	0
3199	6	0	0	0	0	0	0	200	300	0	22.0323	0.175778	-645.503	-97957.2	93993.6	-2212.14	345.613	1054.75	0	0	0	0	0	0	0	603	903	0
3199	7	0	0	0	0	0	0	200	300	0	22.4901	0.480954	-643.978	-98415	93871.6	-1800.16	345.768	1055.82	0	0	0	0	0	0	0	603	903	0
3199	8	0	0	0	0	0	0	200	300	0	21.2694	2.15942	-645.198	-98140.4	94298.8	-2029.04	346.155	1055.11	0	0	0	0	0	0	0	603	903	0
3199	9	0	0	0	0	0	0	200	300	0	21.7271	1.70166	-644.588	-97591	94176.7	-2074.81	346.104	1054.4	0	0	0	0	0	0	0	603	903	0
3200	0	0	0	0	0	0	0	200	300	0	22.6427	2.4646	-644.588	-98140.4	93932.6	-2212.14	345.725	1055.25	0	0	0	0	0	0	0	603	903	0
3200	1	0	0	0	0	0	0	200	300	0	23.4056	2.31201	-645.198	-97957.2	94237.8	-1891.71	346.06	1054.82	0	0	0	0	0	0	0	603	903	0
3200	2	0	0	0	0	0	0	200	300	0	22.6427	2.31201	-644.283	-97133.3	94787.1	-1708.6	347.12	1053.76	0	0	0	0	0	0	0	603	903	0
3200	3	0	0	0	0	0	0	200	300	0	22.6427	3.6853	-643.367	-97591	93993.6	-1525.5	346.096	1054.69	0	0	0	0	0	0	0	603	903	0
3200	4	0	0	0	0	0	0	200	300	0	21.422	3.83789	-644.893	-97591	94604	-1662.83	346.697	1054.33	0	0	0	0	0	0	0	603	903	0
3200	5	0	0	0	0	0	0	200	300	0	22.4901	3.99048	-644.283	-97041.7	94237.8	-1754.38	346.268	1053.62	0	0	0	0	0	0	0	603	903	0
3200	6	0	0	0	0	0	0	200	300	0	22.6427	4.60083	-644.283	-97041.7	94237.8	-1617.05	346.268	1053.62	0	0	0	0	0	0	0	603	903	0
3200	7	0	0	0	0	0	0	200	300	0	21.7271	5.05859	-640.315	-97224.8	94420.9	-1388.17	347.46	1054.84	0	0	0	0	0	0	0	603	903	0
3200	8	0	0	0	0	0	0	200	300	0	21.5746	5.21118	-643.367	-96858.6	94542.9	-1479.72	346.95	1053.55	0	0	0	0	0	0	0	603	903	0
3200	9	0	0	0	0	0	0	200	300	0	23.5582	5.05859	-641.536	-96767.1	94359.9	-1296.62	347.084	1053.84	0	0	0	0	0	0	0	603	903	0
3201	0	0	0	0	0	0	0	200	300	0	22.0323	5.97412	-643.978	-96400.9	94420.9	-1342.39	346.621	1052.7	0	0	0	0	0	0	0	603	903	0
3201	1	0	0	0	0	0	0	200	300	0	21.5746	5.97412	-643.062	-96583.9	94726.1	-1205.06	347.305	1053.19	0	0	0	0	0	0	0	603	903	0
3201	2	0	0	0	0	0	0	200	300	0	23.5582	6.88965	-643.672	-95943.1	94237.8	-1205.06	346.406	1052.06	0	0	0	0	0	0	0	603	903	0
3201	3	0	0	0	0	0	0	200	300	0	21.8797	6.27929	-643.672	-96675.5	94115.7	-1205.06	346.217	1053.19	0	0	0	0	0	0	0	603	903	0
3201	4	0	0	0	0	0	0	200	300	0	20.9642	8.41552	-642.147	-96309.3	94665	-1113.51	347.42	1052.98	0	0	0	0	0	0	0	603	903	0
3201	5	0	0	0	0	0	0	200	300	0	22.7953	8.41552	-640.01	-95210.7	94481.9	-976.181	347.626	1051.76	0	0	0	0	0	0	0	603	903	0
3201	6	0	0	0	0	0	0	200	300	0	22.6427	8.56811	-642.147	-96400.9	94176.7	-884.628	346.659	1053.12	0	0	0	0	0	0	0	603	903	0
3201	7	0	0	0	0	0	0	200	300	0	25.2367	7.95776	-641.841	-96034.7	94542.9	-609.97	347.3	1052.62	0	0	0	0	0	0	0	603	903	0
3201	8	0	0	0	0	0	0	200	300	0	22.9478	8.87329	-642.147	-95668.5	94176.7	-884.628	346.659	1051.98	0	0	0	0	0	0	0	603	903	0
3201	9	0	0	0	0	0	0	200	300	0	22.7953	8.87329	-641.841	-95943.1	94359.9	-838.852	347.014	1052.48	0	0	0	0	0	0	0	603	903	0
3202	0	0	0	0	0	0	0	200	300	0	22.7953	10.094	-642.452	-95760	94481.9	-793.076	347.065	1052.05	0	0	0	0	0	0	0	603	903	0
3202	1	0	0	0	0	0	0	200	300	0	22.1849	9.63623	-641.536	-95393.8	94604	-701.523	347.465	1051.7	0	0	0	0	0	0	0	603	903	0
3202	2	0	0	0	0	0	0	200	300	0	23.253	11.4673	-641.841	-95119.1	94115.7	-243.759	346.634	1051.2	0	0	0	0	0	0	0	603	903	0
3202	3	0	0	0	0	0	0	200	300	0	22.7953	11.0095	-640.926	-94478.3	94665	-518.417	347.7	1050.41	0	0	0	0	0	0	0	603	903	0
3202	4	0	0	0	0	0	0	200	300	0	23.253	11.4673	-640.621	-94936	94726.1	-426.864	347.866	1051.19	0	0	0	0	0	0	0	603	903	0
3202	5	0	0	0	0	0	0	200	300	0	23.5582	11.1621	-641.231	-94752.9	94359.9	-289.535	347.154	1050.77	0	0	0	0	0	0	0	603	903	0
3202	6	0	0	0	0	0	0	200	300	0	24.016	12.8406	-640.926	-95027.5	94726.1	-426.864	347.796	1051.27	0	0	0	0	0	0	0	603	903	0
3202	7	0	0	0	0	0	0	200	300	0	25.2367	12.8406	-640.621	-94661.3	94665	30.8993	347.771	1050.77	0	0	0	0	0	0	0	603	903	0
3202	8	0	0	0	0	0	0	200	300	0	23.8634	13.6035	-641.231	-94020.5	94359.9	122.452	347.154	1049.62	0	0	0	0	0	0	0	603	903	0
3202	9	0	0	0	0	0	0	200	300	0	24.1685	13.2983	-640.621	-94569.8	94237.8	76.6757	347.104	1050.62	0	0	0	0	0	0	0	603	903	0
3203	0	0	0	0	0	0	0	200	300	0	23.1004	14.0613	-640.01	-94478.3	94359.9	168.228	347.435	1050.62	0	0	0	0	0	0	0	603	903	0
3203	1	0	0	0	0	0	0	200	300	0	24.1685	15.1294	-640.621	-94386.7	94420.9	30.8993	347.39	1050.34	0	0	0	0	0	0	0	603	903	0
3203	2	0	0	0	0	0	0	200	300	0	24.016	15.1294	-638.79	-94112.1	94176.7	305.558	347.43	1050.33	0	0	0	0	0	0	0	603	903	0
3203	3	0	0	0	0	0	0	200	300	0	23.1004	15.5872	-639.4	-94295.1	94542.9	259.781	347.862	1050.47	0	0	0	0	0	0	0	603	903	0
3203	4	0	0	0	0	0	0	200	300	0	24.4737	15.5872	-639.095	-93654.2	94176.7	534.44	347.36	1049.54	0	0	0	0	0	0	0	603	903	0
3203	5	0	0	0	0	0	0	200	300	0	24.016	15.4346	-638.179	-93471.2	94665	992.203	348.336	1049.47	0	0	0	0	0	0	0	603	903	0
3203	6	0	0	0	0	0	0	200	300	0	23.4056	17.4182	-638.79	-93928.9	94604	397.11	348.099	1050.04	0	0	0	0	0	0	0	603	903	0
3203	7	0	0	0	0	0	0	200	300	0	24.4737	15.8923	-637.874	-93379.6	94665	580.216	348.407	1049.39	0	0	0	0	0	0	0	603	903	0
3203	8	0	0	0	0	0	0	200	300	0	23.8634	17.876	-638.79	-93471.2	93993.6	717.545	347.143	1049.33	0	0	0	0	0	0	0	603	903	0
3203	9	0	0	0	0	0	0	200	300	0	24.016	17.7234	-637.874	-93471.2	94481.9	763.322	348.12	1049.54	0	0	0	0	0	0	0	603	903	0
3204	0	0	0	0	0	0	0	200	300	0	23.8634	18.0286	-637.264	-93013.4	94604	900.651	348.453	1048.96	0	0	0	0	0	0	0	603	903	0
3204	1	0	0	0	0	0	0	200	300	0	24.7789	19.4019	-638.484	-92738.8	94359.9	809.098	347.787	1048.25	0	0	0	0	0	0	0	603	903	0
3204	2	0	0	0	0	0	0	200	300	0	24.016	18.7915	-636.959	-92464.1	94665	1037.98	348.62	1048.16	0	0	0	0	0	0	0	603	903	0
3204	3	0	0	0	0	0	0	200	300	0	23.8634	19.707	-637.264	-92555.6	94848.1	1129.53	348.837	1048.24	0	0	0	0	0	0	0	603	903	0
3204	4	0	0	0	0	0	0	200	300	0	27.3729	19.707	-636.959	-92281	94237.8	1083.76	347.95	1047.88	0	0	0	0	0	0	0	603	903	0
3204	5	0	0	0	0	0	0	200	300	0	24.4737	19.5544	-637.569	-92372.6	94359.9	1129.53	347.999	1047.88	0	0	0	0	0	0	0	603	903	0
3204	6	0	0	0	0	0	0	200	300	0	24.4737	21.2329	-638.179	-92189.4	93993.6	1083.76	347.284	1047.46	0	0	0	0	0	0	0	603	903	0
3204	7	0	0	0	0	0	0	200	300	0	25.3893	20.7751	-637.264	-92006.3	94359.9	1312.64	348.07	1047.38	0	0	0	0	0	0	0	603	903	0
3204	8	0	0	0	0	0	0	200	300	0	24.7789	21.6907	-637.874	-92555.6	94542.9	1587.3	348.216	1048.1	0	0	0	0	0	0	0	603	903	0
3204	9	0	0	0	0	0	0	200	300	0	25.2367	20.1648	-633.602	-92006.3	94420.9	1541.52	349.022	1048.21	0	0	0	0	0	0	0	603	903	0
3205	0	0	0	0	0	0	0	200	300	0	25.5418	21.9958	-637.569	-91640.1	94604	1404.19	348.382	1046.73	0	0	0	0	0	0	0	603	903	0
3205	1	0	0	0	0	0	0	200	300	0	25.0841	23.064	-636.653	-91914.8	94359.9	1495.74	348.212	1047.37	0	0	0	0	0	0	0	603	903	0
3205	2	0	0	0	0	0	0	200	300	0	24.9315	22.6062	-636.653	-91548.6	94665	1541.52	348.692	1046.8	0	0	0	0	0	0	0	603	903	0
3205	3	0	0	0	0	0	0	200	300	0	25.847	23.6743	-636.348	-91823.2	94665	1587.3	348.763	1047.3	0	0	0	0	0	0	0	603	903	0
3205	4	0	0	0	0	0	0	200	300	0	25.9996	24.1321	-637.264	-91823.2	94481.9	1770.4	348.262	1047.09	0	0	0	0	0	0	0	603	903	0
3205	5	0	0	0	0	0	0	200	300	0	25.3893	23.8269	-636.348	-91273.9	95214.4	1816.18	349.626	1046.43	0	0	0	0	0	0	0	603	903	0
3205	6	0	0	0	0	0	0	200	300	0	26.7625	23.5217	-635.433	-91182.4	94848.1	1999.28	349.265	1046.5	0	0	0	0	0	0	0	603	903	0
3205	7	0	0	0	0	0	0	200	300	0	25.9996	24.895	-637.264	-91273.9	94909.1	1770.4	348.932	1046.23	0	0	0	0	0	0	0	603	903	0
3205	8	0	0	0	0	0	0	200	300	0	25.9996	25.658	-638.179	-90999.2	95275.3	1816.18	349.292	1045.59	0	0	0	0	0	0	0	603	903	0
3205	9	0	0	0	0	0	0	200	300	0	27.0677	25.8105	-638.79	-91365.4	95153.3	1907.73	348.959	1046.03	0	0	0	0	0	0	0	603	903	0
3206	0	0	0	0	0	0	0	200	300	0	25.9996	25.8105	-638.179	-90907.7	95336.4	1953.51	349.388	1045.45	0	0	0	0	0	0	0	603	903	0
3206	1	0	0	0	0	0	0	200	300	0	26.61	24.895	-638.484	-90633	95397.4	1953.51	349.412	1044.95	0	0	0	0	0	0	0	603	903	0
3206	2	0	0	0	0	0	0	200	300	0	27.9832	26.7261	-639.4	-90816.2	95458.5	2136.61	349.294	1045.03	0	0	0	0	0	0	0	603	903	0
3206	3	0	0	0	0	0	0	200	300	0	26.61	27.6416	-637.569	-89900.6	95092.3	2136.61	349.148	1044.01	0	0	0	0	0	0	0	603	903	0
3206	4	0	0	0	0	0	0	200	300	0	26.7625	27.3364	-638.79	-90816.2	95763.6	2457.05	349.914	1045.17	0	0	0	0	0	0	0	603	903	0
3206	5	0	0	0	0	0	0	200	300	0	30.2721	28.4045	-639.4	-90358.4	95580.6	2136.61	349.485	1044.32	0	0	0	0	0	0	0	603	903	0
3206	6	0	0	0	0	0	0	200	300	0	27.8307	28.4045	-640.315	-89717.5	94909.1	2731.7	348.223	1043.11	0	0	0	0	0	0	0	603	903	0
3206	7	0	0	0	0	0	0	200	300	0	27.5255	29.0149	-641.231	-90449.9	95763.6	2228.16	349.343	1044.06	0	0	0	0	0	0	0	603	903	0
3206	8	0	0	0	0	0	0	200	300	0	29.3565	28.2519	-640.315	-90266.8	96007.8	2228.16	349.938	1043.97	0	0	0	0	0	0	0	603	903	0
3206	9	0	0	0	0	0	0	200	300	0	27.5255	29.7778	-641.536	-89809.1	95580.6	2365.49	348.987	1042.99	0	0	0	0	0	0	0	603	903	0
3207	0	0	0	0	0	0	0	200	300	0	28.1358	29.9304	-642.147	-90175.3	96190.9	2411.27	349.796	1043.43	0	0	0	0	0	0	0	603	903	0
3207	1	0	0	0	0	0	0	200	300	0	30.5772	30.6934	-642.147	-90083.7	96251.9	2411.27	349.891	1043.29	0	0	0	0	0	0	0	603	903	0
3207	2	0	0	0	0	0	0	200	300	0	28.7462	30.9985	-643.367	-90358.4	96068.8	2685.93	349.322	1043.45	0	0	0	0	0	0	0	603	903	0
3207	3	0	0	0	0	0	0	200	300	0	28.7462	31.3037	-642.452	-90358.4	96129.8	2548.6	349.63	1043.65	0	0	0	0	0	0	0	603	903	0
3207	4	0	0	0	0	0	0	200	300	0	29.9669	32.5244	-643.672	-90083.7	96618.1	2594.38	350.105	1042.95	0	0	0	0	0	0	0	603	903	0
3207	5	0	0	0	0	0	0	200	300	0	30.7298	31.6089	-646.114	-90724.6	96618.1	2731.7	349.537	1043.42	0	0	0	0	0	0	0	603	903	0
3207	6	0	0	0	0	0	0	200	300	0	29.6617	32.677	-645.809	-90541.5	96618.1	2594.38	349.608	1043.2	0	0	0	0	0	0	0	603	903	0
3207	7	0	0	0	0	0	0	200	300	0	30.7298	33.5925	-645.198	-90083.7	96984.3	2365.49	350.317	1042.62	0	0	0	0	0	0	0	603	903	0
3207	8	0	0	0	0	0	0	200	300	0	29.9669	33.1348	-647.029	-90266.8	96740.2	2960.59	349.514	1042.51	0	0	0	0	0	0	0	603	903	0
3207	9	0	0	0	0	0	0	200	300	0	30.2721	32.9822	-646.114	-90083.7	97045.4	2777.48	350.199	1042.42	0	0	0	0	0	0	0	603	903	0
3208	0	0	0	0	0	0	0	200	300	0	33.0186	33.8977	-650.081	-90083.7	97472.6	2869.03	349.939	1041.57	0	0	0	0	0	0	0	603	903	0
3208	1	0	0	0	0	0	0	200	300	0	30.5772	35.1184	-649.471	-89351.3	97350.5	3006.36	349.892	1040.58	0	0	0	0	0	0	0	603	903	0
3208	2	0	0	0	0	0	0	200	300	0	30.8824	36.3391	-650.081	-89625.9	97411.6	2777.48	349.845	1040.87	0	0	0	0	0	0	0	603	903	0
3208	3	0	0	0	0	0	0	200	300	0	31.1876	35.5762	-651.607	-89900.6	97777.8	3097.92	350.056	1040.97	0	0	0	0	0	0	0	603	903	0
3208	4	0	0	0	0	0	0	200	300	0	31.1876	36.9495	-650.386	-89625.9	97716.8	2960.59	350.244	1040.8	0	0	0	0	0	0	0	603	903	0
3208	5	0	0	0	0	0	0	200	300	0	31.6454	37.102	-653.133	-90083.7	97716.8	2960.59	349.612	1040.93	0	0	0	0	0	0	0	603	903	0
3208	6	0	0	0	0	0	0	200	300	0	34.2393	36.6443	-652.828	-90266.8	97716.8	3189.47	349.682	1041.27	0	0	0	0	0	0	0	603	903	0
3208	7	0	0	0	0	0	0	200	300	0	31.4928	38.3228	-655.269	-90083.7	98144	3097.92	349.777	1040.48	0	0	0	0	0	0	0	603	903	0
3208	8	0	0	0	0	0	0	200	300	0	31.9505	38.1702	-655.574	-90266.8	98205	3326.8	349.8	1040.69	0	0	0	0	0	0	0	603	903	0
3208	9	0	0	0	0	0	0	200	300	0	34.8497	39.2383	-656.185	-90083.7	99059.5	3281.02	350.963	1040.28	0	0	0	0	0	0	0	603	903	0
3209	0	0	0	0	0	0	0	200	300	0	32.2557	39.5435	-657.1	-90816.2	99303.7	2869.03	351.124	1041.21	0	0	0	0	0	0	0	603	903	0
3209	1	0	0	0	0	0	0	200	300	0	32.1031	39.696	-659.236	-90266.8	99120.6	3464.13	350.357	1039.93	0	0	0	0	0	0	0	603	903	0
3209	2	0	0	0	0	0	0	200	300	0	33.9342	41.2219	-661.067	-90358.4	99303.7	3372.57	350.217	1039.69	0	0	0	0	0	0	0	603	903	0
3209	3	0	0	0	0	0	0	200	300	0	33.1712	40.7642	-662.593	-90816.2	99547.8	3738.78	350.24	1040.06	0	0	0	0	0	0	0	603	903	0
3209	4	0	0	0	0	0	0	200	300	0	33.3238	41.8323	-662.593	-89259.7	99669.9	3372.57	350.424	1037.71	0	0	0	0	0	0	0	603	903	0
3209	5	0	0	0	0	0	0	200	300	0	34.2393	42.5952	-664.424	-90633	100219	3464.13	350.836	1039.41	0	0	0	0	0	0	0	603	903	0
3209	6	0	0	0	0	0	0	200	300	0	34.6971	42.7478	-665.34	-90999.2	100219	3647.23	350.629	1039.77	0	0	0	0	0	0	0	603	903	0
3209	7	0	0	0	0	0	0	200	300	0	34.3919	41.3745	-666.255	-91090.8	100036	3601.46	350.147	1039.72	0	0	0	0	0	0	0	603	903	0
3209	8	0	0	0	0	0	0	200	300	0	34.8497	42.9004	-668.392	-90724.6	100585	3738.78	350.489	1038.74	0	0	0	0	0	0	0	603	903	0
3209	9	0	0	0	0	0	0	200	300	0	34.2393	43.5107	-668.697	-91090.8	100769	3738.78	350.694	1039.22	0	0	0	0	0	0	0	603	903	0
3210	0	0	0	0	0	0	0	200	300	0	35.9178	45.1892	-671.138	-91640.1	100646	3784.56	349.964	1039.54	0	0	0	0	0	0	0	603	903	0
3210	1	0	0	0	0	0	0	200	300	0	34.5445	45.1892	-671.749	-90266.8	100830	4196.55	350.1	1037.38	0	0	0	0	0	0	0	603	903	0
3210	2	0	0	0	0	0	0	200	300	0	35.7652	46.5625	-672.664	-91457	101745	3784.56	351.257	1038.96	0	0	0	0	0	0	0	603	903	0
3210	3	0	0	0	0	0	0	200	300	0	35.6126	46.2573	-675.716	-91731.6	101318	3921.89	349.942	1038.75	0	0	0	0	0	0	0	603	903	0
3210	4	0	0	0	0	0	0	200	300	0	36.8333	47.1728	-675.411	-91090.8	101623	3921.89	350.461	1037.87	0	0	0	0	0	0	0	603	903	0
3210	5	0	0	0	0	0	0	200	300	0	36.0704	48.0884	-678.462	-92006.3	102172	3921.89	350.594	1038.61	0	0	0	0	0	0	0	603	903	0
3210	6	0	0	0	0	0	0	200	300	0	35.3075	46.2573	-679.988	-91731.6	102233	4471.21	350.346	1037.9	0	0	0	0	0	0	0	603	903	0
3210	7	0	0	0	0	0	0	200	300	0	36.0704	49.4617	-681.514	-91823.2	102355	4196.55	350.188	1037.73	0	0	0	0	0	0	0	603	903	0
3210	8	0	0	0	0	0	0	200	300	0	36.8333	49.6143	-683.04	-91457	102661	4150.77	350.3	1036.9	0	0	0	0	0	0	0	603	903	0
3210	9	0	0	0	0	0	0	200	300	0	35.6126	49.6143	-683.956	-92281	102844	4425.43	350.366	1037.92	0	0	0	0	0	0	0	603	903	0
3211	0	0	0	0	0	0	0	200	300	0	35.9178	49.9194	-685.482	-92372.6	103088	4471.21	350.388	1037.76	0	0	0	0	0	0	0	603	903	0
3211	1	0	0	0	0	0	0	200	300	0	36.8333	51.2927	-687.618	-92097.9	103881	4471.21	351.074	1036.94	0	0	0	0	0	0	0	603	903	0
3211	2	0	0	0	0	0	0	200	300	0	36.0704	52.2082	-688.533	-92464.1	103271	4608.54	349.987	1037.29	0	0	0	0	0	0	0	603	903	0
3211	3	0	0	0	0	0	0	200	300	0	36.223	52.8186	-691.28	-92372.6	103881	4654.31	350.274	1036.63	0	0	0	0	0	0	0	603	903	0
3211	4	0	0	0	0	0	0	200	300	0	37.2911	52.9712	-692.806	-92738.8	104614	4608.54	351	1036.86	0	0	0	0	0	0	0	603	903	0
3211	5	0	0	0	0	0	0	200	300	0	37.1385	54.1919	-693.721	-93013.4	104614	4654.31	350.801	1037.08	0	0	0	0	0	0	0	603	903	0
3211	6	0	0	0	0	0	0	200	300	0	36.9859	53.5815	-697.078	-92738.8	104980	4837.42	350.6	1036.04	0	0	0	0	0	0	0	603	903	0
3211	7	0	0	0	0	0	0	200	300	0	37.9015	54.6497	-697.994	-93105	105285	4654.31	350.84	1036.39	0	0	0	0	0	0	0	603	903	0
3211	8	0	0	0	0	0	0	200	300	0	37.4437	55.8704	-699.52	-93196.5	105590	4791.64	350.947	1036.23	0	0	0	0	0	0	0	603	903	0
3211	9	0	0	0	0	0	0	200	300	0	38.6644	54.6497	-702.266	-92921.8	105529	5112.08	350.27	1035.32	0	0	0	0	0	0	0	603	903	0
3212	0	0	0	0	0	0	0	200	300	0	38.054	57.7014	-702.266	-93837.4	106140	5066.3	351.139	1036.62	0	0	0	0	0	0	0	603	903	0
3212	1	0	0	0	0	0	0	200	300	0	37.2911	57.2436	-704.402	-93745.8	106384	5020.52	351.027	1036.09	0	0	0	0	0	0	0	603	903	0
3212	2	0	0	0	0	0	0	200	300	0	38.3592	57.854	-705.928	-93654.2	106384	5249.41	350.701	1035.67	0	0	0	0	0	0	0	603	903	0
3212	3	0	0	0	0	0	0	200	300	0	38.6644	58.9221	-708.37	-93379.6	106811	5066.3	350.784	1034.82	0	0	0	0	0	0	0	603	903	0
3212	4	0	0	0	0	0	0	200	300	0	38.2066	59.0747	-710.506	-93837.4	107116	5386.73	350.76	1035.07	0	0	0	0	0	0	0	603	903	0
3212	5	0	0	0	0	0	0	200	300	0	37.9015	60.6006	-712.337	-94112.1	107299	5524.06	350.63	1035.12	0	0	0	0	0	0	0	603	903	0
3212	6	0	0	0	0	0	0	200	300	0	38.5118	60.7532	-714.778	-94203.6	107727	5936.05	350.713	1034.79	0	0	0	0	0	0	0	603	903	0
3212	7	0	0	0	0	0	0	200	300	0	37.4437	61.3635	-716.915	-94478.3	108093	5569.84	350.775	1034.78	0	0	0	0	0	0	0	603	903	0
3212	8	0	0	0	0	0	0	200	300	0	37.9015	61.2109	-716.304	-94386.7	108032	5981.83	350.818	1034.77	0	0	0	0	0	0	0	603	903	0
3212	9	0	0	0	0	0	0	200	300	0	40.648	61.9739	-720.272	-94386.7	108520	5936.05	350.665	1034.04	0	0	0	0	0	0	0	603	903	0
3213	0	0	0	0	0	0	0	200	300	0	38.2066	63.9575	-720.272	-94936	108154	6027.6	350.157	1034.81	0	0	0	0	0	0	0	603	903	0
3213	1	0	0	0	0	0	0	200	300	0	38.3592	64.2627	-723.934	-94936	108642	5936.05	350.072	1034.14	0	0	0	0	0	0	0	603	903	0
3213	2	0	0	0	0	0	0	200	300	0	38.5118	64.2627	-725.46	-94936	109497	6256.49	350.934	1033.86	0	0	0	0	0	0	0	603	903	0
3213	3	0	0	0	0	0	0	200	300	0	38.9696	64.4153	-726.375	-95210.7	109252	6302.26	350.408	1034.08	0	0	0	0	0	0	0	603	903	0
3213	4	0	0	0	0	0	0	200	300	0	40.3429	65.3308	-731.258	-95485.3	109558	6531.14	349.821	1033.58	0	0	0	0	0	0	0	603	903	0
3213	5	0	0	0	0	0	0	200	300	0	39.2747	65.0256	-729.427	-95302.2	110229	6393.81	351.117	1033.65	0	0	0	0	0	0	0	603	903	0
3213	6	0	0	0	0	0	0	200	300	0	39.1222	67.0093	-734.004	-95576.9	110412	6393.81	350.424	1033.21	0	0	0	0	0	0	0	603	903	0
3213	7	0	0	0	0	0	0	200	300	0	40.3429	67.1619	-735.53	-95943.1	110534	6714.25	350.278	1033.44	0	0	0	0	0	0	0	603	903	0
3213	8	0	0	0	0	0	0	200	300	0	39.5799	68.9929	-736.141	-95760	111145	6531.14	350.983	1033.08	0	0	0	0	0	0	0	603	903	0
3213	9	0	0	0	0	0	0	200	300	0	39.2747	68.5352	-740.413	-96400.9	111816	6760.03	351.018	1033.2	0	0	0	0	0	0	0	603	903	0
3214	0	0	0	0	0	0	0	200	300	0	41.1058	68.8403	-740.108	-96126.2	111267	6943.13	350.338	1032.88	0	0	0	0	0	0	0	603	903	0
3214	1	0	0	0	0	0	0	200	300	0	40.3429	71.2817	-742.855	-96034.7	111816	7034.68	350.522	1032.28	0	0	0	0	0	0	0	603	903	0
3214	2	0	0	0	0	0	0	200	300	0	39.7325	70.9766	-744.38	-96492.4	112365	6897.35	350.951	1032.63	0	0	0	0	0	0	0	603	903	0
3214	3	0	0	0	0	0	0	200	300	0	39.2747	71.7395	-745.601	-96492.4	112060	6897.35	350.295	1032.42	0	0	0	0	0	0	0	603	903	0
3214	4	0	0	0	0	0	0	200	300	0	38.9696	71.4343	-748.043	-96309.3	112670	7080.46	350.62	1031.75	0	0	0	0	0	0	0	603	903	0
3214	5	0	0	0	0	0	0	200	300	0	40.1903	72.0447	-748.958	-96492.4	112854	7217.79	350.681	1031.84	0	0	0	0	0	0	0	603	903	0
3214	6	0	0	0	0	0	0	200	300	0	39.7325	72.655	-750.484	-96675.5	112915	7355.12	350.456	1031.82	0	0	0	0	0	0	0	603	903	0
3214	7	0	0	0	0	0	0	200	300	0	39.1222	73.5706	-753.841	-96583.9	113708	7263.57	350.838	1031.12	0	0	0	0	0	0	0	603	903	0
3214	8	0	0	0	0	0	0	200	300	0	40.8006	74.1809	-751.094	-96583.9	113586	7034.68	351.227	1031.59	0	0	0	0	0	0	0	603	903	0
3214	9	0	0	0	0	0	0	200	300	0	39.8851	75.5542	-757.198	-97682.6	113647	7400.9	350.089	1032.01	0	0	0	0	0	0	0	603	903	0
3215	0	0	0	0	0	0	0	200	300	0	40.3429	72.9602	-756.282	-96858.6	114379	7538.23	351.239	1031.07	0	0	0	0	0	0	0	603	903	0
3215	1	0	0	0	0	0	0	200	300	0	41.1058	76.4697	-759.639	-97224.8	114318	7538.23	350.49	1030.99	0	0	0	0	0	0	0	603	903	0
3215	2	0	0	0	0	0	0	200	300	0	39.8851	76.4697	-759.944	-97316.4	114379	7767.11	350.51	1031.06	0	0	0	0	0	0	0	603	903	0
3215	3	0	0	0	0	0	0	200	300	0	40.9532	77.3853	-762.996	-97316.4	114990	7629.78	350.708	1030.55	0	0	0	0	0	0	0	603	903	0
3215	4	0	0	0	0	0	0	200	300	0	43.0894	78.7585	-763.607	-97408	115112	7767.11	350.748	1030.56	0	0	0	0	0	0	0	603	903	0
3215	5	0	0	0	0	0	0	200	300	0	40.9532	78.7585	-766.658	-96858.6	115112	7812.88	350.147	1029.34	0	0	0	0	0	0	0	603	903	0
3215	6	0	0	0	0	0	0	200	300	0	41.411	78.1482	-766.658	-97408	115844	7904.44	351.103	1030.06	0	0	0	0	0	0	0	603	903	0
3215	7	0	0	0	0	0	0	200	300	0	42.0213	81.0474	-770.626	-97591	116149	7812.88	350.721	1029.64	0	0	0	0	0	0	0	603	903	0
3215	8	0	0	0	0	0	0	200	300	0	41.411	79.8267	-772.457	-97865.7	115173	8041.76	349.099	1029.69	0	0	0	0	0	0	0	603	903	0
3215	9	0	0	0	0	0	0	200	300	0	41.2584	82.4207	-772.457	-97865.7	116333	8179.09	350.601	1029.69	0	0	0	0	0	0	0	603	903	0
3216	0	0	0	0	0	0	0	200	300	0	43.242	82.8784	-774.288	-97591	116333	8362.2	350.245	1029.04	0	0	0	0	0	0	0	603	903	0
3216	1	0	0	0	0	0	0	200	300	0	41.8687	83.031	-775.508	-98140.4	116088	8316.43	349.693	1029.55	0	0	0	0	0	0	0	603	903	0
3216	2	0	0	0	0	0	0	200	300	0	41.411	82.4207	-777.339	-97774.2	116943	8316.43	350.44	1028.78	0	0	0	0	0	0	0	603	903	0
3216	3	0	0	0	0	0	0	200	300	0	42.4791	84.2517	-779.476	-97957.2	117370	8270.65	350.576	1028.67	0	0	0	0	0	0	0	603	903	0
3216	4	0	0	0	0	0	0	200	300	0	42.4791	85.0146	-778.255	-98598.1	117248	8407.98	350.655	1029.69	0	0	0	0	0	0	0	603	903	0
3216	5	0	0	0	0	0	0	200	300	0	42.1739	86.3879	-781.612	-98231.9	117492	8453.76	350.32	1028.68	0	0	0	0	0	0	0	603	903	0
3216	6	0	0	0	0	0	0	200	300	0	43.6998	86.8457	-782.222	-98140.4	117675	8636.86	350.437	1028.46	0	0	0	0	0	0	0	603	903	0
3216	7	0	0	0	0	0	0	200	300	0	42.6317	87.7612	-782.527	-98323.4	117736	8636.86	350.457	1028.65	0	0	0	0	0	0	0	603	903	0
3216	8	0	0	0	0	0	0	200	300	0	43.0894	88.3716	-784.969	-98415	118164	8911.52	350.533	1028.37	0	0	0	0	0	0	0	603	903	0
3216	9	0	0	0	0	0	0	200	300	0	43.8524	88.5242	-784.969	-98598.1	118347	8591.08	350.766	1028.61	0	0	0	0	0	0	0	603	903	0
3217	0	0	0	0	0	0	0	200	300	0	44.3102	89.7449	-786.495	-98323.4	117980	9003.07	350.008	1028.01	0	0	0	0	0	0	0	603	903	0
3217	1	0	0	0	0	0	0	200	300	0	45.0731	90.2026	-787.41	-98506.6	118103	9003.07	349.989	1028.1	0	0	0	0	0	0	0	603	903	0
3217	2	0	0	0	0	0	0	200	300	0	44.005	90.5078	-788.326	-98415	118164	9048.85	349.892	1027.84	0	0	0	0	0	0	0	603	903	0
3217	3	0	0	0	0	0	0	200	300	0	44.4627	92.1863	-790.767	-98506.6	118530	9048.85	349.892	1027.57	0	0	0	0	0	0	0	603	903	0
3217	4	0	0	0	0	0	0	200	300	0	44.005	91.7285	-791.378	-98872.8	118591	9094.62	349.854	1027.94	0	0	0	0	0	0	0	603	903	0
3217	5	0	0	0	0	0	0	200	300	0	47.0567	93.2544	-790.767	-98048.8	118896	9277.73	350.355	1026.99	0	0	0	0	0	0	0	603	903	0
3217	6	0	0	0	0	0	0	200	300	0	44.4627	94.0173	-792.903	-97774.2	118713	9186.18	349.719	1026.31	0	0	0	0	0	0	0	603	903	0
3217	7	0	0	0	0	0	0	200	300	0	44.1576	93.8647	-791.072	-98323.4	118957	9460.84	350.374	1027.29	0	0	0	0	0	0	0	603	903	0
3217	8	0	0	0	0	0	0	200	300	0	45.0731	95.3906	-794.124	-98140.4	119323	9506.61	350.258	1026.58	0	0	0	0	0	0	0	603	903	0
3217	9	0	0	0	0	0	0	200	300	0	44.7679	95.6958	-793.209	-98689.6	119445	9552.39	350.585	1027.42	0	0	0	0	0	0	0	603	903	0
3218	0	0	0	0	0	0	0	200	300	0	45.0731	96.3062	-795.345	-98231.9	118408	9872.82	348.876	1026.51	0	0	0	0	0	0	0	603	903	0
3218	1	0	0	0	0	0	0	200	300	0	45.3783	97.5269	-795.955	-98323.4	119689	9598.17	350.372	1026.53	0	0	0	0	0	0	0	603	903	0
3218	2	0	0	0	0	0	0	200	300	0	45.3783	97.3743	-797.176	-98231.9	119506	9735.49	349.912	1026.22	0	0	0	0	0	0	0	603	903	0
3218	3	0	0	0	0	0	0	200	300	0	45.3783	98.595	-796.871	-98231.9	119506	9918.6	349.97	1026.27	0	0	0	0	0	0	0	603	903	0
3218	4	0	0	0	0	0	0	200	300	0	45.6834	100.273	-798.702	-98231.9	119506	9827.05	349.626	1025.99	0	0	0	0	0	0	0	603	903	0
3218	5	3.58824	-5.64621	-14.7296	-3001.37	-408.702	-370.652	172.253	503.765	0	46.1412	99.6631	-798.091	-98140.4	119812	10239	350.123	1025.97	0	0	0	0	0	0	0	603	903	0
3218	6	1.29942	-5.7988	-17.7814	-3642.24	-286.632	-553.758	183.88	504.835	0	45.0731	100.884	-796.871	-98140.4	119506	10147.5	349.97	1026.16	0	0	0	0	0	0	0	603	903	0
3218	7	-0.531631	-7.32468	-18.0865	-3276.03	-347.667	-50.2177	180.778	481.131	0	45.836	100.884	-799.007	-97316.4	119323	10330.6	349.339	1024.8	0	0	0	0	0	0	0	603	903	0
3218	8	4.04601	-8.69797	-19.3072	-4740.88	-713.878	-233.323	163.025	545.549	0	45.836	102.257	-797.481	-97499.5	119689	10422.1	350.084	1025.26	0	0	0	0	0	0	0	603	903	0
3218	9	1.45201	-8.85056	-22.0538	-4374.66	-713.878	-4.44129	167.63	498.363	0	45.5309	103.02	-798.091	-97133.3	119384	10376.4	349.587	1024.71	0	0	0	0	0	0	0	603	903	0
3219	0	0.078721	-9.6135	-26.9366	-5015.53	-164.562	315.993	193.891	486.197	0	45.836	101.342	-800.838	-97224.8	119567	10513.7	349.303	1024.4	0	0	0	0	0	0	0	603	903	0
3219	1	0.84166	-7.32468	-28.4625	-5564.85	-530.773	-50.2177	181.352	495.515	0	45.6834	104.241	-798.091	-97224.8	119934	10513.7	350.276	1024.82	0	0	0	0	0	0	0	603	903	0
3219	2	0.536485	-4.27292	-29.9884	-6571.93	-1019.05	-95.9941	166.018	519.149	0	45.836	104.241	-797.481	-97224.8	119445	10788.4	349.778	1024.92	0	0	0	0	0	0	0	603	903	0
3219	3	-0.836806	-1.37375	-37.6178	-8036.77	-713.878	-279.099	181.023	513.643	0	46.1412	104.851	-799.007	-96858.6	118835	10696.8	348.728	1024.22	0	0	0	0	0	0	0	603	903	0
3219	4	-0.379043	-1.06857	-43.4161	-9410.06	-1019.05	-370.652	176.528	516.741	0	46.1412	106.377	-798.397	-96492.4	119689	11108.8	349.912	1023.86	0	0	0	0	0	0	0	603	903	0
3219	5	0.078721	-0.153047	-47.6886	-9776.28	-958.019	-95.9941	179.911	505.002	0	45.0731	105.614	-798.702	-96583.9	119628	10696.8	349.779	1023.93	0	0	0	0	0	0	0	603	903	0
3219	6	-1.44716	3.20389	-51.3507	-11515.8	-1141.12	-95.9941	177.778	524.258	0	45.0731	108.055	-798.091	-96217.7	119445	11017.2	349.664	1023.56	0	0	0	0	0	0	0	603	903	0
3219	7	0.84166	4.272	-54.4025	-12431.3	-1385.27	-324.876	174.537	528.506	0	45.6834	108.055	-797.176	-96309.3	119018	11246.1	349.3	1023.81	0	0	0	0	0	0	0	603	903	0
3219	8	-0.0738669	3.20389	-60.2008	-13255.3	-1141.12	-279.099	181.045	520.184	0	44.7679	108.361	-796.565	-96126.2	119506	11154.6	350.027	1023.68	0	0	0	0	0	0	0	603	903	0
3219	9	-0.989394	5.4927	-65.0836	-13896.1	-1385.27	-553.758	178.716	513.512	0	45.3783	109.734	-797.786	-95668.5	118957	11475	349.109	1022.92	0	0	0	0	0	0	0	603	903	0
3220	0	2.21495	6.25564	-69.6613	-15269.4	-1263.2	-691.087	181.867	519.196	0	45.2257	110.344	-796.26	-95760	118835	11566.5	349.241	1023.26	0	0	0	0	0	0	0	603	903	0
3220	1	5.26671	5.18753	-72.713	-16093.4	-1385.27	-1286.18	180.949	521.328	0	44.3102	110.955	-795.04	-95760	118469	11932.8	349.01	1023.45	0	0	0	0	0	0	0	603	903	0
3220	2	4.50377	8.69705	-77.5958	-17466.7	-1690.44	-1240.4	178.215	525.099	0	44.9205	110.497	-791.072	-95485.3	118713	11795.4	350.066	1023.7	0	0	0	0	0	0	0	603	903	0
3220	3	5.87706	10.8333	-83.089	-17924.5	-1446.3	-1789.72	182.593	515.726	0	45.2257	111.718	-794.124	-94752.9	118713	11703.9	349.489	1022.32	0	0	0	0	0	0	0	603	903	0
3220	4	7.40294	12.2066	-87.9718	-19847.1	-1934.58	-2018.6	178.009	525.607	0	45.6834	112.48	-793.514	-94936	118652	12024.3	349.527	1022.64	0	0	0	0	0	0	0	603	903	0
3220	5	8.31847	14.3428	-89.8029	-21128.8	-1629.41	-2293.26	181.856	535.28	0	44.4627	112.175	-793.209	-94661.3	118103	12070.1	348.892	1022.34	0	0	0	0	0	0	0	603	903	0
3220	6	9.53917	15.5635	-98.653	-21311.9	-1812.51	-2476.36	181.627	516.029	0	44.6153	114.464	-792.903	-92921.8	118164	12253.2	349.026	1020.19	0	0	0	0	0	0	0	603	903	0
3220	7	11.2176	15.2583	-103.231	-22868.3	-2056.65	-2842.58	180.077	521.527	0	45.0731	114.006	-790.157	-94295.1	118164	12344.7	349.544	1022.34	0	0	0	0	0	0	0	603	903	0
3220	8	11.828	13.5799	-108.724	-23783.8	-1507.34	-2979.91	186.136	518.755	0	45.6834	114.464	-788.936	-93654.2	118042	12024.3	349.621	1021.71	0	0	0	0	0	0	0	603	903	0
3220	9	12.1332	15.8687	-111.165	-24241.6	-1812.51	-3346.12	183.695	518.068	0	45.2257	114.617	-785.884	-92738.8	116760	12527.9	348.571	1021.01	0	0	0	0	0	0	0	603	903	0
3221	0	13.659	16.479	-117.269	-26255.8	-1568.37	-3529.22	186.626	523.894	0	44.6153	115.685	-787.105	-93196.5	117370	12436.3	349.116	1021.4	0	0	0	0	0	0	0	603	903	0
3221	1	13.659	15.7161	-122.151	-26713.5	-1568.37	-3346.12	187.16	518.692	0	43.8524	115.99	-786.19	-92830.3	117370	12527.9	349.29	1021.08	0	0	0	0	0	0	0	603	903	0
3221	2	13.659	13.2747	-126.424	-27079.8	-1751.48	-3117.23	186.146	514.198	0	43.6998	116.6	-784.053	-92372.6	116882	12802.5	349.074	1020.81	0	0	0	0	0	0	0	603	903	0
3221	3	14.5746	12.6643	-128.255	-28361.5	-1324.23	-3986.99	189.675	521.134	0	44.005	116.906	-782.222	-91548.6	116638	12527.9	349.111	1020.04	0	0	0	0	0	0	0	603	903	0
3221	4	15.1849	12.3592	-132.527	-28727.7	-1812.51	-3803.88	186.324	516.768	0	43.8524	115.837	-779.476	-91731.6	116516	13214.5	349.479	1020.68	0	0	0	0	0	0	0	603	903	0
3221	5	14.8797	10.6807	-135.579	-29643.2	-1934.58	-3712.33	185.731	518.641	0	44.1576	117.363	-781.002	-90999.2	116149	12894.1	348.719	1019.52	0	0	0	0	0	0	0	603	903	0
3221	6	15.0323	8.69705	-141.072	-30009.4	-1568.37	-3803.88	188.883	512.724	0	45.0731	118.584	-774.593	-90907.7	115905	13077.2	349.634	1020.36	0	0	0	0	0	0	0	603	903	0
3221	7	15.9479	6.71341	-141.072	-31016.5	-1446.3	-3895.43	189.748	519.862	0	42.6317	119.042	-775.814	-89900.6	115783	12985.6	349.241	1018.88	0	0	0	0	0	0	0	603	903	0
3221	8	16.5582	4.72977	-145.65	-31382.7	-1263.2	-3712.33	191.327	515.467	0	42.4791	118.737	-773.372	-89992.1	115173	12894.1	348.923	1019.36	0	0	0	0	0	0	0	603	903	0
3221	9	17.1686	2.44095	-148.397	-32206.7	-1446.3	-3803.88	190.254	517.031	0	43.242	119.042	-771.846	-89259.7	114685	13626.5	348.585	1018.64	0	0	0	0	0	0	0	603	903	0
3222	0	17.016	-0.763399	-151.754	-32847.6	-1202.16	-3895.43	192.078	516.453	0	42.0213	119.347	-769.71	-89442.9	114807	13351.8	349.156	1019.2	0	0	0	0	0	0	0	603	903	0
3222	1	17.016	-3.05222	-155.721	-33396.9	-1568.37	-3758.1	189.928	514.466	0	41.411	119.347	-767.269	-89076.7	114624	13855.4	349.392	1019.1	0	0	0	0	0	0	0	603	903	0
3222	2	18.6944	-4.73068	-157.247	-34678.6	-1141.12	-3346.12	192.743	520.536	0	42.3265	120.415	-766.048	-88435.7	113769	13534.9	348.514	1018.44	0	0	0	0	0	0	0	603	903	0
3222	3	18.3893	-7.62985	-162.74	-34495.5	-1202.16	-3666.55	192.613	511.967	0	41.2584	118.889	-762.996	-88344.2	113891	13489.2	349.268	1018.79	0	0	0	0	0	0	0	603	903	0
3222	4	17.9315	-10.2238	-165.486	-35044.8	-1019.05	-3620.77	193.842	511.769	0	40.648	119.957	-759.944	-87978	113342	14038.5	349.145	1018.77	0	0	0	0	0	0	0	603	903	0
3222	5	18.3893	-11.1394	-167.928	-36509.7	-1080.09	-3758.1	193.568	517.413	0	41.5636	121.178	-757.503	-87062.5	112548	13946.9	348.578	1017.93	0	0	0	0	0	0	0	603	903	0
3222	6	18.9996	-14.0385	-173.116	-36509.7	-1080.09	-3986.99	193.761	510.897	0	41.1058	120.72	-756.282	-86696.2	112487	14038.5	348.737	1017.63	0	0	0	0	0	0	0	603	903	0
3222	7	18.847	-16.0222	-173.726	-37883	-774.914	-3758.1	195.539	518.061	0	40.0377	120.262	-752.01	-86147	112548	14175.8	349.663	1017.56	0	0	0	0	0	0	0	603	903	0
3222	8	19.4574	-17.5481	-177.999	-38249.2	-1019.05	-3941.21	194.275	514.885	0	40.0377	121.941	-751.094	-84773.6	111450	13992.7	348.383	1015.87	0	0	0	0	0	0	0	603	903	0
3222	9	19.3048	-19.8369	-182.271	-38432.3	-958.019	-3803.88	194.744	510.852	0	39.4273	122.399	-747.737	-85323	111083	13901.1	348.56	1017.11	0	0	0	0	0	0	0	603	903	0
3223	0	18.5419	-21.2102	-185.933	-39988.7	-1080.09	-3941.21	194.191	515.07	0	41.411	122.856	-746.822	-84865.2	110595	13992.7	348.088	1016.64	0	0	0	0	0	0	0	603	903	0
3223	1	19.1522	-21.8205	-191.121	-39714	-958.019	-3620.77	194.987	507.795	0	38.9696	121.788	-742.855	-84224.4	110046	14496.2	348.139	1016.38	0	0	0	0	0	0	0	603	903	0
3223	2	18.9996	-23.499	-194.478	-40629.5	-774.914	-3803.88	196.015	508.916	0	38.5118	122.246	-739.803	-83949.7	109863	14496.2	348.503	1016.48	0	0	0	0	0	0	0	603	903	0
3223	3	18.5419	-22.8886	-197.835	-41819.7	-958.019	-3208.79	195.158	511.387	0	37.7489	122.551	-737.972	-83675	109558	14450.5	348.458	1016.39	0	0	0	0	0	0	0	603	903	0
3223	4	19.4574	-24.2619	-199.056	-41636.6	-1080.09	-3163.01	194.574	509.171	0	37.9015	122.094	-733.089	-82484.9	109069	14587.8	348.781	1015.52	0	0	0	0	0	0	0	603	903	0
3223	5	19.3048	-25.33	-203.328	-43467.7	-1080.09	-3254.56	194.688	513.781	0	37.9015	123.314	-732.173	-82027.1	108154	14130	347.716	1015.03	0	0	0	0	0	0	0	603	903	0
3223	6	18.5419	-24.4145	-209.737	-44841	-958.019	-3300.34	195.432	513.796	0	36.3756	122.399	-726.985	-81203.1	108093	14725.1	348.686	1014.7	0	0	0	0	0	0	0	603	903	0
3223	7	17.1686	-25.33	-215.535	-44749.4	-1202.16	-2796.8	194.422	507.62	0	36.6808	123.925	-725.154	-80836.9	107727	14816.7	348.557	1014.48	0	0	0	0	0	0	0	603	903	0
3223	8	15.7953	-26.093	-223.165	-47404.5	-1385.27	-2751.02	193.793	512.419	0	37.1385	123.314	-723.018	-80562.2	106872	14404.7	347.814	1014.42	0	0	0	0	0	0	0	603	903	0
3223	9	15.4901	-26.8559	-227.132	-48320	-1263.2	-2522.14	194.439	512.74	0	35.4601	122.856	-718.44	-80196	106750	14816.7	348.586	1014.63	0	0	0	0	0	0	0	603	903	0
3224	0	17.6263	-26.8559	-238.729	-49144	-1568.37	-3575	193.43	505.857	0	35.9178	123.772	-716.915	-79189	106079	14587.8	347.965	1013.46	0	0	0	0	0	0	0	603	903	0
3224	1	18.2367	-27.6189	-245.137	-50608.8	-1324.23	-2796.8	194.598	506.451	0	36.223	123.467	-712.947	-78731.2	105102	14908.2	347.419	1013.43	0	0	0	0	0	0	0	603	903	0
3224	2	17.4737	-29.6025	-250.63	-51799	-1385.27	-2842.58	194.473	506.675	0	34.0868	124.382	-707.454	-78548	104797	14679.3	348.132	1014.03	0	0	0	0	0	0	0	603	903	0
3224	3	16.8634	-31.1284	-256.124	-52531.4	-1751.48	-2751.02	193.162	505.102	0	34.3919	124.382	-704.097	-77724.1	104309	15228.7	348.145	1013.39	0	0	0	0	0	0	0	603	903	0
3224	4	17.3212	-30.3654	-264.363	-54270.9	-1751.48	-2476.36	193.375	505.289	0	36.0704	123.925	-701.656	-76625.5	103576	15137.1	347.617	1012.21	0	0	0	0	0	0	0	603	903	0
3224	5	14.5746	-32.3491	-270.467	-53904.7	-2178.72	-2476.36	191.945	499.302	0	33.9342	124.84	-699.52	-75801.5	102966	15137.1	347.195	1011.36	0	0	0	0	0	0	0	603	903	0
3224	6	15.1849	-35.706	-275.96	-55369.5	-1934.58	-1927.05	192.99	500.643	0	33.1712	123.619	-694.637	-75801.5	102722	15320.2	347.878	1012.12	0	0	0	0	0	0	0	603	903	0
3224	7	14.8797	-35.5534	-281.148	-56926	-1995.62	-1927.05	192.902	502.477	0	32.7135	124.84	-689.144	-75160.6	101989	15228.7	347.994	1012.06	0	0	0	0	0	0	0	603	903	0
3224	8	14.1168	-36.3164	-286.336	-57200.6	-1873.55	-1927.05	193.457	499.767	0	32.1031	125.145	-686.092	-75435.3	100646	15457.5	346.695	1012.95	0	0	0	0	0	0	0	603	903	0
3224	9	12.8961	-39.2155	-290.303	-57933	-2056.65	-1698.17	192.916	499.56	0	30.8824	124.23	-682.43	-73695.8	100952	15274.4	347.93	1010.99	0	0	0	0	0	0	0	603	903	0
3225	0	10.9125	-40.2837	-296.102	-58482.3	-2422.86	-1835.5	191.817	497.508	0	31.3402	123.162	-679.378	-73238	100463	15640.6	347.876	1010.8	0	0	0	0	0	0	0	603	903	0
3225	1	11.065	-41.657	-303.121	-59672.5	-2239.76	-1423.51	192.611	496.861	0	30.5772	123.467	-675.716	-73238	99303.7	15640.6	346.961	1011.39	0	0	0	0	0	0	0	603	903	0
3225	2	10.4547	-44.5561	-306.478	-60679.6	-1934.58	-1606.61	193.688	497.99	0	30.4247	124.077	-667.781	-72414	98815.4	15503.3	347.976	1011.44	0	0	0	0	0	0	0	603	903	0
3225	3	10.9125	-45.3191	-310.14	-61228.9	-2361.83	-1515.06	192.385	497.424	0	30.1195	124.382	-666.255	-71681.6	97716.8	15640.6	346.666	1010.59	0	0	0	0	0	0	0	603	903	0
3225	4	8.77623	-46.2346	-315.938	-62236	-2422.86	-1148.85	192.331	496.988	0	28.8988	123.467	-661.983	-71498.5	97228.5	15411.8	346.875	1011.01	0	0	0	0	0	0	0	603	903	0
3225	5	7.09776	-50.0493	-322.347	-63426.2	-2667	-1148.85	191.726	496.764	0	28.7462	123.925	-658.016	-70216.8	96618.1	15594.9	346.833	1009.71	0	0	0	0	0	0	0	603	903	0
[truncated: 1,714 more rows]
