# Supplementary material for: The Effects of an Extemporaneous Speech Dual-task on Older Adult Gait Control
Source: Research Square preprint supplement (doi:10.21203/rs.3.rs-7674245/v1), 2025-11-18
Supplement: Supplementary file 89 [file DT8Walk4.xlsx]

## Sheet: Sheet1
Trajectories
		08:LFHD			08:RFHD			08:LBHD			08:RBHD			08:C7			08:T10			08:CLAV			08:STRN			08:RBAK			08:LSHO			08:LUPA			08:LELB			08:LFRM			08:LWRA			08:LWRB			08:LFIN
Frame	Sub Frame	X	Y	Z	X	Y	Z	X	Y	Z	X	Y	Z	X	Y	Z	X	Y	Z	X	Y	Z	X	Y	Z	X	Y	Z	X	Y	Z	X	Y	Z	X	Y	Z	X	Y	Z	X	Y	Z	X	Y	Z	X	Y	Z
		mm	mm	mm	mm	mm	mm	mm	mm	mm	mm	mm	mm	mm	mm	mm	mm	mm	mm	mm	mm	mm	mm	mm	mm	mm	mm	mm	mm	mm	mm	mm	mm	mm	mm	mm	mm	mm	mm	mm	mm	mm	mm	mm	mm	mm	mm	mm	mm
4544	0	158.863	-368.223	1676.64	243.677	-384.296	1679.51	134.074	-562.721	1698.97	245.618	-558.078	1699.64	191.498	-612.25	1549.13	181.66	-692.241	1284.37	200.425	-463.9	1461.4	224.262	-399.933	1260.84	261.854	-700.053	1341.41	11.6266	-514.786	1500.17	-66.6478	-520.565	1302.92	-69.2221	-527.065	1148.95	-79.8336	-434.206	1001.94	-27.4255	-394.066	918.698	-87.7927	-434.261	902.495	-76.4882	-375.81	854.449
4545	0	158.444	-359.093	1678	243.223	-375.629	1680.79	132.836	-553.396	1699.93	244.65	-549.271	1700.86	189.796	-603.311	1550.32	180.316	-683.132	1285.49	199.59	-455.125	1462.61	224.064	-391.042	1262.16	260.087	-691.39	1342.71	10.4156	-505.273	1500.78	-67.5302	-509.628	1303.56	-70.1748	-514.776	1149.5	-79.436	-420.839	1003.15	-26.2996	-381.04	919.938	-87.3968	-419.967	903.891	-75.2137	-361.468	856.218
4546	0	158.38	-350.04	1679.46	242.822	-367.032	1681.94	131.441	-544.354	1701.49	243.457	-540.738	1702.09	188.142	-594.533	1551.48	179.051	-673.993	1286.53	198.506	-446.367	1463.85	223.827	-382.287	1263.6	258.429	-682.578	1343.89	9.28757	-495.802	1501.67	-68.1557	-498.833	1304.24	-71.0446	-502.606	1150.18	-78.9065	-407.412	1004.53	-25.2351	-367.8	921.68	-85.7463	-406.232	904.744	-73.7466	-347.088	858.007
4547	0	158.03	-341.073	1680.65	242.596	-358.389	1683.39	130.357	-535.256	1702.5	242.307	-532.205	1703.06	186.609	-585.768	1552.57	177.21	-665.928	1287.92	197.891	-437.632	1465.07	223.704	-373.643	1265.08	256.918	-673.863	1345.04	8.17435	-486.471	1502.53	-68.7626	-488.269	1304.85	-71.7161	-490.629	1150.97	-78.3495	-394.307	1005.91	-24.1661	-354.649	923.247	-86.0874	-391.769	906.765	-72.2864	-332.839	859.87
4548	0	157.748	-332.148	1681.82	242.109	-349.964	1684.35	129.313	-526.03	1703.29	241.07	-523.837	1704.17	185.181	-577.097	1553.59	175.888	-657.178	1288.82	197.141	-428.986	1466.18	223.316	-364.922	1266.2	255.501	-665.164	1346.1	7.24032	-477.198	1503.23	-69.2849	-477.996	1305.63	-72.217	-478.702	1151.7	-77.8397	-381.227	1007.3	-22.9487	-340.999	925.4	-85.3454	-377.774	908.289	-71.0687	-318.508	861.976
4549	0	157.608	-323.274	1683.02	241.789	-341.51	1685.38	128.179	-517.005	1704.11	239.946	-515.358	1704.91	183.54	-568.498	1554.45	175.785	-646.869	1289.07	196.545	-420.344	1467.29	223.158	-356.208	1267.57	254.096	-656.343	1347.09	6.27938	-467.899	1504.11	-69.8278	-467.984	1306.31	-72.6214	-466.925	1152.43	-77.3552	-368.201	1008.92	-21.8888	-327.715	927.326	-84.5746	-363.805	909.882	-69.7334	-304.051	864.204
4550	0	157.375	-314.593	1684.29	241.772	-333.102	1686.78	127.107	-508.23	1705.58	239.132	-507.01	1706.21	182.71	-559.622	1555.43	173.938	-639.235	1290.66	195.913	-411.692	1468.4	222.815	-347.606	1268.48	253.053	-647.594	1348.13	5.54164	-458.697	1504.89	-69.9782	-458.058	1306.84	-72.8495	-455.254	1153.15	-76.6916	-355.317	1010.47	-20.7856	-314.475	929.28	-83.5839	-350.019	911.391	-68.4048	-290.012	866.458
4551	0	157.263	-305.763	1685.22	241.623	-324.664	1687.82	126.362	-499.283	1706.35	237.969	-498.595	1706.73	181.637	-550.882	1556.34	172.932	-630.275	1291.61	195.395	-403.036	1469.27	222.692	-338.819	1269.67	251.936	-638.882	1349.14	4.82302	-449.544	1505.71	-70.2521	-448.171	1307.59	-73.0626	-443.683	1153.94	-76.0022	-342.538	1011.98	-19.7461	-301.075	931.402	-82.5035	-336.426	912.916	-67.1363	-275.978	868.594
4552	0	157.261	-297.075	1686.33	241.381	-316.328	1688.59	125.56	-490.424	1706.87	237.004	-490.221	1707.31	180.738	-542.139	1557.08	172.064	-621.371	1292.14	194.896	-394.323	1469.96	222.518	-330.185	1270.49	250.99	-630.138	1349.74	4.17554	-440.411	1506.36	-70.462	-438.416	1308.15	-73.1601	-432.306	1154.53	-75.3604	-329.884	1013.5	-18.6499	-287.637	933.616	-81.3712	-322.769	914.532	-65.6775	-261.985	870.792
4553	0	157.223	-288.406	1687.32	241.179	-308.004	1689.33	124.886	-481.632	1707.37	236.212	-481.841	1707.61	179.927	-533.342	1557.28	171.303	-612.518	1292.64	194.558	-385.564	1470.58	222.407	-321.553	1271.1	250.115	-621.41	1350.36	3.64458	-431.29	1506.62	-70.4998	-428.806	1308.5	-73.1139	-420.986	1155.03	-74.3574	-317.185	1014.85	-17.5731	-274.298	935.657	-78.847	-309.67	915.371	-64.1507	-247.947	873.083
4554	0	157.384	-279.653	1688.1	241.099	-299.63	1690.08	124.225	-472.889	1707.86	235.59	-473.508	1708.07	179.06	-524.658	1557.83	170.486	-603.653	1293.15	194.115	-376.709	1471.08	222.236	-313.001	1271.64	249.33	-612.644	1350.93	3.27441	-422.116	1507.27	-70.5713	-419.048	1308.8	-72.9757	-409.822	1155.53	-73.7535	-304.681	1016.2	-16.2653	-260.789	937.758	-78.4096	-295.904	917.32	-62.8731	-234.078	875.282
4555	0	157.219	-270.999	1688.7	241.107	-291.1	1690.67	123.724	-464.175	1707.96	235.165	-465.087	1708.35	178.758	-515.618	1558.2	169.723	-594.819	1293.65	193.828	-367.833	1471.5	222.265	-304.343	1272.09	248.755	-603.953	1351.59	3.00259	-412.804	1507.65	-70.4139	-409.323	1309.16	-72.7788	-398.819	1155.79	-72.8623	-292.186	1017.55	-14.9819	-247.498	939.97	-75.967	-282.946	918.28	-61.4165	-220.21	877.502
4556	0	157.348	-262.219	1689.21	241.161	-282.661	1691.34	123.334	-455.326	1708.23	234.773	-456.641	1708.58	178.125	-506.82	1558.54	169.237	-585.845	1293.91	193.323	-359.03	1471.86	222.26	-295.878	1272.17	248.244	-595.211	1351.83	2.6496	-403.744	1508.08	-70.3993	-399.595	1309.52	-72.6097	-387.853	1156.06	-71.851	-279.98	1018.82	-13.8942	-234.307	942.002	-75.4002	-269.247	920.111	-59.8145	-206.448	879.75
4557	0	157.565	-253.411	1689.71	241.442	-274.095	1691.77	122.972	-446.545	1708.08	234.428	-448.023	1708.45	177.966	-497.692	1558.59	168.758	-576.844	1294.18	193.56	-350.037	1472.02	222.415	-287.187	1272.39	247.745	-586.394	1352.17	2.52212	-394.327	1508.12	-70.4703	-389.877	1309.65	-72.4364	-376.94	1156.19	-70.858	-267.688	1020.17	-12.5443	-221.26	943.912	-73.8619	-256.068	921.274	-57.5725	-192.96	881.561
4558	0	157.749	-244.674	1689.97	241.731	-265.419	1692.09	122.707	-437.762	1707.98	234.2	-439.572	1708.34	177.881	-488.581	1558.87	168.082	-568.163	1294.4	193.593	-341.066	1471.86	222.455	-278.489	1271.95	247.293	-577.671	1352.19	2.56194	-384.977	1508.13	-70.1512	-380.094	1309.45	-72.1099	-366.309	1155.95	-69.8813	-255.578	1021.1	-10.9722	-208.096	945.954	-72.1401	-242.995	922.357	-56.2832	-179.193	883.683
4559	0	158.06	-235.829	1689.8	241.692	-256.932	1691.57	122.6	-428.789	1707.48	233.942	-430.923	1707.79	177.569	-479.587	1558.31	167.587	-559.331	1294.03	193.528	-332.145	1471.43	222.579	-269.769	1271.66	246.813	-568.822	1352.02	2.42702	-375.733	1507.84	-69.9161	-370.263	1309.09	-71.8994	-355.695	1155.62	-68.8325	-243.579	1021.94	-9.43068	-195.202	947.715	-70.2325	-230.009	923.159	-54.4904	-165.657	885.519
4560	0	158.39	-226.741	1689.42	241.898	-248.241	1691.26	122.522	-419.805	1707	233.881	-422.213	1707.23	177.624	-470.322	1558.14	167.154	-550.462	1293.79	193.76	-323.104	1470.89	222.924	-260.945	1271.03	246.577	-559.934	1351.61	2.63695	-366.241	1507.37	-69.6002	-360.37	1308.73	-71.5836	-345.049	1155.36	-67.5038	-231.596	1022.49	-8.05166	-182.307	949.241	-68.3416	-216.972	924.058	-52.6652	-152.207	887.384
4561	0	159.125	-217.798	1689.05	242.395	-239.399	1690.68	122.728	-410.648	1706.12	233.95	-413.27	1706.37	177.504	-461.283	1557.27	166.912	-541.44	1293.29	193.882	-314.116	1470.2	223.368	-252.096	1270.34	246.384	-551.001	1351.06	2.97221	-356.772	1506.8	-69.14	-350.482	1308.16	-71.178	-334.556	1154.6	-66.6165	-219.749	1022.99	-6.55476	-169.611	950.693	-66.5847	-204.082	924.693	-50.8119	-138.824	889.106
4562	0	159.425	-208.582	1688.28	242.921	-230.436	1690.15	122.826	-401.561	1705.22	234.192	-404.292	1705.67	177.742	-452.03	1556.56	166.828	-532.337	1292.75	194.45	-304.938	1469.15	223.813	-243.253	1269.25	246.295	-542.039	1350.55	3.39628	-347.195	1506.06	-68.863	-340.468	1307.61	-70.8014	-324.215	1153.6	-65.2805	-207.865	1023.34	-4.85809	-156.927	952.218	-64.8658	-191.241	925.36	-48.8895	-125.538	890.403
4563	0	160.024	-199.462	1687.61	243.334	-221.413	1689.11	123.158	-392.253	1703.9	234.308	-395.31	1704.52	178.065	-442.63	1555.49	166.769	-523.291	1291.8	194.951	-295.79	1467.98	224.317	-234.333	1268.28	246.264	-532.987	1349.56	3.80674	-337.675	1505.23	-68.5834	-330.533	1306.68	-70.4427	-313.752	1152.74	-64.3626	-196.236	1023.64	-3.31364	-144.372	953.436	-63.1642	-178.385	925.852	-46.918	-112.4	891.726
4564	0	160.755	-190.238	1686.43	243.909	-212.333	1688.15	123.523	-382.933	1702.67	234.798	-386.13	1703.24	178.588	-433.234	1554.6	166.912	-514.149	1290.71	195.227	-286.6	1466.8	224.813	-225.308	1266.87	246.324	-524.034	1348.51	4.32678	-328.106	1503.99	-68.167	-320.528	1305.76	-69.7889	-303.424	1151.42	-62.9676	-184.504	1023.45	-1.57365	-131.899	954.41	-61.3928	-165.628	926.124	-44.9491	-99.2917	892.796
4565	0	161.491	-180.825	1684.89	244.748	-203.049	1686.82	123.947	-373.498	1701.12	235.25	-376.822	1701.78	179.034	-423.876	1553.09	167.1	-504.996	1289.5	196.034	-277.264	1465.22	225.447	-216.229	1265.15	246.64	-514.836	1347.27	4.95882	-318.575	1502.71	-67.5442	-310.556	1304.55	-69.2932	-293.077	1150.1	-61.8484	-172.923	1023.27	-0.075241	-119.5	955.163	-59.475	-153.098	925.936	-43.0717	-86.2345	893.779
4566	0	162.219	-171.368	1683.26	245.342	-193.76	1685.06	124.598	-364.091	1699.29	235.764	-367.473	1700.16	179.585	-414.543	1551.5	167.445	-495.765	1287.95	196.867	-267.919	1463.5	226.208	-206.993	1263.42	247.021	-505.689	1345.72	5.68659	-308.947	1501.08	-67.0728	-300.559	1302.97	-68.9446	-282.647	1149.14	-60.5652	-161.304	1023.01	1.44707	-107.225	955.629	-57.5531	-140.665	925.715	-41.1789	-73.3827	894.45
4567	0	163.029	-161.834	1681.31	246.025	-184.368	1683.08	125.407	-354.465	1697.13	236.506	-358.055	1698.22	180.523	-405.072	1549.74	168.026	-486.426	1286.07	197.788	-258.539	1461.57	226.71	-197.673	1261.42	247.7	-496.308	1343.88	6.72191	-299.41	1499.42	-66.2118	-290.547	1301.43	-68.0631	-272.398	1146.96	-59.3279	-149.801	1022.26	3.03636	-95.0174	955.893	-55.7715	-128.23	925.348	-39.3364	-60.7291	894.835
4568	0	164.095	-152.286	1679.3	246.962	-174.714	1681.1	126.242	-344.947	1695.01	237.489	-348.46	1696.3	181.531	-395.589	1547.85	168.779	-477.048	1284.32	198.498	-249.051	1459.61	227.641	-188.219	1259.31	248.452	-486.82	1341.97	7.74785	-289.628	1497.76	-65.4459	-280.625	1299.7	-67.474	-262.065	1145.01	-58.0573	-138.385	1021.63	4.43611	-82.9441	955.881	-54.2775	-115.745	925.026	-37.5264	-48.1551	894.937
4569	0	164.894	-142.594	1676.76	247.955	-165.089	1678.85	127.359	-335.295	1692.83	238.528	-338.719	1694.1	182.74	-385.953	1545.67	169.486	-467.678	1282.39	199.394	-239.474	1457.26	228.4	-178.789	1256.99	249.554	-477.147	1339.78	8.82461	-280.03	1495.94	-64.5183	-270.638	1297.96	-66.745	-251.57	1143.27	-56.7245	-126.877	1020.57	5.82338	-70.9714	955.821	-52.7589	-103.594	924.245	-35.4107	-35.8701	894.96
4570	0	165.786	-132.899	1674.41	248.953	-155.264	1676.57	128.485	-325.659	1690.43	239.72	-329.05	1691.67	184.078	-376.393	1543.42	170.525	-458.19	1279.89	200.774	-229.784	1454.97	229.149	-169.257	1254.46	250.649	-467.534	1337.28	10.0507	-270.365	1493.94	-63.664	-260.685	1296.12	-66.1633	-241.069	1141.41	-55.7535	-115.554	1019.73	7.23792	-59.032	955.535	-51.3651	-91.4825	923.596	-34.1196	-23.4148	894.932
4571	0	167.223	-123.461	1671.86	250.115	-145.346	1674.34	129.611	-316.149	1688.04	241.164	-318.988	1689.07	185.585	-366.58	1540.94	171.51	-448.669	1277.5	201.908	-220.008	1452.52	230.042	-159.568	1252.16	251.998	-457.761	1334.83	11.5852	-260.767	1491.71	-62.649	-250.716	1294.28	-65.2076	-230.421	1139.42	-54.5242	-104.103	1018.64	8.46509	-47.2559	955.07	-49.9036	-79.4574	922.747	-32.6943	-11.1884	894.533
4572	0	168.433	-113.681	1669.48	251.3	-135.354	1671.83	131.224	-306.359	1685.34	243.018	-308.858	1686.54	187.38	-356.726	1538.3	173.121	-438.904	1274.99	203.262	-210.202	1449.84	230.874	-149.903	1249.37	253.63	-447.861	1332.19	13.0194	-251.024	1489.69	-61.2766	-240.631	1292.11	-64.1006	-219.973	1137.09	-53.6112	-92.8353	1017.32	9.79005	-35.5769	954.328	-47.0069	-68.1604	920.907	-31.3433	0.863966	893.815
4573	0	169.448	-103.685	1667.13	252.529	-125.176	1669.39	132.916	-296.592	1682.68	244.667	-298.681	1683.96	189.243	-346.799	1536.27	174.447	-429.034	1272.75	204.599	-200.297	1447.14	231.815	-140.067	1246.65	255.431	-437.914	1329.65	14.5559	-241.224	1487.57	-59.8985	-230.424	1289.95	-63.3856	-209.321	1135.03	-52.4203	-81.403	1015.97	11.0593	-23.985	953.251	-45.5153	-56.4382	919.305	-29.7999	12.6468	892.881
4574	0	170.807	-93.661	1664.63	253.98	-114.874	1666.94	134.75	-286.686	1679.94	246.095	-288.839	1681.22	190.767	-336.848	1533.39	176.037	-418.858	1269.93	205.92	-190.309	1444.31	232.78	-130.114	1243.65	257.002	-427.86	1326.92	16.1936	-231.191	1485.34	-58.575	-220.349	1287.71	-62.4367	-198.701	1133.01	-51.3982	-70.3691	1014.12	12.2226	-12.5983	951.901	-45.5595	-44.5045	918.567	-28.712	24.3419	891.651
4575	0	172.351	-83.6276	1662.3	255.395	-104.595	1664.52	136.774	-276.768	1677	248.082	-278.555	1678.24	192.734	-326.41	1530.77	177.712	-408.675	1267.39	207.59	-180.153	1441.34	233.769	-119.989	1240.67	258.685	-417.734	1324.15	17.9226	-221.222	1482.87	-57.0086	-210.311	1285.34	-61.1458	-188.035	1130.79	-50.0478	-59.2389	1012.47	13.3218	-1.22293	950.357	-43.342	-33.4301	916.326	-27.5985	35.903	890.304
4576	0	173.743	-73.5552	1660.15	256.968	-94.1437	1662.13	138.932	-266.706	1674.39	250.25	-268.166	1675.48	194.931	-316.05	1528.31	179.106	-398.365	1265.16	209.309	-169.811	1438.7	235.068	-109.836	1237.83	260.458	-407.462	1321.62	19.5728	-211.025	1480.73	-55.4753	-199.977	1283.29	-60.0991	-177.421	1128.62	-48.9284	-48.3992	1010.52	14.3495	9.83289	948.576	-43.2885	-21.9175	915.063	-26.6531	47.14	888.652
4577	0	175.576	-63.0885	1658.16	258.759	-83.5071	1660.23	141.211	-256.543	1671.48	252.436	-257.751	1672.58	197.013	-305.588	1525.73	180.652	-388.031	1262.54	211.098	-159.458	1436.06	236.353	-99.5497	1235.03	262.102	-397.155	1318.97	21.6264	-200.651	1478.34	-53.7998	-189.834	1280.87	-58.8728	-166.789	1126.56	-47.8793	-37.5863	1008.56	15.3418	20.8331	946.573	-42.3808	-10.8718	913.186	-25.8308	58.2587	887.095
4578	0	177.206	-52.8529	1656.59	260.77	-72.9459	1658.48	143.635	-246.233	1668.62	254.954	-247.187	1669.8	199.428	-294.867	1523.55	182.223	-377.48	1260.31	213.082	-148.822	1433.55	237.671	-89.1602	1232.31	263.816	-386.714	1316.62	23.5014	-190.129	1476.27	-52.1142	-179.693	1278.87	-57.2788	-156.019	1124.63	-46.744	-26.7074	1006.77	16.2354	31.6015	944.747	-41.6845	-0.061399	911.342	-25.2708	68.915	885.28
4579	0	179.437	-42.3259	1655.16	262.909	-62.0834	1656.86	146.294	-235.817	1666.2	257.673	-236.431	1667.23	201.597	-284.108	1521.58	183.673	-366.764	1258.42	215.071	-138.218	1431.26	239.353	-78.5542	1229.86	265.432	-376.109	1314.48	25.8219	-179.368	1474.44	-50.1571	-169.345	1277.16	-56.0342	-145.382	1122.8	-45.8138	-16.2687	1004.78	17.0056	42.1027	942.502	-40.977	10.409	909.37	-24.7113	79.5368	883.497
4580	0	181.272	-31.8003	1653.76	265.18	-51.129	1655.46	149.337	-225.516	1663.29	260.41	-225.623	1664.74	204.221	-273.158	1519.52	185.201	-355.997	1256.73	217.301	-127.374	1428.87	240.864	-67.92	1227.42	267.119	-365.446	1312.3	27.9837	-168.686	1472.69	-48.2011	-158.966	1275.3	-54.2952	-134.703	1121.03	-44.7987	-5.87582	1002.84	17.9468	52.5395	940.185	-40.1891	20.6974	907.395	-24.2945	89.6275	881.247
4581	0	183.796	-20.9041	1652.43	267.475	-40.2048	1654.07	152.041	-214.967	1661.25	263.093	-214.778	1662.33	206.538	-262.186	1517.67	186.618	-345.071	1254.72	219.402	-116.491	1426.8	242.485	-57.2111	1224.96	268.73	-354.636	1310.24	30.4616	-157.761	1470.85	-46.1955	-148.52	1273.66	-52.575	-124.123	1119.44	-43.6392	4.41581	1000.7	18.601	62.663	937.654	-39.5142	30.549	905.057	-23.9178	99.5513	878.838
4582	0	186.283	-10.0611	1651.51	269.983	-29.0352	1652.66	154.98	-204.171	1659.33	266.293	-203.806	1660.57	209.307	-251.172	1515.97	188.074	-334.06	1253.31	221.852	-105.535	1424.84	244.28	-46.3098	1223	270.535	-343.685	1308.52	32.7967	-146.955	1469.38	-43.9389	-137.8	1272.36	-50.8925	-113.531	1118.42	-42.571	14.4232	998.688	19.2836	72.5445	935.241	-38.9935	40.1721	902.966	-23.7643	109.076	876.527
4583	0	188.726	0.952534	1650.64	272.267	-17.9364	1651.56	157.999	-193.248	1657.72	269.434	-192.594	1658.96	212.292	-240.055	1515.03	189.559	-323.057	1252.36	224.24	-94.5764	1423.3	246.117	-35.4511	1221.34	272.482	-332.741	1307.24	35.4449	-136.008	1468.23	-41.7063	-127.018	1271.64	-48.7222	-103.021	1117.39	-41.5124	24.1196	996.936	19.8733	82.1536	932.763	-38.4173	49.479	901.134	-23.5516	118.187	874.113
4584	0	191.372	12.1529	1650.2	274.782	-6.67881	1650.68	161.065	-182.253	1656.64	272.503	-181.406	1657.69	214.758	-229	1513.99	190.842	-311.854	1251.55	226.648	-83.5444	1422.28	247.987	-24.3555	1220.29	274.241	-321.759	1306.22	37.9044	-125.035	1467.47	-39.3782	-116.05	1271.04	-46.7555	-92.7886	1116.81	-40.5077	33.7256	995.504	20.2764	91.4077	930.469	-36.9401	57.9665	898.956	-23.5284	126.986	871.851
4585	0	194.092	23.1779	1649.87	277.686	4.67297	1650.26	164.169	-171.222	1655.8	275.611	-170.246	1656.72	217.697	-217.662	1513.46	192.216	-300.592	1250.9	228.999	-72.5219	1421.66	249.981	-13.2295	1219.57	276.207	-310.664	1305.36	40.3464	-114.267	1467.05	-37.059	-104.757	1270.96	-44.5556	-82.463	1116.54	-39.4418	43.0456	994.171	20.8838	100.429	928.509	-36.4998	66.5708	897.397	-23.7649	135.146	869.63
4586	0	196.814	34.292	1649.81	280.694	15.826	1649.92	167.222	-160.095	1655.39	278.609	-159.038	1655.94	220.075	-206.819	1513.1	193.675	-289.275	1250.72	231.347	-61.5332	1421.24	252.007	-2.00066	1219.39	278.375	-299.578	1304.82	43.061	-103.236	1467.07	-34.9998	-93.4587	1271.42	-42.4365	-72.3409	1116.56	-38.3611	52.1913	993.411	21.3447	109.242	926.497	-36.2997	74.7914	896.278	-23.5494	143.352	868.066
4587	0	199.629	45.4478	1649.93	283.558	26.8712	1649.84	170.236	-148.981	1655.63	281.688	-147.839	1655.83	222.922	-195.798	1512.97	195.383	-277.938	1250.76	233.656	-50.5604	1421.33	253.93	9.06293	1219.48	280.477	-288.348	1304.47	45.2528	-92.5948	1467.49	-32.6447	-81.9781	1272.05	-40.2772	-62.3927	1117	-37.3235	60.9932	992.724	21.812	117.695	924.884	-37.1101	82.9563	895.734	-23.5699	150.802	866.113
4588	0	202.76	56.5453	1650.11	286.443	37.9525	1649.68	173.25	-137.963	1656.15	284.454	-136.7	1655.68	225.265	-185.272	1513.37	196.976	-266.668	1250.77	235.892	-39.8087	1421.74	255.826	19.9324	1219.84	282.526	-277.256	1304.28	47.6215	-81.8611	1467.95	-30.497	-70.6748	1273.11	-37.8925	-52.6091	1117.58	-36.3052	69.4908	992.079	21.9928	125.553	923.35	-36.6855	90.4496	894.812	-23.5363	157.993	864.292
4589	0	205.713	67.4844	1650.65	289.481	49.0021	1649.75	176.303	-126.902	1657.22	287.614	-125.724	1656.33	227.936	-174.653	1513.99	198.816	-255.365	1250.97	237.987	-29.0434	1422.39	257.525	30.8019	1220.67	284.685	-266.005	1304.46	49.9478	-71.5515	1468.83	-28.4595	-59.6129	1274.15	-35.64	-42.9048	1118.64	-35.2863	77.7218	991.859	22.4208	133.153	922.028	-36.5222	97.5678	894.522	-24.0973	164.991	863.298
4590	0	208.574	78.3635	1651.21	292.597	59.8012	1650.32	179.175	-115.916	1658.9	290.868	-115.062	1657.94	230.256	-164.411	1514.8	200.849	-244.116	1251.87	240.034	-18.4988	1423.65	258.991	41.7207	1221.74	286.865	-254.794	1305.01	52.0803	-61.3238	1470.31	-26.4071	-48.7472	1275.82	-33.6406	-33.4008	1120.36	-34.1893	85.6695	991.992	22.9749	140.558	921.092	-35.9655	104.494	894.324	-24.2476	171.359	862.081
4591	0	211.53	89.1692	1652.24	295.388	70.3902	1650.97	182.112	-105.087	1660.85	293.551	-104.163	1659.12	232.63	-154.208	1516.01	202.824	-233.133	1252.87	241.981	-7.94088	1425.21	260.436	52.9287	1223.75	288.949	-243.601	1305.69	54.1331	-51.4171	1471.92	-24.5638	-38.202	1277.69	-31.2372	-24.3166	1121.98	-33.0452	93.4787	992.347	23.3698	147.498	920.353	-35.8574	110.951	894.449	-24.2615	177.562	861.354
4592	0	214.276	99.6749	1653.57	298.27	81.0082	1651.98	184.898	-94.5034	1663.25	296.194	-93.7425	1660.67	235.066	-143.879	1517.62	204.951	-222.107	1253.81	243.595	2.49174	1427.2	261.663	64.1597	1226.07	291.052	-232.397	1306.53	55.9226	-41.8426	1474.03	-23.0789	-28.1162	1279.97	-29.3154	-15.2063	1124.49	-32.068	101.051	993.446	23.6933	154.203	920.162	-35.7963	117.411	895.431	-24.2059	183.525	860.986
4593	0	216.839	109.972	1655.47	301.003	91.1329	1653.47	187.442	-84.0484	1665.71	299.229	-83.4867	1662.93	237.214	-133.916	1518.97	207.181	-211.194	1255.08	245.102	12.8184	1429.52	262.863	75.4778	1228.74	293.367	-221.316	1307.67	57.4795	-32.5332	1476.37	-21.5096	-18.4264	1282.53	-27.1903	-6.58474	1126.71	-31.1605	108.224	994.993	23.9803	160.573	920.459	-35.4844	123.751	896.554	-24.212	189.233	861.141
4594	0	219.671	120.142	1657.84	303.722	101.301	1655.14	190.042	-73.9558	1668.07	301.773	-73.3434	1664.66	239.433	-123.952	1520.66	209.696	-200.468	1256.74	246.629	23.0505	1432.06	263.779	86.6826	1231.38	295.797	-210.302	1309.13	59.2921	-23.2773	1479.05	-20.1927	-9.2201	1285.61	-25.3031	1.66039	1129.36	-30.2298	115.412	996.754	24.5863	166.839	921.293	-35.6046	129.854	898.29	-24.1181	194.891	861.684
4595	0	222.096	130.008	1660.12	306.18	110.994	1657.21	192.503	-64.0632	1670.72	304.425	-63.5358	1666.72	241.689	-113.986	1522.63	212.112	-189.768	1258.43	247.871	33.2643	1434.47	264.565	97.6991	1234.36	298.102	-199.443	1310.71	60.7589	-14.1418	1482	-18.8184	-0.550053	1288.24	-23.6783	9.56395	1131.98	-29.479	122.191	998.697	24.9094	172.843	922.226	-35.6012	135.835	900.03	-23.7961	200.415	862.393
4596	0	224.59	139.537	1662.79	308.484	120.601	1659.06	194.951	-54.4265	1673.14	306.547	-53.9603	1668.39	243.717	-104.128	1524.59	214.659	-179.209	1259.93	249.016	43.3417	1436.95	265.129	108.545	1237.1	300.549	-188.65	1312.4	62.267	-5.14015	1484.62	-17.6808	7.96563	1291.02	-22.0751	17.3852	1134.77	-28.7094	129.055	1000.75	25.5945	178.797	923.433	-35.6971	141.923	902.445	-23.4442	206.012	863.42
4597	0	226.905	149.026	1665.52	310.921	130.034	1661.3	197.274	-45.0197	1675.64	308.947	-44.716	1670.33	245.435	-94.5798	1526.28	217.239	-168.828	1261.75	250.051	53.2071	1439.43	265.541	119.23	1239.71	303.193	-178.016	1314.05	63.6273	3.74927	1487.26	-16.2985	15.9282	1293.73	-21.0468	24.7585	1137.69	-28.0613	135.556	1002.72	26.0518	184.902	924.943	-35.4985	148	904.372	-22.9593	211.541	864.532
4598	0	228.961	158.225	1667.98	312.892	139.235	1663.37	199.432	-35.8852	1677.96	310.319	-35.2338	1671.4	247.486	-85.0736	1528.35	219.61	-158.742	1263.53	250.881	63.0177	1441.56	265.751	129.688	1242.1	305.614	-167.602	1315.91	64.9169	12.5409	1489.95	-15.3915	23.4685	1296.23	-20.0407	31.777	1140.17	-27.3775	142.039	1004.8	26.3939	190.51	926.461	-34.7856	153.84	906.212	-22.261	216.927	865.55
4599	0	231.048	167.167	1670.85	314.811	148.162	1665.62	201.471	-26.9386	1680.25	312.618	-26.3386	1673.11	248.848	-75.7343	1530.2	221.928	-148.829	1265.09	251.557	72.7504	1443.71	265.881	139.962	1244.61	307.964	-157.338	1317.62	66.1112	21.1697	1492.33	-14.5297	30.9294	1298.55	-19.4782	38.6958	1142.82	-27.1134	148.44	1006.8	26.6698	195.867	927.876	-34.8025	159.852	908.363	-21.6286	222.438	866.991
4600	0	232.745	176.002	1673.7	316.586	157.007	1667.94	203.412	-18.203	1682.53	314.263	-17.4272	1674.6	250.821	-66.1749	1532.18	224.285	-139.035	1266.97	252.351	82.2453	1446.05	265.965	150.097	1247.06	310.457	-147.225	1319.5	67.2796	29.6326	1494.77	-13.766	37.9117	1301.24	-18.7525	45.4419	1145.25	-26.597	154.573	1009.25	27.2059	201.49	929.636	-34.748	165.716	910.454	-21.1114	227.92	868.643
4601	0	234.267	184.607	1676.6	318.271	165.711	1670.49	205.195	-9.55567	1684.53	316.18	-8.68228	1676.53	252.218	-57.1361	1534.1	226.558	-129.281	1268.91	252.997	91.6999	1448.34	266.062	159.905	1249.44	312.79	-137.286	1321.39	68.1594	37.9257	1497.51	-12.7759	44.6473	1303.36	-18.6548	51.8303	1147.71	-26.3889	160.586	1010.88	27.5031	207.293	931.514	-34.5566	171.572	912.735	-20.4986	233.487	870.372
4602	0	235.804	193.146	1679.41	319.769	174.277	1673.18	206.811	-1.11084	1686.72	318.047	-0.201275	1678.35	253.812	-47.7928	1536.01	228.528	-119.89	1270.52	253.455	101.024	1450.55	265.928	169.63	1251.76	314.771	-127.421	1323.23	68.9492	46.0566	1499.8	-12.5155	51.059	1305.96	-18.6521	58.0583	1149.99	-26.1964	166.588	1012.92	28.0367	213.082	933.723	-34.1308	177.384	914.651	-19.931	239.076	872.192
4603	0	236.894	201.54	1682.26	320.965	182.799	1675.52	208.312	7.23384	1688.77	319.302	8.25891	1679.87	255.181	-38.7992	1537.9	230.545	-110.32	1272.06	254.009	110.223	1452.73	265.883	179.206	1254.2	316.751	-117.476	1325.15	69.911	54.1737	1501.82	-12.1369	57.6406	1308.26	-18.4006	64.0811	1151.84	-26.0791	172.409	1014.98	28.1597	218.917	936.018	-33.7862	183.141	916.629	-19.4934	244.725	874.082
4604	0	237.966	209.779	1684.89	322.059	191.286	1677.88	209.65	15.4397	1690.61	320.733	16.7575	1681.51	256.522	-29.8589	1539.64	232.445	-101.03	1273.83	254.416	119.352	1454.73	265.691	188.587	1256.25	318.715	-108.079	1326.61	70.6506	62.1954	1504.02	-11.5611	63.9944	1310.29	-18.1444	69.9817	1154.03	-25.995	178.092	1016.77	28.3019	224.413	937.672	-33.7439	188.922	918.609	-19.055	250.334	875.87
4605	0	238.675	217.986	1687.6	322.774	199.689	1680.13	210.82	23.5428	1692.51	321.908	25.0851	1683.32	257.763	-21.0105	1541.41	234.249	-91.836	1275.57	254.808	128.244	1456.82	265.521	197.89	1258.13	320.389	-98.2339	1328.72	71.263	69.8709	1505.85	-11.26	70.0249	1312.08	-18.0899	75.5558	1155.75	-25.9804	183.62	1018.55	28.6192	230.323	939.769	-33.1512	194.314	920.206	-18.661	255.96	877.739
4606	0	239.166	226.033	1690.14	323.345	207.958	1682.61	211.77	31.6245	1694.42	323.006	33.4676	1685.18	258.834	-12.2745	1543.35	235.952	-82.7159	1277.24	255.103	137.03	1458.84	265.383	207.079	1260.29	322.043	-88.8214	1330.26	71.8438	77.6694	1507.71	-10.9518	76.1414	1314.28	-17.9662	80.9781	1157.6	-26.0395	189.11	1020.34	28.5584	235.919	941.531	-33.1923	199.867	921.938	-18.4503	261.546	879.566
4607	0	239.905	234.255	1692.63	323.758	216.295	1684.95	212.784	39.6988	1696.34	323.936	41.8078	1686.93	260.06	-3.55257	1545.03	237.76	-73.5812	1278.89	255.471	145.872	1460.78	265.213	216.338	1262.42	323.502	-79.4935	1332.09	72.51	85.3103	1509.5	-10.5162	82.2781	1315.96	-17.773	86.3046	1159.5	-26.001	194.467	1022.04	28.6815	241.747	943.895	-32.5948	205.214	923.849	-18.3953	267.08	881.483
4608	0	240.078	242.319	1695.02	324.086	224.716	1687.36	213.488	47.7179	1698.05	324.736	50.2229	1688.81	261.183	5.03897	1546.91	239.348	-64.7672	1280.74	255.828	154.555	1462.81	265.065	225.54	1264.64	325.117	-70.3891	1333.75	73.0763	92.6513	1511.59	-9.95292	88.2305	1317.96	-16.7844	91.124	1160.68	-26.1555	199.613	1023.88	28.5075	247.668	945.991	-32.6524	210.696	925.411	-18.4835	272.571	883.58
4609	0	239.814	250.258	1697.35	324.162	233.053	1689.87	213.975	55.6685	1699.98	325.287	58.4523	1690.89	262.151	13.6585	1548.66	240.5	-56.0687	1283.1	256.095	163.291	1464.98	265.057	234.684	1266.89	326.488	-60.9489	1335.68	73.4884	100.37	1513.47	-9.65204	93.9515	1319.82	-16.9504	96.2554	1162.62	-26.3406	204.728	1025.72	28.1226	253.418	948.238	-32.2727	215.723	927.649	-19.0095	277.91	885.695
4610	0	239.81	258.399	1699.87	324.095	241.175	1692.5	214.539	63.633	1701.61	325.836	66.6003	1692.8	263.15	22.2228	1550.56	242.378	-46.8811	1283.84	256.443	171.872	1467.15	264.985	243.829	1269.31	327.979	-51.7382	1337.4	74.0515	107.654	1515.32	-9.39339	99.6222	1321.9	-16.6747	101.273	1164.51	-26.6218	209.726	1027.52	27.6486	259.133	950.707	-32.2785	220.785	929.397	-19.4594	283.243	887.873
4611	0	239.436	266.359	1702.31	323.979	249.543	1694.83	215.008	71.5073	1703.27	326.219	74.901	1694.86	264.076	30.7533	1552.35	243.583	-38.458	1286.19	256.593	180.371	1469.32	264.962	253.091	1271.68	329.644	-42.5869	1338.92	74.9302	114.702	1517.37	-8.64111	105.337	1323.69	-16.3392	106.268	1166.29	-26.9504	214.653	1029.73	27.0259	264.688	952.818	-32.7892	225.898	931.586	-20.1557	288.514	890.231
4612	0	239.011	274.277	1704.29	323.68	257.864	1697.19	215.213	79.4015	1704.7	326.397	83.3422	1696.52	265.092	39.1947	1553.75	245.207	-29.5893	1287.88	256.815	188.829	1471.32	265.054	262.294	1273.88	331.189	-33.5207	1340.72	75.4614	122.117	1519.05	-8.00957	111.049	1325.65	-15.9979	111.135	1168.07	-27.2735	219.537	1031.52	26.3549	270.354	954.836	-32.6392	230.592	933.453	-20.9226	293.568	892
4613	0	238.599	282.276	1706.2	323.109	266.067	1699.39	215.445	87.3589	1706.09	326.708	91.4849	1698.51	265.867	47.6652	1555.31	246.568	-20.8894	1289.41	257.083	197.51	1473	265.06	271.301	1275.81	332.71	-24.3229	1342.24	75.8827	129.539	1520.66	-7.50764	116.607	1327.23	-15.3148	116.056	1169.81	-27.5035	224.4	1032.89	25.6693	276.079	956.768	-32.8683	235.446	934.817	-21.8706	298.661	893.75
4614	0	237.882	290.217	1707.91	322.521	274.585	1701.29	215.496	95.208	1707.55	326.913	99.8501	1700.22	266.701	56.01	1556.81	247.833	-12.2357	1290.69	257.297	206.107	1474.54	265.104	280.2	1277.31	334.041	-15.2679	1343.74	76.4848	137.184	1521.82	-6.7822	122.162	1328.56	-14.7337	121.033	1171.3	-27.6848	229.311	1034.27	24.7487	281.66	958.317	-32.5542	240.041	935.887	-22.9432	303.651	895.389
4615	0	237.328	298.348	1709.54	321.764	282.915	1703.09	215.548	103.162	1708.55	326.764	108.404	1701.4	267.432	64.4401	1558.16	249.288	-3.50208	1292.02	257.519	214.558	1476.08	265.33	289.021	1279.07	335.635	-6.17025	1345.17	76.9553	144.766	1523.32	-6.12054	127.849	1329.95	-13.9077	126.105	1172.81	-28.0921	234.156	1035.59	23.8052	287.221	959.557	-31.1808	244.197	936.603	-24.106	308.452	896.723
4616	0	236.284	306.202	1711.21	321.014	291.228	1704.99	215.559	111.113	1709.51	326.667	116.843	1702.69	268.095	73.0521	1559.26	250.583	5.10998	1293.14	257.517	222.891	1477.44	265.463	297.499	1280.3	336.897	2.85657	1346.5	77.3102	152.447	1524.5	-5.18278	133.568	1331.23	-13.0516	131.296	1173.97	-28.4724	238.913	1036.74	22.7148	292.863	960.783	-32.0244	248.925	938.015	-25.5112	313.221	897.947
4617	0	235.399	314.334	1712.77	320.378	299.669	1707.03	215.37	119.084	1710.45	326.521	125.294	1704.04	268.648	81.5222	1561.16	251.607	13.7854	1294.38	257.786	231.561	1479.2	265.408	305.808	1281.67	338.013	11.9247	1347.7	77.751	160.3	1525.55	-4.54735	139.392	1332.41	-12.1514	136.615	1175.07	-29.1706	243.916	1037.76	21.5182	298.528	962.004	-32.2349	253.571	939.048	-26.9219	318.082	899.2
4618	0	234.371	322.433	1714.46	319.387	308.073	1708.57	215.3	127.156	1711.02	326.377	133.625	1705.34	269.208	90.272	1561.68	252.883	22.4801	1295.49	257.932	240.31	1480.34	265.437	314.208	1282.72	339.337	21.0947	1348.85	78.0431	168.22	1526.64	-3.92444	145.344	1333.65	-11.5158	142.09	1176.23	-29.414	248.82	1038.5	20.4058	304.186	963.008	-31.8205	258.072	939.321	-28.4262	322.85	900.052
4619	0	233.487	330.559	1715.37	318.6	316.59	1710.12	215.044	135.308	1711.59	326.175	142.244	1706.36	269.811	99.0811	1562.53	254.094	31.1661	1296.35	257.838	249.001	1480.94	265.307	322.481	1283.32	340.465	30.1214	1349.99	78.241	176.194	1527.51	-3.08217	151.665	1334.63	-10.7275	147.667	1177.07	-29.9557	253.797	1039.13	19.0684	309.822	963.649	-31.9459	262.739	939.755	-29.9589	327.564	900.653
4620	0	232.48	338.876	1716.33	317.73	325.202	1711.46	214.662	143.516	1711.88	325.733	150.878	1706.97	270.093	107.924	1563.28	254.965	39.9326	1297.1	257.808	257.803	1481.72	265.285	331.096	1284.03	341.197	39.076	1351.03	78.4853	184.435	1528.09	-2.55466	157.907	1335.3	-9.87334	153.548	1177.66	-30.4511	258.855	1039.44	17.6607	315.565	964.028	-32.2638	267.431	939.851	-31.4889	332.186	900.681
4621	0	231.231	347.16	1717.04	316.668	333.746	1712.44	214.412	151.832	1711.94	325.462	159.367	1707.75	270.429	116.798	1563.72	255.863	48.623	1297.61	257.66	266.6	1482.21	265.077	339.443	1284.15	342.014	48.1482	1351.48	78.6899	192.675	1528.48	-1.93093	164.734	1335.77	-9.33131	159.407	1178.25	-31.0147	264.151	1039.54	16.3749	321.374	964.085	-32.6761	272.262	939.825	-33.0247	336.967	900.518
4622	0	230.444	355.653	1717.64	315.691	342.478	1713.14	214.009	160.207	1711.76	324.939	168.201	1707.74	270.85	125.8	1564.01	256.902	57.4465	1298.19	257.493	275.477	1482.39	264.712	347.527	1284.1	343.054	57.1458	1352.26	78.7722	200.935	1528.69	-1.36909	171.529	1335.95	-8.61343	165.709	1178.62	-31.5514	269.54	1039.39	14.9268	327.191	963.66	-33.1402	277.188	939.731	-34.5895	341.786	900.207
4623	0	229.443	364.225	1717.81	314.775	351.4	1713.58	213.501	168.704	1711.36	324.424	177.118	1707.69	271.041	134.813	1564.08	257.751	66.2219	1298.46	257.271	284.429	1482.44	264.572	356.234	1284.1	343.681	66.1702	1352.66	78.7474	209.339	1528.63	-0.768736	178.835	1336.13	-8.005	172.2	1178.79	-32.157	275.107	1038.84	13.5394	332.906	962.998	-33.7261	282.07	939.4	-36.1884	346.516	899.35
4624	0	228.198	372.741	1717.76	313.7	360.325	1713.95	213.092	177.385	1710.94	323.828	186.107	1707.58	271.165	143.975	1564.04	258.284	75.1018	1298.65	257.02	293.528	1482.12	264.312	364.943	1283.61	344.214	75.2117	1352.91	78.8481	217.831	1528.11	-0.597441	186.274	1336.08	-7.54724	178.848	1178.8	-32.9344	280.775	1038.43	12.0686	338.781	962.254	-34.353	287.11	938.67	-37.8487	351.28	898.385
4625	0	227.209	381.546	1717.82	312.525	369.301	1714.03	212.552	186.189	1710.15	323.276	195.139	1707.38	271.287	153.18	1563.9	258.859	83.8869	1298.49	256.747	302.721	1481.71	263.957	373.842	1283.03	344.822	84.2732	1352.96	78.8127	226.617	1527.87	-0.36278	193.916	1335.72	-7.07602	185.819	1178.66	-33.6434	286.627	1037.69	10.5112	344.7	961.338	-35.2296	292.288	937.89	-39.5966	356.187	897.388
4626	0	226.16	390.547	1717.53	311.556	378.321	1714.09	212.039	195.026	1709.33	322.707	204.31	1706.96	271.361	162.515	1563.33	259.325	92.8805	1298.32	256.435	311.909	1481.09	263.62	382.758	1282.38	345.324	93.4986	1352.66	78.8532	235.388	1527.32	-0.082681	202.077	1335.16	-6.65406	192.868	1178.54	-34.5185	292.395	1036.81	8.61457	350.472	959.713	-35.9481	297.512	936.929	-40.9644	361.337	895.807
4627	0	225.181	399.539	1717.18	310.525	387.616	1714.01	211.345	203.994	1708.35	322.132	213.412	1706.51	271.266	171.992	1562.81	259.475	101.819	1297.74	256.088	321.186	1480.28	263.325	391.724	1281.69	345.545	102.729	1352.45	78.6095	244.348	1526.62	-0.1382	210.159	1334.52	-6.46053	200.017	1177.73	-35.2357	298.413	1035.87	7.13698	356.426	958.105	-36.9209	302.844	935.684	-42.823	366.242	894.491
4628	0	223.922	408.725	1716.54	309.496	396.992	1713.62	210.65	213.177	1707.21	321.394	222.841	1705.63	271.108	181.554	1562.15	259.539	110.966	1297.34	255.75	330.558	1479.29	262.873	400.739	1280.66	345.564	111.914	1351.84	78.3617	253.374	1525.48	-0.2881	218.521	1334.06	-6.20431	207.549	1176.92	-36.1984	304.809	1034.43	5.97497	362.705	956.754	-38.0693	308.279	934.314	-44.462	371.455	892.49
4629	0	222.789	417.936	1715.49	308.527	406.501	1712.95	210.068	222.383	1705.77	320.779	232.343	1704.77	270.863	191.282	1561.23	259.64	120.115	1296.49	255.406	339.948	1478.25	262.498	409.751	1279.24	345.61	121.203	1351.13	78.0804	262.632	1524.44	-0.492222	226.935	1332.77	-6.21237	215.077	1176.18	-36.9206	311.14	1032.9	4.5169	368.703	954.553	-39.2679	313.885	932.959	-45.9449	376.694	890.571
4630	0	221.556	427.34	1714.51	307.298	416.134	1712.07	209.359	231.861	1704.26	320.043	241.924	1703.82	270.555	200.947	1560.21	259.453	129.41	1295.72	255.015	349.519	1476.75	262.003	418.839	1277.69	345.419	130.572	1350.32	77.724	271.995	1523.19	-0.595685	235.619	1331.57	-6.16808	222.905	1175.06	-37.9372	317.424	1031.32	3.15977	374.867	952.286	-40.3543	319.488	931.11	-47.3978	382.016	888.128
4631	0	220.378	436.885	1713.16	305.932	425.79	1711.08	208.417	241.441	1702.73	319.067	251.689	1702.45	270.046	210.862	1559	258.897	138.746	1294.71	254.436	359.099	1475.31	261.522	427.942	1275.72	344.903	139.92	1349.41	77.1694	281.706	1521.61	-0.807428	244.495	1330.07	-6.2225	230.948	1173.92	-38.8705	324.004	1029.31	1.74273	381.03	949.699	-41.7009	325.185	929.33	-49.1032	387.357	885.76
4632	0	219.091	446.602	1711.62	304.716	435.755	1709.83	207.639	251.111	1700.95	318.161	261.581	1701.05	269.568	220.819	1557.79	258.308	148.149	1293.65	254.029	368.994	1473.54	261.098	437.147	1273.83	344.486	149.477	1348.36	76.7719	291.476	1519.91	-1.06751	253.445	1328.72	-6.4519	239.004	1172.52	-39.9563	331.012	1027.34	0.207221	387.29	947.208	-43.0117	331.112	927.526	-51.1014	392.749	883.614
4633	0	217.855	456.432	1709.9	303.389	445.563	1708.43	206.728	260.948	1699.05	317.293	271.519	1699.71	269.073	230.832	1556.32	257.675	157.62	1292.25	253.524	378.846	1471.98	260.786	446.481	1272.06	344.009	159.102	1347.13	76.2414	301.392	1518.3	-1.38426	262.498	1327.02	-6.69939	247.196	1171.15	-40.9985	337.67	1025.33	-1.28598	393.713	944.711	-44.1362	337.034	925.359	-52.447	398.391	880.596
4634	0	216.429	466.364	1708.19	302.127	455.592	1707.07	205.628	270.901	1696.9	316.24	281.457	1698.39	268.352	240.978	1554.8	256.753	167.174	1290.98	252.99	388.845	1469.89	260.336	455.898	1269.89	343.322	168.735	1345.76	75.4763	311.446	1516.41	-2.10547	271.767	1325.73	-6.99641	255.7	1169.65	-42.0785	344.824	1023.37	-2.98473	400.364	942.084	-45.3297	343.064	923.001	-54.3889	403.757	878.318
4635	0	214.891	476.537	1706.11	300.788	465.735	1705.51	204.465	280.937	1694.83	315.08	291.762	1696.63	267.497	251.133	1553.22	255.645	176.841	1289.59	252.424	398.908	1467.9	259.873	465.304	1267.83	342.479	178.452	1344.46	74.7003	321.727	1514.7	-2.64487	281.099	1323.81	-7.261	264.438	1168	-42.9906	351.706	1020.94	-4.59835	407.024	939.113	-46.7852	349.322	920.683	-55.935	409.592	875.162
4636	0	213.599	486.762	1703.99	299.287	475.909	1703.67	203.301	291.089	1692.66	313.975	301.93	1695.02	266.59	261.465	1551.24	254.519	186.554	1287.76	251.623	409.051	1465.8	259.3	474.853	1265.4	341.7	188.291	1342.67	73.9011	332.198	1512.68	-3.18077	290.696	1322.1	-7.7819	273.202	1166.49	-44.2527	358.968	1018.72	-6.34558	413.642	936.2	-48.2473	355.71	918.421	-58.0338	415.447	872.681
4637	0	212.22	497.03	1701.7	297.852	486.313	1701.68	201.978	301.407	1690.42	312.539	312.432	1692.96	265.561	271.659	1549.32	253.269	196.353	1285.95	250.79	419.135	1463.61	258.741	484.486	1262.89	340.757	198.116	1341.02	73.0276	342.805	1510.56	-4.19679	300.487	1320.36	-8.33547	282.084	1164.75	-45.5332	366.43	1016.29	-8.05071	420.386	933.213	-49.9615	361.988	916.096	-59.7511	421.386	869.459
4638	0	210.414	507.43	1699.25	296.224	496.917	1699.6	200.466	311.853	1688.29	311.016	322.799	1691.01	264.29	281.933	1547.33	251.9	206.185	1284.07	249.877	429.368	1461.11	258.185	494.235	1260.56	339.509	207.871	1339.29	72.0134	353.588	1508.41	-5.16951	310.238	1318.06	-9.02316	291.313	1162.95	-46.976	373.986	1013.57	-9.73887	427.469	930.03	-51.5719	368.656	913.883	-61.4733	427.474	865.948
4639	0	208.728	517.977	1696.92	294.793	507.524	1697.43	198.952	322.437	1686.17	309.467	333.419	1689.06	262.978	292.235	1545.48	250.635	216.193	1282.06	248.888	439.778	1459.07	257.652	504.051	1258.09	338.205	217.936	1337.45	70.6955	364.339	1506.31	-6.31592	320.525	1316	-9.83491	300.693	1161.13	-48.309	381.902	1011.02	-11.6939	434.58	926.848	-53.0736	375.587	911.329	-63.4509	433.802	862.815
4640	0	207.163	528.691	1694.63	293.079	518.159	1695.16	197.397	333.066	1683.97	307.908	343.999	1687.19	261.488	302.61	1543.47	249.505	226.299	1280.09	247.858	450.169	1456.77	257.025	514.033	1255.74	336.901	227.85	1335.42	69.4514	375.079	1503.92	-7.51621	330.787	1313.78	-10.7027	310.321	1159.14	-49.9369	389.76	1008.66	-13.6192	441.885	923.637	-54.6705	382.518	908.721	-65.4167	440.127	859.727
4641	0	205.468	539.54	1692.11	291.296	528.761	1692.79	195.582	343.797	1681.87	306.076	354.588	1685.41	259.813	313.213	1541.37	248.073	236.47	1278.07	246.645	460.652	1454.56	256.41	524.298	1253.31	335.297	237.915	1333.71	68.1822	385.982	1501.43	-8.71744	341.268	1311.62	-11.727	320.147	1157.09	-51.3737	397.888	1005.76	-15.597	449.537	920.432	-56.6003	389.594	906.168	-67.4564	446.884	856.537
4642	0	203.723	550.286	1689.57	289.537	539.534	1690.53	193.722	354.683	1679.88	304.192	365.226	1683.6	258	323.773	1539.27	246.636	246.719	1276.15	245.175	471.129	1452.19	255.565	534.446	1251.03	333.597	248.119	1331.83	66.5237	397.009	1499.14	-10.5252	351.978	1309.06	-12.8262	330.267	1154.88	-53.0966	406.422	1003.25	-17.4416	457.225	916.955	-58.0946	397.15	903.269	-69.0889	453.843	852.917
4643	0	201.814	561.173	1687.24	287.88	550.52	1688.24	191.747	365.622	1677.69	302.244	376.234	1681.46	256.312	334.371	1537.31	245.212	257.032	1274.07	243.605	481.49	1449.83	254.602	544.708	1248.94	332.005	258.374	1330.09	64.7365	407.85	1496.76	-12.0117	362.911	1306.64	-13.9245	340.539	1152.81	-54.801	414.724	1001.04	-19.3842	465.406	913.71	-60.2901	404.63	900.758	-71.3794	460.951	849.634
4644	0	200.054	572.209	1684.64	285.996	561.414	1685.8	189.756	376.558	1675.85	300.16	386.959	1679.61	254.368	345.136	1535.42	243.768	267.537	1272.02	241.98	492.237	1448.02	253.586	555.296	1246.84	330.281	268.741	1328.11	62.95	418.682	1494.5	-13.4796	373.869	1304.18	-15.2311	350.961	1150.36	-56.6528	423.631	998.351	-21.6499	473.562	910.545	-61.9738	412.707	897.934	-73.4372	468.257	846.452
4645	0	198.103	583.31	1682.28	283.944	572.436	1683.26	187.492	387.617	1673.84	298.042	397.996	1677.66	252.306	355.882	1533.28	242.288	278.123	1270.22	240.313	502.921	1445.66	252.408	565.948	1244.46	328.452	279.259	1326.42	60.9983	429.661	1491.96	-15.2567	384.948	1302.06	-16.643	361.514	1148.12	-58.4306	433.066	995.399	-23.5041	481.984	907.14	-64.1769	420.898	895.421	-75.4181	475.931	843.07
4646	0	195.996	594.442	1679.96	281.843	583.405	1681.03	185.169	398.723	1672.04	295.863	408.996	1675.96	249.815	366.463	1531.53	240.723	288.935	1268.41	238.558	513.721	1443.52	250.942	576.604	1242.42	326.749	289.946	1324.78	59.1153	440.662	1489.56	-16.9711	395.872	1299.46	-18.2925	372.23	1145.94	-60.0334	442.38	992.701	-25.3331	490.725	903.66	-66.0006	429.613	892.785	-77.5974	484.19	839.841
4647	0	193.92	605.762	1677.86	279.9	594.649	1678.92	182.823	409.993	1670.36	293.481	420.143	1674.08	247.967	377.634	1529.64	239.119	299.825	1266.53	236.413	524.384	1441.28	249.365	587.398	1240.43	324.897	300.755	1323.06	56.965	451.651	1487.05	-18.8333	406.974	1296.87	-20.0002	383.127	1143.59	-61.7457	452.119	989.89	-27.3035	499.758	900.583	-67.9531	438.532	890.281	-79.6682	492.465	836.72
4648	0	191.806	617.123	1675.83	277.692	605.865	1677.07	180.494	421.407	1669.07	291.12	431.218	1672.74	245.472	388.435	1528.3	237.338	310.871	1264.78	234.282	535.057	1439.43	247.77	598.468	1238.92	322.801	311.579	1321.54	54.6636	462.612	1484.76	-20.5209	418.107	1294.33	-21.5912	394.192	1141.25	-63.5677	462.016	987.214	-29.3645	508.934	897.604	-69.989	447.669	887.806	-81.5058	501.189	833.784
4649	0	189.461	628.454	1674.34	275.309	617.039	1675.43	177.77	432.798	1667.74	288.485	442.574	1671.42	242.693	399.255	1526.99	235.535	321.996	1263.55	232.077	546.039	1438.12	245.908	609.531	1237.33	320.653	322.568	1320.43	52.1461	473.603	1482.82	-22.6129	429.272	1292.03	-23.3054	405.555	1139.15	-65.3462	472.217	984.698	-31.1039	518.487	894.728	-71.986	457.142	885.428	-83.4216	510.469	830.988
4650	0	187.206	639.962	1672.83	273.179	628.395	1674.05	175.23	444.261	1666.71	285.961	454.006	1670.12	240.096	410.346	1525.6	233.913	333.229	1262.11	229.686	557.053	1437.04	243.862	620.702	1236.36	318.33	333.488	1319.17	49.6635	484.541	1481.07	-24.5509	440.358	1289.89	-25.2176	416.968	1137.09	-67.2389	482.824	982.412	-32.6786	528.148	892.04	-73.8311	466.978	883.257	-84.9082	519.763	828.387
4651	0	184.865	651.403	1671.67	270.865	639.798	1672.66	172.51	455.663	1665.82	283.308	465.133	1669.52	237.815	421.681	1524.66	232.102	344.556	1260.96	227.288	568.321	1436.21	241.801	632.041	1235.71	315.979	344.235	1318.33	47.0589	495.497	1479.58	-26.8243	451.56	1288.21	-27.0283	428.387	1135.47	-68.92	493.267	980.609	-34.4445	538.41	890.031	-75.5022	477.117	881.3	-86.7009	529.436	826.203
4652	0	182.298	662.784	1670.57	268.291	651.02	1671.89	169.662	467.099	1665.39	280.454	476.377	1669.01	235.022	432.636	1523.86	230.126	355.927	1260.25	224.849	579.483	1435.45	239.614	643.607	1235.02	313.411	355.187	1317.66	44.3894	506.427	1478.15	-28.7371	462.948	1286.37	-28.9315	440.04	1133.89	-70.6669	504.172	978.908	-35.9875	548.846	888.157	-77.2196	487.56	879.555	-88.1864	539.745	824.181
4653	0	180.007	674.34	1670.09	265.672	662.297	1671.24	166.713	478.538	1665.21	277.716	487.669	1668.7	232.309	443.754	1523.5	228.072	367.325	1259.46	222.135	590.729	1435.1	237.245	655.14	1234.81	310.813	366.097	1317.19	41.7438	517.417	1477.29	-30.7827	474.272	1284.97	-30.8096	451.781	1132.75	-72.1893	515.44	977.396	-37.2247	559.498	886.131	-78.814	498.457	878.111	-89.6244	550.263	822.436
4654	0	177.493	685.829	1669.89	263.232	673.703	1670.91	163.933	489.973	1665.18	274.698	498.889	1668.61	229.705	454.959	1523.34	226.146	378.674	1258.93	219.357	601.838	1435.18	234.783	666.854	1235.07	308.283	377.007	1316.93	39.1173	528.408	1476.51	-32.9826	485.606	1283.87	-32.782	463.505	1131.86	-73.8974	527.027	976.275	-38.5019	570.255	884.863	-80.1642	509.699	876.923	-90.9208	561.316	821.151
4655	0	174.785	697.113	1669.97	260.647	684.98	1670.98	161.036	501.4	1665.37	271.825	510.127	1668.77	227.002	466.145	1523.31	224.196	389.95	1259.05	216.699	613.022	1435.42	232.608	678.637	1235.39	305.592	387.715	1317.06	36.3738	539.374	1476.12	-35.452	497.036	1283.17	-34.7515	475.473	1131.02	-75.3307	538.853	975.432	-39.5663	581.845	884.153	-81.9522	521.115	876.486	-91.929	572.627	819.954
4656	0	172.181	708.452	1670.55	257.935	696.134	1671.51	158.119	512.806	1665.93	268.948	521.199	1669.36	224.142	477.406	1523.95	222.224	401.06	1259.65	214.078	624.256	1435.95	230.25	690.083	1236.14	302.858	398.337	1317.82	33.6924	550.409	1475.99	-37.5829	508.592	1282.81	-36.8281	487.411	1130.85	-76.6132	550.757	974.96	-40.6191	593.296	883.578	-83.107	533.149	875.898	-93.0124	584.478	819.558
4657	0	169.745	719.741	1671.1	255.333	707.17	1672.17	155.273	524.076	1666.5	266.02	532.322	1669.83	221.387	488.544	1524.62	220.137	412.112	1260.36	211.539	635.478	1436.57	227.862	701.351	1236.78	300.315	408.959	1318.62	31.1096	561.578	1476.23	-39.8002	520.104	1282.82	-38.9781	499.486	1130.89	-77.9665	562.874	974.919	-41.3478	605.286	883.346	-84.526	545.328	875.904	-93.6325	596.817	819.378
4658	0	167.231	730.847	1671.88	252.696	718.123	1672.93	152.48	535.179	1666.9	263.215	543.333	1670.5	218.642	499.691	1525.53	218.047	423.042	1261.01	209.05	646.38	1437.5	225.789	712.599	1237.79	297.934	419.473	1319.76	28.4777	572.732	1476.68	-42.0007	531.624	1282.7	-41.1556	511.655	1131.14	-79.6598	575.611	975.17	-42.2504	617.363	883.638	-85.6019	558.054	875.905	-94.1673	609.57	819.497
4659	0	164.524	741.799	1672.75	250.205	729.083	1673.97	149.744	546.198	1667.73	260.546	554.219	1671.34	215.983	510.602	1526.48	215.711	433.769	1262.09	206.781	657.341	1438.44	224.187	723.526	1238.5	295.577	429.819	1320.94	25.9509	583.88	1477.27	-44.4789	543.247	1283.48	-43.4715	523.677	1131.5	-80.7439	588.436	975.424	-42.7876	629.828	884.164	-86.7087	571.062	876.377	-94.357	622.722	819.542
4660	0	161.901	752.678	1673.82	247.731	739.889	1675.02	147.046	557.1	1668.45	257.825	565.107	1672.03	213.094	521.255	1527.44	213.263	444.391	1263.3	204.499	668.082	1439.53	222.206	734.124	1239.34	293.159	440.041	1322.22	23.6124	595.184	1478.22	-46.8841	555.225	1284.16	-45.877	535.996	1132.01	-81.906	601.498	975.951	-43.1776	642.751	885.084	-87.7575	584.446	876.805	-94.8588	636.268	820.507
4661	0	159.501	763.324	1674.8	245.359	750.655	1676	144.522	567.867	1669.09	255.457	575.752	1672.81	210.633	531.624	1528.35	210.734	454.894	1263.92	202.451	678.64	1440.56	220.389	744.513	1240.32	290.914	450.016	1323.63	21.3975	606.593	1479.13	-49.072	567.017	1284.88	-48.2247	548.293	1132.59	-82.9429	614.697	976.757	-43.3404	655.793	886.006	-88.7646	598.2	877.565	-95.0563	650.259	821.386
4662	0	157.261	773.931	1675.71	243.183	761.056	1677.15	142.21	578.359	1669.95	253.031	586.104	1674.18	207.925	541.706	1529.69	208.302	465.115	1265.22	200.767	688.842	1442.01	218.741	754.718	1241.36	288.542	459.78	1324.77	19.2295	617.896	1479.96	-51.4655	578.934	1285.63	-50.8844	560.615	1133.46	-84.0463	628.265	977.653	-43.4008	668.872	886.946	-89.6462	612.281	878.408	-95.0106	664.648	822.227
4663	0	155.216	784.251	1676.69	240.974	771.286	1678.35	139.793	588.711	1670.93	250.692	596.382	1675.21	205.249	551.655	1530.89	205.726	475.132	1266.38	199.045	698.924	1443.1	217.577	764.886	1242.59	285.945	469.366	1326.13	17.0821	629.116	1481	-53.5322	591.378	1286.26	-53.3128	573.176	1134.24	-84.9738	641.973	978.354	-43.5454	682.555	888.417	-90.4376	626.749	879.042	-94.842	679.569	823.265
4664	0	153.295	794.474	1677.68	238.888	781.339	1679.3	137.657	598.881	1671.92	248.498	606.373	1676.23	202.744	561.657	1532.07	203.04	484.961	1267.29	197.488	708.896	1444.11	216.247	774.869	1243.72	283.481	478.819	1327.44	15.074	640.194	1481.98	-56.0867	603.563	1287.07	-55.8942	585.693	1134.87	-85.8315	656.068	979.29	-43.3396	696.513	889.666	-91.402	641.415	880.032	-94.7511	694.714	824.581
4665	0	151.542	804.463	1678.66	237.005	791.065	1680.44	135.368	608.997	1672.74	246.361	616.197	1677.2	200.302	571.411	1533.07	200.489	494.707	1268.32	195.887	718.615	1445.17	215.206	784.677	1244.84	280.697	488.023	1328.45	13.2174	651.297	1482.95	-58.3656	616.018	1287.89	-58.3586	598.378	1135.5	-86.7882	670.398	980.169	-43.2887	710.812	891.065	-92.2794	656.408	881.14	-94.4247	710.281	825.969
4666	0	149.821	814.208	1680.14	235.306	800.717	1681.74	133.425	618.799	1673.62	244.435	625.847	1678.13	197.89	581.082	1534.13	198.011	504.21	1269.51	194.478	728.135	1446.24	214.404	794.255	1246.04	277.955	497.219	1329.63	11.3537	662.175	1483.96	-60.7319	628.578	1288.77	-60.8641	611.048	1136.24	-87.8114	684.742	981.417	-43.201	725.075	892.642	-92.7498	671.728	881.934	-93.9927	726.07	827.43
4667	0	148.37	823.807	1681.63	233.902	810.131	1683.28	131.57	628.362	1674.94	242.667	635.239	1679.28	195.675	590.487	1535.48	195.402	513.6	1270.89	193.129	737.544	1447.38	213.633	803.609	1247.33	275.186	506.136	1330.8	9.63399	672.721	1484.97	-62.8252	641.199	1289.63	-63.2899	624.104	1136.99	-88.4127	699.318	982.622	-42.9781	739.693	894.268	-93.642	687.079	882.898	-93.6263	741.956	828.956
4668	0	147.026	833.192	1683.03	232.189	819.284	1684.52	129.768	637.849	1676.02	240.919	644.415	1680.38	193.548	599.77	1536.96	193.083	522.896	1272.11	191.911	746.79	1448.64	213.11	812.711	1248.65	272.365	515.091	1331.83	7.9447	683.172	1486.26	-65.0996	653.727	1290.52	-65.7977	637.129	1137.55	-89.0688	714.092	983.805	-42.7281	754.358	895.917	-94.0858	702.853	883.983	-93.3583	758.287	830.788
4669	0	145.907	842.533	1684.71	231.256	828.34	1686.04	128.194	647.192	1677.21	239.405	653.429	1681.61	191.511	609.015	1538.08	190.647	532.101	1273.18	190.737	755.952	1450.3	212.767	821.598	1250.21	269.867	524.16	1332.79	6.28215	693.397	1487.55	-67.2267	666.248	1291.43	-68.0168	650.38	1138.41	-89.6275	728.941	985.04	-42.3926	769.275	897.904	-94.7188	718.65	885.212	-92.9293	774.585	832.772
4670	0	145.029	851.637	1686.54	230.368	837.347	1687.72	126.621	656.365	1678.56	237.89	662.328	1682.88	189.62	618.171	1539.44	188.308	541.098	1274.66	189.61	765.015	1451.85	212.334	830.242	1251.61	267.222	533.197	1333.87	4.72189	703.454	1488.88	-69.1317	678.576	1292.2	-70.1746	663.784	1139.12	-90.0351	744.029	986.32	-42.1228	784.131	899.696	-95.1914	734.718	886.487	-92.6833	791.018	835.089
4671	0	144.01	860.685	1688.09	229.357	846.198	1689.28	125.212	665.463	1679.91	236.467	671.163	1684.18	187.661	627.184	1540.85	186.061	550.07	1276.07	188.534	774.093	1453.26	212.125	838.831	1253.09	264.568	541.46	1335.56	3.30709	713.373	1490.06	-70.9294	690.981	1293.06	-72.351	677.227	1139.75	-90.4209	759.249	987.661	-41.1829	799.326	901.508	-95.3571	751.006	887.722	-91.9274	807.66	836.92
4672	0	143.305	869.758	1690	228.56	854.991	1690.86	123.96	674.5	1681.39	235.308	679.954	1685.33	185.938	636.109	1542.72	183.977	559.004	1277.54	187.434	783.024	1454.57	211.909	847.271	1254.42	262.372	549.554	1337.51	2.03255	723.092	1491.33	-72.3964	703.205	1294.07	-74.3922	690.833	1140.64	-90.4669	774.583	989.255	-41.1051	814.758	903.722	-95.7877	767.372	889.23	-91.0877	824.435	838.931
4673	0	142.834	878.576	1691.61	227.996	863.727	1692.6	122.897	683.491	1682.99	234.264	688.729	1686.75	184.246	645.012	1544.38	181.937	567.905	1279.25	186.505	791.805	1456.25	211.695	855.723	1255.97	260.09	557.986	1339.04	0.798902	732.691	1492.77	-73.8765	715.299	1295.22	-76.1102	704.475	1141.78	-90.5433	789.909	990.94	-40.2305	829.523	905.78	-96.0101	783.7	890.997	-90.1005	841.327	841.141
4674	0	142.232	887.489	1693.52	227.198	872.349	1694.01	121.736	692.403	1684.74	233.172	697.352	1688.24	182.634	653.841	1545.89	179.804	576.673	1281.06	185.662	800.607	1458.12	211.328	864.101	1257.75	257.826	566.341	1340.86	-0.593375	742.171	1494.38	-75.2084	727.129	1296.38	-77.9775	718.128	1143.05	-90.5042	805.358	992.867	-39.5097	844.615	907.976	-95.9686	800.452	893.054	-89.0929	858.198	843.839
4675	0	141.743	896.376	1695.33	226.65	880.944	1695.7	120.706	701.36	1686.47	232.135	705.891	1689.77	180.931	662.599	1547.59	177.297	585.601	1281.59	184.509	809.258	1459.91	210.709	872.378	1259.53	256.018	574.84	1342.51	-1.83451	751.602	1496.07	-76.3373	738.9	1297.75	-79.4232	731.8	1144.36	-90.3658	820.815	995.08	-38.4842	859.987	910.694	-96.4495	817.134	895.448	-88.196	875.067	846.748
4676	0	141.387	905.204	1697.19	226.316	889.394	1697.25	119.655	710.177	1688.22	231.279	714.491	1691.16	179.244	671.133	1549.42	175.799	594.144	1284.19	183.641	817.951	1461.82	209.993	880.615	1261.35	254.06	583.002	1344.47	-3.05917	760.987	1497.76	-77.3995	750.507	1299.39	-80.4568	745.514	1145.52	-90.2253	836.179	997.448	-37.7598	875.245	913.553	-96.6764	833.802	898.08	-87.2233	891.887	849.709
4677	0	141.134	913.958	1698.97	225.992	897.919	1698.59	119.208	719.041	1690.18	230.413	722.876	1692.76	177.745	679.666	1550.88	173.85	602.729	1285.98	183.082	826.646	1463.55	209.369	888.866	1263.22	252.254	591.364	1346.24	-4.22512	770.264	1499.66	-78.3598	761.785	1300.91	-81.7841	758.872	1147.06	-90.1252	851.595	999.99	-36.9066	890.613	916.452	-96.6874	850.39	900.673	-85.8824	908.877	852.838
4678	0	141.077	922.722	1700.33	225.809	906.285	1700.15	118.254	727.725	1692.03	229.375	731.413	1693.81	176.371	688.292	1552.44	171.961	611.248	1287.51	182.139	835.18	1465.21	208.55	897.038	1264.85	250.294	599.856	1347.66	-5.2629	779.569	1501.42	-79.2695	772.995	1302.57	-83.0863	772.218	1148.73	-89.918	866.866	1002.7	-36.251	905.96	919.614	-96.4961	866.955	903.392	-84.795	925.84	856.298
4679	0	140.888	931.417	1702.17	225.607	914.755	1701.35	117.478	736.506	1693.65	228.69	739.842	1695.16	175.024	696.724	1554.25	170.25	619.747	1289.06	180.838	843.57	1467.23	207.734	905.267	1266.23	248.807	608.323	1349.34	-6.34214	788.852	1503.04	-79.9685	784.081	1303.98	-83.8753	785.405	1150.21	-89.7486	881.95	1005.6	-35.3194	921.477	922.75	-96.1927	883.516	906.088	-83.556	942.667	859.616
4680	0	140.746	940.086	1703.48	225.359	923.172	1702.26	116.845	745.305	1695.37	228.078	748.153	1696.58	173.574	705.121	1555.79	168.649	628.262	1290.61	179.939	852.106	1468.88	207.212	913.637	1267.67	247.241	616.666	1350.85	-7.37138	798.068	1504.74	-80.6122	794.979	1305.42	-84.8041	798.482	1151.67	-89.397	896.922	1008.21	-34.1339	936.999	926.107	-95.5182	899.977	908.76	-82.2097	959.453	863.147
4681	0	140.619	948.749	1704.74	225.281	931.536	1703.38	115.921	753.969	1696.91	227.178	756.611	1697.48	172.158	713.648	1556.86	166.881	636.736	1291.96	179.053	860.64	1470.01	206.561	921.687	1269.03	245.723	625.319	1351.74	-8.23623	807.314	1506.16	-81.3329	805.806	1306.83	-85.5947	811.384	1153.08	-88.9894	911.77	1011.02	-33.0702	952.59	929.451	-94.8586	916.318	911.627	-80.683	976.399	866.759
4682	0	140.624	957.411	1706.1	225.194	939.853	1704.53	115.328	762.669	1698.29	226.506	765.043	1698.31	170.973	722.183	1558.21	165.199	644.837	1293.48	178.276	869.03	1471.3	205.755	929.608	1270.13	244.433	633.765	1353.1	-9.29266	816.592	1507.57	-81.9589	816.646	1308.24	-86.3301	824.031	1154.43	-88.6436	926.464	1013.6	-32.0972	967.967	932.913	-93.8309	932.551	914.298	-79.3661	993.143	870.464
4683	0	140.552	966.057	1707.24	225.099	948.229	1705.43	114.735	771.333	1699.48	225.85	773.429	1699.22	169.792	730.695	1559.43	163.706	653.16	1294.61	177.616	877.535	1472.68	204.97	937.374	1271.12	242.93	641.79	1354.54	-10.0299	825.842	1508.8	-82.6036	827.226	1309.46	-86.7495	836.704	1155.6	-88.0614	941.063	1016.4	-30.9569	983.473	936.605	-93.0543	948.724	917.277	-77.9874	1009.63	874.503
4684	0	140.425	974.695	1708.24	224.968	956.637	1706.19	114.241	780.026	1700.64	225.58	781.752	1700.29	168.615	739.164	1560.41	162.103	661.479	1295.73	177.095	885.999	1473.82	204.546	945.519	1272.15	241.602	650.203	1355.27	-10.9396	835.169	1510.19	-83.2667	837.856	1310.73	-87.4356	849.112	1156.6	-87.5268	955.438	1019.06	-29.9204	998.836	940.281	-92.0075	964.718	920.071	-76.4845	1026.3	878.465
4685	0	140.373	983.326	1709.17	224.877	965.041	1706.74	113.656	788.703	1701.52	225.062	790.108	1700.95	167.466	747.676	1561.26	160.653	669.854	1296.7	176.519	894.546	1474.72	204.15	953.699	1272.99	240.056	658.297	1356.35	-11.6195	844.45	1511.1	-83.8926	848.323	1311.77	-88.038	861.294	1157.69	-86.9856	969.78	1021.61	-28.6192	1014.21	944.095	-89.6837	980.229	922.044	-74.8237	1042.85	882.15
4686	0	140.367	991.988	1709.92	224.814	973.549	1707.22	113.241	797.398	1702.12	224.586	798.601	1701.21	166.398	756.287	1561.78	159.266	678.243	1297.34	175.941	903.156	1475.33	203.759	961.956	1273.64	238.758	666.608	1357.16	-12.3175	853.83	1511.96	-84.3824	858.835	1312.52	-88.6276	873.274	1158.55	-86.4166	983.962	1024.13	-27.4661	1029.32	947.512	-89.2907	996.243	925.469	-73.3329	1059.17	886.398
4687	0	140.273	1000.66	1710.5	224.76	982.119	1707.47	112.691	806.084	1702.51	223.747	807.208	1700.89	165.292	764.957	1562.2	157.891	686.65	1298.03	175.427	911.783	1475.88	203.686	970.248	1274.1	237.53	674.857	1357.8	-12.9578	863.2	1512.67	-85.1538	869.346	1313.27	-89.2918	885.074	1159.09	-85.7208	997.888	1026.45	-26.0504	1044.47	951.147	-87.9006	1011.88	927.967	-71.3841	1075.59	890.306
4688	0	140.182	1009.28	1710.89	224.721	990.75	1707.68	112.306	814.869	1702.77	223.64	815.578	1701.22	164.475	773.689	1562.32	156.566	694.983	1298.61	175.005	920.455	1476.15	203.501	978.672	1274.35	236.218	683.085	1358.15	-13.4772	872.565	1512.96	-85.6361	879.758	1313.69	-89.814	896.629	1159.44	-84.9981	1011.72	1028.6	-24.753	1059.36	954.85	-86.3432	1027.32	930.424	-69.5947	1091.83	894.171
4689	0	140.144	1018.02	1711.19	224.626	999.309	1707.75	111.876	823.64	1702.67	223.19	824.141	1700.97	163.581	782.514	1562.41	155.491	703.428	1299	174.48	929.054	1476.2	203.535	987.228	1274.5	235.267	691.733	1358.3	-13.9953	881.918	1513.09	-86.223	890.114	1313.92	-90.3947	908.009	1159.58	-84.2813	1025.39	1030.71	-23.4579	1074.13	958.497	-84.6655	1042.63	932.919	-67.7575	1107.85	898.1
4690	0	140	1026.77	1711.33	224.44	1007.82	1707.73	111.588	832.433	1702.43	222.87	832.845	1700.43	162.865	791.408	1562.46	154.436	711.983	1298.97	174.291	937.882	1476.31	203.442	995.661	1274.25	233.866	700.052	1358.68	-14.4217	891.397	1513.07	-86.6545	900.468	1314.19	-90.8653	919.445	1159.77	-83.5306	1038.84	1032.75	-21.9224	1088.75	962.004	-82.1196	1057.61	934.756	-65.6857	1123.91	902.169
4691	0	139.968	1035.64	1711.36	224.311	1016.37	1707.59	111.261	841.256	1702.02	222.26	841.649	1699.45	162.183	800.262	1562.19	153.547	720.461	1299.06	173.991	946.704	1475.77	203.55	1004.22	1273.82	232.822	708.487	1358.61	-14.7696	900.785	1512.9	-87.1855	910.722	1314.15	-91.3692	930.616	1159.42	-82.6327	1052.08	1034.5	-20.2878	1103.17	965.331	-81.154	1072.88	937.386	-63.7249	1139.63	906.34
4692	0	139.912	1044.37	1711.14	224.307	1025.08	1707.3	111.02	850.15	1701.39	221.91	850.418	1698.84	161.523	809.19	1562.07	152.756	728.986	1298.85	173.769	955.679	1475.42	203.57	1012.65	1273.38	232.041	716.948	1358.48	-15.0569	910.163	1512.47	-87.5816	920.907	1313.92	-91.7692	941.684	1159.15	-81.7353	1065.23	1036.05	-18.6725	1117.53	968.407	-79.2002	1087.61	939.213	-61.7347	1155.05	910.187
4693	0	139.848	1053.23	1710.67	224.361	1033.99	1706.89	110.84	858.981	1700.44	221.996	859.044	1698.09	161.045	818.191	1561.54	151.948	737.517	1298.64	173.754	964.555	1474.85	203.585	1021.14	1272.45	231.293	725.459	1358.21	-15.3624	919.675	1512.03	-88.0211	931.067	1313.52	-92.1435	952.694	1158.44	-80.7477	1078.16	1037.48	-16.9398	1131.47	971.485	-77.192	1102.23	941.148	-59.7125	1170.38	914.003
4694	0	139.609	1062.08	1710.16	224.212	1042.91	1706.2	110.715	867.799	1699.5	222.052	867.992	1697.03	160.723	827.383	1560.94	151.543	746.128	1298.18	173.596	973.41	1474.02	203.497	1029.55	1271.4	230.702	734.023	1357.65	-15.3972	929.129	1511.15	-88.1711	941.129	1312.84	-92.2205	963.581	1157.71	-79.6946	1090.98	1038.76	-15.0774	1145.14	974.059	-75.1911	1116.68	942.933	-57.7151	1185.44	917.856
4695	0	139.294	1070.63	1709.61	223.954	1051.69	1705.54	110.751	876.657	1698.06	222.105	876.849	1695.81	160.524	836.441	1560.25	151.054	754.541	1297.55	173.714	982.41	1472.98	203.57	1037.98	1270.51	230.136	742.579	1357	-15.4903	938.551	1510.25	-88.3963	951.118	1312.03	-92.53	974.295	1156.82	-78.5676	1103.55	1039.91	-13.2726	1158.61	976.74	-73.1601	1130.8	944.568	-55.6234	1200.21	921.585
4696	0	139.399	1079.64	1708.81	223.837	1060.63	1704.88	110.93	885.501	1696.51	222.203	885.95	1694.28	160.348	845.685	1559.17	150.728	763.469	1296.52	173.851	991.531	1472.11	203.751	1046.73	1269.12	229.728	751.18	1356.14	-15.4608	947.991	1509.3	-88.3685	960.992	1310.95	-92.6419	985.044	1155.89	-77.2989	1116.03	1040.72	-11.4596	1172.03	979.081	-70.9266	1144.75	945.902	-53.731	1214.67	925.158
4697	0	139.094	1088.46	1707.88	223.882	1069.8	1704.02	111.22	894.316	1694.64	222.188	895.035	1692.53	160.195	854.776	1558.08	150.508	772.114	1295.52	174.019	1000.59	1470.66	204.022	1055.48	1267.97	229.523	760.023	1355.18	-15.3205	957.445	1508.11	-88.3226	970.838	1310.01	-92.5306	995.719	1154.58	-76.0667	1128.27	1041.43	-9.64206	1185.05	981.452	-68.7906	1158.4	947.046	-51.7814	1228.82	928.525
4698	0	138.922	1097.27	1706.89	223.757	1078.84	1702.88	111.641	903.056	1692.92	222.522	904.135	1690.68	160.338	864.01	1556.82	150.373	780.992	1294.37	174.404	1009.73	1469.68	203.829	1064.04	1266.25	229.334	768.851	1353.99	-15.0694	966.916	1506.89	-88.1111	980.708	1308.87	-92.388	1006.3	1153.5	-74.7987	1140.29	1042.13	-7.71553	1197.85	983.438	-66.5692	1171.86	948.19	-50.1069	1242.57	931.919
4699	0	138.683	1106.12	1705.66	223.552	1087.74	1701.95	112.118	911.875	1690.72	223.045	913.334	1688.77	160.653	873.318	1555.4	150.396	789.874	1293.15	174.695	1018.96	1467.89	204.344	1073.01	1264.85	229.299	777.73	1352.68	-14.8623	976.333	1505.57	-87.8322	990.361	1307.67	-92.1762	1016.77	1152.19	-73.5392	1152.11	1042.63	-6.12986	1210.25	985.429	-64.4035	1184.94	949.092	-48.2805	1256.12	934.911
4700	0	138.312	1114.29	1704.18	223.642	1096.93	1700.65	112.693	920.639	1688.54	223.711	922.231	1687.16	160.924	882.608	1554.08	150.494	798.784	1291.58	175.276	1028.19	1466.66	204.661	1081.96	1263.24	229.475	786.753	1351.12	-14.3505	985.837	1504.03	-87.2644	1000.06	1306.1	-91.7981	1027.2	1150.62	-72.1987	1163.84	1042.83	-4.12465	1222.63	987.012	-61.4108	1197.6	949.443	-46.6306	1269.34	937.611
4701	0	138.544	1123.37	1702.78	223.562	1105.99	1699.23	113.26	929.299	1686.3	224.479	931.424	1684.98	161.476	891.828	1552.19	150.73	807.836	1289.78	175.855	1037.54	1464.9	205.343	1091.29	1261.42	229.728	795.773	1349.35	-13.8744	995.256	1502.41	-86.8006	1009.66	1304.48	-91.3808	1037.51	1149.14	-70.8932	1175.34	1042.83	-2.60255	1234.49	988.192	-60.2339	1210.5	950.348	-45.2464	1282.14	940.306
4702	0	138.567	1132.36	1701.14	223.565	1115.03	1697.57	114.123	938.088	1683.84	225.219	940.606	1682.79	162.051	901.158	1550.27	151.105	816.973	1287.99	176.353	1046.9	1462.87	205.893	1100.65	1259.6	230.1	804.82	1347.44	-13.141	1004.78	1500.59	-86.1448	1019.27	1302.74	-90.8448	1047.71	1147.26	-69.5442	1186.68	1042.6	-0.951026	1246.49	989.189	-58.2571	1222.85	950.762	-43.6319	1294.85	942.429
4703	0	138.722	1140.9	1699.18	223.865	1124.37	1695.88	114.907	946.825	1681.38	226.047	949.838	1680.49	162.65	910.474	1548.23	151.46	826.127	1285.88	177.207	1056.39	1460.88	206.474	1110.13	1257.66	230.549	813.993	1345.62	-12.441	1014.3	1498.72	-85.3403	1028.84	1300.77	-90.1191	1057.77	1145.42	-68.2674	1197.9	1042.14	0.64993	1258.23	989.879	-56.2144	1235.03	950.65	-42.3829	1307.13	943.899
4704	0	138.81	1149.94	1697.52	223.981	1133.34	1694.02	115.916	955.525	1679.13	226.986	959.034	1678.27	163.535	919.937	1546.08	151.957	835.456	1283.88	177.835	1065.86	1458.68	207.252	1119.9	1255.37	231.247	823.414	1343.61	-11.638	1023.81	1496.79	-84.6108	1038.43	1298.93	-89.2443	1067.85	1143.42	-66.9639	1208.96	1041.54	2.11911	1269.69	990.346	-54.4014	1246.98	950.679	-40.9672	1319.32	945.291
4705	0	139.079	1158.7	1695.57	224.61	1142.72	1692.32	117.027	964.3	1676.67	228.164	968.328	1675.88	164.447	929.309	1544.04	152.626	844.933	1281.76	178.76	1075.43	1456.63	207.793	1129.49	1253.35	232.073	832.856	1341.35	-10.7709	1033.44	1495.04	-83.6579	1048	1297.02	-88.2847	1077.84	1141.49	-65.6971	1219.88	1040.89	3.51002	1281.05	990.552	-52.5093	1258.79	950.298	-39.7932	1331.05	946.314
4706	0	139.523	1167.6	1693.97	224.865	1151.7	1690.39	118.209	973.096	1674.17	229.246	977.569	1673.45	165.363	938.871	1541.83	153.153	854.434	1279.41	179.734	1085.12	1454.6	208.517	1139.3	1251.35	232.744	842.349	1338.87	-9.86365	1042.97	1492.98	-82.5249	1057.55	1294.85	-87.2632	1087.87	1139.6	-64.4177	1230.45	1039.93	4.93184	1292.31	990.476	-50.9867	1270.12	949.778	-38.6553	1342.37	946.848
4707	0	140.157	1176.6	1692.08	225.847	1161.2	1688.76	119.628	982.109	1671.9	230.54	986.832	1671.33	166.615	948.508	1539.45	153.748	864.165	1277.25	180.647	1094.7	1452.57	209.612	1149.43	1249.43	233.506	851.938	1336.62	-8.85232	1052.59	1491	-81.4342	1067.1	1292.8	-86.1122	1097.85	1137.57	-63.0655	1241.02	1038.7	6.30146	1303.34	990.198	-49.4317	1281.22	949.127	-37.64	1353.51	947.08
4708	0	140.743	1185.24	1690.43	226.484	1170.33	1686.82	121.041	991.032	1669.57	231.94	996.167	1669.11	168.07	958.226	1537.38	154.404	873.899	1275.06	181.674	1104.52	1450.45	210.328	1159.28	1247.15	234.363	861.664	1334.34	-7.84973	1062.37	1489.39	-80.3469	1076.7	1290.95	-85.003	1107.75	1135.49	-61.8703	1251.47	1037.35	7.59165	1314.19	989.663	-47.9077	1292.03	948.08	-36.6053	1364.36	946.735
4709	0	141.867	1194.62	1688.74	227.653	1179.85	1685.26	122.559	1000.18	1667.21	233.49	1005.59	1666.83	169.128	967.922	1535.19	155.072	883.803	1272.98	182.989	1114.43	1448.72	211.348	1169.46	1245.05	235.184	871.408	1332.13	-6.64276	1072.28	1487.58	-79.0612	1086.49	1288.9	-83.8012	1117.74	1133.7	-60.5264	1261.69	1035.83	8.72533	1324.71	988.629	-46.3289	1302.55	946.683	-35.6581	1374.88	945.95
4710	0	143.012	1203.58	1687.04	228.735	1189.24	1683.43	124.268	1009.35	1665.12	234.936	1015.29	1664	170.564	977.725	1533.42	155.763	893.746	1270.9	184.064	1124.45	1446.47	212.54	1179.78	1243.21	236.212	881.337	1330	-5.33999	1082.15	1485.73	-77.7427	1096.2	1286.96	-82.4978	1127.7	1131.86	-59.1745	1271.84	1034.07	9.97582	1334.98	987.071	-45.0087	1312.74	945.156	-34.6572	1385.06	944.725
4711	0	144.234	1213.01	1685.53	230.06	1198.6	1681.86	125.92	1018.6	1662.93	236.776	1024.78	1661.94	171.98	987.642	1531.26	156.548	903.934	1268.92	185.4	1134.45	1444.67	213.157	1189.86	1241.14	237.139	891.394	1327.88	-3.95633	1092.16	1484.2	-76.5281	1105.94	1285.49	-81.1244	1137.66	1130.2	-58.0212	1281.74	1032.41	11.0387	1344.87	985.302	-43.9614	1322.63	943.489	-33.7616	1395	943.261
4712	0	145.838	1222.37	1684.27	231.704	1208.3	1680.11	127.876	1028.04	1660.86	238.695	1034.39	1659.78	173.793	997.742	1529.3	157.408	914.218	1266.84	186.887	1144.7	1442.78	214.404	1200.44	1239.44	238.177	901.564	1325.55	-2.44834	1102.35	1482.72	-75.131	1115.75	1284	-79.9285	1147.73	1129.52	-56.7297	1291.54	1030.53	12.1478	1354.59	983.304	-42.6801	1332.19	941.417	-32.8475	1404.6	941.323
4713	0	147.342	1231.37	1682.67	233.47	1217.97	1678.72	129.779	1037.5	1658.85	240.645	1044.04	1657.7	175.25	1007.57	1527.58	158.397	924.633	1264.87	188.403	1154.83	1440.91	215.267	1210.87	1237.84	239.251	911.868	1323.38	-0.880046	1112.47	1481.4	-73.7135	1125.69	1282.92	-78.4415	1157.57	1128.17	-55.6213	1301.01	1028.67	13.0811	1363.97	980.959	-41.9334	1341.4	939.399	-32.1687	1413.66	939.078
4714	0	149.264	1241.37	1681.6	235.195	1227.62	1677.05	131.881	1047.1	1657.09	242.569	1053.73	1655.63	177.006	1017.65	1525.53	159.476	935.181	1262.97	190.154	1165.16	1439.64	216.321	1221.6	1236.14	240.517	922.469	1321.17	0.782362	1122.73	1480.33	-72.3109	1135.8	1282.02	-77.1023	1167.41	1127.11	-54.6306	1310.43	1026.71	13.8892	1372.99	978.466	-41.3754	1350.25	937.249	-31.5705	1422.39	936.44
4715	0	151.22	1250.92	1680.37	237.125	1237.31	1675.83	134.009	1056.77	1655.4	244.765	1063.57	1653.69	179.014	1027.73	1523.84	160.843	945.614	1261.01	191.674	1175.57	1437.98	217.394	1232.46	1235.05	242.104	933.295	1319.21	2.52161	1132.89	1479.38	-70.8954	1146.05	1281.35	-75.401	1177.32	1125.99	-53.7452	1319.55	1024.9	14.813	1381.78	975.627	-39.1221	1358.51	934.167	-31.0522	1430.82	933.664
4716	0	153.176	1260.65	1679.7	239.309	1247.26	1674.55	136.337	1066.47	1654.21	247.025	1073.6	1651.99	180.978	1037.83	1522.24	162.604	956.169	1259.39	193.419	1186.12	1436.9	218.686	1243.78	1233.91	243.786	944.146	1317.1	4.24951	1143	1478.73	-69.4881	1156.53	1280.97	-73.1414	1187.02	1124.58	-52.8237	1328.57	1022.76	15.5067	1390.28	972.765	-39.6538	1366.9	932.216	-30.4543	1439.23	930.519
4717	0	155.353	1270.45	1678.96	241.246	1257.19	1673.59	138.662	1076.42	1653.13	249.344	1083.62	1650.61	183.054	1048.03	1521.15	164.306	967.072	1257.92	194.534	1196.62	1436.07	219.736	1254.94	1233.23	245.665	955.165	1315.52	6.07056	1153.26	1478.12	-68.0462	1167.23	1280.6	-71.9413	1196.69	1124.18	-52.0258	1337.24	1020.6	16.0977	1398.67	969.651	-39.4978	1374.79	929.715	-30.3272	1447	927.075
4718	0	157.479	1280.24	1678.51	243.399	1267.19	1672.72	141.06	1086.31	1652.18	251.764	1093.76	1649.24	185.014	1058.5	1520.05	166.083	978.218	1256.62	195.955	1207.41	1435.04	220.542	1266.46	1232.54	247.614	966.31	1314.03	7.7843	1163.52	1477.6	-66.6766	1178.07	1280.33	-70.6098	1206.39	1123.67	-51.3074	1345.75	1018.37	16.3864	1406.64	966.392	-39.4802	1382.24	927.075	-30.1914	1454.44	923.372
4719	0	159.989	1290.19	1678.18	246.008	1277.29	1672.09	143.498	1096.26	1651.59	254.184	1103.92	1647.95	186.923	1069.03	1518.97	167.886	989.509	1255.36	197.572	1218.18	1434.68	221.434	1277.99	1231.85	249.671	977.51	1312.61	9.46768	1173.9	1477.3	-65.2369	1188.95	1280.18	-69.3061	1215.95	1123.52	-50.7071	1354.08	1016.29	16.1339	1413.98	962.945	-39.6463	1389.54	924.451	-30.1152	1461.81	919.757
4720	0	162.493	1300.31	1678.27	248.414	1287.48	1671.61	145.986	1106.36	1651.24	256.603	1114.08	1647.14	188.912	1079.5	1518.27	169.616	1000.77	1254.34	199.094	1228.98	1434.45	222.563	1289.88	1232.14	251.62	988.693	1311.49	11.141	1184.32	1477.24	-63.8604	1199.84	1280.28	-67.8373	1225.4	1123.47	-50.3536	1362.09	1014.45	16.0331	1421.43	959.432	-39.9962	1396.38	921.884	-30.4268	1468.55	915.777
4721	0	164.72	1310.08	1678.6	250.278	1297.47	1671.38	148.457	1116.51	1651.29	259.067	1124.34	1646.5	190.741	1089.99	1517.93	171.286	1012.1	1253.72	200.578	1239.88	1434.48	223.392	1301.64	1232.41	253.439	999.978	1310.76	12.7751	1194.8	1477.45	-62.4798	1210.62	1280.7	-66.3272	1234.76	1123.72	-50.1258	1369.92	1012.48	15.9073	1428.57	956.174	-40.974	1403	919.839	-30.9354	1474.9	911.861
4722	0	167.518	1320.49	1679.24	252.763	1307.64	1671.63	150.946	1126.68	1651.62	261.528	1134.57	1646.39	192.657	1100.61	1517.78	172.835	1023.5	1253.66	202.088	1250.76	1434.89	224.353	1313.6	1232.96	255.162	1011.2	1310.53	14.4293	1205.32	1478.17	-61.2705	1221.27	1281.5	-64.8746	1244.07	1124.21	-49.9252	1377.52	1010.94	15.543	1435.48	952.885	-41.812	1409.09	917.372	-31.5746	1480.92	907.833
4723	0	170.041	1330.62	1680.35	255.736	1317.95	1672.21	153.484	1136.89	1652.29	264.051	1144.82	1646.55	194.681	1111.3	1518.04	174.293	1034.91	1253.72	203.652	1261.69	1435.64	225.084	1325.3	1233.81	256.77	1022.43	1310.45	16.0477	1215.81	1479	-59.8945	1231.66	1282.32	-63.4604	1253.19	1124.87	-49.8619	1384.86	1009.59	14.9125	1441.91	949.767	-42.4588	1414.88	915.118	-32.3475	1486.59	903.837
4724	0	172.555	1340.88	1681.29	258.021	1328.18	1672.77	155.944	1147.09	1653.29	266.519	1155.02	1647.22	196.441	1122.03	1518.75	175.595	1046.26	1254.07	205.029	1272.48	1436.44	226.37	1337.24	1235.18	258.212	1033.61	1310.58	17.6011	1226.28	1479.86	-58.7406	1241.89	1283.55	-62.2998	1262.16	1125.82	-50.023	1391.92	1008.47	14.0889	1448.03	946.815	-43.4607	1420.3	913.08	-33.4458	1491.67	899.929
4725	0	174.919	1351.06	1682.43	260.539	1338.36	1673.65	158.195	1157.31	1654.33	268.85	1165.36	1647.88	198.1	1132.64	1519.49	176.853	1057.59	1254.73	206.58	1283.27	1437.52	227.202	1348.82	1236.37	259.619	1044.83	1311.12	19.1645	1236.76	1481.17	-57.769	1252.05	1285.17	-61.1386	1271.06	1127.19	-50.1378	1398.76	1007.47	13.2315	1454.02	943.864	-45.142	1425.33	911.655	-34.7543	1496.32	895.976
4726	0	177.439	1361.35	1683.71	262.945	1348.65	1674.54	160.555	1167.53	1655.89	270.99	1175.45	1648.97	200.005	1143.17	1520.27	178.172	1068.76	1255.7	208.048	1293.94	1438.91	228.274	1360.22	1237.61	260.997	1056.05	1311.79	20.803	1247.19	1482.55	-56.5689	1262.09	1286.68	-60.1583	1279.99	1129.16	-50.3165	1405.4	1006.78	12.0478	1459.36	941.142	-46.5468	1429.93	910.333	-35.8863	1500.49	892.276
4727	0	179.73	1371.62	1684.66	265.236	1358.95	1675.38	162.715	1177.69	1657.51	273.089	1185.8	1649.78	201.677	1153.48	1521.25	179.669	1079.83	1256.52	209.437	1304.61	1440.07	229.253	1371.39	1239.28	262.576	1067.33	1312.32	22.3438	1257.38	1484.02	-55.2839	1271.92	1288.39	-59.1199	1288.71	1130.91	-50.6154	1412	1005.98	10.9474	1464.52	938.648	-47.9261	1434.28	909.341	-37.242	1504.32	888.506
4728	0	182.003	1381.9	1685.96	267.206	1369.07	1676.25	164.812	1187.85	1659.43	275.292	1195.87	1651.52	203.425	1163.75	1522.03	181.143	1090.7	1257.44	210.651	1315.06	1441.3	230.145	1382.42	1240.89	264.084	1078.54	1312.98	23.8976	1267.35	1485.63	-54.1886	1281.37	1290.14	-58.3319	1297.35	1132.98	-50.8817	1418.01	1005.77	10.0601	1469.41	936.411	-49.1226	1438.34	908.311	-38.6301	1507.88	885.189
4729	0	184.03	1391.83	1687.1	269.363	1379.19	1677.49	166.798	1197.98	1661.38	277.284	1205.96	1653.38	205.248	1173.79	1523.6	182.756	1101.44	1258.54	212.088	1325.41	1443.2	230.847	1393.2	1242.71	265.652	1089.66	1313.92	25.3267	1277.01	1487.5	-53.2352	1290.73	1292.38	-57.7138	1305.84	1135.16	-51.114	1424.06	1005.81	9.01378	1473.8	934.44	-49.5439	1441.99	907.097	-39.8484	1511.07	882.238
4730	0	186.025	1402.21	1688.34	271.126	1389.25	1678.67	168.677	1207.95	1663.8	279.187	1215.85	1655.63	207.137	1183.83	1524.97	184.499	1112.13	1259.6	213.179	1335.73	1444.93	231.789	1403.89	1244.87	267.553	1100.61	1314.84	26.7142	1286.41	1489.55	-52.2708	1299.97	1294.56	-57.1385	1314.1	1137.67	-51.3951	1429.83	1006.09	7.91986	1477.91	933.133	-51.0886	1445.89	907.014	-41.2845	1513.98	880.031
4731	0	187.661	1412.37	1689.69	272.768	1399.2	1679.78	170.388	1217.98	1666	280.934	1225.8	1658.05	208.846	1193.83	1526.3	186.21	1122.55	1260.86	214.092	1345.87	1446.93	232.516	1414.46	1246.78	269.454	1111.37	1316.1	27.8322	1295.67	1491.75	-51.6088	1308.8	1297	-56.4507	1322.27	1140.03	-51.8179	1435.65	1006.73	6.70774	1481.83	931.682	-53.8865	1449.75	907.793	-42.4323	1516.95	877.691
4732	0	189.145	1422.46	1690.57	274.243	1409.19	1681.2	172.003	1227.89	1668.29	282.458	1235.63	1660.56	210.46	1203.61	1528.35	187.968	1132.81	1262.47	214.934	1355.86	1448.73	232.773	1424.69	1248.91	271.417	1121.95	1317.52	29.1046	1304.78	1493.76	-50.8423	1317.46	1299.04	-56.4743	1329.81	1142.59	-52.5716	1441.1	1007.47	5.59068	1485.7	930.744	-55.7263	1453.59	908.099	-43.5683	1519.95	875.9
4733	0	190.507	1432.44	1691.39	275.56	1419.11	1682.41	173.486	1237.69	1670.74	283.957	1245.44	1663.25	211.821	1213.29	1529.41	189.844	1143.02	1263.89	215.717	1365.86	1450.31	233.507	1435.16	1250.96	273.345	1132.29	1319.3	30.1357	1313.81	1495.63	-50.3891	1325.88	1301.34	-55.9418	1337.16	1144.74	-53.2229	1446.62	1008.38	4.49091	1489.22	929.7	-56.977	1457.55	908.458	-44.7245	1522.77	874.3
4734	0	191.601	1442.38	1692.25	276.6	1429.03	1683.54	174.856	1247.44	1673.21	285.402	1255.26	1666.2	213.485	1223.09	1531.1	191.735	1153.03	1265.4	216.538	1375.64	1452.44	233.63	1445.06	1252.78	275.282	1142.45	1320.71	31.0687	1322.73	1497.69	-49.9835	1333.85	1303.37	-56.0237	1343.97	1146.93	-54.153	1451.9	1009.37	3.14629	1492.65	929.422	-59.8308	1461.88	909.903	-45.6724	1525.83	872.726
4735	0	192.473	1452.24	1692.92	278.091	1439.23	1684.88	176.069	1257.24	1675.58	286.514	1265.01	1669.13	214.753	1232.65	1532.85	193.524	1162.93	1266.96	217.131	1385.48	1454.09	233.98	1455.59	1254.73	277.106	1152.52	1322.06	32.0432	1331.56	1499.37	-49.5522	1341.61	1305.27	-55.9212	1350.52	1149.02	-55.0707	1456.99	1010.24	2.04592	1496.34	929.171	-61.632	1466.16	910.913	-46.4041	1529.09	871.783
4736	0	193.141	1461.99	1693.41	278.465	1449.11	1686.09	176.816	1266.79	1678.07	287.597	1274.83	1672.13	215.86	1242.15	1534.4	195.119	1172.56	1268.65	217.796	1395.07	1455.91	234.007	1465.2	1256.46	278.778	1162.37	1324.04	32.8584	1340.34	1501.11	-49.2486	1349.08	1307.03	-55.9957	1356.73	1150.99	-55.8762	1462.07	1011.24	0.89831	1500.14	929.118	-63.5139	1470.3	911.926	-47.546	1531.93	870.851
4737	0	193.439	1471.79	1693.99	278.719	1458.69	1686.94	177.587	1276.43	1680.67	288.229	1284.38	1675.42	217.161	1251.62	1536.18	196.792	1182.27	1270.39	218.423	1404.71	1457.61	233.73	1475.05	1258.12	280.044	1172.11	1326.04	33.6493	1349.06	1502.93	-49.0759	1356.32	1308.96	-56.1099	1362.77	1153.01	-56.7096	1466.9	1012.24	-0.234602	1503.8	929.134	-65.7879	1474.41	913.489	-48.5791	1535.03	870.489
4738	0	193.781	1481.62	1694.43	279.179	1468.53	1688.32	178.078	1286.05	1683.15	288.87	1294.06	1678.63	218.355	1260.92	1537.97	198.292	1191.8	1272.09	219.088	1414.12	1459.49	233.654	1484.77	1260.11	281.927	1182.08	1327.47	34.3402	1357.58	1504.95	-48.7641	1363.04	1310.89	-56.3017	1368.62	1155.15	-57.7392	1471.6	1013.56	-1.24609	1507.44	929.334	-67.5894	1478.36	914.854	-49.623	1538.17	870.592
4739	0	193.957	1491.46	1695.11	279.938	1478.6	1689.87	178.309	1295.74	1685.39	289.283	1303.74	1681.92	219.493	1270.27	1539.71	199.626	1201.14	1273.88	219.61	1423.46	1461.58	233.522	1494.35	1262.37	283.183	1191.77	1328.96	35.1197	1366.06	1506.93	-48.6779	1369.7	1312.87	-56.5652	1374.23	1157.08	-59.0313	1476.04	1015	-2.4319	1510.96	930.183	-68.9933	1482.38	916.163	-50.946	1541	870.79
4740	0	194.039	1501.2	1695.91	279.632	1487.98	1691.19	178.408	1305.51	1687.97	289.483	1313.38	1684.89	220.524	1279.42	1541.57	200.838	1210.43	1275.37	220.045	1432.72	1463.49	233.5	1504.03	1264.24	284.443	1201.39	1330.8	35.7543	1374.48	1508.92	-48.4306	1376.01	1315.15	-56.9136	1379.75	1159.4	-59.953	1480.34	1016.43	-3.61242	1514.61	931.199	-70.6375	1485.82	917.684	-52.2484	1543.76	871.256
4741	0	194.295	1511.05	1696.99	279.933	1497.69	1692.92	178.294	1315.32	1689.98	289.428	1322.91	1687.86	221.51	1288.5	1543.29	202.641	1219.96	1277.19	220.621	1441.89	1465.44	233.259	1513.34	1266.2	285.771	1211.07	1332.15	36.3729	1382.84	1510.85	-48.4605	1382.07	1317.06	-57.187	1385.16	1161.46	-61.0311	1484.74	1017.86	-5.15735	1518.54	932.479	-71.1392	1489.18	918.47	-53.3571	1546.95	872.142
4742	0	194.328	1520.91	1698.4	280.43	1507.59	1694.7	178.103	1325.18	1692.1	289.251	1332.56	1690.34	222.561	1297.64	1545.05	203.916	1229.08	1278.96	220.97	1450.95	1467.1	233.351	1522.79	1268.25	286.726	1220.46	1333.89	36.9655	1391.12	1512.76	-48.2571	1388.15	1319.19	-57.4577	1390.45	1163.76	-62.2282	1488.86	1019.23	-6.28422	1522.2	933.19	-73.1282	1492.55	920.222	-54.9842	1550.06	872.866
4743	0	194.479	1530.73	1699.75	280.003	1516.93	1696.5	177.62	1335	1693.98	288.937	1342.22	1692.73	223.357	1306.71	1546.85	204.657	1237.94	1280.84	221.374	1460.05	1469.11	232.967	1531.93	1270.09	287.777	1229.77	1335.82	37.4721	1399.33	1514.55	-48.2192	1394.19	1320.93	-57.7882	1395.73	1166.05	-63.2987	1493.02	1020.73	-8.01696	1526.09	934.452	-74.3758	1495.86	921.842	-56.7008	1553.2	873.927
4744	0	194.325	1540.43	1701.25	280.182	1526.66	1698.55	177.254	1344.72	1695.95	288.595	1351.7	1695.03	224.187	1315.76	1548.76	206.022	1247.18	1282.63	221.61	1469.2	1470.97	233.058	1541.24	1272.3	288.876	1239.15	1337.77	37.9075	1407.49	1516.52	-47.9898	1400.09	1323.41	-57.9427	1400.94	1168.3	-64.4202	1497.02	1022.31	-9.42602	1530.05	935.746	-75.569	1499.15	923.636	-58.7564	1556.22	875.033
4745	0	194.473	1550.14	1702.97	280.043	1536.02	1700.5	177.026	1354.45	1697.36	288.312	1361.16	1697.08	225.097	1324.89	1550.37	207.387	1256.3	1284.25	221.909	1478.27	1473.07	233.032	1550.37	1274.32	289.844	1248.39	1339.27	38.4845	1415.71	1518.36	-47.7408	1406.11	1325.45	-58.1606	1405.91	1170.46	-65.5962	1501.09	1024.01	-11.2213	1534.19	937.52	-76.1094	1502.18	924.643	-60.7078	1559.36	876.521
4746	0	194.264	1559.62	1704.7	280.289	1545.57	1702.7	176.655	1364.08	1698.87	288.005	1370.43	1699.3	225.764	1333.98	1552.05	208.444	1265.25	1286.01	222.261	1487.38	1474.95	233	1559.57	1276	290.859	1257.72	1340.95	38.8723	1423.91	1520.17	-47.4425	1412.02	1327.55	-58.2925	1410.9	1172.56	-66.8447	1505.1	1025.58	-12.753	1538.42	939.141	-77.2085	1505.5	926.176	-62.5485	1562.82	877.872
4747	0	194.246	1569.13	1706.39	280.21	1554.95	1704.62	176.167	1373.6	1700.47	287.64	1379.96	1700.86	226.347	1343.2	1553.49	209.619	1274.38	1287.61	222.435	1496.47	1476.47	232.968	1568.64	1277.68	291.76	1267.02	1342.7	39.2192	1432.31	1521.7	-47.3761	1417.96	1329.29	-58.348	1415.85	1174.58	-67.9072	1509.23	1026.9	-14.5609	1543.04	940.539	-78.225	1508.94	927.63	-64.4324	1566.25	879.299
4748	0	194.057	1578.58	1708.25	279.929	1564.25	1706.63	175.899	1383.1	1701.51	287.376	1389.16	1702.56	226.967	1352.35	1555.15	210.781	1283.56	1289.15	222.596	1505.68	1478.04	232.995	1577.76	1279.32	292.907	1276.27	1344.31	39.5238	1440.73	1523.22	-47.1494	1424.21	1331.38	-58.413	1420.73	1176.42	-69.1631	1513.36	1028.31	-16.1266	1547.71	941.891	-79.6506	1512.52	929.302	-66.3404	1569.83	880.461
4749	0	193.953	1587.91	1709.97	279.76	1573.41	1708.59	175.638	1392.52	1702.26	286.906	1398.41	1703.81	227.438	1361.56	1556.37	211.83	1292.64	1290.82	222.837	1514.88	1479.45	232.925	1586.83	1280.79	293.831	1285.54	1345.91	39.7644	1449.2	1524.74	-46.8353	1430.36	1332.86	-58.3796	1425.64	1178.21	-70.1583	1517.48	1029.69	-17.8017	1552.57	943.235	-80.3861	1515.95	930.359	-68.2118	1573.61	881.459
4750	0	193.667	1597.17	1711.76	279.414	1582.61	1710.54	175.137	1401.91	1702.98	286.501	1407.57	1704.91	227.788	1370.82	1557.67	212.766	1301.7	1292.16	222.82	1523.95	1480.66	232.793	1595.85	1281.97	294.498	1294.81	1347.14	39.9962	1457.7	1525.75	-46.6445	1436.48	1334.44	-58.2039	1430.59	1179.49	-71.4125	1521.7	1030.77	-19.7134	1557.74	944.639	-81.3751	1519.56	931.367	-70.3334	1577.47	882.633
4751	0	193.38	1606.43	1713.09	279.406	1591.83	1712.13	174.607	1411.19	1703.55	286.114	1416.89	1705.56	228.32	1380.19	1558.6	213.758	1310.8	1293.45	222.87	1533.24	1481.6	232.583	1605.05	1282.87	295.362	1304.27	1348.43	40.2986	1466.35	1526.55	-46.3568	1442.83	1335.6	-58.0942	1435.72	1180.83	-72.485	1526.03	1031.62	-21.1691	1562.9	945.448	-82.0165	1523.39	932.227	-72.2283	1581.37	883.358
4752	0	192.98	1615.69	1714.6	279.228	1601.12	1713.88	174.309	1420.53	1703.56	285.626	1426.05	1706.24	228.87	1389.67	1559.32	215.04	1320.2	1294.23	222.716	1542.46	1482.34	232.137	1614.02	1283.57	296.169	1313.68	1349.31	40.4132	1475.02	1527.15	-46.0987	1449.31	1336.58	-57.8524	1440.94	1181.82	-73.7145	1530.48	1032.35	-22.9842	1568.23	946.171	-82.4589	1527.21	932.764	-74.1462	1585.52	884.007
4753	0	192.594	1624.84	1716.06	278.198	1609.99	1715.4	173.736	1429.81	1703.53	285.078	1435.18	1706.67	229.041	1398.99	1560.29	215.665	1329.31	1295.06	222.628	1552.01	1482.87	231.858	1623.3	1283.93	297.062	1323.23	1350.26	40.5398	1483.77	1527.6	-45.771	1456.02	1337.31	-57.7432	1446.19	1182.85	-74.8767	1534.81	1033.19	-24.8958	1573.51	946.875	-83.1949	1531.23	933.198	-76.11	1589.68	884.4
4754	0	191.968	1634.01	1717.08	278.109	1619.37	1717.01	173.089	1439.03	1703.43	284.346	1444.28	1707.1	229.406	1408.62	1560.99	216.171	1338.39	1296.21	222.61	1561.53	1483.35	231.155	1632.17	1284.32	297.574	1332.74	1351.16	40.5128	1492.63	1527.99	-45.568	1462.79	1337.91	-57.3569	1451.85	1183.6	-75.8343	1539.57	1033.64	-26.4414	1579.31	947.226	-83.7649	1535.31	933.619	-78.01	1594.1	884.918
4755	0	191.169	1643.23	1718.08	277.412	1628.26	1718.42	172.419	1448.32	1702.72	283.688	1453.43	1707.3	229.65	1418.24	1561.54	216.876	1347.54	1297.08	222.364	1571.13	1483.5	230.425	1641.08	1284.26	298.332	1342.4	1351.79	40.5157	1501.53	1528.3	-45.3113	1469.78	1338.59	-57.1868	1457.56	1184.37	-76.8315	1544.42	1033.93	-28.192	1585.16	947.485	-84.2722	1539.75	933.781	-79.9848	1598.55	885.434
4756	0	190.383	1652.32	1718.87	276.826	1637.62	1719.57	171.823	1457.76	1701.55	283.034	1462.72	1707.1	230.059	1428.1	1561.52	217.443	1356.68	1297.02	222.235	1580.72	1483.66	229.768	1650.23	1284	299.049	1352.04	1352.05	40.5848	1510.45	1528.28	-45.0382	1476.8	1338.83	-56.6816	1463.46	1184.43	-77.6866	1549.37	1034.08	-30.073	1591.08	948.136	-84.7742	1544.27	933.505	-81.6716	1603.19	885.361
4757	0	189.364	1661.58	1719.16	275.616	1646.65	1720.51	170.971	1466.99	1700.81	282.1	1471.98	1706.97	230.307	1438.05	1561.46	217.801	1365.85	1297.27	221.962	1590.43	1483.7	229.224	1659.52	1283.68	299.597	1361.79	1352.21	40.6463	1519.56	1527.96	-44.7933	1484	1338.88	-56.2334	1469.66	1184.46	-78.4171	1554.64	1033.68	-31.7426	1596.77	947.34	-85.2485	1549.04	933.365	-83.5951	1607.96	885.199
4758	0	188.419	1670.94	1719.58	274.711	1655.99	1721.2	169.972	1476.54	1699.43	280.565	1481.29	1706.47	230.552	1448.05	1561.61	217.953	1374.97	1297.67	221.671	1600.51	1483.11	228.541	1668.78	1282.92	300.262	1371.62	1352.56	40.5735	1528.73	1527.6	-44.6898	1491.45	1338.98	-55.7356	1476.08	1184.43	-79.204	1560.07	1033.35	-33.1836	1602.86	947.259	-85.7585	1553.97	932.979	-85.2586	1613.05	884.914
4759	0	187.373	1680.27	1719.61	274.418	1665.38	1721.37	168.948	1486.03	1698.1	279.439	1490.76	1705.98	230.907	1458.22	1561.31	218.409	1384.39	1297.82	221.445	1610.45	1482.42	227.79	1678.18	1282.21	300.961	1381.45	1352.47	40.4576	1537.98	1527.22	-44.5488	1499	1338.74	-55.2663	1482.64	1184.16	-79.9307	1565.89	1033.08	-34.5227	1609.27	946.487	-86.2287	1559.24	932.504	-86.9206	1618.33	884.397
4760	0	186.305	1689.7	1719.3	273.197	1674.78	1721.87	167.72	1495.78	1696.32	278.125	1500.24	1705.37	230.856	1468.34	1560.75	218.803	1393.93	1297.51	220.94	1620.18	1481.63	227.005	1687.55	1281.17	301.573	1391.18	1352.03	40.3532	1547.3	1526.54	-44.0065	1506.84	1338.08	-54.7406	1489.47	1183.92	-80.641	1571.71	1032.3	-36.0034	1615.72	946.124	-86.6434	1564.68	931.728	-88.5497	1623.62	883.684
4761	0	185.301	1699.28	1718.78	271.74	1684.26	1722.19	166.089	1505.52	1694.36	276.606	1509.88	1704.58	231.104	1478.55	1560.58	219.016	1403.42	1297.46	220.444	1630.24	1480.61	226.322	1697.16	1280.14	301.953	1401.13	1351.69	40.1854	1556.71	1525.65	-43.8489	1514.87	1337.55	-54.1747	1496.57	1183.42	-81.2182	1578.01	1031.51	-37.3425	1622.28	944.796	-87.2111	1570.28	930.991	-90.178	1629.23	882.718
4762	0	183.873	1709.04	1717.91	270.217	1693.9	1722.25	164.61	1515.6	1692.27	275.095	1519.63	1703.78	231.17	1489.04	1559.39	219.022	1413.01	1296.99	220.323	1640.57	1479.59	225.443	1706.57	1278.67	302.249	1411.16	1351.32	40.1334	1566.47	1524.74	-43.7868	1523.07	1336.85	-53.6553	1503.94	1182.58	-81.7848	1584.47	1030.31	-38.5586	1629.24	943.707	-87.6537	1576.3	930.057	-91.4756	1635.08	881.57
4763	0	182.225	1719	1716.89	268.616	1703.47	1721.99	163.159	1525.71	1690.11	273.305	1529.34	1703.08	231.146	1499.26	1558.83	219.532	1422.99	1295.81	219.607	1650.58	1478.4	224.766	1716.18	1277.39	302.612	1421.17	1350.22	39.7854	1575.98	1523.53	-43.4113	1531.42	1335.69	-53.1699	1511.46	1181.75	-82.4303	1591.05	1029.34	-39.9927	1636.03	942.48	-88.229	1582.49	928.893	-93.0564	1640.95	880.248
4764	0	180.608	1729.12	1715.52	266.824	1713.5	1721.33	161.295	1535.81	1687.89	271.385	1539.31	1702.16	230.883	1509.78	1557.33	219.209	1432.64	1295.18	219.196	1660.97	1477.11	223.965	1725.85	1276	302.767	1431.65	1349.39	39.008	1585.66	1522.27	-43.3204	1540.06	1334.56	-52.8239	1519.22	1180.55	-83.1017	1597.87	1027.97	-41.0026	1643.28	941.119	-88.8309	1588.84	927.429	-94.3484	1647.19	878.859
4765	0	178.647	1739.35	1713.7	264.274	1723.43	1721.04	159.311	1546.18	1685.92	269.26	1549.42	1701.39	230.561	1520.14	1556.69	218.934	1442.48	1294.52	218.447	1671.12	1475.9	223.229	1735.76	1274.38	302.547	1441.81	1348.42	38.6043	1595.57	1520.92	-43.5568	1548.98	1333.68	-52.5243	1527.44	1179.79	-83.6853	1605.13	1026.48	-42.3104	1650.34	939.377	-89.491	1595.59	926.07	-95.9308	1653.28	877.665
4766	0	176.794	1749.8	1711.66	262.549	1733.65	1719.7	157.261	1556.7	1683.58	267.092	1559.63	1700.32	230.489	1530.82	1555.01	218.744	1452.55	1293.4	218.045	1681.71	1474.27	222.509	1745.8	1272.6	302.276	1451.86	1347.55	38.1017	1605.71	1519.5	-43.9024	1558.08	1332.17	-52.1372	1535.89	1178.38	-84.2595	1612.56	1025.03	-43.3609	1657.99	937.603	-90.1301	1602.53	924.66	-97.1398	1660.05	875.76
4767	0	174.84	1760.44	1709.29	260.536	1744.15	1718.39	155.16	1567.28	1681.14	264.781	1570	1699.01	230.315	1541.42	1553.82	218.318	1462.52	1291.89	217.156	1691.94	1472.57	221.678	1755.81	1270.66	301.991	1462.21	1345.92	37.7213	1615.71	1517.73	-43.592	1567.46	1330.47	-51.956	1544.46	1176.77	-84.8635	1620.3	1023.25	-44.4049	1665.54	935.382	-90.6362	1609.83	922.964	-98.221	1666.77	873.719
4768	0	172.985	1771.12	1706.99	258.313	1754.46	1716.89	152.944	1578.07	1678.86	262.425	1580.41	1697.86	229.087	1551.88	1551.83	217.823	1472.61	1290.17	216.856	1702.7	1470.68	220.967	1765.89	1268.77	301.706	1472.77	1344.25	37.1736	1625.93	1515.85	-44.1873	1576.82	1329.01	-51.7706	1553.34	1175.13	-85.5016	1628.28	1021.19	-45.5286	1673.64	933.435	-91.3067	1617.39	921.064	-99.3405	1673.99	871.48
4769	0	170.964	1782.01	1704.53	256.197	1765.08	1714.84	150.68	1588.94	1676.55	260.015	1591.01	1696.47	228.459	1562.6	1549.72	217.162	1482.72	1288.94	215.724	1712.87	1469.03	220.111	1776.5	1266.78	301.306	1483.22	1342.67	36.4571	1636.21	1513.96	-44.6207	1586.54	1327.19	-51.7914	1562.57	1173.42	-86.2767	1636.53	1019.35	-46.7642	1681.64	931.037	-92.1175	1625.09	918.981	-100.519	1681.55	869.231
4770	0	169.104	1793.09	1701.74	254.095	1775.8	1712.69	148.427	1599.89	1674.2	257.618	1601.78	1694.89	227.976	1573.25	1548.04	216.671	1493.01	1286.85	215.131	1723.75	1466.83	219.338	1786.96	1264.73	300.827	1493.83	1340.66	35.5291	1646.49	1511.98	-44.7124	1596.34	1324.97	-51.8512	1571.81	1171.36	-87.1144	1644.94	1017.23	-48.0565	1690.13	928.607	-92.8966	1633.2	916.926	-101.637	1689.25	866.716
4771	0	167.054	1804.26	1698.76	252.015	1786.83	1710.4	146.202	1610.94	1672.04	255.228	1612.55	1693.46	226.865	1583.93	1545.92	215.912	1503.26	1284.99	213.903	1734.09	1464.59	218.668	1797.51	1262.24	300.28	1504.41	1339.04	34.5914	1656.95	1509.63	-45.1301	1606.44	1322.62	-51.9567	1581.33	1169.08	-87.8714	1653.76	1014.71	-49.2699	1699.17	926.177	-93.8286	1641.57	914.668	-102.77	1697.22	863.883
4772	0	165.298	1815.36	1695.59	249.923	1797.97	1707.84	144.073	1622.07	1670.16	253.034	1623.7	1691.94	225.685	1594.65	1544.12	215.164	1513.91	1283.24	212.874	1745	1462.23	217.802	1808.24	1260.02	299.609	1515.06	1337.09	33.4304	1667.55	1507.35	-46.1331	1616.57	1320.47	-52.3036	1591.19	1166.89	-88.8444	1662.72	1012.31	-50.6153	1708.13	923.496	-94.7696	1650.3	912.278	-104.02	1705.6	861.299
4773	0	163.208	1826.67	1692.87	247.977	1809.2	1705.22	141.999	1633.14	1668.22	250.963	1634.83	1690.53	224.373	1605.39	1542.08	214.36	1524.34	1280.91	211.701	1755.58	1459.92	217.08	1818.84	1257.61	298.593	1525.86	1335.14	32.1463	1678.11	1505	-46.9111	1626.84	1317.99	-52.7224	1601.33	1164.53	-89.6977	1672.09	1009.58	-51.9725	1717.53	920.925	-95.7101	1659.14	909.51	-105.077	1714.24	858.364
4774	0	161.292	1838	1689.96	246.088	1820.6	1702.54	139.915	1644.23	1666.44	248.884	1646.24	1688.59	223.098	1616.4	1539.73	213.686	1535.34	1278.37	210.198	1766.27	1457.67	216.155	1829.6	1255.35	297.769	1536.72	1333.26	30.8785	1688.6	1502.41	-47.7948	1637.21	1315.22	-53.2531	1611.52	1161.92	-90.8031	1681.49	1006.97	-53.0921	1727.05	918.247	-96.6097	1668.38	906.624	-106.281	1723.05	855.263
4775	0	159.255	1849.37	1687.13	244.063	1832.01	1699.95	137.815	1655.37	1664.76	246.831	1657.48	1686.96	221.486	1627.25	1537.85	212.522	1546.03	1276.49	208.557	1777.05	1455.41	215.281	1840.07	1252.83	296.471	1547.64	1331.17	29.243	1699.22	1499.93	-48.9481	1647.82	1312.36	-53.9747	1622.09	1159.23	-91.7196	1691.42	1003.95	-54.5017	1736.63	915.141	-97.6534	1677.75	903.819	-107.41	1732.26	852.159
4776	0	157.324	1860.73	1684.23	242.033	1843.47	1697.25	135.721	1666.62	1663.07	244.847	1668.91	1685.16	220.122	1638.36	1535.8	211.387	1556.86	1274.72	206.92	1787.94	1453.05	214.056	1850.52	1250.43	295.233	1558.6	1329.19	27.5093	1709.86	1497.39	-50.3874	1658.59	1309.62	-54.8393	1632.81	1156.39	-92.9215	1701.68	1001.05	-55.7466	1746.16	912.042	-98.6613	1687.65	901.011	-108.766	1741.83	849.159
4777	0	155.596	1871.97	1681.42	240.107	1855.01	1694.33	134.042	1678.05	1660.98	243.36	1680.37	1682.78	218.382	1649.23	1533.49	210.404	1567.93	1272.78	205.058	1798.96	1450.84	212.693	1861.25	1248.12	294.269	1569.87	1327.07	25.685	1720.33	1494.76	-50.8559	1669.25	1306.64	-55.6468	1643.72	1153.45	-93.9632	1712.11	998.17	-56.9207	1756.91	909.144	-99.6331	1697.73	897.882	-109.896	1751.86	846.02
4778	0	153.266	1883.29	1678.99	237.999	1866.51	1691.58	132.163	1689.26	1659.39	241.419	1691.76	1680.56	216.638	1660.27	1531.14	209.467	1578.96	1270.44	203.14	1809.97	1448.47	211.357	1871.4	1245.36	292.9	1580.99	1325.36	23.7586	1730.79	1491.91	-52.6246	1680.08	1303.65	-56.5847	1654.79	1150.62	-94.9299	1722.69	994.79	-58.0428	1767.27	905.789	-100.724	1708.2	894.796	-110.919	1762.13	842.705
4779	0	151.106	1894.55	1676.69	235.929	1877.9	1689.1	130.14	1700.48	1657.93	239.343	1702.97	1678.91	214.851	1671.08	1529.5	208.254	1590.03	1268.35	201.077	1820.98	1446.37	209.772	1882.42	1243.15	291.675	1592.33	1323.49	21.8739	1741.34	1489.17	-53.8142	1691.03	1300.44	-57.6889	1666.06	1147.38	-96.0339	1733.59	991.761	-59.3771	1777.48	902.202	-102.254	1718.65	892.085	-111.946	1772.62	839.39
4780	0	148.807	1906.07	1674.86	233.919	1889.3	1686.81	128.156	1711.69	1656.54	237.436	1714.44	1676.83	212.866	1682.12	1527.46	207.112	1601.31	1266.64	198.802	1832.13	1444.47	207.812	1893.53	1241.42	290.668	1603.8	1321.33	20.0204	1751.87	1486.52	-55.422	1701.89	1297.49	-58.9128	1677.39	1144.52	-97.1868	1744.75	988.719	-60.4532	1789.2	899.689	-103.35	1729.79	889.105	-113.082	1783.6	836.307
4781	0	146.734	1917.4	1673.31	231.897	1900.6	1684.65	126.093	1723	1655.05	235.411	1725.68	1675.03	210.778	1693.11	1525.8	206.128	1612.6	1264.33	196.546	1843.17	1442.6	205.837	1904.87	1239.73	289.174	1615.21	1319.51	17.7446	1762.18	1484.07	-57.0114	1712.95	1294.25	-60.1204	1688.8	1141.41	-98.3283	1756.1	985.725	-61.6068	1800.06	896.266	-104.441	1741.16	885.924	-114.199	1794.82	833.268
4782	0	144.663	1928.81	1671.93	229.809	1912.11	1682.86	123.91	1734.27	1654.11	233.371	1737.12	1673.21	208.413	1704.28	1524.21	204.641	1623.75	1263	194.119	1854.29	1440.92	203.733	1916.37	1238.33	287.691	1626.61	1318.03	15.4318	1772.74	1481.59	-58.3446	1723.89	1291.23	-61.5507	1700.38	1138.58	-99.5255	1767.67	983.044	-62.5921	1811.48	893.495	-105.562	1752.75	883.125	-115.265	1806.4	830.345
4783	0	142.722	1939.94	1670.93	227.742	1923.57	1681.35	121.69	1745.63	1653.3	231.369	1748.52	1671.6	205.855	1715.42	1523.01	203.222	1635.12	1261.85	191.699	1865.45	1439.49	201.722	1928.22	1237.09	286.184	1637.8	1317.18	12.9859	1783.41	1479.39	-60.4653	1734.98	1289.09	-62.8995	1712.3	1136.08	-100.654	1779.69	980.19	-63.4898	1823.52	890.849	-106.587	1764.68	880.543	-116.17	1818.23	827.65
4784	0	140.263	1951.38	1670.69	225.759	1934.79	1680.22	119.493	1756.97	1652.33	229.219	1759.68	1670.27	203.633	1726.78	1521.83	201.95	1646.5	1260.49	189.177	1876.69	1438.39	199.568	1940.1	1236.29	284.559	1648.64	1316.42	10.5296	1794.06	1477.46	-61.3951	1746.1	1285.99	-64.1496	1724.3	1133.3	-101.772	1791.69	977.868	-64.423	1835.73	888.614	-107.474	1776.86	877.842	-116.944	1830.42	825.251
4785	0	138.256	1962.78	1670.48	223.916	1946.23	1679.49	117.211	1768.26	1651.89	227.071	1770.92	1669.03	201.073	1737.8	1521.24	201.28	1658.58	1259.37	186.66	1887.89	1437.81	197.51	1951.94	1235.89	283.085	1659.73	1315.76	7.93395	1804.8	1475.83	-63.0157	1757.25	1283.43	-65.7497	1736.37	1130.92	-102.793	1803.88	975.644	-65.0996	1847.62	886.365	-108.309	1789.18	875.539	-117.614	1842.72	822.97
4786	0	136.137	1973.71	1670.71	221.757	1957.29	1679.28	114.929	1779.59	1651.98	224.981	1782.38	1668.17	198.355	1749.07	1521.27	198.961	1669.32	1259.08	184.019	1898.94	1437.26	195.333	1963.65	1235.69	281.046	1670.47	1315.75	5.25291	1815.73	1474.58	-64.8492	1768.56	1281.65	-67.2863	1748.86	1129.27	-103.742	1816.46	973.715	-65.7038	1860.22	884.708	-109.154	1801.82	873.728	-118.193	1855.48	821.127
4787	0	133.904	1985.16	1671.46	219.736	1968.5	1679.36	112.62	1790.92	1652.16	222.626	1793.4	1668.01	195.606	1760.37	1521.45	197.155	1680.63	1259.64	181.542	1910.18	1437.28	193.261	1975.36	1235.78	279.21	1681.26	1316.24	2.49844	1826.95	1473.74	-66.7453	1780.01	1280.4	-68.9298	1761.34	1127.99	-104.65	1829.24	972.236	-66.2301	1872.78	883.177	-110.027	1814.53	872.411	-118.615	1868.45	819.803
4788	0	132.202	1996.22	1672.06	217.931	1979.8	1679.59	110.448	1802.18	1652.73	220.37	1804.5	1667.78	193.304	1771.5	1521.5	195.362	1691.69	1260.1	179.026	1921.31	1437.44	191.405	1986.65	1236.01	277.031	1691.85	1317.16	-0.092397	1838.35	1473.3	-68.6495	1791.84	1279.74	-70.5298	1774.27	1127.01	-105.589	1842.18	971.389	-66.6415	1885.7	882.137	-110.28	1827.79	871.131	-118.866	1881.61	818.832
4789	0	130.421	2007.39	1673.08	215.998	1990.75	1680.21	108.086	1813.4	1653.55	218.252	1815.59	1667.7	190.56	1782.52	1522.35	193.511	1702.67	1260.39	176.643	1932.29	1438.17	189.776	1997.86	1236.73	274.779	1702.37	1317.79	-2.72522	1849.84	1473.13	-70.2974	1804.05	1279.01	-72.3361	1786.93	1126.6	-106.327	1855.42	970.743	-66.8323	1898.74	881.786	-110.702	1841.2	870.576	-119.002	1894.98	818.326
4790	0	128.607	2018.62	1674.52	214.473	2002.05	1681.21	105.811	1824.52	1654.72	216.19	1826.41	1668.39	187.359	1793.28	1523.19	191.302	1713.65	1261.43	174.505	1943.09	1439.14	188.222	2008.79	1237.82	272.624	1712.86	1319.11	-5.11803	1861.51	1473.56	-72.4142	1816.25	1278.72	-74.0632	1800.14	1126.47	-107.072	1868.86	970.421	-66.8712	1911.83	881.878	-111.435	1854.68	870.536	-118.906	1908.74	818.241
4791	0	127.058	2029.33	1675.63	213.018	2012.93	1681.92	103.552	1835.43	1656.2	214.096	1837.03	1669.15	184.438	1804.02	1523.97	188.779	1724.49	1262.35	172.254	1953.78	1440.33	186.907	2019.42	1238.93	270.145	1722.99	1320.72	-7.80683	1873.1	1474.33	-74.5923	1828.9	1279.1	-75.8946	1813.12	1126.67	-107.671	1882.58	971.004	-66.8903	1925.8	882.784	-111.899	1868.49	870.836	-118.799	1922.84	818.66
4792	0	125.259	2040.34	1677.23	211.567	2023.82	1682.79	101.51	1846.31	1657.9	212.027	1847.85	1669.86	181.379	1814.45	1525.24	186.034	1735.3	1263.42	170.205	1964.44	1441.69	185.837	2030.1	1239.98	267.423	1733.11	1321.89	-10.3008	1885.01	1475.21	-76.7929	1841.68	1279.55	-77.7969	1826.48	1127.21	-108.42	1896.58	971.539	-67.0422	1938.52	882.787	-112.348	1882.7	871.392	-118.482	1937.2	819.271
4793	0	123.958	2050.9	1678.47	210.284	2034.36	1683.73	99.2489	1857.06	1659.58	209.785	1857.88	1671.26	178.236	1824.69	1526.77	182.98	1745.75	1264.76	168.368	1974.91	1443.03	184.799	2040.66	1241.57	264.655	1743.12	1323.6	-12.6786	1897.16	1476.25	-79.0999	1855.09	1280.18	-79.9197	1840.04	1128.22	-109.161	1910.7	972.552	-66.6902	1952.83	884.263	-112.814	1897.17	872.259	-118.052	1951.87	820.245
4794	0	122.676	2061.43	1679.66	208.873	2044.73	1684.81	97.2987	1867.72	1661.54	207.824	1868.41	1672.47	175.208	1834.81	1528.07	180.045	1756.06	1266.3	166.634	1985.24	1444.31	184.119	2051.03	1243.1	261.676	1752.75	1325.31	-14.8498	1909.17	1477.45	-82.0559	1868.4	1281.69	-82.0107	1853.48	1129.06	-109.785	1925.13	973.671	-66.434	1966.97	885.605	-113.201	1912.02	873.226	-117.366	1966.98	821.256
4795	0	121.608	2072.01	1681.33	207.67	2055.01	1685.9	95.4003	1878.24	1663.44	205.781	1877.57	1674.38	172.413	1845	1529.07	177.062	1765.88	1267.53	165.249	1995.59	1445.84	183.656	2061.34	1244.62	258.655	1762.44	1326.63	-17.0304	1921.03	1478.56	-85.0507	1881.92	1282.35	-84.1498	1866.98	1129.87	-110.141	1939.83	974.346	-65.9404	1981.14	886.945	-113.667	1927.1	874.319	-116.631	1982.31	822.309
4796	0	120.673	2082.22	1682.64	206.56	2064.8	1686.86	93.3715	1888.66	1665.28	204.108	1888.38	1675.31	169.786	1854.93	1530.88	174.197	1775.96	1268.76	163.936	2005.65	1447.47	183.21	2071.41	1246.46	255.717	1771.91	1328.02	-18.7186	1933.23	1479.91	-87.5233	1895.78	1283.11	-86.3296	1880.8	1130.89	-110.734	1954.61	975.493	-65.5361	1995.74	888.502	-113.948	1942.44	875.307	-115.827	1997.8	823.566
4797	0	119.802	2092.58	1683.85	205.65	2074.88	1687.95	91.3969	1898.99	1667.49	202.373	1898.39	1676.93	167.079	1864.82	1532.24	171.321	1785.74	1270.33	162.805	2015.7	1449.21	183.005	2081.41	1248.19	252.695	1781.22	1329.63	-20.5236	1944.87	1481.29	-89.7845	1909.91	1284.74	-88.5232	1894.83	1131.83	-111.331	1969.61	977.024	-65.0101	2010.31	890.163	-114.383	1958.13	876.627	-115.013	2013.72	825.012
4798	0	119.127	2102.77	1685.19	205.004	2084.57	1688.81	89.6887	1909.17	1669.58	200.633	1907.31	1679.13	164.677	1874.62	1533.79	168.879	1795.7	1271.8	161.747	2025.58	1450.81	182.822	2091.04	1249.88	249.784	1790.51	1331.17	-22.3233	1956.43	1482.82	-92.3352	1923.88	1286.32	-90.6561	1908.99	1133.02	-111.788	1985.02	978.582	-64.5794	2025.26	891.895	-114.776	1974.09	877.893	-114.142	2029.91	826.7
4799	0	118.422	2112.81	1686.32	204.475	2094.35	1689.73	88.2915	1919.37	1671.79	199.053	1916.78	1681.12	162.641	1884.35	1535.28	166.223	1805.26	1273.33	160.915	2035.36	1452.48	182.623	2100.62	1251.49	246.931	1799.49	1332.64	-23.6402	1968.1	1484.3	-94.5706	1937.9	1287.59	-92.8583	1923.14	1133.98	-112.271	2000.49	980.119	-64.0049	2040.11	893.665	-115.259	1990.23	879.359	-113.306	2046.47	828.496
4800	0	117.965	2122.71	1687.64	204.003	2104.03	1691.01	86.8728	1929.5	1674.06	197.737	1926.65	1682.68	161.024	1894.08	1537.14	163.951	1815.19	1274.67	160.252	2044.95	1454.01	182.758	2109.94	1252.86	244.319	1808.7	1333.98	-25.0458	1979.26	1485.86	-96.7285	1951.86	1288.67	-95.035	1937.42	1135.15	-112.618	2016	981.583	-63.216	2055.84	895.484	-115.538	2006.69	880.793	-112.084	2063.23	830.138
4801	0	117.622	2132.62	1689.06	203.225	2113.19	1691.96	85.62	1939.68	1676.22	196.558	1935.97	1684.71	158.472	1903.19	1538.6	161.801	1824.92	1276.15	159.494	2054.22	1455.93	183.151	2119.13	1254.51	241.755	1817.82	1335.23	-26.3115	1990.14	1487.46	-98.5071	1965.69	1289.71	-96.9857	1951.8	1136.01	-112.738	2031.92	983.162	-62.3146	2070.69	897.303	-115.91	2023.26	882.448	-111.094	2080.16	832.129
4802	0	117.609	2142.74	1690.22	202.351	2121.6	1692.84	84.5887	1949.56	1678.58	195.505	1945.6	1686.48	156.85	1912.58	1540.09	159.711	1834.23	1277.52	158.894	2063.48	1457.43	183.388	2128.07	1256.46	239.079	1826.72	1336.83	-27.5079	2000.89	1489	-100.122	1979.45	1291.07	-98.8824	1966.2	1137.22	-112.851	2048	984.923	-61.4777	2086.45	899.571	-116.086	2040.13	884.168	-109.937	2097.22	834.167
4803	0	117.675	2152.51	1691.19	202.382	2131.21	1693.84	83.6962	1959.63	1681.01	194.779	1955.23	1688.55	155.299	1921.82	1541.73	157.756	1843.62	1278.91	158.329	2072.6	1458.87	183.578	2137.21	1257.92	236.969	1835.55	1338.56	-28.3121	2011.51	1490.43	-101.615	1993	1292.57	-100.75	1980.64	1138.5	-112.862	2064.05	986.766	-60.673	2102.15	901.665	-116.403	2057.13	885.802	-109.052	2114.42	836.378
4804	0	117.977	2162.5	1692.33	202.183	2140.63	1694.93	82.8316	1969.58	1683.44	193.796	1964.86	1690.2	153.598	1930.77	1543.51	156.056	1853.19	1280.54	157.744	2081.51	1460.45	183.742	2146.28	1259.72	234.905	1844.77	1339.89	-29.1465	2021.88	1491.89	-102.574	2006.53	1294.17	-102.402	1995.11	1139.67	-112.782	2080.15	988.75	-59.7948	2118.04	903.767	-116.589	2074.22	887.944	-107.908	2131.78	838.721
4805	0	118.219	2172.34	1693.47	202.367	2150	1695.64	82.9468	1979.71	1686.57	194.333	1975.12	1692.79	152.134	1939.93	1545.14	154.213	1862.49	1282.41	157.333	2090.59	1462.27	184.092	2155.33	1261.63	233.019	1854.01	1341.42	-30.1674	2031.88	1493.8	-103.84	2019.45	1295.58	-103.769	2009.63	1141.1	-112.672	2096.46	991.109	-58.8833	2133.86	906.331	-116.812	2091.6	890.322	-107.129	2149.3	841.806
4806	0	118.76	2182.12	1694.7	202.925	2159.43	1696.58	82.3085	1989.7	1688.99	193.92	1984.47	1695.16	150.951	1948.89	1546.62	152.925	1871.89	1283.65	156.891	2099.54	1464.24	184.143	2164.3	1263.62	230.766	1863.01	1343.45	-30.9596	2041.78	1495.54	-104.696	2031.96	1297.35	-104.872	2024.13	1142.58	-112.378	2112.61	993.48	-57.9502	2149.68	909.243	-116.951	2108.98	892.773	-105.984	2166.8	844.62
4807	0	119.386	2191.86	1695.69	203.501	2168.8	1697.49	81.9732	1999.54	1691.43	193.617	1993.9	1697.34	149.792	1957.82	1548.38	151.438	1881.19	1284.71	156.363	2108.3	1466.2	184.236	2173.65	1266.13	229.361	1872	1344.85	-31.6762	2051.4	1497.18	-105.364	2044.26	1298.99	-106.015	2038.18	1144.02	-112.207	2128.5	996.216	-57.2041	2165.49	912.06	-116.923	2126.08	895.026	-104.931	2184.36	847.848
4808	0	120.01	2201.49	1696.75	203.776	2177.67	1698.55	81.5828	2009.46	1694	193.413	2003.26	1699.37	148.692	1966.63	1550.05	150.164	1890.55	1286.1	156.179	2117.32	1468.14	184.267	2182.8	1268.1	228.445	1880.86	1345.9	-32.2946	2061.02	1498.93	-105.72	2056.33	1300.8	-107.085	2052.07	1145.64	-111.986	2144.52	998.957	-56.3046	2181.51	915.226	-116.939	2143.55	898.063	-104.052	2201.99	851.326
4809	0	120.459	2211.24	1697.56	204.541	2187.24	1698.87	81.5981	2019.31	1696.13	193.09	2012.51	1701.45	148.284	1975.77	1551.35	149.878	1900.15	1286.88	155.728	2126.15	1469.78	184.206	2191.91	1269.76	227.323	1889.83	1347.32	-32.6224	2070.66	1500.75	-106.422	2067.79	1302.7	-107.891	2065.97	1147.39	-111.657	2160.36	1001.6	-55.4715	2197.52	918.373	-117.238	2160.9	901.173	-103.111	2219.76	855.07
4810	0	121.507	2221.2	1698.08	205.108	2196.43	1699.62	81.7467	2029.31	1698.44	193.616	2022.59	1702.63	147.179	1984.5	1552.55	148.882	1909.29	1288.13	155.59	2135.04	1471.32	184.486	2200.63	1271.4	226.227	1898.82	1348.55	-32.9015	2080.35	1502.03	-106.443	2079.23	1304.06	-108.418	2079.64	1148.97	-111.214	2176.16	1004.47	-54.7426	2213.67	921.52	-117.328	2178.18	904.268	-102.067	2237.39	858.552
4811	0	122.359	2230.9	1698.58	205.609	2205.7	1700.12	81.618	2039.04	1700.22	193.932	2032.33	1703.82	146.576	1993.36	1554.08	147.611	1918.29	1289.53	155.708	2143.82	1472.56	184.728	2209.57	1273.02	225.059	1907.5	1349.96	-32.9422	2090.03	1503.37	-106.337	2090.24	1305.38	-108.991	2093.02	1150.35	-110.682	2191.75	1007.24	-53.8585	2229.8	924.897	-116.674	2195.27	906.947	-101.095	2255.04	862.426
4812	0	123.154	2240.6	1699.13	206.292	2215.05	1700.64	81.8186	2048.85	1702	193.837	2041.55	1705.74	145.939	2002.13	1555.42	146.639	1927.34	1290.61	155.772	2152.31	1473.57	185.234	2218.43	1274.24	224.208	1916.46	1351.21	-33.1457	2099.61	1504.74	-106.403	2100.81	1306.58	-109.481	2106.32	1151.93	-110.242	2207.25	1009.85	-52.8171	2245.86	928.003	-116.562	2212.21	910.186	-100.175	2272.57	866.269
4813	0	123.869	2250.22	1699.6	207.089	2224.44	1700.94	82.2189	2058.73	1703.36	194.854	2051.67	1706.24	145.624	2011.15	1556.35	145.76	1936.44	1291.59	155.952	2161	1474.66	185.745	2227.19	1275.38	223.415	1925.41	1352.04	-32.9778	2109.3	1506.05	-106.305	2111.49	1307.74	-109.772	2119.44	1153.24	-109.947	2222.37	1012.71	-51.8197	2262.08	931.639	-116.074	2229.05	913.286	-99.23	2290.02	870.269
4814	0	124.48	2259.71	1699.98	207.953	2233.95	1701.2	82.5489	2068.58	1704.44	194.679	2060.68	1708.04	145.474	2020.26	1557.08	144.57	1945.33	1292.34	156.339	2169.85	1475.72	186.278	2235.85	1276.59	222.483	1934.11	1352.91	-32.8575	2118.98	1507.24	-105.939	2121.86	1308.77	-110.128	2132.27	1154.39	-109.64	2237.32	1015.56	-51.3517	2278.31	935.286	-115.427	2245.62	915.963	-98.3592	2307.3	874.305
4815	0	125.177	2269.4	1700.02	208.653	2243.43	1701.49	83.034	2078.36	1705.68	195.657	2070.97	1708.28	145.118	2029.21	1557.89	143.786	1954.42	1293.36	156.749	2178.67	1476.4	187.169	2244.44	1277.13	221.648	1942.83	1353.74	-32.6723	2128.6	1508.19	-105.771	2132.13	1309.81	-110.22	2145.16	1155.69	-109.086	2252.29	1018.12	-50.4921	2294.29	938.723	-114.42	2261.86	918.509	-97.4108	2324.43	878.279
4816	0	126.09	2279.05	1699.92	209.414	2252.89	1701.36	83.7857	2088.1	1706.57	196.048	2080.1	1709.89	144.876	2038.07	1558.37	142.896	1963.38	1294.08	157.166	2187.45	1476.98	187.846	2252.99	1277.83	220.923	1951.6	1354.38	-32.1961	2138.42	1509.1	-105.516	2142.42	1310.6	-110.518	2157.63	1156.6	-108.636	2267.09	1020.68	-49.7389	2310.29	942.399	-114.373	2278.47	922.38	-96.6701	2341.42	882.538
4817	0	127.276	2288.96	1699.65	210.345	2262.44	1701.11	84.6463	2097.91	1707.02	197.361	2090.37	1709.55	145.2	2047.26	1558.75	142.133	1972.51	1294.31	157.918	2196.31	1477.22	188.898	2261.46	1277.99	220.292	1960.33	1354.54	-31.6995	2148.21	1509.82	-104.996	2152.85	1311.33	-110.608	2170.03	1157.26	-108.144	2281.46	1023.18	-49.0699	2326.4	945.911	-113.3	2294.37	924.713	-95.7848	2358.13	886.349
4818	0	128.083	2298.58	1699.26	211.551	2272.53	1700.51	85.389	2107.67	1707.34	197.84	2099.75	1710.07	146.23	2056.69	1559.22	141.238	1981.47	1294.58	159.258	2205.67	1477.09	189.931	2270.03	1277.98	219.73	1969.11	1354.68	-30.9911	2158.08	1510.19	-104.49	2163.11	1311.68	-110.35	2182.38	1157.7	-107.232	2296.01	1025.25	-48.1316	2342.04	949.179	-111.99	2310.32	927.027	-94.8082	2374.73	890.022
4819	0	129.187	2308.39	1698.52	212.503	2282.08	1699.56	86.4368	2117.6	1707.64	198.581	2109.14	1710.54	146.063	2065.49	1559.43	140.445	1990.41	1294.6	159.827	2214.37	1476.87	191.063	2278.6	1277.68	219.395	1978.01	1354.87	-30.1481	2167.89	1510.26	-103.712	2173.92	1311.89	-110.231	2194.6	1158.26	-106.909	2310.05	1027.41	-47.3331	2357.75	952.269	-110.715	2325.95	929.357	-93.8919	2391.16	893.815
4820	0	130.37	2318.07	1697.63	213.721	2291.77	1698.65	87.6343	2127.38	1707.59	199.921	2119.21	1710.1	146.592	2074.58	1559.27	140.046	1999.44	1294.66	160.625	2223.31	1476.42	192.252	2287.23	1276.96	219.196	1986.88	1354.85	-29.2425	2177.82	1510.35	-103.177	2184.49	1311.92	-110.043	2206.63	1158.52	-106.044	2324.33	1029.22	-46.4398	2373.24	955.382	-107.918	2341.32	930.929	-92.5612	2407.64	897.146
[truncated: 69 more columns]

## Sheet: Sheet2
Devices
		025370 - Force			025370 - Moment			025370 - CoP			027571 - Force			027571 - Moment			027571 - CoP			037720 - Force			037720 - Moment			037720 - CoP
Frame	Sub Frame	Fx	Fy	Fz	Mx	My	Mz	Cx	Cy	Cz	Fx	Fy	Fz	Mx	My	Mz	Cx	Cy	Cz	Fx	Fy	Fz	Mx	My	Mz	Cx	Cy	Cz
		N	N	N	N.mm	N.mm	N.mm	mm	mm	mm	N	N	N	N.mm	N.mm	N.mm	mm	mm	mm	N	N	N	N.mm	N.mm	N.mm	mm	mm	mm
4544	0	0	0	0	0	0	0	200	300	0	0	0	0	0	0	0	200	903	0	0	0	0	0	0	0	603	903	0
4544	1	0	0	0	0	0	0	200	300	0	0	0	0	0	0	0	200	903	0	0	0	0	0	0	0	603	903	0
4544	2	0	0	0	0	0	0	200	300	0	0	0	0	0	0	0	200	903	0	0	0	0	0	0	0	603	903	0
4544	3	0	0	0	0	0	0	200	300	0	0	0	0	0	0	0	200	903	0	0	0	0	0	0	0	603	903	0
4544	4	0	0	0	0	0	0	200	300	0	0	0	0	0	0	0	200	903	0	0	0	0	0	0	0	603	903	0
4544	5	0	0	0	0	0	0	200	300	0	0	0	0	0	0	0	200	903	0	0	0	0	0	0	0	603	903	0
4544	6	0	0	0	0	0	0	200	300	0	0	0	0	0	0	0	200	903	0	0	0	0	0	0	0	603	903	0
4544	7	0	0	0	0	0	0	200	300	0	0	0	0	0	0	0	200	903	0	0	0	0	0	0	0	603	903	0
4544	8	0	0	0	0	0	0	200	300	0	0	0	0	0	0	0	200	903	0	0	0	0	0	0	0	603	903	0
4544	9	0	0	0	0	0	0	200	300	0	0	0	0	0	0	0	200	903	0	0	0	0	0	0	0	603	903	0
4545	0	0	0	0	0	0	0	200	300	0	0	0	0	0	0	0	200	903	0	0	0	0	0	0	0	603	903	0
4545	1	0	0	0	0	0	0	200	300	0	0	0	0	0	0	0	200	903	0	0	0	0	0	0	0	603	903	0
4545	2	0	0	0	0	0	0	200	300	0	0	0	0	0	0	0	200	903	0	0	0	0	0	0	0	603	903	0
4545	3	0	0	0	0	0	0	200	300	0	0	0	0	0	0	0	200	903	0	0	0	0	0	0	0	603	903	0
4545	4	0	0	0	0	0	0	200	300	0	0	0	0	0	0	0	200	903	0	0	0	0	0	0	0	603	903	0
4545	5	0	0	0	0	0	0	200	300	0	0	0	0	0	0	0	200	903	0	0	0	0	0	0	0	603	903	0
4545	6	0	0	0	0	0	0	200	300	0	0	0	0	0	0	0	200	903	0	0	0	0	0	0	0	603	903	0
4545	7	0	0	0	0	0	0	200	300	0	0	0	0	0	0	0	200	903	0	0	0	0	0	0	0	603	903	0
4545	8	0	0	0	0	0	0	200	300	0	0	0	0	0	0	0	200	903	0	0	0	0	0	0	0	603	903	0
4545	9	0	0	0	0	0	0	200	300	0	0	0	0	0	0	0	200	903	0	0	0	0	0	0	0	603	903	0
4546	0	0	0	0	0	0	0	200	300	0	0	0	0	0	0	0	200	903	0	0	0	0	0	0	0	603	903	0
4546	1	0	0	0	0	0	0	200	300	0	0	0	0	0	0	0	200	903	0	0	0	0	0	0	0	603	903	0
4546	2	0	0	0	0	0	0	200	300	0	0	0	0	0	0	0	200	903	0	0	0	0	0	0	0	603	903	0
4546	3	0	0	0	0	0	0	200	300	0	0	0	0	0	0	0	200	903	0	0	0	0	0	0	0	603	903	0
4546	4	0	0	0	0	0	0	200	300	0	0	0	0	0	0	0	200	903	0	0	0	0	0	0	0	603	903	0
4546	5	0	0	0	0	0	0	200	300	0	0	0	0	0	0	0	200	903	0	0	0	0	0	0	0	603	903	0
4546	6	0	0	0	0	0	0	200	300	0	0	0	0	0	0	0	200	903	0	0	0	0	0	0	0	603	903	0
4546	7	0	0	0	0	0	0	200	300	0	0	0	0	0	0	0	200	903	0	0	0	0	0	0	0	603	903	0
4546	8	0	0	0	0	0	0	200	300	0	0	0	0	0	0	0	200	903	0	0	0	0	0	0	0	603	903	0
4546	9	0	0	0	0	0	0	200	300	0	0	0	0	0	0	0	200	903	0	0	0	0	0	0	0	603	903	0
4547	0	0	0	0	0	0	0	200	300	0	0	0	0	0	0	0	200	903	0	0	0	0	0	0	0	603	903	0
4547	1	0	0	0	0	0	0	200	300	0	0	0	0	0	0	0	200	903	0	0	0	0	0	0	0	603	903	0
4547	2	0	0	0	0	0	0	200	300	0	0	0	0	0	0	0	200	903	0	0	0	0	0	0	0	603	903	0
4547	3	0	0	0	0	0	0	200	300	0	0	0	0	0	0	0	200	903	0	0	0	0	0	0	0	603	903	0
4547	4	0	0	0	0	0	0	200	300	0	0	0	0	0	0	0	200	903	0	0	0	0	0	0	0	603	903	0
4547	5	0	0	0	0	0	0	200	300	0	0	0	0	0	0	0	200	903	0	0	0	0	0	0	0	603	903	0
4547	6	0	0	0	0	0	0	200	300	0	0	0	0	0	0	0	200	903	0	0	0	0	0	0	0	603	903	0
4547	7	0	0	0	0	0	0	200	300	0	0	0	0	0	0	0	200	903	0	0	0	0	0	0	0	603	903	0
4547	8	0	0	0	0	0	0	200	300	0	0	0	0	0	0	0	200	903	0	0	0	0	0	0	0	603	903	0
4547	9	0	0	0	0	0	0	200	300	0	0	0	0	0	0	0	200	903	0	0	0	0	0	0	0	603	903	0
4548	0	0	0	0	0	0	0	200	300	0	0	0	0	0	0	0	200	903	0	0	0	0	0	0	0	603	903	0
4548	1	0	0	0	0	0	0	200	300	0	0	0	0	0	0	0	200	903	0	0	0	0	0	0	0	603	903	0
4548	2	0	0	0	0	0	0	200	300	0	0	0	0	0	0	0	200	903	0	0	0	0	0	0	0	603	903	0
4548	3	0	0	0	0	0	0	200	300	0	0	0	0	0	0	0	200	903	0	0	0	0	0	0	0	603	903	0
4548	4	0	0	0	0	0	0	200	300	0	0	0	0	0	0	0	200	903	0	0	0	0	0	0	0	603	903	0
4548	5	0	0	0	0	0	0	200	300	0	0	0	0	0	0	0	200	903	0	0	0	0	0	0	0	603	903	0
4548	6	0	0	0	0	0	0	200	300	0	0	0	0	0	0	0	200	903	0	0	0	0	0	0	0	603	903	0
4548	7	0	0	0	0	0	0	200	300	0	0	0	0	0	0	0	200	903	0	0	0	0	0	0	0	603	903	0
4548	8	0	0	0	0	0	0	200	300	0	0	0	0	0	0	0	200	903	0	0	0	0	0	0	0	603	903	0
4548	9	0	0	0	0	0	0	200	300	0	0	0	0	0	0	0	200	903	0	0	0	0	0	0	0	603	903	0
4549	0	0	0	0	0	0	0	200	300	0	0	0	0	0	0	0	200	903	0	0	0	0	0	0	0	603	903	0
4549	1	0	0	0	0	0	0	200	300	0	0	0	0	0	0	0	200	903	0	0	0	0	0	0	0	603	903	0
4549	2	0	0	0	0	0	0	200	300	0	0	0	0	0	0	0	200	903	0	0	0	0	0	0	0	603	903	0
4549	3	0	0	0	0	0	0	200	300	0	0	0	0	0	0	0	200	903	0	0	0	0	0	0	0	603	903	0
4549	4	0	0	0	0	0	0	200	300	0	0	0	0	0	0	0	200	903	0	0	0	0	0	0	0	603	903	0
4549	5	0	0	0	0	0	0	200	300	0	0	0	0	0	0	0	200	903	0	0	0	0	0	0	0	603	903	0
4549	6	0	0	0	0	0	0	200	300	0	0	0	0	0	0	0	200	903	0	0	0	0	0	0	0	603	903	0
4549	7	0	0	0	0	0	0	200	300	0	0	0	0	0	0	0	200	903	0	0	0	0	0	0	0	603	903	0
4549	8	0	0	0	0	0	0	200	300	0	0	0	0	0	0	0	200	903	0	0	0	0	0	0	0	603	903	0
4549	9	0	0	0	0	0	0	200	300	0	0	0	0	0	0	0	200	903	0	0	0	0	0	0	0	603	903	0
4550	0	0	0	0	0	0	0	200	300	0	0	0	0	0	0	0	200	903	0	0	0	0	0	0	0	603	903	0
4550	1	0	0	0	0	0	0	200	300	0	0	0	0	0	0	0	200	903	0	0	0	0	0	0	0	603	903	0
4550	2	0	0	0	0	0	0	200	300	0	0	0	0	0	0	0	200	903	0	0	0	0	0	0	0	603	903	0
4550	3	0	0	0	0	0	0	200	300	0	0	0	0	0	0	0	200	903	0	0	0	0	0	0	0	603	903	0
4550	4	0	0	0	0	0	0	200	300	0	0	0	0	0	0	0	200	903	0	0	0	0	0	0	0	603	903	0
4550	5	0	0	0	0	0	0	200	300	0	0	0	0	0	0	0	200	903	0	0	0	0	0	0	0	603	903	0
4550	6	0	0	0	0	0	0	200	300	0	0	0	0	0	0	0	200	903	0	0	0	0	0	0	0	603	903	0
4550	7	0	0	0	0	0	0	200	300	0	0	0	0	0	0	0	200	903	0	0	0	0	0	0	0	603	903	0
4550	8	0	0	0	0	0	0	200	300	0	0	0	0	0	0	0	200	903	0	0	0	0	0	0	0	603	903	0
4550	9	0	0	0	0	0	0	200	300	0	0	0	0	0	0	0	200	903	0	0	0	0	0	0	0	603	903	0
4551	0	0	0	0	0	0	0	200	300	0	0	0	0	0	0	0	200	903	0	0	0	0	0	0	0	603	903	0
4551	1	0	0	0	0	0	0	200	300	0	0	0	0	0	0	0	200	903	0	0	0	0	0	0	0	603	903	0
4551	2	0	0	0	0	0	0	200	300	0	0	0	0	0	0	0	200	903	0	0	0	0	0	0	0	603	903	0
4551	3	0	0	0	0	0	0	200	300	0	0	0	0	0	0	0	200	903	0	0	0	0	0	0	0	603	903	0
4551	4	0	0	0	0	0	0	200	300	0	0	0	0	0	0	0	200	903	0	0	0	0	0	0	0	603	903	0
4551	5	0	0	0	0	0	0	200	300	0	0	0	0	0	0	0	200	903	0	0	0	0	0	0	0	603	903	0
4551	6	0	0	0	0	0	0	200	300	0	0	0	0	0	0	0	200	903	0	0	0	0	0	0	0	603	903	0
4551	7	0	0	0	0	0	0	200	300	0	0	0	0	0	0	0	200	903	0	0	0	0	0	0	0	603	903	0
4551	8	0	0	0	0	0	0	200	300	0	0	0	0	0	0	0	200	903	0	0	0	0	0	0	0	603	903	0
4551	9	0	0	0	0	0	0	200	300	0	0	0	0	0	0	0	200	903	0	0	0	0	0	0	0	603	903	0
4552	0	0	0	0	0	0	0	200	300	0	0	0	0	0	0	0	200	903	0	0	0	0	0	0	0	603	903	0
4552	1	0	0	0	0	0	0	200	300	0	0	0	0	0	0	0	200	903	0	0	0	0	0	0	0	603	903	0
4552	2	0	0	0	0	0	0	200	300	0	0	0	0	0	0	0	200	903	0	0	0	0	0	0	0	603	903	0
4552	3	0	0	0	0	0	0	200	300	0	0	0	0	0	0	0	200	903	0	0	0	0	0	0	0	603	903	0
4552	4	0	0	0	0	0	0	200	300	0	0	0	0	0	0	0	200	903	0	0	0	0	0	0	0	603	903	0
4552	5	0	0	0	0	0	0	200	300	0	0	0	0	0	0	0	200	903	0	0	0	0	0	0	0	603	903	0
4552	6	0	0	0	0	0	0	200	300	0	0	0	0	0	0	0	200	903	0	0	0	0	0	0	0	603	903	0
4552	7	0	0	0	0	0	0	200	300	0	0	0	0	0	0	0	200	903	0	0	0	0	0	0	0	603	903	0
4552	8	0	0	0	0	0	0	200	300	0	0	0	0	0	0	0	200	903	0	0	0	0	0	0	0	603	903	0
4552	9	0	0	0	0	0	0	200	300	0	0	0	0	0	0	0	200	903	0	0	0	0	0	0	0	603	903	0
4553	0	0	0	0	0	0	0	200	300	0	0	0	0	0	0	0	200	903	0	0	0	0	0	0	0	603	903	0
4553	1	0	0	0	0	0	0	200	300	0	0	0	0	0	0	0	200	903	0	0	0	0	0	0	0	603	903	0
4553	2	0	0	0	0	0	0	200	300	0	0	0	0	0	0	0	200	903	0	0	0	0	0	0	0	603	903	0
4553	3	0	0	0	0	0	0	200	300	0	0	0	0	0	0	0	200	903	0	0	0	0	0	0	0	603	903	0
4553	4	0	0	0	0	0	0	200	300	0	0	0	0	0	0	0	200	903	0	0	0	0	0	0	0	603	903	0
4553	5	0	0	0	0	0	0	200	300	0	0	0	0	0	0	0	200	903	0	0	0	0	0	0	0	603	903	0
4553	6	0	0	0	0	0	0	200	300	0	0	0	0	0	0	0	200	903	0	0	0	0	0	0	0	603	903	0
4553	7	0	0	0	0	0	0	200	300	0	0	0	0	0	0	0	200	903	0	0	0	0	0	0	0	603	903	0
4553	8	0	0	0	0	0	0	200	300	0	0	0	0	0	0	0	200	903	0	0	0	0	0	0	0	603	903	0
4553	9	0	0	0	0	0	0	200	300	0	0	0	0	0	0	0	200	903	0	0	0	0	0	0	0	603	903	0
4554	0	0	0	0	0	0	0	200	300	0	0	0	0	0	0	0	200	903	0	0	0	0	0	0	0	603	903	0
4554	1	0	0	0	0	0	0	200	300	0	0	0	0	0	0	0	200	903	0	0	0	0	0	0	0	603	903	0
4554	2	0	0	0	0	0	0	200	300	0	0	0	0	0	0	0	200	903	0	0	0	0	0	0	0	603	903	0
4554	3	0	0	0	0	0	0	200	300	0	0	0	0	0	0	0	200	903	0	0	0	0	0	0	0	603	903	0
4554	4	0	0	0	0	0	0	200	300	0	0	0	0	0	0	0	200	903	0	0	0	0	0	0	0	603	903	0
4554	5	0	0	0	0	0	0	200	300	0	0	0	0	0	0	0	200	903	0	0	0	0	0	0	0	603	903	0
4554	6	0	0	0	0	0	0	200	300	0	0	0	0	0	0	0	200	903	0	0	0	0	0	0	0	603	903	0
4554	7	0	0	0	0	0	0	200	300	0	0	0	0	0	0	0	200	903	0	0	0	0	0	0	0	603	903	0
4554	8	0	0	0	0	0	0	200	300	0	0	0	0	0	0	0	200	903	0	0	0	0	0	0	0	603	903	0
4554	9	0	0	0	0	0	0	200	300	0	0	0	0	0	0	0	200	903	0	0	0	0	0	0	0	603	903	0
4555	0	0	0	0	0	0	0	200	300	0	0	0	0	0	0	0	200	903	0	0	0	0	0	0	0	603	903	0
4555	1	0	0	0	0	0	0	200	300	0	0	0	0	0	0	0	200	903	0	0	0	0	0	0	0	603	903	0
4555	2	0	0	0	0	0	0	200	300	0	0	0	0	0	0	0	200	903	0	0	0	0	0	0	0	603	903	0
4555	3	0	0	0	0	0	0	200	300	0	0	0	0	0	0	0	200	903	0	0	0	0	0	0	0	603	903	0
4555	4	0	0	0	0	0	0	200	300	0	0	0	0	0	0	0	200	903	0	0	0	0	0	0	0	603	903	0
4555	5	0	0	0	0	0	0	200	300	0	0	0	0	0	0	0	200	903	0	0	0	0	0	0	0	603	903	0
4555	6	0	0	0	0	0	0	200	300	0	0	0	0	0	0	0	200	903	0	0	0	0	0	0	0	603	903	0
4555	7	0	0	0	0	0	0	200	300	0	0	0	0	0	0	0	200	903	0	0	0	0	0	0	0	603	903	0
4555	8	0	0	0	0	0	0	200	300	0	0	0	0	0	0	0	200	903	0	0	0	0	0	0	0	603	903	0
4555	9	0	0	0	0	0	0	200	300	0	0	0	0	0	0	0	200	903	0	0	0	0	0	0	0	603	903	0
4556	0	0	0	0	0	0	0	200	300	0	0	0	0	0	0	0	200	903	0	0	0	0	0	0	0	603	903	0
4556	1	0	0	0	0	0	0	200	300	0	0	0	0	0	0	0	200	903	0	0	0	0	0	0	0	603	903	0
4556	2	0	0	0	0	0	0	200	300	0	0	0	0	0	0	0	200	903	0	0	0	0	0	0	0	603	903	0
4556	3	0	0	0	0	0	0	200	300	0	0	0	0	0	0	0	200	903	0	0	0	0	0	0	0	603	903	0
4556	4	0	0	0	0	0	0	200	300	0	0	0	0	0	0	0	200	903	0	0	0	0	0	0	0	603	903	0
4556	5	0	0	0	0	0	0	200	300	0	0	0	0	0	0	0	200	903	0	0	0	0	0	0	0	603	903	0
4556	6	0	0	0	0	0	0	200	300	0	0	0	0	0	0	0	200	903	0	0	0	0	0	0	0	603	903	0
4556	7	0	0	0	0	0	0	200	300	0	0	0	0	0	0	0	200	903	0	0	0	0	0	0	0	603	903	0
4556	8	0	0	0	0	0	0	200	300	0	0	0	0	0	0	0	200	903	0	0	0	0	0	0	0	603	903	0
4556	9	0	0	0	0	0	0	200	300	0	0	0	0	0	0	0	200	903	0	0	0	0	0	0	0	603	903	0
4557	0	0	0	0	0	0	0	200	300	0	0	0	0	0	0	0	200	903	0	0	0	0	0	0	0	603	903	0
4557	1	0	0	0	0	0	0	200	300	0	0	0	0	0	0	0	200	903	0	0	0	0	0	0	0	603	903	0
4557	2	0	0	0	0	0	0	200	300	0	0	0	0	0	0	0	200	903	0	0	0	0	0	0	0	603	903	0
4557	3	0	0	0	0	0	0	200	300	0	0	0	0	0	0	0	200	903	0	0	0	0	0	0	0	603	903	0
4557	4	0	0	0	0	0	0	200	300	0	0	0	0	0	0	0	200	903	0	0	0	0	0	0	0	603	903	0
4557	5	0	0	0	0	0	0	200	300	0	0	0	0	0	0	0	200	903	0	0	0	0	0	0	0	603	903	0
4557	6	0	0	0	0	0	0	200	300	0	0	0	0	0	0	0	200	903	0	0	0	0	0	0	0	603	903	0
4557	7	0	0	0	0	0	0	200	300	0	0	0	0	0	0	0	200	903	0	0	0	0	0	0	0	603	903	0
4557	8	0	0	0	0	0	0	200	300	0	0	0	0	0	0	0	200	903	0	0	0	0	0	0	0	603	903	0
4557	9	0	0	0	0	0	0	200	300	0	0	0	0	0	0	0	200	903	0	0	0	0	0	0	0	603	903	0
4558	0	0	0	0	0	0	0	200	300	0	0	0	0	0	0	0	200	903	0	0	0	0	0	0	0	603	903	0
4558	1	0	0	0	0	0	0	200	300	0	0	0	0	0	0	0	200	903	0	0	0	0	0	0	0	603	903	0
4558	2	0	0	0	0	0	0	200	300	0	0	0	0	0	0	0	200	903	0	0	0	0	0	0	0	603	903	0
4558	3	0	0	0	0	0	0	200	300	0	0	0	0	0	0	0	200	903	0	0	0	0	0	0	0	603	903	0
4558	4	0	0	0	0	0	0	200	300	0	0	0	0	0	0	0	200	903	0	0	0	0	0	0	0	603	903	0
4558	5	0	0	0	0	0	0	200	300	0	0	0	0	0	0	0	200	903	0	0	0	0	0	0	0	603	903	0
4558	6	0	0	0	0	0	0	200	300	0	0	0	0	0	0	0	200	903	0	0	0	0	0	0	0	603	903	0
4558	7	0	0	0	0	0	0	200	300	0	0	0	0	0	0	0	200	903	0	0	0	0	0	0	0	603	903	0
4558	8	0	0	0	0	0	0	200	300	0	0	0	0	0	0	0	200	903	0	0	0	0	0	0	0	603	903	0
4558	9	0	0	0	0	0	0	200	300	0	0	0	0	0	0	0	200	903	0	0	0	0	0	0	0	603	903	0
4559	0	0	0	0	0	0	0	200	300	0	0	0	0	0	0	0	200	903	0	0	0	0	0	0	0	603	903	0
4559	1	0	0	0	0	0	0	200	300	0	0	0	0	0	0	0	200	903	0	0	0	0	0	0	0	603	903	0
4559	2	0	0	0	0	0	0	200	300	0	0	0	0	0	0	0	200	903	0	0	0	0	0	0	0	603	903	0
4559	3	0	0	0	0	0	0	200	300	0	0	0	0	0	0	0	200	903	0	0	0	0	0	0	0	603	903	0
4559	4	0	0	0	0	0	0	200	300	0	0	0	0	0	0	0	200	903	0	0	0	0	0	0	0	603	903	0
4559	5	0	0	0	0	0	0	200	300	0	0	0	0	0	0	0	200	903	0	0	0	0	0	0	0	603	903	0
4559	6	0	0	0	0	0	0	200	300	0	0	0	0	0	0	0	200	903	0	0	0	0	0	0	0	603	903	0
4559	7	0	0	0	0	0	0	200	300	0	0	0	0	0	0	0	200	903	0	0	0	0	0	0	0	603	903	0
4559	8	0	0	0	0	0	0	200	300	0	0	0	0	0	0	0	200	903	0	0	0	0	0	0	0	603	903	0
4559	9	0	0	0	0	0	0	200	300	0	0	0	0	0	0	0	200	903	0	0	0	0	0	0	0	603	903	0
4560	0	0	0	0	0	0	0	200	300	0	0	0	0	0	0	0	200	903	0	0	0	0	0	0	0	603	903	0
4560	1	0	0	0	0	0	0	200	300	0	0	0	0	0	0	0	200	903	0	0	0	0	0	0	0	603	903	0
4560	2	0	0	0	0	0	0	200	300	0	0	0	0	0	0	0	200	903	0	0	0	0	0	0	0	603	903	0
4560	3	0	0	0	0	0	0	200	300	0	0	0	0	0	0	0	200	903	0	0	0	0	0	0	0	603	903	0
4560	4	0	0	0	0	0	0	200	300	0	0	0	0	0	0	0	200	903	0	0	0	0	0	0	0	603	903	0
4560	5	0	0	0	0	0	0	200	300	0	0	0	0	0	0	0	200	903	0	0	0	0	0	0	0	603	903	0
4560	6	0	0	0	0	0	0	200	300	0	0	0	0	0	0	0	200	903	0	0	0	0	0	0	0	603	903	0
4560	7	0	0	0	0	0	0	200	300	0	0	0	0	0	0	0	200	903	0	0	0	0	0	0	0	603	903	0
4560	8	0	0	0	0	0	0	200	300	0	0	0	0	0	0	0	200	903	0	0	0	0	0	0	0	603	903	0
4560	9	0	0	0	0	0	0	200	300	0	0	0	0	0	0	0	200	903	0	0	0	0	0	0	0	603	903	0
4561	0	0	0	0	0	0	0	200	300	0	0	0	0	0	0	0	200	903	0	0	0	0	0	0	0	603	903	0
4561	1	0	0	0	0	0	0	200	300	0	0	0	0	0	0	0	200	903	0	0	0	0	0	0	0	603	903	0
4561	2	0	0	0	0	0	0	200	300	0	0	0	0	0	0	0	200	903	0	0	0	0	0	0	0	603	903	0
4561	3	0	0	0	0	0	0	200	300	0	0	0	0	0	0	0	200	903	0	0	0	0	0	0	0	603	903	0
4561	4	0	0	0	0	0	0	200	300	0	0	0	0	0	0	0	200	903	0	0	0	0	0	0	0	603	903	0
4561	5	0	0	0	0	0	0	200	300	0	0	0	0	0	0	0	200	903	0	0	0	0	0	0	0	603	903	0
4561	6	0	0	0	0	0	0	200	300	0	0	0	0	0	0	0	200	903	0	0	0	0	0	0	0	603	903	0
4561	7	0	0	0	0	0	0	200	300	0	0	0	0	0	0	0	200	903	0	0	0	0	0	0	0	603	903	0
4561	8	0	0	0	0	0	0	200	300	0	0	0	0	0	0	0	200	903	0	0	0	0	0	0	0	603	903	0
4561	9	0	0	0	0	0	0	200	300	0	0	0	0	0	0	0	200	903	0	0	0	0	0	0	0	603	903	0
4562	0	0	0	0	0	0	0	200	300	0	0	0	0	0	0	0	200	903	0	0	0	0	0	0	0	603	903	0
4562	1	0	0	0	0	0	0	200	300	0	0	0	0	0	0	0	200	903	0	0	0	0	0	0	0	603	903	0
4562	2	0	0	0	0	0	0	200	300	0	0	0	0	0	0	0	200	903	0	0	0	0	0	0	0	603	903	0
4562	3	0	0	0	0	0	0	200	300	0	0	0	0	0	0	0	200	903	0	0	0	0	0	0	0	603	903	0
4562	4	0	0	0	0	0	0	200	300	0	0	0	0	0	0	0	200	903	0	0	0	0	0	0	0	603	903	0
4562	5	0	0	0	0	0	0	200	300	0	0	0	0	0	0	0	200	903	0	0	0	0	0	0	0	603	903	0
4562	6	0	0	0	0	0	0	200	300	0	0	0	0	0	0	0	200	903	0	0	0	0	0	0	0	603	903	0
4562	7	0	0	0	0	0	0	200	300	0	0	0	0	0	0	0	200	903	0	0	0	0	0	0	0	603	903	0
4562	8	0	0	0	0	0	0	200	300	0	0	0	0	0	0	0	200	903	0	0	0	0	0	0	0	603	903	0
4562	9	0	0	0	0	0	0	200	300	0	0	0	0	0	0	0	200	903	0	0	0	0	0	0	0	603	903	0
4563	0	0	0	0	0	0	0	200	300	0	0	0	0	0	0	0	200	903	0	0	0	0	0	0	0	603	903	0
4563	1	0	0	0	0	0	0	200	300	0	0	0	0	0	0	0	200	903	0	0	0	0	0	0	0	603	903	0
4563	2	0	0	0	0	0	0	200	300	0	0	0	0	0	0	0	200	903	0	0	0	0	0	0	0	603	903	0
4563	3	0	0	0	0	0	0	200	300	0	0	0	0	0	0	0	200	903	0	0	0	0	0	0	0	603	903	0
4563	4	0	0	0	0	0	0	200	300	0	0	0	0	0	0	0	200	903	0	0	0	0	0	0	0	603	903	0
4563	5	0	0	0	0	0	0	200	300	0	0	0	0	0	0	0	200	903	0	0	0	0	0	0	0	603	903	0
4563	6	0	0	0	0	0	0	200	300	0	0	0	0	0	0	0	200	903	0	0	0	0	0	0	0	603	903	0
4563	7	0	0	0	0	0	0	200	300	0	0	0	0	0	0	0	200	903	0	0	0	0	0	0	0	603	903	0
4563	8	0	0	0	0	0	0	200	300	0	0	0	0	0	0	0	200	903	0	0	0	0	0	0	0	603	903	0
4563	9	0	0	0	0	0	0	200	300	0	0	0	0	0	0	0	200	903	0	0	0	0	0	0	0	603	903	0
4564	0	0	0	0	0	0	0	200	300	0	0	0	0	0	0	0	200	903	0	0	0	0	0	0	0	603	903	0
4564	1	0	0	0	0	0	0	200	300	0	0	0	0	0	0	0	200	903	0	0	0	0	0	0	0	603	903	0
4564	2	0	0	0	0	0	0	200	300	0	0	0	0	0	0	0	200	903	0	0	0	0	0	0	0	603	903	0
4564	3	0	0	0	0	0	0	200	300	0	0	0	0	0	0	0	200	903	0	0	0	0	0	0	0	603	903	0
4564	4	0	0	0	0	0	0	200	300	0	0	0	0	0	0	0	200	903	0	0	0	0	0	0	0	603	903	0
4564	5	0	0	0	0	0	0	200	300	0	0	0	0	0	0	0	200	903	0	0	0	0	0	0	0	603	903	0
4564	6	0	0	0	0	0	0	200	300	0	0	0	0	0	0	0	200	903	0	0	0	0	0	0	0	603	903	0
4564	7	0	0	0	0	0	0	200	300	0	0	0	0	0	0	0	200	903	0	0	0	0	0	0	0	603	903	0
4564	8	0	0	0	0	0	0	200	300	0	0	0	0	0	0	0	200	903	0	0	0	0	0	0	0	603	903	0
4564	9	0	0	0	0	0	0	200	300	0	0	0	0	0	0	0	200	903	0	0	0	0	0	0	0	603	903	0
4565	0	0	0	0	0	0	0	200	300	0	0	0	0	0	0	0	200	903	0	0	0	0	0	0	0	603	903	0
4565	1	0	0	0	0	0	0	200	300	0	0	0	0	0	0	0	200	903	0	0	0	0	0	0	0	603	903	0
4565	2	0	0	0	0	0	0	200	300	0	0	0	0	0	0	0	200	903	0	0	0	0	0	0	0	603	903	0
4565	3	0	0	0	0	0	0	200	300	0	0	0	0	0	0	0	200	903	0	0	0	0	0	0	0	603	903	0
4565	4	0	0	0	0	0	0	200	300	0	0	0	0	0	0	0	200	903	0	0	0	0	0	0	0	603	903	0
4565	5	0	0	0	0	0	0	200	300	0	0	0	0	0	0	0	200	903	0	0	0	0	0	0	0	603	903	0
4565	6	0	0	0	0	0	0	200	300	0	0	0	0	0	0	0	200	903	0	0	0	0	0	0	0	603	903	0
4565	7	0	0	0	0	0	0	200	300	0	0	0	0	0	0	0	200	903	0	0	0	0	0	0	0	603	903	0
4565	8	0	0	0	0	0	0	200	300	0	0	0	0	0	0	0	200	903	0	0	0	0	0	0	0	603	903	0
4565	9	0	0	0	0	0	0	200	300	0	0	0	0	0	0	0	200	903	0	0	0	0	0	0	0	603	903	0
4566	0	0	0	0	0	0	0	200	300	0	0	0	0	0	0	0	200	903	0	0	0	0	0	0	0	603	903	0
4566	1	0	0	0	0	0	0	200	300	0	0	0	0	0	0	0	200	903	0	0	0	0	0	0	0	603	903	0
4566	2	0	0	0	0	0	0	200	300	0	0	0	0	0	0	0	200	903	0	0	0	0	0	0	0	603	903	0
4566	3	0	0	0	0	0	0	200	300	0	0	0	0	0	0	0	200	903	0	0	0	0	0	0	0	603	903	0
4566	4	0	0	0	0	0	0	200	300	0	0	0	0	0	0	0	200	903	0	0	0	0	0	0	0	603	903	0
4566	5	0	0	0	0	0	0	200	300	0	0	0	0	0	0	0	200	903	0	0	0	0	0	0	0	603	903	0
4566	6	0	0	0	0	0	0	200	300	0	0	0	0	0	0	0	200	903	0	0	0	0	0	0	0	603	903	0
4566	7	0	0	0	0	0	0	200	300	0	0	0	0	0	0	0	200	903	0	0	0	0	0	0	0	603	903	0
4566	8	0	0	0	0	0	0	200	300	0	0	0	0	0	0	0	200	903	0	0	0	0	0	0	0	603	903	0
4566	9	0	0	0	0	0	0	200	300	0	0	0	0	0	0	0	200	903	0	0	0	0	0	0	0	603	903	0
4567	0	0	0	0	0	0	0	200	300	0	0	0	0	0	0	0	200	903	0	0	0	0	0	0	0	603	903	0
4567	1	0	0	0	0	0	0	200	300	0	0	0	0	0	0	0	200	903	0	0	0	0	0	0	0	603	903	0
4567	2	0	0	0	0	0	0	200	300	0	0	0	0	0	0	0	200	903	0	0	0	0	0	0	0	603	903	0
4567	3	0	0	0	0	0	0	200	300	0	0	0	0	0	0	0	200	903	0	0	0	0	0	0	0	603	903	0
4567	4	0	0	0	0	0	0	200	300	0	0	0	0	0	0	0	200	903	0	0	0	0	0	0	0	603	903	0
4567	5	0	0	0	0	0	0	200	300	0	0	0	0	0	0	0	200	903	0	0	0	0	0	0	0	603	903	0
4567	6	0	0	0	0	0	0	200	300	0	0	0	0	0	0	0	200	903	0	0	0	0	0	0	0	603	903	0
4567	7	0	0	0	0	0	0	200	300	0	0	0	0	0	0	0	200	903	0	0	0	0	0	0	0	603	903	0
4567	8	0	0	0	0	0	0	200	300	0	0	0	0	0	0	0	200	903	0	0	0	0	0	0	0	603	903	0
4567	9	0	0	0	0	0	0	200	300	0	0	0	0	0	0	0	200	903	0	0	0	0	0	0	0	603	903	0
4568	0	0	0	0	0	0	0	200	300	0	0	0	0	0	0	0	200	903	0	0	0	0	0	0	0	603	903	0
4568	1	0	0	0	0	0	0	200	300	0	0	0	0	0	0	0	200	903	0	0	0	0	0	0	0	603	903	0
4568	2	0	0	0	0	0	0	200	300	0	0	0	0	0	0	0	200	903	0	0	0	0	0	0	0	603	903	0
4568	3	0	0	0	0	0	0	200	300	0	0	0	0	0	0	0	200	903	0	0	0	0	0	0	0	603	903	0
4568	4	0	0	0	0	0	0	200	300	0	0	0	0	0	0	0	200	903	0	0	0	0	0	0	0	603	903	0
4568	5	0	0	0	0	0	0	200	300	0	0	0	0	0	0	0	200	903	0	0	0	0	0	0	0	603	903	0
4568	6	0	0	0	0	0	0	200	300	0	0	0	0	0	0	0	200	903	0	0	0	0	0	0	0	603	903	0
4568	7	0	0	0	0	0	0	200	300	0	0	0	0	0	0	0	200	903	0	0	0	0	0	0	0	603	903	0
4568	8	0	0	0	0	0	0	200	300	0	0	0	0	0	0	0	200	903	0	0	0	0	0	0	0	603	903	0
4568	9	0	0	0	0	0	0	200	300	0	0	0	0	0	0	0	200	903	0	0	0	0	0	0	0	603	903	0
4569	0	0	0	0	0	0	0	200	300	0	0	0	0	0	0	0	200	903	0	0	0	0	0	0	0	603	903	0
4569	1	0	0	0	0	0	0	200	300	0	0	0	0	0	0	0	200	903	0	0	0	0	0	0	0	603	903	0
4569	2	0	0	0	0	0	0	200	300	0	0	0	0	0	0	0	200	903	0	0	0	0	0	0	0	603	903	0
4569	3	0	0	0	0	0	0	200	300	0	0	0	0	0	0	0	200	903	0	0	0	0	0	0	0	603	903	0
4569	4	0	0	0	0	0	0	200	300	0	0	0	0	0	0	0	200	903	0	0	0	0	0	0	0	603	903	0
4569	5	0	0	0	0	0	0	200	300	0	0	0	0	0	0	0	200	903	0	0	0	0	0	0	0	603	903	0
4569	6	0	0	0	0	0	0	200	300	0	0	0	0	0	0	0	200	903	0	0	0	0	0	0	0	603	903	0
4569	7	0	0	0	0	0	0	200	300	0	0	0	0	0	0	0	200	903	0	0	0	0	0	0	0	603	903	0
4569	8	0	0	0	0	0	0	200	300	0	0	0	0	0	0	0	200	903	0	0	0	0	0	0	0	603	903	0
4569	9	0	0	0	0	0	0	200	300	0	0	0	0	0	0	0	200	903	0	0	0	0	0	0	0	603	903	0
4570	0	0	0	0	0	0	0	200	300	0	0	0	0	0	0	0	200	903	0	0	0	0	0	0	0	603	903	0
4570	1	0	0	0	0	0	0	200	300	0	0	0	0	0	0	0	200	903	0	0	0	0	0	0	0	603	903	0
4570	2	0	0	0	0	0	0	200	300	0	0	0	0	0	0	0	200	903	0	0	0	0	0	0	0	603	903	0
4570	3	0	0	0	0	0	0	200	300	0	0	0	0	0	0	0	200	903	0	0	0	0	0	0	0	603	903	0
4570	4	0	0	0	0	0	0	200	300	0	0	0	0	0	0	0	200	903	0	0	0	0	0	0	0	603	903	0
4570	5	0	0	0	0	0	0	200	300	0	0	0	0	0	0	0	200	903	0	0	0	0	0	0	0	603	903	0
4570	6	0	0	0	0	0	0	200	300	0	0	0	0	0	0	0	200	903	0	0	0	0	0	0	0	603	903	0
4570	7	0	0	0	0	0	0	200	300	0	0	0	0	0	0	0	200	903	0	0	0	0	0	0	0	603	903	0
4570	8	0	0	0	0	0	0	200	300	0	0	0	0	0	0	0	200	903	0	0	0	0	0	0	0	603	903	0
4570	9	0	0	0	0	0	0	200	300	0	0	0	0	0	0	0	200	903	0	0	0	0	0	0	0	603	903	0
4571	0	0	0	0	0	0	0	200	300	0	0	0	0	0	0	0	200	903	0	0	0	0	0	0	0	603	903	0
4571	1	0	0	0	0	0	0	200	300	0	0	0	0	0	0	0	200	903	0	0	0	0	0	0	0	603	903	0
4571	2	0	0	0	0	0	0	200	300	0	0	0	0	0	0	0	200	903	0	0	0	0	0	0	0	603	903	0
4571	3	0	0	0	0	0	0	200	300	0	0	0	0	0	0	0	200	903	0	0	0	0	0	0	0	603	903	0
4571	4	0	0	0	0	0	0	200	300	0	0	0	0	0	0	0	200	903	0	0	0	0	0	0	0	603	903	0
4571	5	0	0	0	0	0	0	200	300	0	0	0	0	0	0	0	200	903	0	0	0	0	0	0	0	603	903	0
4571	6	0	0	0	0	0	0	200	300	0	0	0	0	0	0	0	200	903	0	0	0	0	0	0	0	603	903	0
4571	7	0	0	0	0	0	0	200	300	0	0	0	0	0	0	0	200	903	0	0	0	0	0	0	0	603	903	0
4571	8	0	0	0	0	0	0	200	300	0	0	0	0	0	0	0	200	903	0	0	0	0	0	0	0	603	903	0
4571	9	0	0	0	0	0	0	200	300	0	0	0	0	0	0	0	200	903	0	0	0	0	0	0	0	603	903	0
4572	0	0	0	0	0	0	0	200	300	0	0	0	0	0	0	0	200	903	0	0	0	0	0	0	0	603	903	0
4572	1	0	0	0	0	0	0	200	300	0	0	0	0	0	0	0	200	903	0	0	0	0	0	0	0	603	903	0
4572	2	0	0	0	0	0	0	200	300	0	0	0	0	0	0	0	200	903	0	0	0	0	0	0	0	603	903	0
4572	3	0	0	0	0	0	0	200	300	0	0	0	0	0	0	0	200	903	0	0	0	0	0	0	0	603	903	0
4572	4	0	0	0	0	0	0	200	300	0	0	0	0	0	0	0	200	903	0	0	0	0	0	0	0	603	903	0
4572	5	0	0	0	0	0	0	200	300	0	0	0	0	0	0	0	200	903	0	0	0	0	0	0	0	603	903	0
4572	6	0	0	0	0	0	0	200	300	0	0	0	0	0	0	0	200	903	0	0	0	0	0	0	0	603	903	0
4572	7	0	0	0	0	0	0	200	300	0	0	0	0	0	0	0	200	903	0	0	0	0	0	0	0	603	903	0
4572	8	0	0	0	0	0	0	200	300	0	0	0	0	0	0	0	200	903	0	0	0	0	0	0	0	603	903	0
4572	9	0	0	0	0	0	0	200	300	0	0	0	0	0	0	0	200	903	0	0	0	0	0	0	0	603	903	0
4573	0	0	0	0	0	0	0	200	300	0	0	0	0	0	0	0	200	903	0	0	0	0	0	0	0	603	903	0
4573	1	0	0	0	0	0	0	200	300	0	0	0	0	0	0	0	200	903	0	0	0	0	0	0	0	603	903	0
4573	2	0	0	0	0	0	0	200	300	0	0	0	0	0	0	0	200	903	0	0	0	0	0	0	0	603	903	0
4573	3	0	0	0	0	0	0	200	300	0	0	0	0	0	0	0	200	903	0	0	0	0	0	0	0	603	903	0
4573	4	0	0	0	0	0	0	200	300	0	0	0	0	0	0	0	200	903	0	0	0	0	0	0	0	603	903	0
4573	5	0	0	0	0	0	0	200	300	0	0	0	0	0	0	0	200	903	0	0	0	0	0	0	0	603	903	0
4573	6	0	0	0	0	0	0	200	300	0	0	0	0	0	0	0	200	903	0	0	0	0	0	0	0	603	903	0
4573	7	0	0	0	0	0	0	200	300	0	0	0	0	0	0	0	200	903	0	0	0	0	0	0	0	603	903	0
4573	8	0	0	0	0	0	0	200	300	0	0	0	0	0	0	0	200	903	0	0	0	0	0	0	0	603	903	0
4573	9	0	0	0	0	0	0	200	300	0	0	0	0	0	0	0	200	903	0	0	0	0	0	0	0	603	903	0
4574	0	0	0	0	0	0	0	200	300	0	0	0	0	0	0	0	200	903	0	0	0	0	0	0	0	603	903	0
4574	1	0	0	0	0	0	0	200	300	0	0	0	0	0	0	0	200	903	0	0	0	0	0	0	0	603	903	0
4574	2	0	0	0	0	0	0	200	300	0	0	0	0	0	0	0	200	903	0	0	0	0	0	0	0	603	903	0
4574	3	0	0	0	0	0	0	200	300	0	0	0	0	0	0	0	200	903	0	0	0	0	0	0	0	603	903	0
4574	4	0	0	0	0	0	0	200	300	0	0	0	0	0	0	0	200	903	0	0	0	0	0	0	0	603	903	0
4574	5	0	0	0	0	0	0	200	300	0	0	0	0	0	0	0	200	903	0	0	0	0	0	0	0	603	903	0
4574	6	0	0	0	0	0	0	200	300	0	0	0	0	0	0	0	200	903	0	0	0	0	0	0	0	603	903	0
4574	7	0	0	0	0	0	0	200	300	0	0	0	0	0	0	0	200	903	0	0	0	0	0	0	0	603	903	0
4574	8	-2.05751	7.32376	-11.983	3041.11	1117.18	956.862	293.23	46.2153	0	0	0	0	0	0	0	200	903	0	0	0	0	0	0	0	603	903	0
4574	9	0.536485	7.17117	-13.5089	2858	1849.6	1048.42	336.917	88.4357	0	0	0	0	0	0	0	200	903	0	0	0	0	0	0	0	603	903	0
4575	0	1.29942	6.866	-12.8986	3681.98	1422.35	727.981	310.272	14.5434	0	0	0	0	0	0	0	200	903	0	0	0	0	0	0	0	603	903	0
4575	1	-2.36269	7.93411	-11.3727	3498.87	1239.25	956.862	308.967	-7.65598	0	0	0	0	0	0	0	200	903	0	0	0	0	0	0	0	603	903	0
4575	2	-1.44716	9.45999	-11.983	3590.43	1239.25	956.862	303.417	0.374146	0	0	0	0	0	0	0	200	903	0	0	0	0	0	0	0	603	903	0
4575	3	-0.836806	9.00223	-14.7296	3315.77	1361.32	1094.19	292.42	74.8911	0	0	0	0	0	0	0	200	903	0	0	0	0	0	0	0	603	903	0
4575	4	-1.14198	7.78152	-13.2037	3681.98	1361.32	1277.3	303.101	21.1411	0	0	0	0	0	0	0	200	903	0	0	0	0	0	0	0	603	903	0
4575	5	-0.684218	9.3074	-11.0675	3498.87	1605.46	956.862	345.061	-16.1393	0	0	0	0	0	0	0	200	903	0	0	0	0	0	0	0	603	903	0
4575	6	0.383897	9.61258	-13.2037	3773.53	1605.46	1323.07	321.591	14.2073	0	0	0	0	0	0	0	200	903	0	0	0	0	0	0	0	603	903	0
4575	7	-2.05751	10.2229	-15.34	3132.66	1300.28	1002.64	284.764	95.7843	0	0	0	0	0	0	0	200	903	0	0	0	0	0	0	0	603	903	0
4575	8	-2.51527	9.61258	-15.9503	3681.98	1544.42	1460.4	296.827	69.1596	0	0	0	0	0	0	0	200	903	0	0	0	0	0	0	0	603	903	0
4575	9	0.231309	9.15481	-15.0348	3956.64	1483.39	1277.3	298.664	36.8346	0	0	0	0	0	0	0	200	903	0	0	0	0	0	0	0	603	903	0
4576	0	0.689073	11.291	-14.7296	3773.53	1605.46	1323.07	308.995	43.8133	0	0	0	0	0	0	0	200	903	0	0	0	0	0	0	0	603	903	0
4576	1	-0.379043	12.054	-15.9503	4780.61	2154.77	1231.52	335.093	0.281128	0	0	0	0	0	0	0	200	903	0	0	0	0	0	0	0	603	903	0
4576	2	-0.226455	9.76517	-19.9176	4505.95	1666.49	1460.4	283.669	73.7703	0	0	0	0	0	0	0	200	903	0	0	0	0	0	0	0	603	903	0
4576	3	-0.989394	12.3592	-19.3072	4780.61	1727.53	1689.28	289.476	52.393	0	0	0	0	0	0	0	200	903	0	0	0	0	0	0	0	603	903	0
4576	4	-1.90492	14.1902	-20.8331	4963.71	1910.63	1323.07	291.711	61.7393	0	0	0	0	0	0	0	200	903	0	0	0	0	0	0	0	603	903	0
4576	5	1.6046	11.7488	-22.359	5421.48	2032.7	1551.96	290.912	57.5259	0	0	0	0	0	0	0	200	903	0	0	0	0	0	0	0	603	903	0
4576	6	0.078721	12.5117	-19.9176	5329.93	2154.77	1643.51	308.184	32.4012	0	0	0	0	0	0	0	200	903	0	0	0	0	0	0	0	603	903	0
4576	7	-2.05751	13.7325	-23.5797	5970.79	2154.77	1872.39	291.383	46.7825	0	0	0	0	0	0	0	200	903	0	0	0	0	0	0	0	603	903	0
4576	8	-1.29457	15.2583	-24.1901	5513.03	2215.81	1643.51	291.6	72.0952	0	0	0	0	0	0	0	200	903	0	0	0	0	0	0	0	603	903	0
4576	9	-1.29457	13.4273	-24.1901	5421.48	2337.88	1735.06	296.646	75.8799	0	0	0	0	0	0	0	200	903	0	0	0	0	0	0	0	603	903	0
4577	0	-2.2101	14.4954	-26.0211	6703.22	2459.95	1643.51	294.537	42.3932	0	0	0	0	0	0	0	200	903	0	0	0	0	0	0	0	603	903	0
4577	1	0.078721	15.4109	-24.8004	5970.79	2643.06	1735.06	306.573	59.2461	0	0	0	0	0	0	0	200	903	0	0	0	0	0	0	0	603	903	0
4577	2	0.078721	17.5471	-25.4108	6703.22	2765.13	1918.17	308.817	36.2056	0	0	0	0	0	0	0	200	903	0	0	0	0	0	0	0	603	903	0
4577	3	-2.36269	16.3264	-26.0211	6977.88	2582.02	1872.39	299.228	31.838	0	0	0	0	0	0	0	200	903	0	0	0	0	0	0	0	603	903	0
4577	4	-1.59975	17.0894	-27.547	6611.66	3192.37	2147.05	315.888	59.986	0	0	0	0	0	0	0	200	903	0	0	0	0	0	0	0	603	903	0
4577	5	0.383897	17.6997	-28.4625	7252.53	2826.16	2009.72	299.294	45.1901	0	0	0	0	0	0	0	200	903	0	0	0	0	0	0	0	603	903	0
4577	6	-0.531631	18.0049	-29.378	7527.19	3009.27	2147.05	302.433	43.7818	0	0	0	0	0	0	0	200	903	0	0	0	0	0	0	0	603	903	0
4577	7	-0.226455	16.9368	-31.2091	7618.74	4168.94	2284.38	333.581	55.8807	0	0	0	0	0	0	0	200	903	0	0	0	0	0	0	0	603	903	0
4577	8	0.536485	18.1575	-30.9039	8442.72	3314.44	2147.05	307.25	26.8074	0	0	0	0	0	0	0	200	903	0	0	0	0	0	0	0	603	903	0
4577	9	0.231309	19.836	-33.0402	8076.51	3619.62	2192.83	309.552	55.5548	0	0	0	0	0	0	0	200	903	0	0	0	0	0	0	0	603	903	0
4578	0	-0.531631	21.0567	-34.2609	8717.38	4107.9	2513.26	319.901	45.5586	0	0	0	0	0	0	0	200	903	0	0	0	0	0	0	0	603	903	0
4578	1	0.078721	19.3782	-36.7023	9266.7	3802.72	2421.71	303.61	47.517	0	0	0	0	0	0	0	200	903	0	0	0	0	0	0	0	603	903	0
4578	2	0.383897	21.8196	-39.4488	9175.15	4107.9	2696.37	304.132	67.4167	0	0	0	0	0	0	0	200	903	0	0	0	0	0	0	0	603	903	0
4578	3	0.078721	22.2774	-42.1954	10182.2	4474.11	2375.93	306.033	58.6889	0	0	0	0	0	0	0	200	903	0	0	0	0	0	0	0	603	903	0
4578	4	-0.226455	22.8877	-41.2799	10182.2	4291.01	2696.37	303.949	53.337	0	0	0	0	0	0	0	200	903	0	0	0	0	0	0	0	603	903	0
4578	5	-0.836806	24.4136	-43.7213	9907.57	4779.29	2604.81	309.313	73.3927	0	0	0	0	0	0	0	200	903	0	0	0	0	0	0	0	603	903	0
4578	6	-1.44716	24.8714	-47.0782	11189.3	5267.57	2879.47	311.89	62.3254	0	0	0	0	0	0	0	200	903	0	0	0	0	0	0	0	603	903	0
4578	7	-0.531631	25.6343	-48.9093	11464	5084.46	2696.37	303.957	65.6077	0	0	0	0	0	0	0	200	903	0	0	0	0	0	0	0	603	903	0
4578	8	2.21495	26.3972	-48.9093	12013.3	5145.5	3199.91	305.205	54.3764	0	0	0	0	0	0	0	200	903	0	0	0	0	0	0	0	603	903	0
4578	9	-0.531631	26.5498	-51.0455	12379.5	5633.78	3154.13	310.368	57.4814	0	0	0	0	0	0	0	200	903	0	0	0	0	0	0	0	603	903	0
4579	0	-0.684218	28.6861	-53.1818	12379.5	5877.92	3108.35	310.525	67.223	0	0	0	0	0	0	0	200	903	0	0	0	0	0	0	0	603	903	0
4579	1	-0.226455	28.2283	-54.0973	14027.4	6061.02	3474.56	312.039	40.6997	0	0	0	0	0	0	0	200	903	0	0	0	0	0	0	0	603	903	0
4579	2	-0.0738669	30.3645	-59.2853	13661.2	6549.31	3520.34	310.471	69.5679	0	0	0	0	0	0	0	200	903	0	0	0	0	0	0	0	603	903	0
4579	3	0.383897	30.6697	-61.1163	14119	6610.34	3520.34	308.16	68.9817	0	0	0	0	0	0	0	200	903	0	0	0	0	0	0	0	603	903	0
4579	4	0.994248	31.7378	-63.8629	14759.9	6793.45	3566.12	306.375	68.8821	0	0	0	0	0	0	0	200	903	0	0	0	0	0	0	0	603	903	0
4579	5	0.994248	33.2637	-69.0509	15400.7	7098.62	3840.77	302.803	76.9655	0	0	0	0	0	0	0	200	903	0	0	0	0	0	0	0	603	903	0
4579	6	-0.226455	32.9585	-73.6285	16590.9	7281.73	3657.67	298.898	74.6673	0	0	0	0	0	0	0	200	903	0	0	0	0	0	0	0	603	903	0
4579	7	-1.14198	28.9912	-76.9855	17781.1	7892.08	3199.91	302.514	69.033	0	0	0	0	0	0	0	200	903	0	0	0	0	0	0	0	603	903	0
4579	8	-2.51527	28.3809	-81.8683	18879.7	8685.54	2604.81	306.092	69.3889	0	0	0	0	0	0	0	200	903	0	0	0	0	0	0	0	603	903	0
4579	9	-5.10927	23.3455	-88.277	20436.1	9295.89	1643.51	305.304	68.4998	0	0	0	0	0	0	0	200	903	0	0	0	0	0	0	0	603	903	0
4580	0	-5.87221	20.1411	-97.1271	21809.4	9845.2	1048.42	301.364	75.4547	0	0	0	0	0	0	0	200	903	0	0	0	0	0	0	0	603	903	0
4580	1	-8.77138	16.479	-102.01	23365.8	10516.6	453.323	303.094	70.9455	0	0	0	0	0	0	0	200	903	0	0	0	0	0	0	0	603	903	0
4580	2	-10.755	14.0376	-109.334	25105.3	11126.9	-507.981	301.77	70.3797	0	0	0	0	0	0	0	200	903	0	0	0	0	0	0	0	603	903	0
4580	3	-10.755	10.0703	-114.522	26112.4	11493.2	-1057.3	300.358	71.9881	0	0	0	0	0	0	0	200	903	0	0	0	0	0	0	0	603	903	0
4580	4	-13.5016	8.0867	-120.626	28492.8	12225.6	-1377.73	301.351	63.7917	0	0	0	0	0	0	0	200	903	0	0	0	0	0	0	0	603	903	0
4580	5	-15.6378	5.95047	-128.865	30323.8	13263.2	-2293.26	302.923	64.6859	0	0	0	0	0	0	0	200	903	0	0	0	0	0	0	0	603	903	0
4580	6	-17.4689	2.74612	-134.969	31147.8	13507.3	-3437.67	300.077	69.2223	0	0	0	0	0	0	0	200	903	0	0	0	0	0	0	0	603	903	0
4580	7	-18.537	-0.305635	-139.547	33345.1	14117.7	-3666.55	301.168	61.047	0	0	0	0	0	0	0	200	903	0	0	0	0	0	0	0	603	903	0
4580	8	-20.3681	-3.66257	-149.312	35176.1	15155.3	-4215.87	301.501	64.4121	0	0	0	0	0	0	0	200	903	0	0	0	0	0	0	0	603	903	0
4580	9	-21.5888	-3.96774	-156.026	36091.7	15521.5	-5222.95	299.48	68.6817	0	0	0	0	0	0	0	200	903	0	0	0	0	0	0	0	603	903	0
4581	0	-22.5043	-7.17209	-161.519	37648	16131.8	-5726.49	299.876	66.9129	0	0	0	0	0	0	0	200	903	0	0	0	0	0	0	0	603	903	0
4581	1	-24.4879	-7.17209	-167.623	38472	16803.2	-5726.49	300.244	70.4843	0	0	0	0	0	0	0	200	903	0	0	0	0	0	0	0	603	903	0
4581	2	-23.4198	-7.32468	-173.421	39936.9	16864.2	-6321.58	297.245	69.7114	0	0	0	0	0	0	0	200	903	0	0	0	0	0	0	0	603	903	0
4581	3	-25.556	-8.39279	-178.304	40669.3	17413.6	-6367.36	297.662	71.9101	0	0	0	0	0	0	0	200	903	0	0	0	0	0	0	0	603	903	0
4581	4	-25.7086	-7.93503	-183.797	41859.5	18512.2	-5863.82	300.721	72.2516	0	0	0	0	0	0	0	200	903	0	0	0	0	0	0	0	603	903	0
4581	5	-26.4716	-8.85056	-189.901	43141.2	18756.3	-5909.6	298.769	72.8221	0	0	0	0	0	0	0	200	903	0	0	0	0	0	0	0	603	903	0
4581	6	-23.725	-7.62985	-191.426	44148.3	19427.7	-5955.37	301.489	69.3719	0	0	0	0	0	0	0	200	903	0	0	0	0	0	0	0	603	903	0
4581	7	-23.1146	-5.34104	-197.835	44697.6	20099.1	-5406.06	301.595	74.0663	0	0	0	0	0	0	0	200	903	0	0	0	0	0	0	0	603	903	0
4581	8	-25.0983	-2.59445	-202.108	46345.6	20343.2	-5360.28	300.656	70.6886	0	0	0	0	0	0	0	200	903	0	0	0	0	0	0	0	603	903	0
4581	9	-24.6405	-0.610811	-208.211	47169.5	20831.5	-5085.62	300.05	73.4533	0	0	0	0	0	0	0	200	903	0	0	0	0	0	0	0	603	903	0
4582	0	-23.8776	0.76248	-212.484	47627.3	21502.9	-5177.17	301.198	75.8541	0	0	0	0	0	0	0	200	903	0	0	0	0	0	0	0	603	903	0
4582	1	-24.7931	3.96683	-214.925	48268.2	21747.1	-4536.3	301.184	75.4185	0	0	0	0	0	0	0	200	903	0	0	0	0	0	0	0	603	903	0
4582	2	-24.1828	8.0867	-217.061	48909	22052.2	-4215.87	301.595	74.6762	0	0	0	0	0	0	0	200	903	0	0	0	0	0	0	0	603	903	0
4582	3	-23.4198	11.9014	-217.366	48817.5	22296.4	-3529.22	302.575	75.4138	0	0	0	0	0	0	0	200	903	0	0	0	0	0	0	0	603	903	0
4582	4	-22.3517	13.4273	-223.775	49000.6	22479.5	-3300.34	300.456	81.0275	0	0	0	0	0	0	0	200	903	0	0	0	0	0	0	0	603	903	0
4582	5	-20.6732	15.8687	-225.911	49641.5	22784.7	-2888.35	300.857	80.2612	0	0	0	0	0	0	0	200	903	0	0	0	0	0	0	0	603	903	0
4582	6	-20.6732	19.3782	-227.437	50007.7	23150.9	-2476.36	301.79	80.1253	0	0	0	0	0	0	0	200	903	0	0	0	0	0	0	0	603	903	0
4582	7	-17.9267	21.2093	-230.489	50282.3	23028.8	-2293.26	299.913	81.8449	0	0	0	0	0	0	0	200	903	0	0	0	0	0	0	0	603	903	0
4582	8	-18.8422	22.5825	-234.151	50557	23700.2	-1515.06	301.218	84.0838	0	0	0	0	0	0	0	200	903	0	0	0	0	0	0	0	603	903	0
4582	9	-18.6896	25.4817	-237.508	51655.6	23761.2	-1698.17	300.044	82.5099	0	0	0	0	0	0	0	200	903	0	0	0	0	0	0	0	603	903	0
4583	0	-17.7741	26.7024	-240.255	52113.4	23700.2	-1240.4	298.646	83.091	0	0	0	0	0	0	0	200	903	0	0	0	0	0	0	0	603	903	0
4583	1	-17.9267	27.7705	-239.949	51747.2	24188.5	-1148.85	300.807	84.3413	0	0	0	0	0	0	0	200	903	0	0	0	0	0	0	0	603	903	0
4583	2	-18.0792	28.6861	-246.358	52754.3	24676.7	-828.416	300.166	85.8635	0	0	0	0	0	0	0	200	903	0	0	0	0	0	0	0	603	903	0
4583	3	-16.8585	28.6861	-250.63	54310.6	24737.8	-507.981	298.702	83.3039	0	0	0	0	0	0	0	200	903	0	0	0	0	0	0	0	603	903	0
4583	4	-16.0956	30.2119	-252.156	53303.6	25226.1	-507.981	300.041	88.609	0	0	0	0	0	0	0	200	903	0	0	0	0	0	0	0	603	903	0
4583	5	-14.2645	29.6016	-252.462	54219.1	25653.3	-141.77	301.613	85.2382	0	0	0	0	0	0	0	200	903	0	0	0	0	0	0	0	603	903	0
4583	6	-14.7223	29.7542	-255.513	53944.4	25897.5	178.664	301.355	88.8782	0	0	0	0	0	0	0	200	903	0	0	0	0	0	0	0	603	903	0
4583	7	-12.5861	30.6697	-260.091	55317.7	26629.9	544.875	302.387	87.3139	0	0	0	0	0	0	0	200	903	0	0	0	0	0	0	0	603	903	0
4583	8	-11.3654	30.0594	-262.532	55775.5	26813	636.428	302.132	87.5482	0	0	0	0	0	0	0	200	903	0	0	0	0	0	0	0	603	903	0
4583	9	-9.38173	30.8223	-264.974	55592.4	27057.1	1185.74	302.112	90.1967	0	0	0	0	0	0	0	200	903	0	0	0	0	0	0	0	603	903	0
4584	0	-8.31361	30.5171	-267.415	56416.4	27606.4	1185.74	303.234	89.0308	0	0	0	0	0	0	0	200	903	0	0	0	0	0	0	0	603	903	0
4584	1	-6.78773	29.6016	-270.162	56874.1	27911.6	1643.51	303.315	89.4812	0	0	0	0	0	0	0	200	903	0	0	0	0	0	0	0	603	903	0
4584	2	-6.32997	30.8223	-272.603	56324.8	27972.7	1506.18	302.613	93.3817	0	0	0	0	0	0	0	200	903	0	0	0	0	0	0	0	603	903	0
4584	3	-3.4308	30.6697	-277.486	57881.2	28460.9	1735.06	302.567	91.4085	0	0	0	0	0	0	0	200	903	0	0	0	0	0	0	0	603	903	0
4584	4	-3.58339	30.3645	-282.369	58247.4	29010.3	1963.94	302.739	93.7186	0	0	0	0	0	0	0	200	903	0	0	0	0	0	0	0	603	903	0
4584	5	-3.73598	31.8904	-286.336	58796.7	29071.3	2284.38	301.529	94.6583	0	0	0	0	0	0	0	200	903	0	0	0	0	0	0	0	603	903	0
4584	6	-2.2101	32.3482	-289.998	60353.1	30231	2559.04	304.245	91.8845	0	0	0	0	0	0	0	200	903	0	0	0	0	0	0	0	603	903	0
4584	7	-0.989394	32.9585	-291.829	59986.9	30658.2	2833.69	305.055	94.4452	0	0	0	0	0	0	0	200	903	0	0	0	0	0	0	0	603	903	0
4584	8	-1.29457	34.3318	-297.628	60353.1	30902.3	2925.25	303.829	97.2193	0	0	0	0	0	0	0	200	903	0	0	0	0	0	0	0	603	903	0
4584	9	1.45201	35.2473	-301.29	60902.4	31634.8	3199.91	304.998	97.8609	0	0	0	0	0	0	0	200	903	0	0	0	0	0	0	0	603	903	0
4585	0	1.14684	35.3999	-304.952	61543.3	32184.1	3886.55	305.538	98.1867	0	0	0	0	0	0	0	200	903	0	0	0	0	0	0	0	603	903	0
4585	1	1.90978	37.6888	-306.783	62092.6	32367.2	4023.88	305.505	97.6007	0	0	0	0	0	0	0	200	903	0	0	0	0	0	0	0	603	903	0
4585	2	3.28307	36.6206	-309.835	63282.8	33038.6	4161.21	306.633	95.7529	0	0	0	0	0	0	0	200	903	0	0	0	0	0	0	0	603	903	0
4585	3	3.89342	37.8413	-313.192	62825.1	33526.8	4481.64	307.049	99.4037	0	0	0	0	0	0	0	200	903	0	0	0	0	0	0	0	603	903	0
4585	4	4.50377	39.6724	-315.328	64106.8	33709.9	4847.85	306.904	96.6979	0	0	0	0	0	0	0	200	903	0	0	0	0	0	0	0	603	903	0
4585	5	4.80895	38.4517	-315.023	64289.9	34320.3	4710.52	308.946	95.9197	0	0	0	0	0	0	0	200	903	0	0	0	0	0	0	0	603	903	0
4585	6	6.33482	41.9612	-323.873	64198.3	34808.6	4802.08	307.476	101.779	0	0	0	0	0	0	0	200	903	0	0	0	0	0	0	0	603	903	0
4585	7	6.79259	40.7405	-324.788	65571.6	34869.6	5259.84	307.361	98.1096	0	0	0	0	0	0	0	200	903	0	0	0	0	0	0	0	603	903	0
4585	8	7.09776	42.7242	-328.45	64747.6	35480	5626.05	308.022	102.869	0	0	0	0	0	0	0	200	903	0	0	0	0	0	0	0	603	903	0
4585	9	7.55553	42.419	-329.976	65480.1	35663.1	5763.38	308.078	101.561	0	0	0	0	0	0	0	200	903	0	0	0	0	0	0	0	603	903	0
4586	0	8.77623	43.9449	-333.638	65754.7	35663.1	5854.93	306.891	102.916	0	0	0	0	0	0	0	200	903	0	0	0	0	0	0	0	603	903	0
4586	1	9.23399	44.25	-335.469	65388.5	36090.3	6495.8	307.582	105.083	0	0	0	0	0	0	0	200	903	0	0	0	0	0	0	0	603	903	0
4586	2	9.53917	45.4707	-335.469	66120.9	36273.4	6404.25	308.127	102.9	0	0	0	0	0	0	0	200	903	0	0	0	0	0	0	0	603	903	0
4586	3	10.1495	45.6233	-338.216	66212.5	35907.2	6862.01	306.167	104.23	0	0	0	0	0	0	0	200	903	0	0	0	0	0	0	0	603	903	0
4586	4	10.6073	47.1492	-338.521	65022.3	36639.6	6724.68	308.234	107.922	0	0	0	0	0	0	0	200	903	0	0	0	0	0	0	0	603	903	0
4586	5	10.7599	47.7596	-342.183	66120.9	37250	6633.13	308.86	106.767	0	0	0	0	0	0	0	200	903	0	0	0	0	0	0	0	603	903	0
4586	6	9.99693	48.0647	-342.183	66578.7	36944.8	7182.45	307.968	105.43	0	0	0	0	0	0	0	200	903	0	0	0	0	0	0	0	603	903	0
4586	7	11.2176	48.9803	-344.319	65937.8	37311	7548.66	308.362	108.498	0	0	0	0	0	0	0	200	903	0	0	0	0	0	0	0	603	903	0
4586	8	10.7599	49.2854	-344.93	66670.3	37555.2	7457.11	308.878	106.714	0	0	0	0	0	0	0	200	903	0	0	0	0	0	0	0	603	903	0
4586	9	12.7435	50.5061	-345.845	66029.4	37066.9	7640.21	307.178	109.078	0	0	0	0	0	0	0	200	903	0	0	0	0	0	0	0	603	903	0
4587	0	11.9806	51.2691	-346.761	65754.7	37677.2	8509.96	308.655	110.374	0	0	0	0	0	0	0	200	903	0	0	0	0	0	0	0	603	903	0
4587	1	11.828	51.7268	-347.066	66487.1	37738.3	8006.42	308.735	108.431	0	0	0	0	0	0	0	200	903	0	0	0	0	0	0	0	603	903	0
4587	2	12.2858	53.7105	-350.423	66670.3	37738.3	8418.41	307.693	109.743	0	0	0	0	0	0	0	200	903	0	0	0	0	0	0	0	603	903	0
4587	3	11.9806	54.1682	-351.339	67036.5	38470.7	8693.07	309.497	109.197	0	0	0	0	0	0	0	200	903	0	0	0	0	0	0	0	603	903	0
4587	4	12.5909	55.3889	-355.306	67585.8	38714.8	8693.07	308.962	109.781	0	0	0	0	0	0	0	200	903	0	0	0	0	0	0	0	603	903	0
4587	5	13.3539	56.7622	-356.832	66944.9	38775.9	9013.5	308.667	112.391	0	0	0	0	0	0	0	200	903	0	0	0	0	0	0	0	603	903	0
4587	6	13.2013	57.0674	-359.883	68318.2	39203.1	9288.16	308.933	110.166	0	0	0	0	0	0	0	200	903	0	0	0	0	0	0	0	603	903	0
4587	7	13.3539	58.7459	-364.156	67494.3	39874.5	9333.94	309.498	114.656	0	0	0	0	0	0	0	200	903	0	0	0	0	0	0	0	603	903	0
4587	8	13.3539	58.4407	-367.513	68135.1	39752.4	9608.6	308.166	114.605	0	0	0	0	0	0	0	200	903	0	0	0	0	0	0	0	603	903	0
4587	9	15.4901	61.3399	-372.701	69691.5	40912.1	10112.1	309.772	113.009	0	0	0	0	0	0	0	200	903	0	0	0	0	0	0	0	603	903	0
4588	0	14.2694	63.4761	-378.499	69233.7	41461.4	10295.2	309.542	117.084	0	0	0	0	0	0	0	200	903	0	0	0	0	0	0	0	603	903	0
4588	1	15.4901	65.4597	-384.603	70698.6	41766.6	10707.2	308.597	116.178	0	0	0	0	0	0	0	200	903	0	0	0	0	0	0	0	603	903	0
4588	2	15.6427	65.6123	-390.401	71614.1	43414.5	11027.7	311.205	116.563	0	0	0	0	0	0	0	200	903	0	0	0	0	0	0	0	603	903	0
4588	3	14.7272	67.9012	-400.167	71980.3	44330.1	11165	310.779	120.124	0	0	0	0	0	0	0	200	903	0	0	0	0	0	0	0	603	903	0
4588	4	20.2203	69.2744	-411.153	73902.9	45794.9	12263.6	311.382	120.254	0	0	0	0	0	0	0	200	903	0	0	0	0	0	0	0	603	903	0
4588	5	28.0023	70.9529	-412.984	74726.9	46588.4	12538.3	312.809	119.056	0	0	0	0	0	0	0	200	903	0	0	0	0	0	0	0	603	903	0
4588	6	24.035	74.3098	-417.562	74726.9	47198.7	12904.5	313.034	121.04	0	0	0	0	0	0	0	200	903	0	0	0	0	0	0	0	603	903	0
4588	7	23.4247	77.5142	-424.886	76100.2	48053.2	13499.6	313.097	120.893	0	0	0	0	0	0	0	200	903	0	0	0	0	0	0	0	603	903	0
4588	8	28.4601	77.0564	-433.126	76283.3	49029.8	14094.7	313.2	123.877	0	0	0	0	0	0	0	200	903	0	0	0	0	0	0	0	603	903	0
4588	9	27.6971	80.1082	-440.755	77015.8	49518.1	14598.2	312.348	125.264	0	0	0	0	0	0	0	200	903	0	0	0	0	0	0	0	603	903	0
4589	0	26.0187	82.7022	-443.502	78938.3	50250.5	14735.6	313.304	122.011	0	0	0	0	0	0	0	200	903	0	0	0	0	0	0	0	603	903	0
4589	1	28.3075	82.0918	-447.164	78755.3	50677.7	15101.8	313.332	123.878	0	0	0	0	0	0	0	200	903	0	0	0	0	0	0	0	603	903	0
4589	2	29.8334	85.6013	-456.014	80220.1	51837.4	15468	313.675	124.084	0	0	0	0	0	0	0	200	903	0	0	0	0	0	0	0	603	903	0
4589	3	26.3238	88.0428	-462.422	80952.5	52325.7	15147.5	313.156	124.938	0	0	0	0	0	0	0	200	903	0	0	0	0	0	0	0	603	903	0
4589	4	26.7816	86.5169	-463.643	80769.4	52508.8	15284.9	313.253	125.794	0	0	0	0	0	0	0	200	903	0	0	0	0	0	0	0	603	903	0
4589	5	25.8661	86.5169	-467.916	82234.2	52630.9	15468	312.479	124.254	0	0	0	0	0	0	0	200	903	0	0	0	0	0	0	0	603	903	0
4589	6	26.9342	86.8221	-477.376	82142.7	53485.4	14689.8	312.04	127.929	0	0	0	0	0	0	0	200	903	0	0	0	0	0	0	0	603	903	0
4589	7	27.6971	86.5169	-479.512	82783.6	54217.8	15468	313.069	127.359	0	0	0	0	0	0	0	200	903	0	0	0	0	0	0	0	603	903	0
4589	8	25.7135	84.2281	-482.259	83790.6	54034.7	15101.8	312.045	126.254	0	0	0	0	0	0	0	200	903	0	0	0	0	0	0	0	603	903	0
4589	9	24.035	83.7703	-487.142	83699.1	55011.2	14735.6	312.927	128.183	0	0	0	0	0	0	0	200	903	0	0	0	0	0	0	0	603	903	0
4590	0	26.0187	85.1436	-491.109	83973.8	55621.6	14598.2	313.257	129.012	0	0	0	0	0	0	0	200	903	0	0	0	0	0	0	0	603	903	0
4590	1	26.9342	82.5496	-493.55	84706.2	56354	14827.1	314.181	128.374	0	0	0	0	0	0	0	200	903	0	0	0	0	0	0	0	603	903	0
4590	2	24.6454	82.397	-498.128	85438.6	56476.1	14827.1	313.377	128.481	0	0	0	0	0	0	0	200	903	0	0	0	0	0	0	0	603	903	0
4590	3	25.2557	81.6341	-501.79	86079.5	57330.6	14598.2	314.252	128.455	0	0	0	0	0	0	0	200	903	0	0	0	0	0	0	0	603	903	0
4590	4	25.7135	82.2444	-507.283	86811.9	56842.3	15101.8	312.052	128.869	0	0	0	0	0	0	0	200	903	0	0	0	0	0	0	0	603	903	0
4590	5	24.798	83.7703	-512.471	86171	58063	14964.4	313.3	131.852	0	0	0	0	0	0	0	200	903	0	0	0	0	0	0	0	603	903	0
4590	6	27.2394	83.1599	-514.302	87452.7	58673.3	14964.4	314.083	129.959	0	0	0	0	0	0	0	200	903	0	0	0	0	0	0	0	603	903	0
4590	7	26.1712	84.2281	-517.049	87544.3	58246.1	15468	312.651	130.685	0	0	0	0	0	0	0	200	903	0	0	0	0	0	0	0	603	903	0
4590	8	25.7135	86.5169	-521.932	87727.4	59100.6	15513.8	313.234	131.918	0	0	0	0	0	0	0	200	903	0	0	0	0	0	0	0	603	903	0
4590	9	26.1712	86.2117	-526.815	88917.6	60016.1	15422.2	313.923	131.217	0	0	0	0	0	0	0	200	903	0	0	0	0	0	0	0	603	903	0
4591	0	27.2394	87.1272	-528.34	88643	59527.8	15788.4	312.669	132.224	0	0	0	0	0	0	0	200	903	0	0	0	0	0	0	0	603	903	0
4591	1	26.1712	89.416	-534.749	89924.6	60748.5	16429.3	313.602	131.838	0	0	0	0	0	0	0	200	903	0	0	0	0	0	0	0	603	903	0
4591	2	26.4764	89.5686	-536.275	90199.4	61053.7	15742.6	313.848	131.804	0	0	0	0	0	0	0	200	903	0	0	0	0	0	0	0	603	903	0
4591	3	27.392	90.0264	-540.242	89833.1	61481	16108.8	313.803	133.717	0	0	0	0	0	0	0	200	903	0	0	0	0	0	0	0	603	903	0
4591	4	26.3238	88.9583	-543.599	91481	61908.2	16200.4	313.886	131.712	0	0	0	0	0	0	0	200	903	0	0	0	0	0	0	0	603	903	0
4591	5	27.8497	90.9419	-549.703	91206.4	62457.5	16246.2	313.621	134.08	0	0	0	0	0	0	0	200	903	0	0	0	0	0	0	0	603	903	0
4591	6	27.6971	91.5523	-552.449	91572.6	63067.9	16429.3	314.16	134.242	0	0	0	0	0	0	0	200	903	0	0	0	0	0	0	0	603	903	0
4591	7	26.0187	91.2471	-557.637	91572.6	63373.1	16383.5	313.646	135.785	0	0	0	0	0	0	0	200	903	0	0	0	0	0	0	0	603	903	0
4591	8	27.392	91.0945	-558.553	92213.5	63861.3	16291.9	314.334	134.906	0	0	0	0	0	0	0	200	903	0	0	0	0	0	0	0	603	903	0
4591	9	26.9342	93.0782	-562.52	92396.6	64166.5	16200.4	314.07	135.745	0	0	0	0	0	0	0	200	903	0	0	0	0	0	0	0	603	903	0
4592	0	26.7816	92.3152	-567.098	93861.5	64166.5	16337.7	313.149	134.488	0	0	0	0	0	0	0	200	903	0	0	0	0	0	0	0	603	903	0
4592	1	26.1712	92.1626	-571.981	93678.3	65082	16383.5	313.784	136.221	0	0	0	0	0	0	0	200	903	0	0	0	0	0	0	0	603	903	0
4592	2	26.629	92.4678	-571.981	94502.3	65814.4	16108.8	315.064	134.781	0	0	0	0	0	0	0	200	903	0	0	0	0	0	0	0	603	903	0
4592	3	26.1712	92.6204	-576.558	95417.8	65326.2	16475.1	313.304	134.504	0	0	0	0	0	0	0	200	903	0	0	0	0	0	0	0	603	903	0
4592	4	26.629	92.773	-579.915	94776.9	66302.7	16475.1	314.332	136.568	0	0	0	0	0	0	0	200	903	0	0	0	0	0	0	0	603	903	0
4592	5	25.5609	93.0782	-580.526	96058.7	66974.1	16063.1	315.368	134.531	0	0	0	0	0	0	0	200	903	0	0	0	0	0	0	0	603	903	0
4592	6	25.7135	92.6204	-586.019	95509.4	66913.1	16658.2	314.183	137.02	0	0	0	0	0	0	0	200	903	0	0	0	0	0	0	0	603	903	0
4592	7	26.629	93.6885	-588.155	95692.5	67523.4	16520.8	314.806	137.3	0	0	0	0	0	0	0	200	903	0	0	0	0	0	0	0	603	903	0
4592	8	26.3238	92.773	-590.596	96058.7	67706.5	16566.6	314.641	137.353	0	0	0	0	0	0	0	200	903	0	0	0	0	0	0	0	603	903	0
4592	9	27.6971	92.9256	-595.479	96516.4	68011.7	16246.2	314.213	137.918	0	0	0	0	0	0	0	200	903	0	0	0	0	0	0	0	603	903	0
4593	0	26.1712	92.01	-598.226	96699.6	68805.2	16246.2	315.015	138.356	0	0	0	0	0	0	0	200	903	0	0	0	0	0	0	0	603	903	0
4593	1	26.4764	92.4678	-600.972	97523.6	69171.4	16475.1	315.099	137.724	0	0	0	0	0	0	0	200	903	0	0	0	0	0	0	0	603	903	0
4593	2	26.7816	93.2307	-603.109	97065.8	69232.4	16429.3	314.793	139.057	0	0	0	0	0	0	0	200	903	0	0	0	0	0	0	0	603	903	0
4593	3	26.4764	93.6885	-607.686	97706.6	69842.8	16475.1	314.932	139.215	0	0	0	0	0	0	0	200	903	0	0	0	0	0	0	0	603	903	0
4593	4	25.8661	93.0782	-610.128	98439.1	69964.8	16246.2	314.672	138.658	0	0	0	0	0	0	0	200	903	0	0	0	0	0	0	0	603	903	0
4593	5	26.7816	93.6885	-613.179	97615.1	70209	16566.6	314.5	140.805	0	0	0	0	0	0	0	200	903	0	0	0	0	0	0	0	603	903	0
4593	6	26.629	93.6885	-613.79	99079.9	70209	16612.4	314.386	138.577	0	0	0	0	0	0	0	200	903	0	0	0	0	0	0	0	603	903	0
4593	7	27.2394	93.5359	-618.367	99354.6	71246.6	16749.7	315.217	139.328	0	0	0	0	0	0	0	200	903	0	0	0	0	0	0	0	603	903	0
4593	8	26.629	94.7566	-620.198	98347.5	71368.7	16520.8	315.074	141.426	0	0	0	0	0	0	0	200	903	0	0	0	0	0	0	0	603	903	0
4593	9	26.9342	94.2989	-622.945	99995.5	71490.7	16337.7	314.763	139.479	0	0	0	0	0	0	0	200	903	0	0	0	0	0	0	0	603	903	0
4594	0	26.7816	93.9937	-621.724	99079.9	71979	16841.3	315.773	140.637	0	0	0	0	0	0	0	200	903	0	0	0	0	0	0	0	603	903	0
4594	1	28.9178	94.9092	-626.912	99537.7	72101.1	17161.7	315.01	141.225	0	0	0	0	0	0	0	200	903	0	0	0	0	0	0	0	603	903	0
4594	2	27.5445	94.604	-630.269	100087	72162.1	16887	314.494	141.2	0	0	0	0	0	0	0	200	903	0	0	0	0	0	0	0	603	903	0
4594	3	27.5445	94.7566	-633.931	100179	72894.5	16978.6	314.988	141.973	0	0	0	0	0	0	0	200	903	0	0	0	0	0	0	0	603	903	0
4594	4	28.1549	94.7566	-634.847	100636	73138.7	16795.5	315.207	141.479	0	0	0	0	0	0	0	200	903	0	0	0	0	0	0	0	603	903	0
4594	5	29.223	93.0782	-637.593	100819	73626.9	16887	315.476	141.875	0	0	0	0	0	0	0	200	903	0	0	0	0	0	0	0	603	903	0
4594	6	29.0704	95.0618	-642.476	100270	73749	17024.4	314.789	143.932	0	0	0	0	0	0	0	200	903	0	0	0	0	0	0	0	603	903	0
4594	7	28.6127	95.367	-644.307	101003	73932.1	16841.3	314.747	143.239	0	0	0	0	0	0	0	200	903	0	0	0	0	0	0	0	603	903	0
4594	8	28.3075	94.7566	-646.749	100545	74420.4	17024.4	315.069	144.538	0	0	0	0	0	0	0	200	903	0	0	0	0	0	0	0	603	903	0
4594	9	28.7652	92.9256	-650.411	101003	74786.6	17070.1	314.984	144.71	0	0	0	0	0	0	0	200	903	0	0	0	0	0	0	0	603	903	0
4595	0	28.1549	94.4514	-650.716	101094	74908.7	16978.6	315.117	144.642	0	0	0	0	0	0	0	200	903	0	0	0	0	0	0	0	603	903	0
4595	1	28.3075	94.7566	-654.683	101369	75335.9	16841.3	315.072	145.164	0	0	0	0	0	0	0	200	903	0	0	0	0	0	0	0	603	903	0
4595	2	28.3075	95.367	-655.294	101827	75580.1	17344.8	315.338	144.609	0	0	0	0	0	0	0	200	903	0	0	0	0	0	0	0	603	903	0
4595	3	28.4601	95.2144	-658.956	102193	75274.9	17070.1	314.234	144.917	0	0	0	0	0	0	0	200	903	0	0	0	0	0	0	0	603	903	0
4595	4	29.3756	94.9092	-658.956	102010	76190.4	17115.9	315.623	145.195	0	0	0	0	0	0	0	200	903	0	0	0	0	0	0	0	603	903	0
4595	5	28.9178	95.2144	-662.007	102834	76434.6	17115.9	315.459	144.664	0	0	0	0	0	0	0	200	903	0	0	0	0	0	0	0	603	903	0
4595	6	28.9178	93.5359	-665.059	102742	76068.4	16932.8	314.378	145.514	0	0	0	0	0	0	0	200	903	0	0	0	0	0	0	0	603	903	0
4595	7	29.8334	95.0618	-666.585	102010	76800.8	17207.5	315.215	146.967	0	0	0	0	0	0	0	200	903	0	0	0	0	0	0	0	603	903	0
4595	8	29.5282	95.8247	-665.364	102925	77533.2	17253.2	316.527	145.31	0	0	0	0	0	0	0	200	903	0	0	0	0	0	0	0	603	903	0
4595	9	30.7489	95.2144	-671.163	102651	77106	17344.8	314.884	147.056	0	0	0	0	0	0	0	200	903	0	0	0	0	0	0	0	603	903	0
4596	0	31.3592	95.6721	-674.52	102925	78265.6	17665.2	316.032	147.41	0	0	0	0	0	0	0	200	903	0	0	0	0	0	0	0	603	903	0
4596	1	31.3592	94.7566	-675.13	103291	78570.8	17665.2	316.379	147.005	0	0	0	0	0	0	0	200	903	0	0	0	0	0	0	0	603	903	0
4596	2	33.1903	95.2144	-679.402	102834	78509.8	17573.7	315.557	148.641	0	0	0	0	0	0	0	200	903	0	0	0	0	0	0	0	603	903	0
4596	3	33.0377	95.6721	-680.318	103566	79059.1	17848.3	316.209	147.768	0	0	0	0	0	0	0	200	903	0	0	0	0	0	0	0	603	903	0
4596	4	32.2748	95.2144	-683.98	103841	79181.2	17619.5	315.765	148.182	0	0	0	0	0	0	0	200	903	0	0	0	0	0	0	0	603	903	0
4596	5	33.0377	95.9773	-685.201	103932	79425.3	17482.1	315.915	148.319	0	0	0	0	0	0	0	200	903	0	0	0	0	0	0	0	603	903	0
4596	6	33.0377	95.8247	-681.844	104115	79791.5	17939.9	317.023	147.303	0	0	0	0	0	0	0	200	903	0	0	0	0	0	0	0	603	903	0
4596	7	33.0377	95.0618	-689.778	104390	80462.9	17848.3	316.65	148.662	0	0	0	0	0	0	0	200	903	0	0	0	0	0	0	0	603	903	0
4596	8	32.4274	95.6721	-691.304	103749	80157.7	17848.3	315.951	149.923	0	0	0	0	0	0	0	200	903	0	0	0	0	0	0	0	603	903	0
4596	9	33.0377	95.9773	-693.135	104390	80646	17939.9	316.35	149.394	0	0	0	0	0	0	0	200	903	0	0	0	0	0	0	0	603	903	0
4597	0	34.5636	95.0618	-692.22	103566	80523.9	17619.5	316.327	150.386	0	0	0	0	0	0	0	200	903	0	0	0	0	0	0	0	603	903	0
4597	1	33.8006	94.7566	-694.661	103841	81012.2	17802.6	316.621	150.516	0	0	0	0	0	0	0	200	903	0	0	0	0	0	0	0	603	903	0
4597	2	33.9532	94.1463	-697.103	104756	81683.6	18123	317.176	149.726	0	0	0	0	0	0	0	200	903	0	0	0	0	0	0	0	603	903	0
4597	3	33.4955	93.6885	-697.713	104024	81988.8	17939.9	317.511	150.907	0	0	0	0	0	0	0	200	903	0	0	0	0	0	0	0	603	903	0
4597	4	34.411	94.604	-701.375	104756	81927.7	17985.7	316.81	150.642	0	0	0	0	0	0	0	200	903	0	0	0	0	0	0	0	603	903	0
4597	5	33.8006	94.1463	-703.817	104482	82355	18351.9	317.012	151.55	0	0	0	0	0	0	0	200	903	0	0	0	0	0	0	0	603	903	0
4597	6	35.0213	94.604	-704.122	104207	82416	18214.6	317.048	152.004	0	0	0	0	0	0	0	200	903	0	0	0	0	0	0	0	603	903	0
4597	7	34.8688	93.9937	-706.563	104573	82660.1	18260.3	316.989	151.998	0	0	0	0	0	0	0	200	903	0	0	0	0	0	0	0	603	903	0
4597	8	35.9369	93.6885	-708.699	104115	82355	17985.7	316.206	153.09	0	0	0	0	0	0	0	200	903	0	0	0	0	0	0	0	603	903	0
4597	9	35.4791	94.604	-711.751	104573	83026.4	18214.6	316.651	153.076	0	0	0	0	0	0	0	200	903	0	0	0	0	0	0	0	603	903	0
4598	0	35.4791	93.3833	-713.887	103566	83392.6	17985.7	316.815	154.927	0	0	0	0	0	0	0	200	903	0	0	0	0	0	0	0	603	903	0
4598	1	36.2421	93.3833	-715.108	104482	83941.9	18397.7	317.384	153.894	0	0	0	0	0	0	0	200	903	0	0	0	0	0	0	0	603	903	0
4598	2	35.6317	93.5359	-711.141	104665	83636.7	18123	317.609	152.822	0	0	0	0	0	0	0	200	903	0	0	0	0	0	0	0	603	903	0
4598	3	35.7843	93.3833	-718.465	105306	83941.9	18397.7	316.835	153.43	0	0	0	0	0	0	0	200	903	0	0	0	0	0	0	0	603	903	0
4598	4	35.6317	93.2307	-719.075	104573	84125	18535	316.991	154.573	0	0	0	0	0	0	0	200	903	0	0	0	0	0	0	0	603	903	0
4598	5	35.7843	93.0782	-722.127	105214	84613.3	18031.5	317.172	154.3	0	0	0	0	0	0	0	200	903	0	0	0	0	0	0	0	603	903	0
4598	6	37.005	90.6367	-720.906	105214	84613.3	18489.2	317.371	154.053	0	0	0	0	0	0	0	200	903	0	0	0	0	0	0	0	603	903	0
4598	7	35.4791	92.6204	-721.822	104573	85040.5	18031.5	317.814	155.126	0	0	0	0	0	0	0	200	903	0	0	0	0	0	0	0	603	903	0
4598	8	35.9369	92.3152	-724.874	104939	85101.6	18260.3	317.402	155.231	0	0	0	0	0	0	0	200	903	0	0	0	0	0	0	0	603	903	0
4598	9	35.6317	91.7049	-722.432	104207	85162.6	18077.2	317.883	155.756	0	0	0	0	0	0	0	200	903	0	0	0	0	0	0	0	603	903	0
4599	0	37.3102	92.6204	-727.315	104482	85406.7	18123	317.427	156.346	0	0	0	0	0	0	0	200	903	0	0	0	0	0	0	0	603	903	0
4599	1	36.0895	91.7049	-728.231	103749	85467.8	17939.9	317.364	157.533	0	0	0	0	0	0	0	200	903	0	0	0	0	0	0	0	603	903	0
4599	2	36.6998	91.8575	-729.451	104298	85528.8	18260.3	317.251	157.018	0	0	0	0	0	0	0	200	903	0	0	0	0	0	0	0	603	903	0
4599	3	36.5472	90.6367	-730.367	104390	86322.3	18397.7	318.19	157.072	0	0	0	0	0	0	0	200	903	0	0	0	0	0	0	0	603	903	0
4599	4	37.1576	91.2471	-732.198	105122	85956.1	18168.8	317.395	156.429	0	0	0	0	0	0	0	200	903	0	0	0	0	0	0	0	603	903	0
4599	5	36.6998	91.2471	-733.724	104298	86383.3	18260.3	317.733	157.851	0	0	0	0	0	0	0	200	903	0	0	0	0	0	0	0	603	903	0
4599	6	36.0895	91.8575	-735.25	104756	86566.4	17756.8	317.737	157.523	0	0	0	0	0	0	0	200	903	0	0	0	0	0	0	0	603	903	0
4599	7	36.8524	89.7212	-734.639	105122	86017.1	17939.9	317.088	156.906	0	0	0	0	0	0	0	200	903	0	0	0	0	0	0	0	603	903	0
4599	8	36.2421	91.0945	-737.386	103841	86871.6	18214.6	317.81	159.177	0	0	0	0	0	0	0	200	903	0	0	0	0	0	0	0	603	903	0
4599	9	36.5472	91.5523	-738.301	105031	86810.6	18214.6	317.582	157.74	0	0	0	0	0	0	0	200	903	0	0	0	0	0	0	0	603	903	0
4600	0	36.5472	90.179	-739.217	104298	87176.8	18123	317.931	158.907	0	0	0	0	0	0	0	200	903	0	0	0	0	0	0	0	603	903	0
4600	1	36.3946	89.7212	-740.743	103932	86993.7	18077.2	317.441	159.692	0	0	0	0	0	0	0	200	903	0	0	0	0	0	0	0	603	903	0
4600	2	37.6153	89.7212	-739.827	104848	87604	18535	318.411	158.281	0	0	0	0	0	0	0	200	903	0	0	0	0	0	0	0	603	903	0
4600	3	37.4628	89.416	-740.743	103932	87543	17985.7	318.183	159.692	0	0	0	0	0	0	0	200	903	0	0	0	0	0	0	0	603	903	0
4600	4	37.4628	90.6367	-740.438	104482	88214.4	18306.1	319.138	158.892	0	0	0	0	0	0	0	200	903	0	0	0	0	0	0	0	603	903	0
4600	5	37.005	89.1109	-742.574	104482	88153.4	18031.5	318.713	159.298	0	0	0	0	0	0	0	200	903	0	0	0	0	0	0	0	603	903	0
4600	6	38.2257	89.5686	-741.353	104207	88519.6	18077.2	319.403	159.437	0	0	0	0	0	0	0	200	903	0	0	0	0	0	0	0	603	903	0
4600	7	38.5309	89.2635	-745.015	104482	88641.6	18031.5	318.98	159.759	0	0	0	0	0	0	0	200	903	0	0	0	0	0	0	0	603	903	0
4600	8	38.9886	88.6531	-743.795	104298	88580.6	18168.8	319.093	159.775	0	0	0	0	0	0	0	200	903	0	0	0	0	0	0	0	603	903	0
4600	9	38.9886	89.2635	-746.541	103474	88946.8	18123	319.145	161.395	0	0	0	0	0	0	0	200	903	0	0	0	0	0	0	0	603	903	0
4601	0	39.9042	87.8902	-749.288	104115	88824.7	18214.6	318.546	161.048	0	0	0	0	0	0	0	200	903	0	0	0	0	0	0	0	603	903	0
4601	1	40.8197	88.1953	-749.288	103291	89007.8	18443.4	318.79	162.147	0	0	0	0	0	0	0	200	903	0	0	0	0	0	0	0	603	903	0
4601	2	40.3619	88.8057	-749.593	103108	89435.1	18351.9	319.312	162.448	0	0	0	0	0	0	0	200	903	0	0	0	0	0	0	0	603	903	0
4601	3	40.3619	88.0428	-749.288	103841	89435.1	18351.9	319.36	161.414	0	0	0	0	0	0	0	200	903	0	0	0	0	0	0	0	603	903	0
4601	4	40.9723	87.8902	-750.814	103017	89435.1	18214.6	319.118	162.793	0	0	0	0	0	0	0	200	903	0	0	0	0	0	0	0	603	903	0
4601	5	41.7352	87.1272	-751.424	103566	89679.2	18672.3	319.346	162.174	0	0	0	0	0	0	0	200	903	0	0	0	0	0	0	0	603	903	0
4601	6	41.43	86.6695	-746.846	103200	89923.3	18306.1	320.404	161.819	0	0	0	0	0	0	0	200	903	0	0	0	0	0	0	0	603	903	0
4601	7	41.43	87.1272	-753.56	101827	89740.3	18580.8	319.088	164.873	0	0	0	0	0	0	0	200	903	0	0	0	0	0	0	0	603	903	0
4601	8	42.4982	86.2117	-753.865	103200	89557.1	18260.3	318.797	163.106	0	0	0	0	0	0	0	200	903	0	0	0	0	0	0	0	603	903	0
4601	9	41.8878	85.9065	-755.391	102376	89984.4	18123	319.123	164.473	0	0	0	0	0	0	0	200	903	0	0	0	0	0	0	0	603	903	0
4602	0	42.9559	85.9065	-755.391	102284	90472.7	18443.4	319.769	164.594	0	0	0	0	0	0	0	200	903	0	0	0	0	0	0	0	603	903	0
4602	1	44.024	84.6858	-754.476	102193	90228.5	18763.9	319.591	164.551	0	0	0	0	0	0	0	200	903	0	0	0	0	0	0	0	603	903	0
4602	2	43.1085	84.6858	-754.781	101918	90594.8	18351.9	320.028	164.97	0	0	0	0	0	0	0	200	903	0	0	0	0	0	0	0	603	903	0
4602	3	44.3292	84.8384	-755.391	101918	90716.8	18718.1	320.092	165.079	0	0	0	0	0	0	0	200	903	0	0	0	0	0	0	0	603	903	0
4602	4	43.8714	83.6177	-755.086	102284	90472.7	18580.8	319.818	164.54	0	0	0	0	0	0	0	200	903	0	0	0	0	0	0	0	603	903	0
4602	5	43.8714	84.6858	-753.255	101460	90961	18718.1	320.757	165.304	0	0	0	0	0	0	0	200	903	0	0	0	0	0	0	0	603	903	0
4602	6	44.1766	83.7703	-757.527	101369	91022	18489.2	320.157	166.185	0	0	0	0	0	0	0	200	903	0	0	0	0	0	0	0	603	903	0
4602	7	44.3292	82.7022	-757.527	102101	90961	18214.6	320.076	165.218	0	0	0	0	0	0	0	200	903	0	0	0	0	0	0	0	603	903	0
4602	8	45.2447	83.3125	-757.527	101277	91144	18626.5	320.318	166.306	0	0	0	0	0	0	0	200	903	0	0	0	0	0	0	0	603	903	0
4602	9	45.2447	82.8548	-756.612	101827	91327.2	18443.4	320.705	165.418	0	0	0	0	0	0	0	200	903	0	0	0	0	0	0	0	603	903	0
4603	0	45.7025	82.8548	-759.664	101643	91571.3	18535	320.542	166.199	0	0	0	0	0	0	0	200	903	0	0	0	0	0	0	0	603	903	0
4603	1	45.0921	82.2444	-759.969	100819	91205.1	18443.4	320.012	167.337	0	0	0	0	0	0	0	200	903	0	0	0	0	0	0	0	603	903	0
4603	2	45.3973	81.6341	-760.579	101735	91327.2	18763.9	320.076	166.24	0	0	0	0	0	0	0	200	903	0	0	0	0	0	0	0	603	903	0
4603	3	44.787	81.3289	-760.579	100270	91876.5	18214.6	320.798	168.166	0	0	0	0	0	0	0	200	903	0	0	0	0	0	0	0	603	903	0
4603	4	45.3973	80.2608	-759.664	100819	91815.5	18351.9	320.863	167.284	0	0	0	0	0	0	0	200	903	0	0	0	0	0	0	0	603	903	0
4603	5	45.0921	81.0237	-760.274	100728	92181.7	18489.2	321.248	167.511	0	0	0	0	0	0	0	200	903	0	0	0	0	0	0	0	603	903	0
4603	6	45.3973	79.3452	-761.495	100087	91998.5	18580.8	320.813	168.565	0	0	0	0	0	0	0	200	903	0	0	0	0	0	0	0	603	903	0
4603	7	45.2447	80.8711	-762.41	100728	91937.5	18489.2	320.588	167.882	0	0	0	0	0	0	0	200	903	0	0	0	0	0	0	0	603	903	0
4603	8	45.3973	79.6504	-762.41	100179	92364.8	18443.4	321.148	168.603	0	0	0	0	0	0	0	200	903	0	0	0	0	0	0	0	603	903	0
4603	9	46.1603	80.1082	-761.495	99903.9	92364.8	18443.4	321.294	168.806	0	0	0	0	0	0	0	200	903	0	0	0	0	0	0	0	603	903	0
4604	0	46.4654	79.803	-760.274	99995.5	92486.8	18351.9	321.649	168.474	0	0	0	0	0	0	0	200	903	0	0	0	0	0	0	0	603	903	0
4604	1	45.7025	79.0401	-760.884	98988.4	92547.9	18580.8	321.632	169.903	0	0	0	0	0	0	0	200	903	0	0	0	0	0	0	0	603	903	0
4604	2	45.5499	79.4978	-760.579	99171.5	92670	18397.7	321.841	169.611	0	0	0	0	0	0	0	200	903	0	0	0	0	0	0	0	603	903	0
4604	3	46.4654	78.4297	-762.105	99446.1	92486.8	18535	321.357	169.511	0	0	0	0	0	0	0	200	903	0	0	0	0	0	0	0	603	903	0
4604	4	46.4654	78.1245	-758.443	98896.9	92914.1	18397.7	322.506	169.605	0	0	0	0	0	0	0	200	903	0	0	0	0	0	0	0	603	903	0
4604	5	46.9232	77.0564	-760.579	98713.7	92792	17939.9	322.002	170.212	0	0	0	0	0	0	0	200	903	0	0	0	0	0	0	0	603	903	0
4604	6	47.0758	77.8194	-761.19	98347.5	92914.1	18214.6	322.064	170.798	0	0	0	0	0	0	0	200	903	0	0	0	0	0	0	0	603	903	0
4604	7	46.7706	77.3616	-759.664	98256	92731	18260.3	322.068	170.659	0	0	0	0	0	0	0	200	903	0	0	0	0	0	0	0	603	903	0
4604	8	47.381	77.972	-760.884	98347.5	93158.2	18306.1	322.434	170.746	0	0	0	0	0	0	0	200	903	0	0	0	0	0	0	0	603	903	0
4604	9	48.1439	76.9038	-760.274	97889.8	92731	18306.1	321.97	171.244	0	0	0	0	0	0	0	200	903	0	0	0	0	0	0	0	603	903	0
4605	0	48.2965	77.0564	-762.715	97706.6	93280.3	18672.3	322.3	171.896	0	0	0	0	0	0	0	200	903	0	0	0	0	0	0	0	603	903	0
4605	1	47.9913	76.1409	-761.8	97798.2	93280.3	18168.8	322.447	171.622	0	0	0	0	0	0	0	200	903	0	0	0	0	0	0	0	603	903	0
4605	2	48.7543	75.2254	-762.105	97615.1	93158.2	18489.2	322.238	171.914	0	0	0	0	0	0	0	200	903	0	0	0	0	0	0	0	603	903	0
4605	3	47.9913	76.1409	-761.495	96974.2	93463.4	18214.6	322.737	172.653	0	0	0	0	0	0	0	200	903	0	0	0	0	0	0	0	603	903	0
4605	4	47.6861	75.8357	-759.969	96699.6	93341.3	18214.6	322.823	172.758	0	0	0	0	0	0	0	200	903	0	0	0	0	0	0	0	603	903	0
4605	5	48.2965	74.7676	-762.105	96516.4	93402.4	18397.7	322.558	173.355	0	0	0	0	0	0	0	200	903	0	0	0	0	0	0	0	603	903	0
4605	6	48.6017	73.5469	-761.19	96058.7	93585.5	18351.9	322.946	173.804	0	0	0	0	0	0	0	200	903	0	0	0	0	0	0	0	603	903	0
4605	7	48.9068	74.3098	-762.105	96424.9	93280.3	18214.6	322.398	173.476	0	0	0	0	0	0	0	200	903	0	0	0	0	0	0	0	603	903	0
4605	8	48.7543	74.1573	-760.579	95234.8	93646.5	18123	323.125	174.787	0	0	0	0	0	0	0	200	903	0	0	0	0	0	0	0	603	903	0
4605	9	47.9913	74.0047	-760.579	95967.2	93463.4	17985.7	322.884	173.824	0	0	0	0	0	0	0	200	903	0	0	0	0	0	0	0	603	903	0
4606	0	49.8224	72.784	-758.748	95784	92853	17985.7	322.377	173.76	0	0	0	0	0	0	0	200	903	0	0	0	0	0	0	0	603	903	0
4606	1	48.7543	72.784	-758.443	94227.7	93585.5	18214.6	323.392	175.762	0	0	0	0	0	0	0	200	903	0	0	0	0	0	0	0	603	903	0
4606	2	48.2965	72.9366	-758.748	95051.6	93707.5	17985.7	323.503	174.726	0	0	0	0	0	0	0	200	903	0	0	0	0	0	0	0	603	903	0
4606	3	48.6017	71.8684	-758.138	94410.7	93219.2	18031.5	322.958	175.47	0	0	0	0	0	0	0	200	903	0	0	0	0	0	0	0	603	903	0
4606	4	49.3646	71.8684	-753.865	94502.3	93463.4	17985.7	323.979	174.643	0	0	0	0	0	0	0	200	903	0	0	0	0	0	0	0	603	903	0
4606	5	48.1439	70.9529	-758.138	93953	93341.3	17756.8	323.119	176.074	0	0	0	0	0	0	0	200	903	0	0	0	0	0	0	0	603	903	0
4606	6	48.7543	70.8003	-756.612	94044.5	93585.5	17802.6	323.69	175.703	0	0	0	0	0	0	0	200	903	0	0	0	0	0	0	0	603	903	0
4606	7	48.6017	71.1055	-755.696	93129	93585.5	17848.3	323.84	176.764	0	0	0	0	0	0	0	200	903	0	0	0	0	0	0	0	603	903	0
4606	8	49.5172	70.0374	-755.086	93769.9	92975.1	17711	323.132	175.816	0	0	0	0	0	0	0	200	903	0	0	0	0	0	0	0	603	903	0
4606	9	48.7543	70.0374	-752.95	92762.8	93524.4	17756.8	324.211	176.801	0	0	0	0	0	0	0	200	903	0	0	0	0	0	0	0	603	903	0
4607	0	48.7543	70.19	-755.086	93129	93707.5	17436.4	324.102	176.664	0	0	0	0	0	0	0	200	903	0	0	0	0	0	0	0	603	903	0
4607	1	49.975	69.2744	-756.612	93220.5	92670	17711	322.48	176.792	0	0	0	0	0	0	0	200	903	0	0	0	0	0	0	0	603	903	0
4607	2	48.9068	69.1219	-755.086	92121.9	93890.7	17573.7	324.344	177.998	0	0	0	0	0	0	0	200	903	0	0	0	0	0	0	0	603	903	0
4607	3	48.6017	69.427	-753.865	93037.5	93707.5	17482.1	324.303	176.586	0	0	0	0	0	0	0	200	903	0	0	0	0	0	0	0	603	903	0
4607	4	48.6017	68.6641	-754.781	92213.5	93341.3	17665.2	323.667	177.827	0	0	0	0	0	0	0	200	903	0	0	0	0	0	0	0	603	903	0
4607	5	49.5172	68.3589	-751.729	91755.7	93585.5	17436.4	324.494	177.94	0	0	0	0	0	0	0	200	903	0	0	0	0	0	0	0	603	903	0
4607	6	48.1439	68.3589	-753.255	92213.5	93158.2	17344.8	323.674	177.58	0	0	0	0	0	0	0	200	903	0	0	0	0	0	0	0	603	903	0
4607	7	48.1439	66.3753	-751.729	91481	93158.2	17344.8	323.925	178.306	0	0	0	0	0	0	0	200	903	0	0	0	0	0	0	0	603	903	0
4607	8	47.9913	68.2063	-751.119	90840.2	93219.2	17299	324.107	179.06	0	0	0	0	0	0	0	200	903	0	0	0	0	0	0	0	603	903	0
4607	9	47.8387	66.3753	-750.814	91206.4	93402.4	16795.5	324.402	178.523	0	0	0	0	0	0	0	200	903	0	0	0	0	0	0	0	603	903	0
4608	0	48.9068	66.833	-748.677	90107.8	93585.5	16932.8	325.001	179.644	0	0	0	0	0	0	0	200	903	0	0	0	0	0	0	0	603	903	0
4608	1	47.9913	66.6805	-747.762	89741.6	93646.5	17024.4	325.236	179.986	0	0	0	0	0	0	0	200	903	0	0	0	0	0	0	0	603	903	0
4608	2	48.2965	65.4597	-747.151	89833.1	93341.3	16978.6	324.93	179.766	0	0	0	0	0	0	0	200	903	0	0	0	0	0	0	0	603	903	0
4608	3	48.9068	65.3072	-746.541	89192.2	93585.5	17115.9	325.359	180.526	0	0	0	0	0	0	0	200	903	0	0	0	0	0	0	0	603	903	0
4608	4	46.9232	65.9175	-743.184	88917.6	93646.5	16887	326.007	180.356	0	0	0	0	0	0	0	200	903	0	0	0	0	0	0	0	603	903	0
4608	5	48.6017	64.6968	-743.489	89283.8	93463.4	16932.8	325.709	179.913	0	0	0	0	0	0	0	200	903	0	0	0	0	0	0	0	603	903	0
4608	6	48.1439	65.002	-743.184	88276.7	93524.4	16887	325.843	181.218	0	0	0	0	0	0	0	200	903	0	0	0	0	0	0	0	603	903	0
4608	7	48.7543	65.1546	-743.184	88643	93402.4	16795.5	325.679	180.725	0	0	0	0	0	0	0	200	903	0	0	0	0	0	0	0	603	903	0
4608	8	48.1439	63.6287	-742.879	88551.4	93158.2	16887	325.402	180.8	0	0	0	0	0	0	0	200	903	0	0	0	0	0	0	0	603	903	0
4608	9	48.2965	64.239	-739.827	87269.7	92608.9	16795.5	325.176	182.041	0	0	0	0	0	0	0	200	903	0	0	0	0	0	0	0	603	903	0
4609	0	49.3646	63.6287	-741.353	88093.6	93280.3	16841.3	325.824	181.172	0	0	0	0	0	0	0	200	903	0	0	0	0	0	0	0	603	903	0
4609	1	47.9913	62.7132	-741.658	86628.8	93158.2	16475.1	325.608	183.196	0	0	0	0	0	0	0	200	903	0	0	0	0	0	0	0	603	903	0
4609	2	48.6017	62.2554	-740.438	86995	93341.3	16612.4	326.062	182.509	0	0	0	0	0	0	0	200	903	0	0	0	0	0	0	0	603	903	0
4609	3	47.6861	62.1028	-739.827	86995	93036.2	16566.6	325.754	182.412	0	0	0	0	0	0	0	200	903	0	0	0	0	0	0	0	603	903	0
4609	4	47.9913	61.9502	-734.944	86537.2	92608.9	16612.4	326.008	182.253	0	0	0	0	0	0	0	200	903	0	0	0	0	0	0	0	603	903	0
4609	5	47.381	61.4925	-737.996	86171	93158.2	16520.8	326.231	183.236	0	0	0	0	0	0	0	200	903	0	0	0	0	0	0	0	603	903	0
4609	6	47.0758	61.0347	-737.081	86628.8	92853	16108.8	325.974	182.47	0	0	0	0	0	0	0	200	903	0	0	0	0	0	0	0	603	903	0
4609	7	47.0758	60.2718	-736.165	85438.6	92731	16200.4	325.965	183.941	0	0	0	0	0	0	0	200	903	0	0	0	0	0	0	0	603	903	0
4609	8	47.2284	60.5769	-734.029	85713.3	92731	16154.6	326.331	183.229	0	0	0	0	0	0	0	200	903	0	0	0	0	0	0	0	603	903	0
4609	9	47.5336	59.5088	-733.113	84706.2	92670	16337.7	326.406	184.457	0	0	0	0	0	0	0	200	903	0	0	0	0	0	0	0	603	903	0
4610	0	46.618	59.0511	-731.893	84248.4	92608.9	16108.8	326.533	184.89	0	0	0	0	0	0	0	200	903	0	0	0	0	0	0	0	603	903	0
4610	1	46.4654	59.3562	-731.282	84614.6	92731	16017.3	326.806	184.293	0	0	0	0	0	0	0	200	903	0	0	0	0	0	0	0	603	903	0
4610	2	46.1603	57.9829	-728.841	83973.8	92242.7	15696.9	326.561	184.785	0	0	0	0	0	0	0	200	903	0	0	0	0	0	0	0	603	903	0
4610	3	48.1439	58.7459	-728.231	83790.6	92486.8	15376.4	327.002	184.939	0	0	0	0	0	0	0	200	903	0	0	0	0	0	0	0	603	903	0
4610	4	47.381	57.8304	-728.231	83882.2	92425.8	15696.9	326.918	184.814	0	0	0	0	0	0	0	200	903	0	0	0	0	0	0	0	603	903	0
4610	5	46.7706	57.6778	-725.789	83516	91998.5	15513.8	326.757	184.931	0	0	0	0	0	0	0	200	903	0	0	0	0	0	0	0	603	903	0
4610	6	46.9232	56.7622	-725.484	83607.6	92303.7	15559.5	327.231	184.756	0	0	0	0	0	0	0	200	903	0	0	0	0	0	0	0	603	903	0
4610	7	46.0077	56.1519	-724.874	83332.9	91815.5	15284.9	326.664	185.038	0	0	0	0	0	0	0	200	903	0	0	0	0	0	0	0	603	903	0
4610	8	46.9232	56.7622	-722.737	82234.2	92059.6	15010.2	327.376	186.218	0	0	0	0	0	0	0	200	903	0	0	0	0	0	0	0	603	903	0
4610	9	46.3129	56.1519	-723.348	82508.9	91998.5	15330.6	327.184	185.935	0	0	0	0	0	0	0	200	903	0	0	0	0	0	0	0	603	903	0
4611	0	46.618	55.6941	-722.127	82508.9	91815.5	15376.4	327.146	185.742	0	0	0	0	0	0	0	200	903	0	0	0	0	0	0	0	603	903	0
4611	1	46.4654	55.6941	-721.517	82142.7	91205.1	15101.8	326.408	186.153	0	0	0	0	0	0	0	200	903	0	0	0	0	0	0	0	603	903	0
4611	2	46.3129	54.626	-719.686	81135.6	91693.4	15239.1	327.408	187.262	0	0	0	0	0	0	0	200	903	0	0	0	0	0	0	0	603	903	0
4611	3	45.7025	54.4734	-716.634	81318.7	91754.4	14781.3	328.035	186.527	0	0	0	0	0	0	0	200	903	0	0	0	0	0	0	0	603	903	0
4611	4	46.0077	55.0838	-713.582	80952.5	91571.3	14735.6	328.326	186.555	0	0	0	0	0	0	0	200	903	0	0	0	0	0	0	0	603	903	0
4611	5	45.7025	53.7105	-717.244	81318.7	91571.3	15101.8	327.671	186.623	0	0	0	0	0	0	0	200	903	0	0	0	0	0	0	0	603	903	0
4611	6	45.5499	53.2527	-715.413	80494.7	91388.2	14781.3	327.742	187.485	0	0	0	0	0	0	0	200	903	0	0	0	0	0	0	0	603	903	0
4611	7	46.0077	53.7105	-715.108	80860.9	91266.1	14918.7	327.626	186.925	0	0	0	0	0	0	0	200	903	0	0	0	0	0	0	0	603	903	0
4611	8	45.5499	52.9475	-713.582	80494.7	91144	14415.1	327.728	187.196	0	0	0	0	0	0	0	200	903	0	0	0	0	0	0	0	603	903	0
4611	9	45.5499	53.2527	-711.141	79670.7	91144	14918.7	328.166	187.968	0	0	0	0	0	0	0	200	903	0	0	0	0	0	0	0	603	903	0
4612	0	44.9396	52.795	-711.141	79762.3	90594.8	14506.7	327.394	187.839	0	0	0	0	0	0	0	200	903	0	0	0	0	0	0	0	603	903	0
4612	1	44.787	51.2691	-708.089	79579.2	91022	14598.2	328.546	187.614	0	0	0	0	0	0	0	200	903	0	0	0	0	0	0	0	603	903	0
4612	2	45.7025	51.4217	-708.089	78755.3	90655.8	14415.1	328.029	188.778	0	0	0	0	0	0	0	200	903	0	0	0	0	0	0	0	603	903	0
4612	3	45.2447	50.9639	-707.784	78938.3	90655.8	14598.2	328.084	188.471	0	0	0	0	0	0	0	200	903	0	0	0	0	0	0	0	603	903	0
4612	4	46.1603	50.3535	-705.037	78938.3	90961	14506.7	329.016	188.037	0	0	0	0	0	0	0	200	903	0	0	0	0	0	0	0	603	903	0
4612	5	45.5499	50.9639	-705.648	78114.4	90533.7	14232	328.299	189.301	0	0	0	0	0	0	0	200	903	0	0	0	0	0	0	0	603	903	0
4612	6	46.0077	47.607	-704.122	78846.8	90655.8	14369.3	328.75	188.021	0	0	0	0	0	0	0	200	903	0	0	0	0	0	0	0	603	903	0
4612	7	45.7025	49.1328	-702.596	77565	90411.6	14140.5	328.682	189.602	0	0	0	0	0	0	0	200	903	0	0	0	0	0	0	0	603	903	0
4612	8	46.4654	49.1328	-705.037	77107.3	89984.4	14232	327.631	190.634	0	0	0	0	0	0	0	200	903	0	0	0	0	0	0	0	603	903	0
4612	9	46.4654	48.2173	-701.985	76924.2	90289.5	14186.2	328.62	190.419	0	0	0	0	0	0	0	200	903	0	0	0	0	0	0	0	603	903	0
4613	0	45.2447	47.607	-699.239	76649.5	89984.4	14048.9	328.689	190.381	0	0	0	0	0	0	0	200	903	0	0	0	0	0	0	0	603	903	0
4613	1	45.5499	48.2173	-701.07	76008.6	90045.4	13865.8	328.44	191.582	0	0	0	0	0	0	0	200	903	0	0	0	0	0	0	0	603	903	0
4613	2	45.2447	47.1492	-695.882	77015.8	89984.4	13911.6	329.31	189.326	0	0	0	0	0	0	0	200	903	0	0	0	0	0	0	0	603	903	0
4613	3	44.3292	47.3018	-698.629	76832.6	89862.3	13682.7	328.627	190.024	0	0	0	0	0	0	0	200	903	0	0	0	0	0	0	0	603	903	0
4613	4	44.787	46.6914	-697.713	76741.1	89374.1	13682.7	328.096	190.011	0	0	0	0	0	0	0	200	903	0	0	0	0	0	0	0	603	903	0
4613	5	44.3292	43.7923	-697.103	76558	89496.1	13545.4	328.383	190.177	0	0	0	0	0	0	0	200	903	0	0	0	0	0	0	0	603	903	0
4613	6	44.024	45.9285	-695.882	75550.9	89618.2	13499.6	328.784	191.431	0	0	0	0	0	0	0	200	903	0	0	0	0	0	0	0	603	903	0
4613	7	44.1766	44.4026	-690.694	76283.3	88824.7	13545.4	328.602	189.556	0	0	0	0	0	0	0	200	903	0	0	0	0	0	0	0	603	903	0
4613	8	44.6344	44.25	-691.915	75184.7	89252	13270.7	328.993	191.338	0	0	0	0	0	0	0	200	903	0	0	0	0	0	0	0	603	903	0
4613	9	42.8033	43.0293	-690.694	75093.1	88946.8	13133.4	328.779	191.279	0	0	0	0	0	0	0	200	903	0	0	0	0	0	0	0	603	903	0
4614	0	43.4137	43.7923	-690.084	75367.8	88763.7	13133.4	328.627	190.785	0	0	0	0	0	0	0	200	903	0	0	0	0	0	0	0	603	903	0
4614	1	42.8033	42.8767	-685.201	74543.8	88702.6	13179.2	329.455	191.209	0	0	0	0	0	0	0	200	903	0	0	0	0	0	0	0	603	903	0
4614	2	43.7189	43.1819	-686.422	75184.7	88519.6	12996	328.958	190.469	0	0	0	0	0	0	0	200	903	0	0	0	0	0	0	0	603	903	0
4614	3	43.2611	41.8086	-687.337	74818.5	88458.5	12950.3	328.697	191.147	0	0	0	0	0	0	0	200	903	0	0	0	0	0	0	0	603	903	0
4614	4	42.9559	42.8767	-685.201	73994.5	88763.7	12401	329.544	192.011	0	0	0	0	0	0	0	200	903	0	0	0	0	0	0	0	603	903	0
4614	5	42.8033	42.1138	-685.506	74910	88275.4	12492.5	328.774	190.723	0	0	0	0	0	0	0	200	903	0	0	0	0	0	0	0	603	903	0
4614	6	43.2611	41.656	-683.98	73536.7	88092.3	12629.8	328.794	192.487	0	0	0	0	0	0	0	200	903	0	0	0	0	0	0	0	603	903	0
4614	7	42.8033	41.8086	-683.065	73719.9	88519.6	12584.1	329.592	192.075	0	0	0	0	0	0	0	200	903	0	0	0	0	0	0	0	603	903	0
4614	8	42.4982	40.5879	-682.454	73078.9	87970.2	12446.7	328.903	192.917	0	0	0	0	0	0	0	200	903	0	0	0	0	0	0	0	603	903	0
4614	9	42.8033	40.4353	-681.234	72895.8	87787.1	12309.4	328.865	192.994	0	0	0	0	0	0	0	200	903	0	0	0	0	0	0	0	603	903	0
4615	0	42.9559	39.5198	-678.182	72987.4	87970.2	12217.8	329.715	192.378	0	0	0	0	0	0	0	200	903	0	0	0	0	0	0	0	603	903	0
4615	1	42.4982	39.5198	-679.402	73445.2	87604	12172.1	328.943	191.897	0	0	0	0	0	0	0	200	903	0	0	0	0	0	0	0	603	903	0
4615	2	41.8878	38.6043	-677.877	72804.3	87909.2	12034.7	329.683	192.599	0	0	0	0	0	0	0	200	903	0	0	0	0	0	0	0	603	903	0
4615	3	41.7352	39.3672	-675.435	73078.9	87604	12080.5	329.7	191.805	0	0	0	0	0	0	0	200	903	0	0	0	0	0	0	0	603	903	0
4615	4	41.5826	38.6043	-675.74	72621.2	87359.9	12172.1	329.28	192.531	0	0	0	0	0	0	0	200	903	0	0	0	0	0	0	0	603	903	0
4615	5	42.4982	38.2991	-671.773	71614.1	87481.9	11714.3	330.225	193.395	0	0	0	0	0	0	0	200	903	0	0	0	0	0	0	0	603	903	0
4615	6	40.9723	37.9939	-672.078	72621.2	87054.7	11668.5	329.531	191.945	0	0	0	0	0	0	0	200	903	0	0	0	0	0	0	0	603	903	0
4615	7	41.1249	37.3836	-671.468	72712.7	86993.7	11577	329.557	191.711	0	0	0	0	0	0	0	200	903	0	0	0	0	0	0	0	603	903	0
4615	8	40.8197	37.231	-668.416	71522.6	86749.5	11439.7	329.784	192.997	0	0	0	0	0	0	0	200	903	0	0	0	0	0	0	0	603	903	0
4615	9	40.5145	36.468	-664.144	71797.2	86627.4	11348.1	330.435	191.895	0	0	0	0	0	0	0	200	903	0	0	0	0	0	0	0	603	903	0
4616	0	40.2093	35.7051	-667.501	70973.2	86261.2	11256.5	329.23	193.673	0	0	0	0	0	0	0	200	903	0	0	0	0	0	0	0	603	903	0
4616	1	41.1249	35.8577	-665.67	71064.8	86566.4	10844.6	330.044	193.243	0	0	0	0	0	0	0	200	903	0	0	0	0	0	0	0	603	903	0
4616	2	40.6671	34.637	-664.449	70607	86200.2	11210.8	329.732	193.736	0	0	0	0	0	0	0	200	903	0	0	0	0	0	0	0	603	903	0
4616	3	41.2775	33.8741	-667.195	70698.6	86017.1	10981.9	328.923	194.036	0	0	0	0	0	0	0	200	903	0	0	0	0	0	0	0	603	903	0
4616	4	40.8197	34.1792	-663.839	70424	86017.1	11027.7	329.575	193.914	0	0	0	0	0	0	0	200	903	0	0	0	0	0	0	0	603	903	0
4616	5	40.0567	33.1111	-662.313	70698.6	85711.9	10524.1	329.413	193.255	0	0	0	0	0	0	0	200	903	0	0	0	0	0	0	0	603	903	0
4616	6	40.5145	32.8059	-662.007	70149.3	85589.9	10981.9	329.288	194.036	0	0	0	0	0	0	0	200	903	0	0	0	0	0	0	0	603	903	0
4616	7	38.9886	32.3482	-660.176	70790.2	85284.7	10753	329.185	192.771	0	0	0	0	0	0	0	200	903	0	0	0	0	0	0	0	603	903	0
4616	8	39.9042	30.0594	-653.768	70424	85040.5	10569.9	330.078	192.28	0	0	0	0	0	0	0	200	903	0	0	0	0	0	0	0	603	903	0
4616	9	39.2938	31.7378	-657.735	69599.9	84857.5	10295.2	329.015	194.182	0	0	0	0	0	0	0	200	903	0	0	0	0	0	0	0	603	903	0
4617	0	38.3783	30.5171	-656.819	70332.4	84613.3	10020.6	328.823	192.92	0	0	0	0	0	0	0	200	903	0	0	0	0	0	0	0	603	903	0
4617	1	38.5309	29.7542	-655.599	69508.4	84369.2	10295.2	328.69	193.977	0	0	0	0	0	0	0	200	903	0	0	0	0	0	0	0	603	903	0
4617	2	38.2257	29.9068	-654.683	69050.6	84308.1	10020.6	328.777	194.528	0	0	0	0	0	0	0	200	903	0	0	0	0	0	0	0	603	903	0
4617	3	37.9205	28.8387	-651.631	69050.6	84247.1	9700.15	329.286	194.034	0	0	0	0	0	0	0	200	903	0	0	0	0	0	0	0	603	903	0
4617	4	39.4464	27.7705	-651.326	68776	84002.9	9562.82	328.972	194.406	0	0	0	0	0	0	0	200	903	0	0	0	0	0	0	0	603	903	0
4617	5	37.1576	28.0757	-651.326	69142.2	83758.8	9379.71	328.597	193.844	0	0	0	0	0	0	0	200	903	0	0	0	0	0	0	0	603	903	0
4617	6	36.8524	27.3128	-649.495	69691.5	83941.9	9333.94	329.242	192.699	0	0	0	0	0	0	0	200	903	0	0	0	0	0	0	0	603	903	0
4617	7	37.1576	27.3128	-647.359	68318.2	83514.6	8967.73	329.008	194.466	0	0	0	0	0	0	0	200	903	0	0	0	0	0	0	0	603	903	0
4617	8	35.7843	26.3972	-643.087	69416.8	83758.8	9242.38	330.245	192.057	0	0	0	0	0	0	0	200	903	0	0	0	0	0	0	0	603	903	0
4617	9	36.8524	25.3291	-644.918	69416.8	83392.6	8967.73	329.307	192.363	0	0	0	0	0	0	0	200	903	0	0	0	0	0	0	0	603	903	0
4618	0	36.3946	25.4817	-644.918	68959.1	83331.5	8921.95	329.213	193.073	0	0	0	0	0	0	0	200	903	0	0	0	0	0	0	0	603	903	0
4618	1	35.6317	24.261	-644.307	68959.1	83209.5	8555.74	329.146	192.972	0	0	0	0	0	0	0	200	903	0	0	0	0	0	0	0	603	903	0
4618	2	36.3946	23.8033	-643.392	68867.5	83026.4	8738.84	329.045	192.962	0	0	0	0	0	0	0	200	903	0	0	0	0	0	0	0	603	903	0
4618	3	36.6998	23.8033	-644.612	68501.3	83026.4	8326.86	328.8	193.733	0	0	0	0	0	0	0	200	903	0	0	0	0	0	0	0	603	903	0
4618	4	35.3265	22.7351	-642.476	69691.5	82355	8464.19	328.184	191.527	0	0	0	0	0	0	0	200	903	0	0	0	0	0	0	0	603	903	0
4618	5	35.1739	22.5825	-642.171	68867.5	82538.1	8281.08	328.53	192.758	0	0	0	0	0	0	0	200	903	0	0	0	0	0	0	0	603	903	0
4618	6	35.1739	22.43	-638.509	68959.1	82355	8052.2	328.98	192	0	0	0	0	0	0	0	200	903	0	0	0	0	0	0	0	603	903	0
4618	7	34.411	20.2937	-639.73	69142.2	82477	8097.98	328.925	191.92	0	0	0	0	0	0	0	200	903	0	0	0	0	0	0	0	603	903	0
4618	8	34.2584	20.7515	-639.424	68501.3	82110.8	7914.87	328.414	192.87	0	0	0	0	0	0	0	200	903	0	0	0	0	0	0	0	603	903	0
4618	9	34.2584	20.1411	-639.119	68776	82477	8052.2	329.048	192.389	0	0	0	0	0	0	0	200	903	0	0	0	0	0	0	0	603	903	0
4619	0	34.2584	19.5308	-638.814	68318.2	81500.5	7502.88	327.581	193.055	0	0	0	0	0	0	0	200	903	0	0	0	0	0	0	0	603	903	0
4619	1	35.1739	17.8523	-635.762	67768.9	81927.7	7548.66	328.865	193.405	0	0	0	0	0	0	0	200	903	0	0	0	0	0	0	0	603	903	0
4619	2	34.411	18.1575	-633.931	68592.9	81927.7	7502.88	329.238	191.798	0	0	0	0	0	0	0	200	903	0	0	0	0	0	0	0	603	903	0
4619	3	33.9532	18.3101	-634.542	67952	81988.8	7182.45	329.209	192.912	0	0	0	0	0	0	0	200	903	0	0	0	0	0	0	0	603	903	0
4619	4	33.8006	18.3101	-631.795	68043.5	81988.8	6999.34	329.771	192.301	0	0	0	0	0	0	0	200	903	0	0	0	0	0	0	0	603	903	0
4619	5	34.411	16.3264	-631.185	68226.7	81378.4	7045.12	328.93	191.907	0	0	0	0	0	0	0	200	903	0	0	0	0	0	0	0	603	903	0
4619	6	34.411	16.9368	-631.795	67768.9	81866.7	6953.57	329.578	192.736	0	0	0	0	0	0	0	200	903	0	0	0	0	0	0	0	603	903	0
4619	7	34.1058	16.1739	-630.88	67585.8	81439.4	6862.01	329.089	192.871	0	0	0	0	0	0	0	200	903	0	0	0	0	0	0	0	603	903	0
4619	8	33.8006	15.4109	-630.574	67677.3	81561.5	6587.36	329.345	192.674	0	0	0	0	0	0	0	200	903	0	0	0	0	0	0	0	603	903	0
4619	9	34.5636	14.4954	-631.185	67128.1	81439.4	6541.58	329.026	193.648	0	0	0	0	0	0	0	200	903	0	0	0	0	0	0	0	603	903	0
4620	0	34.7162	14.0376	-629.659	67494.3	80951.2	6404.25	328.564	192.808	0	0	0	0	0	0	0	200	903	0	0	0	0	0	0	0	603	903	0
4620	1	33.3429	13.1221	-629.354	66944.9	81256.3	6450.03	329.111	193.629	0	0	0	0	0	0	0	200	903	0	0	0	0	0	0	0	603	903	0
4620	2	33.4955	14.0376	-628.743	67311.1	81134.3	6266.92	329.042	192.943	0	0	0	0	0	0	0	200	903	0	0	0	0	0	0	0	603	903	0
4620	3	34.8688	11.5962	-625.692	67311.1	80523.9	6312.7	328.696	192.421	0	0	0	0	0	0	0	200	903	0	0	0	0	0	0	0	603	903	0
4620	4	33.3429	12.6643	-628.438	66761.9	81012.2	6541.58	328.91	193.765	0	0	0	0	0	0	0	200	903	0	0	0	0	0	0	0	603	903	0
4620	5	33.6481	11.9014	-628.133	67311.1	80829.1	6175.37	328.682	192.839	0	0	0	0	0	0	0	200	903	0	0	0	0	0	0	0	603	903	0
4620	6	33.0377	11.4436	-626.607	66578.7	80707	6129.59	328.8	193.747	0	0	0	0	0	0	0	200	903	0	0	0	0	0	0	0	603	903	0
4620	7	32.7325	12.054	-627.217	66578.7	80829.1	5763.38	328.869	193.851	0	0	0	0	0	0	0	200	903	0	0	0	0	0	0	0	603	903	0
4620	8	33.3429	10.5281	-624.776	67219.6	80768.1	6083.82	329.275	192.41	0	0	0	0	0	0	0	200	903	0	0	0	0	0	0	0	603	903	0
4620	9	32.4274	10.6807	-623.86	66212.5	80401.9	5671.83	328.878	193.867	0	0	0	0	0	0	0	200	903	0	0	0	0	0	0	0	603	903	0
4621	0	32.7325	10.0703	-623.86	66944.9	80585	5763.38	329.171	192.692	0	0	0	0	0	0	0	200	903	0	0	0	0	0	0	0	603	903	0
4621	1	32.8851	9.15481	-622.945	66944.9	80035.6	5534.5	328.479	192.535	0	0	0	0	0	0	0	200	903	0	0	0	0	0	0	0	603	903	0
4621	2	32.7325	9.76517	-620.809	66578.7	80401.9	5671.83	329.512	192.755	0	0	0	0	0	0	0	200	903	0	0	0	0	0	0	0	603	903	0
4621	3	33.1903	8.54446	-623.86	66670.3	79669.4	5534.5	327.704	193.133	0	0	0	0	0	0	0	200	903	0	0	0	0	0	0	0	603	903	0
4621	4	32.5799	7.47635	-621.724	66212.5	79852.5	5122.51	328.437	193.502	0	0	0	0	0	0	0	200	903	0	0	0	0	0	0	0	603	903	0
4621	5	32.4274	7.78152	-620.809	66487.1	80096.7	5076.74	329.02	192.902	0	0	0	0	0	0	0	200	903	0	0	0	0	0	0	0	603	903	0
4621	6	32.7325	6.10306	-620.198	66487.1	79852.5	5076.74	328.753	192.797	0	0	0	0	0	0	0	200	903	0	0	0	0	0	0	0	603	903	0
4621	7	32.4274	6.56082	-620.504	66212.5	79852.5	5534.5	328.69	193.292	0	0	0	0	0	0	0	200	903	0	0	0	0	0	0	0	603	903	0
4621	8	33.8006	5.79788	-621.419	66670.3	79791.5	4618.97	328.402	192.713	0	0	0	0	0	0	0	200	903	0	0	0	0	0	0	0	603	903	0
4621	9	32.7325	5.64529	-620.809	66304	79974.6	4710.52	328.823	193.197	0	0	0	0	0	0	0	200	903	0	0	0	0	0	0	0	603	903	0
4622	0	32.2748	5.79788	-620.504	66029.4	79852.5	4573.2	328.69	193.587	0	0	0	0	0	0	0	200	903	0	0	0	0	0	0	0	603	903	0
4622	1	32.5799	5.34012	-620.809	65937.8	79730.5	4618.97	328.43	193.787	0	0	0	0	0	0	0	200	903	0	0	0	0	0	0	0	603	903	0
4622	2	32.8851	4.272	-621.419	65937.8	79852.5	4390.09	328.5	193.892	0	0	0	0	0	0	0	200	903	0	0	0	0	0	0	0	603	903	0
4622	3	32.2748	5.03494	-618.672	66487.1	79669.4	4573.2	328.775	192.533	0	0	0	0	0	0	0	200	903	0	0	0	0	0	0	0	603	903	0
4622	4	33.4955	3.50906	-618.062	66853.4	80157.7	4390.09	329.692	191.834	0	0	0	0	0	0	0	200	903	0	0	0	0	0	0	0	603	903	0
4622	5	32.1222	4.57718	-620.504	65388.5	79913.6	4206.98	328.788	194.62	0	0	0	0	0	0	0	200	903	0	0	0	0	0	0	0	603	903	0
4622	6	31.6644	3.81424	-618.672	66578.7	80096.7	4161.21	329.465	192.385	0	0	0	0	0	0	0	200	903	0	0	0	0	0	0	0	603	903	0
4622	7	31.5118	2.44095	-619.893	65937.8	80096.7	4252.76	329.21	193.63	0	0	0	0	0	0	0	200	903	0	0	0	0	0	0	0	603	903	0
4622	8	32.1222	3.20389	-618.978	65754.7	79913.6	4023.88	329.106	193.769	0	0	0	0	0	0	0	200	903	0	0	0	0	0	0	0	603	903	0
4622	9	32.4274	0.152129	-617.147	66670.3	79730.5	3932.33	329.192	191.97	0	0	0	0	0	0	0	200	903	0	0	0	0	0	0	0	603	903	0
4623	0	32.5799	1.22024	-617.452	65937.8	80157.7	3749.22	329.82	193.21	0	0	0	0	0	0	0	200	903	0	0	0	0	0	0	0	603	903	0
4623	1	31.817	1.67801	-617.757	65571.6	79974.6	3520.34	329.46	193.855	0	0	0	0	0	0	0	200	903	0	0	0	0	0	0	0	603	903	0
4623	2	31.9696	0.609892	-616.841	66212.5	79913.6	3657.67	329.553	192.659	0	0	0	0	0	0	0	200	903	0	0	0	0	0	0	0	603	903	0
4623	3	32.1222	0.76248	-617.147	65571.6	80340.8	3566.12	330.181	193.75	0	0	0	0	0	0	0	200	903	0	0	0	0	0	0	0	603	903	0
4623	4	32.1222	0.457305	-615.316	65846.3	79852.5	3520.34	329.775	192.988	0	0	0	0	0	0	0	200	903	0	0	0	0	0	0	0	603	903	0
4623	5	32.7325	-0.000459142	-617.757	66395.6	80157.7	3474.56	329.756	192.521	0	0	0	0	0	0	0	200	903	0	0	0	0	0	0	0	603	903	0
4623	6	32.5799	0.457305	-617.757	64930.8	79974.6	3428.79	329.46	194.893	0	0	0	0	0	0	0	200	903	0	0	0	0	0	0	0	603	903	0
4623	7	33.0377	-0.305635	-617.757	66029.4	80096.7	3245.68	329.657	193.114	0	0	0	0	0	0	0	200	903	0	0	0	0	0	0	0	603	903	0
4623	8	32.7325	-1.83151	-617.452	65663.2	80218.7	3337.23	329.919	193.655	0	0	0	0	0	0	0	200	903	0	0	0	0	0	0	0	603	903	0
4623	9	32.4274	-1.06857	-618.672	65297	80218.7	3108.35	329.663	194.456	0	0	0	0	0	0	0	200	903	0	0	0	0	0	0	0	603	903	0
4624	0	33.0377	-2.59445	-618.367	65571.6	80157.7	3383.01	329.628	193.96	0	0	0	0	0	0	0	200	903	0	0	0	0	0	0	0	603	903	0
4624	1	33.1903	-3.2048	-619.893	65113.9	80218.7	3062.58	329.407	194.96	0	0	0	0	0	0	0	200	903	0	0	0	0	0	0	0	603	903	0
4624	2	32.8851	-2.74704	-620.504	65388.5	80035.6	3108.35	328.985	194.62	0	0	0	0	0	0	0	200	903	0	0	0	0	0	0	0	603	903	0
4624	3	32.5799	-3.81516	-620.504	65754.7	79913.6	2879.47	328.788	194.03	0	0	0	0	0	0	0	200	903	0	0	0	0	0	0	0	603	903	0
4624	4	32.4274	-3.35739	-620.198	65754.7	79730.5	2513.26	328.556	193.978	0	0	0	0	0	0	0	200	903	0	0	0	0	0	0	0	603	903	0
4624	5	32.5799	-4.12033	-621.114	65937.8	79913.6	2787.92	328.662	193.839	0	0	0	0	0	0	0	200	903	0	0	0	0	0	0	0	603	903	0
4624	6	33.0377	-5.95139	-616.841	65663.2	80096.7	2604.81	329.85	193.549	0	0	0	0	0	0	0	200	903	0	0	0	0	0	0	0	603	903	0
4624	7	31.817	-4.73068	-621.419	65205.4	80523.9	2559.04	329.581	195.07	0	0	0	0	0	0	0	200	903	0	0	0	0	0	0	0	603	903	0
4624	8	31.9696	-4.42551	-621.114	65754.7	80157.7	2787.92	329.055	194.134	0	0	0	0	0	0	0	200	903	0	0	0	0	0	0	0	603	903	0
4624	9	33.1903	-6.25656	-621.724	65388.5	80218.7	2513.26	329.026	194.827	0	0	0	0	0	0	0	200	903	0	0	0	0	0	0	0	603	903	0
4625	0	31.5118	-7.0195	-622.335	65388.5	80401.9	2147.05	329.194	194.93	0	0	0	0	0	0	0	200	903	0	0	0	0	0	0	0	603	903	0
4625	1	32.1222	-7.32468	-623.555	66029.4	80462.9	2330.15	329.039	194.108	0	0	0	0	0	0	0	200	903	0	0	0	0	0	0	0	603	903	0
4625	2	32.8851	-7.0195	-620.809	66029.4	80707	2101.27	330.003	193.64	0	0	0	0	0	0	0	200	903	0	0	0	0	0	0	0	603	903	0
4625	3	31.9696	-6.86691	-622.029	66212.5	80890.1	2238.6	330.042	193.554	0	0	0	0	0	0	0	200	903	0	0	0	0	0	0	0	603	903	0
4625	4	32.2748	-8.39279	-622.64	66304	80523.9	2101.27	329.327	193.511	0	0	0	0	0	0	0	200	903	0	0	0	0	0	0	0	603	903	0
4625	5	31.817	-7.47727	-622.64	65388.5	81073.2	1918.17	330.209	194.982	0	0	0	0	0	0	0	200	903	0	0	0	0	0	0	0	603	903	0
4625	6	32.1222	-9.91867	-623.555	66761.9	81134.3	2055.5	330.116	192.934	0	0	0	0	0	0	0	200	903	0	0	0	0	0	0	0	603	903	0
4625	7	32.4274	-9.76608	-622.029	65297	81012.2	2101.27	330.239	195.026	0	0	0	0	0	0	0	200	903	0	0	0	0	0	0	0	603	903	0
4625	8	33.8006	-10.9868	-624.471	65846.3	81195.3	2009.72	330.023	194.557	0	0	0	0	0	0	0	200	903	0	0	0	0	0	0	0	603	903	0
4625	9	32.8851	-9.76608	-625.081	66029.4	81195.3	1735.06	329.896	194.367	0	0	0	0	0	0	0	200	903	0	0	0	0	0	0	0	603	903	0
4626	0	33.0377	-10.2238	-625.692	65205.4	81134.3	1689.28	329.671	195.787	0	0	0	0	0	0	0	200	903	0	0	0	0	0	0	0	603	903	0
4626	1	33.0377	-10.0713	-624.776	66120.9	81622.6	1414.63	330.643	194.169	0	0	0	0	0	0	0	200	903	0	0	0	0	0	0	0	603	903	0
4626	2	32.5799	-10.9868	-627.217	66029.4	81805.7	1460.4	330.426	194.726	0	0	0	0	0	0	0	200	903	0	0	0	0	0	0	0	603	903	0
4626	3	32.8851	-11.5971	-627.523	65480.1	81744.6	1506.18	330.266	195.653	0	0	0	0	0	0	0	200	903	0	0	0	0	0	0	0	603	903	0
4626	4	33.0377	-11.1394	-628.743	66029.4	81866.7	1185.74	330.207	194.982	0	0	0	0	0	0	0	200	903	0	0	0	0	0	0	0	603	903	0
4626	5	33.3429	-13.886	-629.964	65937.8	81866.7	1323.07	329.955	195.331	0	0	0	0	0	0	0	200	903	0	0	0	0	0	0	0	603	903	0
4626	6	33.0377	-12.2075	-630.269	65388.5	81988.8	1048.42	330.085	196.253	0	0	0	0	0	0	0	200	903	0	0	0	0	0	0	0	603	903	0
4626	7	33.0377	-12.9704	-628.438	66395.6	81134.3	1231.52	329.105	194.348	0	0	0	0	0	0	0	200	903	0	0	0	0	0	0	0	603	903	0
4626	8	33.3429	-13.2756	-631.49	65297	82171.9	1414.63	330.124	196.599	0	0	0	0	0	0	0	200	903	0	0	0	0	0	0	0	603	903	0
4626	9	32.8851	-13.5808	-631.49	65571.6	82232.9	1231.52	330.22	196.164	0	0	0	0	0	0	0	200	903	0	0	0	0	0	0	0	603	903	0
4627	0	33.0377	-14.1911	-632.711	65388.5	82599.1	956.862	330.548	196.653	0	0	0	0	0	0	0	200	903	0	0	0	0	0	0	0	603	903	0
4627	1	32.8851	-14.8015	-633.321	65022.3	82599.1	727.981	330.422	197.331	0	0	0	0	0	0	0	200	903	0	0	0	0	0	0	0	603	903	0
4627	2	34.5636	-14.4963	-632.1	66029.4	83331.5	865.31	331.833	195.54	0	0	0	0	0	0	0	200	903	0	0	0	0	0	0	0	603	903	0
4627	3	33.8006	-16.0222	-634.236	66029.4	83209.5	636.428	331.196	195.891	0	0	0	0	0	0	0	200	903	0	0	0	0	0	0	0	603	903	0
4627	4	34.1058	-16.7851	-634.542	65480.1	82660.1	773.757	330.268	196.807	0	0	0	0	0	0	0	200	903	0	0	0	0	0	0	0	603	903	0
4627	5	33.9532	-15.717	-634.847	66120.9	83453.6	499.099	331.455	195.847	0	0	0	0	0	0	0	200	903	0	0	0	0	0	0	0	603	903	0
4627	6	32.8851	-17.0903	-633.626	66029.4	83636.7	407.546	331.997	195.791	0	0	0	0	0	0	0	200	903	0	0	0	0	0	0	0	603	903	0
4627	7	35.9369	-17.0903	-637.593	65571.6	82721.2	727.981	329.74	197.158	0	0	0	0	0	0	0	200	903	0	0	0	0	0	0	0	603	903	0
4627	8	34.411	-17.0903	-638.509	65937.8	83514.6	270.217	330.796	196.732	0	0	0	0	0	0	0	200	903	0	0	0	0	0	0	0	603	903	0
4627	9	34.411	-18.1584	-638.509	65388.5	83636.7	315.993	330.988	197.592	0	0	0	0	0	0	0	200	903	0	0	0	0	0	0	0	603	903	0
4628	0	34.7162	-18.7688	-638.814	65571.6	83697.8	224.441	331.021	197.354	0	0	0	0	0	0	0	200	903	0	0	0	0	0	0	0	603	903	0
4628	1	34.1058	-19.0739	-639.73	65571.6	84002.9	132.888	331.31	197.501	0	0	0	0	0	0	0	200	903	0	0	0	0	0	0	0	603	903	0
4628	2	33.9532	-19.8369	-640.645	65571.6	84064	407.546	331.218	197.648	0	0	0	0	0	0	0	200	903	0	0	0	0	0	0	0	603	903	0
4628	3	35.4791	-19.0739	-642.781	65022.3	84247.1	41.3351	331.067	198.842	0	0	0	0	0	0	0	200	903	0	0	0	0	0	0	0	603	903	0
4628	4	34.8688	-20.2946	-644.612	66120.9	83697.8	-50.2177	329.842	197.425	0	0	0	0	0	0	0	200	903	0	0	0	0	0	0	0	603	903	0
4628	5	34.411	-20.2946	-644.307	66212.5	84247.1	-4.44129	330.756	197.235	0	0	0	0	0	0	0	200	903	0	0	0	0	0	0	0	603	903	0
4628	6	35.0213	-20.2946	-644.612	66212.5	84735.4	-4.44129	331.452	197.283	0	0	0	0	0	0	0	200	903	0	0	0	0	0	0	0	603	903	0
4628	7	34.2584	-21.6679	-645.528	66578.7	84674.3	-370.652	331.171	196.862	0	0	0	0	0	0	0	200	903	0	0	0	0	0	0	0	603	903	0
4628	8	34.8688	-21.5154	-642.171	66029.4	84674.3	-279.099	331.856	197.178	0	0	0	0	0	0	0	200	903	0	0	0	0	0	0	0	603	903	0
4628	9	33.9532	-21.9731	-646.749	66487.1	84796.4	-416.429	331.112	197.198	0	0	0	0	0	0	0	200	903	0	0	0	0	0	0	0	603	903	0
4629	0	34.411	-22.4309	-649.19	65846.3	85162.6	-462.205	331.183	198.572	0	0	0	0	0	0	0	200	903	0	0	0	0	0	0	0	603	903	0
4629	1	34.411	-23.3464	-649.495	65846.3	85284.7	-416.429	331.309	198.619	0	0	0	0	0	0	0	200	903	0	0	0	0	0	0	0	603	903	0
4629	2	34.2584	-23.1938	-649.19	66212.5	85711.9	-828.416	332.029	198.008	0	0	0	0	0	0	0	200	903	0	0	0	0	0	0	0	603	903	0
4629	3	34.1058	-23.3464	-649.19	66029.4	85589.9	-553.758	331.841	198.29	0	0	0	0	0	0	0	200	903	0	0	0	0	0	0	0	603	903	0
4629	4	36.0895	-23.6516	-650.106	66212.5	85773	-874.193	331.937	198.151	0	0	0	0	0	0	0	200	903	0	0	0	0	0	0	0	603	903	0
4629	5	34.8688	-23.499	-651.631	66487.1	86322.3	-782.64	332.471	197.968	0	0	0	0	0	0	0	200	903	0	0	0	0	0	0	0	603	903	0
4629	6	34.7162	-24.2619	-651.021	65480.1	86322.3	-599.534	332.595	199.419	0	0	0	0	0	0	0	200	903	0	0	0	0	0	0	0	603	903	0
4629	7	34.8688	-24.4145	-652.547	65754.7	86322.3	-919.969	332.285	199.234	0	0	0	0	0	0	0	200	903	0	0	0	0	0	0	0	603	903	0
4629	8	35.4791	-25.4826	-651.326	66578.7	86627.4	-1057.3	333.002	197.78	0	0	0	0	0	0	0	200	903	0	0	0	0	0	0	0	603	903	0
4629	9	34.7162	-25.6352	-654.073	65480.1	86566.4	-1194.63	332.35	199.889	0	0	0	0	0	0	0	200	903	0	0	0	0	0	0	0	603	903	0
4630	0	35.3265	-26.093	-653.463	66120.9	86627.4	-1286.18	332.567	198.814	0	0	0	0	0	0	0	200	903	0	0	0	0	0	0	0	603	903	0
4630	1	36.3946	-26.8559	-655.294	65571.6	86627.4	-1377.73	332.196	199.936	0	0	0	0	0	0	0	200	903	0	0	0	0	0	0	0	603	903	0
4630	2	36.3946	-27.4663	-656.209	65480.1	86932.6	-1194.63	332.477	200.215	0	0	0	0	0	0	0	200	903	0	0	0	0	0	0	0	603	903	0
4630	3	37.1576	-27.4663	-660.482	65205.4	87237.8	-1423.51	332.082	201.276	0	0	0	0	0	0	0	200	903	0	0	0	0	0	0	0	603	903	0
4630	4	36.8524	-27.4663	-659.261	65205.4	87848.1	-1331.96	333.253	201.093	0	0	0	0	0	0	0	200	903	0	0	0	0	0	0	0	603	903	0
4630	5	36.6998	-28.9922	-659.566	64930.8	87420.9	-1469.29	332.543	201.555	0	0	0	0	0	0	0	200	903	0	0	0	0	0	0	0	603	903	0
4630	6	37.1576	-28.9922	-660.482	65480.1	87543	-1331.96	332.544	200.86	0	0	0	0	0	0	0	200	903	0	0	0	0	0	0	0	603	903	0
4630	7	37.3102	-28.3818	-661.397	64930.8	88031.3	-1377.73	333.099	201.828	0	0	0	0	0	0	0	200	903	0	0	0	0	0	0	0	603	903	0
4630	8	36.8524	-29.1447	-663.228	65113.9	87909.2	-1515.06	332.548	201.823	0	0	0	0	0	0	0	200	903	0	0	0	0	0	0	0	603	903	0
4630	9	38.836	-30.0603	-662.313	65205.4	87726.1	-1377.73	332.454	201.549	0	0	0	0	0	0	0	200	903	0	0	0	0	0	0	0	603	903	0
4631	0	36.5472	-29.9077	-663.839	64747.6	88458.5	-1652.39	333.253	202.465	0	0	0	0	0	0	0	200	903	0	0	0	0	0	0	0	603	903	0
4631	1	37.4628	-30.518	-666.585	65388.5	88153.4	-1652.39	332.246	201.905	0	0	0	0	0	0	0	200	903	0	0	0	0	0	0	0	603	903	0
4631	2	37.3102	-30.6706	-665.975	65297	88763.7	-1927.05	333.284	201.953	0	0	0	0	0	0	0	200	903	0	0	0	0	0	0	0	603	903	0
4631	3	37.005	-30.6706	-667.501	64473	88885.8	-2018.6	333.162	203.411	0	0	0	0	0	0	0	200	903	0	0	0	0	0	0	0	603	903	0
4631	4	37.9205	-31.8913	-665.364	64930.8	88214.4	-1423.51	332.581	202.413	0	0	0	0	0	0	0	200	903	0	0	0	0	0	0	0	603	903	0
4631	5	38.0731	-32.6543	-667.501	64289.9	89068.8	-1972.83	333.436	203.686	0	0	0	0	0	0	0	200	903	0	0	0	0	0	0	0	603	903	0
4631	6	37.3102	-32.3491	-668.111	64106.8	89496.1	-2064.38	333.954	204.048	0	0	0	0	0	0	0	200	903	0	0	0	0	0	0	0	603	903	0
4631	7	37.7679	-33.7224	-668.111	64381.4	89007.8	-2201.71	333.223	203.637	0	0	0	0	0	0	0	200	903	0	0	0	0	0	0	0	603	903	0
4631	8	38.2257	-34.0276	-666.585	64564.5	89679.2	-2339.04	334.535	203.141	0	0	0	0	0	0	0	200	903	0	0	0	0	0	0	0	603	903	0
4631	9	37.7679	-35.5534	-670.247	63923.7	89435.1	-2155.93	333.436	204.627	0	0	0	0	0	0	0	200	903	0	0	0	0	0	0	0	603	903	0
4632	0	38.836	-34.3327	-671.773	64747.6	89679.2	-2293.26	333.496	203.617	0	0	0	0	0	0	0	200	903	0	0	0	0	0	0	0	603	903	0
4632	1	38.3783	-34.9431	-671.773	64106.8	90045.4	-2613.69	334.041	204.571	0	0	0	0	0	0	0	200	903	0	0	0	0	0	0	0	603	903	0
4632	2	38.836	-35.2483	-672.383	64289.9	90228.5	-2705.25	334.192	204.385	0	0	0	0	0	0	0	200	903	0	0	0	0	0	0	0	603	903	0
4632	3	39.9042	-36.0112	-678.182	64473	90350.6	-2705.25	333.225	204.933	0	0	0	0	0	0	0	200	903	0	0	0	0	0	0	0	603	903	0
4632	4	39.599	-35.4008	-675.435	64198.3	90716.8	-2934.13	334.309	204.953	0	0	0	0	0	0	0	200	903	0	0	0	0	0	0	0	603	903	0
4632	5	39.2938	-35.706	-676.961	64015.2	90716.8	-2384.81	334.006	205.437	0	0	0	0	0	0	0	200	903	0	0	0	0	0	0	0	603	903	0
4632	6	39.1412	-37.9948	-677.571	63923.7	90289.5	-2979.91	333.255	205.658	0	0	0	0	0	0	0	200	903	0	0	0	0	0	0	0	603	903	0
4632	7	39.4464	-36.3164	-678.182	63008.2	91449.2	-2934.13	334.845	207.093	0	0	0	0	0	0	0	200	903	0	0	0	0	0	0	0	603	903	0
4632	8	40.6671	-37.5371	-676.656	63465.9	91083	-3117.23	334.608	206.207	0	0	0	0	0	0	0	200	903	0	0	0	0	0	0	0	603	903	0
4632	9	39.4464	-38.3	-679.097	64106.8	91693.4	-2705.25	335.022	205.6	0	0	0	0	0	0	0	200	903	0	0	0	0	0	0	0	603	903	0
4633	0	39.4464	-37.9948	-679.402	63191.3	91693.4	-2979.91	334.962	206.99	0	0	0	0	0	0	0	200	903	0	0	0	0	0	0	0	603	903	0
4633	1	39.4464	-39.3681	-680.928	63740.6	91815.5	-3163.01	334.839	206.392	0	0	0	0	0	0	0	200	903	0	0	0	0	0	0	0	603	903	0
4633	2	39.9042	-38.7578	-681.539	62825.1	92364.8	-3437.67	335.524	207.819	0	0	0	0	0	0	0	200	903	0	0	0	0	0	0	0	603	903	0
4633	3	40.8197	-39.2155	-680.623	62550.4	92425.8	-3529.22	335.796	208.098	0	0	0	0	0	0	0	200	903	0	0	0	0	0	0	0	603	903	0
4633	4	40.3619	-39.9785	-680.928	61909.5	92303.7	-3529.22	335.556	209.081	0	0	0	0	0	0	0	200	903	0	0	0	0	0	0	0	603	903	0
4633	5	40.3619	-40.1311	-681.234	61909.5	92608.9	-3254.56	335.943	209.121	0	0	0	0	0	0	0	200	903	0	0	0	0	0	0	0	603	903	0
4633	6	40.8197	-41.9621	-682.759	62184.2	92731	-3620.77	335.818	208.922	0	0	0	0	0	0	0	200	903	0	0	0	0	0	0	0	603	903	0
4633	7	40.3619	-41.3518	-680.318	62367.3	92731	-3666.55	336.305	208.326	0	0	0	0	0	0	0	200	903	0	0	0	0	0	0	0	603	903	0
4633	8	41.8878	-41.1992	-684.285	61818	93219.2	-3483.45	336.229	209.661	0	0	0	0	0	0	0	200	903	0	0	0	0	0	0	0	603	903	0
4633	9	41.7352	-40.5888	-684.59	61543.3	93219.2	-3483.45	336.168	210.102	0	0	0	0	0	0	0	200	903	0	0	0	0	0	0	0	603	903	0
4634	0	41.8878	-42.2673	-685.811	61360.2	93402.4	-3575	336.193	210.529	0	0	0	0	0	0	0	200	903	0	0	0	0	0	0	0	603	903	0
4634	1	42.4982	-43.1828	-685.201	60994	93890.7	-3849.66	337.027	210.984	0	0	0	0	0	0	0	200	903	0	0	0	0	0	0	0	603	903	0
4634	2	42.9559	-42.4199	-688.558	60444.7	93524.4	-3849.66	335.827	212.216	0	0	0	0	0	0	0	200	903	0	0	0	0	0	0	0	603	903	0
4634	3	42.9559	-43.9458	-690.694	61360.2	93829.6	-3849.66	335.848	211.162	0	0	0	0	0	0	0	200	903	0	0	0	0	0	0	0	603	903	0
4634	4	42.9559	-44.2509	-690.084	60810.9	93951.7	-3986.99	336.145	211.879	0	0	0	0	0	0	0	200	903	0	0	0	0	0	0	0	603	903	0
4634	5	42.4982	-43.6406	-690.694	61085.5	94195.8	-4261.65	336.378	211.559	0	0	0	0	0	0	0	200	903	0	0	0	0	0	0	0	603	903	0
4634	6	43.4137	-45.0139	-687.032	60719.3	94317.9	-3849.66	337.283	211.621	0	0	0	0	0	0	0	200	903	0	0	0	0	0	0	0	603	903	0
4634	7	43.1085	-44.7087	-691.609	59529.2	94562	-4307.42	336.728	213.927	0	0	0	0	0	0	0	200	903	0	0	0	0	0	0	0	603	903	0
4634	8	42.4982	-45.0139	-693.746	60170	94623.1	-4215.87	336.395	213.268	0	0	0	0	0	0	0	200	903	0	0	0	0	0	0	0	603	903	0
4634	9	42.9559	-46.2346	-692.525	60078.5	94134.8	-4261.65	335.93	213.247	0	0	0	0	0	0	0	200	903	0	0	0	0	0	0	0	603	903	0
4635	0	42.9559	-45.4716	-694.356	59437.6	94989.3	-4536.3	336.802	214.399	0	0	0	0	0	0	0	200	903	0	0	0	0	0	0	0	603	903	0
4635	1	42.8033	-47.9131	-693.135	60170	94867.2	-4582.08	336.867	213.192	0	0	0	0	0	0	0	200	903	0	0	0	0	0	0	0	603	903	0
4635	2	44.3292	-46.9975	-694.051	59254.5	95111.4	-4673.63	337.038	214.625	0	0	0	0	0	0	0	200	903	0	0	0	0	0	0	0	603	903	0
4635	3	43.7189	-47.9131	-695.577	59071.4	95782.7	-4398.98	337.703	215.076	0	0	0	0	0	0	0	200	903	0	0	0	0	0	0	0	603	903	0
4635	4	43.7189	-47.6079	-694.356	59712.3	95294.4	-4810.96	337.241	214.003	0	0	0	0	0	0	0	200	903	0	0	0	0	0	0	0	603	903	0
4635	5	43.8714	-47.9131	-695.882	58705.2	95904.8	-4810.96	337.818	215.639	0	0	0	0	0	0	0	200	903	0	0	0	0	0	0	0	603	903	0
4635	6	43.4137	-47.6079	-695.882	58796.7	96148.9	-5177.17	338.168	215.508	0	0	0	0	0	0	0	200	903	0	0	0	0	0	0	0	603	903	0
4635	7	45.2447	-48.3708	-697.408	59071.4	96148.9	-4856.74	337.866	215.299	0	0	0	0	0	0	0	200	903	0	0	0	0	0	0	0	603	903	0
4635	8	44.4818	-48.0656	-698.629	57789.6	96576.2	-4765.19	338.237	217.281	0	0	0	0	0	0	0	200	903	0	0	0	0	0	0	0	603	903	0
4635	9	44.4818	-48.5234	-699.544	58613.6	96820.3	-4994.07	338.405	216.212	0	0	0	0	0	0	0	200	903	0	0	0	0	0	0	0	603	903	0
4636	0	44.9396	-49.8967	-700.765	58705.2	96820.3	-5177.17	338.164	216.227	0	0	0	0	0	0	0	200	903	0	0	0	0	0	0	0	603	903	0
4636	1	45.0921	-49.2863	-701.375	57606.5	97247.6	-5222.95	338.653	217.866	0	0	0	0	0	0	0	200	903	0	0	0	0	0	0	0	603	903	0
4636	2	46.1603	-51.1174	-702.596	58522.1	97247.6	-5222.95	338.412	216.706	0	0	0	0	0	0	0	200	903	0	0	0	0	0	0	0	603	903	0
4636	3	45.7025	-50.8122	-704.122	57331.9	97125.5	-5451.83	337.939	218.577	0	0	0	0	0	0	0	200	903	0	0	0	0	0	0	0	603	903	0
4636	4	45.7025	-51.27	-705.648	57148.8	97674.8	-5497.61	338.419	219.012	0	0	0	0	0	0	0	200	903	0	0	0	0	0	0	0	603	903	0
4636	5	45.2447	-51.4226	-707.173	57698.1	97796.9	-5406.06	338.293	218.41	0	0	0	0	0	0	0	200	903	0	0	0	0	0	0	0	603	903	0
4636	6	45.8551	-51.4226	-704.427	56691	97857.9	-5543.38	338.918	219.522	0	0	0	0	0	0	0	200	903	0	0	0	0	0	0	0	603	903	0
4636	7	44.1766	-51.27	-706.868	57057.2	98224.1	-5726.49	338.957	219.282	0	0	0	0	0	0	0	200	903	0	0	0	0	0	0	0	603	903	0
4636	8	45.3973	-52.4907	-708.699	56507.9	98285.2	-5634.94	338.684	220.265	0	0	0	0	0	0	0	200	903	0	0	0	0	0	0	0	603	903	0
4636	9	45.5499	-51.7278	-709.615	56050.2	98529.3	-6001.15	338.849	221.013	0	0	0	0	0	0	0	200	903	0	0	0	0	0	0	0	603	903	0
4637	0	45.5499	-52.4907	-709.31	56324.8	97980	-5909.6	338.134	220.592	0	0	0	0	0	0	0	200	903	0	0	0	0	0	0	0	603	903	0
4637	1	45.7025	-53.101	-711.751	56416.4	98773.5	-5634.94	338.775	220.736	0	0	0	0	0	0	0	200	903	0	0	0	0	0	0	0	603	903	0
4637	2	46.7706	-52.9485	-709.31	55226.2	98834.5	-6184.25	339.339	222.141	0	0	0	0	0	0	0	200	903	0	0	0	0	0	0	0	603	903	0
4637	3	46.3129	-53.101	-711.141	55867.1	99322.8	-5955.37	339.667	221.44	0	0	0	0	0	0	0	200	903	0	0	0	0	0	0	0	603	903	0
4637	4	45.7025	-54.0166	-712.056	54768.4	99322.8	-6367.36	339.487	223.084	0	0	0	0	0	0	0	200	903	0	0	0	0	0	0	0	603	903	0
4637	5	46.7706	-53.4062	-711.446	54860	98895.5	-5772.27	339.006	222.89	0	0	0	0	0	0	0	200	903	0	0	0	0	0	0	0	603	903	0
4637	6	48.1439	-53.5588	-714.193	55043.1	99994.2	-6321.58	340.01	222.93	0	0	0	0	0	0	0	200	903	0	0	0	0	0	0	0	603	903	0
4637	7	46.618	-54.1692	-714.498	54219.1	99933.1	-6092.7	339.865	224.116	0	0	0	0	0	0	0	200	903	0	0	0	0	0	0	0	603	903	0
4637	8	47.381	-54.1692	-715.718	54310.6	100116	-6367.36	339.882	224.117	0	0	0	0	0	0	0	200	903	0	0	0	0	0	0	0	603	903	0
4637	9	47.5336	-56.458	-713.887	54127.5	100299	-6504.69	340.497	224.179	0	0	0	0	0	0	0	200	903	0	0	0	0	0	0	0	603	903	0
4638	0	49.0594	-54.9321	-719.075	53395.1	99872.1	-6321.58	338.89	225.745	0	0	0	0	0	0	0	200	903	0	0	0	0	0	0	0	603	903	0
4638	1	48.4491	-55.3899	-717.855	53669.8	100666	-6504.69	340.231	225.236	0	0	0	0	0	0	0	200	903	0	0	0	0	0	0	0	603	903	0
4638	2	48.2965	-56.3054	-718.77	52479.6	100666	-6596.24	340.053	226.987	0	0	0	0	0	0	0	200	903	0	0	0	0	0	0	0	603	903	0
4638	3	48.4491	-56.1528	-719.686	52388.1	100788	-6550.46	340.044	227.207	0	0	0	0	0	0	0	200	903	0	0	0	0	0	0	0	603	903	0
4638	4	47.9913	-56.7632	-715.718	52662.7	101154	-6687.79	341.332	226.42	0	0	0	0	0	0	0	200	903	0	0	0	0	0	0	0	603	903	0
4638	5	47.5336	-56.9157	-723.043	52113.4	100605	-6779.35	339.141	227.925	0	0	0	0	0	0	0	200	903	0	0	0	0	0	0	0	603	903	0
4638	6	48.4491	-56.7632	-722.432	52113.4	101093	-6642.02	339.934	227.864	0	0	0	0	0	0	0	200	903	0	0	0	0	0	0	0	603	903	0
4638	7	48.2965	-57.6787	-722.737	52479.6	101581	-6916.68	340.55	227.388	0	0	0	0	0	0	0	200	903	0	0	0	0	0	0	0	603	903	0
4638	8	47.9913	-57.5261	-723.348	52204.9	101459	-6870.9	340.263	227.829	0	0	0	0	0	0	0	200	903	0	0	0	0	0	0	0	603	903	0
4638	9	48.2965	-57.5261	-720.906	51472.5	101764	-6870.9	341.161	228.6	0	0	0	0	0	0	0	200	903	0	0	0	0	0	0	0	603	903	0
4639	0	50.1275	-59.8149	-723.958	51197.8	102252	-6916.68	341.241	229.281	0	0	0	0	0	0	0	200	903	0	0	0	0	0	0	0	603	903	0
4639	1	49.0594	-58.5942	-724.568	50740.1	101947	-7008.23	340.701	229.972	0	0	0	0	0	0	0	200	903	0	0	0	0	0	0	0	603	903	0
4639	2	49.6698	-57.9839	-724.263	50923.2	102497	-7054	341.518	229.69	0	0	0	0	0	0	0	200	903	0	0	0	0	0	0	0	603	903	0
4639	3	48.9068	-58.7468	-724.874	49916.1	102436	-7099.78	341.315	231.138	0	0	0	0	0	0	0	200	903	0	0	0	0	0	0	0	603	903	0
4639	4	49.212	-57.9839	-723.958	49641.5	102619	-6642.02	341.747	231.43	0	0	0	0	0	0	0	200	903	0	0	0	0	0	0	0	603	903	0
4639	5	50.2801	-59.2046	-726.094	49275.3	102802	-7145.56	341.582	232.137	0	0	0	0	0	0	0	200	903	0	0	0	0	0	0	0	603	903	0
4639	6	49.6698	-58.5942	-727.01	49366.8	103229	-7465.99	341.991	232.096	0	0	0	0	0	0	0	200	903	0	0	0	0	0	0	0	603	903	0
4639	7	50.4327	-59.8149	-727.01	49000.6	103046	-7191.33	341.739	232.6	0	0	0	0	0	0	0	200	903	0	0	0	0	0	0	0	603	903	0
4639	8	49.975	-59.6623	-727.925	48909	103290	-7420.22	341.897	232.81	0	0	0	0	0	0	0	200	903	0	0	0	0	0	0	0	603	903	0
4639	9	50.5853	-59.3571	-727.925	48451.3	103595	-7374.44	342.316	233.439	0	0	0	0	0	0	0	200	903	0	0	0	0	0	0	0	603	903	0
4640	0	51.1957	-59.2046	-729.756	49183.7	103412	-7420.22	341.708	232.603	0	0	0	0	0	0	0	200	903	0	0	0	0	0	0	0	603	903	0
4640	1	51.5008	-59.6623	-731.893	47993.5	103778	-7649.1	341.795	234.425	0	0	0	0	0	0	0	200	903	0	0	0	0	0	0	0	603	903	0
4640	2	50.7379	-59.3571	-731.282	47535.7	103839	-7465.99	341.996	234.997	0	0	0	0	0	0	0	200	903	0	0	0	0	0	0	0	603	903	0
4640	3	50.7379	-59.8149	-728.841	47901.9	104084	-7649.1	342.807	234.277	0	0	0	0	0	0	0	200	903	0	0	0	0	0	0	0	603	903	0
4640	4	50.5853	-61.4934	-732.503	47169.5	104084	-7603.32	342.093	235.605	0	0	0	0	0	0	0	200	903	0	0	0	0	0	0	0	603	903	0
4640	5	50.7379	-59.6623	-733.113	46345.6	104694	-7694.87	342.807	236.783	0	0	0	0	0	0	0	200	903	0	0	0	0	0	0	0	603	903	0
4640	6	50.8905	-59.9675	-733.724	46711.8	104328	-7603.32	342.189	236.336	0	0	0	0	0	0	0	200	903	0	0	0	0	0	0	0	603	903	0
4640	7	51.3483	-61.0356	-732.808	45613.1	104572	-7786.43	342.7	237.756	0	0	0	0	0	0	0	200	903	0	0	0	0	0	0	0	603	903	0
4640	8	51.9586	-60.5779	-732.198	45338.5	105060	-7694.87	343.486	238.079	0	0	0	0	0	0	0	200	903	0	0	0	0	0	0	0	603	903	0
4640	9	51.6534	-61.1882	-734.029	45430	105426	-7786.43	343.627	238.109	0	0	0	0	0	0	0	200	903	0	0	0	0	0	0	0	603	903	0
4641	0	51.6534	-61.7986	-733.113	44880.7	105365	-7420.22	343.723	238.781	0	0	0	0	0	0	0	200	903	0	0	0	0	0	0	0	603	903	0
4641	1	51.1957	-61.3408	-734.334	44239.8	105426	-7923.76	343.567	239.755	0	0	0	0	0	0	0	200	903	0	0	0	0	0	0	0	603	903	0
4641	2	52.1112	-61.9511	-731.893	44422.9	104816	-7832.2	343.212	239.304	0	0	0	0	0	0	0	200	903	0	0	0	0	0	0	0	603	903	0
4641	3	52.7215	-62.1037	-735.86	43782.1	105792	-8015.31	343.767	240.502	0	0	0	0	0	0	0	200	903	0	0	0	0	0	0	0	603	903	0
4641	4	52.4164	-61.7986	-735.86	43782.1	105670	-7557.54	343.601	240.502	0	0	0	0	0	0	0	200	903	0	0	0	0	0	0	0	603	903	0
4641	5	53.3319	-63.0193	-737.081	43873.6	105792	-7603.32	343.529	240.477	0	0	0	0	0	0	0	200	903	0	0	0	0	0	0	0	603	903	0
4641	6	52.569	-61.9511	-737.081	42866.6	105976	-8106.86	343.777	241.843	0	0	0	0	0	0	0	200	903	0	0	0	0	0	0	0	603	903	0
4641	7	52.4164	-62.5615	-736.165	42866.6	106342	-7969.53	344.454	241.77	0	0	0	0	0	0	0	200	903	0	0	0	0	0	0	0	603	903	0
4641	8	54.4	-63.6296	-739.827	42500.4	106159	-8198.42	343.491	242.554	0	0	0	0	0	0	0	200	903	0	0	0	0	0	0	0	603	903	0
4641	9	53.0267	-63.477	-741.353	42591.9	106647	-8244.19	343.855	242.548	0	0	0	0	0	0	0	200	903	0	0	0	0	0	0	0	603	903	0
4642	0	53.3319	-64.0874	-741.964	42958.1	106342	-8289.97	343.325	242.102	0	0	0	0	0	0	0	200	903	0	0	0	0	0	0	0	603	903	0
4642	1	53.3319	-65.9184	-742.574	41859.5	107074	-8335.75	344.193	243.629	0	0	0	0	0	0	0	200	903	0	0	0	0	0	0	0	603	903	0
4642	2	54.8578	-64.5451	-741.964	41584.8	107196	-8381.52	344.477	243.953	0	0	0	0	0	0	0	200	903	0	0	0	0	0	0	0	603	903	0
4642	3	53.4845	-65.0029	-744.71	41951	106891	-8427.3	343.534	243.668	0	0	0	0	0	0	0	200	903	0	0	0	0	0	0	0	603	903	0
4642	4	52.7215	-65.7658	-745.931	41676.4	107440	-8106.86	344.035	244.128	0	0	0	0	0	0	0	200	903	0	0	0	0	0	0	0	603	903	0
4642	5	52.8741	-66.3762	-745.626	40577.7	107501	-8839.29	344.176	245.579	0	0	0	0	0	0	0	200	903	0	0	0	0	0	0	0	603	903	0
4642	6	54.2474	-67.2917	-744.405	41493.3	106769	-8518.85	343.429	244.26	0	0	0	0	0	0	0	200	903	0	0	0	0	0	0	0	603	903	0
4642	7	53.4845	-67.1391	-745.32	40028.4	107868	-8793.51	344.727	246.294	0	0	0	0	0	0	0	200	903	0	0	0	0	0	0	0	603	903	0
4642	8	53.7897	-67.5969	-746.541	40120	108051	-8701.96	344.735	246.259	0	0	0	0	0	0	0	200	903	0	0	0	0	0	0	0	603	903	0
4642	9	54.0948	-67.9021	-748.372	40120	107746	-8701.96	343.973	246.39	0	0	0	0	0	0	0	200	903	0	0	0	0	0	0	0	603	903	0
4643	0	53.4845	-67.5969	-748.067	39479.1	108539	-9022.39	345.093	247.225	0	0	0	0	0	0	0	200	903	0	0	0	0	0	0	0	603	903	0
4643	1	54.2474	-67.9021	-748.067	39662.2	108295	-8793.51	344.766	246.98	0	0	0	0	0	0	0	200	903	0	0	0	0	0	0	0	603	903	0
4643	2	54.4	-68.3598	-748.983	39662.2	108600	-9068.17	344.997	247.045	0	0	0	0	0	0	0	200	903	0	0	0	0	0	0	0	603	903	0
4643	3	54.4	-67.5969	-749.288	39387.6	109027	-8701.96	345.508	247.433	0	0	0	0	0	0	0	200	903	0	0	0	0	0	0	0	603	903	0
4643	4	55.0104	-69.4279	-751.424	39387.6	108722	-9205.5	344.688	247.583	0	0	0	0	0	0	0	200	903	0	0	0	0	0	0	0	603	903	0
4643	5	54.7052	-71.1064	-752.645	38838.2	108905	-9159.72	344.697	248.398	0	0	0	0	0	0	0	200	903	0	0	0	0	0	0	0	603	903	0
4643	6	54.8578	-70.1909	-751.729	38105.8	109272	-9251.27	345.36	249.309	0	0	0	0	0	0	0	200	903	0	0	0	0	0	0	0	603	903	0
4643	7	55.4681	-70.1909	-752.95	38655.1	109027	-9297.05	344.8	248.662	0	0	0	0	0	0	0	200	903	0	0	0	0	0	0	0	603	903	0
4643	8	55.4681	-71.259	-752.645	37464.9	109455	-9113.94	345.427	250.222	0	0	0	0	0	0	0	200	903	0	0	0	0	0	0	0	603	903	0
4643	9	54.4	-70.9538	-753.56	37648	109272	-9571.71	345.007	250.04	0	0	0	0	0	0	0	200	903	0	0	0	0	0	0	0	603	903	0
4644	0	55.3155	-72.1745	-753.56	37281.8	109394	-9388.6	345.169	250.526	0	0	0	0	0	0	0	200	903	0	0	0	0	0	0	0	603	903	0
4644	1	55.1629	-72.7849	-753.865	36732.5	109455	-9617.48	345.191	251.274	0	0	0	0	0	0	0	200	903	0	0	0	0	0	0	0	603	903	0
4644	2	55.6207	-72.4797	-753.255	36915.6	110004	-9617.48	346.038	250.992	0	0	0	0	0	0	0	200	903	0	0	0	0	0	0	0	603	903	0
4644	3	55.4681	-73.7004	-754.476	37098.7	110004	-9297.05	345.802	250.828	0	0	0	0	0	0	0	200	903	0	0	0	0	0	0	0	603	903	0
4644	4	55.3155	-73.5478	-754.171	36000.1	109638	-9892.14	345.375	252.265	0	0	0	0	0	0	0	200	903	0	0	0	0	0	0	0	603	903	0
4644	5	55.3155	-73.7004	-755.391	36457.9	110187	-9846.37	345.868	251.736	0	0	0	0	0	0	0	200	903	0	0	0	0	0	0	0	603	903	0
4644	6	55.1629	-74.4633	-755.086	36183.2	110126	-9892.14	345.846	252.081	0	0	0	0	0	0	0	200	903	0	0	0	0	0	0	0	603	903	0
4644	7	55.9259	-74.7685	-756.917	35633.9	110492	-10121	345.977	252.922	0	0	0	0	0	0	0	200	903	0	0	0	0	0	0	0	603	903	0
4644	8	55.9259	-75.6841	-756.917	36091.7	110675	-10212.6	346.219	252.318	0	0	0	0	0	0	0	200	903	0	0	0	0	0	0	0	603	903	0
4644	9	56.994	-76.447	-757.527	35267.7	110675	-9937.92	346.101	253.444	0	0	0	0	0	0	0	200	903	0	0	0	0	0	0	0	603	903	0
4645	0	56.6888	-76.1418	-758.443	34993	110736	-10258.4	346.005	253.862	0	0	0	0	0	0	0	200	903	0	0	0	0	0	0	0	603	903	0
4645	1	56.6888	-77.0573	-760.579	35084.6	110736	-10212.6	345.595	253.871	0	0	0	0	0	0	0	200	903	0	0	0	0	0	0	0	603	903	0
4645	2	56.5362	-77.8203	-760.579	35084.6	110797	-10212.6	345.675	253.871	0	0	0	0	0	0	0	200	903	0	0	0	0	0	0	0	603	903	0
4645	3	56.2311	-78.5832	-760.274	34718.4	110919	-9983.69	345.894	254.334	0	4.33212	9.17846	-18.0621	3391.65	-1038.13	442.887	142.524	715.223	0	0	0	0	0	0	0	603	903	0
4645	4	55.9259	-79.041	-763.021	34901.5	110980	-10441.5	345.449	254.259	0	0.670014	5.66894	-18.6724	3300.09	-549.848	534.44	170.553	726.264	0	0	0	0	0	0	0	603	903	0
4645	5	55.1629	-78.8884	-761.19	33528.2	110919	-10533	345.719	255.953	0	0	0	0	0	0	0	200	903	0	0	0	0	0	0	0	603	903	0
4645	6	55.9259	-80.2617	-762.41	34260.6	110980	-10990.8	345.565	255.063	0	4.02695	12.5354	-19.5879	3391.65	-793.989	168.228	159.465	729.85	0	0	0	0	0	0	0	603	903	0
4645	7	55.7733	-81.0246	-762.41	33619.7	110980	-10807.7	345.565	255.903	0	4.94247	9.9414	-25.6915	4490.28	-855.024	625.992	166.72	728.223	0	0	0	0	0	0	0	603	903	0
4645	8	55.1629	-81.9402	-762.41	33345.1	110858	-11173.9	345.405	256.264	0	1.12778	6.27929	-26.9122	4764.94	-1099.16	534.44	159.157	725.945	0	0	0	0	0	0	0	603	903	0
4645	9	55.1629	-82.3979	-762.41	33528.2	111286	-11265.4	345.966	256.023	0	2.0433	3.53271	-28.7432	5588.91	-1465.38	397.11	149.018	708.557	0	0	0	0	0	0	0	603	903	0
4646	0	55.4681	-83.0083	-761.495	33619.7	110919	-11311.2	345.66	255.85	0	3.4166	-0.587161	-33.3209	6229.78	-1404.34	534.44	157.854	716.037	0	0	0	0	0	0	0	603	903	0
4646	1	55.6207	-83.3134	-762.41	33162	111042	-11402.8	345.645	256.504	0	3.26401	-5.62256	-43.0865	7603.07	-1526.41	900.651	164.573	726.539	0	0	0	0	0	0	0	603	903	0
4646	2	54.2474	-85.7549	-762.41	33253.5	111042	-11631.6	345.645	256.384	0	2.0433	-9.89502	-47.6641	9434.13	-2075.73	1083.76	156.451	705.071	0	0	0	0	0	0	0	603	903	0
4646	3	55.1629	-84.9919	-760.274	32612.6	111164	-11814.7	346.215	257.104	0	0.670014	-10.2002	-52.2417	9708.79	-2136.76	946.427	159.099	717.157	0	0	0	0	0	0	0	603	903	0
4646	4	55.7733	-86.3652	-762.41	33070.4	111164	-11128.1	345.805	256.624	0	5.858	-11.1157	-54.9883	10807.4	-1892.62	1358.41	165.581	706.46	0	0	0	0	0	0	0	603	903	0
4646	5	55.1629	-87.2807	-762.41	32338	111225	-11494.3	345.886	257.585	0	4.94247	-13.7097	-62.3125	11722.9	-2258.83	1404.19	163.75	714.869	0	0	0	0	0	0	0	603	903	0
4646	6	54.4	-86.9756	-761.495	32612.6	111042	-11997.9	345.82	257.173	0	1.28037	-17.3718	-69.0264	12272.3	-2564.01	1266.86	162.855	725.209	0	0	0	0	0	0	0	603	903	0
4646	7	54.2474	-87.8911	-762.715	31971.8	111286	-12455.6	345.907	258.082	0	4.17954	-15.9985	-74.5196	13737.1	-2747.11	1678.85	163.136	718.658	0	0	0	0	0	0	0	603	903	0
4646	8	55.4681	-88.9592	-764.241	32154.9	111225	-12181	345.536	257.926	0	7.84164	-19.0503	-77.2662	14561.1	-2686.08	2045.06	165.236	714.547	0	0	0	0	0	0	0	603	903	0
4646	9	54.4	-89.8747	-763.631	31880.2	110919	-12730.3	345.253	258.252	0	9.52011	-21.6443	-80.9283	15385.1	-2991.26	2136.61	163.038	712.893	0	0	0	0	0	0	0	603	903	0
4647	0	53.7897	-89.5695	-762.105	31880.2	111286	-12638.7	346.024	258.168	0	9.06235	-23.3228	-87.9473	17033	-3357.47	2914.81	161.824	709.327	0	0	0	0	0	0	0	603	903	0
4647	1	54.0948	-90.4851	-762.41	31330.9	111286	-12547.2	345.966	258.905	0	8.90976	-26.2219	-92.525	17857	-3296.43	2960.59	164.373	710.004	0	0	0	0	0	0	0	603	903	0
4647	2	54.4	-91.0954	-758.748	31697.1	110919	-12821.8	346.187	258.224	0	9.97787	-28.6633	-94.9664	18131.6	-3052.29	2960.59	167.859	712.073	0	0	0	0	0	0	0	603	903	0
4647	3	55.0104	-91.8584	-760.884	31605.6	111103	-12181	346.018	258.462	0	12.1141	-28.3582	-98.9336	19138.7	-3601.61	3693.01	163.596	709.55	0	0	0	0	0	0	0	603	903	0
4647	4	53.4845	-92.3161	-761.8	31056.3	111164	-13050.7	345.922	259.233	0	13.0296	-28.2056	-102.901	19871.1	-3174.36	3372.57	169.151	709.891	0	0	0	0	0	0	0	603	903	0
4647	5	53.1793	-92.3161	-761.8	31056.3	110736	-13004.9	345.361	259.233	0	10.1305	-30.0366	-109.004	20603.6	-3296.43	3372.57	169.759	713.984	0	0	0	0	0	0	0	603	903	0
4647	6	53.7897	-94.6049	-759.969	30781.6	110858	-13416.9	345.872	259.496	0	12.5719	-30.1892	-112.056	20512	-3784.71	3738.78	166.225	719.949	0	0	0	0	0	0	0	603	903	0
4647	7	53.4845	-94.2998	-760.274	29866.1	110675	-13188	345.573	260.717	0	14.8607	-25.9168	-112.056	21336	-3845.75	3693.01	165.68	712.596	0	0	0	0	0	0	0	603	903	0
4647	8	53.7897	-94.9101	-759.053	30140.7	110431	-13462.7	345.485	260.292	0	13.7926	-25.7642	-115.413	21793.7	-3296.43	3876.11	171.438	714.168	0	0	0	0	0	0	0	603	903	0
4647	9	53.0267	-96.1308	-754.171	30598.5	110431	-13600	346.427	259.428	0	15.0133	-26.0693	-117.855	22251.5	-3784.71	3876.11	167.887	714.195	0	0	0	0	0	0	0	603	903	0
4648	0	52.569	-96.436	-754.171	29225.2	110309	-13600	346.265	261.249	0	13.3348	-23.0176	-121.517	23441.7	-3540.57	3555.68	170.864	710.091	0	0	0	0	0	0	0	603	903	0
4648	1	53.1793	-97.1989	-752.339	29774.5	109943	-13783.1	346.135	260.424	0	13.9452	-20.7288	-123.653	23167	-3784.71	3235.24	169.392	715.645	0	0	0	0	0	0	0	603	903	0
4648	2	53.0267	-96.8938	-751.424	29042.1	109821	-13645.8	346.15	261.351	0	12.7245	-19.5081	-123.043	23624.8	-3723.68	3647.23	169.737	710.995	0	0	0	0	0	0	0	603	903	0
4648	3	53.4845	-97.5041	-751.729	28309.7	109638	-13600	345.847	262.341	0	11.9615	-17.8296	-125.789	24082.6	-3784.71	3326.8	169.912	711.548	0	0	0	0	0	0	0	603	903	0
4648	4	52.8741	-98.2671	-750.203	29042.1	109516	-13737.4	345.981	261.288	0	13.64	-15.083	-130.062	23991	-4272.99	2960.59	167.146	718.541	0	0	0	0	0	0	0	603	903	0
4648	5	52.7215	-98.8774	-748.372	28401.2	109333	-14103.6	346.094	262.049	0	11.8089	-10.9631	-131.282	24174.1	-3967.82	3189.47	169.776	718.862	0	0	0	0	0	0	0	603	903	0
4648	6	52.8741	-98.8774	-746.846	27943.5	108905	-14012	345.82	262.585	0	13.0296	-9.43726	-131.587	24265.7	-3967.82	2914.81	169.847	718.593	0	0	0	0	0	0	0	603	903	0
4648	7	52.4164	-99.4878	-745.32	28401.2	108966	-13737.4	346.201	261.894	0	12.877	-7.14844	-134.029	24815	-3784.71	2685.93	171.762	717.853	0	0	0	0	0	0	0	603	903	0
4648	8	52.2638	-99.9455	-745.015	27760.4	108722	-14240.9	345.933	262.739	0	11.9615	-4.09668	-134.944	24906.5	-4089.89	2869.03	169.692	718.431	0	0	0	0	0	0	0	603	903	0
4648	9	51.9586	-100.861	-743.489	27485.7	108051	-14103.6	345.329	263.032	0	12.2667	-2.26563	-139.217	25272.7	-3967.82	3052.14	171.499	721.465	0	0	0	0	0	0	0	603	903	0
4649	0	51.6534	-102.234	-741.658	27211	107746	-14607.1	345.277	263.311	0	14.2503	-0.892337	-136.775	25639	-3906.78	2594.38	171.437	715.547	0	0	0	0	0	0	0	603	903	0
4649	1	51.5008	-101.624	-737.386	26753.3	107868	-14012	346.284	263.719	0	13.7926	1.70166	-143.794	26096.7	-3967.82	3006.36	172.406	721.514	0	0	0	0	0	0	0	603	903	0
4649	2	50.4327	-102.692	-737.081	26844.8	107257	-14469.8	345.516	263.58	0	14.0977	2.76977	-145.626	26462.9	-4028.85	2731.7	172.334	721.281	0	0	0	0	0	0	0	603	903	0
4649	3	50.7379	-102.845	-735.86	26387.1	107135	-14652.9	345.592	264.141	0	15.9288	3.99048	-149.288	27195.4	-4028.85	2457.05	173.013	720.833	0	0	0	0	0	0	0	603	903	0
4649	4	50.7379	-103.302	-733.724	26204	106708	-14790.2	345.434	264.286	0	15.6236	5.66894	-152.645	27653.1	-4028.85	2823.26	173.606	721.84	0	0	0	0	0	0	0	603	903	0
4649	5	49.8224	-104.218	-731.282	25746.2	105670	-14698.7	344.5	264.793	0	14.4029	7.34741	-155.391	28202.4	-4211.96	2777.48	172.894	721.507	0	0	0	0	0	0	0	603	903	0
4649	6	50.1275	-104.828	-728.231	25471.5	106098	-14790.2	345.692	265.023	0	14.4029	7.5	-161.495	28843.3	-4089.89	2502.82	174.675	724.398	0	0	0	0	0	0	0	603	903	0
4649	7	49.6698	-105.134	-724.874	25471.5	105854	-15110.6	346.03	264.861	0	16.5392	8.11035	-164.241	29941.9	-4456.1	2777.48	172.869	720.695	0	0	0	0	0	0	0	603	903	0
4649	8	49.3646	-105.439	-723.348	25654.6	104572	-15202.2	344.566	264.533	0	15.7762	9.9414	-167.903	29941.9	-4456.1	2685.93	173.46	724.672	0	0	0	0	0	0	0	603	903	0
4649	9	47.5336	-105.896	-721.212	25380	104999	-15614.2	345.587	264.809	0	15.9288	10.2466	-168.209	30765.9	-4883.35	2411.27	170.969	720.097	0	0	0	0	0	0	0	603	903	0
4650	0	47.6861	-106.049	-716.634	25013.8	104938	-14561.3	346.432	265.095	0	15.9288	9.9414	-175.228	31406.8	-4578.17	2731.7	173.873	723.766	0	0	0	0	0	0	0	603	903	0
4650	1	48.4491	-106.354	-716.024	24189.8	104267	-15568.4	345.619	266.217	0	17.9124	11.4673	-180.416	31956.1	-5066.45	2640.15	171.918	725.875	0	0	0	0	0	0	0	603	903	0
4650	2	48.2965	-106.507	-713.277	24281.4	103778	-15431.1	345.495	265.958	0	15.3185	10.5518	-184.688	32780.1	-5554.73	2319.72	169.924	725.511	0	0	0	0	0	0	0	603	903	0
4650	3	47.381	-107.117	-712.056	24556	103473	-15705.7	345.316	265.514	0	15.3185	10.7043	-188.35	33787.2	-5066.45	2457.05	173.101	723.615	0	0	0	0	0	0	0	603	903	0
4650	4	47.9913	-106.965	-709.005	23274.3	103412	-15705.7	345.855	267.173	0	15.7762	10.8569	-192.317	34153.4	-5615.77	2319.72	170.799	725.411	0	0	0	0	0	0	0	603	903	0
4650	5	47.0758	-107.575	-707.479	23823.6	102619	-15568.4	345.048	266.326	0	15.3185	11.925	-196.59	34702.7	-5737.84	2182.39	170.813	726.477	0	0	0	0	0	0	0	603	903	0
4650	6	46.3129	-108.338	-703.511	23365.8	102252	-15934.6	345.346	266.787	0	14.7081	11.925	-201.778	35252	-5554.73	2319.72	172.471	728.293	0	0	0	0	0	0	0	603	903	0
4650	7	46.1603	-108.796	-701.68	22725	102130	-15888.8	345.551	267.614	0	17.3021	10.7043	-209.102	36716.9	-5920.94	2640.15	171.684	727.407	0	0	0	0	0	0	0	603	903	0
4650	8	45.7025	-109.253	-694.661	22358.7	101337	-16117.7	345.88	267.813	0	19.2857	11.4673	-214.29	37174.6	-5981.98	2685.93	172.085	729.522	0	0	0	0	0	0	0	603	903	0
4650	9	44.3292	-109.864	-694.661	22541.8	101093	-16117.7	345.528	267.55	0	20.5064	13.6035	-217.952	37815.5	-5676.8	2594.38	173.954	729.496	0	0	0	0	0	0	0	603	903	0
4651	0	44.6344	-110.169	-691.304	21901	100482	-16300.8	345.352	268.319	0	19.1331	14.519	-222.53	39738.1	-6287.15	3097.92	171.747	724.426	0	0	0	0	0	0	0	603	903	0
4651	1	43.5663	-109.864	-688.558	21626.3	99811	-16438.2	344.957	268.592	0	19.4383	14.519	-226.497	40012.8	-6348.19	2457.05	171.972	726.341	0	0	0	0	0	0	0	603	903	0
4651	2	43.8714	-110.627	-685.811	21717.9	100055	-16026.2	345.893	268.333	0	18.6754	15.8923	-236.873	40470.5	-5981.98	2502.82	174.746	732.147	0	0	0	0	0	0	0	603	903	0
4651	3	44.024	-111.237	-680.623	21077	99322.8	-16438.2	345.929	269.033	0	19.1331	16.3501	-242.061	42026.9	-6714.4	2548.6	172.262	729.379	0	0	0	0	0	0	0	603	903	0
4651	4	43.1085	-111.084	-677.266	21260.1	98651.4	-16575.5	345.661	268.609	0	18.6754	18.0286	-248.47	42759.3	-6958.54	2228.16	171.994	730.909	0	0	0	0	0	0	0	603	903	0
4651	5	42.193	-112	-673.299	20436.1	98346.2	-16483.9	346.066	269.648	0	17.9124	18.9441	-253.658	43400.2	-7019.58	2273.94	172.327	731.903	0	0	0	0	0	0	0	603	903	0
4651	6	42.0404	-111.847	-667.806	20161.5	97735.8	-16941.7	346.354	269.809	0	18.828	21.8433	-260.982	44224.2	-7019.58	2045.06	173.103	733.547	0	0	0	0	0	0	0	603	903	0
4651	7	42.4982	-112.153	-667.195	20253	97064.5	-16621.3	345.481	269.645	0	18.828	22.301	-267.086	45048.1	-7324.75	1724.63	172.575	734.334	0	0	0	0	0	0	0	603	903	0
4651	8	42.193	-112	-664.144	20069.9	96759.3	-16621.3	345.69	269.781	0	16.5392	23.6743	-270.748	46146.8	-7324.75	1770.4	172.946	732.558	0	0	0	0	0	0	0	603	903	0
4651	9	41.5826	-112.305	-660.482	19246	96210	-16758.6	345.666	270.861	0	15.0133	26.1157	-274.41	46146.8	-7813.03	1633.07	171.528	734.833	0	0	0	0	0	0	0	603	903	0
4652	0	40.9723	-113.678	-656.514	19154.4	95477.6	-16117.7	345.431	270.824	0	14.0977	28.0994	-282.039	46787.7	-8240.28	1037.98	170.783	737.109	0	0	0	0	0	0	0	603	903	0
4652	1	41.5826	-112.61	-654.988	18879.7	95355.5	-16895.9	345.583	271.176	0	14.0977	28.7097	-286.922	47977.8	-8057.17	1083.76	171.919	735.784	0	0	0	0	0	0	0	603	903	0
4652	2	40.6671	-113.373	-650.411	18513.5	94562	-16941.7	345.388	271.536	0	13.4874	31.4563	-290.889	48252.5	-8301.31	1083.76	171.462	737.121	0	0	0	0	0	0	0	603	903	0
4652	3	40.5145	-113.373	-647.359	18605.1	93585.5	-16895.9	344.565	271.26	0	14.5555	32.0666	-296.077	48618.7	-8911.66	854.874	169.901	738.79	0	0	0	0	0	0	0	603	903	0
4652	4	39.599	-113.984	-640.34	17872.7	93341.3	-16895.9	345.768	272.089	0	12.7245	33.7451	-301.876	50358.2	-8423.38	671.769	172.097	736.182	0	0	0	0	0	0	0	603	903	0
4652	5	39.4464	-112.763	-639.119	17872.7	92975.1	-17079	345.474	272.036	0	12.4193	35.8813	-307.064	50632.9	-8667.52	717.545	171.773	738.106	0	0	0	0	0	0	0	603	903	0
4652	6	39.1412	-114.289	-636.068	17598	91998.5	-16850.1	344.636	272.333	0	10.4356	36.0339	-315.608	50907.5	-9522.02	671.769	169.83	741.701	0	0	0	0	0	0	0	603	903	0
4652	7	38.0731	-112.763	-631.185	16957.1	91754.4	-16895.9	345.369	273.134	0	10.8934	37.865	-319.271	51914.6	-9399.95	397.11	170.558	740.396	0	0	0	0	0	0	0	603	903	0
4652	8	38.6835	-113.221	-626.912	16957.1	91205.1	-16987.5	345.483	272.951	0	10.7408	38.1702	-325.069	52738.6	-9399.95	809.098	171.083	740.762	0	0	0	0	0	0	0	603	903	0
4652	9	37.3102	-113.221	-622.335	16133.2	90106.5	-16438.2	344.788	274.076	0	9.6727	40.1538	-331.478	53104.8	-9827.2	488.663	170.353	742.794	0	0	0	0	0	0	0	603	903	0
4653	0	36.6998	-112.915	-617.452	16224.7	89618.2	-16438.2	345.142	273.723	0	7.68906	41.6797	-337.581	53654.1	-10071.3	-14.877	170.166	744.063	0	0	0	0	0	0	0	603	903	0
4653	1	36.2421	-113.984	-613.179	16041.6	88946.8	-17033.2	345.058	273.839	0	8.14682	42.29	-342.769	54020.3	-10010.3	442.887	170.796	745.4	0	0	0	0	0	0	0	603	903	0
4653	2	35.9369	-113.678	-603.719	15217.6	88092.3	-17307.9	345.916	274.794	0	7.23129	42.7478	-348.873	54752.7	-10559.6	-106.43	169.732	746.058	0	0	0	0	0	0	0	603	903	0
4653	3	34.8688	-113.373	-604.024	15034.5	87726.1	-17124.8	345.236	275.109	0	5.24765	44.5789	-352.84	55302	-10864.8	-243.759	169.208	746.266	0	0	0	0	0	0	0	603	903	0
4653	4	34.7162	-113.984	-598.836	15034.5	86871.6	-17353.7	345.067	274.894	0	5.858	45.1892	-358.638	56309.1	-10803.8	-197.982	169.876	745.992	0	0	0	0	0	0	0	603	903	0
4653	5	34.5636	-113.373	-593.953	14759.9	86139.2	-17262.1	345.027	275.15	0	4.48471	45.647	-364.437	57224.7	-11292	-335.312	169.015	745.978	0	0	0	0	0	0	0	603	903	0
4653	6	33.3429	-113.221	-593.343	14576.8	85650.9	-17307.9	344.353	275.433	0	4.48471	46.8677	-372.982	58323.3	-11902.4	-381.088	168.089	746.63	0	0	0	0	0	0	0	603	903	0
4653	7	33.9532	-112.61	-585.408	14119	84918.5	-17124.8	345.059	275.882	0	3.87436	48.8513	-381.832	57957.1	-11963.4	-335.312	168.668	751.213	0	0	0	0	0	0	0	603	903	0
4653	8	32.4274	-112.915	-580.526	13478.1	84186	-16941.7	345.017	276.783	0	3.4166	49.0039	-387.63	59513.5	-12146.5	-838.852	168.665	749.468	0	0	0	0	0	0	0	603	903	0
4653	9	32.2748	-112.915	-575.032	13844.3	83331.5	-17216.4	344.916	275.924	0	2.50107	53.2764	-397.396	60337.5	-13001	-976.181	167.284	751.168	0	0	0	0	0	0	0	603	903	0
4654	0	31.6644	-112.763	-568.318	12837.3	82904.3	-17033.2	345.876	277.412	0	2.0433	53.5815	-403.804	60886.8	-12879	-1113.51	168.106	752.217	0	0	0	0	0	0	0	603	903	0
4654	1	30.2911	-112.61	-564.656	12654.1	81866.7	-17491	344.985	277.59	0	0.822602	56.6333	-410.823	61985.4	-13611.4	-1159.29	166.868	752.119	0	0	0	0	0	0	0	603	903	0
4654	2	29.9859	-112.458	-560.384	12654.1	81195.3	-17216.4	344.892	277.419	0	0.0596623	57.0911	-418.148	62077	-13977.6	-1571.27	166.573	754.543	0	0	0	0	0	0	0	603	903	0
4654	3	28.9178	-112.153	-554.586	11830.2	80523.9	-17307.9	345.197	278.668	0	-2.83951	59.0747	-423.946	62809.4	-13794.5	-1845.93	167.462	754.846	0	0	0	0	0	0	0	603	903	0
4654	4	29.3756	-110.932	-547.872	12196.4	79608.4	-17170.6	345.305	277.739	0	-2.83951	61.2109	-431.27	63999.6	-14893.1	-1983.26	165.467	754.602	0	0	0	0	0	0	0	603	903	0
4654	5	28.3075	-111.695	-542.073	11555.5	78814.9	-17307.9	345.395	278.683	0	-1.16104	62.5842	-438.594	64640.4	-14526.9	-2303.7	166.879	755.619	0	0	0	0	0	0	0	603	903	0
4654	6	27.6971	-110.322	-536.885	10548.4	78204.6	-16483.9	345.663	280.353	0	-5.28091	65.1782	-444.393	64640.4	-14832.1	-2532.58	166.624	757.542	0	0	0	0	0	0	0	603	903	0
4654	7	27.0868	-109.406	-531.087	11464	77228	-16529.7	345.415	278.414	0	-6.34903	65.3308	-451.107	65464.4	-15198.3	-2486.8	166.309	757.88	0	0	0	0	0	0	0	603	903	0
4654	8	26.3238	-108.948	-521.627	10914.6	76556.6	-16850.1	346.765	279.076	0	-6.04385	66.5515	-457.21	66013.8	-15625.5	-2898.79	165.824	758.616	0	0	0	0	0	0	0	603	903	0
4654	9	26.3238	-107.88	-519.185	9816.01	76007.3	-16941.7	346.397	281.093	0	-5.89127	67.3145	-462.093	66196.8	-15625.5	-2853.01	166.185	759.746	0	0	0	0	0	0	0	603	903	0
4655	0	25.2557	-108.033	-513.082	10365.3	74725.6	-16758.6	345.641	279.798	0	-8.33267	70.061	-467.891	66563	-15808.6	-3081.89	166.213	760.738	0	0	0	0	0	0	0	603	903	0
4655	1	24.9505	-107.728	-507.283	9449.8	73993.2	-16850.1	345.862	281.372	0	-8.0275	70.061	-470.638	67020.8	-16052.8	-3402.33	165.891	760.596	0	0	0	0	0	0	0	603	903	0
4655	2	24.9505	-107.117	-502.095	8808.93	73321.8	-16804.4	346.032	282.456	0	-8.33267	73.1128	-475.826	67570.1	-16174.8	-3265	166.007	760.994	0	0	0	0	0	0	0	603	903	0
4655	3	23.2721	-106.354	-495.687	8992.04	72223.1	-16621.3	345.703	281.859	0	-9.55338	73.7231	-479.488	66929.2	-16541.1	-3402.33	165.503	763.415	0	0	0	0	0	0	0	603	903	0
4655	4	22.8143	-106.354	-490.804	8351.17	71490.7	-16758.6	345.66	282.985	0	-9.85855	75.249	-482.54	67844.8	-16419	-3768.54	165.974	762.401	0	0	0	0	0	0	0	603	903	0
4655	5	22.3566	-105.134	-481.649	8351.17	70514.2	-16483.9	346.402	282.661	0	-8.94302	75.5542	-486.202	68211	-16846.2	-3768.54	165.351	762.706	0	0	0	0	0	0	0	603	903	0
4655	6	21.1358	-104.828	-479.512	7984.96	69415.5	-16712.8	344.763	283.348	0	-8.94302	75.249	-488.643	67753.2	-16846.2	-3768.54	165.524	764.344	0	0	0	0	0	0	0	603	903	0
4655	7	19.7626	-104.371	-472.798	7069.43	68744.1	-15934.6	345.398	285.048	0	-9.85855	77.5378	-495.052	67753.2	-17212.4	-3905.87	165.231	766.139	0	0	0	0	0	0	0	603	903	0
4655	8	18.9996	-103.455	-466.695	7252.53	68011.7	-16300.8	345.731	284.46	0	-9.55338	76.1646	-497.493	67753.2	-17639.7	-4272.08	164.543	766.811	0	0	0	0	0	0	0	603	903	0
4655	9	19.9151	-103.302	-459.676	6977.88	66974.1	-16071.9	345.699	284.82	0	-10.3163	79.8267	-499.935	68302.6	-17029.3	-4180.53	165.937	766.377	0	0	0	0	0	0	0	603	903	0
4656	0	18.6944	-102.387	-453.572	6337.01	66302.7	-16209.3	346.179	286.029	0	-10.7741	79.2163	-500.545	68027.9	-17517.6	-4272.08	165.003	767.092	0	0	0	0	0	0	0	603	903	0
4656	1	17.4737	-101.929	-447.774	6337.01	65387.2	-15980.4	346.027	285.848	0	-11.537	79.9792	-505.428	68577.2	-17517.6	-4546.74	165.341	767.319	0	0	0	0	0	0	0	603	903	0
4656	2	16.4056	-100.556	-440.45	5329.93	63617.2	-16071.9	344.437	287.899	0	-11.9948	81.3525	-508.785	68211	-17700.7	-4500.96	165.21	768.933	0	0	0	0	0	0	0	603	903	0
4656	3	16.4056	-99.7929	-430.989	6337.01	63556.2	-16026.2	347.466	285.297	0	-11.8422	81.5051	-511.836	68027.9	-17700.7	-4638.29	165.417	770.091	0	0	0	0	0	0	0	603	903	0
4656	4	16.7108	-98.7248	-427.938	5329.93	62518.6	-15568.4	346.093	287.545	0	-12.7577	82.5732	-511.836	67936.4	-18372.1	-4775.62	164.105	770.269	0	0	0	0	0	0	0	603	903	0
4656	5	16.1004	-96.7412	-422.139	4963.71	61664.1	-15293.8	346.075	288.242	0	-12.1474	83.4888	-514.888	67478.6	-17822.8	-4729.85	165.385	771.945	0	0	0	0	0	0	0	603	903	0
4656	6	15.1849	-95.2153	-416.036	4414.4	60748.5	-15156.4	346.018	289.389	0	-12.1474	83.9465	-516.414	68119.4	-18250	-4867.17	164.66	771.091	0	0	0	0	0	0	0	603	903	0
4656	7	15.6427	-94.9101	-411.153	4780.61	59772	-15431.1	345.377	288.373	0	-13.8258	84.7095	-518.245	67844.8	-18677.3	-4775.62	163.961	772.087	0	0	0	0	0	0	0	603	903	0
4656	8	13.659	-94.4524	-403.218	3590.43	58612.3	-14881.8	345.361	291.096	0	-14.2836	83.9465	-520.687	68302.6	-18738.3	-4912.95	164.012	771.822	0	0	0	0	0	0	0	603	903	0
4656	9	13.5065	-94.1472	-397.725	4139.74	57635.8	-14607.1	344.914	289.591	0	-13.5207	85.4724	-520.076	68119.4	-18738.3	-5370.71	163.97	772.02	0	0	0	0	0	0	0	603	903	0
4657	0	12.1332	-92.7739	-389.18	2949.56	56781.3	-14881.8	345.9	292.421	0	-15.5043	86.5405	-525.264	67570.1	-19043.5	-5324.94	163.745	774.36	0	0	0	0	0	0	0	603	903	0
4657	1	10.9125	-92.6213	-383.992	2766.45	55682.6	-14836	345.01	292.796	0	-16.1147	86.3879	-526.18	67936.4	-19226.6	-5553.82	163.46	773.888	0	0	0	0	0	0	0	603	903	0
4657	2	10.7599	-90.9428	-377.584	3132.66	55377.4	-14561.3	346.663	291.703	0	-15.6569	88.5242	-528.621	68119.4	-19043.5	-5828.48	163.975	774.138	0	0	0	0	0	0	0	603	903	0
4657	3	9.53917	-91.248	-372.396	2400.24	53851.6	-14744.4	344.609	293.555	0	-16.4198	89.8975	-528.926	67936.4	-19287.6	-5553.82	163.534	774.558	0	0	0	0	0	0	0	603	903	0
4657	4	10.6073	-89.2644	-365.071	2674.9	52936	-14469.8	345.002	292.673	0	-18.2509	88.5242	-531.673	68119.4	-19409.7	-6057.36	163.493	774.877	0	0	0	0	0	0	0	603	903	0
4657	5	8.31847	-89.1118	-358.358	2308.69	52447.8	-13874.7	346.356	293.558	0	-19.6242	90.2026	-535.03	68119.4	-19592.8	-6194.69	163.38	775.681	0	0	0	0	0	0	0	603	903	0
4657	6	8.92882	-85.9074	-350.728	1942.48	51227.1	-13874.7	346.059	294.462	0	-19.4716	90.9656	-536.861	67387	-19898	-6286.24	162.936	777.48	0	0	0	0	0	0	0	603	903	0
4657	7	8.47106	-84.9919	-345.235	2125.58	50677.7	-13874.7	346.792	293.843	0	-19.0138	92.0337	-538.692	67753.2	-20203.2	-6469.35	162.496	777.226	0	0	0	0	0	0	0	603	903	0
4657	8	7.8607	-84.229	-335.775	1210.05	49701.2	-13874.7	348.02	296.396	0	-21.1501	92.4915	-541.439	68302.6	-20630.4	-6652.45	161.897	776.85	0	0	0	0	0	0	0	603	903	0
4657	9	7.70812	-83.9238	-331.502	1210.05	48358.4	-13279.6	345.877	296.35	0	-22.5233	92.644	-543.575	68668.8	-20020.1	-6515.12	163.17	776.672	0	0	0	0	0	0	0	603	903	0
4658	0	8.16588	-81.635	-324.788	2034.03	47626	-13371.1	346.637	293.737	0	-24.6596	93.5596	-547.237	67753.2	-20691.4	-6606.68	162.189	779.19	0	0	0	0	0	0	0	603	903	0
4658	1	7.55553	-80.872	-318.685	1026.95	46893.6	-12959.2	347.147	296.778	0	-23.8966	93.8647	-550.289	68302.6	-21179.7	-6789.78	161.512	778.879	0	0	0	0	0	0	0	603	903	0
4658	2	8.77623	-80.1091	-312.581	1026.95	45245.6	-13096.5	344.748	296.715	0	-22.2182	94.6277	-552.425	68485.6	-20752.5	-7155.99	162.434	779.027	0	0	0	0	0	0	0	603	903	0
4658	3	6.94518	-79.1936	-307.088	752.289	45062.5	-12318.3	346.741	297.55	0	-26.7958	97.2217	-556.392	68119.4	-21362.8	-7201.77	161.605	780.569	0	0	0	0	0	0	0	603	903	0
4658	4	7.09776	-77.6677	-300.374	111.42	44024.9	-12730.3	346.567	299.629	0	-26.9484	96.001	-560.359	68851.9	-21423.9	-7155.99	161.768	780.129	0	0	0	0	0	0	0	603	903	0
4658	5	6.18224	-77.5151	-294.576	752.289	42804.2	-12547.2	345.308	297.446	0	-27.2536	97.832	-561.275	68485.6	-21301.8	-7247.55	162.047	780.982	0	0	0	0	0	0	0	603	903	0
4658	6	6.33482	-76.2944	-284.2	-71.6857	42621.1	-12409.8	349.969	300.252	0	-28.7794	98.4424	-566.158	68577.2	-21301.8	-7293.32	162.375	781.873	0	0	0	0	0	0	0	603	903	0
4658	7	4.35118	-75.5315	-282.369	-254.791	40973.1	-12226.7	345.105	300.902	0	-29.2372	98.4424	-568.599	68485.6	-21790.1	-7567.98	161.678	782.554	0	0	0	0	0	0	0	603	903	0
4658	8	4.96153	-74.7685	-275.96	660.737	40484.9	-12226.7	346.705	297.606	0	-28.932	99.3579	-572.872	68760.3	-21973.2	-7751.09	161.644	782.973	0	0	0	0	0	0	0	603	903	0
4658	9	4.19859	-73.5478	-269.246	-346.344	39752.4	-12089.4	347.643	301.286	0	-30.4579	99.9683	-577.449	69218.1	-22156.3	-7522.2	161.631	783.131	0	0	0	0	0	0	0	603	903	0
4659	0	4.35118	-72.4797	-262.838	935.395	38592.8	-11585.9	346.831	296.441	0	-31.8312	100.884	-580.196	69218.1	-23010.8	-7888.41	160.34	783.699	0	0	0	0	0	0	0	603	903	0
4659	1	5.87706	-71.1064	-256.124	-712.555	37860.3	-11585.9	347.821	302.782	0	-31.3734	102.562	-584.468	69401.2	-22705.6	-8117.3	161.152	784.258	0	0	0	0	0	0	0	603	903	0
4659	2	4.19859	-69.1228	-248.494	-1261.87	36883.8	-11219.7	348.429	305.078	0	-31.2209	100.731	-588.741	69401.2	-22766.6	-8163.08	161.33	785.119	0	0	0	0	0	0	0	603	903	0
4659	3	4.19859	-67.7495	-242.696	-804.108	36090.3	-10853.4	348.706	303.313	0	-30.7631	104.241	-593.013	69218.1	-23377	-8163.08	160.579	786.277	0	0	0	0	0	0	0	603	903	0
4659	4	4.19859	-67.4443	-235.677	-1444.98	35174.8	-10395.7	349.25	306.131	0	-31.526	104.393	-594.539	70682.9	-23377	-8254.62	160.68	784.113	0	0	0	0	0	0	0	603	903	0
4659	5	4.80895	-64.5451	-229.879	-1353.42	34442.4	-10761.9	349.829	305.888	0	-31.9838	105.461	-600.643	69492.7	-23560.1	-8391.95	160.775	787.303	0	0	0	0	0	0	0	603	903	0
4659	6	5.11412	-64.3925	-224.385	-895.661	33587.9	-10304.1	349.688	303.992	0	-33.6623	105.309	-603.389	70133.6	-23804.2	-8346.18	160.549	786.767	0	0	0	0	0	0	0	603	903	0
4659	7	5.57189	-63.6296	-218.587	-1444.98	32489.2	-10029.5	348.633	306.611	0	-33.3571	107.292	-610.408	70499.8	-24109.4	-8483.5	160.503	787.504	0	0	0	0	0	0	0	603	903	0
4659	8	5.87706	-61.4934	-213.704	-987.213	31817.9	-9892.14	348.887	304.62	0	-31.526	108.666	-612.239	70774.5	-23804.2	-8483.5	161.119	787.401	0	0	0	0	0	0	0	603	903	0
4659	9	5.4193	-60.883	-208.821	-1353.42	30841.3	-10304.1	347.692	306.481	0	-33.3571	109.734	-617.732	70682.9	-24109.4	-8529.28	160.971	788.577	0	0	0	0	0	0	0	603	903	0
4660	0	5.57189	-58.8994	-202.718	-1170.32	30292	-9571.71	349.429	305.773	0	-33.2045	110.039	-619.869	70866	-24597.7	-8529.28	160.318	788.676	0	0	0	0	0	0	0	603	903	0
4660	1	5.57189	-57.9839	-196.309	-1719.64	29071.3	-9251.27	348.089	308.76	0	-32.289	110.955	-626.277	71140.7	-24475.6	-8803.94	160.919	789.407	0	0	0	0	0	0	0	603	903	0
4660	2	5.87706	-58.8994	-189.29	-1536.53	28705.1	-9205.5	351.646	308.117	0	-31.3734	109.886	-627.803	71049.1	-24536.7	-8483.5	160.917	789.829	0	0	0	0	0	0	0	603	903	0
4660	3	4.35118	-56.1528	-187.154	-1994.29	27789.5	-8930.84	348.485	310.656	0	-32.5941	110.955	-633.296	71232.3	-24963.9	-8437.73	160.581	790.521	0	0	0	0	0	0	0	603	903	0
4660	4	4.19859	-55.5424	-182.576	-1719.64	27240.2	-8381.52	349.199	309.419	0	-30.9157	110.649	-634.822	71506.9	-25208.1	-8620.83	160.291	790.359	0	0	0	0	0	0	0	603	903	0
4660	5	4.65636	-54.4743	-176.473	-1994.29	26263.7	-8381.52	348.826	311.301	0	-30.7631	111.412	-640.621	71964.7	-24536.7	-8483.5	161.699	790.664	0	0	0	0	0	0	0	603	903	0
4660	6	5.72447	-51.8803	-170.98	-2085.85	25470.2	-8427.3	348.966	312.199	0	-31.0683	112.175	-642.452	71323.8	-25696.3	-8483.5	160.003	791.982	0	0	0	0	0	0	0	603	903	0
4660	7	4.80895	-50.3545	-164.266	-1170.32	24920.9	-8015.31	351.711	307.125	0	-31.2209	112.48	-649.471	72330.9	-25757.4	-8391.95	160.341	791.631	0	0	0	0	0	0	0	603	903	0
4660	8	4.04601	-49.7441	-159.078	-2452.06	24005.4	-7786.43	350.903	315.414	0	-29.695	109.886	-654.354	72056.2	-25513.2	-8254.62	161.01	792.882	0	0	0	0	0	0	0	603	903	0
4660	9	4.35118	-46.8449	-154.805	-2268.95	23395	-7603.32	351.125	314.657	0	-29.5424	112.48	-654.659	71781.5	-25818.4	-8300.4	160.562	793.353	0	0	0	0	0	0	0	603	903	0
4661	0	4.50377	-45.7768	-146.566	-1811.19	22296.4	-7374.44	352.126	312.358	0	-30.9157	112.633	-657.711	72514	-26123.6	-8254.62	160.281	792.748	0	0	0	0	0	0	0	603	903	0
4661	1	6.64	-44.4035	-143.209	-2085.85	22174.3	-7008.23	354.839	314.565	0	-28.1691	112.328	-661.373	72605.6	-26123.6	-8529.28	160.501	793.22	0	0	0	0	0	0	0	603	903	0
4661	2	5.57189	-42.1147	-138.021	-1719.64	21502.9	-6504.69	355.795	312.459	0	-30.4579	113.854	-667.781	73154.8	-26062.5	-8208.85	160.971	793.451	0	0	0	0	0	0	0	603	903	0
4661	3	5.4193	-41.8095	-132.833	-2085.85	19671.9	-6642.02	348.095	315.703	0	-31.8312	112.938	-669.918	71964.7	-26856	-8437.73	159.911	795.577	0	0	0	0	0	0	0	603	903	0
4661	4	5.4193	-39.5207	-128.865	-1536.53	20099.1	-6184.25	355.97	311.924	0	-32.4416	114.312	-673.274	73063.3	-26550.8	-8529.28	160.565	794.481	0	0	0	0	0	0	0	603	903	0
4661	5	7.40294	-38.4526	-126.119	-1994.29	19122.5	-6504.69	351.623	315.813	0	-31.0683	115.074	-677.852	73063.3	-26917	-8437.73	160.291	795.214	0	0	0	0	0	0	0	603	903	0
4661	6	6.02965	-39.5207	-122.151	-1719.64	18451.2	-6046.92	351.051	314.078	0	-32.4416	113.854	-678.462	72788.6	-27161.2	-8849.72	159.967	795.715	0	0	0	0	0	0	0	603	903	0
4661	7	5.72447	-36.0112	-118.184	-2543.61	18084.9	-5818.04	353.023	321.522	0	-29.5424	115.837	-683.04	72880.2	-26917	-8803.94	160.592	796.3	0	0	0	0	0	0	0	603	903	0
4661	8	5.87706	-34.7905	-111.47	-1536.53	17047.4	-5451.83	352.932	313.784	0	-31.9838	115.227	-682.735	73338	-27527.4	-8483.5	159.681	795.582	0	0	0	0	0	0	0	603	903	0
4661	9	5.26671	-33.2646	-110.25	-1811.19	16620.1	-5406.06	350.75	316.428	0	-32.4416	116.143	-689.449	74070.4	-27222.2	-8895.49	160.516	795.566	0	0	0	0	0	0	0	603	903	0
4662	0	4.65636	-30.8232	-106.588	-2085.85	16253.9	-4627.86	352.493	319.569	0	-33.8148	115.227	-690.059	72697.1	-27466.4	-8849.72	160.197	797.651	0	0	0	0	0	0	0	603	903	0
4662	1	4.50377	-30.518	-102.925	-1170.32	15521.5	-4810.96	350.803	311.371	0	-33.5097	116.143	-696.773	73978.8	-27832.6	-8346.18	160.055	796.827	0	0	0	0	0	0	0	603	903	0
4662	2	4.19859	-28.687	-98.653	-2085.85	15094.2	-4536.3	353.003	321.143	0	-33.2045	116.295	-695.552	73978.8	-27832.6	-8803.94	159.985	796.64	0	0	0	0	0	0	0	603	903	0
4662	3	6.02965	-26.8559	-92.8546	-1811.19	14728	-4398.98	358.614	319.506	0	-32.5941	117.058	-701.351	73795.7	-28015.7	-8895.49	160.055	797.781	0	0	0	0	0	0	0	603	903	0
4662	4	4.04601	-26.8559	-89.8029	-1444.98	13446.3	-4170.09	349.731	316.091	0	-34.7304	115.532	-705.318	73521	-28137.7	-8987.04	160.106	798.762	0	0	0	0	0	0	0	603	903	0
4662	5	4.65636	-24.2619	-86.4459	-895.661	13690.4	-4398.98	358.37	310.361	0	-33.2045	117.211	-705.928	74070.4	-28381.9	-9078.6	159.795	798.074	0	0	0	0	0	0	0	603	903	0
4662	6	5.11412	-23.3464	-81.8683	-1444.98	13019	-3849.66	359.024	317.65	0	-33.3571	116.448	-705.013	74161.9	-28809.1	-8666.61	159.137	797.808	0	0	0	0	0	0	0	603	903	0
4662	7	4.80895	-22.1257	-78.8165	-1261.87	12469.7	-3575	358.212	316.01	0	-32.8993	115.837	-710.201	73795.7	-28442.9	-8849.72	159.951	799.092	0	0	0	0	0	0	0	603	903	0
4662	8	5.72447	-19.5317	-76.6803	-1902.74	12164.5	-3300.34	358.64	324.814	0	-33.8148	115.074	-710.811	74619.7	-28687.1	-8895.49	159.642	798.022	0	0	0	0	0	0	0	603	903	0
4662	9	6.02965	-19.9895	-71.4923	-1261.87	11188	-3163.01	356.492	317.65	0	-33.6623	116.295	-715.389	74985.9	-29358.4	-8941.27	158.962	798.182	0	0	0	0	0	0	0	603	903	0
4663	0	5.26671	-17.7007	-69.9664	-1811.19	10882.8	-3117.23	355.543	325.887	0	-35.3407	115.227	-716.915	74070.4	-28809.1	-8987.04	159.815	799.682	0	0	0	0	0	0	0	603	903	0
4663	1	5.57189	-18.0058	-65.9991	-1628.08	10760.7	-2613.69	363.044	324.668	0	-35.0356	116.6	-721.492	74619.7	-29358.4	-8941.27	159.309	799.576	0	0	0	0	0	0	0	603	903	0
4663	2	5.72447	-17.3955	-64.4733	-1444.98	9906.24	-2888.35	353.649	322.412	0	-35.0356	114.769	-723.018	74161.9	-29541.5	-8666.61	159.141	800.427	0	0	0	0	0	0	0	603	903	0
4663	3	5.57189	-17.0903	-62.337	-1811.19	9417.96	-2567.92	351.081	329.055	0	-34.4252	116.6	-724.849	73978.8	-28931.2	-9032.82	160.087	800.939	0	0	0	0	0	0	0	603	903	0
4663	4	5.72447	-14.8015	-53.7921	-1536.53	8929.68	-2522.14	366.003	328.564	0	-35.3407	115.685	-723.934	74161.9	-29907.8	-9261.7	158.687	800.557	0	0	0	0	0	0	0	603	903	0
4663	5	6.18224	-14.6489	-55.318	-1261.87	8563.47	-2384.81	354.804	322.811	0	-34.5778	115.685	-729.122	74802.8	-29602.6	-8987.04	159.4	800.407	0	0	0	0	0	0	0	603	903	0
4663	6	3.89342	-12.9704	-51.9611	-1628.08	8380.36	-2155.93	361.282	331.333	0	-35.0356	114.617	-729.122	74070.4	-29236.4	-8895.49	159.902	801.411	0	0	0	0	0	0	0	603	903	0
4663	7	4.04601	-11.7497	-48.9093	-1078.77	8075.19	-1927.05	365.105	322.056	0	-36.5614	115.837	-734.31	74345	-30212.9	-8941.27	158.855	801.755	0	0	0	0	0	0	0	603	903	0
4663	8	3.28307	-11.4446	-44.942	-1536.53	7159.66	-1652.39	359.309	334.189	0	-34.883	114.617	-734.92	74161.9	-30274	-8895.49	158.806	802.088	0	0	0	0	0	0	0	603	903	0
4663	9	4.80895	-10.9868	-44.6368	-1353.42	7281.73	-1515.06	363.133	330.321	0	-35.1881	115.837	-738.887	74345	-30274	-8620.83	159.028	802.382	0	0	0	0	0	0	0	603	903	0
4664	0	3.89342	-9.76608	-41.5851	-1078.77	6854.48	-1423.51	364.83	325.941	0	-36.5614	115.074	-740.413	73338	-30457.1	-8712.39	158.865	803.95	0	0	0	0	0	0	0	603	903	0
4664	1	3.74083	-9.46091	-39.4488	-1261.87	5877.92	-1286.18	349.001	331.988	0	-36.2563	116.143	-742.549	74161.9	-30762.2	-8941.27	158.572	803.125	0	0	0	0	0	0	0	603	903	0
4664	2	4.35118	-9.30832	-35.4816	-895.661	5877.92	-1240.4	365.661	325.243	0	-35.4933	114.922	-747.432	74528.2	-30335	-8712.39	159.414	803.288	0	0	0	0	0	0	0	603	903	0
4664	3	4.35118	-9.91867	-34.2609	-895.661	5572.74	-1606.61	362.656	326.142	0	-36.2563	115.38	-746.822	73978.8	-30457.1	-8987.04	159.218	803.942	0	0	0	0	0	0	0	603	903	0
4664	4	4.19859	-8.2402	-32.4298	-1902.74	5084.46	-1286.18	356.784	358.673	0	-36.8666	116.295	-750.789	74436.6	-31250.5	-8803.94	158.376	803.856	0	0	0	0	0	0	0	603	903	0
4664	5	4.65636	-8.08762	-29.6832	-712.555	4779.29	-1286.18	361.01	324.005	0	-35.6459	115.38	-752.315	74161.9	-30762.2	-8666.61	159.11	804.422	0	0	0	0	0	0	0	603	903	0
4664	6	3.74083	-7.93503	-28.4625	-1170.32	4413.08	-1377.73	355.049	341.118	0	-35.7985	115.99	-751.399	73704.2	-30945.4	-9078.6	158.816	804.911	0	0	0	0	0	0	0	603	903	0
4664	7	5.57189	-7.47727	-27.8522	-987.213	4107.9	-874.193	347.489	335.445	0	-35.9511	115.227	-757.198	74161.9	-31433.6	-8803.94	158.487	805.057	0	0	0	0	0	0	0	603	903	0
4664	8	4.35118	-6.71433	-25.7159	-987.213	4046.86	-965.745	357.368	338.389	0	-35.3407	113.091	-758.419	74161.9	-31311.6	-8803.94	158.715	805.215	0	0	0	0	0	0	0	603	903	0
4664	9	3.58824	-5.49362	-23.8849	-987.213	3314.44	-828.416	338.767	341.332	0	-35.7985	115.38	-761.47	73795.7	-31311.6	-8666.61	158.88	806.088	0	0	0	0	0	0	0	603	903	0
4665	0	3.28307	-4.42551	-21.7487	-987.213	3009.27	-599.534	338.366	345.392	0	-35.1881	114.922	-762.386	73795.7	-31921.9	-8666.61	158.129	806.204	0	0	0	0	0	0	0	603	903	0
4665	1	4.19859	-5.34104	-19.9176	-254.791	3131.34	-507.981	357.215	312.792	0	-35.9511	114.159	-763.607	73978.8	-31372.6	-8987.04	158.915	806.119	0	0	0	0	0	0	0	603	903	0
4665	2	2.67272	-3.96774	-17.4762	-712.555	2459.95	-462.205	340.76	340.773	0	-35.7985	114.617	-765.743	73795.7	-31677.8	-8620.83	158.631	806.629	0	0	0	0	0	0	0	603	903	0
4665	3	2.8253	-3.05222	-18.0865	-254.791	2582.02	-233.323	342.759	314.087	0	-36.4088	113.549	-769.1	73612.6	-32227.1	-8849.72	158.098	807.287	0	0	0	0	0	0	0	603	903	0
4665	4	2.36754	-4.73068	-16.5607	-254.791	2276.84	-416.429	337.485	315.385	0	-36.5614	113.854	-769.1	74161.9	-31860.9	-8895.49	158.574	806.573	0	0	0	0	0	0	0	603	903	0
4665	5	1.75719	-2.13669	-14.1193	-621.002	1788.56	-233.323	326.676	343.983	0	-35.6459	114.159	-771.541	74161.9	-32288.1	-8666.61	158.151	806.878	0	0	0	0	0	0	0	603	903	0
4665	6	1.75719	-0.610811	-13.5089	-71.6857	1849.6	-279.099	336.917	305.307	0	-37.9347	112.328	-773.982	74070.4	-32532.3	-8849.72	157.968	807.3	0	0	0	0	0	0	0	603	903	0
4665	7	1.90978	-0.915986	-10.7623	-712.555	1788.56	-4.44129	366.188	366.208	0	-37.6295	113.701	-774.898	74161.9	-32898.5	-8987.04	157.545	807.295	0	0	0	0	0	0	0	603	903	0
4665	8	0	0	0	0	0	0	200	300	0	-36.714	113.701	-777.95	73978.8	-32471.2	-8849.72	158.261	807.905	0	0	0	0	0	0	0	603	903	0
4665	9	0	0	0	0	0	0	200	300	0	-38.2399	112.175	-779.17	73521	-32898.5	-8987.04	157.778	808.642	0	0	0	0	0	0	0	603	903	0
4666	0	0	0	0	0	0	0	200	300	0	-37.477	112.786	-779.476	73704.2	-33203.7	-8712.39	157.403	808.444	0	0	0	0	0	0	0	603	903	0
4666	1	0	0	0	0	0	0	200	300	0	-37.3244	112.48	-781.307	73795.7	-32654.3	-8895.49	158.205	808.548	0	0	0	0	0	0	0	603	903	0
4666	2	0	0	0	0	0	0	200	300	0	-37.1718	112.786	-782.222	73612.6	-33081.6	-9032.82	157.708	808.893	0	0	0	0	0	0	0	603	903	0
4666	3	0	0	0	0	0	0	200	300	0	-38.6977	112.328	-784.358	73795.7	-33386.8	-8803.94	157.434	808.916	0	0	0	0	0	0	0	603	903	0
4666	4	0	0	0	0	0	0	200	300	0	-38.3925	111.565	-785.579	73795.7	-33020.6	-9078.6	157.967	809.062	0	0	0	0	0	0	0	603	903	0
4666	5	0	0	0	0	0	0	200	300	0	-37.0192	111.87	-784.664	74070.4	-33386.8	-9032.82	157.451	808.602	0	0	0	0	0	0	0	603	903	0
4666	6	0	0	0	0	0	0	200	300	0	-38.8503	111.718	-788.631	73978.8	-33630.9	-8803.94	157.355	809.193	0	0	0	0	0	0	0	603	903	0
4666	7	0	0	0	0	0	0	200	300	0	-39.0028	109.886	-789.852	73246.4	-33203.7	-8895.49	157.962	810.266	0	0	0	0	0	0	0	603	903	0
4666	8	0	0	0	0	0	0	200	300	0	-37.7821	111.718	-789.546	73887.2	-33692	-8849.72	157.327	809.418	0	0	0	0	0	0	0	603	903	0
4666	9	0	0	0	0	0	0	200	300	0	-37.7821	111.107	-790.767	72971.8	-33997.1	-8849.72	157.007	810.72	0	0	0	0	0	0	0	603	903	0
4667	0	0	0	0	0	0	0	200	300	0	-39.7658	111.107	-792.598	72971.8	-32959.5	-8529.28	158.416	810.934	0	0	0	0	0	0	0	603	903	0
4667	1	0	0	0	0	0	0	200	300	0	-39.308	111.565	-791.378	73246.4	-33753	-9032.82	157.349	810.444	0	0	0	0	0	0	0	603	903	0
4667	2	0	0	0	0	0	0	200	300	0	-38.8503	110.039	-791.378	72971.8	-34119.2	-8849.72	156.886	810.792	0	0	0	0	0	0	0	603	903	0
4667	3	0	0	0	0	0	0	200	300	0	-39.1554	110.039	-793.514	71964.7	-33936.1	-8712.39	157.233	812.309	0	0	0	0	0	0	0	603	903	0
4667	4	0	0	0	0	0	0	200	300	0	-39.4606	108.361	-794.124	72880.2	-33936.1	-8987.04	157.266	811.226	0	0	0	0	0	0	0	603	903	0
4667	5	0	0	0	0	0	0	200	300	0	-38.6977	109.276	-795.65	72697.1	-34302.3	-8941.27	156.888	811.632	0	0	0	0	0	0	0	603	903	0
4667	6	0	0	0	0	0	0	200	300	0	-39.6132	109.581	-795.04	71506.9	-34363.3	-9032.82	156.778	813.059	0	0	0	0	0	0	0	603	903	0
4667	7	0	0	0	0	0	0	200	300	0	-39.6132	109.429	-797.786	72697.1	-33936.1	-8895.49	157.462	811.876	0	0	0	0	0	0	0	603	903	0
4667	8	0	0	0	0	0	0	200	300	0	-37.6295	108.818	-797.176	71781.5	-34485.4	-8712.39	156.741	812.955	0	0	0	0	0	0	0	603	903	0
4667	9	0	0	0	0	0	0	200	300	0	-40.071	108.971	-798.702	71232.3	-34363.3	-8666.61	156.976	813.815	0	0	0	0	0	0	0	603	903	0
4668	0	0	0	0	0	0	0	200	300	0	-40.071	108.513	-799.617	71781.5	-34363.3	-8941.27	157.025	813.23	0	0	0	0	0	0	0	603	903	0
4668	1	0	0	0	0	0	0	200	300	0	-38.3925	105.919	-800.838	71690	-34790.6	-8529.28	156.557	813.481	0	0	0	0	0	0	0	603	903	0
4668	2	0	0	0	0	0	0	200	300	0	-40.8339	107.598	-799.007	71415.3	-34729.6	-8758.16	156.534	813.62	0	0	0	0	0	0	0	603	903	0
4668	3	0	0	0	0	0	0	200	300	0	-39.9184	107.292	-801.143	71049.1	-34546.4	-8666.61	156.879	814.315	0	0	0	0	0	0	0	603	903	0
4668	4	0	0	0	0	0	0	200	300	0	-39.9184	106.377	-800.533	71415.3	-33936.1	-8483.5	157.608	813.79	0	0	0	0	0	0	0	603	903	0
4668	5	0	0	0	0	0	0	200	300	0	-40.5287	106.835	-801.753	70591.4	-35217.8	-8758.16	156.074	814.954	0	0	0	0	0	0	0	603	903	0
4668	6	0	0	0	0	0	0	200	300	0	-40.2235	105.309	-802.059	70682.9	-34668.5	-8620.83	156.776	814.873	0	0	0	0	0	0	0	603	903	0
4668	7	0	0	0	0	0	0	200	300	0	-39.4606	105.767	-801.753	70682.9	-34668.5	-8437.73	156.759	814.84	0	0	0	0	0	0	0	603	903	0
4668	8	0	0	0	0	0	0	200	300	0	-38.6977	104.546	-802.059	70133.6	-35217.8	-8803.94	156.091	815.558	0	0	0	0	0	0	0	603	903	0
4668	9	0	0	0	0	0	0	200	300	0	-40.071	104.851	-803.279	70133.6	-34912.7	-8483.5	156.537	815.691	0	0	0	0	0	0	0	603	903	0
4669	0	0	0	0	0	0	0	200	300	0	-39.4606	104.393	-801.753	69950.5	-35095.8	-8208.85	156.226	815.753	0	0	0	0	0	0	0	603	903	0
4669	1	0	0	0	0	0	0	200	300	0	-38.6977	104.546	-804.805	69584.3	-35400.9	-8529.28	156.013	816.539	0	0	0	0	0	0	0	603	903	0
4669	2	0	0	0	0	0	0	200	300	0	-40.071	104.088	-803.279	69492.7	-35095.8	-8666.61	156.309	816.489	0	0	0	0	0	0	0	603	903	0
4669	3	0	0	0	0	0	0	200	300	0	-41.2917	103.63	-803.585	69858.9	-35095.8	-8254.62	156.326	816.066	0	0	0	0	0	0	0	603	903	0
4669	4	0	0	0	0	0	0	200	300	0	-39.0028	103.325	-804.195	70316.7	-35889.2	-8529.28	155.372	815.563	0	0	0	0	0	0	0	603	903	0
4669	5	0	0	0	0	0	0	200	300	0	-40.3761	100.426	-806.026	68668.8	-35339.9	-8437.73	156.155	817.806	0	0	0	0	0	0	0	603	903	0
4669	6	0	0	0	0	0	0	200	300	0	-40.2235	101.952	-803.89	69675.9	-35278.9	-7979.97	156.115	816.327	0	0	0	0	0	0	0	603	903	0
4669	7	0	0	0	0	0	0	200	300	0	-39.0028	101.647	-803.89	69401.2	-35950.3	-8208.85	155.28	816.668	0	0	0	0	0	0	0	603	903	0
4669	8	0	0	0	0	0	0	200	300	0	-40.2235	100.731	-803.585	68943.4	-35584	-8437.73	155.718	817.205	0	0	0	0	0	0	0	603	903	0
4669	9	0	0	0	0	0	0	200	300	0	-40.3761	100.579	-804.5	69309.7	-35645.1	-8575.06	155.693	816.848	0	0	0	0	0	0	0	603	903	0
4670	0	0	0	0	0	0	0	200	300	0	-39.4606	99.0527	-804.805	68851.9	-35950.3	-8300.4	155.33	817.449	0	0	0	0	0	0	0	603	903	0
4670	1	0	0	0	0	0	0	200	300	0	-39.308	99.0527	-804.805	68394.1	-35767.2	-8163.08	155.558	818.018	0	0	0	0	0	0	0	603	903	0
4670	2	0	0	0	0	0	0	200	300	0	-38.5451	99.6631	-805.416	68211	-35645.1	-8254.62	155.743	818.31	0	0	0	0	0	0	0	603	903	0
4670	3	0	0	0	0	0	0	200	300	0	-39.1554	98.4424	-805.721	68943.4	-36194.4	-8300.4	155.078	817.433	0	0	0	0	0	0	0	603	903	0
4670	4	0	0	0	0	0	0	200	300	0	-39.1554	98.9001	-805.416	67936.4	-36011.3	-8529.28	155.289	818.651	0	0	0	0	0	0	0	603	903	0
4670	5	0	0	0	0	0	0	200	300	0	-40.2235	98.1372	-804.805	68027.9	-35828.2	-7567.98	155.482	818.473	0	0	0	0	0	0	0	603	903	0
4670	6	0	0	0	0	0	0	200	300	0	-39.0028	97.2217	-803.585	68485.6	-35828.2	-8254.62	155.415	817.775	0	0	0	0	0	0	0	603	903	0
4670	7	0	0	0	0	0	0	200	300	0	-40.071	97.2217	-803.89	67387	-36072.3	-8163.08	155.128	819.174	0	0	0	0	0	0	0	603	903	0
4670	8	0	0	0	0	0	0	200	300	0	-40.9865	96.001	-802.059	67112.4	-35767.2	-7934.19	155.406	819.325	0	0	0	0	0	0	0	603	903	0
4670	9	0	0	0	0	0	0	200	300	0	-40.6813	95.8484	-802.059	67203.9	-35523	-8208.85	155.71	819.211	0	0	0	0	0	0	0	603	903	0
4671	0	0	0	0	0	0	0	200	300	0	-37.6295	95.8484	-803.279	67478.6	-36377.5	-8208.85	154.714	818.996	0	0	0	0	0	0	0	603	903	0
4671	1	0	0	0	0	0	0	200	300	0	-39.9184	94.7803	-802.669	65830.6	-36194.4	-8117.3	154.907	820.985	0	0	0	0	0	0	0	603	903	0
4671	2	0	0	0	0	0	0	200	300	0	-41.2917	95.238	-801.753	66929.2	-35645.1	-7979.97	155.541	819.521	0	0	0	0	0	0	0	603	903	0
4671	3	0	0	0	0	0	0	200	300	0	-39.308	94.6277	-801.753	66563	-36255.4	-7888.41	154.78	819.978	0	0	0	0	0	0	0	603	903	0
4671	4	0	0	0	0	0	0	200	300	0	-39.4606	91.8811	-802.669	65922.2	-36438.5	-8025.75	154.603	820.871	0	0	0	0	0	0	0	603	903	0
4671	5	0	0	0	0	0	0	200	300	0	-40.9865	93.8647	-799.312	65830.6	-36011.3	-7979.97	154.947	820.641	0	0	0	0	0	0	0	603	903	0
4671	6	0	0	0	0	0	0	200	300	0	-39.4606	93.5596	-799.312	65830.6	-35706.1	-7613.76	155.329	820.641	0	0	0	0	0	0	0	603	903	0
4671	7	0	0	0	0	0	0	200	300	0	-39.4606	92.3389	-799.312	65464.4	-36438.5	-7979.97	154.413	821.099	0	0	0	0	0	0	0	603	903	0
4671	8	0	0	0	0	0	0	200	300	0	-40.3761	92.3389	-797.786	65281.3	-35950.3	-7842.64	154.937	821.172	0	0	0	0	0	0	0	603	903	0
4671	9	0	0	0	0	0	0	200	300	0	-39.7658	90.9656	-797.176	64823.5	-35889.2	-7842.64	154.98	821.684	0	0	0	0	0	0	0	603	903	0
4672	0	0	0	0	0	0	0	200	300	0	-39.7658	90.813	-795.65	64274.2	-36316.5	-7888.41	154.356	822.218	0	0	0	0	0	0	0	603	903	0
4672	1	0	0	0	0	0	0	200	300	0	-39.7658	89.2871	-794.124	64365.8	-36255.4	-7613.76	154.345	821.947	0	0	0	0	0	0	0	603	903	0
4672	2	0	0	0	0	0	0	200	300	0	-39.4606	89.8975	-795.04	63999.6	-35828.2	-7842.64	154.935	822.501	0	0	0	0	0	0	0	603	903	0
4672	3	0	0	0	0	0	0	200	300	0	-39.308	89.5923	-793.209	63908	-36560.6	-7567.98	153.908	822.431	0	0	0	0	0	0	0	603	903	0
4672	4	0	0	0	0	0	0	200	300	0	-40.2235	89.4397	-792.903	63541.8	-36011.3	-7659.53	154.583	822.862	0	0	0	0	0	0	0	603	903	0
4672	5	0	0	0	0	0	0	200	300	0	-39.6132	88.3716	-792.293	63633.4	-36194.4	-7613.76	154.317	822.685	0	0	0	0	0	0	0	603	903	0
4672	6	0	0	0	0	0	0	200	300	0	-39.0028	87.1509	-787.105	63908	-36438.5	-7522.2	153.706	821.806	0	0	0	0	0	0	0	603	903	0
4672	7	0	0	0	0	0	0	200	300	0	-40.3761	87.9138	-789.546	62260.1	-36438.5	-7567.98	153.849	824.145	0	0	0	0	0	0	0	603	903	0
4672	8	0	0	0	0	0	0	200	300	0	-40.5287	86.0828	-789.852	63267.2	-36011.3	-7018.66	154.408	822.9	0	0	0	0	0	0	0	603	903	0
4672	9	0	0	0	0	0	0	200	300	0	-39.7658	86.6931	-786.495	62809.4	-36072.3	-7613.76	154.135	823.14	0	0	0	0	0	0	0	603	903	0
4673	0	0	0	0	0	0	0	200	300	0	-40.2235	86.6931	-786.8	62260.1	-36316.5	-7613.76	153.843	823.869	0	0	0	0	0	0	0	603	903	0
4673	1	0	0	0	0	0	0	200	300	0	-39.1554	83.6414	-781.612	62351.6	-36194.4	-6881.33	153.693	823.227	0	0	0	0	0	0	0	603	903	0
4673	2	0	0	0	0	0	0	200	300	0	-38.6977	85.625	-783.138	61985.4	-36072.3	-7384.87	153.939	823.85	0	0	0	0	0	0	0	603	903	0
4673	3	0	0	0	0	0	0	200	300	0	-39.0028	85.1672	-782.222	61619.2	-36072.3	-7384.87	153.885	824.225	0	0	0	0	0	0	0	603	903	0
4673	4	0	0	0	0	0	0	200	300	0	-37.477	83.6414	-780.696	61253	-36194.4	-7201.77	153.638	824.541	0	0	0	0	0	0	0	603	903	0
4673	5	0	0	0	0	0	0	200	300	0	-37.9347	84.2517	-780.391	61802.3	-35950.3	-7522.2	153.933	823.806	0	0	0	0	0	0	0	603	903	0
4673	6	0	0	0	0	0	0	200	300	0	-37.6295	83.3362	-781.002	61069.9	-36743.7	-7293.32	152.953	824.806	0	0	0	0	0	0	0	603	903	0
4673	7	0	0	0	0	0	0	200	300	0	-38.8503	82.4207	-777.95	60795.2	-36743.7	-7339.1	152.769	824.852	0	0	0	0	0	0	0	603	903	0
4673	8	0	0	0	0	0	0	200	300	0	-39.4606	80.437	-775.814	60795.2	-35889.2	-7247.55	153.74	824.637	0	0	0	0	0	0	0	603	903	0
4673	9	0	0	0	0	0	0	200	300	0	-37.6295	81.3525	-776.729	60337.5	-36682.7	-7110.22	152.773	825.319	0	0	0	0	0	0	0	603	903	0
4674	0	0	0	0	0	0	0	200	300	0	-38.3925	81.0474	-773.067	60154.4	-36316.5	-7201.77	153.023	825.187	0	0	0	0	0	0	0	603	903	0
4674	1	0	0	0	0	0	0	200	300	0	-36.5614	81.5051	-772.762	59879.7	-35584	-7201.77	153.952	825.512	0	0	0	0	0	0	0	603	903	0
4674	2	0	0	0	0	0	0	200	300	0	-37.3244	79.5215	-772.457	60520.6	-36377.5	-6835.56	152.907	824.652	0	0	0	0	0	0	0	603	903	0
4674	3	0	0	0	0	0	0	200	300	0	-37.7821	79.9792	-770.32	59421.9	-36255.4	-7064.44	152.935	825.861	0	0	0	0	0	0	0	603	903	0
4674	4	0	0	0	0	0	0	200	300	0	-38.8503	79.6741	-769.1	59330.4	-35706.1	-7110.22	153.574	825.857	0	0	0	0	0	0	0	603	903	0
4674	5	0	0	0	0	0	0	200	300	0	-38.3925	78.1482	-767.574	59421.9	-36255.4	-6744.01	152.766	825.585	0	0	0	0	0	0	0	603	903	0
4674	6	0	0	0	0	0	0	200	300	0	-36.1037	78.7585	-764.827	58781	-36072.3	-7018.66	152.836	826.145	0	0	0	0	0	0	0	603	903	0
4674	7	0	0	0	0	0	0	200	300	0	-38.5451	77.0801	-762.081	59147.3	-35645.1	-7018.66	153.227	825.387	0	0	0	0	0	0	0	603	903	0
4674	8	0	0	0	0	0	0	200	300	0	-38.5451	76.3171	-762.996	58506.4	-35950.3	-6881.33	152.883	826.32	0	0	0	0	0	0	0	603	903	0
4674	9	0	0	0	0	0	0	200	300	0	-37.1718	74.6387	-761.47	58414.8	-35523	-7018.66	153.349	826.287	0	0	0	0	0	0	0	603	903	0
4675	0	0	0	0	0	0	0	200	300	0	-37.3244	75.249	-761.165	57865.5	-35462	-6469.35	153.411	826.978	0	0	0	0	0	0	0	603	903	0
4675	1	0	0	0	0	0	0	200	300	0	-36.4088	74.0283	-757.198	57590.9	-35339.9	-6744.01	153.328	826.942	0	0	0	0	0	0	0	603	903	0
4675	2	0	0	0	0	0	0	200	300	0	-36.5614	75.0964	-757.198	57590.9	-35828.2	-6560.9	152.683	826.942	0	0	0	0	0	0	0	603	903	0
4675	3	0	0	0	0	0	0	200	300	0	-36.8666	73.2654	-755.672	57041.6	-35767.2	-6423.57	152.668	827.516	0	0	0	0	0	0	0	603	903	0
4675	4	0	0	0	0	0	0	200	300	0	-37.6295	73.5706	-754.146	57316.2	-35034.7	-6698.23	153.544	826.999	0	0	0	0	0	0	0	603	903	0
4675	5	0	0	0	0	0	0	200	300	0	-35.9511	73.2654	-752.925	57041.6	-36011.3	-6698.23	152.172	827.24	0	0	0	0	0	0	0	603	903	0
4675	6	0	0	0	0	0	0	200	300	0	-36.5614	72.0447	-752.01	57041.6	-35645.1	-6606.68	152.6	827.148	0	0	0	0	0	0	0	603	903	0
4675	7	0	0	0	0	0	0	200	300	0	-37.6295	71.8921	-750.789	55759.8	-35217.8	-6560.9	153.092	828.732	0	0	0	0	0	0	0	603	903	0
4675	8	0	0	0	0	0	0	200	300	0	-37.477	70.3662	-749.568	56400.7	-35156.8	-6377.79	153.097	827.756	0	0	0	0	0	0	0	603	903	0
4675	9	0	0	0	0	0	0	200	300	0	-36.5614	70.061	-748.043	55942.9	-35767.2	-6240.47	152.186	828.214	0	0	0	0	0	0	0	603	903	0
4676	0	0	0	0	0	0	0	200	300	0	-35.6459	70.3662	-746.517	55576.7	-35828.2	-6286.24	152.006	828.552	0	0	0	0	0	0	0	603	903	0
4676	1	0	0	0	0	0	0	200	300	0	-37.6295	68.6877	-745.601	55576.7	-34729.6	-6332.02	153.421	828.461	0	0	0	0	0	0	0	603	903	0
4676	2	0	0	0	0	0	0	200	300	0	-36.1037	69.1455	-743.16	54478.1	-35462	-5782.7	152.282	829.694	0	0	0	0	0	0	0	603	903	0
4676	3	0	0	0	0	0	0	200	300	0	-35.9511	68.0774	-741.634	54935.8	-35339.9	-6240.47	152.349	828.926	0	0	0	0	0	0	0	603	903	0
4676	4	0	0	0	0	0	0	200	300	0	-35.9511	67.6196	-740.718	54752.7	-35095.8	-6240.47	152.619	829.082	0	0	0	0	0	0	0	603	903	0
4676	5	0	0	0	0	0	0	200	300	0	-37.1718	67.1619	-739.803	54569.6	-35034.7	-5920.03	152.643	829.238	0	0	0	0	0	0	0	603	903	0
4676	6	0	0	0	0	0	0	200	300	0	-33.8148	66.0938	-738.582	54569.6	-35217.8	-6011.58	152.317	829.116	0	0	0	0	0	0	0	603	903	0
4676	7	0	0	0	0	0	0	200	300	0	-35.9511	65.3308	-736.141	54386.5	-34851.6	-6103.14	152.656	829.119	0	0	0	0	0	0	0	603	903	0
4676	8	0	0	0	0	0	0	200	300	0	-36.2563	65.636	-735.225	54111.9	-34790.6	-5828.48	152.68	829.401	0	0	0	0	0	0	0	603	903	0
4676	9	0	0	0	0	0	0	200	300	0	-34.5778	64.7205	-734.92	54020.3	-35400.9	-5965.81	151.83	829.495	0	0	0	0	0	0	0	603	903	0
4677	0	0	0	0	0	0	0	200	300	0	-34.4252	64.1101	-732.784	53013.2	-35400.9	-5736.93	151.69	830.655	0	0	0	0	0	0	0	603	903	0
4677	1	0	0	0	0	0	0	200	300	0	-33.6623	63.4998	-731.258	52830.1	-34546.4	-5691.15	152.758	830.755	0	0	0	0	0	0	0	603	903	0
4677	2	0	0	0	0	0	0	200	300	0	-34.12	62.8894	-728.816	53379.5	-35339.9	-5691.15	151.511	829.759	0	0	0	0	0	0	0	603	903	0
4677	3	0	0	0	0	0	0	200	300	0	-33.6623	62.279	-728.206	52921.7	-35217.8	-5370.71	151.638	830.326	0	0	0	0	0	0	0	603	903	0
4677	4	0	0	0	0	0	0	200	300	0	-34.883	61.3635	-726.375	52372.4	-34851.6	-5691.15	152.02	830.899	0	0	0	0	0	0	0	603	903	0
4677	5	0	0	0	0	0	0	200	300	0	-34.883	61.6687	-725.46	52738.6	-34790.6	-5782.7	152.043	830.303	0	0	0	0	0	0	0	603	903	0
4677	6	0	0	0	0	0	0	200	300	0	-32.4416	61.5161	-723.934	52097.7	-35095.8	-5508.04	151.521	831.035	0	0	0	0	0	0	0	603	903	0
4677	7	0	0	0	0	0	0	200	300	0	-34.2726	59.2273	-721.492	51456.8	-34607.5	-5508.04	152.033	831.68	0	0	0	0	0	0	0	603	903	0
4677	8	0	0	0	0	0	0	200	300	0	-33.9674	60.448	-719.661	52280.8	-34668.5	-5553.82	151.827	830.354	0	0	0	0	0	0	0	603	903	0
4677	9	0	0	0	0	0	0	200	300	0	-30.3053	58.9221	-719.356	51548.4	-34790.6	-5462.27	151.636	831.341	0	0	0	0	0	0	0	603	903	0
4678	0	0	0	0	0	0	0	200	300	0	-33.5097	58.6169	-716.609	50632.9	-34973.7	-5416.49	151.196	832.344	0	0	0	0	0	0	0	603	903	0
4678	1	0	0	0	0	0	0	200	300	0	-33.0519	57.2436	-715.694	51456.8	-34546.4	-5187.61	151.73	831.102	0	0	0	0	0	0	0	603	903	0
4678	2	0	0	0	0	0	0	200	300	0	-30.3053	57.5488	-714.473	51365.3	-34790.6	-5324.94	151.306	831.107	0	0	0	0	0	0	0	603	903	0
4678	3	0	0	0	0	0	0	200	300	0	-33.2045	56.9385	-711.421	50724.4	-34729.6	-5508.04	151.183	831.7	0	0	0	0	0	0	0	603	903	0
4678	4	0	0	0	0	0	0	200	300	0	-33.0519	56.7859	-712.337	50358.2	-34241.3	-5096.06	151.931	832.306	0	0	0	0	0	0	0	603	903	0
4678	5	0	0	0	0	0	0	200	300	0	-31.9838	56.1755	-709.285	50632.9	-34424.4	-5187.61	151.466	831.614	0	0	0	0	0	0	0	603	903	0
4678	6	0	0	0	0	0	0	200	300	0	-32.5941	56.0229	-706.539	50266.7	-34302.3	-4500.96	151.45	831.855	0	0	0	0	0	0	0	603	903	0
4678	7	0	0	0	0	0	0	200	300	0	-31.3734	55.5652	-706.539	50175.1	-34363.3	-5141.83	151.364	831.985	0	0	0	0	0	0	0	603	903	0
4678	8	0	0	0	0	0	0	200	300	0	-31.9838	54.3445	-704.708	49900.5	-34180.2	-5279.16	151.497	832.19	0	0	0	0	0	0	0	603	903	0
4678	9	0	0	0	0	0	0	200	300	0	-31.526	54.1919	-703.487	50816	-34607.5	-4912.95	150.806	830.766	0	0	0	0	0	0	0	603	903	0
4679	0	0	0	0	0	0	0	200	300	0	-32.289	53.2764	-700.74	49534.2	-34668.5	-4821.4	150.526	832.312	0	0	0	0	0	0	0	603	903	0
4679	1	0	0	0	0	0	0	200	300	0	-32.8993	52.2082	-700.74	49900.5	-33936.1	-4729.85	151.571	831.789	0	0	0	0	0	0	0	603	903	0
4679	2	0	0	0	0	0	0	200	300	0	-30.7631	51.2927	-699.825	49442.7	-34363.3	-5004.5	150.897	832.35	0	0	0	0	0	0	0	603	903	0
4679	3	0	0	0	0	0	0	200	300	0	-32.5941	50.9875	-698.604	48618.7	-34119.2	-4958.73	151.161	833.406	0	0	0	0	0	0	0	603	903	0
4679	4	0	0	0	0	0	0	200	300	0	-31.9838	50.835	-694.942	49076.5	-33997.1	-4821.4	151.079	832.381	0	0	0	0	0	0	0	603	903	0
4679	5	0	0	0	0	0	0	200	300	0	-28.932	50.9875	-694.942	48618.7	-34302.3	-4821.4	150.64	833.039	0	0	0	0	0	0	0	603	903	0
4679	6	0	0	0	0	0	0	200	300	0	-32.1364	49.9194	-693.111	48435.6	-34119.2	-4729.85	150.774	833.119	0	0	0	0	0	0	0	603	903	0
4679	7	0	0	0	0	0	0	200	300	0	-31.2209	49.9194	-690.059	48527.1	-33753	-4684.07	151.087	832.677	0	0	0	0	0	0	0	603	903	0
4679	8	0	0	0	0	0	0	200	300	0	-30.9157	48.8513	-690.975	48069.4	-33692	-4500.96	151.24	833.433	0	0	0	0	0	0	0	603	903	0
4679	9	0	0	0	0	0	0	200	300	0	-31.2209	47.9358	-688.228	47428.5	-33936.1	-4317.86	150.691	834.086	0	0	0	0	0	0	0	603	903	0
4680	0	0	0	0	0	0	0	200	300	0	-31.526	48.5461	-687.007	47886.3	-33814	-4684.07	150.781	833.297	0	0	0	0	0	0	0	603	903	0
4680	1	0	0	0	0	0	0	200	300	0	-29.8476	47.0203	-685.482	47886.3	-33569.9	-4592.52	151.027	833.142	0	0	0	0	0	0	0	603	903	0
4680	2	0	0	0	0	0	0	200	300	0	-29.5424	45.9521	-683.04	47062.3	-33997.1	-4272.08	150.227	834.099	0	0	0	0	0	0	0	603	903	0
4680	3	0	0	0	0	0	0	200	300	0	-30.6105	47.0203	-684.261	47062.3	-34241.3	-4317.86	149.959	834.222	0	0	0	0	0	0	0	603	903	0
4680	4	0	0	0	0	0	0	200	300	0	-29.5424	45.7996	-682.735	46696.1	-33386.8	-4088.97	151.098	834.604	0	0	0	0	0	0	0	603	903	0
4680	5	0	0	0	0	0	0	200	300	0	-29.3898	45.1892	-679.683	46787.7	-33692	-4043.2	150.43	834.163	0	0	0	0	0	0	0	603	903	0
4680	6	0	0	0	0	0	0	200	300	0	-27.7113	45.0366	-680.294	46329.9	-33753	-4226.31	150.385	834.897	0	0	0	0	0	0	0	603	903	0
4680	7	0	0	0	0	0	0	200	300	0	-29.0846	43.3582	-677.852	46238.3	-33753	-3814.32	150.206	834.787	0	0	0	0	0	0	0	603	903	0
4680	8	0	0	0	0	0	0	200	300	0	-28.6269	43.053	-675.411	46055.2	-33447.8	-4043.2	150.478	834.812	0	0	0	0	0	0	0	603	903	0
4680	9	0	0	0	0	0	0	200	300	0	-28.0165	42.9004	-677.242	45689	-33630.9	-4043.2	150.341	835.537	0	0	0	0	0	0	0	603	903	0
4681	0	0	0	0	0	0	0	200	300	0	-29.0846	41.9849	-674.19	45414.3	-33325.7	-3676.99	150.569	835.639	0	0	0	0	0	0	0	603	903	0
4681	1	0	0	0	0	0	0	200	300	0	-28.3217	42.29	-673.58	45505.9	-33264.7	-3905.87	150.615	835.442	0	0	0	0	0	0	0	603	903	0
4681	2	0	0	0	0	0	0	200	300	0	-29.2372	40.7642	-672.969	45139.7	-33508.9	-3814.32	150.207	835.925	0	0	0	0	0	0	0	603	903	0
4681	3	0	0	0	0	0	0	200	300	0	-27.2536	40.9167	-669.918	45505.9	-33325.7	-3768.54	150.254	835.072	0	0	0	0	0	0	0	603	903	0
4681	4	0	0	0	0	0	0	200	300	0	-27.8639	41.2219	-669.612	45689	-33081.6	-3951.65	150.596	834.768	0	0	0	0	0	0	0	603	903	0
4681	5	0	0	0	0	0	0	200	300	0	-27.5587	39.8486	-666.866	44773.5	-33692	-3493.88	149.477	835.86	0	0	0	0	0	0	0	603	903	0
4681	6	0	0	0	0	0	0	200	300	0	-28.4743	39.8486	-665.645	45139.7	-33325.7	-3448.1	149.935	835.187	0	0	0	0	0	0	0	603	903	0
4681	7	0	0	0	0	0	0	200	300	0	-27.4062	38.1702	-664.424	44956.6	-33020.6	-3585.43	150.302	835.338	0	0	0	0	0	0	0	603	903	0
4681	8	0	0	0	0	0	0	200	300	0	-26.7958	37.5598	-664.424	44041.1	-33569.9	-3448.1	149.475	836.716	0	0	0	0	0	0	0	603	903	0
4681	9	0	0	0	0	0	0	200	300	0	-27.4062	36.9495	-662.288	44041.1	-33386.8	-3448.1	149.589	836.502	0	0	0	0	0	0	0	603	903	0
4682	0	0	0	0	0	0	0	200	300	0	-26.1855	37.5598	-662.898	44224.2	-33264.7	-3631.21	149.819	836.287	0	0	0	0	0	0	0	603	903	0
4682	1	0	0	0	0	0	0	200	300	0	-26.1855	36.0339	-656.795	43491.8	-33325.7	-3356.55	149.26	836.782	0	0	0	0	0	0	0	603	903	0
4682	2	0	0	0	0	0	0	200	300	0	-27.2536	36.6443	-660.762	43949.5	-33508.9	-3402.33	149.288	836.487	0	0	0	0	0	0	0	603	903	0
4682	3	0	0	0	0	0	0	200	300	0	-25.5751	34.0503	-658.626	44498.8	-33325.7	-3310.78	149.401	835.437	0	0	0	0	0	0	0	603	903	0
4682	4	0	0	0	0	0	0	200	300	0	-25.7277	36.0339	-657.405	43766.4	-32898.5	-3173.45	149.957	836.426	0	0	0	0	0	0	0	603	903	0
4682	5	0	0	0	0	0	0	200	300	0	-27.2536	36.3391	-655.879	43217.1	-33325.7	-3539.66	149.189	837.108	0	0	0	0	0	0	0	603	903	0
4682	6	0	0	0	0	0	0	200	300	0	-26.1855	34.0503	-655.574	43858	-33630.9	-3127.67	148.7	836.1	0	0	0	0	0	0	0	603	903	0
4682	7	0	0	0	0	0	0	200	300	0	-25.4225	33.5925	-654.354	43125.6	-32593.3	-3310.78	150.19	837.094	0	0	0	0	0	0	0	603	903	0
4682	8	0	0	0	0	0	0	200	300	0	-26.6432	33.1348	-654.048	43217.1	-33081.6	-3081.89	149.42	836.924	0	0	0	0	0	0	0	603	903	0
4682	9	0	0	0	0	0	0	200	300	0	-25.5751	32.9822	-651.302	43400.2	-33325.7	-3081.89	148.832	836.364	0	0	0	0	0	0	0	603	903	0
4683	0	0	0	0	0	0	0	200	300	0	-24.6596	32.5244	-651.607	43125.6	-32837.5	-3036.12	149.605	836.817	0	0	0	0	0	0	0	603	903	0
4683	1	0	0	0	0	0	0	200	300	0	-25.5751	29.9304	-649.471	42576.2	-33264.7	-3036.12	148.782	837.445	0	0	0	0	0	0	0	603	903	0
4683	2	0	0	0	0	0	0	200	300	0	-25.4225	31.6089	-648.25	42850.9	-33142.6	-2898.79	148.874	836.898	0	0	0	0	0	0	0	603	903	0
4683	3	0	0	0	0	0	0	200	300	0	-22.9811	30.2356	-645.809	42759.3	-32288.1	-2761.46	150.004	836.789	0	0	0	0	0	0	0	603	903	0
4683	4	0	0	0	0	0	0	200	300	0	-25.1173	30.2356	-647.335	42576.2	-33020.6	-2898.79	148.99	837.228	0	0	0	0	0	0	0	603	903	0
4683	5	0	0	0	0	0	0	200	300	0	-25.2699	28.7097	-645.809	42393.1	-33081.6	-2715.68	148.775	837.357	0	0	0	0	0	0	0	603	903	0
4683	6	0	0	0	0	0	0	200	300	0	-24.3544	29.4727	-645.809	42210	-32715.4	-2715.68	149.342	837.64	0	0	0	0	0	0	0	603	903	0
4683	7	0	0	0	0	0	0	200	300	0	-23.5915	29.6252	-643.672	41935.3	-32715.4	-2669.91	149.174	837.85	0	0	0	0	0	0	0	603	903	0
4683	8	0	0	0	0	0	0	200	300	0	-24.9648	28.5571	-644.283	41294.5	-33142.6	-2761.46	148.559	838.906	0	0	0	0	0	0	0	603	903	0
4683	9	0	0	0	0	0	0	200	300	0	-23.4389	26.5735	-638.179	41935.3	-32654.3	-2441.02	148.832	837.289	0	0	0	0	0	0	0	603	903	0
4684	0	0	0	0	0	0	0	200	300	0	-23.1337	27.3364	-642.147	41294.5	-32715.4	-2578.35	149.053	838.693	0	0	0	0	0	0	0	603	903	0
4684	1	0	0	0	0	0	0	200	300	0	-22.9811	26.5735	-642.452	40928.3	-33020.6	-2532.58	148.602	839.294	0	0	0	0	0	0	0	603	903	0
4684	2	0	0	0	0	0	0	200	300	0	-23.4389	25.9631	-640.926	41294.5	-32898.5	-2578.35	148.67	838.571	0	0	0	0	0	0	0	603	903	0
4684	3	0	0	0	0	0	0	200	300	0	-23.1337	25.8105	-641.536	40928.3	-32654.3	-2441.02	149.1	839.203	0	0	0	0	0	0	0	603	903	0
4684	4	0	0	0	0	0	0	200	300	0	-23.4389	24.7424	-640.926	40653.6	-33325.7	-2257.92	148.004	839.57	0	0	0	0	0	0	0	603	903	0
4684	5	0	0	0	0	0	0	200	300	0	-24.507	24.4373	-639.095	40745.2	-33203.7	-2303.7	148.046	839.245	0	0	0	0	0	0	0	603	903	0
4684	6	0	0	0	0	0	0	200	300	0	-23.4389	24.7424	-639.4	40470.5	-32898.5	-2303.7	148.548	839.706	0	0	0	0	0	0	0	603	903	0
4684	7	0	0	0	0	0	0	200	300	0	-23.5915	22.7588	-637.569	40379	-32776.4	-2349.47	148.592	839.667	0	0	0	0	0	0	0	603	903	0
4684	8	0	0	0	0	0	0	200	300	0	-23.744	23.3691	-636.043	40195.9	-33386.8	-2212.14	147.509	839.803	0	0	0	0	0	0	0	603	903	0
4684	9	0	0	0	0	0	0	200	300	0	-22.6759	22.4536	-638.179	39738.1	-32776.4	-1800.16	148.641	840.732	0	0	0	0	0	0	0	603	903	0
4685	0	0	0	0	0	0	0	200	300	0	-22.2182	22.1484	-635.128	39463.4	-32715.4	-2074.81	148.49	840.865	0	0	0	0	0	0	0	603	903	0
4685	1	0	0	0	0	0	0	200	300	0	-23.1337	21.9958	-635.738	39188.8	-33020.6	-2120.59	148.059	841.357	0	0	0	0	0	0	0	603	903	0
4685	2	0	0	0	0	0	0	200	300	0	-20.2345	21.5381	-634.822	39829.7	-33081.6	-1845.93	147.888	840.259	0	0	0	0	0	0	0	603	903	0
4685	3	0	0	0	0	0	0	200	300	0	-21.6078	21.2329	-633.296	39555	-33081.6	-2120.59	147.763	840.541	0	0	0	0	0	0	0	603	903	0
4685	4	0	0	0	0	0	0	200	300	0	-23.2863	21.2329	-635.128	38456.3	-32654.3	-1845.93	148.586	842.451	0	0	0	0	0	0	0	603	903	0
4685	5	0	0	0	0	0	0	200	300	0	-22.8285	20.3174	-632.076	38914.1	-33081.6	-1891.71	147.662	841.434	0	0	0	0	0	0	0	603	903	0
4685	6	0	0	0	0	0	0	200	300	0	-20.5397	20.7751	-632.686	39280.3	-32898.5	-1983.26	148.002	840.915	0	0	0	0	0	0	0	603	903	0
4685	7	0	0	0	0	0	0	200	300	0	-22.6759	18.9441	-628.414	38639.4	-33142.6	-1937.49	147.26	841.513	0	0	0	0	0	0	0	603	903	0
4685	8	0	0	0	0	0	0	200	300	0	-22.5233	18.9441	-630.855	38547.9	-33142.6	-1800.16	147.464	841.896	0	0	0	0	0	0	0	603	903	0
4685	9	0	0	0	0	0	0	200	300	0	-21.6078	18.3337	-631.465	38547.9	-33325.7	-1983.26	147.225	841.955	0	0	0	0	0	0	0	603	903	0
4686	0	0	0	0	0	0	0	200	300	0	-22.6759	18.6389	-630.55	38273.2	-33997.1	-1754.38	146.083	842.302	0	0	0	0	0	0	0	603	903	0
4686	1	0	0	0	0	0	0	200	300	0	-22.9811	17.5708	-628.719	37723.9	-33814	-1891.71	146.218	842.999	0	0	0	0	0	0	0	603	903	0
4686	2	0	0	0	0	0	0	200	300	0	-21.7604	18.3337	-629.329	37907	-33325.7	-1845.93	147.046	842.766	0	0	0	0	0	0	0	603	903	0
4686	3	0	0	0	0	0	0	200	300	0	-21.7604	15.8923	-629.634	37815.5	-33753	-1479.72	146.393	842.941	0	0	0	0	0	0	0	603	903	0
4686	4	0	0	0	0	0	0	200	300	0	-21.3026	17.4182	-627.498	37540.8	-33630.9	-1754.38	146.405	843.174	0	0	0	0	0	0	0	603	903	0
4686	5	0	0	0	0	0	0	200	300	0	-21.3026	16.5027	-627.803	37998.6	-33630.9	-1708.6	146.431	842.474	0	0	0	0	0	0	0	603	903	0
4686	6	0	0	0	0	0	0	200	300	0	-21.6078	16.3501	-626.277	37540.8	-33325.7	-1937.49	146.788	843.057	0	0	0	0	0	0	0	603	903	0
4686	7	0	0	0	0	0	0	200	300	0	-23.2863	16.6553	-625.057	36991.5	-33630.9	-1800.16	146.195	843.819	0	0	0	0	0	0	0	603	903	0
4686	8	0	0	0	0	0	0	200	300	0	-22.9811	15.5872	-625.972	37266.2	-33569.9	-1479.72	146.372	843.467	0	0	0	0	0	0	0	603	903	0
4686	9	0	0	0	0	0	0	200	300	0	-21.913	15.282	-625.057	37083.1	-33508.9	-1479.72	146.391	843.672	0	0	0	0	0	0	0	603	903	0
4687	0	0	0	0	0	0	0	200	300	0	-23.4389	15.5872	-625.667	36442.2	-33875.1	-1708.6	145.858	844.755	0	0	0	0	0	0	0	603	903	0
4687	1	0	0	0	0	0	0	200	300	0	-22.6759	14.3665	-625.667	36716.9	-33569.9	-1525.5	146.345	844.316	0	0	0	0	0	0	0	603	903	0
4687	2	0	0	0	0	0	0	200	300	0	-21.4552	15.282	-624.141	36533.8	-33569.9	-1617.05	146.214	844.466	0	0	0	0	0	0	0	603	903	0
4687	3	0	0	0	0	0	0	200	300	0	-22.5233	14.3665	-623.531	36167.5	-34241.3	-1067.73	145.085	844.996	0	0	0	0	0	0	0	603	903	0
4687	4	0	0	0	0	0	0	200	300	0	-22.5233	12.9932	-623.836	36076	-34180.2	-1617.05	145.21	845.171	0	0	0	0	0	0	0	603	903	0
4687	5	0	0	0	0	0	0	200	300	0	-22.2182	14.0613	-623.226	36076	-33508.9	-1342.39	146.233	845.114	0	0	0	0	0	0	0	603	903	0
4687	6	0	0	0	0	0	0	200	300	0	-21.6078	13.1457	-624.141	35801.3	-34119.2	-1296.62	145.334	845.639	0	0	0	0	0	0	0	603	903	0
4687	7	0	0	0	0	0	0	200	300	0	-21.3026	12.688	-622.92	35526.7	-34119.2	-1525.5	145.227	845.968	0	0	0	0	0	0	0	603	903	0
4687	8	0	0	0	0	0	0	200	300	0	-21.6078	12.2302	-621.7	35068.9	-33936.1	-1250.84	145.414	846.592	0	0	0	0	0	0	0	603	903	0
4687	9	0	0	0	0	0	0	200	300	0	-21.3026	12.3828	-622.615	35252	-33753	-1296.62	145.788	846.381	0	0	0	0	0	0	0	603	903	0
4688	0	0	0	0	0	0	0	200	300	0	-22.3708	11.1621	-621.7	35068.9	-34058.2	-1250.84	145.218	846.592	0	0	0	0	0	0	0	603	903	0
4688	1	0	0	0	0	0	0	200	300	0	-21.4552	11.7725	-621.7	35343.5	-33814	-1113.51	145.61	846.15	0	0	0	0	0	0	0	603	903	0
4688	2	0	0	0	0	0	0	200	300	0	-21.7604	9.63623	-624.752	35709.8	-33875.1	-1342.39	145.778	845.842	0	0	0	0	0	0	0	603	903	0
4688	3	0	0	0	0	0	0	200	300	0	-23.1337	11.0095	-620.174	34611.1	-34119.2	-1296.62	144.984	847.191	0	0	0	0	0	0	0	603	903	0
4688	4	0	0	0	0	0	0	200	300	0	-22.9811	9.63623	-620.174	34702.7	-34302.3	-976.181	144.689	847.044	0	0	0	0	0	0	0	603	903	0
4688	5	0	0	0	0	0	0	200	300	0	-21.6078	9.78882	-621.089	34336.5	-34058.2	-1205.06	145.164	847.716	0	0	0	0	0	0	0	603	903	0
4688	6	0	0	0	0	0	0	200	300	0	-22.3708	8.7207	-620.479	34244.9	-34607.5	-976.181	144.225	847.809	0	0	0	0	0	0	0	603	903	0
4688	7	0	0	0	0	0	0	200	300	0	-23.2863	9.48364	-620.784	34244.9	-34607.5	-793.076	144.252	847.836	0	0	0	0	0	0	0	603	903	0
4688	8	0	0	0	0	0	0	200	300	0	-21.7604	8.87329	-620.479	34061.8	-34241.3	-1113.51	144.815	848.104	0	0	0	0	0	0	0	603	903	0
4688	9	0	0	0	0	0	0	200	300	0	-21.913	8.56811	-620.479	33878.7	-34119.2	-930.405	145.012	848.399	0	0	0	0	0	0	0	603	903	0
4689	0	0	0	0	0	0	0	200	300	0	-22.6759	8.26294	-620.174	33604.1	-34363.3	-838.852	144.591	848.815	0	0	0	0	0	0	0	603	903	0
4689	1	0	0	0	0	0	0	200	300	0	-22.5233	7.04223	-619.869	33604.1	-34546.4	-747.299	144.268	848.788	0	0	0	0	0	0	0	603	903	0
4689	2	0	0	0	0	0	0	200	300	0	-21.3026	7.95776	-621.395	33787.2	-34485.4	-838.852	144.503	848.627	0	0	0	0	0	0	0	603	903	0
4689	3	0	0	0	0	0	0	200	300	0	-20.5397	5.82153	-621.395	33146.3	-34851.6	-884.628	143.914	849.658	0	0	0	0	0	0	0	603	903	0
4689	4	0	0	0	0	0	0	200	300	0	-22.2182	7.04223	-620.784	33146.3	-34851.6	-701.523	143.859	849.606	0	0	0	0	0	0	0	603	903	0
4689	5	0	0	0	0	0	0	200	300	0	-21.1501	6.43188	-622.615	33421	-34729.6	-426.864	144.22	849.322	0	0	0	0	0	0	0	603	903	0
4689	6	0	0	0	0	0	0	200	300	0	-21.1501	6.12671	-622.005	32780.1	-35095.8	-701.523	143.576	850.299	0	0	0	0	0	0	0	603	903	0
4689	7	0	0	0	0	0	0	200	300	0	-21.6078	5.66894	-620.174	32963.2	-35462	-747.299	142.819	849.849	0	0	0	0	0	0	0	603	903	0
4689	8	0	0	0	0	0	0	200	300	0	-22.2182	4.29565	-618.343	33054.8	-34973.7	-655.746	143.44	849.543	0	0	0	0	0	0	0	603	903	0
4689	9	0	0	0	0	0	0	200	300	0	-20.6923	5.66894	-620.784	33054.8	-35462	-472.641	142.876	849.753	0	0	0	0	0	0	0	603	903	0
4690	0	0	0	0	0	0	0	200	300	0	-20.8449	4.29565	-621.7	32505.4	-35584	-609.97	142.763	850.715	0	0	0	0	0	0	0	603	903	0
4690	1	0	0	0	0	0	0	200	300	0	-20.8449	4.75342	-622.31	32505.4	-35034.7	-335.312	143.702	850.767	0	0	0	0	0	0	0	603	903	0
4690	2	0	0	0	0	0	0	200	300	0	-20.9975	4.14306	-622.005	33146.3	-35339.9	-564.193	143.184	849.711	0	0	0	0	0	0	0	603	903	0
4690	3	0	0	0	0	0	0	200	300	0	-20.9975	4.14306	-622.92	32047.6	-35462	-701.523	143.071	851.553	0	0	0	0	0	0	0	603	903	0
4690	4	0	0	0	0	0	0	200	300	0	-22.3708	3.99048	-622.92	32139.2	-35400.9	-564.193	143.169	851.406	0	0	0	0	0	0	0	603	903	0
4690	5	0	0	0	0	0	0	200	300	0	-22.2182	3.53271	-621.089	32413.9	-35400.9	-381.088	143.002	850.811	0	0	0	0	0	0	0	603	903	0
4690	6	0	0	0	0	0	0	200	300	0	-19.9294	3.22754	-624.141	32230.8	-35828.2	-381.088	142.596	851.36	0	0	0	0	0	0	0	603	903	0
4690	7	0	0	0	0	0	0	200	300	0	-22.2182	1.85425	-622.92	32230.8	-36011.3	-289.535	142.19	851.259	0	0	0	0	0	0	0	603	903	0
4690	8	0	0	0	0	0	0	200	300	0	-21.6078	2.76977	-623.226	32322.3	-35462	-243.759	143.099	851.137	0	0	0	0	0	0	0	603	903	0
4690	9	0	0	0	0	0	0	200	300	0	-21.3026	2.15942	-624.446	32047.6	-35767.2	-426.864	142.722	851.678	0	0	0	0	0	0	0	603	903	0
4691	0	0	0	0	0	0	0	200	300	0	-20.9975	1.54907	-621.7	31956.1	-36133.4	-335.312	141.88	851.599	0	0	0	0	0	0	0	603	903	0
4691	1	0	0	0	0	0	0	200	300	0	-19.0138	1.54907	-623.836	31864.5	-35767.2	-197.982	142.666	851.922	0	0	0	0	0	0	0	603	903	0
4691	2	0	0	0	0	0	0	200	300	0	-20.8449	1.24389	-625.667	32230.8	-35523	-243.759	143.224	851.486	0	0	0	0	0	0	0	603	903	0
4691	3	0	0	0	0	0	0	200	300	0	-20.5397	1.09131	-624.752	31406.8	-36377.5	-381.088	141.773	852.729	0	0	0	0	0	0	0	603	903	0
4691	4	0	0	0	0	0	0	200	300	0	-21.7604	-0.281985	-625.057	31315.2	-35706.1	-152.206	142.875	852.9	0	0	0	0	0	0	0	603	903	0
4691	5	0	0	0	0	0	0	200	300	0	-21.7604	-0.129397	-626.277	31223.7	-35767.2	-106.43	142.889	853.144	0	0	0	0	0	0	0	603	903	0
4691	6	0	0	0	0	0	0	200	300	0	-20.3871	-0.129397	-625.972	31864.5	-36316.5	-518.417	141.984	852.096	0	0	0	0	0	0	0	603	903	0
4691	7	0	0	0	0	0	0	200	300	0	-21.4552	-0.434573	-627.803	30765.9	-36377.5	-243.759	142.056	853.994	0	0	0	0	0	0	0	603	903	0
4691	8	0	0	0	0	0	0	200	300	0	-21.6078	-1.3501	-626.277	31223.7	-36011.3	76.6757	142.499	853.144	0	0	0	0	0	0	0	603	903	0
4691	9	0	0	0	0	0	0	200	300	0	-18.4035	-0.892337	-627.498	31040.6	-36560.6	76.6757	141.736	853.533	0	0	0	0	0	0	0	603	903	0
4692	0	0	0	0	0	0	0	200	300	0	-21.4552	-0.892337	-628.414	30674.4	-36621.6	76.6757	141.724	854.188	0	0	0	0	0	0	0	603	903	0
4692	1	0	0	0	0	0	0	200	300	0	-22.0656	-1.96045	-625.972	31223.7	-36194.4	76.6757	142.179	853.12	0	0	0	0	0	0	0	603	903	0
4692	2	0	0	0	0	0	0	200	300	0	-20.5397	-1.96045	-628.719	30674.4	-36621.6	30.8993	141.752	854.211	0	0	0	0	0	0	0	603	903	0
4692	3	0	0	0	0	0	0	200	300	0	-19.9294	-2.41822	-628.414	30308.1	-36621.6	122.452	141.724	854.77	0	0	0	0	0	0	0	603	903	0
4692	4	0	0	0	0	0	0	200	300	0	-21.4552	-3.18116	-629.329	29850.4	-36682.7	259.781	141.711	855.568	0	0	0	0	0	0	0	603	903	0
4692	5	0	0	0	0	0	0	200	300	0	-20.6923	-2.87598	-628.108	30033.5	-36560.6	214.005	141.793	855.184	0	0	0	0	0	0	0	603	903	0
4692	6	0	0	0	0	0	0	200	300	0	-20.2345	-3.33374	-630.55	29941.9	-37048.9	671.769	141.244	855.515	0	0	0	0	0	0	0	603	903	0
4692	7	0	0	0	0	0	0	200	300	0	-19.1664	-4.55445	-631.771	30033.5	-36743.7	351.334	141.84	855.461	0	0	0	0	0	0	0	603	903	0
4692	8	0	0	0	0	0	0	200	300	0	-20.3871	-3.79151	-632.686	30491.3	-36926.8	305.558	141.635	854.807	0	0	0	0	0	0	0	603	903	0
4692	9	0	0	0	0	0	0	200	300	0	-20.5397	-5.01221	-632.686	29301.1	-37720.3	397.11	140.381	856.688	0	0	0	0	0	0	0	603	903	0
4693	0	0	0	0	0	0	0	200	300	0	-21.3026	-4.40186	-633.296	29758.8	-36926.8	214.005	141.691	856.01	0	0	0	0	0	0	0	603	903	0
4693	1	0	0	0	0	0	0	200	300	0	-21.1501	-4.70703	-634.822	30399.7	-37232	534.44	141.351	855.113	0	0	0	0	0	0	0	603	903	0
4693	2	0	0	0	0	0	0	200	300	0	-19.4716	-5.62256	-633.296	29392.6	-37903.4	305.558	140.149	856.588	0	0	0	0	0	0	0	603	903	0
4693	3	0	0	0	0	0	0	200	300	0	-22.2182	-5.01221	-634.822	29392.6	-36926.8	488.663	141.831	856.7	0	0	0	0	0	0	0	603	903	0
4693	4	0	0	0	0	0	0	200	300	0	-21.3026	-5.92774	-635.433	29667.3	-37659.2	351.334	140.735	856.312	0	0	0	0	0	0	0	603	903	0
4693	5	0	0	0	0	0	0	200	300	0	-20.9975	-6.08033	-635.433	29758.8	-37720.3	305.558	140.638	856.168	0	0	0	0	0	0	0	603	903	0
4693	6	0	0	0	0	0	0	200	300	0	-20.3871	-5.77515	-636.043	29301.1	-38147.5	305.558	140.024	856.932	0	0	0	0	0	0	0	603	903	0
4693	7	0	0	0	0	0	0	200	300	0	-21.7604	-6.84326	-637.874	29026.4	-37781.3	397.11	140.77	857.495	0	0	0	0	0	0	0	603	903	0
4693	8	0	0	0	0	0	0	200	300	0	-21.6078	-6.69068	-635.128	29575.7	-38025.5	351.334	140.129	856.433	0	0	0	0	0	0	0	603	903	0
4693	9	0	0	0	0	0	0	200	300	0	-21.3026	-6.99585	-637.264	29301.1	-38330.6	580.216	139.851	857.021	0	0	0	0	0	0	0	603	903	0
4694	0	0	0	0	0	0	0	200	300	0	-20.8449	-8.36914	-639.705	29026.4	-37964.4	442.887	140.653	857.625	0	0	0	0	0	0	0	603	903	0
4694	1	0	0	0	0	0	0	200	300	0	-21.4552	-7.45362	-638.484	28568.6	-37964.4	534.44	140.54	858.256	0	0	0	0	0	0	0	603	903	0
4694	2	0	0	0	0	0	0	200	300	0	-21.3026	-7.75879	-639.4	29026.4	-38330.6	717.545	140.052	857.604	0	0	0	0	0	0	0	603	903	0
4694	3	0	0	0	0	0	0	200	300	0	-22.3708	-9.13208	-638.79	29026.4	-37964.4	259.781	140.568	857.56	0	0	0	0	0	0	0	603	903	0
4694	4	0	0	0	0	0	0	200	300	0	-23.4389	-8.82691	-639.4	29392.6	-38147.5	580.216	140.339	857.031	0	0	0	0	0	0	0	603	903	0
4694	5	0	0	0	0	0	0	200	300	0	-19.1664	-9.28467	-640.621	28843.3	-38635.8	763.322	139.69	857.976	0	0	0	0	0	0	0	603	903	0
4694	6	0	0	0	0	0	0	200	300	0	-23.2863	-9.43726	-640.926	28568.6	-38269.6	625.992	140.29	858.426	0	0	0	0	0	0	0	603	903	0
4694	7	0	0	0	0	0	0	200	300	0	-22.5233	-9.74243	-640.926	29026.4	-38391.7	763.322	140.1	857.712	0	0	0	0	0	0	0	603	903	0
4694	8	0	0	0	0	0	0	200	300	0	-22.0656	-9.89502	-641.841	29118	-38941	763.322	139.329	857.634	0	0	0	0	0	0	0	603	903	0
4694	9	0	0	0	0	0	0	200	300	0	-22.8285	-10.2002	-642.452	28751.8	-38513.7	854.874	140.052	858.247	0	0	0	0	0	0	0	603	903	0
4695	0	0	0	0	0	0	0	200	300	0	-22.8285	-10.658	-644.283	28477.1	-38757.9	671.769	139.843	858.8	0	0	0	0	0	0	0	603	903	0
4695	1	0	0	0	0	0	0	200	300	0	-22.8285	-11.1157	-643.672	28294	-38941	763.322	139.502	859.043	0	0	0	0	0	0	0	603	903	0
4695	2	0	0	0	0	0	0	200	300	0	-22.5233	-11.1157	-643.367	28568.6	-39185.1	992.203	139.094	858.595	0	0	0	0	0	0	0	603	903	0
4695	3	0	0	0	0	0	0	200	300	0	-22.8285	-12.1838	-644.893	28110.9	-38391.7	1083.76	140.468	859.41	0	0	0	0	0	0	0	603	903	0
4695	4	0	0	0	0	0	0	200	300	0	-21.4552	-12.1838	-644.893	27927.8	-39124.1	992.203	139.332	859.694	0	0	0	0	0	0	0	603	903	0
4695	5	0	0	0	0	0	0	200	300	0	-22.6759	-11.5735	-645.503	28110.9	-39368.2	992.203	139.012	859.451	0	0	0	0	0	0	0	603	903	0
4695	6	0	0	0	0	0	0	200	300	0	-23.1337	-12.7942	-647.029	28019.3	-39124.1	1083.76	139.533	859.695	0	0	0	0	0	0	0	603	903	0
4695	7	0	0	0	0	0	0	200	300	0	-23.8966	-12.7942	-642.757	27836.2	-39246.2	1175.31	138.941	859.693	0	0	0	0	0	0	0	603	903	0
4695	8	0	0	0	0	0	0	200	300	0	-24.2018	-13.5571	-647.029	27561.6	-39368.2	1404.19	139.155	860.403	0	0	0	0	0	0	0	603	903	0
4695	9	0	0	0	0	0	0	200	300	0	-22.9811	-14.7778	-647.64	27378.5	-39185.1	1266.86	139.496	860.726	0	0	0	0	0	0	0	603	903	0
4696	0	0	0	0	0	0	0	200	300	0	-22.8285	-14.7778	-647.335	28202.4	-39551.3	1449.97	138.901	859.433	0	0	0	0	0	0	0	603	903	0
4696	1	0	0	0	0	0	0	200	300	0	-24.2018	-14.1675	-649.166	27103.8	-39978.6	1266.86	138.415	861.248	0	0	0	0	0	0	0	603	903	0
4696	2	0	0	0	0	0	0	200	300	0	-24.3544	-14.7778	-649.166	27378.5	-40222.7	1266.86	138.039	860.825	0	0	0	0	0	0	0	603	903	0
4696	3	0	0	0	0	0	0	200	300	0	-23.1337	-16.6089	-648.555	27286.9	-39368.2	1404.19	139.299	860.927	0	0	0	0	0	0	0	603	903	0
4696	4	0	0	0	0	0	0	200	300	0	-23.1337	-15.6934	-651.607	27195.4	-40222.7	1404.19	138.272	861.264	0	0	0	0	0	0	0	603	903	0
4696	5	0	0	0	0	0	0	200	300	0	-24.3544	-17.5244	-651.302	27103.8	-40161.7	1633.07	138.336	861.385	0	0	0	0	0	0	0	603	903	0
4696	6	0	0	0	0	0	0	200	300	0	-24.3544	-16.7615	-651.607	27012.2	-39856.5	1541.52	138.834	861.545	0	0	0	0	0	0	0	603	903	0
4696	7	0	0	0	0	0	0	200	300	0	-23.4389	-17.8296	-652.523	27195.4	-40344.8	1358.41	138.171	861.323	0	0	0	0	0	0	0	603	903	0
4696	8	0	0	0	0	0	0	200	300	0	-22.9811	-17.9822	-651.607	27012.2	-40466.9	1678.85	137.897	861.545	0	0	0	0	0	0	0	603	903	0
4696	9	0	0	0	0	0	0	200	300	0	-23.8966	-17.5244	-652.828	26371.4	-40100.6	1633.07	138.574	862.604	0	0	0	0	0	0	0	603	903	0
4697	0	0	0	0	0	0	0	200	300	0	-23.744	-18.1348	-652.523	26829.1	-40222.7	1724.63	138.358	861.884	0	0	0	0	0	0	0	603	903	0
4697	1	0	0	0	0	0	0	200	300	0	-23.1337	-18.7451	-652.523	26371.4	-40405.8	1678.85	138.078	862.586	0	0	0	0	0	0	0	603	903	0
4697	2	0	0	0	0	0	0	200	300	0	-24.9648	-19.5081	-655.269	26554.5	-40344.8	1724.63	138.43	862.476	0	0	0	0	0	0	0	603	903	0
4697	3	0	0	0	0	0	0	200	300	0	-23.4389	-18.7451	-654.659	26646	-40833.1	1678.85	137.627	862.298	0	0	0	0	0	0	0	603	903	0
4697	4	0	0	0	0	0	0	200	300	0	-22.3708	-19.6606	-652.523	26829.1	-41077.2	1861.95	137.049	861.884	0	0	0	0	0	0	0	603	903	0
4697	5	0	0	0	0	0	0	200	300	0	-25.4225	-20.1184	-655.574	26554.5	-40833.1	1816.18	137.714	862.494	0	0	0	0	0	0	0	603	903	0
4697	6	0	0	0	0	0	0	200	300	0	-24.8122	-20.7288	-654.964	26554.5	-40650	1999.28	137.936	862.457	0	0	0	0	0	0	0	603	903	0
4697	7	0	0	0	0	0	0	200	300	0	-24.0492	-20.8814	-656.185	26462.9	-41260.3	1816.18	137.121	862.672	0	0	0	0	0	0	0	603	903	0
4697	8	0	0	0	0	0	0	200	300	0	-24.0492	-20.271	-656.795	26005.2	-41382.4	1907.73	136.993	863.406	0	0	0	0	0	0	0	603	903	0
4697	9	0	0	0	0	0	0	200	300	0	-23.4389	-21.9495	-658.016	26279.8	-41138.2	2319.72	137.481	863.062	0	0	0	0	0	0	0	603	903	0
4698	0	0	0	0	0	0	0	200	300	0	-24.6596	-22.2546	-655.269	25913.6	-40955.1	1953.51	137.499	863.453	0	0	0	0	0	0	0	603	903	0
4698	1	0	0	0	0	0	0	200	300	0	-25.1173	-23.0176	-658.016	26829.1	-41565.5	2090.84	136.832	862.227	0	0	0	0	0	0	0	603	903	0
4698	2	0	0	0	0	0	0	200	300	0	-26.338	-23.0176	-656.795	25730.5	-40894.1	2090.84	137.737	863.824	0	0	0	0	0	0	0	603	903	0
4698	3	0	0	0	0	0	0	200	300	0	-26.1855	-22.4072	-654.354	25730.5	-40955.1	2182.39	137.411	863.678	0	0	0	0	0	0	0	603	903	0
4698	4	0	0	0	0	0	0	200	300	0	-22.6759	-24.8486	-659.542	26005.2	-41992.7	2319.72	136.33	863.571	0	0	0	0	0	0	0	603	903	0
4698	5	0	0	0	0	0	0	200	300	0	-26.6432	-25.1538	-658.321	25639	-41809.6	2182.39	136.49	864.054	0	0	0	0	0	0	0	603	903	0
4698	6	0	0	0	0	0	0	200	300	0	-27.101	-24.3909	-660.152	25730.5	-41382.4	2273.94	137.314	864.023	0	0	0	0	0	0	0	603	903	0
4698	7	0	0	0	0	0	0	200	300	0	-25.8803	-24.8486	-660.457	25547.4	-41565.5	2182.39	137.066	864.319	0	0	0	0	0	0	0	603	903	0
4698	8	0	0	0	0	0	0	200	300	0	-26.0329	-25.459	-660.457	25089.6	-41931.7	2319.72	136.511	865.012	0	0	0	0	0	0	0	603	903	0
4698	9	0	0	0	0	0	0	200	300	0	-25.2699	-25.459	-661.067	24998.1	-41565.5	2228.16	137.124	865.185	0	0	0	0	0	0	0	603	903	0
4699	0	0	0	0	0	0	0	200	300	0	-28.0165	-26.3745	-661.983	25089.6	-41931.7	2365.49	136.657	865.099	0	0	0	0	0	0	0	603	903	0
4699	1	0	0	0	0	0	0	200	300	0	-24.0492	-27.29	-662.593	25089.6	-42236.9	2502.82	136.255	865.134	0	0	0	0	0	0	0	603	903	0
4699	2	0	0	0	0	0	0	200	300	0	-27.7113	-27.5952	-663.204	24906.5	-41931.7	2502.82	136.774	865.445	0	0	0	0	0	0	0	603	903	0
4699	3	0	0	0	0	0	0	200	300	0	-28.4743	-27.9004	-662.288	24448.8	-41931.7	2502.82	136.687	866.084	0	0	0	0	0	0	0	603	903	0
4699	4	0	0	0	0	0	0	200	300	0	-27.101	-28.2056	-663.204	23991	-42358.9	2502.82	136.13	866.826	0	0	0	0	0	0	0	603	903	0
4699	5	0	0	0	0	0	0	200	300	0	-27.5587	-29.1211	-659.236	24540.3	-42725.2	2685.93	135.19	865.775	0	0	0	0	0	0	0	603	903	0
4699	6	0	0	0	0	0	0	200	300	0	-28.0165	-29.4263	-663.509	24174.1	-42114.8	2640.15	136.527	866.566	0	0	0	0	0	0	0	603	903	0
4699	7	0	0	0	0	0	0	200	300	0	-28.1691	-30.4944	-664.424	24448.8	-42725.2	2777.48	135.696	866.203	0	0	0	0	0	0	0	603	903	0
4699	8	0	0	0	0	0	0	200	300	0	-27.2536	-30.9522	-665.95	24265.7	-42847.2	2869.03	135.66	866.562	0	0	0	0	0	0	0	603	903	0
4699	9	0	0	0	0	0	0	200	300	0	-28.0165	-30.9522	-665.645	23716.3	-42969.3	2685.93	135.447	867.371	0	0	0	0	0	0	0	603	903	0
4700	0	0	0	0	0	0	0	200	300	0	-27.5587	-30.9522	-667.171	23807.9	-42969.3	2640.15	135.595	867.315	0	0	0	0	0	0	0	603	903	0
4700	1	0	0	0	0	0	0	200	300	0	-28.3217	-31.5625	-667.476	24082.6	-43152.4	2640.15	135.35	866.92	0	0	0	0	0	0	0	603	903	0
4700	2	0	0	0	0	0	0	200	300	0	-28.7794	-31.5625	-668.086	23441.7	-42969.3	2869.03	135.683	867.912	0	0	0	0	0	0	0	603	903	0
4700	3	0	0	0	0	0	0	200	300	0	-29.3898	-32.0203	-668.392	23441.7	-43335.5	2960.59	135.165	867.928	0	0	0	0	0	0	0	603	903	0
4700	4	0	0	0	0	0	0	200	300	0	-28.7794	-32.3254	-668.697	23624.8	-43274.5	2914.81	135.285	867.67	0	0	0	0	0	0	0	603	903	0
4700	5	0	0	0	0	0	0	200	300	0	-28.3217	-32.3254	-669.612	23441.7	-43457.6	2869.03	135.1	867.992	0	0	0	0	0	0	0	603	903	0
4700	6	0	0	0	0	0	0	200	300	0	-30.1527	-33.8513	-671.443	22892.4	-43518.6	3006.36	135.186	868.906	0	0	0	0	0	0	0	603	903	0
4700	7	0	0	0	0	0	0	200	300	0	-30.4579	-33.8513	-670.528	23350.1	-43701.7	3052.14	134.825	868.177	0	0	0	0	0	0	0	603	903	0
4700	8	0	0	0	0	0	0	200	300	0	-29.5424	-33.6987	-667.781	23624.8	-44434.1	2960.59	133.46	867.622	0	0	0	0	0	0	0	603	903	0
4700	9	0	0	0	0	0	0	200	300	0	-31.0683	-34.9194	-674.8	22983.9	-43701.7	3143.69	135.238	868.94	0	0	0	0	0	0	0	603	903	0
4701	0	0	0	0	0	0	0	200	300	0	-28.932	-35.2246	-671.443	22709.3	-44190	3235.24	134.187	869.178	0	0	0	0	0	0	0	603	903	0
4701	1	0	0	0	0	0	0	200	300	0	-29.8476	-35.6824	-672.969	23258.6	-44373.1	3281.02	134.064	868.439	0	0	0	0	0	0	0	603	903	0
4701	2	0	0	0	0	0	0	200	300	0	-29.0846	-36.4453	-672.969	23258.6	-43701.7	3326.8	135.061	868.439	0	0	0	0	0	0	0	603	903	0
4701	3	0	0	0	0	0	0	200	300	0	-32.1364	-36.1401	-673.274	22434.6	-44312.1	3189.47	134.184	869.678	0	0	0	0	0	0	0	603	903	0
4701	4	0	0	0	0	0	0	200	300	0	-31.526	-36.7505	-676.021	22617.7	-44373.1	3097.92	134.361	869.543	0	0	0	0	0	0	0	603	903	0
4701	5	0	0	0	0	0	0	200	300	0	-30.9157	-37.9712	-675.106	22343.1	-44006.9	3189.47	134.815	869.904	0	0	0	0	0	0	0	603	903	0
4701	6	0	0	0	0	0	0	200	300	0	-31.2209	-37.9712	-676.021	22251.5	-44495.2	3509.9	134.181	870.085	0	0	0	0	0	0	0	603	903	0
4701	7	0	0	0	0	0	0	200	300	0	-31.0683	-38.429	-677.242	21610.6	-44800.4	3326.8	133.849	871.09	0	0	0	0	0	0	0	603	903	0
4701	8	0	0	0	0	0	0	200	300	0	-31.6786	-38.7341	-678.157	22160	-44129	3418.35	134.928	870.323	0	0	0	0	0	0	0	603	903	0
4701	9	0	0	0	0	0	0	200	300	0	-31.3734	-39.1919	-677.852	21976.8	-44495.2	3326.8	134.359	870.579	0	0	0	0	0	0	0	603	903	0
4702	0	0	0	0	0	0	0	200	300	0	-32.8993	-40.4126	-679.683	21885.3	-44800.4	3693.01	134.086	870.801	0	0	0	0	0	0	0	603	903	0
4702	1	0	0	0	0	0	0	200	300	0	-33.2045	-39.4971	-678.768	21152.9	-44678.3	3372.57	134.177	871.836	0	0	0	0	0	0	0	603	903	0
4702	2	0	0	0	0	0	0	200	300	0	-32.4416	-40.7178	-679.683	21519.1	-44800.4	3464.13	134.086	871.34	0	0	0	0	0	0	0	603	903	0
4702	3	0	0	0	0	0	0	200	300	0	-33.0519	-41.3281	-681.209	21152.9	-45288.6	3647.23	133.517	871.948	0	0	0	0	0	0	0	603	903	0
4702	4	0	0	0	0	0	0	200	300	0	-31.9838	-41.7859	-681.209	21152.9	-45349.7	3601.46	133.428	871.948	0	0	0	0	0	0	0	603	903	0
4702	5	0	0	0	0	0	0	200	300	0	-33.3571	-42.0911	-681.819	21152.9	-44983.5	4013.44	134.024	871.976	0	0	0	0	0	0	0	603	903	0
4702	6	0	0	0	0	0	0	200	300	0	-32.8993	-43.1592	-683.04	20603.6	-45776.9	3601.46	132.981	872.836	0	0	0	0	0	0	0	603	903	0
4702	7	0	0	0	0	0	0	200	300	0	-34.4252	-43.3118	-683.65	20878.2	-45776.9	3830.34	133.04	872.461	0	0	0	0	0	0	0	603	903	0
4702	8	0	0	0	0	0	0	200	300	0	-34.5778	-43.9221	-686.092	20603.6	-45349.7	3921.89	133.901	872.97	0	0	0	0	0	0	0	603	903	0
4702	9	0	0	0	0	0	0	200	300	0	-33.5097	-44.6851	-687.007	21244.4	-45654.8	4059.22	133.545	872.077	0	0	0	0	0	0	0	603	903	0
4703	0	0	0	0	0	0	0	200	300	0	-34.5778	-44.9902	-687.618	20512	-45410.7	4242.33	133.959	873.17	0	0	0	0	0	0	0	603	903	0
4703	1	0	0	0	0	0	0	200	300	0	-34.883	-45.448	-688.228	20328.9	-45838	3967.67	133.397	873.462	0	0	0	0	0	0	0	603	903	0
4703	2	0	0	0	0	0	0	200	300	0	-33.8148	-46.2109	-689.144	20512	-45838	4196.55	133.486	873.236	0	0	0	0	0	0	0	603	903	0
4703	3	0	0	0	0	0	0	200	300	0	-34.12	-45.9058	-691.28	20054.2	-46448.3	4013.44	132.808	873.99	0	0	0	0	0	0	0	603	903	0
4703	4	0	0	0	0	0	0	200	300	0	-35.4933	-47.1265	-691.89	19779.6	-46631.4	4288.1	132.603	874.412	0	0	0	0	0	0	0	603	903	0
4703	5	0	0	0	0	0	0	200	300	0	-34.4252	-47.4316	-691.89	20145.8	-46326.2	4196.55	133.044	873.883	0	0	0	0	0	0	0	603	903	0
4703	6	0	0	0	0	0	0	200	300	0	-34.5778	-46.3635	-693.111	19962.7	-46753.5	4333.88	132.545	874.198	0	0	0	0	0	0	0	603	903	0
4703	7	0	0	0	0	0	0	200	300	0	-34.883	-48.3472	-694.026	19047.2	-47180.7	4333.88	132.019	875.556	0	0	0	0	0	0	0	603	903	0
4703	8	0	0	0	0	0	0	200	300	0	-35.4933	-48.3472	-694.637	19688	-46936.6	4242.33	132.43	874.657	0	0	0	0	0	0	0	603	903	0
4703	9	0	0	0	0	0	0	200	300	0	-35.9511	-49.5679	-697.689	19596.5	-47119.7	4242.33	132.463	874.912	0	0	0	0	0	0	0	603	903	0
4704	0	0	0	0	0	0	0	200	300	0	-34.883	-50.1782	-697.078	18955.6	-47485.9	4288.1	131.879	875.807	0	0	0	0	0	0	0	603	903	0
4704	1	0	0	0	0	0	0	200	300	0	-36.714	-49.8731	-697.078	19138.7	-47119.7	4425.43	132.404	875.544	0	0	0	0	0	0	0	603	903	0
4704	2	0	0	0	0	0	0	200	300	0	-36.5614	-50.0256	-698.604	19321.8	-47424.9	4333.88	132.115	875.342	0	0	0	0	0	0	0	603	903	0
4704	3	0	0	0	0	0	0	200	300	0	-34.4252	-51.7041	-699.52	18772.5	-47485.9	4425.43	132.116	876.164	0	0	0	0	0	0	0	603	903	0
4704	4	0	0	0	0	0	0	200	300	0	-37.7821	-51.3989	-700.74	19138.7	-47424.9	4700.09	132.322	875.688	0	0	0	0	0	0	0	603	903	0
4704	5	0	0	0	0	0	0	200	300	0	-37.1718	-53.3826	-701.656	19047.2	-47791.1	4516.98	131.888	875.854	0	0	0	0	0	0	0	603	903	0
4704	6	0	0	0	0	0	0	200	300	0	-36.5614	-52.3145	-702.877	18955.6	-48157.3	4471.21	131.485	876.031	0	0	0	0	0	0	0	603	903	0
4704	7	0	0	0	0	0	0	200	300	0	-37.477	-52.1619	-703.792	18589.4	-47608	4425.43	132.355	876.587	0	0	0	0	0	0	0	603	903	0
4704	8	0	0	0	0	0	0	200	300	0	-35.6459	-54.1455	-708.065	18406.3	-47913.1	4700.09	132.332	877.005	0	0	0	0	0	0	0	603	903	0
4704	9	0	0	0	0	0	0	200	300	0	-37.6295	-53.8403	-705.318	18497.8	-48401.4	4700.09	131.376	876.774	0	0	0	0	0	0	0	603	903	0
4705	0	0	0	0	0	0	0	200	300	0	-37.3244	-54.4507	-706.539	19230.3	-48462.5	4791.64	131.409	875.782	0	0	0	0	0	0	0	603	903	0
4705	1	0	0	0	0	0	0	200	300	0	-38.6977	-55.5188	-707.759	18131.6	-48523.5	4837.42	131.441	877.382	0	0	0	0	0	0	0	603	903	0
4705	2	0	0	0	0	0	0	200	300	0	-38.8503	-55.6714	-709.285	17948.5	-48828.7	4562.76	131.158	877.695	0	0	0	0	0	0	0	603	903	0
4705	3	0	0	0	0	0	0	200	300	0	-35.6459	-56.4343	-709.59	18497.8	-48706.6	5066.3	131.36	876.932	0	0	0	0	0	0	0	603	903	0
4705	4	0	0	0	0	0	0	200	300	0	-39.4606	-56.8921	-710.201	17857	-48767.6	5295.18	131.333	877.857	0	0	0	0	0	0	0	603	903	0
4705	5	0	0	0	0	0	0	200	300	0	-40.3761	-57.1973	-713.253	17857	-48462.5	4928.97	132.054	877.964	0	0	0	0	0	0	0	603	903	0
4705	6	0	0	0	0	0	0	200	300	0	-38.2399	-57.8076	-713.863	17490.8	-48950.7	4928.97	131.428	878.498	0	0	0	0	0	0	0	603	903	0
4705	7	0	0	0	0	0	0	200	300	0	-39.4606	-57.9602	-715.084	17124.6	-48828.7	5203.63	131.716	879.052	0	0	0	0	0	0	0	603	903	0
4705	8	0	0	0	0	0	0	200	300	0	-40.071	-58.5706	-715.084	16941.4	-48828.7	4883.19	131.716	879.308	0	0	0	0	0	0	0	603	903	0
4705	9	0	0	0	0	0	0	200	300	0	-39.4606	-59.6387	-715.694	17307.7	-49561.1	4883.19	130.751	878.817	0	0	0	0	0	0	0	603	903	0
4706	0	0	0	0	0	0	0	200	300	0	-39.6132	-59.7913	-716.609	16666.8	-49561.1	5112.08	130.839	879.742	0	0	0	0	0	0	0	603	903	0
4706	1	0	0	0	0	0	0	200	300	0	-40.8339	-60.5542	-715.694	16941.4	-49561.1	5112.08	130.751	879.329	0	0	0	0	0	0	0	603	903	0
4706	2	0	0	0	0	0	0	200	300	0	-40.9865	-61.4697	-719.356	17033	-49805.2	5386.73	130.764	879.322	0	0	0	0	0	0	0	603	903	0
4706	3	0	0	0	0	0	0	200	300	0	-38.3925	-60.249	-719.966	16300.6	-49927.3	5295.18	130.653	880.359	0	0	0	0	0	0	0	603	903	0
4706	4	0	0	0	0	0	0	200	300	0	-41.5968	-62.6904	-722.408	16300.6	-49439	5157.85	131.564	880.436	0	0	0	0	0	0	0	603	903	0
4706	5	0	0	0	0	0	0	200	300	0	-40.9865	-62.6904	-722.408	15751.3	-49866.3	5432.51	130.972	881.196	0	0	0	0	0	0	0	603	903	0
4706	6	0	0	0	0	0	0	200	300	0	-40.2235	-63.1482	-724.849	15934.4	-49866.3	5340.96	131.205	881.017	0	0	0	0	0	0	0	603	903	0
4706	7	0	0	0	0	0	0	200	300	0	-40.5287	-64.0637	-726.375	16025.9	-49805.2	5432.51	131.433	880.937	0	0	0	0	0	0	0	603	903	0
4706	8	0	0	0	0	0	0	200	300	0	-42.0546	-64.6741	-726.68	15934.4	-50110.4	5432.51	131.042	881.072	0	0	0	0	0	0	0	603	903	0
4706	9	0	0	0	0	0	0	200	300	0	-41.902	-64.8267	-728.206	15842.8	-50598.7	5798.72	130.516	881.244	0	0	0	0	0	0	0	603	903	0
4707	0	0	0	0	0	0	0	200	300	0	-41.1391	-66.2	-730.953	15476.6	-50964.9	5569.84	130.276	881.827	0	0	0	0	0	0	0	603	903	0
4707	1	0	0	0	0	0	0	200	300	0	-41.2917	-65.5896	-731.258	15110.4	-50354.6	5707.17	131.14	882.336	0	0	0	0	0	0	0	603	903	0
4707	2	0	0	0	0	0	0	200	300	0	-42.2072	-65.8948	-733.089	15202	-51087	5981.83	130.313	882.263	0	0	0	0	0	0	0	603	903	0
4707	3	0	0	0	0	0	0	200	300	0	-41.7494	-66.9629	-735.53	15018.8	-51209	5478.29	130.378	882.581	0	0	0	0	0	0	0	603	903	0
4707	4	0	0	0	0	0	0	200	300	0	-41.1391	-67.4207	-734.92	14835.7	-50720.8	6164.93	130.985	882.813	0	0	0	0	0	0	0	603	903	0
4707	5	0	0	0	0	0	0	200	300	0	-40.8339	-66.5051	-735.836	14744.2	-51392.2	5752.95	130.158	882.963	0	0	0	0	0	0	0	603	903	0
4707	6	0	0	0	0	0	0	200	300	0	-42.2072	-68.1836	-737.667	15202	-51453.2	5752.95	130.249	882.392	0	0	0	0	0	0	0	603	903	0
4707	7	0	0	0	0	0	0	200	300	0	-41.5968	-68.6414	-738.277	14469.5	-51575.3	6164.93	130.141	883.401	0	0	0	0	0	0	0	603	903	0
4707	8	0	0	0	0	0	0	200	300	0	-43.1227	-69.8621	-737.972	14194.9	-51636.3	5798.72	130.029	883.765	0	0	0	0	0	0	0	603	903	0
4707	9	0	0	0	0	0	0	200	300	0	-42.3598	-69.5569	-741.329	14744.2	-52002.5	5615.62	129.852	883.111	0	0	0	0	0	0	0	603	903	0
4708	0	0	0	0	0	0	0	200	300	0	-41.7494	-70.3198	-742.549	14011.8	-51636.3	5707.17	130.461	884.13	0	0	0	0	0	0	0	603	903	0
4708	1	0	0	0	0	0	0	200	300	0	-43.7331	-70.7776	-743.77	13920.2	-51697.3	5981.83	130.493	884.284	0	0	0	0	0	0	0	603	903	0
4708	2	0	0	0	0	0	0	200	300	0	-43.1227	-71.5405	-744.991	14103.3	-51697.3	5890.27	130.607	884.069	0	0	0	0	0	0	0	603	903	0
4708	3	0	0	0	0	0	0	200	300	0	-41.4442	-70.1672	-747.127	14194.9	-52002.5	5981.83	130.397	884.001	0	0	0	0	0	0	0	603	903	0
4708	4	0	0	0	0	0	0	200	300	0	-44.1908	-72.1509	-747.432	13737.1	-52124.6	5844.5	130.262	884.621	0	0	0	0	0	0	0	603	903	0
4708	5	0	0	0	0	0	0	200	300	0	-44.0382	-72.7612	-748.348	13645.6	-52734.9	6164.93	129.532	884.766	0	0	0	0	0	0	0	603	903	0
4708	6	0	0	0	0	0	0	200	300	0	-43.2753	-72.9138	-749.568	13187.8	-52734.9	6027.6	129.646	885.406	0	0	0	0	0	0	0	603	903	0
4708	7	0	0	0	0	0	0	200	300	0	-43.8857	-73.6768	-750.789	13096.2	-52551.8	6119.16	130.005	885.557	0	0	0	0	0	0	0	603	903	0
4708	8	0	0	0	0	0	0	200	300	0	-44.3434	-73.3716	-748.348	12546.9	-52979.1	6210.71	129.205	886.234	0	0	0	0	0	0	0	603	903	0
4708	9	0	0	0	0	0	0	200	300	0	-43.7331	-74.4397	-753.536	12638.5	-53040.1	6164.93	129.612	886.228	0	0	0	0	0	0	0	603	903	0
4709	0	0	0	0	0	0	0	200	300	0	-44.0382	-74.7449	-753.231	12821.6	-52429.8	6439.59	130.394	885.978	0	0	0	0	0	0	0	603	903	0
4709	1	0	0	0	0	0	0	200	300	0	-43.2753	-75.2026	-754.146	12363.8	-52734.9	6164.93	130.073	886.606	0	0	0	0	0	0	0	603	903	0
4709	2	0	0	0	0	0	0	200	300	0	-44.3434	-75.9656	-756.587	12180.7	-52490.8	6027.6	130.622	886.901	0	0	0	0	0	0	0	603	903	0
4709	3	0	0	0	0	0	0	200	300	0	-44.1908	-76.5759	-756.282	12455.4	-52734.9	6210.71	130.271	886.531	0	0	0	0	0	0	0	603	903	0
4709	4	0	0	0	0	0	0	200	300	0	-46.1745	-76.7285	-758.419	11173.6	-52734.9	6348.04	130.467	888.267	0	0	0	0	0	0	0	603	903	0
4709	5	0	0	0	0	0	0	200	300	0	-46.0219	-77.4915	-757.198	11722.9	-53345.3	6439.59	129.549	887.518	0	0	0	0	0	0	0	603	903	0
4709	6	0	0	0	0	0	0	200	300	0	-45.2589	-78.7122	-759.639	11173.6	-53467.3	6302.26	129.615	888.291	0	0	0	0	0	0	0	603	903	0
4709	7	0	0	0	0	0	0	200	300	0	-46.3271	-78.5596	-760.25	10807.4	-52918	6439.59	130.394	888.784	0	0	0	0	0	0	0	603	903	0
4709	8	0	0	0	0	0	0	200	300	0	-46.0219	-79.6277	-761.165	10441.2	-53589.4	6393.81	129.596	889.283	0	0	0	0	0	0	0	603	903	0
4709	9	0	0	0	0	0	0	200	300	0	-45.4115	-79.9329	-760.86	10715.9	-53528.4	6393.81	129.648	888.916	0	0	0	0	0	0	0	603	903	0
4710	0	0	0	0	0	0	0	200	300	0	-46.0219	-78.407	-760.86	9800.34	-53284.2	6393.81	129.968	890.119	0	0	0	0	0	0	0	603	903	0
4710	1	0	0	0	0	0	0	200	300	0	-44.6486	-81.001	-763.301	10258.1	-53284.2	6439.59	130.192	889.561	0	0	0	0	0	0	0	603	903	0
4710	2	0	0	0	0	0	0	200	300	0	-45.7167	-81.6113	-762.691	10075	-53955.6	6393.81	129.256	889.79	0	0	0	0	0	0	0	603	903	0
4710	3	0	0	0	0	0	0	200	300	0	-45.8693	-80.6958	-764.522	9617.24	-53589.4	6851.58	129.905	890.421	0	0	0	0	0	0	0	603	903	0
4710	4	0	0	0	0	0	0	200	300	0	-46.7848	-81.9165	-764.522	8976.37	-53650.5	6622.7	129.825	891.259	0	0	0	0	0	0	0	603	903	0
4710	5	0	0	0	0	0	0	200	300	0	-47.2426	-83.1372	-765.743	8884.81	-53955.6	6576.92	129.538	891.397	0	0	0	0	0	0	0	603	903	0
4710	6	0	0	0	0	0	0	200	300	0	-44.9538	-83.2898	-765.743	9067.92	-54382.9	6668.47	128.98	891.158	0	0	0	0	0	0	0	603	903	0
4710	7	0	0	0	0	0	0	200	300	0	-47.5478	-83.4424	-765.743	8884.81	-53711.5	6622.7	129.857	891.397	0	0	0	0	0	0	0	603	903	0
4710	8	0	0	0	0	0	0	200	300	0	-48.0055	-82.832	-766.963	7603.07	-54504.9	6760.03	128.934	893.087	0	0	0	0	0	0	0	603	903	0
4710	9	0	0	0	0	0	0	200	300	0	-46.0219	-83.4424	-766.048	7877.73	-54688.1	6714.25	128.61	892.716	0	0	0	0	0	0	0	603	903	0
4711	0	0	0	0	0	0	0	200	300	0	-46.7848	-84.0527	-767.269	7786.18	-54016.7	6668.47	129.599	892.852	0	0	0	0	0	0	0	603	903	0
4711	1	0	0	0	0	0	0	200	300	0	-45.1064	-84.0527	-763.607	7511.52	-54077.7	6760.03	129.181	893.163	0	0	0	0	0	0	0	603	903	0
4711	2	0	0	0	0	0	0	200	300	0	-46.7848	-84.2053	-768.794	7145.31	-54504.9	6805.8	129.103	893.706	0	0	0	0	0	0	0	603	903	0
4711	3	0	0	0	0	0	0	200	300	0	-47.2426	-84.0527	-767.574	6687.55	-54260.8	6943.13	129.309	894.287	0	0	0	0	0	0	0	603	903	0
4711	4	0	0	0	0	0	0	200	300	0	-46.9374	-85.5786	-766.963	6687.55	-54566	6988.91	128.855	894.281	0	0	0	0	0	0	0	603	903	0
4711	5	0	0	0	0	0	0	200	300	0	-47.7003	-85.7312	-768.794	6779.1	-54810.1	6897.35	128.706	894.182	0	0	0	0	0	0	0	603	903	0
4711	6	0	0	0	0	0	0	200	300	0	-46.1745	-85.5786	-770.015	6046.68	-55054.3	6851.58	128.502	895.147	0	0	0	0	0	0	0	603	903	0
4711	7	0	0	0	0	0	0	200	300	0	-47.7003	-86.189	-768.489	5863.57	-54443.9	6760.03	129.155	895.37	0	0	0	0	0	0	0	603	903	0
4711	8	0	0	0	0	0	0	200	300	0	-47.8529	-86.6467	-767.879	5588.91	-54871.2	6943.13	128.542	895.722	0	0	0	0	0	0	0	603	903	0
4711	9	0	0	0	0	0	0	200	300	0	-46.7848	-86.4941	-765.132	5772.02	-55115.3	7034.68	127.966	895.456	0	0	0	0	0	0	0	603	903	0
4712	0	0	0	0	0	0	0	200	300	0	-46.9374	-86.6467	-766.658	5039.6	-54566	6988.91	128.826	896.427	0	0	0	0	0	0	0	603	903	0
4712	1	0	0	0	0	0	0	200	300	0	-46.1745	-87.1045	-767.269	4307.17	-54627	6943.13	128.803	897.386	0	0	0	0	0	0	0	603	903	0
4712	2	0	0	0	0	0	0	200	300	0	-47.09	-88.1726	-766.963	4673.39	-54810.1	7172.01	128.536	896.907	0	0	0	0	0	0	0	603	903	0
4712	3	0	0	0	0	0	0	200	300	0	-47.09	-88.02	-766.353	4490.28	-54504.9	7034.68	128.878	897.141	0	0	0	0	0	0	0	603	903	0
4712	4	0	0	0	0	0	0	200	300	0	-48.1581	-87.2571	-766.963	3391.65	-54688.1	7080.46	128.695	898.578	0	0	0	0	0	0	0	603	903	0
4712	5	0	0	0	0	0	0	200	300	0	-48.4633	-89.2407	-766.048	3483.2	-55176.3	7309.34	127.973	898.453	0	0	0	0	0	0	0	603	903	0
4712	6	0	0	0	0	0	0	200	300	0	-47.09	-88.6304	-765.132	2842.33	-54932.2	7309.34	128.206	899.285	0	0	0	0	0	0	0	603	903	0
4712	7	0	0	0	0	0	0	200	300	0	-47.09	-88.783	-762.386	2842.33	-54443.9	7263.57	128.587	899.272	0	0	0	0	0	0	0	603	903	0
4712	8	0	0	0	0	0	0	200	300	0	-44.9538	-90.0037	-764.217	2384.57	-55054.3	7309.34	127.96	899.88	0	0	0	0	0	0	0	603	903	0
4712	9	0	0	0	0	0	0	200	300	0	-47.09	-89.2407	-765.132	2293.01	-54688.1	7263.57	128.525	900.003	0	0	0	0	0	0	0	603	903	0
4713	0	0	0	0	0	0	0	200	300	0	-46.7848	-89.2407	-764.217	2109.91	-54627	7355.12	128.519	900.239	0	0	0	0	0	0	0	603	903	0
4713	1	0	0	0	0	0	0	200	300	0	-47.5478	-90.614	-763.607	1469.04	-54382.9	7584	128.782	901.076	0	0	0	0	0	0	0	603	903	0
4713	2	0	0	0	0	0	0	200	300	0	-48.0055	-90.3088	-762.386	1377.48	-54627	7629.78	128.347	901.193	0	0	0	0	0	0	0	603	903	0
4713	3	0	0	0	0	0	0	200	300	0	-46.4796	-90.4614	-762.081	828.168	-54382.9	7446.67	128.639	901.913	0	0	0	0	0	0	0	603	903	0
4713	4	0	0	0	0	0	0	200	300	0	-47.2426	-91.5295	-762.386	461.957	-54382.9	7721.33	128.668	902.394	0	0	0	0	0	0	0	603	903	0
4713	5	0	0	0	0	0	0	200	300	0	-44.6486	-91.8347	-760.86	-87.3596	-54993.2	7584	127.722	903.115	0	0	0	0	0	0	0	603	903	0
4713	6	0	0	0	0	0	0	200	300	0	-46.0219	-91.8347	-762.081	187.299	-54688.1	7675.56	128.238	902.754	0	0	0	0	0	0	0	603	903	0
4713	7	0	0	0	0	0	0	200	300	0	-46.4796	-91.0718	-761.47	-819.782	-54138.7	7584	128.902	904.077	0	0	0	0	0	0	0	603	903	0
4713	8	0	0	0	0	0	0	200	300	0	-46.9374	-91.8347	-760.25	-1002.89	-54871.2	7904.44	127.825	904.319	0	0	0	0	0	0	0	603	903	0
4713	9	0	0	0	0	0	0	200	300	0	-46.4796	-92.1399	-760.86	-1002.89	-55115.3	7812.88	127.562	904.318	0	0	0	0	0	0	0	603	903	0
4714	0	0	0	0	0	0	0	200	300	0	-45.4115	-93.208	-760.555	-1460.65	-54566	7995.99	128.255	904.921	0	0	0	0	0	0	0	603	903	0
4714	1	0	0	0	0	0	0	200	300	0	-45.8693	-92.5977	-758.419	-1918.41	-54260.8	8041.76	128.455	905.529	0	0	0	0	0	0	0	603	903	0
4714	2	0	0	0	0	0	0	200	300	0	-46.1745	-93.0554	-759.944	-2559.28	-54138.7	8041.76	128.76	906.368	0	0	0	0	0	0	0	603	903	0
4714	3	0	0	0	0	0	0	200	300	0	-46.1745	-95.0391	-758.419	-2925.49	-54382.9	8179.09	128.294	906.857	0	0	0	0	0	0	0	603	903	0
4714	4	0	0	0	0	0	0	200	300	0	-43.4279	-93.5132	-757.503	-2833.94	-54566	8362.2	127.966	906.741	0	0	0	0	0	0	0	603	903	0
4714	5	0	0	0	0	0	0	200	300	0	-45.1064	-94.5813	-757.808	-3383.26	-54688.1	8407.98	127.834	907.465	0	0	0	0	0	0	0	603	903	0
4714	6	0	0	0	0	0	0	200	300	0	-42.5124	-94.5813	-757.808	-3474.81	-54443.9	8591.08	128.156	907.585	0	0	0	0	0	0	0	603	903	0
4714	7	0	0	0	0	0	0	200	300	0	-44.3434	-94.8865	-755.062	-3566.36	-54138.7	8407.98	128.299	907.723	0	0	0	0	0	0	0	603	903	0
4714	8	0	0	0	0	0	0	200	300	0	-43.8857	-95.802	-754.146	-3383.26	-54688.1	8591.08	127.483	907.486	0	0	0	0	0	0	0	603	903	0
4714	9	0	0	0	0	0	0	200	300	0	-44.3434	-96.2598	-753.841	-4207.23	-54504.9	8453.76	127.697	908.581	0	0	0	0	0	0	0	603	903	0
4715	0	0	0	0	0	0	0	200	300	0	-44.3434	-95.6494	-752.62	-4939.65	-54077.7	8728.41	128.147	909.563	0	0	0	0	0	0	0	603	903	0
4715	1	0	0	0	0	0	0	200	300	0	-42.5124	-96.7175	-752.62	-5031.21	-53955.6	9048.85	128.31	909.685	0	0	0	0	0	0	0	603	903	0
4715	2	0	0	0	0	0	0	200	300	0	-43.1227	-96.8701	-750.484	-5214.31	-54077.7	8728.41	127.943	909.948	0	0	0	0	0	0	0	603	903	0
4715	3	0	0	0	0	0	0	200	300	0	-42.8175	-95.4968	-750.179	-5488.97	-54077.7	8682.64	127.914	910.317	0	0	0	0	0	0	0	603	903	0
4715	4	0	0	0	0	0	0	200	300	0	-42.2072	-97.1753	-750.484	-6038.29	-54016.7	8819.97	128.024	911.046	0	0	0	0	0	0	0	603	903	0
4715	5	0	0	0	0	0	0	200	300	0	-42.2072	-97.6331	-748.348	-6312.95	-54566	8865.74	127.085	911.436	0	0	0	0	0	0	0	603	903	0
4715	6	0	0	0	0	0	0	200	300	0	-42.2072	-97.4805	-748.653	-6221.4	-54077.7	9048.85	127.767	911.31	0	0	0	0	0	0	0	603	903	0
4715	7	0	0	0	0	0	0	200	300	0	-42.9701	-98.2434	-745.906	-6312.95	-53772.5	9323.51	127.91	911.464	0	0	0	0	0	0	0	603	903	0
4715	8	0	0	0	0	0	0	200	300	0	-41.2917	-97.6331	-741.634	-6679.16	-54321.8	8911.52	126.754	912.006	0	0	0	0	0	0	0	603	903	0
4715	9	0	0	0	0	0	0	200	300	0	-40.8339	-98.396	-744.686	-7228.48	-53955.6	8728.41	127.546	912.707	0	0	0	0	0	0	0	603	903	0
4716	0	0	0	0	0	0	0	200	300	0	-39.308	-97.9382	-742.549	-7503.13	-53223.2	8957.3	128.324	913.105	0	0	0	0	0	0	0	603	903	0
4716	1	0	0	0	0	0	0	200	300	0	-41.2917	-98.7012	-741.023	-7136.92	-54077.7	8957.3	127.023	912.631	0	0	0	0	0	0	0	603	903	0
4716	2	0	0	0	0	0	0	200	300	0	-40.8339	-99.1589	-740.718	-8052.45	-53894.6	8865.74	127.24	913.871	0	0	0	0	0	0	0	603	903	0
4716	3	0	0	0	0	0	0	200	300	0	-41.902	-100.227	-738.277	-8144	-53162.2	9003.07	127.992	914.031	0	0	0	0	0	0	0	603	903	0
4716	4	0	0	0	0	0	0	200	300	0	-41.1391	-100.227	-736.446	-7686.24	-53345.3	9231.95	127.564	913.437	0	0	0	0	0	0	0	603	903	0
4716	5	0	0	0	0	0	0	200	300	0	-40.3761	-100.685	-733.394	-7777.79	-53101.1	9094.62	127.595	913.605	0	0	0	0	0	0	0	603	903	0
4716	6	0	0	0	0	0	0	200	300	0	-41.7494	-101.906	-734.31	-8693.32	-52796	9140.4	128.101	914.839	0	0	0	0	0	0	0	603	903	0
4716	7	0	0	0	0	0	0	200	300	0	-40.5287	-101.143	-732.173	-8876.42	-53040.1	9323.51	127.558	915.123	0	0	0	0	0	0	0	603	903	0
4716	8	0	0	0	0	0	0	200	300	0	-37.6295	-102.974	-732.173	-9059.53	-52979.1	9140.4	127.641	915.373	0	0	0	0	0	0	0	603	903	0
4716	9	0	0	0	0	0	0	200	300	0	-40.6813	-102.974	-727.596	-9242.63	-53101.1	9323.51	127.018	915.703	0	0	0	0	0	0	0	603	903	0
4717	0	0	0	0	0	0	0	200	300	0	-40.2235	-101.906	-726.68	-9242.63	-52429.8	9415.06	127.85	915.719	0	0	0	0	0	0	0	603	903	0
4717	1	0	0	0	0	0	0	200	300	0	-38.6977	-103.889	-725.154	-9791.95	-52490.8	9506.61	127.614	916.503	0	0	0	0	0	0	0	603	903	0
4717	2	0	0	0	0	0	0	200	300	0	-38.2399	-104.194	-721.797	-10158.2	-52429.8	9415.06	127.362	917.073	0	0	0	0	0	0	0	603	903	0
4717	3	0	0	0	0	0	0	200	300	0	-37.477	-104.042	-721.187	-10341.3	-52124.6	9552.39	127.724	917.339	0	0	0	0	0	0	0	603	903	0
4717	4	0	0	0	0	0	0	200	300	0	-39.4606	-104.805	-719.356	-10982.1	-52002.5	9369.28	127.71	918.267	0	0	0	0	0	0	0	603	903	0
4717	5	0	0	0	0	0	0	200	300	0	-36.2563	-104.347	-715.694	-10982.1	-51880.4	9460.84	127.51	918.345	0	0	0	0	0	0	0	603	903	0
4717	6	0	0	0	0	0	0	200	300	0	-37.9347	-104.957	-715.084	-10982.1	-51392.2	9598.17	128.131	918.358	0	0	0	0	0	0	0	603	903	0
4717	7	0	0	0	0	0	0	200	300	0	-38.2399	-106.941	-712.642	-11439.9	-51209	9827.05	128.142	919.053	0	0	0	0	0	0	0	603	903	0
4717	8	0	0	0	0	0	0	200	300	0	-36.5614	-106.178	-710.506	-10524.4	-51270.1	9872.82	127.84	917.812	0	0	0	0	0	0	0	603	903	0
4717	9	0	0	0	0	0	0	200	300	0	-36.5614	-105.568	-708.675	-12172.3	-50842.8	9918.6	128.256	920.176	0	0	0	0	0	0	0	603	903	0
4718	0	0	0	0	0	0	0	200	300	0	-36.714	-106.178	-706.233	-11806.1	-50476.6	10055.9	128.527	919.717	0	0	0	0	0	0	0	603	903	0
4718	1	0	0	0	0	0	0	200	300	0	-36.2563	-106.483	-703.792	-11989.2	-51148	9689.72	127.325	920.035	0	0	0	0	0	0	0	603	903	0
4718	2	0	0	0	0	0	0	200	300	0	-34.5778	-107.551	-701.656	-12172.3	-50110.4	9918.6	128.583	920.348	0	0	0	0	0	0	0	603	903	0
4718	3	0	0	0	0	0	0	200	300	0	-35.9511	-107.094	-698.299	-12355.4	-49927.3	10330.6	128.502	920.694	0	0	0	0	0	0	0	603	903	0
4718	4	0	0	0	0	0	0	200	300	0	-33.3571	-107.094	-696.468	-12904.7	-50476.6	10010.2	127.525	921.529	0	0	0	0	0	0	0	603	903	0
4718	5	0	0	0	0	0	0	200	300	0	-34.12	-108.009	-694.637	-12813.2	-50354.6	10284.8	127.51	921.446	0	0	0	0	0	0	0	603	903	0
4718	6	0	0	0	0	0	0	200	300	0	-33.6623	-108.314	-692.195	-12813.2	-49500.1	10055.9	128.488	921.511	0	0	0	0	0	0	0	603	903	0
4718	7	0	0	0	0	0	0	200	300	0	-33.9674	-108.314	-690.669	-12996.3	-49866.3	10330.6	127.8	921.817	0	0	0	0	0	0	0	603	903	0
4718	8	0	0	0	0	0	0	200	300	0	-33.9674	-108.772	-685.176	-13454.1	-49500.1	10239	127.756	922.636	0	0	0	0	0	0	0	603	903	0
4718	9	0	0	0	0	0	0	200	300	0	-32.5941	-108.772	-683.956	-13545.6	-49133.9	10330.6	128.162	922.805	0	0	0	0	0	0	0	603	903	0
4719	0	0	0	0	0	0	0	200	300	0	-31.8312	-108.772	-682.125	-13911.8	-48889.7	10330.6	128.327	923.395	0	0	0	0	0	0	0	603	903	0
4719	1	0	0	0	0	0	0	200	300	0	-32.4416	-109.84	-681.209	-14186.5	-48950.7	10376.4	128.141	923.826	0	0	0	0	0	0	0	603	903	0
4719	2	0	0	0	0	0	0	200	300	0	-31.526	-109.688	-676.937	-14094.9	-48340.4	10559.5	128.589	923.822	0	0	0	0	0	0	0	603	903	0
4719	3	0	0	0	0	0	0	200	300	0	-30.9157	-108.925	-672.969	-14918.9	-48462.5	10422.1	127.987	925.169	0	0	0	0	0	0	0	603	903	0
4719	4	0	0	0	0	0	0	200	300	0	-32.289	-110.45	-672.054	-14735.8	-48340.4	10788.4	128.071	924.927	0	0	0	0	0	0	0	603	903	0
4719	5	0	0	0	0	0	0	200	300	0	-31.0683	-109.535	-667.781	-14461.1	-48584.5	10284.8	127.245	924.656	0	0	0	0	0	0	0	603	903	0
4719	6	0	0	0	0	0	0	200	300	0	-30.1527	-108.772	-665.95	-14735.8	-47974.2	10284.8	127.961	925.128	0	0	0	0	0	0	0	603	903	0
4719	7	0	0	0	0	0	0	200	300	0	-31.0683	-110.145	-663.814	-14644.2	-47424.9	10284.8	128.557	925.061	0	0	0	0	0	0	0	603	903	0
4719	8	0	0	0	0	0	0	200	300	0	-30.4579	-110.756	-659.847	-15010.5	-47791.1	10559.5	127.572	925.748	0	0	0	0	0	0	0	603	903	0
4719	9	0	0	0	0	0	0	200	300	0	-29.3898	-110.145	-657.405	-15193.6	-46936.6	10559.5	128.603	926.111	0	0	0	0	0	0	0	603	903	0
4720	0	0	0	0	0	0	0	200	300	0	-30.6105	-109.993	-654.354	-15010.5	-46753.5	10239	128.55	925.939	0	0	0	0	0	0	0	603	903	0
4720	1	0	0	0	0	0	0	200	300	0	-30.6105	-109.23	-647.029	-15193.6	-46936.6	10422.1	127.458	926.482	0	0	0	0	0	0	0	603	903	0
4720	2	0	0	0	0	0	0	200	300	0	-29.2372	-109.84	-647.945	-15559.8	-46997.6	10193.3	127.467	927.014	0	0	0	0	0	0	0	603	903	0
4720	3	0	0	0	0	0	0	200	300	0	-30.4579	-111.519	-644.283	-15651.3	-45960	10330.6	128.665	927.293	0	0	0	0	0	0	0	603	903	0
4720	4	0	0	0	0	0	0	200	300	0	-29.8476	-109.688	-639.095	-15926	-46387.3	10284.8	127.417	927.92	0	0	0	0	0	0	0	603	903	0
4720	5	0	0	0	0	0	0	200	300	0	-28.932	-109.993	-637.874	-15468.2	-46021.1	10376.4	127.852	927.25	0	0	0	0	0	0	0	603	903	0
4720	6	0	0	0	0	0	0	200	300	0	-28.6269	-109.535	-633.602	-16109.1	-45349.7	10467.9	128.426	928.425	0	0	0	0	0	0	0	603	903	0
4720	7	0	0	0	0	0	0	200	300	0	-29.695	-109.993	-630.855	-16475.3	-45532.8	10193.3	127.824	929.116	0	0	0	0	0	0	0	603	903	0
4720	8	0	0	0	0	0	0	200	300	0	-29.3898	-110.45	-627.498	-16292.2	-44739.3	10101.7	128.702	928.964	0	0	0	0	0	0	0	603	903	0
4720	9	0	0	0	0	0	0	200	300	0	-28.0165	-109.688	-620.174	-16475.3	-44617.2	10101.7	128.057	929.566	0	0	0	0	0	0	0	603	903	0
4721	0	0	0	0	0	0	0	200	300	0	-29.0846	-110.45	-619.258	-17207.7	-44312.1	10193.3	128.443	930.788	0	0	0	0	0	0	0	603	903	0
4721	1	0	0	0	0	0	0	200	300	0	-28.7794	-110.45	-615.901	-16841.5	-44617.2	10193.3	127.558	930.345	0	0	0	0	0	0	0	603	903	0
4721	2	0	0	0	0	0	0	200	300	0	-27.5587	-111.366	-611.324	-17116.2	-44006.9	10147.5	128.014	930.999	0	0	0	0	0	0	0	603	903	0
4721	3	0	0	0	0	0	0	200	300	0	-28.6269	-110.145	-608.577	-17299.3	-43152.4	10193.3	129.093	931.426	0	0	0	0	0	0	0	603	903	0
4721	4	0	0	0	0	0	0	200	300	0	-28.7794	-109.84	-604.305	-17299.3	-43518.6	9781.27	127.986	931.627	0	0	0	0	0	0	0	603	903	0
4721	5	0	0	0	0	0	0	200	300	0	-25.5751	-111.824	-600.032	-17299.3	-43335.5	10101.7	127.778	931.831	0	0	0	0	0	0	0	603	903	0
4721	6	0	0	0	0	0	0	200	300	0	-28.7794	-111.061	-596.675	-17665.5	-42481	10055.9	128.804	932.607	0	0	0	0	0	0	0	603	903	0
4721	7	0	0	0	0	0	0	200	300	0	-28.932	-112.129	-590.267	-17665.5	-42114.8	10010.2	128.651	932.928	0	0	0	0	0	0	0	603	903	0
4721	8	0	0	0	0	0	0	200	300	0	-27.2536	-111.213	-589.046	-17757	-42297.9	10055.9	128.193	933.145	0	0	0	0	0	0	0	603	903	0
4721	9	0	0	0	0	0	0	200	300	0	-27.4062	-111.213	-584.163	-18214.8	-41626.5	10239	128.742	934.181	0	0	0	0	0	0	0	603	903	0
4722	0	0	0	0	0	0	0	200	300	0	-28.4743	-111.671	-578.975	-18123.2	-41321.4	10055.9	128.63	934.302	0	0	0	0	0	0	0	603	903	0
4722	1	0	0	0	0	0	0	200	300	0	-27.4062	-111.824	-575.923	-17665.5	-41504.5	9918.6	127.934	933.673	0	0	0	0	0	0	0	603	903	0
4722	2	0	0	0	0	0	0	200	300	0	-26.1855	-111.671	-572.261	-18306.4	-41199.3	10055.9	128.006	934.99	0	0	0	0	0	0	0	603	903	0
4722	3	0	0	0	0	0	0	200	300	0	-27.2536	-111.213	-568.294	-18581	-40344.8	9872.82	129.007	935.696	0	0	0	0	0	0	0	603	903	0
4722	4	0	0	0	0	0	0	200	300	0	-24.3544	-111.519	-563.716	-18123.2	-40466.9	9872.82	128.214	935.15	0	0	0	0	0	0	0	603	903	0
4722	5	0	0	0	0	0	0	200	300	0	-25.7277	-110.756	-559.749	-18581	-40161.7	9872.82	128.251	936.195	0	0	0	0	0	0	0	603	903	0
4722	6	0	0	0	0	0	0	200	300	0	-26.338	-111.213	-554.256	-18489.5	-39185.1	9827.05	129.301	936.359	0	0	0	0	0	0	0	603	903	0
4722	7	0	0	0	0	0	0	200	300	0	-25.4225	-110.45	-549.678	-18672.6	-39307.2	10193.3	128.491	936.97	0	0	0	0	0	0	0	603	903	0
4722	8	0	0	0	0	0	0	200	300	0	-24.6596	-109.688	-545.101	-18764.1	-39307.2	9689.72	127.89	937.423	0	0	0	0	0	0	0	603	903	0
4722	9	0	0	0	0	0	0	200	300	0	-24.507	-110.145	-542.049	-19038.8	-38269.6	9964.38	129.398	938.124	0	0	0	0	0	0	0	603	903	0
4723	0	0	0	0	0	0	0	200	300	0	-23.1337	-108.925	-533.199	-19038.8	-38208.6	9735.49	128.341	938.707	0	0	0	0	0	0	0	603	903	0
4723	1	0	0	0	0	0	0	200	300	0	-23.2863	-108.619	-532.283	-18581	-38330.6	9552.39	127.988	937.908	0	0	0	0	0	0	0	603	903	0
4723	2	0	0	0	0	0	0	200	300	0	-21.913	-109.23	-527.095	-18947.2	-37415.1	9643.94	129.016	938.947	0	0	0	0	0	0	0	603	903	0
4723	3	0	0	0	0	0	0	200	300	0	-23.5915	-108.162	-520.992	-19038.8	-37048.9	9827.05	128.888	939.543	0	0	0	0	0	0	0	603	903	0
4723	4	0	0	0	0	0	0	200	300	0	-23.5915	-107.551	-517.94	-18855.7	-36987.9	9598.17	128.587	939.405	0	0	0	0	0	0	0	603	903	0
4723	5	0	0	0	0	0	0	200	300	0	-20.9975	-107.551	-513.668	-19313.4	-36865.8	9506.61	128.23	940.599	0	0	0	0	0	0	0	603	903	0
4723	6	0	0	0	0	0	0	200	300	0	-20.9975	-107.094	-507.564	-19130.3	-35828.2	9506.61	129.411	940.69	0	0	0	0	0	0	0	603	903	0
4723	7	0	0	0	0	0	0	200	300	0	-18.8612	-105.873	-502.071	-19313.4	-35278.9	9460.84	129.733	941.468	0	0	0	0	0	0	0	603	903	0
4723	8	0	0	0	0	0	0	200	300	0	-20.2345	-105.72	-495.967	-19221.9	-35400.9	9598.17	128.622	941.756	0	0	0	0	0	0	0	603	903	0
4723	9	0	0	0	0	0	0	200	300	0	-19.7768	-105.72	-491.39	-19130.3	-34546.4	9735.49	129.696	941.931	0	0	0	0	0	0	0	603	903	0
4724	0	0	0	0	0	0	0	200	300	0	-20.2345	-104.957	-483.455	-19771.2	-34424.4	9369.28	128.795	943.896	0	0	0	0	0	0	0	603	903	0
4724	1	0	0	0	0	0	0	200	300	0	-19.9294	-105.415	-481.014	-19221.9	-34546.4	8957.3	128.18	942.961	0	0	0	0	0	0	0	603	903	0
4724	2	0	0	0	0	0	0	200	300	0	-18.4035	-104.347	-474.91	-19496.5	-33447.8	9048.85	129.57	944.053	0	0	0	0	0	0	0	603	903	0
4724	3	0	0	0	0	0	0	200	300	0	-17.0302	-104.042	-470.333	-19405	-32898.5	9277.73	130.053	944.258	0	0	0	0	0	0	0	603	903	0
4724	4	0	0	0	0	0	0	200	300	0	-18.0983	-103.737	-463.008	-19496.5	-33203.7	9231.95	128.287	945.108	0	0	0	0	0	0	0	603	903	0
4724	5	0	0	0	0	0	0	200	300	0	-17.3354	-101.6	-457.515	-18489.5	-32349.2	9277.73	129.294	943.413	0	0	0	0	0	0	0	603	903	0
4724	6	0	0	0	0	0	0	200	300	0	-15.9621	-102.516	-453.243	-19405	-31372.6	9369.28	130.782	945.814	0	0	0	0	0	0	0	603	903	0
4724	7	0	0	0	0	0	0	200	300	0	-16.4198	-102.974	-447.139	-19588.1	-31738.8	9140.4	129.018	946.808	0	0	0	0	0	0	0	603	903	0
4724	8	0	0	0	0	0	0	200	300	0	-15.6569	-100.99	-441.951	-19130.3	-31372.6	9140.4	129.013	946.286	0	0	0	0	0	0	0	603	903	0
4724	9	0	0	0	0	0	0	200	300	0	-13.9784	-101.448	-437.068	-19130.3	-30762.2	9003.07	129.617	946.77	0	0	0	0	0	0	0	603	903	0
4725	0	0	0	0	0	0	0	200	300	0	-15.3517	-99.9219	-430.355	-19496.5	-30090.9	9003.07	130.079	948.304	0	0	0	0	0	0	0	603	903	0
4725	1	0	0	0	0	0	0	200	300	0	-14.4362	-98.8538	-424.556	-18947.2	-29968.8	8774.19	129.411	947.628	0	0	0	0	0	0	0	603	903	0
4725	2	0	0	0	0	0	0	200	300	0	-13.6732	-99.7693	-419.979	-18947.2	-29053.3	9048.85	130.822	948.115	0	0	0	0	0	0	0	603	903	0
4725	3	0	0	0	0	0	0	200	300	0	-12.9103	-97.7856	-411.739	-19496.5	-28626	9094.62	130.475	950.352	0	0	0	0	0	0	0	603	903	0
4725	4	0	0	0	0	0	0	200	300	0	-14.131	-96.5649	-407.161	-19221.9	-28626	8819.97	129.694	950.21	0	0	0	0	0	0	0	603	903	0
4725	5	0	0	0	0	0	0	200	300	0	-13.8258	-96.8701	-401.058	-18855.7	-27710.5	8774.19	130.906	950.015	0	0	0	0	0	0	0	603	903	0
4725	6	0	0	0	0	0	0	200	300	0	-11.3844	-95.9546	-394.954	-18855.7	-27344.3	8682.64	130.766	950.741	0	0	0	0	0	0	0	603	903	0
4725	7	0	0	0	0	0	0	200	300	0	-11.2318	-93.9709	-385.189	-19405	-27039.1	8453.76	129.803	953.378	0	0	0	0	0	0	0	603	903	0
4725	8	0	0	0	0	0	0	200	300	0	-11.8422	-94.5813	-383.052	-19038.8	-26611.9	8499.53	130.527	952.703	0	0	0	0	0	0	0	603	903	0
4725	9	0	0	0	0	0	0	200	300	0	-10.6215	-93.3606	-377.254	-18214.8	-26001.5	8407.98	131.077	951.283	0	0	0	0	0	0	0	603	903	0
4726	0	0	0	0	0	0	0	200	300	0	-9.40079	-92.2925	-373.287	-19313.4	-25818.4	8362.2	130.835	954.739	0	0	0	0	0	0	0	603	903	0
4726	1	0	0	0	0	0	0	200	300	0	-10.3163	-91.5295	-365.352	-18855.7	-25208.1	8499.53	131.003	954.61	0	0	0	0	0	0	0	603	903	0
4726	2	0	0	0	0	0	0	200	300	0	-10.9267	-90.0037	-360.164	-18764.1	-24841.8	8179.09	131.026	955.099	0	0	0	0	0	0	0	603	903	0
4726	3	0	0	0	0	0	0	200	300	0	-8.18008	-90.0037	-354.366	-18947.2	-24414.6	8041.76	131.103	956.468	0	0	0	0	0	0	0	603	903	0
4726	4	0	0	0	0	0	0	200	300	0	-9.40079	-88.9355	-347.347	-18031.7	-23926.3	8133.32	131.117	954.913	0	0	0	0	0	0	0	603	903	0
4726	5	0	0	0	0	0	0	200	300	0	-8.48526	-87.1045	-341.243	-18397.9	-23438	7812.88	131.316	956.914	0	0	0	0	0	0	0	603	903	0
4726	6	0	0	0	0	0	0	200	300	0	-7.87491	-86.6467	-336.971	-18031.7	-23621.1	8041.76	129.902	956.511	0	0	0	0	0	0	0	603	903	0
4726	7	0	0	0	0	0	0	200	300	0	-5.89127	-85.8838	-327.815	-18306.4	-22644.6	7858.66	130.923	958.844	0	0	0	0	0	0	0	603	903	0
4726	8	0	0	0	0	0	0	200	300	0	-8.18008	-83.4424	-323.238	-18123.2	-22095.3	7629.78	131.644	959.068	0	0	0	0	0	0	0	603	903	0
4726	9	0	0	0	0	0	0	200	300	0	-6.19644	-83.595	-317.134	-17024.6	-22339.4	7675.56	129.559	956.683	0	0	0	0	0	0	0	603	903	0
4727	0	0	0	0	0	0	0	200	300	0	-6.19644	-82.2217	-308.895	-18123.2	-21912.2	7263.57	129.063	961.671	0	0	0	0	0	0	0	603	903	0
4727	1	0	0	0	0	0	0	200	300	0	-6.50162	-80.8484	-306.453	-17848.6	-20874.6	7263.57	131.883	961.243	0	0	0	0	0	0	0	603	903	0
4727	2	0	0	0	0	0	0	200	300	0	-4.82315	-80.6958	-299.129	-17757	-20996.6	7492.45	129.807	962.363	0	0	0	0	0	0	0	603	903	0
4727	3	0	0	0	0	0	0	200	300	0	-4.97574	-77.7966	-293.941	-17207.7	-20447.3	6943.13	130.437	961.542	0	0	0	0	0	0	0	603	903	0
4727	4	0	0	0	0	0	0	200	300	0	-5.4335	-76.5759	-288.448	-16841.5	-20020.1	6714.25	130.594	961.387	0	0	0	0	0	0	0	603	903	0
4727	5	0	0	0	0	0	0	200	300	0	-5.28091	-75.5078	-283.87	-16933.1	-19837	6668.47	130.12	962.651	0	0	0	0	0	0	0	603	903	0
4727	6	0	0	0	0	0	0	200	300	0	-4.82315	-73.9819	-277.156	-17024.6	-19226.6	6393.81	130.629	964.426	0	0	0	0	0	0	0	603	903	0
4727	7	0	0	0	0	0	0	200	300	0	-4.2128	-72.7612	-270.748	-16750	-18738.3	6531.14	130.79	964.866	0	0	0	0	0	0	0	603	903	0
4727	8	0	0	0	0	0	0	200	300	0	-4.97574	-70.9302	-264.034	-16566.9	-18250	6485.37	130.88	965.745	0	0	0	0	0	0	0	603	903	0
4727	9	0	0	0	0	0	0	200	300	0	-4.06021	-69.2517	-258.541	-15926	-18005.9	5752.95	130.356	964.6	0	0	0	0	0	0	0	603	903	0
4728	0	0	0	0	0	0	0	200	300	0	-2.22916	-69.4043	-252.437	-15651.3	-17456.6	6073.38	130.848	965.001	0	0	0	0	0	0	0	603	903	0
4728	1	0	0	0	0	0	0	200	300	0	-4.67056	-66.9629	-247.859	-16017.5	-17029.3	5981.83	131.294	967.624	0	0	0	0	0	0	0	603	903	0
4728	2	0	0	0	0	0	0	200	300	0	-4.67056	-66.8103	-241.756	-15651.3	-17029.3	5615.62	129.56	967.74	0	0	0	0	0	0	0	603	903	0
4728	3	0	0	0	0	0	0	200	300	0	-2.68692	-65.5896	-238.094	-14461.1	-16785.2	5752.95	129.502	963.737	0	0	0	0	0	0	0	603	903	0
4728	4	0	0	0	0	0	0	200	300	0	-3.44986	-64.0637	-230.159	-15376.7	-15991.7	5157.85	130.519	969.809	0	0	0	0	0	0	0	603	903	0
4728	5	0	0	0	0	0	0	200	300	0	-3.90762	-61.9275	-226.192	-15010.5	-15686.6	5249.41	130.649	969.362	0	0	0	0	0	0	0	603	903	0
4728	6	0	0	0	0	0	0	200	300	0	-2.9921	-61.1646	-220.394	-15102	-15381.4	5249.41	130.209	971.523	0	0	0	0	0	0	0	603	903	0
4728	7	0	0	0	0	0	0	200	300	0	-3.90762	-61.3171	-214.9	-14461.1	-14160.7	5157.85	134.106	970.292	0	0	0	0	0	0	0	603	903	0
4728	8	0	0	0	0	0	0	200	300	0	-3.90762	-58.2654	-209.407	-14369.6	-14710	4837.42	129.754	971.62	0	0	0	0	0	0	0	603	903	0
4728	9	0	0	0	0	0	0	200	300	0	-4.36539	-56.2817	-202.999	-13911.8	-14282.8	5020.52	129.641	971.532	0	0	0	0	0	0	0	603	903	0
4729	0	0	0	0	0	0	0	200	300	0	-2.9921	-56.1292	-197.2	-13820.3	-13611.4	4791.64	130.977	973.082	0	0	0	0	0	0	0	603	903	0
4729	1	0	0	0	0	0	0	200	300	0	-2.83951	-53.8403	-193.538	-13820.3	-13550.3	4608.54	129.986	974.409	0	0	0	0	0	0	0	603	903	0
4729	2	0	0	0	0	0	0	200	300	0	-3.75503	-53.6877	-187.435	-13545.6	-13001	4654.31	130.637	975.269	0	0	0	0	0	0	0	603	903	0
4729	3	0	0	0	0	0	0	200	300	0	-2.68692	-52.1619	-181.636	-12630.1	-12573.8	4516.98	130.775	972.535	0	0	0	0	0	0	0	603	903	0
4729	4	0	0	0	0	0	0	200	300	0	-2.38174	-51.5515	-178.89	-13362.5	-12085.5	4425.43	132.442	977.697	0	0	0	0	0	0	0	603	903	0
4729	5	0	0	0	0	0	0	200	300	0	-3.75503	-51.0938	-172.176	-12904.7	-12268.6	4013.44	128.744	977.951	0	0	0	0	0	0	0	603	903	0
4729	6	0	0	0	0	0	0	200	300	0	-2.22916	-48.6523	-167.903	-12263.9	-11597.2	4059.22	130.929	976.041	0	0	0	0	0	0	0	603	903	0
4729	7	0	0	0	0	0	0	200	300	0	-1.6188	-47.2791	-164.241	-12263.9	-11170	3830.34	131.99	977.67	0	0	0	0	0	0	0	603	903	0
4729	8	0	0	0	0	0	0	200	300	0	-3.14468	-46.3635	-157.222	-11714.6	-11108.9	3784.56	129.342	977.51	0	0	0	0	0	0	0	603	903	0
4729	9	0	0	0	0	0	0	200	300	0	-4.2128	-44.8377	-155.086	-11714.6	-10803.8	3738.78	130.337	978.536	0	0	0	0	0	0	0	603	903	0
4730	0	0	0	0	0	0	0	200	300	0	-2.53433	-43.9221	-149.593	-11806.1	-10254.4	3693.01	131.451	981.922	0	0	0	0	0	0	0	603	903	0
4730	1	0	0	0	0	0	0	200	300	0	-3.60245	-42.5488	-144.405	-11256.8	-10132.4	3464.13	129.834	980.953	0	0	0	0	0	0	0	603	903	0
4730	2	0	0	0	0	0	0	200	300	0	-1.77139	-41.1755	-142.574	-11348.4	-9949.27	3372.57	130.217	982.596	0	0	0	0	0	0	0	603	903	0
4730	3	0	0	0	0	0	0	200	300	0	-2.22916	-40.5652	-137.081	-10707.5	-9644.09	3509.9	129.647	981.111	0	0	0	0	0	0	0	603	903	0
4730	4	0	0	0	0	0	0	200	300	0	-2.38174	-39.1919	-134.639	-10707.5	-9522.02	3281.02	129.278	982.527	0	0	0	0	0	0	0	603	903	0
4730	5	0	0	0	0	0	0	200	300	0	-3.60245	-37.666	-130.977	-10615.9	-9216.84	3189.47	129.63	984.052	0	0	0	0	0	0	0	603	903	0
4730	6	0	0	0	0	0	0	200	300	0	-2.22916	-35.5298	-125.484	-9975.05	-8667.52	2960.59	130.927	982.493	0	0	0	0	0	0	0	603	903	0
4730	7	0	0	0	0	0	0	200	300	0	-0.245513	-34.0039	-121.822	-9975.05	-8667.52	2823.26	128.851	984.882	0	0	0	0	0	0	0	603	903	0
4730	8	0	0	0	0	0	0	200	300	0	-3.44986	-32.6306	-119.686	-9883.5	-8850.63	2869.03	126.051	985.579	0	0	0	0	0	0	0	603	903	0
4730	9	0	0	0	0	0	0	200	300	0	-3.75503	-31.7151	-115.718	-8784.87	-8240.28	2594.38	128.79	978.916	0	0	0	0	0	0	0	603	903	0
4731	0	0	0	0	0	0	0	200	300	0	-2.53433	-30.0366	-112.667	-9242.63	-7752	2502.82	131.195	985.035	0	0	0	0	0	0	0	603	903	0
4731	1	0	0	0	0	0	0	200	300	0	-1.77139	-30.4944	-106.868	-9242.63	-8057.17	2502.82	124.606	989.486	0	0	0	0	0	0	0	603	903	0
4731	2	0	0	0	0	0	0	200	300	0	-1.31363	-28.5107	-105.037	-8876.42	-8057.17	2502.82	123.292	987.508	0	0	0	0	0	0	0	603	903	0
4731	3	0	0	0	0	0	0	200	300	0	-2.9921	-27.29	-102.291	-8418.66	-7202.68	2548.6	129.586	985.301	0	0	0	0	0	0	0	603	903	0
4731	4	0	0	0	0	0	0	200	300	0	-1.92398	-26.6797	-97.1026	-8327.11	-7324.75	2319.72	124.567	988.756	0	0	0	0	0	0	0	603	903	0
4731	5	0	0	0	0	0	0	200	300	0	-3.14468	-27.4426	-93.1353	-8327.11	-6775.44	2548.6	127.252	992.409	0	0	0	0	0	0	0	603	903	0
4731	6	0	0	0	0	0	0	200	300	0	-1.6188	-25.6116	-91.3043	-7777.79	-6470.26	2090.84	129.135	988.185	0	0	0	0	0	0	0	603	903	0
4731	7	0	0	0	0	0	0	200	300	0	-1.77139	-25.0012	-87.9473	-7503.13	-6592.33	2090.84	125.042	988.314	0	0	0	0	0	0	0	603	903	0
4731	8	0	0	0	0	0	0	200	300	0	-2.9921	-25.0012	-85.2007	-7503.13	-6226.12	1861.95	126.924	991.064	0	0	0	0	0	0	0	603	903	0
4731	9	0	0	0	0	0	0	200	300	0	-1.77139	-23.3228	-79.7076	-6862.26	-5798.87	2045.06	127.248	989.093	0	0	0	0	0	0	0	603	903	0
4732	0	0	0	0	0	0	0	200	300	0	-0.0929256	-22.1021	-79.4024	-6496.05	-5493.7	2365.49	130.812	984.812	0	0	0	0	0	0	0	603	903	0
4732	1	0	0	0	0	0	0	200	300	0	-2.07657	-22.1021	-77.2662	-6679.16	-5798.87	1724.63	124.949	989.444	0	0	0	0	0	0	0	603	903	0
4732	2	0	0	0	0	0	0	200	300	0	-2.38174	-20.4236	-73.6041	-6312.95	-5066.45	1770.4	131.166	988.769	0	0	0	0	0	0	0	603	903	0
4732	3	0	0	0	0	0	0	200	300	0	-1.77139	-19.2029	-71.1627	-6221.4	-4944.38	1633.07	130.52	990.425	0	0	0	0	0	0	0	603	903	0
4732	4	0	0	0	0	0	0	200	300	0	-2.22916	-18.1348	-67.1954	-5946.73	-5188.52	1541.52	122.785	991.499	0	0	0	0	0	0	0	603	903	0
4732	5	0	0	0	0	0	0	200	300	0	-2.38174	-16.9141	-65.3643	-5855.18	-5005.42	1404.19	123.423	992.578	0	0	0	0	0	0	0	603	903	0
4732	6	0	0	0	0	0	0	200	300	0	-1.16104	-15.6934	-64.1436	-5580.52	-4456.1	1358.41	130.529	990.001	0	0	0	0	0	0	0	603	903	0
4732	7	0	0	0	0	0	0	200	300	0	-1.77139	-15.6934	-60.4815	-5305.87	-4456.1	1221.09	126.323	990.727	0	0	0	0	0	0	0	603	903	0
4732	8	0	0	0	0	0	0	200	300	0	-1.00845	-15.2356	-57.7349	-5214.31	-4150.92	1312.64	128.104	993.315	0	0	0	0	0	0	0	603	903	0
4732	9	0	0	0	0	0	0	200	300	0	-1.92398	-14.4727	-54.6832	-4390.34	-3967.82	1175.31	127.44	983.287	0	0	0	0	0	0	0	603	903	0
4733	0	0	0	0	0	0	0	200	300	0	-1.31363	-14.0149	-51.9366	-4573.44	-4028.85	1312.64	122.427	991.058	0	0	0	0	0	0	0	603	903	0
4733	1	0	0	0	0	0	0	200	300	0	-3.29727	-14.4727	-49.4952	-4481.89	-3723.68	1175.31	124.767	993.552	0	0	0	0	0	0	0	603	903	0
4733	2	0	0	0	0	0	0	200	300	0	-2.9921	-13.4045	-45.8331	-4298.79	-3357.47	1221.09	126.746	996.792	0	0	0	0	0	0	0	603	903	0
4733	3	0	0	0	0	0	0	200	300	0	-1.92398	-11.7261	-45.2227	-3841.02	-2502.97	1312.64	144.652	987.936	0	0	0	0	0	0	0	603	903	0
4733	4	0	0	0	0	0	0	200	300	0	-1.92398	-11.5735	-44.3072	-4024.13	-3357.47	1037.98	124.223	993.823	0	0	0	0	0	0	0	603	903	0
4733	5	0	0	0	0	0	0	200	300	0	-1.00845	-10.658	-37.5933	-3841.02	-2930.22	671.769	122.055	1005.17	0	0	0	0	0	0	0	603	903	0
4733	6	0	0	0	0	0	0	200	300	0	-2.68692	-9.74243	-41.5606	-3841.02	-2625.04	1037.98	136.838	995.42	0	0	0	0	0	0	0	603	903	0
4733	7	0	0	0	0	0	0	200	300	0	-2.07657	-8.9795	-37.2881	-3383.26	-2747.11	809.098	126.327	993.733	0	0	0	0	0	0	0	603	903	0
4733	8	0	0	0	0	0	0	200	300	0	-2.9921	-7.45362	-34.8467	-3200.15	-2686.08	717.545	122.917	994.835	0	0	0	0	0	0	0	603	903	0
4733	9	0	0	0	0	0	0	200	300	0	-3.60245	-7.45362	-34.5416	-3383.26	-1587.45	946.427	154.042	1000.95	0	0	0	0	0	0	0	603	903	0
4734	0	0	0	0	0	0	0	200	300	0	-2.38174	-6.3855	-30.8794	-2742.39	-2502.97	534.44	118.944	991.81	0	0	0	0	0	0	0	603	903	0
4734	1	0	0	0	0	0	0	200	300	0	-2.38174	-6.69068	-30.2691	-3017.05	-2258.83	763.322	125.375	1002.67	0	0	0	0	0	0	0	603	903	0
4734	2	0	0	0	0	0	0	200	300	0	-1.16104	-6.23291	-28.7432	-2650.84	-1892.62	534.44	134.154	995.225	0	0	0	0	0	0	0	603	903	0
4734	3	0	0	0	0	0	0	200	300	0	-2.68692	-6.3855	-24.7759	-2193.07	-1953.66	534.44	121.147	991.516	0	0	0	0	0	0	0	603	903	0
4734	4	0	0	0	0	0	0	200	300	0	-2.38174	-5.01221	-26.607	-2650.84	-1770.55	534.44	133.455	1002.63	0	0	0	0	0	0	0	603	903	0
4734	5	0	0	0	0	0	0	200	300	0	-3.14468	-5.92774	-23.2501	-2376.18	-1160.2	580.216	150.099	1005.2	0	0	0	0	0	0	0	603	903	0
4734	6	0	0	0	0	0	0	200	300	0	-3.29727	-4.55445	-21.7242	-2376.18	-1343.3	671.769	138.165	1012.38	0	0	0	0	0	0	0	603	903	0
4734	7	0	0	0	0	0	0	200	300	0	-1.92398	-3.79151	-19.8931	-2284.62	-1709.52	488.663	114.065	1017.85	0	0	0	0	0	0	0	603	903	0
4734	8	0	0	0	0	0	0	200	300	0	0	0	0	0	0	0	200	903	0	0	0	0	0	0	0	603	903	0
4734	9	0	0	0	0	0	0	200	300	0	0	0	0	0	0	0	200	903	0	0	0	0	0	0	0	603	903	0
4735	0	0	0	0	0	0	0	200	300	0	0	0	0	0	0	0	200	903	0	0	0	0	0	0	0	603	903	0
4735	1	0	0	0	0	0	0	200	300	0	0	0	0	0	0	0	200	903	0	0	0	0	0	0	0	603	903	0
4735	2	0	0	0	0	0	0	200	300	0	0	0	0	0	0	0	200	903	0	0	0	0	0	0	0	603	903	0
4735	3	0	0	0	0	0	0	200	300	0	0	0	0	0	0	0	200	903	0	0	0	0	0	0	0	603	903	0
4735	4	0	0	0	0	0	0	200	300	0	0	0	0	0	0	0	200	903	0	0	0	0	0	0	0	603	903	0
4735	5	0	0	0	0	0	0	200	300	0	0	0	0	0	0	0	200	903	0	0	0	0	0	0	0	603	903	0
4735	6	0	0	0	0	0	0	200	300	0	0	0	0	0	0	0	200	903	0	0	0	0	0	0	0	603	903	0
4735	7	0	0	0	0	0	0	200	300	0	0	0	0	0	0	0	200	903	0	0	0	0	0	0	0	603	903	0
4735	8	0	0	0	0	0	0	200	300	0	0	0	0	0	0	0	200	903	0	0	0	0	0	0	0	603	903	0
4735	9	0	0	0	0	0	0	200	300	0	0	0	0	0	0	0	200	903	0	0	0	0	0	0	0	603	903	0
4736	0	0	0	0	0	0	0	200	300	0	0	0	0	0	0	0	200	903	0	0	0	0	0	0	0	603	903	0
4736	1	0	0	0	0	0	0	200	300	0	0	0	0	0	0	0	200	903	0	0	0	0	0	0	0	603	903	0
4736	2	0	0	0	0	0	0	200	300	0	0	0	0	0	0	0	200	903	0	0	0	0	0	0	0	603	903	0
4736	3	0	0	0	0	0	0	200	300	0	0	0	0	0	0	0	200	903	0	0	0	0	0	0	0	603	903	0
4736	4	0	0	0	0	0	0	200	300	0	0	0	0	0	0	0	200	903	0	0	0	0	0	0	0	603	903	0
4736	5	0	0	0	0	0	0	200	300	0	0	0	0	0	0	0	200	903	0	0	0	0	0	0	0	603	903	0
4736	6	0	0	0	0	0	0	200	300	0	0	0	0	0	0	0	200	903	0	0	0	0	0	0	0	603	903	0
4736	7	0	0	0	0	0	0	200	300	0	0	0	0	0	0	0	200	903	0	0	0	0	0	0	0	603	903	0
4736	8	0	0	0	0	0	0	200	300	0	0	0	0	0	0	0	200	903	0	0	0	0	0	0	0	603	903	0
4736	9	0	0	0	0	0	0	200	300	0	0	0	0	0	0	0	200	903	0	0	0	0	0	0	0	603	903	0
4737	0	0	0	0	0	0	0	200	300	0	0	0	0	0	0	0	200	903	0	0	0	0	0	0	0	603	903	0
4737	1	0	0	0	0	0	0	200	300	0	0	0	0	0	0	0	200	903	0	0	0	0	0	0	0	603	903	0
4737	2	0	0	0	0	0	0	200	300	0	0	0	0	0	0	0	200	903	0	0	0	0	0	0	0	603	903	0
4737	3	0	0	0	0	0	0	200	300	0	0	0	0	0	0	0	200	903	0	0	0	0	0	0	0	603	903	0
4737	4	0	0	0	0	0	0	200	300	0	0	0	0	0	0	0	200	903	0	0	0	0	0	0	0	603	903	0
4737	5	0	0	0	0	0	0	200	300	0	0	0	0	0	0	0	200	903	0	0	0	0	0	0	0	603	903	0
4737	6	0	0	0	0	0	0	200	300	0	0	0	0	0	0	0	200	903	0	0	0	0	0	0	0	603	903	0
4737	7	0	0	0	0	0	0	200	300	0	0	0	0	0	0	0	200	903	0	0	0	0	0	0	0	603	903	0
4737	8	0	0	0	0	0	0	200	300	0	0	0	0	0	0	0	200	903	0	0	0	0	0	0	0	603	903	0
4737	9	0	0	0	0	0	0	200	300	0	0	0	0	0	0	0	200	903	0	0	0	0	0	0	0	603	903	0
4738	0	0	0	0	0	0	0	200	300	0	0	0	0	0	0	0	200	903	0	0	0	0	0	0	0	603	903	0
4738	1	0	0	0	0	0	0	200	300	0	0	0	0	0	0	0	200	903	0	0	0	0	0	0	0	603	903	0
4738	2	0	0	0	0	0	0	200	300	0	0	0	0	0	0	0	200	903	0	0	0	0	0	0	0	603	903	0
4738	3	0	0	0	0	0	0	200	300	0	0	0	0	0	0	0	200	903	0	0	0	0	0	0	0	603	903	0
4738	4	0	0	0	0	0	0	200	300	0	0	0	0	0	0	0	200	903	0	0	0	0	0	0	0	603	903	0
4738	5	0	0	0	0	0	0	200	300	0	0	0	0	0	0	0	200	903	0	0	0	0	0	0	0	603	903	0
4738	6	0	0	0	0	0	0	200	300	0	0	0	0	0	0	0	200	903	0	0	0	0	0	0	0	603	903	0
4738	7	0	0	0	0	0	0	200	300	0	0	0	0	0	0	0	200	903	0	0	0	0	0	0	0	603	903	0
4738	8	0	0	0	0	0	0	200	300	0	0	0	0	0	0	0	200	903	0	0	0	0	0	0	0	603	903	0
4738	9	0	0	0	0	0	0	200	300	0	0	0	0	0	0	0	200	903	0	0	0	0	0	0	0	603	903	0
4739	0	0	0	0	0	0	0	200	300	0	0	0	0	0	0	0	200	903	0	0	0	0	0	0	0	603	903	0
4739	1	0	0	0	0	0	0	200	300	0	0	0	0	0	0	0	200	903	0	0	0	0	0	0	0	603	903	0
4739	2	0	0	0	0	0	0	200	300	0	0	0	0	0	0	0	200	903	0	0	0	0	0	0	0	603	903	0
4739	3	0	0	0	0	0	0	200	300	0	0	0	0	0	0	0	200	903	0	0	0	0	0	0	0	603	903	0
4739	4	0	0	0	0	0	0	200	300	0	0	0	0	0	0	0	200	903	0	0	0	0	0	0	0	603	903	0
4739	5	0	0	0	0	0	0	200	300	0	0	0	0	0	0	0	200	903	0	0	0	0	0	0	0	603	903	0
4739	6	0	0	0	0	0	0	200	300	0	0	0	0	0	0	0	200	903	0	0	0	0	0	0	0	603	903	0
4739	7	0	0	0	0	0	0	200	300	0	0	0	0	0	0	0	200	903	0	0	0	0	0	0	0	603	903	0
4739	8	0	0	0	0	0	0	200	300	0	0	0	0	0	0	0	200	903	0	0	0	0	0	0	0	603	903	0
4739	9	0	0	0	0	0	0	200	300	0	0	0	0	0	0	0	200	903	0	0	0	0	0	0	0	603	903	0
4740	0	0	0	0	0	0	0	200	300	0	0	0	0	0	0	0	200	903	0	0	0	0	0	0	0	603	903	0
4740	1	0	0	0	0	0	0	200	300	0	0	0	0	0	0	0	200	903	0	0	0	0	0	0	0	603	903	0
4740	2	0	0	0	0	0	0	200	300	0	0	0	0	0	0	0	200	903	0	0	0	0	0	0	0	603	903	0
4740	3	0	0	0	0	0	0	200	300	0	0	0	0	0	0	0	200	903	0	0	0	0	0	0	0	603	903	0
4740	4	0	0	0	0	0	0	200	300	0	0	0	0	0	0	0	200	903	0	0	0	0	0	0	0	603	903	0
4740	5	0	0	0	0	0	0	200	300	0	0	0	0	0	0	0	200	903	0	0	0	0	0	0	0	603	903	0
4740	6	0	0	0	0	0	0	200	300	0	0	0	0	0	0	0	200	903	0	0	0	0	0	0	0	603	903	0
4740	7	0	0	0	0	0	0	200	300	0	0	0	0	0	0	0	200	903	0	0	0	0	0	0	0	603	903	0
4740	8	0	0	0	0	0	0	200	300	0	0	0	0	0	0	0	200	903	0	0	0	0	0	0	0	603	903	0
4740	9	0	0	0	0	0	0	200	300	0	0	0	0	0	0	0	200	903	0	0	0	0	0	0	0	603	903	0
4741	0	0	0	0	0	0	0	200	300	0	0	0	0	0	0	0	200	903	0	0	0	0	0	0	0	603	903	0
4741	1	0	0	0	0	0	0	200	300	0	0	0	0	0	0	0	200	903	0	0	0	0	0	0	0	603	903	0
4741	2	0	0	0	0	0	0	200	300	0	0	0	0	0	0	0	200	903	0	0	0	0	0	0	0	603	903	0
4741	3	0	0	0	0	0	0	200	300	0	0	0	0	0	0	0	200	903	0	0	0	0	0	0	0	603	903	0
4741	4	0	0	0	0	0	0	200	300	0	0	0	0	0	0	0	200	903	0	0	0	0	0	0	0	603	903	0
4741	5	0	0	0	0	0	0	200	300	0	0	0	0	0	0	0	200	903	0	0	0	0	0	0	0	603	903	0
4741	6	0	0	0	0	0	0	200	300	0	0	0	0	0	0	0	200	903	0	0	0	0	0	0	0	603	903	0
4741	7	0	0	0	0	0	0	200	300	0	0	0	0	0	0	0	200	903	0	0	0	0	0	0	0	603	903	0
4741	8	0	0	0	0	0	0	200	300	0	0	0	0	0	0	0	200	903	0	0	0	0	0	0	0	603	903	0
4741	9	0	0	0	0	0	0	200	300	0	0	0	0	0	0	0	200	903	0	0	0	0	0	0	0	603	903	0
4742	0	0	0	0	0	0	0	200	300	0	0	0	0	0	0	0	200	903	0	0	0	0	0	0	0	603	903	0
4742	1	0	0	0	0	0	0	200	300	0	0	0	0	0	0	0	200	903	0	0	0	0	0	0	0	603	903	0
4742	2	0	0	0	0	0	0	200	300	0	0	0	0	0	0	0	200	903	0	0	0	0	0	0	0	603	903	0
4742	3	0	0	0	0	0	0	200	300	0	0	0	0	0	0	0	200	903	0	0	0	0	0	0	0	603	903	0
4742	4	0	0	0	0	0	0	200	300	0	0	0	0	0	0	0	200	903	0	0	0	0	0	0	0	603	903	0
4742	5	0	0	0	0	0	0	200	300	0	0	0	0	0	0	0	200	903	0	0	0	0	0	0	0	603	903	0
4742	6	0	0	0	0	0	0	200	300	0	0	0	0	0	0	0	200	903	0	0	0	0	0	0	0	603	903	0
4742	7	0	0	0	0	0	0	200	300	0	0	0	0	0	0	0	200	903	0	0	0	0	0	0	0	603	903	0
4742	8	0	0	0	0	0	0	200	300	0	0	0	0	0	0	0	200	903	0	0	0	0	0	0	0	603	903	0
4742	9	0	0	0	0	0	0	200	300	0	0	0	0	0	0	0	200	903	0	0	0	0	0	0	0	603	903	0
4743	0	0	0	0	0	0	0	200	300	0	0	0	0	0	0	0	200	903	0	0	0	0	0	0	0	603	903	0
4743	1	0	0	0	0	0	0	200	300	0	0	0	0	0	0	0	200	903	0	0	0	0	0	0	0	603	903	0
4743	2	0	0	0	0	0	0	200	300	0	0	0	0	0	0	0	200	903	0	0	0	0	0	0	0	603	903	0
4743	3	0	0	0	0	0	0	200	300	0	0	0	0	0	0	0	200	903	0	0	0	0	0	0	0	603	903	0
4743	4	0	0	0	0	0	0	200	300	0	0	0	0	0	0	0	200	903	0	0	0	0	0	0	0	603	903	0
4743	5	0	0	0	0	0	0	200	300	0	0	0	0	0	0	0	200	903	0	0	0	0	0	0	0	603	903	0
[truncated: 774 more rows]
