# Supplementary material for: The Effects of an Extemporaneous Speech Dual-task on Older Adult Gait Control
Source: Research Square preprint supplement (doi:10.21203/rs.3.rs-7674245/v1), 2025-11-18
Supplement: Supplementary file 91 [file DT8Walk5.xlsx]

## Sheet: Sheet1
Trajectories
		08:LFHD			08:RFHD			08:LBHD			08:RBHD			08:C7			08:T10			08:CLAV			08:STRN			08:RBAK			08:LSHO			08:LUPA			08:LELB			08:LFRM			08:LWRA			08:LWRB			08:LFIN
Frame	Sub Frame	X	Y	Z	X	Y	Z	X	Y	Z	X	Y	Z	X	Y	Z	X	Y	Z	X	Y	Z	X	Y	Z	X	Y	Z	X	Y	Z	X	Y	Z	X	Y	Z	X	Y	Z	X	Y	Z	X	Y	Z	X	Y	Z
		mm	mm	mm	mm	mm	mm	mm	mm	mm	mm	mm	mm	mm	mm	mm	mm	mm	mm	mm	mm	mm	mm	mm	mm	mm	mm	mm	mm	mm	mm	mm	mm	mm	mm	mm	mm	mm	mm	mm	mm	mm	mm	mm	mm	mm	mm	mm	mm
5473	0	250.504	2615.01	1692.46	167.156	2638.34	1674.8	289.781	2804.74	1705.9	178.553	2810.22	1684.29	246.453	2852.06	1550.53	257.385	2928.07	1284.83	252.639	2701.54	1461.75	237.542	2634.29	1262.41	169.262	2927.81	1342.38	434.22	2763.28	1508.25	514.904	2783.62	1314.2	521.47	2790.7	1159	530.938	2697.26	1012.64	472.93	2654.4	928.724	535.444	2694.37	912.61	522.514	2636.69	866.08
5474	0	250.496	2605.55	1693.39	167.298	2628.87	1676.84	290.715	2795.68	1707.44	178.681	2800.81	1686.87	243.208	2839.2	1551.33	255.693	2919.12	1286.78	252.119	2692.43	1463.6	237.236	2625.09	1264.35	167.469	2918.2	1344.46	434.187	2755.54	1509.45	515.153	2777.79	1316.39	520.82	2785.52	1160.9	530.979	2692.6	1013.75	473.852	2649.59	929.873	535.865	2690.77	913.733	523.556	2632.94	867.368
5475	0	250.887	2596.12	1694.8	167.744	2619.42	1678.79	290.705	2786.73	1709.45	178.815	2791.47	1689.29	244.487	2833.93	1553.77	253.94	2910.11	1288.63	251.74	2683.6	1465.77	236.805	2616.03	1266.07	166.459	2910.17	1347.01	433.249	2747.55	1511.36	514.455	2771.95	1318.4	519.131	2778.5	1163.51	531.093	2688.15	1015.44	474.562	2644.7	931.194	535.937	2686.97	915.46	524.619	2629.16	868.707
5476	0	251.483	2586.76	1696.24	168.235	2610.09	1680.77	290.742	2777.15	1710.47	179.206	2782.11	1691.42	241.644	2822.16	1554.43	252.424	2901.09	1290.1	251.491	2674.76	1467.69	236.504	2606.91	1268.41	164.395	2899.49	1348.03	432.518	2739.64	1512.84	513.324	2765.78	1320.4	519.218	2775.28	1164.64	531.328	2683.61	1016.57	475.668	2640.05	932.858	535.921	2683.15	916.95	525.233	2624.76	869.586
5477	0	252.596	2577.7	1697.62	168.853	2600.59	1682.55	291.493	2768.43	1711.69	179.344	2772.8	1693.55	240.674	2812.81	1556.04	251.016	2892.04	1291.6	251.215	2665.82	1469.32	236.305	2597.94	1270.17	162.903	2890.12	1349.59	432.076	2731.7	1514.12	512.693	2759.98	1321.63	518.604	2770.21	1166.29	531.784	2679.22	1017.95	476.653	2635.2	934.089	536.346	2679.1	918.093	526.732	2621.11	870.931
5478	0	253.524	2568.39	1698.97	169.595	2591.18	1684.27	291.73	2759.28	1713.43	180.597	2765.29	1696.16	240.059	2804.2	1557.42	249.564	2882.95	1293.13	251.184	2656.84	1471.21	236.02	2589	1271.67	161.55	2880.93	1351.05	431.433	2723.67	1515.53	511.89	2753.77	1323.3	517.66	2764.77	1168.06	532.091	2674.54	1019.32	477.28	2629.94	934.815	536.893	2675.19	919.528	528.081	2617.06	872.164
5479	0	254.272	2559.09	1700.07	170.281	2581.76	1686.07	292.043	2750.1	1714.74	181.85	2757.8	1698.73	238.73	2793.9	1558.61	247.986	2873.97	1294.64	250.866	2647.8	1472.37	235.975	2580.05	1273.39	160.053	2871.36	1352.78	430.753	2715.54	1516.85	510.875	2747.46	1324.82	516.999	2759.62	1169.66	532.488	2669.94	1020.64	478.602	2624.92	936.151	537.058	2670.94	920.849	529.64	2613.22	873.45
5480	0	255.122	2549.83	1700.63	171.236	2572.31	1687.48	292.225	2740.84	1715.48	179.969	2744.46	1699.01	238.32	2786.34	1560.64	246.654	2864.97	1296.13	250.669	2638.79	1473.49	235.815	2571.07	1274.57	158.582	2861.89	1354.18	430.482	2707.48	1517.74	510.225	2741.33	1326.32	515.882	2753.65	1171.3	532.961	2665.32	1021.76	483.875	2624.26	937.196	537.509	2666.61	921.868	530.9	2608.72	874.362
5481	0	256.185	2540.61	1701.48	171.983	2562.56	1688.48	292.482	2731.69	1716.71	180.303	2735	1700.42	239.082	2779.58	1562.86	245.181	2855.9	1297.19	250.512	2629.75	1474.31	235.892	2562.21	1275.02	157.396	2852.65	1355.24	430.384	2699.4	1518.29	509.91	2734.89	1326.62	517.917	2749.68	1171.61	533.38	2660.25	1022.8	481.068	2614.38	937.523	537.832	2662.31	922.955	532.511	2604.29	875.024
5482	0	257.257	2531.42	1702.16	172.856	2553.24	1689.76	292.969	2722.73	1716.76	180.497	2725.53	1701.44	236.484	2766.88	1561.85	243.836	2846.8	1298.4	250.361	2620.47	1474.95	236.177	2553.36	1275.87	156.111	2843.24	1356.25	429.803	2691.12	1518.94	509.102	2728.42	1327.76	514.332	2742.55	1173.44	533.288	2654.87	1022.93	482.816	2609.22	938.613	534.018	2658.2	919.998	534.197	2599.89	875.514
5483	0	257.964	2521.99	1702.59	173.532	2543.63	1690.65	293.215	2713.69	1717.23	180.79	2716.07	1702.23	235.705	2757.53	1562.4	242.692	2837.75	1298.85	250.333	2611.35	1475.78	236.286	2544.37	1276.34	154.871	2833.72	1356.99	429.342	2682.86	1519.63	508.126	2721.79	1329.28	514.8	2737.7	1173.89	533.83	2649.9	1023.46	483.887	2603.47	938.713	538.775	2653.12	924.164	535.464	2595.18	875.945
5484	0	259.531	2512.86	1703.07	174.436	2534.01	1691.47	293.472	2704.36	1717.36	181	2706.44	1702.84	235.465	2749.44	1563.38	241.496	2828.7	1299.46	250.656	2602.3	1476.13	237.003	2535.41	1277.07	153.707	2824.2	1357.48	428.805	2674.56	1520.18	507.539	2714.95	1329.01	514.206	2731.72	1174.55	534.385	2644.77	1023.85	487.288	2599.22	940.352	539.328	2648.47	924	537.075	2590.64	876.408
5485	0	260.453	2503.45	1702.9	175.405	2524.19	1691.44	293.67	2695.19	1717.19	181.169	2696.88	1703.33	234.907	2740.03	1563.63	240.396	2819.72	1299.9	250.571	2592.8	1476.19	237.495	2526.42	1276.72	152.513	2814.6	1357.89	428.36	2666.3	1519.33	507.078	2707.82	1329.62	513.138	2725.33	1174.84	534.938	2639.36	1023.91	486.559	2592.09	938.824	536.057	2643.7	921.463	538.844	2585.89	876.365
5486	0	261.228	2493.95	1702.55	176.229	2514.6	1691.99	293.913	2685.9	1716.91	181.33	2687.17	1703.41	234.226	2729.7	1562.99	239.223	2810.55	1300.05	250.631	2583.55	1475.93	234.372	2512.97	1274.35	151.354	2804.93	1358.07	428.098	2657.78	1520.16	506.423	2700.82	1330.04	511.981	2718.76	1175.51	535.559	2634.01	1023.96	488.18	2586.3	938.979	536.452	2638.75	921.352	540.145	2580.61	875.998
5487	0	262.332	2484.47	1702.42	177.038	2504.85	1692.01	294.142	2676.46	1716.39	181.56	2677.37	1703.48	233.739	2721.11	1563.43	238.418	2801.27	1300.18	250.816	2574.11	1475.8	238.421	2508.28	1276.01	150.553	2795.4	1358.04	427.929	2649.11	1519.96	505.804	2693.5	1330.23	511.218	2712.15	1175.65	536.185	2628.23	1023.76	489.194	2579.97	938.022	541.175	2633.2	923.991	541.798	2575.58	875.856
5488	0	263.328	2474.87	1701.77	177.986	2495.01	1691.73	294.35	2666.89	1715.8	181.742	2667.58	1703.48	233.505	2711.37	1563.26	237.634	2792.09	1300.3	251.108	2564.66	1475.31	238.785	2499.17	1274.28	149.659	2785.74	1358.15	428.028	2640.53	1519.26	505.742	2686.13	1329.81	510.671	2705.34	1175.51	536.8	2622.21	1023.57	490.604	2573.98	937.818	537.945	2627.97	921.055	543.229	2569.95	875.363
5489	0	264.34	2465.18	1701.16	178.895	2485.02	1691.42	294.804	2657.49	1714.99	182.087	2657.66	1703.11	233.204	2701.75	1562.87	237.128	2783	1300.05	251.203	2555.14	1474.42	239.54	2490.02	1273.24	149.128	2776.26	1357.86	427.878	2631.62	1518.86	505.127	2678.55	1329.19	509.992	2698.29	1175.36	537.386	2615.98	1023.28	492.101	2567.76	937.282	541.646	2621.9	923.02	545.089	2564.78	875.002
5490	0	265.146	2455.3	1700.51	179.744	2475.11	1691.04	295.181	2647.65	1714.08	182.488	2647.63	1702.53	232.673	2692.12	1562.46	236.676	2773.63	1299.52	251.466	2545.42	1473.61	240.155	2480.58	1272.45	148.671	2766.57	1357.22	427.634	2622.45	1518.25	504.869	2670.58	1329.17	509.408	2691.03	1175.38	538.161	2609.87	1022.78	493.433	2561.24	936.499	539.782	2616.44	920.327	546.683	2559.09	874.332
5491	0	266.28	2445.42	1699.59	180.58	2464.95	1690.52	295.594	2637.88	1712.76	182.995	2637.75	1701.84	232.405	2682.05	1561.56	236.476	2764.35	1298.83	251.756	2535.8	1472.49	241.121	2471.1	1271.87	148.188	2756.88	1356.63	427.719	2613.31	1517.28	504.654	2662.48	1328.54	508.912	2683.65	1174.93	538.916	2603.49	1022.1	495.144	2554.59	935.491	541.058	2610.35	919.811	548.327	2553.42	873.59
5492	0	267.275	2435.41	1698.21	181.727	2454.73	1689.67	296.197	2627.96	1711.35	183.417	2627.55	1701.01	232.574	2672.12	1560.67	236.314	2755.09	1298.19	252.056	2525.87	1471.12	241.852	2461.79	1270.05	148.082	2747.2	1355.78	427.872	2603.85	1516.35	505.206	2654.22	1328.28	508.516	2676.05	1174.33	539.885	2596.95	1021.09	496.673	2547.94	934.456	541.719	2604.14	918.758	549.858	2547.18	872.31
5493	0	268.221	2425.24	1696.94	182.646	2444.29	1688.72	296.426	2617.92	1710.13	183.934	2617.22	1699.89	232.79	2662.1	1559.23	236.466	2745.64	1297.34	252.253	2516	1469.76	242.476	2452.33	1268.46	148.021	2737.51	1354.85	427.894	2594.36	1515.63	504.693	2645.9	1327.23	508.345	2668.39	1173.69	540.637	2590.04	1020.3	499.944	2541.95	934.551	543	2597.98	918.449	551.277	2540.94	871.078
5494	0	269.344	2414.88	1695.63	183.419	2433.63	1687.64	297.305	2607.91	1708.35	184.581	2606.8	1698.67	232.473	2651.5	1558.02	236.671	2736.18	1296.33	252.567	2505.92	1468.43	243.062	2442.72	1267.05	148.111	2727.65	1353.83	427.74	2584.45	1514.75	503.377	2636.46	1326.88	508.307	2660.51	1172.93	541.486	2583.1	1019.25	501.586	2534.79	933.491	543.752	2591.31	917.273	553.096	2534.9	869.926
5495	0	270.99	2404.64	1694.29	184.885	2423.18	1686.58	298.447	2597.78	1706.45	185.326	2596.48	1697.54	232.687	2641.3	1556.83	236.96	2726.57	1295.36	253.238	2495.85	1466.83	244.053	2433.13	1266.02	148.254	2717.75	1352.77	428.064	2574.57	1513.38	503.86	2627.73	1325.53	508.3	2652.36	1172.02	542.61	2576.03	1018.06	501.324	2527.09	930.65	544.943	2584.5	915.908	553.706	2527.84	867.709
5496	0	272.017	2394.17	1692.28	186.03	2412.61	1685.16	299.126	2587.26	1704.61	186.053	2585.82	1696.17	233.376	2631.34	1555.4	237.39	2716.82	1294.23	253.671	2485.81	1464.84	244.589	2423.59	1263.49	148.625	2707.88	1351.63	428.528	2564.57	1511.84	504.547	2618.9	1324.33	508.349	2644.06	1171.02	543.616	2568.58	1016.76	505.374	2520.13	930.688	546.293	2577.6	914.941	555.649	2521.24	866.484
5497	0	273.231	2383.44	1690.4	187.356	2401.75	1683.39	299.813	2576.76	1703.02	186.935	2575.13	1694.73	233.5	2620.66	1553.97	237.896	2707.02	1293.14	253.975	2475.34	1463.11	245.028	2413.85	1261.45	149.097	2697.99	1350.33	428.606	2554.01	1510.6	504.83	2609.18	1323.44	508.655	2635.62	1170.08	544.656	2560.89	1015.57	504.886	2512.2	927.99	547.704	2570.44	914.009	557.723	2514.59	865.384
5498	0	274.63	2372.88	1688.22	188.557	2390.98	1681.47	301.029	2566.08	1700.91	187.988	2564.46	1693.3	233.992	2610.24	1552.73	238.678	2697.22	1291.64	254.689	2465.03	1461.21	245.741	2403.98	1259.64	149.673	2688.1	1349.01	429.442	2543.91	1508.9	505.611	2600.04	1322.03	509.055	2626.78	1169.05	545.954	2553.19	1014.16	507.639	2504.86	926.906	548.881	2563.08	912.326	559.314	2507.33	863.589
5499	0	276.303	2362.16	1685.67	190.088	2380.06	1679.55	302.088	2555.46	1698.92	189.084	2553.48	1691.68	234.529	2599.69	1551.08	239.303	2687.2	1290.35	255.529	2454.91	1459.05	246.475	2394.05	1257.35	150.472	2678.19	1347.43	430.535	2533.58	1506.92	506.988	2590.57	1320.37	509.314	2617.48	1167.67	547.145	2545.05	1012.68	508.223	2496.53	924.02	550.308	2555.62	910.168	561.071	2500.09	861.365
5500	0	277.823	2351.41	1683.52	191.731	2369.24	1677.26	303.456	2544.81	1697.06	190.314	2542.61	1690	235.244	2589.29	1549.14	240.423	2677.32	1288.68	256.093	2444.52	1456.99	246.901	2384.06	1254.99	151.172	2668.01	1345.94	430.899	2522.95	1505.28	506.224	2579.95	1319.05	510.171	2608.64	1166.01	548.424	2536.82	1010.91	509.75	2488.42	922.019	551.695	2547.92	909.011	562.499	2492.57	859.672
5501	0	279.361	2340.45	1681.09	193.051	2358.17	1675.12	304.638	2533.89	1695.17	191.665	2531.67	1688.35	236.464	2578.88	1547.25	241.401	2667.03	1286.76	256.738	2434.02	1455.01	247.308	2373.75	1253.29	152.124	2657.95	1344.01	430.712	2511.75	1503.7	507.236	2570.06	1317.91	510.701	2598.97	1164.6	549.788	2528.41	1008.98	511.431	2480.04	919.859	554.728	2539.71	908.661	565.23	2485.26	858.142
5502	0	281.062	2329.63	1678.19	194.821	2347.17	1672.93	306.212	2522.89	1693.2	193.12	2520.63	1686.85	237.31	2568.18	1545.56	242.42	2656.85	1284.93	257.733	2423.7	1453.1	247.754	2363.34	1251.36	153.011	2647.68	1342.29	431.506	2501.03	1501.85	508.218	2559.82	1315.58	511.678	2589.37	1162.69	551.19	2519.63	1007.02	513.423	2471.68	917.637	556.282	2531.43	906.786	566.737	2477.13	856.024
5503	0	282.925	2318.7	1675.48	196.56	2336.1	1670.08	307.803	2511.94	1691.22	194.712	2509.74	1685.42	238.543	2557.81	1543.37	243.549	2646.5	1282.89	258.81	2413.34	1450.88	248.693	2353.44	1248.49	154.108	2637.53	1340.68	432.96	2490.63	1499.53	510.152	2549.75	1313.28	512.589	2579.29	1160.78	552.704	2510.58	1004.89	515.565	2462.97	915.308	557.819	2522.86	904.706	567.974	2468.53	852.995
5504	0	284.594	2307.79	1672.61	198.487	2325.32	1667.81	309.458	2501.17	1689.36	196.387	2498.56	1683.61	239.54	2547.19	1541.09	244.76	2635.99	1280.78	259.619	2402.83	1448.75	249.3	2343.09	1246.54	155.336	2627.33	1338.69	433.799	2479.77	1497.53	510.08	2538.48	1311.65	513.565	2569.01	1159.04	554.115	2501.17	1002.71	517.356	2454.04	912.984	558.41	2514.31	901.347	570.16	2460.18	850.791
5505	0	286.673	2296.96	1670.12	200.343	2314.31	1665.39	311.112	2490.16	1687.45	198.001	2487.57	1681.93	241.084	2536.92	1539.47	246.049	2625.52	1278.81	260.451	2392.29	1446.73	249.764	2332.41	1245.17	156.593	2617.02	1336.58	434.775	2469.07	1495.54	511.085	2527.66	1309.65	514.653	2558.51	1157.03	555.472	2491.47	1000.44	520.178	2445.18	910.839	561.261	2505.14	900.427	572.137	2451.61	848.338
5506	0	288.803	2286.06	1667.49	202.481	2303.28	1663.24	313.066	2479.25	1685.41	200.05	2476.6	1680.33	242.569	2526.64	1537.71	247.14	2615	1276.65	262.164	2382.02	1444.96	250.848	2321.82	1243.3	157.785	2606.6	1334.66	436.17	2458.55	1493.43	512.437	2516.86	1307.14	515.877	2547.81	1154.83	557.089	2481.69	998.122	521.109	2435.44	907.52	563.103	2495.82	898.245	573.759	2442.46	845.367
5507	0	291.125	2275.43	1664.79	204.681	2292.53	1660.79	315.111	2468.5	1683.43	202.062	2465.76	1678.64	244.076	2516.09	1535.29	248.341	2604.22	1274.49	263.626	2371.47	1442.97	251.534	2310.92	1241.47	159.209	2596.03	1332.54	437.368	2447.72	1491.21	515.319	2506.57	1304	517.105	2536.74	1152.54	558.732	2471.58	995.737	522.801	2425.6	904.685	564.719	2486.04	895.845	575.786	2433.34	842.673
5508	0	293.162	2264.64	1662.27	206.75	2281.64	1658.6	317.304	2457.72	1681.44	204.234	2454.9	1677.02	245.883	2505.72	1533.19	249.658	2593.22	1272.18	264.659	2360.75	1440.91	252.315	2299.98	1239.44	160.786	2585.36	1330.43	439.163	2437.28	1488.8	515.141	2494.99	1302.33	518.335	2525.56	1150.4	560.292	2461.12	993.188	524.623	2415.59	902.061	566.754	2476.36	893.367	577.699	2423.68	839.873
5509	0	295.392	2253.91	1660	209.189	2270.94	1656.73	319.578	2447.03	1679.55	206.407	2444.21	1675.54	247.657	2495.3	1531.21	251.242	2582.27	1270.15	266.436	2350.05	1439.25	253.079	2288.41	1238.05	162.341	2574.62	1328.42	441.073	2426.86	1486.34	516.993	2484.23	1299.54	519.734	2514.26	1147.85	562.052	2450.55	990.681	526.923	2405.54	899.31	568.568	2466.03	891.057	579.648	2413.71	837.16
5510	0	298.045	2243.35	1658.18	211.617	2260.16	1655.02	321.964	2436.39	1677.73	208.773	2433.34	1674.04	249.676	2484.69	1529.35	252.901	2571.22	1267.95	268.035	2339.42	1437.49	254.582	2277.15	1236.32	164.006	2563.6	1326.26	442.569	2415.85	1484.34	518.933	2473.24	1296.78	521.169	2502.84	1145.32	563.735	2439.78	987.951	528.486	2394.96	896.479	570.186	2455.48	888.517	581.291	2403.49	834.299
5511	0	300.391	2232.55	1656.54	214.091	2249.41	1653.81	324.283	2425.69	1676.05	211.169	2422.71	1672.67	251.71	2474.17	1527.44	254.663	2560.07	1265.93	269.879	2328.6	1436.06	255.724	2265.21	1235.43	165.998	2552.71	1324.32	444.513	2405.05	1482.19	520.098	2461.91	1294.31	522.679	2491.06	1143.04	565.258	2428.61	985.524	529.465	2383.94	893.357	571.933	2444.76	886.074	583.013	2393.06	831.465
5512	0	303.135	2222.02	1655.45	216.514	2238.78	1652.97	326.744	2415.16	1674.61	213.699	2412.03	1671.65	253.837	2463.37	1525.91	256.515	2548.83	1264.07	272.085	2317.82	1435.08	257.778	2253.76	1234.85	168.008	2541.73	1322.6	446.619	2394.16	1480.34	521.394	2450.42	1292.13	524.247	2478.99	1140.88	566.777	2417.23	983.034	532.988	2373.83	891.458	574.066	2434.17	883.971	584.661	2382.2	828.982
5513	0	305.811	2211.35	1654.44	219.241	2228.14	1652.21	329.356	2404.57	1673.4	216.19	2401.5	1670.85	256.139	2452.36	1524.64	258.383	2537.44	1262.76	274.081	2306.92	1433.92	258.864	2241.43	1234.02	170.252	2530.8	1321.28	448.686	2382.85	1478.69	522.985	2438.72	1289.93	526.01	2466.88	1138.67	567.999	2405.23	980.786	533.189	2361.95	888.375	575.487	2422.82	881.494	585.874	2370.76	826.416
5514	0	308.097	2200.7	1653.7	221.74	2217.46	1651.44	331.901	2393.94	1672.4	218.835	2390.86	1670.19	258.545	2441.55	1523.66	260.532	2526.28	1261.65	276.013	2295.95	1433.01	260.831	2229.48	1233.13	172.735	2520	1320.19	451.386	2372.22	1476.91	524.945	2426.94	1288.08	527.508	2454.4	1136.93	569.977	2393.76	978.825	534.436	2350.23	886.367	577.168	2411.06	880.177	587.557	2359.48	824.518
5515	0	310.614	2190.01	1653.56	224.093	2206.8	1651.25	334.479	2383.33	1671.81	221.451	2380.34	1669.69	261.254	2430.84	1523.07	262.589	2514.85	1260.72	277.881	2284.76	1432.45	262.393	2217.21	1232.81	175.204	2509.17	1319.46	453.824	2361.19	1475.84	526.737	2415.25	1286.65	529.394	2441.94	1135.27	570.932	2381.12	976.985	535.913	2338.4	884.7	578.401	2399.15	878.233	588.901	2347.69	822.582
5516	0	313.11	2179.37	1653.64	226.671	2196.12	1651.74	337.072	2372.67	1671.44	224.076	2369.75	1669.45	263.609	2419.83	1522.77	264.678	2503.7	1260.03	280.387	2273.82	1432.42	264.425	2205.44	1233.38	177.639	2498.4	1318.87	456.05	2350.09	1474.89	528.278	2402.87	1285.26	531.219	2429.26	1133.95	572.547	2368.9	975.622	536.683	2326.17	882.751	579.729	2386.83	876.773	590.163	2335.6	820.89
5517	0	316.096	2168.74	1654.14	229.23	2185.49	1652.21	339.791	2361.99	1671.23	226.654	2359.06	1669.75	265.955	2408.74	1522.99	266.826	2492.77	1260.26	282.925	2262.81	1432.48	266.48	2193.74	1233.93	180.205	2487.87	1319.07	458.415	2339.06	1474.36	529.28	2388.99	1285.11	532.985	2416.15	1132.9	573.539	2355.72	974.445	537.945	2313.96	881.564	581.314	2374.23	875.926	591.425	2323.35	819.641
5518	0	318.275	2157.97	1654.77	231.859	2174.71	1653.12	342.459	2351.25	1671.28	229.207	2348.26	1669.96	268.849	2398.05	1522.92	268.754	2481.86	1260.56	285.065	2251.84	1432.9	267.824	2181.91	1234.1	182.636	2477.1	1319.39	460.625	2327.77	1474.23	531.417	2376.66	1284.48	534.723	2403.04	1132.34	574.823	2342.6	973.746	538.512	2301.24	881.241	582.491	2361.38	875.38	592.17	2310.38	819.027
5519	0	320.562	2147.14	1655.6	234.169	2164.02	1653.97	344.792	2340.46	1671.7	231.769	2337.67	1670.58	270.737	2386.65	1523.89	270.987	2471.17	1260.99	286.46	2240.66	1433.5	269.709	2170.82	1234.8	185.023	2466.41	1320.01	462.444	2316.64	1474.49	534.155	2365.44	1283.7	536.674	2389.83	1132.17	575.868	2328.96	973.568	539.478	2288.1	880.993	584.566	2348.48	875.757	592.952	2297.14	818.538
5520	0	323.014	2136.58	1656.11	236.649	2153.26	1654.91	347.168	2329.91	1671.94	234.147	2326.91	1671.15	272.757	2375.64	1524.72	272.99	2460.5	1262	288.826	2230.03	1433.95	271.531	2159.84	1235.27	187.022	2455.98	1321.17	464.941	2305.57	1474.86	536.456	2353.2	1283.53	538.638	2376.61	1131.99	577.242	2315.4	973.376	540.209	2274.96	880.967	584.579	2333.88	874.902	593.572	2283.48	818.249
5521	0	325.635	2125.98	1656.61	239.138	2142.67	1655.71	349.605	2319.3	1672.44	236.363	2316.31	1672.1	274.974	2365.1	1525.7	275.057	2449.91	1262.84	290.797	2219.46	1434.75	273.292	2149.06	1236.06	189.223	2445.78	1322.09	466.751	2294.68	1475.38	538.662	2340.53	1283.9	540.656	2363.19	1132.28	578.381	2301.32	973.829	540.903	2261.16	881.527	585.87	2319.55	875.503	593.961	2269.21	818.432
5522	0	327.828	2115.47	1657.35	241.307	2132.06	1656.54	351.742	2308.77	1673.19	238.539	2305.79	1673	277.797	2355.04	1526.25	277.073	2439.39	1263.71	292.577	2208.8	1435.85	274.909	2138.69	1236.99	190.927	2435.56	1323.28	468.578	2283.25	1476.61	540.659	2327.88	1284.61	542.812	2349.77	1133.04	579.272	2286.88	974.49	540.922	2247.61	882.33	587.101	2304.86	876.223	594.051	2254.46	819.388
5523	0	330.156	2104.95	1658.25	243.527	2121.52	1657.73	353.604	2298.36	1674.42	240.673	2295.16	1674.46	279.143	2344.82	1527.7	279.141	2428.97	1264.51	294.115	2198.27	1437.32	276.147	2128.38	1238.36	192.704	2425.57	1324.38	470.081	2272.48	1477.78	542.661	2315.24	1285.45	545.296	2336.79	1133.67	580.225	2272.39	975.403	541.23	2233.08	883.659	588.421	2290.12	877.308	594.112	2239.23	819.999
5524	0	332.292	2094.74	1658.65	245.738	2111.17	1658.33	355.627	2288	1675.41	242.621	2284.75	1675.97	281.863	2335.28	1528.57	281.133	2418.9	1265.79	295.826	2188.36	1438.39	277.282	2118.14	1239.4	194.598	2415.77	1325.48	472.296	2261.8	1478.82	544.752	2302.53	1286.22	547.295	2323.06	1134.43	580.977	2257.49	976.434	541.602	2218.63	885.122	589.507	2274.59	878.177	594.011	2223.52	821.107
5525	0	333.969	2084.68	1658.67	247.576	2100.86	1659.07	357.509	2277.72	1676.38	244.208	2274.39	1677.29	283.847	2325.47	1529.6	283.348	2408.97	1266.76	297.054	2178.39	1439.31	278.188	2107.97	1240.48	196.405	2406.05	1326.25	473.526	2251.19	1480.07	547.003	2290.25	1287.06	549.863	2309.87	1134.93	581.832	2242.4	977.528	541.191	2204.34	886.328	590.508	2258.88	879.105	593.998	2207.49	822.316
5526	0	335.701	2074.47	1659.45	249.364	2090.87	1659.77	358.92	2267.63	1677.85	245.882	2264.29	1678.75	285.285	2315.76	1530.8	285.477	2399.16	1267.69	297.695	2168.34	1440.98	279.165	2098.13	1241.75	198.591	2396.7	1327.47	475.232	2240.53	1481.53	549.045	2277.6	1288.33	552.01	2296.54	1136.06	582.777	2227.39	978.972	541.133	2188.73	888.201	591.641	2242.9	880.67	593.572	2190.82	823.939
5527	0	337.13	2064.5	1660.21	250.672	2080.79	1660.69	360.261	2257.69	1679.37	247.255	2254.14	1680.35	287.046	2306.25	1531.84	287.405	2389.53	1268.81	298.66	2158.63	1442.55	280.108	2088.44	1243.5	200.705	2387.41	1328.46	476.381	2230.03	1483.03	550.99	2265.29	1289.39	554.213	2282.91	1137	583.461	2212.06	980.32	541.066	2173.54	890.562	592.462	2226.46	881.983	593.082	2173.87	825.6
5528	0	338.855	2054.9	1660.85	252.071	2070.95	1661.45	361.627	2247.81	1680.68	248.614	2244.33	1681.96	288.488	2296.98	1533.22	289.56	2379.86	1269.76	300.024	2149.26	1443.96	281.092	2079.12	1245.21	202.776	2378.28	1329.51	477.555	2219.76	1484.32	552.715	2252.81	1290.59	556.592	2269.84	1137.7	584.203	2196.73	981.968	540.607	2158.07	892.663	593.258	2209.63	883.261	592.593	2156.65	827.687
5529	0	339.759	2045.28	1661.64	253.347	2061.36	1662.48	362.496	2238.1	1682.37	249.736	2234.61	1683.56	289.926	2287.69	1534.33	291.455	2370.33	1271.03	300.741	2139.71	1445.54	281.304	2069.41	1246.76	204.794	2369.03	1330.63	478.443	2210	1485.68	554.618	2240.69	1291.81	559.018	2256.56	1138.8	584.857	2181.28	983.664	540.535	2142.05	895.239	593.815	2192.84	884.786	592.452	2139.38	830.363
5530	0	340.654	2035.81	1662.77	254.309	2051.97	1663.61	363.479	2228.56	1683.86	250.61	2225.11	1684.92	291.129	2278.35	1535.62	293.528	2361.07	1272.19	301.03	2130.31	1447.03	281.712	2060.21	1248.17	207.016	2360.08	1331.39	479.443	2199.99	1487.02	556.466	2228.82	1293.25	561.223	2243.24	1139.93	585.391	2165.71	985.377	540.058	2126.8	897.725	594.478	2175.93	886.286	591.842	2121.7	832.582
5531	0	341.532	2026.5	1663.99	254.887	2042.54	1664.62	364.298	2219.21	1685.36	251.232	2215.58	1686.5	292.69	2269.4	1537.06	295.303	2351.61	1273.46	301.605	2120.91	1448.42	281.753	2050.91	1249.41	208.756	2351.1	1332.65	481.08	2190.16	1488.49	558.14	2217.05	1294.48	563.373	2229.85	1140.88	585.815	2149.95	987.463	539.545	2111.12	900.055	595.116	2158.8	888.107	591.24	2103.87	835.548
5532	0	342.021	2017.2	1665.37	255.534	2033.38	1665.95	364.928	2209.81	1687.17	251.899	2206.47	1688.13	293.892	2260.24	1538.48	297.109	2342.52	1274.87	302.124	2111.66	1450.04	282.21	2042.04	1251.03	210.608	2342.14	1333.89	481.862	2180.33	1490.16	559.13	2204.86	1296.24	565.501	2216.67	1142.38	586.017	2134.11	989.613	539.001	2095.09	902.74	595.314	2141.46	890.392	590.498	2085.88	838.497
5533	0	342.274	2008.01	1667.09	255.728	2024.31	1667.42	365.379	2200.63	1689.12	252.381	2197.41	1689.78	294.924	2251.21	1540.07	298.902	2333.27	1276.24	302	2102.19	1451.69	282.305	2032.93	1252.73	212.393	2333.32	1335.34	482.677	2170.76	1491.75	560.233	2193.07	1297.72	567.532	2203.37	1143.36	586.295	2118.58	991.933	538.007	2079.59	905.48	595.551	2124.39	892.589	589.788	2067.96	842.124
5534	0	342.662	1998.87	1668.93	255.852	2015.25	1669.37	365.855	2191.55	1690.83	252.92	2188.51	1691.46	295.883	2242.2	1541.67	300.287	2324.06	1277.91	303.425	2093.69	1453.84	282.478	2023.94	1255.03	213.981	2324.6	1336.9	483.274	2160.93	1493.54	560.128	2180.8	1298.57	569.279	2189.87	1144.72	586.501	2102.99	994.313	537.324	2063.56	909.014	595.343	2107.14	894.798	588.877	2049.98	845.413
5535	0	342.686	1989.81	1670.58	256.11	2006.48	1670.91	366.174	2182.39	1692.65	253.231	2179.6	1693.12	296.129	2232.86	1543.67	302.163	2315.17	1279.62	303.992	2084.45	1455.43	282.667	2015.21	1256.52	215.457	2315.5	1338.01	483.773	2151.58	1494.76	560.985	2169.48	1299.75	570.909	2176.74	1146.06	586.456	2087.25	996.941	536.603	2047.41	912.304	595.459	2089.96	897.496	588.176	2032.13	848.985
5536	0	342.209	1980.87	1672.18	255.8	1997.79	1672.16	366.299	2173.25	1694.52	253.467	2170.88	1694.59	297.929	2224.31	1545.03	303.88	2305.82	1281.1	303.5	2075.11	1457.21	282.803	2006.44	1258.03	217.191	2307.2	1339.82	484.737	2141.73	1496.87	562.129	2158.11	1301.9	572.482	2163.46	1147.7	586.473	2071.81	999.441	536.013	2031.51	915.243	595.335	2072.98	900.034	587.27	2014.3	853.075
5537	0	341.691	1971.98	1674.17	255.156	1989.04	1673.93	366.595	2164.46	1696.56	253.735	2162.43	1695.98	298.592	2215.32	1546.73	305.614	2297.25	1282.97	303.23	2065.84	1458.75	282.767	1997.65	1259.61	218.714	2298.11	1340.77	485.394	2132.23	1498.69	563.012	2147.16	1303.71	574.339	2150.93	1149.65	586.87	2056.54	1002.8	535.428	2015.68	919.041	594.97	2055.99	902.927	586.44	1996.69	857.228
5538	0	341.317	1963.14	1675.83	254.999	1980.53	1675.56	366.932	2155.39	1698.21	253.955	2153.86	1697.58	299.84	2206.69	1548.36	307.103	2288.01	1284.41	303.794	2058.19	1460.49	282.952	1989.2	1261.47	220.285	2289.85	1342.53	485.818	2122.43	1500.62	563.571	2136.06	1305.12	575.288	2137.33	1151.07	586.789	2041.3	1005.75	534.507	1999.63	922.866	594.611	2039.14	906.039	585.434	1979.09	861.29
5539	0	341.193	1954.3	1677.71	254.435	1971.91	1677.1	367.075	2146.46	1699.85	254.294	2145.4	1699.12	300.631	2197.91	1549.7	308.771	2279.32	1285.9	304.322	2049.45	1462.48	283.002	1980.52	1263.34	221.69	2281.01	1343.94	486.181	2112.67	1502.5	563.974	2125.24	1306.46	576.339	2124.68	1152.75	586.627	2026.15	1008.79	533.705	1983.65	927.484	594.07	2022.37	909.065	584.556	1961.68	865.68
5540	0	340.497	1945.31	1679.71	254.072	1963.53	1678.95	367.372	2137.63	1701.67	254.449	2136.86	1700.48	301.59	2189.26	1551.41	310.119	2270.33	1287.52	304.232	2040.61	1463.82	282.9	1972.06	1265.01	223.089	2272.69	1345.77	486.522	2102.98	1504.46	564.497	2114.3	1308.09	577.53	2111.93	1154.76	586.409	2011	1011.91	533.016	1967.82	931.064	593.618	2005.69	912.272	583.51	1944.35	870.189
5541	0	339.583	1936.51	1681.5	253.097	1955.03	1680.2	367.354	2128.62	1703.36	254.56	2128.45	1701.93	302.141	2180.43	1552.94	311.643	2261.63	1288.92	303.945	2031.72	1465.36	282.702	1963.39	1266.38	224.292	2263.65	1346.96	486.859	2093.3	1506.41	564.945	2103.23	1310.01	578.497	2099.29	1156.84	586.384	1996.11	1015.39	532.348	1951.93	935.433	593.096	1989.23	915.704	582.446	1927.22	874.719
5542	0	338.967	1927.84	1682.93	252.723	1946.52	1681.79	367.629	2119.77	1704.53	254.71	2119.73	1703.2	303.154	2171.81	1554.11	313.053	2252.65	1290.39	304.046	2023	1466.52	282.914	1955.01	1267.67	225.729	2255.41	1348.21	487.259	2083.61	1507.94	565.556	2091.95	1311.83	579.169	2086.52	1158.07	586.24	1981.32	1018.46	531.673	1935.99	939.357	592.409	1972.77	918.955	581.677	1910.29	878.977
5543	0	338.337	1919.02	1684.21	251.997	1938.18	1683	368.08	2110.92	1705.67	254.965	2111.59	1704.3	303.851	2163.14	1555.38	314.208	2243.94	1291.93	303.732	2014.07	1467.57	282.582	1946.49	1268.71	226.857	2246.53	1349.27	487.83	2074.14	1509.28	566.142	2080.88	1313.4	579.951	2074.2	1159.49	586.069	1966.59	1021.38	530.932	1920.42	943.405	591.646	1956.61	922.361	580.346	1893.11	883.239
5544	0	337.519	1910.06	1685.98	251.101	1929.65	1684.47	367.864	2101.93	1706.87	255.061	2103.09	1705.18	304.071	2154.13	1556.72	315.563	2235.04	1292.73	303.667	2005.41	1468.71	281.9	1937.85	1270.36	228.081	2238.32	1350.62	487.408	2064.01	1510.97	566.646	2069.72	1314.77	580.532	2061.62	1161.17	585.836	1952.1	1024.21	530.273	1904.78	946.915	590.985	1940.45	925.306	579.514	1876.61	887.603
5545	0	336.916	1901.19	1687.37	250.504	1921.09	1685.8	367.977	2093.06	1707.81	255.257	2094.69	1706.14	304.777	2145.5	1557.6	316.72	2226.17	1293.89	303.488	1996.54	1469.91	281.467	1929.31	1271.58	229.007	2229.8	1351.39	487.542	2054.28	1512.34	566.906	2058.62	1316.08	581.029	2049.17	1162.27	585.558	1937.74	1027.19	529.481	1889.34	951.522	590.096	1924.72	928.108	578.449	1860	891.573
5546	0	336.408	1892.4	1688.26	250.042	1912.57	1686.87	368.312	2084.2	1708.27	255.26	2086.13	1706.74	305.018	2136.38	1558.47	318.038	2217.37	1294.69	303.095	1987.59	1470.62	280.916	1920.7	1272.22	230.088	2221.43	1352.38	487.553	2044.5	1513.28	567.158	2047.46	1317	581.469	2036.88	1163.36	585.262	1923.5	1029.74	528.606	1873.94	955.105	589.043	1909.02	930.636	577.575	1843.71	895.48
5547	0	335.494	1883.57	1688.85	249.263	1903.93	1687.48	368.228	2075.25	1708.73	255.365	2077.55	1707.33	305.802	2127.75	1559.05	318.937	2208.49	1295.41	302.932	1978.83	1470.92	280.519	1912.1	1272.55	231.131	2212.89	1352.87	487.345	2034.44	1514.24	567.482	2036.18	1318.12	581.769	2024.63	1164.27	584.714	1909.35	1032.09	527.765	1858.65	957.921	588.069	1893.6	933.225	576.665	1827.49	899.472
5548	0	334.745	1874.6	1689.54	248.727	1895.32	1688.39	368.119	2066.15	1709.27	255.353	2068.84	1707.87	306.015	2118.71	1559.68	320.163	2199.93	1296.26	302.516	1970	1471.45	280.024	1903.61	1273.03	231.976	2204.29	1353.58	487.557	2024.8	1514.91	567.727	2024.89	1319.09	582.026	2012.36	1164.99	584.126	1895.29	1034.17	527.102	1843.33	961.641	586.782	1878.12	935.585	575.762	1811.56	903.379
5549	0	334.171	1865.54	1689.89	248.07	1886.42	1688.69	368.185	2057.08	1709.4	255.392	2060.18	1708.22	306.64	2109.75	1559.84	320.94	2190.82	1296.62	302.09	1961.09	1471.43	279.178	1894.9	1273.07	233.022	2195.87	1353.91	486.605	2014.15	1515.45	567.699	2013.34	1319.62	582.135	1999.99	1165.87	583.547	1881.38	1036.48	525.97	1828.82	964.449	585.574	1863.08	938.078	574.719	1795.68	907.246
5550	0	333.823	1856.5	1689.92	247.652	1877.6	1688.75	368.43	2047.9	1709.38	255.276	2051.17	1708.5	306.789	2100.71	1560.33	322.046	2182.08	1296.96	301.547	1952.18	1471.55	278.489	1886.26	1273.24	233.808	2187.2	1354.29	487.005	2004.77	1515.97	567.912	2003.24	1320.15	582.11	1987.72	1166.28	582.771	1867.52	1038.36	524.868	1813.56	967.757	584.335	1848.03	939.956	573.399	1779.83	910.769
5551	0	333.243	1847.34	1689.65	247.055	1868.64	1688.72	368.027	2038.64	1709.46	255.084	2042.13	1708.6	306.627	2091.56	1560.38	322.562	2173.26	1297.31	300.989	1943.32	1471.47	277.709	1877.6	1273.18	234.6	2178.89	1354.35	486.448	1994.71	1516.05	567.726	1992	1320.38	582.232	1975.83	1166.31	581.964	1853.99	1040.03	523.79	1799.17	970.372	582.632	1833.07	942.021	572.346	1764.46	914.253
5552	0	332.84	1838.17	1689.08	246.561	1859.47	1688.39	367.903	2029.36	1709.1	254.841	2032.96	1708.45	306.748	2082.47	1560	323.423	2164.45	1296.76	300.462	1934.41	1471.28	276.97	1868.93	1272.87	235.016	2170.07	1354.02	485.648	1984.31	1515.77	567.627	1980.99	1320.28	582.11	1963.82	1166.45	581.041	1840.56	1041.4	522.652	1784.65	973.168	581.129	1818.51	943.771	571.181	1749.34	917.476
5553	0	332.425	1828.85	1688.05	246.283	1850.23	1687.73	367.576	2020.02	1708.56	254.785	2023.82	1708.14	306.793	2073.54	1559.49	323.726	2155.52	1296.5	299.9	1925.47	1470.69	276.065	1860.27	1272.12	235.853	2161.58	1353.52	485.123	1974.3	1515.48	567.33	1969.75	1320.24	581.781	1952.06	1166.27	580.028	1827.16	1042.63	521.375	1770.49	975.341	579.642	1803.9	945.066	569.883	1734.3	920.289
5554	0	331.824	1819.38	1686.93	245.827	1840.9	1686.87	367.212	2010.53	1707.92	254.497	2014.4	1707.69	306.467	2064.3	1559.11	324.186	2146.53	1295.81	299.042	1916.37	1469.81	275.129	1851.54	1271.16	236.19	2152.69	1352.82	484.529	1964.32	1514.9	566.934	1958.48	1320.05	581.416	1940.21	1165.7	578.846	1813.9	1043.51	519.744	1756.28	977.452	578.059	1789.47	946.385	568.552	1719.56	923.201
5555	0	330.347	1809.44	1685.82	245.341	1831.39	1685.83	366.689	2000.87	1707.14	254.066	2004.86	1706.99	306.206	2055.25	1558.41	324.41	2137.72	1295.37	298.428	1907.51	1469.09	274.297	1842.85	1270.52	236.566	2144.05	1352.18	483.944	1954.62	1514.19	566.485	1947.61	1319.44	581.097	1928.66	1165.15	577.758	1800.81	1044.5	518.547	1742.68	979.659	576.449	1775.35	947.607	567.077	1704.98	925.93
5556	0	330.054	1799.97	1684.2	244.747	1821.82	1684.35	366.136	1991.49	1706.07	253.475	1995.28	1706.04	306.502	2046.26	1557.19	324.4	2128.63	1294.45	297.617	1898.43	1468.09	273.257	1834.05	1269.61	236.518	2135.29	1351.33	483.014	1944.5	1513.43	565.946	1936.77	1318.71	580.569	1917.1	1164.5	576.426	1787.76	1045.19	516.484	1728.83	981.05	574.635	1761.26	948.843	565.66	1690.63	928.224
5557	0	330.895	1790.98	1682.77	244.392	1812.18	1682.99	365.512	1981.77	1704.58	252.747	1985.58	1704.89	305.62	2037.01	1556.18	324.482	2119.85	1293.43	296.867	1889.41	1466.79	272.315	1825.26	1268.22	236.267	2126.38	1350.31	482.253	1934.81	1512.22	565.133	1926.02	1317.65	579.921	1905.6	1163.41	575.227	1775.15	1045.55	514.99	1715.59	982.421	572.927	1747.31	949.413	564.061	1676.49	930.423
5558	0	329.036	1780.92	1680.9	243.897	1802.49	1681.52	364.698	1972.27	1703.33	252.075	1976.05	1703.42	304.869	2027.67	1554.99	324.098	2110.54	1292.04	295.912	1880.18	1465.19	271.407	1816.41	1266.47	236.223	2117.67	1349	481.458	1925.06	1511.1	564.506	1915.31	1316.54	579.097	1894.33	1162.11	573.869	1762.59	1045.61	513.897	1702.72	983.529	571.161	1733.71	949.864	562.459	1662.66	932.135
5559	0	328.228	1771.15	1679.2	243.033	1792.84	1679.56	363.661	1962.76	1701.83	251.08	1966.19	1702.03	304.558	2018.6	1553.36	323.755	2101.52	1290.82	294.998	1870.95	1463.67	270.422	1807.47	1264.73	235.767	2108.42	1347.68	480.692	1915.52	1509.61	563.79	1904.86	1315.29	578.282	1883.13	1160.73	572.612	1750.19	1045.82	512.353	1689.76	984.398	569.319	1720.25	950.191	560.713	1648.96	933.671
5560	0	327.592	1761.71	1677.12	242.469	1783.25	1677.66	362.707	1953.08	1699.89	250.109	1956.64	1700.23	303.801	2009.27	1551.68	323.214	2092.83	1289.54	294.112	1861.71	1461.88	269.392	1798.49	1262.95	235.191	2099.23	1346	479.742	1905.8	1507.99	562.863	1894.7	1313.57	577.488	1871.92	1159.19	571.026	1737.9	1045.42	510.733	1677.04	984.866	567.447	1707.04	950.275	559.161	1635.68	934.874
5561	0	326.502	1752.19	1675.04	241.455	1773.47	1675.7	361.569	1943.55	1698.07	248.88	1946.89	1698.38	302.615	1999.76	1550.02	322.566	2083.28	1287.53	292.949	1852.14	1460.08	268.273	1789.38	1261.03	234.399	2090.13	1344.23	478.629	1896.14	1505.94	561.766	1884.29	1311.64	576.341	1860.65	1157.68	569.597	1725.8	1044.92	509.131	1664.45	984.874	565.666	1694.22	949.858	557.477	1622.52	935.764
5562	0	325.183	1742.37	1673.59	240.266	1763.96	1673.95	360.267	1934.11	1696.02	247.518	1937.31	1696.33	301.527	1990.2	1548.3	321.446	2073.36	1285.69	291.992	1842.88	1458.2	267.209	1780.08	1258.98	233.436	2080.85	1342.62	477.529	1886.53	1504.19	560.603	1874.26	1309.84	575.146	1849.62	1155.86	567.905	1713.82	1044.23	507.355	1651.97	985.11	563.719	1681.42	949.636	555.832	1609.73	936.275
5563	0	323.922	1732.83	1671.68	238.984	1754.34	1671.84	358.702	1924.54	1693.82	246.099	1927.87	1693.89	300.346	1980.66	1546.14	320.456	2063.7	1283.41	290.761	1833.27	1456	266.11	1770.8	1257.15	232.271	2071.36	1340.35	476.352	1876.92	1502.23	559.289	1864.23	1307.93	573.789	1838.85	1153.78	566.451	1702.25	1043.37	505.438	1640.12	984.662	561.724	1668.98	948.917	554.106	1597.26	936.739
5564	0	322.473	1723.45	1669.42	237.708	1744.81	1669.53	357.118	1915.14	1691.7	244.603	1918.47	1691.42	299.38	1971.31	1543.83	319.491	2054.5	1281.32	289.157	1823.71	1454.16	264.831	1760.94	1254.67	231.207	2061.78	1338.05	475.295	1867.51	1500.08	557.756	1854.39	1305.55	572.336	1828.06	1151.62	564.825	1690.74	1042	503.88	1628.07	984.035	559.789	1656.83	947.839	552.359	1584.88	936.339
5565	0	320.838	1714.01	1667.64	235.827	1735.32	1667.59	355.313	1905.6	1689.23	242.77	1908.85	1689.05	297.994	1961.75	1541.48	318.295	2044.8	1278.76	287.894	1814.07	1451.7	263.717	1751.33	1252.36	229.871	2052.09	1335.41	474.1	1858.05	1497.62	556.398	1844.71	1303.09	570.68	1817.41	1149.24	563	1679.33	1040.42	502.078	1616.24	983.24	557.92	1644.97	946.536	550.347	1572.81	935.573
5566	0	318.172	1704	1666.15	233.97	1725.88	1665.42	353.411	1896.27	1687.18	241.036	1899.57	1686.34	296.602	1952.23	1539.01	317.112	2034.9	1276.46	286.413	1804.26	1449.47	262.465	1741.6	1250.03	228.735	2042.2	1332.72	472.609	1848.57	1495.62	554.732	1835.05	1300.69	569.111	1806.93	1146.84	561.493	1668.44	1038.79	500.277	1604.78	982.145	555.987	1633.35	945.129	548.914	1561.41	934.761
5567	0	315.958	1694.42	1664.33	232.04	1716.43	1663.48	351.432	1886.83	1684.94	238.979	1890.18	1683.76	294.865	1942.37	1536.86	315.81	2024.63	1273.69	284.816	1794.42	1447.54	260.84	1731.44	1248.19	227.38	2032.34	1330.23	471.015	1838.76	1493.29	552.868	1825.48	1298.15	567.302	1796.57	1144.53	559.526	1657.43	1037	498.611	1593.68	980.912	553.977	1622.01	943.439	547.245	1550.14	933.795
5568	0	313.91	1684.93	1662.57	229.849	1706.87	1661.46	349.328	1877.45	1682.61	236.814	1880.76	1681.33	293.325	1932.58	1534.32	314.624	2014.8	1271.63	283.011	1784.42	1445.36	259.434	1721.27	1245.92	225.916	2022.32	1327.65	469.333	1828.78	1491.13	550.828	1815.8	1295.67	565.343	1786	1142.33	557.687	1646.71	1035.13	496.786	1582.66	979.242	551.996	1611.11	941.59	545.446	1539.08	932.094
5569	0	311.67	1675.26	1661.11	227.505	1697.41	1659.34	347.017	1867.95	1680.64	234.539	1871.25	1678.9	291.264	1922.56	1532.06	313.331	2004.16	1268.82	281.206	1774.34	1442.78	258.16	1711.27	1243.19	224.562	2012.38	1325.4	467.567	1818.63	1488.93	549.017	1806.17	1293.55	563.367	1775.93	1140.07	556.036	1636.4	1033.12	495.095	1572	977.107	550.079	1600.75	939.883	543.846	1528.46	930.607
5570	0	309.178	1665.62	1659.58	225.187	1687.73	1657.66	344.801	1858.16	1678.23	232.009	1861.57	1676.51	289.056	1912.33	1530	311.898	1994.05	1267	279.232	1764.27	1440.69	256.467	1700.88	1240.88	223.152	2002.23	1322.91	465.755	1808.57	1487.02	546.826	1796.74	1290.95	561.217	1765.64	1137.95	554.044	1626.13	1030.92	493.447	1561.75	975.125	548.35	1590.37	937.679	542.133	1518.21	928.406
5571	0	306.612	1655.88	1658.02	222.532	1678.01	1655.6	342.424	1848.63	1675.89	229.377	1851.87	1674.04	287.008	1902.1	1527.68	310.565	1983.44	1264.5	277.155	1754.05	1438.48	254.714	1690.41	1238.67	221.649	1992.46	1320.81	463.696	1798.12	1485.02	544.563	1786.89	1288.95	559.011	1755.63	1135.87	552.289	1616.31	1028.65	491.659	1551.69	972.711	546.509	1580.54	935.467	540.74	1508.48	926.18
5572	0	303.839	1646.12	1656.44	219.906	1668.25	1653.77	339.494	1838.81	1674.1	226.749	1842.21	1671.46	284.872	1891.95	1525.36	309.076	1972.87	1262.49	274.856	1743.73	1436.47	252.711	1679.75	1236.74	220.14	1982.06	1318.44	461.421	1787.73	1483.12	542.161	1777	1286.87	556.703	1745.66	1133.89	550.18	1606.45	1026.23	489.939	1541.95	970.249	544.467	1571.18	933.052	539.175	1499.09	923.485
5573	0	300.864	1636.15	1654.99	217.053	1658.34	1652.03	336.717	1829.06	1671.97	223.715	1832.35	1669.07	282.584	1881.69	1523.23	307.5	1962.18	1259.96	272.467	1733.4	1434.44	250.91	1669.52	1234.66	218.456	1971.32	1315.62	459.125	1777.2	1481.35	539.791	1767.01	1285	554.231	1735.86	1131.94	548.224	1597.03	1023.98	488.156	1532.54	967.477	542.841	1562.13	930.203	537.597	1490.04	920.531
5574	0	298.005	1626.16	1653.74	214.179	1648.37	1650.13	333.551	1819.01	1670.04	220.896	1822.52	1666.71	279.938	1871.46	1521.1	305.65	1951.58	1257.97	269.981	1722.82	1432.54	248.905	1658.81	1232.72	216.685	1960.57	1312.91	456.566	1766.7	1479.62	537.19	1756.93	1283.3	551.562	1725.95	1130.35	546.309	1587.89	1021.32	486.618	1523.53	964.659	540.904	1553.59	927.582	536.025	1481.36	917.521
5575	0	295.064	1616.19	1652.4	211.236	1638.18	1648.58	330.355	1808.87	1668.46	217.66	1812.43	1664.69	277.498	1861.17	1519.15	303.576	1940.55	1255.61	267.494	1712.38	1430.96	247.051	1648.17	1230.89	214.947	1950.26	1310.81	454.011	1756.04	1478.17	534.81	1746.35	1281.8	548.941	1716.23	1128.68	544.51	1578.99	1018.62	484.996	1514.55	961.561	539.327	1545.05	924.641	534.702	1473.12	914
5576	0	291.817	1605.81	1651.48	207.996	1628.03	1646.97	327.02	1798.92	1667.24	214.392	1802.25	1662.83	274.588	1850.55	1517.38	301.529	1929.58	1254.02	265.023	1701.71	1429.03	244.85	1637.07	1229.18	213.052	1939.41	1308.44	451.325	1745.32	1477.13	532.436	1735.77	1280.64	546.1	1706.55	1127.26	542.431	1570.06	1016.24	483.385	1506.07	958.254	537.77	1537.05	921.88	533.328	1465.18	910.5
5577	0	288.538	1595.61	1650.37	204.645	1617.63	1645.67	323.596	1788.68	1666.33	211.002	1791.88	1661.36	272.116	1840.12	1515.93	299.573	1918.54	1252.47	262.4	1691.11	1427.75	242.791	1626.07	1228.12	210.561	1928.28	1306.96	448.716	1734.56	1476.24	530.045	1724.78	1280.15	543.172	1696.84	1126.23	540.53	1561.59	1013.91	481.816	1497.87	955.063	536.496	1529.5	919.256	532.034	1457.66	906.846
5578	0	285.034	1585.14	1649.53	201.285	1607.25	1644.19	319.889	1777.84	1665.74	207.553	1781.51	1660.18	269.255	1829.18	1514.95	297.558	1906.98	1251.21	260.43	1680.55	1426.57	240.183	1614.45	1227.53	208.482	1917.25	1305.57	445.95	1723.59	1475.73	527.575	1713.62	1279.5	540.398	1687.3	1125.55	538.609	1553.22	1011.84	480.161	1489.61	951.831	535.197	1522.14	916.537	530.873	1450.45	903.328
5579	0	281.413	1574.6	1648.85	197.706	1596.87	1642.93	316.69	1767.54	1665.33	203.834	1770.96	1659.13	266.434	1818.49	1513.96	295.592	1895.86	1250.33	257.839	1669.75	1425.84	237.739	1602.84	1227.52	206.188	1905.83	1303.97	443.31	1712.58	1475.63	525.12	1702.36	1279.37	537.557	1677.79	1125.07	536.792	1545.02	1009.93	478.914	1481.99	948.97	533.892	1515.16	913.892	529.743	1443.56	899.787
5580	0	277.658	1564.02	1648.24	194.12	1586.35	1641.95	312.377	1756.78	1665.62	200.329	1760.41	1658.34	263.882	1807.94	1513.32	293.407	1884.56	1249.64	255.058	1658.93	1425.01	235.805	1591.68	1226.52	204.112	1894.82	1303.08	440.655	1701.56	1475.19	522.738	1691.12	1279.57	534.443	1668.23	1124.87	534.87	1537.16	1007.55	477.692	1474.82	945.156	532.678	1508.49	911.756	528.823	1437.25	895.872
5581	0	274.02	1553.41	1648.18	190.399	1575.86	1641.1	309.002	1746.12	1665.69	196.712	1749.93	1657.78	261.391	1797.3	1512.65	291.26	1873.16	1248.87	252.596	1648.21	1424.89	233.336	1580.09	1226.84	201.924	1883.6	1302.37	438.064	1690.55	1475.28	520.449	1679.84	1279.78	531.389	1658.89	1124.61	533.061	1529.55	1005.61	476.479	1467.77	941.961	531.774	1502.38	909.237	527.898	1431.33	892.016
5582	0	269.889	1542.55	1648.25	186.435	1565.27	1640.42	305.297	1735.21	1666.12	193.117	1739.41	1657.2	258.758	1786.57	1512.69	289.336	1862.05	1248.67	250.043	1637.37	1425	231.196	1568.77	1227.15	199.616	1872.36	1301.58	435.492	1679.37	1475.51	517.99	1668.64	1280.26	528.352	1649.61	1124.55	531.287	1522.04	1003.81	475.233	1461.06	938.798	530.67	1496.38	906.935	527.034	1425.74	888.047
5583	0	265.963	1531.83	1648.82	182.588	1554.77	1640.36	301.362	1724.49	1666.77	189.755	1728.92	1656.98	256.305	1775.9	1512.86	287.385	1850.44	1248.38	247.374	1626.44	1425.3	228.973	1557.68	1227.49	197.668	1861.3	1301.81	433.046	1668.35	1475.96	515.679	1657.47	1280.98	525.389	1640.28	1125.02	529.59	1514.9	1002.19	474.109	1454.89	935.875	529.745	1490.71	904.855	526.166	1420.57	884.404
5584	0	261.67	1520.96	1649.62	178.56	1544.26	1640.6	297.869	1713.35	1667.67	186.298	1718.31	1657	253.936	1765.05	1513.33	285.617	1839.31	1248.88	244.946	1615.72	1426.19	226.892	1546.73	1228.32	195.592	1850.14	1301.86	430.583	1657.22	1476.77	513.315	1646.49	1282.01	522.58	1631.18	1125.8	527.864	1507.88	1001.05	473.296	1448.8	933.248	528.788	1485.44	903.14	525.436	1415.75	881.006
5585	0	257.471	1510.15	1650.77	174.607	1533.89	1640.9	294.495	1702.55	1668.94	182.889	1707.96	1657.32	251.77	1754.24	1514.3	283.727	1827.95	1249.72	242.628	1604.96	1427.2	224.251	1535.23	1229.52	194.042	1839.33	1302.89	428.121	1646	1478	510.984	1635.57	1283.3	519.764	1622.13	1126.87	526.22	1500.98	1000.27	471.917	1443.6	930.876	528.385	1480.54	901.824	524.559	1411.17	877.768
5586	0	253.25	1499.5	1651.66	170.451	1523.56	1641.41	290.715	1691.37	1670.37	179.652	1697.46	1657.82	250.669	1743.52	1514.89	281.775	1816.7	1250.41	239.605	1593.85	1428.7	222.583	1524.52	1230.31	192.239	1828.37	1303.58	425.826	1634.86	1479.42	508.768	1624.76	1284.84	517.154	1613.06	1128.32	524.685	1494.29	999.684	470.968	1438.1	928.369	527.748	1475.67	900.87	523.788	1406.88	874.799
5587	0	249.126	1488.73	1653.18	166.752	1513.41	1641.95	287.571	1680.62	1671.92	176.658	1687.28	1658.48	247.523	1732.71	1516.4	279.986	1805.82	1251.58	237.333	1583.08	1429.83	220.158	1513.29	1231.85	190.606	1817.57	1304.78	423.766	1624.11	1480.97	506.7	1614.22	1286.62	514.664	1604.21	1130.01	523.279	1487.75	999.524	470.189	1433.03	926.207	527.239	1470.87	900.475	523.109	1402.85	872.247
5588	0	244.987	1478.17	1654.84	162.728	1503.31	1643.06	284.509	1669.72	1673.58	173.672	1677.02	1659.27	245.383	1722.06	1517.7	277.575	1794.77	1252.94	235.258	1572.35	1431.12	218.17	1502.36	1233.17	188.714	1806.75	1305.82	421.628	1613.47	1482.62	504.818	1604.19	1288.32	512.137	1595.51	1131.86	521.966	1481.33	999.628	469.347	1428.01	924.734	526.841	1466.08	900.22	522.494	1399.03	869.686
5589	0	240.944	1467.73	1656.43	159.433	1493.54	1644.28	281.557	1658.97	1675.21	170.976	1667.03	1660.12	243.391	1711.65	1519.06	275.295	1783.91	1254.32	234.17	1562.24	1432.44	216.592	1491.76	1235.42	186.36	1795.81	1307.42	419.654	1603.03	1484.42	502.748	1594.26	1289.93	509.746	1587.13	1133.52	520.806	1475.04	999.847	468.627	1423.12	923.93	526.345	1461.42	900.152	521.487	1394.89	867.553
5590	0	237.195	1457.34	1658.38	155.807	1483.56	1645.64	278.823	1648.52	1676.92	168.314	1656.99	1661.11	241.287	1701.18	1520.64	272.985	1773.63	1255.63	231.863	1551.24	1433.9	214.611	1480.74	1237.05	184.193	1785.18	1308.68	417.799	1592.91	1486.1	500.95	1584.76	1291.73	507.636	1579.24	1135.12	519.682	1468.9	1000.1	468.026	1418.31	923.115	526.172	1456.97	900.588	520.875	1391.17	865.662
5591	0	233.643	1447.17	1660.28	152.446	1473.83	1646.91	276.159	1638.13	1678.53	166.031	1647.23	1661.92	239.235	1690.71	1522.25	270.645	1763.21	1257.23	230.726	1541.23	1435.6	213.199	1470.18	1238.38	181.625	1774.3	1310.42	416.077	1583.02	1487.66	499.315	1575.64	1293.51	505.635	1571.5	1136.95	518.92	1462.99	1000.58	467.6	1413.49	922.208	526.222	1452.14	900.92	519.994	1387.28	863.887
5592	0	230.431	1437.05	1662.3	149.425	1464.06	1648.57	273.7	1627.8	1680.19	163.779	1637.54	1663.02	237.052	1680.36	1523.76	267.687	1752.91	1258.72	229.211	1530.81	1437.31	211.725	1459.69	1240.2	178.857	1763.63	1312.16	414.283	1573.19	1489.42	497.699	1566.95	1295.13	503.609	1563.92	1138.68	518.034	1456.97	1001.39	467.105	1408.67	922.08	526.137	1447.25	901.643	519.577	1383.55	862.72
5593	0	227.484	1427.15	1664.33	146.683	1454.46	1650.05	271.473	1617.66	1681.98	161.752	1627.84	1664.29	235.101	1670.04	1525.8	265.145	1742.76	1260.69	227.177	1520.36	1439.17	210.298	1449.29	1241.9	176.321	1753.21	1314.2	412.674	1563.57	1491.07	496.127	1558.53	1296.78	501.943	1556.69	1140.4	517.475	1451.07	1002.31	466.762	1403.7	921.779	526.309	1442.39	902.417	518.827	1379.43	861.586
5594	0	224.883	1417.28	1666.44	144.043	1444.83	1651.85	269.343	1607.77	1683.71	159.701	1618.19	1665.72	233.2	1659.96	1527.46	262.34	1732.86	1262.34	225.91	1510.31	1440.98	209.078	1439.26	1243.62	173.734	1742.94	1316.19	411.333	1554.22	1492.68	494.855	1550.79	1298.32	500.552	1549.54	1142.32	516.791	1445.11	1003.16	466.549	1398.92	921.905	526.03	1437.31	903.703	518.346	1375.45	861.006
5595	0	222.316	1407.54	1668.53	141.726	1435.32	1653.57	267.533	1597.97	1685.62	157.946	1608.77	1667.18	231.53	1649.98	1529.31	259.941	1723.2	1264.31	224.708	1500.43	1442.78	208.233	1429.5	1245.23	171.172	1732.93	1318.3	410.019	1545.08	1494.42	493.366	1542.95	1300.1	499.03	1542.81	1143.91	516.021	1439.53	1003.76	466.231	1393.97	922.151	526.094	1432.46	904.4	517.801	1371.34	860.596
5596	0	220.179	1397.91	1670.44	139.736	1425.78	1655.5	265.727	1588.06	1687.28	156.049	1599.05	1668.87	229.681	1640.06	1531.25	257.289	1713.64	1266.3	223.501	1490.53	1444.66	207.037	1419.5	1247.23	168.609	1723.11	1320.51	408.737	1535.92	1496.15	492.123	1535.82	1301.43	497.933	1536.11	1145.6	515.503	1433.84	1004.74	465.907	1388.8	922.955	526.058	1427.46	905.61	517.428	1367.1	860.384
5597	0	218.394	1388.42	1672.14	137.891	1416.35	1657.09	264.274	1578.41	1689.23	154.751	1589.59	1670.48	228.012	1630.35	1533.16	254.809	1704.17	1268	222.381	1480.84	1446.31	206.377	1409.98	1248.48	166.265	1713.31	1322.85	407.565	1527.09	1497.71	491.024	1528.94	1302.94	496.532	1529.5	1147.12	515.232	1428.44	1005.69	465.76	1383.67	923.239	525.92	1422.67	906.556	517.163	1362.83	860.473
5598	0	216.791	1378.72	1674.25	136.343	1406.91	1659.09	262.804	1568.85	1690.94	153.498	1580.26	1671.98	226.513	1620.8	1535.26	252.601	1694.92	1270.03	221.425	1471.39	1447.81	205.664	1400.55	1250.01	163.929	1703.71	1324.77	406.592	1518.53	1499.08	489.835	1522.09	1304.42	495.514	1523.31	1148.78	514.833	1423.15	1006.56	465.802	1378.71	923.757	525.686	1417.92	907.605	517.076	1358.63	860.843
5599	0	215.382	1369.31	1676	134.927	1397.49	1660.85	261.64	1559.46	1692.95	152.249	1570.84	1674.07	225.188	1611.47	1537.11	250.409	1685.85	1271.86	220.479	1462.11	1449.66	204.72	1390.97	1252.24	161.733	1694.1	1326.66	405.289	1509.94	1500.65	488.716	1515.64	1305.81	494.596	1517.34	1150.21	514.523	1417.91	1007.72	465.612	1373.52	924.85	525.346	1413.27	908.691	517.008	1354.29	861.465
5600	0	214.125	1359.88	1677.84	133.799	1388.1	1662.64	260.662	1549.97	1695.1	151.285	1561.39	1676.31	223.61	1602.16	1539	248.26	1676.71	1273.77	219.387	1452.77	1451.81	204.22	1381.72	1254.13	159.685	1684.49	1329.04	404.291	1501.51	1502.31	487.523	1508.99	1307.56	493.589	1511.42	1151.91	514.251	1412.71	1008.97	465.74	1368.35	926.028	524.827	1408.64	909.887	517.101	1349.81	862.264
5601	0	213.249	1350.35	1679.75	132.808	1378.77	1664.81	259.652	1540.5	1697.2	150.271	1552.06	1678.57	222.424	1593.03	1541.08	246.192	1667.71	1276.04	218.517	1443.62	1453.89	203.216	1372.24	1256.6	157.787	1675.08	1331.24	403.375	1493.3	1503.96	486.543	1502.65	1309.25	492.507	1505.37	1153.9	513.859	1407.5	1010.25	465.803	1363.02	927.353	524.775	1404.13	911.26	517.5	1345.46	863.632
5602	0	212.586	1341.16	1681.32	132.026	1369.39	1666.64	258.727	1530.98	1699.4	149.363	1542.69	1681.03	220.975	1583.91	1543.26	244.009	1658.65	1278	217.595	1434.58	1456.01	202.434	1363.05	1258.52	155.72	1665.78	1333.24	402.261	1485.03	1505.84	485.477	1496.14	1311.04	491.362	1499.65	1155.7	513.731	1402.59	1011.92	466.131	1357.78	928.689	524.348	1399.72	912.781	517.547	1340.64	864.919
5603	0	211.999	1331.86	1683.03	131.413	1360.05	1668.66	258.304	1521.79	1701.67	148.556	1533.28	1683.63	219.362	1574.76	1545.4	241.869	1649.69	1279.97	216.795	1425.65	1458.28	201.882	1354.18	1260.46	153.815	1656.48	1335.62	401.338	1476.92	1507.65	484.527	1489.83	1312.97	490.233	1494.11	1157.53	513.523	1397.67	1013.35	466.397	1352.41	930.292	524.12	1394.92	914.264	518.032	1335.98	866.533
5604	0	211.642	1322.5	1684.9	131.029	1350.75	1670.93	257.764	1512.58	1703.67	147.964	1523.93	1686.34	218.142	1565.99	1547.57	239.977	1640.99	1282.33	215.968	1416.7	1460.41	201.039	1345.29	1262.56	151.875	1647.23	1337.94	400.41	1468.95	1509.36	483.489	1483.5	1314.73	489.185	1488.63	1159.48	513.462	1392.69	1015.26	466.784	1346.63	932.168	523.571	1390.36	916.057	518.579	1331.19	868.223
5605	0	211.436	1313.43	1686.53	130.68	1341.44	1673.15	257.196	1503.36	1705.62	147.535	1514.72	1688.71	216.765	1557.15	1549.68	237.828	1632.2	1284.26	215.019	1407.84	1462.59	200.059	1336.41	1264.86	149.943	1638.11	1339.99	399.304	1461.01	1511.31	482.424	1477.18	1316.94	488.036	1483.17	1161.54	513.403	1387.77	1017.01	466.856	1340.59	933.238	523.634	1385.84	917.771	519.187	1326.35	870.285
5606	0	211.48	1304.27	1688.23	130.566	1332.17	1675.27	256.947	1494.49	1707.59	147.077	1505.39	1691.05	215.213	1548.32	1551.64	235.793	1623.44	1286.05	214.231	1399.14	1464.82	199.418	1327.93	1267.09	147.789	1629.02	1341.97	398.307	1453.25	1513.07	481.153	1470.89	1318.83	486.842	1477.58	1163.6	513.259	1382.88	1018.85	467.3	1334.38	935.823	523.195	1381.5	919.463	519.857	1321.6	872.039
5607	0	211.59	1295.26	1689.91	130.621	1322.87	1677.6	256.566	1485.36	1709.32	146.79	1496.25	1693.48	213.787	1539.72	1553.55	233.879	1614.87	1288.26	213.462	1390.43	1466.93	198.596	1319.19	1269.41	145.706	1619.97	1344.17	397.251	1445.39	1514.91	480.091	1464.58	1320.77	485.637	1471.96	1165.65	512.749	1377.9	1020.27	467.847	1328.96	937.69	522.638	1376.46	921.253	520.527	1316.51	874.05
5608	0	211.901	1286.14	1691.7	130.749	1313.61	1679.82	256.308	1476.62	1710.81	146.383	1487.01	1695.68	212.475	1530.98	1555.64	231.834	1606.14	1290.04	212.515	1381.63	1468.54	198.033	1310.75	1270.9	143.604	1610.81	1346.14	395.902	1437.84	1516.61	478.972	1458.32	1322.65	484.43	1466.47	1167.48	512.72	1372.79	1022.41	468.704	1323.28	939.281	522.29	1371.67	923.06	521.372	1311.51	876.076
5609	0	212.261	1277.27	1693.37	130.89	1304.29	1681.82	255.96	1467.76	1712.36	145.968	1477.8	1697.79	211.08	1522.21	1557.37	229.893	1597.54	1291.94	211.837	1372.96	1470.31	197.355	1302.1	1272.59	141.511	1601.81	1347.85	394.937	1430.11	1518.47	477.916	1452.07	1324.71	483.221	1460.91	1169.47	512.779	1367.65	1024.26	469.462	1317.21	941.372	521.999	1366.82	924.935	522.398	1306.45	878.141
5610	0	212.749	1268.45	1694.98	131.137	1295.07	1683.72	255.686	1459.24	1713.63	145.315	1468.55	1699.93	209.709	1513.46	1559.11	228.122	1588.98	1293.76	210.937	1364.26	1471.96	196.86	1293.53	1274.1	139.561	1592.74	1349.74	393.986	1422.29	1520.04	476.625	1445.53	1326.66	482.015	1455.03	1171.51	512.622	1362.32	1026.11	470.158	1311.19	943.261	521.805	1361.63	926.795	523.005	1300.99	880.232
5611	0	213.192	1259.66	1696.54	131.49	1285.87	1685.94	255.173	1450.55	1714.65	144.951	1459.55	1701.36	208.299	1504.68	1560.36	226.157	1580.23	1295.32	210.17	1355.5	1473.61	196.232	1284.63	1275.81	137.613	1583.75	1351.28	392.815	1414.34	1521.61	475.529	1439.32	1328.19	480.919	1449.18	1173.27	512.385	1356.81	1027.87	470.794	1304.89	945.097	521.397	1356.26	928.33	523.944	1295.74	881.672
5612	0	213.707	1250.95	1698.22	131.822	1276.75	1687.91	254.832	1442.2	1715.74	144.311	1450.46	1703.01	206.802	1495.7	1562.1	224.588	1571.62	1296.86	209.634	1346.83	1474.86	196.098	1276.18	1277.24	135.79	1574.75	1352.85	391.932	1406.55	1522.92	474.352	1432.87	1329.75	479.747	1443.41	1174.65	512.359	1351.34	1029.25	471.533	1298.56	946.985	521.042	1350.98	929.886	524.863	1290.25	883.551
5613	0	214.044	1242.4	1699.61	131.811	1267.75	1689.56	254.328	1433.99	1716.23	143.844	1441.51	1703.85	205.526	1486.96	1562.85	222.793	1562.89	1297.87	208.924	1337.98	1475.88	195.778	1267.41	1278.19	133.958	1565.7	1353.75	390.989	1398.67	1524.16	473.22	1426.35	1330.92	478.659	1437.51	1175.92	512.317	1345.81	1030.42	472.541	1291.8	948.21	520.746	1345.81	931.006	525.785	1284.75	884.965
5614	0	214.466	1233.73	1701.23	131.864	1258.56	1691.27	253.65	1425.55	1716.58	143.255	1432.6	1704.75	204.376	1478.09	1563.55	221.307	1554.22	1299.02	208.306	1329.24	1476.78	195.692	1258.73	1279.03	132.457	1556.55	1354.88	390.115	1390.58	1525.12	472.22	1419.86	1332.14	477.508	1431.23	1177.03	512.309	1340.08	1031.55	473.195	1285.2	949.428	520.346	1339.97	931.913	526.673	1279.02	886.268
5615	0	214.805	1225.21	1702.43	132.258	1249.52	1692.53	253.222	1417.38	1716.71	142.666	1423.72	1705.29	203.206	1469.04	1564.49	219.86	1545.52	1299.96	207.943	1320.43	1477.35	195.57	1249.92	1279.47	130.892	1547.44	1355.74	389.4	1382.46	1525.83	471.345	1413.17	1333	476.557	1425.03	1177.85	512.417	1334.22	1032.45	473.912	1278.32	950.682	520.233	1334.26	932.687	527.586	1273.22	887.427
5616	0	214.958	1216.65	1703.71	132.322	1240.6	1693.99	252.761	1408.99	1716.97	142.205	1414.93	1705.52	202.064	1459.99	1564.99	218.471	1536.69	1300.47	207.389	1311.39	1477.62	195.583	1241.25	1279.68	129.681	1538.44	1356.43	388.547	1374.08	1526.63	470.448	1406.27	1334.05	475.642	1418.48	1178.86	512.356	1328.07	1033.34	474.451	1271.66	951.403	520.023	1328.26	933.598	528.458	1267.27	888.512
5617	0	214.89	1208.14	1704.6	132.281	1231.72	1694.75	252.07	1400.52	1717.03	141.416	1406.03	1705.82	200.98	1450.78	1565.52	217.364	1528.02	1301.33	206.949	1302.5	1478.03	195.478	1232.43	1279.95	128.413	1529.16	1357.15	387.949	1365.79	1526.98	469.494	1399.2	1334.75	474.65	1411.75	1179.51	512.45	1321.84	1034	475.251	1264.75	952.132	519.961	1322.19	934.283	529.162	1260.95	889.281
5618	0	214.954	1199.51	1705.44	132.225	1222.85	1695.73	251.511	1392.18	1716.8	140.854	1397.26	1705.73	200.202	1441.68	1565.85	216.28	1519.2	1301.84	206.59	1293.47	1478.13	195.643	1223.71	1280.17	127.139	1519.91	1357.58	387.244	1357.14	1527.31	468.666	1391.87	1335.12	474.105	1404.95	1180.16	512.519	1315.4	1034.45	476.182	1257.82	952.474	519.718	1315.6	934.689	530.146	1254.65	889.835
5619	0	214.875	1190.83	1706.06	132.161	1213.96	1696.06	251.089	1383.74	1716.41	140.27	1388.45	1705.42	199.537	1432.59	1565.74	215.405	1510.33	1301.88	206.256	1284.54	1477.77	195.663	1214.8	1279.59	126.239	1510.79	1357.68	386.792	1348.59	1527.31	468.164	1384.38	1335.58	473.306	1397.86	1180.39	512.571	1308.73	1034.47	477.002	1250.9	952.587	519.741	1309.11	934.778	530.984	1248.13	890.196
5620	0	214.869	1182.17	1706.27	131.973	1205.06	1696.37	250.364	1375.1	1716.06	139.773	1379.65	1704.77	198.87	1423.43	1565.6	214.587	1501.5	1301.89	206.043	1275.55	1477.27	195.651	1206.01	1279.08	125.381	1501.56	1357.35	386.526	1339.92	1527.15	467.584	1376.75	1335.46	472.886	1390.83	1180.26	512.742	1301.92	1034.46	477.96	1243.63	952.787	519.777	1302.58	934.636	531.642	1241.67	889.991
5621	0	214.812	1173.48	1706.1	131.833	1196.09	1696.22	249.918	1366.57	1715.52	139.183	1370.66	1704.23	198.381	1414.29	1565.1	214.021	1492.57	1301.34	205.834	1266.53	1476.85	195.612	1197.1	1278.44	124.74	1492.42	1357.04	386.021	1331.02	1526.54	467.263	1368.83	1335.14	472.474	1383.54	1179.87	513.082	1295.17	1034.08	478.775	1236.42	952.316	519.894	1295.86	934.14	532.358	1234.97	889.56
5622	0	214.703	1164.53	1705.9	131.863	1187.09	1695.85	249.405	1357.78	1714.88	138.896	1361.72	1703.47	198.129	1405.04	1564.56	213.691	1483.57	1300.85	205.63	1257.37	1476.29	195.618	1188.18	1277.83	124.534	1483.34	1356.55	385.722	1322.06	1525.85	466.848	1360.48	1334.51	471.961	1375.91	1179.41	513.354	1288.03	1033.52	479.402	1228.92	951.904	520.044	1288.76	933.521	533.097	1228.07	888.975
5623	0	214.65	1155.59	1705.43	131.636	1177.84	1695.14	249.054	1349.02	1714.23	138.382	1352.61	1702.59	197.957	1395.85	1563.71	213.412	1474.56	1300.2	205.528	1248.24	1475.45	195.426	1179.05	1276.98	124.184	1474.1	1355.87	385.4	1312.78	1525.19	466.556	1352.06	1334.02	471.694	1368.13	1178.79	513.621	1280.7	1032.69	480.178	1221.37	951.198	520.079	1281.57	932.793	533.921	1221.14	888.223
5624	0	214.596	1146.54	1704.64	131.781	1168.67	1694.23	248.721	1340.03	1713.54	138.084	1343.36	1701.76	197.749	1386.44	1562.89	213.261	1465.4	1299.57	205.338	1238.95	1474.55	195.336	1170.04	1275.89	123.659	1464.6	1355.01	385.348	1303.64	1524.27	466.421	1343.32	1333.28	471.538	1360.12	1178.01	513.837	1273.16	1031.82	480.963	1213.69	950.207	520.563	1274.42	932.054	534.619	1213.93	887.169
5625	0	214.856	1137.36	1703.57	131.697	1159.39	1693.05	248.343	1330.84	1712.54	137.819	1334.06	1700.91	197.87	1377.05	1562.03	213.391	1456.2	1298.73	205.402	1229.53	1473.51	195.299	1160.94	1274.84	123.999	1455.42	1354.52	385.439	1294.16	1523.25	466.591	1334.57	1332.34	471.383	1351.64	1177.24	514.268	1265.36	1030.91	481.547	1205.89	948.7	521.04	1266.95	930.904	535.443	1206.63	886.26
5626	0	215.168	1128.17	1702.3	132.229	1150.08	1692.01	248.313	1321.74	1711.48	137.795	1324.66	1699.59	197.974	1367.57	1560.95	213.619	1446.85	1297.92	205.565	1220.11	1472.17	195.337	1151.81	1273.13	124.065	1446.12	1353.61	385.583	1284.68	1522.11	466.72	1325.36	1331.49	471.44	1343.01	1176.41	514.786	1257.29	1029.85	482.532	1198.12	947.464	521.943	1259.69	929.82	536.297	1199.17	885.02
5627	0	215.37	1118.82	1701.09	132.216	1140.51	1690.73	248.302	1312.34	1710.26	137.793	1315.19	1698.18	197.938	1358.03	1559.68	214.002	1437.53	1296.84	205.568	1210.49	1470.69	195.165	1142.59	1271.52	124.22	1436.58	1352.5	385.673	1275.02	1521.02	466.9	1315.97	1330.34	471.72	1334.39	1175.29	515.212	1249.18	1028.65	483.126	1190.22	946.13	521.956	1251.53	928.613	536.989	1191.58	883.573
5628	0	215.824	1109.46	1699.6	132.663	1131.01	1689.2	248.492	1303.01	1708.64	137.901	1305.63	1696.75	198.023	1348.32	1558.27	214.346	1428.01	1295.39	205.722	1200.97	1469.46	195.257	1133.51	1270.11	124.533	1427.18	1351.02	385.76	1265.33	1519.37	467.058	1306.55	1328.86	471.755	1325.42	1173.89	515.603	1240.86	1026.95	483.623	1182.09	944.274	522.904	1243.93	926.989	537.548	1183.76	881.717
5629	0	216.329	1099.86	1698.32	133.658	1121.44	1687.89	248.759	1293.66	1706.61	138.133	1295.99	1694.91	198.587	1338.83	1556.46	214.622	1418.79	1293.62	206.067	1191.31	1467.97	195.423	1124.39	1268.56	124.592	1417.62	1349.19	385.997	1255.66	1517.56	467.296	1296.96	1327.04	471.765	1316.23	1172.22	516.069	1232.36	1024.94	484.542	1173.97	941.727	523.123	1235.69	924.986	538.336	1175.99	879.566
5630	0	217.02	1090.24	1696.81	134.31	1111.76	1686.49	249.298	1284.19	1704.65	138.707	1286.37	1692.99	199.009	1329.27	1554.62	215.092	1409.29	1291.78	206.357	1181.68	1465.89	195.545	1115.13	1266.31	125.127	1408.12	1347.55	386.316	1245.81	1515.78	467.68	1287.3	1325.41	471.93	1306.93	1170.5	516.72	1223.76	1023.06	485.153	1165.45	939.703	523.883	1227.46	922.976	539.023	1167.89	877.209
5631	0	217.987	1080.67	1695.33	134.968	1102.07	1684.9	249.782	1274.67	1702.52	139.288	1276.67	1690.88	199.455	1319.55	1552.86	215.755	1399.74	1290.1	206.641	1171.9	1464	195.748	1105.74	1264.18	125.494	1398.4	1345.95	386.728	1235.89	1514.12	468.128	1277.28	1323.73	472.171	1297.28	1168.86	517.31	1214.83	1021.15	485.882	1156.89	937.888	524.729	1219.08	921.149	539.964	1159.83	875.109
5632	0	218.883	1071.01	1693.87	135.862	1092.25	1683.5	250.606	1264.91	1700.45	140.061	1266.94	1689	200.109	1309.72	1551	216.265	1390.02	1288.26	207.116	1162.07	1462.14	196.054	1096.41	1262.19	126.164	1388.64	1344.25	387.253	1225.77	1512.19	468.56	1267.31	1321.77	472.749	1287.54	1167.16	517.967	1205.64	1019.16	486.759	1148.31	935.409	525.662	1210.41	919.264	540.774	1151.39	872.64
5633	0	219.904	1061.23	1692.42	136.922	1082.48	1682.13	251.685	1255.33	1698.16	140.857	1257.08	1687.1	200.829	1299.85	1549.24	216.741	1380.11	1286.41	207.758	1152.16	1460.16	196.274	1086.58	1259.98	126.726	1378.75	1342.32	387.869	1215.79	1509.99	469.4	1257.26	1319.69	473.083	1277.38	1165.32	518.732	1196.37	1016.93	487.606	1139.37	932.636	526.611	1201.51	917.127	541.65	1142.8	870.219
5634	0	220.952	1051.58	1691	138.061	1072.67	1680.81	252.696	1245.63	1695.83	141.918	1247.25	1684.92	201.384	1289.7	1547.5	217.37	1370.14	1284.69	208.173	1142.1	1458.1	196.512	1076.79	1258.04	127.479	1368.92	1340.67	388.459	1205.48	1508.14	469.677	1246.79	1317.7	473.647	1267.35	1163.39	519.56	1186.94	1014.76	488.634	1130.5	930.106	527.649	1192.55	915.012	542.564	1133.99	867.458
5635	0	222.246	1041.83	1689.72	139.297	1062.78	1679.63	253.884	1235.89	1693.5	143.164	1237.52	1682.52	202.294	1279.61	1545.24	217.946	1360.09	1282.82	208.792	1132	1456.25	196.76	1066.78	1256.37	128.192	1358.8	1338.8	389.17	1195.3	1505.85	470.112	1236.24	1315.43	474.234	1257.26	1161.07	520.247	1177.39	1012.43	489.352	1120.97	927.131	528.52	1183.34	912.677	543.571	1125.16	864.943
5636	0	223.801	1032.16	1688.49	140.736	1052.92	1678.4	255.222	1226.27	1690.72	144.395	1227.66	1680.41	203.08	1269.23	1543.45	218.412	1349.87	1280.6	209.566	1121.72	1454.25	197.103	1056.61	1254.11	128.965	1348.74	1336.94	390.063	1184.95	1503.29	470.787	1225.89	1312.96	474.555	1246.76	1158.75	521.074	1167.63	1009.81	490.485	1111.61	924.375	529.581	1174	910.148	544.593	1116.13	861.976
5637	0	225.494	1022.37	1687.34	142.345	1043.08	1677.28	256.759	1216.5	1688.26	145.981	1217.85	1677.83	204.329	1258.9	1541.43	219.01	1339.58	1278.54	210.549	1111.31	1451.9	197.604	1046.29	1251.73	129.917	1338.56	1335.06	391.072	1174.53	1500.95	471.487	1215.41	1310.48	475.182	1236.31	1156.27	522.045	1157.81	1007.14	491.482	1102.31	921.697	530.445	1164.49	907.409	545.716	1107.01	859.172
5638	0	227.103	1012.62	1686.1	143.622	1033.15	1676.13	258.192	1206.73	1685.57	147.494	1207.96	1675.51	205.392	1248.37	1539.41	219.605	1329.21	1276.74	211.358	1100.72	1449.74	197.958	1035.84	1249.8	130.568	1328.19	1333.26	392.031	1164.02	1498.65	472.119	1204.82	1307.88	475.594	1225.78	1153.63	522.874	1147.91	1004.51	492.423	1092.58	918.705	531.344	1154.8	904.713	546.839	1097.53	856.182
5639	0	228.802	1002.79	1684.81	145.392	1023.29	1675	259.931	1197.02	1682.97	149.19	1198.03	1673.19	206.883	1237.87	1537.19	219.856	1318.42	1274.53	212.407	1090.12	1447.85	198.488	1025.34	1247.74	131.287	1317.77	1331.36	393.162	1153.44	1495.95	472.777	1194.24	1305.14	476.285	1215.33	1151	523.528	1137.69	1001.75	493.186	1082.46	915.724	532.274	1145.1	902.054	547.699	1087.96	853.377
5640	0	230.622	992.989	1683.42	147.26	1013.32	1673.6	261.888	1187.17	1680.63	150.999	1188.13	1670.98	207.968	1227.16	1535.3	220.655	1307.96	1272.63	213.732	1079.42	1445.95	199.224	1014.77	1245.77	132.008	1307.1	1329.59	394.425	1142.6	1493.67	473.548	1183.54	1302.46	476.936	1204.49	1148.74	524.18	1127.32	999.04	494.127	1072.69	912.894	533.1	1135.12	899.541	548.625	1078.19	850.61
5641	0	232.574	982.992	1682.28	149.284	1003.22	1672.4	263.834	1177.21	1678.27	152.908	1178.07	1669.04	209.634	1216.47	1533.45	221.22	1296.94	1270.89	215.041	1068.53	1443.68	200.099	1003.99	1243.51	132.833	1296.27	1327.96	395.87	1131.74	1491.38	474.494	1172.58	1300.07	477.625	1193.58	1146.44	525.141	1117.02	996.683	495.006	1062.5	909.97	533.808	1124.95	896.932	549.625	1068.24	848.048
5642	0	234.768	972.883	1681.22	151.248	993.09	1671.46	265.681	1166.94	1676.35	154.818	1167.86	1667.09	211.062	1205.63	1531.66	221.896	1286.09	1269	216.391	1057.6	1441.82	200.911	993.205	1241.65	133.633	1285.17	1326.45	397.415	1120.79	1489.08	475.556	1161.84	1297.63	478.447	1182.74	1144.06	525.889	1106.62	993.956	495.809	1052	907.606	534.586	1114.72	894.577	550.492	1058.14	845.409
5643	0	236.918	962.643	1680.16	153.27	982.781	1670.5	267.827	1156.81	1674.31	156.779	1157.57	1665.4	212.652	1194.71	1530.03	222.704	1275.14	1267.16	217.713	1046.54	1440.14	201.835	982.148	1240.01	134.8	1274.13	1324.82	398.936	1109.77	1486.95	476.522	1150.63	1295.15	479.07	1171.8	1141.62	526.861	1096.28	991.419	496.842	1041.76	905.123	535.251	1104.4	892.033	551.43	1048.02	842.74
5644	0	239.201	952.295	1678.86	155.576	972.311	1669.55	269.875	1146.62	1672.31	159.071	1147.2	1663.96	214.406	1183.66	1528.22	223.492	1264.11	1265.48	219.259	1035.46	1438.53	202.991	970.89	1238.31	135.918	1262.77	1323.37	400.428	1098.72	1484.72	477.544	1139.46	1292.87	479.714	1160.63	1139.27	527.546	1085.48	988.997	497.623	1030.97	902.258	535.82	1093.94	889.358	552.22	1037.6	840.262
5645	0	241.575	941.986	1677.57	157.875	961.821	1668.62	272.028	1136.11	1670.91	161.075	1136.62	1662.58	215.76	1172.45	1527.12	224.142	1252.66	1263.89	220.767	1024.22	1437.22	204.168	959.579	1237.05	136.951	1251.37	1322.01	402.08	1087.66	1482.79	478.64	1128.28	1290.7	480.573	1149.57	1137.18	528.013	1074.63	986.472	498.33	1020.04	899.833	536.303	1083.33	887.109	552.763	1027	837.983
5646	0	243.97	931.269	1676.57	160.155	951.144	1667.76	274.215	1125.62	1669.85	163.355	1126.08	1661.91	217.54	1161.47	1525.88	225.21	1241.56	1262.83	222.389	1013.14	1436.33	205.385	948.128	1236.38	138.004	1239.95	1320.81	403.571	1076.62	1481.06	479.747	1117.04	1288.63	481.196	1138.17	1135.25	528.692	1063.7	984.369	499.035	1009.11	897.861	536.731	1072.49	884.996	553.353	1016.29	835.844
5647	0	246.413	920.555	1675.41	162.605	940.288	1666.91	276.449	1114.9	1669.41	165.334	1115.15	1661.72	219.34	1150.31	1525.01	225.956	1230.09	1261.75	224.004	1001.84	1435.23	206.776	936.599	1235.41	139.134	1228.54	1319.94	405.344	1065.75	1479.69	480.965	1105.71	1286.98	482.025	1126.6	1133.66	529.534	1052.59	982.73	499.954	998.043	895.967	537.152	1061.4	883.187	553.975	1005.46	833.838
5648	0	249.07	909.613	1674.6	165.118	929.344	1666.35	278.564	1104.05	1669.18	167.689	1104.34	1662.04	220.688	1139.19	1524.77	226.968	1218.86	1261.06	225.645	990.672	1434.61	208.263	925.078	1234.69	140.359	1217.38	1319.42	407.078	1054.94	1478.67	482.289	1094.37	1285.9	482.87	1114.96	1132.28	530.142	1041.21	981.215	500.367	986.75	894.453	537.51	1050.1	881.691	554.381	994.3	832.287
5649	0	251.476	898.687	1674.02	167.439	918.344	1666.04	280.858	1093.29	1669.55	169.551	1093.27	1662.56	222.304	1128.35	1524.47	227.753	1207.54	1260.88	227.349	979.634	1434.55	209.542	913.639	1234.8	141.365	1206.25	1319.03	408.822	1044.34	1478.14	483.47	1083.18	1284.79	483.656	1103.23	1131.29	530.606	1029.64	980.165	500.812	975.43	893.351	537.883	1038.84	880.494	554.706	983.032	831.169
5650	0	253.892	887.671	1673.66	169.782	907.177	1666.15	283.064	1082.21	1670.42	171.971	1082.27	1663.63	223.722	1117.23	1524.84	229.08	1196.48	1261.17	229.024	968.579	1435.06	211.083	902.327	1235.57	142.189	1194.72	1319.05	410.5	1033.87	1477.62	484.617	1071.8	1284.01	483.844	1090.9	1130.17	530.89	1017.88	979.011	500.719	963.829	892.277	538.183	1027.37	879.584	554.675	971.6	830.005
5651	0	256.452	876.647	1673.5	172.376	896.096	1666.37	285.365	1071.43	1671.02	173.936	1071.07	1664.89	225.426	1106.48	1525.23	229.706	1185.28	1261.3	230.957	957.687	1435.95	212.771	891.007	1236.63	143.554	1184.02	1319.61	412.136	1023.44	1477.62	485.726	1060.4	1283.51	485.211	1079.09	1130.13	531.272	1005.89	978.713	500.907	952.273	891.781	538.387	1015.53	878.865	554.614	959.803	829.028
5652	0	258.933	865.653	1673.79	174.816	884.929	1667.18	287.48	1060.41	1672.04	176.13	1060.11	1666.12	226.875	1095.55	1525.83	230.787	1174.2	1262.12	232.595	946.816	1436.83	214.254	879.75	1237.58	144.509	1173.26	1320.32	413.884	1013.22	1478.08	486.929	1049.25	1283.62	485.98	1067.02	1130.22	531.608	993.855	978.632	500.779	940.147	891.699	538.556	1003.54	878.982	554.409	947.793	829.066
5653	0	261.331	854.791	1674.36	177.115	873.937	1668.04	289.605	1049.8	1673.08	178.21	1049.02	1667.61	228.085	1084.94	1526.99	232.092	1163.37	1262.84	234.061	936.03	1438.14	215.78	868.714	1238.97	145.578	1162.52	1321.3	415.371	1002.92	1478.92	488.03	1038.03	1284.03	486.772	1055.07	1130.58	531.806	981.652	979.027	500.579	928.411	892.414	538.74	991.413	879.401	554.262	935.834	829.252
5654	0	263.833	844.438	1674.82	179.652	863.093	1669.29	291.623	1039.12	1674.36	179.973	1038.21	1669.3	229.779	1074.42	1527.96	233.293	1152.49	1264.17	235.672	925.479	1439.57	217.372	857.772	1240.55	146.672	1152.1	1322.55	416.891	992.805	1479.9	489.113	1026.96	1284.81	487.678	1043.03	1131.23	532.172	969.336	979.778	500.482	916.446	893.124	538.859	978.892	880.085	553.949	923.367	829.872
5655	0	266.231	833.669	1675.95	181.925	852.304	1670.45	293.374	1028.63	1675.57	181.843	1027.45	1671.07	231.222	1064.2	1529.44	234.093	1141.53	1264.93	236.991	914.934	1441.18	218.734	846.757	1242.17	147.729	1141.66	1323.71	418.204	982.405	1481.31	490.357	1016.06	1285.67	488.754	1031.17	1132.19	532.304	956.735	980.801	499.967	903.656	894.219	538.976	966.334	881.05	553.405	910.582	830.831
5656	0	268.491	823.378	1676.97	184.05	841.683	1671.99	295.468	1018.48	1677.28	183.599	1016.91	1672.99	232.569	1053.99	1530.72	235.812	1131.1	1266.53	238.253	904.657	1442.86	219.95	836.03	1243.94	149.271	1131.48	1325.26	419.496	971.983	1482.74	491.388	1004.83	1286.99	489.833	1019.07	1133.69	532.506	944.039	982.461	499.223	891.156	895.796	539.007	953.326	882.555	552.515	897.278	832.013
5657	0	270.63	813.229	1678.11	186.161	831.336	1673.59	297.036	1008.32	1678.68	185.035	1006.46	1675.11	234.019	1043.99	1532.29	237.383	1120.68	1268.05	239.625	894.555	1444.9	221.044	825.409	1246.12	150.441	1121.12	1326.58	420.734	961.508	1484.41	492.409	993.853	1288.32	491.1	1007.3	1135.17	532.614	931.268	984.047	498.576	879.042	897.123	539.015	940.17	884.224	551.678	883.892	833.475
5658	0	272.73	803.344	1679.4	188.257	821.153	1675.25	298.544	998.508	1680.13	186.369	996.295	1676.98	235.204	1034.05	1533.77	238.829	1110.34	1269.43	240.609	884.349	1446.45	222.22	814.949	1247.81	151.974	1111.23	1328.12	421.832	951.067	1485.96	493.725	982.857	1289.9	492.401	995.352	1136.64	532.693	918.342	985.624	497.636	866.396	899.383	539.081	926.914	885.715	551.3	870.698	834.919
5659	0	274.676	793.475	1680.93	190.122	811.133	1676.99	299.747	988.997	1681.34	187.566	986.212	1678.47	236.265	1024.08	1535.15	240.315	1100.15	1270.62	241.603	874.411	1447.91	223.061	804.647	1249.32	153.368	1101.41	1329.56	422.964	940.662	1487.8	494.946	971.701	1291.63	493.812	983.623	1138.04	532.904	905.446	987.286	496.908	853.474	901.571	538.957	913.349	887.313	550.094	856.565	837.07
5660	0	276.323	783.999	1682.55	191.529	801.289	1678.76	300.866	979.519	1682.77	188.641	976.444	1680	237.444	1014.44	1536.4	242.13	1090.31	1272.11	242.379	864.479	1449.53	223.595	794.423	1251.14	154.795	1091.34	1330.99	423.93	930.456	1489.4	496.145	960.459	1293.16	495.091	971.726	1139.53	532.901	892.391	988.98	496.622	841.094	903.43	538.74	899.622	888.931	548.955	842.358	839.169
5661	0	277.705	774.95	1683.85	192.914	791.651	1680.68	301.686	970.142	1683.82	189.678	966.911	1681.88	238.335	1004.7	1538.15	243.62	1080.32	1273.47	243.153	854.703	1451.13	224.373	784.747	1252.8	156.399	1081.85	1332.15	424.561	920.133	1491.01	497.486	949.12	1294.76	496.821	959.971	1141.04	532.994	879.104	990.823	495.535	827.468	905.579	538.88	885.662	890.806	547.746	827.798	841.078
5662	0	278.935	765.3	1685.84	194.152	782.151	1682.45	302.492	960.879	1685.16	190.13	957.315	1683.29	239.058	995.017	1539.42	244.999	1070.57	1274.88	243.919	845.062	1452.72	224.86	775.066	1254.17	157.834	1072.31	1333.71	425.352	909.949	1492.71	498.715	937.595	1296.34	498.322	948.011	1142.52	532.908	865.541	992.801	494.308	814.152	908.133	538.798	871.366	892.671	546.943	813.385	843.173
5663	0	279.881	756.107	1687.63	195.079	772.806	1684.29	303.067	951.777	1686.26	190.691	947.847	1684.55	239.883	985.521	1540.86	246.42	1060.95	1276.56	244.476	835.443	1454.16	225.264	765.666	1255.46	158.958	1062.73	1334.96	425.971	899.987	1494.51	499.922	926.184	1297.98	499.883	936.222	1143.95	532.954	852.089	994.742	493.16	800.551	910.587	538.675	856.98	894.523	545.428	798.308	845.89
5664	0	280.648	747.082	1689.37	195.894	763.568	1686.29	303.595	942.801	1687.63	191.312	938.679	1686.09	240.676	976.086	1542.25	247.792	1051.57	1277.82	244.953	825.942	1455.74	225.678	756.538	1256.83	160.057	1053.36	1336.14	426.476	890.235	1495.93	501.452	915.426	1299.12	501.361	924.217	1145.27	532.803	838.523	996.599	492.09	787.037	912.91	538.506	842.387	896.571	544.189	783.352	848.197
5665	0	281.533	737.907	1691.2	196.634	754.286	1687.91	304.059	933.759	1688.77	191.705	929.477	1687.11	241.258	966.749	1543.67	248.748	1041.8	1279.23	245.432	816.504	1457.02	225.437	746.811	1258.41	161.221	1044.11	1337.37	426.985	880.451	1497.58	502.469	903.177	1300.94	502.988	912.285	1146.61	532.76	824.784	998.546	491.07	773.482	915.29	538.305	827.84	898.373	543.02	768.317	850.735
5666	0	281.973	728.87	1693.06	196.947	745.106	1689.68	304.235	924.619	1690.1	192.027	920.152	1688.34	241.721	957.439	1545.01	249.837	1032.68	1280.73	245.783	807.221	1458.37	226.065	738.246	1259.39	162.282	1034.99	1338.69	427.482	870.721	1499.22	503.5	891.866	1302.44	504.556	900.266	1147.99	532.582	811.036	1000.64	489.774	759.705	918.011	538.223	813.244	900.37	541.84	753.133	853.382
5667	0	282.137	719.734	1694.81	197.225	735.931	1691.52	304.384	915.388	1691.6	192.077	911.013	1689.93	241.988	948.246	1546.49	250.855	1023.17	1282.29	246.11	798.076	1459.9	226.33	729.446	1260.84	163.454	1025.91	1339.97	427.818	861.167	1500.87	504.443	880.407	1304.06	505.974	888.103	1149.46	532.231	797.187	1002.68	488.378	746.099	920.34	537.869	798.484	902.637	540.23	737.741	856.232
5668	0	282.343	710.624	1696.37	197.392	726.801	1693.18	304.575	906.342	1693.11	192.16	901.917	1691.62	242.642	939.049	1548.1	251.711	1013.93	1283.75	246.515	788.975	1461.64	226.416	720.482	1262.76	164.25	1016.68	1341.51	428.053	851.574	1502.46	505.167	869.165	1305.59	507.516	876.055	1150.97	531.852	783.394	1004.74	487.083	732.663	922.99	537.527	783.644	904.915	538.727	722.506	858.98
5669	0	282.521	701.375	1697.97	197.684	717.667	1694.52	304.706	897.176	1694.72	192.154	892.71	1693.1	243.154	929.943	1549.4	252.635	1004.62	1285.16	246.633	779.881	1462.85	226.631	711.52	1263.82	165.452	1007.84	1342.67	428.493	842.119	1503.86	505.971	858.229	1307.06	508.893	863.871	1152.29	531.576	769.732	1006.9	485.626	718.769	925.65	537.086	768.888	906.938	537.461	707.438	861.969
5670	0	282.755	692.65	1699.29	197.602	708.487	1695.91	304.61	887.928	1696.15	192.321	883.448	1694.19	243.538	920.689	1550.94	253.819	995.669	1286.45	246.603	770.747	1464.23	226.743	702.59	1265.1	166.522	998.9	1344.07	428.813	832.527	1505.61	506.718	847.449	1308.67	510.12	851.691	1153.73	531.068	755.917	1009.03	484.327	705.296	928.346	536.413	754.099	909.159	535.869	692.134	865.148
5671	0	282.542	683.011	1700.77	197.454	699.234	1697.24	304.594	878.698	1697.81	192.358	874.306	1695.66	244	911.699	1552.26	254.567	986.317	1287.78	246.744	761.754	1465.83	226.907	693.712	1266.54	167.8	990.206	1345.34	429.067	823.056	1507.15	507.168	836.739	1310.39	511.454	839.735	1155.26	530.605	742.309	1011.33	482.67	691.633	931.149	536.043	739.568	911.557	534.366	677.197	868.278
5672	0	282.353	673.797	1701.85	197.3	689.988	1698.23	304.542	869.521	1699.29	192.209	865.152	1697.57	244.543	902.711	1553.66	255.841	977.466	1289.07	246.767	752.775	1467.16	226.983	684.671	1268.26	168.939	981.286	1346.73	429.325	813.561	1508.71	507.586	826.152	1311.95	512.6	827.719	1156.8	530.081	728.734	1013.67	481.319	678.42	934.003	535.449	724.911	913.953	532.776	662.27	871.39
5673	0	282.207	664.981	1702.45	197.116	680.807	1699.06	304.555	860.078	1700.99	191.862	855.816	1698.88	245.147	893.742	1554.98	256.777	968.235	1290.64	246.959	743.883	1468.57	227.128	675.752	1269.52	169.725	972.195	1347.69	429.351	803.869	1510.28	507.925	815.661	1313.46	513.669	815.687	1158.35	529.532	715.083	1016.05	479.802	664.805	937.079	534.924	710.305	916.421	531.019	647.128	874.613
5674	0	281.793	655.568	1703.3	196.829	671.558	1699.94	304.197	850.659	1702.53	191.862	846.567	1700.02	245.496	884.722	1556.28	257.886	959.228	1291.79	247.09	734.969	1469.82	226.973	666.759	1270.76	170.883	963.654	1348.94	429.663	794.433	1511.72	508.207	805.229	1315.04	514.736	803.94	1159.93	529.015	701.674	1018.59	478.447	651.49	939.952	534.223	695.783	919.041	529.304	632.301	877.822
5675	0	281.379	646.204	1703.99	196.415	662.189	1700.54	304.116	841.388	1703.97	191.537	837.338	1701.34	245.812	875.704	1557.35	258.869	950.293	1292.92	246.964	726.008	1470.82	226.939	657.901	1272.17	171.413	954.34	1350.15	429.723	784.835	1513.08	508.559	794.944	1316.4	515.432	792.245	1161.29	528.515	688.509	1020.86	477.193	638.237	942.906	533.497	681.416	921.467	527.695	617.692	881
5676	0	281.197	636.757	1704.74	195.978	652.838	1700.85	303.675	831.905	1705.28	191.318	827.955	1702.41	245.964	866.649	1558.12	259.603	941.204	1293.65	246.893	716.974	1471.62	227.128	649.287	1272.72	172.777	945.975	1351.29	429.792	775.122	1514.43	508.919	784.558	1317.69	516.153	780.6	1162.47	528.091	675.348	1023.1	476.076	624.999	945.57	532.926	667.243	923.818	526.189	603.095	883.966
5677	0	280.689	627.329	1705.13	195.593	643.58	1701.24	303.259	822.357	1706.51	191.096	818.685	1703.32	246.471	857.555	1559.06	260.531	932.18	1294.78	246.865	708.018	1472.35	226.958	640.505	1273.51	173.598	937.246	1352.22	429.933	765.417	1515.65	509.421	774.394	1318.86	516.853	769.115	1163.69	527.661	662.259	1025.42	474.995	611.655	948.463	531.881	653.076	926.122	524.594	588.633	887.04
5678	0	280.053	617.869	1705.42	195.06	634.179	1701.59	303.169	812.968	1707.73	190.923	809.29	1704	246.716	848.545	1559.77	261.335	923.098	1295.53	246.763	699.032	1473.08	226.698	631.887	1274.17	173.896	927.789	1352.54	429.876	755.737	1516.59	509.567	763.849	1319.79	517.44	757.615	1164.8	527.053	649.298	1027.39	473.593	598.073	951.267	531.296	638.926	928.265	523.096	574.272	889.804
5679	0	279.512	608.481	1705.54	194.491	624.749	1701.68	302.665	803.334	1708.41	190.291	799.91	1704.8	247.048	839.405	1560.36	262.096	914.066	1296.16	246.889	690.056	1473.76	226.488	623.329	1274.7	174.624	919.046	1353.1	429.76	746.007	1517.3	509.772	753.452	1320.47	517.869	746.196	1165.58	526.502	636.541	1029.01	472.438	584.93	953.933	530.382	625.124	930.116	521.59	559.881	892.496
5680	0	278.968	598.964	1705.58	193.924	615.258	1701.53	302.274	793.752	1708.83	190.104	790.565	1705.38	247.368	830.155	1560.79	263.031	904.923	1296.79	246.717	680.996	1473.92	226.409	614.687	1274.93	175.809	910.681	1354.2	429.821	736.235	1517.91	510.103	742.868	1321.16	518.235	734.943	1166.07	525.922	623.669	1030.8	471.419	571.554	956.35	529.382	611.222	931.993	520.146	545.707	894.951
5681	0	278.352	589.283	1705.94	193.36	605.992	1701.51	302.09	784.272	1709.12	189.869	781.082	1705.04	247.539	820.946	1561.01	263.744	896.013	1296.95	246.393	671.823	1473.85	225.993	606.104	1274.87	176.554	901.86	1354.68	429.968	726.503	1518.48	510.297	732.084	1321.88	518.602	723.737	1166.58	525.419	611.131	1032.35	470.45	558.592	958.266	528.253	597.679	933.778	518.969	531.808	897.607
5682	0	277.594	579.691	1705.97	192.585	596.462	1701.53	301.629	774.566	1709.07	189.273	771.666	1705	247.581	811.671	1561.01	264.172	886.81	1297.09	246.257	662.829	1473.78	225.498	597.312	1274.83	177.03	893.035	1354.58	429.974	716.739	1518.82	510.393	721.494	1322.3	518.794	712.551	1166.77	524.75	598.549	1033.67	469.583	545.836	960.196	527.379	584.052	935.183	517.551	517.87	899.826
5683	0	276.9	570.052	1705.87	191.87	586.99	1701.17	301.413	764.833	1708.67	188.862	762.351	1704.66	247.867	802.343	1560.78	264.79	877.704	1297.23	246.15	653.675	1473.48	225.097	588.463	1274.26	177.535	884.187	1354.61	429.857	706.81	1518.67	510.322	710.557	1322.31	519.063	701.479	1166.62	524.159	586.174	1034.5	468.372	532.128	962.916	526.135	570.54	936.469	516.194	504.015	901.83
5684	0	276.097	560.352	1705.7	191.189	577.564	1700.81	301.244	755.173	1707.97	188.53	752.926	1704.2	248.225	792.952	1560.61	265.353	868.529	1297.18	245.928	644.324	1473.09	224.693	579.352	1273.85	178.235	875.264	1354.78	429.765	696.97	1518.37	510.361	699.701	1322	519.243	690.243	1166.55	523.383	573.511	1035.44	467.375	519.484	964.38	525.24	556.962	937.461	514.839	490.106	903.589
5685	0	275.284	550.657	1705.7	190.473	568.052	1700.67	300.996	745.373	1707.11	188.493	743.254	1702.33	248.199	783.389	1560.02	265.503	859.297	1296.62	245.406	634.921	1472.43	224.19	570.372	1273.05	178.488	866.296	1354.22	429.487	686.912	1517.97	510.405	689.133	1321.65	519.306	679.348	1165.89	522.655	561.219	1036.13	466.238	506.914	965.474	523.944	543.787	938.246	513.27	476.332	905.229
5686	0	274.494	541.013	1705.65	189.605	558.473	1700.42	300.442	735.552	1705.49	187.933	733.852	1701.33	248.099	773.745	1559.33	265.531	850.01	1295.82	245.171	625.541	1471.59	223.753	561.375	1272.06	178.171	856.509	1353.01	429.293	676.911	1517.08	510.322	678.492	1320.7	519.367	668.385	1165.11	521.993	549.036	1036.34	465.088	494.229	966.694	522.975	530.447	938.694	512.037	462.929	906.647
5687	0	273.903	531.275	1705.48	188.917	548.912	1700.11	300.154	725.876	1703.83	188.13	724.325	1699.34	248.19	764.066	1558.5	265.856	840.754	1295.06	244.841	616.228	1470.26	223.277	552.146	1270.75	178.451	847.357	1352.22	429.1	666.928	1515.96	510.227	667.773	1319.78	519.302	657.403	1163.83	521.373	536.876	1036.4	464.043	481.397	967.479	521.934	517.297	938.87	510.716	449.424	907.775
5688	0	273.073	521.541	1705.23	188.189	539.316	1699.75	299.819	715.916	1701.98	187.685	714.604	1697.24	247.819	754.301	1557.39	265.838	831.473	1294.04	244.199	606.621	1469	222.597	542.962	1269.43	179.087	838.662	1351.76	428.833	656.837	1514.69	510.143	657.141	1318.75	519.312	646.449	1162.76	520.582	524.69	1036.35	462.995	468.936	968.043	520.843	504.124	939.276	509.369	436.014	908.88
5689	0	272.039	511.636	1704.75	187.201	529.641	1699.22	299.456	706.036	1699.78	187.023	704.953	1695.41	247.75	744.467	1556.29	265.713	822.055	1292.97	243.637	597.005	1467.65	221.705	533.652	1267.85	179.058	829.267	1350.56	428.346	646.687	1513.25	509.822	646.647	1317.33	519.311	635.625	1161.49	519.699	512.579	1035.94	461.544	456.337	968.584	519.627	491.017	939.164	507.789	422.676	909.532
5690	0	271.175	501.818	1703.83	186.465	519.882	1698.4	299.212	696.047	1697.58	186.698	695.296	1693.59	247.582	734.542	1554.92	265.561	812.506	1291.99	243.32	587.399	1466.14	221.006	524.453	1266.01	179.02	819.822	1349.6	427.794	636.419	1511.5	509.337	636.058	1315.61	519.149	624.624	1159.87	518.87	500.581	1035.41	460.444	443.904	969.084	518.381	477.984	939.014	506.342	409.459	909.945
5691	0	270.448	491.923	1702.82	185.798	510.127	1697.23	298.61	685.939	1695.29	186.308	685.486	1691.53	247.224	724.406	1553.33	265.42	802.956	1290.74	242.517	577.403	1464.33	220.451	515.434	1263.86	178.878	810.262	1348.22	427.421	626.127	1509.82	508.893	625.562	1313.88	518.919	613.664	1158.17	518.034	488.537	1034.82	459.307	431.438	969.106	517.346	465.145	938.572	504.928	396.305	910.37
5692	0	269.651	481.931	1701.59	184.811	500.232	1695.99	298.132	675.935	1692.72	185.632	675.47	1688.84	246.712	714.29	1551.59	265.008	793.18	1289.01	241.553	567.578	1462.07	219.466	506.013	1261.7	178.666	800.587	1346.62	426.864	615.795	1507.95	508.481	615.157	1312.14	518.652	602.836	1156.35	517.167	476.68	1033.95	458.02	419.168	968.505	516.285	452.683	937.968	503.565	383.432	910.523
5693	0	268.781	471.925	1699.85	183.91	490.292	1694.3	297.496	665.792	1690.19	185.18	665.556	1686.49	246.179	704.157	1549.7	264.549	783.454	1287.07	240.767	557.891	1459.78	218.468	496.435	1259.35	178.192	790.838	1344.69	426.105	605.321	1505.91	507.838	604.885	1310.04	518.286	592.08	1154.05	516.184	464.798	1032.76	456.804	407.063	967.977	515.003	439.96	936.955	502.238	370.806	910.113
5694	0	267.836	461.724	1697.75	183.077	480.297	1692.29	296.749	655.352	1687.56	184.654	655.506	1684.28	245.568	693.909	1547.55	263.934	773.62	1285	239.878	547.706	1457.33	217.667	486.31	1257.17	177.84	781.029	1342.81	425.248	594.886	1503.53	507.038	594.477	1307.68	517.806	581.007	1151.85	515.689	453.429	1031.16	455.672	395.034	967.11	513.814	427.606	935.526	500.869	358.12	909.544
5695	0	266.739	451.411	1695.26	182.043	470.038	1689.92	296.303	645.211	1685.16	183.963	645.327	1681.84	244.889	683.597	1545.21	263.21	763.706	1282.74	238.95	537.589	1454.87	216.677	476.305	1254.51	176.427	770.294	1339.78	424.298	584.339	1501.01	506.03	584.007	1305.22	517.273	570.264	1149.32	514.443	441.616	1029.59	454.565	383.094	966.097	512.647	415.354	933.998	499.393	345.607	908.68
5696	0	265.56	441.04	1692.65	181.058	459.946	1687.34	295.251	634.738	1682.74	183.122	635.121	1679.67	243.862	673.287	1542.91	262.338	753.741	1280.27	237.818	527.276	1452.37	215.529	466.208	1251.96	176.393	760.676	1338.07	423.248	573.902	1498.59	505.041	573.684	1302.63	516.667	559.645	1146.74	513.293	429.931	1027.72	453.314	371.443	964.949	511.141	403.443	932.521	498.088	333.44	907.477
5697	0	264.416	430.567	1689.61	179.858	449.565	1684.84	294.453	624.414	1680.34	182.074	624.703	1677.25	243.054	662.985	1540.4	261.461	743.658	1277.91	236.906	516.935	1449.93	214.637	456.052	1249.13	174.782	749.921	1334.97	422.294	563.344	1496.04	503.954	563.175	1299.93	515.917	548.632	1144.21	512.234	418.44	1025.69	452.139	359.783	963.371	510.236	391.374	930.54	496.871	321.361	906.016
5698	0	263.46	419.991	1686.85	178.806	439.18	1681.97	293.351	613.676	1678.08	181.266	614.298	1675.34	241.856	652.478	1537.95	260.461	733.309	1275.45	235.814	506.583	1447.04	213.69	445.529	1246.47	173.749	739.591	1332.39	421.295	552.833	1493.33	502.873	552.667	1297.27	515.066	537.835	1141.54	511.642	407.264	1023.29	450.991	348.069	961.223	508.923	379.785	928.451	495.86	309.576	904.375
5699	0	262.218	409.324	1683.95	177.623	428.685	1678.97	292.268	603.144	1675.91	180.101	603.711	1673.1	240.619	642.086	1535.39	259.269	722.787	1272.89	234.412	496.002	1444.45	212.374	434.982	1243.71	173.32	729.526	1330.34	420.065	542.283	1490.84	501.688	542.148	1294.76	513.981	526.743	1139.04	510.137	395.665	1021.3	449.802	336.641	958.939	507.982	368.02	926.385	494.851	297.857	902.843
5700	0	260.789	398.535	1680.94	176.268	418.015	1676	291.022	592.32	1673.84	178.71	593.002	1671.16	239.016	631.386	1533.02	258.031	712.157	1270.3	232.976	485.425	1441.99	211.168	424.671	1241.06	172.123	718.799	1327.73	418.607	531.615	1488.36	500.247	531.46	1291.94	512.763	515.336	1136.61	508.866	384.38	1018.78	448.608	325.459	956.695	506.63	356.835	924.12	493.657	286.487	900.648
5701	0	259.3	387.796	1677.65	174.828	407.154	1673.34	289.676	581.56	1671.67	177.398	582.326	1669.24	237.715	620.635	1530.4	256.807	701.397	1267.93	231.576	474.79	1439.33	209.979	413.959	1238.38	170.806	708.16	1325.01	417.2	521.006	1485.7	498.715	520.662	1289.3	511.355	504.19	1134.08	507.73	373.266	1016.24	447.586	314.309	954.209	505.687	345.439	921.336	492.765	275.379	898.128
5702	0	257.959	377.025	1674.46	173.499	396.349	1670.23	288.109	570.904	1669.72	175.684	571.41	1666.94	236.198	609.981	1527.74	255.241	690.326	1265.38	230.038	463.922	1436.89	208.686	403.149	1235.62	169.312	697.33	1322.16	415.614	510.286	1483.03	497.06	509.878	1286.66	509.855	493.099	1131.58	506.534	362.255	1013.62	446.409	303.274	951.541	504.36	334.758	918.882	491.738	264.319	895.622
5703	0	256.41	366.196	1671.65	171.717	385.279	1667.41	286.295	560.069	1667.85	173.847	560.392	1665.05	233.93	599.002	1525.29	253.707	679.252	1262.62	228.125	453	1434.51	207.207	392.05	1233.41	167.835	686.332	1319.47	413.847	499.462	1480.71	495.395	499.141	1284.41	508.122	482.186	1129.24	505.605	351.804	1010.76	445.263	292.432	948.441	503.389	324.038	916.028	490.874	253.718	892.944
5704	0	254.642	355.416	1668.54	170.174	374.316	1664.71	284.266	549.172	1665.86	172.18	549.452	1663.45	232.197	587.947	1523.06	252.332	668.125	1260.13	226.364	441.966	1432.17	205.819	381.101	1230.85	166.284	675.154	1317.14	412.055	488.597	1478.48	493.434	488.209	1282.2	506.083	470.709	1127.02	504.208	341.11	1007.99	444.188	281.788	945.546	502.321	313.715	913.077	490.008	243.467	890.047
5705	0	253.068	344.63	1665.49	168.365	363.244	1661.9	282.314	538.316	1663.98	169.973	538.336	1661.66	230.074	576.76	1520.62	250.881	656.697	1257.8	224.501	430.731	1429.97	204.329	369.446	1228.77	164.697	663.989	1314.65	409.903	477.378	1476.36	491.519	477.364	1280.14	503.943	459.266	1125.03	502.574	330.233	1005.55	443.723	271.714	942.217	500.96	303.685	910.184	489.333	233.461	886.877
5706	0	251.115	333.323	1662.91	166.324	351.984	1659.29	280.155	527.404	1662.41	167.763	527.221	1659.94	227.833	565.52	1518.39	249.191	644.992	1255.68	222.39	419.387	1427.79	202.665	358.318	1226.35	162.938	652.771	1312.3	407.799	466.248	1474.51	489.359	466.159	1278.51	502.027	448.74	1123.23	501.092	319.76	1003.1	442.62	261.483	939.089	500.236	293.605	907.735	488.51	223.634	883.79
5707	0	249.029	322.138	1660.44	164.309	340.831	1656.97	277.87	516.399	1660.79	165.421	516.018	1658.21	225.327	554.35	1516.27	247.532	633.565	1253.68	220.227	407.913	1425.82	201.06	346.754	1224.39	160.826	641.133	1309.94	405.499	454.901	1472.96	487.048	454.744	1277.06	499.691	437.692	1121.73	499.647	309.468	1000.72	441.54	251.586	936.415	499.367	284.173	905.315	487.789	214.18	880.743
5708	0	247.061	311.103	1658.37	162.286	329.559	1654.82	275.171	505.296	1659.34	162.873	504.69	1656.71	223.069	543.063	1514.24	245.433	621.902	1251.73	218.154	396.313	1423.86	199.473	334.608	1222.76	157.87	628.511	1307.03	403.153	443.664	1471.47	484.76	443.319	1275.69	497.225	426.647	1120.23	498.22	299.46	998.497	440.785	241.777	933.284	498.114	274.869	902.571	487.18	204.928	877.424
5709	0	244.935	299.936	1656.77	160.028	318.108	1653.1	272.395	494.14	1658.2	160.165	493.239	1655.34	220.302	531.573	1512.58	243.363	610.001	1249.88	215.862	384.552	1422.28	197.768	322.932	1220.72	155.404	616.594	1305.01	400.925	432.389	1469.75	482.511	431.711	1274.6	494.574	415.271	1119.02	496.899	289.623	996.146	439.782	231.992	929.764	497.473	265.704	900.138	486.961	196.116	874.384
5710	0	242.558	288.628	1655.68	157.552	306.633	1651.76	269.612	483	1657.35	157.421	481.806	1654.26	217.571	519.854	1511.18	241.284	598.032	1248.32	213.63	372.722	1421.23	195.881	310.32	1220.03	153.032	604.701	1303.19	398.454	420.885	1469.26	480.261	419.951	1273.91	491.965	404.409	1118.2	495.428	279.86	994.123	438.992	222.731	926.793	496.702	257.021	897.616	486.448	187.704	871.159
5711	0	239.942	277.416	1654.52	154.982	295.032	1650.41	266.576	471.765	1656.47	154.37	470.272	1652.93	214.722	507.898	1510.21	239.255	585.637	1247.13	211.378	360.769	1420.21	194.12	298.216	1218.97	150.683	592.498	1301.83	396.054	409.441	1468.39	477.839	408.136	1273.08	489.195	393.571	1117.41	493.94	270.398	992.126	438.165	213.577	924.07	495.623	248.636	895.546	485.921	179.368	867.859
5712	0	237.373	266.112	1653.69	152.323	283.485	1649.46	263.602	460.55	1656.04	151.307	458.722	1651.95	212.236	496.004	1509.28	237.266	573.394	1246.08	209.254	348.721	1419.41	192.402	285.619	1218.22	148.428	580.139	1300.75	393.682	397.836	1467.75	475.426	396.059	1272.72	486.555	383.05	1116.79	492.769	261.267	990.225	436.836	203.552	921.8	494.837	240.465	893.375	485.551	171.373	864.847
5713	0	234.714	254.69	1653.57	149.656	271.933	1648.81	260.497	449.229	1655.93	148.242	447.114	1651.4	209.494	484.192	1508.76	235.236	561.157	1245.49	207.074	336.658	1419.08	190.48	272.604	1218.22	146.884	568.52	1300.23	391.395	386.275	1467.56	473.196	384.258	1272.62	483.724	372.433	1116.66	491.208	251.914	988.896	436.331	196.088	917.533	494.073	232.43	891.832	485.286	163.805	862
5714	0	231.977	243.18	1653.91	146.824	260.334	1648.51	257.372	437.816	1656.34	145.046	435.493	1651.22	206.934	472.442	1508.68	233.041	548.948	1245.3	204.81	324.652	1419.16	188.646	260.037	1218.36	144.741	556.147	1300.05	389.112	374.711	1467.8	471.025	372.6	1272.99	481.003	362.096	1116.67	489.862	243.087	987.677	435.595	187.564	915.66	493.513	224.502	890.325	484.956	156.423	859.518
5715	0	229.159	231.713	1654.28	143.992	248.725	1648.61	254.275	426.431	1656.97	141.878	423.838	1651.24	204.316	460.495	1508.75	231.071	536.765	1245.69	202.683	312.648	1419.33	186.991	247.684	1218.56	142.335	543.961	1300.06	386.81	363.223	1467.93	468.782	360.914	1273.41	478.294	351.808	1116.9	488.399	234.329	986.746	435.119	179.59	913.533	492.632	217.128	889.02	484.718	149.471	857.101
5716	0	226.292	220.182	1655.2	141.081	237.123	1648.95	251.19	414.977	1657.91	138.609	412.172	1651.57	202.149	448.443	1509.29	228.949	524.701	1246.03	200.639	300.692	1419.92	185.095	234.908	1219.57	140.046	531.919	1300.47	384.685	351.712	1468.56	466.738	349.589	1274.27	475.812	341.809	1117.44	487.182	226.002	986.142	434.506	171.734	911.893	491.738	210.032	888.229	484.489	142.671	855.206
5717	0	223.262	208.708	1656.37	138.105	225.527	1649.54	247.968	403.528	1659.08	135.584	400.618	1651.9	199.402	436.643	1510.14	226.947	512.623	1246.95	198.485	288.778	1420.97	183.262	222.615	1220.75	138.009	519.98	1301.3	382.533	340.351	1469.59	464.769	338.542	1275.31	473.517	331.875	1118.75	485.674	217.67	985.882	433.643	163.936	910.858	491.041	203.055	887.951	484.098	136.064	853.718
5718	0	220.106	197.123	1657.55	135.161	213.944	1650.28	244.968	392.048	1660.42	132.63	389.081	1652.58	197.397	424.782	1511.24	224.775	500.648	1247.79	196.536	277.041	1422.12	181.535	210.609	1221.87	135.951	508.035	1302.07	380.454	329.076	1470.74	462.665	327.634	1276.52	471.148	322.186	1119.94	484.266	209.574	986.023	432.986	156.687	909.718	490.278	196.232	887.783	483.66	129.652	852.328
5719	0	217.067	185.691	1658.93	132.185	202.472	1651.26	242.048	380.544	1662.01	129.767	377.644	1653.28	194.801	413.244	1512.26	222.705	488.999	1249.07	194.687	265.34	1423.24	179.958	199.77	1222.2	133.666	496.127	1303.21	378.39	318	1472	460.829	317.107	1277.92	468.922	312.729	1121.28	483.011	201.679	986.204	432.222	149.358	909.115	489.393	189.417	887.558	483.269	123.484	851.353
5720	0	214.294	174.213	1660.81	129.306	191.126	1652.43	239.071	369.107	1663.67	126.914	366.213	1654.17	192.867	401.819	1513.58	220.273	477.344	1250.27	192.952	253.718	1424.79	178.49	188.721	1223.66	131.447	484.339	1304.32	376.55	307.147	1473.65	459.129	307.071	1279.81	466.903	303.541	1123.04	481.871	194.017	987.027	431.471	142.359	909.119	488.544	182.975	888.165	482.705	117.388	850.946
5721	0	211.372	162.839	1662.83	126.455	179.928	1653.54	236.34	357.778	1665.67	124.169	354.95	1655.15	190.671	390.495	1515.38	218.027	466.101	1251.77	191.364	242.393	1426.46	177.128	177.317	1225.63	128.866	472.566	1305.67	374.832	296.51	1475.74	457.514	297.367	1281.9	464.935	294.555	1124.93	480.749	186.438	988.099	430.63	135.511	909.565	487.807	176.51	889.177	482.112	111.42	850.899
5722	0	208.34	151.52	1664.58	123.587	168.797	1654.55	233.801	346.501	1667.65	121.676	343.808	1656.34	188.545	379.48	1516.72	215.536	454.903	1253.27	189.93	231.243	1427.95	175.936	166.111	1227.08	126.507	460.903	1307.28	373.068	286.143	1477.53	455.809	287.911	1283.75	463.114	285.88	1126.97	479.553	178.868	989.074	429.836	128.725	909.843	487.272	169.914	890.172	481.418	105.351	850.839
5723	0	205.468	140.494	1666.12	120.831	157.767	1655.66	231.321	335.269	1669.64	119.363	332.77	1657.79	186.668	368.592	1518.42	213.119	443.867	1254.91	188.726	220.249	1429.65	174.98	154.993	1228.94	124.093	449.694	1309.29	371.439	275.976	1479.29	454.177	278.685	1285.49	461.481	277.37	1128.97	478.391	171.356	990.451	429.217	121.89	910.454	486.736	163.167	891.601	480.575	99.107	851.009
5724	0	202.782	129.385	1667.95	118.262	146.854	1657.01	229.041	324.109	1671.96	117.366	322.004	1659.33	184.676	357.829	1520.17	210.825	433.164	1256.88	187.593	209.282	1431.59	174.098	144.043	1230.68	121.692	438.483	1311.12	369.943	266.035	1481.36	452.772	269.878	1287.47	460.038	269.4	1130.83	477.903	164.436	991.896	428.731	115.719	910.963	485.936	156.66	893.007	479.698	92.934	851.703
5725	0	200.304	118.423	1670.06	115.852	136.199	1658.36	226.867	313.181	1674.07	115.36	311.342	1660.36	183.182	347.103	1522.15	208.343	422.545	1258.7	186.769	198.809	1433.25	173.501	133.157	1232.98	119.263	427.49	1313.1	368.817	256.428	1483.47	451.492	261.279	1289.77	458.68	261.758	1133.14	476.893	157.215	993.457	428.021	108.995	912.228	485.403	149.913	894.644	478.812	86.6505	852.449
5726	0	197.963	107.757	1671.74	113.71	125.725	1659.58	225.203	302.447	1676.21	113.518	300.761	1662.05	181.803	336.569	1523.98	205.948	412.319	1260.45	185.928	188.352	1434.94	173.097	122.761	1234.63	116.707	416.583	1315.3	367.623	246.802	1485.45	450.472	253.219	1291.61	457.414	254.056	1135.05	476.313	150.45	994.952	427.366	102.273	913.602	484.688	143.268	896.189	478.005	80.5568	853.432
5727	0	195.926	97.1374	1673.73	111.585	115.216	1661.07	223.528	291.769	1678.54	111.855	290.423	1663.8	179.85	326.095	1525.93	204.287	402.896	1263.16	185.264	178.262	1436.64	172.784	112.332	1236.58	114.221	405.963	1317.54	366.659	237.487	1487.45	449.427	245.219	1293.59	456.26	246.635	1136.82	475.613	143.488	996.661	426.734	95.5686	914.981	484.264	136.695	897.887	477.353	74.2015	854.542
5728	0	193.936	86.777	1675.59	109.841	105.11	1662.77	222.013	281.275	1680.86	110.545	280.153	1665.37	178.834	315.815	1528.16	202.117	392.897	1265.15	184.622	168.463	1438.32	172.655	102.264	1238.58	112.044	395.768	1319.97	365.623	228.348	1489.45	448.488	237.46	1295.65	455.153	239.447	1139.02	474.846	136.655	998.38	426.061	88.9017	916.828	483.534	130.275	899.59	476.558	68.0029	855.973
5729	0	192.176	76.4583	1677.38	108.207	94.9612	1664.35	220.817	270.951	1682.93	109.54	270.106	1667.26	177.317	305.769	1530.23	199.851	382.912	1267.13	183.935	158.414	1439.97	172.502	92.3961	1240.11	109.926	385.51	1322.07	364.585	219.243	1491.25	447.347	229.871	1297.5	454.166	232.318	1140.82	474.112	129.944	999.97	425.412	82.1106	918.081	482.598	123.88	901.096	475.767	61.6127	857.203
5730	0	190.838	66.2641	1679.36	106.878	84.9995	1666.02	219.79	260.759	1685.07	108.514	260.112	1669.12	176.077	295.776	1532.31	197.625	373.007	1268.78	182.806	149.001	1440.65	172.57	82.5339	1241.8	107.892	375.396	1324.17	363.857	210.316	1493.11	446.381	222.655	1299.04	453.144	225.418	1142.54	473.465	123.496	1001.29	425.043	75.5145	919.786	481.706	117.612	902.738	475.191	55.3629	858.531
5731	0	189.649	56.2803	1681.45	105.941	75.1965	1667.94	218.91	250.618	1687.27	107.739	250.274	1671.11	174.779	286.007	1534.4	195.876	363.492	1271.15	182.471	139.286	1442.98	172.694	72.8562	1243.87	106.096	365.325	1326.64	363.209	201.476	1495.09	445.524	215.297	1301.15	452.112	218.605	1144.42	472.951	117.05	1003.05	424.63	68.7572	921.764	480.837	111.501	904.236	474.779	49.1472	860.274
5732	0	188.831	46.555	1683.56	104.942	65.284	1670.16	218.428	240.742	1689.66	107.006	240.438	1673.41	173.971	276.197	1536.72	194.076	354.148	1273.4	182.827	129.183	1446.34	172.877	63.4472	1246.01	104.398	355.373	1328.83	362.463	192.826	1497.31	444.851	208.474	1303.43	451.225	211.834	1146.56	472.476	110.825	1004.91	424.349	62.1084	923.834	479.909	105.291	906.052	474.464	42.901	862.269
5733	0	188.074	36.6049	1685.52	104.19	55.6574	1672.35	217.847	230.829	1691.95	106.472	230.691	1675.86	172.978	266.702	1539.13	192.55	344.868	1276.1	182.252	119.709	1448.34	172.848	54.1248	1247.88	102.575	345.485	1331.47	361.696	184.336	1499.42	443.9	201.402	1305.34	450.641	205.437	1148.79	471.863	104.304	1006.7	423.925	55.4526	925.714	479.105	99.1605	907.977	474.17	36.7663	864.054
5734	0	187.683	26.8295	1687.52	103.724	45.8895	1674.49	217.617	220.993	1694.61	106.287	220.972	1678.72	171.612	257.148	1541.65	190.857	335.641	1279.15	181.841	110.384	1450.6	172.802	44.8701	1250.05	100.929	335.775	1334	361.031	175.8	1501.53	443.004	194.329	1307.62	449.439	198.414	1150.96	471.052	97.7825	1008.39	423.522	48.8114	927.601	478.378	93.0654	909.967	473.957	30.3977	866.242
5735	0	187.217	17.525	1689.41	103.509	36.2651	1676.94	217.332	211.339	1696.91	106.046	211.448	1681.42	170.68	247.68	1543.98	189.052	326.435	1281.27	181.448	101.048	1453.05	172.699	35.7096	1252.34	99.4234	326.034	1336.5	360.383	167.54	1503.79	442.123	187.236	1309.86	448.969	191.994	1153.59	470.404	91.9123	1010.29	423.297	42.2093	929.789	477.692	87.283	912.168	473.712	24.2026	868.464
5736	0	187.262	7.93918	1691.36	103.513	26.742	1679.29	217.216	201.793	1699.09	105.901	201.864	1684.05	169.907	238.598	1546.38	187.39	317.208	1283.72	181.067	91.8073	1455.47	172.501	26.6142	1254.54	97.6916	316.453	1338.77	359.574	159.221	1505.93	441.173	180.227	1311.94	447.833	185.185	1155.8	469.844	85.6895	1012.39	423.026	35.5982	931.842	476.803	81.0239	913.984	473.552	18.0863	870.393
5737	0	187.578	-1.44458	1693.21	103.612	17.1831	1681.74	217.221	192.406	1701.22	106.047	192.363	1687.07	168.62	229.426	1548.63	185.673	308.011	1285.94	180.671	82.6348	1457.82	172.323	17.6283	1257	96.114	306.852	1341.16	358.871	151.052	1508.08	440.303	173.195	1314.15	446.945	178.585	1157.78	469.306	79.3314	1014.37	422.876	29.0689	933.825	476.23	75.0593	915.78	473.519	11.9452	872.419
5738	0	188.1	-10.8233	1695.29	103.89	7.66092	1684.2	217.399	183.103	1703.52	106.013	182.827	1689.91	167.559	220.156	1550.92	184.063	298.834	1288.3	180.352	73.5042	1460.38	172.134	8.69577	1259.38	94.6355	297.275	1343.48	358.27	142.922	1510.37	439.417	166.089	1316.46	446.006	171.921	1160.19	468.947	73.1888	1016.47	422.806	22.3735	936.094	475.538	68.9316	917.82	473.533	5.90985	874.599
5739	0	188.666	-20.3024	1697.17	104.29	-1.7489	1686.66	217.546	173.781	1705.49	105.929	173.304	1692.6	166.8	211.323	1553.13	182.458	289.726	1290.45	179.74	64.505	1462.71	171.793	-0.15632	1261.65	92.9597	287.747	1345.57	357.537	134.871	1512.49	438.524	158.995	1318.66	444.954	165.216	1162.33	468.477	66.8529	1018.58	422.593	15.8295	938.393	474.781	62.7749	919.714	473.395	-0.377219	876.725
5740	0	189.178	-29.4616	1698.52	104.812	-11.1783	1688.85	217.84	164.574	1707.61	106.248	163.878	1695.59	165.793	202.127	1555.15	180.87	280.619	1292.39	179.2	55.5781	1464.66	171.364	-9.00212	1263.56	91.6046	278.368	1347.89	356.814	126.591	1514.32	437.526	152.037	1320.5	444.138	158.519	1164.46	467.911	60.3844	1020.26	422.404	9.1334	940.141	474.392	56.623	921.675	473.368	-6.55206	878.659
5741	0	190.022	-38.7219	1700.08	105.556	-20.6736	1691.19	217.913	155.38	1709.35	106.193	154.365	1698.25	164.832	193.192	1557.42	179.562	271.569	1294.7	178.91	46.6383	1466.61	170.998	-17.8132	1265.5	90.2298	268.934	1349.94	356.142	118.458	1516.3	436.667	144.942	1322.43	443.13	151.724	1166.54	467.496	53.9744	1022.03	422.394	2.42106	941.771	473.863	50.3701	923.56	473.418	-12.9135	880.32
5742	0	190.907	-47.8648	1701.72	106.383	-30.059	1693.39	218.166	146.353	1711.03	106.342	144.871	1700.56	163.839	184.192	1559.22	178.198	262.51	1296.68	178.516	37.649	1468.78	170.88	-26.6129	1267.69	88.838	259.572	1351.87	355.635	110.157	1518.34	435.997	137.847	1324.45	442.241	144.976	1168.47	467.168	47.5866	1023.95	422.383	-4.31351	943.811	473.436	44.1967	925.38	473.431	-19.1525	882.19
5743	0	192.037	-57.1165	1703.28	107.256	-39.4943	1695.4	218.511	137.273	1712.55	106.57	135.443	1702.94	163.389	175.126	1560.96	176.845	253.385	1298.43	178.251	28.7669	1470.71	170.497	-35.389	1269.53	87.7305	250.378	1353.62	355.145	101.936	1520.04	435.254	130.554	1326.25	441.271	138.183	1170.11	466.868	41.2386	1025.76	422.426	-11.1188	945.651	472.869	37.7058	927.054	473.544	-25.3969	883.88
5744	0	193.001	-66.1138	1704.2	108.078	-48.9953	1697.22	218.836	128.29	1713.82	106.744	125.95	1704.94	163.4	165.83	1562.34	175.799	244.377	1300.06	177.872	19.838	1472.2	170.336	-44.1982	1271	86.6199	241.047	1355.29	354.509	93.5829	1521.42	434.421	123.273	1327.57	440.345	131.12	1171.84	466.362	34.4574	1027.07	422.443	-17.9498	946.914	472.497	31.4481	928.239	473.574	-31.772	885.113
5745	0	194.044	-75.2604	1705.15	108.966	-58.4799	1698.95	219.22	119.331	1714.85	107.109	116.457	1706.95	162.15	156.789	1563.91	174.693	235.174	1301.32	177.473	10.8401	1473.56	170.061	-52.9623	1272.18	85.6842	231.774	1356.67	353.957	85.0891	1522.62	433.59	115.875	1328.93	439.436	124.076	1173.08	466.102	27.9528	1028.1	422.365	-24.8501	948.059	472.086	24.9534	929.617	473.536	-38.2326	886.079
5746	0	195.156	-84.3582	1706.1	109.959	-67.8887	1700.6	219.454	110.391	1715.57	107.343	106.967	1708.35	161.642	147.727	1565.02	173.738	226.195	1302.64	177.182	1.80802	1474.8	170.085	-61.8522	1273.38	84.9437	222.577	1357.79	353.513	76.5711	1523.72	432.883	108.443	1330.12	438.545	116.978	1174.27	465.883	21.3279	1029.19	422.407	-31.7446	949.245	471.587	18.4668	930.368	473.61	-44.6742	886.954
5747	0	196.136	-93.4654	1706.79	110.915	-77.4165	1701.78	219.634	101.322	1715.98	107.649	97.4666	1709.84	160.915	138.586	1565.98	172.947	217.128	1303.64	176.993	-7.26744	1475.67	170.027	-70.6989	1274.27	84.1648	213.288	1358.89	353.13	68.0975	1524.67	432.032	100.903	1331.03	437.833	109.875	1175.16	465.579	14.4179	1029.94	422.596	-38.8162	949.887	471.292	12.04	931.18	474.148	-51.1222	887.894
5748	0	198.083	-102.059	1707.32	112.049	-86.8169	1703.12	220.033	92.2366	1716.5	107.963	87.9796	1710.95	160.125	128.984	1566.68	172.14	208.036	1304.64	176.892	-16.3239	1476.45	170.088	-79.6577	1274.9	83.3958	204.03	1359.73	352.852	59.4681	1525.45	431.654	93.3001	1332.01	436.938	102.432	1176.05	465.395	7.64136	1030.61	422.762	-45.9915	950.474	471.087	5.43632	931.836	474.098	-57.7234	888.298
5749	0	199.257	-111.159	1707.81	112.977	-96.45	1704.02	220.351	83.2678	1716.78	108.26	78.4535	1711.66	159.922	119.837	1567.19	171.478	198.973	1305.56	176.864	-25.6233	1477.13	170.259	-88.6578	1275.57	82.8809	194.691	1360.49	352.618	50.7753	1526.13	431.547	85.5923	1332.72	436.369	94.9979	1176.95	465.239	0.603545	1031.37	422.982	-53.4342	951.14	470.745	-1.37934	932.352	474.261	-64.5207	888.826
5750	0	200.186	-120.299	1708.08	113.972	-105.845	1704.68	220.656	74.2706	1716.73	108.504	68.9293	1712.13	159.635	110.481	1567.67	170.93	189.847	1305.96	176.785	-34.7898	1477.41	170.345	-97.715	1275.86	82.3965	185.392	1361.04	352.381	41.803	1526.54	431.077	77.8333	1333.33	435.759	87.4723	1177.38	465.21	-6.46377	1031.72	423.068	-61.0508	951.279	470.595	-8.28997	932.778	474.513	-71.1855	889.018
5751	0	201.097	-129.516	1707.92	114.802	-115.489	1704.99	220.926	65.1952	1716.28	108.763	59.2824	1712.2	159.27	101.011	1567.83	170.448	180.605	1306.28	176.563	-44.0947	1477.18	170.416	-106.873	1275.52	81.9762	176.119	1361.13	352.157	32.7625	1526.54	430.297	69.5169	1333.36	435.189	79.9614	1177.43	464.998	-13.8585	1031.38	423.193	-68.5488	950.832	470.538	-15.2209	932.867	474.578	-78.3039	888.72
5752	0	202.1	-138.751	1707.73	115.851	-125.143	1705.19	221.137	55.977	1715.75	109.122	49.7079	1712.04	159.13	91.4791	1567.65	170.283	171.367	1306.18	176.578	-53.5376	1476.81	170.691	-116.091	1275.14	81.8302	166.697	1361.12	352.054	23.7019	1526.3	430.221	61.5616	1333.2	434.654	72.1579	1177.49	464.923	-21.0073	1030.98	423.103	-74.9768	949.528	470.303	-22.2857	932.282	474.782	-85.1712	888.052
5753	0	203.333	-148.295	1707.86	116.816	-134.759	1705.4	221.31	46.7837	1714.96	109.402	40.0265	1711.65	158.972	81.7935	1567.41	170.24	162.093	1305.81	176.857	-63.0135	1476.61	171.08	-125.318	1274.84	81.7395	157.259	1360.66	352.13	14.621	1525.88	429.9	53.1887	1332.85	434.155	64.3667	1176.94	465.137	-28.2713	1030.63	423.655	-82.3737	949.389	470.17	-29.4944	931.569	475.234	-92.1385	887.538
5754	0	204.264	-157.476	1707.45	117.877	-144.2	1705.18	221.409	37.5207	1713.63	109.716	30.3126	1710.93	158.924	72.1166	1566.75	170.341	152.756	1305.26	177.153	-72.512	1476	171.378	-134.731	1274.23	81.7779	147.928	1359.98	352.26	5.25491	1525.35	429.958	44.8878	1332.39	433.802	56.4863	1176.29	465.243	-35.6195	1029.9	424.083	-89.8317	948.917	470.058	-36.6686	930.739	475.518	-99.1338	886.655
5755	0	204.59	-167.498	1706.89	118.573	-154.178	1704.75	221.711	28.0579	1712.53	109.945	20.4701	1710.09	158.661	62.1365	1565.9	170.619	143.362	1304.93	177.318	-82.1313	1475	171.648	-144.17	1273.14	81.9637	138.307	1359.53	352.381	-4.32875	1524.45	429.776	36.0681	1331.54	433.501	48.3655	1175.46	465.346	-43.2342	1028.85	424.443	-97.6167	947.643	470.269	-43.9087	929.685	476.315	-106.456	885.728
5756	0	205.518	-177.172	1706.26	119.52	-163.928	1704.03	222.178	18.6497	1711.34	110.214	10.6091	1708.99	159.09	52.3317	1565.03	170.855	133.974	1304.31	177.564	-91.8629	1473.89	171.994	-153.739	1271.93	82.3254	128.709	1358.77	352.648	-14.0017	1523.46	429.677	27.3373	1330.74	433.506	40.1296	1174.88	465.55	-50.982	1027.69	424.902	-105.404	946.264	470.473	-51.3827	928.687	476.363	-113.801	884.164
5757	0	206.285	-186.789	1705.45	120.089	-174.072	1703.46	222.583	9.04384	1709.87	110.579	0.715164	1707.57	159.371	42.4576	1564.05	171.242	124.474	1303.29	177.874	-101.573	1472.57	172.311	-163.359	1270.68	82.5575	119.053	1357.91	353	-23.9231	1522.34	430.151	18.366	1330.06	433.534	31.7039	1173.98	465.885	-58.8589	1026.65	425.424	-113.12	944.995	470.768	-58.8835	927.847	476.876	-120.942	882.661
5758	0	207.13	-196.533	1704.33	121.083	-183.862	1702.44	222.905	-0.620713	1708.06	110.975	-9.25713	1706.12	159.82	32.5574	1562.9	171.738	114.89	1302.33	178.266	-111.448	1470.93	172.484	-173.059	1268.9	82.8845	109.298	1356.74	353.338	-33.9634	1521.02	430.455	9.19404	1328.96	433.675	23.1366	1173.08	466.162	-67.0233	1025.3	425.897	-121.091	943.16	471.182	-66.4666	926.608	477.415	-128.525	880.776
5759	0	208.064	-206.399	1703.05	122	-193.901	1701.36	223.44	-10.4472	1706.43	111.447	-19.3164	1704.46	160.375	22.2339	1561.41	172.42	105.188	1301.19	178.882	-121.445	1469.23	172.983	-182.747	1267.21	83.3831	99.4014	1355.7	353.888	-44.0346	1519.57	430.91	-0.104449	1327.73	433.968	14.5997	1171.71	466.734	-74.9413	1023.38	426.634	-129.182	941.304	471.476	-74.3943	924.714	478.031	-136.174	879.044
5760	0	209.065	-216.093	1701.74	122.833	-203.979	1699.98	223.876	-20.3196	1704.38	112.25	-29.3214	1702.47	161.021	12.133	1559.74	173.282	95.3606	1299.52	179.462	-131.426	1467.48	173.463	-192.5	1265.49	84.0757	89.5573	1354.15	354.58	-54.2587	1517.96	431.183	-9.65118	1325.8	434.257	5.69054	1170.15	467.391	-83.1642	1021.72	427.61	-137.172	939.65	471.959	-82.2763	922.686	478.736	-143.571	876.933
5761	0	210.083	-226.149	1700.41	123.709	-213.961	1698.34	224.579	-30.1679	1702.32	112.925	-39.3057	1700.19	161.823	2.13158	1558.23	174.124	85.4169	1297.61	179.974	-141.592	1465.66	173.977	-202.29	1263.56	84.8058	79.6008	1352.36	355.287	-64.5673	1516.1	432.389	-19.4017	1324.09	434.49	-3.38474	1167.96	468.028	-91.4374	1019.56	428.394	-145.437	937.582	472.847	-89.8893	920.523	479.483	-151.374	874.48
5762	0	210.844	-236.19	1698.42	124.995	-223.857	1696.16	225.263	-39.9726	1699.88	113.635	-49.4399	1697.85	162.852	-8.07201	1556.05	175.091	75.4579	1295.45	180.647	-151.755	1463.21	174.372	-212.166	1261.05	85.6238	69.5344	1350.54	355.942	-75.0174	1513.69	432.819	-29.3795	1321.8	435.008	-12.7225	1166.07	468.616	-100.147	1016.98	429.117	-153.787	934.593	473.436	-98.1887	918.138	480.194	-159.229	871.553
5763	0	211.924	-246.261	1696.52	125.824	-234.124	1694.28	226.332	-50.0409	1697.96	114.46	-59.5747	1695.45	163.755	-18.537	1554.13	176.101	65.3481	1293.67	181.672	-162.023	1460.98	175.007	-222.18	1258.72	86.5993	59.4143	1348.7	356.846	-85.5503	1511.49	433.676	-39.4495	1319.66	435.74	-22.2392	1164.03	469.436	-108.968	1014.43	430.014	-162.33	931.844	474.362	-106.363	915.521	481.054	-167.599	868.69
5764	0	213.141	-256.343	1694.77	127.21	-244.08	1692.32	227.194	-60.1637	1695.61	115.686	-69.6988	1693.45	164.92	-28.8248	1552.22	177.112	55.2484	1291.78	182.657	-172.338	1458.86	175.79	-232.188	1256.62	87.5025	49.2242	1346.8	358.173	-95.9853	1509.4	434.823	-49.8514	1317.63	436.377	-31.9346	1161.93	470.455	-117.917	1012.25	431.302	-170.902	929.23	475.044	-115.054	913.053	482.261	-175.496	866.051
5765	0	214.407	-266.475	1693.05	128.504	-254.031	1690.31	228.507	-70.1979	1693.55	116.905	-79.7727	1690.99	166.209	-39.1344	1550.02	178.026	44.8544	1289.47	183.925	-182.803	1456.79	176.6	-242.413	1254.49	88.5838	38.9958	1344.88	359.378	-106.522	1507.09	435.953	-60.2548	1315.46	437.132	-42.0024	1159.87	471.501	-127.01	1009.79	432.381	-179.649	926.397	476.431	-123.469	910.802	483.41	-183.976	863.298
5766	0	215.664	-276.562	1691.11	129.502	-264.416	1688.57	230.117	-80.3841	1691.48	118.35	-89.8772	1688.83	167.916	-49.6246	1548.11	179.01	34.5456	1287.69	185	-193.218	1454.48	177.379	-252.818	1252.15	89.717	28.6006	1342.97	360.766	-117.153	1504.84	437.264	-71.0722	1312.95	438.053	-52.2172	1157.58	472.605	-136.35	1007.04	433.653	-188.509	923.209	477.788	-132.295	908.226	485.067	-192.11	859.653
5767	0	217.02	-286.834	1689.42	131.142	-274.39	1686.49	231.759	-90.6456	1689.3	119.848	-100.012	1686.54	169.127	-59.974	1545.95	180.135	24.0482	1285.68	186.403	-203.733	1452.22	178.388	-263.314	1250.02	90.9769	18.1244	1341.05	362.153	-127.696	1502.13	438.068	-81.7648	1310.21	439.116	-62.6868	1155.16	473.796	-145.804	1004.17	435.028	-197.595	919.864	479.157	-141.229	905.734	486.153	-201.035	856.842
5768	0	218.553	-297.065	1687.68	132.444	-284.541	1684.86	233.38	-100.838	1686.83	121.732	-110.034	1684.01	170.464	-70.6975	1544.24	180.945	13.4359	1283.12	187.91	-214.38	1450.2	179.284	-274.051	1247.82	92.2798	7.52063	1338.78	363.677	-138.205	1499.7	439.637	-92.6121	1307.59	440.021	-73.1773	1152.37	475.046	-155.498	1001.08	436.452	-206.772	916.534	480.32	-150.173	902.234	487.671	-209.472	853.227
5769	0	220.023	-307.285	1685.8	134.289	-294.51	1682.79	235.394	-111.073	1684.3	123.659	-120.142	1681.34	172.306	-81.2403	1541.66	182.039	2.49727	1280.55	189.34	-225.095	1447.83	180.366	-284.824	1245.59	93.6405	-2.94963	1336.59	365.173	-148.91	1496.78	440.825	-103.552	1304.41	440.948	-84.0464	1149.58	476.232	-165.245	997.679	437.848	-216.186	912.757	481.701	-159.35	898.958	489.027	-218.461	849.598
5770	0	221.971	-317.526	1684.44	135.924	-304.704	1681.29	237.511	-121.442	1681.71	125.838	-130.183	1678.84	174.34	-92.0234	1539.19	183.019	-8.3374	1278.04	191.153	-235.746	1445.66	181.746	-295.69	1243.54	95.2078	-13.7522	1334.55	366.953	-159.433	1494.05	442.032	-114.603	1301.34	442.121	-94.8984	1146.73	477.653	-175.257	994.49	439.518	-225.7	909.412	483.036	-168.769	895.528	490.812	-227.244	845.984
5771	0	223.843	-327.704	1683.05	137.663	-314.796	1679.8	239.832	-131.347	1679.13	128.188	-140.178	1676.25	176.363	-102.648	1537.01	184.25	-19.3909	1275.53	193.143	-246.574	1443.89	182.843	-307.539	1241.91	96.5804	-24.6842	1332.34	368.994	-169.894	1491.61	443.731	-125.42	1298.67	443.093	-106.108	1143.8	479.237	-185.276	991.692	441.376	-235.262	906.419	484.702	-178.172	892.621	492.754	-236.233	842.794
5772	0	225.551	-338.047	1681.59	139.483	-324.799	1678.15	242.39	-141.725	1676.84	130.493	-150.124	1673.84	178.217	-113.522	1534.82	185.271	-30.5292	1273.33	195.009	-257.412	1441.7	184.293	-318.624	1239.86	97.9417	-35.6185	1330.32	370.906	-180.633	1488.95	445.104	-136.647	1296.04	444.426	-117.298	1141.42	480.627	-195.561	988.721	443.042	-245.141	902.908	486.237	-187.814	889.585	494.323	-245.584	839.391
5773	0	227.389	-348.233	1679.99	141.657	-334.559	1676.02	245.013	-152.006	1674.54	132.984	-160.113	1671.32	180.633	-124.309	1532.74	186.65	-41.7547	1271.46	196.974	-268.388	1439.32	185.836	-329.89	1237.48	99.3015	-47.0102	1328.27	372.841	-191.525	1486.44	446.667	-147.748	1293.17	445.583	-128.717	1138.76	482.064	-206.371	985.671	444.611	-255.244	899.143	488.095	-197.739	886.996	496.303	-255.114	835.584
5774	0	229.441	-358.55	1678.74	143.727	-344.565	1674.73	247.803	-162.372	1672.23	135.837	-170.058	1669.03	183.16	-135.103	1530.6	188.084	-53.0311	1269.43	199.119	-279.491	1437.13	187.87	-340.516	1235.51	100.878	-58.1361	1326.6	375.264	-202.54	1483.96	448.451	-158.829	1290.46	446.945	-140.179	1136.11	483.749	-216.884	982.968	446.467	-265.417	895.77	489.951	-207.804	884.254	498.009	-264.976	832.554
5775	0	232.014	-368.238	1677.52	145.948	-354.397	1673.54	250.872	-172.906	1670.08	138.558	-179.925	1666.78	185.351	-145.98	1528.56	189.529	-64.4639	1267.14	201.555	-290.509	1435.59	189.711	-352.091	1233.94	102.709	-69.5055	1324.61	377.59	-213.58	1481.33	450.078	-169.919	1287.73	448.204	-151.574	1133.52	485.57	-227.431	980.092	448.452	-275.875	892.893	491.635	-218.09	881.545	500.005	-274.902	829.648
5776	0	234.003	-378.556	1676.65	147.767	-364.531	1672.69	253.828	-183.409	1667.9	141.577	-189.855	1664.6	188.041	-156.814	1526.64	191.318	-76.0075	1264.86	203.651	-301.713	1433.98	191.348	-363.936	1232.59	104.855	-80.7433	1322.68	380.114	-224.633	1478.88	451.479	-181.334	1284.64	449.538	-163.069	1130.59	487.188	-238.164	977.105	450.266	-286.478	889.858	493.282	-228.466	878.439	501.729	-284.962	826.461
5777	0	236.224	-388.887	1676.01	150.044	-374.336	1671.86	256.919	-193.823	1665.78	144.68	-199.825	1662.58	190.98	-167.865	1524.88	193.053	-87.719	1262.64	206.068	-312.938	1432.52	193.109	-375.919	1231.28	107.287	-91.8323	1320.94	382.589	-236.011	1476.2	453.419	-192.532	1281.69	450.997	-174.688	1128.08	488.956	-248.942	974.186	452.208	-297.23	886.987	494.84	-239.059	875.421	503.663	-295.289	823.232
5778	0	238.45	-399.238	1675.47	152.271	-384.305	1671.22	260.256	-204.433	1663.92	147.91	-209.74	1660.69	194.176	-179.229	1523.2	194.865	-99.4123	1260.71	208.332	-324.402	1431.12	194.866	-388.046	1230.27	109.916	-102.818	1319.31	385.136	-247.439	1473.77	455.323	-203.783	1279.1	452.632	-186.307	1125.3	490.731	-259.926	971.392	454.044	-308.158	884.129	496.403	-249.823	872.477	505.501	-305.748	820.337
5779	0	240.258	-409.783	1675.19	154.501	-394.169	1670.95	263.377	-214.961	1662.16	151.183	-219.613	1659.26	196.909	-190.107	1522.06	196.758	-111.153	1258.97	210.438	-335.738	1430.12	196.462	-400.269	1229.57	112.522	-113.704	1317.8	387.816	-258.902	1471.61	457.16	-215.519	1276.88	454.228	-198.142	1123.03	492.362	-271.1	968.834	455.8	-319.356	881.503	497.922	-260.719	869.932	507.155	-316.661	817.756
5780	0	242.357	-420.336	1675.29	156.928	-404.024	1671.1	266.813	-225.481	1661.17	154.598	-229.623	1658.28	199.603	-201.132	1521.22	198.911	-122.738	1257.99	212.765	-347.219	1429.5	198.021	-412.57	1228.99	115.148	-124.615	1316.86	390.307	-270.657	1469.75	459.252	-227.436	1274.62	455.889	-210.124	1121.07	493.95	-282.756	966.598	457.502	-330.675	878.884	499.433	-271.858	867.943	508.863	-327.699	815.243
5781	0	244.736	-430.801	1676	159.396	-413.973	1671.74	270.346	-236.243	1660.55	158.108	-239.624	1658.11	202.601	-212.407	1521.1	201.006	-134.065	1257.71	215.096	-358.649	1429.34	199.5	-424.626	1229.12	117.829	-135.395	1316.72	393.092	-282.378	1468.52	461.174	-238.688	1273.4	457.74	-222.28	1119.74	495.744	-294.26	964.834	459.279	-342.229	877.103	500.92	-283.18	866.341	510.544	-338.831	813.496
5782	0	247.097	-441.238	1677.12	161.579	-424.07	1672.93	273.936	-247.048	1660.23	161.621	-249.699	1658	205.586	-223.525	1521.35	203.143	-145.17	1257.9	217.266	-369.947	1429.93	200.895	-436.583	1230.01	121.012	-145.941	1316.7	395.989	-294.098	1467.94	463.472	-250.975	1272.37	459.5	-234.707	1118.64	497.41	-305.868	963.949	460.929	-353.721	876.059	502.424	-294.673	865.061	512.258	-349.931	812.442
5783	0	249.288	-451.864	1678.31	163.816	-434.068	1674.43	277.591	-258.067	1660.29	165.058	-259.844	1658.2	208.606	-235.107	1522.1	205.239	-156.17	1258.58	219.392	-381.257	1430.65	202.158	-448.3	1230.82	123.925	-156.345	1317.44	398.54	-306.011	1467.64	465.308	-263.671	1271.53	461.2	-247.259	1118.06	498.898	-318.024	963.145	462.298	-365.445	875.126	503.799	-306.262	864.325	513.661	-361.604	811.499
5784	0	251.426	-462.521	1679.32	166.301	-444.039	1675.56	281.151	-268.878	1660.28	168.58	-269.941	1658.65	211.087	-246.45	1522.81	207.447	-167.089	1259.39	221.361	-392.573	1431.29	203.308	-459.686	1231.69	126.643	-166.701	1318.59	400.729	-318.047	1467.47	466.978	-276.011	1271.55	462.999	-259.966	1118.01	500.216	-330.399	962.723	463.424	-377.46	874.432	505.112	-318.315	864.045	514.846	-373.425	810.962
5785	0	253.695	-473.181	1680.44	168.668	-454.13	1677.22	284.534	-279.81	1660.27	171.967	-280.107	1659.33	214.056	-257.415	1523.76	209.866	-177.936	1260.4	223.229	-403.755	1432.26	204.607	-470.693	1232.52	129.269	-176.924	1319.78	402.948	-330.075	1467.92	469.195	-288.774	1271.54	464.928	-272.688	1118.47	501.657	-342.87	962.944	464.643	-389.457	874.59	506.489	-330.441	864.307	516.003	-385.318	810.885
5786	0	255.918	-483.839	1681.65	171.013	-464.261	1678.58	287.699	-290.711	1660.51	175.289	-290.149	1660.31	216.609	-268.037	1524.68	212.354	-188.694	1261.15	225.037	-414.776	1433.56	205.944	-481.34	1233.53	131.835	-187.017	1321.06	404.971	-342.007	1468.92	470.964	-301.266	1272.13	466.675	-285.358	1119.04	503.088	-355.401	963.634	465.711	-401.711	875.576	507.807	-342.855	864.805	516.93	-397.797	811.586
5787	0	257.924	-494.385	1682.57	173.178	-474.253	1680.05	290.801	-301.406	1661.3	178.288	-300.268	1661.75	219.191	-278.248	1525.89	214.98	-199.244	1262.32	226.587	-425.347	1434.76	207.051	-491.72	1234.66	134.077	-196.872	1322.38	406.938	-353.912	1470.14	473.104	-313.991	1273.57	468.726	-297.967	1120.54	504.29	-368.363	964.989	466.475	-414.133	876.798	509.089	-355.576	866.02	517.862	-410.361	812.523
5788	0	259.866	-504.914	1683.51	175.185	-484.29	1681.38	293.572	-312.135	1662.29	181.192	-310.27	1663.3	221.755	-288.302	1526.83	217.583	-209.409	1263.77	227.726	-435.467	1436.33	208.088	-501.819	1235.78	136.328	-206.58	1323.92	408.803	-365.736	1471.82	475.174	-326.804	1275.08	470.662	-310.738	1122.02	505.734	-381.397	966.572	467.472	-426.73	878.434	510.461	-368.728	867.59	518.703	-423.561	814.225
5789	0	261.47	-515.461	1684.32	176.946	-494.221	1682.54	296.267	-322.687	1663.64	184.314	-320.167	1665.54	224.241	-298.034	1528.17	220.188	-219.363	1265.2	229.38	-445.678	1437.68	209.197	-511.622	1237.1	138.748	-216.098	1325.36	410.504	-377.441	1473.68	477.374	-339.656	1277.01	472.77	-323.372	1123.84	507.051	-394.68	968.549	468.234	-439.679	880.206	511.99	-382.033	869.579	519.485	-437.019	816.012
5790	0	262.606	-525.805	1684.91	178.283	-504.084	1683.6	298.465	-333.014	1665.55	186.414	-330.003	1667.3	226.306	-307.554	1529.78	222.92	-229.162	1266.52	230.25	-455.424	1439.03	209.789	-521.187	1238.49	141.266	-225.261	1326.59	412.014	-388.958	1475.41	479.529	-352.347	1278.78	475.055	-335.887	1125.73	508.17	-408.354	970.421	468.889	-452.826	882.035	513.449	-395.627	871.703	520.018	-450.895	817.631
5791	0	263.561	-536.056	1685.38	179.617	-513.74	1684.45	300.761	-343.527	1667.07	188.546	-339.656	1669.04	228.5	-316.885	1531	225.897	-238.36	1267.81	231.233	-464.988	1440.2	210.432	-530.756	1240.05	143.946	-234.283	1327.62	413.406	-400.215	1477	481.642	-365.097	1280.52	477.062	-348.523	1127.45	509.515	-421.867	972.211	469.452	-466.341	883.887	514.92	-409.652	873.657	520.492	-465.561	819.576
5792	0	264.351	-546.283	1686.64	180.462	-523.294	1685.52	302.774	-353.687	1668.97	190.736	-349.187	1671.09	230.231	-326.247	1531.9	227.177	-249.997	1267.2	231.92	-474.041	1441.7	211.318	-540.198	1241.75	146.72	-243.339	1328.44	414.927	-410.977	1478.71	483.792	-377.738	1281.92	479.208	-361.092	1128.88	510.983	-435.371	973.999	470.851	-479.85	886.144	516.421	-423.906	875.348	521.156	-479.964	821.452
5793	0	264.784	-556.008	1687.94	180.973	-532.57	1686.68	304.415	-363.854	1670.69	192.272	-358.377	1672.62	232.272	-335.37	1533.23	230.786	-257.84	1268.77	232.946	-483.141	1443.41	211.963	-549.513	1243.82	149.716	-252.319	1329	416.318	-421.53	1480.48	486.008	-390.031	1283.65	481.294	-373.457	1130.42	512.563	-448.945	975.97	471.584	-493.953	888.951	517.803	-438.455	876.802	522.019	-494.606	823.709
5794	0	264.627	-565.795	1688.98	180.955	-541.779	1687.66	305.645	-373.756	1672.6	193.958	-367.812	1674.18	233.978	-344.668	1534.57	233.28	-266.975	1269.5	233.588	-492.257	1444.86	212.23	-558.908	1245.52	152.466	-261.386	1329.79	417.564	-431.81	1481.89	487.97	-402.304	1285.08	483.219	-385.704	1131.38	513.842	-463.052	977.843	472.467	-508.259	891.259	519.36	-453.185	878.619	522.688	-509.637	825.539
5795	0	264.312	-575.471	1690.76	180.954	-550.64	1688.61	306.819	-383.606	1674.98	195.062	-376.807	1675.96	235.598	-353.566	1535.8	235.358	-277.706	1270.42	234.406	-501.245	1446.29	212.562	-568.289	1247.17	155.227	-270.493	1330.89	418.751	-441.873	1483.45	489.369	-414.551	1286.27	485.202	-397.993	1132.6	515.178	-477.007	979.737	473.346	-522.829	893.482	520.739	-468.285	880.53	523.389	-525.156	827.825
5796	0	263.657	-584.84	1692.18	180.435	-559.483	1689.7	307.629	-393.313	1677.33	195.512	-385.523	1677.57	237.109	-362.566	1537.47	238.133	-286.026	1272.85	235.44	-510.258	1448.05	212.941	-577.643	1248.96	157.763	-279.597	1332.04	420.018	-451.507	1485.31	491.088	-426.162	1287.96	487.154	-410.561	1134.17	516.533	-491.254	982.006	474.483	-537.422	896.04	522.321	-483.364	882.723	524.34	-540.668	830.418
5797	0	262.685	-594.288	1694.34	179.694	-568.03	1690.95	308.25	-403.065	1680.1	196.66	-394.282	1679.43	238.58	-371.499	1538.97	240.165	-295.389	1274.34	236.358	-519.39	1450.14	213.336	-586.988	1251.17	160.013	-288.699	1333.37	421.374	-460.925	1487.13	492.757	-437.517	1289.55	489.136	-422.9	1135.56	517.907	-505.387	984.294	475.693	-552.181	898.873	523.804	-498.463	885.058	525.343	-556.375	833.139
5798	0	261.357	-603.418	1696.04	178.821	-576.439	1692.3	308.798	-412.549	1682.74	197.184	-402.844	1681.07	239.841	-380.389	1540.77	242.217	-304.781	1275.88	237.367	-528.496	1452.18	213.566	-596.351	1253.14	162.155	-297.699	1334.81	422.575	-470.372	1488.93	494.106	-448.749	1291.12	491.09	-435.167	1137.2	519.138	-519.592	986.617	476.732	-567.134	901.766	525.094	-513.551	887.68	526.322	-572.207	836.06
5799	0	260.022	-612.319	1698.32	177.66	-584.646	1693.65	309.19	-422.013	1685.22	197.692	-411.156	1682.6	241.368	-389.302	1542.42	243.969	-314.049	1277.52	238.406	-537.37	1454.3	214.196	-605.685	1255.56	164.148	-306.768	1336.37	423.844	-479.725	1490.86	495.696	-459.432	1292.8	492.942	-447.339	1138.65	520.504	-533.723	989.301	478.238	-582.224	905.117	526.05	-528.839	889.826	527.587	-587.959	839.379
5800	0	258.475	-621.161	1700.63	176.294	-592.643	1694.97	309.744	-431.335	1687.93	197.892	-419.407	1684.05	242.945	-398.088	1544.33	245.866	-323.335	1279.07	239.493	-546.276	1456.47	214.882	-615.069	1257.83	166.176	-315.544	1337.56	425.145	-488.912	1492.68	496.856	-469.722	1294.29	494.846	-459.307	1140.41	521.913	-547.642	991.815	479.881	-597.457	908.758	527.035	-543.929	892.132	528.973	-603.307	842.449
5801	0	256.455	-629.986	1702.68	174.81	-600.587	1696.33	309.933	-440.725	1690.08	198.78	-427.705	1685.12	243.907	-407.007	1545.77	247.525	-332.558	1280.49	240.024	-555.146	1458.31	215.213	-624.412	1259.9	167.622	-324.594	1339.01	426.012	-498.367	1494.35	497.692	-479.967	1295.72	496.494	-471.232	1141.79	522.894	-561.616	994.431	481.43	-612.955	912.31	527.656	-558.747	894.588	530.034	-619.04	845.67
5802	0	254.596	-638.666	1704.8	173.417	-608.365	1697.71	310.311	-449.962	1692.56	199.346	-435.764	1686.21	245.567	-415.468	1547.44	249.254	-341.677	1282.07	240.729	-563.879	1460.09	215.91	-633.688	1261.93	169.373	-333.515	1340.5	426.748	-507.853	1495.81	498.559	-490.196	1297.21	497.903	-483.255	1143.29	524.171	-575.609	996.993	483.205	-628.634	916.147	528.218	-573.77	897.04	531.209	-634.502	849.033
5803	0	252.898	-647.176	1707.05	172.068	-616.042	1699.1	310.584	-459.207	1694.42	199.963	-443.852	1687.34	247.25	-424.524	1549.29	250.856	-350.842	1283.36	241.723	-572.511	1461.93	216.633	-642.955	1264.04	170.925	-342.559	1341.91	427.828	-517.225	1497.82	499.667	-499.966	1299.06	499.491	-494.55	1144.98	525.787	-589.087	999.849	488.421	-645.814	929.157	528.452	-588.642	899.571	532.571	-649.896	852.515
5804	0	251.275	-655.512	1709.47	170.629	-623.587	1700.57	311.043	-468.353	1696.47	200.653	-451.797	1688.44	248.435	-433.167	1551.2	252.36	-359.944	1285.01	242.495	-581.31	1463.77	217.129	-651.975	1266.22	172.439	-351.505	1343.37	428.746	-526.689	1499.9	500.768	-509.578	1301.12	500.764	-506.261	1146.75	527.346	-602.222	1003.11	490.47	-661.252	933.226	528.401	-603.405	902.481	533.774	-665.223	856.57
5805	0	249.508	-664.097	1711.43	169.325	-631.127	1702.02	311.368	-477.44	1698.38	201.01	-459.662	1689.71	249.15	-441.521	1552.18	253.875	-368.916	1286.51	242.835	-590.184	1465.54	217.513	-660.932	1268.09	173.873	-360.613	1344.85	429.447	-536.216	1501.97	501.574	-519.449	1303.06	502.085	-517.933	1148.84	528.713	-615.664	1006.2	490.395	-677.267	931.497	528.356	-618.249	905.685	534.829	-680.579	860.451
5806	0	248.064	-672.319	1713.26	168.229	-638.673	1703.55	311.988	-486.424	1700.27	201.58	-467.529	1690.99	250.519	-450.423	1553.85	255.278	-378.139	1287.73	243.348	-598.819	1467.1	217.947	-669.738	1269.64	175.324	-369.597	1346.08	430.003	-545.832	1503.6	502.435	-529.346	1304.89	503.545	-528.924	1150.41	530.036	-628.915	1009.21	493.176	-692.322	936.398	528.07	-632.928	908.787	535.878	-696.003	864.109
5807	0	246.725	-680.541	1715.05	167.229	-646.262	1704.99	312.254	-495.452	1701.23	202.387	-475.559	1691.75	251.323	-459.008	1554.65	256.835	-387.284	1289	243.623	-607.627	1468.46	218.33	-678.494	1271.09	176.711	-378.61	1346.98	430.572	-555.402	1505.37	503.269	-539.295	1306.7	504.929	-540.079	1152.23	531.679	-641.943	1012.19	496.481	-708.005	942.999	527.565	-647.938	911.51	536.639	-711.341	868.141
5808	0	245.491	-689.093	1716.77	166.414	-653.928	1706.48	312.805	-504.359	1702.29	202.861	-483.613	1692.44	251.903	-467.815	1555.67	258.038	-396.441	1289.75	243.892	-616.49	1469.85	218.507	-687.177	1272.44	177.774	-387.663	1347.79	431.002	-564.841	1506.84	504.043	-549.275	1308.27	506.102	-551.028	1153.52	532.763	-655.122	1015.1	498.8	-723.902	946.909	526.677	-662.753	914.602	537.315	-726.663	871.906
5809	0	244.564	-697.393	1718.2	165.758	-661.554	1707.94	313.101	-513.318	1702.9	203.589	-491.61	1693.14	252.879	-476.361	1556.7	259.294	-405.665	1290.42	244.12	-625.331	1470.89	219.188	-695.103	1273.14	178.876	-396.7	1348.55	431.316	-574.365	1508.19	504.763	-559.525	1309.71	507.147	-562.11	1154.7	534.014	-668.164	1017.72	501.705	-739.297	952.067	525.732	-677.633	917.612	537.628	-742.062	875.662
5810	0	244.049	-705.726	1719.58	165.241	-669.387	1709.18	313.786	-522.091	1703.42	204.205	-499.717	1693.77	253.288	-485.437	1557.52	260.514	-414.945	1290.83	244.467	-634.19	1471.96	219.537	-703.646	1274.17	179.921	-405.743	1348.95	431.707	-583.873	1509.31	505.681	-569.683	1311.06	508.2	-573.095	1155.65	535.395	-680.776	1020.39	505.004	-754.539	957.127	523.738	-692.722	919.789	538.04	-757.288	879.506
5811	0	243.344	-713.784	1720.81	164.766	-677.269	1710.38	314.113	-530.97	1703.44	204.873	-508.035	1694.04	254.16	-494.212	1557.81	261.713	-424.078	1291.43	244.617	-643.132	1472.84	219.628	-712.507	1275.05	180.923	-414.82	1349.34	431.823	-593.291	1510.37	506.795	-579.96	1312.47	509.771	-583.639	1156.66	536.766	-693.444	1023.07	507.829	-769.435	962.362	522.652	-707.952	923.13	538.317	-772.598	883.744
5812	0	242.485	-722.227	1721.91	164.393	-685.202	1711.15	314.619	-539.682	1703.68	205.409	-516.254	1694.12	254.431	-503.372	1558.84	262.514	-433.336	1291.62	244.349	-652.168	1473.23	219.736	-721.305	1275.1	181.636	-423.779	1349.26	431.887	-603.006	1511.14	507.087	-590.695	1313.28	510.641	-594.429	1157.37	537.296	-706.968	1025.47	510.234	-784.341	967.284	520.468	-723.494	926.091	537.218	-787.898	887.518
5813	0	242.05	-730.816	1722.31	164.177	-693.418	1711.81	314.965	-548.692	1703.41	205.778	-524.615	1694.4	254.391	-512.139	1558.32	263.486	-442.525	1291.77	244.375	-661.301	1473.29	219.842	-730.283	1274.96	182.406	-432.89	1349.4	431.943	-612.705	1511.63	507.559	-601.314	1313.86	511.492	-605.306	1157.64	538.198	-720.08	1027.44	512.767	-799.03	972.088	518.694	-739.092	929.139	536.523	-803.901	891.172
5814	0	242.021	-739.374	1722.61	164.134	-701.699	1712.47	315.461	-557.446	1703.34	206.299	-533.186	1694.26	254.687	-521.245	1558.57	264.195	-451.831	1291.52	244.479	-670.336	1473.43	219.926	-739.329	1275.18	183.109	-441.983	1349.25	432.004	-622.291	1512.02	508.362	-611.635	1314.5	512.221	-616.459	1157.86	538.924	-732.992	1029.81	515.028	-813.412	976.867	517.553	-754.237	932.176	535.82	-819.767	895.358
5815	0	241.83	-747.838	1723.06	163.915	-710.06	1712.93	315.443	-566.434	1702.39	206.636	-541.805	1694.04	254.709	-530.424	1557.96	265.017	-461.071	1291.48	244.28	-679.554	1473.47	219.857	-748.382	1275.32	183.692	-450.995	1348.95	432.098	-631.91	1512.51	509.06	-622.084	1315.01	513.552	-626.573	1157.97	539.566	-745.84	1032.17	516.92	-827.689	981.757	515.864	-769.913	935.401	535.096	-835.72	899.769
5816	0	241.617	-756.605	1722.83	163.814	-718.737	1712.99	315.924	-575.243	1702.06	206.74	-550.497	1693.6	254.948	-539.487	1557.55	265.47	-470.447	1291.05	243.918	-688.633	1473.06	219.7	-757.381	1274.63	184.321	-460.163	1348.56	431.959	-641.593	1511.84	509.487	-632.613	1314.97	514.292	-637.445	1157.79	539.851	-759.341	1033.88	518.366	-841.95	986.17	512.533	-787.508	937.903	534.026	-852.015	903.891
5817	0	241.698	-765.489	1722.45	163.856	-727.504	1712.8	315.982	-584.435	1701.03	207.086	-559.466	1692.96	255.069	-548.914	1557.11	266.066	-479.704	1290.43	243.813	-697.829	1472.25	219.431	-766.573	1273.91	184.793	-469.276	1347.63	431.757	-651.421	1511.51	509.841	-643.136	1314.5	514.8	-648.548	1156.95	540.12	-772.253	1035.36	519.636	-856.124	990.407	511.346	-802.01	941.349	533.02	-868.388	907.869
5818	0	241.549	-774.587	1721.97	163.713	-736.506	1712.3	316.077	-593.542	1699.91	207.107	-568.581	1691.96	255.03	-558.255	1556.25	266.261	-489.063	1289.38	243.388	-707.081	1471.44	219.016	-775.828	1273.07	185.28	-478.476	1346.92	431.467	-661.176	1510.67	510.227	-653.342	1313.81	515.899	-658.727	1156.18	540.264	-785.325	1036.75	520.472	-870.326	994.602	509.571	-818.019	944.051	532.128	-884.679	911.764
5819	0	241.462	-783.288	1721.09	163.584	-745.672	1711.5	315.847	-602.848	1698.37	207.107	-577.808	1690.71	254.917	-567.512	1554.99	266.459	-498.346	1288.46	242.647	-716.196	1470.38	218.588	-784.968	1271.82	185.49	-487.702	1345.72	431.063	-671.024	1509.66	510.366	-663.576	1313.01	516.249	-669.625	1155.04	540.019	-798.523	1038.1	520.876	-884.469	998.685	507.607	-834.059	946.789	531.127	-900.691	915.996
5820	0	241.394	-792.649	1719.99	163.506	-755.011	1710.71	315.822	-612.194	1697.22	206.915	-587.105	1689.78	255.049	-577.241	1554.31	266.671	-507.753	1287.55	242.261	-725.51	1469.06	218.17	-794.095	1270.52	185.728	-496.974	1344.87	430.717	-680.89	1508.5	510.314	-673.99	1312.01	516.65	-680.571	1153.87	539.921	-812.103	1039.34	521.355	-898.429	1002.52	505.973	-849.934	949.603	530.366	-916.694	920.446
5821	0	241.176	-802.429	1718.9	163.098	-764.526	1709.78	315.418	-621.722	1695.64	206.467	-596.636	1688.42	254.381	-586.759	1552.65	266.6	-517.23	1286.27	241.887	-734.932	1467.81	217.674	-803.357	1269.3	185.814	-506.393	1343.58	430.523	-690.708	1507.37	510.319	-684.072	1311.02	517.135	-691.346	1152.57	539.797	-825.413	1040.87	521.472	-912.387	1006.44	504.507	-865.814	952.472	529.898	-932.553	924.794
5822	0	240.857	-811.999	1717.47	162.648	-774.213	1708.37	314.973	-631.288	1694.19	205.893	-606.38	1687.05	254.203	-596.424	1551.46	266.357	-526.747	1284.82	241.365	-744.622	1466.45	217.044	-812.629	1267.83	185.707	-515.933	1342.2	430.134	-700.467	1506.01	510.221	-694.029	1309.81	517.165	-702.71	1151.3	539.424	-838.483	1042.18	521.353	-926.159	1009.89	502.907	-881.51	955.23	529.135	-948.417	928.707
5823	0	240.31	-821.962	1715.55	162.173	-784.056	1706.61	314.528	-640.999	1692.97	205.348	-616.176	1685.46	253.541	-606.187	1549.86	266.066	-536.216	1283.31	240.619	-754.263	1464.55	216.371	-821.849	1265.77	185.541	-525.438	1340.72	429.356	-710.529	1504.23	509.675	-704.335	1308.02	517.757	-713.223	1149.83	538.83	-852.108	1043	521.114	-939.853	1012.9	501.325	-896.973	957.774	528.297	-963.8	932.64
5824	0	239.423	-831.484	1713.43	161.559	-794.149	1704.35	313.625	-650.963	1690.77	204.595	-626.138	1683.74	253.269	-615.934	1548.23	265.612	-545.821	1281.37	240.064	-763.976	1462.55	215.731	-831.265	1263.63	185.156	-535.107	1338.9	428.791	-720.284	1501.83	509.115	-714.545	1306.21	517.654	-724.484	1147.8	538.349	-865.463	1043.68	520.92	-953.537	1015.91	500.037	-912.3	959.948	527.706	-979.036	936.258
5825	0	239.029	-841.974	1711.1	160.941	-804.423	1702.41	312.817	-660.926	1688.98	203.753	-636.316	1681.82	252.496	-625.544	1545.79	264.961	-555.464	1279.44	239.501	-773.823	1460.51	215.07	-840.757	1261.62	184.419	-544.793	1336.51	428.204	-730.145	1500.14	508.568	-724.416	1304.16	517.383	-736.02	1145.72	537.95	-878.616	1044.16	520.653	-967.08	1018.5	498.704	-927.545	961.856	526.961	-994.052	939.239
5826	0	238.231	-851.969	1708.67	160.092	-814.809	1700.02	311.863	-671.122	1687.07	202.735	-646.688	1679.93	251.8	-635.489	1543.66	264.357	-565.166	1277.52	238.732	-783.714	1458.56	214.42	-850.126	1259.46	183.794	-554.576	1334.72	427.52	-739.81	1498.17	507.864	-734.383	1302.08	516.891	-747.239	1143.61	537.395	-891.636	1044.6	520.43	-980.279	1020.82	497.425	-942.299	963.371	526.15	-1008.92	941.809
5827	0	237.452	-862.755	1705.93	159.232	-825.418	1697.41	310.789	-681.445	1685.25	201.673	-657.133	1678.04	251.465	-645.393	1542	263.415	-575.029	1274.95	237.982	-793.477	1456.3	213.773	-859.662	1257.11	182.938	-564.488	1332.44	426.721	-749.451	1495.85	507.216	-744.286	1299.83	516.35	-758.582	1140.97	536.845	-904.595	1044.45	520.124	-993.585	1022.67	496.167	-956.989	964.7	525.301	-1023.63	944.087
5828	0	236.567	-873.478	1703.04	158.234	-836.208	1694.8	309.27	-691.917	1682.75	200.468	-667.773	1676.21	250.11	-655.108	1539.26	262.568	-584.905	1272.61	237.194	-803.366	1453.9	213.082	-869.481	1254.77	181.931	-574.394	1330.08	425.91	-759.281	1493.52	506.242	-754.428	1297.46	516.012	-770.034	1138.86	536.412	-917.426	1044.43	519.898	-1006.5	1024.07	495.401	-971.337	965.879	524.697	-1038.04	946.108
5829	0	235.517	-883.977	1699.88	157.124	-847.103	1691.66	308.168	-702.421	1681.32	198.945	-678.536	1674.13	249.192	-665.106	1536.67	261.475	-594.937	1270.22	236.011	-813.314	1451.49	212.088	-879.581	1252.35	180.704	-584.428	1327.41	424.637	-769.008	1490.95	504.834	-764.712	1294.91	515.312	-781.443	1136.91	536.01	-930.273	1044.42	519.463	-1019.56	1025.35	494.272	-985.567	966.884	524.084	-1052.03	948.031
5830	0	234.231	-894.987	1696.71	155.946	-858.098	1688.58	306.584	-713.162	1679.24	197.435	-689.305	1672.45	247.521	-674.995	1534.49	260.314	-605.15	1267.9	234.752	-823.49	1449.1	211.255	-889.618	1249.77	179.46	-594.557	1325.18	423.546	-778.899	1488.68	503.806	-774.86	1292.51	514.489	-792.956	1134.83	535.169	-942.936	1043.82	518.971	-1032.48	1026.02	493.427	-999.358	967.404	523.609	-1065.78	949.75
5831	0	232.907	-905.935	1693.68	154.54	-869.286	1685.7	305.108	-724.008	1677.37	195.794	-700.227	1670.57	246.35	-685.057	1531.79	259.122	-615.455	1265.06	233.656	-833.613	1446.68	210.07	-900.042	1247.38	178.332	-604.762	1322.46	422.33	-788.75	1486.46	502.617	-785.151	1290.1	513.599	-804.475	1132.57	534.95	-955.42	1043.03	518.553	-1045.14	1026.49	492.559	-1012.97	967.49	523.179	-1079.32	950.779
5832	0	231.695	-917.068	1690.5	153.009	-880.451	1682.93	303.323	-734.887	1675.21	194.077	-711.278	1668.65	244.619	-695.406	1529.48	258.081	-625.787	1262.88	232.485	-843.816	1444.34	209.506	-910.423	1244.99	176.834	-615.028	1319.53	421.057	-798.618	1483.92	501.213	-795.367	1287.71	512.542	-816.112	1130.24	534.316	-967.662	1042.18	518.147	-1057.46	1026.48	491.846	-1026.26	967.022	522.595	-1092.45	950.93
5833	0	230.207	-928.453	1687.62	151.319	-891.684	1680.1	301.343	-746.005	1672.93	192.255	-722.471	1666.33	242.888	-705.756	1526.95	256.891	-636.229	1260.25	231.026	-854.196	1442.19	208.392	-921.06	1242.72	175.603	-625.417	1317.16	419.668	-808.747	1482.1	499.663	-805.492	1285.35	511.318	-827.616	1128.05	533.602	-979.857	1041.56	517.659	-1069.74	1026.37	490.855	-1039.22	966.614	522.017	-1105.31	950.776
5834	0	228.103	-939.812	1684.54	149.565	-903	1676.9	299.407	-757.153	1670.82	190.199	-733.677	1664.2	241.084	-716.056	1524.2	255.668	-646.686	1257.93	229.152	-864.799	1439.55	206.711	-931.46	1240.06	174.157	-635.853	1314.39	417.854	-819.411	1479.75	497.784	-816.145	1282.9	509.901	-839.331	1125.91	532.455	-991.957	1039.8	516.941	-1081.82	1025.5	489.93	-1051.84	965.686	521.376	-1117.81	950.168
5835	0	226.16	-951.138	1681.44	147.49	-914.408	1674.07	297.08	-768.368	1668.3	188.062	-744.952	1662.1	239.127	-726.841	1522.06	254.462	-657.469	1255.27	227.529	-875.421	1436.91	205.547	-942.232	1237.49	172.972	-646.535	1312	415.982	-829.912	1477.31	495.907	-826.686	1280.76	508.446	-851.02	1123.63	531.248	-1003.97	1038.32	516.323	-1093.76	1024.17	489.319	-1064.08	964.475	520.708	-1130.08	948.893
5836	0	224.338	-962.686	1678.78	145.495	-925.995	1671.39	294.951	-779.519	1666.38	185.812	-756.203	1659.97	237.361	-737.768	1519.75	253.304	-668.174	1253.43	225.872	-886.23	1434.56	204.174	-952.845	1235.03	171.537	-657.273	1309.39	414.213	-840.776	1475.49	494.066	-837.383	1278.85	506.958	-862.513	1122.06	530.68	-1015.36	1036.79	515.65	-1105.38	1022.93	488.377	-1076.1	963.11	520.463	-1141.68	947.676
5837	0	222.095	-974.133	1676.34	143.378	-937.454	1668.85	292.798	-790.814	1664.71	183.422	-767.733	1657.93	235.14	-748.853	1517.8	251.966	-679.057	1251.35	223.856	-897.164	1432.43	202.622	-963.747	1232.79	170.125	-668.319	1307.33	412.361	-851.715	1474.05	492.361	-848.275	1277.28	505.392	-874.058	1120.32	529.761	-1026.98	1035.52	514.943	-1116.67	1021.22	487.466	-1087.56	961.455	519.951	-1152.86	946.062
5838	0	220.01	-985.353	1674	141.047	-949.182	1666.55	290.126	-802.233	1662.83	180.93	-779.249	1656.13	232.733	-759.975	1516.09	250.527	-690.151	1249.65	221.814	-908.276	1430.03	201.214	-974.671	1230.5	168.64	-679.304	1304.99	410.399	-862.959	1472.28	490.302	-859.406	1275.68	503.662	-885.636	1119.06	528.273	-1038.21	1033.45	514.166	-1127.97	1019.12	486.551	-1098.79	959.447	519.554	-1163.71	944.003
5839	0	217.789	-996.989	1671.89	138.76	-960.885	1664.37	287.627	-813.706	1661.4	178.282	-790.83	1654.27	230.821	-771.414	1514.1	249.144	-701.34	1247.92	220.026	-919.447	1428	199.649	-985.8	1228.36	167.151	-690.583	1303.13	408.33	-874.349	1471.07	488.281	-870.794	1274.3	501.97	-897.133	1117.56	527.557	-1049.3	1031.6	513.532	-1138.94	1016.65	486.138	-1109.65	956.896	519.171	-1174.47	941.242
5840	0	215.217	-1008.82	1670.17	136.389	-972.651	1662.32	284.989	-825.241	1659.91	175.6	-802.625	1652.71	228.494	-782.792	1512.75	247.504	-712.692	1246.27	217.899	-930.88	1426.27	197.888	-997.16	1226.66	165.527	-701.788	1301.12	406.226	-885.934	1469.94	486.206	-882.461	1273.26	500.003	-908.53	1116.59	526.053	-1059.99	1029.66	512.543	-1149.58	1013.85	485.347	-1119.94	954.378	518.754	-1184.37	938.351
5841	0	212.587	-1020.73	1668.38	133.785	-984.615	1660.4	282.332	-836.773	1658.95	172.786	-814.41	1651.02	226.252	-794.615	1511.28	246.263	-724.148	1245.13	215.706	-942.419	1424.44	196.117	-1008.41	1224.71	163.922	-713.362	1299.82	403.897	-897.912	1468.67	484.094	-894.459	1272.28	497.807	-919.936	1115.54	524.81	-1070.68	1027.42	511.559	-1160.26	1010.92	484.402	-1129.93	951.582	518.432	-1194.05	935.162
5842	0	210.209	-1032.6	1666.92	131.329	-996.509	1658.46	279.443	-848.471	1657.9	170.16	-826.132	1649.72	224.189	-806.082	1510.16	244.943	-735.779	1243.94	213.826	-954.051	1423.1	194.639	-1020.02	1223.44	162.4	-724.803	1298.26	401.909	-909.804	1467.95	482.014	-906.581	1271.7	495.577	-931.455	1114.59	523.249	-1080.8	1024.92	510.729	-1170.47	1007.54	483.897	-1139.54	948.455	518.147	-1203.45	931.268
5843	0	207.731	-1044.48	1665.88	128.924	-1008.45	1657.04	276.737	-860.214	1657.15	167.44	-838.168	1648.61	222.2	-817.847	1509.46	243.236	-747.506	1242.85	211.983	-965.655	1422.21	192.955	-1031.78	1222.62	160.791	-736.506	1297.23	399.8	-921.504	1467.39	480.33	-918.818	1271.47	493.48	-942.605	1114.01	522.305	-1090.86	1022.84	509.719	-1180.48	1004.16	483.356	-1148.61	945.028	517.862	-1212.13	927.165
5844	0	205.003	-1056.52	1665.13	126.067	-1020.33	1656.05	273.867	-871.964	1657.2	164.613	-849.918	1647.84	219.935	-829.301	1508.79	241.595	-759.378	1242.38	209.966	-977.346	1421.72	191.284	-1043.6	1222.12	159.277	-748.106	1296.45	397.817	-933.346	1467.54	478.563	-931.523	1271.87	491.36	-953.928	1114.07	520.967	-1100.62	1021	508.721	-1190.04	1000.82	482.867	-1157.36	941.824	517.874	-1220.4	923.217
5845	0	202.179	-1068.48	1664.28	123.472	-1032.33	1654.78	271.091	-883.791	1657.4	161.854	-861.791	1647.72	218.1	-841.039	1508.5	239.683	-771.127	1241.82	208.005	-989.053	1421.17	189.62	-1055.53	1221.51	157.845	-759.996	1296.37	395.654	-945.044	1466.84	476.699	-944.423	1272.07	489.147	-965.203	1114.12	519.515	-1110.38	1018.69	507.357	-1199.45	996.662	482.535	-1165.62	938.164	517.801	-1228.18	919.04
5846	0	199.653	-1080.67	1663.84	121.011	-1044.17	1653.58	268.515	-895.551	1658.33	159.149	-873.761	1647.89	215.89	-852.513	1508.87	238.163	-782.941	1241.87	206.176	-1000.58	1421.03	187.91	-1067.77	1221.5	155.967	-771.943	1296.35	393.565	-956.698	1467.13	474.976	-957.388	1272.49	486.925	-976.381	1114.42	518.047	-1119.87	1016.47	506.152	-1208.63	992.546	482.393	-1173.18	934.661	517.915	-1235.14	914.654
5847	0	196.966	-1092.79	1663.85	118.548	-1056.29	1653.62	265.713	-907.416	1659.4	156.451	-885.601	1648.59	213.856	-864.154	1509.35	236.221	-794.697	1242.61	204.333	-1012.19	1421.62	186.228	-1079.95	1222.26	154.104	-783.92	1296.33	391.732	-967.883	1467.75	473.128	-970.05	1273.56	484.778	-987.528	1115.37	516.667	-1128.83	1014.5	504.828	-1217.36	988.483	482.025	-1180.28	931.135	517.855	-1241.7	910.002
5848	0	194.414	-1104.66	1664.21	116.087	-1068.16	1653.71	262.937	-919.068	1660.75	153.663	-897.546	1649.54	211.609	-875.676	1510.2	234.15	-806.455	1243.38	202.596	-1023.66	1422.68	184.769	-1091.84	1223.39	152	-795.772	1297.1	389.881	-978.66	1468.46	471.503	-982.594	1274.74	482.511	-998.625	1116.47	515.21	-1137.45	1013.02	503.152	-1225.53	984.445	481.871	-1186.57	927.563	517.952	-1247.74	905.219
5849	0	192.111	-1116.7	1664.92	113.731	-1080.18	1654.31	260.479	-930.822	1662.88	151.105	-909.32	1650.93	209.051	-887.083	1511.17	231.974	-818.119	1244.48	200.979	-1035.16	1424.05	183.488	-1103.59	1225.09	149.704	-807.902	1298.1	388.11	-989.652	1470.21	469.568	-994.681	1276.36	480.271	-1009.6	1117.88	513.885	-1145.87	1011.61	501.473	-1233.4	980.368	482.123	-1192.33	924.003	518.229	-1253.05	901.224
5850	0	189.773	-1128.7	1665.98	111.554	-1091.98	1655.12	257.674	-942.503	1664.65	148.458	-921.148	1652.8	207.119	-898.625	1512.54	229.67	-829.77	1245.61	199.471	-1046.53	1425.76	182.769	-1114.85	1226.62	147.37	-819.729	1299.53	386.407	-1000.09	1471.77	467.857	-1006.16	1278.14	477.928	-1020.42	1119.63	512.334	-1153.84	1010.54	499.692	-1240.84	976.334	482.59	-1197.57	920.706	518.267	-1257.81	896.775
5851	0	187.482	-1140.69	1667.26	109.543	-1103.75	1656.25	255.435	-953.935	1666.98	146.056	-933.038	1654.68	204.774	-909.958	1514.51	227.32	-841.244	1247.55	198.01	-1057.86	1427.76	181.142	-1127.02	1229.06	144.656	-831.228	1300.94	384.765	-1010.39	1473.71	465.771	-1017.24	1280.13	475.528	-1031.01	1121.79	510.703	-1161.48	1009.87	497.54	-1247.91	972.552	482.966	-1201.95	918.205	518.615	-1262.09	892.824
5852	0	185.491	-1152.73	1668.57	107.582	-1115.48	1657.32	252.982	-965.424	1669.06	143.759	-944.557	1656.71	202.415	-921.16	1516.29	225.059	-852.229	1249.55	196.637	-1069.14	1429.54	180.462	-1138.35	1230.81	141.691	-842.597	1302.6	382.78	-1020.71	1475.51	463.662	-1027.95	1282.07	473.022	-1041.22	1124.18	508.78	-1169.29	1009.32	495	-1254.57	968.841	482.306	-1208.67	915.028	518.85	-1265.77	889.861
5853	0	183.688	-1164.39	1670.21	105.879	-1127.18	1658.91	250.771	-976.808	1671.29	141.502	-956.149	1658.95	200.615	-932.354	1518.44	222.434	-863.485	1251.28	195.53	-1080.27	1431.55	180.169	-1149.24	1232.59	139.301	-854.443	1304.88	381.219	-1030.94	1478.03	462.002	-1037.78	1284.22	470.741	-1051.07	1126.66	507.201	-1176.2	1009.33	492.162	-1260.8	965.263	484.6	-1209.73	913.909	519.041	-1269.45	886.796
5854	0	182.246	-1175.89	1672.08	104.414	-1138.75	1660.75	249.028	-987.878	1673.92	139.531	-967.807	1661.19	198.475	-943.25	1520.51	220.046	-874.349	1253.91	194.353	-1091.31	1433.8	179.462	-1160.37	1235	136.171	-865.604	1306.81	379.907	-1040.83	1480.62	460.491	-1047.35	1286.96	468.701	-1060.19	1129.26	505.576	-1182.95	1009.87	489.076	-1266.6	962.155	485.717	-1213.06	912.669	519.53	-1272.6	884.877
5855	0	180.943	-1187.06	1673.96	102.988	-1150.13	1662.69	247.07	-998.764	1676.16	137.539	-978.951	1663.54	196.375	-954.272	1522.87	217.448	-885.136	1255.89	193.274	-1102.23	1436.19	178.353	-1171.65	1237.56	133.713	-876.917	1309.69	378.324	-1050.75	1483.19	458.638	-1056.77	1289.29	466.352	-1069.21	1132.09	503.566	-1189.2	1010.62	485.477	-1271.9	959.316	487.268	-1215.95	912.308	519.774	-1275.91	883.695
5856	0	179.851	-1198.36	1675.73	101.876	-1161.5	1664.47	245.47	-1009.69	1678.66	135.917	-990.281	1665.88	194.598	-965.07	1525.03	215.245	-895.639	1258.25	192.185	-1113.09	1438.09	177.855	-1182.33	1239.33	130.805	-888.031	1312.02	376.875	-1060.98	1485.92	457.12	-1065.96	1291.43	464.135	-1077.82	1134.65	501.488	-1195.88	1011.08	481.722	-1276.99	956.144	488.672	-1219.09	911.847	519.671	-1279.64	882.457
5857	0	179.035	-1209.4	1677.4	101.08	-1172.76	1666.25	243.918	-1020.36	1680.8	134.289	-1001.46	1668.27	192.72	-975.773	1527.25	212.954	-905.985	1260.62	191.166	-1123.82	1440.07	177.482	-1192.75	1241.06	128.101	-899.058	1314.58	375.489	-1070.65	1487.55	455.485	-1074.92	1293.31	462.274	-1085.95	1136.84	499.67	-1202.24	1011.65	477.794	-1281.58	953.075	490.445	-1222.19	911.761	519.289	-1283.59	881.616
5858	0	178.535	-1220.32	1679.26	100.413	-1184.01	1668.36	242.518	-1030.87	1682.76	132.779	-1012.55	1670.57	191.197	-986.365	1529.6	210.763	-916.154	1263.05	190.255	-1134.32	1442.12	176.636	-1203.34	1243.2	125.638	-909.929	1317.22	374.271	-1080.43	1489.79	454.057	-1083.59	1295.3	460.554	-1093.59	1139.12	497.852	-1208.15	1012.29	473.637	-1285.8	950.395	492.139	-1225.52	912	519.135	-1287.91	880.978
5859	0	178.3	-1231.02	1680.98	99.9505	-1195.09	1670.37	241.466	-1041.25	1685.07	131.374	-1023.23	1672.98	189.64	-996.845	1531.64	208.595	-926.359	1265.12	189.342	-1144.83	1444.2	175.96	-1213.8	1245.27	123.706	-920.635	1319.97	373.023	-1090.14	1491.86	452.909	-1092.07	1297.29	458.869	-1101.17	1141.33	496.057	-1213.87	1012.6	468.087	-1290.42	948.036	493.854	-1228.91	912.526	517.323	-1292.27	880.136
5860	0	178.267	-1241.66	1682.77	99.8264	-1206.1	1672.31	240.135	-1051.57	1686.85	130.368	-1034.36	1675.24	188.171	-1007.11	1533.77	206.636	-936.29	1267.48	188.536	-1155.03	1446.12	175.177	-1224.05	1247.17	121.129	-930.963	1322.04	372.041	-1099.51	1493.91	451.799	-1100.26	1298.92	457.549	-1108.25	1143.2	494.386	-1219.27	1013.1	464.412	-1290.91	944.175	495.632	-1232.51	912.98	515.295	-1296.67	879.457
5861	0	178.38	-1252.16	1684.53	99.6617	-1217.08	1674.59	239.386	-1061.71	1688.93	129.388	-1045.09	1677.56	186.74	-1017.28	1535.86	204.545	-946.21	1269.34	187.699	-1165.33	1448.16	174.235	-1234.32	1249.37	119.03	-941.246	1324.47	371.117	-1108.91	1495.79	450.72	-1108.16	1300.82	456.127	-1115.44	1145.09	492.856	-1224.5	1013.54	460.16	-1293.1	941.68	497.117	-1236.46	913.433	513.15	-1300.94	878.633
[truncated: 69 more columns]

## Sheet: Sheet2
Devices
		025370 - Force			025370 - Moment			025370 - CoP			027571 - Force			027571 - Moment			027571 - CoP			037720 - Force			037720 - Moment			037720 - CoP
Frame	Sub Frame	Fx	Fy	Fz	Mx	My	Mz	Cx	Cy	Cz	Fx	Fy	Fz	Mx	My	Mz	Cx	Cy	Cz	Fx	Fy	Fz	Mx	My	Mz	Cx	Cy	Cz
		N	N	N	N.mm	N.mm	N.mm	mm	mm	mm	N	N	N	N.mm	N.mm	N.mm	mm	mm	mm	N	N	N	N.mm	N.mm	N.mm	mm	mm	mm
5473	0	0	0	0	0	0	0	200	300	0	0	0	0	0	0	0	200	903	0	0	0	0	0	0	0	603	903	0
5473	1	0	0	0	0	0	0	200	300	0	0	0	0	0	0	0	200	903	0	0	0	0	0	0	0	603	903	0
5473	2	0	0	0	0	0	0	200	300	0	0	0	0	0	0	0	200	903	0	0	0	0	0	0	0	603	903	0
5473	3	0	0	0	0	0	0	200	300	0	0	0	0	0	0	0	200	903	0	0	0	0	0	0	0	603	903	0
5473	4	0	0	0	0	0	0	200	300	0	0	0	0	0	0	0	200	903	0	0	0	0	0	0	0	603	903	0
5473	5	0	0	0	0	0	0	200	300	0	0	0	0	0	0	0	200	903	0	0	0	0	0	0	0	603	903	0
5473	6	0	0	0	0	0	0	200	300	0	0	0	0	0	0	0	200	903	0	0	0	0	0	0	0	603	903	0
5473	7	0	0	0	0	0	0	200	300	0	0	0	0	0	0	0	200	903	0	0	0	0	0	0	0	603	903	0
5473	8	0	0	0	0	0	0	200	300	0	0	0	0	0	0	0	200	903	0	0	0	0	0	0	0	603	903	0
5473	9	0	0	0	0	0	0	200	300	0	0	0	0	0	0	0	200	903	0	0	0	0	0	0	0	603	903	0
5474	0	0	0	0	0	0	0	200	300	0	0	0	0	0	0	0	200	903	0	0	0	0	0	0	0	603	903	0
5474	1	0	0	0	0	0	0	200	300	0	0	0	0	0	0	0	200	903	0	0	0	0	0	0	0	603	903	0
5474	2	0	0	0	0	0	0	200	300	0	0	0	0	0	0	0	200	903	0	0	0	0	0	0	0	603	903	0
5474	3	0	0	0	0	0	0	200	300	0	0	0	0	0	0	0	200	903	0	0	0	0	0	0	0	603	903	0
5474	4	0	0	0	0	0	0	200	300	0	0	0	0	0	0	0	200	903	0	0	0	0	0	0	0	603	903	0
5474	5	0	0	0	0	0	0	200	300	0	0	0	0	0	0	0	200	903	0	0	0	0	0	0	0	603	903	0
5474	6	0	0	0	0	0	0	200	300	0	0	0	0	0	0	0	200	903	0	0	0	0	0	0	0	603	903	0
5474	7	0	0	0	0	0	0	200	300	0	0	0	0	0	0	0	200	903	0	0	0	0	0	0	0	603	903	0
5474	8	0	0	0	0	0	0	200	300	0	0	0	0	0	0	0	200	903	0	0	0	0	0	0	0	603	903	0
5474	9	0	0	0	0	0	0	200	300	0	0	0	0	0	0	0	200	903	0	0	0	0	0	0	0	603	903	0
5475	0	0	0	0	0	0	0	200	300	0	0	0	0	0	0	0	200	903	0	0	0	0	0	0	0	603	903	0
5475	1	0	0	0	0	0	0	200	300	0	0	0	0	0	0	0	200	903	0	0	0	0	0	0	0	603	903	0
5475	2	0	0	0	0	0	0	200	300	0	0	0	0	0	0	0	200	903	0	0	0	0	0	0	0	603	903	0
5475	3	0	0	0	0	0	0	200	300	0	0	0	0	0	0	0	200	903	0	0	0	0	0	0	0	603	903	0
5475	4	0	0	0	0	0	0	200	300	0	0	0	0	0	0	0	200	903	0	0	0	0	0	0	0	603	903	0
5475	5	0	0	0	0	0	0	200	300	0	0	0	0	0	0	0	200	903	0	0	0	0	0	0	0	603	903	0
5475	6	0	0	0	0	0	0	200	300	0	0	0	0	0	0	0	200	903	0	0	0	0	0	0	0	603	903	0
5475	7	0	0	0	0	0	0	200	300	0	0	0	0	0	0	0	200	903	0	0	0	0	0	0	0	603	903	0
5475	8	0	0	0	0	0	0	200	300	0	0	0	0	0	0	0	200	903	0	0	0	0	0	0	0	603	903	0
5475	9	0	0	0	0	0	0	200	300	0	0	0	0	0	0	0	200	903	0	0	0	0	0	0	0	603	903	0
5476	0	0	0	0	0	0	0	200	300	0	0	0	0	0	0	0	200	903	0	0	0	0	0	0	0	603	903	0
5476	1	0	0	0	0	0	0	200	300	0	0	0	0	0	0	0	200	903	0	0	0	0	0	0	0	603	903	0
5476	2	0	0	0	0	0	0	200	300	0	0	0	0	0	0	0	200	903	0	0	0	0	0	0	0	603	903	0
5476	3	0	0	0	0	0	0	200	300	0	0	0	0	0	0	0	200	903	0	0	0	0	0	0	0	603	903	0
5476	4	0	0	0	0	0	0	200	300	0	0	0	0	0	0	0	200	903	0	0	0	0	0	0	0	603	903	0
5476	5	0	0	0	0	0	0	200	300	0	0	0	0	0	0	0	200	903	0	0	0	0	0	0	0	603	903	0
5476	6	0	0	0	0	0	0	200	300	0	0	0	0	0	0	0	200	903	0	0	0	0	0	0	0	603	903	0
5476	7	0	0	0	0	0	0	200	300	0	0	0	0	0	0	0	200	903	0	0	0	0	0	0	0	603	903	0
5476	8	0	0	0	0	0	0	200	300	0	0	0	0	0	0	0	200	903	0	0	0	0	0	0	0	603	903	0
5476	9	0	0	0	0	0	0	200	300	0	0	0	0	0	0	0	200	903	0	0	0	0	0	0	0	603	903	0
5477	0	0	0	0	0	0	0	200	300	0	0	0	0	0	0	0	200	903	0	0	0	0	0	0	0	603	903	0
5477	1	0	0	0	0	0	0	200	300	0	0	0	0	0	0	0	200	903	0	0	0	0	0	0	0	603	903	0
5477	2	0	0	0	0	0	0	200	300	0	0	0	0	0	0	0	200	903	0	0	0	0	0	0	0	603	903	0
5477	3	0	0	0	0	0	0	200	300	0	0	0	0	0	0	0	200	903	0	0	0	0	0	0	0	603	903	0
5477	4	0	0	0	0	0	0	200	300	0	0	0	0	0	0	0	200	903	0	0	0	0	0	0	0	603	903	0
5477	5	0	0	0	0	0	0	200	300	0	0	0	0	0	0	0	200	903	0	0	0	0	0	0	0	603	903	0
5477	6	0	0	0	0	0	0	200	300	0	0	0	0	0	0	0	200	903	0	0	0	0	0	0	0	603	903	0
5477	7	0	0	0	0	0	0	200	300	0	0	0	0	0	0	0	200	903	0	0	0	0	0	0	0	603	903	0
5477	8	0	0	0	0	0	0	200	300	0	0	0	0	0	0	0	200	903	0	0	0	0	0	0	0	603	903	0
5477	9	0	0	0	0	0	0	200	300	0	0	0	0	0	0	0	200	903	0	0	0	0	0	0	0	603	903	0
5478	0	0	0	0	0	0	0	200	300	0	0	0	0	0	0	0	200	903	0	0	0	0	0	0	0	603	903	0
5478	1	0	0	0	0	0	0	200	300	0	0	0	0	0	0	0	200	903	0	0	0	0	0	0	0	603	903	0
5478	2	0	0	0	0	0	0	200	300	0	0	0	0	0	0	0	200	903	0	0	0	0	0	0	0	603	903	0
5478	3	0	0	0	0	0	0	200	300	0	0	0	0	0	0	0	200	903	0	0	0	0	0	0	0	603	903	0
5478	4	0	0	0	0	0	0	200	300	0	0	0	0	0	0	0	200	903	0	0	0	0	0	0	0	603	903	0
5478	5	0	0	0	0	0	0	200	300	0	0	0	0	0	0	0	200	903	0	0	0	0	0	0	0	603	903	0
5478	6	0	0	0	0	0	0	200	300	0	0	0	0	0	0	0	200	903	0	0	0	0	0	0	0	603	903	0
5478	7	0	0	0	0	0	0	200	300	0	0	0	0	0	0	0	200	903	0	0	0	0	0	0	0	603	903	0
5478	8	0	0	0	0	0	0	200	300	0	0	0	0	0	0	0	200	903	0	0	0	0	0	0	0	603	903	0
5478	9	0	0	0	0	0	0	200	300	0	0	0	0	0	0	0	200	903	0	0	0	0	0	0	0	603	903	0
5479	0	0	0	0	0	0	0	200	300	0	0	0	0	0	0	0	200	903	0	0	0	0	0	0	0	603	903	0
5479	1	0	0	0	0	0	0	200	300	0	0	0	0	0	0	0	200	903	0	0	0	0	0	0	0	603	903	0
5479	2	0	0	0	0	0	0	200	300	0	0	0	0	0	0	0	200	903	0	0	0	0	0	0	0	603	903	0
5479	3	0	0	0	0	0	0	200	300	0	0	0	0	0	0	0	200	903	0	0	0	0	0	0	0	603	903	0
5479	4	0	0	0	0	0	0	200	300	0	0	0	0	0	0	0	200	903	0	0	0	0	0	0	0	603	903	0
5479	5	0	0	0	0	0	0	200	300	0	0	0	0	0	0	0	200	903	0	0	0	0	0	0	0	603	903	0
5479	6	0	0	0	0	0	0	200	300	0	0	0	0	0	0	0	200	903	0	0	0	0	0	0	0	603	903	0
5479	7	0	0	0	0	0	0	200	300	0	0	0	0	0	0	0	200	903	0	0	0	0	0	0	0	603	903	0
5479	8	0	0	0	0	0	0	200	300	0	0	0	0	0	0	0	200	903	0	0	0	0	0	0	0	603	903	0
5479	9	0	0	0	0	0	0	200	300	0	0	0	0	0	0	0	200	903	0	0	0	0	0	0	0	603	903	0
5480	0	0	0	0	0	0	0	200	300	0	0	0	0	0	0	0	200	903	0	0	0	0	0	0	0	603	903	0
5480	1	0	0	0	0	0	0	200	300	0	0	0	0	0	0	0	200	903	0	0	0	0	0	0	0	603	903	0
5480	2	0	0	0	0	0	0	200	300	0	0	0	0	0	0	0	200	903	0	0	0	0	0	0	0	603	903	0
5480	3	0	0	0	0	0	0	200	300	0	0	0	0	0	0	0	200	903	0	0	0	0	0	0	0	603	903	0
5480	4	0	0	0	0	0	0	200	300	0	0	0	0	0	0	0	200	903	0	0	0	0	0	0	0	603	903	0
5480	5	0	0	0	0	0	0	200	300	0	0	0	0	0	0	0	200	903	0	0	0	0	0	0	0	603	903	0
5480	6	0	0	0	0	0	0	200	300	0	0	0	0	0	0	0	200	903	0	0	0	0	0	0	0	603	903	0
5480	7	0	0	0	0	0	0	200	300	0	0	0	0	0	0	0	200	903	0	0	0	0	0	0	0	603	903	0
5480	8	0	0	0	0	0	0	200	300	0	0	0	0	0	0	0	200	903	0	0	0	0	0	0	0	603	903	0
5480	9	0	0	0	0	0	0	200	300	0	0	0	0	0	0	0	200	903	0	0	0	0	0	0	0	603	903	0
5481	0	0	0	0	0	0	0	200	300	0	0	0	0	0	0	0	200	903	0	0	0	0	0	0	0	603	903	0
5481	1	0	0	0	0	0	0	200	300	0	0	0	0	0	0	0	200	903	0	0	0	0	0	0	0	603	903	0
5481	2	0	0	0	0	0	0	200	300	0	0	0	0	0	0	0	200	903	0	0	0	0	0	0	0	603	903	0
5481	3	0	0	0	0	0	0	200	300	0	0	0	0	0	0	0	200	903	0	0	0	0	0	0	0	603	903	0
5481	4	0	0	0	0	0	0	200	300	0	0	0	0	0	0	0	200	903	0	0	0	0	0	0	0	603	903	0
5481	5	0	0	0	0	0	0	200	300	0	0	0	0	0	0	0	200	903	0	0	0	0	0	0	0	603	903	0
5481	6	0	0	0	0	0	0	200	300	0	0	0	0	0	0	0	200	903	0	0	0	0	0	0	0	603	903	0
5481	7	0	0	0	0	0	0	200	300	0	0	0	0	0	0	0	200	903	0	0	0	0	0	0	0	603	903	0
5481	8	0	0	0	0	0	0	200	300	0	0	0	0	0	0	0	200	903	0	0	0	0	0	0	0	603	903	0
5481	9	0	0	0	0	0	0	200	300	0	0	0	0	0	0	0	200	903	0	0	0	0	0	0	0	603	903	0
5482	0	0	0	0	0	0	0	200	300	0	0	0	0	0	0	0	200	903	0	0	0	0	0	0	0	603	903	0
5482	1	0	0	0	0	0	0	200	300	0	0	0	0	0	0	0	200	903	0	0	0	0	0	0	0	603	903	0
5482	2	0	0	0	0	0	0	200	300	0	0	0	0	0	0	0	200	903	0	0	0	0	0	0	0	603	903	0
5482	3	0	0	0	0	0	0	200	300	0	0	0	0	0	0	0	200	903	0	0	0	0	0	0	0	603	903	0
5482	4	0	0	0	0	0	0	200	300	0	0	0	0	0	0	0	200	903	0	0	0	0	0	0	0	603	903	0
5482	5	0	0	0	0	0	0	200	300	0	0	0	0	0	0	0	200	903	0	0	0	0	0	0	0	603	903	0
5482	6	0	0	0	0	0	0	200	300	0	0	0	0	0	0	0	200	903	0	0	0	0	0	0	0	603	903	0
5482	7	0	0	0	0	0	0	200	300	0	0	0	0	0	0	0	200	903	0	0	0	0	0	0	0	603	903	0
5482	8	0	0	0	0	0	0	200	300	0	0	0	0	0	0	0	200	903	0	0	0	0	0	0	0	603	903	0
5482	9	0	0	0	0	0	0	200	300	0	0	0	0	0	0	0	200	903	0	0	0	0	0	0	0	603	903	0
5483	0	0	0	0	0	0	0	200	300	0	0	0	0	0	0	0	200	903	0	0	0	0	0	0	0	603	903	0
5483	1	0	0	0	0	0	0	200	300	0	0	0	0	0	0	0	200	903	0	0	0	0	0	0	0	603	903	0
5483	2	0	0	0	0	0	0	200	300	0	0	0	0	0	0	0	200	903	0	0	0	0	0	0	0	603	903	0
5483	3	0	0	0	0	0	0	200	300	0	0	0	0	0	0	0	200	903	0	0	0	0	0	0	0	603	903	0
5483	4	0	0	0	0	0	0	200	300	0	0	0	0	0	0	0	200	903	0	0	0	0	0	0	0	603	903	0
5483	5	0	0	0	0	0	0	200	300	0	0	0	0	0	0	0	200	903	0	0	0	0	0	0	0	603	903	0
5483	6	0	0	0	0	0	0	200	300	0	0	0	0	0	0	0	200	903	0	0	0	0	0	0	0	603	903	0
5483	7	0	0	0	0	0	0	200	300	0	0	0	0	0	0	0	200	903	0	0	0	0	0	0	0	603	903	0
5483	8	0	0	0	0	0	0	200	300	0	0	0	0	0	0	0	200	903	0	0	0	0	0	0	0	603	903	0
5483	9	0	0	0	0	0	0	200	300	0	0	0	0	0	0	0	200	903	0	0	0	0	0	0	0	603	903	0
5484	0	0	0	0	0	0	0	200	300	0	0	0	0	0	0	0	200	903	0	0	0	0	0	0	0	603	903	0
5484	1	0	0	0	0	0	0	200	300	0	0	0	0	0	0	0	200	903	0	0	0	0	0	0	0	603	903	0
5484	2	0	0	0	0	0	0	200	300	0	0	0	0	0	0	0	200	903	0	0	0	0	0	0	0	603	903	0
5484	3	0	0	0	0	0	0	200	300	0	0	0	0	0	0	0	200	903	0	0	0	0	0	0	0	603	903	0
5484	4	0	0	0	0	0	0	200	300	0	0	0	0	0	0	0	200	903	0	0	0	0	0	0	0	603	903	0
5484	5	0	0	0	0	0	0	200	300	0	0	0	0	0	0	0	200	903	0	0	0	0	0	0	0	603	903	0
5484	6	0	0	0	0	0	0	200	300	0	0	0	0	0	0	0	200	903	0	0	0	0	0	0	0	603	903	0
5484	7	0	0	0	0	0	0	200	300	0	0	0	0	0	0	0	200	903	0	0	0	0	0	0	0	603	903	0
5484	8	0	0	0	0	0	0	200	300	0	0	0	0	0	0	0	200	903	0	0	0	0	0	0	0	603	903	0
5484	9	0	0	0	0	0	0	200	300	0	0	0	0	0	0	0	200	903	0	0	0	0	0	0	0	603	903	0
5485	0	0	0	0	0	0	0	200	300	0	0	0	0	0	0	0	200	903	0	0	0	0	0	0	0	603	903	0
5485	1	0	0	0	0	0	0	200	300	0	0	0	0	0	0	0	200	903	0	0	0	0	0	0	0	603	903	0
5485	2	0	0	0	0	0	0	200	300	0	0	0	0	0	0	0	200	903	0	0	0	0	0	0	0	603	903	0
5485	3	0	0	0	0	0	0	200	300	0	0	0	0	0	0	0	200	903	0	0	0	0	0	0	0	603	903	0
5485	4	0	0	0	0	0	0	200	300	0	0	0	0	0	0	0	200	903	0	0	0	0	0	0	0	603	903	0
5485	5	0	0	0	0	0	0	200	300	0	0	0	0	0	0	0	200	903	0	0	0	0	0	0	0	603	903	0
5485	6	0	0	0	0	0	0	200	300	0	0	0	0	0	0	0	200	903	0	0	0	0	0	0	0	603	903	0
5485	7	0	0	0	0	0	0	200	300	0	0	0	0	0	0	0	200	903	0	0	0	0	0	0	0	603	903	0
5485	8	0	0	0	0	0	0	200	300	0	0	0	0	0	0	0	200	903	0	0	0	0	0	0	0	603	903	0
5485	9	0	0	0	0	0	0	200	300	0	0	0	0	0	0	0	200	903	0	0	0	0	0	0	0	603	903	0
5486	0	0	0	0	0	0	0	200	300	0	0	0	0	0	0	0	200	903	0	0	0	0	0	0	0	603	903	0
5486	1	0	0	0	0	0	0	200	300	0	0	0	0	0	0	0	200	903	0	0	0	0	0	0	0	603	903	0
5486	2	0	0	0	0	0	0	200	300	0	0	0	0	0	0	0	200	903	0	0	0	0	0	0	0	603	903	0
5486	3	0	0	0	0	0	0	200	300	0	0	0	0	0	0	0	200	903	0	0	0	0	0	0	0	603	903	0
5486	4	0	0	0	0	0	0	200	300	0	0	0	0	0	0	0	200	903	0	0	0	0	0	0	0	603	903	0
5486	5	0	0	0	0	0	0	200	300	0	0	0	0	0	0	0	200	903	0	0	0	0	0	0	0	603	903	0
5486	6	0	0	0	0	0	0	200	300	0	0	0	0	0	0	0	200	903	0	0	0	0	0	0	0	603	903	0
5486	7	0	0	0	0	0	0	200	300	0	0	0	0	0	0	0	200	903	0	0	0	0	0	0	0	603	903	0
5486	8	0	0	0	0	0	0	200	300	0	0	0	0	0	0	0	200	903	0	0	0	0	0	0	0	603	903	0
5486	9	0	0	0	0	0	0	200	300	0	0	0	0	0	0	0	200	903	0	0	0	0	0	0	0	603	903	0
5487	0	0	0	0	0	0	0	200	300	0	0	0	0	0	0	0	200	903	0	0	0	0	0	0	0	603	903	0
5487	1	0	0	0	0	0	0	200	300	0	0	0	0	0	0	0	200	903	0	0	0	0	0	0	0	603	903	0
5487	2	0	0	0	0	0	0	200	300	0	0	0	0	0	0	0	200	903	0	0	0	0	0	0	0	603	903	0
5487	3	0	0	0	0	0	0	200	300	0	0	0	0	0	0	0	200	903	0	0	0	0	0	0	0	603	903	0
5487	4	0	0	0	0	0	0	200	300	0	0	0	0	0	0	0	200	903	0	0	0	0	0	0	0	603	903	0
5487	5	0	0	0	0	0	0	200	300	0	0	0	0	0	0	0	200	903	0	0	0	0	0	0	0	603	903	0
5487	6	0	0	0	0	0	0	200	300	0	0	0	0	0	0	0	200	903	0	0	0	0	0	0	0	603	903	0
5487	7	0	0	0	0	0	0	200	300	0	0	0	0	0	0	0	200	903	0	0	0	0	0	0	0	603	903	0
5487	8	0	0	0	0	0	0	200	300	0	0	0	0	0	0	0	200	903	0	0	0	0	0	0	0	603	903	0
5487	9	0	0	0	0	0	0	200	300	0	0	0	0	0	0	0	200	903	0	0	0	0	0	0	0	603	903	0
5488	0	0	0	0	0	0	0	200	300	0	0	0	0	0	0	0	200	903	0	0	0	0	0	0	0	603	903	0
5488	1	0	0	0	0	0	0	200	300	0	0	0	0	0	0	0	200	903	0	0	0	0	0	0	0	603	903	0
5488	2	0	0	0	0	0	0	200	300	0	0	0	0	0	0	0	200	903	0	0	0	0	0	0	0	603	903	0
5488	3	0	0	0	0	0	0	200	300	0	0	0	0	0	0	0	200	903	0	0	0	0	0	0	0	603	903	0
5488	4	0	0	0	0	0	0	200	300	0	0	0	0	0	0	0	200	903	0	0	0	0	0	0	0	603	903	0
5488	5	0	0	0	0	0	0	200	300	0	0	0	0	0	0	0	200	903	0	0	0	0	0	0	0	603	903	0
5488	6	0	0	0	0	0	0	200	300	0	0	0	0	0	0	0	200	903	0	0	0	0	0	0	0	603	903	0
5488	7	0	0	0	0	0	0	200	300	0	0	0	0	0	0	0	200	903	0	0	0	0	0	0	0	603	903	0
5488	8	0	0	0	0	0	0	200	300	0	0	0	0	0	0	0	200	903	0	0	0	0	0	0	0	603	903	0
5488	9	0	0	0	0	0	0	200	300	0	0	0	0	0	0	0	200	903	0	0	0	0	0	0	0	603	903	0
5489	0	0	0	0	0	0	0	200	300	0	0	0	0	0	0	0	200	903	0	0	0	0	0	0	0	603	903	0
5489	1	0	0	0	0	0	0	200	300	0	0	0	0	0	0	0	200	903	0	0	0	0	0	0	0	603	903	0
5489	2	0	0	0	0	0	0	200	300	0	0	0	0	0	0	0	200	903	0	0	0	0	0	0	0	603	903	0
5489	3	0	0	0	0	0	0	200	300	0	0	0	0	0	0	0	200	903	0	0	0	0	0	0	0	603	903	0
5489	4	0	0	0	0	0	0	200	300	0	0	0	0	0	0	0	200	903	0	0	0	0	0	0	0	603	903	0
5489	5	0	0	0	0	0	0	200	300	0	0	0	0	0	0	0	200	903	0	0	0	0	0	0	0	603	903	0
5489	6	0	0	0	0	0	0	200	300	0	0	0	0	0	0	0	200	903	0	0	0	0	0	0	0	603	903	0
5489	7	0	0	0	0	0	0	200	300	0	0	0	0	0	0	0	200	903	0	0	0	0	0	0	0	603	903	0
5489	8	0	0	0	0	0	0	200	300	0	0	0	0	0	0	0	200	903	0	0	0	0	0	0	0	603	903	0
5489	9	0	0	0	0	0	0	200	300	0	0	0	0	0	0	0	200	903	0	0	0	0	0	0	0	603	903	0
5490	0	0	0	0	0	0	0	200	300	0	0	0	0	0	0	0	200	903	0	0	0	0	0	0	0	603	903	0
5490	1	0	0	0	0	0	0	200	300	0	0	0	0	0	0	0	200	903	0	0	0	0	0	0	0	603	903	0
5490	2	0	0	0	0	0	0	200	300	0	0	0	0	0	0	0	200	903	0	0	0	0	0	0	0	603	903	0
5490	3	0	0	0	0	0	0	200	300	0	0	0	0	0	0	0	200	903	0	0	0	0	0	0	0	603	903	0
5490	4	0	0	0	0	0	0	200	300	0	0	0	0	0	0	0	200	903	0	0	0	0	0	0	0	603	903	0
5490	5	0	0	0	0	0	0	200	300	0	0	0	0	0	0	0	200	903	0	0	0	0	0	0	0	603	903	0
5490	6	0	0	0	0	0	0	200	300	0	0	0	0	0	0	0	200	903	0	0	0	0	0	0	0	603	903	0
5490	7	0	0	0	0	0	0	200	300	0	0	0	0	0	0	0	200	903	0	0	0	0	0	0	0	603	903	0
5490	8	0	0	0	0	0	0	200	300	0	0	0	0	0	0	0	200	903	0	0	0	0	0	0	0	603	903	0
5490	9	0	0	0	0	0	0	200	300	0	0	0	0	0	0	0	200	903	0	0	0	0	0	0	0	603	903	0
5491	0	0	0	0	0	0	0	200	300	0	0	0	0	0	0	0	200	903	0	0	0	0	0	0	0	603	903	0
5491	1	0	0	0	0	0	0	200	300	0	0	0	0	0	0	0	200	903	0	0	0	0	0	0	0	603	903	0
5491	2	0	0	0	0	0	0	200	300	0	0	0	0	0	0	0	200	903	0	0	0	0	0	0	0	603	903	0
5491	3	0	0	0	0	0	0	200	300	0	0	0	0	0	0	0	200	903	0	0	0	0	0	0	0	603	903	0
5491	4	0	0	0	0	0	0	200	300	0	0	0	0	0	0	0	200	903	0	0	0	0	0	0	0	603	903	0
5491	5	0	0	0	0	0	0	200	300	0	0	0	0	0	0	0	200	903	0	0	0	0	0	0	0	603	903	0
5491	6	0	0	0	0	0	0	200	300	0	0	0	0	0	0	0	200	903	0	0	0	0	0	0	0	603	903	0
5491	7	0	0	0	0	0	0	200	300	0	0	0	0	0	0	0	200	903	0	0	0	0	0	0	0	603	903	0
5491	8	0	0	0	0	0	0	200	300	0	0	0	0	0	0	0	200	903	0	0	0	0	0	0	0	603	903	0
5491	9	0	0	0	0	0	0	200	300	0	0	0	0	0	0	0	200	903	0	0	0	0	0	0	0	603	903	0
5492	0	0	0	0	0	0	0	200	300	0	0	0	0	0	0	0	200	903	0	0	0	0	0	0	0	603	903	0
5492	1	0	0	0	0	0	0	200	300	0	0	0	0	0	0	0	200	903	0	0	0	0	0	0	0	603	903	0
5492	2	0	0	0	0	0	0	200	300	0	0	0	0	0	0	0	200	903	0	0	0	0	0	0	0	603	903	0
5492	3	0	0	0	0	0	0	200	300	0	0	0	0	0	0	0	200	903	0	0	0	0	0	0	0	603	903	0
5492	4	0	0	0	0	0	0	200	300	0	0	0	0	0	0	0	200	903	0	0	0	0	0	0	0	603	903	0
5492	5	0	0	0	0	0	0	200	300	0	0	0	0	0	0	0	200	903	0	0	0	0	0	0	0	603	903	0
5492	6	0	0	0	0	0	0	200	300	0	0	0	0	0	0	0	200	903	0	0	0	0	0	0	0	603	903	0
5492	7	0	0	0	0	0	0	200	300	0	0	0	0	0	0	0	200	903	0	0	0	0	0	0	0	603	903	0
5492	8	0	0	0	0	0	0	200	300	0	0	0	0	0	0	0	200	903	0	0	0	0	0	0	0	603	903	0
5492	9	0	0	0	0	0	0	200	300	0	0	0	0	0	0	0	200	903	0	0	0	0	0	0	0	603	903	0
5493	0	0	0	0	0	0	0	200	300	0	0	0	0	0	0	0	200	903	0	0	0	0	0	0	0	603	903	0
5493	1	0	0	0	0	0	0	200	300	0	0	0	0	0	0	0	200	903	0	0	0	0	0	0	0	603	903	0
5493	2	0	0	0	0	0	0	200	300	0	0	0	0	0	0	0	200	903	0	0	0	0	0	0	0	603	903	0
5493	3	0	0	0	0	0	0	200	300	0	0	0	0	0	0	0	200	903	0	0	0	0	0	0	0	603	903	0
5493	4	0	0	0	0	0	0	200	300	0	0	0	0	0	0	0	200	903	0	0	0	0	0	0	0	603	903	0
5493	5	0	0	0	0	0	0	200	300	0	0	0	0	0	0	0	200	903	0	0	0	0	0	0	0	603	903	0
5493	6	0	0	0	0	0	0	200	300	0	0	0	0	0	0	0	200	903	0	0	0	0	0	0	0	603	903	0
5493	7	0	0	0	0	0	0	200	300	0	0	0	0	0	0	0	200	903	0	0	0	0	0	0	0	603	903	0
5493	8	0	0	0	0	0	0	200	300	0	0	0	0	0	0	0	200	903	0	0	0	0	0	0	0	603	903	0
5493	9	0	0	0	0	0	0	200	300	0	0	0	0	0	0	0	200	903	0	0	0	0	0	0	0	603	903	0
5494	0	0	0	0	0	0	0	200	300	0	0	0	0	0	0	0	200	903	0	0	0	0	0	0	0	603	903	0
5494	1	0	0	0	0	0	0	200	300	0	0	0	0	0	0	0	200	903	0	0	0	0	0	0	0	603	903	0
5494	2	0	0	0	0	0	0	200	300	0	0	0	0	0	0	0	200	903	0	0	0	0	0	0	0	603	903	0
5494	3	0	0	0	0	0	0	200	300	0	0	0	0	0	0	0	200	903	0	0	0	0	0	0	0	603	903	0
5494	4	0	0	0	0	0	0	200	300	0	0	0	0	0	0	0	200	903	0	0	0	0	0	0	0	603	903	0
5494	5	0	0	0	0	0	0	200	300	0	0	0	0	0	0	0	200	903	0	0	0	0	0	0	0	603	903	0
5494	6	0	0	0	0	0	0	200	300	0	0	0	0	0	0	0	200	903	0	0	0	0	0	0	0	603	903	0
5494	7	0	0	0	0	0	0	200	300	0	0	0	0	0	0	0	200	903	0	0	0	0	0	0	0	603	903	0
5494	8	0	0	0	0	0	0	200	300	0	0	0	0	0	0	0	200	903	0	0	0	0	0	0	0	603	903	0
5494	9	0	0	0	0	0	0	200	300	0	0	0	0	0	0	0	200	903	0	0	0	0	0	0	0	603	903	0
5495	0	0	0	0	0	0	0	200	300	0	0	0	0	0	0	0	200	903	0	0	0	0	0	0	0	603	903	0
5495	1	0	0	0	0	0	0	200	300	0	0	0	0	0	0	0	200	903	0	0	0	0	0	0	0	603	903	0
5495	2	0	0	0	0	0	0	200	300	0	0	0	0	0	0	0	200	903	0	0	0	0	0	0	0	603	903	0
5495	3	0	0	0	0	0	0	200	300	0	0	0	0	0	0	0	200	903	0	0	0	0	0	0	0	603	903	0
5495	4	0	0	0	0	0	0	200	300	0	0	0	0	0	0	0	200	903	0	0	0	0	0	0	0	603	903	0
5495	5	0	0	0	0	0	0	200	300	0	0	0	0	0	0	0	200	903	0	0	0	0	0	0	0	603	903	0
5495	6	0	0	0	0	0	0	200	300	0	0	0	0	0	0	0	200	903	0	0	0	0	0	0	0	603	903	0
5495	7	0	0	0	0	0	0	200	300	0	0	0	0	0	0	0	200	903	0	0	0	0	0	0	0	603	903	0
5495	8	0	0	0	0	0	0	200	300	0	0	0	0	0	0	0	200	903	0	0	0	0	0	0	0	603	903	0
5495	9	0	0	0	0	0	0	200	300	0	0	0	0	0	0	0	200	903	0	0	0	0	0	0	0	603	903	0
5496	0	0	0	0	0	0	0	200	300	0	0	0	0	0	0	0	200	903	0	0	0	0	0	0	0	603	903	0
5496	1	0	0	0	0	0	0	200	300	0	0	0	0	0	0	0	200	903	0	0	0	0	0	0	0	603	903	0
5496	2	0	0	0	0	0	0	200	300	0	0	0	0	0	0	0	200	903	0	0	0	0	0	0	0	603	903	0
5496	3	0	0	0	0	0	0	200	300	0	0	0	0	0	0	0	200	903	0	0	0	0	0	0	0	603	903	0
5496	4	0	0	0	0	0	0	200	300	0	0	0	0	0	0	0	200	903	0	0	0	0	0	0	0	603	903	0
5496	5	0	0	0	0	0	0	200	300	0	0	0	0	0	0	0	200	903	0	0	0	0	0	0	0	603	903	0
5496	6	0	0	0	0	0	0	200	300	0	0	0	0	0	0	0	200	903	0	0	0	0	0	0	0	603	903	0
5496	7	0	0	0	0	0	0	200	300	0	0	0	0	0	0	0	200	903	0	0	0	0	0	0	0	603	903	0
5496	8	0	0	0	0	0	0	200	300	0	0	0	0	0	0	0	200	903	0	0	0	0	0	0	0	603	903	0
5496	9	0	0	0	0	0	0	200	300	0	0	0	0	0	0	0	200	903	0	0	0	0	0	0	0	603	903	0
5497	0	0	0	0	0	0	0	200	300	0	0	0	0	0	0	0	200	903	0	0	0	0	0	0	0	603	903	0
5497	1	0	0	0	0	0	0	200	300	0	0	0	0	0	0	0	200	903	0	0	0	0	0	0	0	603	903	0
5497	2	0	0	0	0	0	0	200	300	0	0	0	0	0	0	0	200	903	0	0	0	0	0	0	0	603	903	0
5497	3	0	0	0	0	0	0	200	300	0	0	0	0	0	0	0	200	903	0	0	0	0	0	0	0	603	903	0
5497	4	0	0	0	0	0	0	200	300	0	0	0	0	0	0	0	200	903	0	0	0	0	0	0	0	603	903	0
5497	5	0	0	0	0	0	0	200	300	0	0	0	0	0	0	0	200	903	0	0	0	0	0	0	0	603	903	0
5497	6	0	0	0	0	0	0	200	300	0	0	0	0	0	0	0	200	903	0	0	0	0	0	0	0	603	903	0
5497	7	0	0	0	0	0	0	200	300	0	0	0	0	0	0	0	200	903	0	0	0	0	0	0	0	603	903	0
5497	8	0	0	0	0	0	0	200	300	0	0	0	0	0	0	0	200	903	0	0	0	0	0	0	0	603	903	0
5497	9	0	0	0	0	0	0	200	300	0	0	0	0	0	0	0	200	903	0	0	0	0	0	0	0	603	903	0
5498	0	0	0	0	0	0	0	200	300	0	0	0	0	0	0	0	200	903	0	0	0	0	0	0	0	603	903	0
5498	1	0	0	0	0	0	0	200	300	0	0	0	0	0	0	0	200	903	0	0	0	0	0	0	0	603	903	0
5498	2	0	0	0	0	0	0	200	300	0	0	0	0	0	0	0	200	903	0	0	0	0	0	0	0	603	903	0
5498	3	0	0	0	0	0	0	200	300	0	0	0	0	0	0	0	200	903	0	0	0	0	0	0	0	603	903	0
5498	4	0	0	0	0	0	0	200	300	0	0	0	0	0	0	0	200	903	0	0	0	0	0	0	0	603	903	0
5498	5	0	0	0	0	0	0	200	300	0	0	0	0	0	0	0	200	903	0	0	0	0	0	0	0	603	903	0
5498	6	0	0	0	0	0	0	200	300	0	0	0	0	0	0	0	200	903	0	0	0	0	0	0	0	603	903	0
5498	7	0	0	0	0	0	0	200	300	0	0	0	0	0	0	0	200	903	0	0	0	0	0	0	0	603	903	0
5498	8	0	0	0	0	0	0	200	300	0	0	0	0	0	0	0	200	903	0	0	0	0	0	0	0	603	903	0
5498	9	0	0	0	0	0	0	200	300	0	0	0	0	0	0	0	200	903	0	0	0	0	0	0	0	603	903	0
5499	0	0	0	0	0	0	0	200	300	0	0	0	0	0	0	0	200	903	0	0	0	0	0	0	0	603	903	0
5499	1	0	0	0	0	0	0	200	300	0	0	0	0	0	0	0	200	903	0	0	0	0	0	0	0	603	903	0
5499	2	0	0	0	0	0	0	200	300	0	0	0	0	0	0	0	200	903	0	0	0	0	0	0	0	603	903	0
5499	3	0	0	0	0	0	0	200	300	0	0	0	0	0	0	0	200	903	0	0	0	0	0	0	0	603	903	0
5499	4	0	0	0	0	0	0	200	300	0	0	0	0	0	0	0	200	903	0	0	0	0	0	0	0	603	903	0
5499	5	0	0	0	0	0	0	200	300	0	0	0	0	0	0	0	200	903	0	0	0	0	0	0	0	603	903	0
5499	6	0	0	0	0	0	0	200	300	0	0	0	0	0	0	0	200	903	0	0	0	0	0	0	0	603	903	0
5499	7	0	0	0	0	0	0	200	300	0	0	0	0	0	0	0	200	903	0	0	0	0	0	0	0	603	903	0
5499	8	0	0	0	0	0	0	200	300	0	0	0	0	0	0	0	200	903	0	0	0	0	0	0	0	603	903	0
5499	9	0	0	0	0	0	0	200	300	0	0	0	0	0	0	0	200	903	0	0	0	0	0	0	0	603	903	0
5500	0	0	0	0	0	0	0	200	300	0	0	0	0	0	0	0	200	903	0	0	0	0	0	0	0	603	903	0
5500	1	0	0	0	0	0	0	200	300	0	0	0	0	0	0	0	200	903	0	0	0	0	0	0	0	603	903	0
5500	2	0	0	0	0	0	0	200	300	0	0	0	0	0	0	0	200	903	0	0	0	0	0	0	0	603	903	0
5500	3	0	0	0	0	0	0	200	300	0	0	0	0	0	0	0	200	903	0	0	0	0	0	0	0	603	903	0
5500	4	0	0	0	0	0	0	200	300	0	0	0	0	0	0	0	200	903	0	0	0	0	0	0	0	603	903	0
5500	5	0	0	0	0	0	0	200	300	0	0	0	0	0	0	0	200	903	0	0	0	0	0	0	0	603	903	0
5500	6	0	0	0	0	0	0	200	300	0	0	0	0	0	0	0	200	903	0	0	0	0	0	0	0	603	903	0
5500	7	0	0	0	0	0	0	200	300	0	0	0	0	0	0	0	200	903	0	0	0	0	0	0	0	603	903	0
5500	8	0	0	0	0	0	0	200	300	0	0	0	0	0	0	0	200	903	0	0	0	0	0	0	0	603	903	0
5500	9	0	0	0	0	0	0	200	300	0	0	0	0	0	0	0	200	903	0	0	0	0	0	0	0	603	903	0
5501	0	0	0	0	0	0	0	200	300	0	0	0	0	0	0	0	200	903	0	0	0	0	0	0	0	603	903	0
5501	1	0	0	0	0	0	0	200	300	0	0	0	0	0	0	0	200	903	0	0	0	0	0	0	0	603	903	0
5501	2	0	0	0	0	0	0	200	300	0	0	0	0	0	0	0	200	903	0	0	0	0	0	0	0	603	903	0
5501	3	0	0	0	0	0	0	200	300	0	0	0	0	0	0	0	200	903	0	0	0	0	0	0	0	603	903	0
5501	4	0	0	0	0	0	0	200	300	0	0	0	0	0	0	0	200	903	0	0	0	0	0	0	0	603	903	0
5501	5	0	0	0	0	0	0	200	300	0	0	0	0	0	0	0	200	903	0	0	0	0	0	0	0	603	903	0
5501	6	0	0	0	0	0	0	200	300	0	0	0	0	0	0	0	200	903	0	0	0	0	0	0	0	603	903	0
5501	7	0	0	0	0	0	0	200	300	0	0	0	0	0	0	0	200	903	0	0	0	0	0	0	0	603	903	0
5501	8	0	0	0	0	0	0	200	300	0	0	0	0	0	0	0	200	903	0	0	0	0	0	0	0	603	903	0
5501	9	0	0	0	0	0	0	200	300	0	0	0	0	0	0	0	200	903	0	0	0	0	0	0	0	603	903	0
5502	0	0	0	0	0	0	0	200	300	0	0	0	0	0	0	0	200	903	0	0	0	0	0	0	0	603	903	0
5502	1	0	0	0	0	0	0	200	300	0	0	0	0	0	0	0	200	903	0	0	0	0	0	0	0	603	903	0
5502	2	0	0	0	0	0	0	200	300	0	0	0	0	0	0	0	200	903	0	0	0	0	0	0	0	603	903	0
5502	3	0	0	0	0	0	0	200	300	0	0	0	0	0	0	0	200	903	0	0	0	0	0	0	0	603	903	0
5502	4	0	0	0	0	0	0	200	300	0	0	0	0	0	0	0	200	903	0	0	0	0	0	0	0	603	903	0
5502	5	0	0	0	0	0	0	200	300	0	0	0	0	0	0	0	200	903	0	0	0	0	0	0	0	603	903	0
5502	6	0	0	0	0	0	0	200	300	0	0	0	0	0	0	0	200	903	0	0	0	0	0	0	0	603	903	0
5502	7	0	0	0	0	0	0	200	300	0	0	0	0	0	0	0	200	903	0	0	0	0	0	0	0	603	903	0
5502	8	0	0	0	0	0	0	200	300	0	0	0	0	0	0	0	200	903	0	0	0	0	0	0	0	603	903	0
5502	9	0	0	0	0	0	0	200	300	0	0	0	0	0	0	0	200	903	0	0	0	0	0	0	0	603	903	0
5503	0	0	0	0	0	0	0	200	300	0	0	0	0	0	0	0	200	903	0	0	0	0	0	0	0	603	903	0
5503	1	0	0	0	0	0	0	200	300	0	0	0	0	0	0	0	200	903	0	0	0	0	0	0	0	603	903	0
5503	2	0	0	0	0	0	0	200	300	0	0	0	0	0	0	0	200	903	0	0	0	0	0	0	0	603	903	0
5503	3	0	0	0	0	0	0	200	300	0	0	0	0	0	0	0	200	903	0	0	0	0	0	0	0	603	903	0
5503	4	0	0	0	0	0	0	200	300	0	0	0	0	0	0	0	200	903	0	0	0	0	0	0	0	603	903	0
5503	5	0	0	0	0	0	0	200	300	0	0	0	0	0	0	0	200	903	0	0	0	0	0	0	0	603	903	0
5503	6	0	0	0	0	0	0	200	300	0	0	0	0	0	0	0	200	903	0	0	0	0	0	0	0	603	903	0
5503	7	0	0	0	0	0	0	200	300	0	0	0	0	0	0	0	200	903	0	0	0	0	0	0	0	603	903	0
5503	8	0	0	0	0	0	0	200	300	0	0	0	0	0	0	0	200	903	0	0	0	0	0	0	0	603	903	0
5503	9	0	0	0	0	0	0	200	300	0	0	0	0	0	0	0	200	903	0	0	0	0	0	0	0	603	903	0
5504	0	0	0	0	0	0	0	200	300	0	0	0	0	0	0	0	200	903	0	0	0	0	0	0	0	603	903	0
5504	1	0	0	0	0	0	0	200	300	0	0	0	0	0	0	0	200	903	0	0	0	0	0	0	0	603	903	0
5504	2	0	0	0	0	0	0	200	300	0	0	0	0	0	0	0	200	903	0	0	0	0	0	0	0	603	903	0
5504	3	0	0	0	0	0	0	200	300	0	0	0	0	0	0	0	200	903	0	0	0	0	0	0	0	603	903	0
5504	4	0	0	0	0	0	0	200	300	0	0	0	0	0	0	0	200	903	0	0	0	0	0	0	0	603	903	0
5504	5	0	0	0	0	0	0	200	300	0	0	0	0	0	0	0	200	903	0	0	0	0	0	0	0	603	903	0
5504	6	0	0	0	0	0	0	200	300	0	0	0	0	0	0	0	200	903	0	0	0	0	0	0	0	603	903	0
5504	7	0	0	0	0	0	0	200	300	0	0	0	0	0	0	0	200	903	0	0	0	0	0	0	0	603	903	0
5504	8	0	0	0	0	0	0	200	300	0	0	0	0	0	0	0	200	903	0	0	0	0	0	0	0	603	903	0
5504	9	0	0	0	0	0	0	200	300	0	0	0	0	0	0	0	200	903	0	0	0	0	0	0	0	603	903	0
5505	0	0	0	0	0	0	0	200	300	0	0	0	0	0	0	0	200	903	0	0	0	0	0	0	0	603	903	0
5505	1	0	0	0	0	0	0	200	300	0	0	0	0	0	0	0	200	903	0	0	0	0	0	0	0	603	903	0
5505	2	0	0	0	0	0	0	200	300	0	0	0	0	0	0	0	200	903	0	0	0	0	0	0	0	603	903	0
5505	3	0	0	0	0	0	0	200	300	0	0	0	0	0	0	0	200	903	0	0	0	0	0	0	0	603	903	0
5505	4	0	0	0	0	0	0	200	300	0	0	0	0	0	0	0	200	903	0	0	0	0	0	0	0	603	903	0
5505	5	0	0	0	0	0	0	200	300	0	0	0	0	0	0	0	200	903	0	0	0	0	0	0	0	603	903	0
5505	6	0	0	0	0	0	0	200	300	0	0	0	0	0	0	0	200	903	0	0	0	0	0	0	0	603	903	0
5505	7	0	0	0	0	0	0	200	300	0	0	0	0	0	0	0	200	903	0	0	0	0	0	0	0	603	903	0
5505	8	0	0	0	0	0	0	200	300	0	0	0	0	0	0	0	200	903	0	0	0	0	0	0	0	603	903	0
5505	9	0	0	0	0	0	0	200	300	0	0	0	0	0	0	0	200	903	0	0	0	0	0	0	0	603	903	0
5506	0	0	0	0	0	0	0	200	300	0	0	0	0	0	0	0	200	903	0	0	0	0	0	0	0	603	903	0
5506	1	0	0	0	0	0	0	200	300	0	0	0	0	0	0	0	200	903	0	0	0	0	0	0	0	603	903	0
5506	2	0	0	0	0	0	0	200	300	0	0	0	0	0	0	0	200	903	0	0	0	0	0	0	0	603	903	0
5506	3	0	0	0	0	0	0	200	300	0	0	0	0	0	0	0	200	903	0	0	0	0	0	0	0	603	903	0
5506	4	0	0	0	0	0	0	200	300	0	0	0	0	0	0	0	200	903	0	0	0	0	0	0	0	603	903	0
5506	5	0	0	0	0	0	0	200	300	0	0	0	0	0	0	0	200	903	0	0	0	0	0	0	0	603	903	0
5506	6	0	0	0	0	0	0	200	300	0	0	0	0	0	0	0	200	903	0	0	0	0	0	0	0	603	903	0
5506	7	0	0	0	0	0	0	200	300	0	0	0	0	0	0	0	200	903	0	0	0	0	0	0	0	603	903	0
5506	8	0	0	0	0	0	0	200	300	0	0	0	0	0	0	0	200	903	0	0	0	0	0	0	0	603	903	0
5506	9	0	0	0	0	0	0	200	300	0	0	0	0	0	0	0	200	903	0	0	0	0	0	0	0	603	903	0
5507	0	0	0	0	0	0	0	200	300	0	0	0	0	0	0	0	200	903	0	0	0	0	0	0	0	603	903	0
5507	1	0	0	0	0	0	0	200	300	0	0	0	0	0	0	0	200	903	0	0	0	0	0	0	0	603	903	0
5507	2	0	0	0	0	0	0	200	300	0	0	0	0	0	0	0	200	903	0	0	0	0	0	0	0	603	903	0
5507	3	0	0	0	0	0	0	200	300	0	0	0	0	0	0	0	200	903	0	0	0	0	0	0	0	603	903	0
5507	4	0	0	0	0	0	0	200	300	0	0	0	0	0	0	0	200	903	0	0	0	0	0	0	0	603	903	0
5507	5	0	0	0	0	0	0	200	300	0	0	0	0	0	0	0	200	903	0	0	0	0	0	0	0	603	903	0
5507	6	0	0	0	0	0	0	200	300	0	0	0	0	0	0	0	200	903	0	0	0	0	0	0	0	603	903	0
5507	7	0	0	0	0	0	0	200	300	0	0	0	0	0	0	0	200	903	0	0	0	0	0	0	0	603	903	0
5507	8	0	0	0	0	0	0	200	300	0	0	0	0	0	0	0	200	903	0	0	0	0	0	0	0	603	903	0
5507	9	0	0	0	0	0	0	200	300	0	0	0	0	0	0	0	200	903	0	0	0	0	0	0	0	603	903	0
5508	0	0	0	0	0	0	0	200	300	0	0	0	0	0	0	0	200	903	0	0	0	0	0	0	0	603	903	0
5508	1	0	0	0	0	0	0	200	300	0	0	0	0	0	0	0	200	903	0	0	0	0	0	0	0	603	903	0
5508	2	0	0	0	0	0	0	200	300	0	0	0	0	0	0	0	200	903	0	0	0	0	0	0	0	603	903	0
5508	3	0	0	0	0	0	0	200	300	0	0	0	0	0	0	0	200	903	0	0	0	0	0	0	0	603	903	0
5508	4	0	0	0	0	0	0	200	300	0	0	0	0	0	0	0	200	903	0	0	0	0	0	0	0	603	903	0
5508	5	0	0	0	0	0	0	200	300	0	0	0	0	0	0	0	200	903	0	0	0	0	0	0	0	603	903	0
5508	6	0	0	0	0	0	0	200	300	0	0	0	0	0	0	0	200	903	0	0	0	0	0	0	0	603	903	0
5508	7	0	0	0	0	0	0	200	300	0	0	0	0	0	0	0	200	903	0	0	0	0	0	0	0	603	903	0
5508	8	0	0	0	0	0	0	200	300	0	0	0	0	0	0	0	200	903	0	0	0	0	0	0	0	603	903	0
5508	9	0	0	0	0	0	0	200	300	0	0	0	0	0	0	0	200	903	0	0	0	0	0	0	0	603	903	0
5509	0	0	0	0	0	0	0	200	300	0	0	0	0	0	0	0	200	903	0	0	0	0	0	0	0	603	903	0
5509	1	0	0	0	0	0	0	200	300	0	0	0	0	0	0	0	200	903	0	0	0	0	0	0	0	603	903	0
5509	2	0	0	0	0	0	0	200	300	0	0	0	0	0	0	0	200	903	0	0	0	0	0	0	0	603	903	0
5509	3	0	0	0	0	0	0	200	300	0	0	0	0	0	0	0	200	903	0	0	0	0	0	0	0	603	903	0
5509	4	0	0	0	0	0	0	200	300	0	0	0	0	0	0	0	200	903	0	0	0	0	0	0	0	603	903	0
5509	5	0	0	0	0	0	0	200	300	0	0	0	0	0	0	0	200	903	0	0	0	0	0	0	0	603	903	0
5509	6	0	0	0	0	0	0	200	300	0	0	0	0	0	0	0	200	903	0	0	0	0	0	0	0	603	903	0
5509	7	0	0	0	0	0	0	200	300	0	0	0	0	0	0	0	200	903	0	0	0	0	0	0	0	603	903	0
5509	8	0	0	0	0	0	0	200	300	0	0	0	0	0	0	0	200	903	0	0	0	0	0	0	0	603	903	0
5509	9	0	0	0	0	0	0	200	300	0	0	0	0	0	0	0	200	903	0	0	0	0	0	0	0	603	903	0
5510	0	0	0	0	0	0	0	200	300	0	0	0	0	0	0	0	200	903	0	0	0	0	0	0	0	603	903	0
5510	1	0	0	0	0	0	0	200	300	0	0	0	0	0	0	0	200	903	0	0	0	0	0	0	0	603	903	0
5510	2	0	0	0	0	0	0	200	300	0	0	0	0	0	0	0	200	903	0	0	0	0	0	0	0	603	903	0
5510	3	0	0	0	0	0	0	200	300	0	0	0	0	0	0	0	200	903	0	0	0	0	0	0	0	603	903	0
5510	4	0	0	0	0	0	0	200	300	0	0	0	0	0	0	0	200	903	0	0	0	0	0	0	0	603	903	0
5510	5	0	0	0	0	0	0	200	300	0	0	0	0	0	0	0	200	903	0	0	0	0	0	0	0	603	903	0
5510	6	0	0	0	0	0	0	200	300	0	0	0	0	0	0	0	200	903	0	0	0	0	0	0	0	603	903	0
5510	7	0	0	0	0	0	0	200	300	0	0	0	0	0	0	0	200	903	0	0	0	0	0	0	0	603	903	0
5510	8	0	0	0	0	0	0	200	300	0	0	0	0	0	0	0	200	903	0	0	0	0	0	0	0	603	903	0
5510	9	0	0	0	0	0	0	200	300	0	0	0	0	0	0	0	200	903	0	0	0	0	0	0	0	603	903	0
5511	0	0	0	0	0	0	0	200	300	0	0	0	0	0	0	0	200	903	0	0	0	0	0	0	0	603	903	0
5511	1	0	0	0	0	0	0	200	300	0	0	0	0	0	0	0	200	903	0	0	0	0	0	0	0	603	903	0
5511	2	0	0	0	0	0	0	200	300	0	0	0	0	0	0	0	200	903	0	0	0	0	0	0	0	603	903	0
5511	3	0	0	0	0	0	0	200	300	0	0	0	0	0	0	0	200	903	0	0	0	0	0	0	0	603	903	0
5511	4	0	0	0	0	0	0	200	300	0	0	0	0	0	0	0	200	903	0	0	0	0	0	0	0	603	903	0
5511	5	0	0	0	0	0	0	200	300	0	0	0	0	0	0	0	200	903	0	0	0	0	0	0	0	603	903	0
5511	6	0	0	0	0	0	0	200	300	0	0	0	0	0	0	0	200	903	0	0	0	0	0	0	0	603	903	0
5511	7	0	0	0	0	0	0	200	300	0	0	0	0	0	0	0	200	903	0	0	0	0	0	0	0	603	903	0
5511	8	0	0	0	0	0	0	200	300	0	0	0	0	0	0	0	200	903	0	0	0	0	0	0	0	603	903	0
5511	9	0	0	0	0	0	0	200	300	0	0	0	0	0	0	0	200	903	0	0	0	0	0	0	0	603	903	0
5512	0	0	0	0	0	0	0	200	300	0	0	0	0	0	0	0	200	903	0	0	0	0	0	0	0	603	903	0
5512	1	0	0	0	0	0	0	200	300	0	0	0	0	0	0	0	200	903	0	0	0	0	0	0	0	603	903	0
5512	2	0	0	0	0	0	0	200	300	0	0	0	0	0	0	0	200	903	0	0	0	0	0	0	0	603	903	0
5512	3	0	0	0	0	0	0	200	300	0	0	0	0	0	0	0	200	903	0	0	0	0	0	0	0	603	903	0
5512	4	0	0	0	0	0	0	200	300	0	0	0	0	0	0	0	200	903	0	0	0	0	0	0	0	603	903	0
5512	5	0	0	0	0	0	0	200	300	0	0	0	0	0	0	0	200	903	0	0	0	0	0	0	0	603	903	0
5512	6	0	0	0	0	0	0	200	300	0	0	0	0	0	0	0	200	903	0	0	0	0	0	0	0	603	903	0
5512	7	0	0	0	0	0	0	200	300	0	0	0	0	0	0	0	200	903	0	0	0	0	0	0	0	603	903	0
5512	8	0	0	0	0	0	0	200	300	0	0	0	0	0	0	0	200	903	0	0	0	0	0	0	0	603	903	0
5512	9	0	0	0	0	0	0	200	300	0	0	0	0	0	0	0	200	903	0	0	0	0	0	0	0	603	903	0
5513	0	0	0	0	0	0	0	200	300	0	0	0	0	0	0	0	200	903	0	0	0	0	0	0	0	603	903	0
5513	1	0	0	0	0	0	0	200	300	0	0	0	0	0	0	0	200	903	0	0	0	0	0	0	0	603	903	0
5513	2	0	0	0	0	0	0	200	300	0	0	0	0	0	0	0	200	903	0	0	0	0	0	0	0	603	903	0
5513	3	0	0	0	0	0	0	200	300	0	0	0	0	0	0	0	200	903	0	0	0	0	0	0	0	603	903	0
5513	4	0	0	0	0	0	0	200	300	0	0	0	0	0	0	0	200	903	0	0	0	0	0	0	0	603	903	0
5513	5	0	0	0	0	0	0	200	300	0	0	0	0	0	0	0	200	903	0	0	0	0	0	0	0	603	903	0
5513	6	0	0	0	0	0	0	200	300	0	0	0	0	0	0	0	200	903	0	0	0	0	0	0	0	603	903	0
5513	7	0	0	0	0	0	0	200	300	0	0	0	0	0	0	0	200	903	0	0	0	0	0	0	0	603	903	0
5513	8	0	0	0	0	0	0	200	300	0	0	0	0	0	0	0	200	903	0	0	0	0	0	0	0	603	903	0
5513	9	0	0	0	0	0	0	200	300	0	0	0	0	0	0	0	200	903	0	0	0	0	0	0	0	603	903	0
5514	0	0	0	0	0	0	0	200	300	0	0	0	0	0	0	0	200	903	0	0	0	0	0	0	0	603	903	0
5514	1	0	0	0	0	0	0	200	300	0	0	0	0	0	0	0	200	903	0	0	0	0	0	0	0	603	903	0
5514	2	0	0	0	0	0	0	200	300	0	0	0	0	0	0	0	200	903	0	0	0	0	0	0	0	603	903	0
5514	3	0	0	0	0	0	0	200	300	0	0	0	0	0	0	0	200	903	0	0	0	0	0	0	0	603	903	0
5514	4	0	0	0	0	0	0	200	300	0	0	0	0	0	0	0	200	903	0	0	0	0	0	0	0	603	903	0
5514	5	0	0	0	0	0	0	200	300	0	0	0	0	0	0	0	200	903	0	0	0	0	0	0	0	603	903	0
5514	6	0	0	0	0	0	0	200	300	0	0	0	0	0	0	0	200	903	0	0	0	0	0	0	0	603	903	0
5514	7	0	0	0	0	0	0	200	300	0	0	0	0	0	0	0	200	903	0	0	0	0	0	0	0	603	903	0
5514	8	0	0	0	0	0	0	200	300	0	0	0	0	0	0	0	200	903	0	0	0	0	0	0	0	603	903	0
5514	9	0	0	0	0	0	0	200	300	0	0	0	0	0	0	0	200	903	0	0	0	0	0	0	0	603	903	0
5515	0	0	0	0	0	0	0	200	300	0	0	0	0	0	0	0	200	903	0	0	0	0	0	0	0	603	903	0
5515	1	0	0	0	0	0	0	200	300	0	0	0	0	0	0	0	200	903	0	0	0	0	0	0	0	603	903	0
5515	2	0	0	0	0	0	0	200	300	0	0	0	0	0	0	0	200	903	0	0	0	0	0	0	0	603	903	0
5515	3	0	0	0	0	0	0	200	300	0	0	0	0	0	0	0	200	903	0	0	0	0	0	0	0	603	903	0
5515	4	0	0	0	0	0	0	200	300	0	0	0	0	0	0	0	200	903	0	0	0	0	0	0	0	603	903	0
5515	5	0	0	0	0	0	0	200	300	0	0	0	0	0	0	0	200	903	0	0	0	0	0	0	0	603	903	0
5515	6	0	0	0	0	0	0	200	300	0	0	0	0	0	0	0	200	903	0	0	0	0	0	0	0	603	903	0
5515	7	0	0	0	0	0	0	200	300	0	0	0	0	0	0	0	200	903	0	0	0	0	0	0	0	603	903	0
5515	8	0	0	0	0	0	0	200	300	0	0	0	0	0	0	0	200	903	0	0	0	0	0	0	0	603	903	0
5515	9	0	0	0	0	0	0	200	300	0	0	0	0	0	0	0	200	903	0	0	0	0	0	0	0	603	903	0
5516	0	0	0	0	0	0	0	200	300	0	0	0	0	0	0	0	200	903	0	0	0	0	0	0	0	603	903	0
5516	1	0	0	0	0	0	0	200	300	0	0	0	0	0	0	0	200	903	0	0	0	0	0	0	0	603	903	0
5516	2	0	0	0	0	0	0	200	300	0	0	0	0	0	0	0	200	903	0	0	0	0	0	0	0	603	903	0
5516	3	0	0	0	0	0	0	200	300	0	0	0	0	0	0	0	200	903	0	0	0	0	0	0	0	603	903	0
5516	4	0	0	0	0	0	0	200	300	0	0	0	0	0	0	0	200	903	0	0	0	0	0	0	0	603	903	0
5516	5	0	0	0	0	0	0	200	300	0	0	0	0	0	0	0	200	903	0	0	0	0	0	0	0	603	903	0
5516	6	0	0	0	0	0	0	200	300	0	0	0	0	0	0	0	200	903	0	0	0	0	0	0	0	603	903	0
5516	7	0	0	0	0	0	0	200	300	0	0	0	0	0	0	0	200	903	0	0	0	0	0	0	0	603	903	0
5516	8	0	0	0	0	0	0	200	300	0	0	0	0	0	0	0	200	903	0	0	0	0	0	0	0	603	903	0
5516	9	0	0	0	0	0	0	200	300	0	0	0	0	0	0	0	200	903	0	0	0	0	0	0	0	603	903	0
5517	0	0	0	0	0	0	0	200	300	0	0	0	0	0	0	0	200	903	0	0	0	0	0	0	0	603	903	0
5517	1	0	0	0	0	0	0	200	300	0	0	0	0	0	0	0	200	903	0	0	0	0	0	0	0	603	903	0
5517	2	0	0	0	0	0	0	200	300	0	0	0	0	0	0	0	200	903	0	0	0	0	0	0	0	603	903	0
5517	3	0	0	0	0	0	0	200	300	0	0	0	0	0	0	0	200	903	0	0	0	0	0	0	0	603	903	0
5517	4	0	0	0	0	0	0	200	300	0	0	0	0	0	0	0	200	903	0	0	0	0	0	0	0	603	903	0
5517	5	0	0	0	0	0	0	200	300	0	0	0	0	0	0	0	200	903	0	0	0	0	0	0	0	603	903	0
5517	6	0	0	0	0	0	0	200	300	0	0	0	0	0	0	0	200	903	0	0	0	0	0	0	0	603	903	0
5517	7	0	0	0	0	0	0	200	300	0	0	0	0	0	0	0	200	903	0	0	0	0	0	0	0	603	903	0
5517	8	0	0	0	0	0	0	200	300	0	0	0	0	0	0	0	200	903	0	0	0	0	0	0	0	603	903	0
5517	9	0	0	0	0	0	0	200	300	0	0	0	0	0	0	0	200	903	0	0	0	0	0	0	0	603	903	0
5518	0	0	0	0	0	0	0	200	300	0	0	0	0	0	0	0	200	903	0	0	0	0	0	0	0	603	903	0
5518	1	0	0	0	0	0	0	200	300	0	0	0	0	0	0	0	200	903	0	0	0	0	0	0	0	603	903	0
5518	2	0	0	0	0	0	0	200	300	0	0	0	0	0	0	0	200	903	0	0	0	0	0	0	0	603	903	0
5518	3	0	0	0	0	0	0	200	300	0	0	0	0	0	0	0	200	903	0	0	0	0	0	0	0	603	903	0
5518	4	0	0	0	0	0	0	200	300	0	0	0	0	0	0	0	200	903	0	0	0	0	0	0	0	603	903	0
5518	5	0	0	0	0	0	0	200	300	0	0	0	0	0	0	0	200	903	0	0	0	0	0	0	0	603	903	0
5518	6	0	0	0	0	0	0	200	300	0	0	0	0	0	0	0	200	903	0	0	0	0	0	0	0	603	903	0
5518	7	0	0	0	0	0	0	200	300	0	0	0	0	0	0	0	200	903	0	0	0	0	0	0	0	603	903	0
5518	8	0	0	0	0	0	0	200	300	0	0	0	0	0	0	0	200	903	0	0	0	0	0	0	0	603	903	0
5518	9	0	0	0	0	0	0	200	300	0	0	0	0	0	0	0	200	903	0	0	0	0	0	0	0	603	903	0
5519	0	0	0	0	0	0	0	200	300	0	0	0	0	0	0	0	200	903	0	0	0	0	0	0	0	603	903	0
5519	1	0	0	0	0	0	0	200	300	0	0	0	0	0	0	0	200	903	0	0	0	0	0	0	0	603	903	0
5519	2	0	0	0	0	0	0	200	300	0	0	0	0	0	0	0	200	903	0	0	0	0	0	0	0	603	903	0
5519	3	0	0	0	0	0	0	200	300	0	0	0	0	0	0	0	200	903	0	0	0	0	0	0	0	603	903	0
5519	4	0	0	0	0	0	0	200	300	0	0	0	0	0	0	0	200	903	0	0	0	0	0	0	0	603	903	0
5519	5	0	0	0	0	0	0	200	300	0	0	0	0	0	0	0	200	903	0	0	0	0	0	0	0	603	903	0
5519	6	0	0	0	0	0	0	200	300	0	0	0	0	0	0	0	200	903	0	0	0	0	0	0	0	603	903	0
5519	7	0	0	0	0	0	0	200	300	0	0	0	0	0	0	0	200	903	0	0	0	0	0	0	0	603	903	0
5519	8	0	0	0	0	0	0	200	300	0	0	0	0	0	0	0	200	903	0	0	0	0	0	0	0	603	903	0
5519	9	0	0	0	0	0	0	200	300	0	0	0	0	0	0	0	200	903	0	0	0	0	0	0	0	603	903	0
5520	0	0	0	0	0	0	0	200	300	0	0	0	0	0	0	0	200	903	0	0	0	0	0	0	0	603	903	0
5520	1	0	0	0	0	0	0	200	300	0	0	0	0	0	0	0	200	903	0	0	0	0	0	0	0	603	903	0
5520	2	0	0	0	0	0	0	200	300	0	0	0	0	0	0	0	200	903	0	0	0	0	0	0	0	603	903	0
5520	3	0	0	0	0	0	0	200	300	0	0	0	0	0	0	0	200	903	0	0	0	0	0	0	0	603	903	0
5520	4	0	0	0	0	0	0	200	300	0	0	0	0	0	0	0	200	903	0	0	0	0	0	0	0	603	903	0
5520	5	0	0	0	0	0	0	200	300	0	0	0	0	0	0	0	200	903	0	0	0	0	0	0	0	603	903	0
5520	6	0	0	0	0	0	0	200	300	0	0	0	0	0	0	0	200	903	0	0	0	0	0	0	0	603	903	0
5520	7	0	0	0	0	0	0	200	300	0	0	0	0	0	0	0	200	903	0	0	0	0	0	0	0	603	903	0
5520	8	0	0	0	0	0	0	200	300	0	0	0	0	0	0	0	200	903	0	0	0	0	0	0	0	603	903	0
5520	9	0	0	0	0	0	0	200	300	0	0	0	0	0	0	0	200	903	0	0	0	0	0	0	0	603	903	0
5521	0	0	0	0	0	0	0	200	300	0	0	0	0	0	0	0	200	903	0	0	0	0	0	0	0	603	903	0
5521	1	0	0	0	0	0	0	200	300	0	0	0	0	0	0	0	200	903	0	0	0	0	0	0	0	603	903	0
5521	2	0	0	0	0	0	0	200	300	0	0	0	0	0	0	0	200	903	0	0	0	0	0	0	0	603	903	0
5521	3	0	0	0	0	0	0	200	300	0	0	0	0	0	0	0	200	903	0	0	0	0	0	0	0	603	903	0
5521	4	0	0	0	0	0	0	200	300	0	0	0	0	0	0	0	200	903	0	0	0	0	0	0	0	603	903	0
5521	5	0	0	0	0	0	0	200	300	0	0	0	0	0	0	0	200	903	0	0	0	0	0	0	0	603	903	0
5521	6	0	0	0	0	0	0	200	300	0	0	0	0	0	0	0	200	903	0	0	0	0	0	0	0	603	903	0
5521	7	0	0	0	0	0	0	200	300	0	0	0	0	0	0	0	200	903	0	0	0	0	0	0	0	603	903	0
5521	8	0	0	0	0	0	0	200	300	0	0	0	0	0	0	0	200	903	0	0	0	0	0	0	0	603	903	0
5521	9	0	0	0	0	0	0	200	300	0	0	0	0	0	0	0	200	903	0	0	0	0	0	0	0	603	903	0
5522	0	0	0	0	0	0	0	200	300	0	0	0	0	0	0	0	200	903	0	0	0	0	0	0	0	603	903	0
5522	1	0	0	0	0	0	0	200	300	0	0	0	0	0	0	0	200	903	0	0	0	0	0	0	0	603	903	0
5522	2	0	0	0	0	0	0	200	300	0	0	0	0	0	0	0	200	903	0	0	0	0	0	0	0	603	903	0
5522	3	0	0	0	0	0	0	200	300	0	0	0	0	0	0	0	200	903	0	0	0	0	0	0	0	603	903	0
5522	4	0	0	0	0	0	0	200	300	0	0	0	0	0	0	0	200	903	0	0	0	0	0	0	0	603	903	0
5522	5	0	0	0	0	0	0	200	300	0	0	0	0	0	0	0	200	903	0	0	0	0	0	0	0	603	903	0
5522	6	0	0	0	0	0	0	200	300	0	0	0	0	0	0	0	200	903	0	0	0	0	0	0	0	603	903	0
5522	7	0	0	0	0	0	0	200	300	0	0	0	0	0	0	0	200	903	0	0	0	0	0	0	0	603	903	0
5522	8	0	0	0	0	0	0	200	300	0	0	0	0	0	0	0	200	903	0	0	0	0	0	0	0	603	903	0
5522	9	0	0	0	0	0	0	200	300	0	0	0	0	0	0	0	200	903	0	0	0	0	0	0	0	603	903	0
5523	0	0	0	0	0	0	0	200	300	0	0	0	0	0	0	0	200	903	0	0	0	0	0	0	0	603	903	0
5523	1	0	0	0	0	0	0	200	300	0	0	0	0	0	0	0	200	903	0	0	0	0	0	0	0	603	903	0
5523	2	0	0	0	0	0	0	200	300	0	0	0	0	0	0	0	200	903	0	0	0	0	0	0	0	603	903	0
5523	3	0	0	0	0	0	0	200	300	0	0	0	0	0	0	0	200	903	0	0	0	0	0	0	0	603	903	0
5523	4	0	0	0	0	0	0	200	300	0	0	0	0	0	0	0	200	903	0	0	0	0	0	0	0	603	903	0
5523	5	0	0	0	0	0	0	200	300	0	0	0	0	0	0	0	200	903	0	0	0	0	0	0	0	603	903	0
5523	6	0	0	0	0	0	0	200	300	0	0	0	0	0	0	0	200	903	0	0	0	0	0	0	0	603	903	0
5523	7	0	0	0	0	0	0	200	300	0	0	0	0	0	0	0	200	903	0	0	0	0	0	0	0	603	903	0
5523	8	0	0	0	0	0	0	200	300	0	0	0	0	0	0	0	200	903	0	0	0	0	0	0	0	603	903	0
5523	9	0	0	0	0	0	0	200	300	0	0	0	0	0	0	0	200	903	0	0	0	0	0	0	0	603	903	0
5524	0	0	0	0	0	0	0	200	300	0	0	0	0	0	0	0	200	903	0	0	0	0	0	0	0	603	903	0
5524	1	0	0	0	0	0	0	200	300	0	0	0	0	0	0	0	200	903	0	0	0	0	0	0	0	603	903	0
5524	2	0	0	0	0	0	0	200	300	0	0	0	0	0	0	0	200	903	0	0	0	0	0	0	0	603	903	0
5524	3	0	0	0	0	0	0	200	300	0	0	0	0	0	0	0	200	903	0	0	0	0	0	0	0	603	903	0
5524	4	0	0	0	0	0	0	200	300	0	0	0	0	0	0	0	200	903	0	0	0	0	0	0	0	603	903	0
5524	5	0	0	0	0	0	0	200	300	0	0	0	0	0	0	0	200	903	0	0	0	0	0	0	0	603	903	0
5524	6	0	0	0	0	0	0	200	300	0	0	0	0	0	0	0	200	903	0	0	0	0	0	0	0	603	903	0
5524	7	0	0	0	0	0	0	200	300	0	0	0	0	0	0	0	200	903	0	0	0	0	0	0	0	603	903	0
5524	8	0	0	0	0	0	0	200	300	0	0	0	0	0	0	0	200	903	0	0	0	0	0	0	0	603	903	0
5524	9	0	0	0	0	0	0	200	300	0	0	0	0	0	0	0	200	903	0	0	0	0	0	0	0	603	903	0
5525	0	0	0	0	0	0	0	200	300	0	0	0	0	0	0	0	200	903	0	0	0	0	0	0	0	603	903	0
5525	1	0	0	0	0	0	0	200	300	0	0	0	0	0	0	0	200	903	0	0	0	0	0	0	0	603	903	0
5525	2	0	0	0	0	0	0	200	300	0	0	0	0	0	0	0	200	903	0	0	0	0	0	0	0	603	903	0
5525	3	0	0	0	0	0	0	200	300	0	0	0	0	0	0	0	200	903	0	0	0	0	0	0	0	603	903	0
5525	4	0	0	0	0	0	0	200	300	0	0	0	0	0	0	0	200	903	0	0	0	0	0	0	0	603	903	0
5525	5	0	0	0	0	0	0	200	300	0	0	0	0	0	0	0	200	903	0	0	0	0	0	0	0	603	903	0
5525	6	0	0	0	0	0	0	200	300	0	0	0	0	0	0	0	200	903	0	0	0	0	0	0	0	603	903	0
5525	7	0	0	0	0	0	0	200	300	0	0	0	0	0	0	0	200	903	0	0	0	0	0	0	0	603	903	0
5525	8	0	0	0	0	0	0	200	300	0	0	0	0	0	0	0	200	903	0	0	0	0	0	0	0	603	903	0
5525	9	0	0	0	0	0	0	200	300	0	0	0	0	0	0	0	200	903	0	0	0	0	0	0	0	603	903	0
5526	0	0	0	0	0	0	0	200	300	0	0	0	0	0	0	0	200	903	0	0	0	0	0	0	0	603	903	0
5526	1	0	0	0	0	0	0	200	300	0	0	0	0	0	0	0	200	903	0	0	0	0	0	0	0	603	903	0
5526	2	0	0	0	0	0	0	200	300	0	0	0	0	0	0	0	200	903	0	0	0	0	0	0	0	603	903	0
5526	3	0	0	0	0	0	0	200	300	0	0	0	0	0	0	0	200	903	0	0	0	0	0	0	0	603	903	0
5526	4	0	0	0	0	0	0	200	300	0	0	0	0	0	0	0	200	903	0	0	0	0	0	0	0	603	903	0
5526	5	0	0	0	0	0	0	200	300	0	0	0	0	0	0	0	200	903	0	0	0	0	0	0	0	603	903	0
5526	6	0	0	0	0	0	0	200	300	0	0	0	0	0	0	0	200	903	0	0	0	0	0	0	0	603	903	0
5526	7	0	0	0	0	0	0	200	300	0	0	0	0	0	0	0	200	903	0	0	0	0	0	0	0	603	903	0
5526	8	0	0	0	0	0	0	200	300	0	0	0	0	0	0	0	200	903	0	0	0	0	0	0	0	603	903	0
5526	9	0	0	0	0	0	0	200	300	0	0	0	0	0	0	0	200	903	0	0	0	0	0	0	0	603	903	0
5527	0	0	0	0	0	0	0	200	300	0	0	0	0	0	0	0	200	903	0	0	0	0	0	0	0	603	903	0
5527	1	0	0	0	0	0	0	200	300	0	0	0	0	0	0	0	200	903	0	0	0	0	0	0	0	603	903	0
5527	2	0	0	0	0	0	0	200	300	0	0	0	0	0	0	0	200	903	0	0	0	0	0	0	0	603	903	0
5527	3	0	0	0	0	0	0	200	300	0	0	0	0	0	0	0	200	903	0	0	0	0	0	0	0	603	903	0
5527	4	0	0	0	0	0	0	200	300	0	0	0	0	0	0	0	200	903	0	0	0	0	0	0	0	603	903	0
5527	5	0	0	0	0	0	0	200	300	0	0	0	0	0	0	0	200	903	0	0	0	0	0	0	0	603	903	0
5527	6	0	0	0	0	0	0	200	300	0	0	0	0	0	0	0	200	903	0	0	0	0	0	0	0	603	903	0
5527	7	0	0	0	0	0	0	200	300	0	0	0	0	0	0	0	200	903	0	0	0	0	0	0	0	603	903	0
5527	8	0	0	0	0	0	0	200	300	0	0	0	0	0	0	0	200	903	0	0	0	0	0	0	0	603	903	0
5527	9	0	0	0	0	0	0	200	300	0	0	0	0	0	0	0	200	903	0	0	0	0	0	0	0	603	903	0
5528	0	0	0	0	0	0	0	200	300	0	0	0	0	0	0	0	200	903	0	0	0	0	0	0	0	603	903	0
5528	1	0	0	0	0	0	0	200	300	0	0	0	0	0	0	0	200	903	0	0	0	0	0	0	0	603	903	0
5528	2	0	0	0	0	0	0	200	300	0	0	0	0	0	0	0	200	903	0	0	0	0	0	0	0	603	903	0
5528	3	0	0	0	0	0	0	200	300	0	0	0	0	0	0	0	200	903	0	0	0	0	0	0	0	603	903	0
5528	4	0	0	0	0	0	0	200	300	0	0	0	0	0	0	0	200	903	0	0	0	0	0	0	0	603	903	0
5528	5	0	0	0	0	0	0	200	300	0	0	0	0	0	0	0	200	903	0	0	0	0	0	0	0	603	903	0
5528	6	0	0	0	0	0	0	200	300	0	0	0	0	0	0	0	200	903	0	0	0	0	0	0	0	603	903	0
5528	7	0	0	0	0	0	0	200	300	0	0	0	0	0	0	0	200	903	0	0	0	0	0	0	0	603	903	0
5528	8	0	0	0	0	0	0	200	300	0	0	0	0	0	0	0	200	903	0	0	0	0	0	0	0	603	903	0
5528	9	0	0	0	0	0	0	200	300	0	0	0	0	0	0	0	200	903	0	0	0	0	0	0	0	603	903	0
5529	0	0	0	0	0	0	0	200	300	0	0	0	0	0	0	0	200	903	0	0	0	0	0	0	0	603	903	0
5529	1	0	0	0	0	0	0	200	300	0	0	0	0	0	0	0	200	903	0	0	0	0	0	0	0	603	903	0
5529	2	0	0	0	0	0	0	200	300	0	0	0	0	0	0	0	200	903	0	0	0	0	0	0	0	603	903	0
5529	3	0	0	0	0	0	0	200	300	0	0	0	0	0	0	0	200	903	0	0	0	0	0	0	0	603	903	0
5529	4	0	0	0	0	0	0	200	300	0	0	0	0	0	0	0	200	903	0	0	0	0	0	0	0	603	903	0
5529	5	0	0	0	0	0	0	200	300	0	0	0	0	0	0	0	200	903	0	0	0	0	0	0	0	603	903	0
5529	6	0	0	0	0	0	0	200	300	0	0	0	0	0	0	0	200	903	0	0	0	0	0	0	0	603	903	0
5529	7	0	0	0	0	0	0	200	300	0	0	0	0	0	0	0	200	903	0	0	0	0	0	0	0	603	903	0
5529	8	0	0	0	0	0	0	200	300	0	0	0	0	0	0	0	200	903	0	0	0	0	0	0	0	603	903	0
5529	9	0	0	0	0	0	0	200	300	0	0	0	0	0	0	0	200	903	0	0	0	0	0	0	0	603	903	0
5530	0	0	0	0	0	0	0	200	300	0	0	0	0	0	0	0	200	903	0	0	0	0	0	0	0	603	903	0
5530	1	0	0	0	0	0	0	200	300	0	0	0	0	0	0	0	200	903	0	0	0	0	0	0	0	603	903	0
5530	2	0	0	0	0	0	0	200	300	0	0	0	0	0	0	0	200	903	0	0	0	0	0	0	0	603	903	0
5530	3	0	0	0	0	0	0	200	300	0	0	0	0	0	0	0	200	903	0	0	0	0	0	0	0	603	903	0
5530	4	0	0	0	0	0	0	200	300	0	0	0	0	0	0	0	200	903	0	0	0	0	0	0	0	603	903	0
5530	5	0	0	0	0	0	0	200	300	0	0	0	0	0	0	0	200	903	0	0	0	0	0	0	0	603	903	0
5530	6	0	0	0	0	0	0	200	300	0	0	0	0	0	0	0	200	903	0	0	0	0	0	0	0	603	903	0
5530	7	0	0	0	0	0	0	200	300	0	0	0	0	0	0	0	200	903	0	0	0	0	0	0	0	603	903	0
5530	8	0	0	0	0	0	0	200	300	0	0	0	0	0	0	0	200	903	0	0	0	0	0	0	0	603	903	0
5530	9	0	0	0	0	0	0	200	300	0	0	0	0	0	0	0	200	903	0	0	0	0	0	0	0	603	903	0
5531	0	0	0	0	0	0	0	200	300	0	0	0	0	0	0	0	200	903	0	0	0	0	0	0	0	603	903	0
5531	1	0	0	0	0	0	0	200	300	0	0	0	0	0	0	0	200	903	0	0	0	0	0	0	0	603	903	0
5531	2	0	0	0	0	0	0	200	300	0	0	0	0	0	0	0	200	903	0	0	0	0	0	0	0	603	903	0
5531	3	0	0	0	0	0	0	200	300	0	0	0	0	0	0	0	200	903	0	0	0	0	0	0	0	603	903	0
5531	4	0	0	0	0	0	0	200	300	0	0	0	0	0	0	0	200	903	0	0	0	0	0	0	0	603	903	0
5531	5	0	0	0	0	0	0	200	300	0	0	0	0	0	0	0	200	903	0	0	0	0	0	0	0	603	903	0
5531	6	0	0	0	0	0	0	200	300	0	0	0	0	0	0	0	200	903	0	0	0	0	0	0	0	603	903	0
5531	7	0	0	0	0	0	0	200	300	0	0	0	0	0	0	0	200	903	0	0	0	0	0	0	0	603	903	0
5531	8	0	0	0	0	0	0	200	300	0	0	0	0	0	0	0	200	903	0	0	0	0	0	0	0	603	903	0
5531	9	0	0	0	0	0	0	200	300	0	0	0	0	0	0	0	200	903	0	0	0	0	0	0	0	603	903	0
5532	0	0	0	0	0	0	0	200	300	0	0	0	0	0	0	0	200	903	0	0	0	0	0	0	0	603	903	0
5532	1	0	0	0	0	0	0	200	300	0	0	0	0	0	0	0	200	903	0	0	0	0	0	0	0	603	903	0
5532	2	0	0	0	0	0	0	200	300	0	0	0	0	0	0	0	200	903	0	0	0	0	0	0	0	603	903	0
5532	3	0	0	0	0	0	0	200	300	0	0	0	0	0	0	0	200	903	0	0	0	0	0	0	0	603	903	0
5532	4	0	0	0	0	0	0	200	300	0	0	0	0	0	0	0	200	903	0	0	0	0	0	0	0	603	903	0
5532	5	0	0	0	0	0	0	200	300	0	0	0	0	0	0	0	200	903	0	0	0	0	0	0	0	603	903	0
5532	6	0	0	0	0	0	0	200	300	0	0	0	0	0	0	0	200	903	0	0	0	0	0	0	0	603	903	0
5532	7	0	0	0	0	0	0	200	300	0	0	0	0	0	0	0	200	903	0	0	0	0	0	0	0	603	903	0
5532	8	0	0	0	0	0	0	200	300	0	0	0	0	0	0	0	200	903	0	0	0	0	0	0	0	603	903	0
5532	9	0	0	0	0	0	0	200	300	0	0	0	0	0	0	0	200	903	0	0	0	0	0	0	0	603	903	0
5533	0	0	0	0	0	0	0	200	300	0	0	0	0	0	0	0	200	903	0	0	0	0	0	0	0	603	903	0
5533	1	0	0	0	0	0	0	200	300	0	0	0	0	0	0	0	200	903	0	0	0	0	0	0	0	603	903	0
5533	2	0	0	0	0	0	0	200	300	0	0	0	0	0	0	0	200	903	0	0	0	0	0	0	0	603	903	0
5533	3	0	0	0	0	0	0	200	300	0	0	0	0	0	0	0	200	903	0	0	0	0	0	0	0	603	903	0
5533	4	0	0	0	0	0	0	200	300	0	0	0	0	0	0	0	200	903	0	0	0	0	0	0	0	603	903	0
5533	5	0	0	0	0	0	0	200	300	0	0	0	0	0	0	0	200	903	0	0	0	0	0	0	0	603	903	0
5533	6	0	0	0	0	0	0	200	300	0	0	0	0	0	0	0	200	903	0	0	0	0	0	0	0	603	903	0
5533	7	0	0	0	0	0	0	200	300	0	0	0	0	0	0	0	200	903	0	0	0	0	0	0	0	603	903	0
5533	8	0	0	0	0	0	0	200	300	0	0	0	0	0	0	0	200	903	0	0	0	0	0	0	0	603	903	0
5533	9	0	0	0	0	0	0	200	300	0	0	0	0	0	0	0	200	903	0	0	0	0	0	0	0	603	903	0
5534	0	0	0	0	0	0	0	200	300	0	0	0	0	0	0	0	200	903	0	0	0	0	0	0	0	603	903	0
5534	1	0	0	0	0	0	0	200	300	0	0	0	0	0	0	0	200	903	0	0	0	0	0	0	0	603	903	0
5534	2	0	0	0	0	0	0	200	300	0	0	0	0	0	0	0	200	903	0	0	0	0	0	0	0	603	903	0
5534	3	0	0	0	0	0	0	200	300	0	0	0	0	0	0	0	200	903	0	0	0	0	0	0	0	603	903	0
5534	4	0	0	0	0	0	0	200	300	0	0	0	0	0	0	0	200	903	0	0	0	0	0	0	0	603	903	0
5534	5	0	0	0	0	0	0	200	300	0	0	0	0	0	0	0	200	903	0	0	0	0	0	0	0	603	903	0
5534	6	0	0	0	0	0	0	200	300	0	0	0	0	0	0	0	200	903	0	0	0	0	0	0	0	603	903	0
5534	7	0	0	0	0	0	0	200	300	0	0	0	0	0	0	0	200	903	0	0	0	0	0	0	0	603	903	0
5534	8	0	0	0	0	0	0	200	300	0	0	0	0	0	0	0	200	903	0	0	0	0	0	0	0	603	903	0
5534	9	0	0	0	0	0	0	200	300	0	0	0	0	0	0	0	200	903	0	0	0	0	0	0	0	603	903	0
5535	0	0	0	0	0	0	0	200	300	0	0	0	0	0	0	0	200	903	0	0	0	0	0	0	0	603	903	0
5535	1	0	0	0	0	0	0	200	300	0	0	0	0	0	0	0	200	903	0	0	0	0	0	0	0	603	903	0
5535	2	0	0	0	0	0	0	200	300	0	0	0	0	0	0	0	200	903	0	0	0	0	0	0	0	603	903	0
5535	3	0	0	0	0	0	0	200	300	0	0	0	0	0	0	0	200	903	0	0	0	0	0	0	0	603	903	0
5535	4	0	0	0	0	0	0	200	300	0	0	0	0	0	0	0	200	903	0	0	0	0	0	0	0	603	903	0
5535	5	0	0	0	0	0	0	200	300	0	0	0	0	0	0	0	200	903	0	0	0	0	0	0	0	603	903	0
5535	6	0	0	0	0	0	0	200	300	0	0	0	0	0	0	0	200	903	0	0	0	0	0	0	0	603	903	0
5535	7	0	0	0	0	0	0	200	300	0	0	0	0	0	0	0	200	903	0	0	0	0	0	0	0	603	903	0
5535	8	0	0	0	0	0	0	200	300	0	0	0	0	0	0	0	200	903	0	0	0	0	0	0	0	603	903	0
5535	9	0	0	0	0	0	0	200	300	0	0	0	0	0	0	0	200	903	0	0	0	0	0	0	0	603	903	0
5536	0	0	0	0	0	0	0	200	300	0	0	0	0	0	0	0	200	903	0	0	0	0	0	0	0	603	903	0
5536	1	0	0	0	0	0	0	200	300	0	0	0	0	0	0	0	200	903	0	0	0	0	0	0	0	603	903	0
5536	2	0	0	0	0	0	0	200	300	0	0	0	0	0	0	0	200	903	0	0	0	0	0	0	0	603	903	0
5536	3	0	0	0	0	0	0	200	300	0	0	0	0	0	0	0	200	903	0	0	0	0	0	0	0	603	903	0
5536	4	0	0	0	0	0	0	200	300	0	0	0	0	0	0	0	200	903	0	0	0	0	0	0	0	603	903	0
5536	5	0	0	0	0	0	0	200	300	0	0	0	0	0	0	0	200	903	0	0	0	0	0	0	0	603	903	0
5536	6	0	0	0	0	0	0	200	300	0	0	0	0	0	0	0	200	903	0	0	0	0	0	0	0	603	903	0
5536	7	0	0	0	0	0	0	200	300	0	0	0	0	0	0	0	200	903	0	0	0	0	0	0	0	603	903	0
5536	8	0	0	0	0	0	0	200	300	0	0	0	0	0	0	0	200	903	0	0	0	0	0	0	0	603	903	0
5536	9	0	0	0	0	0	0	200	300	0	0	0	0	0	0	0	200	903	0	0	0	0	0	0	0	603	903	0
5537	0	0	0	0	0	0	0	200	300	0	0	0	0	0	0	0	200	903	0	0	0	0	0	0	0	603	903	0
5537	1	0	0	0	0	0	0	200	300	0	0	0	0	0	0	0	200	903	0	0	0	0	0	0	0	603	903	0
5537	2	0	0	0	0	0	0	200	300	0	0	0	0	0	0	0	200	903	0	0	0	0	0	0	0	603	903	0
5537	3	0	0	0	0	0	0	200	300	0	0	0	0	0	0	0	200	903	0	0	0	0	0	0	0	603	903	0
5537	4	0	0	0	0	0	0	200	300	0	0	0	0	0	0	0	200	903	0	0	0	0	0	0	0	603	903	0
5537	5	0	0	0	0	0	0	200	300	0	0	0	0	0	0	0	200	903	0	0	0	0	0	0	0	603	903	0
5537	6	0	0	0	0	0	0	200	300	0	0	0	0	0	0	0	200	903	0	0	0	0	0	0	0	603	903	0
5537	7	0	0	0	0	0	0	200	300	0	0	0	0	0	0	0	200	903	0	0	0	0	0	0	0	603	903	0
5537	8	0	0	0	0	0	0	200	300	0	0	0	0	0	0	0	200	903	0	0	0	0	0	0	0	603	903	0
5537	9	0	0	0	0	0	0	200	300	0	0	0	0	0	0	0	200	903	0	0	0	0	0	0	0	603	903	0
5538	0	0	0	0	0	0	0	200	300	0	0	0	0	0	0	0	200	903	0	0	0	0	0	0	0	603	903	0
5538	1	0	0	0	0	0	0	200	300	0	0	0	0	0	0	0	200	903	0	0	0	0	0	0	0	603	903	0
5538	2	0	0	0	0	0	0	200	300	0	0	0	0	0	0	0	200	903	0	0	0	0	0	0	0	603	903	0
5538	3	0	0	0	0	0	0	200	300	0	0	0	0	0	0	0	200	903	0	0	0	0	0	0	0	603	903	0
5538	4	0	0	0	0	0	0	200	300	0	0	0	0	0	0	0	200	903	0	0	0	0	0	0	0	603	903	0
5538	5	0	0	0	0	0	0	200	300	0	0	0	0	0	0	0	200	903	0	0	0	0	0	0	0	603	903	0
5538	6	0	0	0	0	0	0	200	300	0	0	0	0	0	0	0	200	903	0	0	0	0	0	0	0	603	903	0
5538	7	0	0	0	0	0	0	200	300	0	0	0	0	0	0	0	200	903	0	0	0	0	0	0	0	603	903	0
5538	8	0	0	0	0	0	0	200	300	0	0	0	0	0	0	0	200	903	0	0	0	0	0	0	0	603	903	0
5538	9	0	0	0	0	0	0	200	300	0	0	0	0	0	0	0	200	903	0	0	0	0	0	0	0	603	903	0
5539	0	0	0	0	0	0	0	200	300	0	0	0	0	0	0	0	200	903	0	0	0	0	0	0	0	603	903	0
5539	1	0	0	0	0	0	0	200	300	0	0	0	0	0	0	0	200	903	0	0	0	0	0	0	0	603	903	0
5539	2	0	0	0	0	0	0	200	300	0	0	0	0	0	0	0	200	903	0	0	0	0	0	0	0	603	903	0
5539	3	0	0	0	0	0	0	200	300	0	0	0	0	0	0	0	200	903	0	0	0	0	0	0	0	603	903	0
5539	4	0	0	0	0	0	0	200	300	0	0	0	0	0	0	0	200	903	0	0	0	0	0	0	0	603	903	0
5539	5	0	0	0	0	0	0	200	300	0	0	0	0	0	0	0	200	903	0	0	0	0	0	0	0	603	903	0
5539	6	0	0	0	0	0	0	200	300	0	0	0	0	0	0	0	200	903	0	0	0	0	0	0	0	603	903	0
5539	7	0	0	0	0	0	0	200	300	0	0	0	0	0	0	0	200	903	0	0	0	0	0	0	0	603	903	0
5539	8	0	0	0	0	0	0	200	300	0	0	0	0	0	0	0	200	903	0	0	0	0	0	0	0	603	903	0
5539	9	0	0	0	0	0	0	200	300	0	0	0	0	0	0	0	200	903	0	0	0	0	0	0	0	603	903	0
5540	0	0	0	0	0	0	0	200	300	0	0	0	0	0	0	0	200	903	0	0	0	0	0	0	0	603	903	0
5540	1	0	0	0	0	0	0	200	300	0	0	0	0	0	0	0	200	903	0	0	0	0	0	0	0	603	903	0
5540	2	0	0	0	0	0	0	200	300	0	0	0	0	0	0	0	200	903	0	0	0	0	0	0	0	603	903	0
5540	3	0	0	0	0	0	0	200	300	0	0	0	0	0	0	0	200	903	0	0	0	0	0	0	0	603	903	0
5540	4	0	0	0	0	0	0	200	300	0	0	0	0	0	0	0	200	903	0	0	0	0	0	0	0	603	903	0
5540	5	0	0	0	0	0	0	200	300	0	0	0	0	0	0	0	200	903	0	0	0	0	0	0	0	603	903	0
5540	6	0	0	0	0	0	0	200	300	0	0	0	0	0	0	0	200	903	0	0	0	0	0	0	0	603	903	0
5540	7	0	0	0	0	0	0	200	300	0	0	0	0	0	0	0	200	903	0	0	0	0	0	0	0	603	903	0
5540	8	0	0	0	0	0	0	200	300	0	0	0	0	0	0	0	200	903	0	0	0	0	0	0	0	603	903	0
5540	9	0	0	0	0	0	0	200	300	0	0	0	0	0	0	0	200	903	0	0	0	0	0	0	0	603	903	0
5541	0	0	0	0	0	0	0	200	300	0	0	0	0	0	0	0	200	903	0	0	0	0	0	0	0	603	903	0
5541	1	0	0	0	0	0	0	200	300	0	0	0	0	0	0	0	200	903	0	0	0	0	0	0	0	603	903	0
5541	2	0	0	0	0	0	0	200	300	0	0	0	0	0	0	0	200	903	0	0	0	0	0	0	0	603	903	0
5541	3	0	0	0	0	0	0	200	300	0	0	0	0	0	0	0	200	903	0	0	0	0	0	0	0	603	903	0
5541	4	0	0	0	0	0	0	200	300	0	0	0	0	0	0	0	200	903	0	0	0	0	0	0	0	603	903	0
5541	5	0	0	0	0	0	0	200	300	0	0	0	0	0	0	0	200	903	0	0	0	0	0	0	0	603	903	0
5541	6	0	0	0	0	0	0	200	300	0	0	0	0	0	0	0	200	903	0	0	0	0	0	0	0	603	903	0
5541	7	0	0	0	0	0	0	200	300	0	0	0	0	0	0	0	200	903	0	0	0	0	0	0	0	603	903	0
5541	8	0	0	0	0	0	0	200	300	0	0	0	0	0	0	0	200	903	0	0	0	0	0	0	0	603	903	0
5541	9	0	0	0	0	0	0	200	300	0	0	0	0	0	0	0	200	903	0	0	0	0	0	0	0	603	903	0
5542	0	0	0	0	0	0	0	200	300	0	0	0	0	0	0	0	200	903	0	0	0	0	0	0	0	603	903	0
5542	1	0	0	0	0	0	0	200	300	0	0	0	0	0	0	0	200	903	0	0	0	0	0	0	0	603	903	0
5542	2	0	0	0	0	0	0	200	300	0	0	0	0	0	0	0	200	903	0	0	0	0	0	0	0	603	903	0
5542	3	0	0	0	0	0	0	200	300	0	0	0	0	0	0	0	200	903	0	0	0	0	0	0	0	603	903	0
5542	4	0	0	0	0	0	0	200	300	0	0	0	0	0	0	0	200	903	0	0	0	0	0	0	0	603	903	0
5542	5	0	0	0	0	0	0	200	300	0	0	0	0	0	0	0	200	903	0	0	0	0	0	0	0	603	903	0
5542	6	0	0	0	0	0	0	200	300	0	0	0	0	0	0	0	200	903	0	0	0	0	0	0	0	603	903	0
5542	7	0	0	0	0	0	0	200	300	0	0	0	0	0	0	0	200	903	0	0	0	0	0	0	0	603	903	0
5542	8	0	0	0	0	0	0	200	300	0	0	0	0	0	0	0	200	903	0	0	0	0	0	0	0	603	903	0
5542	9	0	0	0	0	0	0	200	300	0	0	0	0	0	0	0	200	903	0	0	0	0	0	0	0	603	903	0
5543	0	0	0	0	0	0	0	200	300	0	0	0	0	0	0	0	200	903	0	0	0	0	0	0	0	603	903	0
5543	1	0	0	0	0	0	0	200	300	0	0	0	0	0	0	0	200	903	0	0	0	0	0	0	0	603	903	0
5543	2	0	0	0	0	0	0	200	300	0	0	0	0	0	0	0	200	903	0	0	0	0	0	0	0	603	903	0
5543	3	0	0	0	0	0	0	200	300	0	0	0	0	0	0	0	200	903	0	0	0	0	0	0	0	603	903	0
5543	4	0	0	0	0	0	0	200	300	0	0	0	0	0	0	0	200	903	0	0	0	0	0	0	0	603	903	0
5543	5	0	0	0	0	0	0	200	300	0	0	0	0	0	0	0	200	903	0	0	0	0	0	0	0	603	903	0
5543	6	0	0	0	0	0	0	200	300	0	0	0	0	0	0	0	200	903	0	0	0	0	0	0	0	603	903	0
5543	7	0	0	0	0	0	0	200	300	0	0	0	0	0	0	0	200	903	0	0	0	0	0	0	0	603	903	0
5543	8	0	0	0	0	0	0	200	300	0	0	0	0	0	0	0	200	903	0	0	0	0	0	0	0	603	903	0
5543	9	0	0	0	0	0	0	200	300	0	0	0	0	0	0	0	200	903	0	0	0	0	0	0	0	603	903	0
5544	0	0	0	0	0	0	0	200	300	0	0	0	0	0	0	0	200	903	0	0	0	0	0	0	0	603	903	0
5544	1	0	0	0	0	0	0	200	300	0	0	0	0	0	0	0	200	903	0	0	0	0	0	0	0	603	903	0
5544	2	0	0	0	0	0	0	200	300	0	0	0	0	0	0	0	200	903	0	0	0	0	0	0	0	603	903	0
5544	3	0	0	0	0	0	0	200	300	0	0	0	0	0	0	0	200	903	0	0	0	0	0	0	0	603	903	0
5544	4	0	0	0	0	0	0	200	300	0	0	0	0	0	0	0	200	903	0	0	0	0	0	0	0	603	903	0
5544	5	0	0	0	0	0	0	200	300	0	0	0	0	0	0	0	200	903	0	0	0	0	0	0	0	603	903	0
5544	6	0	0	0	0	0	0	200	300	0	0	0	0	0	0	0	200	903	0	0	0	0	0	0	0	603	903	0
5544	7	0	0	0	0	0	0	200	300	0	0	0	0	0	0	0	200	903	0	0	0	0	0	0	0	603	903	0
5544	8	0	0	0	0	0	0	200	300	0	0	0	0	0	0	0	200	903	0	0	0	0	0	0	0	603	903	0
5544	9	0	0	0	0	0	0	200	300	0	0	0	0	0	0	0	200	903	0	0	0	0	0	0	0	603	903	0
5545	0	0	0	0	0	0	0	200	300	0	0	0	0	0	0	0	200	903	0	0	0	0	0	0	0	603	903	0
5545	1	0	0	0	0	0	0	200	300	0	0	0	0	0	0	0	200	903	0	0	0	0	0	0	0	603	903	0
5545	2	0	0	0	0	0	0	200	300	0	0	0	0	0	0	0	200	903	0	0	0	0	0	0	0	603	903	0
5545	3	0	0	0	0	0	0	200	300	0	0	0	0	0	0	0	200	903	0	0	0	0	0	0	0	603	903	0
5545	4	0	0	0	0	0	0	200	300	0	0	0	0	0	0	0	200	903	0	0	0	0	0	0	0	603	903	0
5545	5	0	0	0	0	0	0	200	300	0	0	0	0	0	0	0	200	903	0	0	0	0	0	0	0	603	903	0
5545	6	0	0	0	0	0	0	200	300	0	0	0	0	0	0	0	200	903	0	0	0	0	0	0	0	603	903	0
5545	7	0	0	0	0	0	0	200	300	0	0	0	0	0	0	0	200	903	0	0	0	0	0	0	0	603	903	0
5545	8	0	0	0	0	0	0	200	300	0	0	0	0	0	0	0	200	903	0	0	0	0	0	0	0	603	903	0
5545	9	0	0	0	0	0	0	200	300	0	0	0	0	0	0	0	200	903	0	0	0	0	0	0	0	603	903	0
5546	0	0	0	0	0	0	0	200	300	0	0	0	0	0	0	0	200	903	0	0	0	0	0	0	0	603	903	0
5546	1	0	0	0	0	0	0	200	300	0	0	0	0	0	0	0	200	903	0	0	0	0	0	0	0	603	903	0
5546	2	0	0	0	0	0	0	200	300	0	0	0	0	0	0	0	200	903	0	0	0	0	0	0	0	603	903	0
5546	3	0	0	0	0	0	0	200	300	0	0	0	0	0	0	0	200	903	0	0	0	0	0	0	0	603	903	0
5546	4	0	0	0	0	0	0	200	300	0	0	0	0	0	0	0	200	903	0	0	0	0	0	0	0	603	903	0
5546	5	0	0	0	0	0	0	200	300	0	0	0	0	0	0	0	200	903	0	0	0	0	0	0	0	603	903	0
5546	6	0	0	0	0	0	0	200	300	0	0	0	0	0	0	0	200	903	0	0	0	0	0	0	0	603	903	0
5546	7	0	0	0	0	0	0	200	300	0	0	0	0	0	0	0	200	903	0	0	0	0	0	0	0	603	903	0
5546	8	0	0	0	0	0	0	200	300	0	0	0	0	0	0	0	200	903	0	0	0	0	0	0	0	603	903	0
5546	9	0	0	0	0	0	0	200	300	0	0	0	0	0	0	0	200	903	0	0	0	0	0	0	0	603	903	0
5547	0	0	0	0	0	0	0	200	300	0	0	0	0	0	0	0	200	903	0	0	0	0	0	0	0	603	903	0
5547	1	0	0	0	0	0	0	200	300	0	0	0	0	0	0	0	200	903	0	0	0	0	0	0	0	603	903	0
5547	2	0	0	0	0	0	0	200	300	0	0	0	0	0	0	0	200	903	0	0	0	0	0	0	0	603	903	0
5547	3	0	0	0	0	0	0	200	300	0	0	0	0	0	0	0	200	903	0	0	0	0	0	0	0	603	903	0
5547	4	0	0	0	0	0	0	200	300	0	0	0	0	0	0	0	200	903	0	0	0	0	0	0	0	603	903	0
5547	5	0	0	0	0	0	0	200	300	0	0	0	0	0	0	0	200	903	0	0	0	0	0	0	0	603	903	0
5547	6	0	0	0	0	0	0	200	300	0	0	0	0	0	0	0	200	903	0	0	0	0	0	0	0	603	903	0
5547	7	0	0	0	0	0	0	200	300	0	0	0	0	0	0	0	200	903	0	0	0	0	0	0	0	603	903	0
5547	8	0	0	0	0	0	0	200	300	0	0	0	0	0	0	0	200	903	0	0	0	0	0	0	0	603	903	0
5547	9	0	0	0	0	0	0	200	300	0	0	0	0	0	0	0	200	903	0	0	0	0	0	0	0	603	903	0
5548	0	0	0	0	0	0	0	200	300	0	0	0	0	0	0	0	200	903	0	0	0	0	0	0	0	603	903	0
5548	1	0	0	0	0	0	0	200	300	0	0	0	0	0	0	0	200	903	0	0	0	0	0	0	0	603	903	0
5548	2	0	0	0	0	0	0	200	300	0	0	0	0	0	0	0	200	903	0	0	0	0	0	0	0	603	903	0
5548	3	0	0	0	0	0	0	200	300	0	0	0	0	0	0	0	200	903	0	0	0	0	0	0	0	603	903	0
5548	4	0	0	0	0	0	0	200	300	0	0	0	0	0	0	0	200	903	0	0	0	0	0	0	0	603	903	0
5548	5	0	0	0	0	0	0	200	300	0	0	0	0	0	0	0	200	903	0	0	0	0	0	0	0	603	903	0
5548	6	0	0	0	0	0	0	200	300	0	0	0	0	0	0	0	200	903	0	0	0	0	0	0	0	603	903	0
5548	7	0	0	0	0	0	0	200	300	0	0	0	0	0	0	0	200	903	0	0	0	0	0	0	0	603	903	0
5548	8	0	0	0	0	0	0	200	300	0	0	0	0	0	0	0	200	903	0	0	0	0	0	0	0	603	903	0
5548	9	0	0	0	0	0	0	200	300	0	0	0	0	0	0	0	200	903	0	0	0	0	0	0	0	603	903	0
5549	0	0	0	0	0	0	0	200	300	0	0	0	0	0	0	0	200	903	0	0	0	0	0	0	0	603	903	0
5549	1	0	0	0	0	0	0	200	300	0	0	0	0	0	0	0	200	903	0	0	0	0	0	0	0	603	903	0
5549	2	0	0	0	0	0	0	200	300	0	0	0	0	0	0	0	200	903	0	0	0	0	0	0	0	603	903	0
5549	3	0	0	0	0	0	0	200	300	0	0	0	0	0	0	0	200	903	0	0	0	0	0	0	0	603	903	0
5549	4	0	0	0	0	0	0	200	300	0	0	0	0	0	0	0	200	903	0	0	0	0	0	0	0	603	903	0
5549	5	0	0	0	0	0	0	200	300	0	0	0	0	0	0	0	200	903	0	0	0	0	0	0	0	603	903	0
5549	6	0	0	0	0	0	0	200	300	0	0	0	0	0	0	0	200	903	0	0	0	0	0	0	0	603	903	0
5549	7	0	0	0	0	0	0	200	300	0	0	0	0	0	0	0	200	903	0	0	0	0	0	0	0	603	903	0
5549	8	0	0	0	0	0	0	200	300	0	0	0	0	0	0	0	200	903	0	0	0	0	0	0	0	603	903	0
5549	9	0	0	0	0	0	0	200	300	0	0	0	0	0	0	0	200	903	0	0	0	0	0	0	0	603	903	0
5550	0	0	0	0	0	0	0	200	300	0	0	0	0	0	0	0	200	903	0	0	0	0	0	0	0	603	903	0
5550	1	0	0	0	0	0	0	200	300	0	0	0	0	0	0	0	200	903	0	0	0	0	0	0	0	603	903	0
5550	2	0	0	0	0	0	0	200	300	0	0	0	0	0	0	0	200	903	0	0	0	0	0	0	0	603	903	0
5550	3	0	0	0	0	0	0	200	300	0	0	0	0	0	0	0	200	903	0	0	0	0	0	0	0	603	903	0
5550	4	0	0	0	0	0	0	200	300	0	0	0	0	0	0	0	200	903	0	0	0	0	0	0	0	603	903	0
5550	5	0	0	0	0	0	0	200	300	0	0	0	0	0	0	0	200	903	0	0	0	0	0	0	0	603	903	0
5550	6	0	0	0	0	0	0	200	300	0	0	0	0	0	0	0	200	903	0	0	0	0	0	0	0	603	903	0
5550	7	0	0	0	0	0	0	200	300	0	0	0	0	0	0	0	200	903	0	0	0	0	0	0	0	603	903	0
5550	8	0	0	0	0	0	0	200	300	0	0	0	0	0	0	0	200	903	0	0	0	0	0	0	0	603	903	0
5550	9	0	0	0	0	0	0	200	300	0	0	0	0	0	0	0	200	903	0	0	0	0	0	0	0	603	903	0
5551	0	0	0	0	0	0	0	200	300	0	0	0	0	0	0	0	200	903	0	0	0	0	0	0	0	603	903	0
5551	1	0	0	0	0	0	0	200	300	0	0	0	0	0	0	0	200	903	0	0	0	0	0	0	0	603	903	0
5551	2	0	0	0	0	0	0	200	300	0	0	0	0	0	0	0	200	903	0	0	0	0	0	0	0	603	903	0
5551	3	0	0	0	0	0	0	200	300	0	0	0	0	0	0	0	200	903	0	0	0	0	0	0	0	603	903	0
5551	4	0	0	0	0	0	0	200	300	0	0	0	0	0	0	0	200	903	0	0	0	0	0	0	0	603	903	0
5551	5	0	0	0	0	0	0	200	300	0	0	0	0	0	0	0	200	903	0	0	0	0	0	0	0	603	903	0
5551	6	0	0	0	0	0	0	200	300	0	0	0	0	0	0	0	200	903	0	0	0	0	0	0	0	603	903	0
5551	7	0	0	0	0	0	0	200	300	0	0	0	0	0	0	0	200	903	0	0	0	0	0	0	0	603	903	0
5551	8	0	0	0	0	0	0	200	300	0	0	0	0	0	0	0	200	903	0	0	0	0	0	0	0	603	903	0
5551	9	0	0	0	0	0	0	200	300	0	0	0	0	0	0	0	200	903	0	0	0	0	0	0	0	603	903	0
5552	0	0	0	0	0	0	0	200	300	0	0	0	0	0	0	0	200	903	0	0	0	0	0	0	0	603	903	0
5552	1	0	0	0	0	0	0	200	300	0	0	0	0	0	0	0	200	903	0	0	0	0	0	0	0	603	903	0
5552	2	0	0	0	0	0	0	200	300	0	0	0	0	0	0	0	200	903	0	0	0	0	0	0	0	603	903	0
5552	3	0	0	0	0	0	0	200	300	0	0	0	0	0	0	0	200	903	0	0	0	0	0	0	0	603	903	0
5552	4	0	0	0	0	0	0	200	300	0	0	0	0	0	0	0	200	903	0	0	0	0	0	0	0	603	903	0
5552	5	0	0	0	0	0	0	200	300	0	0	0	0	0	0	0	200	903	0	0	0	0	0	0	0	603	903	0
5552	6	0	0	0	0	0	0	200	300	0	0	0	0	0	0	0	200	903	0	0	0	0	0	0	0	603	903	0
5552	7	0	0	0	0	0	0	200	300	0	0	0	0	0	0	0	200	903	0	0	0	0	0	0	0	603	903	0
5552	8	0	0	0	0	0	0	200	300	0	0	0	0	0	0	0	200	903	0	0	0	0	0	0	0	603	903	0
5552	9	0	0	0	0	0	0	200	300	0	0	0	0	0	0	0	200	903	0	0	0	0	0	0	0	603	903	0
5553	0	0	0	0	0	0	0	200	300	0	0	0	0	0	0	0	200	903	0	0	0	0	0	0	0	603	903	0
5553	1	0	0	0	0	0	0	200	300	0	0	0	0	0	0	0	200	903	0	0	0	0	0	0	0	603	903	0
5553	2	0	0	0	0	0	0	200	300	0	0	0	0	0	0	0	200	903	0	0	0	0	0	0	0	603	903	0
5553	3	0	0	0	0	0	0	200	300	0	0	0	0	0	0	0	200	903	0	0	0	0	0	0	0	603	903	0
5553	4	0	0	0	0	0	0	200	300	0	0	0	0	0	0	0	200	903	0	0	0	0	0	0	0	603	903	0
5553	5	0	0	0	0	0	0	200	300	0	0	0	0	0	0	0	200	903	0	0	0	0	0	0	0	603	903	0
5553	6	0	0	0	0	0	0	200	300	0	0	0	0	0	0	0	200	903	0	0	0	0	0	0	0	603	903	0
5553	7	0	0	0	0	0	0	200	300	0	0	0	0	0	0	0	200	903	0	0	0	0	0	0	0	603	903	0
5553	8	0	0	0	0	0	0	200	300	0	0	0	0	0	0	0	200	903	0	0	0	0	0	0	0	603	903	0
5553	9	0	0	0	0	0	0	200	300	0	0	0	0	0	0	0	200	903	0	0	0	0	0	0	0	603	903	0
5554	0	0	0	0	0	0	0	200	300	0	0	0	0	0	0	0	200	903	0	0	0	0	0	0	0	603	903	0
5554	1	0	0	0	0	0	0	200	300	0	0	0	0	0	0	0	200	903	0	0	0	0	0	0	0	603	903	0
5554	2	0	0	0	0	0	0	200	300	0	0	0	0	0	0	0	200	903	0	0	0	0	0	0	0	603	903	0
5554	3	0	0	0	0	0	0	200	300	0	0	0	0	0	0	0	200	903	0	0	0	0	0	0	0	603	903	0
5554	4	0	0	0	0	0	0	200	300	0	0	0	0	0	0	0	200	903	0	0	0	0	0	0	0	603	903	0
5554	5	0	0	0	0	0	0	200	300	0	0	0	0	0	0	0	200	903	0	0	0	0	0	0	0	603	903	0
5554	6	0	0	0	0	0	0	200	300	0	0	0	0	0	0	0	200	903	0	0	0	0	0	0	0	603	903	0
5554	7	0	0	0	0	0	0	200	300	0	0	0	0	0	0	0	200	903	0	0	0	0	0	0	0	603	903	0
5554	8	0	0	0	0	0	0	200	300	0	0	0	0	0	0	0	200	903	0	0	0	0	0	0	0	603	903	0
5554	9	0	0	0	0	0	0	200	300	0	0	0	0	0	0	0	200	903	0	0	0	0	0	0	0	603	903	0
5555	0	0	0	0	0	0	0	200	300	0	0	0	0	0	0	0	200	903	0	0	0	0	0	0	0	603	903	0
5555	1	0	0	0	0	0	0	200	300	0	0	0	0	0	0	0	200	903	0	0	0	0	0	0	0	603	903	0
5555	2	0	0	0	0	0	0	200	300	0	0	0	0	0	0	0	200	903	0	0	0	0	0	0	0	603	903	0
5555	3	0	0	0	0	0	0	200	300	0	0	0	0	0	0	0	200	903	0	0	0	0	0	0	0	603	903	0
5555	4	0	0	0	0	0	0	200	300	0	0	0	0	0	0	0	200	903	0	0	0	0	0	0	0	603	903	0
5555	5	0	0	0	0	0	0	200	300	0	0	0	0	0	0	0	200	903	0	0	0	0	0	0	0	603	903	0
5555	6	0	0	0	0	0	0	200	300	0	0	0	0	0	0	0	200	903	0	0	0	0	0	0	0	603	903	0
5555	7	0	0	0	0	0	0	200	300	0	0	0	0	0	0	0	200	903	0	0	0	0	0	0	0	603	903	0
5555	8	0	0	0	0	0	0	200	300	0	0	0	0	0	0	0	200	903	0	0	0	0	0	0	0	603	903	0
5555	9	0	0	0	0	0	0	200	300	0	0	0	0	0	0	0	200	903	0	0	0	0	0	0	0	603	903	0
5556	0	0	0	0	0	0	0	200	300	0	0	0	0	0	0	0	200	903	0	0	0	0	0	0	0	603	903	0
5556	1	0	0	0	0	0	0	200	300	0	0	0	0	0	0	0	200	903	0	0	0	0	0	0	0	603	903	0
5556	2	0	0	0	0	0	0	200	300	0	0	0	0	0	0	0	200	903	0	0	0	0	0	0	0	603	903	0
5556	3	0	0	0	0	0	0	200	300	0	0	0	0	0	0	0	200	903	0	0	0	0	0	0	0	603	903	0
5556	4	0	0	0	0	0	0	200	300	0	0	0	0	0	0	0	200	903	0	0	0	0	0	0	0	603	903	0
5556	5	0	0	0	0	0	0	200	300	0	0	0	0	0	0	0	200	903	0	0	0	0	0	0	0	603	903	0
5556	6	0	0	0	0	0	0	200	300	0	0	0	0	0	0	0	200	903	0	0	0	0	0	0	0	603	903	0
5556	7	0	0	0	0	0	0	200	300	0	0	0	0	0	0	0	200	903	0	0	0	0	0	0	0	603	903	0
5556	8	0	0	0	0	0	0	200	300	0	0	0	0	0	0	0	200	903	0	0	0	0	0	0	0	603	903	0
5556	9	0	0	0	0	0	0	200	300	0	0	0	0	0	0	0	200	903	0	0	0	0	0	0	0	603	903	0
5557	0	0	0	0	0	0	0	200	300	0	0	0	0	0	0	0	200	903	0	0	0	0	0	0	0	603	903	0
5557	1	0	0	0	0	0	0	200	300	0	0	0	0	0	0	0	200	903	0	0	0	0	0	0	0	603	903	0
5557	2	0	0	0	0	0	0	200	300	0	0	0	0	0	0	0	200	903	0	0	0	0	0	0	0	603	903	0
5557	3	0	0	0	0	0	0	200	300	0	0	0	0	0	0	0	200	903	0	0	0	0	0	0	0	603	903	0
5557	4	0	0	0	0	0	0	200	300	0	0	0	0	0	0	0	200	903	0	0	0	0	0	0	0	603	903	0
5557	5	0	0	0	0	0	0	200	300	0	0	0	0	0	0	0	200	903	0	0	0	0	0	0	0	603	903	0
5557	6	0	0	0	0	0	0	200	300	0	0	0	0	0	0	0	200	903	0	0	0	0	0	0	0	603	903	0
5557	7	0	0	0	0	0	0	200	300	0	0	0	0	0	0	0	200	903	0	0	0	0	0	0	0	603	903	0
5557	8	0	0	0	0	0	0	200	300	0	0	0	0	0	0	0	200	903	0	0	0	0	0	0	0	603	903	0
5557	9	0	0	0	0	0	0	200	300	0	0	0	0	0	0	0	200	903	0	0	0	0	0	0	0	603	903	0
5558	0	0	0	0	0	0	0	200	300	0	0	0	0	0	0	0	200	903	0	0	0	0	0	0	0	603	903	0
5558	1	0	0	0	0	0	0	200	300	0	0	0	0	0	0	0	200	903	0	0	0	0	0	0	0	603	903	0
5558	2	0	0	0	0	0	0	200	300	0	0	0	0	0	0	0	200	903	0	0	0	0	0	0	0	603	903	0
5558	3	0	0	0	0	0	0	200	300	0	0	0	0	0	0	0	200	903	0	0	0	0	0	0	0	603	903	0
5558	4	0	0	0	0	0	0	200	300	0	0	0	0	0	0	0	200	903	0	0	0	0	0	0	0	603	903	0
5558	5	0	0	0	0	0	0	200	300	0	0	0	0	0	0	0	200	903	0	0	0	0	0	0	0	603	903	0
5558	6	0	0	0	0	0	0	200	300	0	0	0	0	0	0	0	200	903	0	0	0	0	0	0	0	603	903	0
5558	7	0	0	0	0	0	0	200	300	0	0	0	0	0	0	0	200	903	0	0	0	0	0	0	0	603	903	0
5558	8	0	0	0	0	0	0	200	300	0	0	0	0	0	0	0	200	903	0	0	0	0	0	0	0	603	903	0
5558	9	0	0	0	0	0	0	200	300	0	0	0	0	0	0	0	200	903	0	0	0	0	0	0	0	603	903	0
5559	0	0	0	0	0	0	0	200	300	0	0	0	0	0	0	0	200	903	0	0	0	0	0	0	0	603	903	0
5559	1	0	0	0	0	0	0	200	300	0	0	0	0	0	0	0	200	903	0	0	0	0	0	0	0	603	903	0
5559	2	0	0	0	0	0	0	200	300	0	0	0	0	0	0	0	200	903	0	0	0	0	0	0	0	603	903	0
5559	3	0	0	0	0	0	0	200	300	0	0	0	0	0	0	0	200	903	0	0	0	0	0	0	0	603	903	0
5559	4	0	0	0	0	0	0	200	300	0	0	0	0	0	0	0	200	903	0	0	0	0	0	0	0	603	903	0
5559	5	0	0	0	0	0	0	200	300	0	0	0	0	0	0	0	200	903	0	0	0	0	0	0	0	603	903	0
5559	6	0	0	0	0	0	0	200	300	0	0	0	0	0	0	0	200	903	0	0	0	0	0	0	0	603	903	0
5559	7	0	0	0	0	0	0	200	300	0	0	0	0	0	0	0	200	903	0	0	0	0	0	0	0	603	903	0
5559	8	0	0	0	0	0	0	200	300	0	0	0	0	0	0	0	200	903	0	0	0	0	0	0	0	603	903	0
5559	9	0	0	0	0	0	0	200	300	0	0	0	0	0	0	0	200	903	0	0	0	0	0	0	0	603	903	0
5560	0	0	0	0	0	0	0	200	300	0	0	0	0	0	0	0	200	903	0	0	0	0	0	0	0	603	903	0
5560	1	0	0	0	0	0	0	200	300	0	0	0	0	0	0	0	200	903	0	0	0	0	0	0	0	603	903	0
5560	2	0	0	0	0	0	0	200	300	0	0	0	0	0	0	0	200	903	0	0	0	0	0	0	0	603	903	0
5560	3	0	0	0	0	0	0	200	300	0	0	0	0	0	0	0	200	903	0	0	0	0	0	0	0	603	903	0
5560	4	0	0	0	0	0	0	200	300	0	0	0	0	0	0	0	200	903	0	0	0	0	0	0	0	603	903	0
5560	5	0	0	0	0	0	0	200	300	0	0	0	0	0	0	0	200	903	0	0	0	0	0	0	0	603	903	0
5560	6	0	0	0	0	0	0	200	300	0	0	0	0	0	0	0	200	903	0	0	0	0	0	0	0	603	903	0
5560	7	0	0	0	0	0	0	200	300	0	0	0	0	0	0	0	200	903	0	0	0	0	0	0	0	603	903	0
5560	8	0	0	0	0	0	0	200	300	0	0	0	0	0	0	0	200	903	0	0	0	0	0	0	0	603	903	0
5560	9	0	0	0	0	0	0	200	300	0	0	0	0	0	0	0	200	903	0	0	0	0	0	0	0	603	903	0
5561	0	0	0	0	0	0	0	200	300	0	0	0	0	0	0	0	200	903	0	0	0	0	0	0	0	603	903	0
5561	1	0	0	0	0	0	0	200	300	0	0	0	0	0	0	0	200	903	0	0	0	0	0	0	0	603	903	0
5561	2	0	0	0	0	0	0	200	300	0	0	0	0	0	0	0	200	903	0	0	0	0	0	0	0	603	903	0
5561	3	0	0	0	0	0	0	200	300	0	0	0	0	0	0	0	200	903	0	0	0	0	0	0	0	603	903	0
5561	4	0	0	0	0	0	0	200	300	0	0	0	0	0	0	0	200	903	0	0	0	0	0	0	0	603	903	0
5561	5	0	0	0	0	0	0	200	300	0	0	0	0	0	0	0	200	903	0	0	0	0	0	0	0	603	903	0
5561	6	0	0	0	0	0	0	200	300	0	0	0	0	0	0	0	200	903	0	0	0	0	0	0	0	603	903	0
5561	7	0	0	0	0	0	0	200	300	0	0	0	0	0	0	0	200	903	0	0	0	0	0	0	0	603	903	0
5561	8	0	0	0	0	0	0	200	300	0	0	0	0	0	0	0	200	903	0	0	0	0	0	0	0	603	903	0
5561	9	0	0	0	0	0	0	200	300	0	0	0	0	0	0	0	200	903	0	0	0	0	0	0	0	603	903	0
5562	0	0	0	0	0	0	0	200	300	0	0	0	0	0	0	0	200	903	0	0	0	0	0	0	0	603	903	0
5562	1	0	0	0	0	0	0	200	300	0	0	0	0	0	0	0	200	903	0	0	0	0	0	0	0	603	903	0
5562	2	0	0	0	0	0	0	200	300	0	0	0	0	0	0	0	200	903	0	0	0	0	0	0	0	603	903	0
5562	3	0	0	0	0	0	0	200	300	0	0	0	0	0	0	0	200	903	0	0	0	0	0	0	0	603	903	0
5562	4	0	0	0	0	0	0	200	300	0	0	0	0	0	0	0	200	903	0	0	0	0	0	0	0	603	903	0
5562	5	0	0	0	0	0	0	200	300	0	0	0	0	0	0	0	200	903	0	0	0	0	0	0	0	603	903	0
5562	6	0	0	0	0	0	0	200	300	0	0	0	0	0	0	0	200	903	0	0	0	0	0	0	0	603	903	0
5562	7	0	0	0	0	0	0	200	300	0	0	0	0	0	0	0	200	903	0	0	0	0	0	0	0	603	903	0
5562	8	0	0	0	0	0	0	200	300	0	0	0	0	0	0	0	200	903	0	0	0	0	0	0	0	603	903	0
5562	9	0	0	0	0	0	0	200	300	0	0	0	0	0	0	0	200	903	0	0	0	0	0	0	0	603	903	0
5563	0	0	0	0	0	0	0	200	300	0	0	0	0	0	0	0	200	903	0	0	0	0	0	0	0	603	903	0
5563	1	0	0	0	0	0	0	200	300	0	0	0	0	0	0	0	200	903	0	0	0	0	0	0	0	603	903	0
5563	2	0	0	0	0	0	0	200	300	0	0	0	0	0	0	0	200	903	0	0	0	0	0	0	0	603	903	0
5563	3	0	0	0	0	0	0	200	300	0	0	0	0	0	0	0	200	903	0	0	0	0	0	0	0	603	903	0
5563	4	0	0	0	0	0	0	200	300	0	0	0	0	0	0	0	200	903	0	0	0	0	0	0	0	603	903	0
5563	5	0	0	0	0	0	0	200	300	0	0	0	0	0	0	0	200	903	0	0	0	0	0	0	0	603	903	0
5563	6	0	0	0	0	0	0	200	300	0	0	0	0	0	0	0	200	903	0	0	0	0	0	0	0	603	903	0
5563	7	0	0	0	0	0	0	200	300	0	0	0	0	0	0	0	200	903	0	0	0	0	0	0	0	603	903	0
5563	8	0	0	0	0	0	0	200	300	0	0	0	0	0	0	0	200	903	0	0	0	0	0	0	0	603	903	0
5563	9	0	0	0	0	0	0	200	300	0	0	0	0	0	0	0	200	903	0	0	0	0	0	0	0	603	903	0
5564	0	0	0	0	0	0	0	200	300	0	0	0	0	0	0	0	200	903	0	0	0	0	0	0	0	603	903	0
5564	1	0	0	0	0	0	0	200	300	0	0	0	0	0	0	0	200	903	0	0	0	0	0	0	0	603	903	0
5564	2	0	0	0	0	0	0	200	300	0	0	0	0	0	0	0	200	903	0	0	0	0	0	0	0	603	903	0
5564	3	0	0	0	0	0	0	200	300	0	0	0	0	0	0	0	200	903	0	0	0	0	0	0	0	603	903	0
5564	4	0	0	0	0	0	0	200	300	0	0	0	0	0	0	0	200	903	0	0	0	0	0	0	0	603	903	0
5564	5	0	0	0	0	0	0	200	300	0	0	0	0	0	0	0	200	903	0	0	0	0	0	0	0	603	903	0
5564	6	0	0	0	0	0	0	200	300	0	0	0	0	0	0	0	200	903	0	0	0	0	0	0	0	603	903	0
5564	7	0	0	0	0	0	0	200	300	0	0	0	0	0	0	0	200	903	0	0	0	0	0	0	0	603	903	0
5564	8	0	0	0	0	0	0	200	300	0	0	0	0	0	0	0	200	903	0	0	0	0	0	0	0	603	903	0
5564	9	0	0	0	0	0	0	200	300	0	0	0	0	0	0	0	200	903	0	0	0	0	0	0	0	603	903	0
5565	0	0	0	0	0	0	0	200	300	0	0	0	0	0	0	0	200	903	0	0	0	0	0	0	0	603	903	0
5565	1	0	0	0	0	0	0	200	300	0	0	0	0	0	0	0	200	903	0	0	0	0	0	0	0	603	903	0
5565	2	0	0	0	0	0	0	200	300	0	0	0	0	0	0	0	200	903	0	0	0	0	0	0	0	603	903	0
5565	3	0	0	0	0	0	0	200	300	0	0	0	0	0	0	0	200	903	0	0	0	0	0	0	0	603	903	0
5565	4	0	0	0	0	0	0	200	300	0	0	0	0	0	0	0	200	903	0	0	0	0	0	0	0	603	903	0
5565	5	0	0	0	0	0	0	200	300	0	0	0	0	0	0	0	200	903	0	0	0	0	0	0	0	603	903	0
5565	6	0	0	0	0	0	0	200	300	0	0	0	0	0	0	0	200	903	0	0	0	0	0	0	0	603	903	0
5565	7	0	0	0	0	0	0	200	300	0	0	0	0	0	0	0	200	903	0	0	0	0	0	0	0	603	903	0
5565	8	0	0	0	0	0	0	200	300	0	0	0	0	0	0	0	200	903	0	0	0	0	0	0	0	603	903	0
5565	9	0	0	0	0	0	0	200	300	0	0	0	0	0	0	0	200	903	0	0	0	0	0	0	0	603	903	0
5566	0	0	0	0	0	0	0	200	300	0	0	0	0	0	0	0	200	903	0	0	0	0	0	0	0	603	903	0
5566	1	0	0	0	0	0	0	200	300	0	0	0	0	0	0	0	200	903	0	0	0	0	0	0	0	603	903	0
5566	2	0	0	0	0	0	0	200	300	0	0	0	0	0	0	0	200	903	0	0	0	0	0	0	0	603	903	0
5566	3	0	0	0	0	0	0	200	300	0	0	0	0	0	0	0	200	903	0	0	0	0	0	0	0	603	903	0
5566	4	0	0	0	0	0	0	200	300	0	0	0	0	0	0	0	200	903	0	0	0	0	0	0	0	603	903	0
5566	5	0	0	0	0	0	0	200	300	0	0	0	0	0	0	0	200	903	0	0	0	0	0	0	0	603	903	0
5566	6	0	0	0	0	0	0	200	300	0	0	0	0	0	0	0	200	903	0	0	0	0	0	0	0	603	903	0
5566	7	0	0	0	0	0	0	200	300	0	0	0	0	0	0	0	200	903	0	0	0	0	0	0	0	603	903	0
5566	8	0	0	0	0	0	0	200	300	0	0	0	0	0	0	0	200	903	0	0	0	0	0	0	0	603	903	0
5566	9	0	0	0	0	0	0	200	300	0	0	0	0	0	0	0	200	903	0	0	0	0	0	0	0	603	903	0
5567	0	0	0	0	0	0	0	200	300	0	0	0	0	0	0	0	200	903	0	0	0	0	0	0	0	603	903	0
5567	1	0	0	0	0	0	0	200	300	0	0	0	0	0	0	0	200	903	0	0	0	0	0	0	0	603	903	0
5567	2	0	0	0	0	0	0	200	300	0	0	0	0	0	0	0	200	903	0	0	0	0	0	0	0	603	903	0
5567	3	0	0	0	0	0	0	200	300	0	0	0	0	0	0	0	200	903	0	0	0	0	0	0	0	603	903	0
5567	4	0	0	0	0	0	0	200	300	0	0	0	0	0	0	0	200	903	0	0	0	0	0	0	0	603	903	0
5567	5	0	0	0	0	0	0	200	300	0	0	0	0	0	0	0	200	903	0	0	0	0	0	0	0	603	903	0
5567	6	0	0	0	0	0	0	200	300	0	0	0	0	0	0	0	200	903	0	0	0	0	0	0	0	603	903	0
5567	7	0	0	0	0	0	0	200	300	0	0	0	0	0	0	0	200	903	0	0	0	0	0	0	0	603	903	0
5567	8	0	0	0	0	0	0	200	300	0	0	0	0	0	0	0	200	903	0	0	0	0	0	0	0	603	903	0
5567	9	0	0	0	0	0	0	200	300	0	0	0	0	0	0	0	200	903	0	0	0	0	0	0	0	603	903	0
5568	0	0	0	0	0	0	0	200	300	0	0	0	0	0	0	0	200	903	0	0	0	0	0	0	0	603	903	0
5568	1	0	0	0	0	0	0	200	300	0	0	0	0	0	0	0	200	903	0	0	0	0	0	0	0	603	903	0
5568	2	0	0	0	0	0	0	200	300	0	0	0	0	0	0	0	200	903	0	0	0	0	0	0	0	603	903	0
5568	3	0	0	0	0	0	0	200	300	0	0	0	0	0	0	0	200	903	0	0	0	0	0	0	0	603	903	0
5568	4	0	0	0	0	0	0	200	300	0	0	0	0	0	0	0	200	903	0	0	0	0	0	0	0	603	903	0
5568	5	0	0	0	0	0	0	200	300	0	0	0	0	0	0	0	200	903	0	0	0	0	0	0	0	603	903	0
5568	6	0	0	0	0	0	0	200	300	0	0	0	0	0	0	0	200	903	0	0	0	0	0	0	0	603	903	0
5568	7	0	0	0	0	0	0	200	300	0	0	0	0	0	0	0	200	903	0	0	0	0	0	0	0	603	903	0
5568	8	0	0	0	0	0	0	200	300	0	0	0	0	0	0	0	200	903	0	0	0	0	0	0	0	603	903	0
5568	9	0	0	0	0	0	0	200	300	0	0	0	0	0	0	0	200	903	0	0	0	0	0	0	0	603	903	0
5569	0	0	0	0	0	0	0	200	300	0	0	0	0	0	0	0	200	903	0	0	0	0	0	0	0	603	903	0
5569	1	0	0	0	0	0	0	200	300	0	0	0	0	0	0	0	200	903	0	0	0	0	0	0	0	603	903	0
5569	2	0	0	0	0	0	0	200	300	0	0	0	0	0	0	0	200	903	0	0	0	0	0	0	0	603	903	0
5569	3	0	0	0	0	0	0	200	300	0	0	0	0	0	0	0	200	903	0	0	0	0	0	0	0	603	903	0
5569	4	0	0	0	0	0	0	200	300	0	0	0	0	0	0	0	200	903	0	0	0	0	0	0	0	603	903	0
5569	5	0	0	0	0	0	0	200	300	0	0	0	0	0	0	0	200	903	0	0	0	0	0	0	0	603	903	0
5569	6	0	0	0	0	0	0	200	300	0	0	0	0	0	0	0	200	903	0	0	0	0	0	0	0	603	903	0
5569	7	0	0	0	0	0	0	200	300	0	0	0	0	0	0	0	200	903	0	0	0	0	0	0	0	603	903	0
5569	8	0	0	0	0	0	0	200	300	0	0	0	0	0	0	0	200	903	0	0	0	0	0	0	0	603	903	0
5569	9	0	0	0	0	0	0	200	300	0	0	0	0	0	0	0	200	903	0	0	0	0	0	0	0	603	903	0
5570	0	0	0	0	0	0	0	200	300	0	0	0	0	0	0	0	200	903	0	0	0	0	0	0	0	603	903	0
5570	1	0	0	0	0	0	0	200	300	0	0	0	0	0	0	0	200	903	0	0	0	0	0	0	0	603	903	0
5570	2	0	0	0	0	0	0	200	300	0	0	0	0	0	0	0	200	903	0	0	0	0	0	0	0	603	903	0
5570	3	0	0	0	0	0	0	200	300	0	0	0	0	0	0	0	200	903	0	0	0	0	0	0	0	603	903	0
5570	4	0	0	0	0	0	0	200	300	0	0	0	0	0	0	0	200	903	0	0	0	0	0	0	0	603	903	0
5570	5	0	0	0	0	0	0	200	300	0	0	0	0	0	0	0	200	903	0	0	0	0	0	0	0	603	903	0
5570	6	0	0	0	0	0	0	200	300	0	0	0	0	0	0	0	200	903	0	0	0	0	0	0	0	603	903	0
5570	7	0	0	0	0	0	0	200	300	0	0	0	0	0	0	0	200	903	0	0	0	0	0	0	0	603	903	0
5570	8	0	0	0	0	0	0	200	300	0	0	0	0	0	0	0	200	903	0	0	0	0	0	0	0	603	903	0
5570	9	0	0	0	0	0	0	200	300	0	0	0	0	0	0	0	200	903	0	0	0	0	0	0	0	603	903	0
5571	0	0	0	0	0	0	0	200	300	0	0	0	0	0	0	0	200	903	0	0	0	0	0	0	0	603	903	0
5571	1	0	0	0	0	0	0	200	300	0	0	0	0	0	0	0	200	903	0	0	0	0	0	0	0	603	903	0
5571	2	0	0	0	0	0	0	200	300	0	0	0	0	0	0	0	200	903	0	0	0	0	0	0	0	603	903	0
5571	3	0	0	0	0	0	0	200	300	0	0	0	0	0	0	0	200	903	0	0	0	0	0	0	0	603	903	0
5571	4	0	0	0	0	0	0	200	300	0	0	0	0	0	0	0	200	903	0	0	0	0	0	0	0	603	903	0
5571	5	0	0	0	0	0	0	200	300	0	0	0	0	0	0	0	200	903	0	0	0	0	0	0	0	603	903	0
5571	6	0	0	0	0	0	0	200	300	0	0	0	0	0	0	0	200	903	0	0	0	0	0	0	0	603	903	0
5571	7	0	0	0	0	0	0	200	300	0	0	0	0	0	0	0	200	903	0	0	0	0	0	0	0	603	903	0
5571	8	0	0	0	0	0	0	200	300	0	0	0	0	0	0	0	200	903	0	0	0	0	0	0	0	603	903	0
5571	9	0	0	0	0	0	0	200	300	0	0	0	0	0	0	0	200	903	0	0	0	0	0	0	0	603	903	0
5572	0	0	0	0	0	0	0	200	300	0	0	0	0	0	0	0	200	903	0	0	0	0	0	0	0	603	903	0
5572	1	0	0	0	0	0	0	200	300	0	0	0	0	0	0	0	200	903	0	0	0	0	0	0	0	603	903	0
5572	2	0	0	0	0	0	0	200	300	0	0	0	0	0	0	0	200	903	0	0	0	0	0	0	0	603	903	0
5572	3	0	0	0	0	0	0	200	300	0	0	0	0	0	0	0	200	903	0	0	0	0	0	0	0	603	903	0
5572	4	0	0	0	0	0	0	200	300	0	0	0	0	0	0	0	200	903	0	0	0	0	0	0	0	603	903	0
5572	5	0	0	0	0	0	0	200	300	0	0	0	0	0	0	0	200	903	0	0	0	0	0	0	0	603	903	0
5572	6	0	0	0	0	0	0	200	300	0	0	0	0	0	0	0	200	903	0	0	0	0	0	0	0	603	903	0
5572	7	0	0	0	0	0	0	200	300	0	0	0	0	0	0	0	200	903	0	0	0	0	0	0	0	603	903	0
5572	8	0	0	0	0	0	0	200	300	0	0	0	0	0	0	0	200	903	0	0	0	0	0	0	0	603	903	0
5572	9	0	0	0	0	0	0	200	300	0	0	0	0	0	0	0	200	903	0	0	0	0	0	0	0	603	903	0
5573	0	0	0	0	0	0	0	200	300	0	0	0	0	0	0	0	200	903	0	0	0	0	0	0	0	603	903	0
5573	1	0	0	0	0	0	0	200	300	0	0	0	0	0	0	0	200	903	0	0	0	0	0	0	0	603	903	0
5573	2	0	0	0	0	0	0	200	300	0	0	0	0	0	0	0	200	903	0	0	0	0	0	0	0	603	903	0
5573	3	0	0	0	0	0	0	200	300	0	0	0	0	0	0	0	200	903	0	0	0	0	0	0	0	603	903	0
5573	4	0	0	0	0	0	0	200	300	0	0	0	0	0	0	0	200	903	0	0	0	0	0	0	0	603	903	0
5573	5	0	0	0	0	0	0	200	300	0	0	0	0	0	0	0	200	903	0	0	0	0	0	0	0	603	903	0
5573	6	0	0	0	0	0	0	200	300	0	0	0	0	0	0	0	200	903	0	0	0	0	0	0	0	603	903	0
5573	7	0	0	0	0	0	0	200	300	0	0	0	0	0	0	0	200	903	0	0	0	0	0	0	0	603	903	0
5573	8	0	0	0	0	0	0	200	300	0	0	0	0	0	0	0	200	903	0	0	0	0	0	0	0	603	903	0
5573	9	0	0	0	0	0	0	200	300	0	0	0	0	0	0	0	200	903	0	0	0	0	0	0	0	603	903	0
5574	0	0	0	0	0	0	0	200	300	0	0	0	0	0	0	0	200	903	0	0	0	0	0	0	0	603	903	0
5574	1	0	0	0	0	0	0	200	300	0	0	0	0	0	0	0	200	903	0	0	0	0	0	0	0	603	903	0
5574	2	0	0	0	0	0	0	200	300	0	0	0	0	0	0	0	200	903	0	0	0	0	0	0	0	603	903	0
5574	3	0	0	0	0	0	0	200	300	0	0	0	0	0	0	0	200	903	0	0	0	0	0	0	0	603	903	0
5574	4	0	0	0	0	0	0	200	300	0	0	0	0	0	0	0	200	903	0	0	0	0	0	0	0	603	903	0
5574	5	0	0	0	0	0	0	200	300	0	0	0	0	0	0	0	200	903	0	0	0	0	0	0	0	603	903	0
5574	6	0	0	0	0	0	0	200	300	0	0	0	0	0	0	0	200	903	0	0	0	0	0	0	0	603	903	0
5574	7	0	0	0	0	0	0	200	300	0	0	0	0	0	0	0	200	903	0	0	0	0	0	0	0	603	903	0
5574	8	0	0	0	0	0	0	200	300	0	0	0	0	0	0	0	200	903	0	0	0	0	0	0	0	603	903	0
5574	9	0	0	0	0	0	0	200	300	0	0	0	0	0	0	0	200	903	0	0	0	0	0	0	0	603	903	0
5575	0	0	0	0	0	0	0	200	300	0	0	0	0	0	0	0	200	903	0	0	0	0	0	0	0	603	903	0
5575	1	0	0	0	0	0	0	200	300	0	0	0	0	0	0	0	200	903	0	0	0	0	0	0	0	603	903	0
5575	2	0	0	0	0	0	0	200	300	0	0	0	0	0	0	0	200	903	0	0	0	0	0	0	0	603	903	0
5575	3	0	0	0	0	0	0	200	300	0	0	0	0	0	0	0	200	903	0	0	0	0	0	0	0	603	903	0
5575	4	0	0	0	0	0	0	200	300	0	0	0	0	0	0	0	200	903	0	0	0	0	0	0	0	603	903	0
5575	5	0	0	0	0	0	0	200	300	0	0	0	0	0	0	0	200	903	0	0	0	0	0	0	0	603	903	0
5575	6	0	0	0	0	0	0	200	300	0	0	0	0	0	0	0	200	903	0	0	0	0	0	0	0	603	903	0
5575	7	0	0	0	0	0	0	200	300	0	0	0	0	0	0	0	200	903	0	0	0	0	0	0	0	603	903	0
5575	8	0	0	0	0	0	0	200	300	0	0	0	0	0	0	0	200	903	0	0	0	0	0	0	0	603	903	0
5575	9	0	0	0	0	0	0	200	300	0	0	0	0	0	0	0	200	903	0	0	0	0	0	0	0	603	903	0
5576	0	0	0	0	0	0	0	200	300	0	0	0	0	0	0	0	200	903	0	0	0	0	0	0	0	603	903	0
5576	1	0	0	0	0	0	0	200	300	0	0	0	0	0	0	0	200	903	0	0	0	0	0	0	0	603	903	0
5576	2	0	0	0	0	0	0	200	300	0	0	0	0	0	0	0	200	903	0	0	0	0	0	0	0	603	903	0
5576	3	0	0	0	0	0	0	200	300	0	0	0	0	0	0	0	200	903	0	0	0	0	0	0	0	603	903	0
5576	4	0	0	0	0	0	0	200	300	0	0	0	0	0	0	0	200	903	0	0	0	0	0	0	0	603	903	0
5576	5	0	0	0	0	0	0	200	300	0	0	0	0	0	0	0	200	903	0	0	0	0	0	0	0	603	903	0
5576	6	0	0	0	0	0	0	200	300	0	0	0	0	0	0	0	200	903	0	0	0	0	0	0	0	603	903	0
5576	7	0	0	0	0	0	0	200	300	0	0	0	0	0	0	0	200	903	0	0	0	0	0	0	0	603	903	0
5576	8	0	0	0	0	0	0	200	300	0	0	0	0	0	0	0	200	903	0	0	0	0	0	0	0	603	903	0
5576	9	0	0	0	0	0	0	200	300	0	0	0	0	0	0	0	200	903	0	0	0	0	0	0	0	603	903	0
5577	0	0	0	0	0	0	0	200	300	0	0	0	0	0	0	0	200	903	0	0	0	0	0	0	0	603	903	0
5577	1	0	0	0	0	0	0	200	300	0	0	0	0	0	0	0	200	903	0	0	0	0	0	0	0	603	903	0
5577	2	0	0	0	0	0	0	200	300	0	0	0	0	0	0	0	200	903	0	0	0	0	0	0	0	603	903	0
5577	3	0	0	0	0	0	0	200	300	0	0	0	0	0	0	0	200	903	0	0	0	0	0	0	0	603	903	0
5577	4	0	0	0	0	0	0	200	300	0	0	0	0	0	0	0	200	903	0	0	0	0	0	0	0	603	903	0
5577	5	0	0	0	0	0	0	200	300	0	0	0	0	0	0	0	200	903	0	0	0	0	0	0	0	603	903	0
5577	6	0	0	0	0	0	0	200	300	0	0	0	0	0	0	0	200	903	0	0	0	0	0	0	0	603	903	0
5577	7	0	0	0	0	0	0	200	300	0	0	0	0	0	0	0	200	903	0	0	0	0	0	0	0	603	903	0
5577	8	0	0	0	0	0	0	200	300	0	0	0	0	0	0	0	200	903	0	0	0	0	0	0	0	603	903	0
5577	9	0	0	0	0	0	0	200	300	0	0	0	0	0	0	0	200	903	0	0	0	0	0	0	0	603	903	0
5578	0	0	0	0	0	0	0	200	300	0	0	0	0	0	0	0	200	903	0	0	0	0	0	0	0	603	903	0
5578	1	0	0	0	0	0	0	200	300	0	0	0	0	0	0	0	200	903	0	0	0	0	0	0	0	603	903	0
5578	2	0	0	0	0	0	0	200	300	0	0	0	0	0	0	0	200	903	0	0	0	0	0	0	0	603	903	0
5578	3	0	0	0	0	0	0	200	300	0	0	0	0	0	0	0	200	903	0	0	0	0	0	0	0	603	903	0
5578	4	0	0	0	0	0	0	200	300	0	0	0	0	0	0	0	200	903	0	0	0	0	0	0	0	603	903	0
5578	5	0	0	0	0	0	0	200	300	0	0	0	0	0	0	0	200	903	0	0	0	0	0	0	0	603	903	0
5578	6	0	0	0	0	0	0	200	300	0	0	0	0	0	0	0	200	903	0	0	0	0	0	0	0	603	903	0
5578	7	0	0	0	0	0	0	200	300	0	0	0	0	0	0	0	200	903	0	0	0	0	0	0	0	603	903	0
5578	8	0	0	0	0	0	0	200	300	0	0	0	0	0	0	0	200	903	0	0	0	0	0	0	0	603	903	0
5578	9	0	0	0	0	0	0	200	300	0	0	0	0	0	0	0	200	903	0	0	0	0	0	0	0	603	903	0
5579	0	0	0	0	0	0	0	200	300	0	0	0	0	0	0	0	200	903	0	0	0	0	0	0	0	603	903	0
5579	1	0	0	0	0	0	0	200	300	0	0	0	0	0	0	0	200	903	0	0	0	0	0	0	0	603	903	0
5579	2	0	0	0	0	0	0	200	300	0	0	0	0	0	0	0	200	903	0	0	0	0	0	0	0	603	903	0
5579	3	0	0	0	0	0	0	200	300	0	0	0	0	0	0	0	200	903	0	0	0	0	0	0	0	603	903	0
5579	4	0	0	0	0	0	0	200	300	0	0	0	0	0	0	0	200	903	0	0	0	0	0	0	0	603	903	0
5579	5	0	0	0	0	0	0	200	300	0	0	0	0	0	0	0	200	903	0	0	0	0	0	0	0	603	903	0
5579	6	0	0	0	0	0	0	200	300	0	0	0	0	0	0	0	200	903	0	0	0	0	0	0	0	603	903	0
5579	7	0	0	0	0	0	0	200	300	0	0	0	0	0	0	0	200	903	0	0	0	0	0	0	0	603	903	0
5579	8	0	0	0	0	0	0	200	300	0	0	0	0	0	0	0	200	903	0	0	0	0	0	0	0	603	903	0
5579	9	0	0	0	0	0	0	200	300	0	0	0	0	0	0	0	200	903	0	0	0	0	0	0	0	603	903	0
5580	0	0	0	0	0	0	0	200	300	0	0	0	0	0	0	0	200	903	0	0	0	0	0	0	0	603	903	0
5580	1	0	0	0	0	0	0	200	300	0	0	0	0	0	0	0	200	903	0	0	0	0	0	0	0	603	903	0
5580	2	0	0	0	0	0	0	200	300	0	0	0	0	0	0	0	200	903	0	0	0	0	0	0	0	603	903	0
5580	3	0	0	0	0	0	0	200	300	0	0	0	0	0	0	0	200	903	0	0	0	0	0	0	0	603	903	0
5580	4	0	0	0	0	0	0	200	300	0	0	0	0	0	0	0	200	903	0	0	0	0	0	0	0	603	903	0
5580	5	0	0	0	0	0	0	200	300	0	0	0	0	0	0	0	200	903	0	0	0	0	0	0	0	603	903	0
5580	6	0	0	0	0	0	0	200	300	0	0	0	0	0	0	0	200	903	0	0	0	0	0	0	0	603	903	0
5580	7	0	0	0	0	0	0	200	300	0	0	0	0	0	0	0	200	903	0	0	0	0	0	0	0	603	903	0
5580	8	0	0	0	0	0	0	200	300	0	0	0	0	0	0	0	200	903	0	0	0	0	0	0	0	603	903	0
5580	9	0	0	0	0	0	0	200	300	0	0	0	0	0	0	0	200	903	0	0	0	0	0	0	0	603	903	0
5581	0	0	0	0	0	0	0	200	300	0	0	0	0	0	0	0	200	903	0	0	0	0	0	0	0	603	903	0
5581	1	0	0	0	0	0	0	200	300	0	0	0	0	0	0	0	200	903	0	0	0	0	0	0	0	603	903	0
5581	2	0	0	0	0	0	0	200	300	0	0	0	0	0	0	0	200	903	0	0	0	0	0	0	0	603	903	0
5581	3	0	0	0	0	0	0	200	300	0	0	0	0	0	0	0	200	903	0	0	0	0	0	0	0	603	903	0
5581	4	0	0	0	0	0	0	200	300	0	0	0	0	0	0	0	200	903	0	0	0	0	0	0	0	603	903	0
5581	5	0	0	0	0	0	0	200	300	0	0	0	0	0	0	0	200	903	0	0	0	0	0	0	0	603	903	0
5581	6	0	0	0	0	0	0	200	300	0	0	0	0	0	0	0	200	903	0	0	0	0	0	0	0	603	903	0
5581	7	0	0	0	0	0	0	200	300	0	0	0	0	0	0	0	200	903	0	0	0	0	0	0	0	603	903	0
5581	8	0	0	0	0	0	0	200	300	0	0	0	0	0	0	0	200	903	0	0	0	0	0	0	0	603	903	0
5581	9	0	0	0	0	0	0	200	300	0	0	0	0	0	0	0	200	903	0	0	0	0	0	0	0	603	903	0
5582	0	0	0	0	0	0	0	200	300	0	0	0	0	0	0	0	200	903	0	0	0	0	0	0	0	603	903	0
5582	1	0	0	0	0	0	0	200	300	0	0	0	0	0	0	0	200	903	0	0	0	0	0	0	0	603	903	0
5582	2	0	0	0	0	0	0	200	300	0	0	0	0	0	0	0	200	903	0	0	0	0	0	0	0	603	903	0
5582	3	0	0	0	0	0	0	200	300	0	0	0	0	0	0	0	200	903	0	0	0	0	0	0	0	603	903	0
5582	4	0	0	0	0	0	0	200	300	0	0	0	0	0	0	0	200	903	0	0	0	0	0	0	0	603	903	0
5582	5	0	0	0	0	0	0	200	300	0	0	0	0	0	0	0	200	903	0	0	0	0	0	0	0	603	903	0
5582	6	0	0	0	0	0	0	200	300	0	0	0	0	0	0	0	200	903	0	0	0	0	0	0	0	603	903	0
5582	7	0	0	0	0	0	0	200	300	0	0	0	0	0	0	0	200	903	0	0	0	0	0	0	0	603	903	0
5582	8	0	0	0	0	0	0	200	300	0	0	0	0	0	0	0	200	903	0	0	0	0	0	0	0	603	903	0
5582	9	0	0	0	0	0	0	200	300	0	0	0	0	0	0	0	200	903	0	0	0	0	0	0	0	603	903	0
5583	0	0	0	0	0	0	0	200	300	0	0	0	0	0	0	0	200	903	0	0	0	0	0	0	0	603	903	0
5583	1	0	0	0	0	0	0	200	300	0	0	0	0	0	0	0	200	903	0	0	0	0	0	0	0	603	903	0
5583	2	0	0	0	0	0	0	200	300	0	0	0	0	0	0	0	200	903	0	0	0	0	0	0	0	603	903	0
5583	3	0	0	0	0	0	0	200	300	0	0	0	0	0	0	0	200	903	0	0	0	0	0	0	0	603	903	0
5583	4	0	0	0	0	0	0	200	300	0	0	0	0	0	0	0	200	903	0	0	0	0	0	0	0	603	903	0
5583	5	0	0	0	0	0	0	200	300	0	0	0	0	0	0	0	200	903	0	0	0	0	0	0	0	603	903	0
5583	6	0	0	0	0	0	0	200	300	0	0	0	0	0	0	0	200	903	0	0	0	0	0	0	0	603	903	0
5583	7	0	0	0	0	0	0	200	300	0	0	0	0	0	0	0	200	903	0	0	0	0	0	0	0	603	903	0
5583	8	0	0	0	0	0	0	200	300	0	0	0	0	0	0	0	200	903	0	0	0	0	0	0	0	603	903	0
5583	9	0	0	0	0	0	0	200	300	0	0	0	0	0	0	0	200	903	0	0	0	0	0	0	0	603	903	0
5584	0	0	0	0	0	0	0	200	300	0	0	0	0	0	0	0	200	903	0	0	0	0	0	0	0	603	903	0
5584	1	0	0	0	0	0	0	200	300	0	0	0	0	0	0	0	200	903	0	0	0	0	0	0	0	603	903	0
5584	2	0	0	0	0	0	0	200	300	0	0	0	0	0	0	0	200	903	0	0	0	0	0	0	0	603	903	0
5584	3	0	0	0	0	0	0	200	300	0	0	0	0	0	0	0	200	903	0	0	0	0	0	0	0	603	903	0
5584	4	0	0	0	0	0	0	200	300	0	0	0	0	0	0	0	200	903	0	0	0	0	0	0	0	603	903	0
5584	5	0	0	0	0	0	0	200	300	0	0	0	0	0	0	0	200	903	0	0	0	0	0	0	0	603	903	0
5584	6	0	0	0	0	0	0	200	300	0	0	0	0	0	0	0	200	903	0	0	0	0	0	0	0	603	903	0
5584	7	0	0	0	0	0	0	200	300	0	0	0	0	0	0	0	200	903	0	0	0	0	0	0	0	603	903	0
5584	8	0	0	0	0	0	0	200	300	0	0	0	0	0	0	0	200	903	0	0	0	0	0	0	0	603	903	0
5584	9	0	0	0	0	0	0	200	300	0	0	0	0	0	0	0	200	903	0	0	0	0	0	0	0	603	903	0
5585	0	0	0	0	0	0	0	200	300	0	0	0	0	0	0	0	200	903	0	0	0	0	0	0	0	603	903	0
5585	1	0	0	0	0	0	0	200	300	0	0	0	0	0	0	0	200	903	0	0	0	0	0	0	0	603	903	0
5585	2	0	0	0	0	0	0	200	300	0	0	0	0	0	0	0	200	903	0	0	0	0	0	0	0	603	903	0
5585	3	0	0	0	0	0	0	200	300	0	0	0	0	0	0	0	200	903	0	0	0	0	0	0	0	603	903	0
5585	4	0	0	0	0	0	0	200	300	0	0	0	0	0	0	0	200	903	0	0	0	0	0	0	0	603	903	0
5585	5	0	0	0	0	0	0	200	300	0	0	0	0	0	0	0	200	903	0	0	0	0	0	0	0	603	903	0
5585	6	0	0	0	0	0	0	200	300	0	0	0	0	0	0	0	200	903	0	0	0	0	0	0	0	603	903	0
5585	7	0	0	0	0	0	0	200	300	0	0	0	0	0	0	0	200	903	0	0	0	0	0	0	0	603	903	0
5585	8	0	0	0	0	0	0	200	300	0	0	0	0	0	0	0	200	903	0	0	0	0	0	0	0	603	903	0
5585	9	0	0	0	0	0	0	200	300	0	0	0	0	0	0	0	200	903	0	0	0	0	0	0	0	603	903	0
5586	0	0	0	0	0	0	0	200	300	0	0	0	0	0	0	0	200	903	0	0	0	0	0	0	0	603	903	0
5586	1	0	0	0	0	0	0	200	300	0	0	0	0	0	0	0	200	903	0	0	0	0	0	0	0	603	903	0
5586	2	0	0	0	0	0	0	200	300	0	0	0	0	0	0	0	200	903	0	0	0	0	0	0	0	603	903	0
5586	3	0	0	0	0	0	0	200	300	0	0	0	0	0	0	0	200	903	0	0	0	0	0	0	0	603	903	0
5586	4	0	0	0	0	0	0	200	300	0	0	0	0	0	0	0	200	903	0	0	0	0	0	0	0	603	903	0
5586	5	0	0	0	0	0	0	200	300	0	0	0	0	0	0	0	200	903	0	0	0	0	0	0	0	603	903	0
5586	6	0	0	0	0	0	0	200	300	0	0	0	0	0	0	0	200	903	0	0	0	0	0	0	0	603	903	0
5586	7	0	0	0	0	0	0	200	300	0	0	0	0	0	0	0	200	903	0	0	0	0	0	0	0	603	903	0
5586	8	0	0	0	0	0	0	200	300	0	0	0	0	0	0	0	200	903	0	0	0	0	0	0	0	603	903	0
5586	9	0	0	0	0	0	0	200	300	0	0	0	0	0	0	0	200	903	0	0	0	0	0	0	0	603	903	0
5587	0	0	0	0	0	0	0	200	300	0	0	0	0	0	0	0	200	903	0	0	0	0	0	0	0	603	903	0
5587	1	0	0	0	0	0	0	200	300	0	0	0	0	0	0	0	200	903	0	0	0	0	0	0	0	603	903	0
5587	2	0	0	0	0	0	0	200	300	0	0	0	0	0	0	0	200	903	0	0	0	0	0	0	0	603	903	0
5587	3	0	0	0	0	0	0	200	300	0	0	0	0	0	0	0	200	903	0	0	0	0	0	0	0	603	903	0
5587	4	0	0	0	0	0	0	200	300	0	0	0	0	0	0	0	200	903	0	0	0	0	0	0	0	603	903	0
5587	5	0	0	0	0	0	0	200	300	0	0	0	0	0	0	0	200	903	0	0	0	0	0	0	0	603	903	0
5587	6	0	0	0	0	0	0	200	300	0	0	0	0	0	0	0	200	903	0	0	0	0	0	0	0	603	903	0
5587	7	0	0	0	0	0	0	200	300	0	0	0	0	0	0	0	200	903	0	0	0	0	0	0	0	603	903	0
5587	8	0	0	0	0	0	0	200	300	0	0	0	0	0	0	0	200	903	0	0	0	0	0	0	0	603	903	0
5587	9	0	0	0	0	0	0	200	300	0	0	0	0	0	0	0	200	903	0	0	0	0	0	0	0	603	903	0
5588	0	0	0	0	0	0	0	200	300	0	0	0	0	0	0	0	200	903	0	0	0	0	0	0	0	603	903	0
5588	1	0	0	0	0	0	0	200	300	0	0	0	0	0	0	0	200	903	0	0	0	0	0	0	0	603	903	0
5588	2	0	0	0	0	0	0	200	300	0	0	0	0	0	0	0	200	903	0	0	0	0	0	0	0	603	903	0
5588	3	0	0	0	0	0	0	200	300	0	0	0	0	0	0	0	200	903	0	0	0	0	0	0	0	603	903	0
5588	4	0	0	0	0	0	0	200	300	0	0	0	0	0	0	0	200	903	0	0	0	0	0	0	0	603	903	0
5588	5	0	0	0	0	0	0	200	300	0	0	0	0	0	0	0	200	903	0	0	0	0	0	0	0	603	903	0
5588	6	0	0	0	0	0	0	200	300	0	0	0	0	0	0	0	200	903	0	0	0	0	0	0	0	603	903	0
5588	7	0	0	0	0	0	0	200	300	0	0	0	0	0	0	0	200	903	0	0	0	0	0	0	0	603	903	0
5588	8	0	0	0	0	0	0	200	300	0	0	0	0	0	0	0	200	903	0	0	0	0	0	0	0	603	903	0
5588	9	0	0	0	0	0	0	200	300	0	0	0	0	0	0	0	200	903	0	0	0	0	0	0	0	603	903	0
5589	0	0	0	0	0	0	0	200	300	0	0	0	0	0	0	0	200	903	0	0	0	0	0	0	0	603	903	0
5589	1	0	0	0	0	0	0	200	300	0	0	0	0	0	0	0	200	903	0	0	0	0	0	0	0	603	903	0
5589	2	0	0	0	0	0	0	200	300	0	0	0	0	0	0	0	200	903	0	0	0	0	0	0	0	603	903	0
5589	3	0	0	0	0	0	0	200	300	0	0	0	0	0	0	0	200	903	0	0	0	0	0	0	0	603	903	0
5589	4	0	0	0	0	0	0	200	300	0	0	0	0	0	0	0	200	903	0	0	0	0	0	0	0	603	903	0
5589	5	0	0	0	0	0	0	200	300	0	0	0	0	0	0	0	200	903	0	0	0	0	0	0	0	603	903	0
5589	6	0	0	0	0	0	0	200	300	0	0	0	0	0	0	0	200	903	0	0	0	0	0	0	0	603	903	0
5589	7	0	0	0	0	0	0	200	300	0	0	0	0	0	0	0	200	903	0	0	0	0	0	0	0	603	903	0
5589	8	0	0	0	0	0	0	200	300	0	0	0	0	0	0	0	200	903	0	0	0	0	0	0	0	603	903	0
5589	9	0	0	0	0	0	0	200	300	0	0	0	0	0	0	0	200	903	0	0	0	0	0	0	0	603	903	0
5590	0	0	0	0	0	0	0	200	300	0	0	0	0	0	0	0	200	903	0	0	0	0	0	0	0	603	903	0
5590	1	0	0	0	0	0	0	200	300	0	0	0	0	0	0	0	200	903	0	0	0	0	0	0	0	603	903	0
5590	2	0	0	0	0	0	0	200	300	0	0	0	0	0	0	0	200	903	0	0	0	0	0	0	0	603	903	0
5590	3	0	0	0	0	0	0	200	300	0	0	0	0	0	0	0	200	903	0	0	0	0	0	0	0	603	903	0
5590	4	0	0	0	0	0	0	200	300	0	0	0	0	0	0	0	200	903	0	0	0	0	0	0	0	603	903	0
5590	5	0	0	0	0	0	0	200	300	0	0	0	0	0	0	0	200	903	0	0	0	0	0	0	0	603	903	0
5590	6	0	0	0	0	0	0	200	300	0	0	0	0	0	0	0	200	903	0	0	0	0	0	0	0	603	903	0
5590	7	0	0	0	0	0	0	200	300	0	0	0	0	0	0	0	200	903	0	0	0	0	0	0	0	603	903	0
5590	8	0	0	0	0	0	0	200	300	0	0	0	0	0	0	0	200	903	0	0	0	0	0	0	0	603	903	0
5590	9	0	0	0	0	0	0	200	300	0	0	0	0	0	0	0	200	903	0	0	0	0	0	0	0	603	903	0
5591	0	0	0	0	0	0	0	200	300	0	0	0	0	0	0	0	200	903	0	0	0	0	0	0	0	603	903	0
5591	1	0	0	0	0	0	0	200	300	0	0	0	0	0	0	0	200	903	0	0	0	0	0	0	0	603	903	0
5591	2	0	0	0	0	0	0	200	300	0	0	0	0	0	0	0	200	903	0	0	0	0	0	0	0	603	903	0
5591	3	0	0	0	0	0	0	200	300	0	0	0	0	0	0	0	200	903	0	0	0	0	0	0	0	603	903	0
5591	4	0	0	0	0	0	0	200	300	0	0	0	0	0	0	0	200	903	0	0	0	0	0	0	0	603	903	0
5591	5	0	0	0	0	0	0	200	300	0	0	0	0	0	0	0	200	903	0	0	0	0	0	0	0	603	903	0
5591	6	0	0	0	0	0	0	200	300	0	0	0	0	0	0	0	200	903	0	0	0	0	0	0	0	603	903	0
5591	7	0	0	0	0	0	0	200	300	0	0	0	0	0	0	0	200	903	0	0	0	0	0	0	0	603	903	0
5591	8	0	0	0	0	0	0	200	300	0	0	0	0	0	0	0	200	903	0	0	0	0	0	0	0	603	903	0
5591	9	0	0	0	0	0	0	200	300	0	0	0	0	0	0	0	200	903	0	0	0	0	0	0	0	603	903	0
5592	0	0	0	0	0	0	0	200	300	0	0	0	0	0	0	0	200	903	0	0	0	0	0	0	0	603	903	0
5592	1	0	0	0	0	0	0	200	300	0	0	0	0	0	0	0	200	903	0	0	0	0	0	0	0	603	903	0
5592	2	0	0	0	0	0	0	200	300	0	0	0	0	0	0	0	200	903	0	0	0	0	0	0	0	603	903	0
5592	3	0	0	0	0	0	0	200	300	0	0	0	0	0	0	0	200	903	0	0	0	0	0	0	0	603	903	0
5592	4	0	0	0	0	0	0	200	300	0	0	0	0	0	0	0	200	903	0	0	0	0	0	0	0	603	903	0
5592	5	0	0	0	0	0	0	200	300	0	0	0	0	0	0	0	200	903	0	0	0	0	0	0	0	603	903	0
5592	6	0	0	0	0	0	0	200	300	0	0	0	0	0	0	0	200	903	0	0	0	0	0	0	0	603	903	0
5592	7	0	0	0	0	0	0	200	300	0	0	0	0	0	0	0	200	903	0	0	0	0	0	0	0	603	903	0
5592	8	0	0	0	0	0	0	200	300	0	0	0	0	0	0	0	200	903	0	0	0	0	0	0	0	603	903	0
5592	9	0	0	0	0	0	0	200	300	0	0	0	0	0	0	0	200	903	0	0	0	0	0	0	0	603	903	0
5593	0	0	0	0	0	0	0	200	300	0	0	0	0	0	0	0	200	903	0	0	0	0	0	0	0	603	903	0
5593	1	0	0	0	0	0	0	200	300	0	0	0	0	0	0	0	200	903	0	0	0	0	0	0	0	603	903	0
5593	2	0	0	0	0	0	0	200	300	0	0	0	0	0	0	0	200	903	0	0	0	0	0	0	0	603	903	0
5593	3	0	0	0	0	0	0	200	300	0	0	0	0	0	0	0	200	903	0	0	0	0	0	0	0	603	903	0
5593	4	0	0	0	0	0	0	200	300	0	0	0	0	0	0	0	200	903	0	0	0	0	0	0	0	603	903	0
5593	5	0	0	0	0	0	0	200	300	0	0	0	0	0	0	0	200	903	0	0	0	0	0	0	0	603	903	0
5593	6	0	0	0	0	0	0	200	300	0	0	0	0	0	0	0	200	903	0	0	0	0	0	0	0	603	903	0
5593	7	0	0	0	0	0	0	200	300	0	0	0	0	0	0	0	200	903	0	0	0	0	0	0	0	603	903	0
5593	8	0	0	0	0	0	0	200	300	0	0	0	0	0	0	0	200	903	0	0	0	0	0	0	0	603	903	0
5593	9	0	0	0	0	0	0	200	300	0	0	0	0	0	0	0	200	903	0	0	0	0	0	0	0	603	903	0
5594	0	0	0	0	0	0	0	200	300	0	0	0	0	0	0	0	200	903	0	0	0	0	0	0	0	603	903	0
5594	1	0	0	0	0	0	0	200	300	0	0	0	0	0	0	0	200	903	0	0	0	0	0	0	0	603	903	0
5594	2	0	0	0	0	0	0	200	300	0	0	0	0	0	0	0	200	903	0	0	0	0	0	0	0	603	903	0
5594	3	0	0	0	0	0	0	200	300	0	0	0	0	0	0	0	200	903	0	0	0	0	0	0	0	603	903	0
5594	4	0	0	0	0	0	0	200	300	0	0	0	0	0	0	0	200	903	0	0	0	0	0	0	0	603	903	0
5594	5	0	0	0	0	0	0	200	300	0	0	0	0	0	0	0	200	903	0	0	0	0	0	0	0	603	903	0
5594	6	0	0	0	0	0	0	200	300	0	0	0	0	0	0	0	200	903	0	0	0	0	0	0	0	603	903	0
5594	7	0	0	0	0	0	0	200	300	0	0	0	0	0	0	0	200	903	0	0	0	0	0	0	0	603	903	0
5594	8	0	0	0	0	0	0	200	300	0	0	0	0	0	0	0	200	903	0	0	0	0	0	0	0	603	903	0
5594	9	0	0	0	0	0	0	200	300	0	0	0	0	0	0	0	200	903	0	0	0	0	0	0	0	603	903	0
5595	0	0	0	0	0	0	0	200	300	0	0	0	0	0	0	0	200	903	0	0	0	0	0	0	0	603	903	0
5595	1	0	0	0	0	0	0	200	300	0	0	0	0	0	0	0	200	903	0	0	0	0	0	0	0	603	903	0
5595	2	0	0	0	0	0	0	200	300	0	0	0	0	0	0	0	200	903	0	0	0	0	0	0	0	603	903	0
5595	3	0	0	0	0	0	0	200	300	0	0	0	0	0	0	0	200	903	0	0	0	0	0	0	0	603	903	0
5595	4	0	0	0	0	0	0	200	300	0	0	0	0	0	0	0	200	903	0	0	0	0	0	0	0	603	903	0
5595	5	0	0	0	0	0	0	200	300	0	0	0	0	0	0	0	200	903	0	0	0	0	0	0	0	603	903	0
5595	6	0	0	0	0	0	0	200	300	0	0	0	0	0	0	0	200	903	0	0	0	0	0	0	0	603	903	0
5595	7	0	0	0	0	0	0	200	300	0	0	0	0	0	0	0	200	903	0	0	0	0	0	0	0	603	903	0
5595	8	0	0	0	0	0	0	200	300	0	0	0	0	0	0	0	200	903	0	0	0	0	0	0	0	603	903	0
5595	9	0	0	0	0	0	0	200	300	0	0	0	0	0	0	0	200	903	0	0	0	0	0	0	0	603	903	0
5596	0	0	0	0	0	0	0	200	300	0	0	0	0	0	0	0	200	903	0	0	0	0	0	0	0	603	903	0
5596	1	0	0	0	0	0	0	200	300	0	0	0	0	0	0	0	200	903	0	0	0	0	0	0	0	603	903	0
5596	2	0	0	0	0	0	0	200	300	0	0	0	0	0	0	0	200	903	0	0	0	0	0	0	0	603	903	0
5596	3	0	0	0	0	0	0	200	300	0	0	0	0	0	0	0	200	903	0	0	0	0	0	0	0	603	903	0
5596	4	0	0	0	0	0	0	200	300	0	0	0	0	0	0	0	200	903	0	0	0	0	0	0	0	603	903	0
5596	5	0	0	0	0	0	0	200	300	0	0	0	0	0	0	0	200	903	0	0	0	0	0	0	0	603	903	0
5596	6	0	0	0	0	0	0	200	300	0	0	0	0	0	0	0	200	903	0	0	0	0	0	0	0	603	903	0
5596	7	0	0	0	0	0	0	200	300	0	0	0	0	0	0	0	200	903	0	0	0	0	0	0	0	603	903	0
5596	8	0	0	0	0	0	0	200	300	0	0	0	0	0	0	0	200	903	0	0	0	0	0	0	0	603	903	0
5596	9	0	0	0	0	0	0	200	300	0	0	0	0	0	0	0	200	903	0	0	0	0	0	0	0	603	903	0
5597	0	0	0	0	0	0	0	200	300	0	0	0	0	0	0	0	200	903	0	0	0	0	0	0	0	603	903	0
5597	1	0	0	0	0	0	0	200	300	0	0	0	0	0	0	0	200	903	0	0	0	0	0	0	0	603	903	0
5597	2	0	0	0	0	0	0	200	300	0	0	0	0	0	0	0	200	903	0	0	0	0	0	0	0	603	903	0
5597	3	0	0	0	0	0	0	200	300	0	0	0	0	0	0	0	200	903	0	0	0	0	0	0	0	603	903	0
5597	4	0	0	0	0	0	0	200	300	0	0	0	0	0	0	0	200	903	0	0	0	0	0	0	0	603	903	0
5597	5	0	0	0	0	0	0	200	300	0	0	0	0	0	0	0	200	903	0	0	0	0	0	0	0	603	903	0
5597	6	0	0	0	0	0	0	200	300	0	0	0	0	0	0	0	200	903	0	0	0	0	0	0	0	603	903	0
5597	7	0	0	0	0	0	0	200	300	0	0	0	0	0	0	0	200	903	0	0	0	0	0	0	0	603	903	0
5597	8	0	0	0	0	0	0	200	300	0	0	0	0	0	0	0	200	903	0	0	0	0	0	0	0	603	903	0
5597	9	0	0	0	0	0	0	200	300	0	0	0	0	0	0	0	200	903	0	0	0	0	0	0	0	603	903	0
5598	0	0	0	0	0	0	0	200	300	0	0	0	0	0	0	0	200	903	0	0	0	0	0	0	0	603	903	0
5598	1	0	0	0	0	0	0	200	300	0	0	0	0	0	0	0	200	903	0	0	0	0	0	0	0	603	903	0
5598	2	0	0	0	0	0	0	200	300	0	0	0	0	0	0	0	200	903	0	0	0	0	0	0	0	603	903	0
5598	3	0	0	0	0	0	0	200	300	0	0	0	0	0	0	0	200	903	0	0	0	0	0	0	0	603	903	0
5598	4	0	0	0	0	0	0	200	300	0	0	0	0	0	0	0	200	903	0	0	0	0	0	0	0	603	903	0
5598	5	0	0	0	0	0	0	200	300	0	0	0	0	0	0	0	200	903	0	0	0	0	0	0	0	603	903	0
5598	6	0	0	0	0	0	0	200	300	0	0	0	0	0	0	0	200	903	0	0	0	0	0	0	0	603	903	0
5598	7	0	0	0	0	0	0	200	300	0	0	0	0	0	0	0	200	903	0	0	0	0	0	0	0	603	903	0
5598	8	0	0	0	0	0	0	200	300	0	0	0	0	0	0	0	200	903	0	0	0	0	0	0	0	603	903	0
5598	9	0	0	0	0	0	0	200	300	0	0	0	0	0	0	0	200	903	0	0	0	0	0	0	0	603	903	0
5599	0	0	0	0	0	0	0	200	300	0	0	0	0	0	0	0	200	903	0	0	0	0	0	0	0	603	903	0
5599	1	0	0	0	0	0	0	200	300	0	0	0	0	0	0	0	200	903	0	0	0	0	0	0	0	603	903	0
5599	2	0	0	0	0	0	0	200	300	0	0	0	0	0	0	0	200	903	0	0	0	0	0	0	0	603	903	0
5599	3	0	0	0	0	0	0	200	300	0	0	0	0	0	0	0	200	903	0	0	0	0	0	0	0	603	903	0
5599	4	0	0	0	0	0	0	200	300	0	0	0	0	0	0	0	200	903	0	0	0	0	0	0	0	603	903	0
5599	5	0	0	0	0	0	0	200	300	0	0	0	0	0	0	0	200	903	0	0	0	0	0	0	0	603	903	0
5599	6	0	0	0	0	0	0	200	300	0	0	0	0	0	0	0	200	903	0	0	0	0	0	0	0	603	903	0
5599	7	0	0	0	0	0	0	200	300	0	0	0	0	0	0	0	200	903	0	0	0	0	0	0	0	603	903	0
5599	8	0	0	0	0	0	0	200	300	0	0	0	0	0	0	0	200	903	0	0	0	0	0	0	0	603	903	0
5599	9	0	0	0	0	0	0	200	300	0	0	0	0	0	0	0	200	903	0	0	0	0	0	0	0	603	903	0
5600	0	0	0	0	0	0	0	200	300	0	0	0	0	0	0	0	200	903	0	0	0	0	0	0	0	603	903	0
5600	1	0	0	0	0	0	0	200	300	0	0	0	0	0	0	0	200	903	0	0	0	0	0	0	0	603	903	0
5600	2	0	0	0	0	0	0	200	300	0	0	0	0	0	0	0	200	903	0	0	0	0	0	0	0	603	903	0
5600	3	0	0	0	0	0	0	200	300	0	0	0	0	0	0	0	200	903	0	0	0	0	0	0	0	603	903	0
5600	4	0	0	0	0	0	0	200	300	0	0	0	0	0	0	0	200	903	0	0	0	0	0	0	0	603	903	0
5600	5	0	0	0	0	0	0	200	300	0	0	0	0	0	0	0	200	903	0	0	0	0	0	0	0	603	903	0
5600	6	0	0	0	0	0	0	200	300	0	0	0	0	0	0	0	200	903	0	0	0	0	0	0	0	603	903	0
5600	7	0	0	0	0	0	0	200	300	0	0	0	0	0	0	0	200	903	0	0	0	0	0	0	0	603	903	0
5600	8	0	0	0	0	0	0	200	300	0	0	0	0	0	0	0	200	903	0	0	0	0	0	0	0	603	903	0
5600	9	0	0	0	0	0	0	200	300	0	0	0	0	0	0	0	200	903	0	0	0	0	0	0	0	603	903	0
5601	0	0	0	0	0	0	0	200	300	0	0	0	0	0	0	0	200	903	0	0	0	0	0	0	0	603	903	0
5601	1	0	0	0	0	0	0	200	300	0	0	0	0	0	0	0	200	903	0	0	0	0	0	0	0	603	903	0
5601	2	0	0	0	0	0	0	200	300	0	0	0	0	0	0	0	200	903	0	0	0	0	0	0	0	603	903	0
5601	3	0	0	0	0	0	0	200	300	0	0	0	0	0	0	0	200	903	0	0	0	0	0	0	0	603	903	0
5601	4	0	0	0	0	0	0	200	300	0	0	0	0	0	0	0	200	903	0	0	0	0	0	0	0	603	903	0
5601	5	0	0	0	0	0	0	200	300	0	0	0	0	0	0	0	200	903	0	0	0	0	0	0	0	603	903	0
5601	6	0	0	0	0	0	0	200	300	0	0	0	0	0	0	0	200	903	0	0	0	0	0	0	0	603	903	0
5601	7	0	0	0	0	0	0	200	300	0	0	0	0	0	0	0	200	903	0	0	0	0	0	0	0	603	903	0
5601	8	0	0	0	0	0	0	200	300	0	0	0	0	0	0	0	200	903	0	0	0	0	0	0	0	603	903	0
5601	9	0	0	0	0	0	0	200	300	0	0	0	0	0	0	0	200	903	0	0	0	0	0	0	0	603	903	0
5602	0	0	0	0	0	0	0	200	300	0	0	0	0	0	0	0	200	903	0	0	0	0	0	0	0	603	903	0
5602	1	0	0	0	0	0	0	200	300	0	0	0	0	0	0	0	200	903	0	0	0	0	0	0	0	603	903	0
5602	2	0	0	0	0	0	0	200	300	0	0	0	0	0	0	0	200	903	0	0	0	0	0	0	0	603	903	0
5602	3	0	0	0	0	0	0	200	300	0	0	0	0	0	0	0	200	903	0	0	0	0	0	0	0	603	903	0
5602	4	0	0	0	0	0	0	200	300	0	0	0	0	0	0	0	200	903	0	0	0	0	0	0	0	603	903	0
5602	5	0	0	0	0	0	0	200	300	0	0	0	0	0	0	0	200	903	0	0	0	0	0	0	0	603	903	0
5602	6	0	0	0	0	0	0	200	300	0	0	0	0	0	0	0	200	903	0	0	0	0	0	0	0	603	903	0
5602	7	0	0	0	0	0	0	200	300	0	0	0	0	0	0	0	200	903	0	0	0	0	0	0	0	603	903	0
5602	8	0	0	0	0	0	0	200	300	0	0	0	0	0	0	0	200	903	0	0	0	0	0	0	0	603	903	0
5602	9	0	0	0	0	0	0	200	300	0	0	0	0	0	0	0	200	903	0	0	0	0	0	0	0	603	903	0
5603	0	0	0	0	0	0	0	200	300	0	0	0	0	0	0	0	200	903	0	0	0	0	0	0	0	603	903	0
5603	1	0	0	0	0	0	0	200	300	0	0	0	0	0	0	0	200	903	0	0	0	0	0	0	0	603	903	0
5603	2	0	0	0	0	0	0	200	300	0	0	0	0	0	0	0	200	903	0	0	0	0	0	0	0	603	903	0
5603	3	0	0	0	0	0	0	200	300	0	0	0	0	0	0	0	200	903	0	0	0	0	0	0	0	603	903	0
5603	4	0	0	0	0	0	0	200	300	0	0	0	0	0	0	0	200	903	0	0	0	0	0	0	0	603	903	0
5603	5	0	0	0	0	0	0	200	300	0	0	0	0	0	0	0	200	903	0	0	0	0	0	0	0	603	903	0
5603	6	0	0	0	0	0	0	200	300	0	0	0	0	0	0	0	200	903	0	0	0	0	0	0	0	603	903	0
5603	7	0	0	0	0	0	0	200	300	0	0	0	0	0	0	0	200	903	0	0	0	0	0	0	0	603	903	0
5603	8	0	0	0	0	0	0	200	300	0	0	0	0	0	0	0	200	903	0	0	0	0	0	0	0	603	903	0
5603	9	0	0	0	0	0	0	200	300	0	0	0	0	0	0	0	200	903	0	0	0	0	0	0	0	603	903	0
5604	0	0	0	0	0	0	0	200	300	0	0	0	0	0	0	0	200	903	0	0	0	0	0	0	0	603	903	0
5604	1	0	0	0	0	0	0	200	300	0	0	0	0	0	0	0	200	903	0	0	0	0	0	0	0	603	903	0
5604	2	0	0	0	0	0	0	200	300	0	0	0	0	0	0	0	200	903	0	0	0	0	0	0	0	603	903	0
5604	3	0	0	0	0	0	0	200	300	0	0	0	0	0	0	0	200	903	0	0	0	0	0	0	0	603	903	0
5604	4	0	0	0	0	0	0	200	300	0	0	0	0	0	0	0	200	903	0	0	0	0	0	0	0	603	903	0
5604	5	0	0	0	0	0	0	200	300	0	0	0	0	0	0	0	200	903	0	0	0	0	0	0	0	603	903	0
5604	6	0	0	0	0	0	0	200	300	0	0	0	0	0	0	0	200	903	0	0	0	0	0	0	0	603	903	0
5604	7	0	0	0	0	0	0	200	300	0	0	0	0	0	0	0	200	903	0	0	0	0	0	0	0	603	903	0
5604	8	0	0	0	0	0	0	200	300	0	0	0	0	0	0	0	200	903	0	0	0	0	0	0	0	603	903	0
5604	9	0	0	0	0	0	0	200	300	0	0	0	0	0	0	0	200	903	0	0	0	0	0	0	0	603	903	0
5605	0	0	0	0	0	0	0	200	300	0	0	0	0	0	0	0	200	903	0	0	0	0	0	0	0	603	903	0
5605	1	0	0	0	0	0	0	200	300	0	0	0	0	0	0	0	200	903	0	0	0	0	0	0	0	603	903	0
5605	2	0	0	0	0	0	0	200	300	0	0	0	0	0	0	0	200	903	0	0	0	0	0	0	0	603	903	0
5605	3	0	0	0	0	0	0	200	300	0	0	0	0	0	0	0	200	903	0	0	0	0	0	0	0	603	903	0
5605	4	0	0	0	0	0	0	200	300	0	0	0	0	0	0	0	200	903	0	0	0	0	0	0	0	603	903	0
5605	5	0	0	0	0	0	0	200	300	0	0	0	0	0	0	0	200	903	0	0	0	0	0	0	0	603	903	0
5605	6	0	0	0	0	0	0	200	300	0	0	0	0	0	0	0	200	903	0	0	0	0	0	0	0	603	903	0
5605	7	0	0	0	0	0	0	200	300	0	0	0	0	0	0	0	200	903	0	0	0	0	0	0	0	603	903	0
5605	8	0	0	0	0	0	0	200	300	0	0	0	0	0	0	0	200	903	0	0	0	0	0	0	0	603	903	0
5605	9	0	0	0	0	0	0	200	300	0	0	0	0	0	0	0	200	903	0	0	0	0	0	0	0	603	903	0
5606	0	0	0	0	0	0	0	200	300	0	0	0	0	0	0	0	200	903	0	0	0	0	0	0	0	603	903	0
5606	1	0	0	0	0	0	0	200	300	0	0	0	0	0	0	0	200	903	0	0	0	0	0	0	0	603	903	0
5606	2	0	0	0	0	0	0	200	300	0	0	0	0	0	0	0	200	903	0	0	0	0	0	0	0	603	903	0
5606	3	0	0	0	0	0	0	200	300	0	0	0	0	0	0	0	200	903	0	0	0	0	0	0	0	603	903	0
5606	4	0	0	0	0	0	0	200	300	0	0	0	0	0	0	0	200	903	0	0	0	0	0	0	0	603	903	0
5606	5	0	0	0	0	0	0	200	300	0	0	0	0	0	0	0	200	903	0	0	0	0	0	0	0	603	903	0
5606	6	0	0	0	0	0	0	200	300	0	0	0	0	0	0	0	200	903	0	0	0	0	0	0	0	603	903	0
5606	7	0	0	0	0	0	0	200	300	0	0	0	0	0	0	0	200	903	0	0	0	0	0	0	0	603	903	0
5606	8	0	0	0	0	0	0	200	300	0	0	0	0	0	0	0	200	903	0	0	0	0	0	0	0	603	903	0
5606	9	0	0	0	0	0	0	200	300	0	0	0	0	0	0	0	200	903	0	0	0	0	0	0	0	603	903	0
5607	0	0	0	0	0	0	0	200	300	0	0	0	0	0	0	0	200	903	0	0	0	0	0	0	0	603	903	0
5607	1	0	0	0	0	0	0	200	300	0	0	0	0	0	0	0	200	903	0	0	0	0	0	0	0	603	903	0
5607	2	0	0	0	0	0	0	200	300	0	0	0	0	0	0	0	200	903	0	0	0	0	0	0	0	603	903	0
5607	3	0	0	0	0	0	0	200	300	0	0	0	0	0	0	0	200	903	0	0	0	0	0	0	0	603	903	0
5607	4	0	0	0	0	0	0	200	300	0	0	0	0	0	0	0	200	903	0	0	0	0	0	0	0	603	903	0
5607	5	0	0	0	0	0	0	200	300	0	0	0	0	0	0	0	200	903	0	0	0	0	0	0	0	603	903	0
5607	6	0	0	0	0	0	0	200	300	0	0	0	0	0	0	0	200	903	0	0	0	0	0	0	0	603	903	0
5607	7	0	0	0	0	0	0	200	300	0	0	0	0	0	0	0	200	903	0	0	0	0	0	0	0	603	903	0
5607	8	0	0	0	0	0	0	200	300	0	0	0	0	0	0	0	200	903	0	0	0	0	0	0	0	603	903	0
5607	9	0	0	0	0	0	0	200	300	0	0	0	0	0	0	0	200	903	0	0	0	0	0	0	0	603	903	0
5608	0	0	0	0	0	0	0	200	300	0	0	0	0	0	0	0	200	903	0	0	0	0	0	0	0	603	903	0
5608	1	0	0	0	0	0	0	200	300	0	0	0	0	0	0	0	200	903	0	0	0	0	0	0	0	603	903	0
5608	2	0	0	0	0	0	0	200	300	0	0	0	0	0	0	0	200	903	0	0	0	0	0	0	0	603	903	0
5608	3	0	0	0	0	0	0	200	300	0	0	0	0	0	0	0	200	903	0	0	0	0	0	0	0	603	903	0
5608	4	0	0	0	0	0	0	200	300	0	0	0	0	0	0	0	200	903	0	0	0	0	0	0	0	603	903	0
5608	5	0	0	0	0	0	0	200	300	0	0	0	0	0	0	0	200	903	0	0	0	0	0	0	0	603	903	0
5608	6	0	0	0	0	0	0	200	300	0	0	0	0	0	0	0	200	903	0	0	0	0	0	0	0	603	903	0
5608	7	0	0	0	0	0	0	200	300	0	0	0	0	0	0	0	200	903	0	0	0	0	0	0	0	603	903	0
5608	8	0	0	0	0	0	0	200	300	0	0	0	0	0	0	0	200	903	0	0	0	0	0	0	0	603	903	0
5608	9	0	0	0	0	0	0	200	300	0	0	0	0	0	0	0	200	903	0	0	0	0	0	0	0	603	903	0
5609	0	0	0	0	0	0	0	200	300	0	0	0	0	0	0	0	200	903	0	0	0	0	0	0	0	603	903	0
5609	1	0	0	0	0	0	0	200	300	0	0	0	0	0	0	0	200	903	0	0	0	0	0	0	0	603	903	0
5609	2	0	0	0	0	0	0	200	300	0	0	0	0	0	0	0	200	903	0	0	0	0	0	0	0	603	903	0
5609	3	0	0	0	0	0	0	200	300	0	0	0	0	0	0	0	200	903	0	0	0	0	0	0	0	603	903	0
5609	4	0	0	0	0	0	0	200	300	0	0	0	0	0	0	0	200	903	0	0	0	0	0	0	0	603	903	0
5609	5	0	0	0	0	0	0	200	300	0	0	0	0	0	0	0	200	903	0	0	0	0	0	0	0	603	903	0
5609	6	0	0	0	0	0	0	200	300	0	0	0	0	0	0	0	200	903	0	0	0	0	0	0	0	603	903	0
5609	7	0	0	0	0	0	0	200	300	0	0	0	0	0	0	0	200	903	0	0	0	0	0	0	0	603	903	0
5609	8	0	0	0	0	0	0	200	300	0	0	0	0	0	0	0	200	903	0	0	0	0	0	0	0	603	903	0
5609	9	0	0	0	0	0	0	200	300	0	0	0	0	0	0	0	200	903	0	0	0	0	0	0	0	603	903	0
5610	0	0	0	0	0	0	0	200	300	0	0	0	0	0	0	0	200	903	0	0	0	0	0	0	0	603	903	0
5610	1	0	0	0	0	0	0	200	300	0	0	0	0	0	0	0	200	903	0	0	0	0	0	0	0	603	903	0
5610	2	0	0	0	0	0	0	200	300	0	0	0	0	0	0	0	200	903	0	0	0	0	0	0	0	603	903	0
5610	3	0	0	0	0	0	0	200	300	0	0	0	0	0	0	0	200	903	0	0	0	0	0	0	0	603	903	0
5610	4	0	0	0	0	0	0	200	300	0	0	0	0	0	0	0	200	903	0	0	0	0	0	0	0	603	903	0
5610	5	0	0	0	0	0	0	200	300	0	0	0	0	0	0	0	200	903	0	0	0	0	0	0	0	603	903	0
5610	6	0	0	0	0	0	0	200	300	0	0	0	0	0	0	0	200	903	0	0	0	0	0	0	0	603	903	0
5610	7	0	0	0	0	0	0	200	300	0	0	0	0	0	0	0	200	903	0	0	0	0	0	0	0	603	903	0
5610	8	0	0	0	0	0	0	200	300	0	0	0	0	0	0	0	200	903	0	0	0	0	0	0	0	603	903	0
5610	9	0	0	0	0	0	0	200	300	0	0	0	0	0	0	0	200	903	0	0	0	0	0	0	0	603	903	0
5611	0	0	0	0	0	0	0	200	300	0	0	0	0	0	0	0	200	903	0	0	0	0	0	0	0	603	903	0
5611	1	0	0	0	0	0	0	200	300	0	0	0	0	0	0	0	200	903	0	0	0	0	0	0	0	603	903	0
5611	2	0	0	0	0	0	0	200	300	0	0	0	0	0	0	0	200	903	0	0	0	0	0	0	0	603	903	0
5611	3	0	0	0	0	0	0	200	300	0	0	0	0	0	0	0	200	903	0	0	0	0	0	0	0	603	903	0
5611	4	0	0	0	0	0	0	200	300	0	0	0	0	0	0	0	200	903	0	0	0	0	0	0	0	603	903	0
5611	5	0	0	0	0	0	0	200	300	0	0	0	0	0	0	0	200	903	0	0	0	0	0	0	0	603	903	0
5611	6	0	0	0	0	0	0	200	300	0	0	0	0	0	0	0	200	903	0	0	0	0	0	0	0	603	903	0
5611	7	0	0	0	0	0	0	200	300	0	0	0	0	0	0	0	200	903	0	0	0	0	0	0	0	603	903	0
5611	8	0	0	0	0	0	0	200	300	0	0	0	0	0	0	0	200	903	0	0	0	0	0	0	0	603	903	0
5611	9	0	0	0	0	0	0	200	300	0	0	0	0	0	0	0	200	903	0	0	0	0	0	0	0	603	903	0
5612	0	0	0	0	0	0	0	200	300	0	0	0	0	0	0	0	200	903	0	0	0	0	0	0	0	603	903	0
5612	1	0	0	0	0	0	0	200	300	0	0	0	0	0	0	0	200	903	0	0	0	0	0	0	0	603	903	0
5612	2	0	0	0	0	0	0	200	300	0	0	0	0	0	0	0	200	903	0	0	0	0	0	0	0	603	903	0
5612	3	0	0	0	0	0	0	200	300	0	0	0	0	0	0	0	200	903	0	0	0	0	0	0	0	603	903	0
5612	4	0	0	0	0	0	0	200	300	0	0	0	0	0	0	0	200	903	0	0	0	0	0	0	0	603	903	0
5612	5	0	0	0	0	0	0	200	300	0	0	0	0	0	0	0	200	903	0	0	0	0	0	0	0	603	903	0
5612	6	0	0	0	0	0	0	200	300	0	0	0	0	0	0	0	200	903	0	0	0	0	0	0	0	603	903	0
5612	7	0	0	0	0	0	0	200	300	0	0	0	0	0	0	0	200	903	0	0	0	0	0	0	0	603	903	0
5612	8	0	0	0	0	0	0	200	300	0	0	0	0	0	0	0	200	903	0	0	0	0	0	0	0	603	903	0
5612	9	0	0	0	0	0	0	200	300	0	0	0	0	0	0	0	200	903	0	0	0	0	0	0	0	603	903	0
5613	0	0	0	0	0	0	0	200	300	0	0	0	0	0	0	0	200	903	0	0	0	0	0	0	0	603	903	0
5613	1	0	0	0	0	0	0	200	300	0	0	0	0	0	0	0	200	903	0	0	0	0	0	0	0	603	903	0
5613	2	0	0	0	0	0	0	200	300	0	0	0	0	0	0	0	200	903	0	0	0	0	0	0	0	603	903	0
5613	3	0	0	0	0	0	0	200	300	0	0	0	0	0	0	0	200	903	0	0	0	0	0	0	0	603	903	0
5613	4	0	0	0	0	0	0	200	300	0	0	0	0	0	0	0	200	903	0	0	0	0	0	0	0	603	903	0
5613	5	0	0	0	0	0	0	200	300	0	0	0	0	0	0	0	200	903	0	0	0	0	0	0	0	603	903	0
5613	6	0	0	0	0	0	0	200	300	0	0	0	0	0	0	0	200	903	0	0	0	0	0	0	0	603	903	0
5613	7	0	0	0	0	0	0	200	300	0	0	0	0	0	0	0	200	903	0	0	0	0	0	0	0	603	903	0
5613	8	0	0	0	0	0	0	200	300	0	0	0	0	0	0	0	200	903	0	0	0	0	0	0	0	603	903	0
5613	9	0	0	0	0	0	0	200	300	0	0	0	0	0	0	0	200	903	0	0	0	0	0	0	0	603	903	0
5614	0	0	0	0	0	0	0	200	300	0	0	0	0	0	0	0	200	903	0	0	0	0	0	0	0	603	903	0
5614	1	0	0	0	0	0	0	200	300	0	0	0	0	0	0	0	200	903	0	0	0	0	0	0	0	603	903	0
5614	2	0	0	0	0	0	0	200	300	0	0	0	0	0	0	0	200	903	0	0	0	0	0	0	0	603	903	0
5614	3	0	0	0	0	0	0	200	300	0	0	0	0	0	0	0	200	903	0	0	0	0	0	0	0	603	903	0
5614	4	0	0	0	0	0	0	200	300	0	0	0	0	0	0	0	200	903	0	0	0	0	0	0	0	603	903	0
5614	5	0	0	0	0	0	0	200	300	0	0	0	0	0	0	0	200	903	0	0	0	0	0	0	0	603	903	0
5614	6	0	0	0	0	0	0	200	300	0	0	0	0	0	0	0	200	903	0	0	0	0	0	0	0	603	903	0
5614	7	0	0	0	0	0	0	200	300	0	0	0	0	0	0	0	200	903	0	0	0	0	0	0	0	603	903	0
5614	8	0	0	0	0	0	0	200	300	0	0	0	0	0	0	0	200	903	0	0	0	0	0	0	0	603	903	0
5614	9	0	0	0	0	0	0	200	300	0	0	0	0	0	0	0	200	903	0	0	0	0	0	0	0	603	903	0
5615	0	0	0	0	0	0	0	200	300	0	0	0	0	0	0	0	200	903	0	0	0	0	0	0	0	603	903	0
5615	1	0	0	0	0	0	0	200	300	0	0	0	0	0	0	0	200	903	0	0	0	0	0	0	0	603	903	0
5615	2	0	0	0	0	0	0	200	300	0	0	0	0	0	0	0	200	903	0	0	0	0	0	0	0	603	903	0
5615	3	0	0	0	0	0	0	200	300	0	0	0	0	0	0	0	200	903	0	0	0	0	0	0	0	603	903	0
5615	4	0	0	0	0	0	0	200	300	0	0	0	0	0	0	0	200	903	0	0	0	0	0	0	0	603	903	0
5615	5	0	0	0	0	0	0	200	300	0	0	0	0	0	0	0	200	903	0	0	0	0	0	0	0	603	903	0
5615	6	0	0	0	0	0	0	200	300	0	0	0	0	0	0	0	200	903	0	0	0	0	0	0	0	603	903	0
5615	7	0	0	0	0	0	0	200	300	0	0	0	0	0	0	0	200	903	0	0	0	0	0	0	0	603	903	0
5615	8	0	0	0	0	0	0	200	300	0	0	0	0	0	0	0	200	903	0	0	0	0	0	0	0	603	903	0
5615	9	0	0	0	0	0	0	200	300	0	0	0	0	0	0	0	200	903	0	0	0	0	0	0	0	603	903	0
5616	0	0	0	0	0	0	0	200	300	0	0	0	0	0	0	0	200	903	0	0	0	0	0	0	0	603	903	0
5616	1	0	0	0	0	0	0	200	300	0	0	0	0	0	0	0	200	903	0	0	0	0	0	0	0	603	903	0
5616	2	0	0	0	0	0	0	200	300	0	0	0	0	0	0	0	200	903	0	0	0	0	0	0	0	603	903	0
5616	3	0	0	0	0	0	0	200	300	0	0	0	0	0	0	0	200	903	0	0	0	0	0	0	0	603	903	0
5616	4	0	0	0	0	0	0	200	300	0	0	0	0	0	0	0	200	903	0	0	0	0	0	0	0	603	903	0
5616	5	0	0	0	0	0	0	200	300	0	0	0	0	0	0	0	200	903	0	0	0	0	0	0	0	603	903	0
5616	6	0	0	0	0	0	0	200	300	0	0	0	0	0	0	0	200	903	0	0	0	0	0	0	0	603	903	0
5616	7	0	0	0	0	0	0	200	300	0	0	0	0	0	0	0	200	903	0	0	0	0	0	0	0	603	903	0
5616	8	0	0	0	0	0	0	200	300	0	0	0	0	0	0	0	200	903	0	0	0	0	0	0	0	603	903	0
5616	9	0	0	0	0	0	0	200	300	0	0	0	0	0	0	0	200	903	0	0	0	0	0	0	0	603	903	0
5617	0	0	0	0	0	0	0	200	300	0	0	0	0	0	0	0	200	903	0	0	0	0	0	0	0	603	903	0
5617	1	0	0	0	0	0	0	200	300	0	0	0	0	0	0	0	200	903	0	0	0	0	0	0	0	603	903	0
5617	2	0	0	0	0	0	0	200	300	0	0	0	0	0	0	0	200	903	0	0	0	0	0	0	0	603	903	0
5617	3	0	0	0	0	0	0	200	300	0	0	0	0	0	0	0	200	903	0	0	0	0	0	0	0	603	903	0
5617	4	0	0	0	0	0	0	200	300	0	0	0	0	0	0	0	200	903	0	0	0	0	0	0	0	603	903	0
5617	5	0	0	0	0	0	0	200	300	0	0	0	0	0	0	0	200	903	0	0	0	0	0	0	0	603	903	0
5617	6	0	0	0	0	0	0	200	300	0	0	0	0	0	0	0	200	903	0	0	0	0	0	0	0	603	903	0
5617	7	0	0	0	0	0	0	200	300	0	0	0	0	0	0	0	200	903	0	0	0	0	0	0	0	603	903	0
5617	8	0	0	0	0	0	0	200	300	0	0	0	0	0	0	0	200	903	0	0	0	0	0	0	0	603	903	0
5617	9	0	0	0	0	0	0	200	300	0	0	0	0	0	0	0	200	903	0	0	0	0	0	0	0	603	903	0
5618	0	0	0	0	0	0	0	200	300	0	0	0	0	0	0	0	200	903	0	0	0	0	0	0	0	603	903	0
5618	1	0	0	0	0	0	0	200	300	0	0	0	0	0	0	0	200	903	0	0	0	0	0	0	0	603	903	0
5618	2	0	0	0	0	0	0	200	300	0	0	0	0	0	0	0	200	903	0	0	0	0	0	0	0	603	903	0
5618	3	0	0	0	0	0	0	200	300	0	0	0	0	0	0	0	200	903	0	0	0	0	0	0	0	603	903	0
5618	4	0	0	0	0	0	0	200	300	0	0	0	0	0	0	0	200	903	0	0	0	0	0	0	0	603	903	0
5618	5	0	0	0	0	0	0	200	300	0	0	0	0	0	0	0	200	903	0	0	0	0	0	0	0	603	903	0
5618	6	0	0	0	0	0	0	200	300	0	0	0	0	0	0	0	200	903	0	0	0	0	0	0	0	603	903	0
5618	7	0	0	0	0	0	0	200	300	0	0	0	0	0	0	0	200	903	0	0	0	0	0	0	0	603	903	0
5618	8	0	0	0	0	0	0	200	300	0	0	0	0	0	0	0	200	903	0	0	0	0	0	0	0	603	903	0
5618	9	0	0	0	0	0	0	200	300	0	0	0	0	0	0	0	200	903	0	0	0	0	0	0	0	603	903	0
5619	0	0	0	0	0	0	0	200	300	0	0	0	0	0	0	0	200	903	0	0	0	0	0	0	0	603	903	0
5619	1	0	0	0	0	0	0	200	300	0	0	0	0	0	0	0	200	903	0	0	0	0	0	0	0	603	903	0
5619	2	0	0	0	0	0	0	200	300	0	0	0	0	0	0	0	200	903	0	0	0	0	0	0	0	603	903	0
5619	3	0	0	0	0	0	0	200	300	0	0	0	0	0	0	0	200	903	0	0	0	0	0	0	0	603	903	0
5619	4	0	0	0	0	0	0	200	300	0	0	0	0	0	0	0	200	903	0	0	0	0	0	0	0	603	903	0
5619	5	0	0	0	0	0	0	200	300	0	0	0	0	0	0	0	200	903	0	0	0	0	0	0	0	603	903	0
5619	6	0	0	0	0	0	0	200	300	0	0	0	0	0	0	0	200	903	0	0	0	0	0	0	0	603	903	0
5619	7	0	0	0	0	0	0	200	300	0	0	0	0	0	0	0	200	903	0	0	0	0	0	0	0	603	903	0
5619	8	0	0	0	0	0	0	200	300	0	0	0	0	0	0	0	200	903	0	0	0	0	0	0	0	603	903	0
5619	9	0	0	0	0	0	0	200	300	0	0	0	0	0	0	0	200	903	0	0	0	0	0	0	0	603	903	0
5620	0	0	0	0	0	0	0	200	300	0	0	0	0	0	0	0	200	903	0	0	0	0	0	0	0	603	903	0
5620	1	0	0	0	0	0	0	200	300	0	0	0	0	0	0	0	200	903	0	0	0	0	0	0	0	603	903	0
5620	2	0	0	0	0	0	0	200	300	0	0	0	0	0	0	0	200	903	0	0	0	0	0	0	0	603	903	0
5620	3	0	0	0	0	0	0	200	300	0	0	0	0	0	0	0	200	903	0	0	0	0	0	0	0	603	903	0
5620	4	0	0	0	0	0	0	200	300	0	0	0	0	0	0	0	200	903	0	0	0	0	0	0	0	603	903	0
5620	5	0	0	0	0	0	0	200	300	0	0	0	0	0	0	0	200	903	0	0	0	0	0	0	0	603	903	0
5620	6	0	0	0	0	0	0	200	300	0	0	0	0	0	0	0	200	903	0	0	0	0	0	0	0	603	903	0
5620	7	0	0	0	0	0	0	200	300	0	0	0	0	0	0	0	200	903	0	0	0	0	0	0	0	603	903	0
5620	8	0	0	0	0	0	0	200	300	0	0	0	0	0	0	0	200	903	0	0	0	0	0	0	0	603	903	0
5620	9	0	0	0	0	0	0	200	300	0	0	0	0	0	0	0	200	903	0	0	0	0	0	0	0	603	903	0
5621	0	0	0	0	0	0	0	200	300	0	0	0	0	0	0	0	200	903	0	0	0	0	0	0	0	603	903	0
5621	1	0	0	0	0	0	0	200	300	0	0	0	0	0	0	0	200	903	0	0	0	0	0	0	0	603	903	0
5621	2	0	0	0	0	0	0	200	300	0	0	0	0	0	0	0	200	903	0	0	0	0	0	0	0	603	903	0
5621	3	0	0	0	0	0	0	200	300	0	0	0	0	0	0	0	200	903	0	0	0	0	0	0	0	603	903	0
5621	4	0	0	0	0	0	0	200	300	0	0	0	0	0	0	0	200	903	0	0	0	0	0	0	0	603	903	0
5621	5	0	0	0	0	0	0	200	300	0	0	0	0	0	0	0	200	903	0	0	0	0	0	0	0	603	903	0
5621	6	0	0	0	0	0	0	200	300	0	0	0	0	0	0	0	200	903	0	0	0	0	0	0	0	603	903	0
5621	7	0	0	0	0	0	0	200	300	0	0	0	0	0	0	0	200	903	0	0	0	0	0	0	0	603	903	0
5621	8	0	0	0	0	0	0	200	300	0	0	0	0	0	0	0	200	903	0	0	0	0	0	0	0	603	903	0
5621	9	0	0	0	0	0	0	200	300	0	0	0	0	0	0	0	200	903	0	0	0	0	0	0	0	603	903	0
5622	0	0	0	0	0	0	0	200	300	0	0	0	0	0	0	0	200	903	0	0	0	0	0	0	0	603	903	0
5622	1	0	0	0	0	0	0	200	300	0	0	0	0	0	0	0	200	903	0	0	0	0	0	0	0	603	903	0
5622	2	0	0	0	0	0	0	200	300	0	0	0	0	0	0	0	200	903	0	0	0	0	0	0	0	603	903	0
5622	3	0	0	0	0	0	0	200	300	0	0	0	0	0	0	0	200	903	0	0	0	0	0	0	0	603	903	0
5622	4	0	0	0	0	0	0	200	300	0	0	0	0	0	0	0	200	903	0	0	0	0	0	0	0	603	903	0
5622	5	0	0	0	0	0	0	200	300	0	0	0	0	0	0	0	200	903	0	0	0	0	0	0	0	603	903	0
5622	6	0	0	0	0	0	0	200	300	0	0	0	0	0	0	0	200	903	0	0	0	0	0	0	0	603	903	0
5622	7	0	0	0	0	0	0	200	300	0	0	0	0	0	0	0	200	903	0	0	0	0	0	0	0	603	903	0
5622	8	0	0	0	0	0	0	200	300	0	0	0	0	0	0	0	200	903	0	0	0	0	0	0	0	603	903	0
5622	9	0	0	0	0	0	0	200	300	0	0	0	0	0	0	0	200	903	0	0	0	0	0	0	0	603	903	0
5623	0	0	0	0	0	0	0	200	300	0	0	0	0	0	0	0	200	903	0	0	0	0	0	0	0	603	903	0
5623	1	0	0	0	0	0	0	200	300	0	0	0	0	0	0	0	200	903	0	0	0	0	0	0	0	603	903	0
5623	2	0	0	0	0	0	0	200	300	0	0	0	0	0	0	0	200	903	0	0	0	0	0	0	0	603	903	0
5623	3	0	0	0	0	0	0	200	300	0	0	0	0	0	0	0	200	903	0	0	0	0	0	0	0	603	903	0
5623	4	0	0	0	0	0	0	200	300	0	0	0	0	0	0	0	200	903	0	0	0	0	0	0	0	603	903	0
5623	5	0	0	0	0	0	0	200	300	0	0	0	0	0	0	0	200	903	0	0	0	0	0	0	0	603	903	0
5623	6	0	0	0	0	0	0	200	300	0	0	0	0	0	0	0	200	903	0	0	0	0	0	0	0	603	903	0
5623	7	0	0	0	0	0	0	200	300	0	0	0	0	0	0	0	200	903	0	0	0	0	0	0	0	603	903	0
5623	8	0	0	0	0	0	0	200	300	0	0	0	0	0	0	0	200	903	0	0	0	0	0	0	0	603	903	0
5623	9	0	0	0	0	0	0	200	300	0	0	0	0	0	0	0	200	903	0	0	0	0	0	0	0	603	903	0
5624	0	0	0	0	0	0	0	200	300	0	0	0	0	0	0	0	200	903	0	0	0	0	0	0	0	603	903	0
5624	1	0	0	0	0	0	0	200	300	0	0	0	0	0	0	0	200	903	0	0	0	0	0	0	0	603	903	0
5624	2	0	0	0	0	0	0	200	300	0	0	0	0	0	0	0	200	903	0	0	0	0	0	0	0	603	903	0
5624	3	0	0	0	0	0	0	200	300	0	0	0	0	0	0	0	200	903	0	0	0	0	0	0	0	603	903	0
5624	4	0	0	0	0	0	0	200	300	0	0	0	0	0	0	0	200	903	0	0	0	0	0	0	0	603	903	0
5624	5	0	0	0	0	0	0	200	300	0	0	0	0	0	0	0	200	903	0	0	0	0	0	0	0	603	903	0
5624	6	0	0	0	0	0	0	200	300	0	0	0	0	0	0	0	200	903	0	0	0	0	0	0	0	603	903	0
5624	7	0	0	0	0	0	0	200	300	0	0	0	0	0	0	0	200	903	0	0	0	0	0	0	0	603	903	0
5624	8	0	0	0	0	0	0	200	300	0	0	0	0	0	0	0	200	903	0	0	0	0	0	0	0	603	903	0
5624	9	0	0	0	0	0	0	200	300	0	0	0	0	0	0	0	200	903	0	0	0	0	0	0	0	603	903	0
5625	0	0	0	0	0	0	0	200	300	0	0	0	0	0	0	0	200	903	0	0	0	0	0	0	0	603	903	0
5625	1	0	0	0	0	0	0	200	300	0	0	0	0	0	0	0	200	903	0	0	0	0	0	0	0	603	903	0
5625	2	0	0	0	0	0	0	200	300	0	0	0	0	0	0	0	200	903	0	0	0	0	0	0	0	603	903	0
5625	3	0	0	0	0	0	0	200	300	0	0	0	0	0	0	0	200	903	0	0	0	0	0	0	0	603	903	0
5625	4	0	0	0	0	0	0	200	300	0	0	0	0	0	0	0	200	903	0	0	0	0	0	0	0	603	903	0
5625	5	0	0	0	0	0	0	200	300	0	0	0	0	0	0	0	200	903	0	0	0	0	0	0	0	603	903	0
5625	6	0	0	0	0	0	0	200	300	0	0	0	0	0	0	0	200	903	0	0	0	0	0	0	0	603	903	0
5625	7	0	0	0	0	0	0	200	300	0	0	0	0	0	0	0	200	903	0	0	0	0	0	0	0	603	903	0
5625	8	0	0	0	0	0	0	200	300	0	0	0	0	0	0	0	200	903	0	0	0	0	0	0	0	603	903	0
5625	9	0	0	0	0	0	0	200	300	0	0	0	0	0	0	0	200	903	0	0	0	0	0	0	0	603	903	0
5626	0	0	0	0	0	0	0	200	300	0	0	0	0	0	0	0	200	903	0	0	0	0	0	0	0	603	903	0
5626	1	0	0	0	0	0	0	200	300	0	0	0	0	0	0	0	200	903	0	0	0	0	0	0	0	603	903	0
5626	2	0	0	0	0	0	0	200	300	0	0	0	0	0	0	0	200	903	0	0	0	0	0	0	0	603	903	0
5626	3	0	0	0	0	0	0	200	300	0	0	0	0	0	0	0	200	903	0	0	0	0	0	0	0	603	903	0
5626	4	0	0	0	0	0	0	200	300	0	0	0	0	0	0	0	200	903	0	0	0	0	0	0	0	603	903	0
5626	5	0	0	0	0	0	0	200	300	0	0	0	0	0	0	0	200	903	0	0	0	0	0	0	0	603	903	0
5626	6	0	0	0	0	0	0	200	300	0	0	0	0	0	0	0	200	903	0	0	0	0	0	0	0	603	903	0
5626	7	0	0	0	0	0	0	200	300	0	0	0	0	0	0	0	200	903	0	0	0	0	0	0	0	603	903	0
5626	8	0	0	0	0	0	0	200	300	0	0	0	0	0	0	0	200	903	0	0	0	0	0	0	0	603	903	0
5626	9	0	0	0	0	0	0	200	300	0	0	0	0	0	0	0	200	903	0	0	0	0	0	0	0	603	903	0
5627	0	0	0	0	0	0	0	200	300	0	0	0	0	0	0	0	200	903	0	0	0	0	0	0	0	603	903	0
5627	1	0	0	0	0	0	0	200	300	0	0	0	0	0	0	0	200	903	0	0	0	0	0	0	0	603	903	0
5627	2	0	0	0	0	0	0	200	300	0	0	0	0	0	0	0	200	903	0	0	0	0	0	0	0	603	903	0
5627	3	0	0	0	0	0	0	200	300	0	0	0	0	0	0	0	200	903	0	0	0	0	0	0	0	603	903	0
5627	4	0	0	0	0	0	0	200	300	0	0	0	0	0	0	0	200	903	0	0	0	0	0	0	0	603	903	0
5627	5	0	0	0	0	0	0	200	300	0	0	0	0	0	0	0	200	903	0	0	0	0	0	0	0	603	903	0
5627	6	0	0	0	0	0	0	200	300	0	0	0	0	0	0	0	200	903	0	0	0	0	0	0	0	603	903	0
5627	7	0	0	0	0	0	0	200	300	0	0	0	0	0	0	0	200	903	0	0	0	0	0	0	0	603	903	0
5627	8	0	0	0	0	0	0	200	300	0	0	0	0	0	0	0	200	903	0	0	0	0	0	0	0	603	903	0
5627	9	0	0	0	0	0	0	200	300	0	0	0	0	0	0	0	200	903	0	0	0	0	0	0	0	603	903	0
5628	0	0	0	0	0	0	0	200	300	0	0	0	0	0	0	0	200	903	0	0	0	0	0	0	0	603	903	0
5628	1	0	0	0	0	0	0	200	300	0	0	0	0	0	0	0	200	903	0	0	0	0	0	0	0	603	903	0
5628	2	0	0	0	0	0	0	200	300	0	0	0	0	0	0	0	200	903	0	0	0	0	0	0	0	603	903	0
5628	3	0	0	0	0	0	0	200	300	0	0	0	0	0	0	0	200	903	0	0	0	0	0	0	0	603	903	0
5628	4	0	0	0	0	0	0	200	300	0	0	0	0	0	0	0	200	903	0	0	0	0	0	0	0	603	903	0
5628	5	0	0	0	0	0	0	200	300	0	0	0	0	0	0	0	200	903	0	0	0	0	0	0	0	603	903	0
5628	6	0	0	0	0	0	0	200	300	0	0	0	0	0	0	0	200	903	0	0	0	0	0	0	0	603	903	0
5628	7	0	0	0	0	0	0	200	300	0	0	0	0	0	0	0	200	903	0	0	0	0	0	0	0	603	903	0
5628	8	0	0	0	0	0	0	200	300	0	0	0	0	0	0	0	200	903	0	0	0	0	0	0	0	603	903	0
5628	9	0	0	0	0	0	0	200	300	0	0	0	0	0	0	0	200	903	0	0	0	0	0	0	0	603	903	0
5629	0	0	0	0	0	0	0	200	300	0	0	0	0	0	0	0	200	903	0	0	0	0	0	0	0	603	903	0
5629	1	0	0	0	0	0	0	200	300	0	0	0	0	0	0	0	200	903	0	0	0	0	0	0	0	603	903	0
5629	2	0	0	0	0	0	0	200	300	0	0	0	0	0	0	0	200	903	0	0	0	0	0	0	0	603	903	0
5629	3	0	0	0	0	0	0	200	300	0	0	0	0	0	0	0	200	903	0	0	0	0	0	0	0	603	903	0
5629	4	0	0	0	0	0	0	200	300	0	0	0	0	0	0	0	200	903	0	0	0	0	0	0	0	603	903	0
5629	5	0	0	0	0	0	0	200	300	0	0	0	0	0	0	0	200	903	0	0	0	0	0	0	0	603	903	0
5629	6	0	0	0	0	0	0	200	300	0	0	0	0	0	0	0	200	903	0	0	0	0	0	0	0	603	903	0
5629	7	0	0	0	0	0	0	200	300	0	0	0	0	0	0	0	200	903	0	0	0	0	0	0	0	603	903	0
5629	8	0	0	0	0	0	0	200	300	0	0	0	0	0	0	0	200	903	0	0	0	0	0	0	0	603	903	0
5629	9	0	0	0	0	0	0	200	300	0	0	0	0	0	0	0	200	903	0	0	0	0	0	0	0	603	903	0
5630	0	0	0	0	0	0	0	200	300	0	0	0	0	0	0	0	200	903	0	0	0	0	0	0	0	603	903	0
5630	1	0	0	0	0	0	0	200	300	0	0	0	0	0	0	0	200	903	0	0	0	0	0	0	0	603	903	0
5630	2	0	0	0	0	0	0	200	300	0	0	0	0	0	0	0	200	903	0	0	0	0	0	0	0	603	903	0
5630	3	0	0	0	0	0	0	200	300	0	0	0	0	0	0	0	200	903	0	0	0	0	0	0	0	603	903	0
5630	4	0	0	0	0	0	0	200	300	0	0	0	0	0	0	0	200	903	0	0	0	0	0	0	0	603	903	0
5630	5	0	0	0	0	0	0	200	300	0	0	0	0	0	0	0	200	903	0	0	0	0	0	0	0	603	903	0
5630	6	0	0	0	0	0	0	200	300	0	0	0	0	0	0	0	200	903	0	0	0	0	0	0	0	603	903	0
5630	7	0	0	0	0	0	0	200	300	0	0	0	0	0	0	0	200	903	0	0	0	0	0	0	0	603	903	0
5630	8	0	0	0	0	0	0	200	300	0	0	0	0	0	0	0	200	903	0	0	0	0	0	0	0	603	903	0
5630	9	0	0	0	0	0	0	200	300	0	0	0	0	0	0	0	200	903	0	0	0	0	0	0	0	603	903	0
5631	0	0	0	0	0	0	0	200	300	0	0	0	0	0	0	0	200	903	0	0	0	0	0	0	0	603	903	0
5631	1	0	0	0	0	0	0	200	300	0	0	0	0	0	0	0	200	903	0	0	0	0	0	0	0	603	903	0
5631	2	0	0	0	0	0	0	200	300	0	0	0	0	0	0	0	200	903	0	0	0	0	0	0	0	603	903	0
5631	3	0	0	0	0	0	0	200	300	0	0	0	0	0	0	0	200	903	0	0	0	0	0	0	0	603	903	0
5631	4	0	0	0	0	0	0	200	300	0	0	0	0	0	0	0	200	903	0	0	0	0	0	0	0	603	903	0
5631	5	0	0	0	0	0	0	200	300	0	0	0	0	0	0	0	200	903	0	0	0	0	0	0	0	603	903	0
5631	6	0	0	0	0	0	0	200	300	0	0	0	0	0	0	0	200	903	0	0	0	0	0	0	0	603	903	0
5631	7	0	0	0	0	0	0	200	300	0	0	0	0	0	0	0	200	903	0	0	0	0	0	0	0	603	903	0
5631	8	0	0	0	0	0	0	200	300	0	0	0	0	0	0	0	200	903	0	0	0	0	0	0	0	603	903	0
5631	9	0	0	0	0	0	0	200	300	0	0	0	0	0	0	0	200	903	0	0	0	0	0	0	0	603	903	0
5632	0	0	0	0	0	0	0	200	300	0	0	0	0	0	0	0	200	903	0	0	0	0	0	0	0	603	903	0
5632	1	0	0	0	0	0	0	200	300	0	0	0	0	0	0	0	200	903	0	0	0	0	0	0	0	603	903	0
5632	2	0	0	0	0	0	0	200	300	0	0	0	0	0	0	0	200	903	0	0	0	0	0	0	0	603	903	0
5632	3	0	0	0	0	0	0	200	300	0	0	0	0	0	0	0	200	903	0	0	0	0	0	0	0	603	903	0
5632	4	0	0	0	0	0	0	200	300	0	0	0	0	0	0	0	200	903	0	0	0	0	0	0	0	603	903	0
5632	5	0	0	0	0	0	0	200	300	0	0	0	0	0	0	0	200	903	0	0	0	0	0	0	0	603	903	0
5632	6	0	0	0	0	0	0	200	300	0	0	0	0	0	0	0	200	903	0	0	0	0	0	0	0	603	903	0
5632	7	0	0	0	0	0	0	200	300	0	0	0	0	0	0	0	200	903	0	0	0	0	0	0	0	603	903	0
5632	8	0	0	0	0	0	0	200	300	0	0	0	0	0	0	0	200	903	0	0	0	0	0	0	0	603	903	0
5632	9	0	0	0	0	0	0	200	300	0	0	0	0	0	0	0	200	903	0	0	0	0	0	0	0	603	903	0
5633	0	0	0	0	0	0	0	200	300	0	0	0	0	0	0	0	200	903	0	0	0	0	0	0	0	603	903	0
5633	1	0	0	0	0	0	0	200	300	0	0	0	0	0	0	0	200	903	0	0	0	0	0	0	0	603	903	0
5633	2	0	0	0	0	0	0	200	300	0	0	0	0	0	0	0	200	903	0	0	0	0	0	0	0	603	903	0
5633	3	0	0	0	0	0	0	200	300	0	0	0	0	0	0	0	200	903	0	0	0	0	0	0	0	603	903	0
5633	4	0	0	0	0	0	0	200	300	0	0	0	0	0	0	0	200	903	0	0	0	0	0	0	0	603	903	0
5633	5	0	0	0	0	0	0	200	300	0	0	0	0	0	0	0	200	903	0	0	0	0	0	0	0	603	903	0
5633	6	0	0	0	0	0	0	200	300	0	0	0	0	0	0	0	200	903	0	0	0	0	0	0	0	603	903	0
5633	7	0	0	0	0	0	0	200	300	0	0	0	0	0	0	0	200	903	0	0	0	0	0	0	0	603	903	0
5633	8	0	0	0	0	0	0	200	300	0	0	0	0	0	0	0	200	903	0	0	0	0	0	0	0	603	903	0
5633	9	0	0	0	0	0	0	200	300	0	0	0	0	0	0	0	200	903	0	0	0	0	0	0	0	603	903	0
5634	0	0	0	0	0	0	0	200	300	0	0	0	0	0	0	0	200	903	0	0	0	0	0	0	0	603	903	0
5634	1	0	0	0	0	0	0	200	300	0	0	0	0	0	0	0	200	903	0	0	0	0	0	0	0	603	903	0
5634	2	0	0	0	0	0	0	200	300	0	0	0	0	0	0	0	200	903	0	0	0	0	0	0	0	603	903	0
5634	3	0	0	0	0	0	0	200	300	0	0	0	0	0	0	0	200	903	0	0	0	0	0	0	0	603	903	0
5634	4	0	0	0	0	0	0	200	300	0	0	0	0	0	0	0	200	903	0	0	0	0	0	0	0	603	903	0
5634	5	0	0	0	0	0	0	200	300	0	0	0	0	0	0	0	200	903	0	0	0	0	0	0	0	603	903	0
5634	6	0	0	0	0	0	0	200	300	0	0	0	0	0	0	0	200	903	0	0	0	0	0	0	0	603	903	0
5634	7	0	0	0	0	0	0	200	300	0	0	0	0	0	0	0	200	903	0	0	0	0	0	0	0	603	903	0
5634	8	0	0	0	0	0	0	200	300	0	0	0	0	0	0	0	200	903	0	0	0	0	0	0	0	603	903	0
5634	9	0	0	0	0	0	0	200	300	0	0	0	0	0	0	0	200	903	0	0	0	0	0	0	0	603	903	0
5635	0	0	0	0	0	0	0	200	300	0	0	0	0	0	0	0	200	903	0	0	0	0	0	0	0	603	903	0
5635	1	0	0	0	0	0	0	200	300	0	0	0	0	0	0	0	200	903	0	0	0	0	0	0	0	603	903	0
5635	2	0	0	0	0	0	0	200	300	0	0	0	0	0	0	0	200	903	0	0	0	0	0	0	0	603	903	0
5635	3	0	0	0	0	0	0	200	300	0	0	0	0	0	0	0	200	903	0	0	0	0	0	0	0	603	903	0
5635	4	0	0	0	0	0	0	200	300	0	0	0	0	0	0	0	200	903	0	0	0	0	0	0	0	603	903	0
5635	5	0	0	0	0	0	0	200	300	0	0	0	0	0	0	0	200	903	0	0	0	0	0	0	0	603	903	0
5635	6	0	0	0	0	0	0	200	300	0	0	0	0	0	0	0	200	903	0	0	0	0	0	0	0	603	903	0
5635	7	0	0	0	0	0	0	200	300	0	0	0	0	0	0	0	200	903	0	0	0	0	0	0	0	603	903	0
5635	8	0	0	0	0	0	0	200	300	0	0	0	0	0	0	0	200	903	0	0	0	0	0	0	0	603	903	0
5635	9	0	0	0	0	0	0	200	300	0	0	0	0	0	0	0	200	903	0	0	0	0	0	0	0	603	903	0
5636	0	0	0	0	0	0	0	200	300	0	0	0	0	0	0	0	200	903	0	0	0	0	0	0	0	603	903	0
5636	1	0	0	0	0	0	0	200	300	0	0	0	0	0	0	0	200	903	0	0	0	0	0	0	0	603	903	0
5636	2	0	0	0	0	0	0	200	300	0	0	0	0	0	0	0	200	903	0	0	0	0	0	0	0	603	903	0
5636	3	0	0	0	0	0	0	200	300	0	0	0	0	0	0	0	200	903	0	0	0	0	0	0	0	603	903	0
5636	4	0	0	0	0	0	0	200	300	0	0	0	0	0	0	0	200	903	0	0	0	0	0	0	0	603	903	0
5636	5	0	0	0	0	0	0	200	300	0	0	0	0	0	0	0	200	903	0	0	0	0	0	0	0	603	903	0
5636	6	0	0	0	0	0	0	200	300	0	0	0	0	0	0	0	200	903	0	0	0	0	0	0	0	603	903	0
5636	7	0	0	0	0	0	0	200	300	0	0	0	0	0	0	0	200	903	0	0	0	0	0	0	0	603	903	0
5636	8	0	0	0	0	0	0	200	300	0	0	0	0	0	0	0	200	903	0	0	0	0	0	0	0	603	903	0
5636	9	0	0	0	0	0	0	200	300	0	0	0	0	0	0	0	200	903	0	0	0	0	0	0	0	603	903	0
5637	0	0	0	0	0	0	0	200	300	0	0	0	0	0	0	0	200	903	0	0	0	0	0	0	0	603	903	0
5637	1	0	0	0	0	0	0	200	300	0	0	0	0	0	0	0	200	903	0	0	0	0	0	0	0	603	903	0
5637	2	0	0	0	0	0	0	200	300	0	0	0	0	0	0	0	200	903	0	0	0	0	0	0	0	603	903	0
5637	3	0	0	0	0	0	0	200	300	0	0	0	0	0	0	0	200	903	0	0	0	0	0	0	0	603	903	0
5637	4	0	0	0	0	0	0	200	300	0	0	0	0	0	0	0	200	903	0	0	0	0	0	0	0	603	903	0
5637	5	0	0	0	0	0	0	200	300	0	0	0	0	0	0	0	200	903	0	0	0	0	0	0	0	603	903	0
5637	6	0	0	0	0	0	0	200	300	0	0	0	0	0	0	0	200	903	0	0	0	0	0	0	0	603	903	0
5637	7	0	0	0	0	0	0	200	300	0	0	0	0	0	0	0	200	903	0	0	0	0	0	0	0	603	903	0
5637	8	0	0	0	0	0	0	200	300	0	0	0	0	0	0	0	200	903	0	0	0	0	0	0	0	603	903	0
5637	9	0	0	0	0	0	0	200	300	0	0	0	0	0	0	0	200	903	0	0	0	0	0	0	0	603	903	0
5638	0	0	0	0	0	0	0	200	300	0	0	0	0	0	0	0	200	903	0	0	0	0	0	0	0	603	903	0
5638	1	0	0	0	0	0	0	200	300	0	0	0	0	0	0	0	200	903	0	0	0	0	0	0	0	603	903	0
5638	2	0	0	0	0	0	0	200	300	0	0	0	0	0	0	0	200	903	0	0	0	0	0	0	0	603	903	0
5638	3	0	0	0	0	0	0	200	300	0	0	0	0	0	0	0	200	903	0	0	0	0	0	0	0	603	903	0
5638	4	0	0	0	0	0	0	200	300	0	0	0	0	0	0	0	200	903	0	0	0	0	0	0	0	603	903	0
5638	5	0	0	0	0	0	0	200	300	0	0	0	0	0	0	0	200	903	0	0	0	0	0	0	0	603	903	0
5638	6	0	0	0	0	0	0	200	300	0	0	0	0	0	0	0	200	903	0	0	0	0	0	0	0	603	903	0
5638	7	0	0	0	0	0	0	200	300	0	0	0	0	0	0	0	200	903	0	0	0	0	0	0	0	603	903	0
5638	8	0	0	0	0	0	0	200	300	0	0	0	0	0	0	0	200	903	0	0	0	0	0	0	0	603	903	0
5638	9	0	0	0	0	0	0	200	300	0	-0.855865	-9.43726	-17.1465	553.51	1769.49	-793.076	303.198	870.719	0	0	0	0	0	0	0	603	903	0
5639	0	0	0	0	0	0	0	200	300	0	-0.0929256	-7.45362	-17.7569	95.7459	1342.24	-655.746	275.59	897.608	0	0	0	0	0	0	0	603	903	0
5639	1	0	0	0	0	0	0	200	300	0	0	0	0	0	0	0	200	903	0	0	0	0	0	0	0	603	903	0
5639	2	0	0	0	0	0	0	200	300	0	0	0	0	0	0	0	200	903	0	0	0	0	0	0	0	603	903	0
5639	3	0	0	0	0	0	0	200	300	0	1.73813	-10.0476	-22.3345	95.7459	2013.63	-838.852	290.158	898.713	0	0	0	0	0	0	0	603	903	0
5639	4	0	0	0	0	0	0	200	300	0	-0.550689	-9.58985	-22.3345	4.19319	2074.66	-930.405	292.89	902.812	0	0	0	0	0	0	0	603	903	0
5639	5	0	0	0	0	0	0	200	300	0	-1.31363	-9.74243	-21.419	4.19319	2257.77	-1067.73	305.41	902.804	0	0	0	0	0	0	0	603	903	0
5639	6	0	0	0	0	0	0	200	300	0	3.26401	-9.58985	-24.7759	4.19319	2685.02	-518.417	308.372	902.831	0	0	0	0	0	0	0	603	903	0
5639	7	0	0	0	0	0	0	200	300	0	2.95883	-5.1648	-32.7105	278.851	3356.4	-335.312	302.609	894.475	0	0	0	0	0	0	0	603	903	0
5639	8	0	0	0	0	0	0	200	300	0	0.517426	-1.65528	-38.814	187.299	3783.65	-14.877	297.482	898.174	0	0	0	0	0	0	0	603	903	0
5639	9	0	0	0	0	0	0	200	300	0	2.80624	-0.281985	-40.9502	278.851	3905.72	259.781	295.377	896.191	0	0	0	0	0	0	0	603	903	0
5640	0	0	0	0	0	0	0	200	300	0	2.95883	1.70166	-42.1709	645.062	4821.25	305.558	314.326	887.704	0	0	0	0	0	0	0	603	903	0
5640	1	0	0	0	0	0	0	200	300	0	1.28037	5.66894	-50.1055	4.19319	4577.11	259.781	291.349	902.916	0	0	0	0	0	0	0	603	903	0
5640	2	0	0	0	0	0	0	200	300	0	-0.398101	4.75342	-57.1246	553.51	5187.46	442.887	290.81	893.311	0	0	0	0	0	0	0	603	903	0
5640	3	0	0	0	0	0	0	200	300	0	-2.22916	6.88965	-58.6504	645.062	5736.77	854.874	297.813	892.002	0	0	0	0	0	0	0	603	903	0
5640	4	0	0	0	0	0	0	200	300	0	-0.703277	9.63623	-60.1763	919.721	5736.77	946.427	295.333	887.716	0	0	0	0	0	0	0	603	903	0
5640	5	0	0	0	0	0	0	200	300	0	-1.6188	13.6035	-66.585	828.168	6408.16	1175.31	296.24	890.562	0	0	0	0	0	0	0	603	903	0
5640	6	0	0	0	0	0	0	200	300	0	-4.36539	13.4509	-71.4678	1835.25	6591.27	1266.86	292.227	877.321	0	0	0	0	0	0	0	603	903	0
5640	7	0	0	0	0	0	0	200	300	0	-5.12833	15.1294	-75.7403	1285.93	6835.41	1724.63	290.248	886.022	0	0	0	0	0	0	0	603	903	0
5640	8	0	0	0	0	0	0	200	300	0	-4.36539	20.0122	-77.8765	828.168	7140.58	1678.85	291.691	892.366	0	0	0	0	0	0	0	603	903	0
5640	9	0	0	0	0	0	0	200	300	0	-5.89127	21.0803	-81.5386	1652.14	7689.9	1861.95	294.31	882.738	0	0	0	0	0	0	0	603	903	0
5641	0	0	0	0	0	0	0	200	300	0	-6.80679	20.0122	-85.5059	1011.27	7201.62	1816.18	284.224	891.173	0	0	0	0	0	0	0	603	903	0
5641	1	0	0	0	0	0	0	200	300	0	-7.41714	21.5381	-88.5577	1285.93	8300.25	2273.94	293.727	888.479	0	0	0	0	0	0	0	603	903	0
5641	2	0	0	0	0	0	0	200	300	0	-8.48526	23.9795	-94.6612	1926.8	8544.39	2136.61	290.263	882.645	0	0	0	0	0	0	0	603	903	0
5641	3	0	0	0	0	0	0	200	300	0	-6.50162	22.9114	-94.9664	1560.59	8239.21	2136.61	286.759	886.567	0	0	0	0	0	0	0	603	903	0
5641	4	0	0	0	0	0	0	200	300	0	-8.48526	21.6907	-97.4078	1652.14	9276.81	2090.84	295.237	886.039	0	0	0	0	0	0	0	603	903	0
5641	5	0	0	0	0	0	0	200	300	0	-9.85855	21.8433	-101.07	1652.14	9215.78	1678.85	291.182	886.654	0	0	0	0	0	0	0	603	903	0
5641	6	0	0	0	0	0	0	200	300	0	-9.2482	20.47	-103.816	1560.59	9215.78	1770.4	288.77	887.968	0	0	0	0	0	0	0	603	903	0
5641	7	0	0	0	0	0	0	200	300	0	-7.87491	19.4019	-103.816	2018.35	9520.95	1953.51	291.709	883.558	0	0	0	0	0	0	0	603	903	0
5641	8	0	0	0	0	0	0	200	300	0	-9.70596	18.0286	-105.342	1743.7	9826.13	1495.74	293.278	886.447	0	0	0	0	0	0	0	603	903	0
5641	9	0	0	0	0	0	0	200	300	0	-9.55338	16.8079	-108.089	1743.7	9826.13	1312.64	290.908	886.868	0	0	0	0	0	0	0	603	903	0
5642	0	0	0	0	0	0	0	200	300	0	-7.56973	13.7561	-110.836	2018.35	9765.09	1449.97	288.104	884.79	0	0	0	0	0	0	0	603	903	0
5642	1	0	0	0	0	0	0	200	300	0	-8.48526	12.3828	-112.667	1194.38	10131.3	1358.41	289.923	892.399	0	0	0	0	0	0	0	603	903	0
5642	2	0	0	0	0	0	0	200	300	0	-9.2482	11.1621	-112.056	1835.25	9826.13	992.203	287.689	886.622	0	0	0	0	0	0	0	603	903	0
5642	3	0	0	0	0	0	0	200	300	0	-7.72232	8.26294	-116.023	2201.46	10314.4	946.427	288.899	884.026	0	0	0	0	0	0	0	603	903	0
5642	4	0	0	0	0	0	0	200	300	0	-8.48526	5.51635	-117.549	2018.35	10131.3	717.545	286.188	885.83	0	0	0	0	0	0	0	603	903	0
5642	5	0	0	0	0	0	0	200	300	0	-8.63785	4.906	-114.803	2293.01	10253.4	671.769	289.313	883.027	0	0	0	0	0	0	0	603	903	0
5642	6	0	0	0	0	0	0	200	300	0	-6.95938	2.92236	-121.211	2384.57	10375.4	397.11	285.598	883.327	0	0	0	0	0	0	0	603	903	0
5642	7	0	0	0	0	0	0	200	300	0	-9.09561	-0.892337	-123.043	2109.91	10619.6	76.6757	286.308	885.852	0	0	0	0	0	0	0	603	903	0
5642	8	0	0	0	0	0	0	200	300	0	-9.09561	-1.65528	-123.348	2659.22	10802.7	259.781	287.579	881.441	0	0	0	0	0	0	0	603	903	0
5642	9	0	0	0	0	0	0	200	300	0	-7.87491	-2.26563	-124.568	2750.78	10924.8	122.452	287.701	880.918	0	0	0	0	0	0	0	603	903	0
5643	0	0	0	0	0	0	0	200	300	0	-9.55338	-3.63892	-128.536	2842.33	11229.9	76.6757	287.368	880.887	0	0	0	0	0	0	0	603	903	0
5643	1	0	0	0	0	0	0	200	300	0	-9.09561	-5.46997	-129.146	2567.67	11718.2	-106.43	290.736	883.118	0	0	0	0	0	0	0	603	903	0
5643	2	0	0	0	0	0	0	200	300	0	-9.09561	-4.85962	-134.639	3025.43	11352	-289.535	284.314	880.529	0	0	0	0	0	0	0	603	903	0
5643	3	0	0	0	0	0	0	200	300	0	-8.48526	-6.84326	-134.944	3025.43	11779.3	-60.6534	287.29	880.58	0	0	0	0	0	0	0	603	903	0
5643	4	0	0	0	0	0	0	200	300	0	-9.40079	-6.99585	-140.132	3208.54	11901.3	-472.641	284.929	880.104	0	0	0	0	0	0	0	603	903	0
5643	5	0	0	0	0	0	0	200	300	0	-8.79044	-6.84326	-143.184	3116.99	12328.6	-335.312	286.103	881.231	0	0	0	0	0	0	0	603	903	0
5643	6	0	0	0	0	0	0	200	300	0	-9.55338	-6.84326	-144.71	3300.09	12511.7	-518.417	286.46	880.195	0	0	0	0	0	0	0	603	903	0
5643	7	0	0	0	0	0	0	200	300	0	-10.3163	-7.6062	-149.288	3757.86	12816.9	-564.193	285.853	877.828	0	0	0	0	0	0	0	603	903	0
5643	8	0	0	0	0	0	0	200	300	0	-8.48526	-8.06397	-150.203	3940.96	12572.7	-472.641	283.705	876.763	0	0	0	0	0	0	0	603	903	0
5643	9	0	0	0	0	0	0	200	300	0	-9.2482	-7.14844	-153.865	4032.52	13122	-747.299	285.283	876.792	0	0	0	0	0	0	0	603	903	0
5644	0	0	0	0	0	0	0	200	300	0	-10.4689	-8.52173	-156.307	4673.39	13610.3	-564.193	287.074	873.101	0	0	0	0	0	0	0	603	903	0
5644	1	0	0	0	0	0	0	200	300	0	-9.70596	-8.06397	-159.664	4124.07	13244.1	-609.97	282.95	877.17	0	0	0	0	0	0	0	603	903	0
5644	2	0	0	0	0	0	0	200	300	0	-8.94302	-7.91138	-162.715	4581.83	14037.6	-884.628	286.271	874.841	0	0	0	0	0	0	0	603	903	0
5644	3	0	0	0	0	0	0	200	300	0	-8.48526	-7.45362	-165.157	4673.39	14159.6	-793.076	285.734	874.703	0	0	0	0	0	0	0	603	903	0
5644	4	0	0	0	0	0	0	200	300	0	-9.70596	-9.13208	-168.514	5131.15	14403.8	-655.746	285.475	872.551	0	0	0	0	0	0	0	603	903	0
5644	5	0	0	0	0	0	0	200	300	0	-8.0275	-9.13208	-171.871	4856.49	14892.1	-793.076	286.647	874.743	0	0	0	0	0	0	0	603	903	0
5644	6	0	0	0	0	0	0	200	300	0	-9.09561	-8.9795	-177.669	5497.36	15136.2	-930.405	285.193	872.058	0	0	0	0	0	0	0	603	903	0
5644	7	0	0	0	0	0	0	200	300	0	-10.3163	-9.74243	-182.247	5588.91	15563.4	-976.181	285.398	872.333	0	0	0	0	0	0	0	603	903	0
5644	8	0	0	0	0	0	0	200	300	0	-11.2318	-10.2002	-186.824	5588.91	15929.6	-1342.39	285.265	873.085	0	0	0	0	0	0	0	603	903	0
5644	9	0	0	0	0	0	0	200	300	0	-11.8422	-11.4209	-190.181	5863.57	16051.7	-1342.39	284.402	872.169	0	0	0	0	0	0	0	603	903	0
5645	0	0	0	0	0	0	0	200	300	0	-10.6215	-12.0313	-192.012	5955.12	16356.9	-1525.5	285.187	871.986	0	0	0	0	0	0	0	603	903	0
5645	1	0	0	0	0	0	0	200	300	0	-11.8422	-12.6416	-199.947	6504.44	17272.4	-1525.5	286.385	870.469	0	0	0	0	0	0	0	603	903	0
5645	2	0	0	0	0	0	0	200	300	0	-11.8422	-14.3201	-202.999	7328.41	17272.4	-1754.38	285.086	866.899	0	0	0	0	0	0	0	603	903	0
5645	3	0	0	0	0	0	0	200	300	0	-13.5207	-15.6934	-208.492	6870.65	17699.7	-1845.93	284.894	870.046	0	0	0	0	0	0	0	603	903	0
5645	4	0	0	0	0	0	0	200	300	0	-11.9948	-15.9985	-213.68	7877.73	18249	-1845.93	285.403	866.133	0	0	0	0	0	0	0	603	903	0
5645	5	0	0	0	0	0	0	200	300	0	-8.33267	-16.4563	-218.257	7694.63	18676.2	-2029.04	285.57	867.745	0	0	0	0	0	0	0	603	903	0
5645	6	0	0	0	0	0	0	200	300	0	-11.8422	-18.1348	-223.14	8243.94	18554.2	-2029.04	283.15	866.055	0	0	0	0	0	0	0	603	903	0
5645	7	0	0	0	0	0	0	200	300	0	-11.537	-18.8977	-228.328	8793.26	19652.8	-2486.8	286.073	864.489	0	0	0	0	0	0	0	603	903	0
5645	8	0	0	0	0	0	0	200	300	0	-8.94302	-20.1184	-232.295	9067.92	20202.1	-2349.47	286.967	863.964	0	0	0	0	0	0	0	603	903	0
5645	9	0	0	0	0	0	0	200	300	0	-8.0275	-21.4917	-235.652	8701.7	20324.2	-2349.47	286.246	866.074	0	0	0	0	0	0	0	603	903	0
5646	0	0	0	0	0	0	0	200	300	0	-10.6215	-22.7124	-239.62	9251.02	20934.5	-2349.47	287.366	864.393	0	0	0	0	0	0	0	603	903	0
5646	1	0	0	0	0	0	0	200	300	0	-8.48526	-23.6279	-245.113	9525.68	21605.9	-2578.35	288.147	864.138	0	0	0	0	0	0	0	603	903	0
5646	2	0	0	0	0	0	0	200	300	0	-7.56973	-26.2219	-249.385	9708.79	21422.8	-2578.35	285.902	864.069	0	0	0	0	0	0	0	603	903	0
5646	3	0	0	0	0	0	0	200	300	0	-6.04385	-26.9849	-254.878	10075	22094.2	-2761.46	286.685	863.471	0	0	0	0	0	0	0	603	903	0
5646	4	0	0	0	0	0	0	200	300	0	-7.26456	-27.29	-257.625	10532.8	22643.5	-2944.56	287.893	862.116	0	0	0	0	0	0	0	603	903	0
5646	5	0	0	0	0	0	0	200	300	0	-7.87491	-29.1211	-264.644	10807.4	22887.7	-2944.56	286.485	862.162	0	0	0	0	0	0	0	603	903	0
5646	6	0	0	0	0	0	0	200	300	0	-5.58609	-29.884	-269.832	11265.2	23375.9	-2944.56	286.631	861.251	0	0	0	0	0	0	0	603	903	0
5646	7	0	0	0	0	0	0	200	300	0	-6.19644	-31.1047	-274.715	12363.8	23681.1	-2990.34	286.203	857.994	0	0	0	0	0	0	0	603	903	0
5646	8	0	0	0	0	0	0	200	300	0	-6.6542	-31.4099	-278.682	12821.6	24169.4	-3127.67	286.727	856.992	0	0	0	0	0	0	0	603	903	0
5646	9	0	0	0	0	0	0	200	300	0	-7.56973	-32.478	-282.039	12546.9	24474.6	-3081.89	286.777	858.514	0	0	0	0	0	0	0	603	903	0
5647	0	0	0	0	0	0	0	200	300	0	-6.50162	-34.1565	-288.143	13187.8	25512.2	-3265	288.54	857.232	0	0	0	0	0	0	0	603	903	0
5647	1	0	0	0	0	0	0	200	300	0	-5.12833	-34.4617	-293.941	13645.6	25634.2	-3265	287.209	856.577	0	0	0	0	0	0	0	603	903	0
5647	2	0	0	0	0	0	0	200	300	0	-6.6542	-35.6824	-298.519	13645.6	26122.5	-3539.66	287.507	857.289	0	0	0	0	0	0	0	603	903	0
5647	3	0	0	0	0	0	0	200	300	0	-4.97574	-36.5979	-304.012	14103.3	26732.9	-3448.1	287.934	856.609	0	0	0	0	0	0	0	603	903	0
5647	4	0	0	0	0	0	0	200	300	0	-4.36539	-38.429	-310.726	15476.6	27160.1	-3402.33	287.409	853.192	0	0	0	0	0	0	0	603	903	0
5647	5	0	0	0	0	0	0	200	300	0	-4.82315	-39.4971	-317.44	15934.4	27465.3	-3722.76	286.521	852.803	0	0	0	0	0	0	0	603	903	0
5647	6	0	0	0	0	0	0	200	300	0	-3.14468	-41.4807	-323.543	16483.7	28319.8	-3493.88	287.53	852.053	0	0	0	0	0	0	0	603	903	0
5647	7	0	0	0	0	0	0	200	300	0	-4.51797	-42.2437	-331.172	17673.9	28930.1	-4180.53	287.357	849.633	0	0	0	0	0	0	0	603	903	0
5647	8	0	0	0	0	0	0	200	300	0	-3.90762	-42.5488	-338.191	17582.3	29357.4	-4043.2	286.807	851.011	0	0	0	0	0	0	0	603	903	0
5647	9	0	0	0	0	0	0	200	300	0	-3.90762	-44.6851	-348.262	18680.9	29967.7	-4546.74	286.049	849.36	0	0	0	0	0	0	0	603	903	0
5648	0	0	0	0	0	0	0	200	300	0	-3.29727	-47.1265	-353.755	19779.6	30822.2	-4592.52	287.129	847.087	0	0	0	0	0	0	0	603	903	0
5648	1	0	0	0	0	0	0	200	300	0	-3.14468	-48.9575	-360.774	20512	31737.8	-4500.96	287.971	846.145	0	0	0	0	0	0	0	603	903	0
5648	2	0	0	0	0	0	0	200	300	0	-3.14468	-48.1946	-367.488	20603.6	32958.5	-4638.29	289.686	846.934	0	0	0	0	0	0	0	603	903	0
5648	3	0	0	0	0	0	0	200	300	0	-2.22916	-50.9412	-374.202	22343.1	33019.5	-4729.85	288.24	843.292	0	0	0	0	0	0	0	603	903	0
5648	4	0	0	0	0	0	0	200	300	0	-1.46622	-51.3989	-377.254	22617.7	33751.9	-5141.83	289.467	843.047	0	0	0	0	0	0	0	603	903	0
5648	5	0	0	0	0	0	0	200	300	0	-1.92398	-52.467	-387.02	23258.6	34728.5	-5462.27	289.733	842.903	0	0	0	0	0	0	0	603	903	0
5648	6	0	0	0	0	0	0	200	300	0	-1.31363	-54.7559	-393.428	24357.2	35338.8	-5462.27	289.823	841.09	0	0	0	0	0	0	0	603	903	0
5648	7	0	0	0	0	0	0	200	300	0	0.21225	-56.1292	-396.175	24906.5	35583	-5416.49	289.816	840.132	0	0	0	0	0	0	0	603	903	0
5648	8	0	0	0	0	0	0	200	300	0	0.21225	-57.3499	-405.33	25455.9	36864.7	-5370.71	290.95	840.197	0	0	0	0	0	0	0	603	903	0
5648	9	0	0	0	0	0	0	200	300	0	-0.398101	-58.8757	-410.518	26005.2	37291.9	-5874.25	290.841	839.653	0	0	0	0	0	0	0	603	903	0
5649	0	0	0	0	0	0	0	200	300	0	1.12778	-59.4861	-414.18	26737.6	37536.1	-5691.15	290.627	838.445	0	0	0	0	0	0	0	603	903	0
5649	1	0	0	0	0	0	0	200	300	0	3.11142	-60.4016	-419.673	27103.8	37963.3	-6057.36	290.459	838.417	0	0	0	0	0	0	0	603	903	0
5649	2	0	0	0	0	0	0	200	300	0	0.670014	-61.6223	-424.251	28110.9	38451.6	-6332.02	290.634	836.74	0	0	0	0	0	0	0	603	903	0
5649	3	0	0	0	0	0	0	200	300	0	1.12778	-62.3853	-428.523	28843.3	38756.8	-6240.47	290.443	835.691	0	0	0	0	0	0	0	603	903	0
5649	4	0	0	0	0	0	0	200	300	0	2.50107	-63.4534	-433.711	29118	39184	-6332.02	290.346	835.863	0	0	0	0	0	0	0	603	903	0
5649	5	0	0	0	0	0	0	200	300	0	4.6373	-66.0474	-437.984	29941.9	39855.4	-6423.57	290.997	834.637	0	0	0	0	0	0	0	603	903	0
5649	6	0	0	0	0	0	0	200	300	0	2.80624	-65.8948	-440.12	29667.3	40038.5	-6377.79	290.972	835.593	0	0	0	0	0	0	0	603	903	0
5649	7	0	0	0	0	0	0	200	300	0	2.50107	-66.9629	-442.867	30765.9	40465.8	-6377.79	291.372	833.53	0	0	0	0	0	0	0	603	903	0
5649	8	0	0	0	0	0	0	200	300	0	4.78989	-67.8784	-448.055	31223.7	41076.1	-6881.33	291.677	833.313	0	0	0	0	0	0	0	603	903	0
5649	9	0	0	0	0	0	0	200	300	0	4.33212	-68.1836	-450.496	31681.4	41076.1	-6332.02	291.18	832.674	0	0	0	0	0	0	0	603	903	0
5650	0	0	0	0	0	0	0	200	300	0	4.02695	-69.4043	-454.463	32413.9	41381.3	-6789.78	291.055	831.677	0	0	0	0	0	0	0	603	903	0
5650	1	0	0	0	0	0	0	200	300	0	2.80624	-70.4724	-457.21	32597	41991.7	-6927.11	291.843	831.705	0	0	0	0	0	0	0	603	903	0
5650	2	0	0	0	0	0	0	200	300	0	4.17954	-70.9302	-461.177	33787.2	42541	-6744.01	292.244	829.737	0	0	0	0	0	0	0	603	903	0
5650	3	0	0	0	0	0	0	200	300	0	7.84164	-71.2354	-462.398	33970.3	41808.6	-6698.23	290.417	829.535	0	0	0	0	0	0	0	603	903	0
5650	4	0	0	0	0	0	0	200	300	0	4.48471	-72.4561	-466.67	34428	43151.3	-6927.11	292.466	829.226	0	0	0	0	0	0	0	603	903	0
5650	5	0	0	0	0	0	0	200	300	0	4.94247	-71.6931	-468.502	34885.8	43334.4	-7018.66	292.496	828.538	0	0	0	0	0	0	0	603	903	0
5650	6	0	0	0	0	0	0	200	300	0	7.07871	-73.0664	-471.858	34977.3	43151.3	-7155.99	291.45	828.873	0	0	0	0	0	0	0	603	903	0
5650	7	0	0	0	0	0	0	200	300	0	7.23129	-74.5923	-472.469	35526.7	42785.1	-6881.33	290.556	827.806	0	0	0	0	0	0	0	603	903	0
5650	8	0	0	0	0	0	0	200	300	0	6.77353	-73.8293	-473.995	35709.8	43822.7	-7476.43	292.454	827.662	0	0	0	0	0	0	0	603	903	0
5650	9	0	0	0	0	0	0	200	300	0	7.99423	-75.3552	-476.741	35984.4	43700.6	-7430.65	291.665	827.52	0	0	0	0	0	0	0	603	903	0
5651	0	0	0	0	0	0	0	200	300	0	9.6727	-74.7449	-476.131	36167.5	44066.9	-7384.87	292.552	827.039	0	0	0	0	0	0	0	603	903	0
5651	1	0	0	0	0	0	0	200	300	0	8.75717	-75.3552	-480.098	36991.5	44433.1	-7064.44	292.55	825.95	0	0	0	0	0	0	0	603	903	0
5651	2	0	0	0	0	0	0	200	300	0	9.06235	-75.2026	-477.352	37357.7	44066.9	-7293.32	292.315	824.74	0	0	0	0	0	0	0	603	903	0
5651	3	0	0	0	0	0	0	200	300	0	12.1141	-76.5759	-481.624	37632.4	44494.1	-7293.32	292.383	824.864	0	0	0	0	0	0	0	603	903	0
5651	4	0	0	0	0	0	0	200	300	0	10.8934	-76.8811	-484.065	38273.2	45043.4	-7567.98	293.052	823.934	0	0	0	0	0	0	0	603	903	0
5651	5	0	0	0	0	0	0	200	300	0	11.3512	-78.2544	-485.591	38639.4	44860.3	-7659.53	292.383	823.428	0	0	0	0	0	0	0	603	903	0
5651	6	0	0	0	0	0	0	200	300	0	12.4193	-78.7122	-487.728	39005.7	45531.7	-7339.1	293.355	823.026	0	0	0	0	0	0	0	603	903	0
5651	7	0	0	0	0	0	0	200	300	0	13.64	-78.8647	-492	39738.1	46081	-7476.43	293.661	822.232	0	0	0	0	0	0	0	603	903	0
5651	8	0	0	0	0	0	0	200	300	0	13.4874	-80.0854	-493.831	40195.9	46081	-7293.32	293.313	821.604	0	0	0	0	0	0	0	603	903	0
5651	9	0	0	0	0	0	0	200	300	0	13.7926	-80.238	-495.662	40745.2	46325.2	-7567.98	293.461	820.797	0	0	0	0	0	0	0	603	903	0
5652	0	0	0	0	0	0	0	200	300	0	15.9288	-80.8484	-499.324	41477.6	46996.5	-7613.76	294.12	819.933	0	0	0	0	0	0	0	603	903	0
5652	1	0	0	0	0	0	0	200	300	0	15.9288	-81.9165	-501.766	41111.4	47240.7	-7567.98	294.149	821.067	0	0	0	0	0	0	0	603	903	0
5652	2	0	0	0	0	0	0	200	300	0	15.6236	-82.5269	-505.733	42118.4	47240.7	-7476.43	293.41	819.718	0	0	0	0	0	0	0	603	903	0
5652	3	0	0	0	0	0	0	200	300	0	17.3021	-82.832	-508.785	43125.6	48034.1	-7705.31	294.41	818.238	0	0	0	0	0	0	0	603	903	0
5652	4	0	0	0	0	0	0	200	300	0	16.8443	-83.595	-511.836	42850.9	48278.3	-7659.53	294.324	819.28	0	0	0	0	0	0	0	603	903	0
5652	5	0	0	0	0	0	0	200	300	0	17.4547	-84.9683	-515.193	43400.2	48705.5	-7567.98	294.538	818.759	0	0	0	0	0	0	0	603	903	0
5652	6	0	0	0	0	0	0	200	300	0	19.7435	-85.8838	-519.771	44224.2	49071.7	-7384.87	294.41	817.916	0	0	0	0	0	0	0	603	903	0
5652	7	0	0	0	0	0	0	200	300	0	19.7435	-86.6467	-520.992	44498.8	49499	-7613.76	295.009	817.588	0	0	0	0	0	0	0	603	903	0
5652	8	0	0	0	0	0	0	200	300	0	18.9806	-87.2571	-524.349	45231.2	49071.7	-7979.97	293.586	816.738	0	0	0	0	0	0	0	603	903	0
5652	9	0	0	0	0	0	0	200	300	0	20.9642	-88.02	-528.621	45322.8	50048.3	-7796.86	294.677	817.262	0	0	0	0	0	0	0	603	903	0
5653	0	0	0	0	0	0	0	200	300	0	20.8116	-89.0881	-531.673	46146.8	50902.8	-7751.09	295.741	816.205	0	0	0	0	0	0	0	603	903	0
5653	1	0	0	0	0	0	0	200	300	0	20.659	-89.2407	-533.504	46970.8	50719.7	-8025.75	295.069	814.958	0	0	0	0	0	0	0	603	903	0
5653	2	0	0	0	0	0	0	200	300	0	22.1849	-89.8511	-540.523	47520.1	51635.2	-7567.98	295.528	815.085	0	0	0	0	0	0	0	603	903	0
5653	3	0	0	0	0	0	0	200	300	0	22.0323	-90.4614	-543.27	47794.7	52001.4	-7934.19	295.719	815.024	0	0	0	0	0	0	0	603	903	0
5653	4	0	0	0	0	0	0	200	300	0	21.1168	-90.9192	-549.678	48893.4	52550.7	-7842.64	295.603	814.051	0	0	0	0	0	0	0	603	903	0
5653	5	0	0	0	0	0	0	200	300	0	22.9478	-91.5295	-553.646	49534.2	52916.9	-7842.64	295.579	813.531	0	0	0	0	0	0	0	603	903	0
5653	6	0	0	0	0	0	0	200	300	0	24.1685	-91.0718	-554.561	50541.3	53466.3	-7842.64	296.412	811.863	0	0	0	0	0	0	0	603	903	0
5653	7	0	0	0	0	0	0	200	300	0	23.1004	-93.5132	-561.275	50724.4	53771.4	-7705.31	295.802	812.626	0	0	0	0	0	0	0	603	903	0
5653	8	0	0	0	0	0	0	200	300	0	23.5582	-94.1235	-565.853	51273.7	54137.7	-8117.3	295.674	812.387	0	0	0	0	0	0	0	603	903	0
5653	9	0	0	0	0	0	0	200	300	0	24.7789	-94.1235	-571.041	52555.5	54931.1	-7751.09	296.195	810.965	0	0	0	0	0	0	0	603	903	0
5654	0	0	0	0	0	0	0	200	300	0	24.1685	-95.1917	-576.229	52189.2	54870.1	-8117.3	295.223	812.43	0	0	0	0	0	0	0	603	903	0
5654	1	0	0	0	0	0	0	200	300	0	24.7789	-95.3442	-578.975	53196.4	55053.2	-7659.53	295.087	811.12	0	0	0	0	0	0	0	603	903	0
5654	2	0	0	0	0	0	0	200	300	0	24.9315	-95.802	-582.942	53745.7	55114.2	-7979.97	294.545	810.803	0	0	0	0	0	0	0	603	903	0
5654	3	0	0	0	0	0	0	200	300	0	24.3211	-96.2598	-586.605	53654.1	55846.6	-8071.52	295.203	811.535	0	0	0	0	0	0	0	603	903	0
5654	4	0	0	0	0	0	0	200	300	0	24.3211	-96.4124	-587.52	54935.8	56151.8	-8208.85	295.574	809.495	0	0	0	0	0	0	0	603	903	0
5654	5	0	0	0	0	0	0	200	300	0	26.7625	-96.8701	-594.539	55302	56823.2	-7979.97	295.575	809.983	0	0	0	0	0	0	0	603	903	0
5654	6	0	0	0	0	0	0	200	300	0	23.253	-96.2598	-600.948	55027.4	56334.9	-8208.85	293.743	811.432	0	0	0	0	0	0	0	603	903	0
5654	7	0	0	0	0	0	0	200	300	0	24.1685	-96.2598	-600.337	56034.5	57189.4	-8254.62	295.262	809.662	0	0	0	0	0	0	0	603	903	0
5654	8	0	0	0	0	0	0	200	300	0	25.5418	-95.9546	-604.305	56766.9	57982.9	-8254.62	295.95	809.063	0	0	0	0	0	0	0	603	903	0
5654	9	0	0	0	0	0	0	200	300	0	24.6263	-96.1072	-608.272	57224.7	58104.9	-8117.3	295.525	808.923	0	0	0	0	0	0	0	603	903	0
5655	0	0	0	0	0	0	0	200	300	0	24.1685	-95.0391	-611.934	57407.8	57372.5	-8071.52	293.756	809.186	0	0	0	0	0	0	0	603	903	0
5655	1	0	0	0	0	0	0	200	300	0	26.3048	-94.8865	-615.901	58140.2	59020.5	-7979.97	295.828	808.602	0	0	0	0	0	0	0	603	903	0
5655	2	0	0	0	0	0	0	200	300	0	25.0841	-96.1072	-618.953	58964.2	58898.4	-8208.85	295.158	807.736	0	0	0	0	0	0	0	603	903	0
5655	3	0	0	0	0	0	0	200	300	0	24.6263	-95.3442	-622.92	59605	59447.7	-8163.08	295.434	807.314	0	0	0	0	0	0	0	603	903	0
5655	4	0	0	0	0	0	0	200	300	0	26.3048	-95.3442	-625.972	59971.3	59813.9	-8208.85	295.554	807.195	0	0	0	0	0	0	0	603	903	0
5655	5	0	0	0	0	0	0	200	300	0	25.2367	-96.4124	-630.855	60337.5	60241.2	-7934.19	295.491	807.356	0	0	0	0	0	0	0	603	903	0
5655	6	0	0	0	0	0	0	200	300	0	25.9996	-95.3442	-633.602	61069.9	60363.2	-7751.09	295.27	806.615	0	0	0	0	0	0	0	603	903	0
5655	7	0	0	0	0	0	0	200	300	0	27.0677	-96.2598	-637.264	61893.9	60607.4	-7751.09	295.106	805.876	0	0	0	0	0	0	0	603	903	0
5655	8	0	0	0	0	0	0	200	300	0	27.5255	-97.0227	-640.621	61619.2	61339.8	-8025.75	295.751	806.813	0	0	0	0	0	0	0	603	903	0
5655	9	0	0	0	0	0	0	200	300	0	27.0677	-96.7175	-642.452	62443.2	61278.8	-8117.3	295.383	805.805	0	0	0	0	0	0	0	603	903	0
5656	0	0	0	0	0	0	0	200	300	0	28.441	-97.1753	-646.724	63358.7	61706	-7842.64	295.413	805.031	0	0	0	0	0	0	0	603	903	0
5656	1	0	0	0	0	0	0	200	300	0	29.2039	-97.0227	-649.471	63084	62316.4	-8071.52	295.949	805.869	0	0	0	0	0	0	0	603	903	0
5656	2	0	0	0	0	0	0	200	300	0	27.3729	-96.8701	-653.743	63541.8	62621.6	-7888.41	295.789	805.803	0	0	0	0	0	0	0	603	903	0
5656	3	0	0	0	0	0	0	200	300	0	28.8988	-97.3279	-657.1	64365.8	62621.6	-7430.65	295.3	805.046	0	0	0	0	0	0	0	603	903	0
5656	4	0	0	0	0	0	0	200	300	0	28.8988	-97.3279	-658.321	64732	63415	-7842.64	296.328	804.671	0	0	0	0	0	0	0	603	903	0
5656	5	0	0	0	0	0	0	200	300	0	28.5936	-96.7175	-662.898	65189.7	63354	-7751.09	295.571	804.66	0	0	0	0	0	0	0	603	903	0
5656	6	0	0	0	0	0	0	200	300	0	28.2884	-97.0227	-665.34	65922.2	63537.1	-7842.64	295.496	803.92	0	0	0	0	0	0	0	603	903	0
5656	7	0	0	0	0	0	0	200	300	0	28.8988	-96.8701	-668.697	66654.6	64452.6	-7522.2	296.385	803.322	0	0	0	0	0	0	0	603	903	0
5656	8	0	0	0	0	0	0	200	300	0	28.8988	-96.7175	-670.528	66471.5	64513.6	-8025.75	296.213	803.867	0	0	0	0	0	0	0	603	903	0
5656	9	0	0	0	0	0	0	200	300	0	28.7462	-98.0908	-674.8	66929.2	64757.8	-7659.53	295.966	803.816	0	0	0	0	0	0	0	603	903	0
5657	0	0	0	0	0	0	0	200	300	0	32.1031	-95.802	-675.411	67478.6	65185	-7659.53	296.512	803.092	0	0	0	0	0	0	0	603	903	0
5657	1	0	0	0	0	0	0	200	300	0	28.8988	-96.2598	-679.683	67387	65368.1	-7796.86	296.174	803.855	0	0	0	0	0	0	0	603	903	0
5657	2	0	0	0	0	0	0	200	300	0	29.6617	-96.5649	-681.819	68119.4	65490.2	-7522.2	296.052	803.092	0	0	0	0	0	0	0	603	903	0
5657	3	0	0	0	0	0	0	200	300	0	29.9669	-95.6494	-683.956	69035	65917.5	-7522.2	296.377	802.065	0	0	0	0	0	0	0	603	903	0
5657	4	0	0	0	0	0	0	200	300	0	30.1195	-96.1072	-686.397	68760.3	66222.6	-7384.87	296.479	802.824	0	0	0	0	0	0	0	603	903	0
5657	5	0	0	0	0	0	0	200	300	0	32.1031	-96.4124	-688.533	68760.3	66161.6	-7522.2	296.091	803.135	0	0	0	0	0	0	0	603	903	0
5657	6	0	0	0	0	0	0	200	300	0	31.1876	-96.2598	-691.28	69950.5	66833	-7339.1	296.68	801.81	0	0	0	0	0	0	0	603	903	0
5657	7	0	0	0	0	0	0	200	300	0	31.6454	-95.3442	-694.942	70499.8	67077.1	-7339.1	296.522	801.553	0	0	0	0	0	0	0	603	903	0
5657	8	0	0	0	0	0	0	200	300	0	31.035	-96.1072	-696.163	70133.6	67016.1	-7064.44	296.265	802.257	0	0	0	0	0	0	0	603	903	0
5657	9	0	0	0	0	0	0	200	300	0	31.9505	-95.3442	-699.52	70957.6	67382.3	-7064.44	296.327	801.562	0	0	0	0	0	0	0	603	903	0
5658	0	0	0	0	0	0	0	200	300	0	33.1712	-95.4968	-702.266	71323.8	67626.5	-7110.22	296.297	801.438	0	0	0	0	0	0	0	603	903	0
5658	1	0	0	0	0	0	0	200	300	0	31.7979	-95.0391	-703.487	71506.9	67870.6	-6927.11	296.477	801.354	0	0	0	0	0	0	0	603	903	0
5658	2	0	0	0	0	0	0	200	300	0	31.9505	-93.9709	-707.454	71690	67870.6	-7155.99	295.936	801.665	0	0	0	0	0	0	0	603	903	0
5658	3	0	0	0	0	0	0	200	300	0	33.4764	-95.4968	-710.506	72514	68664	-6972.89	296.641	800.94	0	0	0	0	0	0	0	603	903	0
5658	4	0	0	0	0	0	0	200	300	0	33.0186	-93.8184	-709.285	72514	68053.7	-6789.78	295.947	800.765	0	0	0	0	0	0	0	603	903	0
5658	5	0	0	0	0	0	0	200	300	0	34.3919	-93.208	-712.642	72788.6	68786.1	-6423.57	296.523	800.861	0	0	0	0	0	0	0	603	903	0
5658	6	0	0	0	0	0	0	200	300	0	34.5445	-93.5132	-714.168	72605.6	69030.2	-6789.78	296.658	801.336	0	0	0	0	0	0	0	603	903	0
5658	7	0	0	0	0	0	0	200	300	0	33.9342	-92.5977	-716.915	73521	69274.4	-6789.78	296.629	800.448	0	0	0	0	0	0	0	603	903	0
5658	8	0	0	0	0	0	0	200	300	0	33.4764	-92.4451	-714.168	73978.8	68664	-6835.56	296.146	799.413	0	0	0	0	0	0	0	603	903	0
5658	9	0	0	0	0	0	0	200	300	0	36.8333	-93.208	-719.661	74711.2	69518.5	-6789.78	296.599	799.186	0	0	0	0	0	0	0	603	903	0
5659	0	0	0	0	0	0	0	200	300	0	35.3075	-91.8347	-723.323	74894.4	70128.9	-6652.45	296.954	799.458	0	0	0	0	0	0	0	603	903	0
5659	1	0	0	0	0	0	0	200	300	0	34.0868	-91.6821	-725.765	74711.2	69579.6	-6652.45	295.871	800.059	0	0	0	0	0	0	0	603	903	0
5659	2	0	0	0	0	0	0	200	300	0	36.5282	-92.2925	-726.985	75718.3	70189.9	-6194.69	296.549	798.846	0	0	0	0	0	0	0	603	903	0
5659	3	0	0	0	0	0	0	200	300	0	34.6971	-91.377	-730.037	75993	70617.1	-6606.68	296.731	798.905	0	0	0	0	0	0	0	603	903	0
5659	4	0	0	0	0	0	0	200	300	0	34.3919	-91.5295	-730.953	76267.7	70617.1	-6698.23	296.61	798.66	0	0	0	0	0	0	0	603	903	0
5659	5	0	0	0	0	0	0	200	300	0	34.6971	-91.0718	-730.953	76908.5	70800.3	-6515.12	296.86	797.783	0	0	0	0	0	0	0	603	903	0
5659	6	0	0	0	0	0	0	200	300	0	35.3075	-90.614	-734.92	76908.5	70922.4	-6332.02	296.504	798.351	0	0	0	0	0	0	0	603	903	0
5659	7	0	0	0	0	0	0	200	300	0	34.6971	-90.0037	-736.751	77274.7	71105.4	-6423.57	296.512	798.114	0	0	0	0	0	0	0	603	903	0
5659	8	0	0	0	0	0	0	200	300	0	35.4601	-90.0037	-737.972	77732.5	71349.6	-6377.79	296.683	797.667	0	0	0	0	0	0	0	603	903	0
5659	9	0	0	0	0	0	0	200	300	0	37.5963	-89.6985	-740.718	78464.9	71654.8	-6377.79	296.737	797.069	0	0	0	0	0	0	0	603	903	0
5660	0	0	0	0	0	0	0	200	300	0	35.9178	-89.6985	-741.023	77457.8	71715.8	-6286.24	296.779	798.472	0	0	0	0	0	0	0	603	903	0
5660	1	0	0	0	0	0	0	200	300	0	35.9178	-89.0881	-742.549	78373.3	72021	-6194.69	296.992	797.454	0	0	0	0	0	0	0	603	903	0
5660	2	0	0	0	0	0	0	200	300	0	38.5118	-88.6304	-743.465	79380.4	72448.2	-6148.91	297.447	796.229	0	0	0	0	0	0	0	603	903	0
5660	3	0	0	0	0	0	0	200	300	0	35.3075	-88.3252	-745.906	78739.5	72265.1	-5828.48	296.882	797.438	0	0	0	0	0	0	0	603	903	0
5660	4	0	0	0	0	0	0	200	300	0	35.6126	-88.1726	-747.127	79929.8	72631.3	-5965.81	297.214	796.017	0	0	0	0	0	0	0	603	903	0
5660	5	0	0	0	0	0	0	200	300	0	39.1222	-88.3252	-749.263	80021.3	72875.5	-6011.58	297.263	796.2	0	0	0	0	0	0	0	603	903	0
5660	6	0	0	0	0	0	0	200	300	0	36.0704	-88.3252	-749.568	80021.3	73119.6	-5828.48	297.549	796.243	0	0	0	0	0	0	0	603	903	0
5660	7	0	0	0	0	0	0	200	300	0	36.223	-86.6467	-748.348	80387.5	72753.4	-5508.04	297.219	795.58	0	0	0	0	0	0	0	603	903	0
5660	8	0	0	0	0	0	0	200	300	0	37.7489	-87.5623	-753.231	80753.7	73485.8	-5828.48	297.561	795.79	0	0	0	0	0	0	0	603	903	0
5660	9	0	0	0	0	0	0	200	300	0	36.9859	-87.1045	-753.231	80845.3	73607.9	-5691.15	297.723	795.669	0	0	0	0	0	0	0	603	903	0
5661	0	0	0	0	0	0	0	200	300	0	37.4437	-86.189	-754.756	81394.6	72814.4	-5645.37	296.474	795.158	0	0	0	0	0	0	0	603	903	0
5661	1	0	0	0	0	0	0	200	300	0	38.9696	-86.7993	-755.977	81577.7	73913	-5782.7	297.772	795.09	0	0	0	0	0	0	0	603	903	0
5661	2	0	0	0	0	0	0	200	300	0	37.5963	-87.7148	-758.113	81760.8	74096.2	-5508.04	297.738	795.152	0	0	0	0	0	0	0	603	903	0
5661	3	0	0	0	0	0	0	200	300	0	37.5963	-85.426	-758.113	82310.1	73974.1	-5370.71	297.577	794.428	0	0	0	0	0	0	0	603	903	0
5661	4	0	0	0	0	0	0	200	300	0	39.1222	-84.2053	-760.25	82493.2	74401.3	-5370.71	297.864	794.492	0	0	0	0	0	0	0	603	903	0
5661	5	0	0	0	0	0	0	200	300	0	38.6644	-85.2734	-759.944	82310.1	74462.4	-5279.16	297.984	794.689	0	0	0	0	0	0	0	603	903	0
5661	6	0	0	0	0	0	0	200	300	0	38.5118	-84.9683	-761.775	82767.9	74523.4	-5462.27	297.829	794.349	0	0	0	0	0	0	0	603	903	0
5661	7	0	0	0	0	0	0	200	300	0	39.2747	-84.6631	-761.775	82859.5	74767.5	-5370.71	298.149	794.229	0	0	0	0	0	0	0	603	903	0
5661	8	0	0	0	0	0	0	200	300	0	39.8851	-84.3579	-762.081	83225.7	74767.5	-4958.73	298.11	793.792	0	0	0	0	0	0	0	603	903	0
5661	9	0	0	0	0	0	0	200	300	0	39.1222	-84.2053	-761.775	83134.1	74523.4	-5050.28	297.829	793.868	0	0	0	0	0	0	0	603	903	0
5662	0	0	0	0	0	0	0	200	300	0	39.2747	-83.9001	-765.438	83866.5	75072.8	-5233.39	298.078	793.433	0	0	0	0	0	0	0	603	903	0
5662	1	0	0	0	0	0	0	200	300	0	39.7325	-83.1372	-764.827	84049.6	75011.7	-4867.17	298.077	793.106	0	0	0	0	0	0	0	603	903	0
5662	2	0	0	0	0	0	0	200	300	0	39.2747	-83.595	-766.353	83958.1	75072.8	-4729.85	297.961	793.445	0	0	0	0	0	0	0	603	903	0
5662	3	0	0	0	0	0	0	200	300	0	39.8851	-83.1372	-766.353	84507.4	74645.5	-4867.17	297.404	792.728	0	0	0	0	0	0	0	603	903	0
5662	4	0	0	0	0	0	0	200	300	0	41.7162	-81.6113	-768.184	84598.9	75133.7	-4867.17	297.807	792.872	0	0	0	0	0	0	0	603	903	0
5662	5	0	0	0	0	0	0	200	300	0	39.4273	-81.7639	-768.489	83958.1	75011.7	-4958.73	297.609	793.749	0	0	0	0	0	0	0	603	903	0
5662	6	0	0	0	0	0	0	200	300	0	40.648	-80.3906	-764.827	85148.3	75194.8	-4775.62	298.316	791.67	0	0	0	0	0	0	0	603	903	0
5662	7	0	0	0	0	0	0	200	300	0	41.7162	-81.3062	-769.71	85422.9	75561	-4684.07	298.168	792.019	0	0	0	0	0	0	0	603	903	0
5662	8	0	0	0	0	0	0	200	300	0	40.0377	-80.5432	-770.931	85514.5	75133.7	-4729.85	297.458	792.076	0	0	0	0	0	0	0	603	903	0
5662	9	0	0	0	0	0	0	200	300	0	40.3429	-80.6958	-770.626	85697.6	75439	-4180.53	297.893	791.795	0	0	0	0	0	0	0	603	903	0
5663	0	0	0	0	0	0	0	200	300	0	41.8687	-79.0173	-770.931	85972.2	75255.8	-4592.52	297.617	791.483	0	0	0	0	0	0	0	603	903	0
5663	1	0	0	0	0	0	0	200	300	0	40.1903	-77.9492	-771.236	86155.4	75377.9	-4500.96	297.736	791.289	0	0	0	0	0	0	0	603	903	0
5663	2	0	0	0	0	0	0	200	300	0	40.4955	-78.5596	-771.846	86613.1	75500	-4409.41	297.817	790.785	0	0	0	0	0	0	0	603	903	0
5663	3	0	0	0	0	0	0	200	300	0	42.0213	-77.7966	-772.762	86338.4	75866.2	-4500.96	298.175	791.273	0	0	0	0	0	0	0	603	903	0
5663	4	0	0	0	0	0	0	200	300	0	40.4955	-77.4915	-770.32	87162.4	75805.2	-4272.08	298.407	789.849	0	0	0	0	0	0	0	603	903	0
5663	5	0	0	0	0	0	0	200	300	0	40.4955	-77.1863	-772.151	87070.8	75683.1	-4409.41	298.016	790.236	0	0	0	0	0	0	0	603	903	0
5663	6	0	0	0	0	0	0	200	300	0	41.2584	-77.4915	-774.288	87803.3	75500	-4226.31	297.509	789.601	0	0	0	0	0	0	0	603	903	0
5663	7	0	0	0	0	0	0	200	300	0	41.1058	-77.4915	-773.677	87162.4	75744.1	-4088.97	297.901	790.34	0	0	0	0	0	0	0	603	903	0
5663	8	0	0	0	0	0	0	200	300	0	40.8006	-76.2708	-774.898	87620.2	75927.2	-4363.63	297.984	789.927	0	0	0	0	0	0	0	603	903	0
5663	9	0	0	0	0	0	0	200	300	0	42.0213	-76.8811	-772.762	88352.6	75988.2	-4180.53	298.333	788.666	0	0	0	0	0	0	0	603	903	0
5664	0	0	0	0	0	0	0	200	300	0	41.411	-75.813	-773.677	87803.3	76049.3	-4134.75	298.296	789.512	0	0	0	0	0	0	0	603	903	0
5664	1	0	0	0	0	0	0	200	300	0	40.648	-74.8975	-774.898	87986.4	76354.4	-3997.42	298.535	789.454	0	0	0	0	0	0	0	603	903	0
5664	2	0	0	0	0	0	0	200	300	0	42.1739	-75.2026	-773.982	87894.8	76537.6	-4043.2	298.888	789.438	0	0	0	0	0	0	0	603	903	0
5664	3	0	0	0	0	0	0	200	300	0	41.7162	-75.05	-774.593	87986.4	76354.4	-3860.09	298.574	789.41	0	0	0	0	0	0	0	603	903	0
5664	4	0	0	0	0	0	0	200	300	0	41.5636	-73.8293	-775.814	87711.8	76415.5	-3905.87	298.497	789.942	0	0	0	0	0	0	0	603	903	0
5664	5	0	0	0	0	0	0	200	300	0	43.3946	-73.8293	-776.119	88901.9	76720.7	-3860.09	298.852	788.453	0	0	0	0	0	0	0	603	903	0
5664	6	0	0	0	0	0	0	200	300	0	42.0213	-73.8293	-775.203	88627.2	76354.4	-3676.99	298.496	788.672	0	0	0	0	0	0	0	603	903	0
5664	7	0	0	0	0	0	0	200	300	0	41.5636	-72.9138	-774.898	88627.2	76476.5	-3631.21	298.692	788.627	0	0	0	0	0	0	0	603	903	0
5664	8	0	0	0	0	0	0	200	300	0	40.9532	-72.7612	-775.508	89268.1	76842.7	-3539.66	299.087	787.891	0	0	0	0	0	0	0	603	903	0
5664	9	0	0	0	0	0	0	200	300	0	41.8687	-73.0664	-774.593	88627.2	77331	-3493.88	299.834	788.582	0	0	0	0	0	0	0	603	903	0
5665	0	0	0	0	0	0	0	200	300	0	41.411	-71.8457	-775.814	88444.2	76598.6	-3448.1	298.733	788.998	0	0	0	0	0	0	0	603	903	0
5665	1	0	0	0	0	0	0	200	300	0	42.1739	-71.3879	-776.119	89359.7	76842.7	-3493.88	299.009	787.863	0	0	0	0	0	0	0	603	903	0
5665	2	0	0	0	0	0	0	200	300	0	42.0213	-70.4724	-775.508	89634.3	77025.9	-3081.89	299.323	787.419	0	0	0	0	0	0	0	603	903	0
5665	3	0	0	0	0	0	0	200	300	0	42.0213	-69.8621	-776.119	88810.4	76537.6	-3127.67	298.616	788.571	0	0	0	0	0	0	0	603	903	0
5665	4	0	0	0	0	0	0	200	300	0	42.0213	-69.0991	-775.508	89451.3	76781.7	-3173.45	299.008	787.655	0	0	0	0	0	0	0	603	903	0
5665	5	0	0	0	0	0	0	200	300	0	43.5472	-69.7095	-774.288	89634.3	76537.6	-2944.56	298.849	787.236	0	0	0	0	0	0	0	603	903	0
5665	6	0	0	0	0	0	0	200	300	0	41.5636	-68.7939	-775.203	89542.8	76476.5	-3081.89	298.654	787.491	0	0	0	0	0	0	0	603	903	0
5665	7	0	0	0	0	0	0	200	300	0	42.1739	-68.1836	-774.288	89817.5	76781.7	-2761.46	299.164	787	0	0	0	0	0	0	0	603	903	0
5665	8	0	0	0	0	0	0	200	300	0	42.9369	-68.031	-773.067	89634.3	76659.7	-2944.56	299.163	787.054	0	0	0	0	0	0	0	603	903	0
5665	9	0	0	0	0	0	0	200	300	0	43.0894	-66.8103	-771.541	89634.3	76476.5	-2898.79	299.122	786.824	0	0	0	0	0	0	0	603	903	0
5666	0	0	0	0	0	0	0	200	300	0	42.4791	-67.1155	-772.151	89542.8	76476.5	-2807.24	299.043	787.035	0	0	0	0	0	0	0	603	903	0
5666	1	0	0	0	0	0	0	200	300	0	42.7843	-67.2681	-772.151	90000.5	76598.6	-2761.46	299.202	786.442	0	0	0	0	0	0	0	603	903	0
5666	2	0	0	0	0	0	0	200	300	0	42.4791	-66.5051	-772.762	89725.9	76110.3	-2578.35	298.491	786.889	0	0	0	0	0	0	0	603	903	0
5666	3	0	0	0	0	0	0	200	300	0	42.3265	-65.8948	-770.32	90000.5	76354.4	-2761.46	299.12	786.165	0	0	0	0	0	0	0	603	903	0
5666	4	0	0	0	0	0	0	200	300	0	42.7843	-65.1318	-770.626	90549.9	76598.6	-2853.01	299.398	785.498	0	0	0	0	0	0	0	603	903	0
5666	5	0	0	0	0	0	0	200	300	0	43.8524	-64.5215	-770.015	89909	75927.2	-2624.13	298.605	786.237	0	0	0	0	0	0	0	603	903	0
5666	6	0	0	0	0	0	0	200	300	0	42.0213	-64.2163	-766.048	90275.2	76354.4	-2395.25	299.673	785.155	0	0	0	0	0	0	0	603	903	0
5666	7	0	0	0	0	0	0	200	300	0	43.0894	-63.7585	-768.184	90733	75988.2	-2441.02	298.919	784.887	0	0	0	0	0	0	0	603	903	0
5666	8	0	0	0	0	0	0	200	300	0	42.1739	-63.4534	-767.879	90275.2	75866.2	-2303.7	298.8	785.436	0	0	0	0	0	0	0	603	903	0
5666	9	0	0	0	0	0	0	200	300	0	42.3265	-62.9956	-766.048	90092.1	75927.2	-2441.02	299.116	785.394	0	0	0	0	0	0	0	603	903	0
5667	0	0	0	0	0	0	0	200	300	0	43.0894	-61.7749	-761.775	90824.5	76110.3	-2395.25	299.912	783.773	0	0	0	0	0	0	0	603	903	0
5667	1	0	0	0	0	0	0	200	300	0	43.0894	-62.2327	-763.607	90549.9	75744.1	-2212.14	299.193	784.418	0	0	0	0	0	0	0	603	903	0
5667	2	0	0	0	0	0	0	200	300	0	42.1739	-61.1646	-762.691	90366.7	75744.1	-2212.14	299.312	784.516	0	0	0	0	0	0	0	603	903	0
5667	3	0	0	0	0	0	0	200	300	0	42.3265	-61.1646	-762.996	90733	75866.2	-2029.04	299.432	784.083	0	0	0	0	0	0	0	603	903	0
5667	4	0	0	0	0	0	0	200	300	0	42.7843	-60.8594	-761.165	90733	75377.9	-2166.37	299.03	783.797	0	0	0	0	0	0	0	603	903	0
5667	5	0	0	0	0	0	0	200	300	0	41.7162	-60.4016	-760.86	90458.3	75561	-2120.59	299.31	784.11	0	0	0	0	0	0	0	603	903	0
5667	6	0	0	0	0	0	0	200	300	0	42.3265	-61.012	-759.639	91099.2	76049.3	-2029.04	300.112	783.076	0	0	0	0	0	0	0	603	903	0
5667	7	0	0	0	0	0	0	200	300	0	42.6317	-59.0283	-757.808	90458.3	75805.2	-1937.49	300.032	783.632	0	0	0	0	0	0	0	603	903	0
5667	8	0	0	0	0	0	0	200	300	0	41.5636	-58.1128	-757.198	90641.4	74767.5	-1891.71	298.742	783.294	0	0	0	0	0	0	0	603	903	0
5667	9	0	0	0	0	0	0	200	300	0	42.6317	-58.8757	-755.672	90824.5	75683.1	-1937.49	300.153	782.81	0	0	0	0	0	0	0	603	903	0
5668	0	0	0	0	0	0	0	200	300	0	41.2584	-58.5706	-755.367	90458.3	75377.9	-1845.93	299.79	783.246	0	0	0	0	0	0	0	603	903	0
5668	1	0	0	0	0	0	0	200	300	0	41.7162	-58.8757	-751.705	91099.2	74950.7	-1479.72	299.708	781.81	0	0	0	0	0	0	0	603	903	0
5668	2	0	0	0	0	0	0	200	300	0	42.1739	-57.8076	-752.925	91190.7	74889.6	-1891.71	299.465	781.885	0	0	0	0	0	0	0	603	903	0
5668	3	0	0	0	0	0	0	200	300	0	42.4791	-56.7395	-752.315	90549.9	75561	-1617.05	300.438	782.638	0	0	0	0	0	0	0	603	903	0
5668	4	0	0	0	0	0	0	200	300	0	41.8687	-56.8921	-750.484	90824.5	74767.5	-1662.83	299.626	781.979	0	0	0	0	0	0	0	603	903	0
5668	5	0	0	0	0	0	0	200	300	0	42.0213	-56.2817	-749.568	90549.9	74828.6	-1342.39	299.829	782.197	0	0	0	0	0	0	0	603	903	0
5668	6	0	0	0	0	0	0	200	300	0	42.1739	-55.3662	-748.653	90275.2	74706.5	-1479.72	299.788	782.416	0	0	0	0	0	0	0	603	903	0
5668	7	0	0	0	0	0	0	200	300	0	43.0894	-55.3662	-747.737	90733	74950.7	-1296.62	300.237	781.657	0	0	0	0	0	0	0	603	903	0
5668	8	0	0	0	0	0	0	200	300	0	42.4791	-54.1455	-746.822	90366.7	74645.5	-1388.17	299.951	781.998	0	0	0	0	0	0	0	603	903	0
5668	9	0	0	0	0	0	0	200	300	0	42.3265	-53.9929	-745.906	90549.9	74645.5	-1250.84	300.074	781.604	0	0	0	0	0	0	0	603	903	0
5669	0	0	0	0	0	0	0	200	300	0	43.242	-54.2981	-745.296	90641.4	74462.4	-1159.29	299.91	781.382	0	0	0	0	0	0	0	603	903	0
5669	1	0	0	0	0	0	0	200	300	0	42.3265	-53.8403	-741.023	90916.1	74462.4	-1113.51	300.486	780.31	0	0	0	0	0	0	0	603	903	0
5669	2	0	0	0	0	0	0	200	300	0	42.3265	-53.0774	-743.16	90824.5	74584.5	-930.405	300.361	780.786	0	0	0	0	0	0	0	603	903	0
5669	3	0	0	0	0	0	0	200	300	0	41.8687	-51.3989	-742.549	90824.5	74035.1	-793.076	299.704	780.686	0	0	0	0	0	0	0	603	903	0
5669	4	0	0	0	0	0	0	200	300	0	41.8687	-52.3145	-740.413	91373.9	74035.1	-838.852	299.992	779.591	0	0	0	0	0	0	0	603	903	0
5669	5	0	0	0	0	0	0	200	300	0	42.1739	-51.0938	-739.498	90275.2	74279.2	-884.628	300.446	780.924	0	0	0	0	0	0	0	603	903	0
5669	6	0	0	0	0	0	0	200	300	0	41.1058	-51.2463	-737.667	90549.9	73974.1	-976.181	300.281	780.248	0	0	0	0	0	0	0	603	903	0
5669	7	0	0	0	0	0	0	200	300	0	42.0213	-50.7886	-737.361	90824.5	73607.9	-426.864	299.826	779.825	0	0	0	0	0	0	0	603	903	0
5669	8	0	0	0	0	0	0	200	300	0	42.3265	-49.2627	-731.258	91190.7	74096.2	-564.193	301.327	778.296	0	0	0	0	0	0	0	603	903	0
5669	9	0	0	0	0	0	0	200	300	0	41.2584	-49.4153	-736.446	90733	73974.1	-701.523	300.447	779.796	0	0	0	0	0	0	0	603	903	0
5670	0	0	0	0	0	0	0	200	300	0	41.5636	-49.2627	-733.699	90824.5	73424.8	-609.97	300.075	779.21	0	0	0	0	0	0	0	603	903	0
5670	1	0	0	0	0	0	0	200	300	0	43.5472	-49.1101	-733.394	90916.1	73607.9	-747.299	300.366	779.034	0	0	0	0	0	0	0	603	903	0
5670	2	0	0	0	0	0	0	200	300	0	41.8687	-48.1946	-731.563	90824.5	73546.8	-472.641	300.534	778.849	0	0	0	0	0	0	0	603	903	0
5670	3	0	0	0	0	0	0	200	300	0	41.5636	-47.7368	-730.953	90549.9	73363.8	-289.535	300.367	779.121	0	0	0	0	0	0	0	603	903	0
5670	4	0	0	0	0	0	0	200	300	0	41.411	-47.7368	-730.648	90824.5	73607.9	-243.759	300.743	778.693	0	0	0	0	0	0	0	603	903	0
5670	5	0	0	0	0	0	0	200	300	0	41.8687	-46.9739	-728.816	90733	73241.7	-197.982	300.494	778.507	0	0	0	0	0	0	0	603	903	0
5670	6	0	0	0	0	0	0	200	300	0	40.9532	-46.9739	-728.816	90366.7	73119.6	-335.312	300.327	779.009	0	0	0	0	0	0	0	603	903	0
5670	7	0	0	0	0	0	0	200	300	0	41.8687	-44.8377	-727.596	91007.6	73119.6	-518.417	300.495	777.92	0	0	0	0	0	0	0	603	903	0
5670	8	0	0	0	0	0	0	200	300	0	41.2584	-45.2954	-725.46	90824.5	73119.6	-197.982	300.791	777.804	0	0	0	0	0	0	0	603	903	0
5670	9	0	0	0	0	0	0	200	300	0	42.4791	-43.6169	-724.239	90458.3	72753.4	-152.206	300.455	778.099	0	0	0	0	0	0	0	603	903	0
5671	0	0	0	0	0	0	0	200	300	0	41.2584	-44.8377	-723.628	90916.1	72814.4	76.6757	300.624	777.361	0	0	0	0	0	0	0	603	903	0
5671	1	0	0	0	0	0	0	200	300	0	40.9532	-43.7695	-721.797	90458.3	72814.4	-152.206	300.879	777.676	0	0	0	0	0	0	0	603	903	0
5671	2	0	0	0	0	0	0	200	300	0	42.0213	-42.5488	-717.525	90183.7	72265.1	-289.535	300.714	777.313	0	0	0	0	0	0	0	603	903	0
5671	3	0	0	0	0	0	0	200	300	0	40.8006	-43.6169	-719.966	90092.1	72326.1	259.781	300.458	777.866	0	0	0	0	0	0	0	603	903	0
5671	4	0	0	0	0	0	0	200	300	0	40.648	-42.854	-718.44	90458.3	72326.1	-60.6534	300.671	777.091	0	0	0	0	0	0	0	603	903	0
5671	5	0	0	0	0	0	0	200	300	0	41.1058	-41.9385	-717.83	90824.5	72204.1	122.452	300.587	776.474	0	0	0	0	0	0	0	603	903	0
5671	6	0	0	0	0	0	0	200	300	0	39.8851	-41.9385	-716.304	90733	71959.9	122.452	300.46	776.332	0	0	0	0	0	0	0	603	903	0
5671	7	0	0	0	0	0	0	200	300	0	39.8851	-40.7178	-715.999	91099.2	72570.3	214.005	301.355	775.766	0	0	0	0	0	0	0	603	903	0
5671	8	0	0	0	0	0	0	200	300	0	39.4273	-41.1755	-714.473	90641.4	71837.8	76.6757	300.547	776.135	0	0	0	0	0	0	0	603	903	0
5671	9	0	0	0	0	0	0	200	300	0	39.2747	-40.8704	-711.421	90733	71898.9	259.781	301.064	775.462	0	0	0	0	0	0	0	603	903	0
5672	0	0	0	0	0	0	0	200	300	0	40.4955	-39.3445	-712.642	90641.4	72326.1	168.228	301.49	775.809	0	0	0	0	0	0	0	603	903	0
5672	1	0	0	0	0	0	0	200	300	0	38.9696	-38.5815	-709.59	90275.2	71715.8	259.781	301.066	775.778	0	0	0	0	0	0	0	603	903	0
5672	2	0	0	0	0	0	0	200	300	0	38.5118	-38.8867	-708.065	89817.5	71166.5	534.44	300.508	776.151	0	0	0	0	0	0	0	603	903	0
5672	3	0	0	0	0	0	0	200	300	0	39.4273	-38.2764	-707.454	89725.9	71837.8	534.44	301.544	776.171	0	0	0	0	0	0	0	603	903	0
5672	4	0	0	0	0	0	0	200	300	0	39.1222	-37.8186	-706.844	90183.7	71715.8	168.228	301.459	775.414	0	0	0	0	0	0	0	603	903	0
5672	5	0	0	0	0	0	0	200	300	0	39.1222	-37.2083	-705.013	89817.5	71471.6	580.216	301.376	775.602	0	0	0	0	0	0	0	603	903	0
[truncated: 1,894 more rows]
