# Supplementary material for: The Effects of an Extemporaneous Speech Dual-task on Older Adult Gait Control
Source: Research Square preprint supplement (doi:10.21203/rs.3.rs-7674245/v1), 2025-11-18
Supplement: Supplementary file 93 [file DT8Walk6.xlsx]

## Sheet: Sheet1
Trajectories
		08:LFHD			08:RFHD			08:LBHD			08:RBHD			08:C7			08:T10			08:CLAV			08:STRN			08:RBAK			08:LSHO			08:LUPA			08:LELB			08:LFRM			08:LWRA			08:LWRB			08:LFIN
Frame	Sub Frame	X	Y	Z	X	Y	Z	X	Y	Z	X	Y	Z	X	Y	Z	X	Y	Z	X	Y	Z	X	Y	Z	X	Y	Z	X	Y	Z	X	Y	Z	X	Y	Z	X	Y	Z	X	Y	Z	X	Y	Z	X	Y	Z
		mm	mm	mm	mm	mm	mm	mm	mm	mm	mm	mm	mm	mm	mm	mm	mm	mm	mm	mm	mm	mm	mm	mm	mm	mm	mm	mm	mm	mm	mm	mm	mm	mm	mm	mm	mm	mm	mm	mm	mm	mm	mm	mm	mm	mm	mm	mm	mm
7047	0	139.428	-208.309	1696.73	222.413	-231.571	1693.77	100.318	-401.52	1701.23	211.713	-405.645	1696.74	153.22	-445.705	1555.07	138.3	-525.21	1291.45	167.042	-299.834	1465.63	193.159	-235.374	1267.25	223.059	-531.641	1349.29	-22.2581	-339.976	1508.42	-98.9771	-350.369	1311.29	-97.8289	-352.058	1151.91	-85.9842	-228.34	1027.06	-21.1892	-171.558	966.003	-76.0124	-206.484	931.01	-60.1274	-138.162	902.5
7048	0	140.028	-198.372	1695.28	222.728	-221.849	1692.26	100.589	-391.545	1700.26	211.854	-395.982	1695.84	153.512	-436.017	1554.16	138.388	-516.014	1290.57	167.538	-290.419	1464.38	193.924	-226.233	1266.17	223.159	-522.348	1348.28	-21.6826	-330.018	1507.39	-98.6035	-339.551	1310.05	-97.7108	-340.427	1150.99	-84.5372	-215.209	1027.65	-19.1793	-158.423	967.257	-75.16	-191.875	932.382	-57.5396	-123.811	904.112
7049	0	140.592	-188.411	1693.67	223.373	-212.017	1690.85	101.013	-381.489	1699.13	212.212	-386.081	1694.68	153.951	-426.378	1553.06	138.854	-506.644	1289.53	168.207	-280.998	1462.95	194.622	-217.268	1264.49	223.414	-513.028	1347.29	-21.1304	-320.055	1506.25	-98.1751	-328.641	1309.06	-97.6513	-328.805	1149.8	-83.3075	-202.342	1028.13	-17.1867	-145.389	968.139	-72.5576	-178.262	932.538	-55.1083	-109.555	905.554
7050	0	141.045	-178.448	1691.87	223.849	-202.094	1689.17	101.35	-371.503	1697.95	212.784	-375.858	1693.54	154.461	-416.649	1551.59	139.155	-497.495	1288.7	168.628	-271.505	1461.58	195.533	-208.194	1263.17	223.924	-503.492	1346.36	-20.4261	-310.045	1505.15	-97.4411	-317.722	1307.88	-97.356	-317.204	1148.39	-81.883	-189.448	1028.12	-15.4931	-132.391	968.994	-71.0241	-164.312	932.924	-53.089	-95.4743	906.754
7051	0	141.447	-168.381	1689.72	224.302	-191.97	1687.22	101.87	-361.318	1696.16	213.084	-366.032	1692.4	154.983	-406.832	1550.2	139.696	-488.033	1287.44	169.551	-261.819	1459.68	196.133	-199.275	1261.09	224.546	-493.984	1345.05	-19.6248	-300.035	1503.7	-96.9074	-306.698	1306.35	-96.863	-305.274	1146.86	-80.6559	-176.445	1027.72	-13.8993	-119.426	969.346	-69.7495	-150.445	932.99	-51.381	-81.4651	907.649
7052	0	141.971	-158.259	1687.49	224.78	-181.901	1685.32	102.381	-351.26	1694.33	213.433	-355.968	1690.47	155.969	-397.017	1548.7	140.587	-478.593	1285.41	170.474	-252.134	1457.73	197.113	-190.186	1259.04	225.41	-484.377	1343.19	-18.6544	-290.07	1501.75	-96.037	-295.675	1304.6	-96.4784	-293.443	1145.16	-79.3982	-163.658	1027.33	-12.3633	-106.38	969.038	-69.6702	-136.322	933.211	-49.7886	-67.6988	908.151
7053	0	142.769	-148.196	1685.27	225.377	-171.753	1683.05	103.215	-341.182	1692.09	214.106	-345.753	1688.52	156.987	-387.165	1546.67	141.27	-469.414	1283.67	171.326	-242.345	1455.5	197.96	-181.084	1256.74	226.427	-474.723	1341.45	-17.5904	-280.148	1500.11	-94.9449	-284.585	1302.51	-95.8961	-281.579	1143.53	-78.4269	-151.006	1026.54	-10.9878	-93.5676	968.74	-68.3476	-122.95	932.501	-48.2851	-54.1052	908.254
7054	0	143.362	-137.968	1682.66	226.05	-161.405	1680.77	103.962	-331.01	1690.16	215.199	-335.516	1686.96	158.15	-377.222	1544.84	142.716	-459.535	1282	172.415	-232.512	1453.34	198.706	-171.79	1254.27	227.727	-464.924	1339.78	-16.5722	-270.229	1498.03	-94.0175	-273.501	1300.58	-95.0051	-269.694	1141.31	-77.3995	-138.257	1025.34	-9.88607	-80.7697	967.736	-67.5396	-109.627	931.628	-47.2094	-40.611	907.91
7055	0	143.914	-127.774	1680.02	226.862	-151.076	1678.47	104.88	-320.877	1687.52	216.108	-325.268	1684.62	159.373	-367.321	1542.77	143.913	-449.772	1279.74	173.336	-222.596	1450.89	199.637	-162.227	1251.75	229.032	-455.12	1337.5	-15.4219	-260.37	1495.93	-92.8639	-262.319	1298.46	-94.3061	-257.768	1139.24	-76.4873	-125.717	1023.99	-8.91544	-67.998	966.73	-66.8538	-96.4187	930.545	-46.3207	-27.2986	906.965
7056	0	144.778	-117.773	1677.56	227.703	-140.859	1675.9	106.082	-310.749	1685.12	217.053	-314.915	1681.78	160.579	-357.46	1540.14	145.145	-440.221	1277.34	174.603	-212.537	1448.39	200.609	-152.611	1249.22	230.649	-445.177	1335.08	-14.0611	-250.655	1493.51	-91.6889	-251.112	1296.17	-93.1462	-245.838	1137	-75.6377	-113.329	1022.45	-8.02649	-55.3938	965.232	-66.2037	-83.4148	929.297	-45.7007	-14.1929	906.171
7057	0	145.738	-107.606	1674.92	228.722	-130.444	1673.41	107.367	-300.671	1682.45	218.645	-304.616	1679.76	162.422	-347.355	1538.13	146.897	-430.253	1275.04	175.626	-202.538	1445.8	201.417	-142.771	1246.46	232.278	-435.076	1332.75	-12.7731	-240.687	1491.33	-90.3034	-240.251	1293.63	-92.0258	-234.022	1134.61	-74.7519	-100.83	1020.55	-7.24936	-42.8028	963.453	-64.607	-71.0503	926.945	-45.2195	-1.35318	904.821
7058	0	146.788	-97.2233	1672.06	229.784	-120.014	1670.74	108.807	-290.437	1679.97	220.003	-294.222	1677.27	163.665	-337.429	1535.31	148.408	-420.219	1272.77	176.722	-192.416	1443.18	202.557	-132.653	1243.87	233.973	-424.933	1330.12	-11.3754	-230.966	1488.72	-88.7308	-229.151	1291.04	-90.7703	-222.063	1132.11	-74.0586	-88.5885	1018.46	-6.7538	-30.2897	961.304	-65.3523	-58.0046	925.505	-45.0118	11.3248	902.93
7059	0	148.057	-87.1065	1669.56	230.978	-109.666	1668.02	110.438	-280.294	1677.2	221.527	-283.969	1674.41	165.642	-327.093	1532.62	150.089	-410.113	1269.71	178.027	-182.238	1440.53	203.563	-122.521	1241.09	235.866	-414.664	1327.19	-9.88122	-221.232	1486.02	-87.3472	-218.331	1288.44	-89.3529	-210.153	1129.58	-73.4445	-76.4887	1016.15	-6.19551	-17.9554	958.888	-64.8932	-45.5167	923.45	-44.7882	23.8691	900.913
7060	0	149.325	-76.9107	1666.92	232.529	-99.2994	1665.51	112.12	-270.41	1674.63	223.408	-273.511	1671.66	167.46	-316.885	1529.96	152.057	-399.822	1267.04	179.554	-171.968	1437.98	204.612	-112.141	1238.4	237.773	-404.304	1324.44	-8.33314	-211.482	1483.56	-85.6	-207.489	1285.71	-88.0023	-198.383	1127.19	-72.5908	-64.4159	1013.77	-5.96365	-5.73273	956.154	-64.8581	-33.4332	921.109	-44.9426	36.0592	898.664
7061	0	150.845	-66.4928	1664.21	234.09	-88.7318	1662.87	114.132	-260.135	1672.13	225.441	-262.903	1669.21	169.51	-306.54	1527.53	153.823	-389.406	1264.82	181.022	-161.549	1435.18	205.586	-101.586	1235.52	239.839	-393.775	1321.98	-6.66215	-201.411	1480.97	-83.8391	-196.926	1283.08	-86.2626	-186.577	1124.59	-72.1634	-52.67	1011.27	-5.70276	6.33149	953.36	-64.6936	-21.4696	918.657	-45.1345	48.0367	896.071
7062	0	152.78	-56.4455	1661.72	235.679	-78.1711	1660.3	116.215	-249.863	1669.2	227.433	-252.421	1666.35	171.867	-295.785	1524.8	155.476	-378.893	1262.11	182.62	-151.042	1432.49	206.868	-90.8751	1232.78	241.861	-383.221	1319.12	-4.72068	-191.329	1478.26	-82.0856	-186.259	1280.5	-84.6826	-174.861	1122.15	-71.3107	-40.8432	1008.58	-5.58059	18.244	950.213	-64.6925	-9.81451	915.885	-45.6749	59.7976	893.305
7063	0	154.55	-45.9127	1659.33	237.531	-67.4942	1657.74	118.513	-239.551	1666.56	229.564	-241.824	1663.06	173.9	-285.306	1522.08	157.438	-368.261	1259.26	184.503	-140.323	1429.75	208.084	-80.1421	1229.86	243.834	-372.546	1316.21	-2.86421	-181.231	1475.72	-79.9286	-176.092	1277.52	-82.9659	-163.26	1119.73	-70.8394	-29.5232	1005.87	-5.46895	29.8712	947.103	-63.8056	1.13747	912.802	-46.2147	71.1415	890.332
7064	0	156.268	-35.5435	1656.94	239.46	-56.8675	1655.37	120.998	-229.202	1663.67	232.086	-231.303	1660.54	176.558	-274.352	1519.98	159.518	-357.434	1256.7	186.292	-129.583	1427.07	209.28	-69.3088	1226.97	245.971	-361.717	1313.47	-0.745318	-170.727	1473.2	-77.9374	-165.784	1275.34	-81.0185	-151.719	1117.49	-70.1933	-18.1616	1003.16	-5.57595	41.2683	943.912	-64.6637	12.4467	910.248	-46.9138	82.0667	887.324
7065	0	158.435	-25.0227	1654.95	241.631	-45.9005	1653.14	123.502	-218.651	1661.2	234.719	-220.437	1658.03	178.797	-263.62	1517.18	161.507	-346.481	1254.42	188.281	-118.62	1424.46	210.693	-58.3725	1224.36	248.088	-350.723	1311	1.36059	-160.27	1471.21	-75.7392	-155.429	1272.99	-79.2469	-140.35	1115.32	-69.7313	-7.16029	1000.48	-5.8134	52.4206	940.725	-64.8944	23.1243	907.399	-47.7422	92.8589	884.084
7066	0	160.313	-14.5406	1652.93	243.79	-35.0727	1651.16	126.509	-208.282	1658.44	237.376	-209.555	1655.29	181.624	-252.513	1515.14	163.387	-335.622	1252.13	190.393	-107.711	1422.1	212.269	-47.2528	1221.74	250.407	-339.693	1308.23	3.66724	-149.584	1469	-73.5686	-145.252	1270.99	-77.2901	-128.956	1113.45	-69.4305	3.56646	997.963	-6.07373	63.341	937.476	-65.353	33.4651	904.711	-48.7316	103.177	881.181
7067	0	162.745	-3.62699	1651.29	246.124	-23.9796	1649.2	129.464	-197.641	1656.13	240.231	-198.46	1652.79	184.373	-241.428	1512.95	165.533	-324.55	1249.83	192.591	-96.5429	1419.79	213.878	-36.0263	1219.53	252.588	-328.54	1305.75	5.88831	-139.005	1467.19	-71.0228	-134.881	1269.01	-75.2628	-117.827	1111.69	-68.8	14.0941	995.301	-6.33302	73.9207	934.142	-64.625	43.0216	901.347	-49.8357	113.059	877.958
7068	0	165.038	7.20649	1649.89	248.569	-12.6973	1647.42	132.35	-186.839	1654.19	243.309	-187.254	1650.93	187.048	-230.156	1510.89	167.647	-313.383	1248.1	194.825	-85.3768	1417.74	215.429	-24.6992	1217.23	254.821	-317.288	1303.74	8.36313	-127.953	1465.43	-68.8252	-124.267	1267.47	-73.2035	-106.78	1110.2	-68.3994	24.3723	992.674	-6.77867	84.2291	930.772	-65.9584	52.9669	899.192	-50.8252	122.576	874.533
7069	0	167.159	18.365	1648.31	250.978	-1.42584	1645.88	135.391	-175.791	1652.74	246.404	-175.975	1649.02	189.94	-218.82	1509.22	169.55	-302.077	1246.48	197.069	-74.1357	1415.82	217.295	-13.2743	1215.31	256.95	-305.922	1302.14	10.7131	-116.863	1463.99	-66.0287	-113.694	1265.64	-70.9012	-95.854	1108.95	-68.0388	34.329	990.44	-7.33002	94.1826	927.486	-66.1704	62.1758	896.482	-52.0838	131.628	871.26
7070	0	170.045	29.6289	1647.08	253.496	10.0324	1644.39	138.761	-164.72	1651.45	249.473	-164.497	1647.09	192.831	-207.379	1508.02	171.436	-290.662	1245.07	199.504	-62.7467	1414.19	219.067	-1.70458	1213.64	259.003	-294.904	1300.48	13.3378	-105.909	1462.75	-63.737	-102.823	1264.69	-68.7987	-85.2298	1108.04	-67.7767	43.9125	988.378	-7.76894	103.93	924.371	-66.4818	70.9293	893.872	-53.4819	140.445	868.319
7071	0	172.596	40.8906	1646.21	256.291	21.56	1643.14	141.974	-153.59	1650.46	252.77	-152.974	1646	195.404	-196.092	1507.14	173.487	-279.19	1244.06	201.975	-51.3124	1413.1	221.117	9.99973	1212.58	261.512	-283.406	1299.02	15.9417	-94.5591	1462.12	-61.3695	-91.6555	1264.05	-66.0836	-74.965	1107.2	-67.3598	53.2858	986.347	-8.19098	113.199	921.382	-66.0229	78.9243	891.203	-54.628	148.551	865.383
7072	0	175.142	52.2684	1645.57	259.173	33.2681	1642.33	145.287	-142.28	1650.18	256.584	-141.372	1645.6	198.248	-184.576	1506.24	175.425	-267.682	1243.62	204.293	-39.9483	1412.42	223.041	21.8043	1211.97	263.64	-272.073	1298.61	18.536	-83.339	1461.94	-58.9603	-80.1967	1263.84	-64.2405	-64.4423	1107.02	-67.0793	62.4074	985.079	-8.84129	122.04	918.795	-67.4164	87.2894	889.85	-55.8546	156.385	862.536
7073	0	177.91	63.6055	1645.17	262.017	44.9009	1641.51	148.676	-130.965	1650.04	259.717	-129.764	1644.85	201.265	-173.151	1505.86	177.432	-256.14	1243.03	206.774	-28.5423	1412.1	224.99	33.3805	1211.43	265.957	-260.618	1297.68	20.9096	-72.0932	1461.74	-57.0192	-68.9419	1264.16	-62.5462	-53.5326	1107.74	-66.5865	71.3134	983.729	-9.36985	130.574	916.658	-66.8832	94.6182	887.825	-57.2786	163.968	860.341
7074	0	180.823	75.0072	1644.92	264.702	56.4576	1640.89	152.055	-119.57	1650.21	263.041	-118.167	1644.65	203.49	-162.155	1505.61	179.452	-244.68	1242.61	209.116	-17.2856	1411.96	227.024	44.982	1211.6	267.966	-249.086	1297.37	23.5879	-60.8181	1461.91	-54.9406	-57.4233	1264.69	-60.411	-43.1961	1108.04	-66.2144	79.9391	982.983	-9.9094	138.723	914.45	-67.1224	101.831	886.181	-58.4494	170.743	857.943
7075	0	183.529	86.5194	1644.89	267.616	67.9465	1640.71	155.486	-108.141	1651.09	266.439	-106.577	1645.11	206.438	-150.83	1506.12	181.419	-233.156	1243.05	211.421	-6.06882	1412.36	228.855	56.5683	1211.94	270.318	-237.767	1297.22	26.0877	-49.7137	1462.37	-52.909	-45.7746	1265.45	-58.8218	-32.9308	1109.14	-65.7944	88.2795	982.098	-10.2808	146.487	912.53	-67.6061	108.801	885.524	-59.5802	177.334	855.917
7076	0	186.607	97.9249	1645.16	270.529	79.4328	1640.55	158.706	-96.8039	1652.3	269.758	-94.967	1645.84	208.673	-139.978	1506.69	183.373	-221.648	1243.68	213.826	5.06932	1413.03	230.9	68.125	1212.79	272.366	-226.27	1297.87	28.2534	-38.7436	1463.52	-51.0828	-34.3386	1267.03	-56.8897	-22.7214	1110.71	-65.3579	96.3701	982.097	-10.7171	153.885	910.839	-67.7227	115.529	884.719	-60.6193	183.602	854.199
7077	0	189.531	109.152	1645.87	273.478	90.8835	1640.64	161.928	-85.5394	1653.77	272.996	-83.6078	1646.72	211.289	-128.79	1507.58	185.3	-210.24	1244.25	216.074	16.066	1414.14	232.73	79.6295	1214.01	274.514	-214.802	1298.15	30.7986	-27.7856	1464.72	-49.1696	-22.8062	1268.84	-54.5042	-13.0378	1111.77	-64.8704	104.348	982.354	-10.973	161.068	909.875	-69.234	122.297	885.184	-61.4767	189.535	852.939
7078	0	192.383	120.165	1646.57	276.321	102.149	1641.06	165.254	-74.4225	1655.5	276.142	-72.4733	1647.83	213.383	-118.182	1508.45	187.218	-198.912	1245.09	218.128	27.0708	1415.5	234.507	91.1643	1215.52	276.63	-203.278	1298.84	32.8388	-17.1808	1466.26	-47.5537	-11.6812	1270.95	-53.4504	-3.23928	1114.02	-64.1797	112.178	983.007	-11.234	167.737	909.141	-69.7234	128.541	885.498	-62.2885	195.246	852.09
7079	0	195.211	131.117	1647.79	279.127	113.117	1641.95	168.11	-63.3405	1657.77	279.395	-61.3798	1649.37	216.04	-107.369	1509.87	189.088	-187.695	1246.34	219.906	37.82	1417.29	236.309	102.658	1217.44	278.758	-191.969	1299.99	34.9969	-6.60035	1468.39	-45.8407	-0.641752	1273.52	-51.8233	6.03572	1116.32	-63.7909	119.655	984.055	-11.3802	174.349	908.914	-70.0037	134.678	886.193	-62.7461	200.713	851.425
7080	0	198.211	142.031	1649.26	281.801	123.869	1642.77	171.022	-52.543	1659.9	282.247	-50.536	1650.93	218.17	-96.8182	1511.41	191.108	-176.565	1247.62	221.804	48.7578	1419.14	237.75	113.936	1219.48	280.705	-180.762	1301.34	36.841	3.77834	1470.43	-44.436	9.86706	1276.11	-50.4377	15.2839	1119.3	-63.2499	127.186	985.321	-11.6367	180.839	909.003	-69.2784	140.412	886.734	-63.2027	205.969	851.069
7081	0	200.886	152.601	1651.1	284.639	134.559	1644.04	174.045	-41.8788	1662.14	284.961	-40.0276	1652.34	220.045	-86.456	1512.78	193.19	-165.51	1248.8	223.335	59.2666	1420.97	239.261	125.216	1221.75	282.63	-169.739	1302.46	38.6843	13.9241	1472.52	-43.0096	20.1217	1278.56	-48.9411	23.947	1121.86	-62.7243	134.448	987.324	-11.8656	186.59	909.311	-70.5277	146.787	888.767	-63.4405	211.455	851.023
7082	0	203.526	162.967	1653.1	287.13	144.738	1645.6	176.708	-31.5706	1664.53	287.742	-29.56	1654.05	222.052	-76.1064	1514.45	195.333	-154.652	1250.57	225.038	69.8497	1423.27	240.583	136.291	1224.07	284.76	-158.578	1304.09	40.5604	24.0091	1475.04	-41.4247	29.7936	1281.34	-47.5238	32.155	1124.02	-62.2542	141.439	988.595	-11.8197	192.665	910.133	-70.8479	152.802	890.456	-63.4227	216.866	851.38
7083	0	206.147	173.071	1655.33	289.77	155.074	1647.39	179.402	-21.3884	1666.92	290.629	-19.3455	1656.01	224.176	-65.6583	1516.48	197.272	-144.107	1252.69	226.533	80.3348	1425.43	241.802	147.271	1226.36	286.786	-147.899	1306.02	42.2438	33.9218	1477.21	-40.3241	39.1017	1284.04	-46.7996	40.1483	1126.88	-62.1094	148.337	990.433	-11.7704	198.835	911.27	-71.3086	158.772	892.394	-63.4922	222.26	852.009
7084	0	208.541	183.113	1657.67	291.976	164.937	1649.37	181.814	-11.4496	1669.02	292.676	-9.44628	1657.56	225.976	-55.5519	1518.49	199.222	-133.632	1254.3	227.708	90.6131	1427.6	242.705	158.018	1228.71	288.735	-136.977	1308	43.5836	43.6116	1479.79	-39.0761	47.5838	1286.29	-46.0259	47.7933	1129.37	-61.7885	155.14	992.527	-11.8651	204.536	912.122	-71.603	164.729	894.286	-63.4107	227.599	852.805
7085	0	210.689	192.753	1660.32	294.404	174.835	1651.49	184.167	-1.68459	1671.47	295.121	0.195585	1659.44	227.603	-45.3574	1520.43	201.32	-123.345	1256.24	228.904	100.836	1429.88	243.623	168.515	1231.04	290.911	-126.275	1309.58	44.8812	53.0419	1482.09	-38.1533	55.7772	1288.97	-44.9357	55.1693	1131.81	-61.6559	161.483	994.475	-11.8194	210.469	913.71	-71.8392	170.72	896.479	-63.3297	233.082	853.889
7086	0	212.957	202.481	1663.01	296.543	184.453	1653.88	186.367	7.93607	1673.71	297.447	9.9271	1661.26	229.069	-35.4887	1522.57	202.885	-113.549	1259.23	230.066	110.912	1432.13	244.24	178.704	1233.36	292.831	-116.032	1312.05	46.1639	62.4399	1484.4	-36.9344	63.6408	1291.11	-44.3583	62.0554	1134.33	-61.4704	167.821	996.453	-11.8046	216.407	915.291	-71.8691	176.659	898.356	-63.1615	238.537	855.096
7087	0	214.979	212.013	1665.78	298.527	193.847	1656.17	188.327	17.4747	1675.93	299.448	19.3646	1663.17	230.815	-25.5501	1524.79	204.947	-103.484	1261.21	230.895	120.839	1434.29	244.908	188.671	1235.75	294.73	-105.732	1314.4	47.2084	71.6285	1486.82	-36.2134	70.974	1293.72	-43.5905	68.9412	1136.6	-61.2871	174.08	998.386	-11.6655	222.55	917.212	-71.8464	182.533	900.199	-62.8491	244.042	856.354
7088	0	216.776	221.347	1668.56	300.532	203.187	1658.68	190.179	26.8575	1678.34	300.945	28.8477	1664.63	232.328	-15.9203	1527.56	206.737	-93.7922	1263.36	231.741	130.709	1436.55	245.329	198.366	1237.8	296.598	-95.6068	1316.39	48.2204	80.6405	1488.96	-35.5196	78.0889	1295.98	-42.8851	75.3931	1138.93	-61.2916	180.069	1000.33	-11.7155	228.218	918.81	-70.6445	187.959	901.815	-62.6539	249.541	857.921
7089	0	218.59	230.58	1671.38	302.331	212.526	1661.05	191.863	36.1349	1680.74	302.54	38.0883	1666.53	233.703	-6.19952	1529.58	208.813	-84.0793	1265.53	232.549	140.383	1439.04	245.575	207.686	1240.09	298.383	-85.6497	1318.9	49.2732	89.5148	1491.46	-34.7133	84.7678	1298.39	-42.3618	81.5416	1141.19	-61.2078	185.861	1002.45	-11.7344	234.227	921.099	-71.6115	193.89	904.454	-62.5078	255.048	859.813
7090	0	220.207	239.953	1674.16	304.041	221.769	1663.56	193.347	45.3507	1683.07	304.134	47.3128	1668.71	234.993	3.32095	1531.97	210.638	-74.6157	1268.05	233.196	149.888	1441.19	245.739	217.037	1242.32	300.306	-75.7946	1321.36	50.0855	98.2482	1493.84	-33.8392	91.4773	1300.82	-41.5982	87.7527	1143.64	-61.2655	191.49	1004.51	-11.9915	240.059	923.057	-71.3076	199.293	906.4	-62.4765	260.411	861.612
7091	0	221.836	249.156	1676.83	305.53	230.928	1665.85	194.573	54.5783	1685.5	305.705	56.1699	1670.98	236.153	12.735	1534.34	212.423	-65.2174	1270.23	233.78	159.392	1443.64	245.774	226.282	1244.54	301.824	-66.152	1323.66	50.9436	106.745	1495.95	-33.2384	97.6682	1303.03	-40.8858	93.7364	1145.87	-61.2124	197.026	1006.67	-12.0639	245.865	925.385	-70.3061	204.343	908.24	-62.5495	265.829	863.642
7092	0	223.121	258.292	1679.81	306.732	239.969	1668.51	195.819	63.7277	1688.07	306.52	65.5364	1672.78	237.399	22.0946	1536.85	214.101	-56.0014	1272.64	234.242	168.608	1446.15	245.731	235.394	1246.92	303.549	-56.5196	1326.24	51.6665	115.058	1498.58	-32.4489	104.078	1305.75	-40.3105	99.4189	1148.35	-61.1814	202.52	1009.17	-12.2996	251.795	927.953	-70.9056	209.917	910.817	-62.7406	271.188	865.968
7093	0	224.402	267.412	1682.64	307.986	248.962	1671.24	196.909	72.7598	1690.51	307.999	74.3314	1675.45	238.66	31.3375	1539.29	215.975	-46.7153	1275.15	234.712	177.891	1448.61	245.609	244.591	1249.41	305.213	-47.0261	1328.74	52.2507	123.218	1501.11	-31.5857	110.277	1308.28	-39.5978	105.094	1150.95	-61.0585	207.894	1011.52	-12.3909	257.844	930.69	-69.5015	214.77	912.733	-63.0034	276.441	868.392
7094	0	225.405	276.442	1685.35	308.943	258.037	1673.84	197.83	81.867	1693.03	308.843	83.3433	1677.99	239.695	40.6195	1541.91	217.796	-37.4911	1277.77	235.158	187.015	1451.2	245.436	253.684	1251.95	306.866	-37.4849	1331.5	53.0021	131.416	1503.69	-30.9901	116.354	1310.95	-38.8017	110.792	1153.62	-60.9895	213.196	1013.97	-12.6755	263.72	933.3	-70.0038	220.196	915.572	-63.2386	281.675	870.912
7095	0	226.186	285.345	1688.08	309.85	266.937	1676.63	198.679	90.8315	1695.61	309.22	92.4147	1679.92	240.973	49.7911	1544.47	219.365	-28.4229	1280.17	235.677	196.171	1453.97	245.489	262.715	1254.41	308.405	-28.0065	1333.96	53.713	139.542	1506.21	-30.0719	122.615	1313.67	-37.9354	116.314	1156.06	-60.7937	218.428	1016.39	-12.8978	269.496	935.947	-68.6537	224.943	917.447	-63.5899	286.966	873.624
7096	0	226.904	294.239	1690.86	310.481	275.878	1679.15	199.465	99.7104	1697.95	309.809	101.461	1682.05	242.095	58.8566	1546.84	221.151	-19.3866	1282.57	236.009	205.05	1456.29	245.322	271.559	1256.82	310.001	-18.604	1336.41	54.3718	147.639	1508.58	-29.3317	128.823	1316.13	-37.0737	121.72	1158.64	-60.7658	223.621	1018.96	-13.239	275.296	938.607	-69.0165	230.268	920.426	-63.9929	292.206	876.327
7097	0	227.371	303.169	1693.44	311.072	284.896	1681.85	200.127	108.636	1700.21	310.896	110.141	1684.98	243.312	67.9414	1549.35	223.024	-10.4161	1285.24	236.546	214.264	1458.93	245.42	280.757	1259.46	311.831	-9.22651	1339.02	55.0877	155.454	1511.21	-28.4663	134.864	1318.68	-36.389	127.017	1161.28	-60.6439	228.769	1021.41	-13.6636	281.041	941.256	-67.6341	234.914	922.209	-64.4981	297.451	878.882
7098	0	227.825	311.944	1695.92	311.435	293.812	1684.47	200.596	117.412	1702.47	311.428	119.12	1687.35	244.297	76.9786	1551.63	224.548	-1.47576	1287.8	236.87	223.174	1461.19	245.425	289.849	1261.5	313.317	0.039032	1341.45	55.7378	163.517	1513.59	-27.707	141.302	1321.22	-35.6292	132.425	1163.86	-60.5039	233.987	1023.51	-14.0939	286.827	943.692	-67.2439	240.004	924.538	-64.9782	302.685	881.554
7099	0	227.998	320.707	1698.4	311.696	302.651	1687	200.936	126.19	1704.52	311.991	127.776	1689.77	245.368	85.972	1553.71	226.12	7.44191	1290	237.186	232.011	1463.36	245.524	298.809	1263.77	314.816	9.26509	1343.8	56.4246	171.685	1515.63	-26.9459	147.465	1323.47	-34.6802	137.858	1166.17	-60.3569	239.14	1025.87	-14.4326	292.617	946.325	-66.8355	245.044	926.797	-65.4839	307.886	884.076
7100	0	228.057	329.452	1700.91	311.96	311.484	1689.59	201.374	134.91	1706.5	312.611	136.743	1691.99	246.328	95.0122	1555.95	227.773	16.3158	1292.23	237.658	240.824	1465.6	245.654	307.318	1265.93	316.419	18.3882	1346.05	57.3103	179.378	1518.17	-26.095	153.831	1326.06	-33.8344	143.277	1168.48	-60.354	244.308	1028.22	-14.771	298.364	948.94	-66.3709	250.069	928.881	-66.0291	313.13	886.815
7101	0	228.139	338.202	1702.93	312.018	320.275	1691.98	201.649	143.703	1708.15	312.732	145.716	1694.1	247.33	104.121	1557.99	229.299	25.1257	1294.59	237.999	249.721	1467.63	245.9	315.997	1267.63	317.813	27.3543	1348.66	57.8809	187.459	1520.02	-25.2491	160.336	1328.18	-32.9751	148.884	1170.81	-60.0966	249.627	1030.02	-15.2482	304.214	951.348	-66.119	255.142	931.067	-66.7348	318.339	888.982
7102	0	228.118	347.011	1704.9	312.062	329.174	1694.3	201.831	152.465	1709.78	313.033	154.436	1696.31	248.031	113.237	1559.83	230.443	33.9146	1296.6	238.343	258.521	1469.38	245.496	324.167	1268.77	318.907	36.2462	1350.66	58.4685	195.703	1522.03	-24.6774	166.74	1330.37	-32.2656	154.36	1172.88	-60.1267	254.877	1032.04	-15.6755	310.064	953.388	-65.6717	260.343	932.677	-67.3522	323.626	891.219
7103	0	228.01	355.871	1706.77	312.052	338.164	1696.29	202.14	161.255	1711.19	313.17	163.313	1697.95	249.041	122.219	1561.75	231.824	42.7109	1298.29	238.685	267.588	1470.97	245.776	332.457	1270.16	320.336	45.2939	1352.53	59.0763	204.006	1523.71	-23.8703	173.511	1332.3	-31.6237	159.831	1174.82	-60.1249	260.142	1033.74	-16.1913	315.934	955.509	-65.6479	265.407	934.752	-67.944	328.847	893.376
7104	0	227.938	364.678	1708.3	311.91	347.196	1698.11	202.189	169.94	1712.33	313.364	172.334	1699.43	249.898	131.17	1563.09	233.301	51.4762	1300.02	239.009	276.165	1472.4	246.316	341.141	1272.57	321.614	54.2166	1354.24	59.8096	212.201	1525.03	-23.2595	180.06	1334.25	-30.5585	165.554	1176.64	-60.0889	265.415	1035.44	-16.7329	321.894	957.111	-65.4179	270.566	936.323	-68.4801	334.079	894.909
7105	0	227.633	373.447	1709.6	311.674	356.277	1699.7	202.178	178.689	1713.26	313.311	181.386	1700.74	250.675	140.277	1564.63	234.465	60.25	1301.69	239.356	285.05	1473.45	246.36	349.267	1273.06	322.737	63.0785	1355.97	60.3124	220.449	1526.3	-22.3383	187.003	1335.4	-30.0882	171.664	1178.22	-60.2485	270.839	1036.83	-17.1512	327.756	958.306	-65.1918	275.944	937.498	-69.1296	339.45	896.264
7106	0	227.121	382.245	1710.54	311.342	365.281	1701.15	202.179	187.49	1713.99	313.367	190.425	1701.81	251.456	149.34	1565.69	235.445	68.9705	1302.82	239.66	293.869	1474.51	246.622	357.382	1273.63	323.793	71.9887	1357.37	60.8572	228.748	1527.17	-21.9424	193.805	1336.93	-29.276	177.629	1179.63	-60.1779	276.429	1037.99	-17.7655	333.723	959.483	-64.9233	281.393	938.593	-69.7519	344.905	897.443
7107	0	226.529	391.078	1711.39	310.92	374.293	1702.13	202.23	196.293	1714.36	313.421	199.533	1702.62	252.141	158.32	1566.56	236.533	77.6687	1303.84	239.97	302.685	1475.1	246.823	365.695	1273.89	324.936	80.9255	1358.45	61.3547	237.055	1527.87	-21.0065	200.797	1337.96	-28.4253	183.819	1180.64	-60.1985	282.188	1038.85	-18.3191	339.616	960.433	-64.7342	286.811	939.554	-70.413	350.302	898.451
7108	0	225.951	399.894	1711.96	310.488	383.391	1703.1	202.213	205.162	1714.48	313.433	208.547	1703.45	252.819	167.342	1567.29	237.557	86.395	1304.78	240.265	311.681	1475.86	246.898	373.943	1274.3	325.927	89.7598	1359.44	61.807	245.567	1528.62	-20.5454	207.843	1338.92	-27.9533	190.061	1181.78	-60.219	288.009	1039.52	-18.8916	345.724	961.193	-64.6499	292.322	940.219	-71.0371	355.81	899.015
7109	0	225.437	408.855	1712.47	309.919	392.492	1703.9	202.19	214.002	1714.49	312.927	217.896	1703.65	253.393	176.369	1567.69	238.283	95.1259	1305.23	240.465	320.639	1476.49	246.956	382.135	1274.6	326.675	98.559	1359.99	62.2474	254.091	1529.19	-20.1372	215.024	1339.62	-27.2445	196.597	1182.39	-59.9493	293.666	1039.96	-19.5827	351.875	961.713	-64.8606	297.939	940.706	-71.8404	361.298	899.546
7110	0	224.916	417.848	1712.68	309.381	401.677	1704.41	202.164	222.895	1714.23	313.398	226.87	1704.29	253.958	185.413	1567.94	238.936	103.888	1305.69	240.721	329.603	1476.84	247.002	390.532	1274.76	327.498	107.41	1360.39	62.6236	262.699	1529.54	-19.3964	222.398	1340.09	-26.7687	203.116	1182.86	-60.6659	299.729	1040.7	-20.2367	358.04	962.118	-65.1367	303.554	941.042	-72.5305	366.82	899.829
7111	0	224.232	426.818	1712.53	308.788	410.887	1704.53	202.22	231.765	1713.77	312.78	236.615	1703.34	254.532	194.444	1567.91	239.587	112.602	1305.78	240.961	338.737	1477	247.177	398.996	1274.54	328.319	116.219	1360.65	63.0921	271.253	1529.46	-19.0204	229.664	1340.46	-26.2378	209.929	1183.25	-60.3547	305.673	1040.54	-20.8973	364.164	961.989	-65.1273	309.287	941.033	-72.9643	372.453	899.432
7112	0	223.532	435.811	1712.05	308.195	420.267	1704.37	202.083	240.681	1713.2	312.749	245.87	1703.27	254.866	203.558	1567.64	239.966	121.325	1305.71	241.089	347.914	1476.82	247.329	407.633	1274.22	328.39	124.211	1360.78	63.2773	279.976	1529.34	-18.7183	237.281	1340.58	-25.8348	216.792	1183.23	-60.5022	312.026	1040.28	-21.5269	370.418	961.642	-65.1613	315.151	940.744	-73.9089	378.011	899.303
7113	0	222.943	444.873	1711.32	307.552	429.658	1703.86	202.042	249.676	1712.56	312.599	255.2	1702.69	255.029	212.561	1567.33	240.068	130.139	1305.33	241.088	356.849	1476.06	247.425	416.204	1273.45	328.842	133.167	1360.54	63.4403	288.76	1528.72	-18.2584	245.104	1340.15	-25.374	224.097	1182.96	-61.1916	318.492	1039.84	-22.0774	376.82	960.753	-65.3601	321.109	940.105	-74.4821	383.777	898.207
7114	0	222.205	453.95	1710.48	306.848	439.075	1703.01	202.019	258.616	1711.51	312.452	264.629	1701.84	255.373	221.613	1566.84	240.242	138.849	1304.59	241.161	365.79	1474.9	247.597	424.902	1272.3	329.143	142.097	1359.85	63.6899	297.556	1527.97	-18.0165	252.968	1339.65	-25.2248	231.41	1182.84	-60.8947	324.932	1038.88	-22.7389	383.164	959.541	-65.946	327.034	939.602	-75.1296	389.609	897.027
7115	0	221.476	463.044	1709.38	306.215	448.52	1702.07	202.005	267.728	1710.5	312.799	273.905	1701.43	255.54	230.663	1565.71	240.351	147.713	1304.04	241.337	374.971	1474.18	247.727	433.774	1271.39	329.928	151.806	1359.09	63.8955	306.403	1527.15	-17.8221	260.926	1338.9	-25.0689	238.954	1182.44	-61.6042	331.736	1037.74	-23.426	389.599	958.268	-66.2833	333.157	938.752	-76.0456	395.459	895.927
7116	0	220.727	472.213	1708.15	305.564	457.92	1701.09	201.89	276.857	1709.32	312.821	283.299	1700.5	255.501	239.897	1564.83	240.12	156.561	1303.1	241.367	384.226	1473.58	247.863	442.786	1270.66	329.919	160.779	1358.25	63.768	315.429	1526.17	-17.7802	269.229	1338.19	-24.9917	246.738	1181.76	-61.7075	338.346	1036.77	-24.0182	396.124	956.849	-66.4465	339.372	937.207	-76.7165	401.417	894.485
7117	0	219.83	481.492	1707.21	304.887	467.402	1700.08	201.721	286.021	1708.03	312.71	292.749	1699.45	255.373	248.962	1563.83	239.819	165.533	1301.95	241.213	393.496	1472.86	247.912	451.961	1269.82	329.889	169.753	1357.12	63.5864	324.603	1525.45	-17.8629	277.786	1337.55	-25.009	254.649	1181.04	-62.1807	345.515	1035.43	-24.9182	402.752	955.355	-67.1626	345.675	936.12	-77.7247	407.351	892.746
7118	0	219.015	490.745	1705.74	304.348	476.9	1698.77	201.668	295.262	1706.57	312.496	302.361	1698	255.216	258.04	1562.52	239.459	174.552	1300.63	240.962	402.693	1471.87	247.902	461.21	1268.93	329.846	178.82	1355.82	63.3799	333.693	1524.39	-18.296	286.366	1336.67	-25.0567	262.781	1180.09	-62.8263	352.37	1034.41	-25.6071	409.647	953.911	-67.6665	352.064	934.589	-78.4263	413.33	890.823
7119	0	218.311	500.063	1704.21	303.578	486.502	1697.18	201.428	304.506	1705.19	312.133	312.094	1696.43	254.976	267.252	1561.11	239.026	183.556	1299.42	240.792	412.11	1470.63	247.991	470.697	1267.55	329.555	187.932	1354.54	63.1122	342.935	1522.96	-18.5382	295.114	1335.5	-25.0376	271.217	1178.92	-63.2378	359.706	1032.47	-26.1872	416.473	951.531	-67.9978	358.568	932.66	-79.2957	419.598	889.13
7120	0	217.433	509.448	1702.26	302.687	496.159	1695.53	201.031	313.87	1703.59	311.853	321.556	1695.16	254.495	276.498	1559.51	238.353	192.729	1297.71	240.359	421.459	1469.34	247.973	480.314	1266.19	329.062	197.1	1353.06	62.7944	352.34	1521.47	-18.9537	304.12	1334.03	-25.1118	279.946	1177.52	-63.7795	367.089	1030.82	-27.0615	423.323	949.039	-69.0921	365.167	931.118	-79.9704	425.883	886.571
7121	0	216.555	518.847	1700.51	301.779	505.845	1693.47	200.652	323.194	1701.81	311.442	331.21	1693.28	253.96	285.794	1558.1	237.684	201.943	1295.94	240.004	430.936	1467.63	247.91	490.102	1264.61	328.706	206.302	1351.54	62.2474	361.866	1519.76	-19.1682	313.307	1332.38	-25.2983	288.721	1176.14	-64.2688	374.63	1028.75	-27.708	430.348	946.307	-69.5597	372.018	929.057	-80.5591	432.228	883.818
7122	0	215.552	528.258	1698.25	300.915	515.542	1691.32	200.192	332.511	1699.85	310.902	340.876	1691.28	253.43	295.113	1556.07	237.055	211.147	1294.06	239.52	440.471	1465.91	247.931	499.988	1263.02	328.325	215.654	1349.77	61.7865	371.374	1517.94	-19.5994	322.632	1330.35	-25.5171	297.789	1174.6	-64.9667	382.64	1026.39	-28.6497	437.408	943.639	-70.3417	378.852	926.921	-81.5523	438.76	881.239
7123	0	214.565	537.66	1696.07	299.924	525.127	1689.47	199.472	341.87	1697.96	310.203	350.495	1689.46	252.548	304.415	1554.42	236.153	220.55	1292.27	238.811	449.983	1464.15	247.639	509.835	1261.26	327.761	225.038	1348.05	61.0697	380.973	1516.06	-20.2646	332.19	1328.68	-25.8701	307.081	1173.06	-65.4398	390.354	1023.69	-29.5286	444.721	940.576	-71.3199	385.942	924.578	-82.5605	445.331	878.174
7124	0	213.327	547.103	1694.11	298.659	534.763	1687.25	198.699	351.325	1696.01	309.346	360.125	1687.43	251.654	313.84	1552.39	235.1	230.011	1290.1	238.146	459.618	1462.48	247.283	519.679	1259.69	327.145	234.551	1346.16	60.4503	390.615	1514.04	-20.9647	341.956	1326.78	-26.3001	316.509	1171.13	-66.5043	398.579	1021.71	-30.5147	452.132	937.777	-72.2468	393.209	922.212	-83.4328	452.225	874.965
7125	0	212.057	556.524	1692.18	297.36	544.369	1685.11	197.901	360.669	1694.02	308.346	369.728	1685.35	250.865	323.143	1550.38	234.333	239.565	1287.77	237.281	469.346	1460.8	246.846	529.759	1258.27	326.612	244.057	1344.06	59.4995	400.264	1512.29	-21.5961	351.995	1324.59	-26.602	326.15	1169.21	-67.076	406.725	1019.14	-31.5901	459.727	934.844	-73.3869	400.631	920.047	-84.4768	459.119	872.079
7126	0	210.727	566.01	1689.9	296.163	553.935	1683.41	196.784	370.122	1692	307.507	379.316	1683.75	249.731	332.584	1548.32	233.426	249.275	1285.81	236.458	479.159	1459.38	246.491	539.831	1256.77	325.965	253.749	1342.08	58.5795	409.897	1510.34	-22.4898	361.797	1322.59	-27.0976	335.931	1167.28	-67.8727	415.295	1016.54	-32.8862	467.525	931.993	-74.5612	408.2	917.488	-85.6245	466.154	868.896
7127	0	209.001	575.488	1688.19	294.579	563.564	1681.42	195.493	379.584	1690.01	306.176	388.791	1682	248.547	342.096	1546.38	232.335	259.092	1283.55	235.468	489.048	1457.72	245.819	550.132	1255.55	324.974	263.476	1340.01	57.4067	419.602	1508.23	-23.7052	371.964	1320.55	-27.8229	345.901	1165.14	-68.99	423.88	1014.21	-34.1523	475.479	928.972	-75.6054	416.089	914.834	-86.8251	473.595	865.83
7128	0	207.352	584.957	1686.18	293.014	573.136	1679.46	194.101	389.087	1687.91	304.881	398.378	1680.02	247.269	351.753	1544.2	231.487	269.083	1281.18	234.318	499.039	1456.26	245.095	560.317	1253.92	324.121	273.38	1337.93	56.1509	429.393	1506.18	-24.6506	382.309	1318.31	-28.3118	356.133	1162.96	-70.0691	432.783	1011.6	-35.2619	483.86	925.562	-77.028	423.865	912.259	-87.8638	481.097	862.423
7129	0	205.635	594.457	1684.05	291.339	582.722	1677.59	192.637	398.556	1685.79	303.271	407.939	1678.13	245.8	361.21	1542.09	230.75	279.147	1278.88	233.196	509.243	1454.56	244.267	570.833	1252.37	323.172	283.383	1335.75	54.9129	439.152	1504.04	-25.2703	392.758	1315.57	-28.828	366.547	1160.66	-71.114	441.856	1008.87	-36.392	492.381	922.228	-78.1733	432.382	909.608	-89.1677	488.831	859.053
7130	0	203.703	603.995	1682.19	289.275	592.408	1675.76	190.914	408.153	1683.74	301.408	417.681	1675.99	244.295	371.073	1539.87	229.794	289.366	1276.74	231.839	519.46	1452.65	243.456	581.454	1250.61	322.146	293.366	1333.85	53.5529	449.1	1501.75	-26.568	403.139	1313.04	-29.5643	377.054	1158.32	-72.0409	451.008	1006.01	-37.5608	500.938	918.792	-79.4854	440.794	906.994	-90.4328	496.876	855.622
7131	0	201.585	613.472	1680.34	287.271	602.07	1674.22	189.094	417.673	1681.54	299.525	427.34	1673.89	243.044	381.131	1538	228.86	299.785	1274.38	230.355	529.851	1451.14	242.274	592.02	1248.97	321.08	303.553	1331.96	51.9459	459.05	1499.49	-27.6275	413.516	1310.43	-30.4201	387.604	1156.03	-73.7227	460.902	1003.81	-39.0511	509.729	915.615	-81.1241	449.554	904.613	-91.8065	505.056	852.413
7132	0	199.475	623.045	1678.89	285.075	611.62	1672.43	187.044	427.148	1679.27	297.518	437.107	1671.64	241.484	391.26	1535.88	228.083	310.316	1272.13	228.588	540.276	1449.47	240.959	602.712	1247.63	320.235	314.355	1329.73	50.4431	469.041	1497.44	-28.7815	424.034	1308.11	-31.134	398.321	1153.88	-75.0298	470.63	1001.54	-40.5343	518.862	912.63	-82.6292	458.596	902.2	-93.3439	513.67	849.494
7133	0	197.069	632.603	1677.46	282.865	621.203	1671.31	184.958	436.644	1677.11	295.57	446.598	1669.95	239.433	401.242	1533.55	227.288	320.964	1269.91	226.807	550.913	1448.03	239.844	613.766	1246.19	319.214	324.931	1327.8	48.7014	479.148	1495.39	-30.057	434.336	1305.6	-32.0103	409.105	1151.66	-76.2625	480.427	998.765	-41.9396	528.261	910.056	-84.0108	467.894	899.721	-94.796	522.503	846.67
7134	0	194.574	642.247	1676.06	280.364	630.969	1670.19	182.571	446.372	1674.9	293.234	456.322	1668.19	237.807	411.762	1531.8	226.118	331.741	1267.99	225.016	561.859	1446.88	238.356	624.772	1244.81	317.896	335.449	1326.01	46.8762	489.506	1493.35	-31.3138	444.83	1303.08	-33.0383	419.862	1149.32	-77.4367	490.478	996.562	-43.4008	537.892	907.429	-85.5544	477.503	897.373	-96.3144	531.806	843.9
7135	0	192.214	652.116	1675.09	277.941	640.846	1669.2	180.244	456.083	1672.83	291.025	466.312	1666.39	235.932	422.25	1529.82	224.843	342.669	1265.86	223.091	572.798	1445.3	236.758	635.907	1243.44	316.668	346.44	1324.31	44.8699	500.105	1491.38	-32.8493	455.349	1301.08	-34.2157	430.621	1147.19	-78.6684	500.686	994.048	-44.8733	547.914	904.909	-86.9931	487.371	895.121	-97.8281	541.495	841.188
7136	0	189.706	661.977	1674.14	275.393	650.81	1668.27	178.092	465.992	1670.77	288.577	476.386	1664.36	233.391	432.519	1528.07	223.669	353.67	1263.96	221.108	583.778	1443.95	235.309	647.252	1242.18	315.242	357.438	1322.7	42.9337	510.757	1489.31	-34.2272	465.916	1298.9	-35.2999	441.557	1144.92	-79.8815	510.78	992.007	-45.9773	558.017	902.089	-88.2738	497.429	892.835	-99.0636	551.292	838.664
7137	0	187.058	671.929	1673.14	272.823	660.949	1667.58	175.604	475.969	1668.9	286.236	486.35	1662.99	231.776	443.704	1526.61	222.406	364.766	1262.33	218.959	594.776	1442.77	233.555	658.547	1240.93	313.689	368.449	1321.36	40.8159	521.508	1487.35	-35.9718	476.512	1296.76	-36.6539	452.687	1142.91	-81.3865	521.189	989.769	-47.4654	568.491	899.856	-89.5379	507.82	890.596	-100.303	561.197	836.2
7138	0	184.365	682.048	1672.52	270.152	671.119	1666.99	173.266	486.04	1667.18	283.773	496.602	1661.66	229.582	454.501	1525.56	220.816	375.917	1260.9	216.821	605.836	1441.58	231.977	670.035	1240.13	312.03	379.82	1319.92	38.6449	532.299	1485.7	-37.6962	487.424	1294.92	-38.2039	463.744	1140.96	-82.7392	531.756	987.523	-48.9653	579.006	897.645	-90.7567	518.492	888.587	-101.627	571.78	834.029
7139	0	181.522	692.198	1671.82	267.306	681.431	1666.5	170.789	496.192	1665.74	281.228	506.926	1660.29	227.114	465.199	1524.44	219.443	387.254	1259.43	214.875	617.092	1440.77	229.959	681.465	1238.74	310.26	390.603	1319.04	36.4311	543.218	1484.1	-39.312	498.487	1293.2	-39.5953	474.96	1139.24	-84.1155	542.85	985.78	-50.2749	589.875	895.885	-92.0186	529.255	886.828	-102.716	582.497	832.052
7140	0	178.793	702.391	1671.64	264.596	691.787	1666.4	168.349	506.457	1664.8	278.743	517.41	1659.61	225.122	476.146	1523.71	217.86	398.531	1258.62	212.637	628.321	1440.34	228.054	692.973	1238.45	308.545	401.765	1318.1	34.2688	554.246	1483.07	-41.1824	509.698	1291.61	-41.1074	486.377	1137.78	-85.5186	553.845	984.06	-51.5602	601.143	894.377	-93.3074	540.317	885.509	-104.255	593.432	830.679
7141	0	175.786	712.84	1671.75	261.722	702.351	1666.72	165.691	516.828	1664.2	276.111	527.861	1659.36	222.674	487.21	1523.01	216.027	409.778	1258.16	210.41	639.499	1440.1	226.373	704.836	1238.33	306.727	413.058	1317.75	32.0762	565.278	1482.1	-43.1777	520.968	1290.58	-42.9216	497.935	1136.79	-87.0668	565.395	983.306	-53.0221	612.529	893.108	-94.3685	551.769	884.023	-105.286	605.017	829.413
7142	0	173.034	723.24	1672.25	259	712.887	1667.28	163.115	527.269	1663.88	273.498	538.442	1659.46	220.657	498.157	1523.06	214.314	421.034	1257.7	208.176	650.763	1440.38	224.449	716.261	1238.65	304.842	424.087	1317.75	29.6685	576.363	1481.89	-45.0629	532.579	1289.72	-44.4728	509.872	1135.74	-88.1691	577.067	981.959	-54.0504	624.147	892.179	-95.7608	563.337	883.247	-106.552	616.544	828.56
7143	0	170.327	733.787	1672.85	256.187	723.479	1668.07	160.609	537.804	1663.82	270.952	549.102	1659.78	218.176	509.202	1523.34	212.747	432.082	1258.02	206.16	662.171	1441.28	223.355	728.222	1240.03	302.903	435.017	1318.02	27.4364	587.25	1481.58	-46.9831	544.268	1289.19	-46.2878	521.81	1135.49	-89.3562	588.967	981.508	-55.2456	635.986	891.973	-96.6815	575.369	882.402	-107.536	628.487	827.943
7144	0	167.411	744.373	1673.74	253.415	734.151	1669.11	157.979	548.415	1664.27	268.418	559.784	1660.53	216.02	520.186	1523.98	211.06	442.951	1258.96	203.952	673.352	1442.06	221.473	739.589	1240.99	301.016	445.887	1319.02	25.2415	598.14	1481.74	-49.0332	555.959	1289.07	-48.1186	534.065	1135.37	-91.025	601.392	981.671	-56.1167	648.344	891.697	-97.9103	587.502	882.368	-108.543	640.813	827.854
7145	0	164.621	754.944	1674.57	250.592	744.847	1670.26	155.281	558.985	1664.85	265.767	570.559	1661.3	213.78	531.367	1525.1	209.26	453.729	1260.01	201.497	684.285	1442.97	219.767	750.932	1242.16	299.13	456.722	1320.25	23.1559	609.112	1482.25	-51.0231	567.972	1289.43	-49.8508	546.383	1135.75	-92.1056	614.118	982.014	-56.9916	660.603	892.151	-99.208	600.106	882.684	-109.366	653.429	828.083
7146	0	161.852	765.503	1675.54	247.966	755.623	1671.47	152.823	569.554	1665.4	263.157	581.271	1662.25	211.995	542.385	1526.12	207.684	464.528	1260.96	199.651	695.108	1443.92	218.175	762.235	1243.42	297.589	467.685	1321.58	21.1829	620.286	1483.27	-52.8433	579.821	1290.14	-51.6354	558.824	1136.55	-93.2767	626.976	982.602	-57.6125	673.212	892.584	-100.201	613.072	883.308	-109.973	666.414	828.8
7147	0	159.115	776.029	1676.42	245.429	766.25	1672.75	150.407	580.1	1666.25	260.604	591.82	1663.48	210.006	553.176	1527.34	206.164	475.213	1262.13	197.925	706.116	1445.17	216.345	773.161	1244.81	296.105	478.321	1323.07	19.39	631.232	1484.56	-54.681	591.757	1291.14	-53.5112	571.212	1137.5	-94.4492	639.929	983.684	-58.3985	685.854	893.604	-101.348	626.368	884.547	-110.695	679.782	829.811
7148	0	156.583	786.522	1677.48	242.865	776.81	1674.36	147.996	590.59	1667.37	258.318	602.426	1665.22	208.02	563.661	1528.68	204.42	485.823	1263.83	196.145	716.918	1446.69	214.819	784.217	1246.45	294.617	488.756	1324.73	17.609	642.094	1486.15	-56.4214	603.671	1292.36	-55.3302	583.823	1138.63	-95.6189	653.183	985.137	-58.9188	698.75	895.061	-102.525	639.936	885.976	-111.219	693.445	831.163
7149	0	154.076	797.005	1678.49	240.424	787.341	1675.75	145.82	600.964	1668.6	256.12	612.902	1666.89	206.388	574.102	1530	202.731	496.333	1265.19	194.506	727.261	1448.43	213.316	794.993	1248.21	293.229	499.168	1326.33	15.8674	652.998	1488.01	-58.4073	615.585	1294	-57.3935	596.359	1140.18	-96.9315	666.913	986.842	-59.5451	712.045	896.984	-103.746	653.822	887.539	-111.76	707.529	832.836
7150	0	151.752	807.353	1679.71	238.12	797.778	1676.96	143.788	611.343	1669.73	254.084	623.259	1668.77	204.784	584.327	1531.54	201.086	506.471	1266.52	192.851	737.778	1450.22	211.779	805.299	1249.97	291.729	509.278	1327.85	14.4745	663.863	1489.69	-59.8109	627.74	1295.45	-59.3162	609.013	1141.49	-98.0391	680.47	988.6	-59.9107	725.671	899.091	-104.756	667.966	889.112	-111.886	722.11	834.719
7151	0	149.651	817.605	1680.54	235.958	808.042	1678.29	141.852	621.527	1671.1	252.045	633.497	1670.57	203.156	594.552	1532.92	199.248	516.467	1268.04	191.774	748.045	1451.75	210.426	815.284	1251.43	290.189	519.176	1329.45	13.1103	674.624	1491.34	-62.0389	639.552	1297.12	-61.5055	621.63	1143.12	-99.1172	694.293	990.346	-60.0119	739.516	901.188	-105.78	682.345	890.726	-112.238	736.873	836.622
7152	0	147.777	827.802	1681.35	233.819	818.243	1679.64	139.981	631.649	1672.54	250.208	643.915	1672.15	201.343	604.357	1534.42	197.258	526.208	1269.57	190.449	758.226	1453.06	209.284	825.079	1252.66	288.653	528.95	1331.06	11.5885	685.332	1493.24	-63.6594	651.69	1298.52	-63.6631	634.403	1144.57	-99.9534	708.367	992.085	-60.0948	753.249	902.95	-106.908	696.967	892.648	-112.346	751.962	838.696
7153	0	145.933	837.939	1682.19	232.113	828.397	1680.75	138.267	641.802	1673.91	248.619	654.127	1673.76	199.837	614.174	1535.76	195.508	535.857	1271.01	189.323	768.208	1454.44	208.331	834.743	1253.76	286.958	538.647	1332.65	10.3745	695.996	1494.96	-65.5008	663.559	1300.14	-65.7543	647.144	1146.22	-100.802	722.71	993.776	-60.2558	767.354	904.98	-107.869	712.007	894.523	-112.466	767.282	840.838
7154	0	144.352	847.863	1683.08	230.594	838.453	1681.76	136.987	651.724	1675.35	247.194	664.116	1675.42	198.518	623.953	1537.38	193.761	545.333	1272.54	188.328	778.026	1455.98	207.747	844.312	1255.14	285.404	548.122	1334.02	9.31713	706.506	1496.49	-67.126	675.611	1301.52	-67.9928	659.917	1147.47	-101.462	737.08	995.519	-60.5578	781.707	907.285	-108.728	727.245	896.131	-112.434	783.103	842.955
7155	0	142.994	857.8	1684.07	229.317	848.476	1682.95	135.642	661.561	1677.11	245.923	674.07	1677.24	197.137	633.372	1539.18	192.071	554.77	1274.41	187.369	787.724	1457.6	206.969	853.868	1256.72	283.646	557.387	1335.67	8.32207	716.811	1498.33	-68.8819	687.644	1303.23	-70.1091	672.866	1149.01	-102.441	751.655	997.466	-60.4459	796.421	909.599	-109.768	742.624	898.167	-112.507	798.972	845.473
7156	0	141.925	867.732	1685.1	228.381	858.489	1684.2	134.5	671.37	1678.93	244.795	683.962	1678.98	195.72	642.886	1540.62	190.405	563.815	1276.29	186.466	797.301	1459.26	206.333	863.27	1258.47	281.921	566.573	1337.25	7.11719	726.972	1500.18	-70.4489	699.781	1304.88	-72.3337	685.733	1150.42	-103.225	766.356	999.611	-60.5306	811.106	912.145	-110.482	758.358	899.997	-112.531	815.081	847.993
7157	0	140.929	877.54	1686.45	227.264	868.15	1685.51	133.568	681.113	1680.75	243.84	693.679	1680.93	194.654	652.404	1542.27	188.669	573.061	1277.7	185.804	806.844	1461.13	205.593	872.598	1260.29	280.282	575.664	1338.71	6.13094	737.053	1501.95	-72.1046	711.838	1306.53	-74.4093	698.703	1151.71	-103.787	781.202	1001.74	-60.2752	826.091	914.822	-111.299	774.184	902.07	-112.494	831.355	850.671
7158	0	140.182	887.363	1687.78	226.167	877.669	1686.68	132.811	690.881	1682.71	243.072	703.304	1683.11	193.543	661.756	1544.04	187.125	582.522	1279.28	185.21	816.295	1462.81	205.046	881.624	1261.89	278.748	584.788	1340.33	5.35501	746.976	1503.79	-73.6113	723.789	1308.17	-76.4088	711.799	1153.28	-104.396	796.009	1003.96	-60.1658	840.9	917.525	-111.965	790.061	904.131	-112.53	847.779	853.997
7159	0	139.589	897.081	1688.86	225.445	887.388	1687.9	132.144	700.668	1685.02	242.423	713.059	1685.11	192.473	671.201	1545.61	185.611	591.638	1281.21	184.477	825.469	1464.48	204.806	890.551	1263.52	277.177	593.439	1342.29	4.47818	756.764	1505.61	-74.8609	735.678	1309.64	-78.3807	724.829	1154.8	-104.958	811.06	1006.27	-59.9191	855.905	920.03	-112.57	806.159	906.178	-112.206	864.356	857.045
7160	0	139.289	906.909	1690.02	225.17	897.157	1689.04	131.624	710.462	1687.21	241.785	722.673	1687.26	191.491	680.357	1547.42	184.172	600.81	1282.87	183.966	834.527	1466.39	204.47	899.319	1265.38	275.715	602.328	1344.15	3.66653	766.39	1507.3	-76.1709	747.482	1311.32	-80.3246	737.893	1156.28	-105.254	825.992	1008.43	-59.4802	871.065	923.018	-113.092	822.284	908.689	-111.891	881.064	859.889
7161	0	139.017	916.573	1691.12	225.051	906.72	1690.12	131.114	720.129	1689.58	241.275	732.308	1689.28	190.527	689.503	1549.29	182.783	609.838	1284.62	183.461	843.669	1468.02	204.308	908.127	1267.26	273.715	610.668	1345.77	2.90503	775.955	1509.17	-77.1627	759.156	1312.62	-82.1666	751.013	1158.04	-105.39	841.091	1010.65	-59.2994	885.919	925.747	-113.537	838.427	911.184	-111.257	897.793	863.062
7162	0	138.885	926.321	1692.05	224.73	916.317	1690.92	130.555	729.86	1692.11	240.892	741.925	1691.37	189.521	698.732	1551.38	181.351	618.646	1286.81	182.757	852.797	1469.42	203.975	916.651	1268.72	272.43	619.142	1347.62	2.23492	785.318	1510.69	-77.9888	770.647	1314.06	-83.9033	763.99	1159.65	-105.556	856.054	1013.07	-58.7242	900.725	928.364	-114.015	854.796	913.966	-110.683	914.472	866.305
7163	0	139.052	936.133	1692.9	224.62	925.963	1691.5	130.045	739.601	1694.65	240.353	751.421	1693.31	188.627	707.777	1552.92	179.921	627.834	1288.46	182.2	861.763	1471.19	203.573	925.084	1270.39	271.253	628.708	1348.91	1.52049	794.869	1512.29	-78.9368	782.068	1315.8	-85.2281	776.986	1161.04	-105.674	871.007	1015.61	-58.0208	916.065	931.646	-113.93	870.968	916.351	-110	931.193	869.536
7164	0	139.141	945.892	1693.66	224.704	935.213	1691.99	129.818	749.455	1697.12	239.955	760.851	1695.32	187.643	716.716	1554.53	178.56	636.926	1289.88	181.753	870.664	1472.86	202.893	933.242	1271.47	269.869	637.429	1350.32	0.808805	804.386	1514.29	-79.7937	793.267	1317.5	-86.4773	789.806	1162.55	-105.665	885.911	1018.31	-57.6503	931.156	934.78	-114.061	887.099	919.011	-109.358	947.849	873.263
7165	0	139.504	955.704	1694.45	225.344	944.739	1692.65	129.492	759.266	1699.3	239.662	770.157	1697.32	186.774	725.569	1555.88	177.298	645.523	1291.59	181.301	879.419	1474.53	202.488	941.541	1272.98	268.423	645.887	1351.84	0.147987	813.786	1516.06	-80.5263	804.228	1319.23	-87.6616	802.344	1164.08	-105.778	900.672	1021.12	-57.2736	946.36	938.553	-113.871	903.217	921.83	-108.735	964.369	876.864
7166	0	139.909	965.416	1695.24	225.856	954.166	1693.2	129.03	769.087	1701.64	239.431	779.534	1699.07	186.035	734.444	1557.61	175.91	654.005	1293.5	180.813	888.172	1476.13	201.991	949.822	1274.22	267.104	654.47	1353.31	-0.434358	823.071	1517.63	-81.0945	815.042	1320.95	-88.6044	814.876	1165.6	-105.913	915.115	1024.12	-56.887	961.457	941.77	-114.481	919.403	925.223	-108.209	980.739	880.758
7167	0	140.54	974.959	1695.92	226.1	963.307	1693.67	128.653	778.908	1703.67	239.131	788.845	1700.67	185.135	743.21	1558.79	174.693	662.812	1294.85	180.442	896.91	1477.52	201.559	958.014	1275.29	265.844	662.828	1354.73	-0.987445	832.452	1519.28	-81.7902	825.802	1322.57	-89.4852	827.224	1167.03	-106.078	929.726	1026.94	-56.1723	976.997	945.596	-114.423	935.394	928.038	-107.692	997.221	884.364
7168	0	141.136	984.81	1696.5	226.982	972.733	1693.83	128.392	788.812	1705.32	238.891	798.141	1701.85	184.361	751.95	1559.68	173.509	671.482	1295.74	180.075	905.694	1478.62	201.222	966.204	1276.61	264.603	671.325	1355.83	-1.54266	841.663	1520.68	-82.4007	836.362	1324	-90.2497	839.461	1168.29	-106.035	943.952	1029.64	-55.8438	992.38	949.132	-114.076	951.184	930.871	-107.177	1013.69	888.297
7169	0	141.945	994.502	1696.89	227.581	981.736	1694.08	128.218	798.693	1706.85	238.657	807.299	1702.91	183.643	760.683	1560.61	172.324	679.826	1297.27	179.809	914.42	1479.47	200.946	974.477	1277.47	263.487	679.457	1357.15	-1.92408	850.949	1521.67	-82.7727	846.744	1325.05	-90.8838	851.541	1169.43	-105.987	958.124	1032.15	-55.416	1007.69	952.662	-113.538	966.894	933.562	-106.447	1030.18	891.709
7170	0	142.872	1004.06	1697.05	228.429	991.051	1694.11	127.75	808.394	1708.38	238.433	816.502	1703.78	183.068	769.515	1561.58	171.182	688.584	1298.28	179.491	923.177	1479.96	200.748	982.889	1278	262.281	688.219	1357.62	-2.23728	860.294	1522.51	-83.2964	857.163	1326.02	-91.4931	863.641	1170.46	-105.912	972.25	1034.39	-55.0712	1022.98	956	-113.148	982.428	935.998	-105.873	1046.56	895.311
7171	0	143.729	1013.83	1697.22	229.293	1000.14	1693.97	127.606	818.204	1709.54	238.325	825.601	1704.34	182.442	778.315	1562.14	170.259	697.297	1299.02	179.285	931.939	1480.68	200.617	991.316	1278.6	261.333	696.387	1358.77	-2.61436	869.661	1523.38	-83.6987	867.439	1326.83	-92.0443	875.526	1171.27	-106.065	986.173	1036.94	-54.8517	1038.1	959.246	-112.458	997.883	938.427	-105.273	1062.9	898.757
7172	0	144.827	1023.45	1697.26	230.171	1009.05	1693.73	127.545	827.99	1710.34	238.159	834.525	1704.87	181.899	787.14	1562.64	169.335	705.889	1299.64	179.168	940.726	1481.15	200.596	999.962	1279.11	260.388	704.837	1359.24	-2.97304	878.918	1524.01	-84.0149	877.679	1327.48	-92.5096	887.271	1171.96	-105.98	999.829	1039.02	-54.3589	1053.11	962.608	-111.638	1013.08	940.464	-104.822	1079.05	902.613
7173	0	145.877	1032.91	1697.19	231.319	1018.15	1693.42	127.119	837.66	1711.05	238.096	843.547	1705.18	181.294	796.007	1563.03	168.369	714.474	1300.28	179.059	949.573	1481.54	200.532	1008.43	1279.39	259.382	713.25	1359.5	-3.20226	888.264	1524.36	-84.3036	887.754	1327.77	-92.897	898.958	1172.42	-105.723	1013.37	1040.75	-53.8098	1068.04	965.684	-110.505	1028.05	942.211	-104.189	1095.02	906.474
7174	0	147.064	1042.49	1696.98	232.004	1026.85	1693.02	126.956	847.441	1711.41	237.801	852.448	1705.35	180.674	804.921	1563.22	167.465	723.301	1300.45	178.938	958.321	1481.49	200.556	1017	1279.43	258.377	721.764	1359.71	-3.47548	897.76	1524.52	-84.4689	898.046	1328.01	-93.179	910.609	1172.5	-105.517	1026.73	1042.26	-52.9963	1082.77	968.793	-108.738	1042.88	943.704	-103.551	1110.89	909.961
7175	0	148.085	1051.69	1696.78	233.355	1036.06	1692.3	126.898	857.204	1711.57	237.682	861.406	1705.11	180.239	813.768	1563.33	166.95	732.105	1300.53	179.011	967.111	1481.54	200.689	1025.48	1279.13	257.791	730.312	1360.17	-3.7201	907.122	1524.58	-84.6766	908.255	1327.99	-93.4786	921.867	1172.25	-104.996	1039.91	1043.83	-52.0911	1097.42	971.723	-107.981	1057.86	945.638	-102.71	1126.68	913.808
7176	0	149.219	1061.38	1696.3	234.259	1044.73	1692.02	126.618	866.859	1711.53	237.676	870.326	1704.78	179.853	822.644	1563.07	166.259	740.756	1300.4	179.434	975.865	1481.22	201.224	1034.33	1279.11	256.984	738.822	1359.94	-3.83329	916.503	1524.4	-84.6208	918.377	1327.73	-93.6334	933.076	1172.02	-104.239	1052.99	1045.15	-51.3976	1111.93	974.924	-105.206	1072.26	946.666	-101.773	1142.27	917.604
7177	0	150.486	1070.93	1695.66	235.471	1053.82	1691.38	126.508	876.681	1711.26	237.547	879.247	1704.41	179.484	831.628	1562.9	165.705	749.519	1300.22	179.608	984.792	1480.8	201.483	1042.84	1278.5	256.322	747.44	1359.52	-3.89367	925.981	1523.91	-84.482	928.595	1327.16	-93.7064	943.948	1171.24	-103.5	1066	1046.23	-50.3114	1126.44	977.901	-104.43	1087.16	948.612	-100.828	1157.57	921.339
7178	0	151.623	1080.55	1694.81	235.874	1062.65	1690.41	126.357	886.339	1710.87	237.167	888.28	1703.57	179.182	840.651	1562.4	165.207	758.309	1299.81	179.791	993.751	1479.95	201.681	1051.44	1277.7	255.813	756.068	1359.21	-3.84524	935.457	1523.17	-84.5699	938.777	1326.59	-93.8686	954.858	1170.58	-102.637	1078.92	1047.52	-48.9942	1140.84	980.936	-101.376	1101.6	949.619	-99.6124	1172.82	925.196
7179	0	152.654	1089.85	1694.14	237.317	1071.78	1689.42	126.418	896.125	1710.01	237.157	897.407	1702.46	179.273	849.856	1561.84	165.01	767.09	1299.18	180.009	1002.62	1479.27	202.36	1060.41	1276.89	255.398	764.701	1358.78	-3.68845	944.933	1522.1	-84.4065	948.946	1325.66	-93.692	965.159	1169.24	-101.682	1091.7	1048.41	-47.7228	1155.18	984.009	-99.2241	1116.1	951.167	-98.4572	1187.66	929.237
7180	0	153.956	1099.69	1693.03	238.432	1080.8	1688.58	126.332	905.999	1709.09	237.135	906.526	1701.69	179.136	859.046	1560.97	164.56	775.723	1298.58	180.559	1011.8	1478.08	203.015	1069.34	1275.79	255.062	773.428	1357.95	-3.55319	954.413	1521.04	-84.2353	958.973	1324.5	-93.6444	975.392	1168.32	-100.522	1104.34	1049.44	-46.1061	1169.21	986.831	-97.2014	1130.49	952.65	-96.6404	1202.81	932.242
7181	0	155.017	1109.45	1691.69	239.411	1090.02	1687.25	126.22	915.767	1708.15	237.091	915.689	1700.63	179.04	868.241	1560.18	164.408	784.76	1297.88	180.523	1020.78	1476.85	203.56	1078.1	1274.42	254.816	782.264	1357.29	-3.33221	963.992	1519.66	-84.1711	969.051	1323.31	-93.476	985.718	1166.78	-99.2664	1116.85	1050.19	-44.7064	1182.92	989.604	-95.2167	1144.88	954.267	-95.4161	1217.46	936.246
7182	0	156.25	1119.08	1690.43	240.424	1099.15	1685.9	126.44	925.696	1706.64	237.132	924.91	1699.24	179.406	877.596	1559.08	164.669	793.85	1296.83	181.196	1029.83	1475.74	204.489	1087.11	1273.25	254.844	791.137	1356.31	-2.85925	973.452	1518.28	-83.9079	978.921	1322.04	-93.2772	995.788	1165.1	-98.1423	1129.16	1051.15	-43.045	1196.58	992.588	-93.0806	1159.17	955.791	-93.886	1231.93	940.032
7183	0	157.378	1128.6	1689.16	241.734	1108.64	1684.74	126.481	935.522	1705.11	237.309	934.269	1697.73	179.665	886.888	1558.08	164.817	802.902	1295.37	181.844	1039	1474.31	204.95	1095.83	1271.65	254.902	800.021	1355.05	-2.42492	982.868	1516.67	-83.5852	988.471	1320.5	-92.8002	1005.75	1163.52	-96.8023	1141.44	1051.89	-41.4174	1210.13	995.363	-90.8187	1173.19	957.226	-92.1817	1246.27	943.494
7184	0	158.569	1138.51	1687.45	242.51	1117.93	1683.19	126.648	945.563	1703.26	237.991	943.485	1696.78	180.08	896.156	1556.67	164.842	812.016	1294.08	182.511	1048.04	1472.8	205.808	1104.85	1270.11	255.064	809.115	1353.59	-1.82599	992.301	1514.9	-83.1227	998.077	1318.73	-92.366	1015.7	1161.68	-95.5654	1153.37	1052.58	-39.8358	1223.38	998.332	-88.6557	1187.1	958.546	-90.6336	1260.06	946.922
7185	0	159.593	1148.58	1685.87	243.696	1127.53	1681.9	126.95	955.553	1701.38	238.293	953.082	1694.99	180.695	905.558	1554.98	165.258	821.338	1292.52	183.278	1057.4	1471.03	207.111	1114.49	1268.61	255.456	818.198	1352.08	-1.22271	1001.64	1513.1	-82.7283	1007.49	1317.14	-91.7775	1025.5	1159.7	-94.2409	1165.4	1053	-38.4698	1236.45	1000.92	-86.2237	1200.82	959.914	-88.9028	1273.91	950.09
7186	0	160.651	1158.28	1684.24	244.758	1137.22	1679.97	127.298	965.578	1699.16	238.708	962.634	1693.07	181.388	914.85	1553.2	165.818	830.615	1290.69	184.061	1066.48	1469.23	207.75	1123.61	1266.53	255.956	827.375	1350.41	-0.537346	1010.92	1511.11	-81.8606	1016.88	1315.16	-91.0791	1035.2	1157.7	-92.519	1177.18	1053.24	-36.9088	1249.46	1003.82	-83.7532	1214.31	961.019	-86.8944	1287.56	952.646
7187	0	161.87	1168.44	1682.17	245.861	1146.82	1678.45	127.693	975.73	1696.6	239.106	972.379	1690.84	182.278	924.248	1551.27	166.39	839.952	1288.76	185.106	1075.86	1467.33	208.854	1132.98	1264.86	256.598	836.694	1348.23	0.346115	1020.24	1509.11	-81.0524	1025.92	1313.03	-90.2718	1044.84	1155.43	-91.0068	1188.54	1053.17	-35.4821	1262.05	1006.24	-81.2622	1227.53	962.138	-85.0963	1300.83	955.409
7188	0	163.062	1178.52	1680.23	246.938	1156.67	1676.48	128.167	985.916	1694.24	239.655	982.163	1688.69	183.134	933.675	1549.13	167.188	849.571	1286.65	185.975	1085.25	1465.13	210.399	1142.99	1263	257.333	846.148	1346.18	1.33065	1029.58	1507.06	-80.1503	1035.13	1311.02	-89.4236	1054.46	1153.21	-89.8295	1200.02	1053.54	-33.9301	1274.6	1008.73	-78.7224	1240.58	963.215	-83.2484	1313.95	957.917
7189	0	164.245	1188.58	1677.95	248.239	1166.46	1674.56	128.697	996.004	1691.55	240.344	991.944	1686.37	184.406	943.176	1546.74	168.109	859.122	1284.48	187.087	1094.6	1463.05	211.097	1152.4	1260.82	258.237	855.611	1343.79	2.33832	1038.95	1504.87	-79.0762	1044.11	1308.86	-88.5149	1063.95	1150.91	-88.3171	1211.23	1053.65	-32.4986	1286.77	1010.88	-75.6711	1253.24	963.617	-81.5297	1326.7	960.503
7190	0	165.588	1198.57	1675.69	249.537	1176.36	1672.35	129.436	1006.17	1688.61	240.565	1002.01	1683.33	185.677	952.678	1544.51	169.219	868.913	1282.04	188.339	1104.22	1460.84	212.523	1162.42	1258.91	259.347	865.206	1341.35	3.55133	1048.37	1502.71	-77.9721	1053.08	1306.37	-87.2762	1073.46	1148.43	-86.7173	1222.25	1053.43	-30.6938	1298.79	1012.79	-73.5819	1265.79	964.699	-79.7561	1339.13	962.785
7191	0	167.022	1208.7	1673.39	250.755	1186.13	1670.35	130.204	1016.44	1685.73	241.82	1011.69	1681.36	187.003	962.248	1542.02	170.178	878.737	1279.44	189.535	1113.75	1458.5	213.643	1172.35	1256.66	260.452	874.916	1338.62	4.90667	1057.92	1500.16	-76.5191	1062.04	1303.98	-85.7902	1083.16	1146.02	-84.9435	1233.15	1053.08	-29.0997	1310.44	1014.31	-71.1516	1278.2	965.319	-77.9642	1351.36	964.687
7192	0	168.425	1218.96	1671	252.254	1196.14	1668.3	131.125	1026.72	1682.92	242.848	1021.63	1679.08	188.425	971.948	1539.89	171.384	888.852	1277.08	190.879	1123.48	1455.99	215.083	1182.78	1254.46	261.699	884.783	1336.11	6.18627	1067.53	1498.02	-75.0813	1070.87	1301.61	-84.7657	1092.44	1143.62	-83.2456	1243.96	1052.95	-27.4281	1321.85	1015.76	-68.9053	1290.2	965.965	-76.1613	1363.37	966.677
7193	0	169.981	1229.02	1668.75	253.74	1206.09	1666.12	132.356	1036.94	1680.32	244.007	1031.53	1676.67	190.053	981.805	1537.52	172.799	898.963	1274.54	192.568	1133.36	1454.04	216.354	1192.9	1252.29	262.991	894.709	1333.5	7.7469	1077.4	1495.88	-73.5661	1079.89	1299.58	-83.2656	1101.92	1141.27	-81.4212	1254.28	1052.76	-25.6431	1333.02	1016.98	-66.6254	1302.07	966.358	-74.5854	1374.83	968.345
7194	0	171.698	1239.19	1666.71	255.513	1216.12	1664.24	133.653	1047.19	1677.67	245.495	1041.62	1674.36	191.691	991.817	1534.96	173.931	909.182	1271.91	194.384	1143.43	1451.79	217.527	1202.92	1250.03	264.34	904.66	1330.69	9.3073	1087.42	1493.85	-71.9201	1088.63	1297.16	-81.6286	1111.32	1138.92	-79.5483	1264.73	1051.96	-23.7768	1344.02	1017.66	-63.4681	1313.35	965.719	-72.8266	1386.16	969.518
7195	0	173.471	1249.43	1664.54	257.241	1226.2	1662.36	134.989	1057.3	1675.22	246.855	1051.72	1672.11	193.402	1002.09	1532.47	175.12	919.769	1269.64	196.125	1153.54	1449.34	219.006	1213.36	1247.84	265.596	914.849	1328.08	10.9953	1097.71	1491.82	-70.051	1097.64	1294.79	-80.0519	1120.78	1136.7	-77.7745	1274.99	1051.27	-21.8899	1354.85	1017.98	-61.9722	1324.67	965.836	-71.1642	1397.29	970.364
7196	0	175.243	1259.52	1662.56	259.065	1236.23	1660.51	136.78	1067.48	1672.63	248.64	1061.67	1670	195.215	1012.36	1530.23	176.269	930.286	1267.33	198.015	1163.83	1447.1	220.498	1223.8	1245.34	266.816	925.023	1325.68	12.8096	1108.22	1489.65	-68.1965	1106.94	1292.94	-78.3747	1130.16	1134.42	-76.0352	1285.22	1050.41	-20.097	1365.36	1017.92	-60.0135	1335.68	965.538	-69.5392	1407.96	970.829
7197	0	177.172	1269.65	1660.84	261.132	1246.42	1658.58	138.69	1077.62	1670.26	250.631	1071.78	1667.74	197.351	1022.97	1527.92	177.357	940.971	1264.99	200.05	1174.24	1444.94	222.061	1234.4	1242.98	267.996	935.37	1323.26	14.7628	1118.95	1487.78	-66.1924	1116.38	1290.76	-76.5552	1139.66	1132.41	-74.1233	1295.32	1049.1	-18.4585	1375.63	1017.32	-58.0674	1346.22	964.903	-67.4865	1418.32	970.554
7198	0	179.348	1279.73	1658.94	263.255	1256.46	1656.96	140.795	1087.66	1668.16	252.637	1081.85	1665.41	199.23	1033.36	1526.04	178.349	951.875	1262.73	202.147	1184.71	1442.56	224.2	1245.31	1241	269.085	945.886	1320.61	16.8143	1129.85	1485.79	-63.965	1125.94	1288.68	-74.683	1149.23	1130.45	-72.437	1305.17	1047.69	-16.6168	1385.78	1016.49	-56.1224	1356.5	963.647	-66.1643	1428.48	969.654
7199	0	181.852	1289.8	1657.37	265.606	1266.53	1655.45	143.013	1097.64	1665.84	254.524	1092.03	1662.99	201.12	1043.89	1523.95	179.469	963.044	1260.53	204.365	1195.28	1440.64	225.895	1256.13	1238.87	270.222	956.608	1318.16	18.9858	1140.98	1484.16	-61.9352	1136.01	1287.11	-72.839	1158.84	1128.7	-70.4957	1315.01	1046.13	-14.903	1395.69	1015.22	-54.2828	1366.45	962.336	-64.6651	1438.35	968.707
7200	0	184.161	1299.7	1656.32	268.114	1276.5	1653.83	145.701	1107.58	1663.98	257.607	1101.89	1660.94	203.357	1054.54	1521.79	180.782	974.274	1258.39	206.717	1206.08	1438.74	227.763	1267.19	1236.71	271.508	967.55	1315.82	21.2272	1152.1	1482.52	-59.948	1146.39	1285.73	-70.9427	1168.61	1127.37	-68.7382	1324.71	1044.54	-13.2112	1405.47	1013.58	-52.4574	1376.12	960.699	-62.7043	1447.88	966.799
7201	0	186.677	1309.61	1655.06	270.723	1286.56	1652.4	148.444	1117.36	1661.97	260.291	1111.86	1658.76	205.588	1065.1	1519.89	181.962	985.445	1256.13	209.043	1216.86	1437	230.085	1278.6	1235.49	272.825	978.599	1313.25	23.6679	1163.29	1481.25	-57.9284	1157.13	1284.63	-68.9477	1178.4	1125.8	-67.003	1334.27	1042.7	-11.6365	1415.02	1011.39	-50.7048	1385.49	958.556	-61.574	1457.22	964.669
7202	0	189.559	1319.55	1654.5	273.707	1296.64	1651.55	151.581	1127.27	1660.9	263.361	1121.7	1657.17	208.014	1075.81	1517.84	183.395	996.782	1254.27	211.471	1227.74	1435.49	231.997	1289.86	1233.92	274.39	989.875	1310.94	26.2099	1174.4	1479.98	-56.0186	1168.17	1283.79	-67.0532	1188.37	1124.77	-65.3445	1343.72	1040.63	-10.0531	1424.3	1008.86	-49.209	1394.44	956.262	-60.2631	1466.07	962.125
7203	0	192.486	1329.51	1654.44	276.678	1306.65	1650.93	154.755	1137.07	1659.72	266.688	1131.79	1655.54	210.464	1086.51	1516.4	184.978	1008.17	1252.78	213.899	1238.73	1434.22	234.186	1301.52	1233.05	276.156	1001.17	1309.1	28.5688	1185.48	1479.31	-54.2855	1179.77	1283.47	-64.985	1198.48	1123.86	-63.7531	1353.08	1038.62	-8.53635	1433.41	1005.92	-47.8541	1403.16	953.677	-58.7531	1474.88	959.012
7204	0	195.539	1339.28	1654.79	279.776	1316.66	1650.43	158.282	1146.83	1658.66	269.601	1141.88	1653.34	213.121	1097.36	1514.99	186.919	1019.95	1251.26	216.285	1249.75	1433.36	236.225	1313.37	1232.23	278.038	1012.65	1307.42	31.0706	1196.57	1478.91	-52.4917	1191.68	1283.45	-62.8903	1208.81	1123.48	-62.1493	1362.36	1036.59	-6.949	1442.4	1002.73	-46.5448	1411.48	951.021	-57.4354	1483.28	955.718
7205	0	198.877	1349.1	1655.3	283.102	1326.66	1650.15	161.833	1156.56	1658.12	273.119	1151.81	1651.7	215.769	1108.31	1513.86	188.868	1031.69	1250.03	218.762	1260.89	1432.84	238.198	1325.19	1231.75	280.087	1024.16	1305.79	33.6857	1207.54	1478.26	-50.627	1203.55	1283.5	-60.8079	1219.17	1123.33	-60.3679	1371.62	1034.03	-5.41664	1451.13	999.109	-45.0581	1419.48	947.586	-56.1092	1491.26	951.548
7206	0	202.184	1358.98	1656.12	286.398	1336.69	1650.34	165.403	1166.35	1657.79	277.154	1161.7	1650.98	218.431	1119.25	1513.52	190.954	1043.42	1249.29	221.274	1272.15	1432.44	240.287	1337.54	1231.73	282.157	1035.8	1304.6	36.3111	1218.58	1478.24	-48.6627	1215.83	1283.79	-58.6652	1229.74	1123.38	-58.8669	1380.75	1031.75	-4.0897	1459.63	995.027	-44.2075	1427.14	944.536	-54.8997	1498.99	946.839
7207	0	205.404	1368.85	1657.38	289.08	1346.79	1650.74	169.171	1176.03	1657.87	280.752	1171.72	1650.19	221.317	1130.27	1513.25	193.25	1055.16	1248.79	223.691	1283.4	1432.49	241.891	1349.46	1231.98	284.494	1047.53	1304.07	38.7611	1229.49	1478.48	-46.8328	1227.94	1284.65	-56.4531	1240.49	1123.83	-57.5082	1389.75	1029.54	-2.75902	1468.01	990.674	-43.4845	1434.43	941.371	-53.7965	1506.47	942.186
7208	0	208.739	1378.69	1659.03	292.792	1356.91	1651.52	172.922	1185.74	1658.31	283.885	1181.99	1649.29	224.179	1141.41	1513.16	195.576	1066.86	1248.91	226.007	1294.62	1432.76	243.637	1361.72	1232.46	286.989	1059.14	1303.91	41.4064	1240.29	1479.05	-44.6219	1239.99	1285.41	-54.2484	1251.34	1124.59	-55.978	1398.89	1027.42	-1.53518	1475.89	986.069	-42.9375	1441.41	937.929	-52.7168	1513.54	937.087
7209	0	212.136	1388.53	1660.89	296.188	1367.01	1652.94	176.626	1195.53	1658.83	287.621	1192.02	1649.4	227.077	1152.66	1513.42	197.628	1078.47	1249.26	228.352	1305.86	1433.44	245.295	1373.61	1233.39	289.531	1070.79	1304.07	44.0039	1251.01	1480	-42.5335	1251.73	1286.89	-51.9995	1262.4	1125.82	-54.2395	1407.69	1024.75	-0.518528	1483.55	981.488	-42.4766	1448.04	934.661	-51.8098	1520.14	931.615
7210	0	215.487	1398.44	1662.93	298.847	1376.94	1654.31	180.182	1205.33	1659.68	291.27	1202.2	1649.66	230.036	1163.7	1514.48	199.886	1090.02	1250.24	230.778	1317.07	1434.79	246.642	1385.18	1234.51	292.075	1082.38	1304.55	46.5067	1261.62	1481.35	-40.1857	1263.38	1288.4	-49.7168	1273.72	1127.39	-53.1496	1416.16	1022.93	0.551516	1490.87	976.832	-42.1985	1454.2	931.394	-51.0554	1526.21	926.392
7211	0	218.684	1408.29	1665.27	302.138	1387.01	1656.13	183.827	1215.09	1661.02	295.087	1212.06	1650.49	233.034	1174.75	1515.76	202.154	1101.34	1251.21	233.03	1328.24	1436.22	248.231	1396.79	1236.1	294.707	1093.98	1305.41	49.0383	1272.03	1482.93	-37.9855	1274.57	1290.36	-47.3868	1285.07	1129.39	-51.7909	1424.69	1021.2	1.53203	1497.77	971.946	-42.2027	1459.86	928.358	-50.4122	1531.71	920.911
7212	0	221.695	1418.09	1667.69	305.516	1397.09	1657.83	187.191	1224.9	1662.25	298.481	1222.03	1651.35	236.139	1185.78	1516.87	204.701	1112.61	1252.58	235.161	1339.25	1437.44	249.834	1408.21	1237.64	297.527	1105.66	1306.5	51.6234	1282.32	1484.75	-35.4862	1285.59	1292.26	-45.0536	1296.38	1131.64	-50.563	1432.71	1019.52	2.39427	1504.16	967.005	-42.2902	1465.07	925.44	-49.7175	1536.92	915.309
7213	0	224.689	1427.87	1669.97	308.382	1407.03	1659.74	190.408	1234.64	1663.88	301.245	1232.34	1652.1	239.129	1196.61	1518.2	207.208	1123.64	1254.03	237.412	1350.28	1439.25	251.229	1419.4	1239.28	300.375	1117.26	1307.47	54.1902	1292.29	1486.55	-32.8084	1296.41	1294.15	-42.6383	1307.71	1134.18	-49.2911	1440.72	1018.25	3.19185	1510.11	962.246	-42.7708	1470.09	923.128	-49.1507	1541.56	909.719
7214	0	227.512	1437.68	1672.12	311.187	1416.97	1661.6	193.491	1244.39	1665.51	304.484	1242.15	1653.43	242.031	1207.31	1519.42	209.989	1134.53	1255.76	239.309	1361.2	1440.81	252.404	1430.31	1241.01	303.487	1128.88	1308.95	56.6112	1302.1	1488.67	-30.4509	1307.07	1296.37	-40.1808	1318.89	1136.9	-48.066	1448.49	1017.31	3.9875	1515.47	957.369	-43.473	1474.75	921.164	-48.6841	1546.05	904.977
7215	0	230.201	1447.43	1674.55	313.758	1426.89	1663.51	196.422	1254.02	1667.29	306.828	1252.24	1654.52	244.99	1217.86	1521.21	212.78	1145.27	1257.53	241.203	1371.94	1442.86	253.572	1441.08	1243.1	306.86	1140.37	1310.55	58.9674	1311.76	1490.94	-28.169	1317.46	1298.91	-37.7549	1329.71	1139.57	-47.103	1456.01	1017.1	4.57475	1520.41	953.29	-44.5449	1479.42	919.938	-48.311	1550.24	899.939
7216	0	232.675	1457.04	1676.97	316.25	1436.66	1665.85	199.145	1263.6	1669.14	309.977	1261.85	1656.36	247.627	1228.19	1522.87	215.529	1155.7	1258.98	242.898	1382.47	1444.66	254.427	1451.75	1245.52	310.21	1151.63	1311.96	61.219	1321.16	1493.16	-25.8769	1327.65	1300.95	-35.1572	1340.1	1142.36	-46.0538	1463.13	1016.88	5.04298	1525.06	949.73	-45.761	1483.82	918.761	-47.8146	1553.99	895.482
7217	0	234.647	1466.51	1679.4	318.429	1446.31	1668.16	201.608	1273.18	1670.68	312.445	1271.58	1658.01	250.387	1238.57	1524.69	218.312	1165.92	1260.87	244.586	1392.97	1446.73	255.441	1462.32	1247.77	313.72	1162.81	1313.53	63.2565	1330.45	1495.42	-23.46	1337.66	1303.15	-32.7527	1350.05	1145.1	-45.2179	1470.25	1017.18	5.33145	1529.31	946.483	-47.3106	1488.54	918.496	-47.2151	1557.8	891.152
7218	0	236.378	1475.92	1681.84	319.786	1455.77	1670.3	203.809	1282.49	1672.59	314.199	1281.44	1659.29	252.822	1248.79	1526.33	221.195	1176.15	1262.95	245.906	1403.25	1448.55	256.249	1472.74	1249.69	317.086	1173.75	1315.75	64.9114	1339.64	1497.67	-21.4293	1347.52	1305.3	-30.4366	1359.69	1147.78	-44.416	1477.13	1017.73	5.81207	1533.48	943.905	-49.2637	1493.33	918.785	-46.9863	1561.33	887.806
7219	0	238.118	1485.26	1684.24	321.46	1465.35	1672.67	205.777	1291.73	1674.12	316.428	1291.02	1661.16	255.25	1258.96	1528.34	224	1186	1264.97	247.322	1413.38	1450.45	257.109	1482.85	1251.7	320.459	1184.55	1317.68	66.7851	1348.74	1499.82	-19.4744	1357.16	1307.32	-27.862	1368.74	1149.82	-43.7085	1483.79	1018.5	5.96375	1537.69	941.647	-51.0747	1498.03	919.206	-46.4229	1564.79	884.687
7220	0	239.369	1494.55	1686.41	322.95	1474.88	1675.17	207.506	1300.95	1675.82	318.458	1300.38	1663.17	257.338	1269.04	1530.12	226.896	1196.02	1266.5	248.553	1423.56	1452.22	258.063	1493.01	1253.08	323.517	1195.12	1319.25	68.607	1357.81	1501.66	-17.4021	1366.38	1308.84	-25.5965	1377.21	1152.04	-43.1611	1490.3	1019.27	6.58129	1541.53	940.006	-52.6846	1503.09	920.216	-45.8324	1568.17	881.965
7221	0	240.189	1503.62	1688.59	323.646	1484.24	1677.39	208.995	1310.04	1677.16	319.905	1309.89	1664.87	259.295	1278.93	1532.14	229.647	1205.7	1268.44	249.583	1433.69	1453.97	258.939	1503.05	1254.61	326.286	1205.46	1321.36	70.1404	1366.95	1503.79	-15.8625	1375.25	1310.84	-23.6854	1385.33	1154.09	-42.5543	1496.57	1020.08	6.60435	1545.04	938.511	-54.1304	1508.13	921.342	-45.278	1571.49	879.893
7222	0	240.9	1512.77	1690.9	324.462	1493.62	1680.01	210.318	1319.05	1678.74	321.275	1319.25	1666.97	261.279	1288.85	1533.93	232.291	1215.38	1270.43	250.523	1443.48	1455.76	259.565	1512.59	1256.55	329.016	1215.78	1323.6	71.6106	1375.96	1505.64	-14.4403	1383.77	1312.43	-21.9169	1393.14	1156.16	-42.072	1502.52	1020.83	6.83914	1548.56	937.517	-55.901	1513.16	922.937	-45.0113	1574.6	878.158
7223	0	241.062	1521.76	1692.87	325.301	1503.14	1682.58	211.45	1328.09	1680.1	322.231	1328.79	1668.69	263.037	1298.55	1535.91	234.527	1224.75	1272.51	251.56	1453.2	1457.21	259.78	1521.75	1257.9	331.748	1226	1325.01	73.0548	1384.84	1507.22	-13.0007	1391.72	1314.09	-20.5067	1400.6	1157.87	-41.7251	1508.31	1021.52	7.04485	1552.57	936.844	-56.5103	1517.93	923.946	-44.748	1577.68	876.782
7224	0	241.295	1530.93	1694.94	325.002	1512.4	1684.9	212.279	1337.03	1681.46	323.358	1337.93	1671.05	264.841	1308.35	1537.81	236.793	1234.22	1274.29	252.563	1462.66	1458.87	260.769	1531.46	1259.32	333.932	1236.02	1327.34	74.446	1393.77	1508.9	-11.7335	1399.34	1315.36	-19.3778	1407.68	1159.78	-41.2973	1514.11	1022.33	7.40386	1556.65	936.417	-57.0557	1522.64	925.167	-44.6266	1580.93	875.886
7225	0	241.152	1539.85	1697.02	325.252	1521.94	1687.53	213.077	1345.93	1683.01	324.161	1347.26	1673.22	266.387	1317.99	1539.8	238.858	1243.55	1276.65	253.619	1472.25	1460.58	261.241	1540.38	1260.79	336.224	1245.9	1329.63	75.6131	1402.7	1510.66	-10.6938	1406.74	1317.25	-18.391	1414.46	1161.49	-41.1072	1519.48	1023.46	7.55734	1560.59	936.501	-57.0622	1527.12	926.291	-44.18	1584.27	875.821
7226	0	240.813	1548.86	1699.28	325.08	1531.11	1690.25	213.658	1354.89	1684.37	324.546	1356.88	1675.23	267.79	1327.46	1541.53	240.842	1252.85	1278.79	254.619	1481.75	1462.41	262.044	1549.43	1262.55	338.195	1255.64	1331.65	76.7505	1411.48	1512.68	-9.78918	1413.7	1319.04	-17.6625	1420.73	1163.4	-40.7414	1524.7	1024.44	7.58655	1564.73	936.942	-58.0463	1531.56	927.901	-44.1502	1587.71	876.023
7227	0	240.303	1557.88	1701.2	324.708	1540.63	1692.89	214.087	1363.86	1685.83	324.853	1366.6	1677.16	269.294	1336.94	1543.78	242.798	1262.11	1280.52	255.406	1491.32	1464.36	262.72	1558.29	1264.15	340.047	1265.29	1333.57	77.9152	1420.24	1514.3	-8.89476	1420.44	1320.66	-16.9122	1426.77	1164.96	-40.6519	1529.64	1025.59	7.62933	1569	937.622	-58.1442	1535.83	929.04	-43.969	1591.33	876.232
7228	0	239.766	1566.96	1703.29	324.362	1550	1695.68	214.455	1372.74	1687.43	325.383	1375.89	1679.78	270.559	1346.45	1545.52	244.637	1271.25	1282.7	256.242	1500.67	1466	263.449	1567.44	1265.61	341.707	1274.78	1335.76	78.9043	1429.04	1516.16	-7.80343	1427.16	1322.52	-16.2605	1432.56	1166.74	-40.6537	1534.31	1026.69	7.51835	1573.38	938.373	-58.2702	1539.81	930.105	-44.2419	1595	876.864
7229	0	238.975	1575.99	1705.18	323.819	1559.52	1698.07	214.728	1381.79	1688.72	325.663	1385.35	1682.15	271.726	1355.75	1547.62	246.242	1280.3	1285.06	257.165	1509.8	1468.09	264.105	1576.37	1267.44	343.653	1284.09	1337.63	79.8386	1437.72	1517.88	-7.25956	1433.49	1324.15	-15.8372	1437.93	1168.64	-40.6352	1538.87	1027.96	7.24093	1577.86	939.503	-57.7632	1543.63	930.91	-44.6902	1598.84	877.817
7230	0	238.135	1585.12	1707.09	323.033	1569.02	1700.46	215.016	1390.79	1690.26	326.137	1394.67	1684.73	273.139	1365.1	1549.75	247.918	1289.34	1286.94	258.166	1518.88	1469.83	264.965	1585.66	1269.25	345.375	1293.53	1339.64	80.866	1446.35	1519.67	-6.49855	1439.72	1326.14	-15.1707	1443.19	1170.44	-40.7907	1543.13	1029.1	6.6805	1582.32	940.892	-58.2964	1547.39	932.412	-45.282	1602.66	879.101
7231	0	237.235	1594.23	1708.66	322.4	1578.4	1703.17	214.94	1399.61	1691.84	325.827	1404.41	1686.7	274.084	1374.22	1551.79	249.757	1298.45	1288.99	258.78	1527.72	1471.85	265.506	1594.75	1271.06	346.952	1302.79	1341.69	81.7347	1454.81	1521.35	-5.68747	1445.82	1327.78	-14.7858	1448.2	1172.45	-40.9666	1547.2	1030.46	6.05791	1586.88	942.521	-57.4543	1550.76	933.33	-46.2632	1606.57	880.94
7232	0	236.206	1603.23	1710.32	321.469	1588.05	1705.21	215.164	1408.67	1693.37	326.03	1413.76	1689.47	275.238	1383.35	1553.94	251.302	1307.42	1291.27	259.571	1536.85	1473.64	266.28	1604.02	1273.06	348.351	1312.02	1343.88	82.6558	1463.32	1523.35	-4.97577	1452.09	1330	-14.1771	1453.1	1174.16	-41.1944	1551.24	1032.04	5.47867	1591.7	944.1	-57.8403	1554.31	934.754	-46.8978	1610.61	882.79
7233	0	235.241	1612.38	1711.78	320.361	1597.34	1707.41	215.297	1417.56	1695.1	326.009	1423.48	1691.38	276.209	1392.37	1555.66	252.901	1316.35	1293.1	260.169	1545.79	1475.37	266.835	1613.29	1274.79	349.902	1321.3	1345.71	83.4211	1471.68	1524.95	-4.20974	1458.26	1331.82	-13.6287	1457.81	1176.11	-41.5987	1555	1033.51	4.83671	1596.74	945.824	-57.2034	1557.65	935.752	-47.7453	1614.69	884.285
7234	0	234.249	1621.59	1712.89	319.622	1607.14	1709.06	215.151	1426.47	1696.48	326.557	1432.77	1694.32	277.233	1401.38	1557.42	254.525	1325.25	1294.52	260.83	1554.75	1477.21	267.159	1622.13	1276.31	351.304	1330.48	1347.44	84.212	1480.05	1526.53	-3.34007	1464.16	1333.43	-12.9946	1462.35	1177.81	-41.9162	1558.81	1034.74	4.00425	1601.81	947.865	-56.4518	1560.9	936.629	-48.6309	1618.81	886.233
7235	0	233.133	1630.68	1713.82	318.627	1616.41	1710.95	215.237	1435.45	1698.3	326.563	1442.31	1696.57	278.012	1410.35	1558.98	255.787	1334.1	1296.36	261.209	1563.47	1478.69	268.004	1631.33	1278.3	352.648	1339.58	1349.29	84.8632	1488.35	1527.87	-2.69634	1470.13	1334.96	-12.2246	1467	1179.71	-42.0934	1562.74	1036.17	2.87063	1606.94	949.855	-55.7289	1564.27	937.759	-49.6487	1623	888.285
7236	0	232.361	1639.89	1714.87	317.71	1626.16	1712.39	215.215	1444.45	1699.96	326.513	1451.94	1698.58	278.778	1419.27	1560.46	257.043	1342.94	1298.31	261.662	1572.3	1480.55	268.257	1640.09	1279.66	353.821	1348.69	1351.01	85.3515	1496.65	1529.51	-2.06256	1476.32	1336.99	-11.5564	1471.7	1181.23	-42.4402	1566.59	1037.73	2.06772	1612.5	951.57	-55.067	1567.72	938.656	-50.7862	1627.3	890.167
7237	0	231.329	1648.98	1715.83	316.851	1635.57	1713.65	215.136	1453.51	1701.18	326.441	1461.3	1700.72	279.489	1428.09	1562.04	258.389	1351.86	1299.57	262.182	1581.21	1482.14	268.716	1648.88	1281.32	354.916	1357.68	1352.47	85.8933	1504.86	1530.93	-1.38002	1482.45	1338.5	-10.8662	1476.18	1182.75	-42.5249	1570.49	1038.93	1.102	1618	953.616	-54.2057	1571.3	939.661	-51.8638	1631.61	892.072
7238	0	230.516	1658.23	1716.66	316.036	1645.19	1714.82	215.212	1462.51	1702.63	326.479	1470.96	1702.37	280.048	1436.91	1563.34	259.699	1360.63	1300.41	262.375	1589.81	1483.43	269.221	1657.75	1282.86	356.123	1366.67	1354.01	86.327	1512.97	1531.86	-0.546085	1488.27	1339.67	-9.88021	1480.93	1183.95	-42.6519	1574.44	1040.01	0.058995	1623.51	955.484	-53.238	1575.08	940.481	-52.9808	1635.92	893.991
7239	0	229.776	1667.42	1717.33	315.305	1654.57	1715.93	215.143	1471.59	1703.96	326.069	1480.35	1703.83	280.442	1445.71	1564.41	260.894	1368.96	1301.58	262.68	1598.68	1484.75	269.428	1666.39	1284.06	357.081	1375.57	1355.38	86.6952	1521.16	1532.79	0.018935	1494.27	1340.96	-9.02017	1485.72	1185.04	-42.746	1578.76	1041.03	-1.00574	1629.29	957.113	-52.2764	1579.05	941.151	-54.162	1640.44	895.681
7240	0	229.157	1676.67	1717.75	314.603	1664.15	1716.72	215.103	1480.76	1704.94	325.936	1489.89	1705.08	280.872	1454.52	1565.73	261.791	1377.74	1302.92	262.806	1607.51	1485.72	269.649	1675.23	1285	357.927	1384.34	1356.52	86.8934	1529.32	1533.67	0.471396	1500.39	1342.21	-8.32855	1490.75	1186.34	-42.73	1582.94	1042.2	-1.96121	1634.82	958.264	-51.303	1583.35	941.827	-55.1175	1645.11	896.953
7241	0	228.472	1685.96	1718.1	314.002	1673.69	1717.07	214.853	1489.87	1705.61	325.847	1499.41	1706.13	281.199	1463.29	1566.46	262.73	1386.49	1303.51	262.681	1616.12	1486.59	269.718	1683.82	1285.7	358.651	1393.21	1357.42	87.158	1537.58	1534.24	1.23808	1506.64	1342.72	-7.42287	1495.71	1187.16	-42.5543	1587.55	1042.71	-2.76383	1640.91	959.435	-50.2628	1587.68	942.145	-55.9388	1649.95	898.103
7242	0	227.805	1695.36	1718.18	313.985	1683.06	1717.17	214.662	1499.06	1706.47	325.781	1508.99	1706.99	281.441	1472.24	1567.1	263.542	1395.32	1304.3	262.817	1625.09	1487.07	269.767	1692.57	1286.23	359.39	1402.17	1358.35	87.2415	1545.75	1534.58	2.00796	1512.79	1343.25	-6.45613	1501.05	1187.69	-42.4459	1592.16	1043.09	-3.40477	1646.78	960.275	-49.3116	1592.43	942.499	-56.7033	1654.86	898.836
7243	0	227.387	1704.65	1718.25	313.578	1692.87	1717.27	214.385	1508.35	1707.39	325.598	1518.45	1707.71	281.591	1481.09	1567.83	264.212	1404.13	1305.14	262.456	1633.69	1487.44	269.793	1701.45	1286.65	360.075	1411.19	1359.05	87.1736	1554.01	1534.97	2.28935	1519.16	1344	-5.61047	1506.58	1188.2	-42.2194	1597.28	1043.46	-4.1176	1652.92	961.219	-48.5227	1597.37	942.788	-57.5857	1659.29	899.878
7244	0	226.909	1714.06	1718.04	312.854	1702.16	1717.14	214.477	1517.63	1707.76	325.502	1528.03	1708.04	281.578	1490.03	1567.81	264.957	1412.92	1305.43	262.254	1642.37	1487.84	269.578	1710.22	1286.91	360.642	1420.11	1359.59	87.1017	1562.27	1535.04	2.71944	1525.61	1344.23	-4.7083	1512.26	1188.24	-42.0964	1602.43	1043.48	-4.46145	1659.18	961.586	-47.6533	1602.51	942.593	-58.0478	1664.53	900.199
7245	0	226.027	1723.23	1718.03	312.498	1711.9	1716.82	214.367	1526.99	1707.76	325.306	1537.61	1708.35	281.755	1499.11	1567.84	265.556	1421.79	1305.2	261.987	1651.29	1487.78	269.515	1719.12	1286.88	361.071	1429.11	1359.58	86.8023	1570.41	1534.67	3.45945	1532.13	1344	-3.67318	1518.29	1187.98	-41.6833	1607.92	1043.02	-4.99769	1665.32	961.626	-46.9373	1607.9	942.344	-58.6411	1669.82	900.289
7246	0	225.77	1732.87	1717.45	312.147	1721.69	1716.6	214.124	1536.43	1707.77	325.065	1547.28	1708.26	281.497	1508.15	1568.01	265.991	1430.65	1305.29	261.743	1660.19	1487.44	269.258	1727.82	1286.68	361.276	1438.21	1359.62	86.6149	1578.87	1534.19	3.70425	1539.06	1343.96	-2.99008	1524.61	1187.61	-41.7047	1613.56	1042.74	-5.60982	1671.6	961.191	-46.5121	1613.71	941.85	-59.0551	1675.33	899.755
7247	0	224.923	1742.14	1716.71	311.223	1731.01	1715.79	213.756	1545.88	1707.75	324.809	1556.99	1708.2	281.31	1517.2	1567.47	266.487	1439.55	1305.36	261.638	1669.37	1487.14	269.015	1736.94	1286.45	361.66	1447.4	1359.55	86.1857	1587.38	1533.77	4.00642	1546.14	1343.58	-2.44742	1531.12	1187.26	-41.7194	1619.67	1042.26	-5.78306	1678.07	960.89	-45.3217	1619.17	940.78	-59.5644	1681.04	899.524
7248	0	224.403	1751.74	1715.87	310.758	1740.84	1714.8	213.68	1555.41	1707.4	324.61	1566.7	1707.64	281.138	1526.21	1567.35	266.756	1448.44	1304.74	261.426	1678.42	1486.64	268.805	1746.06	1285.89	361.948	1456.46	1359.08	85.952	1595.84	1532.95	4.50759	1553.44	1342.76	-0.924186	1537.44	1186.19	-41.4669	1625.93	1041.4	-5.98553	1684.73	959.926	-44.8674	1625.2	940.077	-59.7346	1686.97	898.513
7249	0	223.741	1761.31	1714.41	310.273	1750.83	1713.63	213.488	1564.94	1706.82	324.289	1576.41	1707.03	280.381	1535.42	1566.38	266.821	1457.46	1303.81	260.564	1687.29	1485.69	268.619	1754.8	1285.04	362.023	1465.58	1358.67	85.6434	1604.49	1531.86	5.01324	1560.92	1341.68	-0.389316	1544.6	1185.1	-41.3591	1632.32	1039.9	-6.15093	1691.19	958.725	-44.5333	1631.32	938.514	-59.9836	1692.87	897.27
7250	0	222.965	1770.91	1713.35	309.338	1760.34	1712.34	212.928	1574.47	1706.12	323.845	1586.3	1706.31	279.962	1544.67	1565.35	266.817	1466.43	1303.31	260.147	1696.41	1484.76	268.443	1763.81	1283.79	361.704	1474.6	1358.16	85.2044	1613.26	1530.48	5.60082	1568.7	1340.13	0.139857	1551.77	1184.08	-40.8942	1638.66	1038.28	-6.51382	1697.96	957.197	-44.2549	1637.8	937.3	-60.2929	1699.08	895.693
7251	0	222.172	1780.62	1711.69	308.519	1770.2	1710.6	212.607	1584.13	1705.29	323.415	1596.18	1705.3	279.763	1554.05	1564.36	266.884	1475.51	1302.28	260.068	1705.98	1483.47	268.05	1772.44	1282.67	361.813	1483.9	1357.08	84.7522	1622.28	1529.25	5.70931	1576.59	1339.17	0.678569	1559.33	1182.66	-40.8731	1645.7	1036.87	-6.66687	1704.72	955.28	-44.0886	1644.28	935.642	-60.4809	1705.59	894.139
7252	0	221.438	1790.32	1709.97	307.938	1780.29	1709.1	212.184	1593.69	1703.94	322.995	1606.03	1704.03	279.263	1563.35	1563.04	266.709	1484.68	1300.82	259.318	1715.19	1482.38	267.569	1781.96	1281.48	361.521	1493.16	1355.89	84.2604	1631.31	1527.74	6.1168	1584.88	1337.31	1.04601	1567.09	1181.36	-40.8174	1652.74	1034.99	-6.92088	1711.66	953.455	-44.0537	1651.02	933.923	-60.6566	1712	892.085
7253	0	220.253	1799.81	1708.36	307.063	1790.1	1707.45	211.626	1603.39	1702.7	322.366	1615.89	1702.81	278.564	1572.87	1561.6	266.393	1493.96	1299.65	259.039	1724.71	1480.94	267.413	1790.87	1279.81	361.218	1502.53	1354.72	83.6577	1640.43	1526.08	5.86645	1593.32	1335.59	1.30587	1575.21	1179.7	-40.8655	1659.96	1032.95	-7.1805	1718.83	951.533	-44.2519	1657.94	932.048	-61.1634	1718.73	889.988
7254	0	219.377	1809.63	1706.31	305.822	1799.68	1705.43	211.04	1613.13	1701.19	321.716	1625.71	1701.58	278.151	1582.64	1559.81	265.899	1503.15	1298.51	258.456	1734.17	1479.15	267.102	1799.57	1277.76	360.91	1511.89	1353.4	83.0894	1649.94	1524.51	5.76973	1602.18	1334	1.59018	1583.55	1177.96	-41.1198	1667.63	1031.37	-7.45925	1725.96	948.878	-44.2915	1664.93	929.875	-61.1727	1725.19	887.544
7255	0	218.335	1819.43	1704.27	304.975	1809.73	1703.3	210.327	1622.74	1699.51	320.987	1635.69	1699.7	277.386	1592	1558.23	265.404	1512.53	1296.6	257.52	1743.71	1477.3	266.765	1809.09	1275.95	360.505	1521.36	1351.85	82.3804	1659.32	1522.46	5.64873	1611.05	1331.95	1.75526	1592.15	1175.87	-41.2925	1675.2	1028.84	-7.74134	1733.28	946.159	-44.487	1672.02	927.596	-61.4046	1732.12	884.752
7256	0	217.341	1829.16	1701.85	304.057	1819.88	1701.4	209.621	1632.55	1697.64	320.35	1645.74	1697.76	276.7	1601.86	1556.28	264.865	1522.11	1294.47	257.05	1753.53	1475.24	266.091	1818.53	1273.89	359.78	1530.91	1350.01	81.845	1668.96	1520.17	5.55833	1620.35	1329.62	1.67353	1601.04	1174.03	-41.4149	1683	1026.17	-8.00947	1740.73	943.305	-44.8704	1679.4	925.136	-61.7069	1739.03	881.665
7257	0	216.072	1838.94	1699.87	302.787	1829.71	1699.49	208.834	1642.46	1695.49	319.407	1655.74	1695.94	276.184	1611.87	1554.63	264.027	1531.71	1292.81	256.336	1763.54	1473.3	265.627	1828.33	1271.58	359.106	1540.5	1348.21	80.9535	1678.85	1518.03	4.49341	1629.82	1327.69	1.5778	1610.33	1172.04	-41.8497	1691.29	1023.57	-8.49496	1748.41	940.455	-45.3087	1686.83	922.529	-61.9881	1746.31	878.617
7258	0	214.961	1848.83	1697.82	301.424	1839.54	1697.35	207.728	1652.18	1693.62	318.53	1665.76	1693.82	275.06	1621.55	1552.5	263.203	1541.41	1291.04	255.471	1773.32	1471.22	265.056	1838.22	1269.33	358.194	1550.17	1346.42	79.9312	1688.66	1516	4.0511	1639.59	1325.47	1.29131	1619.61	1169.87	-42.3593	1699.58	1020.92	-9.02876	1756.38	937.633	-45.9382	1694.49	919.981	-62.3641	1753.8	875.613
7259	0	213.785	1858.69	1695.75	300.276	1849.6	1695.19	206.858	1662.09	1691.54	317.351	1675.62	1691.83	274.123	1631.65	1550.38	262.381	1551.32	1288.86	254.329	1783.04	1469.03	264.324	1848.02	1267.17	357.27	1559.94	1344.24	79.0246	1698.71	1513.68	3.26307	1649.65	1323.17	1.03187	1629.34	1167.51	-42.8868	1708.06	1018.37	-9.61626	1764.14	934.144	-46.4764	1702.3	917.334	-62.4853	1761.06	872.031
7260	0	212.296	1868.7	1693.62	298.954	1859.91	1693.19	206.4	1671.99	1689.19	316.167	1685.69	1690.02	273.103	1641.7	1548.51	261.446	1561.28	1286.67	253.558	1793.4	1466.86	263.509	1857.79	1264.94	356.15	1569.88	1342.46	77.9934	1708.76	1511.41	2.69895	1659.97	1320.56	0.582509	1639.35	1165.25	-43.4505	1717.01	1015.68	-10.0568	1772.26	930.931	-47.334	1710.45	914.556	-63.0562	1768.76	868.708
7261	0	210.661	1878.57	1691.65	297.557	1869.75	1691.11	205.039	1681.81	1687.24	315.304	1695.65	1687.74	271.942	1651.93	1546.59	260.511	1571.26	1284.68	252.489	1803.62	1464.85	262.727	1867.99	1262.82	355.257	1579.93	1340.47	76.8655	1719.04	1509.07	1.56479	1670.4	1318.22	-0.016328	1649.52	1162.81	-44.2726	1725.98	1013.06	-10.8086	1780.68	927.639	-48.1897	1718.86	911.823	-63.7084	1776.56	865.257
7262	0	209.054	1888.46	1689.66	295.862	1879.68	1689.37	203.734	1691.83	1684.94	314.066	1705.97	1685.49	270.6	1662.31	1544.07	259.686	1581.43	1282.6	251.299	1813.7	1462.63	261.982	1878.16	1260.57	354.216	1590.02	1338.67	75.588	1729.36	1506.91	0.690859	1680.94	1315.41	-0.599635	1659.93	1160.34	-45.0001	1735.33	1010.17	-11.547	1789.23	924.22	-49.0657	1727.38	908.959	-64.453	1784.48	861.835
7263	0	207.435	1898.63	1687.67	294.251	1889.82	1687.53	202.25	1701.88	1682.79	312.484	1716.07	1683.74	269.428	1672.66	1542.31	258.862	1591.65	1280.6	249.852	1824.04	1460.57	261.03	1888.45	1258.43	352.668	1600.12	1336.68	74.3019	1739.77	1504.42	-0.586176	1691.79	1313	-1.43892	1670.58	1157.95	-45.8317	1744.83	1007.36	-12.506	1798.09	921.247	-50.0664	1736.2	906.269	-65.0297	1792.9	858.322
7264	0	205.715	1908.63	1685.7	292.411	1900.22	1685.73	200.5	1711.84	1680.77	310.698	1725.98	1682.06	267.997	1683.21	1540.5	257.811	1601.99	1278.88	248.66	1834.51	1458.2	260.04	1898.62	1256.03	351.423	1610.59	1335.07	73.327	1750.28	1501.63	-1.53436	1702.6	1310.4	-2.36657	1681.3	1155.68	-46.8361	1754.56	1004.6	-13.4176	1807.36	917.757	-51.4627	1745.3	903.64	-65.8153	1801.56	854.743
7265	0	203.691	1918.73	1683.84	290.452	1910.33	1683.88	198.824	1721.82	1678.87	308.998	1736.37	1679.75	266.337	1693.75	1538.81	256.787	1612.45	1277.38	247.309	1845.17	1456.04	258.849	1909.02	1253.87	350.543	1621.17	1333.27	71.9587	1760.92	1499.41	-2.69056	1713.62	1308.05	-3.21761	1692.3	1153.45	-47.9061	1764.66	1001.75	-14.4066	1816.61	914.572	-52.7536	1754.48	900.977	-66.6566	1810.33	851.444
7266	0	201.722	1928.77	1682.25	288.37	1920.19	1682.45	196.929	1731.86	1676.61	307.184	1746.53	1677.71	264.872	1704.42	1536.74	255.906	1623.05	1275.14	245.922	1855.87	1454.04	257.789	1919.59	1251.55	349.296	1631.73	1331.45	70.4598	1771.62	1497.05	-4.60562	1724.78	1305.97	-4.21666	1703.28	1150.99	-48.8635	1774.91	998.906	-15.4397	1826.36	911.598	-53.9165	1764.09	898.425	-67.4334	1819.44	848.028
7267	0	199.642	1938.9	1680.67	286.471	1930.44	1681.04	195.015	1741.94	1674.46	305.139	1756.43	1675.96	263.217	1715.09	1534.87	254.842	1633.83	1273.18	244.318	1866.55	1452.12	256.636	1930.12	1249.7	348.03	1642.43	1329.83	68.8692	1782.31	1494.72	-5.42973	1735.74	1303.13	-5.41276	1714.48	1148.83	-49.8705	1785.24	996.352	-16.612	1835.69	909.061	-55.4956	1773.91	896.086	-68.3716	1828.69	844.878
7268	0	197.454	1949.09	1679.48	284.329	1940.94	1679.73	192.829	1752.21	1672.73	303.105	1766.83	1673.98	261.355	1725.84	1533.13	253.402	1644.54	1271.59	242.628	1877.21	1450.48	255.483	1940.59	1248.05	346.585	1653.12	1328.29	67.0188	1793.11	1492.76	-6.76407	1746.83	1300.61	-6.58998	1725.75	1146.69	-51.2302	1795.94	994.336	-17.8569	1845.16	906.225	-56.9927	1783.82	893.545	-69.6567	1838.43	842.3
7269	0	195.269	1959.34	1678.48	282.075	1951.01	1678.78	190.874	1762.54	1670.85	300.841	1776.96	1672.47	259.444	1736.75	1531.34	251.991	1655.41	1270.23	240.957	1888.02	1448.83	254.246	1951.3	1246.37	345.167	1663.98	1326.72	65.0924	1804.02	1490.87	-8.81541	1758.06	1298.74	-7.83456	1737.01	1144.23	-52.5259	1806.68	992.017	-18.8825	1855.32	903.528	-58.3533	1794.26	891.216	-70.8214	1848.49	839.596
7270	0	192.869	1969.67	1677.47	279.708	1961.17	1677.91	188.55	1772.98	1668.88	298.527	1787.2	1671.03	257.307	1747.46	1530.03	250.552	1666.44	1268.3	239.168	1898.8	1447.31	253.009	1962.17	1244.93	343.368	1674.78	1325.44	63.2494	1815.03	1488.67	-9.72302	1769.19	1295.87	-9.28833	1748.37	1141.94	-53.7074	1817.57	989.23	-19.9837	1865.81	900.893	-59.6557	1804.86	888.725	-71.8203	1858.8	837.043
7271	0	190.506	1980.08	1676.38	277.277	1971.55	1677.01	186.108	1783.45	1667.51	296.082	1797.71	1669.75	255.146	1758.26	1528.97	249.191	1677.65	1266.95	237.499	1909.74	1445.79	251.606	1973.26	1243.83	341.347	1685.45	1324.34	61.274	1826.13	1486.52	-11.317	1780.48	1293.55	-10.9419	1759.94	1139.84	-55.0583	1828.76	987.012	-20.8663	1876.14	898.024	-61.1499	1815.7	886.58	-72.8282	1869.46	834.241
7272	0	188.175	1990.6	1675.49	274.953	1982.22	1676.42	183.587	1793.87	1666.25	293.546	1808.11	1668.59	253.352	1769.32	1528.08	247.54	1688.73	1265.93	235.572	1920.61	1444.49	250.215	1984.46	1242.82	339.473	1696.32	1323.26	59.1388	1837.27	1484.65	-13.2455	1791.96	1291.69	-12.5087	1771.56	1137.85	-56.2514	1839.99	984.915	-21.8038	1887.22	895.742	-62.4228	1826.72	884.587	-73.7754	1880.32	831.784
7273	0	185.782	2001.3	1674.76	272.657	1992.88	1675.67	181.097	1804.45	1665.02	290.974	1818.58	1667.74	251.905	1780.31	1526.54	246.038	1699.88	1264.5	233.99	1931.56	1443.67	248.765	1995.96	1241.88	337.566	1707.41	1321.67	57.0804	1848.28	1482.96	-14.6205	1803.47	1289.87	-13.8692	1783.4	1135.94	-57.4613	1851.42	982.743	-22.743	1898.48	893.591	-63.609	1837.94	882.561	-74.8451	1891.46	829.619
7274	0	183.266	2012.04	1674.43	270.186	2003.52	1675.55	178.308	1815.14	1664.27	288.379	1829.21	1667.33	249.083	1790.95	1525.78	244.372	1711.18	1263.53	232.032	1942.48	1442.91	247.468	2007.74	1241.62	335.478	1718.16	1321.01	55.0134	1859.33	1481.48	-16.3724	1814.98	1288.23	-15.5623	1795.42	1134.46	-58.5818	1863.04	980.671	-23.6038	1909.65	891.448	-64.965	1849.38	880.746	-75.6967	1902.79	827.702
7275	0	180.863	2022.84	1674.05	267.66	2014.03	1675.77	175.561	1826.1	1663.8	285.491	1839.74	1667.31	246.797	1801.89	1525.43	242.578	1722.25	1263.25	230.372	1953.48	1442.62	246.029	2019.52	1241.46	333.13	1728.85	1320.85	52.8948	1870.32	1480.49	-19.0403	1826.75	1287.21	-17.5332	1807.44	1133.25	-59.8886	1875.13	979.284	-24.603	1921.33	889.932	-65.9617	1861.22	879.091	-76.6109	1914.72	826.305
7276	0	178.268	2033.59	1674.37	265.079	2024.6	1676.18	172.843	1836.92	1663.76	282.636	1850.38	1667.4	244.605	1812.21	1525.86	240.889	1733.22	1263.42	228.286	1964.3	1442.76	244.559	2031.05	1241.93	330.849	1739.55	1320.79	50.722	1881.25	1479.9	-20.9384	1838.71	1286.71	-19.0441	1819.86	1132.2	-61.2807	1887.28	978.582	-25.498	1933.31	889.061	-66.3288	1873.29	877.703	-77.6475	1926.75	825.305
7277	0	175.835	2044.46	1674.75	262.572	2035.19	1676.89	170.053	1847.76	1663.59	279.929	1860.96	1668.08	242.586	1823.45	1525.52	239.346	1744.17	1263.52	226.33	1975.05	1443.42	243.138	2042.47	1242.7	328.637	1750.11	1320.97	48.5669	1892.11	1479.75	-21.4465	1850.14	1284.2	-20.8285	1832.18	1131.45	-62.217	1899.89	977.992	-26.198	1945.24	888.32	-67.3575	1885.64	876.946	-78.3937	1939.14	824.615
7278	0	173.24	2055.31	1675.38	260.084	2045.9	1677.77	167.087	1858.65	1663.84	277.197	1871.66	1668.88	240.366	1834.25	1526.48	237.646	1754.85	1264.05	224.557	1985.81	1444.29	241.585	2053.72	1243.57	326.431	1760.77	1321.6	46.5769	1902.87	1479.71	-24.9786	1862.47	1285.02	-22.8826	1844.73	1131.25	-63.3603	1912.54	977.659	-26.918	1957.6	888.06	-68.6678	1898.44	876.745	-79.1404	1951.78	824.341
7279	0	170.88	2066.21	1675.57	257.621	2056.7	1678.47	164.317	1869.56	1664.44	274.361	1882.32	1669.95	238.253	1844.99	1527.19	235.774	1765.38	1264.99	222.654	1996.5	1445.2	239.861	2064.7	1244.44	324.46	1771.23	1322.58	44.4887	1913.7	1480.15	-25.4392	1874.12	1284.04	-24.7714	1857.52	1131.37	-64.532	1925.51	977.858	-27.3709	1970.64	888.517	-69.6472	1911.5	876.808	-79.6152	1964.89	824.481
7280	0	168.271	2077.04	1675.88	255.122	2067.63	1679.19	161.853	1880.37	1665.07	271.622	1892.89	1670.95	236.285	1855.65	1527.91	233.991	1775.95	1265.95	220.682	2007.06	1446.04	238.084	2075.53	1245.35	322.754	1781.64	1323.34	42.587	1924.45	1480.86	-28.7159	1886.73	1285.37	-26.6183	1870.04	1131.75	-65.4037	1939.03	978.105	-27.8254	1983.22	888.403	-70.6293	1924.79	877.172	-80.0167	1978.58	824.634
7281	0	166.008	2087.87	1676.29	252.768	2078.48	1679.92	159.28	1891.1	1665.71	269.174	1903.71	1672.12	234.492	1866.07	1529	232.223	1786.49	1266.76	219.142	2017.58	1446.94	236.648	2086.07	1246.06	321.125	1791.95	1324.5	40.8981	1935.21	1481.51	-30.2459	1898.45	1285.64	-28.6481	1882.92	1132.35	-66.0137	1952.63	978.672	-27.8805	1996.41	889.157	-71.7027	1938.7	877.955	-80.0852	1992.47	825.26
7282	0	163.906	2098.56	1676.52	250.484	2089.12	1680.83	156.935	1901.81	1666.81	266.524	1914.14	1673.46	232.419	1876.08	1530.2	230.256	1796.94	1267.53	217.527	2027.91	1447.73	235.149	2096.49	1247.07	319.382	1802.21	1325.77	39.3165	1945.97	1482.49	-32.2505	1910.47	1286.23	-30.8677	1895.55	1133.26	-66.8718	1966.46	979.458	-27.9237	2009.8	890.117	-72.8257	1952.86	879.094	-80.1037	2007.06	826.321
7283	0	161.955	2109.04	1677.09	248.602	2099.57	1681.66	154.596	1912.36	1667.81	264.345	1924.56	1674.9	230.386	1886.05	1531.08	228.426	1807.15	1268.71	216.083	2038.06	1448.98	233.85	2106.76	1248.23	317.748	1812.04	1327.01	37.5172	1956.81	1483.9	-34.1611	1922.68	1287.29	-32.8318	1908.25	1134.31	-67.6855	1980.38	980.68	-28.0027	2022.85	891.229	-73.9278	1967.47	880.579	-79.9437	2021.95	827.699
7284	0	160.17	2119.49	1677.64	246.962	2109.87	1682.37	152.611	1922.84	1668.85	262.404	1934.93	1676.27	228.788	1896	1531.89	226.418	1817.15	1269.66	214.675	2048	1450.25	232.633	2116.54	1249.49	315.977	1821.74	1327.98	35.925	1967.52	1485.28	-36.474	1934.57	1288.8	-34.9408	1920.89	1135.23	-68.6224	1994.4	982.365	-27.8952	2037.56	893.633	-74.9149	1982.2	881.924	-79.8497	2036.95	829.39
7285	0	158.7	2129.8	1678.58	245.246	2119.9	1683.45	150.495	1933.04	1669.97	260.333	1944.78	1677.87	226.731	1905.71	1533.2	224.306	1826.92	1270.68	213.327	2057.83	1451.51	231.31	2126.38	1250.93	314.04	1831.27	1329.28	34.3359	1978.22	1486.54	-37.8972	1946.38	1289.85	-37.1928	1933.51	1136.43	-69.48	2008.61	984.044	-27.794	2051.44	895.396	-75.7756	1997.35	883.438	-79.5675	2052.6	831.249
7286	0	157.303	2139.88	1679.31	243.787	2129.72	1684.42	148.781	1943.43	1671.34	258.53	1954.65	1679.38	224.667	1915.41	1534.14	222.174	1836.59	1271.88	212.036	2067.58	1452.74	230.421	2136.1	1252.08	311.925	1840.74	1330.55	32.7195	1988.84	1488.03	-40.1983	1958.55	1291.55	-39.4674	1946.18	1137.72	-70.4388	2023.03	985.889	-27.844	2065.8	897.538	-76.6003	2012.76	884.998	-79.4092	2068.44	833.303
7287	0	156.409	2149.95	1680.56	242.954	2139.64	1685.22	147.131	1953.32	1672.88	256.814	1964.33	1680.57	222.947	1924.95	1535.6	219.942	1846.06	1273.39	210.9	2077.34	1453.98	229.529	2145.9	1253.4	309.822	1849.85	1331.82	31.2162	1999.46	1489.56	-42.5309	1970.44	1293.15	-41.4416	1958.7	1138.84	-71.1746	2037.56	987.47	-27.7557	2080.02	899.5	-77.4218	2028.12	886.556	-79.0622	2084.42	835.433
7288	0	155.656	2159.75	1681.4	242.197	2149.4	1686.4	145.71	1963.15	1674.19	255.447	1973.89	1681.81	221.433	1934.47	1536.69	218.034	1855.52	1274.2	209.945	2086.8	1455.08	229.009	2155.41	1254.46	307.559	1859.08	1332.62	30.018	2009.99	1490.7	-44.1437	1982.5	1294.29	-43.5981	1971.18	1139.65	-71.7924	2051.99	988.948	-27.4996	2095.2	901.858	-77.9532	2043.97	888.311	-78.6418	2100.55	837.53
7289	0	154.979	2169.59	1682.52	241.509	2159.05	1687.53	144.531	1973.07	1675.66	254.193	1983.25	1683.09	219.592	1943.84	1537.89	215.832	1864.88	1275.65	209.032	2096.21	1456.31	228.52	2164.59	1255.67	305.424	1868.16	1333.79	28.8659	2020.57	1492	-45.9798	1994.5	1295.32	-45.5223	1984.05	1140.73	-72.5953	2066.46	990.626	-27.4694	2110.12	903.833	-78.5093	2059.74	889.707	-78.1428	2117.11	839.529
7290	0	154.629	2179.15	1683.84	241.127	2168.51	1688.57	143.404	1982.84	1677.2	253.885	1993.38	1684.71	217.863	1953.14	1539.17	213.883	1874.03	1277.09	208.142	2105.59	1457.54	228.102	2174.01	1256.93	303.182	1877.04	1335.23	27.5884	2030.74	1493.46	-47.7916	2006.38	1296.5	-47.2312	1996.94	1141.14	-73.2104	2081.3	992.341	-27.0295	2124.98	905.798	-79.0416	2075.6	891.617	-77.8	2133.72	842.048
7291	0	154.313	2188.73	1685.4	240.925	2178.12	1689.6	143.345	1992.77	1679.01	253.127	2002.85	1685.88	216.779	1962.34	1540.78	211.879	1883.19	1278.55	207.368	2114.86	1459.01	227.824	2183.06	1258.11	301.033	1886.03	1336.15	26.5236	2041.09	1494.87	-49.4251	2018.56	1297.54	-49.3086	2009.79	1141.62	-73.8207	2096.04	994.143	-27.0707	2139.91	908.252	-79.3615	2091.55	893.243	-77.3934	2150.23	844.675
7292	0	154.252	2198.33	1687.09	240.937	2187.35	1690.96	142.339	2002.31	1680.88	252.49	2012	1687.13	214.999	1971.6	1542.26	209.978	1892.23	1279.93	206.459	2124	1460.44	227.521	2191.83	1259.64	299.043	1894.76	1337.9	25.4906	2051.08	1496.04	-51.0261	2030.31	1298.67	-51.3508	2022.47	1143.76	-74.2954	2110.83	995.976	-26.7775	2155.29	910.924	-79.7256	2107.63	895.094	-77.1062	2166.92	847.37
7293	0	154.344	2207.72	1688.64	240.955	2196.51	1692.37	141.672	2011.77	1682.76	251.52	2020.67	1688.79	213.64	1980.63	1543.98	208.199	1901.35	1281.56	206.092	2133.23	1461.75	227.277	2200.62	1261.38	297.831	1903.53	1339.19	24.2503	2060.95	1497.6	-52.3925	2042.37	1300.06	-53.1582	2035.31	1144.9	-74.7612	2125.74	998.12	-26.3562	2170.83	913.936	-79.9567	2123.73	897.292	-76.8015	2183.73	850.498
7294	0	154.609	2217.13	1690.51	241.335	2205.65	1693.48	141.415	2021.24	1684.91	251.323	2030.01	1690.11	212.04	1989.79	1544.86	206.515	1910.38	1283.25	205.067	2142.11	1463.48	226.953	2209.28	1262.97	296.272	1912.47	1340.48	23.2073	2070.63	1499.3	-53.7363	2053.91	1301.65	-55.0836	2048.08	1146.09	-75.1609	2140.51	1000.56	-26.2414	2185.97	916.721	-80.1501	2139.7	899.46	-76.4067	2200.33	853.638
7295	0	154.972	2226.44	1692.25	241.759	2214.59	1694.75	140.866	2030.72	1686.57	251.457	2039.38	1691.14	211.878	1999.05	1547.09	205.712	1919.78	1284.1	204.408	2151.1	1465.4	226.672	2218.12	1264.64	294.542	1921.16	1342	22.4362	2080.39	1501.03	-54.6566	2065.64	1303.01	-56.5127	2061.24	1147.6	-75.2437	2155.39	1002.91	-25.8081	2201.34	919.816	-80.3861	2155.66	901.725	-76.0571	2216.99	857.12
7296	0	155.417	2235.79	1694.16	242.401	2223.64	1696.03	140.284	2039.97	1688.86	250.79	2047.81	1692.91	210.037	2007.78	1548.87	204.239	1928.81	1285.62	203.904	2160.1	1467.07	226.387	2226.66	1266.34	292.591	1929.39	1343.74	21.5121	2089.95	1502.74	-55.7102	2076.92	1304.78	-57.9206	2074.28	1149.09	-75.6117	2170.02	1005.52	-25.3023	2216.48	923.036	-80.5583	2171.86	904.529	-75.6947	2233.57	860.601
7297	0	155.938	2245.01	1695.7	242.836	2232.45	1697.25	140.028	2049.28	1690.85	250.043	2056.07	1694.7	208.923	2016.76	1550.38	202.625	1937.7	1287.45	203.286	2168.92	1468.68	226.035	2235.31	1267.98	291.304	1938.03	1345.57	20.4379	2099.55	1504.55	-56.7712	2088.27	1306.77	-59.4234	2087.06	1150.76	-75.7461	2184.96	1008.32	-25.0964	2231.57	926.184	-80.7035	2187.78	907.36	-75.2521	2250.2	864.456
7298	0	156.52	2254.2	1697.37	244.749	2241	1697.71	139.987	2058.68	1692.71	251.611	2066.74	1694.22	207.993	2025.79	1551.63	201.375	1946.64	1288.93	202.999	2177.89	1470.03	225.597	2243.82	1269.43	290.174	1946.76	1347.08	19.695	2109.22	1506.43	-57.4794	2099.55	1308.44	-60.6898	2099.78	1152.65	-75.6908	2199.89	1010.9	-24.4751	2246.87	929.67	-80.9423	2203.95	910.695	-74.7899	2266.73	868.219
7299	0	157.01	2263.29	1698.96	243.687	2249.98	1699.51	139.473	2067.88	1694.33	250.153	2074.43	1696.37	206.924	2034.5	1552.89	200.016	1955.53	1290.11	202.33	2186.77	1471.72	225.194	2252.41	1270.73	288.858	1955.48	1348.32	19.2191	2118.87	1507.93	-58.0038	2110.39	1310.08	-61.7534	2112.5	1154.14	-75.7387	2214.62	1013.76	-24.026	2261.95	932.971	-80.5459	2219.81	913.055	-74.082	2283.25	872.175
7300	0	157.634	2272.43	1700.21	244.878	2258.79	1700.45	139.102	2077.09	1695.98	250.345	2083.57	1697.29	205.923	2043.06	1554.61	198.645	1964.33	1291.49	201.923	2195.57	1472.92	224.815	2260.93	1271.89	287.351	1963.84	1349.84	18.7693	2128.62	1509.3	-58.4118	2121.28	1311.46	-62.7479	2125.28	1155.92	-75.8615	2229.11	1016.44	-23.443	2276.95	936.419	-80.6643	2235.65	916.277	-73.3207	2299.58	875.755
7301	0	158.353	2281.54	1701.6	245.53	2267.43	1701.37	138.907	2086.18	1697.55	250.25	2092.43	1698.22	205.03	2051.92	1555.83	197.432	1973.13	1292.72	201.678	2204.42	1474.15	224.598	2269.47	1272.98	286.181	1972.43	1351.07	18.4479	2138.4	1510.81	-58.883	2132.19	1312.92	-63.6948	2137.65	1157.41	-75.7433	2243.62	1019.22	-22.7425	2292.1	939.852	-80.4463	2251.57	919.373	-72.5188	2316.04	879.604
7302	0	159.102	2290.58	1702.95	246.258	2275.8	1702.15	138.805	2095.43	1698.7	250.252	2101.29	1698.88	204.26	2060.8	1556.52	196.104	1981.77	1293.82	201.465	2213.14	1475.3	224.365	2277.87	1274.2	285.09	1980.95	1351.93	17.8676	2147.83	1512.35	-59.4539	2142.71	1314.46	-64.8246	2149.83	1159	-75.695	2257.81	1022.32	-22.3192	2307.23	943.431	-80.224	2267.3	922.14	-71.8744	2332.33	883.796
7303	0	159.734	2299.58	1704.27	246.752	2284.48	1703.4	138.368	2104.59	1699.68	249.722	2109.48	1700.02	203.676	2069.64	1557.69	194.656	1990.43	1294.79	201.639	2221.96	1476.25	224.367	2286.36	1275.16	283.369	1988.98	1352.96	17.5051	2157.47	1513.86	-60.0473	2153.25	1316.13	-65.6071	2162.1	1160.19	-75.7504	2272.16	1025.06	-22.0201	2322.16	947.644	-80.2325	2283.11	925.664	-71.3329	2348.44	887.982
7304	0	160.145	2308.58	1705.43	247.238	2292.68	1703.83	138.005	2113.65	1700.65	249.475	2117.81	1700.98	203.026	2078.43	1558.58	193.458	1999.17	1295.82	201.256	2230.71	1477.48	224.291	2294.76	1276.1	282.188	1997.39	1354.04	17.2915	2167.22	1515.37	-60.5219	2164.03	1317.61	-66.448	2174.21	1161.71	-75.8582	2286.05	1028.01	-21.2768	2337.1	951.141	-79.7158	2298.57	928.451	-70.5554	2364.43	892.121
7305	0	160.952	2317.59	1706.16	249.001	2301.32	1704.67	137.989	2122.76	1701.19	249.874	2126.99	1700.49	202.442	2087.13	1559.26	192.589	2008.11	1296.56	201.516	2239.64	1477.9	224.369	2303.25	1276.79	281.089	2005.9	1354.51	16.9011	2176.79	1516.38	-60.8993	2174.69	1318.65	-67.1792	2186.15	1162.9	-75.7802	2300.12	1030.77	-20.9177	2352.09	955.165	-79.3527	2314.09	931.209	-69.6509	2380.55	896.163
7306	0	161.383	2326.42	1706.81	249.518	2309.95	1705.31	137.792	2131.88	1701.43	249.641	2135.62	1700.98	202.031	2096.07	1559.69	191.578	2016.86	1296.99	201.263	2248.28	1478.56	224.781	2311.89	1277.01	280.003	2014.43	1354.92	16.9504	2186.39	1516.87	-61.2656	2185.19	1319.48	-67.5904	2197.59	1163.04	-75.3262	2314.02	1032.94	-20.13	2366.68	958.34	-78.4707	2329.74	934.322	-68.6557	2396.38	899.803
7307	0	162.055	2335.37	1707.14	248.844	2318.8	1705.99	137.539	2140.89	1701.78	249.147	2143.76	1701.89	201.181	2104.64	1560.48	190.498	2025.5	1297.31	201.503	2257.17	1478.64	224.833	2320.46	1277.35	278.966	2022.8	1355.5	17.1304	2196.01	1517.22	-61.5414	2195.79	1319.87	-68.4161	2209.08	1163.59	-75.4305	2327.57	1035.03	-19.2099	2381.42	961.586	-77.9023	2344.8	936.923	-67.4712	2412.16	903.504
7308	0	162.61	2344.39	1707.38	249.473	2327.7	1706.01	137.489	2149.92	1702	249.103	2152.4	1701.86	201.964	2113.88	1560.79	189.538	2034.28	1297.86	201.637	2265.99	1478.58	225.209	2329.21	1277.45	278.252	2031.44	1355.51	17.1271	2205.61	1517.7	-61.7004	2206.76	1320.5	-69.0232	2221.17	1164.76	-74.8301	2341.31	1037.34	-18.4344	2396	964.74	-79.6157	2360.42	940.742	-66.529	2427.99	907.46
7309	0	163.287	2353.4	1707.41	249.51	2335.99	1705.57	137.685	2158.97	1701.86	249.408	2161.4	1701.43	201.863	2122.73	1560.55	189.016	2043.24	1297.71	201.888	2274.85	1478.32	225.677	2337.99	1277.25	277.363	2039.84	1355.44	17.2685	2215.17	1517.78	-62.0702	2217.11	1321.02	-69.707	2232.72	1165.49	-74.599	2354.66	1039.66	-17.7271	2410.38	968.047	-76.585	2374.95	941.968	-65.4871	2443.36	911.016
7310	0	163.92	2362.43	1707.28	250.489	2345	1706.09	137.613	2168.07	1701.32	249.293	2169.75	1701.46	201.504	2131.62	1560.35	188.24	2051.88	1297.58	202.169	2283.62	1477.97	226.077	2346.55	1276.99	276.807	2048.35	1355.33	17.4268	2224.61	1517.78	-62.2599	2227.48	1321.36	-69.8862	2244.25	1165.11	-73.9649	2368.01	1041.45	-16.6884	2424.64	971.291	-75.9912	2390.04	945.106	-64.2781	2458.73	914.689
7311	0	164.427	2371.36	1707.24	250.91	2353.69	1705.77	137.702	2177.17	1700.81	249.364	2178.54	1701.17	201.133	2140.45	1559.88	187.747	2060.69	1297.19	202.498	2292.31	1477.68	226.638	2355.23	1276.66	276.16	2056.74	1355.05	17.6952	2233.97	1517.57	-62.2394	2238.09	1321.34	-70.5138	2255.4	1165.32	-73.6867	2381.05	1043.22	-15.8323	2438.72	974.169	-75.0121	2404.45	946.982	-63.2289	2473.75	918.302
7312	0	164.799	2380.44	1706.75	252.971	2362.57	1705.02	138.039	2186.29	1700.04	249.997	2187.76	1700.12	201.702	2149.49	1559.5	187.559	2069.64	1296.94	202.916	2300.92	1476.75	227.072	2363.87	1276.02	275.538	2065.27	1355.22	18.045	2243.49	1517.53	-62.4082	2248.43	1321.38	-70.7857	2266.95	1165.17	-73.0036	2394.18	1044.91	-14.8974	2452.7	977.206	-73.932	2419.01	948.982	-61.7988	2488.8	921.605
7313	0	165.512	2389.46	1706.32	253.493	2371.84	1704.25	138.432	2195.38	1698.91	250.621	2196.89	1699.09	201.706	2158.36	1558.62	187.105	2078.38	1295.95	203.759	2309.89	1475.86	227.699	2372.4	1275.08	275.206	2073.87	1353.54	18.4805	2252.85	1516.87	-62.1245	2258.9	1321.51	-71.1025	2277.94	1164.92	-72.1928	2407.2	1046.43	-13.6579	2466.4	979.786	-74.8389	2433.52	951.671	-60.5232	2503.36	924.833
7314	0	166.201	2398.51	1705.06	254.039	2380.85	1703.74	138.687	2204.49	1698.04	250.249	2204.94	1699.27	202.509	2167.74	1558.03	187.048	2087.57	1295.32	204.146	2318.96	1475.19	228.258	2381.1	1274.17	275.042	2082.57	1353.21	19.189	2262.42	1516.26	-61.8852	2269	1320.49	-71.3128	2289.24	1164.35	-71.4034	2420	1047.59	-12.8476	2479.61	982.101	-71.5671	2447.41	952.437	-59.9318	2517.82	928.368
7315	0	166.796	2407.72	1703.97	254.793	2389.75	1702.98	139.245	2213.67	1696.66	250.686	2214.21	1698.3	203.206	2176.99	1556.9	187.022	2096.48	1294.61	204.853	2328.04	1474.03	228.751	2389.85	1273.03	275.634	2091.78	1352.36	19.8926	2271.95	1515.47	-61.4861	2279.29	1320.24	-71.3583	2300.09	1163.88	-70.5063	2432.69	1048.63	-11.7282	2492.91	984.362	-72.4028	2461.58	954.687	-58.1971	2532.26	930.825
7316	0	167.229	2416.89	1702.76	255.481	2399.05	1701.46	139.961	2222.89	1695.2	251.785	2223.73	1696.64	203.839	2186.09	1555.43	186.878	2105.36	1293.27	205.765	2336.96	1472.44	229.285	2398.54	1271.5	276.015	2100.88	1350.75	20.7066	2281.4	1514.39	-60.9444	2289.28	1319.12	-71.2912	2311.07	1162.91	-69.5691	2445.15	1049.38	-10.346	2506.06	986.218	-70.9724	2475.17	955.965	-56.8763	2546.11	933.354
7317	0	167.846	2426.15	1701.08	255.982	2408.36	1700.22	140.561	2232.2	1693.47	252.149	2232.75	1695.37	204.248	2195.09	1554.18	187.329	2114.7	1291.69	206.688	2345.86	1471.01	230.072	2407.59	1270.02	275.584	2109.24	1348.93	21.5545	2290.77	1513.1	-60.3702	2299.06	1318.09	-71.0863	2321.84	1161.9	-68.5727	2457.45	1049.86	-9.08538	2518.97	987.794	-69.6282	2488.64	957.033	-55.3924	2559.82	935.459
7318	0	168.579	2435.5	1699.1	255.292	2417.83	1699.08	141.216	2241.55	1691.59	252.717	2242.05	1693.97	205.114	2204.42	1552.51	187.477	2123.84	1290.34	207.533	2354.99	1469.15	230.698	2416.57	1268.31	275.984	2118.47	1348.1	22.4436	2300.21	1511.74	-59.6575	2308.95	1316.83	-70.6079	2332.68	1160.84	-67.6999	2469.58	1050.29	-7.89515	2531.65	989.301	-66.4029	2501.63	957.261	-54.0066	2573.23	937.39
7319	0	169.272	2444.95	1697.23	256.397	2427.23	1697.35	142.294	2250.96	1689.54	253.836	2251.68	1692.14	205.914	2213.59	1550.89	187.598	2132.72	1288.88	208.517	2364.28	1467.23	231.453	2425.61	1266.24	276.972	2127.92	1345.96	23.4216	2309.73	1510.31	-58.8373	2318.87	1315.52	-70.235	2343.24	1159.8	-66.6693	2481.26	1050.46	-6.62057	2544.05	990.419	-65.4569	2514.56	958.231	-52.5784	2586.4	939.146
7320	0	170.34	2454.42	1695.26	258.875	2436.82	1695.25	143.34	2260.3	1687.41	254.835	2261.07	1690.28	207.37	2223.12	1548.76	188.624	2142.36	1286.83	209.697	2373.5	1465.26	232.308	2434.7	1264.17	277.112	2136.86	1343.6	24.6664	2319.2	1508.68	-57.8812	2328.65	1314.28	-69.7002	2353.7	1158.27	-65.7162	2492.84	1050.67	-5.20299	2556.32	991.424	-64.0623	2527.28	958.585	-51.4014	2599.21	940.644
7321	0	171.43	2464.03	1693.36	259.542	2446.5	1693.04	144.471	2269.85	1685.32	255.874	2270.5	1688.65	208.317	2232.31	1546.79	188.324	2150.81	1284.91	210.809	2382.79	1463.29	233.191	2443.85	1262.03	278.134	2146.25	1341.58	25.8678	2328.78	1507.09	-56.7265	2338.22	1312.57	-68.6572	2364.2	1156.44	-64.6226	2504.51	1050.44	-4.02446	2568.37	992.242	-62.5888	2539.8	958.611	-50.1417	2611.76	941.783
7322	0	172.4	2473.49	1691.15	260.34	2456.6	1690.56	145.586	2279.38	1683.12	257.486	2280.45	1686.14	209.792	2241.82	1544.63	189.47	2160.71	1282.65	212.167	2392.04	1460.92	233.924	2453.35	1259.95	278.994	2155.61	1339.3	27.1716	2338.42	1505.22	-55.7864	2347.76	1310.89	-68.054	2374.33	1154.51	-63.401	2515.83	1050.08	-2.8411	2580.08	992.693	-61.5064	2552.01	958.864	-49.0252	2624.1	942.854
7323	0	173.639	2483.09	1688.36	262.092	2465.97	1688.07	147.094	2289.01	1680.72	258.4	2289.61	1684.33	210.963	2251.13	1542.26	190.391	2170.08	1280.02	213.464	2401.42	1458.47	235.032	2463.09	1257.38	279.449	2164.66	1336.45	28.4935	2348.12	1503.18	-54.676	2357.36	1308.78	-67.027	2384.69	1152.85	-62.3123	2527	1049.24	-1.5886	2591.55	992.439	-60.2396	2563.85	958.388	-47.5674	2636.09	942.892
7324	0	175.216	2492.8	1685.89	263.081	2475.68	1685.54	148.674	2298.71	1678.36	260.038	2299.58	1681.72	212.287	2260.64	1539.77	191.836	2180.16	1277.41	214.865	2410.98	1455.97	236.234	2472.82	1254.86	281.079	2174.53	1334.18	29.8376	2357.66	1500.93	-53.1645	2367.19	1306.38	-66.0825	2395.05	1150.86	-61.1603	2537.92	1048.25	-0.278498	2603.05	992.142	-58.7752	2575.5	957.783	-46.0865	2647.89	942.91
7325	0	177.043	2502.49	1682.91	263.555	2485.26	1683.07	150.21	2308.45	1676.24	261.723	2309.39	1679.47	213.697	2270.13	1537.52	192.323	2189.45	1275.02	216.212	2420.51	1453.51	237.332	2482.77	1252.45	281.68	2183.84	1331.28	31.377	2367.46	1498.66	-51.7087	2376.78	1303.95	-64.9726	2404.97	1148.54	-59.7717	2548.86	1046.93	0.939643	2614.29	991.4	-58.9939	2587.08	956.893	-44.5196	2659.57	942.28
7326	0	178.935	2512.4	1680.34	265.016	2494.3	1680.36	152.082	2318.33	1674.35	263.266	2318.79	1677.34	215.434	2279.94	1535.05	193.296	2199.35	1272.96	217.873	2430.16	1450.99	238.684	2492.9	1249.91	284.041	2194.31	1329.87	33.0357	2377.62	1496.85	-50.2509	2386.39	1301.81	-64.0096	2415.4	1147.01	-58.5664	2559.42	1045.23	2.32858	2625.19	990.278	-58.3646	2598.16	955.665	-43.6093	2670.39	941.797
7327	0	181.035	2522.18	1678.05	267.919	2504.42	1677.15	154.156	2328.31	1672.28	265.374	2328.67	1675.05	217.015	2289.72	1532.59	194.668	2209.6	1270.4	219.495	2439.96	1448.71	240.05	2502.82	1247.64	285.182	2204.02	1326.15	34.5139	2387.56	1494.88	-48.8705	2395.98	1299.75	-62.8111	2425.57	1145.06	-57.1716	2569.92	1043.54	3.60486	2635.8	988.884	-56.0288	2608.82	954.086	-42.3508	2681.24	940.637
7328	0	183.237	2532.13	1675.76	271.127	2514.58	1675.19	156.125	2338.19	1670.12	267.757	2338.86	1672.52	218.513	2299.69	1530.27	195.111	2219.09	1267.7	221.233	2449.8	1446.34	241.398	2512.88	1245.53	285.867	2213.43	1323.75	36.2551	2397.79	1492.74	-47.1132	2405.67	1297.72	-61.0043	2435.44	1142.5	-55.9516	2580.15	1041.8	4.85228	2646.24	987.416	-53.1838	2618.92	952.059	-40.9349	2691.9	939.246
7329	0	185.808	2542.15	1673.46	273.624	2524.25	1672.97	158.29	2348.31	1668.15	270.026	2348.68	1670.32	219.927	2309.56	1527.94	196.498	2229.84	1265.76	223.036	2459.75	1444.01	242.883	2522.89	1243.22	286.755	2223.3	1321.5	37.9343	2408.21	1490.83	-45.1814	2415.72	1295.99	-59.5333	2445.91	1140.81	-54.7947	2590.19	1039.82	5.94191	2656.33	985.471	-51.768	2629.01	949.976	-40.5986	2701.67	938.152
7330	0	188.515	2552.19	1671.49	275.7	2534.43	1670.53	160.899	2358.52	1666.16	273.202	2359.23	1667.49	221.795	2319.73	1525.89	197.601	2240.22	1263.64	224.958	2469.92	1441.74	244.377	2532.91	1241.06	288.53	2233.79	1319.23	39.8233	2418.9	1489.02	-43.6691	2425.58	1294.2	-58.2548	2455.96	1139.08	-53.3277	2600.12	1037.75	7.1337	2666.2	983.219	-53.8956	2638.88	949.262	-39.5221	2711.57	935.9
7331	0	191.55	2562.42	1669.52	278.072	2544.18	1668.21	163.288	2368.67	1664.56	275.71	2369.2	1665.13	223.761	2330.06	1523.88	198.388	2250.58	1261.51	227.072	2480.01	1439.6	246.262	2543.14	1238.69	289.089	2243.52	1316.68	41.7737	2429.63	1487.2	-41.7824	2436.12	1292.63	-56.4168	2465.82	1136.98	-51.8924	2610.04	1035.37	8.17337	2675.89	980.866	-52.438	2648.2	946.874	-38.5775	2720.96	933.515
7332	0	194.701	2572.55	1667.62	280.578	2553.84	1666.48	165.892	2379.01	1662.77	277.964	2379.06	1663.27	225.298	2340.21	1521.79	198.861	2260.71	1259.32	229.313	2490.38	1437.45	248.199	2553.39	1236.57	289.65	2253.68	1314.48	43.9418	2440.78	1485.64	-40.207	2446.4	1290.96	-54.2863	2476	1135.58	-50.5746	2619.47	1032.97	9.43093	2685.47	978.181	-51.0491	2657.48	944.139	-37.4815	2730.3	930.656
7333	0	197.995	2583	1666.06	283.837	2563.74	1664.32	168.506	2389.29	1661.39	281.016	2389.19	1661.06	226.936	2350.51	1519.88	200.239	2271.56	1257.5	231.408	2500.64	1435.46	249.987	2563.87	1234.58	291.038	2264.18	1312.46	46.0914	2451.85	1484.1	-38.2719	2457.29	1289.8	-53.2465	2486.23	1134.98	-49.3556	2628.68	1030.5	10.3844	2694.71	975.377	-49.8585	2666.07	941.334	-36.9065	2738.82	927.595
7334	0	201.419	2593.07	1664.85	287.776	2574.05	1661.64	171.606	2399.79	1659.9	283.891	2399.4	1658.97	229.255	2361.12	1518.01	201.283	2282.33	1255.82	233.475	2511.27	1433.77	251.95	2574.45	1232.91	293.843	2275.88	1310.11	48.2633	2462.93	1482.92	-36.5546	2468.28	1288.59	-50.6048	2495.9	1132.7	-47.9829	2637.85	1027.88	11.4238	2703.71	972.225	-48.8826	2674.78	938.486	-36.2722	2747.38	924.578
7335	0	205.074	2603.7	1663.88	290.9	2584.13	1660.44	174.534	2410.21	1659.07	286.779	2409.6	1657.42	231.134	2371.43	1517.07	202.298	2293.18	1253.96	235.721	2521.7	1432.42	254.004	2585.41	1231.7	294.838	2286.89	1308.24	50.2881	2474.06	1481.92	-34.723	2479.54	1288.08	-48.4085	2506	1131.88	-46.7039	2646.87	1025.5	12.1593	2712.22	968.795	-48.242	2682.95	935.68	-35.8102	2755.38	921.209
7336	0	208.288	2613.92	1662.95	294.036	2594.16	1659.42	177.419	2420.83	1658.41	289.863	2419.77	1655.99	232.999	2382.19	1515.8	205.03	2306.2	1252.59	237.784	2532.41	1431.28	255.976	2596.49	1230.81	295.638	2297.15	1306.96	52.5463	2485.32	1481.21	-32.9146	2491.28	1287.54	-46.3282	2515.98	1130.96	-45.417	2655.79	1023.16	12.9597	2720.64	965.64	-47.4668	2690.69	932.972	-35.7137	2762.87	917.885
7337	0	212.075	2624.48	1662.28	298.432	2604.52	1656.95	180.692	2431.36	1657.9	293.026	2430.09	1654.76	234.647	2392.53	1514.63	204.516	2315.93	1251.52	240.067	2542.99	1430.65	258.089	2607.74	1230.31	297.233	2308.29	1305.45	54.7176	2496.58	1480.75	-31.2256	2503.24	1287.41	-44.6531	2526.18	1130.93	-44.6983	2663.89	1021.26	13.8106	2728.95	962.301	-46.6554	2697.95	930.171	-35.438	2770.08	914.199
7338	0	215.615	2634.87	1661.94	302.325	2614.73	1655.6	183.818	2441.91	1657.62	296.276	2440.43	1653.41	237.443	2403.5	1514.13	208.02	2328.96	1250.07	242.356	2553.71	1429.88	260.259	2619.31	1229.94	298.589	2319.24	1304.1	56.8849	2507.7	1480.55	-29.2929	2515.28	1287.66	-42.5	2536.24	1130.81	-43.2224	2672.56	1018.91	14.5648	2737.17	959.037	-45.4715	2705.2	927.219	-34.9919	2777.18	910.3
7339	0	219.7	2645.45	1661.68	305.278	2625.01	1655.43	186.909	2452.63	1657.98	299.258	2450.7	1652.75	238.767	2413.76	1513.28	209.206	2340.11	1249.37	244.543	2564.39	1429.57	262.139	2630.89	1230.04	299.572	2330.25	1303	59.0651	2518.59	1480.34	-27.29	2527.37	1288	-39.5412	2546.35	1130.15	-41.9765	2680.95	1016.61	15.3496	2744.74	955.438	-44.6946	2711.99	924.27	-34.7979	2783.74	906.186
7340	0	223.301	2656.2	1661.68	308.899	2635.47	1654.97	189.997	2463.39	1658.65	302.194	2460.99	1652.74	240.653	2424.04	1513.23	210.588	2351.45	1248.94	246.61	2575.06	1429.7	264.046	2642.48	1230.25	300.737	2341.26	1302.4	61.1615	2529.6	1480.41	-25.2838	2539.35	1288.43	-37.949	2556.76	1131.24	-40.8463	2689.03	1014.58	15.7605	2752.03	951.805	-44.1703	2718.36	921.536	-34.7695	2789.79	902.236
7341	0	226.827	2666.62	1661.92	312.596	2645.79	1654.4	193.35	2474.1	1659.55	305.697	2471.66	1652.33	242.577	2434.83	1512.79	212.554	2363.1	1248.95	248.763	2585.84	1430.07	265.931	2654.03	1231.06	302.586	2352.76	1302.02	63.2062	2540.43	1480.9	-23.4915	2550.98	1289.23	-35.9644	2566.73	1131.84	-39.8239	2696.8	1012.94	16.1563	2758.95	948.418	-43.8057	2724.74	919.092	-34.5763	2795.99	898.497
7342	0	230.652	2677.16	1662.71	316.124	2656.31	1654.68	196.422	2484.77	1660.81	308.719	2482.12	1652.87	244.896	2445.28	1513.63	214.046	2374.32	1249.3	250.92	2596.41	1430.87	267.852	2665.4	1232.25	304.079	2363.39	1302.35	65.2435	2551.09	1481.72	-21.3148	2562.3	1290.19	-33.4739	2576.84	1132.77	-38.6886	2704.76	1011.7	16.7207	2765.47	945.215	-43.5192	2730.58	917.146	-34.6601	2801.36	895.003
7343	0	235.382	2689.28	1664.63	319.659	2666.51	1655.42	199.395	2495.48	1662.2	311.807	2492.44	1653.59	247.214	2456.27	1514.45	215.413	2385.51	1250.12	253.059	2607.05	1432.06	269.809	2676.85	1233.81	305.607	2374.41	1303.05	67.2812	2561.96	1482.96	-19.5531	2573.79	1291.85	-31.5513	2586.71	1134.15	-37.7885	2712.11	1010.91	17.0675	2771.6	942.597	-43.2915	2735.7	915.74	-35.1028	2805.92	892.172
7344	0	237.582	2698.33	1665.06	323.513	2677.11	1655.11	202.562	2506.06	1663.8	314.879	2502.95	1654.34	249.098	2466.94	1515.66	217.112	2396.76	1251.05	255.084	2617.66	1433.5	271.653	2688.26	1235.34	307.535	2385.38	1303.94	69.2796	2572.74	1484.57	-17.4472	2584.42	1293.85	-29.3851	2596.4	1135.89	-36.7329	2719.45	1010.4	17.2711	2777.54	940.207	-43.1424	2741.07	914.547	-35.2586	2810.89	889.407
7345	0	242.245	2710.23	1667.64	327.06	2687.42	1657.16	205.449	2516.84	1665.14	317.812	2513.3	1655.17	250.677	2477.15	1516.94	218.878	2407.95	1251.93	257.065	2628.15	1434.98	273.412	2699.27	1237.1	309.288	2396.32	1304.75	71.215	2583.45	1486.29	-15.6159	2594.77	1295.57	-27.4636	2605.85	1137.82	-35.916	2726.37	1010.33	17.5426	2783.02	938.12	-43.4705	2746.23	914.005	-35.1488	2815.53	886.637
7346	0	246.115	2721.01	1668.64	329.759	2697.45	1657.43	208.105	2527.35	1667.15	320.456	2523.64	1656.1	253.592	2488.17	1518.03	220.443	2418.65	1253.3	258.911	2638.7	1436.36	275.22	2710.36	1238.91	310.91	2407.28	1306.01	73.2466	2593.92	1487.98	-13.7142	2604.88	1297.54	-24.8939	2614.81	1139.4	-35.0576	2733.33	1010.56	17.6736	2788.17	936.325	-42.2778	2751.08	913.31	-35.2544	2819.79	884.486
7347	0	249.368	2731.65	1670.08	332.304	2707.23	1659.21	210.855	2537.85	1668.77	322.831	2533.63	1657.42	254.44	2497.83	1519.45	222.275	2429.31	1254.83	260.616	2649.19	1437.89	276.658	2720.91	1240.37	312.856	2418.14	1307.44	75.0896	2604.34	1490.09	-12.062	2614.67	1299.38	-23.6161	2623.48	1141.76	-34.1497	2740.29	1011.13	17.9174	2793.26	935.095	-44.0999	2756.24	913.957	-35.3751	2824.03	882.576
7348	0	252.779	2742.04	1671.39	335.542	2717.43	1659.72	213.086	2548.26	1670.92	325.573	2543.92	1658.55	256.226	2508.13	1520.76	224.296	2439.73	1256.44	262.265	2659.43	1439.33	278.299	2731.69	1242.04	315.494	2428.98	1308.92	76.8854	2614.44	1491.75	-10.4248	2624.08	1301.37	-22.4887	2631.8	1144.36	-33.5403	2746.59	1011.72	17.9638	2798.15	934.065	-44.4707	2761.18	914.281	-35.4419	2828.33	881.034
7349	0	255.574	2752.64	1672.95	338.481	2727.56	1660.68	215.587	2558.75	1672.69	327.833	2554.09	1659.71	257.912	2518.29	1522.13	226.327	2450.12	1257.81	263.726	2669.67	1440.85	279.733	2741.9	1243.8	317.4	2439.58	1310.33	78.6532	2624.33	1493.65	-8.96773	2633.21	1303.3	-20.9542	2639.65	1146.44	-33.1198	2752.66	1012.49	18.2966	2803.1	933.627	-44.3998	2766.07	915.107	-35.4232	2832.27	879.846
7350	0	258.681	2762.87	1673.97	341.001	2737.38	1661.81	217.979	2568.77	1674.41	329.963	2564.07	1661.13	260.497	2528.56	1523.84	228.009	2460.13	1259.14	265.238	2679.91	1442.48	280.997	2751.96	1245.3	319.533	2450.15	1311.92	80.1656	2633.95	1495.3	-7.83044	2642.15	1305.36	-19.4828	2647.19	1148.22	-32.8166	2758.88	1013.29	18.1849	2808.02	933.373	-45.5097	2771.21	915.859	-35.3493	2836.53	878.645
7351	0	261.425	2773.01	1675.38	348.556	2741.72	1664.88	220.005	2578.95	1676.23	331.958	2574.09	1662.66	261.616	2538.45	1526.23	230.107	2469.96	1260.85	266.411	2689.89	1444.06	281.933	2761.72	1246.91	321.731	2460.41	1313.54	81.5617	2643.42	1497.23	-6.46756	2650.64	1307.15	-18.3706	2654.15	1150.02	-32.7492	2764.74	1014.39	17.8386	2813	933.619	-46.2573	2776.22	917.05	-35.5806	2840.95	878.331
7352	0	263.709	2783.19	1677.23	355.764	2746.24	1668	222.112	2589.14	1678.04	334.01	2584.09	1663.83	263.243	2548.44	1527.49	232.426	2479.82	1262.65	267.208	2699.33	1445.48	282.891	2771.3	1248.59	324.562	2470.7	1315.37	82.8589	2652.77	1498.99	-4.77359	2659.89	1309.75	-17.9271	2661.23	1152.23	-32.7976	2770.37	1015.49	17.5728	2817.9	933.974	-46.9114	2781.16	918.136	-35.9731	2845.11	877.999
7353	0	271.498	2792.24	1680.76	357.653	2755.92	1669.02	223.701	2599.23	1679.84	335.801	2594.13	1665.5	265.931	2558.61	1528.81	234.282	2489.43	1264.18	268.508	2709.39	1446.97	283.641	2780.71	1250.33	326.526	2480.79	1316.99	83.7157	2662.29	1501.06	-3.97818	2667.18	1311.25	-17.0682	2667.96	1153.84	-33.0111	2776.01	1016.68	17.3039	2822.9	934.496	-47.5021	2786.18	919.543	-36.2316	2849.49	877.798
7354	0	267.757	2803.24	1679.76	349.788	2776.91	1666.17	225.46	2609.22	1681.74	337.145	2603.77	1667.14	266.677	2567.93	1530.58	236.124	2498.83	1265.68	269.592	2718.99	1448.51	284.374	2790.2	1251.65	328.444	2490.42	1319.04	85.0799	2671.06	1502.32	-3.91846	2673.51	1312.15	-15.6529	2674.32	1154.73	-33.1042	2781.5	1017.6	16.9817	2827.83	934.849	-47.8423	2790.85	920.339	-36.4008	2853.67	877.718
7355	0	269.636	2813.15	1680.51	345.708	2786.15	1664.6	226.708	2619.11	1683.43	338.658	2613.68	1668.69	271.642	2579.75	1532.91	238.32	2508.21	1267.43	270.375	2728.54	1449.96	285.061	2799.68	1252.68	330.562	2500.25	1320.68	86.0611	2679.77	1503.49	-3.23979	2680.48	1313.38	-15.7643	2680.67	1156.9	-33.5363	2786.33	1018.62	16.513	2832.8	935.397	-47.9344	2795.5	921.396	-35.4661	2860.36	878.01
7356	0	271.533	2823.3	1681.65	341.664	2795.51	1663.2	228.382	2629.05	1685.29	340.062	2623.52	1670.16	268.7	2586.71	1533.36	240.261	2517.47	1268.88	270.956	2737.46	1451.09	285.654	2809.08	1253.98	332.659	2509.93	1322.2	87.0994	2688.34	1504.72	-2.41247	2687.13	1314.89	-15.529	2686.93	1158.93	-33.7139	2791.51	1019.5	16.0981	2837.92	935.831	-48.3956	2800.24	922.146	-37.1313	2861.81	877.697
7357	0	272.601	2833.17	1682.67	354.043	2806.27	1669.27	229.227	2638.73	1687.02	341.13	2633.24	1671.99	271.841	2596.88	1535.53	241.941	2526.37	1270.65	271.706	2746.68	1452.72	286.24	2818.59	1255.25	334.314	2519.25	1324.07	88.0357	2696.61	1505.96	-1.53432	2693.77	1316.06	-11.8945	2691.4	1157.39	-33.7183	2796.77	1020.35	15.7804	2843	936.669	-48.5495	2804.65	922.918	-36.1752	2869.06	878.57
7358	0	273.595	2842.81	1683.57	354.986	2815.92	1670.62	230.239	2648.55	1688.95	342.102	2642.75	1674	270.815	2603.94	1537.5	243.633	2535.36	1272.29	272.384	2755.76	1454.39	286.489	2827.46	1256.88	335.988	2528.68	1325.79	88.8919	2704.86	1507.28	-0.770157	2700.31	1317.35	-14.1383	2698.62	1161.66	-33.8533	2801.35	1021.15	15.1122	2848	937.399	-48.8089	2808.94	924.173	-36.9462	2873.11	879.206
7359	0	274.344	2852.42	1685.24	356.185	2825.61	1671.12	230.805	2657.89	1690.73	343.092	2652.57	1676.03	272.578	2613.52	1538.93	245.553	2544.18	1274.34	273.011	2764.59	1455.99	286.591	2836.14	1258.71	338.24	2537.99	1327.85	89.5537	2713.14	1508.96	-0.005138	2706.73	1319.24	-13.6529	2704.33	1163.17	-34.1873	2806.43	1022.63	14.4399	2852.84	938.408	-48.9618	2813.4	924.995	-37.6396	2877.31	880.112
7360	0	274.709	2861.82	1686.83	357.311	2837.04	1674.29	231.534	2667.31	1692.71	343.736	2662.13	1678.06	273.522	2622.53	1540.57	247.193	2553.02	1275.92	273.64	2773.36	1457.91	286.742	2844.63	1260.66	339.693	2547.04	1329.54	90.4217	2721.09	1510.62	0.712211	2712.91	1320.87	-13.2299	2709.95	1165.1	-34.2346	2811.21	1023.96	13.8901	2857.82	939.924	-49.0962	2817.59	926.311	-38.3788	2881.6	881.282
7361	0	275.174	2871.38	1688.23	358.602	2848.38	1677.38	232.363	2676.9	1694.51	344.138	2671.41	1680.12	274.498	2631.33	1542.36	248.819	2561.76	1277.47	274.185	2782.08	1459.84	287.313	2853.84	1262.43	341.104	2556.13	1331.5	91.1079	2729.09	1512.28	1.33407	2719.05	1322.64	-12.5675	2715.44	1166.76	-34.469	2815.8	1025.35	13.1108	2862.91	941.35	-49.1745	2821.76	927.635	-39.1185	2886.04	882.783
7362	0	275.432	2880.73	1689.57	359.623	2859.8	1680.44	232.985	2686.26	1696.23	344.719	2680.94	1682.1	275.717	2640.3	1544.05	250.397	2570.41	1279.36	274.625	2790.7	1461.54	287.505	2862.4	1264.38	342.665	2565.12	1333.39	91.8888	2736.96	1513.75	1.98423	2725.22	1324.32	-11.732	2720.91	1168.36	-34.6379	2820.9	1026.97	12.4968	2867.9	942.355	-49.4443	2826.04	929.068	-39.8955	2890.45	883.93
7363	0	275.625	2890.05	1690.69	358.83	2867.17	1680.46	233.193	2695.35	1698.13	345.211	2690.32	1684.11	276.638	2649.05	1545.56	252.251	2579.1	1281.21	275.239	2799.15	1463.29	290.085	2870.53	1266.54	344.556	2574.07	1335.1	92.5549	2744.82	1515.39	2.81261	2731.52	1325.62	-11.1292	2726.4	1170.34	-34.6994	2825.06	1027.9	11.769	2873.1	943.81	-49.3699	2830.32	930.125	-40.5075	2895.01	885.033
7364	0	275.801	2899.51	1691.61	358.109	2874.42	1680.73	233.416	2704.27	1699.59	345.585	2699.47	1686.34	281.199	2660.42	1547.95	253.758	2587.68	1282.48	275.956	2807.89	1464.83	288.325	2879.25	1267.64	346.102	2583.01	1336.89	93.4894	2752.77	1516.51	3.40671	2738.12	1327.52	-10.2145	2731.88	1171.95	-34.4396	2829.45	1028.61	11.0824	2878.36	944.806	-48.905	2834.57	931.646	-41.3012	2899.54	886.386
7365	0	275.565	2908.15	1692.13	357.053	2881.65	1680.57	233.892	2713.32	1701.22	345.94	2708.85	1688.63	277.918	2666.14	1548.97	255.288	2596.21	1284.44	276.364	2816.61	1466.26	289.131	2888.32	1269.11	347.73	2591.91	1339.03	94.0578	2760.63	1518.13	4.58916	2744.44	1328.69	-9.10978	2737.49	1173.42	-34.5186	2834.2	1029.79	10.2908	2883.47	945.863	-44.1902	2837.16	929.545	-42.3884	2903.7	887.651
[truncated: 69 more columns]

## Sheet: Sheet2
Devices
		025370 - Force			025370 - Moment			025370 - CoP			027571 - Force			027571 - Moment			027571 - CoP			037720 - Force			037720 - Moment			037720 - CoP
Frame	Sub Frame	Fx	Fy	Fz	Mx	My	Mz	Cx	Cy	Cz	Fx	Fy	Fz	Mx	My	Mz	Cx	Cy	Cz	Fx	Fy	Fz	Mx	My	Mz	Cx	Cy	Cz
		N	N	N	N.mm	N.mm	N.mm	mm	mm	mm	N	N	N	N.mm	N.mm	N.mm	mm	mm	mm	N	N	N	N.mm	N.mm	N.mm	mm	mm	mm
7047	0	0	0	0	0	0	0	200	300	0	0	0	0	0	0	0	200	903	0	0	0	0	0	0	0	603	903	0
7047	1	0	0	0	0	0	0	200	300	0	0	0	0	0	0	0	200	903	0	0	0	0	0	0	0	603	903	0
7047	2	0	0	0	0	0	0	200	300	0	0	0	0	0	0	0	200	903	0	0	0	0	0	0	0	603	903	0
7047	3	0	0	0	0	0	0	200	300	0	0	0	0	0	0	0	200	903	0	0	0	0	0	0	0	603	903	0
7047	4	0	0	0	0	0	0	200	300	0	0	0	0	0	0	0	200	903	0	0	0	0	0	0	0	603	903	0
7047	5	0	0	0	0	0	0	200	300	0	0	0	0	0	0	0	200	903	0	0	0	0	0	0	0	603	903	0
7047	6	0	0	0	0	0	0	200	300	0	0	0	0	0	0	0	200	903	0	0	0	0	0	0	0	603	903	0
7047	7	0	0	0	0	0	0	200	300	0	0	0	0	0	0	0	200	903	0	0	0	0	0	0	0	603	903	0
7047	8	0	0	0	0	0	0	200	300	0	0	0	0	0	0	0	200	903	0	0	0	0	0	0	0	603	903	0
7047	9	0	0	0	0	0	0	200	300	0	0	0	0	0	0	0	200	903	0	0	0	0	0	0	0	603	903	0
7048	0	0	0	0	0	0	0	200	300	0	0	0	0	0	0	0	200	903	0	0	0	0	0	0	0	603	903	0
7048	1	0	0	0	0	0	0	200	300	0	0	0	0	0	0	0	200	903	0	0	0	0	0	0	0	603	903	0
7048	2	0	0	0	0	0	0	200	300	0	0	0	0	0	0	0	200	903	0	0	0	0	0	0	0	603	903	0
7048	3	0	0	0	0	0	0	200	300	0	0	0	0	0	0	0	200	903	0	0	0	0	0	0	0	603	903	0
7048	4	0	0	0	0	0	0	200	300	0	0	0	0	0	0	0	200	903	0	0	0	0	0	0	0	603	903	0
7048	5	0	0	0	0	0	0	200	300	0	0	0	0	0	0	0	200	903	0	0	0	0	0	0	0	603	903	0
7048	6	0	0	0	0	0	0	200	300	0	0	0	0	0	0	0	200	903	0	0	0	0	0	0	0	603	903	0
7048	7	0	0	0	0	0	0	200	300	0	0	0	0	0	0	0	200	903	0	0	0	0	0	0	0	603	903	0
7048	8	0	0	0	0	0	0	200	300	0	0	0	0	0	0	0	200	903	0	0	0	0	0	0	0	603	903	0
7048	9	0	0	0	0	0	0	200	300	0	0	0	0	0	0	0	200	903	0	0	0	0	0	0	0	603	903	0
7049	0	0	0	0	0	0	0	200	300	0	0	0	0	0	0	0	200	903	0	0	0	0	0	0	0	603	903	0
7049	1	0	0	0	0	0	0	200	300	0	0	0	0	0	0	0	200	903	0	0	0	0	0	0	0	603	903	0
7049	2	0	0	0	0	0	0	200	300	0	0	0	0	0	0	0	200	903	0	0	0	0	0	0	0	603	903	0
7049	3	0	0	0	0	0	0	200	300	0	0	0	0	0	0	0	200	903	0	0	0	0	0	0	0	603	903	0
7049	4	0	0	0	0	0	0	200	300	0	0	0	0	0	0	0	200	903	0	0	0	0	0	0	0	603	903	0
7049	5	0	0	0	0	0	0	200	300	0	0	0	0	0	0	0	200	903	0	0	0	0	0	0	0	603	903	0
7049	6	0	0	0	0	0	0	200	300	0	0	0	0	0	0	0	200	903	0	0	0	0	0	0	0	603	903	0
7049	7	0	0	0	0	0	0	200	300	0	0	0	0	0	0	0	200	903	0	0	0	0	0	0	0	603	903	0
7049	8	0	0	0	0	0	0	200	300	0	0	0	0	0	0	0	200	903	0	0	0	0	0	0	0	603	903	0
7049	9	0	0	0	0	0	0	200	300	0	0	0	0	0	0	0	200	903	0	0	0	0	0	0	0	603	903	0
7050	0	0	0	0	0	0	0	200	300	0	0	0	0	0	0	0	200	903	0	0	0	0	0	0	0	603	903	0
7050	1	0	0	0	0	0	0	200	300	0	0	0	0	0	0	0	200	903	0	0	0	0	0	0	0	603	903	0
7050	2	0	0	0	0	0	0	200	300	0	0	0	0	0	0	0	200	903	0	0	0	0	0	0	0	603	903	0
7050	3	0	0	0	0	0	0	200	300	0	0	0	0	0	0	0	200	903	0	0	0	0	0	0	0	603	903	0
7050	4	0	0	0	0	0	0	200	300	0	0	0	0	0	0	0	200	903	0	0	0	0	0	0	0	603	903	0
7050	5	0	0	0	0	0	0	200	300	0	0	0	0	0	0	0	200	903	0	0	0	0	0	0	0	603	903	0
7050	6	0	0	0	0	0	0	200	300	0	0	0	0	0	0	0	200	903	0	0	0	0	0	0	0	603	903	0
7050	7	0	0	0	0	0	0	200	300	0	0	0	0	0	0	0	200	903	0	0	0	0	0	0	0	603	903	0
7050	8	0	0	0	0	0	0	200	300	0	0	0	0	0	0	0	200	903	0	0	0	0	0	0	0	603	903	0
7050	9	0	0	0	0	0	0	200	300	0	0	0	0	0	0	0	200	903	0	0	0	0	0	0	0	603	903	0
7051	0	0	0	0	0	0	0	200	300	0	0	0	0	0	0	0	200	903	0	0	0	0	0	0	0	603	903	0
7051	1	0	0	0	0	0	0	200	300	0	0	0	0	0	0	0	200	903	0	0	0	0	0	0	0	603	903	0
7051	2	0	0	0	0	0	0	200	300	0	0	0	0	0	0	0	200	903	0	0	0	0	0	0	0	603	903	0
7051	3	0	0	0	0	0	0	200	300	0	0	0	0	0	0	0	200	903	0	0	0	0	0	0	0	603	903	0
7051	4	0	0	0	0	0	0	200	300	0	0	0	0	0	0	0	200	903	0	0	0	0	0	0	0	603	903	0
7051	5	0	0	0	0	0	0	200	300	0	0	0	0	0	0	0	200	903	0	0	0	0	0	0	0	603	903	0
7051	6	0	0	0	0	0	0	200	300	0	0	0	0	0	0	0	200	903	0	0	0	0	0	0	0	603	903	0
7051	7	0	0	0	0	0	0	200	300	0	0	0	0	0	0	0	200	903	0	0	0	0	0	0	0	603	903	0
7051	8	0	0	0	0	0	0	200	300	0	0	0	0	0	0	0	200	903	0	0	0	0	0	0	0	603	903	0
7051	9	0	0	0	0	0	0	200	300	0	0	0	0	0	0	0	200	903	0	0	0	0	0	0	0	603	903	0
7052	0	0	0	0	0	0	0	200	300	0	0	0	0	0	0	0	200	903	0	0	0	0	0	0	0	603	903	0
7052	1	0	0	0	0	0	0	200	300	0	0	0	0	0	0	0	200	903	0	0	0	0	0	0	0	603	903	0
7052	2	0	0	0	0	0	0	200	300	0	0	0	0	0	0	0	200	903	0	0	0	0	0	0	0	603	903	0
7052	3	0	0	0	0	0	0	200	300	0	0	0	0	0	0	0	200	903	0	0	0	0	0	0	0	603	903	0
7052	4	0	0	0	0	0	0	200	300	0	0	0	0	0	0	0	200	903	0	0	0	0	0	0	0	603	903	0
7052	5	0	0	0	0	0	0	200	300	0	0	0	0	0	0	0	200	903	0	0	0	0	0	0	0	603	903	0
7052	6	0	0	0	0	0	0	200	300	0	0	0	0	0	0	0	200	903	0	0	0	0	0	0	0	603	903	0
7052	7	0	0	0	0	0	0	200	300	0	0	0	0	0	0	0	200	903	0	0	0	0	0	0	0	603	903	0
7052	8	0	0	0	0	0	0	200	300	0	0	0	0	0	0	0	200	903	0	0	0	0	0	0	0	603	903	0
7052	9	0	0	0	0	0	0	200	300	0	0	0	0	0	0	0	200	903	0	0	0	0	0	0	0	603	903	0
7053	0	0	0	0	0	0	0	200	300	0	0	0	0	0	0	0	200	903	0	0	0	0	0	0	0	603	903	0
7053	1	0	0	0	0	0	0	200	300	0	0	0	0	0	0	0	200	903	0	0	0	0	0	0	0	603	903	0
7053	2	0	0	0	0	0	0	200	300	0	0	0	0	0	0	0	200	903	0	0	0	0	0	0	0	603	903	0
7053	3	0	0	0	0	0	0	200	300	0	0	0	0	0	0	0	200	903	0	0	0	0	0	0	0	603	903	0
7053	4	0	0	0	0	0	0	200	300	0	0	0	0	0	0	0	200	903	0	0	0	0	0	0	0	603	903	0
7053	5	0	0	0	0	0	0	200	300	0	0	0	0	0	0	0	200	903	0	0	0	0	0	0	0	603	903	0
7053	6	0	0	0	0	0	0	200	300	0	0	0	0	0	0	0	200	903	0	0	0	0	0	0	0	603	903	0
7053	7	0	0	0	0	0	0	200	300	0	0	0	0	0	0	0	200	903	0	0	0	0	0	0	0	603	903	0
7053	8	0	0	0	0	0	0	200	300	0	0	0	0	0	0	0	200	903	0	0	0	0	0	0	0	603	903	0
7053	9	0	0	0	0	0	0	200	300	0	0	0	0	0	0	0	200	903	0	0	0	0	0	0	0	603	903	0
7054	0	0	0	0	0	0	0	200	300	0	0	0	0	0	0	0	200	903	0	0	0	0	0	0	0	603	903	0
7054	1	0	0	0	0	0	0	200	300	0	0	0	0	0	0	0	200	903	0	0	0	0	0	0	0	603	903	0
7054	2	0	0	0	0	0	0	200	300	0	0	0	0	0	0	0	200	903	0	0	0	0	0	0	0	603	903	0
7054	3	0	0	0	0	0	0	200	300	0	0	0	0	0	0	0	200	903	0	0	0	0	0	0	0	603	903	0
7054	4	0	0	0	0	0	0	200	300	0	0	0	0	0	0	0	200	903	0	0	0	0	0	0	0	603	903	0
7054	5	0	0	0	0	0	0	200	300	0	0	0	0	0	0	0	200	903	0	0	0	0	0	0	0	603	903	0
7054	6	0	0	0	0	0	0	200	300	0	0	0	0	0	0	0	200	903	0	0	0	0	0	0	0	603	903	0
7054	7	0	0	0	0	0	0	200	300	0	0	0	0	0	0	0	200	903	0	0	0	0	0	0	0	603	903	0
7054	8	0	0	0	0	0	0	200	300	0	0	0	0	0	0	0	200	903	0	0	0	0	0	0	0	603	903	0
7054	9	0	0	0	0	0	0	200	300	0	0	0	0	0	0	0	200	903	0	0	0	0	0	0	0	603	903	0
7055	0	0	0	0	0	0	0	200	300	0	0	0	0	0	0	0	200	903	0	0	0	0	0	0	0	603	903	0
7055	1	0	0	0	0	0	0	200	300	0	0	0	0	0	0	0	200	903	0	0	0	0	0	0	0	603	903	0
7055	2	0	0	0	0	0	0	200	300	0	0	0	0	0	0	0	200	903	0	0	0	0	0	0	0	603	903	0
7055	3	0	0	0	0	0	0	200	300	0	0	0	0	0	0	0	200	903	0	0	0	0	0	0	0	603	903	0
7055	4	0	0	0	0	0	0	200	300	0	0	0	0	0	0	0	200	903	0	0	0	0	0	0	0	603	903	0
7055	5	0	0	0	0	0	0	200	300	0	0	0	0	0	0	0	200	903	0	0	0	0	0	0	0	603	903	0
7055	6	0	0	0	0	0	0	200	300	0	0	0	0	0	0	0	200	903	0	0	0	0	0	0	0	603	903	0
7055	7	0	0	0	0	0	0	200	300	0	0	0	0	0	0	0	200	903	0	0	0	0	0	0	0	603	903	0
7055	8	0	0	0	0	0	0	200	300	0	0	0	0	0	0	0	200	903	0	0	0	0	0	0	0	603	903	0
7055	9	0	0	0	0	0	0	200	300	0	0	0	0	0	0	0	200	903	0	0	0	0	0	0	0	603	903	0
7056	0	0	0	0	0	0	0	200	300	0	0	0	0	0	0	0	200	903	0	0	0	0	0	0	0	603	903	0
7056	1	0	0	0	0	0	0	200	300	0	0	0	0	0	0	0	200	903	0	0	0	0	0	0	0	603	903	0
7056	2	0	0	0	0	0	0	200	300	0	0	0	0	0	0	0	200	903	0	0	0	0	0	0	0	603	903	0
7056	3	0	0	0	0	0	0	200	300	0	0	0	0	0	0	0	200	903	0	0	0	0	0	0	0	603	903	0
7056	4	0	0	0	0	0	0	200	300	0	0	0	0	0	0	0	200	903	0	0	0	0	0	0	0	603	903	0
7056	5	0	0	0	0	0	0	200	300	0	0	0	0	0	0	0	200	903	0	0	0	0	0	0	0	603	903	0
7056	6	0	0	0	0	0	0	200	300	0	0	0	0	0	0	0	200	903	0	0	0	0	0	0	0	603	903	0
7056	7	0	0	0	0	0	0	200	300	0	0	0	0	0	0	0	200	903	0	0	0	0	0	0	0	603	903	0
7056	8	0	0	0	0	0	0	200	300	0	0	0	0	0	0	0	200	903	0	0	0	0	0	0	0	603	903	0
7056	9	0	0	0	0	0	0	200	300	0	0	0	0	0	0	0	200	903	0	0	0	0	0	0	0	603	903	0
7057	0	0	0	0	0	0	0	200	300	0	0	0	0	0	0	0	200	903	0	0	0	0	0	0	0	603	903	0
7057	1	0	0	0	0	0	0	200	300	0	0	0	0	0	0	0	200	903	0	0	0	0	0	0	0	603	903	0
7057	2	0	0	0	0	0	0	200	300	0	0	0	0	0	0	0	200	903	0	0	0	0	0	0	0	603	903	0
7057	3	0	0	0	0	0	0	200	300	0	0	0	0	0	0	0	200	903	0	0	0	0	0	0	0	603	903	0
7057	4	0	0	0	0	0	0	200	300	0	0	0	0	0	0	0	200	903	0	0	0	0	0	0	0	603	903	0
7057	5	0	0	0	0	0	0	200	300	0	0	0	0	0	0	0	200	903	0	0	0	0	0	0	0	603	903	0
7057	6	0	0	0	0	0	0	200	300	0	0	0	0	0	0	0	200	903	0	0	0	0	0	0	0	603	903	0
7057	7	0	0	0	0	0	0	200	300	0	0	0	0	0	0	0	200	903	0	0	0	0	0	0	0	603	903	0
7057	8	0	0	0	0	0	0	200	300	0	0	0	0	0	0	0	200	903	0	0	0	0	0	0	0	603	903	0
7057	9	0	0	0	0	0	0	200	300	0	0	0	0	0	0	0	200	903	0	0	0	0	0	0	0	603	903	0
7058	0	0	0	0	0	0	0	200	300	0	0	0	0	0	0	0	200	903	0	0	0	0	0	0	0	603	903	0
7058	1	0	0	0	0	0	0	200	300	0	0	0	0	0	0	0	200	903	0	0	0	0	0	0	0	603	903	0
7058	2	0	0	0	0	0	0	200	300	0	0	0	0	0	0	0	200	903	0	0	0	0	0	0	0	603	903	0
7058	3	0	0	0	0	0	0	200	300	0	0	0	0	0	0	0	200	903	0	0	0	0	0	0	0	603	903	0
7058	4	0	0	0	0	0	0	200	300	0	0	0	0	0	0	0	200	903	0	0	0	0	0	0	0	603	903	0
7058	5	0	0	0	0	0	0	200	300	0	0	0	0	0	0	0	200	903	0	0	0	0	0	0	0	603	903	0
7058	6	0	0	0	0	0	0	200	300	0	0	0	0	0	0	0	200	903	0	0	0	0	0	0	0	603	903	0
7058	7	0	0	0	0	0	0	200	300	0	0	0	0	0	0	0	200	903	0	0	0	0	0	0	0	603	903	0
7058	8	0	0	0	0	0	0	200	300	0	0	0	0	0	0	0	200	903	0	0	0	0	0	0	0	603	903	0
7058	9	0	0	0	0	0	0	200	300	0	0	0	0	0	0	0	200	903	0	0	0	0	0	0	0	603	903	0
7059	0	0	0	0	0	0	0	200	300	0	0	0	0	0	0	0	200	903	0	0	0	0	0	0	0	603	903	0
7059	1	0	0	0	0	0	0	200	300	0	0	0	0	0	0	0	200	903	0	0	0	0	0	0	0	603	903	0
7059	2	0	0	0	0	0	0	200	300	0	0	0	0	0	0	0	200	903	0	0	0	0	0	0	0	603	903	0
7059	3	0	0	0	0	0	0	200	300	0	0	0	0	0	0	0	200	903	0	0	0	0	0	0	0	603	903	0
7059	4	0	0	0	0	0	0	200	300	0	0	0	0	0	0	0	200	903	0	0	0	0	0	0	0	603	903	0
7059	5	0	0	0	0	0	0	200	300	0	0	0	0	0	0	0	200	903	0	0	0	0	0	0	0	603	903	0
7059	6	0	0	0	0	0	0	200	300	0	0	0	0	0	0	0	200	903	0	0	0	0	0	0	0	603	903	0
7059	7	0	0	0	0	0	0	200	300	0	0	0	0	0	0	0	200	903	0	0	0	0	0	0	0	603	903	0
7059	8	0	0	0	0	0	0	200	300	0	0	0	0	0	0	0	200	903	0	0	0	0	0	0	0	603	903	0
7059	9	0	0	0	0	0	0	200	300	0	0	0	0	0	0	0	200	903	0	0	0	0	0	0	0	603	903	0
7060	0	0	0	0	0	0	0	200	300	0	0	0	0	0	0	0	200	903	0	0	0	0	0	0	0	603	903	0
7060	1	0	0	0	0	0	0	200	300	0	0	0	0	0	0	0	200	903	0	0	0	0	0	0	0	603	903	0
7060	2	0	0	0	0	0	0	200	300	0	0	0	0	0	0	0	200	903	0	0	0	0	0	0	0	603	903	0
7060	3	0	0	0	0	0	0	200	300	0	0	0	0	0	0	0	200	903	0	0	0	0	0	0	0	603	903	0
7060	4	0	0	0	0	0	0	200	300	0	0	0	0	0	0	0	200	903	0	0	0	0	0	0	0	603	903	0
7060	5	0	0	0	0	0	0	200	300	0	0	0	0	0	0	0	200	903	0	0	0	0	0	0	0	603	903	0
7060	6	0	0	0	0	0	0	200	300	0	0	0	0	0	0	0	200	903	0	0	0	0	0	0	0	603	903	0
7060	7	0	0	0	0	0	0	200	300	0	0	0	0	0	0	0	200	903	0	0	0	0	0	0	0	603	903	0
7060	8	0	0	0	0	0	0	200	300	0	0	0	0	0	0	0	200	903	0	0	0	0	0	0	0	603	903	0
7060	9	0	0	0	0	0	0	200	300	0	0	0	0	0	0	0	200	903	0	0	0	0	0	0	0	603	903	0
7061	0	0	0	0	0	0	0	200	300	0	0	0	0	0	0	0	200	903	0	0	0	0	0	0	0	603	903	0
7061	1	0	0	0	0	0	0	200	300	0	0	0	0	0	0	0	200	903	0	0	0	0	0	0	0	603	903	0
7061	2	0	0	0	0	0	0	200	300	0	0	0	0	0	0	0	200	903	0	0	0	0	0	0	0	603	903	0
7061	3	0	0	0	0	0	0	200	300	0	0	0	0	0	0	0	200	903	0	0	0	0	0	0	0	603	903	0
7061	4	0	0	0	0	0	0	200	300	0	0	0	0	0	0	0	200	903	0	0	0	0	0	0	0	603	903	0
7061	5	0	0	0	0	0	0	200	300	0	0	0	0	0	0	0	200	903	0	0	0	0	0	0	0	603	903	0
7061	6	0	0	0	0	0	0	200	300	0	0	0	0	0	0	0	200	903	0	0	0	0	0	0	0	603	903	0
7061	7	0	0	0	0	0	0	200	300	0	0	0	0	0	0	0	200	903	0	0	0	0	0	0	0	603	903	0
7061	8	0	0	0	0	0	0	200	300	0	0	0	0	0	0	0	200	903	0	0	0	0	0	0	0	603	903	0
7061	9	0	0	0	0	0	0	200	300	0	0	0	0	0	0	0	200	903	0	0	0	0	0	0	0	603	903	0
7062	0	0	0	0	0	0	0	200	300	0	0	0	0	0	0	0	200	903	0	0	0	0	0	0	0	603	903	0
7062	1	0	0	0	0	0	0	200	300	0	0	0	0	0	0	0	200	903	0	0	0	0	0	0	0	603	903	0
7062	2	0	0	0	0	0	0	200	300	0	0	0	0	0	0	0	200	903	0	0	0	0	0	0	0	603	903	0
7062	3	0	0	0	0	0	0	200	300	0	0	0	0	0	0	0	200	903	0	0	0	0	0	0	0	603	903	0
7062	4	0	0	0	0	0	0	200	300	0	0	0	0	0	0	0	200	903	0	0	0	0	0	0	0	603	903	0
7062	5	0	0	0	0	0	0	200	300	0	0	0	0	0	0	0	200	903	0	0	0	0	0	0	0	603	903	0
7062	6	0	0	0	0	0	0	200	300	0	0	0	0	0	0	0	200	903	0	0	0	0	0	0	0	603	903	0
7062	7	0	0	0	0	0	0	200	300	0	0	0	0	0	0	0	200	903	0	0	0	0	0	0	0	603	903	0
7062	8	0	0	0	0	0	0	200	300	0	0	0	0	0	0	0	200	903	0	0	0	0	0	0	0	603	903	0
7062	9	0	0	0	0	0	0	200	300	0	0	0	0	0	0	0	200	903	0	0	0	0	0	0	0	603	903	0
7063	0	0	0	0	0	0	0	200	300	0	0	0	0	0	0	0	200	903	0	0	0	0	0	0	0	603	903	0
7063	1	0	0	0	0	0	0	200	300	0	0	0	0	0	0	0	200	903	0	0	0	0	0	0	0	603	903	0
7063	2	0	0	0	0	0	0	200	300	0	0	0	0	0	0	0	200	903	0	0	0	0	0	0	0	603	903	0
7063	3	0	0	0	0	0	0	200	300	0	0	0	0	0	0	0	200	903	0	0	0	0	0	0	0	603	903	0
7063	4	0	0	0	0	0	0	200	300	0	0	0	0	0	0	0	200	903	0	0	0	0	0	0	0	603	903	0
7063	5	0	0	0	0	0	0	200	300	0	0	0	0	0	0	0	200	903	0	0	0	0	0	0	0	603	903	0
7063	6	0	0	0	0	0	0	200	300	0	0	0	0	0	0	0	200	903	0	0	0	0	0	0	0	603	903	0
7063	7	0	0	0	0	0	0	200	300	0	0	0	0	0	0	0	200	903	0	0	0	0	0	0	0	603	903	0
7063	8	0	0	0	0	0	0	200	300	0	0	0	0	0	0	0	200	903	0	0	0	0	0	0	0	603	903	0
7063	9	0	0	0	0	0	0	200	300	0	0	0	0	0	0	0	200	903	0	0	0	0	0	0	0	603	903	0
7064	0	0	0	0	0	0	0	200	300	0	0	0	0	0	0	0	200	903	0	0	0	0	0	0	0	603	903	0
7064	1	0	0	0	0	0	0	200	300	0	0	0	0	0	0	0	200	903	0	0	0	0	0	0	0	603	903	0
7064	2	-2.97304	9.00223	-15.34	3224.21	1178.21	636.428	276.807	89.816	0	0	0	0	0	0	0	200	903	0	0	0	0	0	0	0	603	903	0
7064	3	1.75719	9.76517	-21.7487	3498.87	1849.6	1139.97	285.044	139.122	0	0	0	0	0	0	0	200	903	0	0	0	0	0	0	0	603	903	0
7064	4	4.96153	7.32376	-22.6642	3041.11	1666.49	1277.3	273.53	165.819	0	0	0	0	0	0	0	200	903	0	0	0	0	0	0	0	603	903	0
7064	5	0.383897	9.76517	-18.6969	3681.98	1971.67	1002.64	305.454	103.07	0	0	0	0	0	0	0	200	903	0	0	0	0	0	0	0	603	903	0
7064	6	-1.75233	13.4273	-21.4435	4505.95	2032.7	1643.51	294.794	89.8684	0	0	0	0	0	0	0	200	903	0	0	0	0	0	0	0	603	903	0
7064	7	0.994248	12.6643	-26.3263	4231.29	1849.6	1323.07	270.257	139.275	0	0	0	0	0	0	0	200	903	0	0	0	0	0	0	0	603	903	0
7064	8	2.21495	12.054	-27.2418	5146.82	2215.81	1918.17	281.339	111.069	0	0	0	0	0	0	0	200	903	0	0	0	0	0	0	0	603	903	0
7064	9	2.36754	13.7325	-28.4625	5879.24	3009.27	2192.83	305.727	93.4392	0	0	0	0	0	0	0	200	903	0	0	0	0	0	0	0	603	903	0
7065	0	5.87706	13.2747	-32.735	6062.35	3253.41	1963.94	299.386	114.805	0	0	0	0	0	0	0	200	903	0	0	0	0	0	0	0	603	903	0
7065	1	5.26671	14.0376	-38.8385	6794.77	3619.62	1963.94	293.197	125.051	0	0	0	0	0	0	0	200	903	0	0	0	0	0	0	0	603	903	0
7065	2	3.43565	10.8333	-47.0782	8900.49	4168.94	1872.39	288.553	110.943	0	0	0	0	0	0	0	200	903	0	0	0	0	0	0	0	603	903	0
7065	3	3.43565	7.01858	-54.4025	9358.25	5206.53	1735.06	295.704	127.981	0	0	0	0	0	0	0	200	903	0	0	0	0	0	0	0	603	903	0
7065	4	5.57189	5.4927	-58.6749	10365.3	5389.64	1094.19	291.856	123.343	0	0	0	0	0	0	0	200	903	0	0	0	0	0	0	0	603	903	0
7065	5	4.35118	6.10306	-64.7784	11738.6	6122.06	1094.19	294.508	118.788	0	0	0	0	0	0	0	200	903	0	0	0	0	0	0	0	603	903	0
7065	6	2.21495	1.8306	-70.5768	12196.4	6671.38	773.757	294.527	127.19	0	0	0	0	0	0	0	200	903	0	0	0	0	0	0	0	603	903	0
7065	7	2.21495	0.76248	-72.713	13203.5	6854.48	361.77	294.268	118.417	0	0	0	0	0	0	0	200	903	0	0	0	0	0	0	0	603	903	0
7065	8	-1.44716	2.13577	-82.4786	13661.2	7525.87	132.888	291.246	134.366	0	0	0	0	0	0	0	200	903	0	0	0	0	0	0	0	603	903	0
7065	9	-0.684218	-1.37375	-87.6666	15492.3	8197.25	-141.77	293.505	123.282	0	0	0	0	0	0	0	200	903	0	0	0	0	0	0	0	603	903	0
7066	0	-0.836806	-5.7988	-94.3805	16865.6	8624.5	-965.745	291.38	121.302	0	0	0	0	0	0	0	200	903	0	0	0	0	0	0	0	603	903	0
7066	1	-2.36269	-6.40915	-99.5685	16957.1	8746.57	-1469.29	287.845	129.694	0	0	0	0	0	0	0	200	903	0	0	0	0	0	0	0	603	903	0
7066	2	-4.6515	-7.62985	-103.841	18513.5	9478.99	-1103.07	291.284	121.713	0	0	0	0	0	0	0	200	903	0	0	0	0	0	0	0	603	903	0
7066	3	-6.78773	-10.9868	-109.029	19337.5	9967.27	-2247.48	291.419	122.639	0	0	0	0	0	0	0	200	903	0	0	0	0	0	0	0	603	903	0
7066	4	-8.92396	-13.5808	-116.658	19886.8	10455.6	-2659.47	289.625	129.529	0	0	0	0	0	0	0	200	903	0	0	0	0	0	0	0	603	903	0
7066	5	-8.77138	-14.6489	-121.541	20985.5	10821.8	-2796.8	289.038	127.339	0	0	0	0	0	0	0	200	903	0	0	0	0	0	0	0	603	903	0
7066	6	-6.63515	-14.6489	-126.424	22267.2	11493.2	-3071.46	290.91	123.869	0	0	0	0	0	0	0	200	903	0	0	0	0	0	0	0	603	903	0
7066	7	-8.31361	-14.8015	-129.476	22725	11310	-3254.56	287.353	124.485	0	0	0	0	0	0	0	200	903	0	0	0	0	0	0	0	603	903	0
7066	8	-10.2973	-13.4282	-134.969	23365.8	11798.3	-3163.01	287.415	126.88	0	0	0	0	0	0	0	200	903	0	0	0	0	0	0	0	603	903	0
7066	9	-10.1447	-13.5808	-140.767	24464.5	12530.8	-3254.56	289.018	126.206	0	0	0	0	0	0	0	200	903	0	0	0	0	0	0	0	603	903	0
7067	0	-9.22914	-13.4282	-145.65	25563.1	12530.8	-3208.79	286.033	124.49	0	0	0	0	0	0	0	200	903	0	0	0	0	0	0	0	603	903	0
7067	1	-9.07655	-12.0549	-150.228	25746.2	13385.2	-3208.79	289.1	128.619	0	0	0	0	0	0	0	200	903	0	0	0	0	0	0	0	603	903	0
7067	2	-10.1447	-11.4446	-154.5	26844.8	13446.3	-3071.46	287.031	126.247	0	0	0	0	0	0	0	200	903	0	0	0	0	0	0	0	603	903	0
7067	3	-10.1447	-10.529	-158.773	27668.8	13263.2	-2888.35	283.536	125.733	0	0	0	0	0	0	0	200	903	0	0	0	0	0	0	0	603	903	0
7067	4	-11.0602	-6.10397	-162.435	27577.2	14178.7	-2522.14	287.289	130.226	0	0	0	0	0	0	0	200	903	0	0	0	0	0	0	0	603	903	0
7067	5	-9.53432	-4.73068	-162.435	28950.5	14178.7	-2430.59	287.289	121.771	0	0	0	0	0	0	0	200	903	0	0	0	0	0	0	0	603	903	0
7067	6	-9.07655	-3.66257	-167.928	28584.3	14239.7	-1881.27	284.797	129.782	0	0	0	0	0	0	0	200	903	0	0	0	0	0	0	0	603	903	0
7067	7	-9.38173	0.609892	-170.674	28675.9	14972.2	-1881.27	287.724	131.985	0	0	0	0	0	0	0	200	903	0	0	0	0	0	0	0	603	903	0
7067	8	-8.92396	2.44095	-173.116	29591.4	14667	-1423.51	284.724	129.066	0	0	0	0	0	0	0	200	903	0	0	0	0	0	0	0	603	903	0
7067	9	-10.2973	4.72977	-177.999	29957.6	15094.2	-1286.18	284.8	131.698	0	0	0	0	0	0	0	200	903	0	0	0	0	0	0	0	603	903	0
7068	0	-8.61879	8.23929	-178.914	30232.3	15521.5	-1011.52	286.754	131.024	0	0	0	0	0	0	0	200	903	0	0	0	0	0	0	0	603	903	0
7068	1	-9.38173	10.8333	-181.356	30598.5	15277.3	-874.193	284.24	131.279	0	0	0	0	0	0	0	200	903	0	0	0	0	0	0	0	603	903	0
7068	2	-8.16103	13.2747	-183.492	31697.1	16009.8	-187.547	287.251	127.256	0	0	0	0	0	0	0	200	903	0	0	0	0	0	0	0	603	903	0
7068	3	-9.83949	14.4954	-187.459	31880.2	15948.7	-416.429	285.078	129.935	0	0	0	0	0	0	0	200	903	0	0	0	0	0	0	0	603	903	0
7068	4	-9.83949	18.3101	-191.121	32154.9	16437	-4.44129	286.003	131.757	0	0	0	0	0	0	0	200	903	0	0	0	0	0	0	0	603	903	0
7068	5	-9.53432	19.6834	-192.342	32429.5	16681.1	87.1114	286.727	131.396	0	0	0	0	0	0	0	200	903	0	0	0	0	0	0	0	603	903	0
7068	6	-9.53432	21.3618	-198.751	33528.2	16620.1	270.217	283.623	131.305	0	0	0	0	0	0	0	200	903	0	0	0	0	0	0	0	603	903	0
7068	7	-9.38173	22.5825	-202.108	33436.6	17352.5	224.441	285.858	134.56	0	0	0	0	0	0	0	200	903	0	0	0	0	0	0	0	603	903	0
7068	8	-9.53432	24.7188	-206.075	33619.7	17413.6	315.993	284.501	136.857	0	0	0	0	0	0	0	200	903	0	0	0	0	0	0	0	603	903	0
7068	9	-9.53432	26.855	-208.516	34901.5	17413.6	682.204	283.512	132.62	0	0	0	0	0	0	0	200	903	0	0	0	0	0	0	0	603	903	0
7069	0	-10.6024	27.0076	-213.094	35084.6	17840.8	544.875	283.723	135.356	0	0	0	0	0	0	0	200	903	0	0	0	0	0	0	0	603	903	0
7069	1	-8.31361	27.6179	-218.587	35450.8	17840.8	911.086	281.619	137.818	0	0	0	0	0	0	0	200	903	0	0	0	0	0	0	0	603	903	0
7069	2	-9.99208	29.2964	-220.113	35817	18207	865.31	282.717	137.279	0	0	0	0	0	0	0	200	903	0	0	0	0	0	0	0	603	903	0
7069	3	-9.99208	29.1438	-222.249	36824.1	19000.5	773.757	285.492	134.312	0	0	0	0	0	0	0	200	903	0	0	0	0	0	0	0	603	903	0
7069	4	-9.6869	28.8387	-226.522	36641	18451.2	1002.64	281.454	138.245	0	0	0	0	0	0	0	200	903	0	0	0	0	0	0	0	603	903	0
7069	5	-9.99208	28.3809	-231.099	37190.3	19183.6	1048.42	283.01	139.072	0	0	0	0	0	0	0	200	903	0	0	0	0	0	0	0	603	903	0
7069	6	-10.1447	30.6697	-232.93	37831.1	19793.9	1094.19	284.978	137.586	0	0	0	0	0	0	0	200	903	0	0	0	0	0	0	0	603	903	0
7069	7	-9.83949	29.2964	-242.391	39204.5	19977	1323.07	282.417	138.259	0	0	0	0	0	0	0	200	903	0	0	0	0	0	0	0	603	903	0
7069	8	-9.07655	30.0594	-250.63	40211.5	20892.6	1826.61	283.36	139.559	0	0	0	0	0	0	0	200	903	0	0	0	0	0	0	0	603	903	0
7069	9	-11.2128	30.3645	-257.344	41218.6	21502.9	956.862	283.557	139.831	0	0	0	0	0	0	0	200	903	0	0	0	0	0	0	0	603	903	0
7070	0	-10.755	30.6697	-264.974	42500.4	21991.2	1231.52	282.994	139.605	0	0	0	0	0	0	0	200	903	0	0	0	0	0	0	0	603	903	0
7070	1	-11.518	33.2637	-266.5	42775	22784.7	1277.3	285.496	139.493	0	0	0	0	0	0	0	200	903	0	0	0	0	0	0	0	603	903	0
7070	2	-10.755	34.9422	-274.129	43232.8	23150.9	1963.94	284.452	142.29	0	0	0	0	0	0	0	200	903	0	0	0	0	0	0	0	603	903	0
7070	3	-10.755	34.0266	-279.927	44514.5	24005.4	1826.61	285.756	140.978	0	0	0	0	0	0	0	200	903	0	0	0	0	0	0	0	603	903	0
7070	4	-9.53432	35.7051	-286.031	44422.9	24249.5	2101.27	284.779	144.692	0	0	0	0	0	0	0	200	903	0	0	0	0	0	0	0	603	903	0
7070	5	-9.6869	37.5362	-290.303	45704.7	24737.8	2330.15	285.214	142.562	0	0	0	0	0	0	0	200	903	0	0	0	0	0	0	0	603	903	0
7070	6	-10.2973	38.4517	-292.745	46528.7	24859.9	2467.48	284.92	141.061	0	0	0	0	0	0	0	200	903	0	0	0	0	0	0	0	603	903	0
7070	7	-8.92396	39.825	-300.679	46162.5	25348.1	2650.59	284.303	146.473	0	0	0	0	0	0	0	200	903	0	0	0	0	0	0	0	603	903	0
7070	8	-8.16103	41.8086	-302.51	46620.2	25592.3	2971.02	284.6	145.889	0	0	0	0	0	0	0	200	903	0	0	0	0	0	0	0	603	903	0
7070	9	-6.02479	43.7923	-307.393	47718.8	26385.7	2833.69	285.837	144.763	0	0	0	0	0	0	0	200	903	0	0	0	0	0	0	0	603	903	0
7071	0	-4.80409	43.0293	-309.835	47718.8	26385.7	3337.23	285.161	145.986	0	0	0	0	0	0	0	200	903	0	0	0	0	0	0	0	603	903	0
7071	1	-5.26186	46.5388	-317.159	48268.2	26996.1	3703.45	285.119	147.811	0	0	0	0	0	0	0	200	903	0	0	0	0	0	0	0	603	903	0
7071	2	-6.17738	47.9121	-320.821	48634.4	27118.2	3703.45	284.527	148.407	0	0	0	0	0	0	0	200	903	0	0	0	0	0	0	0	603	903	0
7071	3	-5.10927	49.1328	-324.483	49366.8	27240.2	4390.09	283.95	147.86	0	0	0	0	0	0	0	200	903	0	0	0	0	0	0	0	603	903	0
7071	4	-4.95668	50.201	-327.23	49183.7	28277.8	4435.87	286.416	149.697	0	0	0	0	0	0	0	200	903	0	0	0	0	0	0	0	603	903	0
7071	5	-4.19374	50.9639	-331.197	49183.7	28460.9	4481.64	285.934	151.497	0	0	0	0	0	0	0	200	903	0	0	0	0	0	0	0	603	903	0
7071	6	-2.2101	52.1846	-334.859	50648.5	28949.2	4756.3	286.452	148.747	0	0	0	0	0	0	0	200	903	0	0	0	0	0	0	0	603	903	0
7071	7	-3.12562	53.7105	-339.131	50648.5	28949.2	4985.18	285.363	150.652	0	0	0	0	0	0	0	200	903	0	0	0	0	0	0	0	603	903	0
7071	8	-3.73598	55.3889	-342.794	50190.8	29193.4	5259.84	285.163	153.583	0	0	0	0	0	0	0	200	903	0	0	0	0	0	0	0	603	903	0
7071	9	-2.2101	55.8467	-344.625	51197.8	29193.4	4985.18	284.711	151.439	0	0	0	0	0	0	0	200	903	0	0	0	0	0	0	0	603	903	0
7072	0	-0.989394	55.6941	-348.287	51747.2	29742.7	5122.51	285.397	151.424	0	0	0	0	0	0	0	200	903	0	0	0	0	0	0	0	603	903	0
7072	1	-1.75233	56.1519	-349.202	51564.1	30169.9	5671.83	286.397	152.338	0	0	0	0	0	0	0	200	903	0	0	0	0	0	0	0	603	903	0
7072	2	0.994248	57.6778	-351.644	51472.5	30475.1	5534.5	286.665	153.623	0	0	0	0	0	0	0	200	903	0	0	0	0	0	0	0	603	903	0
7072	3	0.231309	58.1355	-354.085	52113.4	30292	5580.28	285.55	152.822	0	0	0	0	0	0	0	200	903	0	0	0	0	0	0	0	603	903	0
7072	4	1.6046	58.8985	-357.442	51747.2	30658.2	6312.7	285.771	155.229	0	0	0	0	0	0	0	200	903	0	0	0	0	0	0	0	603	903	0
7072	5	2.97789	59.2036	-358.968	52021.8	31024.4	6129.59	286.427	155.079	0	0	0	0	0	0	0	200	903	0	0	0	0	0	0	0	603	903	0
7072	6	4.65636	60.5769	-363.546	53120.5	31695.8	6038.04	287.185	153.882	0	0	0	0	0	0	0	200	903	0	0	0	0	0	0	0	603	903	0
7072	7	4.04601	61.3399	-366.902	53578.2	32001	6450.03	287.219	153.972	0	0	0	0	0	0	0	200	903	0	0	0	0	0	0	0	603	903	0
7072	8	4.35118	62.8658	-370.259	52662.7	32123	6358.47	286.758	157.768	0	0	0	0	0	0	0	200	903	0	0	0	0	0	0	0	603	903	0
7072	9	4.96153	65.002	-372.701	53852.9	32428.2	6633.13	287.009	155.506	0	0	0	0	0	0	0	200	903	0	0	0	0	0	0	0	603	903	0
7073	0	5.57189	63.9339	-376.668	54127.5	32733.4	6953.57	286.902	156.299	0	0	0	0	0	0	0	200	903	0	0	0	0	0	0	0	603	903	0
7073	1	5.87706	67.2908	-383.077	53852.9	33709.9	7228.22	287.998	159.42	0	0	0	0	0	0	0	200	903	0	0	0	0	0	0	0	603	903	0
7073	2	8.77623	68.2063	-387.044	54493.7	34015.1	7502.88	287.884	159.205	0	0	0	0	0	0	0	200	903	0	0	0	0	0	0	0	603	903	0
7073	3	8.47106	68.9693	-390.096	54768.4	34076.2	7731.76	287.353	159.603	0	0	0	0	0	0	0	200	903	0	0	0	0	0	0	0	603	903	0
7073	4	7.70812	70.6477	-390.706	54310.6	34869.6	7960.65	289.248	160.994	0	0	0	0	0	0	0	200	903	0	0	0	0	0	0	0	603	903	0
7073	5	9.38658	72.021	-397.115	54402.2	35052.7	8372.63	288.268	163.006	0	0	0	0	0	0	0	200	903	0	0	0	0	0	0	0	603	903	0
7073	6	11.065	73.6995	-401.998	55592.4	35846.2	8738.84	289.17	161.71	0	0	0	0	0	0	0	200	903	0	0	0	0	0	0	0	603	903	0
7073	7	10.6073	74.615	-404.744	54310.6	36273.4	8693.07	289.621	165.815	0	0	0	0	0	0	0	200	903	0	0	0	0	0	0	0	603	903	0
7073	8	11.3702	74.4624	-408.101	55317.7	36456.5	9105.06	289.332	164.451	0	0	0	0	0	0	0	200	903	0	0	0	0	0	0	0	603	903	0
7073	9	11.3702	77.0564	-412.984	56050.2	36700.7	9425.49	288.867	164.28	0	0	0	0	0	0	0	200	903	0	0	0	0	0	0	0	603	903	0
7074	0	12.8961	78.4297	-414.51	55683.9	37127.9	9791.7	289.571	165.663	0	0	0	0	0	0	0	200	903	0	0	0	0	0	0	0	603	903	0
7074	1	13.2013	79.4978	-418.477	55775.5	37677.2	9608.6	290.034	166.718	0	0	0	0	0	0	0	200	903	0	0	0	0	0	0	0	603	903	0
7074	2	12.4383	81.0237	-422.139	56691	37982.4	10020.6	289.976	165.705	0	0	0	0	0	0	0	200	903	0	0	0	0	0	0	0	603	903	0
7074	3	13.3539	80.8711	-427.022	57148.8	38409.7	10432.6	289.948	166.169	0	0	0	0	0	0	0	200	903	0	0	0	0	0	0	0	603	903	0
7074	4	13.2013	83.1599	-429.769	56599.5	38714.8	10432.6	290.083	168.302	0	0	0	0	0	0	0	200	903	0	0	0	0	0	0	0	603	903	0
7074	5	13.5065	84.0755	-432.21	57240.3	38959	10341	290.139	167.564	0	0	0	0	0	0	0	200	903	0	0	0	0	0	0	0	603	903	0
7074	6	14.422	84.0755	-437.703	57423.4	39508.3	10798.8	290.263	168.807	0	0	0	0	0	0	0	200	903	0	0	0	0	0	0	0	603	903	0
7074	7	15.3375	85.2962	-439.839	57423.4	39874.5	10936.1	290.657	169.445	0	0	0	0	0	0	0	200	903	0	0	0	0	0	0	0	603	903	0
7074	8	15.3375	86.2117	-442.891	57331.9	40057.6	10844.6	290.446	170.551	0	0	0	0	0	0	0	200	903	0	0	0	0	0	0	0	603	903	0
7074	9	16.1004	85.4488	-447.164	58247.4	39935.5	11073.4	289.309	169.74	0	0	0	0	0	0	0	200	903	0	0	0	0	0	0	0	603	903	0
7075	0	17.6263	87.7376	-448.995	58247.4	40912.1	11393.9	291.119	170.271	0	0	0	0	0	0	0	200	903	0	0	0	0	0	0	0	603	903	0
7075	1	16.8634	88.8057	-453.878	58064.3	41278.3	11485.4	290.946	172.071	0	0	0	0	0	0	0	200	903	0	0	0	0	0	0	0	603	903	0
7075	2	16.8634	88.9583	-458.455	58430.5	41644.5	11760.1	290.837	172.549	0	0	0	0	0	0	0	200	903	0	0	0	0	0	0	0	603	903	0
7075	3	17.016	88.5005	-459.371	58522.1	41705.6	11622.8	290.788	172.604	0	0	0	0	0	0	0	200	903	0	0	0	0	0	0	0	603	903	0
7075	4	17.6263	90.179	-458.455	58339	41766.6	11943.2	291.103	172.749	0	0	0	0	0	0	0	200	903	0	0	0	0	0	0	0	603	903	0
7075	5	17.6263	91.5523	-463.643	58522.1	42193.8	12080.5	291.005	173.778	0	0	0	0	0	0	0	200	903	0	0	0	0	0	0	0	603	903	0
7075	6	17.3212	91.0945	-466.695	58522.1	43048.3	12126.3	292.241	174.603	0	0	0	0	0	0	0	200	903	0	0	0	0	0	0	0	603	903	0
7075	7	17.7789	91.3997	-470.967	58613.6	43231.4	12172.1	291.793	175.546	0	0	0	0	0	0	0	200	903	0	0	0	0	0	0	0	603	903	0
7075	8	18.0841	93.0782	-474.935	58705.2	43231.4	12584.1	291.026	176.393	0	0	0	0	0	0	0	200	903	0	0	0	0	0	0	0	603	903	0
7075	9	18.847	93.6885	-475.545	59071.4	44024.9	12584.1	292.578	175.782	0	0	0	0	0	0	0	200	903	0	0	0	0	0	0	0	603	903	0
7076	0	20.6781	94.2989	-478.597	58979.8	44024.9	12629.8	291.987	176.765	0	0	0	0	0	0	0	200	903	0	0	0	0	0	0	0	603	903	0
7076	1	18.847	95.5196	-482.869	59712.3	44513.2	12675.6	292.185	176.339	0	0	0	0	0	0	0	200	903	0	0	0	0	0	0	0	603	903	0
7076	2	19.7626	96.5877	-485.005	60170	44940.4	12767.2	292.66	175.94	0	0	0	0	0	0	0	200	903	0	0	0	0	0	0	0	603	903	0
7076	3	20.3729	95.0618	-489.278	60078.5	45245.6	13362.3	292.474	177.21	0	0	0	0	0	0	0	200	903	0	0	0	0	0	0	0	603	903	0
7076	4	20.9833	97.961	-493.245	59254.5	45794.9	13270.7	292.844	179.868	0	0	0	0	0	0	0	200	903	0	0	0	0	0	0	0	603	903	0
7076	5	22.0514	98.5713	-495.381	60536.2	46100.1	13408	293.06	177.799	0	0	0	0	0	0	0	200	903	0	0	0	0	0	0	0	603	903	0
7076	6	22.5091	99.3343	-498.738	60444.7	46344.2	13041.8	292.923	178.805	0	0	0	0	0	0	0	200	903	0	0	0	0	0	0	0	603	903	0
7076	7	23.1195	100.097	-503.316	60353.1	47076.7	14232	293.533	180.089	0	0	0	0	0	0	0	200	903	0	0	0	0	0	0	0	603	903	0
7076	8	23.4247	99.0291	-507.283	60627.8	46710.5	13682.7	292.08	180.485	0	0	0	0	0	0	0	200	903	0	0	0	0	0	0	0	603	903	0
7076	9	24.3402	100.86	-513.387	60810.9	48053.2	13865.8	293.6	181.55	0	0	0	0	0	0	0	200	903	0	0	0	0	0	0	0	603	903	0
7077	0	24.798	101.623	-517.354	61268.6	47931.2	13957.4	292.647	181.573	0	0	0	0	0	0	0	200	903	0	0	0	0	0	0	0	603	903	0
7077	1	26.1712	102.844	-522.237	61360.2	48663.6	14186.2	293.183	182.505	0	0	0	0	0	0	0	200	903	0	0	0	0	0	0	0	603	903	0
7077	2	26.4764	102.691	-528.951	62367.3	49518.1	14277.8	293.616	182.092	0	0	0	0	0	0	0	200	903	0	0	0	0	0	0	0	603	903	0
7077	3	26.7816	103.302	-531.392	61818	49396	14506.7	292.956	183.668	0	0	0	0	0	0	0	200	903	0	0	0	0	0	0	0	603	903	0
7077	4	26.629	104.675	-536.885	62367.3	50494.6	14644	294.051	183.835	0	0	0	0	0	0	0	200	903	0	0	0	0	0	0	0	603	903	0
7077	5	27.2394	104.675	-541.158	63099.7	50494.6	14552.4	293.309	183.399	0	0	0	0	0	0	0	200	903	0	0	0	0	0	0	0	603	903	0
7077	6	27.8497	104.37	-542.989	63282.8	51288.1	14964.4	294.455	183.455	0	0	0	0	0	0	0	200	903	0	0	0	0	0	0	0	603	903	0
7077	7	27.392	106.506	-550.008	63191.3	51959.5	14735.6	294.47	185.108	0	0	0	0	0	0	0	200	903	0	0	0	0	0	0	0	603	903	0
7077	8	28.0023	106.658	-554.586	64106.8	52081.6	15101.8	293.911	184.406	0	0	0	0	0	0	0	200	903	0	0	0	0	0	0	0	603	903	0
7077	9	28.7652	106.353	-562.52	64106.8	53363.3	15101.8	294.865	186.036	0	0	0	0	0	0	0	200	903	0	0	0	0	0	0	0	603	903	0
7078	0	30.9015	107.879	-568.318	63832.1	53790.5	15056	294.649	187.682	0	0	0	0	0	0	0	200	903	0	0	0	0	0	0	0	603	903	0
7078	1	34.2584	108.184	-568.318	64473	54339.9	15605.3	295.615	186.555	0	0	0	0	0	0	0	200	903	0	0	0	0	0	0	0	603	903	0
7078	2	34.7162	109.863	-572.896	65022.3	54767.1	15651.1	295.597	186.502	0	0	0	0	0	0	0	200	903	0	0	0	0	0	0	0	603	903	0
7078	3	32.7325	111.999	-578.389	64839.2	55133.3	16017.3	295.322	187.897	0	0	0	0	0	0	0	200	903	0	0	0	0	0	0	0	603	903	0
7078	4	33.3429	113.067	-583.577	64656.1	55011.2	16200.4	294.266	189.207	0	0	0	0	0	0	0	200	903	0	0	0	0	0	0	0	603	903	0
7078	5	33.4955	114.288	-586.629	65571.6	55865.7	16703.9	295.232	188.223	0	0	0	0	0	0	0	200	903	0	0	0	0	0	0	0	603	903	0
7078	6	32.1222	113.372	-587.239	66304	56415	16108.8	296.068	187.092	0	0	0	0	0	0	0	200	903	0	0	0	0	0	0	0	603	903	0
7078	7	31.5118	115.051	-589.681	65113.9	56537.1	16566.6	295.878	189.578	0	0	0	0	0	0	0	200	903	0	0	0	0	0	0	0	603	903	0
7078	8	32.7325	116.577	-596.395	66304	56720.2	16291.9	295.105	188.825	0	0	0	0	0	0	0	200	903	0	0	0	0	0	0	0	603	903	0
7078	9	30.4437	115.966	-599.141	66395.6	57086.4	16017.3	295.28	189.182	0	0	0	0	0	0	0	200	903	0	0	0	0	0	0	0	603	903	0
7079	0	29.6808	115.203	-601.583	65937.8	57330.6	16383.5	295.3	190.393	0	0	0	0	0	0	0	200	903	0	0	0	0	0	0	0	603	903	0
7079	1	29.5282	113.372	-602.803	65388.5	57757.8	16337.7	295.815	191.526	0	0	0	0	0	0	0	200	903	0	0	0	0	0	0	0	603	903	0
7079	2	31.3592	115.356	-607.076	66395.6	58185.1	15925.7	295.845	190.63	0	0	0	0	0	0	0	200	903	0	0	0	0	0	0	0	603	903	0
7079	3	29.3756	114.288	-612.569	65937.8	58063	16017.3	294.786	192.359	0	0	0	0	0	0	0	200	903	0	0	0	0	0	0	0	603	903	0
7079	4	28.7652	114.593	-615.316	66212.5	58673.3	16337.7	295.355	192.393	0	0	0	0	0	0	0	200	903	0	0	0	0	0	0	0	603	903	0
7079	5	29.223	114.593	-619.283	67036.5	58917.5	16154.6	295.138	191.751	0	0	0	0	0	0	0	200	903	0	0	0	0	0	0	0	603	903	0
7079	6	29.9859	113.067	-622.64	66853.4	58978.5	16246.2	294.723	192.629	0	0	0	0	0	0	0	200	903	0	0	0	0	0	0	0	603	903	0
7079	7	30.4437	114.593	-622.64	66487.1	59772	16337.7	295.998	193.217	0	0	0	0	0	0	0	200	903	0	0	0	0	0	0	0	603	903	0
7079	8	29.5282	114.898	-628.438	67219.6	59405.8	16154.6	294.529	193.037	0	0	0	0	0	0	0	200	903	0	0	0	0	0	0	0	603	903	0
7079	9	30.7489	115.051	-633.016	67494.3	60443.4	16566.6	295.485	193.377	0	0	0	0	0	0	0	200	903	0	0	0	0	0	0	0	603	903	0
7080	0	30.9015	115.509	-636.068	66304	60626.5	16566.6	295.315	195.759	0	0	0	0	0	0	0	200	903	0	0	0	0	0	0	0	603	903	0
7080	1	31.0541	116.882	-640.95	66761.9	61053.7	16749.7	295.255	195.839	0	0	0	0	0	0	0	200	903	0	0	0	0	0	0	0	603	903	0
7080	2	31.817	116.577	-643.392	67402.7	61542	16703.9	295.652	195.238	0	0	0	0	0	0	0	200	903	0	0	0	0	0	0	0	603	903	0
7080	3	32.2748	117.95	-644.002	67128.1	61481	17024.4	295.467	195.764	0	0	0	0	0	0	0	200	903	0	0	0	0	0	0	0	603	903	0
7080	4	33.6481	119.018	-648.58	67402.7	62701.7	17253.2	296.675	196.076	0	0	0	0	0	0	0	200	903	0	0	0	0	0	0	0	603	903	0
7080	5	33.4955	117.95	-652.242	68226.7	62579.6	17207.5	295.945	195.397	0	0	0	0	0	0	0	200	903	0	0	0	0	0	0	0	603	903	0
7080	6	33.9532	118.866	-654.683	68684.4	62945.8	17024.4	296.147	195.088	0	0	0	0	0	0	0	200	903	0	0	0	0	0	0	0	603	903	0
7080	7	33.3429	119.781	-657.125	67494.3	63373.1	17207.5	296.44	197.288	0	0	0	0	0	0	0	200	903	0	0	0	0	0	0	0	603	903	0
7080	8	34.8688	119.781	-661.397	68867.5	63434.1	17344.8	295.909	195.876	0	0	0	0	0	0	0	200	903	0	0	0	0	0	0	0	603	903	0
7080	9	34.1058	119.476	-661.702	68959.1	63922.4	17207.5	296.603	195.785	0	0	0	0	0	0	0	200	903	0	0	0	0	0	0	0	603	903	0
7081	0	34.7162	120.239	-667.195	68501.3	64532.7	17344.8	296.722	197.329	0	0	0	0	0	0	0	200	903	0	0	0	0	0	0	0	603	903	0
7081	1	35.6317	119.018	-670.247	68684.4	64532.7	17253.2	296.282	197.524	0	0	0	0	0	0	0	200	903	0	0	0	0	0	0	0	603	903	0
7081	2	35.4791	119.781	-674.52	68592.9	65204.1	17344.8	296.667	198.309	0	0	0	0	0	0	0	200	903	0	0	0	0	0	0	0	603	903	0
7081	3	36.2421	119.934	-676.046	68959.1	65021	17527.9	296.178	197.996	0	0	0	0	0	0	0	200	903	0	0	0	0	0	0	0	603	903	0
7081	4	36.6998	120.391	-681.539	68776	65936.5	17619.5	296.747	199.087	0	0	0	0	0	0	0	200	903	0	0	0	0	0	0	0	603	903	0
7081	5	36.5472	121.154	-684.285	69691.5	66119.6	17436.4	296.626	198.154	0	0	0	0	0	0	0	200	903	0	0	0	0	0	0	0	603	903	0
7081	6	35.7843	118.408	-687.642	70149.3	66302.7	17756.8	296.42	197.986	0	0	0	0	0	0	0	200	903	0	0	0	0	0	0	0	603	903	0
7081	7	36.2421	120.391	-691.609	69325.3	66913.1	17161.7	296.75	199.762	0	0	0	0	0	0	0	200	903	0	0	0	0	0	0	0	603	903	0
7081	8	35.7843	121.307	-694.661	69966.2	66913.1	17665.2	296.325	199.28	0	0	0	0	0	0	0	200	903	0	0	0	0	0	0	0	603	903	0
7081	9	35.7843	121.307	-697.408	70149.3	67706.5	17802.6	297.083	199.414	0	0	0	0	0	0	0	200	903	0	0	0	0	0	0	0	603	903	0
7082	0	36.5472	121.154	-696.187	69416.8	67645.5	17802.6	297.166	200.29	0	0	0	0	0	0	0	200	903	0	0	0	0	0	0	0	603	903	0
7082	1	36.8524	121.917	-704.732	69599.9	67950.7	17894.1	296.421	201.239	0	0	0	0	0	0	0	200	903	0	0	0	0	0	0	0	603	903	0
7082	2	36.5472	121.307	-708.394	70057.8	68744.1	17802.6	297.042	201.103	0	0	0	0	0	0	0	200	903	0	0	0	0	0	0	0	603	903	0
7082	3	36.3946	121.612	-712.056	69691.5	68377.9	17711	296.029	202.126	0	0	0	0	0	0	0	200	903	0	0	0	0	0	0	0	603	903	0
7082	4	37.005	121.765	-715.108	70607	69537.6	18260.3	297.241	201.264	0	0	0	0	0	0	0	200	903	0	0	0	0	0	0	0	603	903	0
7082	5	36.0895	121.765	-717.549	70790.2	69415.5	18031.5	296.74	201.345	0	0	0	0	0	0	0	200	903	0	0	0	0	0	0	0	603	903	0
7082	6	37.9205	120.239	-719.075	71156.4	69781.7	18031.5	297.044	201.045	0	0	0	0	0	0	0	200	903	0	0	0	0	0	0	0	603	903	0
7082	7	37.3102	122.528	-721.822	69691.5	70270	18123	297.351	203.451	0	0	0	0	0	0	0	200	903	0	0	0	0	0	0	0	603	903	0
7082	8	37.1576	122.528	-727.01	71339.4	70575.2	17894.1	297.076	201.873	0	0	0	0	0	0	0	200	903	0	0	0	0	0	0	0	603	903	0
7082	9	37.7679	121.765	-729.756	71339.4	70819.3	18077.2	297.045	202.242	0	0	0	0	0	0	0	200	903	0	0	0	0	0	0	0	603	903	0
7083	0	37.7679	121.917	-731.282	70332.4	71124.5	18260.3	297.26	203.823	0	0	0	0	0	0	0	200	903	0	0	0	0	0	0	0	603	903	0
7083	1	37.6153	121.002	-731.282	70881.7	71734.9	18077.2	298.095	203.072	0	0	0	0	0	0	0	200	903	0	0	0	0	0	0	0	603	903	0
7083	2	38.3783	122.07	-736.776	71705.7	71551.8	18306.1	297.115	202.676	0	0	0	0	0	0	0	200	903	0	0	0	0	0	0	0	603	903	0
7083	3	37.6153	122.528	-740.743	71064.8	71918	18031.5	297.089	204.063	0	0	0	0	0	0	0	200	903	0	0	0	0	0	0	0	603	903	0
7083	4	37.7679	122.833	-742.879	71064.8	72223.1	18077.2	297.221	204.339	0	0	0	0	0	0	0	200	903	0	0	0	0	0	0	0	603	903	0
7083	5	38.3783	122.833	-745.32	71980.3	72223.1	18123	296.902	203.424	0	0	0	0	0	0	0	200	903	0	0	0	0	0	0	0	603	903	0
7083	6	38.9886	122.375	-746.541	71705.7	72955.6	18260.3	297.725	203.949	0	0	0	0	0	0	0	200	903	0	0	0	0	0	0	0	603	903	0
7083	7	37.7679	122.375	-750.814	71339.4	73077.6	18077.2	297.331	204.984	0	0	0	0	0	0	0	200	903	0	0	0	0	0	0	0	603	903	0
7083	8	37.7679	121.612	-754.476	71522.6	73260.7	18214.6	297.102	205.202	0	0	0	0	0	0	0	200	903	0	0	0	0	0	0	0	603	903	0
7083	9	37.7679	121.917	-755.391	70973.2	73688	18168.8	297.549	206.044	0	0	0	0	0	0	0	200	903	0	0	0	0	0	0	0	603	903	0
7084	0	37.7679	122.07	-751.729	71431	73504.9	18214.6	297.781	204.978	0	0	0	0	0	0	0	200	903	0	0	0	0	0	0	0	603	903	0
7084	1	37.9205	121.917	-757.833	71431	73871.1	18260.3	297.477	205.743	0	0	0	0	0	0	0	200	903	0	0	0	0	0	0	0	603	903	0
7084	2	37.7679	122.833	-761.495	72438.1	74420.4	18351.9	297.729	204.874	0	0	0	0	0	0	0	200	903	0	0	0	0	0	0	0	603	903	0
7084	3	37.9205	120.544	-763.326	72071.9	74359.4	18168.8	297.415	205.582	0	0	0	0	0	0	0	200	903	0	0	0	0	0	0	0	603	903	0
7084	4	38.2257	122.528	-766.378	71339.4	75213.9	18214.6	298.142	206.913	0	0	0	0	0	0	0	200	903	0	0	0	0	0	0	0	603	903	0
7084	5	39.599	122.375	-764.852	72163.4	74969.7	18397.7	298.019	205.65	0	0	0	0	0	0	0	200	903	0	0	0	0	0	0	0	603	903	0
7084	6	38.9886	121.612	-767.903	72163.4	75397	18580.8	298.185	206.025	0	0	0	0	0	0	0	200	903	0	0	0	0	0	0	0	603	903	0
7084	7	39.1412	121.765	-769.734	71247.9	75641.1	18306.1	298.269	207.438	0	0	0	0	0	0	0	200	903	0	0	0	0	0	0	0	603	903	0
7084	8	39.1412	120.391	-770.345	71614.1	75641.1	18397.7	298.191	207.036	0	0	0	0	0	0	0	200	903	0	0	0	0	0	0	0	603	903	0
7084	9	39.599	121.46	-770.955	70881.7	75824.2	18260.3	298.351	208.06	0	0	0	0	0	0	0	200	903	0	0	0	0	0	0	0	603	903	0
7085	0	40.5145	121.002	-774.312	70790.2	75885.2	18397.7	298.003	208.577	0	0	0	0	0	0	0	200	903	0	0	0	0	0	0	0	603	903	0
7085	1	40.5145	121.307	-776.448	71247.9	76556.6	18306.1	298.599	208.239	0	0	0	0	0	0	0	200	903	0	0	0	0	0	0	0	603	903	0
7085	2	40.2093	120.697	-779.195	71705.7	76556.6	18168.8	298.251	207.975	0	0	0	0	0	0	0	200	903	0	0	0	0	0	0	0	603	903	0
7085	3	41.1249	119.628	-780.721	71980.3	76861.8	18397.7	298.45	207.803	0	0	0	0	0	0	0	200	903	0	0	0	0	0	0	0	603	903	0
7085	4	40.9723	120.239	-781.331	71431	76922.8	18260.3	298.451	208.578	0	0	0	0	0	0	0	200	903	0	0	0	0	0	0	0	603	903	0
7085	5	40.6671	119.628	-780.11	71247.9	76983.9	18351.9	298.683	208.669	0	0	0	0	0	0	0	200	903	0	0	0	0	0	0	0	603	903	0
7085	6	42.4982	118.866	-785.604	71980.3	77472.2	18626.5	298.615	208.376	0	0	0	0	0	0	0	200	903	0	0	0	0	0	0	0	603	903	0
7085	7	41.8878	117.34	-787.435	71247.9	77594.2	18214.6	298.541	209.519	0	0	0	0	0	0	0	200	903	0	0	0	0	0	0	0	603	903	0
7085	8	41.2775	118.56	-790.181	71064.8	77533.2	18397.7	298.121	210.065	0	0	0	0	0	0	0	200	903	0	0	0	0	0	0	0	603	903	0
7085	9	42.4982	117.187	-791.402	71522.6	78021.5	18718.1	298.586	209.625	0	0	0	0	0	0	0	200	903	0	0	0	0	0	0	0	603	903	0
7086	0	42.3456	117.187	-792.012	71064.8	77960.5	18123	298.433	210.273	0	0	0	0	0	0	0	200	903	0	0	0	0	0	0	0	603	903	0
7086	1	42.8033	117.034	-794.149	71064.8	77838.4	18306.1	298.015	210.514	0	0	0	0	0	0	0	200	903	0	0	0	0	0	0	0	603	903	0
7086	2	43.4137	117.492	-791.402	71156.4	78448.7	17985.7	299.126	210.088	0	0	0	0	0	0	0	200	903	0	0	0	0	0	0	0	603	903	0
7086	3	42.8033	116.272	-794.759	71156.4	78570.8	18077.2	298.861	210.468	0	0	0	0	0	0	0	200	903	0	0	0	0	0	0	0	603	903	0
7086	4	42.8033	116.272	-796.59	70240.8	78326.7	18031.5	298.327	211.823	0	0	0	0	0	0	0	200	903	0	0	0	0	0	0	0	603	903	0
7086	5	43.7189	116.272	-797.505	71522.6	78692.9	18351.9	298.674	210.317	0	0	0	0	0	0	0	200	903	0	0	0	0	0	0	0	603	903	0
7086	6	43.1085	115.203	-798.421	71247.9	78937	17848.3	298.866	210.764	0	0	0	0	0	0	0	200	903	0	0	0	0	0	0	0	603	903	0
7086	7	43.7189	114.44	-799.337	70790.2	79181.2	18168.8	299.059	211.439	0	0	0	0	0	0	0	200	903	0	0	0	0	0	0	0	603	903	0
7086	8	44.3292	114.746	-797.2	70881.7	78937	17985.7	299.018	211.087	0	0	0	0	0	0	0	200	903	0	0	0	0	0	0	0	603	903	0
7086	9	45.5499	114.135	-799.337	70881.7	79303.2	17894.1	299.211	211.324	0	0	0	0	0	0	0	200	903	0	0	0	0	0	0	0	603	903	0
7087	0	45.2447	113.678	-801.473	70332.4	79059.1	18031.5	298.642	212.246	0	0	0	0	0	0	0	200	903	0	0	0	0	0	0	0	603	903	0
7087	1	44.787	113.678	-800.557	70240.8	79730.5	17802.6	299.594	212.26	0	0	0	0	0	0	0	200	903	0	0	0	0	0	0	0	603	903	0
7087	2	45.0921	113.83	-800.862	71247.9	78998	17985.7	298.641	211.036	0	0	0	0	0	0	0	200	903	0	0	0	0	0	0	0	603	903	0
7087	3	45.2447	112.152	-800.557	70790.2	79303.2	17711	299.06	211.574	0	0	0	0	0	0	0	200	903	0	0	0	0	0	0	0	603	903	0
7087	4	45.3973	112.457	-798.421	69691.5	79974.6	17985.7	300.166	212.713	0	0	0	0	0	0	0	200	903	0	0	0	0	0	0	0	603	903	0
7087	5	47.0758	111.236	-801.168	70607	79730.5	17756.8	299.518	211.87	0	0	0	0	0	0	0	200	903	0	0	0	0	0	0	0	603	903	0
7087	6	46.7706	110.778	-801.778	70332.4	80218.7	17848.3	300.051	212.279	0	0	0	0	0	0	0	200	903	0	0	0	0	0	0	0	603	903	0
7087	7	46.7706	109.405	-802.083	69966.2	80096.7	17894.1	299.861	212.769	0	0	0	0	0	0	0	200	903	0	0	0	0	0	0	0	603	903	0
7087	8	46.618	110.626	-802.388	69691.5	80096.7	17665.2	299.823	213.145	0	0	0	0	0	0	0	200	903	0	0	0	0	0	0	0	603	903	0
7087	9	47.2284	109.405	-803.609	69966.2	80279.8	17665.2	299.899	212.935	0	0	0	0	0	0	0	200	903	0	0	0	0	0	0	0	603	903	0
7088	0	47.5336	109.1	-802.693	69508.4	80218.7	17802.6	299.937	213.406	0	0	0	0	0	0	0	200	903	0	0	0	0	0	0	0	603	903	0
7088	1	48.2965	109.71	-803.914	68959.1	80462.9	17894.1	300.089	214.221	0	0	0	0	0	0	0	200	903	0	0	0	0	0	0	0	603	903	0
7088	2	48.2965	108.947	-804.525	69691.5	80218.7	17619.5	299.71	213.375	0	0	0	0	0	0	0	200	903	0	0	0	0	0	0	0	603	903	0
7088	3	48.1439	107.421	-804.525	69416.8	80768.1	17665.2	300.392	213.717	0	0	0	0	0	0	0	200	903	0	0	0	0	0	0	0	603	903	0
7088	4	48.2965	107.269	-805.135	69050.6	80707	17711	300.24	214.237	0	0	0	0	0	0	0	200	903	0	0	0	0	0	0	0	603	903	0
7088	5	49.3646	107.879	-805.44	68135.1	80523.9	17756.8	299.975	215.406	0	0	0	0	0	0	0	200	903	0	0	0	0	0	0	0	603	903	0
7088	6	48.4491	107.116	-805.135	68409.8	80279.8	17619.5	299.71	215.033	0	0	0	0	0	0	0	200	903	0	0	0	0	0	0	0	603	903	0
7088	7	48.6017	106.353	-805.745	68043.5	80401.9	17390.6	299.786	215.552	0	0	0	0	0	0	0	200	903	0	0	0	0	0	0	0	603	903	0
7088	8	49.5172	106.658	-801.168	68318.2	80768.1	17802.6	300.813	214.727	0	0	0	0	0	0	0	200	903	0	0	0	0	0	0	0	603	903	0
7088	9	48.6017	105.59	-804.525	68684.4	80585	17482.1	300.165	214.627	0	0	0	0	0	0	0	200	903	0	0	0	0	0	0	0	603	903	0
7089	0	49.3646	105.133	-804.525	68409.8	80523.9	17573.7	300.089	214.969	0	0	0	0	0	0	0	200	903	0	0	0	0	0	0	0	603	903	0
7089	1	49.3646	104.217	-805.135	67677.3	80829.1	17436.4	300.392	215.943	0	0	0	0	0	0	0	200	903	0	0	0	0	0	0	0	603	903	0
7089	2	49.8224	102.539	-804.83	67768.9	80768.1	17344.8	300.354	215.797	0	0	0	0	0	0	0	200	903	0	0	0	0	0	0	0	603	903	0
7089	3	48.9068	102.844	-804.219	68226.7	80340.8	17115.9	299.899	215.164	0	0	0	0	0	0	0	200	903	0	0	0	0	0	0	0	603	903	0
7089	4	49.3646	102.539	-805.44	67860.5	80585	17024.4	300.051	215.747	0	0	0	0	0	0	0	200	903	0	0	0	0	0	0	0	603	903	0
7089	5	49.8224	103.149	-801.778	66853.4	80951.2	17436.4	300.965	216.619	0	0	0	0	0	0	0	200	903	0	0	0	0	0	0	0	603	903	0
7089	6	50.1275	101.776	-802.999	67677.3	80218.7	17070.1	299.899	215.719	0	0	0	0	0	0	0	200	903	0	0	0	0	0	0	0	603	903	0
7089	7	49.6698	101.165	-803.304	67677.3	80707	17207.5	300.469	215.751	0	0	0	0	0	0	0	200	903	0	0	0	0	0	0	0	603	903	0
7089	8	49.0594	100.86	-802.083	66761.9	80829.1	16841.3	300.774	216.764	0	0	0	0	0	0	0	200	903	0	0	0	0	0	0	0	603	903	0
7089	9	49.5172	100.708	-802.999	67036.5	80462.9	17024.4	300.203	216.517	0	0	0	0	0	0	0	200	903	0	0	0	0	0	0	0	603	903	0
7090	0	49.3646	100.097	-802.388	67494.3	81073.2	16703.9	301.04	215.883	0	0	0	0	0	0	0	200	903	0	0	0	0	0	0	0	603	903	0
7090	1	48.7543	99.3343	-801.473	66761.9	80951.2	16749.7	301.003	216.701	0	0	0	0	0	0	0	200	903	0	0	0	0	0	0	0	603	903	0
7090	2	49.8224	99.0291	-801.168	66578.7	80646	16749.7	300.661	216.898	0	0	0	0	0	0	0	200	903	0	0	0	0	0	0	0	603	903	0
7090	3	50.2801	99.0291	-800.862	66487.1	81073.2	16749.7	301.232	216.981	0	0	0	0	0	0	0	200	903	0	0	0	0	0	0	0	603	903	0
7090	4	50.2801	97.5032	-800.252	66578.7	80646	16520.8	300.776	216.803	0	0	0	0	0	0	0	200	903	0	0	0	0	0	0	0	603	903	0
7090	5	50.2801	97.198	-800.557	66120.9	80707	16658.2	300.814	217.406	0	0	0	0	0	0	0	200	903	0	0	0	0	0	0	0	603	903	0
7090	6	50.7379	97.3506	-800.252	66395.6	80890.1	16383.5	301.081	217.032	0	0	0	0	0	0	0	200	903	0	0	0	0	0	0	0	603	903	0
7090	7	50.8905	96.2825	-799.031	66395.6	80829.1	16520.8	301.159	216.905	0	0	0	0	0	0	0	200	903	0	0	0	0	0	0	0	603	903	0
7090	8	50.7379	95.6721	-799.642	65388.5	80829.1	16475.1	301.082	218.228	0	0	0	0	0	0	0	200	903	0	0	0	0	0	0	0	603	903	0
7090	9	50.1275	95.6721	-798.726	65297	80585	16154.6	300.892	218.249	0	0	0	0	0	0	0	200	903	0	0	0	0	0	0	0	603	903	0
7091	0	50.7379	95.9773	-796.895	66029.4	80585	16703.9	301.124	217.142	0	0	0	0	0	0	0	200	903	0	0	0	0	0	0	0	603	903	0
7091	1	51.0431	94.1463	-795.064	65480.1	80462.9	16017.3	301.203	217.642	0	0	0	0	0	0	0	200	903	0	0	0	0	0	0	0	603	903	0
7091	2	50.5853	93.8411	-795.064	65022.3	80768.1	16337.7	301.587	218.218	0	0	0	0	0	0	0	200	903	0	0	0	0	0	0	0	603	903	0
7091	3	49.975	93.6885	-795.064	65571.6	80707	16017.3	301.51	217.527	0	0	0	0	0	0	0	200	903	0	0	0	0	0	0	0	603	903	0
7091	4	49.6698	92.4678	-794.454	64656.1	80462.9	16154.6	301.281	218.616	0	0	0	0	0	0	0	200	903	0	0	0	0	0	0	0	603	903	0
7091	5	50.5853	92.4678	-794.759	64473	80768.1	15971.5	301.626	218.877	0	0	0	0	0	0	0	200	903	0	0	0	0	0	0	0	603	903	0
7091	6	49.8224	91.3997	-790.486	63191.3	80157.7	15971.5	301.403	220.06	0	0	0	0	0	0	0	200	903	0	0	0	0	0	0	0	603	903	0
7091	7	50.2801	90.6367	-792.623	64564.5	80340.8	15925.7	301.361	218.543	0	0	0	0	0	0	0	200	903	0	0	0	0	0	0	0	603	903	0
7091	8	49.3646	90.4842	-788.35	63191.3	80035.6	15696.9	301.523	219.844	0	0	0	0	0	0	0	200	903	0	0	0	0	0	0	0	603	903	0
7091	9	50.5853	88.9583	-788.655	63465.9	79974.6	15742.6	301.406	219.526	0	0	0	0	0	0	0	200	903	0	0	0	0	0	0	0	603	903	0
7092	0	49.8224	88.6531	-786.824	64289.9	79669.4	15696.9	301.254	218.292	0	0	0	0	0	0	0	200	903	0	0	0	0	0	0	0	603	903	0
7092	1	50.1275	88.3479	-785.909	64106.8	79242.2	16063.1	300.829	218.43	0	0	0	0	0	0	0	200	903	0	0	0	0	0	0	0	603	903	0
7092	2	49.212	88.3479	-786.214	62825.1	79852.5	15239.1	301.566	220.092	0	0	0	0	0	0	0	200	903	0	0	0	0	0	0	0	603	903	0
7092	3	49.5172	87.7376	-783.162	63374.4	79364.2	15605.3	301.338	219.079	0	0	0	0	0	0	0	200	903	0	0	0	0	0	0	0	603	903	0
7092	4	50.2801	86.6695	-783.162	63282.8	79791.5	15330.6	301.884	219.196	0	0	0	0	0	0	0	200	903	0	0	0	0	0	0	0	603	903	0
7092	5	49.212	86.3643	-782.552	62184.2	79486.3	15147.5	301.573	220.537	0	0	0	0	0	0	0	200	903	0	0	0	0	0	0	0	603	903	0
7092	6	49.975	84.8384	-781.636	62458.9	79242.2	15284.9	301.38	220.092	0	0	0	0	0	0	0	200	903	0	0	0	0	0	0	0	603	903	0
7092	7	49.975	85.4488	-779.805	61818	79303.2	14918.7	301.696	220.726	0	0	0	0	0	0	0	200	903	0	0	0	0	0	0	0	603	903	0
7092	8	50.1275	84.8384	-778.279	62092.6	78876	15010.2	301.347	220.218	0	0	0	0	0	0	0	200	903	0	0	0	0	0	0	0	603	903	0
7092	9	50.4327	84.6858	-779.195	61818	79181.2	15147.5	301.619	220.664	0	0	0	0	0	0	0	200	903	0	0	0	0	0	0	0	603	903	0
7093	0	50.1275	84.2281	-777.059	61909.5	79242.2	14827.1	301.977	220.328	0	0	0	0	0	0	0	200	903	0	0	0	0	0	0	0	603	903	0
7093	1	49.212	83.3125	-776.143	61909.5	78692.9	14918.7	301.39	220.234	0	0	0	0	0	0	0	200	903	0	0	0	0	0	0	0	603	903	0
7093	2	49.212	82.5496	-775.533	61177.1	78998	15010.2	301.863	221.116	0	0	0	0	0	0	0	200	903	0	0	0	0	0	0	0	603	903	0
7093	3	49.212	82.7022	-773.702	61360.2	78753.9	14644	301.788	220.693	0	0	0	0	0	0	0	200	903	0	0	0	0	0	0	0	603	903	0
7093	4	48.7543	81.4815	-769.124	60994	78814.9	14689.8	302.474	220.697	0	0	0	0	0	0	0	200	903	0	0	0	0	0	0	0	603	903	0
7093	5	50.5853	80.5659	-768.514	60627.8	78204.6	14644	301.761	221.11	0	0	0	0	0	0	0	200	903	0	0	0	0	0	0	0	603	903	0
7093	6	48.6017	80.2608	-769.734	60627.8	78387.7	14735.6	301.837	221.235	0	0	0	0	0	0	0	200	903	0	0	0	0	0	0	0	603	903	0
7093	7	48.4491	79.3452	-768.209	60536.2	78509.8	14369.3	302.198	221.198	0	0	0	0	0	0	0	200	903	0	0	0	0	0	0	0	603	903	0
7093	8	48.6017	79.1927	-767.598	60078.5	77838.4	14460.9	301.405	221.732	0	0	0	0	0	0	0	200	903	0	0	0	0	0	0	0	603	903	0
7093	9	48.6017	78.8875	-765.462	59986.9	78204.6	14369.3	302.167	221.633	0	0	0	0	0	0	0	200	903	0	0	0	0	0	0	0	603	903	0
7094	0	48.6017	78.4297	-765.157	59529.2	78021.5	14232	301.968	222.2	0	0	0	0	0	0	0	200	903	0	0	0	0	0	0	0	603	903	0
7094	1	48.6017	77.209	-763.631	59254.5	77838.4	14277.8	301.932	222.404	0	0	0	0	0	0	0	200	903	0	0	0	0	0	0	0	603	903	0
7094	2	49.6698	77.8194	-760.884	59163	78082.5	14094.7	302.621	222.245	0	0	0	0	0	0	0	200	903	0	0	0	0	0	0	0	603	903	0
7094	3	48.2965	76.7513	-759.969	59529.2	77777.3	13957.4	302.343	221.669	0	0	0	0	0	0	0	200	903	0	0	0	0	0	0	0	603	903	0
7094	4	48.7543	75.9883	-760.274	58705.2	77533.2	13957.4	301.981	222.784	0	0	0	0	0	0	0	200	903	0	0	0	0	0	0	0	603	903	0
7094	5	48.2965	76.2935	-758.138	58613.6	77655.3	13957.4	302.429	222.687	0	0	0	0	0	0	0	200	903	0	0	0	0	0	0	0	603	903	0
7094	6	48.1439	75.0728	-756.917	58705.2	77777.3	13820	302.755	222.442	0	0	0	0	0	0	0	200	903	0	0	0	0	0	0	0	603	903	0
7094	7	48.9068	73.8521	-754.781	57789.6	77533.2	14140.5	302.723	223.435	0	0	0	0	0	0	0	200	903	0	0	0	0	0	0	0	603	903	0
7094	8	48.4491	73.6995	-753.865	57789.6	77350.1	13636.9	302.605	223.342	0	0	0	0	0	0	0	200	903	0	0	0	0	0	0	0	603	903	0
7094	9	48.1439	73.6995	-754.171	58339	77411.1	13774.2	302.644	222.645	0	0	0	0	0	0	0	200	903	0	0	0	0	0	0	0	603	903	0
7095	0	48.1439	71.8684	-751.729	58064.3	77106	13636.9	302.571	222.759	0	0	0	0	0	0	0	200	903	0	0	0	0	0	0	0	603	903	0
7095	1	47.9913	72.6314	-750.814	57331.9	77289.1	13499.6	302.94	223.64	0	0	0	0	0	0	0	200	903	0	0	0	0	0	0	0	603	903	0
7095	2	48.4491	71.4107	-754.171	57972.7	76739.8	13408	301.754	223.13	0	0	0	0	0	0	0	200	903	0	0	0	0	0	0	0	603	903	0
7095	3	47.6861	69.1219	-750.508	57240.3	76922.8	13179.2	302.494	223.731	0	0	0	0	0	0	0	200	903	0	0	0	0	0	0	0	603	903	0
7095	4	47.381	70.4951	-748.677	56599.5	76983.9	13362.3	302.827	224.401	0	0	0	0	0	0	0	200	903	0	0	0	0	0	0	0	603	903	0
7095	5	47.2284	69.5796	-747.457	57240.3	76373.5	13133.4	302.178	223.42	0	0	0	0	0	0	0	200	903	0	0	0	0	0	0	0	603	903	0
7095	6	47.2284	68.6641	-746.541	57423.4	76251.5	13362.3	302.14	223.081	0	0	0	0	0	0	0	200	903	0	0	0	0	0	0	0	603	903	0
7095	7	47.0758	67.596	-745.626	56324.8	76434.6	12721.4	302.511	224.46	0	0	0	0	0	0	0	200	903	0	0	0	0	0	0	0	603	903	0
7095	8	47.381	67.596	-739.217	57331.9	76556.6	13270.7	303.565	222.442	0	0	0	0	0	0	0	200	903	0	0	0	0	0	0	0	603	903	0
7095	9	46.7706	66.5279	-743.489	56599.5	76373.5	12904.5	302.723	223.873	0	0	0	0	0	0	0	200	903	0	0	0	0	0	0	0	603	903	0
7096	0	46.0077	66.6805	-741.353	56324.8	76129.4	12858.7	302.69	224.024	0	0	0	0	0	0	0	200	903	0	0	0	0	0	0	0	603	903	0
7096	1	46.618	66.833	-739.217	56050.2	76007.3	12629.8	302.821	224.176	0	0	0	0	0	0	0	200	903	0	0	0	0	0	0	0	603	903	0
7096	2	46.0077	65.6123	-738.607	56050.2	75885.2	12629.8	302.741	224.114	0	0	0	0	0	0	0	200	903	0	0	0	0	0	0	0	603	903	0
7096	3	46.618	65.1546	-736.776	55775.5	75885.2	12904.5	302.996	224.298	0	0	0	0	0	0	0	200	903	0	0	0	0	0	0	0	603	903	0
7096	4	46.0077	64.8494	-735.86	55409.3	75580.1	12446.7	302.71	224.701	0	0	0	0	0	0	0	200	903	0	0	0	0	0	0	0	603	903	0
7096	5	46.1603	64.0865	-733.419	55775.5	75946.3	12309.4	303.551	223.951	0	0	0	0	0	0	0	200	903	0	0	0	0	0	0	0	603	903	0
7096	6	45.2447	63.4761	-731.282	55043.1	75641.1	12172.1	303.436	224.731	0	0	0	0	0	0	0	200	903	0	0	0	0	0	0	0	603	903	0
7096	7	46.1603	63.0183	-730.672	55226.2	75397	12538.3	303.189	224.417	0	0	0	0	0	0	0	200	903	0	0	0	0	0	0	0	603	903	0
7096	8	45.3973	61.9502	-728.231	54860	75458	12172.1	303.618	224.667	0	0	0	0	0	0	0	200	903	0	0	0	0	0	0	0	603	903	0
7096	9	45.3973	61.4925	-724.568	54493.7	75091.8	12172.1	303.637	224.791	0	0	0	0	0	0	0	200	903	0	0	0	0	0	0	0	603	903	0
7097	0	45.5499	61.4925	-726.094	54219.1	75335.9	11943.2	303.755	225.328	0	0	0	0	0	0	0	200	903	0	0	0	0	0	0	0	603	903	0
7097	1	46.0077	60.2718	-723.043	54860	74420.4	11989	302.927	224.126	0	0	0	0	0	0	0	200	903	0	0	0	0	0	0	0	603	903	0
7097	2	45.8551	60.5769	-723.958	53944.4	74847.6	11897.4	303.387	225.487	0	0	0	0	0	0	0	200	903	0	0	0	0	0	0	0	603	903	0
7097	3	45.7025	59.814	-722.737	53578.2	74786.6	11714.3	303.477	225.868	0	0	0	0	0	0	0	200	903	0	0	0	0	0	0	0	603	903	0
7097	4	45.8551	58.5933	-721.212	54219.1	74298.3	11805.9	303.019	224.822	0	0	0	0	0	0	0	200	903	0	0	0	0	0	0	0	603	903	0
7097	5	46.4654	57.6778	-721.822	53120.5	74542.5	11714.3	303.27	226.408	0	0	0	0	0	0	0	200	903	0	0	0	0	0	0	0	603	903	0
7097	6	46.1603	56.4571	-720.906	53212	74237.3	11805.9	302.978	226.187	0	0	0	0	0	0	0	200	903	0	0	0	0	0	0	0	603	903	0
7097	7	45.0921	56.9148	-719.38	53212	73565.9	11439.7	302.263	226.031	0	0	0	0	0	0	0	200	903	0	0	0	0	0	0	0	603	903	0
7097	8	44.787	56.9148	-717.855	53120.5	74176.3	11348.1	303.331	226.001	0	0	0	0	0	0	0	200	903	0	0	0	0	0	0	0	603	903	0
7097	9	44.4818	56.1519	-717.244	52845.8	73688	11439.7	302.738	226.321	0	0	0	0	0	0	0	200	903	0	0	0	0	0	0	0	603	903	0
7098	0	44.4818	54.9312	-715.108	53395.1	73749	11256.5	303.13	225.333	0	0	0	0	0	0	0	200	903	0	0	0	0	0	0	0	603	903	0
7098	1	44.3292	54.626	-709.92	52388.1	73565.9	11256.5	303.626	226.206	0	0	0	0	0	0	0	200	903	0	0	0	0	0	0	0	603	903	0
7098	2	42.6507	54.0157	-712.056	51930.3	73443.8	11073.4	303.143	227.07	0	0	0	0	0	0	0	200	903	0	0	0	0	0	0	0	603	903	0
7098	3	43.2611	54.1682	-710.836	52479.6	73504.9	10844.6	303.406	226.172	0	0	0	0	0	0	0	200	903	0	0	0	0	0	0	0	603	903	0
7098	4	42.4982	52.6424	-710.53	52113.4	72955.6	10753	302.678	226.656	0	0	0	0	0	0	0	200	903	0	0	0	0	0	0	0	603	903	0
7098	5	42.4982	53.4053	-708.699	51838.7	73016.6	10844.6	303.029	226.854	0	0	0	0	0	0	0	200	903	0	0	0	0	0	0	0	603	903	0
7098	6	42.193	52.3372	-706.868	52113.4	72833.5	10478.3	303.037	226.276	0	0	0	0	0	0	0	200	903	0	0	0	0	0	0	0	603	903	0
7098	7	41.7352	51.2691	-705.648	52754.3	72650.4	10615.7	302.956	225.24	0	0	0	0	0	0	0	200	903	0	0	0	0	0	0	0	603	903	0
7098	8	42.3456	50.5061	-704.122	51197.8	72894.5	10478.3	303.525	227.288	0	0	0	0	0	0	0	200	903	0	0	0	0	0	0	0	603	903	0
7098	9	41.1249	50.5061	-701.07	50740.1	72528.3	10524.1	303.454	227.625	0	0	0	0	0	0	0	200	903	0	0	0	0	0	0	0	603	903	0
7099	0	41.1249	50.201	-700.154	52021.8	72467.3	10524.1	303.502	225.699	0	0	0	0	0	0	0	200	903	0	0	0	0	0	0	0	603	903	0
7099	1	40.9723	49.1328	-697.408	51930.3	71856.9	10066.4	303.034	225.538	0	0	0	0	0	0	0	200	903	0	0	0	0	0	0	0	603	903	0
7099	2	40.3619	49.2854	-696.187	50831.6	72284.2	10203.7	303.829	226.986	0	0	0	0	0	0	0	200	903	0	0	0	0	0	0	0	603	903	0
7099	3	41.2775	48.6751	-694.661	51289.4	71673.8	10112.1	303.178	226.166	0	0	0	0	0	0	0	200	903	0	0	0	0	0	0	0	603	903	0
7099	4	41.5826	47.7596	-693.441	51106.3	72284.2	9929.03	304.24	226.3	0	0	0	0	0	0	0	200	903	0	0	0	0	0	0	0	603	903	0
7099	5	40.8197	46.9966	-692.22	50282.3	71856.9	9837.48	303.807	227.361	0	0	0	0	0	0	0	200	903	0	0	0	0	0	0	0	603	903	0
7099	6	40.5145	47.607	-690.389	50282.3	71551.8	9700.15	303.64	227.168	0	0	0	0	0	0	0	200	903	0	0	0	0	0	0	0	603	903	0
7099	7	40.6671	46.9966	-689.778	50648.5	71490.7	9654.37	303.643	226.573	0	0	0	0	0	0	0	200	903	0	0	0	0	0	0	0	603	903	0
7099	8	40.3619	45.013	-686.422	50465.4	71124.5	9700.15	303.616	226.48	0	0	0	0	0	0	0	200	903	0	0	0	0	0	0	0	603	903	0
7099	9	40.8197	44.25	-686.422	49824.6	71246.6	9425.49	303.794	227.414	0	0	0	0	0	0	0	200	903	0	0	0	0	0	0	0	603	903	0
7100	0	39.599	44.8604	-686.116	49458.4	71124.5	9379.71	303.662	227.915	0	0	0	0	0	0	0	200	903	0	0	0	0	0	0	0	603	903	0
7100	1	39.599	44.0974	-685.506	50190.8	70697.3	9288.16	303.132	226.783	0	0	0	0	0	0	0	200	903	0	0	0	0	0	0	0	603	903	0
7100	2	38.836	43.4871	-684.896	49183.7	70819.3	9196.61	303.402	228.188	0	0	0	0	0	0	0	200	903	0	0	0	0	0	0	0	603	903	0
7100	3	39.7516	42.7242	-683.98	49092.2	70270	9013.5	302.737	228.226	0	0	0	0	0	0	0	200	903	0	0	0	0	0	0	0	603	903	0
7100	4	39.4464	42.419	-681.844	49641.5	70636.2	9288.16	303.596	227.195	0	0	0	0	0	0	0	200	903	0	0	0	0	0	0	0	603	903	0
7100	5	38.836	40.7405	-677.266	49824.6	70025.9	9013.5	303.395	226.433	0	0	0	0	0	0	0	200	903	0	0	0	0	0	0	0	603	903	0
7100	6	38.5309	41.3509	-679.402	48634.4	69781.7	9105.06	302.71	228.416	0	0	0	0	0	0	0	200	903	0	0	0	0	0	0	0	603	903	0
7100	7	38.0731	41.0457	-678.182	49092.2	70025.9	8876.17	303.255	227.612	0	0	0	0	0	0	0	200	903	0	0	0	0	0	0	0	603	903	0
7100	8	37.3102	39.825	-676.351	48909	69720.7	8876.17	303.084	227.687	0	0	0	0	0	0	0	200	903	0	0	0	0	0	0	0	603	903	0
7100	9	37.4628	39.062	-674.52	48359.7	69537.6	8738.84	303.092	228.305	0	0	0	0	0	0	0	200	903	0	0	0	0	0	0	0	603	903	0
7101	0	37.005	38.2991	-673.909	48817.5	69293.5	8555.74	302.823	227.561	0	0	0	0	0	0	0	200	903	0	0	0	0	0	0	0	603	903	0
7101	1	37.005	38.2991	-668.416	48359.7	69232.4	8509.96	303.577	227.65	0	0	0	0	0	0	0	200	903	0	0	0	0	0	0	0	603	903	0
7101	2	37.3102	37.5362	-669.637	47993.5	68988.3	8281.08	303.023	228.329	0	0	0	0	0	0	0	200	903	0	0	0	0	0	0	0	603	903	0
7101	3	35.9369	37.8413	-667.195	47627.3	68927.2	8372.63	303.309	228.616	0	0	0	0	0	0	0	200	903	0	0	0	0	0	0	0	603	903	0
7101	4	35.4791	36.0103	-666.28	48542.8	68744.1	8235.3	303.176	227.143	0	0	0	0	0	0	0	200	903	0	0	0	0	0	0	0	603	903	0
7101	5	35.6317	35.7051	-664.449	47901.9	68377.9	8006.42	302.909	227.907	0	0	0	0	0	0	0	200	903	0	0	0	0	0	0	0	603	903	0
7101	6	36.6998	36.0103	-661.702	47718.8	68561	7914.87	303.613	227.885	0	0	0	0	0	0	0	200	903	0	0	0	0	0	0	0	603	903	0
7101	7	35.7843	35.3999	-662.007	48359.7	68194.8	8143.75	303.012	226.95	0	0	0	0	0	0	0	200	903	0	0	0	0	0	0	0	603	903	0
7101	8	35.4791	34.1792	-659.261	47810.4	68133.8	7777.54	303.349	227.479	0	0	0	0	0	0	0	200	903	0	0	0	0	0	0	0	603	903	0
7101	9	35.6317	34.3318	-658.04	47901.9	68072.8	7548.66	303.448	227.205	0	0	0	0	0	0	0	200	903	0	0	0	0	0	0	0	603	903	0
7102	0	35.0213	33.4163	-656.514	47352.6	67950.7	7640.21	303.502	227.873	0	0	0	0	0	0	0	200	903	0	0	0	0	0	0	0	603	903	0
7102	1	34.5636	32.6534	-655.599	47993.5	67889.6	7502.88	303.554	226.794	0	0	0	0	0	0	0	200	903	0	0	0	0	0	0	0	603	903	0
7102	2	35.3265	32.1956	-654.988	47261.1	67462.4	7548.66	302.998	227.844	0	0	0	0	0	0	0	200	903	0	0	0	0	0	0	0	603	903	0
7102	3	33.8006	31.8904	-652.547	47078	67523.4	7502.88	303.477	227.855	0	0	0	0	0	0	0	200	903	0	0	0	0	0	0	0	603	903	0
7102	4	33.9532	32.3482	-651.937	47993.5	67706.5	7274	303.854	226.383	0	0	0	0	0	0	0	200	903	0	0	0	0	0	0	0	603	903	0
7102	5	33.4955	30.0594	-649.495	47718.8	66974.1	7045.12	303.117	226.529	0	0	0	0	0	0	0	200	903	0	0	0	0	0	0	0	603	903	0
7102	6	33.4955	30.3645	-649.495	46711.8	67279.3	6999.34	303.587	228.08	0	0	0	0	0	0	0	200	903	0	0	0	0	0	0	0	603	903	0
7102	7	33.8006	29.9068	-643.392	47261.1	66974.1	6724.68	304.095	226.544	0	0	0	0	0	0	0	200	903	0	0	0	0	0	0	0	603	903	0
7102	8	32.5799	28.9912	-646.749	47078	66913.1	6541.58	303.461	227.208	0	0	0	0	0	0	0	200	903	0	0	0	0	0	0	0	603	903	0
7102	9	32.4274	28.3809	-645.528	46254	66485.8	6862.01	302.995	228.347	0	0	0	0	0	0	0	200	903	0	0	0	0	0	0	0	603	903	0
7103	0	32.8851	27.3128	-643.697	46254	66485.8	6816.24	303.288	228.143	0	0	0	0	0	0	0	200	903	0	0	0	0	0	0	0	603	903	0
7103	1	32.5799	27.3128	-642.781	46254	66424.8	6862.01	303.34	228.041	0	0	0	0	0	0	0	200	903	0	0	0	0	0	0	0	603	903	0
7103	2	31.9696	26.7024	-639.73	45613.1	66180.7	6633.13	303.451	228.699	0	0	0	0	0	0	0	200	903	0	0	0	0	0	0	0	603	903	0
7103	3	32.8851	26.3972	-638.509	46254	66363.8	6587.36	303.936	227.559	0	0	0	0	0	0	0	200	903	0	0	0	0	0	0	0	603	903	0
7103	4	31.817	25.9395	-637.899	46620.2	65753.4	6404.25	303.078	226.916	0	0	0	0	0	0	0	200	903	0	0	0	0	0	0	0	603	903	0
7103	5	31.5118	23.3455	-636.373	46345.6	65509.3	6221.14	302.942	227.172	0	0	0	0	0	0	0	200	903	0	0	0	0	0	0	0	603	903	0
7103	6	31.2066	24.7188	-634.847	46437.1	65753.4	6266.92	303.574	226.853	0	0	0	0	0	0	0	200	903	0	0	0	0	0	0	0	603	903	0
7103	7	30.7489	24.4136	-630.88	46437.1	65570.3	6038.04	303.935	226.393	0	0	0	0	0	0	0	200	903	0	0	0	0	0	0	0	603	903	0
7103	8	31.6644	23.0403	-633.016	46620.2	65509.3	6266.92	303.488	226.352	0	0	0	0	0	0	0	200	903	0	0	0	0	0	0	0	603	903	0
7103	9	31.5118	23.1929	-632.711	45521.6	65082	5946.49	302.862	228.053	0	0	0	0	0	0	0	200	903	0	0	0	0	0	0	0	603	903	0
7104	0	31.0541	22.2774	-631.185	45521.6	65387.2	5763.38	303.594	227.879	0	0	0	0	0	0	0	200	903	0	0	0	0	0	0	0	603	903	0
7104	1	31.2066	21.2093	-629.659	45704.7	65204.1	5809.16	303.555	227.414	0	0	0	0	0	0	0	200	903	0	0	0	0	0	0	0	603	903	0
7104	2	31.0541	21.2093	-625.997	45155.4	64776.8	5671.83	303.478	227.866	0	0	0	0	0	0	0	200	903	0	0	0	0	0	0	0	603	903	0
7104	3	31.6644	20.4463	-628.743	45246.9	64898.9	5671.83	303.22	228.036	0	0	0	0	0	0	0	200	903	0	0	0	0	0	0	0	603	903	0
7104	4	31.817	19.9886	-627.523	45704.7	64532.7	5214.06	302.837	227.166	0	0	0	0	0	0	0	200	903	0	0	0	0	0	0	0	603	903	0
7104	5	30.2911	19.9886	-626.607	45613.1	64715.8	5488.72	303.28	227.206	0	0	0	0	0	0	0	200	903	0	0	0	0	0	0	0	603	903	0
7104	6	30.5963	19.5308	-624.776	45063.8	64532.7	5488.72	303.289	227.872	0	0	0	0	0	0	0	200	903	0	0	0	0	0	0	0	603	903	0
7104	7	30.5963	18.9204	-624.166	45430	64471.7	5351.39	303.293	227.215	0	0	0	0	0	0	0	200	903	0	0	0	0	0	0	0	603	903	0
7104	8	29.8334	17.5471	-621.419	45338.5	63983.4	4939.41	302.963	227.04	0	0	0	0	0	0	0	200	903	0	0	0	0	0	0	0	603	903	0
7104	9	29.3756	16.7842	-622.945	44606	64227.5	4985.18	303.103	228.395	0	0	0	0	0	0	0	200	903	0	0	0	0	0	0	0	603	903	0
7105	0	29.223	17.3946	-621.419	44697.6	64349.6	4939.41	303.553	228.072	0	0	0	0	0	0	0	200	903	0	0	0	0	0	0	0	603	903	0
7105	1	29.3756	16.479	-621.114	45246.9	64349.6	5030.96	303.604	227.152	0	0	0	0	0	0	0	200	903	0	0	0	0	0	0	0	603	903	0
7105	2	29.6808	15.4109	-619.283	44880.7	63922.4	5122.51	303.22	227.528	0	0	0	0	0	0	0	200	903	0	0	0	0	0	0	0	603	903	0
7105	3	30.9015	15.8687	-616.841	44331.4	64044.4	4756.3	303.826	228.132	0	0	0	0	0	0	0	200	903	0	0	0	0	0	0	0	603	903	0
7105	4	29.0704	14.4954	-615.316	45521.6	63617.2	4710.52	303.39	226.019	0	0	0	0	0	0	0	200	903	0	0	0	0	0	0	0	603	903	0
7105	5	28.7652	14.0376	-615.621	44697.6	63922.4	4527.42	303.834	227.394	0	0	0	0	0	0	0	200	903	0	0	0	0	0	0	0	603	903	0
7105	6	29.0704	14.648	-615.01	44422.9	63800.3	4481.64	303.739	227.769	0	0	0	0	0	0	0	200	903	0	0	0	0	0	0	0	603	903	0
7105	7	28.4601	13.7325	-614.095	45063.8	63434.1	4344.31	303.297	226.617	0	0	0	0	0	0	0	200	903	0	0	0	0	0	0	0	603	903	0
7105	8	30.5963	10.6807	-611.959	44606	63800.3	4298.54	304.256	227.109	0	0	0	0	0	0	0	200	903	0	0	0	0	0	0	0	603	903	0
7105	9	29.0704	12.8169	-611.348	44331.4	63067.9	4115.43	303.162	227.486	0	0	0	0	0	0	0	200	903	0	0	0	0	0	0	0	603	903	0
7106	0	29.5282	12.3592	-610.738	44880.7	64044.4	4390.09	304.864	226.514	0	0	0	0	0	0	0	200	903	0	0	0	0	0	0	0	603	903	0
7106	1	29.3756	10.9859	-611.348	44880.7	63373.1	4115.43	303.661	226.587	0	0	0	0	0	0	0	200	903	0	0	0	0	0	0	0	603	903	0
7106	2	29.5282	9.61258	-608.907	44056.7	63495.1	4161.21	304.277	227.646	0	0	0	0	0	0	0	200	903	0	0	0	0	0	0	0	603	903	0
7106	3	31.0541	10.0703	-609.212	44056.7	63617.2	4206.98	304.425	227.682	0	0	0	0	0	0	0	200	903	0	0	0	0	0	0	0	603	903	0
7106	4	29.6808	9.76517	-609.517	44056.7	63312	3886.55	303.872	227.719	0	0	0	0	0	0	0	200	903	0	0	0	0	0	0	0	603	903	0
7106	5	30.1385	9.3074	-608.297	43873.6	63556.2	3978.1	304.482	227.875	0	0	0	0	0	0	0	200	903	0	0	0	0	0	0	0	603	903	0
7106	6	29.5282	9.00223	-607.686	43507.4	63067.9	3840.77	303.784	228.405	0	0	0	0	0	0	0	200	903	0	0	0	0	0	0	0	603	903	0
7106	7	29.3756	8.54446	-604.94	44239.8	63434.1	4023.88	304.86	226.869	0	0	0	0	0	0	0	200	903	0	0	0	0	0	0	0	603	903	0
7106	8	29.5282	8.0867	-606.16	44331.4	63434.1	3703.45	304.649	226.865	0	0	0	0	0	0	0	200	903	0	0	0	0	0	0	0	603	903	0
7106	9	29.0704	6.56082	-607.076	43782.1	63067.9	3657.67	303.888	227.88	0	0	0	0	0	0	0	200	903	0	0	0	0	0	0	0	603	903	0
7107	0	28.6127	6.71341	-605.855	44239.8	63128.9	3566.12	304.198	226.98	0	0	0	0	0	0	0	200	903	0	0	0	0	0	0	0	603	903	0
7107	1	28.4601	6.40823	-604.634	44239.8	62274.4	3611.89	302.995	226.832	0	0	0	0	0	0	0	200	903	0	0	0	0	0	0	0	603	903	0
7107	2	28.7652	5.4927	-605.245	43507.4	62945.8	3291.46	304.001	228.116	0	0	0	0	0	0	0	200	903	0	0	0	0	0	0	0	603	903	0
7107	3	29.6808	3.96683	-601.277	43507.4	62640.6	3291.46	304.179	227.642	0	0	0	0	0	0	0	200	903	0	0	0	0	0	0	0	603	903	0
7107	4	29.223	5.03494	-602.803	44056.7	62701.7	3291.46	304.017	226.914	0	0	0	0	0	0	0	200	903	0	0	0	0	0	0	0	603	903	0
7107	5	28.1549	4.11941	-601.888	43507.4	62701.7	3245.68	304.175	227.715	0	0	0	0	0	0	0	200	903	0	0	0	0	0	0	0	603	903	0
7107	6	28.7652	4.88235	-601.583	43324.3	62518.6	3016.8	303.924	227.983	0	0	0	0	0	0	0	200	903	0	0	0	0	0	0	0	603	903	0
7107	7	28.0023	4.11941	-600.362	44422.9	62823.7	2787.92	304.643	226.006	0	0	0	0	0	0	0	200	903	0	0	0	0	0	0	0	603	903	0
7107	8	28.7652	3.0513	-600.057	44422.9	62701.7	2971.02	304.493	225.969	0	0	0	0	0	0	0	200	903	0	0	0	0	0	0	0	603	903	0
7107	9	28.6127	3.50906	-600.972	43415.9	62579.6	3337.23	304.131	227.757	0	0	0	0	0	0	0	200	903	0	0	0	0	0	0	0	603	903	0
7108	0	28.4601	2.74612	-598.226	43782.1	62396.5	2696.37	304.303	226.813	0	0	0	0	0	0	0	200	903	0	0	0	0	0	0	0	603	903	0
7108	1	29.0704	1.37283	-599.141	43965.2	62518.6	2650.59	304.347	226.62	0	0	0	0	0	0	0	200	903	0	0	0	0	0	0	0	603	903	0
7108	2	29.3756	1.98318	-599.446	43599	62701.7	2513.26	304.599	227.268	0	0	0	0	0	0	0	200	903	0	0	0	0	0	0	0	603	903	0
7108	3	28.6127	1.37283	-599.446	43690.5	62640.6	2650.59	304.497	227.115	0	0	0	0	0	0	0	200	903	0	0	0	0	0	0	0	603	903	0
7108	4	28.0023	-0.153047	-599.752	43599	62152.4	2467.48	303.63	227.305	0	0	0	0	0	0	0	200	903	0	0	0	0	0	0	0	603	903	0
7108	5	28.4601	-0.000459142	-599.752	43141.2	62518.6	2284.38	304.241	228.068	0	0	0	0	0	0	0	200	903	0	0	0	0	0	0	0	603	903	0
7108	6	27.8497	-1.83151	-598.226	43599	62823.7	2147.05	305.017	227.12	0	0	0	0	0	0	0	200	903	0	0	0	0	0	0	0	603	903	0
7108	7	27.392	-0.305635	-598.531	43690.5	62579.6	2192.83	304.555	227.004	0	0	0	0	0	0	0	200	903	0	0	0	0	0	0	0	603	903	0
7108	8	27.5445	-1.22116	-598.226	43232.8	62579.6	2330.15	304.609	227.732	0	0	0	0	0	0	0	200	903	0	0	0	0	0	0	0	603	903	0
7108	9	27.6971	-1.9841	-596.7	43324.3	62457.5	2055.5	304.672	227.393	0	0	0	0	0	0	0	200	903	0	0	0	0	0	0	0	603	903	0
7109	0	29.0704	-2.74704	-595.479	42958.1	62457.5	2284.38	304.886	227.86	0	0	0	0	0	0	0	200	903	0	0	0	0	0	0	0	603	903	0
7109	1	28.0023	-2.74704	-597.005	42958.1	62823.7	2192.83	305.232	228.044	0	0	0	0	0	0	0	200	903	0	0	0	0	0	0	0	603	903	0
7109	2	27.6971	-2.89963	-596.089	43415.9	62701.7	1826.61	305.188	227.166	0	0	0	0	0	0	0	200	903	0	0	0	0	0	0	0	603	903	0
7109	3	27.8497	-3.05222	-596.7	43599	62518.6	1918.17	304.774	226.933	0	0	0	0	0	0	0	200	903	0	0	0	0	0	0	0	603	903	0
7109	4	28.7652	-5.34104	-596.089	43507.4	62823.7	2009.72	305.393	227.012	0	0	0	0	0	0	0	200	903	0	0	0	0	0	0	0	603	903	0
7109	5	29.0704	-3.35739	-596.395	42591.9	62396.5	1918.17	304.623	228.584	0	0	0	0	0	0	0	200	903	0	0	0	0	0	0	0	603	903	0
7109	6	28.0023	-4.5781	-596.7	43324.3	62884.8	1689.28	305.388	227.393	0	0	0	0	0	0	0	200	903	0	0	0	0	0	0	0	603	903	0
7109	7	28.9178	-5.95139	-596.395	43599	62884.8	1689.28	305.442	226.896	0	0	0	0	0	0	0	200	903	0	0	0	0	0	0	0	603	903	0
7109	8	30.1385	-5.18845	-597.615	43324.3	62640.6	1506.18	304.818	227.505	0	0	0	0	0	0	0	200	903	0	0	0	0	0	0	0	603	903	0
7109	9	28.9178	-6.10397	-599.141	43415.9	63006.8	1963.94	305.162	227.536	0	0	0	0	0	0	0	200	903	0	0	0	0	0	0	0	603	903	0
7110	0	28.9178	-6.40915	-597.921	43599	62762.7	1597.73	304.968	227.082	0	0	0	0	0	0	0	200	903	0	0	0	0	0	0	0	603	903	0
7110	1	28.9178	-6.86691	-598.226	43049.7	63128.9	1231.52	305.527	228.038	0	0	0	0	0	0	0	200	903	0	0	0	0	0	0	0	603	903	0
7110	2	28.7652	-6.86691	-595.479	42958.1	62945.8	1551.96	305.706	227.86	0	0	0	0	0	0	0	200	903	0	0	0	0	0	0	0	603	903	0
7110	3	28.4601	-7.47727	-599.141	43507.4	62945.8	956.862	305.06	227.384	0	0	0	0	0	0	0	200	903	0	0	0	0	0	0	0	603	903	0
7110	4	28.0023	-8.2402	-599.752	43415.9	63251	1231.52	305.462	227.61	0	0	0	0	0	0	0	200	903	0	0	0	0	0	0	0	603	903	0
7110	5	28.4601	-8.39279	-597.615	43049.7	63067.9	1185.74	305.533	227.964	0	0	0	0	0	0	0	200	903	0	0	0	0	0	0	0	603	903	0
7110	6	28.9178	-8.39279	-597.31	43324.3	63189.9	1048.42	305.791	227.468	0	0	0	0	0	0	0	200	903	0	0	0	0	0	0	0	603	903	0
7110	7	27.6971	-10.3764	-598.226	43599	62823.7	1139.97	305.017	227.12	0	0	0	0	0	0	0	200	903	0	0	0	0	0	0	0	603	903	0
7110	8	28.0023	-10.529	-598.226	42958.1	63434.1	865.31	306.037	228.191	0	0	0	0	0	0	0	200	903	0	0	0	0	0	0	0	603	903	0
7110	9	27.8497	-11.5971	-598.226	43415.9	63495.1	865.31	306.139	227.426	0	0	0	0	0	0	0	200	903	0	0	0	0	0	0	0	603	903	0
7111	0	28.6127	-10.9868	-597.005	43690.5	63128.9	819.533	305.743	226.817	0	0	0	0	0	0	0	200	903	0	0	0	0	0	0	0	603	903	0
7111	1	28.4601	-11.9023	-599.446	42958.1	63556.2	773.757	306.025	228.337	0	0	0	0	0	0	0	200	903	0	0	0	0	0	0	0	603	903	0
7111	2	27.6971	-12.6653	-599.446	43049.7	63495.1	590.651	305.923	228.184	0	0	0	0	0	0	0	200	903	0	0	0	0	0	0	0	603	903	0
7111	3	27.8497	-12.2075	-600.057	42958.1	63800.3	544.875	306.324	228.41	0	0	0	0	0	0	0	200	903	0	0	0	0	0	0	0	603	903	0
7111	4	29.223	-12.0549	-601.277	43049.7	64044.4	544.875	306.514	228.403	0	0	0	0	0	0	0	200	903	0	0	0	0	0	0	0	603	903	0
7111	5	28.0023	-12.6653	-602.193	43324.3	63800.3	499.099	305.947	228.056	0	0	0	0	0	0	0	200	903	0	0	0	0	0	0	0	603	903	0
7111	6	28.4601	-12.9704	-602.498	43782.1	63922.4	590.651	306.096	227.332	0	0	0	0	0	0	0	200	903	0	0	0	0	0	0	0	603	903	0
7111	7	27.5445	-13.4282	-603.719	43415.9	63739.3	132.888	305.578	228.086	0	0	0	0	0	0	0	200	903	0	0	0	0	0	0	0	603	903	0
7111	8	28.6127	-13.4282	-601.888	43415.9	64044.4	315.993	306.406	227.867	0	0	0	0	0	0	0	200	903	0	0	0	0	0	0	0	603	903	0
7111	9	26.9342	-14.0385	-604.94	43965.2	63861.3	361.77	305.566	227.323	0	0	0	0	0	0	0	200	903	0	0	0	0	0	0	0	603	903	0
7112	0	27.2394	-14.4963	-604.634	44514.5	64349.6	-4.44129	306.427	226.378	0	0	0	0	0	0	0	200	903	0	0	0	0	0	0	0	603	903	0
7112	1	27.0868	-14.6489	-605.245	43324.3	64166.5	-50.2177	306.017	228.419	0	0	0	0	0	0	0	200	903	0	0	0	0	0	0	0	603	903	0
7112	2	28.3075	-14.6489	-604.94	43782.1	63922.4	87.1114	305.667	227.626	0	0	0	0	0	0	0	200	903	0	0	0	0	0	0	0	603	903	0
7112	3	27.8497	-16.1748	-605.245	43599	64654.8	-4.44129	306.824	227.965	0	0	0	0	0	0	0	200	903	0	0	0	0	0	0	0	603	903	0
7112	4	27.8497	-16.0222	-605.855	43324.3	64349.6	-233.323	306.213	228.491	0	0	0	0	0	0	0	200	903	0	0	0	0	0	0	0	603	903	0
7112	5	29.0704	-16.1748	-605.855	43690.5	64898.9	-141.77	307.12	227.886	0	0	0	0	0	0	0	200	903	0	0	0	0	0	0	0	603	903	0
7112	6	28.6127	-17.8532	-606.465	43965.2	64776.8	-645.311	306.81	227.506	0	0	0	0	0	0	0	200	903	0	0	0	0	0	0	0	603	903	0
7112	7	28.9178	-17.0903	-608.297	43965.2	64654.8	-370.652	306.288	227.724	0	0	0	0	0	0	0	200	903	0	0	0	0	0	0	0	603	903	0
7112	8	28.1549	-17.7007	-606.771	43507.4	65082	-416.429	307.26	228.297	0	0	0	0	0	0	0	200	903	0	0	0	0	0	0	0	603	903	0
7112	9	29.223	-18.7688	-610.433	44148.3	65143.1	-507.981	306.716	227.677	0	0	0	0	0	0	0	200	903	0	0	0	0	0	0	0	603	903	0
7113	0	29.0704	-19.6843	-612.569	43232.8	65143.1	-736.863	306.344	229.424	0	0	0	0	0	0	0	200	903	0	0	0	0	0	0	0	603	903	0
7113	1	29.5282	-18.9214	-612.874	43599	65509.3	-141.77	306.889	228.861	0	0	0	0	0	0	0	200	903	0	0	0	0	0	0	0	603	903	0
7113	2	29.223	-19.8369	-613.179	43873.6	65326.2	-599.534	306.537	228.449	0	0	0	0	0	0	0	200	903	0	0	0	0	0	0	0	603	903	0
7113	3	28.3075	-20.2946	-613.79	42866.6	65692.4	-874.193	307.028	230.161	0	0	0	0	0	0	0	200	903	0	0	0	0	0	0	0	603	903	0
7113	4	28.7652	-22.8886	-614.4	43507.4	65570.3	-507.981	306.723	229.187	0	0	0	0	0	0	0	200	903	0	0	0	0	0	0	0	603	903	0
7113	5	28.7652	-21.3628	-615.01	43232.8	65692.4	-874.193	306.815	229.704	0	0	0	0	0	0	0	200	903	0	0	0	0	0	0	0	603	903	0
7113	6	30.4437	-21.5154	-615.926	43049.7	66180.7	-691.087	307.449	230.106	0	0	0	0	0	0	0	200	903	0	0	0	0	0	0	0	603	903	0
7113	7	28.7652	-21.9731	-616.231	42958.1	65753.4	-965.745	306.703	230.289	0	0	0	0	0	0	0	200	903	0	0	0	0	0	0	0	603	903	0
7113	8	28.3075	-21.6679	-617.452	44331.4	66607.9	-1011.52	307.876	228.203	0	0	0	0	0	0	0	200	903	0	0	0	0	0	0	0	603	903	0
7113	9	28.4601	-23.3464	-618.978	43141.2	65997.6	-1103.07	306.624	230.302	0	0	0	0	0	0	0	200	903	0	0	0	0	0	0	0	603	903	0
7114	0	29.8334	-23.0412	-620.198	43232.8	66363.8	-1194.63	307.004	230.292	0	0	0	0	0	0	0	200	903	0	0	0	0	0	0	0	603	903	0
7114	1	29.0704	-23.3464	-621.724	43690.5	66730	-1240.4	307.331	229.727	0	0	0	0	0	0	0	200	903	0	0	0	0	0	0	0	603	903	0
7114	2	29.0704	-24.5671	-622.029	44056.7	66852	-1011.52	307.474	229.173	0	0	0	0	0	0	0	200	903	0	0	0	0	0	0	0	603	903	0
7114	3	29.3756	-24.7197	-622.335	43415.9	67035.1	-1331.96	307.716	230.237	0	0	0	0	0	0	0	200	903	0	0	0	0	0	0	0	603	903	0
7114	4	29.8334	-24.2619	-622.64	43782.1	66913.1	-1698.17	307.467	229.683	0	0	0	0	0	0	0	200	903	0	0	0	0	0	0	0	603	903	0
7114	5	29.3756	-25.7878	-626.607	44239.8	67218.3	-1331.96	307.273	229.398	0	0	0	0	0	0	0	200	903	0	0	0	0	0	0	0	603	903	0
7114	6	29.5282	-25.33	-628.133	43324.3	67706.5	-1469.29	307.79	231.027	0	0	0	0	0	0	0	200	903	0	0	0	0	0	0	0	603	903	0
7114	7	29.223	-25.6352	-628.743	44239.8	67828.6	-1789.72	307.88	229.638	0	0	0	0	0	0	0	200	903	0	0	0	0	0	0	0	603	903	0
7114	8	28.3075	-27.0085	-630.88	44148.3	68194.8	-1606.61	308.095	230.021	0	0	0	0	0	0	0	200	903	0	0	0	0	0	0	0	603	903	0
7114	9	28.9178	-27.6189	-630.269	43690.5	68011.7	-1789.72	307.909	230.68	0	0	0	0	0	0	0	200	903	0	0	0	0	0	0	0	603	903	0
7115	0	29.223	-27.1611	-632.1	44422.9	68194.8	-1606.61	307.886	229.722	0	0	0	0	0	0	0	200	903	0	0	0	0	0	0	0	603	903	0
7115	1	29.6808	-28.0766	-630.88	44331.4	68500	-2018.6	308.579	229.731	0	0	0	0	0	0	0	200	903	0	0	0	0	0	0	0	603	903	0
7115	2	28.9178	-27.6189	-632.1	43782.1	68622.1	-1835.5	308.562	230.736	0	0	0	0	0	0	0	200	903	0	0	0	0	0	0	0	603	903	0
7115	3	29.0704	-28.3818	-634.847	43965.2	68744.1	-2339.04	308.285	230.747	0	0	0	0	0	0	0	200	903	0	0	0	0	0	0	0	603	903	0
7115	4	29.3756	-29.2973	-635.152	44056.7	68316.9	-2339.04	307.56	230.636	0	0	0	0	0	0	0	200	903	0	0	0	0	0	0	0	603	903	0
7115	5	29.9859	-29.9077	-635.762	43507.4	69110.3	-2247.48	308.705	231.567	0	0	0	0	0	0	0	200	903	0	0	0	0	0	0	0	603	903	0
7115	6	29.9859	-30.3654	-638.204	43690.5	69537.6	-2522.14	308.958	231.541	0	0	0	0	0	0	0	200	903	0	0	0	0	0	0	0	603	903	0
7115	7	30.4437	-30.8232	-639.73	43599	69598.6	-2201.71	308.794	231.848	0	0	0	0	0	0	0	200	903	0	0	0	0	0	0	0	603	903	0
7115	8	30.2911	-31.1284	-640.035	43873.6	69964.8	-2293.26	309.314	231.451	0	0	0	0	0	0	0	200	903	0	0	0	0	0	0	0	603	903	0
7115	9	31.3592	-30.6706	-642.781	43599	70086.9	-2247.48	309.037	232.171	0	0	0	0	0	0	0	200	903	0	0	0	0	0	0	0	603	903	0
7116	0	30.4437	-31.281	-644.612	43782.1	70025.9	-2567.92	308.633	232.08	0	0	0	0	0	0	0	200	903	0	0	0	0	0	0	0	603	903	0
7116	1	31.0541	-32.8069	-646.138	44239.8	70453.1	-2476.36	309.037	231.532	0	0	0	0	0	0	0	200	903	0	0	0	0	0	0	0	603	903	0
7116	2	30.9015	-34.3327	-648.58	43415.9	70514.2	-2751.02	308.721	233.06	0	0	0	0	0	0	0	200	903	0	0	0	0	0	0	0	603	903	0
7116	3	30.2911	-32.9594	-648.58	43232.8	71002.4	-2339.04	309.474	233.342	0	0	0	0	0	0	0	200	903	0	0	0	0	0	0	0	603	903	0
7116	4	30.9015	-34.0276	-649.8	43782.1	71246.6	-2613.69	309.644	232.622	0	0	0	0	0	0	0	200	903	0	0	0	0	0	0	0	603	903	0
7116	5	30.5963	-34.1801	-651.631	43324.3	71002.4	-2751.02	308.961	233.514	0	0	0	0	0	0	0	200	903	0	0	0	0	0	0	0	603	903	0
7116	6	30.9015	-33.875	-653.157	43599	71246.6	-2842.58	309.08	233.249	0	0	0	0	0	0	0	200	903	0	0	0	0	0	0	0	603	903	0
7116	7	31.5118	-34.7905	-653.463	43782.1	71368.7	-3163.01	309.216	233	0	0	0	0	0	0	0	200	903	0	0	0	0	0	0	0	603	903	0
7116	8	31.0541	-35.706	-654.378	43873.6	70758.3	-2796.8	308.131	232.954	0	0	0	0	0	0	0	200	903	0	0	0	0	0	0	0	603	903	0
7116	9	31.2066	-34.7905	-654.988	42958.1	71979	-2934.13	309.894	234.414	0	0	0	0	0	0	0	200	903	0	0	0	0	0	0	0	603	903	0
7117	0	31.2066	-35.706	-655.599	43782.1	71856.9	-3071.46	309.605	233.218	0	0	0	0	0	0	0	200	903	0	0	0	0	0	0	0	603	903	0
7117	1	32.1222	-37.2319	-657.125	43873.6	72284.2	-3254.56	310.001	233.234	0	0	0	0	0	0	0	200	903	0	0	0	0	0	0	0	603	903	0
7117	2	32.1222	-37.5371	-657.735	42866.6	72162.1	-3254.56	309.713	234.827	0	0	0	0	0	0	0	200	903	0	0	0	0	0	0	0	603	903	0
7117	3	31.6644	-37.2319	-660.176	43415.9	72650.4	-3483.45	310.047	234.236	0	0	0	0	0	0	0	200	903	0	0	0	0	0	0	0	603	903	0
7117	4	32.7325	-38.9104	-660.787	43415.9	72833.5	-3666.55	310.222	234.297	0	0	0	0	0	0	0	200	903	0	0	0	0	0	0	0	603	903	0
7117	5	32.8851	-38.9104	-663.533	43141.2	72894.5	-3483.45	309.858	234.983	0	0	0	0	0	0	0	200	903	0	0	0	0	0	0	0	603	903	0
7117	6	31.9696	-39.6733	-664.144	42775	73260.7	-4032.76	310.309	235.594	0	0	0	0	0	0	0	200	903	0	0	0	0	0	0	0	603	903	0
7117	7	32.7325	-40.1311	-667.501	43507.4	73199.7	-3575	309.662	234.82	0	0	0	0	0	0	0	200	903	0	0	0	0	0	0	0	603	903	0
7117	8	31.817	-39.8259	-666.585	42591.9	74115.2	-3895.43	311.186	236.104	0	0	0	0	0	0	0	200	903	0	0	0	0	0	0	0	603	903	0
7117	9	32.1222	-39.2155	-667.806	42958.1	73749	-3712.33	310.435	235.673	0	0	0	0	0	0	0	200	903	0	0	0	0	0	0	0	603	903	0
7118	0	32.2748	-39.3681	-669.942	43324.3	73810.1	-3895.43	310.174	235.331	0	0	0	0	0	0	0	200	903	0	0	0	0	0	0	0	603	903	0
7118	1	32.7325	-41.1992	-670.247	41676.4	74298.3	-3986.99	310.852	237.819	0	0	0	0	0	0	0	200	903	0	0	0	0	0	0	0	603	903	0
7118	2	32.4274	-40.5888	-670.552	42775	74237.3	-4170.09	310.711	236.209	0	0	0	0	0	0	0	200	903	0	0	0	0	0	0	0	603	903	0
7118	3	32.4274	-41.657	-671.468	42775	74481.4	-4124.32	310.923	236.296	0	0	0	0	0	0	0	200	903	0	0	0	0	0	0	0	603	903	0
7118	4	32.4274	-41.657	-672.994	43049.7	75030.8	-4124.32	311.488	236.033	0	0	0	0	0	0	0	200	903	0	0	0	0	0	0	0	603	903	0
7118	5	33.9532	-41.657	-673.909	42042.6	74786.6	-4307.42	310.974	237.614	0	0	0	0	0	0	0	200	903	0	0	0	0	0	0	0	603	903	0
7118	6	33.9532	-42.1147	-674.214	42408.8	75397	-4353.2	311.829	237.099	0	0	0	0	0	0	0	200	903	0	0	0	0	0	0	0	603	903	0
7118	7	33.6481	-43.1828	-675.13	42408.8	75519	-3986.99	311.859	237.184	0	0	0	0	0	0	0	200	903	0	0	0	0	0	0	0	603	903	0
7118	8	34.8688	-44.5561	-678.487	41676.4	75458	-4536.3	311.215	238.575	0	0	0	0	0	0	0	200	903	0	0	0	0	0	0	0	603	903	0
7118	9	34.411	-42.8777	-679.097	42042.6	75519	-4536.3	311.205	238.091	0	0	0	0	0	0	0	200	903	0	0	0	0	0	0	0	603	903	0
7119	0	34.2584	-44.4035	-680.013	42042.6	75824.2	-4627.86	311.504	238.174	0	0	0	0	0	0	0	200	903	0	0	0	0	0	0	0	603	903	0
7119	1	34.5636	-43.7932	-680.928	41310.1	76190.4	-4627.86	311.892	239.333	0	0	0	0	0	0	0	200	903	0	0	0	0	0	0	0	603	903	0
7119	2	34.2584	-44.5561	-683.37	40577.7	76678.7	-4673.63	312.207	240.621	0	0	0	0	0	0	0	200	903	0	0	0	0	0	0	0	603	903	0
7119	3	34.7162	-44.8613	-683.37	41401.7	76556.6	-4719.41	312.028	239.415	0	0	0	0	0	0	0	200	903	0	0	0	0	0	0	0	603	903	0
7119	4	35.0213	-46.082	-684.59	41035.5	77228	-4765.19	312.809	240.058	0	0	0	0	0	0	0	200	903	0	0	0	0	0	0	0	603	903	0
7119	5	34.7162	-45.9294	-681.539	40852.4	76800.8	-4719.41	312.687	240.059	0	0	0	0	0	0	0	200	903	0	0	0	0	0	0	0	603	903	0
7119	6	36.0895	-46.8449	-684.59	41584.8	77167	-4719.41	312.72	239.256	0	0	0	0	0	0	0	200	903	0	0	0	0	0	0	0	603	903	0
7119	7	34.2584	-47.3027	-685.506	40120	77533.2	-4948.29	313.104	241.474	0	0	0	0	0	0	0	200	903	0	0	0	0	0	0	0	603	903	0
7119	8	35.7843	-46.6924	-686.727	40577.7	77472.2	-4765.19	312.814	240.911	0	0	0	0	0	0	0	200	903	0	0	0	0	0	0	0	603	903	0
7119	9	35.4791	-47.4553	-687.642	40760.8	77594.2	-5085.62	312.841	240.724	0	0	0	0	0	0	0	200	903	0	0	0	0	0	0	0	603	903	0
7120	0	37.4628	-49.4389	-690.694	40486.2	77899.4	-5314.5	312.784	241.383	0	0	0	0	0	0	0	200	903	0	0	0	0	0	0	0	603	903	0
7120	1	36.8524	-48.0656	-690.694	39570.7	78021.5	-5177.17	312.961	242.709	0	0	0	0	0	0	0	200	903	0	0	0	0	0	0	0	603	903	0
7120	2	36.3946	-48.2182	-690.694	40211.5	78204.6	-5222.95	313.226	241.781	0	0	0	0	0	0	0	200	903	0	0	0	0	0	0	0	603	903	0
7120	3	36.3946	-49.8967	-692.525	39936.9	78021.5	-5451.83	312.662	242.332	0	0	0	0	0	0	0	200	903	0	0	0	0	0	0	0	603	903	0
7120	4	37.005	-48.8286	-691.304	39387.6	78204.6	-5406.06	313.126	243.024	0	0	0	0	0	0	0	200	903	0	0	0	0	0	0	0	603	903	0
7120	5	37.4628	-48.9812	-695.882	39936.9	78753.9	-5222.95	313.171	242.61	0	0	0	0	0	0	0	200	903	0	0	0	0	0	0	0	603	903	0
7120	6	37.1576	-50.507	-696.797	39296	78570.8	-5268.73	312.76	243.605	0	0	0	0	0	0	0	200	903	0	0	0	0	0	0	0	603	903	0
7120	7	37.6153	-49.7441	-698.323	39479.1	78876	-5268.73	312.951	243.466	0	0	0	0	0	0	0	200	903	0	0	0	0	0	0	0	603	903	0
7120	8	37.005	-50.3545	-698.934	39112.9	78998	-5726.49	313.027	244.039	0	0	0	0	0	0	0	200	903	0	0	0	0	0	0	0	603	903	0
7120	9	38.0731	-50.9648	-698.018	39479.1	79242.2	-5772.27	313.525	243.441	0	0	0	0	0	0	0	200	903	0	0	0	0	0	0	0	603	903	0
7121	0	36.5472	-50.8122	-699.849	38105.8	79120.1	-5772.27	313.053	245.551	0	0	0	0	0	0	0	200	903	0	0	0	0	0	0	0	603	903	0
7121	1	37.1576	-50.9648	-700.154	38014.2	79547.4	-5909.6	313.614	245.706	0	0	0	0	0	0	0	200	903	0	0	0	0	0	0	0	603	903	0
7121	2	37.9205	-52.4907	-702.291	38288.9	79486.3	-5726.49	313.182	245.48	0	0	0	0	0	0	0	200	903	0	0	0	0	0	0	0	603	903	0
7121	3	37.6153	-52.3381	-700.46	37739.6	79974.6	-5634.94	314.174	246.122	0	0	0	0	0	0	0	200	903	0	0	0	0	0	0	0	603	903	0
7121	4	38.2257	-52.4907	-700.46	38105.8	79242.2	-6092.7	313.129	245.599	0	0	0	0	0	0	0	200	903	0	0	0	0	0	0	0	603	903	0
7121	5	38.0731	-52.4907	-701.07	37648	80279.8	-6138.48	314.51	246.299	0	0	0	0	0	0	0	200	903	0	0	0	0	0	0	0	603	903	0
7121	6	39.7516	-52.4907	-703.511	37556.5	81012.2	-6230.03	315.154	246.616	0	0	0	0	0	0	0	200	903	0	0	0	0	0	0	0	603	903	0
7121	7	38.5309	-53.101	-703.511	36732.5	80523.9	-6367.36	314.46	247.787	0	0	0	0	0	0	0	200	903	0	0	0	0	0	0	0	603	903	0
7121	8	39.4464	-54.3217	-704.122	37648	80768.1	-6367.36	314.708	246.532	0	0	0	0	0	0	0	200	903	0	0	0	0	0	0	0	603	903	0
7121	9	40.3619	-54.1692	-704.732	36915.6	80829.1	-5818.04	314.695	247.618	0	0	0	0	0	0	0	200	903	0	0	0	0	0	0	0	603	903	0
7122	0	39.7516	-53.5588	-707.173	36457.9	81134.3	-6504.69	314.73	248.446	0	0	0	0	0	0	0	200	903	0	0	0	0	0	0	0	603	903	0
7122	1	40.5145	-54.6269	-708.699	36274.8	81561.5	-6458.91	315.086	248.815	0	0	0	0	0	0	0	200	903	0	0	0	0	0	0	0	603	903	0
7122	2	40.3619	-55.0847	-705.648	36274.8	81256.3	-6733.57	315.151	248.594	0	0	0	0	0	0	0	200	903	0	0	0	0	0	0	0	603	903	0
7122	3	39.9042	-54.1692	-709.005	35450.8	81988.8	-6870.9	315.639	249.999	0	0	0	0	0	0	0	200	903	0	0	0	0	0	0	0	603	903	0
7122	4	40.0567	-55.2373	-709.31	35817	81805.7	-6687.79	315.331	249.504	0	0	0	0	0	0	0	200	903	0	0	0	0	0	0	0	603	903	0
7122	5	40.8197	-56.9157	-706.868	35725.5	81988.8	-6733.57	315.989	249.46	0	0	0	0	0	0	0	200	903	0	0	0	0	0	0	0	603	903	0
7122	6	40.6671	-55.695	-709.615	34901.5	82355	-6962.45	316.056	250.816	0	0	0	0	0	0	0	200	903	0	0	0	0	0	0	0	603	903	0
7122	7	40.9723	-56.1528	-710.836	35267.7	82232.9	-6321.58	315.685	250.386	0	0	0	0	0	0	0	200	903	0	0	0	0	0	0	0	603	903	0
7122	8	41.5826	-56.9157	-707.479	35267.7	82843.3	-7008.23	317.096	250.15	0	0	0	0	0	0	0	200	903	0	0	0	0	0	0	0	603	903	0
7122	9	42.3456	-56.0002	-712.361	34352.1	82721.2	-7374.44	316.122	251.777	0	0	0	0	0	0	0	200	903	0	0	0	0	0	0	0	603	903	0
7123	0	42.4982	-56.9157	-712.667	34443.7	82293.9	-6962.45	315.473	251.669	0	0	0	0	0	0	0	200	903	0	0	0	0	0	0	0	603	903	0
7123	1	42.3456	-57.9839	-714.193	33985.9	83026.4	-7237.11	316.252	252.413	0	0	0	0	0	0	0	200	903	0	0	0	0	0	0	0	603	903	0
7123	2	43.1085	-57.5261	-715.108	33619.7	83026.4	-7054	316.103	252.987	0	0	0	0	0	0	0	200	903	0	0	0	0	0	0	0	603	903	0
7123	3	42.8033	-57.9839	-715.718	33528.2	83148.4	-7328.66	316.175	253.155	0	0	0	0	0	0	0	200	903	0	0	0	0	0	0	0	603	903	0
7123	4	43.1085	-58.289	-717.855	33345.1	83453.6	-7374.44	316.254	253.549	0	0	0	0	0	0	0	200	903	0	0	0	0	0	0	0	603	903	0
7123	5	43.1085	-59.6623	-713.887	33070.4	83148.4	-7420.22	316.473	253.676	0	0	0	0	0	0	0	200	903	0	0	0	0	0	0	0	603	903	0
7123	6	42.6507	-60.2727	-718.16	32429.5	83758.8	-7603.32	316.63	254.844	0	0	0	0	0	0	0	200	903	0	0	0	0	0	0	0	603	903	0
7123	7	42.9559	-59.6623	-719.075	32612.6	83941.9	-7557.54	316.736	254.646	0	0	0	0	0	0	0	200	903	0	0	0	0	0	0	0	603	903	0
7123	8	42.9559	-60.2727	-720.296	31880.2	83697.8	-7694.87	316.199	255.74	0	0	0	0	0	0	0	200	903	0	0	0	0	0	0	0	603	903	0
7123	9	44.9396	-60.2727	-719.38	31605.6	84125	-7786.43	316.941	256.066	0	0	0	0	0	0	0	200	903	0	0	0	0	0	0	0	603	903	0
7124	0	42.8033	-60.883	-719.075	32154.9	84186	-7649.1	317.075	255.283	0	0	0	0	0	0	0	200	903	0	0	0	0	0	0	0	603	903	0
7124	1	43.5663	-61.0356	-719.991	30873.1	84369.2	-7694.87	317.181	257.12	0	0	0	0	0	0	0	200	903	0	0	0	0	0	0	0	603	903	0
7124	2	43.5663	-60.7304	-717.244	30690	84674.3	-8106.86	318.055	257.211	0	0	0	0	0	0	0	200	903	0	0	0	0	0	0	0	603	903	0
7124	3	43.8714	-60.5779	-721.212	31330.9	84735.4	-8061.09	317.49	256.558	0	0	0	0	0	0	0	200	903	0	0	0	0	0	0	0	603	903	0
7124	4	44.024	-61.7986	-720.296	30873.1	85040.5	-8198.42	318.063	257.138	0	0	0	0	0	0	0	200	903	0	0	0	0	0	0	0	603	903	0
7124	5	44.1766	-61.3408	-722.127	29499.9	85162.6	-8335.75	317.933	259.149	0	0	0	0	0	0	0	200	903	0	0	0	0	0	0	0	603	903	0
7124	6	46.0077	-61.4934	-725.484	30415.4	85223.7	-8244.19	317.471	258.076	0	0	0	0	0	0	0	200	903	0	0	0	0	0	0	0	603	903	0
7124	7	44.6344	-61.9511	-724.263	29683	85345.7	-8610.4	317.838	259.016	0	0	0	0	0	0	0	200	903	0	0	0	0	0	0	0	603	903	0
7124	8	45.0921	-62.2563	-726.094	29499.9	85589.9	-8335.75	317.877	259.372	0	0	0	0	0	0	0	200	903	0	0	0	0	0	0	0	603	903	0
7124	9	44.787	-61.9511	-722.432	29957.6	85589.9	-8061.09	318.475	258.532	0	0	0	0	0	0	0	200	903	0	0	0	0	0	0	0	603	903	0
7125	0	44.6344	-62.8667	-725.484	29133.6	85895	-8518.85	318.397	259.842	0	0	0	0	0	0	0	200	903	0	0	0	0	0	0	0	603	903	0
7125	1	44.4818	-62.7141	-726.4	28309.7	85834	-8793.51	318.164	261.027	0	0	0	0	0	0	0	200	903	0	0	0	0	0	0	0	603	903	0
7125	2	44.4818	-63.9348	-726.4	27943.5	86322.3	-8656.18	318.836	261.532	0	0	0	0	0	0	0	200	903	0	0	0	0	0	0	0	603	903	0
7125	3	45.5499	-63.0193	-724.874	27851.9	86627.4	-8610.4	319.507	261.577	0	0	0	0	0	0	0	200	903	0	0	0	0	0	0	0	603	903	0
7125	4	44.9396	-63.3244	-725.179	27302.6	86017.1	-8930.84	318.615	262.351	0	0	0	0	0	0	0	200	903	0	0	0	0	0	0	0	603	903	0
7125	5	45.0921	-63.1718	-727.62	26661.7	86810.6	-8793.51	319.308	263.358	0	0	0	0	0	0	0	200	903	0	0	0	0	0	0	0	603	903	0
7125	6	46.0077	-63.3244	-727.925	26570.2	86688.5	-9068.17	319.09	263.499	0	0	0	0	0	0	0	200	903	0	0	0	0	0	0	0	603	903	0
7125	7	46.1603	-64.24	-727.62	26753.3	86871.6	-8747.73	319.391	263.232	0	0	0	0	0	0	0	200	903	0	0	0	0	0	0	0	603	903	0
7125	8	46.0077	-63.7822	-728.841	25380	87359.9	-9113.94	319.861	265.178	0	0	0	0	0	0	0	200	903	0	0	0	0	0	0	0	603	903	0
7125	9	46.9232	-64.5451	-730.062	25654.6	86932.6	-8793.51	319.076	264.86	0	0	0	0	0	0	0	200	903	0	0	0	0	0	0	0	603	903	0
7126	0	46.618	-65.0029	-730.977	25105.3	87543	-9205.5	319.762	265.655	0	0	0	0	0	0	0	200	903	0	0	0	0	0	0	0	603	903	0
7126	1	46.618	-64.24	-730.672	23640.5	87420.9	-9159.72	319.645	267.646	0	0	0	0	0	0	0	200	903	0	0	0	0	0	0	0	603	903	0
7126	2	46.4654	-64.5451	-728.841	24556	87665.1	-9297.05	320.28	266.308	0	0	0	0	0	0	0	200	903	0	0	0	0	0	0	0	603	903	0
7126	3	46.7706	-66.2236	-731.588	23823.6	87787.1	-9297.05	319.995	267.436	0	0	0	0	0	0	0	200	903	0	0	0	0	0	0	0	603	903	0
7126	4	46.4654	-64.5451	-732.808	23274.3	87787.1	-9113.94	319.796	268.24	0	0	0	0	0	0	0	200	903	0	0	0	0	0	0	0	603	903	0
7126	5	46.4654	-64.6977	-733.113	23274.3	87909.2	-9480.15	319.912	268.253	0	0	0	0	0	0	0	200	903	0	0	0	0	0	0	0	603	903	0
7126	6	47.381	-65.4607	-731.588	22999.6	88214.4	-9388.6	320.579	268.562	0	0	0	0	0	0	0	200	903	0	0	0	0	0	0	0	603	903	0
7126	7	46.618	-65.9184	-732.198	21901	88092.3	-9297.05	320.312	270.089	0	0	0	0	0	0	0	200	903	0	0	0	0	0	0	0	603	903	0
7126	8	46.7706	-66.071	-732.808	21809.4	88275.4	-9480.15	320.462	270.239	0	0	0	0	0	0	0	200	903	0	0	0	0	0	0	0	603	903	0
7126	9	47.381	-66.071	-731.588	21992.5	88092.3	-9113.94	320.413	269.939	0	0	0	0	0	0	0	200	903	0	0	0	0	0	0	0	603	903	0
7127	0	47.6861	-66.2236	-733.113	20802.3	88397.5	-9480.15	320.578	271.625	0	0	0	0	0	0	0	200	903	0	0	0	0	0	0	0	603	903	0
7127	1	47.6861	-65.1555	-734.029	20344.6	88458.5	-9754.81	320.511	272.284	0	0	0	0	0	0	0	200	903	0	0	0	0	0	0	0	603	903	0
7127	2	47.8387	-65.3081	-733.724	20344.6	87787.1	-9480.15	319.646	272.272	0	0	0	0	0	0	0	200	903	0	0	0	0	0	0	0	603	903	0
7127	3	48.1439	-66.9865	-730.977	19978.4	88763.7	-9754.81	321.432	272.669	0	0	0	0	0	0	0	200	903	0	0	0	0	0	0	0	603	903	0
7127	4	48.1439	-64.6977	-736.165	18696.6	88946.8	-9342.83	320.824	274.603	0	0	0	0	0	0	0	200	903	0	0	0	0	0	0	0	603	903	0
7127	5	48.4491	-65.7658	-735.555	19062.8	88885.8	-9800.59	320.842	274.084	0	0	0	0	0	0	0	200	903	0	0	0	0	0	0	0	603	903	0
7127	6	48.2965	-66.2236	-737.691	18971.3	89313	-9800.59	321.071	274.283	0	0	0	0	0	0	0	200	903	0	0	0	0	0	0	0	603	903	0
7127	7	47.9913	-66.9865	-736.165	17964.2	89190.9	-9937.92	321.156	275.598	0	0	0	0	0	0	0	200	903	0	0	0	0	0	0	0	603	903	0
7127	8	48.6017	-65.6133	-737.996	17781.1	89557.1	-10029.5	321.352	275.906	0	0	0	0	0	0	0	200	903	0	0	0	0	0	0	0	603	903	0
7127	9	48.7543	-65.9184	-735.86	17323.3	89679.2	-9434.38	321.87	276.458	0	0	0	0	0	0	0	200	903	0	0	0	0	0	0	0	603	903	0
7128	0	49.0594	-65.9184	-736.776	16957.1	89496.1	-10121	321.47	276.985	0	0	0	0	0	0	0	200	903	0	0	0	0	0	0	0	603	903	0
7128	1	49.0594	-66.5288	-736.776	16407.8	89984.4	-9937.92	322.133	277.73	0	0	0	0	0	0	0	200	903	0	0	0	0	0	0	0	603	903	0
7128	2	48.9068	-66.2236	-734.944	16682.5	90045.4	-10212.6	322.52	277.301	0	0	0	0	0	0	0	200	903	0	0	0	0	0	0	0	603	903	0
7128	3	49.5172	-66.2236	-733.113	15675.4	90167.5	-9983.69	322.993	278.618	0	0	0	0	0	0	0	200	903	0	0	0	0	0	0	0	603	903	0
7128	4	49.6698	-65.7658	-735.86	14943	90167.5	-10029.5	322.533	279.693	0	0	0	0	0	0	0	200	903	0	0	0	0	0	0	0	603	903	0
7128	5	50.2801	-65.3081	-736.776	14943	90533.7	-10212.6	322.878	279.718	0	0	0	0	0	0	0	200	903	0	0	0	0	0	0	0	603	903	0
7128	6	50.1275	-67.9021	-737.386	14759.9	90716.8	-9571.71	323.025	279.984	0	0	0	0	0	0	0	200	903	0	0	0	0	0	0	0	603	903	0
7128	7	50.8905	-65.6133	-739.217	13844.3	90716.8	-10166.8	322.72	281.272	0	0	0	0	0	0	0	200	903	0	0	0	0	0	0	0	603	903	0
7128	8	51.0431	-66.071	-737.691	13386.6	90961	-10075.2	323.305	281.853	0	0	0	0	0	0	0	200	903	0	0	0	0	0	0	0	603	903	0
7128	9	51.1957	-66.3762	-738.607	13203.5	91144	-10304.1	323.4	282.124	0	0	0	0	0	0	0	200	903	0	0	0	0	0	0	0	603	903	0
7129	0	51.6534	-66.6814	-738.912	12287.9	91144	-9617.48	323.349	283.37	0	0	0	0	0	0	0	200	903	0	0	0	0	0	0	0	603	903	0
7129	1	51.6534	-66.071	-739.522	11372.4	91022	-10212.6	323.082	284.622	0	0	0	0	0	0	0	200	903	0	0	0	0	0	0	0	603	903	0
7129	2	51.3483	-66.3762	-739.827	11647.1	91388.2	-10166.8	323.526	284.257	0	0	0	0	0	0	0	200	903	0	0	0	0	0	0	0	603	903	0
7129	3	51.1957	-66.6814	-739.522	10365.3	91632.3	-10166.8	323.908	285.984	0	0	0	0	0	0	0	200	903	0	0	0	0	0	0	0	603	903	0
7129	4	52.569	-67.2917	-737.996	10548.4	91815.5	-10212.6	324.412	285.707	0	0	0	0	0	0	0	200	903	0	0	0	0	0	0	0	603	903	0
7129	5	52.4164	-66.3762	-738.301	10548.4	91754.4	-9754.81	324.278	285.713	0	0	0	0	0	0	0	200	903	0	0	0	0	0	0	0	603	903	0
7129	6	53.0267	-66.5288	-737.996	9358.25	91693.4	-10212.6	324.246	287.319	0	0	0	0	0	0	0	200	903	0	0	0	0	0	0	0	603	903	0
7129	7	53.4845	-65.6133	-738.301	8717.38	92181.7	-10121	324.856	288.193	0	0	0	0	0	0	0	200	903	0	0	0	0	0	0	0	603	903	0
7129	8	53.1793	-66.5288	-739.522	8717.38	92303.7	-10349.9	324.815	288.212	0	0	0	0	0	0	0	200	903	0	0	0	0	0	0	0	603	903	0
7129	9	54.0948	-66.9865	-737.081	8442.72	92425.8	-10166.8	325.394	288.546	0	0	0	0	0	0	0	200	903	0	0	0	0	0	0	0	603	903	0
7130	0	54.4	-65.9184	-741.964	7344.09	92242.7	-10212.6	324.322	290.102	0	0	0	0	0	0	0	200	903	0	0	0	0	0	0	0	603	903	0
7130	1	53.3319	-66.3762	-742.574	7069.43	92670	-10349.9	324.796	290.48	0	0	0	0	0	0	0	200	903	0	0	0	0	0	0	0	603	903	0
7130	2	53.4845	-67.4443	-738.607	6520.11	92670	-10304.1	325.466	291.172	0	0	0	0	0	0	0	200	903	0	0	0	0	0	0	0	603	903	0
7130	3	53.9422	-66.6814	-742.269	6245.45	92914.1	-10441.5	325.176	291.586	0	0	0	0	0	0	0	200	903	0	0	0	0	0	0	0	603	903	0
7130	4	53.4845	-67.4443	-741.658	6062.35	92547.9	-10075.2	324.785	291.826	0	0	0	0	0	0	0	200	903	0	0	0	0	0	0	0	603	903	0
7130	5	53.9422	-67.5969	-742.879	5329.93	92303.7	-10578.8	324.251	292.825	0	0	0	0	0	0	0	200	903	0	0	0	0	0	0	0	603	903	0
7130	6	54.0948	-67.4443	-740.438	4505.95	93036.2	-10395.7	325.65	293.914	0	0	0	0	0	0	0	200	903	0	0	0	0	0	0	0	603	903	0
7130	7	54.5526	-67.2917	-740.132	3865.08	92853	-10670.3	325.455	294.778	0	0	0	0	0	0	0	200	903	0	0	0	0	0	0	0	603	903	0
7130	8	54.4	-68.0547	-739.827	4048.19	93158.2	-10441.5	325.919	294.528	0	0	0	0	0	0	0	200	903	0	0	0	0	0	0	0	603	903	0
7130	9	54.4	-68.0547	-740.743	2858	93463.4	-10761.9	326.175	296.142	0	0	0	0	0	0	0	200	903	0	0	0	0	0	0	0	603	903	0
7131	0	55.0104	-67.5969	-740.743	2766.45	93158.2	-10487.2	325.763	296.265	0	0	0	0	0	0	0	200	903	0	0	0	0	0	0	0	603	903	0
7131	1	55.4681	-67.5969	-741.658	2674.9	93768.6	-10716.1	326.431	296.393	0	0	0	0	0	0	0	200	903	0	0	0	0	0	0	0	603	903	0
7131	2	56.2311	-67.9021	-742.574	2491.79	92914.1	-10807.7	325.124	296.644	0	0	0	0	0	0	0	200	903	0	0	0	0	0	0	0	603	903	0
7131	3	55.6207	-67.4443	-741.048	1210.05	93463.4	-10670.3	326.123	298.367	0	0	0	0	0	0	0	200	903	0	0	0	0	0	0	0	603	903	0
7131	4	55.6207	-67.5969	-741.353	1026.95	93951.7	-10853.4	326.73	298.615	0	0	0	0	0	0	0	200	903	0	0	0	0	0	0	0	603	903	0
7131	5	55.3155	-67.9021	-740.743	752.289	93280.3	-10807.7	325.928	298.984	0	0	0	0	0	0	0	200	903	0	0	0	0	0	0	0	603	903	0
7131	6	55.0104	-67.9021	-741.658	111.42	94073.7	-10990.8	326.842	299.85	0	0	0	0	0	0	0	200	903	0	0	0	0	0	0	0	603	903	0
7131	7	55.0104	-67.4443	-741.353	-621.002	94256.9	-10349.9	327.142	300.838	0	0	0	0	0	0	0	200	903	0	0	0	0	0	0	0	603	903	0
7131	8	55.6207	-68.3598	-740.132	-621.002	94256.9	-11128.1	327.351	300.839	0	0	0	0	0	0	0	200	903	0	0	0	0	0	0	0	603	903	0
7131	9	55.4681	-68.3598	-740.438	-1719.64	94378.9	-10761.9	327.464	302.322	0	0	0	0	0	0	0	200	903	0	0	0	0	0	0	0	603	903	0
7132	0	56.0785	-68.665	-738.301	-2452.06	94134.8	-11082.3	327.502	303.321	0	0	0	0	0	0	0	200	903	0	0	0	0	0	0	0	603	903	0
7132	1	55.6207	-68.3598	-738.912	-2268.95	94562	-10990.8	327.975	303.071	0	0	0	0	0	0	0	200	903	0	0	0	0	0	0	0	603	903	0
7132	2	55.4681	-68.665	-739.522	-3459.14	94684.1	-11082.3	328.034	304.678	0	0	0	0	0	0	0	200	903	0	0	0	0	0	0	0	603	903	0
7132	3	56.3837	-67.9021	-739.217	-3733.8	94378.9	-10899.2	327.674	305.051	0	0	0	0	0	0	0	200	903	0	0	0	0	0	0	0	603	903	0
7132	4	56.5362	-67.9021	-738.607	-3733.8	94623.1	-11128.1	328.11	305.055	0	0	0	0	0	0	0	200	903	0	0	0	0	0	0	0	603	903	0
7132	5	55.7733	-68.9702	-738.912	-4283.11	94378.9	-11128.1	327.727	305.797	0	0	0	0	0	0	0	200	903	0	0	0	0	0	0	0	603	903	0
7132	6	57.6044	-68.0547	-739.827	-5198.64	94562	-11311.2	327.816	307.027	0	2.65366	8.41552	-21.7242	2933.88	-1099.16	305.558	149.404	767.948	0	0	0	0	0	0	0	603	903	0
7132	7	55.9259	-68.3598	-739.827	-5931.06	94684.1	-10716.1	327.981	308.017	0	-1.46622	3.22754	-22.6397	3208.54	-1099.16	-197.982	151.45	761.278	0	0	0	0	0	0	0	603	903	0
7132	8	56.2311	-68.8176	-739.827	-5839.51	94623.1	-11128.1	327.899	307.893	0	-0.0929256	-1.65528	-18.9776	3025.43	-793.989	305.558	158.162	743.579	0	0	0	0	0	0	0	603	903	0
7132	9	55.9259	-69.2754	-737.081	-6114.17	95050.3	-11311.2	328.955	308.295	0	3.26401	0.633542	-22.0293	3391.65	-977.094	717.545	155.646	749.04	0	0	0	0	0	0	0	603	903	0
7133	0	55.0104	-69.5805	-739.827	-5931.06	94928.2	-11448.5	328.311	308.017	0	2.65366	-2.11304	-30.2691	4398.73	-1343.3	625.992	155.621	757.679	0	0	0	0	0	0	0	603	903	0
7133	1	55.1629	-70.1909	-739.217	-7029.69	94623.1	-11540.1	328.004	309.51	0	3.56918	-10.9631	-37.8985	5314.25	-1038.13	1495.74	172.608	762.777	0	0	0	0	0	0	0	603	903	0
7133	2	54.7052	-71.259	-739.217	-8036.77	94378.9	-11036.6	327.674	310.872	0	3.4166	-14.1675	-37.5933	5955.12	-1892.62	1495.74	149.655	744.591	0	0	0	0	0	0	0	603	903	0
7133	3	55.1629	-70.6487	-738.301	-8128.33	95050.3	-11677.4	328.742	311.009	0	3.26401	-13.0994	-40.6451	6229.78	-1343.3	1404.19	166.95	749.727	0	0	0	0	0	0	0	603	903	0
7133	4	55.1629	-71.8694	-738.912	-8219.88	94867.2	-11723.2	328.388	311.124	0	5.09506	-16.1511	-47.3589	6504.44	-1648.48	1724.63	165.192	765.657	0	0	0	0	0	0	0	603	903	0
7133	5	53.7897	-72.1745	-737.691	-8036.77	95294.4	-11997.9	329.179	310.895	0	3.4166	-20.4236	-54.0728	8152.39	-2197.8	1724.63	159.355	752.233	0	0	0	0	0	0	0	603	903	0
7133	6	53.3319	-71.8694	-736.776	-9501.62	94867.2	-11952.1	328.76	312.896	0	0.364838	-20.7288	-58.9556	8518.6	-2502.97	1404.19	157.545	758.508	0	0	0	0	0	0	0	603	903	0
7133	7	55.1629	-72.0219	-739.217	-9226.96	95172.4	-11860.5	328.748	312.482	0	3.56918	-17.5244	-62.0074	8884.81	-2441.94	2090.84	160.619	759.714	0	0	0	0	0	0	0	603	903	0
7133	8	54.7052	-74.0056	-738.912	-9776.28	95294.4	-12318.3	328.966	313.231	0	7.23129	-19.5081	-63.2281	9159.47	-2808.15	1953.51	155.587	758.136	0	0	0	0	0	0	0	603	903	0
7133	9	53.6371	-72.6323	-738.301	-9684.72	95294.4	-12272.5	329.073	313.118	0	5.858	-22.4072	-69.9419	9983.45	-3174.36	1678.85	154.614	760.261	0	0	0	0	0	0	0	603	903	0
7134	0	54.8578	-73.7004	-741.048	-10325.6	95477.6	-12409.8	328.841	313.934	0	1.43295	-20.8814	-75.7403	10990.5	-3296.43	2273.94	156.477	757.892	0	0	0	0	0	0	0	603	903	0
7134	1	53.9422	-74.3108	-741.048	-10691.8	94867.2	-12684.5	328.018	314.428	0	6.62094	-20.1184	-73.2989	11265.2	-3540.57	1999.28	151.697	749.312	0	0	0	0	0	0	0	603	903	0
7134	2	53.6371	-73.7004	-740.438	-11332.7	95599.6	-12364.1	329.112	315.305	0	8.60458	-23.1702	-80.0127	11722.9	-3296.43	2090.84	158.801	756.487	0	0	0	0	0	0	0	603	903	0
7134	3	53.3319	-74.3108	-736.47	-11241.1	95416.5	-12638.7	329.559	315.264	0	6.16318	-23.4753	-83.6749	12730	-3662.64	2457.05	156.228	750.863	0	0	0	0	0	0	0	603	903	0
7134	4	52.8741	-74.6159	-739.217	-11790.4	95599.6	-12730.3	329.326	315.95	0	5.09506	-22.1021	-86.4214	12913.1	-3418.5	2457.05	160.444	753.58	0	0	0	0	0	0	0	603	903	0
7134	5	53.0267	-75.9892	-738.912	-12522.9	95599.6	-12821.8	329.379	316.948	0	7.68906	-23.3228	-86.7266	13096.2	-3357.47	2273.94	161.287	751.994	0	0	0	0	0	0	0	603	903	0
7134	6	53.1793	-75.2263	-739.522	-12339.8	95477.6	-13096.5	329.107	316.686	0	8.60458	-21.7969	-89.4732	13279.3	-3845.75	2640.15	157.018	754.583	0	0	0	0	0	0	0	603	903	0
7134	7	52.2638	-76.1418	-734.639	-12706	95843.8	-12776.1	330.464	317.296	0	9.21494	-20.271	-91.6094	13828.7	-3601.61	2594.38	160.685	752.048	0	0	0	0	0	0	0	603	903	0
7134	8	53.4845	-75.9892	-735.86	-13529.9	95538.6	-12959.2	329.833	318.387	0	7.07871	-19.5081	-95.2715	14011.8	-4089.89	2090.84	157.071	755.928	0	0	0	0	0	0	0	603	903	0
7134	9	52.1112	-77.2099	-736.47	-13987.7	95477.6	-13188	329.642	318.993	0	7.68906	-19.6606	-95.5767	14194.9	-3235.4	2457.05	166.149	754.482	0	0	0	0	0	0	0	603	903	0
7135	0	51.9586	-77.3625	-734.639	-13346.8	95294.4	-13188	329.716	318.168	0	11.3512	-14.6252	-96.1871	13920.2	-3540.57	2502.82	163.191	758.28	0	0	0	0	0	0	0	603	903	0
7135	1	52.2638	-77.5151	-731.588	-14720.1	95416.5	-13233.8	330.424	320.121	0	8.75717	-14.1675	-97.4078	14103.3	-3845.75	2045.06	160.519	758.214	0	0	0	0	0	0	0	603	903	0
7135	2	52.7215	-77.8203	-733.419	-15361	95599.6	-12913.4	330.348	320.944	0	6.62094	-14.6252	-97.7129	14194.9	-3723.68	2411.27	161.892	757.729	0	0	0	0	0	0	0	603	903	0
7135	3	51.5008	-79.041	-733.724	-14903.2	95538.6	-13188	330.211	320.312	0	8.452	-12.0313	-100.46	14927.3	-3601.61	2365.49	164.149	754.41	0	0	0	0	0	0	0	603	903	0
7135	4	51.9586	-79.8039	-733.419	-15910.3	95172.4	-13416.9	329.765	321.693	0	9.97787	-9.74243	-101.375	14927.3	-3540.57	2090.84	165.075	755.752	0	0	0	0	0	0	0	603	903	0
7135	5	53.1793	-79.4987	-734.334	-15818.8	95477.6	-13508.5	330.019	321.542	0	7.53647	-8.21656	-99.8492	14835.7	-3723.68	2090.84	162.707	754.419	0	0	0	0	0	0	0	603	903	0
7135	6	51.1957	-79.8039	-733.724	-15910.3	95416.5	-13691.6	330.044	321.684	0	7.23129	-7.91138	-102.596	15202	-4028.85	2090.84	160.731	754.827	0	0	0	0	0	0	0	603	903	0
7135	7	50.7379	-80.7195	-732.198	-16276.5	95233.4	-13508.5	330.065	322.23	0	7.68906	-5.31739	-104.732	15110.4	-3906.78	1678.85	162.697	758.723	0	0	0	0	0	0	0	603	903	0
7135	8	52.4164	-80.872	-731.282	-16825.8	95355.5	-13828.9	330.395	323.009	0	7.99423	-3.02857	-106.868	15476.6	-4028.85	1907.73	162.301	758.18	0	0	0	0	0	0	0	603	903	0
7135	9	50.1275	-81.3298	-731.282	-16642.7	95050.3	-14103.6	329.978	322.758	0	8.90976	-3.02857	-107.173	15110.4	-4028.85	1999.28	162.408	762.01	0	0	0	0	0	0	0	603	903	0
7136	0	49.8224	-82.2453	-732.808	-16734.3	95111.4	-14195.1	329.79	322.836	0	9.36752	-1.19751	-106.868	16117.5	-4150.92	1724.63	161.158	752.184	0	0	0	0	0	0	0	603	903	0
7136	1	49.3646	-82.3979	-730.062	-17558.3	94684.1	-13600	329.693	324.05	0	8.14682	1.39648	-111.446	15934.4	-3479.54	1449.97	168.778	760.021	0	0	0	0	0	0	0	603	903	0
7136	2	49.8224	-82.8557	-727.925	-17100.5	94806.2	-14469.8	330.242	323.492	0	10.2831	2.00683	-112.972	16117.5	-4150.92	1816.18	163.257	760.332	0	0	0	0	0	0	0	603	903	0
7136	3	48.4491	-83.9238	-728.231	-17375.2	94623.1	-14195.1	329.936	323.859	0	10.1305	2.61718	-113.582	16575.2	-3784.71	1724.63	166.679	757.068	0	0	0	0	0	0	0	603	903	0
7136	4	47.9913	-84.8393	-726.4	-18473.8	93951.7	-14607.1	329.339	325.432	0	9.52011	4.75342	-117.244	16483.7	-3967.82	1404.19	166.158	762.407	0	0	0	0	0	0	0	603	903	0
7136	5	47.5336	-85.6023	-722.127	-18473.8	94623.1	-14607.1	331.034	325.582	0	8.29941	4.906	-119.991	16483.7	-4272.99	1953.51	164.389	765.625	0	0	0	0	0	0	0	603	903	0
7136	6	47.5336	-86.06	-725.179	-17924.5	93951.7	-14378.2	329.557	324.717	0	9.97787	5.36377	-122.432	16941.4	-4028.85	1449.97	167.093	764.626	0	0	0	0	0	0	0	603	903	0
7136	7	47.2284	-86.6704	-724.874	-18748.4	94195.8	-14973.3	329.948	325.864	0	10.7408	6.88965	-127.01	17857	-4334.03	1404.19	165.876	762.405	0	0	0	0	0	0	0	603	903	0
7136	8	46.1603	-87.5859	-723.653	-18931.5	94073.7	-15064.9	329.998	326.161	0	11.046	9.02588	-128.536	17673.9	-4883.35	1770.4	162.008	765.498	0	0	0	0	0	0	0	603	903	0
7136	9	46.1603	-88.654	-718.16	-18473.8	93646.5	-15156.4	330.398	325.724	0	11.9615	8.41552	-132.198	17948.5	-4517.14	1541.52	165.83	767.23	0	0	0	0	0	0	0	603	903	0
7137	0	46.0077	-88.654	-722.127	-19389.3	93829.6	-15202.2	329.935	326.85	0	11.046	8.56811	-135.25	19413.4	-5005.42	1221.09	162.991	759.463	0	0	0	0	0	0	0	603	903	0
7137	1	45.3973	-88.5014	-721.517	-19847.1	93585.5	-15522.6	329.707	327.507	0	11.046	10.094	-138.606	19138.7	-4944.38	1724.63	164.328	764.921	0	0	0	0	0	0	0	603	903	0
7137	2	44.9396	-89.7221	-720.601	-19206.2	93219.2	-15568.4	329.363	326.653	0	9.97787	10.2466	-141.048	19504.9	-4883.35	1129.53	165.378	764.714	0	0	0	0	0	0	0	603	903	0
7137	3	43.2611	-91.4006	-717.549	-19664	93219.2	-15797.3	329.913	327.404	0	10.5882	9.78882	-146.236	20328.9	-5310.59	1129.53	163.685	763.986	0	0	0	0	0	0	0	603	903	0
7137	4	43.8714	-90.7903	-717.549	-19297.8	92731	-15522.6	329.233	326.894	0	11.8089	11.0095	-150.508	20695.1	-5188.52	1221.09	165.527	765.499	0	0	0	0	0	0	0	603	903	0
7137	5	43.1085	-91.8584	-716.329	-19664	92914.1	-16026.2	329.709	327.451	0	9.06235	12.688	-154.17	20969.8	-5554.73	946.427	163.97	766.983	0	0	0	0	0	0	0	603	903	0
7137	6	43.2611	-92.1635	-714.193	-19206.2	92547.9	-15980.4	329.584	326.892	0	9.97787	11.6199	-157.222	21885.3	-5676.8	1037.98	163.893	763.8	0	0	0	0	0	0	0	603	903	0
7137	7	42.4982	-93.6894	-709.92	-20213.3	92242.7	-16209.3	329.934	328.473	0	11.1986	12.8406	-161.8	22160	-5676.8	1221.09	164.915	766.041	0	0	0	0	0	0	0	603	903	0
7137	8	42.6507	-93.0791	-709.31	-20762.6	92059.6	-15705.7	329.788	329.272	0	7.99423	12.5354	-164.852	22434.6	-5737.84	580.216	165.194	766.91	0	0	0	0	0	0	0	603	903	0
7137	9	41.1249	-93.9946	-705.953	-20030.2	91876.5	-16255.1	330.145	328.373	0	9.6727	15.1294	-170.04	23441.7	-6104.05	1541.52	164.102	765.14	0	0	0	0	0	0	0	603	903	0
7138	0	40.6671	-94.4524	-702.901	-20671.1	91754.4	-16621.3	330.537	329.408	0	13.0296	13.2983	-177.364	23533.2	-5920.94	1266.86	166.617	770.317	0	0	0	0	0	0	0	603	903	0
7138	1	41.2775	-95.9782	-702.901	-21128.8	91754.4	-16621.3	330.537	330.059	0	13.4874	14.3665	-181.331	24815	-6104.05	1221.09	166.338	766.151	0	0	0	0	0	0	0	603	903	0
7138	2	40.8197	-95.9782	-701.07	-20579.5	90961	-16392.4	329.746	329.354	0	12.5719	16.9604	-186.519	24998.1	-6409.23	992.203	165.638	768.976	0	0	0	0	0	0	0	603	903	0
7138	3	40.8197	-96.436	-699.239	-21495	90838.9	-16667	329.911	330.741	0	13.7926	17.2656	-193.233	25455.9	-6409.23	1266.86	166.832	771.263	0	0	0	0	0	0	0	603	903	0
7138	4	40.6671	-97.1989	-697.713	-21678.1	90716.8	-16895.9	330.02	331.07	0	14.8607	16.6553	-197.2	26554.5	-7019.58	1633.07	164.404	768.343	0	0	0	0	0	0	0	603	903	0
7138	5	39.1412	-97.1989	-696.187	-21311.9	90228.5	-16941.7	329.604	330.612	0	16.0814	19.8596	-204.219	26920.7	-6897.51	992.203	166.225	771.178	0	0	0	0	0	0	0	603	903	0
7138	6	39.2938	-97.5041	-694.356	-22044.3	90289.5	-16804.4	330.034	331.748	0	14.7081	20.47	-210.323	28385.5	-6714.4	1221.09	168.076	768.038	0	0	0	0	0	0	0	603	903	0
7138	7	39.599	-98.8774	-691.609	-22227.4	89435.1	-16758.6	329.314	332.139	0	15.0133	19.8596	-216.121	28202.4	-7568.89	763.322	164.978	772.506	0	0	0	0	0	0	0	603	903	0
7138	8	39.1412	-98.4196	-688.558	-21403.5	89374.1	-17124.8	329.799	331.085	0	14.0977	20.9277	-223.751	28843.3	-7507.86	671.769	166.445	774.092	0	0	0	0	0	0	0	603	903	0
7138	9	37.9205	-99.3352	-685.811	-22776.8	88946.8	-17262.1	329.696	333.211	0	14.0977	23.064	-230.159	29484.2	-8057.17	854.874	164.993	774.897	0	0	0	0	0	0	0	603	903	0
7139	0	38.3783	-99.03	-683.98	-22410.6	88397.5	-16941.7	329.24	332.765	0	13.0296	23.3691	-233.516	29941.9	-7996.14	534.44	165.758	774.778	0	0	0	0	0	0	0	603	903	0
7139	1	37.1576	-100.251	-681.539	-22319	88519.6	-16667	329.882	332.748	0	12.877	24.2847	-239.925	30399.7	-8423.38	305.558	164.892	776.295	0	0	0	0	0	0	0	603	903	0
7139	2	38.2257	-100.403	-678.182	-22319	87604	-17033.2	329.175	332.91	0	11.8089	25.5054	-245.418	31315.2	-8667.52	580.216	164.683	775.4	0	0	0	0	0	0	0	603	903	0
7139	3	37.1576	-100.861	-673.299	-23051.4	87604	-17353.7	330.112	334.237	0	11.1986	27.7942	-251.216	32139.2	-8606.49	214.005	165.741	775.066	0	0	0	0	0	0	0	603	903	0
7139	4	36.2421	-101.014	-671.163	-22776.8	87054.7	-17262.1	329.707	333.936	0	11.046	27.9468	-257.32	31406.8	-9155.81	-289.535	164.419	780.947	0	0	0	0	0	0	0	603	903	0
7139	5	36.8524	-101.471	-668.416	-22227.4	86932.6	-17216.4	330.058	333.254	0	12.5719	29.4727	-261.287	32780.1	-9277.88	168.228	164.492	777.544	0	0	0	0	0	0	0	603	903	0
7139	6	36.0895	-102.387	-663.839	-23234.5	86627.4	-17353.7	330.495	335	0	10.4356	32.9822	-267.391	33421	-9460.99	-106.43	164.617	778.011	0	0	0	0	0	0	0	603	903	0
7139	7	36.0895	-101.471	-662.923	-23417.6	85834	-17216.4	329.478	335.325	0	10.4356	32.8296	-275.936	33329.4	-10071.3	-152.206	163.501	782.213	0	0	0	0	0	0	0	603	903	0
7139	8	35.7843	-102.845	-658.345	-22959.9	85589.9	-17536.8	330.008	334.875	0	10.8934	34.0503	-276.546	34428	-9949.27	168.228	164.023	778.507	0	0	0	0	0	0	0	603	903	0
7139	9	35.7843	-103.15	-655.904	-23600.7	85345.7	-17399.5	330.119	335.982	0	11.3512	37.102	-285.701	34611.1	-9888.23	-289.535	165.39	781.856	0	0	0	0	0	0	0	603	903	0
7140	0	34.2584	-103.15	-652.547	-23509.2	84430.2	-17353.7	329.386	336.027	0	10.7408	36.3391	-292.11	34794.2	-10925.8	-426.864	162.597	783.887	0	0	0	0	0	0	0	603	903	0
7140	1	34.5636	-103.302	-650.716	-23234.5	83636.7	-17445.2	328.53	335.706	0	10.1305	38.4753	-297.298	35801.3	-10803.8	-335.312	163.66	782.578	0	0	0	0	0	0	0	603	903	0
7140	2	34.1058	-103.455	-647.664	-23783.8	83453.6	-17719.9	328.853	336.723	0	10.5882	41.0693	-304.012	36350.6	-10864.8	-518.417	164.262	783.43	0	0	0	0	0	0	0	603	903	0
7140	3	34.2584	-103.76	-644.002	-24058.5	83270.5	-17399.5	329.302	337.358	0	9.21494	43.2056	-308.284	36259.1	-11597.2	-609.97	162.381	785.384	0	0	0	0	0	0	0	603	903	0
7140	4	33.8006	-104.065	-638.814	-23417.6	82965.3	-17674.1	329.874	336.658	0	8.90976	42.9004	-314.693	37174.6	-11658.3	-472.641	162.954	784.87	0	0	0	0	0	0	0	603	903	0
7140	5	32.1222	-105.439	-636.373	-23509.2	82232.9	-17948.8	329.221	336.943	0	9.21494	43.8159	-322.933	37723.9	-12146.5	-747.299	162.387	786.183	0	0	0	0	0	0	0	603	903	0
7140	6	31.9696	-104.981	-633.626	-23234.5	81561.5	-17536.8	328.722	336.669	0	7.99423	46.7151	-330.867	37998.6	-12573.8	-793.076	161.998	788.155	0	0	0	0	0	0	0	603	903	0
7140	7	31.5118	-105.134	-629.659	-23417.6	81378.4	-17857.2	329.242	337.191	0	8.29941	49.4617	-340.023	38639.4	-12329.6	-930.405	163.739	789.362	0	0	0	0	0	0	0	603	903	0
7140	8	31.817	-105.591	-625.386	-23509.2	81134.3	-16941.7	329.735	337.591	0	9.82529	48.0884	-347.042	39463.4	-13245.2	-747.299	161.834	789.286	0	0	0	0	0	0	0	603	903	0
7140	9	32.7325	-106.507	-620.504	-24424.7	80279.8	-17811.5	329.378	339.363	0	9.36752	51.9031	-352.84	39738.1	-13245.2	-1479.72	162.461	790.376	0	0	0	0	0	0	0	603	903	0
7141	0	30.7489	-105.896	-615.621	-23966.9	79486.3	-17674.1	329.116	338.931	0	6.77353	54.9548	-365.047	40470.5	-13977.6	-1250.84	161.71	792.136	0	0	0	0	0	0	0	603	903	0
7141	1	30.7489	-106.812	-610.433	-23326.1	79120.1	-17857.2	329.613	338.212	0	6.62094	55.1074	-373.592	41019.8	-14465.9	-1296.62	161.279	793.202	0	0	0	0	0	0	0	603	903	0
7141	2	30.2911	-106.965	-607.076	-24241.6	78448.7	-17262.1	329.224	339.932	0	6.16318	56.7859	-380.916	41386	-14587.9	-1708.6	161.703	794.351	0	0	0	0	0	0	0	603	903	0
7141	3	28.6127	-106.202	-601.888	-24058.5	78265.6	-17536.8	330.034	339.972	0	5.40024	58.7695	-389.156	42393.1	-14954.1	-1662.83	161.573	794.064	0	0	0	0	0	0	0	603	903	0
7141	4	30.4437	-106.965	-597.615	-23509.2	77472.2	-17994.6	329.635	339.338	0	6.01059	60.1428	-395.87	43034	-15869.7	-1800.16	159.912	794.293	0	0	0	0	0	0	0	603	903	0
7141	5	29.9859	-106.812	-593.648	-24516.3	76922.8	-17628.4	329.577	341.298	0	3.56918	61.5161	-406.551	43491.8	-16113.8	-2303.7	160.365	796.023	0	0	0	0	0	0	0	603	903	0
7141	6	29.3756	-106.354	-589.07	-24516.3	76373.5	-17674.1	329.651	341.619	0	2.19589	63.042	-413.875	43308.7	-16785.2	-2029.04	159.444	798.358	0	0	0	0	0	0	0	603	903	0
7141	7	29.0704	-106.659	-583.882	-23875.4	75580.1	-17033.2	329.444	340.891	0	0.670014	65.636	-420.894	44224.2	-17090.4	-2257.92	159.395	797.928	0	0	0	0	0	0	0	603	903	0
7141	8	29.5282	-107.575	-581.136	-24333.2	74908.7	-17399.5	328.9	341.872	0	3.56918	66.2463	-430.355	44590.4	-17029.3	-2669.91	160.43	799.387	0	0	0	0	0	0	0	603	903	0
7141	9	28.3075	-106.202	-575.032	-24974	74603.5	-17582.6	329.738	343.431	0	0.0596623	67.9248	-437.374	44681.9	-17761.8	-2944.56	159.39	800.84	0	0	0	0	0	0	0	603	903	0
7142	0	28.4601	-106.049	-570.76	-23600.7	73932.1	-17582.6	329.533	341.35	0	-1.92398	68.8403	-444.698	44865	-17761.8	-2944.56	160.059	802.111	0	0	0	0	0	0	0	603	903	0
7142	1	27.8497	-106.659	-565.267	-24058.5	73199.7	-17582.6	329.496	342.561	0	-0.855865	69.9084	-448.665	45139.7	-18128	-3127.67	159.596	802.391	0	0	0	0	0	0	0	603	903	0
7142	2	25.7135	-105.439	-557.332	-24424.7	72528.3	-17491	330.135	343.824	0	-0.550689	73.418	-455.379	45322.8	-18860.4	-3219.22	158.583	803.472	0	0	0	0	0	0	0	603	903	0
7142	3	26.0187	-106.202	-555.501	-24058.5	71612.8	-17307.9	328.916	343.31	0	-2.07657	73.418	-462.398	45689	-18616.3	-3173.45	159.74	804.191	0	0	0	0	0	0	0	603	903	0
7142	4	25.7135	-106.659	-549.703	-24058.5	71246.6	-16804.4	329.609	343.766	0	-1.92398	74.7913	-465.145	46055.2	-19409.7	-3173.45	158.272	803.987	0	0	0	0	0	0	0	603	903	0
7142	5	24.798	-106.049	-545.43	-24699.4	70270	-17262.1	328.834	345.284	0	-1.92398	76.7749	-473.384	45689	-19409.7	-3356.55	158.998	806.484	0	0	0	0	0	0	0	603	903	0
7142	6	25.4083	-105.591	-538.106	-24516.3	69720.7	-17353.7	329.567	345.56	0	-2.53433	77.6904	-477.046	45689	-19775.9	-3448.1	158.545	807.225	0	0	0	0	0	0	0	603	903	0
7142	7	24.9505	-106.354	-531.087	-23783.8	68927.2	-17399.5	329.785	344.783	0	-2.9921	79.9792	-482.845	46604.6	-20020.1	-3585.43	158.537	806.479	0	0	0	0	0	0	0	603	903	0
7142	8	23.7298	-105.744	-526.509	-24699.4	68133.8	-17033.2	329.407	346.912	0	-3.75503	79.9792	-483.15	46329.9	-20447.3	-3860.09	157.679	807.109	0	0	0	0	0	0	0	603	903	0
7142	9	23.8824	-105.286	-521.932	-24790.9	67584.5	-17033.2	329.489	347.498	0	-4.2128	80.437	-490.779	46146.8	-20447.3	-3631.21	158.337	808.973	0	0	0	0	0	0	0	603	903	0
7143	0	22.6617	-105.134	-514.302	-23966.9	66180.7	-16255.1	328.68	346.601	0	-3.60245	82.8784	-495.357	46696.1	-20813.5	-3722.76	157.983	808.732	0	0	0	0	0	0	0	603	903	0
7143	1	22.9669	-104.523	-509.725	-24607.8	66180.7	-16529.7	329.836	348.277	0	-4.67056	83.3362	-498.714	46146.8	-20813.5	-4088.97	158.266	810.469	0	0	0	0	0	0	0	603	903	0
7143	2	22.8143	-104.218	-503.926	-24516.3	65143.1	-16712.8	329.271	348.65	0	-6.19644	83.031	-501.155	46146.8	-21118.7	-3997.42	157.86	810.919	0	0	0	0	0	0	0	603	903	0
7143	3	21.8988	-103.608	-498.433	-23875.4	64349.6	-16804.4	329.104	347.901	0	-4.67056	85.0146	-504.207	46604.6	-21607	-4317.86	157.147	810.569	0	0	0	0	0	0	0	603	903	0
7143	4	22.5091	-103.913	-493.856	-23966.9	63922.4	-16483.9	329.435	348.53	0	-4.82315	85.4724	-508.48	46146.8	-21545.9	-4226.31	157.627	812.246	0	0	0	0	0	0	0	603	903	0
7143	5	21.2884	-102.54	-486.226	-23417.6	62457.5	-16575.5	328.454	348.162	0	-6.95938	84.7095	-508.48	45963.7	-21729	-4500.96	157.267	812.606	0	0	0	0	0	0	0	603	903	0
7143	6	20.3729	-101.777	-481.038	-23509.2	62457.5	-16163.5	329.839	348.872	0	-6.34903	85.9302	-513.057	46329.9	-22156.3	-4684.07	156.815	812.698	0	0	0	0	0	0	0	603	903	0
7143	7	19.7626	-101.777	-473.104	-23326.1	61419.9	-16438.2	329.823	349.304	0	-6.34903	88.219	-513.973	46055.2	-22400.4	-4684.07	156.417	813.394	0	0	0	0	0	0	0	603	903	0
7143	8	19.1522	-100.708	-469.136	-23875.4	60382.3	-16255.1	328.71	350.892	0	-8.0275	88.5242	-517.33	45963.7	-22583.5	-5233.39	156.346	814.152	0	0	0	0	0	0	0	603	903	0
7143	9	18.0841	-100.403	-462.117	-23875.4	59710.9	-16163.5	329.212	351.665	0	-7.87491	88.8293	-518.856	46238.3	-22400.4	-5096.06	156.827	813.884	0	0	0	0	0	0	0	603	903	0
7144	0	17.4737	-101.624	-456.014	-23143	58612.3	-16071.9	328.532	350.751	0	-7.87491	89.8975	-519.466	45597.5	-22766.6	-5141.83	156.173	815.222	0	0	0	0	0	0	0	603	903	0
7144	1	18.0841	-99.4878	-447.774	-22868.3	58368.2	-15843.1	330.352	351.071	0	-8.63785	88.9819	-522.518	45689	-22766.6	-5233.39	156.429	815.56	0	0	0	0	0	0	0	603	903	0
7144	2	15.4901	-98.1145	-441.976	-23143	57696.8	-16071.9	330.543	352.363	0	-8.79044	91.2708	-521.602	45048.1	-22644.6	-5233.39	156.587	816.635	0	0	0	0	0	0	0	603	903	0
7144	3	15.7953	-97.1989	-436.177	-22685.2	56598.2	-15293.8	329.76	352.009	0	-9.70596	92.3389	-525.569	45505.9	-22949.8	-5370.71	156.334	816.416	0	0	0	0	0	0	0	603	903	0
7144	4	14.5746	-96.5886	-425.801	-22959.9	55743.7	-15202.2	330.915	353.922	0	-12.4525	92.0337	-525.569	45139.7	-23254.9	-5599.6	155.753	817.113	0	0	0	0	0	0	0	603	903	0
7144	5	14.5746	-96.2834	-423.055	-23051.4	54767.1	-15293.8	329.456	354.488	0	-11.9948	92.7966	-527.706	45597.5	-23499.1	-5828.48	155.469	816.593	0	0	0	0	0	0	0	603	903	0
7144	6	15.3375	-97.3515	-415.425	-23051.4	53729.5	-15522.6	329.336	355.489	0	-11.9948	93.7122	-530.452	45322.8	-23499.1	-5874.25	155.7	817.558	0	0	0	0	0	0	0	603	903	0
7144	7	13.8116	-94.6049	-407.491	-22135.9	53424.3	-15019.1	331.106	354.322	0	-15.1991	94.4751	-531.368	44681.9	-23926.3	-6103.14	154.972	818.912	0	0	0	0	0	0	0	603	903	0
7144	8	13.659	-94.1472	-403.218	-23234.5	51959.5	-14973.3	328.862	357.623	0	-15.3517	96.3062	-535.03	45505.9	-24048.4	-5920.03	155.052	817.947	0	0	0	0	0	0	0	603	903	0
7144	9	13.3539	-93.2317	-395.589	-22593.7	51898.4	-14836	331.193	357.114	0	-13.0629	96.4587	-536.556	45048.1	-24353.6	-6103.14	154.611	819.042	0	0	0	0	0	0	0	603	903	0
7145	0	12.5909	-91.248	-390.096	-21678.1	50677.7	-14744.4	329.911	355.571	0	-17.6405	98.2898	-538.692	45231.2	-24658.7	-6103.14	154.225	819.035	0	0	0	0	0	0	0	603	903	0
7145	1	12.7435	-90.9428	-380.635	-22044.3	49518.1	-14332.4	330.093	357.915	0	-19.0138	98.4424	-542.659	44956.6	-24231.5	-6240.47	155.347	820.155	0	0	0	0	0	0	0	603	903	0
7145	2	12.8961	-89.1118	-377.278	-21769.7	49151.9	-14195.1	330.28	357.702	0	-18.8612	99.0527	-544.185	44407.3	-24475.6	-6423.57	155.023	821.397	0	0	0	0	0	0	0	603	903	0
7145	3	10.6073	-88.9592	-369.649	-20671.1	47931.2	-14103.6	329.667	355.921	0	-18.0983	100.426	-547.237	44590.4	-24841.8	-6332.02	154.605	821.517	0	0	0	0	0	0	0	603	903	0
7145	4	10.1495	-87.5859	-363.24	-21403.5	47503.9	-13874.7	330.778	358.924	0	-20.3871	101.342	-547.542	44498.8	-24963.9	-6789.78	154.407	821.73	0	0	0	0	0	0	0	603	903	0
7145	5	10.4547	-86.6704	-358.052	-22044.3	47015.6	-13737.4	331.309	361.567	0	-21.1501	102.41	-550.594	44590.4	-25391.2	-6744.01	153.884	822.014	0	0	0	0	0	0	0	603	903	0
7145	6	8.92882	-85.9074	-345.845	-21403.5	45611.8	-13508.5	331.885	361.887	0	-21.1501	102.104	-554.561	44224.2	-25818.4	-6835.56	153.444	823.254	0	0	0	0	0	0	0	603	903	0
7145	7	9.84435	-85.6023	-343.099	-20671.1	45306.6	-13142.3	332.051	360.248	0	-22.0656	103.325	-557.308	44041.1	-26245.6	-6789.78	152.906	823.975	0	0	0	0	0	0	0	603	903	0
7145	8	8.92882	-83.466	-336.385	-20671.1	44147	-13050.7	331.239	361.451	0	-21.913	105.614	-562.496	44498.8	-26123.6	-7064.44	153.558	823.89	0	0	0	0	0	0	0	603	903	0
7145	9	9.23399	-81.3298	-329.366	-21220.4	43475.6	-12913.4	331.998	364.428	0	-24.2018	103.478	-561.275	44956.6	-26367.7	-7064.44	153.022	822.903	0	0	0	0	0	0	0	603	903	0
7146	0	8.31847	-81.1772	-321.431	-20396.4	42560	-12730.3	332.408	363.455	0	-26.6432	106.072	-568.904	44132.6	-26733.9	-7476.43	153.008	825.425	0	0	0	0	0	0	0	603	903	0
7146	1	8.92882	-80.7195	-311.666	-20213.3	41339.3	-12547.2	332.64	364.856	0	-26.338	106.835	-571.651	44498.8	-26733.9	-7247.55	153.234	825.157	0	0	0	0	0	0	0	603	903	0
7146	2	9.38658	-77.9729	-308.919	-20213.3	40790	-12409.8	332.041	365.432	0	-26.338	107.292	-575.618	44865	-26917	-7018.66	153.238	825.058	0	0	0	0	0	0	0	603	903	0
7146	3	8.31847	-76.1418	-302.816	-19755.5	39752.4	-11952.1	331.276	365.239	0	-28.1691	108.971	-580.196	44224.2	-27527.4	-7384.87	152.555	826.777	0	0	0	0	0	0	0	603	903	0
7146	4	9.08141	-76.1418	-296.102	-19023.1	38959	-11723.2	331.573	364.245	0	-27.5587	107.14	-585.079	44681.9	-27710.5	-7247.55	152.638	826.631	0	0	0	0	0	0	0	603	903	0
7146	5	8.47106	-75.2263	-289.083	-19480.9	38470.7	-11631.6	333.079	367.389	0	-28.1691	110.955	-588.741	44865	-28076.7	-7567.98	152.311	826.795	0	0	0	0	0	0	0	603	903	0
7146	6	8.62364	-74.0056	-283.895	-19114.7	37066.9	-11082.3	330.566	367.33	0	-29.8476	110.039	-592.403	44041.1	-28503.9	-7430.65	151.884	828.657	0	0	0	0	0	0	0	603	903	0
7146	7	9.99693	-72.9375	-277.791	-18656.9	36761.7	-11265.4	332.336	367.162	0	-30.9157	111.26	-597.896	45048.1	-28442.9	-7796.86	152.428	827.656	0	0	0	0	0	0	0	603	903	0
7146	8	7.70812	-74.0056	-271.688	-18290.7	35602	-11311.2	331.04	367.322	0	-30.3053	113.549	-602.474	44590.4	-28503.9	-7796.86	152.688	828.988	0	0	0	0	0	0	0	603	903	0
7146	9	8.01329	-71.4116	-265.279	-17649.8	34869.6	-10899.2	331.445	366.533	0	-31.3734	112.48	-606.746	44956.6	-28687.1	-7659.53	152.72	828.905	0	0	0	0	0	0	0	603	903	0
7147	0	6.64	-70.9538	-258.565	-17832.9	34015.1	-10945	331.553	368.969	0	-31.6786	115.227	-609.798	44681.9	-29297.4	-8025.75	151.956	829.727	0	0	0	0	0	0	0	603	903	0
7147	1	7.40294	-70.1909	-253.377	-17283.6	33221.7	-10807.7	331.116	368.213	0	-30.3053	115.227	-614.376	44773.5	-29663.6	-7842.64	151.717	830.124	0	0	0	0	0	0	0	603	903	0
7147	2	5.4193	-69.5805	-242.696	-17832.9	32428.2	-10670.3	333.617	373.478	0	-31.2209	114.922	-617.427	44681.9	-29480.5	-7842.64	152.253	830.632	0	0	0	0	0	0	0	603	903	0
7147	3	5.87706	-67.1391	-239.339	-17008.9	31878.9	-10441.5	333.196	371.066	0	-31.526	114.922	-621.395	44956.6	-29907.8	-8208.85	151.87	830.652	0	0	0	0	0	0	0	603	903	0
7147	4	4.65636	-65.7658	-233.541	-16185	30597.2	-9571.71	331.014	369.303	0	-29.695	115.99	-625.057	45139.7	-30335	-7796.86	151.468	830.783	0	0	0	0	0	0	0	603	903	0
7147	5	5.26671	-64.3925	-228.047	-16001.9	30047.8	-10029.5	331.761	370.169	0	-31.3734	116.906	-628.414	44865	-30090.9	-7934.19	152.116	831.606	0	0	0	0	0	0	0	603	903	0
7147	6	4.50377	-61.7986	-216.451	-15910.3	29376.5	-9617.48	335.719	373.505	0	-31.6786	116.143	-634.212	45322.8	-30701.2	-8025.75	151.592	831.537	0	0	0	0	0	0	0	603	903	0
7147	7	5.87706	-61.3408	-211.568	-15269.4	28094.7	-9663.26	332.793	372.173	0	-30.3053	115.837	-636.959	45048.1	-30579.1	-8254.62	151.992	832.276	0	0	0	0	0	0	0	603	903	0
7147	8	5.4193	-60.5779	-206.38	-14720.1	27789.5	-9342.83	334.652	371.325	0	-31.6786	116.448	-639.4	45139.7	-30701.2	-8117.3	151.984	832.403	0	0	0	0	0	0	0	603	903	0
7147	9	4.50377	-59.6623	-199.971	-15269.4	26141.6	-9663.26	330.727	376.358	0	-31.6786	115.837	-645.503	45322.8	-31555.7	-8254.62	151.115	832.787	0	0	0	0	0	0	0	603	903	0
7148	0	5.26671	-58.7468	-194.173	-14720.1	26141.6	-8564.63	334.631	375.809	0	-32.1364	115.837	-648.25	45689	-31311.6	-7842.64	151.698	832.52	0	0	0	0	0	0	0	603	903	0
7148	1	5.87706	-56.7632	-187.764	-13987.7	25226.1	-8427.3	334.35	374.496	0	-33.0519	116.6	-652.828	45689	-31433.6	-7934.19	151.85	833.014	0	0	0	0	0	0	0	603	903	0
7148	2	5.57189	-55.3899	-182.271	-12889.1	24676.7	-8839.29	335.385	370.714	0	-32.5941	116.143	-657.1	46146.8	-32410.2	-8025.75	150.677	832.772	0	0	0	0	0	0	0	603	903	0
7148	3	5.4193	-54.3217	-178.304	-13713	24127.4	-8427.3	335.316	376.908	0	-30.6105	117.363	-660.457	46146.8	-32044	-8163.08	151.482	833.129	0	0	0	0	0	0	0	603	903	0
7148	4	5.57189	-52.9485	-172.811	-12980.6	23150.9	-8427.3	333.967	375.115	0	-34.7304	117.821	-663.509	44865	-32410.2	-8437.73	151.153	835.382	0	0	0	0	0	0	0	603	903	0
7148	5	5.72447	-51.27	-167.012	-12431.3	23028.8	-7923.76	337.887	374.434	0	-35.1881	117.058	-667.476	46146.8	-32837.5	-8437.73	150.804	833.864	0	0	0	0	0	0	0	603	903	0
7148	6	6.48741	-49.4389	-162.13	-12614.4	22052.2	-7969.53	336.016	377.805	0	-35.1881	117.058	-670.528	45780.6	-32288.1	-8483.5	151.847	834.725	0	0	0	0	0	0	0	603	903	0
7148	7	5.57189	-47.4553	-158.773	-12431.3	21380.8	-7465.99	334.663	378.296	0	-36.2563	118.279	-674.495	46329.9	-33020.6	-8391.95	151.044	834.312	0	0	0	0	0	0	0	603	903	0
7148	8	4.80895	-46.6924	-151.143	-11515.8	20465.3	-7465.99	335.404	376.191	0	-36.4088	119.5	-675.411	46604.6	-33508.9	-8346.18	150.387	833.998	0	0	0	0	0	0	0	603	903	0
7148	9	5.72447	-44.5561	-147.176	-11698.9	19977	-6596.24	335.736	379.489	0	-35.9511	119.347	-681.819	46421.4	-33264.7	-8575.06	151.212	834.915	0	0	0	0	0	0	0	603	903	0
7149	0	6.02965	-42.4199	-138.936	-11607.3	18939.4	-6825.12	336.318	383.544	0	-35.7985	118.431	-683.345	46421.4	-33630.9	-8575.06	150.785	835.067	0	0	0	0	0	0	0	603	903	0
7149	1	5.11412	-41.1992	-135.884	-10691.8	18756.3	-6779.35	338.032	378.683	0	-35.1881	119.5	-686.397	45963.7	-34119.2	-8666.61	150.292	836.036	0	0	0	0	0	0	0	603	903	0
7149	2	4.96153	-40.2837	-131.307	-10234	17596.7	-6321.58	334.012	377.94	0	-36.714	118.584	-690.669	46879.2	-33508.9	-8712.39	151.484	835.125	0	0	0	0	0	0	0	603	903	0
7149	3	5.72447	-37.9948	-125.814	-11058	17535.6	-5955.37	339.378	387.892	0	-37.0192	118.584	-692.501	47337	-34363.3	-8666.61	150.378	834.643	0	0	0	0	0	0	0	603	903	0
7149	4	5.72447	-35.4008	-122.762	-9684.72	16742.2	-5726.49	336.379	378.89	0	-38.2399	118.431	-696.163	46604.6	-33814	-8483.5	151.428	836.055	0	0	0	0	0	0	0	603	903	0
7149	5	6.18224	-35.706	-115.743	-9684.72	16376	-5680.71	341.486	383.675	0	-38.3925	117.821	-698.604	46238.3	-34119.2	-8346.18	151.161	836.813	0	0	0	0	0	0	0	603	903	0
7149	6	5.57189	-34.0276	-110.555	-9867.83	15826.7	-5222.95	343.157	389.257	0	-37.0192	118.279	-700.435	46696.1	-34546.4	-8529.28	150.679	836.333	0	0	0	0	0	0	0	603	903	0
7149	7	4.96153	-32.5017	-107.808	-9410.06	14361.8	-5131.4	333.216	387.285	0	-38.8503	117.516	-705.318	45872.1	-34363.3	-8712.39	151.28	837.963	0	0	0	0	0	0	0	603	903	0
7149	8	6.02965	-30.3654	-103.231	-8219.88	14789.1	-4719.41	343.262	379.626	0	-38.5451	116.448	-706.233	47062.3	-34851.6	-8529.28	150.651	836.362	0	0	0	0	0	0	0	603	903	0
7149	9	5.4193	-28.9922	-96.8219	-8677.64	14056.6	-4307.42	345.18	389.625	0	-35.3407	117.516	-710.811	46970.8	-34973.7	-8483.5	150.797	836.92	0	0	0	0	0	0	0	603	903	0
7150	0	5.72447	-26.8559	-95.296	-8769.2	13263.2	-4307.42	339.179	392.021	0	-38.5451	117.058	-713.558	45689	-35095.8	-8758.16	150.816	838.97	0	0	0	0	0	0	0	603	903	0
7150	1	6.94518	-24.7197	-92.5494	-7762.12	13019	-3895.43	340.671	383.87	0	-38.8503	116.906	-715.389	46970.8	-35400.9	-8575.06	150.515	837.342	0	0	0	0	0	0	0	603	903	0
7150	2	6.18224	-25.33	-89.1925	-8036.77	12469.7	-4078.54	339.807	390.106	0	-37.7821	116.143	-716.915	46696.1	-35584	-8071.52	150.365	837.865	0	0	0	0	0	0	0	603	903	0
7150	3	6.79259	-22.1257	-85.2252	-7304.35	12408.7	-3712.33	345.599	385.706	0	-38.6977	116.295	-721.187	46787.7	-35278.9	-8437.73	151.082	838.124	0	0	0	0	0	0	0	603	903	0
7150	4	7.70812	-20.7524	-84.6149	-7304.35	11310	-3254.56	333.665	386.325	0	-38.6977	116.448	-723.628	46421.4	-36255.4	-8666.61	149.898	838.849	0	0	0	0	0	0	0	603	903	0
7150	5	6.79259	-19.8369	-80.6476	-6663.48	10943.8	-3437.67	335.7	382.625	0	-38.5451	116.143	-727.291	47062.3	-36316.5	-8575.06	150.066	838.291	0	0	0	0	0	0	0	603	903	0
7150	6	6.02965	-18.9214	-75.7648	-6938.14	9967.27	-3163.01	331.556	391.575	0	-38.5451	115.99	-728.206	46970.8	-35950.3	-8529.28	150.632	838.498	0	0	0	0	0	0	0	603	903	0
7150	7	5.72447	-16.7851	-72.713	-6663.48	9967.27	-2934.13	337.077	391.641	0	-40.071	115.38	-732.173	46787.7	-36316.5	-8620.83	150.399	839.098	0	0	0	0	0	0	0	603	903	0
7150	8	5.26671	-16.0222	-70.2716	-6022.61	9784.17	-2705.25	339.234	385.705	0	-39.1554	114.769	-734.004	46329.9	-36072.3	-8208.85	150.855	839.881	0	0	0	0	0	0	0	603	903	0
7150	9	5.72447	-15.4118	-63.8629	-6205.72	8990.71	-2659.47	340.781	397.173	0	-39.308	114.769	-733.394	46787.7	-36316.5	-8254.62	150.482	839.204	0	0	0	0	0	0	0	603	903	0
7151	0	5.57189	-13.886	-64.1681	-5473.3	8807.61	-2384.81	337.258	385.296	0	-40.3761	114.312	-739.192	47062.3	-36255.4	-8346.18	150.953	839.333	0	0	0	0	0	0	0	603	903	0
7151	1	4.19859	-13.886	-60.8112	-4923.98	8441.4	-2567.92	338.813	380.972	0	-39.6132	114.312	-741.329	47611.6	-36926.8	-8529.28	150.188	838.775	0	0	0	0	0	0	0	603	903	0
7151	2	4.80895	-13.5808	-57.7594	-5473.3	7953.11	-2476.36	337.694	394.76	0	-40.2235	114.464	-744.075	48160.9	-36804.8	-8849.72	150.536	838.274	0	0	0	0	0	0	0	603	903	0
7151	3	3.89342	-11.4446	-54.4025	-5107.09	7586.9	-2201.71	339.459	393.876	0	-41.902	114.159	-745.906	47245.4	-37232	-8620.83	150.085	839.66	0	0	0	0	0	0	0	603	903	0
7151	4	4.35118	-10.0713	-52.5714	-4008.45	7464.83	-1698.17	341.994	376.248	0	-41.4442	113.243	-746.822	47794.7	-37293	-8254.62	150.064	839.003	0	0	0	0	0	0	0	603	903	0
7151	5	4.19859	-10.6816	-49.8248	-4557.77	6671.38	-1927.05	333.897	391.476	0	-38.5451	112.938	-751.705	47428.5	-37537.2	-8117.3	150.064	839.905	0	0	0	0	0	0	0	603	903	0
7151	6	5.26671	-8.54538	-46.1627	-4466.22	6427.24	-1881.27	339.23	396.749	0	-41.902	113.243	-751.705	47611.6	-37903.4	-8483.5	149.577	839.662	0	0	0	0	0	0	0	603	903	0
7151	7	5.11412	-7.47727	-43.111	-3550.69	5938.95	-1606.61	337.76	382.362	0	-42.3598	113.091	-754.451	47428.5	-37659.2	-8391.95	150.084	840.135	0	0	0	0	0	0	0	603	903	0
7151	8	4.04601	-7.93503	-41.2799	-3459.14	5816.88	-1286.18	340.913	383.797	0	-40.9865	110.039	-756.587	47520.1	-37781.3	-8391.95	150.064	840.192	0	0	0	0	0	0	0	603	903	0
7151	9	3.43565	-7.0195	-39.1437	-3642.24	5999.99	-1515.06	353.281	393.048	0	-39.9184	112.633	-757.503	47520.1	-37720.3	-8575.06	150.204	840.267	0	0	0	0	0	0	0	603	903	0
7152	0	3.43565	-7.62985	-36.7023	-3001.37	4962.39	-1469.29	335.207	381.776	0	-41.7494	111.718	-760.25	47520.1	-37842.3	-7979.97	150.224	840.494	0	0	0	0	0	0	0	603	903	0
7152	1	3.89342	-6.86691	-34.8712	-3184.48	5023.43	-1423.51	344.057	391.321	0	-41.2917	111.87	-761.47	46696.1	-38086.5	-8208.85	149.983	841.676	0	0	0	0	0	0	0	603	903	0
7152	2	3.74083	-5.64621	-29.6832	-3092.93	4535.15	-1240.4	352.785	404.198	0	-40.8339	111.26	-763.607	47886.3	-37903.4	-8117.3	150.363	840.289	0	0	0	0	0	0	0	603	903	0
7152	3	3.74083	-5.03586	-29.9884	-2818.27	4168.94	-1057.3	339.018	393.979	0	-40.2235	111.565	-765.743	47428.5	-38025.5	-8346.18	150.342	841.062	0	0	0	0	0	0	0	603	903	0
7152	4	4.19859	-4.5781	-27.2418	-2085.85	4107.9	-965.745	350.794	376.568	0	-42.0546	110.802	-766.048	48435.6	-38269.6	-8254.62	150.043	839.772	0	0	0	0	0	0	0	603	903	0
7152	5	4.04601	-4.42551	-24.8004	-2635.16	3680.65	-1011.52	348.411	406.255	0	-41.5968	110.649	-768.794	48435.6	-38330.6	-8483.5	150.142	839.998	0	0	0	0	0	0	0	603	903	0
7152	6	4.35118	-2.89963	-25.1056	-2543.61	3680.65	-736.863	346.607	401.316	0	-42.2072	108.818	-770.015	47428.5	-38208.6	-8208.85	150.379	841.406	0	0	0	0	0	0	0	603	903	0
7152	7	3.28307	-2.59445	-22.359	-1994.29	3314.44	-370.652	348.238	389.194	0	-42.2072	109.581	-771.541	47977.8	-38941	-7934.19	149.528	840.816	0	0	0	0	0	0	0	603	903	0
7152	8	3.43565	-1.52634	-20.528	-1994.29	2887.2	-279.099	340.647	397.15	0	-40.6813	108.513	-772.762	47611.6	-38513.7	-7705.31	150.161	841.388	0	0	0	0	0	0	0	603	903	0
7152	9	4.80895	-0.915986	-19.3072	-2085.85	2704.09	-370.652	340.056	408.034	0	-42.8175	108.361	-772.457	47245.4	-38757.9	-8025.75	149.825	841.838	0	0	0	0	0	0	0	603	903	0
7153	0	3.89342	-0.000459142	-18.0865	-1536.53	1971.67	-233.323	309.013	384.954	0	-42.2072	108.361	-774.898	47703.2	-38757.9	-8163.08	149.983	841.439	0	0	0	0	0	0	0	603	903	0
7153	1	3.58824	-0.153047	-16.5607	-1353.42	2154.77	-95.9941	330.114	381.725	0	-42.2072	107.14	-776.424	47611.6	-38269.6	-7934.19	150.71	841.678	0	0	0	0	0	0	0	603	903	0
7153	2	2.67272	0.915068	-14.7296	-987.213	2093.74	-95.9941	342.145	367.022	0	-43.1227	107.598	-777.645	46696.1	-39002	-8025.75	149.846	842.952	0	0	0	0	0	0	0	603	903	0
7153	3	3.58824	1.52542	-14.1193	-987.213	1849.6	361.77	330.998	369.92	0	-43.5805	106.53	-776.424	46970.8	-38879.9	-7934.19	149.924	842.504	0	0	0	0	0	0	0	603	903	0
7153	4	2.67272	2.13577	-13.8141	-895.661	2032.7	315.993	347.147	364.837	0	-42.0546	106.682	-780.086	46970.8	-38757.9	-7796.86	150.316	842.788	0	0	0	0	0	0	0	603	903	0
7153	5	4.04601	2.89871	-10.7623	-1353.42	1727.53	407.546	360.516	425.756	0	-43.1227	105.461	-781.917	46879.2	-39368.2	-7476.43	149.652	843.046	0	0	0	0	0	0	0	603	903	0
7153	6	1.90978	3.35647	-10.152	-1170.32	1117.18	544.875	310.045	415.28	0	-43.4279	105.309	-782.527	47062.3	-38818.9	-7567.98	150.393	842.859	0	0	0	0	0	0	0	603	903	0
7153	7	1.45201	3.66165	-9.23645	-895.661	1422.35	499.099	353.993	396.97	0	-42.0546	105.767	-782.833	46970.8	-39307.2	-8163.08	149.789	842.999	0	0	0	0	0	0	0	603	903	0
7153	8	0	0	0	0	0	0	200	300	0	-42.2072	104.851	-783.748	46879.2	-39429.3	-7476.43	149.691	843.186	0	0	0	0	0	0	0	603	903	0
7153	9	0	0	0	0	0	0	200	300	0	-42.6649	104.241	-784.664	46696.1	-39307.2	-7796.86	149.906	843.489	0	0	0	0	0	0	0	603	903	0
7154	0	0	0	0	0	0	0	200	300	0	-44.0382	103.173	-786.495	46787.7	-39368.2	-7522.2	149.945	843.511	0	0	0	0	0	0	0	603	903	0
7154	1	0	0	0	0	0	0	200	300	0	-42.6649	103.173	-787.41	46879.2	-39612.4	-7567.98	149.693	843.464	0	0	0	0	0	0	0	603	903	0
7154	2	0	0	0	0	0	0	200	300	0	-43.7331	103.478	-786.495	46329.9	-39673.4	-7567.98	149.557	844.093	0	0	0	0	0	0	0	603	903	0
7154	3	0	0	0	0	0	0	200	300	0	-42.9701	103.325	-789.546	46970.8	-40222.7	-7567.98	149.056	843.509	0	0	0	0	0	0	0	603	903	0
7154	4	0	0	0	0	0	0	200	300	0	-42.6649	103.02	-789.546	46604.6	-40283.8	-7659.53	148.979	843.973	0	0	0	0	0	0	0	603	903	0
7154	5	0	0	0	0	0	0	200	300	0	-44.496	102.562	-790.157	46329.9	-39246.2	-7476.43	150.331	844.366	0	0	0	0	0	0	0	603	903	0
7154	6	0	0	0	0	0	0	200	300	0	-43.4279	102.104	-791.988	46146.8	-40527.9	-7705.31	148.828	844.733	0	0	0	0	0	0	0	603	903	0
7154	7	0	0	0	0	0	0	200	300	0	-42.6649	100.579	-791.988	46329.9	-40527.9	-7522.2	148.828	844.502	0	0	0	0	0	0	0	603	903	0
7154	8	0	0	0	0	0	0	200	300	0	-43.8857	101.342	-792.293	45689	-40039.6	-7476.43	149.464	845.333	0	0	0	0	0	0	0	603	903	0
7154	9	0	0	0	0	0	0	200	300	0	-43.8857	99.6631	-791.988	45689	-40711	-7339.1	148.596	845.311	0	0	0	0	0	0	0	603	903	0
7155	0	0	0	0	0	0	0	200	300	0	-43.1227	99.5105	-793.819	46146.8	-40405.8	-7430.65	149.099	844.867	0	0	0	0	0	0	0	603	903	0
7155	1	0	0	0	0	0	0	200	300	0	-43.7331	98.595	-793.819	45963.7	-40222.7	-7476.43	149.33	845.098	0	0	0	0	0	0	0	603	903	0
7155	2	0	0	0	0	0	0	200	300	0	-44.0382	98.1372	-795.04	45231.2	-40955.1	-7567.98	148.487	846.108	0	0	0	0	0	0	0	603	903	0
7155	3	0	0	0	0	0	0	200	300	0	-43.7331	97.9846	-794.124	45963.7	-40222.7	-7659.53	149.35	845.12	0	0	0	0	0	0	0	603	903	0
7155	4	0	0	0	0	0	0	200	300	0	-43.7331	97.9846	-796.26	45689	-40222.7	-7293.32	149.485	845.62	0	0	0	0	0	0	0	603	903	0
7155	5	0	0	0	0	0	0	200	300	0	-44.496	97.0691	-795.955	45597.5	-40527.9	-6972.89	149.083	845.714	0	0	0	0	0	0	0	603	903	0
7155	6	0	0	0	0	0	0	200	300	0	-44.1908	97.0691	-795.345	45597.5	-40100.6	-7293.32	149.581	845.67	0	0	0	0	0	0	0	603	903	0
7155	7	0	0	0	0	0	0	200	300	0	-43.4279	96.7639	-796.565	45139.7	-40222.7	-7293.32	149.505	846.332	0	0	0	0	0	0	0	603	903	0
7155	8	0	0	0	0	0	0	200	300	0	-44.9538	95.238	-795.955	44865	-40711	-7430.65	148.853	846.634	0	0	0	0	0	0	0	603	903	0
7155	9	0	0	0	0	0	0	200	300	0	-44.0382	95.5432	-795.345	45505.9	-40466.9	-7155.99	149.12	845.785	0	0	0	0	0	0	0	603	903	0
7156	0	0	0	0	0	0	0	200	300	0	-43.5805	94.6277	-796.871	45322.8	-40711	-7155.99	148.911	846.124	0	0	0	0	0	0	0	603	903	0
7156	1	0	0	0	0	0	0	200	300	0	-45.1064	94.3225	-796.26	44956.6	-40711	-7064.44	148.872	846.54	0	0	0	0	0	0	0	603	903	0
7156	2	0	0	0	0	0	0	200	300	0	-44.6486	94.0173	-798.091	44956.6	-40466.9	-7247.55	149.295	846.67	0	0	0	0	0	0	0	603	903	0
7156	3	0	0	0	0	0	0	200	300	0	-43.5805	92.9492	-797.481	44773.5	-40527.9	-6972.89	149.18	846.856	0	0	0	0	0	0	0	603	903	0
7156	4	0	0	0	0	0	0	200	300	0	-43.2753	92.3389	-796.26	44315.7	-40894.1	-7018.66	148.642	847.345	0	0	0	0	0	0	0	603	903	0
7156	5	0	0	0	0	0	0	200	300	0	-45.2589	92.4915	-796.565	44224.2	-40405.8	-7064.44	149.275	847.482	0	0	0	0	0	0	0	603	903	0
7156	6	0	0	0	0	0	0	200	300	0	-43.1227	92.1863	-796.565	44132.6	-40955.1	-7018.66	148.585	847.596	0	0	0	0	0	0	0	603	903	0
7156	7	0	0	0	0	0	0	200	300	0	-43.4279	91.1182	-795.345	43949.5	-40466.9	-6881.33	149.12	847.742	0	0	0	0	0	0	0	603	903	0
7156	8	0	0	0	0	0	0	200	300	0	-43.7331	90.3552	-795.04	43766.4	-40344.8	-6789.78	149.254	847.951	0	0	0	0	0	0	0	603	903	0
7156	9	0	0	0	0	0	0	200	300	0	-43.7331	89.7449	-795.345	43583.3	-40833.1	-6789.78	148.66	848.202	0	0	0	0	0	0	0	603	903	0
7157	0	0	0	0	0	0	0	200	300	0	-43.4279	89.1345	-793.514	43308.7	-40466.9	-6560.9	149.003	848.422	0	0	0	0	0	0	0	603	903	0
7157	1	0	0	0	0	0	0	200	300	0	-42.6649	88.8293	-794.429	43217.1	-40405.8	-6652.45	149.139	848.6	0	0	0	0	0	0	0	603	903	0
7157	2	0	0	0	0	0	0	200	300	0	-43.2753	88.219	-791.378	43583.3	-40833.1	-6560.9	148.403	847.927	0	0	0	0	0	0	0	603	903	0
7157	3	0	0	0	0	0	0	200	300	0	-42.8175	88.0664	-793.819	42942.4	-40588.9	-6652.45	148.869	848.904	0	0	0	0	0	0	0	603	903	0
7157	4	0	0	0	0	0	0	200	300	0	-44.496	87.1509	-792.598	42393.1	-40711	-6698.23	148.636	849.514	0	0	0	0	0	0	0	603	903	0
7157	5	0	0	0	0	0	0	200	300	0	-42.8175	86.9983	-792.293	42759.3	-41138.2	-6286.24	148.077	849.031	0	0	0	0	0	0	0	603	903	0
7157	6	0	0	0	0	0	0	200	300	0	-44.6486	86.5405	-791.072	42118.4	-40161.7	-6423.57	149.231	849.758	0	0	0	0	0	0	0	603	903	0
7157	7	0	0	0	0	0	0	200	300	0	-44.6486	85.625	-789.852	42576.2	-40955.1	-6560.9	148.148	849.096	0	0	0	0	0	0	0	603	903	0
7157	8	0	0	0	0	0	0	200	300	0	-42.6649	84.5569	-788.936	42301.6	-40650	-6652.45	148.475	849.382	0	0	0	0	0	0	0	603	903	0
7157	9	0	0	0	0	0	0	200	300	0	-44.0382	84.0991	-789.546	42210	-40588.9	-6377.79	148.592	849.539	0	0	0	0	0	0	0	603	903	0
7158	0	0	0	0	0	0	0	200	300	0	-43.7331	85.4724	-785.579	42210	-41077.2	-6515.12	147.711	849.269	0	0	0	0	0	0	0	603	903	0
7158	1	0	0	0	0	0	0	200	300	0	-42.2072	84.2517	-788.936	41752.2	-40588.9	-6332.02	148.552	850.078	0	0	0	0	0	0	0	603	903	0
7158	2	0	0	0	0	0	0	200	300	0	-43.7331	83.4888	-786.8	41111.4	-40405.8	-6240.47	148.645	850.749	0	0	0	0	0	0	0	603	903	0
7158	3	0	0	0	0	0	0	200	300	0	-43.5805	82.8784	-784.664	41660.7	-41016.2	-6148.91	147.728	849.906	0	0	0	0	0	0	0	603	903	0
7158	4	0	0	0	0	0	0	200	300	0	-40.3761	81.6577	-784.969	41386	-40405.8	-6103.14	148.526	850.277	0	0	0	0	0	0	0	603	903	0
7158	5	0	0	0	0	0	0	200	300	0	-43.4279	82.1155	-783.748	40195.9	-40894.1	-6423.57	147.822	851.713	0	0	0	0	0	0	0	603	903	0
7158	6	0	0	0	0	0	0	200	300	0	-43.4279	81.5051	-783.443	41294.5	-40588.9	-6148.91	148.192	850.291	0	0	0	0	0	0	0	603	903	0
7158	7	0	0	0	0	0	0	200	300	0	-39.4606	79.9792	-781.002	40653.6	-39978.6	-6194.69	148.811	850.947	0	0	0	0	0	0	0	603	903	0
7158	8	0	0	0	0	0	0	200	300	0	-43.5805	81.3525	-779.17	40379	-40405.8	-6011.58	148.143	851.177	0	0	0	0	0	0	0	603	903	0
7158	9	0	0	0	0	0	0	200	300	0	-42.5124	79.6741	-777.034	40287.4	-40405.8	-5965.81	148	851.152	0	0	0	0	0	0	0	603	903	0
7159	0	0	0	0	0	0	0	200	300	0	-41.7494	78.7585	-777.339	39829.7	-39856.5	-5691.15	148.727	851.762	0	0	0	0	0	0	0	603	903	0
7159	1	0	0	0	0	0	0	200	300	0	-41.5968	78.9111	-777.034	39829.7	-40283.8	-5645.37	148.157	851.742	0	0	0	0	0	0	0	603	903	0
7159	2	0	0	0	0	0	0	200	300	0	-42.6649	77.2327	-775.203	39280.3	-40100.6	-5828.48	148.271	852.329	0	0	0	0	0	0	0	603	903	0
7159	3	0	0	0	0	0	0	200	300	0	-42.2072	77.9956	-773.982	38639.4	-39673.4	-5691.15	148.741	853.077	0	0	0	0	0	0	0	603	903	0
7159	4	0	0	0	0	0	0	200	300	0	-41.2917	77.3853	-772.762	39097.2	-40222.7	-5920.03	147.949	852.406	0	0	0	0	0	0	0	603	903	0
7159	5	0	0	0	0	0	0	200	300	0	-41.5968	76.1646	-770.32	38639.4	-39795.5	-5645.37	148.339	852.84	0	0	0	0	0	0	0	603	903	0
7159	6	0	0	0	0	0	0	200	300	0	-41.4442	76.3171	-769.405	38822.6	-39673.4	-5553.82	148.436	852.542	0	0	0	0	0	0	0	603	903	0
7159	7	0	0	0	0	0	0	200	300	0	-40.9865	74.6387	-767.879	38456.3	-40039.6	-5828.48	147.857	852.919	0	0	0	0	0	0	0	603	903	0
7159	8	0	0	0	0	0	0	200	300	0	-42.0546	75.8594	-765.438	37815.5	-39368.2	-5508.04	148.568	853.596	0	0	0	0	0	0	0	603	903	0
7159	9	0	0	0	0	0	0	200	300	0	-41.2917	76.012	-765.132	38181.7	-39978.6	-5462.27	147.749	853.098	0	0	0	0	0	0	0	603	903	0
7160	0	0	0	0	0	0	0	200	300	0	-40.6813	73.8757	-763.301	37266.2	-40039.6	-5370.71	147.544	854.178	0	0	0	0	0	0	0	603	903	0
7160	1	0	0	0	0	0	0	200	300	0	-42.0546	74.3335	-761.775	36625.3	-39124.1	-5370.71	148.641	854.921	0	0	0	0	0	0	0	603	903	0
7160	2	0	0	0	0	0	0	200	300	0	-42.2072	72.5024	-759.944	37266.2	-39917.5	-5233.39	147.473	853.962	0	0	0	0	0	0	0	603	903	0
7160	3	0	0	0	0	0	0	200	300	0	-40.6813	73.2654	-759.639	36808.4	-39856.5	-5187.61	147.532	854.545	0	0	0	0	0	0	0	603	903	0
7160	4	0	0	0	0	0	0	200	300	0	-41.4442	72.0447	-758.113	35984.4	-39490.3	-4912.95	147.91	855.534	0	0	0	0	0	0	0	603	903	0
7160	5	0	0	0	0	0	0	200	300	0	-41.5968	71.2817	-755.672	36076	-39307.2	-5096.06	147.984	855.26	0	0	0	0	0	0	0	603	903	0
7160	6	0	0	0	0	0	0	200	300	0	-40.5287	70.2136	-754.451	35984.4	-39307.2	-5233.39	147.9	855.304	0	0	0	0	0	0	0	603	903	0
7160	7	0	0	0	0	0	0	200	300	0	-40.8339	70.824	-754.146	35435.1	-39551.3	-5004.5	147.555	856.013	0	0	0	0	0	0	0	603	903	0
7160	8	0	0	0	0	0	0	200	300	0	-40.8339	69.4507	-751.399	35160.4	-39612.4	-4912.95	147.282	856.207	0	0	0	0	0	0	0	603	903	0
7160	9	0	0	0	0	0	0	200	300	0	-39.9184	70.6714	-752.01	35160.4	-39063.1	-5004.5	148.055	856.245	0	0	0	0	0	0	0	603	903	0
7161	0	0	0	0	0	0	0	200	300	0	-40.3761	68.23	-749.568	34519.6	-39490.3	-4958.73	147.316	856.947	0	0	0	0	0	0	0	603	903	0
7161	1	0	0	0	0	0	0	200	300	0	-40.6813	69.2981	-747.432	34885.8	-39185.1	-4867.17	147.574	856.326	0	0	0	0	0	0	0	603	903	0
7161	2	0	0	0	0	0	0	200	300	0	-39.1554	69.4507	-745.906	34519.6	-39307.2	-4775.62	147.303	856.721	0	0	0	0	0	0	0	603	903	0
7161	3	0	0	0	0	0	0	200	300	0	-40.3761	67.9248	-744.075	33970.3	-39307.2	-4729.85	147.173	857.346	0	0	0	0	0	0	0	603	903	0
7161	4	0	0	0	0	0	0	200	300	0	-40.5287	66.3989	-741.634	33787.2	-38879.9	-5004.5	147.575	857.442	0	0	0	0	0	0	0	603	903	0
7161	5	0	0	0	0	0	0	200	300	0	-39.0028	66.3989	-741.023	33878.7	-39551.3	-4729.85	146.626	857.281	0	0	0	0	0	0	0	603	903	0
7161	6	0	0	0	0	0	0	200	300	0	-38.5451	67.1619	-737.361	33237.9	-39185.1	-4775.62	146.858	857.923	0	0	0	0	0	0	0	603	903	0
7161	7	0	0	0	0	0	0	200	300	0	-40.071	66.5515	-738.887	32871.6	-38757.9	-4409.41	147.546	858.512	0	0	0	0	0	0	0	603	903	0
7161	8	0	0	0	0	0	0	200	300	0	-38.8503	64.7205	-736.446	33237.9	-39002	-4638.29	147.04	857.867	0	0	0	0	0	0	0	603	903	0
7161	9	0	0	0	0	0	0	200	300	0	-38.8503	65.3308	-734.615	32597	-38635.8	-4226.31	147.407	858.627	0	0	0	0	0	0	0	603	903	0
7162	0	0	0	0	0	0	0	200	300	0	-37.9347	64.4153	-735.225	32871.6	-38391.7	-4455.19	147.782	858.29	0	0	0	0	0	0	0	603	903	0
7162	1	0	0	0	0	0	0	200	300	0	-38.2399	63.3472	-731.563	32688.5	-39063.1	-4317.86	146.603	858.317	0	0	0	0	0	0	0	603	903	0
7162	2	0	0	0	0	0	0	200	300	0	-39.1554	63.3472	-731.258	31956.1	-38513.7	-4546.74	147.332	859.3	0	0	0	0	0	0	0	603	903	0
7162	3	0	0	0	0	0	0	200	300	0	-39.4606	62.7368	-728.816	31864.5	-38879.9	-4043.2	146.653	859.279	0	0	0	0	0	0	0	603	903	0
7162	4	0	0	0	0	0	0	200	300	0	-38.2399	62.279	-726.68	32322.3	-38941	-4546.74	146.412	858.521	0	0	0	0	0	0	0	603	903	0
7162	5	0	0	0	0	0	0	200	300	0	-38.8503	62.7368	-724.239	31589.9	-38147.5	-4409.41	147.327	859.382	0	0	0	0	0	0	0	603	903	0
7162	6	0	0	0	0	0	0	200	300	0	-38.3925	61.0583	-723.018	31132.1	-38696.8	-4409.41	146.479	859.941	0	0	0	0	0	0	0	603	903	0
7162	7	0	0	0	0	0	0	200	300	0	-38.3925	58.9221	-718.746	30582.8	-38025.5	-4272.08	147.095	860.45	0	0	0	0	0	0	0	603	903	0
7162	8	0	0	0	0	0	0	200	300	0	-38.8503	59.6851	-721.187	30308.1	-38208.6	-4043.2	147.02	860.975	0	0	0	0	0	0	0	603	903	0
7162	9	0	0	0	0	0	0	200	300	0	-39.1554	59.9902	-717.525	30399.7	-38391.7	-4272.08	146.494	860.633	0	0	0	0	0	0	0	603	903	0
7163	0	0	0	0	0	0	0	200	300	0	-38.2399	58.7695	-719.051	30125	-37842.3	-4180.53	147.372	861.104	0	0	0	0	0	0	0	603	903	0
7163	1	0	0	0	0	0	0	200	300	0	-37.1718	57.2436	-714.778	30033.5	-38391.7	-3951.65	146.289	860.982	0	0	0	0	0	0	0	603	903	0
7163	2	0	0	0	0	0	0	200	300	0	-38.8503	57.2436	-714.168	29667.3	-38513.7	-3905.87	146.072	861.459	0	0	0	0	0	0	0	603	903	0
7163	3	0	0	0	0	0	0	200	300	0	-37.477	56.1755	-712.947	29209.5	-38086.5	-3905.87	146.579	862.03	0	0	0	0	0	0	0	603	903	0
7163	4	0	0	0	0	0	0	200	300	0	-38.6977	55.7178	-710.811	29392.6	-38147.5	-3539.66	146.332	861.649	0	0	0	0	0	0	0	603	903	0
7163	5	0	0	0	0	0	0	200	300	0	-38.2399	56.3281	-711.116	29118	-37659.2	-3860.09	147.042	862.053	0	0	0	0	0	0	0	603	903	0
7163	6	0	0	0	0	0	0	200	300	0	-36.714	54.3445	-709.59	28934.9	-37903.4	-3722.76	146.584	862.223	0	0	0	0	0	0	0	603	903	0
7163	7	0	0	0	0	0	0	200	300	0	-38.2399	54.8022	-706.844	28385.5	-38269.6	-3585.43	145.858	862.842	0	0	0	0	0	0	0	603	903	0
7163	8	0	0	0	0	0	0	200	300	0	-37.6295	54.9548	-706.539	28477.1	-37537.2	-3631.21	146.872	862.695	0	0	0	0	0	0	0	603	903	0
7163	9	0	0	0	0	0	0	200	300	0	-35.7985	52.5134	-704.097	28294	-37659.2	-3081.89	146.514	862.815	0	0	0	0	0	0	0	603	903	0
7164	0	0	0	0	0	0	0	200	300	0	-37.1718	51.1401	-699.52	27836.2	-38025.5	-3585.43	145.641	863.207	0	0	0	0	0	0	0	603	903	0
7164	1	0	0	0	0	0	0	200	300	0	-37.3244	51.9031	-701.045	27744.7	-37537.2	-3448.1	146.455	863.424	0	0	0	0	0	0	0	603	903	0
7164	2	0	0	0	0	0	0	200	300	0	-34.2726	51.2927	-700.13	27195.4	-38086.5	-3310.78	145.601	864.157	0	0	0	0	0	0	0	603	903	0
7164	3	0	0	0	0	0	0	200	300	0	-37.3244	51.4453	-698.909	26737.6	-37781.3	-3448.1	145.942	864.744	0	0	0	0	0	0	0	603	903	0
7164	4	0	0	0	0	0	0	200	300	0	-36.5614	49.0039	-697.383	27378.5	-37903.4	-3310.78	145.649	863.741	0	0	0	0	0	0	0	603	903	0
7164	5	0	0	0	0	0	0	200	300	0	-34.12	50.3772	-694.026	27195.4	-37903.4	-3173.45	145.386	863.815	0	0	0	0	0	0	0	603	903	0
7164	6	0	0	0	0	0	0	200	300	0	-37.0192	49.1565	-694.026	27012.2	-37842.3	-3402.33	145.474	864.079	0	0	0	0	0	0	0	603	903	0
7164	7	0	0	0	0	0	0	200	300	0	-36.5614	48.3936	-690.975	27378.5	-37476.1	-3173.45	145.763	863.377	0	0	0	0	0	0	0	603	903	0
7164	8	0	0	0	0	0	0	200	300	0	-36.2563	48.6987	-690.059	26462.9	-37781.3	-2990.34	145.249	864.651	0	0	0	0	0	0	0	603	903	0
7164	9	0	0	0	0	0	0	200	300	0	-35.4933	46.8677	-688.228	26096.7	-37232	-3265	145.902	865.081	0	0	0	0	0	0	0	603	903	0
7165	0	0	0	0	0	0	0	200	300	0	-34.2726	47.1728	-686.702	26279.8	-37232	-2898.79	145.781	864.73	0	0	0	0	0	0	0	603	903	0
7165	1	0	0	0	0	0	0	200	300	0	-35.4933	46.4099	-685.482	25364.3	-37537.2	-2990.34	145.24	865.998	0	0	0	0	0	0	0	603	903	0
7165	2	0	0	0	0	0	0	200	300	0	-35.6459	45.7996	-684.566	25730.5	-36804.8	-2990.34	146.236	865.413	0	0	0	0	0	0	0	603	903	0
7165	3	0	0	0	0	0	0	200	300	0	-36.4088	45.9521	-684.566	25455.9	-36804.8	-2990.34	146.236	865.815	0	0	0	0	0	0	0	603	903	0
7165	4	0	0	0	0	0	0	200	300	0	-36.2563	44.1211	-682.735	25272.7	-37048.9	-2853.01	145.735	865.983	0	0	0	0	0	0	0	603	903	0
7165	5	0	0	0	0	0	0	200	300	0	-34.883	45.0366	-680.599	25547.4	-36987.9	-2761.46	145.654	865.463	0	0	0	0	0	0	0	603	903	0
7165	6	0	0	0	0	0	0	200	300	0	-35.9511	43.8159	-677.852	24998.1	-36926.8	-2853.01	145.524	866.122	0	0	0	0	0	0	0	603	903	0
7165	7	0	0	0	0	0	0	200	300	0	-36.4088	43.053	-676.937	24815	-37232	-2669.91	144.999	866.342	0	0	0	0	0	0	0	603	903	0
7165	8	0	0	0	0	0	0	200	300	0	-34.7304	43.3582	-676.631	24540.3	-37171	-2807.24	145.065	866.732	0	0	0	0	0	0	0	603	903	0
7165	9	0	0	0	0	0	0	200	300	0	-36.5614	42.1374	-674.19	24082.6	-37109.9	-2624.13	144.956	867.279	0	0	0	0	0	0	0	603	903	0
7166	0	0	0	0	0	0	0	200	300	0	-35.7985	42.29	-673.274	23716.3	-37171	-2486.8	144.791	867.775	0	0	0	0	0	0	0	603	903	0
7166	1	0	0	0	0	0	0	200	300	0	-35.0356	42.1374	-669.307	23899.5	-36682.7	-2807.24	145.193	867.292	0	0	0	0	0	0	0	603	903	0
7166	2	0	0	0	0	0	0	200	300	0	-35.3407	40.459	-669.918	23441.7	-37048.9	-2578.35	144.696	868.008	0	0	0	0	0	0	0	603	903	0
7166	3	0	0	0	0	0	0	200	300	0	-35.1881	40.3064	-669.612	23807.9	-36499.6	-2441.02	145.492	867.445	0	0	0	0	0	0	0	603	903	0
7166	4	0	0	0	0	0	0	200	300	0	-34.12	39.5435	-667.781	23533.2	-36438.5	-2212.14	145.433	867.759	0	0	0	0	0	0	0	603	903	0
7166	5	0	0	0	0	0	0	200	300	0	-34.2726	39.5435	-666.561	22800.8	-36682.7	-2349.47	144.967	868.793	0	0	0	0	0	0	0	603	903	0
7166	6	0	0	0	0	0	0	200	300	0	-35.3407	39.0857	-664.73	22983.9	-36316.5	-2166.37	145.367	868.424	0	0	0	0	0	0	0	603	903	0
7166	7	0	0	0	0	0	0	200	300	0	-33.9674	37.7124	-662.593	22892.4	-36682.7	-2257.92	144.638	868.45	0	0	0	0	0	0	0	603	903	0
7166	8	0	0	0	0	0	0	200	300	0	-33.0519	37.2546	-662.288	22526.2	-36804.8	-2166.37	144.428	868.987	0	0	0	0	0	0	0	603	903	0
7166	9	0	0	0	0	0	0	200	300	0	-34.2726	37.2546	-660.457	21976.8	-36255.4	-2166.37	145.106	869.725	0	0	0	0	0	0	0	603	903	0
7167	0	0	0	0	0	0	0	200	300	0	-33.3571	35.8813	-654.354	22160	-36560.6	-2074.81	144.127	869.135	0	0	0	0	0	0	0	603	903	0
7167	1	0	0	0	0	0	0	200	300	0	-32.7467	36.1865	-658.016	21885.3	-36377.5	-1937.49	144.716	869.741	0	0	0	0	0	0	0	603	903	0
7167	2	0	0	0	0	0	0	200	300	0	-32.1364	35.4236	-654.354	21793.7	-36011.3	-1937.49	144.967	869.694	0	0	0	0	0	0	0	603	903	0
7167	3	0	0	0	0	0	0	200	300	0	-32.7467	34.2029	-654.354	21519.1	-36560.6	-1937.49	144.127	870.114	0	0	0	0	0	0	0	603	903	0
7167	4	0	0	0	0	0	0	200	300	0	-32.4416	34.5081	-653.438	20969.8	-36316.5	-1983.26	144.422	870.909	0	0	0	0	0	0	0	603	903	0
7167	5	0	0	0	0	0	0	200	300	0	-33.3571	34.5081	-651.607	21152.9	-35950.3	-1800.16	144.828	870.537	0	0	0	0	0	0	0	603	903	0
7167	6	0	0	0	0	0	0	200	300	0	-31.526	33.5925	-651.302	21336	-36011.3	-1571.27	144.709	870.241	0	0	0	0	0	0	0	603	903	0
7167	7	0	0	0	0	0	0	200	300	0	-31.8312	33.5925	-648.86	20512	-36011.3	-1800.16	144.501	871.388	0	0	0	0	0	0	0	603	903	0
7167	8	0	0	0	0	0	0	200	300	0	-33.2045	32.5244	-649.166	20786.7	-35889.2	-1845.93	144.715	870.979	0	0	0	0	0	0	0	603	903	0
7167	9	0	0	0	0	0	0	200	300	0	-32.289	31.9141	-647.64	20786.7	-36499.6	-1754.38	143.642	870.904	0	0	0	0	0	0	0	603	903	0
7168	0	0	0	0	0	0	0	200	300	0	-30.0002	31.7615	-643.978	20512	-36072.3	-1708.6	143.985	871.148	0	0	0	0	0	0	0	603	903	0
7168	1	0	0	0	0	0	0	200	300	0	-31.9838	32.3718	-646.114	20512	-36377.5	-1708.6	143.698	871.253	0	0	0	0	0	0	0	603	903	0
7168	2	0	0	0	0	0	0	200	300	0	-31.9838	31.4563	-644.283	20420.5	-36438.5	-1754.38	143.443	871.305	0	0	0	0	0	0	0	603	903	0
7168	3	0	0	0	0	0	0	200	300	0	-31.526	30.9985	-642.757	20328.9	-35645.1	-1754.38	144.543	871.372	0	0	0	0	0	0	0	603	903	0
7168	4	0	0	0	0	0	0	200	300	0	-31.0683	29.9304	-641.231	19962.7	-36438.5	-1250.84	143.174	871.868	0	0	0	0	0	0	0	603	903	0
7168	5	0	0	0	0	0	0	200	300	0	-32.1364	28.2519	-641.231	20145.8	-35523	-1342.39	144.602	871.583	0	0	0	0	0	0	0	603	903	0
7168	6	0	0	0	0	0	0	200	300	0	-31.0683	30.083	-639.4	19779.6	-35767.2	-1617.05	144.061	872.065	0	0	0	0	0	0	0	603	903	0
7168	7	0	0	0	0	0	0	200	300	0	-30.0002	28.5571	-638.179	19779.6	-35462	-1433.95	144.433	872.006	0	0	0	0	0	0	0	603	903	0
7168	8	0	0	0	0	0	0	200	300	0	-30.9157	28.7097	-636.043	19138.7	-35523	-1571.27	144.15	872.91	0	0	0	0	0	0	0	603	903	0
7168	9	0	0	0	0	0	0	200	300	0	-30.6105	28.0994	-636.959	19688	-35523	-1433.95	144.23	872.091	0	0	0	0	0	0	0	603	903	0
7169	0	0	0	0	0	0	0	200	300	0	-30.4579	27.7942	-635.433	18680.9	-35950.3	-1433.95	143.424	873.601	0	0	0	0	0	0	0	603	903	0
7169	1	0	0	0	0	0	0	200	300	0	-30.6105	27.1838	-635.433	18589.4	-35584	-1342.39	144	873.745	0	0	0	0	0	0	0	603	903	0
7169	2	0	0	0	0	0	0	200	300	0	-29.5424	26.8787	-634.212	18955.6	-35889.2	-1296.62	143.411	873.112	0	0	0	0	0	0	0	603	903	0
7169	3	0	0	0	0	0	0	200	300	0	-29.3898	26.4209	-631.771	18772.5	-36011.3	-1433.95	142.999	873.286	0	0	0	0	0	0	0	603	903	0
7169	4	0	0	0	0	0	0	200	300	0	-31.0683	26.4209	-632.686	18497.8	-35156.8	-1342.39	144.432	873.763	0	0	0	0	0	0	0	603	903	0
7169	5	0	0	0	0	0	0	200	300	0	-29.5424	25.3528	-630.245	18589.4	-36011.3	-1296.62	142.861	873.505	0	0	0	0	0	0	0	603	903	0
7169	6	0	0	0	0	0	0	200	300	0	-30.7631	25.0476	-631.16	18314.7	-35156.8	-1159.29	144.298	873.982	0	0	0	0	0	0	0	603	903	0
7169	7	0	0	0	0	0	0	200	300	0	-30.3053	24.5898	-629.94	17948.5	-35462	-1113.51	143.706	874.508	0	0	0	0	0	0	0	603	903	0
7169	8	0	0	0	0	0	0	200	300	0	-29.695	24.4373	-627.803	18131.6	-35400.9	-1021.96	143.611	874.119	0	0	0	0	0	0	0	603	903	0
7169	9	0	0	0	0	0	0	200	300	0	-30.3053	23.5217	-629.329	18314.7	-35339.9	-1571.27	143.845	873.898	0	0	0	0	0	0	0	603	903	0
7170	0	0	0	0	0	0	0	200	300	0	-29.695	22.6062	-626.888	17673.9	-35462	-930.405	143.432	874.807	0	0	0	0	0	0	0	603	903	0
7170	1	0	0	0	0	0	0	200	300	0	-28.4743	23.064	-627.498	17673.9	-35889.2	-884.628	142.806	874.834	0	0	0	0	0	0	0	603	903	0
7170	2	0	0	0	0	0	0	200	300	0	-29.5424	22.301	-628.108	16483.7	-35278.9	-793.076	143.833	876.757	0	0	0	0	0	0	0	603	903	0
7170	3	0	0	0	0	0	0	200	300	0	-29.2372	21.6907	-622.31	17582.3	-35706.1	-747.299	142.623	874.747	0	0	0	0	0	0	0	603	903	0
7170	4	0	0	0	0	0	0	200	300	0	-27.7113	21.8433	-626.888	17216.1	-35889.2	-564.193	142.75	875.537	0	0	0	0	0	0	0	603	903	0
7170	5	0	0	0	0	0	0	200	300	0	-29.3898	20.9277	-625.667	16666.8	-35217.8	-701.523	143.712	876.362	0	0	0	0	0	0	0	603	903	0
7170	6	0	0	0	0	0	0	200	300	0	-28.932	21.5381	-624.752	16849.9	-35767.2	-747.299	142.75	876.029	0	0	0	0	0	0	0	603	903	0
7170	7	0	0	0	0	0	0	200	300	0	-25.7277	20.47	-624.752	17033	-35278.9	-747.299	143.531	875.736	0	0	0	0	0	0	0	603	903	0
7170	8	0	0	0	0	0	0	200	300	0	-28.3217	20.3174	-622.92	16483.7	-35339.9	-564.193	143.267	876.538	0	0	0	0	0	0	0	603	903	0
7170	9	0	0	0	0	0	0	200	300	0	-28.0165	19.5544	-623.836	17033	-35889.2	-609.97	142.47	875.696	0	0	0	0	0	0	0	603	903	0
7171	0	0	0	0	0	0	0	200	300	0	-25.5751	19.707	-623.226	16483.7	-35339.9	-930.405	143.295	876.551	0	0	0	0	0	0	0	603	903	0
7171	1	0	0	0	0	0	0	200	300	0	-28.4743	19.0967	-622.005	16666.8	-35706.1	-609.97	142.595	876.205	0	0	0	0	0	0	0	603	903	0
7171	2	0	0	0	0	0	0	200	300	0	-27.7113	18.9441	-623.226	16575.2	-35645.1	-609.97	142.805	876.404	0	0	0	0	0	0	0	603	903	0
7171	3	0	0	0	0	0	0	200	300	0	-24.3544	18.4863	-622.31	16209	-35278.9	-655.746	143.31	876.953	0	0	0	0	0	0	0	603	903	0
7171	4	0	0	0	0	0	0	200	300	0	-27.8639	18.1811	-622.615	15659.7	-35889.2	-701.523	142.357	877.849	0	0	0	0	0	0	0	603	903	0
7171	5	0	0	0	0	0	0	200	300	0	-28.4743	16.6553	-621.395	16025.9	-35034.7	-609.97	143.619	877.21	0	0	0	0	0	0	0	603	903	0
7171	6	0	0	0	0	0	0	200	300	0	-26.338	16.9604	-620.174	16209	-35767.2	-472.641	142.327	876.864	0	0	0	0	0	0	0	603	903	0
7171	7	0	0	0	0	0	0	200	300	0	-28.0165	16.6553	-618.648	16483.7	-35645.1	-609.97	142.382	876.355	0	0	0	0	0	0	0	603	903	0
7171	8	0	0	0	0	0	0	200	300	0	-27.5587	16.9604	-620.784	15659.7	-35400.9	-472.641	142.974	877.774	0	0	0	0	0	0	0	603	903	0
7171	9	0	0	0	0	0	0	200	300	0	-26.338	16.8079	-621.395	16025.9	-35584	-289.535	142.735	877.21	0	0	0	0	0	0	0	603	903	0
7172	0	0	0	0	0	0	0	200	300	0	-28.4743	15.7397	-619.869	15476.6	-36133.4	-426.864	141.708	878.033	0	0	0	0	0	0	0	603	903	0
7172	1	0	0	0	0	0	0	200	300	0	-28.3217	16.0449	-619.564	16117.5	-35523	-518.417	142.664	876.986	0	0	0	0	0	0	0	603	903	0
7172	2	0	0	0	0	0	0	200	300	0	-24.3544	15.7397	-620.784	15659.7	-36011.3	-289.535	141.991	877.774	0	0	0	0	0	0	0	603	903	0
7172	3	0	0	0	0	0	0	200	300	0	-27.8639	14.9768	-619.258	15568.2	-35767.2	-472.641	142.242	877.86	0	0	0	0	0	0	0	603	903	0
7172	4	0	0	0	0	0	0	200	300	0	-27.8639	14.0613	-616.817	15568.2	-35584	-335.312	142.31	877.761	0	0	0	0	0	0	0	603	903	0
7172	5	0	0	0	0	0	0	200	300	0	-27.101	14.519	-619.869	15293.5	-36011.3	-197.982	141.905	878.328	0	0	0	0	0	0	0	603	903	0
7172	6	0	0	0	0	0	0	200	300	0	-27.7113	12.9932	-616.207	14927.3	-35339.9	-335.312	142.649	878.776	0	0	0	0	0	0	0	603	903	0
7172	7	0	0	0	0	0	0	200	300	0	-25.1173	13.9087	-618.343	14835.7	-35706.1	-152.206	142.255	879.007	0	0	0	0	0	0	0	603	903	0
7172	8	0	0	0	0	0	0	200	300	0	-26.338	11.925	-620.784	14469.5	-35828.2	-197.982	142.286	879.692	0	0	0	0	0	0	0	603	903	0
7172	9	0	0	0	0	0	0	200	300	0	-26.338	12.688	-617.732	14194.9	-35706.1	-289.535	142.198	880.021	0	0	0	0	0	0	0	603	903	0
7173	0	0	0	0	0	0	0	200	300	0	-27.101	12.688	-616.207	14286.4	-35889.2	-60.6534	141.758	879.816	0	0	0	0	0	0	0	603	903	0
7173	1	0	0	0	0	0	0	200	300	0	-25.8803	11.6199	-618.038	14561.1	-35767.2	-106.43	142.128	879.44	0	0	0	0	0	0	0	603	903	0
7173	2	0	0	0	0	0	0	200	300	0	-26.338	11.1621	-618.038	14286.4	-35584	-60.6534	142.424	879.884	0	0	0	0	0	0	0	603	903	0
7173	3	0	0	0	0	0	0	200	300	0	-27.2536	11.1621	-618.648	13737.1	-36133.4	76.6757	141.593	880.795	0	0	0	0	0	0	0	603	903	0
7173	4	0	0	0	0	0	0	200	300	0	-27.2536	10.8569	-616.512	13828.7	-35156.8	214.005	142.975	880.57	0	0	0	0	0	0	0	603	903	0
7173	5	0	0	0	0	0	0	200	300	0	-26.1855	10.2466	-618.038	13645.6	-35706.1	76.6757	142.227	880.921	0	0	0	0	0	0	0	603	903	0
7173	6	0	0	0	0	0	0	200	300	0	-26.7958	10.3992	-618.953	13828.7	-35828.2	76.6757	142.115	880.658	0	0	0	0	0	0	0	603	903	0
7173	7	0	0	0	0	0	0	200	300	0	-26.4906	9.63623	-617.732	14103.3	-35889.2	305.558	141.902	880.169	0	0	0	0	0	0	0	603	903	0
7173	8	0	0	0	0	0	0	200	300	0	-25.5751	9.48364	-618.953	13737.1	-35767.2	259.781	142.213	880.806	0	0	0	0	0	0	0	603	903	0
7173	9	0	0	0	0	0	0	200	300	0	-25.8803	8.7207	-618.343	13370.9	-36194.4	168.228	141.465	881.376	0	0	0	0	0	0	0	603	903	0
7174	0	0	0	0	0	0	0	200	300	0	-23.4389	8.41552	-618.953	13462.5	-35645.1	442.887	142.411	881.25	0	0	0	0	0	0	0	603	903	0
7174	1	0	0	0	0	0	0	200	300	0	-25.1173	7.34741	-618.648	13554	-36316.5	305.558	141.297	881.091	0	0	0	0	0	0	0	603	903	0
7174	2	0	0	0	0	0	0	200	300	0	-25.5751	7.80517	-618.953	13370.9	-35767.2	488.663	142.213	881.398	0	0	0	0	0	0	0	603	903	0
7174	3	0	0	0	0	0	0	200	300	0	-26.338	7.65259	-619.564	12821.6	-35828.2	534.44	142.172	882.305	0	0	0	0	0	0	0	603	903	0
7174	4	0	0	0	0	0	0	200	300	0	-25.2699	7.19482	-618.648	13279.3	-36438.5	351.334	141.1	881.535	0	0	0	0	0	0	0	603	903	0
7174	5	0	0	0	0	0	0	200	300	0	-24.8122	5.82153	-618.953	13370.9	-36255.4	351.334	141.425	881.398	0	0	0	0	0	0	0	603	903	0
7174	6	0	0	0	0	0	0	200	300	0	-25.5751	6.27929	-619.564	13370.9	-36743.7	351.334	140.694	881.419	0	0	0	0	0	0	0	603	903	0
7174	7	0	0	0	0	0	0	200	300	0	-25.8803	6.73706	-619.258	12913.1	-36621.6	488.663	140.862	882.147	0	0	0	0	0	0	0	603	903	0
7174	8	0	0	0	0	0	0	200	300	0	-24.6596	6.43188	-619.869	12821.6	-36438.5	397.11	141.216	882.316	0	0	0	0	0	0	0	603	903	0
7174	9	0	0	0	0	0	0	200	300	0	-25.1173	5.36377	-620.479	12546.9	-36804.8	580.216	140.683	882.779	0	0	0	0	0	0	0	603	903	0
7175	0	0	0	0	0	0	0	200	300	0	-25.5751	5.21118	-620.479	12455.4	-36438.5	580.216	141.274	882.926	0	0	0	0	0	0	0	603	903	0
7175	1	0	0	0	0	0	0	200	300	0	-24.6596	4.75342	-622.005	12730	-36377.5	854.874	141.516	882.534	0	0	0	0	0	0	0	603	903	0
7175	2	0	0	0	0	0	0	200	300	0	-24.9648	5.05859	-620.174	12455.4	-36682.7	671.769	140.851	882.916	0	0	0	0	0	0	0	603	903	0
7175	3	0	0	0	0	0	0	200	300	0	-24.9648	4.29565	-620.479	12730	-36682.7	488.663	140.88	882.484	0	0	0	0	0	0	0	603	903	0
7175	4	0	0	0	0	0	0	200	300	0	-25.2699	3.38012	-621.395	12180.7	-36804.8	580.216	140.771	883.398	0	0	0	0	0	0	0	603	903	0
7175	5	0	0	0	0	0	0	200	300	0	-25.4225	2.76977	-620.784	12089.2	-36865.8	580.216	140.614	883.526	0	0	0	0	0	0	0	603	903	0
7175	6	0	0	0	0	0	0	200	300	0	-26.338	3.22754	-622.615	12455.4	-36560.6	488.663	141.279	882.995	0	0	0	0	0	0	0	603	903	0
7175	7	0	0	0	0	0	0	200	300	0	-25.7277	3.38012	-618.648	12180.7	-37232	1129.53	139.817	883.311	0	0	0	0	0	0	0	603	903	0
7175	8	0	0	0	0	0	0	200	300	0	-25.5751	2.4646	-622.92	12730	-36499.6	946.427	141.406	882.564	0	0	0	0	0	0	0	603	903	0
7175	9	0	0	0	0	0	0	200	300	0	-26.338	1.70166	-621.7	11997.6	-36926.8	1037.98	140.603	883.702	0	0	0	0	0	0	0	603	903	0
7176	0	0	0	0	0	0	0	200	300	0	-25.8803	1.39648	-622.31	11997.6	-36926.8	900.651	140.662	883.721	0	0	0	0	0	0	0	603	903	0
7176	1	0	0	0	0	0	0	200	300	0	-24.3544	1.39648	-619.869	11814.5	-36865.8	671.769	140.526	883.94	0	0	0	0	0	0	0	603	903	0
7176	2	0	0	0	0	0	0	200	300	0	-26.1855	0.480954	-623.226	11631.4	-37232	809.098	140.259	884.337	0	0	0	0	0	0	0	603	903	0
7176	3	0	0	0	0	0	0	200	300	0	-26.4906	0.0231904	-621.7	11448.3	-37109.9	671.769	140.309	884.586	0	0	0	0	0	0	0	603	903	0
7176	4	0	0	0	0	0	0	200	300	0	-25.1173	-0.434573	-623.531	11631.4	-36865.8	854.874	140.876	884.346	0	0	0	0	0	0	0	603	903	0
7176	5	0	0	0	0	0	0	200	300	0	-25.8803	-0.587161	-623.836	11448.3	-37415.1	1037.98	140.024	884.649	0	0	0	0	0	0	0	603	903	0
7176	6	0	0	0	0	0	0	200	300	0	-24.507	-0.587161	-624.752	10899	-36987.9	1083.76	140.796	885.555	0	0	0	0	0	0	0	603	903	0
7176	7	0	0	0	0	0	0	200	300	0	-25.8803	-1.19751	-623.836	11722.9	-36804.8	1083.76	141.003	884.208	0	0	0	0	0	0	0	603	903	0
7176	8	0	0	0	0	0	0	200	300	0	-24.9648	-2.41822	-624.752	10990.5	-37415.1	946.427	140.112	885.408	0	0	0	0	0	0	0	603	903	0
7176	9	0	0	0	0	0	0	200	300	0	-26.7958	-1.65528	-626.888	10715.9	-37232	1221.09	140.608	885.906	0	0	0	0	0	0	0	603	903	0
7177	0	0	0	0	0	0	0	200	300	0	-26.4906	-3.18116	-622.92	10899	-37720.3	1266.86	139.446	885.503	0	0	0	0	0	0	0	603	903	0
7177	1	0	0	0	0	0	0	200	300	0	-23.5915	-2.41822	-626.277	10807.4	-37781.3	992.203	139.673	885.743	0	0	0	0	0	0	0	603	903	0
7177	2	0	0	0	0	0	0	200	300	0	-26.1855	-3.79151	-627.498	11173.6	-37415.1	1633.07	140.374	885.193	0	0	0	0	0	0	0	603	903	0
7177	3	0	0	0	0	0	0	200	300	0	-26.4906	-2.72339	-625.362	10624.3	-37659.2	1541.52	139.78	886.011	0	0	0	0	0	0	0	603	903	0
7177	4	0	0	0	0	0	0	200	300	0	-25.5751	-3.63892	-628.108	10624.3	-37415.1	1587.3	140.432	886.085	0	0	0	0	0	0	0	603	903	0
7177	5	0	0	0	0	0	0	200	300	0	-26.338	-3.94409	-626.277	10349.7	-37537.2	1541.52	140.063	886.474	0	0	0	0	0	0	0	603	903	0
7177	6	0	0	0	0	0	0	200	300	0	-26.338	-4.24927	-628.719	10258.1	-37903.4	1358.41	139.713	886.684	0	0	0	0	0	0	0	603	903	0
7177	7	0	0	0	0	0	0	200	300	0	-25.5751	-4.24927	-628.414	10441.2	-37842.3	1587.3	139.781	886.385	0	0	0	0	0	0	0	603	903	0
7177	8	0	0	0	0	0	0	200	300	0	-25.4225	-5.01221	-628.414	10258.1	-38147.5	1358.41	139.296	886.676	0	0	0	0	0	0	0	603	903	0
7177	9	0	0	0	0	0	0	200	300	0	-26.7958	-5.01221	-629.94	9983.45	-38147.5	1404.19	139.443	887.152	0	0	0	0	0	0	0	603	903	0
7178	0	0	0	0	0	0	0	200	300	0	-25.5751	-5.46997	-628.719	10166.6	-38147.5	1678.85	139.325	886.83	0	0	0	0	0	0	0	603	903	0
7178	1	0	0	0	0	0	0	200	300	0	-26.0329	-6.84326	-628.719	10075	-38330.6	1724.63	139.034	886.975	0	0	0	0	0	0	0	603	903	0
7178	2	0	0	0	0	0	0	200	300	0	-26.6432	-6.23291	-631.771	10258.1	-38391.7	1587.3	139.232	886.763	0	0	0	0	0	0	0	603	903	0
7178	3	0	0	0	0	0	0	200	300	0	-24.6596	-7.30103	-629.329	10166.6	-37964.4	1724.63	139.675	886.845	0	0	0	0	0	0	0	603	903	0
7178	4	0	0	0	0	0	0	200	300	0	-26.1855	-6.99585	-631.465	10166.6	-38269.6	1404.19	139.396	886.9	0	0	0	0	0	0	0	603	903	0
7178	5	0	0	0	0	0	0	200	300	0	-26.7958	-7.45362	-629.024	9800.34	-38208.6	1541.52	139.257	887.42	0	0	0	0	0	0	0	603	903	0
7178	6	0	0	0	0	0	0	200	300	0	-27.2536	-7.75879	-631.16	9891.89	-38025.5	1770.4	139.753	887.328	0	0	0	0	0	0	0	603	903	0
7178	7	0	0	0	0	0	0	200	300	0	-26.7958	-7.30103	-630.855	9800.34	-38513.7	1404.19	138.95	887.465	0	0	0	0	0	0	0	603	903	0
7178	8	0	0	0	0	0	0	200	300	0	-26.1855	-8.82691	-631.16	9525.68	-38025.5	1907.73	139.753	887.908	0	0	0	0	0	0	0	603	903	0
7178	9	0	0	0	0	0	0	200	300	0	-27.101	-8.82691	-630.245	9251.02	-38269.6	2045.06	139.278	888.322	0	0	0	0	0	0	0	603	903	0
7179	0	0	0	0	0	0	0	200	300	0	-26.7958	-9.74243	-632.381	9800.34	-38513.7	1770.4	139.097	887.503	0	0	0	0	0	0	0	603	903	0
7179	1	0	0	0	0	0	0	200	300	0	-26.6432	-9.43726	-630.55	9159.47	-38330.6	1587.3	139.211	888.474	0	0	0	0	0	0	0	603	903	0
7179	2	0	0	0	0	0	0	200	300	0	-27.7113	-9.89502	-631.771	8884.81	-38635.8	1816.18	138.845	888.937	0	0	0	0	0	0	0	603	903	0
7179	3	0	0	0	0	0	0	200	300	0	-26.9484	-11.2683	-630.855	9525.68	-38452.7	1907.73	139.047	887.9	0	0	0	0	0	0	0	603	903	0
7179	4	0	0	0	0	0	0	200	300	0	-27.101	-10.5054	-631.16	9067.92	-38147.5	1953.51	139.56	888.633	0	0	0	0	0	0	0	603	903	0
7179	5	0	0	0	0	0	0	200	300	0	-28.6269	-11.2683	-632.076	9159.47	-38513.7	2045.06	139.068	888.509	0	0	0	0	0	0	0	603	903	0
7179	6	0	0	0	0	0	0	200	300	0	-27.4062	-11.4209	-632.076	8976.37	-38330.6	1999.28	139.358	888.799	0	0	0	0	0	0	0	603	903	0
7179	7	0	0	0	0	0	0	200	300	0	-26.9484	-12.0313	-631.465	8884.81	-38513.7	2319.72	139.009	888.93	0	0	0	0	0	0	0	603	903	0
7179	8	0	0	0	0	0	0	200	300	0	-28.4743	-12.3364	-633.296	7969.28	-38513.7	2273.94	139.185	890.416	0	0	0	0	0	0	0	603	903	0
7179	9	0	0	0	0	0	0	200	300	0	-27.7113	-12.6416	-629.329	8793.26	-38452.7	2090.84	138.899	889.028	0	0	0	0	0	0	0	603	903	0
7180	0	0	0	0	0	0	0	200	300	0	-27.101	-12.9468	-634.212	8152.39	-38452.7	2365.49	139.369	890.146	0	0	0	0	0	0	0	603	903	0
7180	1	0	0	0	0	0	0	200	300	0	-28.7794	-14.1675	-633.602	8152.39	-39124.1	2457.05	138.251	890.133	0	0	0	0	0	0	0	603	903	0
7180	2	0	0	0	0	0	0	200	300	0	-28.6269	-14.1675	-633.602	8335.49	-38696.8	2273.94	138.926	889.844	0	0	0	0	0	0	0	603	903	0
7180	3	0	0	0	0	0	0	200	300	0	-28.0165	-14.6252	-634.517	7511.52	-39063.1	2319.72	138.437	891.162	0	0	0	0	0	0	0	603	903	0
7180	4	0	0	0	0	0	0	200	300	0	-27.4062	-15.3882	-635.128	8060.83	-39002	2777.48	138.592	890.308	0	0	0	0	0	0	0	603	903	0
7180	5	0	0	0	0	0	0	200	300	0	-27.8639	-15.6934	-635.738	7969.28	-38757.9	2594.38	139.035	890.465	0	0	0	0	0	0	0	603	903	0
7180	6	0	0	0	0	0	0	200	300	0	-27.7113	-16.7615	-637.874	8243.94	-39307.2	2640.15	138.378	890.076	0	0	0	0	0	0	0	603	903	0
7180	7	0	0	0	0	0	0	200	300	0	-29.0846	-16.3037	-636.348	7694.63	-39063.1	2548.6	138.614	890.908	0	0	0	0	0	0	0	603	903	0
7180	8	0	0	0	0	0	0	200	300	0	-28.6269	-15.9985	-633.907	7603.07	-38879.9	2548.6	138.666	891.006	0	0	0	0	0	0	0	603	903	0
7180	9	0	0	0	0	0	0	200	300	0	-27.101	-17.3718	-635.738	7419.97	-39673.4	2731.7	137.595	891.329	0	0	0	0	0	0	0	603	903	0
7181	0	0	0	0	0	0	0	200	300	0	-28.932	-17.3718	-638.484	7236.86	-39124.1	2502.82	138.724	891.666	0	0	0	0	0	0	0	603	903	0
7181	1	0	0	0	0	0	0	200	300	0	-29.3898	-17.8296	-638.79	7328.41	-39673.4	2823.26	137.893	891.528	0	0	0	0	0	0	0	603	903	0
7181	2	0	0	0	0	0	0	200	300	0	-28.3217	-17.677	-637.264	7236.86	-39673.4	2685.93	137.744	891.644	0	0	0	0	0	0	0	603	903	0
7181	3	0	0	0	0	0	0	200	300	0	-29.5424	-18.1348	-639.4	7145.31	-39246.2	2777.48	138.62	891.825	0	0	0	0	0	0	0	603	903	0
7181	4	0	0	0	0	0	0	200	300	0	-28.6269	-18.8977	-638.79	7053.76	-40100.6	2869.03	137.224	891.958	0	0	0	0	0	0	0	603	903	0
7181	5	0	0	0	0	0	0	200	300	0	-28.3217	-19.9658	-639.4	6870.65	-39185.1	2777.48	138.716	892.255	0	0	0	0	0	0	0	603	903	0
7181	6	0	0	0	0	0	0	200	300	0	-28.7794	-19.9658	-641.231	6504.44	-39551.3	2914.81	138.32	892.856	0	0	0	0	0	0	0	603	903	0
7181	7	0	0	0	0	0	0	200	300	0	-28.932	-20.5762	-638.484	6321.33	-39612.4	2777.48	137.959	893.1	0	0	0	0	0	0	0	603	903	0
7181	8	0	0	0	0	0	0	200	300	0	-28.1691	-20.4236	-641.536	6779.1	-39490.3	2960.59	138.444	892.433	0	0	0	0	0	0	0	603	903	0
7181	9	0	0	0	0	0	0	200	300	0	-28.7794	-19.8132	-639.4	6138.23	-39612.4	2777.48	138.048	893.4	0	0	0	0	0	0	0	603	903	0
7182	0	0	0	0	0	0	0	200	300	0	-28.932	-21.1865	-641.231	6595.99	-39795.5	3189.47	137.939	892.714	0	0	0	0	0	0	0	603	903	0
7182	1	0	0	0	0	0	0	200	300	0	-28.0165	-21.0339	-642.452	6321.33	-39734.4	3143.69	138.152	893.161	0	0	0	0	0	0	0	603	903	0
7182	2	0	0	0	0	0	0	200	300	0	-29.2372	-21.7969	-641.841	6779.1	-39917.5	3235.24	137.808	892.438	0	0	0	0	0	0	0	603	903	0
7182	3	0	0	0	0	0	0	200	300	0	-30.3053	-21.7969	-642.757	5772.02	-40222.7	3097.92	137.422	894.02	0	0	0	0	0	0	0	603	903	0
7182	4	0	0	0	0	0	0	200	300	0	-30.3053	-23.1702	-642.757	5955.12	-39612.4	3235.24	138.371	893.735	0	0	0	0	0	0	0	603	903	0
7182	5	0	0	0	0	0	0	200	300	0	-26.9484	-23.0176	-642.147	6046.68	-40344.8	3143.69	137.172	893.584	0	0	0	0	0	0	0	603	903	0
7182	6	0	0	0	0	0	0	200	300	0	-30.3053	-22.865	-643.367	5588.91	-40466.9	3281.02	137.101	894.313	0	0	0	0	0	0	0	603	903	0
7182	7	0	0	0	0	0	0	200	300	0	-30.9157	-23.9331	-642.757	5772.02	-39612.4	3326.8	138.371	894.02	0	0	0	0	0	0	0	603	903	0
7182	8	0	0	0	0	0	0	200	300	0	-29.695	-23.1702	-645.198	5680.47	-40711	3235.24	136.902	894.196	0	0	0	0	0	0	0	603	903	0
7182	9	0	0	0	0	0	0	200	300	0	-29.695	-24.696	-645.198	5314.25	-39795.5	3601.46	138.321	894.763	0	0	0	0	0	0	0	603	903	0
7183	0	0	0	0	0	0	0	200	300	0	-27.8639	-24.5435	-643.978	5131.15	-40222.7	3509.9	137.54	895.032	0	0	0	0	0	0	0	603	903	0
7183	1	0	0	0	0	0	0	200	300	0	-30.1527	-25.0012	-646.114	5497.36	-40527.9	3326.8	137.274	894.492	0	0	0	0	0	0	0	603	903	0
7183	2	0	0	0	0	0	0	200	300	0	-29.695	-25.7642	-645.503	5131.15	-40222.7	3464.13	137.688	895.051	0	0	0	0	0	0	0	603	903	0
7183	3	0	0	0	0	0	0	200	300	0	-30.9157	-26.0693	-643.978	4673.39	-40650	3555.68	136.877	895.743	0	0	0	0	0	0	0	603	903	0
7183	4	0	0	0	0	0	0	200	300	0	-31.2209	-26.2219	-646.114	4673.39	-40466.9	3693.01	137.369	895.767	0	0	0	0	0	0	0	603	903	0
7183	5	0	0	0	0	0	0	200	300	0	-28.0165	-28.053	-645.809	4307.17	-40161.7	3693.01	137.812	896.331	0	0	0	0	0	0	0	603	903	0
7183	6	0	0	0	0	0	0	200	300	0	-31.9838	-26.6797	-645.809	4581.83	-41016.2	3967.67	136.489	895.905	0	0	0	0	0	0	0	603	903	0
7183	7	0	0	0	0	0	0	200	300	0	-30.9157	-27.7478	-647.029	3940.96	-40222.7	3784.56	137.835	896.909	0	0	0	0	0	0	0	603	903	0
7183	8	0	0	0	0	0	0	200	300	0	-30.6105	-28.2056	-646.419	4032.52	-40588.9	4150.77	137.21	896.762	0	0	0	0	0	0	0	603	903	0
7183	9	0	0	0	0	0	0	200	300	0	-30.9157	-29.2737	-644.283	3666.3	-40955.1	3967.67	136.433	897.31	0	0	0	0	0	0	0	603	903	0
7184	0	0	0	0	0	0	0	200	300	0	-31.6786	-29.1211	-647.029	3666.3	-40833.1	3967.67	136.891	897.334	0	0	0	0	0	0	0	603	903	0
7184	1	0	0	0	0	0	0	200	300	0	-30.6105	-29.4263	-647.029	3940.96	-40833.1	4059.22	136.891	896.909	0	0	0	0	0	0	0	603	903	0
7184	2	0	0	0	0	0	0	200	300	0	-30.7631	-29.5789	-647.335	3208.54	-41382.4	4105	136.073	898.044	0	0	0	0	0	0	0	603	903	0
7184	3	0	0	0	0	0	0	200	300	0	-31.8312	-30.9522	-648.86	3208.54	-41016.2	4608.54	136.787	898.055	0	0	0	0	0	0	0	603	903	0
7184	4	0	0	0	0	0	0	200	300	0	-31.3734	-30.0366	-648.86	2750.78	-40711	4196.55	137.258	898.761	0	0	0	0	0	0	0	603	903	0
7184	5	0	0	0	0	0	0	200	300	0	-31.0683	-31.2573	-648.555	2933.88	-40894.1	4516.98	136.946	898.476	0	0	0	0	0	0	0	603	903	0
7184	6	0	0	0	0	0	0	200	300	0	-30.6105	-30.647	-649.166	2659.22	-41748.6	4379.65	135.689	898.904	0	0	0	0	0	0	0	603	903	0
7184	7	0	0	0	0	0	0	200	300	0	-30.9157	-31.2573	-650.386	3025.43	-41565.5	4379.65	136.091	898.348	0	0	0	0	0	0	0	603	903	0
7184	8	0	0	0	0	0	0	200	300	0	-31.8312	-31.4099	-649.776	2201.46	-41077.2	4333.88	136.783	899.612	0	0	0	0	0	0	0	603	903	0
7184	9	0	0	0	0	0	0	200	300	0	-32.289	-31.8677	-649.471	1835.25	-41992.7	4242.33	135.343	900.174	0	0	0	0	0	0	0	603	903	0
7185	0	0	0	0	0	0	0	200	300	0	-32.8993	-32.478	-651.607	2293.01	-41138.2	4471.21	136.867	899.481	0	0	0	0	0	0	0	603	903	0
7185	1	0	0	0	0	0	0	200	300	0	-30.1527	-31.7151	-650.386	1926.8	-41748.6	4425.43	135.81	900.038	0	0	0	0	0	0	0	603	903	0
7185	2	0	0	0	0	0	0	200	300	0	-33.3571	-32.9358	-652.217	2201.46	-42114.8	4608.54	135.428	899.625	0	0	0	0	0	0	0	603	903	0
7185	3	0	0	0	0	0	0	200	300	0	-33.6623	-32.7832	-653.438	1652.14	-41504.5	4516.98	136.483	900.472	0	0	0	0	0	0	0	603	903	0
7185	4	0	0	0	0	0	0	200	300	0	-32.1364	-33.0884	-651.302	1652.14	-42297.9	4700.09	135.056	900.463	0	0	0	0	0	0	0	603	903	0
7185	5	0	0	0	0	0	0	200	300	0	-33.8148	-33.5461	-653.743	1652.14	-42236.9	4608.54	135.392	900.473	0	0	0	0	0	0	0	603	903	0
7185	6	0	0	0	0	0	0	200	300	0	-33.9674	-33.6987	-653.133	1285.93	-41931.7	4608.54	135.799	901.031	0	0	0	0	0	0	0	603	903	0
7185	7	0	0	0	0	0	0	200	300	0	-33.3571	-34.4617	-652.828	1560.59	-42297.9	4608.54	135.208	900.61	0	0	0	0	0	0	0	603	903	0
7185	8	0	0	0	0	0	0	200	300	0	-32.5941	-35.072	-652.828	736.615	-42175.8	4791.64	135.395	901.872	0	0	0	0	0	0	0	603	903	0
7185	9	0	0	0	0	0	0	200	300	0	-35.0356	-35.5298	-653.743	1011.27	-41931.7	4837.42	135.859	901.453	0	0	0	0	0	0	0	603	903	0
7186	0	0	0	0	0	0	0	200	300	0	-33.8148	-34.9194	-651.912	1102.83	-42297.9	5020.52	135.117	901.308	0	0	0	0	0	0	0	603	903	0
7186	1	0	0	0	0	0	0	200	300	0	-34.2726	-35.835	-655.879	278.851	-41931.7	5066.3	136.068	902.575	0	0	0	0	0	0	0	603	903	0
7186	2	0	0	0	0	0	0	200	300	0	-35.1881	-36.5979	-654.659	370.404	-42358.9	5020.52	135.296	902.434	0	0	0	0	0	0	0	603	903	0
7186	3	0	0	0	0	0	0	200	300	0	-33.8148	-36.5979	-655.269	95.7459	-42603.1	5157.85	134.984	902.854	0	0	0	0	0	0	0	603	903	0
7186	4	0	0	0	0	0	0	200	300	0	-34.4252	-37.2083	-655.879	-87.3596	-42175.8	5020.52	135.696	903.133	0	0	0	0	0	0	0	603	903	0
7186	5	0	0	0	0	0	0	200	300	0	-34.12	-37.666	-656.185	-453.571	-42786.2	4928.97	134.796	903.691	0	0	0	0	0	0	0	603	903	0
7186	6	0	0	0	0	0	0	200	300	0	-35.0356	-39.0393	-659.847	95.7459	-42847.2	4928.97	135.065	902.855	0	0	0	0	0	0	0	603	903	0
7186	7	0	0	0	0	0	0	200	300	0	-34.5778	-38.7341	-658.016	-819.782	-42542.1	5249.41	135.348	904.246	0	0	0	0	0	0	0	603	903	0
7186	8	0	0	0	0	0	0	200	300	0	-35.6459	-39.1919	-658.931	-1185.99	-42908.3	5386.73	134.882	904.8	0	0	0	0	0	0	0	603	903	0
7186	9	0	0	0	0	0	0	200	300	0	-35.0356	-39.3445	-660.152	-911.334	-42725.2	5524.06	135.28	904.381	0	0	0	0	0	0	0	603	903	0
7187	0	0	0	0	0	0	0	200	300	0	-35.0356	-39.6497	-659.236	-1552.2	-42908.3	5661.39	134.912	905.355	0	0	0	0	0	0	0	603	903	0
7187	1	0	0	0	0	0	0	200	300	0	-36.4088	-39.9548	-661.983	-1369.1	-43152.4	5432.51	134.813	905.068	0	0	0	0	0	0	0	603	903	0
7187	2	0	0	0	0	0	0	200	300	0	-36.2563	-40.4126	-660.457	-1552.2	-43091.4	5661.39	134.755	905.35	0	0	0	0	0	0	0	603	903	0
7187	3	0	0	0	0	0	0	200	300	0	-36.1037	-41.3281	-662.593	-1552.2	-43213.4	5661.39	134.781	905.343	0	0	0	0	0	0	0	603	903	0
7187	4	0	0	0	0	0	0	200	300	0	-37.0192	-41.9385	-662.898	-2009.97	-43701.7	5661.39	134.075	906.032	0	0	0	0	0	0	0	603	903	0
7187	5	0	0	0	0	0	0	200	300	0	-37.1718	-43.1592	-664.73	-1918.41	-43335.5	6027.6	134.807	905.886	0	0	0	0	0	0	0	603	903	0
7187	6	0	0	0	0	0	0	200	300	0	-36.1037	-41.6333	-662.593	-2284.62	-43396.5	5844.5	134.505	906.448	0	0	0	0	0	0	0	603	903	0
7187	7	0	0	0	0	0	0	200	300	0	-37.477	-43.1592	-667.781	-2650.84	-43213.4	5890.27	135.288	906.97	0	0	0	0	0	0	0	603	903	0
7187	8	0	0	0	0	0	0	200	300	0	-37.477	-43.9221	-666.255	-2559.28	-43701.7	6210.71	134.407	906.841	0	0	0	0	0	0	0	603	903	0
7187	9	0	0	0	0	0	0	200	300	0	-36.8666	-44.2273	-669.307	-2650.84	-44067.9	6073.38	134.159	906.961	0	0	0	0	0	0	0	603	903	0
7188	0	0	0	0	0	0	0	200	300	0	-37.9347	-44.2273	-669.307	-3383.26	-43762.8	6256.49	134.615	908.055	0	0	0	0	0	0	0	603	903	0
7188	1	0	0	0	0	0	0	200	300	0	-37.9347	-45.1428	-671.443	-3749.47	-44373.1	6256.49	133.914	908.584	0	0	0	0	0	0	0	603	903	0
7188	2	0	0	0	0	0	0	200	300	0	-37.477	-46.2109	-670.528	-3749.47	-44312.1	6256.49	133.915	908.592	0	0	0	0	0	0	0	603	903	0
7188	3	0	0	0	0	0	0	200	300	0	-37.0192	-45.7532	-673.885	-3657.92	-44434.1	6210.71	134.063	908.428	0	0	0	0	0	0	0	603	903	0
7188	4	0	0	0	0	0	0	200	300	0	-37.7821	-46.3635	-675.106	-4298.79	-44739.3	6302.26	133.73	909.368	0	0	0	0	0	0	0	603	903	0
7188	5	0	0	0	0	0	0	200	300	0	-37.477	-46.6687	-675.716	-3657.92	-44739.3	6439.59	133.79	908.413	0	0	0	0	0	0	0	603	903	0
7188	6	0	0	0	0	0	0	200	300	0	-37.9347	-47.5842	-675.411	-4390.34	-44739.3	6348.04	133.76	909.5	0	0	0	0	0	0	0	603	903	0
7188	7	0	0	0	0	0	0	200	300	0	-38.8503	-47.5842	-678.462	-4390.34	-44983.5	6256.49	133.698	909.471	0	0	0	0	0	0	0	603	903	0
7188	8	0	0	0	0	0	0	200	300	0	-37.9347	-47.5842	-680.294	-4481.89	-44800.4	6439.59	134.146	909.588	0	0	0	0	0	0	0	603	903	0
7188	9	0	0	0	0	0	0	200	300	0	-38.3925	-48.4998	-679.988	-3749.47	-45166.6	6302.26	133.577	908.514	0	0	0	0	0	0	0	603	903	0
7189	0	0	0	0	0	0	0	200	300	0	-40.3761	-49.8731	-679.378	-5031.21	-44983.5	6622.7	133.787	910.406	0	0	0	0	0	0	0	603	903	0
7189	1	0	0	0	0	0	0	200	300	0	-40.6813	-49.7205	-682.125	-4848.1	-45227.6	6576.92	133.696	910.107	0	0	0	0	0	0	0	603	903	0
7189	2	0	0	0	0	0	0	200	300	0	-39.6132	-49.1101	-682.43	-5672.08	-45838	6760.03	132.831	911.312	0	0	0	0	0	0	0	603	903	0
7189	3	0	0	0	0	0	0	200	300	0	-41.2917	-51.3989	-684.566	-5946.73	-45776.9	7080.46	133.13	911.687	0	0	0	0	0	0	0	603	903	0
7189	4	0	0	0	0	0	0	200	300	0	-40.6813	-50.4834	-684.261	-5305.87	-45349.7	6897.35	133.725	910.754	0	0	0	0	0	0	0	603	903	0
7189	5	0	0	0	0	0	0	200	300	0	-38.5451	-51.5515	-687.313	-6129.84	-46021.1	6897.35	133.042	911.919	0	0	0	0	0	0	0	603	903	0
7189	6	0	0	0	0	0	0	200	300	0	-41.902	-52.0093	-688.838	-5672.08	-45654.8	6805.8	133.722	911.234	0	0	0	0	0	0	0	603	903	0
7189	7	0	0	0	0	0	0	200	300	0	-41.2917	-52.3145	-688.838	-6221.4	-45838	6851.58	133.456	912.032	0	0	0	0	0	0	0	603	903	0
7189	8	0	0	0	0	0	0	200	300	0	-41.2917	-53.23	-692.195	-6587.61	-45715.9	7080.46	133.955	912.517	0	0	0	0	0	0	0	603	903	0
7189	9	0	0	0	0	0	0	200	300	0	-40.9865	-53.9929	-691.28	-7045.37	-45960	7080.46	133.515	913.192	0	0	0	0	0	0	0	603	903	0
7190	0	0	0	0	0	0	0	200	300	0	-40.9865	-54.6033	-693.721	-7045.37	-46143.1	7217.79	133.485	913.156	0	0	0	0	0	0	0	603	903	0
7190	1	0	0	0	0	0	0	200	300	0	-41.5968	-55.5188	-694.942	-7136.92	-46631.4	7355.12	132.899	913.27	0	0	0	0	0	0	0	603	903	0
7190	2	0	0	0	0	0	0	200	300	0	-41.5968	-55.061	-695.247	-7594.69	-46631.4	7400.9	132.928	913.924	0	0	0	0	0	0	0	603	903	0
7190	3	0	0	0	0	0	0	200	300	0	-43.1227	-55.9766	-698.909	-7869.34	-47119.7	7355.12	132.581	914.26	0	0	0	0	0	0	0	603	903	0
7190	4	0	0	0	0	0	0	200	300	0	-41.7494	-57.0447	-699.52	-8327.11	-47241.8	7172.01	132.465	914.904	0	0	0	0	0	0	0	603	903	0
7190	5	0	0	0	0	0	0	200	300	0	-42.3598	-57.3499	-701.961	-8418.66	-46570.4	7629.78	133.657	914.993	0	0	0	0	0	0	0	603	903	0
7190	6	0	0	0	0	0	0	200	300	0	-42.9701	-56.4343	-701.961	-8784.87	-47669	7355.12	132.092	915.515	0	0	0	0	0	0	0	603	903	0
7190	7	0	0	0	0	0	0	200	300	0	-43.8857	-58.1128	-704.097	-8967.97	-47241.8	7721.33	132.904	915.737	0	0	0	0	0	0	0	603	903	0
7190	8	0	0	0	0	0	0	200	300	0	-43.7331	-58.5706	-706.539	-8876.42	-47485.9	7629.78	132.791	915.563	0	0	0	0	0	0	0	603	903	0
7190	9	0	0	0	0	0	0	200	300	0	-44.3434	-59.1809	-707.454	-9334.19	-47852.1	7538.23	132.36	916.194	0	0	0	0	0	0	0	603	903	0
7191	0	0	0	0	0	0	0	200	300	0	-44.496	-58.8757	-709.896	-9517.29	-47913.1	7858.66	132.507	916.407	0	0	0	0	0	0	0	603	903	0
7191	1	0	0	0	0	0	0	200	300	0	-43.4279	-60.8594	-711.421	-9975.05	-48401.4	7767.11	131.965	917.021	0	0	0	0	0	0	0	603	903	0
7191	2	0	0	0	0	0	0	200	300	0	-44.6486	-60.4016	-711.727	-10066.6	-48767.6	7675.56	131.48	917.144	0	0	0	0	0	0	0	603	903	0
7191	3	0	0	0	0	0	0	200	300	0	-43.8857	-60.249	-713.863	-10524.4	-48279.4	7721.33	132.369	917.743	0	0	0	0	0	0	0	603	903	0
7191	4	0	0	0	0	0	0	200	300	0	-44.1908	-61.4697	-714.778	-10615.9	-48950.7	7904.44	131.516	917.852	0	0	0	0	0	0	0	603	903	0
7191	5	0	0	0	0	0	0	200	300	0	-44.1908	-61.7749	-716.304	-11256.8	-49133.9	7721.33	131.406	918.715	0	0	0	0	0	0	0	603	903	0
7191	6	0	0	0	0	0	0	200	300	0	-45.4115	-62.2327	-715.694	-11348.4	-49072.8	8041.76	131.433	918.857	0	0	0	0	0	0	0	603	903	0
7191	7	0	0	0	0	0	0	200	300	0	-45.2589	-62.6904	-718.746	-10982.1	-49683.2	7995.99	130.875	918.28	0	0	0	0	0	0	0	603	903	0
7191	8	0	0	0	0	0	0	200	300	0	-45.1064	-62.2327	-719.966	-12080.8	-49439	8362.2	131.331	919.78	0	0	0	0	0	0	0	603	903	0
7191	9	0	0	0	0	0	0	200	300	0	-46.0219	-64.0637	-722.713	-12263.9	-49194.9	8041.76	131.93	919.969	0	0	0	0	0	0	0	603	903	0
7192	0	0	0	0	0	0	0	200	300	0	-47.09	-64.3689	-722.713	-12538.5	-50110.4	8041.76	130.663	920.349	0	0	0	0	0	0	0	603	903	0
7192	1	0	0	0	0	0	0	200	300	0	-46.0219	-64.3689	-725.46	-12263.9	-49866.3	7950.21	131.262	919.905	0	0	0	0	0	0	0	603	903	0
7192	2	0	0	0	0	0	0	200	300	0	-46.3271	-64.9792	-726.375	-13271	-50476.6	8087.54	130.509	921.27	0	0	0	0	0	0	0	603	903	0
7192	3	0	0	0	0	0	0	200	300	0	-48.0055	-64.5215	-727.901	-13179.4	-50659.7	8133.32	130.403	921.106	0	0	0	0	0	0	0	603	903	0
7192	4	0	0	0	0	0	0	200	300	0	-45.1064	-64.2163	-730.037	-13362.5	-50049.4	8224.87	131.443	921.304	0	0	0	0	0	0	0	603	903	0
7192	5	0	0	0	0	0	0	200	300	0	-48.0055	-66.0474	-730.953	-13637.2	-49988.3	8316.43	131.612	921.657	0	0	0	0	0	0	0	603	903	0
7192	6	0	0	0	0	0	0	200	300	0	-47.5478	-66.2	-730.342	-14094.9	-50537.7	8499.53	130.803	922.299	0	0	0	0	0	0	0	603	903	0
7192	7	0	0	0	0	0	0	200	300	0	-47.5478	-66.3525	-731.868	-14735.8	-50537.7	8179.09	130.947	923.135	0	0	0	0	0	0	0	603	903	0
7192	8	0	0	0	0	0	0	200	300	0	-48.3107	-66.2	-734.615	-14918.9	-51209	8407.98	130.291	923.308	0	0	0	0	0	0	0	603	903	0
7192	9	0	0	0	0	0	0	200	300	0	-48.6159	-66.3525	-734.92	-15285.1	-51087	8316.43	130.486	923.798	0	0	0	0	0	0	0	603	903	0
7193	0	0	0	0	0	0	0	200	300	0	-48.1581	-68.4888	-736.446	-14827.4	-51575.3	8316.43	129.967	923.134	0	0	0	0	0	0	0	603	903	0
7193	1	0	0	0	0	0	0	200	300	0	-48.6159	-68.3362	-737.361	-16841.5	-51880.4	8362.2	129.64	925.84	0	0	0	0	0	0	0	603	903	0
7193	2	0	0	0	0	0	0	200	300	0	-48.7685	-67.8784	-740.413	-16658.4	-51331.1	8545.31	130.672	925.499	0	0	0	0	0	0	0	603	903	0
7193	3	0	0	0	0	0	0	200	300	0	-48.7685	-70.3198	-742.855	-17024.6	-52490.8	8453.76	129.339	925.918	0	0	0	0	0	0	0	603	903	0
7193	4	0	0	0	0	0	0	200	300	0	-49.0736	-69.2517	-741.939	-17390.8	-51636.3	8636.86	130.404	926.44	0	0	0	0	0	0	0	603	903	0
7193	5	0	0	0	0	0	0	200	300	0	-51.0573	-69.2517	-743.77	-17665.5	-52002.5	8545.31	130.083	926.751	0	0	0	0	0	0	0	603	903	0
7193	6	0	0	0	0	0	0	200	300	0	-49.8366	-70.625	-744.075	-18214.8	-52673.9	8545.31	129.209	927.48	0	0	0	0	0	0	0	603	903	0
7193	7	0	0	0	0	0	0	200	300	0	-50.1418	-70.4724	-746.211	-18306.4	-52551.8	9003.07	129.575	927.532	0	0	0	0	0	0	0	603	903	0
7193	8	0	0	0	0	0	0	200	300	0	-51.515	-71.0828	-749.568	-18855.7	-52979.1	8591.08	129.321	928.155	0	0	0	0	0	0	0	603	903	0
7193	9	0	0	0	0	0	0	200	300	0	-50.7521	-71.5405	-749.874	-18764.1	-53223.2	8682.64	129.024	928.023	0	0	0	0	0	0	0	603	903	0
7194	0	0	0	0	0	0	0	200	300	0	-50.5995	-70.1672	-746.517	-19130.3	-52979.1	8545.31	129.032	928.626	0	0	0	0	0	0	0	603	903	0
7194	1	0	0	0	0	0	0	200	300	0	-51.8202	-71.9983	-753.536	-19862.8	-53467.3	8728.41	129.045	929.359	0	0	0	0	0	0	0	603	903	0
7194	2	0	0	0	0	0	0	200	300	0	-51.8202	-71.3879	-749.568	-19954.3	-53284.2	8407.98	128.913	929.621	0	0	0	0	0	0	0	603	903	0
7194	3	0	0	0	0	0	0	200	300	0	-50.9047	-72.1509	-755.367	-19496.5	-53345.3	8728.41	129.378	928.811	0	0	0	0	0	0	0	603	903	0
7194	4	0	0	0	0	0	0	200	300	0	-53.0409	-72.3035	-756.282	-20961.4	-53650.5	8636.86	129.06	930.716	0	0	0	0	0	0	0	603	903	0
7194	5	0	0	0	0	0	0	200	300	0	-53.1935	-71.3879	-756.282	-21052.9	-53955.6	8911.52	128.657	930.837	0	0	0	0	0	0	0	603	903	0
7194	6	0	0	0	0	0	0	200	300	0	-51.8202	-73.0664	-760.25	-21327.6	-53772.5	8819.97	129.27	931.053	0	0	0	0	0	0	0	603	903	0
7194	7	0	0	0	0	0	0	200	300	0	-52.8883	-72.6086	-759.639	-22243.1	-54627	8682.64	128.088	932.281	0	0	0	0	0	0	0	603	903	0
7194	8	0	0	0	0	0	0	200	300	0	-53.0409	-72.7612	-761.165	-21968.5	-53955.6	8865.74	129.114	931.862	0	0	0	0	0	0	0	603	903	0
7194	9	0	0	0	0	0	0	200	300	0	-52.8883	-73.5242	-762.081	-22334.7	-54871.2	8774.19	127.998	932.308	0	0	0	0	0	0	0	603	903	0
7195	0	0	0	0	0	0	0	200	300	0	-53.3461	-73.8293	-758.724	-22609.3	-54688.1	9003.07	127.921	932.799	0	0	0	0	0	0	0	603	903	0
7195	1	0	0	0	0	0	0	200	300	0	-53.9565	-73.6768	-764.217	-23250.2	-54566	8819.97	128.599	933.424	0	0	0	0	0	0	0	603	903	0
7195	2	0	0	0	0	0	0	200	300	0	-52.4306	-74.5923	-763.912	-23524.9	-54993.2	8728.41	128.011	933.795	0	0	0	0	0	0	0	603	903	0
7195	3	0	0	0	0	0	0	200	300	0	-54.4142	-74.7449	-764.827	-23708	-54993.2	8957.3	128.097	933.998	0	0	0	0	0	0	0	603	903	0
7195	4	0	0	0	0	0	0	200	300	0	-55.0246	-75.2026	-766.658	-24531.9	-55481.5	8819.97	127.632	934.999	0	0	0	0	0	0	0	603	903	0
7195	5	0	0	0	0	0	0	200	300	0	-54.5668	-75.2026	-766.658	-24806.6	-55481.5	8911.52	127.632	935.357	0	0	0	0	0	0	0	603	903	0
7195	6	0	0	0	0	0	0	200	300	0	-55.6349	-75.3552	-768.184	-25447.5	-55298.4	9003.07	128.014	936.127	0	0	0	0	0	0	0	603	903	0
7195	7	0	0	0	0	0	0	200	300	0	-56.0927	-75.5078	-768.184	-25813.7	-55847.7	8911.52	127.299	936.604	0	0	0	0	0	0	0	603	903	0
7195	8	0	0	0	0	0	0	200	300	0	-55.6349	-75.2026	-769.1	-25630.6	-56336	8957.3	126.751	936.326	0	0	0	0	0	0	0	603	903	0
7195	9	0	0	0	0	0	0	200	300	0	-57.1608	-75.5078	-771.541	-26637.7	-55603.6	8957.3	127.932	937.525	0	0	0	0	0	0	0	603	903	0
7196	0	0	0	0	0	0	0	200	300	0	-57.0082	-77.0337	-771.846	-26363	-56030.8	9140.4	127.407	937.156	0	0	0	0	0	0	0	603	903	0
7196	1	0	0	0	0	0	0	200	300	0	-56.0927	-74.8975	-772.457	-26912.3	-55969.8	9003.07	127.543	937.84	0	0	0	0	0	0	0	603	903	0
7196	2	0	0	0	0	0	0	200	300	0	-56.5504	-77.1863	-773.372	-28010.9	-55969.8	9094.62	127.629	939.219	0	0	0	0	0	0	0	603	903	0
7196	3	0	0	0	0	0	0	200	300	0	-57.1608	-76.5759	-769.405	-28285.6	-56702.2	8957.3	126.304	939.763	0	0	0	0	0	0	0	603	903	0
7196	4	0	0	0	0	0	0	200	300	0	-57.0082	-77.4915	-774.898	-28102.5	-56641.2	8865.74	126.905	939.266	0	0	0	0	0	0	0	603	903	0
7196	5	0	0	0	0	0	0	200	300	0	-57.9237	-77.9492	-774.898	-29201.1	-56885.3	8957.3	126.59	940.684	0	0	0	0	0	0	0	603	903	0
7196	6	0	0	0	0	0	0	200	300	0	-57.6186	-78.2544	-774.288	-29292.7	-57190.5	9003.07	126.138	940.832	0	0	0	0	0	0	0	603	903	0
7196	7	0	0	0	0	0	0	200	300	0	-57.466	-79.0173	-777.034	-29567.3	-56641.2	9186.18	127.106	941.052	0	0	0	0	0	0	0	603	903	0
7196	8	0	0	0	0	0	0	200	300	0	-58.3815	-78.407	-776.424	-30391.3	-57434.6	9231.95	126.027	942.143	0	0	0	0	0	0	0	603	903	0
7196	9	0	0	0	0	0	0	200	300	0	-59.4496	-78.8647	-778.865	-30757.5	-56702.2	9277.73	127.199	942.49	0	0	0	0	0	0	0	603	903	0
7197	0	0	0	0	0	0	0	200	300	0	-57.466	-80.5432	-778.255	-29658.9	-57007.4	9369.28	126.75	941.11	0	0	0	0	0	0	0	603	903	0
7197	1	0	0	0	0	0	0	200	300	0	-58.9919	-79.7803	-778.865	-31489.9	-57739.8	9323.51	125.867	943.431	0	0	0	0	0	0	0	603	903	0
7197	2	0	0	0	0	0	0	200	300	0	-58.9919	-79.0173	-779.781	-31489.9	-57007.4	9186.18	126.893	943.383	0	0	0	0	0	0	0	603	903	0
7197	3	0	0	0	0	0	0	200	300	0	-58.9919	-80.238	-778.255	-31673.1	-57739.8	9186.18	125.809	943.698	0	0	0	0	0	0	0	603	903	0
7197	4	0	0	0	0	0	0	200	300	0	-58.5341	-81.001	-778.865	-32588.6	-57922.9	9323.51	125.632	944.841	0	0	0	0	0	0	0	603	903	0
7197	5	0	0	0	0	0	0	200	300	0	-60.06	-81.001	-781.002	-33137.9	-57617.7	9552.39	126.226	945.43	0	0	0	0	0	0	0	603	903	0
7197	6	0	0	0	0	0	0	200	300	0	-58.5341	-79.7803	-780.391	-33229.4	-58167.1	9460.84	125.464	945.581	0	0	0	0	0	0	0	603	903	0
7197	7	0	0	0	0	0	0	200	300	0	-58.2289	-81.4587	-781.612	-33870.3	-57800.8	9277.73	126.049	946.334	0	0	0	0	0	0	0	603	903	0
7197	8	0	0	0	0	0	0	200	300	0	-60.8229	-80.0854	-781.307	-34053.4	-57922.9	9552.39	125.864	946.585	0	0	0	0	0	0	0	603	903	0
7197	9	0	0	0	0	0	0	200	300	0	-60.5177	-80.8484	-780.086	-34145	-58350.2	9277.73	125.2	946.771	0	0	0	0	0	0	0	603	903	0
7198	0	0	0	0	0	0	0	200	300	0	-58.6867	-81.9165	-781.307	-34694.3	-57922.9	9598.17	125.864	947.406	0	0	0	0	0	0	0	603	903	0
7198	1	0	0	0	0	0	0	200	300	0	-60.3651	-82.3743	-781.002	-35243.6	-57800.8	9369.28	125.991	948.126	0	0	0	0	0	0	0	603	903	0
7198	2	0	0	0	0	0	0	200	300	0	-60.2126	-82.0691	-780.086	-35243.6	-58960.5	9598.17	124.418	948.179	0	0	0	0	0	0	0	603	903	0
7198	3	0	0	0	0	0	0	200	300	0	-60.06	-81.9165	-782.222	-35518.3	-58167.1	9460.84	125.639	948.407	0	0	0	0	0	0	0	603	903	0
7198	4	0	0	0	0	0	0	200	300	0	-60.9755	-82.832	-780.696	-36250.7	-58655.3	9369.28	124.868	949.434	0	0	0	0	0	0	0	603	903	0
7198	5	0	0	0	0	0	0	200	300	0	-60.3651	-82.832	-782.527	-36433.8	-58411.2	9781.27	125.356	949.559	0	0	0	0	0	0	0	603	903	0
7198	6	0	0	0	0	0	0	200	300	0	-59.7548	-82.3743	-780.696	-37074.7	-58167.1	9689.72	125.493	950.489	0	0	0	0	0	0	0	603	903	0
7198	7	0	0	0	0	0	0	200	300	0	-60.6703	-82.5269	-780.391	-36891.6	-58533.3	9689.72	124.995	950.273	0	0	0	0	0	0	0	603	903	0
7198	8	0	0	0	0	0	0	200	300	0	-59.7548	-83.4424	-780.696	-37532.4	-58228.1	9872.82	125.415	951.076	0	0	0	0	0	0	0	603	903	0
7198	9	0	0	0	0	0	0	200	300	0	-60.06	-82.832	-775.508	-37807.1	-58411.2	9643.94	124.68	951.751	0	0	0	0	0	0	0	603	903	0
7199	0	0	0	0	0	0	0	200	300	0	-60.3651	-82.3743	-778.56	-38448	-58838.4	9552.39	124.427	952.383	0	0	0	0	0	0	0	603	903	0
7199	1	0	0	0	0	0	0	200	300	0	-61.891	-83.595	-774.593	-39180.4	-58594.3	9460.84	124.355	953.582	0	0	0	0	0	0	0	603	903	0
7199	2	0	0	0	0	0	0	200	300	0	-61.2807	-84.8157	-777.95	-38905.7	-58594.3	9827.05	124.681	953.011	0	0	0	0	0	0	0	603	903	0
7199	3	0	0	0	0	0	0	200	300	0	-59.4496	-82.5269	-776.424	-39180.4	-58960.5	9598.17	124.061	953.463	0	0	0	0	0	0	0	603	903	0
7199	4	0	0	0	0	0	0	200	300	0	-61.5858	-84.8157	-778.255	-40004.4	-58228.1	9827.05	125.181	954.403	0	0	0	0	0	0	0	603	903	0
7199	5	0	0	0	0	0	0	200	300	0	-60.9755	-86.3416	-775.203	-39912.8	-58838.4	10010.2	124.099	954.487	0	0	0	0	0	0	0	603	903	0
7199	6	0	0	0	0	0	0	200	300	0	-59.297	-85.1208	-776.424	-40187.5	-58228.1	9872.82	125.005	954.76	0	0	0	0	0	0	0	603	903	0
7199	7	0	0	0	0	0	0	200	300	0	-59.4496	-84.3579	-776.729	-40919.9	-58106	9918.6	125.191	955.682	0	0	0	0	0	0	0	603	903	0
7199	8	0	0	0	0	0	0	200	300	0	-60.06	-85.426	-774.288	-41194.6	-58899.5	10193.3	123.931	956.203	0	0	0	0	0	0	0	603	903	0
7199	9	0	0	0	0	0	0	200	300	0	-59.4496	-86.4941	-773.372	-41286.1	-58289.1	10193.3	124.63	956.385	0	0	0	0	0	0	0	603	903	0
7200	0	0	0	0	0	0	0	200	300	0	-58.6867	-86.7993	-772.762	-42476.3	-58655.3	10239	124.096	957.967	0	0	0	0	0	0	0	603	903	0
7200	1	0	0	0	0	0	0	200	300	0	-59.297	-86.4941	-771.846	-42018.5	-58533.3	10422.1	124.165	957.439	0	0	0	0	0	0	0	603	903	0
7200	2	0	0	0	0	0	0	200	300	0	-58.0763	-87.5623	-772.457	-42293.2	-57800.8	10376.4	125.173	957.752	0	0	0	0	0	0	0	603	903	0
7200	3	0	0	0	0	0	0	200	300	0	-58.0763	-88.3252	-770.626	-42750.9	-58594.3	10376.4	123.965	958.476	0	0	0	0	0	0	0	603	903	0
7200	4	0	0	0	0	0	0	200	300	0	-56.703	-87.5623	-770.931	-43025.6	-58655.3	10513.7	123.916	958.81	0	0	0	0	0	0	0	603	903	0
7200	5	0	0	0	0	0	0	200	300	0	-57.3134	-88.783	-770.32	-42384.7	-57983.9	10605.2	124.728	958.022	0	0	0	0	0	0	0	603	903	0
7200	6	0	0	0	0	0	0	200	300	0	-57.3134	-87.7148	-767.574	-43849.6	-58716.4	10742.6	123.504	960.128	0	0	0	0	0	0	0	603	903	0
7200	7	0	0	0	0	0	0	200	300	0	-56.703	-87.5623	-766.963	-44124.2	-57983.9	10742.6	124.398	960.531	0	0	0	0	0	0	0	603	903	0
7200	8	0	0	0	0	0	0	200	300	0	-56.8556	-89.2407	-765.743	-43758	-57800.8	10925.7	124.517	960.145	0	0	0	0	0	0	0	603	903	0
7200	9	0	0	0	0	0	0	200	300	0	-56.0927	-88.9355	-764.217	-44765.1	-58655.3	10788.4	123.248	961.576	0	0	0	0	0	0	0	603	903	0
7201	0	0	0	0	0	0	0	200	300	0	-58.2289	-89.6985	-766.048	-44765.1	-57556.7	10651	124.865	961.436	0	0	0	0	0	0	0	603	903	0
7201	1	0	0	0	0	0	0	200	300	0	-56.703	-89.8511	-762.996	-44582	-58533.3	10834.1	123.285	961.43	0	0	0	0	0	0	0	603	903	0
7201	2	0	0	0	0	0	0	200	300	0	-55.1772	-90.1562	-763.301	-44856.7	-58167.1	10925.7	123.795	961.767	0	0	0	0	0	0	0	603	903	0
7201	3	0	0	0	0	0	0	200	300	0	-56.3979	-91.0718	-762.081	-45222.9	-57251.5	11017.2	124.875	962.341	0	0	0	0	0	0	0	603	903	0
7201	4	0	0	0	0	0	0	200	300	0	-55.7875	-90.614	-760.555	-45039.8	-58106	11154.6	123.6	962.22	0	0	0	0	0	0	0	603	903	0
7201	5	0	0	0	0	0	0	200	300	0	-55.7875	-92.1399	-762.081	-45222.9	-57251.5	11475	124.875	962.341	0	0	0	0	0	0	0	603	903	0
7201	6	0	0	0	0	0	0	200	300	0	-55.6349	-92.5977	-758.724	-45863.7	-57373.6	11200.3	124.381	963.449	0	0	0	0	0	0	0	603	903	0
7201	7	0	0	0	0	0	0	200	300	0	-55.9401	-92.4451	-756.893	-45589.1	-57495.7	11337.7	124.037	963.232	0	0	0	0	0	0	0	603	903	0
7201	8	0	0	0	0	0	0	200	300	0	-54.4142	-93.8184	-754.146	-45680.6	-56824.3	11154.6	124.651	963.573	0	0	0	0	0	0	0	603	903	0
7201	9	0	0	0	0	0	0	200	300	0	-53.8039	-94.4287	-756.282	-46138.4	-57190.5	11337.7	124.379	964.007	0	0	0	0	0	0	0	603	903	0
7202	0	0	0	0	0	0	0	200	300	0	-52.5832	-93.6658	-755.062	-46229.9	-57312.6	11383.4	124.096	964.227	0	0	0	0	0	0	0	603	903	0
7202	1	0	0	0	0	0	0	200	300	0	-53.6513	-95.4968	-753.536	-45680.6	-56580.1	11246.1	124.914	963.622	0	0	0	0	0	0	0	603	903	0
7202	2	0	0	0	0	0	0	200	300	0	-52.7357	-95.4968	-748.043	-46321.5	-56763.2	11612.3	124.118	964.924	0	0	0	0	0	0	0	603	903	0
7202	3	0	0	0	0	0	0	200	300	0	-53.6513	-96.4124	-749.874	-46962.4	-56336	11566.5	124.873	965.627	0	0	0	0	0	0	0	603	903	0
7202	4	0	0	0	0	0	0	200	300	0	-54.7194	-96.1072	-750.789	-46504.6	-56458.1	11749.7	124.802	964.941	0	0	0	0	0	0	0	603	903	0
7202	5	0	0	0	0	0	0	200	300	0	-53.0409	-96.7175	-746.211	-46779.3	-56213.9	11566.5	124.668	965.689	0	0	0	0	0	0	0	603	903	0
7202	6	0	0	0	0	0	0	200	300	0	-53.3461	-98.0908	-742.244	-46596.1	-55847.7	12070.1	124.758	965.777	0	0	0	0	0	0	0	603	903	0
7202	7	0	0	0	0	0	0	200	300	0	-53.0409	-98.8538	-742.855	-47053.9	-56091.9	11795.4	124.491	966.342	0	0	0	0	0	0	0	603	903	0
7202	8	0	0	0	0	0	0	200	300	0	-52.278	-98.396	-741.634	-47145.5	-55603.6	11475	125.026	966.57	0	0	0	0	0	0	0	603	903	0
7202	9	0	0	0	0	0	0	200	300	0	-50.1418	-100.227	-740.718	-47694.8	-55054.3	11658.1	125.674	967.39	0	0	0	0	0	0	0	603	903	0
7203	0	0	0	0	0	0	0	200	300	0	-52.1254	-100.837	-736.446	-47328.6	-55542.5	11703.9	124.58	967.266	0	0	0	0	0	0	0	603	903	0
7203	1	0	0	0	0	0	0	200	300	0	-51.0573	-99.6167	-735.836	-46870.8	-54871.2	11978.5	125.43	966.698	0	0	0	0	0	0	0	603	903	0
7203	2	0	0	0	0	0	0	200	300	0	-50.1418	-99.4641	-733.699	-48061	-55237.4	11795.4	124.714	968.505	0	0	0	0	0	0	0	603	903	0
7203	3	0	0	0	0	0	0	200	300	0	-51.0573	-100.837	-730.342	-48244.1	-54932.2	11978.5	124.786	969.057	0	0	0	0	0	0	0	603	903	0
7203	4	0	0	0	0	0	0	200	300	0	-50.5995	-100.074	-729.732	-47603.2	-54504.9	11978.5	125.308	968.234	0	0	0	0	0	0	0	603	903	0
7203	5	0	0	0	0	0	0	200	300	0	-48.9211	-102.058	-727.291	-47877.9	-54932.2	12299	124.47	968.83	0	0	0	0	0	0	0	603	903	0
7203	6	0	0	0	0	0	0	200	300	0	-49.8366	-102.211	-723.323	-48152.6	-53772.5	12070.1	125.659	969.571	0	0	0	0	0	0	0	603	903	0
7203	7	0	0	0	0	0	0	200	300	0	-49.3788	-102.516	-722.713	-47969.5	-53772.5	12115.9	125.596	969.374	0	0	0	0	0	0	0	603	903	0
7203	8	0	0	0	0	0	0	200	300	0	-47.09	-103.126	-720.272	-47877.9	-53955.6	12024.3	125.09	969.472	0	0	0	0	0	0	0	603	903	0
7203	9	0	0	0	0	0	0	200	300	0	-48.0055	-101.906	-717.525	-48976.5	-53284.2	12115.9	125.739	971.258	0	0	0	0	0	0	0	603	903	0
7204	0	0	0	0	0	0	0	200	300	0	-48.1581	-103.737	-715.694	-47877.9	-53467.3	12207.4	125.293	969.897	0	0	0	0	0	0	0	603	903	0
7204	1	0	0	0	0	0	0	200	300	0	-44.8012	-102.211	-710.506	-48335.7	-53650.5	12207.4	124.49	971.03	0	0	0	0	0	0	0	603	903	0
7204	2	0	0	0	0	0	0	200	300	0	-47.2426	-102.821	-709.285	-48061	-52612.9	12207.4	125.823	970.76	0	0	0	0	0	0	0	603	903	0
7204	3	0	0	0	0	0	0	200	300	0	-45.8693	-104.194	-705.013	-48335.7	-53040.1	12299	124.767	971.56	0	0	0	0	0	0	0	603	903	0
7204	4	0	0	0	0	0	0	200	300	0	-44.8012	-103.279	-701.656	-48610.3	-52612.9	12115.9	125.016	972.279	0	0	0	0	0	0	0	603	903	0
7204	5	0	0	0	0	0	0	200	300	0	-46.0219	-103.584	-701.045	-47877.9	-51880.4	12115.9	125.996	971.295	0	0	0	0	0	0	0	603	903	0
7204	6	0	0	0	0	0	0	200	300	0	-44.9538	-104.652	-695.857	-48244.1	-52002.5	12115.9	125.268	972.331	0	0	0	0	0	0	0	603	903	0
7204	7	0	0	0	0	0	0	200	300	0	-44.1908	-104.957	-693.416	-48244.1	-51514.2	12161.6	125.71	972.575	0	0	0	0	0	0	0	603	903	0
7204	8	0	0	0	0	0	0	200	300	0	-44.6486	-104.805	-690.669	-48885	-51148	12207.4	125.944	973.779	0	0	0	0	0	0	0	603	903	0
7204	9	0	0	0	0	0	0	200	300	0	-44.3434	-104.957	-686.397	-47877.9	-51270.1	12482.1	125.306	972.753	0	0	0	0	0	0	0	603	903	0
7205	0	0	0	0	0	0	0	200	300	0	-43.2753	-104.347	-684.261	-48793.4	-50659.7	12115.9	125.964	974.308	0	0	0	0	0	0	0	603	903	0
7205	1	0	0	0	0	0	0	200	300	0	-42.2072	-106.178	-681.209	-48244.1	-50964.9	12344.7	125.185	973.821	0	0	0	0	0	0	0	603	903	0
7205	2	0	0	0	0	0	0	200	300	0	-43.5805	-105.568	-679.683	-48152.6	-50049.4	12619.4	126.364	973.846	0	0	0	0	0	0	0	603	903	0
7205	3	0	0	0	0	0	0	200	300	0	-42.2072	-105.72	-674.8	-48061	-49805.2	12070.1	126.193	974.223	0	0	0	0	0	0	0	603	903	0
7205	4	0	0	0	0	0	0	200	300	0	-41.7494	-106.483	-670.833	-48061	-49500.1	12207.4	126.211	974.644	0	0	0	0	0	0	0	603	903	0
7205	5	0	0	0	0	0	0	200	300	0	-40.3761	-105.11	-669.307	-48335.7	-49378	11932.8	126.225	975.218	0	0	0	0	0	0	0	603	903	0
7205	6	0	0	0	0	0	0	200	300	0	-41.5968	-106.941	-664.119	-48152.6	-49072.8	12115.9	126.108	975.506	0	0	0	0	0	0	0	603	903	0
7205	7	0	0	0	0	0	0	200	300	0	-40.2235	-106.025	-660.152	-48061	-48950.7	12070.1	125.849	975.803	0	0	0	0	0	0	0	603	903	0
7205	8	0	0	0	0	0	0	200	300	0	-41.5968	-106.636	-656.795	-48610.3	-48340.4	12299	126.4	977.011	0	0	0	0	0	0	0	603	903	0
7205	9	0	0	0	0	0	0	200	300	0	-39.4606	-106.636	-652.217	-47694.8	-48340.4	12390.5	125.883	976.127	0	0	0	0	0	0	0	603	903	0
7206	0	0	0	0	0	0	0	200	300	0	-39.4606	-106.178	-649.471	-48061	-47791.1	12161.6	126.415	977	0	0	0	0	0	0	0	603	903	0
7206	1	0	0	0	0	0	0	200	300	0	-40.6813	-107.551	-645.809	-48335.7	-47485.9	12161.6	126.471	977.845	0	0	0	0	0	0	0	603	903	0
7206	2	0	0	0	0	0	0	200	300	0	-39.7658	-107.551	-640.315	-47603.2	-47485.9	11978.5	125.84	977.344	0	0	0	0	0	0	0	603	903	0
7206	3	0	0	0	0	0	0	200	300	0	-37.6295	-105.72	-637.874	-47145.5	-46631.4	12024.3	126.896	976.91	0	0	0	0	0	0	0	603	903	0
7206	4	0	0	0	0	0	0	200	300	0	-39.308	-107.856	-634.212	-48152.6	-46875.6	11749.7	126.089	978.925	0	0	0	0	0	0	0	603	903	0
7206	5	0	0	0	0	0	0	200	300	0	-39.0028	-106.178	-629.94	-47603.2	-46448.3	12024.3	126.265	978.568	0	0	0	0	0	0	0	603	903	0
7206	6	0	0	0	0	0	0	200	300	0	-37.6295	-105.415	-627.193	-47786.4	-45838	11932.8	126.916	979.191	0	0	0	0	0	0	0	603	903	0
7206	7	0	0	0	0	0	0	200	300	0	-37.7821	-106.788	-621.395	-47969.5	-46021.1	12390.5	125.939	980.197	0	0	0	0	0	0	0	603	903	0
7206	8	0	0	0	0	0	0	200	300	0	-38.2399	-106.178	-617.427	-47420.1	-44861.4	12207.4	127.341	979.803	0	0	0	0	0	0	0	603	903	0
7206	9	0	0	0	0	0	0	200	300	0	-36.5614	-106.636	-614.07	-47511.7	-44739.3	11841.2	127.143	980.372	0	0	0	0	0	0	0	603	903	0
7207	0	0	0	0	0	0	0	200	300	0	-35.9511	-106.483	-609.493	-47694.8	-44617.2	12253.2	126.796	981.253	0	0	0	0	0	0	0	603	903	0
7207	1	0	0	0	0	0	0	200	300	0	-36.714	-105.72	-605.831	-47420.1	-44251	11978.5	126.958	981.273	0	0	0	0	0	0	0	603	903	0
7207	2	0	0	0	0	0	0	200	300	0	-35.1881	-107.704	-601.863	-47237	-44251	11932.8	126.477	981.485	0	0	0	0	0	0	0	603	903	0
7207	3	0	0	0	0	0	0	200	300	0	-34.12	-106.025	-595.149	-47511.7	-43945.9	11978.5	126.16	982.832	0	0	0	0	0	0	0	603	903	0
7207	4	0	0	0	0	0	0	200	300	0	-35.3407	-105.568	-592.708	-46779.3	-42969.3	11703.9	127.503	981.925	0	0	0	0	0	0	0	603	903	0
7207	5	0	0	0	0	0	0	200	300	0	-33.5097	-107.094	-586.299	-46321.5	-43213.4	12024.3	126.295	982.007	0	0	0	0	0	0	0	603	903	0
7207	6	0	0	0	0	0	0	200	300	0	-33.3571	-105.415	-582.027	-46596.1	-42297.9	11978.5	127.327	983.058	0	0	0	0	0	0	0	603	903	0
7207	7	0	0	0	0	0	0	200	300	0	-34.5778	-106.483	-578.67	-46596.1	-42297.9	11841.2	126.905	983.523	0	0	0	0	0	0	0	603	903	0
7207	8	0	0	0	0	0	0	200	300	0	-31.8312	-106.483	-572.261	-46229.9	-42053.8	12024.3	126.513	983.785	0	0	0	0	0	0	0	603	903	0
7207	9	0	0	0	0	0	0	200	300	0	-32.1364	-105.262	-568.904	-46321.5	-41199.3	12024.3	127.581	984.422	0	0	0	0	0	0	0	603	903	0
7208	0	0	0	0	0	0	0	200	300	0	-31.0683	-104.5	-564.022	-46138.4	-41443.4	11475	126.522	984.803	0	0	0	0	0	0	0	603	903	0
7208	1	0	0	0	0	0	0	200	300	0	-31.6786	-104.194	-558.834	-45222.9	-40833.1	11658.1	126.932	983.924	0	0	0	0	0	0	0	603	903	0
7208	2	0	0	0	0	0	0	200	300	0	-31.9838	-103.889	-554.866	-45955.3	-40222.7	11475	127.509	985.822	0	0	0	0	0	0	0	603	903	0
7208	3	0	0	0	0	0	0	200	300	0	-31.8312	-104.347	-548.763	-45314.4	-40283.8	11383.4	126.592	985.576	0	0	0	0	0	0	0	603	903	0
7208	4	0	0	0	0	0	0	200	300	0	-30.9157	-103.431	-546.627	-44490.5	-39307.2	11612.3	128.091	984.391	0	0	0	0	0	0	0	603	903	0
7208	5	0	0	0	0	0	0	200	300	0	-30.4579	-103.737	-538.082	-45039.8	-38941	11475	127.63	986.704	0	0	0	0	0	0	0	603	903	0
7208	6	0	0	0	0	0	0	200	300	0	-31.2209	-104.042	-534.114	-44582	-39185.1	11475	126.635	986.469	0	0	0	0	0	0	0	603	903	0
7208	7	0	0	0	0	0	0	200	300	0	-29.0846	-101.906	-529.842	-44307.4	-38147.5	11291.9	128.002	986.624	0	0	0	0	0	0	0	603	903	0
7208	8	0	0	0	0	0	0	200	300	0	-29.695	-103.126	-525.569	-43941.1	-37903.4	11429.2	127.881	986.607	0	0	0	0	0	0	0	603	903	0
7208	9	0	0	0	0	0	0	200	300	0	-30.0002	-101.295	-517.635	-43117.1	-38086.5	11108.8	126.422	986.296	0	0	0	0	0	0	0	603	903	0
7209	0	0	0	0	0	0	0	200	300	0	-29.695	-100.99	-514.888	-43666.5	-37171	11017.2	127.808	987.808	0	0	0	0	0	0	0	603	903	0
7209	1	0	0	0	0	0	0	200	300	0	-28.3217	-102.516	-508.174	-43300.2	-36987.9	11063	127.214	988.208	0	0	0	0	0	0	0	603	903	0
7209	2	0	0	0	0	0	0	200	300	0	-28.3217	-99.9219	-503.292	-43666.5	-36316.5	11017.2	127.842	989.762	0	0	0	0	0	0	0	603	903	0
7209	3	0	0	0	0	0	0	200	300	0	-28.6269	-100.227	-499.935	-43208.7	-35645.1	11063	128.701	989.429	0	0	0	0	0	0	0	603	903	0
7209	4	0	0	0	0	0	0	200	300	0	-26.7958	-100.837	-491.39	-42567.8	-35889.2	10879.9	126.964	989.628	0	0	0	0	0	0	0	603	903	0
7209	5	0	0	0	0	0	0	200	300	0	-26.7958	-99.3115	-487.728	-42934	-35278.9	10879.9	127.667	991.029	0	0	0	0	0	0	0	603	903	0
7209	6	0	0	0	0	0	0	200	300	0	-27.4062	-100.074	-482.845	-42567.8	-34912.7	10925.7	127.694	991.161	0	0	0	0	0	0	0	603	903	0
7209	7	0	0	0	0	0	0	200	300	0	-25.7277	-100.074	-475.826	-41835.4	-34485.4	10696.8	127.525	990.922	0	0	0	0	0	0	0	603	903	0
7209	8	0	0	0	0	0	0	200	300	0	-24.6596	-97.9382	-471.858	-42201.6	-33692	10605.2	128.597	992.437	0	0	0	0	0	0	0	603	903	0
7209	9	0	0	0	0	0	0	200	300	0	-24.0492	-99.0063	-466.06	-41652.3	-33814	10513.7	127.447	992.371	0	0	0	0	0	0	0	603	903	0
7210	0	0	0	0	0	0	0	200	300	0	-24.3544	-96.8701	-461.177	-40462.1	-32715.4	10559.5	129.061	990.737	0	0	0	0	0	0	0	603	903	0
7210	1	0	0	0	0	0	0	200	300	0	-24.2018	-96.1072	-456.905	-41469.2	-32349.2	10834.1	129.199	993.761	0	0	0	0	0	0	0	603	903	0
7210	2	0	0	0	0	0	0	200	300	0	-23.2863	-96.8701	-449.581	-40736.8	-32410.2	10742.6	127.91	993.611	0	0	0	0	0	0	0	603	903	0
7210	3	0	0	0	0	0	0	200	300	0	-23.2863	-95.0391	-443.782	-40187.5	-31860.9	10788.4	128.206	993.557	0	0	0	0	0	0	0	603	903	0
7210	4	0	0	0	0	0	0	200	300	0	-23.4389	-95.6494	-437.984	-40279	-31616.7	10513.7	127.813	994.965	0	0	0	0	0	0	0	603	903	0
7210	5	0	0	0	0	0	0	200	300	0	-23.2863	-95.6494	-432.491	-40095.9	-31372.6	10467.9	127.461	995.709	0	0	0	0	0	0	0	603	903	0
7210	6	0	0	0	0	0	0	200	300	0	-22.5233	-92.1399	-424.556	-39180.4	-30212.9	10010.2	128.836	995.286	0	0	0	0	0	0	0	603	903	0
7210	7	0	0	0	0	0	0	200	300	0	-21.1501	-93.3606	-421.81	-38722.6	-30274	10239	128.228	994.801	0	0	0	0	0	0	0	603	903	0
7210	8	0	0	0	0	0	0	200	300	0	-22.3708	-93.8184	-415.096	-39180.4	-29419.5	9918.6	129.126	997.389	0	0	0	0	0	0	0	603	903	0
7210	9	0	0	0	0	0	0	200	300	0	-22.6759	-91.6821	-408.992	-37990.2	-29053.3	9506.61	128.964	995.887	0	0	0	0	0	0	0	603	903	0
7211	0	0	0	0	0	0	0	200	300	0	-20.3871	-92.4451	-403.194	-37898.7	-28931.2	9872.82	128.245	996.996	0	0	0	0	0	0	0	603	903	0
7211	1	0	0	0	0	0	0	200	300	0	-20.6923	-91.2244	-396.175	-37624	-28076.7	9872.82	129.131	997.968	0	0	0	0	0	0	0	603	903	0
7211	2	0	0	0	0	0	0	200	300	0	-19.6242	-90.3088	-391.902	-36891.6	-28076.7	9506.61	128.358	997.135	0	0	0	0	0	0	0	603	903	0
7211	3	0	0	0	0	0	0	200	300	0	-19.319	-90.1562	-384.578	-36433.8	-27893.6	9643.94	127.47	997.737	0	0	0	0	0	0	0	603	903	0
7211	4	0	0	0	0	0	0	200	300	0	-19.6242	-88.6304	-379.39	-36433.8	-26978.1	9277.73	128.891	999.033	0	0	0	0	0	0	0	603	903	0
7211	5	0	0	0	0	0	0	200	300	0	-19.0138	-88.9355	-374.507	-35609.8	-26917	9140.4	128.127	998.084	0	0	0	0	0	0	0	603	903	0
7211	6	0	0	0	0	0	0	200	300	0	-17.7931	-87.8674	-367.488	-35335.2	-26367.7	9048.85	128.249	999.153	0	0	0	0	0	0	0	603	903	0
7211	7	0	0	0	0	0	0	200	300	0	-18.7086	-85.2734	-362.911	-35609.8	-25635.3	8682.64	129.362	1001.12	0	0	0	0	0	0	0	603	903	0
7211	8	0	0	0	0	0	0	200	300	0	-17.9457	-86.0364	-355.892	-34236.6	-25513.2	8911.52	128.312	999.199	0	0	0	0	0	0	0	603	903	0
7211	9	0	0	0	0	0	0	200	300	0	-16.5724	-84.2053	-349.483	-34145	-25086	8682.64	128.22	1000.7	0	0	0	0	0	0	0	603	903	0
7212	0	0	0	0	0	0	0	200	300	0	-17.6405	-82.9846	-343.685	-33321	-24170.5	8682.64	129.673	999.952	0	0	0	0	0	0	0	603	903	0
7212	1	0	0	0	0	0	0	200	300	0	-16.725	-81.4587	-333.309	-33137.9	-24231.5	8270.65	127.3	1002.42	0	0	0	0	0	0	0	603	903	0
7212	2	0	0	0	0	0	0	200	300	0	-15.9621	-81.3062	-329.952	-32771.7	-23987.3	8270.65	127.3	1002.32	0	0	0	0	0	0	0	603	903	0
7212	3	0	0	0	0	0	0	200	300	0	-16.4198	-82.3743	-321.712	-32497	-22949.8	8179.09	128.664	1004.01	0	0	0	0	0	0	0	603	903	0
7212	4	0	0	0	0	0	0	200	300	0	-15.5043	-79.7803	-316.524	-32313.9	-22888.7	7995.99	127.687	1005.09	0	0	0	0	0	0	0	603	903	0
7212	5	0	0	0	0	0	0	200	300	0	-14.5888	-78.407	-312.252	-31673.1	-22400.4	8133.32	128.262	1004.43	0	0	0	0	0	0	0	603	903	0
7212	6	0	0	0	0	0	0	200	300	0	-12.7577	-78.2544	-306.148	-31489.9	-21423.9	7767.11	130.021	1005.86	0	0	0	0	0	0	0	603	903	0
7212	7	0	0	0	0	0	0	200	300	0	-14.4362	-77.9492	-300.044	-30940.6	-21607	7629.78	127.987	1006.12	0	0	0	0	0	0	0	603	903	0
7212	8	0	0	0	0	0	0	200	300	0	-13.8258	-75.3552	-295.162	-30391.3	-20813.5	7629.78	129.484	1005.96	0	0	0	0	0	0	0	603	903	0
7212	9	0	0	0	0	0	0	200	300	0	-12.4525	-76.2708	-289.669	-30208.2	-20508.3	7446.67	129.201	1007.29	0	0	0	0	0	0	0	603	903	0
7213	0	0	0	0	0	0	0	200	300	0	-10.7741	-73.9819	-284.175	-29567.3	-20264.2	7217.79	128.691	1007.05	0	0	0	0	0	0	0	603	903	0
7213	1	0	0	0	0	0	0	200	300	0	-11.6896	-72.4561	-278.377	-28926.5	-19592.8	7355.12	129.618	1006.91	0	0	0	0	0	0	0	603	903	0
7213	2	0	0	0	0	0	0	200	300	0	-11.6896	-72.1509	-271.663	-28468.7	-19775.9	7034.68	127.204	1007.79	0	0	0	0	0	0	0	603	903	0
7213	3	0	0	0	0	0	0	200	300	0	-11.537	-69.0991	-266.475	-28651.8	-19104.5	6851.58	128.307	1010.52	0	0	0	0	0	0	0	603	903	0
7213	4	0	0	0	0	0	0	200	300	0	-10.9267	-69.0991	-262.203	-27644.7	-18250	7034.68	130.397	1008.43	0	0	0	0	0	0	0	603	903	0
7213	5	0	0	0	0	0	0	200	300	0	-10.3163	-68.3362	-253.658	-27095.4	-18128	6668.47	128.534	1009.82	0	0	0	0	0	0	0	603	903	0
7213	6	0	0	0	0	0	0	200	300	0	-11.0793	-65.7422	-250.606	-27095.4	-17700.7	6576.92	129.368	1011.12	0	0	0	0	0	0	0	603	903	0
7213	7	0	0	0	0	0	0	200	300	0	-10.3163	-62.9956	-242.366	-26179.9	-16846.2	6531.14	130.493	1011.02	0	0	0	0	0	0	0	603	903	0
7213	8	0	0	0	0	0	0	200	300	0	-9.2482	-62.6904	-236.873	-25630.6	-16907.3	6210.71	128.623	1011.2	0	0	0	0	0	0	0	603	903	0
7213	9	0	0	0	0	0	0	200	300	0	-9.2482	-62.0801	-230.159	-25355.9	-16480	6256.49	128.397	1013.17	0	0	0	0	0	0	0	603	903	0
7214	0	0	0	0	0	0	0	200	300	0	-9.40079	-61.012	-224.666	-24623.5	-15808.6	6119.16	129.635	1012.6	0	0	0	0	0	0	0	603	903	0
7214	1	0	0	0	0	0	0	200	300	0	-7.72232	-59.4861	-220.394	-23891.1	-15991.7	5844.5	127.44	1011.4	0	0	0	0	0	0	0	603	903	0
7214	2	0	0	0	0	0	0	200	300	0	-8.79044	-59.1809	-214.29	-23524.9	-15137.3	5890.27	129.361	1012.78	0	0	0	0	0	0	0	603	903	0
7214	3	0	0	0	0	0	0	200	300	0	-9.09561	-57.655	-207.881	-23067.1	-14404.8	5798.72	130.706	1013.96	0	0	0	0	0	0	0	603	903	0
7214	4	0	0	0	0	0	0	200	300	0	-7.11197	-57.0447	-203.914	-22792.4	-14771	5615.62	127.562	1014.77	0	0	0	0	0	0	0	603	903	0
7214	5	0	0	0	0	0	0	200	300	0	-7.87491	-57.3499	-199.642	-22426.2	-13794.5	5340.96	130.904	1015.33	0	0	0	0	0	0	0	603	903	0
7214	6	0	0	0	0	0	0	200	300	0	-7.87491	-54.9085	-194.759	-21602.3	-14160.7	5249.41	127.291	1013.92	0	0	0	0	0	0	0	603	903	0
7214	7	0	0	0	0	0	0	200	300	0	-6.50162	-54.4507	-188.35	-21052.9	-13794.5	5295.18	126.762	1014.78	0	0	0	0	0	0	0	603	903	0
7214	8	0	0	0	0	0	0	200	300	0	-6.04385	-52.7722	-181.636	-20961.4	-12879	4837.42	129.095	1018.4	0	0	0	0	0	0	0	603	903	0
7214	9	0	0	0	0	0	0	200	300	0	-7.11197	-50.1782	-177.974	-20412.1	-12695.8	4883.19	128.665	1017.69	0	0	0	0	0	0	0	603	903	0
7215	0	0	0	0	0	0	0	200	300	0	-6.19644	-49.2627	-171.871	-19771.2	-12634.8	4654.31	126.486	1018.04	0	0	0	0	0	0	0	603	903	0
7215	1	0	0	0	0	0	0	200	300	0	-5.58609	-47.5842	-167.293	-19405	-11902.4	4288.1	128.853	1018.99	0	0	0	0	0	0	0	603	903	0
7215	2	0	0	0	0	0	0	200	300	0	-4.67056	-46.2109	-162.105	-18581	-11780.3	4516.98	127.329	1017.62	0	0	0	0	0	0	0	603	903	0
7215	3	0	0	0	0	0	0	200	300	0	-5.73868	-44.3799	-157.527	-18031.7	-11536.2	4516.98	126.767	1017.47	0	0	0	0	0	0	0	603	903	0
7215	4	0	0	0	0	0	0	200	300	0	-5.89127	-43.3118	-152.95	-18306.4	-10620.7	4150.77	130.561	1022.69	0	0	0	0	0	0	0	603	903	0
7215	5	0	0	0	0	0	0	200	300	0	-5.28091	-41.7859	-147.151	-17207.7	-10681.7	4150.77	127.41	1019.94	0	0	0	0	0	0	0	603	903	0
7215	6	0	0	0	0	0	0	200	300	0	-5.89127	-40.1074	-141.353	-16200.6	-10132.4	3967.67	128.319	1017.61	0	0	0	0	0	0	0	603	903	0
7215	7	0	0	0	0	0	0	200	300	0	-6.19644	-38.8867	-135.555	-16475.3	-9827.2	3738.78	127.504	1024.54	0	0	0	0	0	0	0	603	903	0
7215	8	0	0	0	0	0	0	200	300	0	-6.50162	-38.2764	-132.198	-16017.5	-9827.2	3464.13	125.663	1024.16	0	0	0	0	0	0	0	603	903	0
7215	9	0	0	0	0	0	0	200	300	0	-5.58609	-36.7505	-128.231	-15559.8	-9277.88	3647.23	127.647	1024.34	0	0	0	0	0	0	0	603	903	0
7216	0	0	0	0	0	0	0	200	300	0	-5.73868	-35.835	-126.705	-14918.9	-9338.92	3601.46	126.294	1020.75	0	0	0	0	0	0	0	603	903	0
7216	1	0	0	0	0	0	0	200	300	0	-6.80679	-34.0039	-121.822	-14918.9	-9338.92	3418.35	123.34	1025.46	0	0	0	0	0	0	0	603	903	0
7216	2	0	0	0	0	0	0	200	300	0	-5.4335	-33.0884	-119.686	-14461.1	-8362.35	3372.57	130.131	1023.83	0	0	0	0	0	0	0	603	903	0
7216	3	0	0	0	0	0	0	200	300	0	-4.82315	-31.8677	-112.972	-13637.2	-8545.45	3189.47	124.358	1023.71	0	0	0	0	0	0	0	603	903	0
7216	4	0	0	0	0	0	0	200	300	0	-6.50162	-31.5625	-111.751	-14003.4	-8240.28	3418.35	126.262	1028.31	0	0	0	0	0	0	0	603	903	0
7216	5	0	0	0	0	0	0	200	300	0	-5.28091	-29.2737	-107.479	-13454.1	-7874.07	2777.48	126.738	1028.18	0	0	0	0	0	0	0	603	903	0
7216	6	0	0	0	0	0	0	200	300	0	-4.67056	-29.4263	-99.544	-12538.5	-7385.79	2914.81	125.804	1028.96	0	0	0	0	0	0	0	603	903	0
7216	7	0	0	0	0	0	0	200	300	0	-5.4335	-27.7478	-100.46	-12538.5	-7446.82	2869.03	125.872	1027.81	0	0	0	0	0	0	0	603	903	0
7216	8	0	0	0	0	0	0	200	300	0	-5.4335	-27.1375	-96.4922	-11714.6	-6897.51	2914.81	128.518	1024.4	0	0	0	0	0	0	0	603	903	0
7216	9	0	0	0	0	0	0	200	300	0	-4.67056	-26.9849	-91.9146	-11623	-7263.72	2960.59	120.973	1029.45	0	0	0	0	0	0	0	603	903	0
7217	0	0	0	0	0	0	0	200	300	0	-5.58609	-24.3909	-88.2525	-10890.6	-6470.26	2548.6	126.685	1026.4	0	0	0	0	0	0	0	603	903	0
7217	1	0	0	0	0	0	0	200	300	0	-4.67056	-23.9331	-84.2852	-10707.5	-6348.19	2914.81	124.682	1030.04	0	0	0	0	0	0	0	603	903	0
7217	2	0	0	0	0	0	0	200	300	0	-4.06021	-23.1702	-82.4542	-10524.4	-6348.19	2502.82	123.009	1030.64	0	0	0	0	0	0	0	603	903	0
7217	3	0	0	0	0	0	0	200	300	0	-4.67056	-21.6443	-80.3179	-10249.7	-5676.8	2228.16	129.321	1030.61	0	0	0	0	0	0	0	603	903	0
7217	4	0	0	0	0	0	0	200	300	0	-2.68692	-18.7451	-76.0455	-9883.5	-6470.26	2228.16	114.916	1032.97	0	0	0	0	0	0	0	603	903	0
7217	5	0	0	0	0	0	0	200	300	0	-3.60245	-18.1348	-74.8248	-8876.42	-5737.84	1999.28	123.316	1021.63	0	0	0	0	0	0	0	603	903	0
7217	6	0	0	0	0	0	0	200	300	0	-4.67056	-17.5244	-70.8575	-9059.53	-5554.73	1816.18	121.607	1030.86	0	0	0	0	0	0	0	603	903	0
7217	7	0	0	0	0	0	0	200	300	0	-4.51797	-17.2192	-67.5005	-8876.42	-5188.52	1724.63	123.134	1034.5	0	0	0	0	0	0	0	603	903	0
7217	8	0	0	0	0	0	0	200	300	0	-4.51797	-16.6089	-64.4488	-8235.55	-4639.21	1999.28	128.017	1030.78	0	0	0	0	0	0	0	603	903	0
7217	9	0	0	0	0	0	0	200	300	0	-4.97574	-17.5244	-60.4815	-7869.34	-4334.03	2228.16	128.341	1033.11	0	0	0	0	0	0	0	603	903	0
7218	0	0	0	0	0	0	0	200	300	0	-5.28091	-16.4563	-56.8194	-7411.58	-4700.24	1907.73	117.278	1033.44	0	0	0	0	0	0	0	603	903	0
7218	1	0	0	0	0	0	0	200	300	0	-3.60245	-14.7778	-57.1246	-7045.37	-4089.89	1495.74	128.404	1026.33	0	0	0	0	0	0	0	603	903	0
7218	2	0	0	0	0	0	0	200	300	0	-3.90762	-14.0149	-51.021	-6587.61	-3906.78	1678.85	123.428	1032.12	0	0	0	0	0	0	0	603	903	0
7218	3	0	0	0	0	0	0	200	300	0	-4.97574	-12.9468	-51.3262	-6312.95	-3845.75	1449.97	125.072	1026	0	0	0	0	0	0	0	603	903	0
7218	4	0	0	0	0	0	0	200	300	0	-4.82315	-11.8787	-47.0538	-6038.29	-3235.4	1221.09	131.24	1031.33	0	0	0	0	0	0	0	603	903	0
7218	5	0	0	0	0	0	0	200	300	0	-3.75503	-10.0476	-45.8331	-5672.08	-3357.47	1678.85	126.746	1026.76	0	0	0	0	0	0	0	603	903	0
7218	6	0	0	0	0	0	0	200	300	0	-4.82315	-9.89502	-44.3072	-6038.29	-3601.61	1312.64	118.713	1039.28	0	0	0	0	0	0	0	603	903	0
7218	7	0	0	0	0	0	0	200	300	0	-5.4335	-9.89502	-41.2554	-5580.52	-3174.36	1449.97	123.056	1038.27	0	0	0	0	0	0	0	603	903	0
7218	8	0	0	0	0	0	0	200	300	0	-1.77139	-9.74243	-40.0347	-5305.87	-3174.36	1175.31	120.71	1035.53	0	0	0	0	0	0	0	603	903	0
7218	9	0	0	0	0	0	0	200	300	0	-5.12833	-9.43726	-38.2037	-4848.1	-2502.97	1358.41	134.483	1029.9	0	0	0	0	0	0	0	603	903	0
7219	0	0	0	0	0	0	0	200	300	0	-5.12833	-9.58985	-35.4571	-4848.1	-2625.04	1175.31	125.966	1039.73	0	0	0	0	0	0	0	603	903	0
7219	1	0	0	0	0	0	0	200	300	0	-4.82315	-9.89502	-33.9312	-4573.44	-2686.08	1266.86	120.837	1037.79	0	0	0	0	0	0	0	603	903	0
7219	2	0	0	0	0	0	0	200	300	0	-5.12833	-8.36914	-30.5743	-4665	-2136.76	1083.76	130.112	1055.58	0	0	0	0	0	0	0	603	903	0
7219	3	0	0	0	0	0	0	200	300	0	-4.51797	-8.06397	-29.3536	-3566.36	-2014.69	1175.31	131.365	1024.5	0	0	0	0	0	0	0	603	903	0
7219	4	0	0	0	0	0	0	200	300	0	-3.44986	-7.6062	-28.7432	-3841.02	-2197.8	1083.76	123.537	1036.63	0	0	0	0	0	0	0	603	903	0
7219	5	0	0	0	0	0	0	200	300	0	-4.82315	-7.30103	-26.3018	-3474.81	-1831.59	1358.41	130.363	1035.11	0	0	0	0	0	0	0	603	903	0
7219	6	0	0	0	0	0	0	200	300	0	-4.67056	-6.23291	-25.0811	-3749.47	-1709.52	992.203	131.84	1052.49	0	0	0	0	0	0	0	603	903	0
7219	7	0	0	0	0	0	0	200	300	0	-3.60245	-6.69068	-23.5552	-2925.49	-1770.55	717.545	124.834	1027.2	0	0	0	0	0	0	0	603	903	0
7219	8	0	0	0	0	0	0	200	300	0	-2.38174	-6.08033	-21.419	-3291.71	-1709.52	900.651	120.187	1056.68	0	0	0	0	0	0	0	603	903	0
7219	9	0	0	0	0	0	0	200	300	0	-4.36539	-3.63892	-19.5879	-3200.15	-1709.52	717.545	112.726	1066.37	0	0	0	0	0	0	0	603	903	0
7220	0	0	0	0	0	0	0	200	300	0	-3.60245	-3.18116	-19.5879	-2559.28	-1282.27	671.769	134.538	1033.66	0	0	0	0	0	0	0	603	903	0
7220	1	0	0	0	0	0	0	200	300	0	0	0	0	0	0	0	200	903	0	0	0	0	0	0	0	603	903	0
7220	2	0	0	0	0	0	0	200	300	0	0	0	0	0	0	0	200	903	0	0	0	0	0	0	0	603	903	0
7220	3	0	0	0	0	0	0	200	300	0	0	0	0	0	0	0	200	903	0	0	0	0	0	0	0	603	903	0
7220	4	0	0	0	0	0	0	200	300	0	0	0	0	0	0	0	200	903	0	0	0	0	0	0	0	603	903	0
7220	5	0	0	0	0	0	0	200	300	0	0	0	0	0	0	0	200	903	0	0	0	0	0	0	0	603	903	0
7220	6	0	0	0	0	0	0	200	300	0	0	0	0	0	0	0	200	903	0	0	0	0	0	0	0	603	903	0
7220	7	0	0	0	0	0	0	200	300	0	0	0	0	0	0	0	200	903	0	0	0	0	0	0	0	603	903	0
7220	8	0	0	0	0	0	0	200	300	0	0	0	0	0	0	0	200	903	0	0	0	0	0	0	0	603	903	0
7220	9	0	0	0	0	0	0	200	300	0	0	0	0	0	0	0	200	903	0	0	0	0	0	0	0	603	903	0
7221	0	0	0	0	0	0	0	200	300	0	0	0	0	0	0	0	200	903	0	0	0	0	0	0	0	603	903	0
7221	1	0	0	0	0	0	0	200	300	0	0	0	0	0	0	0	200	903	0	0	0	0	0	0	0	603	903	0
7221	2	0	0	0	0	0	0	200	300	0	0	0	0	0	0	0	200	903	0	0	0	0	0	0	0	603	903	0
7221	3	0	0	0	0	0	0	200	300	0	0	0	0	0	0	0	200	903	0	0	0	0	0	0	0	603	903	0
7221	4	0	0	0	0	0	0	200	300	0	0	0	0	0	0	0	200	903	0	0	0	0	0	0	0	603	903	0
7221	5	0	0	0	0	0	0	200	300	0	0	0	0	0	0	0	200	903	0	0	0	0	0	0	0	603	903	0
7221	6	0	0	0	0	0	0	200	300	0	0	0	0	0	0	0	200	903	0	0	0	0	0	0	0	603	903	0
7221	7	0	0	0	0	0	0	200	300	0	0	0	0	0	0	0	200	903	0	0	0	0	0	0	0	603	903	0
7221	8	0	0	0	0	0	0	200	300	0	0	0	0	0	0	0	200	903	0	0	0	0	0	0	0	603	903	0
7221	9	0	0	0	0	0	0	200	300	0	0	0	0	0	0	0	200	903	0	0	0	0	0	0	0	603	903	0
7222	0	0	0	0	0	0	0	200	300	0	0	0	0	0	0	0	200	903	0	0	0	0	0	0	0	603	903	0
7222	1	0	0	0	0	0	0	200	300	0	0	0	0	0	0	0	200	903	0	0	0	0	0	0	0	603	903	0
7222	2	0	0	0	0	0	0	200	300	0	0	0	0	0	0	0	200	903	0	0	0	0	0	0	0	603	903	0
7222	3	0	0	0	0	0	0	200	300	0	0	0	0	0	0	0	200	903	0	0	0	0	0	0	0	603	903	0
7222	4	0	0	0	0	0	0	200	300	0	0	0	0	0	0	0	200	903	0	0	0	0	0	0	0	603	903	0
7222	5	0	0	0	0	0	0	200	300	0	0	0	0	0	0	0	200	903	0	0	0	0	0	0	0	603	903	0
7222	6	0	0	0	0	0	0	200	300	0	0	0	0	0	0	0	200	903	0	0	0	0	0	0	0	603	903	0
7222	7	0	0	0	0	0	0	200	300	0	0	0	0	0	0	0	200	903	0	0	0	0	0	0	0	603	903	0
7222	8	0	0	0	0	0	0	200	300	0	0	0	0	0	0	0	200	903	0	0	0	0	0	0	0	603	903	0
7222	9	0	0	0	0	0	0	200	300	0	0	0	0	0	0	0	200	903	0	0	0	0	0	0	0	603	903	0
7223	0	0	0	0	0	0	0	200	300	0	0	0	0	0	0	0	200	903	0	0	0	0	0	0	0	603	903	0
7223	1	0	0	0	0	0	0	200	300	0	0	0	0	0	0	0	200	903	0	0	0	0	0	0	0	603	903	0
7223	2	0	0	0	0	0	0	200	300	0	0	0	0	0	0	0	200	903	0	0	0	0	0	0	0	603	903	0
7223	3	0	0	0	0	0	0	200	300	0	0	0	0	0	0	0	200	903	0	0	0	0	0	0	0	603	903	0
7223	4	0	0	0	0	0	0	200	300	0	0	0	0	0	0	0	200	903	0	0	0	0	0	0	0	603	903	0
7223	5	0	0	0	0	0	0	200	300	0	0	0	0	0	0	0	200	903	0	0	0	0	0	0	0	603	903	0
7223	6	0	0	0	0	0	0	200	300	0	0	0	0	0	0	0	200	903	0	0	0	0	0	0	0	603	903	0
7223	7	0	0	0	0	0	0	200	300	0	0	0	0	0	0	0	200	903	0	0	0	0	0	0	0	603	903	0
7223	8	0	0	0	0	0	0	200	300	0	0	0	0	0	0	0	200	903	0	0	0	0	0	0	0	603	903	0
7223	9	0	0	0	0	0	0	200	300	0	0	0	0	0	0	0	200	903	0	0	0	0	0	0	0	603	903	0
7224	0	0	0	0	0	0	0	200	300	0	0	0	0	0	0	0	200	903	0	0	0	0	0	0	0	603	903	0
7224	1	0	0	0	0	0	0	200	300	0	0	0	0	0	0	0	200	903	0	0	0	0	0	0	0	603	903	0
7224	2	0	0	0	0	0	0	200	300	0	0	0	0	0	0	0	200	903	0	0	0	0	0	0	0	603	903	0
7224	3	0	0	0	0	0	0	200	300	0	0	0	0	0	0	0	200	903	0	0	0	0	0	0	0	603	903	0
7224	4	0	0	0	0	0	0	200	300	0	0	0	0	0	0	0	200	903	0	0	0	0	0	0	0	603	903	0
7224	5	0	0	0	0	0	0	200	300	0	0	0	0	0	0	0	200	903	0	0	0	0	0	0	0	603	903	0
7224	6	0	0	0	0	0	0	200	300	0	0	0	0	0	0	0	200	903	0	0	0	0	0	0	0	603	903	0
7224	7	0	0	0	0	0	0	200	300	0	0	0	0	0	0	0	200	903	0	0	0	0	0	0	0	603	903	0
7224	8	0	0	0	0	0	0	200	300	0	0	0	0	0	0	0	200	903	0	0	0	0	0	0	0	603	903	0
7224	9	0	0	0	0	0	0	200	300	0	0	0	0	0	0	0	200	903	0	0	0	0	0	0	0	603	903	0
7225	0	0	0	0	0	0	0	200	300	0	0	0	0	0	0	0	200	903	0	0	0	0	0	0	0	603	903	0
7225	1	0	0	0	0	0	0	200	300	0	0	0	0	0	0	0	200	903	0	0	0	0	0	0	0	603	903	0
7225	2	0	0	0	0	0	0	200	300	0	0	0	0	0	0	0	200	903	0	0	0	0	0	0	0	603	903	0
7225	3	0	0	0	0	0	0	200	300	0	0	0	0	0	0	0	200	903	0	0	0	0	0	0	0	603	903	0
7225	4	0	0	0	0	0	0	200	300	0	0	0	0	0	0	0	200	903	0	0	0	0	0	0	0	603	903	0
7225	5	0	0	0	0	0	0	200	300	0	0	0	0	0	0	0	200	903	0	0	0	0	0	0	0	603	903	0
7225	6	0	0	0	0	0	0	200	300	0	0	0	0	0	0	0	200	903	0	0	0	0	0	0	0	603	903	0
7225	7	0	0	0	0	0	0	200	300	0	0	0	0	0	0	0	200	903	0	0	0	0	0	0	0	603	903	0
7225	8	0	0	0	0	0	0	200	300	0	0	0	0	0	0	0	200	903	0	0	0	0	0	0	0	603	903	0
7225	9	0	0	0	0	0	0	200	300	0	0	0	0	0	0	0	200	903	0	0	0	0	0	0	0	603	903	0
7226	0	0	0	0	0	0	0	200	300	0	0	0	0	0	0	0	200	903	0	0	0	0	0	0	0	603	903	0
7226	1	0	0	0	0	0	0	200	300	0	0	0	0	0	0	0	200	903	0	0	0	0	0	0	0	603	903	0
7226	2	0	0	0	0	0	0	200	300	0	0	0	0	0	0	0	200	903	0	0	0	0	0	0	0	603	903	0
7226	3	0	0	0	0	0	0	200	300	0	0	0	0	0	0	0	200	903	0	0	0	0	0	0	0	603	903	0
7226	4	0	0	0	0	0	0	200	300	0	0	0	0	0	0	0	200	903	0	0	0	0	0	0	0	603	903	0
7226	5	0	0	0	0	0	0	200	300	0	0	0	0	0	0	0	200	903	0	0	0	0	0	0	0	603	903	0
7226	6	0	0	0	0	0	0	200	300	0	0	0	0	0	0	0	200	903	0	0	0	0	0	0	0	603	903	0
7226	7	0	0	0	0	0	0	200	300	0	0	0	0	0	0	0	200	903	0	0	0	0	0	0	0	603	903	0
7226	8	0	0	0	0	0	0	200	300	0	0	0	0	0	0	0	200	903	0	0	0	0	0	0	0	603	903	0
7226	9	0	0	0	0	0	0	200	300	0	0	0	0	0	0	0	200	903	0	0	0	0	0	0	0	603	903	0
7227	0	0	0	0	0	0	0	200	300	0	0	0	0	0	0	0	200	903	0	0	0	0	0	0	0	603	903	0
7227	1	0	0	0	0	0	0	200	300	0	0	0	0	0	0	0	200	903	0	0	0	0	0	0	0	603	903	0
7227	2	0	0	0	0	0	0	200	300	0	0	0	0	0	0	0	200	903	0	0	0	0	0	0	0	603	903	0
7227	3	0	0	0	0	0	0	200	300	0	0	0	0	0	0	0	200	903	0	0	0	0	0	0	0	603	903	0
7227	4	0	0	0	0	0	0	200	300	0	0	0	0	0	0	0	200	903	0	0	0	0	0	0	0	603	903	0
7227	5	0	0	0	0	0	0	200	300	0	0	0	0	0	0	0	200	903	0	0	0	0	0	0	0	603	903	0
7227	6	0	0	0	0	0	0	200	300	0	0	0	0	0	0	0	200	903	0	0	0	0	0	0	0	603	903	0
7227	7	0	0	0	0	0	0	200	300	0	0	0	0	0	0	0	200	903	0	0	0	0	0	0	0	603	903	0
7227	8	0	0	0	0	0	0	200	300	0	0	0	0	0	0	0	200	903	0	0	0	0	0	0	0	603	903	0
7227	9	0	0	0	0	0	0	200	300	0	0	0	0	0	0	0	200	903	0	0	0	0	0	0	0	603	903	0
7228	0	0	0	0	0	0	0	200	300	0	0	0	0	0	0	0	200	903	0	0	0	0	0	0	0	603	903	0
7228	1	0	0	0	0	0	0	200	300	0	0	0	0	0	0	0	200	903	0	0	0	0	0	0	0	603	903	0
7228	2	0	0	0	0	0	0	200	300	0	0	0	0	0	0	0	200	903	0	0	0	0	0	0	0	603	903	0
7228	3	0	0	0	0	0	0	200	300	0	0	0	0	0	0	0	200	903	0	0	0	0	0	0	0	603	903	0
7228	4	0	0	0	0	0	0	200	300	0	0	0	0	0	0	0	200	903	0	0	0	0	0	0	0	603	903	0
7228	5	0	0	0	0	0	0	200	300	0	0	0	0	0	0	0	200	903	0	0	0	0	0	0	0	603	903	0
7228	6	0	0	0	0	0	0	200	300	0	0	0	0	0	0	0	200	903	0	0	0	0	0	0	0	603	903	0
7228	7	0	0	0	0	0	0	200	300	0	0	0	0	0	0	0	200	903	0	0	0	0	0	0	0	603	903	0
7228	8	0	0	0	0	0	0	200	300	0	0	0	0	0	0	0	200	903	0	0	0	0	0	0	0	603	903	0
7228	9	0	0	0	0	0	0	200	300	0	0	0	0	0	0	0	200	903	0	0	0	0	0	0	0	603	903	0
7229	0	0	0	0	0	0	0	200	300	0	0	0	0	0	0	0	200	903	0	0	0	0	0	0	0	603	903	0
7229	1	0	0	0	0	0	0	200	300	0	0	0	0	0	0	0	200	903	0	0	0	0	0	0	0	603	903	0
7229	2	0	0	0	0	0	0	200	300	0	0	0	0	0	0	0	200	903	0	0	0	0	0	0	0	603	903	0
7229	3	0	0	0	0	0	0	200	300	0	0	0	0	0	0	0	200	903	0	0	0	0	0	0	0	603	903	0
7229	4	0	0	0	0	0	0	200	300	0	0	0	0	0	0	0	200	903	0	0	0	0	0	0	0	603	903	0
7229	5	0	0	0	0	0	0	200	300	0	0	0	0	0	0	0	200	903	0	0	0	0	0	0	0	603	903	0
7229	6	0	0	0	0	0	0	200	300	0	0	0	0	0	0	0	200	903	0	0	0	0	0	0	0	603	903	0
7229	7	0	0	0	0	0	0	200	300	0	0	0	0	0	0	0	200	903	0	0	0	0	0	0	0	603	903	0
7229	8	0	0	0	0	0	0	200	300	0	0	0	0	0	0	0	200	903	0	0	0	0	0	0	0	603	903	0
7229	9	0	0	0	0	0	0	200	300	0	0	0	0	0	0	0	200	903	0	0	0	0	0	0	0	603	903	0
7230	0	0	0	0	0	0	0	200	300	0	0	0	0	0	0	0	200	903	0	0	0	0	0	0	0	603	903	0
7230	1	0	0	0	0	0	0	200	300	0	0	0	0	0	0	0	200	903	0	0	0	0	0	0	0	603	903	0
7230	2	0	0	0	0	0	0	200	300	0	0	0	0	0	0	0	200	903	0	0	0	0	0	0	0	603	903	0
7230	3	0	0	0	0	0	0	200	300	0	0	0	0	0	0	0	200	903	0	0	0	0	0	0	0	603	903	0
7230	4	0	0	0	0	0	0	200	300	0	0	0	0	0	0	0	200	903	0	0	0	0	0	0	0	603	903	0
7230	5	0	0	0	0	0	0	200	300	0	0	0	0	0	0	0	200	903	0	0	0	0	0	0	0	603	903	0
7230	6	0	0	0	0	0	0	200	300	0	0	0	0	0	0	0	200	903	0	0	0	0	0	0	0	603	903	0
7230	7	0	0	0	0	0	0	200	300	0	0	0	0	0	0	0	200	903	0	0	0	0	0	0	0	603	903	0
7230	8	0	0	0	0	0	0	200	300	0	0	0	0	0	0	0	200	903	0	0	0	0	0	0	0	603	903	0
7230	9	0	0	0	0	0	0	200	300	0	0	0	0	0	0	0	200	903	0	0	0	0	0	0	0	603	903	0
7231	0	0	0	0	0	0	0	200	300	0	0	0	0	0	0	0	200	903	0	0	0	0	0	0	0	603	903	0
7231	1	0	0	0	0	0	0	200	300	0	0	0	0	0	0	0	200	903	0	0	0	0	0	0	0	603	903	0
7231	2	0	0	0	0	0	0	200	300	0	0	0	0	0	0	0	200	903	0	0	0	0	0	0	0	603	903	0
7231	3	0	0	0	0	0	0	200	300	0	0	0	0	0	0	0	200	903	0	0	0	0	0	0	0	603	903	0
7231	4	0	0	0	0	0	0	200	300	0	0	0	0	0	0	0	200	903	0	0	0	0	0	0	0	603	903	0
7231	5	0	0	0	0	0	0	200	300	0	0	0	0	0	0	0	200	903	0	0	0	0	0	0	0	603	903	0
7231	6	0	0	0	0	0	0	200	300	0	0	0	0	0	0	0	200	903	0	0	0	0	0	0	0	603	903	0
7231	7	0	0	0	0	0	0	200	300	0	0	0	0	0	0	0	200	903	0	0	0	0	0	0	0	603	903	0
7231	8	0	0	0	0	0	0	200	300	0	0	0	0	0	0	0	200	903	0	0	0	0	0	0	0	603	903	0
7231	9	0	0	0	0	0	0	200	300	0	0	0	0	0	0	0	200	903	0	0	0	0	0	0	0	603	903	0
7232	0	0	0	0	0	0	0	200	300	0	0	0	0	0	0	0	200	903	0	0	0	0	0	0	0	603	903	0
7232	1	0	0	0	0	0	0	200	300	0	0	0	0	0	0	0	200	903	0	0	0	0	0	0	0	603	903	0
7232	2	0	0	0	0	0	0	200	300	0	0	0	0	0	0	0	200	903	0	0	0	0	0	0	0	603	903	0
7232	3	0	0	0	0	0	0	200	300	0	0	0	0	0	0	0	200	903	0	0	0	0	0	0	0	603	903	0
7232	4	0	0	0	0	0	0	200	300	0	0	0	0	0	0	0	200	903	0	0	0	0	0	0	0	603	903	0
7232	5	0	0	0	0	0	0	200	300	0	0	0	0	0	0	0	200	903	0	0	0	0	0	0	0	603	903	0
7232	6	0	0	0	0	0	0	200	300	0	0	0	0	0	0	0	200	903	0	0	0	0	0	0	0	603	903	0
7232	7	0	0	0	0	0	0	200	300	0	0	0	0	0	0	0	200	903	0	0	0	0	0	0	0	603	903	0
7232	8	0	0	0	0	0	0	200	300	0	0	0	0	0	0	0	200	903	0	0	0	0	0	0	0	603	903	0
7232	9	0	0	0	0	0	0	200	300	0	0	0	0	0	0	0	200	903	0	0	0	0	0	0	0	603	903	0
7233	0	0	0	0	0	0	0	200	300	0	0	0	0	0	0	0	200	903	0	0	0	0	0	0	0	603	903	0
7233	1	0	0	0	0	0	0	200	300	0	0	0	0	0	0	0	200	903	0	0	0	0	0	0	0	603	903	0
7233	2	0	0	0	0	0	0	200	300	0	0	0	0	0	0	0	200	903	0	0	0	0	0	0	0	603	903	0
7233	3	0	0	0	0	0	0	200	300	0	0	0	0	0	0	0	200	903	0	0	0	0	0	0	0	603	903	0
7233	4	0	0	0	0	0	0	200	300	0	0	0	0	0	0	0	200	903	0	0	0	0	0	0	0	603	903	0
7233	5	0	0	0	0	0	0	200	300	0	0	0	0	0	0	0	200	903	0	0	0	0	0	0	0	603	903	0
7233	6	0	0	0	0	0	0	200	300	0	0	0	0	0	0	0	200	903	0	0	0	0	0	0	0	603	903	0
7233	7	0	0	0	0	0	0	200	300	0	0	0	0	0	0	0	200	903	0	0	0	0	0	0	0	603	903	0
7233	8	0	0	0	0	0	0	200	300	0	0	0	0	0	0	0	200	903	0	0	0	0	0	0	0	603	903	0
7233	9	0	0	0	0	0	0	200	300	0	0	0	0	0	0	0	200	903	0	0	0	0	0	0	0	603	903	0
7234	0	0	0	0	0	0	0	200	300	0	0	0	0	0	0	0	200	903	0	0	0	0	0	0	0	603	903	0
7234	1	0	0	0	0	0	0	200	300	0	0	0	0	0	0	0	200	903	0	0	0	0	0	0	0	603	903	0
7234	2	0	0	0	0	0	0	200	300	0	0	0	0	0	0	0	200	903	0	0	0	0	0	0	0	603	903	0
7234	3	0	0	0	0	0	0	200	300	0	0	0	0	0	0	0	200	903	0	0	0	0	0	0	0	603	903	0
7234	4	0	0	0	0	0	0	200	300	0	0	0	0	0	0	0	200	903	0	0	0	0	0	0	0	603	903	0
7234	5	0	0	0	0	0	0	200	300	0	0	0	0	0	0	0	200	903	0	0	0	0	0	0	0	603	903	0
7234	6	0	0	0	0	0	0	200	300	0	0	0	0	0	0	0	200	903	0	0	0	0	0	0	0	603	903	0
7234	7	0	0	0	0	0	0	200	300	0	0	0	0	0	0	0	200	903	0	0	0	0	0	0	0	603	903	0
7234	8	0	0	0	0	0	0	200	300	0	0	0	0	0	0	0	200	903	0	0	0	0	0	0	0	603	903	0
7234	9	0	0	0	0	0	0	200	300	0	0	0	0	0	0	0	200	903	0	0	0	0	0	0	0	603	903	0
7235	0	0	0	0	0	0	0	200	300	0	0	0	0	0	0	0	200	903	0	0	0	0	0	0	0	603	903	0
7235	1	0	0	0	0	0	0	200	300	0	0	0	0	0	0	0	200	903	0	0	0	0	0	0	0	603	903	0
7235	2	0	0	0	0	0	0	200	300	0	0	0	0	0	0	0	200	903	0	0	0	0	0	0	0	603	903	0
7235	3	0	0	0	0	0	0	200	300	0	0	0	0	0	0	0	200	903	0	0	0	0	0	0	0	603	903	0
7235	4	0	0	0	0	0	0	200	300	0	0	0	0	0	0	0	200	903	0	0	0	0	0	0	0	603	903	0
7235	5	0	0	0	0	0	0	200	300	0	0	0	0	0	0	0	200	903	0	0	0	0	0	0	0	603	903	0
7235	6	0	0	0	0	0	0	200	300	0	0	0	0	0	0	0	200	903	0	0	0	0	0	0	0	603	903	0
7235	7	0	0	0	0	0	0	200	300	0	0	0	0	0	0	0	200	903	0	0	0	0	0	0	0	603	903	0
7235	8	0	0	0	0	0	0	200	300	0	0	0	0	0	0	0	200	903	0	0	0	0	0	0	0	603	903	0
7235	9	0	0	0	0	0	0	200	300	0	0	0	0	0	0	0	200	903	0	0	0	0	0	0	0	603	903	0
7236	0	0	0	0	0	0	0	200	300	0	0	0	0	0	0	0	200	903	0	0	0	0	0	0	0	603	903	0
7236	1	0	0	0	0	0	0	200	300	0	0	0	0	0	0	0	200	903	0	0	0	0	0	0	0	603	903	0
7236	2	0	0	0	0	0	0	200	300	0	0	0	0	0	0	0	200	903	0	0	0	0	0	0	0	603	903	0
7236	3	0	0	0	0	0	0	200	300	0	0	0	0	0	0	0	200	903	0	0	0	0	0	0	0	603	903	0
7236	4	0	0	0	0	0	0	200	300	0	0	0	0	0	0	0	200	903	0	0	0	0	0	0	0	603	903	0
7236	5	0	0	0	0	0	0	200	300	0	0	0	0	0	0	0	200	903	0	0	0	0	0	0	0	603	903	0
7236	6	0	0	0	0	0	0	200	300	0	0	0	0	0	0	0	200	903	0	0	0	0	0	0	0	603	903	0
7236	7	0	0	0	0	0	0	200	300	0	0	0	0	0	0	0	200	903	0	0	0	0	0	0	0	603	903	0
7236	8	0	0	0	0	0	0	200	300	0	0	0	0	0	0	0	200	903	0	0	0	0	0	0	0	603	903	0
7236	9	0	0	0	0	0	0	200	300	0	0	0	0	0	0	0	200	903	0	0	0	0	0	0	0	603	903	0
7237	0	0	0	0	0	0	0	200	300	0	0	0	0	0	0	0	200	903	0	0	0	0	0	0	0	603	903	0
7237	1	0	0	0	0	0	0	200	300	0	0	0	0	0	0	0	200	903	0	0	0	0	0	0	0	603	903	0
7237	2	0	0	0	0	0	0	200	300	0	0	0	0	0	0	0	200	903	0	0	0	0	0	0	0	603	903	0
7237	3	0	0	0	0	0	0	200	300	0	0	0	0	0	0	0	200	903	0	0	0	0	0	0	0	603	903	0
7237	4	0	0	0	0	0	0	200	300	0	0	0	0	0	0	0	200	903	0	0	0	0	0	0	0	603	903	0
7237	5	0	0	0	0	0	0	200	300	0	0	0	0	0	0	0	200	903	0	0	0	0	0	0	0	603	903	0
7237	6	0	0	0	0	0	0	200	300	0	0	0	0	0	0	0	200	903	0	0	0	0	0	0	0	603	903	0
7237	7	0	0	0	0	0	0	200	300	0	0	0	0	0	0	0	200	903	0	0	0	0	0	0	0	603	903	0
7237	8	0	0	0	0	0	0	200	300	0	0	0	0	0	0	0	200	903	0	0	0	0	0	0	0	603	903	0
7237	9	0	0	0	0	0	0	200	300	0	0	0	0	0	0	0	200	903	0	0	0	0	0	0	0	603	903	0
7238	0	0	0	0	0	0	0	200	300	0	0	0	0	0	0	0	200	903	0	0	0	0	0	0	0	603	903	0
7238	1	0	0	0	0	0	0	200	300	0	0	0	0	0	0	0	200	903	0	0	0	0	0	0	0	603	903	0
7238	2	0	0	0	0	0	0	200	300	0	0	0	0	0	0	0	200	903	0	0	0	0	0	0	0	603	903	0
7238	3	0	0	0	0	0	0	200	300	0	0	0	0	0	0	0	200	903	0	0	0	0	0	0	0	603	903	0
7238	4	0	0	0	0	0	0	200	300	0	0	0	0	0	0	0	200	903	0	0	0	0	0	0	0	603	903	0
7238	5	0	0	0	0	0	0	200	300	0	0	0	0	0	0	0	200	903	0	0	0	0	0	0	0	603	903	0
7238	6	0	0	0	0	0	0	200	300	0	0	0	0	0	0	0	200	903	0	0	0	0	0	0	0	603	903	0
7238	7	0	0	0	0	0	0	200	300	0	0	0	0	0	0	0	200	903	0	0	0	0	0	0	0	603	903	0
7238	8	0	0	0	0	0	0	200	300	0	0	0	0	0	0	0	200	903	0	0	0	0	0	0	0	603	903	0
7238	9	0	0	0	0	0	0	200	300	0	0	0	0	0	0	0	200	903	0	0	0	0	0	0	0	603	903	0
7239	0	0	0	0	0	0	0	200	300	0	0	0	0	0	0	0	200	903	0	0	0	0	0	0	0	603	903	0
7239	1	0	0	0	0	0	0	200	300	0	0	0	0	0	0	0	200	903	0	0	0	0	0	0	0	603	903	0
7239	2	0	0	0	0	0	0	200	300	0	0	0	0	0	0	0	200	903	0	0	0	0	0	0	0	603	903	0
7239	3	0	0	0	0	0	0	200	300	0	0	0	0	0	0	0	200	903	0	0	0	0	0	0	0	603	903	0
7239	4	0	0	0	0	0	0	200	300	0	0	0	0	0	0	0	200	903	0	0	0	0	0	0	0	603	903	0
7239	5	0	0	0	0	0	0	200	300	0	0	0	0	0	0	0	200	903	0	0	0	0	0	0	0	603	903	0
7239	6	0	0	0	0	0	0	200	300	0	0	0	0	0	0	0	200	903	0	0	0	0	0	0	0	603	903	0
7239	7	0	0	0	0	0	0	200	300	0	0	0	0	0	0	0	200	903	0	0	0	0	0	0	0	603	903	0
7239	8	0	0	0	0	0	0	200	300	0	0	0	0	0	0	0	200	903	0	0	0	0	0	0	0	603	903	0
7239	9	0	0	0	0	0	0	200	300	0	0	0	0	0	0	0	200	903	0	0	0	0	0	0	0	603	903	0
7240	0	0	0	0	0	0	0	200	300	0	0	0	0	0	0	0	200	903	0	0	0	0	0	0	0	603	903	0
7240	1	0	0	0	0	0	0	200	300	0	0	0	0	0	0	0	200	903	0	0	0	0	0	0	0	603	903	0
7240	2	0	0	0	0	0	0	200	300	0	0	0	0	0	0	0	200	903	0	0	0	0	0	0	0	603	903	0
7240	3	0	0	0	0	0	0	200	300	0	0	0	0	0	0	0	200	903	0	0	0	0	0	0	0	603	903	0
7240	4	0	0	0	0	0	0	200	300	0	0	0	0	0	0	0	200	903	0	0	0	0	0	0	0	603	903	0
7240	5	0	0	0	0	0	0	200	300	0	0	0	0	0	0	0	200	903	0	0	0	0	0	0	0	603	903	0
7240	6	0	0	0	0	0	0	200	300	0	0	0	0	0	0	0	200	903	0	0	0	0	0	0	0	603	903	0
7240	7	0	0	0	0	0	0	200	300	0	0	0	0	0	0	0	200	903	0	0	0	0	0	0	0	603	903	0
7240	8	0	0	0	0	0	0	200	300	0	0	0	0	0	0	0	200	903	0	0	0	0	0	0	0	603	903	0
7240	9	0	0	0	0	0	0	200	300	0	0	0	0	0	0	0	200	903	0	0	0	0	0	0	0	603	903	0
7241	0	0	0	0	0	0	0	200	300	0	0	0	0	0	0	0	200	903	0	0	0	0	0	0	0	603	903	0
7241	1	0	0	0	0	0	0	200	300	0	0	0	0	0	0	0	200	903	0	0	0	0	0	0	0	603	903	0
7241	2	0	0	0	0	0	0	200	300	0	0	0	0	0	0	0	200	903	0	0	0	0	0	0	0	603	903	0
7241	3	0	0	0	0	0	0	200	300	0	0	0	0	0	0	0	200	903	0	0	0	0	0	0	0	603	903	0
7241	4	0	0	0	0	0	0	200	300	0	0	0	0	0	0	0	200	903	0	0	0	0	0	0	0	603	903	0
7241	5	0	0	0	0	0	0	200	300	0	0	0	0	0	0	0	200	903	0	0	0	0	0	0	0	603	903	0
7241	6	0	0	0	0	0	0	200	300	0	0	0	0	0	0	0	200	903	0	0	0	0	0	0	0	603	903	0
7241	7	0	0	0	0	0	0	200	300	0	0	0	0	0	0	0	200	903	0	0	0	0	0	0	0	603	903	0
7241	8	0	0	0	0	0	0	200	300	0	0	0	0	0	0	0	200	903	0	0	0	0	0	0	0	603	903	0
7241	9	0	0	0	0	0	0	200	300	0	0	0	0	0	0	0	200	903	0	0	0	0	0	0	0	603	903	0
7242	0	0	0	0	0	0	0	200	300	0	0	0	0	0	0	0	200	903	0	0	0	0	0	0	0	603	903	0
7242	1	0	0	0	0	0	0	200	300	0	0	0	0	0	0	0	200	903	0	0	0	0	0	0	0	603	903	0
7242	2	0	0	0	0	0	0	200	300	0	0	0	0	0	0	0	200	903	0	0	0	0	0	0	0	603	903	0
7242	3	0	0	0	0	0	0	200	300	0	0	0	0	0	0	0	200	903	0	0	0	0	0	0	0	603	903	0
7242	4	0	0	0	0	0	0	200	300	0	0	0	0	0	0	0	200	903	0	0	0	0	0	0	0	603	903	0
7242	5	0	0	0	0	0	0	200	300	0	0	0	0	0	0	0	200	903	0	0	0	0	0	0	0	603	903	0
7242	6	0	0	0	0	0	0	200	300	0	0	0	0	0	0	0	200	903	0	0	0	0	0	0	0	603	903	0
7242	7	0	0	0	0	0	0	200	300	0	0	0	0	0	0	0	200	903	0	0	0	0	0	0	0	603	903	0
7242	8	0	0	0	0	0	0	200	300	0	0	0	0	0	0	0	200	903	0	0	0	0	0	0	0	603	903	0
7242	9	0	0	0	0	0	0	200	300	0	0	0	0	0	0	0	200	903	0	0	0	0	0	0	0	603	903	0
7243	0	0	0	0	0	0	0	200	300	0	0	0	0	0	0	0	200	903	0	0	0	0	0	0	0	603	903	0
7243	1	0	0	0	0	0	0	200	300	0	0	0	0	0	0	0	200	903	0	0	0	0	0	0	0	603	903	0
7243	2	0	0	0	0	0	0	200	300	0	0	0	0	0	0	0	200	903	0	0	0	0	0	0	0	603	903	0
7243	3	0	0	0	0	0	0	200	300	0	0	0	0	0	0	0	200	903	0	0	0	0	0	0	0	603	903	0
7243	4	0	0	0	0	0	0	200	300	0	0	0	0	0	0	0	200	903	0	0	0	0	0	0	0	603	903	0
7243	5	0	0	0	0	0	0	200	300	0	0	0	0	0	0	0	200	903	0	0	0	0	0	0	0	603	903	0
7243	6	0	0	0	0	0	0	200	300	0	0	0	0	0	0	0	200	903	0	0	0	0	0	0	0	603	903	0
7243	7	0	0	0	0	0	0	200	300	0	0	0	0	0	0	0	200	903	0	0	0	0	0	0	0	603	903	0
7243	8	0	0	0	0	0	0	200	300	0	0	0	0	0	0	0	200	903	0	0	0	0	0	0	0	603	903	0
7243	9	0	0	0	0	0	0	200	300	0	0	0	0	0	0	0	200	903	0	0	0	0	0	0	0	603	903	0
7244	0	0	0	0	0	0	0	200	300	0	0	0	0	0	0	0	200	903	0	0	0	0	0	0	0	603	903	0
7244	1	0	0	0	0	0	0	200	300	0	0	0	0	0	0	0	200	903	0	0	0	0	0	0	0	603	903	0
7244	2	0	0	0	0	0	0	200	300	0	0	0	0	0	0	0	200	903	0	0	0	0	0	0	0	603	903	0
7244	3	0	0	0	0	0	0	200	300	0	0	0	0	0	0	0	200	903	0	0	0	0	0	0	0	603	903	0
7244	4	0	0	0	0	0	0	200	300	0	0	0	0	0	0	0	200	903	0	0	0	0	0	0	0	603	903	0
7244	5	0	0	0	0	0	0	200	300	0	0	0	0	0	0	0	200	903	0	0	0	0	0	0	0	603	903	0
7244	6	0	0	0	0	0	0	200	300	0	0	0	0	0	0	0	200	903	0	0	0	0	0	0	0	603	903	0
7244	7	0	0	0	0	0	0	200	300	0	0	0	0	0	0	0	200	903	0	0	0	0	0	0	0	603	903	0
7244	8	0	0	0	0	0	0	200	300	0	0	0	0	0	0	0	200	903	0	0	0	0	0	0	0	603	903	0
7244	9	0	0	0	0	0	0	200	300	0	0	0	0	0	0	0	200	903	0	0	0	0	0	0	0	603	903	0
7245	0	0	0	0	0	0	0	200	300	0	0	0	0	0	0	0	200	903	0	0	0	0	0	0	0	603	903	0
7245	1	0	0	0	0	0	0	200	300	0	0	0	0	0	0	0	200	903	0	0	0	0	0	0	0	603	903	0
7245	2	0	0	0	0	0	0	200	300	0	0	0	0	0	0	0	200	903	0	0	0	0	0	0	0	603	903	0
7245	3	0	0	0	0	0	0	200	300	0	0	0	0	0	0	0	200	903	0	0	0	0	0	0	0	603	903	0
7245	4	0	0	0	0	0	0	200	300	0	0	0	0	0	0	0	200	903	0	0	0	0	0	0	0	603	903	0
7245	5	0	0	0	0	0	0	200	300	0	0	0	0	0	0	0	200	903	0	0	0	0	0	0	0	603	903	0
7245	6	0	0	0	0	0	0	200	300	0	0	0	0	0	0	0	200	903	0	0	0	0	0	0	0	603	903	0
7245	7	0	0	0	0	0	0	200	300	0	0	0	0	0	0	0	200	903	0	0	0	0	0	0	0	603	903	0
7245	8	0	0	0	0	0	0	200	300	0	0	0	0	0	0	0	200	903	0	0	0	0	0	0	0	603	903	0
7245	9	0	0	0	0	0	0	200	300	0	0	0	0	0	0	0	200	903	0	0	0	0	0	0	0	603	903	0
7246	0	0	0	0	0	0	0	200	300	0	0	0	0	0	0	0	200	903	0	0	0	0	0	0	0	603	903	0
7246	1	0	0	0	0	0	0	200	300	0	0	0	0	0	0	0	200	903	0	0	0	0	0	0	0	603	903	0
7246	2	0	0	0	0	0	0	200	300	0	0	0	0	0	0	0	200	903	0	0	0	0	0	0	0	603	903	0
7246	3	0	0	0	0	0	0	200	300	0	0	0	0	0	0	0	200	903	0	0	0	0	0	0	0	603	903	0
7246	4	0	0	0	0	0	0	200	300	0	0	0	0	0	0	0	200	903	0	0	0	0	0	0	0	603	903	0
7246	5	0	0	0	0	0	0	200	300	0	0	0	0	0	0	0	200	903	0	0	0	0	0	0	0	603	903	0
[truncated: 1,194 more rows]
