# Supplementary material for: The Effects of an Extemporaneous Speech Dual-task on Older Adult Gait Control
Source: Research Square preprint supplement (doi:10.21203/rs.3.rs-7674245/v1), 2025-11-18
Supplement: Supplementary file 95 [file DT8Walk7.xlsx]

## Sheet: Sheet1
Trajectories
		08:LFHD			08:RFHD			08:LBHD			08:RBHD			08:C7			08:T10			08:CLAV			08:STRN			08:RBAK			08:LSHO			08:LUPA			08:LELB			08:LFRM			08:LWRA			08:LWRB			08:LFIN
Frame	Sub Frame	X	Y	Z	X	Y	Z	X	Y	Z	X	Y	Z	X	Y	Z	X	Y	Z	X	Y	Z	X	Y	Z	X	Y	Z	X	Y	Z	X	Y	Z	X	Y	Z	X	Y	Z	X	Y	Z	X	Y	Z	X	Y	Z
		mm	mm	mm	mm	mm	mm	mm	mm	mm	mm	mm	mm	mm	mm	mm	mm	mm	mm	mm	mm	mm	mm	mm	mm	mm	mm	mm	mm	mm	mm	mm	mm	mm	mm	mm	mm	mm	mm	mm	mm	mm	mm	mm	mm	mm	mm	mm	mm
8013	0	299.246	2372.45	1672.67	214.35	2393.37	1676.07	333.643	2564.79	1676.46	220.518	2567.01	1680.81	260.897	2601.88	1533.19	260.491	2681.1	1270.11	262.181	2454.73	1443.13	239.708	2391.98	1242.77	173.763	2679.91	1330.71	445.745	2513.21	1478.18	512.022	2531.65	1281.03	515.287	2559.53	1129.92	544.291	2485.25	975.434	501.936	2442.53	887.522	549.403	2496.04	874.563	553.068	2441.04	822.625
8014	0	300.661	2363.28	1673.56	215.863	2384.61	1677.12	336.258	2556.25	1677.64	222.486	2558.27	1682.5	262.234	2592.71	1534.47	262.594	2672.24	1271.13	263.44	2446.04	1444.36	240.636	2383.15	1244.26	175.611	2671.09	1331.97	448.134	2504	1478.8	513.698	2519.84	1281.97	517.231	2547.07	1130.51	544.776	2470.68	977.015	501.037	2427.8	888.811	551.433	2481.22	876.637	552.397	2425.39	824.36
8015	0	301.713	2354.22	1674.34	216.863	2375.55	1678.1	339.708	2546.76	1678.4	224.166	2549.37	1683.84	264.11	2584.24	1535.95	264.534	2663.55	1272.47	264.771	2437.22	1445.63	241.882	2374.55	1245.74	177.967	2662.7	1332.92	449.605	2494.75	1479.68	515.344	2507.97	1282.71	519.219	2534.89	1130.99	545.698	2456.89	978.182	500.882	2414.04	890.93	548.929	2465.83	875.468	551.601	2409.61	826.249
8016	0	302.605	2345.29	1675.77	217.952	2366.99	1679.46	339.21	2537.86	1680.39	225.639	2540.71	1685.23	266.207	2575.78	1536.95	266.789	2654.91	1273.61	265.878	2428.45	1447.31	242.582	2365.9	1247.13	180.028	2654.06	1334.04	450.999	2485.43	1481.4	517.182	2496.67	1283.5	520.904	2522.4	1131.85	545.676	2442.4	979.898	498.824	2398.22	891.901	551.889	2450.25	879.413	550.675	2393.38	827.978
8017	0	303.275	2336.51	1677.12	218.702	2358.49	1680.49	341.08	2529.17	1681.91	226.904	2532.18	1686.58	267.742	2567.52	1538.23	268.833	2646.25	1274.74	266.61	2419.74	1448.66	243.034	2357.34	1248.53	182.36	2645.86	1334.9	451.506	2475.91	1482.99	522.289	2495.54	1285.93	522.641	2510.08	1132.61	546.147	2428.26	981.199	499.319	2384.43	894.898	551.177	2434.29	880.055	550.183	2377.51	830.449
8018	0	303.779	2327.74	1678.37	219.218	2349.85	1681.68	341.374	2519.82	1683.13	227.896	2523.6	1687.7	269.128	2558.88	1539.17	270.881	2637.8	1275.69	267.842	2411.34	1450.27	244.004	2348.81	1249.9	184.422	2637.55	1335.91	453	2467.19	1484.15	523.68	2484.37	1286.59	524.086	2497.78	1133.12	545.779	2413.51	982.489	497.54	2368.84	896.409	551.027	2418.68	881.517	549.229	2361.12	832.448
8019	0	304.178	2319.23	1679.75	219.794	2341.69	1682.81	342.704	2511.42	1684.82	228.642	2515.17	1688.99	270.682	2550.79	1540.82	272.633	2629.61	1277.02	269.369	2403.16	1451.58	244.66	2340.36	1251.35	186.619	2629.5	1336.97	454.408	2458.63	1485.46	525.113	2473.45	1287.44	525.682	2485.46	1133.81	546.45	2399.56	984.306	497.477	2353.91	898.888	551.074	2403.12	882.984	548.186	2344.38	834.675
8020	0	304.246	2310.56	1681.34	219.777	2333.05	1683.84	343.03	2503.06	1687.35	229.344	2506.91	1690.38	272.151	2542.55	1542.12	274.57	2621.15	1278.17	270.012	2394.66	1453.29	244.925	2331.6	1253.07	188.724	2621.61	1338.1	455.354	2449.89	1487.16	526.453	2462.87	1288.61	527.056	2473.14	1134.71	546.482	2385.14	986.197	497.857	2339.82	902.476	551.469	2387.3	885.28	548.012	2328.54	837.944
8021	0	304.229	2302.12	1683.13	219.982	2324.9	1685.2	342.806	2493.99	1689.31	229.572	2498.43	1691.8	273.499	2534.46	1543.65	276.47	2612.92	1279.81	270.824	2386.3	1455.16	245.814	2323.23	1254.8	190.62	2613.57	1339.48	456.44	2441.43	1488.89	527.605	2452.34	1289.76	528.352	2460.72	1136.03	546.277	2370.47	988.612	495.862	2323.94	904.701	550.675	2371.39	887.449	546.97	2311.91	840.991
8022	0	304.501	2293.68	1684.78	219.91	2316.49	1686.18	345.175	2485.7	1691.22	229.842	2490.07	1693.36	274.765	2526.27	1545.28	278.095	2604.64	1281.48	272.198	2378.21	1456.96	246.5	2314.6	1256.97	192.284	2605.51	1341.06	457.762	2433.11	1490.63	525.585	2433.05	1290.07	529.123	2448.08	1137.04	546.063	2355.91	991.094	495.916	2309.39	908.251	550.856	2355.86	889.699	546.318	2295.65	844.667
8023	0	304.154	2285.32	1686.23	219.763	2308.34	1687.26	345.762	2477.05	1693.56	229.911	2481.79	1694.8	276.065	2518.22	1546.8	279.556	2596.34	1283.24	273.33	2370.32	1458.4	247.487	2306.25	1258.68	194.276	2597.95	1342.51	460.15	2425.56	1491.66	529.688	2431.82	1292.64	530.257	2435.88	1138.41	546.382	2341.83	994.019	494.826	2293.94	910.927	550.687	2340	892.493	545.512	2279.3	848.228
8024	0	303.427	2276.72	1687.79	219.244	2300.02	1687.98	345.719	2468.73	1695.76	230.119	2473.61	1696.03	277.835	2510.85	1548.47	281.319	2588.35	1284.64	273.934	2362.12	1460.11	248.679	2298.52	1260.13	195.733	2589.91	1343.98	459.989	2416.48	1494.38	527.563	2413.4	1293.48	531.169	2423.75	1140.1	546.508	2327.74	996.708	494.634	2279.18	915.142	550.239	2324.18	895.432	544.906	2263.21	851.981
8025	0	302.972	2268.4	1689.2	218.837	2291.93	1688.92	345.462	2460.21	1697.88	230.14	2465.45	1697.2	279.12	2502.92	1549.61	282.846	2580.04	1285.65	274.798	2354.39	1461.85	248.146	2289.09	1262.56	197.182	2582.05	1345.32	461.845	2408.95	1495.8	531.251	2412.23	1295.91	532.018	2411.88	1141.5	545.94	2313.43	999.402	493.935	2264.35	918.911	549.578	2308.52	898.462	543.849	2246.96	855.877
8026	0	302.656	2259.92	1690.62	218.481	2283.84	1689.78	344.335	2451.63	1700.05	230.104	2457.23	1698.21	279.926	2494.92	1550.99	284.336	2571.86	1286.68	275.832	2346.54	1463.95	250.637	2282.1	1264.33	198.928	2574.5	1346.39	462.846	2400.75	1497.48	529.344	2395.07	1296.2	532.857	2400.01	1143.02	545.937	2299.52	1002.24	493.087	2249.69	923.058	548.919	2292.99	901.491	542.861	2230.85	859.9
8027	0	301.814	2251.53	1691.87	217.766	2275.64	1690.3	344	2443.3	1702.2	230.242	2449.1	1699.51	281.495	2487.67	1552.38	285.924	2564.2	1288.14	277.627	2340.49	1465.07	251.56	2274.38	1266.09	200.514	2566.75	1347.6	463.482	2392.3	1499.57	532.752	2393.41	1299.1	533.667	2388.29	1144.78	545.999	2285.75	1005.58	493.202	2235.44	927.368	548.425	2277.63	904.77	541.988	2214.9	864.232
8028	0	301.047	2243.01	1692.97	217.314	2267.69	1690.83	344.311	2434.54	1704.35	230.061	2440.92	1700.71	282.752	2480.09	1554.02	287.427	2555.89	1289.2	278.031	2332.6	1466.62	251.284	2265.74	1267.51	201.909	2558.87	1348.83	464.283	2384.01	1501.52	530.726	2376.2	1299.74	534.576	2376.73	1146.59	545.616	2271.95	1008.71	491.947	2219.96	931.481	547.708	2262.29	908.345	541.129	2199.02	868.598
8029	0	300.354	2234.72	1693.76	216.68	2259.45	1691.4	345.373	2425.75	1706.16	230.032	2432.7	1701.95	284.282	2472.58	1554.84	288.533	2547.97	1290.46	278.706	2324.81	1468.05	252.337	2257.97	1269.29	203.423	2551.27	1350.02	465.271	2375.87	1503.1	531.467	2367.22	1301.53	535.337	2365.15	1148.25	545.113	2258.05	1011.97	491.314	2205.44	935.952	546.633	2247.24	911.669	539.961	2183.18	873.02
8030	0	299.559	2226.25	1694.39	215.965	2251.33	1691.57	343.654	2416.93	1707.36	229.969	2424.45	1703.17	284.817	2464.43	1556.14	290.088	2540.13	1291.46	279.562	2317.18	1469.17	253.317	2250.37	1270.54	204.889	2543.54	1350.87	466.517	2368.07	1504.43	532.167	2357.7	1303.26	536.185	2353.78	1149.79	544.754	2244.27	1015.18	490.562	2190.84	940.131	546.159	2232.19	914.958	538.91	2167.53	877.676
8031	0	298.893	2217.97	1695.11	215.276	2243.3	1691.64	345.12	2408.49	1709.9	229.95	2416.35	1704.24	286.225	2457.12	1557.12	291.359	2532.08	1292.51	280.227	2309.49	1470.41	253.426	2242.07	1272	206.278	2535.84	1351.88	466.878	2359.5	1506.37	532.783	2348.27	1304.86	536.897	2342.45	1151.51	544.545	2230.98	1018.29	489.723	2177.16	944.239	545.3	2217.18	918.724	537.785	2151.97	882.232
8032	0	298.159	2209.54	1695.56	214.633	2235.2	1691.54	343.54	2400.13	1711.72	229.86	2408.06	1705.22	287.11	2449.55	1558.27	292.578	2523.82	1293.09	281.003	2301.94	1471.64	253.983	2234.08	1273.56	207.676	2528.06	1352.59	467.196	2351.1	1507.72	533.562	2338.97	1306.13	537.622	2331.27	1153	543.948	2217.41	1021.33	488.974	2162.48	948.728	544.194	2202.31	921.76	536.656	2136.66	886.834
8033	0	297.739	2201.28	1695.69	214.806	2227.51	1692	344.774	2391.24	1712.71	229.83	2399.97	1706.31	292.181	2442.92	1557.72	293.821	2516.21	1294.13	281.422	2293.87	1473.05	254.843	2226.35	1275.04	209.079	2520.41	1353.06	467.959	2342.94	1508.82	534.254	2329.59	1307.26	538.407	2320.17	1154.2	543.088	2203.93	1024.4	488.205	2148.3	953.035	543.518	2187.82	925.457	535.221	2121.14	890.915
8034	0	296.999	2192.86	1695.6	213.734	2219.14	1691.41	344.558	2382.74	1714.06	229.806	2391.84	1706.85	288.933	2433.62	1559.54	294.97	2507.91	1294.53	282.431	2286.42	1473.49	254.34	2217.73	1275.22	210.168	2512.48	1353.76	468.356	2334.38	1509.91	539.125	2329.28	1307.18	539.215	2309.29	1155.15	542.6	2190.74	1027.08	487.179	2134.01	956.887	542.31	2172.94	928.246	534.01	2105.94	895.352
8035	0	296.189	2184.4	1695.76	213.172	2210.97	1691.19	343.311	2374.34	1715.47	229.763	2383.7	1707.52	290.615	2426.24	1559.59	295.904	2499.69	1294.98	282.686	2278.69	1473.77	254.825	2209.84	1276.42	211.421	2504.68	1354.07	468.743	2325.92	1510.77	535.763	2310.66	1309.45	539.591	2298.4	1156.2	542.198	2177.86	1029.84	486.133	2120.09	961.002	540.996	2158.55	931.447	532.839	2091.01	899.698
8036	0	295.687	2176.08	1695.53	212.708	2203.02	1690.76	344.463	2365.73	1716.08	229.735	2375.58	1707.97	290.806	2417.94	1560.27	296.864	2491.92	1295.37	282.638	2270.2	1474.46	255.138	2202.02	1276.78	212.218	2496.76	1354.5	468.958	2317.35	1511.58	536.545	2300.78	1310.04	540.17	2287.52	1156.88	541.76	2165.08	1032.37	484.949	2106.22	964.902	540.157	2144.19	934.693	531.298	2075.94	903.934
8037	0	295.378	2167.8	1695.14	212.349	2194.77	1690.46	344.696	2357.06	1716.71	229.658	2367.16	1708.3	291.7	2409.99	1560.25	297.753	2483.7	1295.55	283.105	2262.34	1474.84	255.963	2194.39	1277.21	213.224	2488.82	1354.67	469.446	2308.95	1511.86	537.237	2297.9	1308.97	540.808	2276.62	1157.38	541.235	2152.3	1034.87	483.687	2092.44	968.529	539.073	2129.84	937.466	529.899	2061.21	908.181
8038	0	294.675	2159.44	1694.81	211.874	2186.66	1689.99	344.453	2348.52	1717	229.733	2359.05	1708.4	292.125	2401.58	1560.43	298.522	2475.43	1295.62	283.224	2254.15	1474.7	255.532	2186.16	1277.21	214.13	2480.92	1354.72	469.904	2300.48	1512.08	537.586	2281.39	1311.1	541.073	2266.2	1158.09	540.973	2139.83	1037.49	482.783	2079.06	972.246	537.659	2115.36	940.219	528.281	2046.27	911.955
8039	0	294.252	2150.95	1694.71	211.416	2178.51	1689.53	343.126	2340.19	1717.4	229.819	2350.73	1708.2	291.809	2393.09	1560.72	299.385	2467.42	1295.52	283.571	2246.2	1474.63	255.362	2178.09	1277.13	214.755	2472.83	1354.69	470.182	2291.95	1512.14	537.988	2271.99	1311.35	541.58	2255.49	1158.19	540.084	2127.09	1039.56	481.288	2065.66	975.763	536.385	2101.21	942.896	526.518	2031.58	915.921
8040	0	293.987	2142.59	1694.04	211.192	2170.19	1688.9	344.634	2331.4	1716.95	229.661	2342.26	1708	292.794	2384.86	1560.31	299.922	2458.94	1295	283.528	2237.66	1474.41	255.371	2170.1	1276.87	215.356	2464.84	1354.49	470.334	2283.22	1511.9	538.402	2262.35	1311.25	542.004	2244.92	1157.95	539.471	2114.61	1041.39	480.12	2052.51	978.971	535.062	2087.05	945.477	524.939	2017.17	919.672
8041	0	293.34	2134.08	1693.15	210.836	2161.85	1688.08	344.789	2322.72	1716.45	229.921	2334.12	1707.37	293.207	2376.35	1559.48	300.463	2451.13	1294.97	283.677	2229.56	1473.31	255.311	2162.15	1275.93	215.97	2456.73	1354.14	470.586	2274.48	1511.47	538.75	2252.8	1311.39	542.766	2234.66	1157.57	538.773	2102.14	1043.18	478.607	2039.45	982.1	534.063	2073.11	947.7	523.329	2002.87	923.224
8042	0	292.923	2125.44	1692.45	210.387	2153.47	1687.38	344.592	2313.95	1715.89	229.926	2325.53	1706.53	293.358	2367.81	1559.17	300.476	2442.59	1294.57	283.414	2220.9	1472.73	255.055	2153.97	1275.09	216.272	2448.47	1353.65	470.499	2265.63	1510.96	541.128	2250.3	1311.51	543.031	2224.12	1157.17	538.068	2089.95	1044.79	477.283	2026.6	984.961	532.849	2059.32	949.93	521.477	1988.66	926.781
8043	0	292.689	2116.72	1691.8	210.07	2144.98	1686.66	344.746	2305.35	1715.28	230.02	2317.19	1705.67	293.386	2359.14	1558.58	300.831	2434.34	1293.91	283.356	2212.44	1471.79	254.899	2146	1274.19	216.521	2440.24	1353.03	470.306	2256.68	1510.2	539.104	2234.59	1310.22	543.207	2213.61	1156.5	537.2	2077.8	1046.17	475.927	2014.07	987.701	531.429	2045.65	951.952	519.67	1974.72	929.874
8044	0	292.727	2108.01	1690.94	209.871	2136.38	1685.72	345.14	2296.48	1714.4	230.046	2308.45	1704.81	293.138	2350.16	1557.71	300.896	2425.79	1293.09	283.374	2203.88	1471.09	254.619	2137.75	1273.41	216.565	2431.73	1352.26	470.031	2247.61	1509.41	539.005	2225.18	1309.2	543.56	2203.35	1155.53	536.496	2065.83	1047.44	474.263	2001.55	990.098	530.022	2032.27	953.469	517.826	1960.9	933.141
8045	0	292.212	2099.14	1689.53	209.624	2127.67	1684.41	345.346	2287.42	1713.07	230.132	2299.71	1703.68	293.13	2341.32	1556.88	301.217	2417.49	1292.14	283.044	2195.07	1469.7	253.859	2129.14	1271.65	216.78	2423.41	1351.45	470.138	2238.79	1507.88	538.998	2215.9	1308.39	543.76	2192.98	1154.49	535.549	2053.88	1048.15	472.876	1989.28	992.044	528.673	2018.96	954.993	516.067	1947.34	935.825
8046	0	291.539	2090.14	1688.14	209.171	2118.81	1683.06	345.026	2278.69	1711.58	230.224	2290.88	1702.34	292.964	2332.42	1555.58	301.155	2408.55	1290.98	282.686	2186.29	1468.24	253.682	2121.07	1270.23	216.592	2414.49	1350.38	469.83	2229.57	1506.78	538.967	2206.65	1307.4	543.897	2182.62	1153.55	534.618	2042.17	1048.89	471.126	1977.19	993.739	527.41	2005.95	956.427	514.418	1934.08	938.83
8047	0	291.325	2081.12	1686.69	208.951	2109.85	1681.73	345.047	2269.44	1710.19	230.086	2281.87	1700.85	292.645	2323.41	1554.3	301.03	2400.23	1289.86	282.213	2177.44	1466.75	253.318	2112.52	1268.61	216.5	2405.93	1349.18	469.595	2220.6	1505.16	539.273	2201.94	1305.92	543.994	2172.81	1152.5	533.642	2030.69	1049.5	469.627	1965.46	995.588	525.914	1993.16	957.384	512.507	1920.91	941.208
8048	0	291.12	2072.08	1684.82	208.741	2100.73	1680.25	344.819	2260.16	1708.05	229.847	2272.65	1699.38	292.39	2314.25	1552.94	300.552	2391.51	1288.55	281.979	2168.58	1464.99	252.569	2103.68	1266.82	216.381	2397.28	1347.75	469.024	2211.27	1503.35	538.307	2188.51	1304.48	543.975	2162.61	1150.46	532.606	2019.32	1049.59	468.45	1953.91	996.847	524.44	1980.57	958.247	511.033	1908.3	943.387
8049	0	290.917	2062.79	1683.27	208.443	2091.49	1678.56	344.703	2251.1	1706.27	229.701	2263.55	1697.53	291.882	2305.05	1551.23	300.297	2382.69	1287.08	281.387	2159.54	1463.25	251.517	2094.69	1264.79	215.902	2388.36	1346.16	468.267	2201.86	1501.9	538.465	2183.21	1302.76	543.751	2152.58	1148.92	531.59	2008.23	1049.59	466.734	1942.34	997.846	522.966	1968.34	958.846	509.473	1895.88	945.535
8050	0	290.553	2053.41	1681.55	208.111	2082.22	1677.21	342.936	2241.83	1704.34	229.495	2254.32	1695.72	291.318	2295.87	1549.45	299.947	2374.22	1285.64	280.631	2150.26	1461.45	251.169	2086.16	1262.87	215.341	2379.34	1344.6	467.8	2192.86	1499.92	537.761	2174.25	1300.86	543.402	2142.82	1147.03	530.581	1997.3	1049.52	465.073	1931.03	998.783	521.57	1956.31	959.281	507.757	1883.59	947.1
8051	0	290.499	2044.16	1679.55	207.952	2072.88	1675.21	344.112	2232.39	1702.08	229.072	2244.91	1693.79	290.961	2286.5	1547.58	299.381	2364.96	1283.83	279.937	2140.91	1459.53	250.511	2077.23	1260.81	214.891	2370.4	1342.9	467.134	2183.51	1497.91	537.019	2164.85	1298.7	543.037	2132.98	1145.18	529.479	1986.33	1049.15	464.052	1920.06	999.551	520.104	1944.5	959.181	506.366	1871.71	948.489
8052	0	289.892	2034.68	1677.37	207.6	2063.21	1673.34	343.606	2222.96	1699.82	228.755	2235.44	1691.83	290.019	2277.07	1545.67	298.679	2355.93	1282.15	279.066	2131.52	1457	249.771	2068.19	1258.22	214.305	2361.38	1341.09	466.456	2174.14	1495.88	536.261	2154.53	1296.99	542.614	2123.4	1142.88	528.505	1975.71	1048.5	462.563	1909.02	999.222	518.945	1932.93	959.316	505.178	1860.19	949.453
8053	0	289.419	2025.15	1675.46	207.026	2053.59	1671.48	343.182	2213.64	1697.67	228.211	2225.92	1689.75	289.299	2267.39	1543.83	298.156	2346.8	1280.36	278.131	2122.04	1454.83	248.709	2058.92	1255.91	213.599	2352.28	1339.33	465.356	2164.35	1493.84	535.311	2145.1	1294.8	541.68	2113.71	1141.21	527.341	1965.27	1047.51	461.184	1898.29	999.173	517.569	1921.57	958.887	503.707	1848.67	949.968
8054	0	289.069	2015.55	1673.57	206.495	2043.97	1669.79	342.123	2204.05	1694.97	227.475	2216.22	1687.59	287.715	2257.79	1541.84	297.42	2337.77	1278.63	277.02	2112.31	1452.78	247.574	2049.51	1253.44	212.548	2342.88	1337.41	464.19	2154.71	1491.67	534.291	2137.34	1292.04	540.87	2104.35	1138.75	526.3	1954.99	1046.83	459.919	1887.77	999.005	516.226	1910.7	958.37	502.364	1837.62	950.161
8055	0	288.978	2005.96	1671.45	206.1	2034.1	1667.99	341.968	2194.53	1692.74	226.54	2206.43	1685.66	286.596	2247.92	1540.02	296.672	2328.47	1276.69	276.02	2102.51	1450.58	246.831	2040.32	1251.23	211.618	2333.39	1335.5	463.111	2144.9	1489.46	533.1	2128.19	1289.89	539.888	2094.86	1136.44	525.211	1944.92	1045.39	458.55	1877.42	998.09	514.827	1899.97	957.195	501.13	1826.91	950.142
8056	0	288.245	1996.24	1669.42	205.379	2024.11	1665.96	340.951	2185.02	1690.23	225.762	2196.72	1683.07	285.093	2237.88	1537.87	295.938	2318.8	1274.78	274.396	2092.41	1447.88	245.652	2030.86	1248.22	210.787	2323.9	1333.41	462.12	2135.22	1486.96	531.999	2119.11	1287.33	538.843	2085.52	1133.98	524.024	1935.07	1043.48	457.429	1867.38	996.918	513.702	1889.58	956.015	500.055	1816.44	949.296
8057	0	287.351	1986.31	1667.61	204.432	2014.01	1664.38	338.099	2175.57	1687.68	224.646	2186.82	1680.92	283.764	2227.68	1535.83	295.037	2308.98	1272.78	272.668	2082.16	1445.4	245.128	2021.99	1245.46	209.716	2314.31	1331.31	460.674	2125	1484.84	530.736	2110.34	1285.06	537.797	2076.32	1131.79	522.818	1925.5	1041.5	456.243	1857.49	995.503	512.523	1879.5	954.444	498.911	1806.45	948.266
8058	0	286.715	1976.47	1665.82	203.498	2003.82	1662.52	337.08	2165.71	1684.84	223.312	2176.71	1678.71	282.255	2217.35	1533.78	294.243	2299.29	1270.88	271.28	2072.05	1443.14	243.881	2012.41	1242.88	208.802	2304.57	1329.44	459.452	2114.98	1482.64	529.213	2101.09	1282.64	536.331	2067.17	1129.49	521.753	1915.95	1039.56	455.176	1847.9	993.752	511.263	1869.88	952.488	497.986	1796.76	946.815
8059	0	285.987	1966.49	1664.19	202.656	1993.62	1661.04	337.221	2155.83	1682.39	221.971	2166.51	1676.35	280.723	2207.01	1531.75	293.3	2289.28	1269.25	269.829	2061.82	1440.81	242.38	2002.49	1240.14	207.741	2294.91	1327.36	457.672	2104.36	1480.7	527.76	2091.75	1280.34	535.08	2057.89	1126.98	520.332	1906.62	1037.01	453.999	1838.53	991.344	510.1	1860.55	950.283	497.125	1787.39	944.763
8060	0	284.805	1956.42	1662.71	201.511	1983.45	1659.62	334.186	2146.31	1679.98	220.475	2156.4	1674.06	279.358	2196.41	1529.63	292.494	2279.23	1267.41	267.975	2051.28	1438.48	241.416	1993.23	1237.5	206.831	2284.9	1325.56	455.96	2093.71	1478.74	526.166	2082.45	1278.52	533.795	2048.89	1125	519.351	1897.72	1034.82	453.079	1829.53	989.166	508.957	1851.56	948.006	496.237	1778.46	942.503
8061	0	283.907	1946.37	1661.31	200.088	1972.99	1658.08	332.232	2136.27	1677.48	218.83	2146.21	1671.84	277.384	2185.67	1528	291.366	2269.09	1265.83	266.372	2040.67	1436.65	239.699	1982.98	1235.52	205.731	2274.88	1323.61	454.121	2082.91	1477.17	524.504	2072.84	1276.59	532.189	2039.81	1122.87	518.197	1888.85	1032.37	451.934	1820.67	986.31	507.852	1842.9	945.266	495.58	1769.95	939.997
8062	0	282.704	1936.22	1659.82	198.901	1962.6	1656.92	332.096	2126.13	1675.09	217.061	2135.88	1669.82	275.412	2175.04	1526.29	290.04	2258.83	1264.43	264.495	2029.99	1434.51	238.658	1973.2	1233.04	204.455	2264.5	1321.85	452.413	2072.18	1475.49	522.904	2063.08	1274.63	530.68	2030.69	1121.12	517.027	1880.13	1029.7	450.955	1812.07	983.238	506.904	1834.68	942.277	494.908	1761.67	937.043
8063	0	281.073	1925.94	1658.67	197.503	1952.07	1655.6	329.885	2115.96	1673.14	215.055	2125.43	1667.91	273.819	2164.46	1524.57	288.939	2248.11	1262.69	262.419	2019.17	1432.04	237.262	1963.4	1230.08	203.208	2253.95	1320.1	450.383	2061.11	1473.95	521.36	2053.17	1273.23	528.806	2021.69	1119.54	515.923	1871.69	1026.87	450.107	1803.75	979.785	506.226	1826.88	939.198	494.315	1753.87	933.402
8064	0	278.74	1915.24	1657.74	195.694	1941.68	1654.47	326.497	2105.87	1671.6	212.988	2115.08	1665.95	271.625	2153.43	1523.23	287.42	2237.34	1261.04	260.704	2008.45	1430.65	236.2	1953.41	1228.3	202.047	2243.29	1318.19	448.426	2050.31	1472.44	519.662	2042.72	1272	527.079	2012.6	1117.81	514.768	1863.66	1023.67	449.113	1795.7	976.106	505.409	1819.36	935.891	493.814	1746.59	929.478
8065	0	277.802	1905.34	1657.09	193.631	1930.94	1653.48	324.286	2095.72	1669.86	210.721	2104.51	1664.39	269.442	2142.66	1521.96	285.873	2227	1260.06	258.669	1997.4	1429.2	233.258	1941.16	1227.76	200.157	2232.63	1316.98	445.98	2038.95	1471.41	517.913	2032.67	1270.75	525.272	2003.69	1116.47	513.66	1855.59	1020.68	448.542	1788.2	972.073	504.414	1812.38	932.182	493.328	1739.56	925.077
8066	0	276.014	1894.81	1656.41	191.791	1920.35	1652.81	323.211	2085.44	1668.28	208.362	2094.04	1662.66	267.121	2131.54	1520.79	284.506	2215.81	1258.76	257.06	1986.6	1428.11	232.008	1930.38	1226.56	198.773	2221.66	1315.34	443.856	2028	1470.29	516.274	2022.09	1269.71	523.262	1994.77	1115.18	512.634	1847.84	1017.57	447.91	1780.89	967.924	503.734	1805.83	928.32	493.06	1733.19	920.559
8067	0	273.001	1883.98	1656.13	189.679	1909.64	1652.15	318.853	2075.14	1667.53	205.824	2083.55	1661.22	265.257	2120.87	1519.72	283.229	2204.63	1257.72	255.129	1975.64	1426.76	230.465	1918.93	1225.21	196.951	2210.53	1314.29	442.054	2017.52	1469.61	514.93	2011.84	1270.05	520.937	1985.73	1114.51	511.562	1840.44	1014.24	447.244	1773.78	963.589	503.235	1799.73	924.639	492.827	1727.17	915.408
8068	0	270.39	1873.25	1655.87	187.261	1898.92	1651.54	316.014	2064.69	1666.89	203.205	2072.92	1660.13	262.676	2109.83	1519.17	281.607	2193.87	1257.07	253.004	1964.32	1425.88	229.29	1907.6	1224.47	195.301	2199.67	1313.3	439.936	2006.57	1469.41	513.289	2001.14	1269.77	519.002	1976.7	1113.85	510.576	1833.16	1011.22	446.804	1767.2	959.054	502.82	1794.11	920.73	492.841	1721.73	910.425
8069	0	268.136	1862.85	1655.48	184.96	1888.26	1651.03	313.631	2054.39	1666.27	200.401	2062.15	1659.48	260.502	2099.07	1518.69	279.955	2182.52	1256.35	251.37	1953.49	1425.68	227.915	1896	1224.05	193.259	2188.36	1312.47	437.947	1996.05	1469.1	511.685	1990.2	1269.88	516.947	1967.68	1113.77	509.514	1826.11	1007.91	446.583	1761.03	954.17	502.621	1788.84	916.61	492.836	1716.68	905.099
8070	0	265.826	1852.34	1655.71	182.302	1877.39	1650.75	310.358	2043.75	1666.37	197.384	2051.37	1659.1	257.876	2088.15	1518.69	278.16	2171.73	1256.37	249.528	1942.56	1425.3	226.837	1884.59	1223.96	191.353	2177.38	1312.1	435.894	1985.48	1469.51	509.978	1979.16	1270.49	514.766	1958.61	1113.99	508.685	1819.42	1005.38	446.2	1755.13	949.396	502.27	1784.08	913.577	493.073	1712.21	899.584
8071	0	262.93	1841.48	1656.33	179.886	1866.76	1650.95	307.415	2033.26	1666.9	194.569	2040.82	1659.01	255.424	2077.44	1518.75	276.234	2160.4	1256.38	247.387	1931.62	1425.63	225.634	1873.07	1224.26	189.044	2166.24	1312.25	433.605	1975.02	1470.15	508.36	1968.53	1271.65	512.485	1949.39	1114.89	507.887	1812.93	1003.03	445.967	1749.77	944.882	502.516	1779.7	910.062	493.285	1708.13	894.408
8072	0	260.272	1830.83	1657.03	177.181	1855.88	1651.27	303.75	2022.56	1667.54	191.283	2029.86	1659.44	252.829	2066.8	1519.27	274.222	2149.39	1256.87	245.659	1920.92	1426.39	224.238	1861.55	1225.24	186.578	2154.94	1312.46	431.377	1964.89	1471.2	506.448	1957.75	1272.65	510.208	1940.27	1115.97	507.022	1806.64	1000.78	445.961	1744.71	940.643	502.55	1775.67	906.966	493.681	1704.55	889.256
8073	0	257.626	1820.24	1657.29	174.674	1845.13	1651.55	300.653	2012.09	1668.06	188.301	2019.12	1659.87	250.154	2056.07	1519.64	271.987	2138.63	1257.65	243.921	1910.33	1427.16	223.024	1850.16	1226.22	183.888	2143.63	1312.55	429.345	1955.13	1472.15	504.722	1947.54	1273.81	507.854	1931.21	1117.22	506.336	1800.68	998.888	446.033	1739.78	936.162	502.936	1772.22	903.927	494.279	1701.51	883.919
8074	0	255.213	1809.74	1658.31	172.104	1834.39	1652.05	297.427	2001.5	1669.46	185.326	2008.4	1660.53	247.534	2045.79	1520.81	270.069	2127.55	1258.01	242.078	1899.88	1427.95	221.948	1839.12	1227.17	181.634	2132.67	1312.97	427.286	1945.45	1473.7	503.168	1937.15	1275.91	505.495	1922.39	1118.84	505.745	1794.9	997.224	445.895	1735.24	931.798	503.733	1768.94	901.275	495.11	1699.1	878.76
8075	0	252.392	1799.21	1659.45	169.452	1823.78	1652.86	294.082	1991.22	1670.98	182.283	1998.01	1661.16	244.683	2035.48	1521.72	267.795	2116.58	1258.8	240.338	1889.53	1429.32	220.821	1828.18	1228.42	178.737	2121.39	1313.7	425.079	1935.89	1475.43	501.14	1927.24	1277.74	503.076	1913.59	1120.62	505.198	1789.5	996.073	446.803	1731.42	929.163	504.605	1766.15	899.308	495.858	1696.88	874.2
8076	0	249.76	1788.55	1660.71	167.087	1813.17	1653.77	291.024	1980.69	1672.46	179.276	1987.34	1662.5	242.056	2025.27	1522.88	265.691	2105.89	1259.65	238.568	1879.13	1430.94	219.837	1817.39	1230.48	176.231	2110.62	1314.4	422.852	1926.58	1477.19	499.332	1917.78	1279.84	500.92	1905.03	1122.84	504.742	1784.22	995.526	447.522	1728.8	925.405	505.494	1763.49	897.773	496.877	1695.11	870.111
8077	0	247.474	1778.44	1661.63	164.576	1802.68	1654.66	287.981	1970.6	1674.09	176.232	1976.8	1663.9	239.308	2015.39	1524.22	263.275	2095.36	1260.74	237.01	1869.02	1432.6	218.738	1806.53	1232.1	173.177	2099.57	1315.31	420.76	1917.5	1479.18	497.458	1908.31	1282.17	498.92	1896.65	1125.35	504.587	1779.06	995.67	447.89	1725.09	923.863	506.785	1760.84	897.115	497.941	1693.58	866.419
8078	0	245.218	1768.39	1662.62	162.284	1792.26	1655.52	285.077	1960.56	1676.02	173.366	1966.45	1665.26	237.017	2005.59	1525.41	260.632	2084.73	1262.25	235.346	1858.99	1434	217.964	1795.93	1233.67	170.538	2088.62	1316.44	418.733	1908.56	1481.45	495.597	1899.14	1284.56	496.784	1888.39	1128.03	504.265	1773.94	995.858	449.148	1722.47	921.08	508.194	1758.09	896.997	498.708	1691.89	863.025
8079	0	242.994	1758.11	1664.27	160.253	1782.06	1656.86	281.965	1950.49	1677.44	170.406	1956	1666.81	234.556	1995.84	1526.71	257.99	2074.5	1263.4	233.848	1849.11	1435.62	217.104	1785.48	1235.72	167.362	2077.95	1317.44	416.84	1899.9	1483.72	493.976	1890.51	1286.86	495.088	1880.73	1130.74	504.252	1768.93	996.578	449.883	1719.16	919.88	509.671	1755.44	897.18	500.084	1690.69	860.52
8080	0	241.182	1748.44	1665.5	158.281	1771.84	1657.97	279.314	1940.92	1679.46	167.649	1945.91	1668.1	231.647	1986.09	1528.06	255.623	2064.63	1264.72	232.446	1839.34	1437.41	216.285	1775.09	1237.34	164.118	2067.21	1318.82	414.902	1891.25	1485.56	492.232	1882.3	1288.72	493.441	1873.29	1133.14	504.22	1764.06	997.117	450.841	1716.17	918.817	511.266	1752.67	897.685	501.122	1689.15	858.248
8081	0	239.479	1738.66	1666.89	156.668	1761.66	1659.39	276.611	1931.31	1680.82	165.243	1935.92	1669.47	229.323	1976.52	1529.47	253.036	2054.49	1265.75	230.923	1829.62	1438.85	215.558	1764.91	1239.05	161.381	2056.84	1320.24	412.922	1882.55	1487.75	490.491	1874.3	1290.7	492.056	1866.4	1135.53	504.653	1759.34	998.088	451.99	1713.18	917.89	513.004	1749.65	898.507	502.349	1687.66	856.297
8082	0	238.296	1729.31	1668.37	154.992	1751.78	1660.68	274.194	1921.82	1682.33	162.661	1926.14	1670.79	226.35	1966.93	1531.02	250.311	2044.42	1267.24	229.335	1820.06	1440.48	214.763	1754.93	1241.05	158.402	2046.53	1321.56	411.059	1874.13	1489.6	489.115	1866.96	1292.62	491.093	1859.73	1137.9	504.994	1754.63	999.246	453.157	1710.24	917.582	514.481	1746.51	899.652	503.505	1685.87	855.189
8083	0	237.114	1719.68	1670.16	153.798	1741.75	1662.43	271.626	1912.6	1683.59	160.194	1916.18	1672.4	224.129	1957.49	1532.5	247.781	2034.67	1268.34	227.392	1810.48	1442.62	213.92	1745.1	1242.91	155.36	2036.23	1322.92	409.031	1865.54	1491.63	487.734	1859.66	1294.48	490.236	1853.53	1139.86	505.516	1750.13	1000.26	454.047	1706.98	917.973	515.883	1743.26	901.082	504.599	1684.04	854.234
8084	0	236.131	1710.42	1671.41	152.739	1731.94	1663.72	269.334	1903.65	1685.33	157.756	1905.93	1674.09	221.764	1948.15	1533.85	245.514	2025.18	1269.8	225.859	1801.04	1444.07	212.944	1735.35	1244.45	152.397	2026.06	1324.32	407.203	1857.02	1493.22	486.522	1852.84	1296.35	489.532	1847.45	1141.92	506.143	1745.67	1001.32	455.055	1703.72	918.249	517.463	1739.86	902.015	505.894	1681.97	853.753
8085	0	235.263	1701.19	1672.93	151.723	1722.12	1665.41	267.345	1894.64	1686.5	155.632	1896.11	1675.75	219.275	1938.83	1535.44	243.062	2015.79	1270.95	224.467	1791.71	1445.22	212.093	1725.95	1245.53	149.636	2016.03	1325.76	405.3	1848.34	1495.25	485.628	1846.43	1298.47	489.383	1841.82	1143.96	506.941	1741.24	1002.64	456.22	1700.34	918.231	518.937	1736.22	903.492	507.061	1679.51	853.683
8086	0	234.674	1692.16	1674.33	150.77	1712.34	1666.95	265.254	1885.78	1687.95	153.638	1886.7	1677.25	217.14	1929.59	1536.64	240.954	2006.53	1272.66	222.863	1782.42	1446.73	211.28	1716.79	1246.84	147.135	2006.21	1327.03	403.653	1840.08	1496.93	484.739	1840.16	1300.34	489.025	1836.17	1146.18	507.622	1736.9	1003.8	457.391	1697.17	918.917	520.351	1732.59	905.036	508.202	1676.75	853.973
8087	0	234.045	1683.14	1675.67	150.189	1702.71	1668.67	263.449	1877	1689.35	151.648	1876.97	1678.97	215.091	1920.34	1538.32	238.724	1997.27	1274.1	221.416	1773.24	1448.4	210.286	1707.67	1248.55	144.538	1996.41	1328.7	401.812	1831.61	1498.65	483.792	1834.15	1302.1	489.178	1830.82	1148.17	508.142	1732.6	1004.73	458.447	1693.6	919.804	521.586	1728.99	906.333	509.375	1673.98	854.635
8088	0	233.526	1674.12	1677.46	149.698	1693.13	1670.47	261.772	1868.21	1690.78	149.765	1867.39	1680.84	212.806	1911.21	1539.97	236.639	1988.26	1275.96	219.977	1764.18	1450.14	209.466	1698.75	1249.94	142.269	1986.92	1330.23	400.112	1823.53	1500.62	482.881	1828.31	1303.9	489.125	1825.62	1150.19	508.824	1728.4	1006.24	459.497	1690.06	920.947	522.843	1725.49	907.991	510.617	1670.87	855.704
8089	0	233.062	1665.07	1679.25	149.019	1683.57	1672.16	259.85	1859.46	1692.39	147.956	1857.92	1682.52	210.947	1902.2	1541.59	234.702	1979.2	1277.51	218.501	1755.14	1451.56	208.521	1689.92	1251.21	139.981	1977.53	1331.69	398.562	1815.2	1502.35	482.091	1822.46	1306.09	489.355	1820.79	1152.34	509.561	1724.44	1007.72	460.629	1686.42	921.878	523.712	1722.13	909.783	511.913	1667.78	857.02
8090	0	232.75	1656.12	1680.91	149.09	1674.33	1674.34	258.265	1850.82	1693.82	146.195	1848.38	1684.49	209.072	1893.31	1543.11	232.903	1970.3	1279.02	217.329	1746.2	1453.32	207.941	1681.44	1252.97	137.749	1968.29	1333.47	397.042	1807.16	1503.86	481.137	1816.81	1308.05	489.474	1815.81	1154.47	510.296	1720.55	1009.31	461.571	1682.71	923.427	524.755	1718.74	911.033	513.047	1664.44	858.447
8091	0	232.811	1647.5	1682.06	148.663	1664.82	1676.02	257.012	1842.38	1695.36	144.575	1838.82	1686.43	207.279	1884.47	1544.73	231.134	1961.49	1280.98	215.83	1737.15	1454.72	206.955	1672.54	1254.49	135.868	1959.26	1334.89	395.573	1799.12	1505.28	480.25	1811.07	1310.1	489.521	1811.05	1156.5	510.967	1716.62	1010.82	462.719	1678.86	924.796	525.447	1715.34	912.517	514.508	1661	860.043
8092	0	232.359	1638.39	1683.95	148.146	1655.28	1677.72	255.463	1833.59	1697.1	143.093	1829.49	1688.18	205.243	1875.39	1546.64	229.526	1952.65	1282.62	214.67	1728.36	1456.56	206.354	1664.01	1255.93	133.957	1950.17	1336.86	393.965	1791.15	1506.82	479.468	1805.19	1312.44	489.508	1806.43	1158.74	511.717	1712.87	1012.6	463.942	1675.11	926.146	526.252	1712.18	914.323	515.989	1657.52	862.136
8093	0	232.093	1629.73	1685.41	147.822	1646.01	1679.75	253.622	1824.76	1698.78	141.759	1820.08	1690.37	203.432	1866.46	1548.34	227.699	1943.79	1284.41	213.32	1719.46	1458.56	205.552	1655.34	1257.67	132.203	1941.26	1338.66	392.251	1783.05	1508.65	478.491	1799.46	1314.79	489.547	1801.84	1161.23	512.378	1709.19	1014.62	464.89	1670.94	928.13	526.77	1709.05	916.537	517.41	1653.87	864.592
8094	0	231.855	1620.84	1687.04	147.842	1636.83	1681.66	252.093	1816.23	1700.67	140.435	1810.63	1692.66	201.987	1857.56	1550.26	226.155	1935.07	1286.5	212.049	1710.59	1460.74	204.992	1646.75	1260.01	130.565	1932.32	1340.6	390.776	1774.93	1510.65	477.473	1793.39	1317.19	488.885	1797.17	1163.71	512.992	1705.48	1016.74	466.02	1666.31	931.029	527.364	1705.72	918.348	518.774	1650	867.151
8095	0	231.925	1612.25	1688.46	147.372	1627.53	1683.24	251.08	1807.62	1702.02	139.104	1801.37	1694.68	199.842	1848.52	1552.27	224.586	1926.38	1288.23	210.721	1701.78	1462.31	204.35	1638.28	1261.57	128.512	1923.42	1342.64	389.367	1767.01	1512.08	476.408	1787.27	1319.6	488.786	1792.7	1166.36	513.589	1701.64	1019.02	466.861	1661.89	932.235	527.913	1702.55	920.549	520.425	1646.3	869.87
8096	0	231.587	1603.42	1690.17	147.025	1618.32	1685.04	249.321	1799	1704.06	137.737	1792.18	1696.53	198.357	1839.86	1553.98	222.978	1917.65	1290.07	209.541	1693.02	1463.69	203.492	1629.68	1263.02	126.697	1914.51	1344.57	387.93	1758.57	1514.35	475.628	1781.38	1322.24	488.328	1788.18	1169.05	514.187	1698	1021.39	468.24	1657.51	934.463	528.244	1699.11	922.99	522.064	1642.47	872.644
8097	0	231.557	1595	1691.55	146.857	1609.29	1687.05	248.075	1790.59	1705.44	136.464	1783.1	1698.41	196.806	1831.2	1555.56	221.432	1909.09	1292.1	208.418	1684.36	1465.4	202.558	1621.18	1264.75	124.899	1905.92	1346	386.466	1750.21	1516.27	474.49	1775.08	1324.89	487.787	1783.8	1171.5	514.761	1694.21	1023.58	469.645	1653.05	937.032	528.679	1696.14	924.928	523.883	1638.68	875.612
8098	0	231.234	1586.31	1693.13	146.554	1600.24	1688.69	246.919	1782.18	1706.73	135.31	1774.1	1700.06	195.778	1822.66	1556.95	219.896	1900.6	1293.71	207.002	1675.54	1467.12	201.682	1612.57	1266.43	123.507	1897.17	1347.79	384.871	1741.83	1517.89	473.346	1768.96	1326.96	486.805	1779.15	1173.75	515.179	1690.41	1025.61	470.863	1648.16	939.518	528.615	1692.85	927.06	525.614	1634.8	877.977
8099	0	231.095	1577.84	1694.6	146.272	1591.26	1690.4	245.64	1773.71	1707.86	134.252	1765.2	1701.59	194.229	1813.85	1558.51	218.529	1892.01	1295.21	205.905	1666.87	1468.8	200.701	1604.02	1267.74	121.922	1888.54	1349.24	383.453	1733.28	1519.57	472.25	1762.58	1329.44	486.1	1774.42	1176.12	515.585	1686.54	1027.67	472.043	1643.23	941.752	528.786	1689.25	929.003	527.233	1630.87	880.49
8100	0	230.569	1569.23	1696.19	145.849	1582.43	1692.05	244.48	1765.46	1709.24	133.062	1756.17	1703.18	192.596	1805.06	1560.19	217.326	1883.46	1297.06	204.798	1658.13	1470.15	199.982	1595.82	1268.97	120.551	1879.82	1350.88	382.113	1724.88	1521.46	471.168	1756.23	1331.55	485.13	1769.45	1178.5	515.939	1682.45	1029.75	473.315	1638.14	943.81	528.585	1685.65	930.958	528.756	1626.67	882.774
8101	0	230.442	1560.78	1697.68	145.498	1573.51	1693.55	243.133	1757.1	1710.24	131.763	1747.33	1704.66	190.955	1796.07	1561.52	216.064	1875.03	1298.34	203.613	1649.38	1471.42	199.072	1587.43	1270.26	119.1	1871.24	1352.54	381.008	1716.42	1523.28	469.996	1749.62	1334.04	484.322	1764.22	1180.95	516.453	1678.26	1031.92	474.655	1632.85	946.011	528.638	1681.81	932.941	530.249	1622.8	884.776
8102	0	230.295	1552.56	1698.67	145.395	1564.76	1694.99	241.922	1748.68	1711.43	130.573	1738.29	1706.15	189.577	1787.15	1562.73	214.877	1866.53	1300.16	202.683	1640.65	1472.42	198.214	1579.14	1270.9	117.822	1862.66	1353.87	380.008	1707.95	1524.66	469.033	1743.09	1335.96	483.367	1758.78	1183.16	516.685	1673.7	1033.86	475.877	1627.45	947.639	528.413	1677.73	934.788	531.79	1618.73	886.944
8103	0	229.953	1544.24	1699.75	144.771	1555.93	1696.16	240.796	1740.44	1712.49	129.391	1729.47	1707.26	188.184	1778.35	1564.16	213.598	1858.06	1301.56	201.524	1631.93	1473.34	197.411	1570.86	1271.72	116.639	1853.97	1355.43	378.672	1699.18	1526.23	467.843	1735.99	1338.07	482.465	1753.33	1184.93	516.843	1668.91	1035.58	476.984	1621.85	949.233	528.16	1673.6	936.421	532.995	1614.28	888.962
8104	0	229.583	1535.94	1700.89	144.476	1547.29	1697.58	239.509	1732.28	1713.05	128.126	1720.78	1708.03	187.061	1769.71	1564.96	212.601	1849.55	1302.62	200.559	1623.2	1474.28	196.627	1562.74	1272.68	115.486	1845.42	1356.22	377.649	1690.77	1527.17	466.659	1729.31	1339.55	481.263	1747.49	1186.61	516.862	1664.03	1037.09	478.273	1615.79	950.72	528.018	1669.21	937.902	534.299	1610.01	890.448
8105	0	229.147	1527.48	1702.06	144.036	1538.54	1698.59	238.234	1723.97	1713.35	127.062	1711.92	1708.98	185.816	1760.8	1565.85	211.531	1841.1	1303.35	199.625	1614.43	1475.63	195.909	1554.37	1273.63	114.616	1836.99	1357.13	376.404	1682.27	1528.06	465.514	1722.3	1340.91	479.884	1741.25	1187.89	516.986	1658.85	1038.17	479.249	1610.01	952.135	527.586	1664.54	938.789	535.101	1605.38	891.323
8106	0	228.983	1519.26	1702.69	143.553	1529.84	1699.11	236.988	1715.68	1713.83	125.879	1703.29	1709.19	184.694	1752.01	1566.38	210.699	1832.68	1304.22	198.829	1605.69	1475.67	195.389	1546	1273.74	113.635	1828.42	1357.76	375.479	1673.68	1528.86	464.382	1714.88	1342.26	478.87	1735.03	1189.07	516.697	1653.33	1038.89	480.194	1603.9	952.897	527.345	1659.55	939.709	536.255	1600.61	892.358
8107	0	228.5	1510.9	1703.35	143.164	1521.15	1700	235.817	1707.62	1714.03	124.748	1694.61	1709.3	183.687	1743.37	1566.83	209.786	1824.07	1304.58	197.934	1596.97	1476.14	195.126	1538.13	1273.35	112.909	1819.96	1357.89	374.562	1665.11	1529.38	463.529	1707.58	1343.19	477.684	1728.44	1190.04	516.646	1647.61	1039.76	480.999	1597.7	953.691	527.238	1654.55	940.381	537.198	1595.77	893.028
8108	0	228.132	1502.61	1704.07	142.671	1512.46	1700.65	234.476	1699.3	1714.04	123.554	1685.86	1709.24	182.197	1734.39	1567.06	208.994	1815.63	1304.93	197.138	1588.28	1476.37	194.616	1529.63	1273.57	112.032	1811.3	1358.29	373.787	1656.57	1529.82	462.435	1700.05	1343.92	476.653	1721.64	1190.95	516.627	1641.71	1040.45	481.783	1591.54	954.12	526.884	1648.95	940.96	537.794	1590.45	893.609
8109	0	227.629	1494.2	1704.33	142.327	1503.81	1700.86	233.374	1691.04	1713.86	122.358	1677.17	1709.12	181.362	1725.57	1567.3	208.275	1807.01	1305.26	196.374	1579.6	1476.37	194.382	1521.24	1273.4	111.325	1802.75	1358.5	372.81	1647.88	1530.13	461.528	1692.25	1344.35	475.041	1714.32	1191.15	516.491	1635.49	1040.66	482.371	1585.13	954.232	526.703	1643.12	941.358	538.443	1584.94	893.68
8110	0	227.272	1485.86	1704.53	141.937	1495.07	1700.93	232.25	1682.58	1713.7	121.379	1668.37	1708.9	180.677	1716.86	1567.23	207.806	1798.59	1305.55	195.808	1570.98	1476.21	193.455	1511.95	1273.5	110.792	1794.13	1358.54	372.114	1639.18	1530.45	460.656	1684.09	1344.97	474.662	1707.02	1192.12	516.287	1628.71	1041.23	482.567	1578.78	954.488	526.689	1636.99	941.84	538.846	1579.02	893.796
8111	0	226.699	1477.41	1704.82	141.466	1486.42	1701	231.186	1674.3	1713.26	120.231	1659.64	1708.64	179.654	1707.92	1567.04	207.258	1789.91	1305.58	194.736	1561.98	1475.77	193.237	1503.52	1273.28	110.033	1785.4	1358.44	371.415	1630.55	1530.39	459.937	1676.1	1345.26	473.82	1699.45	1192.51	516.038	1621.88	1041.34	483.09	1571.91	954.337	526.602	1630.54	942.146	539.211	1572.97	893.85
8112	0	226.532	1469	1704.77	141.048	1477.7	1700.75	230.162	1665.87	1712.52	119.342	1650.74	1708.01	179.272	1699.25	1566.61	206.852	1781.22	1305.2	194.542	1553.49	1475.58	192.767	1494.71	1273.09	109.543	1776.8	1357.97	370.801	1621.75	1530.03	459.3	1667.81	1345.27	472.975	1691.59	1192.44	515.871	1614.88	1041.04	483.214	1564.88	953.764	526.477	1623.85	941.952	539.144	1566.46	893.179
8113	0	226.054	1460.53	1704.18	140.56	1468.98	1700.37	228.825	1657.39	1711.9	118.55	1641.98	1707	178.401	1690.27	1565.97	206.604	1772.58	1304.51	193.43	1544.43	1474.58	192.447	1486	1272.05	108.981	1768.15	1357.25	370.217	1612.85	1529.6	458.7	1659.45	1344.86	472.195	1683.54	1192.2	515.795	1607.52	1040.67	483.182	1557.66	952.965	526.368	1616.95	941.401	539.44	1559.82	892.745
8114	0	225.661	1452.01	1703.7	140.222	1460.27	1699.91	228.097	1648.9	1711.09	117.805	1633.11	1705.7	177.899	1681.53	1565.22	206.329	1763.86	1303.75	193.145	1535.72	1473.6	192.313	1477.48	1271.11	108.797	1759.55	1356.38	369.827	1604.06	1529.12	458.321	1650.95	1344.37	471.551	1675.48	1191.58	515.594	1599.99	1040.09	482.793	1550.42	951.945	526.43	1609.79	940.871	539.548	1552.99	891.884
8115	0	225.065	1443.37	1703.1	139.662	1451.47	1699.25	227.311	1640.35	1709.91	117.202	1624.47	1704.72	177.543	1672.69	1564.2	206.246	1755.03	1302.84	192.913	1527.1	1472.96	191.983	1468.65	1270.21	108.471	1750.76	1355.33	369.286	1595.19	1528.19	457.819	1642.32	1343.61	470.948	1667.16	1190.84	515.26	1592.22	1039.15	482.729	1543	950.922	526.448	1602.43	940.071	539.392	1545.71	890.756
8116	0	224.667	1434.58	1702.42	139.463	1442.82	1698.34	226.681	1631.61	1708.52	116.615	1615.72	1703.61	177.279	1663.72	1563.2	206.156	1746.2	1301.84	192.702	1518.17	1472.27	191.681	1459.73	1269.61	108.398	1742.04	1354.12	368.855	1586.06	1527.2	457.371	1633.49	1342.61	470.456	1658.59	1190.02	515.057	1584.13	1038.17	482.588	1535.22	949.658	526.448	1594.66	939.072	539.287	1538.09	889.362
8117	0	224.349	1425.82	1701.21	138.957	1433.94	1697.02	226.353	1622.78	1707.34	116.265	1607	1701.98	177.088	1654.88	1561.88	206.169	1737.2	1300.69	192.473	1509.22	1470.92	191.562	1450.91	1268.09	108.445	1733.15	1352.79	368.647	1576.85	1526.26	457.218	1624.39	1341.7	470.329	1650	1189.14	515.008	1575.8	1037.08	482.469	1527.12	948.192	526.474	1586.49	938.04	539.336	1530.37	888.069
8118	0	223.947	1416.95	1699.95	138.582	1425.16	1695.81	226.204	1613.88	1705.93	116.154	1598.07	1700.57	176.917	1645.91	1560.57	206.267	1728.25	1299.29	192.279	1500.17	1469.63	191.29	1441.91	1266.72	108.47	1724.27	1351.51	368.699	1567.75	1525.12	457.348	1615.29	1340.84	469.901	1641	1188.08	515.017	1567.36	1035.9	482.284	1519.33	947.039	526.692	1578.32	936.96	539.267	1522.19	886.616
8119	0	223.565	1407.9	1698.69	138.212	1416.28	1694.53	226.189	1604.93	1704.21	116.089	1589.35	1698.96	177.138	1636.98	1558.98	206.309	1718.98	1297.53	192.133	1491.13	1468.2	191.32	1432.97	1265.31	108.798	1715.41	1349.96	368.563	1558.37	1523.84	457.279	1605.99	1339.45	469.673	1631.97	1186.7	514.873	1558.5	1034.51	482.26	1510.91	945.23	526.749	1569.68	935.527	539.079	1513.72	884.959
8120	0	223.105	1398.65	1697.17	137.821	1407.55	1692.75	226.521	1595.78	1702.74	116.255	1580.56	1697.33	177.141	1627.81	1557.3	206.881	1709.8	1295.93	191.893	1481.87	1466.95	190.978	1423.6	1263.93	109.076	1706.42	1348.34	368.577	1548.51	1522.74	457.275	1596.74	1337.48	469.601	1622.72	1185.19	515.009	1549.58	1032.77	482.33	1501.79	943.287	526.783	1560.66	934.078	539.116	1505.01	882.938
8121	0	222.718	1389.64	1695.39	137.415	1398.7	1691.3	226.997	1586.55	1700.74	116.69	1571.9	1695.34	177.742	1618.81	1555.3	207.302	1700.26	1293.98	192.225	1472.77	1464.75	190.969	1414.3	1262	109.542	1697.35	1346.27	368.872	1539.36	1520.57	457.417	1587.06	1336.09	469.686	1613.42	1183.44	514.901	1540.24	1030.95	482.312	1492.72	941.338	527.087	1551.7	932.425	538.891	1496.23	880.853
8122	0	222.267	1380.21	1693.86	137.094	1389.79	1689.53	227.787	1577.16	1698.87	117.318	1563.2	1693.41	178.022	1609.64	1553.35	207.719	1690.95	1291.75	192.419	1463.63	1463.02	191.042	1404.98	1260.61	110.127	1688.14	1344.44	369.127	1530	1518.5	457.618	1577.54	1333.9	469.67	1603.85	1181.41	515.006	1530.94	1029.05	482.345	1483.46	939.307	527.246	1542.57	930.216	538.79	1487.1	878.526
8123	0	222.038	1370.79	1692.11	136.887	1380.95	1687.77	228.664	1567.72	1696.45	118.134	1554.71	1691.37	178.556	1600.49	1551.06	208.465	1681.44	1289.66	192.656	1454.34	1461.14	191.088	1395.35	1258.75	111.05	1678.91	1341.89	369.489	1520.48	1516.16	457.789	1567.79	1331.61	469.676	1594.14	1178.88	515.14	1521.36	1026.5	482.469	1473.89	936.987	527.313	1533	927.703	538.796	1477.66	875.988
8124	0	221.7	1361.27	1690.08	136.594	1372.06	1685.82	229.936	1558.14	1694.37	119.328	1545.87	1688.96	179.367	1591.22	1548.95	209.23	1672.22	1287.22	192.868	1444.79	1458.99	191.065	1385.59	1256.23	111.804	1669.62	1339.48	370.041	1510.9	1513.89	458.257	1557.84	1329.38	469.661	1584.2	1176.42	515.431	1511.54	1024.01	482.688	1464.18	934.548	527.479	1523.2	925.269	538.705	1467.76	873.37
8125	0	221.462	1351.63	1688.29	136.315	1363.19	1684.09	231.23	1548.42	1692.17	120.559	1537.18	1687.12	180.059	1581.87	1546.67	210.018	1661.89	1284.76	193.24	1435.25	1456.75	191.225	1375.96	1254.49	112.574	1660.3	1337.44	370.926	1501.37	1511.53	458.925	1547.88	1327.01	470.191	1574.2	1174.03	515.784	1501.56	1021.68	483.013	1454.19	932.249	527.716	1513.1	922.827	538.911	1457.78	870.905
8126	0	221.127	1342.08	1686.17	136.08	1354.27	1682.24	232.879	1538.58	1690.05	121.912	1528.35	1685	180.985	1572.34	1544.55	210.727	1652.23	1282.71	193.847	1425.68	1454.74	191.243	1365.93	1252.49	113.177	1650.78	1335.37	371.502	1491.63	1509.16	459.365	1537.8	1324.33	470.53	1563.89	1171.55	516.015	1491.18	1019.15	483.214	1443.78	929.406	528.006	1502.64	920.399	538.869	1447.36	868.107
8127	0	220.832	1332.15	1684.33	136.114	1345.32	1680.4	234.833	1528.64	1687.76	123.616	1519.55	1683.2	181.913	1562.62	1542.35	211.295	1642.3	1280.2	194.519	1415.91	1452.93	191.619	1356.06	1250.46	114.412	1641.24	1333.34	372.242	1481.67	1506.49	459.828	1527.5	1321.6	471.006	1553.32	1168.76	516.158	1480.45	1016.43	483.104	1433.03	926.879	528.249	1492.04	917.551	539.018	1436.81	865.132
8128	0	220.788	1322.34	1682.38	136.111	1336.29	1678.62	236.885	1518.61	1685.44	125.307	1510.48	1680.99	183.087	1552.84	1540.02	212.035	1632.13	1278.09	195.282	1405.94	1450.68	191.864	1346.08	1248.3	115.303	1631.38	1331.07	373.204	1471.81	1504.04	460.622	1517.11	1318.81	471.428	1542.68	1165.93	516.528	1469.71	1013.64	483.495	1422.21	923.837	528.615	1481.18	914.816	539.188	1425.9	862.517
8129	0	220.747	1312.46	1680.59	136.068	1327.19	1676.92	238.692	1508.44	1683.04	127.506	1501.71	1678.83	184.368	1542.98	1537.87	212.635	1621.68	1275.43	196.151	1396	1448.41	192.362	1336.25	1245.97	116.21	1621.19	1328.88	374.311	1461.84	1501.42	461.322	1506.77	1315.94	471.958	1531.89	1163.04	516.944	1458.77	1010.83	483.733	1411.13	921.267	528.9	1470.14	911.972	539.529	1414.92	859.664
8130	0	220.9	1302.35	1679.07	136.372	1318.01	1675.53	240.753	1498.12	1680.78	129.531	1492.64	1676.81	185.508	1532.72	1535.98	213.079	1611.08	1273.41	197.1	1385.72	1446.43	192.882	1325.95	1243.73	116.827	1610.94	1326.78	375.467	1451.74	1498.69	462	1496.17	1312.87	472.374	1520.89	1159.98	517.293	1447.54	1007.77	484.061	1400.23	918.417	529.201	1458.78	908.912	539.741	1403.44	856.669
8131	0	221.179	1292.29	1677.28	136.68	1308.7	1674	242.895	1487.69	1678.49	131.791	1483.3	1675.02	187.024	1522.65	1533.85	213.24	1599.85	1271.12	198.039	1375.27	1444.39	193.363	1315.45	1241.63	117.988	1600.89	1325.17	376.636	1441.47	1496.13	462.74	1485.43	1309.9	473.044	1509.89	1157.06	517.629	1436.05	1004.85	484.152	1388.19	915.491	529.385	1447.05	906.116	539.832	1391.73	853.94
8132	0	221.275	1282	1676.02	137.054	1299.29	1672.81	245.589	1477.33	1676.37	134.004	1474.05	1673.01	188.377	1512.2	1531.86	213.422	1588.24	1269.24	199.06	1364.85	1442.52	193.853	1304.98	1240.29	118.939	1590.33	1323.11	377.905	1431.32	1493.64	463.543	1474.81	1307.07	473.6	1498.65	1154.05	517.813	1424.5	1002.03	484.237	1376.44	912.855	529.66	1435.39	903.178	540.011	1379.92	851.231
8133	0	221.804	1271.74	1675.08	137.684	1289.78	1671.99	247.976	1466.69	1674.53	136.477	1464.58	1671.24	190.368	1501.62	1530.22	215.341	1580.09	1267.24	200.255	1354.28	1441.07	194.436	1294.25	1238.78	120.065	1579.65	1321.4	379.192	1420.94	1491.1	464.249	1464	1303.92	474.024	1487.17	1151.02	517.974	1412.74	999.097	484.367	1364.89	910.526	529.745	1423.48	900.226	539.956	1367.82	848.277
8134	0	222.503	1261.19	1674.52	138.621	1280.14	1671.35	250.474	1456.07	1672.58	139.091	1454.97	1669.87	191.635	1491.14	1528.67	215.283	1567.67	1263.74	201.606	1343.55	1439.87	195.172	1283.26	1237.43	121.125	1569.07	1320.02	380.552	1410.49	1488.72	464.916	1452.95	1301	474.422	1475.52	1148	518.297	1400.99	996.151	484.374	1352.79	907.332	529.646	1411.38	897.254	539.979	1355.56	845.633
8135	0	223.277	1250.84	1673.48	139.535	1270.41	1670.75	252.936	1445.27	1670.99	141.374	1445.16	1668.51	192.966	1480.22	1527.71	216.176	1558.06	1263.99	202.985	1332.68	1438.51	196.004	1272.3	1236.04	122.099	1558.33	1319.05	382.179	1399.96	1486.75	465.761	1441.71	1298.66	475.141	1463.7	1145.54	518.457	1388.78	993.687	484.541	1340.35	905.071	529.552	1399.01	894.65	540.069	1343.13	843.467
8136	0	224.247	1240.28	1673.19	140.553	1260.55	1670.56	255.62	1434.54	1669.8	143.842	1435.25	1667.61	194.243	1469.26	1526.82	216.679	1546.85	1262.88	204.357	1321.82	1437.63	196.736	1261.02	1235.14	123.308	1547.3	1317.92	383.805	1389.4	1485.09	466.631	1430.43	1296.55	475.615	1451.65	1143.49	518.588	1376.49	991.656	484.62	1327.88	903.057	529.65	1386.59	892.617	540.091	1330.61	841.586
8137	0	225.397	1229.73	1672.92	141.873	1250.58	1670.42	257.762	1423.56	1668.74	146.632	1425.25	1667.13	196.074	1458.54	1525.83	217.209	1535.71	1262.18	205.694	1310.81	1437.1	197.557	1249.59	1234.52	124.463	1536.16	1317.03	385.291	1378.67	1483.64	467.308	1419.03	1294.29	476.217	1439.47	1141.55	518.567	1363.96	989.586	484.131	1314.77	901.13	529.503	1374.08	890.421	539.775	1317.73	839.584
8138	0	226.636	1219.22	1672.9	143.275	1240.5	1670.82	260.772	1412.91	1667.97	149.324	1415.19	1666.65	197.647	1447.7	1525.49	217.755	1524.45	1261.25	207.082	1299.77	1436.82	198.701	1238.35	1234.37	125.577	1525.38	1317.03	386.681	1367.88	1482.34	467.954	1407.4	1292.45	476.446	1426.99	1139.77	518.495	1351.33	987.999	483.593	1302.36	899.992	529.209	1361.21	888.723	539.299	1304.77	837.925
8139	0	228.061	1208.51	1673.49	144.732	1230.38	1671.59	263.177	1401.91	1667.5	151.698	1404.93	1666.74	199.055	1436.88	1525.31	218.324	1513.25	1260.81	208.456	1288.89	1436.63	199.484	1226.92	1234.43	127.079	1514.58	1316.63	388.313	1357.25	1481.57	468.774	1395.74	1291.13	476.975	1414.16	1139.09	518.3	1338.62	986.476	483.28	1289.46	898.211	528.638	1348.17	887.298	538.766	1291.71	836.733
8140	0	229.449	1197.72	1674.11	146.375	1220.19	1672.35	265.783	1391.17	1667.45	154.367	1394.74	1667.13	200.616	1426.11	1525.66	218.274	1501.07	1260.43	209.841	1278.04	1437.15	200.333	1215.56	1235.02	128.771	1503.86	1316.71	389.815	1346.38	1481.22	469.764	1384.05	1290.14	477.28	1401.86	1137.31	518.191	1325.66	985.471	482.717	1277.25	897.637	528.28	1335.03	886.382	538.207	1278.63	835.648
8141	0	231.041	1187.15	1674.71	148.123	1209.9	1673.52	268.173	1380.29	1667.68	156.941	1384.43	1667.57	202.218	1415.34	1526.14	219.397	1491.02	1260.94	211.082	1267.14	1437.83	201.258	1204.24	1235.8	130.14	1493.1	1317.11	391.254	1335.68	1480.96	470.555	1372.09	1289.42	477.78	1389.13	1136.42	517.828	1312.46	984.705	481.737	1263.98	897.258	527.553	1321.84	885.267	537.314	1265.15	835.036
8142	0	232.927	1176.68	1675.52	149.859	1199.63	1674.61	270.474	1369.58	1668.04	159.236	1374.09	1668.65	203.812	1404.73	1526.64	220.39	1479.84	1261.28	212.232	1256.22	1438.72	202.145	1193.09	1236.67	131.986	1482.52	1317.83	392.763	1324.8	1481.37	471.483	1360.13	1289.35	477.928	1375.93	1136.28	517.495	1299.15	984.643	480.909	1250.7	897.139	526.979	1308.13	885.234	536.354	1251.58	834.847
8143	0	234.528	1166.12	1676.66	151.591	1189.29	1676.21	272.825	1359.13	1668.51	161.551	1363.81	1669.57	205.234	1394.11	1527.66	221.421	1468.87	1262.07	213.385	1245.47	1439.94	203.023	1182.11	1238.07	133.193	1472.06	1318.73	394.1	1313.98	1482.05	472.234	1347.88	1289.55	478.514	1363.06	1136.39	516.947	1285.59	984.736	479.954	1237.5	897.563	526.231	1294.42	885.419	535.123	1237.73	835.076
8144	0	236.452	1155.76	1677.87	153.553	1179.01	1677.81	274.78	1348.41	1669.47	163.492	1353.42	1671.18	206.89	1383.86	1528.63	222.525	1458.06	1262.97	214.452	1234.86	1441.72	203.785	1171.25	1239.82	134.314	1461.52	1319.6	395.176	1303.04	1482.93	473.045	1335.65	1289.96	478.953	1349.84	1137.01	516.348	1271.76	985.354	478.75	1223.96	898.067	525.441	1280.46	885.947	533.624	1223.54	835.534
8145	0	238.534	1145.37	1679.36	155.608	1168.77	1679.22	276.897	1338.34	1670.16	165.333	1343.14	1672.57	208.25	1373.54	1529.91	223.582	1447.42	1264.2	215.514	1224.41	1443.28	204.602	1160.61	1241.22	135.118	1450.87	1320.95	396.428	1292.19	1483.84	473.968	1323.2	1290.62	479.501	1336.79	1137.54	515.799	1257.74	986.378	477.316	1210.05	899.106	524.799	1266.18	886.728	532.056	1209.07	836.244
8146	0	240.392	1135.31	1680.42	157.448	1158.58	1680.97	278.741	1328.04	1671.28	167.223	1333.01	1674.09	209.64	1363.48	1531.14	224.712	1436.84	1265.45	216.313	1213.98	1444.27	205.11	1150.08	1242.34	136.554	1440.66	1322.18	397.598	1281.14	1485.27	475.149	1310.8	1291.65	480.246	1323.51	1138.57	515.092	1243.57	987.284	476.045	1196.17	900.432	523.934	1251.61	887.848	530.419	1194.44	837.347
8147	0	242.334	1125.41	1681.82	159.27	1148.54	1682.73	280.344	1318.17	1672.22	168.916	1323.02	1675.45	211.006	1353.46	1532.33	225.956	1426.43	1266.47	217.108	1203.8	1445.72	205.467	1139.9	1243.9	137.771	1430.53	1323.39	398.753	1270.39	1486.69	476.214	1298.4	1292.61	480.972	1310.3	1139.44	514.573	1229.55	988.453	474.48	1182.27	901.867	523.076	1236.95	888.867	528.8	1179.75	838.547
8148	0	244.096	1115.54	1683.15	161.156	1138.59	1684.35	282.089	1308.52	1673.29	170.479	1313.11	1676.93	212.483	1343.6	1533.61	226.991	1416.19	1267.48	217.85	1193.76	1447.32	206.434	1130.29	1244.8	139.214	1420.57	1324.78	399.52	1259.53	1487.64	477.054	1285.99	1293.19	481.967	1297.02	1140.1	513.805	1215.23	989.325	472.658	1168.12	903.172	521.991	1221.94	889.726	526.535	1164.35	839.444
8149	0	245.9	1105.9	1684.66	162.939	1128.74	1686.13	283.144	1298.77	1674.25	171.908	1303.27	1678.31	213.714	1333.61	1535.06	228.16	1406.2	1268.73	218.587	1183.79	1448.95	206.629	1120.46	1246.42	140.374	1410.64	1326.42	400.375	1248.96	1488.8	478.039	1273.45	1294.11	482.916	1283.68	1140.93	512.975	1200.66	990.494	470.505	1153.63	904.928	521.03	1206.85	890.748	524.224	1148.82	840.811
8150	0	247.57	1096.4	1686.25	164.505	1119.04	1687.95	284.535	1289.53	1675.84	173.139	1293.58	1679.99	214.888	1323.95	1536.46	229.438	1396.64	1270.61	219.212	1174.05	1450.3	206.403	1110.53	1248.11	141.373	1400.94	1327.95	401.312	1238.46	1490.36	479.189	1260.94	1295.49	484.044	1270.27	1142.17	512.018	1185.93	991.971	468.51	1139.48	906.578	519.995	1191.41	892.33	521.972	1133.12	842.593
8151	0	249.248	1087.05	1687.86	166.002	1109.45	1689.62	285.557	1280.23	1677.03	174.035	1284.01	1681.57	215.962	1314.27	1538.09	230.617	1387.1	1272.22	219.846	1164.39	1451.62	206.741	1101.32	1249.33	142.274	1391.11	1329.6	402.146	1228.11	1491.82	480.312	1248.51	1296.58	485.351	1256.85	1143.14	510.978	1170.97	993.427	466.316	1125.2	908.236	518.783	1175.73	893.754	519.455	1117.24	844.479
8152	0	250.588	1077.76	1689.41	167.491	1100.01	1691.27	286.606	1270.99	1678.45	174.8	1274.53	1682.89	217.053	1304.84	1539.55	231.525	1377.37	1273.56	220.009	1154.6	1452.92	206.749	1092.07	1250.61	143.96	1381.97	1331.72	402.844	1217.98	1493	481.295	1235.94	1297.59	486.597	1243.22	1144.23	509.863	1155.97	994.895	463.744	1110.53	909.958	517.484	1159.88	895.006	516.604	1100.93	846.36
8153	0	252.096	1068.68	1691.21	168.748	1090.64	1693.04	286.589	1261.96	1679.63	175.488	1265.21	1684.26	218.079	1295.35	1540.94	232.49	1367.83	1275.12	221.177	1145.25	1454.62	206.407	1082.55	1252.32	145.27	1372.78	1333.03	403.729	1208.04	1494.32	482.401	1223.68	1298.69	487.923	1229.69	1145.15	508.732	1140.88	996.532	461.289	1096.01	912.083	516.232	1143.82	896.601	513.858	1084.66	848.443
8154	0	253.316	1059.72	1693.01	169.851	1081.36	1694.73	287.712	1253.12	1681.42	176.07	1255.94	1685.76	218.936	1286.08	1542.57	233.474	1358.27	1276.45	221.784	1135.94	1456.17	206.138	1073.4	1254.16	146.33	1363.46	1334.5	404.421	1198.19	1495.84	483.408	1211.3	1299.94	489.173	1216.12	1146.16	507.355	1125.61	998.161	458.67	1081.82	914.093	515.12	1127.62	898.146	510.824	1068.23	850.67
8155	0	254.31	1050.69	1694.91	170.957	1072.07	1696.52	287.956	1244.22	1682.89	176.709	1246.7	1687.37	220.056	1276.89	1544.07	234.252	1348.97	1278.18	222.289	1126.6	1457.98	206.297	1064.26	1255.95	147.239	1354.02	1336	405.118	1188.64	1496.91	484.206	1199.16	1300.9	490.52	1202.46	1147.35	505.897	1110.44	999.814	455.547	1067.1	916.657	513.442	1111.49	899.874	507.384	1051.61	852.963
8156	0	255.547	1041.87	1696.79	172.032	1062.9	1698.16	288.367	1235.42	1684.59	176.978	1237.42	1688.93	220.898	1267.52	1545.9	235.147	1339.67	1279.82	223.016	1117.48	1459.57	206.279	1054.87	1257.65	148.363	1344.67	1337.88	406.01	1179.19	1498.36	484.984	1187.06	1302	491.693	1188.8	1148.48	504.365	1095.2	1001.54	452.714	1052.56	919.09	511.908	1095.19	901.857	504.323	1035.11	855.735
8157	0	256.542	1032.94	1698.78	172.892	1053.74	1699.99	288.741	1226.9	1686.4	177.299	1228.28	1690.41	221.951	1258.36	1547.27	235.852	1330.31	1281.24	223.638	1108.4	1460.99	206.26	1045.61	1259.29	149.706	1335.58	1339.19	406.77	1169.71	1499.96	485.922	1175.4	1303.31	492.76	1175.36	1149.5	502.831	1080.03	1003.63	450.06	1038.48	921.142	510.292	1078.66	903.861	501.062	1018.64	858.713
8158	0	257.544	1024.25	1700.62	173.726	1044.58	1701.73	288.814	1218.19	1688.03	177.316	1219.22	1691.59	222.983	1249.3	1548.82	236.655	1321.02	1282.71	224.196	1099.37	1462.55	206.539	1036.45	1261.23	150.857	1326.64	1340.39	407.572	1160.47	1501.4	486.606	1163.81	1304.48	493.853	1161.98	1150.65	501.321	1065.23	1005.79	447.193	1024.29	923.725	508.468	1062.39	905.888	497.696	1002.52	861.561
8159	0	258.173	1015.35	1702.6	174.434	1035.47	1703.22	288.34	1209.17	1689.88	177.524	1210.04	1693.08	223.668	1240.13	1550.52	237.539	1311.72	1284.07	224.566	1090.07	1464.14	206.942	1027.18	1262.92	151.81	1317.55	1341.86	408.249	1151.24	1502.76	487.037	1152.32	1305.73	494.766	1148.85	1151.99	499.637	1050.24	1007.92	444.199	1010.1	926.352	506.549	1046.35	908.183	494.118	986.219	864.521
8160	0	259.056	1006.57	1704.51	175.193	1026.36	1704.91	288.874	1200.76	1691.47	177.798	1200.9	1694.51	224.471	1230.96	1551.99	238.483	1302.68	1285.91	225.418	1081.2	1466.07	207.378	1018.13	1264.93	152.918	1308.39	1343.84	409.062	1142.02	1504.18	487.552	1141.17	1307.13	495.525	1135.7	1153.39	497.881	1035.39	1010.49	441.032	995.445	929.739	504.464	1030.17	911.162	490.552	969.873	867.992
8161	0	259.582	997.854	1706.21	175.772	1017.29	1706.32	288.711	1191.99	1693.53	177.457	1191.75	1695.74	225.442	1221.95	1553.65	239.409	1293.53	1287.64	226.284	1072.27	1467.73	207.935	1009.13	1266.52	153.925	1299.26	1345.63	409.768	1132.52	1506.05	488.157	1130.35	1308.89	496.294	1122.82	1155.13	496.247	1020.9	1013.24	438.927	982.058	933.361	502.632	1013.9	914.017	487.101	953.808	871.84
8162	0	260.422	989.085	1708.05	176.39	1008.19	1707.77	288.889	1183.29	1695.03	177.497	1182.71	1696.89	226.388	1212.92	1554.97	240.047	1284.29	1288.95	226.754	1063.05	1469.12	208.467	1000.19	1267.97	154.716	1290.24	1347.14	410.585	1123.32	1507.35	488.528	1119.74	1310.34	496.759	1110.25	1156.65	494.678	1006.41	1016.05	436.288	968.191	936.487	500.598	998.043	916.849	483.641	937.779	875.433
8163	0	260.963	980.303	1709.43	176.948	999.057	1708.86	288.915	1174.61	1696.36	177.623	1173.6	1697.84	227.105	1203.78	1556.3	240.648	1275.17	1290.15	227.467	1054.03	1470.42	209.008	991.272	1269.32	155.529	1281.2	1348.44	411.171	1113.88	1508.67	488.917	1109.29	1311.55	497.164	1098.14	1157.73	493.002	992.242	1018.6	434.095	954.645	939.318	498.374	982.084	919.754	480.155	921.854	879.122
8164	0	261.702	971.42	1711.02	177.626	989.993	1710.11	288.495	1165.93	1697.45	177.635	1164.51	1698.72	228.061	1194.81	1557.14	241.475	1266.07	1291.22	227.994	1044.87	1471.49	209.453	982.351	1270.43	156.426	1272.33	1349.48	411.895	1104.47	1510	489.364	1098.99	1312.92	497.545	1086.28	1158.93	491.408	978.168	1021.56	431.487	940.432	942.968	496.346	966.479	922.906	476.724	905.942	883.167
8165	0	262.196	962.647	1712.31	178.014	980.968	1711.19	289.015	1157.25	1698.75	177.488	1155.44	1699.4	229.009	1185.85	1558.22	242.009	1256.9	1292.11	228.301	1035.57	1472.73	209.847	973.502	1271.57	157.178	1263.36	1350.62	412.501	1095.07	1511.13	489.66	1088.72	1314.1	497.825	1074.63	1160.03	490.193	964.469	1024.26	428.281	926.262	946.957	494.02	950.876	925.797	473.439	890.255	887.143
8166	0	262.69	953.747	1713.47	178.684	971.846	1711.93	288.962	1148.4	1699.64	177.733	1146.29	1700.06	229.661	1176.7	1559.1	242.814	1247.91	1293.11	229.057	1026.72	1473.85	210.221	964.523	1272.73	157.993	1254.4	1351.64	412.986	1085.62	1511.98	489.967	1078.71	1314.88	498.099	1063.14	1160.79	488.738	950.878	1026.96	425.621	912.045	951.105	491.553	935.504	928.633	470.398	874.699	891.318
8167	0	263.292	944.852	1714.34	179.145	962.691	1712.69	289.031	1139.44	1700.3	177.936	1137.11	1700.63	230.415	1167.52	1559.83	243.404	1238.72	1293.92	229.645	1017.63	1474.53	210.606	955.808	1273.13	158.649	1245.36	1352.78	413.472	1075.99	1512.64	490.322	1068.54	1315.78	498.404	1052.01	1161.51	487.209	937.588	1029.17	423.227	897.828	954.588	489.223	920.52	931.514	467.075	859.218	895.323
8168	0	263.909	935.847	1714.95	179.57	953.487	1713.16	289.323	1130.65	1700.85	177.858	1127.97	1700.83	231.118	1158.28	1560.41	244.057	1229.75	1294.67	229.969	1008.46	1474.74	210.716	946.927	1273.35	159.284	1236.42	1353.28	414.05	1066.49	1513.44	490.776	1058.68	1316.53	498.641	1040.88	1161.85	485.74	924.446	1031.53	421.063	883.81	957.899	486.84	905.639	934.288	463.972	843.863	899.182
8169	0	264.341	926.799	1715.52	180.024	944.393	1713.53	289.501	1121.59	1701.22	177.939	1118.69	1700.99	231.859	1149.12	1560.81	244.419	1220.64	1294.91	230.27	999.319	1475.17	210.813	938.1	1273.38	160.032	1227.42	1354.04	414.475	1056.84	1513.78	491.195	1048.82	1316.74	498.807	1029.94	1162.12	484.18	911.213	1033.71	418.594	869.607	961.647	484.394	891.113	936.836	460.995	828.492	903.457
8170	0	264.673	917.568	1715.86	180.517	935.216	1713.65	289.662	1112.38	1701.29	178.435	1109.51	1701.08	232.273	1139.75	1561.03	244.891	1211.67	1295.59	230.568	990.117	1475.3	211.168	929.591	1273.2	160.664	1218.42	1354.46	414.753	1047.22	1513.78	491.372	1038.86	1316.93	499.11	1019.13	1162.23	482.733	898.361	1035.59	416.255	855.463	965.237	481.726	876.477	939.07	458.143	813.447	907.407
8171	0	265.117	908.454	1715.81	180.872	925.873	1713.68	290.177	1103.33	1701.09	178.631	1100.22	1700.78	232.798	1130.36	1560.94	245.256	1202.63	1295.57	230.782	980.981	1475.08	210.95	920.488	1273.12	161.2	1209.5	1354.69	415.132	1037.73	1513.56	491.615	1029.02	1316.63	499.229	1008.47	1161.91	481.653	885.701	1037.39	414.117	841.492	968.815	479.241	862.271	941.296	455.247	798.432	911.083
8172	0	265.412	899.117	1715.67	181.146	916.508	1713.6	290.404	1094	1700.73	179.098	1090.83	1700.42	233.097	1121	1560.97	245.45	1193.68	1295.45	230.93	971.743	1474.72	210.964	911.769	1272.61	161.636	1200.5	1354.63	415.556	1028.24	1513.11	491.819	1019.12	1316.25	499.366	998.018	1161.26	480.428	872.723	1039.46	411.905	827.577	971.97	476.601	848.022	943.347	452.705	783.753	914.562
8173	0	265.664	889.654	1715.43	181.507	907.138	1713.31	290.694	1084.49	1700.04	179.328	1081.51	1699.89	233.462	1111.46	1560.7	245.835	1184.86	1295.33	231.162	962.531	1474.3	210.687	902.689	1272.17	162.127	1191.51	1354.59	415.732	1018.81	1512.45	491.879	1009.39	1315.44	499.286	987.394	1160.5	479.158	860.302	1040.79	409.969	813.774	975.572	474.117	833.92	944.928	449.92	769.044	918.092
8174	0	266.089	880.109	1714.98	181.766	897.681	1712.9	290.987	1075.04	1699.27	179.658	1071.94	1699.34	233.63	1101.93	1560.16	245.749	1175.82	1294.98	231.055	953.16	1473.42	210.509	893.8	1271.12	162.286	1182.47	1354.33	415.852	1009.26	1511.49	491.945	999.575	1314.72	499.166	977.082	1159.52	477.554	847.993	1041.95	408.061	800.021	978.463	471.626	820.029	946.895	447.277	754.534	921.554
8175	0	266.137	870.481	1714.29	181.834	888.037	1712.46	291.309	1065.24	1698.28	179.9	1062.42	1698.37	233.855	1092.34	1559.69	245.965	1166.94	1294.76	230.896	943.706	1472.44	210.122	884.963	1270.07	162.478	1173.51	1353.77	415.777	999.403	1510.95	492.002	989.896	1313.97	499.127	966.883	1158.4	476.602	835.901	1043.17	406.16	786.473	981.072	469.292	806.629	948.464	444.689	740.244	924.808
8176	0	266.24	860.803	1713.35	181.904	878.499	1711.75	291.661	1055.39	1697.1	180.404	1052.78	1697.64	233.787	1082.65	1558.95	245.99	1157.95	1294.27	230.826	934.433	1471.52	209.57	875.893	1268.99	162.5	1164.44	1353.4	415.591	989.717	1509.68	491.757	980.153	1312.65	498.857	956.497	1157.14	475.306	824.049	1044.18	404.486	772.994	984.081	466.666	792.93	950.097	442.245	726.156	927.879
8177	0	266.097	850.791	1712.38	181.964	868.717	1710.99	292.126	1045.48	1695.83	180.617	1042.95	1696.8	233.815	1072.95	1558.21	246.411	1149.31	1294.11	230.506	924.978	1470.61	209.307	866.968	1267.92	162.467	1155.12	1353.13	415.39	980.241	1508.18	491.328	970.418	1311.08	498.581	946.2	1155.83	473.531	811.937	1044.62	402.588	759.919	987.359	464.294	779.454	951.568	440	712.297	930.768
8178	0	266.091	840.907	1711.08	181.784	858.904	1709.76	292.12	1035.34	1694.27	180.855	1033.17	1695.36	233.569	1063.28	1556.99	245.526	1139.79	1292.69	229.706	915.286	1468.92	208.676	857.753	1266.44	162.22	1145.98	1352.19	415.12	970.646	1506.76	490.92	960.893	1309.62	498.289	936.131	1154.25	471.703	800.302	1045.09	400.888	747.131	989.645	462.082	766.464	952.105	437.981	698.568	934.015
8179	0	265.828	830.807	1709.52	181.628	849.108	1708.52	292.498	1025.32	1692.67	181.14	1023.28	1693.99	233.295	1053.73	1555.71	245.054	1130.64	1291.39	229.751	905.999	1467.38	208.011	848.677	1264.81	161.89	1136.87	1350.78	414.956	961.07	1505.26	490.641	951.519	1308.15	497.751	926.149	1152.39	470.525	788.672	1045.88	399.106	734.413	991.314	460.242	753.604	953.457	435.969	685.271	936.328
8180	0	265.497	820.629	1707.84	181.24	839.05	1707.01	292.446	1015.01	1690.81	180.962	1013.48	1692.34	232.75	1043.89	1554.41	244.421	1121.37	1290.06	229.271	896.422	1465.63	207.321	839.623	1263.01	161.412	1127.58	1349.55	414.375	951.402	1503.44	489.973	942.125	1306.27	497.243	916.135	1150.5	469.175	777.104	1046.15	397.43	722.133	993.106	458.135	740.805	954.258	433.753	672.043	938.678
8181	0	265.099	810.179	1706.08	180.928	829.14	1705.18	291.988	1004.69	1688.81	180.824	1003.33	1691.1	232.419	1034.07	1553.04	243.729	1111.98	1288.69	228.73	886.744	1463.93	206.533	830.305	1261.22	160.952	1118.04	1348.8	413.877	941.738	1501.57	489.192	932.704	1304.26	496.543	905.997	1148.5	467.835	765.805	1045.76	395.812	709.876	994.727	455.904	728.202	954.524	432.016	659.315	940.571
8182	0	264.449	800.011	1703.67	180.274	818.949	1703.42	292.071	994.318	1687.04	180.886	993.283	1689.58	231.746	1024.11	1551.42	243.34	1102.66	1287.36	228.041	877.029	1461.99	205.842	821.453	1259.23	160.34	1108.67	1347	413.218	932.028	1499.69	488.299	923.31	1302.33	495.996	896.092	1146.55	466.54	754.457	1045.98	394.22	697.874	995.753	454.092	715.813	955.251	430.134	646.522	942.484
8183	0	263.859	789.71	1701.44	179.675	808.838	1701.26	291.463	983.872	1685.02	180.55	983.147	1687.71	231.003	1014.38	1549.59	242.715	1093.19	1285.75	226.901	867.121	1459.89	204.975	812.192	1257.22	159.55	1099.12	1345.09	412.45	922.401	1497.57	487.362	914.048	1300.16	495.285	886.101	1144.59	465.423	743.386	1045.91	392.687	686.202	996.716	452.235	703.608	955.609	428.34	634.107	943.947
8184	0	263.126	779.326	1698.86	178.892	798.514	1699.11	291.428	973.652	1682.8	180.116	972.931	1685.7	230.079	1004.42	1547.55	241.472	1083.17	1283.75	226.552	857.465	1458.07	204.126	802.932	1254.86	158.764	1089.39	1343.23	411.633	912.717	1495.31	486.406	904.756	1297.79	494.534	876.06	1142.47	464.455	732.575	1045.15	391.217	674.576	997.29	450.294	691.371	956.003	426.691	621.824	945.462
8185	0	262.145	768.766	1696.22	177.993	788.266	1696.62	290.758	963.087	1680.56	179.117	962.728	1683.79	229.191	994.568	1545.44	240.52	1073.2	1281.77	225.596	847.476	1455.75	203.269	793.343	1252.63	157.873	1079.48	1341.48	410.716	902.799	1493.19	485.418	895.437	1295.54	493.784	866.161	1140.32	462.892	721.483	1044.1	389.887	663.146	997.311	448.652	679.625	955.481	425.387	609.876	946.234
8186	0	261.103	758.367	1693.61	176.861	777.922	1694.13	290.131	952.826	1678.32	178.472	952.508	1682	227.868	984.626	1542.97	239.418	1063.28	1279.38	224.63	837.528	1453.38	202.214	783.611	1250.17	156.727	1069.62	1338.92	409.702	892.962	1491.07	484.297	886.03	1293.32	492.766	856.163	1137.91	461.942	710.688	1043.58	388.574	651.846	996.88	447.377	668.207	955.206	424.057	598.129	947.103
8187	0	259.746	747.96	1690.71	175.688	767.647	1691.56	289.304	942.357	1676.06	177.631	942.301	1679.67	226.662	974.487	1540.64	238.989	1053.83	1277.26	223.507	827.438	1450.99	201.241	773.574	1247.88	155.628	1059.62	1336.28	408.548	883.183	1488.55	483.112	876.647	1290.67	491.838	846.257	1135.5	460.739	700.094	1042.12	387.231	640.686	996.403	445.708	656.722	954.382	422.977	586.501	947.455
8188	0	258.463	737.435	1688.16	174.467	757.284	1689	288.011	931.713	1673.59	176.331	931.855	1677.21	225.618	964.359	1538.18	237.136	1043.16	1274.12	222.551	817.326	1448.84	200.237	763.366	1245.34	154.582	1049.51	1333.64	407.245	873.241	1485.94	481.622	866.886	1287.93	490.797	836.469	1132.78	459.264	689.406	1040.02	386.177	629.783	996.081	444.134	645.534	952.977	421.876	575.225	947.184
8189	0	257.061	726.869	1685.66	172.907	746.796	1686.43	286.825	921.524	1671.11	174.898	921.455	1675.01	224.205	954.092	1535.41	236.567	1033.15	1271.91	221.19	807.003	1446.23	199.21	752.919	1242.82	153.409	1039.21	1330.98	405.978	863.039	1483.57	480.413	857.354	1285.25	489.676	826.616	1130.24	458.31	678.968	1038.4	385.148	618.953	994.801	443.002	634.497	951.344	421.035	564.271	946.36
8190	0	255.473	716.46	1683.05	171.265	736.396	1683.81	285.449	911.066	1668.92	173.642	911.145	1672.61	222.597	943.633	1533.06	235.563	1022.85	1269.44	219.816	796.598	1443.44	198.019	741.996	1240.46	152.141	1028.99	1328.14	404.797	852.801	1481.35	479.213	847.714	1282.99	488.521	816.594	1127.97	457.425	668.642	1036.88	384.223	608.314	993.079	442.008	623.915	949.924	420.234	553.384	945.382
8191	0	253.644	706.052	1680.57	169.548	726.01	1681.26	283.576	900.434	1666.55	171.726	900.691	1669.85	221.029	933.075	1530.71	234.541	1012.33	1267.06	218.417	786.168	1441	197.04	731.667	1237.6	150.889	1018.47	1325.5	403.354	842.301	1479.13	477.785	837.82	1280.63	487.278	806.632	1125.62	456.527	658.452	1034.83	383.292	597.741	991.257	441.076	613.492	947.945	419.6	542.906	943.899
8192	0	251.766	695.495	1678.43	167.586	715.488	1678.91	281.557	889.947	1664.12	169.565	890.176	1667.52	219.377	922.396	1528.4	233.512	1001.66	1264.85	216.918	775.543	1438.38	195.71	720.593	1235.16	149.728	1007.87	1323.16	401.741	831.64	1476.81	476.379	827.809	1278.31	486.128	796.609	1123.5	455.458	648.278	1032.44	382.646	587.457	989.137	440.254	603.155	945.797	419.189	532.61	942.105
8193	0	249.588	685.102	1676.17	165.342	704.997	1676.73	279.515	879.546	1661.98	167.447	879.652	1665.23	217.538	911.656	1525.89	232.653	991.061	1262.79	215.294	764.897	1435.84	194.549	709.559	1232.74	148.414	997.203	1320.7	400.064	820.848	1474.75	474.888	817.75	1276.33	484.754	786.352	1121.66	454.579	638.302	1029.98	381.982	577.293	986.583	439.44	593.31	943.591	418.783	522.676	939.761
8194	0	247.289	674.809	1674.08	163.109	694.461	1674.41	277.206	869.127	1659.64	165.039	869.071	1662.58	215.736	900.781	1523.63	231.538	980.131	1260.46	213.466	753.952	1433.44	193.331	698.874	1230.05	147.134	986.341	1318.11	398.163	809.704	1472.77	473.221	807.417	1274.25	483.394	776.293	1119.65	453.881	628.47	1027.65	381.457	567.374	983.874	438.701	583.646	940.725	418.565	513.053	937.054
8195	0	244.878	664.302	1672.21	160.82	683.955	1672.57	274.711	858.759	1657.07	162.402	858.49	1659.69	213.489	889.801	1521.27	230.342	968.904	1258.07	211.681	743.037	1431.29	192.083	687.859	1227.55	145.668	975.277	1315.65	396.142	798.492	1470.77	471.493	796.885	1272.38	481.912	766.29	1117.56	452.979	618.71	1024.48	380.982	557.602	981.043	438.266	574.601	937.444	418.786	503.697	933.752
8196	0	242.388	653.735	1670.51	158.17	673.373	1670.32	271.827	848.277	1654.74	159.578	847.914	1657.21	211.401	878.806	1519.02	229.148	957.772	1255.73	209.559	731.918	1428.72	190.591	676.801	1224.85	144.242	964.169	1312.86	394.058	787.176	1469.27	469.951	786.326	1270.91	480.301	756.059	1115.83	452.491	609.111	1022	380.751	547.946	977.242	438.213	565.568	934.152	418.642	494.521	930.268
8197	0	239.57	643.173	1669.2	155.403	662.735	1668.72	268.971	837.675	1652.9	156.828	837.286	1655.13	209.039	867.779	1517.01	227.955	946.57	1253.73	207.231	720.608	1426.7	189.063	665.145	1223.22	142.676	953.071	1310.17	391.926	775.959	1468.03	468.302	775.427	1269.78	478.622	745.867	1114.43	452.502	599.481	1019.89	380.629	538.594	973.544	438.112	556.861	931.29	418.931	485.806	926.325
8198	0	236.696	632.554	1668.2	152.485	651.948	1667.36	265.942	827.014	1651.28	153.703	826.471	1653.31	206.549	856.467	1515.35	226.564	935.036	1252.05	205.035	709.409	1424.9	187.446	654.124	1221.05	140.852	941.519	1308.17	389.452	764.462	1466.9	466.386	764.033	1268.77	476.913	735.554	1113.3	451.783	590.21	1016.48	380.633	529.413	969.795	438.18	548.365	927.529	419.384	477.274	921.945
8199	0	233.567	621.797	1667.51	149.545	641.296	1666.27	262.83	816.297	1650.07	150.326	815.668	1651.49	204.01	845.082	1513.77	225.267	923.497	1250.75	202.749	697.891	1423.63	185.965	642.093	1220	138.933	929.907	1306.42	386.88	752.943	1465.86	464.38	752.321	1267.92	474.914	725.047	1112.41	451.246	580.897	1013.53	380.873	520.449	965.992	438.239	540.139	924.027	419.958	469.083	917.795
8200	0	230.335	611.167	1666.89	146.226	630.469	1665.35	259.559	805.475	1648.98	147.031	804.861	1649.9	201.149	833.444	1512.67	224.011	911.75	1249.68	200.545	686.494	1422.33	184.43	630.584	1218.5	137.192	918.159	1305.05	384.57	741.355	1465.5	462.613	740.472	1267.77	472.99	714.53	1112.09	450.546	571.84	1010.12	381.242	511.744	961.764	438.793	532.32	920.496	420.9	461.316	912.846
8201	0	227.057	600.351	1666.69	142.912	619.632	1664.6	256.192	794.619	1648.18	143.71	793.995	1648.33	198.561	821.888	1511.71	222.755	899.979	1248.69	198.221	674.926	1421.36	182.635	618.284	1217.84	135.268	906.469	1303.53	382.167	729.583	1465.37	460.842	728.614	1268.07	470.828	703.974	1111.81	450.328	562.945	1007.56	381.559	503.282	957.015	439.509	525.117	917.067	422.02	453.933	907.946
8202	0	223.544	589.58	1666.53	139.492	608.796	1664.08	252.695	783.672	1647.68	140.536	783.073	1647.45	195.962	810.333	1510.9	221.138	888.066	1247.74	195.991	663.249	1420.72	181.003	606.389	1217.12	133.383	894.489	1302.57	379.67	717.659	1465.39	458.779	716.423	1268.22	468.763	693.401	1111.96	449.977	554.156	1004.72	382.214	495.082	952.609	440.369	517.885	913.345	423.407	446.982	902.842
8203	0	220.034	578.711	1666.88	135.877	597.883	1663.83	249.371	772.691	1647.42	137.264	772.134	1646.23	193.643	798.867	1510.33	219.429	875.986	1247.26	193.614	651.427	1420.35	179.466	593.881	1217.03	131.473	882.594	1301.55	377.243	705.801	1465.52	456.89	704.176	1268.83	466.501	682.621	1112.23	449.496	545.71	1001.86	382.855	487.131	947.797	440.962	511.584	910.074	424.961	440.332	897.576
8204	0	216.418	567.622	1667.72	132.45	586.975	1663.73	245.941	761.665	1647.69	133.643	761.142	1645.53	191.164	787.477	1510.12	217.836	864.138	1246.97	191.319	639.786	1420.4	177.763	581.742	1216.96	129.608	870.769	1300.94	374.855	693.909	1466.19	454.918	691.853	1269.78	464.232	671.781	1112.94	449.708	537.252	999.618	383.729	479.619	943.121	442.354	505.134	906.534	426.509	434.465	891.645
8205	0	212.706	556.797	1668.5	128.679	576.086	1664.05	242.467	750.661	1648.23	130.456	750.145	1645.22	188.818	775.993	1510.25	216.186	852.254	1247.21	189.15	628.256	1420.79	176.235	569.592	1217.42	127.678	858.828	1300.95	372.279	681.957	1467.11	452.703	679.264	1270.89	461.943	660.912	1114.08	449.553	529.06	997.327	384.649	472.349	938.752	443.382	499.313	903.652	428.274	428.813	886.491
8206	0	209.149	546.004	1669.68	125.189	565.209	1664.67	239.256	739.698	1649.24	127.256	739.272	1645.45	186.409	764.436	1510.9	214.515	840.362	1247.82	186.863	616.505	1421.49	174.778	557.758	1218.29	125.69	846.865	1301.01	370.223	670.286	1468.49	450.705	666.665	1272.36	459.646	649.921	1115.41	449.462	520.899	995.287	385.953	465.741	934.518	445.003	493.443	900.531	430.797	423.675	881.627
8207	0	205.518	534.977	1671.1	121.703	554.355	1665.28	236.07	728.674	1650.54	124.202	728.446	1646.18	183.862	752.949	1511.8	212.893	828.389	1248.76	184.764	604.904	1422.41	173.176	545.504	1219.38	123.548	834.84	1301.62	368.198	658.666	1470.07	448.998	654.247	1274.09	457.371	638.827	1117.18	449.792	513.234	993.945	387.299	459.166	929.893	446.545	488.508	898.146	432.566	418.99	876.161
8208	0	201.869	524.079	1672.87	118.109	543.622	1666.36	232.978	717.597	1652.35	121.222	717.666	1646.81	181.76	741.552	1513.04	211.172	816.601	1249.91	182.851	593.435	1423.96	171.421	533.67	1220.81	121.684	823.103	1302.52	366.156	647.137	1471.86	447.137	641.72	1276.46	455.248	627.951	1119.27	449.844	505.509	992.84	388.733	453.055	925.772	448.531	483.392	896.17	434.824	414.658	871.666
8209	0	198.186	513.138	1674.87	114.64	532.984	1667.43	229.964	706.611	1654.33	118.55	706.847	1647.74	179.685	730.24	1514.47	209.531	804.913	1251.29	180.956	581.967	1425.74	169.85	521.896	1222.54	119.082	810.436	1303.27	364.072	635.814	1473.76	445.237	629.361	1278.63	453.039	616.927	1121.75	449.671	498.124	991.723	390.35	447.417	922.377	450.13	478.782	894.794	436.793	410.72	867.361
8210	0	194.57	502.152	1677.04	111.341	522.433	1668.67	227.165	695.604	1656.63	115.498	696.246	1649.32	177.792	719.132	1516.21	207.904	793.126	1253.35	179.354	570.611	1427.73	168.458	510.217	1224.87	117.123	798.619	1305.02	362.289	624.776	1475.94	443.345	617.155	1280.97	451.049	606.173	1124.42	450.121	490.712	991.76	392.044	442.076	919.761	452.209	473.857	893.814	439.113	407.112	863.452
8211	0	191.25	491.572	1679.24	108.08	512.015	1670.08	224.445	684.761	1658.95	112.939	685.737	1650.7	176.12	708.211	1517.8	205.795	781.905	1254.66	177.967	559.523	1429.82	167.213	498.831	1226.9	115.876	787.972	1307.15	360.701	613.98	1478.34	441.858	605.499	1283.59	449.167	595.692	1127.17	450.483	483.644	992.174	393.534	436.065	917.217	454.351	469.308	893.562	441.446	403.555	860.478
8212	0	187.865	480.839	1681.43	104.955	501.566	1671.56	222.016	673.992	1661.56	110.394	675.409	1652.06	174.432	697.458	1519.6	203.941	770.724	1256.31	176.552	548.447	1431.97	165.972	487.454	1229.12	112.998	775.655	1307.87	359.15	603.331	1480.75	440.31	594.081	1286.28	447.176	585.547	1129.84	450.762	476.451	992.956	394.945	431.557	914.458	456.312	464.832	893.999	443.741	400.382	857.48
8213	0	184.769	470.276	1683.83	101.949	491.289	1673.17	219.711	663.355	1663.96	108.191	665.017	1654.1	173.224	686.858	1521.51	201.888	759.672	1257.84	175.493	537.488	1434.51	165.081	476.35	1231.66	111.582	764.911	1310.18	357.786	592.888	1483.06	438.931	583.242	1288.61	445.589	575.858	1132.73	451.299	469.483	993.936	396.629	426.498	913.35	458.888	459.891	894.502	445.812	396.774	855.23
8214	0	182.027	459.855	1686.23	99.261	481.232	1674.92	217.86	652.819	1666.52	106.107	654.96	1655.51	171.655	676.273	1523.39	200.029	748.942	1259.78	174.62	526.837	1436.61	164.155	465.494	1233.98	109.067	753.137	1311.73	356.82	582.728	1485.58	437.888	572.901	1291.13	444.283	566.796	1135.4	452.063	462.63	995.523	398.539	421.639	912.977	461.35	454.819	896.025	447.925	393.474	853.489
8215	0	179.343	449.752	1688.58	96.8539	471.276	1676.75	216.208	642.432	1669.2	105.021	644.93	1657.13	170.494	665.811	1525.64	198.226	738.341	1262.02	173.671	516.231	1438.77	163.34	455.513	1235.74	107.67	742.614	1314.46	355.753	572.593	1488.08	436.916	562.946	1293.74	443.31	558.23	1138.18	452.713	455.862	997.02	400.236	416.701	912.794	463.763	449.439	897.958	449.814	389.589	852.808
8216	0	176.798	439.41	1691.06	94.4925	461.447	1678.63	214.587	631.937	1671.74	103.82	634.945	1658.7	169.416	655.612	1527.85	196.413	727.833	1264.36	172.99	505.705	1441.37	162.621	444.633	1238.35	105.969	731.896	1317.21	354.747	562.664	1490.31	435.96	553.427	1296.04	442.488	549.859	1141.07	453.59	449.214	998.768	401.805	412.036	912.792	465.887	443.949	899.87	451.547	385.592	852.283
8217	0	174.815	429.334	1693.53	92.6914	451.808	1680.68	213.576	621.785	1674.26	102.438	625.254	1661.12	168.498	645.358	1529.87	194.686	717.42	1266.82	172.652	495.403	1444.04	162.163	434.471	1240.44	104.077	721.015	1319.81	353.979	552.795	1492.55	435.241	544.603	1297.94	441.876	541.974	1143.42	454.591	442.828	1000.2	403.268	406.837	913.328	467.752	438.216	901.825	453.129	381.523	852.282
8218	0	173.102	419.415	1695.93	91.023	442.126	1682.71	212.618	611.635	1676.67	101.554	615.57	1663	167.481	635.365	1532.15	192.832	707.17	1268.81	171.74	485.201	1445.67	161.83	425.207	1242.08	102.349	710.644	1322.02	353.418	543.251	1494.67	434.934	536.544	1300.35	441.661	534.645	1145.58	455.702	436.634	1001.83	404.765	401.6	914.313	469.659	432.64	903.659	454.377	377.357	852.054
8219	0	171.552	409.527	1698.32	89.5277	432.52	1684.86	211.835	601.613	1679	101.209	605.907	1664.68	166.715	625.37	1534.31	191.027	697.142	1270.66	171.123	475.094	1447.99	161.413	415.107	1244.62	100.67	700.315	1324.07	352.82	533.808	1496.77	434.721	529.138	1302.42	441.696	527.733	1147.66	456.779	430.606	1003.64	406.066	396.246	915.649	471.275	427.198	905.749	455.725	372.762	853.112
8220	0	170.2	399.789	1700.53	88.3029	423.035	1687.04	211.259	591.681	1681.26	100.547	596.416	1666.97	165.711	615.562	1536.46	189.436	687.184	1272.66	170.802	465.243	1450.32	161.035	405.384	1246.53	99.1245	690.126	1326.32	352.06	524.396	1498.68	434.315	521.834	1304.05	441.707	520.984	1149.72	457.789	424.669	1005.04	407.093	390.851	916.7	472.605	421.728	907.354	456.978	368.032	853.841
8221	0	169.19	389.928	1702.87	87.4459	413.678	1689.36	211.109	581.83	1683.63	100.212	586.987	1669.46	165.117	605.714	1538.75	187.777	677.393	1274.69	170.254	455.274	1452.69	160.807	395.788	1248.51	97.7123	680.071	1328.77	351.436	515.35	1500.64	434.041	514.988	1306.08	442.039	514.508	1151.83	458.724	418.835	1006.86	408.36	385.343	918.267	473.565	416.578	909.35	458.232	362.967	855.207
8222	0	168.478	380.403	1705.1	86.8728	404.364	1691.63	210.751	571.977	1685.88	100.159	577.495	1671.97	164.379	596.076	1541.18	186.471	667.762	1277.11	169.922	445.652	1454.98	160.657	386.125	1250.76	96.4321	670.071	1331.17	350.981	506.45	1502.66	433.961	508.523	1308.28	442.245	508.232	1153.94	459.809	413.24	1008.8	409.614	379.747	919.959	474.808	411.322	911.162	459.557	357.882	857.082
8223	0	167.918	370.645	1707.49	86.1574	394.815	1694.23	210.861	562.282	1688.38	100.06	568.059	1674.4	163.568	586.409	1543.54	184.913	658.087	1279.42	169.563	436.014	1457.36	160.468	376.392	1253.23	95.2611	660.282	1333.95	350.557	497.612	1504.77	433.785	502.227	1310.34	442.753	502.497	1156.53	460.76	407.698	1010.78	410.85	373.967	922.153	475.67	405.985	913.201	460.857	352.57	859.091
8224	0	167.592	360.88	1709.92	86.1661	385.558	1696.67	211.1	552.632	1690.84	100.231	558.53	1676.89	162.858	576.962	1545.8	183.436	648.323	1282.06	169.298	426.424	1459.77	160.506	366.734	1255.65	93.9416	650.471	1336.65	350.108	488.829	1506.97	433.511	496.036	1312.66	442.931	496.591	1158.73	461.779	402.558	1012.83	412.115	368.06	924.202	476.464	401	915.154	462.308	347.143	861.168
8225	0	167.634	351.344	1712.2	86.1291	376.219	1699.25	211.241	543.061	1692.97	100.281	549.235	1679.78	162.251	567.465	1548.15	182.044	638.806	1284.33	168.966	416.834	1462.09	160.566	357.101	1258.1	92.7998	640.768	1338.87	349.841	480.271	1509.26	433.486	490.182	1314.94	443.224	491.292	1161.07	462.79	397.276	1015.18	413.565	361.988	926.875	477.194	395.975	917.339	463.987	341.785	863.992
8226	0	167.813	341.838	1714.41	86.2747	366.81	1701.78	211.47	533.449	1695.08	100.658	539.831	1682.39	161.412	557.954	1550.32	180.62	629.421	1286.33	168.573	407.342	1464.42	160.507	347.497	1260.48	91.6157	631.176	1341.01	349.382	471.79	1511.28	433.117	484.205	1317.23	443.236	485.973	1163.28	463.754	392.212	1017.37	414.829	355.88	929.472	477.54	391.434	919.337	465.703	335.915	867.112
8227	0	168.174	332.583	1716.16	86.5714	357.341	1704.39	211.768	523.91	1697.05	100.905	530.332	1684.78	160.826	548.611	1552.38	179.209	620.06	1288.38	168.395	397.892	1467	160.394	337.854	1262.81	90.4114	621.393	1343.23	348.79	463.258	1513.1	432.421	478.065	1319.19	443.251	480.901	1165.5	464.614	387.374	1019.4	416.155	349.581	931.955	477.959	386.418	921.346	467.175	330.251	869.714
8228	0	168.767	323.054	1718.23	87.0697	347.856	1707.04	212.142	514.562	1698.88	101.117	520.83	1687.33	159.88	539.162	1554.55	177.795	610.591	1290.42	168.416	388.483	1469.55	160.462	328.241	1264.89	89.315	611.65	1345.47	348.346	454.864	1515.03	431.982	472.007	1321.33	442.919	475.878	1167.6	465.444	382.359	1021.62	417.48	343.081	934.679	478.026	381.665	923.188	468.724	324.567	872.638
8229	0	169.608	313.666	1720.1	87.6613	338.276	1709.15	212.584	505.316	1700.68	101.421	511.287	1689.63	158.95	529.966	1556.57	176.418	601.137	1292.57	167.948	379.028	1471.42	160.625	318.676	1267.28	88.0348	601.998	1347.65	348.015	446.59	1517.26	431.813	466.291	1323.58	442.74	470.888	1169.9	466.324	377.501	1023.94	419.106	336.616	937.522	478.086	377.095	925.403	470.351	318.914	875.556
8230	0	170.465	304.468	1721.86	88.339	328.709	1711.42	212.851	496.019	1702.23	101.803	501.819	1691.93	158.302	520.75	1558.4	174.915	591.845	1294.28	167.818	369.896	1473.23	160.579	309.125	1269.65	86.6454	592.549	1349.61	347.686	438.176	1519.21	431.248	460.081	1326.03	442.223	465.89	1171.92	467.014	372.699	1026.17	420.647	330.025	940.446	478.111	372.181	927.361	472.018	313.183	878.629
8231	0	171.345	295.013	1723.45	89.053	319.088	1713.47	213.253	486.733	1703.78	102.066	492.259	1693.95	157.834	511.443	1560.1	173.97	582.66	1296.05	167.717	360.519	1475.19	160.595	299.564	1271.42	85.3026	582.923	1351.78	347.293	429.837	1520.87	430.683	453.825	1327.92	441.788	460.822	1173.96	467.616	367.761	1028.08	421.83	322.954	943.213	477.846	367.336	929.047	473.581	307.493	881.317
8232	0	172.348	286.098	1724.57	89.8051	309.414	1715.28	213.501	477.402	1705.11	102.193	482.678	1695.95	157.213	502.163	1561.64	172.837	573.396	1297.92	167.742	350.647	1476.62	160.789	290.224	1273.2	84.101	573.279	1353.53	346.941	421.4	1522.41	430.312	447.757	1330	441.238	455.757	1175.81	468.129	362.708	1029.98	423.408	316.177	945.826	477.474	362.258	930.811	475.439	301.851	883.93
8233	0	173.169	276.186	1726.27	90.6572	299.785	1717.15	213.678	468.077	1706.33	102.336	473.02	1697.59	156.857	492.772	1563.24	171.822	564.172	1299.44	167.415	341.282	1477.76	160.864	280.924	1274.45	82.91	563.637	1355.15	346.652	412.933	1524	429.824	441.003	1331.85	440.473	450.549	1177.49	468.528	357.495	1031.72	424.947	309.311	948.313	477.404	357.416	932.583	477.005	295.951	886.592
8234	0	174.251	267.246	1727.05	91.5047	290.06	1718.41	214.089	458.685	1707.54	102.603	463.325	1699.01	156.36	483.461	1564.44	170.867	554.977	1300.86	167.877	332.657	1479.51	161.072	271.599	1275.9	81.9083	554.025	1356.64	346.406	404.36	1525.32	429.238	434.634	1333.18	440.087	445.586	1179.12	468.622	352.451	1032.87	426.282	302.305	950.577	476.965	351.943	934.066	478.408	289.943	888.856
8235	0	175.309	257.823	1728.11	92.4361	280.322	1719.75	214.223	449.48	1708.2	102.76	453.666	1700.25	156.043	474.129	1565.56	169.818	545.608	1302	167.977	323.268	1480.56	161.252	262.483	1276.82	80.8333	544.296	1357.91	346.321	395.899	1526.35	428.841	428.043	1334.64	439.263	440.048	1180.4	469.047	347.101	1034.14	427.783	295.138	952.538	476.516	346.532	935.167	480.089	284.155	890.795
8236	0	176.324	248.251	1729.01	93.3169	270.545	1720.72	214.425	440.148	1708.89	103.029	444.017	1701.23	155.826	464.679	1566.33	169.508	536.795	1303.29	168.148	313.969	1481.18	161.699	253.242	1277.88	79.9229	534.708	1358.98	346.442	387.356	1527.17	428.534	421.329	1335.91	438.324	434.434	1181.23	469.603	341.806	1035.47	429.288	287.785	954.666	476.176	340.733	936.137	481.626	278.093	892.586
8237	0	177.246	238.836	1729.41	94.1194	260.732	1721.33	214.574	430.73	1709.45	103.165	434.211	1701.97	155.437	455.207	1566.95	168.861	527.658	1304.24	168.443	304.577	1481.89	162.027	244.058	1278.52	79.2269	525.186	1359.68	346.408	378.645	1527.95	428.151	414.477	1336.76	437.315	428.587	1181.81	469.819	336.107	1036.31	430.471	280.332	956.443	475.78	334.865	936.911	482.86	271.891	894.041
8238	0	178.063	229.296	1729.42	95.0118	250.853	1721.64	214.774	421.364	1709.78	103.219	424.343	1702.53	155.451	445.577	1567.52	168.349	518.443	1305.07	168.832	295.271	1482.06	162.281	234.937	1278.47	78.6059	515.435	1360.37	346.343	369.925	1528.09	427.575	407.434	1337.21	436.441	422.529	1182.38	469.961	330.139	1036.7	431.59	273.084	957.343	475.542	328.783	937.408	483.858	265.339	894.697
8239	0	179.082	219.745	1729.2	95.9208	240.899	1721.58	214.838	412.008	1709.86	103.342	414.408	1702.8	155.21	435.956	1567.69	167.804	509.274	1305.26	169.218	285.463	1482.41	163.002	225.645	1278.57	78.0244	505.73	1360.91	346.577	361.204	1528.04	427.267	400.202	1337.42	435.573	416.188	1182.35	470.139	323.86	1036.73	432.901	265.68	958.228	475.227	322.447	937.666	485.791	259.475	895.114
8240	0	180.193	210.032	1728.94	96.8291	230.882	1721.42	215.074	402.655	1709.87	103.338	404.5	1702.74	155.455	426.201	1567.72	167.399	499.984	1305.45	169.762	275.916	1482.32	163.769	216.455	1278.62	77.8173	496.087	1361.03	346.902	352.233	1528	427.048	392.95	1337.73	434.812	409.626	1182.47	470.472	317.531	1036.97	434.4	258.686	958.42	475.251	316.048	937.579	486.685	252.82	896.016
8241	0	181.262	200.299	1728.44	97.7642	220.762	1720.93	215.273	393.246	1709.73	103.798	394.506	1702.58	155.693	416.431	1567.59	166.205	489.85	1304.78	170.255	266.227	1482.04	164.528	207.223	1278.25	77.5342	486.392	1360.99	347.313	343.17	1527.77	426.831	385.292	1337.65	433.912	402.718	1182.12	470.728	311.104	1036.82	435.376	251.141	958.758	475.388	309.665	937.152	487.686	246.301	895.902
8242	0	182.336	190.319	1727.66	98.7404	210.528	1720.13	215.627	383.645	1709.46	104.051	384.362	1702.44	155.967	406.555	1567.23	167.144	481.424	1305.73	171.06	257.31	1480.89	165.385	197.921	1277.46	77.5158	476.616	1360.93	347.675	334.186	1527.09	426.596	377.576	1337.1	433.292	395.409	1181.6	471.031	304.246	1036.18	436.257	243.503	958.447	475.075	302.496	936.67	488.688	239.598	895.357
8243	0	183.424	180.457	1726.45	99.7924	200.246	1719.25	215.952	373.929	1708.99	104.124	374.1	1702.01	156.166	396.536	1566.68	166.895	471.738	1305.23	171.743	247.594	1480.05	166.313	188.586	1276.59	77.4166	466.776	1360.57	348.093	324.901	1526.5	426.414	369.51	1336.65	432.775	387.968	1181.04	471.314	297.169	1035.6	437.29	235.944	957.847	475.308	295.491	936.098	489.593	232.664	894.633
8244	0	184.493	170.518	1725.08	100.868	189.933	1717.98	216.267	364.18	1708.45	104.167	363.775	1701.25	156.28	386.417	1566.22	167.041	462.32	1304.69	172.398	237.575	1479.3	167.148	179.195	1275.48	77.5746	456.976	1359.99	348.468	315.385	1525.62	426.328	361.365	1335.96	432.315	380.247	1180.47	471.701	289.821	1034.79	438.091	228.232	956.981	475.596	288.37	935.322	490.492	225.649	893.813
8245	0	185.756	160.465	1723.52	101.99	179.465	1716.39	216.572	354.359	1707.66	104.626	353.482	1700.45	156.858	376.32	1565.13	167.273	452.762	1303.99	173.263	227.537	1478.26	167.972	169.725	1274	77.6411	447.116	1359.33	348.99	305.907	1524.47	426.294	352.762	1334.97	431.966	372.327	1179.37	472.012	282.357	1033.41	438.974	220.549	955.683	476.033	281.068	934.376	491.181	218.277	892.24
8246	0	187.13	150.267	1722.06	103.23	168.978	1715.04	217.075	344.329	1706.61	105.057	343.057	1699.35	157.07	366.12	1563.85	167.557	443.052	1302.89	174.155	217.695	1476.69	168.955	160.269	1272.44	78.0391	437.104	1358.39	349.699	296.231	1523.14	426.303	343.974	1333.66	431.612	363.966	1178.01	472.633	274.828	1032.1	440.165	212.921	954.135	476.434	273.582	932.546	492.336	211.673	890.585
8247	0	188.661	140.036	1720.5	104.436	158.389	1713.46	217.616	334.337	1705.25	105.747	332.529	1698.17	157.899	355.82	1562.55	167.853	433.177	1301.44	175.011	207.285	1475.43	170.046	150.749	1270.99	78.452	427.133	1357.13	350.555	286.515	1521.74	426.801	335.131	1332.22	431.552	355.59	1176.59	473.263	267.116	1030.61	441.185	204.983	952.693	477.143	266.265	930.947	493.494	204.549	889.039
8248	0	189.934	129.796	1718.49	105.709	147.813	1711.52	218.06	324.152	1703.63	106.377	321.96	1696.62	158.557	345.306	1561.13	168.651	423.539	1300.21	175.761	197.012	1473.68	170.772	141.086	1269.09	78.9088	417.042	1355.89	351.275	276.646	1520.01	427.444	325.885	1330.59	431.464	346.839	1174.95	473.843	259.144	1028.63	442.033	197.022	950.485	477.865	258.775	929.062	494.411	197.067	886.788
8249	0	191.196	119.417	1716.46	107.166	137.211	1709.63	218.847	313.866	1702	106.769	311.259	1694.86	159.287	334.904	1559.59	169.492	413.67	1299.02	176.766	186.846	1471.63	171.521	131.417	1266.7	79.5736	406.929	1354.6	351.892	266.321	1518.04	427.534	316.255	1328.65	431.584	337.76	1173.29	474.41	250.864	1026.31	442.974	188.696	947.881	478.567	250.954	927.007	495.334	189.698	884.108
8250	0	192.796	109.038	1714.27	108.655	126.451	1707.76	219.728	303.585	1700.19	107.774	300.53	1693.2	160.5	324.344	1557.8	170.146	403.577	1297.49	177.891	176.426	1469.72	172.597	121.667	1264.49	80.2836	396.747	1353.21	352.997	255.968	1516.18	428.221	306.512	1326.81	431.933	328.511	1171.47	475.135	242.199	1024.09	443.895	179.676	945.536	479.676	243.242	924.776	496.472	182.171	881.437
8251	0	194.536	98.5913	1712.45	110.207	115.728	1705.8	220.963	293.146	1698.32	108.758	289.794	1691.18	161.954	313.591	1555.98	171.097	393.598	1295.97	178.843	165.82	1467.6	173.463	111.679	1262.62	81.0337	386.472	1351.46	354.094	245.633	1514.26	429.362	296.656	1325.08	432.241	319.011	1169.6	476.195	233.967	1022.06	444.809	170.669	943.145	481.185	235.837	922.6	497.762	174.682	879.132
8252	0	196.178	87.9649	1710.49	111.819	104.93	1703.84	221.913	282.655	1696.08	110.144	279.081	1689.19	162.532	303.059	1554.02	172.086	383.385	1294.13	180.018	155.22	1465.48	174.353	101.618	1260.39	81.9755	376.142	1349.79	355.281	235.079	1512.13	430.276	286.404	1323.05	432.828	309.231	1167.67	477.151	225.432	1019.53	445.996	163.272	939.302	482.229	227.875	920.001	499.15	167.198	876.046
8253	0	197.98	77.3673	1708.1	113.536	94.051	1701.67	223.326	272.019	1693.82	111.248	268.216	1687.01	164.066	292.234	1552.06	173.206	373.123	1292.73	181.284	144.775	1462.96	175.344	91.4355	1257.66	83.1269	365.691	1348.03	356.517	224.278	1509.55	430.753	275.945	1320.64	433.542	299.233	1165.37	478.259	216.512	1016.63	446.9	154.129	936.073	483.41	219.592	917.402	500.428	159.305	872.797
8254	0	199.925	66.5798	1706.07	115.214	83.1556	1699.6	224.729	261.402	1691.31	112.757	257.36	1684.68	165.488	281.473	1549.79	174.399	362.733	1290.68	182.423	133.777	1460.66	176.236	80.9456	1255.17	84.2021	355.129	1346.09	357.905	213.531	1507.05	432.039	265.015	1318.09	434.354	288.975	1163.12	479.606	207.682	1013.86	448.457	145.977	932.743	484.873	211.465	914.374	501.714	151.417	869.403
8255	0	201.694	55.8362	1703.66	117.1	72.1709	1697.39	226.195	250.662	1688.84	114.369	246.391	1682.19	166.742	270.584	1547.65	175.626	352.167	1287.98	183.683	123.404	1457.98	176.867	70.4013	1252.68	85.533	344.581	1343.74	359.218	202.43	1504.58	433.673	254.396	1315.62	435.542	278.813	1160.75	480.776	198.434	1010.99	449.834	137.331	929.095	486.184	203.163	911.505	503.099	143.406	865.818
8256	0	203.808	45.0737	1701.39	119.615	61.239	1695.01	228.096	239.847	1686.39	116.181	235.387	1679.95	168.455	259.689	1545.49	176.823	341.502	1285.66	185.151	112.377	1455.58	177.928	59.862	1250	86.954	333.946	1341.73	360.693	191.401	1501.64	434.538	243.103	1312.41	436.506	268.038	1157.84	481.953	188.975	1007.37	451.016	128.162	925.054	487.281	194.313	908.038	504.525	135.358	861.86
8257	0	206.041	34.049	1699.03	121.763	50.2347	1692.89	230.019	228.943	1683.93	118.092	224.35	1677.49	170.307	248.515	1543.18	178.144	330.837	1283.29	186.752	101.602	1453.06	179.082	49.0812	1247.38	88.5985	323.155	1339.67	362.35	180.267	1498.85	436.392	231.994	1309.69	437.616	257.048	1154.86	483.476	179.446	1004.26	452.783	119.378	921.547	488.72	185.453	904.87	506.179	127.169	857.975
8258	0	208.46	23.1318	1696.83	123.848	39.1133	1690.73	232.049	218.042	1681.46	120.003	213.218	1675.38	171.982	237.55	1540.78	179.366	319.947	1281.23	188.422	90.6715	1450.66	180.212	38.374	1245.2	90.0428	312.256	1337.52	364.247	169.259	1496.32	437.443	220.509	1306.77	438.893	245.866	1152.45	485.223	169.982	1001.27	454.7	110.67	918.252	490.295	176.576	901.737	507.889	118.92	854.486
8259	0	210.713	12.0453	1694.43	126.105	28.0137	1688.49	234.298	206.971	1679.24	122.126	202.01	1673	173.696	226.429	1538.57	180.589	308.965	1279.03	189.99	79.6761	1448.16	181.289	27.5748	1242.61	91.5585	301.21	1335.48	365.954	157.895	1493.76	439.291	208.881	1303.97	440.117	234.365	1149.87	486.555	159.825	998.234	456.351	101.713	914.213	492.197	167.75	899.066	509.503	110.283	850.809
8260	0	213.147	0.937032	1691.9	128.567	16.7485	1686.11	236.655	195.809	1676.56	124.445	190.769	1670.95	175.874	215.17	1536.4	181.767	297.833	1277.09	191.792	68.6002	1445.4	182.659	16.7889	1239.68	93.1459	290.129	1333.53	367.846	146.684	1490.85	440.937	197.164	1301.04	441.466	222.749	1147.37	487.966	149.494	994.829	457.486	91.6914	909.964	493.783	158.216	895.74	511.071	101.341	846.786
8261	0	215.716	-10.2935	1689.32	131.328	5.50937	1683.82	239.092	184.673	1674.05	126.834	179.473	1668.54	177.852	203.969	1533.97	183.237	286.717	1274.85	193.765	57.4471	1442.78	184.103	5.67397	1237.07	94.6249	278.777	1331.44	369.885	135.451	1488.07	442.544	185.435	1298.04	443.019	211.1	1144.96	489.542	138.992	991.511	459.146	82.1416	906.165	495.919	148.997	892.75	512.705	92.3567	842.823
8262	0	218.519	-21.5635	1687	134.126	-5.73856	1681.52	241.548	173.429	1671.46	129.389	168.224	1666.13	179.748	192.769	1531.75	184.557	275.302	1272.41	195.772	46.1845	1440.41	185.794	-5.30296	1234.92	96.1528	267.358	1329.21	371.996	124.303	1485.32	444.439	173.973	1294.99	444.501	199.626	1141.44	491.211	128.558	988.362	460.996	72.416	902.609	497.592	139.272	889.463	514.51	83.232	839.314
8263	0	221.309	-32.8443	1684.75	136.69	-17.0357	1679.56	244.271	162.112	1669.12	132.165	156.879	1663.97	182.282	181.505	1529.37	186.065	263.897	1270.04	198.017	34.9535	1438.24	187.462	-16.5358	1232.51	97.7937	255.856	1326.96	374.238	113.182	1482.47	446.185	162.163	1291.91	446.02	187.894	1138.55	492.898	118.089	984.911	462.393	62.2329	898.886	499.334	129.336	886.242	516.168	73.8467	835.392
8264	0	224.278	-44.2551	1682.64	139.381	-28.5682	1677.67	247.048	150.63	1666.83	135.063	145.465	1661.85	184.226	170.149	1527.23	187.637	252.346	1267.69	200.233	23.6588	1435.84	189.323	-28.003	1230.34	99.6908	244.282	1324.97	376.531	101.912	1479.7	448.334	150.844	1288.73	447.741	176.103	1135.52	494.496	107.257	981.762	464.928	54.1	894.486	501.117	119.179	882.955	517.765	64.1988	831.687
8265	0	227.187	-55.7507	1680.82	142.183	-40.0578	1676.11	250.02	139.169	1664.94	137.958	134.096	1660.31	186.914	158.888	1525.27	189.223	240.807	1265.51	202.535	12.2232	1434.07	191.33	-39.5684	1228.58	101.68	232.693	1322.94	379.005	90.6499	1477.3	450.295	139.134	1286.06	449.514	164.152	1132.89	496.265	96.3684	978.862	465.755	42.196	891.783	502.779	108.738	880.087	519.478	54.3812	828.358
8266	0	230.12	-67.3416	1679.06	145.193	-51.4146	1674.63	253.17	127.644	1663.42	140.98	122.538	1658.79	189.333	147.311	1523.61	191.025	229.144	1263.9	204.81	0.79833	1432.55	193.214	-51.5017	1227.07	103.834	221.055	1321.15	381.435	79.3812	1474.85	452.33	127.645	1283.24	451.348	152.191	1130.46	497.652	85.1815	975.719	467.097	31.5612	888.26	504.439	98.3097	877.243	520.644	43.956	825.01
8267	0	232.964	-78.8695	1677.25	148.341	-63.0417	1673.24	256.195	116.032	1661.7	144.073	110.975	1657.66	191.874	135.662	1522.25	192.835	217.315	1261.97	207.347	-10.7506	1431.07	195.321	-63.7377	1225.67	106.267	209.471	1319.46	383.936	67.9136	1472.51	454.162	116.038	1280.69	453.354	140.135	1127.86	499.041	73.6109	972.773	468.088	20.4696	884.779	505.902	87.414	874.524	522.07	33.5667	821.643
8268	0	236.303	-90.6984	1676.23	151.41	-74.7648	1672.1	259.45	104.386	1660.53	147.275	99.3121	1656.68	194.561	124.156	1520.84	194.894	205.531	1260.61	209.935	-22.4089	1430	197.812	-75.9603	1224.86	108.863	197.861	1318.01	386.694	56.6913	1470.65	455.992	104.179	1278.1	455.099	127.775	1125.64	500.783	62.3103	970.305	469.399	9.442	882.466	507.285	76.4365	872.029	523.349	22.9317	819.145
8269	0	239.567	-102.398	1675.44	154.37	-86.3959	1671.45	262.785	92.5604	1659.82	150.554	87.7624	1656.27	197.076	112.668	1520.13	196.947	193.673	1259.16	212.629	-33.9772	1429.38	200.137	-88.3073	1224.45	111.656	186.225	1316.99	389.535	45.4372	1469.37	458.409	92.5494	1276.3	457.087	115.494	1123.99	502.329	50.7367	968.639	470.96	-1.25918	880.614	508.714	65.197	870.128	524.608	11.9933	817.128
8270	0	242.29	-113.898	1674.62	157.569	-98.0907	1671.05	265.997	80.7589	1659.24	153.898	76.0855	1656	200.112	101.045	1519.63	198.96	182.037	1258.41	215.272	-45.544	1428.94	202.415	-100.618	1224.17	114.392	174.858	1316.3	392.241	33.9242	1468.21	460.56	80.6505	1274.84	459.057	103.123	1122.58	503.695	38.6353	966.825	471.661	-13.1203	878.55	509.878	53.6413	868.264	525.489	0.61867	815.026
8271	0	245.284	-125.793	1674.06	160.671	-109.848	1671.02	269.234	68.8372	1659.04	157.217	64.4388	1656.18	202.728	89.4361	1519.48	201.09	170.535	1258.19	217.692	-57.1827	1428.53	204.699	-113.074	1224	117.045	163.604	1316.03	394.81	22.3422	1467.14	462.551	68.641	1273.51	461.225	90.6353	1121.4	505.074	26.4949	965.195	473.385	-20.245	874.543	511.169	41.7571	866.909	526.213	-11.1212	813.07
8272	0	248.628	-137.613	1674.08	163.744	-121.689	1671.16	272.507	57.0382	1659.1	160.389	52.609	1656.33	205.709	77.7156	1519.73	203.224	159.174	1258.37	220.434	-68.6403	1428.64	207.05	-125.171	1224.26	119.883	152.62	1316.2	397.513	10.8466	1466.68	464.771	56.9233	1272.82	463.382	78.1538	1120.73	506.358	14.1537	964.287	473.197	-36.2663	875.565	512.348	29.6956	866.124	526.913	-23.1238	812.102
8273	0	251.827	-149.378	1674.27	166.862	-133.462	1671.49	275.624	45.2716	1659.29	163.589	40.8576	1656.91	208.775	65.9721	1520.16	205.27	147.902	1258.71	222.911	-80.209	1429.28	209.033	-137.697	1224.99	122.554	141.791	1316.75	400.137	-0.742983	1466.94	467.417	44.7654	1272.86	465.662	65.5403	1120.69	507.586	1.42029	964.066	474.676	-44.3168	873.441	513.404	17.2045	865.92	527.269	-35.6463	811.613
8274	0	254.874	-161.138	1674.24	170.035	-145.25	1672.04	278.693	33.5978	1659.61	166.62	29.1043	1657.83	211.13	54.5483	1521.03	206.156	135.41	1258.15	225.186	-91.5341	1429.58	211.242	-149.114	1225.39	124.864	131.01	1317.66	402.569	-12.4478	1467.18	469.846	32.5311	1272.81	467.785	52.5574	1120.61	508.64	-11.4227	963.991	475.053	-56.5779	873.193	514.467	4.39194	865.841	527.721	-48.4873	811.043
8275	0	257.986	-172.835	1674.23	173.053	-156.967	1672.59	281.687	21.9265	1659.97	169.452	17.3964	1658.68	213.658	43.397	1521.6	208.587	124.474	1258.8	227.477	-102.764	1430.04	214.093	-159.321	1225.73	127.158	120.437	1318.72	404.993	-24.2984	1467.59	471.87	20.2338	1272.83	470.199	40.0659	1120.8	509.843	-24.5009	964.073	475.354	-69.1825	873.619	515.415	-8.81161	865.785	527.796	-61.4946	811.167
8276	0	260.906	-184.452	1674.39	175.893	-168.563	1672.95	284.396	10.4218	1660.84	172.091	5.81365	1659.84	216.391	32.5492	1522.4	211.175	113.604	1259.69	229.427	-113.603	1430.6	215.896	-170.281	1226.48	129.423	110.112	1319.65	407.246	-36.2298	1468.33	474.715	7.84045	1273.49	472.762	27.4839	1121.39	510.839	-37.9379	964.63	475.27	-82.0857	874.335	516.396	-22.2744	866.411	527.653	-75.3497	811.689
8277	0	263.283	-195.985	1674.18	178.504	-180.133	1673.27	286.832	-1.07997	1661.44	174.645	-5.70141	1660.99	218.921	21.8847	1523.31	213.687	102.962	1260.43	231.182	-124.552	1431.24	217.385	-181.088	1227.12	131.815	99.8965	1320.66	409.178	-48.1938	1469.06	476.998	-4.71945	1274.23	475.194	14.7983	1121.96	511.617	-51.749	965.06	475.013	-95.0676	874.758	517.271	-36.0043	866.949	527.129	-89.6449	812.066
8278	0	265.796	-207.513	1674.13	180.963	-191.57	1673.65	289.283	-12.3905	1662.63	177.16	-17.0231	1662.47	221.29	11.4696	1523.94	216.191	92.5442	1261.14	232.975	-135.242	1431.84	218.775	-191.763	1227.72	134.303	89.8034	1321.69	411.246	-60.0314	1469.81	479.298	-17.3828	1274.81	478.105	2.31742	1122.87	512.547	-65.4492	965.569	474.733	-108.651	875.402	518.313	-50.1193	867.29	526.67	-104.212	812.54
8279	0	267.976	-218.717	1674.31	183.086	-202.791	1674.18	291.569	-23.6507	1663.84	179.444	-28.1587	1663.89	223.981	1.23508	1525.15	218.855	82.4094	1262.05	234.693	-145.595	1432.89	220.007	-202.121	1228.97	137	79.9848	1322.7	413.347	-71.7441	1470.88	481.765	-30.3008	1275.3	480.791	-10.339	1123.33	513.591	-79.2831	966.515	474.686	-121.933	876.972	519.074	-64.5932	868.016	526.391	-118.691	813.554
8280	0	269.983	-229.814	1674.86	184.972	-213.736	1674.84	293.577	-34.7373	1665.12	181.611	-39.0185	1665.64	226.214	-8.9697	1526.02	222.558	73.3463	1263.45	236.065	-155.615	1434.22	220.877	-212.339	1230.56	139.815	70.3605	1323.73	415.254	-83.3142	1471.99	484.389	-43.2575	1276.55	483.703	-23.09	1124.53	514.529	-93.4497	967.698	474.323	-135.75	878.796	519.637	-79.4489	869.195	525.964	-133.822	814.922
8281	0	271.503	-240.788	1675.13	186.654	-224.592	1675.4	295.459	-45.659	1666.56	183.482	-49.8798	1666.89	228.5	-19.0671	1527.32	226.07	63.9614	1265.3	237.23	-165.543	1434.97	221.433	-222.366	1231.67	142.681	60.95	1324.75	416.954	-94.896	1472.94	486.799	-56.3786	1277.29	486.305	-36.5103	1125.27	515.203	-107.931	968.512	473.692	-149.858	879.908	520.461	-94.3242	869.944	525.107	-149.251	815.894
8282	0	272.973	-251.558	1675.5	188.062	-235.32	1675.96	297.179	-56.4707	1668.05	185.195	-60.5296	1668.48	230.705	-28.9175	1528.53	228.62	54.0235	1266.57	238.229	-175.262	1435.63	221.933	-232.2	1232.66	145.498	51.4847	1325.94	418.58	-106.243	1473.92	489.199	-69.5417	1277.99	489.186	-49.6415	1126.16	515.703	-122.714	969.384	473.041	-163.861	880.882	521.007	-109.712	870.95	524.244	-165.14	817.074
8283	0	274.426	-262.226	1676.43	189.414	-245.835	1676.9	298.93	-67.1338	1669.78	186.739	-71.0144	1670.01	232.599	-38.809	1529.83	231.176	44.4038	1267.9	239.427	-184.957	1437.03	222.254	-241.867	1234.12	148.324	42.1859	1327.05	420.07	-117.318	1475.19	491.524	-82.8832	1278.98	491.437	-63.4704	1127.07	516.412	-137.523	970.598	472.522	-178.26	882.421	521.755	-125.072	872.113	523.437	-181.118	818.627
8284	0	275.641	-272.593	1677.65	190.453	-256.222	1677.93	300.102	-77.64	1671.07	188.109	-81.3838	1671.55	234.568	-48.3008	1531.29	233.659	34.7593	1269.16	240.379	-194.35	1438.34	222.167	-251.491	1235.59	151.102	32.9961	1328.23	421.635	-128.137	1476.69	493.81	-95.9082	1280.14	494.155	-77.1062	1128.1	516.802	-152.644	972.018	471.629	-192.689	884.216	522.197	-140.784	873.289	522.559	-197.101	820.208
8285	0	276.45	-282.879	1678.63	191.582	-266.398	1679.01	301.527	-88.0435	1672.9	189.306	-91.5831	1673.16	236.465	-57.728	1532.81	236.021	25.3432	1270.55	241.331	-203.749	1439.6	222.229	-260.808	1237.02	154.125	24.1758	1329.31	422.895	-138.711	1477.79	495.802	-108.924	1280.86	496.595	-90.882	1128.68	517.051	-167.8	973.038	470.739	-207.223	885.745	522.296	-156.85	874.067	521.5	-213.434	821.71
8286	0	277.492	-293.084	1680.28	192.282	-276.516	1680.64	302.62	-98.283	1674.32	190.289	-101.701	1674.83	238.072	-67.4348	1534.29	238.327	15.8179	1272.04	242.484	-213.047	1441.41	221.993	-270.332	1238.78	156.754	15.1517	1330.78	424.366	-149.016	1479.43	497.807	-121.966	1282.11	499.119	-104.74	1129.64	517.47	-182.98	974.543	469.926	-221.824	887.9	522.913	-172.797	875.283	520.559	-229.76	823.7
8287	0	277.925	-303.158	1682.03	192.706	-286.481	1682.2	303.51	-108.333	1676.57	191.113	-111.616	1676.48	239.817	-76.7808	1536.46	240.469	6.52236	1273.71	243.513	-222.266	1443.44	221.961	-279.591	1240.87	159.216	6.14733	1332.34	425.604	-159.259	1481.36	499.656	-134.7	1283.55	501.511	-118.729	1130.99	517.666	-198.451	976.51	468.86	-236.493	890.145	523.216	-189.02	877.078	519.615	-246.444	826.214
8288	0	278.043	-313.248	1683.66	193.194	-296.299	1683.66	304.293	-118.432	1678.48	191.856	-121.419	1678.38	240.953	-86.0413	1538.19	242.723	-2.88469	1275.4	244.564	-231.52	1445.04	221.897	-288.848	1242.42	161.358	-2.8862	1334.13	426.63	-169.273	1483.19	500.919	-147.679	1285.02	503.768	-132.895	1132.53	517.432	-214.214	978.396	467.412	-251.436	892.019	523.477	-205.553	879.346	518.171	-263.171	828.619
8289	0	278.448	-323.165	1685.55	193.497	-306.167	1685.1	304.945	-128.318	1680.71	192.445	-131.216	1679.96	242.481	-95.5811	1540.39	244.746	-12.2526	1277.38	245.524	-240.521	1446.61	222.124	-298.192	1244.15	163.335	-11.7769	1336.12	427.736	-179.334	1485.14	502.232	-160.165	1286.64	506.072	-147.01	1134.42	517.175	-230.228	980.511	466.154	-266.282	894.168	523.692	-222.019	881.604	516.724	-280.101	831.33
8290	0	278.567	-332.924	1687.52	193.596	-315.807	1686.86	305.41	-138.112	1682.77	192.824	-140.913	1681.73	243.955	-104.707	1542.35	246.362	-21.4421	1279.73	246.358	-249.551	1448.87	222.883	-307.119	1246.42	165.133	-20.4211	1337.85	428.899	-189.026	1487.51	503.664	-172.387	1288.94	507.597	-161.21	1136.15	517.219	-245.754	983.403	465.026	-281.136	897.438	523.485	-238.93	884.033	515.403	-296.717	834.635
8291	0	278.555	-342.607	1689.71	193.668	-325.286	1688.84	305.712	-147.793	1684.85	193.132	-150.431	1683.48	245.056	-113.91	1544.68	247.897	-30.7499	1281.63	247.09	-258.55	1451.08	223.622	-315.883	1248.77	166.979	-29.3484	1339.7	429.909	-198.752	1489.98	504.886	-184.254	1291.28	509.567	-175.237	1138.42	516.994	-261.191	986.454	463.938	-296.675	901.36	523.422	-255.649	886.968	513.888	-313.503	838.106
8292	0	278.387	-352.337	1691.71	193.72	-334.735	1690.28	305.911	-157.415	1686.86	193.258	-159.945	1684.91	246.222	-122.965	1546.44	249.666	-39.7673	1283.46	247.819	-267.55	1452.88	224.2	-324.683	1250.63	168.505	-37.9299	1341.66	430.729	-208.527	1492.05	505.601	-196.166	1293.32	511.153	-189.08	1140.4	516.543	-276.909	989.161	462.434	-311.566	904.519	523.201	-272.474	889.707	512.228	-330.336	841.272
8293	0	278.139	-361.876	1693.46	193.422	-344.21	1691.86	305.688	-166.899	1689.17	193.351	-169.427	1686.6	247.418	-131.94	1548.24	251.178	-48.9628	1285.37	247.899	-276.287	1454.81	224.763	-333.355	1252.41	169.943	-47.0169	1343.61	431.438	-218.444	1494.24	506.509	-207.664	1295.25	512.445	-202.862	1142.45	515.803	-292.423	991.686	461.522	-326.356	907.461	523.279	-289.28	892.724	510.549	-347.2	844.638
8294	0	277.714	-371.512	1695.5	193.176	-353.575	1693.43	305.717	-176.381	1691.25	193.442	-178.778	1688.04	248.405	-140.927	1550.43	252.549	-58.235	1287.15	248.677	-285.488	1456.77	225.319	-341.91	1254.35	171.195	-55.5265	1345.59	432.091	-228.38	1496.61	507.191	-219.012	1297.72	513.767	-216.213	1144.7	515.635	-307.818	995.223	459.644	-341.561	911.444	522.818	-306.064	896.146	508.73	-364.278	848.843
8295	0	277.261	-381.033	1697.35	192.857	-362.898	1694.79	305.607	-185.884	1693	193.402	-188.136	1689.53	249.008	-149.977	1551.9	254.046	-67.1408	1288.87	248.722	-294.382	1458.85	225.856	-350.514	1256.42	172.485	-64.3117	1347.43	432.716	-238.028	1498.89	507.875	-230.149	1300.13	514.94	-229.6	1146.96	515.197	-323.121	998.55	458.322	-356.819	915.347	522.293	-323.031	899.525	507.283	-380.993	852.612
8296	0	276.902	-390.382	1699	192.472	-372.234	1696.25	305.702	-195.412	1694.81	193.414	-197.406	1690.85	250.11	-158.848	1553.75	255.421	-76.3166	1290.62	249.623	-303.517	1460.66	226.448	-359.044	1258.08	173.76	-73.0257	1348.97	433.2	-247.915	1501	508.496	-241.309	1302.22	515.338	-242.857	1148.5	514.861	-338.092	1001.75	457.151	-372.033	919.132	521.755	-339.692	902.543	505.066	-397.703	856.346
8297	0	276.514	-399.908	1700.76	192.234	-381.38	1697.46	305.463	-205.028	1696.69	193.392	-206.668	1692.22	250.833	-168.045	1555.17	256.98	-85.3913	1292.23	250.029	-312.528	1462.54	226.93	-367.696	1260.01	174.87	-81.7742	1350.67	433.701	-257.836	1503.03	509.268	-252.093	1304.34	516.651	-255.644	1150.75	514.564	-352.892	1005.1	456.095	-387.319	923.11	521.119	-356.109	906.063	503.359	-414.652	860.556
8298	0	275.967	-409.297	1702.15	191.796	-390.416	1698.44	305.233	-214.463	1698.03	193.205	-215.862	1693.36	251.516	-177.036	1556.72	258.313	-94.4492	1293.79	249.637	-321.456	1464.33	226.903	-376.757	1261.68	176.053	-90.471	1352.03	434.013	-267.796	1505.16	509.64	-263.171	1306.57	517.441	-268.432	1152.79	514.088	-367.983	1008.65	455.399	-402.659	927.17	520.312	-372.345	909.395	502.054	-431.065	864.939
8299	0	275.285	-418.751	1703.09	191.258	-399.751	1699.13	305.162	-223.943	1699.63	193.062	-225.177	1694.31	252.006	-186.072	1557.98	259.52	-103.563	1295	250.175	-330.681	1465.47	226.741	-385.95	1262.86	177.334	-99.1691	1353.46	434.178	-277.769	1506.69	509.97	-274.168	1308.14	518.204	-281.043	1154.56	513.573	-382.584	1011.62	454.149	-418.122	930.703	519.189	-388.625	912.551	500.457	-447.839	869.046
8300	0	274.603	-428.258	1703.72	190.858	-409.072	1699.58	305.072	-233.487	1700.89	193.019	-234.445	1695.17	252.533	-195.071	1558.94	261.103	-112.532	1296.33	250.207	-339.746	1466.38	225.622	-397.466	1263.62	178.355	-107.78	1354.53	434.324	-287.812	1508.08	510.245	-285.278	1309.59	518.902	-293.397	1156.15	513.014	-397.159	1014.38	452.595	-433.629	934.353	518.055	-404.579	915.49	498.947	-464.44	872.906
8301	0	274.153	-437.737	1704.76	190.253	-418.25	1700.14	304.827	-243.03	1701.79	192.924	-243.64	1695.8	253.281	-204.227	1560.09	262.175	-121.658	1297.23	250.381	-348.96	1467.85	227.345	-402.759	1264.7	179.48	-116.46	1355.5	434.646	-297.626	1509.63	510.878	-296.199	1311.11	519.092	-305.864	1157.41	512.588	-411.427	1017.42	451.653	-448.957	938.376	517.115	-420.38	918.668	497.696	-480.788	877.155
8302	0	273.607	-447.1	1705.12	189.643	-427.468	1700.5	304.621	-252.587	1702.69	192.742	-252.896	1696.45	253.512	-213.175	1560.69	263.356	-130.628	1298.07	250.148	-358.078	1468.87	226.727	-412.468	1265.61	180.433	-125.251	1356.18	434.752	-307.601	1510.82	511.313	-307.105	1312.71	520.055	-317.713	1158.74	512.13	-425.551	1020.34	450.647	-464.347	942.398	516	-435.852	921.66	496.348	-497.233	881.648
8303	0	272.949	-456.747	1705.36	189.066	-436.791	1700.37	304.516	-262.166	1703.46	192.58	-262.289	1696.7	253.822	-222.468	1561.38	264.468	-139.445	1298.8	249.96	-367.277	1469.33	226.405	-421.414	1266.03	181.39	-133.922	1356.53	434.667	-317.696	1511.64	511.557	-318.113	1313.52	520.514	-329.745	1159.6	511.647	-439.616	1022.72	449.595	-479.71	945.974	514.286	-451.201	924.511	494.93	-513.612	885.584
8304	0	272.276	-466.275	1705.06	188.423	-446.234	1700.02	304.411	-271.834	1703.86	192.406	-271.668	1696.83	254.388	-231.663	1561.62	265.19	-148.631	1298.91	249.299	-376.548	1469.68	225.843	-430.438	1266.02	182.205	-142.821	1357	434.516	-327.642	1511.9	511.709	-329.159	1314.11	520.95	-341.454	1160.26	511.059	-453.714	1024.99	448.552	-495.114	949.423	513.09	-466.597	926.92	493.879	-529.903	889.413
8305	0	271.585	-475.926	1704.85	187.95	-455.452	1699.56	304.069	-281.504	1703.83	192.104	-280.992	1696.7	254.39	-240.947	1561.4	266.171	-157.373	1299.17	248.962	-385.932	1469.98	225.207	-439.521	1266.31	182.837	-151.722	1357.13	434.417	-337.573	1512.42	511.874	-340.208	1314.72	521.191	-353.107	1160.56	510.655	-467.532	1027.16	447.465	-510.308	952.87	511.923	-482.218	929.067	492.423	-545.939	893.163
8306	0	270.919	-485.528	1704.17	187.279	-464.981	1699.02	303.791	-291.168	1703.56	191.959	-290.463	1696.41	254.403	-250.18	1561.24	266.802	-166.1	1299.15	248.48	-395.268	1469.73	224.525	-448.43	1265.9	183.488	-160.603	1356.97	434.081	-347.697	1512.26	511.829	-351.245	1314.77	521.59	-364.484	1160.56	509.997	-481.198	1028.92	446.323	-525.502	955.838	510.337	-497.601	931.071	490.858	-562.12	896.767
8307	0	270.342	-495.255	1703.45	186.812	-474.51	1698.39	303.541	-300.9	1702.91	191.744	-299.945	1695.83	254.406	-259.695	1560.83	267.329	-175.205	1298.66	247.965	-404.676	1469.18	223.805	-457.408	1265.33	184.028	-169.557	1356.55	433.725	-357.735	1511.94	511.798	-362.151	1314.53	520.961	-376.466	1159.68	508.863	-494.782	1030.33	445.344	-540.501	958.629	508.752	-512.744	932.622	489.458	-578.007	899.956
8308	0	269.942	-504.799	1702.5	186.19	-483.973	1697.48	303.307	-310.675	1702.37	191.587	-309.503	1695.25	254.426	-269.193	1560.31	267.729	-184.447	1298.15	247.521	-414.188	1468.78	223.238	-466.12	1265.04	184.305	-178.586	1356.15	433.416	-367.741	1511.66	511.824	-372.838	1314.46	521.069	-387.893	1159.32	508.66	-508.068	1031.88	444.409	-555.362	961.63	507.395	-527.5	934.351	488.24	-593.644	903.472
8309	0	269.23	-514.661	1701.56	185.575	-493.525	1696.47	302.973	-320.453	1701.44	191.145	-319.093	1694.47	254.13	-278.67	1559.45	268.003	-193.685	1297.58	246.844	-423.829	1468.14	222.455	-474.995	1264.33	184.492	-187.563	1355.53	432.81	-377.761	1510.93	511.564	-383.487	1314.25	521.053	-399.258	1159.06	507.911	-521.541	1033.41	443.257	-570.009	964.433	505.818	-542.346	936.328	486.823	-609.092	906.635
8310	0	268.457	-524.481	1699.75	184.97	-503.182	1695.08	302.721	-330.35	1700.36	190.787	-328.741	1693.36	253.743	-288.332	1558.58	268.115	-203.108	1296.74	245.909	-433.472	1466.74	221.553	-484.014	1262.75	184.531	-196.672	1354.66	431.984	-388.099	1509.95	511.144	-394.227	1313.29	521.13	-410.608	1158.28	506.947	-534.8	1034.11	441.848	-584.626	966.686	504.159	-557.17	937.641	485.262	-624.623	909.361
8311	0	267.756	-534.389	1697.94	184.301	-513.041	1693.33	302.34	-340.224	1698.83	190.392	-338.39	1692.38	253.836	-298.103	1557.37	268.191	-212.415	1295.69	245.177	-443.169	1465.32	220.418	-493.479	1261.21	184.302	-205.869	1353.48	431.178	-398.323	1508.5	510.593	-404.989	1312.13	520.818	-421.903	1157.18	506.071	-548.135	1034.73	440.531	-598.959	968.476	502.401	-571.263	938.739	483.835	-639.882	912.056
8312	0	267.252	-544.251	1696.32	183.697	-522.791	1691.88	301.945	-350.157	1697.25	189.961	-348.149	1690.72	252.749	-307.739	1555.94	268.08	-221.778	1294.58	244.343	-452.95	1464.01	220.402	-502.363	1259.75	184.072	-215.117	1352.18	430.579	-408.359	1507.41	510.24	-415.095	1311.14	520.57	-433.126	1155.76	505.234	-560.905	1035.3	439.464	-612.975	970.251	500.901	-585.905	939.616	482.549	-654.574	914.524
8313	0	266.575	-554.326	1694.86	182.942	-532.629	1690.13	301.346	-360.111	1695.22	189.486	-357.97	1689.02	252.307	-317.491	1554.18	267.746	-231.332	1292.78	243.255	-462.746	1462.44	219.043	-511.347	1258.14	183.634	-224.488	1350.74	429.598	-418.613	1505.66	509.48	-425.49	1309.75	519.941	-444.346	1154.15	503.953	-573.773	1035.71	438.948	-626.929	972.134	499.061	-599.8	940.209	481.21	-669.296	916.817
8314	0	265.825	-564.221	1692.32	182.202	-542.564	1688.18	300.782	-370.087	1693.13	188.797	-367.881	1687.22	251.373	-327.359	1552.6	267.33	-240.911	1290.98	242.232	-472.673	1460.42	217.476	-521.553	1256.29	183.053	-234.02	1348.86	428.675	-428.77	1504.06	508.579	-435.935	1307.78	519.343	-455.423	1152.29	502.842	-586.474	1035.51	437.62	-640.723	973.079	498.282	-613.973	940.472	480.006	-683.858	918.646
8315	0	264.953	-574.376	1690.12	181.32	-552.514	1685.88	300.061	-380.145	1690.8	187.995	-377.833	1685.15	250.415	-337.199	1550.39	266.866	-250.57	1289.14	241.054	-482.572	1458.38	216.285	-531.308	1254.18	182.318	-243.578	1346.9	427.366	-438.937	1501.59	507.675	-446.086	1305.75	518.581	-466.508	1150.17	502.062	-599.045	1035.18	436.309	-654.317	974.016	496.592	-627.762	940.606	478.681	-698.161	920.362
8316	0	264.006	-584.46	1687.51	180.405	-562.508	1683.66	299.248	-390.297	1688.48	187.289	-387.867	1682.98	249.326	-347.129	1548.51	266.09	-260.308	1286.98	239.699	-492.632	1456.24	215.064	-541.047	1251.93	181.421	-253.286	1344.75	426.28	-449.166	1499.71	506.422	-456.518	1303.6	517.631	-477.714	1148.11	500.49	-611.651	1034.71	434.984	-667.705	974.67	494.725	-641.412	940.475	477.281	-712.155	921.688
8317	0	262.9	-594.637	1684.78	179.402	-572.651	1681.16	298.28	-400.422	1685.92	186.364	-398.019	1680.66	248.197	-357.095	1545.85	265.229	-270.155	1284.74	238.393	-502.762	1453.93	213.732	-551.023	1249.51	180.44	-263.09	1342.59	425.046	-459.378	1497.41	505.055	-466.871	1301.1	516.715	-488.705	1145.82	499.17	-623.829	1033.75	433.592	-680.864	974.791	493.089	-654.807	939.917	475.972	-725.989	922.469
8318	0	261.947	-604.751	1682.24	178.483	-582.7	1678.52	297.267	-410.615	1683.44	185.155	-408.095	1678.39	246.835	-367.072	1543.59	264.259	-280.074	1282.23	237.03	-512.993	1451.61	214.093	-559.535	1247.26	179.358	-273.013	1340.07	423.623	-469.615	1494.91	503.797	-477.022	1298.71	515.887	-499.417	1143.63	497.931	-636.071	1032.81	432.343	-693.929	974.771	491.521	-667.954	939.383	474.753	-739.39	922.949
8319	0	260.753	-614.907	1679.77	177.026	-592.983	1676.47	296.1	-420.835	1681.09	183.957	-418.2	1676.21	245.565	-377.273	1541.31	263.226	-290.126	1280.04	235.684	-523.248	1449.62	211.308	-570.919	1245.21	178.197	-283.039	1337.69	422.329	-479.634	1492.46	502.557	-487.159	1296.48	514.651	-510.402	1141.59	496.85	-648.072	1031.91	431.113	-706.661	974.707	490.285	-680.864	939.024	473.741	-752.404	923.418
8320	0	259.333	-625.192	1677.11	175.614	-603.19	1673.86	294.697	-431.059	1678.43	182.48	-428.414	1673.79	243.774	-387.213	1538.57	262.195	-300.368	1277.51	233.924	-533.64	1447.32	209.787	-581.702	1242.81	176.748	-293.134	1335.01	421.04	-489.89	1490.52	500.878	-497.481	1294.04	513.203	-521.42	1139.17	495.444	-659.843	1030.38	429.713	-719.403	974.343	488.83	-693.433	937.995	472.524	-765.292	923.348
8321	0	257.715	-635.592	1674.28	174.029	-613.532	1670.88	293.182	-441.368	1675.83	180.878	-438.853	1671.13	242.279	-397.703	1536.11	261.073	-310.67	1274.92	232.196	-544.166	1444.56	207.853	-592.35	1240.06	175.454	-303.343	1332.25	418.747	-500.298	1486.94	498.906	-507.946	1290.93	511.563	-532.345	1136.43	493.897	-671.775	1028.64	428.31	-731.826	973.059	486.288	-705.726	936.019	471.296	-777.913	922.505
8322	0	255.933	-645.997	1671.55	172.365	-624.064	1668.52	291.246	-451.76	1672.86	179.145	-449.191	1668.43	240.551	-408.029	1533.41	259.783	-321.09	1272.05	230.436	-554.794	1442.06	206.081	-603.354	1237.49	174.027	-313.705	1329.67	417.254	-510.963	1484.62	496.932	-518.092	1288.15	509.588	-543.21	1133.78	492.344	-683.389	1026.51	427.131	-743.869	971.45	485.485	-717.929	934.774	470.118	-790.247	921.339
8323	0	254.212	-656.463	1669.18	170.642	-634.343	1666.06	289.363	-462.206	1670.19	177.385	-459.678	1665.73	239.267	-418.576	1530.78	258.679	-331.721	1269.6	228.619	-565.49	1439.82	204.469	-613.936	1235.3	172.484	-324.077	1326.89	415.74	-521.687	1482.91	495.021	-528.313	1285.71	507.671	-554.181	1131.41	491.013	-694.709	1024.94	425.733	-755.954	970.451	484.063	-729.672	933.113	469.271	-801.948	920.169
8324	0	252.154	-666.971	1666.84	168.467	-644.923	1663.7	287.366	-472.722	1667.79	175.252	-470.167	1663.14	236.961	-429.268	1528.24	257.558	-342.421	1267.19	226.704	-576.298	1437.53	202.751	-624.765	1232.78	170.983	-334.564	1324.31	413.746	-532.569	1480.37	492.866	-538.601	1283.3	505.549	-564.976	1128.9	489.51	-705.832	1022.8	424.355	-767.685	968.608	481.908	-741.042	930.818	468.548	-813.389	918.628
8325	0	249.956	-677.461	1664.54	166.236	-655.533	1661.42	285.171	-483.292	1665.16	172.997	-480.652	1660.77	234.935	-440.171	1526.03	256.242	-353.216	1264.57	224.648	-587.208	1435.24	201.01	-635.564	1230.38	169.642	-345.166	1321.7	411.868	-543.794	1478.57	490.559	-548.949	1281.05	503.286	-575.807	1126.75	488.345	-716.692	1020.61	423.458	-778.571	966.041	480.274	-751.912	928.595	467.555	-824.421	916.655
8326	0	247.577	-688.161	1662.35	163.979	-665.941	1659.12	282.865	-493.886	1662.9	170.73	-491.354	1658.39	233.366	-450.96	1523.82	255.242	-364.234	1262.67	222.369	-598.22	1433	199.104	-646.447	1228.19	168.178	-355.954	1319.52	409.625	-555.186	1476.68	488.309	-559.419	1279.2	501.055	-586.66	1124.75	486.813	-727.349	1018.43	422.202	-789.689	963.983	479.184	-762.448	926.475	467.054	-835.09	914.508
8327	0	244.967	-698.863	1660.29	161.316	-676.711	1656.8	280.403	-504.652	1660.85	168.158	-501.977	1655.99	231.151	-462.011	1521.46	253.784	-375.348	1260.39	219.882	-609.356	1430.75	197.03	-657.538	1225.79	166.636	-366.866	1317.09	407.278	-566.821	1474.89	485.907	-570.143	1277.45	498.211	-597.542	1122.61	485.111	-737.875	1015.86	420.98	-800.391	961.309	477.664	-772.71	923.986	465.91	-845.37	911.66
8328	0	242.029	-709.857	1658.34	158.649	-687.489	1654.86	277.658	-515.451	1658.62	165.597	-512.796	1653.65	228.491	-473.117	1519.39	252.471	-386.567	1258.45	217.335	-620.643	1428.46	193.407	-671.648	1223.46	165.088	-377.956	1314.77	404.416	-578.617	1472.71	483.314	-581.32	1275.85	495.478	-608.328	1120.86	483.509	-748.138	1013.09	419.746	-810.834	958.243	476.465	-782.475	921.293	465.001	-855.223	908.391
8329	0	239.091	-720.723	1656.74	155.756	-698.349	1653	275.01	-526.426	1657.1	162.835	-523.61	1651.81	226.393	-484.134	1517.85	251.135	-397.854	1256.73	214.911	-631.861	1426.7	192.735	-680.154	1221.48	163.524	-389.18	1312.83	402.139	-590.472	1471.88	480.973	-592.897	1274.67	493.133	-618.957	1119.78	481.917	-758.143	1010.59	418.847	-820.831	955.047	475.151	-791.862	918.49	464.411	-864.593	905.478
8330	0	236.126	-731.592	1655.78	152.485	-709.276	1651.87	272.166	-537.409	1655.5	159.961	-534.49	1650.06	223.926	-495.054	1516.01	249.559	-409.225	1254.86	212.518	-643.268	1425.49	190.399	-692.053	1220.37	161.787	-400.549	1310.66	399.782	-601.986	1471.25	478.846	-604.582	1274.18	490.499	-629.631	1118.69	480.537	-767.793	1008.57	417.952	-830.371	952.174	473.761	-800.737	915.681	463.896	-873.358	902.139
8331	0	232.834	-742.58	1654.78	149.246	-720.124	1650.39	269.236	-548.534	1654.43	157.163	-545.351	1648.27	221.412	-506.555	1514.66	248.158	-420.83	1253.55	209.91	-654.643	1424.3	187.985	-703.979	1219.27	160.101	-411.879	1309.08	397.19	-613.761	1470.53	476.597	-617.048	1273.58	487.684	-640.339	1117.85	478.858	-777.264	1006.18	416.967	-839.703	949.077	472.903	-809.303	912.923	463.246	-881.823	898.589
8332	0	229.331	-753.934	1653.75	145.865	-731.152	1649.14	266.21	-559.666	1653.65	154.021	-556.426	1647.17	218.851	-517.661	1513.9	246.386	-432.687	1252.2	207.271	-666.21	1423.18	185.516	-716.497	1218.02	158.223	-423.478	1307.72	394.312	-625.664	1469.7	474.157	-629.875	1273.04	484.89	-651.038	1117.02	477.069	-786.77	1003.41	415.72	-848.817	945.386	471.646	-817.352	909.976	462.393	-889.887	894.337
8333	0	225.873	-765.138	1653.17	142.479	-742.16	1648.11	263.151	-571.026	1653.15	151.127	-567.337	1646.18	216.729	-529.134	1513.14	244.613	-444.456	1251.22	204.824	-677.632	1422.65	183.511	-728.398	1217.55	156.321	-435.01	1306.49	391.78	-636.816	1468.93	471.932	-642.698	1273.07	482.247	-661.733	1116.83	475.14	-795.626	1000.9	414.761	-857.446	941.87	470.617	-825.058	907.339	461.81	-897.318	890.515
8334	0	222.375	-776.231	1652.92	138.961	-753.082	1647.74	260.134	-582.225	1653.4	147.927	-578.304	1645.85	214.033	-540.294	1513.15	242.634	-456.225	1250.72	202.478	-689.027	1422.79	181.672	-740.325	1217.84	154.164	-446.578	1305.85	389.529	-648.144	1469.48	469.856	-655.48	1273.7	479.595	-672.567	1117.12	473.903	-804.508	999.24	413.684	-865.498	938.594	469.553	-832.269	904.794	461.08	-904.431	886.813
8335	0	218.708	-787.698	1653.25	135.48	-764.175	1647.4	257.007	-593.614	1653.91	144.967	-589.485	1645.79	211.502	-551.313	1512.76	240.469	-467.857	1250.5	200.032	-700.368	1423.14	179.441	-752.965	1218.57	151.967	-458.245	1305.42	386.929	-658.93	1469.47	467.658	-668.124	1274.45	477.081	-683.128	1117.6	472.195	-813.047	997.347	412.619	-873.256	935.325	468.567	-839.223	902.383	460.228	-910.978	882.908
8336	0	215.009	-799.207	1653.88	132.027	-775.26	1647.39	254.043	-604.986	1654.94	142.013	-600.591	1646.14	208.757	-562.418	1513.23	238.312	-479.539	1250.66	197.761	-711.584	1423.78	177.562	-765.335	1219.56	149.553	-469.825	1305.55	384.693	-669.864	1470.36	465.455	-680.449	1275.4	474.446	-693.949	1118.36	470.515	-821.322	995.652	411.56	-880.506	932.073	467.629	-845.792	899.735	459.656	-916.949	879.024
8337	0	211.543	-810.265	1654.49	128.496	-786.222	1647.76	250.842	-616.284	1655.95	138.865	-611.556	1646.89	206.138	-573.45	1513.92	236.093	-491.074	1251.35	195.54	-722.781	1425.05	175.699	-777.69	1220.99	147.1	-481.467	1305.86	382.408	-680.383	1471.45	463.291	-692.436	1277.03	472.036	-704.553	1119.58	468.946	-829.399	994.714	410.521	-887.292	929.256	466.756	-851.974	898.047	458.754	-922.737	875.638
8338	0	207.924	-821.486	1655.29	125.047	-797.079	1648.12	247.84	-627.537	1657.4	135.892	-622.49	1647.6	203.386	-584.432	1514.51	233.642	-502.595	1252.27	193.262	-733.93	1426.38	173.594	-790.157	1222.74	144.378	-493.092	1306.6	380.032	-690.843	1472.44	461.095	-703.939	1278.7	469.64	-714.747	1121.27	467.101	-837.339	994.029	409.371	-893.707	926.561	466.304	-857.884	897.209	458.106	-928.144	872.474
8339	0	204.426	-832.694	1656.1	122.092	-807.834	1648.63	245.04	-638.712	1659.49	133.008	-633.4	1648.79	200.723	-595.287	1515.8	230.924	-513.886	1253.26	191.19	-745.111	1427.82	171.747	-802.347	1224.27	141.56	-504.742	1307.46	377.406	-701.277	1473.43	458.752	-715.077	1280.36	467.289	-724.844	1123.31	465.421	-845.115	993.611	408.102	-899.651	924.146	465.748	-863.584	896.471	456.92	-933.159	869.344
8340	0	201.332	-843.732	1657.67	119.014	-818.637	1649.76	242.243	-649.656	1661.43	130.26	-644.214	1650.28	198.286	-606.081	1517.5	228.153	-525.141	1254.35	189.298	-756.025	1429.77	170.095	-814.195	1226.62	138.702	-516.274	1308.64	375.482	-711.355	1475.78	456.815	-725.186	1282.55	465.25	-734.177	1125.42	463.923	-852.479	994.041	406.995	-905.144	922.5	465.242	-869.158	895.966	455.854	-937.769	866.861
8341	0	198.519	-854.41	1659.41	116.169	-829.078	1651.19	239.479	-660.496	1663.24	127.725	-654.766	1651.85	195.512	-616.65	1518.78	225.387	-536.153	1255.75	187.51	-766.85	1432.03	168.684	-825.678	1229.23	135.671	-527.702	1309.81	373.73	-721.109	1478.34	455.003	-734.755	1285.01	462.839	-743.746	1127.66	462.516	-859.671	995.171	405.895	-910.214	921.54	465.145	-874.671	896.251	454.922	-942.151	865.129
8342	0	195.666	-864.956	1660.97	113.422	-839.545	1652.62	236.949	-670.995	1665.47	125.007	-665.216	1653.29	192.946	-627.012	1520.42	222.535	-547.079	1257.27	185.772	-777.708	1434.05	167.283	-837.026	1231.39	132.464	-539.134	1311.13	371.602	-730.775	1480.62	453.038	-744.085	1287.2	460.964	-752.44	1130.21	460.991	-866.744	996.231	404.571	-915.173	920.675	465.361	-880.165	897.372	453.533	-946.467	863.454
8343	0	192.836	-875.709	1662.81	111.052	-849.897	1653.82	234.406	-681.407	1667.46	122.91	-675.587	1655.1	191.196	-637.365	1521.92	219.759	-557.796	1258.81	183.967	-788.392	1435.8	165.82	-848.379	1233.31	129.293	-550.511	1312.76	369.408	-740.329	1482.23	450.952	-753.214	1289.14	459.101	-760.772	1132.5	459.427	-873.289	996.704	403.303	-919.914	920.023	465.851	-885.698	898.488	452.171	-951.111	862.261
8344	0	190.514	-885.875	1664.54	108.716	-860.123	1655.38	232.115	-691.641	1669.78	120.746	-685.775	1656.99	188.1	-647.531	1523.53	216.757	-568.337	1260.31	182.394	-798.934	1437.86	164.709	-859.371	1235.48	126.026	-561.688	1314.41	367.57	-749.754	1484.68	449.308	-761.558	1291.24	457.492	-768.534	1134.96	458.226	-879.64	998.006	402.146	-924.452	920.035	465.392	-891.215	899.777	450.772	-955.312	861.233
8345	0	188.5	-895.95	1666.6	106.461	-870.111	1657.19	229.857	-701.588	1671.73	119.412	-696.167	1658.54	185.538	-657.729	1525.13	213.859	-578.742	1261.97	181.084	-809.262	1440.06	163.835	-869.87	1237.79	122.678	-572.776	1316.07	365.988	-758.725	1487.08	447.844	-769.512	1293.48	456.067	-775.801	1137.19	457.217	-885.899	999.612	400.664	-928.845	920.226	465.48	-896.916	901.292	449.113	-959.571	860.943
8346	0	186.496	-905.876	1668.52	104.748	-880.115	1658.91	227.717	-711.535	1673.4	116.913	-705.926	1660.32	183.509	-667.832	1526.84	210.968	-588.88	1263.52	179.861	-819.51	1441.84	162.943	-880.432	1239.66	119.399	-583.455	1317.42	364.124	-767.94	1489.03	446.27	-777.357	1295.28	454.614	-782.84	1139.08	456.202	-891.962	1000.75	399.515	-933.298	920.646	465.721	-902.529	902.598	447.728	-963.748	860.262
8347	0	184.797	-915.94	1670.67	103.031	-889.972	1660.78	225.865	-721.203	1675.67	115.157	-715.953	1661.94	181.769	-677.75	1529.36	208.027	-598.93	1264.98	178.656	-829.679	1443.88	162.329	-890.561	1241.7	116.312	-594.013	1319.16	362.635	-776.707	1490.88	445.112	-784.646	1297.2	453.396	-789.616	1140.91	455.517	-897.642	1002.03	398.542	-937.671	921.113	465.46	-907.919	903.991	446.244	-967.933	860.145
8348	0	183.389	-925.369	1672.74	101.479	-899.691	1662.61	224.039	-730.722	1677.64	113.284	-725.676	1663.66	179.212	-687.293	1530.76	205.038	-608.778	1266.47	177.537	-839.507	1446	161.642	-900.544	1243.83	113.405	-604.369	1321.12	361.323	-785.345	1493.06	444.246	-791.539	1299.37	452.338	-795.983	1142.9	454.955	-903.027	1003.42	397.663	-942.03	922.16	465.329	-913.184	905.792	444.828	-972.1	860.622
8349	0	181.86	-935.004	1674.56	100.022	-909.348	1664.57	222.349	-740.146	1679.6	111.495	-735.261	1665.56	177.321	-696.904	1532.34	202.31	-618.559	1268.4	176.321	-849.308	1447.81	160.918	-910.544	1245.61	110.735	-614.633	1323.06	359.785	-793.98	1494.94	443.063	-798.446	1301.09	451.618	-802.113	1144.97	453.889	-908.592	1004.58	397.111	-946.544	922.9	465.185	-918.195	907.251	443.704	-976.222	860.71
8350	0	180.05	-944.846	1676.46	98.9533	-918.923	1665.87	220.953	-749.437	1681.74	110.329	-744.978	1667.5	175.509	-706.564	1534.34	199.664	-628.191	1270.01	175.275	-859.023	1449.34	160.434	-920.366	1246.95	107.97	-624.686	1324.8	358.221	-802.434	1496.08	441.93	-804.997	1302.57	450.689	-808.206	1146.83	453.254	-914.054	1005.53	395.784	-951.523	923.633	464.377	-923.092	908.315	442.662	-980.6	861.059
8351	0	179.097	-954.399	1678.64	97.9455	-928.597	1668.07	219.495	-758.632	1683.67	108.58	-754.396	1669.31	173.654	-715.972	1536.31	197.309	-637.696	1271.87	174.44	-868.477	1451.35	160.03	-929.885	1249.1	105.103	-634.526	1326.15	357.077	-810.859	1498.34	441.057	-811.109	1304.49	449.836	-814.075	1148.53	452.856	-918.898	1006.84	394.712	-957.031	924.789	463.908	-927.642	909.476	442.106	-984.598	861.788
8352	0	178.999	-963.159	1680.45	97.199	-937.939	1670.31	218.1	-767.766	1685.21	107.13	-763.775	1671.23	171.867	-725.215	1537.8	194.747	-646.899	1273.38	173.667	-877.832	1453.48	159.587	-939.334	1251.15	102.567	-644.246	1327.81	356.036	-818.947	1500.36	440.379	-816.976	1306.37	449.168	-819.823	1150.36	452.506	-923.681	1008.36	394.375	-960.839	925.641	463.435	-931.834	910.957	441.775	-988.646	863.091
8353	0	177.783	-972.821	1682.7	96.5726	-947.368	1672.39	217.058	-776.71	1687.23	105.904	-773.185	1673.14	170.18	-734.434	1539.7	192.38	-656.193	1274.69	172.664	-887.022	1455.35	158.871	-949.153	1253.25	100.424	-653.936	1329.68	354.821	-827.149	1502.14	439.318	-822.994	1308.07	448.414	-825.467	1152.05	451.946	-928.448	1009.53	393.944	-965.573	926.771	462.838	-935.946	911.935	441.489	-992.715	863.971
8354	0	177.322	-981.981	1684.49	96.1178	-956.75	1674.41	215.997	-785.754	1689.08	104.744	-782.609	1675.41	168.564	-743.605	1541.78	190.304	-665.485	1276.83	171.662	-896.278	1457.03	158.379	-958.728	1255	98.2521	-663.499	1331.22	353.569	-835.409	1503.91	438.311	-829.078	1309.9	447.649	-831.003	1154.05	451.407	-933.119	1010.42	394.009	-970.365	927.717	461.825	-940.001	912.732	441.31	-997.107	864.884
8355	0	177.591	-990.968	1686.19	95.7504	-966.147	1676.63	215.158	-794.593	1691.16	103.502	-791.725	1677.69	166.911	-752.6	1543.41	188.169	-674.645	1278.65	170.818	-905.418	1459.08	157.98	-968.042	1256.97	96.2481	-672.981	1333.55	352.329	-843.43	1505.46	437.261	-835.185	1311.7	446.812	-836.397	1155.86	451.106	-937.663	1011.94	393.626	-974.991	929.153	460.946	-943.267	914.137	441.377	-1000.72	865.973
8356	0	177.604	-999.951	1688.09	95.6138	-975.331	1678.88	214.407	-803.363	1692.77	102.945	-800.986	1679.97	165.369	-761.624	1545.43	186.059	-683.802	1280.57	169.999	-914.341	1461.08	157.42	-977.367	1259.02	94.1786	-682.346	1335.31	351.259	-851.46	1507.4	436.273	-841.167	1313.62	445.938	-841.707	1157.7	450.795	-942.141	1013.36	393.526	-979.829	930.573	460.373	-947.445	915.264	441.562	-1004.86	867.362
8357	0	177.492	-1009.15	1689.97	95.5665	-984.742	1680.99	213.549	-812.224	1694.39	102.146	-810.246	1682.28	164.393	-770.711	1547.54	184.107	-692.841	1282.5	169.046	-923.393	1463.06	156.783	-986.646	1260.92	92.1972	-691.721	1337.35	349.978	-859.562	1508.97	435.015	-847.523	1315.21	444.919	-846.792	1159.51	450.355	-946.497	1014.33	393.608	-984.687	931.801	460.103	-951.31	916.41	441.972	-1009.12	868.705
8358	0	177.859	-1018.03	1692.01	95.8437	-993.923	1683.49	213.253	-821.008	1696.56	101.477	-819.556	1684.77	162.352	-779.661	1549.48	182.129	-701.694	1284.16	168.113	-932.217	1465.09	156.209	-995.778	1263.07	90.4721	-700.98	1339.33	348.967	-867.508	1510.91	434.141	-853.59	1317.43	443.852	-851.768	1161.42	450.582	-950.765	1016.28	394.445	-989.549	933.762	459.783	-954.961	918.236	442.671	-1013.2	870.548
8359	0	178.122	-1026.97	1694.03	95.8289	-1003.1	1685.88	212.785	-829.667	1698.21	100.912	-828.711	1687.11	160.859	-788.63	1551.27	180.365	-710.576	1286.51	167.232	-941.028	1467.31	155.469	-1004.67	1265.34	88.3982	-710.152	1341.17	347.965	-875.53	1512.87	433.143	-859.843	1319.69	442.852	-856.75	1163.7	450.615	-954.964	1018.07	395.054	-994.46	935.757	459.428	-958.68	919.643	443.407	-1017.15	872.391
8360	0	178.332	-1035.96	1695.58	96.1746	-1012.31	1687.95	212.149	-838.35	1699.84	100.442	-837.925	1689.24	159.457	-797.371	1553.36	178.292	-719.385	1288.15	166.195	-949.919	1468.97	154.498	-1013.71	1266.97	86.5715	-719.201	1343.51	346.534	-883.59	1514.16	431.969	-866.262	1321.48	441.676	-861.76	1165.67	450.314	-959.52	1019.41	395.404	-999.626	937.107	458.809	-962.552	921.16	444.28	-1021.83	874.206
[truncated: 69 more columns]

## Sheet: Sheet2
Devices
		025370 - Force			025370 - Moment			025370 - CoP			027571 - Force			027571 - Moment			027571 - CoP			037720 - Force			037720 - Moment			037720 - CoP
Frame	Sub Frame	Fx	Fy	Fz	Mx	My	Mz	Cx	Cy	Cz	Fx	Fy	Fz	Mx	My	Mz	Cx	Cy	Cz	Fx	Fy	Fz	Mx	My	Mz	Cx	Cy	Cz
		N	N	N	N.mm	N.mm	N.mm	mm	mm	mm	N	N	N	N.mm	N.mm	N.mm	mm	mm	mm	N	N	N	N.mm	N.mm	N.mm	mm	mm	mm
8013	0	0	0	0	0	0	0	200	300	0	0	0	0	0	0	0	200	903	0	0	0	0	0	0	0	603	903	0
8013	1	0	0	0	0	0	0	200	300	0	0	0	0	0	0	0	200	903	0	0	0	0	0	0	0	603	903	0
8013	2	0	0	0	0	0	0	200	300	0	0	0	0	0	0	0	200	903	0	0	0	0	0	0	0	603	903	0
8013	3	0	0	0	0	0	0	200	300	0	0	0	0	0	0	0	200	903	0	0	0	0	0	0	0	603	903	0
8013	4	0	0	0	0	0	0	200	300	0	0	0	0	0	0	0	200	903	0	0	0	0	0	0	0	603	903	0
8013	5	0	0	0	0	0	0	200	300	0	0	0	0	0	0	0	200	903	0	0	0	0	0	0	0	603	903	0
8013	6	0	0	0	0	0	0	200	300	0	0	0	0	0	0	0	200	903	0	0	0	0	0	0	0	603	903	0
8013	7	0	0	0	0	0	0	200	300	0	0	0	0	0	0	0	200	903	0	0	0	0	0	0	0	603	903	0
8013	8	0	0	0	0	0	0	200	300	0	0	0	0	0	0	0	200	903	0	0	0	0	0	0	0	603	903	0
8013	9	0	0	0	0	0	0	200	300	0	0	0	0	0	0	0	200	903	0	0	0	0	0	0	0	603	903	0
8014	0	0	0	0	0	0	0	200	300	0	0	0	0	0	0	0	200	903	0	0	0	0	0	0	0	603	903	0
8014	1	0	0	0	0	0	0	200	300	0	0	0	0	0	0	0	200	903	0	0	0	0	0	0	0	603	903	0
8014	2	0	0	0	0	0	0	200	300	0	0	0	0	0	0	0	200	903	0	0	0	0	0	0	0	603	903	0
8014	3	0	0	0	0	0	0	200	300	0	0	0	0	0	0	0	200	903	0	0	0	0	0	0	0	603	903	0
8014	4	0	0	0	0	0	0	200	300	0	0	0	0	0	0	0	200	903	0	0	0	0	0	0	0	603	903	0
8014	5	0	0	0	0	0	0	200	300	0	0	0	0	0	0	0	200	903	0	0	0	0	0	0	0	603	903	0
8014	6	0	0	0	0	0	0	200	300	0	0	0	0	0	0	0	200	903	0	0	0	0	0	0	0	603	903	0
8014	7	0	0	0	0	0	0	200	300	0	0	0	0	0	0	0	200	903	0	0	0	0	0	0	0	603	903	0
8014	8	0	0	0	0	0	0	200	300	0	0	0	0	0	0	0	200	903	0	0	0	0	0	0	0	603	903	0
8014	9	0	0	0	0	0	0	200	300	0	0	0	0	0	0	0	200	903	0	0	0	0	0	0	0	603	903	0
8015	0	0	0	0	0	0	0	200	300	0	0	0	0	0	0	0	200	903	0	0	0	0	0	0	0	603	903	0
8015	1	0	0	0	0	0	0	200	300	0	0	0	0	0	0	0	200	903	0	0	0	0	0	0	0	603	903	0
8015	2	0	0	0	0	0	0	200	300	0	0	0	0	0	0	0	200	903	0	0	0	0	0	0	0	603	903	0
8015	3	0	0	0	0	0	0	200	300	0	0	0	0	0	0	0	200	903	0	0	0	0	0	0	0	603	903	0
8015	4	0	0	0	0	0	0	200	300	0	0	0	0	0	0	0	200	903	0	0	0	0	0	0	0	603	903	0
8015	5	0	0	0	0	0	0	200	300	0	0	0	0	0	0	0	200	903	0	0	0	0	0	0	0	603	903	0
8015	6	0	0	0	0	0	0	200	300	0	0	0	0	0	0	0	200	903	0	0	0	0	0	0	0	603	903	0
8015	7	0	0	0	0	0	0	200	300	0	0	0	0	0	0	0	200	903	0	0	0	0	0	0	0	603	903	0
8015	8	0	0	0	0	0	0	200	300	0	0	0	0	0	0	0	200	903	0	0	0	0	0	0	0	603	903	0
8015	9	0	0	0	0	0	0	200	300	0	0	0	0	0	0	0	200	903	0	0	0	0	0	0	0	603	903	0
8016	0	0	0	0	0	0	0	200	300	0	0	0	0	0	0	0	200	903	0	0	0	0	0	0	0	603	903	0
8016	1	0	0	0	0	0	0	200	300	0	0	0	0	0	0	0	200	903	0	0	0	0	0	0	0	603	903	0
8016	2	0	0	0	0	0	0	200	300	0	0	0	0	0	0	0	200	903	0	0	0	0	0	0	0	603	903	0
8016	3	0	0	0	0	0	0	200	300	0	0	0	0	0	0	0	200	903	0	0	0	0	0	0	0	603	903	0
8016	4	0	0	0	0	0	0	200	300	0	0	0	0	0	0	0	200	903	0	0	0	0	0	0	0	603	903	0
8016	5	0	0	0	0	0	0	200	300	0	0	0	0	0	0	0	200	903	0	0	0	0	0	0	0	603	903	0
8016	6	0	0	0	0	0	0	200	300	0	0	0	0	0	0	0	200	903	0	0	0	0	0	0	0	603	903	0
8016	7	0	0	0	0	0	0	200	300	0	0	0	0	0	0	0	200	903	0	0	0	0	0	0	0	603	903	0
8016	8	0	0	0	0	0	0	200	300	0	0	0	0	0	0	0	200	903	0	0	0	0	0	0	0	603	903	0
8016	9	0	0	0	0	0	0	200	300	0	0	0	0	0	0	0	200	903	0	0	0	0	0	0	0	603	903	0
8017	0	0	0	0	0	0	0	200	300	0	0	0	0	0	0	0	200	903	0	0	0	0	0	0	0	603	903	0
8017	1	0	0	0	0	0	0	200	300	0	0	0	0	0	0	0	200	903	0	0	0	0	0	0	0	603	903	0
8017	2	0	0	0	0	0	0	200	300	0	0	0	0	0	0	0	200	903	0	0	0	0	0	0	0	603	903	0
8017	3	0	0	0	0	0	0	200	300	0	0	0	0	0	0	0	200	903	0	0	0	0	0	0	0	603	903	0
8017	4	0	0	0	0	0	0	200	300	0	0	0	0	0	0	0	200	903	0	0	0	0	0	0	0	603	903	0
8017	5	0	0	0	0	0	0	200	300	0	0	0	0	0	0	0	200	903	0	0	0	0	0	0	0	603	903	0
8017	6	0	0	0	0	0	0	200	300	0	0	0	0	0	0	0	200	903	0	0	0	0	0	0	0	603	903	0
8017	7	0	0	0	0	0	0	200	300	0	0	0	0	0	0	0	200	903	0	0	0	0	0	0	0	603	903	0
8017	8	0	0	0	0	0	0	200	300	0	0	0	0	0	0	0	200	903	0	0	0	0	0	0	0	603	903	0
8017	9	0	0	0	0	0	0	200	300	0	0	0	0	0	0	0	200	903	0	0	0	0	0	0	0	603	903	0
8018	0	0	0	0	0	0	0	200	300	0	0	0	0	0	0	0	200	903	0	0	0	0	0	0	0	603	903	0
8018	1	0	0	0	0	0	0	200	300	0	0	0	0	0	0	0	200	903	0	0	0	0	0	0	0	603	903	0
8018	2	0	0	0	0	0	0	200	300	0	0	0	0	0	0	0	200	903	0	0	0	0	0	0	0	603	903	0
8018	3	0	0	0	0	0	0	200	300	0	0	0	0	0	0	0	200	903	0	0	0	0	0	0	0	603	903	0
8018	4	0	0	0	0	0	0	200	300	0	0	0	0	0	0	0	200	903	0	0	0	0	0	0	0	603	903	0
8018	5	0	0	0	0	0	0	200	300	0	0	0	0	0	0	0	200	903	0	0	0	0	0	0	0	603	903	0
8018	6	0	0	0	0	0	0	200	300	0	0	0	0	0	0	0	200	903	0	0	0	0	0	0	0	603	903	0
8018	7	0	0	0	0	0	0	200	300	0	0	0	0	0	0	0	200	903	0	0	0	0	0	0	0	603	903	0
8018	8	0	0	0	0	0	0	200	300	0	0	0	0	0	0	0	200	903	0	0	0	0	0	0	0	603	903	0
8018	9	0	0	0	0	0	0	200	300	0	0	0	0	0	0	0	200	903	0	0	0	0	0	0	0	603	903	0
8019	0	0	0	0	0	0	0	200	300	0	0	0	0	0	0	0	200	903	0	0	0	0	0	0	0	603	903	0
8019	1	0	0	0	0	0	0	200	300	0	0	0	0	0	0	0	200	903	0	0	0	0	0	0	0	603	903	0
8019	2	0	0	0	0	0	0	200	300	0	0	0	0	0	0	0	200	903	0	0	0	0	0	0	0	603	903	0
8019	3	0	0	0	0	0	0	200	300	0	0	0	0	0	0	0	200	903	0	0	0	0	0	0	0	603	903	0
8019	4	0	0	0	0	0	0	200	300	0	0	0	0	0	0	0	200	903	0	0	0	0	0	0	0	603	903	0
8019	5	0	0	0	0	0	0	200	300	0	0	0	0	0	0	0	200	903	0	0	0	0	0	0	0	603	903	0
8019	6	0	0	0	0	0	0	200	300	0	0	0	0	0	0	0	200	903	0	0	0	0	0	0	0	603	903	0
8019	7	0	0	0	0	0	0	200	300	0	0	0	0	0	0	0	200	903	0	0	0	0	0	0	0	603	903	0
8019	8	0	0	0	0	0	0	200	300	0	0	0	0	0	0	0	200	903	0	0	0	0	0	0	0	603	903	0
8019	9	0	0	0	0	0	0	200	300	0	0	0	0	0	0	0	200	903	0	0	0	0	0	0	0	603	903	0
8020	0	0	0	0	0	0	0	200	300	0	0	0	0	0	0	0	200	903	0	0	0	0	0	0	0	603	903	0
8020	1	0	0	0	0	0	0	200	300	0	0	0	0	0	0	0	200	903	0	0	0	0	0	0	0	603	903	0
8020	2	0	0	0	0	0	0	200	300	0	0	0	0	0	0	0	200	903	0	0	0	0	0	0	0	603	903	0
8020	3	0	0	0	0	0	0	200	300	0	0	0	0	0	0	0	200	903	0	0	0	0	0	0	0	603	903	0
8020	4	0	0	0	0	0	0	200	300	0	0	0	0	0	0	0	200	903	0	0	0	0	0	0	0	603	903	0
8020	5	0	0	0	0	0	0	200	300	0	0	0	0	0	0	0	200	903	0	0	0	0	0	0	0	603	903	0
8020	6	0	0	0	0	0	0	200	300	0	0	0	0	0	0	0	200	903	0	0	0	0	0	0	0	603	903	0
8020	7	0	0	0	0	0	0	200	300	0	0	0	0	0	0	0	200	903	0	0	0	0	0	0	0	603	903	0
8020	8	0	0	0	0	0	0	200	300	0	0	0	0	0	0	0	200	903	0	0	0	0	0	0	0	603	903	0
8020	9	0	0	0	0	0	0	200	300	0	0	0	0	0	0	0	200	903	0	0	0	0	0	0	0	603	903	0
8021	0	0	0	0	0	0	0	200	300	0	0	0	0	0	0	0	200	903	0	0	0	0	0	0	0	603	903	0
8021	1	0	0	0	0	0	0	200	300	0	0	0	0	0	0	0	200	903	0	0	0	0	0	0	0	603	903	0
8021	2	0	0	0	0	0	0	200	300	0	0	0	0	0	0	0	200	903	0	0	0	0	0	0	0	603	903	0
8021	3	0	0	0	0	0	0	200	300	0	0	0	0	0	0	0	200	903	0	0	0	0	0	0	0	603	903	0
8021	4	0	0	0	0	0	0	200	300	0	0	0	0	0	0	0	200	903	0	0	0	0	0	0	0	603	903	0
8021	5	0	0	0	0	0	0	200	300	0	0	0	0	0	0	0	200	903	0	0	0	0	0	0	0	603	903	0
8021	6	0	0	0	0	0	0	200	300	0	0	0	0	0	0	0	200	903	0	0	0	0	0	0	0	603	903	0
8021	7	0	0	0	0	0	0	200	300	0	0	0	0	0	0	0	200	903	0	0	0	0	0	0	0	603	903	0
8021	8	0	0	0	0	0	0	200	300	0	0	0	0	0	0	0	200	903	0	0	0	0	0	0	0	603	903	0
8021	9	0	0	0	0	0	0	200	300	0	0	0	0	0	0	0	200	903	0	0	0	0	0	0	0	603	903	0
8022	0	0	0	0	0	0	0	200	300	0	0	0	0	0	0	0	200	903	0	0	0	0	0	0	0	603	903	0
8022	1	0	0	0	0	0	0	200	300	0	0	0	0	0	0	0	200	903	0	0	0	0	0	0	0	603	903	0
8022	2	0	0	0	0	0	0	200	300	0	0	0	0	0	0	0	200	903	0	0	0	0	0	0	0	603	903	0
8022	3	0	0	0	0	0	0	200	300	0	0	0	0	0	0	0	200	903	0	0	0	0	0	0	0	603	903	0
8022	4	0	0	0	0	0	0	200	300	0	0	0	0	0	0	0	200	903	0	0	0	0	0	0	0	603	903	0
8022	5	0	0	0	0	0	0	200	300	0	0	0	0	0	0	0	200	903	0	0	0	0	0	0	0	603	903	0
8022	6	0	0	0	0	0	0	200	300	0	0	0	0	0	0	0	200	903	0	0	0	0	0	0	0	603	903	0
8022	7	0	0	0	0	0	0	200	300	0	0	0	0	0	0	0	200	903	0	0	0	0	0	0	0	603	903	0
8022	8	0	0	0	0	0	0	200	300	0	0	0	0	0	0	0	200	903	0	0	0	0	0	0	0	603	903	0
8022	9	0	0	0	0	0	0	200	300	0	0	0	0	0	0	0	200	903	0	0	0	0	0	0	0	603	903	0
8023	0	0	0	0	0	0	0	200	300	0	0	0	0	0	0	0	200	903	0	0	0	0	0	0	0	603	903	0
8023	1	0	0	0	0	0	0	200	300	0	0	0	0	0	0	0	200	903	0	0	0	0	0	0	0	603	903	0
8023	2	0	0	0	0	0	0	200	300	0	0	0	0	0	0	0	200	903	0	0	0	0	0	0	0	603	903	0
8023	3	0	0	0	0	0	0	200	300	0	0	0	0	0	0	0	200	903	0	0	0	0	0	0	0	603	903	0
8023	4	0	0	0	0	0	0	200	300	0	0	0	0	0	0	0	200	903	0	0	0	0	0	0	0	603	903	0
8023	5	0	0	0	0	0	0	200	300	0	0	0	0	0	0	0	200	903	0	0	0	0	0	0	0	603	903	0
8023	6	0	0	0	0	0	0	200	300	0	0	0	0	0	0	0	200	903	0	0	0	0	0	0	0	603	903	0
8023	7	0	0	0	0	0	0	200	300	0	0	0	0	0	0	0	200	903	0	0	0	0	0	0	0	603	903	0
8023	8	0	0	0	0	0	0	200	300	0	0	0	0	0	0	0	200	903	0	0	0	0	0	0	0	603	903	0
8023	9	0	0	0	0	0	0	200	300	0	0	0	0	0	0	0	200	903	0	0	0	0	0	0	0	603	903	0
8024	0	0	0	0	0	0	0	200	300	0	0	0	0	0	0	0	200	903	0	0	0	0	0	0	0	603	903	0
8024	1	0	0	0	0	0	0	200	300	0	0	0	0	0	0	0	200	903	0	0	0	0	0	0	0	603	903	0
8024	2	0	0	0	0	0	0	200	300	0	0	0	0	0	0	0	200	903	0	0	0	0	0	0	0	603	903	0
8024	3	0	0	0	0	0	0	200	300	0	0	0	0	0	0	0	200	903	0	0	0	0	0	0	0	603	903	0
8024	4	0	0	0	0	0	0	200	300	0	0	0	0	0	0	0	200	903	0	0	0	0	0	0	0	603	903	0
8024	5	0	0	0	0	0	0	200	300	0	0	0	0	0	0	0	200	903	0	0	0	0	0	0	0	603	903	0
8024	6	0	0	0	0	0	0	200	300	0	0	0	0	0	0	0	200	903	0	0	0	0	0	0	0	603	903	0
8024	7	0	0	0	0	0	0	200	300	0	0	0	0	0	0	0	200	903	0	0	0	0	0	0	0	603	903	0
8024	8	0	0	0	0	0	0	200	300	0	0	0	0	0	0	0	200	903	0	0	0	0	0	0	0	603	903	0
8024	9	0	0	0	0	0	0	200	300	0	0	0	0	0	0	0	200	903	0	0	0	0	0	0	0	603	903	0
8025	0	0	0	0	0	0	0	200	300	0	0	0	0	0	0	0	200	903	0	0	0	0	0	0	0	603	903	0
8025	1	0	0	0	0	0	0	200	300	0	0	0	0	0	0	0	200	903	0	0	0	0	0	0	0	603	903	0
8025	2	0	0	0	0	0	0	200	300	0	0	0	0	0	0	0	200	903	0	0	0	0	0	0	0	603	903	0
8025	3	0	0	0	0	0	0	200	300	0	0	0	0	0	0	0	200	903	0	0	0	0	0	0	0	603	903	0
8025	4	0	0	0	0	0	0	200	300	0	0	0	0	0	0	0	200	903	0	0	0	0	0	0	0	603	903	0
8025	5	0	0	0	0	0	0	200	300	0	0	0	0	0	0	0	200	903	0	0	0	0	0	0	0	603	903	0
8025	6	0	0	0	0	0	0	200	300	0	0	0	0	0	0	0	200	903	0	0	0	0	0	0	0	603	903	0
8025	7	0	0	0	0	0	0	200	300	0	0	0	0	0	0	0	200	903	0	0	0	0	0	0	0	603	903	0
8025	8	0	0	0	0	0	0	200	300	0	0	0	0	0	0	0	200	903	0	0	0	0	0	0	0	603	903	0
8025	9	0	0	0	0	0	0	200	300	0	0	0	0	0	0	0	200	903	0	0	0	0	0	0	0	603	903	0
8026	0	0	0	0	0	0	0	200	300	0	0	0	0	0	0	0	200	903	0	0	0	0	0	0	0	603	903	0
8026	1	0	0	0	0	0	0	200	300	0	0	0	0	0	0	0	200	903	0	0	0	0	0	0	0	603	903	0
8026	2	0	0	0	0	0	0	200	300	0	0	0	0	0	0	0	200	903	0	0	0	0	0	0	0	603	903	0
8026	3	0	0	0	0	0	0	200	300	0	0	0	0	0	0	0	200	903	0	0	0	0	0	0	0	603	903	0
8026	4	0	0	0	0	0	0	200	300	0	0	0	0	0	0	0	200	903	0	0	0	0	0	0	0	603	903	0
8026	5	0	0	0	0	0	0	200	300	0	0	0	0	0	0	0	200	903	0	0	0	0	0	0	0	603	903	0
8026	6	0	0	0	0	0	0	200	300	0	0	0	0	0	0	0	200	903	0	0	0	0	0	0	0	603	903	0
8026	7	0	0	0	0	0	0	200	300	0	0	0	0	0	0	0	200	903	0	0	0	0	0	0	0	603	903	0
8026	8	0	0	0	0	0	0	200	300	0	0	0	0	0	0	0	200	903	0	0	0	0	0	0	0	603	903	0
8026	9	0	0	0	0	0	0	200	300	0	0	0	0	0	0	0	200	903	0	0	0	0	0	0	0	603	903	0
8027	0	0	0	0	0	0	0	200	300	0	0	0	0	0	0	0	200	903	0	0	0	0	0	0	0	603	903	0
8027	1	0	0	0	0	0	0	200	300	0	0	0	0	0	0	0	200	903	0	0	0	0	0	0	0	603	903	0
8027	2	0	0	0	0	0	0	200	300	0	0	0	0	0	0	0	200	903	0	0	0	0	0	0	0	603	903	0
8027	3	0	0	0	0	0	0	200	300	0	0	0	0	0	0	0	200	903	0	0	0	0	0	0	0	603	903	0
8027	4	0	0	0	0	0	0	200	300	0	0	0	0	0	0	0	200	903	0	0	0	0	0	0	0	603	903	0
8027	5	0	0	0	0	0	0	200	300	0	0	0	0	0	0	0	200	903	0	0	0	0	0	0	0	603	903	0
8027	6	0	0	0	0	0	0	200	300	0	0	0	0	0	0	0	200	903	0	0	0	0	0	0	0	603	903	0
8027	7	0	0	0	0	0	0	200	300	0	0	0	0	0	0	0	200	903	0	0	0	0	0	0	0	603	903	0
8027	8	0	0	0	0	0	0	200	300	0	0	0	0	0	0	0	200	903	0	0	0	0	0	0	0	603	903	0
8027	9	0	0	0	0	0	0	200	300	0	0	0	0	0	0	0	200	903	0	0	0	0	0	0	0	603	903	0
8028	0	0	0	0	0	0	0	200	300	0	0	0	0	0	0	0	200	903	0	0	0	0	0	0	0	603	903	0
8028	1	0	0	0	0	0	0	200	300	0	0	0	0	0	0	0	200	903	0	0	0	0	0	0	0	603	903	0
8028	2	0	0	0	0	0	0	200	300	0	0	0	0	0	0	0	200	903	0	0	0	0	0	0	0	603	903	0
8028	3	0	0	0	0	0	0	200	300	0	0	0	0	0	0	0	200	903	0	0	0	0	0	0	0	603	903	0
8028	4	0	0	0	0	0	0	200	300	0	0	0	0	0	0	0	200	903	0	0	0	0	0	0	0	603	903	0
8028	5	0	0	0	0	0	0	200	300	0	0	0	0	0	0	0	200	903	0	0	0	0	0	0	0	603	903	0
8028	6	0	0	0	0	0	0	200	300	0	0	0	0	0	0	0	200	903	0	0	0	0	0	0	0	603	903	0
8028	7	0	0	0	0	0	0	200	300	0	0	0	0	0	0	0	200	903	0	0	0	0	0	0	0	603	903	0
8028	8	0	0	0	0	0	0	200	300	0	0	0	0	0	0	0	200	903	0	0	0	0	0	0	0	603	903	0
8028	9	0	0	0	0	0	0	200	300	0	0	0	0	0	0	0	200	903	0	0	0	0	0	0	0	603	903	0
8029	0	0	0	0	0	0	0	200	300	0	0	0	0	0	0	0	200	903	0	0	0	0	0	0	0	603	903	0
8029	1	0	0	0	0	0	0	200	300	0	0	0	0	0	0	0	200	903	0	0	0	0	0	0	0	603	903	0
8029	2	0	0	0	0	0	0	200	300	0	0	0	0	0	0	0	200	903	0	0	0	0	0	0	0	603	903	0
8029	3	0	0	0	0	0	0	200	300	0	0	0	0	0	0	0	200	903	0	0	0	0	0	0	0	603	903	0
8029	4	0	0	0	0	0	0	200	300	0	0	0	0	0	0	0	200	903	0	0	0	0	0	0	0	603	903	0
8029	5	0	0	0	0	0	0	200	300	0	0	0	0	0	0	0	200	903	0	0	0	0	0	0	0	603	903	0
8029	6	0	0	0	0	0	0	200	300	0	0	0	0	0	0	0	200	903	0	0	0	0	0	0	0	603	903	0
8029	7	0	0	0	0	0	0	200	300	0	0	0	0	0	0	0	200	903	0	0	0	0	0	0	0	603	903	0
8029	8	0	0	0	0	0	0	200	300	0	0	0	0	0	0	0	200	903	0	0	0	0	0	0	0	603	903	0
8029	9	0	0	0	0	0	0	200	300	0	0	0	0	0	0	0	200	903	0	0	0	0	0	0	0	603	903	0
8030	0	0	0	0	0	0	0	200	300	0	0	0	0	0	0	0	200	903	0	0	0	0	0	0	0	603	903	0
8030	1	0	0	0	0	0	0	200	300	0	0	0	0	0	0	0	200	903	0	0	0	0	0	0	0	603	903	0
8030	2	0	0	0	0	0	0	200	300	0	0	0	0	0	0	0	200	903	0	0	0	0	0	0	0	603	903	0
8030	3	0	0	0	0	0	0	200	300	0	0	0	0	0	0	0	200	903	0	0	0	0	0	0	0	603	903	0
8030	4	0	0	0	0	0	0	200	300	0	0	0	0	0	0	0	200	903	0	0	0	0	0	0	0	603	903	0
8030	5	0	0	0	0	0	0	200	300	0	0	0	0	0	0	0	200	903	0	0	0	0	0	0	0	603	903	0
8030	6	0	0	0	0	0	0	200	300	0	0	0	0	0	0	0	200	903	0	0	0	0	0	0	0	603	903	0
8030	7	0	0	0	0	0	0	200	300	0	0	0	0	0	0	0	200	903	0	0	0	0	0	0	0	603	903	0
8030	8	0	0	0	0	0	0	200	300	0	0	0	0	0	0	0	200	903	0	0	0	0	0	0	0	603	903	0
8030	9	0	0	0	0	0	0	200	300	0	0	0	0	0	0	0	200	903	0	0	0	0	0	0	0	603	903	0
8031	0	0	0	0	0	0	0	200	300	0	0	0	0	0	0	0	200	903	0	0	0	0	0	0	0	603	903	0
8031	1	0	0	0	0	0	0	200	300	0	0	0	0	0	0	0	200	903	0	0	0	0	0	0	0	603	903	0
8031	2	0	0	0	0	0	0	200	300	0	0	0	0	0	0	0	200	903	0	0	0	0	0	0	0	603	903	0
8031	3	0	0	0	0	0	0	200	300	0	0	0	0	0	0	0	200	903	0	0	0	0	0	0	0	603	903	0
8031	4	0	0	0	0	0	0	200	300	0	0	0	0	0	0	0	200	903	0	0	0	0	0	0	0	603	903	0
8031	5	0	0	0	0	0	0	200	300	0	0	0	0	0	0	0	200	903	0	0	0	0	0	0	0	603	903	0
8031	6	0	0	0	0	0	0	200	300	0	0	0	0	0	0	0	200	903	0	0	0	0	0	0	0	603	903	0
8031	7	0	0	0	0	0	0	200	300	0	0	0	0	0	0	0	200	903	0	0	0	0	0	0	0	603	903	0
8031	8	0	0	0	0	0	0	200	300	0	0	0	0	0	0	0	200	903	0	0	0	0	0	0	0	603	903	0
8031	9	0	0	0	0	0	0	200	300	0	0	0	0	0	0	0	200	903	0	0	0	0	0	0	0	603	903	0
8032	0	0	0	0	0	0	0	200	300	0	0	0	0	0	0	0	200	903	0	0	0	0	0	0	0	603	903	0
8032	1	0	0	0	0	0	0	200	300	0	0	0	0	0	0	0	200	903	0	0	0	0	0	0	0	603	903	0
8032	2	0	0	0	0	0	0	200	300	0	0	0	0	0	0	0	200	903	0	0	0	0	0	0	0	603	903	0
8032	3	0	0	0	0	0	0	200	300	0	0	0	0	0	0	0	200	903	0	0	0	0	0	0	0	603	903	0
8032	4	0	0	0	0	0	0	200	300	0	0	0	0	0	0	0	200	903	0	0	0	0	0	0	0	603	903	0
8032	5	0	0	0	0	0	0	200	300	0	0	0	0	0	0	0	200	903	0	0	0	0	0	0	0	603	903	0
8032	6	0	0	0	0	0	0	200	300	0	0	0	0	0	0	0	200	903	0	0	0	0	0	0	0	603	903	0
8032	7	0	0	0	0	0	0	200	300	0	0	0	0	0	0	0	200	903	0	0	0	0	0	0	0	603	903	0
8032	8	0	0	0	0	0	0	200	300	0	0	0	0	0	0	0	200	903	0	0	0	0	0	0	0	603	903	0
8032	9	0	0	0	0	0	0	200	300	0	0	0	0	0	0	0	200	903	0	0	0	0	0	0	0	603	903	0
8033	0	0	0	0	0	0	0	200	300	0	0	0	0	0	0	0	200	903	0	0	0	0	0	0	0	603	903	0
8033	1	0	0	0	0	0	0	200	300	0	0	0	0	0	0	0	200	903	0	0	0	0	0	0	0	603	903	0
8033	2	0	0	0	0	0	0	200	300	0	0	0	0	0	0	0	200	903	0	0	0	0	0	0	0	603	903	0
8033	3	0	0	0	0	0	0	200	300	0	0	0	0	0	0	0	200	903	0	0	0	0	0	0	0	603	903	0
8033	4	0	0	0	0	0	0	200	300	0	0	0	0	0	0	0	200	903	0	0	0	0	0	0	0	603	903	0
8033	5	0	0	0	0	0	0	200	300	0	0	0	0	0	0	0	200	903	0	0	0	0	0	0	0	603	903	0
8033	6	0	0	0	0	0	0	200	300	0	0	0	0	0	0	0	200	903	0	0	0	0	0	0	0	603	903	0
8033	7	0	0	0	0	0	0	200	300	0	0	0	0	0	0	0	200	903	0	0	0	0	0	0	0	603	903	0
8033	8	0	0	0	0	0	0	200	300	0	0	0	0	0	0	0	200	903	0	0	0	0	0	0	0	603	903	0
8033	9	0	0	0	0	0	0	200	300	0	0	0	0	0	0	0	200	903	0	0	0	0	0	0	0	603	903	0
8034	0	0	0	0	0	0	0	200	300	0	0	0	0	0	0	0	200	903	0	0	0	0	0	0	0	603	903	0
8034	1	0	0	0	0	0	0	200	300	0	0	0	0	0	0	0	200	903	0	0	0	0	0	0	0	603	903	0
8034	2	0	0	0	0	0	0	200	300	0	0	0	0	0	0	0	200	903	0	0	0	0	0	0	0	603	903	0
8034	3	0	0	0	0	0	0	200	300	0	0	0	0	0	0	0	200	903	0	0	0	0	0	0	0	603	903	0
8034	4	0	0	0	0	0	0	200	300	0	0	0	0	0	0	0	200	903	0	0	0	0	0	0	0	603	903	0
8034	5	0	0	0	0	0	0	200	300	0	0	0	0	0	0	0	200	903	0	0	0	0	0	0	0	603	903	0
8034	6	0	0	0	0	0	0	200	300	0	0	0	0	0	0	0	200	903	0	0	0	0	0	0	0	603	903	0
8034	7	0	0	0	0	0	0	200	300	0	0	0	0	0	0	0	200	903	0	0	0	0	0	0	0	603	903	0
8034	8	0	0	0	0	0	0	200	300	0	0	0	0	0	0	0	200	903	0	0	0	0	0	0	0	603	903	0
8034	9	0	0	0	0	0	0	200	300	0	0	0	0	0	0	0	200	903	0	0	0	0	0	0	0	603	903	0
8035	0	0	0	0	0	0	0	200	300	0	0	0	0	0	0	0	200	903	0	0	0	0	0	0	0	603	903	0
8035	1	0	0	0	0	0	0	200	300	0	0	0	0	0	0	0	200	903	0	0	0	0	0	0	0	603	903	0
8035	2	0	0	0	0	0	0	200	300	0	0	0	0	0	0	0	200	903	0	0	0	0	0	0	0	603	903	0
8035	3	0	0	0	0	0	0	200	300	0	0	0	0	0	0	0	200	903	0	0	0	0	0	0	0	603	903	0
8035	4	0	0	0	0	0	0	200	300	0	0	0	0	0	0	0	200	903	0	0	0	0	0	0	0	603	903	0
8035	5	0	0	0	0	0	0	200	300	0	0	0	0	0	0	0	200	903	0	0	0	0	0	0	0	603	903	0
8035	6	0	0	0	0	0	0	200	300	0	0	0	0	0	0	0	200	903	0	0	0	0	0	0	0	603	903	0
8035	7	0	0	0	0	0	0	200	300	0	0	0	0	0	0	0	200	903	0	0	0	0	0	0	0	603	903	0
8035	8	0	0	0	0	0	0	200	300	0	0	0	0	0	0	0	200	903	0	0	0	0	0	0	0	603	903	0
8035	9	0	0	0	0	0	0	200	300	0	0	0	0	0	0	0	200	903	0	0	0	0	0	0	0	603	903	0
8036	0	0	0	0	0	0	0	200	300	0	0	0	0	0	0	0	200	903	0	0	0	0	0	0	0	603	903	0
8036	1	0	0	0	0	0	0	200	300	0	0	0	0	0	0	0	200	903	0	0	0	0	0	0	0	603	903	0
8036	2	0	0	0	0	0	0	200	300	0	0	0	0	0	0	0	200	903	0	0	0	0	0	0	0	603	903	0
8036	3	0	0	0	0	0	0	200	300	0	0	0	0	0	0	0	200	903	0	0	0	0	0	0	0	603	903	0
8036	4	0	0	0	0	0	0	200	300	0	0	0	0	0	0	0	200	903	0	0	0	0	0	0	0	603	903	0
8036	5	0	0	0	0	0	0	200	300	0	0	0	0	0	0	0	200	903	0	0	0	0	0	0	0	603	903	0
8036	6	0	0	0	0	0	0	200	300	0	0	0	0	0	0	0	200	903	0	0	0	0	0	0	0	603	903	0
8036	7	0	0	0	0	0	0	200	300	0	0	0	0	0	0	0	200	903	0	0	0	0	0	0	0	603	903	0
8036	8	0	0	0	0	0	0	200	300	0	0	0	0	0	0	0	200	903	0	0	0	0	0	0	0	603	903	0
8036	9	0	0	0	0	0	0	200	300	0	0	0	0	0	0	0	200	903	0	0	0	0	0	0	0	603	903	0
8037	0	0	0	0	0	0	0	200	300	0	0	0	0	0	0	0	200	903	0	0	0	0	0	0	0	603	903	0
8037	1	0	0	0	0	0	0	200	300	0	0	0	0	0	0	0	200	903	0	0	0	0	0	0	0	603	903	0
8037	2	0	0	0	0	0	0	200	300	0	0	0	0	0	0	0	200	903	0	0	0	0	0	0	0	603	903	0
8037	3	0	0	0	0	0	0	200	300	0	0	0	0	0	0	0	200	903	0	0	0	0	0	0	0	603	903	0
8037	4	0	0	0	0	0	0	200	300	0	0	0	0	0	0	0	200	903	0	0	0	0	0	0	0	603	903	0
8037	5	0	0	0	0	0	0	200	300	0	0	0	0	0	0	0	200	903	0	0	0	0	0	0	0	603	903	0
8037	6	0	0	0	0	0	0	200	300	0	0	0	0	0	0	0	200	903	0	0	0	0	0	0	0	603	903	0
8037	7	0	0	0	0	0	0	200	300	0	0	0	0	0	0	0	200	903	0	0	0	0	0	0	0	603	903	0
8037	8	0	0	0	0	0	0	200	300	0	0	0	0	0	0	0	200	903	0	0	0	0	0	0	0	603	903	0
8037	9	0	0	0	0	0	0	200	300	0	0	0	0	0	0	0	200	903	0	0	0	0	0	0	0	603	903	0
8038	0	0	0	0	0	0	0	200	300	0	0	0	0	0	0	0	200	903	0	0	0	0	0	0	0	603	903	0
8038	1	0	0	0	0	0	0	200	300	0	0	0	0	0	0	0	200	903	0	0	0	0	0	0	0	603	903	0
8038	2	0	0	0	0	0	0	200	300	0	0	0	0	0	0	0	200	903	0	0	0	0	0	0	0	603	903	0
8038	3	0	0	0	0	0	0	200	300	0	0	0	0	0	0	0	200	903	0	0	0	0	0	0	0	603	903	0
8038	4	0	0	0	0	0	0	200	300	0	0	0	0	0	0	0	200	903	0	0	0	0	0	0	0	603	903	0
8038	5	0	0	0	0	0	0	200	300	0	0	0	0	0	0	0	200	903	0	0	0	0	0	0	0	603	903	0
8038	6	0	0	0	0	0	0	200	300	0	0	0	0	0	0	0	200	903	0	0	0	0	0	0	0	603	903	0
8038	7	0	0	0	0	0	0	200	300	0	0	0	0	0	0	0	200	903	0	0	0	0	0	0	0	603	903	0
8038	8	0	0	0	0	0	0	200	300	0	0	0	0	0	0	0	200	903	0	0	0	0	0	0	0	603	903	0
8038	9	0	0	0	0	0	0	200	300	0	0	0	0	0	0	0	200	903	0	0	0	0	0	0	0	603	903	0
8039	0	0	0	0	0	0	0	200	300	0	0	0	0	0	0	0	200	903	0	0	0	0	0	0	0	603	903	0
8039	1	0	0	0	0	0	0	200	300	0	0	0	0	0	0	0	200	903	0	0	0	0	0	0	0	603	903	0
8039	2	0	0	0	0	0	0	200	300	0	0	0	0	0	0	0	200	903	0	0	0	0	0	0	0	603	903	0
8039	3	0	0	0	0	0	0	200	300	0	0	0	0	0	0	0	200	903	0	0	0	0	0	0	0	603	903	0
8039	4	0	0	0	0	0	0	200	300	0	0	0	0	0	0	0	200	903	0	0	0	0	0	0	0	603	903	0
8039	5	0	0	0	0	0	0	200	300	0	0	0	0	0	0	0	200	903	0	0	0	0	0	0	0	603	903	0
8039	6	0	0	0	0	0	0	200	300	0	0	0	0	0	0	0	200	903	0	0	0	0	0	0	0	603	903	0
8039	7	0	0	0	0	0	0	200	300	0	0	0	0	0	0	0	200	903	0	0	0	0	0	0	0	603	903	0
8039	8	0	0	0	0	0	0	200	300	0	0	0	0	0	0	0	200	903	0	0	0	0	0	0	0	603	903	0
8039	9	0	0	0	0	0	0	200	300	0	0	0	0	0	0	0	200	903	0	0	0	0	0	0	0	603	903	0
8040	0	0	0	0	0	0	0	200	300	0	0	0	0	0	0	0	200	903	0	0	0	0	0	0	0	603	903	0
8040	1	0	0	0	0	0	0	200	300	0	0	0	0	0	0	0	200	903	0	0	0	0	0	0	0	603	903	0
8040	2	0	0	0	0	0	0	200	300	0	0	0	0	0	0	0	200	903	0	0	0	0	0	0	0	603	903	0
8040	3	0	0	0	0	0	0	200	300	0	0	0	0	0	0	0	200	903	0	0	0	0	0	0	0	603	903	0
8040	4	0	0	0	0	0	0	200	300	0	0	0	0	0	0	0	200	903	0	0	0	0	0	0	0	603	903	0
8040	5	0	0	0	0	0	0	200	300	0	0	0	0	0	0	0	200	903	0	0	0	0	0	0	0	603	903	0
8040	6	0	0	0	0	0	0	200	300	0	0	0	0	0	0	0	200	903	0	0	0	0	0	0	0	603	903	0
8040	7	0	0	0	0	0	0	200	300	0	0	0	0	0	0	0	200	903	0	0	0	0	0	0	0	603	903	0
8040	8	0	0	0	0	0	0	200	300	0	0	0	0	0	0	0	200	903	0	0	0	0	0	0	0	603	903	0
8040	9	0	0	0	0	0	0	200	300	0	0	0	0	0	0	0	200	903	0	0	0	0	0	0	0	603	903	0
8041	0	0	0	0	0	0	0	200	300	0	0	0	0	0	0	0	200	903	0	0	0	0	0	0	0	603	903	0
8041	1	0	0	0	0	0	0	200	300	0	0	0	0	0	0	0	200	903	0	0	0	0	0	0	0	603	903	0
8041	2	0	0	0	0	0	0	200	300	0	0	0	0	0	0	0	200	903	0	0	0	0	0	0	0	603	903	0
8041	3	0	0	0	0	0	0	200	300	0	0	0	0	0	0	0	200	903	0	0	0	0	0	0	0	603	903	0
8041	4	0	0	0	0	0	0	200	300	0	0	0	0	0	0	0	200	903	0	0	0	0	0	0	0	603	903	0
8041	5	0	0	0	0	0	0	200	300	0	0	0	0	0	0	0	200	903	0	0	0	0	0	0	0	603	903	0
8041	6	0	0	0	0	0	0	200	300	0	0	0	0	0	0	0	200	903	0	0	0	0	0	0	0	603	903	0
8041	7	0	0	0	0	0	0	200	300	0	0	0	0	0	0	0	200	903	0	0	0	0	0	0	0	603	903	0
8041	8	0	0	0	0	0	0	200	300	0	0	0	0	0	0	0	200	903	0	0	0	0	0	0	0	603	903	0
8041	9	0	0	0	0	0	0	200	300	0	0	0	0	0	0	0	200	903	0	0	0	0	0	0	0	603	903	0
8042	0	0	0	0	0	0	0	200	300	0	0	0	0	0	0	0	200	903	0	0	0	0	0	0	0	603	903	0
8042	1	0	0	0	0	0	0	200	300	0	0	0	0	0	0	0	200	903	0	0	0	0	0	0	0	603	903	0
8042	2	0	0	0	0	0	0	200	300	0	0	0	0	0	0	0	200	903	0	0	0	0	0	0	0	603	903	0
8042	3	0	0	0	0	0	0	200	300	0	0	0	0	0	0	0	200	903	0	0	0	0	0	0	0	603	903	0
8042	4	0	0	0	0	0	0	200	300	0	0	0	0	0	0	0	200	903	0	0	0	0	0	0	0	603	903	0
8042	5	0	0	0	0	0	0	200	300	0	0	0	0	0	0	0	200	903	0	0	0	0	0	0	0	603	903	0
8042	6	0	0	0	0	0	0	200	300	0	0	0	0	0	0	0	200	903	0	0	0	0	0	0	0	603	903	0
8042	7	0	0	0	0	0	0	200	300	0	0	0	0	0	0	0	200	903	0	0	0	0	0	0	0	603	903	0
8042	8	0	0	0	0	0	0	200	300	0	0	0	0	0	0	0	200	903	0	0	0	0	0	0	0	603	903	0
8042	9	0	0	0	0	0	0	200	300	0	0	0	0	0	0	0	200	903	0	0	0	0	0	0	0	603	903	0
8043	0	0	0	0	0	0	0	200	300	0	0	0	0	0	0	0	200	903	0	0	0	0	0	0	0	603	903	0
8043	1	0	0	0	0	0	0	200	300	0	0	0	0	0	0	0	200	903	0	0	0	0	0	0	0	603	903	0
8043	2	0	0	0	0	0	0	200	300	0	0	0	0	0	0	0	200	903	0	0	0	0	0	0	0	603	903	0
8043	3	0	0	0	0	0	0	200	300	0	0	0	0	0	0	0	200	903	0	0	0	0	0	0	0	603	903	0
8043	4	0	0	0	0	0	0	200	300	0	0	0	0	0	0	0	200	903	0	0	0	0	0	0	0	603	903	0
8043	5	0	0	0	0	0	0	200	300	0	0	0	0	0	0	0	200	903	0	0	0	0	0	0	0	603	903	0
8043	6	0	0	0	0	0	0	200	300	0	0	0	0	0	0	0	200	903	0	0	0	0	0	0	0	603	903	0
8043	7	0	0	0	0	0	0	200	300	0	0	0	0	0	0	0	200	903	0	0	0	0	0	0	0	603	903	0
8043	8	0	0	0	0	0	0	200	300	0	0	0	0	0	0	0	200	903	0	0	0	0	0	0	0	603	903	0
8043	9	0	0	0	0	0	0	200	300	0	0	0	0	0	0	0	200	903	0	0	0	0	0	0	0	603	903	0
8044	0	0	0	0	0	0	0	200	300	0	0	0	0	0	0	0	200	903	0	0	0	0	0	0	0	603	903	0
8044	1	0	0	0	0	0	0	200	300	0	0	0	0	0	0	0	200	903	0	0	0	0	0	0	0	603	903	0
8044	2	0	0	0	0	0	0	200	300	0	0	0	0	0	0	0	200	903	0	0	0	0	0	0	0	603	903	0
8044	3	0	0	0	0	0	0	200	300	0	0	0	0	0	0	0	200	903	0	0	0	0	0	0	0	603	903	0
8044	4	0	0	0	0	0	0	200	300	0	0	0	0	0	0	0	200	903	0	0	0	0	0	0	0	603	903	0
8044	5	0	0	0	0	0	0	200	300	0	0	0	0	0	0	0	200	903	0	0	0	0	0	0	0	603	903	0
8044	6	0	0	0	0	0	0	200	300	0	0	0	0	0	0	0	200	903	0	0	0	0	0	0	0	603	903	0
8044	7	0	0	0	0	0	0	200	300	0	0	0	0	0	0	0	200	903	0	0	0	0	0	0	0	603	903	0
8044	8	0	0	0	0	0	0	200	300	0	0	0	0	0	0	0	200	903	0	0	0	0	0	0	0	603	903	0
8044	9	0	0	0	0	0	0	200	300	0	0	0	0	0	0	0	200	903	0	0	0	0	0	0	0	603	903	0
8045	0	0	0	0	0	0	0	200	300	0	0	0	0	0	0	0	200	903	0	0	0	0	0	0	0	603	903	0
8045	1	0	0	0	0	0	0	200	300	0	0	0	0	0	0	0	200	903	0	0	0	0	0	0	0	603	903	0
8045	2	0	0	0	0	0	0	200	300	0	0	0	0	0	0	0	200	903	0	0	0	0	0	0	0	603	903	0
8045	3	0	0	0	0	0	0	200	300	0	0	0	0	0	0	0	200	903	0	0	0	0	0	0	0	603	903	0
8045	4	0	0	0	0	0	0	200	300	0	0	0	0	0	0	0	200	903	0	0	0	0	0	0	0	603	903	0
8045	5	0	0	0	0	0	0	200	300	0	0	0	0	0	0	0	200	903	0	0	0	0	0	0	0	603	903	0
8045	6	0	0	0	0	0	0	200	300	0	0	0	0	0	0	0	200	903	0	0	0	0	0	0	0	603	903	0
8045	7	0	0	0	0	0	0	200	300	0	0	0	0	0	0	0	200	903	0	0	0	0	0	0	0	603	903	0
8045	8	0	0	0	0	0	0	200	300	0	0	0	0	0	0	0	200	903	0	0	0	0	0	0	0	603	903	0
8045	9	0	0	0	0	0	0	200	300	0	0	0	0	0	0	0	200	903	0	0	0	0	0	0	0	603	903	0
8046	0	0	0	0	0	0	0	200	300	0	0	0	0	0	0	0	200	903	0	0	0	0	0	0	0	603	903	0
8046	1	0	0	0	0	0	0	200	300	0	0	0	0	0	0	0	200	903	0	0	0	0	0	0	0	603	903	0
8046	2	0	0	0	0	0	0	200	300	0	0	0	0	0	0	0	200	903	0	0	0	0	0	0	0	603	903	0
8046	3	0	0	0	0	0	0	200	300	0	0	0	0	0	0	0	200	903	0	0	0	0	0	0	0	603	903	0
8046	4	0	0	0	0	0	0	200	300	0	0	0	0	0	0	0	200	903	0	0	0	0	0	0	0	603	903	0
8046	5	0	0	0	0	0	0	200	300	0	0	0	0	0	0	0	200	903	0	0	0	0	0	0	0	603	903	0
8046	6	0	0	0	0	0	0	200	300	0	0	0	0	0	0	0	200	903	0	0	0	0	0	0	0	603	903	0
8046	7	0	0	0	0	0	0	200	300	0	0	0	0	0	0	0	200	903	0	0	0	0	0	0	0	603	903	0
8046	8	0	0	0	0	0	0	200	300	0	0	0	0	0	0	0	200	903	0	0	0	0	0	0	0	603	903	0
8046	9	0	0	0	0	0	0	200	300	0	0	0	0	0	0	0	200	903	0	0	0	0	0	0	0	603	903	0
8047	0	0	0	0	0	0	0	200	300	0	0	0	0	0	0	0	200	903	0	0	0	0	0	0	0	603	903	0
8047	1	0	0	0	0	0	0	200	300	0	0	0	0	0	0	0	200	903	0	0	0	0	0	0	0	603	903	0
8047	2	0	0	0	0	0	0	200	300	0	0	0	0	0	0	0	200	903	0	0	0	0	0	0	0	603	903	0
8047	3	0	0	0	0	0	0	200	300	0	0	0	0	0	0	0	200	903	0	0	0	0	0	0	0	603	903	0
8047	4	0	0	0	0	0	0	200	300	0	0	0	0	0	0	0	200	903	0	0	0	0	0	0	0	603	903	0
8047	5	0	0	0	0	0	0	200	300	0	0	0	0	0	0	0	200	903	0	0	0	0	0	0	0	603	903	0
8047	6	0	0	0	0	0	0	200	300	0	0	0	0	0	0	0	200	903	0	0	0	0	0	0	0	603	903	0
8047	7	0	0	0	0	0	0	200	300	0	0	0	0	0	0	0	200	903	0	0	0	0	0	0	0	603	903	0
8047	8	0	0	0	0	0	0	200	300	0	0	0	0	0	0	0	200	903	0	0	0	0	0	0	0	603	903	0
8047	9	0	0	0	0	0	0	200	300	0	0	0	0	0	0	0	200	903	0	0	0	0	0	0	0	603	903	0
8048	0	0	0	0	0	0	0	200	300	0	0	0	0	0	0	0	200	903	0	0	0	0	0	0	0	603	903	0
8048	1	0	0	0	0	0	0	200	300	0	0	0	0	0	0	0	200	903	0	0	0	0	0	0	0	603	903	0
8048	2	0	0	0	0	0	0	200	300	0	0	0	0	0	0	0	200	903	0	0	0	0	0	0	0	603	903	0
8048	3	0	0	0	0	0	0	200	300	0	0	0	0	0	0	0	200	903	0	0	0	0	0	0	0	603	903	0
8048	4	0	0	0	0	0	0	200	300	0	0	0	0	0	0	0	200	903	0	0	0	0	0	0	0	603	903	0
8048	5	0	0	0	0	0	0	200	300	0	0	0	0	0	0	0	200	903	0	0	0	0	0	0	0	603	903	0
8048	6	0	0	0	0	0	0	200	300	0	0	0	0	0	0	0	200	903	0	0	0	0	0	0	0	603	903	0
8048	7	0	0	0	0	0	0	200	300	0	0	0	0	0	0	0	200	903	0	0	0	0	0	0	0	603	903	0
8048	8	0	0	0	0	0	0	200	300	0	0	0	0	0	0	0	200	903	0	0	0	0	0	0	0	603	903	0
8048	9	0	0	0	0	0	0	200	300	0	0	0	0	0	0	0	200	903	0	0	0	0	0	0	0	603	903	0
8049	0	0	0	0	0	0	0	200	300	0	0	0	0	0	0	0	200	903	0	0	0	0	0	0	0	603	903	0
8049	1	0	0	0	0	0	0	200	300	0	0	0	0	0	0	0	200	903	0	0	0	0	0	0	0	603	903	0
8049	2	0	0	0	0	0	0	200	300	0	0	0	0	0	0	0	200	903	0	0	0	0	0	0	0	603	903	0
8049	3	0	0	0	0	0	0	200	300	0	0	0	0	0	0	0	200	903	0	0	0	0	0	0	0	603	903	0
8049	4	0	0	0	0	0	0	200	300	0	0	0	0	0	0	0	200	903	0	0	0	0	0	0	0	603	903	0
8049	5	0	0	0	0	0	0	200	300	0	0	0	0	0	0	0	200	903	0	0	0	0	0	0	0	603	903	0
8049	6	0	0	0	0	0	0	200	300	0	0	0	0	0	0	0	200	903	0	0	0	0	0	0	0	603	903	0
8049	7	0	0	0	0	0	0	200	300	0	0	0	0	0	0	0	200	903	0	0	0	0	0	0	0	603	903	0
8049	8	0	0	0	0	0	0	200	300	0	0	0	0	0	0	0	200	903	0	0	0	0	0	0	0	603	903	0
8049	9	0	0	0	0	0	0	200	300	0	0	0	0	0	0	0	200	903	0	0	0	0	0	0	0	603	903	0
8050	0	0	0	0	0	0	0	200	300	0	0	0	0	0	0	0	200	903	0	0	0	0	0	0	0	603	903	0
8050	1	0	0	0	0	0	0	200	300	0	0	0	0	0	0	0	200	903	0	0	0	0	0	0	0	603	903	0
8050	2	0	0	0	0	0	0	200	300	0	0	0	0	0	0	0	200	903	0	0	0	0	0	0	0	603	903	0
8050	3	0	0	0	0	0	0	200	300	0	0	0	0	0	0	0	200	903	0	0	0	0	0	0	0	603	903	0
8050	4	0	0	0	0	0	0	200	300	0	0	0	0	0	0	0	200	903	0	0	0	0	0	0	0	603	903	0
8050	5	0	0	0	0	0	0	200	300	0	0	0	0	0	0	0	200	903	0	0	0	0	0	0	0	603	903	0
8050	6	0	0	0	0	0	0	200	300	0	0	0	0	0	0	0	200	903	0	0	0	0	0	0	0	603	903	0
8050	7	0	0	0	0	0	0	200	300	0	0	0	0	0	0	0	200	903	0	0	0	0	0	0	0	603	903	0
8050	8	0	0	0	0	0	0	200	300	0	0	0	0	0	0	0	200	903	0	0	0	0	0	0	0	603	903	0
8050	9	0	0	0	0	0	0	200	300	0	0	0	0	0	0	0	200	903	0	0	0	0	0	0	0	603	903	0
8051	0	0	0	0	0	0	0	200	300	0	0	0	0	0	0	0	200	903	0	0	0	0	0	0	0	603	903	0
8051	1	0	0	0	0	0	0	200	300	0	0	0	0	0	0	0	200	903	0	0	0	0	0	0	0	603	903	0
8051	2	0	0	0	0	0	0	200	300	0	0	0	0	0	0	0	200	903	0	0	0	0	0	0	0	603	903	0
8051	3	0	0	0	0	0	0	200	300	0	0	0	0	0	0	0	200	903	0	0	0	0	0	0	0	603	903	0
8051	4	0	0	0	0	0	0	200	300	0	0	0	0	0	0	0	200	903	0	0	0	0	0	0	0	603	903	0
8051	5	0	0	0	0	0	0	200	300	0	0	0	0	0	0	0	200	903	0	0	0	0	0	0	0	603	903	0
8051	6	0	0	0	0	0	0	200	300	0	0	0	0	0	0	0	200	903	0	0	0	0	0	0	0	603	903	0
8051	7	0	0	0	0	0	0	200	300	0	0	0	0	0	0	0	200	903	0	0	0	0	0	0	0	603	903	0
8051	8	0	0	0	0	0	0	200	300	0	0	0	0	0	0	0	200	903	0	0	0	0	0	0	0	603	903	0
8051	9	0	0	0	0	0	0	200	300	0	0	0	0	0	0	0	200	903	0	0	0	0	0	0	0	603	903	0
8052	0	0	0	0	0	0	0	200	300	0	0	0	0	0	0	0	200	903	0	0	0	0	0	0	0	603	903	0
8052	1	0	0	0	0	0	0	200	300	0	0	0	0	0	0	0	200	903	0	0	0	0	0	0	0	603	903	0
8052	2	0	0	0	0	0	0	200	300	0	0	0	0	0	0	0	200	903	0	0	0	0	0	0	0	603	903	0
8052	3	0	0	0	0	0	0	200	300	0	0	0	0	0	0	0	200	903	0	0	0	0	0	0	0	603	903	0
8052	4	0	0	0	0	0	0	200	300	0	0	0	0	0	0	0	200	903	0	0	0	0	0	0	0	603	903	0
8052	5	0	0	0	0	0	0	200	300	0	0	0	0	0	0	0	200	903	0	0	0	0	0	0	0	603	903	0
8052	6	0	0	0	0	0	0	200	300	0	0	0	0	0	0	0	200	903	0	0	0	0	0	0	0	603	903	0
8052	7	0	0	0	0	0	0	200	300	0	0	0	0	0	0	0	200	903	0	0	0	0	0	0	0	603	903	0
8052	8	0	0	0	0	0	0	200	300	0	0	0	0	0	0	0	200	903	0	0	0	0	0	0	0	603	903	0
8052	9	0	0	0	0	0	0	200	300	0	0	0	0	0	0	0	200	903	0	0	0	0	0	0	0	603	903	0
8053	0	0	0	0	0	0	0	200	300	0	0	0	0	0	0	0	200	903	0	0	0	0	0	0	0	603	903	0
8053	1	0	0	0	0	0	0	200	300	0	0	0	0	0	0	0	200	903	0	0	0	0	0	0	0	603	903	0
8053	2	0	0	0	0	0	0	200	300	0	0	0	0	0	0	0	200	903	0	0	0	0	0	0	0	603	903	0
8053	3	0	0	0	0	0	0	200	300	0	0	0	0	0	0	0	200	903	0	0	0	0	0	0	0	603	903	0
8053	4	0	0	0	0	0	0	200	300	0	0	0	0	0	0	0	200	903	0	0	0	0	0	0	0	603	903	0
8053	5	0	0	0	0	0	0	200	300	0	0	0	0	0	0	0	200	903	0	0	0	0	0	0	0	603	903	0
8053	6	0	0	0	0	0	0	200	300	0	0	0	0	0	0	0	200	903	0	0	0	0	0	0	0	603	903	0
8053	7	0	0	0	0	0	0	200	300	0	0	0	0	0	0	0	200	903	0	0	0	0	0	0	0	603	903	0
8053	8	0	0	0	0	0	0	200	300	0	0	0	0	0	0	0	200	903	0	0	0	0	0	0	0	603	903	0
8053	9	0	0	0	0	0	0	200	300	0	0	0	0	0	0	0	200	903	0	0	0	0	0	0	0	603	903	0
8054	0	0	0	0	0	0	0	200	300	0	0	0	0	0	0	0	200	903	0	0	0	0	0	0	0	603	903	0
8054	1	0	0	0	0	0	0	200	300	0	0	0	0	0	0	0	200	903	0	0	0	0	0	0	0	603	903	0
8054	2	0	0	0	0	0	0	200	300	0	0	0	0	0	0	0	200	903	0	0	0	0	0	0	0	603	903	0
8054	3	0	0	0	0	0	0	200	300	0	0	0	0	0	0	0	200	903	0	0	0	0	0	0	0	603	903	0
8054	4	0	0	0	0	0	0	200	300	0	0	0	0	0	0	0	200	903	0	0	0	0	0	0	0	603	903	0
8054	5	0	0	0	0	0	0	200	300	0	0	0	0	0	0	0	200	903	0	0	0	0	0	0	0	603	903	0
8054	6	0	0	0	0	0	0	200	300	0	0	0	0	0	0	0	200	903	0	0	0	0	0	0	0	603	903	0
8054	7	0	0	0	0	0	0	200	300	0	0	0	0	0	0	0	200	903	0	0	0	0	0	0	0	603	903	0
8054	8	0	0	0	0	0	0	200	300	0	0	0	0	0	0	0	200	903	0	0	0	0	0	0	0	603	903	0
8054	9	0	0	0	0	0	0	200	300	0	0	0	0	0	0	0	200	903	0	0	0	0	0	0	0	603	903	0
8055	0	0	0	0	0	0	0	200	300	0	0	0	0	0	0	0	200	903	0	0	0	0	0	0	0	603	903	0
8055	1	0	0	0	0	0	0	200	300	0	0	0	0	0	0	0	200	903	0	0	0	0	0	0	0	603	903	0
8055	2	0	0	0	0	0	0	200	300	0	0	0	0	0	0	0	200	903	0	0	0	0	0	0	0	603	903	0
8055	3	0	0	0	0	0	0	200	300	0	0	0	0	0	0	0	200	903	0	0	0	0	0	0	0	603	903	0
8055	4	0	0	0	0	0	0	200	300	0	0	0	0	0	0	0	200	903	0	0	0	0	0	0	0	603	903	0
8055	5	0	0	0	0	0	0	200	300	0	0	0	0	0	0	0	200	903	0	0	0	0	0	0	0	603	903	0
8055	6	0	0	0	0	0	0	200	300	0	0	0	0	0	0	0	200	903	0	0	0	0	0	0	0	603	903	0
8055	7	0	0	0	0	0	0	200	300	0	0	0	0	0	0	0	200	903	0	0	0	0	0	0	0	603	903	0
8055	8	0	0	0	0	0	0	200	300	0	0	0	0	0	0	0	200	903	0	0	0	0	0	0	0	603	903	0
8055	9	0	0	0	0	0	0	200	300	0	0	0	0	0	0	0	200	903	0	0	0	0	0	0	0	603	903	0
8056	0	0	0	0	0	0	0	200	300	0	0	0	0	0	0	0	200	903	0	0	0	0	0	0	0	603	903	0
8056	1	0	0	0	0	0	0	200	300	0	0	0	0	0	0	0	200	903	0	0	0	0	0	0	0	603	903	0
8056	2	0	0	0	0	0	0	200	300	0	0	0	0	0	0	0	200	903	0	0	0	0	0	0	0	603	903	0
8056	3	0	0	0	0	0	0	200	300	0	0	0	0	0	0	0	200	903	0	0	0	0	0	0	0	603	903	0
8056	4	0	0	0	0	0	0	200	300	0	0	0	0	0	0	0	200	903	0	0	0	0	0	0	0	603	903	0
8056	5	0	0	0	0	0	0	200	300	0	0	0	0	0	0	0	200	903	0	0	0	0	0	0	0	603	903	0
8056	6	0	0	0	0	0	0	200	300	0	0	0	0	0	0	0	200	903	0	0	0	0	0	0	0	603	903	0
8056	7	0	0	0	0	0	0	200	300	0	0	0	0	0	0	0	200	903	0	0	0	0	0	0	0	603	903	0
8056	8	0	0	0	0	0	0	200	300	0	0	0	0	0	0	0	200	903	0	0	0	0	0	0	0	603	903	0
8056	9	0	0	0	0	0	0	200	300	0	0	0	0	0	0	0	200	903	0	0	0	0	0	0	0	603	903	0
8057	0	0	0	0	0	0	0	200	300	0	0	0	0	0	0	0	200	903	0	0	0	0	0	0	0	603	903	0
8057	1	0	0	0	0	0	0	200	300	0	0	0	0	0	0	0	200	903	0	0	0	0	0	0	0	603	903	0
8057	2	0	0	0	0	0	0	200	300	0	0	0	0	0	0	0	200	903	0	0	0	0	0	0	0	603	903	0
8057	3	0	0	0	0	0	0	200	300	0	0	0	0	0	0	0	200	903	0	0	0	0	0	0	0	603	903	0
8057	4	0	0	0	0	0	0	200	300	0	0	0	0	0	0	0	200	903	0	0	0	0	0	0	0	603	903	0
8057	5	0	0	0	0	0	0	200	300	0	0	0	0	0	0	0	200	903	0	0	0	0	0	0	0	603	903	0
8057	6	0	0	0	0	0	0	200	300	0	0	0	0	0	0	0	200	903	0	0	0	0	0	0	0	603	903	0
8057	7	0	0	0	0	0	0	200	300	0	0	0	0	0	0	0	200	903	0	0	0	0	0	0	0	603	903	0
8057	8	0	0	0	0	0	0	200	300	0	0	0	0	0	0	0	200	903	0	0	0	0	0	0	0	603	903	0
8057	9	0	0	0	0	0	0	200	300	0	0	0	0	0	0	0	200	903	0	0	0	0	0	0	0	603	903	0
8058	0	0	0	0	0	0	0	200	300	0	0	0	0	0	0	0	200	903	0	0	0	0	0	0	0	603	903	0
8058	1	0	0	0	0	0	0	200	300	0	0	0	0	0	0	0	200	903	0	0	0	0	0	0	0	603	903	0
8058	2	0	0	0	0	0	0	200	300	0	0	0	0	0	0	0	200	903	0	0	0	0	0	0	0	603	903	0
8058	3	0	0	0	0	0	0	200	300	0	0	0	0	0	0	0	200	903	0	0	0	0	0	0	0	603	903	0
8058	4	0	0	0	0	0	0	200	300	0	0	0	0	0	0	0	200	903	0	0	0	0	0	0	0	603	903	0
8058	5	0	0	0	0	0	0	200	300	0	0	0	0	0	0	0	200	903	0	0	0	0	0	0	0	603	903	0
8058	6	0	0	0	0	0	0	200	300	0	0	0	0	0	0	0	200	903	0	0	0	0	0	0	0	603	903	0
8058	7	0	0	0	0	0	0	200	300	0	0	0	0	0	0	0	200	903	0	0	0	0	0	0	0	603	903	0
8058	8	0	0	0	0	0	0	200	300	0	0	0	0	0	0	0	200	903	0	0	0	0	0	0	0	603	903	0
8058	9	0	0	0	0	0	0	200	300	0	0	0	0	0	0	0	200	903	0	0	0	0	0	0	0	603	903	0
8059	0	0	0	0	0	0	0	200	300	0	0	0	0	0	0	0	200	903	0	0	0	0	0	0	0	603	903	0
8059	1	0	0	0	0	0	0	200	300	0	0	0	0	0	0	0	200	903	0	0	0	0	0	0	0	603	903	0
8059	2	0	0	0	0	0	0	200	300	0	0	0	0	0	0	0	200	903	0	0	0	0	0	0	0	603	903	0
8059	3	0	0	0	0	0	0	200	300	0	0	0	0	0	0	0	200	903	0	0	0	0	0	0	0	603	903	0
8059	4	0	0	0	0	0	0	200	300	0	0	0	0	0	0	0	200	903	0	0	0	0	0	0	0	603	903	0
8059	5	0	0	0	0	0	0	200	300	0	0	0	0	0	0	0	200	903	0	0	0	0	0	0	0	603	903	0
8059	6	0	0	0	0	0	0	200	300	0	0	0	0	0	0	0	200	903	0	0	0	0	0	0	0	603	903	0
8059	7	0	0	0	0	0	0	200	300	0	0	0	0	0	0	0	200	903	0	0	0	0	0	0	0	603	903	0
8059	8	0	0	0	0	0	0	200	300	0	0	0	0	0	0	0	200	903	0	0	0	0	0	0	0	603	903	0
8059	9	0	0	0	0	0	0	200	300	0	0	0	0	0	0	0	200	903	0	0	0	0	0	0	0	603	903	0
8060	0	0	0	0	0	0	0	200	300	0	0	0	0	0	0	0	200	903	0	0	0	0	0	0	0	603	903	0
8060	1	0	0	0	0	0	0	200	300	0	0	0	0	0	0	0	200	903	0	0	0	0	0	0	0	603	903	0
8060	2	0	0	0	0	0	0	200	300	0	0	0	0	0	0	0	200	903	0	0	0	0	0	0	0	603	903	0
8060	3	0	0	0	0	0	0	200	300	0	0	0	0	0	0	0	200	903	0	0	0	0	0	0	0	603	903	0
8060	4	0	0	0	0	0	0	200	300	0	0	0	0	0	0	0	200	903	0	0	0	0	0	0	0	603	903	0
8060	5	0	0	0	0	0	0	200	300	0	0	0	0	0	0	0	200	903	0	0	0	0	0	0	0	603	903	0
8060	6	0	0	0	0	0	0	200	300	0	0	0	0	0	0	0	200	903	0	0	0	0	0	0	0	603	903	0
8060	7	0	0	0	0	0	0	200	300	0	0	0	0	0	0	0	200	903	0	0	0	0	0	0	0	603	903	0
8060	8	0	0	0	0	0	0	200	300	0	0	0	0	0	0	0	200	903	0	0	0	0	0	0	0	603	903	0
8060	9	0	0	0	0	0	0	200	300	0	0	0	0	0	0	0	200	903	0	0	0	0	0	0	0	603	903	0
8061	0	0	0	0	0	0	0	200	300	0	0	0	0	0	0	0	200	903	0	0	0	0	0	0	0	603	903	0
8061	1	0	0	0	0	0	0	200	300	0	0	0	0	0	0	0	200	903	0	0	0	0	0	0	0	603	903	0
8061	2	0	0	0	0	0	0	200	300	0	0	0	0	0	0	0	200	903	0	0	0	0	0	0	0	603	903	0
8061	3	0	0	0	0	0	0	200	300	0	0	0	0	0	0	0	200	903	0	0	0	0	0	0	0	603	903	0
8061	4	0	0	0	0	0	0	200	300	0	0	0	0	0	0	0	200	903	0	0	0	0	0	0	0	603	903	0
8061	5	0	0	0	0	0	0	200	300	0	0	0	0	0	0	0	200	903	0	0	0	0	0	0	0	603	903	0
8061	6	0	0	0	0	0	0	200	300	0	0	0	0	0	0	0	200	903	0	0	0	0	0	0	0	603	903	0
8061	7	0	0	0	0	0	0	200	300	0	0	0	0	0	0	0	200	903	0	0	0	0	0	0	0	603	903	0
8061	8	0	0	0	0	0	0	200	300	0	0	0	0	0	0	0	200	903	0	0	0	0	0	0	0	603	903	0
8061	9	0	0	0	0	0	0	200	300	0	0	0	0	0	0	0	200	903	0	0	0	0	0	0	0	603	903	0
8062	0	0	0	0	0	0	0	200	300	0	0	0	0	0	0	0	200	903	0	0	0	0	0	0	0	603	903	0
8062	1	0	0	0	0	0	0	200	300	0	0	0	0	0	0	0	200	903	0	0	0	0	0	0	0	603	903	0
8062	2	0	0	0	0	0	0	200	300	0	0	0	0	0	0	0	200	903	0	0	0	0	0	0	0	603	903	0
8062	3	0	0	0	0	0	0	200	300	0	0	0	0	0	0	0	200	903	0	0	0	0	0	0	0	603	903	0
8062	4	0	0	0	0	0	0	200	300	0	0	0	0	0	0	0	200	903	0	0	0	0	0	0	0	603	903	0
8062	5	0	0	0	0	0	0	200	300	0	0	0	0	0	0	0	200	903	0	0	0	0	0	0	0	603	903	0
8062	6	0	0	0	0	0	0	200	300	0	0	0	0	0	0	0	200	903	0	0	0	0	0	0	0	603	903	0
8062	7	0	0	0	0	0	0	200	300	0	0	0	0	0	0	0	200	903	0	0	0	0	0	0	0	603	903	0
8062	8	0	0	0	0	0	0	200	300	0	0	0	0	0	0	0	200	903	0	0	0	0	0	0	0	603	903	0
8062	9	0	0	0	0	0	0	200	300	0	0	0	0	0	0	0	200	903	0	0	0	0	0	0	0	603	903	0
8063	0	0	0	0	0	0	0	200	300	0	0	0	0	0	0	0	200	903	0	0	0	0	0	0	0	603	903	0
8063	1	0	0	0	0	0	0	200	300	0	0	0	0	0	0	0	200	903	0	0	0	0	0	0	0	603	903	0
8063	2	0	0	0	0	0	0	200	300	0	0	0	0	0	0	0	200	903	0	0	0	0	0	0	0	603	903	0
8063	3	0	0	0	0	0	0	200	300	0	0	0	0	0	0	0	200	903	0	0	0	0	0	0	0	603	903	0
8063	4	0	0	0	0	0	0	200	300	0	0	0	0	0	0	0	200	903	0	0	0	0	0	0	0	603	903	0
8063	5	0	0	0	0	0	0	200	300	0	0	0	0	0	0	0	200	903	0	0	0	0	0	0	0	603	903	0
8063	6	0	0	0	0	0	0	200	300	0	0	0	0	0	0	0	200	903	0	0	0	0	0	0	0	603	903	0
8063	7	0	0	0	0	0	0	200	300	0	0	0	0	0	0	0	200	903	0	0	0	0	0	0	0	603	903	0
8063	8	0	0	0	0	0	0	200	300	0	0	0	0	0	0	0	200	903	0	0	0	0	0	0	0	603	903	0
8063	9	0	0	0	0	0	0	200	300	0	0	0	0	0	0	0	200	903	0	0	0	0	0	0	0	603	903	0
8064	0	0	0	0	0	0	0	200	300	0	0	0	0	0	0	0	200	903	0	0	0	0	0	0	0	603	903	0
8064	1	0	0	0	0	0	0	200	300	0	0	0	0	0	0	0	200	903	0	0	0	0	0	0	0	603	903	0
8064	2	0	0	0	0	0	0	200	300	0	0	0	0	0	0	0	200	903	0	0	0	0	0	0	0	603	903	0
8064	3	0	0	0	0	0	0	200	300	0	0	0	0	0	0	0	200	903	0	0	0	0	0	0	0	603	903	0
8064	4	0	0	0	0	0	0	200	300	0	0	0	0	0	0	0	200	903	0	0	0	0	0	0	0	603	903	0
8064	5	0	0	0	0	0	0	200	300	0	0	0	0	0	0	0	200	903	0	0	0	0	0	0	0	603	903	0
8064	6	0	0	0	0	0	0	200	300	0	0	0	0	0	0	0	200	903	0	0	0	0	0	0	0	603	903	0
8064	7	0	0	0	0	0	0	200	300	0	0	0	0	0	0	0	200	903	0	0	0	0	0	0	0	603	903	0
8064	8	0	0	0	0	0	0	200	300	0	0	0	0	0	0	0	200	903	0	0	0	0	0	0	0	603	903	0
8064	9	0	0	0	0	0	0	200	300	0	0	0	0	0	0	0	200	903	0	0	0	0	0	0	0	603	903	0
8065	0	0	0	0	0	0	0	200	300	0	0	0	0	0	0	0	200	903	0	0	0	0	0	0	0	603	903	0
8065	1	0	0	0	0	0	0	200	300	0	0	0	0	0	0	0	200	903	0	0	0	0	0	0	0	603	903	0
8065	2	0	0	0	0	0	0	200	300	0	0	0	0	0	0	0	200	903	0	0	0	0	0	0	0	603	903	0
8065	3	0	0	0	0	0	0	200	300	0	0	0	0	0	0	0	200	903	0	0	0	0	0	0	0	603	903	0
8065	4	0	0	0	0	0	0	200	300	0	0	0	0	0	0	0	200	903	0	0	0	0	0	0	0	603	903	0
8065	5	0	0	0	0	0	0	200	300	0	0	0	0	0	0	0	200	903	0	0	0	0	0	0	0	603	903	0
8065	6	0	0	0	0	0	0	200	300	0	0	0	0	0	0	0	200	903	0	0	0	0	0	0	0	603	903	0
8065	7	0	0	0	0	0	0	200	300	0	0	0	0	0	0	0	200	903	0	0	0	0	0	0	0	603	903	0
8065	8	0	0	0	0	0	0	200	300	0	0	0	0	0	0	0	200	903	0	0	0	0	0	0	0	603	903	0
8065	9	0	0	0	0	0	0	200	300	0	0	0	0	0	0	0	200	903	0	0	0	0	0	0	0	603	903	0
8066	0	0	0	0	0	0	0	200	300	0	0	0	0	0	0	0	200	903	0	0	0	0	0	0	0	603	903	0
8066	1	0	0	0	0	0	0	200	300	0	0	0	0	0	0	0	200	903	0	0	0	0	0	0	0	603	903	0
8066	2	0	0	0	0	0	0	200	300	0	0	0	0	0	0	0	200	903	0	0	0	0	0	0	0	603	903	0
8066	3	0	0	0	0	0	0	200	300	0	0	0	0	0	0	0	200	903	0	0	0	0	0	0	0	603	903	0
8066	4	0	0	0	0	0	0	200	300	0	0	0	0	0	0	0	200	903	0	0	0	0	0	0	0	603	903	0
8066	5	0	0	0	0	0	0	200	300	0	0	0	0	0	0	0	200	903	0	0	0	0	0	0	0	603	903	0
8066	6	0	0	0	0	0	0	200	300	0	0	0	0	0	0	0	200	903	0	0	0	0	0	0	0	603	903	0
8066	7	0	0	0	0	0	0	200	300	0	0	0	0	0	0	0	200	903	0	0	0	0	0	0	0	603	903	0
8066	8	0	0	0	0	0	0	200	300	0	0	0	0	0	0	0	200	903	0	0	0	0	0	0	0	603	903	0
8066	9	0	0	0	0	0	0	200	300	0	0	0	0	0	0	0	200	903	0	0	0	0	0	0	0	603	903	0
8067	0	0	0	0	0	0	0	200	300	0	0	0	0	0	0	0	200	903	0	0	0	0	0	0	0	603	903	0
8067	1	0	0	0	0	0	0	200	300	0	0	0	0	0	0	0	200	903	0	0	0	0	0	0	0	603	903	0
8067	2	0	0	0	0	0	0	200	300	0	0	0	0	0	0	0	200	903	0	0	0	0	0	0	0	603	903	0
8067	3	0	0	0	0	0	0	200	300	0	0	0	0	0	0	0	200	903	0	0	0	0	0	0	0	603	903	0
8067	4	0	0	0	0	0	0	200	300	0	0	0	0	0	0	0	200	903	0	0	0	0	0	0	0	603	903	0
8067	5	0	0	0	0	0	0	200	300	0	0	0	0	0	0	0	200	903	0	0	0	0	0	0	0	603	903	0
8067	6	0	0	0	0	0	0	200	300	0	0	0	0	0	0	0	200	903	0	0	0	0	0	0	0	603	903	0
8067	7	0	0	0	0	0	0	200	300	0	0	0	0	0	0	0	200	903	0	0	0	0	0	0	0	603	903	0
8067	8	0	0	0	0	0	0	200	300	0	0	0	0	0	0	0	200	903	0	0	0	0	0	0	0	603	903	0
8067	9	0	0	0	0	0	0	200	300	0	0	0	0	0	0	0	200	903	0	0	0	0	0	0	0	603	903	0
8068	0	0	0	0	0	0	0	200	300	0	0	0	0	0	0	0	200	903	0	0	0	0	0	0	0	603	903	0
8068	1	0	0	0	0	0	0	200	300	0	0	0	0	0	0	0	200	903	0	0	0	0	0	0	0	603	903	0
8068	2	0	0	0	0	0	0	200	300	0	0	0	0	0	0	0	200	903	0	0	0	0	0	0	0	603	903	0
8068	3	0	0	0	0	0	0	200	300	0	0	0	0	0	0	0	200	903	0	0	0	0	0	0	0	603	903	0
8068	4	0	0	0	0	0	0	200	300	0	0	0	0	0	0	0	200	903	0	0	0	0	0	0	0	603	903	0
8068	5	0	0	0	0	0	0	200	300	0	0	0	0	0	0	0	200	903	0	0	0	0	0	0	0	603	903	0
8068	6	0	0	0	0	0	0	200	300	0	0	0	0	0	0	0	200	903	0	0	0	0	0	0	0	603	903	0
8068	7	0	0	0	0	0	0	200	300	0	0	0	0	0	0	0	200	903	0	0	0	0	0	0	0	603	903	0
8068	8	0	0	0	0	0	0	200	300	0	0	0	0	0	0	0	200	903	0	0	0	0	0	0	0	603	903	0
8068	9	0	0	0	0	0	0	200	300	0	0	0	0	0	0	0	200	903	0	0	0	0	0	0	0	603	903	0
8069	0	0	0	0	0	0	0	200	300	0	0	0	0	0	0	0	200	903	0	0	0	0	0	0	0	603	903	0
8069	1	0	0	0	0	0	0	200	300	0	0	0	0	0	0	0	200	903	0	0	0	0	0	0	0	603	903	0
8069	2	0	0	0	0	0	0	200	300	0	0	0	0	0	0	0	200	903	0	0	0	0	0	0	0	603	903	0
8069	3	0	0	0	0	0	0	200	300	0	0	0	0	0	0	0	200	903	0	0	0	0	0	0	0	603	903	0
8069	4	0	0	0	0	0	0	200	300	0	0	0	0	0	0	0	200	903	0	0	0	0	0	0	0	603	903	0
8069	5	0	0	0	0	0	0	200	300	0	0	0	0	0	0	0	200	903	0	0	0	0	0	0	0	603	903	0
8069	6	0	0	0	0	0	0	200	300	0	0	0	0	0	0	0	200	903	0	0	0	0	0	0	0	603	903	0
8069	7	0	0	0	0	0	0	200	300	0	0	0	0	0	0	0	200	903	0	0	0	0	0	0	0	603	903	0
8069	8	0	0	0	0	0	0	200	300	0	0	0	0	0	0	0	200	903	0	0	0	0	0	0	0	603	903	0
8069	9	0	0	0	0	0	0	200	300	0	0	0	0	0	0	0	200	903	0	0	0	0	0	0	0	603	903	0
8070	0	0	0	0	0	0	0	200	300	0	0	0	0	0	0	0	200	903	0	0	0	0	0	0	0	603	903	0
8070	1	0	0	0	0	0	0	200	300	0	0	0	0	0	0	0	200	903	0	0	0	0	0	0	0	603	903	0
8070	2	0	0	0	0	0	0	200	300	0	0	0	0	0	0	0	200	903	0	0	0	0	0	0	0	603	903	0
8070	3	0	0	0	0	0	0	200	300	0	0	0	0	0	0	0	200	903	0	0	0	0	0	0	0	603	903	0
8070	4	0	0	0	0	0	0	200	300	0	0	0	0	0	0	0	200	903	0	0	0	0	0	0	0	603	903	0
8070	5	0	0	0	0	0	0	200	300	0	0	0	0	0	0	0	200	903	0	0	0	0	0	0	0	603	903	0
8070	6	0	0	0	0	0	0	200	300	0	0	0	0	0	0	0	200	903	0	0	0	0	0	0	0	603	903	0
8070	7	0	0	0	0	0	0	200	300	0	0	0	0	0	0	0	200	903	0	0	0	0	0	0	0	603	903	0
8070	8	0	0	0	0	0	0	200	300	0	0	0	0	0	0	0	200	903	0	0	0	0	0	0	0	603	903	0
8070	9	0	0	0	0	0	0	200	300	0	0	0	0	0	0	0	200	903	0	0	0	0	0	0	0	603	903	0
8071	0	0	0	0	0	0	0	200	300	0	0	0	0	0	0	0	200	903	0	0	0	0	0	0	0	603	903	0
8071	1	0	0	0	0	0	0	200	300	0	0	0	0	0	0	0	200	903	0	0	0	0	0	0	0	603	903	0
8071	2	0	0	0	0	0	0	200	300	0	0	0	0	0	0	0	200	903	0	0	0	0	0	0	0	603	903	0
8071	3	0	0	0	0	0	0	200	300	0	0	0	0	0	0	0	200	903	0	0	0	0	0	0	0	603	903	0
8071	4	0	0	0	0	0	0	200	300	0	0	0	0	0	0	0	200	903	0	0	0	0	0	0	0	603	903	0
8071	5	0	0	0	0	0	0	200	300	0	0	0	0	0	0	0	200	903	0	0	0	0	0	0	0	603	903	0
8071	6	0	0	0	0	0	0	200	300	0	0	0	0	0	0	0	200	903	0	0	0	0	0	0	0	603	903	0
8071	7	0	0	0	0	0	0	200	300	0	0	0	0	0	0	0	200	903	0	0	0	0	0	0	0	603	903	0
8071	8	0	0	0	0	0	0	200	300	0	0	0	0	0	0	0	200	903	0	0	0	0	0	0	0	603	903	0
8071	9	0	0	0	0	0	0	200	300	0	0	0	0	0	0	0	200	903	0	0	0	0	0	0	0	603	903	0
8072	0	0	0	0	0	0	0	200	300	0	0	0	0	0	0	0	200	903	0	0	0	0	0	0	0	603	903	0
8072	1	0	0	0	0	0	0	200	300	0	0	0	0	0	0	0	200	903	0	0	0	0	0	0	0	603	903	0
8072	2	0	0	0	0	0	0	200	300	0	0	0	0	0	0	0	200	903	0	0	0	0	0	0	0	603	903	0
8072	3	0	0	0	0	0	0	200	300	0	0	0	0	0	0	0	200	903	0	0	0	0	0	0	0	603	903	0
8072	4	0	0	0	0	0	0	200	300	0	0	0	0	0	0	0	200	903	0	0	0	0	0	0	0	603	903	0
8072	5	0	0	0	0	0	0	200	300	0	0	0	0	0	0	0	200	903	0	0	0	0	0	0	0	603	903	0
8072	6	0	0	0	0	0	0	200	300	0	0	0	0	0	0	0	200	903	0	0	0	0	0	0	0	603	903	0
8072	7	0	0	0	0	0	0	200	300	0	0	0	0	0	0	0	200	903	0	0	0	0	0	0	0	603	903	0
8072	8	0	0	0	0	0	0	200	300	0	0	0	0	0	0	0	200	903	0	0	0	0	0	0	0	603	903	0
8072	9	0	0	0	0	0	0	200	300	0	0	0	0	0	0	0	200	903	0	0	0	0	0	0	0	603	903	0
8073	0	0	0	0	0	0	0	200	300	0	0	0	0	0	0	0	200	903	0	0	0	0	0	0	0	603	903	0
8073	1	0	0	0	0	0	0	200	300	0	0	0	0	0	0	0	200	903	0	0	0	0	0	0	0	603	903	0
8073	2	0	0	0	0	0	0	200	300	0	0	0	0	0	0	0	200	903	0	0	0	0	0	0	0	603	903	0
8073	3	0	0	0	0	0	0	200	300	0	0	0	0	0	0	0	200	903	0	0	0	0	0	0	0	603	903	0
8073	4	0	0	0	0	0	0	200	300	0	0	0	0	0	0	0	200	903	0	0	0	0	0	0	0	603	903	0
8073	5	0	0	0	0	0	0	200	300	0	0	0	0	0	0	0	200	903	0	0	0	0	0	0	0	603	903	0
8073	6	0	0	0	0	0	0	200	300	0	0	0	0	0	0	0	200	903	0	0	0	0	0	0	0	603	903	0
8073	7	0	0	0	0	0	0	200	300	0	0	0	0	0	0	0	200	903	0	0	0	0	0	0	0	603	903	0
8073	8	0	0	0	0	0	0	200	300	0	0	0	0	0	0	0	200	903	0	0	0	0	0	0	0	603	903	0
8073	9	0	0	0	0	0	0	200	300	0	0	0	0	0	0	0	200	903	0	0	0	0	0	0	0	603	903	0
8074	0	0	0	0	0	0	0	200	300	0	0	0	0	0	0	0	200	903	0	0	0	0	0	0	0	603	903	0
8074	1	0	0	0	0	0	0	200	300	0	0	0	0	0	0	0	200	903	0	0	0	0	0	0	0	603	903	0
8074	2	0	0	0	0	0	0	200	300	0	0	0	0	0	0	0	200	903	0	0	0	0	0	0	0	603	903	0
8074	3	0	0	0	0	0	0	200	300	0	0	0	0	0	0	0	200	903	0	0	0	0	0	0	0	603	903	0
8074	4	0	0	0	0	0	0	200	300	0	0	0	0	0	0	0	200	903	0	0	0	0	0	0	0	603	903	0
8074	5	0	0	0	0	0	0	200	300	0	0	0	0	0	0	0	200	903	0	0	0	0	0	0	0	603	903	0
8074	6	0	0	0	0	0	0	200	300	0	0	0	0	0	0	0	200	903	0	0	0	0	0	0	0	603	903	0
8074	7	0	0	0	0	0	0	200	300	0	0	0	0	0	0	0	200	903	0	0	0	0	0	0	0	603	903	0
8074	8	0	0	0	0	0	0	200	300	0	0	0	0	0	0	0	200	903	0	0	0	0	0	0	0	603	903	0
8074	9	0	0	0	0	0	0	200	300	0	0	0	0	0	0	0	200	903	0	0	0	0	0	0	0	603	903	0
8075	0	0	0	0	0	0	0	200	300	0	0	0	0	0	0	0	200	903	0	0	0	0	0	0	0	603	903	0
8075	1	0	0	0	0	0	0	200	300	0	0	0	0	0	0	0	200	903	0	0	0	0	0	0	0	603	903	0
8075	2	0	0	0	0	0	0	200	300	0	0	0	0	0	0	0	200	903	0	0	0	0	0	0	0	603	903	0
8075	3	0	0	0	0	0	0	200	300	0	0	0	0	0	0	0	200	903	0	0	0	0	0	0	0	603	903	0
8075	4	0	0	0	0	0	0	200	300	0	0	0	0	0	0	0	200	903	0	0	0	0	0	0	0	603	903	0
8075	5	0	0	0	0	0	0	200	300	0	0	0	0	0	0	0	200	903	0	0	0	0	0	0	0	603	903	0
8075	6	0	0	0	0	0	0	200	300	0	0	0	0	0	0	0	200	903	0	0	0	0	0	0	0	603	903	0
8075	7	0	0	0	0	0	0	200	300	0	0	0	0	0	0	0	200	903	0	0	0	0	0	0	0	603	903	0
8075	8	0	0	0	0	0	0	200	300	0	0	0	0	0	0	0	200	903	0	0	0	0	0	0	0	603	903	0
8075	9	0	0	0	0	0	0	200	300	0	0	0	0	0	0	0	200	903	0	0	0	0	0	0	0	603	903	0
8076	0	0	0	0	0	0	0	200	300	0	0	0	0	0	0	0	200	903	0	0	0	0	0	0	0	603	903	0
8076	1	0	0	0	0	0	0	200	300	0	0	0	0	0	0	0	200	903	0	0	0	0	0	0	0	603	903	0
8076	2	0	0	0	0	0	0	200	300	0	0	0	0	0	0	0	200	903	0	0	0	0	0	0	0	603	903	0
8076	3	0	0	0	0	0	0	200	300	0	0	0	0	0	0	0	200	903	0	0	0	0	0	0	0	603	903	0
8076	4	0	0	0	0	0	0	200	300	0	0	0	0	0	0	0	200	903	0	0	0	0	0	0	0	603	903	0
8076	5	0	0	0	0	0	0	200	300	0	0	0	0	0	0	0	200	903	0	0	0	0	0	0	0	603	903	0
8076	6	0	0	0	0	0	0	200	300	0	0	0	0	0	0	0	200	903	0	0	0	0	0	0	0	603	903	0
8076	7	0	0	0	0	0	0	200	300	0	0	0	0	0	0	0	200	903	0	0	0	0	0	0	0	603	903	0
8076	8	0	0	0	0	0	0	200	300	0	0	0	0	0	0	0	200	903	0	0	0	0	0	0	0	603	903	0
8076	9	0	0	0	0	0	0	200	300	0	0	0	0	0	0	0	200	903	0	0	0	0	0	0	0	603	903	0
8077	0	0	0	0	0	0	0	200	300	0	0	0	0	0	0	0	200	903	0	0	0	0	0	0	0	603	903	0
8077	1	0	0	0	0	0	0	200	300	0	0	0	0	0	0	0	200	903	0	0	0	0	0	0	0	603	903	0
8077	2	0	0	0	0	0	0	200	300	0	0	0	0	0	0	0	200	903	0	0	0	0	0	0	0	603	903	0
8077	3	0	0	0	0	0	0	200	300	0	0	0	0	0	0	0	200	903	0	0	0	0	0	0	0	603	903	0
8077	4	0	0	0	0	0	0	200	300	0	0	0	0	0	0	0	200	903	0	0	0	0	0	0	0	603	903	0
8077	5	0	0	0	0	0	0	200	300	0	0	0	0	0	0	0	200	903	0	0	0	0	0	0	0	603	903	0
8077	6	0	0	0	0	0	0	200	300	0	0	0	0	0	0	0	200	903	0	0	0	0	0	0	0	603	903	0
8077	7	0	0	0	0	0	0	200	300	0	0	0	0	0	0	0	200	903	0	0	0	0	0	0	0	603	903	0
8077	8	0	0	0	0	0	0	200	300	0	0	0	0	0	0	0	200	903	0	0	0	0	0	0	0	603	903	0
8077	9	0	0	0	0	0	0	200	300	0	0	0	0	0	0	0	200	903	0	0	0	0	0	0	0	603	903	0
8078	0	0	0	0	0	0	0	200	300	0	0	0	0	0	0	0	200	903	0	0	0	0	0	0	0	603	903	0
8078	1	0	0	0	0	0	0	200	300	0	0	0	0	0	0	0	200	903	0	0	0	0	0	0	0	603	903	0
8078	2	0	0	0	0	0	0	200	300	0	0	0	0	0	0	0	200	903	0	0	0	0	0	0	0	603	903	0
8078	3	0	0	0	0	0	0	200	300	0	0	0	0	0	0	0	200	903	0	0	0	0	0	0	0	603	903	0
8078	4	0	0	0	0	0	0	200	300	0	0	0	0	0	0	0	200	903	0	0	0	0	0	0	0	603	903	0
8078	5	0	0	0	0	0	0	200	300	0	0	0	0	0	0	0	200	903	0	0	0	0	0	0	0	603	903	0
8078	6	0	0	0	0	0	0	200	300	0	0	0	0	0	0	0	200	903	0	0	0	0	0	0	0	603	903	0
8078	7	0	0	0	0	0	0	200	300	0	0	0	0	0	0	0	200	903	0	0	0	0	0	0	0	603	903	0
8078	8	0	0	0	0	0	0	200	300	0	0	0	0	0	0	0	200	903	0	0	0	0	0	0	0	603	903	0
8078	9	0	0	0	0	0	0	200	300	0	0	0	0	0	0	0	200	903	0	0	0	0	0	0	0	603	903	0
8079	0	0	0	0	0	0	0	200	300	0	0	0	0	0	0	0	200	903	0	0	0	0	0	0	0	603	903	0
8079	1	0	0	0	0	0	0	200	300	0	0	0	0	0	0	0	200	903	0	0	0	0	0	0	0	603	903	0
8079	2	0	0	0	0	0	0	200	300	0	0	0	0	0	0	0	200	903	0	0	0	0	0	0	0	603	903	0
8079	3	0	0	0	0	0	0	200	300	0	0	0	0	0	0	0	200	903	0	0	0	0	0	0	0	603	903	0
8079	4	0	0	0	0	0	0	200	300	0	0	0	0	0	0	0	200	903	0	0	0	0	0	0	0	603	903	0
8079	5	0	0	0	0	0	0	200	300	0	0	0	0	0	0	0	200	903	0	0	0	0	0	0	0	603	903	0
8079	6	0	0	0	0	0	0	200	300	0	0	0	0	0	0	0	200	903	0	0	0	0	0	0	0	603	903	0
8079	7	0	0	0	0	0	0	200	300	0	0	0	0	0	0	0	200	903	0	0	0	0	0	0	0	603	903	0
8079	8	0	0	0	0	0	0	200	300	0	0	0	0	0	0	0	200	903	0	0	0	0	0	0	0	603	903	0
8079	9	0	0	0	0	0	0	200	300	0	0	0	0	0	0	0	200	903	0	0	0	0	0	0	0	603	903	0
8080	0	0	0	0	0	0	0	200	300	0	0	0	0	0	0	0	200	903	0	0	0	0	0	0	0	603	903	0
8080	1	0	0	0	0	0	0	200	300	0	0	0	0	0	0	0	200	903	0	0	0	0	0	0	0	603	903	0
8080	2	0	0	0	0	0	0	200	300	0	0	0	0	0	0	0	200	903	0	0	0	0	0	0	0	603	903	0
8080	3	0	0	0	0	0	0	200	300	0	0	0	0	0	0	0	200	903	0	0	0	0	0	0	0	603	903	0
8080	4	0	0	0	0	0	0	200	300	0	0	0	0	0	0	0	200	903	0	0	0	0	0	0	0	603	903	0
8080	5	0	0	0	0	0	0	200	300	0	0	0	0	0	0	0	200	903	0	0	0	0	0	0	0	603	903	0
8080	6	0	0	0	0	0	0	200	300	0	0	0	0	0	0	0	200	903	0	0	0	0	0	0	0	603	903	0
8080	7	0	0	0	0	0	0	200	300	0	0	0	0	0	0	0	200	903	0	0	0	0	0	0	0	603	903	0
8080	8	0	0	0	0	0	0	200	300	0	0	0	0	0	0	0	200	903	0	0	0	0	0	0	0	603	903	0
8080	9	0	0	0	0	0	0	200	300	0	0	0	0	0	0	0	200	903	0	0	0	0	0	0	0	603	903	0
8081	0	0	0	0	0	0	0	200	300	0	0	0	0	0	0	0	200	903	0	0	0	0	0	0	0	603	903	0
8081	1	0	0	0	0	0	0	200	300	0	0	0	0	0	0	0	200	903	0	0	0	0	0	0	0	603	903	0
8081	2	0	0	0	0	0	0	200	300	0	0	0	0	0	0	0	200	903	0	0	0	0	0	0	0	603	903	0
8081	3	0	0	0	0	0	0	200	300	0	0	0	0	0	0	0	200	903	0	0	0	0	0	0	0	603	903	0
8081	4	0	0	0	0	0	0	200	300	0	0	0	0	0	0	0	200	903	0	0	0	0	0	0	0	603	903	0
8081	5	0	0	0	0	0	0	200	300	0	0	0	0	0	0	0	200	903	0	0	0	0	0	0	0	603	903	0
8081	6	0	0	0	0	0	0	200	300	0	0	0	0	0	0	0	200	903	0	0	0	0	0	0	0	603	903	0
8081	7	0	0	0	0	0	0	200	300	0	0	0	0	0	0	0	200	903	0	0	0	0	0	0	0	603	903	0
8081	8	0	0	0	0	0	0	200	300	0	0	0	0	0	0	0	200	903	0	0	0	0	0	0	0	603	903	0
8081	9	0	0	0	0	0	0	200	300	0	0	0	0	0	0	0	200	903	0	0	0	0	0	0	0	603	903	0
8082	0	0	0	0	0	0	0	200	300	0	0	0	0	0	0	0	200	903	0	0	0	0	0	0	0	603	903	0
8082	1	0	0	0	0	0	0	200	300	0	0	0	0	0	0	0	200	903	0	0	0	0	0	0	0	603	903	0
8082	2	0	0	0	0	0	0	200	300	0	0	0	0	0	0	0	200	903	0	0	0	0	0	0	0	603	903	0
8082	3	0	0	0	0	0	0	200	300	0	0	0	0	0	0	0	200	903	0	0	0	0	0	0	0	603	903	0
8082	4	0	0	0	0	0	0	200	300	0	0	0	0	0	0	0	200	903	0	0	0	0	0	0	0	603	903	0
8082	5	0	0	0	0	0	0	200	300	0	0	0	0	0	0	0	200	903	0	0	0	0	0	0	0	603	903	0
8082	6	0	0	0	0	0	0	200	300	0	0	0	0	0	0	0	200	903	0	0	0	0	0	0	0	603	903	0
8082	7	0	0	0	0	0	0	200	300	0	0	0	0	0	0	0	200	903	0	0	0	0	0	0	0	603	903	0
8082	8	0	0	0	0	0	0	200	300	0	0	0	0	0	0	0	200	903	0	0	0	0	0	0	0	603	903	0
8082	9	0	0	0	0	0	0	200	300	0	0	0	0	0	0	0	200	903	0	0	0	0	0	0	0	603	903	0
8083	0	0	0	0	0	0	0	200	300	0	0	0	0	0	0	0	200	903	0	0	0	0	0	0	0	603	903	0
8083	1	0	0	0	0	0	0	200	300	0	0	0	0	0	0	0	200	903	0	0	0	0	0	0	0	603	903	0
8083	2	0	0	0	0	0	0	200	300	0	0	0	0	0	0	0	200	903	0	0	0	0	0	0	0	603	903	0
8083	3	0	0	0	0	0	0	200	300	0	0	0	0	0	0	0	200	903	0	0	0	0	0	0	0	603	903	0
8083	4	0	0	0	0	0	0	200	300	0	0	0	0	0	0	0	200	903	0	0	0	0	0	0	0	603	903	0
8083	5	0	0	0	0	0	0	200	300	0	0	0	0	0	0	0	200	903	0	0	0	0	0	0	0	603	903	0
8083	6	0	0	0	0	0	0	200	300	0	0	0	0	0	0	0	200	903	0	0	0	0	0	0	0	603	903	0
8083	7	0	0	0	0	0	0	200	300	0	0	0	0	0	0	0	200	903	0	0	0	0	0	0	0	603	903	0
8083	8	0	0	0	0	0	0	200	300	0	0	0	0	0	0	0	200	903	0	0	0	0	0	0	0	603	903	0
8083	9	0	0	0	0	0	0	200	300	0	0	0	0	0	0	0	200	903	0	0	0	0	0	0	0	603	903	0
8084	0	0	0	0	0	0	0	200	300	0	0	0	0	0	0	0	200	903	0	0	0	0	0	0	0	603	903	0
8084	1	0	0	0	0	0	0	200	300	0	0	0	0	0	0	0	200	903	0	0	0	0	0	0	0	603	903	0
8084	2	0	0	0	0	0	0	200	300	0	0	0	0	0	0	0	200	903	0	0	0	0	0	0	0	603	903	0
8084	3	0	0	0	0	0	0	200	300	0	0	0	0	0	0	0	200	903	0	0	0	0	0	0	0	603	903	0
8084	4	0	0	0	0	0	0	200	300	0	0	0	0	0	0	0	200	903	0	0	0	0	0	0	0	603	903	0
8084	5	0	0	0	0	0	0	200	300	0	0	0	0	0	0	0	200	903	0	0	0	0	0	0	0	603	903	0
8084	6	0	0	0	0	0	0	200	300	0	0	0	0	0	0	0	200	903	0	0	0	0	0	0	0	603	903	0
8084	7	0	0	0	0	0	0	200	300	0	0	0	0	0	0	0	200	903	0	0	0	0	0	0	0	603	903	0
8084	8	0	0	0	0	0	0	200	300	0	0	0	0	0	0	0	200	903	0	0	0	0	0	0	0	603	903	0
8084	9	0	0	0	0	0	0	200	300	0	0	0	0	0	0	0	200	903	0	0	0	0	0	0	0	603	903	0
8085	0	0	0	0	0	0	0	200	300	0	0	0	0	0	0	0	200	903	0	0	0	0	0	0	0	603	903	0
8085	1	0	0	0	0	0	0	200	300	0	0	0	0	0	0	0	200	903	0	0	0	0	0	0	0	603	903	0
8085	2	0	0	0	0	0	0	200	300	0	0	0	0	0	0	0	200	903	0	0	0	0	0	0	0	603	903	0
8085	3	0	0	0	0	0	0	200	300	0	0	0	0	0	0	0	200	903	0	0	0	0	0	0	0	603	903	0
8085	4	0	0	0	0	0	0	200	300	0	0	0	0	0	0	0	200	903	0	0	0	0	0	0	0	603	903	0
8085	5	0	0	0	0	0	0	200	300	0	0	0	0	0	0	0	200	903	0	0	0	0	0	0	0	603	903	0
8085	6	0	0	0	0	0	0	200	300	0	0	0	0	0	0	0	200	903	0	0	0	0	0	0	0	603	903	0
8085	7	0	0	0	0	0	0	200	300	0	0	0	0	0	0	0	200	903	0	0	0	0	0	0	0	603	903	0
8085	8	0	0	0	0	0	0	200	300	0	0	0	0	0	0	0	200	903	0	0	0	0	0	0	0	603	903	0
8085	9	0	0	0	0	0	0	200	300	0	0	0	0	0	0	0	200	903	0	0	0	0	0	0	0	603	903	0
8086	0	0	0	0	0	0	0	200	300	0	0	0	0	0	0	0	200	903	0	0	0	0	0	0	0	603	903	0
8086	1	0	0	0	0	0	0	200	300	0	0	0	0	0	0	0	200	903	0	0	0	0	0	0	0	603	903	0
8086	2	0	0	0	0	0	0	200	300	0	0	0	0	0	0	0	200	903	0	0	0	0	0	0	0	603	903	0
8086	3	0	0	0	0	0	0	200	300	0	0	0	0	0	0	0	200	903	0	0	0	0	0	0	0	603	903	0
8086	4	0	0	0	0	0	0	200	300	0	0	0	0	0	0	0	200	903	0	0	0	0	0	0	0	603	903	0
8086	5	0	0	0	0	0	0	200	300	0	0	0	0	0	0	0	200	903	0	0	0	0	0	0	0	603	903	0
8086	6	0	0	0	0	0	0	200	300	0	0	0	0	0	0	0	200	903	0	0	0	0	0	0	0	603	903	0
8086	7	0	0	0	0	0	0	200	300	0	0	0	0	0	0	0	200	903	0	0	0	0	0	0	0	603	903	0
8086	8	0	0	0	0	0	0	200	300	0	0	0	0	0	0	0	200	903	0	0	0	0	0	0	0	603	903	0
8086	9	0	0	0	0	0	0	200	300	0	0	0	0	0	0	0	200	903	0	0	0	0	0	0	0	603	903	0
8087	0	0	0	0	0	0	0	200	300	0	0	0	0	0	0	0	200	903	0	0	0	0	0	0	0	603	903	0
8087	1	0	0	0	0	0	0	200	300	0	0	0	0	0	0	0	200	903	0	0	0	0	0	0	0	603	903	0
8087	2	0	0	0	0	0	0	200	300	0	0	0	0	0	0	0	200	903	0	0	0	0	0	0	0	603	903	0
8087	3	0	0	0	0	0	0	200	300	0	0	0	0	0	0	0	200	903	0	0	0	0	0	0	0	603	903	0
8087	4	0	0	0	0	0	0	200	300	0	0	0	0	0	0	0	200	903	0	0	0	0	0	0	0	603	903	0
8087	5	0	0	0	0	0	0	200	300	0	0	0	0	0	0	0	200	903	0	0	0	0	0	0	0	603	903	0
8087	6	0	0	0	0	0	0	200	300	0	0	0	0	0	0	0	200	903	0	0	0	0	0	0	0	603	903	0
8087	7	0	0	0	0	0	0	200	300	0	0	0	0	0	0	0	200	903	0	0	0	0	0	0	0	603	903	0
8087	8	0	0	0	0	0	0	200	300	0	0	0	0	0	0	0	200	903	0	0	0	0	0	0	0	603	903	0
8087	9	0	0	0	0	0	0	200	300	0	0	0	0	0	0	0	200	903	0	0	0	0	0	0	0	603	903	0
8088	0	0	0	0	0	0	0	200	300	0	0	0	0	0	0	0	200	903	0	0	0	0	0	0	0	603	903	0
8088	1	0	0	0	0	0	0	200	300	0	0	0	0	0	0	0	200	903	0	0	0	0	0	0	0	603	903	0
8088	2	0	0	0	0	0	0	200	300	0	0	0	0	0	0	0	200	903	0	0	0	0	0	0	0	603	903	0
8088	3	0	0	0	0	0	0	200	300	0	0	0	0	0	0	0	200	903	0	0	0	0	0	0	0	603	903	0
8088	4	0	0	0	0	0	0	200	300	0	0	0	0	0	0	0	200	903	0	0	0	0	0	0	0	603	903	0
8088	5	0	0	0	0	0	0	200	300	0	0	0	0	0	0	0	200	903	0	0	0	0	0	0	0	603	903	0
8088	6	0	0	0	0	0	0	200	300	0	0	0	0	0	0	0	200	903	0	0	0	0	0	0	0	603	903	0
8088	7	0	0	0	0	0	0	200	300	0	0	0	0	0	0	0	200	903	0	0	0	0	0	0	0	603	903	0
8088	8	0	0	0	0	0	0	200	300	0	0	0	0	0	0	0	200	903	0	0	0	0	0	0	0	603	903	0
8088	9	0	0	0	0	0	0	200	300	0	0	0	0	0	0	0	200	903	0	0	0	0	0	0	0	603	903	0
8089	0	0	0	0	0	0	0	200	300	0	0	0	0	0	0	0	200	903	0	0	0	0	0	0	0	603	903	0
8089	1	0	0	0	0	0	0	200	300	0	0	0	0	0	0	0	200	903	0	0	0	0	0	0	0	603	903	0
8089	2	0	0	0	0	0	0	200	300	0	0	0	0	0	0	0	200	903	0	0	0	0	0	0	0	603	903	0
8089	3	0	0	0	0	0	0	200	300	0	0	0	0	0	0	0	200	903	0	0	0	0	0	0	0	603	903	0
8089	4	0	0	0	0	0	0	200	300	0	0	0	0	0	0	0	200	903	0	0	0	0	0	0	0	603	903	0
8089	5	0	0	0	0	0	0	200	300	0	0	0	0	0	0	0	200	903	0	0	0	0	0	0	0	603	903	0
8089	6	0	0	0	0	0	0	200	300	0	0	0	0	0	0	0	200	903	0	0	0	0	0	0	0	603	903	0
8089	7	0	0	0	0	0	0	200	300	0	0	0	0	0	0	0	200	903	0	0	0	0	0	0	0	603	903	0
8089	8	0	0	0	0	0	0	200	300	0	0	0	0	0	0	0	200	903	0	0	0	0	0	0	0	603	903	0
8089	9	0	0	0	0	0	0	200	300	0	0	0	0	0	0	0	200	903	0	0	0	0	0	0	0	603	903	0
8090	0	0	0	0	0	0	0	200	300	0	0	0	0	0	0	0	200	903	0	0	0	0	0	0	0	603	903	0
8090	1	0	0	0	0	0	0	200	300	0	0	0	0	0	0	0	200	903	0	0	0	0	0	0	0	603	903	0
8090	2	0	0	0	0	0	0	200	300	0	0	0	0	0	0	0	200	903	0	0	0	0	0	0	0	603	903	0
8090	3	0	0	0	0	0	0	200	300	0	0	0	0	0	0	0	200	903	0	0	0	0	0	0	0	603	903	0
8090	4	0	0	0	0	0	0	200	300	0	0	0	0	0	0	0	200	903	0	0	0	0	0	0	0	603	903	0
8090	5	0	0	0	0	0	0	200	300	0	0	0	0	0	0	0	200	903	0	0	0	0	0	0	0	603	903	0
8090	6	0	0	0	0	0	0	200	300	0	0	0	0	0	0	0	200	903	0	0	0	0	0	0	0	603	903	0
8090	7	0	0	0	0	0	0	200	300	0	0	0	0	0	0	0	200	903	0	0	0	0	0	0	0	603	903	0
8090	8	0	0	0	0	0	0	200	300	0	0	0	0	0	0	0	200	903	0	0	0	0	0	0	0	603	903	0
8090	9	0	0	0	0	0	0	200	300	0	0	0	0	0	0	0	200	903	0	0	0	0	0	0	0	603	903	0
8091	0	0	0	0	0	0	0	200	300	0	0	0	0	0	0	0	200	903	0	0	0	0	0	0	0	603	903	0
8091	1	0	0	0	0	0	0	200	300	0	0	0	0	0	0	0	200	903	0	0	0	0	0	0	0	603	903	0
8091	2	0	0	0	0	0	0	200	300	0	0	0	0	0	0	0	200	903	0	0	0	0	0	0	0	603	903	0
8091	3	0	0	0	0	0	0	200	300	0	0	0	0	0	0	0	200	903	0	0	0	0	0	0	0	603	903	0
8091	4	0	0	0	0	0	0	200	300	0	0	0	0	0	0	0	200	903	0	0	0	0	0	0	0	603	903	0
8091	5	0	0	0	0	0	0	200	300	0	0	0	0	0	0	0	200	903	0	0	0	0	0	0	0	603	903	0
8091	6	0	0	0	0	0	0	200	300	0	0	0	0	0	0	0	200	903	0	0	0	0	0	0	0	603	903	0
8091	7	0	0	0	0	0	0	200	300	0	0	0	0	0	0	0	200	903	0	0	0	0	0	0	0	603	903	0
8091	8	0	0	0	0	0	0	200	300	0	0	0	0	0	0	0	200	903	0	0	0	0	0	0	0	603	903	0
8091	9	0	0	0	0	0	0	200	300	0	0	0	0	0	0	0	200	903	0	0	0	0	0	0	0	603	903	0
8092	0	0	0	0	0	0	0	200	300	0	0	0	0	0	0	0	200	903	0	0	0	0	0	0	0	603	903	0
8092	1	0	0	0	0	0	0	200	300	0	0	0	0	0	0	0	200	903	0	0	0	0	0	0	0	603	903	0
8092	2	0	0	0	0	0	0	200	300	0	0	0	0	0	0	0	200	903	0	0	0	0	0	0	0	603	903	0
8092	3	0	0	0	0	0	0	200	300	0	0	0	0	0	0	0	200	903	0	0	0	0	0	0	0	603	903	0
8092	4	0	0	0	0	0	0	200	300	0	0	0	0	0	0	0	200	903	0	0	0	0	0	0	0	603	903	0
8092	5	0	0	0	0	0	0	200	300	0	0	0	0	0	0	0	200	903	0	0	0	0	0	0	0	603	903	0
8092	6	0	0	0	0	0	0	200	300	0	0	0	0	0	0	0	200	903	0	0	0	0	0	0	0	603	903	0
8092	7	0	0	0	0	0	0	200	300	0	0	0	0	0	0	0	200	903	0	0	0	0	0	0	0	603	903	0
8092	8	0	0	0	0	0	0	200	300	0	0	0	0	0	0	0	200	903	0	0	0	0	0	0	0	603	903	0
8092	9	0	0	0	0	0	0	200	300	0	0	0	0	0	0	0	200	903	0	0	0	0	0	0	0	603	903	0
8093	0	0	0	0	0	0	0	200	300	0	0	0	0	0	0	0	200	903	0	0	0	0	0	0	0	603	903	0
8093	1	0	0	0	0	0	0	200	300	0	0	0	0	0	0	0	200	903	0	0	0	0	0	0	0	603	903	0
8093	2	0	0	0	0	0	0	200	300	0	0	0	0	0	0	0	200	903	0	0	0	0	0	0	0	603	903	0
8093	3	0	0	0	0	0	0	200	300	0	0	0	0	0	0	0	200	903	0	0	0	0	0	0	0	603	903	0
8093	4	0	0	0	0	0	0	200	300	0	0	0	0	0	0	0	200	903	0	0	0	0	0	0	0	603	903	0
8093	5	0	0	0	0	0	0	200	300	0	0	0	0	0	0	0	200	903	0	0	0	0	0	0	0	603	903	0
8093	6	0	0	0	0	0	0	200	300	0	0	0	0	0	0	0	200	903	0	0	0	0	0	0	0	603	903	0
8093	7	0	0	0	0	0	0	200	300	0	0	0	0	0	0	0	200	903	0	0	0	0	0	0	0	603	903	0
8093	8	0	0	0	0	0	0	200	300	0	0	0	0	0	0	0	200	903	0	0	0	0	0	0	0	603	903	0
8093	9	0	0	0	0	0	0	200	300	0	0	0	0	0	0	0	200	903	0	0	0	0	0	0	0	603	903	0
8094	0	0	0	0	0	0	0	200	300	0	0	0	0	0	0	0	200	903	0	0	0	0	0	0	0	603	903	0
8094	1	0	0	0	0	0	0	200	300	0	0	0	0	0	0	0	200	903	0	0	0	0	0	0	0	603	903	0
8094	2	0	0	0	0	0	0	200	300	0	0	0	0	0	0	0	200	903	0	0	0	0	0	0	0	603	903	0
8094	3	0	0	0	0	0	0	200	300	0	0	0	0	0	0	0	200	903	0	0	0	0	0	0	0	603	903	0
8094	4	0	0	0	0	0	0	200	300	0	0	0	0	0	0	0	200	903	0	0	0	0	0	0	0	603	903	0
8094	5	0	0	0	0	0	0	200	300	0	0	0	0	0	0	0	200	903	0	0	0	0	0	0	0	603	903	0
8094	6	0	0	0	0	0	0	200	300	0	0	0	0	0	0	0	200	903	0	0	0	0	0	0	0	603	903	0
8094	7	0	0	0	0	0	0	200	300	0	0	0	0	0	0	0	200	903	0	0	0	0	0	0	0	603	903	0
8094	8	0	0	0	0	0	0	200	300	0	0	0	0	0	0	0	200	903	0	0	0	0	0	0	0	603	903	0
8094	9	0	0	0	0	0	0	200	300	0	0	0	0	0	0	0	200	903	0	0	0	0	0	0	0	603	903	0
8095	0	0	0	0	0	0	0	200	300	0	0	0	0	0	0	0	200	903	0	0	0	0	0	0	0	603	903	0
8095	1	0	0	0	0	0	0	200	300	0	0	0	0	0	0	0	200	903	0	0	0	0	0	0	0	603	903	0
8095	2	0	0	0	0	0	0	200	300	0	0	0	0	0	0	0	200	903	0	0	0	0	0	0	0	603	903	0
8095	3	0	0	0	0	0	0	200	300	0	0	0	0	0	0	0	200	903	0	0	0	0	0	0	0	603	903	0
8095	4	0	0	0	0	0	0	200	300	0	0	0	0	0	0	0	200	903	0	0	0	0	0	0	0	603	903	0
8095	5	0	0	0	0	0	0	200	300	0	0	0	0	0	0	0	200	903	0	0	0	0	0	0	0	603	903	0
8095	6	0	0	0	0	0	0	200	300	0	0	0	0	0	0	0	200	903	0	0	0	0	0	0	0	603	903	0
8095	7	0	0	0	0	0	0	200	300	0	0	0	0	0	0	0	200	903	0	0	0	0	0	0	0	603	903	0
8095	8	0	0	0	0	0	0	200	300	0	0	0	0	0	0	0	200	903	0	0	0	0	0	0	0	603	903	0
8095	9	0	0	0	0	0	0	200	300	0	0	0	0	0	0	0	200	903	0	0	0	0	0	0	0	603	903	0
8096	0	0	0	0	0	0	0	200	300	0	0	0	0	0	0	0	200	903	0	0	0	0	0	0	0	603	903	0
8096	1	0	0	0	0	0	0	200	300	0	0	0	0	0	0	0	200	903	0	0	0	0	0	0	0	603	903	0
8096	2	0	0	0	0	0	0	200	300	0	0	0	0	0	0	0	200	903	0	0	0	0	0	0	0	603	903	0
8096	3	0	0	0	0	0	0	200	300	0	0	0	0	0	0	0	200	903	0	0	0	0	0	0	0	603	903	0
8096	4	0	0	0	0	0	0	200	300	0	0	0	0	0	0	0	200	903	0	0	0	0	0	0	0	603	903	0
8096	5	0	0	0	0	0	0	200	300	0	0	0	0	0	0	0	200	903	0	0	0	0	0	0	0	603	903	0
8096	6	0	0	0	0	0	0	200	300	0	0	0	0	0	0	0	200	903	0	0	0	0	0	0	0	603	903	0
8096	7	0	0	0	0	0	0	200	300	0	0	0	0	0	0	0	200	903	0	0	0	0	0	0	0	603	903	0
8096	8	0	0	0	0	0	0	200	300	0	0	0	0	0	0	0	200	903	0	0	0	0	0	0	0	603	903	0
8096	9	0	0	0	0	0	0	200	300	0	0	0	0	0	0	0	200	903	0	0	0	0	0	0	0	603	903	0
8097	0	0	0	0	0	0	0	200	300	0	0	0	0	0	0	0	200	903	0	0	0	0	0	0	0	603	903	0
8097	1	0	0	0	0	0	0	200	300	0	0	0	0	0	0	0	200	903	0	0	0	0	0	0	0	603	903	0
8097	2	0	0	0	0	0	0	200	300	0	0	0	0	0	0	0	200	903	0	0	0	0	0	0	0	603	903	0
8097	3	0	0	0	0	0	0	200	300	0	0	0	0	0	0	0	200	903	0	0	0	0	0	0	0	603	903	0
8097	4	0	0	0	0	0	0	200	300	0	0	0	0	0	0	0	200	903	0	0	0	0	0	0	0	603	903	0
8097	5	0	0	0	0	0	0	200	300	0	0	0	0	0	0	0	200	903	0	0	0	0	0	0	0	603	903	0
8097	6	0	0	0	0	0	0	200	300	0	0	0	0	0	0	0	200	903	0	0	0	0	0	0	0	603	903	0
8097	7	0	0	0	0	0	0	200	300	0	0	0	0	0	0	0	200	903	0	0	0	0	0	0	0	603	903	0
8097	8	0	0	0	0	0	0	200	300	0	0	0	0	0	0	0	200	903	0	0	0	0	0	0	0	603	903	0
8097	9	0	0	0	0	0	0	200	300	0	0	0	0	0	0	0	200	903	0	0	0	0	0	0	0	603	903	0
8098	0	0	0	0	0	0	0	200	300	0	0	0	0	0	0	0	200	903	0	0	0	0	0	0	0	603	903	0
8098	1	0	0	0	0	0	0	200	300	0	0	0	0	0	0	0	200	903	0	0	0	0	0	0	0	603	903	0
8098	2	0	0	0	0	0	0	200	300	0	0	0	0	0	0	0	200	903	0	0	0	0	0	0	0	603	903	0
8098	3	0	0	0	0	0	0	200	300	0	0	0	0	0	0	0	200	903	0	0	0	0	0	0	0	603	903	0
8098	4	0	0	0	0	0	0	200	300	0	0	0	0	0	0	0	200	903	0	0	0	0	0	0	0	603	903	0
8098	5	0	0	0	0	0	0	200	300	0	0	0	0	0	0	0	200	903	0	0	0	0	0	0	0	603	903	0
8098	6	0	0	0	0	0	0	200	300	0	0	0	0	0	0	0	200	903	0	0	0	0	0	0	0	603	903	0
8098	7	0	0	0	0	0	0	200	300	0	0	0	0	0	0	0	200	903	0	0	0	0	0	0	0	603	903	0
8098	8	0	0	0	0	0	0	200	300	0	0	0	0	0	0	0	200	903	0	0	0	0	0	0	0	603	903	0
8098	9	0	0	0	0	0	0	200	300	0	0	0	0	0	0	0	200	903	0	0	0	0	0	0	0	603	903	0
8099	0	0	0	0	0	0	0	200	300	0	0	0	0	0	0	0	200	903	0	0	0	0	0	0	0	603	903	0
8099	1	0	0	0	0	0	0	200	300	0	0	0	0	0	0	0	200	903	0	0	0	0	0	0	0	603	903	0
8099	2	0	0	0	0	0	0	200	300	0	0	0	0	0	0	0	200	903	0	0	0	0	0	0	0	603	903	0
8099	3	0	0	0	0	0	0	200	300	0	0	0	0	0	0	0	200	903	0	0	0	0	0	0	0	603	903	0
8099	4	0	0	0	0	0	0	200	300	0	0	0	0	0	0	0	200	903	0	0	0	0	0	0	0	603	903	0
8099	5	0	0	0	0	0	0	200	300	0	0	0	0	0	0	0	200	903	0	0	0	0	0	0	0	603	903	0
8099	6	0	0	0	0	0	0	200	300	0	0	0	0	0	0	0	200	903	0	0	0	0	0	0	0	603	903	0
8099	7	0	0	0	0	0	0	200	300	0	0	0	0	0	0	0	200	903	0	0	0	0	0	0	0	603	903	0
8099	8	0	0	0	0	0	0	200	300	0	0	0	0	0	0	0	200	903	0	0	0	0	0	0	0	603	903	0
8099	9	0	0	0	0	0	0	200	300	0	0	0	0	0	0	0	200	903	0	0	0	0	0	0	0	603	903	0
8100	0	0	0	0	0	0	0	200	300	0	0	0	0	0	0	0	200	903	0	0	0	0	0	0	0	603	903	0
8100	1	0	0	0	0	0	0	200	300	0	0	0	0	0	0	0	200	903	0	0	0	0	0	0	0	603	903	0
8100	2	0	0	0	0	0	0	200	300	0	0	0	0	0	0	0	200	903	0	0	0	0	0	0	0	603	903	0
8100	3	0	0	0	0	0	0	200	300	0	0	0	0	0	0	0	200	903	0	0	0	0	0	0	0	603	903	0
8100	4	0	0	0	0	0	0	200	300	0	0	0	0	0	0	0	200	903	0	0	0	0	0	0	0	603	903	0
8100	5	0	0	0	0	0	0	200	300	0	0	0	0	0	0	0	200	903	0	0	0	0	0	0	0	603	903	0
8100	6	0	0	0	0	0	0	200	300	0	0	0	0	0	0	0	200	903	0	0	0	0	0	0	0	603	903	0
8100	7	0	0	0	0	0	0	200	300	0	0	0	0	0	0	0	200	903	0	0	0	0	0	0	0	603	903	0
8100	8	0	0	0	0	0	0	200	300	0	0	0	0	0	0	0	200	903	0	0	0	0	0	0	0	603	903	0
8100	9	0	0	0	0	0	0	200	300	0	0	0	0	0	0	0	200	903	0	0	0	0	0	0	0	603	903	0
8101	0	0	0	0	0	0	0	200	300	0	0	0	0	0	0	0	200	903	0	0	0	0	0	0	0	603	903	0
8101	1	0	0	0	0	0	0	200	300	0	0	0	0	0	0	0	200	903	0	0	0	0	0	0	0	603	903	0
8101	2	0	0	0	0	0	0	200	300	0	0	0	0	0	0	0	200	903	0	0	0	0	0	0	0	603	903	0
8101	3	0	0	0	0	0	0	200	300	0	0	0	0	0	0	0	200	903	0	0	0	0	0	0	0	603	903	0
8101	4	0	0	0	0	0	0	200	300	0	0	0	0	0	0	0	200	903	0	0	0	0	0	0	0	603	903	0
8101	5	0	0	0	0	0	0	200	300	0	0	0	0	0	0	0	200	903	0	0	0	0	0	0	0	603	903	0
8101	6	0	0	0	0	0	0	200	300	0	0	0	0	0	0	0	200	903	0	0	0	0	0	0	0	603	903	0
8101	7	0	0	0	0	0	0	200	300	0	0	0	0	0	0	0	200	903	0	0	0	0	0	0	0	603	903	0
8101	8	0	0	0	0	0	0	200	300	0	0	0	0	0	0	0	200	903	0	0	0	0	0	0	0	603	903	0
8101	9	0	0	0	0	0	0	200	300	0	0	0	0	0	0	0	200	903	0	0	0	0	0	0	0	603	903	0
8102	0	0	0	0	0	0	0	200	300	0	0	0	0	0	0	0	200	903	0	0	0	0	0	0	0	603	903	0
8102	1	0	0	0	0	0	0	200	300	0	0	0	0	0	0	0	200	903	0	0	0	0	0	0	0	603	903	0
8102	2	0	0	0	0	0	0	200	300	0	0	0	0	0	0	0	200	903	0	0	0	0	0	0	0	603	903	0
8102	3	0	0	0	0	0	0	200	300	0	0	0	0	0	0	0	200	903	0	0	0	0	0	0	0	603	903	0
8102	4	0	0	0	0	0	0	200	300	0	0	0	0	0	0	0	200	903	0	0	0	0	0	0	0	603	903	0
8102	5	0	0	0	0	0	0	200	300	0	0	0	0	0	0	0	200	903	0	0	0	0	0	0	0	603	903	0
8102	6	0	0	0	0	0	0	200	300	0	0	0	0	0	0	0	200	903	0	0	0	0	0	0	0	603	903	0
8102	7	0	0	0	0	0	0	200	300	0	0	0	0	0	0	0	200	903	0	0	0	0	0	0	0	603	903	0
8102	8	0	0	0	0	0	0	200	300	0	0	0	0	0	0	0	200	903	0	0	0	0	0	0	0	603	903	0
8102	9	0	0	0	0	0	0	200	300	0	0	0	0	0	0	0	200	903	0	0	0	0	0	0	0	603	903	0
8103	0	0	0	0	0	0	0	200	300	0	0	0	0	0	0	0	200	903	0	0	0	0	0	0	0	603	903	0
8103	1	0	0	0	0	0	0	200	300	0	0	0	0	0	0	0	200	903	0	0	0	0	0	0	0	603	903	0
8103	2	0	0	0	0	0	0	200	300	0	0	0	0	0	0	0	200	903	0	0	0	0	0	0	0	603	903	0
8103	3	0	0	0	0	0	0	200	300	0	0	0	0	0	0	0	200	903	0	0	0	0	0	0	0	603	903	0
8103	4	0	0	0	0	0	0	200	300	0	0	0	0	0	0	0	200	903	0	0	0	0	0	0	0	603	903	0
8103	5	0	0	0	0	0	0	200	300	0	0	0	0	0	0	0	200	903	0	0	0	0	0	0	0	603	903	0
8103	6	0	0	0	0	0	0	200	300	0	0	0	0	0	0	0	200	903	0	0	0	0	0	0	0	603	903	0
8103	7	0	0	0	0	0	0	200	300	0	0	0	0	0	0	0	200	903	0	0	0	0	0	0	0	603	903	0
8103	8	0	0	0	0	0	0	200	300	0	0	0	0	0	0	0	200	903	0	0	0	0	0	0	0	603	903	0
8103	9	0	0	0	0	0	0	200	300	0	0	0	0	0	0	0	200	903	0	0	0	0	0	0	0	603	903	0
8104	0	0	0	0	0	0	0	200	300	0	0	0	0	0	0	0	200	903	0	0	0	0	0	0	0	603	903	0
8104	1	0	0	0	0	0	0	200	300	0	0	0	0	0	0	0	200	903	0	0	0	0	0	0	0	603	903	0
8104	2	0	0	0	0	0	0	200	300	0	0	0	0	0	0	0	200	903	0	0	0	0	0	0	0	603	903	0
8104	3	0	0	0	0	0	0	200	300	0	0	0	0	0	0	0	200	903	0	0	0	0	0	0	0	603	903	0
8104	4	0	0	0	0	0	0	200	300	0	0	0	0	0	0	0	200	903	0	0	0	0	0	0	0	603	903	0
8104	5	0	0	0	0	0	0	200	300	0	0	0	0	0	0	0	200	903	0	0	0	0	0	0	0	603	903	0
8104	6	0	0	0	0	0	0	200	300	0	0	0	0	0	0	0	200	903	0	0	0	0	0	0	0	603	903	0
8104	7	0	0	0	0	0	0	200	300	0	0	0	0	0	0	0	200	903	0	0	0	0	0	0	0	603	903	0
8104	8	0	0	0	0	0	0	200	300	0	0	0	0	0	0	0	200	903	0	0	0	0	0	0	0	603	903	0
8104	9	0	0	0	0	0	0	200	300	0	0	0	0	0	0	0	200	903	0	0	0	0	0	0	0	603	903	0
8105	0	0	0	0	0	0	0	200	300	0	0	0	0	0	0	0	200	903	0	0	0	0	0	0	0	603	903	0
8105	1	0	0	0	0	0	0	200	300	0	0	0	0	0	0	0	200	903	0	0	0	0	0	0	0	603	903	0
8105	2	0	0	0	0	0	0	200	300	0	0	0	0	0	0	0	200	903	0	0	0	0	0	0	0	603	903	0
8105	3	0	0	0	0	0	0	200	300	0	0	0	0	0	0	0	200	903	0	0	0	0	0	0	0	603	903	0
8105	4	0	0	0	0	0	0	200	300	0	0	0	0	0	0	0	200	903	0	0	0	0	0	0	0	603	903	0
8105	5	0	0	0	0	0	0	200	300	0	0	0	0	0	0	0	200	903	0	0	0	0	0	0	0	603	903	0
8105	6	0	0	0	0	0	0	200	300	0	0	0	0	0	0	0	200	903	0	0	0	0	0	0	0	603	903	0
8105	7	0	0	0	0	0	0	200	300	0	0	0	0	0	0	0	200	903	0	0	0	0	0	0	0	603	903	0
8105	8	0	0	0	0	0	0	200	300	0	0	0	0	0	0	0	200	903	0	0	0	0	0	0	0	603	903	0
8105	9	0	0	0	0	0	0	200	300	0	0	0	0	0	0	0	200	903	0	0	0	0	0	0	0	603	903	0
8106	0	0	0	0	0	0	0	200	300	0	0	0	0	0	0	0	200	903	0	0	0	0	0	0	0	603	903	0
8106	1	0	0	0	0	0	0	200	300	0	0	0	0	0	0	0	200	903	0	0	0	0	0	0	0	603	903	0
8106	2	0	0	0	0	0	0	200	300	0	0	0	0	0	0	0	200	903	0	0	0	0	0	0	0	603	903	0
8106	3	0	0	0	0	0	0	200	300	0	0	0	0	0	0	0	200	903	0	0	0	0	0	0	0	603	903	0
8106	4	0	0	0	0	0	0	200	300	0	0	0	0	0	0	0	200	903	0	0	0	0	0	0	0	603	903	0
8106	5	0	0	0	0	0	0	200	300	0	0	0	0	0	0	0	200	903	0	0	0	0	0	0	0	603	903	0
8106	6	0	0	0	0	0	0	200	300	0	0	0	0	0	0	0	200	903	0	0	0	0	0	0	0	603	903	0
8106	7	0	0	0	0	0	0	200	300	0	0	0	0	0	0	0	200	903	0	0	0	0	0	0	0	603	903	0
8106	8	0	0	0	0	0	0	200	300	0	0	0	0	0	0	0	200	903	0	0	0	0	0	0	0	603	903	0
8106	9	0	0	0	0	0	0	200	300	0	0	0	0	0	0	0	200	903	0	0	0	0	0	0	0	603	903	0
8107	0	0	0	0	0	0	0	200	300	0	0	0	0	0	0	0	200	903	0	0	0	0	0	0	0	603	903	0
8107	1	0	0	0	0	0	0	200	300	0	0	0	0	0	0	0	200	903	0	0	0	0	0	0	0	603	903	0
8107	2	0	0	0	0	0	0	200	300	0	0	0	0	0	0	0	200	903	0	0	0	0	0	0	0	603	903	0
8107	3	0	0	0	0	0	0	200	300	0	0	0	0	0	0	0	200	903	0	0	0	0	0	0	0	603	903	0
8107	4	0	0	0	0	0	0	200	300	0	0	0	0	0	0	0	200	903	0	0	0	0	0	0	0	603	903	0
8107	5	0	0	0	0	0	0	200	300	0	0	0	0	0	0	0	200	903	0	0	0	0	0	0	0	603	903	0
8107	6	0	0	0	0	0	0	200	300	0	0	0	0	0	0	0	200	903	0	0	0	0	0	0	0	603	903	0
8107	7	0	0	0	0	0	0	200	300	0	0	0	0	0	0	0	200	903	0	0	0	0	0	0	0	603	903	0
8107	8	0	0	0	0	0	0	200	300	0	0	0	0	0	0	0	200	903	0	0	0	0	0	0	0	603	903	0
8107	9	0	0	0	0	0	0	200	300	0	0	0	0	0	0	0	200	903	0	0	0	0	0	0	0	603	903	0
8108	0	0	0	0	0	0	0	200	300	0	0	0	0	0	0	0	200	903	0	0	0	0	0	0	0	603	903	0
8108	1	0	0	0	0	0	0	200	300	0	0	0	0	0	0	0	200	903	0	0	0	0	0	0	0	603	903	0
8108	2	0	0	0	0	0	0	200	300	0	0	0	0	0	0	0	200	903	0	0	0	0	0	0	0	603	903	0
8108	3	0	0	0	0	0	0	200	300	0	0	0	0	0	0	0	200	903	0	0	0	0	0	0	0	603	903	0
8108	4	0	0	0	0	0	0	200	300	0	0	0	0	0	0	0	200	903	0	0	0	0	0	0	0	603	903	0
8108	5	0	0	0	0	0	0	200	300	0	0	0	0	0	0	0	200	903	0	0	0	0	0	0	0	603	903	0
8108	6	0	0	0	0	0	0	200	300	0	0	0	0	0	0	0	200	903	0	0	0	0	0	0	0	603	903	0
8108	7	0	0	0	0	0	0	200	300	0	0	0	0	0	0	0	200	903	0	0	0	0	0	0	0	603	903	0
8108	8	0	0	0	0	0	0	200	300	0	0	0	0	0	0	0	200	903	0	0	0	0	0	0	0	603	903	0
8108	9	0	0	0	0	0	0	200	300	0	0	0	0	0	0	0	200	903	0	0	0	0	0	0	0	603	903	0
8109	0	0	0	0	0	0	0	200	300	0	0	0	0	0	0	0	200	903	0	0	0	0	0	0	0	603	903	0
8109	1	0	0	0	0	0	0	200	300	0	0	0	0	0	0	0	200	903	0	0	0	0	0	0	0	603	903	0
8109	2	0	0	0	0	0	0	200	300	0	0	0	0	0	0	0	200	903	0	0	0	0	0	0	0	603	903	0
8109	3	0	0	0	0	0	0	200	300	0	0	0	0	0	0	0	200	903	0	0	0	0	0	0	0	603	903	0
8109	4	0	0	0	0	0	0	200	300	0	0	0	0	0	0	0	200	903	0	0	0	0	0	0	0	603	903	0
8109	5	0	0	0	0	0	0	200	300	0	0	0	0	0	0	0	200	903	0	0	0	0	0	0	0	603	903	0
8109	6	0	0	0	0	0	0	200	300	0	0	0	0	0	0	0	200	903	0	0	0	0	0	0	0	603	903	0
8109	7	0	0	0	0	0	0	200	300	0	0	0	0	0	0	0	200	903	0	0	0	0	0	0	0	603	903	0
8109	8	0	0	0	0	0	0	200	300	0	0	0	0	0	0	0	200	903	0	0	0	0	0	0	0	603	903	0
8109	9	0	0	0	0	0	0	200	300	0	0	0	0	0	0	0	200	903	0	0	0	0	0	0	0	603	903	0
8110	0	0	0	0	0	0	0	200	300	0	0	0	0	0	0	0	200	903	0	0	0	0	0	0	0	603	903	0
8110	1	0	0	0	0	0	0	200	300	0	0	0	0	0	0	0	200	903	0	0	0	0	0	0	0	603	903	0
8110	2	0	0	0	0	0	0	200	300	0	0	0	0	0	0	0	200	903	0	0	0	0	0	0	0	603	903	0
8110	3	0	0	0	0	0	0	200	300	0	0	0	0	0	0	0	200	903	0	0	0	0	0	0	0	603	903	0
8110	4	0	0	0	0	0	0	200	300	0	0	0	0	0	0	0	200	903	0	0	0	0	0	0	0	603	903	0
8110	5	0	0	0	0	0	0	200	300	0	0	0	0	0	0	0	200	903	0	0	0	0	0	0	0	603	903	0
8110	6	0	0	0	0	0	0	200	300	0	0	0	0	0	0	0	200	903	0	0	0	0	0	0	0	603	903	0
8110	7	0	0	0	0	0	0	200	300	0	0	0	0	0	0	0	200	903	0	0	0	0	0	0	0	603	903	0
8110	8	0	0	0	0	0	0	200	300	0	0	0	0	0	0	0	200	903	0	0	0	0	0	0	0	603	903	0
8110	9	0	0	0	0	0	0	200	300	0	0	0	0	0	0	0	200	903	0	0	0	0	0	0	0	603	903	0
8111	0	0	0	0	0	0	0	200	300	0	0	0	0	0	0	0	200	903	0	0	0	0	0	0	0	603	903	0
8111	1	0	0	0	0	0	0	200	300	0	0	0	0	0	0	0	200	903	0	0	0	0	0	0	0	603	903	0
8111	2	0	0	0	0	0	0	200	300	0	0	0	0	0	0	0	200	903	0	0	0	0	0	0	0	603	903	0
8111	3	0	0	0	0	0	0	200	300	0	0	0	0	0	0	0	200	903	0	0	0	0	0	0	0	603	903	0
8111	4	0	0	0	0	0	0	200	300	0	0	0	0	0	0	0	200	903	0	0	0	0	0	0	0	603	903	0
8111	5	0	0	0	0	0	0	200	300	0	0	0	0	0	0	0	200	903	0	0	0	0	0	0	0	603	903	0
8111	6	0	0	0	0	0	0	200	300	0	0	0	0	0	0	0	200	903	0	0	0	0	0	0	0	603	903	0
8111	7	0	0	0	0	0	0	200	300	0	0	0	0	0	0	0	200	903	0	0	0	0	0	0	0	603	903	0
8111	8	0	0	0	0	0	0	200	300	0	0	0	0	0	0	0	200	903	0	0	0	0	0	0	0	603	903	0
8111	9	0	0	0	0	0	0	200	300	0	0	0	0	0	0	0	200	903	0	0	0	0	0	0	0	603	903	0
8112	0	0	0	0	0	0	0	200	300	0	0	0	0	0	0	0	200	903	0	0	0	0	0	0	0	603	903	0
8112	1	0	0	0	0	0	0	200	300	0	0	0	0	0	0	0	200	903	0	0	0	0	0	0	0	603	903	0
8112	2	0	0	0	0	0	0	200	300	0	0	0	0	0	0	0	200	903	0	0	0	0	0	0	0	603	903	0
8112	3	0	0	0	0	0	0	200	300	0	0	0	0	0	0	0	200	903	0	0	0	0	0	0	0	603	903	0
8112	4	0	0	0	0	0	0	200	300	0	0	0	0	0	0	0	200	903	0	0	0	0	0	0	0	603	903	0
8112	5	0	0	0	0	0	0	200	300	0	0	0	0	0	0	0	200	903	0	0	0	0	0	0	0	603	903	0
8112	6	0	0	0	0	0	0	200	300	0	0	0	0	0	0	0	200	903	0	0	0	0	0	0	0	603	903	0
8112	7	0	0	0	0	0	0	200	300	0	0	0	0	0	0	0	200	903	0	0	0	0	0	0	0	603	903	0
8112	8	0	0	0	0	0	0	200	300	0	0	0	0	0	0	0	200	903	0	0	0	0	0	0	0	603	903	0
8112	9	0	0	0	0	0	0	200	300	0	0	0	0	0	0	0	200	903	0	0	0	0	0	0	0	603	903	0
8113	0	0	0	0	0	0	0	200	300	0	0	0	0	0	0	0	200	903	0	0	0	0	0	0	0	603	903	0
8113	1	0	0	0	0	0	0	200	300	0	0	0	0	0	0	0	200	903	0	0	0	0	0	0	0	603	903	0
8113	2	0	0	0	0	0	0	200	300	0	0	0	0	0	0	0	200	903	0	0	0	0	0	0	0	603	903	0
8113	3	0	0	0	0	0	0	200	300	0	0	0	0	0	0	0	200	903	0	0	0	0	0	0	0	603	903	0
8113	4	0	0	0	0	0	0	200	300	0	0	0	0	0	0	0	200	903	0	0	0	0	0	0	0	603	903	0
8113	5	0	0	0	0	0	0	200	300	0	0	0	0	0	0	0	200	903	0	0	0	0	0	0	0	603	903	0
8113	6	0	0	0	0	0	0	200	300	0	0	0	0	0	0	0	200	903	0	0	0	0	0	0	0	603	903	0
8113	7	0	0	0	0	0	0	200	300	0	0	0	0	0	0	0	200	903	0	0	0	0	0	0	0	603	903	0
8113	8	0	0	0	0	0	0	200	300	0	0	0	0	0	0	0	200	903	0	0	0	0	0	0	0	603	903	0
8113	9	0	0	0	0	0	0	200	300	0	0	0	0	0	0	0	200	903	0	0	0	0	0	0	0	603	903	0
8114	0	0	0	0	0	0	0	200	300	0	0	0	0	0	0	0	200	903	0	0	0	0	0	0	0	603	903	0
8114	1	0	0	0	0	0	0	200	300	0	0	0	0	0	0	0	200	903	0	0	0	0	0	0	0	603	903	0
8114	2	0	0	0	0	0	0	200	300	0	0	0	0	0	0	0	200	903	0	0	0	0	0	0	0	603	903	0
8114	3	0	0	0	0	0	0	200	300	0	0	0	0	0	0	0	200	903	0	0	0	0	0	0	0	603	903	0
8114	4	0	0	0	0	0	0	200	300	0	0	0	0	0	0	0	200	903	0	0	0	0	0	0	0	603	903	0
8114	5	0	0	0	0	0	0	200	300	0	0	0	0	0	0	0	200	903	0	0	0	0	0	0	0	603	903	0
8114	6	0	0	0	0	0	0	200	300	0	0	0	0	0	0	0	200	903	0	0	0	0	0	0	0	603	903	0
8114	7	0	0	0	0	0	0	200	300	0	0	0	0	0	0	0	200	903	0	0	0	0	0	0	0	603	903	0
8114	8	0	0	0	0	0	0	200	300	0	0	0	0	0	0	0	200	903	0	0	0	0	0	0	0	603	903	0
8114	9	0	0	0	0	0	0	200	300	0	0	0	0	0	0	0	200	903	0	0	0	0	0	0	0	603	903	0
8115	0	0	0	0	0	0	0	200	300	0	0	0	0	0	0	0	200	903	0	0	0	0	0	0	0	603	903	0
8115	1	0	0	0	0	0	0	200	300	0	0	0	0	0	0	0	200	903	0	0	0	0	0	0	0	603	903	0
8115	2	0	0	0	0	0	0	200	300	0	0	0	0	0	0	0	200	903	0	0	0	0	0	0	0	603	903	0
8115	3	0	0	0	0	0	0	200	300	0	0	0	0	0	0	0	200	903	0	0	0	0	0	0	0	603	903	0
8115	4	0	0	0	0	0	0	200	300	0	0	0	0	0	0	0	200	903	0	0	0	0	0	0	0	603	903	0
8115	5	0	0	0	0	0	0	200	300	0	0	0	0	0	0	0	200	903	0	0	0	0	0	0	0	603	903	0
8115	6	0	0	0	0	0	0	200	300	0	0	0	0	0	0	0	200	903	0	0	0	0	0	0	0	603	903	0
8115	7	0	0	0	0	0	0	200	300	0	0	0	0	0	0	0	200	903	0	0	0	0	0	0	0	603	903	0
8115	8	0	0	0	0	0	0	200	300	0	0	0	0	0	0	0	200	903	0	0	0	0	0	0	0	603	903	0
8115	9	0	0	0	0	0	0	200	300	0	0	0	0	0	0	0	200	903	0	0	0	0	0	0	0	603	903	0
8116	0	0	0	0	0	0	0	200	300	0	0	0	0	0	0	0	200	903	0	0	0	0	0	0	0	603	903	0
8116	1	0	0	0	0	0	0	200	300	0	0	0	0	0	0	0	200	903	0	0	0	0	0	0	0	603	903	0
8116	2	0	0	0	0	0	0	200	300	0	0	0	0	0	0	0	200	903	0	0	0	0	0	0	0	603	903	0
8116	3	0	0	0	0	0	0	200	300	0	0	0	0	0	0	0	200	903	0	0	0	0	0	0	0	603	903	0
8116	4	0	0	0	0	0	0	200	300	0	0	0	0	0	0	0	200	903	0	0	0	0	0	0	0	603	903	0
8116	5	0	0	0	0	0	0	200	300	0	0	0	0	0	0	0	200	903	0	0	0	0	0	0	0	603	903	0
8116	6	0	0	0	0	0	0	200	300	0	0	0	0	0	0	0	200	903	0	0	0	0	0	0	0	603	903	0
8116	7	0	0	0	0	0	0	200	300	0	0	0	0	0	0	0	200	903	0	0	0	0	0	0	0	603	903	0
8116	8	0	0	0	0	0	0	200	300	0	0	0	0	0	0	0	200	903	0	0	0	0	0	0	0	603	903	0
8116	9	0	0	0	0	0	0	200	300	0	0	0	0	0	0	0	200	903	0	0	0	0	0	0	0	603	903	0
8117	0	0	0	0	0	0	0	200	300	0	0	0	0	0	0	0	200	903	0	0	0	0	0	0	0	603	903	0
8117	1	0	0	0	0	0	0	200	300	0	0	0	0	0	0	0	200	903	0	0	0	0	0	0	0	603	903	0
8117	2	0	0	0	0	0	0	200	300	0	0	0	0	0	0	0	200	903	0	0	0	0	0	0	0	603	903	0
8117	3	0	0	0	0	0	0	200	300	0	0	0	0	0	0	0	200	903	0	0	0	0	0	0	0	603	903	0
8117	4	0	0	0	0	0	0	200	300	0	0	0	0	0	0	0	200	903	0	0	0	0	0	0	0	603	903	0
8117	5	0	0	0	0	0	0	200	300	0	0	0	0	0	0	0	200	903	0	0	0	0	0	0	0	603	903	0
8117	6	0	0	0	0	0	0	200	300	0	0	0	0	0	0	0	200	903	0	0	0	0	0	0	0	603	903	0
8117	7	0	0	0	0	0	0	200	300	0	0	0	0	0	0	0	200	903	0	0	0	0	0	0	0	603	903	0
8117	8	0	0	0	0	0	0	200	300	0	0	0	0	0	0	0	200	903	0	0	0	0	0	0	0	603	903	0
8117	9	0	0	0	0	0	0	200	300	0	0	0	0	0	0	0	200	903	0	0	0	0	0	0	0	603	903	0
8118	0	0	0	0	0	0	0	200	300	0	0	0	0	0	0	0	200	903	0	0	0	0	0	0	0	603	903	0
8118	1	0	0	0	0	0	0	200	300	0	0	0	0	0	0	0	200	903	0	0	0	0	0	0	0	603	903	0
8118	2	0	0	0	0	0	0	200	300	0	0	0	0	0	0	0	200	903	0	0	0	0	0	0	0	603	903	0
8118	3	0	0	0	0	0	0	200	300	0	0	0	0	0	0	0	200	903	0	0	0	0	0	0	0	603	903	0
8118	4	0	0	0	0	0	0	200	300	0	0	0	0	0	0	0	200	903	0	0	0	0	0	0	0	603	903	0
8118	5	0	0	0	0	0	0	200	300	0	0	0	0	0	0	0	200	903	0	0	0	0	0	0	0	603	903	0
8118	6	0	0	0	0	0	0	200	300	0	0	0	0	0	0	0	200	903	0	0	0	0	0	0	0	603	903	0
8118	7	0	0	0	0	0	0	200	300	0	0	0	0	0	0	0	200	903	0	0	0	0	0	0	0	603	903	0
8118	8	0	0	0	0	0	0	200	300	0	0	0	0	0	0	0	200	903	0	0	0	0	0	0	0	603	903	0
8118	9	0	0	0	0	0	0	200	300	0	0	0	0	0	0	0	200	903	0	0	0	0	0	0	0	603	903	0
8119	0	0	0	0	0	0	0	200	300	0	0	0	0	0	0	0	200	903	0	0	0	0	0	0	0	603	903	0
8119	1	0	0	0	0	0	0	200	300	0	0	0	0	0	0	0	200	903	0	0	0	0	0	0	0	603	903	0
8119	2	0	0	0	0	0	0	200	300	0	0	0	0	0	0	0	200	903	0	0	0	0	0	0	0	603	903	0
8119	3	0	0	0	0	0	0	200	300	0	0	0	0	0	0	0	200	903	0	0	0	0	0	0	0	603	903	0
8119	4	0	0	0	0	0	0	200	300	0	0	0	0	0	0	0	200	903	0	0	0	0	0	0	0	603	903	0
8119	5	0	0	0	0	0	0	200	300	0	0	0	0	0	0	0	200	903	0	0	0	0	0	0	0	603	903	0
8119	6	0	0	0	0	0	0	200	300	0	0	0	0	0	0	0	200	903	0	0	0	0	0	0	0	603	903	0
8119	7	0	0	0	0	0	0	200	300	0	0	0	0	0	0	0	200	903	0	0	0	0	0	0	0	603	903	0
8119	8	0	0	0	0	0	0	200	300	0	0	0	0	0	0	0	200	903	0	0	0	0	0	0	0	603	903	0
8119	9	0	0	0	0	0	0	200	300	0	0	0	0	0	0	0	200	903	0	0	0	0	0	0	0	603	903	0
8120	0	0	0	0	0	0	0	200	300	0	0	0	0	0	0	0	200	903	0	0	0	0	0	0	0	603	903	0
8120	1	0	0	0	0	0	0	200	300	0	0	0	0	0	0	0	200	903	0	0	0	0	0	0	0	603	903	0
8120	2	0	0	0	0	0	0	200	300	0	0	0	0	0	0	0	200	903	0	0	0	0	0	0	0	603	903	0
8120	3	0	0	0	0	0	0	200	300	0	0	0	0	0	0	0	200	903	0	0	0	0	0	0	0	603	903	0
8120	4	0	0	0	0	0	0	200	300	0	0	0	0	0	0	0	200	903	0	0	0	0	0	0	0	603	903	0
8120	5	0	0	0	0	0	0	200	300	0	0	0	0	0	0	0	200	903	0	0	0	0	0	0	0	603	903	0
8120	6	0	0	0	0	0	0	200	300	0	0	0	0	0	0	0	200	903	0	0	0	0	0	0	0	603	903	0
8120	7	0	0	0	0	0	0	200	300	0	0	0	0	0	0	0	200	903	0	0	0	0	0	0	0	603	903	0
8120	8	0	0	0	0	0	0	200	300	0	0	0	0	0	0	0	200	903	0	0	0	0	0	0	0	603	903	0
8120	9	0	0	0	0	0	0	200	300	0	0	0	0	0	0	0	200	903	0	0	0	0	0	0	0	603	903	0
8121	0	0	0	0	0	0	0	200	300	0	0	0	0	0	0	0	200	903	0	0	0	0	0	0	0	603	903	0
8121	1	0	0	0	0	0	0	200	300	0	0	0	0	0	0	0	200	903	0	0	0	0	0	0	0	603	903	0
8121	2	0	0	0	0	0	0	200	300	0	0	0	0	0	0	0	200	903	0	0	0	0	0	0	0	603	903	0
8121	3	0	0	0	0	0	0	200	300	0	0	0	0	0	0	0	200	903	0	0	0	0	0	0	0	603	903	0
8121	4	0	0	0	0	0	0	200	300	0	0	0	0	0	0	0	200	903	0	0	0	0	0	0	0	603	903	0
8121	5	0	0	0	0	0	0	200	300	0	0	0	0	0	0	0	200	903	0	0	0	0	0	0	0	603	903	0
8121	6	0	0	0	0	0	0	200	300	0	0	0	0	0	0	0	200	903	0	0	0	0	0	0	0	603	903	0
8121	7	0	0	0	0	0	0	200	300	0	0	0	0	0	0	0	200	903	0	0	0	0	0	0	0	603	903	0
8121	8	0	0	0	0	0	0	200	300	0	0	0	0	0	0	0	200	903	0	0	0	0	0	0	0	603	903	0
8121	9	0	0	0	0	0	0	200	300	0	0	0	0	0	0	0	200	903	0	0	0	0	0	0	0	603	903	0
8122	0	0	0	0	0	0	0	200	300	0	0	0	0	0	0	0	200	903	0	0	0	0	0	0	0	603	903	0
8122	1	0	0	0	0	0	0	200	300	0	0	0	0	0	0	0	200	903	0	0	0	0	0	0	0	603	903	0
8122	2	0	0	0	0	0	0	200	300	0	0	0	0	0	0	0	200	903	0	0	0	0	0	0	0	603	903	0
8122	3	0	0	0	0	0	0	200	300	0	0	0	0	0	0	0	200	903	0	0	0	0	0	0	0	603	903	0
8122	4	0	0	0	0	0	0	200	300	0	0	0	0	0	0	0	200	903	0	0	0	0	0	0	0	603	903	0
8122	5	0	0	0	0	0	0	200	300	0	0	0	0	0	0	0	200	903	0	0	0	0	0	0	0	603	903	0
8122	6	0	0	0	0	0	0	200	300	0	0	0	0	0	0	0	200	903	0	0	0	0	0	0	0	603	903	0
8122	7	0	0	0	0	0	0	200	300	0	0	0	0	0	0	0	200	903	0	0	0	0	0	0	0	603	903	0
8122	8	0	0	0	0	0	0	200	300	0	0	0	0	0	0	0	200	903	0	0	0	0	0	0	0	603	903	0
8122	9	0	0	0	0	0	0	200	300	0	0	0	0	0	0	0	200	903	0	0	0	0	0	0	0	603	903	0
8123	0	0	0	0	0	0	0	200	300	0	0	0	0	0	0	0	200	903	0	0	0	0	0	0	0	603	903	0
8123	1	0	0	0	0	0	0	200	300	0	0	0	0	0	0	0	200	903	0	0	0	0	0	0	0	603	903	0
8123	2	0	0	0	0	0	0	200	300	0	0	0	0	0	0	0	200	903	0	0	0	0	0	0	0	603	903	0
8123	3	0	0	0	0	0	0	200	300	0	0	0	0	0	0	0	200	903	0	0	0	0	0	0	0	603	903	0
8123	4	0	0	0	0	0	0	200	300	0	0	0	0	0	0	0	200	903	0	0	0	0	0	0	0	603	903	0
8123	5	0	0	0	0	0	0	200	300	0	0	0	0	0	0	0	200	903	0	0	0	0	0	0	0	603	903	0
8123	6	0	0	0	0	0	0	200	300	0	0	0	0	0	0	0	200	903	0	0	0	0	0	0	0	603	903	0
8123	7	0	0	0	0	0	0	200	300	0	0	0	0	0	0	0	200	903	0	0	0	0	0	0	0	603	903	0
8123	8	0	0	0	0	0	0	200	300	0	0	0	0	0	0	0	200	903	0	0	0	0	0	0	0	603	903	0
8123	9	0	0	0	0	0	0	200	300	0	0	0	0	0	0	0	200	903	0	0	0	0	0	0	0	603	903	0
8124	0	0	0	0	0	0	0	200	300	0	0	0	0	0	0	0	200	903	0	0	0	0	0	0	0	603	903	0
8124	1	0	0	0	0	0	0	200	300	0	0	0	0	0	0	0	200	903	0	0	0	0	0	0	0	603	903	0
8124	2	0	0	0	0	0	0	200	300	0	0	0	0	0	0	0	200	903	0	0	0	0	0	0	0	603	903	0
8124	3	0	0	0	0	0	0	200	300	0	0	0	0	0	0	0	200	903	0	0	0	0	0	0	0	603	903	0
8124	4	0	0	0	0	0	0	200	300	0	0	0	0	0	0	0	200	903	0	0	0	0	0	0	0	603	903	0
8124	5	0	0	0	0	0	0	200	300	0	0	0	0	0	0	0	200	903	0	0	0	0	0	0	0	603	903	0
8124	6	0	0	0	0	0	0	200	300	0	0	0	0	0	0	0	200	903	0	0	0	0	0	0	0	603	903	0
8124	7	0	0	0	0	0	0	200	300	0	0	0	0	0	0	0	200	903	0	0	0	0	0	0	0	603	903	0
8124	8	0	0	0	0	0	0	200	300	0	0	0	0	0	0	0	200	903	0	0	0	0	0	0	0	603	903	0
8124	9	0	0	0	0	0	0	200	300	0	0	0	0	0	0	0	200	903	0	0	0	0	0	0	0	603	903	0
8125	0	0	0	0	0	0	0	200	300	0	0	0	0	0	0	0	200	903	0	0	0	0	0	0	0	603	903	0
8125	1	0	0	0	0	0	0	200	300	0	0	0	0	0	0	0	200	903	0	0	0	0	0	0	0	603	903	0
8125	2	0	0	0	0	0	0	200	300	0	0	0	0	0	0	0	200	903	0	0	0	0	0	0	0	603	903	0
8125	3	0	0	0	0	0	0	200	300	0	0	0	0	0	0	0	200	903	0	0	0	0	0	0	0	603	903	0
8125	4	0	0	0	0	0	0	200	300	0	0	0	0	0	0	0	200	903	0	0	0	0	0	0	0	603	903	0
8125	5	0	0	0	0	0	0	200	300	0	0	0	0	0	0	0	200	903	0	0	0	0	0	0	0	603	903	0
8125	6	0	0	0	0	0	0	200	300	0	0	0	0	0	0	0	200	903	0	0	0	0	0	0	0	603	903	0
8125	7	0	0	0	0	0	0	200	300	0	0	0	0	0	0	0	200	903	0	0	0	0	0	0	0	603	903	0
8125	8	0	0	0	0	0	0	200	300	0	0	0	0	0	0	0	200	903	0	0	0	0	0	0	0	603	903	0
8125	9	0	0	0	0	0	0	200	300	0	0	0	0	0	0	0	200	903	0	0	0	0	0	0	0	603	903	0
8126	0	0	0	0	0	0	0	200	300	0	0	0	0	0	0	0	200	903	0	0	0	0	0	0	0	603	903	0
8126	1	0	0	0	0	0	0	200	300	0	0	0	0	0	0	0	200	903	0	0	0	0	0	0	0	603	903	0
8126	2	0	0	0	0	0	0	200	300	0	0	0	0	0	0	0	200	903	0	0	0	0	0	0	0	603	903	0
8126	3	0	0	0	0	0	0	200	300	0	0	0	0	0	0	0	200	903	0	0	0	0	0	0	0	603	903	0
8126	4	0	0	0	0	0	0	200	300	0	0	0	0	0	0	0	200	903	0	0	0	0	0	0	0	603	903	0
8126	5	0	0	0	0	0	0	200	300	0	0	0	0	0	0	0	200	903	0	0	0	0	0	0	0	603	903	0
8126	6	0	0	0	0	0	0	200	300	0	0	0	0	0	0	0	200	903	0	0	0	0	0	0	0	603	903	0
8126	7	0	0	0	0	0	0	200	300	0	0	0	0	0	0	0	200	903	0	0	0	0	0	0	0	603	903	0
8126	8	0	0	0	0	0	0	200	300	0	0	0	0	0	0	0	200	903	0	0	0	0	0	0	0	603	903	0
8126	9	0	0	0	0	0	0	200	300	0	0	0	0	0	0	0	200	903	0	0	0	0	0	0	0	603	903	0
8127	0	0	0	0	0	0	0	200	300	0	0	0	0	0	0	0	200	903	0	0	0	0	0	0	0	603	903	0
8127	1	0	0	0	0	0	0	200	300	0	0	0	0	0	0	0	200	903	0	0	0	0	0	0	0	603	903	0
8127	2	0	0	0	0	0	0	200	300	0	0	0	0	0	0	0	200	903	0	0	0	0	0	0	0	603	903	0
8127	3	0	0	0	0	0	0	200	300	0	0	0	0	0	0	0	200	903	0	0	0	0	0	0	0	603	903	0
8127	4	0	0	0	0	0	0	200	300	0	0	0	0	0	0	0	200	903	0	0	0	0	0	0	0	603	903	0
8127	5	0	0	0	0	0	0	200	300	0	0	0	0	0	0	0	200	903	0	0	0	0	0	0	0	603	903	0
8127	6	0	0	0	0	0	0	200	300	0	0	0	0	0	0	0	200	903	0	0	0	0	0	0	0	603	903	0
8127	7	0	0	0	0	0	0	200	300	0	0	0	0	0	0	0	200	903	0	0	0	0	0	0	0	603	903	0
8127	8	0	0	0	0	0	0	200	300	0	0	0	0	0	0	0	200	903	0	0	0	0	0	0	0	603	903	0
8127	9	0	0	0	0	0	0	200	300	0	0	0	0	0	0	0	200	903	0	0	0	0	0	0	0	603	903	0
8128	0	0	0	0	0	0	0	200	300	0	0	0	0	0	0	0	200	903	0	0	0	0	0	0	0	603	903	0
8128	1	0	0	0	0	0	0	200	300	0	0	0	0	0	0	0	200	903	0	0	0	0	0	0	0	603	903	0
8128	2	0	0	0	0	0	0	200	300	0	0	0	0	0	0	0	200	903	0	0	0	0	0	0	0	603	903	0
8128	3	0	0	0	0	0	0	200	300	0	0	0	0	0	0	0	200	903	0	0	0	0	0	0	0	603	903	0
8128	4	0	0	0	0	0	0	200	300	0	0	0	0	0	0	0	200	903	0	0	0	0	0	0	0	603	903	0
8128	5	0	0	0	0	0	0	200	300	0	0	0	0	0	0	0	200	903	0	0	0	0	0	0	0	603	903	0
8128	6	0	0	0	0	0	0	200	300	0	0	0	0	0	0	0	200	903	0	0	0	0	0	0	0	603	903	0
8128	7	0	0	0	0	0	0	200	300	0	0	0	0	0	0	0	200	903	0	0	0	0	0	0	0	603	903	0
8128	8	0	0	0	0	0	0	200	300	0	0	0	0	0	0	0	200	903	0	0	0	0	0	0	0	603	903	0
8128	9	0	0	0	0	0	0	200	300	0	0	0	0	0	0	0	200	903	0	0	0	0	0	0	0	603	903	0
8129	0	0	0	0	0	0	0	200	300	0	0	0	0	0	0	0	200	903	0	0	0	0	0	0	0	603	903	0
8129	1	0	0	0	0	0	0	200	300	0	0	0	0	0	0	0	200	903	0	0	0	0	0	0	0	603	903	0
8129	2	0	0	0	0	0	0	200	300	0	-4.36539	-14.1675	-14.7051	-4848.1	1159.14	-381.088	278.825	1232.69	0	0	0	0	0	0	0	603	903	0
8129	3	0	0	0	0	0	0	200	300	0	-2.38174	-15.9985	-15.3155	-4298.79	1464.31	-243.759	295.61	1183.68	0	0	0	0	0	0	0	603	903	0
8129	4	0	0	0	0	0	0	200	300	0	0.364838	-16.3037	-13.7896	-4298.79	1098.1	-930.405	279.633	1214.74	0	0	0	0	0	0	0	603	903	0
8129	5	0	0	0	0	0	0	200	300	0	-1.6188	-18.4399	-16.231	-5488.97	1525.35	-1067.73	293.977	1241.18	0	0	0	0	0	0	0	603	903	0
8129	6	0	0	0	0	0	0	200	300	0	-0.398101	-18.1348	-16.5362	-5305.87	1403.28	-1159.29	284.861	1223.86	0	0	0	0	0	0	0	603	903	0
8129	7	0	0	0	0	0	0	200	300	0	1.43295	-20.1184	-18.3672	-5397.42	1830.52	-1891.71	299.662	1196.86	0	0	0	0	0	0	0	603	903	0
8129	8	0	0	0	0	0	0	200	300	0	1.58554	-18.7451	-21.1138	-6221.4	1952.59	-1800.16	292.479	1197.66	0	0	0	0	0	0	0	603	903	0
8129	9	0	0	0	0	0	0	200	300	0	4.33212	-18.2874	-22.3345	-6312.95	1708.45	-1708.6	276.494	1185.65	0	0	0	0	0	0	0	603	903	0
8130	0	0	0	0	0	0	0	200	300	0	3.56918	-17.8296	-23.5552	-6862.26	2196.73	-2074.81	293.259	1194.33	0	0	0	0	0	0	0	603	903	0
8130	1	0	0	0	0	0	0	200	300	0	1.89072	-15.3882	-27.2173	-7960.9	2379.84	-1937.49	287.438	1195.49	0	0	0	0	0	0	0	603	903	0
8130	2	0	0	0	0	0	0	200	300	0	2.34848	-13.252	-29.0484	-8693.32	2135.7	-1067.73	273.522	1202.27	0	0	0	0	0	0	0	603	903	0
8130	3	0	0	0	0	0	0	200	300	0	2.34848	-11.2683	-31.1846	-9700.4	2623.98	-1205.06	284.143	1214.06	0	0	0	0	0	0	0	603	903	0
8130	4	0	0	0	0	0	0	200	300	0	-0.703277	-10.3528	-33.9312	-10799	2807.09	-609.97	282.729	1221.26	0	0	0	0	0	0	0	603	903	0
8130	5	0	0	0	0	0	0	200	300	0	-0.398101	-4.40186	-38.814	-12172.3	2257.77	351.334	258.169	1216.61	0	0	0	0	0	0	0	603	903	0
8130	6	0	0	0	0	0	0	200	300	0	-0.550689	-1.3501	-44.3072	-13087.9	3112.26	488.663	270.243	1198.39	0	0	0	0	0	0	0	603	903	0
8130	7	0	0	0	0	0	0	200	300	0	-3.29727	0.480954	-47.0538	-14003.4	3295.37	1129.53	270.034	1200.6	0	0	0	0	0	0	0	603	903	0
8130	8	0	0	0	0	0	0	200	300	0	-5.28091	4.75342	-51.3262	-15559.8	3234.33	2182.39	263.015	1206.15	0	0	0	0	0	0	0	603	903	0
8130	9	0	0	0	0	0	0	200	300	0	-6.6542	8.87329	-56.8194	-17116.2	3844.68	2319.72	267.665	1204.24	0	0	0	0	0	0	0	603	903	0
8131	0	0	0	0	0	0	0	200	300	0	-8.33267	10.7043	-60.1763	-17940.1	4088.82	3052.14	267.947	1201.13	0	0	0	0	0	0	0	603	903	0
8131	1	0	0	0	0	0	0	200	300	0	-9.55338	14.8242	-64.1436	-19496.5	4149.86	4105	264.696	1206.95	0	0	0	0	0	0	0	603	903	0
8131	2	0	0	0	0	0	0	200	300	0	-11.8422	17.7234	-71.773	-21052.9	4455.04	4013.44	262.071	1196.33	0	0	0	0	0	0	0	603	903	0
8131	3	0	0	0	0	0	0	200	300	0	-13.6732	18.3337	-75.1299	-22151.6	4577.11	4791.64	260.923	1197.84	0	0	0	0	0	0	0	603	903	0
8131	4	0	0	0	0	0	0	200	300	0	-13.6732	21.9958	-80.3179	-22884	4821.25	5890.27	260.027	1187.92	0	0	0	0	0	0	0	603	903	0
8131	5	0	0	0	0	0	0	200	300	0	-15.3517	23.9795	-84.2852	-24806.6	5126.42	6073.38	260.822	1197.32	0	0	0	0	0	0	0	603	903	0
8131	6	0	0	0	0	0	0	200	300	0	-18.4035	24.7424	-85.2007	-26363	5126.42	6393.81	260.169	1212.42	0	0	0	0	0	0	0	603	903	0
8131	7	0	0	0	0	0	0	200	300	0	-17.3354	25.9631	-92.8301	-27095.4	5431.6	7172.01	258.511	1194.88	0	0	0	0	0	0	0	603	903	0
8131	8	0	0	0	0	0	0	200	300	0	-18.2509	26.1157	-96.4922	-28194.1	5492.63	6851.58	256.923	1195.19	0	0	0	0	0	0	0	603	903	0
8131	9	0	0	0	0	0	0	200	300	0	-20.9975	27.3364	-99.2388	-29842	5492.63	6988.91	255.348	1203.71	0	0	0	0	0	0	0	603	903	0
8132	0	0	0	0	0	0	0	200	300	0	-22.0656	26.8787	-104.732	-30482.9	6041.95	7812.88	257.69	1194.06	0	0	0	0	0	0	0	603	903	0
8132	1	0	0	0	0	0	0	200	300	0	-20.5397	25.3528	-106.868	-31856.2	5797.81	7538.23	254.252	1201.09	0	0	0	0	0	0	0	603	903	0
8132	2	0	0	0	0	0	0	200	300	0	-23.2863	24.1321	-110.225	-32863.2	6164.02	7538.23	255.922	1201.15	0	0	0	0	0	0	0	603	903	0
8132	3	0	0	0	0	0	0	200	300	0	-23.744	22.4536	-114.803	-33595.7	6041.95	8087.54	252.629	1195.64	0	0	0	0	0	0	0	603	903	0
8132	4	0	0	0	0	0	0	200	300	0	-22.5233	19.707	-115.108	-33595.7	6164.02	7767.11	253.55	1194.86	0	0	0	0	0	0	0	603	903	0
8132	5	0	0	0	0	0	0	200	300	0	-23.1337	16.5027	-118.16	-35243.6	6225.06	7400.9	252.683	1201.27	0	0	0	0	0	0	0	603	903	0
8132	6	0	0	0	0	0	0	200	300	0	-24.6596	14.6716	-120.296	-35609.8	6225.06	7995.99	251.748	1199.02	0	0	0	0	0	0	0	603	903	0
8132	7	0	0	0	0	0	0	200	300	0	-24.6596	12.3828	-121.211	-35060.5	6408.16	7538.23	252.868	1192.25	0	0	0	0	0	0	0	603	903	0
8132	8	0	0	0	0	0	0	200	300	0	-24.2018	9.48364	-125.179	-37074.7	6286.09	6760.03	250.217	1199.17	0	0	0	0	0	0	0	603	903	0
8132	9	0	0	0	0	0	0	200	300	0	-24.3544	7.19482	-125.789	-36800	6225.06	7767.11	249.488	1195.55	0	0	0	0	0	0	0	603	903	0
8133	0	0	0	0	0	0	0	200	300	0	-24.507	5.21118	-125.484	-36800	6469.2	7080.46	251.554	1196.27	0	0	0	0	0	0	0	603	903	0
8133	1	0	0	0	0	0	0	200	300	0	-24.3544	2.61718	-128.536	-37440.9	6530.23	6805.8	250.805	1194.29	0	0	0	0	0	0	0	603	903	0
8133	2	0	0	0	0	0	0	200	300	0	-24.9648	1.39648	-127.62	-37807.1	6286.09	7263.57	249.256	1199.25	0	0	0	0	0	0	0	603	903	0
8133	3	0	0	0	0	0	0	200	300	0	-25.2699	-0.587161	-130.062	-37624	6408.16	6668.47	249.27	1192.28	0	0	0	0	0	0	0	603	903	0
8133	4	0	0	0	0	0	0	200	300	0	-24.2018	-2.5708	-132.198	-38173.3	6041.95	6302.26	245.704	1191.76	0	0	0	0	0	0	0	603	903	0
8133	5	0	0	0	0	0	0	200	300	0	-24.2018	-4.09668	-131.587	-38539.5	6347.13	6714.25	248.235	1195.88	0	0	0	0	0	0	0	603	903	0
8133	6	0	0	0	0	0	0	200	300	0	-24.9648	-5.01221	-134.029	-38722.6	6652.3	6393.81	249.633	1191.91	0	0	0	0	0	0	0	603	903	0
8133	7	0	0	0	0	0	0	200	300	0	-23.1337	-6.23291	-134.334	-39180.4	6469.2	5936.05	248.158	1194.66	0	0	0	0	0	0	0	603	903	0
8133	8	0	0	0	0	0	0	200	300	0	-24.8122	-8.06397	-136.775	-39912.8	6591.27	6439.59	248.19	1194.81	0	0	0	0	0	0	0	603	903	0
8133	9	0	0	0	0	0	0	200	300	0	-25.7277	-6.53809	-140.438	-40553.7	6713.34	6302.26	247.803	1191.77	0	0	0	0	0	0	0	603	903	0
8134	0	0	0	0	0	0	0	200	300	0	-24.0492	-6.69068	-143.489	-41011.5	6896.44	6714.25	248.062	1188.82	0	0	0	0	0	0	0	603	903	0
8134	1	0	0	0	0	0	0	200	300	0	-28.932	-6.53809	-145.015	-41469.2	6835.41	7126.24	247.136	1188.96	0	0	0	0	0	0	0	603	903	0
8134	2	0	0	0	0	0	0	200	300	0	-30.4579	-7.6062	-149.593	-42842.5	7140.58	7263.57	247.733	1189.39	0	0	0	0	0	0	0	603	903	0
8134	3	0	0	0	0	0	0	200	300	0	-29.0846	-7.30103	-154.781	-43941.1	7384.73	7034.68	247.711	1186.89	0	0	0	0	0	0	0	603	903	0
8134	4	0	0	0	0	0	0	200	300	0	-29.0846	-6.69068	-156.612	-45314.4	7445.76	7034.68	247.543	1192.34	0	0	0	0	0	0	0	603	903	0
8134	5	0	0	0	0	0	0	200	300	0	-29.2372	-9.28467	-161.495	-46229.9	7750.94	6668.47	247.995	1189.26	0	0	0	0	0	0	0	603	903	0
8134	6	0	0	0	0	0	0	200	300	0	-28.4743	-9.28467	-162.715	-46779.3	7995.08	6576.92	249.135	1190.49	0	0	0	0	0	0	0	603	903	0
8134	7	0	0	0	0	0	0	200	300	0	-28.3217	-7.45362	-170.04	-47603.2	7995.08	6622.7	247.019	1182.95	0	0	0	0	0	0	0	603	903	0
8134	8	0	0	0	0	0	0	200	300	0	-27.101	-8.82691	-171.26	-48701.9	8544.39	6164.93	249.891	1187.37	0	0	0	0	0	0	0	603	903	0
8134	9	0	0	0	0	0	0	200	300	0	-28.0165	-9.58985	-175.228	-49159.6	8971.64	6164.93	251.2	1183.55	0	0	0	0	0	0	0	603	903	0
8135	0	0	0	0	0	0	0	200	300	0	-27.7113	-10.3528	-177.364	-50166.7	8605.43	6164.93	248.519	1185.85	0	0	0	0	0	0	0	603	903	0
8135	1	0	0	0	0	0	0	200	300	0	-28.1691	-12.0313	-181.026	-50990.7	9093.71	5661.39	250.234	1184.68	0	0	0	0	0	0	0	603	903	0
8135	2	0	0	0	0	0	0	200	300	0	-26.7958	-14.0149	-184.993	-51173.8	9704.06	5249.41	252.456	1179.63	0	0	0	0	0	0	0	603	903	0
8135	3	0	0	0	0	0	0	200	300	0	-25.2699	-15.3882	-186.519	-52089.3	9215.78	5066.3	249.409	1182.27	0	0	0	0	0	0	0	603	903	0
8135	4	0	0	0	0	0	0	200	300	0	-26.6432	-16.4563	-189.571	-53187.9	9887.16	4700.09	252.156	1183.57	0	0	0	0	0	0	0	603	903	0
8135	5	0	0	0	0	0	0	200	300	0	-24.8122	-18.5925	-192.012	-53920.4	9887.16	4471.21	251.492	1183.82	0	0	0	0	0	0	0	603	903	0
8135	6	0	0	0	0	0	0	200	300	0	-21.6078	-19.9658	-197.811	-54561.3	10070.3	4608.54	250.909	1178.83	0	0	0	0	0	0	0	603	903	0
8135	7	0	0	0	0	0	0	200	300	0	-24.9648	-19.8132	-200.862	-55202.1	10375.4	4150.77	251.655	1177.83	0	0	0	0	0	0	0	603	903	0
8135	8	0	0	0	0	0	0	200	300	0	-23.5915	-23.1702	-206.356	-56209.2	10680.6	4059.22	251.758	1175.39	0	0	0	0	0	0	0	603	903	0
8135	9	0	0	0	0	0	0	200	300	0	-22.0656	-25.1538	-208.492	-57582.5	10375.4	3876.11	249.764	1179.19	0	0	0	0	0	0	0	603	903	0
8136	0	0	0	0	0	0	0	200	300	0	-22.3708	-25.7642	-214.9	-58955.8	11413	3509.9	253.109	1177.34	0	0	0	0	0	0	0	603	903	0
8136	1	0	0	0	0	0	0	200	300	0	-21.6078	-26.8323	-218.563	-59322	11291	3555.68	251.66	1174.42	0	0	0	0	0	0	0	603	903	0
8136	2	0	0	0	0	0	0	200	300	0	-19.6242	-28.8159	-222.835	-60512.2	11413	3189.47	251.217	1174.56	0	0	0	0	0	0	0	603	903	0
8136	3	0	0	0	0	0	0	200	300	0	-20.0819	-28.6633	-227.413	-61885.5	12084.4	2731.7	253.139	1175.13	0	0	0	0	0	0	0	603	903	0
8136	4	0	0	0	0	0	0	200	300	0	-18.5561	-30.647	-232.906	-63167.2	11962.4	2869.03	251.361	1174.21	0	0	0	0	0	0	0	603	903	0
8136	5	0	0	0	0	0	0	200	300	0	-18.7086	-32.3254	-239.925	-64265.9	12450.6	2731.7	251.894	1170.86	0	0	0	0	0	0	0	603	903	0
8136	6	0	0	0	0	0	0	200	300	0	-17.7931	-34.6143	-248.47	-66646.2	13122	2319.72	252.811	1171.23	0	0	0	0	0	0	0	603	903	0
8136	7	0	0	0	0	0	0	200	300	0	-16.8776	-35.5298	-256.71	-67653.3	13549.3	1724.63	252.781	1166.54	0	0	0	0	0	0	0	603	903	0
8136	8	0	0	0	0	0	0	200	300	0	-15.3517	-36.1401	-262.203	-68935.1	14159.6	1587.3	254.003	1165.91	0	0	0	0	0	0	0	603	903	0
8136	9	0	0	0	0	0	0	200	300	0	-15.1991	-38.5815	-269.527	-70491.4	14525.8	1633.07	253.894	1164.54	0	0	0	0	0	0	0	603	903	0
8137	0	0	0	0	0	0	0	200	300	0	-14.5888	-38.7341	-277.461	-72322.5	15136.2	1266.86	254.552	1163.66	0	0	0	0	0	0	0	603	903	0
8137	1	0	0	0	0	0	0	200	300	0	-12.7577	-39.1919	-285.396	-73787.3	15502.4	900.651	254.319	1161.54	0	0	0	0	0	0	0	603	903	0
8137	2	0	0	0	0	0	0	200	300	0	-9.55338	-41.9385	-292.415	-75069.1	16356.9	397.11	255.937	1159.72	0	0	0	0	0	0	0	603	903	0
8137	3	0	0	0	0	0	0	200	300	0	-9.85855	-42.7014	-300.044	-77357.9	17028.3	-335.312	256.753	1160.82	0	0	0	0	0	0	0	603	903	0
8137	4	0	0	0	0	0	0	200	300	0	-9.2482	-44.5325	-308.589	-78639.6	17455.5	-197.982	256.566	1157.84	0	0	0	0	0	0	0	603	903	0
8137	5	0	0	0	0	0	0	200	300	0	-6.50162	-46.3635	-314.693	-79921.4	18065.9	-793.076	257.408	1156.97	0	0	0	0	0	0	0	603	903	0
8137	6	0	0	0	0	0	0	200	300	0	-4.06021	-46.9739	-323.238	-82027.1	18554.2	-1342.39	257.401	1156.77	0	0	0	0	0	0	0	603	903	0
8137	7	0	0	0	0	0	0	200	300	0	-1.92398	-49.8731	-328.731	-82942.6	18859.3	-1525.5	257.37	1155.31	0	0	0	0	0	0	0	603	903	0
8137	8	0	0	0	0	0	0	200	300	0	-2.68692	-50.4834	-336.36	-84682.1	19652.8	-1845.93	258.428	1154.76	0	0	0	0	0	0	0	603	903	0
8137	9	0	0	0	0	0	0	200	300	0	-1.16104	-52.1619	-346.126	-86238.5	20446.2	-2212.14	259.072	1152.15	0	0	0	0	0	0	0	603	903	0
8138	0	0	0	0	0	0	0	200	300	0	-1.46622	-56.1292	-350.704	-87703.3	20446.2	-2853.01	258.301	1153.08	0	0	0	0	0	0	0	603	903	0
8138	1	0	0	0	0	0	0	200	300	0	-1.16104	-56.8921	-357.723	-88618.9	21178.7	-2807.24	259.204	1150.73	0	0	0	0	0	0	0	603	903	0
8138	2	0	0	0	0	0	0	200	300	0	1.73813	-58.2654	-364.437	-90266.8	21361.8	-3402.33	258.616	1150.69	0	0	0	0	0	0	0	603	903	0
8138	3	0	0	0	0	0	0	200	300	0	0.670014	-60.7068	-370.235	-90541.5	22216.3	-3402.33	260.006	1147.55	0	0	0	0	0	0	0	603	903	0
8138	4	0	0	0	0	0	0	200	300	0	1.58554	-62.0801	-376.338	-92464.1	22277.3	-3539.66	259.195	1148.69	0	0	0	0	0	0	0	603	903	0
8138	5	0	0	0	0	0	0	200	300	0	2.50107	-64.6741	-384.578	-93288	22765.6	-3951.65	259.196	1145.57	0	0	0	0	0	0	0	603	903	0
8138	6	0	0	0	0	0	0	200	300	0	1.73813	-66.0474	-388.851	-94844.5	23131.8	-4455.19	259.488	1146.91	0	0	0	0	0	0	0	603	903	0
8138	7	0	0	0	0	0	0	200	300	0	2.95883	-66.9629	-395.87	-95943.1	23864.2	-4684.07	260.283	1145.36	0	0	0	0	0	0	0	603	903	0
8138	8	0	0	0	0	0	0	200	300	0	4.6373	-70.0146	-400.753	-96583.9	23925.3	-4821.4	259.701	1144.01	0	0	0	0	0	0	0	603	903	0
8138	9	0	0	0	0	0	0	200	300	0	3.56918	-68.9465	-404.415	-97957.2	24474.6	-5462.27	260.518	1145.22	0	0	0	0	0	0	0	603	903	0
8139	0	0	0	0	0	0	0	200	300	0	2.19589	-70.4724	-411.128	-98964.4	24901.8	-5233.39	260.569	1143.71	0	0	0	0	0	0	0	603	903	0
8139	1	0	0	0	0	0	0	200	300	0	6.01059	-72.6086	-414.18	-98506.6	24535.6	-5279.16	259.239	1140.84	0	0	0	0	0	0	0	603	903	0
8139	2	0	0	0	0	0	0	200	300	0	5.09506	-72.6086	-419.368	-100338	25512.2	-6103.14	260.835	1142.26	0	0	0	0	0	0	0	603	903	0
8139	3	0	0	0	0	0	0	200	300	0	4.48471	-73.9819	-423.641	-101253	25451.1	-6103.14	260.077	1142.01	0	0	0	0	0	0	0	603	903	0
8139	4	0	0	0	0	0	0	200	300	0	4.94247	-75.9656	-427.303	-101253	25817.3	-6057.36	260.419	1139.96	0	0	0	0	0	0	0	603	903	0
8139	5	0	0	0	0	0	0	200	300	0	5.24765	-75.813	-431.88	-101345	26305.6	-6423.57	260.91	1137.66	0	0	0	0	0	0	0	603	903	0
8139	6	0	0	0	0	0	0	200	300	0	3.56918	-77.3389	-434.627	-102718	26244.6	-6194.69	260.384	1139.34	0	0	0	0	0	0	0	603	903	0
8139	7	0	0	0	0	0	0	200	300	0	4.02695	-77.3389	-437.984	-102626	26305.6	-6286.24	260.061	1137.32	0	0	0	0	0	0	0	603	903	0
8139	8	0	0	0	0	0	0	200	300	0	4.6373	-78.407	-443.172	-103725	27221.2	-6652.45	261.423	1137.05	0	0	0	0	0	0	0	603	903	0
8139	9	0	0	0	0	0	0	200	300	0	4.6373	-79.0173	-444.698	-103450	27343.2	-6469.35	261.487	1135.63	0	0	0	0	0	0	0	603	903	0
8140	0	0	0	0	0	0	0	200	300	0	4.94247	-79.7803	-447.75	-104366	27221.2	-7247.55	260.795	1136.09	0	0	0	0	0	0	0	603	903	0
8140	1	0	0	0	0	0	0	200	300	0	7.23129	-81.6113	-452.022	-104915	28197.7	-7613.76	262.381	1135.1	0	0	0	0	0	0	0	603	903	0
8140	2	0	0	0	0	0	0	200	300	0	6.16318	-82.9846	-455.684	-105190	28197.7	-7430.65	261.88	1133.84	0	0	0	0	0	0	0	603	903	0
8140	3	0	0	0	0	0	0	200	300	0	6.31577	-83.1372	-459.957	-106105	28014.6	-7659.53	260.907	1133.69	0	0	0	0	0	0	0	603	903	0
8140	4	0	0	0	0	0	0	200	300	0	8.75717	-85.2734	-463.314	-106655	28747	-7705.31	262.047	1133.2	0	0	0	0	0	0	0	603	903	0
8140	5	0	0	0	0	0	0	200	300	0	8.29941	-86.7993	-466.365	-107937	29052.2	-8300.4	262.295	1134.44	0	0	0	0	0	0	0	603	903	0
8140	6	0	0	0	0	0	0	200	300	0	9.82529	-86.9519	-472.469	-107479	28747	-8666.61	260.844	1130.48	0	0	0	0	0	0	0	603	903	0
8140	7	0	0	0	0	0	0	200	300	0	11.3512	-89.2407	-474.91	-108486	29662.6	-8987.04	262.459	1131.43	0	0	0	0	0	0	0	603	903	0
8140	8	0	0	0	0	0	0	200	300	0	11.3512	-91.0718	-477.046	-109859	30028.8	-8987.04	262.947	1133.29	0	0	0	0	0	0	0	603	903	0
8140	9	0	0	0	0	0	0	200	300	0	11.3512	-92.2925	-483.76	-110683	29601.5	-9032.82	261.19	1131.8	0	0	0	0	0	0	0	603	903	0
8141	0	0	0	0	0	0	0	200	300	0	12.4193	-94.7339	-487.422	-110408	30700.2	-9490.58	262.985	1129.51	0	0	0	0	0	0	0	603	903	0
8141	1	0	0	0	0	0	0	200	300	0	14.0977	-94.1235	-491.085	-111324	30883.3	-9673.69	262.888	1129.69	0	0	0	0	0	0	0	603	903	0
8141	2	0	0	0	0	0	0	200	300	0	13.1822	-95.802	-495.662	-112331	30211.9	-9719.47	260.953	1129.63	0	0	0	0	0	0	0	603	903	0
8141	3	0	0	0	0	0	0	200	300	0	15.6236	-96.8701	-498.714	-113063	31493.6	-9994.12	263.15	1129.71	0	0	0	0	0	0	0	603	903	0
8141	4	0	0	0	0	0	0	200	300	0	15.3185	-96.7175	-503.292	-113155	31798.8	-10406.1	263.182	1127.83	0	0	0	0	0	0	0	603	903	0
8141	5	0	0	0	0	0	0	200	300	0	15.6236	-98.5486	-508.48	-114620	31188.4	-10131.5	261.337	1128.42	0	0	0	0	0	0	0	603	903	0
8141	6	0	0	0	0	0	0	200	300	0	15.1659	-99.0063	-513.057	-115352	32348.1	-10497.7	263.05	1127.83	0	0	0	0	0	0	0	603	903	0
8141	7	0	0	0	0	0	0	200	300	0	16.234	-98.0908	-517.635	-115718	32409.1	-10268.8	262.61	1126.55	0	0	0	0	0	0	0	603	903	0
8141	8	0	0	0	0	0	0	200	300	0	16.9969	-98.8538	-520.992	-116634	31554.6	-10589.2	260.566	1126.87	0	0	0	0	0	0	0	603	903	0
8141	9	0	0	0	0	0	0	200	300	0	15.7762	-100.227	-523.738	-117550	32897.4	-10955.4	262.813	1127.44	0	0	0	0	0	0	0	603	903	0
8142	0	0	0	0	0	0	0	200	300	0	16.6917	-99.1589	-529.842	-118099	33080.5	-10635	262.435	1125.89	0	0	0	0	0	0	0	603	903	0
8142	1	0	0	0	0	0	0	200	300	0	19.2857	-101.295	-534.419	-118923	33202.6	-10863.9	262.128	1125.53	0	0	0	0	0	0	0	603	903	0
8142	2	0	0	0	0	0	0	200	300	0	16.8443	-100.227	-537.471	-119655	33935	-11047	263.138	1125.63	0	0	0	0	0	0	0	603	903	0
8142	3	0	0	0	0	0	0	200	300	0	16.8443	-100.532	-542.964	-120113	33996.1	-10772.3	262.612	1124.22	0	0	0	0	0	0	0	603	903	0
8142	4	0	0	0	0	0	0	200	300	0	18.2176	-101.906	-547.847	-120845	34057.1	-11184.3	262.165	1123.58	0	0	0	0	0	0	0	603	903	0
8142	5	0	0	0	0	0	0	200	300	0	17.9124	-101.448	-551.509	-122493	34667.4	-11687.9	262.859	1125.11	0	0	0	0	0	0	0	603	903	0
8142	6	0	0	0	0	0	0	200	300	0	18.5228	-103.584	-553.951	-122768	34972.6	-11367.4	263.133	1124.62	0	0	0	0	0	0	0	603	903	0
8142	7	0	0	0	0	0	0	200	300	0	18.3702	-103.737	-560.359	-123867	34545.4	-11550.5	261.649	1124.05	0	0	0	0	0	0	0	603	903	0
8142	8	0	0	0	0	0	0	200	300	0	17.4547	-102.821	-564.632	-124141	35827.1	-11596.3	263.452	1122.86	0	0	0	0	0	0	0	603	903	0
8142	9	0	0	0	0	0	0	200	300	0	16.9969	-104.652	-570.43	-125515	35827.1	-11504.7	262.807	1123.04	0	0	0	0	0	0	0	603	903	0
8143	0	0	0	0	0	0	0	200	300	0	16.5392	-105.415	-573.482	-126247	35460.9	-11184.3	261.834	1123.14	0	0	0	0	0	0	0	603	903	0
8143	1	0	0	0	0	0	0	200	300	0	18.5228	-105.11	-577.754	-126796	36254.4	-11550.5	262.75	1122.46	0	0	0	0	0	0	0	603	903	0
8143	2	0	0	0	0	0	0	200	300	0	17.3021	-106.331	-582.637	-128078	36437.5	-12008.3	262.539	1122.82	0	0	0	0	0	0	0	603	903	0
8143	3	0	0	0	0	0	0	200	300	0	16.9969	-106.178	-587.215	-128719	36742.6	-11367.4	262.571	1122.2	0	0	0	0	0	0	0	603	903	0
8143	4	0	0	0	0	0	0	200	300	0	18.3702	-106.483	-591.182	-129360	37108.8	-11733.6	262.771	1121.82	0	0	0	0	0	0	0	603	903	0
8143	5	0	0	0	0	0	0	200	300	0	17.3021	-107.704	-596.981	-130733	37353	-11504.7	262.57	1121.99	0	0	0	0	0	0	0	603	903	0
8143	6	0	0	0	0	0	0	200	300	0	18.3702	-107.399	-602.779	-131923	36681.6	-11596.3	260.854	1121.86	0	0	0	0	0	0	0	603	903	0
8143	7	0	0	0	0	0	0	200	300	0	17.1495	-109.23	-607.662	-132198	37780.2	-11642.1	262.173	1120.55	0	0	0	0	0	0	0	603	903	0
8143	8	0	0	0	0	0	0	200	300	0	16.8443	-109.077	-610.713	-133114	38085.4	-11550.5	262.362	1120.96	0	0	0	0	0	0	0	603	903	0
8143	9	0	0	0	0	0	0	200	300	0	15.471	-106.941	-614.07	-134304	38207.5	-11321.6	262.22	1121.71	0	0	0	0	0	0	0	603	903	0
8144	0	0	0	0	0	0	0	200	300	0	15.6236	-109.993	-622.005	-134853	38756.8	-11275.9	262.309	1119.8	0	0	0	0	0	0	0	603	903	0
8144	1	0	0	0	0	0	0	200	300	0	17.4547	-108.772	-623.226	-136043	38939.9	-11504.7	262.481	1121.29	0	0	0	0	0	0	0	603	903	0
8144	2	0	0	0	0	0	0	200	300	0	15.1659	-109.84	-630.855	-136592	38817.8	-11275.9	261.532	1119.52	0	0	0	0	0	0	0	603	903	0
8144	3	0	0	0	0	0	0	200	300	0	15.1659	-109.535	-636.348	-137600	39367.1	-11321.6	261.864	1119.23	0	0	0	0	0	0	0	603	903	0
8144	4	0	0	0	0	0	0	200	300	0	15.1659	-109.84	-639.4	-138515	39733.4	-11230.1	262.142	1119.63	0	0	0	0	0	0	0	603	903	0
8144	5	0	0	0	0	0	0	200	300	0	15.7762	-110.145	-643.978	-139888	39123	-11138.5	260.752	1120.23	0	0	0	0	0	0	0	603	903	0
8144	6	0	0	0	0	0	0	200	300	0	13.9452	-110.298	-649.166	-140163	40099.6	-11184.3	261.771	1118.91	0	0	0	0	0	0	0	603	903	0
8144	7	0	0	0	0	0	0	200	300	0	15.1659	-109.993	-653.133	-139980	40099.6	-11230.1	261.396	1117.32	0	0	0	0	0	0	0	603	903	0
8144	8	0	0	0	0	0	0	200	300	0	14.4029	-110.145	-657.711	-141903	40038.5	-11092.8	260.876	1118.75	0	0	0	0	0	0	0	603	903	0
8144	9	0	0	0	0	0	0	200	300	0	14.8607	-109.688	-660.762	-142635	41015.1	-10955.4	262.072	1118.86	0	0	0	0	0	0	0	603	903	0
8145	0	0	0	0	0	0	0	200	300	0	14.2503	-109.23	-665.95	-142635	40648.9	-10909.7	261.039	1117.18	0	0	0	0	0	0	0	603	903	0
8145	1	0	0	0	0	0	0	200	300	0	14.2503	-109.993	-669.307	-143917	40893	-10726.5	261.098	1118.02	0	0	0	0	0	0	0	603	903	0
8145	2	0	0	0	0	0	0	200	300	0	13.4874	-108.009	-673.885	-144924	41381.3	-11230.1	261.407	1118.06	0	0	0	0	0	0	0	603	903	0
8145	3	0	0	0	0	0	0	200	300	0	13.4874	-108.314	-677.547	-144832	41564.4	-11184.3	261.345	1116.76	0	0	0	0	0	0	0	603	903	0
8145	4	0	0	0	0	0	0	200	300	0	14.4029	-108.467	-679.988	-146206	40771	-10863.9	259.958	1118.01	0	0	0	0	0	0	0	603	903	0
8145	5	0	0	0	0	0	0	200	300	0	13.0296	-107.704	-683.65	-147030	42235.8	-11047	261.78	1118.07	0	0	0	0	0	0	0	603	903	0
8145	6	0	0	0	0	0	0	200	300	0	13.3348	-107.399	-683.65	-147121	42113.7	-10726.5	261.601	1118.2	0	0	0	0	0	0	0	603	903	0
8145	7	0	0	0	0	0	0	200	300	0	14.0977	-108.009	-689.754	-148220	41564.4	-10772.3	260.26	1117.89	0	0	0	0	0	0	0	603	903	0
8145	8	0	0	0	0	0	0	200	300	0	13.3348	-106.788	-692.806	-148861	42785.1	-11047	261.756	1117.87	0	0	0	0	0	0	0	603	903	0
8145	9	0	0	0	0	0	0	200	300	0	13.4874	-107.856	-696.773	-148769	42846.1	-10909.7	261.492	1116.51	0	0	0	0	0	0	0	603	903	0
8146	0	0	0	0	0	0	0	200	300	0	14.5555	-108.009	-700.435	-149410	43029.3	-10818.1	261.432	1116.31	0	0	0	0	0	0	0	603	903	0
8146	1	0	0	0	0	0	0	200	300	0	13.64	-106.941	-704.097	-150600	43334.4	-10406.1	261.546	1116.89	0	0	0	0	0	0	0	603	903	0
8146	2	0	0	0	0	0	0	200	300	0	12.877	-108.314	-707.759	-150783	43395.5	-10635	261.314	1116.04	0	0	0	0	0	0	0	603	903	0
8146	3	0	0	0	0	0	0	200	300	0	16.3866	-106.788	-708.675	-151149	43151.3	-10772.3	260.89	1116.28	0	0	0	0	0	0	0	603	903	0
8146	4	0	0	0	0	0	0	200	300	0	13.0296	-106.941	-712.642	-151424	43883.7	-10360.3	261.579	1115.48	0	0	0	0	0	0	0	603	903	0
8146	5	0	0	0	0	0	0	200	300	0	13.7926	-107.551	-713.863	-151882	43639.6	-10726.5	261.132	1115.76	0	0	0	0	0	0	0	603	903	0
8146	6	0	0	0	0	0	0	200	300	0	15.6236	-106.331	-717.22	-152614	43761.7	-10451.9	261.016	1115.79	0	0	0	0	0	0	0	603	903	0
8146	7	0	0	0	0	0	0	200	300	0	13.4874	-107.551	-718.44	-153530	44250	-10589.2	261.592	1116.7	0	0	0	0	0	0	0	603	903	0
8146	8	0	0	0	0	0	0	200	300	0	13.64	-106.941	-722.103	-153255	43883.7	-10635	260.772	1115.23	0	0	0	0	0	0	0	603	903	0
8146	9	0	0	0	0	0	0	200	300	0	15.0133	-105.873	-723.934	-153896	43944.8	-10314.6	260.703	1115.58	0	0	0	0	0	0	0	603	903	0
8147	0	0	0	0	0	0	0	200	300	0	15.6236	-106.636	-728.206	-154445	44616.2	-10451.9	261.269	1115.09	0	0	0	0	0	0	0	603	903	0
8147	1	0	0	0	0	0	0	200	300	0	13.4874	-106.483	-729.427	-154720	44372	-10497.7	260.831	1115.11	0	0	0	0	0	0	0	603	903	0
8147	2	0	0	0	0	0	0	200	300	0	15.471	-105.11	-733.699	-154995	44372	-10680.8	260.477	1114.25	0	0	0	0	0	0	0	603	903	0
8147	3	0	0	0	0	0	0	200	300	0	13.9452	-105.262	-735.53	-155361	45104.4	-10543.4	261.322	1114.22	0	0	0	0	0	0	0	603	903	0
8147	4	0	0	0	0	0	0	200	300	0	14.4029	-102.974	-733.699	-155452	44860.3	-10635	261.143	1114.87	0	0	0	0	0	0	0	603	903	0
8147	5	0	0	0	0	0	0	200	300	0	15.3185	-104.652	-739.192	-155636	44982.4	-10406.1	260.853	1113.55	0	0	0	0	0	0	0	603	903	0
8147	6	0	0	0	0	0	0	200	300	0	14.8607	-101.906	-741.023	-156185	45653.8	-10543.4	261.609	1113.77	0	0	0	0	0	0	0	603	903	0
8147	7	0	0	0	0	0	0	200	300	0	14.4029	-103.126	-742.549	-156459	45714.8	-10451.9	261.565	1113.71	0	0	0	0	0	0	0	603	903	0
8147	8	0	0	0	0	0	0	200	300	0	15.9288	-103.889	-744.38	-156002	45531.7	-10635	261.167	1112.57	0	0	0	0	0	0	0	603	903	0
8147	9	0	0	0	0	0	0	200	300	0	15.471	-102.974	-746.517	-157650	45958.9	-10818.1	261.565	1114.18	0	0	0	0	0	0	0	603	903	0
8148	0	0	0	0	0	0	0	200	300	0	16.0814	-101.295	-748.958	-156917	45775.8	-10360.3	261.119	1112.51	0	0	0	0	0	0	0	603	903	0
8148	1	0	0	0	0	0	0	200	300	0	16.3866	-102.363	-750.789	-157283	45897.9	-10726.5	261.133	1112.49	0	0	0	0	0	0	0	603	903	0
8148	2	0	0	0	0	0	0	200	300	0	16.234	-101.906	-751.399	-157833	46630.3	-10543.4	262.058	1113.05	0	0	0	0	0	0	0	603	903	0
8148	3	0	0	0	0	0	0	200	300	0	15.6236	-100.685	-755.062	-158382	46325.2	-10589.2	261.353	1112.76	0	0	0	0	0	0	0	603	903	0
8148	4	0	0	0	0	0	0	200	300	0	16.6917	-100.532	-757.198	-158016	46752.4	-10726.5	261.744	1111.69	0	0	0	0	0	0	0	603	903	0
8148	5	0	0	0	0	0	0	200	300	0	19.7435	-100.685	-757.198	-158291	46874.5	-10680.8	261.905	1112.05	0	0	0	0	0	0	0	603	903	0
8148	6	0	0	0	0	0	0	200	300	0	16.6917	-100.685	-759.639	-159023	46813.4	-11047	261.626	1112.34	0	0	0	0	0	0	0	603	903	0
8148	7	0	0	0	0	0	0	200	300	0	16.234	-100.837	-761.165	-159114	46813.4	-10955.4	261.502	1112.04	0	0	0	0	0	0	0	603	903	0
8148	8	0	0	0	0	0	0	200	300	0	18.2176	-99.1589	-761.165	-158382	47179.6	-11230.1	261.983	1111.08	0	0	0	0	0	0	0	603	903	0
8148	9	0	0	0	0	0	0	200	300	0	18.2176	-100.38	-765.743	-159572	46996.5	-10863.9	261.374	1111.39	0	0	0	0	0	0	0	603	903	0
8149	0	0	0	0	0	0	0	200	300	0	17.9124	-100.99	-765.132	-160305	47057.6	-10955.4	261.503	1112.51	0	0	0	0	0	0	0	603	903	0
8149	1	0	0	0	0	0	0	200	300	0	17.6073	-99.0063	-767.574	-159481	46935.5	-10863.9	261.148	1110.77	0	0	0	0	0	0	0	603	903	0
8149	2	0	0	0	0	0	0	200	300	0	20.3539	-98.0908	-768.489	-159938	46996.5	-11047	261.154	1111.12	0	0	0	0	0	0	0	603	903	0
8149	3	0	0	0	0	0	0	200	300	0	17.9124	-97.9382	-770.626	-160671	47362.8	-10955.4	261.46	1111.49	0	0	0	0	0	0	0	603	903	0
8149	4	0	0	0	0	0	0	200	300	0	18.3702	-98.0908	-770.015	-160488	47851	-10818.1	262.143	1111.42	0	0	0	0	0	0	0	603	903	0
8149	5	0	0	0	0	0	0	200	300	0	19.1331	-98.0908	-772.151	-159114	47057.6	-11230.1	260.943	1109.07	0	0	0	0	0	0	0	603	903	0
8149	6	0	0	0	0	0	0	200	300	0	19.2857	-96.1072	-770.626	-160854	48095.2	-10863.9	262.411	1111.73	0	0	0	0	0	0	0	603	903	0
8149	7	0	0	0	0	0	0	200	300	0	18.9806	-97.1753	-774.288	-161037	47606.9	-10955.4	261.485	1110.98	0	0	0	0	0	0	0	603	903	0
8149	8	0	0	0	0	0	0	200	300	0	19.4383	-97.7856	-775.508	-160396	47851	-10955.4	261.703	1109.83	0	0	0	0	0	0	0	603	903	0
8149	9	0	0	0	0	0	0	200	300	0	20.659	-95.9546	-776.119	-160671	48339.3	-11092.8	262.283	1110.02	0	0	0	0	0	0	0	603	903	0
8150	0	0	0	0	0	0	0	200	300	0	20.8116	-96.4124	-777.95	-160854	47851	-10635	261.509	1109.77	0	0	0	0	0	0	0	603	903	0
8150	1	0	0	0	0	0	0	200	300	0	22.0323	-95.3442	-778.255	-161037	48217.2	-11184.3	261.956	1109.92	0	0	0	0	0	0	0	603	903	0
8150	2	0	0	0	0	0	0	200	300	0	21.2694	-95.1917	-779.781	-161129	48339.3	-11092.8	261.991	1109.63	0	0	0	0	0	0	0	603	903	0
8150	3	0	0	0	0	0	0	200	300	0	21.1168	-94.7339	-780.391	-160854	48461.4	-11184.3	262.099	1109.12	0	0	0	0	0	0	0	603	903	0
8150	4	0	0	0	0	0	0	200	300	0	20.659	-93.6658	-781.002	-160488	47484.8	-11047	260.8	1108.49	0	0	0	0	0	0	0	603	903	0
8150	5	0	0	0	0	0	0	200	300	0	20.8116	-93.8184	-779.476	-160213	48217.2	-10909.7	261.859	1108.54	0	0	0	0	0	0	0	603	903	0
8150	6	0	0	0	0	0	0	200	300	0	21.5746	-93.0554	-781.612	-160854	48705.5	-11459	262.314	1108.8	0	0	0	0	0	0	0	603	903	0
8150	7	0	0	0	0	0	0	200	300	0	21.1168	-91.9873	-784.664	-160671	48583.5	-11230.1	261.916	1107.76	0	0	0	0	0	0	0	603	903	0
8150	8	0	0	0	0	0	0	200	300	0	22.1849	-92.7502	-784.358	-160762	48705.5	-11367.4	262.096	1107.96	0	0	0	0	0	0	0	603	903	0
8150	9	0	0	0	0	0	0	200	300	0	21.8797	-91.377	-781.612	-159481	49071.7	-11230.1	262.783	1107.04	0	0	0	0	0	0	0	603	903	0
8151	0	0	0	0	0	0	0	200	300	0	21.8797	-91.5295	-784.664	-160671	48522.4	-11138.5	261.839	1107.76	0	0	0	0	0	0	0	603	903	0
8151	1	0	0	0	0	0	0	200	300	0	21.1168	-90.0037	-786.19	-161129	48766.6	-11275.9	262.029	1107.95	0	0	0	0	0	0	0	603	903	0
8151	2	0	0	0	0	0	0	200	300	0	21.422	-91.0718	-784.664	-159938	48949.7	-11275.9	262.383	1106.83	0	0	0	0	0	0	0	603	903	0
8151	3	0	0	0	0	0	0	200	300	0	22.3375	-90.614	-785.884	-160305	47973.1	-11413.2	261.043	1106.98	0	0	0	0	0	0	0	603	903	0
8151	4	0	0	0	0	0	0	200	300	0	20.2013	-90.614	-785.579	-159938	49499	-11138.5	263.01	1106.59	0	0	0	0	0	0	0	603	903	0
8151	5	0	0	0	0	0	0	200	300	0	21.422	-89.8511	-785.579	-160030	48827.6	-11047	262.155	1106.71	0	0	0	0	0	0	0	603	903	0
8151	6	0	0	0	0	0	0	200	300	0	21.7271	-90.0037	-787.41	-159938	48827.6	-10772.3	262.01	1106.12	0	0	0	0	0	0	0	603	903	0
8151	7	0	0	0	0	0	0	200	300	0	20.9642	-89.6985	-785.579	-159938	49193.8	-10955.4	262.621	1106.59	0	0	0	0	0	0	0	603	903	0
8151	8	0	0	0	0	0	0	200	300	0	21.7271	-88.6304	-786.495	-160030	48949.7	-11184.3	262.238	1106.47	0	0	0	0	0	0	0	603	903	0
8151	9	0	0	0	0	0	0	200	300	0	21.8797	-89.0881	-787.41	-158931	49437.9	-11001.2	262.786	1104.84	0	0	0	0	0	0	0	603	903	0
8152	0	0	0	0	0	0	0	200	300	0	22.4901	-88.02	-785.274	-159664	49621.1	-11047	263.189	1106.32	0	0	0	0	0	0	0	603	903	0
8152	1	0	0	0	0	0	0	200	300	0	21.7271	-87.8674	-787.105	-159572	49315.9	-10955.4	262.655	1105.73	0	0	0	0	0	0	0	603	903	0
8152	2	0	0	0	0	0	0	200	300	0	22.3375	-88.1726	-785.884	-159847	49560	-10772.3	263.063	1106.4	0	0	0	0	0	0	0	603	903	0
8152	3	0	0	0	0	0	0	200	300	0	22.4901	-86.9519	-784.969	-159389	49499	-10772.3	263.059	1106.05	0	0	0	0	0	0	0	603	903	0
8152	4	0	0	0	0	0	0	200	300	0	22.3375	-87.1045	-787.715	-158748	49560	-11047	262.916	1104.53	0	0	0	0	0	0	0	603	903	0
8152	5	0	0	0	0	0	0	200	300	0	22.0323	-86.9519	-786.495	-159023	49743.1	-10726.5	263.247	1105.19	0	0	0	0	0	0	0	603	903	0
8152	6	0	0	0	0	0	0	200	300	0	22.7953	-85.7312	-786.8	-159389	49376.9	-10818.1	262.757	1105.58	0	0	0	0	0	0	0	603	903	0
8152	7	0	0	0	0	0	0	200	300	0	22.6427	-85.5786	-787.105	-159023	49743.1	-10863.9	263.198	1105.04	0	0	0	0	0	0	0	603	903	0
8152	8	0	0	0	0	0	0	200	300	0	24.3211	-84.5105	-784.664	-158748	49193.8	-10635	262.694	1105.31	0	0	0	0	0	0	0	603	903	0
8152	9	0	0	0	0	0	0	200	300	0	23.253	-84.3579	-787.41	-158199	49804.2	-10772.3	263.251	1103.91	0	0	0	0	0	0	0	603	903	0
8153	0	0	0	0	0	0	0	200	300	0	23.7108	-82.3743	-784.358	-158016	49682.1	-10818.1	263.341	1104.46	0	0	0	0	0	0	0	603	903	0
8153	1	0	0	0	0	0	0	200	300	0	23.253	-82.9846	-786.495	-157924	49437.9	-10818.1	262.859	1103.8	0	0	0	0	0	0	0	603	903	0
8153	2	0	0	0	0	0	0	200	300	0	23.4056	-83.4424	-784.969	-158291	48949.7	-10497.7	262.359	1104.65	0	0	0	0	0	0	0	603	903	0
8153	3	0	0	0	0	0	0	200	300	0	23.8634	-82.5269	-787.105	-156459	49499	-11047	262.887	1101.78	0	0	0	0	0	0	0	603	903	0
8153	4	0	0	0	0	0	0	200	300	0	24.4737	-81.1536	-788.631	-158199	49865.2	-10818.1	263.23	1103.6	0	0	0	0	0	0	0	603	903	0
8153	5	0	0	0	0	0	0	200	300	0	24.016	-82.3743	-787.41	-158107	49926.2	-10863.9	263.406	1103.79	0	0	0	0	0	0	0	603	903	0
8153	6	0	0	0	0	0	0	200	300	0	24.6263	-80.8484	-785.274	-157009	49315.9	-10863.9	262.801	1102.94	0	0	0	0	0	0	0	603	903	0
8153	7	0	0	0	0	0	0	200	300	0	26.9151	-79.9329	-786.8	-157009	49254.8	-11047	262.602	1102.55	0	0	0	0	0	0	0	603	903	0
8153	8	0	0	0	0	0	0	200	300	0	24.6263	-80.0854	-786.19	-157466	49682.1	-11275.9	263.194	1103.29	0	0	0	0	0	0	0	603	903	0
8153	9	0	0	0	0	0	0	200	300	0	25.5418	-79.3225	-785.884	-156551	49804.2	-10772.3	263.373	1102.2	0	0	0	0	0	0	0	603	903	0
8154	0	0	0	0	0	0	0	200	300	0	25.9996	-79.0173	-786.19	-156551	50109.3	-11138.5	263.737	1102.13	0	0	0	0	0	0	0	603	903	0
8154	1	0	0	0	0	0	0	200	300	0	25.6944	-78.2544	-785.274	-156551	50109.3	-10955.4	263.811	1102.36	0	0	0	0	0	0	0	603	903	0
8154	2	0	0	0	0	0	0	200	300	0	27.6781	-76.7285	-780.391	-156276	49682.1	-11275.9	263.663	1103.25	0	0	0	0	0	0	0	603	903	0
8154	3	0	0	0	0	0	0	200	300	0	26.1522	-78.2544	-784.664	-155086	50048.3	-11001.2	263.783	1100.65	0	0	0	0	0	0	0	603	903	0
8154	4	0	0	0	0	0	0	200	300	0	25.9996	-75.813	-779.476	-155544	50048.3	-11001.2	264.208	1102.55	0	0	0	0	0	0	0	603	903	0
8154	5	0	0	0	0	0	0	200	300	0	25.847	-76.2708	-783.138	-155727	50109.3	-11092.8	263.985	1101.85	0	0	0	0	0	0	0	603	903	0
8154	6	0	0	0	0	0	0	200	300	0	26.1522	-75.3552	-783.748	-154995	49987.3	-10863.9	263.78	1100.76	0	0	0	0	0	0	0	603	903	0
8154	7	0	0	0	0	0	0	200	300	0	28.441	-75.2026	-779.476	-154995	50048.3	-11184.3	264.208	1101.84	0	0	0	0	0	0	0	603	903	0
8154	8	0	0	0	0	0	0	200	300	0	25.847	-76.2708	-780.391	-154537	49987.3	-10955.4	264.054	1101.02	0	0	0	0	0	0	0	603	903	0
8154	9	0	0	0	0	0	0	200	300	0	26.61	-75.6604	-779.476	-154628	49987.3	-10909.7	264.129	1101.38	0	0	0	0	0	0	0	603	903	0
8155	0	0	0	0	0	0	0	200	300	0	27.2203	-73.3716	-778.865	-153988	50170.4	-11001.2	264.415	1100.71	0	0	0	0	0	0	0	603	903	0
8155	1	0	0	0	0	0	0	200	300	0	27.3729	-74.4397	-780.086	-154445	49315.9	-11550.5	263.219	1100.98	0	0	0	0	0	0	0	603	903	0
8155	2	0	0	0	0	0	0	200	300	0	26.9151	-73.9819	-777.95	-153896	50048.3	-11047	264.334	1100.82	0	0	0	0	0	0	0	603	903	0
8155	3	0	0	0	0	0	0	200	300	0	28.1358	-72.7612	-777.95	-153072	50048.3	-11184.3	264.334	1099.76	0	0	0	0	0	0	0	603	903	0
8155	4	0	0	0	0	0	0	200	300	0	29.6617	-73.5242	-777.034	-153164	49499	-11230.1	263.702	1100.11	0	0	0	0	0	0	0	603	903	0
8155	5	0	0	0	0	0	0	200	300	0	26.7625	-72.4561	-775.203	-152614	50414.5	-10818.1	265.034	1099.87	0	0	0	0	0	0	0	603	903	0
8155	6	0	0	0	0	0	0	200	300	0	27.2203	-71.6931	-773.372	-151973	49682.1	-10543.4	264.241	1099.51	0	0	0	0	0	0	0	603	903	0
8155	7	0	0	0	0	0	0	200	300	0	28.1358	-71.6931	-774.593	-151882	50231.4	-10772.3	264.849	1099.08	0	0	0	0	0	0	0	603	903	0
8155	8	0	0	0	0	0	0	200	300	0	28.1358	-70.7776	-772.457	-151882	49865.2	-10909.7	264.554	1099.62	0	0	0	0	0	0	0	603	903	0
8155	9	0	0	0	0	0	0	200	300	0	28.8988	-70.9302	-772.457	-151607	49865.2	-10863.9	264.554	1099.27	0	0	0	0	0	0	0	603	903	0
8156	0	0	0	0	0	0	0	200	300	0	28.8988	-70.0146	-770.32	-150692	49621.1	-10726.5	264.416	1098.62	0	0	0	0	0	0	0	603	903	0
8156	1	0	0	0	0	0	0	200	300	0	28.1358	-68.9465	-770.626	-150875	49376.9	-10589.2	264.074	1098.78	0	0	0	0	0	0	0	603	903	0
8156	2	0	0	0	0	0	0	200	300	0	27.2203	-69.2517	-769.1	-149410	49621.1	-10680.8	264.518	1097.27	0	0	0	0	0	0	0	603	903	0
8156	3	0	0	0	0	0	0	200	300	0	28.1358	-68.3362	-767.269	-149502	49376.9	-10635	264.354	1097.85	0	0	0	0	0	0	0	603	903	0
8156	4	0	0	0	0	0	0	200	300	0	27.8307	-67.1155	-766.658	-149227	49071.7	-10451.9	264.007	1097.65	0	0	0	0	0	0	0	603	903	0
8156	5	0	0	0	0	0	0	200	300	0	27.9832	-67.4207	-765.438	-149044	49804.2	-10726.5	265.066	1097.72	0	0	0	0	0	0	0	603	903	0
8156	6	0	0	0	0	0	0	200	300	0	27.9832	-66.9629	-764.827	-148586	49193.8	-10497.7	264.32	1097.27	0	0	0	0	0	0	0	603	903	0
8156	7	0	0	0	0	0	0	200	300	0	27.6781	-66.3525	-762.996	-146755	49132.8	-10543.4	264.395	1095.34	0	0	0	0	0	0	0	603	903	0
8156	8	0	0	0	0	0	0	200	300	0	27.3729	-66.0474	-760.555	-147487	49315.9	-10177.2	264.842	1096.92	0	0	0	0	0	0	0	603	903	0
8156	9	0	0	0	0	0	0	200	300	0	28.7462	-64.5215	-760.25	-147304	49132.8	-9994.12	264.627	1096.76	0	0	0	0	0	0	0	603	903	0
8157	0	0	0	0	0	0	0	200	300	0	28.1358	-63.606	-759.334	-146755	49376.9	-10406.1	265.027	1096.27	0	0	0	0	0	0	0	603	903	0
8157	1	0	0	0	0	0	0	200	300	0	27.5255	-64.0637	-757.198	-146114	49254.8	-10406.1	265.049	1095.97	0	0	0	0	0	0	0	603	903	0
8157	2	0	0	0	0	0	0	200	300	0	27.6781	-63.4534	-752.62	-146389	48949.7	-10177.2	265.039	1097.51	0	0	0	0	0	0	0	603	903	0
8157	3	0	0	0	0	0	0	200	300	0	26.9151	-63.4534	-754.451	-145382	48888.6	-10360.3	264.8	1095.7	0	0	0	0	0	0	0	603	903	0
8157	4	0	0	0	0	0	0	200	300	0	29.5091	-60.8594	-749.874	-145473	48949.7	-10177.2	265.277	1097	0	0	0	0	0	0	0	603	903	0
8157	5	0	0	0	0	0	0	200	300	0	26.9151	-62.3853	-753.231	-145015	49315.9	-9994.12	265.472	1095.52	0	0	0	0	0	0	0	603	903	0
8157	6	0	0	0	0	0	0	200	300	0	27.2203	-61.1646	-748.348	-144191	49071.7	-9582.14	265.573	1095.68	0	0	0	0	0	0	0	603	903	0
8157	7	0	0	0	0	0	0	200	300	0	27.5255	-60.5542	-750.179	-144008	49010.7	-10085.7	265.332	1094.97	0	0	0	0	0	0	0	603	903	0
8157	8	0	0	0	0	0	0	200	300	0	28.2884	-59.9439	-744.075	-144191	48400.3	-10131.5	265.048	1096.79	0	0	0	0	0	0	0	603	903	0
8157	9	0	0	0	0	0	0	200	300	0	27.9832	-59.3335	-745.601	-143734	48827.6	-9719.47	265.488	1095.78	0	0	0	0	0	0	0	603	903	0
8158	0	0	0	0	0	0	0	200	300	0	27.0677	-59.7913	-742.855	-142727	49132.8	-9948.35	266.141	1095.13	0	0	0	0	0	0	0	603	903	0
8158	1	0	0	0	0	0	0	200	300	0	27.3729	-59.1809	-743.465	-143367	49010.7	-9719.47	265.922	1095.84	0	0	0	0	0	0	0	603	903	0
8158	2	0	0	0	0	0	0	200	300	0	26.4574	-57.1973	-741.329	-143001	48827.6	-9627.91	265.865	1095.9	0	0	0	0	0	0	0	603	903	0
8158	3	0	0	0	0	0	0	200	300	0	26.3048	-57.655	-741.939	-141994	48827.6	-9582.14	265.811	1094.38	0	0	0	0	0	0	0	603	903	0
8158	4	0	0	0	0	0	0	200	300	0	26.4574	-57.655	-739.498	-141536	48644.5	-9536.36	265.78	1094.4	0	0	0	0	0	0	0	603	903	0
8158	5	0	0	0	0	0	0	200	300	0	25.5418	-56.5869	-738.887	-141445	48644.5	-9582.14	265.835	1094.43	0	0	0	0	0	0	0	603	903	0
8158	6	0	0	0	0	0	0	200	300	0	25.847	-54.9085	-736.446	-141536	48888.6	-9399.03	266.385	1095.19	0	0	0	0	0	0	0	603	903	0
8158	7	0	0	0	0	0	0	200	300	0	26.61	-55.9766	-735.225	-139522	47667.9	-8666.61	264.835	1092.77	0	0	0	0	0	0	0	603	903	0
8158	8	0	0	0	0	0	0	200	300	0	26.7625	-54.9085	-734.004	-140346	48461.4	-9215.93	266.023	1094.21	0	0	0	0	0	0	0	603	903	0
8158	9	0	0	0	0	0	0	200	300	0	25.847	-54.4507	-734.004	-140163	48217.2	-9032.82	265.691	1093.96	0	0	0	0	0	0	0	603	903	0
8159	0	0	0	0	0	0	0	200	300	0	26.4574	-54.7559	-730.342	-139156	48034.1	-8987.04	265.769	1093.54	0	0	0	0	0	0	0	603	903	0
8159	1	0	0	0	0	0	0	200	300	0	26.7625	-54.1455	-730.953	-138149	48217.2	-9124.37	265.965	1092	0	0	0	0	0	0	0	603	903	0
8159	2	0	0	0	0	0	0	200	300	0	26.3048	-53.23	-727.901	-138332	47667.9	-9124.37	265.487	1093.04	0	0	0	0	0	0	0	603	903	0
8159	3	0	0	0	0	0	0	200	300	0	26.1522	-52.6196	-728.206	-138057	48156.2	-8941.27	266.13	1092.59	0	0	0	0	0	0	0	603	903	0
8159	4	0	0	0	0	0	0	200	300	0	26.1522	-52.7722	-726.375	-137600	48400.3	-8758.16	266.633	1092.43	0	0	0	0	0	0	0	603	903	0
8159	5	0	0	0	0	0	0	200	300	0	26.7625	-51.2463	-723.934	-137142	47484.8	-8712.39	265.593	1092.44	0	0	0	0	0	0	0	603	903	0
8159	6	0	0	0	0	0	0	200	300	0	27.0677	-50.9412	-723.323	-136409	48217.2	-8849.72	266.661	1091.59	0	0	0	0	0	0	0	603	903	0
8159	7	0	0	0	0	0	0	200	300	0	25.847	-50.1782	-720.882	-136043	47362.8	-8803.94	265.701	1091.72	0	0	0	0	0	0	0	603	903	0
8159	8	0	0	0	0	0	0	200	300	0	25.9996	-50.0256	-718.746	-136043	47851	-8620.83	266.576	1092.28	0	0	0	0	0	0	0	603	903	0
8159	9	0	0	0	0	0	0	200	300	0	25.2367	-49.5679	-719.051	-135585	47912.1	-8620.83	266.632	1091.56	0	0	0	0	0	0	0	603	903	0
8160	0	0	0	0	0	0	0	200	300	0	25.3893	-48.9575	-716.609	-134395	47301.7	-8483.5	266.008	1090.54	0	0	0	0	0	0	0	603	903	0
8160	1	0	0	0	0	0	0	200	300	0	27.5255	-48.1946	-716.609	-134121	47606.9	-8208.85	266.434	1090.16	0	0	0	0	0	0	0	603	903	0
8160	2	0	0	0	0	0	0	200	300	0	24.1685	-47.5842	-715.084	-133846	47179.6	-8391.95	265.978	1090.18	0	0	0	0	0	0	0	603	903	0
8160	3	0	0	0	0	0	0	200	300	0	24.7789	-47.7368	-713.558	-133114	47118.6	-8300.4	266.033	1089.55	0	0	0	0	0	0	0	603	903	0
8160	4	0	0	0	0	0	0	200	300	0	24.7789	-46.6687	-710.811	-132839	47362.8	-8025.75	266.632	1089.88	0	0	0	0	0	0	0	603	903	0
8160	5	0	0	0	0	0	0	200	300	0	23.7108	-46.9739	-709.59	-132290	47118.6	-8254.62	266.403	1089.43	0	0	0	0	0	0	0	603	903	0
8160	6	0	0	0	0	0	0	200	300	0	23.4056	-45.7532	-707.149	-131740	47301.7	-8117.3	266.891	1089.3	0	0	0	0	0	0	0	603	903	0
8160	7	0	0	0	0	0	0	200	300	0	23.7108	-45.448	-702.266	-131374	46386.2	-7888.41	266.052	1090.07	0	0	0	0	0	0	0	603	903	0
8160	8	0	0	0	0	0	0	200	300	0	24.3211	-45.448	-704.097	-131008	46935.5	-7796.86	266.661	1089.06	0	0	0	0	0	0	0	603	903	0
8160	9	0	0	0	0	0	0	200	300	0	23.7108	-44.5325	-703.182	-130916	46874.5	-7888.41	266.661	1089.18	0	0	0	0	0	0	0	603	903	0
8161	0	0	0	0	0	0	0	200	300	0	23.7108	-44.5325	-702.266	-130733	47240.7	-7842.64	267.269	1089.16	0	0	0	0	0	0	0	603	903	0
8161	1	0	0	0	0	0	0	200	300	0	23.7108	-45.1428	-698.604	-129360	47057.6	-7796.86	267.359	1088.17	0	0	0	0	0	0	0	603	903	0
8161	2	0	0	0	0	0	0	200	300	0	22.7953	-43.1592	-700.74	-129360	47057.6	-7018.66	267.154	1087.6	0	0	0	0	0	0	0	603	903	0
8161	3	0	0	0	0	0	0	200	300	0	22.1849	-43.3118	-697.689	-128261	46630.3	-7293.32	266.835	1086.84	0	0	0	0	0	0	0	603	903	0
8161	4	0	0	0	0	0	0	200	300	0	21.7271	-42.0911	-695.247	-128353	46935.5	-7293.32	267.509	1087.61	0	0	0	0	0	0	0	603	903	0
8161	5	0	0	0	0	0	0	200	300	0	22.7953	-42.0911	-696.163	-128261	46447.2	-7293.32	266.719	1087.24	0	0	0	0	0	0	0	603	903	0
8161	6	0	0	0	0	0	0	200	300	0	22.6427	-41.7859	-692.806	-127620	46325.2	-6972.89	266.866	1087.21	0	0	0	0	0	0	0	603	903	0
8161	7	0	0	0	0	0	0	200	300	0	22.3375	-40.8704	-691.28	-127254	46752.4	-6927.11	267.632	1087.08	0	0	0	0	0	0	0	603	903	0
8161	8	0	0	0	0	0	0	200	300	0	21.7271	-40.4126	-691.89	-127071	46264.1	-6835.56	266.866	1086.66	0	0	0	0	0	0	0	603	903	0
8161	9	0	0	0	0	0	0	200	300	0	21.8797	-40.7178	-688.228	-126522	46569.3	-6469.35	267.665	1086.84	0	0	0	0	0	0	0	603	903	0
8162	0	0	0	0	0	0	0	200	300	0	20.3539	-39.9548	-687.007	-125148	46081	-6744.01	267.075	1085.16	0	0	0	0	0	0	0	603	903	0
8162	1	0	0	0	0	0	0	200	300	0	20.2013	-39.3445	-687.618	-125698	46203.1	-6377.79	267.193	1085.8	0	0	0	0	0	0	0	603	903	0
8162	2	0	0	0	0	0	0	200	300	0	20.9642	-39.0393	-684.261	-125148	46264.1	-6332.02	267.612	1085.9	0	0	0	0	0	0	0	603	903	0
8162	3	0	0	0	0	0	0	200	300	0	20.659	-37.8186	-684.261	-124965	45348.6	-6194.69	266.274	1085.63	0	0	0	0	0	0	0	603	903	0
8162	4	0	0	0	0	0	0	200	300	0	22.1849	-37.666	-683.04	-124599	45836.9	-6240.47	267.107	1085.42	0	0	0	0	0	0	0	603	903	0
8162	5	0	0	0	0	0	0	200	300	0	20.5064	-37.0557	-680.294	-124050	45653.8	-6103.14	267.109	1085.35	0	0	0	0	0	0	0	603	903	0
8162	6	0	0	0	0	0	0	200	300	0	20.3539	-36.5979	-681.209	-123775	45653.8	-5965.81	267.019	1084.7	0	0	0	0	0	0	0	603	903	0
8162	7	0	0	0	0	0	0	200	300	0	19.7435	-35.6824	-679.073	-123134	45653.8	-6011.58	267.23	1084.33	0	0	0	0	0	0	0	603	903	0
8162	8	0	0	0	0	0	0	200	300	0	19.5909	-35.9876	-677.242	-122402	45226.5	-5599.6	266.78	1083.74	0	0	0	0	0	0	0	603	903	0
8162	9	0	0	0	0	0	0	200	300	0	19.5909	-34.6143	-676.631	-121578	45531.7	-6103.14	267.292	1082.68	0	0	0	0	0	0	0	603	903	0
8163	0	0	0	0	0	0	0	200	300	0	19.8961	-34.9194	-674.8	-122127	45226.5	-5920.03	267.022	1083.98	0	0	0	0	0	0	0	603	903	0
8163	1	0	0	0	0	0	0	200	300	0	18.3702	-34.6143	-672.664	-121669	45592.7	-5874.25	267.779	1083.88	0	0	0	0	0	0	0	603	903	0
8163	2	0	0	0	0	0	0	200	300	0	18.3702	-34.0039	-673.885	-120845	45409.6	-5645.37	267.385	1082.33	0	0	0	0	0	0	0	603	903	0
8163	3	0	0	0	0	0	0	200	300	0	20.659	-33.5461	-671.749	-120571	45409.6	-5233.39	267.599	1082.49	0	0	0	0	0	0	0	603	903	0
8163	4	0	0	0	0	0	0	200	300	0	18.065	-32.478	-670.528	-120571	45836.9	-5874.25	268.359	1082.81	0	0	0	0	0	0	0	603	903	0
8163	5	0	0	0	0	0	0	200	300	0	17.9124	-32.3254	-668.697	-119655	45287.6	-5599.6	267.725	1081.94	0	0	0	0	0	0	0	603	903	0
8163	6	0	0	0	0	0	0	200	300	0	18.2176	-31.8677	-665.95	-118923	45287.6	-5370.71	268.004	1081.58	0	0	0	0	0	0	0	603	903	0
8163	7	0	0	0	0	0	0	200	300	0	17.6073	-30.9522	-666.255	-119014	45836.9	-5416.49	268.798	1081.63	0	0	0	0	0	0	0	603	903	0
8163	8	0	0	0	0	0	0	200	300	0	17.1495	-30.9522	-664.119	-119106	44494.1	-5508.04	266.997	1082.34	0	0	0	0	0	0	0	603	903	0
8163	9	0	0	0	0	0	0	200	300	0	17.1495	-30.4944	-663.204	-118374	45531.7	-5141.83	268.654	1081.49	0	0	0	0	0	0	0	603	903	0
8164	0	0	0	0	0	0	0	200	300	0	19.7435	-30.1892	-661.983	-117916	44982.4	-5233.39	267.951	1081.12	0	0	0	0	0	0	0	603	903	0
8164	1	0	0	0	0	0	0	200	300	0	16.9969	-29.4263	-660.152	-118007	44799.3	-5553.82	267.862	1081.76	0	0	0	0	0	0	0	603	903	0
8164	2	0	0	0	0	0	0	200	300	0	16.5392	-29.4263	-660.152	-117092	45470.7	-5141.83	268.879	1080.37	0	0	0	0	0	0	0	603	903	0
8164	3	0	0	0	0	0	0	200	300	0	17.7599	-28.9685	-657.711	-116817	44372	-5324.94	267.464	1080.61	0	0	0	0	0	0	0	603	903	0
8164	4	0	0	0	0	0	0	200	300	0	17.4547	-28.053	-655.574	-116634	45409.6	-4958.73	269.267	1080.91	0	0	0	0	0	0	0	603	903	0
8164	5	0	0	0	0	0	0	200	300	0	16.234	-28.3582	-656.49	-116542	45043.4	-4958.73	268.613	1080.52	0	0	0	0	0	0	0	603	903	0
8164	6	0	0	0	0	0	0	200	300	0	15.9288	-27.9004	-654.048	-115352	45104.4	-5004.5	268.962	1079.37	0	0	0	0	0	0	0	603	903	0
8164	7	0	0	0	0	0	0	200	300	0	19.1331	-26.8323	-653.438	-115352	45226.5	-5096.06	269.213	1079.53	0	0	0	0	0	0	0	603	903	0
8164	8	0	0	0	0	0	0	200	300	0	16.3866	-26.6797	-648.86	-115261	44860.3	-4775.62	269.137	1080.64	0	0	0	0	0	0	0	603	903	0
8164	9	0	0	0	0	0	0	200	300	0	15.6236	-27.1375	-650.691	-114528	45287.6	-4912.95	269.599	1079.01	0	0	0	0	0	0	0	603	903	0
8165	0	0	0	0	0	0	0	200	300	0	16.8443	-26.5271	-650.081	-112972	44250	-4867.17	268.068	1076.78	0	0	0	0	0	0	0	603	903	0
8165	1	0	0	0	0	0	0	200	300	0	17.1495	-26.0693	-648.86	-113887	45043.4	-4684.07	269.419	1078.52	0	0	0	0	0	0	0	603	903	0
8165	2	0	0	0	0	0	0	200	300	0	16.234	-25.6116	-645.198	-113704	44799.3	-4638.29	269.435	1079.23	0	0	0	0	0	0	0	603	903	0
8165	3	0	0	0	0	0	0	200	300	0	16.234	-25.6116	-646.724	-112880	45104.4	-4409.41	269.743	1077.54	0	0	0	0	0	0	0	603	903	0
8165	4	0	0	0	0	0	0	200	300	0	17.3021	-25.7642	-645.198	-112697	45226.5	-4729.85	270.097	1077.67	0	0	0	0	0	0	0	603	903	0
8165	5	0	0	0	0	0	0	200	300	0	16.5392	-24.696	-643.367	-112148	45226.5	-4867.17	270.297	1077.31	0	0	0	0	0	0	0	603	903	0
8165	6	0	0	0	0	0	0	200	300	0	17.3021	-23.7805	-642.147	-111782	44738.2	-4500.96	269.67	1077.08	0	0	0	0	0	0	0	603	903	0
8165	7	0	0	0	0	0	0	200	300	0	17.9124	-23.7805	-639.705	-112148	45226.5	-4821.4	270.699	1078.31	0	0	0	0	0	0	0	603	903	0
8165	8	0	0	0	0	0	0	200	300	0	16.9969	-24.3909	-639.705	-111782	44982.4	-4684.07	270.317	1077.74	0	0	0	0	0	0	0	603	903	0
8165	9	0	0	0	0	0	0	200	300	0	17.1495	-23.9331	-638.484	-111232	44616.2	-4638.29	269.878	1077.21	0	0	0	0	0	0	0	603	903	0
8166	0	0	0	0	0	0	0	200	300	0	17.7599	-24.8486	-636.348	-109584	45348.6	-4867.17	271.264	1075.21	0	0	0	0	0	0	0	603	903	0
8166	1	0	0	0	0	0	0	200	300	0	18.065	-22.7124	-636.959	-110592	44677.2	-5050.28	270.141	1076.62	0	0	0	0	0	0	0	603	903	0
8166	2	0	0	0	0	0	0	200	300	0	16.5392	-23.0176	-636.043	-109859	45165.5	-4821.4	271.01	1075.72	0	0	0	0	0	0	0	603	903	0
8166	3	0	0	0	0	0	0	200	300	0	17.4547	-21.9495	-634.212	-109310	45287.6	-4775.62	271.408	1075.36	0	0	0	0	0	0	0	603	903	0
8166	4	0	0	0	0	0	0	200	300	0	19.4383	-21.7969	-630.245	-108760	44799.3	-4638.29	271.082	1075.57	0	0	0	0	0	0	0	603	903	0
8166	5	0	0	0	0	0	0	200	300	0	16.8443	-21.3391	-632.686	-107753	44677.2	-4638.29	270.615	1073.31	0	0	0	0	0	0	0	603	903	0
8166	6	0	0	0	0	0	0	200	300	0	16.6917	-20.5762	-631.771	-108211	44982.4	-4775.62	271.201	1074.28	0	0	0	0	0	0	0	603	903	0
8166	7	0	0	0	0	0	0	200	300	0	17.4547	-21.1865	-629.634	-107845	45043.4	-4821.4	271.539	1074.28	0	0	0	0	0	0	0	603	903	0
8166	8	0	0	0	0	0	0	200	300	0	16.9969	-20.4236	-626.583	-108303	45348.6	-4821.4	272.374	1075.85	0	0	0	0	0	0	0	603	903	0
8166	9	0	0	0	0	0	0	200	300	0	16.6917	-19.6606	-629.024	-107662	44738.2	-4821.4	271.123	1074.16	0	0	0	0	0	0	0	603	903	0
8167	0	0	0	0	0	0	0	200	300	0	17.1495	-19.0503	-627.803	-107112	45348.6	-4775.62	272.234	1073.61	0	0	0	0	0	0	0	603	903	0
8167	1	0	0	0	0	0	0	200	300	0	17.6073	-19.9658	-626.277	-106929	45226.5	-4500.96	272.215	1073.74	0	0	0	0	0	0	0	603	903	0
8167	2	0	0	0	0	0	0	200	300	0	16.234	-19.8132	-622.92	-106105	45165.5	-4684.07	272.506	1073.34	0	0	0	0	0	0	0	603	903	0
8167	3	0	0	0	0	0	0	200	300	0	16.6917	-19.0503	-625.362	-106197	45287.6	-4546.74	272.418	1072.82	0	0	0	0	0	0	0	603	903	0
8167	4	0	0	0	0	0	0	200	300	0	16.8443	-19.5081	-624.752	-105739	45226.5	-4775.62	272.391	1072.25	0	0	0	0	0	0	0	603	903	0
8167	5	0	0	0	0	0	0	200	300	0	17.3021	-18.1348	-624.446	-105922	45531.7	-4729.85	272.915	1072.63	0	0	0	0	0	0	0	603	903	0
8167	6	0	0	0	0	0	0	200	300	0	19.1331	-18.2874	-623.531	-106014	45104.4	-4592.52	272.337	1073.02	0	0	0	0	0	0	0	603	903	0
8167	7	0	0	0	0	0	0	200	300	0	17.9124	-17.3718	-624.446	-105465	45287.6	-4409.41	272.524	1071.89	0	0	0	0	0	0	0	603	903	0
8167	8	0	0	0	0	0	0	200	300	0	17.1495	-17.3718	-623.531	-105465	45287.6	-4546.74	272.631	1072.14	0	0	0	0	0	0	0	603	903	0
8167	9	0	0	0	0	0	0	200	300	0	16.6917	-16.6089	-618.648	-105373	45287.6	-4317.86	273.204	1073.33	0	0	0	0	0	0	0	603	903	0
8168	0	0	0	0	0	0	0	200	300	0	17.4547	-17.0667	-622.92	-104458	45531.7	-4088.97	273.094	1070.69	0	0	0	0	0	0	0	603	903	0
8168	1	0	0	0	0	0	0	200	300	0	17.4547	-16.4563	-622.005	-103908	45775.8	-4180.53	273.594	1070.05	0	0	0	0	0	0	0	603	903	0
8168	2	0	0	0	0	0	0	200	300	0	16.3866	-15.3882	-621.395	-104915	45409.6	-4409.41	273.077	1071.84	0	0	0	0	0	0	0	603	903	0
8168	3	0	0	0	0	0	0	200	300	0	16.3866	-15.6934	-620.174	-103908	45653.8	-3722.76	273.615	1070.55	0	0	0	0	0	0	0	603	903	0
8168	4	0	0	0	0	0	0	200	300	0	19.8961	-15.2356	-619.869	-104000	45348.6	-4272.08	273.158	1070.78	0	0	0	0	0	0	0	603	903	0
8168	5	0	0	0	0	0	0	200	300	0	16.5392	-15.083	-620.784	-103908	45775.8	-3860.09	273.739	1070.38	0	0	0	0	0	0	0	603	903	0
8168	6	0	0	0	0	0	0	200	300	0	16.0814	-14.0149	-619.258	-104458	46081	-3951.65	274.413	1071.68	0	0	0	0	0	0	0	603	903	0
8168	7	0	0	0	0	0	0	200	300	0	17.6073	-14.6252	-618.343	-103267	45592.7	-4180.53	273.734	1070.01	0	0	0	0	0	0	0	603	903	0
8168	8	0	0	0	0	0	0	200	300	0	17.9124	-14.6252	-619.564	-103359	45775.8	-3493.88	273.884	1069.83	0	0	0	0	0	0	0	603	903	0
8168	9	0	0	0	0	0	0	200	300	0	16.8443	-13.8623	-618.038	-103176	45653.8	-3905.87	273.869	1069.94	0	0	0	0	0	0	0	603	903	0
8169	0	0	0	0	0	0	0	200	300	0	16.234	-13.8623	-617.427	-102535	45653.8	-3814.32	273.942	1069.07	0	0	0	0	0	0	0	603	903	0
8169	1	0	0	0	0	0	0	200	300	0	19.7435	-13.0994	-617.427	-102352	45958.9	-3676.99	274.436	1068.77	0	0	0	0	0	0	0	603	903	0
8169	2	0	0	0	0	0	0	200	300	0	18.065	-13.0994	-619.869	-102352	45653.8	-3402.33	273.651	1068.12	0	0	0	0	0	0	0	603	903	0
8169	3	0	0	0	0	0	0	200	300	0	16.234	-11.7261	-618.343	-102535	46081	-3722.76	274.523	1068.82	0	0	0	0	0	0	0	603	903	0
8169	4	0	0	0	0	0	0	200	300	0	17.1495	-11.8787	-618.648	-100521	45958.9	-3585.43	274.289	1065.48	0	0	0	0	0	0	0	603	903	0
8169	5	0	0	0	0	0	0	200	300	0	16.8443	-11.7261	-618.648	-102077	45897.9	-3539.66	274.191	1068	0	0	0	0	0	0	0	603	903	0
8169	6	0	0	0	0	0	0	200	300	0	16.0814	-11.5735	-615.291	-101528	46142	-3722.76	274.992	1068.01	0	0	0	0	0	0	0	603	903	0
8169	7	0	0	0	0	0	0	200	300	0	15.6236	-11.4209	-618.953	-101345	45836.9	-3448.1	274.055	1066.74	0	0	0	0	0	0	0	603	903	0
8169	8	0	0	0	0	0	0	200	300	0	17.9124	-11.4209	-618.038	-101345	46142	-3265	274.659	1066.98	0	0	0	0	0	0	0	603	903	0
8169	9	0	0	0	0	0	0	200	300	0	15.3185	-9.89502	-618.038	-100795	46447.2	-2853.01	275.153	1066.09	0	0	0	0	0	0	0	603	903	0
8170	0	0	0	0	0	0	0	200	300	0	15.471	-10.0476	-618.038	-100887	46020	-3127.67	274.461	1066.24	0	0	0	0	0	0	0	603	903	0
8170	1	0	0	0	0	0	0	200	300	0	15.1659	-10.0476	-617.427	-100063	46752.4	-3310.78	275.721	1065.06	0	0	0	0	0	0	0	603	903	0
8170	2	0	0	0	0	0	0	200	300	0	15.3185	-9.13208	-617.427	-100795	46813.4	-3081.89	275.82	1066.25	0	0	0	0	0	0	0	603	903	0
8170	3	0	0	0	0	0	0	200	300	0	13.9452	-9.28467	-619.564	-100887	46325.2	-3173.45	274.771	1065.84	0	0	0	0	0	0	0	603	903	0
8170	4	0	0	0	0	0	0	200	300	0	14.2503	-8.52173	-617.427	-100521	46508.3	-2715.68	275.326	1065.81	0	0	0	0	0	0	0	603	903	0
8170	5	0	0	0	0	0	0	200	300	0	15.3185	-8.06397	-616.512	-100429	46203.1	-2761.46	274.943	1065.9	0	0	0	0	0	0	0	603	903	0
8170	6	0	0	0	0	0	0	200	300	0	14.8607	-8.21656	-618.953	-100795	46996.5	-2578.35	275.929	1065.85	0	0	0	0	0	0	0	603	903	0
8170	7	0	0	0	0	0	0	200	300	0	16.5392	-8.06397	-618.038	-100704	46569.3	-2990.34	275.35	1065.94	0	0	0	0	0	0	0	603	903	0
8170	8	0	0	0	0	0	0	200	300	0	14.7081	-7.6062	-619.869	-99971.4	46447.2	-2761.46	274.931	1064.28	0	0	0	0	0	0	0	603	903	0
8170	9	0	0	0	0	0	0	200	300	0	14.4029	-6.84326	-620.174	-100704	47240.7	-2532.58	276.173	1065.38	0	0	0	0	0	0	0	603	903	0
8171	0	0	0	0	0	0	0	200	300	0	13.0296	-6.53809	-618.953	-100429	46752.4	-2303.7	275.535	1065.26	0	0	0	0	0	0	0	603	903	0
8171	1	0	0	0	0	0	0	200	300	0	14.0977	-6.84326	-621.089	-99971.4	47118.6	-2303.7	275.864	1063.96	0	0	0	0	0	0	0	603	903	0
8171	2	0	0	0	0	0	0	200	300	0	16.3866	-7.14844	-621.089	-99788.3	46935.5	-2303.7	275.57	1063.67	0	0	0	0	0	0	0	603	903	0
8171	3	0	0	0	0	0	0	200	300	0	13.7926	-5.1648	-620.479	-99513.6	47118.6	-2257.92	275.939	1063.38	0	0	0	0	0	0	0	603	903	0
8171	4	0	0	0	0	0	0	200	300	0	13.64	-4.70703	-621.089	-99605.2	46996.5	-2441.02	275.668	1063.37	0	0	0	0	0	0	0	603	903	0
8171	5	0	0	0	0	0	0	200	300	0	14.8607	-5.62256	-620.784	-99971.4	46935.5	-1983.26	275.607	1064.04	0	0	0	0	0	0	0	603	903	0
8171	6	0	0	0	0	0	0	200	300	0	14.5555	-5.92774	-619.869	-100063	47362.8	-1937.49	276.408	1064.43	0	0	0	0	0	0	0	603	903	0
8171	7	0	0	0	0	0	0	200	300	0	13.9452	-4.85962	-622.005	-100154	47484.8	-2029.04	276.342	1064.02	0	0	0	0	0	0	0	603	903	0
8171	8	0	0	0	0	0	0	200	300	0	15.471	-3.79151	-621.7	-98781.2	47301.7	-2074.81	276.085	1061.89	0	0	0	0	0	0	0	603	903	0
8171	9	0	0	0	0	0	0	200	300	0	14.7081	-3.48633	-624.141	-99971.4	47301.7	-2074.81	275.787	1063.17	0	0	0	0	0	0	0	603	903	0
8172	0	0	0	0	0	0	0	200	300	0	14.4029	-4.09668	-623.531	-99605.2	47240.7	-1937.49	275.763	1062.74	0	0	0	0	0	0	0	603	903	0
8172	1	0	0	0	0	0	0	200	300	0	14.4029	-2.72339	-623.531	-99330.6	47179.6	-1845.93	275.665	1062.3	0	0	0	0	0	0	0	603	903	0
8172	2	0	0	0	0	0	0	200	300	0	15.0133	-2.41822	-622.92	-99055.9	47851	-1800.16	276.817	1062.02	0	0	0	0	0	0	0	603	903	0
8172	3	0	0	0	0	0	0	200	300	0	14.8607	-1.80786	-624.141	-99513.6	47179.6	-1754.38	275.591	1062.44	0	0	0	0	0	0	0	603	903	0
8172	4	0	0	0	0	0	0	200	300	0	13.9452	-2.26563	-624.752	-99422.1	48217.2	-1891.71	277.178	1062.14	0	0	0	0	0	0	0	603	903	0
8172	5	0	0	0	0	0	0	200	300	0	14.0977	-0.739749	-624.752	-98506.6	47606.9	-1983.26	276.201	1060.67	0	0	0	0	0	0	0	603	903	0
8172	6	0	0	0	0	0	0	200	300	0	15.0133	-1.04492	-625.667	-99055.9	47973.1	-1983.26	276.675	1061.32	0	0	0	0	0	0	0	603	903	0
8172	7	0	0	0	0	0	0	200	300	0	13.7926	-0.587161	-626.277	-99605.2	48156.2	-1708.6	276.893	1062.04	0	0	0	0	0	0	0	603	903	0
8172	8	0	0	0	0	0	0	200	300	0	13.9452	0.0231904	-626.277	-98415	47362.8	-1525.5	275.626	1060.14	0	0	0	0	0	0	0	603	903	0
8172	9	0	0	0	0	0	0	200	300	0	14.7081	0.480954	-624.752	-98598.1	48339.3	-1571.27	277.374	1060.82	0	0	0	0	0	0	0	603	903	0
8173	0	0	0	0	0	0	0	200	300	0	15.6236	0.480954	-627.803	-99330.6	48095.2	-1891.71	276.609	1061.22	0	0	0	0	0	0	0	603	903	0
8173	1	0	0	0	0	0	0	200	300	0	16.0814	-0.587161	-626.277	-98598.1	48034.1	-1754.38	276.698	1060.44	0	0	0	0	0	0	0	603	903	0
8173	2	0	0	0	0	0	0	200	300	0	14.8607	0.78613	-627.193	-98506.6	48705.5	-1754.38	277.656	1060.06	0	0	0	0	0	0	0	603	903	0
8173	3	0	0	0	0	0	0	200	300	0	14.2503	1.39648	-629.94	-98323.4	48949.7	-1662.83	277.705	1059.08	0	0	0	0	0	0	0	603	903	0
8173	4	0	0	0	0	0	0	200	300	0	13.64	1.85425	-627.803	-98506.6	48766.6	-1708.6	277.678	1059.91	0	0	0	0	0	0	0	603	903	0
8173	5	0	0	0	0	0	0	200	300	0	14.4029	1.85425	-627.803	-98140.4	49010.7	-1067.73	278.067	1059.32	0	0	0	0	0	0	0	603	903	0
8173	6	0	0	0	0	0	0	200	300	0	15.1659	2.31201	-629.024	-98231.9	48766.6	-1662.83	277.527	1059.17	0	0	0	0	0	0	0	603	903	0
8173	7	0	0	0	0	0	0	200	300	0	14.2503	2.76977	-629.329	-98323.4	48705.5	-1708.6	277.393	1059.24	0	0	0	0	0	0	0	603	903	0
8173	8	0	0	0	0	0	0	200	300	0	13.7926	3.83789	-628.719	-98598.1	49132.8	-1479.72	278.147	1059.82	0	0	0	0	0	0	0	603	903	0
8173	9	0	0	0	0	0	0	200	300	0	14.7081	3.22754	-632.686	-98506.6	49315.9	-1250.84	277.947	1058.7	0	0	0	0	0	0	0	603	903	0
8174	0	0	0	0	0	0	0	200	300	0	17.1495	4.29565	-629.94	-98415	49499	-1021.96	278.577	1059.23	0	0	0	0	0	0	0	603	903	0
8174	1	0	0	0	0	0	0	200	300	0	13.9452	4.60083	-633.296	-98872.8	49193.8	-1205.06	277.679	1059.12	0	0	0	0	0	0	0	603	903	0
8174	2	0	0	0	0	0	0	200	300	0	13.4874	3.38012	-632.686	-97957.2	49865.2	-1296.62	278.815	1057.83	0	0	0	0	0	0	0	603	903	0
8174	3	0	0	0	0	0	0	200	300	0	15.3185	5.36377	-632.076	-97865.7	49132.8	-1342.39	277.732	1057.83	0	0	0	0	0	0	0	603	903	0
8174	4	0	0	0	0	0	0	200	300	0	14.7081	5.05859	-634.517	-98140.4	49437.9	-1159.29	277.914	1057.67	0	0	0	0	0	0	0	603	903	0
8174	5	0	0	0	0	0	0	200	300	0	14.0977	5.51635	-633.602	-98048.8	49682.1	-1159.29	278.412	1057.75	0	0	0	0	0	0	0	603	903	0
8174	6	0	0	0	0	0	0	200	300	0	14.7081	6.12671	-634.212	-98048.8	49682.1	-1159.29	278.337	1057.6	0	0	0	0	0	0	0	603	903	0
8174	7	0	0	0	0	0	0	200	300	0	17.4547	5.82153	-635.738	-97774.2	49987.3	-655.746	278.629	1056.8	0	0	0	0	0	0	0	603	903	0
8174	8	0	0	0	0	0	0	200	300	0	14.7081	5.97412	-634.822	-97957.2	50170.4	-1159.29	279.031	1057.31	0	0	0	0	0	0	0	603	903	0
8174	9	0	0	0	0	0	0	200	300	0	14.2503	5.82153	-636.653	-97591	49926.2	-1250.84	278.42	1056.29	0	0	0	0	0	0	0	603	903	0
8175	0	0	0	0	0	0	0	200	300	0	17.6073	6.73706	-636.959	-97591	49499	-1113.51	277.711	1056.21	0	0	0	0	0	0	0	603	903	0
8175	1	0	0	0	0	0	0	200	300	0	14.5555	8.11035	-634.212	-97408	50048.3	-1250.84	278.914	1056.59	0	0	0	0	0	0	0	603	903	0
8175	2	0	0	0	0	0	0	200	300	0	15.3185	8.41552	-638.179	-97133.3	49987.3	-1113.51	278.328	1055.2	0	0	0	0	0	0	0	603	903	0
8175	3	0	0	0	0	0	0	200	300	0	16.3866	6.88965	-638.179	-97591	50353.5	-793.076	278.902	1055.92	0	0	0	0	0	0	0	603	903	0
8175	4	0	0	0	0	0	0	200	300	0	15.6236	8.87329	-638.179	-97682.6	50231.4	-1113.51	278.71	1056.06	0	0	0	0	0	0	0	603	903	0
8175	5	0	0	0	0	0	0	200	300	0	15.471	8.56811	-637.874	-97408	50292.4	-1205.06	278.844	1055.71	0	0	0	0	0	0	0	603	903	0
8175	6	0	0	0	0	0	0	200	300	0	16.3866	8.87329	-639.4	-96126.2	50170.4	-1067.73	278.465	1053.34	0	0	0	0	0	0	0	603	903	0
8175	7	0	0	0	0	0	0	200	300	0	16.0814	8.87329	-639.4	-97041.7	50475.5	-930.405	278.942	1054.77	0	0	0	0	0	0	0	603	903	0
8175	8	0	0	0	0	0	0	200	300	0	15.1659	9.33105	-640.926	-96583.9	50597.6	-793.076	278.945	1053.69	0	0	0	0	0	0	0	603	903	0
8175	9	0	0	0	0	0	0	200	300	0	14.8607	9.48364	-640.621	-96583.9	50475.5	-793.076	278.792	1053.77	0	0	0	0	0	0	0	603	903	0
8176	0	0	0	0	0	0	0	200	300	0	17.6073	10.5518	-641.231	-96217.7	51024.9	-930.405	279.573	1053.05	0	0	0	0	0	0	0	603	903	0
8176	1	0	0	0	0	0	0	200	300	0	15.9288	10.3992	-640.926	-95485.3	50536.6	-930.405	278.849	1051.98	0	0	0	0	0	0	0	603	903	0
8176	2	0	0	0	0	0	0	200	300	0	15.1659	11.4673	-638.484	-95943.1	50536.6	-472.641	279.151	1053.27	0	0	0	0	0	0	0	603	903	0
8176	3	0	0	0	0	0	0	200	300	0	16.234	11.3147	-642.147	-95851.5	51024.9	-701.523	279.46	1052.27	0	0	0	0	0	0	0	603	903	0
8176	4	0	0	0	0	0	0	200	300	0	16.5392	11.7725	-643.367	-96400.9	50292.4	-793.076	278.171	1052.84	0	0	0	0	0	0	0	603	903	0
8176	5	0	0	0	0	0	0	200	300	0	15.1659	12.0776	-642.452	-96126.2	51391.1	-472.641	279.992	1052.62	0	0	0	0	0	0	0	603	903	0
8176	6	0	0	0	0	0	0	200	300	0	16.8443	12.5354	-641.841	-95851.5	50658.6	-930.405	278.927	1052.34	0	0	0	0	0	0	0	603	903	0
8176	7	0	0	0	0	0	0	200	300	0	16.6917	11.4673	-642.757	-96126.2	51208	-884.628	279.669	1052.55	0	0	0	0	0	0	0	603	903	0
8176	8	0	0	0	0	0	0	200	300	0	18.065	12.3828	-643.062	-96309.3	51452.1	-518.417	280.011	1052.77	0	0	0	0	0	0	0	603	903	0
8176	9	0	0	0	0	0	0	200	300	0	16.5392	12.8406	-644.893	-95851.5	51269	-381.088	279.5	1051.63	0	0	0	0	0	0	0	603	903	0
8177	0	0	0	0	0	0	0	200	300	0	16.6917	13.1457	-642.757	-96400.9	51452.1	-564.193	280.049	1052.98	0	0	0	0	0	0	0	603	903	0
8177	1	0	0	0	0	0	0	200	300	0	16.9969	11.925	-641.536	-95760	51330	-609.97	280.011	1052.27	0	0	0	0	0	0	0	603	903	0
8177	2	0	0	0	0	0	0	200	300	0	16.6917	12.688	-644.588	-95760	51391.1	-243.759	279.727	1051.56	0	0	0	0	0	0	0	603	903	0
8177	3	0	0	0	0	0	0	200	300	0	16.9969	14.2139	-643.978	-95576.9	51635.2	-472.641	280.182	1051.42	0	0	0	0	0	0	0	603	903	0
8177	4	0	0	0	0	0	0	200	300	0	16.6917	14.2139	-645.809	-95668.5	51574.2	-243.759	279.86	1051.14	0	0	0	0	0	0	0	603	903	0
8177	5	0	0	0	0	0	0	200	300	0	16.8443	13.6035	-645.503	-95393.8	51879.4	-197.982	280.37	1050.78	0	0	0	0	0	0	0	603	903	0
8177	6	0	0	0	0	0	0	200	300	0	17.3021	14.3665	-645.809	-95210.7	51146.9	-14.877	279.198	1050.43	0	0	0	0	0	0	0	603	903	0
8177	7	0	0	0	0	0	0	200	300	0	16.3866	14.9768	-645.503	-95302.2	51635.2	-243.759	279.992	1050.64	0	0	0	0	0	0	0	603	903	0
8177	8	0	0	0	0	0	0	200	300	0	16.8443	14.9768	-646.419	-94936	51513.1	-289.535	279.69	1049.86	0	0	0	0	0	0	0	603	903	0
8177	9	0	0	0	0	0	0	200	300	0	18.2176	14.9768	-646.724	-94661.3	51452.1	-106.43	279.558	1049.37	0	0	0	0	0	0	0	603	903	0
8178	0	0	0	0	0	0	0	200	300	0	17.1495	15.4346	-645.809	-95119.1	51940.4	-289.535	280.427	1050.29	0	0	0	0	0	0	0	603	903	0
8178	1	0	0	0	0	0	0	200	300	0	16.6917	16.0449	-647.945	-95119.1	52245.6	122.452	280.633	1049.8	0	0	0	0	0	0	0	603	903	0
8178	2	0	0	0	0	0	0	200	300	0	18.5228	15.4346	-646.419	-94112.1	51696.2	-106.43	279.973	1048.59	0	0	0	0	0	0	0	603	903	0
8178	3	0	0	0	0	0	0	200	300	0	18.3702	16.8079	-648.25	-95119.1	51940.4	-335.312	280.124	1049.73	0	0	0	0	0	0	0	603	903	0
8178	4	0	0	0	0	0	0	200	300	0	17.6073	16.0449	-647.64	-94752.9	51757.3	-60.6534	279.917	1049.3	0	0	0	0	0	0	0	603	903	0
8178	5	0	0	0	0	0	0	200	300	0	17.9124	16.8079	-648.86	-94203.6	52184.5	-289.535	280.425	1048.18	0	0	0	0	0	0	0	603	903	0
8178	6	0	0	0	0	0	0	200	300	0	20.659	16.9604	-649.776	-94020.5	52489.7	-152.206	280.781	1047.7	0	0	0	0	0	0	0	603	903	0
8178	7	0	0	0	0	0	0	200	300	0	17.6073	17.876	-648.25	-93471.2	51940.4	-106.43	280.124	1047.19	0	0	0	0	0	0	0	603	903	0
8178	8	0	0	0	0	0	0	200	300	0	17.4547	18.0286	-649.471	-93654.2	52611.8	76.6757	281.007	1047.2	0	0	0	0	0	0	0	603	903	0
8178	9	0	0	0	0	0	0	200	300	0	18.5228	18.0286	-649.166	-93928.9	52123.5	-152.206	280.293	1047.69	0	0	0	0	0	0	0	603	903	0
8179	0	0	0	0	0	0	0	200	300	0	18.5228	19.0967	-649.166	-93654.2	52245.6	122.452	280.481	1047.27	0	0	0	0	0	0	0	603	903	0
8179	1	0	0	0	0	0	0	200	300	0	18.3702	18.6389	-649.471	-93562.7	52733.8	30.8993	281.195	1047.06	0	0	0	0	0	0	0	603	903	0
8179	2	0	0	0	0	0	0	200	300	0	18.065	19.2493	-649.471	-93013.4	52550.7	305.558	280.913	1046.21	0	0	0	0	0	0	0	603	903	0
8179	3	0	0	0	0	0	0	200	300	0	18.6754	18.9441	-649.471	-92372.6	52672.8	30.8993	281.101	1045.23	0	0	0	0	0	0	0	603	903	0
8179	4	0	0	0	0	0	0	200	300	0	18.065	20.0122	-651.302	-93654.2	52123.5	76.6757	280.03	1046.8	0	0	0	0	0	0	0	603	903	0
8179	5	0	0	0	0	0	0	200	300	0	18.065	19.8596	-649.776	-93013.4	52550.7	76.6757	280.875	1046.15	0	0	0	0	0	0	0	603	903	0
8179	6	0	0	0	0	0	0	200	300	0	21.422	21.0803	-651.912	-93013.4	52978	259.781	281.266	1045.68	0	0	0	0	0	0	0	603	903	0
8179	7	0	0	0	0	0	0	200	300	0	17.4547	20.47	-650.997	-92830.3	52794.9	351.334	281.099	1045.6	0	0	0	0	0	0	0	603	903	0
8179	8	0	0	0	0	0	0	200	300	0	18.828	21.8433	-650.081	-92555.6	53100.1	122.452	281.682	1045.38	0	0	0	0	0	0	0	603	903	0
8179	9	0	0	0	0	0	0	200	300	0	19.4383	21.0803	-652.217	-91365.4	53344.2	488.663	281.789	1043.08	0	0	0	0	0	0	0	603	903	0
8180	0	0	0	0	0	0	0	200	300	0	19.7435	20.6226	-651.607	-93196.5	52855.9	305.558	281.116	1046.03	0	0	0	0	0	0	0	603	903	0
8180	1	0	0	0	0	0	0	200	300	0	18.3702	22.1484	-651.607	-92647.2	52733.8	122.452	280.929	1045.18	0	0	0	0	0	0	0	603	903	0
8180	2	0	0	0	0	0	0	200	300	0	20.2013	22.6062	-653.133	-92464.1	52855.9	534.44	280.927	1044.57	0	0	0	0	0	0	0	603	903	0
8180	3	0	0	0	0	0	0	200	300	0	20.5064	22.1484	-652.523	-92830.3	53222.1	580.216	281.564	1045.26	0	0	0	0	0	0	0	603	903	0
8180	4	0	0	0	0	0	0	200	300	0	19.4383	22.9114	-652.217	-92555.6	53405.2	488.663	281.883	1044.91	0	0	0	0	0	0	0	603	903	0
8180	5	0	0	0	0	0	0	200	300	0	19.4383	22.6062	-653.438	-92281	53161.1	717.545	281.356	1044.22	0	0	0	0	0	0	0	603	903	0
8180	6	0	0	0	0	0	0	200	300	0	20.3539	22.6062	-654.354	-91731.6	53527.3	671.769	281.802	1043.19	0	0	0	0	0	0	0	603	903	0
8180	7	0	0	0	0	0	0	200	300	0	19.8961	22.7588	-653.743	-91640.1	53100.1	625.992	281.225	1043.18	0	0	0	0	0	0	0	603	903	0
8180	8	0	0	0	0	0	0	200	300	0	19.2857	23.8269	-655.269	-91548.6	53527.3	1037.98	281.688	1042.71	0	0	0	0	0	0	0	603	903	0
8180	9	0	0	0	0	0	0	200	300	0	20.9642	24.1321	-654.659	-92097.9	53405.2	717.545	281.577	1043.68	0	0	0	0	0	0	0	603	903	0
8181	0	0	0	0	0	0	0	200	300	0	21.422	24.895	-656.49	-91640.1	53344.2	625.992	281.257	1042.59	0	0	0	0	0	0	0	603	903	0
8181	1	0	0	0	0	0	0	200	300	0	23.1004	25.658	-656.49	-91823.2	53527.3	854.874	281.536	1042.87	0	0	0	0	0	0	0	603	903	0
8181	2	0	0	0	0	0	0	200	300	0	21.5746	25.658	-656.185	-91365.4	53344.2	992.203	281.294	1042.24	0	0	0	0	0	0	0	603	903	0
8181	3	0	0	0	0	0	0	200	300	0	21.422	26.1157	-657.711	-91090.8	53405.2	946.427	281.199	1041.5	0	0	0	0	0	0	0	603	903	0
8181	4	0	0	0	0	0	0	200	300	0	21.7271	25.5054	-656.185	-91457	53588.3	1129.53	281.667	1042.38	0	0	0	0	0	0	0	603	903	0
8181	5	0	0	0	0	0	0	200	300	0	21.422	27.489	-658.016	-90541.5	53710.4	1221.09	281.625	1040.6	0	0	0	0	0	0	0	603	903	0
8181	6	0	0	0	0	0	0	200	300	0	22.0323	27.7942	-657.711	-90999.2	53954.5	854.874	282.034	1041.36	0	0	0	0	0	0	0	603	903	0
8181	7	0	0	0	0	0	0	200	300	0	21.422	27.489	-659.542	-90816.2	54259.7	1083.76	282.269	1040.7	0	0	0	0	0	0	0	603	903	0
8181	8	0	0	0	0	0	0	200	300	0	21.422	28.2519	-658.931	-90083.7	53893.5	1037.98	281.789	1039.71	0	0	0	0	0	0	0	603	903	0
8181	9	0	0	0	0	0	0	200	300	0	21.7271	27.9468	-659.542	-90266.8	54259.7	1175.31	282.269	1039.86	0	0	0	0	0	0	0	603	903	0
8182	0	0	0	0	0	0	0	200	300	0	22.3375	28.5571	-659.236	-90816.2	53954.5	1312.64	281.844	1040.76	0	0	0	0	0	0	0	603	903	0
8182	1	0	0	0	0	0	0	200	300	0	21.5746	28.7097	-659.542	-90266.8	54442.8	1037.98	282.546	1039.86	0	0	0	0	0	0	0	603	903	0
8182	2	0	0	0	0	0	0	200	300	0	22.4901	29.0149	-660.457	-89809.1	54381.8	1175.31	282.34	1038.98	0	0	0	0	0	0	0	603	903	0
8182	3	0	0	0	0	0	0	200	300	0	22.3375	29.9304	-659.542	-90358.4	54259.7	1221.09	282.269	1040	0	0	0	0	0	0	0	603	903	0
8182	4	0	0	0	0	0	0	200	300	0	23.1004	30.8459	-662.593	-89809.1	54198.7	1221.09	281.798	1038.54	0	0	0	0	0	0	0	603	903	0
8182	5	0	0	0	0	0	0	200	300	0	23.5582	30.8459	-661.678	-89625.9	54442.8	1175.31	282.28	1038.45	0	0	0	0	0	0	0	603	903	0
8182	6	0	0	0	0	0	0	200	300	0	23.253	30.3882	-660.762	-89625.9	54870.1	1449.97	283.041	1038.64	0	0	0	0	0	0	0	603	903	0
8182	7	0	0	0	0	0	0	200	300	0	22.7953	30.9985	-662.288	-89809.1	54625.9	1129.53	282.481	1038.6	0	0	0	0	0	0	0	603	903	0
8182	8	0	0	0	0	0	0	200	300	0	22.7953	31.4563	-663.509	-90083.7	54748	1221.09	282.513	1038.77	0	0	0	0	0	0	0	603	903	0
8182	9	0	0	0	0	0	0	200	300	0	24.1685	32.2192	-661.983	-89717.5	54992.1	1221.09	283.072	1038.53	0	0	0	0	0	0	0	603	903	0
8183	0	0	0	0	0	0	0	200	300	0	24.4737	32.2192	-663.509	-89809.1	54687	1404.19	282.421	1038.35	0	0	0	0	0	0	0	603	903	0
8183	1	0	0	0	0	0	0	200	300	0	23.4056	32.5244	-663.509	-89442.9	55236.3	1449.97	283.249	1037.8	0	0	0	0	0	0	0	603	903	0
8183	2	0	0	0	0	0	0	200	300	0	23.7108	33.8977	-664.424	-89351.3	55236.3	1358.41	283.134	1037.48	0	0	0	0	0	0	0	603	903	0
8183	3	0	0	0	0	0	0	200	300	0	24.3211	31.6089	-661.678	-89168.2	55053.2	1404.19	283.202	1037.76	0	0	0	0	0	0	0	603	903	0
8183	4	0	0	0	0	0	0	200	300	0	24.4737	33.5925	-665.34	-89168.2	55297.3	1449.97	283.111	1037.02	0	0	0	0	0	0	0	603	903	0
8183	5	0	0	0	0	0	0	200	300	0	24.9315	34.3555	-666.561	-88893.5	54992.1	1449.97	282.501	1036.36	0	0	0	0	0	0	0	603	903	0
8183	6	0	0	0	0	0	0	200	300	0	25.6944	34.2029	-667.476	-88710.4	55419.4	1358.41	283.028	1035.9	0	0	0	0	0	0	0	603	903	0
8183	7	0	0	0	0	0	0	200	300	0	26.1522	35.271	-666.561	-89259.7	55663.5	1404.19	283.509	1036.91	0	0	0	0	0	0	0	603	903	0
8183	8	0	0	0	0	0	0	200	300	0	25.5418	34.5081	-667.781	-89442.9	55297.3	1633.07	282.808	1036.94	0	0	0	0	0	0	0	603	903	0
8183	9	0	0	0	0	0	0	200	300	0	26.7625	36.3391	-669.918	-88710.4	55663.5	1587.3	283.09	1035.42	0	0	0	0	0	0	0	603	903	0
8184	0	0	0	0	0	0	0	200	300	0	27.0677	36.1865	-669.918	-88893.5	55663.5	1633.07	283.09	1035.69	0	0	0	0	0	0	0	603	903	0
8184	1	0	0	0	0	0	0	200	300	0	28.5936	36.7969	-671.138	-89259.7	55480.4	1495.74	282.666	1036	0	0	0	0	0	0	0	603	903	0
8184	2	0	0	0	0	0	0	200	300	0	27.2203	36.7969	-672.054	-87886.5	56090.8	1587.3	283.462	1033.77	0	0	0	0	0	0	0	603	903	0
8184	3	0	0	0	0	0	0	200	300	0	27.5255	38.0176	-667.781	-88252.7	55236.3	1633.07	282.716	1035.16	0	0	0	0	0	0	0	603	903	0
8184	4	0	0	0	0	0	0	200	300	0	27.0677	37.7124	-672.664	-88435.7	56151.8	1541.52	283.477	1034.47	0	0	0	0	0	0	0	603	903	0
8184	5	0	0	0	0	0	0	200	300	0	26.9151	38.3228	-675.106	-87886.5	55907.7	1633.07	282.813	1033.18	0	0	0	0	0	0	0	603	903	0
8184	6	0	0	0	0	0	0	200	300	0	29.9669	39.0857	-673.58	-87794.9	55907.7	1770.4	283.001	1033.34	0	0	0	0	0	0	0	603	903	0
8184	7	0	0	0	0	0	0	200	300	0	27.2203	39.8486	-676.021	-87245.6	56457	1678.85	283.514	1032.06	0	0	0	0	0	0	0	603	903	0
8184	8	0	0	0	0	0	0	200	300	0	27.8307	40.1538	-675.411	-87703.3	56151.8	1633.07	283.137	1032.85	0	0	0	0	0	0	0	603	903	0
8184	9	0	0	0	0	0	0	200	300	0	29.2039	40.3064	-675.716	-87520.3	56579.1	1816.18	283.732	1032.52	0	0	0	0	0	0	0	603	903	0
8185	0	0	0	0	0	0	0	200	300	0	29.0514	40.6116	-676.021	-87978	56640.1	1633.07	283.785	1033.14	0	0	0	0	0	0	0	603	903	0
8185	1	0	0	0	0	0	0	200	300	0	29.9669	41.0693	-676.326	-87154	56579.1	1861.95	283.656	1031.86	0	0	0	0	0	0	0	603	903	0
8185	2	0	0	0	0	0	0	200	300	0	29.9669	41.6797	-677.242	-87154	56884.2	1861.95	283.994	1031.69	0	0	0	0	0	0	0	603	903	0
8185	3	0	0	0	0	0	0	200	300	0	29.3565	42.1374	-678.768	-87703.3	56762.2	1724.63	283.625	1032.21	0	0	0	0	0	0	0	603	903	0
8185	4	0	0	0	0	0	0	200	300	0	29.2039	41.9849	-679.378	-87337.1	57067.3	1907.73	283.999	1031.55	0	0	0	0	0	0	0	603	903	0
8185	5	0	0	0	0	0	0	200	300	0	30.7298	41.8323	-680.599	-87337.1	57311.5	1770.4	284.207	1031.32	0	0	0	0	0	0	0	603	903	0
8185	6	0	0	0	0	0	0	200	300	0	32.2557	43.2056	-682.735	-87062.5	57433.6	1861.95	284.123	1030.52	0	0	0	0	0	0	0	603	903	0
8185	7	0	0	0	0	0	0	200	300	0	29.8143	43.9685	-681.819	-86147	57189.4	1816.18	283.878	1029.35	0	0	0	0	0	0	0	603	903	0
8185	8	0	0	0	0	0	0	200	300	0	29.3565	44.2737	-684.566	-87062.5	57250.4	1861.95	283.63	1030.18	0	0	0	0	0	0	0	603	903	0
8185	9	0	0	0	0	0	0	200	300	0	31.1876	44.4263	-683.956	-86970.9	57799.8	1999.28	284.508	1030.16	0	0	0	0	0	0	0	603	903	0
8186	0	0	0	0	0	0	0	200	300	0	32.1031	46.1047	-683.956	-87245.6	57799.8	1953.51	284.508	1030.56	0	0	0	0	0	0	0	603	903	0
8186	1	0	0	0	0	0	0	200	300	0	30.2721	46.5625	-686.092	-87245.6	57738.7	1770.4	284.156	1030.16	0	0	0	0	0	0	0	603	903	0
8186	2	0	0	0	0	0	0	200	300	0	31.6454	45.647	-685.787	-85963.8	57433.6	2045.06	283.748	1028.35	0	0	0	0	0	0	0	603	903	0
8186	3	0	0	0	0	0	0	200	300	0	31.7979	47.478	-687.618	-87245.6	57982.9	2319.72	284.324	1029.88	0	0	0	0	0	0	0	603	903	0
8186	4	0	0	0	0	0	0	200	300	0	31.4928	47.7832	-690.364	-87337.1	58471.1	2045.06	284.696	1029.51	0	0	0	0	0	0	0	603	903	0
8186	5	0	0	0	0	0	0	200	300	0	31.9505	47.0203	-690.059	-86604.7	58532.2	2228.16	284.822	1028.5	0	0	0	0	0	0	0	603	903	0
8186	6	0	0	0	0	0	0	200	300	0	32.4083	48.6987	-691.585	-86696.2	58410.1	1953.51	284.458	1028.36	0	0	0	0	0	0	0	603	903	0
8186	7	0	0	0	0	0	0	200	300	0	31.3402	49.1565	-692.806	-87154	58349.1	2457.05	284.221	1028.8	0	0	0	0	0	0	0	603	903	0
8186	8	0	0	0	0	0	0	200	300	0	32.1031	49.3091	-693.721	-86696.2	58471.1	2594.38	284.286	1027.97	0	0	0	0	0	0	0	603	903	0
8186	9	0	0	0	0	0	0	200	300	0	34.5445	49.9194	-694.637	-86604.7	59142.5	2548.6	285.142	1027.68	0	0	0	0	0	0	0	603	903	0
8187	0	0	0	0	0	0	0	200	300	0	33.1712	49.6143	-697.383	-86696.2	59142.5	2411.27	284.806	1027.32	0	0	0	0	0	0	0	603	903	0
8187	1	0	0	0	0	0	0	200	300	0	32.7135	51.4453	-696.163	-86787.8	59020.5	2457.05	284.78	1027.67	0	0	0	0	0	0	0	603	903	0
8187	2	0	0	0	0	0	0	200	300	0	33.0186	50.3772	-698.299	-86696.2	58959.4	2136.61	284.433	1027.15	0	0	0	0	0	0	0	603	903	0
8187	3	0	0	0	0	0	0	200	300	0	34.0868	51.4453	-700.13	-87154	58898.4	2502.82	284.125	1027.48	0	0	0	0	0	0	0	603	903	0
8187	4	0	0	0	0	0	0	200	300	0	35.1549	52.5134	-700.13	-86604.7	59264.6	2685.93	284.648	1026.7	0	0	0	0	0	0	0	603	903	0
8187	5	0	0	0	0	0	0	200	300	0	34.3919	54.3445	-703.182	-86604.7	59691.9	2502.82	284.888	1026.16	0	0	0	0	0	0	0	603	903	0
8187	6	0	0	0	0	0	0	200	300	0	33.7816	53.1238	-704.708	-86787.8	59447.7	2502.82	284.358	1026.15	0	0	0	0	0	0	0	603	903	0
8187	7	0	0	0	0	0	0	200	300	0	33.7816	54.9548	-701.045	-86696.2	60241.2	2548.6	285.93	1026.67	0	0	0	0	0	0	0	603	903	0
8187	8	0	0	0	0	0	0	200	300	0	34.3919	56.0229	-706.539	-86330	59752.9	2640.15	284.571	1025.19	0	0	0	0	0	0	0	603	903	0
8187	9	0	0	0	0	0	0	200	300	0	34.5445	54.8022	-708.675	-85872.3	59936	2594.38	284.575	1024.17	0	0	0	0	0	0	0	603	903	0
8188	0	0	0	0	0	0	0	200	300	0	34.2393	56.7859	-706.844	-86604.7	60485.3	3097.92	285.571	1025.52	0	0	0	0	0	0	0	603	903	0
8188	1	0	0	0	0	0	0	200	300	0	34.6971	57.0911	-710.506	-86330	60424.3	2823.26	285.044	1024.51	0	0	0	0	0	0	0	603	903	0
8188	2	0	0	0	0	0	0	200	300	0	36.8333	55.4126	-711.116	-86421.6	60668.4	2640.15	285.314	1024.53	0	0	0	0	0	0	0	603	903	0
8188	3	0	0	0	0	0	0	200	300	0	33.9342	58.3118	-711.421	-85139.8	60607.4	2960.59	285.192	1022.68	0	0	0	0	0	0	0	603	903	0
8188	4	0	0	0	0	0	0	200	300	0	34.8497	59.0747	-713.253	-86147	60729.4	2685.93	285.144	1023.78	0	0	0	0	0	0	0	603	903	0
8188	5	0	0	0	0	0	0	200	300	0	36.3756	58.4644	-713.558	-86147	61461.9	2594.38	286.134	1023.73	0	0	0	0	0	0	0	603	903	0
8188	6	0	0	0	0	0	0	200	300	0	35.4601	59.9902	-713.863	-86330	61278.8	2731.7	285.841	1023.93	0	0	0	0	0	0	0	603	903	0
8188	7	0	0	0	0	0	0	200	300	0	35.4601	58.3118	-710.506	-86238.5	61706	3006.36	286.848	1024.38	0	0	0	0	0	0	0	603	903	0
8188	8	0	0	0	0	0	0	200	300	0	36.3756	60.2954	-716.304	-85780.8	61584	2823.26	285.975	1022.75	0	0	0	0	0	0	0	603	903	0
8188	9	0	0	0	0	0	0	200	300	0	36.6808	59.8376	-718.135	-86421.6	61950.2	3326.8	286.265	1023.34	0	0	0	0	0	0	0	603	903	0
8189	0	0	0	0	0	0	0	200	300	0	36.3756	61.0583	-720.577	-85780.8	62133.3	2914.81	286.227	1022.04	0	0	0	0	0	0	0	603	903	0
8189	1	0	0	0	0	0	0	200	300	0	35.9178	61.9739	-719.966	-85872.3	61278.8	2777.48	285.113	1022.27	0	0	0	0	0	0	0	603	903	0
8189	2	0	0	0	0	0	0	200	300	0	37.1385	62.7368	-722.408	-85597.6	62743.6	3372.57	286.853	1021.49	0	0	0	0	0	0	0	603	903	0
8189	3	0	0	0	0	0	0	200	300	0	36.8333	63.3472	-724.544	-85780.8	62255.3	3326.8	285.924	1021.39	0	0	0	0	0	0	0	603	903	0
8189	4	0	0	0	0	0	0	200	300	0	36.5282	63.1946	-724.544	-85872.3	62316.4	3143.69	286.008	1021.52	0	0	0	0	0	0	0	603	903	0
8189	5	0	0	0	0	0	0	200	300	0	37.1385	64.5679	-726.68	-85780.8	62987.8	3097.92	286.679	1021.04	0	0	0	0	0	0	0	603	903	0
8189	6	0	0	0	0	0	0	200	300	0	37.4437	64.1101	-728.511	-86147	62377.4	3097.92	285.623	1021.25	0	0	0	0	0	0	0	603	903	0
8189	7	0	0	0	0	0	0	200	300	0	38.6644	65.636	-728.816	-85506.1	63109.8	3143.69	286.592	1020.32	0	0	0	0	0	0	0	603	903	0
8189	8	0	0	0	0	0	0	200	300	0	38.6644	65.7886	-730.953	-85506.1	62743.6	3097.92	285.838	1019.98	0	0	0	0	0	0	0	603	903	0
8189	9	0	0	0	0	0	0	200	300	0	37.7489	66.2463	-731.563	-85597.6	63170.9	3509.9	286.351	1020.01	0	0	0	0	0	0	0	603	903	0
8190	0	0	0	0	0	0	0	200	300	0	38.6644	65.636	-733.699	-85963.8	63476.1	3464.13	286.515	1020.16	0	0	0	0	0	0	0	603	903	0
8190	1	0	0	0	0	0	0	200	300	0	40.3429	67.3145	-735.836	-84407.4	63903.3	3143.69	286.845	1017.71	0	0	0	0	0	0	0	603	903	0
8190	2	0	0	0	0	0	0	200	300	0	39.7325	68.23	-736.141	-85597.6	63537.1	3372.57	286.311	1019.28	0	0	0	0	0	0	0	603	903	0
8190	3	0	0	0	0	0	0	200	300	0	39.8851	68.9929	-737.056	-85689.2	63659.2	3235.24	286.37	1019.26	0	0	0	0	0	0	0	603	903	0
8190	4	0	0	0	0	0	0	200	300	0	40.1903	68.3826	-738.277	-84773.6	63720.2	2914.81	286.309	1017.83	0	0	0	0	0	0	0	603	903	0
8190	5	0	0	0	0	0	0	200	300	0	40.9532	69.9084	-738.277	-85139.8	63354	3235.24	285.813	1018.32	0	0	0	0	0	0	0	603	903	0
8190	6	0	0	0	0	0	0	200	300	0	39.8851	70.824	-740.413	-85414.5	64147.4	3281.02	286.637	1018.36	0	0	0	0	0	0	0	603	903	0
8190	7	0	0	0	0	0	0	200	300	0	39.2747	70.824	-741.329	-84682.1	64208.4	3006.36	286.613	1017.23	0	0	0	0	0	0	0	603	903	0
8190	8	0	0	0	0	0	0	200	300	0	42.0213	70.9766	-741.634	-84499	64757.8	3509.9	287.318	1016.94	0	0	0	0	0	0	0	603	903	0
8190	9	0	0	0	0	0	0	200	300	0	40.8006	71.4343	-743.16	-85048.3	64513.6	3189.47	286.81	1017.44	0	0	0	0	0	0	0	603	903	0
8191	0	0	0	0	0	0	0	200	300	0	39.8851	71.8921	-744.075	-83858.1	64879.8	3052.14	287.195	1015.7	0	0	0	0	0	0	0	603	903	0
8191	1	0	0	0	0	0	0	200	300	0	40.8006	72.655	-745.296	-84132.8	64513.6	3235.24	286.561	1015.89	0	0	0	0	0	0	0	603	903	0
8191	2	0	0	0	0	0	0	200	300	0	41.411	72.9602	-747.737	-84499	64940.9	3281.02	286.85	1016.01	0	0	0	0	0	0	0	603	903	0
8191	3	0	0	0	0	0	0	200	300	0	43.6998	74.4861	-745.601	-84315.9	65307.1	3143.69	287.59	1016.08	0	0	0	0	0	0	0	603	903	0
8191	4	0	0	0	0	0	0	200	300	0	42.1739	74.4861	-749.263	-84224.4	64696.7	3143.69	286.347	1015.41	0	0	0	0	0	0	0	603	903	0
8191	5	0	0	0	0	0	0	200	300	0	41.8687	72.0447	-752.01	-84224.4	65856.4	3281.02	287.574	1015	0	0	0	0	0	0	0	603	903	0
8191	6	0	0	0	0	0	0	200	300	0	42.0213	75.0964	-749.568	-83949.7	65612.3	2869.03	287.533	1015	0	0	0	0	0	0	0	603	903	0
8191	7	0	0	0	0	0	0	200	300	0	41.2584	74.3335	-752.01	-83400.3	65612.3	2914.81	287.249	1013.9	0	0	0	0	0	0	0	603	903	0
8191	8	0	0	0	0	0	0	200	300	0	42.7843	75.249	-754.146	-83949.7	65917.5	3464.13	287.407	1014.32	0	0	0	0	0	0	0	603	903	0
8191	9	0	0	0	0	0	0	200	300	0	41.5636	75.4016	-754.146	-83675	65795.4	3235.24	287.245	1013.95	0	0	0	0	0	0	0	603	903	0
8192	0	0	0	0	0	0	0	200	300	0	42.4791	76.3171	-755.062	-83400.3	66100.5	3281.02	287.543	1013.46	0	0	0	0	0	0	0	603	903	0
8192	1	0	0	0	0	0	0	200	300	0	44.3102	76.4697	-752.925	-82942.6	66222.6	3189.47	287.954	1013.16	0	0	0	0	0	0	0	603	903	0
8192	2	0	0	0	0	0	0	200	300	0	42.6317	77.9956	-759.029	-83217.3	66161.6	3143.69	287.166	1012.64	0	0	0	0	0	0	0	603	903	0
8192	3	0	0	0	0	0	0	200	300	0	42.7843	77.3853	-757.808	-82484.9	66588.8	3052.14	287.87	1011.85	0	0	0	0	0	0	0	603	903	0
8192	4	0	0	0	0	0	0	200	300	0	43.6998	77.843	-758.419	-82484.9	66344.7	3189.47	287.478	1011.76	0	0	0	0	0	0	0	603	903	0
8192	5	0	0	0	0	0	0	200	300	0	44.4627	77.843	-761.775	-83217.3	66283.7	3143.69	287.012	1012.24	0	0	0	0	0	0	0	603	903	0
8192	6	0	0	0	0	0	0	200	300	0	45.0731	78.4534	-761.47	-82667.9	66833	3418.35	287.768	1011.56	0	0	0	0	0	0	0	603	903	0
8192	7	0	0	0	0	0	0	200	300	0	43.8524	79.3689	-762.996	-81569.3	66588.8	3326.8	287.273	1009.91	0	0	0	0	0	0	0	603	903	0
8192	8	0	0	0	0	0	0	200	300	0	43.8524	78.606	-764.522	-82210.2	67077.1	3097.92	287.737	1010.53	0	0	0	0	0	0	0	603	903	0
8192	9	0	0	0	0	0	0	200	300	0	45.2257	80.1318	-763.607	-82393.3	66894	3418.35	287.603	1010.9	0	0	0	0	0	0	0	603	903	0
8193	0	0	0	0	0	0	0	200	300	0	44.3102	80.8948	-766.353	-81935.5	66772	3326.8	287.13	1009.92	0	0	0	0	0	0	0	603	903	0
8193	1	0	0	0	0	0	0	200	300	0	43.6998	78.606	-765.743	-81569.3	67321.2	3235.24	287.916	1009.52	0	0	0	0	0	0	0	603	903	0
8193	2	0	0	0	0	0	0	200	300	0	44.9205	81.5051	-765.438	-81569.3	66833	3464.13	287.313	1009.57	0	0	0	0	0	0	0	603	903	0
8193	3	0	0	0	0	0	0	200	300	0	44.1576	82.7258	-767.574	-81294.7	67199.2	3555.68	287.548	1008.91	0	0	0	0	0	0	0	603	903	0
8193	4	0	0	0	0	0	0	200	300	0	45.0731	82.5732	-767.269	-81111.5	67443.3	3189.47	287.901	1008.71	0	0	0	0	0	0	0	603	903	0
8193	5	0	0	0	0	0	0	200	300	0	45.5309	82.5732	-768.794	-81752.4	66710.9	3281.02	286.773	1009.34	0	0	0	0	0	0	0	603	903	0
8193	6	0	0	0	0	0	0	200	300	0	45.836	83.031	-769.71	-80928.5	67748.5	3372.57	288.018	1008.14	0	0	0	0	0	0	0	603	903	0
8193	7	0	0	0	0	0	0	200	300	0	44.7679	83.6414	-769.1	-80104.4	67321.2	3235.24	287.533	1007.15	0	0	0	0	0	0	0	603	903	0
8193	8	0	0	0	0	0	0	200	300	0	45.5309	83.9465	-770.32	-80928.5	67382.3	3326.8	287.473	1008.06	0	0	0	0	0	0	0	603	903	0
8193	9	0	0	0	0	0	0	200	300	0	44.7679	81.8103	-772.762	-80745.3	67809.5	3509.9	287.75	1007.49	0	0	0	0	0	0	0	603	903	0
8194	0	0	0	0	0	0	0	200	300	0	44.6153	84.8621	-771.846	-79829.8	67687.5	3418.35	287.696	1006.43	0	0	0	0	0	0	0	603	903	0
8194	1	0	0	0	0	0	0	200	300	0	45.2257	85.3198	-771.236	-80928.5	67870.6	3418.35	288.002	1007.93	0	0	0	0	0	0	0	603	903	0
8194	2	0	0	0	0	0	0	200	300	0	44.005	85.1672	-772.762	-80287.6	68236.8	3418.35	288.303	1006.9	0	0	0	0	0	0	0	603	903	0
8194	3	0	0	0	0	0	0	200	300	0	44.9205	86.6931	-773.067	-79463.6	67809.5	3235.24	287.715	1005.79	0	0	0	0	0	0	0	603	903	0
8194	4	0	0	0	0	0	0	200	300	0	45.0731	86.5405	-773.677	-79097.4	67931.6	3464.13	287.804	1005.24	0	0	0	0	0	0	0	603	903	0
8194	5	0	0	0	0	0	0	200	300	0	44.7679	86.2354	-773.067	-79921.4	67992.7	3693.01	287.952	1006.38	0	0	0	0	0	0	0	603	903	0
8194	6	0	0	0	0	0	0	200	300	0	44.7679	87.3035	-774.288	-78914.3	68297.8	3784.56	288.207	1004.92	0	0	0	0	0	0	0	603	903	0
8194	7	0	0	0	0	0	0	200	300	0	47.2093	87.6086	-774.593	-79097.4	68481	3784.56	288.409	1005.11	0	0	0	0	0	0	0	603	903	0
8194	8	0	0	0	0	0	0	200	300	0	44.3102	88.0664	-773.372	-78731.2	67992.7	4150.77	287.917	1004.8	0	0	0	0	0	0	0	603	903	0
8194	9	0	0	0	0	0	0	200	300	0	44.005	87.9138	-776.119	-78548	68541.9	4150.77	288.314	1004.21	0	0	0	0	0	0	0	603	903	0
8195	0	0	0	0	0	0	0	200	300	0	45.2257	89.1345	-774.288	-78639.6	68114.7	3876.11	287.971	1004.56	0	0	0	0	0	0	0	603	903	0
8195	1	0	0	0	0	0	0	200	300	0	44.6153	89.7449	-777.645	-78731.2	68603	4196.55	288.219	1004.24	0	0	0	0	0	0	0	603	903	0
8195	2	2.97789	-6.10397	-15.34	-3276.03	-1385.27	315.993	109.696	513.562	0	46.1412	90.2026	-776.729	-78273.4	68358.9	4288.1	288.009	1003.77	0	0	0	0	0	0	0	603	903	0
8195	3	-0.684218	-5.64621	-21.7487	-3733.8	-1873.55	865.31	113.855	471.679	0	45.0731	91.2708	-777.645	-77907.2	68175.7	4562.76	287.67	1003.18	0	0	0	0	0	0	0	603	903	0
8195	4	-4.19374	-5.03586	-21.4435	-4374.66	-1873.55	361.77	112.629	504.009	0	44.3102	92.3389	-778.56	-78548	67748.5	4700.09	287.018	1003.89	0	0	0	0	0	0	0	603	903	0
8195	5	0.383897	-3.05222	-23.5797	-4740.88	-1995.62	270.217	115.367	501.057	0	44.6153	92.4915	-778.865	-78090.3	68114.7	4516.98	287.454	1003.26	0	0	0	0	0	0	0	603	903	0
8195	6	1.45201	1.67801	-27.2418	-5473.3	-1995.62	-233.323	126.744	500.915	0	45.3783	93.5596	-779.781	-78090.3	68236.8	4974.75	287.508	1003.14	0	0	0	0	0	0	0	603	903	0
8195	7	0.383897	4.11941	-34.566	-6205.72	-2422.86	-187.547	129.906	479.532	0	44.7679	94.0173	-780.391	-77998.8	68297.8	4700.09	287.517	1002.95	0	0	0	0	0	0	0	603	903	0
8195	8	2.21495	6.866	-39.1437	-7487.46	-3033.22	-874.193	122.511	491.281	0	43.3946	95.6958	-779.476	-77907.2	68541.9	4654.31	287.933	1002.95	0	0	0	0	0	0	0	603	903	0
8195	9	2.36754	10.0703	-42.1954	-8952.3	-3460.46	-1377.73	117.99	512.163	0	44.3102	96.4587	-781.612	-77357.9	68236.8	4928.97	287.303	1001.97	0	0	0	0	0	0	0	603	903	0
8196	0	0.689073	15.2583	-48.6041	-10508.7	-4131.85	-1423.51	114.99	516.21	0	46.1412	96.4587	-781.307	-77266.4	68114.7	5295.18	287.181	1001.89	0	0	0	0	0	0	0	603	903	0
8196	1	2.21495	15.2583	-57.149	-11424.2	-4375.99	-1423.51	123.429	499.902	0	42.9369	96.9165	-776.729	-77541	68236.8	5066.3	287.852	1002.83	0	0	0	0	0	0	0	603	903	0
8196	2	2.52013	15.5635	-62.6422	-12706	-4681.16	-1515.06	125.271	502.834	0	43.3946	97.6794	-781.612	-77266.4	68297.8	5295.18	287.381	1001.86	0	0	0	0	0	0	0	603	903	0
8196	3	3.13048	15.5635	-67.2198	-14079.3	-5047.37	-1927.05	124.912	509.451	0	44.4627	99.0527	-781.002	-76442.3	68053.7	5020.52	287.136	1000.88	0	0	0	0	0	0	0	603	903	0
8196	4	2.06236	18.1575	-73.3234	-14537	-4925.3	-2064.38	132.828	498.259	0	42.9369	100.426	-783.443	-76900.1	68541.9	5203.63	287.488	1001.16	0	0	0	0	0	0	0	603	903	0
8196	5	3.43565	17.3946	-78.5114	-16001.9	-5840.83	-2293.26	125.605	503.816	0	44.6153	97.832	-781.917	-76625.5	68053.7	5203.63	287.034	1001	0	0	0	0	0	0	0	603	903	0
8196	6	4.04601	19.5308	-85.5304	-17375.2	-5779.8	-2247.48	132.424	503.146	0	42.9369	100.731	-781.002	-76350.8	68053.7	5524.06	287.136	1000.76	0	0	0	0	0	0	0	603	903	0
8196	7	4.35118	21.5144	-90.7184	-18016	-6084.97	-2934.13	132.925	498.593	0	42.6317	99.5105	-778.865	-76167.7	67931.6	5615.62	287.219	1000.79	0	0	0	0	0	0	0	603	903	0
8196	8	6.79259	22.7351	-93.465	-18931.5	-6451.18	-3346.12	130.978	502.552	0	41.8687	100.731	-782.222	-75801.5	68053.7	5707.17	287	999.905	0	0	0	0	0	0	0	603	903	0
8196	9	6.79259	24.261	-99.5685	-20213.3	-6817.39	-3346.12	131.531	503.009	0	41.1058	102.562	-781.612	-75618.4	68664	5478.29	287.849	999.747	0	0	0	0	0	0	0	603	903	0
8197	0	7.09776	24.4136	-103.231	-20487.9	-6878.43	-4078.54	133.368	498.468	0	42.3265	101.952	-780.086	-75526.9	68114.7	5569.84	287.317	999.819	0	0	0	0	0	0	0	603	903	0
8197	1	9.23399	25.024	-107.808	-21495	-7000.5	-3529.22	135.065	499.382	0	42.3265	101.952	-780.086	-75801.5	67809.5	5661.39	286.926	1000.17	0	0	0	0	0	0	0	603	903	0
8197	2	8.62364	25.7869	-112.386	-23417.6	-7427.75	-4032.76	133.909	508.368	0	42.4791	103.936	-781.612	-75618.4	67321.2	5981.83	286.131	999.747	0	0	0	0	0	0	0	603	903	0
8197	3	8.77623	24.261	-115.132	-23600.7	-7427.75	-4078.54	135.485	504.988	0	41.1058	102.715	-781.307	-74428.2	67809.5	6027.6	286.79	998.261	0	0	0	0	0	0	0	603	903	0
8197	4	10.4547	22.5825	-116.964	-23051.4	-7793.96	-4170.09	133.364	497.082	0	41.2584	105.309	-780.086	-75069.1	67870.6	6073.38	287.004	999.232	0	0	0	0	0	0	0	603	903	0
8197	5	10.1495	22.2774	-121.541	-24974	-8343.28	-3712.33	131.354	505.478	0	41.5636	105.004	-778.255	-74794.4	67748.5	6256.49	287.052	999.105	0	0	0	0	0	0	0	603	903	0
8197	6	9.84435	21.667	-125.203	-25614.9	-8160.17	-4032.76	134.825	504.587	0	40.3429	105.309	-777.034	-73512.6	67565.4	6119.16	286.953	997.607	0	0	0	0	0	0	0	603	903	0
8197	7	8.62364	19.3782	-128.56	-25614.9	-8282.24	-3803.88	135.577	499.245	0	40.9532	106.224	-778.255	-74519.7	67748.5	6210.71	287.052	998.752	0	0	0	0	0	0	0	603	903	0
8197	8	9.84435	17.0894	-126.729	-26164.2	-8526.38	-3620.77	132.72	506.458	0	40.0377	105.919	-776.424	-73787.3	67321.2	6576.92	286.707	998.035	0	0	0	0	0	0	0	603	903	0
8197	9	9.23399	16.479	-132.833	-27629.1	-8770.52	-3575	133.973	507.999	0	40.8006	106.53	-774.898	-73421.1	67016.1	6439.59	286.484	997.749	0	0	0	0	0	0	0	603	903	0
8198	0	9.38658	14.9532	-136.495	-27262.9	-8709.49	-3575	136.192	499.736	0	40.8006	107.598	-774.898	-73238	67382.3	6485.37	286.956	997.513	0	0	0	0	0	0	0	603	903	0
8198	1	10.6073	12.054	-137.715	-27812.2	-8953.63	-3483.45	134.985	501.954	0	41.5636	108.513	-774.288	-73421.1	66649.9	6622.7	286.079	997.824	0	0	0	0	0	0	0	603	903	0
8198	2	9.84435	10.9859	-140.157	-28453	-9075.7	-3163.01	135.246	503.009	0	39.8851	108.971	-772.151	-71864.7	67016.1	6622.7	286.791	996.071	0	0	0	0	0	0	0	603	903	0
8198	3	9.53917	8.84964	-142.903	-28269.9	-9136.73	-3300.34	136.064	497.825	0	40.648	109.734	-771.846	-72780.2	66283.7	6805.8	285.877	997.294	0	0	0	0	0	0	0	603	903	0
8198	4	11.2176	6.40823	-148.091	-28819.3	-9197.77	-2842.58	137.891	494.605	0	40.648	109.429	-769.1	-72322.5	66344.7	7034.68	286.263	997.035	0	0	0	0	0	0	0	603	903	0
8198	5	9.99693	4.272	-148.397	-29643.2	-9380.88	-3117.23	136.785	499.757	0	39.7325	110.802	-767.269	-71040.8	66588.8	6760.03	286.787	995.589	0	0	0	0	0	0	0	603	903	0
8198	6	10.4547	2.13577	-151.754	-29551.7	-8892.59	-2842.58	141.401	494.735	0	39.1222	110.344	-768.184	-71407	65917.5	6943.13	285.809	995.956	0	0	0	0	0	0	0	603	903	0
8198	7	10.6073	0.457305	-151.754	-30192.5	-9625.02	-2705.25	136.575	498.958	0	38.2066	110.192	-764.217	-71223.8	66222.6	6943.13	286.654	996.199	0	0	0	0	0	0	0	603	903	0
8198	8	10.6073	-1.83151	-152.364	-31199.6	-9380.88	-2384.81	138.431	504.77	0	38.054	112.328	-764.217	-69942.1	66100.5	6668.47	286.495	994.521	0	0	0	0	0	0	0	603	903	0
8198	9	9.69176	-3.50998	-158.467	-31291.2	-10052.3	-2247.48	136.566	497.461	0	39.5799	111.107	-762.386	-69667.5	65490.2	6988.91	285.902	994.381	0	0	0	0	0	0	0	603	903	0
8199	0	9.38658	-5.64621	-161.519	-31291.2	-9869.16	-2476.36	138.898	493.73	0	37.7489	112.633	-758.724	-69942.1	65795.4	7172.01	286.719	995.184	0	0	0	0	0	0	0	603	903	0
8199	1	10.4547	-8.39279	-163.045	-31932	-9991.23	-2201.71	138.721	495.848	0	37.1385	112.786	-757.808	-69118.1	65368.1	7217.79	286.259	994.208	0	0	0	0	0	0	0	603	903	0
8199	2	11.3702	-8.54538	-165.792	-32206.7	-9991.23	-2247.48	139.736	494.26	0	37.4437	112.938	-754.146	-68568.8	65001.9	7263.57	286.193	993.923	0	0	0	0	0	0	0	603	903	0
8199	3	11.065	-9.91867	-168.843	-33213.8	-10113.3	-2293.26	140.103	496.714	0	36.8333	112.48	-753.231	-68935.1	65124	7309.34	286.46	994.519	0	0	0	0	0	0	0	603	903	0
8199	4	10.7599	-11.1394	-170.674	-34037.8	-10540.5	-1927.05	138.242	499.431	0	38.2066	113.701	-751.705	-68568.8	64513.6	7172.01	285.823	994.218	0	0	0	0	0	0	0	603	903	0
8199	5	10.7599	-11.7497	-174.947	-35044.8	-10357.4	-1835.5	140.797	500.317	0	36.9859	112.938	-750.179	-66554.6	64818.8	7126.24	286.404	991.718	0	0	0	0	0	0	0	603	903	0
8199	6	10.9125	-14.3437	-178.609	-35502.6	-10723.6	-2064.38	139.96	498.773	0	36.5282	114.922	-748.348	-67836.4	64513.6	7584	286.208	993.648	0	0	0	0	0	0	0	603	903	0
8199	7	13.2013	-14.9541	-181.05	-35411.1	-10906.8	-1606.61	139.758	495.587	0	37.9015	114.006	-744.686	-67378.7	63903.3	7400.9	285.812	993.479	0	0	0	0	0	0	0	603	903	0
8199	8	11.828	-15.5644	-184.713	-36784.3	-10906.8	-1469.29	140.953	499.144	0	36.3756	115.227	-743.16	-66188.4	64086.4	7675.56	286.235	992.064	0	0	0	0	0	0	0	603	903	0
8199	9	11.5228	-16.0222	-188.069	-37516.8	-11150.9	-1698.17	140.709	499.484	0	35.9178	115.99	-741.023	-66920.9	63659.2	7538.23	285.907	993.309	0	0	0	0	0	0	0	603	903	0
8200	0	11.828	-17.3955	-192.342	-37059	-11639.2	-1286.18	139.487	492.673	0	34.6971	112.786	-737.667	-66371.6	63659.2	7675.56	286.298	992.975	0	0	0	0	0	0	0	603	903	0
8200	1	12.5909	-18.4636	-195.699	-37883	-11639.2	-1331.96	140.525	493.578	0	35.9178	115.837	-735.225	-65089.8	63170.9	7675.56	285.92	991.53	0	0	0	0	0	0	0	603	903	0
8200	2	11.065	-17.3955	-199.971	-37699.9	-11639.2	-1103.07	141.796	488.526	0	35.0023	115.685	-733.699	-65272.9	62682.6	7950.21	285.434	991.964	0	0	0	0	0	0	0	603	903	0
8200	3	10.9125	-18.7688	-202.413	-38615.4	-12249.5	-1057.3	139.482	490.776	0	34.8497	115.685	-730.953	-64723.6	62865.7	7858.66	286.005	991.547	0	0	0	0	0	0	0	603	903	0
8200	4	10.9125	-19.3791	-206.075	-39164.7	-12371.6	-919.969	139.966	490.051	0	34.3919	116.906	-728.206	-63991.2	62682.6	7767.11	286.078	990.875	0	0	0	0	0	0	0	603	903	0
8200	5	9.99693	-20.2946	-207.906	-40812.7	-12737.8	-919.969	138.733	496.304	0	36.8333	115.99	-727.291	-63350.3	61217.7	7995.99	284.172	990.105	0	0	0	0	0	0	0	603	903	0
8200	6	9.53917	-20.4472	-215.535	-41545.1	-12920.9	-416.429	140.052	492.753	0	33.7816	117.058	-723.018	-63441.9	61950.2	7950.21	285.683	990.746	0	0	0	0	0	0	0	603	903	0
8200	7	6.64	-20.2946	-220.723	-41087.3	-13226.1	-416.429	140.078	486.149	0	33.7816	117.516	-720.882	-62617.9	61522.9	8179.09	285.344	989.863	0	0	0	0	0	0	0	603	903	0
8200	8	6.33482	-21.6679	-225.606	-43284.6	-14263.7	-4.44129	136.776	491.859	0	34.2393	117.516	-717.525	-62068.6	61095.7	7995.99	285.148	989.504	0	0	0	0	0	0	0	603	903	0
8200	9	8.31847	-21.0576	-232.93	-44291.7	-14019.5	-507.981	139.812	490.15	0	33.3238	117.821	-714.168	-62343.2	61339.8	8270.65	285.89	990.295	0	0	0	0	0	0	0	603	903	0
8201	0	9.53917	-21.2102	-237.203	-44749.4	-14813	-507.981	137.551	488.655	0	35.0023	118.431	-712.337	-61793.9	60302.2	7950.21	284.654	989.748	0	0	0	0	0	0	0	603	903	0
8201	1	8.01329	-24.7197	-242.696	-45298.7	-14629.9	178.664	139.719	486.648	0	32.8661	117.974	-708.675	-60146	60424.3	8224.87	285.264	987.871	0	0	0	0	0	0	0	603	903	0
8201	2	8.62364	-25.9404	-248.189	-45665	-15301.3	270.217	138.348	483.993	0	32.1031	118.584	-705.318	-61061.5	60424.3	8270.65	285.67	989.573	0	0	0	0	0	0	0	603	903	0
8201	3	8.62364	-25.0249	-255.208	-47038.3	-15484.4	224.441	139.326	484.313	0	31.3402	117.974	-701.351	-59962.8	59691.9	8224.87	285.11	988.496	0	0	0	0	0	0	0	603	903	0
8201	4	7.09776	-26.2456	-260.091	-47862.2	-15911.6	453.323	138.823	484.021	0	31.1876	118.431	-698.909	-59230.4	59203.6	8270.65	284.709	987.747	0	0	0	0	0	0	0	603	903	0
8201	5	8.47106	-29.1447	-262.838	-49144	-16155.8	590.651	138.533	486.975	0	31.035	117.363	-695.552	-59138.9	58959.4	8133.32	284.766	988.024	0	0	0	0	0	0	0	603	903	0
8201	6	9.23399	-30.518	-265.889	-49784.8	-16277.9	819.533	138.78	487.239	0	30.2721	118.431	-693.416	-58589.6	58837.4	8270.65	284.851	987.494	0	0	0	0	0	0	0	603	903	0
8201	7	9.99693	-31.281	-273.824	-49876.4	-16827.2	636.428	138.547	482.148	0	30.7298	117.516	-684.566	-57857.2	58532.2	8224.87	285.503	987.517	0	0	0	0	0	0	0	603	903	0
8201	8	8.62364	-32.8069	-276.265	-50425.7	-16766.1	1185.74	139.311	482.526	0	29.6617	119.347	-685.787	-57216.3	58349.1	8453.76	285.083	986.432	0	0	0	0	0	0	0	603	903	0
8201	9	8.47106	-35.0957	-278.707	-51615.9	-17437.5	1002.64	137.434	485.198	0	29.6617	116.448	-684.261	-57307.8	58166	8362.2	285.006	986.752	0	0	0	0	0	0	0	603	903	0
8202	0	7.25035	-35.8586	-282.674	-51524.3	-17559.6	1597.73	137.88	482.275	0	29.3565	118.584	-678.157	-56209.2	57677.7	8362.2	285.051	985.885	0	0	0	0	0	0	0	603	903	0
8202	1	6.94518	-36.9267	-288.167	-52531.4	-17437.5	1506.18	139.488	482.295	0	29.2039	116.6	-672.054	-56209.2	57189.4	8545.31	285.096	986.638	0	0	0	0	0	0	0	603	903	0
8202	2	8.47106	-38.4526	-292.44	-53263.8	-17376.5	1872.39	140.581	482.136	0	27.9832	117.974	-671.443	-55293.7	57189.4	8316.43	285.174	985.35	0	0	0	0	0	0	0	603	903	0
8202	3	8.31847	-41.0466	-294.576	-53813.2	-18047.9	1872.39	138.733	482.68	0	28.2884	117.058	-668.086	-54835.9	56334.9	8224.87	284.323	985.079	0	0	0	0	0	0	0	603	903	0
8202	4	7.09776	-41.9621	-298.848	-53721.6	-18475.1	2375.93	138.179	479.762	0	28.2884	117.668	-664.424	-54744.4	56457	8774.19	284.971	985.394	0	0	0	0	0	0	0	603	903	0
8202	5	7.40294	-42.2673	-302.51	-55094.9	-18841.3	2192.83	137.717	482.126	0	27.0677	116.753	-658.016	-54652.8	55785.6	8545.31	284.779	986.057	0	0	0	0	0	0	0	603	903	0
8202	6	5.57189	-43.1828	-306.783	-55278	-18841.3	2467.48	138.584	480.186	0	27.2203	118.279	-656.795	-53554.2	55358.4	8636.86	284.286	984.539	0	0	0	0	0	0	0	603	903	0
8202	7	7.55553	-45.7768	-312.276	-55369.5	-19634.8	2833.69	137.124	477.31	0	29.0514	115.837	-653.438	-53096.4	55114.2	8545.31	284.345	984.257	0	0	0	0	0	0	0	603	903	0
8202	8	6.02965	-47.1501	-314.412	-56102	-19878.9	2696.37	136.774	478.434	0	26.61	118.737	-647.029	-53462.6	54687	8224.87	284.52	985.628	0	0	0	0	0	0	0	603	903	0
8202	9	5.26671	-46.9975	-318.38	-57200.6	-20062	2925.25	136.987	479.662	0	26.3048	115.685	-643.367	-51997.8	54687	8774.19	285.001	983.821	0	0	0	0	0	0	0	603	903	0
8203	0	4.35118	-48.5234	-321.736	-57658.4	-20245.1	3154.13	137.075	479.21	0	26.9151	117.821	-641.536	-51540	54198.7	8682.64	284.483	983.338	0	0	0	0	0	0	0	603	903	0
8203	1	4.19859	-50.3545	-327.23	-57109.1	-20428.2	3428.79	137.572	474.523	0	27.3729	116.448	-636.959	-51631.6	53283.2	8362.2	283.652	984.06	0	0	0	0	0	0	0	603	903	0
8203	2	2.97789	-52.0329	-332.112	-58116.1	-21160.7	3337.23	136.285	474.989	0	25.847	117.821	-634.212	-50258.3	53405.2	8591.08	284.207	982.245	0	0	0	0	0	0	0	603	903	0
8203	3	2.97789	-49.8967	-335.775	-58024.6	-21038.6	3795	137.343	472.808	0	26.4574	118.126	-626.583	-50349.8	52611.8	8453.76	283.966	983.356	0	0	0	0	0	0	0	603	903	0
8203	4	1.75719	-52.0329	-338.521	-59031.7	-21404.8	3932.33	136.77	474.381	0	26.61	118.126	-625.667	-50075.2	52367.6	8316.43	283.699	983.035	0	0	0	0	0	0	0	603	903	0
8203	5	1.29942	-52.9485	-344.319	-59214.8	-21587.9	3886.55	137.303	471.976	0	26.1522	118.126	-619.869	-49159.6	51940.4	8636.86	283.793	982.307	0	0	0	0	0	0	0	603	903	0
8203	6	1.14684	-53.864	-349.507	-60771.2	-22381.4	4069.66	135.963	473.877	0	24.6263	117.516	-616.207	-48244.1	51391.1	8636.86	283.399	981.292	0	0	0	0	0	0	0	603	903	0
8203	7	2.52013	-56.6106	-354.39	-61320.5	-22381.4	4069.66	136.845	473.031	0	25.9996	117.058	-611.629	-47511.7	51635.2	8224.87	284.422	980.681	0	0	0	0	0	0	0	603	903	0
8203	8	0.383897	-57.8313	-356.526	-60588.1	-22686.5	4527.42	136.368	469.94	0	24.4737	116.753	-606.746	-47328.6	50719.7	8591.08	283.593	981.004	0	0	0	0	0	0	0	603	903	0
8203	9	0.84166	-58.4416	-362.935	-62510.7	-23296.9	4527.42	135.81	472.236	0	24.3211	115.227	-600.643	-46596.1	50597.6	8453.76	284.239	980.577	0	0	0	0	0	0	0	603	903	0
8204	0	1.29942	-58.4416	-370.565	-63151.5	-23602.1	4847.85	136.308	470.42	0	24.9315	116.295	-598.201	-45863.7	50231.4	8545.31	283.971	979.669	0	0	0	0	0	0	0	603	903	0
8204	1	-1.29457	-62.1037	-374.227	-63151.5	-24517.6	5030.96	134.485	468.752	0	23.7108	116.753	-591.487	-45497.5	49621.1	8453.76	283.892	979.921	0	0	0	0	0	0	0	603	903	0
8204	2	-2.05751	-65.6133	-380.025	-64158.6	-24212.4	5442.95	136.287	468.827	0	22.7953	115.99	-590.572	-45222.9	49499	8911.52	283.815	979.575	0	0	0	0	0	0	0	603	903	0
8204	3	-1.44716	-63.1718	-385.823	-64799.5	-25005.9	5717.6	135.188	467.951	0	25.847	115.227	-584.163	-44582	49315.9	8407.98	284.421	979.318	0	0	0	0	0	0	0	603	903	0
8204	4	-1.59975	-64.0874	-393.148	-65348.8	-25555.2	5946.49	134.998	466.22	0	22.4901	116.753	-578.975	-43025.6	48583.5	8407.98	283.913	977.313	0	0	0	0	0	0	0	603	903	0
8204	5	-4.34633	-67.9021	-396.199	-65989.7	-25799.3	6221.14	134.883	466.557	0	22.6427	115.38	-574.703	-43391.8	47729	8636.86	283.05	978.503	0	0	0	0	0	0	0	603	903	0
8204	6	-5.10927	-69.7331	-403.524	-67637.6	-26836.9	6450.03	133.494	467.618	0	24.4737	114.617	-567.989	-42842.5	47606.9	8270.65	283.817	978.429	0	0	0	0	0	0	0	603	903	0
8204	7	-5.41444	-69.8857	-409.932	-68003.8	-26775.9	6724.68	134.682	465.89	0	21.5746	115.227	-566.768	-42750.9	47790	8087.54	284.32	978.429	0	0	0	0	0	0	0	603	903	0
8204	8	-5.26186	-70.6487	-415.12	-67820.8	-27508.3	6816.24	133.734	463.376	0	21.422	114.159	-560.359	-42018.5	47179.6	8179.09	284.195	977.985	0	0	0	0	0	0	0	603	903	0
8204	9	-6.94032	-74.0056	-418.477	-69102.4	-27569.4	7594.44	134.12	465.128	0	22.0323	114.769	-553.646	-41103	46081	8407.98	283.232	977.241	0	0	0	0	0	0	0	603	903	0
8205	0	-7.39809	-74.4633	-424.276	-69743.3	-28484.9	7365.55	132.862	464.382	0	21.1168	113.701	-550.289	-41194.6	46386.2	8224.87	284.294	977.86	0	0	0	0	0	0	0	603	903	0
8205	1	-8.77138	-73.5478	-427.632	-69651.8	-29034.2	7777.54	132.105	462.878	0	20.3539	112.48	-544.185	-40736.8	45592.7	8545.31	283.782	977.858	0	0	0	0	0	0	0	603	903	0
8205	2	-8.16103	-76.1418	-433.126	-70384.2	-29034.2	7777.54	132.966	462.503	0	21.7271	112.328	-539.607	-38539.5	45226.5	8133.32	283.814	974.421	0	0	0	0	0	0	0	603	903	0
8205	3	-8.61879	-79.041	-438.924	-71208.2	-29827.7	8006.42	132.044	462.234	0	21.422	112.023	-535.64	-39729.7	44860.3	8224.87	283.751	977.172	0	0	0	0	0	0	0	603	903	0
8205	4	-9.22914	-77.9729	-444.722	-71665.9	-30071.8	8647.29	132.381	461.148	0	22.7953	110.955	-529.842	-38722.6	43822.7	8270.65	282.709	976.083	0	0	0	0	0	0	0	603	903	0
8205	5	-8.92396	-78.5832	-450.826	-71025.1	-30560.1	8509.96	132.213	457.544	0	20.8116	111.87	-525.875	-38173.3	44066.9	7995.99	283.797	975.59	0	0	0	0	0	0	0	603	903	0
8205	6	-9.99208	-80.1091	-454.183	-72856.1	-30865.3	8601.52	132.042	460.411	0	20.659	109.886	-520.687	-38081.8	43334.4	8362.2	283.226	976.138	0	0	0	0	0	0	0	603	903	0
8205	7	-11.6705	-81.3298	-458.455	-72947.7	-31231.5	8876.17	131.877	459.116	0	20.5064	110.039	-513.057	-37624	42846.1	8041.76	283.511	976.333	0	0	0	0	0	0	0	603	903	0
8205	8	-10.9076	-80.872	-461.202	-72673	-31353.5	8921.95	132.018	457.573	0	20.0487	110.192	-509.7	-36250.7	42357.9	8270.65	283.103	974.122	0	0	0	0	0	0	0	603	903	0
8205	9	-11.3654	-82.3979	-461.507	-73222.3	-31536.6	8921.95	131.666	458.659	0	20.659	108.818	-503.597	-35701.4	41686.5	8179.09	282.778	973.893	0	0	0	0	0	0	0	603	903	0
8206	0	-12.8912	-83.466	-468.526	-73863.2	-32330.1	9288.16	130.996	457.65	0	19.1331	108.513	-499.629	-35609.8	41686.5	7950.21	283.435	974.272	0	0	0	0	0	0	0	603	903	0
8206	1	-13.6542	-83.7712	-471.273	-74046.3	-31963.9	9333.94	132.175	457.12	0	18.9806	106.835	-491.085	-34419.7	41442.3	7812.88	284.389	973.089	0	0	0	0	0	0	0	603	903	0
8206	2	-13.8068	-83.6186	-474.019	-74046.3	-32024.9	9242.38	132.44	456.21	0	21.2694	107.14	-486.812	-33687.2	40526.8	8041.76	283.249	972.2	0	0	0	0	0	0	0	603	903	0
8206	3	-13.5016	-85.2971	-474.63	-74778.8	-33062.5	9654.37	130.34	457.552	0	18.065	106.682	-482.845	-33412.6	40343.7	8041.76	283.554	972.199	0	0	0	0	0	0	0	603	903	0
8206	4	-14.4171	-86.2126	-480.428	-75236.5	-33062.5	9791.7	131.181	456.603	0	18.6754	106.377	-477.352	-32497	39550.2	7721.33	282.853	971.078	0	0	0	0	0	0	0	603	903	0
8206	5	-14.8749	-88.0437	-483.48	-74870.3	-33856	10066.4	129.974	454.857	0	18.6754	105.461	-470.638	-31489.9	39306.1	8224.87	283.517	969.909	0	0	0	0	0	0	0	603	903	0
8206	6	-15.943	-89.1118	-487.142	-75145	-33733.9	9929.03	130.751	454.257	0	17.1495	105.156	-465.45	-32130.8	38878.9	7629.78	283.53	972.032	0	0	0	0	0	0	0	603	903	0
8206	7	-15.3327	-88.9592	-489.278	-75236.5	-34100.1	10295.2	130.305	453.77	0	16.0814	104.241	-459.957	-31123.7	38390.6	7309.34	283.466	970.667	0	0	0	0	0	0	0	603	903	0
8206	8	-14.7223	-89.7221	-492.33	-76060.5	-34527.4	10295.2	129.869	454.491	0	17.7599	104.088	-452.632	-30025.1	38024.4	7400.9	284.007	969.334	0	0	0	0	0	0	0	603	903	0
8206	9	-15.3327	-90.3325	-496.297	-75785.8	-34588.4	10524.1	130.307	452.703	0	16.6917	103.325	-447.75	-30482.9	37291.9	7858.66	283.288	971.08	0	0	0	0	0	0	0	603	903	0
8207	0	-15.7904	-90.9428	-500.569	-77525.3	-35259.8	10661.5	129.561	454.874	0	16.0814	102.104	-441.341	-29567.3	36620.6	7812.88	282.976	969.994	0	0	0	0	0	0	0	603	903	0
8207	1	-14.112	-92.6213	-505.147	-77342.2	-34710.5	10936.1	131.286	453.108	0	16.9969	101.952	-435.237	-28560.3	36620.6	7721.33	284.139	968.62	0	0	0	0	0	0	0	603	903	0
8207	2	-16.2482	-93.0791	-510.64	-77342.2	-35748.1	11348.1	129.994	451.461	0	16.234	100.731	-430.965	-28102.5	35827.1	7492.45	283.132	968.208	0	0	0	0	0	0	0	603	903	0
8207	3	-16.0956	-93.842	-514.302	-78440.9	-36053.3	11256.5	129.899	452.519	0	15.1659	99.5105	-424.251	-27736.3	35644	7538.23	284.016	968.377	0	0	0	0	0	0	0	603	903	0
8207	4	-16.7059	-94.6049	-518.575	-78440.9	-36602.6	11577	129.417	451.262	0	14.7081	99.0527	-420.589	-27095.4	35399.9	7400.9	284.167	967.423	0	0	0	0	0	0	0	603	903	0
8207	5	-18.537	-95.9782	-521.321	-78440.9	-37212.9	11393.9	128.618	450.465	0	16.234	98.1372	-414.18	-26912.3	34545.4	7538.23	283.407	967.977	0	0	0	0	0	0	0	603	903	0
8207	6	-19.2999	-97.3515	-526.815	-78532.4	-37090.9	11668.5	129.594	449.07	0	14.2503	95.8484	-404.109	-26912.3	33996.1	7446.67	284.126	969.597	0	0	0	0	0	0	0	603	903	0
8207	7	-20.0629	-96.436	-531.392	-79539.5	-37884.3	11622.8	128.707	449.681	0	14.4029	96.7639	-403.194	-25539	33568.8	7355.12	283.257	966.342	0	0	0	0	0	0	0	603	903	0
8207	8	-20.9784	-97.8093	-537.496	-79539.5	-38067.4	11989	129.176	447.982	0	14.8607	93.5596	-396.785	-25081.3	33324.7	7675.56	283.987	966.211	0	0	0	0	0	0	0	603	903	0
8207	9	-19.4525	-98.7248	-540.242	-80180.3	-38738.8	12263.6	128.294	448.416	0	14.0977	94.9329	-387.935	-24989.7	32836.4	6943.13	284.644	967.417	0	0	0	0	0	0	0	603	903	0
8208	0	-22.5043	-99.7929	-544.21	-81095.9	-38738.8	12538.3	128.816	449.016	0	12.877	94.3225	-380.916	-24165.7	31981.9	6988.91	283.96	966.441	0	0	0	0	0	0	0	603	903	0
8208	1	-23.1146	-101.166	-549.092	-81370.6	-39776.4	12538.3	127.56	448.191	0	13.7926	92.1863	-375.423	-23158.7	30944.3	7034.68	282.425	964.687	0	0	0	0	0	0	0	603	903	0
8208	2	-23.8776	-101.014	-552.144	-81553.6	-40142.6	12721.4	127.297	447.704	0	13.7926	91.1182	-369.93	-23067.1	30578.1	7263.57	282.659	965.355	0	0	0	0	0	0	0	603	903	0
8208	3	-23.5724	-101.777	-557.943	-82286	-40020.5	12950.3	128.271	447.481	0	12.4193	91.7285	-364.131	-21968.5	30578.1	7172.01	283.975	963.331	0	0	0	0	0	0	0	603	903	0
8208	4	-24.4879	-102.54	-562.825	-82835.4	-41058.1	12858.7	127.05	447.178	0	12.7245	90.3552	-356.807	-22151.6	29662.6	6897.35	283.133	965.083	0	0	0	0	0	0	0	603	903	0
8208	5	-24.4879	-103.15	-568.318	-82469.2	-40997.1	13087.6	127.862	445.111	0	13.3348	90.2026	-351.924	-20229	29174.3	6576.92	282.899	960.481	0	0	0	0	0	0	0	603	903	0
8208	6	-25.8612	-103.15	-575.032	-83293.1	-42156.8	12996	126.688	444.85	0	12.877	89.5923	-344.295	-20961.4	28563.9	6714.25	282.964	963.882	0	0	0	0	0	0	0	603	903	0
8208	7	-25.7086	-104.523	-582.357	-82835.4	-42461.9	13362.3	127.086	442.242	0	11.046	88.8293	-339.107	-20320.5	28014.6	6485.37	282.613	962.924	0	0	0	0	0	0	0	603	903	0
8208	8	-29.9811	-106.202	-585.408	-83750.9	-42645.1	13636.9	127.153	443.064	0	11.3512	87.9138	-334.224	-19771.2	27831.5	6576.92	283.272	962.156	0	0	0	0	0	0	0	603	903	0
8208	9	-29.3707	-107.117	-589.681	-84025.6	-43255.4	13682.7	126.646	442.493	0	13.7926	86.5405	-326.9	-18855.7	27404.3	6439.59	283.831	960.68	0	0	0	0	0	0	0	603	903	0
8209	0	-29.2182	-109.253	-593.953	-85215.7	-43499.5	14003.1	126.763	443.472	0	10.4356	86.2354	-322.017	-18214.8	26793.9	6439.59	283.206	959.565	0	0	0	0	0	0	0	603	903	0
8209	1	-30.2863	-109.406	-600.057	-85307.3	-43804.7	14277.8	126.999	442.165	0	10.2831	82.4207	-314.083	-18214.8	25878.4	6439.59	282.394	960.994	0	0	0	0	0	0	0	603	903	0
8209	2	-29.9811	-110.779	-601.583	-85124.2	-43926.8	14277.8	126.981	441.5	0	11.046	82.7258	-309.81	-17207.7	25573.2	6027.6	282.545	958.543	0	0	0	0	0	0	0	603	903	0
8209	3	-30.4389	-110.627	-605.855	-86131.3	-44720.2	14186.2	126.187	442.165	0	10.1305	79.5215	-303.707	-17573.9	25634.2	5981.83	284.405	960.865	0	0	0	0	0	0	0	603	903	0
8209	4	-29.3707	-110.627	-608.297	-86222.8	-44476.1	14415.1	126.884	441.745	0	8.75717	78.9111	-297.603	-16658.4	25207	5707.17	284.7	958.975	0	0	0	0	0	0	0	603	903	0
8209	5	-28.913	-111.695	-608.907	-86131.3	-44964.4	14048.9	126.156	441.452	0	10.4356	77.843	-291.5	-15559.8	24474.6	5798.72	283.961	956.378	0	0	0	0	0	0	0	603	903	0
8209	6	-27.5397	-112.61	-614.4	-86589	-45330.6	14232	126.22	440.933	0	9.97787	77.3853	-285.701	-15468.2	24108.4	5478.29	284.383	957.141	0	0	0	0	0	0	0	603	903	0
8209	7	-27.8449	-111.084	-615.621	-87596.1	-45208.5	14186.2	126.564	442.289	0	8.14682	75.7068	-278.682	-15102	23253.9	5661.39	283.442	957.191	0	0	0	0	0	0	0	603	903	0
8209	8	-27.0819	-110.474	-619.588	-87138.4	-45818.9	14094.7	126.049	440.639	0	8.29941	73.5706	-269.527	-15193.6	22521.4	5340.96	283.559	959.371	0	0	0	0	0	0	0	603	903	0
8209	9	-27.0819	-110.932	-622.64	-87504.6	-45818.9	14186.2	126.412	440.538	0	8.90976	73.7231	-267.086	-14094.9	22643.5	5432.51	284.78	955.773	0	0	0	0	0	0	0	603	903	0
8210	0	-25.2509	-110.627	-627.828	-88237	-46429.2	14094.7	126.048	440.543	0	8.75717	71.4343	-259.761	-14644.2	21728	5249.41	283.646	959.376	0	0	0	0	0	0	0	603	903	0
8210	1	-25.556	-109.559	-630.574	-88328.6	-46246.1	13774.2	126.66	440.076	0	7.07871	71.7395	-253.963	-13179.4	21605.9	5157.85	285.075	954.895	0	0	0	0	0	0	0	603	903	0
8210	2	-26.0138	-109.559	-633.626	-88237	-46673.4	14003.1	126.339	439.257	0	7.84164	71.4343	-247.859	-12996.3	20873.5	5386.73	284.215	955.434	0	0	0	0	0	0	0	603	903	0
8210	3	-25.7086	-110.474	-637.288	-88786.3	-47283.7	14140.5	125.805	439.319	0	7.53647	69.2981	-242.061	-12447	20324.2	5249.41	283.963	954.421	0	0	0	0	0	0	0	603	903	0
8210	4	-25.8612	-110.016	-640.95	-89335.6	-47039.6	14140.5	126.61	439.38	0	7.84164	69.2981	-235.347	-12172.3	19835.9	5157.85	284.284	954.721	0	0	0	0	0	0	0	603	903	0
8210	5	-26.0138	-111.084	-645.528	-88603.2	-47955.1	14323.6	125.712	437.257	0	7.68906	67.0093	-231.38	-11531.5	19347.6	5157.85	283.618	952.838	0	0	0	0	0	0	0	603	903	0
8210	6	-27.5397	-111.084	-648.885	-89793.4	-47711	14277.8	126.472	438.381	0	6.77353	66.5515	-224.971	-11256.8	19225.5	4608.54	285.458	953.037	0	0	0	0	0	0	0	603	903	0
8210	7	-27.9975	-111.39	-653.157	-89976.5	-48504.4	14369.3	125.739	437.756	0	6.16318	65.3308	-221.309	-10707.5	18737.3	4700.09	284.666	951.383	0	0	0	0	0	0	0	603	903	0
8210	8	-29.5233	-112.458	-655.294	-89244	-49053.7	14598.2	125.142	436.189	0	6.16318	63.3472	-214.595	-10249.7	18126.9	4837.42	284.47	950.763	0	0	0	0	0	0	0	603	903	0
8210	9	-29.8285	-113.068	-659.261	-90068.1	-48870.6	14506.7	125.871	436.62	0	6.46835	61.8213	-208.492	-10341.3	17699.7	4745.87	284.894	952.6	0	0	0	0	0	0	0	603	903	0
8211	0	-30.5914	-112.763	-663.228	-90892	-49481	14506.7	125.394	437.045	0	5.858	59.6851	-205.135	-9975.05	17211.4	4105	283.903	951.627	0	0	0	0	0	0	0	603	903	0
8211	1	-31.0492	-113.678	-665.67	-89335.6	-49786.2	14781.3	125.209	434.204	0	5.70541	57.854	-199.031	-9517.29	16967.2	4013.44	285.249	950.818	0	0	0	0	0	0	0	603	903	0
8211	2	-31.2018	-114.136	-669.332	-90342.7	-50457.6	14781.3	124.615	434.975	0	5.40024	56.9385	-193.233	-9242.63	16356.9	4196.55	284.649	950.832	0	0	0	0	0	0	0	603	903	0
8211	3	-30.744	-113.831	-670.247	-91258.2	-50030.3	14781.3	125.355	436.156	0	4.94247	54.8022	-189.571	-9242.63	15868.6	3784.56	283.708	951.756	0	0	0	0	0	0	0	603	903	0
8211	4	-32.5751	-114.289	-673.604	-91258.2	-50396.5	14781.3	125.184	435.478	0	4.02695	52.8186	-183.162	-8784.87	15563.4	3967.67	284.971	950.962	0	0	0	0	0	0	0	603	903	0
8211	5	-32.7277	-114.289	-676.961	-90617.4	-50823.8	14918.7	124.924	433.859	0	4.17954	52.666	-178.89	-7777.79	15075.2	3601.46	284.271	946.478	0	0	0	0	0	0	0	603	903	0
8211	6	-32.8803	-113.526	-679.708	-91349.8	-50396.5	14735.6	125.856	434.396	0	5.70541	50.5298	-172.786	-7503.13	14892.1	3647.23	286.188	946.424	0	0	0	0	0	0	0	603	903	0
8211	7	-33.338	-113.221	-680.013	-92173.7	-51373.1	14689.8	124.453	435.547	0	4.48471	49.9194	-166.072	-7320.03	13976.5	3418.35	284.159	947.077	0	0	0	0	0	0	0	603	903	0
8211	8	-32.2699	-112.763	-685.506	-91716	-51373.1	14918.7	125.058	433.793	0	4.17954	48.6987	-163.936	-7136.92	13610.3	3372.57	283.022	946.535	0	0	0	0	0	0	0	603	903	0
8211	9	-32.4225	-113.373	-687.642	-91349.8	-51739.3	15010.2	124.758	432.845	0	4.6373	46.7151	-157.222	-5855.18	13732.4	3189.47	287.344	940.242	0	0	0	0	0	0	0	603	903	0
8212	0	-32.1173	-112.763	-690.694	-92631.5	-52105.5	14918.7	124.561	434.114	0	5.09506	46.4099	-152.339	-6221.4	12877.9	3418.35	284.534	943.839	0	0	0	0	0	0	0	603	903	0
8212	1	-32.4225	-112.153	-694.051	-92082.2	-51922.4	15010.2	125.189	432.674	0	3.87436	43.9685	-149.288	-5855.18	13061	3189.47	287.489	942.221	0	0	0	0	0	0	0	603	903	0
8212	2	-31.8121	-112.915	-697.408	-92448.4	-52715.9	14872.9	124.412	432.56	0	5.40024	43.053	-144.71	-5580.52	11901.3	2960.59	282.243	941.564	0	0	0	0	0	0	0	603	903	0
8212	3	-32.7277	-112.763	-700.154	-93089.3	-52288.6	15056	125.318	432.955	0	4.48471	41.6797	-142.269	-5488.97	12328.6	2685.93	286.657	941.582	0	0	0	0	0	0	0	603	903	0
8212	4	-32.5751	-113.221	-702.291	-93638.6	-53021	15147.5	124.503	433.333	0	3.4166	39.0857	-135.86	-5397.42	11840.3	2823.26	287.151	942.728	0	0	0	0	0	0	0	603	903	0
8212	5	-32.7277	-112.763	-705.953	-91990.7	-53021	15056	124.894	430.307	0	3.4166	38.7805	-130.367	-4939.65	11352	2411.27	287.078	940.891	0	0	0	0	0	0	0	603	903	0
[truncated: 1,484 more rows]
