# Supplementary material for: The Effects of an Extemporaneous Speech Dual-task on Older Adult Gait Control
Source: Research Square preprint supplement (doi:10.21203/rs.3.rs-7674245/v1), 2025-11-18
Supplement: Supplementary file 97 [file DT8Walk8.xlsx]

## Sheet: Sheet1
Trajectories
		08:LFHD			08:RFHD			08:LBHD			08:RBHD			08:C7			08:T10			08:CLAV			08:STRN			08:RBAK			08:LSHO			08:LUPA			08:LELB			08:LFRM			08:LWRA			08:LWRB			08:LFIN
Frame	Sub Frame	X	Y	Z	X	Y	Z	X	Y	Z	X	Y	Z	X	Y	Z	X	Y	Z	X	Y	Z	X	Y	Z	X	Y	Z	X	Y	Z	X	Y	Z	X	Y	Z	X	Y	Z	X	Y	Z	X	Y	Z	X	Y	Z
		mm	mm	mm	mm	mm	mm	mm	mm	mm	mm	mm	mm	mm	mm	mm	mm	mm	mm	mm	mm	mm	mm	mm	mm	mm	mm	mm	mm	mm	mm	mm	mm	mm	mm	mm	mm	mm	mm	mm	mm	mm	mm	mm	mm	mm	mm	mm	mm
9529	0	200.943	-438.354	1678.78	286.427	-449.221	1679.66	189.513	-635.295	1670.74	299.934	-623.488	1672.53	259.568	-663.832	1534.46	259.308	-748.683	1271.69	242.222	-515.653	1446.97	254.943	-450.289	1245.02	346.408	-742.347	1329.73	65.0784	-597.486	1485.16	-4.87027	-636.939	1288.62	-2.11042	-655.654	1135.97	-26.4969	-586.348	978.063	20.0985	-548.774	890.199	-30.9736	-601.406	879.182	-29.0815	-549.481	822.56
9530	0	199.324	-428.444	1679.4	284.772	-439.279	1680.49	187.594	-625.402	1672.28	298.09	-613.435	1673.95	257.602	-654.603	1535.66	256.952	-739.006	1272.68	240.909	-506.003	1448.61	254.427	-441.108	1246.56	343.833	-733.363	1330.73	63.2624	-586.805	1486.67	-7.54926	-624.172	1289.89	-4.98733	-642.182	1136.9	-27.8154	-571.105	979.572	19.5619	-533.68	892.271	-32.3218	-585.221	880.534	-29.2541	-532.943	824.447
9531	0	197.595	-418.604	1680.29	283.033	-429.353	1681.2	185.909	-615.516	1673.87	296.468	-603.622	1675.9	255.675	-645.372	1537.33	254.583	-729.537	1273.99	239.648	-496.554	1450.23	253.596	-432.261	1248.18	341.331	-724.264	1332.17	61.7251	-576.362	1488.34	-10.1428	-611.34	1291.32	-8.05459	-628.569	1137.99	-29.1572	-555.699	981.466	19.2498	-518.462	894.458	-33.6881	-568.751	882.198	-29.4476	-515.883	826.779
9532	0	196.127	-408.638	1680.96	281.668	-419.536	1682.25	184.26	-605.725	1675.7	295.006	-593.809	1677.82	253.912	-636.054	1538.61	252.469	-720.09	1275.49	238.47	-487.066	1452.05	253.28	-423.451	1250.1	339.237	-714.679	1333.18	60.1844	-566.161	1490.2	-12.5683	-598.476	1292.91	-11.1339	-614.807	1139.45	-30.372	-540.139	983.427	19.0254	-503.145	896.831	-35.1964	-551.871	884.068	-29.6463	-498.601	829.225
9533	0	194.707	-398.899	1681.88	280.219	-409.862	1683.19	182.873	-596.01	1677.49	293.551	-584.088	1679.42	252.323	-626.993	1540.16	250.348	-710.874	1276.8	237.365	-477.738	1453.98	252.901	-414.73	1252	336.586	-706.224	1334.84	58.8403	-556.111	1491.96	-14.8531	-585.734	1294.26	-13.9623	-601.06	1140.57	-31.6228	-524.367	985.307	18.7663	-487.402	899.324	-36.2995	-534.994	885.795	-29.9344	-481.181	831.798
9534	0	193.523	-389.356	1682.83	279.067	-400.157	1684.57	181.469	-586.439	1679.58	292.16	-574.541	1681.44	250.835	-617.977	1541.95	248.354	-701.713	1278.27	236.445	-468.479	1455.93	252.441	-406.109	1253.75	334.712	-697.329	1336.16	57.6257	-546.376	1493.67	-16.9719	-573.14	1295.88	-16.6402	-587.22	1141.9	-32.7025	-508.483	987.574	18.5609	-471.662	902.099	-37.812	-517.83	887.885	-30.1736	-463.559	834.746
9535	0	192.181	-379.937	1683.99	277.839	-390.595	1685.69	180.206	-576.853	1681.49	291.008	-564.958	1683.48	249.322	-608.879	1543.44	246.617	-692.487	1279.89	235.287	-459.209	1457.95	251.818	-397.956	1254.98	333.208	-688.024	1337.53	56.5101	-536.76	1495.89	-19.0061	-560.488	1297.64	-19.3193	-573.33	1143.45	-33.7187	-492.467	989.949	18.1517	-455.798	904.737	-39.2009	-500.576	890.334	-30.2464	-445.835	837.815
9536	0	191.115	-370.397	1685.05	276.513	-381.089	1686.57	179.089	-567.363	1683.67	289.979	-555.346	1685.55	248.109	-599.94	1545.34	244.823	-683.264	1281.77	234.3	-450.006	1459.86	251.233	-388.89	1257.21	331.389	-679.388	1339.88	55.3079	-526.946	1497.75	-20.7933	-548.08	1299.47	-21.7763	-559.345	1145.15	-34.7173	-476.387	992.463	17.7763	-439.816	907.339	-40.4892	-483.103	892.947	-30.5112	-427.923	841.125
9537	0	189.995	-361.13	1686.11	275.319	-371.58	1687.62	178.066	-557.937	1685.36	288.874	-545.892	1687.32	246.752	-591.067	1547.29	243.132	-674.125	1283.28	233.431	-441.026	1461.86	250.512	-379.834	1259.11	329.94	-670.495	1341.44	54.1501	-517.452	1499.71	-22.3422	-536.018	1301.24	-24.105	-545.591	1146.72	-35.6856	-460.379	995.278	17.5567	-423.685	910.649	-41.7131	-465.81	895.503	-30.7276	-410.005	844.367
9538	0	188.961	-351.772	1687.2	274.391	-362.192	1689.16	177.149	-548.534	1687.46	287.908	-536.564	1689.38	245.576	-582.226	1548.87	241.544	-664.944	1284.86	232.682	-431.971	1464.06	249.939	-370.921	1261.15	328.651	-661.63	1343.16	53.3609	-508.144	1502.03	-23.6566	-524.222	1303.28	-26.2394	-531.78	1148.65	-36.4367	-444.472	998.201	17.1977	-407.64	914.087	-42.8014	-448.465	898.556	-31.0505	-392.146	848.351
9539	0	187.694	-342.496	1688.18	273.466	-352.84	1690.5	176.212	-539.277	1689.45	287.096	-527.04	1691.6	244.294	-573.384	1550.72	239.944	-655.778	1286.82	231.871	-423.034	1466.17	249.187	-362.011	1263.47	327.669	-652.322	1345.02	52.2015	-498.465	1504.25	-25.0019	-512.583	1305.74	-28.1711	-518.127	1150.68	-37.3903	-428.614	1001.65	16.7531	-391.349	918.066	-43.8726	-431.029	901.878	-31.2879	-374.146	852.578
9540	0	186.676	-333.256	1689.22	272.373	-343.598	1691.54	175.362	-530.018	1691.42	286.18	-517.749	1693.64	243.245	-564.66	1552.3	238.445	-646.657	1288.39	231.122	-414.07	1468.13	248.302	-353.593	1265.35	326.285	-643.85	1346.95	51.4388	-488.978	1506.41	-26.0827	-501.24	1307.92	-30.1443	-504.515	1152.84	-38.2477	-412.807	1004.92	16.294	-375.275	921.284	-44.951	-413.649	905.307	-31.6691	-356.289	856.794
9541	0	185.605	-324.183	1690.21	271.27	-334.322	1692.5	174.434	-520.944	1693.18	285.265	-508.638	1695.41	242.161	-555.953	1553.9	236.984	-637.656	1289.76	230.513	-405.1	1469.96	247.686	-344.968	1267.17	325.348	-634.714	1348.1	50.6655	-479.604	1508.31	-27.0796	-490.082	1309.96	-31.7323	-491.219	1154.73	-39.0373	-397.113	1008.01	15.8804	-358.907	925.592	-45.9435	-396.435	908.557	-31.9478	-338.475	861.127
9542	0	184.682	-315.06	1691.17	270.243	-325.146	1693.62	173.78	-511.789	1694.93	284.469	-499.278	1697.13	241.235	-547.303	1555.46	235.549	-628.607	1291.25	229.838	-396.164	1471.62	247.122	-336.672	1268.76	324.241	-626.221	1350.1	49.9204	-470.055	1510.25	-27.8481	-479.176	1311.97	-33.3055	-478.053	1156.7	-39.9658	-381.626	1011.53	15.5218	-342.6	929.325	-46.6744	-379.219	912.107	-32.2348	-320.635	865.39
9543	0	183.573	-306.082	1691.73	269.241	-315.916	1694.5	173.026	-502.639	1696.46	283.805	-489.968	1699.05	240.239	-538.494	1556.87	234.134	-619.607	1292.83	229.312	-387.193	1473.28	246.565	-327.994	1270.65	323.672	-617.488	1351.55	49.3241	-460.546	1512.24	-28.9681	-468.314	1313.44	-34.8086	-464.993	1158.57	-40.7191	-366.111	1014.85	15.0085	-326.141	933.44	-47.4654	-361.927	915.706	-32.6576	-302.801	870.072
9544	0	182.617	-296.978	1692.31	268.223	-306.79	1695.28	172.312	-493.605	1697.94	282.957	-480.743	1700.39	239.461	-529.758	1557.95	232.747	-610.741	1293.84	228.792	-378.229	1474.79	245.99	-319.695	1271.93	322.727	-608.726	1352.69	48.7231	-451.039	1513.96	-29.44	-457.611	1315.63	-36.0888	-452.305	1160.22	-41.5834	-350.956	1018.34	14.5118	-309.731	937.653	-48.0783	-344.98	919.141	-33.0005	-284.917	874.608
9545	0	181.423	-288.054	1692.96	267.27	-297.599	1696.24	171.631	-484.492	1698.95	282.243	-471.622	1701.81	238.613	-520.914	1559.08	231.151	-601.855	1295.17	228.304	-369.233	1476.12	245.812	-310.775	1273.52	321.773	-599.976	1353.94	48.1525	-441.464	1515.42	-30.1472	-446.902	1317.3	-37.2667	-439.74	1161.87	-42.2722	-335.852	1021.53	13.9243	-293.275	941.795	-48.7762	-328.112	922.617	-33.408	-267.296	879.222
9546	0	180.611	-278.989	1693.25	266.203	-288.487	1696.63	170.97	-475.534	1700.05	281.619	-462.45	1703.14	237.895	-512.009	1560.23	230.035	-592.867	1296.21	227.953	-360.114	1477.37	245.534	-302.074	1274.64	320.68	-591.186	1355.05	47.7437	-431.842	1516.99	-30.8026	-436.322	1318.89	-38.4448	-427.31	1163.4	-43.1461	-320.972	1024.97	13.6296	-276.819	946.236	-49.1328	-311.34	926.197	-33.6067	-249.631	883.903
9547	0	179.716	-270.089	1693.45	265.279	-279.313	1696.98	170.418	-466.454	1701.05	280.933	-453.14	1704.1	237.202	-503.119	1561	228.711	-583.877	1297.08	227.546	-350.986	1478.41	245.395	-292.715	1275.81	319.818	-582.422	1355.94	47.2062	-422.261	1518.21	-31.4562	-425.741	1320.13	-39.4654	-415.102	1164.63	-43.8349	-306.039	1028.05	13.0198	-260.351	950.272	-49.4022	-294.611	929.521	-34.1089	-231.923	888.863
9548	0	178.945	-261.029	1693.56	264.53	-270.181	1697.4	169.802	-457.467	1701.54	280.269	-444.154	1704.81	236.496	-494.19	1561.77	227.553	-574.965	1297.54	227.29	-341.836	1479.13	245.108	-284.447	1276.23	318.738	-573.671	1356.49	46.7462	-412.645	1519.01	-32.2601	-415.162	1321.25	-40.3798	-403.223	1165.44	-44.573	-291.505	1030.91	12.6072	-243.835	954.34	-49.6998	-278.082	932.783	-34.2513	-214.636	893.295
9549	0	177.975	-251.981	1693.86	263.879	-261.075	1697.79	169.45	-448.391	1702.04	279.802	-434.934	1705.36	235.953	-485.078	1562.01	226.497	-565.986	1298.01	226.915	-332.596	1479.74	245.132	-275.395	1276.98	317.61	-564.694	1357.18	46.4628	-402.978	1519.8	-32.7361	-404.647	1322.07	-41.3797	-391.485	1166.19	-45.0689	-276.943	1033.73	12.3422	-227.669	958.767	-50.0355	-261.503	936.19	-34.5283	-197.328	898.148
9550	0	177.506	-242.953	1693.74	263.301	-251.883	1697.92	168.969	-439.317	1702.18	279.482	-425.647	1705.99	235.336	-475.73	1562.28	225.682	-556.914	1298.6	226.618	-323.303	1480.09	245.123	-266.315	1277.28	316.81	-555.729	1357.87	46.1136	-393.202	1520.33	-33.1975	-394.145	1322.67	-42.2767	-379.789	1166.78	-45.7314	-262.677	1036.56	12.0454	-211.279	963.016	-49.9817	-245.146	939.327	-34.6886	-179.934	903.054
9551	0	177.098	-233.791	1693.78	262.608	-242.71	1697.66	168.583	-430.184	1702.18	278.888	-416.543	1705.9	234.938	-466.584	1562.4	224.66	-547.852	1298.82	226.473	-313.959	1480.22	244.981	-257.557	1277.14	315.948	-546.819	1357.95	45.8158	-383.473	1520.54	-33.6679	-383.792	1322.83	-43.053	-368.288	1167.07	-46.13	-248.432	1039.02	11.8076	-195.498	966.799	-49.5369	-229.076	942.076	-34.7947	-162.829	907.692
9552	0	176.425	-224.661	1693.46	262.267	-233.535	1697.69	168.316	-420.962	1701.81	278.541	-407.309	1705.48	234.397	-457.202	1562.25	223.869	-538.841	1298.73	226.343	-304.564	1480.19	245.038	-248.244	1277.01	315.323	-537.925	1357.78	45.7004	-373.742	1520.53	-34.3398	-373.398	1323.1	-43.8347	-357.038	1167.04	-46.5748	-234.548	1041.39	11.7283	-179.739	971.016	-49.807	-212.872	945.114	-34.9239	-145.748	912.636
9553	0	176.186	-215.47	1693.3	262.001	-224.189	1697.56	168.062	-411.778	1701.51	278.368	-398.035	1705.29	234.165	-447.786	1561.91	223.26	-529.802	1298.62	226.295	-295.155	1479.93	245.04	-239.054	1276.53	314.782	-529.003	1357.94	45.6433	-364.108	1520.36	-34.7602	-363.121	1323.18	-44.5522	-345.881	1166.86	-46.8389	-220.689	1043.66	11.5343	-164.051	974.766	-49.9619	-196.49	948.954	-34.8862	-128.955	917.397
9554	0	176.056	-206.07	1692.96	261.914	-214.849	1697.33	167.958	-402.404	1700.81	278.3	-388.669	1704.89	233.968	-438.211	1561.66	222.751	-520.596	1298.58	226.181	-285.601	1479.43	245.166	-229.583	1276.27	314.258	-519.702	1357.62	45.5044	-354.249	1520.26	-35.1101	-352.892	1322.92	-45.1824	-334.789	1166.47	-47.1595	-207.041	1045.78	11.5028	-148.67	978.659	-49.0754	-181.128	951.08	-34.5866	-112.631	921.599
9555	0	176.069	-196.634	1692.57	261.684	-205.492	1696.92	167.856	-393.02	1699.91	278.16	-379.316	1704.06	233.738	-428.518	1561.13	222.27	-511.418	1298.1	226.191	-276.042	1478.79	245.25	-220.977	1275.14	313.796	-510.666	1357.06	45.3328	-344.228	1519.44	-35.3961	-342.706	1322.44	-45.7492	-323.846	1165.67	-47.3166	-193.516	1047.6	11.6974	-133.461	982.618	-49.0542	-165.485	953.801	-34.4228	-96.1404	926.589
9556	0	175.972	-187.156	1692.04	261.854	-196.032	1696.4	167.985	-383.537	1699.07	278.221	-369.939	1703.14	233.699	-418.808	1560.38	221.969	-502.224	1297.6	226.404	-266.405	1478.01	245.348	-211.231	1274.31	313.501	-501.498	1356.65	45.3431	-334.34	1518.72	-35.4901	-332.755	1321.71	-46.2276	-313.065	1164.92	-47.3968	-180.304	1049.63	11.8033	-118.608	986.139	-47.9555	-150.375	956.104	-34.1947	-80.3485	930.509
9557	0	176.164	-177.626	1691.3	262.047	-186.478	1695.6	168.119	-373.974	1698.06	278.417	-360.328	1702.01	233.797	-408.943	1559.66	221.697	-492.944	1297.07	226.508	-256.639	1476.95	245.447	-201.834	1273.03	313.358	-492.219	1356.18	45.5495	-324.514	1518.02	-35.6173	-322.716	1321.04	-46.5496	-302.194	1164.04	-47.3768	-167.062	1051.2	12.0857	-103.869	989.612	-47.2654	-135.284	958.456	-33.899	-64.6669	934.939
9558	0	176.515	-167.959	1690.44	262.249	-176.841	1694.52	168.274	-364.308	1696.78	278.65	-350.696	1700.82	233.849	-399.023	1558.64	221.749	-483.488	1296.21	226.686	-246.854	1475.54	245.669	-192.412	1271.82	313.209	-482.832	1355.26	45.6825	-314.436	1516.74	-35.5122	-312.902	1319.87	-46.8248	-291.514	1162.88	-47.3628	-154.268	1052.51	12.3138	-89.5036	992.712	-46.6903	-120.48	960.536	-33.6695	-49.2214	939.075
9559	0	176.809	-158.279	1689.33	262.565	-167.168	1693.28	168.598	-354.54	1695.15	278.849	-341.017	1699.03	234.095	-389.08	1557.45	221.692	-474.144	1295.08	227	-237.007	1474.22	245.761	-182.804	1270.17	313.089	-473.331	1354.1	45.8853	-304.575	1515.5	-35.4213	-302.939	1318.65	-46.9265	-280.902	1161.48	-46.7125	-141.252	1054.25	12.7273	-75.3999	995.729	-44.7282	-106.391	961.971	-33.2469	-34.2714	942.861
9560	0	177.322	-148.425	1688.21	263.146	-157.301	1692.1	169.084	-344.703	1693.81	279.331	-331.226	1697.63	234.468	-379.059	1556.13	221.987	-464.587	1294.05	227.406	-227.207	1472.69	246.116	-173.253	1268.53	313.297	-463.725	1352.98	46.3344	-294.628	1514.12	-35.2031	-293.189	1317.41	-46.9264	-270.323	1160.16	-46.4041	-128.864	1055.37	13.0741	-61.594	998.563	-44.3337	-92.0105	964.017	-32.8384	-19.6297	946.539
9561	0	177.996	-138.445	1686.66	263.832	-147.465	1690.56	169.66	-334.747	1692.25	280.064	-321.331	1696.02	234.876	-369.073	1554.59	222.394	-455.002	1293.02	227.685	-217.27	1470.91	246.346	-163.683	1266.72	313.671	-453.959	1351.66	46.7454	-284.597	1512.55	-34.7587	-283.244	1315.85	-46.8108	-259.732	1158.71	-45.9948	-116.424	1056.15	13.6121	-48.0089	1001.24	-43.5688	-78.0628	965.675	-32.286	-5.27008	949.756
9562	0	178.838	-128.399	1684.99	264.529	-137.614	1688.63	170.371	-324.777	1690.43	280.643	-311.487	1693.9	235.472	-359.069	1552.9	222.876	-445.432	1291.13	228.319	-207.395	1469.15	246.78	-153.886	1264.91	314.004	-444.1	1349.87	47.2315	-274.728	1510.85	-34.2709	-273.456	1314.22	-46.5875	-249.408	1156.91	-45.638	-104.175	1056.95	14.0546	-34.7686	1003.48	-42.6436	-64.5094	966.803	-31.881	8.66889	952.902
9563	0	179.743	-118.159	1683.45	265.566	-127.591	1686.9	171.161	-314.75	1688.74	281.498	-301.668	1691.93	236.044	-349.078	1551.01	223.524	-435.736	1289.38	228.851	-197.475	1467.16	247.076	-144.201	1262.85	314.56	-434.181	1347.85	47.7044	-265.035	1508.91	-33.6213	-263.684	1312.22	-46.1338	-239.086	1154.94	-45.1226	-92.1651	1057.48	14.6106	-21.789	1005.64	-41.6523	-51.1998	967.885	-31.3852	22.3316	955.644
9564	0	180.616	-108.399	1681.37	266.649	-117.47	1684.77	172.034	-304.591	1686.53	282.439	-291.543	1689.93	236.88	-339.082	1549.08	224.321	-425.895	1287.55	229.445	-187.494	1465.14	247.618	-133.983	1260.76	315.382	-424.117	1346.08	48.4007	-255.171	1507.08	-32.9362	-253.921	1310.38	-45.642	-228.813	1152.99	-44.5241	-80.8222	1057.17	15.0207	-9.06064	1007.3	-40.1666	-38.17	968.412	-30.9642	35.6296	957.907
9565	0	181.791	-98.1834	1678.98	267.737	-107.405	1682.35	173.164	-294.451	1684.66	283.58	-281.447	1687.59	237.844	-329.122	1546.93	225.19	-416.023	1285.57	230.124	-177.503	1462.93	248.058	-124.415	1258.61	316.231	-414.041	1343.85	49.1476	-245.444	1505.05	-32.2501	-243.902	1308.28	-44.9659	-218.535	1151.06	-44.2116	-69.2762	1057.27	15.5315	3.49711	1008.73	-39.6728	-25.2253	969.277	-30.4201	48.6698	959.769
9566	0	183.343	-88.0178	1676.92	269.039	-97.3479	1679.81	174.259	-284.227	1682.37	284.64	-271.477	1685.25	238.854	-319.194	1544.69	226.038	-406.137	1283	231.018	-167.485	1460.56	248.54	-114.334	1256.17	317.248	-403.953	1341.24	50.1334	-235.655	1502.64	-31.2104	-234.213	1305.81	-44.1907	-208.403	1148.67	-43.3413	-57.8204	1056.55	16.1028	15.7314	1009.55	-38.698	-12.8505	969.368	-29.9164	61.2848	961.234
9567	0	184.66	-77.8623	1674.53	270.468	-87.2333	1677.38	175.697	-274.026	1680.21	285.989	-261.231	1682.77	240.017	-309.293	1542.02	226.975	-396.024	1280.55	232.106	-157.4	1458.31	249.175	-104.352	1253.75	318.486	-393.831	1338.6	51.0872	-225.866	1500.41	-30.0837	-224.375	1303.63	-43.2343	-198.246	1146.44	-42.6949	-46.7634	1056.05	16.7189	27.7167	1010.09	-37.5564	-0.674567	968.944	-29.379	73.5113	962.029
9568	0	186.016	-67.6664	1671.81	272.074	-76.9634	1674.66	176.989	-263.831	1677.91	287.528	-251.075	1680.45	241.247	-299.258	1539.63	228.246	-385.46	1277.71	233.144	-147.156	1455.83	249.772	-94.1557	1251.29	319.601	-383.609	1336.14	52.3695	-215.986	1498.22	-29.0538	-214.507	1301.13	-42.2186	-187.942	1144.07	-41.8125	-35.7179	1055.03	17.3931	39.4393	1010.09	-36.642	11.2228	968.631	-28.8789	85.5326	962.531
9569	0	187.946	-57.3493	1669.43	273.448	-66.9109	1671.87	178.679	-253.599	1675.54	288.921	-240.931	1677.76	242.62	-289.296	1536.96	228.973	-375.479	1275.19	234.394	-136.972	1453.5	250.59	-83.8546	1248.93	320.702	-373.512	1333.12	53.6797	-205.843	1495.55	-27.959	-204.747	1298.62	-41.0713	-177.845	1141.65	-41.0273	-24.8219	1053.8	18.1174	50.8842	1009.79	-35.5373	22.8157	967.862	-28.2327	97.1659	962.584
9570	0	189.49	-47.2047	1667.06	275.421	-56.6846	1669.58	180.131	-243.405	1673.14	290.303	-230.729	1674.63	243.854	-279.232	1534.18	229.767	-365.136	1272.19	235.721	-126.73	1451.09	251.428	-73.753	1246.24	321.737	-363.41	1329.9	54.8871	-195.932	1493.21	-26.6598	-195.115	1296.18	-39.7774	-167.85	1139.26	-39.9886	-14.2934	1052.05	18.8546	62.068	1008.98	-34.381	33.8422	966.357	-27.6379	108.316	962.046
9571	0	191.334	-36.8865	1664.7	277.091	-46.5244	1666.76	181.952	-233.132	1670.64	292.223	-220.619	1672.38	245.364	-269.096	1531.51	230.74	-354.581	1269.55	237.187	-116.406	1448.55	252.561	-63.1885	1243.82	322.729	-353.141	1327.21	56.4129	-185.63	1490.75	-25.0972	-185.249	1293.64	-38.5473	-157.694	1136.92	-39.0787	-3.77973	1050.44	19.5922	72.976	1007.68	-33.1232	44.7984	965.045	-26.8078	119.213	961.106
9572	0	193.314	-26.6801	1662.59	279.116	-36.4001	1664.61	183.472	-222.784	1668.2	294.168	-210.532	1669.84	246.871	-258.783	1528.91	231.819	-343.915	1266.96	238.747	-106.017	1446.01	253.694	-52.877	1241.16	324.037	-342.453	1324	57.8772	-175.053	1488.52	-23.5029	-175.311	1291.37	-37.0595	-147.465	1134.68	-38.0805	6.69504	1048.35	20.5142	83.641	1006.03	-32.4001	55.3446	963.292	-26.3506	129.825	959.651
9573	0	195.493	-16.426	1660.6	281.377	-26.158	1662.46	185.416	-212.559	1665.8	295.869	-200.472	1667.15	248.413	-248.453	1526.42	232.683	-333.281	1264.01	240.401	-95.5766	1443.49	255.069	-42.1889	1238.75	324.533	-332.433	1321.4	59.4318	-164.483	1486.39	-21.7599	-165.461	1288.99	-35.607	-137.465	1132.29	-37.0551	16.6127	1046.18	21.5937	94.0388	1004.04	-31.2461	65.4547	960.791	-25.4717	140.125	957.635
9574	0	197.579	-6.12563	1658.97	283.403	-16.0594	1660.73	187.474	-202.177	1663.34	297.809	-190.273	1664.64	250.049	-237.868	1523.77	233.604	-322.458	1261.37	242.331	-85.01	1441.22	256.609	-31.4107	1236.61	325.386	-321.814	1318.55	61.1219	-153.593	1484.07	-20.1664	-155.497	1286.79	-34.0439	-127.371	1130.08	-35.9289	26.5951	1043.74	22.421	104.197	1001.57	-29.8784	75.3288	958.237	-25.2806	149.81	955.504
9575	0	200.008	4.2622	1657.78	285.84	-5.85239	1659.11	189.579	-191.916	1661.4	299.962	-180.244	1662.55	251.746	-227.189	1521.69	234.699	-311.435	1259.29	244.24	-74.3897	1438.99	258.433	-20.7155	1234.25	326.331	-311.07	1315.94	62.9421	-142.525	1482.14	-18.3194	-145.06	1284.98	-32.3362	-117.145	1128	-34.6937	36.4487	1041.18	22.8896	113.866	998.679	-29.0027	84.7899	955.392	-24.6631	159.281	952.386
9576	0	202.42	14.5859	1656.4	288.191	4.27247	1657.55	191.418	-181.658	1659.16	302.007	-170.089	1660.12	253.444	-216.396	1519.59	235.561	-300.501	1257.05	246.276	-63.5031	1436.73	260.287	-9.71601	1232.13	327.137	-300.311	1313.58	64.7016	-131.334	1480.24	-16.5794	-134.623	1282.95	-30.4471	-107.013	1126.19	-33.6498	46.0644	1038.27	23.9278	123.487	995.214	-28.2399	93.9095	952.365	-24.0723	168.421	949.018
9577	0	204.946	24.9421	1655.53	290.866	14.4967	1656.48	193.628	-171.289	1657.26	304.09	-160.105	1657.75	255.186	-205.424	1517.61	236.379	-289.467	1254.68	248.16	-52.6509	1434.8	262.19	1.02957	1229.95	328.024	-289.492	1311.06	66.4468	-120.092	1478.36	-14.7517	-123.808	1281.38	-28.7232	-96.9364	1124.22	-32.5553	55.4817	1034.93	24.791	132.84	991.552	-27.1458	102.547	948.58	-23.6082	177.078	944.773
9578	0	207.731	35.1749	1655.07	293.483	24.539	1655.46	195.803	-160.977	1655.57	306.495	-150.047	1655.89	256.819	-194.56	1516.19	237.298	-278.154	1253.18	250.197	-41.6555	1433.2	264.317	12.746	1228.59	329.007	-278.567	1309.17	68.3818	-108.475	1476.87	-12.9484	-112.791	1279.83	-26.5708	-86.5531	1122.8	-31.4123	64.6358	1031.76	25.4707	141.817	987.406	-26.2699	110.889	944.809	-22.9639	185.393	940.252
9579	0	210.652	45.6265	1654.76	296.38	34.649	1654.81	198.082	-150.544	1654.18	308.853	-139.948	1654.14	258.472	-183.606	1514.73	238.114	-266.805	1251.9	252.155	-30.6479	1431.79	266.281	24.3274	1227.34	329.956	-267.567	1307.64	70.1878	-96.8263	1475.71	-11.2369	-101.26	1279.03	-24.6644	-76.2556	1121.77	-30.2115	73.8581	1028.56	26.1791	150.438	982.977	-25.3812	118.876	941.034	-22.483	193.195	935.53
9580	0	213.575	55.8948	1654.75	299.215	44.6154	1654.26	200.461	-140.125	1653.16	311.085	-129.979	1652.53	260.047	-172.803	1513.5	238.901	-255.486	1250.36	254.165	-19.6756	1430.72	268.236	35.7108	1226.31	330.686	-256.64	1306.09	72.0096	-85.2358	1474.74	-9.85158	-89.5782	1278.59	-22.4523	-65.7557	1120.68	-29.1006	82.5773	1025.29	26.9049	158.77	978.168	-24.6625	126.284	936.866	-22.0872	200.485	930.136
9581	0	216.569	66.129	1654.98	302.332	54.5876	1654.05	202.56	-129.893	1652.53	313.356	-120.175	1651.15	261.609	-162.067	1512.73	239.884	-244.105	1249.16	256.257	-8.65795	1429.96	270.325	47.7016	1225.92	331.487	-245.65	1304.68	73.9278	-73.6032	1474.04	-8.17154	-77.4629	1278.12	-20.2897	-55.3303	1120.12	-27.8492	91.2915	1021.76	27.6027	166.729	973.194	-23.7631	133.082	932.652	-21.6502	207.228	924.432
9582	0	219.86	76.4449	1655.7	305.177	64.3278	1653.79	204.834	-119.554	1652.29	315.804	-110.206	1650.38	263.147	-151.396	1512.13	240.944	-232.542	1248.66	258.246	2.17515	1429.72	272.244	59.8456	1226.02	332.302	-234.511	1303.96	75.6491	-62.0978	1473.79	-6.5653	-65.1731	1278.43	-18.016	-44.6764	1119.97	-26.5705	99.6789	1018.53	28.3542	174.3	967.95	-23.2726	139.546	928.356	-21.3075	213.443	918.488
9583	0	222.899	86.5673	1656.73	308.553	74.3134	1654.24	207.057	-109.339	1652.52	318.216	-100.474	1650.02	264.695	-140.836	1512.05	242.032	-220.93	1248.23	260.212	13.076	1429.76	274.086	71.0916	1226.17	333.168	-223.462	1303.23	77.5205	-50.7815	1473.98	-5.06743	-52.8153	1278.86	-15.8168	-33.9223	1120.26	-25.402	107.801	1015.47	29.0395	181.45	962.771	-22.3616	145.519	924.118	-21.0247	218.916	912.4
9584	0	226.284	96.764	1657.88	311.495	83.8891	1654.77	209.436	-99.0692	1653.24	320.502	-90.7681	1649.73	266.293	-130.348	1511.93	243.076	-209.285	1248.05	261.967	23.7189	1430.41	275.96	82.9876	1227.13	334.109	-212.356	1302.8	79.1474	-39.847	1474.15	-3.47078	-40.2608	1279.59	-13.4676	-23.0755	1120.68	-24.2181	115.664	1012.36	29.5688	188.135	957.345	-21.6936	150.894	919.706	-20.6847	224.082	906.082
9585	0	229.385	106.69	1659.71	314.861	93.6202	1655.94	211.681	-88.9651	1654.17	322.871	-81.1849	1649.95	267.723	-119.987	1512.4	244.38	-198.085	1247.87	263.75	34.3631	1431.37	277.77	94.3413	1228.29	335.138	-201.191	1302.57	80.8207	-29.1083	1474.8	-2.00232	-27.8162	1280.57	-11.3642	-12.2735	1121.59	-23.096	123.301	1009.66	30.1796	194.415	952.046	-21.3117	155.83	915.728	-20.413	228.525	899.946
9586	0	232.629	116.688	1661.69	317.94	103.032	1657.2	213.916	-78.9979	1655.4	324.729	-71.6087	1650.01	269.332	-109.743	1513.21	245.98	-186.576	1248.52	265.557	44.8725	1432.72	279.523	105.96	1230.1	336.289	-190.091	1303.05	82.2513	-18.677	1475.91	-0.359235	-15.662	1281.84	-8.97356	-1.23717	1122.91	-21.9665	130.645	1007.07	30.7538	200.136	946.804	-20.918	160.387	912.258	-20.1633	232.41	893.693
9587	0	235.65	126.398	1664.1	320.949	112.407	1658.63	216.216	-69.0892	1657.01	326.897	-62.231	1650.61	270.691	-99.4216	1514.08	247.431	-175.515	1249.04	266.921	55.2233	1434.35	281.101	117.708	1232.17	337.671	-179.048	1303.59	83.6882	-8.36736	1477.2	1.10501	-3.79094	1283.38	-6.88134	9.41094	1124.35	-20.7169	137.88	1004.76	31.214	205.428	941.823	-20.8064	164.593	909.012	-19.6433	235.804	887.243
9588	0	238.993	136.059	1666.57	323.837	121.605	1660.23	218.315	-59.3812	1658.58	329.236	-53.048	1651.69	272.222	-89.359	1515.27	249.223	-164.299	1250.07	268.359	65.531	1436.24	282.716	129.333	1234.41	339.209	-167.944	1304.39	85.1134	1.69273	1478.41	2.77568	7.75928	1284.86	-4.50489	20.0852	1126.05	-19.5943	144.687	1003.13	31.7681	210.289	937.22	-20.6807	168.38	906.384	-19.44	238.841	881.856
9589	0	241.867	145.377	1669.46	326.559	130.374	1662.23	220.365	-49.8522	1660.47	331.336	-43.9208	1652.76	273.598	-79.1536	1516.72	251.181	-153.29	1251.31	269.688	75.8217	1438.15	283.968	140.875	1236.81	340.93	-156.992	1305.69	86.4342	11.5092	1480.04	4.3095	18.7245	1286.55	-2.50496	30.3689	1128.17	-18.408	151.249	1001.93	32.3128	214.695	933.206	-20.7036	172.069	904.322	-18.937	241.389	876.721
9590	0	244.931	154.733	1672.57	329.44	139.3	1664.7	222.296	-40.4927	1662.22	333.266	-34.9987	1653.96	274.933	-69.0773	1518.23	253.11	-142.507	1252.88	270.692	85.9739	1440.3	285.029	152.148	1239.16	342.622	-146.224	1307.16	87.5109	21.1577	1481.84	5.82509	29.3176	1288.57	-0.440984	40.4439	1130.47	-16.9915	157.853	1001.33	32.7685	218.296	929.653	-20.7868	175.619	902.847	-18.5331	243.763	872.089
9591	0	247.693	163.846	1675.73	332.03	148.124	1667.12	224.033	-31.2736	1664.1	334.567	-26.1155	1654.68	276.279	-59.2629	1519.78	255.134	-131.896	1254.09	271.701	95.8985	1442.52	286.015	163.738	1241.99	344.307	-135.536	1308.72	88.5505	30.7327	1483.75	7.44636	39.2683	1290.01	1.45172	49.939	1132.65	-16.0429	163.9	1001.08	33.3927	221.862	926.84	-21.2066	178.842	901.974	-17.9139	245.783	867.962
9592	0	250.129	172.666	1679.1	334.531	156.674	1669.92	225.734	-22.2256	1665.95	336.389	-17.5145	1656.17	277.45	-49.4057	1521.81	257.168	-121.4	1255.61	272.608	105.837	1444.82	286.856	174.821	1244.95	346.424	-124.472	1310.08	89.5492	40.1952	1485.69	8.89745	48.7158	1292.01	3.32268	59.0641	1134.89	-14.7254	170.026	1001.23	34.2392	224.931	924.419	-21.573	182.343	901.86	-17.0837	247.816	864.77
9593	0	252.287	181.373	1682.5	336.873	165.247	1672.91	227.173	-13.3103	1667.8	337.92	-8.8716	1657.6	278.697	-39.6904	1523.77	259.017	-111.106	1257.71	273.28	115.748	1447.16	287.588	185.674	1247.49	348.233	-114.456	1312.55	90.5098	49.4653	1487.91	10.054	57.6415	1293.89	4.71488	67.4188	1137.24	-13.6517	175.716	1001.62	35.1767	227.871	922.848	-21.6057	185.927	902.053	-15.9634	249.844	861.932
9594	0	254.337	190.013	1685.77	338.687	173.658	1675.54	228.443	-4.47097	1669.61	339.195	-0.452194	1659.13	279.69	-29.9851	1525.56	260.751	-101.151	1259.91	273.947	125.596	1449.22	288.264	196.068	1249.84	349.976	-103.933	1314.7	91.3517	58.6877	1489.99	11.1198	66.1576	1295.83	5.95036	75.2202	1139.45	-12.6488	181.293	1002.28	36.2009	230.632	921.386	-22.4025	189.718	902.992	-14.6656	251.938	859.774
9595	0	255.911	198.457	1688.97	340.366	181.971	1678.47	229.622	4.15672	1671.39	340.134	8.16005	1660.23	280.807	-20.3841	1527.61	262.188	-91.3874	1262.14	274.615	135.212	1451.42	288.674	206.105	1252.06	351.683	-93.758	1316.73	92.2129	67.8118	1491.94	11.9851	74.1337	1297.59	7.225	82.4073	1141.41	-11.6979	186.692	1003.15	37.2198	232.974	920.279	-22.3758	193.509	903.695	-13.0666	254.132	857.881
9596	0	257.373	206.821	1692.09	341.555	190.244	1681.17	230.705	12.7165	1673.32	341.415	16.5389	1662.01	281.926	-10.8827	1529.78	264.153	-81.6282	1263.88	275.122	144.796	1453.4	288.926	215.735	1254.09	353.471	-83.6635	1318.84	92.896	76.8218	1493.94	12.8727	81.7445	1299.31	8.13495	88.8403	1143.37	-10.7556	191.812	1003.92	38.5139	235.364	919.722	-23.0855	197.843	905.122	-11.6549	256.663	856.972
9597	0	258.465	215.219	1694.99	342.549	198.52	1683.88	231.511	21.2652	1674.91	342.118	25.0003	1663.56	282.937	-1.32142	1531.82	265.616	-72.1916	1266.24	275.49	154.251	1455.49	288.976	224.765	1255.86	355.007	-73.8674	1321.25	93.5622	85.6674	1496.1	13.5156	89.0709	1301.36	9.01986	95.0042	1145.36	-10.281	196.54	1004.89	39.4085	237.881	919.641	-22.7808	202.083	906.385	-10.1813	259.182	856.337
9598	0	259.355	223.474	1698.12	343.163	206.783	1686.71	232.168	29.5818	1676.64	342.892	33.3792	1665.11	283.594	7.75727	1534.02	267.308	-62.7758	1268.03	275.767	163.502	1457.52	289.181	233.985	1257.82	356.705	-64.0868	1323.11	94.0447	94.1739	1497.99	13.9633	95.7832	1303.06	9.69552	100.481	1147.18	-9.77847	201.059	1005.88	40.2285	240.743	919.954	-23.317	206.26	908.149	-8.90119	261.828	856.274
9599	0	259.656	231.588	1701.19	343.756	215.154	1689.71	232.813	37.8048	1678.37	343.476	41.86	1666.73	284.537	16.9726	1536.16	268.867	-53.4213	1270.07	275.973	172.601	1459.68	288.922	242.564	1259.7	358.18	-54.5391	1325.68	94.4561	102.599	1500.23	14.2212	102.007	1305.23	10.1431	105.59	1149.11	-9.38107	205.422	1007.25	41.1137	243.759	920.882	-23.2336	210.139	909.612	-7.59543	264.64	856.562
9600	0	259.802	239.722	1704.24	344.049	223.506	1692.71	233.36	46.143	1680.11	344.035	50.4089	1668.83	285.472	25.9901	1538.33	270.424	-44.4038	1272.39	276.175	181.704	1461.88	288.708	251.314	1261.87	359.726	-45.0592	1327.92	94.9606	110.726	1502.17	14.5202	108.065	1307.11	10.509	110.577	1151.14	-8.9868	209.566	1008.94	41.8707	247.09	922.319	-22.5314	213.898	910.885	-6.60911	267.507	857.471
9601	0	259.969	248.016	1707.11	344.125	231.892	1695.71	233.743	54.5068	1681.9	344.593	58.985	1670.98	286.289	34.9928	1540.57	272.07	-35.2252	1274.53	276.258	190.62	1464.08	288.484	260.174	1264.01	361.195	-35.7707	1330.31	95.4957	118.641	1504.54	14.9157	113.745	1309.33	10.8595	115.214	1153.19	-8.83058	213.398	1010.27	42.0424	250.252	923.448	-22.6574	217.57	912.769	-6.13196	270.481	858.403
9602	0	259.577	256.153	1710.22	343.974	240.301	1698.66	233.911	62.667	1683.72	344.711	67.3002	1673.01	287.044	43.7432	1542.96	273.384	-26.3398	1276.74	276.335	199.448	1466.33	288.377	269.031	1266.28	362.336	-26.6009	1332.46	95.8489	126.184	1506.54	15.0251	119.195	1311.41	11.1937	119.68	1155.02	-8.8887	217.002	1011.8	42.4572	253.943	925.351	-22.2242	220.748	914.197	-5.52819	273.391	859.79
9603	0	259.222	264.254	1712.62	343.878	248.695	1701.75	234.044	70.9545	1685.71	344.898	75.8414	1675.17	287.659	52.5591	1545.09	274.816	-17.4443	1278.94	276.283	208.075	1468.73	288.133	277.811	1268.57	363.704	-17.5658	1334.99	96.3146	133.999	1508.67	15.4638	124.344	1313.43	11.5801	124.043	1157.03	-8.71217	220.591	1013.28	42.3222	257.666	926.996	-21.9883	223.678	915.63	-5.46698	276.48	861.346
9604	0	258.891	272.515	1715.04	343.214	257.01	1703.97	234.196	79.2095	1687.49	344.52	84.4827	1677.07	288.472	61.2583	1547.39	276.302	-8.68113	1281.16	276.336	216.642	1470.9	287.782	286.434	1270.83	365.089	-8.52651	1337.33	96.7309	141.609	1510.53	15.7821	129.366	1315.45	11.6626	128.144	1159.27	-8.71324	224.074	1014.93	42.1021	261.581	928.502	-21.4539	226.662	917.069	-5.97808	279.545	862.81
9605	0	258.222	280.595	1717.25	342.717	265.482	1706.53	234.065	87.356	1689.54	344.86	92.8943	1679.64	289.102	69.9114	1549.63	277.625	0.073751	1283.48	276.421	225.274	1473.07	287.582	295.165	1272.75	366.335	0.518797	1339.82	96.9169	149.226	1512.67	16.1756	134.385	1317.64	11.9762	132.146	1161.62	-9.15263	227.323	1016.54	41.5136	265.511	930.416	-21.1836	229.287	918.613	-6.41004	282.809	864.544
9606	0	257.704	288.92	1719.47	342.223	274.032	1709.05	234.025	95.5782	1691.24	344.67	101.3	1681.67	289.768	78.5237	1551.69	278.831	8.67305	1285.44	276.608	233.731	1475.32	287.455	303.93	1274.94	367.423	9.28793	1341.99	97.3412	156.921	1514.45	16.6696	139.272	1319.5	12.3808	136.022	1163.61	-9.05403	230.575	1018.04	41.0094	269.772	932.599	-20.633	231.779	919.731	-6.93173	286.126	866.695
9607	0	256.949	297.084	1721.57	341.394	282.315	1711.33	233.966	103.826	1693.18	344.614	109.836	1683.99	290.231	86.992	1553.64	280	17.2156	1287.49	276.523	242.055	1477.41	287.468	312.559	1277.23	368.709	17.9882	1344.13	97.5799	164.346	1516.51	17.1844	144.147	1321.72	12.7941	139.893	1165.75	-9.5679	233.512	1019.67	40.1125	274.181	934.588	-19.5822	234.268	921.218	-7.88403	289.419	868.595
9608	0	255.943	305.335	1723.3	340.617	290.888	1713.46	233.718	112.003	1694.73	344.594	118.329	1686.38	290.858	95.2127	1555.67	281.087	25.6434	1289.45	276.428	250.333	1479.41	287.297	321.043	1279.11	369.871	26.7096	1346.31	98.0239	171.969	1518.27	17.7254	149.24	1323.8	13.4026	143.891	1167.75	-9.95426	236.743	1021.43	38.9553	278.82	936.834	-19.3402	236.806	922.777	-8.98422	292.912	870.883
9609	0	255.102	313.649	1724.96	339.893	299.344	1715.69	233.494	120.294	1696.38	344.214	126.885	1688.25	291.202	103.573	1557.54	282.037	34.0658	1291.29	276.506	258.554	1481.18	287.199	329.495	1281.1	370.888	35.2549	1348.16	98.1691	179.457	1520.04	18.2494	154.27	1325.79	14.067	147.865	1169.58	-10.5051	239.748	1023.13	37.892	283.367	939.134	-18.8988	239.65	923.808	-10.3279	296.489	873.152
9610	0	254.065	321.867	1726.59	338.861	307.697	1717.43	233.194	128.558	1697.86	343.929	135.464	1690.18	291.579	111.828	1558.99	282.887	42.3269	1292.76	276.525	266.751	1482.98	287.161	337.839	1282.89	371.82	43.7725	1349.87	98.3597	187.001	1521.6	18.8911	159.466	1327.45	14.3494	151.632	1171.6	-10.8651	242.95	1024.62	36.6055	288.366	941.158	-18.2252	242.269	925.182	-11.8167	300.071	875.144
9611	0	253.314	330.281	1727.83	338.213	316.479	1719.09	232.882	136.84	1699.1	343.68	143.853	1692.15	291.837	120.119	1560.54	283.88	50.6875	1294.3	276.458	274.787	1484.3	287.145	346.067	1284.41	372.763	52.1781	1351.56	98.6895	194.625	1522.89	19.4985	164.847	1329.34	14.9424	155.815	1173.36	-11.342	246.42	1025.96	35.3303	293.51	943.191	-17.6504	245.205	926.375	-13.2786	303.948	877.314
9612	0	252.297	338.639	1728.83	337.213	324.984	1720.47	232.535	145.218	1700.28	343.353	152.496	1693.79	292.193	128.281	1561.73	284.592	58.8876	1295.51	276.377	282.997	1485.58	287.108	354.062	1285.86	373.469	60.5602	1353.02	98.6596	202.116	1524.14	20.1365	170.287	1330.72	15.5324	160.09	1174.95	-11.881	249.858	1027.45	33.8282	298.754	945.085	-16.9841	248.618	927.377	-14.8522	307.706	878.889
9613	0	251.117	346.907	1729.7	336.18	333.503	1721.71	232.173	153.525	1701.43	342.932	161.121	1695	292.342	136.547	1562.83	285.179	67.1252	1296.85	276.431	291.159	1486.86	286.949	362.05	1286.75	373.936	68.8465	1354.19	98.9157	209.819	1525.06	20.4234	175.854	1331.94	16.2018	164.561	1176.11	-12.0624	253.773	1028.49	32.4365	304.194	946.553	-16.5298	252.094	928.146	-16.5075	311.729	880.511
9614	0	250.436	355.469	1730.26	335.279	342.203	1722.58	231.823	161.85	1702.18	342.639	169.723	1696.43	292.66	144.73	1563.85	285.716	75.2823	1297.67	276.223	299.235	1487.73	286.881	370.024	1287.56	374.565	77.1815	1355.31	98.938	217.373	1526.04	20.8244	181.512	1333.04	16.8406	169.263	1177.36	-12.3221	257.804	1029.46	31.0425	309.461	947.835	-15.9875	255.882	929	-17.9472	315.974	881.63
9615	0	249.473	363.922	1730.77	334.448	350.775	1723.33	231.481	170.298	1702.86	342.247	178.327	1697.48	292.72	152.986	1564.55	286.289	83.4528	1298.51	275.982	307.346	1488.42	286.648	377.713	1288.03	375.014	85.4802	1356.17	98.9525	225.008	1526.53	21.1919	187.45	1333.75	17.5185	174.312	1178.3	-12.8064	262.177	1030.27	29.8166	314.885	948.763	-15.7308	259.956	929.762	-19.584	320.067	882.863
9616	0	248.194	372.357	1730.8	333.484	359.393	1723.79	230.91	178.655	1703.57	341.841	186.983	1698.51	292.86	161.269	1565.05	286.691	91.5789	1299.29	275.91	315.608	1488.9	286.402	385.62	1288.39	375.22	93.7417	1356.8	98.9287	232.821	1527	21.6592	193.767	1334.75	18.0093	179.555	1179.03	-13.2552	266.851	1030.82	28.4449	320.454	949.612	-15.4899	264.221	930.145	-20.994	324.645	883.697
9617	0	247.403	380.908	1730.63	332.518	368.115	1723.79	230.492	187.113	1703.96	341.233	195.581	1699.01	292.851	169.63	1565.3	286.918	99.6712	1299.6	275.723	323.799	1489.1	286.208	393.463	1288.7	375.513	102.055	1357.26	98.8569	240.408	1527.08	21.7914	199.947	1335.3	18.3822	184.912	1179.51	-13.611	271.778	1031.09	27.2232	326.1	950.164	-15.3381	268.848	930.317	-22.3959	329.374	884.323
9618	0	246.645	389.586	1730.38	331.703	377.066	1723.69	230.173	195.637	1704.16	340.515	204.475	1699.15	293.021	177.908	1565.59	287.176	107.796	1299.72	275.344	331.959	1489.26	285.744	401.513	1288.89	375.651	110.356	1357.35	98.8151	248.322	1527.36	21.9964	206.664	1335.7	18.7757	190.738	1179.92	-13.6476	276.711	1031.1	26.2236	331.734	950.125	-15.2454	273.77	930.358	-23.6054	334.287	884.408
9619	0	245.607	398.181	1729.94	330.926	385.863	1723.55	229.707	204.16	1704.41	340.34	213.135	1699.77	292.868	186.319	1565.38	287.196	115.878	1299.96	275.075	340.2	1489.17	285.47	409.744	1288.94	375.724	118.628	1357.52	98.6215	256.281	1527.27	21.9393	213.346	1335.82	19.288	197.012	1180.04	-14.0219	282.258	1030.82	25.0336	337.568	950.286	-15.343	278.959	930.308	-24.9592	339.308	884.669
9620	0	244.675	406.797	1729.4	330.052	394.565	1723.22	229.16	212.746	1704.22	339.816	221.897	1699.87	292.589	194.629	1565.43	287.074	124.073	1299.72	274.82	348.557	1488.89	285.005	417.98	1288.44	375.562	127	1357.17	98.3092	264.201	1527.02	22.1012	220.428	1335.57	19.3847	203.335	1179.84	-14.3969	287.933	1030.54	24.1473	343.47	949.538	-15.508	284.392	929.824	-26.0716	344.6	884.295
9621	0	243.857	415.489	1728.62	329.095	403.387	1722.48	228.793	221.373	1703.94	339.405	230.769	1699.65	292.346	203.009	1564.88	286.858	132.282	1299.45	274.298	356.738	1488.6	284.465	426.207	1287.89	375.435	135.32	1356.89	97.9468	272.314	1526.42	21.8461	227.603	1335.15	19.6921	210.196	1179.5	-14.9244	294.02	1030	23.3065	349.594	948.872	-15.8705	290.094	929.289	-27.0974	350.056	883.729
9622	0	243.02	424.3	1727.57	328.268	412.277	1721.6	228.526	230.051	1703.55	339.01	239.656	1699.35	292.104	211.479	1564.33	286.61	140.507	1298.92	273.924	365.113	1487.59	283.987	434.46	1287.2	375.137	143.674	1356.41	97.653	280.582	1525.68	21.9804	235.271	1334.42	19.6606	217.239	1179.02	-15.2691	300.19	1029.12	22.4316	355.831	947.861	-16.5828	295.9	928.514	-28.1403	355.583	882.716
9623	0	242.258	433.086	1726.48	327.503	421.243	1720.56	227.953	238.76	1703.07	338.514	248.509	1698.92	291.567	219.95	1563.68	286.036	148.821	1298.3	273.408	373.645	1486.69	283.43	442.692	1286.18	374.683	152.063	1355.73	97.0461	288.822	1524.88	21.4782	242.762	1333.85	19.7283	224.714	1178.29	-15.6919	306.98	1027.91	21.6867	362.23	946.53	-17.3358	302.025	927.607	-29.2215	361.64	881.579
9624	0	241.412	441.919	1725.3	326.71	430.264	1719.23	227.523	247.396	1702.52	337.96	257.458	1698.11	291.034	228.447	1562.83	285.402	157.259	1297.55	273.032	382.178	1485.58	282.888	450.939	1284.98	374.145	160.668	1354.97	96.4024	297.143	1524.04	21.1396	250.787	1332.58	19.3985	232.311	1177.35	-16.5165	313.895	1027.08	20.9387	368.806	944.902	-17.9076	308.493	926.285	-30.1117	367.931	880.236
9625	0	240.449	450.67	1723.71	326.007	439.215	1717.97	226.976	256.102	1701.55	337.514	266.361	1697.28	290.441	237.069	1561.61	284.808	165.67	1296.52	272.349	390.701	1484.49	282.043	459.027	1283.86	373.614	169.13	1353.98	95.8905	305.6	1522.75	20.7083	259.196	1331.66	19.1847	240.416	1176.4	-16.7736	320.894	1025.29	20.1922	375.492	942.957	-18.6395	315.083	925.023	-31.0943	374.042	878.421
9626	0	239.492	459.455	1722.36	325.088	448.159	1716.4	226.437	264.898	1700.45	337.014	275.199	1696.38	289.665	245.74	1560.6	284.132	174.221	1295.39	271.343	399.234	1483.51	281.147	467.158	1282.57	373.035	177.833	1352.91	95.1208	314.234	1521.6	20.2064	267.591	1330.21	18.9452	248.776	1175.12	-17.8443	328.403	1024.04	19.2306	382.315	941.115	-19.8182	321.76	923.505	-31.9915	380.399	876.409
9627	0	238.596	468.227	1720.69	324.205	457.094	1714.99	225.859	273.687	1699.44	336.293	284.077	1695.11	288.804	254.423	1559.36	283.212	182.832	1294.15	270.258	407.927	1482.17	280.343	475.429	1281.06	372.191	186.508	1351.58	94.094	322.872	1520.25	19.0236	276.317	1328.98	18.3455	257.267	1173.79	-18.5061	335.99	1022.26	18.2976	389.429	938.914	-20.6976	328.888	921.684	-32.8715	387.355	874.218
9628	0	237.618	477.064	1719.28	323.188	465.963	1713.27	225.188	282.396	1698.03	335.543	293.08	1693.47	288.022	263.224	1557.91	282.421	191.54	1292.55	269.278	416.726	1480.8	279.54	483.739	1279.56	371.476	195.268	1350.23	93.1423	331.489	1518.98	18.3956	285.067	1326.98	17.8269	266.059	1172.36	-19.3674	343.437	1020.67	17.2972	396.64	936.876	-21.9694	336.051	920.071	-33.6886	393.944	871.624
9629	0	236.651	485.964	1717.59	322.228	474.855	1711.57	224.332	291.205	1696.52	334.729	301.856	1692.08	287.169	272.086	1556.14	281.537	200.257	1290.99	268.162	425.666	1479.34	278.506	492.214	1278.06	370.71	204.21	1348.66	92.25	340.216	1517.16	17.4642	294.149	1325.25	17.2174	275.036	1170.81	-20.2207	351.822	1018.36	16.3999	404.17	934.387	-23.1496	343.597	918.213	-34.7456	401.245	869.342
9630	0	235.601	494.911	1715.82	321.019	483.826	1709.65	223.313	300.008	1694.8	333.793	310.793	1690.41	285.993	281.012	1554.52	280.486	209.106	1289.33	267.074	434.648	1477.58	277.485	500.864	1276.21	369.735	213.074	1347.07	91.1649	349.131	1515.36	16.6997	303.527	1323.43	16.5706	284.163	1169.08	-21.5235	360.19	1016.56	15.0514	411.928	931.887	-24.6157	351.36	916.108	-35.7618	408.617	866.583
9631	0	234.405	503.749	1713.93	319.867	492.805	1707.83	222.264	308.879	1693.04	332.415	320.007	1687.94	284.794	290.059	1552.56	279.373	218.015	1287.62	265.918	443.584	1475.73	276.416	509.762	1274.1	368.771	222.216	1345.37	90.0677	358.064	1513.4	15.3688	313.004	1321.24	15.8897	293.315	1167.04	-22.5631	368.553	1014.33	14.0987	419.937	929.024	-26.0732	359.475	913.899	-36.7838	416.382	863.742
9632	0	232.991	512.62	1712.39	318.496	501.868	1705.9	221.223	317.812	1691.12	331.394	329.013	1686.1	283.563	299.041	1550.85	278.355	226.984	1285.56	264.523	452.713	1473.71	275.283	518.945	1272.06	367.829	231.303	1343.6	88.8209	367.087	1511.18	14.391	322.547	1318.96	14.6689	302.781	1164.42	-23.8024	377.457	1011.88	12.7906	428.394	926.36	-27.8189	367.543	911.803	-37.8326	424.181	860.759
9633	0	231.499	521.462	1710.56	317.172	510.963	1704.22	219.935	326.769	1689.15	330.039	338.068	1684.09	282.191	308.301	1548.78	277.229	236.116	1283.8	263.097	461.832	1471.9	274.167	528.243	1270.2	366.823	240.444	1341.91	87.4427	376.175	1509.28	13.0842	332.086	1316.92	13.7432	312.482	1162.32	-25.1112	386.614	1009.59	11.4733	436.86	923.683	-29.3986	376.264	909.451	-39.0484	432.521	857.933
9634	0	229.734	530.438	1709.05	315.466	519.975	1702.67	218.333	335.706	1687.08	328.621	347.078	1682.34	280.719	317.58	1547.08	275.959	245.335	1282.02	261.62	471.109	1469.93	272.942	537.683	1268.15	365.571	249.651	1340.07	85.8734	385.398	1507.3	11.569	341.754	1314.8	12.6276	322.252	1160.08	-26.3226	395.831	1007.13	10.0699	445.663	921.064	-31.0942	385.11	907.229	-40.3653	441.016	855.147
9635	0	228.071	539.517	1707.63	313.806	529.017	1701.36	216.747	344.849	1684.88	327.023	356.208	1680.28	279.19	326.999	1545.08	274.705	254.547	1279.98	260.184	480.633	1468.04	271.632	547.082	1266.31	364.31	258.914	1338.26	84.3153	394.802	1505.19	10.1588	351.487	1312.6	11.451	332.113	1157.72	-27.8846	405.297	1005.03	8.93525	454.569	918.514	-32.9206	394.137	904.909	-41.7905	449.582	852.557
9636	0	226.288	548.678	1706.13	311.836	538.062	1699.9	215.041	354.005	1682.48	325.302	365.499	1678	277.51	336.395	1543.22	273.538	263.89	1278.05	258.57	489.913	1465.99	270.444	556.518	1264.32	362.943	268.259	1336.37	82.666	404.247	1502.96	8.85402	361.276	1310.09	10.2188	342.098	1155.4	-29.499	414.973	1002.73	7.51227	463.741	915.714	-34.6465	403.519	902.471	-43.0071	458.514	849.752
9637	0	224.167	557.881	1704.67	309.749	547.336	1698.31	213.228	363.375	1680.14	323.432	374.72	1676.05	275.873	346.132	1541.28	272.223	273.304	1276.27	257.018	499.485	1463.79	269.192	566.041	1262.05	361.447	277.61	1334.81	81.0194	413.891	1500.46	7.8503	371.421	1307.3	8.76648	352.242	1153.04	-30.8393	424.859	999.924	6.24	473.09	912.838	-36.3199	413.14	900.142	-44.484	467.964	847.025
9638	0	221.888	567.052	1703	307.648	556.82	1696.75	211.101	372.672	1678.02	321.212	384.197	1673.62	273.912	355.785	1539.55	270.864	282.736	1274.27	255.225	509.173	1461.64	267.768	575.387	1259.62	359.853	287.198	1333.21	79.221	423.694	1498.25	6.3116	381.28	1304.65	7.29332	362.358	1150.45	-32.373	434.991	997.414	4.92297	482.703	909.864	-38.0098	422.87	897.618	-45.9191	477.592	844.145
9639	0	219.534	576.326	1701.51	305.304	566.317	1694.99	208.953	382.041	1675.52	319.047	393.789	1671.21	271.933	365.529	1537.7	269.599	292.371	1272.62	253.445	518.886	1459.3	266.473	584.768	1257.21	358.381	296.929	1331.36	77.4363	433.526	1495.87	4.84074	391.534	1302.12	5.81812	372.464	1148.07	-34.0778	445.237	994.927	3.64897	492.49	907.134	-39.6941	432.887	895.308	-47.3544	487.415	841.487
9640	0	217.091	585.687	1699.91	302.854	575.622	1693.76	206.622	391.494	1673.03	316.873	403.253	1669.23	270.069	375.467	1535.77	268.175	302.081	1270.72	251.54	528.65	1457.13	264.96	594.212	1254.98	356.809	306.689	1329.83	75.4655	443.466	1493.58	2.9155	401.618	1299.74	4.22671	382.892	1145.85	-35.4682	455.59	992.344	2.2073	502.527	904.562	-41.4073	443.208	893.011	-48.789	497.695	839.154
9641	0	214.648	595.234	1698.44	300.176	585.021	1692.39	204.273	401.126	1670.52	314.503	412.78	1667.27	267.91	385.378	1533.8	266.652	311.996	1269.02	249.51	538.503	1455.1	263.3	603.685	1252.9	355.018	316.357	1328.32	73.4218	453.405	1491.39	1.06477	411.868	1297.41	2.50995	393.302	1143.4	-37.3808	466.102	990.166	0.73836	512.809	902.384	-43.1741	453.706	890.691	-50.3237	508.118	836.739
9642	0	211.897	604.715	1697.14	297.555	594.625	1691.28	201.713	410.755	1668.21	311.854	422.44	1665.13	265.822	395.186	1532.1	265.131	321.965	1266.99	247.312	548.364	1453.19	261.517	613.27	1251.03	353.35	326.327	1326.68	71.2399	463.345	1489.46	-0.867756	422.13	1295.18	0.857459	403.721	1140.98	-38.9467	476.463	987.816	-0.711318	523.245	900.31	-44.6882	464.401	888.421	-51.8956	519.103	834.828
9643	0	208.977	614.256	1696.12	294.856	604.344	1690.25	199.103	420.456	1666.11	309.236	432.108	1663.53	263.537	405.087	1530.47	263.556	332.041	1265.2	245.115	558.336	1451.41	259.634	623.091	1249.39	351.543	336.555	1324.92	69.022	473.303	1487.47	-2.85062	432.505	1293	-0.890909	414.151	1138.63	-40.2254	486.632	985.301	-2.10237	534.255	898.268	-46.1387	475.481	886.133	-53.5531	530.071	832.788
9644	0	205.873	623.855	1694.95	291.909	614.112	1689.37	196.235	430.165	1664.25	306.666	441.883	1662.15	261.153	415.174	1528.71	261.931	342.204	1263.69	242.918	568.36	1449.65	257.68	633.162	1247.57	349.653	346.752	1323.52	66.8341	483.323	1485.36	-4.55482	442.961	1290.58	-2.80221	424.895	1136.39	-41.7607	497.871	983.2	-3.65228	545.296	896.216	-47.6159	486.716	883.973	-54.9686	541.324	830.971
9645	0	202.849	633.643	1693.82	288.749	623.856	1688.57	193.381	440.039	1662.27	303.725	451.857	1660.56	258.76	425.212	1527.2	260.344	352.457	1262.19	240.69	578.498	1448.13	255.635	643.377	1246.12	347.622	357.095	1322.04	64.4794	493.315	1483.24	-7.08666	453.381	1288.61	-4.61228	435.518	1134.1	-43.4433	508.966	981.182	-5.00469	556.411	894.112	-49.3283	497.712	881.679	-56.4627	552.896	829.148
9646	0	199.731	643.469	1692.69	285.456	633.671	1687.71	190.625	449.974	1660.73	300.826	461.678	1659.48	256.388	435.315	1526.19	258.713	362.73	1260.76	238.384	588.577	1446.92	253.502	653.854	1245.01	345.399	367.361	1320.76	62.0028	503.284	1481.41	-9.0276	463.795	1286.55	-6.5351	446.268	1132.06	-44.9188	519.838	978.636	-6.14825	567.767	892.209	-50.6367	509.405	879.721	-57.9374	564.426	827.506
9647	0	196.394	653.385	1691.76	282.17	643.747	1687.04	187.577	459.846	1659.49	297.772	471.847	1658.35	253.965	445.523	1525.15	257.081	373.198	1259.42	236.001	598.741	1445.83	251.193	664.551	1244.05	343.288	377.511	1319.69	59.5831	513.337	1480.01	-10.9374	474.405	1284.59	-8.78067	457.162	1130.24	-46.5543	531.391	977.432	-7.45274	579.166	890.443	-52.058	520.982	878.019	-59.1532	576.47	826.022
9648	0	193.047	663.293	1691.03	278.873	653.846	1686.79	184.388	469.828	1658.71	294.704	481.659	1658.43	251.465	455.626	1524.42	255.065	383.739	1258.79	233.532	608.989	1445	249.056	675.624	1243.81	341.046	387.581	1318.79	57.0281	523.388	1478.65	-13.3737	484.879	1283.06	-10.7679	468.076	1128.78	-47.7945	542.251	975.738	-8.76013	591.121	889.319	-53.0093	532.293	876.194	-60.5668	588.577	825.017
9649	0	189.472	673.347	1690.64	275.455	664.059	1686.56	181.262	479.827	1658.3	291.447	491.967	1658.33	248.849	465.754	1523.97	253.118	394.196	1257.89	231.058	619.156	1444.77	246.955	686.825	1243.62	338.69	397.685	1318.24	54.5294	533.475	1477.73	-15.441	495.495	1282.02	-12.8207	479.276	1127.43	-49.5257	554.266	974.587	-10.0979	602.82	888.353	-54.411	544.464	875.039	-61.4626	600.611	823.811
9650	0	186.116	683.445	1690.63	272.068	674.151	1686.93	178.258	489.971	1658.4	288.399	501.93	1659.11	246.316	475.9	1524.01	251.028	404.483	1257.92	228.673	629.23	1444.9	244.782	697.958	1244.07	336.383	407.729	1318.27	52.1184	543.544	1477.07	-17.5156	506.092	1281.25	-14.7755	490.672	1126.45	-50.8455	566.199	973.627	-11.1914	614.993	887.877	-55.5621	556.394	873.938	-62.5599	612.975	823.17
9651	0	182.667	693.651	1690.62	268.623	684.307	1687.5	175.024	500.06	1659.08	285.213	512.066	1660.34	243.826	486.064	1524.4	249.139	414.637	1258.38	226.202	639.305	1445.28	242.622	708.894	1245	333.955	417.609	1318.67	49.5453	553.687	1477.2	-19.3982	516.78	1280.89	-16.8203	502.159	1126.13	-52.3242	578.111	973.799	-12.3633	626.831	887.827	-56.8753	568.58	873.807	-63.7571	625.508	823.124
9652	0	179.29	703.912	1690.98	265.207	694.497	1688.47	171.814	510.136	1659.95	282.084	522.249	1661.79	241.219	496.204	1525.32	246.903	424.626	1259.1	223.742	649.308	1446.03	240.33	719.609	1246.37	331.592	427.57	1319.65	47.1533	563.878	1477.49	-21.5026	527.541	1280.82	-18.9466	513.547	1125.96	-53.7974	590.412	973.984	-13.3898	639.205	888.309	-57.9391	581.073	873.588	-64.7238	638.121	823.307
9653	0	175.957	714.101	1691.2	261.904	704.712	1689.15	168.714	520.168	1660.85	279.02	532.341	1663.35	238.624	506.263	1526.27	244.808	434.479	1260.13	221.398	659.302	1446.92	238.277	730.19	1247.61	329.441	437.403	1321.02	44.7653	574.053	1477.91	-23.4436	538.341	1281.24	-20.8671	525.128	1126.3	-55.0584	602.517	974.293	-14.3076	651.447	889.103	-59.196	593.513	874.022	-65.486	650.96	823.975
9654	0	172.661	724.287	1691.58	258.556	714.963	1690.03	165.884	530.341	1662.05	275.969	542.527	1664.91	236.159	516.211	1527.34	242.613	444.382	1261.17	219.181	669.187	1448.12	236.333	740.407	1248.84	327.259	447.051	1322.33	42.3943	584.283	1478.86	-25.5736	549.182	1282.03	-22.7995	536.843	1127.2	-56.4134	614.732	975.252	-15.3557	663.735	890.217	-60.4473	606.152	875.143	-66.329	663.884	825.213
9655	0	169.435	734.429	1692	255.523	725.215	1690.96	162.947	540.348	1663.42	272.971	552.478	1666.9	233.693	525.849	1528.47	240.393	454.264	1262.6	216.978	679.062	1449.34	234.405	750.466	1250.11	325.191	456.579	1323.85	40.0624	594.529	1480.02	-27.617	560.063	1282.97	-24.8791	548.458	1128.31	-57.5901	627.467	976.336	-15.8687	676.052	891.161	-61.5441	619.221	876.429	-66.914	676.967	826.308
9656	0	166.555	744.457	1692.49	252.541	735.421	1691.89	160.052	550.222	1664.82	270.051	562.572	1668.71	231.081	535.248	1530	238.099	464	1263.89	214.911	688.773	1450.63	232.617	760.295	1251.3	322.874	465.802	1325.45	37.8662	604.759	1481.29	-29.1828	570.864	1283.94	-27.1736	560.019	1129.33	-59.0453	640.08	977.775	-16.5519	688.749	892.836	-62.6341	632.19	877.552	-67.6023	690.31	828.042
9657	0	163.752	754.458	1693.04	249.918	745.382	1692.89	157.279	560.06	1666.41	267.388	572.263	1670.77	228.49	544.324	1531.33	235.741	473.54	1265.04	213.148	698.402	1452.07	230.901	769.745	1252.63	320.721	475.028	1326.71	35.6576	614.917	1482.64	-31.8587	582.069	1285.39	-29.3045	571.74	1130.6	-60.236	652.613	979.257	-17.1006	700.99	894.487	-63.6718	645.291	878.982	-67.999	703.586	829.562
9658	0	161.263	764.326	1693.77	247.447	755.134	1694.22	154.801	569.854	1668.1	264.915	581.931	1673.16	226.112	553.512	1532.66	233.342	482.852	1266.35	211.372	707.688	1453.57	229.234	778.995	1254.21	318.264	483.957	1328.27	33.6453	625.044	1484.17	-33.7329	593.436	1286.77	-31.6532	583.524	1131.92	-61.4338	665.486	980.966	-17.6314	713.721	896.482	-64.822	658.579	880.611	-68.4434	717.107	831.631
9659	0	158.915	774.197	1694.31	245.074	764.841	1695.13	152.378	579.55	1669.96	262.371	591.544	1675.28	223.717	562.632	1533.91	230.846	492	1267.88	209.639	716.987	1455.19	227.605	788.097	1255.74	315.748	492.672	1329.77	31.6378	635.115	1485.79	-36.268	604.629	1288.33	-34.2871	595.22	1133.2	-62.5687	678.335	982.784	-18.5399	726.604	898.851	-65.8959	671.968	882.231	-68.8962	730.914	833.766
9660	0	156.838	783.831	1694.82	242.959	774.442	1696	150.104	589.037	1671.91	260.075	600.979	1677.42	221.457	571.426	1535.35	228.384	501.018	1268.96	207.951	726.063	1457.01	226.354	797.197	1257.32	313.277	501.516	1331.16	29.7137	644.963	1487.35	-38.6847	615.905	1289.72	-36.7497	606.977	1134.62	-63.9281	691.34	984.61	-18.901	739.578	900.809	-66.6953	685.698	883.844	-69.049	744.864	835.668
9661	0	154.91	793.384	1695.39	240.954	783.823	1696.81	147.979	598.369	1673.75	257.945	610.317	1679.41	219.423	580.23	1536.81	226.134	509.85	1270.39	206.535	734.843	1458.42	225.246	806.188	1258.84	310.837	510.19	1332.3	27.9607	654.707	1488.81	-41.1037	627.175	1291.22	-39.3175	618.838	1135.77	-65.0605	704.338	986.179	-19.2352	752.616	902.941	-67.8118	699.275	885.508	-69.33	758.893	837.85
9662	0	153.196	802.773	1696.12	239.145	793.127	1697.76	145.989	607.616	1675.6	256.109	619.535	1681.48	217.032	588.73	1538.03	223.712	518.668	1271.83	205.139	743.559	1459.82	224.336	815.071	1260.32	308.384	518.652	1333.69	26.3671	664.283	1490.14	-43.4758	638.468	1292.69	-42.111	630.851	1137.28	-66.0916	717.584	987.794	-19.3585	765.697	905.004	-68.7839	713.307	887.425	-69.4342	773.182	840.092
9663	0	151.564	812.094	1697.02	237.507	802.343	1698.79	144.368	616.9	1677.33	254.362	628.61	1683.43	215.522	597.705	1539.45	221.332	527.389	1272.97	203.848	752.192	1461.06	223.375	823.975	1261.89	305.898	527.198	1334.67	24.7513	673.795	1491.53	-45.6233	650.018	1294.1	-44.9728	642.75	1138.64	-67.2362	730.946	989.579	-19.7565	779.044	907.455	-69.6772	727.43	889.203	-69.4972	787.586	842.295
9664	0	150.172	821.29	1698.03	236.156	811.472	1699.89	142.851	625.927	1679.38	252.756	637.596	1685.45	213.51	606.048	1540.71	219.177	536.089	1274.44	202.776	760.891	1462.76	222.558	832.586	1263.6	303.592	535.462	1335.89	23.2656	683.063	1493.02	-47.777	661.249	1295.41	-47.7059	654.808	1139.95	-68.1814	744.374	991.573	-19.7941	792.123	909.689	-70.4907	741.578	890.999	-69.3167	802.043	844.679
9665	0	148.847	830.333	1699.14	234.902	820.461	1701.17	141.497	634.895	1681.32	251.373	646.502	1687.38	211.989	614.603	1542.65	216.998	544.803	1275.85	201.752	769.33	1464.32	221.782	841.136	1265.3	301.291	543.662	1337.4	21.905	692.228	1494.61	-50.0371	672.444	1296.93	-50.3272	666.904	1141.54	-68.9978	757.779	993.537	-19.7315	805.164	912.03	-71.4202	755.772	892.952	-68.9249	816.661	847.138
9666	0	147.616	839.336	1700.23	233.681	829.399	1702.45	140.185	643.732	1683.16	250.159	655.467	1689.23	210.476	623.209	1544.05	214.886	553.405	1277.43	200.441	777.759	1465.69	221.087	849.546	1266.92	299.143	551.998	1338.63	20.4725	701.419	1496.35	-52.0999	683.551	1298.52	-53.1931	678.956	1142.86	-69.8234	771.332	995.464	-19.5127	818.235	914.364	-72.3405	770.248	895.111	-68.7739	831.143	849.838
9667	0	146.544	848.232	1701.41	232.559	838.286	1703.65	139.031	652.548	1684.93	249.094	664.33	1690.97	209.007	631.694	1545.72	212.854	561.906	1278.71	199.406	786.151	1467.35	220.42	857.876	1268.67	297.078	560.174	1340.16	19.0647	710.486	1498	-53.9677	694.576	1299.96	-55.6754	691.161	1144.29	-70.5516	785.012	997.832	-19.3389	831.258	916.916	-73.1697	784.595	897.271	-68.4913	845.885	852.746
9668	0	145.635	857.072	1702.82	231.808	847.123	1705	138.054	661.328	1686.7	248.114	673.054	1692.86	207.428	640.025	1547.06	210.96	570.458	1280.21	198.655	794.335	1469.18	219.701	866.209	1270.41	295.12	568.356	1341.39	18.0606	719.519	1499.61	-55.7487	705.452	1301.59	-58.2969	703.296	1145.78	-71.1243	798.56	999.995	-18.9957	844.17	919.589	-73.7741	799.002	899.496	-68.0105	860.37	855.74
9669	0	144.935	865.849	1704.14	231.014	855.927	1706.31	137.24	670.134	1688.63	247.276	681.854	1694.68	205.753	648.268	1548.73	209.073	578.968	1281.98	197.576	802.883	1470.61	219.105	874.527	1271.88	293.237	576.495	1342.97	16.8385	728.602	1501.39	-57.4477	716.223	1303.2	-60.7425	715.489	1147.56	-71.5399	812.095	1002.27	-18.6728	856.805	922.119	-74.4674	813.399	902.041	-67.3405	874.863	858.402
9670	0	144.146	874.599	1705.21	230.127	864.653	1707.34	136.509	678.887	1690.39	246.472	690.684	1696.23	204.663	656.881	1550.28	206.979	587.503	1283.56	196.755	811.327	1471.95	218.462	882.938	1273.31	291.246	584.492	1344.54	15.7495	737.643	1502.86	-58.9688	726.83	1304.68	-63.1489	727.641	1149.39	-72.0062	825.57	1004.41	-18.3179	869.509	924.654	-75.1828	827.576	904.698	-66.6683	889.3	861.411
9671	0	143.594	883.416	1706.44	229.48	873.383	1708.45	135.733	687.585	1692.21	245.581	699.365	1697.63	203.207	665.138	1551.46	204.998	595.973	1284.96	196.193	819.57	1473.58	217.961	891.307	1274.8	289.411	592.582	1345.94	14.7612	746.793	1504.44	-60.284	737.345	1306.16	-65.5262	739.617	1151.03	-72.3959	838.867	1006.92	-18.1154	882.176	927.169	-75.6392	841.695	907.156	-66.0559	903.507	864.422
9672	0	143.039	892.163	1707.67	228.971	882.093	1709.76	135.031	696.271	1693.88	244.891	708.006	1699.22	201.735	673.404	1552.9	203.144	604.434	1286.26	195.585	827.946	1475	217.478	899.595	1276.39	287.538	600.579	1347.34	13.773	755.985	1506.21	-61.4999	747.726	1307.69	-67.4308	751.774	1152.89	-72.7458	852.12	1009.58	-17.4763	894.681	929.943	-75.9085	855.854	909.502	-65.3476	917.762	867.398
9673	0	142.419	900.866	1708.88	228.484	890.729	1710.9	134.199	705.034	1695.45	244.273	716.6	1700.74	200.373	681.732	1554.52	201.199	612.731	1287.8	194.896	836.247	1476.46	216.999	907.807	1277.84	285.793	608.695	1348.69	12.7838	765.106	1507.7	-62.7105	758.035	1309.45	-69.6689	763.6	1154.64	-73.2448	865.348	1012.37	-17.0291	907.292	932.737	-76.8685	870.055	912.374	-64.6167	931.786	870.797
9674	0	142	909.658	1709.93	228.009	899.379	1711.8	133.392	713.787	1696.67	243.561	725.185	1702.04	199.181	690.064	1555.52	199.348	621.107	1288.92	194.322	844.564	1477.79	216.68	915.91	1279.01	284.011	616.729	1349.89	12.0673	774.394	1509.17	-63.8704	768.266	1311.29	-71.5953	775.514	1156.27	-73.5693	878.302	1014.75	-16.558	919.919	935.51	-77.0041	883.632	914.842	-63.7322	945.826	873.581
9675	0	141.57	918.373	1711.04	227.62	907.98	1712.71	132.88	722.435	1697.81	243.064	733.787	1703.12	197.951	698.229	1556.65	197.521	629.322	1290.09	193.984	852.881	1479.22	216.519	923.971	1280.1	282.371	624.856	1350.89	11.3052	783.723	1510.7	-64.8777	778.472	1312.76	-73.4824	787.022	1157.82	-73.9539	891.217	1017.12	-16.1125	932.522	938.37	-76.8523	897.423	917.177	-63.1981	959.493	876.916
9676	0	141.442	926.96	1711.85	227.285	916.621	1713.74	132.348	731.221	1699.01	242.455	742.372	1704.03	196.814	706.694	1557.63	195.707	637.582	1291.12	193.606	861.34	1480.18	216.288	931.969	1281.16	280.595	632.532	1352.07	10.7257	793.125	1511.83	-65.7945	788.721	1314.06	-74.8664	798.648	1159.19	-73.9304	903.811	1019.58	-15.7343	945.114	940.842	-76.9278	910.967	919.348	-62.1728	973.366	879.472
9677	0	141.078	935.839	1712.7	226.609	925.087	1714.39	131.696	739.886	1699.78	241.928	750.999	1704.8	195.801	715.202	1558.66	194.011	646.007	1292.24	193.222	869.867	1480.79	216.17	940.017	1281.83	279.086	641.033	1352.75	10.06	802.666	1512.95	-66.8461	798.996	1315.23	-76.4274	809.936	1160.44	-73.9471	916.484	1021.95	-15.4799	957.769	943.586	-77.5216	924.556	921.718	-61.6569	986.899	882.007
9678	0	140.782	944.599	1713.42	226.583	933.831	1715.04	131.175	748.647	1700.54	241.339	759.641	1705.15	194.838	723.772	1559.23	192.369	654.373	1292.87	192.926	878.375	1481.31	216.124	947.992	1282.17	277.463	648.684	1353.85	9.46331	812.217	1513.79	-67.68	809.393	1316.28	-77.506	821.151	1161.36	-74.3542	928.774	1023.65	-15.1725	970.311	945.843	-77.6387	938.118	923.976	-60.8414	1000.55	884.89
9679	0	140.58	953.286	1713.99	226.325	942.443	1715.38	130.755	757.371	1700.9	241.006	768.249	1705.49	193.858	732.439	1559.69	190.74	662.818	1293.62	192.699	886.993	1481.66	216.142	956.099	1282.48	276.043	656.889	1354.32	8.93272	821.7	1514.48	-68.476	819.786	1317.12	-78.6687	832.105	1162.32	-74.6449	941.07	1025.29	-14.9894	982.869	948.103	-77.5517	951.385	925.748	-60.1468	1013.97	887.073
9680	0	140.633	961.91	1714.3	226.479	951.155	1715.84	130.24	766.163	1701.34	240.554	776.837	1705.7	193.027	741.239	1560.2	189.187	671.229	1294.28	192.538	895.697	1481.9	216.328	964.26	1282.62	274.51	664.917	1354.99	8.50791	831.38	1515.01	-69.1372	830.146	1317.63	-79.3157	843.253	1162.91	-74.8464	953.277	1026.9	-14.9146	995.253	950.029	-77.4574	964.511	927.6	-59.7521	1027.18	889.198
9681	0	140.536	970.904	1714.76	226.385	959.717	1716.07	129.872	775.004	1701.44	240.122	785.447	1705.76	192.203	750.147	1560.53	187.555	679.686	1294.77	192.503	904.381	1481.98	216.464	972.529	1282.57	273.266	673.172	1355.65	8.14632	841.068	1515.43	-69.9524	840.611	1318.22	-80.3222	853.974	1163.17	-74.8018	965.162	1028.38	-14.8559	1007.6	952.059	-77.4472	977.293	929.078	-59.3087	1040.39	891.391
9682	0	140.576	979.73	1715.01	226.153	968.235	1716.1	129.599	783.909	1701.56	239.858	793.966	1705.83	191.484	759.035	1560.73	186.207	687.855	1295.24	192.355	912.997	1481.96	216.707	980.828	1282.52	271.841	681.248	1355.82	7.77474	850.63	1515.79	-70.5705	851.052	1318.84	-80.4447	864.97	1163.28	-75.0925	976.927	1029.34	-14.576	1020.2	954.128	-77.9889	990.281	930.773	-58.8817	1053.43	893.442
9683	0	140.834	988.578	1715.08	226.468	976.877	1716.19	129.333	792.769	1701.55	239.509	802.479	1705.75	190.843	767.939	1560.81	184.932	696.36	1295.41	192.217	921.623	1481.89	216.902	989.212	1282.38	270.618	689.394	1355.94	7.33596	860.333	1515.98	-71.1158	861.402	1319.05	-81.1279	875.768	1163.75	-75.1699	988.688	1030.51	-14.4159	1032.5	955.626	-76.8302	1002.24	931.159	-58.8182	1066.02	895.137
9684	0	141.064	997.358	1714.99	226.671	985.582	1715.9	128.647	801.961	1701.19	239.464	811.321	1705.39	190.202	777.037	1560.59	183.725	704.889	1295.53	192.273	930.427	1481.23	216.939	997.497	1281.63	269.39	697.903	1355.74	7.24719	869.957	1515.83	-71.5669	871.843	1319.12	-81.6393	886.406	1163.72	-74.9511	1000.34	1031.44	-14.1598	1044.77	957.077	-75.9205	1014.41	931.756	-58.6047	1078.76	896.772
9685	0	141.319	1006.6	1714.58	226.914	994.534	1715.29	128.648	810.818	1700.85	239.266	820.038	1705.03	189.737	786.166	1560.55	182.735	713.466	1295.26	192.114	939.169	1480.89	217.016	1005.76	1280.86	268.466	706.223	1355.74	6.88228	879.634	1515.65	-71.8007	882.195	1318.76	-81.7382	896.982	1162.97	-75.1482	1011.82	1031.99	-14.0128	1057.1	958	-76.1335	1026.77	932.42	-58.3813	1091.41	897.935
9686	0	141.566	1015.73	1714	227.181	1003.4	1714.55	128.191	820.077	1700.37	239.044	828.979	1704.34	189.198	795.31	1559.71	181.729	721.937	1295.01	192.375	948.118	1479.96	217.241	1014.11	1279.66	267.564	714.718	1355.52	6.83534	889.339	1514.99	-71.9831	892.51	1318.28	-81.7602	907.466	1162.76	-74.9836	1023.23	1032.04	-13.9234	1069.05	958.466	-75.126	1038.63	932.453	-58.2079	1103.93	898.769
9687	0	142.021	1025	1713.04	227.517	1012.44	1713.69	128.493	829.344	1699.88	239.016	838.041	1703.67	189.098	804.266	1559.61	180.946	730.5	1294.74	192.4	957.136	1478.79	217.002	1022.12	1278.23	266.813	723.427	1354.82	6.89269	898.94	1514.25	-71.9327	902.774	1317.45	-81.2161	918.207	1161.94	-74.9583	1034.53	1031.92	-13.8721	1081.09	958.804	-75.0047	1050.58	932.73	-58.1751	1116.33	899.377
9688	0	142.621	1034.31	1711.87	228.165	1021.76	1712.65	128.531	838.669	1699.26	239.092	847.199	1702.77	189.014	813.424	1558.94	180.29	739.072	1294.22	192.726	966.006	1477.91	217.3	1030.7	1277.13	266.183	732.098	1354.2	6.89866	908.554	1513.46	-71.8717	913.008	1316.65	-81.2262	928.512	1161.43	-74.9031	1045.77	1031.68	-13.7856	1093.08	959.212	-75.2729	1062.64	932.902	-57.8356	1127.92	899.556
9689	0	142.972	1043.87	1710.72	228.42	1030.79	1711.28	128.541	848.161	1698.47	239.117	856.407	1701.92	188.909	822.806	1557.8	179.791	747.695	1293.7	192.865	975	1476.62	217.49	1039.37	1275.79	265.727	740.908	1353.36	7.00281	918.204	1512.49	-71.4918	923.18	1315.64	-80.7881	938.753	1160.31	-74.7669	1056.85	1031.3	-13.6661	1104.96	959.359	-74.7471	1074.26	932.74	-57.8566	1139.78	899.669
9690	0	143.607	1053.5	1709.12	229.293	1040.33	1710.08	128.673	857.784	1697.48	239.212	865.647	1700.92	189.092	831.856	1557.02	179.313	756.287	1293	193.274	984.062	1475.53	217.921	1048.13	1274.62	265.43	749.793	1352.53	7.3244	927.623	1511.51	-71.2251	933.182	1314.57	-80.1396	949.055	1159.22	-74.7329	1067.87	1030.81	-13.6523	1116.69	959.148	-74.6934	1085.9	932.565	-58.0021	1151.62	899.692
9691	0	144.398	1063.2	1707.69	229.733	1049.6	1708.39	128.737	867.356	1696.61	239.447	875.032	1700.05	189.279	841.181	1555.96	179.068	765.297	1291.99	193.434	993.177	1474.24	218.009	1056.84	1273.16	265.286	758.741	1351.3	7.60889	937.206	1510.47	-70.7844	943.185	1313.48	-79.0717	959.5	1157.74	-74.387	1078.75	1030.29	-13.6196	1128.32	958.935	-74.5587	1097.32	932.094	-57.9985	1163.53	900.17
9692	0	145.161	1072.94	1705.76	230.72	1059.29	1706.75	129.135	877.223	1695.56	239.681	884.498	1699.05	189.58	850.511	1554.64	179.043	774.022	1290.99	193.844	1002.2	1472.97	218.267	1065.67	1271.73	265.275	767.689	1350.37	7.9008	946.623	1509.33	-70.2925	953.089	1312.28	-78.199	969.79	1156.71	-74.2903	1089.54	1029.32	-13.6081	1139.81	958.414	-74.2149	1108.52	931.437	-58.1484	1174.82	899.411
9693	0	146.001	1082.94	1703.9	231.475	1068.86	1704.54	129.393	887.128	1694.46	239.977	894.062	1697.87	190.075	859.875	1553.39	179.086	782.992	1289.82	194.387	1011.52	1471.34	218.873	1074.89	1270.33	265.455	776.828	1348.98	8.28838	956.159	1508.12	-69.694	962.818	1310.85	-77.6781	979.859	1155.15	-74.1176	1100.18	1028.49	-13.6429	1151.13	957.968	-75.2764	1120.23	931.912	-58.2164	1186.31	899.499
9694	0	146.978	1093.02	1701.68	232.458	1078.53	1702.63	129.849	897.263	1693.24	240.505	903.823	1696.63	190.549	869.289	1551.84	179.267	792.401	1288.44	194.767	1020.76	1469.82	219.17	1084	1268.44	265.688	786.021	1347.55	8.79708	965.586	1506.62	-68.8614	972.558	1309.2	-76.5628	989.956	1153.79	-73.4576	1110.91	1027.92	-13.3776	1162.49	956.713	-73.4267	1130.15	929.126	-58.3654	1197.33	898.143
9695	0	148.13	1103.12	1699.18	233.508	1088.58	1700.23	130.393	907.323	1692.11	241.065	913.693	1695.27	191.254	878.82	1550.21	179.585	801.394	1286.98	195.276	1030.15	1467.94	219.519	1093.18	1266.76	266.244	795.386	1345.7	9.47075	975.133	1505.22	-68.0265	982.137	1307.55	-75.5677	1000.11	1152.3	-73.1103	1121.45	1026.62	-13.4273	1173.38	955.555	-72.7234	1140.79	927.652	-58.6138	1208.24	897.339
9696	0	149.193	1113.44	1696.58	234.56	1098.8	1697.41	130.978	917.53	1690.42	241.646	923.719	1693.7	191.887	888.329	1548.3	180.155	810.807	1285.29	195.721	1039.59	1466.01	220.053	1102.65	1264.8	266.861	804.792	1344.13	10.1148	984.731	1503.6	-67.1544	991.686	1305.84	-74.3811	1010.18	1150.38	-72.8884	1131.82	1025.17	-13.5553	1184.38	954.51	-72.3321	1151.45	926.745	-59.0407	1218.99	896.602
9697	0	150.138	1123.22	1693.96	235.699	1108.85	1694.91	131.778	927.999	1689.07	242.349	933.858	1692.02	192.817	898.003	1546.53	180.613	820.203	1283.36	196.631	1049.25	1463.97	220.522	1112.04	1262.58	267.525	814.302	1342.2	11.0387	994.372	1501.62	-66.1439	1001.18	1303.9	-73.2894	1020.14	1148.75	-72.6208	1142.01	1023.62	-13.4027	1195.2	952.94	-72.0254	1161.91	925.118	-59.1481	1229.57	894.931
9698	0	151.441	1133.72	1691.19	237.019	1119.14	1692.25	132.666	938.492	1687.43	243.366	944.268	1690.23	193.664	907.689	1544.45	181.333	829.875	1281.51	197.194	1058.89	1461.59	221.225	1121.74	1260.57	268.293	823.944	1340.07	11.911	1004.12	1500.03	-65.0265	1010.65	1301.95	-72.1525	1030.19	1147.24	-72.2567	1152.26	1021.83	-13.4042	1206.04	951.355	-71.8119	1172.2	923.298	-59.3569	1240.26	893.504
9699	0	152.921	1144.79	1688.25	238.302	1129.55	1689.44	133.655	949.116	1685.8	244.291	954.675	1688.45	194.765	917.582	1542.3	182.189	839.605	1279.42	198.266	1068.65	1459.54	221.88	1131.32	1258.47	269.126	833.678	1338.03	12.8463	1013.9	1498.02	-63.9308	1020.14	1299.92	-71.1484	1040	1145.05	-71.8516	1162.46	1020.02	-13.4121	1216.65	949.736	-71.6712	1182.47	921.899	-59.4025	1250.49	891.626
9700	0	154.316	1155.23	1685.29	239.665	1140.15	1686.49	134.633	959.813	1684.02	245.32	965.203	1686.55	195.799	927.516	1540.25	182.911	849.285	1277.54	199.27	1078.62	1457.26	222.582	1140.99	1256.13	269.951	843.522	1335.96	13.8625	1023.88	1496.15	-62.8609	1029.67	1297.89	-70.0271	1049.83	1143.12	-71.6218	1172.41	1018.2	-13.4073	1227.01	948.117	-71.2752	1192.42	919.76	-59.7543	1260.62	889.883
9701	0	155.741	1166.07	1682.53	241.23	1150.9	1683.6	135.898	970.718	1682.35	246.667	975.97	1684.66	196.892	937.599	1538.14	183.727	859.178	1275.34	200.37	1088.53	1455.01	223.547	1151.09	1253.67	270.881	853.443	1333.82	14.9049	1033.94	1494.35	-61.8229	1039.24	1295.92	-68.8707	1059.68	1141.14	-71.2334	1182.25	1016.21	-13.3974	1237.28	946.278	-70.9883	1202.48	918.043	-59.7873	1270.64	888.128
9702	0	157.488	1177.17	1679.79	242.996	1161.78	1680.89	137.273	981.725	1680.33	247.998	986.777	1682.71	198.046	948	1536.34	184.669	869.259	1273.16	201.418	1098.72	1452.7	224.508	1161.15	1251.44	271.789	863.413	1331.53	16.0192	1044.26	1492.28	-60.673	1048.9	1293.99	-67.9445	1069.53	1139.09	-70.7876	1192.06	1014.37	-13.1789	1247.52	944.213	-70.7716	1212.15	915.954	-59.8482	1280.47	886.087
9703	0	159.095	1187.94	1677.11	244.67	1172.84	1677.98	138.705	992.858	1678.47	249.544	997.663	1680.7	199.29	958.421	1533.99	185.499	879.426	1271.11	202.648	1108.96	1450.6	225.52	1171.27	1249.15	272.724	873.544	1329.47	17.2208	1054.7	1490.42	-59.4617	1058.74	1291.74	-66.9365	1079.39	1136.83	-70.5028	1201.71	1012.22	-13.0544	1257.55	942.091	-70.4037	1221.85	913.743	-60.0569	1290.13	884.105
9704	0	160.848	1199.3	1674.51	246.615	1183.85	1675.27	140.28	1004.13	1676.66	251.134	1008.7	1678.62	200.634	969.03	1531.84	186.3	889.585	1269.19	203.966	1119.41	1448.28	226.402	1181.2	1246.54	273.589	883.745	1327.58	18.4433	1065.41	1488.35	-58.4565	1068.79	1289.7	-65.8444	1089.2	1134.84	-70.0222	1211.3	1010	-12.9815	1267.2	939.732	-69.8435	1231.22	911.294	-60.008	1299.62	881.718
9705	0	162.939	1210.7	1671.74	248.479	1194.9	1672.59	141.994	1015.54	1674.9	252.933	1019.96	1676.59	201.826	979.691	1530.24	187.276	900.046	1267.48	205.323	1130.1	1445.73	227.777	1191.67	1244.27	274.498	894.132	1325.4	19.8202	1076.3	1486.27	-57.2068	1078.86	1287.67	-64.7662	1099.04	1133.06	-69.4442	1220.86	1007.37	-12.5949	1276.91	937.151	-69.4303	1240.4	909.069	-60.02	1308.72	879.062
9706	0	165.096	1221.93	1669	250.73	1206.36	1669.62	143.778	1026.98	1673.27	254.763	1031.33	1674.43	203.192	990.607	1528.27	188.318	910.694	1265.51	206.776	1140.77	1443.33	229.175	1202.25	1241.78	275.433	904.676	1323.66	21.2634	1087.39	1484.34	-56.0333	1089.08	1285.73	-63.7694	1108.91	1131.17	-68.9209	1230.14	1004.9	-12.553	1286.21	934.553	-68.9279	1249.5	906.671	-59.8515	1317.84	876.457
9707	0	167.428	1233.48	1666.42	252.924	1217.8	1666.83	145.615	1038.52	1671.65	256.661	1042.55	1672.64	204.588	1001.62	1526.33	189.305	921.517	1263.86	208.448	1151.48	1441.39	230.614	1212.95	1239.51	276.356	915.343	1321.85	22.6503	1098.65	1482.65	-54.6999	1099.47	1284	-62.7578	1118.7	1129.05	-68.3359	1239.53	1002.78	-12.1297	1295.52	932.029	-68.4949	1258.3	904.273	-59.9384	1326.6	874.07
9708	0	169.795	1244.94	1664.27	255.247	1228.94	1664.45	147.693	1050.24	1670.12	258.746	1053.93	1671	206.196	1012.68	1524.53	190.22	932.436	1261.97	210	1162.39	1439.34	232.518	1223.75	1237.67	277.36	926.152	1319.92	24.3436	1110.05	1480.97	-53.4892	1110.16	1282.66	-61.5765	1128.64	1127.98	-67.8681	1248.73	1000.81	-11.9096	1304.41	929.634	-68.071	1266.87	902.068	-59.8922	1335.02	871.467
9709	0	172.317	1256.55	1661.83	258.022	1240.42	1661.9	149.69	1061.82	1668.78	260.945	1065.41	1669.08	207.714	1023.71	1522.79	191.39	943.567	1260.37	211.819	1173.53	1437.46	233.949	1234.46	1235.73	278.58	937.164	1317.93	26.2092	1121.52	1479.56	-52.2472	1120.96	1281.61	-60.4831	1138.4	1126.41	-67.2082	1257.93	998.754	-11.388	1313.36	927.28	-67.7249	1275.4	899.791	-59.6028	1343.44	868.741
9710	0	175.069	1268.31	1659.58	260.553	1251.81	1659.37	151.902	1073.6	1667.49	263.219	1076.87	1667.4	209.449	1034.81	1521.32	192.696	954.777	1258.57	213.85	1184.76	1435.64	235.514	1245.48	1233.77	279.762	948.326	1316.25	27.9929	1133	1478.18	-50.8657	1132.09	1280.68	-59.2969	1148.23	1125.17	-66.4834	1266.72	996.872	-11.2136	1321.73	924.693	-67.5453	1283.65	897.593	-59.5107	1351.52	866.213
9711	0	177.796	1280	1657.9	262.717	1263.28	1657.32	154.166	1085.49	1666.5	265.501	1088.37	1666.09	211.393	1045.98	1519.69	194.131	965.929	1257.29	215.63	1195.9	1433.98	237.614	1256.98	1232.5	281.119	959.598	1314.66	29.8475	1144.43	1477.11	-49.4541	1143.44	1280.11	-57.9742	1157.91	1124.15	-65.7509	1275.59	994.836	-10.8906	1330.11	922.297	-67.1749	1291.72	895.599	-59.3645	1359.32	863.641
9712	0	180.585	1291.77	1656.47	266.024	1274.94	1655.55	156.572	1097.26	1665.8	268.108	1100.03	1664.86	213.469	1057.19	1518.31	195.669	977.259	1255.79	217.65	1207.19	1432.95	239.196	1268.46	1231.06	282.74	971.034	1313.02	31.9174	1155.87	1476.2	-48.0118	1154.88	1279.7	-56.5115	1167.65	1123.45	-64.7059	1284.15	992.746	-10.4796	1338.42	920.07	-66.8916	1299.64	893.984	-59.2766	1366.88	861.289
9713	0	183.715	1303.57	1654.94	268.866	1286.52	1654.07	159.108	1109.16	1665.16	270.662	1111.62	1663.75	215.492	1068.61	1517.44	197.484	988.892	1254.62	219.573	1218.56	1432.09	241.11	1280.34	1230.58	284.433	982.549	1311.65	34.0056	1167.26	1475.27	-46.5449	1166.41	1279.43	-55.2471	1177.27	1122.69	-63.9837	1292.71	991.321	-10.2989	1346.29	917.771	-66.6816	1307.47	892.366	-59.13	1374.17	858.934
9714	0	186.599	1315.32	1654.1	271.673	1298.13	1652.57	161.669	1120.9	1664.73	273.175	1123.27	1662.77	217.47	1080.18	1516.37	199.338	1000.56	1253.72	221.496	1230.11	1431.09	242.93	1292.36	1229.92	286.216	994.247	1310.79	35.8751	1178.66	1474.75	-45.0211	1178.23	1279.39	-53.6416	1186.91	1122.28	-63.4041	1301.06	989.849	-10.0716	1353.99	915.588	-66.4842	1315.01	890.904	-59.0524	1381.45	856.83
9715	0	189.494	1327.11	1653.35	274.747	1309.84	1651.56	164.306	1132.8	1664.53	275.877	1135.03	1661.65	219.202	1091.53	1515.7	201.356	1012.25	1253.14	223.522	1241.6	1430.54	244.601	1304.64	1229.2	288.07	1006.05	1310.02	38.0183	1190.08	1474.19	-43.4329	1189.84	1279.49	-51.9859	1196.48	1121.95	-62.5604	1309.37	988.796	-9.71097	1361.67	913.695	-66.1355	1322.38	889.725	-58.8404	1388.51	854.735
9716	0	192.709	1338.96	1652.87	277.596	1321.39	1650.88	167.012	1144.63	1664.81	278.595	1146.63	1661.54	221.779	1102.88	1515.85	203.476	1023.95	1252.61	225.542	1252.97	1430.29	246.255	1316.7	1229.17	290.061	1017.88	1309.34	40.1496	1201.18	1473.96	-41.6553	1201.18	1279.54	-50.3199	1205.92	1121.95	-61.6262	1317.57	987.472	-9.52086	1368.99	911.826	-65.9696	1329.55	888.649	-58.8024	1395.32	852.725
9717	0	195.585	1350.73	1653.05	280.601	1333.09	1650.69	169.732	1156.44	1665.21	281.206	1158.38	1661.43	224.325	1114.34	1515.89	205.749	1035.59	1252.68	227.55	1264.36	1430.38	248.41	1329.35	1229.45	292.273	1029.55	1309.2	42.2708	1212.24	1473.95	-39.8809	1212.28	1279.99	-48.5767	1215.3	1122.72	-60.9587	1325.46	986.929	-9.17388	1376.24	910.136	-65.7611	1336.56	887.831	-58.7233	1401.95	850.93
9718	0	198.543	1362.53	1653.53	283.526	1344.74	1650.95	172.497	1168.28	1665.88	284.039	1169.88	1662.04	226.741	1125.89	1515.98	207.913	1047.02	1253.28	229.687	1275.68	1430.77	249.959	1341.27	1230.3	294.645	1041.13	1309.85	44.2967	1223.14	1474.45	-38.0265	1223.04	1280.81	-46.8994	1224.41	1123.31	-59.9844	1333.32	986.612	-8.71853	1383.38	908.95	-65.5634	1343.26	887.143	-58.8158	1408.16	849.926
9719	0	201.444	1374.15	1654.21	286.472	1356.41	1651.47	175.232	1179.98	1667.08	286.717	1181.67	1662.52	229.207	1137.42	1517.26	209.99	1058.43	1254.01	231.763	1286.94	1431.6	251.778	1353.33	1231.23	296.985	1052.64	1310.5	46.3643	1234.01	1475.32	-36.0846	1233.31	1281.93	-45.0985	1233.45	1124.17	-59.1039	1340.8	986.7	-8.06372	1390.62	908.227	-65.2675	1349.78	887.145	-58.7014	1414.2	848.897
9720	0	204.354	1385.71	1655.17	288.769	1367.71	1652.04	177.852	1191.53	1668.32	289.543	1193.09	1663.66	231.796	1148.95	1518.6	212.222	1069.82	1255.23	233.693	1298.11	1432.63	253.479	1365.18	1233.14	299.386	1064.1	1311.51	48.5045	1244.74	1476.54	-34.1607	1243.13	1283.28	-43.3903	1242.38	1125.72	-58.1729	1348.25	987.085	-7.40452	1397.35	907.912	-64.9647	1356.17	887.572	-58.5346	1420.33	848.684
9721	0	207.094	1397.15	1656.24	291.796	1379.06	1652.82	180.516	1203.05	1669.75	292.066	1204.36	1664.8	234.055	1160.35	1519.45	214.819	1081.19	1256.54	235.673	1309.1	1433.87	254.81	1376.21	1234.23	301.74	1075.47	1312.85	50.5807	1255.43	1477.91	-32.3651	1252.51	1285.07	-41.5542	1251.26	1127.55	-57.2161	1355.55	987.918	-6.94345	1403.85	907.722	-64.4867	1362.35	888.214	-58.529	1426.1	848.46
9722	0	209.874	1408.49	1656.9	294.655	1390.42	1653.6	183.03	1214.34	1671.32	294.623	1215.61	1665.9	236.545	1171.38	1521.16	216.685	1091.85	1258.06	237.611	1320.05	1435.11	256.613	1387.72	1235.15	304.287	1086.77	1314.31	52.8096	1265.94	1479.37	-30.372	1261.41	1286.65	-39.5472	1259.45	1129.09	-56.0984	1362.8	989.018	-6.59798	1410.12	907.853	-64.0548	1368.29	889.094	-58.2556	1431.92	848.732
9723	0	212.507	1419.61	1657.82	297.089	1401.29	1654.49	185.578	1225.56	1672.68	297.127	1226.74	1667.15	239.001	1182.05	1522.35	219.152	1102.56	1259.49	239.417	1330.79	1436.12	258.127	1398.57	1236.21	306.869	1097.88	1315.45	55.0179	1276.08	1481.17	-28.5294	1269.97	1288.68	-37.7392	1267.61	1131.34	-55.1047	1369.69	990.302	-5.94769	1416.81	908.826	-63.5675	1374.38	890.41	-57.9119	1437.41	849.085
9724	0	215.054	1430.53	1658.92	299.339	1412.09	1655.02	187.806	1236.42	1674.49	299.402	1237.67	1668.25	241.505	1192.49	1523.75	221.588	1113.14	1260.73	241.241	1341.36	1437.42	259.458	1409.1	1237.7	309.678	1108.94	1316.75	57.1037	1285.95	1482.87	-26.5251	1278.37	1290.45	-35.9826	1275.48	1133.23	-54.4134	1376.41	991.32	-5.37065	1423.11	909.558	-62.9981	1380.49	891.913	-57.4608	1443.08	849.723
9725	0	217.363	1441.27	1659.75	301.57	1422.77	1655.97	189.969	1247.24	1676.12	301.663	1248.34	1669.77	243.883	1202.65	1525.31	223.843	1123.26	1262.24	242.841	1351.59	1438.85	260.446	1419.14	1239.18	312.482	1119.84	1318.14	59.0785	1295.42	1484.67	-24.7111	1286.71	1292.64	-34.3763	1282.98	1135.48	-53.4995	1383.1	992.949	-4.48699	1429.61	910.534	-62.4678	1386.49	893.475	-57.0205	1448.78	850.658
9726	0	219.4	1451.87	1660.69	303.75	1433.32	1656.97	192.108	1257.8	1677.97	303.866	1258.92	1671.34	246.198	1212.79	1526.4	226.228	1133.23	1263.69	244.231	1361.66	1440	261.602	1429.27	1240.47	315.489	1130.5	1319.54	60.9342	1304.66	1486.63	-22.972	1294.83	1294.54	-32.7987	1290.26	1137.43	-52.7224	1389.73	994.463	-4.03914	1435.86	911.741	-61.746	1392.56	895.066	-56.6561	1454.59	851.958
9727	0	221.524	1462.21	1661.93	305.615	1443.65	1657.88	194.056	1268.2	1679.59	305.646	1269.42	1672.55	248.636	1222.68	1528.06	228.729	1143.13	1265	245.551	1371.54	1441.63	262.433	1439.03	1241.85	318.451	1140.87	1320.86	62.7658	1313.55	1488.4	-21.6693	1302.35	1296.5	-31.3126	1297.48	1139.45	-51.6047	1396.27	996.372	-3.73997	1442.03	913.018	-61.0718	1398.77	896.921	-55.4167	1460.39	852.195
9728	0	223.362	1472.38	1662.9	307.473	1453.8	1658.76	195.874	1278.4	1681.33	307.644	1279.45	1674.54	250.691	1232.39	1529.57	231.115	1152.82	1266.53	246.906	1381.36	1443.12	263.346	1448.8	1243.51	321.24	1150.96	1322.39	64.2311	1322.23	1490.01	-20.3469	1310	1298.3	-29.8374	1304.34	1141.12	-50.8334	1402.69	998.125	-3.08308	1448.51	914.492	-60.4365	1404.81	898.186	-54.9123	1466.3	853.424
9729	0	224.837	1482.34	1663.86	309.337	1463.8	1660.07	197.527	1288.33	1683.09	309.394	1289.52	1676.14	252.709	1241.97	1531.17	233.439	1162.17	1268.26	248.019	1390.85	1444.36	264.097	1458.58	1245.08	323.927	1160.73	1324.06	65.7684	1330.89	1491.94	-19.0629	1317.45	1300.23	-28.2883	1311.12	1143	-50.1683	1409	999.606	-2.35103	1455.01	916.05	-59.5859	1410.88	899.872	-54.2204	1472.15	854.37
9730	0	226.297	1492.01	1665.11	310.353	1473.47	1661.37	199.201	1298.11	1684.83	311.008	1299.33	1677.91	254.553	1251.39	1532.59	235.769	1171.56	1269.61	249.219	1400.21	1446.02	264.679	1468.11	1246.6	326.362	1170.45	1325.56	67.4117	1339.21	1493.46	-17.4434	1324.84	1301.99	-26.9993	1317.77	1144.6	-49.2489	1415.33	1000.99	-1.7163	1461.5	917.455	-58.6633	1417.07	901.435	-53.6647	1478.34	856.16
9731	0	227.431	1501.55	1666.44	311.458	1483.22	1662.44	200.628	1307.67	1686.56	312.381	1309.18	1679.48	256.521	1260.74	1534.33	238.121	1180.85	1271.2	250.364	1409.49	1447.54	265.18	1477.76	1248.1	328.79	1180.06	1326.95	68.7822	1347.54	1495.21	-16.4203	1331.7	1303.77	-25.6268	1324.33	1146.46	-48.5917	1421.51	1002.7	-1.17178	1468.2	919.15	-57.7747	1423.22	903.022	-52.7816	1484.43	857.508
9732	0	228.326	1510.93	1667.46	312.493	1492.69	1663.93	201.819	1316.97	1688.38	313.651	1318.77	1681.25	257.965	1269.73	1536.14	240.21	1189.92	1272.91	251.292	1418.51	1448.89	265.769	1487.42	1249.92	330.866	1189.42	1328.87	70.0463	1355.85	1496.91	-15.1023	1338.58	1305.39	-24.2731	1330.99	1148.33	-47.9337	1427.61	1004.43	-0.757408	1474.75	920.855	-56.6828	1429.2	904.607	-52.4815	1490.37	859.057
9733	0	229.229	1520.17	1668.67	313.292	1502.08	1665.26	203.02	1326.2	1690.21	314.883	1328.1	1683.56	259.681	1278.77	1537.56	242.016	1198.7	1274.72	252.366	1427.44	1450.64	266.053	1496.46	1251.44	332.807	1198.71	1330.49	71.0827	1363.9	1498.69	-13.7569	1345.52	1307.44	-23.1207	1337.5	1150.13	-47.0883	1434.01	1005.81	-0.198961	1481.15	922.528	-55.6804	1435.22	906.145	-52.0352	1496.53	860.792
9734	0	229.981	1529.27	1670.12	313.974	1511.38	1666.72	204.121	1335.26	1691.98	315.966	1337.35	1685.62	261.197	1287.5	1539.49	243.89	1207.54	1276.22	253.296	1436.21	1452.28	266.583	1505.71	1253.19	334.644	1207.89	1332.03	72.4756	1371.89	1500.3	-12.4651	1352.05	1308.84	-21.7852	1343.97	1151.84	-46.2549	1440.1	1007.07	0.402222	1487.6	924.148	-54.6362	1441.23	907.7	-51.3209	1502.72	862.664
9735	0	230.305	1538.15	1671.35	314.431	1520.39	1668.58	205.179	1344.2	1693.73	316.886	1346.6	1687.67	262.661	1296.28	1540.93	245.353	1216.09	1278.02	254.198	1444.82	1454.08	266.882	1514.5	1255.05	336.23	1216.82	1333.79	73.5149	1379.87	1502.12	-11.2084	1358.74	1310.7	-20.4988	1350.39	1153.59	-45.1213	1446.3	1009.23	1.18046	1494.39	926.298	-53.421	1447.32	909.255	-50.7075	1508.94	864.438
9736	0	230.663	1546.98	1672.82	314.814	1529.58	1670.13	205.809	1352.88	1695.71	317.752	1355.67	1689.85	263.937	1304.77	1543.11	246.982	1224.79	1279.79	255.116	1453.36	1455.98	267.23	1523.03	1256.81	337.892	1225.67	1335.56	74.6006	1387.77	1504.01	-10.1567	1365.53	1312.63	-19.1326	1356.85	1155.32	-44.1979	1452.53	1011.03	1.68536	1500.88	928.055	-52.3119	1453.39	911.167	-50.2409	1515.04	866.422
9737	0	230.807	1555.58	1674.61	315.041	1538.38	1672.2	206.772	1361.54	1697.71	318.566	1364.7	1692.02	265.374	1313.38	1544.87	248.405	1233.22	1282.01	255.836	1461.75	1457.62	267.822	1531.74	1258.67	339.588	1234.53	1337.41	75.6538	1395.58	1505.99	-8.69011	1372.25	1314.49	-17.8214	1363.34	1157.41	-43.3273	1458.64	1012.82	2.39162	1507.63	930.193	-51.129	1459.47	913.035	-49.5472	1521.17	868.406
9738	0	231.016	1564.15	1676	315.305	1547.32	1673.85	207.391	1370.1	1699.49	319.115	1373.44	1694.3	266.624	1321.8	1546.85	249.942	1241.69	1283.8	256.649	1470.08	1459.74	268.264	1540.23	1260.75	340.976	1243.11	1339.34	76.546	1403.25	1507.91	-7.65475	1379.07	1316.43	-16.5846	1369.87	1159.44	-42.407	1464.94	1014.7	3.23194	1514.17	932.162	-49.9918	1465.62	914.708	-49.0017	1527.54	870.28
9739	0	231.091	1572.62	1677.7	315.254	1555.96	1675.72	208.07	1378.45	1701.63	319.773	1382.29	1696.51	267.674	1330.08	1549.11	251.15	1249.98	1286.16	257.355	1478.38	1461.52	268.758	1548.46	1262.5	342.468	1251.82	1341.53	77.5489	1410.95	1509.73	-6.46818	1385.99	1318.5	-15.2994	1376.37	1161.47	-41.4666	1471.4	1016.75	3.85204	1520.62	933.83	-48.8372	1471.8	916.658	-48.3178	1533.81	872.352
9740	0	230.904	1580.97	1679.28	315.072	1564.56	1677.63	208.594	1386.77	1703.45	320.385	1391.08	1698.57	268.771	1338.27	1551.04	252.67	1258.41	1288.47	258.131	1486.62	1463.46	269.487	1556.75	1264.6	344.15	1260.39	1343.58	78.4615	1418.57	1511.76	-5.44381	1392.85	1320.34	-14.0329	1382.9	1163.35	-40.5978	1477.83	1018.51	4.5604	1527.26	935.822	-47.795	1478.07	918.576	-47.5665	1540.16	874.093
9741	0	230.855	1589.27	1680.91	315.175	1573.02	1679.76	209.16	1394.92	1705.27	320.965	1399.66	1700.72	270.078	1346.61	1552.88	254.17	1266.72	1289.55	258.756	1494.8	1465.17	270.088	1564.9	1266.48	345.96	1268.5	1345.09	79.4365	1426.23	1513.66	-4.25839	1399.77	1322.42	-12.7976	1389.46	1165.4	-39.5973	1484.13	1020.52	5.42804	1533.94	937.843	-46.7842	1484.45	920.513	-46.9434	1546.44	876.142
9742	0	230.656	1597.39	1682.74	315.213	1581.66	1681.61	209.738	1403.04	1706.93	321.441	1408.09	1703.06	270.774	1354.65	1554.59	255.446	1274.94	1291.91	259.587	1502.94	1467.45	270.774	1572.9	1268.59	347.368	1277.2	1346.9	80.2264	1433.83	1515.54	-3.35612	1406.7	1324.29	-11.5421	1396.19	1167.21	-38.757	1490.72	1022.41	6.05367	1540.66	939.863	-45.7209	1490.84	922.133	-46.3305	1552.82	878.154
9743	0	230.374	1605.5	1684.21	314.906	1590.11	1683.3	210.18	1411.06	1708.89	321.849	1416.59	1705	271.8	1362.66	1556.84	256.687	1283.08	1293.81	260.041	1510.91	1469.23	271.437	1580.78	1270.6	348.961	1285.69	1348.76	80.8185	1441.44	1517.54	-2.32833	1413.64	1326.16	-10.3794	1402.84	1169.1	-37.974	1497.21	1024.21	6.74311	1547.51	941.834	-44.7653	1497.39	923.862	-45.583	1559.37	879.708
9744	0	229.833	1613.35	1686.16	314.721	1598.45	1685.3	210.79	1419.17	1710.4	322.209	1425.06	1706.82	272.654	1370.73	1558.42	257.92	1291.21	1295.43	260.579	1518.57	1471.2	272.054	1588.82	1272.33	350.245	1294	1350.52	81.5777	1449.01	1519.31	-1.44698	1420.66	1327.9	-9.1695	1409.63	1170.85	-37.2138	1503.84	1025.96	7.28582	1554.22	943.294	-43.7529	1503.98	925.576	-44.8084	1566.07	881.372
9745	0	229.577	1621.4	1687.5	314.55	1607.09	1686.49	211.229	1427.1	1712.03	322.702	1433.62	1708.57	273.502	1378.81	1560.1	259.132	1299.36	1296.98	261.165	1526.78	1472.69	272.936	1596.58	1273.95	351.508	1302.31	1352.24	82.2859	1456.64	1520.65	-0.446447	1427.65	1329.3	-8.07877	1416.48	1172.17	-36.421	1510.56	1027.35	8.07171	1561.31	944.815	-42.7845	1510.66	927.053	-44.1273	1572.74	882.921
9746	0	229.279	1629.48	1688.48	314.316	1615.44	1687.94	211.693	1435.08	1713.47	323.1	1442.09	1710.22	274.173	1386.82	1561.65	260.147	1307.44	1298.53	261.573	1534.61	1474.02	273.406	1604.44	1275.31	352.71	1310.59	1353.94	83.0012	1464.33	1522.02	0.397239	1434.74	1330.64	-6.99462	1423.45	1173.79	-35.5588	1517.36	1028.51	8.51693	1568.36	946.46	-41.9215	1517.34	928.248	-43.4232	1579.45	884.197
9747	0	228.944	1637.45	1689.44	313.929	1623.79	1689.21	211.976	1443.06	1714.84	323.435	1450.52	1711.71	274.767	1394.78	1562.99	261.015	1315.58	1300.46	262.198	1542.58	1475.34	273.787	1612.65	1276.71	353.821	1318.87	1355.33	83.555	1471.87	1523.25	1.31995	1441.9	1331.66	-5.99573	1430.53	1175.05	-34.7469	1524.19	1029.99	9.32143	1575.35	947.398	-40.8455	1524.16	929.617	-42.6587	1586.31	885.057
9748	0	228.532	1645.54	1690.4	313.704	1632.28	1690.18	212.517	1451.11	1716.07	323.854	1459.03	1713.14	275.597	1402.69	1564.4	262.248	1323.74	1300.98	262.795	1550.67	1476.57	274.26	1620.61	1278.22	354.892	1327.12	1356.46	84.2419	1479.56	1524.34	2.02165	1449.04	1332.87	-5.00573	1437.67	1175.98	-34.0063	1530.87	1031	10.0949	1582.63	948.612	-39.9314	1531.11	930.57	-41.8692	1593.12	886.063
9749	0	228.192	1653.56	1691.03	313.363	1640.74	1691	212.845	1459.19	1717.1	324.13	1467.52	1714.25	276.107	1410.63	1565.44	263.268	1331.91	1301.79	263.093	1558.53	1477.69	274.687	1628.63	1279.43	355.655	1335.08	1357.76	84.6665	1487.17	1525.39	2.75742	1456.32	1333.92	-4.06285	1444.92	1176.84	-33.1842	1537.94	1031.9	10.6299	1589.69	949.361	-39.1168	1538.19	931.448	-41.3524	1600.23	886.933
9750	0	227.652	1661.63	1691.51	312.84	1649.05	1691.59	213.146	1467.27	1717.97	323.855	1475.95	1715.22	276.729	1418.62	1566.41	263.834	1339.84	1302.84	263.418	1566.4	1478.73	275.041	1636.67	1280.47	356.52	1343.32	1358.89	85.0422	1494.77	1526.43	3.25737	1463.64	1334.91	-3.19929	1452.22	1177.72	-32.5891	1545.24	1033	11.2142	1597.18	950.342	-38.299	1545.25	932.139	-40.6952	1607.27	887.739
9751	0	227.142	1669.67	1691.92	312.42	1657.47	1692.12	213.319	1475.4	1718.76	324.084	1484.51	1716.22	277.077	1426.52	1566.95	264.471	1347.7	1303.92	263.885	1574.32	1479.62	275.333	1644.27	1281.27	357.386	1351.61	1359.27	85.4222	1502.38	1527.16	3.97342	1471.06	1335.63	-2.4942	1459.45	1178.4	-31.748	1552.49	1033.69	11.9204	1604.49	950.913	-37.4329	1552.59	932.805	-40.2042	1614.67	888.575
9752	0	226.767	1677.94	1691.79	312.17	1666.18	1692.3	213.553	1483.6	1719.14	324.293	1493.1	1716.94	277.573	1434.52	1567.36	265.242	1355.97	1304	263.973	1581.93	1480.39	275.468	1652.52	1282.06	358.153	1359.95	1359.65	85.7713	1509.99	1527.68	4.49669	1478.54	1336.1	-1.70254	1466.81	1178.78	-31.1289	1559.91	1034.14	12.5667	1612.08	951.614	-36.7834	1559.91	933.21	-39.7826	1621.52	889.46
9753	0	226.205	1686.16	1691.62	311.639	1674.65	1692.53	213.411	1491.9	1719.41	324.404	1501.83	1717.47	277.767	1442.44	1567.68	265.709	1364.06	1304.38	264.094	1589.84	1480.76	275.737	1660.32	1282.35	358.652	1368.05	1359.95	86.0096	1517.61	1528	5.07956	1486.16	1336.35	-1.13528	1474.25	1178.89	-30.5282	1567.25	1034.4	12.998	1619.55	952.05	-36.068	1567.44	933.581	-39.0939	1629.1	889.496
9754	0	225.616	1694.54	1691.38	311.111	1683.26	1692.26	213.64	1500.23	1719.61	324.472	1510.61	1717.81	278.336	1450.51	1568.12	266.048	1372.06	1304.89	264.471	1598.29	1480.56	275.862	1668.53	1282.53	359.187	1376.3	1360.22	86.1503	1525.31	1528.2	5.35741	1493.65	1336.4	-0.528319	1481.74	1179.11	-29.959	1574.85	1034.41	13.6486	1627.2	952.089	-35.5393	1574.91	933.376	-38.4951	1636.8	889.595
9755	0	225.034	1702.94	1690.71	311.237	1692.18	1691.51	213.523	1508.64	1719.58	324.378	1519.44	1717.78	278.636	1458.72	1567.87	266.566	1380.3	1304.68	264.529	1606.41	1480.45	275.859	1676.79	1282.38	359.732	1384.72	1359.97	86.3495	1533.11	1528.07	6.02137	1501.2	1335.96	0.117634	1489.32	1178.94	-29.47	1582.4	1033.91	13.9792	1635.02	951.849	-34.8452	1582.61	933.415	-37.843	1644.53	889.247
9756	0	224.466	1711.49	1689.72	310.577	1700.8	1690.75	213.699	1517.24	1719.36	324.363	1528.42	1717.72	278.856	1466.82	1567.68	267.004	1388.52	1304.15	264.599	1614.55	1480.44	275.533	1685.22	1282.24	359.875	1392.98	1359.77	86.5997	1540.91	1527.67	6.20251	1508.77	1335.59	0.489845	1497.03	1178.97	-28.9315	1590.13	1033.56	14.2732	1642.85	951.603	-34.3725	1590.38	933.133	-37.3396	1652.22	888.717
9757	0	223.971	1720.1	1688.87	310.115	1709.88	1690.22	213.43	1525.71	1719.14	324.345	1537.48	1717.38	279.084	1475.2	1567.12	267.63	1397.26	1303.69	264.448	1622.55	1480.16	275.461	1693.42	1281.94	360.292	1401.44	1359.37	86.6043	1548.78	1527.3	6.66059	1516.5	1335.07	0.885984	1504.58	1178.35	-28.6822	1597.91	1033.17	14.864	1650.85	951.431	-33.8854	1598.16	932.779	-37.0468	1660.02	888.559
9758	0	223.295	1728.81	1687.69	309.241	1718.7	1689.23	213.461	1534.54	1718.54	324.185	1546.61	1716.9	279.146	1483.54	1566.54	267.618	1405.34	1303.26	264.216	1630.95	1479.51	275.532	1701.66	1281.29	360.412	1409.79	1358.67	86.5539	1556.81	1526.69	6.68972	1524.23	1334.55	1.50834	1512.13	1177.42	-28.4239	1605.57	1032.5	15.0229	1658.75	950.672	-33.3771	1606.03	931.954	-36.671	1667.93	887.842
9759	0	222.532	1737.59	1686.64	308.86	1727.9	1688.15	213.24	1543.41	1717.64	323.958	1555.7	1716.48	279.342	1492.13	1565.82	267.888	1413.84	1302.69	264.139	1639.43	1478.9	275.221	1710.3	1280.62	360.633	1418.39	1357.85	86.5986	1564.94	1525.96	6.91746	1531.94	1333.66	1.77847	1519.84	1176.67	-28.1329	1613.33	1031.99	15.2038	1666.8	950.117	-32.9977	1613.97	931.194	-36.3651	1676.03	887.243
9760	0	221.846	1746.5	1685.12	308.069	1736.83	1686.83	213.047	1552.34	1716.97	323.846	1565.04	1715.6	279.301	1500.82	1564.82	267.91	1422.3	1301.53	263.922	1648.02	1478.13	274.964	1718.47	1279.73	360.546	1426.93	1357.13	86.4389	1573.09	1525.15	6.85292	1539.59	1333.02	2.0681	1527.6	1175.39	-27.9788	1621.26	1030.88	15.3696	1675.09	949.673	-32.7776	1621.9	930.117	-36.3282	1683.98	886.375
9761	0	221.073	1755.45	1683.84	307.355	1746.27	1685.75	212.831	1561.43	1715.84	323.384	1574.33	1714.67	279.314	1509.66	1563.83	267.896	1430.91	1300.81	263.728	1656.92	1476.93	274.586	1727.2	1278.54	360.344	1435.58	1355.98	85.9173	1581.43	1524.05	6.93269	1547.44	1331.69	2.08704	1535.48	1174.71	-27.9595	1629.2	1030.06	15.2291	1683.16	948.6	-32.3513	1630.07	929.167	-36.2243	1692.02	885.615
9762	0	220.263	1764.48	1682.33	306.438	1755.42	1683.9	212.406	1570.54	1714.74	323.135	1583.84	1713.58	279.204	1518.54	1562.72	267.966	1439.69	1299.49	263.235	1665.53	1475.9	274.064	1736.02	1277.34	360.503	1444.54	1354.82	85.6552	1589.85	1523	6.86251	1555.43	1330.58	2.4058	1543.36	1173.15	-27.9352	1637.09	1028.82	15.1725	1691.39	947.512	-32.109	1638.14	928.007	-36.1404	1700.4	884.387
9763	0	219.505	1773.75	1680.58	306.036	1765.09	1682.33	212.123	1579.82	1713.16	322.683	1593.31	1712.2	279.163	1527.76	1560.98	267.751	1448.44	1298.14	263.035	1674.82	1474.41	273.682	1744.73	1275.99	360.216	1453.48	1353.44	85.4815	1598.47	1521.45	6.89517	1563.45	1329.24	2.28489	1551.19	1171.64	-27.9254	1645.09	1027.19	15.3506	1699.84	946.422	-32.0283	1646.19	926.371	-36.2687	1708.61	883.034
9764	0	218.844	1783.16	1678.61	304.968	1774.48	1680.73	211.527	1589.12	1711.85	322.266	1602.96	1710.48	278.306	1536.81	1559.57	267.456	1457.32	1297.06	262.317	1683.7	1472.79	273.103	1753.57	1274.05	359.796	1462.46	1352.18	85.0917	1607.26	1519.8	6.75103	1571.45	1327.5	2.34218	1559.29	1170.23	-27.8562	1653.25	1025.53	15.1404	1708.13	944.856	-31.893	1654.46	924.84	-36.1889	1716.64	881.599
9765	0	217.809	1792.63	1676.8	304.126	1784.02	1678.65	211.029	1598.61	1710	321.642	1612.68	1708.96	278.114	1546.12	1558.11	267.259	1466.32	1295.59	262.145	1693.07	1470.91	272.235	1762.34	1272.14	359.73	1471.89	1350.37	84.562	1616.24	1518.25	6.60895	1579.82	1326.04	2.20491	1567.49	1168.68	-28.0307	1661.45	1024.05	14.9122	1716.55	943.04	-31.9227	1662.78	923.422	-36.3103	1725.25	879.92
9766	0	217.051	1802.3	1674.81	303.516	1794.05	1676.73	210.43	1608.28	1708.25	320.947	1622.42	1707.09	277.669	1555.49	1556.61	266.79	1475.28	1294.06	261.669	1702.48	1469.09	271.753	1771.79	1270.24	359.349	1481.15	1348.8	84.099	1625.35	1516.51	6.51636	1588.22	1324.24	2.03508	1575.72	1166.86	-28.2009	1669.66	1022.14	14.7742	1725.01	941.374	-31.9634	1671.08	921.716	-36.5702	1733.32	878.304
9767	0	216.291	1811.92	1672.85	302.655	1803.6	1675	209.689	1617.97	1706.57	320.147	1632.15	1705.41	277.238	1565.18	1554.67	266.322	1484.43	1292.57	260.804	1711.91	1467.38	270.974	1780.43	1268.18	358.829	1490.44	1347.41	83.5318	1634.58	1514.81	6.09675	1596.77	1322.45	1.7418	1584.17	1164.99	-28.5087	1678.21	1020.41	14.5243	1733.53	939.988	-32.1522	1679.33	919.819	-36.9491	1741.67	876.638
9768	0	215.412	1821.78	1670.89	301.595	1813.32	1673.3	208.834	1627.87	1704.68	319.286	1642.05	1703.78	276.48	1574.75	1553.47	265.898	1493.75	1291.12	259.773	1721.08	1465.53	270.16	1790.2	1266.53	358.605	1500.13	1345.75	82.7035	1643.9	1513.36	5.71504	1605.62	1320.63	1.36846	1592.79	1163.26	-29.1301	1686.57	1018.81	13.898	1742.07	938.422	-32.3482	1687.86	918.113	-37.2713	1750.15	874.891
9769	0	214.306	1831.65	1669.17	300.777	1823.34	1671.13	207.901	1637.83	1702.85	318.354	1651.96	1702.03	275.991	1584.7	1551.48	265.482	1503.18	1289.38	259.086	1730.87	1463.74	269.019	1799.55	1264.87	357.927	1509.65	1344.07	82.0153	1653.37	1511.53	4.71263	1614.5	1319.2	0.863099	1601.31	1161.47	-29.5918	1694.95	1016.91	13.3658	1750.45	936.596	-32.7246	1696.17	915.867	-37.8182	1758.58	872.914
9770	0	213.259	1841.6	1667.3	300.149	1833.54	1668.83	206.751	1647.85	1701.07	317.335	1661.95	1699.98	275.268	1594.6	1549.9	265.072	1512.7	1287.64	258.27	1740.77	1461.75	268.085	1809.44	1262.81	357.382	1519.22	1342.66	81.189	1662.91	1509.55	4.44779	1623.74	1316.93	0.372497	1610.26	1159.56	-29.9012	1703.57	1014.62	13.092	1758.98	934.299	-33.1024	1704.73	913.785	-38.2698	1766.9	870.735
9771	0	212.461	1851.92	1664.97	298.928	1843.34	1667.07	205.591	1658.09	1699.36	315.994	1671.94	1698.21	274.293	1604.47	1548.52	264.55	1522.19	1286.12	257.155	1750.65	1459.78	267.152	1818.16	1260.07	356.734	1529.05	1341.25	80.2238	1672.52	1507.45	3.39973	1633.06	1315.15	-0.32621	1619.21	1157.68	-30.6485	1712.24	1012.4	12.4388	1767.69	932.049	-33.6742	1713.25	911.751	-38.569	1774.94	868.363
9772	0	211.673	1862.16	1662.79	297.769	1853.28	1665.18	204.637	1668.18	1696.99	314.63	1682.01	1696.2	273.502	1614.71	1546.67	264.007	1531.8	1284.74	255.734	1760.33	1457.71	265.939	1827.7	1257.91	356.192	1538.96	1339.68	79.2658	1682.21	1505.46	2.4064	1642.66	1313.25	-0.886474	1628.47	1155.61	-31.1523	1721.17	1010.06	11.8028	1776.27	929.55	-34.3604	1721.72	909.504	-39.3105	1783.38	866.081
9773	0	210.566	1872.42	1660.98	296.938	1863.33	1663.17	203.114	1678.5	1695.17	313.512	1691.95	1694.05	272.659	1624.85	1544.87	263.797	1541.58	1283.01	254.599	1770.36	1455.71	264.941	1837.59	1255.62	355.467	1548.93	1338.39	78.3053	1691.91	1503.52	1.63652	1652.36	1311.18	-1.6659	1637.74	1153.8	-31.8563	1729.91	1007.75	11.0453	1784.83	927.097	-35.0098	1730.37	907.498	-39.8343	1791.88	863.639
9774	0	209.8	1882.8	1659.12	295.932	1873.5	1661.36	201.469	1688.85	1693.55	311.93	1701.86	1692.33	271.655	1635.07	1543.36	263.115	1551.55	1281.41	253.349	1780.55	1453.82	263.51	1847.02	1253.88	354.987	1559.28	1336.68	77.2101	1701.51	1501.66	0.501521	1662.05	1309.25	-2.32689	1647.23	1151.76	-32.5893	1739.04	1005.66	10.1087	1793.63	924.8	-35.7499	1739.03	905.166	-40.616	1800.36	861.239
9775	0	208.54	1893.07	1657.45	294.881	1883.66	1659.46	199.823	1699.32	1691.77	310.22	1711.86	1690.66	270.723	1645.39	1541.84	262.694	1561.57	1280.09	251.946	1790.66	1452.23	262.192	1857.02	1251.97	354.394	1569.4	1335.46	75.9984	1711.3	1499.91	-0.517413	1671.76	1307.39	-3.26917	1656.8	1149.96	-33.8011	1748.05	1003.73	9.25324	1802.39	922.373	-36.7821	1747.67	902.919	-41.7828	1808.88	858.987
9776	0	207.344	1903.37	1655.72	293.67	1893.59	1657.72	198.109	1709.63	1689.88	308.435	1721.86	1688.88	269.404	1655.67	1540.09	262.321	1571.85	1278.38	250.661	1801.01	1450.42	260.875	1866.97	1250.09	353.724	1579.8	1333.89	74.788	1721.09	1498.1	-1.90956	1681.75	1305.38	-4.12758	1666.41	1147.88	-34.6793	1757.22	1001.68	8.22553	1811.31	920.012	-37.7049	1756.47	900.665	-42.7825	1817.42	856.389
9777	0	205.876	1913.61	1653.93	292.211	1903.74	1656.31	196.195	1719.96	1687.85	306.658	1731.92	1687.06	268.307	1666.21	1538.32	261.653	1582.26	1276.46	249.239	1811.46	1448.8	259.351	1876.86	1248.16	353.265	1590.4	1332.42	73.4566	1730.86	1496.03	-2.67018	1691.48	1303.25	-4.82644	1676.16	1145.86	-35.7284	1766.24	999.363	6.87909	1819.93	917.578	-38.9229	1765.22	898.414	-43.8928	1826.15	853.872
9778	0	204.509	1923.98	1652.14	290.723	1913.83	1654.69	194.21	1730.26	1685.95	304.678	1741.94	1685.46	267.124	1676.54	1536.52	261.059	1592.78	1274.73	247.671	1821.84	1447.01	257.892	1887.11	1246.45	352.143	1600.92	1330.51	72.0686	1740.92	1493.98	-3.99725	1701.21	1301.17	-5.7562	1685.89	1143.8	-36.7244	1775.54	997.084	5.67615	1828.94	915.154	-40.0289	1774.09	896.076	-45.1309	1834.52	851.312
9779	0	202.809	1934.25	1650.95	289.233	1924.17	1653.25	192.187	1740.4	1684.43	302.637	1751.95	1683.96	265.594	1686.93	1534.86	260.181	1603.35	1273.27	246.163	1832.39	1445.32	256.57	1897.73	1244.73	351.25	1611.7	1329.09	70.6154	1751.17	1491.97	-5.15209	1711.12	1299.05	-6.80021	1695.66	1141.84	-37.973	1784.64	994.8	4.20433	1837.9	912.348	-41.2868	1782.86	893.84	-46.3049	1843.22	848.749
9780	0	201.134	1944.66	1649.74	287.518	1934.52	1652.34	190.111	1750.77	1682.85	300.748	1762.21	1682.4	263.859	1697.34	1533	259.253	1614.04	1271.44	244.63	1843.02	1443.54	255.136	1908.51	1243.28	350.159	1622.57	1327.44	69.5492	1761.52	1489.61	-5.61171	1721.07	1296.72	-7.59358	1705.67	1139.91	-39.0403	1794.01	992.305	2.92381	1846.86	909.593	-42.4812	1791.76	891.534	-47.5549	1851.94	846.057
9781	0	199.258	1954.96	1648.53	285.65	1944.77	1651.24	188.012	1760.92	1681.12	298.478	1772.22	1681.28	262.155	1707.89	1531.81	258.249	1624.98	1269.77	243.039	1853.67	1442.44	253.725	1919.53	1242.12	349.004	1633.73	1325.62	67.7866	1771.97	1487.65	-6.86575	1731.07	1294.51	-8.52073	1715.8	1137.82	-40.2147	1803.13	989.859	1.69404	1856.08	907.307	-43.6068	1800.59	889.344	-49.1364	1860.48	843.442
9782	0	197.51	1965.27	1647.65	283.649	1954.91	1650.71	185.924	1771.17	1679.62	296.531	1782.47	1680.28	260.587	1718.59	1530.71	257.22	1635.9	1268.37	241.529	1864.39	1441.21	252.235	1930.73	1241.01	347.389	1644.65	1324.47	66.0964	1782.56	1485.99	-7.71314	1741	1292.53	-9.62478	1726.06	1136.15	-41.4385	1812.57	987.631	0.265501	1865.15	904.859	-44.8232	1809.54	887.156	-50.615	1869.18	841.172
9783	0	195.378	1975.6	1646.87	281.774	1965.26	1649.89	183.682	1781.4	1678.41	294.25	1792.5	1678.92	258.714	1729.4	1529.25	255.992	1646.91	1267.19	240.001	1875.19	1440.13	250.837	1942.24	1239.88	345.64	1655.3	1323.32	64.2184	1793.27	1484.63	-9.87174	1751.55	1291.19	-10.7038	1736.51	1134.67	-43.0769	1822.15	986.066	-1.36656	1874.6	902.784	-46.1391	1818.4	885.204	-52.1896	1877.88	839.132
9784	0	193.559	1985.87	1646.43	280.036	1975.44	1649.49	181.506	1791.57	1677.35	292.081	1802.57	1678.21	257.307	1739.9	1528.64	254.383	1657.92	1265.88	238.452	1885.96	1439.4	249.419	1953.8	1239.51	343.799	1665.82	1322.17	62.4984	1803.96	1483.36	-10.344	1761.88	1289.27	-11.7091	1747.12	1133.23	-44.3676	1831.67	984.218	-3.08518	1884.05	900.833	-47.3393	1827.34	883.205	-53.8174	1886.56	837.021
9785	0	191.65	1996.17	1646.08	277.992	1985.6	1649.49	179.315	1801.91	1676.74	289.884	1812.59	1677.81	254.829	1750.29	1528.12	252.975	1669.11	1264.8	236.878	1896.68	1438.97	248.111	1965.48	1238.99	342.159	1676.35	1321.23	60.7636	1814.81	1482.16	-12.1154	1772.8	1288.17	-12.8366	1758.09	1132.15	-45.4427	1841.35	982.293	-4.66444	1892.89	898.771	-48.5339	1836.44	881.482	-55.2329	1895.36	834.829
9786	0	189.642	2006.5	1646.03	275.964	1995.95	1649.66	177.064	1812.3	1676.07	287.604	1822.76	1677.69	252.947	1760.83	1527.59	251.539	1680.2	1264.17	235.233	1907.51	1438.69	246.667	1977.19	1239.26	340.275	1687.08	1320.57	58.8956	1825.71	1481.31	-13.5889	1783.92	1287.21	-14.0552	1769.2	1131.39	-46.9312	1851.22	981.036	-6.21103	1902.22	897.03	-49.9457	1845.54	880.126	-56.7189	1904.09	832.976
9787	0	187.677	2016.95	1646.41	274.314	2006.63	1649.92	174.771	1822.53	1676.14	285.272	1832.96	1677.83	251.327	1771.63	1526.93	249.795	1691.15	1263.88	233.419	1918.21	1438.79	245.259	1988.79	1239.39	338.111	1697.52	1320.45	56.906	1836.41	1480.88	-14.4463	1795.28	1286.13	-15.1199	1780.64	1130.62	-48.2134	1861.23	979.795	-7.60756	1911.96	895.601	-51.2974	1854.75	878.978	-58.3333	1912.85	831.4
9788	0	185.69	2027.36	1647.05	272.431	2016.79	1650.69	172.49	1832.99	1676.53	283.016	1843.3	1678.13	250.01	1782.31	1527.07	247.974	1701.89	1264.13	231.799	1928.86	1439.25	243.722	2000.24	1240	335.985	1707.9	1320.71	55.0962	1847.32	1480.8	-15.4054	1806.85	1285.24	-16.3531	1792.21	1130.55	-49.446	1871.6	979.227	-8.93244	1921.4	894.272	-52.7569	1864.16	878.199	-59.6316	1921.96	830.085
9789	0	183.878	2037.8	1647.76	270.173	2026.99	1651.87	170.28	1843.5	1676.99	280.639	1853.29	1679.04	247.988	1792.99	1527.74	246.218	1712.52	1264.77	230.19	1939.4	1439.96	242.238	2011.38	1240.95	333.85	1718.31	1321.34	53.264	1858.26	1480.93	-18.1915	1818.7	1285.88	-17.7994	1804	1130.77	-50.7079	1882.08	978.835	-10.2026	1931.04	893.375	-54.1383	1873.93	877.98	-61.0756	1931.04	829.248
9790	0	181.883	2048.16	1648.7	268.185	2037.36	1652.92	168.078	1853.69	1677.41	278.493	1863.58	1679.84	246.178	1803.72	1528.53	244.643	1723.14	1265.6	228.541	1949.97	1440.7	240.667	2022.33	1241.95	331.796	1728.61	1322.21	51.4677	1869.13	1481.5	-19.2365	1830.25	1285.81	-19.0059	1816.08	1131.35	-52.0707	1892.87	978.795	-11.458	1940.66	892.82	-55.7361	1883.59	877.992	-62.3385	1940.42	828.502
9791	0	180.126	2058.41	1649.54	266.467	2047.63	1653.94	166.042	1863.96	1677.97	276.477	1873.77	1680.8	244.846	1814.59	1529.36	242.761	1733.42	1266.45	227.073	1960.64	1441.74	239.282	2033.09	1242.86	330.1	1738.89	1323.26	49.8455	1880.18	1482.34	-21.1054	1842.39	1286.33	-20.2255	1828.11	1132.1	-53.2503	1903.79	979.314	-12.6583	1950.66	892.513	-57.3549	1893.54	878.343	-63.6404	1949.94	828.238
9792	0	178.369	2068.59	1650.36	265.031	2057.99	1654.97	163.995	1874.15	1678.64	274.596	1883.97	1681.73	242.538	1824.71	1530.43	241.241	1743.89	1267.27	225.717	1971.01	1442.77	237.777	2043.66	1243.91	328.212	1748.9	1324.17	48.1468	1891.08	1483.34	-22.7429	1854.49	1287.11	-21.8743	1840	1133.02	-54.6474	1914.89	980.042	-13.7714	1960.78	893.013	-58.9831	1904.08	879.18	-64.8842	1959.71	828.458
9793	0	176.479	2078.62	1651.29	263.789	2068.08	1655.76	162.252	1884.31	1679.47	272.527	1893.76	1683.06	240.803	1834.84	1531.54	239.525	1754.22	1268.21	224.33	1981.3	1443.78	236.317	2053.61	1244.87	326.594	1758.8	1325.38	46.5895	1902.2	1484.73	-24.9426	1866.38	1288.6	-23.4358	1852.26	1134.3	-56.0444	1926.28	980.976	-14.9717	1970.75	893.19	-60.6151	1914.68	880.116	-66.0872	1970.01	828.772
9794	0	174.804	2088.55	1651.94	261.485	2078.09	1656.97	160.522	1894.36	1680.43	270.743	1903.71	1684.33	239.412	1844.92	1532.48	237.779	1764.38	1269.52	223.169	1991.34	1444.71	235.083	2063.4	1245.81	325.03	1768.57	1326.45	45.0567	1913.15	1486.05	-26.7546	1878.46	1289.84	-25.1931	1864.34	1135.67	-57.301	1937.98	982.083	-15.9534	1981.38	893.85	-62.1695	1925.65	881.134	-67.0231	1980.51	829.325
9795	0	173.523	2098.57	1652.38	260.198	2087.75	1657.6	158.914	1904.31	1681.55	269.092	1913.67	1685.49	237.417	1854.36	1533.45	235.751	1774.16	1270.37	221.997	2001.17	1445.73	234.143	2073.01	1246.66	323.32	1778.11	1327.55	43.7725	1924.08	1487.25	-28.4153	1890.61	1290.82	-27.1552	1876.45	1137.19	-58.4783	1949.69	983.321	-16.7246	1991.45	894.306	-63.8918	1937.08	882.642	-67.8333	1991.73	830.071
9796	0	172.22	2108.32	1652.91	258.782	2097.8	1658.59	157.504	1914.2	1682.72	267.728	1923.56	1686.57	236.088	1864.01	1534.63	233.774	1783.91	1271.13	220.877	2010.72	1446.78	233.178	2082.56	1247.78	321.455	1787.48	1328.48	42.4536	1934.68	1488.45	-30.3777	1902.48	1292.15	-29.1867	1888.67	1138.64	-59.7646	1961.65	984.569	-17.4028	2002.83	895.45	-65.6063	1948.93	884.054	-68.3868	2003.23	830.833
9797	0	171.373	2118.11	1653.31	257.902	2107.56	1659.14	156.11	1924	1683.85	266.433	1933.22	1688.02	233.945	1873.13	1535.43	231.628	1793.35	1272.33	220.004	2020.13	1447.74	232.316	2091.73	1248.81	319.433	1796.65	1329.41	41.4246	1945.36	1489.99	-32.2246	1914.51	1293.49	-31.3538	1900.65	1140.11	-60.9849	1974.01	985.919	-18.1058	2014.16	896.581	-67.1764	1961.13	885.585	-68.9871	2015.08	831.885
9798	0	170.526	2127.72	1653.9	257.234	2117.1	1659.57	154.953	1933.81	1685.08	265.237	1942.84	1688.97	232.418	1882.28	1536.39	229.669	1802.66	1273.17	219.002	2029.31	1448.74	231.622	2101.09	1250.06	317.573	1805.85	1330.25	40.1499	1955.78	1491.31	-34.255	1926.43	1294.78	-33.7499	1912.59	1141.49	-62.2316	1986.36	987.325	-18.5922	2026.16	898.251	-68.6617	1973.63	887.052	-69.3888	2027.59	833.169
9799	0	169.651	2137.16	1654.6	256.258	2126.24	1660.45	153.738	1943.41	1686.31	264.001	1951.9	1690.52	230.958	1891.61	1537.19	227.484	1811.89	1274.02	218.194	2038.44	1449.72	230.952	2110.35	1251.38	315.273	1814.79	1331.13	39.0482	1966.14	1492.72	-36.4406	1938.07	1296.22	-36.1366	1924.72	1142.87	-63.5574	1999.04	988.63	-18.9947	2037.44	899.316	-70.2579	1986.65	888.402	-69.8335	2040.43	834.587
9800	0	169.205	2146.5	1655.18	255.871	2135.49	1661.11	152.893	1953.08	1687.94	263.009	1961.35	1691.83	229.49	1900.42	1538.55	225.409	1821.05	1274.95	217.434	2047.49	1450.8	230.506	2119.42	1252.53	313.271	1823.74	1331.82	37.9335	1976.09	1494.13	-38.328	1949.85	1297.49	-38.4841	1936.83	1144.07	-64.6302	2012.03	990.211	-19.4444	2049.31	900.807	-71.7551	1999.9	889.775	-70.104	2053.69	836.112
9801	0	168.809	2155.83	1656.08	255.874	2145.02	1661.69	152.027	1962.47	1689.46	262.245	1970.57	1692.96	228.38	1909.43	1539.53	223.445	1830.17	1275.99	216.773	2056.38	1451.89	230.315	2128.55	1253.8	311.048	1832.54	1332.48	36.8523	1986.03	1495.55	-40.086	1961.57	1298.93	-40.9995	1948.64	1145.41	-65.7348	2025.02	991.916	-19.5595	2061.89	902.471	-73.2361	2013.46	891.314	-70.1453	2067.24	837.72
9802	0	168.745	2165.21	1656.85	257.515	2153.39	1661.8	151.987	1972.36	1690.72	262.044	1979.89	1695.01	226.959	1918.4	1540.27	221.579	1839.21	1276.81	216.169	2065.3	1453.12	230.026	2137.52	1255.14	309.102	1841.24	1333.28	35.9371	1995.76	1496.76	-42.0211	1972.86	1300.25	-43.487	1960.47	1146.55	-66.7389	2038.1	993.59	-19.6836	2074.16	904.263	-74.6151	2027.47	893.046	-70.1927	2081.39	839.621
9803	0	168.712	2174.38	1657.89	257.697	2162.65	1662.71	151.207	1981.7	1692.4	261.901	1989.45	1695.98	225.797	1927.2	1541.45	219.866	1848.27	1277.62	215.565	2074.07	1454.4	229.91	2146.48	1256.45	307.115	1849.88	1334.14	35.1109	2005.43	1497.89	-43.8263	1984.11	1301.68	-45.8054	1972.39	1147.82	-67.5513	2051.32	995.131	-19.7691	2086.72	906.082	-75.9408	2041.61	894.609	-70.0114	2095.62	841.145
9804	0	168.713	2183.53	1658.97	258.085	2171.8	1663.85	150.758	1990.97	1694.09	261.307	1998.31	1697.35	225.084	1936.07	1543.09	218.192	1857.23	1278.78	214.923	2082.87	1455.65	229.888	2155.48	1257.58	305.333	1858.6	1335.04	34.2097	2015.04	1499.24	-45.3602	1995.29	1302.99	-48.0757	1984.21	1149.01	-68.4229	2064.71	997.069	-19.9558	2099.95	908.002	-76.953	2055.89	896.271	-69.8655	2109.93	843.208
9805	0	168.653	2192.73	1660.08	255.741	2179.6	1664.3	150.45	2000.3	1695.56	260.662	2007	1698.81	223.407	1944.66	1544	216.502	1866.09	1280.15	214.325	2091.6	1456.99	229.53	2164.08	1258.94	303.357	1867.19	1335.99	33.2493	2024.32	1500.64	-46.85	2006.36	1304.42	-50.3409	1995.88	1150.34	-69.1073	2078.04	999.036	-19.6677	2112.87	910.013	-77.9393	2070.21	898.228	-69.8385	2124.79	845.683
9806	0	168.909	2201.87	1661.24	255.672	2188.3	1665.4	150.007	2009.59	1697.2	260.413	2015.87	1700.14	222.525	1953.54	1545.27	214.895	1875.04	1281.41	213.773	2100.35	1458.35	229.326	2172.93	1260.53	301.669	1875.69	1337.02	32.2834	2033.54	1501.98	-48.2787	2017.15	1305.68	-52.5085	2007.39	1151.59	-69.7985	2091.49	1000.98	-19.3949	2126.06	912.418	-78.9837	2084.78	900.557	-70.0072	2139.47	848.342
9807	0	169.339	2211.04	1662.66	255.893	2196.95	1666.63	149.728	2018.92	1698.91	260.502	2024.99	1701.27	221.29	1962.19	1546.83	213.512	1883.96	1282.6	213.171	2109.03	1459.55	228.898	2181.56	1262.04	300.36	1884.21	1338.29	31.524	2042.92	1503.45	-49.2925	2027.7	1307.08	-54.4055	2018.88	1152.85	-70.1713	2104.67	1002.96	-19.4613	2139.45	914.958	-79.8561	2099.28	902.598	-69.8975	2154.43	850.874
9808	0	169.79	2220.14	1664.01	256.187	2205.95	1667.71	149.555	2028.16	1700.37	260.178	2033.56	1702.71	220.889	1971.23	1548.37	212.008	1892.8	1284.09	212.658	2117.79	1460.92	228.588	2190.26	1263.48	298.768	1892.66	1339.71	30.8008	2052.31	1504.78	-50.4303	2038.04	1308.58	-56.1001	2030.35	1154.21	-70.6631	2117.9	1004.96	-19.3861	2152.75	917.154	-80.3561	2113.77	904.625	-70.0185	2169.3	853.871
9809	0	170.294	2229.24	1665.21	256.241	2214.41	1668.79	149.363	2037.21	1702.08	260.023	2042.33	1703.74	219.294	1979.8	1549.42	210.534	1901.56	1285.38	212.147	2126.45	1462.24	228.122	2198.63	1264.77	297.957	1901.18	1340.65	29.9621	2061.41	1506.12	-51.3949	2048.06	1310	-57.6817	2041.8	1155.74	-71.1915	2131.1	1007.16	-19.4141	2166.18	919.99	-80.8734	2127.99	906.965	-69.9503	2184.32	857.032
9810	0	170.869	2238.19	1666.56	256.78	2222.86	1669.91	149.033	2046.46	1703.66	259.724	2050.77	1705.08	218.252	1988.51	1550.88	208.955	1910.14	1286.65	211.91	2135.11	1463.21	228.038	2207.12	1265.94	296.386	1909.52	1342.04	29.4131	2070.88	1507.59	-52.2726	2057.97	1311.7	-59.3172	2052.88	1157.2	-71.7297	2144.16	1009.62	-19.501	2179.78	922.836	-81.4477	2142.37	909.367	-70.2181	2199.32	860.365
9811	0	171.399	2247.14	1667.84	257.05	2231.3	1670.9	148.665	2055.55	1705.12	259.432	2059.44	1706.11	217.363	1997.2	1551.98	208.567	1919.24	1287.24	211.154	2143.68	1464.68	227.638	2215.23	1267.09	295.037	1917.91	1343.23	28.593	2080.24	1509.16	-53.1418	2067.58	1313.33	-60.748	2064.01	1158.57	-72.3299	2157.22	1012.12	-19.7731	2193.56	925.577	-81.7392	2156.51	911.667	-70.2502	2214.37	863.71
9812	0	171.959	2256.18	1669.02	257.28	2239.58	1672.02	148.526	2064.79	1706.46	259.366	2068.08	1707.11	216.837	2005.96	1553.32	206.845	1927.4	1288.65	210.824	2152.35	1465.91	227.524	2223.49	1268.28	293.665	1926.11	1344.72	28.1633	2089.72	1510.47	-53.8789	2077.14	1314.71	-61.8838	2075.14	1159.76	-72.8558	2169.95	1014.53	-19.9121	2207.69	928.895	-81.7135	2170.63	914.096	-70.3155	2229.31	867.185
9813	0	172.582	2265.22	1670.12	257.914	2248.15	1673.02	148.361	2073.98	1707.77	259.067	2076.4	1708.37	215.858	2014.63	1554.62	206.016	1936.51	1289.51	210.448	2161.04	1466.96	227.485	2231.71	1269.4	292.079	1934.31	1345.56	27.6875	2099.2	1511.72	-54.5133	2086.83	1316.07	-62.8495	2086.23	1161.09	-73.2741	2182.79	1016.59	-19.9673	2221.81	931.949	-84.0141	2185.17	917.97	-70.3292	2244.23	870.471
9814	0	173.083	2274.2	1671.28	258.114	2256.34	1674.06	147.963	2083.05	1708.93	258.826	2084.86	1709.41	214.344	2023.14	1555.33	204.569	1944.96	1290.67	210.349	2169.75	1467.65	227.509	2239.85	1270.41	290.914	1942.59	1346.89	27.168	2108.61	1512.82	-55.0005	2096.49	1317.26	-63.9293	2097.03	1162.18	-73.7085	2195.5	1018.71	-20.2163	2235.78	935.054	-81.4853	2198.69	918.766	-70.5018	2259.05	873.897
9815	0	173.623	2283.16	1672.05	258.448	2264.8	1674.77	147.769	2092.23	1709.86	258.702	2093.67	1710.06	213.827	2031.98	1556.2	203.376	1953.64	1291.78	210.041	2178.17	1468.2	227.67	2248.24	1271.21	289.729	1950.86	1347.95	26.5726	2118.15	1513.85	-55.4964	2106.25	1318.35	-64.9567	2107.87	1163.36	-74.3865	2208.04	1020.98	-20.3308	2250.02	938.25	-83.1712	2213.14	922.072	-70.3546	2273.87	876.831
9816	0	174.542	2291.98	1672.65	259.039	2273.49	1675.15	147.473	2101.5	1710.59	258.54	2102.52	1710.53	212.854	2040.55	1557.27	202.392	1962.56	1292.38	209.674	2186.59	1468.89	227.973	2256.52	1271.84	288.806	1959.11	1348.95	26.3245	2127.68	1514.69	-55.8739	2116.06	1319.15	-65.6323	2118.89	1164.09	-74.4874	2221.02	1022.84	-20.3866	2264.49	940.968	-80.9748	2226.78	923.199	-70.392	2288.86	880.209
9817	0	174.797	2301.06	1673.07	259.514	2282.12	1675.59	147.162	2110.63	1711.32	258.354	2111.11	1711.22	212.23	2049.48	1557.94	201.371	1971.19	1293.11	209.883	2195.22	1469.28	228.376	2264.94	1272.32	287.261	1967.08	1349.88	25.9911	2137.23	1515.38	-56.2685	2125.94	1319.91	-66.1986	2129.78	1164.66	-74.7836	2233.92	1024.69	-20.474	2278.56	943.952	-82.4053	2241.07	925.946	-70.0343	2303.6	883.011
9818	0	175.408	2310.17	1673.37	259.93	2290.63	1676.04	146.868	2119.83	1711.81	258.079	2119.74	1711.87	211.44	2058.18	1558.41	200.037	1979.37	1294.02	209.645	2203.88	1470.02	228.778	2273.16	1272.73	286.152	1975.29	1350.63	25.986	2146.85	1515.88	-56.652	2136.04	1320.7	-66.8869	2140.56	1165.09	-74.7525	2246.55	1026.26	-20.4879	2292.97	947.041	-79.6566	2254.71	926.569	-69.9888	2318.38	886.096
9819	0	175.916	2319.24	1673.45	260.363	2299.46	1675.89	146.614	2129.09	1712.13	257.845	2128.65	1712.11	210.872	2066.99	1558.77	199.292	1988.17	1294.3	209.689	2212.48	1470.37	229.432	2281.48	1272.81	284.945	1983.31	1351.11	25.6141	2156.31	1516.28	-56.9138	2146.2	1320.9	-67.4745	2151.42	1165.55	-74.5734	2259.27	1027.85	-20.1197	2307.23	949.331	-78.7054	2268.47	927.9	-69.4316	2333.17	888.615
9820	0	176.406	2328.39	1673.3	260.815	2308.2	1675.94	146.328	2138.36	1712.37	257.872	2137.62	1712.15	210.327	2075.66	1559.19	198.412	1996.6	1294.8	209.901	2221.14	1470.59	229.992	2289.64	1272.91	284.014	1991.49	1351.74	25.4549	2165.84	1516.45	-56.9667	2156.56	1320.83	-67.7662	2162.49	1165.41	-74.4142	2272.01	1029.22	-19.9474	2321.17	951.878	-78.0438	2282.56	929.538	-69.0449	2347.77	891.389
9821	0	176.963	2337.49	1673	261.045	2316.68	1675.83	146.002	2147.7	1712.35	257.407	2146.36	1712.44	209.955	2084.46	1559.52	197.611	2005.17	1295.11	210.038	2229.64	1470.43	230.687	2297.89	1272.96	282.644	1999.68	1352.45	25.4019	2175.34	1516.3	-57.1375	2166.9	1321.02	-68.0457	2173.41	1165.3	-74.1809	2284.72	1030.28	-19.4542	2335.42	954.386	-76.9774	2296.4	930.733	-68.5246	2362.4	893.947
9822	0	177.697	2346.59	1672.4	261.602	2325.67	1675.39	145.896	2157.19	1712.2	257.176	2155.39	1712.35	209.447	2093.25	1559.65	196.858	2013.65	1295.06	210.262	2238.32	1470.2	231.463	2306.18	1272.6	281.679	2007.68	1352.66	25.3577	2184.86	1516.11	-57.2099	2177.25	1320.84	-68.3867	2184.16	1164.72	-73.8294	2297.45	1031.34	-18.9564	2349.39	956.651	-76.02	2310.4	932.162	-67.8799	2377	896.363
9823	0	177.776	2355.81	1671.71	262.174	2334.71	1674.57	145.655	2166.71	1711.74	257.106	2164.54	1712.28	209.031	2102.14	1559.22	196.197	2022.02	1294.82	210.898	2246.89	1469.55	232.16	2314.37	1272.29	281.301	2015.93	1352.2	25.4183	2194.28	1515.86	-57.3776	2187.44	1320.43	-68.3948	2195.22	1164.27	-73.4649	2310.17	1032.43	-18.2896	2363.17	958.784	-74.9714	2324.3	933.194	-66.9502	2391.61	898.621
9824	0	178.229	2365.08	1670.74	262.571	2343.7	1673.77	145.593	2176.15	1711.26	256.827	2173.66	1712.01	209.044	2110.99	1559.21	195.857	2030.51	1294.63	211.153	2255.45	1469.23	233.118	2322.86	1271.83	280.579	2024	1352.07	25.6247	2203.71	1515.13	-57.2408	2197.93	1320.1	-68.4619	2205.83	1163.33	-72.819	2322.77	1033.17	-17.5462	2376.97	960.544	-73.7511	2338.31	934.255	-65.9773	2406.06	900.669
9825	0	178.804	2374.34	1669.28	262.72	2352.42	1672.84	145.341	2185.62	1710.62	256.652	2182.85	1711.39	208.628	2119.78	1558.49	195.499	2039.1	1294.17	211.673	2264.23	1468.23	233.895	2331.2	1271.02	280.095	2032.23	1351.74	26.0186	2213.27	1514.29	-56.9251	2208.46	1319.02	-68.0944	2216.77	1162.33	-72.1551	2335.33	1033.64	-16.4726	2390.54	961.989	-72.4975	2352.27	934.738	-64.7821	2420.51	902.447
9826	0	179.276	2383.63	1667.59	263.135	2361.57	1671.59	145.241	2195.14	1709.58	256.602	2192.2	1710.74	208.125	2128.59	1557.19	195.297	2047.66	1293.6	212.102	2272.96	1467.44	234.669	2339.64	1270.1	279.65	2040.67	1351.03	26.1311	2222.57	1513.17	-56.8288	2218.64	1318.1	-67.7392	2227.32	1161.09	-71.2531	2347.88	1033.88	-15.3598	2403.96	963.228	-71.3313	2366.07	935.38	-63.6838	2434.68	904.22
9827	0	179.678	2392.97	1666.22	263.507	2370.76	1670.15	145.243	2204.69	1708.67	256.823	2201.81	1709.4	208.628	2137.57	1556.46	194.884	2056.08	1292.66	212.322	2281.7	1466.39	235.739	2348.19	1268.81	279.26	2049.43	1350.52	26.5521	2231.94	1512.02	-56.2573	2228.89	1317.03	-67.4338	2238.25	1159.89	-70.1839	2360.5	1034.08	-14.2734	2417.5	964.53	-70.6346	2380.14	937.026	-62.078	2448.97	905.554
9828	0	180.21	2402.34	1664.15	264.131	2380.19	1668.42	145.284	2214.32	1707.26	256.664	2210.86	1708.53	209.299	2146.9	1555.45	195.204	2064.99	1291.69	213.256	2290.6	1465.03	236.624	2356.63	1267.63	279.228	2057.45	1349.48	26.9166	2241.4	1510.85	-55.4978	2239.38	1315.62	-66.8934	2249.17	1158.34	-69.1097	2372.98	1034.01	-12.7726	2430.69	965.37	-68.9241	2393.55	936.849	-60.7697	2462.97	907.01
9829	0	180.648	2411.6	1662.4	264.669	2389.36	1666.86	145.466	2223.93	1705.68	256.908	2220.25	1707.43	209.599	2155.8	1554.36	195.531	2073.77	1290.47	213.643	2299.46	1463.85	237.598	2365.29	1266.17	279.228	2066.44	1348.2	27.6221	2250.81	1509.44	-55.0252	2249.39	1313.93	-66.145	2259.97	1156.83	-68.096	2385.25	1033.84	-11.5662	2443.89	966.531	-67.3877	2407.02	936.658	-59.302	2476.82	908.176
9830	0	181.059	2421.01	1660.57	265.587	2399.14	1664.84	145.674	2233.35	1704.11	256.986	2229.47	1706.27	210.082	2164.9	1552.89	195.753	2082.56	1289.04	214.662	2308.45	1462.17	238.43	2373.9	1264.94	279.361	2075.05	1347.08	28.2662	2260.08	1507.93	-54.5283	2259.24	1312.64	-65.4877	2270.95	1155.22	-66.7157	2397.53	1033.64	-9.95056	2456.7	966.978	-66.3261	2420.41	937.211	-57.7769	2490.43	909.12
9831	0	181.585	2430.36	1658.77	268.172	2409.15	1661.95	146.073	2242.8	1702.26	257.877	2239.31	1704.38	210.477	2174.02	1551.28	196.34	2091.67	1287.57	215.161	2317.39	1461	239.411	2382.58	1263.25	280.113	2084.2	1345.45	28.8427	2269.43	1506.18	-53.6405	2269.1	1310.96	-64.5681	2281.75	1153.38	-65.3107	2409.5	1032.76	-8.3175	2469.49	967.264	-64.6445	2433.48	936.563	-56.0078	2503.94	909.715
9832	0	182.678	2439.55	1656.33	266.511	2417.3	1661.2	146.546	2252.32	1700.31	258.197	2248.58	1702.61	211.386	2183.29	1549.67	196.366	2100.29	1285.52	215.975	2326.45	1459.19	240.541	2391.57	1261.35	280.242	2092.73	1343.5	29.6073	2278.78	1504.16	-52.4983	2279.21	1308.97	-63.5788	2292.58	1151.16	-63.9724	2421.59	1032.2	-6.68047	2481.95	967.213	-65.2387	2446.73	937.411	-54.4808	2517.09	910.34
9833	0	183.377	2448.97	1653.91	267.474	2426.21	1659.28	147.207	2261.85	1698.3	258.442	2257.8	1701.08	211.736	2192.17	1547.7	197.477	2109.67	1283.93	217.046	2335.7	1456.8	241.649	2400.75	1259.16	281.221	2101.92	1341.92	30.4078	2288.25	1502.12	-51.4093	2289.03	1306.61	-62.673	2303.27	1149.02	-62.5465	2433.57	1031.14	-4.85563	2494.43	966.849	-61.2536	2459.45	935.622	-52.6358	2530.21	910.458
9834	0	184.175	2458.31	1651.52	268.454	2435.38	1656.96	147.98	2271.22	1696.22	259.495	2267.52	1698.88	212.475	2201.45	1545.69	198.185	2118.91	1281.92	217.917	2344.91	1454.74	242.886	2409.95	1257.08	282.19	2111.22	1340.14	31.5061	2297.63	1499.85	-50.5186	2298.66	1304.08	-61.2937	2314.14	1146.83	-60.8482	2445.39	1029.69	-3.10549	2506.77	966.142	-61.5224	2472.23	935.728	-50.7688	2543.08	910.054
9835	0	185.172	2467.78	1649.31	269.602	2444.41	1654.79	148.625	2280.64	1694.13	260.323	2277.01	1696.67	213.631	2210.77	1543.76	199.128	2128.28	1279.63	219.059	2354.15	1452.51	244.04	2419.46	1255.13	282.821	2120.3	1337.54	32.5518	2307.12	1497.47	-49.2507	2308.19	1301.16	-59.9558	2324.84	1144.5	-59.2901	2456.85	1028.46	-1.41585	2518.95	965.483	-58.4202	2484.5	934.108	-48.7479	2555.7	909.607
9836	0	186.197	2477.19	1646.91	270.891	2453.54	1652.75	149.747	2290.13	1691.89	261.341	2286.46	1694.73	214.587	2220.14	1541.58	200.032	2137.62	1277.4	220.238	2363.46	1450.4	245.365	2429.06	1253	283.576	2129.43	1335.25	33.7053	2316.72	1495.16	-47.7647	2318.12	1298.54	-58.5694	2335.5	1141.96	-57.7639	2468.37	1026.92	0.349729	2530.67	964.425	-55.6021	2496.55	932.285	-46.9522	2568	908.896
9837	0	187.425	2486.67	1644.92	272.332	2462.66	1650.9	150.899	2299.63	1689.69	262.385	2295.9	1692.63	215.652	2229.46	1539.39	201.231	2147.3	1275.37	221.633	2372.83	1448.19	246.634	2438.68	1250.88	284.818	2139.1	1333.27	34.7892	2326.28	1492.88	-46.4086	2327.98	1296.12	-57.0215	2346.12	1139.51	-56.0424	2480	1025.35	2.19913	2542.48	963.394	-56.2702	2508.79	931.731	-45.0942	2580.04	908.047
9838	0	188.665	2496.34	1643	273.818	2472.16	1648.91	152.282	2309.13	1687.6	264.243	2305.74	1690.32	217.032	2239.03	1536.96	201.666	2156.74	1272.52	223.05	2382.33	1446.16	247.913	2448.43	1248.98	285.375	2148.46	1330.46	36.0007	2335.81	1490.72	-44.9509	2337.58	1293.67	-55.154	2356.77	1136.99	-54.1223	2491.03	1023.4	3.9523	2554.03	962.393	-51.7803	2520.1	929.489	-43.325	2591.64	907.005
9839	0	190.232	2505.8	1640.89	275.64	2481.26	1647.12	153.79	2318.72	1685.45	265.613	2315.11	1688.49	217.988	2248.54	1534.91	203.007	2166.86	1270.44	224.182	2391.89	1444.32	249.406	2458.45	1246.88	286.637	2158.26	1328.13	37.1902	2345.41	1488.6	-43.3295	2347.19	1291.19	-53.3603	2367.29	1134.54	-52.3209	2501.92	1021.47	5.99131	2565.04	960.544	-52.3263	2531.59	928.43	-41.3954	2603.02	905.605
9840	0	191.774	2515.36	1639.18	277.471	2490.53	1645.55	155.681	2328.3	1683.51	267.126	2324.6	1686.65	219.464	2258.31	1532.77	204.296	2176.95	1268.34	225.837	2401.59	1442.08	250.918	2468.37	1244.98	287.607	2167.93	1325.78	38.5053	2355.17	1486.42	-41.2909	2357.4	1288.84	-51.2422	2378.02	1132.5	-50.3885	2512.74	1019.44	7.79202	2576.15	958.912	-47.7278	2542.36	925.596	-39.517	2614.15	904.234
9841	0	193.56	2524.99	1637.46	279.466	2500.09	1643.4	157.583	2337.86	1681.6	269.61	2334.6	1684.09	221.053	2268.17	1530.63	204.922	2186.67	1266.07	227.321	2411.49	1440.37	252.414	2478.47	1243.04	288.544	2177.65	1323.71	40.0715	2365.28	1484.22	-39.5203	2367.55	1286.97	-49.2271	2388.35	1130.21	-48.4643	2523.13	1017.42	9.8656	2586.74	956.674	-48.001	2553.32	924.252	-37.456	2624.89	902.371
9842	0	195.626	2534.65	1635.41	281.719	2509.3	1641.37	159.46	2347.35	1679.75	271.71	2344.22	1682.06	222.542	2278	1528.47	206.172	2197.05	1263.81	229.124	2421.39	1438.38	254.13	2488.7	1240.94	290.001	2187.98	1321.39	41.8144	2375.39	1482.04	-37.5367	2377.34	1284.51	-46.9139	2398.72	1127.98	-46.2346	2533.83	1015.12	12.0237	2597.21	954.599	-45.7742	2563.7	921.995	-35.3651	2635.28	900.197
9843	0	197.893	2544.46	1633.77	284.223	2518.78	1639.71	161.904	2357.06	1677.8	273.941	2353.97	1680	224.474	2287.96	1526.54	207.328	2207.36	1261.94	231.022	2431.52	1436.29	255.911	2499.01	1238.89	291.109	2198.02	1319.12	43.657	2385.64	1480.1	-35.2977	2387.56	1282.26	-44.5757	2409.14	1126.01	-44.0646	2544	1012.92	14.0034	2607.39	952.216	-43.5923	2573.75	919.85	-33.4712	2645.31	898.007
9844	0	200.151	2554.29	1632.06	286.73	2528.12	1637.6	164.318	2366.72	1676.41	276.393	2363.64	1677.91	225.851	2297.7	1524.58	208.503	2217.7	1259.85	233.09	2441.51	1434.07	257.409	2508.89	1236.71	292.629	2208.36	1317.02	45.7082	2396.18	1478.44	-33.3684	2397.59	1280.65	-42.0299	2419.46	1124.23	-41.8179	2554.02	1010.77	15.8657	2617.35	949.894	-41.6004	2583.44	917.57	-31.629	2654.97	895.745
9845	0	202.498	2564.05	1630.5	289.375	2537.7	1636.07	166.924	2376.69	1674.85	278.942	2373.52	1676.32	227.792	2307.95	1522.25	209.63	2228	1258.24	235.276	2451.74	1432.25	259.249	2518.98	1234.73	293.5	2218.02	1314.92	47.8459	2406.75	1477.02	-31.0319	2408.46	1279.55	-39.5097	2429.64	1122.95	-39.4187	2563.67	1008.57	18.2237	2627.34	947.667	-39.1708	2592.71	915.327	-29.6572	2664.16	893.383
9846	0	205.013	2574.01	1629.79	292.193	2547.58	1635.15	169.927	2386.56	1673.31	281.939	2383.56	1674.57	230.252	2318.12	1521.03	210.793	2238.39	1256.48	237.347	2462.04	1431	261.007	2529.34	1233.43	295.379	2228.64	1313.12	50.0042	2417.29	1475.9	-28.7954	2419.04	1278.31	-36.9239	2440.1	1121.76	-37.2952	2573.06	1006.57	20.2043	2636.51	945.357	-37.3645	2601.92	913.326	-27.7627	2673.26	891.156
9847	0	207.601	2584.09	1628.78	295.074	2557.43	1633.7	172.826	2396.52	1672.15	285.156	2393.66	1672.79	232.294	2328.32	1519.97	212.605	2249.52	1254.83	239.577	2472.34	1429.53	263.099	2540.02	1231.84	297.653	2239.71	1311.38	52.3778	2428.1	1474.91	-26.7459	2429.89	1277.79	-34.4698	2449.86	1120.47	-35.0496	2582.31	1004.63	22.4121	2645.67	942.933	-35.2411	2610.19	911.018	-26.3025	2681.11	888.844
9848	0	210.396	2594.2	1628.04	298.105	2567.37	1632.56	175.789	2406.51	1671.38	288.612	2404	1671.38	235.072	2339.13	1518.17	213.754	2260.19	1253.58	241.99	2482.8	1428.31	264.786	2550.53	1230.88	297.468	2248.06	1308.99	54.5504	2438.66	1474.35	-24.6893	2441.1	1277.34	-31.7979	2460.24	1119.68	-32.7704	2591.46	1002.94	24.0754	2654.03	940.632	-33.4723	2618.8	909.057	-24.1456	2689.75	886.382
9849	0	213.307	2604.47	1627.39	301.28	2577.21	1631.33	179.037	2416.68	1670.78	291.665	2414.1	1669.94	237.353	2349.47	1517.38	215.405	2271.35	1252.61	244.142	2493.39	1427.26	266.724	2561.31	1229.82	300.567	2260.11	1308.02	56.9813	2449.47	1473.74	-22.4543	2452.62	1276.89	-29.102	2470.18	1119.24	-30.6554	2600.32	1001.33	26.2242	2662.37	938.198	-31.4305	2626.84	907.096	-22.365	2697.41	883.798
9850	0	216.345	2614.78	1626.77	304.583	2587.22	1630.66	182.531	2426.9	1670.23	294.705	2424.43	1669.2	239.717	2359.87	1516.55	217.062	2282.47	1251.83	246.517	2503.97	1426.3	268.616	2572.24	1228.85	301.251	2270.29	1307.09	59.3948	2460.24	1473.3	-20.3704	2464.18	1276.81	-26.6749	2480.27	1118.91	-28.2896	2609.43	999.644	28.4718	2670.7	935.719	-29.4775	2634.63	905.206	-20.3956	2705.21	881.092
9851	0	219.522	2625.3	1626.11	308.074	2597.5	1629.31	186.231	2437.55	1669.92	298.418	2435.02	1667.94	242.709	2370.77	1515.76	218.505	2293.3	1250.94	248.743	2514.62	1425.61	270.351	2583.01	1227.97	302.745	2279.9	1305.33	61.8757	2470.79	1473.18	-18.1873	2475.59	1276.97	-24.2585	2490.12	1118.78	-26.0094	2618.23	998.09	30.6203	2678.46	932.791	-26.9924	2642.01	902.982	-18.6607	2712.3	878.395
9852	0	222.541	2635.6	1625.69	311.366	2607.64	1628.52	189.683	2447.9	1670	301.969	2445.6	1667.38	244.688	2380.78	1515.19	220.444	2304.37	1250.74	251.013	2525.34	1425.25	272.202	2593.97	1227.69	305.818	2292.55	1305.06	64.4254	2481.4	1473.02	-16.2346	2486.82	1277.33	-21.9294	2500.05	1118.92	-24.0197	2626.65	996.725	32.6521	2685.97	930.414	-22.388	2649.04	900.069	-16.4933	2719.56	875.718
9853	0	225.954	2646.15	1625.61	314.997	2617.75	1627.93	193.24	2458.37	1670.34	305.569	2456.11	1666.89	247.603	2391.58	1515.28	222.307	2315.29	1250.23	253.265	2535.87	1425.18	273.84	2605	1227.72	306.715	2301.47	1303.92	66.7454	2491.53	1473.32	-14.1724	2497.95	1278.01	-19.5267	2510.03	1119.22	-22.0868	2634.81	995.883	34.701	2693.26	928.131	-20.9891	2656.24	898.904	-14.7178	2726.03	873.247
9854	0	229.214	2656.81	1625.95	318.576	2628.2	1627.77	197.042	2469.21	1670.97	309.289	2466.87	1666.83	249.839	2401.52	1515.3	223.956	2326.08	1250.02	255.48	2546.27	1425.41	275.417	2616.06	1228.16	308.844	2312.73	1303.77	69.0844	2501.83	1473.85	-12.1266	2509.07	1278.77	-17.5032	2519.75	1119.85	-20.0839	2642.94	994.938	36.5881	2700.19	926.356	-19.3908	2663.18	897.37	-12.9602	2732.63	871.083
9855	0	232.386	2667.33	1626.35	321.975	2638.49	1627.7	200.435	2479.79	1671.79	312.883	2477.61	1666.89	252.773	2412.27	1515.73	226.547	2337.34	1250.6	257.663	2556.99	1426.04	276.977	2627.11	1228.89	311.159	2324.3	1303.38	71.2424	2511.4	1474.39	-12.101	2516.13	1279.55	-15.5169	2529.31	1120.75	-18.0755	2650.98	994.343	38.4958	2706.94	924.553	-21.0389	2670.14	898.159	-10.9933	2738.86	868.862
9856	0	235.711	2678.04	1626.74	325.52	2648.89	1627.54	203.995	2490.6	1673.12	316.647	2488.53	1667.25	255.669	2422.67	1515.97	228.98	2348.16	1251.48	259.691	2567.31	1426.86	278.394	2638.38	1230.13	313.4	2335.1	1303.25	73.4399	2521.11	1475.62	-8.35113	2530.21	1281.59	-13.5337	2539.18	1122.19	-16.0667	2658.98	994.204	40.5799	2713.06	923.038	-18.9236	2676.61	897.19	-9.37247	2744.53	867.435
9857	0	239.379	2689.15	1628.08	329.332	2659.28	1628.26	207.514	2501.47	1674.6	320.064	2499.24	1667.82	257.992	2432.85	1517.03	231.292	2359.01	1251.88	261.577	2577.69	1428.1	279.822	2649.66	1231.43	316.059	2346	1304.06	75.649	2530.72	1477.03	-6.83866	2539.17	1283.03	-11.7453	2548.42	1123.55	-14.4339	2666.33	994.419	42.4683	2719.11	921.889	-16.3278	2682.94	896.073	-7.11742	2750.51	865.675
9858	0	242.207	2699.22	1628.43	332.51	2669.34	1628.4	211.16	2512.12	1675.81	323.212	2509.76	1668.67	260.962	2443.51	1518.53	233.802	2369.72	1252.94	263.528	2588.33	1429.72	280.953	2660.67	1233.07	318.77	2357.16	1305.2	77.7636	2540.19	1478.46	-5.02131	2548.67	1284.63	-10.1683	2557.43	1125.29	-12.26	2673.42	994.579	44.6473	2724.8	921.057	-13.9123	2688.12	894.696	-4.96067	2756.15	864.63
9859	0	245.233	2709.71	1629.44	335.668	2679.53	1628.69	214.214	2522.65	1677.63	326.708	2520.58	1669.29	263.325	2453.7	1519.7	236.202	2380.24	1254.37	265.087	2598.33	1430.79	282.012	2671.58	1234.37	325.237	2370.75	1306.76	79.7766	2549.37	1480.13	-3.07279	2558.03	1287.13	-8.72977	2566.24	1127.31	-10.4167	2680.56	995.225	46.7954	2730.35	920.501	-16.0401	2695.48	897.924	-2.36627	2761.32	863.515
9860	0	250.04	2722.5	1632.01	340.347	2690.17	1631.38	217.522	2533.11	1679.09	329.702	2531.18	1670.57	266.212	2464.11	1521.22	238.967	2390.61	1255.85	266.758	2608.99	1432.32	283.146	2682.42	1235.95	327.973	2381.6	1308.01	81.7116	2558.56	1482.02	-1.42165	2566.42	1288.82	-7.38694	2574.39	1129.7	-8.59201	2687.88	996.313	48.7876	2735.52	920.319	-15.5882	2701.75	898.949	-0.277909	2766.62	863.009
9861	0	251.016	2730.36	1632.01	341.806	2699.55	1630.67	220.374	2543.12	1680.88	332.692	2541.56	1671.43	269.192	2474.83	1522.9	241.802	2400.95	1257.33	268.265	2619.21	1434.02	283.85	2692.89	1237.84	330.779	2392.24	1309.65	83.6539	2567.84	1484.04	0.362882	2574.59	1290.94	-6.15072	2582.12	1131.57	-7.11289	2694.66	997.854	50.4438	2740.53	920.579	-14.6347	2707.99	900.035	1.83011	2771.62	862.661
9862	0	255.776	2743.37	1634.83	346.411	2709.95	1633.3	223.244	2553.72	1682.66	335.387	2551.76	1672.67	269.871	2484.13	1523.92	244.418	2410.94	1259.05	269.456	2629.04	1435.45	284.46	2702.88	1239.52	333.806	2402.88	1311.44	85.4012	2576.82	1485.99	1.78058	2582.4	1292.88	-4.72511	2589.19	1133.7	-5.86029	2701.25	999.343	51.9467	2745.6	921.24	-11.0436	2713.07	899.837	3.96086	2776.85	862.845
9863	0	256.395	2750.89	1635.34	347.599	2719.21	1633.24	225.931	2563.61	1684.65	338.197	2561.92	1674.02	272.481	2493.96	1525.74	246.997	2420.8	1260.99	270.746	2638.84	1437.2	285.017	2712.76	1241.12	336.952	2413.54	1313.06	86.8098	2586.05	1488.43	3.06471	2589.87	1295.44	-3.56208	2595.97	1135.86	-4.88239	2707.34	1001.22	53.4787	2750.69	922.416	-10.8007	2719.35	901.991	5.8139	2782.28	863.739
9864	0	260.446	2763.48	1638.83	351.563	2729.61	1636.27	228.513	2573.83	1686.25	340.742	2571.98	1674.98	275.328	2504.46	1527.41	249.709	2430.55	1262.2	272.018	2648.6	1438.83	285.627	2722.38	1242.89	339.755	2423.73	1314.72	88.5698	2594.69	1490.2	4.46658	2597.3	1297.4	-2.45017	2602.28	1137.69	-3.98992	2713.49	1002.86	58.6989	2755.42	922.959	-10.5388	2725.55	903.845	7.24298	2787.87	864.737
9865	0	262.367	2773.52	1640.74	353.799	2739.19	1637.7	230.951	2583.69	1688.11	342.961	2581.66	1676.24	277.096	2514.17	1529.05	252.177	2440.05	1263.78	272.958	2658.17	1440.45	286.043	2731.92	1244.41	342.383	2433.97	1316.52	89.8375	2603.73	1492.42	5.37293	2604.43	1299.63	-1.34093	2608.35	1139.31	-3.51974	2719.17	1004.48	59.3117	2760.96	924.323	-10.1959	2731.61	905.432	9.16981	2792.22	864.708
9866	0	263.749	2783.36	1642.46	355.511	2748.77	1639.09	232.852	2593.34	1689.76	344.972	2591.44	1677.45	278.992	2523.58	1530.88	254.637	2449.46	1265.63	273.911	2667.79	1441.81	286.622	2741.18	1245.61	345.342	2443.85	1318.48	91.3915	2612.05	1493.72	6.28191	2611.23	1301.24	-0.278522	2614.17	1141.03	-2.97866	2724.98	1005.92	59.9016	2766.79	925.902	-9.7084	2736.97	906.874	9.84926	2797.53	865.544
9867	0	265.049	2792.96	1644.31	357.111	2758.07	1640.38	234.671	2602.76	1691.55	346.844	2600.91	1678.52	280.121	2533	1532.33	257.127	2458.63	1267.29	274.856	2677.1	1443.14	286.959	2750.23	1246.95	348.205	2453.93	1320.12	92.4953	2620.86	1495.56	7.34269	2618.1	1302.94	0.682459	2619.92	1142.65	-2.68555	2730.07	1007.28	60.9422	2771.44	926.699	-9.32235	2742.27	908.202	10.8674	2802.29	865.913
9868	0	266.383	2802.66	1645.75	358.814	2767.44	1641.88	236.524	2612.27	1692.94	348.486	2610.43	1679.95	282.027	2542.67	1534.14	259.451	2467.82	1268.38	275.574	2686.48	1444.65	287.436	2759.56	1248.01	350.404	2463.33	1321.89	93.9333	2628.95	1496.66	8.43568	2624.52	1303.99	1.51733	2625.51	1144.27	-2.35114	2735.33	1008.28	56.9525	2777.4	928.746	-9.06242	2747.41	909.537	11.163	2807.1	866.669
9869	0	267.266	2811.94	1647.57	360.005	2776.46	1643.26	237.926	2621.37	1694.7	349.971	2619.66	1681.13	283.541	2551.68	1535.77	261.888	2476.81	1270.1	276.417	2695.65	1445.84	287.741	2768.2	1249.25	352.961	2472.91	1323.7	94.9247	2636.93	1497.86	9.48974	2631.01	1305.65	2.45562	2631.09	1145.53	-2.14968	2740.33	1009.22	57.0963	2782.94	929.627	-8.26931	2751.67	909.742	11.2007	2811.85	867.33
9870	0	268.138	2821.21	1649	361.23	2785.47	1644.69	239.316	2630.45	1696.07	351.234	2628.87	1682.46	283.879	2560.1	1538.09	264.02	2485.55	1272.03	277.075	2704.53	1447.29	288.085	2776.82	1250.5	355.214	2482.26	1325.41	96.0218	2645.04	1499.29	10.4923	2637.08	1307.15	3.50685	2636.56	1146.91	-1.91019	2745.34	1010.3	56.7605	2788.31	930.767	-8.28287	2756.44	911.22	10.7019	2816.43	868.181
9871	0	268.559	2830.18	1650.64	362.021	2794.25	1646.35	240.257	2639.24	1697.66	352.253	2637.86	1684	286.041	2569.2	1538.91	266.142	2494.24	1273.26	277.8	2713.56	1448.86	288.352	2785.45	1252.06	357.256	2491.26	1327.1	96.8585	2652.79	1500.76	11.3795	2643.11	1308.43	4.3456	2641.91	1148.32	-1.98961	2749.98	1011.26	56.2861	2793.62	931.88	-7.98121	2760.56	911.968	9.96849	2821.01	869.36
9872	0	269.286	2839.33	1652.2	363.132	2803.03	1648.12	241.501	2648.19	1699.16	353.144	2646.78	1685.74	286.828	2577.98	1540.54	268.179	2502.99	1274.62	278.241	2722.21	1450.45	288.396	2793.8	1253.63	359.318	2500.28	1328.93	97.638	2660.55	1502.26	12.391	2649.16	1310.06	5.31761	2647.35	1149.67	-1.97397	2754.58	1012.19	55.5635	2798.94	932.957	-7.61364	2764.58	912.754	8.53275	2825.4	870.629
9873	0	269.345	2848.06	1653.67	363.562	2811.71	1649.81	242.079	2656.74	1700.57	353.846	2655.76	1687.32	288.291	2586.34	1541.96	270.121	2511.48	1276.53	278.751	2730.75	1451.8	288.537	2802.07	1255.15	361.417	2509.27	1330.62	98.4241	2668.25	1503.8	13.4052	2655.18	1311.48	6.41106	2652.95	1151.09	-1.97284	2759.1	1013.2	54.906	2804.23	933.998	-7.29733	2768.42	913.393	7.57247	2829.92	871.557
9874	0	269.058	2856.43	1655.26	363.667	2820.2	1651.84	242.311	2664.93	1702.11	354.407	2664.61	1689.22	289.471	2595.26	1543.81	271.988	2519.87	1278.24	279.2	2739.07	1453.52	289.017	2810.81	1256.31	363.3	2518.08	1332.3	99.2542	2675.56	1505.17	14.523	2661.12	1312.61	7.57822	2658.4	1152.69	-1.86912	2763.65	1014.08	54.1358	2809.54	934.897	-6.97465	2772.18	914.219	6.53441	2834.12	872.437
9875	0	268.961	2864.92	1656.91	363.894	2828.54	1653.49	242.733	2673.23	1703.69	354.722	2673.25	1690.75	290.859	2603.49	1545.19	273.91	2528.35	1279.59	279.74	2747.43	1455.13	289.217	2818.85	1257.86	365.074	2526.67	1334.19	100.072	2682.83	1506.28	15.7332	2667.03	1313.92	8.6959	2663.66	1153.99	-1.89071	2768.03	1014.85	53.4267	2814.74	935.737	-6.46001	2775.87	914.805	5.09977	2838.25	873.572
9876	0	267.688	2872.85	1658.53	363.053	2836.9	1655.72	241.979	2680.97	1705.26	354.915	2682.08	1692.79	291.549	2611.64	1547.06	275.826	2536.7	1281.31	280.226	2755.91	1456.71	289.563	2827.15	1259.4	366.807	2535.17	1336.07	100.606	2690.12	1507.44	16.9231	2673.1	1315.04	9.78738	2669.06	1155.77	-1.85234	2772.59	1015.59	52.6046	2819.84	936.464	-6.02404	2779.58	915.504	3.5155	2841.91	874.651
9877	0	267.725	2881.08	1660.01	363.407	2845.06	1657.71	242.535	2689.02	1706.68	355.03	2690.64	1694.73	292.879	2620.06	1548.3	277.528	2544.91	1283.2	280.656	2764.07	1458.21	289.772	2835.16	1260.81	368.746	2543.85	1337.82	101.568	2696.87	1508.44	17.9993	2679.21	1316.37	11.1444	2674.83	1157.65	-1.76358	2777.1	1016.47	51.7836	2824.92	937.312	-5.81362	2783.48	916.286	2.41921	2846.38	875.731
9878	0	267.531	2889.42	1661.57	363.558	2853.37	1659.66	242.86	2697.18	1708.18	355.221	2699.3	1696.58	293.739	2627.91	1550.02	279.277	2553	1284.88	281.272	2772.18	1459.93	290.213	2843.4	1262.41	370.533	2552.43	1339.54	102.406	2704.53	1510.17	18.9969	2685.05	1317.93	12.133	2680.04	1159.01	-1.75285	2781.69	1017.54	51.0401	2830.2	938.247	-5.15658	2786.92	916.557	1.23752	2850.33	876.824
9879	0	266.828	2897.01	1662.95	363.228	2861.26	1661.87	242.675	2704.58	1709.51	355.298	2707.68	1698.69	295.19	2636.05	1551.89	280.977	2561.28	1286.01	281.68	2780.27	1461.69	290.634	2851.29	1264.31	372.19	2560.9	1341.36	103.065	2711.34	1511.48	20.025	2691.02	1319.37	13.257	2685.52	1160.61	-1.78314	2786.11	1018.77	50.1312	2835	939.326	-5.27869	2791.06	918.03	0.108332	2854.31	878.047
9880	0	266.823	2905.3	1664.16	363.61	2869.46	1663.85	243.188	2712.68	1710.66	355.516	2716.17	1700.64	294.658	2644.36	1552.8	282.662	2569.41	1287.78	282.155	2788.23	1463.51	290.885	2858.93	1266.31	373.799	2569.32	1343.11	103.658	2718.46	1513.12	20.8167	2697.13	1321.25	14.3225	2691.13	1162.23	-2.02679	2790.79	1020.28	49.2102	2839.9	940.535	-5.18618	2795.01	919.168	-1.28823	2858	879.388
9881	0	266.15	2912.87	1665.71	363.206	2877.34	1664.85	243.034	2720.07	1712.15	356.179	2724.61	1701.31	296.473	2651.99	1554.57	284.166	2577.31	1289.22	282.518	2795.94	1465.21	290.3	2866.44	1268.04	375.422	2577.75	1344.57	104.309	2725.65	1514.57	21.6714	2703.13	1322.85	15.2879	2696.57	1163.81	-1.88405	2795.29	1021.46	48.4391	2844.83	941.666	-5.15632	2799.1	920.301	-2.37672	2862.03	880.526
9882	0	266.585	2919.94	1666.66	363.767	2884.53	1666.48	243.988	2726.95	1713.04	356.052	2732.54	1702.83	296.873	2660.19	1556.49	285.627	2585.54	1290.31	282.952	2803.91	1466.69	291.562	2874.26	1269.58	376.921	2586.06	1346.16	105.019	2732.75	1515.78	22.5139	2709.31	1324.12	16.2515	2702.08	1165.16	-1.81526	2800.09	1022.54	47.7568	2849.87	942.526	-5.21608	2803.29	921.153	-3.24836	2866.22	881.353
[truncated: 69 more columns]

## Sheet: Sheet2
Devices
		025370 - Force			025370 - Moment			025370 - CoP			027571 - Force			027571 - Moment			027571 - CoP			037720 - Force			037720 - Moment			037720 - CoP
Frame	Sub Frame	Fx	Fy	Fz	Mx	My	Mz	Cx	Cy	Cz	Fx	Fy	Fz	Mx	My	Mz	Cx	Cy	Cz	Fx	Fy	Fz	Mx	My	Mz	Cx	Cy	Cz
		N	N	N	N.mm	N.mm	N.mm	mm	mm	mm	N	N	N	N.mm	N.mm	N.mm	mm	mm	mm	N	N	N	N.mm	N.mm	N.mm	mm	mm	mm
9529	0	0.994248	13.2747	-5.87951	2491.79	-1263.2	-2476.36	-14.8469	-123.809	0	0	0	0	0	0	0	200	903	0	0	0	0	0	0	0	603	903	0
9529	1	0.994248	13.4273	-7.40539	1942.48	-1507.34	-1743.94	-3.54572	37.6945	0	0	0	0	0	0	0	200	903	0	0	0	0	0	0	0	603	903	0
9529	2	2.06236	13.2747	-8.32092	1759.37	-1324.23	-2155.93	40.8553	88.5607	0	0	0	0	0	0	0	200	903	0	0	0	0	0	0	0	603	903	0
9529	3	0.994248	13.7325	-7.71057	2949.56	-1080.09	-2293.26	59.9209	-82.5342	0	0	0	0	0	0	0	200	903	0	0	0	0	0	0	0	603	903	0
9529	4	0.994248	13.5799	-8.93127	1942.48	-1202.16	-2155.93	65.3988	82.5085	0	0	0	0	0	0	0	200	903	0	0	0	0	0	0	0	603	903	0
9529	5	1.90978	12.2066	-7.10022	2308.69	-1263.2	-1972.83	22.0906	-25.1571	0	0	0	0	0	0	0	200	903	0	0	0	0	0	0	0	603	903	0
9529	6	0.994248	13.1221	-8.62609	2125.58	-1202.16	-1972.83	60.6368	53.5872	0	0	0	0	0	0	0	200	903	0	0	0	0	0	0	0	603	903	0
9529	7	0.994248	13.4273	-8.93127	1759.37	-1385.27	-2201.71	44.8972	103.01	0	0	0	0	0	0	0	200	903	0	0	0	0	0	0	0	603	903	0
9529	8	0.689073	14.4954	-8.01574	2217.13	-1141.12	-2201.71	57.6396	23.4027	0	0	0	0	0	0	0	200	903	0	0	0	0	0	0	0	603	903	0
9529	9	1.45201	13.5799	-7.40539	2217.13	-1324.23	-2201.71	21.1803	0.605591	0	0	0	0	0	0	0	200	903	0	0	0	0	0	0	0	603	903	0
9530	0	1.29942	13.5799	-7.10022	2491.79	-1446.3	-2155.93	-3.69812	-50.946	0	0	0	0	0	0	0	200	903	0	0	0	0	0	0	0	603	903	0
9530	1	0.689073	14.648	-8.01574	3041.11	-1263.2	-2064.38	42.4107	-79.392	0	0	0	0	0	0	0	200	903	0	0	0	0	0	0	0	603	903	0
9530	2	0.84166	13.7325	-6.48986	2308.69	-1507.34	-2110.15	-32.26	-55.7371	0	0	0	0	0	0	0	200	903	0	0	0	0	0	0	0	603	903	0
9530	3	1.45201	13.2747	-5.26916	2217.13	-1019.05	-1698.17	6.60025	-120.775	0	0	0	0	0	0	0	200	903	0	0	0	0	0	0	0	603	903	0
9530	4	1.14684	12.8169	-6.79504	1759.37	-1385.27	-2110.15	-3.8642	41.0803	0	0	0	0	0	0	0	200	903	0	0	0	0	0	0	0	603	903	0
9530	5	2.06236	13.7325	-7.10022	1850.92	-1446.3	-1972.83	-3.69812	39.3146	0	0	0	0	0	0	0	200	903	0	0	0	0	0	0	0	603	903	0
9530	6	1.6046	13.2747	-7.10022	2583.34	-1202.16	-2064.38	30.6868	-63.8403	0	0	0	0	0	0	0	200	903	0	0	0	0	0	0	0	603	903	0
9530	7	1.90978	12.5117	-7.10022	2034.03	-1446.3	-2064.38	-3.69812	13.526	0	0	0	0	0	0	0	200	903	0	0	0	0	0	0	0	603	903	0
9530	8	1.90978	13.2747	-4.96399	1942.48	-1080.09	-2018.6	-17.5852	-91.3136	0	0	0	0	0	0	0	200	903	0	0	0	0	0	0	0	603	903	0
9530	9	2.52013	13.4273	-8.93127	1850.92	-1263.2	-2201.71	58.5649	92.7593	0	0	0	0	0	0	0	200	903	0	0	0	0	0	0	0	603	903	0
9531	0	2.8253	12.6643	-8.93127	2217.13	-1507.34	-1789.72	31.2294	51.7562	0	0	0	0	0	0	0	200	903	0	0	0	0	0	0	0	603	903	0
9531	1	1.90978	12.5117	-8.01574	2034.03	-1385.27	-1927.05	27.1819	46.246	0	0	0	0	0	0	0	200	903	0	0	0	0	0	0	0	603	903	0
9531	2	2.06236	12.6643	-9.54162	1942.48	-1690.44	-2064.38	22.835	96.4209	0	0	0	0	0	0	0	200	903	0	0	0	0	0	0	0	603	903	0
9531	3	1.6046	12.2066	-6.48986	2491.79	-1202.16	-1927.05	14.7635	-83.9514	0	0	0	0	0	0	0	200	903	0	0	0	0	0	0	0	603	903	0
9531	4	0.383897	12.2066	-6.48986	1850.92	-1202.16	-2018.6	14.7635	14.798	0	0	0	0	0	0	0	200	903	0	0	0	0	0	0	0	603	903	0
9531	5	1.14684	12.9695	-9.8468	1850.92	-1385.27	-1835.5	59.3182	112.028	0	0	0	0	0	0	0	200	903	0	0	0	0	0	0	0	603	903	0
9531	6	0.994248	12.9695	-8.93127	2217.13	-1202.16	-1835.5	65.3988	51.7562	0	0	0	0	0	0	0	200	903	0	0	0	0	0	0	0	603	903	0
9531	7	2.36754	10.2229	-7.10022	2125.58	-1446.3	-1881.27	-3.69812	0.631622	0	0	0	0	0	0	0	200	903	0	0	0	0	0	0	0	603	903	0
9531	8	1.75719	11.9014	-7.40539	1942.48	-1385.27	-1652.39	12.9383	37.6945	0	0	0	0	0	0	0	200	903	0	0	0	0	0	0	0	603	903	0
9531	9	0.536485	11.5962	-8.01574	1850.92	-1202.16	-1927.05	50.0251	69.0891	0	0	0	0	0	0	0	200	903	0	0	0	0	0	0	0	603	903	0
9532	0	0.994248	11.5962	-7.10022	1942.48	-1324.23	-1698.17	13.4944	26.4203	0	0	0	0	0	0	0	200	903	0	0	0	0	0	0	0	603	903	0
9532	1	0.84166	12.054	-6.79504	1850.92	-1202.16	-1789.72	23.0827	27.6069	0	0	0	0	0	0	0	200	903	0	0	0	0	0	0	0	603	903	0
9532	2	1.75719	12.054	-6.79504	2125.58	-1263.2	-1789.72	14.1004	-12.8134	0	0	0	0	0	0	0	200	903	0	0	0	0	0	0	0	603	903	0
9532	3	1.45201	10.9859	-6.48986	2034.03	-1324.23	-1835.5	-4.04593	-13.416	0	0	0	0	0	0	0	200	903	0	0	0	0	0	0	0	603	903	0
9532	4	1.6046	10.9859	-6.18469	1667.82	-1446.3	-1789.72	-33.8518	30.3313	0	0	0	0	0	0	0	200	903	0	0	0	0	0	0	0	603	903	0
9532	5	1.45201	10.5281	-7.40539	1759.37	-1324.23	-1789.72	21.1803	62.4204	0	0	0	0	0	0	0	200	903	0	0	0	0	0	0	0	603	903	0
9532	6	3.43565	10.6807	-8.62609	2308.69	-1141.12	-1789.72	67.7125	32.3603	0	0	0	0	0	0	0	200	903	0	0	0	0	0	0	0	603	903	0
9532	7	1.29942	10.6807	-7.10022	1576.26	-1141.12	-1743.94	39.2831	77.9977	0	0	0	0	0	0	0	200	903	0	0	0	0	0	0	0	603	903	0
9532	8	0.994248	10.9859	-7.40539	1576.26	-1629.41	-1606.61	-20.0297	87.1464	0	0	0	0	0	0	0	200	903	0	0	0	0	0	0	0	603	903	0
9532	9	1.29942	9.61258	-7.10022	2034.03	-1019.05	-1331.96	56.4756	13.526	0	0	0	0	0	0	0	200	903	0	0	0	0	0	0	0	603	903	0
9533	0	2.36754	9.76517	-6.18469	1484.71	-1263.2	-1698.17	-4.24556	59.9376	0	0	0	0	0	0	0	200	903	0	0	0	0	0	0	0	603	903	0
9533	1	0.536485	9.91775	-7.10022	1484.71	-1263.2	-1606.61	22.0906	90.8921	0	0	0	0	0	0	0	200	903	0	0	0	0	0	0	0	603	903	0
9533	2	0.689073	10.5281	-8.32092	2034.03	-1141.12	-1698.17	62.8607	55.5526	0	0	0	0	0	0	0	200	903	0	0	0	0	0	0	0	603	903	0
9533	3	0.383897	8.0867	-7.71057	1942.48	-1324.23	-874.193	28.2577	48.0763	0	0	0	0	0	0	0	200	903	0	0	0	0	0	0	0	603	903	0
9533	4	2.06236	10.0703	-5.87951	1759.37	-1019.05	-1423.51	26.677	0.762695	0	0	0	0	0	0	0	200	903	0	0	0	0	0	0	0	603	903	0
9533	5	0.536485	9.91775	-6.79504	1850.92	-1263.2	-1606.61	14.1004	27.6069	0	0	0	0	0	0	0	200	903	0	0	0	0	0	0	0	603	903	0
9533	6	0.231309	9.00223	-6.18469	1484.71	-1385.27	-1606.61	-23.9831	59.9376	0	0	0	0	0	0	0	200	903	0	0	0	0	0	0	0	603	903	0
9533	7	0.078721	9.45999	-6.48986	1576.26	-1019.05	-1469.29	42.9775	57.1191	0	0	0	0	0	0	0	200	903	0	0	0	0	0	0	0	603	903	0
9533	8	0	0	0	0	0	0	200	300	0	0	0	0	0	0	0	200	903	0	0	0	0	0	0	0	603	903	0
9533	9	0.689073	8.84964	-5.87951	2674.9	-1202.16	-1469.29	-4.46593	-154.952	0	0	0	0	0	0	0	200	903	0	0	0	0	0	0	0	603	903	0
9534	0	0.994248	9.15481	-5.57434	1484.71	-896.984	-1469.29	39.0869	33.6524	0	0	0	0	0	0	0	200	903	0	0	0	0	0	0	0	603	903	0
9534	1	0.689073	9.15481	-5.87951	1484.71	-1263.2	-1057.3	-14.8469	47.4771	0	0	0	0	0	0	0	200	903	0	0	0	0	0	0	0	603	903	0
9534	2	2.21495	8.84964	-6.18469	1942.48	-1019.05	-1560.84	35.2295	-14.0781	0	0	0	0	0	0	0	200	903	0	0	0	0	0	0	0	603	903	0
9534	3	0	0	0	0	0	0	200	300	0	0	0	0	0	0	0	200	903	0	0	0	0	0	0	0	603	903	0
9534	4	0.994248	9.15481	-6.18469	1576.26	-896.984	-1286.18	54.967	45.1344	0	0	0	0	0	0	0	200	903	0	0	0	0	0	0	0	603	903	0
9534	5	0.84166	9.00223	-6.48986	1667.82	-713.878	-1057.3	90.001	43.0121	0	0	0	0	0	0	0	200	903	0	0	0	0	0	0	0	603	903	0
9534	6	0	0	0	0	0	0	200	300	0	0	0	0	0	0	0	200	903	0	0	0	0	0	0	0	603	903	0
9534	7	0	0	0	0	0	0	200	300	0	0	0	0	0	0	0	200	903	0	0	0	0	0	0	0	603	903	0
9534	8	-0.531631	8.69705	-5.26916	1210.05	-1202.16	-1331.96	-28.1502	70.3518	0	0	0	0	0	0	0	200	903	0	0	0	0	0	0	0	603	903	0
9534	9	-0.226455	7.78152	-6.48986	2125.58	-713.878	-1103.07	90.001	-27.523	0	0	0	0	0	0	0	200	903	0	0	0	0	0	0	0	603	903	0
9535	0	0	0	0	0	0	0	200	300	0	0	0	0	0	0	0	200	903	0	0	0	0	0	0	0	603	903	0
9535	1	0	0	0	0	0	0	200	300	0	0	0	0	0	0	0	200	903	0	0	0	0	0	0	0	603	903	0
9535	2	0	0	0	0	0	0	200	300	0	0	0	0	0	0	0	200	903	0	0	0	0	0	0	0	603	903	0
9535	3	0	0	0	0	0	0	200	300	0	0	0	0	0	0	0	200	903	0	0	0	0	0	0	0	603	903	0
9535	4	0	0	0	0	0	0	200	300	0	0	0	0	0	0	0	200	903	0	0	0	0	0	0	0	603	903	0
9535	5	0	0	0	0	0	0	200	300	0	0	0	0	0	0	0	200	903	0	0	0	0	0	0	0	603	903	0
9535	6	0	0	0	0	0	0	200	300	0	0	0	0	0	0	0	200	903	0	0	0	0	0	0	0	603	903	0
9535	7	0	0	0	0	0	0	200	300	0	0	0	0	0	0	0	200	903	0	0	0	0	0	0	0	603	903	0
9535	8	0	0	0	0	0	0	200	300	0	0	0	0	0	0	0	200	903	0	0	0	0	0	0	0	603	903	0
9535	9	0	0	0	0	0	0	200	300	0	0	0	0	0	0	0	200	903	0	0	0	0	0	0	0	603	903	0
9536	0	0	0	0	0	0	0	200	300	0	0	0	0	0	0	0	200	903	0	0	0	0	0	0	0	603	903	0
9536	1	0	0	0	0	0	0	200	300	0	0	0	0	0	0	0	200	903	0	0	0	0	0	0	0	603	903	0
9536	2	0	0	0	0	0	0	200	300	0	0	0	0	0	0	0	200	903	0	0	0	0	0	0	0	603	903	0
9536	3	0	0	0	0	0	0	200	300	0	0	0	0	0	0	0	200	903	0	0	0	0	0	0	0	603	903	0
9536	4	0	0	0	0	0	0	200	300	0	0	0	0	0	0	0	200	903	0	0	0	0	0	0	0	603	903	0
9536	5	0	0	0	0	0	0	200	300	0	0	0	0	0	0	0	200	903	0	0	0	0	0	0	0	603	903	0
9536	6	0	0	0	0	0	0	200	300	0	0	0	0	0	0	0	200	903	0	0	0	0	0	0	0	603	903	0
9536	7	0	0	0	0	0	0	200	300	0	0	0	0	0	0	0	200	903	0	0	0	0	0	0	0	603	903	0
9536	8	0	0	0	0	0	0	200	300	0	0	0	0	0	0	0	200	903	0	0	0	0	0	0	0	603	903	0
9536	9	0	0	0	0	0	0	200	300	0	0	0	0	0	0	0	200	903	0	0	0	0	0	0	0	603	903	0
9537	0	0	0	0	0	0	0	200	300	0	0	0	0	0	0	0	200	903	0	0	0	0	0	0	0	603	903	0
9537	1	0	0	0	0	0	0	200	300	0	0	0	0	0	0	0	200	903	0	0	0	0	0	0	0	603	903	0
9537	2	0	0	0	0	0	0	200	300	0	0	0	0	0	0	0	200	903	0	0	0	0	0	0	0	603	903	0
9537	3	0	0	0	0	0	0	200	300	0	0	0	0	0	0	0	200	903	0	0	0	0	0	0	0	603	903	0
9537	4	0	0	0	0	0	0	200	300	0	0	0	0	0	0	0	200	903	0	0	0	0	0	0	0	603	903	0
9537	5	0	0	0	0	0	0	200	300	0	0	0	0	0	0	0	200	903	0	0	0	0	0	0	0	603	903	0
9537	6	0	0	0	0	0	0	200	300	0	0	0	0	0	0	0	200	903	0	0	0	0	0	0	0	603	903	0
9537	7	0	0	0	0	0	0	200	300	0	0	0	0	0	0	0	200	903	0	0	0	0	0	0	0	603	903	0
9537	8	0	0	0	0	0	0	200	300	0	0	0	0	0	0	0	200	903	0	0	0	0	0	0	0	603	903	0
9537	9	0	0	0	0	0	0	200	300	0	0	0	0	0	0	0	200	903	0	0	0	0	0	0	0	603	903	0
9538	0	0	0	0	0	0	0	200	300	0	0	0	0	0	0	0	200	903	0	0	0	0	0	0	0	603	903	0
9538	1	0	0	0	0	0	0	200	300	0	0	0	0	0	0	0	200	903	0	0	0	0	0	0	0	603	903	0
9538	2	0	0	0	0	0	0	200	300	0	0	0	0	0	0	0	200	903	0	0	0	0	0	0	0	603	903	0
9538	3	0	0	0	0	0	0	200	300	0	0	0	0	0	0	0	200	903	0	0	0	0	0	0	0	603	903	0
9538	4	0	0	0	0	0	0	200	300	0	0	0	0	0	0	0	200	903	0	0	0	0	0	0	0	603	903	0
9538	5	0	0	0	0	0	0	200	300	0	0	0	0	0	0	0	200	903	0	0	0	0	0	0	0	603	903	0
9538	6	0	0	0	0	0	0	200	300	0	0	0	0	0	0	0	200	903	0	0	0	0	0	0	0	603	903	0
9538	7	0	0	0	0	0	0	200	300	0	0	0	0	0	0	0	200	903	0	0	0	0	0	0	0	603	903	0
9538	8	0	0	0	0	0	0	200	300	0	0	0	0	0	0	0	200	903	0	0	0	0	0	0	0	603	903	0
9538	9	0	0	0	0	0	0	200	300	0	0	0	0	0	0	0	200	903	0	0	0	0	0	0	0	603	903	0
9539	0	0	0	0	0	0	0	200	300	0	0	0	0	0	0	0	200	903	0	0	0	0	0	0	0	603	903	0
9539	1	0	0	0	0	0	0	200	300	0	0	0	0	0	0	0	200	903	0	0	0	0	0	0	0	603	903	0
9539	2	0	0	0	0	0	0	200	300	0	0	0	0	0	0	0	200	903	0	0	0	0	0	0	0	603	903	0
9539	3	0	0	0	0	0	0	200	300	0	0	0	0	0	0	0	200	903	0	0	0	0	0	0	0	603	903	0
9539	4	0	0	0	0	0	0	200	300	0	0	0	0	0	0	0	200	903	0	0	0	0	0	0	0	603	903	0
9539	5	0	0	0	0	0	0	200	300	0	0	0	0	0	0	0	200	903	0	0	0	0	0	0	0	603	903	0
9539	6	0	0	0	0	0	0	200	300	0	0	0	0	0	0	0	200	903	0	0	0	0	0	0	0	603	903	0
9539	7	0	0	0	0	0	0	200	300	0	0	0	0	0	0	0	200	903	0	0	0	0	0	0	0	603	903	0
9539	8	0	0	0	0	0	0	200	300	0	0	0	0	0	0	0	200	903	0	0	0	0	0	0	0	603	903	0
9539	9	0	0	0	0	0	0	200	300	0	0	0	0	0	0	0	200	903	0	0	0	0	0	0	0	603	903	0
9540	0	0	0	0	0	0	0	200	300	0	0	0	0	0	0	0	200	903	0	0	0	0	0	0	0	603	903	0
9540	1	0	0	0	0	0	0	200	300	0	0	0	0	0	0	0	200	903	0	0	0	0	0	0	0	603	903	0
9540	2	0	0	0	0	0	0	200	300	0	0	0	0	0	0	0	200	903	0	0	0	0	0	0	0	603	903	0
9540	3	0	0	0	0	0	0	200	300	0	0	0	0	0	0	0	200	903	0	0	0	0	0	0	0	603	903	0
9540	4	0	0	0	0	0	0	200	300	0	0	0	0	0	0	0	200	903	0	0	0	0	0	0	0	603	903	0
9540	5	0	0	0	0	0	0	200	300	0	0	0	0	0	0	0	200	903	0	0	0	0	0	0	0	603	903	0
9540	6	0	0	0	0	0	0	200	300	0	0	0	0	0	0	0	200	903	0	0	0	0	0	0	0	603	903	0
9540	7	0	0	0	0	0	0	200	300	0	0	0	0	0	0	0	200	903	0	0	0	0	0	0	0	603	903	0
9540	8	0	0	0	0	0	0	200	300	0	0	0	0	0	0	0	200	903	0	0	0	0	0	0	0	603	903	0
9540	9	0	0	0	0	0	0	200	300	0	0	0	0	0	0	0	200	903	0	0	0	0	0	0	0	603	903	0
9541	0	0	0	0	0	0	0	200	300	0	0	0	0	0	0	0	200	903	0	0	0	0	0	0	0	603	903	0
9541	1	0	0	0	0	0	0	200	300	0	0	0	0	0	0	0	200	903	0	0	0	0	0	0	0	603	903	0
9541	2	0	0	0	0	0	0	200	300	0	0	0	0	0	0	0	200	903	0	0	0	0	0	0	0	603	903	0
9541	3	0	0	0	0	0	0	200	300	0	0	0	0	0	0	0	200	903	0	0	0	0	0	0	0	603	903	0
9541	4	0	0	0	0	0	0	200	300	0	0	0	0	0	0	0	200	903	0	0	0	0	0	0	0	603	903	0
9541	5	0	0	0	0	0	0	200	300	0	0	0	0	0	0	0	200	903	0	0	0	0	0	0	0	603	903	0
9541	6	0	0	0	0	0	0	200	300	0	0	0	0	0	0	0	200	903	0	0	0	0	0	0	0	603	903	0
9541	7	0	0	0	0	0	0	200	300	0	0	0	0	0	0	0	200	903	0	0	0	0	0	0	0	603	903	0
9541	8	0	0	0	0	0	0	200	300	0	0	0	0	0	0	0	200	903	0	0	0	0	0	0	0	603	903	0
9541	9	0	0	0	0	0	0	200	300	0	0	0	0	0	0	0	200	903	0	0	0	0	0	0	0	603	903	0
9542	0	0	0	0	0	0	0	200	300	0	0	0	0	0	0	0	200	903	0	0	0	0	0	0	0	603	903	0
9542	1	0	0	0	0	0	0	200	300	0	0	0	0	0	0	0	200	903	0	0	0	0	0	0	0	603	903	0
9542	2	0	0	0	0	0	0	200	300	0	0	0	0	0	0	0	200	903	0	0	0	0	0	0	0	603	903	0
9542	3	0	0	0	0	0	0	200	300	0	0	0	0	0	0	0	200	903	0	0	0	0	0	0	0	603	903	0
9542	4	0	0	0	0	0	0	200	300	0	0	0	0	0	0	0	200	903	0	0	0	0	0	0	0	603	903	0
9542	5	0	0	0	0	0	0	200	300	0	0	0	0	0	0	0	200	903	0	0	0	0	0	0	0	603	903	0
9542	6	0	0	0	0	0	0	200	300	0	0	0	0	0	0	0	200	903	0	0	0	0	0	0	0	603	903	0
9542	7	0	0	0	0	0	0	200	300	0	0	0	0	0	0	0	200	903	0	0	0	0	0	0	0	603	903	0
9542	8	0	0	0	0	0	0	200	300	0	0	0	0	0	0	0	200	903	0	0	0	0	0	0	0	603	903	0
9542	9	0	0	0	0	0	0	200	300	0	0	0	0	0	0	0	200	903	0	0	0	0	0	0	0	603	903	0
9543	0	0	0	0	0	0	0	200	300	0	0	0	0	0	0	0	200	903	0	0	0	0	0	0	0	603	903	0
9543	1	0	0	0	0	0	0	200	300	0	0	0	0	0	0	0	200	903	0	0	0	0	0	0	0	603	903	0
9543	2	0	0	0	0	0	0	200	300	0	0	0	0	0	0	0	200	903	0	0	0	0	0	0	0	603	903	0
9543	3	0	0	0	0	0	0	200	300	0	0	0	0	0	0	0	200	903	0	0	0	0	0	0	0	603	903	0
9543	4	0	0	0	0	0	0	200	300	0	0	0	0	0	0	0	200	903	0	0	0	0	0	0	0	603	903	0
9543	5	0	0	0	0	0	0	200	300	0	0	0	0	0	0	0	200	903	0	0	0	0	0	0	0	603	903	0
9543	6	0	0	0	0	0	0	200	300	0	0	0	0	0	0	0	200	903	0	0	0	0	0	0	0	603	903	0
9543	7	0	0	0	0	0	0	200	300	0	0	0	0	0	0	0	200	903	0	0	0	0	0	0	0	603	903	0
9543	8	0	0	0	0	0	0	200	300	0	0	0	0	0	0	0	200	903	0	0	0	0	0	0	0	603	903	0
9543	9	0	0	0	0	0	0	200	300	0	0	0	0	0	0	0	200	903	0	0	0	0	0	0	0	603	903	0
9544	0	0	0	0	0	0	0	200	300	0	0	0	0	0	0	0	200	903	0	0	0	0	0	0	0	603	903	0
9544	1	0	0	0	0	0	0	200	300	0	0	0	0	0	0	0	200	903	0	0	0	0	0	0	0	603	903	0
9544	2	0	0	0	0	0	0	200	300	0	0	0	0	0	0	0	200	903	0	0	0	0	0	0	0	603	903	0
9544	3	0	0	0	0	0	0	200	300	0	0	0	0	0	0	0	200	903	0	0	0	0	0	0	0	603	903	0
9544	4	0	0	0	0	0	0	200	300	0	0	0	0	0	0	0	200	903	0	0	0	0	0	0	0	603	903	0
9544	5	0	0	0	0	0	0	200	300	0	0	0	0	0	0	0	200	903	0	0	0	0	0	0	0	603	903	0
9544	6	0	0	0	0	0	0	200	300	0	0	0	0	0	0	0	200	903	0	0	0	0	0	0	0	603	903	0
9544	7	0	0	0	0	0	0	200	300	0	0	0	0	0	0	0	200	903	0	0	0	0	0	0	0	603	903	0
9544	8	0	0	0	0	0	0	200	300	0	0	0	0	0	0	0	200	903	0	0	0	0	0	0	0	603	903	0
9544	9	0	0	0	0	0	0	200	300	0	0	0	0	0	0	0	200	903	0	0	0	0	0	0	0	603	903	0
9545	0	0	0	0	0	0	0	200	300	0	0	0	0	0	0	0	200	903	0	0	0	0	0	0	0	603	903	0
9545	1	0	0	0	0	0	0	200	300	0	0	0	0	0	0	0	200	903	0	0	0	0	0	0	0	603	903	0
9545	2	0	0	0	0	0	0	200	300	0	0	0	0	0	0	0	200	903	0	0	0	0	0	0	0	603	903	0
9545	3	0	0	0	0	0	0	200	300	0	0	0	0	0	0	0	200	903	0	0	0	0	0	0	0	603	903	0
9545	4	0	0	0	0	0	0	200	300	0	0	0	0	0	0	0	200	903	0	0	0	0	0	0	0	603	903	0
9545	5	0	0	0	0	0	0	200	300	0	0	0	0	0	0	0	200	903	0	0	0	0	0	0	0	603	903	0
9545	6	0	0	0	0	0	0	200	300	0	0	0	0	0	0	0	200	903	0	0	0	0	0	0	0	603	903	0
9545	7	0	0	0	0	0	0	200	300	0	0	0	0	0	0	0	200	903	0	0	0	0	0	0	0	603	903	0
9545	8	0	0	0	0	0	0	200	300	0	0	0	0	0	0	0	200	903	0	0	0	0	0	0	0	603	903	0
9545	9	0	0	0	0	0	0	200	300	0	0	0	0	0	0	0	200	903	0	0	0	0	0	0	0	603	903	0
9546	0	0	0	0	0	0	0	200	300	0	0	0	0	0	0	0	200	903	0	0	0	0	0	0	0	603	903	0
9546	1	0	0	0	0	0	0	200	300	0	0	0	0	0	0	0	200	903	0	0	0	0	0	0	0	603	903	0
9546	2	0	0	0	0	0	0	200	300	0	0	0	0	0	0	0	200	903	0	0	0	0	0	0	0	603	903	0
9546	3	0	0	0	0	0	0	200	300	0	0	0	0	0	0	0	200	903	0	0	0	0	0	0	0	603	903	0
9546	4	0	0	0	0	0	0	200	300	0	0	0	0	0	0	0	200	903	0	0	0	0	0	0	0	603	903	0
9546	5	0	0	0	0	0	0	200	300	0	0	0	0	0	0	0	200	903	0	0	0	0	0	0	0	603	903	0
9546	6	0	0	0	0	0	0	200	300	0	0	0	0	0	0	0	200	903	0	0	0	0	0	0	0	603	903	0
9546	7	0	0	0	0	0	0	200	300	0	0	0	0	0	0	0	200	903	0	0	0	0	0	0	0	603	903	0
9546	8	0	0	0	0	0	0	200	300	0	0	0	0	0	0	0	200	903	0	0	0	0	0	0	0	603	903	0
9546	9	0	0	0	0	0	0	200	300	0	0	0	0	0	0	0	200	903	0	0	0	0	0	0	0	603	903	0
9547	0	0	0	0	0	0	0	200	300	0	0	0	0	0	0	0	200	903	0	0	0	0	0	0	0	603	903	0
9547	1	0	0	0	0	0	0	200	300	0	0	0	0	0	0	0	200	903	0	0	0	0	0	0	0	603	903	0
9547	2	0	0	0	0	0	0	200	300	0	0	0	0	0	0	0	200	903	0	0	0	0	0	0	0	603	903	0
9547	3	0	0	0	0	0	0	200	300	0	0	0	0	0	0	0	200	903	0	0	0	0	0	0	0	603	903	0
9547	4	0	0	0	0	0	0	200	300	0	0	0	0	0	0	0	200	903	0	0	0	0	0	0	0	603	903	0
9547	5	0	0	0	0	0	0	200	300	0	0	0	0	0	0	0	200	903	0	0	0	0	0	0	0	603	903	0
9547	6	0	0	0	0	0	0	200	300	0	0	0	0	0	0	0	200	903	0	0	0	0	0	0	0	603	903	0
9547	7	0	0	0	0	0	0	200	300	0	0	0	0	0	0	0	200	903	0	0	0	0	0	0	0	603	903	0
9547	8	0	0	0	0	0	0	200	300	0	0	0	0	0	0	0	200	903	0	0	0	0	0	0	0	603	903	0
9547	9	0	0	0	0	0	0	200	300	0	0	0	0	0	0	0	200	903	0	0	0	0	0	0	0	603	903	0
9548	0	0	0	0	0	0	0	200	300	0	0	0	0	0	0	0	200	903	0	0	0	0	0	0	0	603	903	0
9548	1	0	0	0	0	0	0	200	300	0	0	0	0	0	0	0	200	903	0	0	0	0	0	0	0	603	903	0
9548	2	0	0	0	0	0	0	200	300	0	0	0	0	0	0	0	200	903	0	0	0	0	0	0	0	603	903	0
9548	3	0	0	0	0	0	0	200	300	0	0	0	0	0	0	0	200	903	0	0	0	0	0	0	0	603	903	0
9548	4	0	0	0	0	0	0	200	300	0	0	0	0	0	0	0	200	903	0	0	0	0	0	0	0	603	903	0
9548	5	0	0	0	0	0	0	200	300	0	0	0	0	0	0	0	200	903	0	0	0	0	0	0	0	603	903	0
9548	6	0	0	0	0	0	0	200	300	0	0	0	0	0	0	0	200	903	0	0	0	0	0	0	0	603	903	0
9548	7	0	0	0	0	0	0	200	300	0	0	0	0	0	0	0	200	903	0	0	0	0	0	0	0	603	903	0
9548	8	0	0	0	0	0	0	200	300	0	0	0	0	0	0	0	200	903	0	0	0	0	0	0	0	603	903	0
9548	9	0	0	0	0	0	0	200	300	0	0	0	0	0	0	0	200	903	0	0	0	0	0	0	0	603	903	0
9549	0	0	0	0	0	0	0	200	300	0	0	0	0	0	0	0	200	903	0	0	0	0	0	0	0	603	903	0
9549	1	0	0	0	0	0	0	200	300	0	0	0	0	0	0	0	200	903	0	0	0	0	0	0	0	603	903	0
9549	2	0	0	0	0	0	0	200	300	0	0	0	0	0	0	0	200	903	0	0	0	0	0	0	0	603	903	0
9549	3	0	0	0	0	0	0	200	300	0	0	0	0	0	0	0	200	903	0	0	0	0	0	0	0	603	903	0
9549	4	0	0	0	0	0	0	200	300	0	0	0	0	0	0	0	200	903	0	0	0	0	0	0	0	603	903	0
9549	5	0	0	0	0	0	0	200	300	0	0	0	0	0	0	0	200	903	0	0	0	0	0	0	0	603	903	0
9549	6	0	0	0	0	0	0	200	300	0	0	0	0	0	0	0	200	903	0	0	0	0	0	0	0	603	903	0
9549	7	0	0	0	0	0	0	200	300	0	0	0	0	0	0	0	200	903	0	0	0	0	0	0	0	603	903	0
9549	8	0	0	0	0	0	0	200	300	0	0	0	0	0	0	0	200	903	0	0	0	0	0	0	0	603	903	0
9549	9	0	0	0	0	0	0	200	300	0	0	0	0	0	0	0	200	903	0	0	0	0	0	0	0	603	903	0
9550	0	0	0	0	0	0	0	200	300	0	0	0	0	0	0	0	200	903	0	0	0	0	0	0	0	603	903	0
9550	1	0	0	0	0	0	0	200	300	0	0	0	0	0	0	0	200	903	0	0	0	0	0	0	0	603	903	0
9550	2	0	0	0	0	0	0	200	300	0	0	0	0	0	0	0	200	903	0	0	0	0	0	0	0	603	903	0
9550	3	0	0	0	0	0	0	200	300	0	0	0	0	0	0	0	200	903	0	0	0	0	0	0	0	603	903	0
9550	4	0	0	0	0	0	0	200	300	0	0	0	0	0	0	0	200	903	0	0	0	0	0	0	0	603	903	0
9550	5	0	0	0	0	0	0	200	300	0	0	0	0	0	0	0	200	903	0	0	0	0	0	0	0	603	903	0
9550	6	0	0	0	0	0	0	200	300	0	0	0	0	0	0	0	200	903	0	0	0	0	0	0	0	603	903	0
9550	7	0	0	0	0	0	0	200	300	0	0	0	0	0	0	0	200	903	0	0	0	0	0	0	0	603	903	0
9550	8	0	0	0	0	0	0	200	300	0	0	0	0	0	0	0	200	903	0	0	0	0	0	0	0	603	903	0
9550	9	0	0	0	0	0	0	200	300	0	0	0	0	0	0	0	200	903	0	0	0	0	0	0	0	603	903	0
9551	0	0	0	0	0	0	0	200	300	0	0	0	0	0	0	0	200	903	0	0	0	0	0	0	0	603	903	0
9551	1	0	0	0	0	0	0	200	300	0	0	0	0	0	0	0	200	903	0	0	0	0	0	0	0	603	903	0
9551	2	0	0	0	0	0	0	200	300	0	0	0	0	0	0	0	200	903	0	0	0	0	0	0	0	603	903	0
9551	3	0	0	0	0	0	0	200	300	0	0	0	0	0	0	0	200	903	0	0	0	0	0	0	0	603	903	0
9551	4	0	0	0	0	0	0	200	300	0	0	0	0	0	0	0	200	903	0	0	0	0	0	0	0	603	903	0
9551	5	0	0	0	0	0	0	200	300	0	0	0	0	0	0	0	200	903	0	0	0	0	0	0	0	603	903	0
9551	6	0	0	0	0	0	0	200	300	0	0	0	0	0	0	0	200	903	0	0	0	0	0	0	0	603	903	0
9551	7	0	0	0	0	0	0	200	300	0	0	0	0	0	0	0	200	903	0	0	0	0	0	0	0	603	903	0
9551	8	0	0	0	0	0	0	200	300	0	0	0	0	0	0	0	200	903	0	0	0	0	0	0	0	603	903	0
9551	9	0	0	0	0	0	0	200	300	0	0	0	0	0	0	0	200	903	0	0	0	0	0	0	0	603	903	0
9552	0	0	0	0	0	0	0	200	300	0	0	0	0	0	0	0	200	903	0	0	0	0	0	0	0	603	903	0
9552	1	0	0	0	0	0	0	200	300	0	0	0	0	0	0	0	200	903	0	0	0	0	0	0	0	603	903	0
9552	2	0	0	0	0	0	0	200	300	0	0	0	0	0	0	0	200	903	0	0	0	0	0	0	0	603	903	0
9552	3	0	0	0	0	0	0	200	300	0	0	0	0	0	0	0	200	903	0	0	0	0	0	0	0	603	903	0
9552	4	0	0	0	0	0	0	200	300	0	0	0	0	0	0	0	200	903	0	0	0	0	0	0	0	603	903	0
9552	5	0	0	0	0	0	0	200	300	0	0	0	0	0	0	0	200	903	0	0	0	0	0	0	0	603	903	0
9552	6	0	0	0	0	0	0	200	300	0	0	0	0	0	0	0	200	903	0	0	0	0	0	0	0	603	903	0
9552	7	0	0	0	0	0	0	200	300	0	0	0	0	0	0	0	200	903	0	0	0	0	0	0	0	603	903	0
9552	8	0	0	0	0	0	0	200	300	0	0	0	0	0	0	0	200	903	0	0	0	0	0	0	0	603	903	0
9552	9	0	0	0	0	0	0	200	300	0	0	0	0	0	0	0	200	903	0	0	0	0	0	0	0	603	903	0
9553	0	0	0	0	0	0	0	200	300	0	0	0	0	0	0	0	200	903	0	0	0	0	0	0	0	603	903	0
9553	1	0	0	0	0	0	0	200	300	0	0	0	0	0	0	0	200	903	0	0	0	0	0	0	0	603	903	0
9553	2	0	0	0	0	0	0	200	300	0	0	0	0	0	0	0	200	903	0	0	0	0	0	0	0	603	903	0
9553	3	0	0	0	0	0	0	200	300	0	0	0	0	0	0	0	200	903	0	0	0	0	0	0	0	603	903	0
9553	4	0	0	0	0	0	0	200	300	0	0	0	0	0	0	0	200	903	0	0	0	0	0	0	0	603	903	0
9553	5	0	0	0	0	0	0	200	300	0	0	0	0	0	0	0	200	903	0	0	0	0	0	0	0	603	903	0
9553	6	0	0	0	0	0	0	200	300	0	0	0	0	0	0	0	200	903	0	0	0	0	0	0	0	603	903	0
9553	7	0	0	0	0	0	0	200	300	0	0	0	0	0	0	0	200	903	0	0	0	0	0	0	0	603	903	0
9553	8	0	0	0	0	0	0	200	300	0	0	0	0	0	0	0	200	903	0	0	0	0	0	0	0	603	903	0
9553	9	0	0	0	0	0	0	200	300	0	0	0	0	0	0	0	200	903	0	0	0	0	0	0	0	603	903	0
9554	0	0	0	0	0	0	0	200	300	0	0	0	0	0	0	0	200	903	0	0	0	0	0	0	0	603	903	0
9554	1	0	0	0	0	0	0	200	300	0	0	0	0	0	0	0	200	903	0	0	0	0	0	0	0	603	903	0
9554	2	0	0	0	0	0	0	200	300	0	0	0	0	0	0	0	200	903	0	0	0	0	0	0	0	603	903	0
9554	3	0	0	0	0	0	0	200	300	0	0	0	0	0	0	0	200	903	0	0	0	0	0	0	0	603	903	0
9554	4	0	0	0	0	0	0	200	300	0	0	0	0	0	0	0	200	903	0	0	0	0	0	0	0	603	903	0
9554	5	0	0	0	0	0	0	200	300	0	0	0	0	0	0	0	200	903	0	0	0	0	0	0	0	603	903	0
9554	6	0	0	0	0	0	0	200	300	0	0	0	0	0	0	0	200	903	0	0	0	0	0	0	0	603	903	0
9554	7	0	0	0	0	0	0	200	300	0	0	0	0	0	0	0	200	903	0	0	0	0	0	0	0	603	903	0
9554	8	0	0	0	0	0	0	200	300	0	0	0	0	0	0	0	200	903	0	0	0	0	0	0	0	603	903	0
9554	9	0	0	0	0	0	0	200	300	0	0	0	0	0	0	0	200	903	0	0	0	0	0	0	0	603	903	0
9555	0	0	0	0	0	0	0	200	300	0	0	0	0	0	0	0	200	903	0	0	0	0	0	0	0	603	903	0
9555	1	0	0	0	0	0	0	200	300	0	0	0	0	0	0	0	200	903	0	0	0	0	0	0	0	603	903	0
9555	2	0	0	0	0	0	0	200	300	0	0	0	0	0	0	0	200	903	0	0	0	0	0	0	0	603	903	0
9555	3	0	0	0	0	0	0	200	300	0	0	0	0	0	0	0	200	903	0	0	0	0	0	0	0	603	903	0
9555	4	0	0	0	0	0	0	200	300	0	0	0	0	0	0	0	200	903	0	0	0	0	0	0	0	603	903	0
9555	5	0	0	0	0	0	0	200	300	0	0	0	0	0	0	0	200	903	0	0	0	0	0	0	0	603	903	0
9555	6	0	0	0	0	0	0	200	300	0	0	0	0	0	0	0	200	903	0	0	0	0	0	0	0	603	903	0
9555	7	0	0	0	0	0	0	200	300	0	0	0	0	0	0	0	200	903	0	0	0	0	0	0	0	603	903	0
9555	8	0	0	0	0	0	0	200	300	0	0	0	0	0	0	0	200	903	0	0	0	0	0	0	0	603	903	0
9555	9	0	0	0	0	0	0	200	300	0	0	0	0	0	0	0	200	903	0	0	0	0	0	0	0	603	903	0
9556	0	0	0	0	0	0	0	200	300	0	0	0	0	0	0	0	200	903	0	0	0	0	0	0	0	603	903	0
9556	1	0	0	0	0	0	0	200	300	0	0	0	0	0	0	0	200	903	0	0	0	0	0	0	0	603	903	0
9556	2	0	0	0	0	0	0	200	300	0	0	0	0	0	0	0	200	903	0	0	0	0	0	0	0	603	903	0
9556	3	0	0	0	0	0	0	200	300	0	0	0	0	0	0	0	200	903	0	0	0	0	0	0	0	603	903	0
9556	4	0	0	0	0	0	0	200	300	0	0	0	0	0	0	0	200	903	0	0	0	0	0	0	0	603	903	0
9556	5	0	0	0	0	0	0	200	300	0	0	0	0	0	0	0	200	903	0	0	0	0	0	0	0	603	903	0
9556	6	0	0	0	0	0	0	200	300	0	0	0	0	0	0	0	200	903	0	0	0	0	0	0	0	603	903	0
9556	7	0	0	0	0	0	0	200	300	0	0	0	0	0	0	0	200	903	0	0	0	0	0	0	0	603	903	0
9556	8	0	0	0	0	0	0	200	300	0	0	0	0	0	0	0	200	903	0	0	0	0	0	0	0	603	903	0
9556	9	0	0	0	0	0	0	200	300	0	0	0	0	0	0	0	200	903	0	0	0	0	0	0	0	603	903	0
9557	0	0	0	0	0	0	0	200	300	0	0	0	0	0	0	0	200	903	0	0	0	0	0	0	0	603	903	0
9557	1	0	0	0	0	0	0	200	300	0	0	0	0	0	0	0	200	903	0	0	0	0	0	0	0	603	903	0
9557	2	0	0	0	0	0	0	200	300	0	0	0	0	0	0	0	200	903	0	0	0	0	0	0	0	603	903	0
9557	3	0	0	0	0	0	0	200	300	0	0	0	0	0	0	0	200	903	0	0	0	0	0	0	0	603	903	0
9557	4	0	0	0	0	0	0	200	300	0	0	0	0	0	0	0	200	903	0	0	0	0	0	0	0	603	903	0
9557	5	0	0	0	0	0	0	200	300	0	0	0	0	0	0	0	200	903	0	0	0	0	0	0	0	603	903	0
9557	6	0	0	0	0	0	0	200	300	0	0	0	0	0	0	0	200	903	0	0	0	0	0	0	0	603	903	0
9557	7	0	0	0	0	0	0	200	300	0	0	0	0	0	0	0	200	903	0	0	0	0	0	0	0	603	903	0
9557	8	0	0	0	0	0	0	200	300	0	0	0	0	0	0	0	200	903	0	0	0	0	0	0	0	603	903	0
9557	9	0	0	0	0	0	0	200	300	0	0	0	0	0	0	0	200	903	0	0	0	0	0	0	0	603	903	0
9558	0	0	0	0	0	0	0	200	300	0	0	0	0	0	0	0	200	903	0	0	0	0	0	0	0	603	903	0
9558	1	0	0	0	0	0	0	200	300	0	0	0	0	0	0	0	200	903	0	0	0	0	0	0	0	603	903	0
9558	2	0	0	0	0	0	0	200	300	0	0	0	0	0	0	0	200	903	0	0	0	0	0	0	0	603	903	0
9558	3	0	0	0	0	0	0	200	300	0	0	0	0	0	0	0	200	903	0	0	0	0	0	0	0	603	903	0
9558	4	0	0	0	0	0	0	200	300	0	0	0	0	0	0	0	200	903	0	0	0	0	0	0	0	603	903	0
9558	5	0	0	0	0	0	0	200	300	0	0	0	0	0	0	0	200	903	0	0	0	0	0	0	0	603	903	0
9558	6	0	0	0	0	0	0	200	300	0	0	0	0	0	0	0	200	903	0	0	0	0	0	0	0	603	903	0
9558	7	0	0	0	0	0	0	200	300	0	0	0	0	0	0	0	200	903	0	0	0	0	0	0	0	603	903	0
9558	8	0	0	0	0	0	0	200	300	0	0	0	0	0	0	0	200	903	0	0	0	0	0	0	0	603	903	0
9558	9	0	0	0	0	0	0	200	300	0	0	0	0	0	0	0	200	903	0	0	0	0	0	0	0	603	903	0
9559	0	0	0	0	0	0	0	200	300	0	0	0	0	0	0	0	200	903	0	0	0	0	0	0	0	603	903	0
9559	1	0	0	0	0	0	0	200	300	0	0	0	0	0	0	0	200	903	0	0	0	0	0	0	0	603	903	0
9559	2	0	0	0	0	0	0	200	300	0	0	0	0	0	0	0	200	903	0	0	0	0	0	0	0	603	903	0
9559	3	0	0	0	0	0	0	200	300	0	0	0	0	0	0	0	200	903	0	0	0	0	0	0	0	603	903	0
9559	4	0	0	0	0	0	0	200	300	0	0	0	0	0	0	0	200	903	0	0	0	0	0	0	0	603	903	0
9559	5	0	0	0	0	0	0	200	300	0	0	0	0	0	0	0	200	903	0	0	0	0	0	0	0	603	903	0
9559	6	0	0	0	0	0	0	200	300	0	0	0	0	0	0	0	200	903	0	0	0	0	0	0	0	603	903	0
9559	7	0	0	0	0	0	0	200	300	0	0	0	0	0	0	0	200	903	0	0	0	0	0	0	0	603	903	0
9559	8	0	0	0	0	0	0	200	300	0	0	0	0	0	0	0	200	903	0	0	0	0	0	0	0	603	903	0
9559	9	0	0	0	0	0	0	200	300	0	0	0	0	0	0	0	200	903	0	0	0	0	0	0	0	603	903	0
9560	0	0	0	0	0	0	0	200	300	0	0	0	0	0	0	0	200	903	0	0	0	0	0	0	0	603	903	0
9560	1	0	0	0	0	0	0	200	300	0	0	0	0	0	0	0	200	903	0	0	0	0	0	0	0	603	903	0
9560	2	0	0	0	0	0	0	200	300	0	0	0	0	0	0	0	200	903	0	0	0	0	0	0	0	603	903	0
9560	3	0	0	0	0	0	0	200	300	0	0	0	0	0	0	0	200	903	0	0	0	0	0	0	0	603	903	0
9560	4	0	0	0	0	0	0	200	300	0	0	0	0	0	0	0	200	903	0	0	0	0	0	0	0	603	903	0
9560	5	0	0	0	0	0	0	200	300	0	0	0	0	0	0	0	200	903	0	0	0	0	0	0	0	603	903	0
9560	6	0	0	0	0	0	0	200	300	0	0	0	0	0	0	0	200	903	0	0	0	0	0	0	0	603	903	0
9560	7	0	0	0	0	0	0	200	300	0	0	0	0	0	0	0	200	903	0	0	0	0	0	0	0	603	903	0
9560	8	0	0	0	0	0	0	200	300	0	0	0	0	0	0	0	200	903	0	0	0	0	0	0	0	603	903	0
9560	9	0	0	0	0	0	0	200	300	0	0	0	0	0	0	0	200	903	0	0	0	0	0	0	0	603	903	0
9561	0	0	0	0	0	0	0	200	300	0	0	0	0	0	0	0	200	903	0	0	0	0	0	0	0	603	903	0
9561	1	0	0	0	0	0	0	200	300	0	0	0	0	0	0	0	200	903	0	0	0	0	0	0	0	603	903	0
9561	2	0	0	0	0	0	0	200	300	0	0	0	0	0	0	0	200	903	0	0	0	0	0	0	0	603	903	0
9561	3	0	0	0	0	0	0	200	300	0	0	0	0	0	0	0	200	903	0	0	0	0	0	0	0	603	903	0
9561	4	0	0	0	0	0	0	200	300	0	0	0	0	0	0	0	200	903	0	0	0	0	0	0	0	603	903	0
9561	5	0	0	0	0	0	0	200	300	0	0	0	0	0	0	0	200	903	0	0	0	0	0	0	0	603	903	0
9561	6	0	0	0	0	0	0	200	300	0	0	0	0	0	0	0	200	903	0	0	0	0	0	0	0	603	903	0
9561	7	0	0	0	0	0	0	200	300	0	0	0	0	0	0	0	200	903	0	0	0	0	0	0	0	603	903	0
9561	8	0	0	0	0	0	0	200	300	0	0	0	0	0	0	0	200	903	0	0	0	0	0	0	0	603	903	0
9561	9	0	0	0	0	0	0	200	300	0	0	0	0	0	0	0	200	903	0	0	0	0	0	0	0	603	903	0
9562	0	0	0	0	0	0	0	200	300	0	0	0	0	0	0	0	200	903	0	0	0	0	0	0	0	603	903	0
9562	1	0	0	0	0	0	0	200	300	0	0	0	0	0	0	0	200	903	0	0	0	0	0	0	0	603	903	0
9562	2	0	0	0	0	0	0	200	300	0	0	0	0	0	0	0	200	903	0	0	0	0	0	0	0	603	903	0
9562	3	0	0	0	0	0	0	200	300	0	0	0	0	0	0	0	200	903	0	0	0	0	0	0	0	603	903	0
9562	4	0	0	0	0	0	0	200	300	0	0	0	0	0	0	0	200	903	0	0	0	0	0	0	0	603	903	0
9562	5	0	0	0	0	0	0	200	300	0	0	0	0	0	0	0	200	903	0	0	0	0	0	0	0	603	903	0
9562	6	0	0	0	0	0	0	200	300	0	0	0	0	0	0	0	200	903	0	0	0	0	0	0	0	603	903	0
9562	7	0	0	0	0	0	0	200	300	0	0	0	0	0	0	0	200	903	0	0	0	0	0	0	0	603	903	0
9562	8	0	0	0	0	0	0	200	300	0	0	0	0	0	0	0	200	903	0	0	0	0	0	0	0	603	903	0
9562	9	0	0	0	0	0	0	200	300	0	0	0	0	0	0	0	200	903	0	0	0	0	0	0	0	603	903	0
9563	0	0	0	0	0	0	0	200	300	0	0	0	0	0	0	0	200	903	0	0	0	0	0	0	0	603	903	0
9563	1	0	0	0	0	0	0	200	300	0	0	0	0	0	0	0	200	903	0	0	0	0	0	0	0	603	903	0
9563	2	0	0	0	0	0	0	200	300	0	0	0	0	0	0	0	200	903	0	0	0	0	0	0	0	603	903	0
9563	3	0	0	0	0	0	0	200	300	0	0	0	0	0	0	0	200	903	0	0	0	0	0	0	0	603	903	0
9563	4	0	0	0	0	0	0	200	300	0	0	0	0	0	0	0	200	903	0	0	0	0	0	0	0	603	903	0
9563	5	0	0	0	0	0	0	200	300	0	0	0	0	0	0	0	200	903	0	0	0	0	0	0	0	603	903	0
9563	6	0	0	0	0	0	0	200	300	0	0	0	0	0	0	0	200	903	0	0	0	0	0	0	0	603	903	0
9563	7	0	0	0	0	0	0	200	300	0	0	0	0	0	0	0	200	903	0	0	0	0	0	0	0	603	903	0
9563	8	0	0	0	0	0	0	200	300	0	0	0	0	0	0	0	200	903	0	0	0	0	0	0	0	603	903	0
9563	9	0	0	0	0	0	0	200	300	0	0	0	0	0	0	0	200	903	0	0	0	0	0	0	0	603	903	0
9564	0	0	0	0	0	0	0	200	300	0	0	0	0	0	0	0	200	903	0	0	0	0	0	0	0	603	903	0
9564	1	0	0	0	0	0	0	200	300	0	0	0	0	0	0	0	200	903	0	0	0	0	0	0	0	603	903	0
9564	2	0	0	0	0	0	0	200	300	0	0	0	0	0	0	0	200	903	0	0	0	0	0	0	0	603	903	0
9564	3	0	0	0	0	0	0	200	300	0	0	0	0	0	0	0	200	903	0	0	0	0	0	0	0	603	903	0
9564	4	0	0	0	0	0	0	200	300	0	0	0	0	0	0	0	200	903	0	0	0	0	0	0	0	603	903	0
9564	5	0	0	0	0	0	0	200	300	0	0	0	0	0	0	0	200	903	0	0	0	0	0	0	0	603	903	0
9564	6	0	0	0	0	0	0	200	300	0	0	0	0	0	0	0	200	903	0	0	0	0	0	0	0	603	903	0
9564	7	0	0	0	0	0	0	200	300	0	0	0	0	0	0	0	200	903	0	0	0	0	0	0	0	603	903	0
9564	8	0	0	0	0	0	0	200	300	0	0	0	0	0	0	0	200	903	0	0	0	0	0	0	0	603	903	0
9564	9	0	0	0	0	0	0	200	300	0	0	0	0	0	0	0	200	903	0	0	0	0	0	0	0	603	903	0
9565	0	0	0	0	0	0	0	200	300	0	0	0	0	0	0	0	200	903	0	0	0	0	0	0	0	603	903	0
9565	1	0	0	0	0	0	0	200	300	0	0	0	0	0	0	0	200	903	0	0	0	0	0	0	0	603	903	0
9565	2	0	0	0	0	0	0	200	300	0	0	0	0	0	0	0	200	903	0	0	0	0	0	0	0	603	903	0
9565	3	0	0	0	0	0	0	200	300	0	0	0	0	0	0	0	200	903	0	0	0	0	0	0	0	603	903	0
9565	4	0	0	0	0	0	0	200	300	0	0	0	0	0	0	0	200	903	0	0	0	0	0	0	0	603	903	0
9565	5	0	0	0	0	0	0	200	300	0	0	0	0	0	0	0	200	903	0	0	0	0	0	0	0	603	903	0
9565	6	0	0	0	0	0	0	200	300	0	0	0	0	0	0	0	200	903	0	0	0	0	0	0	0	603	903	0
9565	7	0	0	0	0	0	0	200	300	0	0	0	0	0	0	0	200	903	0	0	0	0	0	0	0	603	903	0
9565	8	0	0	0	0	0	0	200	300	0	0	0	0	0	0	0	200	903	0	0	0	0	0	0	0	603	903	0
9565	9	0	0	0	0	0	0	200	300	0	0	0	0	0	0	0	200	903	0	0	0	0	0	0	0	603	903	0
9566	0	0	0	0	0	0	0	200	300	0	0	0	0	0	0	0	200	903	0	0	0	0	0	0	0	603	903	0
9566	1	0	0	0	0	0	0	200	300	0	0	0	0	0	0	0	200	903	0	0	0	0	0	0	0	603	903	0
9566	2	0	0	0	0	0	0	200	300	0	0	0	0	0	0	0	200	903	0	0	0	0	0	0	0	603	903	0
9566	3	0	0	0	0	0	0	200	300	0	0	0	0	0	0	0	200	903	0	0	0	0	0	0	0	603	903	0
9566	4	0	0	0	0	0	0	200	300	0	0	0	0	0	0	0	200	903	0	0	0	0	0	0	0	603	903	0
9566	5	0	0	0	0	0	0	200	300	0	0	0	0	0	0	0	200	903	0	0	0	0	0	0	0	603	903	0
9566	6	0	0	0	0	0	0	200	300	0	0	0	0	0	0	0	200	903	0	0	0	0	0	0	0	603	903	0
9566	7	0	0	0	0	0	0	200	300	0	0	0	0	0	0	0	200	903	0	0	0	0	0	0	0	603	903	0
9566	8	0	0	0	0	0	0	200	300	0	0	0	0	0	0	0	200	903	0	0	0	0	0	0	0	603	903	0
9566	9	0	0	0	0	0	0	200	300	0	0	0	0	0	0	0	200	903	0	0	0	0	0	0	0	603	903	0
9567	0	0	0	0	0	0	0	200	300	0	0	0	0	0	0	0	200	903	0	0	0	0	0	0	0	603	903	0
9567	1	0	0	0	0	0	0	200	300	0	0	0	0	0	0	0	200	903	0	0	0	0	0	0	0	603	903	0
9567	2	0	0	0	0	0	0	200	300	0	0	0	0	0	0	0	200	903	0	0	0	0	0	0	0	603	903	0
9567	3	0	0	0	0	0	0	200	300	0	0	0	0	0	0	0	200	903	0	0	0	0	0	0	0	603	903	0
9567	4	0	0	0	0	0	0	200	300	0	0	0	0	0	0	0	200	903	0	0	0	0	0	0	0	603	903	0
9567	5	0	0	0	0	0	0	200	300	0	0	0	0	0	0	0	200	903	0	0	0	0	0	0	0	603	903	0
9567	6	0	0	0	0	0	0	200	300	0	0	0	0	0	0	0	200	903	0	0	0	0	0	0	0	603	903	0
9567	7	0	0	0	0	0	0	200	300	0	0	0	0	0	0	0	200	903	0	0	0	0	0	0	0	603	903	0
9567	8	0	0	0	0	0	0	200	300	0	0	0	0	0	0	0	200	903	0	0	0	0	0	0	0	603	903	0
9567	9	0	0	0	0	0	0	200	300	0	0	0	0	0	0	0	200	903	0	0	0	0	0	0	0	603	903	0
9568	0	0	0	0	0	0	0	200	300	0	0	0	0	0	0	0	200	903	0	0	0	0	0	0	0	603	903	0
9568	1	0	0	0	0	0	0	200	300	0	0	0	0	0	0	0	200	903	0	0	0	0	0	0	0	603	903	0
9568	2	0	0	0	0	0	0	200	300	0	0	0	0	0	0	0	200	903	0	0	0	0	0	0	0	603	903	0
9568	3	0	0	0	0	0	0	200	300	0	0	0	0	0	0	0	200	903	0	0	0	0	0	0	0	603	903	0
9568	4	0	0	0	0	0	0	200	300	0	0	0	0	0	0	0	200	903	0	0	0	0	0	0	0	603	903	0
9568	5	0	0	0	0	0	0	200	300	0	0	0	0	0	0	0	200	903	0	0	0	0	0	0	0	603	903	0
9568	6	0	0	0	0	0	0	200	300	0	0	0	0	0	0	0	200	903	0	0	0	0	0	0	0	603	903	0
9568	7	0	0	0	0	0	0	200	300	0	0	0	0	0	0	0	200	903	0	0	0	0	0	0	0	603	903	0
9568	8	0	0	0	0	0	0	200	300	0	0	0	0	0	0	0	200	903	0	0	0	0	0	0	0	603	903	0
9568	9	0	0	0	0	0	0	200	300	0	0	0	0	0	0	0	200	903	0	0	0	0	0	0	0	603	903	0
9569	0	0	0	0	0	0	0	200	300	0	0	0	0	0	0	0	200	903	0	0	0	0	0	0	0	603	903	0
9569	1	0	0	0	0	0	0	200	300	0	0	0	0	0	0	0	200	903	0	0	0	0	0	0	0	603	903	0
9569	2	0	0	0	0	0	0	200	300	0	0	0	0	0	0	0	200	903	0	0	0	0	0	0	0	603	903	0
9569	3	0	0	0	0	0	0	200	300	0	0	0	0	0	0	0	200	903	0	0	0	0	0	0	0	603	903	0
9569	4	0	0	0	0	0	0	200	300	0	0	0	0	0	0	0	200	903	0	0	0	0	0	0	0	603	903	0
9569	5	0	0	0	0	0	0	200	300	0	0	0	0	0	0	0	200	903	0	0	0	0	0	0	0	603	903	0
9569	6	0	0	0	0	0	0	200	300	0	0	0	0	0	0	0	200	903	0	0	0	0	0	0	0	603	903	0
9569	7	0	0	0	0	0	0	200	300	0	0	0	0	0	0	0	200	903	0	0	0	0	0	0	0	603	903	0
9569	8	0	0	0	0	0	0	200	300	0	0	0	0	0	0	0	200	903	0	0	0	0	0	0	0	603	903	0
9569	9	0	0	0	0	0	0	200	300	0	0	0	0	0	0	0	200	903	0	0	0	0	0	0	0	603	903	0
9570	0	0	0	0	0	0	0	200	300	0	0	0	0	0	0	0	200	903	0	0	0	0	0	0	0	603	903	0
9570	1	0	0	0	0	0	0	200	300	0	0	0	0	0	0	0	200	903	0	0	0	0	0	0	0	603	903	0
9570	2	0	0	0	0	0	0	200	300	0	0	0	0	0	0	0	200	903	0	0	0	0	0	0	0	603	903	0
9570	3	0	0	0	0	0	0	200	300	0	0	0	0	0	0	0	200	903	0	0	0	0	0	0	0	603	903	0
9570	4	0	0	0	0	0	0	200	300	0	0	0	0	0	0	0	200	903	0	0	0	0	0	0	0	603	903	0
9570	5	0	0	0	0	0	0	200	300	0	0	0	0	0	0	0	200	903	0	0	0	0	0	0	0	603	903	0
9570	6	0	0	0	0	0	0	200	300	0	0	0	0	0	0	0	200	903	0	0	0	0	0	0	0	603	903	0
9570	7	0	0	0	0	0	0	200	300	0	0	0	0	0	0	0	200	903	0	0	0	0	0	0	0	603	903	0
9570	8	0	0	0	0	0	0	200	300	0	0	0	0	0	0	0	200	903	0	0	0	0	0	0	0	603	903	0
9570	9	0	0	0	0	0	0	200	300	0	0	0	0	0	0	0	200	903	0	0	0	0	0	0	0	603	903	0
9571	0	0	0	0	0	0	0	200	300	0	0	0	0	0	0	0	200	903	0	0	0	0	0	0	0	603	903	0
9571	1	0	0	0	0	0	0	200	300	0	0	0	0	0	0	0	200	903	0	0	0	0	0	0	0	603	903	0
9571	2	0	0	0	0	0	0	200	300	0	0	0	0	0	0	0	200	903	0	0	0	0	0	0	0	603	903	0
9571	3	0	0	0	0	0	0	200	300	0	0	0	0	0	0	0	200	903	0	0	0	0	0	0	0	603	903	0
9571	4	0	0	0	0	0	0	200	300	0	0	0	0	0	0	0	200	903	0	0	0	0	0	0	0	603	903	0
9571	5	0	0	0	0	0	0	200	300	0	0	0	0	0	0	0	200	903	0	0	0	0	0	0	0	603	903	0
9571	6	-3.4308	6.10306	-11.983	2217.13	1727.53	636.428	344.165	114.977	0	0	0	0	0	0	0	200	903	0	0	0	0	0	0	0	603	903	0
9571	7	-1.44716	11.7488	-19.3072	2858	2765.13	2101.27	343.217	151.973	0	0	0	0	0	0	0	200	903	0	0	0	0	0	0	0	603	903	0
9571	8	4.80895	7.32376	-20.2228	3865.08	2887.2	1551.96	342.77	108.875	0	0	0	0	0	0	0	200	903	0	0	0	0	0	0	0	603	903	0
9571	9	6.02965	5.64529	-15.9503	4048.19	2582.02	1323.07	361.879	46.2002	0	0	0	0	0	0	0	200	903	0	0	0	0	0	0	0	603	903	0
9572	0	-2.97304	11.4436	-16.5607	3224.21	2948.23	1918.17	378.026	105.309	0	0	0	0	0	0	0	200	903	0	0	0	0	0	0	0	603	903	0
9572	1	-0.379043	13.7325	-22.0538	3773.53	3009.27	2009.72	336.451	128.895	0	0	0	0	0	0	0	200	903	0	0	0	0	0	0	0	603	903	0
9572	2	3.89342	7.93411	-26.9366	4139.74	3253.41	1689.28	320.78	146.316	0	0	0	0	0	0	0	200	903	0	0	0	0	0	0	0	603	903	0
9572	3	0.994248	10.6807	-26.9366	5879.24	4107.9	2421.71	352.502	81.7381	0	0	0	0	0	0	0	200	903	0	0	0	0	0	0	0	603	903	0
9572	4	3.43565	14.648	-28.1573	5421.48	4779.29	2787.92	369.735	107.458	0	0	0	0	0	0	0	200	903	0	0	0	0	0	0	0	603	903	0
9572	5	6.33482	15.5635	-31.5143	5421.48	4779.29	2650.59	351.655	127.968	0	0	0	0	0	0	0	200	903	0	0	0	0	0	0	0	603	903	0
9572	6	0.84166	14.9532	-38.5333	6153.9	5084.46	3337.23	331.95	140.297	0	0	0	0	0	0	0	200	903	0	0	0	0	0	0	0	603	903	0
9572	7	-0.0738669	13.1221	-40.3644	7252.53	5816.88	3154.13	344.109	120.323	0	0	0	0	0	0	0	200	903	0	0	0	0	0	0	0	603	903	0
9572	8	6.18224	11.4436	-41.5851	7527.19	6244.13	2833.69	350.153	118.993	0	0	0	0	0	0	0	200	903	0	0	0	0	0	0	0	603	903	0
9572	9	4.96153	12.5117	-44.942	8534.28	7220.69	2101.27	360.667	110.105	0	0	0	0	0	0	0	200	903	0	0	0	0	0	0	0	603	903	0
9573	0	0.994248	9.61258	-48.6041	9266.7	7892.08	2330.15	362.375	109.343	0	0	0	0	0	0	0	200	903	0	0	0	0	0	0	0	603	903	0
9573	1	2.97789	3.66165	-58.0646	10823.1	8319.33	1597.73	343.277	113.602	0	0	0	0	0	0	0	200	903	0	0	0	0	0	0	0	603	903	0
9573	2	1.6046	4.272	-63.2526	11555.5	9234.85	727.981	346	117.311	0	0	0	0	0	0	0	200	903	0	0	0	0	0	0	0	603	903	0
9573	3	0.689073	4.88235	-65.3888	11738.6	9967.27	956.862	352.431	120.48	0	0	0	0	0	0	0	200	903	0	0	0	0	0	0	0	603	903	0
9573	4	1.90978	-0.763399	-71.7975	12837.3	10821.8	132.888	350.726	121.202	0	0	0	0	0	0	0	200	903	0	0	0	0	0	0	0	603	903	0
9573	5	0.536485	-4.12033	-78.8165	13844.3	11188	-507.981	341.95	124.347	0	0	0	0	0	0	0	200	903	0	0	0	0	0	0	0	603	903	0
9573	6	-1.44716	-3.05222	-80.9528	14302.1	11859.4	-828.416	346.497	123.328	0	0	0	0	0	0	0	200	903	0	0	0	0	0	0	0	603	903	0
9573	7	-1.59975	-6.10397	-87.6666	15309.2	12408.7	-1103.07	341.544	125.37	0	0	0	0	0	0	0	200	903	0	0	0	0	0	0	0	603	903	0
9573	8	-3.27821	-9.46091	-92.2443	16224.7	12958	-1606.61	340.475	124.111	0	0	0	0	0	0	0	200	903	0	0	0	0	0	0	0	603	903	0
9573	9	-5.87221	-9.91867	-96.5167	16774	13873.5	-1927.05	343.742	126.206	0	0	0	0	0	0	0	200	903	0	0	0	0	0	0	0	603	903	0
9574	0	-3.58339	-10.8342	-99.8737	17689.6	14056.6	-2522.14	340.744	122.881	0	0	0	0	0	0	0	200	903	0	0	0	0	0	0	0	603	903	0
9574	1	-2.97304	-12.6653	-103.841	18788.2	14728	-2842.58	341.832	119.068	0	0	0	0	0	0	0	200	903	0	0	0	0	0	0	0	603	903	0
9574	2	-6.94032	-14.1911	-105.062	19612.2	15460.4	-3025.68	347.156	113.327	0	0	0	0	0	0	0	200	903	0	0	0	0	0	0	0	603	903	0
9574	3	-6.48256	-12.6653	-110.25	19337.5	15155.3	-2888.35	337.463	124.603	0	0	0	0	0	0	0	200	903	0	0	0	0	0	0	0	603	903	0
9574	4	-4.19374	-13.2756	-113.912	20344.6	16192.9	-3071.46	342.153	121.4	0	0	0	0	0	0	0	200	903	0	0	0	0	0	0	0	603	903	0
9574	5	-5.87221	-12.6653	-117.879	21260.1	16620.1	-3025.68	340.993	119.645	0	0	0	0	0	0	0	200	903	0	0	0	0	0	0	0	603	903	0
9574	6	-4.04115	-13.4282	-121.846	21351.7	16864.2	-2796.8	338.406	124.766	0	0	0	0	0	0	0	200	903	0	0	0	0	0	0	0	603	903	0
9574	7	-3.88856	-13.5808	-126.119	21351.7	17596.7	-3025.68	339.525	130.702	0	0	0	0	0	0	0	200	903	0	0	0	0	0	0	0	603	903	0
9574	8	-5.87221	-10.0713	-129.781	22999.6	17718.7	-2842.58	336.528	122.781	0	0	0	0	0	0	0	200	903	0	0	0	0	0	0	0	603	903	0
9574	9	-5.71962	-9.30832	-129.476	22633.4	18268.1	-2384.81	341.093	125.192	0	0	0	0	0	0	0	200	903	0	0	0	0	0	0	0	603	903	0
9575	0	-6.02479	-7.62985	-134.053	22999.6	17901.8	-2018.6	333.543	128.429	0	0	0	0	0	0	0	200	903	0	0	0	0	0	0	0	603	903	0
9575	1	-6.63515	-4.88327	-136.495	24098.2	18756.3	-2155.93	337.414	123.449	0	0	0	0	0	0	0	200	903	0	0	0	0	0	0	0	603	903	0
9575	2	-4.6515	-3.05222	-136.19	24464.5	19549.8	-1377.73	343.548	120.365	0	0	0	0	0	0	0	200	903	0	0	0	0	0	0	0	603	903	0
9575	3	-6.17738	-2.28928	-139.547	24098.2	19549.8	-1377.73	340.095	127.31	0	0	0	0	0	0	0	200	903	0	0	0	0	0	0	0	603	903	0
9575	4	-6.17738	1.37283	-141.378	24281.4	19732.9	-965.745	339.576	128.252	0	0	0	0	0	0	0	200	903	0	0	0	0	0	0	0	603	903	0
9575	5	-6.48256	3.81424	-143.514	25746.2	20648.4	-416.429	343.878	120.601	0	0	0	0	0	0	0	200	903	0	0	0	0	0	0	0	603	903	0
9575	6	-5.56703	5.64529	-147.481	25105.3	20526.4	-187.547	339.18	129.773	0	0	0	0	0	0	0	200	903	0	0	0	0	0	0	0	603	903	0
9575	7	-4.34633	7.47635	-149.312	25746.2	21136.7	132.888	341.561	127.568	0	0	0	0	0	0	0	200	903	0	0	0	0	0	0	0	603	903	0
9575	8	-5.26186	8.54446	-153.585	27211	21319.8	453.323	338.815	122.827	0	0	0	0	0	0	0	200	903	0	0	0	0	0	0	0	603	903	0
9575	9	-5.26186	11.5962	-155.721	28126.6	21625	1002.64	338.87	119.378	0	0	0	0	0	0	0	200	903	0	0	0	0	0	0	0	603	903	0
9576	0	-4.95668	13.4273	-158.773	26753.3	21869.1	819.533	337.739	131.499	0	0	0	0	0	0	0	200	903	0	0	0	0	0	0	0	603	903	0
9576	1	-7.85585	14.4954	-162.13	27668.8	22235.3	1048.42	337.146	129.341	0	0	0	0	0	0	0	200	903	0	0	0	0	0	0	0	603	903	0
9576	2	-6.63515	14.4954	-165.486	28126.6	22967.8	1277.3	338.789	130.037	0	0	0	0	0	0	0	200	903	0	0	0	0	0	0	0	603	903	0
9576	3	-6.63515	17.5471	-167.623	28126.6	23028.8	1551.96	337.385	132.203	0	0	0	0	0	0	0	200	903	0	0	0	0	0	0	0	603	903	0
9576	4	-7.55067	18.1575	-169.759	29683	23883.3	1551.96	340.689	125.146	0	0	0	0	0	0	0	200	903	0	0	0	0	0	0	0	603	903	0
9576	5	-8.16103	18.0049	-172.505	29591.4	23944.3	1689.28	338.803	128.461	0	0	0	0	0	0	0	200	903	0	0	0	0	0	0	0	603	903	0
9576	6	-8.16103	19.3782	-172.2	29316.8	24127.4	1597.73	340.113	129.752	0	0	0	0	0	0	0	200	903	0	0	0	0	0	0	0	603	903	0
9576	7	-8.4662	19.073	-177.999	30323.8	24493.6	2101.27	337.606	129.64	0	0	0	0	0	0	0	200	903	0	0	0	0	0	0	0	603	903	0
9576	8	-8.61879	19.5308	-180.135	30690	24859.9	1963.94	338.007	129.627	0	0	0	0	0	0	0	200	903	0	0	0	0	0	0	0	603	903	0
9576	9	-7.85585	19.9886	-183.187	31056.3	25592.3	1872.39	339.706	130.467	0	0	0	0	0	0	0	200	903	0	0	0	0	0	0	0	603	903	0
9577	0	-8.31361	20.9041	-187.459	31514	25836.4	1918.17	337.824	131.889	0	0	0	0	0	0	0	200	903	0	0	0	0	0	0	0	603	903	0
9577	1	-8.61879	21.0567	-191.121	32795.7	26385.7	1872.39	338.058	128.403	0	0	0	0	0	0	0	200	903	0	0	0	0	0	0	0	603	903	0
9577	2	-8.77138	18.4627	-194.783	33345.1	27240.2	2284.38	339.849	128.809	0	0	0	0	0	0	0	200	903	0	0	0	0	0	0	0	603	903	0
9577	3	-7.70326	20.4463	-199.971	33436.6	27606.4	2559.04	338.052	132.793	0	0	0	0	0	0	0	200	903	0	0	0	0	0	0	0	603	903	0
9577	4	-7.09291	21.667	-203.633	34443.7	28644	2559.04	340.665	130.854	0	0	0	0	0	0	0	200	903	0	0	0	0	0	0	0	603	903	0
9577	5	-6.02479	21.2093	-206.685	34809.9	29071.3	2879.47	340.655	131.58	0	0	0	0	0	0	0	200	903	0	0	0	0	0	0	0	603	903	0
9577	6	-6.78773	20.7515	-210.347	34718.4	29620.6	2696.37	340.818	134.947	0	0	0	0	0	0	0	200	903	0	0	0	0	0	0	0	603	903	0
9577	7	-6.63515	20.4463	-215.23	35725.5	30292	3154.13	340.742	134.013	0	0	0	0	0	0	0	200	903	0	0	0	0	0	0	0	603	903	0
9577	8	-7.55067	21.0567	-219.503	36091.7	30719.2	2696.37	339.949	135.575	0	0	0	0	0	0	0	200	903	0	0	0	0	0	0	0	603	903	0
9577	9	-7.39809	21.5144	-225.911	37007.2	32001	2696.37	341.653	136.187	0	0	0	0	0	0	0	200	903	0	0	0	0	0	0	0	603	903	0
9578	0	-7.70326	22.8877	-228.658	36915.6	32245.1	2925.25	341.019	138.555	0	0	0	0	0	0	0	200	903	0	0	0	0	0	0	0	603	903	0
9578	1	-7.09291	25.4817	-234.151	38472	32916.5	3428.79	340.578	135.696	0	0	0	0	0	0	0	200	903	0	0	0	0	0	0	0	603	903	0
9578	2	-8.77138	25.3291	-238.729	39296	33282.7	3566.12	339.417	135.395	0	0	0	0	0	0	0	200	903	0	0	0	0	0	0	0	603	903	0
9578	3	-8.31361	26.855	-242.086	38746.7	33587.9	3749.22	338.744	139.946	0	0	0	0	0	0	0	200	903	0	0	0	0	0	0	0	603	903	0
9578	4	-8.61879	28.8387	-245.748	39479.1	34686.5	4023.88	341.147	139.351	0	0	0	0	0	0	0	200	903	0	0	0	0	0	0	0	603	903	0
9578	5	-10.4498	29.6016	-247.884	39662.2	34747.5	4252.76	340.177	139.997	0	0	0	0	0	0	0	200	903	0	0	0	0	0	0	0	603	903	0
9578	6	-9.99208	30.8223	-251.546	39112.9	34930.7	4573.2	338.864	144.51	0	0	0	0	0	0	0	200	903	0	0	0	0	0	0	0	603	903	0
9578	7	-9.99208	31.7378	-252.767	39845.3	35052.7	4802.08	338.676	142.363	0	0	0	0	0	0	0	200	903	0	0	0	0	0	0	0	603	903	0
9578	8	-11.3654	33.2637	-255.208	41127	35663.1	4985.18	339.741	138.849	0	0	0	0	0	0	0	200	903	0	0	0	0	0	0	0	603	903	0
9578	9	-10.4498	34.9422	-258.565	40669.3	36761.7	5214.06	342.176	142.712	0	0	0	0	0	0	0	200	903	0	0	0	0	0	0	0	603	903	0
9579	0	-9.38173	36.7732	-261.922	41127	37005.8	5168.29	341.286	142.98	0	0	0	0	0	0	0	200	903	0	0	0	0	0	0	0	603	903	0
9579	1	-9.38173	37.9939	-266.805	41767.9	37311	5809.16	339.844	143.451	0	0	0	0	0	0	0	200	903	0	0	0	0	0	0	0	603	903	0
9579	2	-6.94032	37.6888	-269.551	41676.4	37921.4	5763.38	340.683	145.386	0	0	0	0	0	0	0	200	903	0	0	0	0	0	0	0	603	903	0
9579	3	-9.22914	40.4353	-272.908	42225.7	37799.3	5763.38	338.505	145.275	0	0	0	0	0	0	0	200	903	0	0	0	0	0	0	0	603	903	0
9579	4	-8.61879	41.1983	-277.181	42317.2	38470.7	6221.14	338.793	147.33	0	0	0	0	0	0	0	200	903	0	0	0	0	0	0	0	603	903	0
9579	5	-8.00844	41.3509	-278.707	42775	39325.2	6816.24	341.099	146.523	0	0	0	0	0	0	0	200	903	0	0	0	0	0	0	0	603	903	0
9579	6	-8.4662	42.419	-282.369	42408.8	39447.3	6678.91	339.701	149.811	0	0	0	0	0	0	0	200	903	0	0	0	0	0	0	0	603	903	0
9579	7	-8.31361	42.7242	-283.895	42317.2	39935.5	6953.57	340.67	150.94	0	0	0	0	0	0	0	200	903	0	0	0	0	0	0	0	603	903	0
9579	8	-6.63515	43.9449	-285.726	42958.1	39996.6	7090.9	339.982	149.653	0	0	0	0	0	0	0	200	903	0	0	0	0	0	0	0	603	903	0
9579	9	-6.48256	43.7923	-288.777	42683.5	40423.8	6907.79	339.983	152.193	0	0	0	0	0	0	0	200	903	0	0	0	0	0	0	0	603	903	0
9580	0	-5.26186	45.3181	-287.557	43232.8	40973.1	7594.44	342.487	149.655	0	0	0	0	0	0	0	200	903	0	0	0	0	0	0	0	603	903	0
9580	1	-4.04115	45.6233	-292.44	43507.4	41034.2	7777.54	340.317	151.226	0	0	0	0	0	0	0	200	903	0	0	0	0	0	0	0	603	903	0
9580	2	-3.12562	45.4707	-293.66	43690.5	41644.5	7914.87	341.812	151.221	0	0	0	0	0	0	0	200	903	0	0	0	0	0	0	0	603	903	0
9580	3	-2.66786	46.6914	-299.459	43965.2	42315.9	8189.53	341.308	153.184	0	0	0	0	0	0	0	200	903	0	0	0	0	0	0	0	603	903	0
9580	4	-3.4308	48.6751	-306.478	44789.2	42926.3	8052.2	340.063	153.858	0	0	0	0	0	0	0	200	903	0	0	0	0	0	0	0	603	903	0
9580	5	-1.14198	48.9803	-310.75	44789.2	43475.6	8601.52	339.905	155.868	0	0	0	0	0	0	0	200	903	0	0	0	0	0	0	0	603	903	0
9580	6	0.078721	49.2854	-313.192	44697.6	44330.1	9059.28	341.543	157.283	0	0	0	0	0	0	0	200	903	0	0	0	0	0	0	0	603	903	0
9580	7	-0.379043	52.032	-318.685	45613.1	45245.6	9150.83	341.976	156.871	0	0	0	0	0	0	0	200	903	0	0	0	0	0	0	0	603	903	0
9580	8	1.45201	52.795	-323.873	46162.5	46039.1	9425.49	342.152	157.467	0	0	0	0	0	0	0	200	903	0	0	0	0	0	0	0	603	903	0
9580	9	4.19859	53.7105	-326.009	45704.7	46405.3	9791.7	342.344	159.805	0	0	0	0	0	0	0	200	903	0	0	0	0	0	0	0	603	903	0
9581	0	4.65636	54.3208	-330.892	46162.5	46954.6	10203.7	341.903	160.491	0	0	0	0	0	0	0	200	903	0	0	0	0	0	0	0	603	903	0
9581	1	5.26671	55.0838	-333.638	47078	47626	10386.8	342.747	158.895	0	0	0	0	0	0	0	200	903	0	0	0	0	0	0	0	603	903	0
9581	2	5.72447	56.9148	-337.911	46620.2	48541.5	10524.1	343.652	162.034	0	0	0	0	0	0	0	200	903	0	0	0	0	0	0	0	603	903	0
9581	3	7.25035	59.0511	-344.319	47169.5	49518.1	11439.7	343.814	163.007	0	0	0	0	0	0	0	200	903	0	0	0	0	0	0	0	603	903	0
9581	4	8.47106	59.5088	-350.118	47810.4	49518.1	11165	341.433	163.445	0	0	0	0	0	0	0	200	903	0	0	0	0	0	0	0	603	903	0
9581	5	9.53917	60.4243	-354.085	47444.2	50616.7	11668.5	342.951	166.009	0	0	0	0	0	0	0	200	903	0	0	0	0	0	0	0	603	903	0
9581	6	10.4547	62.1028	-359.883	47810.4	51044	11714.3	341.835	167.15	0	0	0	0	0	0	0	200	903	0	0	0	0	0	0	0	603	903	0
9581	7	10.7599	63.6287	-364.156	49183.7	52142.6	11897.4	343.188	164.938	0	0	0	0	0	0	0	200	903	0	0	0	0	0	0	0	603	903	0
9581	8	11.9806	63.4761	-365.377	48542.8	52508.8	12172.1	343.711	167.143	0	0	0	0	0	0	0	200	903	0	0	0	0	0	0	0	603	903	0
9581	9	11.6754	65.002	-372.09	48909	52814	12584.1	341.939	168.556	0	0	0	0	0	0	0	200	903	0	0	0	0	0	0	0	603	903	0
9582	0	11.5228	66.5279	-375.753	49549.9	53912.6	12675.6	343.479	168.132	0	0	0	0	0	0	0	200	903	0	0	0	0	0	0	0	603	903	0
9582	1	14.5746	66.3753	-377.584	49733	53912.6	12767.2	342.783	168.286	0	0	0	0	0	0	0	200	903	0	0	0	0	0	0	0	603	903	0
9582	2	13.659	67.7486	-381.246	49366.8	54889.2	13362.3	343.973	170.512	0	0	0	0	0	0	0	200	903	0	0	0	0	0	0	0	603	903	0
9582	3	13.5065	68.2063	-381.551	49733	55072.3	13087.6	344.338	169.656	0	0	0	0	0	0	0	200	903	0	0	0	0	0	0	0	603	903	0
9582	4	15.0323	66.5279	-386.129	50190.8	55499.5	13499.6	343.733	170.015	0	0	0	0	0	0	0	200	903	0	0	0	0	0	0	0	603	903	0
9582	5	14.8797	70.8003	-392.537	49458.4	56231.9	13636.9	343.253	174.003	0	0	0	0	0	0	0	200	903	0	0	0	0	0	0	0	603	903	0
9582	6	15.0323	72.021	-395.284	50648.5	56659.2	13957.4	343.338	171.868	0	0	0	0	0	0	0	200	903	0	0	0	0	0	0	0	603	903	0
9582	7	15.7953	72.6314	-400.472	51014.7	57513.7	14048.9	343.615	172.613	0	0	0	0	0	0	0	200	903	0	0	0	0	0	0	0	603	903	0
9582	8	15.6427	72.3262	-404.134	50190.8	57818.9	14094.7	343.069	175.807	0	0	0	0	0	0	0	200	903	0	0	0	0	0	0	0	603	903	0
9582	9	15.6427	72.6314	-405.049	50282.3	58429.2	14415.1	344.252	175.861	0	0	0	0	0	0	0	200	903	0	0	0	0	0	0	0	603	903	0
9583	0	14.5746	74.615	-411.153	51197.8	59100.6	14552.4	343.744	175.477	0	0	0	0	0	0	0	200	903	0	0	0	0	0	0	0	603	903	0
9583	1	14.7272	75.5305	-415.12	50923.2	59649.9	14689.8	343.693	177.329	0	0	0	0	0	0	0	200	903	0	0	0	0	0	0	0	603	903	0
9583	2	15.0323	77.972	-419.393	51106.3	60443.4	14781.3	344.121	178.142	0	0	0	0	0	0	0	200	903	0	0	0	0	0	0	0	603	903	0
9583	3	14.5746	78.7349	-422.75	51747.2	61053.7	15056	344.421	177.594	0	0	0	0	0	0	0	200	903	0	0	0	0	0	0	0	603	903	0
9583	4	15.1849	78.7349	-427.938	52021.8	61725.1	15330.6	344.239	178.436	0	0	0	0	0	0	0	200	903	0	0	0	0	0	0	0	603	903	0
9583	5	16.8634	80.5659	-433.126	51380.9	62762.7	15513.8	344.906	181.372	0	0	0	0	0	0	0	200	903	0	0	0	0	0	0	0	603	903	0
9583	6	16.7108	81.0237	-438.314	52754.3	63434.1	15971.5	344.723	179.643	0	0	0	0	0	0	0	200	903	0	0	0	0	0	0	0	603	903	0
9583	7	16.4056	80.5659	-450.521	52845.8	65387.2	16246.2	345.137	182.701	0	0	0	0	0	0	0	200	903	0	0	0	0	0	0	0	603	903	0
9583	8	20.3729	84.8384	-456.319	52113.4	66424.8	16429.3	345.567	185.796	0	0	0	0	0	0	0	200	903	0	0	0	0	0	0	0	603	903	0
9583	9	26.4764	86.3643	-459.676	53120.5	65936.5	17390.6	343.441	184.439	0	0	0	0	0	0	0	200	903	0	0	0	0	0	0	0	603	903	0
9584	0	23.5773	88.3479	-457.234	52937.4	67584.5	17161.7	347.811	184.223	0	0	0	0	0	0	0	200	903	0	0	0	0	0	0	0	603	903	0
9584	1	22.0514	90.6367	-464.864	52937.4	67828.6	17894.1	345.911	186.123	0	0	0	0	0	0	0	200	903	0	0	0	0	0	0	0	603	903	0
9584	2	25.2557	93.2307	-473.409	53395.1	68316.9	18443.4	344.308	187.211	0	0	0	0	0	0	0	200	903	0	0	0	0	0	0	0	603	903	0
9584	3	25.2557	93.9937	-476.155	53486.7	69171.4	18535	345.271	187.67	0	0	0	0	0	0	0	200	903	0	0	0	0	0	0	0	603	903	0
9584	4	20.3729	96.2825	-478.597	53852.9	69110.3	18809.6	344.402	187.478	0	0	0	0	0	0	0	200	903	0	0	0	0	0	0	0	603	903	0
9584	5	22.5091	97.198	-479.512	53028.9	70209	19130.1	346.417	189.411	0	0	0	0	0	0	0	200	903	0	0	0	0	0	0	0	603	903	0
9584	6	23.7298	97.0454	-485.921	53761.3	70697.3	18992.8	345.491	189.362	0	0	0	0	0	0	0	200	903	0	0	0	0	0	0	0	603	903	0
9584	7	22.3566	98.8765	-488.362	53669.8	70941.4	18855.4	345.264	190.103	0	0	0	0	0	0	0	200	903	0	0	0	0	0	0	0	603	903	0
9584	8	22.0514	99.0291	-489.888	53486.7	71246.6	18992.8	345.434	190.819	0	0	0	0	0	0	0	200	903	0	0	0	0	0	0	0	603	903	0
9584	9	22.6617	97.961	-494.466	54402.2	71673.8	18901.2	344.952	189.978	0	0	0	0	0	0	0	200	903	0	0	0	0	0	0	0	603	903	0
9585	0	20.8307	98.2661	-498.738	53486.7	72406.2	18718.1	345.179	192.756	0	0	0	0	0	0	0	200	903	0	0	0	0	0	0	0	603	903	0
9585	1	22.5091	98.1136	-502.401	53395.1	72711.4	18580.8	344.728	193.72	0	0	0	0	0	0	0	200	903	0	0	0	0	0	0	0	603	903	0
9585	2	21.5936	97.198	-503.926	54036	73199.7	18809.6	345.259	192.77	0	0	0	0	0	0	0	200	903	0	0	0	0	0	0	0	603	903	0
9585	3	22.0514	96.5877	-507.894	54127.5	74054.2	18123	345.807	193.427	0	0	0	0	0	0	0	200	903	0	0	0	0	0	0	0	603	903	0
9585	4	23.4247	97.3506	-511.556	53944.4	74359.4	18947	345.359	194.548	0	0	0	0	0	0	0	200	903	0	0	0	0	0	0	0	603	903	0
9585	5	23.7298	97.5032	-513.387	54402.2	75030.8	18672.3	346.149	194.033	0	0	0	0	0	0	0	200	903	0	0	0	0	0	0	0	603	903	0
9585	6	22.9669	97.6558	-520.101	54127.5	75824.2	18809.6	345.788	195.929	0	0	0	0	0	0	0	200	903	0	0	0	0	0	0	0	603	903	0
9585	7	23.1195	98.4187	-523.152	53944.4	76434.6	19038.5	346.104	196.886	0	0	0	0	0	0	0	200	903	0	0	0	0	0	0	0	603	903	0
9585	8	24.9505	100.708	-526.815	54219.1	77411.1	19221.6	346.942	197.081	0	0	0	0	0	0	0	200	903	0	0	0	0	0	0	0	603	903	0
9585	9	25.1031	101.318	-534.749	54402.2	77777.3	19679.4	345.446	198.266	0	0	0	0	0	0	0	200	903	0	0	0	0	0	0	0	603	903	0
9586	0	25.4083	102.233	-539.022	53669.8	78876	19221.6	346.332	200.431	0	0	0	0	0	0	0	200	903	0	0	0	0	0	0	0	603	903	0
9586	1	26.9342	104.37	-543.904	52845.8	79547.4	20045.6	346.253	202.84	0	0	0	0	0	0	0	200	903	0	0	0	0	0	0	0	603	903	0
9586	2	26.4764	105.743	-549.092	54860	80218.7	20137.2	346.093	200.09	0	0	0	0	0	0	0	200	903	0	0	0	0	0	0	0	603	903	0
9586	3	26.9342	106.964	-555.196	53944.4	81195.3	20320.3	346.246	202.837	0	0	0	0	0	0	0	200	903	0	0	0	0	0	0	0	603	903	0
9586	4	26.3238	107.727	-559.468	53944.4	81561.5	20411.8	345.784	203.579	0	0	0	0	0	0	0	200	903	0	0	0	0	0	0	0	603	903	0
9586	5	26.0187	110.168	-564.351	54585.3	82660.1	20594.9	346.469	203.278	0	0	0	0	0	0	0	200	903	0	0	0	0	0	0	0	603	903	0
9586	6	26.3238	110.473	-569.844	54219.1	82904.3	20778	345.486	204.853	0	0	0	0	0	0	0	200	903	0	0	0	0	0	0	0	603	903	0
9586	7	27.8497	110.168	-572.286	54402.2	83758.8	20686.5	346.358	204.939	0	0	0	0	0	0	0	200	903	0	0	0	0	0	0	0	603	903	0
9586	8	26.1712	111.999	-577.779	54951.5	84613.3	20503.4	346.446	204.892	0	0	0	0	0	0	0	200	903	0	0	0	0	0	0	0	603	903	0
9586	9	25.5609	112.915	-583.272	54127.5	84674.3	21144.2	345.171	207.2	0	0	0	0	0	0	0	200	903	0	0	0	0	0	0	0	603	903	0
9587	0	26.3238	113.83	-587.239	54585.3	86200.2	21144.2	346.789	207.048	0	0	0	0	0	0	0	200	903	0	0	0	0	0	0	0	603	903	0
9587	1	26.629	113.372	-591.207	54768.4	86322.3	21006.9	346.01	207.362	0	0	0	0	0	0	0	200	903	0	0	0	0	0	0	0	603	903	0
9587	2	27.2394	114.135	-595.784	55409.3	86993.7	21373.1	346.015	206.998	0	0	0	0	0	0	0	200	903	0	0	0	0	0	0	0	603	903	0
9587	3	26.7816	114.746	-600.972	54768.4	88092.3	21418.9	346.583	208.867	0	0	0	0	0	0	0	200	903	0	0	0	0	0	0	0	603	903	0
9587	4	27.2394	116.272	-606.771	54951.5	88336.4	21235.8	345.585	209.436	0	0	0	0	0	0	0	200	903	0	0	0	0	0	0	0	603	903	0
9587	5	27.8497	114.44	-610.433	55409.3	89190.9	21556.2	346.111	209.23	0	0	0	0	0	0	0	200	903	0	0	0	0	0	0	0	603	903	0
9587	6	26.9342	116.424	-613.79	54951.5	89435.1	21602	345.71	210.472	0	0	0	0	0	0	0	200	903	0	0	0	0	0	0	0	603	903	0
9587	7	27.6971	117.645	-618.978	54951.5	90350.6	21830.9	345.967	211.222	0	0	0	0	0	0	0	200	903	0	0	0	0	0	0	0	603	903	0
9587	8	28.6127	117.492	-621.114	55134.6	91022	21876.7	346.546	211.233	0	0	0	0	0	0	0	200	903	0	0	0	0	0	0	0	603	903	0
9587	9	27.2394	117.797	-623.86	54402.2	91266.1	21922.4	346.293	212.797	0	0	0	0	0	0	0	200	903	0	0	0	0	0	0	0	603	903	0
9588	0	29.0704	118.255	-627.523	55409.3	91876.5	22242.9	346.411	211.702	0	0	0	0	0	0	0	200	903	0	0	0	0	0	0	0	603	903	0
9588	1	28.7652	119.171	-632.1	55134.6	92486.8	22105.5	346.317	212.775	0	0	0	0	0	0	0	200	903	0	0	0	0	0	0	0	603	903	0
9588	2	29.6808	119.323	-635.762	54493.7	93158.2	22151.3	346.53	214.286	0	0	0	0	0	0	0	200	903	0	0	0	0	0	0	0	603	903	0
9588	3	30.7489	120.239	-640.035	55043.1	93890.7	22334.4	346.696	214	0	0	0	0	0	0	0	200	903	0	0	0	0	0	0	0	603	903	0
9588	4	30.4437	120.391	-644.002	54768.4	93951.7	22563.3	345.887	214.956	0	0	0	0	0	0	0	200	903	0	0	0	0	0	0	0	603	903	0
9588	5	31.2066	120.544	-645.833	54310.6	94562	22563.3	346.419	215.906	0	0	0	0	0	0	0	200	903	0	0	0	0	0	0	0	603	903	0
9588	6	30.9015	121.765	-650.411	54310.6	95477.6	22746.4	346.796	216.498	0	0	0	0	0	0	0	200	903	0	0	0	0	0	0	0	603	903	0
9588	7	31.0541	121.917	-654.073	54402.2	95660.6	22883.7	346.254	216.825	0	0	0	0	0	0	0	200	903	0	0	0	0	0	0	0	603	903	0
9588	8	33.4955	122.222	-654.988	53761.3	96087.9	22746.4	346.702	217.92	0	0	0	0	0	0	0	200	903	0	0	0	0	0	0	0	603	903	0
9588	9	30.9015	121.307	-659.566	53944.4	96454.1	23021.1	346.239	218.212	0	0	0	0	0	0	0	200	903	0	0	0	0	0	0	0	603	903	0
9589	0	32.1222	122.833	-661.092	54219.1	97064.5	22792.2	346.824	217.986	0	0	0	0	0	0	0	200	903	0	0	0	0	0	0	0	603	903	0
9589	1	33.1903	123.443	-665.059	53028.9	97369.6	23295.7	346.407	220.264	0	0	0	0	0	0	0	200	903	0	0	0	0	0	0	0	603	903	0
9589	2	33.3429	123.748	-666.585	53395.1	98224.1	23112.6	347.354	219.898	0	0	0	0	0	0	0	200	903	0	0	0	0	0	0	0	603	903	0
9589	3	32.5799	123.748	-667.195	53761.3	98102	23295.7	347.036	219.422	0	0	0	0	0	0	0	200	903	0	0	0	0	0	0	0	603	903	0
9589	4	34.1058	124.206	-674.214	52113.4	98895.5	23524.6	346.683	222.705	0	0	0	0	0	0	0	200	903	0	0	0	0	0	0	0	603	903	0
9589	5	33.3429	124.816	-677.877	52845.8	99322.8	23295.7	346.52	222.042	0	0	0	0	0	0	0	200	903	0	0	0	0	0	0	0	603	903	0
9589	6	34.2584	124.816	-677.877	53395.1	98956.5	23616.2	345.98	221.232	0	0	0	0	0	0	0	200	903	0	0	0	0	0	0	0	603	903	0
9589	7	33.6481	125.732	-683.98	53578.2	100421	23112.6	346.819	221.667	0	0	0	0	0	0	0	200	903	0	0	0	0	0	0	0	603	903	0
9589	8	34.1058	125.885	-685.811	52662.7	100177	23753.5	346.071	223.211	0	0	0	0	0	0	0	200	903	0	0	0	0	0	0	0	603	903	0
9589	9	33.8006	126.495	-687.947	53120.5	100971	23616.2	346.771	222.784	0	0	0	0	0	0	0	200	903	0	0	0	0	0	0	0	603	903	0
9590	0	34.2584	124.664	-689.778	52845.8	101520	23753.5	347.178	223.387	0	0	0	0	0	0	0	200	903	0	0	0	0	0	0	0	603	903	0
9590	1	35.0213	127.105	-693.746	51838.7	101642	23982.4	346.512	225.277	0	0	0	0	0	0	0	200	903	0	0	0	0	0	0	0	603	903	0
9590	2	35.0213	126.8	-694.966	52571.2	102497	23753.5	347.484	224.354	0	0	0	0	0	0	0	200	903	0	0	0	0	0	0	0	603	903	0
9590	3	36.2421	125.885	-698.018	52479.6	102802	23890.8	347.277	224.816	0	0	0	0	0	0	0	200	903	0	0	0	0	0	0	0	603	903	0
9590	4	36.5472	127.41	-700.765	51472.5	102741	23890.8	346.612	226.548	0	0	0	0	0	0	0	200	903	0	0	0	0	0	0	0	603	903	0
9590	5	37.3102	127.563	-706.868	52204.9	103534	23890.8	346.469	226.146	0	0	0	0	0	0	0	200	903	0	0	0	0	0	0	0	603	903	0
9590	6	37.6153	127.868	-708.394	52296.5	103900	24028.2	346.67	226.176	0	0	0	0	0	0	0	200	903	0	0	0	0	0	0	0	603	903	0
9590	7	37.005	128.173	-711.141	51289.4	104572	24119.7	347.048	227.877	0	0	0	0	0	0	0	200	903	0	0	0	0	0	0	0	603	903	0
9590	8	37.4628	129.089	-710.836	52204.9	104877	24348.6	347.54	226.558	0	0	0	0	0	0	0	200	903	0	0	0	0	0	0	0	603	903	0
9590	9	37.3102	128.326	-717.549	51838.7	105060	24211.3	346.415	227.756	0	0	0	0	0	0	0	200	903	0	0	0	0	0	0	0	603	903	0
9591	0	37.4628	129.547	-717.549	50923.2	105854	24211.3	347.521	229.032	0	0	0	0	0	0	0	200	903	0	0	0	0	0	0	0	603	903	0
9591	1	37.3102	128.936	-720.601	51655.6	105792	24119.7	346.811	228.316	0	0	0	0	0	0	0	200	903	0	0	0	0	0	0	0	603	903	0
9591	2	37.6153	128.326	-722.432	51380.9	106525	24531.7	347.453	228.878	0	0	0	0	0	0	0	200	903	0	0	0	0	0	0	0	603	903	0
9591	3	38.0731	130.462	-723.653	50831.6	106464	24302.8	347.12	229.757	0	0	0	0	0	0	0	200	903	0	0	0	0	0	0	0	603	903	0
9591	4	37.7679	129.852	-723.348	51014.7	106952	24485.9	347.857	229.474	0	0	0	0	0	0	0	200	903	0	0	0	0	0	0	0	603	903	0
9591	5	38.2257	129.394	-728.536	50557	107440	24257	347.475	230.605	0	0	0	0	0	0	0	200	903	0	0	0	0	0	0	0	603	903	0
9591	6	38.5309	129.394	-729.756	51106.3	107074	24119.7	346.726	229.968	0	0	0	0	0	0	0	200	903	0	0	0	0	0	0	0	603	903	0
9591	7	39.2938	129.699	-733.113	50557	108295	24485.9	347.719	231.038	0	0	0	0	0	0	0	200	903	0	0	0	0	0	0	0	603	903	0
9591	8	38.836	128.936	-735.555	50648.5	108478	24440.1	347.478	231.142	0	0	0	0	0	0	0	200	903	0	0	0	0	0	0	0	603	903	0
9591	9	38.5309	128.631	-736.776	49641.5	108661	24348.6	347.482	232.623	0	0	0	0	0	0	0	200	903	0	0	0	0	0	0	0	603	903	0
9592	0	39.1412	129.547	-740.132	49916.1	109455	24257	347.885	232.558	0	0	0	0	0	0	0	200	903	0	0	0	0	0	0	0	603	903	0
9592	1	39.1412	128.784	-741.353	50465.4	109516	24623.2	347.724	231.928	0	0	0	0	0	0	0	200	903	0	0	0	0	0	0	0	603	903	0
9592	2	38.9886	129.089	-743.184	49183.7	109882	24394.4	347.853	233.82	0	0	0	0	0	0	0	200	903	0	0	0	0	0	0	0	603	903	0
9592	3	39.4464	127.41	-744.1	49366.8	110248	24211.3	348.163	233.656	0	0	0	0	0	0	0	200	903	0	0	0	0	0	0	0	603	903	0
9592	4	39.2938	128.479	-745.32	49641.5	110431	24485.9	348.166	233.396	0	0	0	0	0	0	0	200	903	0	0	0	0	0	0	0	603	903	0
9592	5	39.599	128.784	-744.405	49000.6	110858	24440.1	348.922	234.175	0	0	0	0	0	0	0	200	903	0	0	0	0	0	0	0	603	903	0
9592	6	40.5145	128.936	-748.983	49092.2	110858	24257	348.012	234.455	0	0	0	0	0	0	0	200	903	0	0	0	0	0	0	0	603	903	0
9592	7	40.3619	128.326	-752.645	49549.9	111774	24211.3	348.508	234.166	0	0	0	0	0	0	0	200	903	0	0	0	0	0	0	0	603	903	0
9592	8	40.5145	128.021	-752.95	48634.4	111469	24257	348.043	235.408	0	0	0	0	0	0	0	200	903	0	0	0	0	0	0	0	603	903	0
9592	9	41.2775	128.173	-756.612	48542.8	112018	24028.2	348.052	235.842	0	0	0	0	0	0	0	200	903	0	0	0	0	0	0	0	603	903	0
9593	0	40.9723	128.173	-759.053	49000.6	112384	24531.7	348.059	235.445	0	0	0	0	0	0	0	200	903	0	0	0	0	0	0	0	603	903	0
9593	1	41.43	125.427	-760.274	48542.8	112079	24485.9	347.419	236.151	0	0	0	0	0	0	0	200	903	0	0	0	0	0	0	0	603	903	0
9593	2	41.2775	127.563	-762.105	48817.5	112995	24165.5	348.266	235.944	0	0	0	0	0	0	0	200	903	0	0	0	0	0	0	0	603	903	0
9593	3	40.5145	127.868	-762.715	48268.2	113117	24394.4	348.308	236.715	0	0	0	0	0	0	0	200	903	0	0	0	0	0	0	0	603	903	0
9593	4	41.2775	126.647	-765.767	48268.2	113178	23890.8	347.797	236.968	0	0	0	0	0	0	0	200	903	0	0	0	0	0	0	0	603	903	0
9593	5	41.43	126.8	-766.683	47261.1	113666	24623.2	348.257	238.356	0	0	0	0	0	0	0	200	903	0	0	0	0	0	0	0	603	903	0
9593	6	42.0404	125.732	-767.293	47261.1	113178	24257	347.503	238.405	0	0	0	0	0	0	0	200	903	0	0	0	0	0	0	0	603	903	0
9593	7	42.9559	126.495	-768.209	47261.1	114459	24394.4	348.995	238.479	0	0	0	0	0	0	0	200	903	0	0	0	0	0	0	0	603	903	0
9593	8	42.193	126.342	-769.429	46986.4	114337	24348.6	348.6	238.933	0	0	0	0	0	0	0	200	903	0	0	0	0	0	0	0	603	903	0
9593	9	41.5826	126.037	-769.124	46620.2	114521	24028.2	348.897	239.385	0	0	0	0	0	0	0	200	903	0	0	0	0	0	0	0	603	903	0
9594	0	43.8714	126.342	-770.955	47169.5	114887	24302.8	349.019	238.817	0	0	0	0	0	0	0	200	903	0	0	0	0	0	0	0	603	903	0
9594	1	43.2611	124.816	-772.481	46986.4	114826	23753.5	348.645	239.175	0	0	0	0	0	0	0	200	903	0	0	0	0	0	0	0	603	903	0
9594	2	43.4137	125.885	-773.702	46894.9	115497	24119.7	349.279	239.389	0	0	0	0	0	0	0	200	903	0	0	0	0	0	0	0	603	903	0
9594	3	43.5663	125.427	-775.838	46803.3	115131	23936.6	348.396	239.674	0	0	0	0	0	0	0	200	903	0	0	0	0	0	0	0	603	903	0
9594	4	44.4818	124.664	-775.838	46711.8	115375	24211.3	348.71	239.792	0	0	0	0	0	0	0	200	903	0	0	0	0	0	0	0	603	903	0
9594	5	44.4818	123.901	-778.585	45796.3	115985	23936.6	348.97	241.18	0	0	0	0	0	0	0	200	903	0	0	0	0	0	0	0	603	903	0
9594	6	44.1766	124.359	-779.5	45613.1	116046	23616.2	348.873	241.484	0	0	0	0	0	0	0	200	903	0	0	0	0	0	0	0	603	903	0
9594	7	44.9396	122.985	-780.416	46437.1	116657	23982.4	349.48	240.497	0	0	0	0	0	0	0	200	903	0	0	0	0	0	0	0	603	903	0
9594	8	45.8551	123.138	-779.805	46894.9	116168	24028.2	348.971	239.863	0	0	0	0	0	0	0	200	903	0	0	0	0	0	0	0	603	903	0
9594	9	44.9396	124.053	-781.026	45521.6	116535	24211.3	349.207	241.716	0	0	0	0	0	0	0	200	903	0	0	0	0	0	0	0	603	903	0
9595	0	44.4818	123.138	-782.857	45979.4	116901	23936.6	349.326	241.267	0	0	0	0	0	0	0	200	903	0	0	0	0	0	0	0	603	903	0
9595	1	44.9396	122.528	-782.857	45338.5	116107	23936.6	348.312	242.086	0	0	0	0	0	0	0	200	903	0	0	0	0	0	0	0	603	903	0
9595	2	46.1603	122.68	-783.467	44880.7	117267	23982.4	349.677	242.715	0	0	0	0	0	0	0	200	903	0	0	0	0	0	0	0	603	903	0
9595	3	45.3973	121.307	-784.078	44606	117084	23890.8	349.327	243.11	0	0	0	0	0	0	0	200	903	0	0	0	0	0	0	0	603	903	0
9595	4	45.8551	121.307	-784.688	44331.4	116962	24257	349.055	243.504	0	0	0	0	0	0	0	200	903	0	0	0	0	0	0	0	603	903	0
9595	5	46.4654	121.154	-784.078	44239.8	117572	23753.5	349.95	243.577	0	0	0	0	0	0	0	200	903	0	0	0	0	0	0	0	603	903	0
9595	6	46.618	121.154	-785.604	43873.6	117511	23799.3	349.581	244.153	0	0	0	0	0	0	0	200	903	0	0	0	0	0	0	0	603	903	0
9595	7	47.381	121.307	-785.909	44514.5	117755	23661.9	349.833	243.359	0	0	0	0	0	0	0	200	903	0	0	0	0	0	0	0	603	903	0
9595	8	46.3129	119.781	-785.909	44148.3	117450	23616.2	349.445	243.825	0	0	0	0	0	0	0	200	903	0	0	0	0	0	0	0	603	903	0
9595	9	48.2965	120.544	-789.266	43507.4	118000	23661.9	349.505	244.876	0	0	0	0	0	0	0	200	903	0	0	0	0	0	0	0	603	903	0
9596	0	47.6861	120.086	-789.876	43965.2	118000	23753.5	349.39	244.339	0	0	0	0	0	0	0	200	903	0	0	0	0	0	0	0	603	903	0
9596	1	47.2284	119.018	-789.876	43415.9	118061	23021.1	349.467	245.035	0	0	0	0	0	0	0	200	903	0	0	0	0	0	0	0	603	903	0
9596	2	48.1439	118.56	-789.876	43324.3	118061	23295.7	349.467	245.151	0	0	0	0	0	0	0	200	903	0	0	0	0	0	0	0	603	903	0
9596	3	46.7706	117.187	-789.876	43141.2	118183	23433.1	349.622	245.382	0	0	0	0	0	0	0	200	903	0	0	0	0	0	0	0	603	903	0
9596	4	47.6861	118.103	-791.402	43324.3	118366	23661.9	349.565	245.256	0	0	0	0	0	0	0	200	903	0	0	0	0	0	0	0	603	903	0
9596	5	48.1439	117.34	-789.266	42317.2	118610	23341.5	350.279	246.384	0	0	0	0	0	0	0	200	903	0	0	0	0	0	0	0	603	903	0
9596	6	47.6861	117.034	-790.792	42042.6	118549	23433.1	349.912	246.835	0	0	0	0	0	0	0	200	903	0	0	0	0	0	0	0	603	903	0
9596	7	48.1439	116.729	-790.486	42958.1	118549	22975.3	349.97	245.656	0	0	0	0	0	0	0	200	903	0	0	0	0	0	0	0	603	903	0
9596	8	47.8387	116.424	-787.13	41676.4	118366	23066.9	350.376	247.053	0	0	0	0	0	0	0	200	903	0	0	0	0	0	0	0	603	903	0
9596	9	48.6017	115.661	-792.012	41401.7	118366	23387.3	349.449	247.726	0	0	0	0	0	0	0	200	903	0	0	0	0	0	0	0	603	903	0
9597	0	48.7543	115.966	-791.402	41493.3	118915	23066.9	350.259	247.57	0	0	0	0	0	0	0	200	903	0	0	0	0	0	0	0	603	903	0
9597	1	48.7543	115.661	-790.181	41127	118549	23066.9	350.027	247.952	0	0	0	0	0	0	0	200	903	0	0	0	0	0	0	0	603	903	0
9597	2	49.3646	115.966	-793.538	41218.6	118854	22746.4	349.777	248.057	0	0	0	0	0	0	0	200	903	0	0	0	0	0	0	0	603	903	0
9597	3	49.212	114.746	-792.928	42225.7	118732	23021.1	349.739	246.747	0	0	0	0	0	0	0	200	903	0	0	0	0	0	0	0	603	903	0
9597	4	49.212	114.288	-790.486	40852.4	118793	22700.6	350.278	248.32	0	0	0	0	0	0	0	200	903	0	0	0	0	0	0	0	603	903	0
9597	5	48.7543	114.746	-792.623	40577.7	118793	22975.3	349.873	248.806	0	0	0	0	0	0	0	200	903	0	0	0	0	0	0	0	603	903	0
9597	6	48.7543	114.135	-794.454	41310.1	118915	22471.8	349.682	248.002	0	0	0	0	0	0	0	200	903	0	0	0	0	0	0	0	603	903	0
9597	7	48.9068	113.525	-794.149	41310.1	119220	22654.9	350.123	247.982	0	0	0	0	0	0	0	200	903	0	0	0	0	0	0	0	603	903	0
9597	8	48.9068	113.525	-791.707	39479.1	118488	22654.9	349.661	250.134	0	0	0	0	0	0	0	200	903	0	0	0	0	0	0	0	603	903	0
9597	9	48.7543	113.372	-794.454	40669.3	119037	22380.2	349.835	248.808	0	0	0	0	0	0	0	200	903	0	0	0	0	0	0	0	603	903	0
9598	0	48.2965	111.999	-792.012	40120	118732	22197.1	349.912	249.344	0	0	0	0	0	0	0	200	903	0	0	0	0	0	0	0	603	903	0
9598	1	50.4327	112.304	-792.928	39753.8	118732	22288.6	349.739	249.865	0	0	0	0	0	0	0	200	903	0	0	0	0	0	0	0	603	903	0
9598	2	48.7543	111.389	-792.928	40028.4	118793	22197.1	349.816	249.518	0	0	0	0	0	0	0	200	903	0	0	0	0	0	0	0	603	903	0
9598	3	49.8224	110.778	-792.012	39936.9	118549	22242.9	349.681	249.575	0	0	0	0	0	0	0	200	903	0	0	0	0	0	0	0	603	903	0
9598	4	50.8905	109.558	-793.233	39112.9	118610	22288.6	349.527	250.692	0	0	0	0	0	0	0	200	903	0	0	0	0	0	0	0	603	903	0
9598	5	49.5172	110.015	-793.233	38746.7	118854	22517.5	349.835	251.154	0	0	0	0	0	0	0	200	903	0	0	0	0	0	0	0	603	903	0
9598	6	49.8224	109.405	-792.318	39387.6	118793	22105.5	349.931	250.288	0	0	0	0	0	0	0	200	903	0	0	0	0	0	0	0	603	903	0
9598	7	49.0594	108.795	-789.876	38563.6	118976	21830.9	350.626	251.178	0	0	0	0	0	0	0	200	903	0	0	0	0	0	0	0	603	903	0
9598	8	49.212	109.1	-792.318	38472	118915	21830.9	350.085	251.444	0	0	0	0	0	0	0	200	903	0	0	0	0	0	0	0	603	903	0
9598	9	48.7543	109.558	-791.707	38746.7	118732	21830.9	349.97	251.059	0	0	0	0	0	0	0	200	903	0	0	0	0	0	0	0	603	903	0
9599	0	48.7543	107.269	-791.097	38929.8	118366	21922.4	349.622	250.79	0	0	0	0	0	0	0	200	903	0	0	0	0	0	0	0	603	903	0
9599	1	50.1275	107.421	-788.655	37922.7	118732	21739.3	350.55	251.915	0	0	0	0	0	0	0	200	903	0	0	0	0	0	0	0	603	903	0
9599	2	48.6017	106.811	-788.655	38014.2	118732	21327.4	350.55	251.799	0	0	0	0	0	0	0	200	903	0	0	0	0	0	0	0	603	903	0
9599	3	49.3646	104.37	-789.266	38197.4	118488	21510.5	350.124	251.604	0	0	0	0	0	0	0	200	903	0	0	0	0	0	0	0	603	903	0
9599	4	48.2965	106.964	-784.078	36549.4	118488	21556.2	351.117	253.385	0	0	0	0	0	0	0	200	903	0	0	0	0	0	0	0	603	903	0
9599	5	49.5172	105.743	-786.519	38014.2	118549	21281.6	350.726	251.668	0	0	0	0	0	0	0	200	903	0	0	0	0	0	0	0	603	903	0
9599	6	49.975	104.98	-788.045	37922.7	118427	21190	350.279	251.877	0	0	0	0	0	0	0	200	903	0	0	0	0	0	0	0	603	903	0
9599	7	49.5172	104.827	-789.571	36641	118244	20915.4	349.757	253.594	0	0	0	0	0	0	0	200	903	0	0	0	0	0	0	0	603	903	0
9599	8	49.8224	104.98	-787.74	36549.4	118366	21556.2	350.26	253.602	0	0	0	0	0	0	0	200	903	0	0	0	0	0	0	0	603	903	0
9599	9	49.0594	103.149	-785.909	37190.3	118244	20915.4	350.455	252.679	0	0	0	0	0	0	0	200	903	0	0	0	0	0	0	0	603	903	0
9600	0	49.0594	103.607	-781.636	36366.3	118366	21006.9	351.433	253.474	0	0	0	0	0	0	0	200	903	0	0	0	0	0	0	0	603	903	0
9600	1	48.9068	102.691	-785.604	36183.2	118000	20823.8	350.202	253.942	0	0	0	0	0	0	0	200	903	0	0	0	0	0	0	0	603	903	0
9600	2	48.7543	102.539	-784.688	36457.9	118122	20640.7	350.533	253.538	0	0	0	0	0	0	0	200	903	0	0	0	0	0	0	0	603	903	0
9600	3	48.7543	100.708	-784.078	36641	117939	20732.3	350.417	253.269	0	0	0	0	0	0	0	200	903	0	0	0	0	0	0	0	603	903	0
9600	4	49.6698	101.47	-781.026	35359.2	117633	20320.3	350.614	254.727	0	0	0	0	0	0	0	200	903	0	0	0	0	0	0	0	603	903	0
9600	5	48.4491	101.165	-780.11	36000.1	117877	20457.6	351.104	253.853	0	0	0	0	0	0	0	200	903	0	0	0	0	0	0	0	603	903	0
9600	6	48.1439	97.6558	-778.89	36183.2	117389	20182.9	350.713	253.545	0	0	0	0	0	0	0	200	903	0	0	0	0	0	0	0	603	903	0
9600	7	48.1439	99.792	-778.585	35542.3	117389	19954.1	350.773	254.35	0	0	0	0	0	0	0	200	903	0	0	0	0	0	0	0	603	903	0
9600	8	49.212	98.8765	-777.059	35817	117389	19954.1	351.069	253.907	0	0	0	0	0	0	0	200	903	0	0	0	0	0	0	0	603	903	0
9600	9	48.6017	97.8084	-775.838	35267.7	116962	20045.6	350.756	254.542	0	0	0	0	0	0	0	200	903	0	0	0	0	0	0	0	603	903	0
9601	0	48.2965	97.5032	-774.922	34718.4	117328	19725.2	351.406	255.198	0	0	0	0	0	0	0	200	903	0	0	0	0	0	0	0	603	903	0
9601	1	48.6017	95.8247	-773.091	34443.7	116474	19771	350.66	255.447	0	0	0	0	0	0	0	200	903	0	0	0	0	0	0	0	603	903	0
9601	2	49.3646	96.2825	-773.091	33985.9	117023	19404.7	351.37	256.039	0	0	0	0	0	0	0	200	903	0	0	0	0	0	0	0	603	903	0
9601	3	48.4491	95.5196	-771.871	33894.4	116352	19496.3	350.74	256.088	0	0	0	0	0	0	0	200	903	0	0	0	0	0	0	0	603	903	0
9601	4	48.2965	95.367	-772.481	33802.8	116230	19038.5	350.463	256.241	0	0	0	0	0	0	0	200	903	0	0	0	0	0	0	0	603	903	0
9601	5	48.4491	95.5196	-767.598	33985.9	116779	19267.4	352.135	255.724	0	0	0	0	0	0	0	200	903	0	0	0	0	0	0	0	603	903	0
9601	6	47.5336	92.1626	-769.734	33985.9	115741	19175.9	350.365	255.847	0	0	0	0	0	0	0	200	903	0	0	0	0	0	0	0	603	903	0
9601	7	48.2965	93.9937	-767.903	32704.2	116107	18809.6	351.201	257.411	0	0	0	0	0	0	0	200	903	0	0	0	0	0	0	0	603	903	0
9601	8	47.5336	93.6885	-766.378	33802.8	115619	18855.4	350.865	255.893	0	0	0	0	0	0	0	200	903	0	0	0	0	0	0	0	603	903	0
9601	9	47.381	92.3152	-764.241	33528.2	115497	18809.6	351.126	256.129	0	0	0	0	0	0	0	200	903	0	0	0	0	0	0	0	603	903	0
9602	0	46.1603	91.5523	-763.326	32795.7	115558	18901.2	351.388	257.036	0	0	0	0	0	0	0	200	903	0	0	0	0	0	0	0	603	903	0
9602	1	46.618	91.5523	-760.274	32429.5	115253	18626.5	351.594	257.345	0	0	0	0	0	0	0	200	903	0	0	0	0	0	0	0	603	903	0
9602	2	46.618	90.4842	-758.443	33162	115131	18763.9	351.799	256.276	0	0	0	0	0	0	0	200	903	0	0	0	0	0	0	0	603	903	0
9602	3	46.3129	90.0264	-759.359	32063.3	114948	18855.4	351.375	257.776	0	0	0	0	0	0	0	200	903	0	0	0	0	0	0	0	603	903	0
9602	4	46.3129	90.179	-757.222	31880.2	114948	18168.8	351.802	257.898	0	0	0	0	0	0	0	200	903	0	0	0	0	0	0	0	603	903	0
9602	5	46.618	89.5686	-756.002	31971.8	114826	18306.1	351.886	257.709	0	0	0	0	0	0	0	200	903	0	0	0	0	0	0	0	603	903	0
9602	6	46.618	86.9746	-754.476	31971.8	114337	17802.6	351.546	257.624	0	0	0	0	0	0	0	200	903	0	0	0	0	0	0	0	603	903	0
9602	7	47.2284	88.3479	-754.476	30781.6	114337	18397.7	351.546	259.201	0	0	0	0	0	0	0	200	903	0	0	0	0	0	0	0	603	903	0
9602	8	46.4654	87.7376	-753.255	31239.4	113971	17802.6	351.305	258.528	0	0	0	0	0	0	0	200	903	0	0	0	0	0	0	0	603	903	0
9602	9	46.4654	87.2798	-752.645	31514	113971	17848.3	351.428	258.129	0	0	0	0	0	0	0	200	903	0	0	0	0	0	0	0	603	903	0
9603	0	46.0077	87.1272	-747.762	30781.6	113910	17436.4	352.335	258.835	0	0	0	0	0	0	0	200	903	0	0	0	0	0	0	0	603	903	0
9603	1	46.3129	86.6695	-748.983	30964.7	113422	17619.5	351.435	258.658	0	0	0	0	0	0	0	200	903	0	0	0	0	0	0	0	603	903	0
9603	2	46.1603	85.1436	-747.457	30690	113483	17619.5	351.825	258.941	0	0	0	0	0	0	0	200	903	0	0	0	0	0	0	0	603	903	0
9603	3	45.3973	84.991	-746.541	29866.1	113117	17344.8	351.521	259.994	0	0	0	0	0	0	0	200	903	0	0	0	0	0	0	0	603	903	0
9603	4	46.3129	84.5332	-743.489	30049.2	113117	17390.6	352.143	259.584	0	0	0	0	0	0	0	200	903	0	0	0	0	0	0	0	603	903	0
9603	5	45.0921	83.4651	-741.048	30232.3	112812	17207.5	352.232	259.203	0	0	0	0	0	0	0	200	903	0	0	0	0	0	0	0	603	903	0
9603	6	45.3973	83.0074	-739.522	29408.3	112384	17207.5	351.969	260.233	0	0	0	0	0	0	0	200	903	0	0	0	0	0	0	0	603	903	0
9603	7	45.0921	82.397	-737.386	29499.9	112750	16887	352.906	259.994	0	0	0	0	0	0	0	200	903	0	0	0	0	0	0	0	603	903	0
9603	8	45.0921	81.7867	-737.691	29591.4	112140	16658.2	352.015	259.886	0	0	0	0	0	0	0	200	903	0	0	0	0	0	0	0	603	903	0
9603	9	45.5499	81.3289	-735.86	28859	112018	16978.6	352.227	260.782	0	0	0	0	0	0	0	200	903	0	0	0	0	0	0	0	603	903	0
9604	0	45.0921	81.4815	-734.029	28859	111591	16612.4	352.025	260.684	0	0	0	0	0	0	0	200	903	0	0	0	0	0	0	0	603	903	0
9604	1	46.7706	80.5659	-734.639	29225.2	111347	16703.9	351.567	260.218	0	0	0	0	0	0	0	200	903	0	0	0	0	0	0	0	603	903	0
9604	2	45.2447	79.6504	-732.198	28675.9	111652	16108.8	352.489	260.836	0	0	0	0	0	0	0	200	903	0	0	0	0	0	0	0	603	903	0
9604	3	45.2447	79.4978	-731.588	28309.7	110980	16154.6	351.698	261.304	0	0	0	0	0	0	0	200	903	0	0	0	0	0	0	0	603	903	0
9604	4	45.5499	78.2771	-725.484	28675.9	111042	16291.9	353.059	260.473	0	0	0	0	0	0	0	200	903	0	0	0	0	0	0	0	603	903	0
9604	5	44.1766	76.1409	-727.62	28218.1	110797	16291.9	352.274	261.219	0	0	0	0	0	0	0	200	903	0	0	0	0	0	0	0	603	903	0
9604	6	45.0921	77.5142	-727.925	27485.7	110126	16200.4	351.287	262.241	0	0	0	0	0	0	0	200	903	0	0	0	0	0	0	0	603	903	0
9604	7	44.4818	77.3616	-725.484	28035	110248	16017.3	351.965	261.357	0	0	0	0	0	0	0	200	903	0	0	0	0	0	0	0	603	903	0
9604	8	44.4818	76.1409	-724.263	28218.1	109638	15788.4	351.378	261.039	0	0	0	0	0	0	0	200	903	0	0	0	0	0	0	0	603	903	0
9604	9	44.1766	75.6831	-721.517	27577.2	109760	15834.2	352.124	261.779	0	0	0	0	0	0	0	200	903	0	0	0	0	0	0	0	603	903	0
9605	0	44.6344	75.5305	-719.075	26844.8	109516	15651.1	352.301	262.668	0	0	0	0	0	0	0	200	903	0	0	0	0	0	0	0	603	903	0
9605	1	44.024	74.0047	-717.244	26936.4	109272	15605.3	352.349	262.445	0	0	0	0	0	0	0	200	903	0	0	0	0	0	0	0	603	903	0
9605	2	43.8714	73.3943	-715.108	26936.4	109149	15468	352.634	262.332	0	0	0	0	0	0	0	200	903	0	0	0	0	0	0	0	603	903	0
9605	3	43.2611	73.2417	-714.803	26844.8	108783	14918.7	352.186	262.444	0	0	0	0	0	0	0	200	903	0	0	0	0	0	0	0	603	903	0
9605	4	43.7189	72.6314	-709.31	27027.9	108661	15468	353.193	261.895	0	0	0	0	0	0	0	200	903	0	0	0	0	0	0	0	603	903	0
9605	5	44.3292	71.8684	-711.446	26295.5	108112	15147.5	351.961	263.039	0	0	0	0	0	0	0	200	903	0	0	0	0	0	0	0	603	903	0
9605	6	43.4137	72.1736	-710.53	26387.1	108112	15101.8	352.157	262.863	0	0	0	0	0	0	0	200	903	0	0	0	0	0	0	0	603	903	0
9605	7	43.5663	70.8003	-707.784	26661.7	108112	14872.9	352.747	262.331	0	0	0	0	0	0	0	200	903	0	0	0	0	0	0	0	603	903	0
9605	8	43.5663	70.19	-707.173	26295.5	107563	14689.8	352.102	262.816	0	0	0	0	0	0	0	200	903	0	0	0	0	0	0	0	603	903	0
9605	9	43.7189	70.3426	-706.258	25929.3	107563	14552.4	352.299	263.286	0	0	0	0	0	0	0	200	903	0	0	0	0	0	0	0	603	903	0
9606	0	43.7189	68.8167	-705.037	26112.4	107135	14735.6	351.957	262.963	0	0	0	0	0	0	0	200	903	0	0	0	0	0	0	0	603	903	0
9606	1	42.8033	68.0537	-703.817	26478.6	107135	14415.1	352.22	262.379	0	0	0	0	0	0	0	200	903	0	0	0	0	0	0	0	603	903	0
9606	2	43.2611	68.0537	-701.375	25471.5	106586	14140.5	351.967	263.683	0	0	0	0	0	0	0	200	903	0	0	0	0	0	0	0	603	903	0
9606	3	43.1085	67.7486	-695.577	26020.9	106037	14232	352.444	262.591	0	0	0	0	0	0	0	200	903	0	0	0	0	0	0	0	603	903	0
9606	4	42.193	66.6805	-699.239	25929.3	106464	13911.6	352.257	262.918	0	0	0	0	0	0	0	200	903	0	0	0	0	0	0	0	603	903	0
9606	5	42.9559	65.002	-698.018	25196.9	106098	14232	351.998	263.902	0	0	0	0	0	0	0	200	903	0	0	0	0	0	0	0	603	903	0
9606	6	42.4982	66.0701	-696.797	25013.8	105976	13682.7	352.09	264.102	0	0	0	0	0	0	0	200	903	0	0	0	0	0	0	0	603	903	0
9606	7	42.0404	64.239	-693.746	25746.2	105670	13774.2	352.319	262.888	0	0	0	0	0	0	0	200	903	0	0	0	0	0	0	0	603	903	0
9606	8	41.1249	63.6287	-691.609	25013.8	105548	13545.4	352.613	263.833	0	0	0	0	0	0	0	200	903	0	0	0	0	0	0	0	603	903	0
9606	9	42.4982	62.1028	-690.084	24830.7	105426	13362.3	352.773	264.018	0	0	0	0	0	0	0	200	903	0	0	0	0	0	0	0	603	903	0
9607	0	42.0404	62.7132	-689.168	25746.2	105426	13957.4	352.976	262.642	0	0	0	0	0	0	0	200	903	0	0	0	0	0	0	0	603	903	0
9607	1	41.2775	62.5606	-686.727	24464.5	104877	13270.7	352.72	264.375	0	0	0	0	0	0	0	200	903	0	0	0	0	0	0	0	603	903	0
9607	2	41.5826	62.2554	-685.811	24647.6	104633	13087.6	352.568	264.061	0	0	0	0	0	0	0	200	903	0	0	0	0	0	0	0	603	903	0
9607	3	42.193	61.7976	-684.896	25288.4	104206	13041.8	352.148	263.077	0	0	0	0	0	0	0	200	903	0	0	0	0	0	0	0	603	903	0
9607	4	41.1249	60.7295	-682.149	24372.9	104450	13041.8	353.119	264.27	0	0	0	0	0	0	0	200	903	0	0	0	0	0	0	0	603	903	0
9607	5	42.3456	60.2718	-681.844	24189.8	104145	12858.7	352.74	264.523	0	0	0	0	0	0	0	200	903	0	0	0	0	0	0	0	603	903	0
9607	6	42.193	59.2036	-679.708	24830.7	103839	12812.9	352.771	263.469	0	0	0	0	0	0	0	200	903	0	0	0	0	0	0	0	603	903	0
9607	7	41.7352	59.5088	-678.487	24281.4	103656	12721.4	352.776	264.213	0	0	0	0	0	0	0	200	903	0	0	0	0	0	0	0	603	903	0
9607	8	41.7352	59.5088	-676.656	24006.7	103412	12492.5	352.828	264.522	0	0	0	0	0	0	0	200	903	0	0	0	0	0	0	0	603	903	0
9607	9	41.2775	58.7459	-675.13	24372.9	103412	12401	353.174	263.899	0	0	0	0	0	0	0	200	903	0	0	0	0	0	0	0	603	903	0
9608	0	42.3456	57.9829	-676.656	24556	103290	12401	352.648	263.71	0	0	0	0	0	0	0	200	903	0	0	0	0	0	0	0	603	903	0
9608	1	40.9723	58.1355	-675.13	23732	102863	12492.5	352.36	264.848	0	0	0	0	0	0	0	200	903	0	0	0	0	0	0	0	603	903	0
9608	2	41.1249	57.0674	-673.909	24556	102680	12034.7	352.364	263.562	0	0	0	0	0	0	0	200	903	0	0	0	0	0	0	0	603	903	0
9608	3	40.8197	54.7786	-672.078	24189.8	102436	11943.2	352.416	264.007	0	0	0	0	0	0	0	200	903	0	0	0	0	0	0	0	603	903	0
9608	4	41.1249	55.9993	-671.773	23182.7	102619	12080.5	352.758	265.49	0	0	0	0	0	0	0	200	903	0	0	0	0	0	0	0	603	903	0
9608	5	40.5145	56.1519	-669.637	24281.4	102314	11943.2	352.79	263.74	0	0	0	0	0	0	0	200	903	0	0	0	0	0	0	0	603	903	0
9608	6	39.7516	54.3208	-668.416	23823.6	102191	11668.5	352.886	264.358	0	0	0	0	0	0	0	200	903	0	0	0	0	0	0	0	603	903	0
9608	7	39.2938	55.2364	-668.111	23548.9	101886	11714.3	352.499	264.753	0	0	0	0	0	0	0	200	903	0	0	0	0	0	0	0	603	903	0
9608	8	39.7516	53.4053	-665.059	23182.7	101520	11393.9	352.648	265.142	0	0	0	0	0	0	0	200	903	0	0	0	0	0	0	0	603	903	0
9608	9	39.9042	53.5579	-663.533	23732	101947	11302.3	353.643	264.234	0	0	0	0	0	0	0	200	903	0	0	0	0	0	0	0	603	903	0
9609	0	39.4464	52.4898	-662.313	23182.7	101337	11348.1	353.005	264.997	0	0	0	0	0	0	0	200	903	0	0	0	0	0	0	0	603	903	0
9609	1	38.5309	52.795	-661.397	22999.6	101154	11073.4	352.94	265.226	0	0	0	0	0	0	0	200	903	0	0	0	0	0	0	0	603	903	0
9609	2	38.836	50.9639	-658.04	23640.5	101215	11165	353.813	264.074	0	0	0	0	0	0	0	200	903	0	0	0	0	0	0	0	603	903	0
9609	3	39.1412	51.1165	-658.04	24189.8	100666	10936.1	352.978	263.24	0	0	0	0	0	0	0	200	903	0	0	0	0	0	0	0	603	903	0
9609	4	39.4464	51.4217	-658.04	22541.8	100971	10936.1	353.442	265.744	0	0	0	0	0	0	0	200	903	0	0	0	0	0	0	0	603	903	0
9609	5	38.836	50.8113	-656.209	23182.7	99689	10798.8	351.917	264.672	0	0	0	0	0	0	0	200	903	0	0	0	0	0	0	0	603	903	0
9609	6	38.836	49.2854	-655.294	23732	100238	10661.5	352.967	263.784	0	0	0	0	0	0	0	200	903	0	0	0	0	0	0	0	603	903	0
9609	7	38.836	49.7432	-655.904	22541.8	100299	10432.6	352.918	265.632	0	0	0	0	0	0	0	200	903	0	0	0	0	0	0	0	603	903	0
9609	8	38.3783	49.438	-654.378	23274.3	99872.1	10753	352.621	264.433	0	0	0	0	0	0	0	200	903	0	0	0	0	0	0	0	603	903	0
9609	9	38.836	48.2173	-654.378	23823.6	100055	10432.6	352.901	263.594	0	0	0	0	0	0	0	200	903	0	0	0	0	0	0	0	603	903	0
9610	0	38.2257	48.3699	-649.495	22175.6	99628	10432.6	353.393	265.857	0	0	0	0	0	0	0	200	903	0	0	0	0	0	0	0	603	903	0
9610	1	38.836	47.607	-651.631	22725	99383.8	10203.7	352.515	265.126	0	0	0	0	0	0	0	200	903	0	0	0	0	0	0	0	603	903	0
9610	2	37.9205	47.3018	-651.326	23274.3	99811	10112.1	353.243	264.266	0	0	0	0	0	0	0	200	903	0	0	0	0	0	0	0	603	903	0
9610	3	37.1576	46.5388	-648.885	22175.6	98773.5	10249.5	352.22	265.825	0	0	0	0	0	0	0	200	903	0	0	0	0	0	0	0	603	903	0
9610	4	37.005	46.5388	-649.495	23091.2	99383.8	9745.92	353.017	264.448	0	0	0	0	0	0	0	200	903	0	0	0	0	0	0	0	603	903	0
9610	5	38.0731	45.7759	-647.054	22633.4	98773.5	9791.7	352.651	265.021	0	0	0	0	0	0	0	200	903	0	0	0	0	0	0	0	603	903	0
9610	6	36.6998	45.4707	-645.528	22175.6	98834.5	9791.7	353.106	265.647	0	0	0	0	0	0	0	200	903	0	0	0	0	0	0	0	603	903	0
9610	7	37.005	45.4707	-644.307	22633.4	98895.5	9608.6	353.491	264.872	0	0	0	0	0	0	0	200	903	0	0	0	0	0	0	0	603	903	0
9610	8	36.8524	42.8767	-642.171	22541.8	98041	9517.04	352.671	264.897	0	0	0	0	0	0	0	200	903	0	0	0	0	0	0	0	603	903	0
9610	9	37.3102	44.7078	-642.781	21534.8	98712.4	9379.71	353.571	266.498	0	0	0	0	0	0	0	200	903	0	0	0	0	0	0	0	603	903	0
9611	0	36.6998	43.7923	-641.561	22175.6	98163.1	9471.27	353.007	265.435	0	0	0	0	0	0	0	200	903	0	0	0	0	0	0	0	603	903	0
9611	1	36.8524	42.5716	-640.95	22541.8	98468.3	9242.38	353.629	264.831	0	0	0	0	0	0	0	200	903	0	0	0	0	0	0	0	603	903	0
9611	2	36.6998	40.8931	-639.424	21534.8	98163.1	9105.06	353.518	266.322	0	0	0	0	0	0	0	200	903	0	0	0	0	0	0	0	603	903	0
9611	3	37.7679	42.2664	-642.476	22267.2	97796.9	9242.38	352.219	265.342	0	0	0	0	0	0	0	200	903	0	0	0	0	0	0	0	603	903	0
9611	4	36.6998	41.3509	-639.73	21992.5	98041	9333.94	353.254	265.622	0	0	0	0	0	0	0	200	903	0	0	0	0	0	0	0	603	903	0
9611	5	35.7843	40.5879	-638.814	20893.9	97735.8	8876.17	352.996	267.293	0	0	0	0	0	0	0	200	903	0	0	0	0	0	0	0	603	903	0
9611	6	36.5472	39.9776	-637.899	21717.9	97003.4	8693.07	352.067	265.954	0	0	0	0	0	0	0	200	903	0	0	0	0	0	0	0	603	903	0
9611	7	35.9369	39.825	-633.931	21809.4	97674.8	8555.74	354.078	265.597	0	0	0	0	0	0	0	200	903	0	0	0	0	0	0	0	603	903	0
9611	8	35.4791	39.6724	-636.373	21260.1	97247.6	8647.29	352.815	266.592	0	0	0	0	0	0	0	200	903	0	0	0	0	0	0	0	603	903	0
9611	9	35.0213	39.825	-634.542	21351.7	97552.8	8647.29	353.737	266.351	0	0	0	0	0	0	0	200	903	0	0	0	0	0	0	0	603	903	0
9612	0	34.5636	39.062	-634.847	21626.3	97003.4	8281.08	352.798	265.935	0	0	0	0	0	0	0	200	903	0	0	0	0	0	0	0	603	903	0
9612	1	36.0895	37.0784	-632.1	22084.1	97064.5	8372.63	353.559	265.062	0	0	0	0	0	0	0	200	903	0	0	0	0	0	0	0	603	903	0
9612	2	33.9532	38.2991	-631.185	20893.9	97003.4	8097.98	353.685	266.897	0	0	0	0	0	0	0	200	903	0	0	0	0	0	0	0	603	903	0
9612	3	34.411	37.8413	-631.185	21443.2	96637.2	8464.19	353.104	266.027	0	0	0	0	0	0	0	200	903	0	0	0	0	0	0	0	603	903	0
9612	4	34.1058	37.0784	-626.912	21260.1	96637.2	7960.65	354.148	266.088	0	0	0	0	0	0	0	200	903	0	0	0	0	0	0	0	603	903	0
9612	5	33.8006	36.6206	-629.354	20893.9	96576.2	7960.65	353.453	266.801	0	0	0	0	0	0	0	200	903	0	0	0	0	0	0	0	603	903	0
9612	6	34.5636	36.3155	-628.743	20893.9	96576.2	7777.54	353.602	266.769	0	0	0	0	0	0	0	200	903	0	0	0	0	0	0	0	603	903	0
9612	7	34.1058	35.0948	-628.438	21443.2	96332.1	8006.42	353.288	265.879	0	0	0	0	0	0	0	200	903	0	0	0	0	0	0	0	603	903	0
9612	8	35.3265	35.3999	-629.354	21901	96087.9	7823.32	352.677	265.201	0	0	0	0	0	0	0	200	903	0	0	0	0	0	0	0	603	903	0
9612	9	33.9532	34.637	-628.133	20253	95416.5	7640.21	351.905	267.757	0	0	0	0	0	0	0	200	903	0	0	0	0	0	0	0	603	903	0
9613	0	33.1903	34.4844	-628.743	21534.8	95721.7	7457.11	352.243	265.75	0	0	0	0	0	0	0	200	903	0	0	0	0	0	0	0	603	903	0
9613	1	33.4955	33.2637	-626.607	21534.8	95965.9	7365.55	353.152	265.633	0	0	0	0	0	0	0	200	903	0	0	0	0	0	0	0	603	903	0
9613	2	33.4955	33.5689	-624.776	20619.2	95843.8	7228.22	353.405	266.997	0	0	0	0	0	0	0	200	903	0	0	0	0	0	0	0	603	903	0
9613	3	32.4274	33.8741	-625.081	20710.8	95721.7	7228.22	353.135	266.867	0	0	0	0	0	0	0	200	903	0	0	0	0	0	0	0	603	903	0
9613	4	32.7325	32.3482	-623.86	21351.7	95660.6	7319.78	353.337	265.775	0	0	0	0	0	0	0	200	903	0	0	0	0	0	0	0	603	903	0
9613	5	33.0377	32.3482	-622.945	20710.8	95538.6	6999.34	353.366	266.753	0	0	0	0	0	0	0	200	903	0	0	0	0	0	0	0	603	903	0
9613	6	32.2748	32.1956	-621.419	20893.9	95416.5	6816.24	353.546	266.377	0	0	0	0	0	0	0	200	903	0	0	0	0	0	0	0	603	903	0
9613	7	32.2748	31.2801	-620.809	21443.2	95233.4	6770.46	353.402	265.459	0	0	0	0	0	0	0	200	903	0	0	0	0	0	0	0	603	903	0
9613	8	31.817	30.5171	-622.335	21260.1	95233.4	6587.36	353.026	265.838	0	0	0	0	0	0	0	200	903	0	0	0	0	0	0	0	603	903	0
9613	9	33.0377	30.9749	-619.893	20710.8	95172.4	6633.13	353.53	266.59	0	0	0	0	0	0	0	200	903	0	0	0	0	0	0	0	603	903	0
9614	0	32.8851	30.5171	-620.504	20802.3	94806.2	6495.8	352.789	266.475	0	0	0	0	0	0	0	200	903	0	0	0	0	0	0	0	603	903	0
9614	1	31.817	29.449	-620.198	21443.2	95111.4	6358.47	353.356	265.425	0	0	0	0	0	0	0	200	903	0	0	0	0	0	0	0	603	903	0
9614	2	32.4274	29.1438	-619.588	20710.8	94989.3	6312.7	353.31	266.573	0	0	0	0	0	0	0	200	903	0	0	0	0	0	0	0	603	903	0
9614	3	31.817	29.7542	-619.283	20802.3	94684.1	6358.47	352.893	266.409	0	0	0	0	0	0	0	200	903	0	0	0	0	0	0	0	603	903	0
9614	4	32.4274	28.9912	-619.893	21260.1	94562	5946.49	352.546	265.704	0	0	0	0	0	0	0	200	903	0	0	0	0	0	0	0	603	903	0
9614	5	32.2748	27.9231	-619.893	21351.7	94684.1	6129.59	352.743	265.556	0	0	0	0	0	0	0	200	903	0	0	0	0	0	0	0	603	903	0
9614	6	31.3592	28.5335	-619.283	21168.6	94928.2	5900.71	353.287	265.818	0	0	0	0	0	0	0	200	903	0	0	0	0	0	0	0	603	903	0
9614	7	32.2748	28.3809	-619.588	21260.1	94623.1	5900.71	352.719	265.687	0	0	0	0	0	0	0	200	903	0	0	0	0	0	0	0	603	903	0
9614	8	31.5118	27.4654	-613.79	21260.1	94439.9	5717.6	353.864	265.363	0	0	0	0	0	0	0	200	903	0	0	0	0	0	0	0	603	903	0
9614	9	31.5118	26.3972	-618.367	20985.5	94623.1	5717.6	353.021	266.063	0	0	0	0	0	0	0	200	903	0	0	0	0	0	0	0	603	903	0
9615	0	30.9015	25.6343	-617.757	20985.5	94378.9	5580.28	352.777	266.03	0	0	0	0	0	0	0	200	903	0	0	0	0	0	0	0	603	903	0
9615	1	30.7489	26.3972	-618.062	21443.2	94439.9	5259.84	352.8	265.306	0	0	0	0	0	0	0	200	903	0	0	0	0	0	0	0	603	903	0
9615	2	31.817	25.1765	-615.01	21260.1	94867.2	5671.83	354.253	265.431	0	0	0	0	0	0	0	200	903	0	0	0	0	0	0	0	603	903	0
9615	3	31.2066	25.7869	-614.705	20893.9	94317.9	5397.17	353.436	266.01	0	0	0	0	0	0	0	200	903	0	0	0	0	0	0	0	603	903	0
9615	4	30.5963	25.6343	-615.926	21809.4	94195.8	5397.17	352.934	264.591	0	0	0	0	0	0	0	200	903	0	0	0	0	0	0	0	603	903	0
9615	5	31.2066	24.4136	-615.316	21717.9	94195.8	5168.29	353.085	264.705	0	0	0	0	0	0	0	200	903	0	0	0	0	0	0	0	603	903	0
9615	6	29.6808	24.5662	-614.095	21168.6	94501	4939.41	353.887	265.529	0	0	0	0	0	0	0	200	903	0	0	0	0	0	0	0	603	903	0
9615	7	31.0541	24.4136	-615.621	21168.6	94439.9	5030.96	353.406	265.614	0	0	0	0	0	0	0	200	903	0	0	0	0	0	0	0	603	903	0
9615	8	30.9015	23.1929	-614.4	21901	94256.9	4985.18	353.413	264.354	0	0	0	0	0	0	0	200	903	0	0	0	0	0	0	0	603	903	0
9615	9	31.2066	23.3455	-615.316	21443.2	94317.9	4847.85	353.284	265.151	0	0	0	0	0	0	0	200	903	0	0	0	0	0	0	0	603	903	0
9616	0	31.2066	22.8877	-617.757	21351.7	94073.7	4664.75	352.283	265.437	0	0	0	0	0	0	0	200	903	0	0	0	0	0	0	0	603	903	0
9616	1	31.817	22.43	-615.926	21717.9	94195.8	4527.42	352.934	264.739	0	0	0	0	0	0	0	200	903	0	0	0	0	0	0	0	603	903	0
9616	2	31.3592	21.5144	-615.316	22084.1	94256.9	4527.42	353.185	264.109	0	0	0	0	0	0	0	200	903	0	0	0	0	0	0	0	603	903	0
9616	3	30.9015	21.3618	-615.01	21351.7	94073.7	4435.87	352.963	265.282	0	0	0	0	0	0	0	200	903	0	0	0	0	0	0	0	603	903	0
9616	4	30.7489	21.0567	-613.79	21717.9	94562	4252.76	354.063	264.617	0	0	0	0	0	0	0	200	903	0	0	0	0	0	0	0	603	903	0
9616	5	30.2911	20.4463	-615.926	22450.3	93890.7	4115.43	352.438	263.55	0	0	0	0	0	0	0	200	903	0	0	0	0	0	0	0	603	903	0
9616	6	30.5963	20.2937	-615.926	21717.9	94439.9	4435.87	353.33	264.739	0	0	0	0	0	0	0	200	903	0	0	0	0	0	0	0	603	903	0
9616	7	30.4437	20.7515	-615.316	21260.1	94256.9	4298.54	353.185	265.448	0	0	0	0	0	0	0	200	903	0	0	0	0	0	0	0	603	903	0
9616	8	29.9859	19.836	-615.01	22084.1	94134.8	4069.66	353.062	264.092	0	0	0	0	0	0	0	200	903	0	0	0	0	0	0	0	603	903	0
9616	9	31.0541	19.5308	-613.484	21901	94073.7	3886.55	353.343	264.301	0	0	0	0	0	0	0	200	903	0	0	0	0	0	0	0	603	903	0
9617	0	30.5963	19.2256	-614.095	21809.4	93951.7	3932.33	352.992	264.485	0	0	0	0	0	0	0	200	903	0	0	0	0	0	0	0	603	903	0
9617	1	30.2911	16.6316	-614.4	21717.9	94439.9	4023.88	353.711	264.652	0	0	0	0	0	0	0	200	903	0	0	0	0	0	0	0	603	903	0
9617	2	29.8334	17.6997	-614.705	22725	94256.9	3611.89	353.337	263.031	0	0	0	0	0	0	0	200	903	0	0	0	0	0	0	0	603	903	0
9617	3	29.9859	17.242	-611.959	22267.2	93951.7	3566.12	353.526	263.613	0	0	0	0	0	0	0	200	903	0	0	0	0	0	0	0	603	903	0
9617	4	30.9015	18.0049	-615.621	22084.1	94501	3474.56	353.505	264.127	0	0	0	0	0	0	0	200	903	0	0	0	0	0	0	0	603	903	0
9617	5	31.0541	17.242	-615.01	22725	94134.8	3474.56	353.062	263.049	0	0	0	0	0	0	0	200	903	0	0	0	0	0	0	0	603	903	0
9617	6	31.0541	16.6316	-616.231	22816.5	94501	3566.12	353.353	262.974	0	0	0	0	0	0	0	200	903	0	0	0	0	0	0	0	603	903	0
9617	7	31.0541	16.3264	-615.316	22175.6	94256.9	3337.23	353.185	263.961	0	0	0	0	0	0	0	200	903	0	0	0	0	0	0	0	603	903	0
9617	8	32.4274	16.3264	-616.231	22816.5	94195.8	3108.35	352.858	262.974	0	0	0	0	0	0	0	200	903	0	0	0	0	0	0	0	603	903	0
9617	9	30.2911	14.8006	-618.367	22999.6	94684.1	3154.13	353.12	262.806	0	0	0	0	0	0	0	200	903	0	0	0	0	0	0	0	603	903	0
9618	0	30.7489	14.8006	-617.452	22267.2	94745.1	3062.58	353.445	263.937	0	0	0	0	0	0	0	200	903	0	0	0	0	0	0	0	603	903	0
9618	1	31.0541	14.648	-618.978	22267.2	94867.2	2879.47	353.264	264.026	0	0	0	0	0	0	0	200	903	0	0	0	0	0	0	0	603	903	0
9618	2	31.6644	14.648	-616.536	22908.1	94684.1	2925.25	353.574	262.844	0	0	0	0	0	0	0	200	903	0	0	0	0	0	0	0	603	903	0
9618	3	30.4437	13.2747	-618.672	23732	94745.1	2742.14	353.143	261.64	0	0	0	0	0	0	0	200	903	0	0	0	0	0	0	0	603	903	0
9618	4	30.4437	13.2747	-619.893	22450.3	94928.2	2742.14	353.136	263.784	0	0	0	0	0	0	0	200	903	0	0	0	0	0	0	0	603	903	0
9618	5	31.0541	13.4273	-619.893	23365.8	94623.1	2696.37	352.644	262.307	0	0	0	0	0	0	0	200	903	0	0	0	0	0	0	0	603	903	0
9618	6	29.6808	12.3592	-616.841	23365.8	94989.3	2604.81	353.993	262.12	0	0	0	0	0	0	0	200	903	0	0	0	0	0	0	0	603	903	0
9618	7	30.9015	11.7488	-618.672	22725	94745.1	2375.93	353.143	263.268	0	0	0	0	0	0	0	200	903	0	0	0	0	0	0	0	603	903	0
9618	8	31.2066	11.291	-618.978	23640.5	95843.8	2696.37	354.842	261.807	0	0	0	0	0	0	0	200	903	0	0	0	0	0	0	0	603	903	0
9618	9	30.9015	10.9859	-618.978	23457.4	95172.4	2284.38	353.757	262.103	0	0	0	0	0	0	0	200	903	0	0	0	0	0	0	0	603	903	0
9619	0	31.2066	10.5281	-619.588	23182.7	95172.4	2284.38	353.606	262.584	0	0	0	0	0	0	0	200	903	0	0	0	0	0	0	0	603	903	0
9619	1	30.5963	9.76517	-617.452	23457.4	95294.4	2055.5	354.335	262.009	0	0	0	0	0	0	0	200	903	0	0	0	0	0	0	0	603	903	0
9619	2	31.817	9.45999	-620.504	24281.4	94745.1	1918.17	352.691	260.868	0	0	0	0	0	0	0	200	903	0	0	0	0	0	0	0	603	903	0
9619	3	32.1222	9.15481	-620.809	22999.6	95233.4	2009.72	353.402	262.952	0	0	0	0	0	0	0	200	903	0	0	0	0	0	0	0	603	903	0
9619	4	31.3592	8.69705	-619.893	23548.9	95050.3	1826.61	353.333	262.011	0	0	0	0	0	0	0	200	903	0	0	0	0	0	0	0	603	903	0
9619	5	31.5118	9.15481	-622.64	23915.1	95355.5	1826.61	353.147	261.591	0	0	0	0	0	0	0	200	903	0	0	0	0	0	0	0	603	903	0
9619	6	33.3429	8.0867	-623.86	24372.9	95355.5	2009.72	352.847	260.932	0	0	0	0	0	0	0	200	903	0	0	0	0	0	0	0	603	903	0
9619	7	31.6644	7.62894	-624.166	23732	95355.5	1597.73	352.773	261.978	0	0	0	0	0	0	0	200	903	0	0	0	0	0	0	0	603	903	0
9619	8	31.5118	7.17117	-623.86	24006.7	95355.5	1689.28	352.847	261.519	0	0	0	0	0	0	0	200	903	0	0	0	0	0	0	0	603	903	0
9619	9	31.5118	5.4927	-622.945	24556	95294.4	1460.4	352.974	260.581	0	0	0	0	0	0	0	200	903	0	0	0	0	0	0	0	603	903	0
9620	0	31.9696	5.95047	-625.386	25013.8	95721.7	1551.96	353.06	260.003	0	0	0	0	0	0	0	200	903	0	0	0	0	0	0	0	603	903	0
9620	1	31.6644	6.10306	-619.283	24098.2	95477.6	1368.85	354.174	261.087	0	0	0	0	0	0	0	200	903	0	0	0	0	0	0	0	603	903	0
9620	2	31.5118	6.25564	-625.997	24922.2	95416.5	956.862	352.423	260.188	0	0	0	0	0	0	0	200	903	0	0	0	0	0	0	0	603	903	0
9620	3	31.0541	3.81424	-626.302	24830.7	95843.8	1094.19	353.031	260.354	0	0	0	0	0	0	0	200	903	0	0	0	0	0	0	0	603	903	0
9620	4	31.0541	4.272	-625.386	24922.2	95538.6	727.981	352.767	260.149	0	0	0	0	0	0	0	200	903	0	0	0	0	0	0	0	603	903	0
9620	5	30.7489	4.11941	-627.217	24830.7	95965.9	682.204	353.003	260.411	0	0	0	0	0	0	0	200	903	0	0	0	0	0	0	0	603	903	0
9620	6	32.5799	2.89871	-625.692	24922.2	95538.6	819.533	352.693	260.169	0	0	0	0	0	0	0	200	903	0	0	0	0	0	0	0	603	903	0
9620	7	31.5118	2.74612	-626.302	25196.9	95965.9	590.651	353.226	259.769	0	0	0	0	0	0	0	200	903	0	0	0	0	0	0	0	603	903	0
9620	8	30.9015	3.35647	-627.217	25013.8	95965.9	590.651	353.003	260.119	0	0	0	0	0	0	0	200	903	0	0	0	0	0	0	0	603	903	0
9620	9	30.9015	2.89871	-628.133	25563.1	95904.8	453.323	352.682	259.303	0	0	0	0	0	0	0	200	903	0	0	0	0	0	0	0	603	903	0
9621	0	31.6644	1.8306	-627.217	26112.4	96148.9	453.323	353.294	258.368	0	0	0	0	0	0	0	200	903	0	0	0	0	0	0	0	603	903	0
9621	1	31.9696	1.67801	-628.133	25563.1	95843.8	270.217	352.585	259.303	0	0	0	0	0	0	0	200	903	0	0	0	0	0	0	0	603	903	0
9621	2	31.5118	0.915068	-629.964	26295.5	96393.1	132.888	353.014	258.259	0	0	0	0	0	0	0	200	903	0	0	0	0	0	0	0	603	903	0
9621	3	31.2066	0.304717	-630.269	26112.4	96087.9	-324.876	352.455	258.569	0	0	0	0	0	0	0	200	903	0	0	0	0	0	0	0	603	903	0
9621	4	33.1903	0.609892	-633.016	25837.7	96332.1	-4.44129	352.18	259.183	0	0	0	0	0	0	0	200	903	0	0	0	0	0	0	0	603	903	0
9621	5	31.817	-0.000459142	-632.405	26478.6	96393.1	-279.099	352.423	258.13	0	0	0	0	0	0	0	200	903	0	0	0	0	0	0	0	603	903	0
9621	6	31.9696	-1.22116	-633.016	26844.8	96393.1	-279.099	352.276	257.592	0	0	0	0	0	0	0	200	903	0	0	0	0	0	0	0	603	903	0
9621	7	31.5118	-1.06857	-633.626	26295.5	96759.3	-416.429	352.707	258.5	0	0	0	0	0	0	0	200	903	0	0	0	0	0	0	0	603	903	0
9621	8	31.3592	-1.52634	-628.743	27302.6	96942.4	-691.087	354.184	256.576	0	0	0	0	0	0	0	200	903	0	0	0	0	0	0	0	603	903	0
9621	9	32.4274	-2.89963	-634.542	27119.5	96881.3	-324.876	352.679	257.261	0	0	0	0	0	0	0	200	903	0	0	0	0	0	0	0	603	903	0
9622	0	31.817	-2.89963	-634.847	26478.6	97308.6	-324.876	353.279	258.291	0	0	0	0	0	0	0	200	903	0	0	0	0	0	0	0	603	903	0
9622	1	32.2748	-3.81516	-636.068	27211	96881.3	-416.429	352.313	257.22	0	0	0	0	0	0	0	200	903	0	0	0	0	0	0	0	603	903	0
9622	2	32.2748	-3.81516	-638.204	27943.5	97247.6	-874.193	352.377	256.215	0	0	0	0	0	0	0	200	903	0	0	0	0	0	0	0	603	903	0
9622	3	31.0541	-4.27292	-632.711	27027.9	97308.6	-1057.3	353.796	257.282	0	0	0	0	0	0	0	200	903	0	0	0	0	0	0	0	603	903	0
9622	4	33.3429	-4.73068	-635.762	27577.2	97308.6	-919.969	353.058	256.623	0	0	0	0	0	0	0	200	903	0	0	0	0	0	0	0	603	903	0
9622	5	32.1222	-5.18845	-636.373	28126.6	97613.8	-1057.3	353.391	255.802	0	0	0	0	0	0	0	200	903	0	0	0	0	0	0	0	603	903	0
9622	6	32.2748	-5.95139	-636.983	27943.5	97125.5	-1240.4	352.477	256.132	0	0	0	0	0	0	0	200	903	0	0	0	0	0	0	0	603	903	0
9622	7	32.1222	-5.95139	-638.204	28035	97857.9	-1331.96	353.333	256.072	0	0	0	0	0	0	0	200	903	0	0	0	0	0	0	0	603	903	0
9622	8	31.3592	-6.25656	-636.373	28309.7	97613.8	-1469.29	353.391	255.514	0	0	0	0	0	0	0	200	903	0	0	0	0	0	0	0	603	903	0
9622	9	33.0377	-7.32468	-638.509	28675.9	97430.7	-1148.85	352.591	255.089	0	0	0	0	0	0	0	200	903	0	0	0	0	0	0	0	603	903	0
9623	0	33.3429	-7.62985	-640.035	28126.6	97857.9	-1423.51	352.895	256.055	0	0	0	0	0	0	0	200	903	0	0	0	0	0	0	0	603	903	0
9623	1	33.4955	-7.17209	-640.34	28309.7	97919	-1789.72	352.917	255.79	0	0	0	0	0	0	0	200	903	0	0	0	0	0	0	0	603	903	0
9623	2	33.0377	-9.00314	-641.255	28950.5	97796.9	-1789.72	352.509	254.853	0	0	0	0	0	0	0	200	903	0	0	0	0	0	0	0	603	903	0
9623	3	33.6481	-9.00314	-644.612	28675.9	98346.2	-1972.83	352.566	255.515	0	0	0	0	0	0	0	200	903	0	0	0	0	0	0	0	603	903	0
9623	4	33.9532	-8.85056	-642.781	29042.1	98590.3	-2018.6	353.381	254.818	0	0	0	0	0	0	0	200	903	0	0	0	0	0	0	0	603	903	0
9623	5	32.8851	-9.00314	-644.612	29683	97796.9	-2064.38	351.714	253.952	0	0	0	0	0	0	0	200	903	0	0	0	0	0	0	0	603	903	0
9623	6	33.0377	-10.8342	-644.918	29683	98468.3	-2155.93	352.683	253.974	0	0	0	0	0	0	0	200	903	0	0	0	0	0	0	0	603	903	0
9623	7	33.0377	-10.3764	-644.918	29408.3	99017.6	-1835.5	353.535	254.4	0	0	0	0	0	0	0	200	903	0	0	0	0	0	0	0	603	903	0
9623	8	33.0377	-10.9868	-644.918	29683	98956.5	-2339.04	353.441	253.974	0	0	0	0	0	0	0	200	903	0	0	0	0	0	0	0	603	903	0
9623	9	33.1903	-12.2075	-646.749	29957.6	99261.8	-2384.81	353.478	253.68	0	0	0	0	0	0	0	200	903	0	0	0	0	0	0	0	603	903	0
9624	0	33.0377	-11.7497	-647.969	29683	99078.6	-2796.8	352.906	254.191	0	0	0	0	0	0	0	200	903	0	0	0	0	0	0	0	603	903	0
9624	1	33.4955	-12.0549	-648.885	30232.3	98895.5	-2705.25	352.408	253.409	0	0	0	0	0	0	0	200	903	0	0	0	0	0	0	0	603	903	0
9624	2	33.4955	-12.6653	-649.19	30323.8	99505.9	-2842.58	353.277	253.29	0	0	0	0	0	0	0	200	903	0	0	0	0	0	0	0	603	903	0
9624	3	34.1058	-13.7334	-648.275	29957.6	99383.8	-2796.8	353.305	253.789	0	0	0	0	0	0	0	200	903	0	0	0	0	0	0	0	603	903	0
9624	4	33.1903	-14.8015	-648.885	30049.2	99689	-2934.13	353.631	253.691	0	0	0	0	0	0	0	200	903	0	0	0	0	0	0	0	603	903	0
9624	5	33.6481	-15.1067	-650.106	30415.4	99750	-2888.35	353.437	253.215	0	0	0	0	0	0	0	200	903	0	0	0	0	0	0	0	603	903	0
9624	6	33.4955	-15.1067	-650.716	29957.6	99505.9	-3208.79	352.918	253.962	0	0	0	0	0	0	0	200	903	0	0	0	0	0	0	0	603	903	0
9624	7	33.6481	-15.8696	-647.359	30415.4	99933.1	-3437.67	354.371	253.016	0	0	0	0	0	0	0	200	903	0	0	0	0	0	0	0	603	903	0
9624	8	33.9532	-16.1748	-652.242	31330.9	99933.1	-3529.22	353.215	251.964	0	0	0	0	0	0	0	200	903	0	0	0	0	0	0	0	603	903	0
9624	9	34.5636	-16.48	-651.326	30140.7	100238	-3437.67	353.899	253.724	0	0	0	0	0	0	0	200	903	0	0	0	0	0	0	0	603	903	0
9625	0	34.5636	-16.48	-652.852	30598.5	100299	-3620.77	353.633	253.131	0	0	0	0	0	0	0	200	903	0	0	0	0	0	0	0	603	903	0
9625	1	34.8688	-17.5481	-654.073	31239.4	100605	-3666.55	353.812	252.239	0	0	0	0	0	0	0	200	903	0	0	0	0	0	0	0	603	903	0
9625	2	35.1739	-19.0739	-656.514	31239.4	100238	-3849.66	352.683	252.416	0	0	0	0	0	0	0	200	903	0	0	0	0	0	0	0	603	903	0
9625	3	35.6317	-18.1584	-656.819	30781.6	100605	-3803.88	353.169	253.135	0	0	0	0	0	0	0	200	903	0	0	0	0	0	0	0	603	903	0
9625	4	35.9369	-18.7688	-657.125	31147.8	101032	-3895.43	353.748	252.6	0	0	0	0	0	0	0	200	903	0	0	0	0	0	0	0	603	903	0
9625	5	35.7843	-18.9214	-658.651	31514	100910	-3803.88	353.207	252.154	0	0	0	0	0	0	0	200	903	0	0	0	0	0	0	0	603	903	0
9625	6	36.3946	-19.5317	-659.261	30690	101032	-4032.76	353.25	253.448	0	0	0	0	0	0	0	200	903	0	0	0	0	0	0	0	603	903	0
9625	7	36.5472	-21.2102	-658.651	30690	101032	-3712.33	353.392	253.405	0	0	0	0	0	0	0	200	903	0	0	0	0	0	0	0	603	903	0
9625	8	36.2421	-20.5998	-661.702	31788.7	101459	-4307.42	353.33	251.959	0	0	0	0	0	0	0	200	903	0	0	0	0	0	0	0	603	903	0
9625	9	35.4791	-21.2102	-661.397	30598.5	101398	-4307.42	353.309	253.737	0	0	0	0	0	0	0	200	903	0	0	0	0	0	0	0	603	903	0
9626	0	36.5472	-20.905	-661.702	30873.1	101581	-4261.65	353.515	253.343	0	0	0	0	0	0	0	200	903	0	0	0	0	0	0	0	603	903	0
9626	1	35.9369	-22.8886	-664.144	31880.2	101825	-4490.53	353.318	251.998	0	0	0	0	0	0	0	200	903	0	0	0	0	0	0	0	603	903	0
9626	2	37.7679	-23.0412	-663.533	32154.9	101703	-4444.75	353.275	251.54	0	0	0	0	0	0	0	200	903	0	0	0	0	0	0	0	603	903	0
9626	3	37.005	-21.9731	-663.228	31330.9	102130	-4765.19	353.99	252.76	0	0	0	0	0	0	0	200	903	0	0	0	0	0	0	0	603	903	0
9626	4	36.3946	-23.3464	-664.449	32154.9	102069	-4902.52	353.615	251.607	0	0	0	0	0	0	0	200	903	0	0	0	0	0	0	0	603	903	0
9626	5	36.8524	-24.4145	-665.059	32429.5	102375	-4948.29	353.933	251.238	0	0	0	0	0	0	0	200	903	0	0	0	0	0	0	0	603	903	0
9626	6	37.1576	-23.9568	-662.618	31880.2	102252	-5085.62	354.316	251.887	0	0	0	0	0	0	0	200	903	0	0	0	0	0	0	0	603	903	0
9626	7	38.9886	-24.5671	-667.501	32338	102314	-5131.4	353.279	251.554	0	0	0	0	0	0	0	200	903	0	0	0	0	0	0	0	603	903	0
9626	8	37.6153	-26.2456	-667.195	32246.4	102619	-5222.95	353.806	251.669	0	0	0	0	0	0	0	200	903	0	0	0	0	0	0	0	603	903	0
9626	9	37.9205	-25.7878	-667.806	31422.5	102314	-5360.28	353.209	252.947	0	0	0	0	0	0	0	200	903	0	0	0	0	0	0	0	603	903	0
9627	0	38.5309	-26.5508	-668.111	31880.2	102802	-5177.17	353.869	252.283	0	0	0	0	0	0	0	200	903	0	0	0	0	0	0	0	603	903	0
9627	1	38.5309	-27.1611	-669.026	32246.4	102558	-5680.71	353.294	251.801	0	0	0	0	0	0	0	200	903	0	0	0	0	0	0	0	603	903	0
9627	2	38.836	-27.7715	-670.552	31605.6	103046	-5589.16	353.673	252.866	0	0	0	0	0	0	0	200	903	0	0	0	0	0	0	0	603	903	0
9627	3	39.599	-27.1611	-671.163	31605.6	103168	-5818.04	353.715	252.909	0	0	0	0	0	0	0	200	903	0	0	0	0	0	0	0	603	903	0
9627	4	39.2938	-27.924	-672.078	32612.6	103168	-6001.15	353.506	251.475	0	0	0	0	0	0	0	200	903	0	0	0	0	0	0	0	603	903	0
9627	5	39.7516	-29.7551	-672.689	32612.6	103290	-5818.04	353.548	251.519	0	0	0	0	0	0	0	200	903	0	0	0	0	0	0	0	603	903	0
9627	6	39.599	-29.2973	-673.604	32246.4	103290	-6138.48	353.339	252.129	0	0	0	0	0	0	0	200	903	0	0	0	0	0	0	0	603	903	0
9627	7	39.9042	-29.2973	-673.909	31697.1	103412	-6184.25	353.451	252.965	0	0	0	0	0	0	0	200	903	0	0	0	0	0	0	0	603	903	0
9627	8	39.9042	-31.1284	-674.214	32154.9	103900	-5955.37	354.106	252.308	0	0	0	0	0	0	0	200	903	0	0	0	0	0	0	0	603	903	0
9627	9	40.5145	-31.4336	-674.214	31880.2	103839	-6413.14	354.015	252.715	0	0	0	0	0	0	0	200	903	0	0	0	0	0	0	0	603	903	0
9628	0	40.0567	-31.7387	-674.214	31697.1	103717	-6413.14	353.834	252.987	0	0	0	0	0	0	0	200	903	0	0	0	0	0	0	0	603	903	0
9628	1	40.5145	-32.0439	-674.214	32154.9	103778	-6825.12	353.925	252.308	0	0	0	0	0	0	0	200	903	0	0	0	0	0	0	0	603	903	0
9628	2	40.0567	-33.2646	-673.604	32246.4	104450	-6458.91	355.061	252.129	0	0	0	0	0	0	0	200	903	0	0	0	0	0	0	0	603	903	0
9628	3	40.8197	-33.112	-676.656	31880.2	104450	-6870.9	354.362	252.886	0	0	0	0	0	0	0	200	903	0	0	0	0	0	0	0	603	903	0
9628	4	41.2775	-34.1801	-676.351	32246.4	104084	-7099.78	353.89	252.323	0	0	0	0	0	0	0	200	903	0	0	0	0	0	0	0	603	903	0
9628	5	41.43	-35.2483	-677.266	32246.4	103778	-7420.22	353.231	252.387	0	0	0	0	0	0	0	200	903	0	0	0	0	0	0	0	603	903	0
9628	6	41.5826	-36.1638	-677.571	31422.5	104450	-7191.33	354.153	253.625	0	0	0	0	0	0	0	200	903	0	0	0	0	0	0	0	603	903	0
9628	7	42.0404	-37.3845	-680.623	31880.2	104938	-7557.54	354.179	253.16	0	0	0	0	0	0	0	200	903	0	0	0	0	0	0	0	603	903	0
9628	8	42.3456	-37.8423	-679.097	31971.8	104816	-7420.22	354.346	252.92	0	0	0	0	0	0	0	200	903	0	0	0	0	0	0	0	603	903	0
9628	9	41.5826	-37.5371	-680.623	31788.7	104694	-7740.65	353.821	253.295	0	0	0	0	0	0	0	200	903	0	0	0	0	0	0	0	603	903	0
9629	0	41.7352	-37.8423	-674.825	31514	104816	-7969.53	355.323	253.3	0	0	0	0	0	0	0	200	903	0	0	0	0	0	0	0	603	903	0
9629	1	42.4982	-37.8423	-682.454	32338	104755	-7923.76	353.497	252.615	0	0	0	0	0	0	0	200	903	0	0	0	0	0	0	0	603	903	0
9629	2	42.0404	-39.2155	-683.065	32887.3	105426	-8198.42	354.343	251.853	0	0	0	0	0	0	0	200	903	0	0	0	0	0	0	0	603	903	0
9629	3	42.4982	-39.6733	-683.37	31605.6	105060	-8152.64	353.738	253.75	0	0	0	0	0	0	0	200	903	0	0	0	0	0	0	0	603	903	0
9629	4	42.193	-39.9785	-683.675	32246.4	105182	-8335.75	353.848	252.834	0	0	0	0	0	0	0	200	903	0	0	0	0	0	0	0	603	903	0
9629	5	43.4137	-41.0466	-683.675	32338	105304	-8381.52	354.027	252.7	0	0	0	0	0	0	0	200	903	0	0	0	0	0	0	0	603	903	0
9629	6	43.4137	-40.7414	-685.201	31422.5	105304	-8610.4	353.684	254.141	0	0	0	0	0	0	0	200	903	0	0	0	0	0	0	0	603	903	0
9629	7	43.2611	-41.3518	-684.896	32154.9	106037	-8564.63	354.822	253.051	0	0	0	0	0	0	0	200	903	0	0	0	0	0	0	0	603	903	0
9629	8	43.2611	-43.3354	-681.844	32154.9	105670	-8701.96	354.977	252.841	0	0	0	0	0	0	0	200	903	0	0	0	0	0	0	0	603	903	0
9629	9	44.787	-42.5725	-685.506	31605.6	106098	-8930.84	354.773	253.895	0	0	0	0	0	0	0	200	903	0	0	0	0	0	0	0	603	903	0
9630	0	43.7189	-42.8777	-685.811	32154.9	106403	-9113.94	355.149	253.114	0	0	0	0	0	0	0	200	903	0	0	0	0	0	0	0	603	903	0
9630	1	44.9396	-44.4035	-687.947	32246.4	106037	-8885.06	354.135	253.127	0	0	0	0	0	0	0	200	903	0	0	0	0	0	0	0	603	903	0
9630	2	45.7025	-44.7087	-688.253	31239.4	106586	-9205.5	354.865	254.611	0	0	0	0	0	0	0	200	903	0	0	0	0	0	0	0	603	903	0
9630	3	44.787	-46.3872	-690.694	31697.1	106159	-9388.6	353.699	254.108	0	0	0	0	0	0	0	200	903	0	0	0	0	0	0	0	603	903	0
9630	4	45.5499	-46.3872	-691.609	31514	106525	-9480.15	354.025	254.434	0	0	0	0	0	0	0	200	903	0	0	0	0	0	0	0	603	903	0
9630	5	44.9396	-47.4553	-691.609	31422.5	106891	-9434.38	354.554	254.566	0	0	0	0	0	0	0	200	903	0	0	0	0	0	0	0	603	903	0
9630	6	46.3129	-47.1501	-689.168	31239.4	106769	-9754.81	354.925	254.671	0	0	0	0	0	0	0	200	903	0	0	0	0	0	0	0	603	903	0
9630	7	45.2447	-47.3027	-693.135	31697.1	107196	-9892.14	354.654	254.27	0	0	0	0	0	0	0	200	903	0	0	0	0	0	0	0	603	903	0
9630	8	44.9396	-50.0493	-693.441	32154.9	107013	-10075.2	354.322	253.63	0	0	0	0	0	0	0	200	903	0	0	0	0	0	0	0	603	903	0
9630	9	45.3973	-48.676	-694.356	31514	107135	-9892.14	354.294	254.614	0	0	0	0	0	0	0	200	903	0	0	0	0	0	0	0	603	903	0
9631	0	44.6344	-48.676	-695.272	31971.8	107196	-10395.7	354.179	254.015	0	0	0	0	0	0	0	200	903	0	0	0	0	0	0	0	603	903	0
9631	1	46.3129	-50.507	-694.356	31880.2	107379	-10212.6	354.646	254.087	0	0	0	0	0	0	0	200	903	0	0	0	0	0	0	0	603	903	0
9631	2	45.8551	-51.27	-695.272	30873.1	107746	-10578.8	354.969	255.596	0	0	0	0	0	0	0	200	903	0	0	0	0	0	0	0	603	903	0
9631	3	45.5499	-49.7441	-696.187	30781.6	107929	-10670.3	355.028	255.785	0	0	0	0	0	0	0	200	903	0	0	0	0	0	0	0	603	903	0
9631	4	45.7025	-51.5752	-696.187	31422.5	107929	-10807.7	355.028	254.865	0	0	0	0	0	0	0	200	903	0	0	0	0	0	0	0	603	903	0
9631	5	46.1603	-52.3381	-695.272	31056.3	108417	-11082.3	355.935	255.332	0	0	0	0	0	0	0	200	903	0	0	0	0	0	0	0	603	903	0
9631	6	46.618	-52.4907	-698.018	31239.4	107624	-10853.4	354.184	255.246	0	0	0	0	0	0	0	200	903	0	0	0	0	0	0	0	603	903	0
9631	7	46.618	-52.3381	-698.018	31056.3	108783	-11036.6	355.846	255.508	0	0	0	0	0	0	0	200	903	0	0	0	0	0	0	0	603	903	0
9631	8	47.2284	-53.101	-698.934	31330.9	108600	-11036.6	355.38	255.173	0	0	0	0	0	0	0	200	903	0	0	0	0	0	0	0	603	903	0
9631	9	47.6861	-54.4743	-701.07	30232.3	108905	-10990.8	355.342	256.877	0	0	0	0	0	0	0	200	903	0	0	0	0	0	0	0	603	903	0
9632	0	47.0758	-56.3054	-701.985	30049.2	108966	-11357	355.226	257.194	0	0	0	0	0	0	0	200	903	0	0	0	0	0	0	0	603	903	0
9632	1	47.6861	-55.8476	-702.291	30873.1	108844	-11357	354.985	256.039	0	0	0	0	0	0	0	200	903	0	0	0	0	0	0	0	603	903	0
9632	2	47.5336	-56.0002	-703.206	29866.1	109333	-11173.9	355.477	257.529	0	0	0	0	0	0	0	200	903	0	0	0	0	0	0	0	603	903	0
9632	3	47.5336	-55.0847	-702.901	29774.5	109638	-11494.3	355.979	257.641	0	0	0	0	0	0	0	200	903	0	0	0	0	0	0	0	603	903	0
9632	4	47.381	-56.6106	-703.817	30049.2	109394	-11814.7	355.429	257.305	0	0	0	0	0	0	0	200	903	0	0	0	0	0	0	0	603	903	0
9632	5	47.2284	-58.8994	-705.648	30049.2	109333	-11631.6	354.939	257.416	0	0	0	0	0	0	0	200	903	0	0	0	0	0	0	0	603	903	0
9632	6	47.381	-56.7632	-705.953	29499.9	109699	-11814.7	355.391	258.213	0	0	0	0	0	0	0	200	903	0	0	0	0	0	0	0	603	903	0
9632	7	47.6861	-57.8313	-704.732	29499.9	109760	-12043.6	355.747	258.14	0	0	0	0	0	0	0	200	903	0	0	0	0	0	0	0	603	903	0
9632	8	47.6861	-57.9839	-705.953	29499.9	110065	-12135.2	355.91	258.213	0	0	0	0	0	0	0	200	903	0	0	0	0	0	0	0	603	903	0
9632	9	46.7706	-58.7468	-706.868	28675.9	110187	-12409.8	355.881	259.432	0	0	0	0	0	0	0	200	903	0	0	0	0	0	0	0	603	903	0
9633	0	47.6861	-58.5942	-707.784	29225.2	110065	-12043.6	355.506	258.709	0	0	0	0	0	0	0	200	903	0	0	0	0	0	0	0	603	903	0
9633	1	47.5336	-59.6623	-706.258	28859	110431	-12547.2	356.361	259.138	0	0	0	0	0	0	0	200	903	0	0	0	0	0	0	0	603	903	0
9633	2	48.4491	-60.4253	-708.699	28126.6	110248	-12547.2	355.564	260.312	0	0	0	0	0	0	0	200	903	0	0	0	0	0	0	0	603	903	0
9633	3	48.6017	-59.6623	-710.53	27851.9	110797	-12638.7	355.936	260.801	0	0	0	0	0	0	0	200	903	0	0	0	0	0	0	0	603	903	0
9633	4	48.6017	-61.0356	-710.836	28584.3	110614	-12547.2	355.612	259.788	0	0	0	0	0	0	0	200	903	0	0	0	0	0	0	0	603	903	0
9633	5	48.9068	-61.3408	-711.141	27577.2	110919	-12684.5	355.974	261.221	0	0	0	0	0	0	0	200	903	0	0	0	0	0	0	0	603	903	0
9633	6	49.8224	-61.3408	-714.193	26936.4	111164	-12547.2	355.649	262.284	0	0	0	0	0	0	0	200	903	0	0	0	0	0	0	0	603	903	0
9633	7	49.3646	-61.4934	-713.582	27668.8	111042	-12776.1	355.611	261.226	0	0	0	0	0	0	0	200	903	0	0	0	0	0	0	0	603	903	0
9633	8	48.9068	-62.1037	-715.108	26936.4	111042	-12959.2	355.279	262.332	0	0	0	0	0	0	0	200	903	0	0	0	0	0	0	0	603	903	0
9633	9	49.212	-62.1037	-713.887	26478.6	111103	-12821.8	355.63	262.909	0	0	0	0	0	0	0	200	903	0	0	0	0	0	0	0	603	903	0
9634	0	51.1957	-61.9511	-714.193	26936.4	111713	-13050.7	356.419	262.284	0	0	0	0	0	0	0	200	903	0	0	0	0	0	0	0	603	903	0
9634	1	48.9068	-64.5451	-716.024	26204	112262	-12821.8	356.786	263.404	0	0	0	0	0	0	0	200	903	0	0	0	0	0	0	0	603	903	0
9634	2	49.8224	-62.1037	-716.939	25746.2	111713	-12592.9	355.819	264.089	0	0	0	0	0	0	0	200	903	0	0	0	0	0	0	0	603	903	0
9634	3	49.8224	-62.2563	-717.855	25746.2	112018	-12867.6	356.046	264.135	0	0	0	0	0	0	0	200	903	0	0	0	0	0	0	0	603	903	0
9634	4	49.212	-63.477	-713.277	25563.1	111713	-13279.6	356.619	264.161	0	0	0	0	0	0	0	200	903	0	0	0	0	0	0	0	603	903	0
9634	5	49.8224	-62.5615	-716.634	24922.2	112262	-13050.7	356.652	265.223	0	0	0	0	0	0	0	200	903	0	0	0	0	0	0	0	603	903	0
9634	6	49.5172	-62.7141	-716.329	23823.6	112506	-13188	357.06	266.742	0	0	0	0	0	0	0	200	903	0	0	0	0	0	0	0	603	903	0
9634	7	48.9068	-63.3244	-717.549	24556	112262	-13142.3	356.452	265.778	0	0	0	0	0	0	0	200	903	0	0	0	0	0	0	0	603	903	0
9634	8	49.3646	-63.477	-714.803	23640.5	112506	-13096.5	357.395	266.927	0	0	0	0	0	0	0	200	903	0	0	0	0	0	0	0	603	903	0
9634	9	50.1275	-63.3244	-717.244	23548.9	112140	-13416.9	356.349	267.167	0	0	0	0	0	0	0	200	903	0	0	0	0	0	0	0	603	903	0
9635	0	50.2801	-63.0193	-719.075	23274.3	112689	-13188	356.714	267.633	0	0	0	0	0	0	0	200	903	0	0	0	0	0	0	0	603	903	0
9635	1	49.3646	-65.7658	-720.601	22633.4	112995	-12821.8	356.806	268.591	0	0	0	0	0	0	0	200	903	0	0	0	0	0	0	0	603	903	0
9635	2	50.4327	-63.477	-720.296	22816.5	112689	-13142.3	356.449	268.323	0	0	0	0	0	0	0	200	903	0	0	0	0	0	0	0	603	903	0
9635	3	51.5008	-63.9348	-723.043	22175.6	113056	-13416.9	356.361	269.33	0	0	0	0	0	0	0	200	903	0	0	0	0	0	0	0	603	903	0
9635	4	51.3483	-63.9348	-721.822	21901	112934	-13233.8	356.456	269.659	0	0	0	0	0	0	0	200	903	0	0	0	0	0	0	0	603	903	0
9635	5	50.4327	-63.9348	-722.737	21077	113483	-13325.4	357.018	270.837	0	0	0	0	0	0	0	200	903	0	0	0	0	0	0	0	603	903	0
9635	6	50.5853	-64.0874	-723.348	20893.9	113483	-13508.5	356.886	271.115	0	0	0	0	0	0	0	200	903	0	0	0	0	0	0	0	603	903	0
9635	7	51.5008	-64.0874	-717.855	21077	113544	-13142.3	358.171	270.639	0	0	0	0	0	0	0	200	903	0	0	0	0	0	0	0	603	903	0
9635	8	49.975	-65.3081	-724.263	19978.4	113361	-13416.9	356.519	272.416	0	0	0	0	0	0	0	200	903	0	0	0	0	0	0	0	603	903	0
9635	9	50.8905	-63.9348	-725.179	20069.9	113605	-12684.5	356.658	272.324	0	0	0	0	0	0	0	200	903	0	0	0	0	0	0	0	603	903	0
9636	0	50.7379	-64.0874	-724.263	19795.3	113971	-13508.5	357.362	272.668	0	0	0	0	0	0	0	200	903	0	0	0	0	0	0	0	603	903	0
9636	1	50.4327	-64.3925	-725.789	18971.3	114032	-13325.4	357.115	273.861	0	0	0	0	0	0	0	200	903	0	0	0	0	0	0	0	603	903	0
9636	2	51.3483	-64.3925	-723.653	18330.4	114093	-13233.8	357.663	274.67	0	0	0	0	0	0	0	200	903	0	0	0	0	0	0	0	603	903	0
9636	3	50.8905	-63.9348	-723.043	17598	113971	-13325.4	357.627	275.661	0	0	0	0	0	0	0	200	903	0	0	0	0	0	0	0	603	903	0
9636	4	51.5008	-63.6296	-725.789	18147.3	114032	-13188	357.115	274.996	0	0	0	0	0	0	0	200	903	0	0	0	0	0	0	0	603	903	0
9636	5	52.569	-64.8503	-723.653	17414.9	114398	-13279.6	358.085	275.935	0	0	0	0	0	0	0	200	903	0	0	0	0	0	0	0	603	903	0
9636	6	51.806	-65.7658	-725.789	16774	114337	-12913.4	357.535	276.889	0	0	0	0	0	0	0	200	903	0	0	0	0	0	0	0	603	903	0
9636	7	52.4164	-63.7822	-726.094	16224.7	114276	-13142.3	357.385	277.655	0	0	0	0	0	0	0	200	903	0	0	0	0	0	0	0	603	903	0
9636	8	52.2638	-64.5451	-725.179	16224.7	114459	-13096.5	357.836	277.627	0	0	0	0	0	0	0	200	903	0	0	0	0	0	0	0	603	903	0
9636	9	53.7897	-64.6977	-728.841	15675.4	114704	-13371.1	357.378	278.493	0	0	0	0	0	0	0	200	903	0	0	0	0	0	0	0	603	903	0
9637	0	52.2638	-63.3244	-727.62	14943	114948	-12501.4	357.978	279.463	0	0	0	0	0	0	0	200	903	0	0	0	0	0	0	0	603	903	0
9637	1	52.4164	-63.7822	-728.536	14943	114582	-13142.3	357.276	279.489	0	0	0	0	0	0	0	200	903	0	0	0	0	0	0	0	603	903	0
9637	2	52.7215	-64.0874	-726.094	14485.2	114643	-13188	357.889	280.051	0	0	0	0	0	0	0	200	903	0	0	0	0	0	0	0	603	903	0
9637	3	51.9586	-63.477	-728.536	13752.8	115009	-13004.9	357.863	281.123	0	0	0	0	0	0	0	200	903	0	0	0	0	0	0	0	603	903	0
9637	4	52.8741	-63.477	-729.451	13295	114582	-12730.3	357.079	281.774	0	0	0	0	0	0	0	200	903	0	0	0	0	0	0	0	603	903	0
9637	5	52.8741	-64.3925	-729.146	13203.5	115009	-13050.7	357.731	281.892	0	0	0	0	0	0	0	200	903	0	0	0	0	0	0	0	603	903	0
9637	6	52.2638	-64.0874	-728.841	12471	114948	-13233.8	357.713	282.889	0	0	0	0	0	0	0	200	903	0	0	0	0	0	0	0	603	903	0
9637	7	53.4845	-63.1718	-727.01	11830.2	115009	-12867.6	358.194	283.728	0	0	0	0	0	0	0	200	903	0	0	0	0	0	0	0	603	903	0
9637	8	52.7215	-63.0193	-727.315	11464	115253	-12684.5	358.464	284.238	0	0	0	0	0	0	0	200	903	0	0	0	0	0	0	0	603	903	0
9637	9	52.569	-64.3925	-727.925	11372.4	115192	-13188	358.247	284.377	0	0	0	0	0	0	0	200	903	0	0	0	0	0	0	0	603	903	0
9638	0	53.0267	-63.0193	-723.348	10273.8	115497	-13004.9	359.67	285.797	0	0	0	0	0	0	0	200	903	0	0	0	0	0	0	0	603	903	0
9638	1	54.4	-62.8667	-727.62	10365.3	115009	-13142.3	358.062	285.755	0	0	0	0	0	0	0	200	903	0	0	0	0	0	0	0	603	903	0
9638	2	53.7897	-63.6296	-726.705	10090.7	115253	-12547.2	358.597	286.114	0	0	0	0	0	0	0	200	903	0	0	0	0	0	0	0	603	903	0
9638	3	53.7897	-64.24	-727.315	8442.72	115741	-13188	359.135	288.392	0	0	0	0	0	0	0	200	903	0	0	0	0	0	0	0	603	903	0
9638	4	53.9422	-62.8667	-727.925	8717.38	115680	-12959.2	358.918	288.024	0	0	0	0	0	0	0	200	903	0	0	0	0	0	0	0	603	903	0
9638	5	53.1793	-63.7822	-728.841	8259.62	115680	-13142.3	358.718	288.667	0	0	0	0	0	0	0	200	903	0	0	0	0	0	0	0	603	903	0
9638	6	54.0948	-62.8667	-730.062	7618.74	115802	-13004.9	358.62	289.564	0	0	0	0	0	0	0	200	903	0	0	0	0	0	0	0	603	903	0
9638	7	53.6371	-62.5615	-728.841	6977.88	115314	-13325.4	358.216	290.426	0	0	0	0	0	0	0	200	903	0	0	0	0	0	0	0	603	903	0
9638	8	53.7897	-62.5615	-726.4	7160.98	115619	-12821.8	359.167	290.142	0	0	0	0	0	0	0	200	903	0	0	0	0	0	0	0	603	903	0
9638	9	53.0267	-61.9511	-728.841	6520.11	115436	-12867.6	358.383	291.054	0	0	0	0	0	0	0	200	903	0	0	0	0	0	0	0	603	903	0
9639	0	53.7897	-62.1037	-727.925	5421.48	115619	-12959.2	358.834	292.552	0	0	0	0	0	0	0	200	903	0	0	0	0	0	0	0	603	903	0
9639	1	53.4845	-61.9511	-729.451	5604.58	115375	-12959.2	358.167	292.317	0	0	0	0	0	0	0	200	903	0	0	0	0	0	0	0	603	903	0
9639	2	53.1793	-62.5615	-728.231	4872.16	115619	-13233.8	358.767	293.31	0	0	0	0	0	0	0	200	903	0	0	0	0	0	0	0	603	903	0
9639	3	54.8578	-62.1037	-725.484	4139.74	115924	-12913.4	359.789	294.294	0	0	0	0	0	0	0	200	903	0	0	0	0	0	0	0	603	903	0
9639	4	53.1793	-61.0356	-725.179	3681.98	115619	-12913.4	359.435	294.923	0	0	0	0	0	0	0	200	903	0	0	0	0	0	0	0	603	903	0
9639	5	54.5526	-61.7986	-725.484	3498.87	115802	-12409.8	359.621	295.177	0	0	0	0	0	0	0	200	903	0	0	0	0	0	0	0	603	903	0
9639	6	54.2474	-61.9511	-724.568	2766.45	115253	-12821.8	359.064	296.182	0	0	0	0	0	0	0	200	903	0	0	0	0	0	0	0	603	903	0
9639	7	54.8578	-61.4934	-722.737	2308.69	115436	-12821.8	359.721	296.806	0	0	0	0	0	0	0	200	903	0	0	0	0	0	0	0	603	903	0
9639	8	54.8578	-61.646	-725.789	2125.58	115741	-12959.2	359.47	297.071	0	0	0	0	0	0	0	200	903	0	0	0	0	0	0	0	603	903	0
9639	9	54.4	-61.646	-723.043	1210.05	115436	-12776.1	359.653	298.326	0	0	0	0	0	0	0	200	903	0	0	0	0	0	0	0	603	903	0
9640	0	53.9422	-60.5779	-724.874	843.842	115863	-12913.4	359.839	298.836	0	0	0	0	0	0	0	200	903	0	0	0	0	0	0	0	603	903	0
9640	1	55.3155	-61.3408	-723.958	386.078	115802	-12959.2	359.957	299.467	0	0	0	0	0	0	0	200	903	0	0	0	0	0	0	0	603	903	0
9640	2	54.2474	-61.1882	-723.653	-254.791	115436	-12684.5	359.518	300.352	0	0	0	0	0	0	0	200	903	0	0	0	0	0	0	0	603	903	0
9640	3	54.5526	-60.1201	-722.737	-895.661	115741	-12821.8	360.143	301.239	0	0	0	0	0	0	0	200	903	0	0	0	0	0	0	0	603	903	0
9640	4	54.4	-61.646	-720.296	-1353.42	115314	-12776.1	360.092	301.879	0	0	0	0	0	0	0	200	903	0	0	0	0	0	0	0	603	903	0
9640	5	54.4	-60.5779	-722.737	-1353.42	115863	-12821.8	360.312	301.873	0	0	0	0	0	0	0	200	903	0	0	0	0	0	0	0	603	903	0
9640	6	54.0948	-60.1201	-721.517	-1994.29	115314	-12684.5	359.822	302.764	0	6.77353	2.31201	-22.9449	3849.41	-1343.3	1083.76	141.455	735.232	0	0	0	0	0	0	0	603	903	0
9640	7	53.3319	-59.8149	-722.127	-2726.72	115436	-12913.4	359.856	303.776	0	1.12778	-5.31739	-21.419	3574.75	-427.777	397.11	180.028	736.104	0	0	0	0	0	0	0	603	903	0
9640	8	53.9422	-60.4253	-720.601	-2818.27	115558	-12776.1	360.363	303.911	0	2.95883	-5.92774	-18.9776	4856.49	-916.059	1175.31	151.729	647.093	0	0	0	0	0	0	0	603	903	0
9640	9	54.7052	-60.1201	-718.465	-4100.01	115192	-12867.6	360.331	305.707	0	7.23129	-3.94409	-24.1656	4764.94	-1099.16	1541.52	154.515	705.821	0	0	0	0	0	0	0	603	903	0
9641	0	53.3319	-59.9675	-718.465	-4374.66	115619	-12913.4	360.925	306.089	0	3.26401	-12.7942	-33.626	5680.47	-916.059	1221.09	172.757	734.069	0	0	0	0	0	0	0	603	903	0
9641	1	52.7215	-60.2727	-718.16	-4649.32	115253	-12318.3	360.484	306.474	0	3.4166	-16.7615	-36.6778	6504.44	-1404.34	1770.4	161.711	725.66	0	0	0	0	0	0	0	603	903	0
9641	2	53.9422	-60.1201	-718.77	-5473.3	115375	-12684.5	360.517	307.615	0	5.40024	-15.6934	-35.1519	6962.2	-1526.41	1816.18	156.577	704.94	0	0	0	0	0	0	0	603	903	0
9641	3	53.9422	-59.6623	-715.413	-6114.17	115314	-12821.8	361.185	308.546	0	5.70541	-18.5925	-39.7295	8152.39	-1343.3	1587.3	166.189	697.803	0	0	0	0	0	0	0	603	903	0
9641	4	53.9422	-60.7304	-716.024	-5747.96	115192	-13050.7	360.877	308.028	0	7.23129	-23.6279	-45.2227	9342.58	-1587.45	1770.4	164.897	696.41	0	0	0	0	0	0	0	603	903	0
9641	5	53.0267	-61.1882	-716.634	-6846.59	115619	-13096.5	361.336	309.554	0	3.4166	-26.3745	-54.378	10441.2	-2075.73	1953.51	161.828	710.988	0	0	0	0	0	0	0	603	903	0
9641	6	53.6371	-60.7304	-716.329	-7029.69	115192	-13096.5	360.809	309.814	0	0.364838	-25.7642	-58.0401	10349.7	-1831.59	1678.85	168.443	724.681	0	0	0	0	0	0	0	603	903	0
9641	7	54.4	-61.4934	-717.244	-7304.35	115497	-13096.5	361.029	310.184	0	7.38388	-26.5271	-59.8711	11082.1	-2014.69	2502.82	166.35	717.901	0	0	0	0	0	0	0	603	903	0
9641	8	54.7052	-62.2563	-717.244	-7670.56	115253	-13279.6	360.689	310.695	0	8.90976	-27.1375	-62.3125	12363.8	-2258.83	2319.72	163.75	704.584	0	0	0	0	0	0	0	603	903	0
9641	9	54.4	-61.9511	-717.549	-8586.09	115436	-13920.5	360.875	311.966	0	1.89072	-28.8159	-70.5523	12730	-2014.69	1953.51	171.444	722.566	0	0	0	0	0	0	0	603	903	0
9642	0	53.7897	-62.1037	-716.634	-8219.88	115741	-12913.4	361.507	311.47	0	2.50107	-29.1211	-73.9092	13645.6	-2319.87	2594.38	168.612	718.374	0	0	0	0	0	0	0	603	903	0
9642	1	53.7897	-63.477	-717.855	-8677.64	115131	-13508.5	360.382	312.088	0	10.2831	-28.5107	-75.1299	14194.9	-2380.9	2777.48	168.31	714.062	0	0	0	0	0	0	0	603	903	0
9642	2	54.2474	-64.5451	-712.056	-9226.96	115680	-13462.7	362.459	312.958	0	8.14682	-29.884	-78.792	14286.4	-2258.83	2457.05	171.332	721.682	0	0	0	0	0	0	0	603	903	0
9642	3	53.0267	-62.7141	-717.855	-10050.9	115253	-13600	360.552	314.001	0	7.07871	-28.5107	-82.4542	15476.6	-2564.01	3052.14	168.904	715.3	0	0	0	0	0	0	0	603	903	0
9642	4	53.4845	-64.24	-716.024	-9867.83	115558	-13462.7	361.389	313.781	0	9.21494	-29.4263	-86.1163	15934.4	-2808.15	3097.92	167.391	717.967	0	0	0	0	0	0	0	603	903	0
9642	5	53.4845	-63.9348	-717.855	-10600.2	115436	-13783.1	360.807	314.767	0	10.5882	-31.4099	-88.5577	15842.8	-2564.01	2731.7	171.047	724.102	0	0	0	0	0	0	0	603	903	0
9642	6	54.0948	-65.7658	-716.024	-11241.1	115314	-13920.5	361.048	315.699	0	13.1822	-26.5271	-89.168	16392.1	-2625.04	3326.8	170.561	719.166	0	0	0	0	0	0	0	603	903	0
9642	7	53.4845	-64.0874	-714.803	-10508.7	115375	-13554.3	361.408	314.702	0	10.1305	-25.7642	-91.9146	16758.3	-2564.01	3189.47	172.104	720.675	0	0	0	0	0	0	0	603	903	0
9642	8	52.8741	-65.0029	-713.887	-12248.2	115070	-13966.2	361.188	317.157	0	9.52011	-26.8323	-94.356	16666.8	-2991.26	2823.26	168.298	726.363	0	0	0	0	0	0	0	603	903	0
9642	9	53.3319	-65.7658	-712.667	-12065.1	115619	-13508.5	362.235	316.93	0	10.7408	-23.1702	-96.7974	17399.2	-2502.97	3235.24	174.142	723.251	0	0	0	0	0	0	0	603	903	0
9643	0	53.7897	-66.3762	-713.582	-12339.8	115009	-14149.3	361.171	317.293	0	13.3348	-18.7451	-97.4078	17673.9	-2625.04	3143.69	173.051	721.558	0	0	0	0	0	0	0	603	903	0
9643	1	53.7897	-66.5288	-714.193	-12797.5	114948	-14012	360.948	317.919	0	10.1305	-19.8132	-96.7974	18314.7	-2747.11	2411.27	171.62	713.793	0	0	0	0	0	0	0	603	903	0
9643	2	52.7215	-66.3762	-713.582	-12797.5	115314	-14149.3	361.599	317.934	0	9.6727	-17.2192	-101.07	18131.6	-2564.01	3143.69	174.631	723.603	0	0	0	0	0	0	0	603	903	0
9643	3	52.8741	-67.4443	-712.361	-13163.7	114765	-14240.9	361.105	318.479	0	11.9615	-13.7097	-103.511	18406.3	-2441.94	2823.26	176.409	725.181	0	0	0	0	0	0	0	603	903	0
9643	4	53.4845	-67.4443	-713.277	-13804.6	115070	-14195.1	361.326	319.354	0	9.97787	-12.489	-101.07	18406.3	-2625.04	2594.38	174.027	720.885	0	0	0	0	0	0	0	603	903	0
9643	5	52.569	-68.5124	-713.277	-13621.5	114521	-14744.4	360.556	319.097	0	10.4356	-11.5735	-106.258	18497.8	-2747.11	2777.48	174.147	728.916	0	0	0	0	0	0	0	603	903	0
9643	6	52.4164	-69.8857	-714.193	-13804.6	114948	-14469.8	360.948	319.329	0	9.6727	-10.0476	-105.342	19413.4	-2991.26	2685.93	171.604	718.712	0	0	0	0	0	0	0	603	903	0
9643	7	51.6534	-69.7331	-709.31	-14811.7	114765	-14790.2	361.798	320.882	0	9.21494	-6.69068	-112.667	19688	-2869.18	2182.39	174.534	728.254	0	0	0	0	0	0	0	603	903	0
9643	8	51.6534	-69.7331	-711.751	-14262.4	114704	-15019.1	361.157	320.038	0	10.4356	-5.62256	-114.803	19413.4	-2686.08	2777.48	176.603	733.898	0	0	0	0	0	0	0	603	903	0
9643	9	51.0431	-71.259	-712.972	-14537	114459	-14607.1	360.539	320.389	0	9.82529	-5.1648	-113.887	19962.7	-2991.26	2640.15	173.735	727.715	0	0	0	0	0	0	0	603	903	0
9644	0	50.5853	-70.9538	-712.667	-14720.1	114398	-14790.2	360.522	320.655	0	10.1305	-3.02857	-119.075	19962.7	-2869.18	2182.39	175.904	735.352	0	0	0	0	0	0	0	603	903	0
9644	1	49.975	-71.7168	-712.056	-14994.8	114582	-15339.5	360.916	321.058	0	11.1986	-2.26563	-121.822	21152.9	-3113.33	2594.38	174.444	729.362	0	0	0	0	0	0	0	603	903	0
9644	2	50.4327	-73.853	-709.615	-15452.5	114704	-15568.4	361.642	321.776	0	12.2667	-1.19751	-123.043	21519.1	-3174.36	2731.7	174.201	728.109	0	0	0	0	0	0	0	603	903	0
9644	3	49.8224	-73.2426	-709.615	-15452.5	114276	-15751.5	361.04	321.776	0	11.3512	-0.129397	-125.789	21885.3	-2930.22	1999.28	176.705	729.016	0	0	0	0	0	0	0	603	903	0
9644	4	49.3646	-74.3108	-709.31	-15818.8	114337	-15614.2	361.195	322.302	0	11.046	0.0231904	-128.231	22617.7	-3479.54	2548.6	172.865	726.617	0	0	0	0	0	0	0	603	903	0
9644	5	50.4327	-75.6841	-708.394	-16001.9	113605	-15888.8	360.37	322.589	0	10.5882	1.85425	-130.977	22160	-3479.54	2365.49	173.434	733.811	0	0	0	0	0	0	0	603	903	0
9644	6	49.0594	-75.5315	-707.784	-16185	114154	-16071.9	361.284	322.867	0	10.4356	0.633542	-135.86	22709.3	-3235.4	2045.06	176.186	735.848	0	0	0	0	0	0	0	603	903	0
9644	7	48.7543	-77.5151	-706.868	-16734.3	113666	-15614.2	360.802	323.674	0	11.046	3.07495	-138.301	23716.3	-3601.61	2548.6	173.958	731.517	0	0	0	0	0	0	0	603	903	0
9644	8	48.6017	-78.278	-709.615	-16642.7	113788	-16667	360.352	323.453	0	9.52011	2.31201	-141.353	23899.5	-3357.47	2045.06	176.248	733.924	0	0	0	0	0	0	0	603	903	0
9644	9	47.9913	-79.1936	-706.868	-16917.4	113422	-16667	360.457	323.933	0	10.2831	1.70166	-145.626	24815	-3662.64	2045.06	174.849	732.597	0	0	0	0	0	0	0	603	903	0
9645	0	47.6861	-79.8039	-705.648	-17008.9	113300	-16941.7	360.562	324.104	0	10.2831	3.53271	-147.762	25455.9	-3967.82	2365.49	173.147	730.724	0	0	0	0	0	0	0	603	903	0
9645	1	46.7706	-80.7195	-704.732	-17100.5	113300	-17124.8	360.77	324.265	0	8.29941	4.60083	-153.56	24906.5	-3784.71	2319.72	175.354	740.806	0	0	0	0	0	0	0	603	903	0
9645	2	46.4654	-81.4824	-701.375	-17649.8	112689	-17353.7	360.669	325.165	0	8.90976	4.14306	-155.391	25822.1	-4028.85	1633.07	174.073	736.825	0	0	0	0	0	0	0	603	903	0
9645	3	45.2447	-81.7876	-703.817	-17375.2	112934	-17491	360.459	324.687	0	11.8089	4.75342	-157.222	26920.7	-4456.1	1816.18	171.657	731.773	0	0	0	0	0	0	0	603	903	0
9645	4	44.024	-82.2453	-702.901	-17283.6	112628	-17628.4	360.234	324.589	0	7.53647	6.27929	-163.326	26646	-3784.71	1633.07	176.827	739.853	0	0	0	0	0	0	0	603	903	0
9645	5	43.8714	-82.3979	-701.68	-18107.6	112567	-17857.2	360.426	325.806	0	7.07871	5.36377	-167.293	27927.8	-4456.1	1587.3	173.364	736.061	0	0	0	0	0	0	0	603	903	0
9645	6	43.2611	-83.7712	-701.07	-18290.7	112201	-17399.5	360.043	326.09	0	9.82529	6.73706	-172.481	28568.6	-4150.92	1907.73	175.934	737.367	0	0	0	0	0	0	0	603	903	0
9645	7	43.2611	-85.6023	-697.408	-17832.9	111835	-18131.9	360.358	325.57	0	10.7408	5.97412	-174.922	29026.4	-4517.14	2090.84	174.176	737.061	0	0	0	0	0	0	0	603	903	0
9645	8	42.6507	-85.1445	-695.577	-18656.9	112323	-18269.2	361.482	326.822	0	9.97787	8.56811	-181.941	30491.3	-4944.38	1633.07	172.824	735.412	0	0	0	0	0	0	0	603	903	0
9645	9	41.5826	-86.06	-691.915	-18931.5	111713	-18223.4	361.455	327.361	0	12.4193	9.9414	-184.078	30949	-4761.28	1770.4	174.134	734.87	0	0	0	0	0	0	0	603	903	0
9646	0	42.4982	-86.9756	-692.83	-17649.8	111103	-18543.9	360.361	325.475	0	11.046	10.3992	-192.623	31223.7	-4883.35	2045.06	174.648	740.902	0	0	0	0	0	0	0	603	903	0
9646	1	41.8878	-87.4333	-691.609	-19389.3	111225	-18498.1	360.82	328.035	0	9.97787	11.7725	-197.505	32322.3	-5066.45	1907.73	174.348	739.347	0	0	0	0	0	0	0	603	903	0
9646	2	42.4982	-87.5859	-690.999	-19023.1	110553	-18727	359.99	327.53	0	11.9615	13.2983	-205.745	33054.8	-5432.66	1678.85	173.595	742.341	0	0	0	0	0	0	0	603	903	0
9646	3	41.5826	-88.5014	-689.473	-18748.4	110492	-18681.2	360.256	327.192	0	9.82529	12.8406	-210.628	33970.3	-5432.66	1724.63	174.207	741.719	0	0	0	0	0	0	0	603	903	0
9646	4	40.8197	-89.7221	-687.032	-19206.2	110004	-19047.4	360.115	327.955	0	8.75717	14.9768	-217.647	34336.5	-5554.73	1083.76	174.478	745.238	0	0	0	0	0	0	0	603	903	0
9646	5	40.6671	-90.0273	-683.37	-19297.8	109577	-18910.1	360.348	328.239	0	10.4356	16.3501	-222.53	35892.9	-5859.91	1358.41	173.667	741.705	0	0	0	0	0	0	0	603	903	0
9646	6	39.4464	-90.4851	-683.37	-19664	109516	-19322.1	360.258	328.775	0	9.06235	16.6553	-228.939	36625.3	-6165.08	1266.86	173.071	743.021	0	0	0	0	0	0	0	603	903	0
9646	7	38.836	-91.248	-681.234	-19114.7	108722	-19184.8	359.596	328.059	0	7.23129	17.5708	-235.652	37357.7	-6226.12	946.427	173.579	744.471	0	0	0	0	0	0	0	603	903	0
9646	8	38.2257	-91.7058	-679.402	-19847.1	108478	-19276.3	359.667	329.213	0	7.07871	18.1811	-240.84	38547.9	-6348.19	854.874	173.642	742.944	0	0	0	0	0	0	0	603	903	0
9646	9	39.2938	-91.248	-676.046	-20487.9	108356	-19642.5	360.279	330.306	0	6.62094	21.9958	-244.808	39005.7	-6653.37	717.545	172.822	743.668	0	0	0	0	0	0	0	603	903	0
9647	0	38.0731	-92.4687	-673.604	-19938.6	107624	-18818.5	359.773	329.6	0	5.55283	21.8433	-252.437	39829.7	-6653.37	442.887	173.643	745.22	0	0	0	0	0	0	0	603	903	0
9647	1	37.6153	-93.5368	-670.552	-20487.9	107257	-19322.1	359.954	330.554	0	4.48471	23.2165	-255.184	40653.6	-7324.75	259.781	171.296	743.689	0	0	0	0	0	0	0	603	903	0
9647	2	36.6998	-93.0791	-668.111	-19938.6	107074	-19688.3	360.264	329.843	0	3.87436	25.0476	-263.118	41660.7	-7263.72	488.663	172.394	744.666	0	0	0	0	0	0	0	603	903	0
9647	3	35.9369	-93.9946	-663.533	-20213.3	106586	-20008.7	360.634	330.463	0	3.72177	25.5054	-269.832	41843.8	-7263.72	305.558	173.081	747.927	0	0	0	0	0	0	0	603	903	0
9647	4	36.8524	-94.7575	-662.618	-20579.5	106342	-19962.9	360.487	331.058	0	3.87436	28.2519	-274.41	42393.1	-7752	168.228	171.75	748.512	0	0	0	0	0	0	0	603	903	0
9647	5	36.0895	-95.9782	-658.956	-20762.6	105487	-20146	360.083	331.508	0	3.87436	28.4045	-281.124	43949.5	-7629.93	351.334	172.859	746.665	0	0	0	0	0	0	0	603	903	0
9647	6	36.0895	-96.436	-656.209	-21037.3	105487	-20100.3	360.753	332.059	0	3.26401	29.3201	-287.837	44041.1	-7874.07	351.334	172.644	749.993	0	0	0	0	0	0	0	603	903	0
9647	7	35.4791	-95.6731	-654.073	-20030.2	104877	-20237.6	360.345	330.624	0	2.65366	31.1511	-295.162	45139.7	-8240.28	122.452	172.082	750.068	0	0	0	0	0	0	0	603	903	0
9647	8	35.0213	-97.0464	-651.631	-21128.8	104145	-20420.7	359.821	332.425	0	1.43295	31.4563	-300.96	45505.9	-8484.42	168.228	171.809	751.797	0	0	0	0	0	0	0	603	903	0
9647	9	34.5636	-96.7412	-649.8	-21403.5	104145	-19962.9	360.272	332.939	0	0.364838	33.4399	-306.148	46329.9	-8545.45	-197.982	172.087	751.668	0	0	0	0	0	0	0	603	903	0
9648	0	34.411	-97.5041	-645.223	-20671.1	103107	-20512.3	359.801	332.037	0	-0.550689	34.9658	-313.777	47337	-9094.77	-14.877	171.015	752.138	0	0	0	0	0	0	0	603	903	0
9648	1	35.0213	-99.03	-641.866	-20854.2	102863	-20329.1	360.256	332.49	0	-1.6188	34.5081	-320.186	47977.8	-9155.81	-14.877	171.405	753.156	0	0	0	0	0	0	0	603	903	0
9648	2	32.8851	-97.8093	-639.73	-21495	102069	-20558	359.551	333.6	0	-1.77139	37.4072	-326.9	49351.1	-9094.77	-381.088	172.179	752.033	0	0	0	0	0	0	0	603	903	0
9648	3	33.4955	-98.7248	-636.068	-22135.9	101825	-20420.7	360.086	334.801	0	-1.92398	38.9331	-334.224	49717.3	-9399.95	-518.417	171.875	754.246	0	0	0	0	0	0	0	603	903	0
9648	4	33.1903	-99.4878	-632.405	-21128.8	101154	-20649.6	359.951	333.41	0	-2.83951	39.8486	-342.769	50632.9	-10010.3	-518.417	170.796	755.283	0	0	0	0	0	0	0	603	903	0
9648	5	31.9696	-99.6404	-628.743	-22227.4	100482	-20558	359.815	335.352	0	0.0596623	42.4426	-349.788	51731.5	-10193.4	-564.193	170.858	755.106	0	0	0	0	0	0	0	603	903	0
9648	6	32.2748	-99.3352	-624.471	-22044.3	99750	-20695.4	359.735	335.301	0	-3.90762	44.1211	-361.08	52647	-10315.5	-930.405	171.432	757.196	0	0	0	0	0	0	0	603	903	0
9648	7	31.9696	-100.556	-618.672	-21861.2	99200.7	-20786.9	360.344	335.336	0	-5.73868	47.0203	-367.183	52830.1	-10681.7	-884.628	170.909	759.121	0	0	0	0	0	0	0	603	903	0
9648	8	31.0541	-100.861	-612.569	-21952.8	98651.4	-20786.9	361.045	335.837	0	-5.12833	48.3936	-378.475	53745.7	-11292	-1388.17	170.164	760.994	0	0	0	0	0	0	0	603	903	0
9648	9	31.2066	-100.556	-613.484	-22227.4	98163.1	-20924.3	360.009	336.232	0	-4.51797	48.8513	-385.189	54478.1	-11597.2	-1342.39	169.892	761.568	0	0	0	0	0	0	0	603	903	0
9649	0	31.0541	-101.166	-607.381	-21586.6	97125.5	-20878.5	359.909	335.54	0	-6.95938	51.9031	-394.344	55302	-11841.4	-1617.05	169.972	762.762	0	0	0	0	0	0	0	603	903	0
9649	1	30.4437	-102.845	-604.94	-21678.1	96271	-20466.5	359.142	335.835	0	-8.18008	52.2082	-403.194	56492.2	-12085.5	-1800.16	170.026	762.888	0	0	0	0	0	0	0	603	903	0
9649	2	29.8334	-101.624	-599.752	-22227.4	95843.8	-20786.9	359.806	337.061	0	-5.12833	54.8022	-410.213	57224.7	-12940	-2029.04	168.455	763.5	0	0	0	0	0	0	0	603	903	0
9649	3	31.5118	-102.082	-597.31	-21037.3	95355.5	-20786.9	359.642	335.22	0	-9.09561	57.0911	-418.453	58048.6	-13367.2	-2166.37	168.056	764.278	0	0	0	0	0	0	0	603	903	0
9649	4	30.1385	-102.082	-592.733	-21952.8	94623.1	-20603.8	359.639	337.037	0	-10.4689	57.3962	-426.998	58872.6	-13184.1	-2166.37	169.124	765.124	0	0	0	0	0	0	0	603	903	0
9649	5	28.6127	-102.234	-588.46	-22868.3	93646.5	-20878.5	359.138	338.861	0	-8.79044	61.0583	-434.627	58781	-14038.6	-2486.8	167.7	767.755	0	0	0	0	0	0	0	603	903	0
9649	6	29.5282	-101.624	-583.577	-22410.6	93219.2	-20649.6	359.738	338.402	0	-9.70596	60.6006	-438.594	59696.6	-13733.4	-2532.58	168.688	766.891	0	0	0	0	0	0	0	603	903	0
9649	7	29.0704	-102.082	-575.643	-22227.4	92364.8	-20558	360.455	338.613	0	-11.0793	62.5842	-447.75	60245.9	-14099.7	-2303.7	168.51	768.447	0	0	0	0	0	0	0	603	903	0
9649	8	28.3075	-103.608	-574.422	-22227.4	91510.2	-20558	359.308	338.695	0	-10.6215	65.4834	-454.158	61161.4	-14954.1	-2761.46	167.073	768.33	0	0	0	0	0	0	0	603	903	0
9649	9	27.5445	-102.082	-568.624	-22135.9	90716.8	-19917.2	359.538	338.929	0	-10.3163	65.4834	-459.957	61619.2	-14954.1	-2898.79	167.488	769.033	0	0	0	0	0	0	0	603	903	0
9650	0	26.9342	-102.387	-565.267	-22135.9	89984.4	-20603.8	359.189	339.16	0	-11.8422	67.0093	-464.534	60795.2	-15137.3	-3036.12	167.414	772.127	0	0	0	0	0	0	0	603	903	0
9650	1	28.1549	-101.624	-556.722	-21952.8	89496.1	-20146	360.756	339.432	0	-12.1474	69.1455	-471.248	62443.2	-14893.1	-3265	168.396	770.494	0	0	0	0	0	0	0	603	903	0
9650	2	26.7816	-102.234	-552.755	-22776.8	88214.4	-20420.7	359.591	341.206	0	-11.537	69.4507	-474.91	62626.3	-15198.3	-3310.78	167.998	771.13	0	0	0	0	0	0	0	603	903	0
9650	3	26.4764	-102.845	-547.872	-22776.8	87604	-19962.9	359.899	341.573	0	-11.0793	70.6714	-481.319	62626.3	-15442.4	-3219.22	167.916	772.886	0	0	0	0	0	0	0	603	903	0
9650	4	25.5609	-102.54	-542.379	-21952.8	86627.4	-20146	359.718	340.475	0	-11.8422	72.1973	-487.728	62626.3	-15625.5	-3265	167.963	774.596	0	0	0	0	0	0	0	603	903	0
9650	5	23.7298	-101.777	-534.444	-22959.9	86078.2	-20283.4	361.061	342.96	0	-11.8422	73.2654	-489.559	63084	-16174.8	-3676.99	166.96	774.141	0	0	0	0	0	0	0	603	903	0
9650	6	24.6454	-102.234	-532.613	-22776.8	84857.5	-19962.9	359.323	342.764	0	-12.9103	72.9602	-493.221	63541.8	-15869.7	-3402.33	167.824	774.17	0	0	0	0	0	0	0	603	903	0
9650	7	23.2721	-102.54	-526.509	-22410.6	83880.9	-19917.2	359.315	342.564	0	-12.7577	74.9438	-498.104	63267.2	-16235.9	-3951.65	167.405	775.984	0	0	0	0	0	0	0	603	903	0
9650	8	22.6617	-102.692	-521.016	-22227.4	82538.1	-19917.2	358.418	342.662	0	-12.6051	74.7913	-500.24	63541.8	-16541.1	-4043.2	166.934	775.977	0	0	0	0	0	0	0	603	903	0
9650	9	22.5091	-101.319	-514.608	-22776.8	82049.8	-20100.3	359.442	344.26	0	-13.6732	75.0964	-502.376	63724.9	-16541.1	-4134.75	167.074	776.153	0	0	0	0	0	0	0	603	903	0
9651	0	21.7462	-101.166	-510.945	-22044.3	81317.4	-20008.7	359.151	343.144	0	-11.6896	75.8594	-505.123	63541.8	-16663.1	-4272.08	167.012	777.205	0	0	0	0	0	0	0	603	903	0
9651	1	21.2884	-102.082	-505.452	-21861.2	80279.8	-20191.8	358.828	343.251	0	-12.7577	77.3853	-506.648	64365.8	-16541.1	-4409.41	167.352	775.958	0	0	0	0	0	0	0	603	903	0
9651	2	20.8307	-101.471	-499.349	-22502.1	79120.1	-19688.3	358.447	345.063	0	-13.6732	77.3853	-509.09	63450.3	-16907.3	-4409.41	166.789	778.365	0	0	0	0	0	0	0	603	903	0
9651	3	19.9151	-99.6404	-490.804	-22868.3	78753.9	-19871.4	360.459	346.594	0	-15.6569	77.9956	-510.921	63724.9	-17273.5	-4592.52	166.191	778.274	0	0	0	0	0	0	0	603	903	0
9651	4	18.847	-100.098	-486.531	-22410.6	76983.9	-19917.2	358.23	346.062	0	-15.0465	79.5215	-513.057	63450.3	-17334.5	-5004.5	166.213	779.329	0	0	0	0	0	0	0	603	903	0
9651	5	18.5419	-99.4878	-482.259	-22593.7	76678.7	-19551	358.999	346.85	0	-15.5043	79.8267	-514.278	62992.5	-17334.5	-4958.73	166.294	780.513	0	0	0	0	0	0	0	603	903	0
9651	6	18.0841	-98.8774	-474.935	-22502.1	75091.8	-19047.4	358.11	347.379	0	-16.8776	80.437	-515.499	63541.8	-17883.8	-4775.62	165.308	779.737	0	0	0	0	0	0	0	603	903	0
9651	7	19.9151	-97.6567	-468.221	-22044.3	74542.5	-19001.6	359.204	347.081	0	-18.7086	81.2	-517.94	63541.8	-17578.7	-4912.95	166.06	780.318	0	0	0	0	0	0	0	603	903	0
9651	8	17.1686	-96.5886	-462.422	-21678.1	73810.1	-19276.3	359.616	346.88	0	-18.4035	81.5051	-518.856	63816.5	-17578.7	-5050.28	166.12	780.005	0	0	0	0	0	0	0	603	903	0
9651	9	16.8634	-96.1308	-455.709	-22227.4	71734.9	-18589.6	357.414	348.776	0	-19.1664	81.8103	-520.076	62900.9	-18311.1	-5553.82	164.792	782.054	0	0	0	0	0	0	0	603	903	0
9652	0	16.5582	-95.6731	-450.826	-21586.6	71734.9	-18727	359.119	347.882	0	-20.5397	82.5732	-523.128	63358.7	-18311.1	-5553.82	164.997	781.885	0	0	0	0	0	0	0	603	903	0
9652	1	15.4901	-95.5205	-442.891	-21678.1	70392.1	-18772.8	358.938	348.947	0	-21.3026	83.7939	-522.518	63633.4	-18555.2	-5645.37	164.489	781.218	0	0	0	0	0	0	0	603	903	0
9652	2	15.6427	-94.2998	-437.093	-21952.8	69476.6	-18269.2	358.952	350.225	0	-22.9811	84.7095	-525.264	62992.5	-19287.6	-5874.25	163.28	783.075	0	0	0	0	0	0	0	603	903	0
9652	3	14.7272	-93.3842	-430.989	-22319	68866.2	-17903	359.786	351.786	0	-23.5915	84.2517	-526.18	63175.6	-18372.1	-5965.81	165.084	782.935	0	0	0	0	0	0	0	603	903	0
9652	4	14.2694	-93.2317	-424.276	-21037.3	67340.3	-17994.6	358.718	349.584	0	-22.2182	86.0828	-525.569	63267.2	-18921.4	-5965.81	163.998	782.622	0	0	0	0	0	0	0	603	903	0
9652	5	15.4901	-93.0791	-420.003	-21495	65936.5	-18086.1	356.991	351.178	0	-26.4906	86.6931	-528.621	63541.8	-18860.4	-6286.24	164.322	782.797	0	0	0	0	0	0	0	603	903	0
9652	6	13.5065	-92.011	-413.9	-21586.6	65509.3	-17536.8	358.273	352.154	0	-26.338	87.3035	-529.232	63084	-19531.8	-6606.68	163.094	783.801	0	0	0	0	0	0	0	603	903	0
9652	7	13.2013	-90.7903	-407.491	-20854.2	64776.8	-17765.7	358.965	351.177	0	-26.6432	87.3035	-531.368	63358.7	-19348.7	-6652.45	163.587	783.763	0	0	0	0	0	0	0	603	903	0
9652	8	12.1332	-90.3325	-398.03	-21037.3	63983.4	-17536.8	360.75	352.853	0	-26.7958	88.6768	-533.199	62717.8	-19104.5	-6652.45	164.17	785.374	0	0	0	0	0	0	0	603	903	0
9652	9	12.7435	-89.1118	-394.368	-21495	62457.5	-17079	358.374	354.505	0	-28.932	88.9819	-533.504	62809.4	-20142.1	-6835.56	162.246	785.27	0	0	0	0	0	0	0	603	903	0
9653	0	11.9806	-86.9756	-387.654	-21128.8	61725.1	-16667	359.227	354.504	0	-28.7794	90.2026	-538.082	62992.5	-19714.9	-6240.47	163.361	785.931	0	0	0	0	0	0	0	603	903	0
9653	1	10.7599	-87.2807	-380.941	-20945.7	60687.5	-16804.4	359.31	354.984	0	-29.5424	90.6604	-539.302	62534.7	-19959	-7110.22	162.991	787.045	0	0	0	0	0	0	0	603	903	0
9653	2	12.5909	-86.06	-373.616	-20762.6	59405.8	-16575.5	359.002	355.572	0	-29.3898	91.7285	-540.218	62626.3	-20386.3	-7293.32	162.263	787.072	0	0	0	0	0	0	0	603	903	0
9653	3	10.7599	-85.4497	-365.987	-20579.5	58124	-16255.1	358.815	356.23	0	-31.6786	91.8811	-543.88	62534.7	-20142.1	-7201.77	162.966	788.021	0	0	0	0	0	0	0	603	903	0
9653	4	10.1495	-83.7712	-359.578	-19206.2	57208.5	-16163.5	359.099	353.413	0	-31.6786	91.8811	-545.406	62717.8	-21179.7	-7384.87	161.167	788.007	0	0	0	0	0	0	0	603	903	0
9653	5	9.84435	-84.0764	-353.78	-20396.4	56415	-16071.9	359.464	357.653	0	-34.12	93.407	-547.847	62809.4	-20874.6	-7384.87	161.897	788.352	0	0	0	0	0	0	0	603	903	0
9653	6	9.38658	-83.6186	-347.676	-20396.4	54645	-15888.8	357.172	358.665	0	-34.883	94.1699	-550.594	63084	-20813.5	-7522.2	162.198	788.425	0	0	0	0	0	0	0	603	903	0
9653	7	9.53917	-82.3979	-341.878	-18748.4	54461.9	-15705.7	359.302	354.84	0	-32.1364	94.3225	-554.256	63175.6	-21301.8	-7476.43	161.567	789.017	0	0	0	0	0	0	0	603	903	0
9653	8	11.2176	-81.7876	-334.859	-19938.6	53119.1	-15110.6	358.631	359.543	0	-35.7985	95.8484	-557.918	63084	-21301.8	-7751.09	161.819	789.93	0	0	0	0	0	0	0	603	903	0
9653	9	8.92882	-80.1091	-329.061	-19297.8	52081.6	-15110.6	358.273	358.645	0	-36.4088	96.3062	-560.359	62809.4	-21301.8	-8071.52	161.985	790.912	0	0	0	0	0	0	0	603	903	0
9654	0	8.16588	-78.8884	-323.262	-18748.4	51227.1	-14927.5	358.469	357.998	0	-35.9511	97.5269	-562.19	63541.8	-21607	-7842.64	161.566	789.975	0	0	0	0	0	0	0	603	903	0
9654	1	8.62364	-77.6677	-313.497	-19572.4	49945.3	-14927.5	359.317	362.433	0	-36.1037	98.4424	-567.378	63358.7	-21729	-8300.4	161.703	791.331	0	0	0	0	0	0	0	603	903	0
9654	2	7.8607	-75.8366	-310.445	-18748.4	49518.1	-14332.4	359.507	360.392	0	-38.0873	97.9846	-569.21	63541.8	-21851.1	-8071.52	161.611	791.368	0	0	0	0	0	0	0	603	903	0
9654	3	7.70812	-75.5315	-303.731	-18107.6	47992.2	-14378.2	358.009	359.617	0	-38.5451	100.121	-572.566	63816.5	-22034.2	-7751.09	161.517	791.543	0	0	0	0	0	0	0	603	903	0
9654	4	7.8607	-75.0737	-297.017	-17924.5	47626	-14012	360.348	360.348	0	-37.0192	99.5105	-576.229	64548.9	-22095.3	-8208.85	161.655	790.98	0	0	0	0	0	0	0	603	903	0
9654	5	7.40294	-71.7168	-289.388	-17741.4	46283.2	-13691.6	359.935	361.307	0	-38.3925	99.3579	-577.754	64640.4	-22583.5	-8300.4	160.912	791.118	0	0	0	0	0	0	0	603	903	0
9654	6	7.09776	-70.1909	-282.674	-17832.9	45428.7	-13554.3	360.711	363.087	0	-39.4606	101.342	-585.384	64732	-22888.7	-8346.18	160.9	792.42	0	0	0	0	0	0	0	603	903	0
9654	7	6.64	-70.8012	-274.434	-17558.3	44513.2	-13050.7	362.2	363.98	0	-38.6977	100.884	-587.825	65281.3	-22583.5	-8391.95	161.581	791.944	0	0	0	0	0	0	0	603	903	0
9654	8	7.25035	-69.1228	-269.246	-17741.4	43170.4	-12684.5	360.338	365.893	0	-38.8503	103.02	-589.961	64457.3	-23621.1	-8300.4	159.962	793.743	0	0	0	0	0	0	0	603	903	0
9654	9	7.55553	-66.834	-264.974	-17375.2	42926.3	-12867.6	362.002	365.573	0	-39.0028	103.63	-594.539	65006.6	-22583.5	-8208.85	162.015	793.661	0	0	0	0	0	0	0	603	903	0
9655	0	7.09776	-67.1391	-258.87	-16459.6	41522.4	-12867.6	360.399	363.583	0	-39.1554	103.325	-596.37	65647.5	-23316	-8529.28	160.904	792.922	0	0	0	0	0	0	0	603	903	0
9655	1	8.47106	-66.834	-253.682	-17100.5	40790	-12364.1	360.792	367.409	0	-39.6132	102.867	-600.337	65372.8	-23682.2	-8483.5	160.552	794.107	0	0	0	0	0	0	0	603	903	0
9655	2	7.40294	-65.3081	-248.799	-16917.4	39935.5	-12455.6	360.513	367.996	0	-40.6813	103.63	-604.61	65281.3	-23377	-8254.62	161.335	795.027	0	0	0	0	0	0	0	603	903	0
9655	3	8.01329	-64.0874	-242.391	-16185	38592.8	-11997.9	359.217	366.772	0	-39.0028	104.851	-605.831	66380	-24048.4	-8758.16	160.305	793.432	0	0	0	0	0	0	0	603	903	0
9655	4	6.94518	-61.9511	-235.372	-16734.3	38165.5	-11769	362.15	371.097	0	-39.1554	104.546	-611.934	65922.2	-23987.3	-8483.5	160.801	795.272	0	0	0	0	0	0	0	603	903	0
9655	5	6.33482	-59.8149	-230.794	-16001.9	36700.7	-11311.2	359.019	369.334	0	-40.3761	104.546	-614.376	66105.3	-23865.3	-8437.73	161.155	795.403	0	0	0	0	0	0	0	603	903	0
9655	6	6.02965	-58.7468	-224.691	-15177.9	36212.4	-10990.8	361.166	367.55	0	-40.6813	105.309	-617.427	66746.2	-24292.5	-8391.95	160.655	794.896	0	0	0	0	0	0	0	603	903	0
9655	7	6.02965	-57.2209	-218.892	-15452.5	35174.8	-10807.7	360.695	370.594	0	-39.7658	105.156	-622.005	66563	-24597.7	-8529.28	160.454	795.986	0	0	0	0	0	0	0	603	903	0
9655	8	8.16588	-55.2373	-210.347	-15086.3	34320.3	-10441.5	363.16	371.721	0	-40.9865	104.698	-624.752	66288.4	-24536.7	-8254.62	160.726	796.896	0	0	0	0	0	0	0	603	903	0
9655	9	6.02965	-54.1692	-205.464	-14537	33282.7	-10533	361.988	370.752	0	-41.2917	105.004	-628.719	67295.5	-24841.8	-8483.5	160.488	795.964	0	0	0	0	0	0	0	603	903	0
9656	0	7.09776	-55.5424	-198.751	-14170.8	31695.8	-9480.15	359.475	371.299	0	-40.5287	103.783	-632.991	67478.6	-24780.8	-8437.73	160.851	796.397	0	0	0	0	0	0	0	603	903	0
9656	1	7.09776	-51.5752	-190.206	-13987.7	31573.7	-9480.15	365.998	373.54	0	-40.8339	104.393	-634.822	67661.7	-24475.6	-8300.4	161.445	796.416	0	0	0	0	0	0	0	603	903	0
9656	2	8.01329	-50.9648	-189.901	-13987.7	30231	-9663.26	359.194	373.658	0	-41.902	104.851	-638.484	66746.2	-25391.2	-8437.73	160.232	798.462	0	0	0	0	0	0	0	603	903	0
9656	3	8.01329	-50.0493	-183.187	-13346.8	29925.8	-9663.26	363.362	372.859	0	-41.2917	104.393	-642.147	67387	-25024.9	-8575.06	161.029	798.06	0	0	0	0	0	0	0	603	903	0
9656	4	6.94518	-48.2182	-178.304	-13621.5	28888.2	-9297.05	362.017	376.395	0	-41.902	105.156	-643.062	68027.9	-25696.3	-8346.18	160.041	797.213	0	0	0	0	0	0	0	603	903	0
9656	5	7.70812	-47.4553	-173.421	-12889.1	28033.7	-8885.06	361.651	374.322	0	-43.4279	105.309	-647.945	68211	-25879.4	-8666.61	160.059	797.727	0	0	0	0	0	0	0	603	903	0
9656	6	7.70812	-46.5398	-170.369	-12522.9	27545.4	-8839.29	361.681	373.504	0	-42.8175	104.698	-650.997	68851.9	-25391.2	-8391.95	160.996	797.236	0	0	0	0	0	0	0	603	903	0
9656	7	7.70812	-45.3191	-165.486	-12889.1	25714.3	-8473.07	355.386	377.886	0	-43.2753	105.767	-654.354	68851.9	-26184.6	-8346.18	159.984	797.779	0	0	0	0	0	0	0	603	903	0
9656	8	8.47106	-43.0302	-159.993	-12339.8	26019.5	-8244.19	362.629	377.127	0	-44.496	105.004	-656.185	69218.1	-25818.4	-8529.28	160.654	797.514	0	0	0	0	0	0	0	603	903	0
9656	9	7.55553	-41.9621	-153.585	-11698.9	24737.8	-7694.87	361.069	376.172	0	-44.496	105.156	-659.542	68668.8	-25879.4	-8437.73	160.761	798.884	0	0	0	0	0	0	0	603	903	0
9657	0	7.09776	-40.894	-150.838	-11607.3	24432.6	-7649.1	361.979	376.952	0	-43.8857	105.309	-664.119	69401.2	-26856	-8483.5	159.561	798.499	0	0	0	0	0	0	0	603	903	0
9657	1	6.48741	-37.9948	-144.734	-11149.6	23700.2	-7282.89	363.749	377.035	0	-44.496	104.393	-666.561	69035	-25940.5	-8575.06	161.083	799.431	0	0	0	0	0	0	0	603	903	0
9657	2	6.48741	-36.9267	-139.241	-10600.2	22662.6	-6596.24	362.758	376.129	0	-42.9701	105.156	-669.307	69309.7	-26733.9	-8117.3	160.057	799.446	0	0	0	0	0	0	0	603	903	0
9657	3	7.09776	-36.3164	-134.053	-10325.6	21869.1	-6916.68	363.138	377.026	0	-44.3434	104.698	-672.969	69858.9	-26917	-8300.4	160.003	799.193	0	0	0	0	0	0	0	603	903	0
9657	4	7.40294	-34.4853	-127.95	-10417.1	20709.5	-6504.69	361.856	381.416	0	-44.3434	103.63	-671.749	70042.1	-26306.7	-8483.5	160.839	798.732	0	0	0	0	0	0	0	603	903	0
9657	5	7.55553	-31.8913	-126.424	-10508.7	20709.5	-6184.25	363.81	383.123	0	-45.4115	104.698	-676.937	70133.6	-27161.2	-8346.18	159.876	799.396	0	0	0	0	0	0	0	603	903	0
9657	6	7.25035	-30.9758	-120.931	-9776.28	19732.9	-5634.94	363.175	380.842	0	-45.7167	103.783	-677.242	70499.8	-26733.9	-8529.28	160.525	798.901	0	0	0	0	0	0	0	603	903	0
9657	7	6.79259	-29.2973	-113.607	-9410.06	19427.7	-5818.04	371.009	382.83	0	-42.8175	103.63	-682.125	70957.6	-26795	-8437.73	160.718	798.976	0	0	0	0	0	0	0	603	903	0
9657	8	7.8607	-28.687	-112.691	-9776.28	18573.2	-5543.38	364.815	386.753	0	-45.7167	103.325	-685.176	70957.6	-27405.3	-8483.5	160.003	799.439	0	0	0	0	0	0	0	603	903	0
9657	9	8.62364	-26.3982	-108.724	-8860.75	17779.8	-5039.84	363.532	381.498	0	-45.4115	102.41	-687.618	71323.8	-27161.2	-8620.83	160.5	799.274	0	0	0	0	0	0	0	603	903	0
9658	0	8.16588	-26.093	-105.062	-8952.3	17596.7	-4902.52	367.489	385.21	0	-44.6486	103.173	-689.754	71506.9	-27832.6	-8483.5	159.649	799.33	0	0	0	0	0	0	0	603	903	0
9658	1	9.69176	-24.2619	-104.146	-8860.75	16498	-4582.08	358.412	385.08	0	-44.8012	102.562	-690.975	71232.3	-27649.5	-8483.5	159.985	799.91	0	0	0	0	0	0	0	603	903	0
9658	2	7.55553	-22.1257	-99.8737	-8494.54	16559.1	-4444.75	365.8	385.053	0	-45.8693	102.104	-692.806	70866	-27344.3	-8071.52	160.531	800.711	0	0	0	0	0	0	0	603	903	0
9658	3	7.25035	-21.2102	-97.1271	-7853.67	15643.5	-4261.65	361.063	380.86	0	-44.496	102.41	-695.857	71506.9	-28320.8	-8163.08	159.301	800.239	0	0	0	0	0	0	0	603	903	0
9658	4	8.01329	-21.5154	-92.8546	-8219.88	14850.1	-3803.88	359.928	388.524	0	-44.9538	101.647	-698.604	71873.1	-27588.4	-8437.73	160.509	800.119	0	0	0	0	0	0	0	603	903	0
9658	5	7.8607	-17.7007	-86.7511	-7304.35	14544.9	-3849.66	367.663	384.199	0	-44.6486	101.036	-701.045	72330.9	-27649.5	-8712.39	160.56	799.824	0	0	0	0	0	0	0	603	903	0
9658	6	6.94518	-17.7007	-86.4459	-6755.04	13873.5	-3575	360.488	378.142	0	-45.1064	101.647	-702.877	72880.2	-28137.7	-8346.18	159.968	799.312	0	0	0	0	0	0	0	603	903	0
9658	7	6.79259	-17.3955	-84.0045	-6846.59	13812.5	-3391.89	364.426	381.503	0	-44.9538	100.273	-706.233	72788.6	-27710.5	-8529.28	160.763	799.934	0	0	0	0	0	0	0	603	903	0
9658	8	5.87706	-16.9377	-81.2579	-7029.69	12835.9	-3483.45	357.965	386.511	0	-46.1745	100.884	-707.454	72605.6	-28626	-8117.3	159.537	800.371	0	0	0	0	0	0	0	603	903	0
9658	9	7.40294	-13.886	-76.6803	-6846.59	12897	-3071.46	368.191	389.287	0	-45.2589	100.273	-709.896	72880.2	-28320.8	-8163.08	160.106	800.337	0	0	0	0	0	0	0	603	903	0
9659	0	6.94518	-13.2756	-73.3234	-6114.17	12164.5	-2705.25	365.903	383.386	0	-45.8693	97.6794	-713.863	73246.4	-27466.4	-8300.4	161.524	800.394	0	0	0	0	0	0	0	603	903	0
9659	1	6.94518	-11.9023	-70.882	-6755.04	11615.2	-2430.59	363.867	395.3	0	-47.09	99.8157	-712.947	72514	-28809.1	-8254.62	159.592	801.29	0	0	0	0	0	0	0	603	903	0
9659	2	6.79259	-9.76608	-68.4406	-5931.06	11493.2	-2293.26	367.929	386.66	0	-47.09	99.0527	-714.473	73978.8	-28748.1	-8117.3	159.763	799.457	0	0	0	0	0	0	0	603	903	0
9659	3	6.79259	-9.15573	-65.694	-5747.96	11188	-2613.69	370.305	387.496	0	-45.7167	98.4424	-715.999	73795.7	-28137.7	-8391.95	160.701	799.933	0	0	0	0	0	0	0	603	903	0
9659	4	7.40294	-11.292	-63.5577	-5198.64	10333.5	-2155.93	362.584	381.794	0	-46.3271	96.7639	-718.135	73521	-28381.9	-8117.3	160.478	800.622	0	0	0	0	0	0	0	603	903	0
9659	5	6.94518	-8.54538	-60.506	-5564.85	10211.4	-1377.73	368.767	391.972	0	-45.8693	97.6794	-721.492	73795.7	-28198.8	-8300.4	160.916	800.718	0	0	0	0	0	0	0	603	903	0
9659	6	7.09776	-8.08762	-57.4542	-4740.88	9723.13	-1881.27	369.233	382.516	0	-45.1064	96.4587	-722.408	74711.2	-28565	-7979.97	160.459	799.58	0	0	0	0	0	0	0	603	903	0
9659	7	9.23399	-8.54538	-57.149	-4557.77	9478.99	-1789.72	365.864	379.752	0	-46.7848	97.3743	-725.46	75169	-28992.2	-8254.62	160.036	799.384	0	0	0	0	0	0	0	603	903	0
9659	8	6.48741	-6.40915	-53.1818	-4466.22	9112.78	-2018.6	371.352	383.98	0	-47.5478	97.0691	-726.985	73887.2	-28198.8	-7979.97	161.211	801.365	0	0	0	0	0	0	0	603	903	0
9659	9	6.79259	-5.7988	-51.6559	-4008.45	8380.36	-1148.85	362.234	377.599	0	-47.5478	96.4587	-726.375	74802.8	-29114.3	-8025.75	159.918	800.019	0	0	0	0	0	0	0	603	903	0
9660	0	5.87706	-6.71433	-49.8248	-4008.45	8258.29	-1560.84	365.746	380.451	0	-46.6322	96.3062	-730.953	74985.9	-28259.8	-8071.52	161.338	800.414	0	0	0	0	0	0	0	603	903	0
9660	1	6.94518	-4.5781	-47.0782	-4374.66	7770.01	-1286.18	365.045	392.923	0	-48.1581	94.7803	-731.258	74985.9	-28503.9	-7934.19	161.021	800.456	0	0	0	0	0	0	0	603	903	0
9660	2	5.26671	-3.66257	-45.8575	-3916.9	7770.01	-1194.63	369.438	385.415	0	-48.0055	95.3906	-733.394	74802.8	-28748.1	-7979.97	160.801	801.005	0	0	0	0	0	0	0	603	903	0
9660	3	5.26671	-3.81516	-43.7213	-4008.45	7403.8	-1240.4	369.341	391.682	0	-46.7848	94.7803	-736.141	74802.8	-28442.9	-8025.75	161.362	801.385	0	0	0	0	0	0	0	603	903	0
9660	4	5.57189	-3.81516	-42.1954	-3733.8	6915.52	-1148.85	363.893	388.488	0	-46.4796	94.1699	-737.056	75352.1	-29053.3	-7705.31	160.582	800.766	0	0	0	0	0	0	0	603	903	0
9660	5	6.64	-3.2048	-39.1437	-3459.14	6732.41	-1240.4	371.992	388.37	0	-47.5478	94.0173	-738.277	75169	-29114.3	-7842.64	160.565	801.183	0	0	0	0	0	0	0	603	903	0
9660	6	5.11412	-2.59445	-36.3971	-3092.93	5999.99	-965.745	364.848	384.977	0	-47.09	93.407	-740.108	76359.2	-27954.6	-7567.98	162.229	799.827	0	0	0	0	0	0	0	603	903	0
9660	7	4.80895	-3.2048	-34.566	-3459.14	6061.02	-1103.07	375.346	400.073	0	-46.0219	93.407	-741.023	76176.1	-29114.3	-7522.2	160.711	800.202	0	0	0	0	0	0	0	603	903	0
9660	8	4.96153	-1.9841	-30.5988	-3367.59	5511.71	-965.745	380.129	410.056	0	-47.2426	93.1018	-742.244	75352.1	-28320.8	-7888.41	161.844	801.481	0	0	0	0	0	0	0	603	903	0
9660	9	5.4193	-1.52634	-30.5988	-2818.27	5572.74	-874.193	382.123	392.104	0	-46.9374	91.4233	-742.549	76725.4	-28565	-7567.98	161.531	799.673	0	0	0	0	0	0	0	603	903	0
9661	0	4.96153	-3.50998	-28.7677	-2726.72	5023.43	-416.429	374.62	394.784	0	-47.09	91.5759	-744.686	76359.2	-28992.2	-7613.76	161.068	800.461	0	0	0	0	0	0	0	603	903	0
9661	1	4.80895	-0.763399	-28.7677	-2543.61	5023.43	-828.416	374.62	388.419	0	-46.7848	89.2871	-743.465	76542.3	-28381.9	-7751.09	161.825	800.047	0	0	0	0	0	0	0	603	903	0
9661	2	4.96153	-0.458223	-26.9366	-2360.5	4413.08	-782.64	363.832	387.632	0	-46.3271	90.9656	-747.737	75809.9	-29053.3	-7751.09	161.145	801.614	0	0	0	0	0	0	0	603	903	0
9661	3	5.57189	-1.06857	-26.3263	-1994.29	4168.94	-462.205	358.356	375.753	0	-46.0219	89.5923	-749.263	76359.2	-29053.3	-7522.2	161.224	801.088	0	0	0	0	0	0	0	603	903	0
9661	4	5.11412	-0.153047	-24.4952	-2818.27	4107.9	-736.863	367.702	415.054	0	-45.5641	89.8975	-751.399	76816.9	-28992.2	-7476.43	161.416	800.768	0	0	0	0	0	0	0	603	903	0
9661	5	4.19859	-0.305635	-22.9694	-2085.85	3619.62	-691.087	357.585	390.81	0	-46.9374	90.3552	-750.789	76725.4	-29053.3	-7751.09	161.303	800.807	0	0	0	0	0	0	0	603	903	0
9661	6	4.80895	0.609892	-19.9176	-1170.32	3619.62	-187.547	381.73	358.758	0	-47.7003	89.1345	-755.062	77183.1	-29175.3	-7659.53	161.36	800.779	0	0	0	0	0	0	0	603	903	0
9661	7	4.19859	1.06766	-19.0021	-1994.29	3375.48	-141.77	377.637	404.951	0	-45.2589	88.5242	-753.231	77274.7	-28809.1	-7705.31	161.753	800.409	0	0	0	0	0	0	0	603	903	0
9661	8	3.89342	2.59353	-19.0021	-1628.08	3192.37	178.664	368.001	385.679	0	-45.7167	88.219	-754.451	76908.5	-29297.4	-7430.65	161.167	801.06	0	0	0	0	0	0	0	603	903	0
9661	9	4.19859	2.13577	-18.6969	-1719.64	3192.37	87.1114	370.743	391.974	0	-46.3271	87.4561	-756.893	77183.1	-28565	-7339.1	162.26	801.026	0	0	0	0	0	0	0	603	903	0
9662	0	3.58824	2.74612	-18.0865	-1078.77	3131.34	132.888	373.131	359.645	0	-45.1064	87.3035	-756.893	77366.3	-28626	-7430.65	162.18	800.784	0	0	0	0	0	0	0	603	903	0
9662	1	4.19859	3.50906	-15.34	-1628.08	2643.06	315.993	372.299	406.133	0	-46.7848	87.4561	-759.639	77274.7	-29114.3	-7293.32	161.674	801.275	0	0	0	0	0	0	0	603	903	0
9662	2	3.58824	4.272	-13.5089	-1170.32	2337.88	590.651	373.062	386.633	0	-46.4796	85.625	-759.029	77457.8	-28565	-7339.1	162.366	800.951	0	0	0	0	0	0	0	603	903	0
9662	3	3.28307	3.50906	-13.5089	-1170.32	2337.88	1048.42	373.062	386.633	0	-45.1064	85.7776	-758.724	77824.1	-29236.4	-7339.1	161.466	800.428	0	0	0	0	0	0	0	603	903	0
9662	4	2.36754	4.88235	-10.4571	-1353.42	2154.77	773.757	406.057	429.426	0	-46.1745	85.625	-759.944	77091.6	-29297.4	-7339.1	161.448	801.556	0	0	0	0	0	0	0	603	903	0
9662	5	3.58824	5.4927	-11.3727	-621.002	1910.63	682.204	368.002	354.605	0	-46.1745	84.2517	-760.555	77091.6	-28565	-7155.99	162.442	801.638	0	0	0	0	0	0	0	603	903	0
9662	6	2.67272	3.66165	-9.54162	-529.449	1544.42	682.204	361.862	355.488	0	-44.8012	84.0991	-762.386	77640.9	-29175.3	-7018.66	161.732	801.161	0	0	0	0	0	0	0	603	903	0
9662	7	0	0	0	0	0	0	200	300	0	-45.4115	83.3362	-763.301	77549.4	-28503.9	-7201.77	162.657	801.403	0	0	0	0	0	0	0	603	903	0
9662	8	0	0	0	0	0	0	200	300	0	-46.1745	83.3362	-763.301	77824.1	-28381.9	-7064.44	162.817	801.043	0	0	0	0	0	0	0	603	903	0
9662	9	0	0	0	0	0	0	200	300	0	-44.8012	83.6414	-765.438	77366.3	-29175.3	-7018.66	161.884	801.925	0	0	0	0	0	0	0	603	903	0
9663	0	0	0	0	0	0	0	200	300	0	-45.2589	81.8103	-765.132	77640.9	-28626	-6972.89	162.587	801.526	0	0	0	0	0	0	0	603	903	0
9663	1	0	0	0	0	0	0	200	300	0	-43.7331	82.4207	-765.438	77366.3	-28992.2	-6972.89	162.123	801.925	0	0	0	0	0	0	0	603	903	0
9663	2	0	0	0	0	0	0	200	300	0	-44.8012	81.0474	-766.048	77000.1	-28626	-6881.33	162.632	802.484	0	0	0	0	0	0	0	603	903	0
9663	3	0	0	0	0	0	0	200	300	0	-44.6486	80.5896	-764.522	77824.1	-28687.1	-7018.66	162.477	801.206	0	0	0	0	0	0	0	603	903	0
9663	4	0	0	0	0	0	0	200	300	0	-45.1064	79.5215	-766.048	77549.4	-28809.1	-6606.68	162.393	801.767	0	0	0	0	0	0	0	603	903	0
9663	5	0	0	0	0	0	0	200	300	0	-44.0382	79.2163	-766.658	78098.7	-28320.8	-6744.01	163.059	801.131	0	0	0	0	0	0	0	603	903	0
9663	6	0	0	0	0	0	0	200	300	0	-43.4279	79.5215	-765.132	77274.7	-29175.3	-6744.01	161.869	802.005	0	0	0	0	0	0	0	603	903	0
9663	7	0	0	0	0	0	0	200	300	0	-45.4115	79.2163	-766.658	77549.4	-29175.3	-6652.45	161.945	801.848	0	0	0	0	0	0	0	603	903	0
9663	8	0	0	0	0	0	0	200	300	0	-45.2589	78.3008	-765.743	77824.1	-28503.9	-6789.78	162.776	801.368	0	0	0	0	0	0	0	603	903	0
9663	9	0	0	0	0	0	0	200	300	0	-41.5968	78.3008	-766.658	77640.9	-29114.3	-6698.23	162.024	801.728	0	0	0	0	0	0	0	603	903	0
9664	0	0	0	0	0	0	0	200	300	0	-44.9538	77.2327	-767.574	77274.7	-29114.3	-6698.23	162.07	802.326	0	0	0	0	0	0	0	603	903	0
9664	1	0	0	0	0	0	0	200	300	0	-44.1908	76.3171	-765.132	77183.1	-28503.9	-6469.35	162.746	802.125	0	0	0	0	0	0	0	603	903	0
9664	2	0	0	0	0	0	0	200	300	0	-43.8857	76.1646	-767.269	77824.1	-29236.4	-6515.12	161.896	801.57	0	0	0	0	0	0	0	603	903	0
9664	3	0	0	0	0	0	0	200	300	0	-43.7331	75.0964	-766.658	77274.7	-28381.9	-6332.02	162.98	802.206	0	0	0	0	0	0	0	603	903	0
9664	4	0	0	0	0	0	0	200	300	0	-42.9701	76.012	-767.269	77091.6	-28442.9	-6652.45	162.93	802.525	0	0	0	0	0	0	0	603	903	0
9664	5	0	0	0	0	0	0	200	300	0	-43.1227	74.3335	-766.963	78281.8	-29053.3	-6377.79	162.119	800.933	0	0	0	0	0	0	0	603	903	0
9664	6	0	0	0	0	0	0	200	300	0	-43.2753	74.6387	-765.438	76542.3	-28748.1	-6377.79	162.442	803.002	0	0	0	0	0	0	0	603	903	0
9664	7	0	0	0	0	0	0	200	300	0	-44.1908	74.9438	-769.1	77183.1	-28992.2	-6194.69	162.304	802.645	0	0	0	0	0	0	0	603	903	0
9664	8	0	0	0	0	0	0	200	300	0	-43.8857	71.7395	-767.879	77549.4	-29114.3	-6286.24	162.085	802.008	0	0	0	0	0	0	0	603	903	0
9664	9	0	0	0	0	0	0	200	300	0	-42.9701	74.1809	-766.658	77640.9	-28320.8	-6332.02	163.059	801.728	0	0	0	0	0	0	0	603	903	0
9665	0	0	0	0	0	0	0	200	300	0	-42.5124	72.0447	-766.048	76816.9	-29236.4	-6332.02	161.835	802.723	0	0	0	0	0	0	0	603	903	0
9665	1	0	0	0	0	0	0	200	300	0	-43.8857	72.1973	-765.438	76908.5	-28503.9	-6606.68	162.761	802.524	0	0	0	0	0	0	0	603	903	0
9665	2	0	0	0	0	0	0	200	300	0	-42.8175	71.5869	-764.522	76267.7	-28503.9	-6240.47	162.717	803.241	0	0	0	0	0	0	0	603	903	0
9665	3	0	0	0	0	0	0	200	300	0	-42.2072	70.824	-767.269	76725.4	-29236.4	-6103.14	161.896	803.002	0	0	0	0	0	0	0	603	903	0
9665	4	0	0	0	0	0	0	200	300	0	-43.4279	71.5869	-763.607	76725.4	-28320.8	-6011.58	162.912	802.522	0	0	0	0	0	0	0	603	903	0
9665	5	0	0	0	0	0	0	200	300	0	-42.6649	71.5869	-766.353	77091.6	-29053.3	-6011.58	162.089	802.405	0	0	0	0	0	0	0	603	903	0
9665	6	0	0	0	0	0	0	200	300	0	-42.6649	69.7559	-764.522	77000.1	-28870.2	-5599.6	162.238	802.283	0	0	0	0	0	0	0	603	903	0
9665	7	0	0	0	0	0	0	200	300	0	-41.5968	70.6714	-764.522	76359.2	-28198.8	-6423.57	163.116	803.122	0	0	0	0	0	0	0	603	903	0
9665	8	0	0	0	0	0	0	200	300	0	-40.8339	69.1455	-764.522	76176.1	-29175.3	-6286.24	161.838	803.361	0	0	0	0	0	0	0	603	903	0
9665	9	0	0	0	0	0	0	200	300	0	-40.6813	68.8403	-763.607	76816.9	-28320.8	-6240.47	162.912	802.402	0	0	0	0	0	0	0	603	903	0
9666	0	0	0	0	0	0	0	200	300	0	-41.1391	69.4507	-764.217	76633.9	-28442.9	-6423.57	162.782	802.722	0	0	0	0	0	0	0	603	903	0
9666	1	0	0	0	0	0	0	200	300	0	-42.8175	67.3145	-763.912	76359.2	-28809.1	-6057.36	162.287	803.042	0	0	0	0	0	0	0	603	903	0
9666	2	0	0	0	0	0	0	200	300	0	-42.8175	68.0774	-762.691	76084.5	-28015.7	-6148.91	163.267	803.242	0	0	0	0	0	0	0	603	903	0
9666	3	0	0	0	0	0	0	200	300	0	-41.2917	66.7041	-762.081	75901.5	-28870.2	-6240.47	162.117	803.402	0	0	0	0	0	0	0	603	903	0
9666	4	0	0	0	0	0	0	200	300	0	-41.5968	66.2463	-760.25	75535.2	-28809.1	-6148.91	162.106	803.644	0	0	0	0	0	0	0	603	903	0
9666	5	0	0	0	0	0	0	200	300	0	-42.2072	66.8567	-759.334	75169	-28320.8	-6011.58	162.703	804.007	0	0	0	0	0	0	0	603	903	0
9666	6	0	0	0	0	0	0	200	300	0	-42.3598	65.1782	-760.25	75993	-28870.2	-5736.93	162.025	803.042	0	0	0	0	0	0	0	603	903	0
9666	7	0	0	0	0	0	0	200	300	0	-40.3761	65.636	-757.198	75260.6	-28015.7	-5828.48	163.001	803.607	0	0	0	0	0	0	0	603	903	0
9666	8	0	0	0	0	0	0	200	300	0	-41.4442	66.2463	-757.503	74894.4	-27893.6	-6011.58	163.177	804.13	0	0	0	0	0	0	0	603	903	0
9666	9	0	0	0	0	0	0	200	300	0	-42.5124	63.8049	-756.282	74985.9	-28381.9	-6057.36	162.472	803.849	0	0	0	0	0	0	0	603	903	0
9667	0	0	0	0	0	0	0	200	300	0	-40.6813	64.2627	-755.367	75077.4	-28198.8	-6011.58	162.669	803.608	0	0	0	0	0	0	0	603	903	0
9667	1	0	0	0	0	0	0	200	300	0	-40.3761	63.8049	-754.146	75260.6	-28565	-5141.83	162.123	803.204	0	0	0	0	0	0	0	603	903	0
9667	2	0	0	0	0	0	0	200	300	0	-41.5968	63.4998	-751.399	73704.2	-28442.9	-5920.03	162.147	804.911	0	0	0	0	0	0	0	603	903	0
9667	3	0	0	0	0	0	0	200	300	0	-42.3598	62.1265	-750.789	75077.4	-27832.6	-5691.15	162.929	803.002	0	0	0	0	0	0	0	603	903	0
9667	4	0	0	0	0	0	0	200	300	0	-40.2235	62.7368	-751.399	74528.2	-28259.8	-5736.93	162.39	803.814	0	0	0	0	0	0	0	603	903	0
9667	5	0	0	0	0	0	0	200	300	0	-41.2917	62.4316	-748.348	73704.2	-27771.5	-6057.36	162.89	804.511	0	0	0	0	0	0	0	603	903	0
9667	6	0	0	0	0	0	0	200	300	0	-39.4606	62.5842	-747.432	73338	-27954.6	-5874.25	162.599	804.88	0	0	0	0	0	0	0	603	903	0
9667	7	0	0	0	0	0	0	200	300	0	-39.9184	60.7532	-746.211	72239.3	-27954.6	-5828.48	162.538	806.192	0	0	0	0	0	0	0	603	903	0
9667	8	0	0	0	0	0	0	200	300	0	-40.3761	60.9058	-746.517	72880.2	-27527.4	-5599.6	163.126	805.373	0	0	0	0	0	0	0	603	903	0
9667	9	0	0	0	0	0	0	200	300	0	-40.6813	60.6006	-744.686	72605.6	-28137.7	-5599.6	162.215	805.502	0	0	0	0	0	0	0	603	903	0
9668	0	0	0	0	0	0	0	200	300	0	-39.4606	59.6851	-743.465	73154.8	-28198.8	-5508.04	162.071	804.603	0	0	0	0	0	0	0	603	903	0
9668	1	0	0	0	0	0	0	200	300	0	-39.4606	58.6169	-743.16	72330.9	-27527.4	-5782.7	162.959	805.671	0	0	0	0	0	0	0	603	903	0
9668	2	0	0	0	0	0	0	200	300	0	-40.5287	57.3962	-740.413	71964.7	-28137.7	-5828.48	161.997	805.805	0	0	0	0	0	0	0	603	903	0
9668	3	0	0	0	0	0	0	200	300	0	-40.8339	58.6169	-739.803	72514	-27466.4	-5782.7	162.873	804.982	0	0	0	0	0	0	0	603	903	0
9668	4	0	0	0	0	0	0	200	300	0	-39.0028	57.7014	-737.972	72239.3	-27832.6	-5599.6	162.285	805.111	0	0	0	0	0	0	0	603	903	0
9668	5	0	0	0	0	0	0	200	300	0	-39.6132	56.7859	-736.446	71232.3	-27954.6	-5553.82	162.041	806.276	0	0	0	0	0	0	0	603	903	0
9668	6	0	0	0	0	0	0	200	300	0	-39.7658	56.6333	-737.056	71049.1	-27588.4	-5370.71	162.569	806.604	0	0	0	0	0	0	0	603	903	0
9668	7	0	0	0	0	0	0	200	300	0	-39.9184	55.8704	-735.225	70225.1	-27954.6	-5599.6	161.978	807.485	0	0	0	0	0	0	0	603	903	0
9668	8	0	0	0	0	0	0	200	300	0	-39.308	55.8704	-733.699	70408.3	-27893.6	-5553.82	161.982	807.037	0	0	0	0	0	0	0	603	903	0
9668	9	0	0	0	0	0	0	200	300	0	-38.8503	55.5652	-732.173	70316.7	-27466.4	-5599.6	162.487	806.962	0	0	0	0	0	0	0	603	903	0
9669	0	0	0	0	0	0	0	200	300	0	-39.308	54.1919	-730.342	70774.5	-28076.7	-5141.83	161.557	806.094	0	0	0	0	0	0	0	603	903	0
9669	1	0	0	0	0	0	0	200	300	0	-39.308	55.4126	-729.732	69675.9	-27527.4	-5096.06	162.277	807.519	0	0	0	0	0	0	0	603	903	0
9669	2	0	0	0	0	0	0	200	300	0	-40.2235	53.1238	-726.985	69858.9	-27405.3	-5096.06	162.303	806.906	0	0	0	0	0	0	0	603	903	0
9669	3	0	0	0	0	0	0	200	300	0	-38.3925	52.9712	-726.07	69767.4	-27954.6	-5416.49	161.499	806.911	0	0	0	0	0	0	0	603	903	0
9669	4	0	0	0	0	0	0	200	300	0	-38.2399	51.2927	-721.187	69858.9	-27649.5	-5050.28	161.661	806.133	0	0	0	0	0	0	0	603	903	0
9669	5	0	0	0	0	0	0	200	300	0	-40.071	52.0557	-724.544	68760.3	-27710.5	-5096.06	161.755	808.099	0	0	0	0	0	0	0	603	903	0
9669	6	0	0	0	0	0	0	200	300	0	-39.4606	52.2082	-723.628	68760.3	-27588.4	-5004.5	161.875	807.979	0	0	0	0	0	0	0	603	903	0
9669	7	0	0	0	0	0	0	200	300	0	-38.3925	51.2927	-722.408	69218.1	-26978.1	-4958.73	162.655	807.184	0	0	0	0	0	0	0	603	903	0
9669	8	0	0	0	0	0	0	200	300	0	-37.7821	50.2246	-719.966	68211	-27893.6	-5004.5	161.257	808.258	0	0	0	0	0	0	0	603	903	0
9669	9	0	0	0	0	0	0	200	300	0	-39.4606	50.5298	-719.966	68119.4	-27039.1	-4409.41	162.444	808.385	0	0	0	0	0	0	0	603	903	0
9670	0	0	0	0	0	0	0	200	300	0	-39.308	49.9194	-719.051	68577.2	-27039.1	-5004.5	162.396	807.628	0	0	0	0	0	0	0	603	903	0
9670	1	0	0	0	0	0	0	200	300	0	-38.0873	49.1565	-717.22	68302.6	-27405.3	-5096.06	161.79	807.768	0	0	0	0	0	0	0	603	903	0
9670	2	0	0	0	0	0	0	200	300	0	-39.0028	48.8513	-716.304	67203.9	-27527.4	-4729.85	161.57	809.18	0	0	0	0	0	0	0	603	903	0
9670	3	0	0	0	0	0	0	200	300	0	-38.2399	47.9358	-715.999	67753.2	-27588.4	-4867.17	161.469	808.373	0	0	0	0	0	0	0	603	903	0
9670	4	0	0	0	0	0	0	200	300	0	-37.7821	48.241	-714.473	67570.1	-27588.4	-4729.85	161.386	808.427	0	0	0	0	0	0	0	603	903	0
9670	5	0	0	0	0	0	0	200	300	0	-37.0192	48.241	-712.947	66471.5	-27222.2	-4455.19	161.817	809.765	0	0	0	0	0	0	0	603	903	0
9670	6	0	0	0	0	0	0	200	300	0	-36.714	46.8677	-711.116	66380	-27527.4	-5004.5	161.29	809.654	0	0	0	0	0	0	0	603	903	0
9670	7	0	0	0	0	0	0	200	300	0	-37.0192	46.2573	-711.421	66929.2	-27161.2	-4729.85	161.821	808.922	0	0	0	0	0	0	0	603	903	0
9670	8	0	0	0	0	0	0	200	300	0	-37.1718	45.647	-710.201	65739.1	-27283.2	-4592.52	161.584	810.436	0	0	0	0	0	0	0	603	903	0
9670	9	0	0	0	0	0	0	200	300	0	-38.3925	45.0366	-708.37	65464.4	-27161.2	-4821.4	161.657	810.584	0	0	0	0	0	0	0	603	903	0
9671	0	0	0	0	0	0	0	200	300	0	-37.477	45.4944	-707.454	65830.6	-27344.3	-4592.52	161.348	809.947	0	0	0	0	0	0	0	603	903	0
9671	1	0	0	0	0	0	0	200	300	0	-36.714	43.8159	-706.844	65739.1	-27344.3	-5050.28	161.315	809.996	0	0	0	0	0	0	0	603	903	0
9671	2	0	0	0	0	0	0	200	300	0	-37.3244	43.053	-703.792	64915.1	-27649.5	-4729.85	160.714	810.764	0	0	0	0	0	0	0	603	903	0
9671	3	0	0	0	0	0	0	200	300	0	-38.0873	43.5107	-705.013	65098.2	-27344.3	-4684.07	161.214	810.664	0	0	0	0	0	0	0	603	903	0
9671	4	0	0	0	0	0	0	200	300	0	-36.4088	42.1374	-703.792	65189.7	-27283.2	-4455.19	161.234	810.374	0	0	0	0	0	0	0	603	903	0
9671	5	0	0	0	0	0	0	200	300	0	-36.4088	42.5952	-700.74	64274.2	-27283.2	-4363.63	161.065	811.277	0	0	0	0	0	0	0	603	903	0
9671	6	0	0	0	0	0	0	200	300	0	-35.4933	42.29	-702.266	64182.7	-26917	-4500.96	161.671	811.606	0	0	0	0	0	0	0	603	903	0
9671	7	0	0	0	0	0	0	200	300	0	-35.6459	41.6797	-699.825	64365.8	-27527.4	-4638.29	160.665	811.026	0	0	0	0	0	0	0	603	903	0
9671	8	0	0	0	0	0	0	200	300	0	-35.9511	41.0693	-698.604	64457.3	-27039.1	-4180.53	161.296	810.734	0	0	0	0	0	0	0	603	903	0
9671	9	0	0	0	0	0	0	200	300	0	-36.8666	39.8486	-697.994	63267.2	-27222.2	-4409.41	160.999	812.359	0	0	0	0	0	0	0	603	903	0
9672	0	0	0	0	0	0	0	200	300	0	-36.4088	40.1538	-695.247	64091.1	-27466.4	-4363.63	160.494	810.815	0	0	0	0	0	0	0	603	903	0
9672	1	0	0	0	0	0	0	200	300	0	-35.6459	40.0012	-696.163	63908	-26917	-4043.2	161.335	811.2	0	0	0	0	0	0	0	603	903	0
9672	2	0	0	0	0	0	0	200	300	0	-35.9511	39.3909	-694.332	62900.9	-26978.1	-4363.63	161.145	812.408	0	0	0	0	0	0	0	603	903	0
9672	3	0	0	0	0	0	0	200	300	0	-34.5778	38.9331	-692.806	62900.9	-26917	-4272.08	161.148	812.208	0	0	0	0	0	0	0	603	903	0
9672	4	0	0	0	0	0	0	200	300	0	-35.9511	37.865	-692.501	63084	-26917	-4043.2	161.131	811.904	0	0	0	0	0	0	0	603	903	0
9672	5	0	0	0	0	0	0	200	300	0	-35.6459	37.102	-691.28	62534.7	-27344.3	-4043.2	160.444	812.538	0	0	0	0	0	0	0	603	903	0
9672	6	0	0	0	0	0	0	200	300	0	-36.714	37.2546	-690.669	62260.1	-26795	-4088.97	161.204	812.855	0	0	0	0	0	0	0	603	903	0
9672	7	0	0	0	0	0	0	200	300	0	-35.9511	36.7969	-688.838	62260.1	-26978.1	-4043.2	160.835	812.616	0	0	0	0	0	0	0	603	903	0
9672	8	0	0	0	0	0	0	200	300	0	-35.7985	35.5762	-687.313	62351.6	-26917	-3905.87	160.837	812.282	0	0	0	0	0	0	0	603	903	0
9672	9	0	0	0	0	0	0	200	300	0	-35.7985	36.0339	-686.092	60978.3	-26733.9	-4180.53	161.034	814.122	0	0	0	0	0	0	0	603	903	0
9673	0	0	0	0	0	0	0	200	300	0	-37.0192	33.2873	-684.261	61893.9	-26672.9	-3860.09	161.019	812.546	0	0	0	0	0	0	0	603	903	0
9673	1	0	0	0	0	0	0	200	300	0	-36.5614	35.4236	-684.871	61527.6	-26795	-3997.42	160.876	813.162	0	0	0	0	0	0	0	603	903	0
9673	2	0	0	0	0	0	0	200	300	0	-36.8666	34.0503	-682.735	60886.8	-27222.2	-3951.65	160.128	813.819	0	0	0	0	0	0	0	603	903	0
9673	3	0	0	0	0	0	0	200	300	0	-36.5614	33.4399	-681.819	60886.8	-27039.1	-3997.42	160.343	813.7	0	0	0	0	0	0	0	603	903	0
9673	4	0	0	0	0	0	0	200	300	0	-35.7985	33.4399	-682.125	61344.5	-26672.9	-4043.2	160.897	813.068	0	0	0	0	0	0	0	603	903	0
9673	5	0	0	0	0	0	0	200	300	0	-36.2563	32.5244	-681.209	60429	-26856	-3951.65	160.576	814.292	0	0	0	0	0	0	0	603	903	0
9673	6	0	0	0	0	0	0	200	300	0	-34.5778	32.677	-678.768	60062.8	-26795	-4088.97	160.524	814.512	0	0	0	0	0	0	0	603	903	0
9673	7	0	0	0	0	0	0	200	300	0	-35.7985	32.3718	-679.073	59238.8	-26611.9	-3905.87	160.811	815.765	0	0	0	0	0	0	0	603	903	0
9673	8	0	0	0	0	0	0	200	300	0	-35.3407	31.3037	-675.106	60062.8	-27161.2	-3768.54	159.768	814.032	0	0	0	0	0	0	0	603	903	0
9673	9	0	0	0	0	0	0	200	300	0	-35.6459	30.2356	-676.021	59605	-26672.9	-3539.66	160.544	814.83	0	0	0	0	0	0	0	603	903	0
9674	0	0	0	0	0	0	0	200	300	0	-35.4933	30.2356	-675.106	60245.9	-26795	-3631.21	160.31	813.761	0	0	0	0	0	0	0	603	903	0
9674	1	0	0	0	0	0	0	200	300	0	-35.3407	30.3882	-674.19	58597.9	-26428.8	-3768.54	160.799	816.084	0	0	0	0	0	0	0	603	903	0
9674	2	0	0	0	0	0	0	200	300	0	-36.2563	30.083	-674.19	58781	-26611.9	-3631.21	160.528	815.812	0	0	0	0	0	0	0	603	903	0
9674	3	0	0	0	0	0	0	200	300	0	-35.1881	27.7942	-672.359	59330.4	-26856	-3860.09	160.057	814.758	0	0	0	0	0	0	0	603	903	0
9674	4	0	0	0	0	0	0	200	300	0	-35.1881	29.1675	-671.138	59055.7	-26672.9	-3539.66	160.257	815.007	0	0	0	0	0	0	0	603	903	0
9674	5	0	0	0	0	0	0	200	300	0	-36.2563	27.3364	-668.086	58140.2	-26367.7	-3722.76	160.532	815.975	0	0	0	0	0	0	0	603	903	0
9674	6	0	0	0	0	0	0	200	300	0	-35.4933	28.2519	-669.307	58597.9	-26917	-3539.66	159.784	815.45	0	0	0	0	0	0	0	603	903	0
9674	7	0	0	0	0	0	0	200	300	0	-34.7304	27.0312	-669.307	58506.4	-26550.8	-3219.22	160.331	815.587	0	0	0	0	0	0	0	603	903	0
9674	8	0	0	0	0	0	0	200	300	0	-36.1037	27.1838	-666.866	57957.1	-26733.9	-3356.55	159.911	816.09	0	0	0	0	0	0	0	603	903	0
9674	9	0	0	0	0	0	0	200	300	0	-35.6459	26.2683	-666.561	57865.5	-26611.9	-3448.1	160.076	816.188	0	0	0	0	0	0	0	603	903	0
9675	0	0	0	0	0	0	0	200	300	0	-34.5778	26.1157	-666.255	57865.5	-26489.8	-3173.45	160.241	816.148	0	0	0	0	0	0	0	603	903	0
9675	1	0	0	0	0	0	0	200	300	0	-35.1881	23.9795	-663.204	57133.1	-26978.1	-3081.89	159.322	816.853	0	0	0	0	0	0	0	603	903	0
9675	2	0	0	0	0	0	0	200	300	0	-34.7304	25.658	-663.204	57224.7	-26611.9	-3036.12	159.874	816.715	0	0	0	0	0	0	0	603	903	0
9675	3	0	0	0	0	0	0	200	300	0	-34.4252	24.895	-662.898	56950	-26795	-3036.12	159.579	817.089	0	0	0	0	0	0	0	603	903	0
9675	4	0	0	0	0	0	0	200	300	0	-35.0356	24.7424	-661.067	56400.7	-26672.9	-3173.45	159.652	817.682	0	0	0	0	0	0	0	603	903	0
9675	5	0	0	0	0	0	0	200	300	0	-35.0356	25.0476	-661.067	56950	-26428.8	-3081.89	160.021	816.852	0	0	0	0	0	0	0	603	903	0
9675	6	0	0	0	0	0	0	200	300	0	-34.7304	24.1321	-661.067	56766.9	-27039.1	-2944.56	159.098	817.128	0	0	0	0	0	0	0	603	903	0
9675	7	0	0	0	0	0	0	200	300	0	-33.2045	23.3691	-660.152	56492.2	-26367.7	-2898.79	160.058	817.425	0	0	0	0	0	0	0	603	903	0
9675	8	0	0	0	0	0	0	200	300	0	-34.7304	23.8269	-659.542	56034.5	-26428.8	-2853.01	159.929	818.04	0	0	0	0	0	0	0	603	903	0
9675	9	0	0	0	0	0	0	200	300	0	-35.6459	22.7588	-658.321	56309.1	-26611.9	-2944.56	159.576	817.466	0	0	0	0	0	0	0	603	903	0
9676	0	0	0	0	0	0	0	200	300	0	-33.8148	23.064	-657.1	56034.5	-26306.7	-2898.79	159.965	817.725	0	0	0	0	0	0	0	603	903	0
9676	1	0	0	0	0	0	0	200	300	0	-33.3571	21.5381	-657.405	55393.6	-26489.8	-2944.56	159.706	818.739	0	0	0	0	0	0	0	603	903	0
9676	2	0	0	0	0	0	0	200	300	0	-33.6623	21.0803	-655.879	55668.3	-26306.7	-2624.13	159.891	818.124	0	0	0	0	0	0	0	603	903	0
9676	3	0	0	0	0	0	0	200	300	0	-32.5941	21.5381	-654.964	55393.6	-26306.7	-2853.01	159.835	818.425	0	0	0	0	0	0	0	603	903	0
9676	4	0	0	0	0	0	0	200	300	0	-33.5097	20.3174	-655.574	55668.3	-26489.8	-2715.68	159.593	818.085	0	0	0	0	0	0	0	603	903	0
9676	5	0	0	0	0	0	0	200	300	0	-33.6623	19.8596	-654.659	55118.9	-26306.7	-2624.13	159.816	818.805	0	0	0	0	0	0	0	603	903	0
9676	6	0	0	0	0	0	0	200	300	0	-33.2045	20.1648	-654.659	55210.5	-26489.8	-2532.58	159.537	818.665	0	0	0	0	0	0	0	603	903	0
9676	7	0	0	0	0	0	0	200	300	0	-32.4416	19.8596	-651.912	55210.5	-26611.9	-2532.58	159.179	818.31	0	0	0	0	0	0	0	603	903	0
9676	8	0	0	0	0	0	0	200	300	0	-33.8148	19.8596	-651.607	53928.8	-25757.4	-2807.24	160.471	820.237	0	0	0	0	0	0	0	603	903	0
9676	9	0	0	0	0	0	0	200	300	0	-33.3571	19.0967	-651.912	54752.7	-26367.7	-2212.14	159.553	819.012	0	0	0	0	0	0	0	603	903	0
9677	0	0	0	0	0	0	0	200	300	0	-31.526	18.6389	-649.471	54752.7	-26489.8	-2624.13	159.213	818.696	0	0	0	0	0	0	0	603	903	0
9677	1	0	0	0	0	0	0	200	300	0	-33.3571	18.0286	-650.386	54295	-26123.6	-2395.25	159.834	819.519	0	0	0	0	0	0	0	603	903	0
9677	2	0	0	0	0	0	0	200	300	0	-33.0519	17.7234	-650.081	54111.9	-26062.5	-2257.92	159.909	819.761	0	0	0	0	0	0	0	603	903	0
9677	3	0	0	0	0	0	0	200	300	0	-31.8312	17.2656	-648.555	53837.2	-26184.6	-2395.25	159.626	819.989	0	0	0	0	0	0	0	603	903	0
9677	4	0	0	0	0	0	0	200	300	0	-31.3734	16.6553	-649.776	54111.9	-26184.6	-2120.59	159.702	819.722	0	0	0	0	0	0	0	603	903	0
9677	5	0	0	0	0	0	0	200	300	0	-33.0519	15.7397	-649.471	53928.8	-26550.8	-2441.02	159.119	819.965	0	0	0	0	0	0	0	603	903	0
9677	6	0	0	0	0	0	0	200	300	0	-33.0519	16.3501	-647.335	54111.9	-26489.8	-2395.25	159.079	819.408	0	0	0	0	0	0	0	603	903	0
9677	7	0	0	0	0	0	0	200	300	0	-29.2372	15.7397	-648.25	53745.7	-26733.9	-2257.92	158.76	820.091	0	0	0	0	0	0	0	603	903	0
9677	8	0	0	0	0	0	0	200	300	0	-32.4416	14.9768	-647.029	54020.3	-26550.8	-2257.92	158.965	819.51	0	0	0	0	0	0	0	603	903	0
9677	9	0	0	0	0	0	0	200	300	0	-31.9838	14.0613	-646.419	53837.2	-26306.7	-1937.49	159.304	819.715	0	0	0	0	0	0	0	603	903	0
9678	0	0	0	0	0	0	0	200	300	0	-31.0683	14.6716	-647.029	53562.6	-26733.9	-2257.92	158.682	820.218	0	0	0	0	0	0	0	603	903	0
9678	1	0	0	0	0	0	0	200	300	0	-32.289	13.6035	-645.503	52921.7	-26062.5	-2120.59	159.624	821.015	0	0	0	0	0	0	0	603	903	0
9678	2	0	0	0	0	0	0	200	300	0	-29.0846	13.6035	-645.198	52830.1	-26428.8	-2120.59	159.038	821.118	0	0	0	0	0	0	0	603	903	0
9678	3	0	0	0	0	0	0	200	300	0	-31.0683	12.9932	-645.809	52738.6	-26428.8	-2257.92	159.076	821.337	0	0	0	0	0	0	0	603	903	0
9678	4	0	0	0	0	0	0	200	300	0	-30.4579	13.7561	-643.978	52921.7	-26245.6	-2532.58	159.244	820.821	0	0	0	0	0	0	0	603	903	0
9678	5	0	0	0	0	0	0	200	300	0	-31.6786	12.688	-644.893	52555.5	-26428.8	-2029.04	159.018	821.505	0	0	0	0	0	0	0	603	903	0
9678	6	0	0	0	0	0	0	200	300	0	-28.932	11.925	-643.062	52921.7	-26489.8	-2212.14	158.807	820.704	0	0	0	0	0	0	0	603	903	0
9678	7	0	0	0	0	0	0	200	300	0	-30.3053	11.6199	-642.147	52555.5	-26306.7	-2120.59	159.033	821.157	0	0	0	0	0	0	0	603	903	0
9678	8	0	0	0	0	0	0	200	300	0	-31.2209	10.5518	-641.841	52555.5	-26550.8	-2029.04	158.633	821.118	0	0	0	0	0	0	0	603	903	0
9678	9	0	0	0	0	0	0	200	300	0	-30.6105	10.8569	-641.231	52647	-26245.6	-2029.04	159.07	820.897	0	0	0	0	0	0	0	603	903	0
9679	0	0	0	0	0	0	0	200	300	0	-28.4743	10.7043	-642.147	52372.4	-26184.6	-1891.71	159.223	821.442	0	0	0	0	0	0	0	603	903	0
9679	1	0	0	0	0	0	0	200	300	0	-31.0683	9.63623	-642.452	52006.1	-26245.6	-1754.38	159.148	822.051	0	0	0	0	0	0	0	603	903	0
9679	2	0	0	0	0	0	0	200	300	0	-30.1527	9.17846	-636.653	52463.9	-26245.6	-1708.6	158.776	820.594	0	0	0	0	0	0	0	603	903	0
9679	3	0	0	0	0	0	0	200	300	0	-29.8476	9.02588	-640.926	52463.9	-26306.7	-1708.6	158.955	821.144	0	0	0	0	0	0	0	603	903	0
9679	4	0	0	0	0	0	0	200	300	0	-30.0002	9.17846	-640.926	51823	-26489.8	-2029.04	158.669	822.144	0	0	0	0	0	0	0	603	903	0
9679	5	0	0	0	0	0	0	200	300	0	-29.2372	8.41552	-639.095	51823	-26062.5	-1800.16	159.22	821.912	0	0	0	0	0	0	0	603	903	0
9679	6	0	0	0	0	0	0	200	300	0	-29.8476	7.95776	-639.4	51914.6	-26672.9	-1800.16	158.284	821.807	0	0	0	0	0	0	0	603	903	0
9679	7	0	0	0	0	0	0	200	300	0	-30.1527	7.65259	-637.569	51639.9	-26001.5	-1800.16	159.218	822.005	0	0	0	0	0	0	0	603	903	0
9679	8	0	0	0	0	0	0	200	300	0	-30.6105	6.73706	-639.4	51456.8	-26184.6	-1433.95	159.048	822.523	0	0	0	0	0	0	0	603	903	0
9679	9	0	0	0	0	0	0	200	300	0	-30.3053	6.58447	-639.705	51456.8	-26428.8	-1571.27	158.686	822.562	0	0	0	0	0	0	0	603	903	0
9680	0	0	0	0	0	0	0	200	300	0	-30.1527	5.82153	-637.874	52006.1	-26367.7	-1525.5	158.663	821.47	0	0	0	0	0	0	0	603	903	0
9680	1	0	0	0	0	0	0	200	300	0	-30.4579	5.82153	-636.348	51182.2	-26550.8	-1479.72	158.276	822.569	0	0	0	0	0	0	0	603	903	0
9680	2	0	0	0	0	0	0	200	300	0	-31.3734	5.05859	-638.79	51365.3	-26062.5	-1754.38	159.2	822.59	0	0	0	0	0	0	0	603	903	0
9680	3	0	0	0	0	0	0	200	300	0	-30.0002	5.21118	-636.348	51365.3	-26062.5	-1754.38	159.044	822.281	0	0	0	0	0	0	0	603	903	0
9680	4	0	0	0	0	0	0	200	300	0	-30.1527	4.14306	-637.874	50816	-26550.8	-1983.26	158.376	823.335	0	0	0	0	0	0	0	603	903	0
9680	5	0	0	0	0	0	0	200	300	0	-30.3053	3.83789	-637.569	50632.9	-25940.5	-1525.5	159.313	823.584	0	0	0	0	0	0	0	603	903	0
9680	6	0	0	0	0	0	0	200	300	0	-29.0846	3.38012	-636.653	51182.2	-26489.8	-1571.27	158.392	822.607	0	0	0	0	0	0	0	603	903	0
9680	7	0	0	0	0	0	0	200	300	0	-29.5424	1.09131	-633.296	50816	-26245.6	-1571.27	158.557	822.76	0	0	0	0	0	0	0	603	903	0
9680	8	0	0	0	0	0	0	200	300	0	-28.7794	2.4646	-635.433	50816	-26184.6	-1754.38	158.792	823.029	0	0	0	0	0	0	0	603	903	0
9680	9	0	0	0	0	0	0	200	300	0	-29.5424	2.00683	-637.569	50266.7	-26611.9	-1479.72	158.26	824.159	0	0	0	0	0	0	0	603	903	0
9681	0	0	0	0	0	0	0	200	300	0	-29.3898	1.39648	-636.348	50449.8	-26184.6	-1571.27	158.852	823.72	0	0	0	0	0	0	0	603	903	0
9681	1	0	0	0	0	0	0	200	300	0	-29.5424	2.4646	-632.991	50083.6	-26184.6	-1296.62	158.634	823.878	0	0	0	0	0	0	0	603	903	0
9681	2	0	0	0	0	0	0	200	300	0	-29.2372	1.09131	-637.264	50541.3	-26489.8	-1342.39	158.432	823.69	0	0	0	0	0	0	0	603	903	0
9681	3	0	0	0	0	0	0	200	300	0	-28.4743	-0.281985	-635.738	50358.2	-26733.9	-1388.17	157.948	823.788	0	0	0	0	0	0	0	603	903	0
9681	4	0	0	0	0	0	0	200	300	0	-29.8476	0.328366	-637.264	49442.7	-26489.8	-1433.95	158.432	825.414	0	0	0	0	0	0	0	603	903	0
9681	5	0	0	0	0	0	0	200	300	0	-29.8476	0.480954	-636.043	49808.9	-26489.8	-1250.84	158.352	824.69	0	0	0	0	0	0	0	603	903	0
9681	6	0	0	0	0	0	0	200	300	0	-29.695	-0.281985	-634.822	49717.3	-26245.6	-1205.06	158.657	824.683	0	0	0	0	0	0	0	603	903	0
9681	7	0	0	0	0	0	0	200	300	0	-30.1527	-0.434573	-633.602	49259.6	-26795	-1250.84	157.71	825.255	0	0	0	0	0	0	0	603	903	0
9681	8	0	0	0	0	0	0	200	300	0	-29.5424	-1.04492	-635.738	49168	-26489.8	-1067.73	158.332	825.66	0	0	0	0	0	0	0	603	903	0
9681	9	0	0	0	0	0	0	200	300	0	-28.7794	-1.80786	-634.212	48984.9	-26795	-838.852	157.751	825.763	0	0	0	0	0	0	0	603	903	0
9682	0	0	0	0	0	0	0	200	300	0	-28.7794	-1.50269	-636.348	48527.1	-26856	-1067.73	157.797	826.741	0	0	0	0	0	0	0	603	903	0
9682	1	0	0	0	0	0	0	200	300	0	-30.0002	-3.18116	-636.959	48344	-26306.7	-1067.73	158.7	827.102	0	0	0	0	0	0	0	603	903	0
9682	2	0	0	0	0	0	0	200	300	0	-29.5424	-2.26563	-634.517	48801.8	-26978.1	-1021.96	157.483	826.088	0	0	0	0	0	0	0	603	903	0
9682	3	0	0	0	0	0	0	200	300	0	-28.3217	-2.5708	-635.738	48984.9	-26733.9	-1067.73	157.948	825.948	0	0	0	0	0	0	0	603	903	0
9682	4	0	0	0	0	0	0	200	300	0	-29.3898	-3.18116	-634.517	48344	-26978.1	-1067.73	157.483	826.81	0	0	0	0	0	0	0	603	903	0
9682	5	0	0	0	0	0	0	200	300	0	-29.3898	-3.02857	-635.738	48618.7	-27100.1	-838.852	157.372	826.524	0	0	0	0	0	0	0	603	903	0
9682	6	0	0	0	0	0	0	200	300	0	-26.7958	-4.55445	-635.433	48710.2	-26611.9	-701.523	158.12	826.343	0	0	0	0	0	0	0	603	903	0
9682	7	0	0	0	0	0	0	200	300	0	-29.5424	-3.94409	-635.433	48435.6	-27100.1	-243.759	157.352	826.775	0	0	0	0	0	0	0	603	903	0
9682	8	0	0	0	0	0	0	200	300	0	-28.932	-4.55445	-637.264	48527.1	-26978.1	-884.628	157.666	826.851	0	0	0	0	0	0	0	603	903	0
9682	9	0	0	0	0	0	0	200	300	0	-27.8639	-5.31739	-635.433	48344	-26856	-838.852	157.736	826.92	0	0	0	0	0	0	0	603	903	0
9683	0	0	0	0	0	0	0	200	300	0	-28.1691	-4.40186	-634.517	47703.2	-27344.3	-884.628	156.905	827.82	0	0	0	0	0	0	0	603	903	0
9683	1	0	0	0	0	0	0	200	300	0	-26.7958	-5.92774	-636.348	48069.4	-26978.1	-518.417	157.605	827.461	0	0	0	0	0	0	0	603	903	0
9683	2	0	0	0	0	0	0	200	300	0	-27.4062	-6.23291	-636.043	47153.9	-27466.4	-793.076	156.817	828.864	0	0	0	0	0	0	0	603	903	0
9683	3	0	0	0	0	0	0	200	300	0	-28.0165	-6.08033	-636.653	47794.7	-26917	-289.535	157.721	827.928	0	0	0	0	0	0	0	603	903	0
9683	4	0	0	0	0	0	0	200	300	0	-28.6269	-6.3855	-635.433	47428.5	-27344.3	-518.417	156.967	828.36	0	0	0	0	0	0	0	603	903	0
9683	5	0	0	0	0	0	0	200	300	0	-28.7794	-7.30103	-636.043	47886.3	-27710.5	-655.746	156.433	827.712	0	0	0	0	0	0	0	603	903	0
9683	6	0	0	0	0	0	0	200	300	0	-26.9484	-7.91138	-635.738	47794.7	-27527.4	-381.088	156.7	827.82	0	0	0	0	0	0	0	603	903	0
9683	7	0	0	0	0	0	0	200	300	0	-28.3217	-8.21656	-636.348	46787.7	-27710.5	-472.641	156.454	829.475	0	0	0	0	0	0	0	603	903	0
9683	8	0	0	0	0	0	0	200	300	0	-28.4743	-8.9795	-636.959	47337	-27527.4	-381.088	156.783	828.683	0	0	0	0	0	0	0	603	903	0
9683	9	0	0	0	0	0	0	200	300	0	-26.7958	-8.21656	-636.959	46970.8	-27344.3	-381.088	157.071	829.258	0	0	0	0	0	0	0	603	903	0
9684	0	0	0	0	0	0	0	200	300	0	-28.6269	-8.67432	-638.484	47337	-27893.6	-472.641	156.313	828.86	0	0	0	0	0	0	0	603	903	0
9684	1	0	0	0	0	0	0	200	300	0	-27.4062	-8.52173	-637.264	47245.4	-27527.4	-381.088	156.804	828.862	0	0	0	0	0	0	0	603	903	0
9684	2	0	0	0	0	0	0	200	300	0	-27.101	-9.13208	-637.874	46879.2	-28015.7	-106.43	156.08	829.507	0	0	0	0	0	0	0	603	903	0
9684	3	0	0	0	0	0	0	200	300	0	-28.1691	-9.89502	-637.569	46879.2	-27954.6	-289.535	156.154	829.472	0	0	0	0	0	0	0	603	903	0
9684	4	0	0	0	0	0	0	200	300	0	-27.5587	-10.2002	-637.874	46970.8	-27710.5	-197.982	156.558	829.364	0	0	0	0	0	0	0	603	903	0
9684	5	0	0	0	0	0	0	200	300	0	-26.7958	-10.3528	-638.179	46879.2	-28015.7	-243.759	156.101	829.542	0	0	0	0	0	0	0	603	903	0
9684	6	0	0	0	0	0	0	200	300	0	-27.2536	-10.0476	-638.79	46421.4	-27893.6	-243.759	156.334	830.329	0	0	0	0	0	0	0	603	903	0
9684	7	0	0	0	0	0	0	200	300	0	-26.0329	-10.658	-640.315	46513	-27710.5	-60.6534	156.724	830.359	0	0	0	0	0	0	0	603	903	0
9684	8	0	0	0	0	0	0	200	300	0	-27.4062	-11.8787	-640.621	45689	-28259.8	-14.877	155.887	831.68	0	0	0	0	0	0	0	603	903	0
9684	9	0	0	0	0	0	0	200	300	0	-26.9484	-11.5735	-640.01	46238.3	-28137.7	168.228	156.035	830.754	0	0	0	0	0	0	0	603	903	0
9685	0	0	0	0	0	0	0	200	300	0	-28.3217	-12.1838	-640.621	46055.2	-28442.9	-243.759	155.601	831.108	0	0	0	0	0	0	0	603	903	0
9685	1	0	0	0	0	0	0	200	300	0	-28.4743	-11.7261	-639.705	46055.2	-28442.9	-197.982	155.537	831.005	0	0	0	0	0	0	0	603	903	0
9685	2	0	0	0	0	0	0	200	300	0	-26.6432	-12.7942	-640.926	46146.8	-27832.6	30.8993	156.574	831	0	0	0	0	0	0	0	603	903	0
9685	3	0	0	0	0	0	0	200	300	0	-28.3217	-13.4045	-640.926	45597.5	-28442.9	122.452	155.622	831.857	0	0	0	0	0	0	0	603	903	0
9685	4	0	0	0	0	0	0	200	300	0	-27.7113	-13.8623	-641.231	45689	-27954.6	-14.877	156.405	831.748	0	0	0	0	0	0	0	603	903	0
9685	5	0	0	0	0	0	0	200	300	0	-26.9484	-14.0149	-642.452	45780.6	-28198.8	122.452	156.108	831.741	0	0	0	0	0	0	0	603	903	0
9685	6	0	0	0	0	0	0	200	300	0	-27.2536	-13.7097	-642.757	45139.7	-28626	-152.206	155.464	832.772	0	0	0	0	0	0	0	603	903	0
9685	7	0	0	0	0	0	0	200	300	0	-28.1691	-14.9304	-641.536	45597.5	-28137.7	-14.877	156.14	831.925	0	0	0	0	0	0	0	603	903	0
9685	8	0	0	0	0	0	0	200	300	0	-27.2536	-14.6252	-643.062	45414.3	-28931.2	-197.982	155.01	832.378	0	0	0	0	0	0	0	603	903	0
9685	9	0	0	0	0	0	0	200	300	0	-27.8639	-16.1511	-643.367	44407.3	-28687.1	122.452	155.411	833.977	0	0	0	0	0	0	0	603	903	0
9686	0	0	0	0	0	0	0	200	300	0	-27.8639	-15.2356	-642.452	44956.6	-28442.9	-60.6534	155.728	833.023	0	0	0	0	0	0	0	603	903	0
9686	1	0	0	0	0	0	0	200	300	0	-28.4743	-15.2356	-643.978	45048.1	-28931.2	30.8993	155.074	833.047	0	0	0	0	0	0	0	603	903	0
9686	2	0	0	0	0	0	0	200	300	0	-25.7277	-16.3037	-644.283	45231.2	-28931.2	305.558	155.096	832.796	0	0	0	0	0	0	0	603	903	0
9686	3	0	0	0	0	0	0	200	300	0	-28.7794	-16.3037	-643.978	44681.9	-28626	122.452	155.548	833.616	0	0	0	0	0	0	0	603	903	0
9686	4	0	0	0	0	0	0	200	300	0	-28.7794	-17.3718	-644.893	44956.6	-28931.2	351.334	155.138	833.288	0	0	0	0	0	0	0	603	903	0
9686	5	0	0	0	0	0	0	200	300	0	-27.7113	-17.3718	-643.978	44773.5	-28992.2	168.228	154.979	833.474	0	0	0	0	0	0	0	603	903	0
9686	6	0	0	0	0	0	0	200	300	0	-29.5424	-17.0667	-645.809	44132.6	-29175.3	214.005	154.824	834.663	0	0	0	0	0	0	0	603	903	0
9686	7	0	0	0	0	0	0	200	300	0	-29.2372	-18.4399	-645.503	44865	-29419.5	488.663	154.424	833.496	0	0	0	0	0	0	0	603	903	0
9686	8	0	0	0	0	0	0	200	300	0	-27.7113	-18.1348	-643.978	44407.3	-28992.2	305.558	154.979	834.042	0	0	0	0	0	0	0	603	903	0
9686	9	0	0	0	0	0	0	200	300	0	-29.695	-17.677	-642.757	43766.4	-29419.5	214.005	154.229	834.908	0	0	0	0	0	0	0	603	903	0
9687	0	0	0	0	0	0	0	200	300	0	-28.7794	-18.8977	-645.809	43766.4	-29480.5	397.11	154.351	835.23	0	0	0	0	0	0	0	603	903	0
9687	1	0	0	0	0	0	0	200	300	0	-28.1691	-18.8977	-644.283	43491.8	-29419.5	442.887	154.338	835.496	0	0	0	0	0	0	0	603	903	0
9687	2	0	0	0	0	0	0	200	300	0	-28.1691	-19.6606	-647.945	44224.2	-29297.4	625.992	154.784	834.747	0	0	0	0	0	0	0	603	903	0
9687	3	0	0	0	0	0	0	200	300	0	-29.695	-20.4236	-647.64	43583.3	-29602.6	625.992	154.292	835.704	0	0	0	0	0	0	0	603	903	0
9687	4	0	0	0	0	0	0	200	300	0	-30.1527	-19.8132	-648.86	43766.4	-29907.8	580.216	153.907	835.549	0	0	0	0	0	0	0	603	903	0
9687	5	0	0	0	0	0	0	200	300	0	-29.5424	-21.0339	-648.555	43400.2	-29968.8	580.216	153.791	836.082	0	0	0	0	0	0	0	603	903	0
9687	6	0	0	0	0	0	0	200	300	0	-30.1527	-20.7288	-648.86	42942.4	-29724.7	625.992	154.189	836.819	0	0	0	0	0	0	0	603	903	0
9687	7	0	0	0	0	0	0	200	300	0	-30.1527	-20.7288	-649.471	42484.7	-30151.9	717.545	153.575	837.586	0	0	0	0	0	0	0	603	903	0
9687	8	0	0	0	0	0	0	200	300	0	-29.5424	-22.4072	-649.776	43217.1	-29846.7	717.545	154.066	836.489	0	0	0	0	0	0	0	603	903	0
9687	9	0	0	0	0	0	0	200	300	0	-29.3898	-22.7124	-650.691	42759.3	-30090.9	671.769	153.756	837.286	0	0	0	0	0	0	0	603	903	0
9688	0	0	0	0	0	0	0	200	300	0	-28.4743	-22.7124	-651.607	43125.6	-30762.2	809.098	152.79	836.817	0	0	0	0	0	0	0	603	903	0
9688	1	0	0	0	0	0	0	200	300	0	-28.7794	-23.0176	-650.386	43491.8	-30090.9	809.098	153.734	836.129	0	0	0	0	0	0	0	603	903	0
9688	2	0	0	0	0	0	0	200	300	0	-29.2372	-23.0176	-652.217	41752.2	-30396	717.545	153.396	838.984	0	0	0	0	0	0	0	603	903	0
9688	3	0	0	0	0	0	0	200	300	0	-30.4579	-24.5435	-651.607	42210	-30579.1	900.651	153.071	838.222	0	0	0	0	0	0	0	603	903	0
9688	4	0	0	0	0	0	0	200	300	0	-29.3898	-23.7805	-652.828	41935.3	-30212.9	809.098	153.72	838.764	0	0	0	0	0	0	0	603	903	0
9688	5	0	0	0	0	0	0	200	300	0	-29.695	-24.2383	-653.743	41843.8	-31067.4	1221.09	152.478	838.994	0	0	0	0	0	0	0	603	903	0
9688	6	0	0	0	0	0	0	200	300	0	-31.0683	-24.2383	-653.133	41569.1	-31006.4	1083.76	152.527	839.354	0	0	0	0	0	0	0	603	903	0
9688	7	0	0	0	0	0	0	200	300	0	-30.4579	-24.2383	-653.438	41294.5	-30640.2	809.098	153.109	839.804	0	0	0	0	0	0	0	603	903	0
9688	8	0	0	0	0	0	0	200	300	0	-27.5587	-25.1538	-654.659	41843.8	-31250.5	1266.86	152.264	839.083	0	0	0	0	0	0	0	603	903	0
9688	9	0	0	0	0	0	0	200	300	0	-31.9838	-25.3064	-654.659	40562.1	-30884.3	992.203	152.824	841.041	0	0	0	0	0	0	0	603	903	0
9689	0	0	0	0	0	0	0	200	300	0	-31.0683	-26.2219	-655.574	41294.5	-31189.5	1221.09	152.424	840.01	0	0	0	0	0	0	0	603	903	0
9689	1	0	0	0	0	0	0	200	300	0	-29.3898	-25.6116	-656.185	41202.9	-31250.5	1037.98	152.375	840.208	0	0	0	0	0	0	0	603	903	0
9689	2	0	0	0	0	0	0	200	300	0	-31.6786	-25.9168	-654.659	40012.8	-31067.4	1312.64	152.544	841.88	0	0	0	0	0	0	0	603	903	0
9689	3	0	0	0	0	0	0	200	300	0	-31.8312	-26.5271	-655.879	40928.3	-31372.6	1404.19	152.167	840.598	0	0	0	0	0	0	0	603	903	0
9689	4	0	0	0	0	0	0	200	300	0	-28.6269	-26.6797	-654.659	40287.4	-31738.8	1449.97	151.519	841.46	0	0	0	0	0	0	0	603	903	0
9689	5	0	0	0	0	0	0	200	300	0	-31.0683	-26.8323	-656.185	40470.5	-31311.6	1221.09	152.282	841.325	0	0	0	0	0	0	0	603	903	0
9689	6	0	0	0	0	0	0	200	300	0	-31.3734	-27.29	-657.405	40104.3	-31921.9	1221.09	151.443	841.996	0	0	0	0	0	0	0	603	903	0
9689	7	0	0	0	0	0	0	200	300	0	-30.1527	-27.4426	-658.016	40012.8	-31128.5	1221.09	152.693	842.192	0	0	0	0	0	0	0	603	903	0
9689	8	0	0	0	0	0	0	200	300	0	-31.3734	-28.2056	-657.711	40012.8	-31860.9	1495.74	151.558	842.164	0	0	0	0	0	0	0	603	903	0
9689	9	0	0	0	0	0	0	200	300	0	-31.8312	-27.7478	-658.016	39646.5	-32410.2	1404.19	150.746	842.748	0	0	0	0	0	0	0	603	903	0
9690	0	0	0	0	0	0	0	200	300	0	-30.9157	-28.053	-654.354	39280.3	-31860.9	1724.63	151.309	842.971	0	0	0	0	0	0	0	603	903	0
9690	1	0	0	0	0	0	0	200	300	0	-31.9838	-28.053	-658.321	38822.6	-31921.9	1449.97	151.51	844.028	0	0	0	0	0	0	0	603	903	0
9690	2	0	0	0	0	0	0	200	300	0	-31.8312	-28.6633	-658.626	39371.9	-32715.4	1358.41	150.328	843.221	0	0	0	0	0	0	0	603	903	0
9690	3	0	0	0	0	0	0	200	300	0	-31.0683	-28.8159	-658.626	38914.1	-32593.3	1541.52	150.513	843.916	0	0	0	0	0	0	0	603	903	0
9690	4	0	0	0	0	0	0	200	300	0	-31.9838	-29.4263	-659.542	38273.2	-32837.5	1633.07	150.212	844.97	0	0	0	0	0	0	0	603	903	0
9690	5	0	0	0	0	0	0	200	300	0	-32.1364	-29.4263	-659.236	38364.8	-32959.5	1587.3	150.003	844.804	0	0	0	0	0	0	0	603	903	0
9690	6	0	0	0	0	0	0	200	300	0	-30.7631	-29.884	-660.762	38090.1	-32593.3	1495.74	150.673	845.354	0	0	0	0	0	0	0	603	903	0
9690	7	0	0	0	0	0	0	200	300	0	-31.6786	-30.1892	-661.678	38273.2	-33203.7	1678.85	149.819	845.157	0	0	0	0	0	0	0	603	903	0
9690	8	0	0	0	0	0	0	200	300	0	-29.3898	-29.884	-659.847	37632.4	-32715.4	1633.07	150.42	845.968	0	0	0	0	0	0	0	603	903	0
9690	9	0	0	0	0	0	0	200	300	0	-31.6786	-29.884	-661.678	37632.4	-32593.3	1678.85	150.741	846.126	0	0	0	0	0	0	0	603	903	0
9691	0	0	0	0	0	0	0	200	300	0	-31.9838	-31.4099	-661.373	37540.8	-33203.7	1816.18	149.796	846.238	0	0	0	0	0	0	0	603	903	0
9691	1	0	0	0	0	0	0	200	300	0	-32.289	-31.4099	-661.373	37266.2	-33142.6	1770.4	149.888	846.653	0	0	0	0	0	0	0	603	903	0
9691	2	0	0	0	0	0	0	200	300	0	-32.5941	-30.9522	-662.593	37632.4	-33264.7	1861.95	149.796	846.204	0	0	0	0	0	0	0	603	903	0
9691	3	0	0	0	0	0	0	200	300	0	-32.1364	-32.1729	-661.678	36625.3	-33447.8	1678.85	149.45	847.648	0	0	0	0	0	0	0	603	903	0
9691	4	0	0	0	0	0	0	200	300	0	-33.0519	-32.3254	-664.73	36533.8	-33081.6	1633.07	150.233	848.04	0	0	0	0	0	0	0	603	903	0
9691	5	0	0	0	0	0	0	200	300	0	-31.9838	-31.8677	-663.509	37174.6	-33753	1816.18	149.13	846.973	0	0	0	0	0	0	0	603	903	0
9691	6	0	0	0	0	0	0	200	300	0	-32.1364	-32.3254	-663.204	36442.2	-33264.7	1770.4	149.842	848.051	0	0	0	0	0	0	0	603	903	0
9691	7	0	0	0	0	0	0	200	300	0	-33.6623	-32.0203	-662.593	36167.5	-33142.6	2045.06	149.98	848.415	0	0	0	0	0	0	0	603	903	0
9691	8	0	0	0	0	0	0	200	300	0	-33.8148	-32.0203	-664.119	36076	-33753	1816.18	149.176	848.679	0	0	0	0	0	0	0	603	903	0
9691	9	0	0	0	0	0	0	200	300	0	-32.7467	-33.3936	-665.95	36259.1	-33386.8	2228.16	149.866	848.553	0	0	0	0	0	0	0	603	903	0
9692	0	0	0	0	0	0	0	200	300	0	-33.6623	-33.3936	-665.34	35343.5	-33630.9	1999.28	149.453	849.879	0	0	0	0	0	0	0	603	903	0
9692	1	0	0	0	0	0	0	200	300	0	-34.5778	-33.3936	-664.424	35801.3	-33753	1999.28	149.2	849.117	0	0	0	0	0	0	0	603	903	0
9692	2	0	0	0	0	0	0	200	300	0	-33.5097	-33.8513	-666.561	35435.1	-33692	1999.28	149.454	849.839	0	0	0	0	0	0	0	603	903	0
9692	3	0	0	0	0	0	0	200	300	0	-33.6623	-34.1565	-666.866	34702.7	-34241.3	2182.39	148.653	850.961	0	0	0	0	0	0	0	603	903	0
9692	4	0	0	0	0	0	0	200	300	0	-32.7467	-34.3091	-664.73	34977.3	-34302.3	2273.94	148.397	850.381	0	0	0	0	0	0	0	603	903	0
9692	5	0	0	0	0	0	0	200	300	0	-32.8993	-34.3091	-666.255	34611.1	-33753	2319.72	149.339	851.051	0	0	0	0	0	0	0	603	903	0
9692	6	0	0	0	0	0	0	200	300	0	-34.12	-34.6143	-667.781	35160.4	-34485.4	2045.06	148.358	850.347	0	0	0	0	0	0	0	603	903	0
9692	7	0	0	0	0	0	0	200	300	0	-34.5778	-34.4617	-666.866	33329.4	-33875.1	2045.06	149.203	853.021	0	0	0	0	0	0	0	603	903	0
9692	8	0	0	0	0	0	0	200	300	0	-34.5778	-34.9194	-668.392	34153.4	-33936.1	2136.61	149.227	851.902	0	0	0	0	0	0	0	603	903	0
9692	9	0	0	0	0	0	0	200	300	0	-34.7304	-35.5298	-669.002	33970.3	-34668.5	2502.82	148.179	852.222	0	0	0	0	0	0	0	603	903	0
9693	0	0	0	0	0	0	0	200	300	0	-34.5778	-35.5298	-669.002	33421	-34424.4	2548.6	148.544	853.044	0	0	0	0	0	0	0	603	903	0
9693	1	0	0	0	0	0	0	200	300	0	-35.4933	-36.7505	-670.833	33237.9	-34607.5	2594.38	148.411	853.453	0	0	0	0	0	0	0	603	903	0
9693	2	0	0	0	0	0	0	200	300	0	-34.12	-36.4453	-670.223	33695.6	-34973.7	2228.16	147.818	852.725	0	0	0	0	0	0	0	603	903	0
9693	3	0	0	0	0	0	0	200	300	0	-34.883	-36.1401	-670.528	32597	-34363.3	2365.49	148.752	854.386	0	0	0	0	0	0	0	603	903	0
9693	4	0	0	0	0	0	0	200	300	0	-34.12	-37.666	-672.054	33054.8	-34485.4	2548.6	148.687	853.815	0	0	0	0	0	0	0	603	903	0
9693	5	0	0	0	0	0	0	200	300	0	-34.883	-37.0557	-670.223	32963.2	-34546.4	2502.82	148.455	853.818	0	0	0	0	0	0	0	603	903	0
9693	6	0	0	0	0	0	0	200	300	0	-35.4933	-37.666	-673.274	32322.3	-34668.5	2777.48	148.508	854.992	0	0	0	0	0	0	0	603	903	0
9693	7	0	0	0	0	0	0	200	300	0	-35.9511	-38.429	-673.274	32230.8	-35278.9	2502.82	147.601	855.128	0	0	0	0	0	0	0	603	903	0
9693	8	0	0	0	0	0	0	200	300	0	-36.1037	-38.2764	-673.58	31956.1	-34790.6	2960.59	148.35	855.558	0	0	0	0	0	0	0	603	903	0
9693	9	0	0	0	0	0	0	200	300	0	-35.4933	-38.5815	-674.19	31773	-35400.9	2640.15	147.491	855.872	0	0	0	0	0	0	0	603	903	0
9694	0	0	0	0	0	0	0	200	300	0	-36.2563	-39.1919	-673.274	31864.5	-35400.9	2685.93	147.42	855.672	0	0	0	0	0	0	0	603	903	0
9694	1	0	0	0	0	0	0	200	300	0	-37.0192	-39.4971	-675.411	31589.9	-34973.7	2594.38	148.219	856.229	0	0	0	0	0	0	0	603	903	0
9694	2	0	0	0	0	0	0	200	300	0	-35.9511	-39.4971	-675.106	31315.2	-35828.2	2731.7	146.93	856.614	0	0	0	0	0	0	0	603	903	0
9694	3	0	0	0	0	0	0	200	300	0	-36.4088	-40.5652	-676.326	31040.6	-35156.8	3006.36	148.018	857.104	0	0	0	0	0	0	0	603	903	0
9694	4	0	0	0	0	0	0	200	300	0	-37.6295	-40.7178	-677.242	30399.7	-35278.9	3052.14	147.908	858.112	0	0	0	0	0	0	0	603	903	0
9694	5	0	0	0	0	0	0	200	300	0	-36.5614	-41.1755	-677.547	31040.6	-35767.2	2777.48	147.211	857.187	0	0	0	0	0	0	0	603	903	0
9694	6	0	0	0	0	0	0	200	300	0	-36.4088	-41.3281	-678.462	30033.5	-35462	2914.81	147.732	858.733	0	0	0	0	0	0	0	603	903	0
9694	7	0	0	0	0	0	0	200	300	0	-35.9511	-41.9385	-679.378	30125	-36194.4	3006.36	146.724	858.658	0	0	0	0	0	0	0	603	903	0
9694	8	0	0	0	0	0	0	200	300	0	-36.5614	-42.5488	-680.599	30125	-36194.4	3235.24	146.82	858.737	0	0	0	0	0	0	0	603	903	0
9694	9	0	0	0	0	0	0	200	300	0	-37.1718	-41.9385	-678.768	28934.9	-35767.2	3235.24	147.306	860.372	0	0	0	0	0	0	0	603	903	0
9695	0	0	0	0	0	0	0	200	300	0	-38.0873	-42.0911	-681.209	29026.4	-36316.5	3189.47	146.688	860.39	0	0	0	0	0	0	0	603	903	0
9695	1	0	0	0	0	0	0	200	300	0	-38.0873	-43.0066	-682.43	29301.1	-36011.3	3143.69	147.231	860.064	0	0	0	0	0	0	0	603	903	0
9695	2	0	0	0	0	0	0	200	300	0	-36.8666	-43.4644	-681.819	29026.4	-36316.5	3006.36	146.736	860.428	0	0	0	0	0	0	0	603	903	0
9695	3	0	0	0	0	0	0	200	300	0	-37.477	-43.4644	-683.345	28843.3	-36804.8	3326.8	146.14	860.791	0	0	0	0	0	0	0	603	903	0
9695	4	0	0	0	0	0	0	200	300	0	-34.7304	-44.6851	-683.345	28019.3	-36438.5	3464.13	146.676	861.997	0	0	0	0	0	0	0	603	903	0
9695	5	0	0	0	0	0	0	200	300	0	-37.7821	-44.3799	-684.261	28660.2	-36865.8	3601.46	146.123	861.115	0	0	0	0	0	0	0	603	903	0
9695	6	0	0	0	0	0	0	200	300	0	-37.6295	-44.8377	-686.092	28294	-37048.9	3509.9	146	861.761	0	0	0	0	0	0	0	603	903	0
9695	7	0	0	0	0	0	0	200	300	0	-39.4606	-45.9058	-685.482	27744.7	-36743.7	3372.57	146.397	862.525	0	0	0	0	0	0	0	603	903	0
9695	8	0	0	0	0	0	0	200	300	0	-39.308	-45.6006	-687.618	27927.8	-37232	3235.24	145.854	862.385	0	0	0	0	0	0	0	603	903	0
9695	9	0	0	0	0	0	0	200	300	0	-38.3925	-46.0584	-688.533	27561.6	-36926.8	3372.57	146.369	862.971	0	0	0	0	0	0	0	603	903	0
9696	0	0	0	0	0	0	0	200	300	0	-39.308	-46.6687	-687.923	27195.4	-37232	3509.9	145.878	863.467	0	0	0	0	0	0	0	603	903	0
9696	1	0	0	0	0	0	0	200	300	0	-38.8503	-46.9739	-688.228	26646	-37537.2	3830.34	145.458	864.283	0	0	0	0	0	0	0	603	903	0
9696	2	0	0	0	0	0	0	200	300	0	-39.0028	-48.042	-689.754	26920.7	-37415.1	3921.89	145.756	863.971	0	0	0	0	0	0	0	603	903	0
9696	3	0	0	0	0	0	0	200	300	0	-38.6977	-46.9739	-690.059	26462.9	-37903.4	3784.56	145.072	864.651	0	0	0	0	0	0	0	603	903	0
9696	4	0	0	0	0	0	0	200	300	0	-38.6977	-47.7368	-691.89	26096.7	-38147.5	3555.68	144.865	865.282	0	0	0	0	0	0	0	603	903	0
9696	5	0	0	0	0	0	0	200	300	0	-39.1554	-49.5679	-692.195	26188.3	-37781.3	3601.46	145.418	865.166	0	0	0	0	0	0	0	603	903	0
9696	6	0	0	0	0	0	0	200	300	0	-39.7658	-48.9575	-693.721	25822.1	-38513.7	3693.01	144.482	865.777	0	0	0	0	0	0	0	603	903	0
9696	7	0	0	0	0	0	0	200	300	0	-40.3761	-49.4153	-695.552	25272.7	-38086.5	4013.44	145.243	866.665	0	0	0	0	0	0	0	603	903	0
9696	8	0	0	0	0	0	0	200	300	0	-39.7658	-50.1782	-694.942	26096.7	-38025.5	4013.44	145.283	865.448	0	0	0	0	0	0	0	603	903	0
9696	9	0	0	0	0	0	0	200	300	0	-40.071	-49.7205	-696.468	25181.2	-38696.8	4059.22	144.438	866.844	0	0	0	0	0	0	0	603	903	0
9697	0	0	0	0	0	0	0	200	300	0	-40.6813	-50.636	-697.994	24998.1	-38941	3921.89	144.21	867.186	0	0	0	0	0	0	0	603	903	0
9697	1	0	0	0	0	0	0	200	300	0	-40.3761	-50.4834	-696.163	24540.3	-38941	4105	144.063	867.749	0	0	0	0	0	0	0	603	903	0
9697	2	0	0	0	0	0	0	200	300	0	-40.3761	-51.3989	-699.825	23899.5	-38696.8	4059.22	144.705	868.849	0	0	0	0	0	0	0	603	903	0
9697	3	0	0	0	0	0	0	200	300	0	-41.4442	-51.0938	-701.351	24448.8	-39002	4150.77	144.39	868.14	0	0	0	0	0	0	0	603	903	0
9697	4	0	0	0	0	0	0	200	300	0	-41.902	-52.0093	-698.604	24357.2	-39246.2	4105	143.822	868.135	0	0	0	0	0	0	0	603	903	0
9697	5	0	0	0	0	0	0	200	300	0	-40.6813	-51.5515	-702.266	23991	-39063.1	3967.67	144.376	868.838	0	0	0	0	0	0	0	603	903	0
9697	6	0	0	0	0	0	0	200	300	0	-42.6649	-52.9248	-702.877	23533.2	-39673.4	4288.1	143.556	869.519	0	0	0	0	0	0	0	603	903	0
9697	7	0	0	0	0	0	0	200	300	0	-43.2753	-52.6196	-703.182	23441.7	-39673.4	4150.77	143.58	869.663	0	0	0	0	0	0	0	603	903	0
9697	8	0	0	0	0	0	0	200	300	0	-40.3761	-53.6877	-703.487	23075.5	-39551.3	4150.77	143.778	870.198	0	0	0	0	0	0	0	603	903	0
9697	9	0	0	0	0	0	0	200	300	0	-42.8175	-53.5352	-705.623	22709.3	-40527.9	4471.21	142.564	870.817	0	0	0	0	0	0	0	603	903	0
9698	0	0	0	0	0	0	0	200	300	0	-43.8857	-52.9248	-706.844	22709.3	-39673.4	4105	143.872	870.872	0	0	0	0	0	0	0	603	903	0
9698	1	0	0	0	0	0	0	200	300	0	-42.5124	-54.2981	-708.37	22617.7	-39978.6	4425.43	143.563	871.071	0	0	0	0	0	0	0	603	903	0
9698	2	0	0	0	0	0	0	200	300	0	-44.0382	-54.4507	-708.675	21976.8	-40344.8	4196.55	143.07	871.989	0	0	0	0	0	0	0	603	903	0
9698	3	0	0	0	0	0	0	200	300	0	-44.0382	-54.4507	-710.201	22617.7	-40100.6	4333.88	143.536	871.153	0	0	0	0	0	0	0	603	903	0
9698	4	0	0	0	0	0	0	200	300	0	-43.4279	-56.2817	-711.421	21702.2	-40772	4242.33	142.689	872.495	0	0	0	0	0	0	0	603	903	0
9698	5	0	0	0	0	0	0	200	300	0	-44.3434	-54.6033	-710.811	21244.4	-40527.9	4196.55	142.984	873.112	0	0	0	0	0	0	0	603	903	0
9698	6	0	0	0	0	0	0	200	300	0	-44.8012	-55.6714	-713.253	21152.9	-40405.8	4471.21	143.35	873.343	0	0	0	0	0	0	0	603	903	0
9698	7	0	0	0	0	0	0	200	300	0	-43.1227	-56.2817	-711.727	20878.2	-41199.3	4471.21	142.114	873.665	0	0	0	0	0	0	0	603	903	0
9698	8	0	0	0	0	0	0	200	300	0	-45.1064	-55.6714	-714.168	20603.6	-40588.9	4516.98	143.166	874.15	0	0	0	0	0	0	0	603	903	0
9698	9	0	0	0	0	0	0	200	300	0	-43.5805	-56.7395	-713.253	20328.9	-41504.5	4516.98	141.81	874.498	0	0	0	0	0	0	0	603	903	0
9699	0	0	0	0	0	0	0	200	300	0	-44.9538	-57.3499	-716.304	20328.9	-41565.5	4242.33	141.972	874.62	0	0	0	0	0	0	0	603	903	0
9699	1	0	0	0	0	0	0	200	300	0	-44.496	-55.9766	-715.999	19962.7	-41199.3	4562.76	142.459	875.119	0	0	0	0	0	0	0	603	903	0
9699	2	0	0	0	0	0	0	200	300	0	-45.4115	-57.8076	-717.525	19321.8	-41504.5	4516.98	142.156	876.072	0	0	0	0	0	0	0	603	903	0
9699	3	0	0	0	0	0	0	200	300	0	-46.7848	-57.9602	-718.135	19413.4	-41321.4	4837.42	142.46	875.967	0	0	0	0	0	0	0	603	903	0
9699	4	0	0	0	0	0	0	200	300	0	-45.1064	-57.1973	-719.356	19138.7	-41626.5	4608.54	142.134	876.395	0	0	0	0	0	0	0	603	903	0
9699	5	0	0	0	0	0	0	200	300	0	-47.7003	-58.7231	-721.187	18314.7	-42175.8	4654.31	141.519	877.605	0	0	0	0	0	0	0	603	903	0
9699	6	0	0	0	0	0	0	200	300	0	-47.5478	-57.9602	-720.577	18589.4	-42053.8	4654.31	141.639	877.202	0	0	0	0	0	0	0	603	903	0
9699	7	0	0	0	0	0	0	200	300	0	-46.0219	-58.2654	-721.797	17948.5	-42542.1	4654.31	141.061	878.134	0	0	0	0	0	0	0	603	903	0
9699	8	0	0	0	0	0	0	200	300	0	-46.1745	-59.3335	-722.713	17857	-42420	4654.31	141.305	878.292	0	0	0	0	0	0	0	603	903	0
9699	9	0	0	0	0	0	0	200	300	0	-47.7003	-58.8757	-723.323	17582.3	-42236.9	4791.64	141.607	878.692	0	0	0	0	0	0	0	603	903	0
9700	0	0	0	0	0	0	0	200	300	0	-48.0055	-59.1809	-724.849	17216.1	-42725.2	5066.3	141.056	879.249	0	0	0	0	0	0	0	603	903	0
9700	1	0	0	0	0	0	0	200	300	0	-46.7848	-59.9439	-725.154	16575.2	-43274.5	5020.52	140.324	880.143	0	0	0	0	0	0	0	603	903	0
9700	2	0	0	0	0	0	0	200	300	0	-47.5478	-59.9439	-725.46	16483.7	-42786.2	4700.09	141.022	880.278	0	0	0	0	0	0	0	603	903	0
9700	3	0	0	0	0	0	0	200	300	0	-49.2262	-59.4861	-727.901	15934.4	-42725.2	4928.97	141.304	881.109	0	0	0	0	0	0	0	603	903	0
9700	4	0	0	0	0	0	0	200	300	0	-47.5478	-61.1646	-726.68	15842.8	-42969.3	4883.19	140.869	881.198	0	0	0	0	0	0	0	603	903	0
9700	5	0	0	0	0	0	0	200	300	0	-47.8529	-60.7068	-728.206	15202	-43030.3	4974.75	140.909	882.124	0	0	0	0	0	0	0	603	903	0
9700	6	0	0	0	0	0	0	200	300	0	-49.3788	-61.012	-726.985	14652.6	-43579.7	5066.3	140.054	882.845	0	0	0	0	0	0	0	603	903	0
9700	7	0	0	0	0	0	0	200	300	0	-49.9892	-61.7749	-730.648	14652.6	-43518.6	5157.85	140.438	882.946	0	0	0	0	0	0	0	603	903	0
9700	8	0	0	0	0	0	0	200	300	0	-49.0736	-60.249	-732.479	14561.1	-44067.9	5066.3	139.837	883.121	0	0	0	0	0	0	0	603	903	0
9700	9	0	0	0	0	0	0	200	300	0	-49.8366	-62.3853	-732.479	13920.2	-44129	5157.85	139.754	883.996	0	0	0	0	0	0	0	603	903	0
9701	0	0	0	0	0	0	0	200	300	0	-50.2943	-62.843	-732.784	13737.1	-43823.8	5295.18	140.195	884.254	0	0	0	0	0	0	0	603	903	0
9701	1	0	0	0	0	0	0	200	300	0	-49.0736	-61.6223	-735.225	13279.3	-44556.2	4974.75	139.398	884.938	0	0	0	0	0	0	0	603	903	0
9701	2	0	0	0	0	0	0	200	300	0	-49.2262	-63.1482	-736.141	12821.6	-44067.9	4974.75	140.137	885.583	0	0	0	0	0	0	0	603	903	0
9701	3	0	0	0	0	0	0	200	300	0	-50.2943	-62.3853	-734.615	12363.8	-44190	5157.85	139.846	886.17	0	0	0	0	0	0	0	603	903	0
9701	4	0	0	0	0	0	0	200	300	0	-50.2943	-62.843	-738.582	12455.4	-45044.5	5432.51	139.012	886.136	0	0	0	0	0	0	0	603	903	0
9701	5	0	0	0	0	0	0	200	300	0	-49.0736	-64.3689	-738.887	11906.1	-44373.1	5157.85	139.946	886.887	0	0	0	0	0	0	0	603	903	0
9701	6	0	0	0	0	0	0	200	300	0	-48.7685	-62.6904	-738.582	11082.1	-45227.6	5157.85	138.764	887.996	0	0	0	0	0	0	0	603	903	0
9701	7	0	0	0	0	0	0	200	300	0	-51.0573	-63.7585	-741.634	11173.6	-45349.7	5249.41	138.852	887.934	0	0	0	0	0	0	0	603	903	0
9701	8	0	0	0	0	0	0	200	300	0	-50.1418	-63.4534	-737.667	11265.2	-45166.6	5295.18	138.771	887.729	0	0	0	0	0	0	0	603	903	0
9701	9	0	0	0	0	0	0	200	300	0	-50.7521	-64.3689	-742.549	10166.6	-45654.8	5340.96	138.516	889.309	0	0	0	0	0	0	0	603	903	0
9702	0	0	0	0	0	0	0	200	300	0	-52.278	-63.7585	-743.465	9983.45	-45288.6	5386.73	139.084	889.572	0	0	0	0	0	0	0	603	903	0
9702	1	0	0	0	0	0	0	200	300	0	-52.278	-64.6741	-744.075	9800.34	-45471.7	5340.96	138.888	889.829	0	0	0	0	0	0	0	603	903	0
9702	2	0	0	0	0	0	0	200	300	0	-51.3625	-65.1318	-744.686	9983.45	-46204.2	5386.73	137.955	889.594	0	0	0	0	0	0	0	603	903	0
9702	3	0	0	0	0	0	0	200	300	0	-52.7357	-65.1318	-744.686	9067.92	-45715.9	5340.96	138.611	890.823	0	0	0	0	0	0	0	603	903	0
9702	4	0	0	0	0	0	0	200	300	0	-52.278	-64.9792	-747.127	9067.92	-46082.1	5386.73	138.321	890.863	0	0	0	0	0	0	0	603	903	0
9702	5	0	0	0	0	0	0	200	300	0	-51.2099	-65.2844	-747.432	8427.04	-46875.6	5432.51	137.285	891.725	0	0	0	0	0	0	0	603	903	0
9702	6	0	0	0	0	0	0	200	300	0	-51.515	-66.6577	-749.568	8060.83	-46326.2	5432.51	138.196	892.246	0	0	0	0	0	0	0	603	903	0
9702	7	0	0	0	0	0	0	200	300	0	-51.2099	-66.2	-749.263	7603.07	-47363.8	5524.06	136.786	892.853	0	0	0	0	0	0	0	603	903	0
9702	8	0	0	0	0	0	0	200	300	0	-52.5832	-65.1318	-752.01	7877.73	-46936.6	5432.51	137.585	892.524	0	0	0	0	0	0	0	603	903	0
9702	9	0	0	0	0	0	0	200	300	0	-53.3461	-66.8103	-752.62	7145.31	-46814.5	5569.84	137.798	893.506	0	0	0	0	0	0	0	603	903	0
9703	0	0	0	0	0	0	0	200	300	0	-53.9565	-68.031	-749.874	6412.89	-47730	5432.51	136.349	894.448	0	0	0	0	0	0	0	603	903	0
9703	1	0	0	0	0	0	0	200	300	0	-54.4142	-67.1155	-753.841	6321.33	-47180.7	5524.06	137.413	894.615	0	0	0	0	0	0	0	603	903	0
9703	2	0	0	0	0	0	0	200	300	0	-53.8039	-67.2681	-754.146	6046.68	-47669	5569.84	136.791	894.982	0	0	0	0	0	0	0	603	903	0
9703	3	0	0	0	0	0	0	200	300	0	-53.8039	-67.5732	-754.756	5497.36	-47974.2	5478.29	136.438	895.716	0	0	0	0	0	0	0	603	903	0
9703	4	0	0	0	0	0	0	200	300	0	-55.0246	-68.031	-755.672	5772.02	-47730	5432.51	136.838	895.362	0	0	0	0	0	0	0	603	903	0
9703	5	0	0	0	0	0	0	200	300	0	-53.6513	-68.4888	-756.282	5039.6	-48462.5	5569.84	135.92	896.336	0	0	0	0	0	0	0	603	903	0
9703	6	0	0	0	0	0	0	200	300	0	-53.8039	-68.4888	-756.587	4490.28	-48645.6	5340.96	135.704	897.065	0	0	0	0	0	0	0	603	903	0
9703	7	0	0	0	0	0	0	200	300	0	-53.6513	-69.0991	-759.029	3940.96	-48218.3	5524.06	136.474	897.808	0	0	0	0	0	0	0	603	903	0
9703	8	0	0	0	0	0	0	200	300	0	-54.7194	-69.7095	-759.029	4215.62	-48767.6	5844.5	135.75	897.446	0	0	0	0	0	0	0	603	903	0
9703	9	0	0	0	0	0	0	200	300	0	-55.0246	-69.5569	-760.25	3116.99	-48340.4	5707.17	136.415	898.9	0	0	0	0	0	0	0	603	903	0
9704	0	0	0	0	0	0	0	200	300	0	-56.2453	-70.3198	-760.86	2933.88	-48401.4	5615.62	136.386	899.144	0	0	0	0	0	0	0	603	903	0
9704	1	0	0	0	0	0	0	200	300	0	-55.9401	-69.8621	-759.639	2659.22	-48767.6	5478.29	135.802	899.499	0	0	0	0	0	0	0	603	903	0
9704	2	0	0	0	0	0	0	200	300	0	-55.6349	-70.4724	-761.775	2293.01	-48828.7	5524.06	135.901	899.99	0	0	0	0	0	0	0	603	903	0
9704	3	0	0	0	0	0	0	200	300	0	-56.703	-70.7776	-762.691	1743.7	-48767.6	5752.95	136.058	900.714	0	0	0	0	0	0	0	603	903	0
9704	4	0	0	0	0	0	0	200	300	0	-56.8556	-70.625	-762.996	1652.14	-49561.1	5478.29	135.044	900.835	0	0	0	0	0	0	0	603	903	0
9704	5	0	0	0	0	0	0	200	300	0	-56.703	-71.0828	-765.132	1560.59	-48950.7	5661.39	136.023	900.96	0	0	0	0	0	0	0	603	903	0
9704	6	0	0	0	0	0	0	200	300	0	-56.8556	-72.4561	-765.132	1011.27	-49866.3	5707.17	134.827	901.678	0	0	0	0	0	0	0	603	903	0
9704	7	0	0	0	0	0	0	200	300	0	-57.1608	-72.6086	-766.048	553.51	-49866.3	5752.95	134.905	902.278	0	0	0	0	0	0	0	603	903	0
9704	8	0	0	0	0	0	0	200	300	0	-56.5504	-72.9138	-767.269	645.062	-49683.2	5798.72	135.247	902.159	0	0	0	0	0	0	0	603	903	0
9704	9	0	0	0	0	0	0	200	300	0	-56.2453	-73.3716	-766.048	-453.571	-50476.6	5615.62	134.108	903.592	0	0	0	0	0	0	0	603	903	0
9705	0	0	0	0	0	0	0	200	300	0	-58.6867	-72.7612	-768.794	-636.676	-49744.2	5890.27	135.296	903.828	0	0	0	0	0	0	0	603	903	0
9705	1	0	0	0	0	0	0	200	300	0	-57.1608	-73.6768	-769.1	-636.676	-50110.4	5890.27	134.845	903.828	0	0	0	0	0	0	0	603	903	0
9705	2	0	0	0	0	0	0	200	300	0	-57.466	-74.8975	-768.184	-1552.2	-50476.6	6027.6	134.291	905.021	0	0	0	0	0	0	0	603	903	0
9705	3	0	0	0	0	0	0	200	300	0	-58.5341	-74.1345	-770.32	-1735.31	-50232.5	5890.27	134.79	905.253	0	0	0	0	0	0	0	603	903	0
9705	4	0	0	0	0	0	0	200	300	0	-57.466	-75.813	-772.457	-2193.07	-51087	5890.27	133.864	905.839	0	0	0	0	0	0	0	603	903	0
9705	5	0	0	0	0	0	0	200	300	0	-57.466	-75.05	-771.541	-2101.52	-50964.9	5936.05	133.944	905.724	0	0	0	0	0	0	0	603	903	0
9705	6	0	0	0	0	0	0	200	300	0	-58.6867	-74.2871	-771.541	-2650.84	-50598.7	6119.16	134.419	906.436	0	0	0	0	0	0	0	603	903	0
9705	7	0	0	0	0	0	0	200	300	0	-58.8393	-75.813	-770.626	-3200.15	-51148	5981.83	133.628	907.153	0	0	0	0	0	0	0	603	903	0
9705	8	0	0	0	0	0	0	200	300	0	-57.1608	-75.9656	-771.846	-3566.36	-50720.8	6027.6	134.286	907.621	0	0	0	0	0	0	0	603	903	0
9705	9	0	0	0	0	0	0	200	300	0	-59.4496	-76.7285	-773.372	-3841.02	-51087	6210.71	133.943	907.967	0	0	0	0	0	0	0	603	903	0
9706	0	0	0	0	0	0	0	200	300	0	-59.297	-77.3389	-773.372	-3749.47	-51087	6027.6	133.943	907.848	0	0	0	0	0	0	0	603	903	0
9706	1	0	0	0	0	0	0	200	300	0	-58.6867	-75.9656	-772.151	-4665	-51453.2	6164.93	133.364	909.042	0	0	0	0	0	0	0	603	903	0
9706	2	0	0	0	0	0	0	200	300	0	-58.0763	-78.7122	-774.288	-5122.76	-51880.4	6393.81	132.996	909.616	0	0	0	0	0	0	0	603	903	0
9706	3	0	0	0	0	0	0	200	300	0	-57.0082	-79.7803	-772.151	-5672.08	-51941.5	6302.26	132.732	910.346	0	0	0	0	0	0	0	603	903	0
9706	4	0	0	0	0	0	0	200	300	0	-58.9919	-78.2544	-773.982	-5397.42	-51087	6164.93	133.995	909.974	0	0	0	0	0	0	0	603	903	0
9706	5	0	0	0	0	0	0	200	300	0	-58.9919	-78.8647	-773.982	-6862.26	-51880.4	6348.04	132.97	911.866	0	0	0	0	0	0	0	603	903	0
9706	6	0	0	0	0	0	0	200	300	0	-59.9074	-78.5596	-774.288	-6587.61	-51758.4	6393.81	133.154	911.508	0	0	0	0	0	0	0	603	903	0
9706	7	0	0	0	0	0	0	200	300	0	-60.06	-79.1699	-774.593	-7045.37	-51941.5	6531.14	132.944	912.096	0	0	0	0	0	0	0	603	903	0
9706	8	0	0	0	0	0	0	200	300	0	-59.297	-79.4751	-774.898	-7777.79	-52124.6	6485.37	132.734	913.037	0	0	0	0	0	0	0	603	903	0
9706	9	0	0	0	0	0	0	200	300	0	-60.8229	-79.4751	-774.288	-7686.24	-51941.5	6348.04	132.917	912.927	0	0	0	0	0	0	0	603	903	0
9707	0	0	0	0	0	0	0	200	300	0	-60.06	-80.5432	-772.457	-8327.11	-52673.9	6576.92	131.81	913.78	0	0	0	0	0	0	0	603	903	0
9707	1	0	0	0	0	0	0	200	300	0	-59.297	-80.6958	-774.593	-8967.97	-52612.9	6622.7	132.077	914.578	0	0	0	0	0	0	0	603	903	0
9707	2	0	0	0	0	0	0	200	300	0	-60.3651	-79.1699	-775.508	-8693.32	-51087	6531.14	134.125	914.21	0	0	0	0	0	0	0	603	903	0
9707	3	0	0	0	0	0	0	200	300	0	-60.2126	-80.5432	-773.982	-9608.84	-52673.9	6668.47	131.944	915.415	0	0	0	0	0	0	0	603	903	0
9707	4	0	0	0	0	0	0	200	300	0	-60.2126	-82.5269	-775.203	-9883.5	-51880.4	6714.25	133.075	915.75	0	0	0	0	0	0	0	603	903	0
9707	5	0	0	0	0	0	0	200	300	0	-60.8229	-81.3062	-774.288	-10341.3	-52490.8	6714.25	132.208	916.356	0	0	0	0	0	0	0	603	903	0
9707	6	0	0	0	0	0	0	200	300	0	-60.5177	-79.9329	-773.677	-10615.9	-53040.1	6851.58	131.444	916.721	0	0	0	0	0	0	0	603	903	0
9707	7	0	0	0	0	0	0	200	300	0	-59.7548	-81.3062	-773.677	-11073.7	-52368.7	6943.13	132.312	917.313	0	0	0	0	0	0	0	603	903	0
9707	8	0	0	0	0	0	0	200	300	0	-58.5341	-80.6958	-773.372	-11531.5	-52551.8	6897.35	132.048	917.911	0	0	0	0	0	0	0	603	903	0
9707	9	0	0	0	0	0	0	200	300	0	-60.8229	-82.6794	-772.762	-11897.7	-52979.1	6897.35	131.442	918.396	0	0	0	0	0	0	0	603	903	0
9708	0	0	0	0	0	0	0	200	300	0	-59.297	-81.6113	-771.236	-12538.5	-52673.9	6988.91	131.702	919.258	0	0	0	0	0	0	0	603	903	0
9708	1	0	0	0	0	0	0	200	300	0	-58.9919	-83.1372	-773.982	-12813.2	-53040.1	7355.12	131.471	919.555	0	0	0	0	0	0	0	603	903	0
9708	2	0	0	0	0	0	0	200	300	0	-58.5341	-83.1372	-771.236	-13362.5	-53345.3	7034.68	130.831	920.326	0	0	0	0	0	0	0	603	903	0
9708	3	0	0	0	0	0	0	200	300	0	-59.7548	-82.832	-773.067	-12721.6	-52673.9	7034.68	131.864	919.456	0	0	0	0	0	0	0	603	903	0
9708	4	0	0	0	0	0	0	200	300	0	-58.6867	-84.3579	-771.846	-14003.4	-53101.1	7309.34	131.202	921.143	0	0	0	0	0	0	0	603	903	0
9708	5	0	0	0	0	0	0	200	300	0	-59.9074	-83.1372	-770.626	-14278	-52918	7172.01	131.331	921.528	0	0	0	0	0	0	0	603	903	0
9708	6	0	0	0	0	0	0	200	300	0	-59.9074	-83.2898	-772.151	-14094.9	-52796	7217.79	131.625	921.254	0	0	0	0	0	0	0	603	903	0
9708	7	0	0	0	0	0	0	200	300	0	-56.5504	-84.0527	-770.931	-15102	-53467.3	7309.34	130.646	922.589	0	0	0	0	0	0	0	603	903	0
9708	8	0	0	0	0	0	0	200	300	0	-60.2126	-83.7476	-771.236	-14552.7	-53162.2	7217.79	131.069	921.869	0	0	0	0	0	0	0	603	903	0
9708	9	0	0	0	0	0	0	200	300	0	-59.1444	-83.7476	-771.846	-15102	-53650.5	7446.67	130.491	922.566	0	0	0	0	0	0	0	603	903	0
9709	0	0	0	0	0	0	0	200	300	0	-58.3815	-85.1208	-768.794	-15834.4	-53345.3	7309.34	130.612	923.596	0	0	0	0	0	0	0	603	903	0
9709	1	0	0	0	0	0	0	200	300	0	-57.6186	-85.2734	-769.1	-16566.9	-52918	7538.23	131.195	924.541	0	0	0	0	0	0	0	603	903	0
9709	2	0	0	0	0	0	0	200	300	0	-58.5341	-86.189	-768.794	-16841.5	-53406.3	7629.78	130.532	924.906	0	0	0	0	0	0	0	603	903	0
9709	3	0	0	0	0	0	0	200	300	0	-57.0082	-86.6467	-768.489	-15926	-53040.1	7858.66	130.981	923.724	0	0	0	0	0	0	0	603	903	0
9709	4	0	0	0	0	0	0	200	300	0	-57.3134	-86.189	-769.405	-17390.8	-53162.2	7446.67	130.905	925.603	0	0	0	0	0	0	0	603	903	0
9709	5	0	0	0	0	0	0	200	300	0	-57.3134	-87.8674	-769.1	-17482.4	-53650.5	7812.88	130.243	925.731	0	0	0	0	0	0	0	603	903	0
9709	6	0	0	0	0	0	0	200	300	0	-57.466	-86.6467	-766.963	-17207.7	-52551.8	7767.11	131.481	925.436	0	0	0	0	0	0	0	603	903	0
9709	7	0	0	0	0	0	0	200	300	0	-56.3979	-87.7148	-768.489	-18123.2	-53650.5	7812.88	130.187	926.583	0	0	0	0	0	0	0	603	903	0
9709	8	0	0	0	0	0	0	200	300	0	-57.6186	-89.0881	-767.269	-17940.1	-53650.5	7995.99	130.076	926.382	0	0	0	0	0	0	0	603	903	0
9709	9	0	0	0	0	0	0	200	300	0	-57.466	-87.4097	-766.658	-18306.4	-52673.9	7767.11	131.294	926.878	0	0	0	0	0	0	0	603	903	0
9710	0	0	0	0	0	0	0	200	300	0	-55.7875	-88.1726	-767.269	-18764.1	-53589.4	8041.76	130.156	927.456	0	0	0	0	0	0	0	603	903	0
9710	1	0	0	0	0	0	0	200	300	0	-56.703	-87.5623	-765.743	-18306.4	-52796	7950.21	131.053	926.907	0	0	0	0	0	0	0	603	903	0
9710	2	0	0	0	0	0	0	200	300	0	-56.2453	-89.0881	-765.132	-18672.6	-52673.9	8087.54	131.157	927.404	0	0	0	0	0	0	0	603	903	0
9710	3	0	0	0	0	0	0	200	300	0	-55.6349	-89.5459	-765.743	-19496.5	-53162.2	8179.09	130.574	928.461	0	0	0	0	0	0	0	603	903	0
9710	4	0	0	0	0	0	0	200	300	0	-56.5504	-90.4614	-762.996	-19954.3	-52612.9	8133.32	131.044	929.153	0	0	0	0	0	0	0	603	903	0
9710	5	0	0	0	0	0	0	200	300	0	-55.3297	-91.5295	-763.301	-19405	-53406.3	8499.53	130.032	928.422	0	0	0	0	0	0	0	603	903	0
9710	6	0	0	0	0	0	0	200	300	0	-54.4142	-91.5295	-759.029	-20229	-53223.2	8499.53	129.88	929.651	0	0	0	0	0	0	0	603	903	0
9710	7	0	0	0	0	0	0	200	300	0	-55.1772	-92.1399	-760.86	-20229	-52368.7	8453.76	131.172	929.587	0	0	0	0	0	0	0	603	903	0
9710	8	0	0	0	0	0	0	200	300	0	-55.6349	-93.3606	-761.165	-20320.5	-53284.2	8453.76	129.996	929.697	0	0	0	0	0	0	0	603	903	0
9710	9	0	0	0	0	0	0	200	300	0	-53.6513	-92.9028	-760.555	-19862.8	-52246.6	8499.53	131.305	929.116	0	0	0	0	0	0	0	603	903	0
9711	0	0	0	0	0	0	0	200	300	0	-53.6513	-93.6658	-757.198	-20503.6	-52368.7	8774.19	130.839	930.078	0	0	0	0	0	0	0	603	903	0
9711	1	0	0	0	0	0	0	200	300	0	-54.5668	-93.8184	-756.893	-20961.4	-52857	8728.41	130.166	930.694	0	0	0	0	0	0	0	603	903	0
9711	2	0	0	0	0	0	0	200	300	0	-53.3461	-95.1917	-755.977	-20869.8	-51880.4	8591.08	131.373	930.607	0	0	0	0	0	0	0	603	903	0
9711	3	0	0	0	0	0	0	200	300	0	-53.0409	-96.2598	-752.925	-21052.9	-52490.8	8591.08	130.284	930.962	0	0	0	0	0	0	0	603	903	0
9711	4	0	0	0	0	0	0	200	300	0	-53.6513	-95.3442	-753.536	-21144.5	-52185.6	8865.74	130.746	931.06	0	0	0	0	0	0	0	603	903	0
9711	5	0	0	0	0	0	0	200	300	0	-52.7357	-97.7856	-751.399	-21236	-51758.4	8819.97	131.117	931.262	0	0	0	0	0	0	0	603	903	0
9711	6	0	0	0	0	0	0	200	300	0	-52.1254	-96.8701	-748.653	-21602.3	-52368.7	8819.97	130.049	931.855	0	0	0	0	0	0	0	603	903	0
9711	7	0	0	0	0	0	0	200	300	0	-53.6513	-96.7175	-747.737	-22060	-51209	8819.97	131.515	932.502	0	0	0	0	0	0	0	603	903	0
9711	8	0	0	0	0	0	0	200	300	0	-53.0409	-96.5649	-745.296	-22151.6	-51453.2	8957.3	130.963	932.722	0	0	0	0	0	0	0	603	903	0
9711	9	0	0	0	0	0	0	200	300	0	-51.9728	-97.1753	-743.465	-22517.8	-51697.3	9048.85	130.464	933.288	0	0	0	0	0	0	0	603	903	0
9712	0	0	0	0	0	0	0	200	300	0	-51.2099	-98.2434	-741.634	-22609.3	-50903.9	8728.41	131.363	933.486	0	0	0	0	0	0	0	603	903	0
9712	1	0	0	0	0	0	0	200	300	0	-52.278	-99.0063	-738.887	-22700.9	-51453.2	9003.07	130.364	933.723	0	0	0	0	0	0	0	603	903	0
9712	2	0	0	0	0	0	0	200	300	0	-51.3625	-99.3115	-736.751	-22609.3	-50964.9	9186.18	130.825	933.688	0	0	0	0	0	0	0	603	903	0
9712	3	0	0	0	0	0	0	200	300	0	-50.4469	-99.9219	-731.563	-22884	-50659.7	9140.4	130.751	934.281	0	0	0	0	0	0	0	603	903	0
9712	4	0	0	0	0	0	0	200	300	0	-49.0736	-100.837	-731.868	-23158.7	-50842.8	9460.84	130.53	934.643	0	0	0	0	0	0	0	603	903	0
9712	5	0	0	0	0	0	0	200	300	0	-49.8366	-100.685	-729.122	-23067.1	-49988.3	9231.95	131.44	934.637	0	0	0	0	0	0	0	603	903	0
9712	6	0	0	0	0	0	0	200	300	0	-49.8366	-102.058	-727.596	-23708	-49927.3	9186.18	131.38	935.584	0	0	0	0	0	0	0	603	903	0
9712	7	0	0	0	0	0	0	200	300	0	-50.7521	-102.363	-724.544	-23708	-50049.4	9369.28	130.923	935.721	0	0	0	0	0	0	0	603	903	0
9712	8	0	0	0	0	0	0	200	300	0	-49.3788	-101.295	-722.103	-23433.3	-49744.2	9460.84	131.112	935.452	0	0	0	0	0	0	0	603	903	0
9712	9	0	0	0	0	0	0	200	300	0	-46.1745	-102.974	-719.966	-23524.9	-49805.2	9643.94	130.823	935.675	0	0	0	0	0	0	0	603	903	0
9713	0	0	0	0	0	0	0	200	300	0	-48.9211	-102.058	-715.694	-23982.6	-49194.9	9369.28	131.263	936.51	0	0	0	0	0	0	0	603	903	0
9713	1	0	0	0	0	0	0	200	300	0	-49.0736	-102.058	-713.558	-23891.1	-48950.7	9598.17	131.399	936.482	0	0	0	0	0	0	0	603	903	0
9713	2	0	0	0	0	0	0	200	300	0	-47.2426	-104.347	-711.727	-24531.9	-48340.4	9598.17	132.08	937.468	0	0	0	0	0	0	0	603	903	0
9713	3	0	0	0	0	0	0	200	300	0	-47.09	-103.431	-706.539	-24715	-48462.5	9781.27	131.409	937.981	0	0	0	0	0	0	0	603	903	0
9713	4	0	0	0	0	0	0	200	300	0	-46.3271	-103.126	-705.013	-24531.9	-48218.3	9872.82	131.606	937.796	0	0	0	0	0	0	0	603	903	0
9713	5	0	0	0	0	0	0	200	300	0	-46.0219	-103.584	-705.013	-24257.3	-48401.4	9735.49	131.347	937.407	0	0	0	0	0	0	0	603	903	0
9713	6	0	0	0	0	0	0	200	300	0	-46.4796	-104.194	-697.994	-24898.2	-47669	9827.05	131.706	938.671	0	0	0	0	0	0	0	603	903	0
9713	7	0	0	0	0	0	0	200	300	0	-46.7848	-103.126	-695.552	-24898.2	-48340.4	9827.05	130.501	938.796	0	0	0	0	0	0	0	603	903	0
9713	8	0	0	0	0	0	0	200	300	0	-47.09	-105.415	-690.975	-25081.3	-48157.3	9735.49	130.305	939.298	0	0	0	0	0	0	0	603	903	0
9713	9	0	0	0	0	0	0	200	300	0	-43.7331	-104.347	-687.313	-24989.7	-46753.5	9781.27	131.976	939.359	0	0	0	0	0	0	0	603	903	0
9714	0	0	0	0	0	0	0	200	300	0	-45.5641	-104.194	-686.092	-25539	-46936.6	9552.39	131.588	940.224	0	0	0	0	0	0	0	603	903	0
9714	1	0	0	0	0	0	0	200	300	0	-45.2589	-106.025	-681.819	-25447.5	-46387.3	10055.9	131.965	940.323	0	0	0	0	0	0	0	603	903	0
9714	2	0	0	0	0	0	0	200	300	0	-43.5805	-104.652	-678.157	-25539	-46448.3	9781.27	131.508	940.659	0	0	0	0	0	0	0	603	903	0
9714	3	0	0	0	0	0	0	200	300	0	-43.2753	-104.347	-676.326	-25722.1	-46631.4	9872.82	131.052	941.032	0	0	0	0	0	0	0	603	903	0
9714	4	0	0	0	0	0	0	200	300	0	-42.3598	-105.873	-671.443	-25996.8	-45776.9	9918.6	131.823	941.718	0	0	0	0	0	0	0	603	903	0
9714	5	0	0	0	0	0	0	200	300	0	-42.8175	-105.262	-668.086	-25447.5	-46082.1	9964.38	131.024	941.09	0	0	0	0	0	0	0	603	903	0
9714	6	0	0	0	0	0	0	200	300	0	-41.7494	-106.483	-664.424	-26088.3	-45838	10055.9	131.011	942.265	0	0	0	0	0	0	0	603	903	0
9714	7	0	0	0	0	0	0	200	300	0	-43.2753	-106.483	-661.373	-26179.9	-45044.5	10010.2	131.892	942.584	0	0	0	0	0	0	0	603	903	0
9714	8	0	0	0	0	0	0	200	300	0	-42.3598	-105.873	-657.1	-25722.1	-45166.6	9964.38	131.264	942.145	0	0	0	0	0	0	0	603	903	0
9714	9	0	0	0	0	0	0	200	300	0	-40.3761	-106.941	-654.964	-25905.2	-44678.3	9872.82	131.785	942.552	0	0	0	0	0	0	0	603	903	0
9715	0	0	0	0	0	0	0	200	300	0	-41.902	-107.399	-650.386	-25630.6	-44312.1	10010.2	131.868	942.408	0	0	0	0	0	0	0	603	903	0
9715	1	0	0	0	0	0	0	200	300	0	-40.6813	-104.652	-642.147	-25905.2	-44006.9	10376.4	131.469	943.342	0	0	0	0	0	0	0	603	903	0
9715	2	0	0	0	0	0	0	200	300	0	-39.6132	-106.941	-642.757	-25905.2	-43823.8	10101.7	131.819	943.303	0	0	0	0	0	0	0	603	903	0
9715	3	0	0	0	0	0	0	200	300	0	-40.8339	-105.873	-637.569	-26637.7	-43335.5	9918.6	132.03	944.78	0	0	0	0	0	0	0	603	903	0
9715	4	0	0	0	0	0	0	200	300	0	-39.9184	-106.788	-635.128	-25355.9	-43762.8	10101.7	131.096	942.923	0	0	0	0	0	0	0	603	903	0
9715	5	0	0	0	0	0	0	200	300	0	-39.1554	-107.856	-631.465	-25996.8	-42420	9964.38	132.823	944.169	0	0	0	0	0	0	0	603	903	0
9715	6	0	0	0	0	0	0	200	300	0	-38.6977	-104.652	-622.005	-26637.7	-43518.6	9918.6	130.035	945.825	0	0	0	0	0	0	0	603	903	0
9715	7	0	0	0	0	0	0	200	300	0	-39.0028	-106.483	-623.836	-26179.9	-42725.2	10239	131.512	944.966	0	0	0	0	0	0	0	603	903	0
9715	8	0	0	0	0	0	0	200	300	0	-38.0873	-105.262	-618.648	-26088.3	-42053.8	10010.2	132.023	945.17	0	0	0	0	0	0	0	603	903	0
9715	9	0	0	0	0	0	0	200	300	0	-36.8666	-106.025	-612.544	-26637.7	-42542.1	9827.05	130.549	946.487	0	0	0	0	0	0	0	603	903	0
9716	0	0	0	0	0	0	0	200	300	0	-37.6295	-106.178	-609.493	-26363	-41321.4	10055.9	132.204	946.254	0	0	0	0	0	0	0	603	903	0
9716	1	0	0	0	0	0	0	200	300	0	-36.4088	-107.094	-605.22	-25813.7	-41138.2	9735.49	132.028	945.652	0	0	0	0	0	0	0	603	903	0
9716	2	0	0	0	0	0	0	200	300	0	-36.4088	-106.025	-600.643	-26546.1	-41260.3	9964.38	131.306	947.196	0	0	0	0	0	0	0	603	903	0
9716	3	0	0	0	0	0	0	200	300	0	-35.7985	-105.568	-596.37	-26546.1	-40100.6	10010.2	132.759	947.513	0	0	0	0	0	0	0	603	903	0
9716	4	0	0	0	0	0	0	200	300	0	-35.0356	-106.331	-591.487	-25722.1	-40711	10010.2	131.172	946.487	0	0	0	0	0	0	0	603	903	0
9716	5	0	0	0	0	0	0	200	300	0	-34.7304	-105.568	-586.91	-26637.7	-40161.7	9735.49	131.571	948.386	0	0	0	0	0	0	0	603	903	0
9716	6	0	0	0	0	0	0	200	300	0	-35.7985	-104.5	-582.332	-26729.2	-39246.2	9735.49	132.605	948.9	0	0	0	0	0	0	0	603	903	0
9716	7	0	0	0	0	0	0	200	300	0	-35.0356	-106.788	-576.534	-25996.8	-39612.4	9827.05	131.292	948.092	0	0	0	0	0	0	0	603	903	0
9716	8	0	0	0	0	0	0	200	300	0	-33.2045	-106.025	-571.651	-26271.4	-39307.2	9781.27	131.239	948.957	0	0	0	0	0	0	0	603	903	0
9716	9	0	0	0	0	0	0	200	300	0	-34.5778	-105.262	-567.989	-25447.5	-38025.5	9552.39	133.052	947.803	0	0	0	0	0	0	0	603	903	0
9717	0	0	0	0	0	0	0	200	300	0	-33.9674	-104.347	-562.801	-26637.7	-37781.3	9735.49	132.869	950.331	0	0	0	0	0	0	0	603	903	0
9717	1	0	0	0	0	0	0	200	300	0	-32.1364	-104.652	-556.087	-26363	-37354.1	9506.61	132.827	950.408	0	0	0	0	0	0	0	603	903	0
9717	2	0	0	0	0	0	0	200	300	0	-32.289	-104.957	-552.12	-26454.5	-37293	9369.28	132.455	950.915	0	0	0	0	0	0	0	603	903	0
9717	3	0	0	0	0	0	0	200	300	0	-32.4416	-103.889	-547.847	-25996.8	-37293	9552.39	131.928	950.453	0	0	0	0	0	0	0	603	903	0
9717	4	0	0	0	0	0	0	200	300	0	-31.0683	-104.042	-541.439	-25996.8	-36133.4	9643.94	133.264	951.014	0	0	0	0	0	0	0	603	903	0
9717	5	0	0	0	0	0	0	200	300	0	-29.8476	-103.737	-537.471	-26363	-36621.6	9506.61	131.863	952.05	0	0	0	0	0	0	0	603	903	0
9717	6	0	0	0	0	0	0	200	300	0	-30.7631	-104.5	-531.368	-26271.4	-35584	9735.49	133.033	952.441	0	0	0	0	0	0	0	603	903	0
9717	7	0	0	0	0	0	0	200	300	0	-29.8476	-102.974	-526.18	-25539	-35278.9	9369.28	132.953	951.537	0	0	0	0	0	0	0	603	903	0
9717	8	0	0	0	0	0	0	200	300	0	-28.1691	-103.431	-518.856	-25722.1	-34851.6	9460.84	132.83	952.575	0	0	0	0	0	0	0	603	903	0
9717	9	0	0	0	0	0	0	200	300	0	-29.2372	-103.737	-515.499	-26271.4	-34363.3	9735.49	133.34	953.963	0	0	0	0	0	0	0	603	903	0
9718	0	0	0	0	0	0	0	200	300	0	-28.4743	-102.211	-509.09	-26454.5	-34607.5	9460.84	132.021	954.964	0	0	0	0	0	0	0	603	903	0
9718	1	0	0	0	0	0	0	200	300	0	-26.9484	-102.821	-504.207	-25813.7	-34180.2	9369.28	132.21	954.197	0	0	0	0	0	0	0	603	903	0
9718	2	0	0	0	0	0	0	200	300	0	-26.1855	-102.058	-497.493	-26088.3	-32959.5	9186.18	133.749	955.44	0	0	0	0	0	0	0	603	903	0
9718	3	0	0	0	0	0	0	200	300	0	-25.7277	-100.38	-493.221	-25905.2	-33508.9	9231.95	132.061	955.523	0	0	0	0	0	0	0	603	903	0
9718	4	0	0	0	0	0	0	200	300	0	-22.9811	-101.295	-488.033	-25447.5	-32898.5	9186.18	132.59	955.143	0	0	0	0	0	0	0	603	903	0
9718	5	0	0	0	0	0	0	200	300	0	-24.507	-100.837	-479.183	-25081.3	-32105	9323.51	133	955.342	0	0	0	0	0	0	0	603	903	0
9718	6	0	0	0	0	0	0	200	300	0	-25.5751	-99.3115	-475.826	-25447.5	-31860.9	9323.51	133.041	956.481	0	0	0	0	0	0	0	603	903	0
9718	7	0	0	0	0	0	0	200	300	0	-24.6596	-99.3115	-468.807	-25355.9	-31067.4	9186.18	133.731	957.086	0	0	0	0	0	0	0	603	903	0
9718	8	0	0	0	0	0	0	200	300	0	-21.1501	-98.0908	-463.008	-25172.8	-30945.4	9094.62	133.165	957.368	0	0	0	0	0	0	0	603	903	0
9718	9	0	0	0	0	0	0	200	300	0	-23.2863	-98.2434	-457.82	-24806.6	-30762.2	9094.62	132.807	957.184	0	0	0	0	0	0	0	603	903	0
9719	0	0	0	0	0	0	0	200	300	0	-22.6759	-98.5486	-450.496	-24806.6	-30090.9	8865.74	133.205	958.065	0	0	0	0	0	0	0	603	903	0
9719	1	0	0	0	0	0	0	200	300	0	-21.3026	-96.8701	-444.087	-24715	-29907.8	9048.85	132.653	958.654	0	0	0	0	0	0	0	603	903	0
9719	2	0	0	0	0	0	0	200	300	0	-21.6078	-95.3442	-438.899	-25355.9	-29358.4	8911.52	133.109	960.772	0	0	0	0	0	0	0	603	903	0
9719	3	0	0	0	0	0	0	200	300	0	-20.0819	-95.9546	-431.88	-24440.4	-28259.8	8728.41	134.566	959.591	0	0	0	0	0	0	0	603	903	0
9719	4	0	0	0	0	0	0	200	300	0	-19.1664	-94.5813	-425.472	-24257.3	-28626	8453.76	132.719	960.013	0	0	0	0	0	0	0	603	903	0
9719	5	0	0	0	0	0	0	200	300	0	-19.0138	-93.9709	-419.979	-23891.1	-28442.9	8636.86	132.275	959.886	0	0	0	0	0	0	0	603	903	0
9719	6	0	0	0	0	0	0	200	300	0	-19.6242	-92.2925	-412.96	-24257.3	-27344.3	8636.86	133.785	961.74	0	0	0	0	0	0	0	603	903	0
9719	7	0	0	0	0	0	0	200	300	0	-18.7086	-91.9873	-405.33	-23982.6	-26856	8499.53	133.743	962.168	0	0	0	0	0	0	0	603	903	0
9719	8	0	0	0	0	0	0	200	300	0	-17.1828	-91.5295	-401.058	-23433.3	-26428.8	8682.64	134.102	961.429	0	0	0	0	0	0	0	603	903	0
9719	9	0	0	0	0	0	0	200	300	0	-15.5043	-89.6985	-395.259	-23982.6	-26184.6	8362.2	133.753	963.676	0	0	0	0	0	0	0	603	903	0
9720	0	0	0	0	0	0	0	200	300	0	-17.1828	-89.5459	-388.851	-23708	-26123.6	8362.2	132.818	963.969	0	0	0	0	0	0	0	603	903	0
9720	1	0	0	0	0	0	0	200	300	0	-15.9621	-88.6304	-383.052	-22884	-25208.1	8316.43	134.192	962.741	0	0	0	0	0	0	0	603	903	0
9720	2	0	0	0	0	0	0	200	300	0	-15.6569	-88.783	-374.813	-23433.3	-25269.1	8407.98	132.582	965.52	0	0	0	0	0	0	0	603	903	0
9720	3	0	0	0	0	0	0	200	300	0	-16.2672	-87.8674	-366.878	-22975.5	-25208.1	8270.65	131.29	965.625	0	0	0	0	0	0	0	603	903	0
9720	4	0	0	0	0	0	0	200	300	0	-13.9784	-86.3416	-361.995	-22609.3	-24048.4	7812.88	133.567	965.458	0	0	0	0	0	0	0	603	903	0
9720	5	0	0	0	0	0	0	200	300	0	-14.131	-84.6631	-356.807	-22243.1	-23621.1	7950.21	133.799	965.339	0	0	0	0	0	0	0	603	903	0
9720	6	0	0	0	0	0	0	200	300	0	-14.5888	-84.2053	-348.262	-22426.2	-23010.8	7675.56	133.927	967.395	0	0	0	0	0	0	0	603	903	0
9720	7	0	0	0	0	0	0	200	300	0	-13.9784	-83.1372	-342.464	-21693.8	-23010.8	7584	132.808	966.346	0	0	0	0	0	0	0	603	903	0
9720	8	0	0	0	0	0	0	200	300	0	-12.1474	-83.7476	-335.14	-21419.1	-22644.6	7767.11	132.432	966.911	0	0	0	0	0	0	0	603	903	0
9720	9	0	0	0	0	0	0	200	300	0	-13.2155	-81.6113	-329.036	-20869.8	-21607	7538.23	134.333	966.427	0	0	0	0	0	0	0	603	903	0
9721	0	0	0	0	0	0	0	200	300	0	-13.0629	-79.7803	-323.848	-20869.8	-21668	7767.11	133.092	967.443	0	0	0	0	0	0	0	603	903	0
9721	1	0	0	0	0	0	0	200	300	0	-10.9267	-79.9329	-317.134	-21144.5	-20691.4	7080.46	134.755	969.674	0	0	0	0	0	0	0	603	903	0
9721	2	0	0	0	0	0	0	200	300	0	-11.3844	-77.0337	-309.505	-20778.3	-20508.3	6988.91	133.738	970.134	0	0	0	0	0	0	0	603	903	0
9721	3	0	0	0	0	0	0	200	300	0	-10.9267	-77.0337	-302.791	-20686.7	-20386.3	7080.46	132.672	971.32	0	0	0	0	0	0	0	603	903	0
9721	4	0	0	0	0	0	0	200	300	0	-10.9267	-75.6604	-296.382	-20229	-19592.8	6760.03	133.893	971.253	0	0	0	0	0	0	0	603	903	0
9721	5	0	0	0	0	0	0	200	300	0	-10.9267	-73.5242	-290.584	-20229	-19165.6	6760.03	134.045	972.615	0	0	0	0	0	0	0	603	903	0
9721	6	0	0	0	0	0	0	200	300	0	-8.94302	-72.9138	-280.513	-19954.3	-19165.6	6851.58	131.677	974.135	0	0	0	0	0	0	0	603	903	0
9721	7	0	0	0	0	0	0	200	300	0	-9.70596	-72.1509	-278.377	-18947.2	-18433.1	6485.37	133.784	971.063	0	0	0	0	0	0	0	603	903	0
9721	8	0	0	0	0	0	0	200	300	0	-9.09561	-70.0146	-272.884	-19313.4	-18372.1	6256.49	132.674	973.775	0	0	0	0	0	0	0	603	903	0
9721	9	0	0	0	0	0	0	200	300	0	-8.33267	-69.4043	-268.611	-18947.2	-17639.7	6119.16	134.33	973.538	0	0	0	0	0	0	0	603	903	0
9722	0	0	0	0	0	0	0	200	300	0	-8.48526	-67.7258	-260.677	-17848.6	-17273.5	5844.5	133.736	971.47	0	0	0	0	0	0	0	603	903	0
9722	1	0	0	0	0	0	0	200	300	0	-7.87491	-64.5215	-250.606	-18397.9	-17700.7	6027.6	129.368	976.414	0	0	0	0	0	0	0	603	903	0
9722	2	0	0	0	0	0	0	200	300	0	-7.56973	-64.3689	-249.08	-18123.2	-16419	5798.72	134.081	975.761	0	0	0	0	0	0	0	603	903	0
9722	3	0	0	0	0	0	0	200	300	0	-7.87491	-62.2327	-242.977	-17848.6	-16113.8	5295.18	133.682	976.458	0	0	0	0	0	0	0	603	903	0
9722	4	0	0	0	0	0	0	200	300	0	-7.56973	-60.7068	-238.094	-16292.2	-15991.7	5432.51	132.834	971.428	0	0	0	0	0	0	0	603	903	0
9722	5	0	0	0	0	0	0	200	300	0	-8.48526	-60.0964	-231.685	-17390.8	-15259.3	5386.73	134.138	978.062	0	0	0	0	0	0	0	603	903	0
9722	6	0	0	0	0	0	0	200	300	0	-8.0275	-58.8757	-225.582	-16566.9	-15259.3	5249.41	132.356	976.441	0	0	0	0	0	0	0	603	903	0
9722	7	0	0	0	0	0	0	200	300	0	-7.26456	-56.1292	-219.478	-16383.7	-14710	5295.18	132.977	977.649	0	0	0	0	0	0	0	603	903	0
9722	8	0	0	0	0	0	0	200	300	0	-8.48526	-56.2817	-213.68	-16475.3	-13916.6	4883.19	134.872	980.103	0	0	0	0	0	0	0	603	903	0
9722	9	0	0	0	0	0	0	200	300	0	-7.87491	-54.1455	-203.609	-15468.2	-14099.7	4791.64	130.751	978.97	0	0	0	0	0	0	0	603	903	0
9723	0	0	0	0	0	0	0	200	300	0	-6.34903	-53.8403	-201.168	-15559.8	-13367.2	4608.54	133.552	980.347	0	0	0	0	0	0	0	603	903	0
9723	1	0	0	0	0	0	0	200	300	0	-6.34903	-54.1455	-197.2	-15285.1	-13001	4608.54	134.072	980.511	0	0	0	0	0	0	0	603	903	0
9723	2	0	0	0	0	0	0	200	300	0	-6.04385	-52.1619	-191.097	-15010.5	-12940	4516.98	132.286	981.549	0	0	0	0	0	0	0	603	903	0
9723	3	0	0	0	0	0	0	200	300	0	-6.80679	-50.1782	-186.214	-14644.2	-12268.6	4379.65	134.116	981.642	0	0	0	0	0	0	0	603	903	0
9723	4	0	0	0	0	0	0	200	300	0	-6.19644	-49.4153	-179.5	-13545.6	-12329.6	4105	131.311	978.463	0	0	0	0	0	0	0	603	903	0
9723	5	0	0	0	0	0	0	200	300	0	-6.95938	-47.4316	-174.922	-13911.8	-12024.5	3921.89	131.258	982.531	0	0	0	0	0	0	0	603	903	0
9723	6	0	0	0	0	0	0	200	300	0	-7.41714	-45.9058	-171.26	-13545.6	-11170	4105	134.778	982.094	0	0	0	0	0	0	0	603	903	0
9723	7	0	0	0	0	0	0	200	300	0	-5.73868	-43.6169	-165.157	-13179.4	-11475.1	3693.01	130.52	982.799	0	0	0	0	0	0	0	603	903	0
9723	8	0	0	0	0	0	0	200	300	0	-5.4335	-41.7859	-160.274	-13179.4	-10498.6	3647.23	134.496	985.231	0	0	0	0	0	0	0	603	903	0
9723	9	0	0	0	0	0	0	200	300	0	-5.28091	-41.6333	-154.781	-12630.1	-10376.5	3784.56	132.96	984.6	0	0	0	0	0	0	0	603	903	0
9724	0	0	0	0	0	0	0	200	300	0	-5.89127	-39.9548	-150.203	-11897.7	-10437.5	3464.13	130.51	982.211	0	0	0	0	0	0	0	603	903	0
9724	1	0	0	0	0	0	0	200	300	0	-6.04385	-38.8867	-146.236	-12172.3	-9827.2	3235.24	132.799	986.238	0	0	0	0	0	0	0	603	903	0
9724	2	0	0	0	0	0	0	200	300	0	-5.89127	-37.5134	-142.574	-12172.3	-10010.3	3143.69	129.789	988.376	0	0	0	0	0	0	0	603	903	0
9724	3	0	0	0	0	0	0	200	300	0	-5.73868	-37.2083	-137.386	-11806.1	-9277.88	3418.35	132.468	988.934	0	0	0	0	0	0	0	603	903	0
9724	4	0	0	0	0	0	0	200	300	0	-5.4335	-35.2246	-135.25	-11531.5	-9155.81	3189.47	132.304	988.261	0	0	0	0	0	0	0	603	903	0
9724	5	0	0	0	0	0	0	200	300	0	-6.34903	-34.7668	-130.367	-10341.3	-9277.88	2869.03	128.832	982.324	0	0	0	0	0	0	0	603	903	0
9724	6	0	0	0	0	0	0	200	300	0	-6.80679	-33.241	-125.789	-10890.6	-8545.45	2869.03	132.065	989.578	0	0	0	0	0	0	0	603	903	0
9724	7	0	0	0	0	0	0	200	300	0	-4.06021	-31.1047	-121.822	-10707.5	-8606.49	2594.38	129.352	990.895	0	0	0	0	0	0	0	603	903	0
9724	8	0	0	0	0	0	0	200	300	0	-5.73868	-31.1047	-117.549	-10432.8	-8240.28	2731.7	129.899	991.753	0	0	0	0	0	0	0	603	903	0
9724	9	0	0	0	0	0	0	200	300	0	-6.6542	-28.6633	-112.972	-10158.2	-7690.96	2685.93	131.921	992.918	0	0	0	0	0	0	0	603	903	0
9725	0	0	0	0	0	0	0	200	300	0	-5.4335	-27.1375	-110.225	-9242.63	-7752	2548.6	129.671	986.852	0	0	0	0	0	0	0	603	903	0
9725	1	0	0	0	0	0	0	200	300	0	-4.51797	-26.0693	-103.511	-9059.53	-7324.75	2640.15	129.237	990.522	0	0	0	0	0	0	0	603	903	0
9725	2	0	0	0	0	0	0	200	300	0	-6.19644	-25.3064	-102.291	-9151.08	-7080.61	2411.27	130.779	992.462	0	0	0	0	0	0	0	603	903	0
9725	3	0	0	0	0	0	0	200	300	0	-5.4335	-25.0012	-100.154	-8601.76	-7141.65	2273.94	128.694	988.885	0	0	0	0	0	0	0	603	903	0
9725	4	0	0	0	0	0	0	200	300	0	-2.9921	-24.3909	-94.0508	-9151.08	-6287.15	2319.72	133.152	1000.3	0	0	0	0	0	0	0	603	903	0
9725	5	0	0	0	0	0	0	200	300	0	-5.73868	-24.0857	-91.6094	-7686.24	-6287.15	2136.61	131.37	986.902	0	0	0	0	0	0	0	603	903	0
9725	6	0	0	0	0	0	0	200	300	0	-4.97574	-23.7805	-88.5577	-7960.9	-6165.08	2045.06	130.383	992.895	0	0	0	0	0	0	0	603	903	0
9725	7	0	0	0	0	0	0	200	300	0	-4.36539	-23.3228	-83.3697	-7594.69	-5920.94	2136.61	128.98	994.096	0	0	0	0	0	0	0	603	903	0
9725	8	0	0	0	0	0	0	200	300	0	-5.58609	-22.1021	-83.0645	-7777.79	-5798.87	2045.06	130.188	996.636	0	0	0	0	0	0	0	603	903	0
9725	9	0	0	0	0	0	0	200	300	0	-4.97574	-21.1865	-78.792	-7869.34	-5432.66	1999.28	131.051	1002.88	0	0	0	0	0	0	0	603	903	0
9726	0	0	0	0	0	0	0	200	300	0	-3.90762	-19.6606	-75.1299	-6770.71	-5066.45	1816.18	132.564	993.12	0	0	0	0	0	0	0	603	903	0
9726	1	0	0	0	0	0	0	200	300	0	-4.06021	-18.5925	-74.2144	-7045.37	-5310.59	1633.07	128.443	997.933	0	0	0	0	0	0	0	603	903	0
9726	2	0	0	0	0	0	0	200	300	0	-3.29727	-17.9822	-70.8575	-6953.82	-4944.38	1953.51	130.221	1001.14	0	0	0	0	0	0	0	603	903	0
9726	3	0	0	0	0	0	0	200	300	0	-4.36539	-16.4563	-66.585	-5946.73	-4822.31	1861.95	127.577	992.31	0	0	0	0	0	0	0	603	903	0
9726	4	0	0	0	0	0	0	200	300	0	-4.2128	-15.2356	-62.3125	-6587.61	-5005.42	1633.07	119.672	1008.72	0	0	0	0	0	0	0	603	903	0
9726	5	0	0	0	0	0	0	200	300	0	-5.4335	-14.7778	-62.3125	-5946.73	-4150.92	1816.18	133.385	998.434	0	0	0	0	0	0	0	603	903	0
9726	6	0	0	0	0	0	0	200	300	0	-4.51797	-13.8623	-58.3453	-6221.4	-4639.21	1312.64	120.487	1009.63	0	0	0	0	0	0	0	603	903	0
9726	7	0	0	0	0	0	0	200	300	0	-1.92398	-13.5571	-58.9556	-5672.08	-3906.78	1633.07	133.733	999.209	0	0	0	0	0	0	0	603	903	0
9726	8	0	0	0	0	0	0	200	300	0	-4.67056	-13.4045	-54.0728	-5488.97	-3723.68	1449.97	131.136	1004.51	0	0	0	0	0	0	0	603	903	0
9726	9	0	0	0	0	0	0	200	300	0	-5.12833	-12.7942	-54.378	-5305.87	-3906.78	1404.19	128.155	1000.57	0	0	0	0	0	0	0	603	903	0
9727	0	0	0	0	0	0	0	200	300	0	-3.14468	-12.6416	-50.4107	-5031.21	-3540.57	1770.4	129.765	1002.8	0	0	0	0	0	0	0	603	903	0
9727	1	0	0	0	0	0	0	200	300	0	-3.14468	-11.7261	-45.2227	-4939.65	-3723.68	1404.19	117.659	1012.23	0	0	0	0	0	0	0	603	903	0
9727	2	0	0	0	0	0	0	200	300	0	-2.53433	-10.5054	-47.9693	-4665	-3174.36	1129.53	133.825	1000.25	0	0	0	0	0	0	0	603	903	0
9727	3	0	0	0	0	0	0	200	300	0	-2.9921	-9.74243	-40.9502	-4207.23	-3174.36	1266.86	122.483	1005.74	0	0	0	0	0	0	0	603	903	0
9727	4	0	0	0	0	0	0	200	300	0	-3.60245	-8.21656	-41.5606	-4207.23	-3113.33	900.651	125.089	1004.23	0	0	0	0	0	0	0	603	903	0
9727	5	0	0	0	0	0	0	200	300	0	-3.75503	-7.91138	-40.3399	-3932.58	-2747.11	1083.76	131.901	1000.49	0	0	0	0	0	0	0	603	903	0
9727	6	0	0	0	0	0	0	200	300	0	-3.60245	-6.99585	-38.2037	-4298.79	-2930.22	900.651	123.3	1015.52	0	0	0	0	0	0	0	603	903	0
9727	7	0	0	0	0	0	0	200	300	0	-1.00845	-6.69068	-36.983	-3841.02	-2625.04	1037.98	129.02	1006.86	0	0	0	0	0	0	0	603	903	0
9727	8	0	0	0	0	0	0	200	300	0	-3.90762	-6.69068	-34.8467	-3749.47	-2564.01	1175.31	126.42	1010.6	0	0	0	0	0	0	0	603	903	0
9727	9	0	0	0	0	0	0	200	300	0	-4.51797	-6.23291	-32.7105	-2559.28	-2380.9	671.769	127.213	981.24	0	0	0	0	0	0	0	603	903	0
9728	0	0	0	0	0	0	0	200	300	0	-2.83951	-5.62256	-33.0157	-3108.6	-2258.83	671.769	131.583	997.155	0	0	0	0	0	0	0	603	903	0
9728	1	0	0	0	0	0	0	200	300	0	-3.29727	-6.08033	-30.5743	-3108.6	-2258.83	900.651	126.12	1004.67	0	0	0	0	0	0	0	603	903	0
9728	2	0	0	0	0	0	0	200	300	0	-2.68692	-5.62256	-27.8277	-2833.94	-2197.8	854.874	121.021	1004.84	0	0	0	0	0	0	0	603	903	0
9728	3	0	0	0	0	0	0	200	300	0	-4.67056	-5.01221	-26.9122	-2467.73	-2075.73	809.098	122.87	994.696	0	0	0	0	0	0	0	603	903	0
9728	4	0	0	0	0	0	0	200	300	0	-3.14468	-5.31739	-25.0811	-2467.73	-1526.41	854.874	139.141	1001.39	0	0	0	0	0	0	0	603	903	0
9728	5	0	0	0	0	0	0	200	300	0	-4.36539	-3.48633	-23.5552	-2193.07	-1648.48	671.769	130.016	996.103	0	0	0	0	0	0	0	603	903	0
[truncated: 1,544 more rows]
