# Supplementary material for: The Effects of an Extemporaneous Speech Dual-task on Older Adult Gait Control
Source: Research Square preprint supplement (doi:10.21203/rs.3.rs-7674245/v1), 2025-11-18
Supplement: Supplementary file 99 [file DT9Walk1.xlsx]

## Sheet: Sheet1
Trajectories
		09:LFHD			09:RFHD			09:LBHD			09:RBHD			09:C7			09:T10			09:CLAV			09:STRN			09:RBAK			09:LSHO			09:LUPA			09:LELB			09:LFRM			09:LWRA			09:LWRB			09:LFIN
Frame	Sub Frame	X	Y	Z	X	Y	Z	X	Y	Z	X	Y	Z	X	Y	Z	X	Y	Z	X	Y	Z	X	Y	Z	X	Y	Z	X	Y	Z	X	Y	Z	X	Y	Z	X	Y	Z	X	Y	Z	X	Y	Z	X	Y	Z
		mm	mm	mm	mm	mm	mm	mm	mm	mm	mm	mm	mm	mm	mm	mm	mm	mm	mm	mm	mm	mm	mm	mm	mm	mm	mm	mm	mm	mm	mm	mm	mm	mm	mm	mm	mm	mm	mm	mm	mm	mm	mm	mm	mm	mm	mm	mm	mm
473	0	115.901	-2023.78	1625.29	212.292	-2014.42	1623.97	105.164	-2178.02	1661.33	250.098	-2159.44	1651.91	169.489	-2229.46	1483.76	153.969	-2283.97	1226.13	168.21	-2075.29	1404.24	162.239	-1984.82	1195.92	223.934	-2289.81	1285.08	-17.5669	-2148.97	1442.89	-81.6157	-2222.27	1219.82	-86.0052	-2255.07	1123.79	-115.313	-2243.37	952.845	-80.1064	-2228.32	866.007	-131.181	-2277.57	881.244	-127.691	-2254.08	801.458
474	0	115.558	-2010.25	1622.68	212.14	-2001.09	1621.54	104.63	-2164.33	1659.15	249.55	-2146.08	1649.57	168.447	-2216.44	1481.52	152.747	-2270.7	1223.68	167.794	-2062.22	1401.75	162.645	-1971.73	1193.83	222.742	-2276.71	1282.74	-18.2729	-2135.19	1440.83	-81.1405	-2212.73	1219.08	-84.9609	-2246.82	1123.55	-114.759	-2240.62	952.815	-79.7388	-2227.47	865.663	-129.78	-2277.25	882.238	-126.589	-2256.95	801.209
475	0	115.196	-1996.73	1620.33	211.675	-1987.81	1619.21	104.023	-2150.7	1657.19	248.936	-2132.94	1647.3	167.254	-2203.33	1479.18	151.617	-2257.3	1221.46	167.342	-2048.97	1399.65	162.965	-1958.33	1191.81	221.363	-2263.52	1280.28	-19.2296	-2121.39	1438.6	-81.1088	-2202.33	1218.03	-84.0122	-2237.83	1123.38	-114.7	-2236.72	952.814	-79.9378	-2225.3	865.405	-129.279	-2275.6	883.482	-125.57	-2258.57	800.879
476	0	114.609	-1983.32	1618.15	211.082	-1974.65	1617.18	103.002	-2137.32	1655.05	248.035	-2119.75	1645.42	166.071	-2190.17	1476.76	150.508	-2243.85	1219.14	166.786	-2035.71	1397.55	163.205	-1945.02	1190.07	220.035	-2250.22	1277.93	-20.0778	-2107.56	1436.33	-81.4345	-2191.28	1216.92	-83.606	-2228.09	1122.87	-114.969	-2231.71	952.884	-80.5016	-2222.36	865.225	-129.197	-2272.46	884.789	-124.224	-2259.19	800.812
477	0	113.92	-1969.82	1616.19	210.567	-1961.28	1615.43	101.956	-2123.84	1652.99	246.908	-2106.54	1643.76	164.952	-2176.83	1475.04	149.568	-2230.25	1216.94	166.218	-2022.22	1395.82	163.256	-1931.62	1188.61	218.607	-2236.74	1275.84	-20.9911	-2093.63	1434.32	-81.7774	-2179.37	1215.72	-83.6203	-2217.53	1122.28	-115.599	-2225.33	953.047	-80.8815	-2217.33	864.508	-129.955	-2267.96	885.948	-123.388	-2258.5	800.722
478	0	113.06	-1956.36	1614.66	209.582	-1948.12	1613.98	100.535	-2110.48	1651.3	246.007	-2093.4	1642.51	163.792	-2163.32	1473.51	148.578	-2215.93	1215.98	165.272	-2008.67	1394.18	162.961	-1918.3	1187.08	217.354	-2223.02	1274.2	-21.8149	-2079.69	1432.4	-82.4147	-2166.72	1214.49	-83.929	-2206.03	1121.62	-116.761	-2217.62	953.091	-82.4125	-2212.35	864.737	-131.462	-2261.78	887.153	-122.532	-2256.15	801.187
479	0	111.863	-1943.07	1613.27	208.431	-1934.71	1612.97	99.147	-2097.08	1649.77	244.356	-2080.29	1641.25	162.706	-2149.73	1472.11	148.064	-2201.9	1214.43	164.501	-1994.96	1392.69	162.337	-1904.83	1185.94	216.45	-2209.21	1272.7	-22.9798	-2065.76	1430.48	-83.2921	-2153.49	1212.99	-84.5119	-2194.02	1120.82	-118.189	-2208.82	953.064	-83.3513	-2205.98	864.639	-133.591	-2254.17	888.164	-122.653	-2252.48	801.408
480	0	110.488	-1929.7	1611.93	206.933	-1921.7	1611.78	97.5609	-2083.81	1648.15	242.764	-2067.1	1640.18	161.587	-2136.16	1470.64	147.912	-2188.16	1212.23	163.444	-1981.38	1391.52	161.557	-1890.91	1184.95	215.791	-2195.36	1271.3	-23.8843	-2052.11	1428.89	-84.2493	-2139.86	1211.4	-85.3412	-2181.32	1119.93	-120.072	-2199.03	953.008	-85.2838	-2198.22	864.411	-136.04	-2245.52	888.835	-123.045	-2247.29	802.106
481	0	108.866	-1916.45	1610.8	205.414	-1908.55	1611.18	95.5911	-2070.66	1646.9	240.949	-2054.13	1639.39	160.23	-2122.72	1469.59	147.575	-2173.9	1211.06	162.485	-1967.64	1390.59	160.667	-1876.83	1184.38	215.256	-2181.46	1270.29	-25.1271	-2038.53	1427.53	-85.0784	-2125.88	1209.8	-86.418	-2168.07	1118.97	-121.944	-2188.03	952.855	-85.9593	-2191.46	864.966	-138.986	-2235.26	889.679	-124.202	-2240.44	802.577
482	0	107.199	-1903.15	1609.98	203.831	-1895.28	1610.78	93.6945	-2057.36	1645.93	238.97	-2041.01	1639.02	158.827	-2109.3	1468.74	147.418	-2159.56	1210.11	161.388	-1953.91	1390.12	159.372	-1862.48	1184.18	214.838	-2167.49	1269.55	-26.387	-2025.08	1426.32	-86.1504	-2111.89	1208.46	-87.7327	-2154.48	1118.05	-124.053	-2176	952.588	-88.0985	-2181.13	865.441	-142.248	-2223.73	890.537	-125.931	-2231.98	803.226
483	0	105.388	-1889.86	1609.66	202.118	-1882.01	1610.82	91.7112	-2044.03	1645.54	237.009	-2027.79	1639.14	157.477	-2095.88	1468.08	147.297	-2145.22	1209.24	160.169	-1940.26	1389.98	158.017	-1848.14	1184.03	214.45	-2153.48	1268.82	-27.6007	-2011.56	1425.44	-87.2117	-2097.72	1207.2	-89.0518	-2140.39	1117.2	-126.408	-2163.19	952.436	-93.1304	-2167.42	864.258	-145.644	-2211.11	890.843	-128.229	-2221.81	803.784
484	0	103.713	-1876.53	1609.74	200.185	-1868.84	1611.16	89.7297	-2030.5	1645.63	235.029	-2014.4	1639.96	156.082	-2082.34	1467.85	146.943	-2130.8	1208.63	159.125	-1926.44	1390.38	156.842	-1833.64	1184.81	213.909	-2139.34	1268.52	-28.747	-1998.11	1425.1	-88.4422	-2083.25	1206.65	-90.4104	-2125.93	1116.58	-128.954	-2149.4	952.677	-96.0643	-2154.41	863.811	-148.761	-2197.7	891.322	-131.273	-2209.85	804.362
485	0	101.775	-1863.18	1610.17	198.273	-1855.64	1611.98	87.5678	-2017.11	1645.89	232.91	-2001.14	1641	154.701	-2068.72	1468.07	146.343	-2116.34	1208.43	157.704	-1912.76	1391.28	155.536	-1818.99	1185.73	213.048	-2125.13	1268.65	-30.1902	-1984.46	1425.04	-89.7438	-2068.68	1206.45	-91.906	-2111.24	1116.37	-131.559	-2134.56	952.91	-97.0106	-2142.99	864.822	-152.073	-2183.09	891.794	-135.171	-2196.15	804.881
486	0	99.6659	-1849.99	1610.72	196.458	-1842.23	1613.32	85.3159	-2003.98	1646.16	230.719	-1987.96	1642.02	153.382	-2055.14	1468.47	145.57	-2101.83	1208.58	156.805	-1898.92	1392.37	154.309	-1804.27	1186.69	212.009	-2111	1268.9	-31.2402	-1970.74	1425.12	-90.9454	-2053.93	1206.18	-93.6429	-2096.05	1116.37	-134.161	-2119.36	952.945	-101.874	-2125.5	864.435	-155.16	-2167.42	892.332	-139.287	-2180.68	805.136
487	0	97.6729	-1836.66	1611.69	194.296	-1829.09	1614.66	83.1544	-1990.68	1646.82	228.287	-1974.7	1643.23	152.06	-2041.64	1468.82	144.543	-2087.53	1208.83	155.76	-1885.14	1393.5	153.789	-1789.45	1188.2	210.907	-2096.94	1269.33	-32.4945	-1957.06	1425.49	-92.4757	-2039.28	1206.55	-95.3596	-2080.78	1116.18	-136.936	-2103.34	953.123	-105.161	-2108.88	864.136	-158.098	-2150.91	892.574	-143.911	-2163.59	805.328
488	0	95.7224	-1823.3	1613.03	192.334	-1815.51	1616.46	81.117	-1977.44	1647.48	226.408	-1961.64	1644.74	150.864	-2028.01	1469.97	143.334	-2073.32	1209.75	154.838	-1871.38	1394.89	153.422	-1775.17	1189.77	209.726	-2082.94	1270.29	-33.3532	-1943.28	1426.21	-93.8704	-2024.09	1206.97	-97.2416	-2065.17	1116.68	-139.62	-2086.3	953.411	-108.306	-2091.53	864.317	-161.169	-2133.36	892.633	-148.53	-2144.61	805.23
489	0	93.7043	-1810.02	1614.59	190.211	-1802.29	1618.41	79.1555	-1964.2	1648.59	224.396	-1948.05	1646.71	149.948	-2014.4	1471.23	142.081	-2059.46	1211.11	154.103	-1857.64	1396.45	153.109	-1761.3	1191.21	208.519	-2069.09	1271.61	-33.9508	-1929.51	1427.25	-95.237	-2008.99	1207.78	-99.158	-2049.07	1116.86	-142.594	-2068.51	953.852	-111.777	-2072.2	864.167	-164.392	-2114.79	892.73	-153.777	-2124.23	805.249
490	0	92.0297	-1796.81	1615.92	188.299	-1788.9	1620.4	77.4693	-1951.04	1649.41	222.789	-1934.61	1648.59	149.346	-2000.64	1472.65	140.933	-2045.92	1212.52	153.324	-1844.13	1397.86	152.936	-1747.56	1192.36	207.542	-2055.41	1273.13	-34.4817	-1915.77	1428.44	-96.4687	-1993.37	1208.51	-101.053	-2032.8	1117.43	-145.457	-2050.05	954.075	-115.262	-2052.38	864.259	-167.376	-2095.56	892.382	-159.294	-2102.3	805.006
491	0	90.3283	-1783.74	1616.97	186.488	-1775.46	1621.86	76.0941	-1937.94	1650.23	221.144	-1921	1650.27	148.891	-1987.15	1474.16	140.016	-2032.7	1213.91	153.071	-1830.71	1399.26	153.368	-1734.32	1193.85	206.852	-2041.92	1274.73	-34.8014	-1902.27	1429.72	-97.7305	-1977.73	1209.26	-102.907	-2016.4	1117.76	-148.166	-2030.89	954.387	-117.557	-2032.99	864.395	-170.317	-2075.19	891.992	-163.925	-2079.06	804.664
492	0	88.8052	-1770.63	1617.85	185.091	-1762.06	1623.28	74.7389	-1925.06	1650.93	219.827	-1907.72	1651.8	148.46	-1973.89	1475.75	139.269	-2019.6	1215.49	152.713	-1817.47	1400.68	153.36	-1721.14	1195.21	206.331	-2028.75	1276.47	-35.0843	-1888.81	1431.28	-98.9181	-1962.11	1210.2	-104.842	-1999.63	1118.24	-150.749	-2011.16	954.599	-122.177	-2009.28	864.039	-173.185	-2054.11	891.652	-169.105	-2054.47	804.421
493	0	87.4814	-1757.63	1618.73	183.697	-1748.94	1624.83	73.9151	-1911.98	1651.99	218.76	-1894.46	1653.24	148.07	-1960.94	1477.06	138.531	-2006.58	1216.82	152.583	-1804.34	1401.97	153.462	-1708.24	1196.85	206.08	-2015.74	1277.98	-35.2819	-1875.52	1432.68	-100.202	-1946.14	1210.9	-106.704	-1982.71	1118.55	-153.438	-1990.53	954.799	-125.716	-1986.48	864.307	-176.268	-2032.08	890.832	-173.967	-2028.92	804.186
494	0	86.6856	-1744.5	1619.59	182.833	-1735.42	1625.85	73.2316	-1898.93	1653.08	218.053	-1880.81	1655.11	147.725	-1948.07	1478.37	137.991	-1993.75	1218.13	152.527	-1791.47	1403.4	153.635	-1695.54	1197.96	205.88	-2003.25	1279.32	-35.2678	-1862.2	1434.32	-101.339	-1930.08	1211.64	-108.655	-1965.41	1118.85	-155.981	-1969.66	954.875	-128.792	-1962.99	864.34	-178.603	-2009.63	890.008	-178.747	-2002.32	804.238
495	0	86.1593	-1731.35	1620.68	182.252	-1722.22	1626.98	73.0364	-1885.49	1654.73	217.759	-1867.17	1656.92	147.47	-1935.44	1479.87	137.407	-1981.18	1219.41	152.612	-1778.89	1404.87	153.748	-1683.1	1199.25	205.509	-1990.73	1280.73	-35.4278	-1849.13	1436.03	-102.381	-1913.73	1212.66	-110.537	-1947.94	1119.25	-158.313	-1947.99	955.035	-131.873	-1938.95	864.377	-180.456	-1986.7	888.94	-183.177	-1974.89	804.424
496	0	85.9191	-1718.2	1621.75	182.061	-1709.29	1627.91	72.7715	-1872.16	1656.48	217.705	-1853.73	1658.63	147.08	-1922.79	1481.45	136.643	-1968.27	1220.85	152.759	-1766.3	1406.41	153.725	-1670.66	1200.39	204.768	-1978.44	1282.15	-35.5085	-1835.81	1437.67	-103.523	-1897.26	1213.54	-112.517	-1930.27	1119.56	-160.551	-1925.85	955.399	-134.702	-1913.2	864.405	-182.8	-1962.67	888.032	-187.344	-1946.75	804.924
497	0	86.2082	-1705.07	1622.75	182.039	-1696.1	1628.78	72.6704	-1858.84	1658.19	217.593	-1840.56	1660.21	146.703	-1910.22	1482.99	135.885	-1955.58	1222.4	152.885	-1753.83	1407.88	153.958	-1658.12	1201.77	203.827	-1966.13	1283.48	-35.5992	-1822.87	1439.35	-104.534	-1880.73	1214.27	-114.374	-1912.2	1119.96	-162.381	-1903.21	955.537	-137.468	-1888.01	865.275	-184.763	-1938.06	887.241	-190.964	-1917.9	805.735
498	0	86.4801	-1691.89	1623.91	182.62	-1683.17	1629.81	72.9491	-1845.5	1660.05	217.763	-1827.59	1661.63	146.359	-1897.85	1484.38	135.067	-1943.01	1223.87	152.976	-1741.46	1409.66	154.342	-1645.47	1203.29	202.719	-1954.07	1284.74	-35.7796	-1809.7	1440.9	-105.546	-1864.16	1215.24	-116.13	-1894.32	1120.18	-164.342	-1880.01	956.173	-139.15	-1862.72	865.81	-186.372	-1912.8	886.537	-194.453	-1888.18	807.09
499	0	86.9042	-1678.79	1625.23	183.079	-1670.24	1630.67	73.2537	-1832.14	1662.06	218.315	-1814.47	1663.4	145.975	-1885.29	1486.02	133.93	-1930.45	1225.48	153.433	-1729.04	1411.23	154.392	-1632.72	1204.87	201.355	-1941.79	1286.12	-35.7185	-1796.46	1442.82	-106.517	-1847.49	1216.6	-117.878	-1876.08	1120.89	-165.783	-1856.31	956.859	-141.612	-1834.59	867.648	-187.79	-1886.92	886.056	-197.128	-1858.13	808.814
500	0	87.7624	-1665.6	1626.69	183.675	-1657.55	1631.93	73.725	-1818.79	1664.19	218.614	-1801.37	1665.07	145.628	-1872.87	1487.91	132.73	-1918.15	1227.38	153.61	-1716.77	1412.89	154.69	-1619.67	1206.31	199.975	-1929.65	1287.85	-35.6993	-1783.14	1444.84	-107.494	-1830.69	1218.09	-119.536	-1857.84	1121.79	-166.928	-1832.16	957.927	-143.236	-1806.83	869.586	-188.981	-1860.03	886	-199.415	-1827.39	810.98
501	0	88.6883	-1652.43	1628.33	184.828	-1644.64	1633.42	74.4048	-1805.46	1666.4	219.543	-1788.38	1666.82	145.447	-1860.33	1489.8	131.474	-1905.59	1229.38	153.728	-1704.34	1414.62	155.142	-1607.37	1208.24	198.551	-1917.49	1289.58	-35.6089	-1769.68	1446.87	-108.381	-1813.9	1219.8	-121.043	-1839.47	1122.71	-168.071	-1807.48	959.618	-143.88	-1778.86	871.937	-189.869	-1832.68	886.362	-201.042	-1796.16	813.932
502	0	89.7678	-1639.25	1629.98	186.014	-1631.69	1634.55	75.2298	-1792.18	1668.61	220.162	-1775.68	1668.09	145.121	-1847.69	1491.58	130.208	-1893.37	1231.24	154.157	-1692.08	1416.63	155.808	-1595.1	1210.39	197.15	-1905.48	1291.13	-35.514	-1756.13	1449.04	-109.212	-1797.24	1221.8	-122.524	-1821.18	1123.89	-168.931	-1782.42	961.763	-143.843	-1750.71	875.229	-190.238	-1804.53	887.047	-201.892	-1764.43	817.438
503	0	90.6193	-1626.29	1631.49	186.628	-1619.4	1635.43	75.8029	-1779.05	1670.64	220.979	-1762.93	1669.48	144.712	-1835.1	1493.29	128.842	-1880.99	1233.19	154.28	-1679.35	1418.26	156.201	-1582.45	1212.31	195.533	-1893.19	1292.75	-35.5644	-1742.57	1451.22	-110.245	-1780.63	1223.84	-124.154	-1802.67	1125.24	-169.217	-1757.19	964.15	-143.966	-1721.97	879.139	-190.75	-1775.79	888.609	-202.326	-1732.29	821.537
504	0	91.7434	-1613.25	1632.99	187.803	-1606.64	1636.47	76.3797	-1765.91	1672.52	220.822	-1751.32	1669.84	144.282	-1822.21	1494.77	127.524	-1868.49	1234.82	154.353	-1667.23	1419.49	156.498	-1570.02	1214.09	194.151	-1881	1294.27	-35.5934	-1728.91	1453.42	-111.202	-1764.13	1225.78	-125.534	-1784.17	1126.73	-169.629	-1731.42	966.681	-143.523	-1693.07	883.517	-190.691	-1746.77	890.596	-201.987	-1699.95	826.039
505	0	92.7297	-1600.27	1634.45	188.975	-1593.81	1637.5	77.0687	-1752.77	1674.12	221.437	-1738.84	1670.63	143.953	-1809.25	1496.24	126.364	-1856.16	1236.08	154.624	-1654.94	1420.36	156.825	-1557.58	1215.54	192.836	-1868.61	1295.45	-35.4826	-1715.39	1455.45	-112.097	-1747.72	1227.72	-127.024	-1765.5	1128.11	-169.685	-1705.61	969.881	-142.608	-1664.57	887.994	-190.094	-1717.38	893.074	-200.931	-1667.62	830.966
506	0	93.7931	-1587.27	1635.71	190.047	-1581.3	1638	77.9398	-1739.63	1675.86	222.777	-1725.5	1671.93	143.623	-1796.57	1497.5	125.224	-1843.5	1237.39	154.963	-1641.84	1422.1	157.269	-1545.34	1217.07	191.546	-1856.22	1296.48	-35.2868	-1701.65	1457.57	-112.868	-1731.33	1229.79	-128.533	-1746.94	1129.63	-169.148	-1679.83	973.177	-141.353	-1635.45	893.509	-189.31	-1687.88	895.739	-199.349	-1635.04	836.372
507	0	94.623	-1574.3	1636.93	191.064	-1568.56	1638.74	78.6181	-1726.66	1677.24	223.441	-1713	1672.39	143.177	-1783.71	1498.51	124.18	-1831.06	1238.44	154.949	-1630.05	1422.17	157.744	-1533.4	1218.11	190.283	-1843.67	1297.52	-35.2333	-1687.96	1459.34	-113.831	-1714.76	1231.61	-130.14	-1728.09	1131.08	-168.607	-1653.69	976.532	-139.408	-1607.07	898.723	-188.775	-1658.1	898.972	-197.367	-1602.39	841.993
508	0	95.5278	-1561.3	1637.88	191.806	-1556.08	1639.04	79.1656	-1713.61	1678.13	223.911	-1700.62	1672.22	142.782	-1770.76	1499.15	123.129	-1818.47	1239.34	154.943	-1617.37	1422.73	157.588	-1521.66	1218.45	189.088	-1831.09	1298.09	-35.153	-1674.6	1460.34	-114.717	-1698.3	1233.08	-131.666	-1709.22	1132.29	-168.097	-1627.64	980.007	-137.693	-1577.57	904.995	-187.691	-1628.3	902.571	-194.982	-1569.93	847.874
509	0	96.2074	-1548.34	1638.53	192.627	-1543.11	1639.39	79.5781	-1700.54	1678.97	224.415	-1687.88	1672.42	142.311	-1757.83	1499.56	122.072	-1805.98	1239.69	155.143	-1604.63	1423.01	157.447	-1510	1218.49	187.966	-1818.59	1298.49	-35.1049	-1660.91	1461.41	-115.735	-1681.79	1234.31	-133.086	-1690.31	1133.19	-167.416	-1601.57	983.729	-135.637	-1548.94	911.313	-186.261	-1598.56	906.357	-192.093	-1537.68	854.088
510	0	96.9637	-1535.26	1639.02	193.53	-1530.38	1639.52	80.0522	-1687.58	1679.27	224.774	-1675.21	1671.8	141.93	-1744.87	1499.82	121.1	-1793.44	1240.1	155.082	-1591.81	1422.99	157.348	-1498.37	1218.4	186.828	-1805.81	1298.73	-35.075	-1647.52	1462.16	-116.664	-1665.22	1235.24	-134.694	-1671.1	1133.74	-166.815	-1575.63	987.643	-133.402	-1520.59	917.69	-186.186	-1568.66	910.475	-188.996	-1505.57	860.576
511	0	97.4988	-1522.15	1639.24	193.604	-1517.75	1638.91	80.5075	-1674.47	1679.38	225	-1662.79	1671.24	141.472	-1731.68	1499.75	120.239	-1780.63	1240.23	154.881	-1578.95	1422.76	156.988	-1486.63	1217.55	185.807	-1793.1	1298.6	-34.9931	-1634.08	1462.4	-117.578	-1648.46	1235.65	-136.231	-1651.71	1134.11	-166.062	-1549.65	991.343	-131.253	-1492.26	924.297	-184.92	-1539.17	914.809	-185.61	-1473.82	867.271
512	0	98.092	-1508.9	1639.09	194.616	-1504.53	1638.83	80.9662	-1661.08	1679.33	225.866	-1649.24	1670.88	141.227	-1718.48	1499.48	119.6	-1768.09	1239.98	154.713	-1566	1422.01	156.988	-1474.59	1216.81	184.972	-1780.34	1298.24	-35.0062	-1620.71	1462.13	-118.422	-1631.64	1235.95	-137.599	-1632.29	1134.16	-165.219	-1523.65	995.274	-128.656	-1464.26	931.065	-183.312	-1509.88	919.042	-182.153	-1442.35	873.962
513	0	98.7285	-1495.55	1638.68	195.229	-1491.36	1637.97	81.3563	-1647.69	1678.91	226.238	-1636	1669.99	140.973	-1705.36	1498.93	119.199	-1755.51	1239.62	154.739	-1552.92	1421.17	156.836	-1462.08	1215.95	184.27	-1767.38	1297.69	-35.1221	-1607.41	1461.75	-119.23	-1614.73	1235.83	-138.944	-1612.56	1134.01	-164.041	-1497.96	999.186	-126.17	-1436.71	937.839	-181.551	-1480.76	923.594	-178.153	-1411.44	880.91
514	0	98.8865	-1482.15	1637.92	195.453	-1478.15	1637	81.4154	-1634.29	1678.32	226.401	-1623.06	1669.24	140.646	-1692.26	1498.32	118.939	-1742.8	1239.08	154.19	-1539.75	1419.81	156.232	-1449.62	1214.46	183.682	-1754.52	1297.12	-35.3059	-1594.33	1460.85	-120.123	-1597.73	1235.42	-140.371	-1592.62	1133.69	-162.897	-1472.45	1003.05	-123.367	-1409.41	944.598	-179.291	-1451.98	927.828	-174.347	-1380.76	888.148
515	0	99.2181	-1468.67	1636.86	195.787	-1464.81	1635.94	81.6175	-1620.82	1677.41	225.973	-1610.37	1667.59	140.461	-1678.98	1497.32	119.057	-1730.2	1238.53	154.041	-1526.76	1418.76	155.806	-1436.83	1212.83	183.294	-1741.48	1296.3	-35.4328	-1581.32	1459.53	-120.794	-1580.54	1234.62	-141.695	-1572.51	1133.15	-161.607	-1447.06	1006.81	-120.497	-1382.6	951.199	-177.674	-1423.17	932.679	-170.379	-1350.84	895.597
516	0	99.5123	-1455.14	1635.61	196.036	-1451.57	1634.4	81.7675	-1607.24	1676.39	226.041	-1596.91	1666	140.474	-1665.7	1496.3	119.542	-1717.62	1237.43	153.765	-1513.61	1417.17	155.38	-1423.72	1211.02	183.28	-1728.53	1295.32	-35.4824	-1568.31	1458.09	-121.556	-1563.44	1233.72	-142.723	-1552.34	1132.66	-160.048	-1421.95	1010.54	-117.576	-1356.32	957.706	-175.569	-1395	937.796	-166.775	-1321.35	902.939
517	0	99.6635	-1441.54	1634.25	196.171	-1438	1632.54	81.9992	-1593.44	1675.45	226.756	-1582.76	1665.09	140.554	-1652.37	1495.27	120.234	-1705.01	1236.41	153.341	-1500.53	1415.44	154.855	-1410.41	1209.03	183.513	-1715.54	1294.31	-35.5549	-1555.27	1456.5	-121.781	-1546.07	1233.07	-143.64	-1532.26	1132.17	-158.258	-1397.02	1014.51	-114.569	-1330.68	963.912	-173.163	-1367.38	942.727	-162.525	-1292.69	910.67
518	0	99.7672	-1427.87	1632.62	196.201	-1424.45	1630.77	82.0427	-1579.69	1674.31	226.843	-1569.12	1663.62	140.747	-1638.98	1494.15	121.131	-1692.46	1235.32	153.06	-1487.31	1413.81	154.21	-1396.83	1207.12	183.955	-1702.42	1293.18	-35.7095	-1542.47	1454.83	-121.956	-1528.72	1232.31	-144.465	-1511.82	1132.23	-156.428	-1372.74	1018.65	-111.517	-1305.55	970.318	-170.653	-1340.38	947.892	-158.84	-1264.82	918.572
519	0	99.6094	-1414.32	1630.76	196.186	-1410.91	1628.93	81.9281	-1566.07	1672.72	226.838	-1555.65	1661.96	141.09	-1625.43	1492.58	122.415	-1679.57	1234.03	152.817	-1474.05	1411.93	153.658	-1383.03	1205.13	184.789	-1689.35	1291.91	-35.4808	-1529.53	1452.99	-122.18	-1511.49	1231.7	-145.111	-1491.98	1132.21	-154.544	-1348.76	1022.86	-108.302	-1280.94	976.644	-168.38	-1313.8	953.504	-154.952	-1237.63	926.38
520	0	99.5786	-1400.77	1628.8	196.146	-1397.33	1626.96	81.8572	-1552.42	1670.84	226.698	-1542.1	1660.11	141.482	-1612.02	1490.83	123.752	-1666.93	1232.31	152.721	-1460.67	1409.88	153.183	-1369.14	1203.28	185.68	-1676.08	1290.3	-35.3634	-1516.48	1451.07	-122.009	-1494.31	1231.01	-145.51	-1472.41	1132.02	-152.222	-1325.48	1027.08	-105.074	-1256.98	983.013	-165.909	-1288.2	959.115	-151.089	-1211.37	934.547
521	0	99.2986	-1387.39	1626.79	195.885	-1383.78	1625.11	81.6626	-1539.06	1668.88	226.624	-1528.61	1658.2	141.876	-1598.74	1489.1	125.173	-1653.77	1230.52	152.627	-1447.21	1407.83	152.688	-1355.4	1201.25	186.738	-1662.86	1288.78	-34.9481	-1503.55	1449.24	-121.695	-1477.15	1230.46	-145.943	-1452.72	1132.31	-150.393	-1302.92	1031.51	-101.985	-1234.33	989.038	-163.717	-1263.09	965.018	-147.566	-1185.92	942.775
522	0	99.0757	-1374.2	1624.82	195.591	-1370.51	1623.16	81.5592	-1525.99	1666.64	226.033	-1515.63	1656.12	142.445	-1585.2	1487.15	126.685	-1640.66	1228.74	152.665	-1433.65	1405.72	152.205	-1341.82	1199.22	187.948	-1649.43	1287.02	-34.4447	-1490.44	1447.47	-121.145	-1460.07	1229.97	-145.313	-1433.52	1132.41	-148.43	-1280.98	1036.02	-98.9963	-1211.94	995.246	-161.358	-1239.05	970.833	-144.071	-1161.52	950.99
523	0	99.0365	-1360.91	1622.96	195.54	-1356.99	1621.59	81.7198	-1512.76	1664.37	226.401	-1501.95	1654.53	143.33	-1571.71	1485.06	128.142	-1627.1	1226.57	152.947	-1419.99	1403.7	151.879	-1328.46	1196.99	189.315	-1635.86	1285.14	-33.876	-1477.34	1445.84	-120.609	-1443.31	1229.41	-145.534	-1414.76	1132.84	-146.321	-1259.68	1040.28	-96.5036	-1190.55	1001.03	-159.565	-1215.76	976.728	-140.956	-1138.07	958.756
524	0	98.8383	-1347.81	1621.31	195.51	-1343.64	1620.29	81.8788	-1499.69	1662.34	226.825	-1488.2	1653.15	144.149	-1558.38	1483.18	129.394	-1613.58	1224.65	153.555	-1406.36	1401.93	151.756	-1315.2	1195.08	190.656	-1622.3	1283.24	-32.9272	-1464.14	1444.35	-119.761	-1426.49	1229.08	-145.393	-1396.36	1133.2	-144.575	-1239.26	1044.54	-94.198	-1170.04	1006.38	-157.286	-1193.52	982.038	-138.148	-1115.44	966.659
525	0	98.8779	-1334.8	1619.84	195.357	-1330.4	1618.85	82.0881	-1486.91	1660.18	226.991	-1474.98	1651.26	145.007	-1544.78	1481.36	130.457	-1599.89	1222.83	154.184	-1392.65	1400.21	151.79	-1301.82	1193.24	191.854	-1608.4	1281.49	-32.1252	-1450.85	1443.04	-118.944	-1410.21	1228.58	-144.97	-1378.85	1133.59	-143.039	-1219.59	1048.58	-91.7958	-1149.86	1012.42	-155.771	-1172.1	987.587	-135.589	-1093.84	974.184
526	0	98.956	-1321.91	1618.22	195.472	-1317.47	1617.68	82.371	-1474.12	1657.99	226.923	-1462.53	1648.95	145.946	-1531.38	1479.43	131.294	-1585.86	1220.9	154.784	-1378.97	1398.41	152.03	-1288.2	1191.39	192.957	-1594.68	1279.63	-31.2578	-1437.56	1441.68	-118.095	-1394.23	1227.92	-144.648	-1361.83	1133.35	-141.652	-1200.6	1052.13	-90.066	-1130.72	1017.01	-154.281	-1151.59	992.458	-133.681	-1073.21	981.321
527	0	99.398	-1309.16	1616.98	196.112	-1304.42	1616.7	83.0605	-1461.62	1656.05	227.247	-1449.94	1647.41	146.925	-1518.02	1477.53	132.096	-1571.79	1218.98	155.511	-1365.2	1396.79	152.38	-1274.39	1189.79	194.074	-1580.86	1277.79	-30.0248	-1423.9	1440.33	-117.181	-1378.73	1227.3	-144.245	-1345.2	1133.47	-140.418	-1182.47	1055.34	-88.3718	-1112.19	1021.9	-152.943	-1132.09	996.954	-131.783	-1053.51	987.976
528	0	100.049	-1296.29	1616.25	196.617	-1291.51	1615.81	83.8179	-1448.92	1654.31	228.389	-1436.83	1645.98	147.949	-1504.25	1475.8	132.849	-1557.72	1217.17	156.38	-1351.42	1395.44	153.114	-1260.27	1188.47	194.893	-1566.82	1275.97	-29.0937	-1410.29	1439.25	-116.29	-1363.43	1226.77	-143.71	-1329.18	1133.36	-139.312	-1165.02	1058.34	-87.1739	-1094.46	1025.84	-151.827	-1113.56	1000.86	-130.489	-1034.73	994.125
529	0	100.831	-1283.46	1615.68	197.548	-1278.64	1615.25	84.7351	-1436.33	1652.82	229.107	-1424.17	1644.47	148.888	-1490.81	1474.38	133.482	-1543.42	1215.62	157.224	-1337.76	1394.24	154.067	-1246.07	1187.34	195.658	-1552.72	1274.36	-28.0921	-1396.56	1438.28	-115.521	-1348.55	1226.25	-143.256	-1313.46	1133.48	-138.419	-1148.33	1060.74	-86.3447	-1077.42	1029.28	-150.724	-1095.84	1004.2	-129.603	-1016.96	999.592
530	0	101.993	-1270.76	1615.25	198.617	-1265.86	1614.69	85.8256	-1423.75	1651.53	230.607	-1411.41	1643.49	150.028	-1477.34	1472.95	134.129	-1528.99	1214.02	158.189	-1323.93	1393.26	155.158	-1231.87	1186.49	196.34	-1538.64	1272.71	-26.9372	-1382.66	1437.31	-114.779	-1333.9	1225.89	-142.801	-1298.18	1133.23	-137.628	-1132.13	1062.59	-85.5776	-1060.98	1032.1	-150.01	-1079	1006.85	-129.098	-1000.04	1004.41
531	0	103.077	-1257.92	1615.19	199.834	-1253.02	1614.66	86.9646	-1411.2	1650.49	231.821	-1398.79	1642.56	151.101	-1463.81	1471.6	134.72	-1514.45	1212.54	159.353	-1309.99	1392.59	156.775	-1217.52	1186.06	197.024	-1524.37	1271.24	-25.8729	-1368.97	1436.66	-114.224	-1319.72	1225.63	-142.051	-1283.43	1133.11	-137.095	-1116.77	1063.98	-85.0567	-1045.31	1034.51	-149.543	-1063.16	1008.82	-129.103	-984.17	1008.36
532	0	104.458	-1245.27	1615.47	201.263	-1240.36	1615.13	88.2353	-1398.89	1649.76	232.931	-1386.46	1641.79	152.252	-1450.48	1470.73	135.289	-1499.72	1211.4	160.599	-1296.34	1392.39	158.343	-1202.91	1185.99	197.672	-1510	1270.03	-24.6327	-1355.23	1436.2	-113.582	-1305.84	1225.5	-141.329	-1269.25	1132.89	-136.739	-1102.14	1064.86	-84.4721	-1030.13	1036.55	-149.194	-1048.19	1010.08	-129.552	-969.251	1011.59
533	0	105.919	-1232.53	1616.04	202.361	-1227.79	1615.55	89.642	-1386.42	1649.34	234.171	-1374.16	1641.32	153.514	-1436.91	1470.14	136.026	-1484.94	1210.45	161.962	-1282.54	1392.5	159.939	-1188.13	1186.42	198.573	-1495.54	1269.02	-23.5133	-1341.37	1436.15	-113.017	-1291.94	1225.62	-140.691	-1255.38	1133.07	-136.377	-1088.14	1065.22	-84.5811	-1016.01	1037.09	-148.894	-1034.05	1010.81	-130.105	-955.05	1013.93
534	0	107.582	-1219.86	1617.23	204.21	-1214.98	1616.57	91.4494	-1373.88	1649.45	235.756	-1361.75	1641.3	154.938	-1423.45	1469.9	136.9	-1470.02	1210.01	163.423	-1268.62	1393.05	161.71	-1173.1	1187.37	199.563	-1481.01	1268.27	-22.2104	-1327.64	1436.13	-112.168	-1278.52	1225.56	-139.861	-1241.78	1133.03	-136.061	-1074.71	1065.09	-84.7125	-1002.46	1036.99	-148.678	-1020.72	1010.67	-130.978	-941.918	1015.25
535	0	109.323	-1207.16	1618.56	205.985	-1202.18	1617.85	93.3628	-1361.46	1649.9	238.5	-1348.45	1642.02	156.139	-1409.68	1469.96	137.667	-1455.23	1209.94	164.899	-1254.73	1393.77	163.582	-1157.83	1188.65	200.387	-1466.51	1267.97	-21.0036	-1313.67	1436.78	-111.281	-1265.35	1225.97	-139.168	-1228.92	1133.47	-135.816	-1062.08	1064.58	-85.1637	-989.797	1035.92	-148.915	-1008.32	1010.02	-132.053	-929.634	1015.66
536	0	111.101	-1194.43	1620.49	207.784	-1189.52	1619.48	95.3319	-1349.12	1650.53	240.093	-1336.11	1642.25	157.206	-1395.99	1470.61	138.29	-1440.6	1210.44	166.309	-1240.9	1394.7	164.997	-1142.76	1189.92	200.994	-1452.09	1268.19	-19.8715	-1299.66	1437.62	-110.48	-1252.39	1226.22	-138.445	-1216.31	1133.68	-135.854	-1050.02	1063.63	-85.6009	-977.821	1034.18	-149.218	-996.794	1008.67	-133.375	-918.198	1015.08
537	0	112.917	-1181.8	1622.47	209.624	-1176.92	1621.23	97.2646	-1336.47	1651.4	241.482	-1323.92	1642.05	158.293	-1382.37	1471.28	138.718	-1426.46	1211.21	167.367	-1227.13	1395.68	166.377	-1127.75	1191.52	201.576	-1437.73	1268.68	-18.82	-1285.47	1438.52	-109.562	-1239.75	1226.76	-137.566	-1204.21	1134.19	-135.948	-1038.66	1062.1	-85.9688	-966.381	1032.38	-149.753	-986.203	1006.58	-134.945	-907.73	1013.22
538	0	115.025	-1168.88	1624.83	211.97	-1163.98	1623.39	99.2421	-1323.88	1652.63	243.169	-1311.56	1642.48	159.246	-1368.59	1472.29	139.096	-1412.7	1212.58	168.581	-1213.27	1397.07	167.499	-1113.29	1193.23	202.118	-1423.67	1269.59	-17.7728	-1271.5	1439.9	-108.576	-1227.24	1227.52	-136.522	-1192.55	1134.58	-136.104	-1028.02	1060.48	-86.7455	-955.691	1029.73	-150.114	-976.292	1004.26	-136.475	-897.973	1010.67
539	0	116.963	-1155.99	1627.15	213.69	-1151.25	1624.94	101.2	-1311.28	1653.98	245.465	-1298.64	1643.14	160.111	-1354.94	1473.64	139.436	-1399.24	1213.94	169.409	-1199.59	1398.53	168.273	-1099.37	1194.77	202.505	-1410.02	1270.74	-17.1064	-1257.65	1441.76	-107.66	-1214.68	1228.55	-135.367	-1181.05	1135.27	-136.207	-1017.79	1058.68	-87.6057	-945.926	1026.21	-150.863	-967.278	1001.56	-138.031	-888.995	1007.13
540	0	118.792	-1143.05	1629.47	215.358	-1138.66	1626.42	102.849	-1298.52	1655.48	247.087	-1286.04	1643.88	160.879	-1341.48	1474.99	139.795	-1385.85	1215.47	169.916	-1186.24	1399.81	168.886	-1085.58	1196.22	202.966	-1396.33	1272.24	-16.3242	-1243.97	1443.44	-106.629	-1202.34	1229.73	-134.468	-1170.13	1136.12	-136.574	-1008.46	1056.57	-88.4388	-936.601	1022.78	-151.649	-958.99	998.428	-139.76	-880.668	1002.66
541	0	120.48	-1130.09	1631.53	216.931	-1125.86	1627.62	104.431	-1285.53	1657.14	248.717	-1273.03	1644.53	161.651	-1328.08	1476.47	140.334	-1372.63	1216.8	170.301	-1172.87	1400.96	169.382	-1072.36	1197.74	203.524	-1382.85	1273.49	-15.5155	-1230.61	1445.09	-105.509	-1190.14	1230.96	-133.539	-1159.51	1136.84	-136.819	-999.368	1054.02	-89.4883	-928.088	1018.47	-152.407	-951.453	994.888	-141.19	-873.073	997.17
542	0	121.647	-1117	1633.36	218.437	-1112.76	1629.16	105.834	-1272.75	1658.8	250.312	-1260.1	1645.66	162.293	-1315.18	1477.8	141.063	-1359.71	1218.25	170.44	-1159.69	1402.19	169.627	-1059.41	1199.34	204.225	-1369.59	1274.75	-14.881	-1217.82	1446.78	-104.612	-1178.25	1232.04	-132.777	-1149.6	1137.86	-137.444	-991.087	1051.39	-90.412	-920.008	1014.05	-153.369	-944.672	991.075	-142.769	-866.141	991.094
543	0	122.586	-1104.07	1635.11	219.267	-1099.92	1630.63	106.414	-1259.74	1660.38	250.71	-1247.49	1646.54	162.853	-1302.32	1479.19	141.847	-1346.8	1219.75	170.584	-1146.67	1403.74	169.589	-1046.71	1200.87	205.063	-1356.35	1276.18	-14.421	-1205.51	1448.31	-103.814	-1166.56	1233.13	-132.018	-1139.58	1138.49	-138.015	-983.29	1048.44	-91.7391	-912.922	1008.88	-154.431	-938.453	986.822	-144.376	-859.927	984.062
544	0	123.162	-1091.05	1636.7	219.746	-1087.04	1631.9	107.117	-1246.84	1662.2	251.46	-1234.74	1647.63	163.67	-1289.59	1480.83	142.941	-1334.16	1221.35	170.717	-1133.81	1405.25	169.39	-1034.14	1202.26	206.227	-1343.3	1277.72	-13.9851	-1193.47	1449.68	-103.016	-1155.26	1234.21	-131.193	-1129.98	1139.24	-138.589	-976.015	1045.14	-92.8447	-906.185	1003.85	-155.349	-932.997	982.163	-145.677	-854.421	976.233
545	0	123.524	-1078.03	1638.21	220.275	-1073.82	1633.6	107.494	-1233.72	1664.02	251.451	-1221.78	1649.34	164.571	-1276.98	1482.43	144.218	-1321.53	1222.77	170.935	-1121.19	1406.77	168.973	-1021.7	1203.79	207.562	-1330.5	1279.07	-13.7316	-1181.68	1451.3	-102.273	-1144.43	1235.13	-130.573	-1120.69	1139.73	-139.28	-969.263	1041.74	-94.0127	-900.319	997.977	-156.279	-928.304	977.768	-146.863	-849.696	968.223
546	0	123.503	-1065.06	1639.81	220.264	-1060.83	1635.26	107.881	-1220.7	1665.84	252.408	-1208.06	1652.14	165.325	-1264.17	1484.3	145.628	-1308.89	1224.38	170.976	-1108.43	1408.65	168.45	-1009.16	1205.58	208.94	-1317.64	1280.93	-13.5548	-1170.13	1453.01	-101.639	-1133.89	1236.23	-129.304	-1111.81	1140.22	-139.854	-963.267	1038.34	-95.1112	-895.054	992.5	-157.209	-924.011	973.04	-147.898	-845.827	959.844
547	0	123.335	-1052.06	1641.66	220.122	-1047.78	1637.23	107.509	-1207.63	1667.81	252.115	-1194.94	1654.15	165.848	-1251.45	1486.3	147.051	-1296.3	1226.37	170.878	-1095.81	1410.61	167.636	-996.545	1207.59	210.212	-1304.92	1282.97	-13.6955	-1158.48	1454.55	-101.373	-1123.86	1237.06	-128.919	-1103.45	1140.69	-140.556	-957.749	1034.67	-96.2694	-890.227	987.159	-158.164	-920.605	968.088	-149.057	-842.915	951.245
548	0	123.052	-1039.24	1643.48	219.841	-1034.78	1639.35	107.368	-1194.68	1669.82	251.407	-1182.53	1656.18	166.344	-1238.9	1488.34	148.641	-1283.73	1228.27	170.937	-1083.33	1412.7	166.765	-983.955	1209.46	211.573	-1292.3	1285.05	-13.8927	-1147.03	1455.99	-101.011	-1114.51	1237.62	-127.812	-1095.27	1140.96	-141.317	-952.957	1030.66	-97.4365	-886.716	980.776	-159.11	-918.129	962.885	-150.058	-840.922	942.134
549	0	122.566	-1026.4	1645.35	219.506	-1021.84	1641.64	106.943	-1181.84	1671.82	250.873	-1169.63	1658.22	166.759	-1226.08	1490.39	150.176	-1271.51	1230.23	170.851	-1070.7	1414.83	165.984	-971.4	1211.43	212.817	-1280	1287.22	-13.9935	-1135.46	1457.52	-100.855	-1105.55	1238.21	-126.571	-1087.57	1140.89	-141.834	-948.704	1026.8	-98.4536	-883.561	974.557	-159.919	-916.12	957.945	-150.937	-839.915	933.134
550	0	122.089	-1013.59	1647.42	218.98	-1009.01	1643.9	106.487	-1168.95	1673.91	250.971	-1156.37	1661.23	167.156	-1213.32	1492.79	151.693	-1259.06	1232.57	170.699	-1058.15	1417.01	165.009	-959.019	1213.43	213.889	-1267.57	1289.71	-14.2095	-1123.76	1459.04	-100.516	-1096.88	1238.99	-125.536	-1080.17	1140.97	-142.198	-945.105	1022.88	-99.4082	-881.246	968.555	-160.425	-914.922	952.604	-151.839	-839.748	924.613
551	0	121.753	-1000.75	1649.51	218.432	-996.22	1646.07	106.058	-1156.23	1676.01	250.336	-1143.82	1663.7	167.638	-1200.44	1495.09	153.216	-1246.42	1234.92	170.358	-1045.45	1419.06	164.208	-946.749	1215.29	215.156	-1254.82	1292.22	-14.2434	-1111.99	1460.49	-100.106	-1088.75	1239.37	-124.136	-1072.95	1141.18	-142.601	-942.013	1018.97	-100.305	-879.572	962.388	-161.023	-914.52	947.503	-152.502	-840.429	915.911
552	0	121.27	-988.191	1651.35	217.942	-983.496	1648.26	105.64	-1143.49	1677.74	250.14	-1130.79	1665.94	168.235	-1187.4	1497.03	154.744	-1233.77	1236.78	170.357	-1032.66	1421.23	163.468	-934.415	1217.1	216.528	-1241.95	1294.44	-14.185	-1100.16	1461.83	-99.7283	-1080.88	1239.9	-122.716	-1066.1	1141.09	-142.776	-939.562	1015.12	-101.006	-878.643	956.239	-161.449	-914.701	942.345	-153.223	-841.872	907.474
553	0	120.886	-975.471	1653.22	217.651	-970.695	1650.5	105.366	-1130.81	1679.29	250.044	-1117.81	1668.39	168.652	-1174.6	1498.73	156.105	-1221.01	1238.61	170.04	-1019.86	1423.03	162.834	-922.034	1218.92	217.911	-1229.09	1296.45	-14.2719	-1088.34	1463.08	-99.0492	-1073.11	1240.26	-121.268	-1059.74	1140.86	-142.915	-937.519	1011.21	-101.707	-878.335	949.968	-161.793	-915.494	937.381	-153.864	-844.112	899.238
554	0	120.241	-962.969	1654.87	217.037	-958.047	1652.66	104.824	-1118.46	1680.69	248.883	-1105.71	1669.63	169.052	-1161.65	1500.44	157.327	-1208.37	1240.45	170.053	-1006.93	1424.74	162.438	-909.629	1220.88	219.211	-1216.01	1298.46	-14.2821	-1076.44	1464.14	-98.2291	-1065.31	1240.26	-119.875	-1053.35	1140.63	-142.799	-936.134	1007.2	-102.266	-878.5	944.09	-162.027	-916.879	932.587	-154.476	-846.85	891.3
555	0	119.821	-950.556	1656.37	216.165	-945.562	1654.06	104.385	-1105.98	1681.58	248.446	-1093.3	1671.06	169.65	-1148.64	1501.91	158.695	-1195.47	1241.97	170.024	-993.942	1426.18	162.019	-897.253	1222.4	220.599	-1202.95	1299.99	-14.1832	-1064.6	1464.76	-97.3028	-1057.45	1240	-118.066	-1047.39	1140.25	-142.464	-935.177	1003.18	-102.481	-879.094	937.865	-162.207	-918.598	927.926	-155.059	-850.211	883.638
556	0	119.647	-938.131	1657.67	216.112	-932.821	1655.96	104.315	-1093.76	1682.31	248.27	-1080.73	1672.36	170.259	-1135.6	1502.72	159.951	-1182.67	1242.75	169.992	-980.971	1427.25	161.739	-885.001	1223.54	222.207	-1189.71	1301.3	-14.132	-1052.59	1465.29	-96.0672	-1049.47	1239.58	-116.247	-1041.49	1139.62	-142.241	-934.641	999.299	-103.105	-880.208	931.988	-161.602	-920.857	922.99	-155.431	-854.044	876.125
557	0	118.97	-925.741	1658.85	215.801	-920.105	1657.48	104.121	-1081.43	1682.86	248.692	-1067.47	1673.82	170.71	-1122.14	1503.28	161.213	-1169.7	1243.56	169.9	-967.906	1428.01	161.496	-872.719	1224.24	223.797	-1176.29	1302.48	-13.9231	-1040.48	1465.63	-95.0035	-1041.34	1239.24	-114.43	-1035.75	1138.96	-141.729	-934.276	995.371	-103.207	-881.619	926.174	-161.338	-923.344	918.416	-155.788	-858.259	868.999
558	0	118.518	-913.311	1659.61	215.21	-907.521	1658.53	103.786	-1068.99	1683.09	248.263	-1054.87	1674.53	171.241	-1108.83	1503.98	162.483	-1156.83	1244.46	169.986	-954.696	1428.59	161.338	-860.422	1224.47	225.267	-1162.81	1303.47	-13.7546	-1028.27	1465.55	-93.5832	-1033	1238.48	-112.415	-1030.17	1138.11	-141.029	-934.009	991.391	-103.633	-883.332	920.407	-160.869	-926.111	913.967	-156.147	-862.846	862.061
559	0	118.047	-900.986	1659.86	214.738	-894.819	1659.31	103.666	-1056.8	1682.74	247.644	-1042.43	1674.52	171.762	-1095.52	1503.98	163.626	-1143.93	1244.54	169.877	-941.481	1428.71	161.294	-848.072	1224.27	226.688	-1149.48	1303.84	-13.6022	-1016.03	1464.97	-92.2203	-1024.74	1237.31	-110.186	-1024.79	1136.82	-140.331	-934.133	987.165	-103.796	-885.186	914.667	-160.286	-928.99	909.526	-156.59	-867.723	855.322
560	0	117.519	-888.51	1659.93	214.235	-882.075	1659.67	103.594	-1044.51	1682.16	248.257	-1029.22	1674.98	172.258	-1082.29	1503.54	164.743	-1130.81	1244.44	169.92	-928.223	1428.68	161.297	-835.769	1223.79	228.105	-1136.05	1303.91	-13.5365	-1003.74	1464.2	-90.7216	-1016.47	1235.84	-107.873	-1019.47	1135.39	-139.87	-934.407	983.372	-103.933	-887.176	909.216	-159.23	-932.749	905.125	-156.864	-873.259	849.086
561	0	117.006	-875.943	1659.85	213.862	-869.143	1659.98	103.361	-1031.98	1681.49	247.481	-1016.88	1674.55	172.802	-1068.92	1503.44	165.723	-1117.71	1244.26	169.897	-914.979	1428.45	161.441	-823.572	1223.1	229.34	-1122.74	1303.79	-13.4766	-991.242	1463.25	-89.2345	-1008.11	1234.46	-105.547	-1014.15	1133.99	-138.777	-935.037	979.686	-103.93	-889.655	903.853	-158.112	-936.367	901.275	-157.072	-878.795	843.059
562	0	116.57	-863.211	1659.36	213.118	-856.312	1659.61	103.219	-1019.31	1680.61	247.56	-1003.95	1673.92	173.204	-1055.62	1502.74	166.573	-1104.75	1243.68	169.818	-901.796	1427.67	161.679	-811.311	1221.76	230.535	-1109.4	1303.4	-13.4903	-978.708	1462.02	-87.7941	-999.676	1232.81	-103.088	-1008.61	1132.44	-137.674	-935.579	975.809	-103.812	-892.127	898.314	-156.788	-940.127	897.404	-157.274	-884.526	837.366
563	0	116.454	-850.351	1658.54	212.697	-843.195	1659.1	103.453	-1006.55	1679.39	247.497	-990.571	1673.13	173.69	-1042.13	1501.63	167.313	-1091.91	1242.63	169.83	-888.572	1426.54	161.91	-798.78	1220.05	231.658	-1096.1	1302.62	-13.3891	-966.004	1460.58	-86.0598	-991.251	1230.89	-100.54	-1002.93	1130.76	-136.304	-936.028	972.108	-103.299	-894.31	893.288	-155.299	-943.798	893.935	-157.024	-890.406	831.976
564	0	115.832	-837.32	1657.46	212.387	-829.956	1658.37	103.202	-993.581	1677.92	247.725	-976.938	1672.44	174.014	-1028.74	1500.43	167.815	-1079.1	1241.57	169.987	-875.239	1425.51	162.194	-785.921	1218.25	232.566	-1082.79	1301.63	-13.3082	-953.339	1458.8	-84.529	-982.881	1229.16	-98.0462	-997.108	1129.26	-134.992	-936.615	968.918	-102.99	-896.72	888.664	-153.631	-947.578	890.63	-156.915	-896.354	827.368
565	0	115.229	-824.191	1656.09	211.732	-816.558	1657.21	102.879	-980.621	1676.38	247.196	-963.88	1671.22	174.255	-1015.38	1499.37	168.001	-1066.33	1240.46	169.983	-861.914	1423.87	162.389	-772.508	1216.25	233.12	-1069.76	1300.65	-13.347	-940.459	1456.99	-83.132	-974.478	1227.19	-95.4172	-991.106	1127.79	-133.273	-937.229	965.501	-102.343	-899.815	883.966	-151.779	-951.374	887.814	-156.473	-902.43	822.856
566	0	114.832	-811.009	1654.22	211.253	-803.094	1655.9	102.819	-967.537	1674.29	246.576	-950.532	1669.21	174.483	-1001.97	1497.55	168.014	-1053.91	1239.04	169.974	-848.626	1422.11	162.571	-758.894	1213.88	233.709	-1056.51	1299.28	-13.3149	-927.437	1454.97	-81.6119	-965.964	1225.02	-92.8566	-984.924	1126.19	-131.353	-937.463	962.495	-101.666	-902.098	879.366	-149.481	-955.142	885.184	-155.803	-908.498	818.693
567	0	114.217	-797.635	1652.23	210.898	-789.433	1654.19	102.611	-954.082	1672.37	246.359	-936.864	1667.82	174.645	-988.37	1495.64	167.648	-1041.05	1237.48	170.047	-835.256	1419.98	162.915	-744.966	1211.58	234.005	-1043.57	1297.7	-13.3369	-914.331	1452.91	-80.1603	-957.342	1223.17	-90.1872	-978.436	1124.82	-129.47	-937.565	960.054	-100.947	-903.815	876.288	-147.065	-958.41	883.254	-154.644	-914.123	815.081
568	0	113.868	-784.021	1650.22	210.545	-775.769	1652.37	102.599	-940.599	1670.38	246.608	-922.538	1666.93	174.769	-974.833	1494.06	167.007	-1027.9	1235.87	170.171	-821.773	1418	162.987	-731.092	1209.27	234.019	-1030.43	1296.08	-13.4521	-901.022	1450.86	-78.9024	-948.684	1221.6	-87.7336	-971.675	1123.76	-127.454	-937.339	957.95	-99.7951	-906.229	872.668	-144.592	-961.366	881.809	-153.388	-919.788	812.111
569	0	113.404	-770.473	1647.81	209.945	-762.18	1650.26	102.054	-926.985	1668.14	245.97	-909.06	1664.51	174.699	-961.222	1492.33	166.157	-1014.77	1233.97	170.037	-808.279	1415.57	163.213	-717.286	1206.86	233.798	-1017.22	1294.36	-13.646	-887.569	1449.05	-77.6208	-939.757	1220.19	-85.2952	-964.586	1122.77	-125.501	-936.644	956.18	-98.211	-908.592	869.534	-142.108	-963.87	880.95	-151.761	-925.115	809.737
570	0	112.929	-756.829	1645.09	209.487	-748.338	1647.81	101.874	-913.418	1665.77	245.352	-895.3	1662.56	174.404	-947.432	1490.09	165.277	-1001.32	1232.02	170.016	-794.752	1413.47	163.395	-703.508	1204.3	233.39	-1004	1292.35	-13.9834	-873.878	1446.84	-76.7416	-930.683	1218.74	-82.9656	-957.268	1121.8	-123.695	-935.566	954.787	-97.6569	-909.209	867.784	-139.181	-965.819	880.378	-149.973	-930.028	807.541
571	0	112.573	-743.126	1642.62	209.23	-734.529	1645.49	101.486	-899.525	1663.43	244.988	-881.71	1660.12	173.838	-934.176	1487.6	164.434	-987.901	1230.01	169.896	-781.167	1411.04	163.787	-689.868	1202.15	232.728	-990.749	1290.05	-14.3972	-860.138	1444.78	-76.1851	-921.53	1217.8	-80.8713	-949.552	1120.88	-122.362	-934.053	953.959	-96.6554	-909.816	866.165	-136.909	-966.92	880.309	-147.986	-934.542	805.763
572	0	112.112	-729.247	1640.01	208.866	-720.86	1642.98	100.96	-885.764	1660.97	244.719	-868.02	1658.14	173.118	-920.859	1485.55	163.275	-974.515	1227.7	169.538	-767.509	1408.54	163.994	-676.237	1199.82	231.858	-977.403	1288.04	-15.0745	-846.167	1442.7	-75.1354	-911.822	1216.15	-78.9293	-941.372	1120.16	-120.837	-931.749	953.17	-95.5656	-909.787	864.642	-134.965	-967.454	880.754	-145.81	-938.365	804.307
573	0	111.886	-715.354	1637.51	208.474	-707.037	1640.53	100.288	-871.912	1658.95	244.112	-854.369	1655.71	172.335	-907.949	1483.98	162.256	-960.916	1225.7	169.141	-753.855	1406.27	164.248	-662.564	1197.51	230.947	-963.968	1285.87	-15.7513	-832.172	1440.47	-74.857	-901.539	1215.34	-77.2552	-932.712	1119.52	-119.869	-928.767	952.991	-95.0729	-908.854	863.519	-133.252	-966.9	881.675	-143.563	-941.55	803.201
574	0	111.343	-701.435	1635.24	207.981	-693.284	1638.19	99.596	-857.8	1656.92	243.394	-840.434	1654.06	171.29	-894.468	1481.66	161.241	-947.26	1223.34	168.76	-740.173	1404.06	164.64	-648.868	1195.66	229.854	-950.464	1283.5	-16.3249	-818.044	1438.35	-74.2852	-890.91	1214.25	-75.6972	-923.498	1118.84	-119.124	-925.119	952.815	-94.8201	-906.992	863.13	-131.762	-965.201	882.662	-141.348	-943.779	802.602
575	0	110.641	-687.442	1633.24	207.59	-679.37	1636.15	98.8266	-843.75	1655.12	242.056	-826.581	1651.96	170.228	-880.906	1479.83	160.184	-933.483	1221.19	168.012	-726.4	1402.09	164.607	-635.246	1193.94	228.71	-936.804	1281.51	-17.1925	-803.924	1436.39	-74.4364	-879.656	1213.13	-74.347	-913.799	1118.3	-118.796	-920.397	953.063	-94.8736	-904.287	862.512	-130.939	-962.733	884.222	-139.208	-945.045	802.14
576	0	109.774	-673.493	1631.28	206.684	-665.706	1634.28	97.6058	-829.827	1653.26	241.54	-813.043	1650.52	169.101	-867.067	1478	159.322	-919.389	1219.51	167.374	-712.468	1400.38	164.614	-621.431	1192.37	227.386	-923.335	1279.64	-18.2628	-789.868	1434.34	-74.6852	-867.868	1211.98	-73.6731	-903.286	1117.8	-118.693	-914.732	953.319	-95.4227	-900.587	862.548	-130.422	-959.198	885.661	-137.533	-945.4	802.125
577	0	108.721	-659.638	1629.3	205.609	-651.856	1632.63	96.1701	-815.965	1651.32	240.027	-799.574	1648.75	168.094	-853.329	1476.15	158.663	-905.312	1217.65	166.519	-698.584	1398.58	164.183	-607.538	1190.8	226.305	-909.397	1277.76	-18.9846	-775.801	1432.45	-74.9283	-855.541	1210.56	-73.0403	-892.456	1117.15	-118.937	-908.121	953.649	-95.9949	-895.831	862.53	-130.372	-954.429	887.112	-135.935	-944.117	802.371
578	0	107.424	-645.804	1627.71	204.221	-638.17	1631.07	94.9149	-802.211	1649.64	238.434	-785.604	1647.29	167.112	-839.371	1474.61	158.074	-890.843	1215.8	165.801	-684.567	1397.21	163.554	-593.472	1189.57	225.491	-895.256	1276.14	-19.8744	-761.768	1430.65	-75.1782	-842.897	1209.35	-72.6478	-880.975	1116.49	-119.296	-900.597	954.068	-96.506	-890.216	862.331	-130.578	-948.13	888.849	-134.825	-941.431	802.907
579	0	105.886	-632.046	1626.33	203.124	-624.314	1630.2	93.2895	-788.325	1648.22	237.235	-771.688	1646.59	165.976	-825.554	1473.4	157.517	-876.337	1214.39	164.787	-670.591	1395.93	162.599	-579.1	1188.71	224.616	-881.1	1274.71	-20.8002	-747.838	1429.38	-75.6041	-829.761	1208.17	-72.8511	-868.92	1116	-119.909	-891.954	954.584	-97.0637	-883.362	861.965	-130.965	-940.766	890.473	-133.984	-937.071	803.786
580	0	104.278	-618.329	1624.99	201.361	-610.523	1629.31	91.6291	-774.49	1647.03	235.661	-758.048	1645.97	164.89	-811.406	1472.25	157.218	-861.484	1213.14	163.914	-656.43	1395.22	161.542	-564.553	1188.22	223.825	-866.758	1273.53	-22.0544	-733.766	1428.07	-76.043	-816.367	1206.92	-73.4132	-856.428	1115.59	-120.406	-882.237	954.935	-98	-875.58	862.835	-131.769	-932.414	891.853	-133.837	-931.12	804.739
581	0	102.52	-604.592	1624.16	199.571	-596.785	1628.72	89.8771	-760.875	1645.98	233.451	-744.419	1645.61	163.593	-797.46	1471.18	156.793	-846.715	1211.8	162.936	-642.296	1394.6	160.243	-549.909	1187.83	223.124	-852.339	1272.36	-23.2146	-719.8	1427.07	-76.8637	-802.825	1206.3	-73.9925	-843.711	1115.28	-121.399	-871.764	955.526	-99.3846	-866.048	863.381	-132.642	-922.531	892.84	-134.06	-923.393	805.578
582	0	100.676	-590.892	1623.7	197.735	-583.141	1628.82	87.8587	-747.227	1645.34	232.719	-730.483	1646.17	162.102	-783.656	1470.44	156.246	-831.637	1210.76	161.705	-628.064	1394.43	158.745	-535.315	1188.03	222.071	-837.828	1271.46	-24.5617	-705.624	1426.4	-77.7372	-789.166	1205.52	-74.8411	-830.708	1115.01	-122.36	-860.281	955.811	-99.3973	-855.857	863.17	-133.627	-911.473	893.743	-134.684	-913.995	806.437
583	0	98.9468	-577.218	1623.78	195.877	-569.583	1629.3	85.7568	-733.408	1645.08	229.864	-717.371	1646.03	160.562	-769.469	1470.32	155.671	-816.594	1210.38	160.663	-613.864	1394.81	157.366	-520.412	1188.62	220.904	-823.255	1271.04	-26.0106	-691.304	1425.98	-79.046	-775.153	1205.67	-76.0351	-817.281	1115.12	-123.072	-847.648	955.71	-98.7783	-844.854	862.941	-134.808	-899.43	894.415	-135.748	-902.556	807.12
584	0	97.0601	-563.482	1623.93	194.037	-556.006	1629.91	83.6918	-719.722	1644.93	227.767	-703.838	1646.59	159.074	-755.212	1470.32	154.892	-801.54	1210.17	159.425	-599.498	1395.26	156.122	-505.263	1189.26	219.55	-808.611	1270.84	-27.2422	-676.832	1425.7	-80.0313	-761.275	1205.61	-77.1578	-803.479	1115.27	-124.329	-834.249	956.092	-100.764	-831.027	863.674	-135.99	-885.967	894.904	-137.297	-889.436	807.638
585	0	95.3147	-549.627	1624.69	192.387	-542.319	1631	81.7713	-705.811	1645.15	225.785	-690.247	1647.51	157.648	-741.181	1470.48	153.945	-786.284	1210.34	158.235	-585.161	1396	154.982	-489.962	1190.14	218.06	-793.967	1270.89	-28.4776	-662.147	1425.89	-81.2743	-746.948	1206.19	-78.3297	-789.351	1115.67	-125.645	-819.839	956.562	-101.994	-816.748	863.937	-137.294	-871.516	895.099	-139.301	-874.663	808.169
586	0	93.613	-535.725	1625.79	190.874	-528.626	1632.49	79.5281	-691.919	1645.63	224.14	-676.453	1649.13	156.194	-726.698	1471.17	152.518	-771.409	1210.64	157.23	-570.784	1397.02	154.178	-474.786	1191.33	216.37	-779.369	1271.38	-29.6574	-647.287	1426.31	-82.6176	-732.359	1206.95	-79.7034	-774.677	1116.22	-127.286	-804.503	957.126	-103.414	-801.167	864.17	-138.877	-855.81	895.353	-141.54	-858.375	808.46
587	0	91.9097	-521.859	1626.95	188.825	-515.046	1634.21	77.3708	-678.042	1646.19	221.334	-663.231	1650.06	154.807	-712.361	1472.24	150.988	-756.637	1211.75	156.344	-556.501	1398.24	153.526	-459.79	1192.34	214.752	-764.89	1272.36	-30.745	-632.506	1426.77	-83.9477	-717.446	1207.62	-81.3994	-759.614	1116.68	-128.588	-788.316	956.984	-105.127	-784.4	864.406	-140.741	-839.37	895.322	-143.964	-840.632	808.519
588	0	90.2228	-508.105	1628.25	187.082	-501.249	1636.11	75.3915	-664.37	1646.63	219.363	-649.813	1651.2	153.668	-698.232	1473.19	149.356	-742.556	1212.9	155.613	-542.291	1399.57	153.171	-445.333	1193.29	213.262	-750.589	1273.54	-31.678	-617.888	1427.49	-85.1643	-702.346	1208.26	-82.9946	-743.992	1117.23	-130.39	-771.296	956.963	-107.422	-766.335	864.889	-142.795	-821.711	894.883	-147.024	-821.667	808.356
589	0	88.616	-494.267	1629.58	185.628	-487.393	1638.04	73.7281	-650.503	1647.2	217.42	-636.032	1652.63	152.985	-683.733	1474.39	147.864	-729.018	1214.34	155.034	-528.15	1400.99	152.952	-431.17	1194.34	212.088	-736.391	1275.08	-32.1595	-603.262	1428.49	-86.4315	-686.74	1209.18	-84.7924	-727.944	1117.67	-132.169	-753.402	956.979	-109.254	-747.595	864.789	-144.852	-803.034	894.407	-149.945	-801.276	808.028
590	0	87.1848	-480.507	1630.7	184.012	-473.64	1639.52	72.3429	-636.65	1647.88	216.317	-622.188	1654.61	152.409	-669.226	1475.86	146.494	-715.453	1215.77	154.42	-514.162	1402.13	152.817	-417.291	1195.41	211.082	-722.43	1276.85	-32.8402	-588.77	1429.82	-87.553	-671.001	1209.91	-86.5612	-711.61	1118.37	-134.326	-734.516	957.576	-112.341	-727.266	865.286	-147.135	-783.336	894.008	-153.24	-779.613	808.023
591	0	85.9289	-466.607	1631.81	182.524	-459.832	1640.96	71.2701	-622.904	1648.75	215.291	-608.338	1656.3	151.768	-655.326	1477.47	145.56	-701.944	1217.4	154.047	-500.312	1403.34	152.853	-403.689	1196.52	210.538	-708.807	1278.67	-33.1184	-574.386	1431.25	-88.7576	-654.815	1210.97	-88.4086	-694.901	1118.88	-136.371	-715.043	957.505	-113.829	-706.953	865.159	-149.543	-762.924	893.194	-156.682	-756.975	807.811
592	0	85.2412	-453.023	1632.74	181.936	-445.696	1642.5	70.4843	-608.981	1649.72	215.05	-594.067	1657.89	151.223	-641.431	1478.77	144.663	-688.882	1218.77	153.96	-486.697	1404.5	152.852	-390.334	1197.58	210.286	-695.548	1280.35	-33.4985	-560.185	1432.7	-89.8184	-638.551	1211.19	-90.294	-677.855	1119.09	-138.423	-694.914	957.431	-116.778	-684.743	865.393	-151.873	-741.573	892.038	-159.956	-733.216	807.312
593	0	84.7336	-439.087	1633.9	181.596	-431.699	1643.72	70.2468	-595.175	1651.25	214.071	-580.133	1659.44	150.633	-628.099	1480.37	143.785	-675.702	1220.32	154	-473.312	1405.87	152.993	-377.24	1198.54	209.928	-682.56	1281.92	-33.8329	-546.046	1434.33	-91.0746	-621.975	1211.84	-92.31	-660.607	1119.45	-140.65	-674.104	957.249	-119.019	-662.031	865.243	-154.382	-719.337	890.869	-163.381	-708.573	806.961
594	0	84.6424	-425.142	1634.95	181.489	-417.65	1644.9	69.9451	-581.048	1653.17	214.069	-566.346	1661.14	149.848	-614.823	1482.14	142.973	-662.46	1222	153.926	-460.112	1407.26	153.103	-364.31	1199.48	209.3	-669.862	1283.69	-34.062	-531.868	1435.87	-92.4323	-605.201	1212.81	-94.3027	-643.036	1119.86	-142.589	-652.685	956.812	-121.231	-638.65	865.346	-156.836	-696.377	889.782	-166.507	-682.839	806.561
595	0	85.0276	-411.186	1636.3	181.265	-403.942	1645.45	70.2571	-567.125	1655.27	214.183	-552.32	1662.79	149.326	-601.321	1483.75	141.864	-649.607	1223.72	153.889	-447.058	1408.72	153.258	-351.541	1200.61	208.397	-657.253	1285.48	-34.3716	-517.933	1437.54	-93.6958	-588.324	1213.57	-96.4208	-625.015	1120.15	-144.473	-630.42	956.656	-123.185	-614.444	865.529	-159.149	-672.563	888.591	-169.584	-656.184	806.382
596	0	85.5369	-397.2	1637.84	182.424	-389.754	1646.76	70.7348	-552.892	1657.75	214.816	-538.24	1664.44	148.969	-588.354	1485.7	140.994	-636.514	1225.62	153.903	-434.043	1410.27	153.718	-338.604	1201.96	207.232	-644.662	1287.06	-34.4045	-503.863	1439.46	-94.7636	-571.143	1214.38	-98.3195	-607.02	1120.55	-146.324	-607.786	956.599	-124.262	-590.069	865.486	-161.339	-647.783	887.365	-172.348	-628.715	806.359
597	0	86.3791	-383.205	1639.61	183.537	-375.894	1648.06	71.4993	-538.661	1660.48	215.887	-523.976	1666.56	148.451	-575.159	1487.73	139.875	-623.443	1227.83	154.216	-420.988	1412.22	154.208	-325.658	1203.54	205.901	-632.023	1289.03	-34.6215	-489.777	1441.52	-95.9559	-553.98	1215.67	-100.404	-588.73	1121.16	-148.07	-584.401	956.81	-126.552	-563.821	866.812	-163.486	-622.106	886.497	-174.897	-600.145	806.817
598	0	87.4954	-369.141	1641.5	184.167	-362.393	1649.11	72.0843	-524.811	1663.19	216.249	-510.33	1668.12	147.918	-561.829	1489.95	138.305	-610.764	1229.98	154.391	-408.01	1414.1	154.816	-312.715	1205.34	204.183	-619.438	1291.03	-34.7626	-475.59	1443.63	-97.5217	-536.68	1217.32	-102.615	-570.286	1122.01	-149.739	-560.516	957.274	-127.215	-538.16	867.155	-165.587	-595.918	885.832	-177.121	-570.944	807.5
599	0	88.6433	-355.251	1643.28	185.928	-348.37	1650.87	72.9751	-510.768	1665.88	217.202	-496.688	1669.77	147.673	-548.522	1492.48	136.818	-598.067	1232.4	154.651	-395.02	1415.99	155.428	-299.821	1207.21	202.619	-606.86	1293.14	-34.7412	-461.478	1445.87	-98.4083	-519.263	1218.82	-104.628	-551.513	1123.02	-151.088	-536.096	957.948	-128.84	-510.554	869.636	-167.188	-568.869	885.532	-179.031	-540.895	809.007
600	0	90.0883	-341.316	1645.52	186.831	-335.239	1651.82	74.1828	-496.64	1668.79	218.381	-483.056	1671.59	147.253	-535.111	1494.66	135.284	-585.327	1234.81	155.154	-381.998	1418.11	156.173	-286.88	1209.32	201.085	-594.269	1295.33	-34.7327	-447.35	1448.53	-99.5358	-501.949	1220.94	-106.619	-532.796	1124.41	-152.465	-511.286	959.425	-129.487	-483.074	871.999	-168.752	-541.22	885.913	-180.467	-510.044	810.928
601	0	91.398	-327.501	1647.78	188.166	-321.701	1653.19	75.3422	-482.738	1671.59	219.814	-469.55	1673.49	146.999	-521.816	1496.87	133.806	-572.562	1237.27	155.404	-368.983	1419.95	156.731	-274.034	1211.56	199.548	-581.724	1297.42	-34.5878	-433.013	1451.29	-100.979	-484.619	1223.63	-108.615	-513.945	1126.12	-153.374	-485.851	961.532	-129.821	-455.245	875.067	-170.284	-513.014	886.819	-181.507	-478.577	813.483
602	0	93.2073	-313.676	1649.92	189.306	-308.346	1654.38	76.4509	-468.815	1674.1	220.98	-455.999	1674.82	146.877	-508.152	1499.06	132.425	-559.676	1239.45	155.741	-355.779	1421.59	157.327	-261.185	1213.36	198.202	-569	1299.51	-34.3069	-418.664	1454.04	-101.771	-467.251	1225.9	-110.591	-495.044	1128.08	-154.271	-460.236	963.948	-130.098	-426.957	878.688	-171.502	-484.166	888.415	-182.335	-446.589	816.763
603	0	94.3303	-299.926	1651.82	190.593	-294.935	1655.38	77.5379	-454.956	1676.37	222.1	-442.58	1675.89	146.704	-494.822	1500.89	131.203	-546.728	1241.42	156.137	-342.554	1423.06	157.897	-248.389	1215.2	196.959	-556.134	1301.21	-34.1452	-404.396	1456.68	-102.92	-450.12	1228.52	-112.674	-476.244	1130.06	-155.214	-434.385	966.706	-129.387	-398.403	882.35	-172.566	-454.997	890.254	-182.592	-414.22	820.514
604	0	95.5974	-286.207	1653.61	192.728	-281.17	1657.17	78.4997	-441.123	1678.31	223.136	-429.322	1676.84	146.49	-481.405	1502.4	130.077	-533.765	1243.24	156.602	-329.348	1424.4	158.366	-235.823	1216.98	195.875	-543.179	1302.73	-33.9128	-389.981	1459.18	-104.126	-432.953	1231	-114.836	-457.43	1132.08	-155.813	-408.46	969.539	-128.818	-369.633	887.203	-173.62	-425.61	892.539	-182.674	-381.66	824.842
605	0	96.851	-272.528	1655.22	193.473	-268.058	1657.92	79.3667	-427.573	1679.89	223.958	-416.063	1677.4	146.355	-468.024	1503.93	128.936	-520.806	1244.74	156.748	-316.057	1425.42	158.437	-223.613	1217.9	194.639	-530.244	1304.21	-33.7429	-375.537	1461.48	-105.266	-415.847	1233.28	-117.152	-438.485	1133.96	-156.476	-382.226	972.767	-128.392	-340.946	892.085	-174.344	-395.994	895.316	-182.411	-348.895	829.846
606	0	98.0374	-258.875	1656.47	194.381	-254.828	1658.42	80.2536	-414.085	1681.01	224.786	-402.74	1677.69	146.181	-454.323	1504.73	128.155	-507.808	1246.03	157.161	-302.718	1426.01	158.61	-211.343	1218.46	193.701	-517.191	1305.21	-33.3496	-361.081	1463.33	-106.358	-398.817	1235.23	-119.321	-419.437	1135.63	-157.271	-356.096	975.978	-127.789	-312.021	897.443	-174.817	-366.181	898.095	-181.775	-316.024	834.749
607	0	99.0526	-245.197	1657.53	195.485	-241.324	1658.76	81.3256	-400.256	1681.95	225.828	-389.316	1677.89	146.117	-440.599	1505.29	127.486	-494.776	1246.86	157.364	-289.324	1426.24	158.914	-198.987	1218.76	193.032	-504.028	1305.87	-32.8731	-346.647	1464.76	-107.657	-381.713	1236.98	-121.454	-400.66	1136.86	-157.626	-329.854	979.462	-127.049	-283.308	902.779	-175.147	-336.265	900.989	-180.908	-283.188	839.94
608	0	99.9796	-231.474	1658.27	196.655	-227.671	1659.21	82.0655	-386.527	1682.5	226.982	-375.657	1678.1	146.083	-426.872	1505.93	126.772	-481.703	1247.64	157.68	-275.919	1426.35	158.931	-186.713	1218.63	192.253	-490.84	1306.55	-32.5521	-332.208	1465.96	-108.822	-364.606	1238.48	-123.68	-381.673	1137.91	-158.337	-303.754	983.077	-126.313	-254.793	908.013	-175.499	-306.493	904.252	-179.807	-250.411	845.722
609	0	100.787	-217.641	1658.54	197.229	-214.201	1658.87	82.52	-372.885	1682.54	227.257	-362.279	1677.32	146.037	-413.102	1506.11	126.026	-468.65	1247.97	157.864	-262.396	1426.07	159.123	-174.318	1218.25	191.512	-477.481	1306.71	-32.0128	-317.946	1466.54	-110.172	-347.627	1239.38	-125.979	-362.575	1138.49	-158.78	-277.703	986.221	-125.809	-225.728	914.201	-175.565	-276.559	907.543	-178.558	-217.828	851.541
610	0	101.476	-203.833	1658.33	197.973	-200.502	1658.56	83.0882	-359.038	1682.15	227.631	-348.928	1676.27	146.112	-399.355	1505.7	125.295	-455.571	1248.01	158.072	-248.847	1425.42	159.137	-161.819	1217.34	190.847	-464.288	1306.42	-31.8946	-303.811	1466.45	-111.484	-330.737	1239.73	-128.217	-342.994	1139.17	-159.192	-251.696	989.32	-124.662	-197.477	919.685	-175.634	-247.036	910.676	-177.171	-185.517	857.544
611	0	102.016	-189.988	1658.01	198.856	-186.599	1658.13	83.7749	-344.99	1681.55	228.204	-335.04	1675.41	146.164	-385.446	1505.01	124.745	-442.537	1247.64	158.121	-235.271	1424.53	159.234	-149.226	1216.31	190.26	-451.022	1305.94	-31.5775	-289.683	1466.19	-112.964	-313.71	1239.91	-130.542	-323.407	1138.85	-159.448	-225.862	992.376	-123.923	-169.288	925.55	-175.388	-217.359	913.981	-175.668	-153.498	863.766
612	0	102.608	-175.843	1657.22	199.528	-172.504	1657.05	83.967	-331.083	1680.63	228.543	-320.917	1674.31	146.223	-371.607	1504.18	124.273	-429.599	1247.08	158.165	-221.71	1423.26	159.07	-136.458	1214.55	189.605	-437.761	1305.28	-31.3185	-275.786	1465.58	-114.173	-296.523	1239.6	-132.73	-303.792	1137.97	-159.737	-199.934	995.609	-122.779	-141.317	931.102	-175.265	-187.992	917.57	-173.96	-121.857	870.255
613	0	102.999	-161.663	1655.92	199.71	-158.495	1655.4	84.4517	-316.896	1679.53	229.343	-306.998	1673.01	146.564	-357.673	1503.18	124.203	-416.618	1246.17	158.184	-208.082	1421.7	158.93	-123.444	1212.47	189.319	-424.412	1304.26	-30.9628	-261.795	1464.46	-115.377	-279.381	1238.86	-134.72	-283.899	1137.24	-159.647	-174.118	998.414	-121.491	-113.816	936.574	-174.893	-158.71	921.133	-172.076	-90.5413	876.824
614	0	103.259	-147.407	1654.22	200.173	-144.253	1653.61	84.9406	-302.461	1678.2	229.41	-292.672	1671.26	146.862	-343.951	1501.6	124.713	-403.555	1245.07	158.215	-194.44	1419.89	158.66	-110.088	1210.25	189.453	-411.046	1303.06	-30.6934	-248.092	1463.13	-116.297	-261.908	1237.96	-136.529	-263.837	1136.27	-159.437	-148.428	1001.44	-120.029	-86.5996	942.363	-174.624	-130.083	924.837	-170.055	-59.6453	883.678
615	0	103.527	-133.076	1652.24	200.315	-129.897	1651.52	85.0825	-288.068	1676.6	229.61	-278.391	1669.56	147.23	-330.266	1500.39	125.455	-390.583	1243.79	158.139	-180.914	1417.9	158.535	-96.4163	1207.83	189.727	-397.73	1301.64	-30.2738	-234.347	1461.55	-117.264	-244.591	1237.2	-138.447	-243.716	1135.55	-159.137	-123.211	1004.54	-118.3	-59.9897	947.754	-174.054	-101.742	928.814	-167.975	-29.633	890.789
616	0	103.963	-118.755	1649.9	200.254	-115.609	1648.99	85.1305	-273.684	1674.77	229.831	-263.86	1667.63	147.716	-316.605	1498.95	126.332	-377.469	1242.42	158.028	-167.303	1415.73	158.326	-82.4691	1205.38	190.109	-384.547	1300.14	-29.8958	-220.89	1459.7	-117.915	-227.219	1236.34	-140.267	-223.609	1134.86	-158.734	-98.2506	1007.69	-116.748	-33.9782	953.357	-173.302	-73.7171	933.212	-165.815	-0.373168	898.07
617	0	103.818	-104.423	1647.25	200.35	-101.102	1646.44	85.417	-259.343	1672.8	229.839	-249.306	1665.46	148.423	-302.759	1497.19	127.523	-364.376	1240.77	158.276	-153.7	1413.5	158.084	-68.4214	1202.8	190.998	-371.22	1298.53	-29.2255	-207.435	1457.69	-118.241	-209.629	1235.64	-141.703	-203.394	1134.41	-157.819	-73.716	1011.13	-114.742	-8.49257	959.12	-172.281	-46.3685	937.669	-163.555	28.1659	905.366
618	0	103.742	-90.1449	1644.46	200.381	-86.7387	1643.76	85.8698	-244.924	1670.87	230.463	-234.81	1663.91	149.206	-289.186	1495.05	129.046	-351.095	1238.9	158.41	-140.054	1411.16	157.707	-54.326	1200.41	192.291	-357.797	1296.76	-28.5962	-194.183	1456.06	-118.362	-192.058	1234.81	-142.948	-183.672	1134.1	-157.053	-49.7648	1014.91	-112.808	16.2386	964.942	-170.926	-19.6335	942.817	-160.999	55.9549	913.229
619	0	104.056	-75.9799	1641.66	200.618	-72.2555	1641.46	86.1602	-230.574	1668.93	230.947	-219.989	1662.3	150.07	-275.569	1493.44	130.642	-337.814	1237.05	158.638	-126.428	1408.96	157.569	-40.3114	1198.31	193.687	-344.238	1295.07	-27.8187	-180.784	1454.41	-118.464	-174.698	1234.38	-143.873	-164.22	1134.01	-156.045	-26.4934	1019.07	-110.894	40.2617	971.005	-170.029	6.41046	948.218	-158.652	82.6338	921.452
620	0	103.871	-61.9554	1638.85	200.458	-58.123	1638.66	86.4069	-216.437	1666.7	231.145	-205.919	1660.54	150.903	-261.875	1491.4	132.344	-324.296	1235.03	159.092	-112.736	1406.71	157.312	-26.3231	1195.98	195.106	-330.604	1293.09	-27.0383	-167.549	1452.81	-118.022	-157.44	1233.77	-144.69	-145.268	1134.09	-155.08	-4.03247	1023.38	-108.876	63.4937	977.089	-168.995	31.5725	953.896	-156.254	108.411	929.702
621	0	104.294	-48.0877	1636.11	200.625	-43.9724	1636.05	86.881	-202.507	1664.42	231.499	-191.455	1658.38	151.952	-248.284	1489.18	134.179	-310.518	1232.95	159.697	-98.9934	1404.52	157.249	-12.4899	1193.93	196.723	-316.826	1290.82	-26.2245	-154.224	1451.2	-117.707	-140.78	1233.13	-145.144	-126.889	1134	-153.802	17.7039	1027.61	-106.925	85.8109	983.313	-167.841	55.717	959.822	-153.904	133.01	937.776
622	0	104.201	-34.3949	1633.5	200.992	-29.9122	1633.92	87.6293	-188.583	1662.36	232.486	-177.38	1656.87	153.041	-234.939	1487.13	135.784	-296.633	1230.66	160.561	-85.1934	1402.64	157.214	1.42976	1192.22	198.332	-303.048	1288.65	-25.1526	-140.943	1449.9	-116.868	-124.543	1232.52	-145.547	-109.319	1134.08	-152.697	38.4215	1032.07	-105.096	107.256	989.507	-166.681	78.7524	965.669	-151.73	156.596	946.19
623	0	104.855	-20.8282	1631.26	201.482	-16.0909	1631.79	88.5189	-174.949	1660.41	233.345	-163.438	1655.21	154.304	-221.393	1485.11	137.166	-282.391	1228.54	161.373	-71.3662	1400.76	157.459	15.3886	1190.71	199.793	-289.096	1286.59	-23.8658	-127.507	1448.74	-115.947	-108.757	1231.61	-145.244	-92.3908	1134.15	-151.499	58.3139	1036.38	-103.305	127.672	995.636	-165.465	100.91	971.507	-149.76	179.178	954.542
624	0	105.619	-7.30787	1629.28	202.161	-2.35255	1629.78	89.5349	-161.589	1658.46	234.392	-149.495	1653.31	155.708	-207.701	1483.13	138.459	-268.028	1226.34	162.418	-57.4763	1399.03	157.627	29.4648	1189.12	201.301	-274.941	1284.53	-22.5738	-113.93	1447.51	-115.017	-93.6769	1230.93	-145.185	-76.1022	1133.99	-150.289	77.3083	1040.47	-101.692	147.336	1001.39	-164.342	121.968	977.314	-147.752	200.586	962.602
625	0	106.631	6.02855	1627.6	203.135	11.1431	1628.21	91.1097	-148.166	1656.77	235.592	-135.949	1651.46	157.157	-194.013	1481.19	139.666	-253.376	1224.39	163.473	-43.5037	1397.45	158.452	43.6979	1188.04	202.66	-260.673	1282.28	-21.2171	-100.343	1446.7	-113.966	-79.1344	1230.22	-144.476	-60.4928	1133.83	-149.122	95.5622	1044.45	-100.119	166.113	1006.98	-163.145	141.944	982.786	-146.129	220.822	970.28
626	0	107.999	19.2483	1626.54	204.549	24.6235	1627.19	92.6819	-135.145	1655.15	237.417	-122.56	1650.17	158.517	-180.201	1479.26	140.467	-238.827	1222.48	164.697	-29.4962	1396.26	159.108	57.983	1187.07	203.786	-246.277	1280.3	-19.7957	-86.5999	1446.06	-113.013	-64.9699	1229.49	-143.926	-45.417	1133.66	-147.986	113.003	1048.15	-98.9659	183.991	1012.24	-162.155	160.87	987.873	-144.742	240.04	977.786
627	0	109.472	32.5093	1625.8	206.056	38.0448	1626.43	94.1885	-122.132	1653.85	238.908	-109.351	1648.82	160.069	-166.551	1477.87	141.234	-224.154	1220.81	165.889	-15.4406	1395.3	160.138	72.3465	1186.34	204.745	-231.885	1278.51	-18.4237	-72.9521	1445.32	-112.037	-51.2531	1228.97	-143.261	-30.5977	1133.6	-147.057	129.55	1051.37	-97.5576	201.142	1017.15	-161.204	178.659	992.094	-143.717	258.286	984.785
628	0	111.447	45.715	1625.6	207.906	51.4052	1626.12	96.3546	-109.037	1653.01	240.653	-96.026	1647.47	161.767	-152.999	1476.58	142.036	-209.434	1219.32	167.147	-1.34855	1394.6	161.304	86.9708	1185.83	205.809	-217.329	1276.98	-16.9586	-59.1964	1444.88	-110.922	-37.8098	1228.48	-142.432	-16.3059	1133.22	-145.979	145.322	1054.12	-96.6369	217.552	1021.36	-160.046	195.617	996.162	-142.725	275.384	990.904
629	0	113.168	58.9593	1625.85	209.935	64.8141	1626.34	98.771	-95.9112	1652.65	243.068	-82.5414	1647.14	163.618	-139.058	1475.83	142.939	-194.677	1218.29	168.768	12.7895	1394.47	162.735	101.84	1185.93	207.027	-202.73	1275.82	-15.5229	-45.2548	1444.81	-109.885	-24.6586	1228.58	-141.279	-2.46336	1132.9	-144.956	160.403	1056.39	-95.8704	233.086	1024.84	-158.961	211.449	999.028	-142.328	291.483	996.563
630	0	115.277	72.3832	1626.73	212.007	78.327	1626.94	101.31	-82.6212	1652.93	245.754	-69.0727	1647.43	165.421	-124.877	1475.84	143.801	-180.036	1218.13	170.034	26.7953	1394.81	164.236	116.957	1186.35	208.174	-188.15	1275.34	-13.9077	-31.2647	1445.05	-108.931	-11.6676	1228.97	-140.143	11.5177	1133.31	-143.956	174.76	1058.06	-95.1589	247.785	1027.53	-157.81	226.347	1001.23	-142.11	306.431	1001.37
631	0	117.662	85.8496	1628.04	214.183	91.9543	1627.77	104.023	-69.3228	1653.71	248.456	-55.4837	1647.5	167.269	-110.771	1476.61	144.664	-165.39	1218.55	171.539	40.9416	1395.53	165.683	132.129	1187.12	209.314	-173.572	1275.42	-12.3941	-17.2558	1445.73	-107.721	1.12667	1229.36	-138.79	24.9461	1133.71	-143.073	188.455	1058.84	-94.5147	261.711	1029.23	-157.173	240.312	1002.42	-142.052	320.263	1005.02
632	0	120.127	99.4037	1629.64	216.822	105.626	1629.07	106.974	-55.8356	1655.05	250.747	-41.7287	1647.78	168.92	-96.7555	1477.39	145.524	-150.975	1219.6	173.083	55.0054	1396.66	167.239	147.577	1188.67	210.448	-159.129	1276.2	-11.0722	-3.26923	1446.92	-106.912	13.8328	1230.67	-137.121	37.9529	1134.31	-142.162	201.242	1059.22	-93.9366	274.771	1030.04	-155.912	253.108	1002.82	-142.2	332.893	1007.62
633	0	122.687	113.055	1631.78	219.253	119.348	1630.44	109.638	-42.4774	1656.95	253.607	-27.945	1648.71	170.507	-82.9108	1479.12	146.18	-136.82	1221.09	174.382	69.0057	1398.36	168.562	163.012	1190.43	211.452	-144.878	1277.45	-9.69884	10.9008	1448.68	-105.384	26.7158	1231.84	-135.785	50.7663	1135.51	-141.219	213.528	1059.25	-93.1127	287.066	1030.22	-154.965	264.997	1002.36	-142.724	344.418	1009.29
634	0	125.195	126.748	1633.93	221.71	133.089	1631.59	112.155	-28.8573	1659.24	256.418	-14.1815	1649.73	171.897	-68.9995	1480.91	146.906	-122.883	1223.35	175.664	82.896	1400.12	169.769	178.056	1192.43	212.435	-130.809	1279.35	-8.38373	24.9256	1450.73	-104.18	39.7863	1233.84	-134.048	63.3942	1137.4	-140.017	225.233	1058.94	-92.362	298.534	1029.47	-153.91	275.97	1001.54	-142.859	355.061	1009.96
635	0	127.734	140.571	1635.94	224.121	146.843	1632.69	114.779	-15.1477	1661.74	258.821	-0.20939	1650.44	173.523	-55.1373	1482.95	147.775	-109.14	1225.7	176.746	96.6693	1401.94	170.747	192.374	1194.5	213.527	-116.749	1281.26	-6.86863	38.7571	1453.04	-102.595	53.1461	1236.03	-132.341	75.7937	1139.46	-138.863	236.233	1058.49	-91.4524	309.208	1027.99	-152.739	286.099	1000.2	-143.015	364.823	1009.39
636	0	129.93	154.427	1637.9	226.222	160.473	1633.64	117.442	-1.2674	1664.4	261.251	13.5856	1651.73	175.046	-41.4649	1485.06	148.864	-95.5616	1227.7	177.687	110.189	1403.96	171.609	206.092	1196.93	214.854	-102.662	1283.13	-5.4373	52.1846	1455.86	-101.08	66.6243	1238.53	-130.775	87.7141	1141.79	-137.516	246.844	1058.22	-90.7512	319.205	1026.19	-151.792	295.574	999.122	-142.918	373.832	1007.83
637	0	131.723	167.897	1639.79	227.934	174.035	1634.73	119.356	12.3106	1666.95	263.089	27.3717	1653.13	176.497	-28.1333	1486.84	150.019	-82.1852	1229.64	178.414	123.525	1406.16	172.17	219.422	1199.56	216.213	-88.7871	1285.03	-3.92259	64.908	1458.6	-99.7239	80.0543	1241.36	-129.542	99.3536	1144.51	-136.485	256.82	1057.99	-89.8115	328.892	1024.53	-151.047	304.313	997.657	-142.883	382.43	1005.39
638	0	133.044	181.346	1641.48	229.406	187.622	1636.04	120.92	25.651	1669.33	264.701	40.9414	1654.64	178.014	-15.3577	1488.83	151.36	-68.8263	1231.57	178.781	136.696	1408.05	172.687	232.339	1202.26	217.844	-74.9803	1286.81	-2.8033	77.2617	1461.01	-97.7699	93.5478	1243.46	-128.207	110.703	1146.89	-135.458	266.24	1057.49	-89.1906	337.989	1022.39	-150.392	312.489	996.251	-142.653	390.704	1001.62
639	0	133.967	194.525	1643.14	230.404	200.99	1637.5	122.348	38.9555	1671.56	266.303	54.3457	1656.56	179.566	-2.42971	1490.56	153.091	-55.7623	1233.3	179.153	149.827	1409.95	172.757	245.059	1204.81	219.891	-61.3959	1288.38	-1.62965	88.7765	1463.39	-95.9158	106.651	1245.81	-126.829	121.653	1149.26	-134.691	275.392	1056.77	-88.6625	346.497	1019.66	-149.649	320.103	994.136	-142.308	398.749	996.898
640	0	134.737	207.59	1645.21	231.181	214.295	1639.34	123.604	52.1539	1673.86	267.273	67.9773	1658.48	180.96	9.84834	1492.14	154.997	-42.88	1234.88	179.634	162.958	1412.04	172.51	257.529	1207.2	222.015	-47.8289	1290.02	-0.846046	100.457	1465.68	-94.1274	119.193	1247.78	-125.346	132.102	1151	-134.068	283.971	1055.89	-88.3882	354.61	1016.95	-149.699	327.379	992.314	-141.753	406.159	991.438
641	0	134.928	220.52	1647.33	231.545	227.547	1641.47	124.4	65.1545	1676.07	268.051	81.2896	1660.87	182.402	23.2898	1494.46	156.895	-29.9893	1236.79	179.689	175.929	1414.17	172.137	269.821	1209.57	224.097	-34.3507	1292.1	-0.296784	111.789	1467.92	-92.5981	131.015	1249.5	-123.941	142.236	1152.8	-133.723	291.961	1054.55	-88.5233	362.297	1013.91	-149.559	334.161	990.179	-141.36	413.103	985.412
642	0	135.234	233.351	1649.43	231.715	240.631	1643.67	124.807	77.8193	1678.2	268.54	94.3683	1662.91	183.655	36.0646	1496.43	159.109	-17.2302	1238.78	179.914	188.742	1416.21	171.359	281.946	1211.42	226.178	-21.2367	1294.11	0.180443	123.003	1469.62	-91.0731	142.263	1251.08	-122.831	151.789	1154.34	-133.625	299.607	1052.59	-88.8076	369.16	1010.42	-149.708	340.257	987.453	-140.943	419.269	978.329
643	0	135.369	246.128	1651.65	231.727	253.483	1645.9	125.066	90.5134	1680.1	268.737	107.379	1664.73	184.687	48.9998	1498.43	161.266	-4.46086	1240.72	180.065	201.7	1418.23	170.533	294.015	1213.32	228.038	-7.84428	1296.08	0.32526	134.451	1471.41	-90.2321	152.517	1252.09	-121.368	160.786	1155.17	-133.473	306.68	1050.46	-88.7993	375.665	1006.71	-149.879	345.846	984.745	-140.296	424.859	970.901
644	0	135.308	258.869	1654.22	231.936	266.337	1648.69	125.32	103.197	1682.14	268.917	120.104	1667.11	185.533	62.7324	1500.9	163.16	8.2382	1242.73	180.127	214.571	1420.45	169.433	306.264	1214.96	229.99	5.21086	1298.4	0.236149	145.761	1473.01	-89.5598	162.327	1253.11	-120.103	169.501	1155.84	-133.639	313.093	1048.13	-89.087	381.471	1002.62	-150.016	350.854	981.406	-139.797	429.234	963.179
645	0	135.215	271.447	1656.69	231.762	279.181	1651.32	125.121	115.787	1684.26	268.661	132.833	1669.41	186.104	75.6444	1503.24	165.006	20.7998	1244.92	179.861	227.297	1422.57	168.103	318.762	1216.7	231.663	18.336	1300.96	0.060848	157.414	1474.6	-89.3093	171.478	1253.87	-118.845	177.736	1156.23	-133.727	319.092	1045.45	-89.55	386.693	998.306	-150.3	355.12	977.67	-139.498	432.912	955.422
646	0	135.311	284.404	1659.32	231.628	291.81	1653.98	125.03	128.563	1686.26	268.942	145.427	1671.98	186.677	88.3885	1505.41	166.634	33.5112	1247.29	179.712	240.207	1424.77	166.993	331.577	1218.57	233.272	31.3098	1303.48	-0.064646	169.182	1476.02	-89.0903	180.03	1254.57	-117.325	185.824	1156.36	-133.844	324.573	1042.5	-89.8254	391.275	993.896	-150.138	358.658	973.467	-139.138	435.6	947.653
647	0	135.266	297.163	1661.78	231.68	304.695	1656.68	125.001	141.371	1688.37	269.096	158.228	1674.72	187.114	101.594	1507.83	168.27	45.9929	1249.54	179.604	252.878	1427.05	165.465	344.024	1219.94	234.637	44.1423	1306.11	-0.213813	181.087	1477.56	-88.6302	188.097	1255.35	-115.788	193.629	1156.54	-133.682	329.364	1039.41	-90.1229	395.172	989.08	-150.087	361.615	969.365	-138.718	437.393	939.94
648	0	134.958	309.821	1663.86	231.576	317.354	1659.06	124.728	154.132	1690.4	268.625	170.928	1676.86	187.327	114.491	1510.01	169.538	58.6496	1252.04	179.341	265.579	1429.19	164.55	357.229	1221.75	235.798	57.0571	1308.67	-0.37575	193.064	1478.9	-88.5756	195.519	1256.25	-114.387	201.245	1156.84	-133.65	333.628	1036.11	-90.4916	398.473	983.911	-149.836	363.575	964.799	-138.864	438.208	932.46
649	0	134.847	322.683	1665.71	231.43	330.189	1661.17	124.344	166.931	1692	268.152	183.654	1678.65	187.535	127.029	1512.19	170.742	71.1468	1254.14	179.057	278.377	1430.95	163.676	370.034	1223.43	236.86	69.8059	1310.81	-0.557125	204.989	1479.87	-87.9838	202.958	1256.38	-112.995	208.62	1156.93	-133.269	337.321	1032.36	-90.4647	401.322	978.313	-149.638	364.752	960.258	-138.969	438.251	924.665
650	0	134.736	335.579	1667.11	231.221	342.94	1662.86	124.012	179.694	1693.67	268.157	196.344	1680.72	187.754	140.079	1513.81	171.89	83.8934	1255.78	178.739	291.032	1432.74	162.653	382.493	1224.8	237.943	82.8349	1312.93	-0.616911	216.911	1480.83	-87.1219	210.566	1256.73	-111.271	215.762	1156.96	-132.911	340.589	1028.62	-90.5941	403.318	972.694	-148.995	365.533	955.351	-138.924	437.669	917.112
651	0	134.512	348.246	1668.59	230.995	355.814	1664.45	124.014	192.52	1695.19	267.98	209.3	1682.64	187.988	152.813	1515.54	173.084	96.4543	1257.49	178.505	303.733	1434.35	162.121	394.912	1226.28	239.256	95.7187	1314.86	-0.6379	228.724	1481.76	-86.2332	218.272	1257.39	-109.499	222.849	1156.93	-132.334	343.313	1024.91	-90.6419	404.747	967.002	-148.548	365.483	950.43	-139.165	436.562	910.096
652	0	134.073	361.063	1669.74	230.844	368.691	1665.75	124.003	205.477	1696.62	268.085	222.162	1684.26	188.196	165.291	1516.91	173.971	109.204	1258.98	178.209	316.471	1435.72	161.268	406.687	1227.33	240.193	108.768	1316.43	-0.681081	240.585	1482.47	-85.309	226.192	1257.56	-107.628	229.767	1156.9	-131.533	345.706	1021.13	-90.8022	405.557	961.154	-147.358	364.843	945.5	-139.348	434.79	902.945
653	0	133.692	373.812	1670.41	230.216	381.671	1666.54	123.71	218.175	1697.68	267.827	235.374	1685.45	188.424	178.072	1518	175.029	121.858	1260.08	178.027	329.125	1436.85	161.105	419.185	1228.44	241.309	121.687	1317.91	-0.817427	252.404	1482.91	-84.1677	234.435	1257.57	-105.707	236.652	1156.66	-130.653	347.705	1017.19	-90.5752	406.102	955.276	-146.556	363.934	940.74	-139.548	432.736	896.086
654	0	133.336	386.681	1671.08	229.714	394.631	1667.31	123.711	230.903	1698.35	267.534	248.6	1686.27	188.529	190.423	1518.61	175.744	134.528	1260.61	177.808	341.661	1437.64	160.803	431.153	1229.46	242.343	134.673	1318.68	-1.03491	264.295	1483.25	-83.0547	243.013	1257.29	-103.63	243.422	1156.14	-129.447	349.291	1013.1	-90.3204	406.114	949.42	-145.421	362.439	936.066	-139.711	429.84	889.505
655	0	132.641	399.307	1671.46	229.069	407.692	1667.83	123.624	243.708	1698.75	267.644	261.662	1687.02	188.553	203.195	1518.91	176.463	147.085	1260.96	177.721	354.453	1438.3	160.569	443.45	1230.25	243.139	147.556	1319.32	-1.18672	276.176	1483.11	-81.9444	252.02	1256.85	-101.624	250.138	1155.59	-128.562	350.625	1009.44	-90.0815	405.821	943.659	-144.354	360.877	931.543	-139.878	426.783	883.113
656	0	131.853	411.941	1671.37	228.362	420.873	1667.99	123.436	256.369	1698.66	267.003	275.14	1686.98	188.121	215.371	1518.72	177.031	159.788	1261.24	177.737	367.239	1438.42	160.608	455.893	1230.55	243.896	160.427	1319.8	-1.52332	288.319	1482.88	-80.7294	261.397	1256.19	-99.5694	257.031	1154.93	-127.607	352.114	1005.29	-89.8431	405.273	937.819	-143.387	359.094	927.284	-140.19	423.466	876.644
657	0	131.213	424.822	1670.95	227.788	434.099	1667.85	123.351	269.057	1698.44	267.167	288.286	1687.06	188.896	229.399	1519.05	177.725	172.416	1260.98	177.711	380.005	1438.18	160.63	468.562	1230.41	244.656	173.39	1319.73	-1.53758	300.434	1482.12	-79.6304	271.009	1255.13	-97.4674	263.798	1154.01	-126.332	353.109	1001.57	-89.5342	404.702	932.054	-141.835	357.213	923.117	-139.93	419.997	870.494
658	0	130.705	437.66	1670.47	226.944	447.229	1667.46	123.271	281.908	1697.79	267.013	301.824	1686.64	188.998	242.329	1518.35	178.128	185.143	1260.41	177.678	392.735	1437.65	160.738	480.812	1229.85	245.227	186.024	1319.35	-1.73104	312.815	1481.18	-78.2846	281.096	1253.86	-95.075	270.687	1152.93	-125.243	354.229	997.792	-89.0937	404.035	926.759	-141.161	355.218	918.976	-139.867	416.188	864.247
659	0	129.746	450.531	1669.82	226.221	460.395	1666.97	123.082	294.804	1696.89	267.007	315.057	1686.57	189.088	255.186	1517.91	178.51	197.712	1259.88	177.594	405.574	1437.01	160.836	493.052	1229.16	245.551	198.896	1318.86	-2.01684	325.107	1480.12	-77.0202	290.769	1252.39	-92.7067	277.707	1151.7	-123.957	355.15	994.234	-88.6408	403.266	921.304	-139.647	353.178	915.255	-139.911	412.309	858.621
660	0	129.02	463.403	1668.69	225.497	473.637	1666.1	122.495	307.639	1695.53	266.291	328.072	1685.39	188.872	268.549	1517.25	178.628	210.391	1258.81	177.577	418.506	1435.87	160.775	505.424	1227.75	245.774	211.529	1318	-2.28285	337.861	1478.39	-75.8048	300.705	1250.7	-90.3909	284.695	1150.34	-122.635	355.907	990.664	-88.6225	402.434	915.838	-138.858	351.116	911.854	-139.634	408.188	852.756
661	0	128.335	476.422	1667.37	224.725	486.914	1665.01	122.283	320.644	1694.04	265.367	341.753	1683.73	188.601	281.775	1515.62	178.78	223.075	1257.39	177.641	431.559	1434.44	161.281	517.527	1225.82	245.828	224.386	1316.67	-2.47568	350.554	1476.55	-74.6499	310.531	1248.62	-87.8602	291.778	1148.85	-121.488	357.125	987.182	-88.1149	401.653	910.798	-137.392	349.303	908.658	-139.305	404.018	847.165
662	0	127.57	489.526	1665.86	223.915	500.097	1663.78	121.677	333.586	1692.25	265.284	354.948	1682.89	188.463	294.608	1514.02	178.426	235.857	1255.93	177.68	444.628	1432.89	161.729	530.09	1224.05	245.713	237.025	1315.18	-2.96856	363.712	1474.84	-73.4316	319.989	1246.41	-85.402	299.007	1147.09	-120.259	358.296	984.06	-88.0626	400.757	906.249	-136.173	347.219	905.668	-139.098	399.729	842.421
663	0	126.929	502.683	1664.27	223.226	513.342	1662.36	120.899	346.687	1690.12	264.735	368.021	1681.29	188.013	308.107	1512.77	177.661	248.654	1254.49	177.533	457.731	1431.02	162.395	542.713	1221.86	245.226	249.862	1313.73	-3.27503	377.041	1472.7	-72.4298	329.689	1244.84	-83.0102	306.439	1145.72	-119.025	359.873	981.359	-87.877	400.03	901.96	-134.483	345.554	903.034	-138.775	395.212	838.064
664	0	126.141	515.987	1662.23	222.445	526.608	1660.46	120.253	359.865	1687.92	263.668	381.256	1679.34	187.428	321.232	1510.62	176.84	261.465	1252.93	177.494	470.959	1428.92	162.823	555.946	1219.31	244.858	262.266	1312.15	-3.71291	390.693	1470.72	-71.4664	339.134	1242.74	-80.5785	314.116	1144.22	-117.759	361.424	978.747	-87.6606	399.422	897.895	-133.056	344.224	901.034	-138.188	391.089	833.928
665	0	125.419	529.229	1660.11	221.812	539.913	1658.65	119.449	373.218	1685.57	262.691	394.62	1677.09	186.874	334.261	1508.82	175.689	274.582	1250.9	177.382	484.096	1426.7	163.429	569.502	1216.81	244.095	275.059	1310.24	-4.37974	404.607	1468.4	-70.7702	348.486	1241.14	-78.397	322.014	1142.68	-116.484	363.245	976.412	-87.3148	399.055	894.22	-131.244	342.981	899.054	-137.526	387.275	830.391
666	0	124.611	542.652	1657.82	221.096	553.116	1656.55	118.331	386.561	1683.05	261.784	407.73	1674.96	185.771	347.759	1506.61	174.308	287.653	1248.94	177.17	497.318	1424.39	164.287	583.333	1214.21	243.052	287.629	1308.21	-5.16024	418.65	1466.22	-70.0629	358.304	1239.34	-76.6796	330.213	1141.36	-115.21	365.533	974.271	-86.6612	398.807	890.538	-129.395	342.252	897.424	-136.901	383.636	827.352
667	0	123.771	556.047	1655.17	220.297	566.273	1654.07	117.236	399.915	1680.52	261.025	420.679	1672.83	184.848	360.868	1504.86	172.939	300.6	1246.85	176.822	510.612	1421.9	164.819	596.933	1211.41	241.857	300.301	1306.26	-5.83735	432.76	1463.7	-69.5617	368.384	1237.71	-74.97	338.73	1140.2	-114.048	368.14	972.46	-85.9525	399.262	887.527	-127.779	341.804	896.262	-135.813	380.822	824.525
668	0	122.948	569.501	1652.51	219.479	579.591	1651.62	116.14	413.34	1678.01	259.888	433.92	1670.61	183.631	373.682	1502.04	171.395	313.72	1244.47	176.373	523.836	1419.37	165.654	610.369	1208.72	240.467	313.243	1303.82	-6.74755	446.96	1461.32	-69.2313	378.659	1236.24	-73.5363	347.677	1139.14	-113.154	370.954	971.174	-85.3155	399.907	884.795	-125.87	342.03	895.445	-134.784	378.343	822.461
669	0	122.182	583.048	1649.98	218.586	592.849	1649.09	114.966	426.9	1675.63	258.615	447.389	1668.36	182.219	387.059	1499.96	169.639	326.999	1242.17	175.915	537.109	1416.96	166.374	623.892	1206.09	239.072	326.103	1301.51	-7.70646	461.254	1458.97	-68.9733	389.678	1234.45	-71.985	357.234	1138	-111.881	374.512	969.582	-84.7886	401.029	882.494	-124.358	342.917	894.995	-133.738	376.835	820.631
670	0	121.101	596.46	1647.26	217.709	606.143	1646.58	113.46	440.459	1673.51	257.53	460.508	1666.6	180.617	400.259	1497.72	167.655	340.43	1239.96	175.246	550.436	1414.77	167.121	637.312	1204	237.208	339.076	1299.24	-8.86645	475.532	1456.68	-69.2499	400.817	1233.14	-71.2462	367.161	1137.06	-111.417	378.692	968.761	-84.1305	403.056	880.518	-123.087	344.668	894.963	-132.594	375.973	819.053
671	0	120.179	610.123	1644.84	216.513	619.382	1644.08	111.796	453.969	1671.29	255.655	473.712	1664.36	178.649	412.152	1495.52	165.643	353.921	1237.6	174.517	563.801	1412.76	167.549	650.804	1202.12	235.22	352.196	1296.97	-10.1852	489.828	1454.5	-70.0342	412.571	1231.38	-70.7696	377.638	1136.28	-110.921	383.733	967.953	-83.887	405.635	878.821	-122.295	347.285	895.089	-131.682	376.045	817.834
672	0	118.696	623.504	1642.26	215.355	632.54	1641.83	110.25	467.548	1669.44	254.181	486.775	1662.8	176.737	424.995	1493.2	163.806	367.733	1235.2	173.696	577.172	1411.01	167.961	664.77	1200.61	233.181	365.43	1294.51	-11.6085	503.949	1452.4	-70.349	424.787	1230.13	-70.2929	388.766	1135.02	-110.875	389.657	967.53	-84.0141	409.7	877.929	-121.577	351.042	895.573	-130.937	377.104	817.016
673	0	117.229	636.855	1640.23	213.856	645.781	1639.98	108.389	481.089	1667.65	252.504	499.746	1661.41	175.031	438.698	1490.83	162.075	381.689	1232.84	172.736	590.532	1409.7	168.153	678.769	1199.75	231.254	379.039	1292.39	-13.1381	518.059	1450.51	-71.6594	437.739	1228.65	-70.027	400.242	1133.85	-111.012	396.701	966.958	-84.2361	414.528	877.001	-121.704	356.044	896.204	-130.222	379.619	816.201
674	0	115.604	650.323	1638.4	212.432	658.811	1638.33	106.321	494.542	1666.09	250.5	512.804	1660.22	172.989	451.765	1489.14	160.486	395.888	1231	171.596	604.002	1408.31	167.848	692.483	1198.84	229.197	392.626	1290.39	-14.7838	532.298	1448.5	-72.6414	450.935	1227.15	-70.4153	412.346	1132.97	-111.819	404.707	967.034	-84.707	420.311	876.166	-122.219	362.462	896.949	-129.929	383.189	815.538
675	0	113.875	663.618	1636.68	210.606	671.874	1636.88	104.036	507.851	1664.52	248.399	525.907	1658.93	171.043	464.724	1487.24	159.03	410.209	1229.16	170.297	617.625	1406.95	167.262	706.167	1197.88	227.193	406.677	1288.59	-16.3667	546.415	1446.76	-73.6151	464.801	1225.5	-71.2371	424.867	1132.15	-112.502	413.856	966.763	-84.8926	427.106	875.408	-122.976	370.017	897.573	-129.913	388.201	815.093
676	0	112.22	676.878	1635.44	208.632	684.872	1635.9	101.766	521.083	1662.9	246.297	538.867	1658.06	169.166	478.291	1485.84	157.701	424.656	1227.26	168.967	631.335	1405.95	166.534	720.276	1197.45	225.904	419.968	1287.05	-17.9701	560.466	1444.89	-74.7488	478.887	1223.71	-72.0656	438.047	1131.07	-113.467	424.047	966.192	-85.5782	435.389	874.685	-124.291	378.82	898.091	-130.318	394.619	814.634
677	0	109.782	690.043	1634.23	206.653	697.757	1635.2	99.1689	534.149	1661.49	243.597	551.615	1657.18	166.901	491.593	1484.45	156.277	439.196	1225.57	167.436	645.088	1405.11	165.475	734.799	1197.3	223.999	433.951	1285.57	-19.949	574.513	1443.44	-76.1065	493.039	1222.13	-73.1927	451.539	1129.74	-114.554	435.229	965.299	-86.7748	444.867	873.961	-125.866	388.874	898.546	-131.169	402.696	814.047
678	0	107.752	703.021	1633.54	204.457	710.675	1634.84	96.4076	546.915	1660.23	240.899	564.204	1656.45	164.505	505.058	1482.83	154.903	453.89	1223.96	166.005	658.965	1404.53	163.977	749.378	1197	222.159	448.04	1284.19	-21.8121	588.608	1442.22	-77.6062	507.229	1220.49	-74.5307	465.362	1128.71	-115.885	447.375	964.785	-88.4542	455.54	873.363	-127.774	400.142	898.627	-132.447	412.169	813.734
679	0	105.286	715.974	1633.28	201.958	723.483	1634.92	93.9059	559.993	1659.32	238.109	576.984	1656.16	162.322	518.692	1481.95	153.695	468.778	1222.65	164.275	672.859	1404.18	162.513	763.919	1197.17	220.37	462.311	1282.94	-23.7906	602.862	1440.98	-79.1459	521.818	1219.48	-76.2333	479.395	1127.84	-117.503	460.469	964.167	-90.0238	467.357	872.65	-129.535	412.608	898.476	-133.93	422.894	812.925
680	0	102.859	729.013	1633.54	199.573	736.221	1635.62	91.0913	572.914	1658.91	235.821	589.713	1656.52	160.01	532.465	1481.48	152.286	483.789	1221.61	162.58	686.798	1404.42	160.952	778.683	1197.69	218.386	476.7	1282.12	-25.7731	617.124	1440.35	-80.9274	536.586	1218.53	-77.8853	494.107	1126.89	-119.933	474.155	964.14	-91.8745	480.711	871.836	-131.728	426.217	898.352	-136.038	435.392	812.82
681	0	100.296	741.977	1633.98	197.076	748.932	1636.53	88.1251	585.681	1658.48	232.796	602.101	1656.96	157.66	546.106	1480.99	150.579	498.631	1221.09	160.864	700.784	1404.9	159.356	793.393	1198.23	216.129	490.984	1281.77	-27.7506	631.467	1439.82	-82.8363	551.419	1217.77	-79.8589	509.046	1126.26	-122.078	488.934	963.744	-94.1154	495.248	871.459	-134.143	441.042	898.162	-138.467	449.54	812.696
682	0	97.7206	754.734	1634.55	194.553	761.647	1637.62	85.145	598.402	1658.07	229.816	614.635	1657.2	155.381	559.604	1480.57	148.767	513.531	1220.65	159.31	714.788	1405.49	157.814	808.315	1198.89	214.009	505.343	1281.25	-29.6479	645.815	1439.47	-84.9792	566.45	1217.53	-81.9689	524.193	1125.69	-124.361	504.423	963.19	-96.6833	510.956	870.978	-136.564	456.678	897.577	-141.186	465.083	812.2
683	0	95.1063	767.63	1635.6	191.844	774.451	1639.05	82.3976	611.189	1657.89	226.5	627.306	1657.52	153.32	573.27	1480.56	146.909	528.16	1220.46	157.664	728.734	1406.19	156.552	823.293	1199.67	211.974	519.454	1281.16	-31.5213	660.196	1439.24	-86.9185	581.509	1217.1	-84.3105	539.509	1125.33	-126.871	520.815	962.431	-98.9287	527.843	870.432	-139.263	473.588	896.782	-144.277	482.068	811.687
684	0	92.5708	780.589	1636.95	189.24	787.336	1641.07	79.5803	623.937	1658.21	223.952	639.937	1659.15	151.374	586.929	1481.29	144.988	542.36	1220.95	156.135	742.578	1407.31	155.595	838.182	1200.59	210.021	533.589	1281.62	-33.0016	674.484	1439.33	-88.8916	596.753	1216.85	-86.4615	555.407	1124.74	-129.679	538.151	962.124	-102.073	546.095	869.698	-142.139	491.497	895.909	-147.536	500.6	810.964
685	0	89.8701	793.574	1638.24	186.385	800.257	1642.89	76.8188	636.812	1658.7	221.212	652.912	1660.64	149.808	600.601	1482.6	143.292	556.069	1222.22	154.861	756.202	1408.42	154.522	852.459	1201.03	208.254	547.345	1282.63	-34.083	688.667	1439.59	-90.4734	612.616	1216.74	-88.6556	571.958	1124.35	-132.582	556.37	961.583	-106.393	565.689	869.262	-145.292	510.571	894.992	-151.092	520.717	810.088
686	0	87.2828	806.458	1639.13	183.726	813.385	1644.4	74.4246	649.807	1659.27	218.722	665.97	1662.05	148.795	614.479	1483.79	142.017	569.513	1223.47	153.94	769.704	1409.61	153.738	866.116	1201.39	207.121	560.976	1283.95	-34.9454	702.492	1440.1	-92.4837	628.132	1216.47	-90.9151	588.525	1124.14	-135.363	575.451	960.975	-109.633	586.106	868.682	-148.401	530.695	893.945	-154.733	542.032	809.14
687	0	84.9435	819.373	1639.88	181.265	826.501	1645.81	72.2771	662.667	1659.76	216.564	679.185	1663.73	147.822	627.944	1485.33	141.143	582.409	1224.78	152.892	782.929	1410.71	152.503	879.1	1201.61	206.402	574.149	1285.55	-35.7322	715.95	1440.96	-93.6162	644.636	1216.72	-93.3493	605.443	1123.7	-138.174	595.375	960.438	-112.234	607.562	868.19	-151.534	551.818	892.808	-158.294	564.917	808.554
688	0	83.1261	832.375	1640.74	179.172	839.657	1647.41	70.2818	675.437	1660.39	214.561	692.284	1665.52	146.98	640.832	1487.02	140.428	595.217	1226.36	151.949	795.945	1411.92	152.013	891.952	1202.57	205.956	586.939	1287.44	-36.3582	728.834	1442.12	-95.2343	660.516	1217.28	-95.8351	622.437	1123.73	-140.842	616.067	959.714	-115.697	629.933	868.023	-155.036	573.769	891.602	-162.426	589.15	808.18
689	0	81.1664	845.184	1641.42	177.337	852.762	1648.8	68.5861	688.384	1661.46	212.925	705.442	1667.33	146.032	653.663	1488.4	139.755	607.763	1227.75	151.167	808.58	1413.24	151.761	904.662	1203.86	205.705	599.422	1289.06	-37.271	741.958	1443.54	-96.6267	676.629	1217.75	-98.4444	639.709	1123.78	-143.875	637.316	959.619	-118.827	653.16	868.169	-158.159	596.648	890.38	-166.17	614.236	807.728
690	0	80.1612	857.977	1642.47	175.988	865.825	1650.09	67.5335	701.552	1663.1	211.501	718.57	1669.44	145.169	666.169	1489.69	139.172	620.479	1229.23	150.759	821.018	1415.11	151.579	917.164	1205.78	205.669	611.507	1290.95	-37.9715	754.627	1445.21	-98.2554	692.702	1218.56	-100.647	657.149	1123.8	-146.574	659.177	959.889	-121.691	677.257	868.764	-161.185	620.321	889.233	-170.088	640.307	808.15
691	0	79.0401	870.81	1643.67	175.174	878.78	1651.36	66.6578	714.539	1665.28	210.781	731.57	1671.43	144.039	678.804	1491.44	138.34	632.877	1230.69	150.258	833.318	1417.2	151.275	929.516	1207.64	205.128	623.943	1292.55	-38.7341	767.231	1447.18	-99.6786	708.935	1219.43	-103.28	674.724	1124.22	-149.094	681.673	960.331	-124.422	702.161	869.558	-164.078	644.819	888.461	-173.607	667.545	808.685
692	0	78.792	883.804	1645.11	174.724	891.579	1652.55	65.8131	727.608	1667.57	210.155	744.388	1673.63	142.771	691.076	1493.27	137.226	645.398	1232.45	149.596	845.403	1419.06	151.177	941.583	1209.81	203.901	635.532	1294.55	-39.5241	779.901	1449.18	-101.256	725.163	1220.65	-105.638	692.454	1124.84	-151.542	704.416	960.763	-127.347	727.247	870.843	-166.714	670.055	887.866	-177.058	695.847	809.659
693	0	78.6226	896.58	1646.6	174.661	904.195	1653.77	65.346	740.364	1670.05	209.515	757.003	1675.26	142.155	702.392	1494.76	136.151	657.765	1234.26	149.033	857.557	1420.91	150.968	953.687	1211.87	202.46	647.613	1296.05	-40.2363	792.519	1451.05	-102.928	741.183	1222.15	-108.023	710.193	1125.55	-153.757	727.925	961.55	-129.888	753.928	872.489	-169.062	695.927	887.545	-179.907	724.89	810.816
694	0	78.6963	908.989	1648.46	174.617	916.527	1655.14	65.1216	753.176	1672.59	209.352	769.374	1677.3	140.941	714.448	1496.54	134.66	670.125	1236.07	148.466	869.412	1423.08	150.836	965.873	1213.92	200.565	659.603	1297.64	-40.9821	805.217	1453.13	-104.354	757.224	1223.57	-110.29	728.27	1126.14	-155.448	751.794	962.226	-131.806	780.844	874.662	-171.177	722.389	887.556	-182.814	754.456	812.628
695	0	78.8833	921.591	1650.89	175.091	928.853	1657.03	65.0739	765.795	1675.39	209.359	781.646	1679.17	139.789	726.602	1498.76	132.859	682.003	1238.35	147.961	881.299	1425.15	150.963	978.294	1216.59	198.525	670.747	1299.98	-41.5457	817.938	1455.32	-105.759	773.221	1225.18	-112.591	746.164	1127.21	-157.305	776.064	963.784	-133.658	808.249	876.885	-173.089	749.525	887.979	-185.234	784.964	814.928
696	0	79.2557	933.682	1653.41	175.634	940.958	1658.99	65.2449	778.065	1678.32	209.929	793.46	1681.45	138.799	738.81	1500.94	130.91	694.307	1240.61	147.639	893.549	1427.78	151.006	990.883	1219.17	196.34	682.641	1302.03	-42.2222	830.841	1457.74	-107.316	789.304	1227.41	-114.895	764.246	1128.8	-158.96	800.776	965.848	-135.052	836.21	880.306	-174.707	777.237	889.209	-187.428	815.918	818.432
697	0	79.7317	946.067	1656.14	176.147	952.857	1660.96	65.5143	790.396	1681.03	209.885	805.568	1682.83	138.166	751.12	1503.47	129.086	706.609	1242.83	146.833	905.597	1429.62	151.298	1003.42	1222.14	194.236	694.492	1304.05	-42.7151	843.648	1460.31	-108.792	805.32	1229.56	-116.952	782.44	1130.3	-160.221	825.625	968.357	-136.206	864.483	884.364	-175.804	805.456	890.973	-189.106	847.329	822.593
698	0	80.2398	958.088	1659.12	176.776	964.696	1663.35	65.8346	802.527	1683.7	210.771	817.088	1684.9	137.346	763.408	1505.79	127.436	718.604	1244.96	146.652	917.742	1432.16	151.129	1015.61	1224.7	192.129	706.808	1305.95	-43.3087	856.555	1462.95	-110.398	821.369	1232.48	-119.075	800.623	1132.09	-161.412	850.9	971.38	-136.95	893.023	889.521	-176.994	833.931	893.347	-190.352	879.48	827.6
699	0	80.9296	970.184	1662.09	177.444	976.421	1665.88	65.9305	814.411	1686.15	210.724	828.651	1686.75	136.439	775.693	1507.79	125.542	730.898	1247.31	146.235	929.892	1434.39	151.105	1027.55	1227.49	190.211	719.498	1307.82	-43.859	869.553	1465.74	-112.002	837.251	1234.95	-121.509	819.03	1134.07	-162.598	876.326	975.095	-137.534	921.654	895.155	-178.019	862.828	896.291	-191.233	911.41	833.255
700	0	81.2054	982.086	1664.77	177.821	988.125	1667.96	66.1401	826.231	1688.2	211.007	840.07	1687.95	135.714	787.96	1509.29	123.821	743.137	1249.14	145.663	942.029	1436.15	150.854	1039.26	1229.58	188.237	731.571	1309.57	-44.3342	882.423	1468.38	-113.494	853.218	1237.5	-123.654	837.312	1136.14	-163.493	901.964	979.011	-137.62	950.456	901.645	-178.9	892.166	899.68	-191.634	943.74	839.503
701	0	81.84	994.055	1667.24	178.49	999.777	1669.94	66.4613	838.041	1689.91	211.159	851.655	1688.98	135.158	800.357	1510.98	122.513	755.53	1250.91	145.425	954.328	1437.86	150.508	1051.22	1231.41	186.82	744.016	1311.07	-44.7668	895.311	1470.73	-115.016	869.244	1240.23	-125.772	855.744	1138.06	-164.188	927.783	983.34	-137.389	979.239	908.307	-179.405	921.767	903.774	-191.509	976.35	846.135
702	0	82.0727	1006.08	1669.33	178.332	1011.34	1671.44	66.8234	849.983	1691.66	211.191	863.137	1689.68	134.61	812.798	1512.6	121.259	767.857	1252.43	144.844	966.703	1439.19	150.076	1063.22	1232.93	185.643	756.647	1312.39	-45.1126	908.15	1472.86	-116.383	885.305	1242.39	-128.199	874.296	1140.06	-164.976	953.66	987.941	-137.022	1008.01	915.344	-179.913	951.327	908.029	-190.821	1009.01	853.133
703	0	82.5645	1018.04	1671.07	179.016	1023.28	1672.92	66.7137	861.842	1692.95	211.33	874.778	1690.41	133.899	825.198	1513.74	120.079	780.106	1253.86	144.243	979.096	1440.16	149.615	1075.31	1234.06	184.577	769.026	1313.75	-45.4622	920.945	1474.71	-117.847	901.375	1244.35	-130.516	892.86	1141.91	-165.641	979.632	992.63	-136.517	1036.53	922.576	-180.766	980.945	912.725	-190.02	1041.71	860.536
704	0	82.6229	1030.06	1672.26	178.867	1035.07	1673.76	66.5276	873.851	1693.67	211.156	886.57	1690.45	133.403	837.742	1514.22	118.853	792.347	1254.53	143.757	991.434	1440.74	148.944	1087.49	1234.77	183.466	781.529	1314.43	-45.8614	933.634	1475.97	-119.396	917.585	1246.02	-132.826	911.517	1143.49	-166.354	1005.5	997.331	-135.912	1065.03	930.027	-181.672	1010.55	917.717	-189.06	1074.33	868.495
705	0	82.9547	1042.33	1673.47	178.995	1046.99	1674.53	66.2515	886.059	1694.09	211.041	898.441	1690.57	132.938	850.188	1514.33	117.867	804.652	1255.14	143.072	1003.92	1441.17	148.107	1099.29	1235.19	182.514	794.147	1314.77	-46.2605	946.351	1477.09	-120.919	933.814	1247.5	-135.363	930.423	1144.48	-167.099	1031.46	1002.24	-135.229	1093.29	938.182	-181.643	1040.83	923.296	-187.63	1106.7	876.626
706	0	82.8701	1054.56	1674.1	178.889	1058.98	1674.87	65.8841	898.26	1694.26	210.696	910.257	1690.43	132.289	862.548	1514.27	116.927	816.867	1255.51	142.239	1016.36	1441.19	147.104	1110.85	1235.08	181.606	806.643	1315.07	-46.4643	958.635	1477.54	-122.53	949.922	1248.34	-137.728	949.318	1145.54	-167.738	1057.11	1007.21	-134.426	1121.09	946.235	-182.011	1070.46	928.846	-186.212	1138.53	885.147
707	0	82.6326	1067.05	1674.32	178.748	1071.24	1674.87	65.4523	910.624	1694.2	210.087	922.432	1689.82	131.572	874.882	1513.94	116.018	829.032	1255.44	141.529	1028.92	1440.91	145.87	1122.38	1234.37	180.768	819.295	1314.82	-46.9181	971.044	1477.79	-124.267	966.203	1249.22	-140.226	968.554	1146.39	-168.405	1082.99	1012.5	-133.643	1148.69	954.311	-182.254	1099.99	934.782	-184.556	1170.16	893.938
708	0	82.3805	1079.62	1674.11	178.014	1083.46	1674.25	65.2163	923.194	1693.81	209.623	934.791	1689.11	131.442	887.458	1514	115.66	841.166	1254.97	140.821	1041.44	1440.5	144.611	1134	1233.31	180.318	832.034	1314.28	-47.4593	983.45	1477.7	-125.92	982.333	1249.45	-142.83	987.936	1146.97	-168.941	1108.45	1017.61	-132.731	1175.86	962.44	-182.681	1129.35	941.031	-182.738	1201.46	903.165
709	0	81.6873	1092.17	1673.65	177.648	1096	1673.81	64.4987	935.736	1692.97	209.45	947.24	1688.67	131.115	900.006	1513.31	115.357	853.203	1254.23	139.903	1053.87	1439.64	143.415	1146.03	1232.39	179.901	844.494	1313.56	-47.9111	995.782	1477.12	-127.525	998.644	1249.69	-145.106	1007.39	1147.19	-169.232	1133.82	1022.91	-131.638	1202.48	970.714	-182.624	1158.2	947.288	-181.013	1231.87	912.771
710	0	80.7879	1104.8	1672.54	177.306	1108.97	1673.09	63.5544	948.49	1691.95	208.451	959.917	1687.58	130.476	912.589	1512.23	115.336	865.2	1253.54	138.992	1066.55	1438.61	141.917	1158.47	1231.02	179.394	856.91	1312.65	-48.5078	1007.92	1476.25	-129.253	1014.82	1249.61	-147.72	1026.88	1147.55	-169.748	1158.83	1028.21	-130.455	1228.69	978.9	-182.785	1186.5	953.647	-179.207	1261.79	922.548
711	0	79.9422	1117.48	1671.11	176.064	1121.84	1671.53	62.7913	961.209	1690.65	207.56	972.937	1686.37	129.976	925.081	1510.32	115.676	877.249	1252.39	138.275	1079.14	1437.13	140.455	1171.29	1229.28	179.426	869.82	1311.39	-49.0203	1020.09	1475.02	-130.719	1031.13	1249.4	-150.262	1046.52	1147.78	-169.835	1183.62	1033.43	-129.002	1254.35	986.823	-182.999	1214.23	960.727	-177.364	1290.94	932.447
712	0	78.7875	1130.46	1669.32	174.815	1134.8	1669.68	62.2161	973.999	1689.02	206.994	986.068	1685.07	130.196	937.977	1509.28	116.639	889.301	1251.24	137.071	1091.82	1435.26	138.961	1184.29	1227.4	179.675	882.116	1310.35	-49.4582	1032.16	1473.63	-132.048	1047.46	1249.1	-152.187	1066.11	1148.07	-169.781	1207.82	1038.74	-127.498	1279.37	994.584	-183.137	1241.75	968.097	-175.609	1319.32	942.577
713	0	77.6139	1143.27	1667.25	172.775	1147.7	1667.64	61.4027	986.883	1687.54	206.203	999.41	1683.7	130.421	950.631	1508.2	117.508	901.814	1249.68	136.214	1104.46	1433.51	137.462	1197.33	1225.39	180.075	894.68	1308.84	-49.6838	1044.11	1471.96	-133.236	1063.82	1248.72	-154.332	1085.68	1148.79	-169.416	1231.72	1044.2	-126.057	1303.62	1002.37	-182.532	1268.36	974.821	-173.681	1346.78	952.725
714	0	76.2338	1156.01	1664.7	171.99	1161.26	1665.76	60.4362	999.816	1685.7	205.289	1012.86	1682.23	130.409	963.341	1506.68	118.325	913.779	1248.45	135.427	1117.26	1431.55	135.84	1210.3	1223.17	180.7	907.342	1307.57	-49.8757	1056.1	1470.11	-134.272	1080.27	1248.27	-156.193	1104.89	1149.53	-169.025	1254.93	1049.75	-124.617	1327.22	1009.84	-182.161	1294.26	982.043	-172.06	1373.3	963.309
715	0	75.0741	1168.96	1662.27	170.531	1174.5	1663.27	59.7451	1012.75	1683.75	204.415	1026.34	1680.36	130.598	976.18	1504.99	119.731	926.684	1246.55	134.767	1129.94	1429.35	134.358	1223.31	1220.89	181.53	920.132	1305.82	-50.0293	1068.08	1468.4	-135.15	1096.8	1248.24	-157.864	1124.14	1150.19	-168.642	1277.57	1055.39	-123.045	1350.09	1017.17	-181.486	1319.32	989.378	-170.188	1398.87	973.397
716	0	73.8632	1181.81	1659.77	169.267	1187.71	1660.98	59.1003	1025.63	1681.57	203.879	1039.73	1678.93	130.806	988.96	1503.04	121.049	939.042	1244.69	134.331	1142.78	1427.37	132.983	1236.39	1218.93	182.511	932.856	1304.06	-50.0193	1080.05	1466.5	-135.921	1113.05	1247.96	-159.1	1142.95	1150.89	-168.366	1299.41	1061.07	-121.651	1372.15	1024.65	-181.266	1343.73	996.825	-168.686	1423.31	983.451
717	0	72.5175	1194.65	1657.27	167.637	1200.69	1658.76	58.2734	1038.48	1679.49	202.772	1053.07	1677.26	130.849	1001.68	1500.99	122.178	951.779	1242.75	133.644	1155.51	1425.45	131.743	1249.66	1217.24	183.515	945.849	1302.38	-50.061	1092.07	1464.74	-136.466	1129.12	1247.8	-160.434	1161.41	1151.88	-168.164	1320.39	1066.9	-120.696	1393.23	1031.96	-181.471	1366.83	1004.31	-167.413	1446.74	993.665
718	0	71.1756	1207.38	1654.83	167.153	1213.95	1656.81	57.5638	1051.33	1677.28	202.321	1066.24	1675.66	130.953	1014.56	1498.79	123.625	964.758	1240.8	133.315	1168.4	1423.51	130.544	1262.72	1215.33	184.517	958.921	1300.54	-50.0883	1104.1	1463.15	-136.975	1145.04	1247.78	-161.56	1179.47	1152.7	-167.96	1340.77	1072.39	-119.665	1413.74	1039.14	-181.407	1389.29	1011.75	-166.198	1469.14	1003.48
719	0	70.4411	1220.08	1652.52	166.829	1227.21	1654.97	57.4846	1064.21	1675.34	201.837	1079.41	1673.96	131.755	1027.43	1497.37	125.033	978.124	1238.7	133.031	1181.38	1421.48	129.665	1275.69	1213.59	185.675	972.191	1298.57	-50.0729	1116.21	1461.64	-137.275	1160.71	1247.52	-162.302	1196.8	1153.18	-167.81	1360.21	1077.6	-118.951	1433.33	1045.91	-181.348	1410.67	1018.67	-165.173	1490.68	1012.75
720	0	69.806	1232.76	1650.64	166.231	1240.14	1653.24	57.2587	1076.94	1673.51	202.061	1092.58	1672.59	132.038	1040.32	1495.65	125.915	991.586	1236.72	133.079	1194.32	1419.96	129.123	1288.78	1212.35	186.533	985.448	1296.69	-49.8909	1128.62	1460.15	-137.298	1176.05	1247.21	-163.074	1213.6	1153.66	-167.61	1378.92	1082.51	-118.544	1452.27	1052.02	-181.528	1430.99	1025.14	-164.499	1511.07	1021.51
721	0	69.6014	1245.42	1648.6	165.577	1252.88	1651.26	57.0354	1089.56	1671.72	201.772	1105.33	1670.81	132.134	1053.33	1493.67	126.259	1005.01	1234.69	133.167	1207.37	1418.45	128.754	1301.87	1211.06	187.027	998.778	1294.87	-49.7244	1141.21	1458.59	-137.572	1191.07	1246.78	-164.065	1229.96	1154.31	-167.736	1396.78	1086.69	-118.273	1470.54	1057.5	-181.881	1450.58	1031.14	-164.243	1530.42	1029.63
722	0	69.6001	1258.23	1646.83	165.424	1265.72	1649.42	57.2114	1102.16	1669.87	201.741	1118.18	1669.07	132.463	1066.34	1491.64	126.564	1018.59	1232.75	133.115	1220.64	1416.68	128.744	1315.19	1209.56	187.479	1012.21	1293.08	-49.5561	1153.95	1457.23	-137.587	1205.89	1246.29	-164.829	1245.61	1154.49	-167.81	1414.02	1090.34	-118.188	1488.11	1062.47	-182.114	1468.96	1036.09	-164.239	1548.83	1036.9
723	0	70.003	1270.77	1645.54	165.009	1278.1	1647.85	57.6819	1114.75	1668.48	202.147	1130.98	1667.54	133.047	1079.33	1490.2	127.031	1032.67	1230.87	133.268	1233.83	1415.19	128.922	1328.59	1208.27	187.837	1025.73	1291.16	-49.1141	1167.02	1455.96	-137.488	1220.17	1245.61	-165.191	1260.99	1154.65	-168.02	1430.54	1093.49	-118.314	1504.96	1066.66	-182.285	1486.43	1040.4	-164.472	1566.23	1043.58
724	0	70.4759	1283.45	1644.59	165.476	1290.88	1646.78	58.2286	1127.34	1667.02	202.543	1143.6	1665.95	133.448	1092.42	1488.74	126.928	1046.59	1229.19	133.624	1247.16	1414.16	129.425	1342.27	1207.63	187.834	1039.38	1289.34	-48.639	1180.27	1454.89	-137.482	1234.33	1245.02	-165.663	1275.88	1154.58	-168.279	1446.39	1096.02	-118.525	1521.28	1070.44	-182.737	1503.04	1044.12	-165.076	1582.72	1049.41
725	0	70.8991	1296.08	1643.91	166.159	1303.39	1645.93	58.9212	1139.83	1665.94	203.596	1156.19	1664.93	133.819	1105.7	1487.56	126.773	1060.78	1227.79	134.061	1260.58	1413.18	130.029	1356.12	1206.69	187.805	1053.08	1287.85	-48.2166	1193.67	1454.11	-137.586	1248.13	1244.65	-166.179	1290.34	1154.66	-168.61	1461.5	1098.09	-118.806	1536.79	1073.51	-182.983	1518.87	1047.17	-165.942	1598.33	1054.46
726	0	72.2654	1308.84	1643.51	167.155	1315.99	1645.41	59.9499	1152.49	1664.94	204.486	1168.83	1663.79	134.503	1119.08	1486.16	126.68	1075.1	1226.2	134.685	1274.13	1412.5	130.952	1370.09	1206.42	187.808	1066.86	1286.35	-47.6255	1207.21	1453.47	-137.805	1261.72	1244.4	-166.515	1304.41	1154.49	-169.119	1476.1	1099.55	-119.524	1551.58	1075.75	-183.569	1533.9	1049.05	-166.993	1613.1	1058.44
727	0	72.8117	1321.4	1643.41	168.241	1328.56	1645.3	61.0136	1165.08	1664.18	205.43	1181.34	1662.9	135.078	1132.45	1484.96	126.561	1089.71	1224.66	135.623	1287.71	1412.35	132	1384.37	1206.49	187.822	1080.96	1284.8	-47.0025	1220.93	1453.01	-137.935	1275.09	1244.13	-166.547	1318	1154.2	-169.637	1489.97	1100.45	-120.134	1565.74	1077.42	-184.232	1548.11	1050.49	-168.306	1626.96	1061.51
728	0	74.1472	1334.1	1643.65	169.491	1341.41	1645.37	61.9361	1177.68	1663.69	206.327	1193.91	1662.4	135.606	1145.7	1483.87	126.3	1104.28	1223.63	136.403	1301.38	1412.14	133.129	1398.72	1206.58	187.61	1095.03	1283.52	-46.3155	1234.6	1452.78	-138.239	1288.13	1244.17	-166.83	1331.09	1153.92	-170.289	1503.37	1100.72	-121.299	1579.25	1078.04	-184.636	1561.64	1050.58	-169.843	1640.11	1063.62
729	0	75.2948	1346.94	1643.94	170.621	1354.14	1645.61	63.0997	1190.32	1663.49	207.615	1206.6	1661.88	136.379	1159.11	1483.12	126.268	1119.01	1222.88	137.337	1315.14	1412.17	134.296	1413.27	1206.98	187.933	1109.4	1282.56	-45.5052	1248.31	1452.74	-138.13	1301.17	1244.09	-166.615	1344.14	1153.78	-170.875	1516.12	1100.31	-122.203	1592.08	1077.8	-185.774	1574.17	1050.4	-171.55	1652.44	1064.5
730	0	76.6723	1359.8	1644.52	171.948	1367.03	1646	64.7328	1203.21	1663.64	209.045	1219.38	1661.69	137.606	1172.72	1483.12	126.495	1133.69	1222.38	138.312	1328.88	1412.35	135.514	1427.98	1207.54	188.097	1123.71	1281.74	-44.6017	1262.06	1453	-137.947	1313.83	1244.01	-166.378	1356.61	1153.69	-171.341	1528.37	1099.25	-123.22	1604.22	1076.74	-186.641	1586.11	1049.42	-173.107	1664.06	1064.22
731	0	77.9784	1372.69	1645.28	173.48	1380.05	1646.68	66.3472	1216.04	1664.02	210.854	1232.4	1662.04	138.551	1186.42	1483.29	126.771	1148.31	1222.33	139.284	1342.8	1412.92	136.508	1443.02	1208.42	188.423	1138.44	1281.28	-43.6284	1275.98	1453.56	-137.224	1326.62	1244.28	-165.644	1368.99	1153.53	-171.821	1540.04	1097.72	-124.238	1615.93	1074.44	-186.922	1597.28	1047.16	-174.836	1674.96	1062.89
732	0	79.5408	1385.78	1646.25	174.844	1393.02	1647.45	67.8543	1228.9	1664.56	212.309	1245.45	1662.2	139.287	1200.18	1483.43	126.752	1162.81	1222.47	140.209	1356.71	1413.58	137.405	1458.13	1209.48	188.39	1153.03	1281.19	-42.7299	1289.95	1454.27	-136.637	1339.38	1244.55	-165.621	1380.36	1153.75	-172.29	1550.92	1095.52	-125.253	1626.84	1071.61	-187.828	1607.61	1044.53	-176.639	1685.17	1060.4
733	0	81.3446	1399.03	1647.65	176.366	1406.19	1648.43	69.6226	1241.91	1665.31	213.959	1258.64	1662.51	140.438	1213.95	1484.03	127.018	1177.08	1223.04	141.048	1370.59	1414.36	138.147	1473.46	1210.77	188.591	1167.68	1281.36	-41.9812	1303.94	1455.44	-135.94	1351.64	1244.94	-165.006	1391.73	1153.82	-172.852	1561.44	1093.1	-126.14	1637.17	1068.18	-188.568	1617.12	1041.23	-178.307	1694.63	1056.84
734	0	83.2502	1412.33	1649.21	178.102	1419.51	1649.62	71.5299	1255.15	1666.44	215.466	1271.96	1663.18	141.258	1227.77	1484.62	127.133	1191.05	1223.85	141.853	1384.39	1415.49	138.52	1488.39	1212.19	188.877	1182.15	1281.77	-41.215	1317.82	1456.86	-135.083	1364.11	1245.59	-164.185	1402.8	1153.99	-173.257	1571.13	1090.33	-127.079	1646.79	1063.95	-189.52	1625.82	1037.75	-180.208	1703.24	1052.37
735	0	84.9062	1425.81	1650.87	179.869	1433.02	1650.85	73.4118	1268.68	1667.9	217.455	1285.51	1663.64	142.018	1241.47	1485.88	127.055	1204.75	1225.04	142.492	1398.07	1416.74	138.647	1502.74	1213.67	189.128	1196.57	1282.77	-40.5281	1331.73	1458.57	-134.391	1376.19	1246.53	-163.471	1413.41	1154.45	-173.592	1580.27	1087.44	-128.065	1655.77	1059.35	-190.564	1633.71	1033.66	-181.861	1711.27	1046.82
736	0	86.3005	1439.32	1652.49	181.584	1446.58	1651.66	75.0522	1282.17	1669.37	219.216	1299.11	1664.12	142.635	1255.08	1487.4	126.964	1217.87	1226.78	142.818	1411.58	1417.87	138.547	1516.49	1214.87	189.324	1210.38	1283.9	-39.9613	1345.42	1460.62	-133.541	1388.36	1247.52	-162.782	1423.78	1155.01	-173.862	1589.04	1084.17	-128.929	1664.18	1054.07	-190.931	1641.01	1028.68	-183.238	1718.7	1040.35
737	0	87.9069	1453.12	1653.72	183.173	1460.22	1652.13	76.7791	1295.97	1671.12	220.776	1312.62	1664.47	143.3	1268.65	1488.69	126.757	1230.6	1228.47	143.014	1424.86	1418.84	138.448	1530.1	1216.04	189.658	1223.75	1285.17	-39.5249	1358.76	1462.37	-132.735	1400.04	1248.57	-162.067	1433.76	1155.48	-174.036	1597.18	1080.54	-129.529	1671.78	1048.36	-191.347	1647.54	1023.5	-184.422	1725.49	1032.77
738	0	89.251	1466.99	1654.88	184.468	1473.99	1652.43	78.1715	1309.76	1672.96	222.284	1326.53	1664.95	143.62	1281.89	1490.05	126.735	1243.52	1229.9	142.961	1438.13	1419.94	138.045	1543.21	1217.31	189.705	1236.87	1286.43	-39.287	1371.81	1464.09	-132.129	1411.85	1249.59	-161.425	1443.54	1155.99	-174.273	1604.85	1076.67	-130.344	1678.79	1042	-191.872	1653.32	1018.05	-185.425	1731.62	1024.41
739	0	90.475	1480.92	1655.83	185.31	1487.79	1652.63	79.1613	1323.7	1675.04	222.986	1340.32	1665.78	143.822	1294.78	1491.2	126.783	1256.31	1231.62	142.662	1450.95	1421	137.439	1555.98	1218.42	189.733	1249.68	1288.01	-39.0572	1384.44	1465.6	-131.578	1423.35	1250.48	-161.044	1453.15	1156.73	-174.533	1612	1072.43	-130.921	1685.23	1035.35	-192.506	1658.64	1012.11	-186.42	1737.04	1015.32
740	0	91.1918	1494.82	1656.42	185.824	1501.66	1652.65	79.7054	1337.59	1677	223.803	1354.35	1667.03	144.268	1307.76	1492.13	127.059	1268.7	1233.11	142.304	1463.79	1422.03	136.58	1568.32	1219.45	189.911	1262.32	1289.38	-38.9317	1396.55	1467.01	-131.105	1434.43	1251.53	-160.211	1462.67	1157.13	-174.653	1618.78	1067.81	-131.593	1691.02	1028.08	-192.421	1663.32	1005.72	-186.996	1741.72	1005.37
741	0	91.2237	1508.57	1656.87	185.982	1515.41	1652.74	80.4317	1351.57	1679.25	224.144	1368.34	1668.58	144.925	1320.57	1494.03	127.969	1281.43	1234.21	141.984	1476.28	1423.29	135.826	1580.6	1220.66	190.64	1274.82	1290.78	-38.928	1408.36	1468.4	-130.741	1445.27	1252.35	-159.147	1472.01	1157.31	-174.723	1624.88	1062.94	-132.107	1696	1020.37	-192.922	1667.17	999.41	-187.323	1745.68	994.925
742	0	91.1615	1522.09	1657.09	185.784	1529.05	1653.11	80.5265	1365.36	1681.23	224.402	1382.34	1670.54	145.322	1333.13	1496.05	128.436	1293.4	1236.01	141.653	1488.72	1424.76	134.918	1592.64	1221.85	191.476	1287.34	1292.2	-38.9814	1419.85	1469.64	-130.586	1455.46	1253.07	-158.483	1480.91	1157.58	-174.74	1630.4	1057.87	-132.703	1700.18	1012.61	-193.307	1670.51	993.049	-187.562	1748.76	984.084
743	0	90.8132	1535.58	1657.5	185.291	1542.71	1653.66	80.1444	1379.02	1683.25	224.376	1396.26	1672.58	145.376	1345.37	1497.86	129.109	1305.63	1237.62	141.331	1501.04	1426.27	133.89	1604.74	1223.44	192.121	1299.47	1294.03	-39.2536	1431.14	1470.79	-130.262	1465.55	1253.7	-157.653	1489.64	1157.6	-174.778	1635.53	1052.92	-133.231	1703.61	1004.42	-193.713	1672.92	986.354	-187.476	1751.04	972.867
744	0	90.2926	1549.01	1658.27	184.83	1556.3	1654.51	79.7618	1392.59	1685.25	223.778	1409.78	1674.78	145.342	1357.55	1499.47	129.965	1317.83	1239.21	140.94	1513.29	1427.92	132.851	1616.88	1225.14	193.023	1311.67	1295.7	-39.7893	1442.4	1472.05	-129.888	1475.19	1254.15	-156.663	1497.99	1157.44	-174.945	1640.3	1047.86	-133.625	1706.31	996.268	-193.876	1675.07	980.235	-187.06	1752.28	961.644
745	0	89.8369	1562.28	1659.55	184.265	1569.5	1656.07	79.283	1406.06	1687.49	223.338	1423.36	1677.38	145.334	1369.8	1501.46	130.925	1329.86	1241.11	140.719	1525.4	1430.18	131.604	1629.06	1227.14	193.906	1323.89	1297.84	-40.3008	1453.66	1473.29	-129.988	1484.19	1254.47	-155.376	1506.02	1156.98	-174.771	1644.09	1042.97	-133.532	1708.32	988.806	-194.18	1676.31	973.876	-186.701	1752.64	950.38
746	0	89.0347	1575.25	1660.92	183.573	1582.58	1657.91	78.6113	1419.29	1689.64	222.642	1436.61	1680.12	145.267	1382.15	1503.89	131.904	1341.88	1243.22	140.332	1537.52	1432.28	130.573	1641.38	1229.27	194.508	1335.89	1300.15	-40.9014	1465.02	1474.5	-129.538	1493.28	1254.66	-154.33	1513.42	1156.54	-174.572	1647.27	1038.1	-133.424	1709.62	981.207	-194.287	1676.95	967.79	-185.929	1752	939.365
747	0	88.3601	1588.12	1662.34	182.758	1595.56	1659.52	77.7879	1432.27	1691.68	222.001	1449.77	1682.52	145.146	1394.68	1506.2	132.904	1353.82	1245.68	139.85	1549.81	1434.16	129.677	1653.54	1231.25	195.052	1347.88	1302.71	-41.5128	1476.61	1475.53	-129.158	1501.79	1254.79	-152.763	1520.61	1156.08	-174.108	1650.05	1033.18	-133.154	1710.42	973.712	-194.215	1677.01	961.829	-184.917	1750.47	928.451
748	0	87.6167	1600.76	1663.91	182.153	1608.42	1661.48	77.2649	1445.19	1693.74	221.314	1462.57	1684.79	145.333	1407.33	1508.65	133.99	1365.87	1247.9	139.588	1562.03	1436.26	128.798	1665.64	1233.23	195.72	1360	1305.15	-41.944	1488.32	1476.45	-128.403	1510.32	1254.55	-151.094	1527.54	1155.46	-173.504	1652.4	1028.52	-132.788	1710.32	966.303	-193.816	1676.5	956.019	-183.846	1748.19	918.082
749	0	87.1422	1613.47	1665.77	181.514	1621.08	1663.6	76.666	1457.89	1695.45	220.541	1475.05	1687.09	145.061	1419.8	1510.79	135.146	1378.23	1249.9	139.346	1574.46	1438.2	127.847	1677.66	1235.15	196.61	1372.59	1307.35	-42.4634	1500.13	1477.23	-127.646	1518.51	1254.22	-149.591	1533.9	1154.68	-172.75	1653.93	1023.97	-132.124	1710.02	959.462	-193.179	1675.41	950.433	-182.629	1744.92	908.173
750	0	86.6027	1625.88	1667.61	180.963	1633.59	1665.6	75.8367	1470.29	1697.1	220.069	1487.68	1689.16	144.516	1432.31	1512.57	135.485	1390.4	1251.94	138.803	1586.83	1439.95	127.207	1689.47	1237.04	196.964	1384.71	1309.76	-42.9143	1512.03	1477.86	-126.792	1526.75	1253.96	-148.08	1539.89	1153.93	-172.135	1655.08	1019.38	-131.487	1708.23	952.391	-192.703	1673.82	945.328	-181.442	1740.97	898.8
751	0	86.124	1638.31	1669.18	180.529	1645.93	1667.5	75.4134	1482.7	1698.36	219.387	1500	1690.69	143.973	1444.61	1513.93	136.026	1402.73	1253.76	138.519	1599.3	1441.44	126.63	1701.3	1238.52	197.524	1397.01	1311.82	-43.4933	1523.9	1478.44	-125.986	1534.58	1253.47	-146.307	1545.55	1153.09	-170.861	1655.89	1015.15	-130.384	1706.59	945.732	-191.758	1671.81	940.352	-179.912	1736.51	889.877
752	0	85.67	1650.69	1670.74	180.121	1658.28	1669.17	74.9745	1494.87	1699.61	219.013	1512.3	1692.08	144.411	1457.68	1515.87	136.947	1415.17	1255.21	138.132	1611.65	1442.78	126.227	1713.16	1239.97	198.607	1409.86	1313.49	-43.9836	1535.92	1478.99	-124.663	1542.73	1252.72	-144.113	1550.83	1151.85	-169.36	1656.26	1010.74	-129.122	1704.54	939.361	-190.156	1669.24	935.217	-178.641	1731.47	881.751
753	0	85.1745	1662.85	1672.24	179.724	1670.55	1670.76	74.7622	1507.2	1700.59	218.759	1524.54	1693.38	143.954	1470.14	1517.3	136.887	1427.39	1256.55	137.92	1624.02	1444.12	126.248	1725.06	1241.45	199.074	1422.19	1315.2	-44.3774	1548.01	1479.4	-123.694	1550.32	1252.12	-142.248	1555.95	1150.93	-167.881	1656.15	1006.48	-127.826	1701.99	933.441	-188.741	1666.29	930.383	-177.307	1726.13	874.191
754	0	84.7662	1675.12	1673.49	179.313	1683.03	1672.17	74.1187	1519.16	1701.24	218.17	1536.6	1694.32	143.461	1482.67	1518.23	137.125	1439.8	1257.8	137.458	1636.4	1444.99	126.057	1737.01	1242.45	199.391	1434.67	1316.55	-44.9576	1560.19	1479.64	-122.61	1558.02	1251.45	-140.212	1560.93	1150.06	-166.101	1655.72	1002.41	-125.933	1699.48	927.789	-187.044	1662.74	925.799	-176.03	1720.46	867.364
755	0	84.1995	1687.36	1674.33	178.679	1695.24	1673.15	73.691	1531.32	1701.61	217.628	1548.99	1694.81	143.566	1494.87	1519.26	137.357	1452.09	1258.45	137.383	1648.85	1445.69	126.154	1748.99	1243.02	199.868	1447.25	1317.58	-45.4547	1572.47	1479.83	-121.267	1565.91	1250.65	-138.017	1565.82	1149.05	-164.026	1654.48	998.143	-124.389	1695.98	922.122	-184.686	1659.02	921.305	-174.453	1714.38	860.912
756	0	83.7341	1699.43	1674.84	178.205	1707.58	1673.84	73.3276	1543.53	1701.73	217.173	1561.33	1695.13	142.865	1507.72	1519.45	137.27	1464.34	1258.83	137.226	1661.26	1445.99	126.45	1761.14	1243.37	200.164	1459.63	1318.23	-45.9599	1584.81	1479.66	-120.153	1573.46	1249.85	-135.787	1570.47	1148.17	-161.729	1653.36	994.399	-122.458	1692.71	916.936	-182.173	1654.64	917.01	-172.585	1708.21	854.882
757	0	83.1818	1711.7	1674.98	177.556	1719.97	1674.14	72.7452	1555.61	1701.48	216.73	1573.73	1695.32	142.408	1520.2	1519.62	137.157	1476.65	1259.29	136.803	1673.52	1446.02	126.897	1773.19	1243.26	200.109	1471.96	1318.55	-46.3713	1597.38	1479.27	-118.765	1581.44	1248.82	-133.434	1575.12	1147.38	-159.683	1652.08	990.834	-120.718	1689.31	912.126	-179.906	1650.26	913.412	-170.881	1701.97	849.566
758	0	82.1778	1724.08	1674.78	176.629	1732.44	1674.02	72.3988	1567.89	1701.05	216.334	1586.2	1695.08	142.046	1532.79	1519.52	136.828	1488.75	1259.1	136.766	1686.06	1445.63	127.015	1784.82	1242.5	200.667	1484.64	1318.7	-46.7485	1609.89	1478.83	-117.565	1589.26	1248	-130.941	1579.8	1146.52	-157.236	1650.7	987.515	-118.61	1685.93	907.828	-177.024	1645.7	909.996	-169.025	1695.42	844.91
759	0	81.4599	1736.51	1674.33	175.931	1744.91	1673.77	72.0333	1580.28	1700.37	215.865	1598.92	1694.59	141.827	1545.44	1519	136.346	1500.81	1258.66	136.505	1698.37	1445.02	128.545	1797.67	1242.07	200.564	1496.85	1318.32	-47.2489	1622.5	1478.11	-116.315	1597.26	1246.84	-128.23	1584.42	1145.79	-154.865	1649.13	984.615	-116.699	1682.37	904.048	-173.593	1640.78	906.51	-167.047	1689.15	841.04
760	0	80.5289	1748.96	1673.42	175.272	1757.69	1673.17	71.5781	1592.78	1699.39	215.258	1611.53	1694	141.364	1557.82	1518.3	135.917	1512.84	1258.1	136.489	1710.83	1444.25	128.867	1810.16	1241.05	200.151	1508.95	1317.62	-47.6378	1635.23	1477.38	-114.722	1605	1245.47	-125.698	1588.91	1145.02	-152.49	1647.57	982.067	-114.725	1678.19	900.294	-170.937	1636.17	904.09	-165.004	1682.65	836.946
761	0	79.768	1761.53	1672.19	174.212	1770.29	1672.1	70.4664	1605.12	1698.18	214.375	1624.39	1693.18	140.724	1570.16	1517.16	134.814	1524.88	1256.94	136.276	1723.26	1443.12	128.955	1822.55	1239.5	199.387	1521.04	1316.79	-48.3115	1647.95	1476.13	-113.351	1612.92	1244.55	-123.147	1593.86	1144.54	-150.099	1646.3	979.637	-112.669	1675.08	896.869	-167.828	1631.68	901.969	-162.878	1676.32	833.565
762	0	78.7759	1774.22	1670.36	173.356	1783.18	1670.52	69.8081	1617.83	1696.79	213.636	1637.42	1691.9	140.294	1582.87	1515.87	133.785	1536.87	1255.85	136.195	1735.79	1441.61	129.159	1835.26	1237.59	198.698	1533.09	1315.69	-48.7466	1660.75	1474.79	-112.331	1620.47	1243.43	-120.341	1599	1143.97	-147.629	1645.1	977.549	-110.494	1671.92	894.091	-164.111	1627.32	899.945	-160.448	1670.32	830.516
763	0	77.9839	1786.92	1668.74	172.618	1796.25	1669.03	69.1447	1630.51	1695.42	213.039	1650.43	1690.8	139.93	1595.5	1514.77	132.635	1549	1254.39	136.04	1748.35	1440.21	128.921	1847.68	1235.61	197.949	1545.27	1314.12	-49.2142	1673.62	1473.64	-111.113	1628.49	1242.62	-117.53	1604.29	1143.43	-145.015	1644.29	975.918	-108.391	1669.4	891.479	-160.628	1623.31	898.517	-158.04	1664.15	827.846
764	0	77.2452	1799.67	1666.76	171.882	1809.15	1667.18	68.6157	1643.51	1693.89	212.45	1663.43	1689.49	139.182	1608.1	1513.25	131.113	1561.3	1252.94	135.595	1760.74	1438.54	128.839	1860.17	1233.7	196.782	1557.35	1312.53	-49.7891	1686.41	1472.32	-110.714	1636.36	1241.73	-114.949	1610.19	1143.26	-142.671	1643.98	974.609	-105.879	1667.41	889.575	-157.519	1619.92	898.035	-155.467	1658.45	825.585
765	0	76.5194	1812.79	1664.66	171.283	1822.07	1665.07	68.0068	1656.7	1692.14	211.754	1676.61	1687.71	138.321	1620.72	1511.61	129.347	1573.83	1251.42	135.428	1773.5	1436.62	128.468	1872.63	1231.29	195.603	1569.57	1310.87	-50.518	1699.41	1470.86	-110.496	1644.35	1241.36	-112.916	1616.37	1143.13	-140.755	1644.45	973.708	-105.15	1666.24	888.179	-154.293	1617.24	897.484	-152.859	1653.24	823.688
766	0	76.0431	1825.88	1662.55	170.78	1835.01	1662.84	67.3985	1669.76	1690.3	211.086	1689.7	1685.74	137.485	1633.38	1509.72	127.722	1586.29	1249.74	134.978	1786.09	1434.58	128.061	1884.97	1228.75	194.185	1581.69	1309	-51.5018	1712.25	1469.27	-109.979	1653.04	1240.49	-110.78	1623.25	1142.66	-138.557	1645.25	972.831	-98.2144	1666.69	887.216	-151.337	1615.38	897.277	-150.032	1648.45	821.997
767	0	75.3847	1838.96	1660.51	170.148	1847.87	1660.62	66.4403	1682.89	1688.46	210.265	1702.48	1683.74	136.309	1645.9	1507.82	126.124	1598.91	1247.95	134.367	1798.76	1432.61	127.84	1897.58	1226.78	192.622	1593.92	1306.95	-52.4582	1725.35	1467.37	-109.912	1661.5	1239.72	-109.103	1630.75	1142.22	-137.041	1646.95	972.154	-96.4386	1666.56	885.925	-149.144	1614.24	897.617	-147.137	1644.46	820.354
768	0	74.9766	1851.95	1658.33	169.504	1860.75	1658.36	65.5586	1696.12	1686.52	209.451	1715.38	1681.65	134.978	1658.5	1505.96	124.292	1611.56	1246.11	133.261	1811.07	1430.41	127.621	1910.3	1224.78	191.046	1606.24	1305.04	-53.622	1738.43	1465.56	-109.915	1670.7	1238.6	-108.13	1638.54	1141.87	-135.844	1649.72	971.612	-97.443	1663.99	883.886	-147.434	1614.7	897.924	-144.311	1641.45	818.798
769	0	74.4246	1865.21	1656.2	168.958	1873.74	1655.96	64.5783	1709.33	1684.75	208.426	1728.28	1679.35	133.722	1671.27	1503.99	122.667	1624.22	1244.2	132.172	1823.6	1428.15	127.292	1922.94	1222.75	189.439	1618.59	1303.15	-54.8258	1751.52	1463.64	-109.822	1680.52	1237.71	-107.024	1647.31	1141.14	-135.186	1653.4	971.207	-96.1793	1665.55	883.277	-146.384	1616.22	898.556	-141.923	1639.59	818.113
770	0	73.7597	1878.26	1653.99	168.349	1886.67	1653.61	63.7458	1722.54	1683.05	207.57	1741.09	1677.4	132.441	1683.99	1502.18	121.116	1636.88	1242.2	131.457	1836.52	1426.03	126.758	1935.32	1220.72	187.87	1631.17	1300.92	-56.0842	1764.61	1461.67	-109.799	1690.92	1236.37	-106.353	1656.6	1140.43	-134.984	1658.23	970.945	-95.4974	1668.03	882.724	-145.714	1619.23	899.212	-138.513	1638.87	816.505
771	0	72.6219	1891.29	1652.14	167.41	1899.32	1651.61	62.267	1735.6	1681.31	206.457	1753.95	1675.73	130.859	1696.65	1500.15	119.614	1649.74	1240.33	130.211	1849.23	1424.31	126.127	1947.82	1219.06	186.26	1643.78	1299.15	-57.2737	1777.59	1459.68	-110.34	1701.95	1234.87	-106.15	1666.45	1139.58	-135.343	1664.05	970.697	-95.9569	1672.03	882.61	-146.06	1623.69	899.768	-136.498	1639.15	815.713
772	0	71.4358	1904.27	1650.34	166.116	1912.05	1649.91	60.6917	1748.64	1679.51	204.682	1766.66	1674.09	129.172	1709.03	1498.55	118.18	1662.67	1238.63	129.073	1861.99	1422.79	125.289	1960.45	1217.49	184.534	1656.33	1297.44	-58.6609	1790.48	1457.68	-111.019	1713.67	1233.31	-106.462	1676.9	1138.75	-135.851	1670.77	969.774	-96.8456	1677.46	882.399	-146.693	1628.86	899.81	-134.572	1640.95	814.74
773	0	70.2028	1917.24	1648.62	164.743	1924.98	1648.19	58.9697	1761.44	1677.85	203.1	1779.22	1672.44	127.367	1720.84	1496.88	117.334	1675.67	1237.16	127.844	1874.86	1421.09	124.256	1973.1	1216	183.506	1669.12	1296.04	-59.9756	1803.54	1456.08	-112.078	1725.53	1231.75	-106.958	1687.82	1137.7	-136.935	1678.75	969.318	-96.9784	1682.71	881.736	-147.784	1635.58	900.535	-133.581	1644.3	814.141
774	0	68.4778	1929.92	1647.01	163.214	1937.94	1646.98	57.3409	1774.28	1676.24	201.445	1792.17	1671.28	126.278	1733.87	1495.37	116.466	1688.94	1235.63	126.314	1887.66	1419.65	122.994	1985.91	1214.92	182.298	1681.92	1294.5	-61.2609	1816.17	1454.4	-113.069	1738.13	1230.3	-107.648	1698.81	1136.5	-138.147	1687.7	968.76	-98.3907	1689.9	881.105	-149.851	1643.56	900.452	-133.641	1649.1	814.621
775	0	66.8503	1942.71	1645.69	161.333	1950.49	1646.04	55.6138	1787.05	1674.89	200.16	1805.48	1670.51	125.331	1747.38	1494.45	115.773	1702.09	1234.28	125.137	1900.64	1418.76	121.472	1998.9	1214.17	181.315	1695.06	1293.25	-62.526	1828.77	1452.82	-114.16	1750.54	1228.92	-108.813	1710.55	1135.61	-140.166	1697.91	968.85	-99.8586	1698.41	880.622	-151.934	1652.81	900.876	-134.366	1655.6	814.515
776	0	65.0527	1955.31	1644.56	159.253	1963.21	1645.04	53.4546	1799.55	1673.65	197.603	1817.64	1669.73	123.338	1758.89	1493.24	115.053	1715.39	1233.17	123.788	1913.58	1417.88	119.746	2012.17	1213.59	180.587	1708.22	1292.28	-63.9402	1841.34	1451.64	-115.137	1763.31	1227.59	-110.126	1722.85	1134.6	-142.12	1708.81	968.039	-101.916	1708.06	880.161	-154.404	1663.21	900.796	-135.74	1663.65	814.334
777	0	62.64	1967.88	1643.73	157.196	1975.92	1644.52	51.537	1812.15	1672.63	195.55	1830.38	1669.16	121.969	1771.85	1492.41	114.736	1728.93	1231.94	121.85	1926.44	1417.22	117.648	2025.49	1213.23	180.052	1721.7	1291.36	-65.4493	1853.82	1450.74	-116.488	1775.89	1226.56	-111.424	1735.48	1133.53	-143.997	1720.34	967.173	-104.338	1719.04	879.503	-156.826	1674.46	900.658	-138.098	1673.64	814.404
778	0	59.9581	1980.41	1642.94	154.874	1988.51	1644.26	49.2768	1824.56	1672.01	193.421	1842.96	1668.98	120.194	1784.28	1491.61	114.195	1742.63	1230.93	120.379	1939.57	1417.08	115.618	2038.83	1213.29	179.069	1735.11	1290.52	-67.0381	1866.45	1450.08	-117.904	1788.84	1225.8	-113.458	1748.26	1132.84	-146.21	1733.01	966.908	-106.895	1731.16	878.979	-159.373	1686.78	900.724	-141.354	1685.01	813.587
779	0	57.649	1992.74	1642.86	152.692	2000.85	1644.5	46.9309	1836.88	1671.81	191.382	1855.7	1669.17	117.725	1795.91	1491.04	113.503	1756.34	1230.3	118.635	1952.58	1417.26	113.456	2052.36	1213.62	177.979	1748.59	1289.95	-68.8677	1878.91	1449.47	-119.73	1801.98	1225.09	-115.575	1761.29	1132.37	-149.178	1746.09	966.606	-110.342	1744.56	878.324	-162.447	1699.82	900.67	-144.855	1698.39	813.778
780	0	55.5085	2005.14	1643.25	150.614	2013.26	1645.05	44.6305	1849.31	1671.89	188.757	1867.68	1669.42	115.945	1808.74	1490.87	112.463	1770.29	1229.76	116.887	1965.56	1417.87	111.316	2066.14	1214.44	176.692	1761.96	1289.55	-70.7018	1891.66	1449.46	-121.819	1815.09	1224.85	-117.38	1774.98	1132.11	-151.493	1760.05	966.628	-113.59	1759	877.956	-165.152	1713.99	900.496	-149.128	1713.26	813.228
781	0	53.3301	2017.49	1644.03	148.336	2025.51	1646	42.3243	1861.53	1672.07	186.336	1879.87	1670.04	114.023	1821.67	1490.89	111.26	1784.18	1229.45	115.003	1978.72	1418.76	109.285	2079.76	1215.39	174.951	1775.71	1289.58	-72.5057	1904.57	1449.57	-123.687	1828.63	1225.22	-119.509	1789.04	1132	-154.541	1774.81	966.742	-116.898	1774.61	877.599	-167.915	1729.12	900.254	-153.673	1729.86	813.016
782	0	51.097	2029.74	1645.16	146.101	2037.65	1647.43	39.8434	1873.82	1672.44	183.764	1891.77	1670.94	112.255	1835.51	1491.19	109.539	1798.08	1229.49	113.416	1992.03	1419.97	107.428	2093.7	1216.74	172.851	1789.33	1289.62	-74.4399	1917.63	1450.02	-125.976	1842.64	1225.42	-122	1803.66	1132.16	-157.23	1790.32	966.393	-120.78	1791.52	877.305	-171.154	1745.2	900.119	-158.899	1747.74	812.995
783	0	48.7622	2042.11	1646.5	143.822	2049.88	1649.06	37.0312	1885.82	1672.77	181.248	1903.81	1671.71	109.166	1847.2	1491.67	107.45	1811.9	1229.92	111.549	2005.05	1421.05	106.203	2107.52	1217.99	170.542	1802.79	1290.04	-76.3323	1931	1450.62	-128.347	1856.9	1226.06	-124.542	1818.77	1132.1	-160.559	1806.88	966.81	-124.772	1809.39	877.061	-174.548	1762.31	899.697	-163.966	1767.09	812.77
784	0	46.4592	2054.41	1648.06	141.552	2062.13	1650.89	34.405	1897.98	1673.32	178.749	1915.88	1672.76	106.987	1860.03	1492.35	105.327	1825.61	1230.64	109.674	2018.23	1422.27	105.075	2121.18	1219.3	168.226	1816.03	1290.77	-78.1095	1944.42	1451.21	-130.817	1871.8	1226.34	-127.554	1834.21	1132.39	-163.883	1824.32	966.772	-128.714	1828.41	877.026	-177.792	1780.54	899.017	-169.559	1787.82	813.006
785	0	44.0704	2066.72	1650.01	139.194	2074.31	1653.38	32.1177	1910.19	1674	176.554	1928.14	1674.33	106.057	1874.61	1493.48	103.26	1839.14	1231.74	108.256	2031.48	1423.71	104.008	2134.29	1220.46	165.89	1829.33	1291.78	-79.5791	1958.18	1452.06	-132.607	1887.33	1227	-129.896	1850.71	1132.42	-167.444	1842.66	966.92	-133.054	1848.63	877.18	-181.319	1799.92	898.47	-174.753	1809.55	812.962
786	0	41.9122	2079.11	1651.76	136.83	2086.55	1655.6	29.6892	1922.55	1674.6	173.808	1939.85	1675.72	103.946	1886.77	1494.89	100.936	1852.39	1233.15	106.928	2044.55	1425.05	103.251	2147.32	1221.57	163.692	1842.57	1293.28	-80.9633	1971.78	1453.02	-135.021	1903.24	1227.55	-133.283	1867.02	1132.7	-171.081	1862.14	967.14	-137.314	1869.77	877.144	-184.779	1820.39	898.322	-180.307	1832.52	813.192
787	0	39.7612	2091.29	1653.07	134.636	2099.1	1657.42	27.3112	1934.67	1675.05	171.149	1952.19	1677.05	103.429	1901.19	1496.57	98.6084	1865.21	1234.48	105.835	2057.39	1426	103.02	2160.24	1222.32	161.712	1855.53	1294.78	-81.9954	1985.25	1454.1	-137.061	1919.8	1228.05	-136.218	1884.21	1133.01	-174.432	1882.27	967.13	-141.051	1891.48	877.099	-188.714	1841.67	897.629	-186.233	1856.58	813.568
788	0	37.6922	2103.7	1654.31	132.62	2111.59	1659.24	25.2111	1946.86	1675.3	169.306	1964.58	1678.14	102.426	1915.2	1497.65	96.4979	1877.92	1235.81	104.663	2070.14	1426.88	102.79	2173.09	1223.25	160.134	1868.18	1296.32	-82.9377	1998.73	1455.32	-139.219	1936.23	1228.45	-139.046	1901.6	1133.09	-178.024	1903.14	967.149	-144.93	1914.31	877.2	-192.341	1864.09	896.88	-191.23	1881.43	813.533
789	0	35.8256	2116.19	1655.53	130.758	2124	1661.15	23.3781	1959.17	1675.66	167.405	1976.91	1679.55	100.675	1927.19	1498.82	94.7248	1890.36	1237.05	103.951	2082.88	1428.02	102.409	2185.6	1224.33	158.909	1880.54	1297.88	-84.0175	2012.09	1456.49	-141.516	1952.97	1228.8	-141.897	1919.52	1133.2	-181.326	1924.75	967.097	-148.229	1937.62	876.781	-196.322	1887.17	896.372	-196.4	1907.29	813.812
790	0	34.058	2128.55	1656.67	128.967	2136.43	1662.89	21.5482	1971.49	1676.22	165.616	1989.38	1681.04	99.5444	1940.4	1499.93	93.1574	1902.56	1238.34	103.248	2095.36	1429.1	102.172	2197.79	1225.31	158.289	1892.99	1299.1	-84.8832	2025.52	1457.73	-143.495	1969.88	1229.57	-145.133	1937.35	1133.26	-184.547	1947.09	967.156	-152.077	1961.96	877.259	-199.929	1911.54	895.179	-201.396	1934.09	814.232
791	0	32.618	2141.15	1657.79	127.538	2148.98	1664.28	20.1131	1984.05	1677.13	163.908	2001.83	1682.64	98.0683	1951.83	1501.09	92.4276	1914.96	1239.55	102.468	2107.45	1430.14	102.131	2209.87	1226.01	157.372	1904.82	1300.39	-85.6832	2038.72	1458.96	-145.445	1987.13	1230.08	-148.216	1955.32	1133.25	-188.202	1970.15	967.875	-156.68	1987.5	877.784	-203.478	1936.44	894.716	-206.001	1961.49	814.879
792	0	31.6729	2153.79	1658.75	126.443	2161.68	1665.43	19.4593	1997.12	1678.27	163.807	2015.14	1684.02	96.9936	1964.01	1502.45	90.9473	1926.83	1240.59	102.329	2119.71	1431.27	102.043	2221.76	1226.87	155.972	1916.39	1301.64	-86.4548	2051.95	1460.27	-147.798	2003.85	1230.47	-151.431	1973.63	1133.27	-190.607	1993.35	967.591	-159.819	2013.1	878.492	-206.987	1961.94	894.082	-210.394	1989.83	816.125
793	0	30.7669	2166.31	1659.84	125.681	2174.37	1666.61	19.1894	2010.27	1679.86	162.624	2027.62	1685.58	95.8264	1976.06	1503.94	89.3473	1938.83	1241.88	101.91	2131.72	1432.64	101.898	2233.62	1227.89	154.264	1927.9	1303.04	-87.1371	2065.17	1461.59	-149.61	2021.03	1231.4	-154.515	1992.25	1133.72	-193.676	2017.15	968.208	-160.571	2042.91	880.745	-210.014	1988.32	893.702	-214.206	2018.7	817.222
794	0	30.2608	2178.9	1660.77	125.035	2186.94	1667.59	18.2067	2022.94	1681.36	161.71	2040.35	1687	94.5054	1987.9	1505.39	87.6018	1950.9	1243.27	101.255	2143.57	1433.83	102.03	2245.71	1228.93	152.41	1939.32	1304.43	-87.9603	2078.27	1462.8	-151.632	2038.2	1232.32	-157.875	2010.88	1133.84	-196.119	2041.54	968.918	-165.489	2066.25	881.181	-213.381	2014.94	893.724	-217.817	2048.27	818.822
795	0	29.8629	2191.65	1661.88	124.609	2199.5	1668.46	17.7783	2035.66	1682.92	161.339	2052.94	1688.44	93.6901	2000.94	1506.54	86.0237	1963	1244.68	101.19	2155.66	1435.07	102.404	2257.83	1230.03	150.547	1950.8	1305.66	-88.5126	2091.46	1464.14	-153.762	2055.12	1233.1	-161.102	2029.37	1134.13	-198.831	2066.15	970.102	-166.107	2096.49	884.252	-216.113	2042.26	893.887	-220.825	2078.48	820.956
796	0	29.7442	2204.39	1663.08	124.371	2212.15	1669.45	17.7597	2048.71	1684.69	160.86	2065.69	1689.96	92.3512	2012.34	1508.11	84.3027	1974.97	1246.29	100.718	2167.45	1436.37	102.782	2269.73	1231.32	148.682	1962.39	1306.94	-89.1992	2104.43	1465.4	-155.482	2072.14	1234.6	-163.812	2048.34	1134.82	-201.035	2090.99	971.577	-167.912	2124.67	887.284	-218.508	2070.21	894.518	-223.437	2109.14	823.738
797	0	29.5658	2217.17	1664.43	124.324	2224.84	1670.49	17.2421	2061.21	1686.64	161.216	2078.35	1691.2	91.2353	2023.75	1509.84	82.517	1986.9	1248	100.483	2179.46	1437.77	103.197	2281.66	1232.59	146.577	1973.91	1308.44	-89.5794	2117.56	1466.94	-157.371	2089.01	1236.02	-166.905	2067.04	1135.98	-202.985	2116.21	973.622	-169.01	2153.15	890.772	-221.174	2097.98	895.705	-225.623	2140.38	827.137
798	0	29.6861	2230.07	1666.04	124.62	2237.37	1671.62	17.1356	2074	1688.44	160.999	2090.73	1692.22	90.3569	2035.97	1511.48	80.5891	1998.7	1249.58	100.332	2191.5	1439.1	103.683	2293.72	1233.89	144.64	1985.54	1310	-90.1147	2130.63	1468.71	-159.24	2105.65	1237.73	-169.399	2086.02	1136.94	-204.783	2141.49	976.152	-170.881	2180.58	894.647	-222.662	2126.91	898.298	-227.322	2171.83	831.449
799	0	30.292	2242.64	1667.81	125.129	2249.79	1672.9	17.5483	2086.79	1690.36	161.478	2103.13	1693.36	89.5526	2049.12	1512.92	78.7781	2010.51	1251.23	99.739	2203.29	1440.5	103.851	2305.28	1235.35	142.726	1997.31	1311.45	-90.8222	2143.55	1470.55	-161.107	2122.07	1239.64	-172.326	2104.65	1138.07	-206.596	2166.74	979.344	-173.027	2207.86	899.366	-224.218	2155.68	900.8	-228.726	2203.45	836.363
800	0	30.7989	2255.25	1669.55	125.862	2261.89	1674.09	17.4581	2099.46	1692.18	161.384	2115.12	1694.28	88.6937	2062.35	1514.16	76.7092	2022.25	1252.69	99.6694	2215.58	1441.88	104.353	2317.74	1237.18	140.413	2009	1312.7	-91.2964	2156.62	1472.55	-162.799	2138.39	1241.77	-174.765	2123.8	1140.01	-208.019	2192.07	982.951	-172.958	2236.6	905.03	-225.941	2184.07	904.04	-229.68	2235.07	842.276
801	0	31.4089	2267.6	1671.1	126.576	2274.13	1675.04	17.4204	2111.99	1693.73	161.565	2127.03	1694.93	87.1414	2072.82	1515.49	75.028	2034.07	1254.38	99.2962	2227.8	1442.93	104.494	2329.64	1238.53	138.556	2020.91	1314.05	-91.9374	2169.65	1474.29	-164.743	2154.42	1243.63	-177.408	2142.48	1141.39	-209.385	2217.49	986.997	-173.638	2264.62	911.071	-227.476	2212.66	907.873	-230.385	2266.88	848.405
802	0	32.2267	2280.22	1672.76	127.343	2286.25	1675.98	18.0275	2124.63	1695.24	161.766	2139.17	1695.31	86.6595	2085.39	1516.69	73.3354	2045.85	1255.39	98.4953	2239.95	1443.8	104.362	2341.14	1239.45	137.036	2032.99	1315.09	-92.5139	2182.61	1475.81	-166.261	2170.54	1245.82	-179.982	2161.26	1143.1	-210.487	2242.78	991.253	-176.836	2289.31	915.388	-228.343	2241.36	912.052	-230.421	2298.46	855.397
803	0	32.8877	2292.66	1674.19	127.999	2298.2	1676.78	18.2229	2137.14	1696.42	162.283	2150.99	1695.64	86.274	2099.54	1517.37	72.2227	2057.95	1256.28	97.869	2252.25	1444.35	104.324	2353.14	1240.38	135.671	2045.2	1315.87	-92.9812	2195.66	1477.34	-167.947	2186.44	1247.72	-182.113	2180.53	1145.16	-211.353	2267.94	995.575	-174.331	2319.82	923.7	-228.868	2270.02	916.535	-230.311	2329.75	862.63
804	0	33.5017	2305.12	1675.31	128.662	2310.33	1677.42	18.4007	2149.7	1697.52	161.847	2162.93	1695.6	85.1922	2110.63	1518.39	70.8801	2069.96	1257.17	97.4128	2264.75	1444.85	103.797	2364.4	1240.76	134.453	2057.56	1316.55	-93.3621	2208.61	1478.47	-169.63	2202.16	1249.32	-184.607	2199.04	1146.61	-212.033	2293.16	1000.27	-177.057	2345.09	929.212	-229.366	2298.58	921.446	-230.028	2360.8	870.365
805	0	34.0885	2317.7	1676.22	129.241	2322.48	1677.76	18.3358	2162.18	1698.12	162.107	2174.84	1695.42	84.2637	2122.9	1518.76	69.6005	2081.91	1257.78	96.9184	2277.33	1445.19	103.315	2375.46	1240.41	133.402	2070.09	1317.07	-93.9326	2221.45	1479.28	-171.287	2218.01	1250.36	-186.95	2217.64	1148.09	-212.823	2318.15	1004.97	-177.12	2372.52	936.407	-229.933	2326.92	926.515	-229.27	2391.68	878.155
806	0	34.6257	2330.34	1676.79	129.772	2334.7	1677.76	18.4965	2174.92	1698.47	162.129	2187.07	1694.82	84.1077	2136.56	1518.13	68.4863	2093.89	1258.01	95.9265	2289.6	1444.75	102.604	2386.81	1240.09	132.131	2082.53	1317.19	-94.4072	2234.36	1479.9	-172.727	2234.06	1251.72	-189.075	2236.39	1148.92	-213.449	2342.93	1009.65	-176.444	2399.88	943.866	-229.684	2355.38	931.735	-228.392	2422.26	886.33
807	0	34.6446	2342.83	1677.16	129.925	2346.9	1677.9	18.5279	2187.39	1698.34	162.099	2199.18	1694.82	83.3431	2148.93	1518.43	67.7339	2105.95	1258.08	95.2786	2302.17	1444.79	101.988	2398.88	1239.86	131.006	2094.98	1317.14	-94.8597	2247.28	1479.99	-174.091	2249.86	1252.36	-191.304	2254.98	1150	-213.998	2367.57	1014.4	-176.086	2426.79	951.532	-229.662	2383.4	937.16	-227.382	2452.25	894.825
808	0	34.9655	2355.47	1677.27	130.16	2359.28	1677.67	17.9132	2199.93	1698.18	161.522	2211.24	1693.78	82.6138	2162.89	1517.4	66.9139	2117.91	1258.24	94.2648	2314.64	1443.97	100.779	2410.22	1238.87	129.972	2107.36	1316.79	-95.4262	2260.06	1479.87	-175.68	2265.58	1252.9	-193.395	2273.62	1151.07	-214.408	2392.03	1019.18	-175.487	2453.39	959.192	-229.936	2411.31	943.12	-226.121	2481.93	903.452
809	0	34.8718	2368.46	1677.09	130.242	2371.74	1677.06	17.7666	2212.93	1697.54	161.556	2223.74	1692.79	82.3049	2175.72	1517.5	66.539	2130.17	1257.56	93.8669	2327.34	1443.18	99.9449	2422.1	1237.64	129.249	2119.84	1316.3	-95.6444	2273.06	1479.7	-176.865	2281.48	1253.3	-195.352	2292.44	1151.54	-214.679	2416.23	1024.19	-174.692	2479.38	966.865	-229.803	2438.82	948.943	-224.547	2511.1	912.294
810	0	34.7819	2381.24	1676.46	130.102	2384.37	1676.46	17.6155	2226.02	1696.88	160.935	2236.14	1691.98	81.9106	2188.5	1516.72	65.984	2142.2	1257.04	93.6853	2340.34	1442.48	98.85	2433.88	1236.23	128.455	2132.37	1315.5	-96.174	2285.69	1478.96	-178.13	2297.28	1253.45	-197.178	2311.15	1151.85	-214.781	2440.22	1029.11	-173.654	2505.07	974.591	-228.767	2466.1	954.645	-223.1	2539.59	921.299
811	0	34.435	2394.27	1675.56	129.799	2397.24	1675.5	16.6751	2238.85	1695.75	160.641	2249.1	1691.1	81.3318	2201.43	1515.85	65.8781	2154.42	1256.33	92.5718	2352.76	1441.16	97.9245	2446.03	1234.7	128.097	2144.76	1314.77	-96.6135	2298.49	1477.99	-179.55	2313.15	1253.42	-198.72	2330.19	1152.51	-214.685	2463.84	1033.96	-172.636	2530	982.334	-229.815	2492.48	961.167	-221.744	2567.47	930.398
812	0	33.844	2407.27	1674.25	129.252	2410.24	1674.3	15.6047	2251.65	1694.35	159.385	2261.77	1689.62	80.9705	2214.06	1514.78	65.9034	2166.79	1255.36	91.7295	2365.41	1439.61	96.8792	2458.64	1232.95	127.927	2157.28	1314.13	-96.9536	2311.1	1476.8	-180.47	2329.33	1253.35	-200.573	2348.82	1153.06	-214.769	2487.1	1038.97	-171.532	2554.35	989.683	-229.013	2518.89	967.756	-219.997	2594.57	939.579
813	0	33.3093	2420.5	1672.66	128.734	2423.44	1672.76	15.0611	2265.13	1693.04	158.831	2275.09	1688.55	80.8305	2227.06	1513.45	66.6922	2179.43	1254.45	91.1783	2378.25	1438.02	95.8739	2471.68	1231.22	127.909	2169.89	1313.12	-97.1261	2323.82	1475.69	-181.396	2345.17	1253.11	-202.002	2367.54	1153.43	-214.442	2509.87	1043.89	-170.124	2578.18	997.105	-229.126	2544.18	974.337	-218.225	2621.11	949.081
814	0	32.6689	2434.11	1670.56	128.156	2436.74	1670.93	15.0846	2279.49	1691.52	158.091	2288.46	1687.37	80.8827	2239.19	1512.5	67.3349	2192	1253.03	90.4399	2390.94	1436.12	94.9542	2485.07	1229.34	128.456	2182.53	1311.78	-97.3362	2336.23	1474.04	-182.122	2361.3	1253.01	-203.348	2386.18	1153.7	-213.982	2532.12	1048.66	-168.356	2601.57	1004.07	-228.271	2568.97	980.229	-216.893	2646.56	958.07
815	0	32.132	2447.41	1668.14	127.399	2450.32	1668.79	13.6281	2292.3	1689.88	156.86	2301.79	1685.9	81.0127	2251.75	1511.36	68.2772	2204.73	1251.85	89.8855	2403.77	1434.18	94.0043	2498.62	1227.5	128.872	2195.12	1310.55	-97.1011	2348.84	1472.66	-182.626	2377.5	1252.62	-204.57	2404.73	1154.59	-213.262	2554.11	1053.54	-167.401	2623.66	1010.77	-227.122	2593.24	986.345	-214.966	2671.37	967.175
816	0	31.2276	2460.72	1665.5	126.746	2463.69	1666.49	13.2204	2306.24	1688.03	156.133	2315.53	1684.38	80.9454	2264.43	1509.76	69.0954	2217.34	1250.3	89.7849	2416.82	1432.17	93.0817	2512.06	1225.68	129.617	2208	1309.12	-96.8055	2361.54	1471.15	-183.167	2393.68	1252.39	-206.05	2422.76	1155.28	-213.024	2575.33	1058.32	-165.73	2645.06	1017.35	-226.499	2616.49	992.598	-213.235	2695.09	975.98
817	0	30.3837	2474.39	1662.7	125.898	2477.07	1664.16	12.5081	2320.02	1686.06	155.52	2329.26	1683.06	81.353	2277.31	1507.88	70.2002	2229.97	1248.49	89.3038	2429.5	1430.1	92.28	2525.43	1223.78	130.635	2220.83	1307.55	-96.5622	2374.04	1469.5	-183.272	2409.82	1252.2	-206.82	2440.71	1155.52	-212.566	2595.9	1063	-164.258	2666.14	1023.66	-226.077	2639.09	998.752	-211.595	2717.97	984.443
818	0	29.9298	2487.77	1660.02	125.284	2490.61	1661.95	12.0974	2333.75	1683.87	154.611	2342.52	1681.66	81.7082	2290.08	1506.05	71.3215	2242.76	1246.62	90.0297	2442.85	1428.26	91.4729	2538.12	1221.69	131.526	2233.66	1305.72	-96.2626	2386.51	1467.75	-183.323	2425.78	1251.99	-207.377	2458.41	1156.28	-211.993	2615.68	1067.49	-163.181	2686.27	1029.78	-225.552	2660.63	1004.64	-210.046	2739.87	992.773
819	0	29.2779	2500.88	1657.37	124.774	2503.96	1659.87	10.8671	2347	1681.81	154.313	2356.04	1680.51	81.6264	2302.12	1504.33	72.3252	2255.74	1244.63	89.7677	2455.54	1426.32	90.8394	2550.78	1219.71	132.717	2246.74	1304.01	-95.8401	2399	1466.09	-183.619	2441.65	1251.58	-208.161	2475.38	1156.71	-211.384	2635.02	1071.9	-162.21	2705.72	1035.32	-225.006	2681.51	1010.16	-208.694	2760.87	1000.58
820	0	28.9735	2514.4	1654.86	124.468	2517.37	1657.8	10.7071	2360.84	1679.67	153.862	2369.68	1678.91	82.6822	2315.73	1502.48	73.5257	2268.85	1242.7	89.9052	2468.32	1424.36	90.6427	2563.57	1217.88	133.6	2259.78	1302.13	-95.3326	2411.56	1464.54	-183.601	2457.19	1251.21	-208.558	2492.03	1156.68	-210.329	2653.57	1075.88	-160.995	2724.63	1040.64	-224.482	2701.61	1015.39	-207.458	2781.14	1008.16
821	0	29.0025	2527.86	1652.71	124.409	2530.83	1656	10.7102	2374.49	1677.61	153.521	2382.9	1677.8	82.9973	2328.19	1500.68	74.6095	2282.07	1240.56	90.2397	2481.33	1422.75	90.5584	2576.5	1216.47	134.646	2272.83	1300.27	-94.8179	2424.28	1463.07	-182.904	2472.5	1250.93	-208.2	2508.52	1157.23	-210.115	2671.21	1079.3	-160.247	2742.7	1045.46	-224.117	2720.67	1020.1	-206.481	2800.32	1014.93
822	0	29.2673	2540.99	1650.3	124.452	2543.9	1654.33	10.6209	2387.79	1675.78	153.675	2396.17	1676.52	83.6313	2341.08	1499.05	75.4043	2295.38	1238.94	90.6921	2494.51	1421.2	90.6263	2589.58	1215.14	135.426	2285.92	1298.46	-94.4145	2436.91	1461.53	-182.8	2487.38	1250.22	-208.713	2523.84	1156.91	-209.787	2688.32	1082.34	-159.803	2760	1049.63	-223.699	2738.97	1024.24	-206.015	2818.49	1021.19
823	0	29.3645	2554.19	1648.57	125.055	2557.16	1652.5	10.9202	2401.04	1674.17	153.929	2409.32	1674.69	84.2629	2354.66	1497.41	76.0313	2308.87	1237.21	91.4171	2507.9	1419.52	91.1816	2603.1	1213.58	136.054	2299.01	1297.01	-93.7775	2449.85	1460.13	-182.385	2501.96	1249.62	-208.725	2539.26	1156.71	-209.598	2704.59	1084.41	-159.301	2776.7	1052.9	-223.459	2756.29	1027.5	-205.662	2835.82	1026.44
824	0	30.2424	2567.54	1646.94	125.739	2570.33	1650.87	11.6546	2414.39	1672.54	154.381	2422.55	1673.02	84.9932	2367.36	1495.94	76.8416	2322.51	1235.5	92.1297	2521.17	1418.01	92.0215	2616.79	1212.32	136.806	2312.23	1295.52	-92.9103	2463.16	1458.83	-181.965	2516.16	1248.93	-208.442	2554.15	1156.64	-209.29	2720.37	1085.95	-158.864	2792.72	1055.47	-223.177	2772.77	1029.9	-205.477	2852.39	1030.91
825	0	31.2118	2580.7	1645.42	126.731	2583.52	1649.54	12.5617	2427.62	1671.23	155.753	2435.54	1672	85.7891	2380.53	1494.51	77.3839	2336.34	1233.83	92.8796	2534.29	1416.81	93.1318	2630.34	1211.25	137.329	2325.78	1293.82	-91.9109	2476.4	1457.56	-181.229	2530.15	1248.06	-208.108	2568.37	1155.95	-208.566	2735.5	1087.21	-158.836	2808.04	1057.52	-222.872	2788.3	1031.55	-205.717	2867.88	1034.64
826	0	32.3654	2593.73	1644.29	127.92	2596.46	1648.42	13.5532	2440.59	1670.51	156.487	2448.57	1670.66	86.4673	2393.67	1493.45	77.5725	2350.05	1232.5	93.7429	2547.65	1415.78	94.2922	2643.84	1210.45	137.849	2339.29	1292.58	-91.1161	2489.91	1456.29	-180.84	2543.84	1247.26	-207.738	2582.42	1155.29	-208.748	2749.66	1087.46	-158.947	2822.68	1058.76	-222.632	2803.11	1032.52	-206.171	2882.49	1037.52
827	0	33.8944	2606.89	1643.6	129.461	2609.48	1647.34	14.9069	2453.67	1669.85	158.062	2461.54	1669.59	87.5113	2406.8	1492.46	77.9351	2364.17	1231.55	94.9327	2561.11	1414.94	95.9439	2657.75	1209.73	138.185	2353.02	1291.16	-90.0701	2503.3	1455.38	-180.465	2557.18	1246.3	-207.398	2595.75	1154.66	-208.249	2763.4	1087.42	-158.825	2836.69	1059.08	-222.651	2817.08	1032.77	-206.844	2896.2	1039.32
828	0	35.5241	2619.77	1643.35	131.094	2622.36	1646.88	16.6712	2466.72	1669.53	159.477	2474.38	1669.07	88.632	2420.01	1491.71	78.1811	2378.36	1230.08	96.1728	2574.45	1414.58	97.7188	2671.81	1209.79	138.83	2366.8	1290.07	-89.0229	2516.66	1454.77	-179.444	2570.2	1245.97	-206.333	2609.07	1154.4	-208.081	2776.66	1087.24	-158.928	2849.87	1059.04	-222.661	2830.03	1032.43	-207.427	2909.09	1040.29
829	0	37.0373	2632.32	1643.48	132.758	2635.09	1647.06	18.5584	2479.46	1669.82	161.537	2487.38	1669.18	90.2175	2433.6	1491.15	78.9443	2392.88	1229.68	97.4295	2587.51	1414.92	99.5021	2686.11	1210.5	139.514	2380.75	1289.15	-87.8788	2529.76	1454.56	-178.745	2582.88	1245.47	-205.845	2621.28	1153.5	-208.004	2788.64	1086.14	-159.025	2862.3	1058.48	-222.569	2842.21	1031.81	-208.327	2920.98	1040.42
830	0	39.2676	2645.13	1644.3	134.55	2648.09	1647.46	20.4369	2492.19	1670.23	163.131	2500.05	1669.42	91.29	2446.3	1491.27	79.2703	2407.02	1229.47	98.7915	2600.86	1415.39	101.152	2700.42	1211.45	140.224	2394.71	1288.83	-86.6319	2543	1454.81	-177.595	2595.23	1245.68	-204.903	2633.39	1153.35	-208.163	2800.21	1085.19	-159.32	2874.01	1057.17	-222.706	2853.4	1030.44	-209.278	2931.94	1039.65
831	0	41.0944	2657.9	1645.29	136.758	2661.01	1648.02	22.7933	2505.12	1671.01	165.449	2512.89	1669.71	92.796	2459.72	1491.52	80.2952	2421.35	1229.61	100.073	2614.28	1416.08	102.656	2714.93	1212.55	141.369	2408.81	1288.58	-85.4695	2556.25	1455.6	-176.646	2607.04	1245.43	-203.967	2644.8	1153.07	-207.709	2811.1	1083.67	-159.549	2884.82	1055.04	-222.901	2863.72	1028.64	-210.055	2942.26	1037.81
832	0	43.2064	2670.7	1646.75	139.033	2673.69	1649.01	25.0249	2517.85	1671.98	167.213	2525.53	1670.37	94.2653	2473.09	1492.02	80.9489	2435.29	1230.04	101.321	2627.65	1417.03	104.109	2729.54	1213.87	142.278	2422.98	1288.61	-84.2496	2569.53	1456.8	-175.134	2618.78	1245.87	-201.957	2655.63	1153.03	-207.472	2821.15	1081.86	-159.58	2894.88	1052.55	-222.866	2873.11	1026.59	-210.85	2951.59	1035.15
833	0	45.5637	2683.67	1648.18	141.384	2686.42	1650.22	27.3019	2530.64	1673.59	170.061	2538.19	1671.15	95.7372	2486.34	1493.06	81.5024	2448.89	1231.14	102.443	2641.03	1418.17	105.098	2744.13	1215.42	143.107	2437.01	1289.26	-83.01	2582.9	1458.23	-173.757	2630.24	1246.39	-201.04	2665.81	1153.16	-206.895	2830.59	1079.7	-159.857	2904.13	1049.1	-222.834	2881.47	1023.6	-211.768	2959.95	1031.3
834	0	47.9832	2696.66	1649.91	143.765	2699.27	1651.34	29.4589	2543.61	1675.09	172.256	2551	1671.91	97.0771	2499.58	1494.21	81.8451	2461.89	1232.67	103.379	2654.24	1419.22	105.776	2758.22	1216.89	143.644	2450.63	1290.57	-81.946	2596.21	1460.07	-172.672	2641.23	1246.88	-197.575	2677.83	1154.36	-206.199	2839.19	1077.01	-159.83	2912.55	1045.18	-222.472	2889.07	1019.8	-212.227	2967.55	1026.66
835	0	50.67	2709.78	1651.76	146.307	2711.95	1652.35	31.805	2556.74	1676.86	174.411	2563.84	1672.04	98.3404	2512.87	1495.68	82.3452	2474.72	1234.25	104.135	2667.33	1420.54	106.327	2772.12	1218.28	144.44	2464.1	1291.78	-80.9761	2609.41	1461.98	-171.302	2652.07	1247.69	-198.161	2685	1153.43	-205.417	2847.1	1074.14	-159.427	2920.33	1040.89	-221.92	2895.62	1015.99	-212.963	2974.11	1021.17
836	0	53.1238	2722.86	1653.31	148.605	2724.83	1653.17	33.7113	2569.93	1678.67	176.19	2576.59	1672.81	99.3057	2526.11	1496.97	82.8598	2487.45	1235.69	104.625	2680.44	1421.92	106.47	2785.14	1219.72	144.734	2477.25	1292.88	-79.9125	2622.62	1464.21	-170.054	2662.86	1248.6	-196.675	2693.78	1153.87	-204.609	2854.23	1070.97	-159.583	2927.15	1036.09	-221.45	2901.43	1011.51	-213.15	2979.97	1014.98
837	0	55.4681	2736.07	1655.02	150.804	2737.41	1653.88	35.5065	2583.05	1680.67	177.6	2588.83	1673.38	100.277	2539.03	1498.59	83.1264	2499.75	1237.38	105.144	2693.23	1423.18	106.51	2797.54	1221.07	144.987	2489.84	1294.48	-78.998	2635.3	1466.55	-168.741	2673.56	1249.89	-196.024	2702.48	1154.75	-204.241	2861.17	1067.82	-159.269	2933.32	1030.9	-220.892	2906.55	1006.9	-213.236	2985.28	1008.23
838	0	57.3045	2749.16	1656.63	152.865	2750.32	1654.59	37.2972	2596.27	1682.67	179.408	2601.72	1674.04	101.222	2551.67	1500.1	83.508	2512.15	1239.08	105.387	2705.89	1424.58	106.521	2809.76	1222.39	145.504	2502.45	1295.97	-78.3904	2647.52	1468.55	-167.845	2683.72	1251.17	-194.296	2711.28	1155.41	-203.353	2867.31	1064.6	-158.787	2938.85	1025.55	-220.628	2911.03	1002.42	-212.956	2989.6	1000.65
839	0	58.8776	2762.21	1658.02	154.493	2762.99	1655.41	38.5563	2609.68	1684.86	180.798	2614.33	1675.52	102.208	2564	1501.52	84.1878	2524.5	1240.62	105.615	2718.23	1426.34	106.16	2821.55	1224.1	146.642	2514.98	1297.23	-77.4876	2659.69	1470.82	-166.296	2694.28	1252.85	-193.154	2719.69	1155.95	-202.826	2872.95	1061.1	-158.124	2943.76	1020.11	-219.614	2914.78	997.316	-212.717	2993.3	992.638
840	0	60.0292	2775.14	1659.15	155.738	2775.75	1656.35	39.4319	2622.88	1686.63	181.289	2626.98	1677.2	103.221	2576.2	1503.17	84.9582	2536.66	1242.14	105.698	2730.33	1428.17	105.787	2833.39	1225.83	147.678	2527.24	1298.84	-77.0344	2671.03	1472.7	-165.662	2703.88	1254.04	-190.936	2728.95	1157.46	-202.219	2878.17	1057.33	-158.081	2947.77	1014.02	-219.02	2917.95	992.043	-212.314	2996.21	984.03
841	0	61.0067	2787.95	1659.92	156.653	2788.54	1657.06	40.2644	2636.04	1688.71	182.036	2640.37	1678.92	103.985	2588.15	1504.96	85.714	2548.64	1243.89	105.841	2742.32	1429.69	105.443	2845.21	1227.29	148.62	2539.3	1300.69	-76.9423	2682.1	1474.17	-165.061	2713.57	1255.03	-190.47	2736.19	1156.78	-201.67	2883.1	1053.11	-157.706	2951.37	1007.43	-218.737	2920.52	986.396	-211.663	2998.57	974.819
842	0	61.8463	2800.82	1660.65	157.517	2801.39	1657.84	40.7368	2649.1	1690.37	182.858	2652.82	1680.64	104.837	2600.27	1506.7	86.9679	2560.62	1245.36	106.306	2754.31	1431.18	105.202	2856.91	1228.71	149.892	2551.31	1302.11	-76.3317	2693.39	1475.72	-163.796	2723.26	1255.93	-188.757	2744.02	1157.35	-201.013	2887.43	1048.83	-157.104	2954.25	1000.4	-218.043	2922.62	980.886	-210.365	3000.3	965.145
843	0	62.4233	2813.64	1661.58	158.222	2814.09	1658.91	41.308	2662	1692.11	183.054	2665.41	1682.42	105.622	2612.2	1508.34	88.2153	2572.42	1246.86	106.64	2766.3	1432.84	104.716	2868.67	1230.32	151.087	2563.08	1303.64	-75.6716	2704.38	1477.15	-163.151	2732.37	1256.38	-187.205	2751.55	1157.66	-200.333	2891.25	1044.2	-156.362	2956.65	993.556	-217.13	2924.15	974.861	-209.327	3001.06	955.302
844	0	63.2877	2826.34	1662.78	158.686	2826.55	1660.34	41.3617	2674.9	1693.96	183.839	2678.03	1684.39	106.16	2623.98	1510.34	89.2891	2584	1248.76	106.948	2778.27	1434.76	104.118	2880.51	1232.01	151.958	2574.49	1305.63	-75.6452	2715.41	1478.45	-162.51	2741.29	1256.86	-186.001	2759.07	1157.97	-199.645	2894.59	1039.71	-155.769	2958.27	986.76	-216.898	2924.99	969.418	-207.597	3001.34	945.576
845	0	63.5802	2838.88	1664.22	159.287	2838.87	1661.84	41.675	2687.53	1696.02	183.51	2690.54	1686.45	106.616	2635.74	1512.39	90.5584	2595.56	1250.88	107.362	2790.22	1436.54	103.697	2892.33	1233.56	153.184	2586.16	1307.82	-75.7233	2726.34	1479.58	-162.448	2749.58	1256.98	-184.784	2765.75	1157.66	-199.02	2897.5	1035.22	-154.742	2959.28	979.779	-215.898	2925.4	963.58	-206.28	3000.35	935.563
846	0	63.8534	2851.27	1665.85	159.884	2851.25	1663.54	41.9326	2700.18	1697.89	183.797	2702.78	1688.22	107.107	2647.76	1514.38	92.096	2607.18	1252.68	107.692	2801.95	1438.47	103.236	2903.89	1235.21	154.466	2597.7	1309.87	-75.9438	2737.23	1480.64	-161.424	2758.02	1257.63	-182.828	2772.61	1157.31	-198.173	2899.77	1030.97	-153.708	2959.68	973.142	-215.187	2925.34	958.51	-204.494	2998.77	925.862
847	0	64.5831	2863.36	1667.45	160.251	2863.3	1665.36	42.2205	2712.59	1699.54	184.436	2714.69	1690.32	107.692	2659.74	1516.41	93.3588	2618.82	1254.69	107.953	2813.7	1440.49	102.734	2915.42	1237.01	155.319	2609.36	1312.09	-75.8662	2748.65	1481.76	-160.66	2766.12	1258.04	-181.215	2779.47	1157.35	-196.979	2901.83	1027.12	-152.577	2959.39	966.763	-214.276	2924.76	953.508	-202.674	2996.35	916.616
848	0	65.1572	2875.51	1669.15	160.908	2875.32	1667.1	42.4018	2724.67	1701.37	184.509	2726.57	1692.47	107.848	2671.61	1518.48	94.4288	2630.48	1256.79	108.145	2825.22	1442.29	102.296	2926.92	1238.81	156.274	2620.73	1314.23	-75.7276	2760.12	1482.93	-159.735	2774.17	1258.46	-180.081	2785.39	1157.03	-195.664	2903.35	1023.43	-151.29	2958.68	960.66	-213.493	2923.57	948.86	-200.961	2993.19	907.922
849	0	65.7948	2887.49	1670.8	161.425	2887.1	1668.9	42.7709	2736.77	1702.87	185.181	2738.5	1694.21	108.217	2683.59	1520.07	95.637	2642.09	1258.81	108.591	2836.93	1443.92	102.095	2938.29	1240.44	157.166	2632.45	1316.01	-75.6414	2771.61	1484.01	-158.557	2782.3	1258.69	-177.83	2791.75	1157.3	-194.284	2904.51	1019.87	-149.746	2957.32	954.708	-212.484	2922.17	944.557	-198.836	2989.5	899.485
850	0	66.464	2899.32	1672.4	162.487	2899.03	1670.33	43.2929	2748.88	1704.44	185.852	2750.04	1695.61	108.49	2695.27	1521.57	96.6441	2653.96	1259.93	108.934	2848.76	1445.41	102.017	2949.4	1242.05	158.418	2644.21	1317.81	-75.477	2783.07	1484.71	-157.363	2790.29	1258.67	-175.989	2796.75	1156.44	-192.776	2905.29	1016.38	-148.113	2955.72	949.004	-211.058	2920.24	940.03	-196.767	2985.3	891.711
851	0	67.258	2911.11	1673.71	163.012	2910.74	1671.77	43.8012	2760.54	1705.7	186.032	2761.68	1696.88	108.727	2707.01	1523.18	97.3093	2665.74	1261.3	109.265	2860.38	1446.64	102.135	2960.7	1243.38	159.118	2655.83	1319.45	-75.4331	2794.58	1485.41	-156.278	2798.08	1258.63	-174.774	2802.61	1156.68	-191.085	2906.05	1012.73	-146.365	2953.51	943.581	-209.355	2918.38	936.286	-194.648	2980.66	884.082
852	0	68.0512	2922.86	1674.9	163.649	2922.17	1672.84	44.49	2772.1	1706.73	186.592	2773.18	1697.78	108.662	2718.7	1524.29	97.5855	2677.46	1262.53	109.594	2872.06	1447.5	102.341	2971.93	1244.53	159.757	2667.67	1320.67	-75.3521	2806.35	1486	-155.031	2805.91	1258.37	-173.099	2808.08	1156.64	-189.211	2906.45	1009.23	-144.458	2951.17	938.59	-207.786	2916.12	932.31	-192.317	2975.99	877.245
853	0	68.8942	2934.49	1675.95	164.478	2933.63	1673.6	45.1979	2783.74	1707.57	187.503	2784.75	1698.5	109.005	2730.59	1525.12	98.1823	2689.35	1263.35	110.196	2883.89	1448.12	102.965	2983.55	1245.59	160.462	2679.44	1321.56	-75.0374	2818.21	1486.53	-153.416	2813.97	1258.05	-170.405	2813.57	1156.47	-187.125	2906.6	1005.98	-142.336	2948.76	933.599	-205.662	2913.42	928.459	-189.825	2970.78	870.88
854	0	69.7192	2946.13	1676.79	165.231	2945.33	1674.43	45.8207	2795.4	1708.15	189.736	2797.45	1699.08	109.299	2742.37	1525.76	98.5691	2701.17	1263.9	110.663	2895.56	1448.75	103.574	2994.89	1246.29	161.117	2691.06	1322.46	-74.883	2829.97	1486.51	-151.999	2821.75	1257.46	-168.22	2818.43	1156.24	-185.191	2906.28	1002.75	-140.2	2946.27	928.927	-203.531	2910.63	925.114	-187.412	2965.61	864.882
855	0	70.282	2957.64	1677.55	165.799	2956.93	1675.13	46.3235	2806.78	1708.66	188.975	2808.06	1699.03	109.289	2754.34	1526.22	98.6574	2712.9	1264.4	111.3	2907.33	1449.02	104.184	3006.31	1246.91	161.367	2702.79	1323.02	-74.7289	2842	1486.61	-150.963	2829.18	1256.9	-164.702	2824.54	1156.15	-183.212	2905.85	999.895	-138.261	2943.62	924.805	-201.515	2907.67	922.129	-185.638	2959.41	859.517
856	0	70.5224	2969.08	1677.96	166.351	2968.54	1675.52	46.9171	2818.25	1708.7	189.306	2819.38	1699.02	109.314	2766.15	1526.28	98.6825	2724.68	1264.62	111.905	2919.11	1449.18	105.378	3018.05	1247.14	161.665	2714.59	1323.31	-74.8398	2854.1	1486.89	-149.259	2837.08	1256.62	-164.284	2827.03	1154.96	-181.244	2905.19	997.199	-136.645	2940.7	920.981	-199.823	2904.22	919.181	-183.412	2954.01	854.919
857	0	71.0851	2980.53	1678.24	167.011	2980.04	1675.62	47.8618	2829.77	1708.6	189.837	2831.11	1698.9	109.746	2778.02	1526.19	98.9027	2736.48	1264.41	112.558	2930.9	1449.23	106.463	3029.81	1247.1	161.97	2726.25	1323.19	-74.5735	2866.1	1486.35	-147.857	2844.82	1255.87	-159.663	2833.66	1155.43	-179.388	2904.4	994.846	-134.924	2938.09	917.52	-197.593	2900.78	916.614	-181.579	2948.42	850.614
858	0	71.5656	2992.11	1678.38	167.434	2991.7	1675.77	48.3709	2841.08	1708.2	190.499	2842.41	1698.74	109.916	2789.76	1525.93	98.8754	2748.17	1264.13	113.074	2942.57	1449.01	107.455	3041.48	1246.97	161.96	2738.03	1322.79	-74.0591	2878.4	1485.93	-146.438	2852.2	1255.46	-157.102	2838.2	1154.9	-177.576	2903.62	992.438	-133.364	2935.53	914.169	-195.275	2897.5	914.455	-179.837	2942.95	846.811
859	0	71.8273	3003.66	1677.89	167.432	3003.43	1675.27	48.8251	2852.51	1707.81	190.578	2854.18	1698.41	109.946	2801.7	1525.27	98.4128	2759.72	1263.66	113.611	2954.2	1448.52	108.4	3052.8	1245.88	161.795	2749.27	1322.49	-74.0219	2890.46	1485.06	-144.982	2859.84	1254.61	-154.633	2842.95	1154.48	-175.487	2903	990.416	-132.093	2933.17	910.973	-192.887	2893.88	912.05	-178.263	2937.65	843.37
860	0	72.3271	3015.34	1677.29	168.027	3015.1	1674.35	49.5555	2864.24	1707.05	191.365	2865.91	1697.42	110.306	2813.6	1524.53	98.0392	2771.42	1262.93	114.3	2965.92	1447.61	109.862	3064.08	1244.42	161.848	2760.89	1321.44	-73.7583	2902.91	1484.09	-143.615	2867.2	1253.99	-151.805	2848.01	1153.96	-173.67	2902.5	988.173	-130.799	2930.95	907.97	-188.581	2890.53	909.394	-176.979	2932.35	839.877
861	0	72.7506	3027.15	1676.12	168.941	3027.71	1673.66	47.5875	2873.44	1706.09	191.923	2877.96	1696.3	110.445	2825.5	1523.35	97.3101	2782.91	1261.96	114.915	2977.8	1446.56	111.173	3075.69	1242.86	161.476	2772.44	1320.4	-73.4907	2915.34	1482.85	-142.36	2874.7	1252.99	-148.937	2853.32	1153.67	-171.737	2902.14	986.167	-128.876	2929.25	904.947	-185.835	2887.2	907.438	-175.321	2927.37	836.894
862	0	73.25	3039.03	1674.71	169.116	3039.56	1672.28	48.6253	2885.95	1705.06	192.44	2890.07	1695.04	110.617	2837.3	1522.32	95.9808	2794.14	1261.45	115.436	2989.57	1445.4	112.341	3087.44	1241.18	161.161	2783.86	1319.57	-73.3941	2927.78	1481.48	-141.223	2882.33	1252.17	-147.581	2857.19	1152.99	-169.281	2902.12	984.489	-125.235	2932.34	904.094	-183.908	2884.14	906.56	-174.043	2922.63	834.209
[truncated: 69 more columns]

## Sheet: Sheet2
Devices
		025370 - Force			025370 - Moment			025370 - CoP			027571 - Force			027571 - Moment			027571 - CoP			037720 - Force			037720 - Moment			037720 - CoP
Frame	Sub Frame	Fx	Fy	Fz	Mx	My	Mz	Cx	Cy	Cz	Fx	Fy	Fz	Mx	My	Mz	Cx	Cy	Cz	Fx	Fy	Fz	Mx	My	Mz	Cx	Cy	Cz
		N	N	N	N.mm	N.mm	N.mm	mm	mm	mm	N	N	N	N.mm	N.mm	N.mm	mm	mm	mm	N	N	N	N.mm	N.mm	N.mm	mm	mm	mm
473	0	0	0	0	0	0	0	200	300	0	0	0	0	0	0	0	200	903	0	0	0	0	0	0	0	603	903	0
473	1	0	0	0	0	0	0	200	300	0	0	0	0	0	0	0	200	903	0	0	0	0	0	0	0	603	903	0
473	2	0	0	0	0	0	0	200	300	0	0	0	0	0	0	0	200	903	0	0	0	0	0	0	0	603	903	0
473	3	0	0	0	0	0	0	200	300	0	0	0	0	0	0	0	200	903	0	0	0	0	0	0	0	603	903	0
473	4	0	0	0	0	0	0	200	300	0	0	0	0	0	0	0	200	903	0	0	0	0	0	0	0	603	903	0
473	5	0	0	0	0	0	0	200	300	0	0	0	0	0	0	0	200	903	0	0	0	0	0	0	0	603	903	0
473	6	0	0	0	0	0	0	200	300	0	0	0	0	0	0	0	200	903	0	0	0	0	0	0	0	603	903	0
473	7	0	0	0	0	0	0	200	300	0	0	0	0	0	0	0	200	903	0	0	0	0	0	0	0	603	903	0
473	8	0	0	0	0	0	0	200	300	0	0	0	0	0	0	0	200	903	0	0	0	0	0	0	0	603	903	0
473	9	0	0	0	0	0	0	200	300	0	0	0	0	0	0	0	200	903	0	0	0	0	0	0	0	603	903	0
474	0	0	0	0	0	0	0	200	300	0	0	0	0	0	0	0	200	903	0	0	0	0	0	0	0	603	903	0
474	1	0	0	0	0	0	0	200	300	0	0	0	0	0	0	0	200	903	0	0	0	0	0	0	0	603	903	0
474	2	0	0	0	0	0	0	200	300	0	0	0	0	0	0	0	200	903	0	0	0	0	0	0	0	603	903	0
474	3	0	0	0	0	0	0	200	300	0	0	0	0	0	0	0	200	903	0	0	0	0	0	0	0	603	903	0
474	4	0	0	0	0	0	0	200	300	0	0	0	0	0	0	0	200	903	0	0	0	0	0	0	0	603	903	0
474	5	0	0	0	0	0	0	200	300	0	0	0	0	0	0	0	200	903	0	0	0	0	0	0	0	603	903	0
474	6	0	0	0	0	0	0	200	300	0	0	0	0	0	0	0	200	903	0	0	0	0	0	0	0	603	903	0
474	7	0	0	0	0	0	0	200	300	0	0	0	0	0	0	0	200	903	0	0	0	0	0	0	0	603	903	0
474	8	0	0	0	0	0	0	200	300	0	0	0	0	0	0	0	200	903	0	0	0	0	0	0	0	603	903	0
474	9	0	0	0	0	0	0	200	300	0	0	0	0	0	0	0	200	903	0	0	0	0	0	0	0	603	903	0
475	0	0	0	0	0	0	0	200	300	0	0	0	0	0	0	0	200	903	0	0	0	0	0	0	0	603	903	0
475	1	0	0	0	0	0	0	200	300	0	0	0	0	0	0	0	200	903	0	0	0	0	0	0	0	603	903	0
475	2	0	0	0	0	0	0	200	300	0	0	0	0	0	0	0	200	903	0	0	0	0	0	0	0	603	903	0
475	3	0	0	0	0	0	0	200	300	0	0	0	0	0	0	0	200	903	0	0	0	0	0	0	0	603	903	0
475	4	0	0	0	0	0	0	200	300	0	0	0	0	0	0	0	200	903	0	0	0	0	0	0	0	603	903	0
475	5	0	0	0	0	0	0	200	300	0	0	0	0	0	0	0	200	903	0	0	0	0	0	0	0	603	903	0
475	6	0	0	0	0	0	0	200	300	0	0	0	0	0	0	0	200	903	0	0	0	0	0	0	0	603	903	0
475	7	0	0	0	0	0	0	200	300	0	0	0	0	0	0	0	200	903	0	0	0	0	0	0	0	603	903	0
475	8	0	0	0	0	0	0	200	300	0	0	0	0	0	0	0	200	903	0	0	0	0	0	0	0	603	903	0
475	9	0	0	0	0	0	0	200	300	0	0	0	0	0	0	0	200	903	0	0	0	0	0	0	0	603	903	0
476	0	0	0	0	0	0	0	200	300	0	0	0	0	0	0	0	200	903	0	0	0	0	0	0	0	603	903	0
476	1	0	0	0	0	0	0	200	300	0	0	0	0	0	0	0	200	903	0	0	0	0	0	0	0	603	903	0
476	2	0	0	0	0	0	0	200	300	0	0	0	0	0	0	0	200	903	0	0	0	0	0	0	0	603	903	0
476	3	0	0	0	0	0	0	200	300	0	0	0	0	0	0	0	200	903	0	0	0	0	0	0	0	603	903	0
476	4	0	0	0	0	0	0	200	300	0	0	0	0	0	0	0	200	903	0	0	0	0	0	0	0	603	903	0
476	5	0	0	0	0	0	0	200	300	0	0	0	0	0	0	0	200	903	0	0	0	0	0	0	0	603	903	0
476	6	0	0	0	0	0	0	200	300	0	0	0	0	0	0	0	200	903	0	0	0	0	0	0	0	603	903	0
476	7	0	0	0	0	0	0	200	300	0	0	0	0	0	0	0	200	903	0	0	0	0	0	0	0	603	903	0
476	8	0	0	0	0	0	0	200	300	0	0	0	0	0	0	0	200	903	0	0	0	0	0	0	0	603	903	0
476	9	0	0	0	0	0	0	200	300	0	0	0	0	0	0	0	200	903	0	0	0	0	0	0	0	603	903	0
477	0	0	0	0	0	0	0	200	300	0	0	0	0	0	0	0	200	903	0	0	0	0	0	0	0	603	903	0
477	1	0	0	0	0	0	0	200	300	0	0	0	0	0	0	0	200	903	0	0	0	0	0	0	0	603	903	0
477	2	0	0	0	0	0	0	200	300	0	0	0	0	0	0	0	200	903	0	0	0	0	0	0	0	603	903	0
477	3	0	0	0	0	0	0	200	300	0	0	0	0	0	0	0	200	903	0	0	0	0	0	0	0	603	903	0
477	4	0	0	0	0	0	0	200	300	0	0	0	0	0	0	0	200	903	0	0	0	0	0	0	0	603	903	0
477	5	0	0	0	0	0	0	200	300	0	0	0	0	0	0	0	200	903	0	0	0	0	0	0	0	603	903	0
477	6	0	0	0	0	0	0	200	300	0	0	0	0	0	0	0	200	903	0	0	0	0	0	0	0	603	903	0
477	7	0	0	0	0	0	0	200	300	0	0	0	0	0	0	0	200	903	0	0	0	0	0	0	0	603	903	0
477	8	0	0	0	0	0	0	200	300	0	0	0	0	0	0	0	200	903	0	0	0	0	0	0	0	603	903	0
477	9	0	0	0	0	0	0	200	300	0	0	0	0	0	0	0	200	903	0	0	0	0	0	0	0	603	903	0
478	0	0	0	0	0	0	0	200	300	0	0	0	0	0	0	0	200	903	0	0	0	0	0	0	0	603	903	0
478	1	0	0	0	0	0	0	200	300	0	0	0	0	0	0	0	200	903	0	0	0	0	0	0	0	603	903	0
478	2	0	0	0	0	0	0	200	300	0	0	0	0	0	0	0	200	903	0	0	0	0	0	0	0	603	903	0
478	3	0	0	0	0	0	0	200	300	0	0	0	0	0	0	0	200	903	0	0	0	0	0	0	0	603	903	0
478	4	0	0	0	0	0	0	200	300	0	0	0	0	0	0	0	200	903	0	0	0	0	0	0	0	603	903	0
478	5	0	0	0	0	0	0	200	300	0	0	0	0	0	0	0	200	903	0	0	0	0	0	0	0	603	903	0
478	6	0	0	0	0	0	0	200	300	0	0	0	0	0	0	0	200	903	0	0	0	0	0	0	0	603	903	0
478	7	0	0	0	0	0	0	200	300	0	0	0	0	0	0	0	200	903	0	0	0	0	0	0	0	603	903	0
478	8	0	0	0	0	0	0	200	300	0	0	0	0	0	0	0	200	903	0	0	0	0	0	0	0	603	903	0
478	9	0	0	0	0	0	0	200	300	0	0	0	0	0	0	0	200	903	0	0	0	0	0	0	0	603	903	0
479	0	0	0	0	0	0	0	200	300	0	0	0	0	0	0	0	200	903	0	0	0	0	0	0	0	603	903	0
479	1	0	0	0	0	0	0	200	300	0	0	0	0	0	0	0	200	903	0	0	0	0	0	0	0	603	903	0
479	2	0	0	0	0	0	0	200	300	0	0	0	0	0	0	0	200	903	0	0	0	0	0	0	0	603	903	0
479	3	0	0	0	0	0	0	200	300	0	0	0	0	0	0	0	200	903	0	0	0	0	0	0	0	603	903	0
479	4	0	0	0	0	0	0	200	300	0	0	0	0	0	0	0	200	903	0	0	0	0	0	0	0	603	903	0
479	5	0	0	0	0	0	0	200	300	0	0	0	0	0	0	0	200	903	0	0	0	0	0	0	0	603	903	0
479	6	0	0	0	0	0	0	200	300	0	0	0	0	0	0	0	200	903	0	0	0	0	0	0	0	603	903	0
479	7	0	0	0	0	0	0	200	300	0	0	0	0	0	0	0	200	903	0	0	0	0	0	0	0	603	903	0
479	8	0	0	0	0	0	0	200	300	0	0	0	0	0	0	0	200	903	0	0	0	0	0	0	0	603	903	0
479	9	0	0	0	0	0	0	200	300	0	0	0	0	0	0	0	200	903	0	0	0	0	0	0	0	603	903	0
480	0	0	0	0	0	0	0	200	300	0	0	0	0	0	0	0	200	903	0	0	0	0	0	0	0	603	903	0
480	1	0	0	0	0	0	0	200	300	0	0	0	0	0	0	0	200	903	0	0	0	0	0	0	0	603	903	0
480	2	0	0	0	0	0	0	200	300	0	0	0	0	0	0	0	200	903	0	0	0	0	0	0	0	603	903	0
480	3	0	0	0	0	0	0	200	300	0	0	0	0	0	0	0	200	903	0	0	0	0	0	0	0	603	903	0
480	4	0	0	0	0	0	0	200	300	0	0	0	0	0	0	0	200	903	0	0	0	0	0	0	0	603	903	0
480	5	0	0	0	0	0	0	200	300	0	0	0	0	0	0	0	200	903	0	0	0	0	0	0	0	603	903	0
480	6	0	0	0	0	0	0	200	300	0	0	0	0	0	0	0	200	903	0	0	0	0	0	0	0	603	903	0
480	7	0	0	0	0	0	0	200	300	0	0	0	0	0	0	0	200	903	0	0	0	0	0	0	0	603	903	0
480	8	0	0	0	0	0	0	200	300	0	0	0	0	0	0	0	200	903	0	0	0	0	0	0	0	603	903	0
480	9	0	0	0	0	0	0	200	300	0	0	0	0	0	0	0	200	903	0	0	0	0	0	0	0	603	903	0
481	0	0	0	0	0	0	0	200	300	0	0	0	0	0	0	0	200	903	0	0	0	0	0	0	0	603	903	0
481	1	0	0	0	0	0	0	200	300	0	0	0	0	0	0	0	200	903	0	0	0	0	0	0	0	603	903	0
481	2	0	0	0	0	0	0	200	300	0	0	0	0	0	0	0	200	903	0	0	0	0	0	0	0	603	903	0
481	3	0	0	0	0	0	0	200	300	0	0	0	0	0	0	0	200	903	0	0	0	0	0	0	0	603	903	0
481	4	0	0	0	0	0	0	200	300	0	0	0	0	0	0	0	200	903	0	0	0	0	0	0	0	603	903	0
481	5	0	0	0	0	0	0	200	300	0	0	0	0	0	0	0	200	903	0	0	0	0	0	0	0	603	903	0
481	6	0	0	0	0	0	0	200	300	0	0	0	0	0	0	0	200	903	0	0	0	0	0	0	0	603	903	0
481	7	0	0	0	0	0	0	200	300	0	0	0	0	0	0	0	200	903	0	0	0	0	0	0	0	603	903	0
481	8	0	0	0	0	0	0	200	300	0	0	0	0	0	0	0	200	903	0	0	0	0	0	0	0	603	903	0
481	9	0	0	0	0	0	0	200	300	0	0	0	0	0	0	0	200	903	0	0	0	0	0	0	0	603	903	0
482	0	0	0	0	0	0	0	200	300	0	0	0	0	0	0	0	200	903	0	0	0	0	0	0	0	603	903	0
482	1	0	0	0	0	0	0	200	300	0	0	0	0	0	0	0	200	903	0	0	0	0	0	0	0	603	903	0
482	2	0	0	0	0	0	0	200	300	0	0	0	0	0	0	0	200	903	0	0	0	0	0	0	0	603	903	0
482	3	0	0	0	0	0	0	200	300	0	0	0	0	0	0	0	200	903	0	0	0	0	0	0	0	603	903	0
482	4	0	0	0	0	0	0	200	300	0	0	0	0	0	0	0	200	903	0	0	0	0	0	0	0	603	903	0
482	5	0	0	0	0	0	0	200	300	0	0	0	0	0	0	0	200	903	0	0	0	0	0	0	0	603	903	0
482	6	0	0	0	0	0	0	200	300	0	0	0	0	0	0	0	200	903	0	0	0	0	0	0	0	603	903	0
482	7	0	0	0	0	0	0	200	300	0	0	0	0	0	0	0	200	903	0	0	0	0	0	0	0	603	903	0
482	8	0	0	0	0	0	0	200	300	0	0	0	0	0	0	0	200	903	0	0	0	0	0	0	0	603	903	0
482	9	0	0	0	0	0	0	200	300	0	0	0	0	0	0	0	200	903	0	0	0	0	0	0	0	603	903	0
483	0	0	0	0	0	0	0	200	300	0	0	0	0	0	0	0	200	903	0	0	0	0	0	0	0	603	903	0
483	1	0	0	0	0	0	0	200	300	0	0	0	0	0	0	0	200	903	0	0	0	0	0	0	0	603	903	0
483	2	0	0	0	0	0	0	200	300	0	0	0	0	0	0	0	200	903	0	0	0	0	0	0	0	603	903	0
483	3	0	0	0	0	0	0	200	300	0	0	0	0	0	0	0	200	903	0	0	0	0	0	0	0	603	903	0
483	4	0	0	0	0	0	0	200	300	0	0	0	0	0	0	0	200	903	0	0	0	0	0	0	0	603	903	0
483	5	0	0	0	0	0	0	200	300	0	0	0	0	0	0	0	200	903	0	0	0	0	0	0	0	603	903	0
483	6	0	0	0	0	0	0	200	300	0	0	0	0	0	0	0	200	903	0	0	0	0	0	0	0	603	903	0
483	7	0	0	0	0	0	0	200	300	0	0	0	0	0	0	0	200	903	0	0	0	0	0	0	0	603	903	0
483	8	0	0	0	0	0	0	200	300	0	0	0	0	0	0	0	200	903	0	0	0	0	0	0	0	603	903	0
483	9	0	0	0	0	0	0	200	300	0	0	0	0	0	0	0	200	903	0	0	0	0	0	0	0	603	903	0
484	0	0	0	0	0	0	0	200	300	0	0	0	0	0	0	0	200	903	0	0	0	0	0	0	0	603	903	0
484	1	0	0	0	0	0	0	200	300	0	0	0	0	0	0	0	200	903	0	0	0	0	0	0	0	603	903	0
484	2	0	0	0	0	0	0	200	300	0	0	0	0	0	0	0	200	903	0	0	0	0	0	0	0	603	903	0
484	3	0	0	0	0	0	0	200	300	0	0	0	0	0	0	0	200	903	0	0	0	0	0	0	0	603	903	0
484	4	0	0	0	0	0	0	200	300	0	0	0	0	0	0	0	200	903	0	0	0	0	0	0	0	603	903	0
484	5	0	0	0	0	0	0	200	300	0	0	0	0	0	0	0	200	903	0	0	0	0	0	0	0	603	903	0
484	6	0	0	0	0	0	0	200	300	0	0	0	0	0	0	0	200	903	0	0	0	0	0	0	0	603	903	0
484	7	0	0	0	0	0	0	200	300	0	0	0	0	0	0	0	200	903	0	0	0	0	0	0	0	603	903	0
484	8	0	0	0	0	0	0	200	300	0	0	0	0	0	0	0	200	903	0	0	0	0	0	0	0	603	903	0
484	9	0	0	0	0	0	0	200	300	0	0	0	0	0	0	0	200	903	0	0	0	0	0	0	0	603	903	0
485	0	0	0	0	0	0	0	200	300	0	0	0	0	0	0	0	200	903	0	0	0	0	0	0	0	603	903	0
485	1	0	0	0	0	0	0	200	300	0	0	0	0	0	0	0	200	903	0	0	0	0	0	0	0	603	903	0
485	2	0	0	0	0	0	0	200	300	0	0	0	0	0	0	0	200	903	0	0	0	0	0	0	0	603	903	0
485	3	0	0	0	0	0	0	200	300	0	0	0	0	0	0	0	200	903	0	0	0	0	0	0	0	603	903	0
485	4	0	0	0	0	0	0	200	300	0	0	0	0	0	0	0	200	903	0	0	0	0	0	0	0	603	903	0
485	5	0	0	0	0	0	0	200	300	0	0	0	0	0	0	0	200	903	0	0	0	0	0	0	0	603	903	0
485	6	0	0	0	0	0	0	200	300	0	0	0	0	0	0	0	200	903	0	0	0	0	0	0	0	603	903	0
485	7	0	0	0	0	0	0	200	300	0	0	0	0	0	0	0	200	903	0	0	0	0	0	0	0	603	903	0
485	8	0	0	0	0	0	0	200	300	0	0	0	0	0	0	0	200	903	0	0	0	0	0	0	0	603	903	0
485	9	0	0	0	0	0	0	200	300	0	0	0	0	0	0	0	200	903	0	0	0	0	0	0	0	603	903	0
486	0	0	0	0	0	0	0	200	300	0	0	0	0	0	0	0	200	903	0	0	0	0	0	0	0	603	903	0
486	1	0	0	0	0	0	0	200	300	0	0	0	0	0	0	0	200	903	0	0	0	0	0	0	0	603	903	0
486	2	0	0	0	0	0	0	200	300	0	0	0	0	0	0	0	200	903	0	0	0	0	0	0	0	603	903	0
486	3	0	0	0	0	0	0	200	300	0	0	0	0	0	0	0	200	903	0	0	0	0	0	0	0	603	903	0
486	4	0	0	0	0	0	0	200	300	0	0	0	0	0	0	0	200	903	0	0	0	0	0	0	0	603	903	0
486	5	0	0	0	0	0	0	200	300	0	0	0	0	0	0	0	200	903	0	0	0	0	0	0	0	603	903	0
486	6	0	0	0	0	0	0	200	300	0	0	0	0	0	0	0	200	903	0	0	0	0	0	0	0	603	903	0
486	7	0	0	0	0	0	0	200	300	0	0	0	0	0	0	0	200	903	0	0	0	0	0	0	0	603	903	0
486	8	0	0	0	0	0	0	200	300	0	0	0	0	0	0	0	200	903	0	0	0	0	0	0	0	603	903	0
486	9	0	0	0	0	0	0	200	300	0	0	0	0	0	0	0	200	903	0	0	0	0	0	0	0	603	903	0
487	0	0	0	0	0	0	0	200	300	0	0	0	0	0	0	0	200	903	0	0	0	0	0	0	0	603	903	0
487	1	0	0	0	0	0	0	200	300	0	0	0	0	0	0	0	200	903	0	0	0	0	0	0	0	603	903	0
487	2	0	0	0	0	0	0	200	300	0	0	0	0	0	0	0	200	903	0	0	0	0	0	0	0	603	903	0
487	3	0	0	0	0	0	0	200	300	0	0	0	0	0	0	0	200	903	0	0	0	0	0	0	0	603	903	0
487	4	0	0	0	0	0	0	200	300	0	0	0	0	0	0	0	200	903	0	0	0	0	0	0	0	603	903	0
487	5	0	0	0	0	0	0	200	300	0	0	0	0	0	0	0	200	903	0	0	0	0	0	0	0	603	903	0
487	6	0	0	0	0	0	0	200	300	0	0	0	0	0	0	0	200	903	0	0	0	0	0	0	0	603	903	0
487	7	0	0	0	0	0	0	200	300	0	0	0	0	0	0	0	200	903	0	0	0	0	0	0	0	603	903	0
487	8	0	0	0	0	0	0	200	300	0	0	0	0	0	0	0	200	903	0	0	0	0	0	0	0	603	903	0
487	9	0	0	0	0	0	0	200	300	0	0	0	0	0	0	0	200	903	0	0	0	0	0	0	0	603	903	0
488	0	0	0	0	0	0	0	200	300	0	0	0	0	0	0	0	200	903	0	0	0	0	0	0	0	603	903	0
488	1	0	0	0	0	0	0	200	300	0	0	0	0	0	0	0	200	903	0	0	0	0	0	0	0	603	903	0
488	2	0	0	0	0	0	0	200	300	0	0	0	0	0	0	0	200	903	0	0	0	0	0	0	0	603	903	0
488	3	0	0	0	0	0	0	200	300	0	0	0	0	0	0	0	200	903	0	0	0	0	0	0	0	603	903	0
488	4	0	0	0	0	0	0	200	300	0	0	0	0	0	0	0	200	903	0	0	0	0	0	0	0	603	903	0
488	5	0	0	0	0	0	0	200	300	0	0	0	0	0	0	0	200	903	0	0	0	0	0	0	0	603	903	0
488	6	0	0	0	0	0	0	200	300	0	0	0	0	0	0	0	200	903	0	0	0	0	0	0	0	603	903	0
488	7	0	0	0	0	0	0	200	300	0	0	0	0	0	0	0	200	903	0	0	0	0	0	0	0	603	903	0
488	8	0	0	0	0	0	0	200	300	0	0	0	0	0	0	0	200	903	0	0	0	0	0	0	0	603	903	0
488	9	0	0	0	0	0	0	200	300	0	0	0	0	0	0	0	200	903	0	0	0	0	0	0	0	603	903	0
489	0	0	0	0	0	0	0	200	300	0	0	0	0	0	0	0	200	903	0	0	0	0	0	0	0	603	903	0
489	1	0	0	0	0	0	0	200	300	0	0	0	0	0	0	0	200	903	0	0	0	0	0	0	0	603	903	0
489	2	0	0	0	0	0	0	200	300	0	0	0	0	0	0	0	200	903	0	0	0	0	0	0	0	603	903	0
489	3	0	0	0	0	0	0	200	300	0	0	0	0	0	0	0	200	903	0	0	0	0	0	0	0	603	903	0
489	4	0	0	0	0	0	0	200	300	0	0	0	0	0	0	0	200	903	0	0	0	0	0	0	0	603	903	0
489	5	0	0	0	0	0	0	200	300	0	0	0	0	0	0	0	200	903	0	0	0	0	0	0	0	603	903	0
489	6	0	0	0	0	0	0	200	300	0	0	0	0	0	0	0	200	903	0	0	0	0	0	0	0	603	903	0
489	7	0	0	0	0	0	0	200	300	0	0	0	0	0	0	0	200	903	0	0	0	0	0	0	0	603	903	0
489	8	0	0	0	0	0	0	200	300	0	0	0	0	0	0	0	200	903	0	0	0	0	0	0	0	603	903	0
489	9	0	0	0	0	0	0	200	300	0	0	0	0	0	0	0	200	903	0	0	0	0	0	0	0	603	903	0
490	0	0	0	0	0	0	0	200	300	0	0	0	0	0	0	0	200	903	0	0	0	0	0	0	0	603	903	0
490	1	0	0	0	0	0	0	200	300	0	0	0	0	0	0	0	200	903	0	0	0	0	0	0	0	603	903	0
490	2	0	0	0	0	0	0	200	300	0	0	0	0	0	0	0	200	903	0	0	0	0	0	0	0	603	903	0
490	3	0	0	0	0	0	0	200	300	0	0	0	0	0	0	0	200	903	0	0	0	0	0	0	0	603	903	0
490	4	0	0	0	0	0	0	200	300	0	0	0	0	0	0	0	200	903	0	0	0	0	0	0	0	603	903	0
490	5	0	0	0	0	0	0	200	300	0	0	0	0	0	0	0	200	903	0	0	0	0	0	0	0	603	903	0
490	6	0	0	0	0	0	0	200	300	0	0	0	0	0	0	0	200	903	0	0	0	0	0	0	0	603	903	0
490	7	0	0	0	0	0	0	200	300	0	0	0	0	0	0	0	200	903	0	0	0	0	0	0	0	603	903	0
490	8	0	0	0	0	0	0	200	300	0	0	0	0	0	0	0	200	903	0	0	0	0	0	0	0	603	903	0
490	9	0	0	0	0	0	0	200	300	0	0	0	0	0	0	0	200	903	0	0	0	0	0	0	0	603	903	0
491	0	0	0	0	0	0	0	200	300	0	0	0	0	0	0	0	200	903	0	0	0	0	0	0	0	603	903	0
491	1	0	0	0	0	0	0	200	300	0	0	0	0	0	0	0	200	903	0	0	0	0	0	0	0	603	903	0
491	2	0	0	0	0	0	0	200	300	0	0	0	0	0	0	0	200	903	0	0	0	0	0	0	0	603	903	0
491	3	0	0	0	0	0	0	200	300	0	0	0	0	0	0	0	200	903	0	0	0	0	0	0	0	603	903	0
491	4	0	0	0	0	0	0	200	300	0	0	0	0	0	0	0	200	903	0	0	0	0	0	0	0	603	903	0
491	5	0	0	0	0	0	0	200	300	0	0	0	0	0	0	0	200	903	0	0	0	0	0	0	0	603	903	0
491	6	0	0	0	0	0	0	200	300	0	0	0	0	0	0	0	200	903	0	0	0	0	0	0	0	603	903	0
491	7	0	0	0	0	0	0	200	300	0	0	0	0	0	0	0	200	903	0	0	0	0	0	0	0	603	903	0
491	8	0	0	0	0	0	0	200	300	0	0	0	0	0	0	0	200	903	0	0	0	0	0	0	0	603	903	0
491	9	0	0	0	0	0	0	200	300	0	0	0	0	0	0	0	200	903	0	0	0	0	0	0	0	603	903	0
492	0	0	0	0	0	0	0	200	300	0	0	0	0	0	0	0	200	903	0	0	0	0	0	0	0	603	903	0
492	1	0	0	0	0	0	0	200	300	0	0	0	0	0	0	0	200	903	0	0	0	0	0	0	0	603	903	0
492	2	0	0	0	0	0	0	200	300	0	0	0	0	0	0	0	200	903	0	0	0	0	0	0	0	603	903	0
492	3	0	0	0	0	0	0	200	300	0	0	0	0	0	0	0	200	903	0	0	0	0	0	0	0	603	903	0
492	4	0	0	0	0	0	0	200	300	0	0	0	0	0	0	0	200	903	0	0	0	0	0	0	0	603	903	0
492	5	0	0	0	0	0	0	200	300	0	0	0	0	0	0	0	200	903	0	0	0	0	0	0	0	603	903	0
492	6	0	0	0	0	0	0	200	300	0	0	0	0	0	0	0	200	903	0	0	0	0	0	0	0	603	903	0
492	7	0	0	0	0	0	0	200	300	0	0	0	0	0	0	0	200	903	0	0	0	0	0	0	0	603	903	0
492	8	0	0	0	0	0	0	200	300	0	0	0	0	0	0	0	200	903	0	0	0	0	0	0	0	603	903	0
492	9	0	0	0	0	0	0	200	300	0	0	0	0	0	0	0	200	903	0	0	0	0	0	0	0	603	903	0
493	0	0	0	0	0	0	0	200	300	0	0	0	0	0	0	0	200	903	0	0	0	0	0	0	0	603	903	0
493	1	0	0	0	0	0	0	200	300	0	0	0	0	0	0	0	200	903	0	0	0	0	0	0	0	603	903	0
493	2	0	0	0	0	0	0	200	300	0	0	0	0	0	0	0	200	903	0	0	0	0	0	0	0	603	903	0
493	3	0	0	0	0	0	0	200	300	0	0	0	0	0	0	0	200	903	0	0	0	0	0	0	0	603	903	0
493	4	0	0	0	0	0	0	200	300	0	0	0	0	0	0	0	200	903	0	0	0	0	0	0	0	603	903	0
493	5	0	0	0	0	0	0	200	300	0	0	0	0	0	0	0	200	903	0	0	0	0	0	0	0	603	903	0
493	6	0	0	0	0	0	0	200	300	0	0	0	0	0	0	0	200	903	0	0	0	0	0	0	0	603	903	0
493	7	0	0	0	0	0	0	200	300	0	0	0	0	0	0	0	200	903	0	0	0	0	0	0	0	603	903	0
493	8	0	0	0	0	0	0	200	300	0	0	0	0	0	0	0	200	903	0	0	0	0	0	0	0	603	903	0
493	9	0	0	0	0	0	0	200	300	0	0	0	0	0	0	0	200	903	0	0	0	0	0	0	0	603	903	0
494	0	0	0	0	0	0	0	200	300	0	0	0	0	0	0	0	200	903	0	0	0	0	0	0	0	603	903	0
494	1	0	0	0	0	0	0	200	300	0	0	0	0	0	0	0	200	903	0	0	0	0	0	0	0	603	903	0
494	2	0	0	0	0	0	0	200	300	0	0	0	0	0	0	0	200	903	0	0	0	0	0	0	0	603	903	0
494	3	0	0	0	0	0	0	200	300	0	0	0	0	0	0	0	200	903	0	0	0	0	0	0	0	603	903	0
494	4	0	0	0	0	0	0	200	300	0	0	0	0	0	0	0	200	903	0	0	0	0	0	0	0	603	903	0
494	5	0	0	0	0	0	0	200	300	0	0	0	0	0	0	0	200	903	0	0	0	0	0	0	0	603	903	0
494	6	0	0	0	0	0	0	200	300	0	0	0	0	0	0	0	200	903	0	0	0	0	0	0	0	603	903	0
494	7	0	0	0	0	0	0	200	300	0	0	0	0	0	0	0	200	903	0	0	0	0	0	0	0	603	903	0
494	8	0	0	0	0	0	0	200	300	0	0	0	0	0	0	0	200	903	0	0	0	0	0	0	0	603	903	0
494	9	0	0	0	0	0	0	200	300	0	0	0	0	0	0	0	200	903	0	0	0	0	0	0	0	603	903	0
495	0	0	0	0	0	0	0	200	300	0	0	0	0	0	0	0	200	903	0	0	0	0	0	0	0	603	903	0
495	1	0	0	0	0	0	0	200	300	0	0	0	0	0	0	0	200	903	0	0	0	0	0	0	0	603	903	0
495	2	0	0	0	0	0	0	200	300	0	0	0	0	0	0	0	200	903	0	0	0	0	0	0	0	603	903	0
495	3	0	0	0	0	0	0	200	300	0	0	0	0	0	0	0	200	903	0	0	0	0	0	0	0	603	903	0
495	4	0	0	0	0	0	0	200	300	0	0	0	0	0	0	0	200	903	0	0	0	0	0	0	0	603	903	0
495	5	0	0	0	0	0	0	200	300	0	0	0	0	0	0	0	200	903	0	0	0	0	0	0	0	603	903	0
495	6	0	0	0	0	0	0	200	300	0	0	0	0	0	0	0	200	903	0	0	0	0	0	0	0	603	903	0
495	7	0	0	0	0	0	0	200	300	0	0	0	0	0	0	0	200	903	0	0	0	0	0	0	0	603	903	0
495	8	0	0	0	0	0	0	200	300	0	0	0	0	0	0	0	200	903	0	0	0	0	0	0	0	603	903	0
495	9	0	0	0	0	0	0	200	300	0	0	0	0	0	0	0	200	903	0	0	0	0	0	0	0	603	903	0
496	0	0	0	0	0	0	0	200	300	0	0	0	0	0	0	0	200	903	0	0	0	0	0	0	0	603	903	0
496	1	0	0	0	0	0	0	200	300	0	0	0	0	0	0	0	200	903	0	0	0	0	0	0	0	603	903	0
496	2	0	0	0	0	0	0	200	300	0	0	0	0	0	0	0	200	903	0	0	0	0	0	0	0	603	903	0
496	3	0	0	0	0	0	0	200	300	0	0	0	0	0	0	0	200	903	0	0	0	0	0	0	0	603	903	0
496	4	0	0	0	0	0	0	200	300	0	0	0	0	0	0	0	200	903	0	0	0	0	0	0	0	603	903	0
496	5	0	0	0	0	0	0	200	300	0	0	0	0	0	0	0	200	903	0	0	0	0	0	0	0	603	903	0
496	6	0	0	0	0	0	0	200	300	0	0	0	0	0	0	0	200	903	0	0	0	0	0	0	0	603	903	0
496	7	0	0	0	0	0	0	200	300	0	0	0	0	0	0	0	200	903	0	0	0	0	0	0	0	603	903	0
496	8	0	0	0	0	0	0	200	300	0	0	0	0	0	0	0	200	903	0	0	0	0	0	0	0	603	903	0
496	9	0	0	0	0	0	0	200	300	0	0	0	0	0	0	0	200	903	0	0	0	0	0	0	0	603	903	0
497	0	0	0	0	0	0	0	200	300	0	0	0	0	0	0	0	200	903	0	0	0	0	0	0	0	603	903	0
497	1	0	0	0	0	0	0	200	300	0	0	0	0	0	0	0	200	903	0	0	0	0	0	0	0	603	903	0
497	2	0	0	0	0	0	0	200	300	0	0	0	0	0	0	0	200	903	0	0	0	0	0	0	0	603	903	0
497	3	0	0	0	0	0	0	200	300	0	0	0	0	0	0	0	200	903	0	0	0	0	0	0	0	603	903	0
497	4	0	0	0	0	0	0	200	300	0	0	0	0	0	0	0	200	903	0	0	0	0	0	0	0	603	903	0
497	5	0	0	0	0	0	0	200	300	0	0	0	0	0	0	0	200	903	0	0	0	0	0	0	0	603	903	0
497	6	0	0	0	0	0	0	200	300	0	0	0	0	0	0	0	200	903	0	0	0	0	0	0	0	603	903	0
497	7	0	0	0	0	0	0	200	300	0	0	0	0	0	0	0	200	903	0	0	0	0	0	0	0	603	903	0
497	8	0	0	0	0	0	0	200	300	0	0	0	0	0	0	0	200	903	0	0	0	0	0	0	0	603	903	0
497	9	0	0	0	0	0	0	200	300	0	0	0	0	0	0	0	200	903	0	0	0	0	0	0	0	603	903	0
498	0	0	0	0	0	0	0	200	300	0	0	0	0	0	0	0	200	903	0	0	0	0	0	0	0	603	903	0
498	1	0	0	0	0	0	0	200	300	0	0	0	0	0	0	0	200	903	0	0	0	0	0	0	0	603	903	0
498	2	0	0	0	0	0	0	200	300	0	0	0	0	0	0	0	200	903	0	0	0	0	0	0	0	603	903	0
498	3	0	0	0	0	0	0	200	300	0	0	0	0	0	0	0	200	903	0	0	0	0	0	0	0	603	903	0
498	4	0	0	0	0	0	0	200	300	0	0	0	0	0	0	0	200	903	0	0	0	0	0	0	0	603	903	0
498	5	0	0	0	0	0	0	200	300	0	0	0	0	0	0	0	200	903	0	0	0	0	0	0	0	603	903	0
498	6	0	0	0	0	0	0	200	300	0	0	0	0	0	0	0	200	903	0	0	0	0	0	0	0	603	903	0
498	7	0	0	0	0	0	0	200	300	0	0	0	0	0	0	0	200	903	0	0	0	0	0	0	0	603	903	0
498	8	0	0	0	0	0	0	200	300	0	0	0	0	0	0	0	200	903	0	0	0	0	0	0	0	603	903	0
498	9	0	0	0	0	0	0	200	300	0	0	0	0	0	0	0	200	903	0	0	0	0	0	0	0	603	903	0
499	0	0	0	0	0	0	0	200	300	0	0	0	0	0	0	0	200	903	0	0	0	0	0	0	0	603	903	0
499	1	0	0	0	0	0	0	200	300	0	0	0	0	0	0	0	200	903	0	0	0	0	0	0	0	603	903	0
499	2	0	0	0	0	0	0	200	300	0	0	0	0	0	0	0	200	903	0	0	0	0	0	0	0	603	903	0
499	3	0	0	0	0	0	0	200	300	0	0	0	0	0	0	0	200	903	0	0	0	0	0	0	0	603	903	0
499	4	0	0	0	0	0	0	200	300	0	0	0	0	0	0	0	200	903	0	0	0	0	0	0	0	603	903	0
499	5	0	0	0	0	0	0	200	300	0	0	0	0	0	0	0	200	903	0	0	0	0	0	0	0	603	903	0
499	6	0	0	0	0	0	0	200	300	0	0	0	0	0	0	0	200	903	0	0	0	0	0	0	0	603	903	0
499	7	0	0	0	0	0	0	200	300	0	0	0	0	0	0	0	200	903	0	0	0	0	0	0	0	603	903	0
499	8	0	0	0	0	0	0	200	300	0	0	0	0	0	0	0	200	903	0	0	0	0	0	0	0	603	903	0
499	9	0	0	0	0	0	0	200	300	0	0	0	0	0	0	0	200	903	0	0	0	0	0	0	0	603	903	0
500	0	0	0	0	0	0	0	200	300	0	0	0	0	0	0	0	200	903	0	0	0	0	0	0	0	603	903	0
500	1	0	0	0	0	0	0	200	300	0	0	0	0	0	0	0	200	903	0	0	0	0	0	0	0	603	903	0
500	2	0	0	0	0	0	0	200	300	0	0	0	0	0	0	0	200	903	0	0	0	0	0	0	0	603	903	0
500	3	0	0	0	0	0	0	200	300	0	0	0	0	0	0	0	200	903	0	0	0	0	0	0	0	603	903	0
500	4	0	0	0	0	0	0	200	300	0	0	0	0	0	0	0	200	903	0	0	0	0	0	0	0	603	903	0
500	5	0	0	0	0	0	0	200	300	0	0	0	0	0	0	0	200	903	0	0	0	0	0	0	0	603	903	0
500	6	0	0	0	0	0	0	200	300	0	0	0	0	0	0	0	200	903	0	0	0	0	0	0	0	603	903	0
500	7	0	0	0	0	0	0	200	300	0	0	0	0	0	0	0	200	903	0	0	0	0	0	0	0	603	903	0
500	8	0	0	0	0	0	0	200	300	0	0	0	0	0	0	0	200	903	0	0	0	0	0	0	0	603	903	0
500	9	0	0	0	0	0	0	200	300	0	0	0	0	0	0	0	200	903	0	0	0	0	0	0	0	603	903	0
501	0	0	0	0	0	0	0	200	300	0	0	0	0	0	0	0	200	903	0	0	0	0	0	0	0	603	903	0
501	1	0	0	0	0	0	0	200	300	0	0	0	0	0	0	0	200	903	0	0	0	0	0	0	0	603	903	0
501	2	0	0	0	0	0	0	200	300	0	0	0	0	0	0	0	200	903	0	0	0	0	0	0	0	603	903	0
501	3	0	0	0	0	0	0	200	300	0	0	0	0	0	0	0	200	903	0	0	0	0	0	0	0	603	903	0
501	4	0	0	0	0	0	0	200	300	0	0	0	0	0	0	0	200	903	0	0	0	0	0	0	0	603	903	0
501	5	0	0	0	0	0	0	200	300	0	0	0	0	0	0	0	200	903	0	0	0	0	0	0	0	603	903	0
501	6	0	0	0	0	0	0	200	300	0	0	0	0	0	0	0	200	903	0	0	0	0	0	0	0	603	903	0
501	7	0	0	0	0	0	0	200	300	0	0	0	0	0	0	0	200	903	0	0	0	0	0	0	0	603	903	0
501	8	0	0	0	0	0	0	200	300	0	0	0	0	0	0	0	200	903	0	0	0	0	0	0	0	603	903	0
501	9	0	0	0	0	0	0	200	300	0	0	0	0	0	0	0	200	903	0	0	0	0	0	0	0	603	903	0
502	0	0	0	0	0	0	0	200	300	0	0	0	0	0	0	0	200	903	0	0	0	0	0	0	0	603	903	0
502	1	0	0	0	0	0	0	200	300	0	0	0	0	0	0	0	200	903	0	0	0	0	0	0	0	603	903	0
502	2	0	0	0	0	0	0	200	300	0	0	0	0	0	0	0	200	903	0	0	0	0	0	0	0	603	903	0
502	3	0	0	0	0	0	0	200	300	0	0	0	0	0	0	0	200	903	0	0	0	0	0	0	0	603	903	0
502	4	0	0	0	0	0	0	200	300	0	0	0	0	0	0	0	200	903	0	0	0	0	0	0	0	603	903	0
502	5	0	0	0	0	0	0	200	300	0	0	0	0	0	0	0	200	903	0	0	0	0	0	0	0	603	903	0
502	6	0	0	0	0	0	0	200	300	0	0	0	0	0	0	0	200	903	0	0	0	0	0	0	0	603	903	0
502	7	0	0	0	0	0	0	200	300	0	0	0	0	0	0	0	200	903	0	0	0	0	0	0	0	603	903	0
502	8	0	0	0	0	0	0	200	300	0	0	0	0	0	0	0	200	903	0	0	0	0	0	0	0	603	903	0
502	9	0	0	0	0	0	0	200	300	0	0	0	0	0	0	0	200	903	0	0	0	0	0	0	0	603	903	0
503	0	0	0	0	0	0	0	200	300	0	0	0	0	0	0	0	200	903	0	0	0	0	0	0	0	603	903	0
503	1	0	0	0	0	0	0	200	300	0	0	0	0	0	0	0	200	903	0	0	0	0	0	0	0	603	903	0
503	2	0	0	0	0	0	0	200	300	0	0	0	0	0	0	0	200	903	0	0	0	0	0	0	0	603	903	0
503	3	0	0	0	0	0	0	200	300	0	0	0	0	0	0	0	200	903	0	0	0	0	0	0	0	603	903	0
503	4	0	0	0	0	0	0	200	300	0	0	0	0	0	0	0	200	903	0	0	0	0	0	0	0	603	903	0
503	5	0	0	0	0	0	0	200	300	0	0	0	0	0	0	0	200	903	0	0	0	0	0	0	0	603	903	0
503	6	0	0	0	0	0	0	200	300	0	0	0	0	0	0	0	200	903	0	0	0	0	0	0	0	603	903	0
503	7	0	0	0	0	0	0	200	300	0	0	0	0	0	0	0	200	903	0	0	0	0	0	0	0	603	903	0
503	8	0	0	0	0	0	0	200	300	0	0	0	0	0	0	0	200	903	0	0	0	0	0	0	0	603	903	0
503	9	0	0	0	0	0	0	200	300	0	0	0	0	0	0	0	200	903	0	0	0	0	0	0	0	603	903	0
504	0	0	0	0	0	0	0	200	300	0	0	0	0	0	0	0	200	903	0	0	0	0	0	0	0	603	903	0
504	1	0	0	0	0	0	0	200	300	0	0	0	0	0	0	0	200	903	0	0	0	0	0	0	0	603	903	0
504	2	0	0	0	0	0	0	200	300	0	0	0	0	0	0	0	200	903	0	0	0	0	0	0	0	603	903	0
504	3	0	0	0	0	0	0	200	300	0	0	0	0	0	0	0	200	903	0	0	0	0	0	0	0	603	903	0
504	4	0	0	0	0	0	0	200	300	0	0	0	0	0	0	0	200	903	0	0	0	0	0	0	0	603	903	0
504	5	0	0	0	0	0	0	200	300	0	0	0	0	0	0	0	200	903	0	0	0	0	0	0	0	603	903	0
504	6	0	0	0	0	0	0	200	300	0	0	0	0	0	0	0	200	903	0	0	0	0	0	0	0	603	903	0
504	7	0	0	0	0	0	0	200	300	0	0	0	0	0	0	0	200	903	0	0	0	0	0	0	0	603	903	0
504	8	0	0	0	0	0	0	200	300	0	0	0	0	0	0	0	200	903	0	0	0	0	0	0	0	603	903	0
504	9	0	0	0	0	0	0	200	300	0	0	0	0	0	0	0	200	903	0	0	0	0	0	0	0	603	903	0
505	0	0	0	0	0	0	0	200	300	0	0	0	0	0	0	0	200	903	0	0	0	0	0	0	0	603	903	0
505	1	0	0	0	0	0	0	200	300	0	0	0	0	0	0	0	200	903	0	0	0	0	0	0	0	603	903	0
505	2	0	0	0	0	0	0	200	300	0	0	0	0	0	0	0	200	903	0	0	0	0	0	0	0	603	903	0
505	3	0	0	0	0	0	0	200	300	0	0	0	0	0	0	0	200	903	0	0	0	0	0	0	0	603	903	0
505	4	0	0	0	0	0	0	200	300	0	0	0	0	0	0	0	200	903	0	0	0	0	0	0	0	603	903	0
505	5	0	0	0	0	0	0	200	300	0	0	0	0	0	0	0	200	903	0	0	0	0	0	0	0	603	903	0
505	6	0	0	0	0	0	0	200	300	0	0	0	0	0	0	0	200	903	0	0	0	0	0	0	0	603	903	0
505	7	0	0	0	0	0	0	200	300	0	0	0	0	0	0	0	200	903	0	0	0	0	0	0	0	603	903	0
505	8	0	0	0	0	0	0	200	300	0	0	0	0	0	0	0	200	903	0	0	0	0	0	0	0	603	903	0
505	9	0	0	0	0	0	0	200	300	0	0	0	0	0	0	0	200	903	0	0	0	0	0	0	0	603	903	0
506	0	0	0	0	0	0	0	200	300	0	0	0	0	0	0	0	200	903	0	0	0	0	0	0	0	603	903	0
506	1	0	0	0	0	0	0	200	300	0	0	0	0	0	0	0	200	903	0	0	0	0	0	0	0	603	903	0
506	2	0	0	0	0	0	0	200	300	0	0	0	0	0	0	0	200	903	0	0	0	0	0	0	0	603	903	0
506	3	0	0	0	0	0	0	200	300	0	0	0	0	0	0	0	200	903	0	0	0	0	0	0	0	603	903	0
506	4	0	0	0	0	0	0	200	300	0	0	0	0	0	0	0	200	903	0	0	0	0	0	0	0	603	903	0
506	5	0	0	0	0	0	0	200	300	0	0	0	0	0	0	0	200	903	0	0	0	0	0	0	0	603	903	0
506	6	0	0	0	0	0	0	200	300	0	0	0	0	0	0	0	200	903	0	0	0	0	0	0	0	603	903	0
506	7	0	0	0	0	0	0	200	300	0	0	0	0	0	0	0	200	903	0	0	0	0	0	0	0	603	903	0
506	8	0	0	0	0	0	0	200	300	0	0	0	0	0	0	0	200	903	0	0	0	0	0	0	0	603	903	0
506	9	0	0	0	0	0	0	200	300	0	0	0	0	0	0	0	200	903	0	0	0	0	0	0	0	603	903	0
507	0	0	0	0	0	0	0	200	300	0	0	0	0	0	0	0	200	903	0	0	0	0	0	0	0	603	903	0
507	1	0	0	0	0	0	0	200	300	0	0	0	0	0	0	0	200	903	0	0	0	0	0	0	0	603	903	0
507	2	0	0	0	0	0	0	200	300	0	0	0	0	0	0	0	200	903	0	0	0	0	0	0	0	603	903	0
507	3	0	0	0	0	0	0	200	300	0	0	0	0	0	0	0	200	903	0	0	0	0	0	0	0	603	903	0
507	4	0	0	0	0	0	0	200	300	0	0	0	0	0	0	0	200	903	0	0	0	0	0	0	0	603	903	0
507	5	0	0	0	0	0	0	200	300	0	0	0	0	0	0	0	200	903	0	0	0	0	0	0	0	603	903	0
507	6	0	0	0	0	0	0	200	300	0	0	0	0	0	0	0	200	903	0	0	0	0	0	0	0	603	903	0
507	7	0	0	0	0	0	0	200	300	0	0	0	0	0	0	0	200	903	0	0	0	0	0	0	0	603	903	0
507	8	0	0	0	0	0	0	200	300	0	0	0	0	0	0	0	200	903	0	0	0	0	0	0	0	603	903	0
507	9	0	0	0	0	0	0	200	300	0	0	0	0	0	0	0	200	903	0	0	0	0	0	0	0	603	903	0
508	0	0	0	0	0	0	0	200	300	0	0	0	0	0	0	0	200	903	0	0	0	0	0	0	0	603	903	0
508	1	0	0	0	0	0	0	200	300	0	0	0	0	0	0	0	200	903	0	0	0	0	0	0	0	603	903	0
508	2	0	0	0	0	0	0	200	300	0	0	0	0	0	0	0	200	903	0	0	0	0	0	0	0	603	903	0
508	3	0	0	0	0	0	0	200	300	0	0	0	0	0	0	0	200	903	0	0	0	0	0	0	0	603	903	0
508	4	0	0	0	0	0	0	200	300	0	0	0	0	0	0	0	200	903	0	0	0	0	0	0	0	603	903	0
508	5	0	0	0	0	0	0	200	300	0	0	0	0	0	0	0	200	903	0	0	0	0	0	0	0	603	903	0
508	6	0	0	0	0	0	0	200	300	0	0	0	0	0	0	0	200	903	0	0	0	0	0	0	0	603	903	0
508	7	0	0	0	0	0	0	200	300	0	0	0	0	0	0	0	200	903	0	0	0	0	0	0	0	603	903	0
508	8	0	0	0	0	0	0	200	300	0	0	0	0	0	0	0	200	903	0	0	0	0	0	0	0	603	903	0
508	9	0	0	0	0	0	0	200	300	0	0	0	0	0	0	0	200	903	0	0	0	0	0	0	0	603	903	0
509	0	0	0	0	0	0	0	200	300	0	0	0	0	0	0	0	200	903	0	0	0	0	0	0	0	603	903	0
509	1	0	0	0	0	0	0	200	300	0	0	0	0	0	0	0	200	903	0	0	0	0	0	0	0	603	903	0
509	2	0	0	0	0	0	0	200	300	0	0	0	0	0	0	0	200	903	0	0	0	0	0	0	0	603	903	0
509	3	0	0	0	0	0	0	200	300	0	0	0	0	0	0	0	200	903	0	0	0	0	0	0	0	603	903	0
509	4	0	0	0	0	0	0	200	300	0	0	0	0	0	0	0	200	903	0	0	0	0	0	0	0	603	903	0
509	5	0	0	0	0	0	0	200	300	0	0	0	0	0	0	0	200	903	0	0	0	0	0	0	0	603	903	0
509	6	0	0	0	0	0	0	200	300	0	0	0	0	0	0	0	200	903	0	0	0	0	0	0	0	603	903	0
509	7	0	0	0	0	0	0	200	300	0	0	0	0	0	0	0	200	903	0	0	0	0	0	0	0	603	903	0
509	8	0	0	0	0	0	0	200	300	0	0	0	0	0	0	0	200	903	0	0	0	0	0	0	0	603	903	0
509	9	0	0	0	0	0	0	200	300	0	0	0	0	0	0	0	200	903	0	0	0	0	0	0	0	603	903	0
510	0	0	0	0	0	0	0	200	300	0	0	0	0	0	0	0	200	903	0	0	0	0	0	0	0	603	903	0
510	1	0	0	0	0	0	0	200	300	0	0	0	0	0	0	0	200	903	0	0	0	0	0	0	0	603	903	0
510	2	0	0	0	0	0	0	200	300	0	0	0	0	0	0	0	200	903	0	0	0	0	0	0	0	603	903	0
510	3	0	0	0	0	0	0	200	300	0	0	0	0	0	0	0	200	903	0	0	0	0	0	0	0	603	903	0
510	4	0	0	0	0	0	0	200	300	0	0	0	0	0	0	0	200	903	0	0	0	0	0	0	0	603	903	0
510	5	0	0	0	0	0	0	200	300	0	0	0	0	0	0	0	200	903	0	0	0	0	0	0	0	603	903	0
510	6	0	0	0	0	0	0	200	300	0	0	0	0	0	0	0	200	903	0	0	0	0	0	0	0	603	903	0
510	7	0	0	0	0	0	0	200	300	0	0	0	0	0	0	0	200	903	0	0	0	0	0	0	0	603	903	0
510	8	0	0	0	0	0	0	200	300	0	0	0	0	0	0	0	200	903	0	0	0	0	0	0	0	603	903	0
510	9	0	0	0	0	0	0	200	300	0	0	0	0	0	0	0	200	903	0	0	0	0	0	0	0	603	903	0
511	0	0	0	0	0	0	0	200	300	0	0	0	0	0	0	0	200	903	0	0	0	0	0	0	0	603	903	0
511	1	0	0	0	0	0	0	200	300	0	0	0	0	0	0	0	200	903	0	0	0	0	0	0	0	603	903	0
511	2	0	0	0	0	0	0	200	300	0	0	0	0	0	0	0	200	903	0	0	0	0	0	0	0	603	903	0
511	3	0	0	0	0	0	0	200	300	0	0	0	0	0	0	0	200	903	0	0	0	0	0	0	0	603	903	0
511	4	0	0	0	0	0	0	200	300	0	0	0	0	0	0	0	200	903	0	0	0	0	0	0	0	603	903	0
511	5	0	0	0	0	0	0	200	300	0	0	0	0	0	0	0	200	903	0	0	0	0	0	0	0	603	903	0
511	6	0	0	0	0	0	0	200	300	0	0	0	0	0	0	0	200	903	0	0	0	0	0	0	0	603	903	0
511	7	0	0	0	0	0	0	200	300	0	0	0	0	0	0	0	200	903	0	0	0	0	0	0	0	603	903	0
511	8	0	0	0	0	0	0	200	300	0	0	0	0	0	0	0	200	903	0	0	0	0	0	0	0	603	903	0
511	9	0	0	0	0	0	0	200	300	0	0	0	0	0	0	0	200	903	0	0	0	0	0	0	0	603	903	0
512	0	0	0	0	0	0	0	200	300	0	0	0	0	0	0	0	200	903	0	0	0	0	0	0	0	603	903	0
512	1	0	0	0	0	0	0	200	300	0	0	0	0	0	0	0	200	903	0	0	0	0	0	0	0	603	903	0
512	2	0	0	0	0	0	0	200	300	0	0	0	0	0	0	0	200	903	0	0	0	0	0	0	0	603	903	0
512	3	0	0	0	0	0	0	200	300	0	0	0	0	0	0	0	200	903	0	0	0	0	0	0	0	603	903	0
512	4	0	0	0	0	0	0	200	300	0	0	0	0	0	0	0	200	903	0	0	0	0	0	0	0	603	903	0
512	5	0	0	0	0	0	0	200	300	0	0	0	0	0	0	0	200	903	0	0	0	0	0	0	0	603	903	0
512	6	0	0	0	0	0	0	200	300	0	0	0	0	0	0	0	200	903	0	0	0	0	0	0	0	603	903	0
512	7	0	0	0	0	0	0	200	300	0	0	0	0	0	0	0	200	903	0	0	0	0	0	0	0	603	903	0
512	8	0	0	0	0	0	0	200	300	0	0	0	0	0	0	0	200	903	0	0	0	0	0	0	0	603	903	0
512	9	0	0	0	0	0	0	200	300	0	0	0	0	0	0	0	200	903	0	0	0	0	0	0	0	603	903	0
513	0	0	0	0	0	0	0	200	300	0	0	0	0	0	0	0	200	903	0	0	0	0	0	0	0	603	903	0
513	1	0	0	0	0	0	0	200	300	0	0	0	0	0	0	0	200	903	0	0	0	0	0	0	0	603	903	0
513	2	0	0	0	0	0	0	200	300	0	0	0	0	0	0	0	200	903	0	0	0	0	0	0	0	603	903	0
513	3	0	0	0	0	0	0	200	300	0	0	0	0	0	0	0	200	903	0	0	0	0	0	0	0	603	903	0
513	4	0	0	0	0	0	0	200	300	0	0	0	0	0	0	0	200	903	0	0	0	0	0	0	0	603	903	0
513	5	0	0	0	0	0	0	200	300	0	0	0	0	0	0	0	200	903	0	0	0	0	0	0	0	603	903	0
513	6	0	0	0	0	0	0	200	300	0	0	0	0	0	0	0	200	903	0	0	0	0	0	0	0	603	903	0
513	7	0	0	0	0	0	0	200	300	0	0	0	0	0	0	0	200	903	0	0	0	0	0	0	0	603	903	0
513	8	0	0	0	0	0	0	200	300	0	0	0	0	0	0	0	200	903	0	0	0	0	0	0	0	603	903	0
513	9	0	0	0	0	0	0	200	300	0	0	0	0	0	0	0	200	903	0	0	0	0	0	0	0	603	903	0
514	0	0	0	0	0	0	0	200	300	0	0	0	0	0	0	0	200	903	0	0	0	0	0	0	0	603	903	0
514	1	0	0	0	0	0	0	200	300	0	0	0	0	0	0	0	200	903	0	0	0	0	0	0	0	603	903	0
514	2	0	0	0	0	0	0	200	300	0	0	0	0	0	0	0	200	903	0	0	0	0	0	0	0	603	903	0
514	3	0	0	0	0	0	0	200	300	0	0	0	0	0	0	0	200	903	0	0	0	0	0	0	0	603	903	0
514	4	0	0	0	0	0	0	200	300	0	0	0	0	0	0	0	200	903	0	0	0	0	0	0	0	603	903	0
514	5	0	0	0	0	0	0	200	300	0	0	0	0	0	0	0	200	903	0	0	0	0	0	0	0	603	903	0
514	6	0	0	0	0	0	0	200	300	0	0	0	0	0	0	0	200	903	0	0	0	0	0	0	0	603	903	0
514	7	0	0	0	0	0	0	200	300	0	0	0	0	0	0	0	200	903	0	0	0	0	0	0	0	603	903	0
514	8	0	0	0	0	0	0	200	300	0	0	0	0	0	0	0	200	903	0	0	0	0	0	0	0	603	903	0
514	9	0	0	0	0	0	0	200	300	0	0	0	0	0	0	0	200	903	0	0	0	0	0	0	0	603	903	0
515	0	0	0	0	0	0	0	200	300	0	0	0	0	0	0	0	200	903	0	0	0	0	0	0	0	603	903	0
515	1	0	0	0	0	0	0	200	300	0	0	0	0	0	0	0	200	903	0	0	0	0	0	0	0	603	903	0
515	2	0	0	0	0	0	0	200	300	0	0	0	0	0	0	0	200	903	0	0	0	0	0	0	0	603	903	0
515	3	0	0	0	0	0	0	200	300	0	0	0	0	0	0	0	200	903	0	0	0	0	0	0	0	603	903	0
515	4	0	0	0	0	0	0	200	300	0	0	0	0	0	0	0	200	903	0	0	0	0	0	0	0	603	903	0
515	5	0	0	0	0	0	0	200	300	0	0	0	0	0	0	0	200	903	0	0	0	0	0	0	0	603	903	0
515	6	0	0	0	0	0	0	200	300	0	0	0	0	0	0	0	200	903	0	0	0	0	0	0	0	603	903	0
515	7	0	0	0	0	0	0	200	300	0	0	0	0	0	0	0	200	903	0	0	0	0	0	0	0	603	903	0
515	8	0	0	0	0	0	0	200	300	0	0	0	0	0	0	0	200	903	0	0	0	0	0	0	0	603	903	0
515	9	0	0	0	0	0	0	200	300	0	0	0	0	0	0	0	200	903	0	0	0	0	0	0	0	603	903	0
516	0	0	0	0	0	0	0	200	300	0	0	0	0	0	0	0	200	903	0	0	0	0	0	0	0	603	903	0
516	1	0	0	0	0	0	0	200	300	0	0	0	0	0	0	0	200	903	0	0	0	0	0	0	0	603	903	0
516	2	0	0	0	0	0	0	200	300	0	0	0	0	0	0	0	200	903	0	0	0	0	0	0	0	603	903	0
516	3	0	0	0	0	0	0	200	300	0	0	0	0	0	0	0	200	903	0	0	0	0	0	0	0	603	903	0
516	4	0	0	0	0	0	0	200	300	0	0	0	0	0	0	0	200	903	0	0	0	0	0	0	0	603	903	0
516	5	0	0	0	0	0	0	200	300	0	0	0	0	0	0	0	200	903	0	0	0	0	0	0	0	603	903	0
516	6	0	0	0	0	0	0	200	300	0	0	0	0	0	0	0	200	903	0	0	0	0	0	0	0	603	903	0
516	7	0	0	0	0	0	0	200	300	0	0	0	0	0	0	0	200	903	0	0	0	0	0	0	0	603	903	0
516	8	0	0	0	0	0	0	200	300	0	0	0	0	0	0	0	200	903	0	0	0	0	0	0	0	603	903	0
516	9	0	0	0	0	0	0	200	300	0	0	0	0	0	0	0	200	903	0	0	0	0	0	0	0	603	903	0
517	0	0	0	0	0	0	0	200	300	0	0	0	0	0	0	0	200	903	0	0	0	0	0	0	0	603	903	0
517	1	0	0	0	0	0	0	200	300	0	0	0	0	0	0	0	200	903	0	0	0	0	0	0	0	603	903	0
517	2	0	0	0	0	0	0	200	300	0	0	0	0	0	0	0	200	903	0	0	0	0	0	0	0	603	903	0
517	3	0	0	0	0	0	0	200	300	0	0	0	0	0	0	0	200	903	0	0	0	0	0	0	0	603	903	0
517	4	0	0	0	0	0	0	200	300	0	0	0	0	0	0	0	200	903	0	0	0	0	0	0	0	603	903	0
517	5	0	0	0	0	0	0	200	300	0	0	0	0	0	0	0	200	903	0	0	0	0	0	0	0	603	903	0
517	6	0	0	0	0	0	0	200	300	0	0	0	0	0	0	0	200	903	0	0	0	0	0	0	0	603	903	0
517	7	0	0	0	0	0	0	200	300	0	0	0	0	0	0	0	200	903	0	0	0	0	0	0	0	603	903	0
517	8	0	0	0	0	0	0	200	300	0	0	0	0	0	0	0	200	903	0	0	0	0	0	0	0	603	903	0
517	9	0	0	0	0	0	0	200	300	0	0	0	0	0	0	0	200	903	0	0	0	0	0	0	0	603	903	0
518	0	0	0	0	0	0	0	200	300	0	0	0	0	0	0	0	200	903	0	0	0	0	0	0	0	603	903	0
518	1	0	0	0	0	0	0	200	300	0	0	0	0	0	0	0	200	903	0	0	0	0	0	0	0	603	903	0
518	2	0	0	0	0	0	0	200	300	0	0	0	0	0	0	0	200	903	0	0	0	0	0	0	0	603	903	0
518	3	0	0	0	0	0	0	200	300	0	0	0	0	0	0	0	200	903	0	0	0	0	0	0	0	603	903	0
518	4	0	0	0	0	0	0	200	300	0	0	0	0	0	0	0	200	903	0	0	0	0	0	0	0	603	903	0
518	5	0	0	0	0	0	0	200	300	0	0	0	0	0	0	0	200	903	0	0	0	0	0	0	0	603	903	0
518	6	0	0	0	0	0	0	200	300	0	0	0	0	0	0	0	200	903	0	0	0	0	0	0	0	603	903	0
518	7	0	0	0	0	0	0	200	300	0	0	0	0	0	0	0	200	903	0	0	0	0	0	0	0	603	903	0
518	8	0	0	0	0	0	0	200	300	0	0	0	0	0	0	0	200	903	0	0	0	0	0	0	0	603	903	0
518	9	0	0	0	0	0	0	200	300	0	0	0	0	0	0	0	200	903	0	0	0	0	0	0	0	603	903	0
519	0	0	0	0	0	0	0	200	300	0	0	0	0	0	0	0	200	903	0	0	0	0	0	0	0	603	903	0
519	1	0	0	0	0	0	0	200	300	0	0	0	0	0	0	0	200	903	0	0	0	0	0	0	0	603	903	0
519	2	0	0	0	0	0	0	200	300	0	0	0	0	0	0	0	200	903	0	0	0	0	0	0	0	603	903	0
519	3	0	0	0	0	0	0	200	300	0	0	0	0	0	0	0	200	903	0	0	0	0	0	0	0	603	903	0
519	4	0	0	0	0	0	0	200	300	0	0	0	0	0	0	0	200	903	0	0	0	0	0	0	0	603	903	0
519	5	0	0	0	0	0	0	200	300	0	0	0	0	0	0	0	200	903	0	0	0	0	0	0	0	603	903	0
519	6	0	0	0	0	0	0	200	300	0	0	0	0	0	0	0	200	903	0	0	0	0	0	0	0	603	903	0
519	7	0	0	0	0	0	0	200	300	0	0	0	0	0	0	0	200	903	0	0	0	0	0	0	0	603	903	0
519	8	0	0	0	0	0	0	200	300	0	0	0	0	0	0	0	200	903	0	0	0	0	0	0	0	603	903	0
519	9	0	0	0	0	0	0	200	300	0	0	0	0	0	0	0	200	903	0	0	0	0	0	0	0	603	903	0
520	0	0	0	0	0	0	0	200	300	0	0	0	0	0	0	0	200	903	0	0	0	0	0	0	0	603	903	0
520	1	0	0	0	0	0	0	200	300	0	0	0	0	0	0	0	200	903	0	0	0	0	0	0	0	603	903	0
520	2	0	0	0	0	0	0	200	300	0	0	0	0	0	0	0	200	903	0	0	0	0	0	0	0	603	903	0
520	3	0	0	0	0	0	0	200	300	0	0	0	0	0	0	0	200	903	0	0	0	0	0	0	0	603	903	0
520	4	0	0	0	0	0	0	200	300	0	0	0	0	0	0	0	200	903	0	0	0	0	0	0	0	603	903	0
520	5	0	0	0	0	0	0	200	300	0	0	0	0	0	0	0	200	903	0	0	0	0	0	0	0	603	903	0
520	6	0	0	0	0	0	0	200	300	0	0	0	0	0	0	0	200	903	0	0	0	0	0	0	0	603	903	0
520	7	0	0	0	0	0	0	200	300	0	0	0	0	0	0	0	200	903	0	0	0	0	0	0	0	603	903	0
520	8	0	0	0	0	0	0	200	300	0	0	0	0	0	0	0	200	903	0	0	0	0	0	0	0	603	903	0
520	9	0	0	0	0	0	0	200	300	0	0	0	0	0	0	0	200	903	0	0	0	0	0	0	0	603	903	0
521	0	0	0	0	0	0	0	200	300	0	0	0	0	0	0	0	200	903	0	0	0	0	0	0	0	603	903	0
521	1	0	0	0	0	0	0	200	300	0	0	0	0	0	0	0	200	903	0	0	0	0	0	0	0	603	903	0
521	2	0	0	0	0	0	0	200	300	0	0	0	0	0	0	0	200	903	0	0	0	0	0	0	0	603	903	0
521	3	0	0	0	0	0	0	200	300	0	0	0	0	0	0	0	200	903	0	0	0	0	0	0	0	603	903	0
521	4	0	0	0	0	0	0	200	300	0	0	0	0	0	0	0	200	903	0	0	0	0	0	0	0	603	903	0
521	5	0	0	0	0	0	0	200	300	0	0	0	0	0	0	0	200	903	0	0	0	0	0	0	0	603	903	0
521	6	0	0	0	0	0	0	200	300	0	0	0	0	0	0	0	200	903	0	0	0	0	0	0	0	603	903	0
521	7	0	0	0	0	0	0	200	300	0	0	0	0	0	0	0	200	903	0	0	0	0	0	0	0	603	903	0
521	8	0	0	0	0	0	0	200	300	0	0	0	0	0	0	0	200	903	0	0	0	0	0	0	0	603	903	0
521	9	0	0	0	0	0	0	200	300	0	0	0	0	0	0	0	200	903	0	0	0	0	0	0	0	603	903	0
522	0	0	0	0	0	0	0	200	300	0	0	0	0	0	0	0	200	903	0	0	0	0	0	0	0	603	903	0
522	1	0	0	0	0	0	0	200	300	0	0	0	0	0	0	0	200	903	0	0	0	0	0	0	0	603	903	0
522	2	0	0	0	0	0	0	200	300	0	0	0	0	0	0	0	200	903	0	0	0	0	0	0	0	603	903	0
522	3	0	0	0	0	0	0	200	300	0	0	0	0	0	0	0	200	903	0	0	0	0	0	0	0	603	903	0
522	4	0	0	0	0	0	0	200	300	0	0	0	0	0	0	0	200	903	0	0	0	0	0	0	0	603	903	0
522	5	0	0	0	0	0	0	200	300	0	0	0	0	0	0	0	200	903	0	0	0	0	0	0	0	603	903	0
522	6	0	0	0	0	0	0	200	300	0	0	0	0	0	0	0	200	903	0	0	0	0	0	0	0	603	903	0
522	7	0	0	0	0	0	0	200	300	0	0	0	0	0	0	0	200	903	0	0	0	0	0	0	0	603	903	0
522	8	0	0	0	0	0	0	200	300	0	0	0	0	0	0	0	200	903	0	0	0	0	0	0	0	603	903	0
522	9	0	0	0	0	0	0	200	300	0	0	0	0	0	0	0	200	903	0	0	0	0	0	0	0	603	903	0
523	0	0	0	0	0	0	0	200	300	0	0	0	0	0	0	0	200	903	0	0	0	0	0	0	0	603	903	0
523	1	0	0	0	0	0	0	200	300	0	0	0	0	0	0	0	200	903	0	0	0	0	0	0	0	603	903	0
523	2	0	0	0	0	0	0	200	300	0	0	0	0	0	0	0	200	903	0	0	0	0	0	0	0	603	903	0
523	3	0	0	0	0	0	0	200	300	0	0	0	0	0	0	0	200	903	0	0	0	0	0	0	0	603	903	0
523	4	0	0	0	0	0	0	200	300	0	0	0	0	0	0	0	200	903	0	0	0	0	0	0	0	603	903	0
523	5	0	0	0	0	0	0	200	300	0	0	0	0	0	0	0	200	903	0	0	0	0	0	0	0	603	903	0
523	6	0	0	0	0	0	0	200	300	0	0	0	0	0	0	0	200	903	0	0	0	0	0	0	0	603	903	0
523	7	0	0	0	0	0	0	200	300	0	0	0	0	0	0	0	200	903	0	0	0	0	0	0	0	603	903	0
523	8	0	0	0	0	0	0	200	300	0	0	0	0	0	0	0	200	903	0	0	0	0	0	0	0	603	903	0
523	9	0	0	0	0	0	0	200	300	0	0	0	0	0	0	0	200	903	0	0	0	0	0	0	0	603	903	0
524	0	0	0	0	0	0	0	200	300	0	0	0	0	0	0	0	200	903	0	0	0	0	0	0	0	603	903	0
524	1	0	0	0	0	0	0	200	300	0	0	0	0	0	0	0	200	903	0	0	0	0	0	0	0	603	903	0
524	2	0	0	0	0	0	0	200	300	0	0	0	0	0	0	0	200	903	0	0	0	0	0	0	0	603	903	0
524	3	0	0	0	0	0	0	200	300	0	0	0	0	0	0	0	200	903	0	0	0	0	0	0	0	603	903	0
524	4	0	0	0	0	0	0	200	300	0	0	0	0	0	0	0	200	903	0	0	0	0	0	0	0	603	903	0
524	5	0	0	0	0	0	0	200	300	0	0	0	0	0	0	0	200	903	0	0	0	0	0	0	0	603	903	0
524	6	0	0	0	0	0	0	200	300	0	0	0	0	0	0	0	200	903	0	0	0	0	0	0	0	603	903	0
524	7	0	0	0	0	0	0	200	300	0	0	0	0	0	0	0	200	903	0	0	0	0	0	0	0	603	903	0
524	8	0	0	0	0	0	0	200	300	0	0	0	0	0	0	0	200	903	0	0	0	0	0	0	0	603	903	0
524	9	0	0	0	0	0	0	200	300	0	0	0	0	0	0	0	200	903	0	0	0	0	0	0	0	603	903	0
525	0	0	0	0	0	0	0	200	300	0	0	0	0	0	0	0	200	903	0	0	0	0	0	0	0	603	903	0
525	1	0	0	0	0	0	0	200	300	0	0	0	0	0	0	0	200	903	0	0	0	0	0	0	0	603	903	0
525	2	0	0	0	0	0	0	200	300	0	0	0	0	0	0	0	200	903	0	0	0	0	0	0	0	603	903	0
525	3	0	0	0	0	0	0	200	300	0	0	0	0	0	0	0	200	903	0	0	0	0	0	0	0	603	903	0
525	4	0	0	0	0	0	0	200	300	0	0	0	0	0	0	0	200	903	0	0	0	0	0	0	0	603	903	0
525	5	0	0	0	0	0	0	200	300	0	0	0	0	0	0	0	200	903	0	0	0	0	0	0	0	603	903	0
525	6	0	0	0	0	0	0	200	300	0	0	0	0	0	0	0	200	903	0	0	0	0	0	0	0	603	903	0
525	7	0	0	0	0	0	0	200	300	0	0	0	0	0	0	0	200	903	0	0	0	0	0	0	0	603	903	0
525	8	0	0	0	0	0	0	200	300	0	0	0	0	0	0	0	200	903	0	0	0	0	0	0	0	603	903	0
525	9	0	0	0	0	0	0	200	300	0	0	0	0	0	0	0	200	903	0	0	0	0	0	0	0	603	903	0
526	0	0	0	0	0	0	0	200	300	0	0	0	0	0	0	0	200	903	0	0	0	0	0	0	0	603	903	0
526	1	0	0	0	0	0	0	200	300	0	0	0	0	0	0	0	200	903	0	0	0	0	0	0	0	603	903	0
526	2	0	0	0	0	0	0	200	300	0	0	0	0	0	0	0	200	903	0	0	0	0	0	0	0	603	903	0
526	3	0	0	0	0	0	0	200	300	0	0	0	0	0	0	0	200	903	0	0	0	0	0	0	0	603	903	0
526	4	0	0	0	0	0	0	200	300	0	0	0	0	0	0	0	200	903	0	0	0	0	0	0	0	603	903	0
526	5	0	0	0	0	0	0	200	300	0	0	0	0	0	0	0	200	903	0	0	0	0	0	0	0	603	903	0
526	6	0	0	0	0	0	0	200	300	0	0	0	0	0	0	0	200	903	0	0	0	0	0	0	0	603	903	0
526	7	0	0	0	0	0	0	200	300	0	0	0	0	0	0	0	200	903	0	0	0	0	0	0	0	603	903	0
526	8	0	0	0	0	0	0	200	300	0	0	0	0	0	0	0	200	903	0	0	0	0	0	0	0	603	903	0
526	9	0	0	0	0	0	0	200	300	0	0	0	0	0	0	0	200	903	0	0	0	0	0	0	0	603	903	0
527	0	0	0	0	0	0	0	200	300	0	0	0	0	0	0	0	200	903	0	0	0	0	0	0	0	603	903	0
527	1	0	0	0	0	0	0	200	300	0	0	0	0	0	0	0	200	903	0	0	0	0	0	0	0	603	903	0
527	2	0	0	0	0	0	0	200	300	0	0	0	0	0	0	0	200	903	0	0	0	0	0	0	0	603	903	0
527	3	0	0	0	0	0	0	200	300	0	0	0	0	0	0	0	200	903	0	0	0	0	0	0	0	603	903	0
527	4	0	0	0	0	0	0	200	300	0	0	0	0	0	0	0	200	903	0	0	0	0	0	0	0	603	903	0
527	5	0	0	0	0	0	0	200	300	0	0	0	0	0	0	0	200	903	0	0	0	0	0	0	0	603	903	0
527	6	0	0	0	0	0	0	200	300	0	0	0	0	0	0	0	200	903	0	0	0	0	0	0	0	603	903	0
527	7	0	0	0	0	0	0	200	300	0	0	0	0	0	0	0	200	903	0	0	0	0	0	0	0	603	903	0
527	8	0	0	0	0	0	0	200	300	0	0	0	0	0	0	0	200	903	0	0	0	0	0	0	0	603	903	0
527	9	0	0	0	0	0	0	200	300	0	0	0	0	0	0	0	200	903	0	0	0	0	0	0	0	603	903	0
528	0	0	0	0	0	0	0	200	300	0	0	0	0	0	0	0	200	903	0	0	0	0	0	0	0	603	903	0
528	1	0	0	0	0	0	0	200	300	0	0	0	0	0	0	0	200	903	0	0	0	0	0	0	0	603	903	0
528	2	0	0	0	0	0	0	200	300	0	0	0	0	0	0	0	200	903	0	0	0	0	0	0	0	603	903	0
528	3	0	0	0	0	0	0	200	300	0	0	0	0	0	0	0	200	903	0	0	0	0	0	0	0	603	903	0
528	4	0	0	0	0	0	0	200	300	0	0	0	0	0	0	0	200	903	0	0	0	0	0	0	0	603	903	0
528	5	0	0	0	0	0	0	200	300	0	0	0	0	0	0	0	200	903	0	0	0	0	0	0	0	603	903	0
528	6	0	0	0	0	0	0	200	300	0	0	0	0	0	0	0	200	903	0	0	0	0	0	0	0	603	903	0
528	7	0	0	0	0	0	0	200	300	0	0	0	0	0	0	0	200	903	0	0	0	0	0	0	0	603	903	0
528	8	0	0	0	0	0	0	200	300	0	0	0	0	0	0	0	200	903	0	0	0	0	0	0	0	603	903	0
528	9	0	0	0	0	0	0	200	300	0	0	0	0	0	0	0	200	903	0	0	0	0	0	0	0	603	903	0
529	0	0	0	0	0	0	0	200	300	0	0	0	0	0	0	0	200	903	0	0	0	0	0	0	0	603	903	0
529	1	0	0	0	0	0	0	200	300	0	0	0	0	0	0	0	200	903	0	0	0	0	0	0	0	603	903	0
529	2	0	0	0	0	0	0	200	300	0	0	0	0	0	0	0	200	903	0	0	0	0	0	0	0	603	903	0
529	3	0	0	0	0	0	0	200	300	0	0	0	0	0	0	0	200	903	0	0	0	0	0	0	0	603	903	0
529	4	0	0	0	0	0	0	200	300	0	0	0	0	0	0	0	200	903	0	0	0	0	0	0	0	603	903	0
529	5	0	0	0	0	0	0	200	300	0	0	0	0	0	0	0	200	903	0	0	0	0	0	0	0	603	903	0
529	6	0	0	0	0	0	0	200	300	0	0	0	0	0	0	0	200	903	0	0	0	0	0	0	0	603	903	0
529	7	0	0	0	0	0	0	200	300	0	0	0	0	0	0	0	200	903	0	0	0	0	0	0	0	603	903	0
529	8	0	0	0	0	0	0	200	300	0	0	0	0	0	0	0	200	903	0	0	0	0	0	0	0	603	903	0
529	9	0	0	0	0	0	0	200	300	0	0	0	0	0	0	0	200	903	0	0	0	0	0	0	0	603	903	0
530	0	0	0	0	0	0	0	200	300	0	0	0	0	0	0	0	200	903	0	0	0	0	0	0	0	603	903	0
530	1	0	0	0	0	0	0	200	300	0	0	0	0	0	0	0	200	903	0	0	0	0	0	0	0	603	903	0
530	2	0	0	0	0	0	0	200	300	0	0	0	0	0	0	0	200	903	0	0	0	0	0	0	0	603	903	0
530	3	0	0	0	0	0	0	200	300	0	0	0	0	0	0	0	200	903	0	0	0	0	0	0	0	603	903	0
530	4	0	0	0	0	0	0	200	300	0	0	0	0	0	0	0	200	903	0	0	0	0	0	0	0	603	903	0
530	5	0	0	0	0	0	0	200	300	0	0	0	0	0	0	0	200	903	0	0	0	0	0	0	0	603	903	0
530	6	0	0	0	0	0	0	200	300	0	0	0	0	0	0	0	200	903	0	0	0	0	0	0	0	603	903	0
530	7	0	0	0	0	0	0	200	300	0	0	0	0	0	0	0	200	903	0	0	0	0	0	0	0	603	903	0
530	8	0	0	0	0	0	0	200	300	0	0	0	0	0	0	0	200	903	0	0	0	0	0	0	0	603	903	0
530	9	0	0	0	0	0	0	200	300	0	0	0	0	0	0	0	200	903	0	0	0	0	0	0	0	603	903	0
531	0	0	0	0	0	0	0	200	300	0	0	0	0	0	0	0	200	903	0	0	0	0	0	0	0	603	903	0
531	1	0	0	0	0	0	0	200	300	0	0	0	0	0	0	0	200	903	0	0	0	0	0	0	0	603	903	0
531	2	0	0	0	0	0	0	200	300	0	0	0	0	0	0	0	200	903	0	0	0	0	0	0	0	603	903	0
531	3	0	0	0	0	0	0	200	300	0	0	0	0	0	0	0	200	903	0	0	0	0	0	0	0	603	903	0
531	4	0	0	0	0	0	0	200	300	0	0	0	0	0	0	0	200	903	0	0	0	0	0	0	0	603	903	0
531	5	0	0	0	0	0	0	200	300	0	0	0	0	0	0	0	200	903	0	0	0	0	0	0	0	603	903	0
531	6	0	0	0	0	0	0	200	300	0	0	0	0	0	0	0	200	903	0	0	0	0	0	0	0	603	903	0
531	7	0	0	0	0	0	0	200	300	0	0	0	0	0	0	0	200	903	0	0	0	0	0	0	0	603	903	0
531	8	0	0	0	0	0	0	200	300	0	0	0	0	0	0	0	200	903	0	0	0	0	0	0	0	603	903	0
531	9	0	0	0	0	0	0	200	300	0	0	0	0	0	0	0	200	903	0	0	0	0	0	0	0	603	903	0
532	0	0	0	0	0	0	0	200	300	0	0	0	0	0	0	0	200	903	0	0	0	0	0	0	0	603	903	0
532	1	0	0	0	0	0	0	200	300	0	0	0	0	0	0	0	200	903	0	0	0	0	0	0	0	603	903	0
532	2	0	0	0	0	0	0	200	300	0	0	0	0	0	0	0	200	903	0	0	0	0	0	0	0	603	903	0
532	3	0	0	0	0	0	0	200	300	0	0	0	0	0	0	0	200	903	0	0	0	0	0	0	0	603	903	0
532	4	0	0	0	0	0	0	200	300	0	0	0	0	0	0	0	200	903	0	0	0	0	0	0	0	603	903	0
532	5	0	0	0	0	0	0	200	300	0	0	0	0	0	0	0	200	903	0	0	0	0	0	0	0	603	903	0
532	6	0	0	0	0	0	0	200	300	0	0	0	0	0	0	0	200	903	0	0	0	0	0	0	0	603	903	0
532	7	0	0	0	0	0	0	200	300	0	0	0	0	0	0	0	200	903	0	0	0	0	0	0	0	603	903	0
532	8	0	0	0	0	0	0	200	300	0	0	0	0	0	0	0	200	903	0	0	0	0	0	0	0	603	903	0
532	9	0	0	0	0	0	0	200	300	0	0	0	0	0	0	0	200	903	0	0	0	0	0	0	0	603	903	0
533	0	0	0	0	0	0	0	200	300	0	0	0	0	0	0	0	200	903	0	0	0	0	0	0	0	603	903	0
533	1	0	0	0	0	0	0	200	300	0	0	0	0	0	0	0	200	903	0	0	0	0	0	0	0	603	903	0
533	2	0	0	0	0	0	0	200	300	0	0	0	0	0	0	0	200	903	0	0	0	0	0	0	0	603	903	0
533	3	0	0	0	0	0	0	200	300	0	0	0	0	0	0	0	200	903	0	0	0	0	0	0	0	603	903	0
533	4	0	0	0	0	0	0	200	300	0	0	0	0	0	0	0	200	903	0	0	0	0	0	0	0	603	903	0
533	5	0	0	0	0	0	0	200	300	0	0	0	0	0	0	0	200	903	0	0	0	0	0	0	0	603	903	0
533	6	0	0	0	0	0	0	200	300	0	0	0	0	0	0	0	200	903	0	0	0	0	0	0	0	603	903	0
533	7	0	0	0	0	0	0	200	300	0	0	0	0	0	0	0	200	903	0	0	0	0	0	0	0	603	903	0
533	8	0	0	0	0	0	0	200	300	0	0	0	0	0	0	0	200	903	0	0	0	0	0	0	0	603	903	0
533	9	0	0	0	0	0	0	200	300	0	0	0	0	0	0	0	200	903	0	0	0	0	0	0	0	603	903	0
534	0	0	0	0	0	0	0	200	300	0	0	0	0	0	0	0	200	903	0	0	0	0	0	0	0	603	903	0
534	1	0	0	0	0	0	0	200	300	0	0	0	0	0	0	0	200	903	0	0	0	0	0	0	0	603	903	0
534	2	0	0	0	0	0	0	200	300	0	0	0	0	0	0	0	200	903	0	0	0	0	0	0	0	603	903	0
534	3	0	0	0	0	0	0	200	300	0	0	0	0	0	0	0	200	903	0	0	0	0	0	0	0	603	903	0
534	4	0	0	0	0	0	0	200	300	0	0	0	0	0	0	0	200	903	0	0	0	0	0	0	0	603	903	0
534	5	0	0	0	0	0	0	200	300	0	0	0	0	0	0	0	200	903	0	0	0	0	0	0	0	603	903	0
534	6	0	0	0	0	0	0	200	300	0	0	0	0	0	0	0	200	903	0	0	0	0	0	0	0	603	903	0
534	7	0	0	0	0	0	0	200	300	0	0	0	0	0	0	0	200	903	0	0	0	0	0	0	0	603	903	0
534	8	0	0	0	0	0	0	200	300	0	0	0	0	0	0	0	200	903	0	0	0	0	0	0	0	603	903	0
534	9	0	0	0	0	0	0	200	300	0	0	0	0	0	0	0	200	903	0	0	0	0	0	0	0	603	903	0
535	0	0	0	0	0	0	0	200	300	0	0	0	0	0	0	0	200	903	0	0	0	0	0	0	0	603	903	0
535	1	0	0	0	0	0	0	200	300	0	0	0	0	0	0	0	200	903	0	0	0	0	0	0	0	603	903	0
535	2	0	0	0	0	0	0	200	300	0	0	0	0	0	0	0	200	903	0	0	0	0	0	0	0	603	903	0
535	3	0	0	0	0	0	0	200	300	0	0	0	0	0	0	0	200	903	0	0	0	0	0	0	0	603	903	0
535	4	0	0	0	0	0	0	200	300	0	0	0	0	0	0	0	200	903	0	0	0	0	0	0	0	603	903	0
535	5	0	0	0	0	0	0	200	300	0	0	0	0	0	0	0	200	903	0	0	0	0	0	0	0	603	903	0
535	6	0	0	0	0	0	0	200	300	0	0	0	0	0	0	0	200	903	0	0	0	0	0	0	0	603	903	0
535	7	0	0	0	0	0	0	200	300	0	0	0	0	0	0	0	200	903	0	0	0	0	0	0	0	603	903	0
535	8	0	0	0	0	0	0	200	300	0	0	0	0	0	0	0	200	903	0	0	0	0	0	0	0	603	903	0
535	9	0	0	0	0	0	0	200	300	0	0	0	0	0	0	0	200	903	0	0	0	0	0	0	0	603	903	0
536	0	0	0	0	0	0	0	200	300	0	0	0	0	0	0	0	200	903	0	0	0	0	0	0	0	603	903	0
536	1	0	0	0	0	0	0	200	300	0	0	0	0	0	0	0	200	903	0	0	0	0	0	0	0	603	903	0
536	2	0	0	0	0	0	0	200	300	0	0	0	0	0	0	0	200	903	0	0	0	0	0	0	0	603	903	0
536	3	0	0	0	0	0	0	200	300	0	0	0	0	0	0	0	200	903	0	0	0	0	0	0	0	603	903	0
536	4	0	0	0	0	0	0	200	300	0	0	0	0	0	0	0	200	903	0	0	0	0	0	0	0	603	903	0
536	5	0	0	0	0	0	0	200	300	0	0	0	0	0	0	0	200	903	0	0	0	0	0	0	0	603	903	0
536	6	0	0	0	0	0	0	200	300	0	0	0	0	0	0	0	200	903	0	0	0	0	0	0	0	603	903	0
536	7	0	0	0	0	0	0	200	300	0	0	0	0	0	0	0	200	903	0	0	0	0	0	0	0	603	903	0
536	8	0	0	0	0	0	0	200	300	0	0	0	0	0	0	0	200	903	0	0	0	0	0	0	0	603	903	0
536	9	0	0	0	0	0	0	200	300	0	0	0	0	0	0	0	200	903	0	0	0	0	0	0	0	603	903	0
537	0	0	0	0	0	0	0	200	300	0	0	0	0	0	0	0	200	903	0	0	0	0	0	0	0	603	903	0
537	1	0	0	0	0	0	0	200	300	0	0	0	0	0	0	0	200	903	0	0	0	0	0	0	0	603	903	0
537	2	0	0	0	0	0	0	200	300	0	0	0	0	0	0	0	200	903	0	0	0	0	0	0	0	603	903	0
537	3	0	0	0	0	0	0	200	300	0	0	0	0	0	0	0	200	903	0	0	0	0	0	0	0	603	903	0
537	4	0	0	0	0	0	0	200	300	0	0	0	0	0	0	0	200	903	0	0	0	0	0	0	0	603	903	0
537	5	0	0	0	0	0	0	200	300	0	0	0	0	0	0	0	200	903	0	0	0	0	0	0	0	603	903	0
537	6	0	0	0	0	0	0	200	300	0	0	0	0	0	0	0	200	903	0	0	0	0	0	0	0	603	903	0
537	7	0	0	0	0	0	0	200	300	0	0	0	0	0	0	0	200	903	0	0	0	0	0	0	0	603	903	0
537	8	0	0	0	0	0	0	200	300	0	0	0	0	0	0	0	200	903	0	0	0	0	0	0	0	603	903	0
537	9	0	0	0	0	0	0	200	300	0	0	0	0	0	0	0	200	903	0	0	0	0	0	0	0	603	903	0
538	0	0	0	0	0	0	0	200	300	0	0	0	0	0	0	0	200	903	0	0	0	0	0	0	0	603	903	0
538	1	0	0	0	0	0	0	200	300	0	0	0	0	0	0	0	200	903	0	0	0	0	0	0	0	603	903	0
538	2	0	0	0	0	0	0	200	300	0	0	0	0	0	0	0	200	903	0	0	0	0	0	0	0	603	903	0
538	3	0	0	0	0	0	0	200	300	0	0	0	0	0	0	0	200	903	0	0	0	0	0	0	0	603	903	0
538	4	0	0	0	0	0	0	200	300	0	0	0	0	0	0	0	200	903	0	0	0	0	0	0	0	603	903	0
538	5	0	0	0	0	0	0	200	300	0	0	0	0	0	0	0	200	903	0	0	0	0	0	0	0	603	903	0
538	6	0	0	0	0	0	0	200	300	0	0	0	0	0	0	0	200	903	0	0	0	0	0	0	0	603	903	0
538	7	0	0	0	0	0	0	200	300	0	0	0	0	0	0	0	200	903	0	0	0	0	0	0	0	603	903	0
538	8	0	0	0	0	0	0	200	300	0	0	0	0	0	0	0	200	903	0	0	0	0	0	0	0	603	903	0
538	9	0	0	0	0	0	0	200	300	0	0	0	0	0	0	0	200	903	0	0	0	0	0	0	0	603	903	0
539	0	0	0	0	0	0	0	200	300	0	0	0	0	0	0	0	200	903	0	0	0	0	0	0	0	603	903	0
539	1	0	0	0	0	0	0	200	300	0	0	0	0	0	0	0	200	903	0	0	0	0	0	0	0	603	903	0
539	2	0	0	0	0	0	0	200	300	0	0	0	0	0	0	0	200	903	0	0	0	0	0	0	0	603	903	0
539	3	0	0	0	0	0	0	200	300	0	0	0	0	0	0	0	200	903	0	0	0	0	0	0	0	603	903	0
539	4	0	0	0	0	0	0	200	300	0	0	0	0	0	0	0	200	903	0	0	0	0	0	0	0	603	903	0
539	5	0	0	0	0	0	0	200	300	0	0	0	0	0	0	0	200	903	0	0	0	0	0	0	0	603	903	0
539	6	0	0	0	0	0	0	200	300	0	0	0	0	0	0	0	200	903	0	0	0	0	0	0	0	603	903	0
539	7	0	0	0	0	0	0	200	300	0	0	0	0	0	0	0	200	903	0	0	0	0	0	0	0	603	903	0
539	8	0	0	0	0	0	0	200	300	0	0	0	0	0	0	0	200	903	0	0	0	0	0	0	0	603	903	0
539	9	0	0	0	0	0	0	200	300	0	0	0	0	0	0	0	200	903	0	0	0	0	0	0	0	603	903	0
540	0	0	0	0	0	0	0	200	300	0	0	0	0	0	0	0	200	903	0	0	0	0	0	0	0	603	903	0
540	1	0	0	0	0	0	0	200	300	0	0	0	0	0	0	0	200	903	0	0	0	0	0	0	0	603	903	0
540	2	0	0	0	0	0	0	200	300	0	0	0	0	0	0	0	200	903	0	0	0	0	0	0	0	603	903	0
540	3	0	0	0	0	0	0	200	300	0	0	0	0	0	0	0	200	903	0	0	0	0	0	0	0	603	903	0
540	4	0	0	0	0	0	0	200	300	0	0	0	0	0	0	0	200	903	0	0	0	0	0	0	0	603	903	0
540	5	0	0	0	0	0	0	200	300	0	0	0	0	0	0	0	200	903	0	0	0	0	0	0	0	603	903	0
540	6	0	0	0	0	0	0	200	300	0	0	0	0	0	0	0	200	903	0	0	0	0	0	0	0	603	903	0
540	7	0	0	0	0	0	0	200	300	0	0	0	0	0	0	0	200	903	0	0	0	0	0	0	0	603	903	0
540	8	0	0	0	0	0	0	200	300	0	0	0	0	0	0	0	200	903	0	0	0	0	0	0	0	603	903	0
540	9	0	0	0	0	0	0	200	300	0	0	0	0	0	0	0	200	903	0	0	0	0	0	0	0	603	903	0
541	0	0	0	0	0	0	0	200	300	0	0	0	0	0	0	0	200	903	0	0	0	0	0	0	0	603	903	0
541	1	0	0	0	0	0	0	200	300	0	0	0	0	0	0	0	200	903	0	0	0	0	0	0	0	603	903	0
541	2	0	0	0	0	0	0	200	300	0	0	0	0	0	0	0	200	903	0	0	0	0	0	0	0	603	903	0
541	3	0	0	0	0	0	0	200	300	0	0	0	0	0	0	0	200	903	0	0	0	0	0	0	0	603	903	0
541	4	0	0	0	0	0	0	200	300	0	0	0	0	0	0	0	200	903	0	0	0	0	0	0	0	603	903	0
541	5	0	0	0	0	0	0	200	300	0	0	0	0	0	0	0	200	903	0	0	0	0	0	0	0	603	903	0
541	6	0	0	0	0	0	0	200	300	0	0	0	0	0	0	0	200	903	0	0	0	0	0	0	0	603	903	0
541	7	0	0	0	0	0	0	200	300	0	0	0	0	0	0	0	200	903	0	0	0	0	0	0	0	603	903	0
541	8	0	0	0	0	0	0	200	300	0	0	0	0	0	0	0	200	903	0	0	0	0	0	0	0	603	903	0
541	9	0	0	0	0	0	0	200	300	0	0	0	0	0	0	0	200	903	0	0	0	0	0	0	0	603	903	0
542	0	0	0	0	0	0	0	200	300	0	0	0	0	0	0	0	200	903	0	0	0	0	0	0	0	603	903	0
542	1	0	0	0	0	0	0	200	300	0	0	0	0	0	0	0	200	903	0	0	0	0	0	0	0	603	903	0
542	2	0	0	0	0	0	0	200	300	0	0	0	0	0	0	0	200	903	0	0	0	0	0	0	0	603	903	0
542	3	0	0	0	0	0	0	200	300	0	0	0	0	0	0	0	200	903	0	0	0	0	0	0	0	603	903	0
542	4	0	0	0	0	0	0	200	300	0	0	0	0	0	0	0	200	903	0	0	0	0	0	0	0	603	903	0
542	5	0	0	0	0	0	0	200	300	0	0	0	0	0	0	0	200	903	0	0	0	0	0	0	0	603	903	0
542	6	0	0	0	0	0	0	200	300	0	0	0	0	0	0	0	200	903	0	0	0	0	0	0	0	603	903	0
542	7	0	0	0	0	0	0	200	300	0	0	0	0	0	0	0	200	903	0	0	0	0	0	0	0	603	903	0
542	8	0	0	0	0	0	0	200	300	0	0	0	0	0	0	0	200	903	0	0	0	0	0	0	0	603	903	0
542	9	0	0	0	0	0	0	200	300	0	0	0	0	0	0	0	200	903	0	0	0	0	0	0	0	603	903	0
543	0	0	0	0	0	0	0	200	300	0	0	0	0	0	0	0	200	903	0	0	0	0	0	0	0	603	903	0
543	1	0	0	0	0	0	0	200	300	0	0	0	0	0	0	0	200	903	0	0	0	0	0	0	0	603	903	0
543	2	0	0	0	0	0	0	200	300	0	0	0	0	0	0	0	200	903	0	0	0	0	0	0	0	603	903	0
543	3	0	0	0	0	0	0	200	300	0	0	0	0	0	0	0	200	903	0	0	0	0	0	0	0	603	903	0
543	4	0	0	0	0	0	0	200	300	0	0	0	0	0	0	0	200	903	0	0	0	0	0	0	0	603	903	0
543	5	0	0	0	0	0	0	200	300	0	0	0	0	0	0	0	200	903	0	0	0	0	0	0	0	603	903	0
543	6	0	0	0	0	0	0	200	300	0	0	0	0	0	0	0	200	903	0	0	0	0	0	0	0	603	903	0
543	7	0	0	0	0	0	0	200	300	0	0	0	0	0	0	0	200	903	0	0	0	0	0	0	0	603	903	0
543	8	0	0	0	0	0	0	200	300	0	0	0	0	0	0	0	200	903	0	0	0	0	0	0	0	603	903	0
543	9	0	0	0	0	0	0	200	300	0	0	0	0	0	0	0	200	903	0	0	0	0	0	0	0	603	903	0
544	0	0	0	0	0	0	0	200	300	0	0	0	0	0	0	0	200	903	0	0	0	0	0	0	0	603	903	0
544	1	0	0	0	0	0	0	200	300	0	0	0	0	0	0	0	200	903	0	0	0	0	0	0	0	603	903	0
544	2	0	0	0	0	0	0	200	300	0	0	0	0	0	0	0	200	903	0	0	0	0	0	0	0	603	903	0
544	3	0	0	0	0	0	0	200	300	0	0	0	0	0	0	0	200	903	0	0	0	0	0	0	0	603	903	0
544	4	0	0	0	0	0	0	200	300	0	0	0	0	0	0	0	200	903	0	0	0	0	0	0	0	603	903	0
544	5	0	0	0	0	0	0	200	300	0	0	0	0	0	0	0	200	903	0	0	0	0	0	0	0	603	903	0
544	6	0	0	0	0	0	0	200	300	0	0	0	0	0	0	0	200	903	0	0	0	0	0	0	0	603	903	0
544	7	0	0	0	0	0	0	200	300	0	0	0	0	0	0	0	200	903	0	0	0	0	0	0	0	603	903	0
544	8	0	0	0	0	0	0	200	300	0	0	0	0	0	0	0	200	903	0	0	0	0	0	0	0	603	903	0
544	9	0	0	0	0	0	0	200	300	0	0	0	0	0	0	0	200	903	0	0	0	0	0	0	0	603	903	0
545	0	0	0	0	0	0	0	200	300	0	0	0	0	0	0	0	200	903	0	0	0	0	0	0	0	603	903	0
545	1	0	0	0	0	0	0	200	300	0	0	0	0	0	0	0	200	903	0	0	0	0	0	0	0	603	903	0
545	2	0	0	0	0	0	0	200	300	0	0	0	0	0	0	0	200	903	0	0	0	0	0	0	0	603	903	0
545	3	0	0	0	0	0	0	200	300	0	0	0	0	0	0	0	200	903	0	0	0	0	0	0	0	603	903	0
545	4	0	0	0	0	0	0	200	300	0	0	0	0	0	0	0	200	903	0	0	0	0	0	0	0	603	903	0
545	5	0	0	0	0	0	0	200	300	0	0	0	0	0	0	0	200	903	0	0	0	0	0	0	0	603	903	0
545	6	0	0	0	0	0	0	200	300	0	0	0	0	0	0	0	200	903	0	0	0	0	0	0	0	603	903	0
545	7	0	0	0	0	0	0	200	300	0	0	0	0	0	0	0	200	903	0	0	0	0	0	0	0	603	903	0
545	8	0	0	0	0	0	0	200	300	0	0	0	0	0	0	0	200	903	0	0	0	0	0	0	0	603	903	0
545	9	0	0	0	0	0	0	200	300	0	0	0	0	0	0	0	200	903	0	0	0	0	0	0	0	603	903	0
546	0	0	0	0	0	0	0	200	300	0	0	0	0	0	0	0	200	903	0	0	0	0	0	0	0	603	903	0
546	1	0	0	0	0	0	0	200	300	0	0	0	0	0	0	0	200	903	0	0	0	0	0	0	0	603	903	0
546	2	0	0	0	0	0	0	200	300	0	0	0	0	0	0	0	200	903	0	0	0	0	0	0	0	603	903	0
546	3	0	0	0	0	0	0	200	300	0	0	0	0	0	0	0	200	903	0	0	0	0	0	0	0	603	903	0
546	4	0	0	0	0	0	0	200	300	0	0	0	0	0	0	0	200	903	0	0	0	0	0	0	0	603	903	0
546	5	0	0	0	0	0	0	200	300	0	0	0	0	0	0	0	200	903	0	0	0	0	0	0	0	603	903	0
546	6	0	0	0	0	0	0	200	300	0	0	0	0	0	0	0	200	903	0	0	0	0	0	0	0	603	903	0
546	7	0	0	0	0	0	0	200	300	0	0	0	0	0	0	0	200	903	0	0	0	0	0	0	0	603	903	0
546	8	0	0	0	0	0	0	200	300	0	0	0	0	0	0	0	200	903	0	0	0	0	0	0	0	603	903	0
546	9	0	0	0	0	0	0	200	300	0	0	0	0	0	0	0	200	903	0	0	0	0	0	0	0	603	903	0
547	0	0	0	0	0	0	0	200	300	0	0	0	0	0	0	0	200	903	0	0	0	0	0	0	0	603	903	0
547	1	0	0	0	0	0	0	200	300	0	0	0	0	0	0	0	200	903	0	0	0	0	0	0	0	603	903	0
547	2	0	0	0	0	0	0	200	300	0	0	0	0	0	0	0	200	903	0	0	0	0	0	0	0	603	903	0
547	3	0	0	0	0	0	0	200	300	0	0	0	0	0	0	0	200	903	0	0	0	0	0	0	0	603	903	0
547	4	0	0	0	0	0	0	200	300	0	0	0	0	0	0	0	200	903	0	0	0	0	0	0	0	603	903	0
547	5	0	0	0	0	0	0	200	300	0	0	0	0	0	0	0	200	903	0	0	0	0	0	0	0	603	903	0
547	6	0	0	0	0	0	0	200	300	0	0	0	0	0	0	0	200	903	0	0	0	0	0	0	0	603	903	0
547	7	0	0	0	0	0	0	200	300	0	0	0	0	0	0	0	200	903	0	0	0	0	0	0	0	603	903	0
547	8	0	0	0	0	0	0	200	300	0	0	0	0	0	0	0	200	903	0	0	0	0	0	0	0	603	903	0
547	9	0	0	0	0	0	0	200	300	0	0	0	0	0	0	0	200	903	0	0	0	0	0	0	0	603	903	0
548	0	0	0	0	0	0	0	200	300	0	0	0	0	0	0	0	200	903	0	0	0	0	0	0	0	603	903	0
548	1	0	0	0	0	0	0	200	300	0	0	0	0	0	0	0	200	903	0	0	0	0	0	0	0	603	903	0
548	2	0	0	0	0	0	0	200	300	0	0	0	0	0	0	0	200	903	0	0	0	0	0	0	0	603	903	0
548	3	0	0	0	0	0	0	200	300	0	0	0	0	0	0	0	200	903	0	0	0	0	0	0	0	603	903	0
548	4	0	0	0	0	0	0	200	300	0	0	0	0	0	0	0	200	903	0	0	0	0	0	0	0	603	903	0
548	5	0	0	0	0	0	0	200	300	0	0	0	0	0	0	0	200	903	0	0	0	0	0	0	0	603	903	0
548	6	0	0	0	0	0	0	200	300	0	0	0	0	0	0	0	200	903	0	0	0	0	0	0	0	603	903	0
548	7	0	0	0	0	0	0	200	300	0	0	0	0	0	0	0	200	903	0	0	0	0	0	0	0	603	903	0
548	8	0	0	0	0	0	0	200	300	0	0	0	0	0	0	0	200	903	0	0	0	0	0	0	0	603	903	0
548	9	0	0	0	0	0	0	200	300	0	0	0	0	0	0	0	200	903	0	0	0	0	0	0	0	603	903	0
549	0	0	0	0	0	0	0	200	300	0	0	0	0	0	0	0	200	903	0	0	0	0	0	0	0	603	903	0
549	1	0	0	0	0	0	0	200	300	0	0	0	0	0	0	0	200	903	0	0	0	0	0	0	0	603	903	0
549	2	0	0	0	0	0	0	200	300	0	0	0	0	0	0	0	200	903	0	0	0	0	0	0	0	603	903	0
549	3	0	0	0	0	0	0	200	300	0	0	0	0	0	0	0	200	903	0	0	0	0	0	0	0	603	903	0
549	4	0	0	0	0	0	0	200	300	0	0	0	0	0	0	0	200	903	0	0	0	0	0	0	0	603	903	0
549	5	0	0	0	0	0	0	200	300	0	0	0	0	0	0	0	200	903	0	0	0	0	0	0	0	603	903	0
549	6	0	0	0	0	0	0	200	300	0	0	0	0	0	0	0	200	903	0	0	0	0	0	0	0	603	903	0
549	7	0	0	0	0	0	0	200	300	0	0	0	0	0	0	0	200	903	0	0	0	0	0	0	0	603	903	0
549	8	0	0	0	0	0	0	200	300	0	0	0	0	0	0	0	200	903	0	0	0	0	0	0	0	603	903	0
549	9	0	0	0	0	0	0	200	300	0	0	0	0	0	0	0	200	903	0	0	0	0	0	0	0	603	903	0
550	0	0	0	0	0	0	0	200	300	0	0	0	0	0	0	0	200	903	0	0	0	0	0	0	0	603	903	0
550	1	0	0	0	0	0	0	200	300	0	0	0	0	0	0	0	200	903	0	0	0	0	0	0	0	603	903	0
550	2	0	0	0	0	0	0	200	300	0	0	0	0	0	0	0	200	903	0	0	0	0	0	0	0	603	903	0
550	3	0	0	0	0	0	0	200	300	0	0	0	0	0	0	0	200	903	0	0	0	0	0	0	0	603	903	0
550	4	0	0	0	0	0	0	200	300	0	0	0	0	0	0	0	200	903	0	0	0	0	0	0	0	603	903	0
550	5	0	0	0	0	0	0	200	300	0	0	0	0	0	0	0	200	903	0	0	0	0	0	0	0	603	903	0
550	6	0	0	0	0	0	0	200	300	0	0	0	0	0	0	0	200	903	0	0	0	0	0	0	0	603	903	0
550	7	0	0	0	0	0	0	200	300	0	0	0	0	0	0	0	200	903	0	0	0	0	0	0	0	603	903	0
550	8	0	0	0	0	0	0	200	300	0	0	0	0	0	0	0	200	903	0	0	0	0	0	0	0	603	903	0
550	9	0	0	0	0	0	0	200	300	0	0	0	0	0	0	0	200	903	0	0	0	0	0	0	0	603	903	0
551	0	0	0	0	0	0	0	200	300	0	0	0	0	0	0	0	200	903	0	0	0	0	0	0	0	603	903	0
551	1	0	0	0	0	0	0	200	300	0	0	0	0	0	0	0	200	903	0	0	0	0	0	0	0	603	903	0
551	2	0	0	0	0	0	0	200	300	0	0	0	0	0	0	0	200	903	0	0	0	0	0	0	0	603	903	0
551	3	0	0	0	0	0	0	200	300	0	0	0	0	0	0	0	200	903	0	0	0	0	0	0	0	603	903	0
551	4	0	0	0	0	0	0	200	300	0	0	0	0	0	0	0	200	903	0	0	0	0	0	0	0	603	903	0
551	5	0	0	0	0	0	0	200	300	0	0	0	0	0	0	0	200	903	0	0	0	0	0	0	0	603	903	0
551	6	0	0	0	0	0	0	200	300	0	0	0	0	0	0	0	200	903	0	0	0	0	0	0	0	603	903	0
551	7	0	0	0	0	0	0	200	300	0	0	0	0	0	0	0	200	903	0	0	0	0	0	0	0	603	903	0
551	8	0	0	0	0	0	0	200	300	0	0	0	0	0	0	0	200	903	0	0	0	0	0	0	0	603	903	0
551	9	0	0	0	0	0	0	200	300	0	0	0	0	0	0	0	200	903	0	0	0	0	0	0	0	603	903	0
552	0	0	0	0	0	0	0	200	300	0	0	0	0	0	0	0	200	903	0	0	0	0	0	0	0	603	903	0
552	1	0	0	0	0	0	0	200	300	0	0	0	0	0	0	0	200	903	0	0	0	0	0	0	0	603	903	0
552	2	0	0	0	0	0	0	200	300	0	0	0	0	0	0	0	200	903	0	0	0	0	0	0	0	603	903	0
552	3	0	0	0	0	0	0	200	300	0	0	0	0	0	0	0	200	903	0	0	0	0	0	0	0	603	903	0
552	4	0	0	0	0	0	0	200	300	0	0	0	0	0	0	0	200	903	0	0	0	0	0	0	0	603	903	0
552	5	0	0	0	0	0	0	200	300	0	0	0	0	0	0	0	200	903	0	0	0	0	0	0	0	603	903	0
552	6	0	0	0	0	0	0	200	300	0	0	0	0	0	0	0	200	903	0	0	0	0	0	0	0	603	903	0
552	7	0	0	0	0	0	0	200	300	0	0	0	0	0	0	0	200	903	0	0	0	0	0	0	0	603	903	0
552	8	0	0	0	0	0	0	200	300	0	0	0	0	0	0	0	200	903	0	0	0	0	0	0	0	603	903	0
552	9	0	0	0	0	0	0	200	300	0	0	0	0	0	0	0	200	903	0	0	0	0	0	0	0	603	903	0
553	0	0	0	0	0	0	0	200	300	0	0	0	0	0	0	0	200	903	0	0	0	0	0	0	0	603	903	0
553	1	0	0	0	0	0	0	200	300	0	0	0	0	0	0	0	200	903	0	0	0	0	0	0	0	603	903	0
553	2	0	0	0	0	0	0	200	300	0	0	0	0	0	0	0	200	903	0	0	0	0	0	0	0	603	903	0
553	3	0	0	0	0	0	0	200	300	0	0	0	0	0	0	0	200	903	0	0	0	0	0	0	0	603	903	0
553	4	0	0	0	0	0	0	200	300	0	0	0	0	0	0	0	200	903	0	0	0	0	0	0	0	603	903	0
553	5	0	0	0	0	0	0	200	300	0	0	0	0	0	0	0	200	903	0	0	0	0	0	0	0	603	903	0
553	6	0	0	0	0	0	0	200	300	0	0	0	0	0	0	0	200	903	0	0	0	0	0	0	0	603	903	0
553	7	0	0	0	0	0	0	200	300	0	0	0	0	0	0	0	200	903	0	0	0	0	0	0	0	603	903	0
553	8	0	0	0	0	0	0	200	300	0	0	0	0	0	0	0	200	903	0	0	0	0	0	0	0	603	903	0
553	9	0	0	0	0	0	0	200	300	0	0	0	0	0	0	0	200	903	0	0	0	0	0	0	0	603	903	0
554	0	0	0	0	0	0	0	200	300	0	0	0	0	0	0	0	200	903	0	0	0	0	0	0	0	603	903	0
554	1	0	0	0	0	0	0	200	300	0	0	0	0	0	0	0	200	903	0	0	0	0	0	0	0	603	903	0
554	2	0	0	0	0	0	0	200	300	0	0	0	0	0	0	0	200	903	0	0	0	0	0	0	0	603	903	0
554	3	0	0	0	0	0	0	200	300	0	0	0	0	0	0	0	200	903	0	0	0	0	0	0	0	603	903	0
554	4	0	0	0	0	0	0	200	300	0	0	0	0	0	0	0	200	903	0	0	0	0	0	0	0	603	903	0
554	5	0	0	0	0	0	0	200	300	0	0	0	0	0	0	0	200	903	0	0	0	0	0	0	0	603	903	0
554	6	0	0	0	0	0	0	200	300	0	0	0	0	0	0	0	200	903	0	0	0	0	0	0	0	603	903	0
554	7	0	0	0	0	0	0	200	300	0	0	0	0	0	0	0	200	903	0	0	0	0	0	0	0	603	903	0
554	8	0	0	0	0	0	0	200	300	0	0	0	0	0	0	0	200	903	0	0	0	0	0	0	0	603	903	0
554	9	0	0	0	0	0	0	200	300	0	0	0	0	0	0	0	200	903	0	0	0	0	0	0	0	603	903	0
555	0	0	0	0	0	0	0	200	300	0	0	0	0	0	0	0	200	903	0	0	0	0	0	0	0	603	903	0
555	1	0	0	0	0	0	0	200	300	0	0	0	0	0	0	0	200	903	0	0	0	0	0	0	0	603	903	0
555	2	0	0	0	0	0	0	200	300	0	0	0	0	0	0	0	200	903	0	0	0	0	0	0	0	603	903	0
555	3	0	0	0	0	0	0	200	300	0	0	0	0	0	0	0	200	903	0	0	0	0	0	0	0	603	903	0
555	4	0	0	0	0	0	0	200	300	0	0	0	0	0	0	0	200	903	0	0	0	0	0	0	0	603	903	0
555	5	0	0	0	0	0	0	200	300	0	0	0	0	0	0	0	200	903	0	0	0	0	0	0	0	603	903	0
555	6	0	0	0	0	0	0	200	300	0	0	0	0	0	0	0	200	903	0	0	0	0	0	0	0	603	903	0
555	7	0	0	0	0	0	0	200	300	0	0	0	0	0	0	0	200	903	0	0	0	0	0	0	0	603	903	0
555	8	0	0	0	0	0	0	200	300	0	0	0	0	0	0	0	200	903	0	0	0	0	0	0	0	603	903	0
555	9	0	0	0	0	0	0	200	300	0	0	0	0	0	0	0	200	903	0	0	0	0	0	0	0	603	903	0
556	0	0	0	0	0	0	0	200	300	0	0	0	0	0	0	0	200	903	0	0	0	0	0	0	0	603	903	0
556	1	0	0	0	0	0	0	200	300	0	0	0	0	0	0	0	200	903	0	0	0	0	0	0	0	603	903	0
556	2	0	0	0	0	0	0	200	300	0	0	0	0	0	0	0	200	903	0	0	0	0	0	0	0	603	903	0
556	3	0	0	0	0	0	0	200	300	0	0	0	0	0	0	0	200	903	0	0	0	0	0	0	0	603	903	0
556	4	0	0	0	0	0	0	200	300	0	0	0	0	0	0	0	200	903	0	0	0	0	0	0	0	603	903	0
556	5	0	0	0	0	0	0	200	300	0	0	0	0	0	0	0	200	903	0	0	0	0	0	0	0	603	903	0
556	6	0	0	0	0	0	0	200	300	0	0	0	0	0	0	0	200	903	0	0	0	0	0	0	0	603	903	0
556	7	0	0	0	0	0	0	200	300	0	0	0	0	0	0	0	200	903	0	0	0	0	0	0	0	603	903	0
556	8	0	0	0	0	0	0	200	300	0	0	0	0	0	0	0	200	903	0	0	0	0	0	0	0	603	903	0
556	9	0	0	0	0	0	0	200	300	0	0	0	0	0	0	0	200	903	0	0	0	0	0	0	0	603	903	0
557	0	0	0	0	0	0	0	200	300	0	0	0	0	0	0	0	200	903	0	0	0	0	0	0	0	603	903	0
557	1	0	0	0	0	0	0	200	300	0	0	0	0	0	0	0	200	903	0	0	0	0	0	0	0	603	903	0
557	2	0	0	0	0	0	0	200	300	0	0	0	0	0	0	0	200	903	0	0	0	0	0	0	0	603	903	0
557	3	0	0	0	0	0	0	200	300	0	0	0	0	0	0	0	200	903	0	0	0	0	0	0	0	603	903	0
557	4	0	0	0	0	0	0	200	300	0	0	0	0	0	0	0	200	903	0	0	0	0	0	0	0	603	903	0
557	5	0	0	0	0	0	0	200	300	0	0	0	0	0	0	0	200	903	0	0	0	0	0	0	0	603	903	0
557	6	0	0	0	0	0	0	200	300	0	0	0	0	0	0	0	200	903	0	0	0	0	0	0	0	603	903	0
557	7	0	0	0	0	0	0	200	300	0	0	0	0	0	0	0	200	903	0	0	0	0	0	0	0	603	903	0
557	8	0	0	0	0	0	0	200	300	0	0	0	0	0	0	0	200	903	0	0	0	0	0	0	0	603	903	0
557	9	0	0	0	0	0	0	200	300	0	0	0	0	0	0	0	200	903	0	0	0	0	0	0	0	603	903	0
558	0	0	0	0	0	0	0	200	300	0	0	0	0	0	0	0	200	903	0	0	0	0	0	0	0	603	903	0
558	1	0	0	0	0	0	0	200	300	0	0	0	0	0	0	0	200	903	0	0	0	0	0	0	0	603	903	0
558	2	0	0	0	0	0	0	200	300	0	0	0	0	0	0	0	200	903	0	0	0	0	0	0	0	603	903	0
558	3	0	0	0	0	0	0	200	300	0	0	0	0	0	0	0	200	903	0	0	0	0	0	0	0	603	903	0
558	4	0	0	0	0	0	0	200	300	0	0	0	0	0	0	0	200	903	0	0	0	0	0	0	0	603	903	0
558	5	0	0	0	0	0	0	200	300	0	0	0	0	0	0	0	200	903	0	0	0	0	0	0	0	603	903	0
558	6	0	0	0	0	0	0	200	300	0	0	0	0	0	0	0	200	903	0	0	0	0	0	0	0	603	903	0
558	7	0	0	0	0	0	0	200	300	0	0	0	0	0	0	0	200	903	0	0	0	0	0	0	0	603	903	0
558	8	0	0	0	0	0	0	200	300	0	0	0	0	0	0	0	200	903	0	0	0	0	0	0	0	603	903	0
558	9	0	0	0	0	0	0	200	300	0	0	0	0	0	0	0	200	903	0	0	0	0	0	0	0	603	903	0
559	0	0	0	0	0	0	0	200	300	0	0	0	0	0	0	0	200	903	0	0	0	0	0	0	0	603	903	0
559	1	0	0	0	0	0	0	200	300	0	0	0	0	0	0	0	200	903	0	0	0	0	0	0	0	603	903	0
559	2	0	0	0	0	0	0	200	300	0	0	0	0	0	0	0	200	903	0	0	0	0	0	0	0	603	903	0
559	3	0	0	0	0	0	0	200	300	0	0	0	0	0	0	0	200	903	0	0	0	0	0	0	0	603	903	0
559	4	0	0	0	0	0	0	200	300	0	0	0	0	0	0	0	200	903	0	0	0	0	0	0	0	603	903	0
559	5	0	0	0	0	0	0	200	300	0	0	0	0	0	0	0	200	903	0	0	0	0	0	0	0	603	903	0
559	6	0	0	0	0	0	0	200	300	0	0	0	0	0	0	0	200	903	0	0	0	0	0	0	0	603	903	0
559	7	0	0	0	0	0	0	200	300	0	0	0	0	0	0	0	200	903	0	0	0	0	0	0	0	603	903	0
559	8	0	0	0	0	0	0	200	300	0	0	0	0	0	0	0	200	903	0	0	0	0	0	0	0	603	903	0
559	9	0	0	0	0	0	0	200	300	0	0	0	0	0	0	0	200	903	0	0	0	0	0	0	0	603	903	0
560	0	0	0	0	0	0	0	200	300	0	0	0	0	0	0	0	200	903	0	0	0	0	0	0	0	603	903	0
560	1	0	0	0	0	0	0	200	300	0	0	0	0	0	0	0	200	903	0	0	0	0	0	0	0	603	903	0
560	2	0	0	0	0	0	0	200	300	0	0	0	0	0	0	0	200	903	0	0	0	0	0	0	0	603	903	0
560	3	0	0	0	0	0	0	200	300	0	0	0	0	0	0	0	200	903	0	0	0	0	0	0	0	603	903	0
560	4	0	0	0	0	0	0	200	300	0	0	0	0	0	0	0	200	903	0	0	0	0	0	0	0	603	903	0
560	5	0	0	0	0	0	0	200	300	0	0	0	0	0	0	0	200	903	0	0	0	0	0	0	0	603	903	0
560	6	0	0	0	0	0	0	200	300	0	0	0	0	0	0	0	200	903	0	0	0	0	0	0	0	603	903	0
560	7	0	0	0	0	0	0	200	300	0	0	0	0	0	0	0	200	903	0	0	0	0	0	0	0	603	903	0
560	8	0	0	0	0	0	0	200	300	0	0	0	0	0	0	0	200	903	0	0	0	0	0	0	0	603	903	0
560	9	0	0	0	0	0	0	200	300	0	0	0	0	0	0	0	200	903	0	0	0	0	0	0	0	603	903	0
561	0	0	0	0	0	0	0	200	300	0	0	0	0	0	0	0	200	903	0	0	0	0	0	0	0	603	903	0
561	1	0	0	0	0	0	0	200	300	0	0	0	0	0	0	0	200	903	0	0	0	0	0	0	0	603	903	0
561	2	0	0	0	0	0	0	200	300	0	0	0	0	0	0	0	200	903	0	0	0	0	0	0	0	603	903	0
561	3	0	0	0	0	0	0	200	300	0	0	0	0	0	0	0	200	903	0	0	0	0	0	0	0	603	903	0
561	4	0	0	0	0	0	0	200	300	0	0	0	0	0	0	0	200	903	0	0	0	0	0	0	0	603	903	0
561	5	0	0	0	0	0	0	200	300	0	0	0	0	0	0	0	200	903	0	0	0	0	0	0	0	603	903	0
561	6	0	0	0	0	0	0	200	300	0	0	0	0	0	0	0	200	903	0	0	0	0	0	0	0	603	903	0
561	7	0	0	0	0	0	0	200	300	0	0	0	0	0	0	0	200	903	0	0	0	0	0	0	0	603	903	0
561	8	0	0	0	0	0	0	200	300	0	0	0	0	0	0	0	200	903	0	0	0	0	0	0	0	603	903	0
561	9	0	0	0	0	0	0	200	300	0	0	0	0	0	0	0	200	903	0	0	0	0	0	0	0	603	903	0
562	0	0	0	0	0	0	0	200	300	0	0	0	0	0	0	0	200	903	0	0	0	0	0	0	0	603	903	0
562	1	0	0	0	0	0	0	200	300	0	0	0	0	0	0	0	200	903	0	0	0	0	0	0	0	603	903	0
562	2	0	0	0	0	0	0	200	300	0	0	0	0	0	0	0	200	903	0	0	0	0	0	0	0	603	903	0
562	3	0	0	0	0	0	0	200	300	0	0	0	0	0	0	0	200	903	0	0	0	0	0	0	0	603	903	0
562	4	0	0	0	0	0	0	200	300	0	0	0	0	0	0	0	200	903	0	0	0	0	0	0	0	603	903	0
562	5	0	0	0	0	0	0	200	300	0	0	0	0	0	0	0	200	903	0	0	0	0	0	0	0	603	903	0
562	6	0	0	0	0	0	0	200	300	0	0	0	0	0	0	0	200	903	0	0	0	0	0	0	0	603	903	0
562	7	0	0	0	0	0	0	200	300	0	0	0	0	0	0	0	200	903	0	0	0	0	0	0	0	603	903	0
562	8	0	0	0	0	0	0	200	300	0	0	0	0	0	0	0	200	903	0	0	0	0	0	0	0	603	903	0
562	9	0	0	0	0	0	0	200	300	0	0	0	0	0	0	0	200	903	0	0	0	0	0	0	0	603	903	0
563	0	0	0	0	0	0	0	200	300	0	0	0	0	0	0	0	200	903	0	0	0	0	0	0	0	603	903	0
563	1	0	0	0	0	0	0	200	300	0	0	0	0	0	0	0	200	903	0	0	0	0	0	0	0	603	903	0
563	2	0	0	0	0	0	0	200	300	0	0	0	0	0	0	0	200	903	0	0	0	0	0	0	0	603	903	0
563	3	0	0	0	0	0	0	200	300	0	0	0	0	0	0	0	200	903	0	0	0	0	0	0	0	603	903	0
563	4	0	0	0	0	0	0	200	300	0	0	0	0	0	0	0	200	903	0	0	0	0	0	0	0	603	903	0
563	5	0	0	0	0	0	0	200	300	0	0	0	0	0	0	0	200	903	0	0	0	0	0	0	0	603	903	0
563	6	0	0	0	0	0	0	200	300	0	0	0	0	0	0	0	200	903	0	0	0	0	0	0	0	603	903	0
563	7	0	0	0	0	0	0	200	300	0	0	0	0	0	0	0	200	903	0	0	0	0	0	0	0	603	903	0
563	8	0	0	0	0	0	0	200	300	0	0	0	0	0	0	0	200	903	0	0	0	0	0	0	0	603	903	0
563	9	0	0	0	0	0	0	200	300	0	0	0	0	0	0	0	200	903	0	0	0	0	0	0	0	603	903	0
564	0	0	0	0	0	0	0	200	300	0	0	0	0	0	0	0	200	903	0	0	0	0	0	0	0	603	903	0
564	1	0	0	0	0	0	0	200	300	0	0	0	0	0	0	0	200	903	0	0	0	0	0	0	0	603	903	0
564	2	0	0	0	0	0	0	200	300	0	0	0	0	0	0	0	200	903	0	0	0	0	0	0	0	603	903	0
564	3	0	0	0	0	0	0	200	300	0	0	0	0	0	0	0	200	903	0	0	0	0	0	0	0	603	903	0
564	4	0	0	0	0	0	0	200	300	0	0	0	0	0	0	0	200	903	0	0	0	0	0	0	0	603	903	0
564	5	0	0	0	0	0	0	200	300	0	0	0	0	0	0	0	200	903	0	0	0	0	0	0	0	603	903	0
564	6	0	0	0	0	0	0	200	300	0	0	0	0	0	0	0	200	903	0	0	0	0	0	0	0	603	903	0
564	7	0	0	0	0	0	0	200	300	0	0	0	0	0	0	0	200	903	0	0	0	0	0	0	0	603	903	0
564	8	0	0	0	0	0	0	200	300	0	0	0	0	0	0	0	200	903	0	0	0	0	0	0	0	603	903	0
564	9	0	0	0	0	0	0	200	300	0	0	0	0	0	0	0	200	903	0	0	0	0	0	0	0	603	903	0
565	0	0	0	0	0	0	0	200	300	0	0	0	0	0	0	0	200	903	0	0	0	0	0	0	0	603	903	0
565	1	0	0	0	0	0	0	200	300	0	0	0	0	0	0	0	200	903	0	0	0	0	0	0	0	603	903	0
565	2	0	0	0	0	0	0	200	300	0	0	0	0	0	0	0	200	903	0	0	0	0	0	0	0	603	903	0
565	3	0	0	0	0	0	0	200	300	0	0	0	0	0	0	0	200	903	0	0	0	0	0	0	0	603	903	0
565	4	0	0	0	0	0	0	200	300	0	0	0	0	0	0	0	200	903	0	0	0	0	0	0	0	603	903	0
565	5	0	0	0	0	0	0	200	300	0	0	0	0	0	0	0	200	903	0	0	0	0	0	0	0	603	903	0
565	6	0	0	0	0	0	0	200	300	0	0	0	0	0	0	0	200	903	0	0	0	0	0	0	0	603	903	0
565	7	0	0	0	0	0	0	200	300	0	0	0	0	0	0	0	200	903	0	0	0	0	0	0	0	603	903	0
565	8	0	0	0	0	0	0	200	300	0	0	0	0	0	0	0	200	903	0	0	0	0	0	0	0	603	903	0
565	9	0	0	0	0	0	0	200	300	0	0	0	0	0	0	0	200	903	0	0	0	0	0	0	0	603	903	0
566	0	0	0	0	0	0	0	200	300	0	0	0	0	0	0	0	200	903	0	0	0	0	0	0	0	603	903	0
566	1	0	0	0	0	0	0	200	300	0	0	0	0	0	0	0	200	903	0	0	0	0	0	0	0	603	903	0
566	2	0	0	0	0	0	0	200	300	0	0	0	0	0	0	0	200	903	0	0	0	0	0	0	0	603	903	0
566	3	0	0	0	0	0	0	200	300	0	0	0	0	0	0	0	200	903	0	0	0	0	0	0	0	603	903	0
566	4	0	0	0	0	0	0	200	300	0	0	0	0	0	0	0	200	903	0	0	0	0	0	0	0	603	903	0
566	5	0	0	0	0	0	0	200	300	0	0	0	0	0	0	0	200	903	0	0	0	0	0	0	0	603	903	0
566	6	0	0	0	0	0	0	200	300	0	0	0	0	0	0	0	200	903	0	0	0	0	0	0	0	603	903	0
566	7	0	0	0	0	0	0	200	300	0	0	0	0	0	0	0	200	903	0	0	0	0	0	0	0	603	903	0
566	8	0	0	0	0	0	0	200	300	0	0	0	0	0	0	0	200	903	0	0	0	0	0	0	0	603	903	0
566	9	0	0	0	0	0	0	200	300	0	0	0	0	0	0	0	200	903	0	0	0	0	0	0	0	603	903	0
567	0	0	0	0	0	0	0	200	300	0	0	0	0	0	0	0	200	903	0	0	0	0	0	0	0	603	903	0
567	1	0	0	0	0	0	0	200	300	0	0	0	0	0	0	0	200	903	0	0	0	0	0	0	0	603	903	0
567	2	0	0	0	0	0	0	200	300	0	0	0	0	0	0	0	200	903	0	0	0	0	0	0	0	603	903	0
567	3	0	0	0	0	0	0	200	300	0	0	0	0	0	0	0	200	903	0	0	0	0	0	0	0	603	903	0
567	4	0	0	0	0	0	0	200	300	0	0	0	0	0	0	0	200	903	0	0	0	0	0	0	0	603	903	0
567	5	0	0	0	0	0	0	200	300	0	0	0	0	0	0	0	200	903	0	0	0	0	0	0	0	603	903	0
567	6	0	0	0	0	0	0	200	300	0	0	0	0	0	0	0	200	903	0	0	0	0	0	0	0	603	903	0
567	7	0	0	0	0	0	0	200	300	0	0	0	0	0	0	0	200	903	0	0	0	0	0	0	0	603	903	0
567	8	0	0	0	0	0	0	200	300	0	0	0	0	0	0	0	200	903	0	0	0	0	0	0	0	603	903	0
567	9	0	0	0	0	0	0	200	300	0	0	0	0	0	0	0	200	903	0	0	0	0	0	0	0	603	903	0
568	0	0	0	0	0	0	0	200	300	0	0	0	0	0	0	0	200	903	0	0	0	0	0	0	0	603	903	0
568	1	0	0	0	0	0	0	200	300	0	0	0	0	0	0	0	200	903	0	0	0	0	0	0	0	603	903	0
568	2	0	0	0	0	0	0	200	300	0	0	0	0	0	0	0	200	903	0	0	0	0	0	0	0	603	903	0
568	3	0	0	0	0	0	0	200	300	0	0	0	0	0	0	0	200	903	0	0	0	0	0	0	0	603	903	0
568	4	0	0	0	0	0	0	200	300	0	0	0	0	0	0	0	200	903	0	0	0	0	0	0	0	603	903	0
568	5	0	0	0	0	0	0	200	300	0	0	0	0	0	0	0	200	903	0	0	0	0	0	0	0	603	903	0
568	6	0	0	0	0	0	0	200	300	0	0	0	0	0	0	0	200	903	0	0	0	0	0	0	0	603	903	0
568	7	0	0	0	0	0	0	200	300	0	0	0	0	0	0	0	200	903	0	0	0	0	0	0	0	603	903	0
568	8	0	0	0	0	0	0	200	300	0	0	0	0	0	0	0	200	903	0	0	0	0	0	0	0	603	903	0
568	9	0	0	0	0	0	0	200	300	0	0	0	0	0	0	0	200	903	0	0	0	0	0	0	0	603	903	0
569	0	0	0	0	0	0	0	200	300	0	0	0	0	0	0	0	200	903	0	0	0	0	0	0	0	603	903	0
569	1	0	0	0	0	0	0	200	300	0	0	0	0	0	0	0	200	903	0	0	0	0	0	0	0	603	903	0
569	2	0	0	0	0	0	0	200	300	0	0	0	0	0	0	0	200	903	0	0	0	0	0	0	0	603	903	0
569	3	0	0	0	0	0	0	200	300	0	0	0	0	0	0	0	200	903	0	0	0	0	0	0	0	603	903	0
569	4	0	0	0	0	0	0	200	300	0	0	0	0	0	0	0	200	903	0	0	0	0	0	0	0	603	903	0
569	5	0	0	0	0	0	0	200	300	0	0	0	0	0	0	0	200	903	0	0	0	0	0	0	0	603	903	0
569	6	0	0	0	0	0	0	200	300	0	0	0	0	0	0	0	200	903	0	0	0	0	0	0	0	603	903	0
569	7	0	0	0	0	0	0	200	300	0	0	0	0	0	0	0	200	903	0	0	0	0	0	0	0	603	903	0
569	8	0	0	0	0	0	0	200	300	0	0	0	0	0	0	0	200	903	0	0	0	0	0	0	0	603	903	0
569	9	0	0	0	0	0	0	200	300	0	0	0	0	0	0	0	200	903	0	0	0	0	0	0	0	603	903	0
570	0	0	0	0	0	0	0	200	300	0	0	0	0	0	0	0	200	903	0	0	0	0	0	0	0	603	903	0
570	1	0	0	0	0	0	0	200	300	0	0	0	0	0	0	0	200	903	0	0	0	0	0	0	0	603	903	0
570	2	0	0	0	0	0	0	200	300	0	0	0	0	0	0	0	200	903	0	0	0	0	0	0	0	603	903	0
570	3	0	0	0	0	0	0	200	300	0	0	0	0	0	0	0	200	903	0	0	0	0	0	0	0	603	903	0
570	4	0	0	0	0	0	0	200	300	0	0	0	0	0	0	0	200	903	0	0	0	0	0	0	0	603	903	0
570	5	0	0	0	0	0	0	200	300	0	0	0	0	0	0	0	200	903	0	0	0	0	0	0	0	603	903	0
570	6	0	0	0	0	0	0	200	300	0	0	0	0	0	0	0	200	903	0	0	0	0	0	0	0	603	903	0
570	7	0	0	0	0	0	0	200	300	0	0	0	0	0	0	0	200	903	0	0	0	0	0	0	0	603	903	0
570	8	0	0	0	0	0	0	200	300	0	0	0	0	0	0	0	200	903	0	0	0	0	0	0	0	603	903	0
570	9	0	0	0	0	0	0	200	300	0	0	0	0	0	0	0	200	903	0	0	0	0	0	0	0	603	903	0
571	0	0	0	0	0	0	0	200	300	0	0	0	0	0	0	0	200	903	0	0	0	0	0	0	0	603	903	0
571	1	0	0	0	0	0	0	200	300	0	0	0	0	0	0	0	200	903	0	0	0	0	0	0	0	603	903	0
571	2	0	0	0	0	0	0	200	300	0	0	0	0	0	0	0	200	903	0	0	0	0	0	0	0	603	903	0
571	3	0	0	0	0	0	0	200	300	0	0	0	0	0	0	0	200	903	0	0	0	0	0	0	0	603	903	0
571	4	0	0	0	0	0	0	200	300	0	0	0	0	0	0	0	200	903	0	0	0	0	0	0	0	603	903	0
571	5	0	0	0	0	0	0	200	300	0	0	0	0	0	0	0	200	903	0	0	0	0	0	0	0	603	903	0
571	6	0	0	0	0	0	0	200	300	0	0	0	0	0	0	0	200	903	0	0	0	0	0	0	0	603	903	0
571	7	0	0	0	0	0	0	200	300	0	0	0	0	0	0	0	200	903	0	0	0	0	0	0	0	603	903	0
571	8	0	0	0	0	0	0	200	300	0	0	0	0	0	0	0	200	903	0	0	0	0	0	0	0	603	903	0
571	9	0	0	0	0	0	0	200	300	0	0	0	0	0	0	0	200	903	0	0	0	0	0	0	0	603	903	0
572	0	0	0	0	0	0	0	200	300	0	0	0	0	0	0	0	200	903	0	0	0	0	0	0	0	603	903	0
572	1	0	0	0	0	0	0	200	300	0	0	0	0	0	0	0	200	903	0	0	0	0	0	0	0	603	903	0
572	2	0	0	0	0	0	0	200	300	0	0	0	0	0	0	0	200	903	0	0	0	0	0	0	0	603	903	0
572	3	0	0	0	0	0	0	200	300	0	0	0	0	0	0	0	200	903	0	0	0	0	0	0	0	603	903	0
572	4	0	0	0	0	0	0	200	300	0	0	0	0	0	0	0	200	903	0	0	0	0	0	0	0	603	903	0
572	5	0	0	0	0	0	0	200	300	0	0	0	0	0	0	0	200	903	0	0	0	0	0	0	0	603	903	0
572	6	0	0	0	0	0	0	200	300	0	0	0	0	0	0	0	200	903	0	0	0	0	0	0	0	603	903	0
572	7	0	0	0	0	0	0	200	300	0	0	0	0	0	0	0	200	903	0	0	0	0	0	0	0	603	903	0
572	8	0	0	0	0	0	0	200	300	0	0	0	0	0	0	0	200	903	0	0	0	0	0	0	0	603	903	0
572	9	0	0	0	0	0	0	200	300	0	0	0	0	0	0	0	200	903	0	0	0	0	0	0	0	603	903	0
573	0	0	0	0	0	0	0	200	300	0	0	0	0	0	0	0	200	903	0	0	0	0	0	0	0	603	903	0
573	1	0	0	0	0	0	0	200	300	0	0	0	0	0	0	0	200	903	0	0	0	0	0	0	0	603	903	0
573	2	0	0	0	0	0	0	200	300	0	0	0	0	0	0	0	200	903	0	0	0	0	0	0	0	603	903	0
573	3	0	0	0	0	0	0	200	300	0	0	0	0	0	0	0	200	903	0	0	0	0	0	0	0	603	903	0
573	4	0	0	0	0	0	0	200	300	0	0	0	0	0	0	0	200	903	0	0	0	0	0	0	0	603	903	0
573	5	0	0	0	0	0	0	200	300	0	0	0	0	0	0	0	200	903	0	0	0	0	0	0	0	603	903	0
573	6	0	0	0	0	0	0	200	300	0	0	0	0	0	0	0	200	903	0	0	0	0	0	0	0	603	903	0
573	7	0	0	0	0	0	0	200	300	0	0	0	0	0	0	0	200	903	0	0	0	0	0	0	0	603	903	0
573	8	0	0	0	0	0	0	200	300	0	0	0	0	0	0	0	200	903	0	0	0	0	0	0	0	603	903	0
573	9	0	0	0	0	0	0	200	300	0	0	0	0	0	0	0	200	903	0	0	0	0	0	0	0	603	903	0
574	0	0	0	0	0	0	0	200	300	0	0	0	0	0	0	0	200	903	0	0	0	0	0	0	0	603	903	0
574	1	0	0	0	0	0	0	200	300	0	0	0	0	0	0	0	200	903	0	0	0	0	0	0	0	603	903	0
574	2	0	0	0	0	0	0	200	300	0	0	0	0	0	0	0	200	903	0	0	0	0	0	0	0	603	903	0
574	3	0	0	0	0	0	0	200	300	0	0	0	0	0	0	0	200	903	0	0	0	0	0	0	0	603	903	0
574	4	0	0	0	0	0	0	200	300	0	0	0	0	0	0	0	200	903	0	0	0	0	0	0	0	603	903	0
574	5	0	0	0	0	0	0	200	300	0	0	0	0	0	0	0	200	903	0	0	0	0	0	0	0	603	903	0
574	6	0	0	0	0	0	0	200	300	0	0	0	0	0	0	0	200	903	0	0	0	0	0	0	0	603	903	0
574	7	0	0	0	0	0	0	200	300	0	0	0	0	0	0	0	200	903	0	0	0	0	0	0	0	603	903	0
574	8	0	0	0	0	0	0	200	300	0	0	0	0	0	0	0	200	903	0	0	0	0	0	0	0	603	903	0
574	9	0	0	0	0	0	0	200	300	0	0	0	0	0	0	0	200	903	0	0	0	0	0	0	0	603	903	0
575	0	0	0	0	0	0	0	200	300	0	0	0	0	0	0	0	200	903	0	0	0	0	0	0	0	603	903	0
575	1	0	0	0	0	0	0	200	300	0	0	0	0	0	0	0	200	903	0	0	0	0	0	0	0	603	903	0
575	2	0	0	0	0	0	0	200	300	0	0	0	0	0	0	0	200	903	0	0	0	0	0	0	0	603	903	0
575	3	0	0	0	0	0	0	200	300	0	0	0	0	0	0	0	200	903	0	0	0	0	0	0	0	603	903	0
575	4	0	0	0	0	0	0	200	300	0	0	0	0	0	0	0	200	903	0	0	0	0	0	0	0	603	903	0
575	5	0	0	0	0	0	0	200	300	0	0	0	0	0	0	0	200	903	0	0	0	0	0	0	0	603	903	0
575	6	0	0	0	0	0	0	200	300	0	0	0	0	0	0	0	200	903	0	0	0	0	0	0	0	603	903	0
575	7	0	0	0	0	0	0	200	300	0	0	0	0	0	0	0	200	903	0	0	0	0	0	0	0	603	903	0
575	8	0	0	0	0	0	0	200	300	0	0	0	0	0	0	0	200	903	0	0	0	0	0	0	0	603	903	0
575	9	0	0	0	0	0	0	200	300	0	0	0	0	0	0	0	200	903	0	0	0	0	0	0	0	603	903	0
576	0	0	0	0	0	0	0	200	300	0	0	0	0	0	0	0	200	903	0	0	0	0	0	0	0	603	903	0
576	1	0	0	0	0	0	0	200	300	0	0	0	0	0	0	0	200	903	0	0	0	0	0	0	0	603	903	0
576	2	0	0	0	0	0	0	200	300	0	0	0	0	0	0	0	200	903	0	0	0	0	0	0	0	603	903	0
576	3	0	0	0	0	0	0	200	300	0	0	0	0	0	0	0	200	903	0	0	0	0	0	0	0	603	903	0
576	4	0	0	0	0	0	0	200	300	0	0	0	0	0	0	0	200	903	0	0	0	0	0	0	0	603	903	0
576	5	0	0	0	0	0	0	200	300	0	0	0	0	0	0	0	200	903	0	0	0	0	0	0	0	603	903	0
576	6	0	0	0	0	0	0	200	300	0	0	0	0	0	0	0	200	903	0	0	0	0	0	0	0	603	903	0
576	7	0	0	0	0	0	0	200	300	0	0	0	0	0	0	0	200	903	0	0	0	0	0	0	0	603	903	0
576	8	0	0	0	0	0	0	200	300	0	0	0	0	0	0	0	200	903	0	0	0	0	0	0	0	603	903	0
576	9	0	0	0	0	0	0	200	300	0	0	0	0	0	0	0	200	903	0	0	0	0	0	0	0	603	903	0
577	0	0	0	0	0	0	0	200	300	0	0	0	0	0	0	0	200	903	0	0	0	0	0	0	0	603	903	0
577	1	0	0	0	0	0	0	200	300	0	0	0	0	0	0	0	200	903	0	0	0	0	0	0	0	603	903	0
577	2	0	0	0	0	0	0	200	300	0	0	0	0	0	0	0	200	903	0	0	0	0	0	0	0	603	903	0
577	3	0	0	0	0	0	0	200	300	0	0	0	0	0	0	0	200	903	0	0	0	0	0	0	0	603	903	0
577	4	0	0	0	0	0	0	200	300	0	0	0	0	0	0	0	200	903	0	0	0	0	0	0	0	603	903	0
577	5	0	0	0	0	0	0	200	300	0	0	0	0	0	0	0	200	903	0	0	0	0	0	0	0	603	903	0
577	6	0	0	0	0	0	0	200	300	0	0	0	0	0	0	0	200	903	0	0	0	0	0	0	0	603	903	0
577	7	0	0	0	0	0	0	200	300	0	0	0	0	0	0	0	200	903	0	0	0	0	0	0	0	603	903	0
577	8	0	0	0	0	0	0	200	300	0	0	0	0	0	0	0	200	903	0	0	0	0	0	0	0	603	903	0
577	9	0	0	0	0	0	0	200	300	0	0	0	0	0	0	0	200	903	0	0	0	0	0	0	0	603	903	0
578	0	0	0	0	0	0	0	200	300	0	0	0	0	0	0	0	200	903	0	0	0	0	0	0	0	603	903	0
578	1	0	0	0	0	0	0	200	300	0	0	0	0	0	0	0	200	903	0	0	0	0	0	0	0	603	903	0
578	2	0	0	0	0	0	0	200	300	0	0	0	0	0	0	0	200	903	0	0	0	0	0	0	0	603	903	0
578	3	0	0	0	0	0	0	200	300	0	0	0	0	0	0	0	200	903	0	0	0	0	0	0	0	603	903	0
578	4	0	0	0	0	0	0	200	300	0	0	0	0	0	0	0	200	903	0	0	0	0	0	0	0	603	903	0
578	5	0	0	0	0	0	0	200	300	0	0	0	0	0	0	0	200	903	0	0	0	0	0	0	0	603	903	0
578	6	0	0	0	0	0	0	200	300	0	0	0	0	0	0	0	200	903	0	0	0	0	0	0	0	603	903	0
578	7	0	0	0	0	0	0	200	300	0	0	0	0	0	0	0	200	903	0	0	0	0	0	0	0	603	903	0
578	8	0	0	0	0	0	0	200	300	0	0	0	0	0	0	0	200	903	0	0	0	0	0	0	0	603	903	0
578	9	0	0	0	0	0	0	200	300	0	0	0	0	0	0	0	200	903	0	0	0	0	0	0	0	603	903	0
579	0	0	0	0	0	0	0	200	300	0	0	0	0	0	0	0	200	903	0	0	0	0	0	0	0	603	903	0
579	1	0	0	0	0	0	0	200	300	0	0	0	0	0	0	0	200	903	0	0	0	0	0	0	0	603	903	0
579	2	0	0	0	0	0	0	200	300	0	0	0	0	0	0	0	200	903	0	0	0	0	0	0	0	603	903	0
579	3	0	0	0	0	0	0	200	300	0	0	0	0	0	0	0	200	903	0	0	0	0	0	0	0	603	903	0
579	4	0	0	0	0	0	0	200	300	0	0	0	0	0	0	0	200	903	0	0	0	0	0	0	0	603	903	0
579	5	0	0	0	0	0	0	200	300	0	0	0	0	0	0	0	200	903	0	0	0	0	0	0	0	603	903	0
579	6	0	0	0	0	0	0	200	300	0	0	0	0	0	0	0	200	903	0	0	0	0	0	0	0	603	903	0
579	7	0	0	0	0	0	0	200	300	0	0	0	0	0	0	0	200	903	0	0	0	0	0	0	0	603	903	0
579	8	0	0	0	0	0	0	200	300	0	0	0	0	0	0	0	200	903	0	0	0	0	0	0	0	603	903	0
579	9	0	0	0	0	0	0	200	300	0	0	0	0	0	0	0	200	903	0	0	0	0	0	0	0	603	903	0
580	0	0	0	0	0	0	0	200	300	0	0	0	0	0	0	0	200	903	0	0	0	0	0	0	0	603	903	0
580	1	0	0	0	0	0	0	200	300	0	0	0	0	0	0	0	200	903	0	0	0	0	0	0	0	603	903	0
580	2	0	0	0	0	0	0	200	300	0	0	0	0	0	0	0	200	903	0	0	0	0	0	0	0	603	903	0
580	3	0	0	0	0	0	0	200	300	0	0	0	0	0	0	0	200	903	0	0	0	0	0	0	0	603	903	0
580	4	0	0	0	0	0	0	200	300	0	0	0	0	0	0	0	200	903	0	0	0	0	0	0	0	603	903	0
580	5	0	0	0	0	0	0	200	300	0	0	0	0	0	0	0	200	903	0	0	0	0	0	0	0	603	903	0
580	6	0	0	0	0	0	0	200	300	0	0	0	0	0	0	0	200	903	0	0	0	0	0	0	0	603	903	0
580	7	0	0	0	0	0	0	200	300	0	0	0	0	0	0	0	200	903	0	0	0	0	0	0	0	603	903	0
580	8	0	0	0	0	0	0	200	300	0	0	0	0	0	0	0	200	903	0	0	0	0	0	0	0	603	903	0
580	9	0	0	0	0	0	0	200	300	0	0	0	0	0	0	0	200	903	0	0	0	0	0	0	0	603	903	0
581	0	0	0	0	0	0	0	200	300	0	0	0	0	0	0	0	200	903	0	0	0	0	0	0	0	603	903	0
581	1	0	0	0	0	0	0	200	300	0	0	0	0	0	0	0	200	903	0	0	0	0	0	0	0	603	903	0
581	2	0	0	0	0	0	0	200	300	0	0	0	0	0	0	0	200	903	0	0	0	0	0	0	0	603	903	0
581	3	0	0	0	0	0	0	200	300	0	0	0	0	0	0	0	200	903	0	0	0	0	0	0	0	603	903	0
581	4	0	0	0	0	0	0	200	300	0	0	0	0	0	0	0	200	903	0	0	0	0	0	0	0	603	903	0
581	5	0	0	0	0	0	0	200	300	0	0	0	0	0	0	0	200	903	0	0	0	0	0	0	0	603	903	0
581	6	0	0	0	0	0	0	200	300	0	0	0	0	0	0	0	200	903	0	0	0	0	0	0	0	603	903	0
581	7	0	0	0	0	0	0	200	300	0	0	0	0	0	0	0	200	903	0	0	0	0	0	0	0	603	903	0
581	8	0	0	0	0	0	0	200	300	0	0	0	0	0	0	0	200	903	0	0	0	0	0	0	0	603	903	0
581	9	0	0	0	0	0	0	200	300	0	0	0	0	0	0	0	200	903	0	0	0	0	0	0	0	603	903	0
582	0	0	0	0	0	0	0	200	300	0	0	0	0	0	0	0	200	903	0	0	0	0	0	0	0	603	903	0
582	1	0	0	0	0	0	0	200	300	0	0	0	0	0	0	0	200	903	0	0	0	0	0	0	0	603	903	0
582	2	0	0	0	0	0	0	200	300	0	0	0	0	0	0	0	200	903	0	0	0	0	0	0	0	603	903	0
582	3	0	0	0	0	0	0	200	300	0	0	0	0	0	0	0	200	903	0	0	0	0	0	0	0	603	903	0
582	4	0	0	0	0	0	0	200	300	0	0	0	0	0	0	0	200	903	0	0	0	0	0	0	0	603	903	0
582	5	0	0	0	0	0	0	200	300	0	0	0	0	0	0	0	200	903	0	0	0	0	0	0	0	603	903	0
582	6	0	0	0	0	0	0	200	300	0	0	0	0	0	0	0	200	903	0	0	0	0	0	0	0	603	903	0
582	7	0	0	0	0	0	0	200	300	0	0	0	0	0	0	0	200	903	0	0	0	0	0	0	0	603	903	0
582	8	0	0	0	0	0	0	200	300	0	0	0	0	0	0	0	200	903	0	0	0	0	0	0	0	603	903	0
582	9	0	0	0	0	0	0	200	300	0	0	0	0	0	0	0	200	903	0	0	0	0	0	0	0	603	903	0
583	0	0	0	0	0	0	0	200	300	0	0	0	0	0	0	0	200	903	0	0	0	0	0	0	0	603	903	0
583	1	0	0	0	0	0	0	200	300	0	0	0	0	0	0	0	200	903	0	0	0	0	0	0	0	603	903	0
583	2	0	0	0	0	0	0	200	300	0	0	0	0	0	0	0	200	903	0	0	0	0	0	0	0	603	903	0
583	3	0	0	0	0	0	0	200	300	0	0	0	0	0	0	0	200	903	0	0	0	0	0	0	0	603	903	0
583	4	0	0	0	0	0	0	200	300	0	0	0	0	0	0	0	200	903	0	0	0	0	0	0	0	603	903	0
583	5	0	0	0	0	0	0	200	300	0	0	0	0	0	0	0	200	903	0	0	0	0	0	0	0	603	903	0
583	6	0	0	0	0	0	0	200	300	0	0	0	0	0	0	0	200	903	0	0	0	0	0	0	0	603	903	0
583	7	0	0	0	0	0	0	200	300	0	0	0	0	0	0	0	200	903	0	0	0	0	0	0	0	603	903	0
583	8	0	0	0	0	0	0	200	300	0	0	0	0	0	0	0	200	903	0	0	0	0	0	0	0	603	903	0
583	9	0	0	0	0	0	0	200	300	0	0	0	0	0	0	0	200	903	0	0	0	0	0	0	0	603	903	0
584	0	0	0	0	0	0	0	200	300	0	0	0	0	0	0	0	200	903	0	0	0	0	0	0	0	603	903	0
584	1	0	0	0	0	0	0	200	300	0	0	0	0	0	0	0	200	903	0	0	0	0	0	0	0	603	903	0
584	2	0	0	0	0	0	0	200	300	0	0	0	0	0	0	0	200	903	0	0	0	0	0	0	0	603	903	0
584	3	0	0	0	0	0	0	200	300	0	0	0	0	0	0	0	200	903	0	0	0	0	0	0	0	603	903	0
584	4	0	0	0	0	0	0	200	300	0	0	0	0	0	0	0	200	903	0	0	0	0	0	0	0	603	903	0
584	5	0	0	0	0	0	0	200	300	0	0	0	0	0	0	0	200	903	0	0	0	0	0	0	0	603	903	0
584	6	0	0	0	0	0	0	200	300	0	0	0	0	0	0	0	200	903	0	0	0	0	0	0	0	603	903	0
584	7	0	0	0	0	0	0	200	300	0	0	0	0	0	0	0	200	903	0	0	0	0	0	0	0	603	903	0
584	8	0	0	0	0	0	0	200	300	0	0	0	0	0	0	0	200	903	0	0	0	0	0	0	0	603	903	0
584	9	0	0	0	0	0	0	200	300	0	0	0	0	0	0	0	200	903	0	0	0	0	0	0	0	603	903	0
585	0	0	0	0	0	0	0	200	300	0	0	0	0	0	0	0	200	903	0	0	0	0	0	0	0	603	903	0
585	1	0	0	0	0	0	0	200	300	0	0	0	0	0	0	0	200	903	0	0	0	0	0	0	0	603	903	0
585	2	0	0	0	0	0	0	200	300	0	0	0	0	0	0	0	200	903	0	0	0	0	0	0	0	603	903	0
585	3	0	0	0	0	0	0	200	300	0	0	0	0	0	0	0	200	903	0	0	0	0	0	0	0	603	903	0
585	4	0	0	0	0	0	0	200	300	0	0	0	0	0	0	0	200	903	0	0	0	0	0	0	0	603	903	0
585	5	0	0	0	0	0	0	200	300	0	0	0	0	0	0	0	200	903	0	0	0	0	0	0	0	603	903	0
585	6	0	0	0	0	0	0	200	300	0	0	0	0	0	0	0	200	903	0	0	0	0	0	0	0	603	903	0
585	7	0	0	0	0	0	0	200	300	0	0	0	0	0	0	0	200	903	0	0	0	0	0	0	0	603	903	0
585	8	0	0	0	0	0	0	200	300	0	0	0	0	0	0	0	200	903	0	0	0	0	0	0	0	603	903	0
585	9	0	0	0	0	0	0	200	300	0	0	0	0	0	0	0	200	903	0	0	0	0	0	0	0	603	903	0
586	0	0	0	0	0	0	0	200	300	0	0	0	0	0	0	0	200	903	0	0	0	0	0	0	0	603	903	0
586	1	0	0	0	0	0	0	200	300	0	0	0	0	0	0	0	200	903	0	0	0	0	0	0	0	603	903	0
586	2	0	0	0	0	0	0	200	300	0	0	0	0	0	0	0	200	903	0	0	0	0	0	0	0	603	903	0
586	3	0	0	0	0	0	0	200	300	0	0	0	0	0	0	0	200	903	0	0	0	0	0	0	0	603	903	0
586	4	0	0	0	0	0	0	200	300	0	0	0	0	0	0	0	200	903	0	0	0	0	0	0	0	603	903	0
586	5	0	0	0	0	0	0	200	300	0	0	0	0	0	0	0	200	903	0	0	0	0	0	0	0	603	903	0
586	6	0	0	0	0	0	0	200	300	0	0	0	0	0	0	0	200	903	0	0	0	0	0	0	0	603	903	0
586	7	0	0	0	0	0	0	200	300	0	0	0	0	0	0	0	200	903	0	0	0	0	0	0	0	603	903	0
586	8	0	0	0	0	0	0	200	300	0	0	0	0	0	0	0	200	903	0	0	0	0	0	0	0	603	903	0
586	9	0	0	0	0	0	0	200	300	0	0	0	0	0	0	0	200	903	0	0	0	0	0	0	0	603	903	0
587	0	0	0	0	0	0	0	200	300	0	0	0	0	0	0	0	200	903	0	0	0	0	0	0	0	603	903	0
587	1	0	0	0	0	0	0	200	300	0	0	0	0	0	0	0	200	903	0	0	0	0	0	0	0	603	903	0
587	2	0	0	0	0	0	0	200	300	0	0	0	0	0	0	0	200	903	0	0	0	0	0	0	0	603	903	0
587	3	0	0	0	0	0	0	200	300	0	0	0	0	0	0	0	200	903	0	0	0	0	0	0	0	603	903	0
587	4	0	0	0	0	0	0	200	300	0	0	0	0	0	0	0	200	903	0	0	0	0	0	0	0	603	903	0
587	5	0	0	0	0	0	0	200	300	0	0	0	0	0	0	0	200	903	0	0	0	0	0	0	0	603	903	0
587	6	0	0	0	0	0	0	200	300	0	0	0	0	0	0	0	200	903	0	0	0	0	0	0	0	603	903	0
587	7	0	0	0	0	0	0	200	300	0	0	0	0	0	0	0	200	903	0	0	0	0	0	0	0	603	903	0
587	8	0	0	0	0	0	0	200	300	0	0	0	0	0	0	0	200	903	0	0	0	0	0	0	0	603	903	0
587	9	0	0	0	0	0	0	200	300	0	0	0	0	0	0	0	200	903	0	0	0	0	0	0	0	603	903	0
588	0	0	0	0	0	0	0	200	300	0	0	0	0	0	0	0	200	903	0	0	0	0	0	0	0	603	903	0
588	1	0	0	0	0	0	0	200	300	0	0	0	0	0	0	0	200	903	0	0	0	0	0	0	0	603	903	0
588	2	0	0	0	0	0	0	200	300	0	0	0	0	0	0	0	200	903	0	0	0	0	0	0	0	603	903	0
588	3	0	0	0	0	0	0	200	300	0	0	0	0	0	0	0	200	903	0	0	0	0	0	0	0	603	903	0
588	4	0	0	0	0	0	0	200	300	0	0	0	0	0	0	0	200	903	0	0	0	0	0	0	0	603	903	0
588	5	0	0	0	0	0	0	200	300	0	0	0	0	0	0	0	200	903	0	0	0	0	0	0	0	603	903	0
588	6	0	0	0	0	0	0	200	300	0	0	0	0	0	0	0	200	903	0	0	0	0	0	0	0	603	903	0
588	7	0	0	0	0	0	0	200	300	0	0	0	0	0	0	0	200	903	0	0	0	0	0	0	0	603	903	0
588	8	0	0	0	0	0	0	200	300	0	0	0	0	0	0	0	200	903	0	0	0	0	0	0	0	603	903	0
588	9	0	0	0	0	0	0	200	300	0	0	0	0	0	0	0	200	903	0	0	0	0	0	0	0	603	903	0
589	0	0	0	0	0	0	0	200	300	0	0	0	0	0	0	0	200	903	0	0	0	0	0	0	0	603	903	0
589	1	0	0	0	0	0	0	200	300	0	0	0	0	0	0	0	200	903	0	0	0	0	0	0	0	603	903	0
589	2	0	0	0	0	0	0	200	300	0	0	0	0	0	0	0	200	903	0	0	0	0	0	0	0	603	903	0
589	3	0	0	0	0	0	0	200	300	0	0	0	0	0	0	0	200	903	0	0	0	0	0	0	0	603	903	0
589	4	0	0	0	0	0	0	200	300	0	0	0	0	0	0	0	200	903	0	0	0	0	0	0	0	603	903	0
589	5	0	0	0	0	0	0	200	300	0	0	0	0	0	0	0	200	903	0	0	0	0	0	0	0	603	903	0
589	6	0	0	0	0	0	0	200	300	0	0	0	0	0	0	0	200	903	0	0	0	0	0	0	0	603	903	0
589	7	0	0	0	0	0	0	200	300	0	0	0	0	0	0	0	200	903	0	0	0	0	0	0	0	603	903	0
589	8	0	0	0	0	0	0	200	300	0	0	0	0	0	0	0	200	903	0	0	0	0	0	0	0	603	903	0
589	9	0	0	0	0	0	0	200	300	0	0	0	0	0	0	0	200	903	0	0	0	0	0	0	0	603	903	0
590	0	0	0	0	0	0	0	200	300	0	0	0	0	0	0	0	200	903	0	0	0	0	0	0	0	603	903	0
590	1	0	0	0	0	0	0	200	300	0	0	0	0	0	0	0	200	903	0	0	0	0	0	0	0	603	903	0
590	2	0	0	0	0	0	0	200	300	0	0	0	0	0	0	0	200	903	0	0	0	0	0	0	0	603	903	0
590	3	0	0	0	0	0	0	200	300	0	0	0	0	0	0	0	200	903	0	0	0	0	0	0	0	603	903	0
590	4	0	0	0	0	0	0	200	300	0	0	0	0	0	0	0	200	903	0	0	0	0	0	0	0	603	903	0
590	5	0	0	0	0	0	0	200	300	0	0	0	0	0	0	0	200	903	0	0	0	0	0	0	0	603	903	0
590	6	0	0	0	0	0	0	200	300	0	0	0	0	0	0	0	200	903	0	0	0	0	0	0	0	603	903	0
590	7	0	0	0	0	0	0	200	300	0	0	0	0	0	0	0	200	903	0	0	0	0	0	0	0	603	903	0
590	8	0	0	0	0	0	0	200	300	0	0	0	0	0	0	0	200	903	0	0	0	0	0	0	0	603	903	0
590	9	0	0	0	0	0	0	200	300	0	0	0	0	0	0	0	200	903	0	0	0	0	0	0	0	603	903	0
591	0	0	0	0	0	0	0	200	300	0	0	0	0	0	0	0	200	903	0	0	0	0	0	0	0	603	903	0
591	1	0	0	0	0	0	0	200	300	0	0	0	0	0	0	0	200	903	0	0	0	0	0	0	0	603	903	0
591	2	0	0	0	0	0	0	200	300	0	0	0	0	0	0	0	200	903	0	0	0	0	0	0	0	603	903	0
591	3	0	0	0	0	0	0	200	300	0	0	0	0	0	0	0	200	903	0	0	0	0	0	0	0	603	903	0
591	4	0	0	0	0	0	0	200	300	0	0	0	0	0	0	0	200	903	0	0	0	0	0	0	0	603	903	0
591	5	0	0	0	0	0	0	200	300	0	0	0	0	0	0	0	200	903	0	0	0	0	0	0	0	603	903	0
591	6	0	0	0	0	0	0	200	300	0	0	0	0	0	0	0	200	903	0	0	0	0	0	0	0	603	903	0
591	7	0	0	0	0	0	0	200	300	0	0	0	0	0	0	0	200	903	0	0	0	0	0	0	0	603	903	0
591	8	0	0	0	0	0	0	200	300	0	0	0	0	0	0	0	200	903	0	0	0	0	0	0	0	603	903	0
591	9	0	0	0	0	0	0	200	300	0	0	0	0	0	0	0	200	903	0	0	0	0	0	0	0	603	903	0
592	0	0	0	0	0	0	0	200	300	0	0	0	0	0	0	0	200	903	0	0	0	0	0	0	0	603	903	0
592	1	0	0	0	0	0	0	200	300	0	0	0	0	0	0	0	200	903	0	0	0	0	0	0	0	603	903	0
592	2	0	0	0	0	0	0	200	300	0	0	0	0	0	0	0	200	903	0	0	0	0	0	0	0	603	903	0
592	3	0	0	0	0	0	0	200	300	0	0	0	0	0	0	0	200	903	0	0	0	0	0	0	0	603	903	0
592	4	0	0	0	0	0	0	200	300	0	0	0	0	0	0	0	200	903	0	0	0	0	0	0	0	603	903	0
592	5	0	0	0	0	0	0	200	300	0	0	0	0	0	0	0	200	903	0	0	0	0	0	0	0	603	903	0
592	6	0	0	0	0	0	0	200	300	0	0	0	0	0	0	0	200	903	0	0	0	0	0	0	0	603	903	0
592	7	0	0	0	0	0	0	200	300	0	0	0	0	0	0	0	200	903	0	0	0	0	0	0	0	603	903	0
592	8	0	0	0	0	0	0	200	300	0	0	0	0	0	0	0	200	903	0	0	0	0	0	0	0	603	903	0
592	9	0	0	0	0	0	0	200	300	0	0	0	0	0	0	0	200	903	0	0	0	0	0	0	0	603	903	0
593	0	0	0	0	0	0	0	200	300	0	0	0	0	0	0	0	200	903	0	0	0	0	0	0	0	603	903	0
593	1	0	0	0	0	0	0	200	300	0	0	0	0	0	0	0	200	903	0	0	0	0	0	0	0	603	903	0
593	2	0	0	0	0	0	0	200	300	0	0	0	0	0	0	0	200	903	0	0	0	0	0	0	0	603	903	0
593	3	0	0	0	0	0	0	200	300	0	0	0	0	0	0	0	200	903	0	0	0	0	0	0	0	603	903	0
593	4	0	0	0	0	0	0	200	300	0	0	0	0	0	0	0	200	903	0	0	0	0	0	0	0	603	903	0
593	5	0	0	0	0	0	0	200	300	0	0	0	0	0	0	0	200	903	0	0	0	0	0	0	0	603	903	0
593	6	0	0	0	0	0	0	200	300	0	0	0	0	0	0	0	200	903	0	0	0	0	0	0	0	603	903	0
593	7	0	0	0	0	0	0	200	300	0	0	0	0	0	0	0	200	903	0	0	0	0	0	0	0	603	903	0
593	8	0	0	0	0	0	0	200	300	0	0	0	0	0	0	0	200	903	0	0	0	0	0	0	0	603	903	0
593	9	0	0	0	0	0	0	200	300	0	0	0	0	0	0	0	200	903	0	0	0	0	0	0	0	603	903	0
594	0	0	0	0	0	0	0	200	300	0	0	0	0	0	0	0	200	903	0	0	0	0	0	0	0	603	903	0
594	1	0	0	0	0	0	0	200	300	0	0	0	0	0	0	0	200	903	0	0	0	0	0	0	0	603	903	0
594	2	0	0	0	0	0	0	200	300	0	0	0	0	0	0	0	200	903	0	0	0	0	0	0	0	603	903	0
594	3	0	0	0	0	0	0	200	300	0	0	0	0	0	0	0	200	903	0	0	0	0	0	0	0	603	903	0
594	4	0	0	0	0	0	0	200	300	0	0	0	0	0	0	0	200	903	0	0	0	0	0	0	0	603	903	0
594	5	0	0	0	0	0	0	200	300	0	0	0	0	0	0	0	200	903	0	0	0	0	0	0	0	603	903	0
594	6	0	0	0	0	0	0	200	300	0	0	0	0	0	0	0	200	903	0	0	0	0	0	0	0	603	903	0
594	7	0	0	0	0	0	0	200	300	0	0	0	0	0	0	0	200	903	0	0	0	0	0	0	0	603	903	0
594	8	0	0	0	0	0	0	200	300	0	0	0	0	0	0	0	200	903	0	0	0	0	0	0	0	603	903	0
594	9	0	0	0	0	0	0	200	300	0	0	0	0	0	0	0	200	903	0	0	0	0	0	0	0	603	903	0
595	0	0	0	0	0	0	0	200	300	0	0	0	0	0	0	0	200	903	0	0	0	0	0	0	0	603	903	0
595	1	0	0	0	0	0	0	200	300	0	0	0	0	0	0	0	200	903	0	0	0	0	0	0	0	603	903	0
595	2	0	0	0	0	0	0	200	300	0	0	0	0	0	0	0	200	903	0	0	0	0	0	0	0	603	903	0
595	3	0	0	0	0	0	0	200	300	0	0	0	0	0	0	0	200	903	0	0	0	0	0	0	0	603	903	0
595	4	0	0	0	0	0	0	200	300	0	0	0	0	0	0	0	200	903	0	0	0	0	0	0	0	603	903	0
595	5	0	0	0	0	0	0	200	300	0	0	0	0	0	0	0	200	903	0	0	0	0	0	0	0	603	903	0
595	6	0	0	0	0	0	0	200	300	0	0	0	0	0	0	0	200	903	0	0	0	0	0	0	0	603	903	0
595	7	0	0	0	0	0	0	200	300	0	0	0	0	0	0	0	200	903	0	0	0	0	0	0	0	603	903	0
595	8	0	0	0	0	0	0	200	300	0	0	0	0	0	0	0	200	903	0	0	0	0	0	0	0	603	903	0
595	9	0	0	0	0	0	0	200	300	0	0	0	0	0	0	0	200	903	0	0	0	0	0	0	0	603	903	0
596	0	0	0	0	0	0	0	200	300	0	0	0	0	0	0	0	200	903	0	0	0	0	0	0	0	603	903	0
596	1	0	0	0	0	0	0	200	300	0	0	0	0	0	0	0	200	903	0	0	0	0	0	0	0	603	903	0
596	2	0	0	0	0	0	0	200	300	0	0	0	0	0	0	0	200	903	0	0	0	0	0	0	0	603	903	0
596	3	0	0	0	0	0	0	200	300	0	0	0	0	0	0	0	200	903	0	0	0	0	0	0	0	603	903	0
596	4	0	0	0	0	0	0	200	300	0	0	0	0	0	0	0	200	903	0	0	0	0	0	0	0	603	903	0
596	5	0	0	0	0	0	0	200	300	0	0	0	0	0	0	0	200	903	0	0	0	0	0	0	0	603	903	0
596	6	0	0	0	0	0	0	200	300	0	0	0	0	0	0	0	200	903	0	0	0	0	0	0	0	603	903	0
596	7	0	0	0	0	0	0	200	300	0	0	0	0	0	0	0	200	903	0	0	0	0	0	0	0	603	903	0
596	8	0	0	0	0	0	0	200	300	0	0	0	0	0	0	0	200	903	0	0	0	0	0	0	0	603	903	0
596	9	0	0	0	0	0	0	200	300	0	0	0	0	0	0	0	200	903	0	0	0	0	0	0	0	603	903	0
597	0	0	0	0	0	0	0	200	300	0	0	0	0	0	0	0	200	903	0	0	0	0	0	0	0	603	903	0
597	1	0	0	0	0	0	0	200	300	0	0	0	0	0	0	0	200	903	0	0	0	0	0	0	0	603	903	0
597	2	0	0	0	0	0	0	200	300	0	0	0	0	0	0	0	200	903	0	0	0	0	0	0	0	603	903	0
597	3	0	0	0	0	0	0	200	300	0	0	0	0	0	0	0	200	903	0	0	0	0	0	0	0	603	903	0
597	4	0	0	0	0	0	0	200	300	0	0	0	0	0	0	0	200	903	0	0	0	0	0	0	0	603	903	0
597	5	0	0	0	0	0	0	200	300	0	0	0	0	0	0	0	200	903	0	0	0	0	0	0	0	603	903	0
597	6	0	0	0	0	0	0	200	300	0	0	0	0	0	0	0	200	903	0	0	0	0	0	0	0	603	903	0
597	7	0	0	0	0	0	0	200	300	0	0	0	0	0	0	0	200	903	0	0	0	0	0	0	0	603	903	0
597	8	0	0	0	0	0	0	200	300	0	0	0	0	0	0	0	200	903	0	0	0	0	0	0	0	603	903	0
597	9	0	0	0	0	0	0	200	300	0	0	0	0	0	0	0	200	903	0	0	0	0	0	0	0	603	903	0
598	0	0	0	0	0	0	0	200	300	0	0	0	0	0	0	0	200	903	0	0	0	0	0	0	0	603	903	0
598	1	0	0	0	0	0	0	200	300	0	0	0	0	0	0	0	200	903	0	0	0	0	0	0	0	603	903	0
598	2	0	0	0	0	0	0	200	300	0	0	0	0	0	0	0	200	903	0	0	0	0	0	0	0	603	903	0
598	3	0	0	0	0	0	0	200	300	0	0	0	0	0	0	0	200	903	0	0	0	0	0	0	0	603	903	0
598	4	0	0	0	0	0	0	200	300	0	0	0	0	0	0	0	200	903	0	0	0	0	0	0	0	603	903	0
598	5	0	0	0	0	0	0	200	300	0	0	0	0	0	0	0	200	903	0	0	0	0	0	0	0	603	903	0
598	6	0	0	0	0	0	0	200	300	0	0	0	0	0	0	0	200	903	0	0	0	0	0	0	0	603	903	0
598	7	0	0	0	0	0	0	200	300	0	0	0	0	0	0	0	200	903	0	0	0	0	0	0	0	603	903	0
598	8	0	0	0	0	0	0	200	300	0	0	0	0	0	0	0	200	903	0	0	0	0	0	0	0	603	903	0
598	9	0	0	0	0	0	0	200	300	0	0	0	0	0	0	0	200	903	0	0	0	0	0	0	0	603	903	0
599	0	0	0	0	0	0	0	200	300	0	0	0	0	0	0	0	200	903	0	0	0	0	0	0	0	603	903	0
599	1	0	0	0	0	0	0	200	300	0	0	0	0	0	0	0	200	903	0	0	0	0	0	0	0	603	903	0
599	2	0	0	0	0	0	0	200	300	0	0	0	0	0	0	0	200	903	0	0	0	0	0	0	0	603	903	0
599	3	0	0	0	0	0	0	200	300	0	0	0	0	0	0	0	200	903	0	0	0	0	0	0	0	603	903	0
599	4	0	0	0	0	0	0	200	300	0	0	0	0	0	0	0	200	903	0	0	0	0	0	0	0	603	903	0
599	5	0	0	0	0	0	0	200	300	0	0	0	0	0	0	0	200	903	0	0	0	0	0	0	0	603	903	0
599	6	0	0	0	0	0	0	200	300	0	0	0	0	0	0	0	200	903	0	0	0	0	0	0	0	603	903	0
599	7	0	0	0	0	0	0	200	300	0	0	0	0	0	0	0	200	903	0	0	0	0	0	0	0	603	903	0
599	8	0	0	0	0	0	0	200	300	0	0	0	0	0	0	0	200	903	0	0	0	0	0	0	0	603	903	0
599	9	0	0	0	0	0	0	200	300	0	0	0	0	0	0	0	200	903	0	0	0	0	0	0	0	603	903	0
600	0	0	0	0	0	0	0	200	300	0	0	0	0	0	0	0	200	903	0	0	0	0	0	0	0	603	903	0
600	1	0	0	0	0	0	0	200	300	0	0	0	0	0	0	0	200	903	0	0	0	0	0	0	0	603	903	0
600	2	0	0	0	0	0	0	200	300	0	0	0	0	0	0	0	200	903	0	0	0	0	0	0	0	603	903	0
600	3	0	0	0	0	0	0	200	300	0	0	0	0	0	0	0	200	903	0	0	0	0	0	0	0	603	903	0
600	4	0	0	0	0	0	0	200	300	0	0	0	0	0	0	0	200	903	0	0	0	0	0	0	0	603	903	0
600	5	0	0	0	0	0	0	200	300	0	0	0	0	0	0	0	200	903	0	0	0	0	0	0	0	603	903	0
600	6	0	0	0	0	0	0	200	300	0	0	0	0	0	0	0	200	903	0	0	0	0	0	0	0	603	903	0
600	7	0	0	0	0	0	0	200	300	0	0	0	0	0	0	0	200	903	0	0	0	0	0	0	0	603	903	0
600	8	0	0	0	0	0	0	200	300	0	0	0	0	0	0	0	200	903	0	0	0	0	0	0	0	603	903	0
600	9	0	0	0	0	0	0	200	300	0	0	0	0	0	0	0	200	903	0	0	0	0	0	0	0	603	903	0
601	0	0	0	0	0	0	0	200	300	0	0	0	0	0	0	0	200	903	0	0	0	0	0	0	0	603	903	0
601	1	0	0	0	0	0	0	200	300	0	0	0	0	0	0	0	200	903	0	0	0	0	0	0	0	603	903	0
601	2	0	0	0	0	0	0	200	300	0	0	0	0	0	0	0	200	903	0	0	0	0	0	0	0	603	903	0
601	3	0	0	0	0	0	0	200	300	0	0	0	0	0	0	0	200	903	0	0	0	0	0	0	0	603	903	0
601	4	0	0	0	0	0	0	200	300	0	0	0	0	0	0	0	200	903	0	0	0	0	0	0	0	603	903	0
601	5	0	0	0	0	0	0	200	300	0	0	0	0	0	0	0	200	903	0	0	0	0	0	0	0	603	903	0
601	6	0	0	0	0	0	0	200	300	0	0	0	0	0	0	0	200	903	0	0	0	0	0	0	0	603	903	0
601	7	0	0	0	0	0	0	200	300	0	0	0	0	0	0	0	200	903	0	0	0	0	0	0	0	603	903	0
601	8	0	0	0	0	0	0	200	300	0	0	0	0	0	0	0	200	903	0	0	0	0	0	0	0	603	903	0
601	9	0	0	0	0	0	0	200	300	0	0	0	0	0	0	0	200	903	0	0	0	0	0	0	0	603	903	0
602	0	0	0	0	0	0	0	200	300	0	0	0	0	0	0	0	200	903	0	0	0	0	0	0	0	603	903	0
602	1	0	0	0	0	0	0	200	300	0	0	0	0	0	0	0	200	903	0	0	0	0	0	0	0	603	903	0
602	2	0	0	0	0	0	0	200	300	0	0	0	0	0	0	0	200	903	0	0	0	0	0	0	0	603	903	0
602	3	0	0	0	0	0	0	200	300	0	0	0	0	0	0	0	200	903	0	0	0	0	0	0	0	603	903	0
602	4	0	0	0	0	0	0	200	300	0	0	0	0	0	0	0	200	903	0	0	0	0	0	0	0	603	903	0
602	5	0	0	0	0	0	0	200	300	0	0	0	0	0	0	0	200	903	0	0	0	0	0	0	0	603	903	0
602	6	0	0	0	0	0	0	200	300	0	0	0	0	0	0	0	200	903	0	0	0	0	0	0	0	603	903	0
602	7	0	0	0	0	0	0	200	300	0	0	0	0	0	0	0	200	903	0	0	0	0	0	0	0	603	903	0
602	8	0	0	0	0	0	0	200	300	0	0	0	0	0	0	0	200	903	0	0	0	0	0	0	0	603	903	0
602	9	0	0	0	0	0	0	200	300	0	0	0	0	0	0	0	200	903	0	0	0	0	0	0	0	603	903	0
603	0	0	0	0	0	0	0	200	300	0	0	0	0	0	0	0	200	903	0	0	0	0	0	0	0	603	903	0
603	1	0	0	0	0	0	0	200	300	0	0	0	0	0	0	0	200	903	0	0	0	0	0	0	0	603	903	0
603	2	0	0	0	0	0	0	200	300	0	0	0	0	0	0	0	200	903	0	0	0	0	0	0	0	603	903	0
603	3	0	0	0	0	0	0	200	300	0	0	0	0	0	0	0	200	903	0	0	0	0	0	0	0	603	903	0
603	4	0	0	0	0	0	0	200	300	0	0	0	0	0	0	0	200	903	0	0	0	0	0	0	0	603	903	0
603	5	0	0	0	0	0	0	200	300	0	0	0	0	0	0	0	200	903	0	0	0	0	0	0	0	603	903	0
603	6	0	0	0	0	0	0	200	300	0	0	0	0	0	0	0	200	903	0	0	0	0	0	0	0	603	903	0
603	7	0	0	0	0	0	0	200	300	0	0	0	0	0	0	0	200	903	0	0	0	0	0	0	0	603	903	0
603	8	0	0	0	0	0	0	200	300	0	0	0	0	0	0	0	200	903	0	0	0	0	0	0	0	603	903	0
603	9	0	0	0	0	0	0	200	300	0	0	0	0	0	0	0	200	903	0	0	0	0	0	0	0	603	903	0
604	0	0	0	0	0	0	0	200	300	0	0	0	0	0	0	0	200	903	0	0	0	0	0	0	0	603	903	0
604	1	0	0	0	0	0	0	200	300	0	0	0	0	0	0	0	200	903	0	0	0	0	0	0	0	603	903	0
604	2	0	0	0	0	0	0	200	300	0	0	0	0	0	0	0	200	903	0	0	0	0	0	0	0	603	903	0
604	3	0	0	0	0	0	0	200	300	0	0	0	0	0	0	0	200	903	0	0	0	0	0	0	0	603	903	0
604	4	0	0	0	0	0	0	200	300	0	0	0	0	0	0	0	200	903	0	0	0	0	0	0	0	603	903	0
604	5	0	0	0	0	0	0	200	300	0	0	0	0	0	0	0	200	903	0	0	0	0	0	0	0	603	903	0
604	6	0	0	0	0	0	0	200	300	0	0	0	0	0	0	0	200	903	0	0	0	0	0	0	0	603	903	0
604	7	0	0	0	0	0	0	200	300	0	0	0	0	0	0	0	200	903	0	0	0	0	0	0	0	603	903	0
604	8	0	0	0	0	0	0	200	300	0	0	0	0	0	0	0	200	903	0	0	0	0	0	0	0	603	903	0
604	9	0	0	0	0	0	0	200	300	0	0	0	0	0	0	0	200	903	0	0	0	0	0	0	0	603	903	0
605	0	0	0	0	0	0	0	200	300	0	0	0	0	0	0	0	200	903	0	0	0	0	0	0	0	603	903	0
605	1	0	0	0	0	0	0	200	300	0	0	0	0	0	0	0	200	903	0	0	0	0	0	0	0	603	903	0
605	2	0	0	0	0	0	0	200	300	0	0	0	0	0	0	0	200	903	0	0	0	0	0	0	0	603	903	0
605	3	0	0	0	0	0	0	200	300	0	0	0	0	0	0	0	200	903	0	0	0	0	0	0	0	603	903	0
605	4	0	0	0	0	0	0	200	300	0	0	0	0	0	0	0	200	903	0	0	0	0	0	0	0	603	903	0
605	5	0	0	0	0	0	0	200	300	0	0	0	0	0	0	0	200	903	0	0	0	0	0	0	0	603	903	0
605	6	0	0	0	0	0	0	200	300	0	0	0	0	0	0	0	200	903	0	0	0	0	0	0	0	603	903	0
605	7	0	0	0	0	0	0	200	300	0	0	0	0	0	0	0	200	903	0	0	0	0	0	0	0	603	903	0
605	8	0	0	0	0	0	0	200	300	0	0	0	0	0	0	0	200	903	0	0	0	0	0	0	0	603	903	0
605	9	0	0	0	0	0	0	200	300	0	0	0	0	0	0	0	200	903	0	0	0	0	0	0	0	603	903	0
606	0	0	0	0	0	0	0	200	300	0	0	0	0	0	0	0	200	903	0	0	0	0	0	0	0	603	903	0
606	1	0	0	0	0	0	0	200	300	0	0	0	0	0	0	0	200	903	0	0	0	0	0	0	0	603	903	0
606	2	0	0	0	0	0	0	200	300	0	0	0	0	0	0	0	200	903	0	0	0	0	0	0	0	603	903	0
606	3	0	0	0	0	0	0	200	300	0	0	0	0	0	0	0	200	903	0	0	0	0	0	0	0	603	903	0
606	4	0	0	0	0	0	0	200	300	0	0	0	0	0	0	0	200	903	0	0	0	0	0	0	0	603	903	0
606	5	0	0	0	0	0	0	200	300	0	0	0	0	0	0	0	200	903	0	0	0	0	0	0	0	603	903	0
606	6	0	0	0	0	0	0	200	300	0	0	0	0	0	0	0	200	903	0	0	0	0	0	0	0	603	903	0
606	7	0	0	0	0	0	0	200	300	0	0	0	0	0	0	0	200	903	0	0	0	0	0	0	0	603	903	0
606	8	0	0	0	0	0	0	200	300	0	0	0	0	0	0	0	200	903	0	0	0	0	0	0	0	603	903	0
606	9	0	0	0	0	0	0	200	300	0	0	0	0	0	0	0	200	903	0	0	0	0	0	0	0	603	903	0
607	0	0	0	0	0	0	0	200	300	0	0	0	0	0	0	0	200	903	0	0	0	0	0	0	0	603	903	0
607	1	0	0	0	0	0	0	200	300	0	0	0	0	0	0	0	200	903	0	0	0	0	0	0	0	603	903	0
607	2	0	0	0	0	0	0	200	300	0	0	0	0	0	0	0	200	903	0	0	0	0	0	0	0	603	903	0
607	3	0	0	0	0	0	0	200	300	0	0	0	0	0	0	0	200	903	0	0	0	0	0	0	0	603	903	0
607	4	0	0	0	0	0	0	200	300	0	0	0	0	0	0	0	200	903	0	0	0	0	0	0	0	603	903	0
607	5	0	0	0	0	0	0	200	300	0	0	0	0	0	0	0	200	903	0	0	0	0	0	0	0	603	903	0
607	6	0	0	0	0	0	0	200	300	0	0	0	0	0	0	0	200	903	0	0	0	0	0	0	0	603	903	0
607	7	0	0	0	0	0	0	200	300	0	0	0	0	0	0	0	200	903	0	0	0	0	0	0	0	603	903	0
607	8	0	0	0	0	0	0	200	300	0	0	0	0	0	0	0	200	903	0	0	0	0	0	0	0	603	903	0
607	9	0	0	0	0	0	0	200	300	0	0	0	0	0	0	0	200	903	0	0	0	0	0	0	0	603	903	0
608	0	0	0	0	0	0	0	200	300	0	0	0	0	0	0	0	200	903	0	0	0	0	0	0	0	603	903	0
608	1	0	0	0	0	0	0	200	300	0	0	0	0	0	0	0	200	903	0	0	0	0	0	0	0	603	903	0
608	2	0	0	0	0	0	0	200	300	0	0	0	0	0	0	0	200	903	0	0	0	0	0	0	0	603	903	0
608	3	0	0	0	0	0	0	200	300	0	0	0	0	0	0	0	200	903	0	0	0	0	0	0	0	603	903	0
608	4	0	0	0	0	0	0	200	300	0	0	0	0	0	0	0	200	903	0	0	0	0	0	0	0	603	903	0
608	5	0	0	0	0	0	0	200	300	0	0	0	0	0	0	0	200	903	0	0	0	0	0	0	0	603	903	0
608	6	0	0	0	0	0	0	200	300	0	0	0	0	0	0	0	200	903	0	0	0	0	0	0	0	603	903	0
608	7	0	0	0	0	0	0	200	300	0	0	0	0	0	0	0	200	903	0	0	0	0	0	0	0	603	903	0
608	8	0	0	0	0	0	0	200	300	0	0	0	0	0	0	0	200	903	0	0	0	0	0	0	0	603	903	0
608	9	0	0	0	0	0	0	200	300	0	0	0	0	0	0	0	200	903	0	0	0	0	0	0	0	603	903	0
609	0	0	0	0	0	0	0	200	300	0	0	0	0	0	0	0	200	903	0	0	0	0	0	0	0	603	903	0
609	1	0	0	0	0	0	0	200	300	0	0	0	0	0	0	0	200	903	0	0	0	0	0	0	0	603	903	0
609	2	0	0	0	0	0	0	200	300	0	0	0	0	0	0	0	200	903	0	0	0	0	0	0	0	603	903	0
609	3	0	0	0	0	0	0	200	300	0	0	0	0	0	0	0	200	903	0	0	0	0	0	0	0	603	903	0
609	4	0	0	0	0	0	0	200	300	0	0	0	0	0	0	0	200	903	0	0	0	0	0	0	0	603	903	0
609	5	0	0	0	0	0	0	200	300	0	0	0	0	0	0	0	200	903	0	0	0	0	0	0	0	603	903	0
609	6	0	0	0	0	0	0	200	300	0	0	0	0	0	0	0	200	903	0	0	0	0	0	0	0	603	903	0
609	7	0	0	0	0	0	0	200	300	0	0	0	0	0	0	0	200	903	0	0	0	0	0	0	0	603	903	0
609	8	0	0	0	0	0	0	200	300	0	0	0	0	0	0	0	200	903	0	0	0	0	0	0	0	603	903	0
609	9	0	0	0	0	0	0	200	300	0	0	0	0	0	0	0	200	903	0	0	0	0	0	0	0	603	903	0
610	0	0	0	0	0	0	0	200	300	0	0	0	0	0	0	0	200	903	0	0	0	0	0	0	0	603	903	0
610	1	0	0	0	0	0	0	200	300	0	0	0	0	0	0	0	200	903	0	0	0	0	0	0	0	603	903	0
610	2	0	0	0	0	0	0	200	300	0	0	0	0	0	0	0	200	903	0	0	0	0	0	0	0	603	903	0
610	3	0	0	0	0	0	0	200	300	0	0	0	0	0	0	0	200	903	0	0	0	0	0	0	0	603	903	0
610	4	0	0	0	0	0	0	200	300	0	0	0	0	0	0	0	200	903	0	0	0	0	0	0	0	603	903	0
610	5	0	0	0	0	0	0	200	300	0	0	0	0	0	0	0	200	903	0	0	0	0	0	0	0	603	903	0
610	6	0	0	0	0	0	0	200	300	0	0	0	0	0	0	0	200	903	0	0	0	0	0	0	0	603	903	0
610	7	0	0	0	0	0	0	200	300	0	0	0	0	0	0	0	200	903	0	0	0	0	0	0	0	603	903	0
610	8	0	0	0	0	0	0	200	300	0	0	0	0	0	0	0	200	903	0	0	0	0	0	0	0	603	903	0
610	9	0	0	0	0	0	0	200	300	0	0	0	0	0	0	0	200	903	0	0	0	0	0	0	0	603	903	0
611	0	0	0	0	0	0	0	200	300	0	0	0	0	0	0	0	200	903	0	0	0	0	0	0	0	603	903	0
611	1	0	0	0	0	0	0	200	300	0	0	0	0	0	0	0	200	903	0	0	0	0	0	0	0	603	903	0
611	2	0	0	0	0	0	0	200	300	0	0	0	0	0	0	0	200	903	0	0	0	0	0	0	0	603	903	0
611	3	0	0	0	0	0	0	200	300	0	0	0	0	0	0	0	200	903	0	0	0	0	0	0	0	603	903	0
611	4	0	0	0	0	0	0	200	300	0	0	0	0	0	0	0	200	903	0	0	0	0	0	0	0	603	903	0
611	5	0	0	0	0	0	0	200	300	0	0	0	0	0	0	0	200	903	0	0	0	0	0	0	0	603	903	0
611	6	0	0	0	0	0	0	200	300	0	0	0	0	0	0	0	200	903	0	0	0	0	0	0	0	603	903	0
611	7	0	0	0	0	0	0	200	300	0	0	0	0	0	0	0	200	903	0	0	0	0	0	0	0	603	903	0
611	8	0	0	0	0	0	0	200	300	0	0	0	0	0	0	0	200	903	0	0	0	0	0	0	0	603	903	0
611	9	0	0	0	0	0	0	200	300	0	0	0	0	0	0	0	200	903	0	0	0	0	0	0	0	603	903	0
612	0	0	0	0	0	0	0	200	300	0	0	0	0	0	0	0	200	903	0	0	0	0	0	0	0	603	903	0
612	1	0	0	0	0	0	0	200	300	0	0	0	0	0	0	0	200	903	0	0	0	0	0	0	0	603	903	0
612	2	0	0	0	0	0	0	200	300	0	0	0	0	0	0	0	200	903	0	0	0	0	0	0	0	603	903	0
612	3	0	0	0	0	0	0	200	300	0	0	0	0	0	0	0	200	903	0	0	0	0	0	0	0	603	903	0
612	4	0	0	0	0	0	0	200	300	0	0	0	0	0	0	0	200	903	0	0	0	0	0	0	0	603	903	0
612	5	0	0	0	0	0	0	200	300	0	0	0	0	0	0	0	200	903	0	0	0	0	0	0	0	603	903	0
612	6	0	0	0	0	0	0	200	300	0	0	0	0	0	0	0	200	903	0	0	0	0	0	0	0	603	903	0
612	7	0	0	0	0	0	0	200	300	0	0	0	0	0	0	0	200	903	0	0	0	0	0	0	0	603	903	0
612	8	0	0	0	0	0	0	200	300	0	0	0	0	0	0	0	200	903	0	0	0	0	0	0	0	603	903	0
612	9	0	0	0	0	0	0	200	300	0	0	0	0	0	0	0	200	903	0	0	0	0	0	0	0	603	903	0
613	0	0	0	0	0	0	0	200	300	0	0	0	0	0	0	0	200	903	0	0	0	0	0	0	0	603	903	0
613	1	0	0	0	0	0	0	200	300	0	0	0	0	0	0	0	200	903	0	0	0	0	0	0	0	603	903	0
613	2	0	0	0	0	0	0	200	300	0	0	0	0	0	0	0	200	903	0	0	0	0	0	0	0	603	903	0
613	3	0	0	0	0	0	0	200	300	0	0	0	0	0	0	0	200	903	0	0	0	0	0	0	0	603	903	0
613	4	0	0	0	0	0	0	200	300	0	0	0	0	0	0	0	200	903	0	0	0	0	0	0	0	603	903	0
613	5	0	0	0	0	0	0	200	300	0	0	0	0	0	0	0	200	903	0	0	0	0	0	0	0	603	903	0
613	6	0	0	0	0	0	0	200	300	0	0	0	0	0	0	0	200	903	0	0	0	0	0	0	0	603	903	0
613	7	0	0	0	0	0	0	200	300	0	0	0	0	0	0	0	200	903	0	0	0	0	0	0	0	603	903	0
613	8	0	0	0	0	0	0	200	300	0	0	0	0	0	0	0	200	903	0	0	0	0	0	0	0	603	903	0
613	9	0	0	0	0	0	0	200	300	0	0	0	0	0	0	0	200	903	0	0	0	0	0	0	0	603	903	0
614	0	0	0	0	0	0	0	200	300	0	0	0	0	0	0	0	200	903	0	0	0	0	0	0	0	603	903	0
614	1	0	0	0	0	0	0	200	300	0	0	0	0	0	0	0	200	903	0	0	0	0	0	0	0	603	903	0
614	2	0	0	0	0	0	0	200	300	0	0	0	0	0	0	0	200	903	0	0	0	0	0	0	0	603	903	0
614	3	0	0	0	0	0	0	200	300	0	0	0	0	0	0	0	200	903	0	0	0	0	0	0	0	603	903	0
614	4	0	0	0	0	0	0	200	300	0	0	0	0	0	0	0	200	903	0	0	0	0	0	0	0	603	903	0
614	5	0	0	0	0	0	0	200	300	0	0	0	0	0	0	0	200	903	0	0	0	0	0	0	0	603	903	0
614	6	0	0	0	0	0	0	200	300	0	0	0	0	0	0	0	200	903	0	0	0	0	0	0	0	603	903	0
614	7	0	0	0	0	0	0	200	300	0	0	0	0	0	0	0	200	903	0	0	0	0	0	0	0	603	903	0
614	8	0	0	0	0	0	0	200	300	0	0	0	0	0	0	0	200	903	0	0	0	0	0	0	0	603	903	0
614	9	0	0	0	0	0	0	200	300	0	0	0	0	0	0	0	200	903	0	0	0	0	0	0	0	603	903	0
615	0	0	0	0	0	0	0	200	300	0	0	0	0	0	0	0	200	903	0	0	0	0	0	0	0	603	903	0
615	1	0	0	0	0	0	0	200	300	0	0	0	0	0	0	0	200	903	0	0	0	0	0	0	0	603	903	0
615	2	0	0	0	0	0	0	200	300	0	0	0	0	0	0	0	200	903	0	0	0	0	0	0	0	603	903	0
615	3	0	0	0	0	0	0	200	300	0	0	0	0	0	0	0	200	903	0	0	0	0	0	0	0	603	903	0
615	4	0	0	0	0	0	0	200	300	0	0	0	0	0	0	0	200	903	0	0	0	0	0	0	0	603	903	0
615	5	0	0	0	0	0	0	200	300	0	0	0	0	0	0	0	200	903	0	0	0	0	0	0	0	603	903	0
615	6	0	0	0	0	0	0	200	300	0	0	0	0	0	0	0	200	903	0	0	0	0	0	0	0	603	903	0
615	7	0	0	0	0	0	0	200	300	0	0	0	0	0	0	0	200	903	0	0	0	0	0	0	0	603	903	0
615	8	0	0	0	0	0	0	200	300	0	0	0	0	0	0	0	200	903	0	0	0	0	0	0	0	603	903	0
615	9	0	0	0	0	0	0	200	300	0	0	0	0	0	0	0	200	903	0	0	0	0	0	0	0	603	903	0
616	0	0	0	0	0	0	0	200	300	0	0	0	0	0	0	0	200	903	0	0	0	0	0	0	0	603	903	0
616	1	0	0	0	0	0	0	200	300	0	0	0	0	0	0	0	200	903	0	0	0	0	0	0	0	603	903	0
616	2	0	0	0	0	0	0	200	300	0	0	0	0	0	0	0	200	903	0	0	0	0	0	0	0	603	903	0
616	3	0	0	0	0	0	0	200	300	0	0	0	0	0	0	0	200	903	0	0	0	0	0	0	0	603	903	0
616	4	0	0	0	0	0	0	200	300	0	0	0	0	0	0	0	200	903	0	0	0	0	0	0	0	603	903	0
616	5	0	0	0	0	0	0	200	300	0	0	0	0	0	0	0	200	903	0	0	0	0	0	0	0	603	903	0
616	6	0	0	0	0	0	0	200	300	0	0	0	0	0	0	0	200	903	0	0	0	0	0	0	0	603	903	0
616	7	0	0	0	0	0	0	200	300	0	0	0	0	0	0	0	200	903	0	0	0	0	0	0	0	603	903	0
616	8	0	0	0	0	0	0	200	300	0	0	0	0	0	0	0	200	903	0	0	0	0	0	0	0	603	903	0
616	9	0	0	0	0	0	0	200	300	0	0	0	0	0	0	0	200	903	0	0	0	0	0	0	0	603	903	0
617	0	0	0	0	0	0	0	200	300	0	0	0	0	0	0	0	200	903	0	0	0	0	0	0	0	603	903	0
617	1	0	0	0	0	0	0	200	300	0	0	0	0	0	0	0	200	903	0	0	0	0	0	0	0	603	903	0
617	2	0	0	0	0	0	0	200	300	0	0	0	0	0	0	0	200	903	0	0	0	0	0	0	0	603	903	0
617	3	0	0	0	0	0	0	200	300	0	0	0	0	0	0	0	200	903	0	0	0	0	0	0	0	603	903	0
617	4	0	0	0	0	0	0	200	300	0	0	0	0	0	0	0	200	903	0	0	0	0	0	0	0	603	903	0
617	5	0	0	0	0	0	0	200	300	0	0	0	0	0	0	0	200	903	0	0	0	0	0	0	0	603	903	0
617	6	0	0	0	0	0	0	200	300	0	0	0	0	0	0	0	200	903	0	0	0	0	0	0	0	603	903	0
617	7	0	0	0	0	0	0	200	300	0	0	0	0	0	0	0	200	903	0	0	0	0	0	0	0	603	903	0
617	8	0	0	0	0	0	0	200	300	0	0	0	0	0	0	0	200	903	0	0	0	0	0	0	0	603	903	0
617	9	0	0	0	0	0	0	200	300	0	0	0	0	0	0	0	200	903	0	0	0	0	0	0	0	603	903	0
618	0	0	0	0	0	0	0	200	300	0	0	0	0	0	0	0	200	903	0	0	0	0	0	0	0	603	903	0
618	1	0	0	0	0	0	0	200	300	0	0	0	0	0	0	0	200	903	0	0	0	0	0	0	0	603	903	0
618	2	0	0	0	0	0	0	200	300	0	0	0	0	0	0	0	200	903	0	0	0	0	0	0	0	603	903	0
618	3	0	0	0	0	0	0	200	300	0	0	0	0	0	0	0	200	903	0	0	0	0	0	0	0	603	903	0
618	4	0	0	0	0	0	0	200	300	0	0	0	0	0	0	0	200	903	0	0	0	0	0	0	0	603	903	0
618	5	0	0	0	0	0	0	200	300	0	0	0	0	0	0	0	200	903	0	0	0	0	0	0	0	603	903	0
618	6	0	0	0	0	0	0	200	300	0	0	0	0	0	0	0	200	903	0	0	0	0	0	0	0	603	903	0
618	7	0	0	0	0	0	0	200	300	0	0	0	0	0	0	0	200	903	0	0	0	0	0	0	0	603	903	0
618	8	0	0	0	0	0	0	200	300	0	0	0	0	0	0	0	200	903	0	0	0	0	0	0	0	603	903	0
618	9	0	0	0	0	0	0	200	300	0	0	0	0	0	0	0	200	903	0	0	0	0	0	0	0	603	903	0
619	0	0	0	0	0	0	0	200	300	0	0	0	0	0	0	0	200	903	0	0	0	0	0	0	0	603	903	0
619	1	0	0	0	0	0	0	200	300	0	0	0	0	0	0	0	200	903	0	0	0	0	0	0	0	603	903	0
619	2	0	0	0	0	0	0	200	300	0	0	0	0	0	0	0	200	903	0	0	0	0	0	0	0	603	903	0
619	3	0	0	0	0	0	0	200	300	0	0	0	0	0	0	0	200	903	0	0	0	0	0	0	0	603	903	0
619	4	0	0	0	0	0	0	200	300	0	0	0	0	0	0	0	200	903	0	0	0	0	0	0	0	603	903	0
619	5	0	0	0	0	0	0	200	300	0	0	0	0	0	0	0	200	903	0	0	0	0	0	0	0	603	903	0
619	6	0	0	0	0	0	0	200	300	0	0	0	0	0	0	0	200	903	0	0	0	0	0	0	0	603	903	0
619	7	0	0	0	0	0	0	200	300	0	0	0	0	0	0	0	200	903	0	0	0	0	0	0	0	603	903	0
619	8	0	0	0	0	0	0	200	300	0	0	0	0	0	0	0	200	903	0	0	0	0	0	0	0	603	903	0
619	9	0	0	0	0	0	0	200	300	0	0	0	0	0	0	0	200	903	0	0	0	0	0	0	0	603	903	0
620	0	0	0	0	0	0	0	200	300	0	0	0	0	0	0	0	200	903	0	0	0	0	0	0	0	603	903	0
620	1	0	0	0	0	0	0	200	300	0	0	0	0	0	0	0	200	903	0	0	0	0	0	0	0	603	903	0
620	2	0	0	0	0	0	0	200	300	0	0	0	0	0	0	0	200	903	0	0	0	0	0	0	0	603	903	0
620	3	0	0	0	0	0	0	200	300	0	0	0	0	0	0	0	200	903	0	0	0	0	0	0	0	603	903	0
620	4	0	0	0	0	0	0	200	300	0	0	0	0	0	0	0	200	903	0	0	0	0	0	0	0	603	903	0
620	5	0	0	0	0	0	0	200	300	0	0	0	0	0	0	0	200	903	0	0	0	0	0	0	0	603	903	0
620	6	0	0	0	0	0	0	200	300	0	0	0	0	0	0	0	200	903	0	0	0	0	0	0	0	603	903	0
620	7	0	0	0	0	0	0	200	300	0	0	0	0	0	0	0	200	903	0	0	0	0	0	0	0	603	903	0
620	8	0	0	0	0	0	0	200	300	0	0	0	0	0	0	0	200	903	0	0	0	0	0	0	0	603	903	0
620	9	0	0	0	0	0	0	200	300	0	0	0	0	0	0	0	200	903	0	0	0	0	0	0	0	603	903	0
621	0	0	0	0	0	0	0	200	300	0	0	0	0	0	0	0	200	903	0	0	0	0	0	0	0	603	903	0
621	1	0	0	0	0	0	0	200	300	0	0	0	0	0	0	0	200	903	0	0	0	0	0	0	0	603	903	0
621	2	0	0	0	0	0	0	200	300	0	0	0	0	0	0	0	200	903	0	0	0	0	0	0	0	603	903	0
621	3	0	0	0	0	0	0	200	300	0	0	0	0	0	0	0	200	903	0	0	0	0	0	0	0	603	903	0
621	4	0	0	0	0	0	0	200	300	0	0	0	0	0	0	0	200	903	0	0	0	0	0	0	0	603	903	0
621	5	0	0	0	0	0	0	200	300	0	0	0	0	0	0	0	200	903	0	0	0	0	0	0	0	603	903	0
621	6	0	0	0	0	0	0	200	300	0	0	0	0	0	0	0	200	903	0	0	0	0	0	0	0	603	903	0
621	7	0	0	0	0	0	0	200	300	0	0	0	0	0	0	0	200	903	0	0	0	0	0	0	0	603	903	0
621	8	0	0	0	0	0	0	200	300	0	0	0	0	0	0	0	200	903	0	0	0	0	0	0	0	603	903	0
621	9	0	0	0	0	0	0	200	300	0	0	0	0	0	0	0	200	903	0	0	0	0	0	0	0	603	903	0
622	0	0	0	0	0	0	0	200	300	0	0	0	0	0	0	0	200	903	0	0	0	0	0	0	0	603	903	0
622	1	0	0	0	0	0	0	200	300	0	0	0	0	0	0	0	200	903	0	0	0	0	0	0	0	603	903	0
622	2	0	0	0	0	0	0	200	300	0	0	0	0	0	0	0	200	903	0	0	0	0	0	0	0	603	903	0
622	3	0	0	0	0	0	0	200	300	0	0	0	0	0	0	0	200	903	0	0	0	0	0	0	0	603	903	0
622	4	0	0	0	0	0	0	200	300	0	0	0	0	0	0	0	200	903	0	0	0	0	0	0	0	603	903	0
622	5	0	0	0	0	0	0	200	300	0	0	0	0	0	0	0	200	903	0	0	0	0	0	0	0	603	903	0
622	6	0	0	0	0	0	0	200	300	0	0	0	0	0	0	0	200	903	0	0	0	0	0	0	0	603	903	0
622	7	0	0	0	0	0	0	200	300	0	0	0	0	0	0	0	200	903	0	0	0	0	0	0	0	603	903	0
622	8	0	0	0	0	0	0	200	300	0	0	0	0	0	0	0	200	903	0	0	0	0	0	0	0	603	903	0
622	9	0	0	0	0	0	0	200	300	0	0	0	0	0	0	0	200	903	0	0	0	0	0	0	0	603	903	0
623	0	0	0	0	0	0	0	200	300	0	0	0	0	0	0	0	200	903	0	0	0	0	0	0	0	603	903	0
623	1	0	0	0	0	0	0	200	300	0	0	0	0	0	0	0	200	903	0	0	0	0	0	0	0	603	903	0
623	2	0	0	0	0	0	0	200	300	0	0	0	0	0	0	0	200	903	0	0	0	0	0	0	0	603	903	0
623	3	0	0	0	0	0	0	200	300	0	0	0	0	0	0	0	200	903	0	0	0	0	0	0	0	603	903	0
623	4	0	0	0	0	0	0	200	300	0	0	0	0	0	0	0	200	903	0	0	0	0	0	0	0	603	903	0
623	5	0	0	0	0	0	0	200	300	0	0	0	0	0	0	0	200	903	0	0	0	0	0	0	0	603	903	0
623	6	0	0	0	0	0	0	200	300	0	0	0	0	0	0	0	200	903	0	0	0	0	0	0	0	603	903	0
623	7	-2.01604	3.22189	-10.0284	1037.93	786.797	240.28	278.457	196.5	0	0	0	0	0	0	0	200	903	0	0	0	0	0	0	0	603	903	0
623	8	0.272781	3.06931	-11.5543	580.168	359.551	57.1744	231.119	249.787	0	0	0	0	0	0	0	200	903	0	0	0	0	0	0	0	603	903	0
623	9	-0.947922	3.98483	-13.6905	1129.48	420.586	-34.3784	230.721	217.499	0	0	0	0	0	0	0	200	903	0	0	0	0	0	0	0	603	903	0
624	0	-3.23674	4.29001	-13.3853	1129.48	1091.97	423.385	281.58	215.618	0	0	0	0	0	0	0	200	903	0	0	0	0	0	0	0	603	903	0
624	1	-1.40569	4.59518	-12.1646	1861.91	298.516	194.503	224.54	146.941	0	0	0	0	0	0	0	200	903	0	0	0	0	0	0	0	603	903	0
624	2	-1.71086	3.06931	-13.0801	1770.35	664.727	-80.1548	250.82	164.653	0	0	0	0	0	0	0	200	903	0	0	0	0	0	0	0	603	903	0
624	3	-1.71086	3.67966	-12.775	1861.91	420.586	148.727	232.923	154.253	0	0	0	0	0	0	0	200	903	0	0	0	0	0	0	0	603	903	0
624	4	-2.01604	4.4426	-16.1319	2136.56	725.762	57.1744	244.989	167.556	0	0	0	0	0	0	0	200	903	0	0	0	0	0	0	0	603	903	0
624	5	-0.184983	4.90036	-15.2164	1404.14	603.692	57.1744	239.674	207.722	0	0	0	0	0	0	0	200	903	0	0	0	0	0	0	0	603	903	0
624	6	-3.08415	4.4426	-18.2681	1861.91	1030.94	-263.26	256.434	198.079	0	0	0	0	0	0	0	200	903	0	0	0	0	0	0	0	603	903	0
624	7	-4.45744	5.6633	-16.1319	2228.12	481.621	194.503	229.855	161.881	0	0	0	0	0	0	0	200	903	0	0	0	0	0	0	0	603	903	0
624	8	-2.93157	5.96848	-16.4371	2045.01	359.551	102.951	221.874	175.585	0	0	0	0	0	0	0	200	903	0	0	0	0	0	0	0	603	903	0
624	9	-2.62639	6.57883	-19.4888	1953.46	420.586	11.398	221.581	199.765	0	0	0	0	0	0	0	200	903	0	0	0	0	0	0	0	603	903	0
625	0	-3.6945	7.49435	-23.1509	3509.86	969.903	148.727	241.895	148.392	0	0	0	0	0	0	0	200	903	0	0	0	0	0	0	0	603	903	0
625	1	-3.23674	6.73142	-20.7095	2868.99	725.762	377.609	235.045	161.465	0	0	0	0	0	0	0	200	903	0	0	0	0	0	0	0	603	903	0
625	2	-3.99968	7.18918	-24.0665	2868.99	542.657	57.1744	222.548	180.789	0	0	0	0	0	0	0	200	903	0	0	0	0	0	0	0	603	903	0
625	3	-4.15227	7.95212	-25.5923	3326.75	603.692	194.503	223.589	170.01	0	0	0	0	0	0	0	200	903	0	0	0	0	0	0	0	603	903	0
625	4	-5.37297	8.10471	-26.813	3052.09	725.762	-171.707	227.068	186.171	0	0	0	0	0	0	0	200	903	0	0	0	0	0	0	0	603	903	0
625	5	-3.6945	8.56247	-28.6441	3601.41	1091.97	331.833	238.122	174.27	0	0	0	0	0	0	0	200	903	0	0	0	0	0	0	0	603	903	0
625	6	-5.0678	10.3935	-31.3907	3784.51	1030.94	-34.3784	232.842	179.438	0	0	0	0	0	0	0	200	903	0	0	0	0	0	0	0	603	903	0
625	7	-3.84709	11.6142	-32.001	3601.41	786.797	148.727	224.587	187.46	0	0	0	0	0	0	0	200	903	0	0	0	0	0	0	0	603	903	0
625	8	-5.37297	13.1401	-36.5787	3967.62	908.867	-80.1548	224.847	191.532	0	0	0	0	0	0	0	200	903	0	0	0	0	0	0	0	603	903	0
625	9	-5.83074	15.8867	-39.0201	5615.57	1153.01	-125.931	229.549	156.085	0	0	0	0	0	0	0	200	903	0	0	0	0	0	0	0	603	903	0
626	0	-6.13591	16.8022	-39.0201	4974.7	1336.11	-125.931	234.242	172.509	0	0	0	0	0	0	0	200	903	0	0	0	0	0	0	0	603	903	0
626	1	-4.91521	16.1919	-42.6822	4974.7	1153.01	-217.484	227.014	183.448	0	0	0	0	0	0	0	200	903	0	0	0	0	0	0	0	603	903	0
626	2	-5.67815	19.3962	-48.4805	6622.65	969.903	-354.813	220.006	163.396	0	0	0	0	0	0	0	200	903	0	0	0	0	0	0	0	603	903	0
626	3	-6.13591	22.1428	-50.0064	6073.33	1275.08	-400.589	225.498	178.549	0	0	0	0	0	0	0	200	903	0	0	0	0	0	0	0	603	903	0
626	4	-6.74626	24.4316	-55.1944	6714.2	1091.97	-34.3784	219.784	178.354	0	0	0	0	0	0	0	200	903	0	0	0	0	0	0	0	603	903	0
626	5	-6.2885	24.5842	-57.0254	7080.41	1091.97	-354.813	219.149	175.838	0	0	0	0	0	0	0	200	903	0	0	0	0	0	0	0	603	903	0
626	6	-7.96697	27.4834	-60.3824	7812.84	1336.11	57.1744	222.128	170.611	0	0	0	0	0	0	0	200	903	0	0	0	0	0	0	0	603	903	0
626	7	-6.59367	27.0256	-64.3497	7812.84	1214.04	-263.26	218.866	178.588	0	0	0	0	0	0	0	200	903	0	0	0	0	0	0	0	603	903	0
626	8	-6.59367	30.6877	-71.3687	7995.94	1397.15	-263.26	219.577	187.963	0	0	0	0	0	0	0	200	903	0	0	0	0	0	0	0	603	903	0
626	9	-8.27214	32.5188	-74.4205	8636.81	1641.29	-400.589	222.054	183.946	0	0	0	0	0	0	0	200	903	0	0	0	0	0	0	0	603	903	0
627	0	-8.27214	31.6032	-80.524	9369.23	1397.15	-583.695	217.351	183.647	0	0	0	0	0	0	0	200	903	0	0	0	0	0	0	0	603	903	0
627	1	-9.95061	30.3825	-88.7637	10101.7	1214.04	-629.471	213.677	186.196	0	0	0	0	0	0	0	200	903	0	0	0	0	0	0	0	603	903	0
627	2	-13.155	28.5515	-95.1724	10925.6	1214.04	-904.13	212.756	185.202	0	0	0	0	0	0	0	200	903	0	0	0	0	0	0	0	603	903	0
627	3	-11.4765	27.3308	-104.328	12024.3	1397.15	-1041.46	213.392	184.745	0	0	0	0	0	0	0	200	903	0	0	0	0	0	0	0	603	903	0
627	4	-12.392	25.8049	-111.652	13214.4	2007.5	-1178.79	217.98	181.646	0	0	0	0	0	0	0	200	903	0	0	0	0	0	0	0	603	903	0
627	5	-13.7653	24.7368	-122.333	14587.7	1946.46	-1087.24	215.911	180.754	0	0	0	0	0	0	0	200	903	0	0	0	0	0	0	0	603	903	0
627	6	-13.6127	20.0066	-133.319	15686.4	1763.36	-1041.46	213.227	182.34	0	0	0	0	0	0	0	200	903	0	0	0	0	0	0	0	603	903	0
627	7	-13.7653	16.1919	-144.916	16510.4	2251.64	-1133.01	215.538	186.07	0	0	0	0	0	0	0	200	903	0	0	0	0	0	0	0	603	903	0
627	8	-14.0705	12.8349	-155.902	18433	2617.85	-949.906	216.792	181.766	0	0	0	0	0	0	0	200	903	0	0	0	0	0	0	0	603	903	0
627	9	-14.986	7.18918	-164.753	18707.6	2923.03	-1361.89	217.742	186.45	0	0	0	0	0	0	0	200	903	0	0	0	0	0	0	0	603	903	0
628	0	-13.3075	2.00119	-177.265	21454.2	2984.06	-1041.46	216.834	178.971	0	0	0	0	0	0	0	200	903	0	0	0	0	0	0	0	603	903	0
628	1	-13.0024	-2.42386	-188.861	21271.1	3228.2	-1316.12	217.093	187.372	0	0	0	0	0	0	0	200	903	0	0	0	0	0	0	0	603	903	0
628	2	-12.5446	-5.47562	-204.425	22827.5	3472.34	-1361.89	216.986	188.333	0	0	0	0	0	0	0	200	903	0	0	0	0	0	0	0	603	903	0
628	3	-11.0187	-10.6636	-215.107	24475.4	3899.59	-1224.56	218.129	186.217	0	0	0	0	0	0	0	200	903	0	0	0	0	0	0	0	603	903	0
628	4	-12.6972	-14.0205	-227.008	25665.6	4326.84	-1361.89	219.06	186.94	0	0	0	0	0	0	0	200	903	0	0	0	0	0	0	0	603	903	0
628	5	-11.9343	-15.699	-237.69	27222	4754.08	-1224.56	220.001	185.472	0	0	0	0	0	0	0	200	903	0	0	0	0	0	0	0	603	903	0
628	6	-12.5446	-18.4456	-248.371	27679.8	4693.05	-1682.33	218.895	188.555	0	0	0	0	0	0	0	200	903	0	0	0	0	0	0	0	603	903	0
628	7	-10.4084	-20.1241	-261.493	28686.9	4937.19	-1636.55	218.881	190.296	0	0	0	0	0	0	0	200	903	0	0	0	0	0	0	0	603	903	0
628	8	-9.34026	-20.1241	-275.226	29236.2	5425.47	-1773.88	219.713	193.774	0	0	0	0	0	0	0	200	903	0	0	0	0	0	0	0	603	903	0
628	9	-7.81438	-18.7508	-286.823	30334.8	6096.86	-1773.88	221.257	194.238	0	0	0	0	0	0	0	200	903	0	0	0	0	0	0	0	603	903	0
629	0	-9.64543	-17.3775	-296.283	30975.7	6402.03	-1956.99	221.608	195.452	0	0	0	0	0	0	0	200	903	0	0	0	0	0	0	0	603	903	0
629	1	-10.4084	-14.4783	-307.575	32623.6	6341	-1956.99	220.616	193.933	0	0	0	0	0	0	0	200	903	0	0	0	0	0	0	0	603	903	0
629	2	-9.18767	-11.8843	-315.204	32898.3	6341	-1865.43	220.117	195.629	0	0	0	0	0	0	0	200	903	0	0	0	0	0	0	0	603	903	0
629	3	-7.66179	-7.76443	-322.223	33356	6768.24	-1865.43	221.005	196.482	0	0	0	0	0	0	0	200	903	0	0	0	0	0	0	0	603	903	0
629	4	-4.91521	-3.03421	-330.768	34271.6	7256.52	-1545	221.938	196.388	0	0	0	0	0	0	0	200	903	0	0	0	0	0	0	0	603	903	0
629	5	-3.54192	1.39084	-341.449	33722.3	7622.73	-1728.1	222.325	201.238	0	0	0	0	0	0	0	200	903	0	0	0	0	0	0	0	603	903	0
629	6	-3.6945	7.64694	-349.384	34271.6	7622.73	-1590.78	221.818	201.909	0	0	0	0	0	0	0	200	903	0	0	0	0	0	0	0	603	903	0
629	7	-3.6945	13.5979	-358.234	34454.7	7744.8	-1545	221.619	203.821	0	0	0	0	0	0	0	200	903	0	0	0	0	0	0	0	603	903	0
629	8	-1.55827	17.7177	-364.032	35004	8049.98	-1682.33	222.113	203.844	0	0	0	0	0	0	0	200	903	0	0	0	0	0	0	0	603	903	0
629	9	-1.2531	22.6006	-370.136	35919.5	8355.16	-1361.89	222.573	202.956	0	0	0	0	0	0	0	200	903	0	0	0	0	0	0	0	603	903	0
630	0	0.272781	26.5678	-376.85	35828	8965.51	-1453.45	223.791	204.928	0	0	0	0	0	0	0	200	903	0	0	0	0	0	0	0	603	903	0
630	1	1.18831	32.8239	-383.258	36011.1	8721.37	-1361.89	222.756	206.04	0	0	0	0	0	0	0	200	903	0	0	0	0	0	0	0	603	903	0
630	2	1.3409	36.9438	-391.803	36194.2	8660.34	-1224.56	222.104	207.622	0	0	0	0	0	0	0	200	903	0	0	0	0	0	0	0	603	903	0
630	3	1.49348	40.9111	-397.907	36011.1	8965.51	-766.8	222.532	209.499	0	0	0	0	0	0	0	200	903	0	0	0	0	0	0	0	603	903	0
630	4	1.95125	45.3362	-401.264	36560.4	9453.79	-995.682	223.56	208.887	0	0	0	0	0	0	0	200	903	0	0	0	0	0	0	0	603	903	0
630	5	2.71419	48.9983	-408.588	36102.6	9148.62	-1361.89	222.391	211.641	0	0	0	0	0	0	0	200	903	0	0	0	0	0	0	0	603	903	0
630	6	2.71419	50.5241	-414.691	36011.1	9453.79	-858.353	222.797	213.162	0	0	0	0	0	0	0	200	903	0	0	0	0	0	0	0	603	903	0
630	7	4.08748	51.7448	-423.847	37018.2	9392.76	-766.8	222.161	212.661	0	0	0	0	0	0	0	200	903	0	0	0	0	0	0	0	603	903	0
630	8	2.86677	52.3552	-433.307	37292.8	10003.1	-583.695	223.086	213.934	0	0	0	0	0	0	0	200	903	0	0	0	0	0	0	0	603	903	0
630	9	2.71419	54.3388	-446.43	37109.7	10247.2	-766.8	222.954	216.874	0	0	0	0	0	0	0	200	903	0	0	0	0	0	0	0	603	903	0
631	0	5.61336	53.5759	-455.89	37659	11345.9	-492.142	224.887	217.395	0	0	0	0	0	0	0	200	903	0	0	0	0	0	0	0	603	903	0
631	1	6.07112	54.0337	-461.994	37292.8	11406.9	-354.813	224.691	219.279	0	0	0	0	0	0	0	200	903	0	0	0	0	0	0	0	603	903	0
631	2	7.29182	54.9492	-469.928	37659	11651.1	57.1744	224.793	219.862	0	0	0	0	0	0	0	200	903	0	0	0	0	0	0	0	603	903	0
631	3	8.20735	54.9492	-481.525	37475.9	11895.2	102.951	224.703	222.172	0	0	0	0	0	0	0	200	903	0	0	0	0	0	0	0	603	903	0
631	4	10.3436	55.7121	-489.46	37475.9	12322.4	331.833	225.176	223.434	0	0	0	0	0	0	0	200	903	0	0	0	0	0	0	0	603	903	0
631	5	12.022	58.3061	-496.784	38208.4	12566.6	606.491	225.296	223.089	0	0	0	0	0	0	0	200	903	0	0	0	0	0	0	0	603	903	0
631	6	13.2428	60.5949	-500.141	38208.4	12932.8	698.044	225.858	223.605	0	0	0	0	0	0	0	200	903	0	0	0	0	0	0	0	603	903	0
631	7	11.2591	63.3415	-509.296	38299.9	13054.9	1018.48	225.633	224.798	0	0	0	0	0	0	0	200	903	0	0	0	0	0	0	0	603	903	0
631	8	11.7169	65.4778	-515.399	38299.9	12993.8	1018.48	225.211	225.689	0	0	0	0	0	0	0	200	903	0	0	0	0	0	0	0	603	903	0
631	9	12.1746	68.8347	-523.029	38025.3	13543.1	1384.69	225.894	227.298	0	0	0	0	0	0	0	200	903	0	0	0	0	0	0	0	603	903	0
632	0	11.8695	70.6657	-523.944	37659	13665.2	1522.02	226.081	228.124	0	0	0	0	0	0	0	200	903	0	0	0	0	0	0	0	603	903	0
632	1	11.2591	72.802	-528.522	37292.8	13115.9	1567.79	224.816	229.439	0	0	0	0	0	0	0	200	903	0	0	0	0	0	0	0	603	903	0
632	2	9.27547	74.4804	-527.912	37750.6	13543.1	1522.02	225.654	228.491	0	0	0	0	0	0	0	200	903	0	0	0	0	0	0	0	603	903	0
632	3	8.35994	75.8537	-531.269	37933.7	13421.1	1613.57	225.262	228.598	0	0	0	0	0	0	0	200	903	0	0	0	0	0	0	0	603	903	0
632	4	8.05476	76.6167	-534.015	37659	13787.3	1659.35	225.818	229.479	0	0	0	0	0	0	0	200	903	0	0	0	0	0	0	0	603	903	0
632	5	8.66511	77.0744	-533.405	37475.9	13726.3	1522.02	225.733	229.742	0	0	0	0	0	0	0	200	903	0	0	0	0	0	0	0	603	903	0
632	6	9.12288	77.3796	-534.931	37475.9	13665.2	1796.68	225.546	229.942	0	0	0	0	0	0	0	200	903	0	0	0	0	0	0	0	603	903	0
632	7	7.74959	77.5322	-534.626	36651.9	13115.9	1659.35	224.533	231.444	0	0	0	0	0	0	0	200	903	0	0	0	0	0	0	0	603	903	0
632	8	5.91853	77.3796	-534.015	36377.3	13543.1	1842.45	225.361	231.88	0	0	0	0	0	0	0	200	903	0	0	0	0	0	0	0	603	903	0
632	9	5.61336	78.1425	-531.574	35278.7	13909.4	1613.57	226.166	233.634	0	0	0	0	0	0	0	200	903	0	0	0	0	0	0	0	603	903	0
633	0	7.44441	77.5322	-527.607	35187.1	13970.4	1613.57	226.479	233.308	0	0	0	0	0	0	0	200	903	0	0	0	0	0	0	0	603	903	0
633	1	9.12288	77.0744	-530.353	35644.9	13726.3	1659.35	225.881	232.79	0	0	0	0	0	0	0	200	903	0	0	0	0	0	0	0	603	903	0
633	2	8.97029	76.9218	-533.1	35278.7	13726.3	1659.35	225.748	233.823	0	0	0	0	0	0	0	200	903	0	0	0	0	0	0	0	603	903	0
633	3	9.27547	77.227	-532.794	34637.8	14336.6	1842.45	226.908	234.988	0	0	0	0	0	0	0	200	903	0	0	0	0	0	0	0	603	903	0
633	4	9.42805	76.4641	-531.574	34546.2	14031.4	1796.68	226.396	235.011	0	0	0	0	0	0	0	200	903	0	0	0	0	0	0	0	603	903	0
633	5	10.6488	76.9218	-528.522	33539.2	13909.4	1934.01	226.317	236.542	0	0	0	0	0	0	0	200	903	0	0	0	0	0	0	0	603	903	0
633	6	10.8013	77.0744	-529.438	33081.4	14092.5	2025.56	226.618	237.516	0	0	0	0	0	0	0	200	903	0	0	0	0	0	0	0	603	903	0
633	7	12.9376	79.9736	-530.658	32623.6	14580.7	2025.56	227.477	238.522	0	0	0	0	0	0	0	200	903	0	0	0	0	0	0	0	603	903	0
633	8	13.7005	79.6684	-532.489	32074.3	14458.7	2300.22	227.153	239.765	0	0	0	0	0	0	0	200	903	0	0	0	0	0	0	0	603	903	0
633	9	14.7686	82.2624	-531.879	32623.6	14824.9	2483.32	227.873	238.663	0	0	0	0	0	0	0	200	903	0	0	0	0	0	0	0	603	903	0
634	0	15.6842	84.2461	-532.489	32165.9	14702.8	2437.55	227.611	239.593	0	0	0	0	0	0	0	200	903	0	0	0	0	0	0	0	603	903	0
634	1	17.21	85.6194	-532.794	31250.3	14763.9	2483.32	227.71	241.346	0	0	0	0	0	0	0	200	903	0	0	0	0	0	0	0	603	903	0
634	2	18.1256	86.5349	-532.184	31525	15008	2803.76	228.201	240.763	0	0	0	0	0	0	0	200	903	0	0	0	0	0	0	0	603	903	0
634	3	19.1937	88.8237	-530.963	30517.9	14885.9	2941.09	228.036	242.524	0	0	0	0	0	0	0	200	903	0	0	0	0	0	0	0	603	903	0
634	4	20.2618	89.5866	-534.626	29968.6	14947	3124.19	227.958	243.945	0	0	0	0	0	0	0	200	903	0	0	0	0	0	0	0	603	903	0
634	5	21.3299	92.791	-535.541	29877.1	15008	3307.3	228.024	244.211	0	0	0	0	0	0	0	200	903	0	0	0	0	0	0	0	603	903	0
634	6	22.2454	93.4013	-535.846	29419.3	15435.2	3169.97	228.805	245.098	0	0	0	0	0	0	0	200	903	0	0	0	0	0	0	0	603	903	0
634	7	21.7877	94.622	-537.677	30151.7	15374.2	3307.3	228.594	243.922	0	0	0	0	0	0	0	200	903	0	0	0	0	0	0	0	603	903	0
634	8	24.5343	96.9109	-536.151	29602.4	15435.2	3627.73	228.789	244.787	0	0	0	0	0	0	0	200	903	0	0	0	0	0	0	0	603	903	0
634	9	21.9403	96.9109	-537.982	29236.2	15618.3	3581.96	229.031	245.656	0	0	0	0	0	0	0	200	903	0	0	0	0	0	0	0	603	903	0
635	0	23.6187	97.5212	-539.203	29236.2	15740.4	3536.18	229.192	245.779	0	0	0	0	0	0	0	200	903	0	0	0	0	0	0	0	603	903	0
635	1	25.9075	96.4531	-541.95	28961.5	15862.5	3627.73	229.269	246.561	0	0	0	0	0	0	0	200	903	0	0	0	0	0	0	0	603	903	0
635	2	24.992	98.7419	-543.781	28320.7	15557.3	3856.61	228.61	247.919	0	0	0	0	0	0	0	200	903	0	0	0	0	0	0	0	603	903	0
635	3	25.4498	99.81	-545.612	28229.1	15923.5	3948.17	229.185	248.262	0	0	0	0	0	0	0	200	903	0	0	0	0	0	0	0	603	903	0
635	4	26.2127	100.726	-547.443	27679.8	16228.7	3810.84	229.645	249.438	0	0	0	0	0	0	0	200	903	0	0	0	0	0	0	0	603	903	0
635	5	26.6705	100.115	-548.358	27954.4	15862.5	3993.94	228.927	249.022	0	0	0	0	0	0	0	200	903	0	0	0	0	0	0	0	603	903	0
635	6	28.5015	101.641	-551.715	27862.9	16411.8	3993.94	229.747	249.498	0	0	0	0	0	0	0	200	903	0	0	0	0	0	0	0	603	903	0
635	7	28.8067	103.472	-553.546	27771.3	16472.8	4085.5	229.759	249.83	0	0	0	0	0	0	0	200	903	0	0	0	0	0	0	0	603	903	0
635	8	29.2645	102.099	-555.988	28046	16533.9	4314.38	229.738	249.556	0	0	0	0	0	0	0	200	903	0	0	0	0	0	0	0	603	903	0
635	9	29.1119	101.336	-559.04	27496.7	17022.2	4497.48	230.449	250.814	0	0	0	0	0	0	0	200	903	0	0	0	0	0	0	0	603	903	0
636	0	29.4171	103.777	-562.397	27222	17205.3	4589.04	230.593	251.596	0	0	0	0	0	0	0	200	903	0	0	0	0	0	0	0	603	903	0
636	1	30.0274	103.472	-562.091	26855.8	17083.2	4680.59	230.392	252.222	0	0	0	0	0	0	0	200	903	0	0	0	0	0	0	0	603	903	0
636	2	30.7904	105.761	-566.974	26306.5	17266.3	4634.81	230.453	253.602	0	0	0	0	0	0	0	200	903	0	0	0	0	0	0	0	603	903	0
636	3	32.774	106.524	-567.279	26672.7	17632.5	4634.81	231.083	252.981	0	0	0	0	0	0	0	200	903	0	0	0	0	0	0	0	603	903	0
636	4	32.774	107.592	-573.078	27130.5	17632.5	4772.14	230.768	252.658	0	0	0	0	0	0	0	200	903	0	0	0	0	0	0	0	603	903	0
636	5	32.3162	107.592	-576.435	26855.8	17693.5	4817.92	230.695	253.411	0	0	0	0	0	0	0	200	903	0	0	0	0	0	0	0	603	903	0
636	6	33.3844	107.134	-579.181	27313.6	17144.2	4772.14	229.601	252.841	0	0	0	0	0	0	0	200	903	0	0	0	0	0	0	0	603	903	0
636	7	33.8421	108.05	-581.623	27038.9	17815.6	5001.02	230.631	253.511	0	0	0	0	0	0	0	200	903	0	0	0	0	0	0	0	603	903	0
636	8	34.9102	107.745	-584.98	25848.7	18242.9	4909.47	231.185	255.813	0	0	0	0	0	0	0	200	903	0	0	0	0	0	0	0	603	903	0
636	9	35.0628	107.745	-590.168	26398	18609.1	4909.47	231.532	255.27	0	0	0	0	0	0	0	200	903	0	0	0	0	0	0	0	603	903	0
637	0	35.2154	109.118	-596.576	26306.5	18303.9	5046.8	230.682	255.904	0	0	0	0	0	0	0	200	903	0	0	0	0	0	0	0	603	903	0
637	1	36.4361	109.27	-599.628	26398	18426	5275.68	230.729	255.976	0	0	0	0	0	0	0	200	903	0	0	0	0	0	0	0	603	903	0
637	2	35.8258	109.27	-605.121	25848.7	18731.1	5138.35	230.954	257.283	0	0	0	0	0	0	0	200	903	0	0	0	0	0	0	0	603	903	0
637	3	35.8258	109.27	-606.647	26581.2	19219.4	5275.68	231.681	256.184	0	0	0	0	0	0	0	200	903	0	0	0	0	0	0	0	603	903	0
637	4	37.6568	108.508	-610.004	26489.6	19097.4	5550.34	231.307	256.575	0	0	0	0	0	0	0	200	903	0	0	0	0	0	0	0	603	903	0
637	5	38.1146	108.66	-614.582	26764.3	19097.4	5641.89	231.074	256.451	0	0	0	0	0	0	0	200	903	0	0	0	0	0	0	0	603	903	0
637	6	37.8094	106.829	-623.127	26489.6	19463.6	5504.56	231.235	257.489	0	0	0	0	0	0	0	200	903	0	0	0	0	0	0	0	603	903	0
637	7	38.1146	107.897	-627.399	25757.2	19646.7	5229.91	231.314	258.946	0	0	0	0	0	0	0	200	903	0	0	0	0	0	0	0	603	903	0
637	8	38.1146	108.05	-631.061	26031.8	19585.6	5504.56	231.036	258.749	0	0	0	0	0	0	0	200	903	0	0	0	0	0	0	0	603	903	0
637	9	38.4198	107.745	-634.113	26489.6	19585.6	5596.12	230.887	258.226	0	0	0	0	0	0	0	200	903	0	0	0	0	0	0	0	603	903	0
638	0	39.3353	108.05	-638.08	25940.3	19951.8	5504.56	231.269	259.346	0	0	0	0	0	0	0	200	903	0	0	0	0	0	0	0	603	903	0
638	1	40.556	107.287	-644.489	26214.9	20501.2	5458.79	231.81	259.324	0	0	0	0	0	0	0	200	903	0	0	0	0	0	0	0	603	903	0
638	2	39.6405	106.829	-649.677	26947.4	20134.9	5458.79	230.992	258.522	0	0	0	0	0	0	0	200	903	0	0	0	0	0	0	0	603	903	0
638	3	39.0301	105.914	-655.17	27313.6	20073.9	5596.12	230.639	258.311	0	0	0	0	0	0	0	200	903	0	0	0	0	0	0	0	603	903	0
638	4	40.0982	106.219	-657.917	27038.9	20501.2	5596.12	231.161	258.902	0	0	0	0	0	0	0	200	903	0	0	0	0	0	0	0	603	903	0
638	5	39.1827	104.998	-662.494	27038.9	20501.2	5596.12	230.945	259.186	0	0	0	0	0	0	0	200	903	0	0	0	0	0	0	0	603	903	0
638	6	39.9456	104.235	-665.851	26855.8	21111.5	5504.56	231.706	259.667	0	0	0	0	0	0	0	200	903	0	0	0	0	0	0	0	603	903	0
638	7	40.4034	105.456	-673.481	27405.1	20928.4	5687.67	231.075	259.308	0	0	0	0	0	0	0	200	903	0	0	0	0	0	0	0	603	903	0
638	8	40.4034	103.777	-678.363	27038.9	21050.5	5550.34	231.031	260.141	0	0	0	0	0	0	0	200	903	0	0	0	0	0	0	0	603	903	0
638	9	39.6405	104.235	-682.941	27771.3	21599.8	5458.79	231.628	259.336	0	0	0	0	0	0	0	200	903	0	0	0	0	0	0	0	603	903	0
639	0	41.0137	101.336	-684.772	28137.5	21599.8	5733.45	231.543	258.91	0	0	0	0	0	0	0	200	903	0	0	0	0	0	0	0	603	903	0
639	1	39.3353	102.404	-688.129	27679.8	21294.6	5321.46	230.946	259.775	0	0	0	0	0	0	0	200	903	0	0	0	0	0	0	0	603	903	0
639	2	39.793	102.099	-693.012	28046	21843.9	5825	231.52	259.53	0	0	0	0	0	0	0	200	903	0	0	0	0	0	0	0	603	903	0
639	3	40.556	100.878	-699.115	26855.8	21905	5367.23	231.332	261.586	0	0	0	0	0	0	0	200	903	0	0	0	0	0	0	0	603	903	0
639	4	39.6405	101.336	-703.388	27588.2	22271.2	5641.89	231.663	260.778	0	0	0	0	0	0	0	200	903	0	0	0	0	0	0	0	603	903	0
639	5	38.8775	100.42	-705.829	26947.4	21782.9	5367.23	230.861	261.822	0	0	0	0	0	0	0	200	903	0	0	0	0	0	0	0	603	903	0
639	6	40.2508	99.3523	-708.881	27313.6	21966	5550.34	230.987	261.469	0	0	0	0	0	0	0	200	903	0	0	0	0	0	0	0	603	903	0
639	7	37.8094	98.7419	-713.459	27496.7	22393.2	5504.56	231.387	261.46	0	0	0	0	0	0	0	200	903	0	0	0	0	0	0	0	603	903	0
639	8	38.5723	97.0634	-714.374	27954.4	22393.2	5367.23	231.347	260.869	0	0	0	0	0	0	0	200	903	0	0	0	0	0	0	0	603	903	0
639	9	38.4198	97.3686	-721.393	27954.4	22393.2	5321.46	231.042	261.249	0	0	0	0	0	0	0	200	903	0	0	0	0	0	0	0	603	903	0
640	0	37.5042	94.9272	-724.445	27679.8	22332.2	5367.23	230.827	261.792	0	0	0	0	0	0	0	200	903	0	0	0	0	0	0	0	603	903	0
640	1	37.6568	95.385	-728.107	27130.5	22637.4	5138.35	231.091	262.738	0	0	0	0	0	0	0	200	903	0	0	0	0	0	0	0	603	903	0
640	2	36.7413	94.1643	-727.497	27038.9	22637.4	5596.12	231.117	262.833	0	0	0	0	0	0	0	200	903	0	0	0	0	0	0	0	603	903	0
640	3	36.2835	94.3169	-731.464	27130.5	22759.5	5504.56	231.115	262.909	0	0	0	0	0	0	0	200	903	0	0	0	0	0	0	0	603	903	0
640	4	36.7413	92.3332	-733.6	27222	22820.5	5046.8	231.108	262.893	0	0	0	0	0	0	0	200	903	0	0	0	0	0	0	0	603	903	0
640	5	36.4361	93.7065	-738.178	27405.1	22515.3	5184.13	230.501	262.875	0	0	0	0	0	0	0	200	903	0	0	0	0	0	0	0	603	903	0
640	6	36.1309	92.028	-740.924	27496.7	23003.6	5321.46	231.047	262.889	0	0	0	0	0	0	0	200	903	0	0	0	0	0	0	0	603	903	0
640	7	35.368	91.5703	-742.755	27496.7	22942.6	5092.58	230.888	262.98	0	0	0	0	0	0	0	200	903	0	0	0	0	0	0	0	603	903	0
640	8	35.2154	90.8073	-744.586	27496.7	23064.6	5184.13	230.976	263.071	0	0	0	0	0	0	0	200	903	0	0	0	0	0	0	0	603	903	0
640	9	34.4525	89.8918	-742.45	26764.3	22698.4	5184.13	230.572	263.951	0	0	0	0	0	0	0	200	903	0	0	0	0	0	0	0	603	903	0
641	0	35.2154	88.9763	-748.859	26947.4	22820.5	5367.23	230.474	264.015	0	0	0	0	0	0	0	200	903	0	0	0	0	0	0	0	603	903	0
641	1	34.1473	89.1289	-751.606	26764.3	23064.6	5001.02	230.687	264.391	0	0	0	0	0	0	0	200	903	0	0	0	0	0	0	0	603	903	0
641	2	34.4525	87.1452	-753.742	26764.3	23064.6	4817.92	230.6	264.491	0	0	0	0	0	0	0	200	903	0	0	0	0	0	0	0	603	903	0
641	3	33.3844	88.3659	-754.657	27038.9	22881.5	4909.47	230.32	264.171	0	0	0	0	0	0	0	200	903	0	0	0	0	0	0	0	603	903	0
641	4	32.9266	86.2297	-754.657	27313.6	22637.4	5001.02	229.997	263.807	0	0	0	0	0	0	0	200	903	0	0	0	0	0	0	0	603	903	0
641	5	33.0792	86.8401	-756.488	26855.8	23186.7	4817.92	230.65	264.499	0	0	0	0	0	0	0	200	903	0	0	0	0	0	0	0	603	903	0
641	6	33.0792	85.6194	-756.794	26672.7	23003.6	4680.59	230.396	264.756	0	0	0	0	0	0	0	200	903	0	0	0	0	0	0	0	603	903	0
641	7	33.0792	85.3142	-759.845	26214.9	23430.8	4909.47	230.836	265.5	0	0	0	0	0	0	0	200	903	0	0	0	0	0	0	0	603	903	0
641	8	32.0111	83.7883	-761.371	26031.8	22454.3	4543.26	229.492	265.809	0	0	0	0	0	0	0	200	903	0	0	0	0	0	0	0	603	903	0
641	9	31.4007	85.3142	-762.897	26123.4	23064.6	4680.59	230.233	265.758	0	0	0	0	0	0	0	200	903	0	0	0	0	0	0	0	603	903	0
642	0	31.5533	82.2624	-760.15	25665.6	23247.7	4817.92	230.583	266.236	0	0	0	0	0	0	0	200	903	0	0	0	0	0	0	0	603	903	0
642	1	32.6214	83.9409	-761.371	26123.4	23308.8	4451.71	230.614	265.689	0	0	0	0	0	0	0	200	903	0	0	0	0	0	0	0	603	903	0
642	2	31.7059	83.3305	-761.371	26123.4	23064.6	4726.37	230.294	265.689	0	0	0	0	0	0	0	200	903	0	0	0	0	0	0	0	603	903	0
642	3	32.0111	82.415	-764.728	25665.6	23003.6	4634.81	230.081	266.438	0	0	0	0	0	0	0	200	903	0	0	0	0	0	0	0	603	903	0
642	4	31.4007	80.1262	-765.033	25848.7	23369.8	4634.81	230.547	266.212	0	0	0	0	0	0	0	200	903	0	0	0	0	0	0	0	603	903	0
642	5	30.6378	80.7365	-765.033	24841.7	23247.7	4451.71	230.388	267.529	0	0	0	0	0	0	0	200	903	0	0	0	0	0	0	0	603	903	0
642	6	31.0955	79.3633	-764.728	24933.2	23186.7	4314.38	230.32	267.396	0	0	0	0	0	0	0	200	903	0	0	0	0	0	0	0	603	903	0
642	7	30.9429	80.2788	-763.507	24841.7	22942.6	4451.71	230.049	267.464	0	0	0	0	0	0	0	200	903	0	0	0	0	0	0	0	603	903	0
642	8	30.9429	79.6684	-763.813	24658.5	23247.7	4314.38	230.436	267.716	0	0	0	0	0	0	0	200	903	0	0	0	0	0	0	0	603	903	0
642	9	30.4852	78.6003	-766.864	24750.1	23491.9	4268.6	230.634	267.726	0	0	0	0	0	0	0	200	903	0	0	0	0	0	0	0	603	903	0
643	0	30.7904	77.0744	-765.033	24383.9	23064.6	4405.93	230.149	268.127	0	0	0	0	0	0	0	200	903	0	0	0	0	0	0	0	603	903	0
643	1	29.7222	76.3115	-767.475	24567	22637.4	4405.93	229.496	267.99	0	0	0	0	0	0	0	200	903	0	0	0	0	0	0	0	603	903	0
643	2	30.9429	75.396	-765.644	24658.5	23247.7	4268.6	230.364	267.794	0	0	0	0	0	0	0	200	903	0	0	0	0	0	0	0	603	903	0
643	3	29.1119	74.4804	-764.118	23926.1	23308.8	4177.05	230.504	268.688	0	0	0	0	0	0	0	200	903	0	0	0	0	0	0	0	603	903	0
643	4	30.0274	74.0227	-765.033	23102.1	23247.7	4177.05	230.388	269.802	0	0	0	0	0	0	0	200	903	0	0	0	0	0	0	0	603	903	0
643	5	30.3326	73.4123	-763.202	23559.9	23003.6	4085.5	230.141	269.13	0	0	0	0	0	0	0	200	903	0	0	0	0	0	0	0	603	903	0
643	6	30.0274	73.1071	-765.338	23926.1	22881.5	4177.05	229.897	268.738	0	0	0	0	0	0	0	200	903	0	0	0	0	0	0	0	603	903	0
643	7	30.0274	72.039	-761.982	23651.5	23186.7	3993.94	230.43	268.961	0	0	0	0	0	0	0	200	903	0	0	0	0	0	0	0	603	903	0
643	8	29.4171	69.9028	-763.202	24017.7	23491.9	4222.83	230.781	268.53	0	0	0	0	0	0	0	200	903	0	0	0	0	0	0	0	603	903	0
643	9	28.8067	69.1399	-761.676	23102.1	22820.5	4177.05	229.961	269.669	0	0	0	0	0	0	0	200	903	0	0	0	0	0	0	0	603	903	0
644	0	28.9593	68.8347	-760.456	23010.6	22759.5	4268.6	229.929	269.741	0	0	0	0	0	0	0	200	903	0	0	0	0	0	0	0	603	903	0
644	1	29.7222	67.7666	-757.709	22369.7	23125.7	4177.05	230.521	270.477	0	0	0	0	0	0	0	200	903	0	0	0	0	0	0	0	603	903	0
644	2	29.1119	67.3088	-755.573	22461.3	22942.6	3902.39	230.364	270.273	0	0	0	0	0	0	0	200	903	0	0	0	0	0	0	0	603	903	0
644	3	29.5697	66.3933	-757.404	22095.1	22576.4	4222.83	229.808	270.828	0	0	0	0	0	0	0	200	903	0	0	0	0	0	0	0	603	903	0
644	4	28.5015	66.2407	-754.962	21637.3	22149.1	3765.06	229.338	271.34	0	0	0	0	0	0	0	200	903	0	0	0	0	0	0	0	603	903	0
644	5	28.349	65.3252	-753.742	22186.6	22515.3	3993.94	229.871	270.565	0	0	0	0	0	0	0	200	903	0	0	0	0	0	0	0	603	903	0
644	6	29.2645	64.5622	-750.385	22186.6	22576.4	3993.94	230.086	270.433	0	0	0	0	0	0	0	200	903	0	0	0	0	0	0	0	603	903	0
644	7	28.5015	63.7993	-748.554	21545.8	22820.5	3627.73	230.486	271.217	0	0	0	0	0	0	0	200	903	0	0	0	0	0	0	0	603	903	0
644	8	28.5015	63.0363	-745.807	21637.3	22515.3	3627.73	230.189	270.988	0	0	0	0	0	0	0	200	903	0	0	0	0	0	0	0	603	903	0
644	9	29.8748	61.9682	-747.638	21637.3	22393.2	3719.28	229.952	271.059	0	0	0	0	0	0	0	200	903	0	0	0	0	0	0	0	603	903	0
645	0	28.9593	61.2053	-742.755	20355.6	22759.5	3490.4	230.642	272.595	0	0	0	0	0	0	0	200	903	0	0	0	0	0	0	0	603	903	0
645	1	29.2645	60.9001	-739.704	20630.2	22576.4	3902.39	230.521	272.11	0	0	0	0	0	0	0	200	903	0	0	0	0	0	0	0	603	903	0
645	2	28.6541	60.2898	-738.788	20447.1	22393.2	3810.84	230.311	272.323	0	0	0	0	0	0	0	200	903	0	0	0	0	0	0	0	603	903	0
645	3	29.1119	59.2216	-733.6	19623.1	21966	3307.3	229.943	273.251	0	0	0	0	0	0	0	200	903	0	0	0	0	0	0	0	603	903	0
645	4	28.5015	59.2216	-730.548	20172.5	22576.4	3627.73	230.903	272.387	0	0	0	0	0	0	0	200	903	0	0	0	0	0	0	0	603	903	0
645	5	29.4171	58.6113	-727.497	19897.8	22454.3	3673.51	230.865	272.649	0	0	0	0	0	0	0	200	903	0	0	0	0	0	0	0	603	903	0
645	6	30.6378	58.1535	-724.14	19165.4	22515.3	3353.07	231.093	273.534	0	0	0	0	0	0	0	200	903	0	0	0	0	0	0	0	603	903	0
645	7	29.4171	57.3906	-722.919	19073.8	22088.1	3261.52	230.554	273.616	0	0	0	0	0	0	0	200	903	0	0	0	0	0	0	0	603	903	0
645	8	28.8067	56.7802	-720.783	19440	22088.1	3490.4	230.645	273.029	0	0	0	0	0	0	0	200	903	0	0	0	0	0	0	0	603	903	0
645	9	28.8067	56.3225	-717.121	18341.4	22332.2	3490.4	231.142	274.424	0	0	0	0	0	0	0	200	903	0	0	0	0	0	0	0	603	903	0
646	0	28.349	54.7966	-711.628	18066.7	22576.4	3719.28	231.725	274.612	0	0	0	0	0	0	0	200	903	0	0	0	0	0	0	0	603	903	0
646	1	30.3326	56.1699	-709.796	17517.4	22332.2	3536.18	231.463	275.32	0	0	0	0	0	0	0	200	903	0	0	0	0	0	0	0	603	903	0
646	2	29.5697	54.9492	-704.303	17517.4	22027	3261.52	231.275	275.128	0	0	0	0	0	0	0	200	903	0	0	0	0	0	0	0	603	903	0
646	3	29.2645	55.2544	-703.693	17609	22088.1	3353.07	231.389	274.976	0	0	0	0	0	0	0	200	903	0	0	0	0	0	0	0	603	903	0
646	4	29.8748	54.644	-697.895	17059.7	22027	3215.74	231.562	275.556	0	0	0	0	0	0	0	200	903	0	0	0	0	0	0	0	603	903	0
646	5	29.2645	53.1181	-696.674	16968.1	21966	3078.42	231.53	275.644	0	0	0	0	0	0	0	200	903	0	0	0	0	0	0	0	603	903	0
646	6	29.7222	53.1181	-691.791	16235.7	21660.8	3124.19	231.311	276.531	0	0	0	0	0	0	0	200	903	0	0	0	0	0	0	0	603	903	0
646	7	29.5697	51.8974	-688.434	15411.7	21477.7	3169.97	231.198	277.613	0	0	0	0	0	0	0	200	903	0	0	0	0	0	0	0	603	903	0
646	8	29.5697	51.2871	-685.077	15777.9	21782.9	2986.86	231.796	276.969	0	0	0	0	0	0	0	200	903	0	0	0	0	0	0	0	603	903	0
646	9	29.5697	51.4397	-681.11	15869.5	21721.9	2803.76	231.892	276.701	0	0	0	0	0	0	0	200	903	0	0	0	0	0	0	0	603	903	0
647	0	30.0274	51.1345	-679.279	15320.2	21111.5	2941.09	231.079	277.446	0	0	0	0	0	0	0	200	903	0	0	0	0	0	0	0	603	903	0
647	1	29.5697	50.3716	-676.837	14404.6	20867.4	3032.64	230.831	278.718	0	0	0	0	0	0	0	200	903	0	0	0	0	0	0	0	603	903	0
647	2	29.7222	50.219	-673.786	14679.3	20867.4	3032.64	230.97	278.214	0	0	0	0	0	0	0	200	903	0	0	0	0	0	0	0	603	903	0
647	3	29.1119	48.3879	-667.377	14496.2	21599.8	2757.98	232.365	278.279	0	0	0	0	0	0	0	200	903	0	0	0	0	0	0	0	603	903	0
647	4	29.7222	48.3879	-663.715	14130	21233.6	2895.31	231.992	278.711	0	0	0	0	0	0	0	200	903	0	0	0	0	0	0	0	603	903	0
647	5	29.7222	46.0991	-660.663	14038.4	20684.3	3307.3	231.308	278.751	0	0	0	0	0	0	0	200	903	0	0	0	0	0	0	0	603	903	0
647	6	29.1119	47.4724	-659.748	13031.3	20867.4	3032.64	231.629	280.248	0	0	0	0	0	0	0	200	903	0	0	0	0	0	0	0	603	903	0
647	7	28.5015	47.0146	-653.949	12939.8	21111.5	2895.31	232.283	280.213	0	0	0	0	0	0	0	200	903	0	0	0	0	0	0	0	603	903	0
647	8	28.349	46.7094	-652.729	12482	21050.5	2712.2	232.25	280.877	0	0	0	0	0	0	0	200	903	0	0	0	0	0	0	0	603	903	0
647	9	27.7386	46.862	-648.151	12298.9	20745.3	2620.65	232.007	281.025	0	0	0	0	0	0	0	200	903	0	0	0	0	0	0	0	603	903	0
648	0	27.7386	44.8784	-644.184	12298.9	20501.2	2757.98	231.825	280.908	0	0	0	0	0	0	0	200	903	0	0	0	0	0	0	0	603	903	0
648	1	29.1119	45.4887	-642.963	12115.8	20745.3	2620.65	232.265	281.156	0	0	0	0	0	0	0	200	903	0	0	0	0	0	0	0	603	903	0
648	2	28.9593	45.1836	-640.216	11932.7	20501.2	2208.66	232.022	281.361	0	0	0	0	0	0	0	200	903	0	0	0	0	0	0	0	603	903	0
648	3	29.1119	44.1154	-635.334	11566.5	20562.2	2666.43	232.364	281.795	0	0	0	0	0	0	0	200	903	0	0	0	0	0	0	0	603	903	0
648	4	27.8912	43.6577	-635.334	11200.3	20379.1	2437.55	232.076	282.371	0	0	0	0	0	0	0	200	903	0	0	0	0	0	0	0	603	903	0
648	5	28.5015	43.5051	-630.451	11749.6	20318.1	2345.99	232.228	281.363	0	0	0	0	0	0	0	200	903	0	0	0	0	0	0	0	603	903	0
648	6	28.6541	43.0473	-627.704	10376.3	20806.3	2345.99	233.147	283.469	0	0	0	0	0	0	0	200	903	0	0	0	0	0	0	0	603	903	0
648	7	28.6541	42.5896	-624.652	10284.8	20562.2	2345.99	232.918	283.535	0	0	0	0	0	0	0	200	903	0	0	0	0	0	0	0	603	903	0
648	8	29.2645	42.8947	-621.906	10193.2	20134.9	2345.99	232.376	283.61	0	0	0	0	0	0	0	200	903	0	0	0	0	0	0	0	603	903	0
648	9	28.9593	41.674	-620.99	9277.68	20318.1	2437.55	232.719	285.06	0	0	0	0	0	0	0	200	903	0	0	0	0	0	0	0	603	903	0
649	0	29.1119	41.674	-617.023	9460.79	20501.2	2437.55	233.226	284.667	0	0	0	0	0	0	0	200	903	0	0	0	0	0	0	0	603	903	0
649	1	28.1964	39.9956	-613.971	10376.3	20501.2	2300.22	233.391	283.1	0	0	0	0	0	0	0	200	903	0	0	0	0	0	0	0	603	903	0
649	2	28.349	39.5378	-609.699	8911.47	20257	2117.11	233.225	285.384	0	0	0	0	0	0	0	200	903	0	0	0	0	0	0	0	603	903	0
649	3	28.1964	39.2326	-603.9	8545.26	20073.9	2254.44	233.24	285.85	0	0	0	0	0	0	0	200	903	0	0	0	0	0	0	0	603	903	0
649	4	29.1119	38.0119	-603.595	8179.05	20073.9	2162.89	233.257	286.449	0	0	0	0	0	0	0	200	903	0	0	0	0	0	0	0	603	903	0
649	5	30.0274	38.3171	-603.29	7721.28	20379.1	2300.22	233.78	287.201	0	0	0	0	0	0	0	200	903	0	0	0	0	0	0	0	603	903	0
649	6	29.4171	36.6386	-599.628	7538.18	20379.1	2162.89	233.986	287.429	0	0	0	0	0	0	0	200	903	0	0	0	0	0	0	0	603	903	0
649	7	28.9593	37.4016	-597.187	7812.84	20012.9	2025.56	233.512	286.917	0	0	0	0	0	0	0	200	903	0	0	0	0	0	0	0	603	903	0
649	8	28.5015	37.7068	-594.745	7446.62	20134.9	2025.56	233.855	287.479	0	0	0	0	0	0	0	200	903	0	0	0	0	0	0	0	603	903	0
649	9	28.8067	35.2654	-589.557	7080.41	19646.7	1934.01	233.324	287.99	0	0	0	0	0	0	0	200	903	0	0	0	0	0	0	0	603	903	0
650	0	28.349	34.5024	-588.336	6988.86	20012.9	2162.89	234.016	288.121	0	0	0	0	0	0	0	200	903	0	0	0	0	0	0	0	603	903	0
650	1	28.9593	34.655	-584.369	5981.78	20134.9	2071.33	234.456	289.764	0	0	0	0	0	0	0	200	903	0	0	0	0	0	0	0	603	903	0
650	2	29.2645	33.5869	-584.369	6073.33	20012.9	1888.23	234.247	289.607	0	0	0	0	0	0	0	200	903	0	0	0	0	0	0	0	603	903	0
650	3	28.9593	33.8921	-583.148	5981.78	19829.8	1979.78	234.005	289.742	0	0	0	0	0	0	0	200	903	0	0	0	0	0	0	0	603	903	0
650	4	28.5015	33.5869	-579.486	5707.12	20012.9	2025.56	234.536	290.151	0	0	0	0	0	0	0	200	903	0	0	0	0	0	0	0	603	903	0
650	5	28.349	32.061	-577.961	5798.68	20073.9	1750.9	234.732	289.967	0	0	0	0	0	0	0	200	903	0	0	0	0	0	0	0	603	903	0
650	6	28.5015	31.7558	-573.688	5890.23	20012.9	1705.12	234.885	289.733	0	0	0	0	0	0	0	200	903	0	0	0	0	0	0	0	603	903	0
650	7	27.7386	30.8403	-570.331	5249.36	19585.6	1979.78	234.341	290.796	0	0	0	0	0	0	0	200	903	0	0	0	0	0	0	0	603	903	0
650	8	28.9593	30.3825	-569.11	5066.25	19707.7	1934.01	234.629	291.098	0	0	0	0	0	0	0	200	903	0	0	0	0	0	0	0	603	903	0
650	9	29.1119	29.7722	-566.669	4425.38	19829.8	1888.23	234.994	292.191	0	0	0	0	0	0	0	200	903	0	0	0	0	0	0	0	603	903	0
651	0	29.1119	29.3144	-565.753	4333.83	19646.7	1430.47	234.727	292.34	0	0	0	0	0	0	0	200	903	0	0	0	0	0	0	0	603	903	0
651	1	27.8912	29.0092	-563.312	4150.73	20012.9	1567.79	235.527	292.632	0	0	0	0	0	0	0	200	903	0	0	0	0	0	0	0	603	903	0
651	2	28.0438	28.0937	-561.176	3601.41	19463.6	2117.11	234.684	293.582	0	0	0	0	0	0	0	200	903	0	0	0	0	0	0	0	603	903	0
651	3	28.9593	27.9411	-556.903	3692.96	19524.6	1705.12	235.059	293.369	0	0	0	0	0	0	0	200	903	0	0	0	0	0	0	0	603	903	0
651	4	28.349	26.4153	-554.767	3326.75	20073.9	1567.79	236.184	294.003	0	0	0	0	0	0	0	200	903	0	0	0	0	0	0	0	603	903	0
651	5	28.9593	25.6523	-552.936	3418.3	19646.7	1659.35	235.532	293.818	0	0	0	0	0	0	0	200	903	0	0	0	0	0	0	0	603	903	0
651	6	29.5697	25.8049	-553.546	3235.2	19707.7	1659.35	235.603	294.156	0	0	0	0	0	0	0	200	903	0	0	0	0	0	0	0	603	903	0
651	7	29.1119	24.8894	-550.495	2685.88	19280.5	1430.47	235.024	295.121	0	0	0	0	0	0	0	200	903	0	0	0	0	0	0	0	603	903	0
651	8	29.2645	24.8894	-549.579	2685.88	19585.6	1384.69	235.638	295.113	0	0	0	0	0	0	0	200	903	0	0	0	0	0	0	0	603	903	0
651	9	28.9593	24.279	-546.222	2411.22	20073.9	1430.47	236.75	295.586	0	0	0	0	0	0	0	200	903	0	0	0	0	0	0	0	603	903	0
652	0	28.8067	21.9902	-543.17	2319.67	19951.8	1384.69	236.732	295.729	0	0	0	0	0	0	0	200	903	0	0	0	0	0	0	0	603	903	0
652	1	28.8067	22.9057	-539.203	2319.67	19585.6	1338.91	236.323	295.698	0	0	0	0	0	0	0	200	903	0	0	0	0	0	0	0	603	903	0
652	2	29.2645	22.6006	-539.203	2045.01	19646.7	1155.81	236.436	296.207	0	0	0	0	0	0	0	200	903	0	0	0	0	0	0	0	603	903	0
652	3	31.2481	21.2273	-539.203	1953.46	19524.6	1338.91	236.21	296.377	0	0	0	0	0	0	0	200	903	0	0	0	0	0	0	0	603	903	0
652	4	29.7222	20.6169	-537.067	1587.25	20012.9	1430.47	237.263	297.045	0	0	0	0	0	0	0	200	903	0	0	0	0	0	0	0	603	903	0
652	5	29.5697	20.4643	-534.626	946.379	20012.9	1384.69	237.433	298.23	0	0	0	0	0	0	0	200	903	0	0	0	0	0	0	0	603	903	0
652	6	28.9593	19.2436	-533.1	854.827	19524.6	1201.58	236.625	298.396	0	0	0	0	0	0	0	200	903	0	0	0	0	0	0	0	603	903	0
652	7	29.4171	19.7014	-529.438	1037.93	19585.6	1201.58	236.993	298.04	0	0	0	0	0	0	0	200	903	0	0	0	0	0	0	0	603	903	0
652	8	29.5697	18.9384	-524.86	580.168	19951.8	1338.91	238.014	298.895	0	0	0	0	0	0	0	200	903	0	0	0	0	0	0	0	603	903	0
652	9	29.5697	18.3281	-525.47	305.51	19768.7	1201.58	237.621	299.419	0	0	0	0	0	0	0	200	903	0	0	0	0	0	0	0	603	903	0
653	0	30.18	18.0229	-526.081	397.063	20073.9	1155.81	238.158	299.245	0	0	0	0	0	0	0	200	903	0	0	0	0	0	0	0	603	903	0
653	1	30.18	16.9548	-519.977	122.405	19585.6	789.596	237.666	299.765	0	0	0	0	0	0	0	200	903	0	0	0	0	0	0	0	603	903	0
653	2	29.2645	16.6496	-523.029	-152.254	19646.7	1201.58	237.563	300.291	0	0	0	0	0	0	0	200	903	0	0	0	0	0	0	0	603	903	0
653	3	30.0274	14.666	-519.672	-426.912	20012.9	1110.03	238.511	300.822	0	0	0	0	0	0	0	200	903	0	0	0	0	0	0	0	603	903	0
653	4	29.7222	15.8867	-517.841	-884.675	19829.8	698.044	238.293	301.708	0	0	0	0	0	0	0	200	903	0	0	0	0	0	0	0	603	903	0
653	5	30.7904	16.497	-517.841	-1250.89	19646.7	926.926	237.94	302.416	0	0	0	0	0	0	0	200	903	0	0	0	0	0	0	0	603	903	0
653	6	30.7904	16.0393	-514.179	-1342.44	19768.7	926.926	238.447	302.611	0	0	0	0	0	0	0	200	903	0	0	0	0	0	0	0	603	903	0
653	7	30.3326	13.903	-516.315	-1250.89	20012.9	881.149	238.761	302.423	0	0	0	0	0	0	0	200	903	0	0	0	0	0	0	0	603	903	0
653	8	30.18	15.2763	-514.484	-1525.55	20257	881.149	239.373	302.965	0	0	0	0	0	0	0	200	903	0	0	0	0	0	0	0	603	903	0
653	9	30.18	15.1237	-512.348	-1433.99	20318.1	698.044	239.657	302.799	0	0	0	0	0	0	0	200	903	0	0	0	0	0	0	0	603	903	0
654	0	29.8748	13.2927	-511.737	-1708.65	19707.7	743.82	238.511	303.339	0	0	0	0	0	0	0	200	903	0	0	0	0	0	0	0	603	903	0
654	1	30.4852	13.7505	-509.601	-1983.31	20012.9	881.149	239.272	303.892	0	0	0	0	0	0	0	200	903	0	0	0	0	0	0	0	603	903	0
654	2	31.2481	13.2927	-507.465	-2898.84	20379.1	606.491	240.159	305.712	0	0	0	0	0	0	0	200	903	0	0	0	0	0	0	0	603	903	0
654	3	30.18	12.9875	-506.244	-3081.94	20318.1	560.714	240.135	306.088	0	0	0	0	0	0	0	200	903	0	0	0	0	0	0	0	603	903	0
654	4	30.6378	12.6823	-506.549	-2349.52	20318.1	698.044	240.111	304.638	0	0	0	0	0	0	0	200	903	0	0	0	0	0	0	0	603	903	0
654	5	30.6378	12.6823	-505.023	-3448.15	19707.7	1110.03	239.023	306.828	0	0	0	0	0	0	0	200	903	0	0	0	0	0	0	0	603	903	0
654	6	29.8748	12.6823	-505.634	-3448.15	20073.9	743.82	239.701	306.819	0	0	0	0	0	0	0	200	903	0	0	0	0	0	0	0	603	903	0
654	7	30.0274	12.072	-503.192	-3539.71	20318.1	606.491	240.378	307.034	0	0	0	0	0	0	0	200	903	0	0	0	0	0	0	0	603	903	0
654	8	30.0274	11.4616	-501.667	-3356.6	20257	560.714	240.379	306.691	0	0	0	0	0	0	0	200	903	0	0	0	0	0	0	0	603	903	0
654	9	29.7222	10.6987	-499.836	-3539.71	19890.8	652.267	239.795	307.082	0	0	0	0	0	0	0	200	903	0	0	0	0	0	0	0	603	903	0
655	0	30.0274	9.63058	-498.92	-3905.92	20134.9	606.491	240.357	307.829	0	0	0	0	0	0	0	200	903	0	0	0	0	0	0	0	603	903	0
655	1	29.8748	10.8513	-499.53	-4638.34	20501.2	331.833	241.041	309.285	0	0	0	0	0	0	0	200	903	0	0	0	0	0	0	0	603	903	0
655	2	29.5697	10.3935	-500.141	-4546.78	20257	423.385	240.503	309.091	0	0	0	0	0	0	0	200	903	0	0	0	0	0	0	0	603	903	0
655	3	29.5697	10.8513	-498.615	-4729.89	20318.1	789.596	240.749	309.486	0	0	0	0	0	0	0	200	903	0	0	0	0	0	0	0	603	903	0
655	4	29.4171	10.6987	-496.784	-4821.44	19707.7	194.503	239.671	309.705	0	0	0	0	0	0	0	200	903	0	0	0	0	0	0	0	603	903	0
655	5	29.5697	10.6987	-495.563	-4729.89	20562.2	514.938	241.493	309.544	0	0	0	0	0	0	0	200	903	0	0	0	0	0	0	0	603	903	0
655	6	29.5697	10.2409	-494.648	-5096.1	20257	102.951	240.952	310.302	0	0	0	0	0	0	0	200	903	0	0	0	0	0	0	0	603	903	0
655	7	29.4171	9.17282	-496.784	-4180.57	20379.1	377.609	241.022	308.415	0	0	0	0	0	0	0	200	903	0	0	0	0	0	0	0	603	903	0
655	8	29.5697	8.71506	-493.427	-5096.1	20318.1	560.714	241.177	310.328	0	0	0	0	0	0	0	200	903	0	0	0	0	0	0	0	603	903	0
655	9	29.2645	8.25729	-495.868	-5462.31	20318.1	102.951	240.975	311.016	0	0	0	0	0	0	0	200	903	0	0	0	0	0	0	0	603	903	0
656	0	28.9593	8.71506	-492.816	-5645.42	20623.2	102.951	241.848	311.455	0	0	0	0	0	0	0	200	903	0	0	0	0	0	0	0	603	903	0
656	1	28.0438	8.25729	-492.816	-6103.18	20623.2	148.727	241.848	312.384	0	0	0	0	0	0	0	200	903	0	0	0	0	0	0	0	603	903	0
656	2	28.6541	9.478	-493.122	-5920.08	20623.2	-34.3784	241.822	312.005	0	0	0	0	0	0	0	200	903	0	0	0	0	0	0	0	603	903	0
656	3	30.3326	8.10471	-492.511	-6835.6	20440.1	194.503	241.502	313.879	0	0	0	0	0	0	0	200	903	0	0	0	0	0	0	0	603	903	0
656	4	29.1119	7.18918	-494.648	-6835.6	21050.5	-34.3784	242.557	313.819	0	0	0	0	0	0	0	200	903	0	0	0	0	0	0	0	603	903	0
656	5	27.8912	7.64694	-493.732	-6652.5	20989.4	-125.931	242.512	313.474	0	0	0	0	0	0	0	200	903	0	0	0	0	0	0	0	603	903	0
656	6	29.4171	7.18918	-490.985	-6744.05	20379.1	-34.3784	241.507	313.736	0	0	0	0	0	0	0	200	903	0	0	0	0	0	0	0	603	903	0
656	7	27.7386	6.884	-491.596	-6560.94	20684.3	-34.3784	242.076	313.346	0	0	0	0	0	0	0	200	903	0	0	0	0	0	0	0	603	903	0
656	8	28.9593	6.12106	-489.765	-7384.92	20745.3	-446.366	242.358	315.078	0	0	0	0	0	0	0	200	903	0	0	0	0	0	0	0	603	903	0
656	9	28.349	6.27365	-495.258	-7018.71	20989.4	-217.484	242.381	314.172	0	0	0	0	0	0	0	200	903	0	0	0	0	0	0	0	603	903	0
657	0	28.0438	5.81589	-491.901	-8392	21050.5	-446.366	242.794	317.06	0	0	0	0	0	0	0	200	903	0	0	0	0	0	0	0	603	903	0
657	1	27.586	6.12106	-492.511	-7842.68	20745.3	-583.695	242.121	315.924	0	0	0	0	0	0	0	200	903	0	0	0	0	0	0	0	603	903	0
657	2	27.4334	5.81589	-492.511	-8483.55	20867.4	-583.695	242.369	317.225	0	0	0	0	0	0	0	200	903	0	0	0	0	0	0	0	603	903	0
657	3	27.7386	4.13742	-491.901	-8849.76	21111.5	-354.813	242.918	317.991	0	0	0	0	0	0	0	200	903	0	0	0	0	0	0	0	603	903	0
657	4	27.2808	4.59518	-492.816	-8117.34	21172.5	-583.695	242.962	316.471	0	0	0	0	0	0	0	200	903	0	0	0	0	0	0	0	603	903	0
657	5	28.349	4.59518	-491.901	-8666.66	20745.3	-766.8	242.174	317.619	0	0	0	0	0	0	0	200	903	0	0	0	0	0	0	0	603	903	0
657	6	28.1964	3.06931	-494.342	-8483.55	21111.5	-583.695	242.706	317.161	0	0	0	0	0	0	0	200	903	0	0	0	0	0	0	0	603	903	0
657	7	27.8912	2.45895	-490.68	-8758.21	20989.4	-858.353	242.776	317.849	0	0	0	0	0	0	0	200	903	0	0	0	0	0	0	0	603	903	0
657	8	27.1283	0.780487	-495.563	-8941.32	21416.7	-492.142	243.217	318.043	0	0	0	0	0	0	0	200	903	0	0	0	0	0	0	0	603	903	0
657	9	27.4334	1.39084	-493.122	-9948.4	21355.7	-995.682	243.307	320.174	0	0	0	0	0	0	0	200	903	0	0	0	0	0	0	0	603	903	0
658	0	26.6705	1.23825	-494.342	-9582.19	21172.5	-1087.24	242.83	319.384	0	0	0	0	0	0	0	200	903	0	0	0	0	0	0	0	603	903	0
658	1	28.0438	1.39084	-493.732	-9490.63	21172.5	-1041.46	242.883	319.222	0	0	0	0	0	0	0	200	903	0	0	0	0	0	0	0	603	903	0
658	2	29.7222	1.23825	-496.784	-10497.7	21416.7	-1087.24	243.111	321.131	0	0	0	0	0	0	0	200	903	0	0	0	0	0	0	0	603	903	0
658	3	28.0438	-0.440216	-497.089	-10314.6	21782.9	-1178.79	243.821	320.75	0	0	0	0	0	0	0	200	903	0	0	0	0	0	0	0	603	903	0
658	4	27.586	0.170136	-497.089	-10131.5	21172.5	-1453.45	242.593	320.382	0	0	0	0	0	0	0	200	903	0	0	0	0	0	0	0	603	903	0
658	5	27.4334	-0.287628	-498.615	-9856.84	21050.5	-1545	242.218	319.768	0	0	0	0	0	0	0	200	903	0	0	0	0	0	0	0	603	903	0
658	6	27.2808	-1.96609	-497.394	-9582.19	21660.8	-1545	243.549	319.265	0	0	0	0	0	0	0	200	903	0	0	0	0	0	0	0	603	903	0
658	7	29.1119	-1.96609	-499.836	-10223.1	21843.9	-1133.01	243.702	320.453	0	0	0	0	0	0	0	200	903	0	0	0	0	0	0	0	603	903	0
658	8	28.0438	-4.10232	-498.92	-10772.4	21905	-1361.89	243.905	321.591	0	0	0	0	0	0	0	200	903	0	0	0	0	0	0	0	603	903	0
658	9	28.0438	-2.42386	-502.277	-11047	21782.9	-1316.12	243.368	321.994	0	0	0	0	0	0	0	200	903	0	0	0	0	0	0	0	603	903	0
659	0	28.1964	-3.64456	-500.751	-11779.5	21782.9	-1911.21	243.5	323.524	0	0	0	0	0	0	0	200	903	0	0	0	0	0	0	0	603	903	0
659	1	28.0438	-3.1868	-503.192	-11413.2	21966	-1773.88	243.653	322.682	0	0	0	0	0	0	0	200	903	0	0	0	0	0	0	0	603	903	0
659	2	28.6541	-4.10232	-503.498	-11687.9	22271.2	-1865.43	244.233	323.213	0	0	0	0	0	0	0	200	903	0	0	0	0	0	0	0	603	903	0
659	3	27.7386	-4.25491	-504.108	-12054.1	22271.2	-2002.76	244.179	323.912	0	0	0	0	0	0	0	200	903	0	0	0	0	0	0	0	603	903	0
659	4	28.8067	-4.4075	-505.023	-11871	22210.1	-2277.42	243.978	323.506	0	0	0	0	0	0	0	200	903	0	0	0	0	0	0	0	603	903	0
659	5	29.5697	-5.17044	-507.16	-12054.1	22210.1	-2140.09	243.793	323.768	0	0	0	0	0	0	0	200	903	0	0	0	0	0	0	0	603	903	0
659	6	29.2645	-6.08597	-509.296	-12237.2	22576.4	-2185.87	244.329	324.028	0	0	0	0	0	0	0	200	903	0	0	0	0	0	0	0	603	903	0
659	7	28.349	-7.00149	-508.686	-12420.3	22332.2	-2414.75	243.902	324.417	0	0	0	0	0	0	0	200	903	0	0	0	0	0	0	0	603	903	0
659	8	29.8748	-7.45926	-508.075	-12695	22637.4	-2277.42	244.555	324.986	0	0	0	0	0	0	0	200	903	0	0	0	0	0	0	0	603	903	0
659	9	29.2645	-8.06961	-510.517	-13152.7	22637.4	-2552.08	244.342	325.764	0	0	0	0	0	0	0	200	903	0	0	0	0	0	0	0	603	903	0
660	0	30.0274	-8.06961	-511.432	-13702.1	22637.4	-2140.09	244.263	326.792	0	0	0	0	0	0	0	200	903	0	0	0	0	0	0	0	603	903	0
660	1	30.3326	-8.98514	-512.348	-13610.5	23003.6	-2506.3	244.898	326.565	0	0	0	0	0	0	0	200	903	0	0	0	0	0	0	0	603	903	0
660	2	30.0274	-8.98514	-515.094	-13976.7	22942.6	-2460.53	244.541	327.134	0	0	0	0	0	0	0	200	903	0	0	0	0	0	0	0	603	903	0
660	3	30.6378	-8.83255	-512.653	-13976.7	23247.7	-2735.18	245.348	327.264	0	0	0	0	0	0	0	200	903	0	0	0	0	0	0	0	603	903	0
660	4	30.18	-10.0533	-518.146	-14709.1	23003.6	-2231.64	244.396	328.388	0	0	0	0	0	0	0	200	903	0	0	0	0	0	0	0	603	903	0
660	5	31.0955	-10.511	-518.146	-13976.7	22942.6	-3238.72	244.278	326.975	0	0	0	0	0	0	0	200	903	0	0	0	0	0	0	0	603	903	0
660	6	30.7904	-11.1214	-519.977	-14526	23186.7	-2826.74	244.592	327.936	0	0	0	0	0	0	0	200	903	0	0	0	0	0	0	0	603	903	0
660	7	31.2481	-12.0369	-521.198	-14892.2	23369.8	-3238.72	244.839	328.573	0	0	0	0	0	0	0	200	903	0	0	0	0	0	0	0	603	903	0
660	8	32.6214	-12.4947	-523.029	-14526	23308.8	-2689.41	244.565	327.773	0	0	0	0	0	0	0	200	903	0	0	0	0	0	0	0	603	903	0
660	9	31.4007	-13.5628	-525.165	-15716.2	22942.6	-3101.39	243.686	329.926	0	0	0	0	0	0	0	200	903	0	0	0	0	0	0	0	603	903	0
661	0	31.5533	-13.7154	-527.912	-15899.3	23552.9	-3192.95	244.615	330.117	0	0	0	0	0	0	0	200	903	0	0	0	0	0	0	0	603	903	0
661	1	32.0111	-13.868	-526.386	-15075.4	23858.1	-3284.5	245.324	328.639	0	0	0	0	0	0	0	200	903	0	0	0	0	0	0	0	603	903	0
661	2	31.5533	-14.1731	-528.522	-16265.5	23797.1	-3192.95	245.026	330.776	0	0	0	0	0	0	0	200	903	0	0	0	0	0	0	0	603	903	0
661	3	32.3162	-15.699	-529.743	-16448.6	23491.9	-2872.51	244.346	331.05	0	0	0	0	0	0	0	200	903	0	0	0	0	0	0	0	603	903	0
661	4	33.6895	-15.3938	-531.879	-15990.9	23736	-3421.83	244.627	330.065	0	0	0	0	0	0	0	200	903	0	0	0	0	0	0	0	603	903	0
661	5	32.774	-15.5464	-535.236	-16631.7	24163.3	-3650.71	245.145	331.074	0	0	0	0	0	0	0	200	903	0	0	0	0	0	0	0	603	903	0
661	6	32.0111	-16.7671	-537.372	-16723.3	24285.3	-3604.93	245.193	331.121	0	0	0	0	0	0	0	200	903	0	0	0	0	0	0	0	603	903	0
661	7	32.0111	-17.5301	-536.762	-16357.1	24041.2	-3696.49	244.789	330.474	0	0	0	0	0	0	0	200	903	0	0	0	0	0	0	0	603	903	0
661	8	32.3162	-17.8352	-538.288	-17364.2	24041.2	-3650.71	244.662	332.258	0	0	0	0	0	0	0	200	903	0	0	0	0	0	0	0	603	903	0
661	9	33.5369	-17.8352	-540.729	-17913.5	24224.3	-3971.15	244.799	333.128	0	0	0	0	0	0	0	200	903	0	0	0	0	0	0	0	603	903	0
662	0	33.8421	-18.7508	-542.865	-18096.6	24529.5	-4108.48	245.185	333.335	0	0	0	0	0	0	0	200	903	0	0	0	0	0	0	0	603	903	0
662	1	34.2999	-19.8189	-546.527	-18554.4	24468.4	-3925.37	244.771	333.95	0	0	0	0	0	0	0	200	903	0	0	0	0	0	0	0	603	903	0
662	2	34.7576	-19.2085	-546.527	-18554.4	24529.5	-4062.7	244.882	333.95	0	0	0	0	0	0	0	200	903	0	0	0	0	0	0	0	603	903	0
662	3	33.6895	-19.0559	-551.41	-19195.2	23858.1	-4383.13	243.267	334.811	0	0	0	0	0	0	0	200	903	0	0	0	0	0	0	0	603	903	0
662	4	34.9102	-19.5137	-552.326	-19103.7	24834.7	-4383.13	244.964	334.588	0	0	0	0	0	0	0	200	903	0	0	0	0	0	0	0	603	903	0
662	5	34.1473	-20.4292	-553.852	-18829	25139.8	-4245.8	245.391	333.996	0	0	0	0	0	0	0	200	903	0	0	0	0	0	0	0	603	903	0
662	6	35.0628	-20.5818	-556.598	-18737.5	25139.8	-4245.8	245.167	333.664	0	0	0	0	0	0	0	200	903	0	0	0	0	0	0	0	603	903	0
662	7	34.9102	-22.718	-557.209	-18920.6	24956.7	-4566.24	244.789	333.956	0	0	0	0	0	0	0	200	903	0	0	0	0	0	0	0	603	903	0
662	8	34.9102	-22.718	-562.091	-19927.6	25139.8	-4795.12	244.726	335.453	0	0	0	0	0	0	0	200	903	0	0	0	0	0	0	0	603	903	0
662	9	34.9102	-23.0232	-563.922	-19469.9	25445	-4291.58	245.121	334.526	0	0	0	0	0	0	0	200	903	0	0	0	0	0	0	0	603	903	0
663	0	35.0628	-23.9388	-566.059	-20843.2	25078.8	-4428.91	244.304	336.822	0	0	0	0	0	0	0	200	903	0	0	0	0	0	0	0	603	903	0
663	1	34.9102	-23.7862	-568.805	-21117.8	25933.3	-4612.02	245.593	337.127	0	0	0	0	0	0	0	200	903	0	0	0	0	0	0	0	603	903	0
663	2	35.0628	-24.5491	-567.279	-21484	25628.1	-5024	245.177	337.872	0	0	0	0	0	0	0	200	903	0	0	0	0	0	0	0	603	903	0
663	3	36.2835	-24.3965	-571.247	-21667.1	25811.2	-4932.45	245.184	337.93	0	0	0	0	0	0	0	200	903	0	0	0	0	0	0	0	603	903	0
663	4	37.8094	-25.7698	-574.909	-21941.8	26055.4	-4749.34	245.321	338.166	0	0	0	0	0	0	0	200	903	0	0	0	0	0	0	0	603	903	0
663	5	36.4361	-24.7017	-579.181	-21758.7	26177.4	-5024	245.197	337.568	0	0	0	0	0	0	0	200	903	0	0	0	0	0	0	0	603	903	0
663	6	36.2835	-25.6172	-582.233	-22033.4	26055.4	-5207.11	244.751	337.843	0	0	0	0	0	0	0	200	903	0	0	0	0	0	0	0	603	903	0
663	7	36.2835	-26.6853	-584.369	-22399.6	25689.1	-5252.88	243.96	338.331	0	0	0	0	0	0	0	200	903	0	0	0	0	0	0	0	603	903	0
663	8	35.8258	-26.9905	-586.2	-22674.2	26299.5	-5298.66	244.864	338.68	0	0	0	0	0	0	0	200	903	0	0	0	0	0	0	0	603	903	0
663	9	35.9783	-27.6009	-584.369	-23223.5	26665.7	-5435.99	245.632	339.741	0	0	0	0	0	0	0	200	903	0	0	0	0	0	0	0	603	903	0
664	0	37.5042	-29.4319	-591.083	-23132	26665.7	-5298.66	245.113	339.135	0	0	0	0	0	0	0	200	903	0	0	0	0	0	0	0	603	903	0
664	1	37.1991	-28.3638	-596.576	-24322.2	26482.6	-5664.87	244.391	340.77	0	0	0	0	0	0	0	200	903	0	0	0	0	0	0	0	603	903	0
664	2	37.5042	-28.8216	-595.356	-24322.2	26665.7	-5527.54	244.79	340.853	0	0	0	0	0	0	0	200	903	0	0	0	0	0	0	0	603	903	0
664	3	36.4361	-28.9742	-601.764	-24139.1	27276.1	-5664.87	245.327	340.114	0	0	0	0	0	0	0	200	903	0	0	0	0	0	0	0	603	903	0
664	4	36.4361	-28.9742	-602.375	-25054.6	26848.8	-5710.65	244.572	341.593	0	0	0	0	0	0	0	200	903	0	0	0	0	0	0	0	603	903	0
664	5	36.4361	-30.6526	-606.342	-25420.8	27398.1	-5664.87	245.186	341.925	0	0	0	0	0	0	0	200	903	0	0	0	0	0	0	0	603	903	0
664	6	37.3516	-29.7371	-608.783	-24871.5	26970.9	-5847.98	244.303	340.854	0	0	0	0	0	0	0	200	903	0	0	0	0	0	0	0	603	903	0
664	7	38.2672	-30.0423	-614.582	-25420.8	27031.9	-5802.2	243.984	341.363	0	0	0	0	0	0	0	200	903	0	0	0	0	0	0	0	603	903	0
664	8	37.3516	-31.5681	-615.802	-24779.9	27459.2	-5710.65	244.591	340.24	0	0	0	0	0	0	0	200	903	0	0	0	0	0	0	0	603	903	0
664	9	36.8939	-31.8733	-619.159	-25878.6	27520.2	-6122.64	244.448	341.796	0	0	0	0	0	0	0	200	903	0	0	0	0	0	0	0	603	903	0
665	0	37.3516	-32.4837	-620.38	-25878.6	27459.2	-6122.64	244.262	341.714	0	0	0	0	0	0	0	200	903	0	0	0	0	0	0	0	603	903	0
665	1	36.8939	-32.4837	-623.432	-27160.3	27276.1	-6397.29	243.751	343.566	0	0	0	0	0	0	0	200	903	0	0	0	0	0	0	0	603	903	0
665	2	36.8939	-32.0259	-627.094	-26702.6	27886.4	-6259.96	244.469	342.581	0	0	0	0	0	0	0	200	903	0	0	0	0	0	0	0	603	903	0
665	3	37.5042	-32.6363	-631.671	-27709.6	28069.5	-6031.08	244.437	343.867	0	0	0	0	0	0	0	200	903	0	0	0	0	0	0	0	603	903	0
665	4	36.5887	-35.0777	-633.503	-27892.7	28130.6	-6443.07	244.405	344.029	0	0	0	0	0	0	0	200	903	0	0	0	0	0	0	0	603	903	0
665	5	35.5206	-34.0096	-637.775	-27618.1	27825.4	-6626.18	243.629	343.304	0	0	0	0	0	0	0	200	903	0	0	0	0	0	0	0	603	903	0
665	6	37.3516	-34.4673	-639.301	-27801.2	28313.7	-6626.18	244.288	343.487	0	0	0	0	0	0	0	200	903	0	0	0	0	0	0	0	603	903	0
665	7	35.8258	-35.9932	-641.132	-27618.1	28679.9	-6671.95	244.733	343.077	0	0	0	0	0	0	0	200	903	0	0	0	0	0	0	0	603	903	0
665	8	36.4361	-35.9932	-644.489	-28350.5	28435.7	-6717.73	244.121	343.989	0	0	0	0	0	0	0	200	903	0	0	0	0	0	0	0	603	903	0
665	9	37.6568	-36.9087	-651.508	-29449.1	28679.9	-6809.28	244.021	345.202	0	0	0	0	0	0	0	200	903	0	0	0	0	0	0	0	603	903	0
666	0	36.5887	-37.6717	-652.729	-29998.5	28740.9	-6717.73	244.032	345.959	0	0	0	0	0	0	0	200	903	0	0	0	0	0	0	0	603	903	0
666	1	36.2835	-38.1294	-655.78	-28716.7	28801.9	-6900.83	243.92	343.79	0	0	0	0	0	0	0	200	903	0	0	0	0	0	0	0	603	903	0
666	2	36.8939	-38.5872	-656.391	-30364.7	29351.3	-6946.61	244.716	346.26	0	0	0	0	0	0	0	200	903	0	0	0	0	0	0	0	603	903	0
666	3	35.8258	-39.8079	-659.748	-30639.3	29473.3	-7083.94	244.674	346.441	0	0	0	0	0	0	0	200	903	0	0	0	0	0	0	0	603	903	0
666	4	35.9783	-39.9605	-663.105	-30273.1	28985	-7175.49	243.711	345.654	0	0	0	0	0	0	0	200	903	0	0	0	0	0	0	0	603	903	0
666	5	37.0465	-41.3338	-667.072	-30547.8	28924	-7312.82	243.36	345.794	0	0	0	0	0	0	0	200	903	0	0	0	0	0	0	0	603	903	0
666	6	36.1309	-41.6389	-670.429	-30822.4	29473.3	-7267.04	243.962	345.974	0	0	0	0	0	0	0	200	903	0	0	0	0	0	0	0	603	903	0
666	7	35.8258	-42.8596	-674.091	-31005.5	29839.5	-7267.04	244.266	345.996	0	0	0	0	0	0	0	200	903	0	0	0	0	0	0	0	603	903	0
666	8	35.2154	-42.8596	-673.481	-32287.3	30022.6	-7358.6	244.578	347.941	0	0	0	0	0	0	0	200	903	0	0	0	0	0	0	0	603	903	0
666	9	35.5206	-44.0804	-677.753	-32470.4	29778.5	-7267.04	243.937	347.909	0	0	0	0	0	0	0	200	903	0	0	0	0	0	0	0	603	903	0
667	0	36.2835	-42.5545	-680.194	-33019.7	30022.6	-7495.93	244.138	348.544	0	0	0	0	0	0	0	200	903	0	0	0	0	0	0	0	603	903	0
667	1	35.8258	-44.5381	-684.162	-33385.9	30266.8	-7358.6	244.239	348.798	0	0	0	0	0	0	0	200	903	0	0	0	0	0	0	0	603	903	0
667	2	36.4361	-44.8433	-688.434	-32745	30083.7	-7587.48	243.699	347.565	0	0	0	0	0	0	0	200	903	0	0	0	0	0	0	0	603	903	0
667	3	34.9102	-45.7588	-689.655	-33111.2	30388.9	-7816.36	244.064	348.011	0	0	0	0	0	0	0	200	903	0	0	0	0	0	0	0	603	903	0
667	4	35.2154	-45.7588	-695.148	-33019.7	30266.8	-7816.36	243.54	347.5	0	0	0	0	0	0	0	200	903	0	0	0	0	0	0	0	603	903	0
667	5	34.6051	-46.8269	-694.843	-33752.1	30449.9	-7633.26	243.823	348.575	0	0	0	0	0	0	0	200	903	0	0	0	0	0	0	0	603	903	0
667	6	34.4525	-47.8951	-695.453	-34393	30694	-7175.49	244.135	349.454	0	0	0	0	0	0	0	200	903	0	0	0	0	0	0	0	603	903	0
667	7	35.368	-48.3528	-701.862	-35033.8	30999.2	-7679.03	244.167	349.916	0	0	0	0	0	0	0	200	903	0	0	0	0	0	0	0	603	903	0
667	8	35.368	-47.8951	-704.608	-34118.3	30388.9	-8045.24	243.129	348.422	0	0	0	0	0	0	0	200	903	0	0	0	0	0	0	0	603	903	0
667	9	34.7576	-48.8106	-705.524	-35400.1	30877.1	-7953.69	243.765	350.176	0	0	0	0	0	0	0	200	903	0	0	0	0	0	0	0	603	903	0
668	0	34.2999	-49.8787	-710.102	-35949.4	30755.1	-7953.69	243.311	350.626	0	0	0	0	0	0	0	200	903	0	0	0	0	0	0	0	603	903	0
668	1	34.7576	-50.3365	-710.712	-35308.5	31243.3	-8091.02	243.961	349.68	0	0	0	0	0	0	0	200	903	0	0	0	0	0	0	0	603	903	0
668	2	33.6895	-52.1675	-714.069	-36224	31304.4	-8319.9	243.839	350.729	0	0	0	0	0	0	0	200	903	0	0	0	0	0	0	0	603	903	0
668	3	33.8421	-52.7779	-715.9	-36040.9	31060.2	-7724.81	243.386	350.344	0	0	0	0	0	0	0	200	903	0	0	0	0	0	0	0	603	903	0
668	4	33.6895	-54.9141	-719.562	-36407.1	31304.4	-8365.68	243.505	350.596	0	0	0	0	0	0	0	200	903	0	0	0	0	0	0	0	603	903	0
668	5	33.8421	-54.1512	-722.614	-37322.7	31426.5	-8182.57	243.49	351.65	0	0	0	0	0	0	0	200	903	0	0	0	0	0	0	0	603	903	0
668	6	33.5369	-54.9141	-725.666	-37597.3	31731.6	-8457.23	243.728	351.811	0	0	0	0	0	0	0	200	903	0	0	0	0	0	0	0	603	903	0
668	7	32.774	-55.2193	-728.717	-37414.2	31731.6	-8594.56	243.545	351.343	0	0	0	0	0	0	0	200	903	0	0	0	0	0	0	0	603	903	0
668	8	33.5369	-55.677	-728.717	-38238.2	31487.5	-8640.33	243.209	352.473	0	0	0	0	0	0	0	200	903	0	0	0	0	0	0	0	603	903	0
668	9	33.9947	-56.5926	-730.548	-37780.4	31670.6	-8503.01	243.352	351.715	0	0	0	0	0	0	0	200	903	0	0	0	0	0	0	0	603	903	0
669	0	33.8421	-57.0503	-732.379	-37872	32097.8	-8594.56	243.827	351.711	0	0	0	0	0	0	0	200	903	0	0	0	0	0	0	0	603	903	0
669	1	34.4525	-59.1866	-736.652	-38512.8	32219.9	-8869.22	243.738	352.281	0	0	0	0	0	0	0	200	903	0	0	0	0	0	0	0	603	903	0
669	2	34.2999	-60.5598	-733.295	-39245.3	32158.9	-8869.22	243.855	353.519	0	0	0	0	0	0	0	200	903	0	0	0	0	0	0	0	603	903	0
669	3	33.2318	-60.2547	-740.924	-39886.1	32097.8	-8640.33	243.321	353.833	0	0	0	0	0	0	0	200	903	0	0	0	0	0	0	0	603	903	0
669	4	35.2154	-60.4073	-741.84	-39886.1	32219.9	-8731.89	243.432	353.767	0	0	0	0	0	0	0	200	903	0	0	0	0	0	0	0	603	903	0
669	5	33.8421	-60.7124	-743.366	-40435.5	32891.3	-9006.55	244.246	354.395	0	0	0	0	0	0	0	200	903	0	0	0	0	0	0	0	603	903	0
669	6	34.9102	-62.0857	-744.892	-40252.4	32647.1	-8686.11	243.828	354.038	0	0	0	0	0	0	0	200	903	0	0	0	0	0	0	0	603	903	0
669	7	35.368	-62.5435	-746.723	-40710.1	32830.3	-8960.77	243.966	354.518	0	0	0	0	0	0	0	200	903	0	0	0	0	0	0	0	603	903	0
669	8	35.2154	-63.7642	-750.69	-40618.6	32769.2	-8960.77	243.652	354.108	0	0	0	0	0	0	0	200	903	0	0	0	0	0	0	0	603	903	0
669	9	34.7576	-64.5271	-752.216	-40984.8	32891.3	-9052.32	243.726	354.485	0	0	0	0	0	0	0	200	903	0	0	0	0	0	0	0	603	903	0
670	0	34.4525	-65.2901	-754.962	-42266.5	33379.6	-9281.2	244.214	355.985	0	0	0	0	0	0	0	200	903	0	0	0	0	0	0	0	603	903	0
670	1	34.4525	-65.5952	-754.047	-42541.2	33318.5	-9281.2	244.186	356.417	0	0	0	0	0	0	0	200	903	0	0	0	0	0	0	0	603	903	0
670	2	34.7576	-68.0367	-754.352	-42632.7	32952.3	-9052.32	243.683	356.516	0	0	0	0	0	0	0	200	903	0	0	0	0	0	0	0	603	903	0
670	3	35.368	-66.8159	-757.099	-42632.7	33318.5	-9052.32	244.008	356.311	0	0	0	0	0	0	0	200	903	0	0	0	0	0	0	0	603	903	0
670	4	36.7413	-67.8841	-760.15	-43182	33318.5	-9281.2	243.832	356.807	0	0	0	0	0	0	0	200	903	0	0	0	0	0	0	0	603	903	0
670	5	35.6732	-68.9522	-763.507	-42998.9	33440.6	-9326.98	243.799	356.318	0	0	0	0	0	0	0	200	903	0	0	0	0	0	0	0	603	903	0
670	6	35.9783	-69.4099	-765.033	-44189.1	33440.6	-8503.01	243.711	357.761	0	0	0	0	0	0	0	200	903	0	0	0	0	0	0	0	603	903	0
670	7	35.5206	-70.0203	-765.644	-44372.2	33928.9	-8777.66	244.314	357.954	0	0	0	0	0	0	0	200	903	0	0	0	0	0	0	0	603	903	0
670	8	35.2154	-69.8677	-765.949	-44738.4	33501.6	-9189.65	243.739	358.409	0	0	0	0	0	0	0	200	903	0	0	0	0	0	0	0	603	903	0
670	9	35.9783	-72.7669	-762.897	-45013.1	33379.6	-9326.98	243.754	359.003	0	0	0	0	0	0	0	200	903	0	0	0	0	0	0	0	603	903	0
671	0	36.2835	-71.6988	-767.78	-44555.3	33745.8	-9464.31	243.952	358.031	0	0	0	0	0	0	0	200	903	0	0	0	0	0	0	0	603	903	0
671	1	36.4361	-72.3091	-771.442	-45013.1	33623.7	-9052.32	243.586	358.349	0	0	0	0	0	0	0	200	903	0	0	0	0	0	0	0	603	903	0
671	2	36.8939	-73.835	-771.747	-45196.2	33501.6	-9189.65	243.41	358.563	0	0	0	0	0	0	0	200	903	0	0	0	0	0	0	0	603	903	0
671	3	36.4361	-74.2928	-774.494	-45196.2	33318.5	-9464.31	243.02	358.356	0	0	0	0	0	0	0	200	903	0	0	0	0	0	0	0	603	903	0
671	4	36.7413	-74.5979	-772.968	-46203.3	33440.6	-9052.32	243.263	359.774	0	0	0	0	0	0	0	200	903	0	0	0	0	0	0	0	603	903	0
671	5	35.9783	-74.7505	-773.273	-46569.5	34173	-9326.98	244.193	360.224	0	0	0	0	0	0	0	200	903	0	0	0	0	0	0	0	603	903	0
671	6	36.4361	-76.1238	-774.189	-47027.3	34112	-8731.89	244.062	360.744	0	0	0	0	0	0	0	200	903	0	0	0	0	0	0	0	603	903	0
671	7	37.0465	-75.9712	-774.799	-46477.9	33806.8	-9098.1	243.633	359.987	0	0	0	0	0	0	0	200	903	0	0	0	0	0	0	0	603	903	0
671	8	36.7413	-76.8867	-779.071	-46294.8	33867.9	-8960.77	243.472	359.423	0	0	0	0	0	0	0	200	903	0	0	0	0	0	0	0	603	903	0
671	9	36.2835	-77.4971	-778.156	-46935.7	34295.1	-9647.42	244.072	360.317	0	0	0	0	0	0	0	200	903	0	0	0	0	0	0	0	603	903	0
672	0	36.4361	-78.8704	-782.123	-48034.3	34112	-9326.98	243.615	361.415	0	0	0	0	0	0	0	200	903	0	0	0	0	0	0	0	603	903	0
672	1	36.1309	-79.1756	-778.461	-47942.8	34173	-9418.53	243.898	361.587	0	0	0	0	0	0	0	200	903	0	0	0	0	0	0	0	603	903	0
672	2	36.5887	-78.8704	-776.02	-48309	33989.9	-9555.86	243.8	362.252	0	0	0	0	0	0	0	200	903	0	0	0	0	0	0	0	603	903	0
672	3	37.1991	-79.7859	-780.902	-48217.5	34173	-9510.09	243.761	361.746	0	0	0	0	0	0	0	200	903	0	0	0	0	0	0	0	603	903	0
672	4	37.6568	-80.5489	-783.039	-48125.9	34478.2	-9464.31	244.031	361.46	0	0	0	0	0	0	0	200	903	0	0	0	0	0	0	0	603	903	0
672	5	37.1991	-82.0747	-782.428	-47576.6	34295.1	-8914.99	243.832	360.806	0	0	0	0	0	0	0	200	903	0	0	0	0	0	0	0	603	903	0
[truncated: 1,904 more rows]
