# Supplementary material for: The Effects of an Extemporaneous Speech Dual-task on Older Adult Gait Control
Source: Research Square preprint supplement (doi:10.21203/rs.3.rs-7674245/v1), 2025-11-18
Supplement: Supplementary file 101 [file DT9Walk2.xlsx]

## Sheet: Sheet1
Trajectories
		09:LFHD			09:RFHD			09:LBHD			09:RBHD			09:C7			09:T10			09:CLAV			09:STRN			09:RBAK			09:LSHO			09:LUPA			09:LELB			09:LFRM			09:LWRA			09:LWRB			09:LFIN
Frame	Sub Frame	X	Y	Z	X	Y	Z	X	Y	Z	X	Y	Z	X	Y	Z	X	Y	Z	X	Y	Z	X	Y	Z	X	Y	Z	X	Y	Z	X	Y	Z	X	Y	Z	X	Y	Z	X	Y	Z	X	Y	Z	X	Y	Z
		mm	mm	mm	mm	mm	mm	mm	mm	mm	mm	mm	mm	mm	mm	mm	mm	mm	mm	mm	mm	mm	mm	mm	mm	mm	mm	mm	mm	mm	mm	mm	mm	mm	mm	mm	mm	mm	mm	mm	mm	mm	mm	mm	mm	mm	mm	mm	mm
1391	0	262.441	1969.01	1635.31	166.879	1958.47	1632.29	268.953	2120.35	1684.11	123.88	2099.02	1673.11	205.144	2186.2	1505.25	222.967	2245.06	1246.11	206.518	2035.53	1421.71	213.744	1947.89	1215.29	154.35	2250.05	1304.51	394.505	2106.8	1462.99	461.633	2181.27	1241.91	467.861	2217.63	1149.17	518.648	2224.42	985.782	495.285	2212.26	892.672	536.273	2267.99	919.214	542.863	2258.07	835.737
1392	0	263.007	1956.66	1633.72	167.488	1946.39	1630.7	269.574	2107.98	1682.41	124.806	2087	1671.48	206.007	2173.95	1503.52	223.349	2232.3	1244.25	207.291	2023.19	1420.22	214.141	1935.51	1213.67	155.201	2237.58	1302.57	395.159	2094.45	1461.12	461.898	2170.13	1240.39	468.509	2207.21	1148.63	519.706	2217.51	985.892	496.688	2207.33	892.325	537.839	2262.26	920.519	543.572	2255.79	836.197
1393	0	263.658	1944.4	1632.17	168.07	1934.28	1629.26	270.614	2095.84	1680.69	125.825	2074.99	1669.91	207.064	2161.63	1501.79	223.922	2219.53	1242.38	207.568	2010.66	1418.45	214.713	1923.16	1212.38	155.95	2224.94	1300.6	395.896	2082.23	1459.27	462.536	2158.77	1238.81	467.22	2196.81	1146.61	520.891	2209.93	985.483	496.849	2200.78	890.95	538.599	2256.09	920.849	544.294	2252.25	836.424
1394	0	264.967	1932.31	1630.86	169.173	1922.29	1628.1	271.771	2083.72	1679.04	126.811	2062.91	1668.6	208.013	2149.29	1500.26	224.377	2206.74	1240.64	208.586	1998.27	1416.98	215.731	1910.79	1211.16	156.766	2212.39	1298.86	397.037	2070.06	1457.45	463.165	2147.31	1237.06	469.232	2186.08	1146.12	522.147	2201.6	984.837	498.236	2193.71	889.998	540.046	2248.71	921.182	545.086	2247.31	836.451
1395	0	266.426	1920.29	1629.58	170.463	1910.12	1627.14	273.455	2071.83	1677.58	128.225	2050.74	1667.46	208.946	2137.04	1498.83	224.645	2193.74	1239.07	209.507	1985.68	1415.89	217.101	1898.23	1209.99	157.332	2199.6	1297.23	398.005	2057.9	1455.8	464.408	2135.45	1236.01	466.57	2174.96	1143.44	523.384	2192.5	984.513	500.782	2185.87	890.06	541.707	2240.02	921.544	545.775	2240.53	836.242
1396	0	267.556	1908.17	1628.45	171.657	1897.9	1626.35	274.578	2059.7	1676.21	129.904	2038.89	1666.74	209.701	2124.7	1497.48	224.716	2180.6	1237.67	210.385	1973.01	1415.04	218.897	1885.72	1209.16	157.799	2186.81	1295.76	398.792	2045.58	1454.74	465.16	2123.45	1235.25	467.546	2163.61	1142.66	524.957	2182.4	984.448	501.675	2176.64	889.52	543.05	2230.53	921.84	547.428	2232.37	836.902
1397	0	269.088	1896.1	1627.44	173.067	1885.74	1625.75	276.088	2047.64	1675.1	131.337	2026.82	1666.28	210.601	2112.42	1496.27	225.031	2167.17	1236.21	211.624	1960.43	1414.32	220.439	1872.43	1208.8	158.388	2173.85	1294.43	399.737	2033.58	1453.65	466.041	2111.56	1234.27	472.034	2152.05	1143.63	526.25	2171.69	983.936	503.051	2166.26	888.954	544.659	2219.99	921.753	549.132	2222.58	836.853
1398	0	270.881	1884.35	1626.88	174.607	1873.56	1625.46	277.784	2035.52	1674.51	132.806	2014.67	1666.1	211.772	2100.16	1495.45	225.471	2153.95	1235.05	212.957	1947.92	1414.04	222.192	1859.18	1208.8	159.211	2161.04	1293.42	401.036	2021.52	1452.88	467.313	2099.62	1233.6	473.675	2140.05	1143.51	527.62	2160.19	983.591	504.514	2154.84	888.646	545.914	2208.51	921.391	550.698	2211.25	836.579
1399	0	272.295	1871.96	1626.97	176.167	1861.37	1625.62	279.553	2023.23	1674.58	134.441	2002.09	1666.15	212.799	2087.6	1495.12	226.026	2140.5	1234.51	213.987	1935.32	1414.31	223.441	1845.26	1209.62	160.234	2148.2	1292.97	402.263	2009.06	1452.82	468.512	2087.27	1233.83	471.247	2127.7	1141.41	528.845	2147.84	983.536	506.004	2142.4	888.543	546.831	2196.34	921.051	552.406	2198.45	836.502
1400	0	273.493	1859.64	1627.13	177.545	1849.11	1625.98	280.989	2011.1	1674.65	136.276	1989.94	1666.74	214.132	2074.98	1494.9	226.903	2126.99	1234.24	214.884	1922.58	1414.67	224.797	1831.57	1210.55	161.439	2134.99	1292.52	403.442	1996.58	1452.79	469.639	2074.8	1233.88	472.566	2114.91	1141.48	529.953	2134.55	983.438	507.027	2128.63	888.342	548.559	2182.73	921.139	551.94	2183.28	834.901
1401	0	275.216	1847.63	1627.39	179.109	1836.98	1626.54	282.695	1998.99	1674.87	137.798	1977.88	1667.41	215.308	2062.05	1495.35	228.091	2113.62	1233.96	216.17	1909.88	1415.32	226.16	1817.8	1211.61	163.021	2121.73	1292.51	404.784	1984.11	1453.13	470.974	2061.82	1234.15	473	2101.19	1140.86	528.64	2119.67	981.717	508.318	2114.07	888.082	547.587	2168.39	919.658	556.02	2168.34	835.751
1402	0	277.263	1835.76	1628.17	180.916	1824.92	1627.33	284.476	1987.06	1675.35	139.569	1965.9	1668.11	216.611	2049.39	1495.34	229.338	2100.15	1234.06	217.563	1897.01	1416.23	227.509	1804.15	1212.78	164.432	2108.59	1292.4	406.011	1971.4	1453.62	472.307	2048.67	1234.59	474.462	2087.42	1141.5	532.584	2105.6	983.379	509.822	2098.23	888.396	550.594	2153.12	920.039	558.043	2151.45	835.56
1403	0	278.782	1823.59	1629.36	182.478	1812.76	1628.67	286.027	1975.04	1676.04	140.925	1953.95	1668.99	218.031	2036.95	1495.79	230.932	2086.59	1234.3	218.854	1884.16	1417.23	228.119	1790.46	1214.14	166.059	2095.53	1292.82	407.196	1958.53	1454.59	473.946	2034.86	1235.53	480.767	2073.58	1144.22	533.723	2089.8	983.446	511.528	2081.49	888.666	551.22	2136.85	919.071	560.567	2133.29	835.723
1404	0	280.035	1811.63	1630.17	183.755	1800.48	1629.99	287.2	1962.86	1676.59	142.557	1941.87	1669.99	219.33	2024.28	1496.12	232.802	2073.58	1234.75	219.855	1871.47	1418.23	228.362	1776.84	1215.36	167.954	2082.55	1292.97	408.158	1945.62	1455.22	472.313	2020	1234.32	477.63	2058.58	1141.77	534.731	2073.4	982.894	512.762	2063.96	888.419	550.947	2119.18	917.627	562.044	2114.14	834.59
1405	0	281.102	1799.17	1631.36	185.163	1788.23	1631.32	288.716	1950.98	1677.36	143.931	1929.81	1670.93	220.615	2011.72	1497.04	234.562	2060.79	1235.49	220.979	1858.79	1419.23	229.238	1764.04	1216.42	169.59	2069.51	1293.71	408.888	1932.66	1455.94	474.012	2004.91	1234.66	479.413	2043.56	1141.94	534.036	2055.35	981.438	514.248	2045.31	888.143	554.154	2101.61	917.373	562.484	2093.28	832.981
1406	0	282.731	1787.16	1632.84	186.776	1776.07	1632.88	290.431	1938.92	1678.35	145.29	1917.57	1671.81	221.66	1998.86	1497.97	236.031	2047.88	1236.51	221.822	1846.02	1420.38	229.714	1751.49	1217.2	171.147	2056.77	1294.88	409.587	1919.54	1456.97	475.075	1990.72	1235.38	481.065	2028.06	1142.26	536.293	2037.49	981.947	515.653	2025.76	888.387	554.881	2082.2	916.266	566.651	2072.6	833.99
1407	0	283.576	1774.86	1633.93	188.12	1764.03	1634.32	291.267	1926.93	1679.01	147.069	1905.5	1673.26	222.36	1986.76	1498.87	237.574	2035.37	1237.67	222.426	1833.56	1421.4	230.22	1739.12	1217.96	172.38	2043.98	1296.14	410.356	1906.62	1458.15	476.366	1975.61	1235.88	482.829	2012.26	1142.51	537.515	2018.68	981.487	516.911	2005.5	888.234	556.67	2062.03	915.182	568.335	2050.54	833.161
1408	0	284.715	1762.82	1634.91	189.085	1751.85	1635.42	292.193	1914.99	1679.58	147.779	1893.44	1674.1	223.29	1973.91	1500.11	238.709	2022.76	1238.59	222.988	1820.99	1422.27	230.614	1726.84	1218.61	173.334	2031.66	1297.14	411.065	1894.02	1458.94	477.474	1960.49	1235.76	484.546	1996.45	1142.11	538.358	1999.19	980.48	518.433	1984.21	888.075	556.784	2041.33	912.816	569.934	2027.46	831.922
1409	0	286.107	1750.93	1636.03	189.992	1739.61	1636.7	293.347	1902.95	1680.56	148.851	1881.24	1675.34	223.97	1961.52	1501.29	239.888	2010.64	1239.69	223.524	1808.65	1423.06	231.161	1714.87	1219.12	173.918	2019.62	1298.34	411.591	1881.42	1459.89	478.483	1945.06	1236.02	486.2	1980.28	1141.95	540.3	1979.27	980.196	519.453	1962.31	887.785	560.095	2019.69	912.055	571.276	2003.26	830.785
1410	0	286.616	1738.7	1637.18	191.007	1727.57	1637.9	294.068	1890.8	1681.75	149.281	1869.1	1676.92	224.613	1950.09	1502.22	240.528	1998.44	1240.96	223.775	1796.32	1424.05	231.435	1702.97	1219.81	174.349	2007.57	1299.73	412.052	1868.59	1461.07	479.62	1929.5	1236.46	487.865	1963.93	1141.94	541.58	1958.44	979.843	520.521	1939.6	887.954	560.781	1997.19	910.223	572.169	1977.94	830.064
1411	0	286.491	1726.16	1638.16	191.173	1715.18	1638.86	293.904	1878.31	1682.85	149.688	1856.78	1677.66	225.345	1937.97	1503.45	241.289	1986.5	1242.1	224.185	1784.38	1425.35	231.646	1691.21	1220.35	175.084	1995.9	1300.94	411.605	1855.18	1461.92	480.689	1914.1	1236.66	489.729	1947.4	1141.71	541.603	1937.09	978.626	520.723	1916.13	887.745	560.884	1973.61	908.276	571.786	1951.72	828.425
1412	0	287.083	1714.19	1639.03	191.583	1703.17	1640.03	294.227	1866.06	1683.73	150.38	1844.76	1678.98	226.208	1925.87	1504.42	242.269	1974.64	1242.99	224.389	1772.34	1426.35	231.965	1679.56	1220.96	176.078	1984.3	1302	412.259	1842.57	1462.76	481.624	1898.62	1236.84	491.326	1930.71	1141.24	542.63	1915.31	977.914	521.654	1892.67	888.019	562.012	1949.62	906.404	572.314	1925.03	827.594
1413	0	287.057	1701.59	1640.17	191.428	1690.86	1641.1	295.057	1853.83	1685.15	150.634	1832.8	1680.44	226.848	1913.97	1505.39	243.087	1962.7	1244.13	224.749	1760.4	1427.57	232.26	1667.88	1221.76	177.165	1972.8	1303.09	412.72	1829.97	1463.7	482.728	1883	1237.55	492.841	1914.03	1140.99	543.801	1893.12	978.063	521.04	1867.48	888.452	564.537	1924.78	905.738	574.887	1898.04	829.009
1414	0	286.776	1689	1641.6	191.456	1678.77	1642.43	294.956	1841.48	1686.62	150.729	1820.75	1681.33	227.583	1901.84	1506.94	244.138	1950.97	1245.77	224.545	1748.39	1428.9	231.793	1655.83	1222.62	178.254	1961.23	1304.51	412.921	1817.04	1465.02	483.967	1867.47	1238.63	494.966	1896.99	1141.58	545.034	1870.36	978.986	521.635	1842.29	890.619	563.682	1899.65	904.378	574.698	1869.63	829.647
1415	0	286.301	1676.6	1643.22	190.957	1666.49	1643.81	294.547	1828.92	1688.19	150.841	1808.6	1682.77	228.162	1889.6	1508.77	245.328	1939.5	1247.72	224.428	1736.36	1430.19	231.33	1643.77	1223.79	179.483	1949.77	1306.25	412.94	1803.94	1466.45	484.748	1852.01	1239.49	496.85	1880.17	1141.98	544.555	1847.01	979.034	520.197	1816.93	891.729	565.307	1873.67	904.412	573.637	1840.32	830.323
1416	0	286.138	1664.46	1645.02	190.62	1654.31	1645.22	294.452	1816.56	1690.04	150.365	1796.69	1684.49	228.825	1877.34	1510.78	246.718	1927.97	1249.75	224.644	1724.5	1431.56	230.911	1631.82	1225.08	180.929	1938.4	1308.19	413.173	1790.86	1467.9	485.639	1836.47	1240.48	498.373	1863.04	1142.24	545.53	1823.91	980.526	519.356	1791.27	893.874	565.155	1847.38	904.369	573.478	1811.29	832.386
1417	0	285.491	1651.78	1646.91	190.176	1642.11	1646.63	294.201	1804.15	1692.12	149.885	1784.49	1685.56	229.3	1864.94	1512.71	248.009	1916.36	1251.95	224.585	1712.58	1433.13	230.501	1619.73	1226.66	182.304	1926.88	1310.36	413.432	1777.84	1469.96	486.465	1820.94	1242.15	500.047	1845.7	1143.35	544.795	1800.24	981.953	517.657	1765.43	897.106	564.765	1821.05	904.941	572.336	1781.4	835.037
1418	0	284.662	1639.31	1648.81	189.363	1630.06	1648.1	293.581	1791.67	1693.9	149.39	1772.6	1686.84	229.871	1852.64	1514.48	249.449	1904.66	1253.97	224.498	1700.62	1434.62	230.081	1608.22	1228.19	183.693	1915.31	1312.28	413.088	1764.58	1471.73	487.332	1805.5	1243.98	501.457	1828.34	1144.45	544.181	1776.51	984.079	516.003	1739.18	900.67	563.079	1793.4	906.297	570.796	1751.21	838.485
1419	0	283.377	1626.94	1650.27	188.665	1617.96	1649.41	293.059	1779.32	1695.52	148.944	1760.83	1688.03	230.626	1840.46	1516.07	250.873	1892.94	1255.74	224.78	1688.72	1435.98	229.577	1596.42	1229.77	185.079	1903.5	1313.91	413.585	1751.59	1473.9	488.758	1789.8	1246.09	503.326	1811.03	1145.88	543.897	1752.94	986.543	514.431	1713.16	904.931	562.34	1766.37	907.993	569.127	1720.76	842.645
1420	0	283.428	1614.66	1652.71	187.914	1605.99	1650.6	292.769	1767.05	1697.48	148.53	1749.07	1688.66	231.36	1828.27	1517.64	252.37	1881.32	1257.55	224.897	1676.7	1437.28	229.129	1585.06	1230.83	186.542	1891.89	1315.54	413.956	1738.62	1476	489.739	1774.19	1248.07	504.728	1793.62	1147.37	544.095	1729.8	989.679	512.745	1686.89	909.835	561.144	1739.27	910.402	567.257	1690.59	847.359
1421	0	282.305	1602.2	1654.47	187.045	1594.1	1651.73	292.189	1754.67	1699.09	148.088	1737.47	1689.26	232.221	1816.19	1519.13	253.537	1869.59	1259.13	225.077	1664.69	1438.44	228.828	1573.9	1231.92	187.892	1880.08	1316.99	414.098	1725.45	1477.82	490.745	1758.62	1249.89	505.87	1775.85	1149.13	542.901	1705.3	992.885	510.711	1660.46	914.998	559.199	1712.25	912.813	564.867	1660.06	852.671
1422	0	281.33	1590.08	1655.83	186.16	1582.2	1652.67	291.565	1742.53	1700.23	147.535	1725.9	1689.53	232.921	1803.87	1519.97	254.716	1857.94	1260.17	225.265	1652.64	1439.12	228.495	1562.74	1232.72	189.127	1868.22	1318.1	414.752	1712.7	1479.44	491.603	1742.97	1251.17	507.511	1758.58	1150.19	541.677	1681.37	995.598	508.081	1633.88	920.005	557.703	1685.17	915.444	562.347	1629.9	857.82
1423	0	280.767	1577.73	1657.34	185.608	1570.5	1653.62	291.216	1730.45	1701.32	147.134	1714.25	1689.72	233.776	1791.72	1520.7	255.838	1846.23	1261.04	225.75	1640.56	1439.83	228.579	1551.65	1233.52	190.374	1856.35	1318.9	414.707	1699.58	1480.44	492.469	1727.39	1252.22	509.134	1740.89	1151.12	541.071	1657.51	999.047	506.482	1607.9	925.686	556.608	1658.1	918.534	560.095	1600.01	863.475
1424	0	280.268	1565.6	1658.88	185.109	1558.68	1654.43	290.778	1718.5	1702.2	147.201	1702.82	1689.73	234.326	1779.15	1521.45	256.945	1834.53	1262.1	226.02	1628.39	1440.33	228.7	1540.31	1233.98	191.426	1844.53	1319.74	415.124	1686.74	1481.54	493.696	1711.77	1253.49	510.669	1723.26	1152.07	540.502	1633.78	1002.56	504.531	1581.59	931.664	555.682	1630.51	922.429	558.245	1570.69	870.131
1425	0	279.477	1553.48	1660.28	184.58	1546.79	1655.16	290.503	1706.6	1702.92	146.899	1691.34	1689.6	235.167	1766.67	1521.97	258.104	1822.76	1262.65	226.491	1616.26	1440.4	228.723	1528.83	1234.21	192.695	1832.74	1320.66	415.497	1673.89	1482.27	494.705	1696.05	1254.37	512.217	1705.41	1152.54	539.696	1609.93	1005.86	502.848	1555.83	937.6	555.456	1604.34	926.454	555.304	1541.04	876.126
1426	0	279.676	1541.5	1661.32	184.272	1534.9	1655.81	290.425	1694.88	1703.02	146.663	1679.76	1689.2	235.74	1754	1521.97	259.249	1810.8	1263.09	226.788	1603.85	1440.21	228.668	1517.23	1234.16	193.755	1820.8	1320.85	415.863	1661.07	1482.43	495.709	1680.39	1254.51	513.487	1687.54	1152.35	539.095	1586.11	1009.03	500.964	1530	943.402	552.915	1576.49	929.146	552.556	1512.07	882.117
1427	0	279.432	1529.65	1662.11	184.29	1523.13	1656.25	290.407	1683.27	1702.91	146.668	1668.14	1688.61	236.4	1741.58	1521.86	259.895	1798.74	1263.13	227.123	1591.44	1439.65	228.916	1505.82	1233.42	194.919	1808.85	1321.1	416.322	1648.29	1482.38	496.808	1664.71	1254.65	515.16	1669.54	1152.51	538.118	1562.59	1011.98	498.68	1504.28	948.92	551.28	1549.5	932.664	549.745	1483.08	888.422
1428	0	279.655	1517.66	1662.74	184.239	1511.17	1656.65	290.202	1671.31	1702.3	146.441	1656.44	1687.52	236.878	1728.76	1521.56	260.438	1787.09	1262.98	227.605	1579	1439	229.164	1494.43	1232.48	195.528	1796.62	1320.81	416.708	1635.64	1481.95	497.65	1648.75	1254.37	516.536	1651.21	1152.2	537.039	1538.73	1015.13	496.635	1478.8	954.953	549.997	1522.94	936.726	546.538	1454.51	894.643
1429	0	279.54	1505.82	1662.91	184.245	1499.3	1656.65	290.271	1659.77	1701.27	146.608	1644.77	1686.27	237.296	1716.34	1520.81	260.766	1775.51	1262.46	227.77	1566.38	1437.92	229.534	1482.99	1230.96	196.045	1784.31	1320.1	416.867	1622.91	1481.04	498.611	1633.27	1253.76	517.702	1632.61	1151.44	536.172	1515.13	1018.3	494.36	1453.7	960.585	548.426	1496.33	940.518	543.639	1426.51	901.017
1430	0	279.273	1494.14	1662.6	184.334	1487.34	1656.5	290.374	1648.21	1699.96	146.874	1633.27	1685.35	237.604	1703.56	1519.63	260.847	1763.84	1261.54	228.338	1553.9	1436.74	230.055	1471.46	1229.19	196.569	1772.19	1319.09	417.178	1610.3	1479.81	499.527	1617.34	1252.8	518.965	1614.05	1150.53	535.321	1492.08	1021.12	492.13	1429.11	965.888	546.706	1470.32	944.027	540.869	1399.07	907.378
1431	0	279.94	1482.23	1662.32	184.629	1475.44	1656.08	290.524	1636.47	1698.54	147.146	1621.61	1683.83	237.999	1691.11	1518.45	260.557	1751.81	1260.59	229.028	1541.66	1435.05	230.685	1459.64	1227.24	196.68	1759.66	1318.14	417.795	1597.83	1478.66	500.235	1601.36	1252.01	520.136	1595.52	1149.85	534.259	1469.07	1023.97	490.008	1405.05	971.284	544.907	1444.32	947.892	538.072	1372.19	913.814
1432	0	279.961	1470.34	1661.61	184.666	1463.47	1655.3	290.836	1624.66	1697.27	147.198	1609.71	1682.03	237.854	1678.21	1517.19	260.131	1740.08	1259.71	229.323	1529.24	1433.55	231.206	1447.2	1225.14	196.683	1747.47	1317.21	417.684	1585.15	1477.13	500.816	1585.3	1251.2	521.317	1576.66	1149.35	533.095	1446.15	1027.28	487.59	1381.34	976.6	543.422	1419.06	952.104	535.109	1345.69	920.527
1433	0	279.914	1458.1	1660.7	184.751	1451.44	1654.09	290.974	1612.86	1695.54	147.452	1597.87	1680.2	238.025	1665.83	1515.87	259.599	1728.2	1258.49	229.453	1516.63	1431.87	231.852	1434.44	1223.19	196.554	1735.28	1316.11	417.254	1572.36	1475.39	501.214	1568.93	1250.34	522.182	1557.9	1148.69	531.527	1423.61	1030.18	485.162	1358.2	981.75	541.694	1394.05	956.199	532.125	1320.04	927.096
1434	0	280.316	1446.21	1659.53	185.12	1439.48	1653.05	291.141	1601.08	1693.67	147.523	1585.98	1678.73	237.973	1653.26	1514.27	258.772	1716.17	1256.91	230.019	1504.26	1430.23	232.67	1421.48	1221.08	196.082	1723.05	1314.75	417.14	1559.8	1473.69	501.392	1552.63	1249.42	523.071	1539.47	1148.23	530.555	1401.73	1033.38	483.031	1335.76	986.726	540.048	1369.99	960.158	529.511	1295	933.523
1435	0	280.508	1434.4	1658.16	185.453	1427.54	1651.68	291.364	1589.24	1691.83	147.832	1574.15	1676.79	237.981	1641.07	1512.67	257.956	1704.07	1255.35	230.437	1491.89	1428.29	233.464	1408.48	1219.02	195.359	1710.48	1313.42	417.167	1547.46	1472.03	501.578	1536.33	1248.55	523.832	1521.03	1147.86	529.434	1380.42	1036.56	480.928	1313.88	991.593	539.341	1346.14	965.061	527.184	1270.93	940.125
1436	0	280.572	1422.38	1656.65	185.556	1415.42	1650.37	291.368	1577.37	1689.82	147.927	1562.28	1675.05	237.541	1628.54	1510.85	256.878	1691.73	1253.68	230.582	1479.29	1426.38	233.988	1395.51	1216.88	194.404	1698.06	1311.82	416.768	1535.03	1470.36	501.569	1520.11	1247.87	524.089	1502.92	1147.48	528.052	1359.47	1039.79	478.945	1292.69	996.504	537.487	1323.13	969.33	524.569	1247.48	946.616
1437	0	280.533	1410.62	1654.75	185.63	1403.38	1648.73	291.533	1565.56	1687.89	148.635	1550.39	1673.32	237.494	1616.57	1508.88	256.002	1679.45	1251.74	230.796	1466.93	1424.46	234.637	1383	1214.73	193.408	1685.58	1309.86	416.453	1522.62	1468.62	501.386	1503.86	1246.89	524.56	1485.16	1147.07	526.747	1339.06	1042.97	476.704	1271.91	1001.02	536.246	1300.89	973.511	522.429	1224.98	953.011
1438	0	281.097	1398.61	1653.25	185.871	1391.56	1647.02	291.561	1553.79	1685.81	147.938	1538.23	1671.48	237.163	1604.38	1506.98	254.753	1666.79	1249.66	230.465	1454.43	1422.48	235.115	1370.5	1212.64	192.375	1672.93	1308.04	416.176	1510.55	1466.77	500.876	1487.88	1245.83	524.628	1467.91	1146.65	525.469	1319.48	1045.95	474.887	1251.89	1005.38	534.86	1279.34	977.667	520.164	1202.95	959.17
1439	0	280.76	1386.93	1651.44	185.904	1379.57	1645.57	291.501	1541.93	1684.02	148.038	1526.47	1669.67	236.63	1592.09	1504.91	253.618	1653.98	1247.63	230.404	1442.1	1420.9	235.387	1357.85	1210.91	191.553	1660.34	1306.14	415.63	1498.37	1465.02	500.373	1472.25	1245	524.84	1451.01	1146.32	524.53	1300.5	1048.89	472.895	1232.34	1009.55	533.764	1258.56	981.828	518.127	1181.73	965.233
1440	0	280.891	1375.04	1649.8	185.605	1367.58	1644.04	291.07	1530.12	1682	147.818	1514.48	1668.06	236.236	1580.12	1502.87	252.76	1641.31	1245.37	229.995	1429.67	1419.42	235.356	1345.03	1209.48	190.498	1647.62	1303.81	415.157	1486.4	1463.31	499.825	1457.21	1243.96	524.358	1434.79	1145.53	523.453	1282.28	1051.71	471.543	1213.85	1013.43	532.65	1238.73	985.64	516.462	1161.47	970.983
1441	0	280.67	1363.25	1648.22	185.355	1355.69	1642.5	290.78	1518.42	1680.26	147.305	1502.37	1666.32	235.586	1567.9	1500.76	251.919	1628.24	1242.99	229.425	1417.28	1417.75	235.304	1332.24	1208.16	189.869	1635.06	1301.7	414.481	1474.28	1461.73	499.119	1442.6	1242.91	523.892	1419.34	1144.95	522.42	1264.52	1054.17	470.198	1195.76	1017.04	531.701	1219.78	989.083	515.191	1142.27	976.279
1442	0	280.293	1351.52	1646.93	185.034	1343.85	1641.26	290.221	1506.66	1678.65	146.956	1490.73	1664.93	235.071	1556.06	1498.93	251.296	1615.11	1240.95	229.13	1404.94	1416.23	234.886	1319.1	1207.2	189.178	1622.25	1299.68	414.464	1462.5	1460.56	498.6	1428.43	1242.12	523.707	1403.84	1144.51	521.792	1247.79	1056.41	469.334	1178.45	1020.62	530.845	1201.55	992.571	514.168	1123.98	981.226
1443	0	279.701	1339.66	1645.81	184.403	1332.02	1640.2	289.608	1494.93	1677.21	146.28	1478.88	1663.35	234.509	1543.96	1497.34	250.878	1601.98	1238.96	228.449	1392.44	1415.03	234.328	1306.22	1206.36	188.559	1609.36	1297.64	413.867	1450.13	1459.45	497.794	1414.83	1241.04	523.291	1389.25	1144.17	520.872	1231.52	1058.54	468.295	1161.68	1023.78	530.28	1184.3	995.769	513.191	1106.17	985.924
1444	0	278.607	1327.69	1644.56	183.387	1320.13	1639.04	288.783	1483.08	1675.79	145.173	1466.95	1662.15	233.884	1531.59	1495.56	250.385	1588.61	1236.89	227.485	1379.81	1413.83	233.355	1293.2	1205.39	188.389	1596.52	1295.66	412.895	1437.2	1458.21	496.981	1401.56	1239.79	522.349	1374.95	1143.1	520.199	1216	1060.15	467.585	1145.73	1026.42	528.98	1167.89	997.517	512.583	1089.51	989.855
1445	0	277.895	1316.02	1643.85	182.513	1308.38	1638.12	287.889	1471.32	1674.78	144.289	1455.31	1661.07	233.384	1519.5	1494.15	249.953	1575.25	1235.25	226.866	1367.36	1412.87	232.449	1280.15	1204.67	188.001	1583.37	1293.98	412.103	1424.47	1457.25	496.105	1388.75	1238.68	521.668	1361.11	1142.56	519.568	1201.24	1061.29	467.098	1130.32	1028.72	528.495	1152.27	999.436	512.676	1073.9	993.359
1446	0	276.917	1304.17	1643.25	181.562	1296.67	1637.46	286.892	1459.54	1673.85	143.417	1443.57	1659.92	232.545	1506.82	1492.82	249.739	1561.92	1233.71	225.774	1354.55	1412.11	231.311	1266.89	1204.23	187.755	1570.17	1292.22	411.321	1411.68	1456.46	495.433	1376.09	1237.88	520.685	1347.76	1141.76	519.094	1186.93	1062.37	466.887	1115.55	1030.7	528.758	1137.76	1001.53	512.465	1058.83	996.28
1447	0	275.72	1292.28	1642.77	180.131	1284.7	1636.82	285.664	1447.66	1672.93	142.182	1431.87	1658.82	231.736	1494.65	1491.55	249.209	1548.25	1232.05	224.636	1341.93	1411.59	229.884	1253.26	1204.1	187.392	1556.97	1290.29	410.325	1398.8	1455.78	494.737	1363.73	1237.06	520.05	1334.77	1141.09	518.622	1173.3	1062.95	466.703	1101.53	1032.12	528.475	1123.8	1002.64	512.88	1044.74	998.633
1448	0	274.381	1280.44	1642.31	178.869	1272.9	1636.41	284.505	1436.04	1672.14	141.041	1420.15	1658.24	230.605	1482.07	1490.15	248.782	1534.23	1230.45	223.159	1329.05	1411.18	228.295	1239.39	1204.29	186.882	1543.3	1288.6	409.072	1385.8	1455.08	493.907	1351.5	1236.16	519.175	1322.27	1140.28	517.835	1160.2	1062.88	466.619	1088.07	1032.79	527.487	1110.33	1002.42	513.354	1031.32	999.997
1449	0	272.912	1268.68	1642.1	177.747	1261.16	1636.32	283.106	1424.22	1671.66	139.694	1408.2	1657.76	229.647	1470.01	1489.3	248.256	1520.09	1229.17	222.008	1316.35	1411.16	226.81	1225.41	1204.6	186.418	1529.7	1287.1	408.029	1372.99	1454.64	493.107	1339.52	1235.49	518.102	1310	1139.42	517.569	1147.74	1062.36	466.813	1075.18	1032.77	527.671	1098.01	1002.34	514.107	1018.75	1000.67
1450	0	271.788	1256.86	1642.41	176.281	1249.18	1636.56	281.572	1412.42	1671.53	138.114	1396.5	1657.74	228.228	1457.28	1488.5	247.614	1505.95	1228.19	220.576	1303.49	1411.36	224.964	1211.13	1205.32	185.552	1515.92	1285.96	406.773	1360.2	1454.53	492.306	1327.64	1235.29	516.846	1297.75	1139.05	517.327	1135.77	1061.58	466.896	1062.9	1032.27	528.291	1086.56	1001.85	514.937	1006.87	1000.78
1451	0	270.176	1245.04	1642.82	174.785	1237.3	1636.99	279.987	1401	1671.48	136.541	1384.4	1657.42	227.124	1444.76	1488.05	246.785	1491.91	1227.41	218.967	1290.3	1411.85	223.311	1196.82	1206.35	184.654	1502.15	1285.03	405.336	1347.29	1454.59	491.376	1315.7	1235.16	515.811	1285.89	1138.73	517.025	1124.3	1060.43	467.111	1051.06	1031.03	527.683	1075.22	999.974	515.892	995.777	999.951
1452	0	268.616	1233.25	1643.66	173.519	1225.41	1637.96	278.217	1389.32	1671.61	134.909	1372.67	1657.75	225.677	1431.98	1487.82	245.797	1477.8	1226.95	217.677	1277.35	1412.37	221.921	1182.46	1207.41	183.773	1488.33	1284.23	404.145	1334.53	1454.98	490.465	1303.73	1235.36	514.728	1274.37	1138.72	516.962	1113.42	1058.76	468.187	1040.46	1029.29	527.56	1064.68	997.815	517.261	985.494	998.11
1453	0	267.317	1221.56	1644.93	172.006	1213.49	1639.03	276.428	1377.52	1672.18	133.271	1360.69	1658.07	224.351	1418.98	1488.02	244.747	1463.89	1226.9	216.327	1264.13	1413.13	220.791	1168.08	1208.71	182.729	1474.39	1283.87	403.063	1321.49	1455.8	489.439	1291.56	1235.92	513.563	1262.85	1138.95	517.817	1103.48	1057.33	468.823	1030.03	1026.73	528.241	1055.2	995.838	518.557	975.891	995.657
1454	0	265.715	1209.61	1646.57	170.288	1201.52	1640.45	274.696	1365.96	1672.84	131.2	1348.75	1658.58	223.022	1406.14	1488.67	243.821	1450.17	1227.31	215.041	1250.92	1414.22	219.515	1153.68	1210.09	181.685	1460.64	1284.05	401.766	1308.39	1456.81	488.379	1279.41	1236.7	512.36	1251.7	1139.55	517.655	1093.5	1055.39	469.447	1020.28	1023.85	528.739	1046.45	993.196	520.087	967.221	992.574
1455	0	263.371	1197.61	1647.95	168.537	1189.41	1641.78	272.738	1354.13	1673.44	129.412	1336.83	1659.04	221.725	1393.07	1489.29	243.003	1436.72	1228.09	213.774	1237.77	1414.99	218.651	1139.57	1211.39	180.852	1446.97	1284.68	400.462	1295.05	1457.92	487.128	1267	1237.3	511.41	1240.87	1140.08	516.887	1083.72	1052.99	470.064	1011.07	1020.15	528.426	1038	989.508	521.618	959.481	988.132
1456	0	262.105	1185.59	1649.9	166.997	1177.49	1643.16	270.894	1342.43	1674.12	127.7	1324.94	1659.17	220.326	1379.82	1490.03	242.475	1423.91	1229.04	213.086	1224.84	1416.13	218.058	1125.7	1212.54	180.006	1433.78	1285.31	399.484	1282	1459.11	485.897	1254.74	1238.18	510.034	1230.15	1140.59	517.717	1074.96	1050.74	470.853	1002.52	1016.18	529.945	1031.12	986.835	522.971	952.027	983.098
1457	0	260.059	1173.43	1651.4	165.289	1165.44	1644.47	269.157	1330.48	1674.91	126.06	1312.88	1659.21	219.226	1366.83	1490.78	241.845	1410.88	1230.05	212.483	1212.02	1416.97	217.353	1112.31	1213.51	179.338	1420.8	1286.24	398.668	1269.08	1460.46	484.601	1242.55	1239.13	508.794	1219.84	1141.28	517.783	1066.58	1048.23	471.689	994.411	1011.79	530.298	1023.95	983.153	524.525	945.505	977.516
1458	0	258.41	1161.31	1652.82	163.697	1153.31	1645.47	267.575	1318.49	1675.73	124.781	1300.96	1659.42	218.289	1354.01	1491.65	241.458	1398.44	1231.07	211.824	1199.17	1417.94	216.695	1099.29	1214.46	178.403	1407.7	1286.82	397.634	1256.32	1461.69	483.376	1230.39	1240.01	507.681	1209.69	1141.84	518.19	1058.71	1045.64	472.788	987.125	1007.17	530.799	1017.95	979.18	525.76	939.446	971.15
1459	0	257.464	1149.02	1654.14	162.615	1141.11	1646.61	266.21	1306.36	1676.52	123.505	1288.77	1660.02	217.188	1341.17	1492.12	240.881	1385.8	1231.93	211.472	1186.64	1418.67	216.424	1086.72	1215.33	177.964	1395.1	1287.83	396.933	1243.82	1462.94	482.132	1218.39	1240.78	506.541	1199.62	1142.49	518.635	1051.25	1042.66	473.876	980.331	1001.92	532.051	1012.26	975.233	527.109	934.097	964.179
1460	0	256.556	1136.75	1655.38	161.715	1128.88	1647.52	265.2	1294.03	1677.84	122.504	1276.52	1660.9	216.334	1328.76	1493.29	240.389	1373.52	1233.21	211.365	1174.34	1419.65	216.296	1074.61	1216.04	176.979	1382.52	1288.78	396.208	1231.79	1464.13	480.903	1206.66	1241.79	505.536	1189.73	1143.38	518.976	1044.26	1039.43	474.977	973.999	996.632	533.323	1007.32	971.284	528.485	929.557	956.816
1461	0	255.786	1124.43	1656.59	160.986	1116.56	1648.44	264.398	1281.76	1679.25	121.542	1263.98	1661.99	215.285	1316.71	1494.78	239.556	1361.6	1234.55	210.849	1162.01	1420.66	216.056	1062.81	1216.81	176.097	1370.13	1290.13	395.556	1220.08	1465.38	479.836	1195.07	1242.99	504.62	1180.2	1144.42	519.221	1037.63	1036.06	476.019	968.292	991.059	534.365	1002.76	967.13	529.461	925.509	949.158
1462	0	255.197	1112.04	1657.53	160.458	1104.16	1649.48	263.826	1269.21	1680.69	121.063	1251.56	1663.53	214.522	1304.77	1495.91	238.508	1349.47	1235.73	210.45	1149.89	1421.88	215.557	1050.62	1217.6	175.184	1357.96	1291.38	394.868	1208.75	1466.48	478.82	1184.04	1243.85	503.447	1170.72	1145.04	519.639	1031.53	1032.48	477.205	963.214	985.297	534.94	998.832	962.107	530.939	922.586	941.202
1463	0	255.275	1099.77	1658.42	160.339	1091.77	1650.25	263.448	1256.94	1682.05	120.669	1239.03	1664.97	213.77	1292.87	1497.16	237.306	1337.63	1236.96	210.34	1138.02	1423.2	216.115	1039.25	1218.65	173.919	1345.99	1292.54	394.731	1197.92	1467.58	478.134	1173.47	1244.67	502.372	1161.69	1145.51	520.608	1026.16	1029.16	478.69	958.903	979.292	536.415	995.66	957.696	532.06	920.122	932.931
1464	0	255.27	1087.6	1659.65	160.377	1079.75	1651.72	263.402	1244.61	1683.99	120.493	1226.58	1666.89	213.116	1281.25	1499.06	236.087	1326.09	1238.34	210.604	1126.29	1424.87	217.011	1027.46	1220.42	173.071	1334.18	1294.21	394.714	1187.08	1468.89	477.763	1163.4	1245.88	501.385	1152.91	1146.26	521.475	1021.16	1025.94	480.081	955.016	973.48	538.24	993.423	953.915	533.43	918.57	925.11
1465	0	255.264	1075.31	1661.13	160.254	1067.3	1653.16	263.232	1232.14	1685.81	120.434	1214.27	1669.05	212.384	1269.25	1500.84	234.671	1314.39	1239.97	210.546	1114.49	1426.61	217.748	1015.52	1222.23	171.315	1321.99	1295.46	394.645	1176.3	1470.06	477.093	1153.83	1246.58	499.921	1144.37	1146.5	521.903	1016.69	1022.48	481.346	951.821	967.702	539.131	991.192	949.83	534.904	917.876	917.411
1466	0	255.39	1063.06	1662.43	160.377	1055.05	1654.85	263.188	1219.87	1687.49	120.481	1201.92	1671.09	211.866	1257.3	1502.25	232.999	1302.76	1241.34	210.456	1102.72	1428.4	218.595	1003.63	1224.11	170.326	1310.41	1297.3	394.676	1165.63	1471.07	476.611	1144.97	1246.82	498.343	1136.36	1146.51	522.641	1012.88	1019.19	482.986	949.39	961.931	540.037	989.983	945.099	536.354	917.921	909.766
1467	0	255.449	1051.1	1664.12	160.634	1042.94	1656.77	263.516	1207.81	1689.38	120.457	1189.76	1673.09	211.621	1245.81	1504.24	231.497	1291.24	1243.18	210.571	1090.88	1430.29	219.546	991.794	1226.02	169.15	1298.53	1299.24	394.976	1154.8	1472.3	476.032	1136.57	1247.05	496.948	1128.72	1146.59	523.465	1009.65	1016.15	484.477	947.453	956.368	540.073	989.327	940.282	538.118	918.884	902.482
1468	0	256.045	1039.2	1666.05	160.902	1030.95	1658.81	263.828	1195.83	1691.32	120.83	1177.73	1675.33	211.142	1233.83	1506.37	229.948	1279.96	1245.32	210.59	1078.95	1432.29	220.465	980.23	1227.96	168.239	1286.84	1301.51	395.101	1143.96	1473.77	475.49	1128.64	1247.85	495.126	1121.43	1146.91	523.95	1007.06	1013.45	486.092	946.058	951.356	542.421	989.807	937.821	539.823	920.56	895.939
1469	0	256.292	1027.33	1668.07	161.104	1019.01	1661.04	263.973	1184.02	1692.93	121.063	1165.9	1677.66	210.592	1221.6	1508.39	228.295	1268.17	1247.3	210.631	1067.01	1434.35	221.221	968.734	1229.97	166.803	1274.78	1303.53	394.971	1133.15	1475.03	474.746	1121.1	1248.41	493.332	1114.48	1147.29	524.416	1004.76	1011.23	487.602	945.364	946.76	543.008	990.596	934.408	541.644	922.796	890.089
1470	0	256.428	1015.58	1669.96	161.574	1007.2	1663.43	264.508	1172.43	1694.58	121.34	1154.05	1679.77	209.97	1209.62	1510.21	226.861	1256.19	1249.02	210.751	1055	1436.14	222.061	957.408	1231.81	165.679	1262.74	1305.75	394.941	1122.29	1476.4	473.852	1113.61	1248.92	491.609	1107.93	1147.77	524.875	1003.02	1008.81	489.049	944.822	942.007	542.803	991.231	930.996	543.825	925.727	884.499
1471	0	257.112	1004.14	1671.94	162.149	995.597	1665.66	264.574	1160.83	1695.72	121.662	1142.4	1681.56	209.755	1197.64	1511.97	225.873	1244.39	1250.89	210.898	1042.92	1437.86	222.657	946.042	1233.5	164.543	1250.52	1307.92	395.118	1111.4	1477.74	472.965	1106.3	1249.41	489.846	1101.78	1148.23	525.515	1001.82	1006.79	490.938	945.039	937.847	544.565	993.133	928.909	545.47	929.146	878.927
1472	0	257.564	992.632	1673.76	162.415	983.898	1667.69	264.959	1149.55	1697.02	121.583	1130.65	1683.29	209.364	1185.76	1513.59	225.127	1232.8	1252.81	211.048	1030.96	1439.4	222.957	934.576	1235.05	163.205	1238.25	1309.85	395.021	1100.19	1478.87	471.736	1098.71	1249.92	488.072	1095.66	1148.85	525.919	1000.72	1005	492.512	945.341	934.16	545.908	995.268	927.008	547.616	932.718	874.595
1473	0	257.947	981.23	1675.42	162.787	972.116	1669.55	265.147	1138.3	1697.81	122.011	1119.11	1684.59	208.8	1173.91	1515.05	223.898	1220.38	1254.01	211.037	1018.58	1440.72	223.186	923.037	1236.45	161.693	1225.76	1311.28	394.532	1088.94	1479.56	470.525	1091.21	1250.03	486.292	1089.75	1149.09	526.402	999.845	1003.07	494.279	945.91	930.558	543.919	997.051	923.61	549.472	936.52	870.236
1474	0	258.671	970.176	1676.76	163.519	960.626	1671.39	265.204	1127.06	1698.15	122.188	1107.39	1685.6	208.277	1161.63	1515.81	222.992	1208.37	1254.97	211.257	1006.68	1441.7	223.537	911.381	1237.56	160.51	1213.39	1312.69	394.522	1077.81	1480.1	469.506	1083.64	1250.1	484.734	1084.07	1149.17	526.958	999.19	1001.23	496.095	946.646	927.081	545.375	999.05	921.981	551.831	940.618	866.382
1475	0	259.415	958.886	1677.95	164.25	949.023	1672.98	265.275	1115.98	1698.45	122.344	1095.73	1686.42	207.808	1149.48	1516.55	222.355	1196.3	1255.9	211.641	994.622	1442.58	223.787	899.629	1238.37	158.814	1200.77	1313.49	394.607	1066.81	1480.53	468.702	1076.13	1250.23	483.346	1078.74	1149.23	527.775	998.641	999.646	498.392	947.75	923.88	547.575	1001.66	921.138	553.848	944.76	862.604
1476	0	259.742	947.722	1678.74	164.851	937.187	1674.17	265.421	1104.89	1698.46	122.541	1084.08	1686.82	207.444	1137.59	1516.91	221.43	1184.12	1256.35	211.721	982.56	1443.16	223.809	887.735	1238.97	157.743	1188.39	1314.29	394.656	1055.66	1480.62	467.713	1068.43	1249.95	481.995	1073.04	1149.12	528.354	998.026	997.967	500.12	948.583	920.712	548.331	1003.86	919.586	555.96	948.917	859.364
1477	0	260.422	936.337	1679.35	165.397	925.47	1674.99	265.435	1093.79	1698.14	122.69	1072.26	1687.09	206.959	1125.52	1517.09	220.382	1171.79	1256.45	211.786	970.424	1443.3	223.805	875.69	1239.14	156.333	1175.85	1314.5	394.368	1044.44	1480.19	467.082	1060.68	1249.51	480.754	1067.2	1148.81	529.084	997.369	996.208	502.11	949.472	917.585	546.925	1005.27	916.737	557.7	952.79	855.93
1478	0	260.972	925.138	1679.49	166.2	913.794	1675.41	265.588	1082.56	1697.55	122.617	1060.32	1686.85	206.318	1113.24	1516.63	219.626	1159.54	1256.14	211.712	958.229	1443.16	223.902	863.793	1238.85	155.057	1163.57	1314.52	394.229	1033.12	1479.52	466.304	1052.79	1248.78	479.465	1060.77	1148.52	530.075	996.791	994.683	503.841	950.219	914.269	548.839	1007.62	916.082	559.759	957	852.892
1479	0	261.636	913.678	1679.42	166.925	901.889	1675.64	265.542	1071.22	1696.71	122.814	1048.37	1686.45	205.718	1101.06	1516.15	218.71	1147.53	1255.7	211.79	946.226	1442.82	223.8	852.073	1238.29	153.951	1151.24	1314.17	394.301	1022	1478.92	465.944	1044.85	1248.19	478.586	1054.79	1148.16	530.447	995.983	992.926	505.86	951.041	911.52	550.031	1009.72	914.94	561.521	960.761	850.179
1480	0	261.93	901.939	1678.88	167.272	890.312	1675.43	265.481	1059.75	1695.58	123.081	1036.43	1685.66	205.434	1089.01	1515.24	217.945	1135.44	1254.79	212.155	934.456	1441.88	223.577	840.437	1237.26	152.829	1138.97	1313.31	394.176	1010.62	1477.77	465.502	1036.67	1247.11	477.692	1048.55	1147.37	531.333	994.926	991.519	507.804	951.74	908.603	549.55	1010.93	913.055	563.167	964.309	847.592
1481	0	262.578	890.214	1678.02	167.812	878.141	1674.77	265.646	1048.04	1694.4	123.102	1024.39	1684.9	205.224	1077.03	1514.16	217.642	1123.52	1253.79	212.445	922.532	1440.91	223.584	828.734	1235.87	152.291	1126.85	1312.37	394.258	999.407	1476.46	465.191	1028.39	1245.94	477.246	1042.61	1146.52	531.563	993.851	989.539	509.732	952.344	905.722	548.56	1012.36	910.91	565.189	967.909	845.323
1482	0	263.276	878.477	1677.12	168.38	866.163	1673.88	265.779	1036.22	1693.11	123.275	1012.14	1683.61	204.923	1065.26	1513.31	217.25	1111.45	1252.79	212.338	910.403	1439.55	223.535	816.849	1234.21	151.575	1114.83	1311.36	394.409	987.829	1475.24	465.232	1020.07	1245.15	476.907	1036.31	1146.18	532.25	992.461	988.264	511.602	952.663	903.374	549.581	1013.39	910.592	566.68	970.948	843.28
1483	0	263.47	866.494	1675.76	168.584	854.115	1672.61	265.838	1024.26	1691.64	123.198	1000.05	1682.44	204.831	1052.92	1512.11	217.23	1099.46	1251.63	212.358	898.332	1438.12	223.366	804.541	1232.52	151.404	1102.9	1310.34	394.55	976.205	1474.1	464.959	1011.5	1244.03	476.356	1029.54	1145.5	532.61	990.636	986.943	513.256	952.752	901.18	549.333	1013.76	909.502	568.304	973.673	841.68
1484	0	263.337	854.43	1673.78	168.819	841.837	1670.96	266.104	1012.29	1690	123.36	987.79	1681.06	204.658	1040.91	1510.16	217.448	1087.58	1249.89	212.468	886.305	1436.51	223.271	791.988	1230.71	151.141	1091.01	1308.61	394.391	964.379	1472.08	464.774	1003.1	1242.63	475.828	1022.97	1144.44	531.685	988.719	984.233	514.375	952.478	898.328	549.659	1014.03	908.575	569.248	975.976	839.665
1485	0	264.015	842.538	1671.96	169.306	829.828	1669.09	266.117	1000.22	1687.84	123.551	975.57	1679.1	204.805	1029	1508.44	218.285	1075.57	1248.06	212.711	874.181	1434.61	223.373	779.3	1228.88	151.26	1079.23	1306.74	394.479	952.322	1470.17	464.698	994.681	1241.32	475.536	1016.23	1143.56	532.349	986.484	983.196	516.439	951.708	896.797	550.111	1013.82	908.022	570.984	977.969	838.597
1486	0	264.395	830.503	1669.81	169.831	817.799	1667.12	266.429	988.218	1686.05	123.846	963.396	1677.17	204.972	1016.77	1506.39	219.289	1063.35	1246.23	212.834	862.35	1432.4	223.073	766.716	1226.89	151.467	1067.28	1304.68	395.231	940.449	1468.87	465.071	986.465	1240.37	475.142	1009.28	1142.7	533.462	984.051	982.948	517.39	950.82	894.625	550.655	1013.25	908.12	571.815	979.461	837.307
1487	0	264.59	818.251	1667.43	170.067	805.579	1664.76	266.255	975.908	1683.76	124.286	951.098	1674.84	205.257	1004.61	1504.23	220.411	1050.92	1244.02	213.083	850.244	1430.56	222.814	754.319	1224.83	151.999	1055.36	1302.37	395.315	928.116	1466.93	464.975	977.924	1239.29	474.9	1002.01	1141.92	534.036	981.097	982.266	518.653	949.529	893.197	551.189	1012.22	908.174	572.852	980.392	836.565
1488	0	264.915	806.162	1665.01	170.317	793.344	1662.2	266.576	963.723	1681.7	124.377	938.896	1672.94	205.701	992.645	1502.04	221.652	1038.49	1241.69	213.128	838.116	1428.22	222.539	741.955	1222.43	152.861	1043.37	1299.98	395.88	915.841	1465.15	464.541	969.153	1238	474.664	994.496	1141.18	534.633	977.831	981.268	519.546	947.425	891.216	551.479	1010.67	908.045	573.586	980.829	835.346
1489	0	265.174	793.974	1662.45	170.572	781.34	1659.48	267.214	951.604	1679.71	124.545	926.709	1670.56	206.23	980.365	1499.69	222.928	1025.99	1239.41	213.465	826.131	1425.77	222.504	729.738	1220.17	153.98	1031.3	1297.69	396.345	903.34	1463.37	465.24	960.003	1237.15	474.669	986.667	1140.65	535.393	974.075	980.705	521.028	945.038	890.008	551.913	1008.61	908.246	574.595	980.713	834.705
1490	0	265.436	781.681	1660.08	170.702	769.203	1656.96	267.614	939.345	1677.79	124.91	914.647	1668.39	207.107	968.548	1497.62	224.427	1013.41	1237.17	213.764	813.885	1423.68	222.289	717.442	1218.33	155.173	1019.06	1295.08	396.954	890.786	1461.65	465.664	950.648	1236.34	474.655	978.498	1140.16	536.367	969.826	980.642	522.751	942.335	889.221	552.627	1005.96	909.011	575.747	980.061	834.695
1491	0	265.791	769.454	1657.87	170.935	757.003	1654.5	267.861	927.028	1675.73	125.987	902.479	1665.87	207.994	956.866	1495.05	225.975	1000.71	1234.61	214.095	801.659	1421.65	221.938	704.847	1216.51	156.713	1006.98	1292.49	397.518	878.213	1459.7	466.04	940.722	1235.2	474.81	970.03	1139.46	537.192	965.066	980.385	524.544	938.742	888.495	553.131	1002.75	909.284	576.453	978.67	834.136
1492	0	266.321	757.386	1655.84	171.445	745.075	1652.34	268.759	914.888	1673.87	126.177	890.536	1664.05	209.287	944.827	1492.83	227.598	987.929	1231.99	214.734	789.476	1419.72	222.078	692.167	1215	158.384	994.858	1289.81	398.752	865.868	1457.97	466.587	930.52	1234.01	475.138	960.844	1138.66	538.23	959.769	980.01	526.579	934.687	887.657	553.902	999.094	909.715	578.139	977.026	834.242
1493	0	266.965	745.252	1654.06	172.066	733.331	1650.34	269.687	902.814	1672.35	126.868	878.463	1662.03	210.247	932.324	1490.66	229.209	975.112	1229.88	215.631	777.098	1418.02	222.255	679.561	1213.48	159.976	982.101	1287.41	399.907	853.249	1456.38	467.578	919.852	1233.1	475.753	951.284	1138.15	539.968	954.061	980.513	529.026	930.073	887.486	555.033	994.535	910.796	579.868	974.591	834.671
1494	0	267.437	733.013	1652.39	172.588	721.305	1648.62	270.488	890.611	1670.47	127.744	866.756	1660.38	211.42	919.966	1488.68	230.714	962.113	1227.82	216.29	764.617	1416.45	222.505	667.1	1212.18	161.753	969.549	1285.33	400.692	840.314	1454.64	468.613	908.725	1232.05	476.431	941.142	1137.49	541.009	947.295	980.403	530.715	924.298	886.923	555.474	989.163	911.379	581.143	971.024	834.97
1495	0	267.973	720.878	1650.76	173.203	709.181	1647.16	271.499	878.521	1668.66	128.876	854.994	1658.57	212.938	908.09	1486.87	231.976	949.014	1225.64	217.056	752.004	1415.11	223.101	654.359	1210.83	163.339	956.698	1283.14	401.772	827.618	1452.88	470.076	897.044	1230.93	477.318	930.537	1136.71	541.62	939.601	979.763	532.813	917.849	886.349	556.312	982.847	911.706	581.538	966.264	834.245
1496	0	269.223	708.89	1649.63	174.346	697.49	1646.07	272.821	866.553	1666.96	129.989	843.051	1656.91	214.24	895.678	1484.95	233.255	935.728	1223.82	218.29	739.337	1413.77	224.004	641.639	1209.63	165.004	943.98	1281.34	402.972	814.75	1451.24	471.265	885.187	1229.64	478.17	919.286	1135.88	543.97	931.638	980.225	534.897	910.833	885.64	557.46	975.728	912.297	583.389	960.828	834.596
1497	0	270.595	696.932	1648.7	175.54	685.624	1645.16	274.267	854.702	1665.35	131.492	831.478	1655.77	215.566	883.034	1483.4	234.382	922.39	1222.24	219.257	726.583	1412.62	225.206	628.43	1208.84	166.277	930.813	1279.63	404.566	801.988	1450.19	472.191	872.676	1228.56	479.323	907.723	1135.33	544.771	922.105	980.131	536.907	902.725	885.705	558.816	967.61	913.184	585.133	954.204	835.349
1498	0	271.715	684.917	1647.99	176.639	673.706	1644.68	275.73	842.574	1663.94	132.954	819.856	1654.65	216.876	870.248	1481.99	235.444	908.726	1220.77	220.546	713.727	1411.8	226.447	614.89	1208.54	167.444	917.82	1278.07	405.899	789.076	1449.07	474.027	860.002	1227.78	480.561	895.804	1134.7	546.775	912.261	980.579	538.865	893.773	885.576	560.059	958.349	913.731	586.845	946.248	835.881
1499	0	273.059	672.794	1647.42	177.896	661.948	1644.29	277.655	830.653	1662.83	134.467	807.995	1653.92	218.63	857.574	1480.71	236.656	895.037	1219.32	222.015	701.008	1411.03	227.96	601.327	1208.24	168.878	904.41	1276.7	407.408	776.003	1448.02	475.184	847.156	1226.74	481.786	883.253	1133.99	548.016	901.356	980.001	540.539	883.814	884.884	561.448	948.14	913.743	588.331	937.043	835.741
1500	0	274.502	660.681	1647.49	179.381	649.994	1644.53	279.57	818.575	1662.26	136.912	796.309	1653.24	220.498	845.013	1479.96	237.935	881.181	1218.22	223.467	687.909	1410.8	229.724	587.711	1208.03	170.536	890.946	1275.9	409.176	762.999	1447.39	477.058	833.879	1226.27	483.259	870.291	1133.5	549.507	889.635	979.82	542.19	872.835	884.376	563.406	937.122	914.425	590.612	926.923	836.247
1501	0	275.987	648.473	1647.99	180.883	638.125	1645.12	281.42	806.334	1661.78	138.139	784.455	1653.13	222.478	832.305	1479.56	239.364	867.235	1217.57	224.876	674.819	1410.88	231.51	574.058	1208.33	172.313	877.487	1275.21	410.8	749.691	1446.69	478.705	820.387	1225.76	484.785	856.895	1133.16	550.527	876.854	979.542	544.256	860.84	884.544	564.94	924.952	914.564	592.394	915.055	836.646
1502	0	277.527	636.137	1648.48	182.231	626.053	1645.67	283.564	794.348	1661.33	140.54	772.828	1653.01	224.338	819.311	1479.04	240.917	853.328	1217	226.205	661.607	1411.23	233.217	560.459	1208.68	174.289	863.789	1274.61	412.519	736.331	1446.36	479.961	806.523	1225.18	486.338	843.152	1132.79	552.101	863.452	979.233	545.895	847.559	884.263	566.107	911.487	914.424	594.099	902.091	836.717
1503	0	279.55	624.106	1649.3	184.16	614.08	1646.83	285.648	782.084	1661.05	142.453	760.998	1653.27	226.523	806.317	1479.06	242.719	839.381	1216.64	228.027	648.366	1411.76	234.916	546.398	1209.35	176.566	850.245	1274.16	414.413	722.807	1446.28	481.605	792.473	1224.82	487.877	828.932	1132.32	553.817	849.184	979.07	547.889	833.488	884.109	568.072	897.323	914.282	596.083	888.02	836.686
1504	0	281.525	611.806	1650.5	186.035	602.049	1648.29	287.986	769.961	1661.19	145.115	748.869	1653.81	228.472	793.053	1479.13	244.697	825.426	1216.79	229.585	635.158	1412.56	236.489	532.258	1210.21	178.947	836.916	1274.42	416.184	709.052	1446.53	483.596	778.232	1224.96	489.583	814.196	1132.21	555.745	834.19	979.14	549.613	817.873	884.171	570.154	882.073	914.359	598.485	872.7	837.086
1505	0	283.366	599.358	1651.99	187.938	589.598	1650.07	290.337	757.586	1661.63	146.697	736.863	1654.85	230.195	779.91	1479.99	246.895	811.678	1217.65	230.949	621.937	1413.54	237.611	518.089	1211.33	181.145	823.516	1274.98	417.693	695.341	1446.87	484.904	763.542	1225.12	491.481	799.193	1132.37	557.918	818.315	979.349	551.207	801.543	884.04	571.646	865.546	914.005	600.53	856.283	836.604
1506	0	285.214	586.758	1653.36	189.957	577.137	1651.83	292.422	744.975	1661.92	148.972	724.297	1655.85	231.952	766.715	1480.76	248.993	798.436	1218.58	232.203	608.679	1414.5	238.692	504.349	1212.26	183.359	810.403	1276.07	418.675	681.415	1447.03	486.664	748.57	1225.35	493.267	783.649	1132.33	559.38	801.249	978.838	552.88	783.959	883.952	573.453	848.13	913.185	601.928	837.856	836.244
1507	0	287.341	574.257	1654.53	192.146	564.652	1653.57	294.769	732.546	1662.37	151.163	711.82	1656.96	233.228	753.47	1481.95	250.936	785.4	1219.84	233.604	595.749	1415.51	239.754	491.18	1213.06	185.392	797.39	1277.51	420.381	668.079	1448.21	488.408	733.361	1225.77	495.092	767.763	1132.49	560.946	783.498	978.388	554.707	765.569	883.856	576.101	829.98	913.027	603.832	818.602	835.655
1508	0	289.582	561.717	1655.54	194.525	551.881	1655.1	296.822	719.954	1662.78	153.21	699.044	1658.12	234.584	740.505	1483	252.815	772.774	1221.21	234.655	582.571	1416.5	240.766	478.182	1213.84	186.902	784.624	1279.13	421.569	654.729	1449.09	490.521	717.891	1226.45	497.058	751.766	1132.7	563.484	765.29	978.899	556.243	745.952	883.771	578.267	810.622	912.315	606.331	798.385	835.618
1509	0	291.72	548.964	1656.33	196.427	539.067	1656.23	298.541	707.117	1663.12	155.101	686.105	1658.98	235.742	727.436	1484.26	254.28	760.363	1222.49	235.559	569.931	1417.35	241.369	465.643	1214.61	187.898	771.897	1280.52	422.664	641.447	1450.45	491.837	702.261	1226.79	498.811	735.33	1132.86	565.843	746.299	979.13	558.034	725.46	884.157	580.468	790.404	911.519	608.348	776.884	834.806
1510	0	293.456	536.165	1656.89	198.078	526.06	1657.35	300.187	694.325	1663.75	156.484	673.179	1660.65	236.798	714.635	1485.25	255.711	748.138	1223.61	236.354	557.172	1418	242.151	453.101	1215.25	188.863	759.804	1282.02	423.373	628.217	1451.25	493.42	686.705	1227.25	500.843	718.872	1132.9	567.067	726.367	978.213	559.654	704.222	884.242	582.864	769.497	910.542	610.286	754.131	833.796
1511	0	295.063	523.338	1657.5	199.939	513.149	1658.21	301.83	681.467	1664.81	158.613	660.191	1661.61	237.783	701.896	1486.59	256.79	736.159	1224.91	237.413	545.017	1418.88	242.96	441.242	1215.74	189.878	748.039	1283.57	424.674	615.453	1452.69	495.057	671.193	1227.73	502.798	702.107	1132.98	568.946	706.102	977.72	561.125	682.253	884.222	585.152	747.776	909.256	612.201	730.577	832.865
1512	0	296.237	510.307	1658.22	200.996	500.171	1658.87	303.027	668.498	1665.93	159.287	647.34	1663.41	239.188	689.892	1487.54	257.987	724.287	1225.94	238.175	532.862	1419.88	243.342	429.331	1216.49	190.674	736.422	1284.62	425.249	602.199	1453.41	496.09	655.277	1227.97	504.772	685.339	1132.88	571.297	685.589	977.848	562.268	659.536	884.187	587.292	725.311	908.081	613.89	705.795	832.069
1513	0	297.051	497.285	1658.82	202.049	487.59	1659.59	304.257	655.466	1667.48	160.646	634.545	1664.55	240.506	678.034	1488.63	259.158	712.414	1227.13	238.681	520.674	1421.01	243.826	417.775	1217.13	191.907	724.865	1285.92	425.932	589.238	1454.41	497.524	639.743	1228.27	506.706	668.388	1132.79	572.739	664.158	977.366	563.375	636.262	884.475	588.73	702.034	906.215	615.206	680.125	831.164
1514	0	297.838	484.336	1659.59	202.714	474.822	1660.16	305.077	642.315	1669.09	161.485	621.925	1665.97	241.829	665.435	1489.98	260.518	700.494	1228.31	239.335	508.935	1422.14	244.515	406.632	1217.77	193.404	713.48	1286.9	427.282	576.576	1455.65	499.089	624.066	1228.89	508.731	651.273	1132.69	573.972	642.369	976.824	564.279	612.395	885.01	590.941	678.389	905.081	617.289	653.982	831.074
1515	0	298.326	471.606	1660.64	203.094	462.254	1660.93	305.835	629.214	1671.02	162.303	609.317	1667.47	243.386	653.776	1491.72	262.009	688.452	1229.83	239.821	497.014	1423.31	244.619	394.761	1218.9	195.187	701.82	1288.33	428.506	563.858	1457.24	500.549	608.308	1229.61	510.758	634.06	1132.88	575.659	620.25	976.967	565.016	588.014	885.811	591.86	653.575	903.413	618.588	626.828	831.079
1516	0	298.412	458.603	1661.87	202.954	449.698	1661.82	306.432	616.286	1673.16	162.691	596.77	1668.92	244.568	641.684	1493.33	263.644	676.519	1231.49	240.224	484.947	1424.79	244.611	382.816	1220.19	197.338	690.342	1290.02	429.098	550.856	1458.51	501.687	592.203	1230.5	512.706	616.739	1133.19	576.329	597.31	976.865	565.043	563.138	886.741	593.306	628.623	902.364	619.496	598.95	831.471
1517	0	297.863	445.836	1663.19	202.878	437.185	1662.85	306.719	603.374	1675.13	162.922	584.547	1670.71	245.87	629.52	1495.13	265.512	664.83	1233.31	240.605	473.149	1426.32	244.545	370.865	1221.81	199.622	678.816	1291.68	429.523	537.742	1459.7	502.885	576.142	1231.26	514.644	599.141	1133.68	576.384	573.86	976.39	564.887	537.545	887.918	594.56	603.066	901.587	620.126	570.238	832.196
1518	0	298.198	433.319	1665.02	202.733	424.969	1664.22	307.023	590.747	1677.29	162.987	572.184	1672.1	247.118	617.59	1497.22	267.39	653.14	1235.28	241.485	461.574	1427.85	244.522	359.082	1223.32	201.546	667.037	1293.38	430.628	524.988	1461.59	504.254	560.048	1232.56	516.685	581.671	1134.34	577.295	550.578	977.301	564.458	511.933	890.011	595.359	576.956	901.465	620.259	541.267	833.519
1519	0	298.013	420.751	1667.13	202.202	412.807	1665.79	307.101	578.101	1679.48	163.432	560.101	1673.32	247.931	605.307	1499	269.314	641.537	1237.63	242.11	449.56	1429.53	244.413	347.501	1224.81	203.695	655.676	1295.43	431.553	512.081	1463.66	505.763	544.078	1234.48	518.496	563.782	1135.51	577.799	526.757	978.958	564.64	486.438	893.546	595.789	550.434	901.738	620.346	511.944	835.992
1520	0	297.381	408.317	1669.17	201.865	400.54	1667.41	307.014	565.683	1681.45	163.304	548.127	1674.78	248.834	592.523	1500.88	271.093	629.967	1239.44	242.421	437.398	1431.21	244.458	335.604	1226.49	205.509	643.764	1297.07	432.209	499.158	1465.67	506.8	527.818	1236	519.904	545.548	1136.56	577.581	502.465	980.458	563.261	459.903	896.516	595.674	523.424	902.423	619.413	481.65	838.695
1521	0	297.327	396.178	1671.29	201.6	388.347	1669.04	307.126	553.431	1683.32	163.387	536.114	1675.68	249.845	580.078	1502.4	273.018	618.321	1241.5	242.971	425.466	1432.6	244.792	323.897	1228	207.469	632.069	1298.85	432.891	486.188	1467.7	508.088	511.729	1237.8	521.459	527.476	1137.6	577.41	478.125	982.51	561.502	433.332	900.133	595.627	496.148	903.794	618.395	451.471	841.899
1522	0	297.077	383.814	1673.35	201.353	376.428	1670.47	307.069	541.162	1685.09	163.171	523.985	1676.7	251	568.268	1504.16	274.553	606.584	1243.21	243.708	413.237	1433.96	245.128	312.411	1229.35	209.166	620.206	1300.74	433.522	473.303	1469.94	509.383	495.497	1240.02	523.185	509.42	1139.38	577.652	453.577	985.651	559.724	406.641	904.605	595.38	468.493	906.071	616.909	420.712	845.97
1523	0	296.717	371.573	1675.49	200.984	364.226	1671.9	307.074	528.984	1686.86	163.107	511.872	1677.43	251.713	555.456	1505.77	275.903	594.758	1245.06	244.143	401.016	1435.27	245.439	301.005	1230.5	210.815	608.243	1302.36	433.944	460.327	1472	510.256	479.108	1242.06	524.875	491.246	1141.34	577.145	428.886	988.814	557.314	379.699	909.405	595.029	440.693	908.786	614.933	390.013	850.63
1524	0	296.438	359.28	1677.04	200.787	351.949	1673.04	307.028	516.767	1688.01	163.242	499.875	1678.16	252.616	543.047	1507.02	277.234	583.009	1246.55	245.075	388.89	1436.36	246.025	289.495	1231.27	212.015	595.989	1303.66	434.036	447.288	1473.55	511.313	462.939	1243.94	526.173	472.696	1142.97	576.447	404.021	991.749	555.005	352.815	914.374	594.567	412.479	911.98	612.575	359.297	855.275
1525	0	296.853	347.043	1678.48	200.879	339.903	1674.22	307.107	504.48	1689.11	163.613	487.823	1678.66	253.415	530.635	1507.82	278.398	571.177	1247.75	246.081	376.795	1437.09	246.849	278.267	1231.95	213.508	583.867	1304.87	435.069	434.641	1475.43	512.719	446.927	1245.76	527.825	454.587	1144.39	576.218	379.387	995.23	552.938	326.09	919.798	596.104	385.152	916.128	610.165	328.731	860.239
1526	0	296.756	334.753	1679.56	201.166	327.625	1674.96	307.356	492.073	1689.95	163.78	475.604	1679.07	254.481	518.295	1508.94	279.574	559.382	1248.79	246.514	364.26	1437.61	247.632	267.236	1232.21	214.681	571.595	1305.72	435.662	422.069	1476.78	514.106	430.988	1247.52	529.45	436.321	1145.71	575.698	354.707	998.886	550.694	299.182	925.686	595.092	356.608	919.949	607.593	298.176	865.757
1527	0	297.067	322.211	1680.24	201.116	315.195	1675.39	307.775	479.708	1690.41	164.147	463.175	1678.97	254.738	505.332	1509.1	280.511	547.619	1249.56	247.247	351.936	1437.98	248.612	255.993	1232.16	215.656	559.398	1306.42	435.882	409.111	1477.67	515.128	414.789	1248.74	531.233	418.16	1146.94	574.923	329.781	1002.57	548.204	272.196	931.51	592.145	328.064	922.286	604.591	267.641	871.456
1528	0	297.294	309.637	1680.6	201.425	302.563	1675.41	308.282	467.113	1690.45	164.609	450.818	1678.95	256.671	493.709	1510.59	281.631	536.017	1250.06	248.087	339.444	1437.94	249.6	244.763	1231.76	216.77	547.242	1306.61	436.266	396.513	1478.01	516.176	398.716	1249.44	533.116	399.912	1147.65	573.91	305.109	1005.76	545.996	245.581	937.256	592.735	300.276	926.938	601.665	237.364	877.067
1529	0	298.05	296.953	1680.4	202.081	290.184	1675.25	308.871	454.405	1690.28	165.135	438.174	1678.49	256.506	480.303	1509.87	282.819	524.487	1250.28	249.008	327.168	1437.6	250.865	233.678	1231.02	217.764	535.066	1306.69	436.854	383.916	1478.08	517.59	382.882	1250.07	535.583	382.007	1148.47	573.798	280.567	1009.53	544.121	219.418	943.479	591.833	272.323	930.812	598.741	207.352	883.153
1530	0	298.423	284.127	1680.06	202.722	277.206	1674.69	309.58	441.563	1689.88	165.892	425.427	1677.85	257.77	468.357	1510.17	283.591	512.989	1250.24	249.865	314.535	1437.01	251.996	222.13	1229.85	218.519	522.795	1306.54	437.656	371.494	1478.08	519.086	367.005	1250.44	536.916	363.056	1148.52	573.248	256.211	1013.2	541.787	193.095	949.631	590.627	244.513	935.055	595.845	177.662	889.713
1531	0	299.321	271.162	1679.21	203.475	264.346	1673.96	310.498	428.638	1689.12	166.824	412.506	1677.21	258.283	455.437	1509.38	284.252	501.271	1249.66	250.675	302.1	1436.23	253.027	210.433	1228.62	219.362	510.783	1306.11	437.92	358.828	1477.25	520.395	351.331	1250.35	538.741	344.409	1148.55	572.594	231.921	1016.71	539.43	167.154	955.746	589.725	217.083	939.347	592.909	148.284	896.414
1532	0	300.551	258.141	1678.04	204.442	251.403	1672.7	311.458	415.574	1688.15	167.907	399.529	1676.19	258.766	442.872	1508.55	284.38	489.483	1248.92	251.643	289.587	1434.9	254.423	198.419	1227.08	219.757	498.402	1305.33	438.656	346.492	1476.31	521.791	335.571	1250.12	540.659	325.823	1148.34	571.937	207.887	1020.19	537.087	141.745	961.836	588.3	189.71	943.367	590.164	119.39	903.514
1533	0	301.585	245.067	1676.55	205.533	238.278	1671.42	312.348	402.401	1686.98	168.713	386.204	1674.79	259.337	430.214	1507.67	284.135	477.564	1248.04	252.558	277.068	1433.42	255.768	186.048	1225.15	220.037	486.315	1304.73	439.2	334.11	1475.08	523.237	319.783	1249.91	542.854	307.375	1148.68	571.118	184.204	1023.76	534.784	116.661	968.123	587.056	162.848	947.974	587.347	90.9173	910.88
1534	0	302.242	231.933	1674.85	206.491	224.896	1669.65	313.322	389.197	1685.58	169.675	372.856	1673.78	258.613	416.123	1505.71	283.717	465.513	1247.09	253.358	264.956	1431.85	256.796	173.554	1223.33	220.122	474.194	1303.8	439.465	321.695	1473.54	524.093	303.833	1249.28	544.521	288.823	1148.66	570.299	160.711	1027.76	532.519	92.2716	974.538	585.656	136.541	953.073	584.637	62.9857	918.825
1535	0	303.243	218.613	1672.63	207.818	211.574	1667.8	314.45	376.001	1683.87	170.706	359.571	1672.43	259.588	404.766	1504.51	282.997	453.436	1245.49	254.314	252.186	1429.91	257.907	160.97	1221.14	219.786	461.928	1302.36	439.688	309.343	1471.62	524.914	287.974	1248.39	545.863	270.413	1148.28	569.296	137.614	1031.47	530.323	68.1926	980.869	584.184	110.112	957.583	582.215	35.7729	926.893
1536	0	304.858	205.481	1670.54	209.116	198.241	1665.84	315.49	362.779	1682.16	171.709	346.104	1670.84	260.868	393	1503.8	282.401	441.391	1244.09	255.188	239.582	1427.9	259.146	148.255	1218.83	219.354	449.625	1301.07	440.282	297.207	1469.79	526.1	272.427	1247.85	547.543	252.419	1148.38	568.633	115.205	1035.53	528.149	44.7236	987.241	583.746	84.9791	963.451	579.894	9.34589	935.21
1537	0	306.138	192.413	1668.31	210.502	184.912	1663.62	316.441	349.563	1680.3	172.803	332.676	1669.16	259.783	378.958	1501.28	281.575	429.234	1242.46	255.803	227.085	1425.62	260.514	135.587	1216.68	218.883	437.444	1299.66	440.745	284.944	1467.97	526.863	256.733	1247.16	548.989	234.676	1148.33	567.687	93.207	1039.71	526.303	22.158	993.768	582.733	60.4033	969.339	577.886	-16.2443	943.935
1538	0	307.502	179.222	1665.89	211.642	171.53	1661.45	317.499	336.499	1678.28	173.706	319.24	1667.48	260.293	366.393	1499.52	280.736	417.084	1240.69	256.284	214.471	1423.45	261.294	122.537	1214.39	218.376	425.224	1298.12	440.861	272.643	1465.76	527.33	241.107	1246.05	549.604	216.835	1147.7	566.793	71.8026	1043.89	524.345	0.137603	1000.16	582.032	36.2399	975.094	575.883	-40.9859	952.548
1539	0	308.393	166.101	1663.16	212.868	158.3	1658.99	318.38	323.368	1676.01	175.217	305.869	1665.59	260.689	354.042	1497.36	279.758	404.775	1238.43	256.864	201.708	1421.12	262.112	109.477	1212.32	217.727	412.707	1296.18	441.1	260.204	1463.47	527.48	225.674	1244.61	550.736	199.799	1147.32	565.744	50.9676	1047.91	522.761	-21.1151	1006.17	581.14	12.9822	980.524	574.097	-64.8511	960.929
1540	0	309.819	153.263	1660.8	214.075	145.177	1656.81	319.163	310.487	1673.97	176.044	292.668	1663.62	260.862	341.229	1495.2	279.008	392.316	1236.53	257.214	189.008	1418.7	262.848	96.8168	1209.89	217.268	400.119	1294.31	441.203	247.84	1461.18	527.764	210.676	1243.32	552.842	183.759	1147.55	565.2	31.0185	1051.86	521.389	-41.7227	1012.05	580.727	-9.23472	986.132	572.718	-87.6846	969.371
1541	0	310.932	140.414	1658.53	215.074	132.127	1654.65	319.894	297.742	1671.81	176.418	279.873	1661.91	260.957	328.465	1493.24	278.213	379.535	1234.37	257.445	176.177	1416.71	263.59	84.7929	1207.26	216.716	387.411	1292.42	441.593	235.273	1459.29	528.04	196.043	1242.11	553.453	167.387	1146.89	564.714	11.6754	1055.91	520.093	-61.6276	1017.89	580.236	-30.7286	991.805	571.444	-109.62	977.855
1542	0	311.72	127.769	1656.29	215.846	119.187	1652.76	320.402	284.974	1669.53	176.748	266.832	1660.23	260.949	315.425	1490.79	277.721	366.612	1232.27	257.63	163.279	1414.72	264	72.0611	1205.48	216.27	374.412	1290.15	441.606	222.594	1456.99	528.06	181.423	1240.44	552.603	150.489	1145.06	564.079	-6.97302	1059.33	519.227	-80.7815	1023.31	579.623	-51.3648	996.792	570.444	-130.564	985.659
1543	0	312.554	115.291	1654.32	216.641	106.527	1650.94	320.836	272.447	1667.29	177.384	254.144	1658.48	261.072	302.641	1488.52	277.312	353.413	1229.82	257.737	150.489	1412.9	264.041	59.3837	1203.54	216.134	361.568	1288.18	441.955	209.899	1455.36	528.278	167.276	1239.06	554.156	135.524	1144.88	564.041	-24.7309	1062.72	518.512	-99.0394	1028.21	579.483	-70.9448	1001.49	569.771	-150.398	993.066
1544	0	313.146	102.883	1652.56	217.015	93.8959	1649.47	321.243	259.93	1665.46	177.632	241.106	1656.28	261.125	289.743	1486.78	277.123	340.082	1227.85	257.596	137.554	1411.04	263.785	46.347	1201.84	216.12	348.497	1286.36	441.891	196.94	1453.4	529.168	154.065	1238.04	554.635	120.166	1144.13	563.638	-41.8352	1065.44	518.097	-116.694	1032.92	579.053	-89.6583	1005.67	569.439	-169.272	1000.13
1545	0	313.318	90.1658	1651.19	217.079	81.1121	1648.16	321.287	247.311	1663.53	177.683	228.506	1654.98	261.016	276.722	1484.81	277.42	326.589	1226.2	257.448	124.355	1409.66	263.298	32.8617	1200.49	215.981	335.186	1284.39	441.575	183.635	1451.88	529.226	140.223	1236.95	554.94	105.191	1143.33	563.441	-58.3553	1068.11	517.61	-133.553	1037.1	578.724	-107.558	1009.55	569.132	-187.134	1006.64
1546	0	312.751	77.4229	1649.88	216.814	68.5863	1646.82	321.303	234.889	1661.69	177.571	216.261	1653.41	260.82	263.514	1483.26	277.479	312.929	1224.22	257.062	111.15	1408.14	262.503	19.358	1198.98	216.165	321.789	1282.62	441.235	170.144	1450.3	529.163	126.516	1235.43	554.898	90.4975	1142.07	563.236	-74.2401	1070.15	517.259	-149.771	1040.32	578.419	-124.533	1012.44	569.119	-204.036	1012.3
1547	0	312.374	64.8622	1648.75	216.518	56.1216	1646.03	321.197	222.286	1660.08	177.297	203.639	1651.67	260.883	250.715	1481.41	277.777	299.238	1222.34	256.786	97.9509	1406.99	261.771	5.96589	1197.95	216.355	308.274	1280.86	441.215	156.684	1449.12	529.239	112.944	1234.41	555.754	76.727	1141.52	563.272	-89.3969	1071.58	517.193	-165.179	1043	578.254	-140.537	1014.78	569.578	-219.847	1017.17
1548	0	312.027	52.3434	1648.29	216.162	43.7229	1645.47	320.873	209.729	1658.65	177.108	191.537	1650.67	262.305	239.131	1481.43	278.031	285.295	1220.84	256.315	84.5251	1405.84	260.76	-7.65371	1196.93	216.472	294.498	1279.16	440.914	143.055	1448.21	529.76	99.7694	1233.78	556.136	62.9527	1140.95	563.427	-103.935	1072.78	517.229	-180.007	1045.21	578.44	-155.696	1016.82	569.963	-234.885	1021.38
1549	0	311.106	39.5936	1647.7	215.256	31.2812	1644.99	320.364	197.2	1657.35	177.101	179.096	1649.32	260.393	224.02	1478.88	278.292	271.203	1219.43	255.673	70.9598	1405.04	259.639	-21.5722	1196.36	216.74	280.701	1277.64	440.333	129.202	1447.31	529.75	86.533	1233.08	556.466	49.595	1140.32	563.391	-117.902	1073.18	517.383	-194.126	1046.37	578.324	-170.138	1017.92	570.533	-249.03	1024.44
1550	0	310.576	27.0205	1647.38	214.399	18.6512	1644.66	319.717	184.539	1656.24	176.029	166.429	1648.1	260.147	210.726	1477.85	278.555	256.918	1218.13	254.896	57.4254	1404.48	258.428	-35.6883	1195.73	216.781	266.809	1276.12	439.816	115.378	1446.61	529.635	73.2802	1232.29	556.228	36.294	1139.51	563.487	-131.323	1072.98	517.543	-207.631	1046.63	578.418	-183.839	1017.96	571.4	-262.233	1026.47
1551	0	309.396	14.2937	1647.31	213.378	6.13823	1644.7	318.856	171.87	1655.61	175.228	154.04	1647.75	260.041	198.045	1477.3	278.607	242.422	1217.16	254.014	43.7779	1404.16	257.156	-49.8937	1195.49	216.783	252.805	1274.99	439.228	101.551	1446.3	529.717	60.1482	1231.86	556.124	23.457	1138.83	563.76	-144.08	1072.31	517.885	-220.443	1046.14	578.859	-196.651	1017.47	572.446	-274.804	1027.47
1552	0	308.206	1.51	1647.62	212.365	-6.61074	1645.12	317.854	159.203	1655.24	174.238	141.241	1647.17	260.058	185.268	1477.16	278.723	227.931	1216.72	253.091	30.0748	1404.24	255.965	-64.2487	1195.86	216.492	238.55	1274.1	438.085	87.6265	1445.93	529.189	47.1174	1231.66	555.002	10.3614	1137.7	564.116	-156.289	1071.32	518.45	-232.691	1044.92	579.383	-208.556	1016.57	573.453	-286.512	1027.23
1553	0	306.876	-11.3111	1648.25	210.938	-19.3592	1645.68	316.697	146.439	1655.05	173.009	128.709	1647.37	259.189	171.569	1476.78	278.234	213.396	1216.05	252.041	16.2417	1404.6	254.748	-78.9118	1196.45	216.114	224.245	1273.49	437.223	73.7147	1446.09	528.647	34.0437	1231.6	554.603	-2.04272	1137.42	564.33	-167.905	1069.69	519.285	-244.142	1042.87	579.812	-219.732	1014.67	574.683	-297.441	1025.83
1554	0	305.84	-24.0968	1649.12	209.768	-32.2482	1646.53	315.506	133.719	1655.48	171.922	115.823	1647.46	258.517	158.367	1477.39	277.734	198.981	1216	251.031	2.56859	1405.12	253.894	-93.7258	1197.45	215.698	209.858	1273.4	436.529	59.8613	1446.75	528.416	21.3629	1232.06	555.506	-12.9801	1138.36	564.87	-178.933	1067.92	520.141	-255.022	1040.12	580.694	-230.039	1012.43	576.13	-307.56	1023.21
1555	0	304.385	-37.0137	1650.42	208.155	-45.2073	1647.52	314.349	121.079	1656.66	170.171	102.984	1648.26	257.697	144.509	1478.34	277.381	184.792	1216.91	250.092	-11.2215	1406.03	253.008	-108.734	1198.6	215.452	195.566	1273.96	435.791	46.0389	1447.9	527.788	8.60028	1232.75	554.794	-24.6595	1138.63	565.228	-189.38	1065.88	521.013	-265.375	1036.99	581.44	-239.586	1009.58	577.466	-317.202	1019.47
1556	0	302.645	-50.1995	1651.84	206.43	-58.3424	1648.67	312.387	107.91	1657.39	168.446	89.9037	1648.9	256.858	131.198	1479.15	276.951	170.732	1217.51	249.187	-25.0155	1407.28	252.091	-123.797	1200.16	214.96	181.339	1274.47	434.788	32.089	1449.09	526.731	-4.01726	1233.39	554.283	-35.6383	1139.11	565.597	-199.18	1063.55	521.978	-275.111	1033.26	582.089	-248.332	1006.28	578.647	-326.113	1014.56
1557	0	300.46	-63.4039	1653.35	204.669	-71.5641	1649.87	310.538	94.6911	1658.46	167.325	76.607	1649.22	255.755	117.306	1479.78	276.911	156.945	1218.63	248.511	-38.6881	1408.66	251.583	-138.271	1201.55	214.368	167.107	1274.99	433.56	17.8271	1450.21	525.298	-16.9907	1233.75	553.303	-46.5111	1139.35	565.836	-208.454	1060.54	522.942	-284.041	1028.89	582.79	-256.307	1002.3	580.032	-334.166	1008.66
1558	0	299.042	-76.598	1655.02	202.96	-84.7692	1650.96	308.87	81.4275	1659.68	165.191	63.4197	1649.88	254.744	103.605	1480.68	276.612	143.21	1219.59	247.862	-52.1784	1409.8	251.437	-152.207	1202.87	214.084	153.417	1276.14	433.098	4.13778	1452.12	524.681	-29.1155	1234.95	552.044	-57.315	1139.73	566.705	-217.018	1057.84	523.96	-292.324	1023.88	583.694	-263.326	998.138	581.344	-341.49	1001.78
1559	0	297.251	-89.9053	1656.5	201.37	-98.0598	1651.87	307.293	68.2905	1661.45	163.727	50.0895	1650.34	253.766	89.8487	1482.1	276.776	129.77	1221.4	247.365	-65.5466	1411.02	251.109	-165.897	1204.39	213.72	139.812	1277.49	432.477	-9.40347	1454.09	523.785	-41.2189	1236.45	551.509	-67.5063	1140.95	566.974	-225.101	1054.66	524.674	-300.006	1018.74	584.606	-269.565	994.101	582.491	-347.974	994.282
1560	0	295.674	-103.472	1657.91	199.652	-111.366	1652.44	305.577	54.8369	1662.93	162.209	36.5178	1650.55	252.96	76.6034	1483.41	276.713	116.614	1222.8	247.028	-78.7953	1412.2	250.99	-179.335	1206.02	213.588	126.52	1278.61	431.604	-22.8356	1455.88	522.816	-53.3441	1237.68	550.417	-77.7362	1141.92	567.285	-232.773	1051.38	525.547	-306.851	1013.13	585.213	-275.231	989.221	583.451	-353.689	986.015
1561	0	294.414	-116.89	1659.06	198.354	-124.785	1652.85	304.001	41.2559	1664.34	160.77	23.217	1651.41	252.447	63.6245	1484.51	276.595	103.509	1223.93	246.921	-91.9561	1413.16	251.052	-192.424	1207.3	213.311	113.206	1279.5	431.022	-35.6027	1457.38	521.815	-65.2739	1238.64	549.645	-87.6101	1142.75	567.421	-239.873	1047.42	526.348	-313.183	1006.68	585.795	-280.247	983.822	584.133	-358.624	976.819
1562	0	293.095	-130.285	1659.93	197.434	-138.235	1653.39	303.237	28.1487	1666.47	159.592	9.4935	1652.05	251.826	50.8477	1486.18	276.007	90.5608	1225.13	246.77	-104.781	1414.21	251.239	-205.188	1208.44	212.897	100.262	1280.85	430.554	-47.6888	1459	521.26	-76.7391	1240.05	548.959	-97.4732	1143.92	567.725	-246.648	1043.73	526.93	-318.529	999.69	586.354	-284.649	978.459	584.801	-362.769	967.575
1563	0	292.241	-143.694	1660.83	196.759	-151.731	1654	302.257	14.7179	1668.23	158.618	-3.84854	1653.51	251.143	38.3581	1487.52	275.445	78.0374	1226.75	246.711	-117.567	1415.45	251.312	-217.562	1209.58	211.899	87.318	1282.03	430.087	-59.7339	1460.48	520.477	-88.2787	1241.25	548.303	-107.16	1144.98	567.921	-252.83	1039.73	527.463	-323.481	992.896	586.966	-288.383	973.159	585.107	-366.167	958.047
1564	0	291.752	-157.023	1661.52	196.608	-165.046	1654.68	301.503	1.45626	1669.71	157.952	-17.3682	1654.84	250.308	26.0499	1488.74	274.719	65.5139	1227.71	246.67	-130.222	1416.61	251.798	-229.641	1210.56	210.885	74.4768	1283.06	429.887	-71.2201	1461.52	519.906	-99.284	1242.29	547.435	-116.705	1145.65	568.041	-258.582	1035.37	528.008	-327.559	985.887	587.408	-291.665	967.396	585.299	-368.683	948.151
1565	0	291.902	-170.001	1662.38	196.404	-178.473	1655.43	300.959	-11.5875	1671.15	157.635	-31.0542	1656.06	249.427	13.3643	1489.78	273.766	53.1697	1228.9	246.771	-142.898	1417.76	252.527	-241.777	1211.62	209.795	61.8239	1284.09	429.711	-82.6002	1462.73	519.589	-109.758	1243.05	546.601	-126.118	1145.92	568.294	-263.666	1030.98	528.441	-331.045	978.531	587.849	-294.26	961.404	585.534	-370.283	938.18
1566	0	292.349	-182.895	1663.58	196.701	-191.514	1656.64	300.56	-24.4871	1672.67	156.987	-44.1863	1657.87	248.62	0.623785	1491.12	272.282	40.6448	1229.84	246.733	-155.454	1419.01	253.379	-253.961	1212.69	208.422	49.184	1285.22	429.939	-93.9009	1463.94	519.231	-119.803	1243.64	545.491	-134.986	1146.21	568.411	-268.38	1026.74	528.701	-333.689	971.33	588.288	-295.874	956.377	585.376	-371.149	928.325
1567	0	292.179	-195.684	1664.9	196.776	-204.606	1658.18	300.09	-37.4562	1674.02	156.666	-57.333	1659.42	247.831	-12.3671	1492.15	270.996	28.4652	1231.23	246.759	-168.098	1420.55	254.298	-266.348	1214.03	207.291	36.6656	1286.68	429.943	-105.45	1464.96	518.848	-129.643	1243.95	544.862	-143.375	1146.16	568.307	-272.459	1022.35	528.807	-335.829	964.326	588.672	-297.419	950.85	584.905	-371.242	918.583
1568	0	292.065	-208.617	1666.32	196.539	-217.692	1659.61	299.846	-50.173	1675.64	156.7	-70.3921	1661.05	247.181	-25.0607	1493.68	269.54	16.3117	1232.69	246.925	-180.764	1422.09	255.443	-278.833	1215.31	206.011	23.9951	1288.24	430.199	-117.114	1465.56	517.644	-139.585	1243.22	543.573	-151.658	1145.69	568.11	-276.091	1017.82	528.766	-337.091	957.088	588.636	-298.25	945.244	584.566	-370.388	909.084
1569	0	292.587	-221.188	1668.15	196.931	-230.505	1661.63	299.994	-62.7486	1677.47	156.674	-83.3503	1662.94	246.627	-38.3368	1495.44	268.162	4.13889	1234.51	247.561	-193.27	1423.56	256.692	-291.368	1216.53	205.089	11.5223	1290.31	430.868	-128.777	1466.7	517.952	-148.034	1243.73	542.417	-159.25	1145.11	567.945	-278.896	1013.68	528.842	-337.901	950.399	588.756	-298.444	940.101	584.014	-368.851	899.972
1570	0	292.605	-233.9	1670.01	197.262	-243.097	1663.65	299.878	-75.5338	1679.07	157.125	-96.1669	1664.88	246.293	-51.4966	1497.59	266.74	-8.16124	1236.63	247.556	-205.847	1425.14	257.652	-303.881	1217.89	204.061	-0.95331	1292.37	431.065	-141.024	1467.57	517.279	-156.877	1243.64	541.086	-166.733	1144.89	567.746	-281.399	1009.79	528.846	-337.675	943.741	588.693	-298.048	935.386	583.457	-366.482	891.516
1571	0	292.527	-246.654	1671.8	197.246	-255.909	1665.53	299.597	-88.346	1680.48	156.583	-108.822	1666.72	246.598	-63.6078	1499.56	265.751	-20.3692	1238.74	247.45	-218.741	1427.13	258.506	-316.457	1219.2	203.368	-13.3277	1294.65	431.108	-153.149	1468.15	516.666	-165.355	1243.65	539.597	-173.724	1144.46	566.942	-283.21	1005.93	528.464	-337.109	937.603	588.263	-297.113	930.851	582.764	-363.538	883.546
1572	0	292.484	-259.249	1673.68	197.079	-268.724	1667.25	299.759	-101.003	1682.1	156.559	-121.5	1668.35	246.686	-76.277	1501.54	264.892	-32.6988	1240.61	247.654	-231.457	1428.69	259.526	-328.705	1220.54	202.595	-25.7296	1296.94	431.396	-165.47	1468.89	515.901	-173.721	1243.67	538.121	-180.392	1144.11	566.235	-284.71	1002.33	527.97	-336.001	931.564	587.766	-295.81	926.623	582.18	-360.067	876.06
1573	0	292.685	-271.866	1675.09	197.057	-281.277	1668.9	300.056	-113.551	1683.8	157.314	-134.463	1669.5	246.784	-88.9179	1503.76	264.142	-45.2355	1242.53	247.812	-244.166	1429.98	260.138	-341.125	1221.85	201.676	-38.4111	1298.97	431.612	-177.707	1469.82	515.223	-181.965	1243.88	536.54	-186.737	1144	565.209	-285.562	998.957	527.321	-334.71	926.313	586.887	-293.955	922.619	581.5	-356.055	869.44
1574	0	292.49	-284.656	1676.49	197.127	-293.954	1670.32	299.94	-126.249	1684.9	156.592	-146.946	1671.16	246.619	-101.919	1505.05	263.6	-57.7353	1244.14	247.873	-256.773	1431.57	260.374	-353.386	1223.17	200.833	-51.1239	1300.72	431.634	-189.921	1470.57	514.129	-190.259	1243.77	534.942	-192.723	1143.99	564.09	-286.237	996.05	526.503	-332.993	921.453	585.849	-291.756	919.248	580.762	-351.558	863.464
1575	0	292.501	-297.465	1677.7	197.234	-306.651	1671.53	299.828	-138.928	1685.81	156.658	-159.569	1672.31	246.394	-114.567	1506.1	263.055	-70.2522	1245.27	247.919	-269.424	1432.77	260.585	-365.625	1223.99	199.989	-63.9296	1302.08	431.644	-202.287	1471.19	512.733	-198.778	1243.44	533.457	-198.529	1144	562.778	-286.566	993.038	525.668	-331.114	916.983	584.696	-289.212	915.965	580.058	-346.851	858.002
1576	0	292.81	-309.961	1678.49	197.562	-319.416	1672.42	299.962	-151.521	1686.54	156.6	-172.589	1673.09	246.017	-127.629	1506.72	262.437	-82.9416	1246.12	248.182	-282.056	1433.66	260.919	-377.772	1225.14	199.176	-76.3684	1303.41	431.823	-214.379	1471.69	512.145	-206.871	1243.51	531.401	-203.899	1143.41	561.442	-286.726	990.286	524.98	-328.449	912.815	583.49	-286.456	913.143	579.369	-342.05	853.128
1577	0	293.325	-322.589	1679.07	197.72	-332.345	1673.11	300.107	-164.179	1687.35	156.811	-185.377	1673.9	245.776	-140.616	1507.55	262.113	-95.1263	1246.95	248.182	-294.704	1434.38	260.937	-389.927	1225.87	198.185	-89.2636	1304.43	432.045	-226.47	1472.27	511.211	-214.955	1243.64	529.488	-209.219	1143.31	560.059	-286.539	987.918	523.942	-325.99	908.982	582.094	-283.412	910.866	578.749	-336.702	848.993
1578	0	293.02	-335.408	1679.29	198.097	-345.201	1673.49	299.672	-177.072	1687.3	156.703	-198.44	1674.24	245.691	-153.221	1507.85	261.63	-108.005	1247.54	248.187	-307.394	1434.88	260.8	-402.16	1226.38	197.412	-102.024	1304.92	432.241	-238.893	1472.61	509.703	-223.369	1243.1	527.505	-214.2	1143.27	558.704	-286.271	985.749	522.953	-323.711	905.551	580.288	-280.259	908.248	577.771	-331.63	845.049
1579	0	293.244	-348.182	1679.05	198.349	-358.212	1673.38	299.709	-189.809	1687.23	156.671	-211.521	1674.26	245.634	-165.926	1507.66	261.42	-120.529	1247.48	248.173	-320.05	1434.95	260.632	-414.389	1226.35	196.782	-114.743	1305.21	432.109	-251.313	1471.97	508.171	-231.841	1242.13	525.355	-219.201	1142.86	557.166	-285.848	983.305	522.073	-321.333	901.977	578.486	-277.203	905.609	576.951	-326.418	841.177
1580	0	293.714	-360.868	1678.76	198.723	-371.21	1673.18	300.033	-202.476	1687.18	156.798	-224.66	1674.05	245.445	-178.887	1507.49	260.966	-133.179	1247.11	248.327	-332.734	1434.68	260.4	-426.62	1225.95	196.208	-127.472	1305.26	432.372	-263.497	1471.58	507.559	-239.533	1241.88	523.492	-223.715	1142.52	555.802	-285.324	981.168	521.367	-319.027	898.936	576.868	-273.545	904.278	575.967	-321.352	837.821
1581	0	294.25	-373.781	1678.34	199.049	-384.3	1672.78	300.092	-215.388	1686.77	156.786	-237.759	1673.71	245.465	-191.838	1507.35	261.024	-145.518	1246.96	248.271	-345.438	1434.14	260.245	-438.699	1225.29	195.687	-140.142	1305.12	432.775	-275.89	1471.17	506.62	-247.334	1241.35	521.025	-228.734	1142.09	554.439	-284.266	979.307	521.143	-316.849	896.217	574.803	-270.426	902.175	575.297	-316.009	834.864
1582	0	294.283	-386.902	1677.31	199.444	-397.435	1672.03	299.998	-228.447	1685.82	156.852	-251.051	1672.93	245.54	-204.823	1506.51	260.736	-158.067	1246.41	248.397	-358.165	1433.31	259.923	-450.558	1224.19	195.404	-152.871	1304.49	433.036	-288.434	1470.17	505.651	-254.98	1240.43	518.925	-233.611	1141.69	553.163	-283.862	977.585	520.295	-315.072	893.592	573.002	-267.117	900.65	574.421	-311	832.005
1583	0	295.051	-399.632	1676.24	199.705	-410.706	1670.81	300.299	-241.448	1684.86	157.474	-264.398	1671.89	245.737	-217.544	1505.66	260.678	-170.502	1245.5	248.651	-371.077	1432.04	259.636	-462.511	1222.52	195.422	-165.573	1303.66	433.457	-301.195	1468.81	504.811	-262.491	1239.34	516.606	-238.684	1141.06	551.902	-283.471	975.914	519.357	-313.54	890.568	571.106	-263.856	899.362	573.727	-306.002	829.339
1584	0	295.371	-412.828	1674.79	200.078	-424.019	1669.37	300.461	-254.717	1683.55	157.251	-277.605	1670.76	246.03	-230.44	1504.82	261.091	-183	1244.65	248.803	-384.057	1430.45	259.527	-474.561	1220.48	195.642	-178.12	1302.47	433.819	-313.917	1467.55	504.075	-269.969	1238.51	514.443	-244.195	1140.49	550.956	-283.164	974.403	518.959	-312.035	888.255	569.021	-260.545	898.639	572.923	-300.986	827.155
1585	0	295.378	-426.159	1672.92	200.352	-437.381	1667.71	300.565	-268.08	1681.79	157.555	-290.939	1669.21	246.007	-243.933	1502.99	261.312	-195.62	1243.2	248.969	-396.983	1428.67	259.175	-487.096	1218.42	195.972	-190.802	1301.06	434.118	-326.986	1466.01	503.486	-277.428	1237.72	511.682	-250.315	1139.41	549.44	-283.424	973.039	518.523	-310.877	886.283	566.83	-257.749	897.897	572.086	-296.286	825.435
1586	0	295.869	-439.597	1670.79	200.413	-450.913	1665.58	300.538	-281.595	1679.68	157.712	-304.426	1667.42	246.087	-257.218	1500.86	262.204	-208.251	1241.43	249.312	-410.024	1426.55	259.081	-500.045	1216.1	196.344	-203.48	1299.26	434.647	-340.06	1464.01	502.652	-285.41	1236.29	509.357	-256.547	1138.32	547.965	-284.079	971.543	517.651	-310.508	883.504	564.648	-255.739	896.996	570.76	-292.068	823.489
1587	0	296.071	-452.931	1668.43	200.866	-464.341	1663.2	301.242	-294.928	1678.01	157.949	-317.841	1665.46	246.641	-270.493	1498.65	263.113	-220.823	1239.33	249.747	-423.187	1424.06	259.104	-513.399	1213.67	197.115	-216.101	1297.52	435.14	-353.152	1461.9	502.287	-292.976	1235.46	507.419	-263.289	1137.6	547.03	-284.95	970.684	517.698	-309.723	882.331	562.671	-254.271	896.604	569.868	-287.949	821.835
1588	0	296.378	-466.575	1666.07	201.288	-477.911	1660.87	301.511	-308.693	1675.83	158.677	-331.798	1663.03	247.208	-283.753	1496.78	264.399	-233.476	1237.62	250.204	-436.308	1421.49	259.014	-526.926	1211.28	197.812	-228.863	1295.47	435.938	-366.379	1460.07	502.109	-301.28	1234.86	505.967	-270.207	1137.16	546.282	-286.449	970.151	517.731	-309.709	881.448	560.778	-253.307	896.6	568.95	-284.497	820.914
1589	0	296.807	-480.402	1663.48	201.267	-491.715	1658.03	301.703	-322.5	1673.6	158.838	-345.185	1660.88	247.938	-296.987	1494.91	265.683	-246.28	1235.86	250.766	-449.415	1419.02	258.985	-540.293	1208.6	198.775	-241.635	1293.54	436.417	-379.874	1457.96	501.129	-310.267	1233.73	504.323	-277.906	1136.53	545.158	-288.798	969.596	517.192	-310.509	880.059	559.041	-253.147	896.982	567.808	-281.709	820.075
1590	0	296.904	-494.173	1660.63	201.574	-505.367	1655.08	302.102	-336.437	1671.4	159.155	-358.776	1658.46	249.034	-309.712	1493.1	267.013	-259.159	1233.81	251.363	-462.695	1416.19	258.843	-553.562	1205.76	199.755	-254.181	1291.49	436.968	-393.425	1455.59	500.852	-319.323	1233.16	502.932	-286.122	1135.97	544.567	-291.685	969.205	517.48	-311.553	879.078	557.906	-253.79	897.727	566.724	-279.66	819.174
1591	0	297.341	-507.966	1657.73	202.035	-519.116	1652.12	303.029	-350.158	1669.43	159.9	-372.811	1655.7	249.952	-323.086	1490.99	268.252	-272.107	1231.56	252.062	-475.902	1413.36	259.053	-566.555	1202.93	200.868	-267.114	1289.21	437.991	-406.916	1453.4	500.719	-329.546	1231.76	501.788	-294.866	1135.35	544.367	-295.203	969.102	517.531	-313.029	879.195	557.018	-255.26	898.578	565.754	-278.464	818.724
1592	0	297.876	-521.942	1655	202.472	-532.884	1649.22	303.827	-364.02	1667.28	160.951	-386.374	1653.65	250.701	-336.547	1488.58	269.574	-285.146	1229.27	252.51	-488.971	1410.8	259.343	-579.538	1200.25	201.956	-280.022	1286.84	438.576	-420.626	1450.98	500.635	-340.289	1230.47	500.858	-304.092	1134.59	543.995	-299.672	968.895	518.944	-315.715	879.382	556.285	-257.887	899.275	565.036	-277.932	818.541
1593	0	298.649	-535.7	1652.34	203.199	-546.544	1646.57	304.348	-378.149	1664.81	161.521	-399.924	1651.47	251.591	-350.141	1486.29	271.031	-298.253	1227.14	253.284	-502.322	1408.22	259.687	-592.634	1197.75	203.21	-292.668	1284.58	439.351	-434.267	1448.52	500.98	-351.571	1228.96	500.366	-314.125	1133.52	544.159	-304.898	968.837	516.901	-319.315	876.636	556.014	-261.212	900.13	564.345	-278.466	818.191
1594	0	299.678	-549.576	1649.65	204.192	-560.322	1643.9	305.645	-391.869	1662.87	162.576	-413.629	1649.54	252.71	-363.292	1483.89	272.157	-311.643	1224.79	254.001	-515.555	1406.15	260.035	-606.025	1195.7	204.485	-305.554	1282.42	440.472	-447.904	1446.1	501.365	-363.562	1227.08	499.988	-324.821	1132.36	544.445	-311.171	968.363	519.251	-322.692	877.442	556.409	-265.59	901.228	564.687	-279.554	818.648
1595	0	300.654	-563.27	1647.13	205.198	-574.016	1641.58	307.342	-405.488	1661.33	163.793	-427.387	1647.61	253.84	-376.5	1481.77	272.826	-325.494	1222.37	254.698	-528.887	1404.04	260.385	-619.582	1193.89	205.598	-318.687	1280.32	441.39	-461.434	1443.78	501.979	-375.997	1225.28	500.116	-335.974	1131.36	545.393	-318.429	968.465	521.749	-328.562	877.669	557.187	-271.028	902.365	564.483	-281.763	818.889
1596	0	301.729	-577.049	1644.88	206.311	-587.742	1639.48	308.348	-419.275	1659.1	164.979	-440.829	1645.99	254.898	-389.918	1479.76	274.089	-338.773	1220.62	255.428	-542.368	1402.26	260.647	-633.212	1192.24	206.567	-332.073	1278.27	442.066	-475.375	1441.33	502.697	-388.871	1223.6	500.303	-347.839	1130.13	545.859	-326.857	968.052	520.164	-334.707	874.719	558.252	-277.775	903.423	564.992	-285.482	819.446
1597	0	303.185	-590.648	1642.79	207.76	-601.182	1637.73	309.541	-433.119	1656.81	166.604	-454.344	1644.45	255.841	-403.577	1477.61	274.719	-352.771	1218.47	256.455	-555.906	1400.61	261.303	-646.791	1190.92	207.724	-345.697	1276.3	442.814	-489.145	1438.88	503.192	-402.183	1221.35	500.805	-360.175	1128.67	547.154	-336.03	967.725	525.018	-342.311	877.052	559.918	-285.669	904.425	565.946	-290.313	819.852
1598	0	304.893	-603.798	1641.03	209.585	-614.574	1636.44	311.721	-446.128	1655.37	168.249	-467.704	1643.13	257.263	-416.939	1475.85	275.642	-366.574	1216.72	257.503	-569.524	1399.06	262.237	-660.349	1189.68	208.632	-359.5	1274.58	444.428	-502.293	1437.33	504.103	-415.608	1219.4	501.622	-372.758	1127.44	549.001	-346.026	967.735	527.154	-350.907	876.388	561.919	-294.552	905.223	567.293	-296.689	820.091
1599	0	306.822	-617.146	1639.89	211.249	-627.792	1635.39	313.423	-459.422	1653.9	169.943	-480.874	1642.26	258.845	-430.032	1474.95	276.223	-380.582	1215.29	258.529	-583.205	1397.97	263.262	-674.182	1189.15	209.373	-373.568	1273.14	445.585	-515.883	1435.83	505.164	-429.208	1217.97	502.89	-385.495	1126.69	550.686	-357.002	967.687	528.46	-360.089	875.183	563.778	-304.793	905.909	569.025	-304.486	820.626
1600	0	308.655	-630.176	1638.96	212.899	-641.04	1634.63	315.001	-472.693	1652.16	171.828	-494.062	1641.39	260.385	-443.501	1473.7	276.804	-394.58	1213.74	259.645	-597.001	1397.2	264.195	-688.574	1188.68	210.298	-387.678	1271.76	446.648	-529.24	1434.49	506.06	-442.668	1216.71	504.215	-398.753	1125.69	552.481	-368.918	967.385	530.951	-371.526	874.808	565.768	-315.973	906.194	571.271	-313.782	821.279
1601	0	310.592	-643.235	1638.15	214.852	-654.122	1634.35	317.008	-485.545	1651.21	173.474	-507.061	1640.91	261.886	-456.842	1472.84	277.67	-408.71	1212.59	260.94	-610.781	1396.39	265.475	-703.174	1188.17	211.214	-401.956	1270.56	447.996	-543.128	1433.05	507.377	-456.316	1215.47	506.374	-411.913	1125.11	554.314	-381.677	966.617	534.069	-382.975	874.67	568.044	-328.187	906.32	573.731	-324.748	821.406
1602	0	312.609	-656.261	1637.93	216.975	-667.054	1634.5	319.223	-498.358	1650.66	175.697	-520.108	1640.8	263.701	-470.282	1472.15	278.094	-423.414	1211.43	262.235	-624.645	1396.13	267.298	-717.267	1188.1	212.288	-416.337	1269.56	449.666	-556.712	1432.36	508.673	-470.156	1214.53	507.435	-426.229	1123.95	556.527	-395.188	966.191	536.451	-396.224	874.002	570.372	-341.622	906.15	576.497	-337.445	821.54
1603	0	314.753	-669.012	1638.26	219.063	-679.98	1635.18	321.302	-511.202	1650.25	177.616	-532.941	1641	265.038	-483.907	1471.73	279.031	-437.954	1210.97	263.59	-638.419	1396.49	268.783	-731.853	1188.5	213.656	-430.78	1269.04	451.084	-570.389	1432.01	510.156	-484.274	1214.07	509.492	-440.292	1123.62	558.697	-409.405	965.869	538.807	-410.285	873.634	572.571	-356.226	905.723	579.41	-351.761	821.527
1604	0	317.028	-681.781	1638.6	221.238	-692.858	1635.98	323.205	-524.135	1649.6	179.911	-545.724	1641.46	266.457	-497.761	1471.27	279.593	-452.888	1210.17	264.879	-652.365	1396.82	270.29	-746.519	1189.02	214.915	-445.349	1268.48	452.471	-584.205	1431.77	511.78	-498.482	1213.9	510.928	-455.267	1122.83	561.279	-424.718	965.475	540.699	-425.569	873.008	575.238	-371.774	905.281	582.6	-367.731	821.144
1605	0	319.277	-694.635	1639.15	223.594	-705.728	1637.13	325.516	-536.723	1649.55	181.713	-558.658	1642.22	267.669	-511.592	1471.02	280.852	-467.491	1210.13	266.232	-666.199	1397.44	271.862	-761.401	1189.77	216.341	-459.862	1268.29	453.851	-597.917	1431.93	513.584	-513.058	1213.84	513.877	-469.758	1123.33	563.661	-441.033	964.984	543.413	-442.46	872.459	577.783	-388.622	904.357	585.854	-385.369	820.29
1606	0	321.528	-707.358	1640.1	225.942	-718.683	1638.81	327.556	-549.44	1649.7	183.933	-571.677	1643.15	269.129	-525.139	1471.29	281.927	-482.253	1210.33	267.445	-680.084	1398.36	273.165	-776.262	1190.82	217.554	-474.354	1268.49	455.119	-611.719	1432.51	515.275	-527.992	1214.17	515.729	-485.531	1123.04	566.072	-458.272	964.66	546.865	-461.212	872.466	580.605	-406.431	903.532	589.398	-404.482	819.777
1607	0	323.708	-720.302	1641.4	228.142	-731.809	1640.76	329.362	-562.41	1649.96	186.009	-584.833	1644.71	269.82	-539.254	1472.17	283.097	-496.393	1210.91	268.418	-693.906	1399.72	274.138	-790.998	1191.94	218.705	-488.612	1269.04	455.932	-625.581	1433.1	516.805	-543.165	1214.53	516.974	-502.24	1122.09	568.63	-476.306	964.394	549.582	-480.201	872.547	583.472	-425.287	902.707	593.067	-424.906	819.308
1608	0	325.918	-733.211	1642.66	230.163	-745.171	1642.44	331.371	-575.285	1650.69	187.887	-598.111	1646.34	270.731	-552.522	1473.27	284.023	-510.63	1212.04	269.343	-707.546	1401.06	274.989	-805.317	1193.01	219.716	-502.639	1270.43	456.851	-639.214	1434.3	518.331	-558.851	1214.93	519.33	-518.597	1122.33	571.183	-495.022	964.103	551.252	-499.497	871.966	586.339	-445.26	901.552	596.404	-446.642	818.314
1609	0	328.139	-746.093	1643.62	232.646	-758.224	1644.36	333.089	-588.251	1651.42	189.479	-611.478	1648.07	270.812	-567.242	1474.78	285.192	-524.46	1213.47	270.294	-721.131	1402.38	276.013	-819.129	1194.25	220.346	-516.578	1271.79	457.57	-652.534	1435.79	519.963	-574.91	1215.49	522.356	-534.937	1123.28	573.632	-515.066	963.719	554.248	-521.255	871.711	589.412	-466.2	900.409	599.826	-469.883	817.381
1610	0	329.975	-759.11	1644.55	234.466	-771.6	1645.86	334.51	-601.202	1652.29	190.95	-624.891	1649.87	271.599	-580.097	1476.39	285.98	-538.192	1215.2	270.918	-734.516	1403.74	276.877	-832.69	1195.59	220.818	-530.227	1273.69	458.087	-665.81	1437.46	521.665	-591.166	1216.33	524.344	-552.22	1123.41	576.199	-535.483	963.778	557.114	-544.052	871.865	592.582	-487.988	899.612	603.338	-494.413	816.38
1611	0	331.452	-772.224	1645.5	235.858	-785.096	1647.19	335.475	-614.333	1653.15	191.856	-638.536	1651.48	272.164	-593.337	1477.46	286.496	-551.578	1216.37	271.459	-747.779	1405	277.519	-846.02	1196.87	220.828	-543.601	1275.09	458.434	-679.154	1439	523.05	-607.561	1217.06	526.139	-569.897	1123.36	578.546	-556.604	963.54	558.862	-566.19	871.729	595.304	-510.973	898.195	606.462	-519.823	815.558
1612	0	332.619	-785.602	1646.43	237.128	-798.593	1648.34	336.491	-627.491	1654.65	192.833	-652.092	1653.08	272.095	-606.718	1479.07	286.945	-564.843	1217.8	272.059	-760.926	1406.36	278.119	-859.156	1198.01	220.869	-556.54	1276.56	458.747	-692.421	1440.53	524.388	-623.899	1217.76	528.23	-587.383	1123.45	580.455	-578.7	963.099	561.004	-590.053	871.598	598.022	-534.496	896.863	609.609	-546.165	814.856
1613	0	333.332	-799.076	1647.41	238.11	-811.899	1649.44	336.843	-641.061	1656.19	193.289	-665.768	1654.97	272.926	-619.229	1480.66	287.423	-577.748	1219.21	272.45	-773.949	1407.72	278.697	-871.857	1199.26	221.113	-569.255	1278.1	459.225	-705.614	1442.4	525.632	-640.548	1218.55	531.259	-604.565	1124.64	582.617	-600.991	962.955	563.468	-615.223	871.67	600.626	-558.709	895.597	612.603	-573.526	814.354
1614	0	333.476	-812.523	1648.55	238.216	-825.703	1650.55	337.176	-654.526	1658.14	193.628	-679.419	1656.53	273.249	-632.212	1482.02	287.787	-590.659	1220.72	272.667	-786.848	1409.26	279.033	-884.338	1200.57	221.639	-581.738	1279.74	459.499	-719.18	1444.17	527.086	-657.007	1219.63	532.508	-623.172	1124.12	584.377	-623.829	962.767	563.74	-639.9	871.177	602.811	-583.764	894.314	615.183	-601.77	814.048
1615	0	333.444	-826.087	1649.82	238.166	-839.172	1651.46	337.142	-668.252	1660.09	193.706	-692.759	1658.15	273.823	-645.219	1483.36	288.512	-603.29	1222.1	272.829	-799.654	1410.63	279.279	-896.706	1201.84	222.527	-594.156	1281.24	459.822	-732.25	1445.9	528.311	-673.742	1220.56	534.779	-641.044	1124.52	586.24	-647.208	962.822	565.646	-665.816	872.224	604.89	-609.497	893.035	617.266	-631.122	813.66
1616	0	333.316	-839.687	1651.36	237.957	-852.45	1652.64	337.249	-681.671	1662.43	193.4	-706.297	1659.88	274.342	-658.268	1485.03	289.373	-616.152	1223.79	273.107	-812.465	1412.18	279.525	-909.202	1203.1	223.68	-606.572	1282.83	460.154	-745.788	1447.6	529.714	-690.331	1221.71	537.111	-659.045	1125.15	587.789	-670.915	962.932	566.377	-692.428	872.65	606.57	-635.869	891.796	619.514	-660.697	814.394
1617	0	332.695	-853.23	1652.93	237.389	-865.97	1653.98	336.994	-695.22	1664.76	192.878	-719.798	1661.32	274.849	-671.181	1487.26	290.89	-628.844	1225.95	273.115	-825.306	1413.83	279.519	-921.803	1204.57	225.188	-618.888	1284.68	460.479	-759.343	1449.76	530.905	-707.103	1223.21	539.528	-676.988	1126.17	589.262	-695.161	963.735	567.48	-719.408	874.213	608.141	-662.843	891.279	621.171	-691.237	815.576
1618	0	331.747	-866.776	1654.73	236.302	-879.487	1655.23	336.281	-708.94	1666.9	192.264	-733.132	1662.91	275.347	-684.254	1488.82	292.605	-641.454	1228.11	273.017	-838.054	1415.57	279.017	-934.79	1206.12	226.747	-631.31	1286.5	460.522	-773.198	1451.78	532.123	-723.707	1224.78	541.129	-695.612	1126.65	590.301	-719.831	964.559	567.997	-746.527	876.171	609.285	-690.373	890.877	622.194	-722.467	817.038
1619	0	330.767	-880.353	1656.45	235.46	-892.735	1656.5	335.61	-722.524	1669.01	191.427	-746.29	1664.25	274.992	-697.954	1490.82	293.856	-654.265	1229.8	272.974	-850.962	1417.22	278.67	-947.627	1207.9	228.462	-643.766	1288.35	460.525	-787.287	1453.6	533.196	-740.558	1226.28	542.984	-714.256	1127.47	590.562	-745.192	965.176	565.813	-775.958	876.266	610.113	-718.445	890.97	622.649	-754.294	818.793
1620	0	329.831	-893.94	1658.36	234.406	-905.975	1657.8	335.248	-735.881	1671.47	190.963	-759.545	1665.4	275.918	-710.782	1492.64	295.676	-666.797	1232.03	273.085	-863.739	1418.76	278.51	-960.528	1209.81	230.141	-656.205	1290.22	460.834	-800.98	1455.98	534.492	-757.347	1227.99	545.215	-732.782	1128.8	591.416	-770.244	967.121	566.609	-803.355	880.155	610.731	-746.817	891.512	623.115	-786.039	821.82
1621	0	328.664	-907.399	1660.3	233.237	-919.188	1659.12	334.434	-749.272	1673.57	190.23	-772.611	1666.54	276.347	-723.809	1494.78	297.505	-679.189	1234.31	273.044	-876.659	1420.4	278.115	-973.395	1211.57	231.776	-668.76	1292	461.034	-814.835	1458.4	535.732	-774.057	1230.19	547.527	-751.383	1130.55	591.841	-795.634	969.381	565.396	-832.231	883.483	610.84	-775.604	892.626	622.811	-818.322	825.334
1622	0	327.542	-920.645	1662.32	232.119	-932.439	1660.3	332.674	-763.218	1674.63	189.265	-785.683	1667.22	276.74	-737.163	1496.3	298.978	-691.66	1236.08	273.1	-889.591	1421.78	277.65	-986.181	1213.06	233.134	-681.343	1293.56	460.875	-828.868	1460.6	536.961	-790.934	1232.22	548.974	-770.737	1131.41	591.916	-821.439	971.803	564.871	-860.467	888.02	610.771	-804.641	894.41	622.137	-850.827	829.49
1623	0	326.364	-933.864	1663.87	231.06	-945.451	1661.37	332.849	-775.904	1677.1	188.71	-798.634	1667.8	277.127	-750.354	1497.66	300.44	-704.148	1237.62	273.168	-902.551	1422.77	277.47	-998.706	1214.2	234.428	-694.043	1294.82	460.889	-842.745	1462.56	538.032	-807.978	1234.07	551.442	-789.491	1133.31	591.705	-847.482	974.324	563.896	-888.896	892.73	609.235	-834.93	894.937	620.913	-883.461	833.817
1624	0	325.362	-947.15	1665.38	230.148	-958.463	1662.17	331.611	-789.436	1677.96	187.697	-811.792	1668.08	277.525	-763.527	1498.82	301.697	-716.58	1238.97	273.221	-915.568	1423.64	277.469	-1011.02	1215.17	235.705	-706.908	1296.09	461.093	-856.54	1464.56	539.198	-824.99	1235.92	553.192	-808.655	1134.75	591.575	-873.508	977.354	562.668	-917.622	897.837	608.629	-864.476	897.377	619.29	-915.945	838.747
1625	0	324.473	-960.312	1666.7	229.158	-971.554	1662.89	330.576	-802.85	1678.49	187.047	-824.561	1668.02	277.677	-777.077	1499.46	302.923	-729.069	1240.07	273.408	-928.575	1424.42	277.271	-1023.39	1215.98	236.594	-719.825	1296.9	461.344	-870.408	1466.44	540.233	-842.192	1237.5	554.627	-828.107	1135.65	591.152	-899.535	980.609	560.962	-946.297	903.28	608.007	-894.024	900.038	617.322	-948.448	844.114
1626	0	323.752	-973.696	1667.56	228.634	-984.561	1663.55	330.09	-815.901	1679.07	186.938	-837.425	1667.68	278.109	-790.353	1499.87	303.836	-741.611	1240.82	273.536	-941.653	1424.75	277.341	-1035.69	1216.31	237.448	-732.822	1297.36	461.11	-884.356	1467.57	541.141	-859.437	1238.98	556.523	-847.359	1136.86	590.677	-925.67	983.809	559.582	-974.872	909.067	607.173	-923.642	902.968	615.196	-980.69	849.534
1627	0	323.377	-986.869	1668.19	228.181	-997.689	1663.56	330.007	-828.92	1679.54	186.55	-850.501	1667.32	278.591	-803.48	1500.3	304.853	-754.198	1241.33	273.751	-954.76	1424.67	277.8	-1047.71	1216.11	238.511	-745.743	1297.92	461.207	-898.223	1468.43	542.317	-876.586	1239.99	558.3	-866.542	1137.78	590.503	-951.656	987.191	557.896	-1003.24	914.822	606.993	-952.656	907.09	612.843	-1012.8	855.332
1628	0	323.037	-1000.04	1668.46	227.902	-1010.86	1663.49	329.595	-842.297	1679.27	186.39	-863.729	1666.83	279.014	-816.699	1500.49	305.869	-766.902	1241.63	273.986	-967.886	1424.43	277.989	-1060.01	1215.78	239.325	-758.605	1298.06	461.238	-912.112	1469.16	543.266	-893.737	1240.85	560.221	-885.623	1138.75	590.159	-977.348	990.808	556.198	-1031.54	920.96	606.612	-981.699	911.627	610.223	-1044.65	861.459
1629	0	322.911	-1013.45	1668.27	227.595	-1024.17	1662.98	329.502	-855.698	1678.61	186.117	-876.872	1666.17	279.338	-830.042	1499.97	306.65	-779.832	1241.33	274.089	-981.058	1423.87	277.998	-1072.44	1215.03	240.126	-771.52	1297.75	461.131	-925.998	1469.19	544.154	-911.005	1241.19	561.535	-905.279	1138.66	589.386	-1003.19	994.168	554.262	-1059.66	927.152	604.514	-1011.89	914.389	607.574	-1076.06	867.933
1630	0	322.981	-1026.95	1667.62	227.652	-1037.45	1662.32	329.966	-868.999	1677.88	186.293	-890.037	1665.35	279.759	-843.296	1499.25	307.463	-792.682	1240.9	274.351	-994.33	1422.92	278.245	-1084.68	1213.73	240.672	-784.554	1297.03	461.086	-939.897	1468.85	545.015	-928.298	1241.08	563.036	-924.787	1138.53	588.814	-1028.96	997.55	552.247	-1087.41	933.16	603.15	-1041.29	918.098	604.556	-1107.46	874.189
1631	0	323.371	-1040.45	1666.58	228.058	-1050.9	1661.43	330.932	-882.375	1677.16	186.908	-903.372	1664.41	280.168	-856.518	1498.61	308.181	-805.489	1240.47	274.668	-1007.55	1421.65	278.627	-1097.04	1212.18	241.393	-797.639	1296.3	461.188	-953.655	1468.22	546.13	-945.316	1240.84	565.027	-943.986	1138.71	588.17	-1054.54	1000.89	550.26	-1114.87	939.254	602.844	-1069.32	923.138	601.69	-1138.48	880.938
1632	0	323.881	-1054.04	1665.46	228.539	-1064.43	1660.43	331.459	-896.089	1675.75	187.634	-916.712	1663.45	280.188	-870.133	1497.46	308.202	-818.578	1239.31	274.918	-1020.78	1420.26	278.895	-1109.42	1210.58	241.732	-810.578	1295.1	461.231	-967.257	1467.31	547.07	-962.436	1240.39	566.454	-963.655	1138.25	587.245	-1079.73	1004.2	547.877	-1142.16	945.299	600.261	-1098.95	926.157	598.713	-1168.66	887.809
1633	0	324.446	-1067.87	1663.86	229.061	-1078.11	1659.02	332.249	-909.897	1674.36	188.969	-930.254	1662.25	280.579	-883.338	1496.09	308.465	-831.394	1238.37	275.127	-1033.93	1418.69	279.02	-1122.11	1208.53	242.104	-823.536	1293.91	461.127	-980.911	1465.92	547.841	-979.651	1239.59	568.043	-983.269	1137.92	586.201	-1104.96	1007.56	545.396	-1168.72	951.268	598.685	-1127.25	930.275	595.728	-1198.41	894.881
1634	0	325.121	-1081.63	1662	229.813	-1091.78	1657.4	333.091	-923.668	1672.83	189.55	-944.069	1661	280.653	-896.789	1494.71	308.104	-844.096	1237.08	275.45	-1047.11	1416.8	279.417	-1135.17	1206.28	242.289	-836.446	1292.66	461.258	-994.316	1464.48	548.488	-996.972	1238.57	569.426	-1003.13	1137.46	585.149	-1129.8	1010.75	542.952	-1194.86	957.109	597.139	-1155.1	934.762	592.712	-1227.6	901.93
1635	0	325.885	-1095.46	1659.87	230.561	-1105.67	1655.64	333.937	-937.431	1670.94	190.188	-957.845	1659.59	280.659	-910.307	1493.33	307.629	-856.745	1235.65	275.63	-1060.32	1414.84	279.575	-1148.5	1204.1	242.215	-849.388	1291.43	461.106	-1007.57	1462.41	548.909	-1014.16	1237.5	570.487	-1022.9	1136.75	583.666	-1154.27	1014.01	540.448	-1220.26	962.784	596.793	-1181.54	940.268	589.726	-1255.91	909.353
1636	0	326.616	-1109.29	1657.61	231.251	-1119.58	1653.65	334.081	-951.69	1668.72	190.853	-971.76	1657.94	280.59	-923.744	1491.62	306.966	-869.409	1234.09	275.688	-1073.64	1412.85	279.723	-1162.13	1201.9	241.87	-862.42	1289.9	460.874	-1020.85	1460.36	549.305	-1031.46	1236.62	571.269	-1042.64	1136.08	582.427	-1178.19	1017.56	537.829	-1245.17	968.491	595.267	-1208.42	944.985	586.568	-1283.71	916.75
1637	0	327.567	-1122.88	1655.27	232.102	-1133.46	1651.5	335.193	-965.082	1667.09	191.383	-985.771	1656.43	280.519	-937.146	1489.73	306.09	-882.358	1232.25	275.875	-1086.97	1410.73	280.006	-1175.96	1199.83	241.348	-875.474	1288.29	460.743	-1034.11	1458.22	549.302	-1048.85	1235.28	571.989	-1062.19	1135.43	581.03	-1201.8	1020.85	535.393	-1269.25	974.231	592.324	-1235.33	948.432	583.723	-1310.67	924.188
1638	0	328.528	-1136.47	1652.79	233.131	-1147.23	1649.24	335.485	-978.82	1664.85	191.865	-999.857	1655.01	280.372	-950.571	1487.77	304.975	-895.563	1230.15	276.012	-1100.2	1408.48	280.381	-1189.57	1197.87	240.654	-888.476	1286.53	460.685	-1047.21	1456.09	549.354	-1065.91	1234.25	572.374	-1081.57	1134.55	579.8	-1224.48	1024.37	533.191	-1292.67	979.468	592.529	-1259.64	954.681	581.178	-1336.57	931.75
1639	0	329.29	-1150.02	1650.29	233.85	-1161.07	1647.01	335.891	-992.305	1662.92	192.244	-1013.78	1653.34	280.448	-963.729	1486.07	303.905	-908.875	1228.18	275.938	-1113.63	1406.17	280.853	-1203.11	1196.09	239.88	-901.827	1284.48	460.433	-1060.37	1454.08	549.042	-1082.83	1233.11	572.609	-1100.58	1134.15	578.55	-1246.66	1028.25	531.035	-1315.2	984.945	591.378	-1284.12	959.936	578.779	-1361.55	939.367
1640	0	329.821	-1163.41	1647.8	234.388	-1174.8	1644.79	335.942	-1005.87	1660.91	192.185	-1027.45	1651.67	280.235	-976.979	1484.03	302.841	-922.286	1226.12	275.718	-1127.06	1404.07	280.919	-1216.58	1193.91	239.25	-915.136	1282.74	460.117	-1073.62	1452.03	548.558	-1099.41	1231.94	572.621	-1118.9	1133.62	577.061	-1267.93	1031.63	528.894	-1337.03	990.096	590.132	-1307.69	964.798	576.317	-1385.58	946.742
1641	0	330.188	-1176.91	1645.47	234.841	-1188.45	1642.58	336.428	-1018.93	1659.24	192.088	-1041.34	1649.75	279.994	-990.071	1481.94	301.522	-936.097	1223.74	275.587	-1140.56	1402.09	280.691	-1230.67	1192.06	238.266	-928.781	1280.49	459.727	-1086.91	1449.87	547.787	-1116.05	1230.28	572.478	-1136.81	1132.83	575.825	-1288.58	1034.79	527.133	-1358.15	995.053	588.766	-1330.37	969.207	574.191	-1408.74	953.749
1642	0	330.454	-1190.03	1643.44	235.103	-1201.91	1640.63	335.929	-1032.32	1656.97	192.588	-1054.91	1648.26	279.678	-1003.44	1479.96	300.585	-949.905	1221.6	275.214	-1153.97	1400.2	280.873	-1244.11	1190.66	237.351	-942.487	1278.33	459.413	-1100.2	1448.01	547.209	-1131.91	1229.14	572.138	-1154.15	1131.92	574.833	-1308.42	1038.13	525.652	-1378.45	999.677	587.714	-1351.88	973.724	572.661	-1430.6	960.576
1643	0	330.296	-1203.36	1641.54	234.954	-1215.26	1639.04	336.144	-1045.36	1655.81	192.111	-1068.23	1646.65	279.342	-1016.79	1478	299.847	-963.96	1219.74	274.665	-1167.55	1398.59	280.62	-1257.87	1189.53	236.85	-956.055	1276.55	459.175	-1113.51	1446.5	546.381	-1147.32	1227.91	572.103	-1170.97	1131.55	573.753	-1327.38	1040.98	524.441	-1398.06	1004.03	586.419	-1372.32	977.69	571.34	-1451.43	967.132
1644	0	330.034	-1216.47	1640.12	234.576	-1228.41	1637.57	335.048	-1059.03	1653.32	192.028	-1081.42	1645.01	279.15	-1029.99	1476.33	298.939	-978.469	1217.65	274.098	-1181.21	1397.19	280.355	-1271.62	1188.21	236.507	-969.912	1274.89	458.656	-1127.04	1444.99	545.479	-1162.37	1226.63	571.315	-1187.19	1130.6	572.939	-1345.55	1043.55	523.311	-1416.73	1008.09	585.662	-1391.85	981.334	570.344	-1471.34	973.042
1645	0	329.505	-1229.7	1638.84	233.993	-1241.27	1636	335.465	-1071.57	1652.64	191.629	-1094.44	1643.33	278.607	-1043.53	1474.61	298.474	-992.734	1215.9	273.517	-1194.88	1395.86	279.892	-1285.79	1187.13	235.868	-983.887	1272.93	458.13	-1140.72	1443.6	544.622	-1177.11	1225.31	570.671	-1203.14	1129.68	572.016	-1362.93	1045.54	522.583	-1434.71	1011.48	584.706	-1410.42	984.302	569.671	-1489.97	978.206
1646	0	328.56	-1242.91	1637.73	233.174	-1254.16	1635.15	334.482	-1084.95	1650.8	191.007	-1107.48	1641.9	278.044	-1057.37	1472.78	298.098	-1007.11	1214.22	272.69	-1208.69	1394.66	279.214	-1300.03	1186.46	235.538	-997.894	1271.24	457.319	-1154.64	1442.42	543.886	-1191.32	1224.22	569.891	-1218.63	1128.82	571.275	-1379.72	1047.11	521.855	-1451.89	1014.29	583.935	-1427.96	986.642	569.385	-1507.76	982.854
1647	0	327.523	-1255.9	1637.01	231.993	-1267.3	1634.32	333.086	-1098.63	1648.84	190.182	-1120.35	1640.67	277.264	-1071.14	1471.04	297.522	-1021.82	1212.33	271.775	-1222.56	1393.76	277.802	-1314.84	1185.8	235.073	-1012.13	1269.34	456.586	-1168.5	1441.34	543.082	-1205.42	1223.09	569.187	-1233.47	1128.25	570.565	-1395.41	1048.08	521.292	-1468.34	1016.59	583.233	-1444.51	988.475	569.683	-1524.4	986.989
1648	0	326.552	-1269.14	1636.71	230.809	-1280.24	1633.8	332.449	-1111.62	1648.02	189.14	-1133.09	1639.65	276.415	-1084.84	1469.83	297.16	-1036.55	1210.76	270.735	-1236.48	1393.19	276.357	-1329.68	1185.63	234.771	-1026.47	1267.9	455.324	-1183.03	1440.15	542.428	-1219.41	1222.17	568.355	-1247.95	1127.48	570.199	-1411.01	1049.12	521.122	-1484.06	1018.23	582.664	-1460.31	989.503	569.828	-1540.26	989.799
1649	0	325.255	-1282.23	1636.19	229.841	-1292.88	1633.57	332.22	-1124.2	1647.75	187.761	-1145.62	1639.36	275.597	-1098.31	1469.04	296.625	-1051.6	1209.57	269.653	-1250.48	1392.79	275.082	-1344.43	1185.57	234.233	-1041.06	1266.56	454.723	-1196.83	1439.86	541.768	-1233.04	1221.77	567.334	-1262.27	1126.65	569.451	-1425.58	1048.88	521.07	-1499.14	1019.15	582.268	-1475.15	989.986	570.543	-1554.95	992.237
1650	0	324.026	-1295.23	1636.31	228.348	-1305.85	1633.86	330.997	-1137.34	1647.1	187.026	-1158.7	1639.13	274.541	-1112.06	1468.32	296.233	-1066.57	1208.82	268.298	-1264.47	1392.79	273.292	-1359.3	1186.23	233.881	-1055.45	1265.64	453.517	-1210.91	1439.61	540.968	-1246.71	1221.48	566.304	-1276.15	1126.13	569.157	-1439.25	1048.58	521.137	-1513.33	1019.46	582.092	-1489.12	990.153	571.352	-1568.82	993.629
1651	0	322.592	-1308.32	1636.8	226.857	-1319	1634.26	329.673	-1150.56	1646.81	185.634	-1171.53	1639.07	273.437	-1125.68	1467.95	295.368	-1081.82	1208.05	266.734	-1278.62	1393.16	270.861	-1374.83	1186.89	233.048	-1070.24	1264.87	452.072	-1225.01	1439.4	540.065	-1260.03	1221.44	565.268	-1289.49	1126.02	569.01	-1452.76	1048.26	521.136	-1527.02	1018.92	581.921	-1502.36	989.544	572.097	-1581.95	994.02
1652	0	321.125	-1321.48	1637.33	225.447	-1331.95	1634.85	328.361	-1163.53	1646.96	184.389	-1184.38	1639.05	273.309	-1137.61	1468.41	294.628	-1096.87	1207.66	265.211	-1292.7	1393.59	268.706	-1390.27	1187.69	232.227	-1084.93	1264.37	450.661	-1239.09	1439.3	538.944	-1273.65	1221.27	563.981	-1302.79	1125.76	568.413	-1465.11	1046.88	521.398	-1539.84	1017.84	581.79	-1514.74	988.117	573.059	-1594.34	993.39
1653	0	319.599	-1334.59	1638.48	223.829	-1344.98	1636.03	326.301	-1176.87	1646.66	183.471	-1197.29	1639.68	271.928	-1151.52	1468.79	293.546	-1111.88	1207.74	263.772	-1306.87	1394.44	267.113	-1405.12	1189.1	231.073	-1099.88	1264.23	449.542	-1253.04	1440.01	537.783	-1286.94	1221.61	562.862	-1315.55	1125.72	568.575	-1477.61	1045.93	521.837	-1552.01	1016.16	581.972	-1526.33	986.805	574.213	-1605.68	991.908
1654	0	317.668	-1347.75	1639.78	221.961	-1358.11	1637.55	325.519	-1189.54	1648.25	181.231	-1210.63	1640.49	270.312	-1165.47	1469.28	292.342	-1126.63	1207.9	262.223	-1321.06	1395.64	264.872	-1420.68	1190.74	229.759	-1114.65	1264.13	448.346	-1267.11	1440.92	536.586	-1300.09	1222.19	561.54	-1327.89	1126.17	568.274	-1488.67	1044.44	522.184	-1563.48	1013.95	582.352	-1537.05	984.977	575.395	-1616.32	989.836
1655	0	315.71	-1361.24	1641.29	219.971	-1371.39	1639.04	323.392	-1203.03	1648.91	179.62	-1223.54	1641.32	268.685	-1179.71	1469.84	291.365	-1141.19	1208.71	260.911	-1335.18	1396.92	263.095	-1436.05	1192.44	228.505	-1129.65	1264.65	447.015	-1281.16	1441.93	535.166	-1313.27	1222.82	560.235	-1339.88	1126.56	568.159	-1499.45	1042.54	522.69	-1574.22	1011.29	582.688	-1546.85	982.705	576.305	-1626.24	986.517
1656	0	313.539	-1374.67	1643.03	218.001	-1384.69	1640.41	321.96	-1216.18	1650.31	177.634	-1236.91	1641.83	267.481	-1193.92	1470.79	290.425	-1155.59	1209.59	259.785	-1349.23	1398.13	261.81	-1451.06	1194.04	227.465	-1144.27	1265.46	445.949	-1295.2	1443.31	533.772	-1326.31	1223.43	558.879	-1351.54	1127.03	568.078	-1509.68	1040.51	523.226	-1584.23	1007.98	582.974	-1555.95	979.844	577.346	-1635.27	982.552
1657	0	311.469	-1388.29	1644.79	215.95	-1398.07	1641.69	320.074	-1229.9	1651.8	176.047	-1250.23	1642.6	266.559	-1207.78	1472.19	289.906	-1169.39	1211.44	258.9	-1363.09	1399.61	260.703	-1465.69	1195.69	226.529	-1158.61	1266.91	444.911	-1309.19	1444.81	532.328	-1339.12	1224.64	557.542	-1362.84	1127.98	567.96	-1519.22	1038.54	523.868	-1593.48	1004.3	583.249	-1564.15	976.959	578.492	-1643.48	977.807
1658	0	309.39	-1402.04	1646.51	213.836	-1411.7	1642.63	318.049	-1243.83	1653.19	174.373	-1263.77	1643.17	265.949	-1221.04	1474.08	289.221	-1183.03	1213.01	258.101	-1376.91	1400.99	259.352	-1480.2	1197.11	225.7	-1172.74	1268.43	443.926	-1322.93	1446.78	530.902	-1351.85	1225.87	556.509	-1373.76	1129.37	567.977	-1528.2	1036.61	524.287	-1602.07	1000.35	583.676	-1571.54	973.778	579.234	-1651.15	972.324
1659	0	307.684	-1415.86	1647.98	212.15	-1425.35	1643.27	316.871	-1257.3	1655.34	172.757	-1277.41	1643.85	264.586	-1234.61	1475.53	288.318	-1196.5	1214.51	257.52	-1390.39	1402.13	258.123	-1494.32	1198.44	225.08	-1186.38	1269.98	442.915	-1336.42	1448.26	529.601	-1364.29	1227.12	555.162	-1384.47	1130.27	567.797	-1536.84	1033.88	524.769	-1610.06	995.792	584.316	-1578.37	970.462	580.135	-1657.91	966.146
1660	0	306.307	-1429.74	1649.22	210.835	-1438.99	1644.14	315.555	-1271.18	1657.13	171.656	-1291.24	1644.9	263.747	-1248.07	1477.28	287.525	-1209.72	1216.1	257.307	-1403.83	1403.45	257.704	-1507.66	1200.01	224.236	-1199.76	1271.51	442.285	-1349.01	1450.01	528.505	-1376.4	1228.43	554.162	-1395	1131.53	567.905	-1544.75	1031.46	525.471	-1617.36	991.186	584.356	-1584.51	966.502	581.013	-1663.82	959.595
1661	0	305.223	-1443.62	1650.36	209.739	-1452.93	1644.84	314.517	-1285.1	1659.36	170.256	-1304.99	1646.6	263.034	-1260.8	1479.05	286.868	-1222.83	1217.98	257.034	-1416.98	1404.91	257.374	-1520.68	1201.84	223.03	-1212.94	1273.05	441.568	-1361.46	1451.77	527.522	-1388.29	1230.03	553.18	-1405.2	1132.78	567.921	-1552.11	1028.77	525.944	-1624.07	986.203	584.673	-1589.92	962.46	581.683	-1668.95	952.58
1662	0	304.486	-1457.4	1651.16	208.979	-1466.87	1645.41	313.926	-1298.74	1661.78	169.339	-1318.98	1648.57	261.858	-1273.59	1480.45	285.543	-1235.78	1219.46	256.744	-1429.92	1406.41	257.867	-1532.74	1203.03	221.56	-1226.07	1274.49	440.937	-1373.22	1453.18	526.564	-1399.63	1231.33	552.024	-1415.15	1133.78	567.992	-1559.07	1026.03	526.3	-1630.13	981.149	585.006	-1594.71	958.493	582.05	-1673.5	945.15
1663	0	304.257	-1471.17	1651.88	208.865	-1480.63	1646.18	313.165	-1312.74	1663.64	169.221	-1333.12	1649.95	260.411	-1287.01	1481.7	284.149	-1248.47	1220.9	256.582	-1442.71	1407.9	258.101	-1545.45	1204.51	219.771	-1239.02	1275.84	440.472	-1384.9	1454.48	525.84	-1410.73	1232.44	550.997	-1425.01	1134.6	567.895	-1565.6	1022.72	527.004	-1635.2	975.634	585.229	-1598.97	954.244	582.318	-1677.36	937.082
1664	0	304.305	-1484.83	1652.88	208.81	-1494.32	1647.16	312.939	-1326.22	1665.66	169.161	-1346.85	1652.4	259.45	-1299.82	1483.17	282.487	-1261.22	1222.06	256.499	-1455.38	1409.6	258.436	-1558.21	1206.32	218.442	-1251.85	1277.37	440.166	-1396.22	1455.86	525.318	-1421.16	1233.5	549.943	-1434.43	1135.14	568.031	-1571.57	1019.38	527.425	-1639.74	969.985	585.349	-1602.53	949.888	582.5	-1680.34	929.033
1665	0	304.379	-1497.99	1653.89	208.908	-1507.91	1648.41	312.44	-1339.54	1667.42	168.991	-1360.67	1654.39	258.549	-1312.24	1484.53	280.627	-1273.64	1223.54	256.312	-1468.1	1411.52	259.085	-1570.72	1208.35	216.408	-1264.95	1278.66	440.037	-1407.42	1457.33	525.115	-1431.1	1234.71	548.943	-1443.3	1135.99	568.2	-1576.88	1016.4	527.667	-1643.7	964.456	585.505	-1605.39	945.503	582.659	-1682.17	921.221
1666	0	304.592	-1511.38	1655.21	209.193	-1521.4	1649.93	312.385	-1352.84	1669.62	168.724	-1374.14	1656.7	256.847	-1326.14	1485.42	278.973	-1286.34	1225.22	256.068	-1480.68	1413.38	260.153	-1583.32	1210.23	215.09	-1277.73	1280.77	439.902	-1418.72	1458.52	524.551	-1440.56	1235.3	548.013	-1451.63	1136.47	568.166	-1581.6	1013.2	528.002	-1647.13	959.082	585.979	-1608.09	941.656	582.556	-1683.76	913.139
1667	0	304.983	-1524.32	1656.6	209.717	-1534.61	1651.79	312.379	-1365.92	1671.65	168.513	-1387.35	1659.3	256.295	-1338.15	1487.98	277.202	-1298.54	1227.27	256.206	-1493.09	1415.22	261.11	-1595.82	1212.1	213.546	-1290.48	1282.98	440.218	-1430	1460.02	524.187	-1449.43	1236.12	546.638	-1459.91	1136.48	568.1	-1585.89	1009.97	528.225	-1649.71	953.474	586.074	-1609.99	937.461	582.35	-1684.48	905.258
1668	0	305.356	-1537.17	1658.5	210.092	-1547.71	1653.74	312.524	-1378.69	1673.86	168.713	-1400.75	1661.72	255.718	-1350.87	1490.17	275.496	-1310.82	1229.46	255.975	-1505.88	1417.36	262.345	-1608.34	1213.98	212.137	-1303.02	1285.25	440.13	-1441.48	1461.42	523.786	-1458.03	1236.8	545.455	-1467.44	1136.89	568.129	-1589.55	1006.95	528.416	-1651.89	948.264	586.198	-1611.35	933.564	581.998	-1684.38	897.737
1669	0	305.663	-1549.78	1660.17	210.366	-1560.68	1655.59	312.526	-1391.36	1675.69	168.689	-1413.65	1663.75	255.012	-1364.13	1492.39	273.654	-1323.16	1231.49	255.767	-1518.44	1419.38	262.698	-1621.35	1215.99	210.763	-1315.62	1287.74	440.091	-1453.18	1462.81	523.413	-1466.12	1237.61	544.105	-1474.49	1137.34	567.868	-1592.5	1004.24	528.418	-1653.19	943.185	586.098	-1611.7	930.094	581.513	-1683.61	890.586
1670	0	306.048	-1562.41	1661.75	210.784	-1573.46	1657.59	312.519	-1403.85	1677.49	168.279	-1426.44	1666.2	254.46	-1376.67	1494.36	272.008	-1335.7	1233.47	255.794	-1531.2	1421.14	263.543	-1633.94	1217.78	209.169	-1328.38	1289.69	439.898	-1465.04	1463.88	522.546	-1474.13	1237.96	542.837	-1481.39	1137.54	567.734	-1595.3	1001.17	528.328	-1654.14	938.09	586.141	-1611.95	926.565	581.283	-1682.01	883.869
1671	0	306.403	-1574.65	1663.42	211.132	-1586.11	1659.54	312.461	-1416.18	1678.84	168.497	-1439.23	1667.92	253.784	-1389.94	1495.92	270.519	-1348.25	1235.26	255.844	-1543.8	1422.83	266.192	-1644.03	1218.76	208.127	-1341.02	1291.85	439.813	-1477.04	1464.83	521.85	-1482.01	1238.29	541.681	-1487.87	1137.71	567.292	-1597.37	998.376	528.497	-1654.5	933.365	585.561	-1611.64	922.541	580.966	-1680.07	877.3
1672	0	306.629	-1586.87	1665.08	211.486	-1598.53	1661.6	312.372	-1428.49	1680.04	168.271	-1451.89	1669.64	253.484	-1402.57	1497.6	269.794	-1360.89	1237.16	255.823	-1556.42	1424.36	266.71	-1656.14	1220.35	206.723	-1354.01	1293.55	439.716	-1488.96	1465.94	521.014	-1489.77	1238.86	540.123	-1494.07	1137.9	566.821	-1598.97	995.688	528.235	-1654.4	928.912	585.133	-1610.72	919.379	580.619	-1677.49	871.372
1673	0	306.851	-1599.17	1666.48	211.629	-1611.07	1663.02	312.037	-1440.73	1681.04	168.402	-1464.42	1670.88	252.985	-1415.12	1498.67	268.384	-1373.66	1238.06	255.661	-1569.22	1425.77	267.011	-1668.34	1221.63	205.552	-1366.87	1295.04	439.555	-1501.04	1466.56	520.18	-1497.72	1239.07	538.435	-1500.38	1137.8	566.115	-1600.4	993	528.009	-1653.96	924.452	584.775	-1609.55	916.292	580.288	-1674.39	865.394
1674	0	307.054	-1611.34	1667.58	211.99	-1623.51	1664.34	311.992	-1452.8	1681.83	167.739	-1476.78	1672.18	253.216	-1426.86	1500.26	267.787	-1386.33	1239.35	255.645	-1581.82	1426.73	267.462	-1680.29	1222.54	204.555	-1379.8	1296.39	439.311	-1513.12	1466.82	519.15	-1505.73	1239.07	537.305	-1505.9	1138.09	565.271	-1601.61	989.978	527.684	-1653.3	920	583.928	-1607.96	913.091	579.918	-1671.22	860.081
1675	0	307.175	-1623.64	1668.31	212.08	-1635.95	1665.57	311.937	-1464.92	1682.37	168.248	-1489.48	1672.65	252.982	-1439.17	1500.75	266.954	-1399.13	1240.27	255.615	-1594.53	1427.58	267.666	-1692.45	1223.49	203.322	-1392.71	1297.42	439.303	-1525.15	1467.21	518.091	-1513.89	1239.1	535.573	-1511.89	1137.78	564.536	-1602.42	987.501	527.66	-1652.33	915.671	583.05	-1606.21	909.938	579.56	-1667.71	854.963
1676	0	307.399	-1635.77	1669.02	212.247	-1648.41	1666.25	311.777	-1477.08	1682.73	168.365	-1501.97	1673.22	252.456	-1451.77	1501.47	266.024	-1411.94	1240.61	255.47	-1607.01	1428.25	267.761	-1704.76	1224.33	202.157	-1405.57	1298.29	439.286	-1537.09	1467.76	516.997	-1522.12	1239.12	533.948	-1517.29	1137.84	563.59	-1602.96	985.177	527.011	-1651.29	911.762	582.11	-1603.96	907.437	579.25	-1663.82	850.246
1677	0	307.618	-1647.96	1669.41	212.563	-1660.77	1666.73	311.696	-1489.38	1682.7	167.884	-1514.33	1673.55	252.188	-1464.78	1501.63	265.219	-1424.66	1240.7	255.506	-1619.59	1428.54	267.859	-1717.15	1224.7	201.026	-1418.44	1298.73	439.27	-1549.11	1467.43	515.926	-1530.33	1238.75	531.976	-1523.07	1137.15	562.644	-1603.4	982.538	526.923	-1649.77	907.601	581.151	-1601.62	904.6	578.974	-1660	845.769
1678	0	307.882	-1660.35	1669.16	213.052	-1673.13	1667.12	311.555	-1501.69	1682.32	167.764	-1526.91	1673.63	252.057	-1477.16	1501.76	264.721	-1437.26	1240.74	255.409	-1632.21	1428.46	267.895	-1729.64	1224.52	200.012	-1431.3	1298.74	439.351	-1561.09	1467.26	514.821	-1538.9	1237.95	530.477	-1528.38	1137.11	561.626	-1603.7	979.969	526.659	-1648.66	903.604	580.038	-1599.43	901.911	578.876	-1656.01	841.431
1679	0	308.055	-1672.73	1668.83	213.187	-1685.78	1666.86	311.611	-1514.04	1681.85	167.738	-1539.57	1673.36	251.852	-1489.55	1501.58	264.216	-1449.85	1240.38	255.286	-1644.85	1428.14	267.759	-1742.25	1224.4	199.224	-1444.09	1298.61	439.33	-1573.07	1466.28	513.691	-1547.28	1237.12	528.92	-1533.81	1136.72	560.709	-1603.98	977.516	526.59	-1647.09	900.178	578.853	-1596.97	899.352	578.481	-1651.41	837.232
1680	0	308.248	-1685.37	1668.09	213.246	-1698.61	1666.15	311.458	-1526.64	1680.83	167.713	-1552.28	1672.56	251.541	-1502.48	1500.68	263.573	-1462.35	1239.6	255.207	-1657.43	1427.48	267.497	-1754.48	1223.44	198.438	-1456.85	1297.82	439.371	-1585.05	1465.42	512.616	-1555.59	1236.16	526.894	-1539.35	1136.14	559.796	-1604.08	975.194	524.966	-1647.05	895.556	577.722	-1594.33	897.267	578.144	-1647.29	833.222
1681	0	308.616	-1698.01	1667.15	213.584	-1711.47	1665.23	311.527	-1539.24	1679.67	167.536	-1565.15	1671.99	251.168	-1514.43	1499.29	263.074	-1475	1238.39	255.176	-1670.15	1426.4	267.29	-1766.45	1221.99	197.756	-1469.6	1296.65	439.366	-1597.25	1463.79	511.075	-1563.3	1234.76	524.85	-1545.2	1135.1	558.849	-1604.58	972.664	524.926	-1645.74	891.738	576.23	-1591.99	894.44	578.103	-1643.07	829.311
1682	0	308.96	-1710.73	1665.72	214.127	-1724.25	1664.15	311.679	-1552.11	1678.08	168.275	-1578.36	1670.42	250.165	-1529.18	1497.45	262.593	-1487.54	1237.01	255.201	-1682.85	1425.04	266.98	-1778.25	1220.33	197.243	-1482.3	1295.29	439.52	-1609.45	1462.27	510.35	-1571.97	1233.19	522.947	-1551.28	1133.97	558.11	-1605.09	970.246	525.531	-1643.77	888.549	575.101	-1589.69	892.311	577.82	-1638.54	825.483
1683	0	309.266	-1723.56	1664.08	214.356	-1737.28	1662.78	311.676	-1564.95	1676.55	168.462	-1591.51	1669.25	250.602	-1541.21	1496.41	262.617	-1500	1235.71	255.171	-1695.52	1423.61	266.69	-1790.23	1218.41	197.111	-1494.86	1293.98	439.655	-1621.71	1460.68	509.488	-1580.14	1231.87	521.222	-1557.58	1133.1	557.23	-1605.64	968.299	524.835	-1643.26	885.109	573.949	-1587.47	890.703	577.869	-1634.46	822.435
1684	0	309.581	-1736.62	1662.2	214.655	-1750.53	1660.94	311.857	-1577.89	1674.83	168.493	-1604.55	1667.59	250.01	-1554.33	1494.15	262.821	-1512.55	1234.11	255.19	-1708.34	1421.68	266.402	-1802.52	1215.98	196.851	-1507.35	1292.29	439.717	-1634.15	1458.71	508.711	-1588.26	1230.45	519.5	-1564.07	1132.15	556.468	-1606.67	966.338	525.122	-1642.33	882.157	572.761	-1585.59	889.098	577.663	-1630.29	819.38
1685	0	309.939	-1749.67	1659.85	215.064	-1763.75	1658.71	312.043	-1591.17	1672.76	168.626	-1618.02	1665.65	250.5	-1566.91	1492.85	263.567	-1524.81	1232.35	255.312	-1721.05	1419.6	266.093	-1815.62	1213.49	197.104	-1519.63	1290.52	439.951	-1646.73	1456.7	507.961	-1596.63	1229.03	517.875	-1571.28	1130.99	555.697	-1608.06	964.351	525.284	-1641.83	878.843	571.408	-1584.03	887.493	577.393	-1626.51	816.376
1686	0	310.253	-1762.89	1657.5	215.489	-1776.95	1656.43	312.067	-1604.37	1670.78	168.816	-1631.43	1663.84	250.754	-1579.17	1491.42	264.401	-1537.34	1230.48	255.47	-1733.92	1417.29	265.682	-1829.05	1211.11	197.449	-1532.31	1288.63	440.204	-1659.52	1454.65	507.03	-1605.09	1227.37	516.168	-1578.87	1129.86	555.071	-1609.99	962.7	526.037	-1641.14	876.133	570.493	-1583.24	886.535	577.215	-1622.87	814.034
1687	0	310.606	-1776.08	1654.94	215.906	-1790.33	1653.98	312.362	-1617.61	1668.82	168.999	-1644.85	1661.74	250.308	-1593.25	1488.74	265.539	-1549.71	1228.62	255.608	-1746.74	1415	265.274	-1842.82	1208.79	197.758	-1544.83	1286.54	440.497	-1672.28	1452.65	506.52	-1613.97	1226.17	514.643	-1586.59	1128.78	554.642	-1612.12	961.465	526.546	-1641.79	873.718	569.863	-1583.02	886.212	577.108	-1619.56	811.926
1688	0	311.086	-1789.4	1652.24	216.233	-1803.83	1651.13	312.607	-1631.12	1666.52	169.406	-1658.39	1659.51	250.929	-1605.94	1486.68	266.639	-1562.26	1226.5	255.909	-1759.57	1412.44	264.982	-1856.35	1206.34	198.426	-1557.38	1284.29	440.8	-1685.24	1450.28	505.873	-1623.42	1224.53	513.208	-1594.66	1127.45	554.433	-1614.84	960.41	527.89	-1641.78	872.591	569.07	-1583.27	885.915	576.905	-1616.7	810.2
1689	0	311.486	-1802.74	1649.43	216.935	-1817.05	1648.52	313.02	-1644.54	1664.43	169.535	-1671.73	1657.47	251.126	-1619.15	1484.05	267.816	-1575.06	1224.27	256.349	-1772.52	1409.86	264.694	-1869.3	1203.71	199.003	-1569.79	1282.31	441.396	-1698.24	1447.95	505.362	-1633.23	1222.66	511.971	-1603.58	1126.19	554.414	-1618.39	959.449	529.253	-1642.44	871.591	568.569	-1584.41	885.817	576.804	-1614.68	808.57
1690	0	311.935	-1816.21	1646.65	217.164	-1830.55	1645.68	313.403	-1658.05	1662.33	170.148	-1685.06	1655.19	252.018	-1631.47	1482.18	269.002	-1588.04	1222.23	256.677	-1785.41	1407.45	264.523	-1881.95	1201.18	200.023	-1582.54	1279.82	441.992	-1711.37	1445.99	505.136	-1643.57	1221.27	511.189	-1612.28	1125.49	554.708	-1622.35	958.939	529.567	-1645.05	870.028	568.19	-1586.13	886.103	576.946	-1613.26	807.703
1691	0	312.496	-1829.85	1644.02	217.575	-1843.94	1642.93	314.035	-1671.53	1660.3	170.784	-1698.56	1653.13	252.738	-1644.83	1479.86	270.136	-1601.01	1219.99	257.172	-1798.43	1405.14	264.387	-1894.51	1198.7	201.04	-1595.25	1277.5	442.607	-1724.59	1443.64	505.07	-1654.02	1219.87	510.327	-1621.73	1124.71	554.764	-1627.06	958.403	530.445	-1647.77	868.989	568.137	-1588.62	886.807	576.845	-1611.89	807.544
1692	0	313.085	-1843.12	1641.49	218.362	-1857.24	1640.45	314.789	-1685.02	1658.56	171.562	-1711.97	1651.11	253.699	-1657.56	1477.67	271.224	-1614.25	1217.56	257.84	-1811.43	1403.02	264.497	-1907.42	1196.66	202.297	-1608.08	1275.27	443.349	-1737.74	1441.37	505.46	-1665.49	1218.37	509.587	-1631.77	1123.42	554.918	-1631.7	958.526	531.56	-1651.29	867.945	568.414	-1592.21	887.38	576.934	-1612.25	806.967
1693	0	314.006	-1856.3	1639.45	219.057	-1870.46	1638.35	315.846	-1698.38	1656.83	172.526	-1725.07	1649.25	254.896	-1670.47	1475.9	272.506	-1627.6	1215.48	258.542	-1824.51	1401.12	264.63	-1920.6	1195.01	203.371	-1621	1273.11	444.34	-1750.89	1439.62	505.687	-1676.93	1216.64	509.001	-1642.18	1122.47	555.484	-1638.07	958.187	532.836	-1655.7	867.073	568.757	-1596.63	888.223	577.04	-1613.7	806.565
1694	0	314.983	-1869.52	1637.65	219.946	-1883.67	1636.51	316.864	-1711.56	1655.07	173.526	-1738.32	1647.79	256.005	-1683.63	1474.1	273.698	-1641.12	1213.82	259.332	-1837.64	1399.67	264.885	-1934.21	1193.89	204.8	-1633.97	1271.48	445.375	-1764.19	1437.72	506.323	-1688.92	1215.41	509.041	-1653.33	1121.81	556.083	-1644.92	958.286	534.181	-1660.84	866.591	569.549	-1602.03	889.395	577.748	-1616.06	807.049
1695	0	316.108	-1882.63	1635.85	221.213	-1896.63	1634.88	318.211	-1724.64	1653.64	174.576	-1751.24	1646.34	257.028	-1696.73	1472.1	274.513	-1654.74	1211.87	260.136	-1850.99	1398.14	265.473	-1947.82	1192.98	205.816	-1647.43	1269.45	446.398	-1777.39	1436.12	506.886	-1701.12	1213.96	508.963	-1664.6	1120.77	557.161	-1652.88	958.236	535.593	-1666.95	866.144	570.583	-1608.39	890.458	578.664	-1619.75	807.393
1696	0	317.454	-1895.57	1634.24	222.646	-1909.66	1633.74	319.624	-1737.68	1651.86	176.173	-1764.39	1645.07	258.159	-1709.88	1470.78	275.138	-1668.46	1210.31	261.126	-1864.33	1396.74	266.324	-1961.14	1191.73	207.018	-1660.9	1268.12	447.313	-1790.75	1434.28	507.758	-1714.14	1212.42	509.38	-1676.54	1119.83	558.18	-1661.68	958.048	537.101	-1674.09	865.594	571.702	-1615.88	891.318	579.505	-1624.58	807.481
1697	0	319.104	-1908.31	1632.9	224.148	-1922.59	1632.76	321.112	-1750.58	1650.39	177.475	-1777.11	1644.15	259.334	-1722.95	1469.56	275.751	-1682.23	1208.89	262.114	-1877.71	1395.79	267.342	-1974.44	1190.97	207.859	-1674.53	1266.7	448.375	-1804.07	1432.76	508.389	-1727.02	1211.28	509.733	-1688.71	1118.75	559.24	-1671.29	957.958	538.698	-1682.25	865.247	572.838	-1624.48	892.114	580.475	-1630.82	807.939
1698	0	320.716	-1920.92	1631.99	225.798	-1935.37	1632.2	322.809	-1763.27	1649.16	179.256	-1790.06	1643.21	260.869	-1736.22	1468.5	276.35	-1696.26	1207.49	263.135	-1891.21	1394.99	268.664	-1988.07	1190.46	208.562	-1688.3	1265.29	449.569	-1817.38	1431.51	509.074	-1739.88	1210.01	510.994	-1701.29	1118.25	560.497	-1681.58	958.086	540.239	-1691.52	864.944	574.279	-1633.99	892.898	581.71	-1638.24	808.576
1699	0	322.601	-1933.73	1631.14	227.617	-1948.15	1631.74	324.564	-1775.94	1648.1	181.019	-1802.78	1642.86	262.225	-1749.24	1466.92	276.672	-1710.58	1206.19	264.341	-1904.75	1394.55	270.175	-2002.12	1190.3	209.522	-1702.21	1264.28	450.946	-1830.81	1430.38	510.273	-1753.37	1209.03	511.867	-1713.86	1117.45	561.866	-1692.86	957.694	541.959	-1701.83	864.685	575.589	-1644.68	893.196	583.562	-1647.52	808.975
1700	0	324.488	-1946.44	1630.83	229.496	-1960.82	1631.82	326.662	-1788.7	1647.31	183.152	-1815.49	1642.67	263.533	-1762.99	1466.22	277.44	-1724.89	1205.03	265.641	-1918.36	1394.37	271.811	-2016.42	1190.37	210.412	-1716.37	1263.12	452.568	-1844.22	1429.58	511.355	-1766.9	1207.95	513.194	-1727.13	1116.77	563.379	-1705.24	957.361	543.7	-1713.49	864.266	577.259	-1656.49	893.343	585.304	-1658.28	809.123
1701	0	326.367	-1959.01	1630.72	231.17	-1973.5	1632.17	328.599	-1801.46	1646.79	185.138	-1827.92	1642.95	265.379	-1775.95	1465.76	278.169	-1739.36	1204.23	266.823	-1931.84	1394.72	273.328	-2030.86	1191.12	211.649	-1730.36	1262.6	453.939	-1857.67	1428.97	512.655	-1780.52	1207.66	514.536	-1740.41	1116.42	565.058	-1718.13	957.34	545.367	-1726.15	863.983	578.831	-1669.23	893.434	587.113	-1670.38	809.29
1702	0	328.202	-1971.75	1631.07	233.144	-1986.02	1632.72	330.723	-1813.96	1646.67	187.264	-1840.48	1643.2	266.917	-1789.47	1465.4	279.243	-1753.82	1203.66	268.075	-1945.49	1395.21	274.855	-2045.42	1191.93	212.927	-1744.63	1261.88	455.347	-1871.35	1428.6	514.16	-1794.08	1207.74	516.094	-1754.04	1116.41	566.694	-1731.65	957.419	547.596	-1739.44	864.36	580.624	-1683	893.521	589.251	-1683.81	809.56
1703	0	330.169	-1984.31	1631.29	235.163	-1998.57	1633.51	332.877	-1826.49	1646.45	189.032	-1852.7	1643.88	268.781	-1802.71	1465.42	280.293	-1768.6	1203.35	269.424	-1959.12	1395.82	276.342	-2060.01	1192.81	214.584	-1758.78	1261.72	456.752	-1884.99	1428.23	515.742	-1807.97	1207.65	517.621	-1768	1116.23	568.73	-1746.26	957.285	549.407	-1754.54	863.981	582.612	-1697.7	893.323	591.356	-1698.86	809.288
1704	0	332.186	-1996.99	1632.23	237.093	-2011.13	1634.84	335.196	-1839.07	1646.55	191.432	-1865.1	1644.74	270.412	-1815.64	1465.5	281.543	-1783.35	1203.29	270.791	-1972.73	1396.7	277.715	-2074.45	1193.87	216.239	-1772.85	1261.78	458.202	-1898.67	1428.78	517.392	-1822.19	1207.77	519.455	-1782.64	1116.3	570.638	-1761.72	957.07	551.427	-1770.52	863.718	584.557	-1713.56	892.866	593.855	-1715.35	808.999
1705	0	334.17	-2009.61	1633.46	239.179	-2023.59	1636.54	337.274	-1851.74	1646.92	193.8	-1877.85	1645.68	271.678	-1829.84	1466.03	283.22	-1797.67	1203.53	271.98	-1986.32	1397.84	278.715	-2088.8	1195.08	217.783	-1786.79	1262.14	459.502	-1912.34	1429.28	519.021	-1836.47	1208.29	521.224	-1797.25	1116.39	572.702	-1777.64	956.997	553.652	-1787.39	863.682	586.603	-1729.99	892.383	596.282	-1732.55	808.685
1706	0	336.065	-2022.19	1634.74	241.101	-2036.34	1638.12	339.164	-1864.44	1647.43	195.217	-1890.19	1646.96	273.143	-1842.71	1466.58	284.865	-1811.79	1204.26	273.162	-1999.92	1399.1	279.577	-2103.01	1196.38	219.569	-1800.83	1263.11	460.733	-1925.98	1429.97	520.636	-1851.06	1208.83	523.269	-1812.48	1116.68	574.855	-1794.46	956.99	556.005	-1805.09	863.841	588.89	-1747.5	891.75	599.089	-1751.43	808.493
1707	0	338.017	-2034.99	1635.79	243.095	-2049.08	1639.8	341.228	-1876.98	1647.94	197.249	-1903.01	1648.34	274.416	-1856.09	1467.19	286.391	-1825.82	1205.34	274.188	-2013.39	1400.35	280.227	-2117.09	1197.47	220.989	-1814.6	1264.01	461.68	-1939.62	1430.56	522.065	-1865.98	1209.07	525.21	-1828.3	1116.64	576.861	-1812.1	956.678	558.337	-1823.95	863.676	591.441	-1765.9	891.035	601.673	-1771.49	807.656
1708	0	339.844	-2047.69	1636.92	244.937	-2061.9	1641.56	342.975	-1889.65	1648.31	199.201	-1915.94	1649.52	275.466	-1869.4	1469.06	288.064	-1839.36	1206.46	275.155	-2026.7	1401.61	280.642	-2130.74	1198.7	222.405	-1828.14	1265.23	462.45	-1953.04	1431.41	523.849	-1881.34	1209.62	527.261	-1844.2	1116.73	579.292	-1830.57	956.676	560.752	-1843.69	863.793	593.896	-1785.23	890.265	604.479	-1792.55	807.02
1709	0	341.508	-2060.44	1637.93	246.495	-2074.83	1642.83	344.227	-1902.6	1648.79	200.879	-1928.78	1650.72	276.146	-1883.17	1469.43	289.157	-1852.76	1207.31	275.839	-2039.84	1402.75	281.008	-2144.13	1199.74	223.176	-1841.46	1266.52	463.274	-1966.48	1432.44	525.391	-1896.69	1210.24	529.241	-1860.4	1116.97	581.335	-1849.33	956.627	563.38	-1863.86	864.188	596.139	-1805.39	889.182	607.263	-1814.47	806.448
1710	0	342.952	-2073.29	1638.94	248.066	-2087.74	1644.3	345.722	-1915.25	1649.93	202.182	-1941.92	1652.17	276.854	-1896.66	1469.97	290.291	-1865.67	1208.42	276.589	-2052.93	1403.91	281.375	-2157.16	1200.61	223.822	-1854.3	1267.7	463.949	-1979.74	1433.71	526.541	-1912.13	1210.34	531.254	-1876.91	1117.16	583.355	-1868.98	956.255	565.79	-1885.23	864.254	598.606	-1826.27	888.136	610.016	-1837.59	805.72
1711	0	343.945	-2086.16	1639.91	249.287	-2100.74	1645.48	346.694	-1928.24	1650.98	203.073	-1954.99	1653.47	277.574	-1909.95	1471.3	291.21	-1878.27	1209.52	277.155	-2065.76	1405.06	281.594	-2169.94	1201.42	224.566	-1866.91	1269.52	464.6	-1993.18	1435.07	527.956	-1928.19	1211.05	533.329	-1893.76	1117.3	585.265	-1889.19	955.647	567.641	-1907.63	864.059	601.03	-1847.9	887.05	612.849	-1861.88	805.262
1712	0	344.619	-2099.27	1641.12	249.926	-2113.84	1646.58	347.369	-1941.51	1652.41	203.928	-1968.11	1655.13	279.025	-1921.76	1473.47	292.041	-1890.78	1211.31	277.378	-2078.48	1406.38	281.737	-2182.37	1202.51	224.851	-1879.33	1270.62	465.174	-2006.47	1436.62	529.28	-1944.09	1212.03	535.395	-1910.81	1117.57	587.365	-1910.16	956.033	569.611	-1930.35	864.559	603.306	-1870.37	886.322	615.582	-1886.83	805.298
1713	0	344.983	-2112.55	1641.92	250.163	-2126.98	1647.41	347.896	-1954.67	1654.24	204.367	-1981.21	1656.64	281.405	-1933.27	1475.03	293.146	-1902.98	1212.86	277.682	-2091.02	1407.76	281.782	-2194.77	1203.44	225.645	-1891.41	1272.2	465.658	-2019.73	1438.16	530.579	-1959.95	1212.87	537.516	-1927.93	1118.22	589.652	-1931.6	956.341	571.512	-1953.53	865.335	605.235	-1893.7	885.373	617.965	-1912.57	805.383
1714	0	344.97	-2125.81	1643.06	250.207	-2140.04	1648.25	348.326	-1968.09	1656.19	204.792	-1994.34	1658.13	279.568	-1947.93	1476.45	294.021	-1915.63	1214.25	277.961	-2103.52	1409.13	281.816	-2206.95	1204.5	226.991	-1903.39	1273.5	466.183	-2033.24	1439.7	531.844	-1976.19	1213.59	539.463	-1945.17	1118.41	591.239	-1953.75	956.103	572.573	-1977.87	865.782	607.363	-1917.49	884.398	620.341	-1939.46	805.55
1715	0	344.679	-2139.17	1644.18	249.88	-2153.01	1649.25	348.735	-1981.47	1657.97	204.887	-2007.12	1659.64	280.598	-1960.22	1478	295.613	-1928.16	1215.78	278.089	-2116.11	1410.57	281.66	-2219.35	1205.86	228.268	-1915.42	1274.9	466.56	-2046.77	1441.14	533.001	-1992.7	1214.6	541.56	-1963.02	1118.85	592.744	-1976.39	956.286	573.648	-2002.64	866.587	609.37	-1942.49	883.567	622.565	-1967.62	805.743
1716	0	344.198	-2152.48	1645.65	249.203	-2166.04	1650.37	348.703	-1994.84	1660.22	204.806	-2020.02	1661.4	280.654	-1973.08	1479.15	296.795	-1940.95	1217.11	278.154	-2128.48	1412.21	281.307	-2231.73	1207.34	230.037	-1927.34	1276.44	466.956	-2060.3	1442.93	534.446	-2009.03	1215.98	543.62	-1980.52	1119.46	594.112	-1999.39	956.898	574.381	-2027.8	868.021	611.087	-1967.58	883.299	624.312	-1995.89	806.839
1717	0	343.467	-2165.85	1647.28	248.423	-2178.98	1651.42	348.95	-2008.15	1662.55	204.753	-2032.82	1662.72	282.382	-1983.91	1481.61	298.516	-1953.35	1218.95	278.191	-2140.99	1413.78	280.888	-2244.27	1208.94	231.785	-1939.27	1277.82	467.368	-2073.99	1444.35	535.608	-2025.44	1217.22	545.523	-1998.08	1120.38	595.101	-2022.68	957.539	575.128	-2052.93	869.977	612.716	-1993.46	883.365	625.513	-2024.76	807.851
1718	0	342.533	-2179.36	1648.99	247.516	-2191.92	1652.5	348.489	-2021.78	1664.63	204.347	-2045.7	1664.17	283.039	-1997.78	1482.62	300.264	-1965.8	1220.76	278.288	-2153.41	1415.4	280.397	-2256.93	1210.56	233.687	-1951.36	1279.34	467.558	-2087.62	1446.74	536.716	-2042.11	1218.67	547.312	-2016.14	1121.09	595.949	-2046.68	958.504	574.921	-2079.58	872.057	613.766	-2020.13	883.431	626.585	-2054.58	810.311
1719	0	341.46	-2192.62	1650.69	246.447	-2204.63	1653.78	348.212	-2035.22	1666.86	203.897	-2058.35	1665.51	284.232	-2010.16	1485.13	301.774	-1978.22	1222.52	278.222	-2166	1416.98	279.787	-2269.54	1212.36	235.717	-1963.48	1281.11	467.863	-2101.54	1448.99	537.958	-2058.57	1220.68	549.358	-2034.03	1122.43	596.806	-2071.01	960.335	574.917	-2106.12	875.257	614.579	-2047.05	884.368	627.184	-2084.62	812.928
1720	0	340.35	-2206.01	1652.32	245.19	-2217.55	1654.69	347.646	-2048.45	1668.9	203.205	-2071.09	1666.54	284.821	-2022.52	1486.5	303.626	-1990.39	1224.68	278.187	-2178.47	1418.46	279.224	-2282.12	1214.01	237.628	-1975.53	1282.6	468.066	-2115.47	1451.19	539.269	-2075.03	1222.87	550.846	-2052.31	1123.73	597.098	-2095.22	962.377	574.763	-2132.89	879.254	615.327	-2074.35	885.914	627.313	-2115.01	816.462
1721	0	339.377	-2219.32	1653.93	244.075	-2230.32	1655.6	347.301	-2061.77	1670.78	203.08	-2083.77	1667.41	285.639	-2035.24	1488.52	305.319	-2002.57	1226.24	278.176	-2191.22	1419.56	278.824	-2294.57	1215.42	239.282	-1987.78	1284.61	468.178	-2129.41	1453.5	540.549	-2091.66	1225.08	552.845	-2070.6	1125.54	597.291	-2119.79	964.924	573.951	-2159.95	883.03	615.662	-2101.93	887.636	626.997	-2145.66	820.071
1722	0	338.055	-2232.44	1655.36	242.988	-2242.98	1656.57	346.801	-2075.03	1672.42	202.33	-2096.41	1668.07	285.475	-2049.42	1490.02	306.738	-2014.88	1227.92	278.243	-2203.74	1420.63	278.534	-2306.8	1216.66	241.214	-2000.15	1286.25	468.188	-2143.44	1455.54	541.742	-2108.35	1227.01	554.857	-2088.94	1127.06	597.421	-2144.61	967.54	572.437	-2186.77	886.621	616.066	-2129.84	890.135	626.527	-2176.96	824.545
1723	0	337.031	-2245.65	1656.72	241.808	-2255.73	1657.28	346.24	-2088.28	1673.81	201.597	-2108.51	1668.71	286.269	-2062.28	1490.84	308.332	-2026.95	1229.41	278.157	-2216.39	1421.46	278.304	-2318.72	1217.71	242.647	-2012.78	1286.92	468.211	-2157.33	1457.59	542.889	-2124.74	1228.93	556.788	-2107	1128.81	597.549	-2169.44	970.464	571.242	-2213.88	891.405	616.122	-2157.78	892.656	625.9	-2208.01	829.428
1724	0	336.049	-2258.89	1657.75	240.768	-2268.6	1657.62	345.803	-2101.43	1675	201.375	-2121.37	1668.74	289.365	-2070.61	1491.68	309.703	-2039.22	1230.1	278.137	-2229.06	1422.02	278.12	-2330.62	1218.08	243.782	-2025.74	1287.87	468.243	-2171.41	1459.25	544.185	-2141.24	1230.66	558.833	-2125.16	1130.25	597.6	-2194.1	973.476	570.14	-2240.89	896.683	615.956	-2185.59	895.237	624.559	-2239.06	834.204
1725	0	335.152	-2272.21	1658.45	239.949	-2281.4	1657.89	345.529	-2114.82	1675.55	201.123	-2134.23	1668.8	286.977	-2088.96	1491.58	310.699	-2051.41	1231.03	278.189	-2241.91	1422.27	277.979	-2342.54	1218.14	245.137	-2038.19	1288.36	468.219	-2185.45	1460.44	545.544	-2158.13	1232.15	560.751	-2143.68	1131.09	597.7	-2219.21	976.367	569.067	-2268.22	902.007	615.729	-2214.03	897.869	623.139	-2270.15	839.379
1726	0	334.28	-2285.35	1658.95	239.1	-2294.36	1657.97	345.045	-2128.17	1675.82	200.431	-2146.92	1668.75	288.043	-2101.03	1492.24	311.686	-2063.78	1231.59	278.258	-2254.57	1422.29	277.941	-2354.38	1218.13	246.03	-2050.93	1288.25	468.289	-2199.39	1461.29	546.817	-2174.85	1233.18	562.813	-2162.11	1131.94	597.845	-2244.06	979.454	566.568	-2295.62	905.805	615.37	-2242.24	900.771	621.271	-2301.06	844.741
1727	0	333.769	-2298.7	1659.19	238.441	-2307.3	1657.85	344.93	-2141.56	1676.14	198.538	-2159.07	1668.96	287.613	-2115.54	1492.28	312.361	-2076.19	1231.71	278.23	-2267.3	1422.16	277.931	-2366.01	1217.49	247.232	-2063.49	1288.65	468.239	-2213.06	1462.09	547.958	-2191.35	1234	564.746	-2180.48	1132.48	597.654	-2268.69	982.423	563.451	-2324.5	910.943	614.786	-2270.14	903.653	619.231	-2331.63	850.295
1728	0	333.151	-2311.99	1659.02	237.936	-2320.34	1657.37	344.486	-2154.85	1675.91	200.169	-2172.85	1667.71	289.63	-2124.92	1492.33	313.405	-2088.31	1231.97	278.329	-2280.14	1421.56	278.16	-2377.61	1216.71	248.374	-2075.82	1288.7	468.309	-2226.91	1462.31	549.269	-2208.04	1234.5	566.791	-2199.19	1133	597.283	-2293.17	985.579	563.448	-2349.06	916.735	614.204	-2298.23	907.166	617.051	-2362.15	856.016
1729	0	332.639	-2325.26	1658.74	237.475	-2333.64	1656.88	344.491	-2168.02	1675.71	199.727	-2185.96	1667.01	288.521	-2141.62	1491.75	314.239	-2100.6	1231.77	278.631	-2292.94	1420.79	278.386	-2389.3	1215.35	249.231	-2088.48	1288.74	468.217	-2240.52	1462.2	550.46	-2224.9	1234.71	568.804	-2218.21	1132.91	597.159	-2318.03	988.503	561.918	-2375.79	922.162	613.315	-2326.21	910.085	614.873	-2392.47	861.9
1730	0	332.355	-2338.69	1658.11	237.141	-2346.88	1656.16	344.144	-2181.6	1674.99	197.996	-2198.63	1666.7	288.815	-2154.66	1491.34	314.952	-2112.82	1232.02	278.766	-2306.06	1419.65	278.568	-2401.04	1213.91	250.411	-2100.93	1288.43	468.135	-2254.02	1461.87	551.7	-2241.66	1234.9	571.024	-2236.86	1133.22	596.966	-2342.68	991.619	559.998	-2401.96	927.593	612.658	-2354.11	913.852	612.369	-2422.55	868.367
1731	0	332.209	-2352.37	1657.11	236.938	-2360.41	1654.9	343.942	-2194.95	1674.25	197.701	-2211.84	1665.55	288.657	-2168.43	1491.01	315.748	-2124.74	1231.58	278.779	-2318.93	1418.39	278.839	-2412.99	1212.04	250.791	-2113.54	1287.76	467.973	-2267.47	1461.2	552.923	-2258.37	1234.84	572.629	-2255.77	1133.08	595.98	-2366.3	994.707	557.978	-2427.78	933.039	611.646	-2381.46	917.666	609.763	-2451.81	874.806
1732	0	332.123	-2365.94	1655.89	236.848	-2374.06	1653.55	343.818	-2208.75	1673.07	197.421	-2225.48	1664.27	288.641	-2181.35	1489.95	315.765	-2137.01	1230.9	278.995	-2332.04	1416.84	279.25	-2425.45	1209.98	251.288	-2126.1	1286.81	467.948	-2280.83	1460.27	553.836	-2275.27	1234.18	574.378	-2274.98	1132.45	595.859	-2391.24	997.343	555.999	-2453.37	938.437	610.468	-2408.89	921.26	606.972	-2480.65	881.334
1733	0	332.085	-2379.44	1654.52	236.972	-2387.65	1652.17	343.594	-2222.4	1671.77	197.19	-2239.38	1662.94	289.006	-2194.12	1489.85	315.968	-2148.81	1230.63	279.198	-2345.01	1415.27	279.699	-2438.17	1207.94	251.307	-2138.81	1285.74	467.979	-2294.02	1458.84	554.894	-2292.52	1233.34	576.087	-2294.56	1131.9	594.907	-2415.33	1000.35	553.84	-2478.49	943.601	609.392	-2436.12	924.925	604.265	-2509.19	887.762
1734	0	332.271	-2393.09	1653.03	237.13	-2401.26	1650.4	343.758	-2235.9	1670.64	197.163	-2253.14	1661.74	288.783	-2207.03	1488.92	315.015	-2161.09	1229.2	279.283	-2358.02	1413.63	280.053	-2451.23	1206.11	251.474	-2151.24	1285.32	467.587	-2307.02	1457.54	555.488	-2309.25	1232.93	577.432	-2313.67	1131.58	593.864	-2439.07	1003.68	551.729	-2503.08	948.75	608.031	-2462.59	929.431	601.663	-2536.85	894.816
1735	0	332.547	-2406.94	1651.07	237.29	-2415.14	1648.26	343.215	-2249.61	1668.91	198.362	-2267.57	1659.53	288.908	-2218.11	1486.69	314.089	-2173.61	1227.75	279.348	-2371.05	1411.65	280.483	-2464.51	1204.06	250.663	-2164.06	1283.7	467.426	-2320.33	1455.91	555.683	-2325.75	1232.41	578.765	-2332.65	1131.38	592.715	-2462.2	1007.08	549.161	-2527.22	954.202	607.019	-2488.8	934.021	598.541	-2563.99	901.663
1736	0	332.627	-2420.45	1648.72	237.617	-2428.82	1646.07	343.251	-2263.33	1667.35	198.792	-2281.51	1657.7	287.495	-2234.41	1485.52	312.798	-2186.23	1226.28	279.491	-2384.11	1409.56	281.056	-2477.81	1201.89	250.334	-2176.6	1282.41	467.06	-2333.27	1454.18	556.023	-2342.67	1231.58	579.837	-2351.62	1130.74	591.617	-2485.51	1010.5	546.837	-2550.69	959.16	605.477	-2514.28	938.221	595.723	-2590.36	908.491
1737	0	332.707	-2433.97	1646.48	237.714	-2442.49	1643.78	343.255	-2276.83	1665.65	199.094	-2295.46	1655.98	287.048	-2247.59	1483.74	311.808	-2198.87	1224.82	279.393	-2397.19	1407.44	281.503	-2491.05	1199.83	249.298	-2189.4	1280.68	466.654	-2346.28	1452.52	556.175	-2359.65	1230.69	580.504	-2370.74	1130.7	590.574	-2508.13	1013.82	544.839	-2573.74	964.327	604.177	-2539.31	943.134	593.18	-2615.9	915.398
1738	0	333.041	-2447.5	1644.23	237.928	-2456.1	1641.52	343.263	-2290.23	1664.02	199.211	-2309.05	1654.2	288.358	-2257.03	1482.13	310.308	-2211.71	1222.73	279.257	-2410.22	1405.4	281.949	-2504	1197.7	248.197	-2202.23	1278.99	466.041	-2359.11	1450.86	556.084	-2376.1	1229.95	580.672	-2389.4	1130.48	588.985	-2529.58	1017.4	542.376	-2595.78	969.457	602.888	-2563.28	948.167	590.393	-2640.52	922.581
1739	0	333.128	-2460.96	1642.2	238.175	-2469.58	1639.24	343.06	-2303.74	1661.95	199.023	-2322.86	1652.49	287.447	-2270.5	1480.47	309.22	-2224.54	1221.12	279.128	-2423.24	1403.2	282.326	-2516.8	1195.52	246.984	-2215.2	1277.51	465.541	-2372.09	1449.18	555.657	-2392.26	1229.26	580.927	-2407.61	1130.22	586.985	-2549.84	1020.88	540.692	-2617.53	974.218	601.994	-2586.76	953.144	587.946	-2664.33	929.267
1740	0	333.101	-2474.25	1639.65	238.036	-2483.15	1637.26	342.834	-2317.14	1659.92	198.702	-2336.3	1650.72	287.584	-2283.04	1479.17	307.929	-2237.5	1219.4	278.728	-2436.53	1401.19	282.578	-2529.69	1193.45	245.918	-2228.26	1275.78	464.926	-2385.1	1447.35	555.121	-2408.44	1227.99	580.945	-2425.41	1129.61	585.798	-2570.56	1024.12	539.017	-2638.48	978.948	600.568	-2609.19	957.1	585.828	-2687.44	936.029
1741	0	333.116	-2487.46	1637.42	238.037	-2496.48	1635.25	342.61	-2330.4	1658.17	199.111	-2349.13	1648.95	286.969	-2295.7	1477.62	306.521	-2250.72	1217.19	278.2	-2449.61	1399.32	282.554	-2542.74	1191.65	244.562	-2241.5	1273.99	464.327	-2397.94	1446.15	554.213	-2423.8	1227.21	580.589	-2442.43	1129.17	585.046	-2590.64	1027.38	537.41	-2658.84	983.452	599.446	-2630.76	961.524	584.179	-2709.28	942.456
1742	0	332.891	-2500.48	1635.64	237.962	-2509.55	1633.21	342.178	-2343.39	1656.18	198.705	-2362.63	1647.12	284.55	-2310.48	1474.71	305.293	-2263.93	1215.57	277.569	-2462.68	1397.48	282.349	-2556.01	1190.02	243.288	-2254.82	1272.21	463.442	-2410.58	1444.54	553.653	-2439.29	1225.83	580.187	-2458.99	1128.84	583.915	-2609.4	1030.51	536.094	-2678.53	987.511	598.746	-2651.46	965.978	582.676	-2730.41	948.739
1743	0	332.583	-2513.43	1633.65	237.556	-2522.79	1631.95	341.603	-2356.29	1654.02	198.425	-2375.81	1645.46	284.693	-2322.4	1473.06	304.153	-2277.56	1213.27	276.921	-2476	1395.71	282.029	-2569.46	1188.43	242.401	-2268	1270.35	462.436	-2423.58	1442.38	552.174	-2453.51	1224.74	579.552	-2475.33	1127.78	582.435	-2627.45	1032.54	534.987	-2697.39	991.558	597.676	-2671.18	969.369	581.354	-2750.22	954.336
1744	0	332.139	-2526.2	1632.03	237.199	-2535.59	1630.35	340.95	-2368.46	1652	197.454	-2388.67	1643.75	283.308	-2335.81	1470.54	303.098	-2291.23	1211.18	276.233	-2489.3	1394.18	281.468	-2582.96	1187.05	241.25	-2281.52	1268.05	461.819	-2436.56	1441.04	551.725	-2468.87	1223.24	578.721	-2491.28	1126.76	581.732	-2645.24	1034.46	534.12	-2715.67	994.925	596.6	-2689.97	971.993	581.01	-2769.82	959.194
1745	0	331.468	-2538.84	1630.7	236.356	-2548.55	1629.38	340.474	-2381.59	1650.59	196.892	-2401.53	1642.11	282.332	-2349.19	1468.63	302.428	-2305.08	1209.35	275.334	-2502.52	1392.71	280.746	-2596.43	1185.74	240.42	-2295.19	1266.14	460.955	-2449.64	1439.69	550.655	-2482.77	1222.31	577.913	-2506.71	1126.18	581.112	-2662.18	1036.31	533.572	-2733.27	997.796	596.07	-2707.8	974.514	580.683	-2787.78	964.046
1746	0	330.599	-2551.47	1629.58	235.556	-2561.41	1628.26	339.388	-2394.17	1648.96	195.745	-2414.37	1640.28	281.384	-2361.83	1467.02	301.422	-2319.14	1207.27	274.43	-2516	1391.42	279.919	-2610.08	1184.59	239.377	-2308.74	1264.56	460.005	-2462.86	1438.48	549.381	-2496.24	1221.36	577.04	-2521.72	1125.32	580.428	-2678.3	1037.54	533.11	-2750.08	1000.36	595.03	-2724.43	976.22	580.161	-2804.34	968.203
1747	0	329.564	-2564.25	1628.75	234.574	-2574.09	1627.42	337.95	-2406.72	1647.43	194.648	-2427.73	1638.62	280.497	-2375.27	1465.83	300.586	-2332.82	1205.79	273.539	-2529.4	1390.3	278.946	-2623.95	1183.51	238.462	-2322.48	1262.74	458.844	-2476.24	1437.38	548.295	-2510.07	1220.33	575.74	-2536.42	1124.48	579.692	-2693.8	1038.09	533.175	-2766.51	1001.98	594.677	-2740.56	977.372	580.656	-2820.81	971.379
1748	0	328.283	-2576.79	1628.48	233.276	-2586.69	1626.72	336.674	-2419.28	1646.25	193.159	-2439.76	1637.46	279.618	-2388.28	1464.57	300.012	-2346.98	1204.73	272.443	-2542.89	1389.34	277.754	-2638.04	1182.83	237.837	-2336.39	1261.47	457.797	-2489.73	1436.64	547.47	-2523.76	1219.65	574.74	-2550.98	1124	579.1	-2708.58	1038.16	533.176	-2781.97	1002.94	594.333	-2755.92	977.87	581.28	-2836.03	973.647
1749	0	326.95	-2589.56	1628.34	231.903	-2599.53	1626.37	335.294	-2431.77	1645.67	191.689	-2452.58	1636.66	278.67	-2401.28	1463.82	298.95	-2361.21	1203.38	271.274	-2556.41	1388.76	276.347	-2652.35	1182.61	237.056	-2350.36	1260.11	456.702	-2503.27	1436.16	546.548	-2537.28	1219.24	573.546	-2564.88	1123.5	578.523	-2722.52	1037.91	533.313	-2796.68	1003.32	593.766	-2769.92	977.771	582.19	-2850.24	975.397
1750	0	325.472	-2602.28	1628.44	230.426	-2612.17	1626.27	333.738	-2444.27	1645.07	190.26	-2465.03	1635.68	277.782	-2414.56	1463.26	298.28	-2375.42	1202.41	270.082	-2570.02	1388.44	274.825	-2666.87	1182.42	236.346	-2364.41	1259.05	455.662	-2516.96	1435.73	545.537	-2550.75	1218.6	571.842	-2578.58	1122.7	578.655	-2736.59	1037.4	533.433	-2810.54	1002.9	593.48	-2783.27	976.763	583.455	-2863.77	976.016
1751	0	323.832	-2615.06	1628.58	228.802	-2624.94	1626.58	332.065	-2457.1	1644.67	188.486	-2477.84	1635.55	276.607	-2427.83	1462.8	297.62	-2389.8	1201.77	268.965	-2583.46	1388.27	273.189	-2681.54	1182.74	235.6	-2378.67	1258.3	454.324	-2530.56	1435.43	544.314	-2564.34	1218.23	570.712	-2592.06	1122.16	578.156	-2749.55	1036.2	533.859	-2823.93	1001.72	593.364	-2796	975.529	584.875	-2876.61	975.802
1752	0	322.001	-2627.74	1629.05	226.996	-2637.8	1627.05	330.451	-2469.74	1644.67	186.955	-2490.39	1635.34	275.435	-2441.14	1462.25	297.018	-2404.3	1201.45	267.441	-2597.26	1388.85	271.5	-2696.25	1183.57	234.921	-2393.03	1257.59	453.052	-2544.27	1435.61	543.159	-2577.74	1218.15	569.197	-2604.93	1122	577.658	-2761.66	1034.9	534.134	-2836.35	1000.14	593.074	-2807.53	973.798	585.99	-2888.11	974.704
1753	0	320.055	-2640.77	1630.04	225.167	-2650.54	1627.68	328.619	-2482.82	1645.03	185.484	-2503.23	1635.41	274.175	-2455.01	1462.34	296.245	-2418.79	1201.34	266.178	-2610.66	1389.25	269.792	-2711.21	1184.52	234.479	-2407.33	1257.1	451.888	-2557.86	1436.15	541.754	-2590.94	1218.29	567.571	-2617.35	1121.76	575.908	-2771.36	1032.38	534.553	-2847.99	997.994	593.559	-2818.54	972.109	587.685	-2899.21	972.834
1754	0	318.233	-2653.94	1631.1	223.181	-2663.51	1628.68	326.806	-2495.56	1645.53	183.805	-2516.09	1635.6	272.119	-2469.35	1461.6	295.75	-2432.9	1201.64	264.86	-2624.49	1390.18	268.281	-2726.07	1185.74	233.758	-2421.49	1257.33	450.84	-2572.32	1436.31	540.159	-2604.24	1218.35	566.486	-2629.53	1122.02	575.466	-2782.21	1030.26	535.08	-2859.09	995.219	593.928	-2828.89	969.987	588.405	-2908.53	969.51
1755	0	316.228	-2667.49	1633.07	221.11	-2676.56	1629.89	325.174	-2508.91	1646.55	182.017	-2528.95	1636.49	271.539	-2482.26	1462.82	295.897	-2446.89	1203.06	263.72	-2637.8	1391.33	266.844	-2740.63	1187.5	233.142	-2435.45	1258.03	449.974	-2586.01	1437.68	538.85	-2617.62	1219.13	564.621	-2641.35	1122.08	578.631	-2796.57	1029.71	535.627	-2869.29	992.361	593.888	-2838.06	967.05	589.55	-2917.62	965.719
1756	0	314.046	-2680.23	1634.11	219.082	-2689.5	1630.89	323.258	-2522.15	1647.82	180.209	-2541.91	1636.93	270.476	-2495.77	1463.76	295.268	-2460.62	1203.96	262.591	-2651.34	1392.66	265.529	-2755.05	1189.29	232.732	-2449.18	1259.02	448.837	-2599.66	1439.31	537.057	-2630.28	1219.94	561.041	-2655.75	1120.42	575.27	-2802.23	1026.33	536.159	-2878.62	989.091	594.181	-2846.18	964.294	590.734	-2925.84	960.996
1757	0	313.87	-2692.37	1633.68	217.383	-2702.57	1631.57	321.46	-2535.63	1649.3	178.4	-2554.93	1637.31	270.133	-2509.34	1465.43	294.802	-2473.92	1205.18	261.959	-2664.54	1393.5	264.436	-2768.95	1190.82	232.464	-2462.64	1260.19	447.806	-2613.31	1440.83	535.763	-2643.02	1221.21	562.138	-2663.66	1124.14	578.458	-2815.15	1026.2	536.759	-2887.36	985.271	594.203	-2853.58	961.666	592.031	-2933.45	956.093
1758	0	310.548	-2707.53	1636.91	215.7	-2715.86	1632.21	320.13	-2548.82	1650.8	177.282	-2568.25	1637.95	269.479	-2522.01	1467.43	294.532	-2487.1	1206.61	261.091	-2677.97	1394.81	263.477	-2782.31	1192.21	232.002	-2476.18	1261.48	446.924	-2626.71	1442.84	534.524	-2655.84	1222.48	560.61	-2674.91	1124.73	575.715	-2820.7	1023.01	537.309	-2895.48	981.144	594.39	-2860.46	958.126	592.69	-2940.23	949.798
1759	0	311.542	-2718.53	1635.53	214.272	-2729.17	1632.74	318.844	-2562.14	1652.36	175.637	-2582.33	1638.72	268.608	-2535.18	1468.62	294.085	-2500.12	1207.95	260.581	-2691.04	1395.9	262.564	-2795.35	1193.62	231.387	-2489.21	1262.78	445.875	-2639.61	1444.24	533.127	-2667.96	1223.81	559.858	-2685.35	1126.29	575.314	-2828.57	1020.73	537.7	-2902.69	976.887	594.666	-2866.56	954.516	593.077	-2946.06	943.424
1760	0	309.304	-2733.19	1637.2	213.302	-2742.57	1633.41	317.396	-2575.42	1653.46	174.85	-2595.2	1639.74	267.363	-2548.58	1469.31	293.263	-2513.11	1209.06	259.824	-2704.31	1397.4	261.884	-2808.07	1194.92	230.368	-2502.14	1263.93	444.673	-2651.3	1446.48	532.179	-2679.84	1224.98	558.613	-2695.77	1126.95	575.502	-2836.13	1018.42	538.081	-2909.46	972.26	594.745	-2871.94	950.926	593.682	-2951.23	936.473
1761	0	307.777	-2747.97	1639.33	212.865	-2755.96	1633.98	317.174	-2588.61	1655.65	174.512	-2608.46	1640.89	266.158	-2561.76	1470.51	292.328	-2525.79	1210.11	259.452	-2717.06	1398.47	261.493	-2820.57	1196.21	229.27	-2515.28	1264.93	444.057	-2663.55	1447.68	531.019	-2691.3	1225.99	557.751	-2705.72	1128.24	575.545	-2843.36	1015.6	538.487	-2915.38	967.426	594.533	-2876.73	947.17	594.185	-2955.95	929.239
1762	0	307.561	-2760.67	1640.02	212.734	-2769.42	1634.71	316.716	-2602.09	1656.95	173.697	-2622.13	1642.57	264.879	-2574.68	1471.41	291.187	-2538.01	1211.31	259.134	-2729.74	1399.75	261.244	-2832.76	1197.65	227.861	-2527.79	1265.95	443.654	-2675.8	1448.44	530.35	-2702.64	1226.78	554.592	-2718.31	1126.57	575.341	-2849.9	1012.38	538.855	-2920.89	962.349	595.428	-2882.09	943.423	594.32	-2960.34	921.493
1763	0	307.7	-2774.04	1641.15	212.86	-2782.8	1635.54	316.293	-2615.21	1658.49	173.446	-2635.68	1644.39	263.061	-2588.43	1472.36	289.624	-2550.48	1212.68	258.781	-2742.29	1401.2	261.14	-2844.94	1198.99	226.419	-2540.28	1267.24	442.99	-2686.83	1449.61	529.673	-2713.19	1227.7	556.058	-2724.52	1129.3	575.208	-2855.56	1009.42	539.141	-2925.73	957.325	595.08	-2885.34	939.284	594.278	-2963.2	914.347
1764	0	308.04	-2787.09	1641.85	213.184	-2796.14	1636.55	316.19	-2628.26	1660.39	172.734	-2650.43	1646.6	262.256	-2600.66	1473.76	287.726	-2562.79	1214.03	258.595	-2754.73	1402.63	261.357	-2857.05	1200.29	225.023	-2552.78	1268.97	442.575	-2697.82	1450.8	529.373	-2723.15	1228.71	552.243	-2736.61	1126.77	575.278	-2860.65	1006.43	539.551	-2929.83	952.285	595.705	-2888.96	936.013	593.728	-2965.33	906.811
1765	0	308.428	-2800.12	1642.72	213.635	-2809.43	1637.7	316.15	-2641.41	1661.78	173.014	-2662.87	1648.29	261.417	-2613.17	1475.43	286.18	-2574.78	1215.48	258.446	-2767.24	1404.02	261.902	-2869.26	1201.55	223.304	-2564.84	1270.51	442.895	-2709.19	1451.93	526.134	-2735.66	1225.81	550.933	-2744.98	1126.7	575.359	-2865.58	1003.3	539.935	-2933.26	947.441	594.847	-2890.89	931.43	594.074	-2967.4	899.632
1766	0	308.81	-2812.98	1643.97	213.981	-2822.45	1639.32	316.04	-2654.39	1663.51	172.976	-2676.13	1650.62	263.24	-2623.99	1478.38	284.29	-2586.7	1216.97	258.398	-2779.62	1405.77	262.646	-2881.49	1203.06	221.57	-2576.82	1272.66	442.456	-2720.12	1452.5	528.5	-2741.45	1229.09	552.839	-2749.17	1129.82	575.536	-2870	1000.41	540.302	-2936.34	942.568	596.488	-2894.53	928.324	593.908	-2968.67	892.283
[truncated: 69 more columns]

## Sheet: Sheet2
Devices
		025370 - Force			025370 - Moment			025370 - CoP			027571 - Force			027571 - Moment			027571 - CoP			037720 - Force			037720 - Moment			037720 - CoP
Frame	Sub Frame	Fx	Fy	Fz	Mx	My	Mz	Cx	Cy	Cz	Fx	Fy	Fz	Mx	My	Mz	Cx	Cy	Cz	Fx	Fy	Fz	Mx	My	Mz	Cx	Cy	Cz
		N	N	N	N.mm	N.mm	N.mm	mm	mm	mm	N	N	N	N.mm	N.mm	N.mm	mm	mm	mm	N	N	N	N.mm	N.mm	N.mm	mm	mm	mm
1391	0	0	0	0	0	0	0	200	300	0	0	0	0	0	0	0	200	903	0	0	0	0	0	0	0	603	903	0
1391	1	0	0	0	0	0	0	200	300	0	0	0	0	0	0	0	200	903	0	0	0	0	0	0	0	603	903	0
1391	2	0	0	0	0	0	0	200	300	0	0	0	0	0	0	0	200	903	0	0	0	0	0	0	0	603	903	0
1391	3	0	0	0	0	0	0	200	300	0	0	0	0	0	0	0	200	903	0	0	0	0	0	0	0	603	903	0
1391	4	0	0	0	0	0	0	200	300	0	0	0	0	0	0	0	200	903	0	0	0	0	0	0	0	603	903	0
1391	5	0	0	0	0	0	0	200	300	0	0	0	0	0	0	0	200	903	0	0	0	0	0	0	0	603	903	0
1391	6	0	0	0	0	0	0	200	300	0	0	0	0	0	0	0	200	903	0	0	0	0	0	0	0	603	903	0
1391	7	0	0	0	0	0	0	200	300	0	0	0	0	0	0	0	200	903	0	0	0	0	0	0	0	603	903	0
1391	8	0	0	0	0	0	0	200	300	0	0	0	0	0	0	0	200	903	0	0	0	0	0	0	0	603	903	0
1391	9	0	0	0	0	0	0	200	300	0	0	0	0	0	0	0	200	903	0	0	0	0	0	0	0	603	903	0
1392	0	0	0	0	0	0	0	200	300	0	0	0	0	0	0	0	200	903	0	0	0	0	0	0	0	603	903	0
1392	1	0	0	0	0	0	0	200	300	0	0	0	0	0	0	0	200	903	0	0	0	0	0	0	0	603	903	0
1392	2	0	0	0	0	0	0	200	300	0	0	0	0	0	0	0	200	903	0	0	0	0	0	0	0	603	903	0
1392	3	0	0	0	0	0	0	200	300	0	0	0	0	0	0	0	200	903	0	0	0	0	0	0	0	603	903	0
1392	4	0	0	0	0	0	0	200	300	0	0	0	0	0	0	0	200	903	0	0	0	0	0	0	0	603	903	0
1392	5	0	0	0	0	0	0	200	300	0	0	0	0	0	0	0	200	903	0	0	0	0	0	0	0	603	903	0
1392	6	0	0	0	0	0	0	200	300	0	0	0	0	0	0	0	200	903	0	0	0	0	0	0	0	603	903	0
1392	7	0	0	0	0	0	0	200	300	0	0	0	0	0	0	0	200	903	0	0	0	0	0	0	0	603	903	0
1392	8	0	0	0	0	0	0	200	300	0	0	0	0	0	0	0	200	903	0	0	0	0	0	0	0	603	903	0
1392	9	0	0	0	0	0	0	200	300	0	0	0	0	0	0	0	200	903	0	0	0	0	0	0	0	603	903	0
1393	0	0	0	0	0	0	0	200	300	0	0	0	0	0	0	0	200	903	0	0	0	0	0	0	0	603	903	0
1393	1	0	0	0	0	0	0	200	300	0	0	0	0	0	0	0	200	903	0	0	0	0	0	0	0	603	903	0
1393	2	0	0	0	0	0	0	200	300	0	0	0	0	0	0	0	200	903	0	0	0	0	0	0	0	603	903	0
1393	3	0	0	0	0	0	0	200	300	0	0	0	0	0	0	0	200	903	0	0	0	0	0	0	0	603	903	0
1393	4	0	0	0	0	0	0	200	300	0	0	0	0	0	0	0	200	903	0	0	0	0	0	0	0	603	903	0
1393	5	0	0	0	0	0	0	200	300	0	0	0	0	0	0	0	200	903	0	0	0	0	0	0	0	603	903	0
1393	6	0	0	0	0	0	0	200	300	0	0	0	0	0	0	0	200	903	0	0	0	0	0	0	0	603	903	0
1393	7	0	0	0	0	0	0	200	300	0	0	0	0	0	0	0	200	903	0	0	0	0	0	0	0	603	903	0
1393	8	0	0	0	0	0	0	200	300	0	0	0	0	0	0	0	200	903	0	0	0	0	0	0	0	603	903	0
1393	9	0	0	0	0	0	0	200	300	0	0	0	0	0	0	0	200	903	0	0	0	0	0	0	0	603	903	0
1394	0	0	0	0	0	0	0	200	300	0	0	0	0	0	0	0	200	903	0	0	0	0	0	0	0	603	903	0
1394	1	0	0	0	0	0	0	200	300	0	0	0	0	0	0	0	200	903	0	0	0	0	0	0	0	603	903	0
1394	2	0	0	0	0	0	0	200	300	0	0	0	0	0	0	0	200	903	0	0	0	0	0	0	0	603	903	0
1394	3	0	0	0	0	0	0	200	300	0	0	0	0	0	0	0	200	903	0	0	0	0	0	0	0	603	903	0
1394	4	0	0	0	0	0	0	200	300	0	0	0	0	0	0	0	200	903	0	0	0	0	0	0	0	603	903	0
1394	5	0	0	0	0	0	0	200	300	0	0	0	0	0	0	0	200	903	0	0	0	0	0	0	0	603	903	0
1394	6	0	0	0	0	0	0	200	300	0	0	0	0	0	0	0	200	903	0	0	0	0	0	0	0	603	903	0
1394	7	0	0	0	0	0	0	200	300	0	0	0	0	0	0	0	200	903	0	0	0	0	0	0	0	603	903	0
1394	8	0	0	0	0	0	0	200	300	0	0	0	0	0	0	0	200	903	0	0	0	0	0	0	0	603	903	0
1394	9	0	0	0	0	0	0	200	300	0	0	0	0	0	0	0	200	903	0	0	0	0	0	0	0	603	903	0
1395	0	0	0	0	0	0	0	200	300	0	0	0	0	0	0	0	200	903	0	0	0	0	0	0	0	603	903	0
1395	1	0	0	0	0	0	0	200	300	0	0	0	0	0	0	0	200	903	0	0	0	0	0	0	0	603	903	0
1395	2	0	0	0	0	0	0	200	300	0	0	0	0	0	0	0	200	903	0	0	0	0	0	0	0	603	903	0
1395	3	0	0	0	0	0	0	200	300	0	0	0	0	0	0	0	200	903	0	0	0	0	0	0	0	603	903	0
1395	4	0	0	0	0	0	0	200	300	0	0	0	0	0	0	0	200	903	0	0	0	0	0	0	0	603	903	0
1395	5	0	0	0	0	0	0	200	300	0	0	0	0	0	0	0	200	903	0	0	0	0	0	0	0	603	903	0
1395	6	0	0	0	0	0	0	200	300	0	0	0	0	0	0	0	200	903	0	0	0	0	0	0	0	603	903	0
1395	7	0	0	0	0	0	0	200	300	0	0	0	0	0	0	0	200	903	0	0	0	0	0	0	0	603	903	0
1395	8	0	0	0	0	0	0	200	300	0	0	0	0	0	0	0	200	903	0	0	0	0	0	0	0	603	903	0
1395	9	0	0	0	0	0	0	200	300	0	0	0	0	0	0	0	200	903	0	0	0	0	0	0	0	603	903	0
1396	0	0	0	0	0	0	0	200	300	0	0	0	0	0	0	0	200	903	0	0	0	0	0	0	0	603	903	0
1396	1	0	0	0	0	0	0	200	300	0	0	0	0	0	0	0	200	903	0	0	0	0	0	0	0	603	903	0
1396	2	0	0	0	0	0	0	200	300	0	0	0	0	0	0	0	200	903	0	0	0	0	0	0	0	603	903	0
1396	3	0	0	0	0	0	0	200	300	0	0	0	0	0	0	0	200	903	0	0	0	0	0	0	0	603	903	0
1396	4	0	0	0	0	0	0	200	300	0	0	0	0	0	0	0	200	903	0	0	0	0	0	0	0	603	903	0
1396	5	0	0	0	0	0	0	200	300	0	0	0	0	0	0	0	200	903	0	0	0	0	0	0	0	603	903	0
1396	6	0	0	0	0	0	0	200	300	0	0	0	0	0	0	0	200	903	0	0	0	0	0	0	0	603	903	0
1396	7	0	0	0	0	0	0	200	300	0	0	0	0	0	0	0	200	903	0	0	0	0	0	0	0	603	903	0
1396	8	0	0	0	0	0	0	200	300	0	0	0	0	0	0	0	200	903	0	0	0	0	0	0	0	603	903	0
1396	9	0	0	0	0	0	0	200	300	0	0	0	0	0	0	0	200	903	0	0	0	0	0	0	0	603	903	0
1397	0	0	0	0	0	0	0	200	300	0	0	0	0	0	0	0	200	903	0	0	0	0	0	0	0	603	903	0
1397	1	0	0	0	0	0	0	200	300	0	0	0	0	0	0	0	200	903	0	0	0	0	0	0	0	603	903	0
1397	2	0	0	0	0	0	0	200	300	0	0	0	0	0	0	0	200	903	0	0	0	0	0	0	0	603	903	0
1397	3	0	0	0	0	0	0	200	300	0	0	0	0	0	0	0	200	903	0	0	0	0	0	0	0	603	903	0
1397	4	0	0	0	0	0	0	200	300	0	0	0	0	0	0	0	200	903	0	0	0	0	0	0	0	603	903	0
1397	5	0	0	0	0	0	0	200	300	0	0	0	0	0	0	0	200	903	0	0	0	0	0	0	0	603	903	0
1397	6	0	0	0	0	0	0	200	300	0	0	0	0	0	0	0	200	903	0	0	0	0	0	0	0	603	903	0
1397	7	0	0	0	0	0	0	200	300	0	0	0	0	0	0	0	200	903	0	0	0	0	0	0	0	603	903	0
1397	8	0	0	0	0	0	0	200	300	0	0	0	0	0	0	0	200	903	0	0	0	0	0	0	0	603	903	0
1397	9	0	0	0	0	0	0	200	300	0	0	0	0	0	0	0	200	903	0	0	0	0	0	0	0	603	903	0
1398	0	0	0	0	0	0	0	200	300	0	0	0	0	0	0	0	200	903	0	0	0	0	0	0	0	603	903	0
1398	1	0	0	0	0	0	0	200	300	0	0	0	0	0	0	0	200	903	0	0	0	0	0	0	0	603	903	0
1398	2	0	0	0	0	0	0	200	300	0	0	0	0	0	0	0	200	903	0	0	0	0	0	0	0	603	903	0
1398	3	0	0	0	0	0	0	200	300	0	0	0	0	0	0	0	200	903	0	0	0	0	0	0	0	603	903	0
1398	4	0	0	0	0	0	0	200	300	0	0	0	0	0	0	0	200	903	0	0	0	0	0	0	0	603	903	0
1398	5	0	0	0	0	0	0	200	300	0	0	0	0	0	0	0	200	903	0	0	0	0	0	0	0	603	903	0
1398	6	0	0	0	0	0	0	200	300	0	0	0	0	0	0	0	200	903	0	0	0	0	0	0	0	603	903	0
1398	7	0	0	0	0	0	0	200	300	0	0	0	0	0	0	0	200	903	0	0	0	0	0	0	0	603	903	0
1398	8	0	0	0	0	0	0	200	300	0	0	0	0	0	0	0	200	903	0	0	0	0	0	0	0	603	903	0
1398	9	0	0	0	0	0	0	200	300	0	0	0	0	0	0	0	200	903	0	0	0	0	0	0	0	603	903	0
1399	0	0	0	0	0	0	0	200	300	0	0	0	0	0	0	0	200	903	0	0	0	0	0	0	0	603	903	0
1399	1	0	0	0	0	0	0	200	300	0	0	0	0	0	0	0	200	903	0	0	0	0	0	0	0	603	903	0
1399	2	0	0	0	0	0	0	200	300	0	0	0	0	0	0	0	200	903	0	0	0	0	0	0	0	603	903	0
1399	3	0	0	0	0	0	0	200	300	0	0	0	0	0	0	0	200	903	0	0	0	0	0	0	0	603	903	0
1399	4	0	0	0	0	0	0	200	300	0	0	0	0	0	0	0	200	903	0	0	0	0	0	0	0	603	903	0
1399	5	0	0	0	0	0	0	200	300	0	0	0	0	0	0	0	200	903	0	0	0	0	0	0	0	603	903	0
1399	6	0	0	0	0	0	0	200	300	0	0	0	0	0	0	0	200	903	0	0	0	0	0	0	0	603	903	0
1399	7	0	0	0	0	0	0	200	300	0	0	0	0	0	0	0	200	903	0	0	0	0	0	0	0	603	903	0
1399	8	0	0	0	0	0	0	200	300	0	0	0	0	0	0	0	200	903	0	0	0	0	0	0	0	603	903	0
1399	9	0	0	0	0	0	0	200	300	0	0	0	0	0	0	0	200	903	0	0	0	0	0	0	0	603	903	0
1400	0	0	0	0	0	0	0	200	300	0	0	0	0	0	0	0	200	903	0	0	0	0	0	0	0	603	903	0
1400	1	0	0	0	0	0	0	200	300	0	0	0	0	0	0	0	200	903	0	0	0	0	0	0	0	603	903	0
1400	2	0	0	0	0	0	0	200	300	0	0	0	0	0	0	0	200	903	0	0	0	0	0	0	0	603	903	0
1400	3	0	0	0	0	0	0	200	300	0	0	0	0	0	0	0	200	903	0	0	0	0	0	0	0	603	903	0
1400	4	0	0	0	0	0	0	200	300	0	0	0	0	0	0	0	200	903	0	0	0	0	0	0	0	603	903	0
1400	5	0	0	0	0	0	0	200	300	0	0	0	0	0	0	0	200	903	0	0	0	0	0	0	0	603	903	0
1400	6	0	0	0	0	0	0	200	300	0	0	0	0	0	0	0	200	903	0	0	0	0	0	0	0	603	903	0
1400	7	0	0	0	0	0	0	200	300	0	0	0	0	0	0	0	200	903	0	0	0	0	0	0	0	603	903	0
1400	8	0	0	0	0	0	0	200	300	0	0	0	0	0	0	0	200	903	0	0	0	0	0	0	0	603	903	0
1400	9	0	0	0	0	0	0	200	300	0	0	0	0	0	0	0	200	903	0	0	0	0	0	0	0	603	903	0
1401	0	0	0	0	0	0	0	200	300	0	0	0	0	0	0	0	200	903	0	0	0	0	0	0	0	603	903	0
1401	1	0	0	0	0	0	0	200	300	0	0	0	0	0	0	0	200	903	0	0	0	0	0	0	0	603	903	0
1401	2	0	0	0	0	0	0	200	300	0	0	0	0	0	0	0	200	903	0	0	0	0	0	0	0	603	903	0
1401	3	0	0	0	0	0	0	200	300	0	0	0	0	0	0	0	200	903	0	0	0	0	0	0	0	603	903	0
1401	4	0	0	0	0	0	0	200	300	0	0	0	0	0	0	0	200	903	0	0	0	0	0	0	0	603	903	0
1401	5	0	0	0	0	0	0	200	300	0	0	0	0	0	0	0	200	903	0	0	0	0	0	0	0	603	903	0
1401	6	0	0	0	0	0	0	200	300	0	0	0	0	0	0	0	200	903	0	0	0	0	0	0	0	603	903	0
1401	7	0	0	0	0	0	0	200	300	0	0	0	0	0	0	0	200	903	0	0	0	0	0	0	0	603	903	0
1401	8	0	0	0	0	0	0	200	300	0	0	0	0	0	0	0	200	903	0	0	0	0	0	0	0	603	903	0
1401	9	0	0	0	0	0	0	200	300	0	0	0	0	0	0	0	200	903	0	0	0	0	0	0	0	603	903	0
1402	0	0	0	0	0	0	0	200	300	0	0	0	0	0	0	0	200	903	0	0	0	0	0	0	0	603	903	0
1402	1	0	0	0	0	0	0	200	300	0	0	0	0	0	0	0	200	903	0	0	0	0	0	0	0	603	903	0
1402	2	0	0	0	0	0	0	200	300	0	0	0	0	0	0	0	200	903	0	0	0	0	0	0	0	603	903	0
1402	3	0	0	0	0	0	0	200	300	0	0	0	0	0	0	0	200	903	0	0	0	0	0	0	0	603	903	0
1402	4	0	0	0	0	0	0	200	300	0	0	0	0	0	0	0	200	903	0	0	0	0	0	0	0	603	903	0
1402	5	0	0	0	0	0	0	200	300	0	0	0	0	0	0	0	200	903	0	0	0	0	0	0	0	603	903	0
1402	6	0	0	0	0	0	0	200	300	0	0	0	0	0	0	0	200	903	0	0	0	0	0	0	0	603	903	0
1402	7	0	0	0	0	0	0	200	300	0	0	0	0	0	0	0	200	903	0	0	0	0	0	0	0	603	903	0
1402	8	0	0	0	0	0	0	200	300	0	0	0	0	0	0	0	200	903	0	0	0	0	0	0	0	603	903	0
1402	9	0	0	0	0	0	0	200	300	0	0	0	0	0	0	0	200	903	0	0	0	0	0	0	0	603	903	0
1403	0	0	0	0	0	0	0	200	300	0	0	0	0	0	0	0	200	903	0	0	0	0	0	0	0	603	903	0
1403	1	0	0	0	0	0	0	200	300	0	0	0	0	0	0	0	200	903	0	0	0	0	0	0	0	603	903	0
1403	2	0	0	0	0	0	0	200	300	0	0	0	0	0	0	0	200	903	0	0	0	0	0	0	0	603	903	0
1403	3	0	0	0	0	0	0	200	300	0	0	0	0	0	0	0	200	903	0	0	0	0	0	0	0	603	903	0
1403	4	0	0	0	0	0	0	200	300	0	0	0	0	0	0	0	200	903	0	0	0	0	0	0	0	603	903	0
1403	5	0	0	0	0	0	0	200	300	0	0	0	0	0	0	0	200	903	0	0	0	0	0	0	0	603	903	0
1403	6	0	0	0	0	0	0	200	300	0	0	0	0	0	0	0	200	903	0	0	0	0	0	0	0	603	903	0
1403	7	0	0	0	0	0	0	200	300	0	0	0	0	0	0	0	200	903	0	0	0	0	0	0	0	603	903	0
1403	8	0	0	0	0	0	0	200	300	0	0	0	0	0	0	0	200	903	0	0	0	0	0	0	0	603	903	0
1403	9	0	0	0	0	0	0	200	300	0	0	0	0	0	0	0	200	903	0	0	0	0	0	0	0	603	903	0
1404	0	0	0	0	0	0	0	200	300	0	0	0	0	0	0	0	200	903	0	0	0	0	0	0	0	603	903	0
1404	1	0	0	0	0	0	0	200	300	0	0	0	0	0	0	0	200	903	0	0	0	0	0	0	0	603	903	0
1404	2	0	0	0	0	0	0	200	300	0	0	0	0	0	0	0	200	903	0	0	0	0	0	0	0	603	903	0
1404	3	0	0	0	0	0	0	200	300	0	0	0	0	0	0	0	200	903	0	0	0	0	0	0	0	603	903	0
1404	4	0	0	0	0	0	0	200	300	0	0	0	0	0	0	0	200	903	0	0	0	0	0	0	0	603	903	0
1404	5	0	0	0	0	0	0	200	300	0	0	0	0	0	0	0	200	903	0	0	0	0	0	0	0	603	903	0
1404	6	0	0	0	0	0	0	200	300	0	0	0	0	0	0	0	200	903	0	0	0	0	0	0	0	603	903	0
1404	7	0	0	0	0	0	0	200	300	0	0	0	0	0	0	0	200	903	0	0	0	0	0	0	0	603	903	0
1404	8	0	0	0	0	0	0	200	300	0	0	0	0	0	0	0	200	903	0	0	0	0	0	0	0	603	903	0
1404	9	0	0	0	0	0	0	200	300	0	0	0	0	0	0	0	200	903	0	0	0	0	0	0	0	603	903	0
1405	0	0	0	0	0	0	0	200	300	0	0	0	0	0	0	0	200	903	0	0	0	0	0	0	0	603	903	0
1405	1	0	0	0	0	0	0	200	300	0	0	0	0	0	0	0	200	903	0	0	0	0	0	0	0	603	903	0
1405	2	0	0	0	0	0	0	200	300	0	0	0	0	0	0	0	200	903	0	0	0	0	0	0	0	603	903	0
1405	3	0	0	0	0	0	0	200	300	0	0	0	0	0	0	0	200	903	0	0	0	0	0	0	0	603	903	0
1405	4	0	0	0	0	0	0	200	300	0	0	0	0	0	0	0	200	903	0	0	0	0	0	0	0	603	903	0
1405	5	0	0	0	0	0	0	200	300	0	0	0	0	0	0	0	200	903	0	0	0	0	0	0	0	603	903	0
1405	6	0	0	0	0	0	0	200	300	0	0	0	0	0	0	0	200	903	0	0	0	0	0	0	0	603	903	0
1405	7	0	0	0	0	0	0	200	300	0	0	0	0	0	0	0	200	903	0	0	0	0	0	0	0	603	903	0
1405	8	0	0	0	0	0	0	200	300	0	0	0	0	0	0	0	200	903	0	0	0	0	0	0	0	603	903	0
1405	9	0	0	0	0	0	0	200	300	0	0	0	0	0	0	0	200	903	0	0	0	0	0	0	0	603	903	0
1406	0	0	0	0	0	0	0	200	300	0	0	0	0	0	0	0	200	903	0	0	0	0	0	0	0	603	903	0
1406	1	0	0	0	0	0	0	200	300	0	0	0	0	0	0	0	200	903	0	0	0	0	0	0	0	603	903	0
1406	2	0	0	0	0	0	0	200	300	0	0	0	0	0	0	0	200	903	0	0	0	0	0	0	0	603	903	0
1406	3	0	0	0	0	0	0	200	300	0	0	0	0	0	0	0	200	903	0	0	0	0	0	0	0	603	903	0
1406	4	0	0	0	0	0	0	200	300	0	0	0	0	0	0	0	200	903	0	0	0	0	0	0	0	603	903	0
1406	5	0	0	0	0	0	0	200	300	0	0	0	0	0	0	0	200	903	0	0	0	0	0	0	0	603	903	0
1406	6	0	0	0	0	0	0	200	300	0	0	0	0	0	0	0	200	903	0	0	0	0	0	0	0	603	903	0
1406	7	0	0	0	0	0	0	200	300	0	0	0	0	0	0	0	200	903	0	0	0	0	0	0	0	603	903	0
1406	8	0	0	0	0	0	0	200	300	0	0	0	0	0	0	0	200	903	0	0	0	0	0	0	0	603	903	0
1406	9	0	0	0	0	0	0	200	300	0	0	0	0	0	0	0	200	903	0	0	0	0	0	0	0	603	903	0
1407	0	0	0	0	0	0	0	200	300	0	0	0	0	0	0	0	200	903	0	0	0	0	0	0	0	603	903	0
1407	1	0	0	0	0	0	0	200	300	0	0	0	0	0	0	0	200	903	0	0	0	0	0	0	0	603	903	0
1407	2	0	0	0	0	0	0	200	300	0	0	0	0	0	0	0	200	903	0	0	0	0	0	0	0	603	903	0
1407	3	0	0	0	0	0	0	200	300	0	0	0	0	0	0	0	200	903	0	0	0	0	0	0	0	603	903	0
1407	4	0	0	0	0	0	0	200	300	0	0	0	0	0	0	0	200	903	0	0	0	0	0	0	0	603	903	0
1407	5	0	0	0	0	0	0	200	300	0	0	0	0	0	0	0	200	903	0	0	0	0	0	0	0	603	903	0
1407	6	0	0	0	0	0	0	200	300	0	0	0	0	0	0	0	200	903	0	0	0	0	0	0	0	603	903	0
1407	7	0	0	0	0	0	0	200	300	0	0	0	0	0	0	0	200	903	0	0	0	0	0	0	0	603	903	0
1407	8	0	0	0	0	0	0	200	300	0	0	0	0	0	0	0	200	903	0	0	0	0	0	0	0	603	903	0
1407	9	0	0	0	0	0	0	200	300	0	0	0	0	0	0	0	200	903	0	0	0	0	0	0	0	603	903	0
1408	0	0	0	0	0	0	0	200	300	0	0	0	0	0	0	0	200	903	0	0	0	0	0	0	0	603	903	0
1408	1	0	0	0	0	0	0	200	300	0	0	0	0	0	0	0	200	903	0	0	0	0	0	0	0	603	903	0
1408	2	0	0	0	0	0	0	200	300	0	0	0	0	0	0	0	200	903	0	0	0	0	0	0	0	603	903	0
1408	3	0	0	0	0	0	0	200	300	0	0	0	0	0	0	0	200	903	0	0	0	0	0	0	0	603	903	0
1408	4	0	0	0	0	0	0	200	300	0	0	0	0	0	0	0	200	903	0	0	0	0	0	0	0	603	903	0
1408	5	0	0	0	0	0	0	200	300	0	0	0	0	0	0	0	200	903	0	0	0	0	0	0	0	603	903	0
1408	6	0	0	0	0	0	0	200	300	0	0	0	0	0	0	0	200	903	0	0	0	0	0	0	0	603	903	0
1408	7	0	0	0	0	0	0	200	300	0	0	0	0	0	0	0	200	903	0	0	0	0	0	0	0	603	903	0
1408	8	0	0	0	0	0	0	200	300	0	0	0	0	0	0	0	200	903	0	0	0	0	0	0	0	603	903	0
1408	9	0	0	0	0	0	0	200	300	0	0	0	0	0	0	0	200	903	0	0	0	0	0	0	0	603	903	0
1409	0	0	0	0	0	0	0	200	300	0	0	0	0	0	0	0	200	903	0	0	0	0	0	0	0	603	903	0
1409	1	0	0	0	0	0	0	200	300	0	0	0	0	0	0	0	200	903	0	0	0	0	0	0	0	603	903	0
1409	2	0	0	0	0	0	0	200	300	0	0	0	0	0	0	0	200	903	0	0	0	0	0	0	0	603	903	0
1409	3	0	0	0	0	0	0	200	300	0	0	0	0	0	0	0	200	903	0	0	0	0	0	0	0	603	903	0
1409	4	0	0	0	0	0	0	200	300	0	0	0	0	0	0	0	200	903	0	0	0	0	0	0	0	603	903	0
1409	5	0	0	0	0	0	0	200	300	0	0	0	0	0	0	0	200	903	0	0	0	0	0	0	0	603	903	0
1409	6	0	0	0	0	0	0	200	300	0	0	0	0	0	0	0	200	903	0	0	0	0	0	0	0	603	903	0
1409	7	0	0	0	0	0	0	200	300	0	0	0	0	0	0	0	200	903	0	0	0	0	0	0	0	603	903	0
1409	8	0	0	0	0	0	0	200	300	0	0	0	0	0	0	0	200	903	0	0	0	0	0	0	0	603	903	0
1409	9	0	0	0	0	0	0	200	300	0	0	0	0	0	0	0	200	903	0	0	0	0	0	0	0	603	903	0
1410	0	0	0	0	0	0	0	200	300	0	0	0	0	0	0	0	200	903	0	0	0	0	0	0	0	603	903	0
1410	1	0	0	0	0	0	0	200	300	0	0	0	0	0	0	0	200	903	0	0	0	0	0	0	0	603	903	0
1410	2	0	0	0	0	0	0	200	300	0	0	0	0	0	0	0	200	903	0	0	0	0	0	0	0	603	903	0
1410	3	0	0	0	0	0	0	200	300	0	0	0	0	0	0	0	200	903	0	0	0	0	0	0	0	603	903	0
1410	4	0	0	0	0	0	0	200	300	0	0	0	0	0	0	0	200	903	0	0	0	0	0	0	0	603	903	0
1410	5	0	0	0	0	0	0	200	300	0	0	0	0	0	0	0	200	903	0	0	0	0	0	0	0	603	903	0
1410	6	0	0	0	0	0	0	200	300	0	0	0	0	0	0	0	200	903	0	0	0	0	0	0	0	603	903	0
1410	7	0	0	0	0	0	0	200	300	0	0	0	0	0	0	0	200	903	0	0	0	0	0	0	0	603	903	0
1410	8	0	0	0	0	0	0	200	300	0	0	0	0	0	0	0	200	903	0	0	0	0	0	0	0	603	903	0
1410	9	0	0	0	0	0	0	200	300	0	0	0	0	0	0	0	200	903	0	0	0	0	0	0	0	603	903	0
1411	0	0	0	0	0	0	0	200	300	0	0	0	0	0	0	0	200	903	0	0	0	0	0	0	0	603	903	0
1411	1	0	0	0	0	0	0	200	300	0	0	0	0	0	0	0	200	903	0	0	0	0	0	0	0	603	903	0
1411	2	0	0	0	0	0	0	200	300	0	0	0	0	0	0	0	200	903	0	0	0	0	0	0	0	603	903	0
1411	3	0	0	0	0	0	0	200	300	0	0	0	0	0	0	0	200	903	0	0	0	0	0	0	0	603	903	0
1411	4	0	0	0	0	0	0	200	300	0	0	0	0	0	0	0	200	903	0	0	0	0	0	0	0	603	903	0
1411	5	0	0	0	0	0	0	200	300	0	0	0	0	0	0	0	200	903	0	0	0	0	0	0	0	603	903	0
1411	6	0	0	0	0	0	0	200	300	0	0	0	0	0	0	0	200	903	0	0	0	0	0	0	0	603	903	0
1411	7	0	0	0	0	0	0	200	300	0	0	0	0	0	0	0	200	903	0	0	0	0	0	0	0	603	903	0
1411	8	0	0	0	0	0	0	200	300	0	0	0	0	0	0	0	200	903	0	0	0	0	0	0	0	603	903	0
1411	9	0	0	0	0	0	0	200	300	0	0	0	0	0	0	0	200	903	0	0	0	0	0	0	0	603	903	0
1412	0	0	0	0	0	0	0	200	300	0	0	0	0	0	0	0	200	903	0	0	0	0	0	0	0	603	903	0
1412	1	0	0	0	0	0	0	200	300	0	0	0	0	0	0	0	200	903	0	0	0	0	0	0	0	603	903	0
1412	2	0	0	0	0	0	0	200	300	0	0	0	0	0	0	0	200	903	0	0	0	0	0	0	0	603	903	0
1412	3	0	0	0	0	0	0	200	300	0	0	0	0	0	0	0	200	903	0	0	0	0	0	0	0	603	903	0
1412	4	0	0	0	0	0	0	200	300	0	0	0	0	0	0	0	200	903	0	0	0	0	0	0	0	603	903	0
1412	5	0	0	0	0	0	0	200	300	0	0	0	0	0	0	0	200	903	0	0	0	0	0	0	0	603	903	0
1412	6	0	0	0	0	0	0	200	300	0	0	0	0	0	0	0	200	903	0	0	0	0	0	0	0	603	903	0
1412	7	0	0	0	0	0	0	200	300	0	0	0	0	0	0	0	200	903	0	0	0	0	0	0	0	603	903	0
1412	8	0	0	0	0	0	0	200	300	0	0	0	0	0	0	0	200	903	0	0	0	0	0	0	0	603	903	0
1412	9	0	0	0	0	0	0	200	300	0	0	0	0	0	0	0	200	903	0	0	0	0	0	0	0	603	903	0
1413	0	0	0	0	0	0	0	200	300	0	0	0	0	0	0	0	200	903	0	0	0	0	0	0	0	603	903	0
1413	1	0	0	0	0	0	0	200	300	0	0	0	0	0	0	0	200	903	0	0	0	0	0	0	0	603	903	0
1413	2	0	0	0	0	0	0	200	300	0	0	0	0	0	0	0	200	903	0	0	0	0	0	0	0	603	903	0
1413	3	0	0	0	0	0	0	200	300	0	0	0	0	0	0	0	200	903	0	0	0	0	0	0	0	603	903	0
1413	4	0	0	0	0	0	0	200	300	0	0	0	0	0	0	0	200	903	0	0	0	0	0	0	0	603	903	0
1413	5	0	0	0	0	0	0	200	300	0	0	0	0	0	0	0	200	903	0	0	0	0	0	0	0	603	903	0
1413	6	0	0	0	0	0	0	200	300	0	0	0	0	0	0	0	200	903	0	0	0	0	0	0	0	603	903	0
1413	7	0	0	0	0	0	0	200	300	0	0	0	0	0	0	0	200	903	0	0	0	0	0	0	0	603	903	0
1413	8	0	0	0	0	0	0	200	300	0	0	0	0	0	0	0	200	903	0	0	0	0	0	0	0	603	903	0
1413	9	0	0	0	0	0	0	200	300	0	0	0	0	0	0	0	200	903	0	0	0	0	0	0	0	603	903	0
1414	0	0	0	0	0	0	0	200	300	0	0	0	0	0	0	0	200	903	0	0	0	0	0	0	0	603	903	0
1414	1	0	0	0	0	0	0	200	300	0	0	0	0	0	0	0	200	903	0	0	0	0	0	0	0	603	903	0
1414	2	0	0	0	0	0	0	200	300	0	0	0	0	0	0	0	200	903	0	0	0	0	0	0	0	603	903	0
1414	3	0	0	0	0	0	0	200	300	0	0	0	0	0	0	0	200	903	0	0	0	0	0	0	0	603	903	0
1414	4	0	0	0	0	0	0	200	300	0	0	0	0	0	0	0	200	903	0	0	0	0	0	0	0	603	903	0
1414	5	0	0	0	0	0	0	200	300	0	0	0	0	0	0	0	200	903	0	0	0	0	0	0	0	603	903	0
1414	6	0	0	0	0	0	0	200	300	0	0	0	0	0	0	0	200	903	0	0	0	0	0	0	0	603	903	0
1414	7	0	0	0	0	0	0	200	300	0	0	0	0	0	0	0	200	903	0	0	0	0	0	0	0	603	903	0
1414	8	0	0	0	0	0	0	200	300	0	0	0	0	0	0	0	200	903	0	0	0	0	0	0	0	603	903	0
1414	9	0	0	0	0	0	0	200	300	0	0	0	0	0	0	0	200	903	0	0	0	0	0	0	0	603	903	0
1415	0	0	0	0	0	0	0	200	300	0	0	0	0	0	0	0	200	903	0	0	0	0	0	0	0	603	903	0
1415	1	0	0	0	0	0	0	200	300	0	0	0	0	0	0	0	200	903	0	0	0	0	0	0	0	603	903	0
1415	2	0	0	0	0	0	0	200	300	0	0	0	0	0	0	0	200	903	0	0	0	0	0	0	0	603	903	0
1415	3	0	0	0	0	0	0	200	300	0	0	0	0	0	0	0	200	903	0	0	0	0	0	0	0	603	903	0
1415	4	0	0	0	0	0	0	200	300	0	0	0	0	0	0	0	200	903	0	0	0	0	0	0	0	603	903	0
1415	5	0	0	0	0	0	0	200	300	0	0	0	0	0	0	0	200	903	0	0	0	0	0	0	0	603	903	0
1415	6	0	0	0	0	0	0	200	300	0	0	0	0	0	0	0	200	903	0	0	0	0	0	0	0	603	903	0
1415	7	0	0	0	0	0	0	200	300	0	0	0	0	0	0	0	200	903	0	0	0	0	0	0	0	603	903	0
1415	8	0	0	0	0	0	0	200	300	0	0	0	0	0	0	0	200	903	0	0	0	0	0	0	0	603	903	0
1415	9	0	0	0	0	0	0	200	300	0	0	0	0	0	0	0	200	903	0	0	0	0	0	0	0	603	903	0
1416	0	0	0	0	0	0	0	200	300	0	0	0	0	0	0	0	200	903	0	0	0	0	0	0	0	603	903	0
1416	1	0	0	0	0	0	0	200	300	0	0	0	0	0	0	0	200	903	0	0	0	0	0	0	0	603	903	0
1416	2	0	0	0	0	0	0	200	300	0	0	0	0	0	0	0	200	903	0	0	0	0	0	0	0	603	903	0
1416	3	0	0	0	0	0	0	200	300	0	0	0	0	0	0	0	200	903	0	0	0	0	0	0	0	603	903	0
1416	4	0	0	0	0	0	0	200	300	0	0	0	0	0	0	0	200	903	0	0	0	0	0	0	0	603	903	0
1416	5	0	0	0	0	0	0	200	300	0	0	0	0	0	0	0	200	903	0	0	0	0	0	0	0	603	903	0
1416	6	0	0	0	0	0	0	200	300	0	0	0	0	0	0	0	200	903	0	0	0	0	0	0	0	603	903	0
1416	7	0	0	0	0	0	0	200	300	0	0	0	0	0	0	0	200	903	0	0	0	0	0	0	0	603	903	0
1416	8	0	0	0	0	0	0	200	300	0	0	0	0	0	0	0	200	903	0	0	0	0	0	0	0	603	903	0
1416	9	0	0	0	0	0	0	200	300	0	0	0	0	0	0	0	200	903	0	0	0	0	0	0	0	603	903	0
1417	0	0	0	0	0	0	0	200	300	0	0	0	0	0	0	0	200	903	0	0	0	0	0	0	0	603	903	0
1417	1	0	0	0	0	0	0	200	300	0	0	0	0	0	0	0	200	903	0	0	0	0	0	0	0	603	903	0
1417	2	0	0	0	0	0	0	200	300	0	0	0	0	0	0	0	200	903	0	0	0	0	0	0	0	603	903	0
1417	3	0	0	0	0	0	0	200	300	0	0	0	0	0	0	0	200	903	0	0	0	0	0	0	0	603	903	0
1417	4	0	0	0	0	0	0	200	300	0	0	0	0	0	0	0	200	903	0	0	0	0	0	0	0	603	903	0
1417	5	0	0	0	0	0	0	200	300	0	0	0	0	0	0	0	200	903	0	0	0	0	0	0	0	603	903	0
1417	6	0	0	0	0	0	0	200	300	0	0	0	0	0	0	0	200	903	0	0	0	0	0	0	0	603	903	0
1417	7	0	0	0	0	0	0	200	300	0	0	0	0	0	0	0	200	903	0	0	0	0	0	0	0	603	903	0
1417	8	0	0	0	0	0	0	200	300	0	0	0	0	0	0	0	200	903	0	0	0	0	0	0	0	603	903	0
1417	9	0	0	0	0	0	0	200	300	0	0	0	0	0	0	0	200	903	0	0	0	0	0	0	0	603	903	0
1418	0	0	0	0	0	0	0	200	300	0	0	0	0	0	0	0	200	903	0	0	0	0	0	0	0	603	903	0
1418	1	0	0	0	0	0	0	200	300	0	0	0	0	0	0	0	200	903	0	0	0	0	0	0	0	603	903	0
1418	2	0	0	0	0	0	0	200	300	0	0	0	0	0	0	0	200	903	0	0	0	0	0	0	0	603	903	0
1418	3	0	0	0	0	0	0	200	300	0	0	0	0	0	0	0	200	903	0	0	0	0	0	0	0	603	903	0
1418	4	0	0	0	0	0	0	200	300	0	0	0	0	0	0	0	200	903	0	0	0	0	0	0	0	603	903	0
1418	5	0	0	0	0	0	0	200	300	0	0	0	0	0	0	0	200	903	0	0	0	0	0	0	0	603	903	0
1418	6	0	0	0	0	0	0	200	300	0	0	0	0	0	0	0	200	903	0	0	0	0	0	0	0	603	903	0
1418	7	0	0	0	0	0	0	200	300	0	0	0	0	0	0	0	200	903	0	0	0	0	0	0	0	603	903	0
1418	8	0	0	0	0	0	0	200	300	0	0	0	0	0	0	0	200	903	0	0	0	0	0	0	0	603	903	0
1418	9	0	0	0	0	0	0	200	300	0	0	0	0	0	0	0	200	903	0	0	0	0	0	0	0	603	903	0
1419	0	0	0	0	0	0	0	200	300	0	0	0	0	0	0	0	200	903	0	0	0	0	0	0	0	603	903	0
1419	1	0	0	0	0	0	0	200	300	0	0	0	0	0	0	0	200	903	0	0	0	0	0	0	0	603	903	0
1419	2	0	0	0	0	0	0	200	300	0	0	0	0	0	0	0	200	903	0	0	0	0	0	0	0	603	903	0
1419	3	0	0	0	0	0	0	200	300	0	0	0	0	0	0	0	200	903	0	0	0	0	0	0	0	603	903	0
1419	4	0	0	0	0	0	0	200	300	0	0	0	0	0	0	0	200	903	0	0	0	0	0	0	0	603	903	0
1419	5	0	0	0	0	0	0	200	300	0	0	0	0	0	0	0	200	903	0	0	0	0	0	0	0	603	903	0
1419	6	0	0	0	0	0	0	200	300	0	0	0	0	0	0	0	200	903	0	0	0	0	0	0	0	603	903	0
1419	7	0	0	0	0	0	0	200	300	0	0	0	0	0	0	0	200	903	0	0	0	0	0	0	0	603	903	0
1419	8	0	0	0	0	0	0	200	300	0	0	0	0	0	0	0	200	903	0	0	0	0	0	0	0	603	903	0
1419	9	0	0	0	0	0	0	200	300	0	0	0	0	0	0	0	200	903	0	0	0	0	0	0	0	603	903	0
1420	0	0	0	0	0	0	0	200	300	0	0	0	0	0	0	0	200	903	0	0	0	0	0	0	0	603	903	0
1420	1	0	0	0	0	0	0	200	300	0	0	0	0	0	0	0	200	903	0	0	0	0	0	0	0	603	903	0
1420	2	0	0	0	0	0	0	200	300	0	0	0	0	0	0	0	200	903	0	0	0	0	0	0	0	603	903	0
1420	3	0	0	0	0	0	0	200	300	0	0	0	0	0	0	0	200	903	0	0	0	0	0	0	0	603	903	0
1420	4	0	0	0	0	0	0	200	300	0	0	0	0	0	0	0	200	903	0	0	0	0	0	0	0	603	903	0
1420	5	0	0	0	0	0	0	200	300	0	0	0	0	0	0	0	200	903	0	0	0	0	0	0	0	603	903	0
1420	6	0	0	0	0	0	0	200	300	0	0	0	0	0	0	0	200	903	0	0	0	0	0	0	0	603	903	0
1420	7	0	0	0	0	0	0	200	300	0	0	0	0	0	0	0	200	903	0	0	0	0	0	0	0	603	903	0
1420	8	0	0	0	0	0	0	200	300	0	0	0	0	0	0	0	200	903	0	0	0	0	0	0	0	603	903	0
1420	9	0	0	0	0	0	0	200	300	0	0	0	0	0	0	0	200	903	0	0	0	0	0	0	0	603	903	0
1421	0	0	0	0	0	0	0	200	300	0	0	0	0	0	0	0	200	903	0	0	0	0	0	0	0	603	903	0
1421	1	0	0	0	0	0	0	200	300	0	0	0	0	0	0	0	200	903	0	0	0	0	0	0	0	603	903	0
1421	2	0	0	0	0	0	0	200	300	0	0	0	0	0	0	0	200	903	0	0	0	0	0	0	0	603	903	0
1421	3	0	0	0	0	0	0	200	300	0	0	0	0	0	0	0	200	903	0	0	0	0	0	0	0	603	903	0
1421	4	0	0	0	0	0	0	200	300	0	0	0	0	0	0	0	200	903	0	0	0	0	0	0	0	603	903	0
1421	5	0	0	0	0	0	0	200	300	0	0	0	0	0	0	0	200	903	0	0	0	0	0	0	0	603	903	0
1421	6	0	0	0	0	0	0	200	300	0	0	0	0	0	0	0	200	903	0	0	0	0	0	0	0	603	903	0
1421	7	0	0	0	0	0	0	200	300	0	0	0	0	0	0	0	200	903	0	0	0	0	0	0	0	603	903	0
1421	8	0	0	0	0	0	0	200	300	0	0	0	0	0	0	0	200	903	0	0	0	0	0	0	0	603	903	0
1421	9	0	0	0	0	0	0	200	300	0	0	0	0	0	0	0	200	903	0	0	0	0	0	0	0	603	903	0
1422	0	0	0	0	0	0	0	200	300	0	0	0	0	0	0	0	200	903	0	0	0	0	0	0	0	603	903	0
1422	1	0	0	0	0	0	0	200	300	0	0	0	0	0	0	0	200	903	0	0	0	0	0	0	0	603	903	0
1422	2	0	0	0	0	0	0	200	300	0	0	0	0	0	0	0	200	903	0	0	0	0	0	0	0	603	903	0
1422	3	0	0	0	0	0	0	200	300	0	0	0	0	0	0	0	200	903	0	0	0	0	0	0	0	603	903	0
1422	4	0	0	0	0	0	0	200	300	0	0	0	0	0	0	0	200	903	0	0	0	0	0	0	0	603	903	0
1422	5	0	0	0	0	0	0	200	300	0	0	0	0	0	0	0	200	903	0	0	0	0	0	0	0	603	903	0
1422	6	0	0	0	0	0	0	200	300	0	0	0	0	0	0	0	200	903	0	0	0	0	0	0	0	603	903	0
1422	7	0	0	0	0	0	0	200	300	0	0	0	0	0	0	0	200	903	0	0	0	0	0	0	0	603	903	0
1422	8	0	0	0	0	0	0	200	300	0	0	0	0	0	0	0	200	903	0	0	0	0	0	0	0	603	903	0
1422	9	0	0	0	0	0	0	200	300	0	0	0	0	0	0	0	200	903	0	0	0	0	0	0	0	603	903	0
1423	0	0	0	0	0	0	0	200	300	0	0	0	0	0	0	0	200	903	0	0	0	0	0	0	0	603	903	0
1423	1	0	0	0	0	0	0	200	300	0	0	0	0	0	0	0	200	903	0	0	0	0	0	0	0	603	903	0
1423	2	0	0	0	0	0	0	200	300	0	0	0	0	0	0	0	200	903	0	0	0	0	0	0	0	603	903	0
1423	3	0	0	0	0	0	0	200	300	0	0	0	0	0	0	0	200	903	0	0	0	0	0	0	0	603	903	0
1423	4	0	0	0	0	0	0	200	300	0	0	0	0	0	0	0	200	903	0	0	0	0	0	0	0	603	903	0
1423	5	0	0	0	0	0	0	200	300	0	0	0	0	0	0	0	200	903	0	0	0	0	0	0	0	603	903	0
1423	6	0	0	0	0	0	0	200	300	0	0	0	0	0	0	0	200	903	0	0	0	0	0	0	0	603	903	0
1423	7	0	0	0	0	0	0	200	300	0	0	0	0	0	0	0	200	903	0	0	0	0	0	0	0	603	903	0
1423	8	0	0	0	0	0	0	200	300	0	0	0	0	0	0	0	200	903	0	0	0	0	0	0	0	603	903	0
1423	9	0	0	0	0	0	0	200	300	0	0	0	0	0	0	0	200	903	0	0	0	0	0	0	0	603	903	0
1424	0	0	0	0	0	0	0	200	300	0	0	0	0	0	0	0	200	903	0	0	0	0	0	0	0	603	903	0
1424	1	0	0	0	0	0	0	200	300	0	0	0	0	0	0	0	200	903	0	0	0	0	0	0	0	603	903	0
1424	2	0	0	0	0	0	0	200	300	0	0	0	0	0	0	0	200	903	0	0	0	0	0	0	0	603	903	0
1424	3	0	0	0	0	0	0	200	300	0	0	0	0	0	0	0	200	903	0	0	0	0	0	0	0	603	903	0
1424	4	0	0	0	0	0	0	200	300	0	0	0	0	0	0	0	200	903	0	0	0	0	0	0	0	603	903	0
1424	5	0	0	0	0	0	0	200	300	0	0	0	0	0	0	0	200	903	0	0	0	0	0	0	0	603	903	0
1424	6	0	0	0	0	0	0	200	300	0	0	0	0	0	0	0	200	903	0	0	0	0	0	0	0	603	903	0
1424	7	0	0	0	0	0	0	200	300	0	0	0	0	0	0	0	200	903	0	0	0	0	0	0	0	603	903	0
1424	8	0	0	0	0	0	0	200	300	0	0	0	0	0	0	0	200	903	0	0	0	0	0	0	0	603	903	0
1424	9	0	0	0	0	0	0	200	300	0	0	0	0	0	0	0	200	903	0	0	0	0	0	0	0	603	903	0
1425	0	0	0	0	0	0	0	200	300	0	0	0	0	0	0	0	200	903	0	0	0	0	0	0	0	603	903	0
1425	1	0	0	0	0	0	0	200	300	0	0	0	0	0	0	0	200	903	0	0	0	0	0	0	0	603	903	0
1425	2	0	0	0	0	0	0	200	300	0	0	0	0	0	0	0	200	903	0	0	0	0	0	0	0	603	903	0
1425	3	0	0	0	0	0	0	200	300	0	0	0	0	0	0	0	200	903	0	0	0	0	0	0	0	603	903	0
1425	4	0	0	0	0	0	0	200	300	0	0	0	0	0	0	0	200	903	0	0	0	0	0	0	0	603	903	0
1425	5	0	0	0	0	0	0	200	300	0	0	0	0	0	0	0	200	903	0	0	0	0	0	0	0	603	903	0
1425	6	0	0	0	0	0	0	200	300	0	0	0	0	0	0	0	200	903	0	0	0	0	0	0	0	603	903	0
1425	7	0	0	0	0	0	0	200	300	0	0	0	0	0	0	0	200	903	0	0	0	0	0	0	0	603	903	0
1425	8	0	0	0	0	0	0	200	300	0	0	0	0	0	0	0	200	903	0	0	0	0	0	0	0	603	903	0
1425	9	0	0	0	0	0	0	200	300	0	0	0	0	0	0	0	200	903	0	0	0	0	0	0	0	603	903	0
1426	0	0	0	0	0	0	0	200	300	0	0	0	0	0	0	0	200	903	0	0	0	0	0	0	0	603	903	0
1426	1	0	0	0	0	0	0	200	300	0	0	0	0	0	0	0	200	903	0	0	0	0	0	0	0	603	903	0
1426	2	0	0	0	0	0	0	200	300	0	0	0	0	0	0	0	200	903	0	0	0	0	0	0	0	603	903	0
1426	3	0	0	0	0	0	0	200	300	0	0	0	0	0	0	0	200	903	0	0	0	0	0	0	0	603	903	0
1426	4	0	0	0	0	0	0	200	300	0	0	0	0	0	0	0	200	903	0	0	0	0	0	0	0	603	903	0
1426	5	0	0	0	0	0	0	200	300	0	0	0	0	0	0	0	200	903	0	0	0	0	0	0	0	603	903	0
1426	6	0	0	0	0	0	0	200	300	0	0	0	0	0	0	0	200	903	0	0	0	0	0	0	0	603	903	0
1426	7	0	0	0	0	0	0	200	300	0	0	0	0	0	0	0	200	903	0	0	0	0	0	0	0	603	903	0
1426	8	0	0	0	0	0	0	200	300	0	0	0	0	0	0	0	200	903	0	0	0	0	0	0	0	603	903	0
1426	9	0	0	0	0	0	0	200	300	0	0	0	0	0	0	0	200	903	0	0	0	0	0	0	0	603	903	0
1427	0	0	0	0	0	0	0	200	300	0	0	0	0	0	0	0	200	903	0	0	0	0	0	0	0	603	903	0
1427	1	0	0	0	0	0	0	200	300	0	0	0	0	0	0	0	200	903	0	0	0	0	0	0	0	603	903	0
1427	2	0	0	0	0	0	0	200	300	0	0	0	0	0	0	0	200	903	0	0	0	0	0	0	0	603	903	0
1427	3	0	0	0	0	0	0	200	300	0	0	0	0	0	0	0	200	903	0	0	0	0	0	0	0	603	903	0
1427	4	0	0	0	0	0	0	200	300	0	0	0	0	0	0	0	200	903	0	0	0	0	0	0	0	603	903	0
1427	5	0	0	0	0	0	0	200	300	0	0	0	0	0	0	0	200	903	0	0	0	0	0	0	0	603	903	0
1427	6	0	0	0	0	0	0	200	300	0	0	0	0	0	0	0	200	903	0	0	0	0	0	0	0	603	903	0
1427	7	0	0	0	0	0	0	200	300	0	0	0	0	0	0	0	200	903	0	0	0	0	0	0	0	603	903	0
1427	8	0	0	0	0	0	0	200	300	0	0	0	0	0	0	0	200	903	0	0	0	0	0	0	0	603	903	0
1427	9	0	0	0	0	0	0	200	300	0	0	0	0	0	0	0	200	903	0	0	0	0	0	0	0	603	903	0
1428	0	0	0	0	0	0	0	200	300	0	0	0	0	0	0	0	200	903	0	0	0	0	0	0	0	603	903	0
1428	1	0	0	0	0	0	0	200	300	0	0	0	0	0	0	0	200	903	0	0	0	0	0	0	0	603	903	0
1428	2	0	0	0	0	0	0	200	300	0	0	0	0	0	0	0	200	903	0	0	0	0	0	0	0	603	903	0
1428	3	0	0	0	0	0	0	200	300	0	0	0	0	0	0	0	200	903	0	0	0	0	0	0	0	603	903	0
1428	4	0	0	0	0	0	0	200	300	0	0	0	0	0	0	0	200	903	0	0	0	0	0	0	0	603	903	0
1428	5	0	0	0	0	0	0	200	300	0	0	0	0	0	0	0	200	903	0	0	0	0	0	0	0	603	903	0
1428	6	0	0	0	0	0	0	200	300	0	0	0	0	0	0	0	200	903	0	0	0	0	0	0	0	603	903	0
1428	7	0	0	0	0	0	0	200	300	0	0	0	0	0	0	0	200	903	0	0	0	0	0	0	0	603	903	0
1428	8	0	0	0	0	0	0	200	300	0	0	0	0	0	0	0	200	903	0	0	0	0	0	0	0	603	903	0
1428	9	0	0	0	0	0	0	200	300	0	0	0	0	0	0	0	200	903	0	0	0	0	0	0	0	603	903	0
1429	0	0	0	0	0	0	0	200	300	0	0	0	0	0	0	0	200	903	0	0	0	0	0	0	0	603	903	0
1429	1	0	0	0	0	0	0	200	300	0	0	0	0	0	0	0	200	903	0	0	0	0	0	0	0	603	903	0
1429	2	0	0	0	0	0	0	200	300	0	0	0	0	0	0	0	200	903	0	0	0	0	0	0	0	603	903	0
1429	3	0	0	0	0	0	0	200	300	0	0	0	0	0	0	0	200	903	0	0	0	0	0	0	0	603	903	0
1429	4	0	0	0	0	0	0	200	300	0	0	0	0	0	0	0	200	903	0	0	0	0	0	0	0	603	903	0
1429	5	0	0	0	0	0	0	200	300	0	0	0	0	0	0	0	200	903	0	0	0	0	0	0	0	603	903	0
1429	6	0	0	0	0	0	0	200	300	0	0	0	0	0	0	0	200	903	0	0	0	0	0	0	0	603	903	0
1429	7	0	0	0	0	0	0	200	300	0	0	0	0	0	0	0	200	903	0	0	0	0	0	0	0	603	903	0
1429	8	0	0	0	0	0	0	200	300	0	0	0	0	0	0	0	200	903	0	0	0	0	0	0	0	603	903	0
1429	9	0	0	0	0	0	0	200	300	0	0	0	0	0	0	0	200	903	0	0	0	0	0	0	0	603	903	0
1430	0	0	0	0	0	0	0	200	300	0	0	0	0	0	0	0	200	903	0	0	0	0	0	0	0	603	903	0
1430	1	0	0	0	0	0	0	200	300	0	0	0	0	0	0	0	200	903	0	0	0	0	0	0	0	603	903	0
1430	2	0	0	0	0	0	0	200	300	0	0	0	0	0	0	0	200	903	0	0	0	0	0	0	0	603	903	0
1430	3	0	0	0	0	0	0	200	300	0	0	0	0	0	0	0	200	903	0	0	0	0	0	0	0	603	903	0
1430	4	0	0	0	0	0	0	200	300	0	0	0	0	0	0	0	200	903	0	0	0	0	0	0	0	603	903	0
1430	5	0	0	0	0	0	0	200	300	0	0	0	0	0	0	0	200	903	0	0	0	0	0	0	0	603	903	0
1430	6	0	0	0	0	0	0	200	300	0	0	0	0	0	0	0	200	903	0	0	0	0	0	0	0	603	903	0
1430	7	0	0	0	0	0	0	200	300	0	0	0	0	0	0	0	200	903	0	0	0	0	0	0	0	603	903	0
1430	8	0	0	0	0	0	0	200	300	0	0	0	0	0	0	0	200	903	0	0	0	0	0	0	0	603	903	0
1430	9	0	0	0	0	0	0	200	300	0	0	0	0	0	0	0	200	903	0	0	0	0	0	0	0	603	903	0
1431	0	0	0	0	0	0	0	200	300	0	0	0	0	0	0	0	200	903	0	0	0	0	0	0	0	603	903	0
1431	1	0	0	0	0	0	0	200	300	0	0	0	0	0	0	0	200	903	0	0	0	0	0	0	0	603	903	0
1431	2	0	0	0	0	0	0	200	300	0	0	0	0	0	0	0	200	903	0	0	0	0	0	0	0	603	903	0
1431	3	0	0	0	0	0	0	200	300	0	0	0	0	0	0	0	200	903	0	0	0	0	0	0	0	603	903	0
1431	4	0	0	0	0	0	0	200	300	0	0	0	0	0	0	0	200	903	0	0	0	0	0	0	0	603	903	0
1431	5	0	0	0	0	0	0	200	300	0	0	0	0	0	0	0	200	903	0	0	0	0	0	0	0	603	903	0
1431	6	0	0	0	0	0	0	200	300	0	0	0	0	0	0	0	200	903	0	0	0	0	0	0	0	603	903	0
1431	7	0	0	0	0	0	0	200	300	0	0	0	0	0	0	0	200	903	0	0	0	0	0	0	0	603	903	0
1431	8	0	0	0	0	0	0	200	300	0	0	0	0	0	0	0	200	903	0	0	0	0	0	0	0	603	903	0
1431	9	0	0	0	0	0	0	200	300	0	0	0	0	0	0	0	200	903	0	0	0	0	0	0	0	603	903	0
1432	0	0	0	0	0	0	0	200	300	0	0	0	0	0	0	0	200	903	0	0	0	0	0	0	0	603	903	0
1432	1	0	0	0	0	0	0	200	300	0	0	0	0	0	0	0	200	903	0	0	0	0	0	0	0	603	903	0
1432	2	0	0	0	0	0	0	200	300	0	0	0	0	0	0	0	200	903	0	0	0	0	0	0	0	603	903	0
1432	3	0	0	0	0	0	0	200	300	0	0	0	0	0	0	0	200	903	0	0	0	0	0	0	0	603	903	0
1432	4	0	0	0	0	0	0	200	300	0	0	0	0	0	0	0	200	903	0	0	0	0	0	0	0	603	903	0
1432	5	0	0	0	0	0	0	200	300	0	0	0	0	0	0	0	200	903	0	0	0	0	0	0	0	603	903	0
1432	6	0	0	0	0	0	0	200	300	0	0	0	0	0	0	0	200	903	0	0	0	0	0	0	0	603	903	0
1432	7	0	0	0	0	0	0	200	300	0	0	0	0	0	0	0	200	903	0	0	0	0	0	0	0	603	903	0
1432	8	0	0	0	0	0	0	200	300	0	0	0	0	0	0	0	200	903	0	0	0	0	0	0	0	603	903	0
1432	9	0	0	0	0	0	0	200	300	0	0	0	0	0	0	0	200	903	0	0	0	0	0	0	0	603	903	0
1433	0	0	0	0	0	0	0	200	300	0	0	0	0	0	0	0	200	903	0	0	0	0	0	0	0	603	903	0
1433	1	0	0	0	0	0	0	200	300	0	0	0	0	0	0	0	200	903	0	0	0	0	0	0	0	603	903	0
1433	2	0	0	0	0	0	0	200	300	0	0	0	0	0	0	0	200	903	0	0	0	0	0	0	0	603	903	0
1433	3	0	0	0	0	0	0	200	300	0	0	0	0	0	0	0	200	903	0	0	0	0	0	0	0	603	903	0
1433	4	0	0	0	0	0	0	200	300	0	0	0	0	0	0	0	200	903	0	0	0	0	0	0	0	603	903	0
1433	5	0	0	0	0	0	0	200	300	0	0	0	0	0	0	0	200	903	0	0	0	0	0	0	0	603	903	0
1433	6	0	0	0	0	0	0	200	300	0	0	0	0	0	0	0	200	903	0	0	0	0	0	0	0	603	903	0
1433	7	0	0	0	0	0	0	200	300	0	0	0	0	0	0	0	200	903	0	0	0	0	0	0	0	603	903	0
1433	8	0	0	0	0	0	0	200	300	0	0	0	0	0	0	0	200	903	0	0	0	0	0	0	0	603	903	0
1433	9	0	0	0	0	0	0	200	300	0	0	0	0	0	0	0	200	903	0	0	0	0	0	0	0	603	903	0
1434	0	0	0	0	0	0	0	200	300	0	0	0	0	0	0	0	200	903	0	0	0	0	0	0	0	603	903	0
1434	1	0	0	0	0	0	0	200	300	0	0	0	0	0	0	0	200	903	0	0	0	0	0	0	0	603	903	0
1434	2	0	0	0	0	0	0	200	300	0	0	0	0	0	0	0	200	903	0	0	0	0	0	0	0	603	903	0
1434	3	0	0	0	0	0	0	200	300	0	0	0	0	0	0	0	200	903	0	0	0	0	0	0	0	603	903	0
1434	4	0	0	0	0	0	0	200	300	0	0	0	0	0	0	0	200	903	0	0	0	0	0	0	0	603	903	0
1434	5	0	0	0	0	0	0	200	300	0	0	0	0	0	0	0	200	903	0	0	0	0	0	0	0	603	903	0
1434	6	0	0	0	0	0	0	200	300	0	0	0	0	0	0	0	200	903	0	0	0	0	0	0	0	603	903	0
1434	7	0	0	0	0	0	0	200	300	0	0	0	0	0	0	0	200	903	0	0	0	0	0	0	0	603	903	0
1434	8	0	0	0	0	0	0	200	300	0	0	0	0	0	0	0	200	903	0	0	0	0	0	0	0	603	903	0
1434	9	0	0	0	0	0	0	200	300	0	0	0	0	0	0	0	200	903	0	0	0	0	0	0	0	603	903	0
1435	0	0	0	0	0	0	0	200	300	0	0	0	0	0	0	0	200	903	0	0	0	0	0	0	0	603	903	0
1435	1	0	0	0	0	0	0	200	300	0	0	0	0	0	0	0	200	903	0	0	0	0	0	0	0	603	903	0
1435	2	0	0	0	0	0	0	200	300	0	0	0	0	0	0	0	200	903	0	0	0	0	0	0	0	603	903	0
1435	3	0	0	0	0	0	0	200	300	0	0	0	0	0	0	0	200	903	0	0	0	0	0	0	0	603	903	0
1435	4	0	0	0	0	0	0	200	300	0	0	0	0	0	0	0	200	903	0	0	0	0	0	0	0	603	903	0
1435	5	0	0	0	0	0	0	200	300	0	0	0	0	0	0	0	200	903	0	0	0	0	0	0	0	603	903	0
1435	6	0	0	0	0	0	0	200	300	0	0	0	0	0	0	0	200	903	0	0	0	0	0	0	0	603	903	0
1435	7	0	0	0	0	0	0	200	300	0	0	0	0	0	0	0	200	903	0	0	0	0	0	0	0	603	903	0
1435	8	0	0	0	0	0	0	200	300	0	0	0	0	0	0	0	200	903	0	0	0	0	0	0	0	603	903	0
1435	9	0	0	0	0	0	0	200	300	0	0	0	0	0	0	0	200	903	0	0	0	0	0	0	0	603	903	0
1436	0	0	0	0	0	0	0	200	300	0	0	0	0	0	0	0	200	903	0	0	0	0	0	0	0	603	903	0
1436	1	0	0	0	0	0	0	200	300	0	0	0	0	0	0	0	200	903	0	0	0	0	0	0	0	603	903	0
1436	2	0	0	0	0	0	0	200	300	0	0	0	0	0	0	0	200	903	0	0	0	0	0	0	0	603	903	0
1436	3	0	0	0	0	0	0	200	300	0	0	0	0	0	0	0	200	903	0	0	0	0	0	0	0	603	903	0
1436	4	0	0	0	0	0	0	200	300	0	0	0	0	0	0	0	200	903	0	0	0	0	0	0	0	603	903	0
1436	5	0	0	0	0	0	0	200	300	0	0	0	0	0	0	0	200	903	0	0	0	0	0	0	0	603	903	0
1436	6	0	0	0	0	0	0	200	300	0	0	0	0	0	0	0	200	903	0	0	0	0	0	0	0	603	903	0
1436	7	0	0	0	0	0	0	200	300	0	0	0	0	0	0	0	200	903	0	0	0	0	0	0	0	603	903	0
1436	8	0	0	0	0	0	0	200	300	0	0	0	0	0	0	0	200	903	0	0	0	0	0	0	0	603	903	0
1436	9	0	0	0	0	0	0	200	300	0	0	0	0	0	0	0	200	903	0	0	0	0	0	0	0	603	903	0
1437	0	0	0	0	0	0	0	200	300	0	0	0	0	0	0	0	200	903	0	0	0	0	0	0	0	603	903	0
1437	1	0	0	0	0	0	0	200	300	0	0	0	0	0	0	0	200	903	0	0	0	0	0	0	0	603	903	0
1437	2	0	0	0	0	0	0	200	300	0	0	0	0	0	0	0	200	903	0	0	0	0	0	0	0	603	903	0
1437	3	0	0	0	0	0	0	200	300	0	0	0	0	0	0	0	200	903	0	0	0	0	0	0	0	603	903	0
1437	4	0	0	0	0	0	0	200	300	0	0	0	0	0	0	0	200	903	0	0	0	0	0	0	0	603	903	0
1437	5	0	0	0	0	0	0	200	300	0	0	0	0	0	0	0	200	903	0	0	0	0	0	0	0	603	903	0
1437	6	0	0	0	0	0	0	200	300	0	0	0	0	0	0	0	200	903	0	0	0	0	0	0	0	603	903	0
1437	7	0	0	0	0	0	0	200	300	0	0	0	0	0	0	0	200	903	0	0	0	0	0	0	0	603	903	0
1437	8	0	0	0	0	0	0	200	300	0	0	0	0	0	0	0	200	903	0	0	0	0	0	0	0	603	903	0
1437	9	0	0	0	0	0	0	200	300	0	0	0	0	0	0	0	200	903	0	0	0	0	0	0	0	603	903	0
1438	0	0	0	0	0	0	0	200	300	0	0	0	0	0	0	0	200	903	0	0	0	0	0	0	0	603	903	0
1438	1	0	0	0	0	0	0	200	300	0	0	0	0	0	0	0	200	903	0	0	0	0	0	0	0	603	903	0
1438	2	0	0	0	0	0	0	200	300	0	0	0	0	0	0	0	200	903	0	0	0	0	0	0	0	603	903	0
1438	3	0	0	0	0	0	0	200	300	0	0	0	0	0	0	0	200	903	0	0	0	0	0	0	0	603	903	0
1438	4	0	0	0	0	0	0	200	300	0	0	0	0	0	0	0	200	903	0	0	0	0	0	0	0	603	903	0
1438	5	0	0	0	0	0	0	200	300	0	0	0	0	0	0	0	200	903	0	0	0	0	0	0	0	603	903	0
1438	6	0	0	0	0	0	0	200	300	0	0	0	0	0	0	0	200	903	0	0	0	0	0	0	0	603	903	0
1438	7	0	0	0	0	0	0	200	300	0	0	0	0	0	0	0	200	903	0	0	0	0	0	0	0	603	903	0
1438	8	0	0	0	0	0	0	200	300	0	0	0	0	0	0	0	200	903	0	0	0	0	0	0	0	603	903	0
1438	9	0	0	0	0	0	0	200	300	0	0	0	0	0	0	0	200	903	0	0	0	0	0	0	0	603	903	0
1439	0	0	0	0	0	0	0	200	300	0	0	0	0	0	0	0	200	903	0	0	0	0	0	0	0	603	903	0
1439	1	0	0	0	0	0	0	200	300	0	0	0	0	0	0	0	200	903	0	0	0	0	0	0	0	603	903	0
1439	2	0	0	0	0	0	0	200	300	0	0	0	0	0	0	0	200	903	0	0	0	0	0	0	0	603	903	0
1439	3	0	0	0	0	0	0	200	300	0	0	0	0	0	0	0	200	903	0	0	0	0	0	0	0	603	903	0
1439	4	0	0	0	0	0	0	200	300	0	0	0	0	0	0	0	200	903	0	0	0	0	0	0	0	603	903	0
1439	5	0	0	0	0	0	0	200	300	0	0	0	0	0	0	0	200	903	0	0	0	0	0	0	0	603	903	0
1439	6	0	0	0	0	0	0	200	300	0	0	0	0	0	0	0	200	903	0	0	0	0	0	0	0	603	903	0
1439	7	0	0	0	0	0	0	200	300	0	0	0	0	0	0	0	200	903	0	0	0	0	0	0	0	603	903	0
1439	8	0	0	0	0	0	0	200	300	0	0	0	0	0	0	0	200	903	0	0	0	0	0	0	0	603	903	0
1439	9	0	0	0	0	0	0	200	300	0	0	0	0	0	0	0	200	903	0	0	0	0	0	0	0	603	903	0
1440	0	0	0	0	0	0	0	200	300	0	0	0	0	0	0	0	200	903	0	0	0	0	0	0	0	603	903	0
1440	1	0	0	0	0	0	0	200	300	0	0	0	0	0	0	0	200	903	0	0	0	0	0	0	0	603	903	0
1440	2	0	0	0	0	0	0	200	300	0	0	0	0	0	0	0	200	903	0	0	0	0	0	0	0	603	903	0
1440	3	0	0	0	0	0	0	200	300	0	0	0	0	0	0	0	200	903	0	0	0	0	0	0	0	603	903	0
1440	4	0	0	0	0	0	0	200	300	0	0	0	0	0	0	0	200	903	0	0	0	0	0	0	0	603	903	0
1440	5	0	0	0	0	0	0	200	300	0	0	0	0	0	0	0	200	903	0	0	0	0	0	0	0	603	903	0
1440	6	0	0	0	0	0	0	200	300	0	0	0	0	0	0	0	200	903	0	0	0	0	0	0	0	603	903	0
1440	7	0	0	0	0	0	0	200	300	0	0	0	0	0	0	0	200	903	0	0	0	0	0	0	0	603	903	0
1440	8	0	0	0	0	0	0	200	300	0	0	0	0	0	0	0	200	903	0	0	0	0	0	0	0	603	903	0
1440	9	0	0	0	0	0	0	200	300	0	0	0	0	0	0	0	200	903	0	0	0	0	0	0	0	603	903	0
1441	0	0	0	0	0	0	0	200	300	0	0	0	0	0	0	0	200	903	0	0	0	0	0	0	0	603	903	0
1441	1	0	0	0	0	0	0	200	300	0	0	0	0	0	0	0	200	903	0	0	0	0	0	0	0	603	903	0
1441	2	0	0	0	0	0	0	200	300	0	0	0	0	0	0	0	200	903	0	0	0	0	0	0	0	603	903	0
1441	3	0	0	0	0	0	0	200	300	0	0	0	0	0	0	0	200	903	0	0	0	0	0	0	0	603	903	0
1441	4	0	0	0	0	0	0	200	300	0	0	0	0	0	0	0	200	903	0	0	0	0	0	0	0	603	903	0
1441	5	0	0	0	0	0	0	200	300	0	0	0	0	0	0	0	200	903	0	0	0	0	0	0	0	603	903	0
1441	6	0	0	0	0	0	0	200	300	0	0	0	0	0	0	0	200	903	0	0	0	0	0	0	0	603	903	0
1441	7	0	0	0	0	0	0	200	300	0	0	0	0	0	0	0	200	903	0	0	0	0	0	0	0	603	903	0
1441	8	0	0	0	0	0	0	200	300	0	0	0	0	0	0	0	200	903	0	0	0	0	0	0	0	603	903	0
1441	9	0	0	0	0	0	0	200	300	0	0	0	0	0	0	0	200	903	0	0	0	0	0	0	0	603	903	0
1442	0	0	0	0	0	0	0	200	300	0	0	0	0	0	0	0	200	903	0	0	0	0	0	0	0	603	903	0
1442	1	0	0	0	0	0	0	200	300	0	0	0	0	0	0	0	200	903	0	0	0	0	0	0	0	603	903	0
1442	2	0	0	0	0	0	0	200	300	0	0	0	0	0	0	0	200	903	0	0	0	0	0	0	0	603	903	0
1442	3	0	0	0	0	0	0	200	300	0	0	0	0	0	0	0	200	903	0	0	0	0	0	0	0	603	903	0
1442	4	0	0	0	0	0	0	200	300	0	0	0	0	0	0	0	200	903	0	0	0	0	0	0	0	603	903	0
1442	5	0	0	0	0	0	0	200	300	0	0	0	0	0	0	0	200	903	0	0	0	0	0	0	0	603	903	0
1442	6	0	0	0	0	0	0	200	300	0	0	0	0	0	0	0	200	903	0	0	0	0	0	0	0	603	903	0
1442	7	0	0	0	0	0	0	200	300	0	0	0	0	0	0	0	200	903	0	0	0	0	0	0	0	603	903	0
1442	8	0	0	0	0	0	0	200	300	0	0	0	0	0	0	0	200	903	0	0	0	0	0	0	0	603	903	0
1442	9	0	0	0	0	0	0	200	300	0	0	0	0	0	0	0	200	903	0	0	0	0	0	0	0	603	903	0
1443	0	0	0	0	0	0	0	200	300	0	0	0	0	0	0	0	200	903	0	0	0	0	0	0	0	603	903	0
1443	1	0	0	0	0	0	0	200	300	0	0	0	0	0	0	0	200	903	0	0	0	0	0	0	0	603	903	0
1443	2	0	0	0	0	0	0	200	300	0	0	0	0	0	0	0	200	903	0	0	0	0	0	0	0	603	903	0
1443	3	0	0	0	0	0	0	200	300	0	0	0	0	0	0	0	200	903	0	0	0	0	0	0	0	603	903	0
1443	4	0	0	0	0	0	0	200	300	0	0	0	0	0	0	0	200	903	0	0	0	0	0	0	0	603	903	0
1443	5	0	0	0	0	0	0	200	300	0	0	0	0	0	0	0	200	903	0	0	0	0	0	0	0	603	903	0
1443	6	0	0	0	0	0	0	200	300	0	0	0	0	0	0	0	200	903	0	0	0	0	0	0	0	603	903	0
1443	7	0	0	0	0	0	0	200	300	0	0	0	0	0	0	0	200	903	0	0	0	0	0	0	0	603	903	0
1443	8	0	0	0	0	0	0	200	300	0	0	0	0	0	0	0	200	903	0	0	0	0	0	0	0	603	903	0
1443	9	0	0	0	0	0	0	200	300	0	0	0	0	0	0	0	200	903	0	0	0	0	0	0	0	603	903	0
1444	0	0	0	0	0	0	0	200	300	0	0	0	0	0	0	0	200	903	0	0	0	0	0	0	0	603	903	0
1444	1	0	0	0	0	0	0	200	300	0	0	0	0	0	0	0	200	903	0	0	0	0	0	0	0	603	903	0
1444	2	0	0	0	0	0	0	200	300	0	0	0	0	0	0	0	200	903	0	0	0	0	0	0	0	603	903	0
1444	3	0	0	0	0	0	0	200	300	0	0	0	0	0	0	0	200	903	0	0	0	0	0	0	0	603	903	0
1444	4	0	0	0	0	0	0	200	300	0	0	0	0	0	0	0	200	903	0	0	0	0	0	0	0	603	903	0
1444	5	0	0	0	0	0	0	200	300	0	0	0	0	0	0	0	200	903	0	0	0	0	0	0	0	603	903	0
1444	6	0	0	0	0	0	0	200	300	0	0	0	0	0	0	0	200	903	0	0	0	0	0	0	0	603	903	0
1444	7	0	0	0	0	0	0	200	300	0	0	0	0	0	0	0	200	903	0	0	0	0	0	0	0	603	903	0
1444	8	0	0	0	0	0	0	200	300	0	0	0	0	0	0	0	200	903	0	0	0	0	0	0	0	603	903	0
1444	9	0	0	0	0	0	0	200	300	0	0	0	0	0	0	0	200	903	0	0	0	0	0	0	0	603	903	0
1445	0	0	0	0	0	0	0	200	300	0	0	0	0	0	0	0	200	903	0	0	0	0	0	0	0	603	903	0
1445	1	0	0	0	0	0	0	200	300	0	0	0	0	0	0	0	200	903	0	0	0	0	0	0	0	603	903	0
1445	2	0	0	0	0	0	0	200	300	0	0	0	0	0	0	0	200	903	0	0	0	0	0	0	0	603	903	0
1445	3	0	0	0	0	0	0	200	300	0	0	0	0	0	0	0	200	903	0	0	0	0	0	0	0	603	903	0
1445	4	0	0	0	0	0	0	200	300	0	0	0	0	0	0	0	200	903	0	0	0	0	0	0	0	603	903	0
1445	5	0	0	0	0	0	0	200	300	0	0	0	0	0	0	0	200	903	0	0	0	0	0	0	0	603	903	0
1445	6	0	0	0	0	0	0	200	300	0	0	0	0	0	0	0	200	903	0	0	0	0	0	0	0	603	903	0
1445	7	0	0	0	0	0	0	200	300	0	0	0	0	0	0	0	200	903	0	0	0	0	0	0	0	603	903	0
1445	8	0	0	0	0	0	0	200	300	0	0	0	0	0	0	0	200	903	0	0	0	0	0	0	0	603	903	0
1445	9	0	0	0	0	0	0	200	300	0	0	0	0	0	0	0	200	903	0	0	0	0	0	0	0	603	903	0
1446	0	0	0	0	0	0	0	200	300	0	0	0	0	0	0	0	200	903	0	0	0	0	0	0	0	603	903	0
1446	1	0	0	0	0	0	0	200	300	0	0	0	0	0	0	0	200	903	0	0	0	0	0	0	0	603	903	0
1446	2	0	0	0	0	0	0	200	300	0	0	0	0	0	0	0	200	903	0	0	0	0	0	0	0	603	903	0
1446	3	0	0	0	0	0	0	200	300	0	0	0	0	0	0	0	200	903	0	0	0	0	0	0	0	603	903	0
1446	4	0	0	0	0	0	0	200	300	0	0	0	0	0	0	0	200	903	0	0	0	0	0	0	0	603	903	0
1446	5	0	0	0	0	0	0	200	300	0	0	0	0	0	0	0	200	903	0	0	0	0	0	0	0	603	903	0
1446	6	0	0	0	0	0	0	200	300	0	-12.8209	4.51446	-26.3467	-7674.59	51.3148	3475.94	201.948	1194.29	0	0	0	0	0	0	0	603	903	0
1446	7	0	0	0	0	0	0	200	300	0	-10.2269	13.9749	-30.0088	-7674.59	-803.178	1782.21	173.235	1158.74	0	0	0	0	0	0	0	603	903	0
1446	8	0	0	0	0	0	0	200	300	0	-1.83456	16.4163	-29.0932	-8681.67	-681.107	500.472	176.589	1201.41	0	0	0	0	0	0	0	603	903	0
1446	9	0	0	0	0	0	0	200	300	0	-3.81821	15.5008	-29.7036	-9414.09	-253.861	1232.89	191.454	1219.93	0	0	0	0	0	0	0	603	903	0
1447	0	0	0	0	0	0	0	200	300	0	-4.73373	19.6207	-36.1123	-9597.2	-314.896	958.235	191.28	1168.76	0	0	0	0	0	0	0	603	903	0
1447	1	0	0	0	0	0	0	200	300	0	-4.27597	22.0621	-40.3847	-11336.7	-925.248	363.142	177.089	1183.72	0	0	0	0	0	0	0	603	903	0
1447	2	0	0	0	0	0	0	200	300	0	-6.10703	24.5035	-46.4883	-12984.6	-253.861	1278.67	194.539	1182.31	0	0	0	0	0	0	0	603	903	0
1447	3	0	0	0	0	0	0	200	300	0	-2.5975	29.2337	-52.2866	-14174.8	-620.072	1507.55	188.141	1174.1	0	0	0	0	0	0	0	603	903	0
1447	4	0	0	0	0	0	0	200	300	0	-8.70102	32.438	-63.2729	-16555.2	-1230.42	683.577	180.554	1164.65	0	0	0	0	0	0	0	603	903	0
1447	5	0	0	0	0	0	0	200	300	0	-9.15878	31.9803	-71.5127	-19210.2	-803.178	1644.88	188.769	1171.63	0	0	0	0	0	0	0	603	903	0
1447	6	0	0	0	0	0	0	200	300	0	-4.73373	33.0484	-81.2783	-21316	-742.143	1049.79	190.869	1165.26	0	0	0	0	0	0	0	603	903	0
1447	7	0	0	0	0	0	0	200	300	0	-3.97079	37.0157	-88.6025	-23055.5	-620.072	225.813	193.002	1163.21	0	0	0	0	0	0	0	603	903	0
1447	8	0	0	0	0	0	0	200	300	0	-7.93808	34.8795	-95.3164	-24978.1	-742.143	1187.12	192.214	1165.05	0	0	0	0	0	0	0	603	903	0
1447	9	0	0	0	0	0	0	200	300	0	-5.1915	32.5906	-102.641	-26442.9	-986.283	958.235	190.391	1160.63	0	0	0	0	0	0	0	603	903	0
1448	0	0	0	0	0	0	0	200	300	0	-1.98715	34.8795	-110.88	-28823.3	-559.037	-140.398	194.958	1162.95	0	0	0	0	0	0	0	603	903	0
1448	1	0	0	0	0	0	0	200	300	0	-4.12338	35.6424	-119.425	-30471.2	-559.037	500.472	195.319	1158.15	0	0	0	0	0	0	0	603	903	0
1448	2	0	0	0	0	0	0	200	300	0	-4.12338	33.201	-124.308	-31295.2	-1047.32	180.037	191.575	1154.76	0	0	0	0	0	0	0	603	903	0
1448	3	0	0	0	0	0	0	200	300	0	-0.461273	32.438	-129.801	-32851.6	-1169.39	-1101.7	190.991	1156.09	0	0	0	0	0	0	0	603	903	0
1448	4	0	0	0	0	0	0	200	300	0	0.606842	34.5743	-138.041	-34408	-375.931	-552.385	197.277	1152.26	0	0	0	0	0	0	0	603	903	0
1448	5	0	0	0	0	0	0	200	300	0	0.912018	34.2691	-142.619	-36330.6	-436.967	-598.161	196.936	1157.74	0	0	0	0	0	0	0	603	903	0
1448	6	0	0	0	0	0	0	200	300	0	0.75943	30.3018	-149.638	-37795.5	-498.002	-1696.79	196.672	1155.58	0	0	0	0	0	0	0	603	903	0
1448	7	0	0	0	0	0	0	200	300	0	1.82755	28.6234	-153.91	-38344.8	-192.826	-1101.7	198.747	1152.14	0	0	0	0	0	0	0	603	903	0
1448	8	0	0	0	0	0	0	200	300	0	4.8793	27.7078	-159.098	-39992.7	-9.7204	-964.372	199.939	1154.37	0	0	0	0	0	0	0	603	903	0
1448	9	0	0	0	0	0	0	200	300	0	4.57413	24.3509	-163.065	-41366	51.3148	-2108.78	200.315	1156.68	0	0	0	0	0	0	0	603	903	0
1449	0	0	0	0	0	0	0	200	300	0	5.79483	20.3836	-168.864	-42464.6	51.3148	-2017.23	200.304	1154.47	0	0	0	0	0	0	0	603	903	0
1449	1	0	0	0	0	0	0	200	300	0	7.77847	19.1629	-176.188	-43013.9	-131.791	-1925.68	199.252	1147.14	0	0	0	0	0	0	0	603	903	0
1449	2	0	0	0	0	0	0	200	300	0	9.9147	15.043	-180.155	-44387.3	173.385	-2978.53	200.962	1149.38	0	0	0	0	0	0	0	603	903	0
1449	3	0	0	0	0	0	0	200	300	0	10.2199	10.3128	-184.123	-44387.3	51.3148	-2658.1	200.279	1144.07	0	0	0	0	0	0	0	603	903	0
1449	4	0	0	0	0	0	0	200	300	0	10.2199	9.39728	-188.395	-46676.1	722.701	-2429.22	203.836	1150.76	0	0	0	0	0	0	0	603	903	0
1449	5	0	0	0	0	0	0	200	300	0	12.8139	5.2774	-194.804	-47957.8	905.807	-3298.97	204.65	1149.19	0	0	0	0	0	0	0	603	903	0
1449	6	0	0	0	0	0	0	200	300	0	12.3561	1.00494	-196.94	-48324	600.631	-2795.43	203.05	1148.37	0	0	0	0	0	0	0	603	903	0
1449	7	0	0	0	0	0	0	200	300	0	14.3398	-3.57269	-203.043	-49056.4	478.561	-2932.76	202.357	1144.61	0	0	0	0	0	0	0	603	903	0
1449	8	0	0	0	0	0	0	200	300	0	14.4923	-6.16669	-207.621	-50063.5	1088.91	-3710.95	205.245	1144.13	0	0	0	0	0	0	0	603	903	0
1449	9	0	0	0	0	0	0	200	300	0	14.9501	-9.52362	-212.199	-50612.8	966.842	-3482.07	204.556	1141.52	0	0	0	0	0	0	0	603	903	0
1450	0	0	0	0	0	0	0	200	300	0	15.4079	-13.4909	-218.302	-52077.7	783.737	-2978.53	203.59	1141.56	0	0	0	0	0	0	0	603	903	0
1450	1	0	0	0	0	0	0	200	300	0	16.6286	-16.6953	-222.88	-52535.4	1088.91	-3848.28	204.886	1138.71	0	0	0	0	0	0	0	603	903	0
1450	2	0	0	0	0	0	0	200	300	0	19.8329	-20.3574	-228.373	-53634.1	966.842	-3619.4	204.234	1137.85	0	0	0	0	0	0	0	603	903	0
1450	3	0	0	0	0	0	0	200	300	0	17.6967	-23.8669	-234.171	-55739.8	966.842	-3161.64	204.129	1141.03	0	0	0	0	0	0	0	603	903	0
1450	4	0	0	0	0	0	0	200	300	0	16.7812	-27.0712	-242.411	-57204.6	1027.88	-4168.72	204.24	1138.98	0	0	0	0	0	0	0	603	903	0
1450	5	0	0	0	0	0	0	200	300	0	18.0019	-28.2919	-251.872	-57754	1088.91	-3756.73	204.323	1132.3	0	0	0	0	0	0	0	603	903	0
1450	6	0	0	0	0	0	0	200	300	0	20.1381	-32.4118	-258.585	-59218.8	1210.98	-3482.07	204.683	1132.01	0	0	0	0	0	0	0	603	903	0
1450	7	0	0	0	0	0	0	200	300	0	20.7484	-35.7687	-267.741	-60866.7	1210.98	-4031.39	204.523	1130.33	0	0	0	0	0	0	0	603	903	0
1450	8	0	0	0	0	0	0	200	300	0	20.1381	-35.9213	-276.896	-63247.1	783.737	-3802.51	202.83	1131.41	0	0	0	0	0	0	0	603	903	0
1450	9	0	0	0	0	0	0	200	300	0	22.8847	-38.3627	-286.662	-65078.2	1394.09	-3298.97	204.863	1130.02	0	0	0	0	0	0	0	603	903	0
1451	0	0	0	0	0	0	0	200	300	0	22.1217	-41.4145	-294.901	-66359.9	1333.05	-4031.39	204.52	1128.02	0	0	0	0	0	0	0	603	903	0
1451	1	0	0	0	0	0	0	200	300	0	23.6476	-42.1774	-304.972	-68557.2	661.666	-3985.61	202.17	1127.8	0	0	0	0	0	0	0	603	903	0
1451	2	0	0	0	0	0	0	200	300	0	23.6476	-43.8559	-313.517	-70754.4	1394.09	-3619.4	204.447	1128.68	0	0	0	0	0	0	0	603	903	0
1451	3	0	0	0	0	0	0	200	300	0	24.4106	-44.924	-322.672	-71578.4	1516.16	-4351.82	204.699	1124.83	0	0	0	0	0	0	0	603	903	0
1451	4	0	0	0	0	0	0	200	300	0	24.7157	-45.687	-336.1	-73958.8	783.737	-3985.61	202.332	1123.05	0	0	0	0	0	0	0	603	903	0
1451	5	0	0	0	0	0	0	200	300	0	24.7157	-46.6025	-346.171	-75972.9	844.772	-3710.95	202.44	1122.47	0	0	0	0	0	0	0	603	903	0
1451	6	0	0	0	0	0	0	200	300	0	25.0209	-47.518	-354.105	-77987.1	1088.91	-4351.82	203.075	1123.24	0	0	0	0	0	0	0	603	903	0
1451	7	0	0	0	0	0	0	200	300	0	26.2416	-47.8232	-364.481	-79909.7	966.842	-4168.72	202.653	1122.24	0	0	0	0	0	0	0	603	903	0
1451	8	0	0	0	0	0	0	200	300	0	26.089	-48.1284	-374.247	-82198.5	722.701	-3527.85	201.931	1122.64	0	0	0	0	0	0	0	603	903	0
1451	9	0	0	0	0	0	0	200	300	0	24.1054	-48.7387	-385.233	-82564.7	661.666	-4077.17	201.718	1117.32	0	0	0	0	0	0	0	603	903	0
1452	0	0	0	0	0	0	0	200	300	0	25.7838	-51.4853	-394.083	-84670.4	722.701	-4122.94	201.834	1117.85	0	0	0	0	0	0	0	603	903	0
1452	1	0	0	0	0	0	0	200	300	0	25.0209	-52.706	-401.713	-86410	1027.88	-3253.19	202.559	1118.1	0	0	0	0	0	0	0	603	903	0
1452	2	0	0	0	0	0	0	200	300	0	23.8002	-52.0956	-409.647	-87325.5	-70.7556	-3939.84	199.827	1116.17	0	0	0	0	0	0	0	603	903	0
1452	3	0	0	0	0	0	0	200	300	0	23.0373	-54.8422	-419.108	-88881.9	539.596	-3894.06	201.287	1115.07	0	0	0	0	0	0	0	603	903	0
1452	4	0	0	0	0	0	0	200	300	0	22.7321	-57.131	-422.16	-89797.4	661.666	-3436.3	201.567	1115.71	0	0	0	0	0	0	0	603	903	0
1452	5	0	0	0	0	0	0	200	300	0	23.9528	-56.9785	-432.23	-91079.2	234.42	-3894.06	200.542	1113.72	0	0	0	0	0	0	0	603	903	0
1452	6	0	0	0	0	0	0	200	300	0	21.2062	-58.6569	-437.724	-92727.1	51.3148	-3482.07	200.117	1114.84	0	0	0	0	0	0	0	603	903	0
1452	7	0	0	0	0	0	0	200	300	0	18.6122	-61.2509	-445.658	-93734.2	173.385	-3024.31	200.389	1113.33	0	0	0	0	0	0	0	603	903	0
1452	8	0	0	0	0	0	0	200	300	0	18.1544	-62.6242	-455.729	-94283.5	-9.7204	-3253.19	199.979	1109.89	0	0	0	0	0	0	0	603	903	0
1452	9	0	0	0	0	0	0	200	300	0	17.3915	-63.3871	-463.664	-95748.3	-681.107	-3253.19	198.531	1109.5	0	0	0	0	0	0	0	603	903	0
1453	0	0	0	0	0	0	0	200	300	0	14.1872	-65.8286	-472.819	-97121.6	-620.072	-2429.22	198.689	1108.41	0	0	0	0	0	0	0	603	903	0
1453	1	0	0	0	0	0	0	200	300	0	11.1354	-66.8967	-477.396	-97304.8	-986.283	-2429.22	197.934	1106.82	0	0	0	0	0	0	0	603	903	0
1453	2	0	0	0	0	0	0	200	300	0	8.54141	-70.2536	-486.857	-99227.4	-1047.32	-2383.44	197.849	1106.81	0	0	0	0	0	0	0	603	903	0
1453	3	0	0	0	0	0	0	200	300	0	7.01553	-69.3381	-492.96	-99959.8	-1596.64	-1422.14	196.761	1105.77	0	0	0	0	0	0	0	603	903	0
1453	4	0	0	0	0	0	0	200	300	0	3.81119	-71.9321	-499.674	-100418	-1657.67	-1147.48	196.682	1103.97	0	0	0	0	0	0	0	603	903	0
1453	5	0	0	0	0	0	0	200	300	0	1.06461	-76.8149	-505.473	-101974	-1718.71	-1010.15	196.6	1104.74	0	0	0	0	0	0	0	603	903	0
1453	6	0	0	0	0	0	0	200	300	0	-3.36044	-80.9348	-511.576	-102340	-1474.56	-140.398	197.118	1103.05	0	0	0	0	0	0	0	603	903	0
1453	7	0	0	0	0	0	0	200	300	0	-5.03891	-80.477	-516.154	-102157	-2390.09	134.261	195.369	1100.92	0	0	0	0	0	0	0	603	903	0
1453	8	0	0	0	0	0	0	200	300	0	-5.1915	-83.3762	-522.868	-102340	-2023.88	271.59	196.129	1098.73	0	0	0	0	0	0	0	603	903	0
1453	9	0	0	0	0	0	0	200	300	0	-7.6329	-87.496	-527.445	-103897	-2206.99	1141.34	195.816	1099.98	0	0	0	0	0	0	0	603	903	0
1454	0	0	0	0	0	0	0	200	300	0	-10.6847	-88.259	-530.192	-104721	-2634.23	820.906	195.032	1100.51	0	0	0	0	0	0	0	603	903	0
1454	1	0	0	0	0	0	0	200	300	0	-8.09067	-88.259	-531.413	-105087	-2634.23	958.235	195.043	1100.75	0	0	0	0	0	0	0	603	903	0
1454	2	0	0	0	0	0	0	200	300	0	-11.295	-91.9211	-538.432	-105087	-2756.3	1553.33	194.881	1098.17	0	0	0	0	0	0	0	603	903	0
1454	3	0	0	0	0	0	0	200	300	0	-11.7528	-92.3788	-543.009	-105453	-2817.34	1553.33	194.812	1097.2	0	0	0	0	0	0	0	603	903	0
1454	4	0	0	0	0	0	0	200	300	0	-12.6683	-93.2944	-543.925	-106002	-2939.41	1690.66	194.596	1097.88	0	0	0	0	0	0	0	603	903	0
1454	5	0	0	0	0	0	0	200	300	0	-12.9735	-95.5832	-545.146	-105270	-3061.48	2468.86	194.384	1096.1	0	0	0	0	0	0	0	603	903	0
1454	6	0	0	0	0	0	0	200	300	0	-13.4312	-95.8884	-548.197	-105819	-3000.44	2148.42	194.527	1096.03	0	0	0	0	0	0	0	603	903	0
1454	7	0	0	0	0	0	0	200	300	0	-12.9735	-94.8203	-550.333	-106185	-3122.51	2011.09	194.326	1095.95	0	0	0	0	0	0	0	603	903	0
1454	8	0	0	0	0	0	0	200	300	0	-11.7528	-95.278	-553.385	-105544	-3427.69	2514.63	193.806	1093.73	0	0	0	0	0	0	0	603	903	0
1454	9	0	0	0	0	0	0	200	300	0	-11.6002	-96.1935	-555.216	-106460	-3183.55	2423.08	194.266	1094.75	0	0	0	0	0	0	0	603	903	0
1455	0	0	0	0	0	0	0	200	300	0	-10.9898	-95.278	-554.301	-106368	-3244.58	2239.97	194.147	1094.9	0	0	0	0	0	0	0	603	903	0
1455	1	0	0	0	0	0	0	200	300	0	-13.4312	-96.041	-555.216	-105361	-3427.69	2606.19	193.826	1092.77	0	0	0	0	0	0	0	603	903	0
1455	2	0	0	0	0	0	0	200	300	0	-12.2105	-95.7358	-556.742	-105544	-3549.76	2926.62	193.624	1092.58	0	0	0	0	0	0	0	603	903	0
1455	3	0	0	0	0	0	0	200	300	0	-10.3795	-96.1935	-557.658	-105911	-3183.55	2697.74	194.291	1092.92	0	0	0	0	0	0	0	603	903	0
1455	4	0	0	0	0	0	0	200	300	0	-12.3631	-95.8884	-558.878	-104904	-3244.58	2789.29	194.194	1090.7	0	0	0	0	0	0	0	603	903	0
1455	5	0	0	0	0	0	0	200	300	0	-12.8209	-97.5668	-558.878	-105087	-3305.62	2880.84	194.085	1091.03	0	0	0	0	0	0	0	603	903	0
1455	6	0	0	0	0	0	0	200	300	0	-11.295	-99.2453	-558.268	-105728	-3305.62	2560.41	194.079	1092.39	0	0	0	0	0	0	0	603	903	0
1455	7	0	0	0	0	0	0	200	300	0	-10.0743	-98.6349	-558.573	-105178	-3488.72	2972.4	193.754	1091.3	0	0	0	0	0	0	0	603	903	0
1455	8	0	0	0	0	0	0	200	300	0	-12.2105	-98.7875	-559.489	-105270	-3915.97	3292.83	193.001	1091.15	0	0	0	0	0	0	0	603	903	0
1455	9	0	0	0	0	0	0	200	300	0	-14.4994	-100.924	-561.32	-105361	-3854.94	3201.28	193.132	1090.7	0	0	0	0	0	0	0	603	903	0
1456	0	0	0	0	0	0	0	200	300	0	-15.1097	-100.313	-561.93	-104812	-3488.72	3521.71	193.792	1089.52	0	0	0	0	0	0	0	603	903	0
1456	1	0	0	0	0	0	0	200	300	0	-14.3468	-101.992	-562.235	-104721	-3915.97	3796.37	193.035	1089.26	0	0	0	0	0	0	0	603	903	0
1456	2	0	0	0	0	0	0	200	300	0	-15.7201	-103.06	-564.066	-104629	-3977.01	3750.59	192.949	1088.49	0	0	0	0	0	0	0	603	903	0
1456	3	0	0	0	0	0	0	200	300	0	-16.7882	-104.128	-566.813	-105087	-4282.18	4116.81	192.445	1088.4	0	0	0	0	0	0	0	603	903	0
1456	4	0	0	0	0	0	0	200	300	0	-19.6873	-105.349	-568.949	-104812	-4099.08	4162.58	192.795	1087.22	0	0	0	0	0	0	0	603	903	0
1456	5	0	0	0	0	0	0	200	300	0	-18.0089	-105.807	-572.306	-105178	-3977.01	4025.25	193.051	1086.78	0	0	0	0	0	0	0	603	903	0
1456	6	0	0	0	0	0	0	200	300	0	-22.2813	-108.248	-572.001	-104537	-4282.18	4666.12	192.514	1085.76	0	0	0	0	0	0	0	603	903	0
1456	7	0	0	0	0	0	0	200	300	0	-23.502	-107.79	-575.358	-104812	-4343.22	4940.78	192.451	1085.17	0	0	0	0	0	0	0	603	903	0
1456	8	0	0	0	0	0	0	200	300	0	-24.8753	-108.401	-578.715	-105636	-4404.25	4528.79	192.39	1085.54	0	0	0	0	0	0	0	603	903	0
1456	9	0	0	0	0	0	0	200	300	0	-26.859	-110.384	-581.156	-105178	-4831.5	5123.89	191.686	1083.98	0	0	0	0	0	0	0	603	903	0
1457	0	0	0	0	0	0	0	200	300	0	-28.0797	-111.605	-585.734	-106094	-4587.36	5352.77	192.168	1084.13	0	0	0	0	0	0	0	603	903	0
1457	1	0	0	0	0	0	0	200	300	0	-30.6737	-112.063	-589.091	-105911	-4831.5	5398.54	191.798	1082.79	0	0	0	0	0	0	0	603	903	0
1457	2	0	0	0	0	0	0	200	300	0	-29.1478	-112.673	-591.227	-106552	-4831.5	5902.08	191.828	1083.22	0	0	0	0	0	0	0	603	903	0
1457	3	0	0	0	0	0	0	200	300	0	-30.6737	-113.589	-596.72	-107467	-5075.64	5856.31	191.494	1083.1	0	0	0	0	0	0	0	603	903	0
1457	4	0	0	0	0	0	0	200	300	0	-32.5047	-114.809	-599.162	-106643	-5319.78	6085.19	191.121	1080.99	0	0	0	0	0	0	0	603	903	0
1457	5	0	0	0	0	0	0	200	300	0	-33.878	-115.877	-604.35	-108291	-5136.67	6359.85	191.501	1082.19	0	0	0	0	0	0	0	603	903	0
1457	6	0	0	0	0	0	0	200	300	0	-32.6573	-116.945	-607.401	-108200	-5075.64	6588.73	191.644	1081.14	0	0	0	0	0	0	0	603	903	0
1457	7	0	0	0	0	0	0	200	300	0	-32.9625	-116.488	-611.369	-108932	-5624.95	6451.4	190.799	1081.18	0	0	0	0	0	0	0	603	903	0
1457	8	0	0	0	0	0	0	200	300	0	-35.0987	-116.335	-615.946	-109664	-5624.95	6909.17	190.868	1081.04	0	0	0	0	0	0	0	603	903	0
1457	9	0	0	0	0	0	0	200	300	0	-34.7935	-117.861	-621.439	-110488	-5808.06	7138.05	190.654	1080.79	0	0	0	0	0	0	0	603	903	0
1458	0	0	0	0	0	0	0	200	300	0	-34.3358	-118.929	-626.322	-110580	-5563.92	6954.94	191.117	1079.55	0	0	0	0	0	0	0	603	903	0
1458	1	0	0	0	0	0	0	200	300	0	-35.5565	-119.082	-629.374	-111495	-5502.88	7046.49	191.257	1080.15	0	0	0	0	0	0	0	603	903	0
1458	2	0	0	0	0	0	0	200	300	0	-35.4039	-119.387	-632.121	-112045	-5319.78	7183.82	191.584	1080.25	0	0	0	0	0	0	0	603	903	0
1458	3	0	0	0	0	0	0	200	300	0	-36.472	-119.082	-637.309	-112777	-5441.85	7550.03	191.461	1079.96	0	0	0	0	0	0	0	603	903	0
1458	4	0	0	0	0	0	0	200	300	0	-36.6246	-120.455	-643.107	-113693	-5685.99	7595.81	191.159	1079.79	0	0	0	0	0	0	0	603	903	0
1458	5	0	0	0	0	0	0	200	300	0	-36.0143	-121.218	-648.6	-112960	-5502.88	7595.81	191.516	1077.16	0	0	0	0	0	0	0	603	903	0
1458	6	0	0	0	0	0	0	200	300	0	-33.5728	-121.218	-651.957	-114150	-5563.92	7504.26	191.466	1078.09	0	0	0	0	0	0	0	603	903	0
1458	7	0	0	0	0	0	0	200	300	0	-36.6246	-122.896	-655.009	-115249	-5563.92	7504.26	191.506	1078.95	0	0	0	0	0	0	0	603	903	0
1458	8	0	0	0	0	0	0	200	300	0	-35.2513	-121.065	-660.197	-115798	-5869.1	7962.02	191.11	1078.4	0	0	0	0	0	0	0	603	903	0
1458	9	0	0	0	0	0	0	200	300	0	-37.6927	-121.523	-666.3	-116256	-5747.02	7412.71	191.375	1077.48	0	0	0	0	0	0	0	603	903	0
1459	0	0	0	0	0	0	0	200	300	0	-35.4039	-123.049	-669.657	-116439	-5380.81	7778.92	191.965	1076.88	0	0	0	0	0	0	0	603	903	0
1459	1	0	0	0	0	0	0	200	300	0	-36.472	-123.507	-676.981	-117721	-5747.02	7458.48	191.511	1076.89	0	0	0	0	0	0	0	603	903	0
1459	2	0	0	0	0	0	0	200	300	0	-37.9979	-123.354	-680.338	-118820	-5869.1	8282.45	191.373	1077.65	0	0	0	0	0	0	0	603	903	0
1459	3	0	0	0	0	0	0	200	300	0	-37.3875	-123.354	-684.611	-119186	-6174.27	7595.81	190.981	1077.09	0	0	0	0	0	0	0	603	903	0
1459	4	0	0	0	0	0	0	200	300	0	-36.6246	-123.965	-689.799	-119277	-5319.78	7870.47	192.288	1075.92	0	0	0	0	0	0	0	603	903	0
1459	5	0	0	0	0	0	0	200	300	0	-34.641	-123.965	-694.071	-120101	-6052.2	7778.92	191.28	1076.04	0	0	0	0	0	0	0	603	903	0
1459	6	0	0	0	0	0	0	200	300	0	-36.7772	-124.727	-699.87	-120742	-5991.17	7824.69	191.44	1075.52	0	0	0	0	0	0	0	603	903	0
1459	7	0	0	0	0	0	0	200	300	0	-37.8453	-124.422	-702.616	-121566	-5563.92	7916.25	192.081	1076.02	0	0	0	0	0	0	0	603	903	0
1459	8	0	0	0	0	0	0	200	300	0	-37.3875	-125.033	-706.583	-121932	-5869.1	7641.59	191.694	1075.57	0	0	0	0	0	0	0	603	903	0
1459	9	0	0	0	0	0	0	200	300	0	-36.9298	-124.117	-710.856	-122756	-5869.1	7778.92	191.744	1075.69	0	0	0	0	0	0	0	603	903	0
1460	0	0	0	0	0	0	0	200	300	0	-34.9461	-123.659	-715.739	-122756	-5869.1	7916.25	191.8	1074.51	0	0	0	0	0	0	0	603	903	0
1460	1	0	0	0	0	0	0	200	300	0	-36.472	-123.812	-719.096	-123855	-5869.1	7778.92	191.838	1075.24	0	0	0	0	0	0	0	603	903	0
1460	2	0	0	0	0	0	0	200	300	0	-37.0824	-122.286	-723.979	-124496	-5930.13	7733.14	191.809	1074.96	0	0	0	0	0	0	0	603	903	0
1460	3	0	0	0	0	0	0	200	300	0	-37.235	-122.896	-726.725	-124954	-5869.1	7824.69	191.924	1074.94	0	0	0	0	0	0	0	603	903	0
1460	4	0	0	0	0	0	0	200	300	0	-35.4039	-121.676	-730.692	-125137	-5563.92	7733.14	192.385	1074.26	0	0	0	0	0	0	0	603	903	0
1460	5	0	0	0	0	0	0	200	300	0	-34.3358	-121.218	-733.744	-125961	-5624.95	6909.17	192.334	1074.67	0	0	0	0	0	0	0	603	903	0
1460	6	0	0	0	0	0	0	200	300	0	-35.8617	-121.218	-734.049	-126602	-5747.02	7687.36	192.171	1075.47	0	0	0	0	0	0	0	603	903	0
1460	7	0	0	0	0	0	0	200	300	0	-36.1668	-121.828	-742.289	-127517	-5563.92	7458.48	192.504	1074.79	0	0	0	0	0	0	0	603	903	0
1460	8	0	0	0	0	0	0	200	300	0	-35.7091	-120.913	-743.815	-127242	-5441.85	7733.14	192.684	1074.07	0	0	0	0	0	0	0	603	903	0
1460	9	0	0	0	0	0	0	200	300	0	-34.4884	-119.082	-747.477	-127975	-5441.85	7595.81	192.72	1074.21	0	0	0	0	0	0	0	603	903	0
1461	0	0	0	0	0	0	0	200	300	0	-34.7935	-117.403	-749.308	-128524	-5563.92	7458.48	192.575	1074.52	0	0	0	0	0	0	0	603	903	0
1461	1	0	0	0	0	0	0	200	300	0	-35.0987	-118.319	-756.022	-128341	-5563.92	7595.81	192.641	1072.76	0	0	0	0	0	0	0	603	903	0
1461	2	0	0	0	0	0	0	200	300	0	-35.4039	-118.624	-758.769	-128707	-5380.81	7595.81	192.908	1072.63	0	0	0	0	0	0	0	603	903	0
1461	3	0	0	0	0	0	0	200	300	0	-33.5728	-118.014	-760.6	-128890	-5014.6	7366.93	193.407	1072.46	0	0	0	0	0	0	0	603	903	0
1461	4	0	0	0	0	0	0	200	300	0	-32.8099	-116.793	-763.041	-129989	-5502.88	7138.05	192.788	1073.36	0	0	0	0	0	0	0	603	903	0
1461	5	0	0	0	0	0	0	200	300	0	-34.1832	-115.877	-768.229	-130905	-5075.64	7458.48	193.393	1073.4	0	0	0	0	0	0	0	603	903	0
1461	6	0	0	0	0	0	0	200	300	0	-31.284	-116.183	-769.45	-132003	-5075.64	6954.94	193.404	1074.56	0	0	0	0	0	0	0	603	903	0
1461	7	0	0	0	0	0	0	200	300	0	-33.2677	-115.572	-773.417	-131545	-5136.67	7000.72	193.358	1073.08	0	0	0	0	0	0	0	603	903	0
1461	8	0	0	0	0	0	0	200	300	0	-31.4366	-115.114	-774.333	-132369	-5197.71	7000.72	193.288	1073.95	0	0	0	0	0	0	0	603	903	0
1461	9	0	0	0	0	0	0	200	300	0	-30.6737	-113.283	-776.469	-132827	-5075.64	7046.49	193.463	1074.07	0	0	0	0	0	0	0	603	903	0
1462	0	0	0	0	0	0	0	200	300	0	-32.1996	-112.826	-780.436	-132553	-4770.46	6863.39	193.887	1072.84	0	0	0	0	0	0	0	603	903	0
1462	1	0	0	0	0	0	0	200	300	0	-31.7418	-112.368	-781.657	-134567	-5563.92	6771.84	192.882	1075.16	0	0	0	0	0	0	0	603	903	0
1462	2	0	0	0	0	0	0	200	300	0	-30.3685	-112.215	-785.624	-132827	-4526.32	6680.28	194.239	1072.07	0	0	0	0	0	0	0	603	903	0
1462	3	0	0	0	0	0	0	200	300	0	-30.0633	-110.995	-786.845	-134384	-4831.5	6451.4	193.86	1073.79	0	0	0	0	0	0	0	603	903	0
1462	4	0	0	0	0	0	0	200	300	0	-30.6737	-109.469	-790.202	-134658	-4770.46	6634.51	193.963	1073.41	0	0	0	0	0	0	0	603	903	0
1462	5	0	0	0	0	0	0	200	300	0	-28.0797	-108.706	-792.948	-135116	-4831.5	6542.95	193.907	1073.4	0	0	0	0	0	0	0	603	903	0
1462	6	0	0	0	0	0	0	200	300	0	-29.7581	-108.401	-794.474	-135116	-4526.32	6039.41	194.303	1073.07	0	0	0	0	0	0	0	603	903	0
1462	7	0	0	0	0	0	0	200	300	0	-27.9271	-105.959	-797.831	-135116	-4709.43	6497.18	194.097	1072.35	0	0	0	0	0	0	0	603	903	0
1462	8	0	0	0	0	0	0	200	300	0	-27.9271	-107.027	-797.831	-135848	-4709.43	6085.19	194.097	1073.27	0	0	0	0	0	0	0	603	903	0
1462	9	0	0	0	0	0	0	200	300	0	-28.9952	-105.349	-800.578	-136398	-4831.5	6085.19	193.965	1073.37	0	0	0	0	0	0	0	603	903	0
1463	0	0	0	0	0	0	0	200	300	0	-26.2486	-103.67	-803.324	-136764	-4465.29	6130.97	194.441	1073.25	0	0	0	0	0	0	0	603	903	0
1463	1	0	0	0	0	0	0	200	300	0	-27.3167	-103.213	-804.545	-136215	-4526.32	5947.86	194.374	1072.31	0	0	0	0	0	0	0	603	903	0
1463	2	0	0	0	0	0	0	200	300	0	-27.3167	-101.229	-807.292	-136856	-4709.43	5810.53	194.166	1072.52	0	0	0	0	0	0	0	603	903	0
1463	3	0	0	0	0	0	0	200	300	0	-27.4693	-101.229	-806.986	-137496	-4282.18	5902.08	194.694	1073.38	0	0	0	0	0	0	0	603	903	0
1463	4	0	0	0	0	0	0	200	300	0	-27.9271	-99.3979	-806.681	-137313	-4282.18	5718.98	194.692	1073.22	0	0	0	0	0	0	0	603	903	0
1463	5	0	0	0	0	0	0	200	300	0	-26.2486	-98.4824	-810.343	-137588	-4709.43	5581.65	194.188	1072.79	0	0	0	0	0	0	0	603	903	0
1463	6	0	0	0	0	0	0	200	300	0	-27.6219	-98.6349	-812.479	-137679	-4465.29	5902.08	194.504	1072.46	0	0	0	0	0	0	0	603	903	0
1463	7	0	0	0	0	0	0	200	300	0	-27.0116	-96.4987	-814.005	-137863	-4282.18	5581.65	194.739	1072.36	0	0	0	0	0	0	0	603	903	0
1463	8	0	0	0	0	0	0	200	300	0	-26.5538	-96.4987	-811.259	-138229	-4343.22	5535.87	194.646	1073.39	0	0	0	0	0	0	0	603	903	0
1463	9	0	0	0	0	0	0	200	300	0	-28.3849	-94.6677	-812.785	-137313	-4282.18	5764.76	194.731	1071.94	0	0	0	0	0	0	0	603	903	0
1464	0	0	0	0	0	0	0	200	300	0	-28.69	-93.5995	-814.616	-138320	-4343.22	5444.32	194.668	1072.8	0	0	0	0	0	0	0	603	903	0
1464	1	0	0	0	0	0	0	200	300	0	-26.7064	-93.447	-813.395	-137771	-3977.01	5306.99	195.111	1072.38	0	0	0	0	0	0	0	603	903	0
1464	2	0	0	0	0	0	0	200	300	0	-26.859	-91.1581	-813.7	-138229	-4099.08	5306.99	194.962	1072.88	0	0	0	0	0	0	0	603	903	0
1464	3	0	0	0	0	0	0	200	300	0	-28.2323	-91.9211	-812.479	-138137	-4282.18	5535.87	194.73	1073.02	0	0	0	0	0	0	0	603	903	0
1464	4	0	0	0	0	0	0	200	300	0	-28.3849	-89.1745	-812.174	-138229	-4038.04	5169.66	195.028	1073.2	0	0	0	0	0	0	0	603	903	0
1464	5	0	0	0	0	0	0	200	300	0	-26.7064	-88.7167	-813.395	-137771	-3854.94	5215.44	195.261	1072.38	0	0	0	0	0	0	0	603	903	0
1464	6	0	0	0	0	0	0	200	300	0	-25.7909	-88.5641	-809.733	-137679	-4587.36	5261.22	194.335	1073.03	0	0	0	0	0	0	0	603	903	0
1464	7	0	0	0	0	0	0	200	300	0	-26.7064	-87.9538	-810.954	-137679	-4404.25	5261.22	194.569	1072.77	0	0	0	0	0	0	0	603	903	0
1464	8	0	0	0	0	0	0	200	300	0	-26.4012	-87.1909	-807.597	-137496	-4099.08	5215.44	194.924	1073.25	0	0	0	0	0	0	0	603	903	0
1464	9	0	0	0	0	0	0	200	300	0	-28.0797	-85.0546	-806.681	-136489	-4282.18	5169.66	194.692	1072.2	0	0	0	0	0	0	0	603	903	0
1465	0	0	0	0	0	0	0	200	300	0	-28.2323	-83.8339	-806.681	-136489	-4160.11	5169.66	194.843	1072.2	0	0	0	0	0	0	0	603	903	0
1465	1	0	0	0	0	0	0	200	300	0	-27.3167	-84.5969	-803.019	-136489	-3915.97	5261.22	195.123	1072.97	0	0	0	0	0	0	0	603	903	0
1465	2	0	0	0	0	0	0	200	300	0	-28.5374	-82.9184	-802.714	-135299	-3671.83	5352.77	195.426	1071.55	0	0	0	0	0	0	0	603	903	0
1465	3	0	0	0	0	0	0	200	300	0	-28.3849	-81.8503	-799.662	-134841	-4099.08	5261.22	194.874	1071.62	0	0	0	0	0	0	0	603	903	0
1465	4	0	0	0	0	0	0	200	300	0	-27.4693	-80.6296	-796.61	-134292	-3732.86	5306.99	195.314	1071.58	0	0	0	0	0	0	0	603	903	0
1465	5	0	0	0	0	0	0	200	300	0	-27.0116	-80.0192	-794.474	-134567	-3854.94	5215.44	195.148	1072.38	0	0	0	0	0	0	0	603	903	0
1465	6	0	0	0	0	0	0	200	300	0	-28.3849	-78.7985	-792.338	-134017	-4526.32	5444.32	194.287	1072.14	0	0	0	0	0	0	0	603	903	0
1465	7	0	0	0	0	0	0	200	300	0	-28.2323	-78.3408	-789.591	-133651	-3671.83	5261.22	195.35	1072.27	0	0	0	0	0	0	0	603	903	0
1465	8	0	0	0	0	0	0	200	300	0	-26.859	-77.4252	-789.286	-133285	-3732.86	5306.99	195.271	1071.87	0	0	0	0	0	0	0	603	903	0
1465	9	0	0	0	0	0	0	200	300	0	-27.0116	-76.3571	-781.352	-132095	-3977.01	5490.1	194.91	1072.06	0	0	0	0	0	0	0	603	903	0
1466	0	0	0	0	0	0	0	200	300	0	-28.69	-74.9838	-778.3	-132186	-3977.01	5078.11	194.89	1072.84	0	0	0	0	0	0	0	603	903	0
1466	1	0	0	0	0	0	0	200	300	0	-26.859	-73.3054	-777.079	-131271	-3915.97	5123.89	194.961	1071.93	0	0	0	0	0	0	0	603	903	0
1466	2	0	0	0	0	0	0	200	300	0	-28.0797	-73.6105	-774.027	-130905	-3671.83	5169.66	195.256	1072.12	0	0	0	0	0	0	0	603	903	0
1466	3	0	0	0	0	0	0	200	300	0	-27.4693	-72.8476	-769.45	-129989	-3732.86	5032.33	195.149	1071.94	0	0	0	0	0	0	0	603	903	0
1466	4	0	0	0	0	0	0	200	300	0	-27.0116	-71.4743	-765.482	-129623	-4099.08	4986.56	194.645	1072.33	0	0	0	0	0	0	0	603	903	0
1466	5	0	0	0	0	0	0	200	300	0	-28.3849	-71.4743	-762.736	-128982	-3915.97	4940.78	194.866	1072.1	0	0	0	0	0	0	0	603	903	0
1466	6	0	0	0	0	0	0	200	300	0	-28.8426	-69.1855	-759.074	-127334	-3610.79	4803.45	195.243	1070.75	0	0	0	0	0	0	0	603	903	0
1466	7	0	0	0	0	0	0	200	300	0	-27.1642	-68.7277	-756.327	-126235	-3854.94	5078.11	194.903	1069.91	0	0	0	0	0	0	0	603	903	0
1466	8	0	0	0	0	0	0	200	300	0	-27.0116	-67.9648	-752.36	-126968	-3977.01	4757.68	194.714	1071.76	0	0	0	0	0	0	0	603	903	0
1466	9	0	0	0	0	0	0	200	300	0	-28.69	-66.8967	-750.529	-126418	-3977.01	4711.9	194.701	1071.44	0	0	0	0	0	0	0	603	903	0
1467	0	0	0	0	0	0	0	200	300	0	-28.5374	-66.4389	-744.425	-125503	-3488.72	4849.23	195.314	1071.59	0	0	0	0	0	0	0	603	903	0
1467	1	0	0	0	0	0	0	200	300	0	-27.3167	-66.5915	-740.763	-124679	-3793.9	4803.45	194.878	1071.31	0	0	0	0	0	0	0	603	903	0
1467	2	0	0	0	0	0	0	200	300	0	-26.096	-64.3027	-735.575	-123763	-3671.83	4666.12	195.008	1071.25	0	0	0	0	0	0	0	603	903	0
1467	3	0	0	0	0	0	0	200	300	0	-27.6219	-62.4716	-733.744	-123397	-3427.69	4895	195.329	1071.17	0	0	0	0	0	0	0	603	903	0
1467	4	0	0	0	0	0	0	200	300	0	-27.1642	-61.8613	-730.082	-122756	-3488.72	4299.91	195.221	1071.14	0	0	0	0	0	0	0	603	903	0
1467	5	0	0	0	0	0	0	200	300	0	-27.7745	-61.7087	-724.284	-121292	-3671.83	4620.35	194.93	1070.46	0	0	0	0	0	0	0	603	903	0
1467	6	0	0	0	0	0	0	200	300	0	-27.3167	-60.1828	-720.316	-121383	-3549.76	4391.46	195.072	1071.51	0	0	0	0	0	0	0	603	903	0
1467	7	0	0	0	0	0	0	200	300	0	-27.3167	-59.5724	-716.044	-120559	-3305.62	4574.57	195.383	1071.37	0	0	0	0	0	0	0	603	903	0
1467	8	0	0	0	0	0	0	200	300	0	-28.0797	-58.5043	-711.771	-119918	-3366.65	4391.46	195.27	1071.48	0	0	0	0	0	0	0	603	903	0
1467	9	0	0	0	0	0	0	200	300	0	-28.0797	-57.894	-708.72	-118728	-3488.72	4345.69	195.077	1070.52	0	0	0	0	0	0	0	603	903	0
1468	0	0	0	0	0	0	0	200	300	0	-26.859	-55.6052	-705.058	-117629	-3488.72	4437.24	195.052	1069.84	0	0	0	0	0	0	0	603	903	0
1468	1	0	0	0	0	0	0	200	300	0	-27.1642	-55.9103	-700.175	-117263	-3305.62	4208.36	195.279	1070.48	0	0	0	0	0	0	0	603	903	0
1468	2	0	0	0	0	0	0	200	300	0	-28.0797	-55.3	-695.597	-117080	-3122.51	4437.24	195.511	1071.32	0	0	0	0	0	0	0	603	903	0
1468	3	0	0	0	0	0	0	200	300	0	-26.7064	-55.3	-690.714	-116348	-3793.9	4483.02	194.507	1071.45	0	0	0	0	0	0	0	603	903	0
1468	4	0	0	0	0	0	0	200	300	0	-28.0797	-53.6215	-687.968	-115158	-2939.41	4666.12	195.727	1070.39	0	0	0	0	0	0	0	603	903	0
1468	5	0	0	0	0	0	0	200	300	0	-27.0116	-52.8586	-684	-114883	-3366.65	4574.57	195.078	1070.96	0	0	0	0	0	0	0	603	903	0
1468	6	0	0	0	0	0	0	200	300	0	-27.1642	-52.0956	-680.949	-114150	-3549.76	4437.24	194.787	1070.63	0	0	0	0	0	0	0	603	903	0
1468	7	0	0	0	0	0	0	200	300	0	-27.4693	-50.4172	-675.761	-112411	-3305.62	4666.12	195.108	1069.35	0	0	0	0	0	0	0	603	903	0
1468	8	0	0	0	0	0	0	200	300	0	-27.9271	-51.1801	-671.488	-112136	-3122.51	3979.48	195.35	1070	0	0	0	0	0	0	0	603	903	0
1468	9	0	0	0	0	0	0	200	300	0	-27.0116	-49.3491	-667.826	-111221	-3061.48	4025.25	195.416	1069.54	0	0	0	0	0	0	0	603	903	0
1469	0	0	0	0	0	0	0	200	300	0	-26.859	-48.7387	-665.08	-110671	-3366.65	4025.25	194.938	1069.4	0	0	0	0	0	0	0	603	903	0
1469	1	0	0	0	0	0	0	200	300	0	-27.0116	-47.9758	-660.807	-109939	-3244.58	3979.48	195.09	1069.37	0	0	0	0	0	0	0	603	903	0
1469	2	0	0	0	0	0	0	200	300	0	-27.9271	-48.2809	-657.45	-109390	-3183.55	3887.92	195.158	1069.38	0	0	0	0	0	0	0	603	903	0
1469	3	0	0	0	0	0	0	200	300	0	-28.2323	-47.8232	-652.567	-108108	-3122.51	3842.15	195.215	1068.67	0	0	0	0	0	0	0	603	903	0
1469	4	0	0	0	0	0	0	200	300	0	-26.7064	-46.9077	-645.243	-106918	-3366.65	4071.03	194.782	1068.7	0	0	0	0	0	0	0	603	903	0
1469	5	0	0	0	0	0	0	200	300	0	-27.0116	-46.6025	-643.717	-106368	-3183.55	4483.02	195.054	1068.24	0	0	0	0	0	0	0	603	903	0
1469	6	0	0	0	0	0	0	200	300	0	-27.4693	-45.5344	-641.276	-106002	-3122.51	4071.03	195.131	1068.3	0	0	0	0	0	0	0	603	903	0
1469	7	0	0	0	0	0	0	200	300	0	-27.7745	-44.924	-636.698	-105178	-3366.65	4162.58	194.712	1068.19	0	0	0	0	0	0	0	603	903	0
1469	8	0	0	0	0	0	0	200	300	0	-27.6219	-44.924	-633.646	-103805	-3427.69	4208.36	194.591	1066.82	0	0	0	0	0	0	0	603	903	0
1469	9	0	0	0	0	0	0	200	300	0	-25.7909	-44.7714	-630.29	-103439	-3122.51	3887.92	195.046	1067.11	0	0	0	0	0	0	0	603	903	0
1470	0	0	0	0	0	0	0	200	300	0	-26.4012	-43.093	-625.407	-102798	-2817.34	3750.59	195.495	1067.37	0	0	0	0	0	0	0	603	903	0
1470	1	0	0	0	0	0	0	200	300	0	-26.7064	-42.0248	-623.576	-101425	-3488.72	3979.48	194.405	1065.65	0	0	0	0	0	0	0	603	903	0
1470	2	0	0	0	0	0	0	200	300	0	-27.0116	-42.1774	-619.608	-101608	-3305.62	3659.04	194.665	1066.99	0	0	0	0	0	0	0	603	903	0
1470	3	0	0	0	0	0	0	200	300	0	-26.2486	-40.0412	-616.251	-100326	-3000.44	3567.49	195.131	1065.8	0	0	0	0	0	0	0	603	903	0
1470	4	0	0	0	0	0	0	200	300	0	-25.4857	-40.1938	-610.148	-99685.1	-3427.69	3704.82	194.382	1066.38	0	0	0	0	0	0	0	603	903	0
1470	5	0	0	0	0	0	0	200	300	0	-26.859	-39.736	-607.707	-99044.2	-3427.69	3750.59	194.36	1065.98	0	0	0	0	0	0	0	603	903	0
1470	6	0	0	0	0	0	0	200	300	0	-26.859	-38.8205	-605.265	-98403.4	-3488.72	3750.59	194.236	1065.58	0	0	0	0	0	0	0	603	903	0
1470	7	0	0	0	0	0	0	200	300	0	-25.9435	-37.5998	-601.908	-97487.8	-3183.55	3659.04	194.711	1064.96	0	0	0	0	0	0	0	603	903	0
1470	8	0	0	0	0	0	0	200	300	0	-26.2486	-37.905	-598.856	-96663.9	-3366.65	3842.15	194.378	1064.41	0	0	0	0	0	0	0	603	903	0
1470	9	0	0	0	0	0	0	200	300	0	-25.9435	-37.4472	-593.974	-96114.5	-3915.97	3659.04	193.407	1064.82	0	0	0	0	0	0	0	603	903	0
1471	0	0	0	0	0	0	0	200	300	0	-26.859	-36.8369	-591.532	-95565.2	-3305.62	3063.95	194.412	1064.56	0	0	0	0	0	0	0	603	903	0
1471	1	0	0	0	0	0	0	200	300	0	-26.5538	-35.1584	-586.039	-94283.5	-3366.65	3109.73	194.255	1063.88	0	0	0	0	0	0	0	603	903	0
1471	2	0	0	0	0	0	0	200	300	0	-25.1805	-35.9213	-586.955	-93642.6	-3488.72	3338.61	194.056	1062.54	0	0	0	0	0	0	0	603	903	0
1471	3	0	0	0	0	0	0	200	300	0	-24.8753	-36.5317	-583.598	-93276.4	-3610.79	3155.5	193.813	1062.83	0	0	0	0	0	0	0	603	903	0
1471	4	0	0	0	0	0	0	200	300	0	-27.0116	-34.7006	-580.241	-92452.4	-3183.55	3201.28	194.513	1062.33	0	0	0	0	0	0	0	603	903	0
1471	5	0	0	0	0	0	0	200	300	0	-25.9435	-33.6325	-577.494	-91536.9	-3366.65	3292.83	194.17	1061.51	0	0	0	0	0	0	0	603	903	0
1471	6	0	0	0	0	0	0	200	300	0	-24.8753	-34.0903	-576.273	-91170.7	-3488.72	3384.38	193.946	1061.21	0	0	0	0	0	0	0	603	903	0
1471	7	0	0	0	0	0	0	200	300	0	-24.8753	-33.6325	-571.696	-89980.5	-3671.83	3384.38	193.577	1060.39	0	0	0	0	0	0	0	603	903	0
1471	8	0	0	0	0	0	0	200	300	0	-25.9435	-33.9377	-568.644	-90072.1	-3549.76	3521.71	193.758	1061.4	0	0	0	0	0	0	0	603	903	0
1471	9	0	0	0	0	0	0	200	300	0	-24.1124	-33.9377	-566.508	-89248.1	-3305.62	3109.73	194.165	1060.54	0	0	0	0	0	0	0	603	903	0
1472	0	0	0	0	0	0	0	200	300	0	-25.0279	-31.8015	-563.456	-88332.5	-3793.9	3338.61	193.267	1059.77	0	0	0	0	0	0	0	603	903	0
1472	1	0	0	0	0	0	0	200	300	0	-24.7227	-31.6489	-562.541	-87508.6	-3305.62	3247.05	194.124	1058.56	0	0	0	0	0	0	0	603	903	0
1472	2	0	0	0	0	0	0	200	300	0	-24.265	-31.6489	-559.794	-87233.9	-3427.69	3613.27	193.877	1058.83	0	0	0	0	0	0	0	603	903	0
1472	3	0	0	0	0	0	0	200	300	0	-25.6383	-30.8859	-556.742	-86776.2	-3793.9	3063.95	193.186	1058.86	0	0	0	0	0	0	0	603	903	0
1472	4	0	0	0	0	0	0	200	300	0	-22.4339	-29.9704	-555.216	-86410	-3427.69	2926.62	193.826	1058.63	0	0	0	0	0	0	0	603	903	0
1472	5	0	0	0	0	0	0	200	300	0	-25.3331	-29.8178	-550.944	-85036.6	-3610.79	3018.17	193.446	1057.35	0	0	0	0	0	0	0	603	903	0
1472	6	0	0	0	0	0	0	200	300	0	-24.1124	-29.5126	-550.944	-84304.2	-3488.72	3155.5	193.668	1056.02	0	0	0	0	0	0	0	603	903	0
1472	7	0	0	0	0	0	0	200	300	0	-24.4176	-28.2919	-549.113	-84762	-3671.83	3201.28	193.313	1057.36	0	0	0	0	0	0	0	603	903	0
1472	8	0	0	0	0	0	0	200	300	0	-25.7909	-27.6816	-546.061	-83480.3	-3854.94	3018.17	192.94	1055.88	0	0	0	0	0	0	0	603	903	0
1472	9	0	0	0	0	0	0	200	300	0	-25.1805	-28.1393	-543.009	-83297.1	-3732.86	2972.4	193.126	1056.4	0	0	0	0	0	0	0	603	903	0
1473	0	0	0	0	0	0	0	200	300	0	-25.4857	-27.3764	-541.483	-82381.7	-3610.79	3201.28	193.332	1055.14	0	0	0	0	0	0	0	603	903	0
1473	1	0	0	0	0	0	0	200	300	0	-23.502	-26.9186	-539.958	-81283	-3977.01	2972.4	192.635	1053.54	0	0	0	0	0	0	0	603	903	0
1473	2	0	0	0	0	0	0	200	300	0	-23.6546	-25.8505	-535.075	-81740.8	-3854.94	3292.83	192.796	1055.77	0	0	0	0	0	0	0	603	903	0
1473	3	0	0	0	0	0	0	200	300	0	-24.4176	-27.6816	-534.77	-81099.9	-3671.83	3338.61	193.134	1054.65	0	0	0	0	0	0	0	603	903	0
1473	4	0	0	0	0	0	0	200	300	0	-24.5702	-25.5453	-532.328	-80001.2	-4099.08	3292.83	192.3	1053.29	0	0	0	0	0	0	0	603	903	0
1473	5	0	0	0	0	0	0	200	300	0	-23.8072	-25.0876	-529.887	-79177.3	-4038.04	3247.05	192.379	1052.42	0	0	0	0	0	0	0	603	903	0
1473	6	0	0	0	0	0	0	200	300	0	-23.6546	-25.0876	-529.887	-78902.6	-4099.08	3475.94	192.264	1051.9	0	0	0	0	0	0	0	603	903	0
1473	7	0	0	0	0	0	0	200	300	0	-25.1805	-25.0876	-529.582	-78536.4	-4099.08	3384.38	192.26	1051.3	0	0	0	0	0	0	0	603	903	0
1473	8	0	0	0	0	0	0	200	300	0	-22.7391	-24.4772	-526.53	-78628	-4282.18	3475.94	191.867	1052.33	0	0	0	0	0	0	0	603	903	0
1473	9	0	0	0	0	0	0	200	300	0	-24.5702	-24.0195	-523.783	-77346.2	-4160.11	3155.5	192.058	1050.67	0	0	0	0	0	0	0	603	903	0
1474	0	0	0	0	0	0	0	200	300	0	-24.265	-23.1039	-522.257	-76796.9	-4343.22	3430.16	191.684	1050.05	0	0	0	0	0	0	0	603	903	0
1474	1	0	0	0	0	0	0	200	300	0	-24.4176	-23.1039	-521.647	-76888.5	-4282.18	3201.28	191.791	1050.4	0	0	0	0	0	0	0	603	903	0
1474	2	0	0	0	0	0	0	200	300	0	-25.1805	-22.341	-517.985	-75515.2	-4404.25	3109.73	191.497	1048.79	0	0	0	0	0	0	0	603	903	0
1474	3	0	0	0	0	0	0	200	300	0	-25.6383	-22.7988	-517.68	-75881.4	-4831.5	2926.62	190.667	1049.58	0	0	0	0	0	0	0	603	903	0
1474	4	0	0	0	0	0	0	200	300	0	-24.265	-22.0358	-516.764	-75240.5	-4221.15	3155.5	191.832	1048.6	0	0	0	0	0	0	0	603	903	0
1474	5	0	0	0	0	0	0	200	300	0	-22.7391	-21.4255	-514.628	-74599.7	-4526.32	3109.73	191.205	1047.96	0	0	0	0	0	0	0	603	903	0
1474	6	0	0	0	0	0	0	200	300	0	-24.7227	-20.8151	-513.712	-73958.8	-5014.6	3063.95	190.239	1046.97	0	0	0	0	0	0	0	603	903	0
1474	7	0	0	0	0	0	0	200	300	0	-25.3331	-20.5099	-514.018	-73867.2	-4892.53	3109.73	190.482	1046.71	0	0	0	0	0	0	0	603	903	0
1474	8	0	0	0	0	0	0	200	300	0	-25.7909	-20.3574	-505.473	-72402.4	-4587.36	2926.62	190.925	1046.24	0	0	0	0	0	0	0	603	903	0
1474	9	0	0	0	0	0	0	200	300	0	-24.1124	-20.9677	-510.355	-72494	-4526.32	2972.4	191.131	1045.05	0	0	0	0	0	0	0	603	903	0
1475	0	0	0	0	0	0	0	200	300	0	-24.4176	-19.4418	-507.304	-72310.8	-4953.57	3109.73	190.236	1045.54	0	0	0	0	0	0	0	603	903	0
1475	1	0	0	0	0	0	0	200	300	0	-25.1805	-19.2892	-507.609	-71761.5	-4770.46	3109.73	190.602	1044.37	0	0	0	0	0	0	0	603	903	0
1475	2	0	0	0	0	0	0	200	300	0	-22.4339	-19.1367	-506.083	-71670	-4953.57	3063.95	190.212	1044.62	0	0	0	0	0	0	0	603	903	0
1475	3	0	0	0	0	0	0	200	300	0	-25.4857	-18.8315	-504.252	-70937.6	-4892.53	3063.95	190.297	1043.68	0	0	0	0	0	0	0	603	903	0
1475	4	0	0	0	0	0	0	200	300	0	-25.3331	-18.6789	-503.642	-70296.7	-5136.67	3247.05	189.801	1042.58	0	0	0	0	0	0	0	603	903	0
1475	5	0	0	0	0	0	0	200	300	0	-25.0279	-17.153	-504.862	-70846	-5014.6	2972.4	190.067	1043.33	0	0	0	0	0	0	0	603	903	0
1475	6	0	0	0	0	0	0	200	300	0	-26.096	-17.3056	-503.031	-70296.7	-4526.32	3109.73	191.002	1042.75	0	0	0	0	0	0	0	603	903	0
1475	7	0	0	0	0	0	0	200	300	0	-25.4857	-17.916	-501.811	-69198.1	-4892.53	2926.62	190.25	1040.9	0	0	0	0	0	0	0	603	903	0
1475	8	0	0	0	0	0	0	200	300	0	-25.1805	-17.6108	-500.59	-69381.1	-5075.64	2926.62	189.861	1041.6	0	0	0	0	0	0	0	603	903	0
1475	9	0	0	0	0	0	0	200	300	0	-24.8753	-16.6953	-500.59	-68831.9	-5197.71	2926.62	189.617	1040.5	0	0	0	0	0	0	0	603	903	0
1476	0	0	0	0	0	0	0	200	300	0	-26.2486	-17.0004	-499.979	-67916.3	-4648.39	3063.95	190.703	1038.84	0	0	0	0	0	0	0	603	903	0
1476	1	0	0	0	0	0	0	200	300	0	-25.4857	-17.153	-499.979	-68557.2	-5075.64	2835.07	189.848	1040.12	0	0	0	0	0	0	0	603	903	0
1476	2	0	0	0	0	0	0	200	300	0	-25.4857	-17.916	-500.285	-67550.1	-5380.81	2835.07	189.244	1038.02	0	0	0	0	0	0	0	603	903	0
1476	3	0	0	0	0	0	0	200	300	0	-25.4857	-17.153	-500.895	-67367	-5502.88	2835.07	189.014	1037.49	0	0	0	0	0	0	0	603	903	0
1476	4	0	0	0	0	0	0	200	300	0	-24.5702	-16.0849	-498.759	-67916.3	-5319.78	2926.62	189.334	1039.17	0	0	0	0	0	0	0	603	903	0
1476	5	0	0	0	0	0	0	200	300	0	-25.1805	-16.2375	-500.59	-66726.1	-5075.64	2835.07	189.861	1036.29	0	0	0	0	0	0	0	603	903	0
1476	6	0	0	0	0	0	0	200	300	0	-25.3331	-16.3901	-499.064	-67000.8	-5808.06	2651.96	188.362	1037.25	0	0	0	0	0	0	0	603	903	0
1476	7	0	0	0	0	0	0	200	300	0	-24.1124	-15.9323	-498.759	-66268.4	-5563.92	2880.84	188.844	1035.87	0	0	0	0	0	0	0	603	903	0
1476	8	0	0	0	0	0	0	200	300	0	-23.9598	-15.322	-496.928	-65535.9	-5502.88	2697.74	188.926	1034.88	0	0	0	0	0	0	0	603	903	0
1476	9	0	0	0	0	0	0	200	300	0	-25.0279	-15.6271	-499.064	-66176.8	-5258.74	2606.19	189.463	1035.6	0	0	0	0	0	0	0	603	903	0
1477	0	0	0	0	0	0	0	200	300	0	-22.7391	-14.7116	-495.402	-65810.6	-6174.27	2880.84	187.537	1035.84	0	0	0	0	0	0	0	603	903	0
1477	1	0	0	0	0	0	0	200	300	0	-23.502	-15.4745	-499.674	-65261.3	-5624.95	2697.74	188.743	1033.61	0	0	0	0	0	0	0	603	903	0
1477	2	0	0	0	0	0	0	200	300	0	-21.9762	-15.0168	-498.759	-65078.2	-5869.1	2789.29	188.233	1033.48	0	0	0	0	0	0	0	603	903	0
1477	3	0	0	0	0	0	0	200	300	0	-23.1969	-14.4064	-499.369	-65444.4	-6113.24	2560.41	187.758	1034.05	0	0	0	0	0	0	0	603	903	0
1477	4	0	0	0	0	0	0	200	300	0	-24.7227	-14.559	-500.59	-64986.6	-6052.2	2331.53	187.91	1032.82	0	0	0	0	0	0	0	603	903	0
1477	5	0	0	0	0	0	0	200	300	0	-24.4176	-14.559	-500.59	-64437.3	-5808.06	2560.41	188.398	1031.72	0	0	0	0	0	0	0	603	903	0
1477	6	0	0	0	0	0	0	200	300	0	-23.3495	-14.559	-499.369	-63155.5	-5930.13	2423.08	188.125	1029.47	0	0	0	0	0	0	0	603	903	0
1477	7	0	0	0	0	0	0	200	300	0	-22.8917	-13.6435	-501.2	-63521.8	-6235.31	2331.53	187.559	1029.74	0	0	0	0	0	0	0	603	903	0
1477	8	0	0	0	0	0	0	200	300	0	-23.6546	-14.2538	-501.505	-64254.2	-6601.52	2514.63	186.837	1031.12	0	0	0	0	0	0	0	603	903	0
1477	9	0	0	0	0	0	0	200	300	0	-21.5184	-12.5754	-503.031	-63888	-6174.27	2148.42	187.726	1030.01	0	0	0	0	0	0	0	603	903	0
1478	0	0	0	0	0	0	0	200	300	0	-23.9598	-12.728	-503.336	-63247.1	-6235.31	1919.54	187.612	1028.66	0	0	0	0	0	0	0	603	903	0
1478	1	0	0	0	0	0	0	200	300	0	-22.2813	-12.8806	-502.726	-62697.8	-6723.59	2011.09	186.626	1027.72	0	0	0	0	0	0	0	603	903	0
1478	2	0	0	0	0	0	0	200	300	0	-22.1288	-11.965	-503.642	-62606.2	-6479.45	1965.32	187.135	1027.31	0	0	0	0	0	0	0	603	903	0
1478	3	0	0	0	0	0	0	200	300	0	-23.9598	-12.5754	-503.947	-62789.3	-6235.31	2102.65	187.627	1027.6	0	0	0	0	0	0	0	603	903	0
1478	4	0	0	0	0	0	0	200	300	0	-20.2977	-12.4228	-506.083	-62697.8	-6479.45	2148.42	187.197	1026.89	0	0	0	0	0	0	0	603	903	0
1478	5	0	0	0	0	0	0	200	300	0	-23.502	-13.0331	-505.167	-62240	-7028.76	1782.21	186.086	1026.21	0	0	0	0	0	0	0	603	903	0
1478	6	0	0	0	0	0	0	200	300	0	-22.1288	-11.965	-505.167	-61324.5	-6845.66	2377.3	186.449	1024.39	0	0	0	0	0	0	0	603	903	0
1478	7	0	0	0	0	0	0	200	300	0	-21.5184	-11.5073	-505.778	-61599.2	-6357.38	1736.43	187.43	1024.79	0	0	0	0	0	0	0	603	903	0
1478	8	0	0	0	0	0	0	200	300	0	-23.3495	-11.3547	-507.609	-61233	-6723.59	1827.99	186.754	1023.63	0	0	0	0	0	0	0	603	903	0
1478	9	0	0	0	0	0	0	200	300	0	-21.0606	-10.7443	-508.524	-61782.3	-6967.73	1690.66	186.298	1024.49	0	0	0	0	0	0	0	603	903	0
1479	0	0	0	0	0	0	0	200	300	0	-23.1969	-10.8969	-508.524	-61324.5	-6662.55	1690.66	186.898	1023.59	0	0	0	0	0	0	0	603	903	0
1479	1	0	0	0	0	0	0	200	300	0	-21.3658	-10.5917	-507.914	-61049.9	-6906.69	1690.66	186.402	1023.2	0	0	0	0	0	0	0	603	903	0
1479	2	0	0	0	0	0	0	200	300	0	-21.8236	-10.7443	-507.914	-61507.6	-7150.83	1644.88	185.921	1024.1	0	0	0	0	0	0	0	603	903	0
1479	3	0	0	0	0	0	0	200	300	0	-22.1288	-9.52362	-512.797	-60958.3	-7150.83	1690.66	186.055	1021.87	0	0	0	0	0	0	0	603	903	0
1479	4	0	0	0	0	0	0	200	300	0	-21.9762	-9.98139	-512.492	-60866.7	-7028.76	1461.78	186.285	1021.77	0	0	0	0	0	0	0	603	903	0
1479	5	0	0	0	0	0	0	200	300	0	-22.4339	-9.37103	-511.881	-60134.3	-6906.69	1416	186.507	1020.48	0	0	0	0	0	0	0	603	903	0
1479	6	0	0	0	0	0	0	200	300	0	-20.7555	-8.30292	-513.407	-60683.6	-7517.05	1187.12	185.359	1021.2	0	0	0	0	0	0	0	603	903	0
1479	7	0	0	0	0	0	0	200	300	0	-21.5184	-8.60809	-514.933	-59951.2	-7456.01	1232.89	185.52	1019.43	0	0	0	0	0	0	0	603	903	0
1479	8	0	0	0	0	0	0	200	300	0	-21.671	-7.84515	-516.459	-60683.6	-6967.73	1095.56	186.509	1020.5	0	0	0	0	0	0	0	603	903	0
1479	9	0	0	0	0	0	0	200	300	0	-19.2296	-8.91327	-515.849	-60409	-7578.08	1324.45	185.309	1020.11	0	0	0	0	0	0	0	603	903	0
1480	0	0	0	0	0	0	0	200	300	0	-21.5184	-8.60809	-516.459	-59768.1	-7456.01	958.235	185.563	1018.73	0	0	0	0	0	0	0	603	903	0
1480	1	0	0	0	0	0	0	200	300	0	-19.6873	-6.62445	-517.985	-59859.6	-7150.83	1187.12	186.195	1018.56	0	0	0	0	0	0	0	603	903	0
1480	2	0	0	0	0	0	0	200	300	0	-19.6873	-6.62445	-520.426	-59951.2	-7333.94	1004.01	185.908	1018.2	0	0	0	0	0	0	0	603	903	0
1480	3	0	0	0	0	0	0	200	300	0	-21.0606	-6.47186	-520.731	-60409	-7822.22	866.683	184.978	1019.01	0	0	0	0	0	0	0	603	903	0
1480	4	0	0	0	0	0	0	200	300	0	-21.3658	-6.0141	-520.731	-59401.9	-7822.22	1141.34	184.978	1017.07	0	0	0	0	0	0	0	603	903	0
1480	5	0	0	0	0	0	0	200	300	0	-19.077	-4.94598	-521.647	-59493.4	-7944.29	958.235	184.771	1017.05	0	0	0	0	0	0	0	603	903	0
1480	6	0	0	0	0	0	0	200	300	0	-17.8563	-4.48822	-523.783	-59401.9	-7639.12	958.235	185.416	1016.41	0	0	0	0	0	0	0	603	903	0
1480	7	0	0	0	0	0	0	200	300	0	-18.3141	-3.57269	-523.173	-59585	-8127.4	958.235	184.465	1016.89	0	0	0	0	0	0	0	603	903	0
1480	8	0	0	0	0	0	0	200	300	0	-20.7555	-3.87787	-526.835	-59493.4	-7761.19	820.906	185.268	1015.93	0	0	0	0	0	0	0	603	903	0
1480	9	0	0	0	0	0	0	200	300	0	-20.7555	-3.57269	-526.225	-57937.1	-7883.26	958.235	185.019	1013.1	0	0	0	0	0	0	0	603	903	0
1481	0	0	0	0	0	0	0	200	300	0	-18.9244	-3.26752	-527.14	-59127.2	-8371.54	546.248	184.119	1015.17	0	0	0	0	0	0	0	603	903	0
1481	1	0	0	0	0	0	0	200	300	0	-17.8563	-2.50458	-529.276	-58577.9	-8249.47	820.906	184.414	1013.68	0	0	0	0	0	0	0	603	903	0
1481	2	0	0	0	0	0	0	200	300	0	-19.6873	-2.1994	-528.971	-59035.7	-8249.47	180.037	184.405	1014.6	0	0	0	0	0	0	0	603	903	0
1481	3	0	0	0	0	0	0	200	300	0	-20.9081	-2.65717	-531.718	-58669.5	-8066.36	363.142	184.83	1013.34	0	0	0	0	0	0	0	603	903	0
1481	4	0	0	0	0	0	0	200	300	0	-20.2977	-1.89423	-531.413	-58486.4	-8737.75	42.7079	183.558	1013.06	0	0	0	0	0	0	0	603	903	0
1481	5	0	0	0	0	0	0	200	300	0	-19.5348	-1.43646	-532.023	-57754	-8310.5	134.261	184.379	1011.56	0	0	0	0	0	0	0	603	903	0
1481	6	0	0	0	0	0	0	200	300	0	-19.5348	-1.13129	-535.38	-58669.5	-8371.54	363.142	184.363	1012.58	0	0	0	0	0	0	0	603	903	0
1481	7	0	0	0	0	0	0	200	300	0	-20.7555	-0.520936	-535.38	-57570.8	-8493.61	-323.503	184.135	1010.53	0	0	0	0	0	0	0	603	903	0
1481	8	0	0	0	0	0	0	200	300	0	-21.0606	-0.520936	-535.075	-57937.1	-8493.61	500.472	184.126	1011.28	0	0	0	0	0	0	0	603	903	0
1481	9	0	0	0	0	0	0	200	300	0	-19.5348	-0.0631721	-535.685	-57754	-8615.68	-140.398	183.917	1010.81	0	0	0	0	0	0	0	603	903	0
1482	0	0	0	0	0	0	0	200	300	0	-19.5348	-0.520936	-538.432	-57021.5	-8615.68	225.813	183.999	1008.9	0	0	0	0	0	0	0	603	903	0
1482	1	0	0	0	0	0	0	200	300	0	-19.8399	1.31012	-540.568	-58028.6	-9287.06	-140.398	182.82	1010.35	0	0	0	0	0	0	0	603	903	0
1482	2	0	0	0	0	0	0	200	300	0	-21.5184	1.00494	-542.094	-57937.1	-8676.71	-277.727	183.994	1009.88	0	0	0	0	0	0	0	603	903	0
1482	3	0	0	0	0	0	0	200	300	0	-21.3658	1.61529	-542.094	-57113.1	-8920.85	-48.8449	183.544	1008.36	0	0	0	0	0	0	0	603	903	0
1482	4	0	0	0	0	0	0	200	300	0	-20.7555	2.37823	-543.314	-56289.1	-9287.06	-506.608	182.907	1006.6	0	0	0	0	0	0	0	603	903	0
1482	5	0	0	0	0	0	0	200	300	0	-21.2132	1.61529	-543.314	-57387.7	-9042.92	-277.727	183.356	1008.63	0	0	0	0	0	0	0	603	903	0
1482	6	0	0	0	0	0	0	200	300	0	-21.8236	3.14117	-546.671	-57570.8	-9409.13	-369.28	182.788	1008.31	0	0	0	0	0	0	0	603	903	0
1482	7	0	0	0	0	0	0	200	300	0	-23.0443	2.98859	-548.808	-57570.8	-9287.06	-94.6212	183.078	1007.9	0	0	0	0	0	0	0	603	903	0
1482	8	0	0	0	0	0	0	200	300	0	-23.0443	2.98859	-548.197	-56930	-9714.31	-323.503	182.28	1006.85	0	0	0	0	0	0	0	603	903	0
1482	9	0	0	0	0	0	0	200	300	0	-21.5184	3.59894	-549.723	-56746.9	-9226.03	-277.727	183.217	1006.23	0	0	0	0	0	0	0	603	903	0
1483	0	0	0	0	0	0	0	200	300	0	-21.5184	3.75153	-551.859	-56472.2	-9164.99	-415.056	183.393	1005.33	0	0	0	0	0	0	0	603	903	0
1483	1	0	0	0	0	0	0	200	300	0	-22.4339	4.36188	-553.08	-56838.4	-9714.31	-277.727	182.436	1005.77	0	0	0	0	0	0	0	603	903	0
1483	2	0	0	0	0	0	0	200	300	0	-23.1969	4.20929	-555.827	-56289.1	-9714.31	-140.398	182.523	1004.27	0	0	0	0	0	0	0	603	903	0
1483	3	0	0	0	0	0	0	200	300	0	-22.1288	5.73517	-555.827	-57296.2	-9531.21	-140.398	182.852	1006.08	0	0	0	0	0	0	0	603	903	0
1483	4	0	0	0	0	0	0	200	300	0	-23.6546	5.58258	-556.742	-56106	-9653.28	-48.8449	182.661	1003.78	0	0	0	0	0	0	0	603	903	0
1483	5	0	0	0	0	0	0	200	300	0	-23.0443	5.88776	-559.184	-56380.6	-9714.31	-231.95	182.628	1003.83	0	0	0	0	0	0	0	603	903	0
1483	6	0	0	0	0	0	0	200	300	0	-23.1969	6.19293	-560.404	-56472.2	-10019.5	-186.174	182.121	1003.77	0	0	0	0	0	0	0	603	903	0
1483	7	0	0	0	0	0	0	200	300	0	-22.5865	6.95587	-561.625	-56472.2	-9775.35	-186.174	182.595	1003.55	0	0	0	0	0	0	0	603	903	0
1483	8	0	0	0	0	0	0	200	300	0	-24.8753	7.41363	-562.846	-57204.6	-10019.5	-369.28	182.199	1004.63	0	0	0	0	0	0	0	603	903	0
1483	9	0	0	0	0	0	0	200	300	0	-24.7227	7.56622	-564.982	-56014.4	-10629.8	-277.727	181.186	1002.14	0	0	0	0	0	0	0	603	903	0
1484	0	0	0	0	0	0	0	200	300	0	-24.4176	7.8714	-564.372	-55739.8	-10385.7	-231.95	181.598	1001.76	0	0	0	0	0	0	0	603	903	0
1484	1	0	0	0	0	0	0	200	300	0	-24.7227	8.48175	-569.254	-55922.9	-10324.7	-140.398	181.863	1001.24	0	0	0	0	0	0	0	603	903	0
1484	2	0	0	0	0	0	0	200	300	0	-24.7227	8.93951	-569.56	-56289.1	-10507.8	-369.28	181.551	1001.83	0	0	0	0	0	0	0	603	903	0
1484	3	0	0	0	0	0	0	200	300	0	-26.2486	8.93951	-570.475	-56106	-10629.8	-643.938	181.367	1001.35	0	0	0	0	0	0	0	603	903	0
1484	4	0	0	0	0	0	0	200	300	0	-25.3331	9.85504	-570.475	-54915.8	-10629.8	-323.503	181.367	999.263	0	0	0	0	0	0	0	603	903	0
1484	5	0	0	0	0	0	0	200	300	0	-25.0279	8.63434	-573.527	-55739.8	-10812.9	-277.727	181.147	1000.19	0	0	0	0	0	0	0	603	903	0
1484	6	0	0	0	0	0	0	200	300	0	-23.9598	10.9232	-577.799	-55282	-10996	-186.174	180.969	998.677	0	0	0	0	0	0	0	603	903	0
1484	7	0	0	0	0	0	0	200	300	0	-25.3331	10.3128	-578.41	-56014.4	-10935	-186.174	181.095	999.842	0	0	0	0	0	0	0	603	903	0
1484	8	0	0	0	0	0	0	200	300	0	-27.1642	10.9232	-579.325	-55648.2	-11240.2	-48.8449	180.598	999.057	0	0	0	0	0	0	0	603	903	0
1484	9	0	0	0	0	0	0	200	300	0	-27.1642	11.8387	-580.546	-55831.3	-11362.3	-231.95	180.428	999.17	0	0	0	0	0	0	0	603	903	0
1485	0	0	0	0	0	0	0	200	300	0	-26.4012	11.0757	-581.461	-55190.5	-11362.3	-94.6212	180.459	997.917	0	0	0	0	0	0	0	603	903	0
1485	1	0	0	0	0	0	0	200	300	0	-27.4693	12.1439	-586.344	-55007.4	-11179.2	-140.398	180.934	996.814	0	0	0	0	0	0	0	603	903	0
1485	2	0	0	0	0	0	0	200	300	0	-27.0116	11.9913	-587.565	-55282	-11545.4	-323.503	180.35	997.087	0	0	0	0	0	0	0	603	903	0
1485	3	0	0	0	0	0	0	200	300	0	-28.3849	13.0594	-589.396	-54824.3	-11545.4	-323.503	180.412	996.018	0	0	0	0	0	0	0	603	903	0
1485	4	0	0	0	0	0	0	200	300	0	-28.3849	13.6697	-590.312	-55098.9	-11911.6	-369.28	179.822	996.339	0	0	0	0	0	0	0	603	903	0
1485	5	0	0	0	0	0	0	200	300	0	-27.7745	13.3646	-589.701	-54732.7	-11850.5	-415.056	179.904	995.814	0	0	0	0	0	0	0	603	903	0
1485	6	0	0	0	0	0	0	200	300	0	-27.9271	14.5853	-594.584	-54458.1	-11484.3	-415.056	180.685	994.59	0	0	0	0	0	0	0	603	903	0
1485	7	0	0	0	0	0	0	200	300	0	-29.3004	13.8223	-596.415	-54549.6	-12155.7	-552.385	179.619	994.462	0	0	0	0	0	0	0	603	903	0
1485	8	0	0	0	0	0	0	200	300	0	-29.3004	14.5853	-597.025	-54183.4	-11911.6	-277.727	180.048	993.756	0	0	0	0	0	0	0	603	903	0
1485	9	0	0	0	0	0	0	200	300	0	-29.1478	15.3482	-599.772	-55007.4	-11850.5	-460.832	180.242	994.714	0	0	0	0	0	0	0	603	903	0
1486	0	0	0	0	0	0	0	200	300	0	-30.3685	15.6534	-603.434	-54183.4	-12460.9	-48.8449	179.35	992.792	0	0	0	0	0	0	0	603	903	0
1486	1	0	0	0	0	0	0	200	300	0	-29.1478	15.3482	-604.655	-54000.3	-12460.9	-552.385	179.392	992.308	0	0	0	0	0	0	0	603	903	0
1486	2	0	0	0	0	0	0	200	300	0	-29.7581	16.1111	-606.791	-54091.8	-12033.6	-369.28	180.168	992.144	0	0	0	0	0	0	0	603	903	0
1486	3	0	0	0	0	0	0	200	300	0	-28.9952	17.0267	-608.622	-54641.2	-12338.8	-506.608	179.727	992.779	0	0	0	0	0	0	0	603	903	0
1486	4	0	0	0	0	0	0	200	300	0	-31.1314	15.3482	-611.369	-54549.6	-12766.1	-277.727	179.119	992.225	0	0	0	0	0	0	0	603	903	0
1486	5	0	0	0	0	0	0	200	300	0	-30.5211	16.4163	-612.895	-54000.3	-12705	-552.385	179.27	991.107	0	0	0	0	0	0	0	603	903	0
1486	6	0	0	0	0	0	0	200	300	0	-30.2159	17.3318	-615.946	-54000.3	-12155.7	-460.832	180.265	990.67	0	0	0	0	0	0	0	603	903	0
1486	7	0	0	0	0	0	0	200	300	0	-30.2159	17.637	-617.167	-54183.4	-12705	-506.608	179.414	990.794	0	0	0	0	0	0	0	603	903	0
1486	8	0	0	0	0	0	0	200	300	0	-31.1314	18.4	-618.998	-54366.5	-13071.2	-735.49	178.883	990.83	0	0	0	0	0	0	0	603	903	0
1486	9	0	0	0	0	0	0	200	300	0	-31.4366	18.8577	-624.186	-54366.5	-12827.1	-552.385	179.45	990.1	0	0	0	0	0	0	0	603	903	0
1487	0	0	0	0	0	0	0	200	300	0	-31.4366	19.0103	-624.796	-53908.7	-13132.3	-369.28	178.982	989.282	0	0	0	0	0	0	0	603	903	0
1487	1	0	0	0	0	0	0	200	300	0	-30.9789	17.637	-628.458	-52718.5	-13498.5	-643.938	178.521	986.886	0	0	0	0	0	0	0	603	903	0
1487	2	0	0	0	0	0	0	200	300	0	-30.8263	18.8577	-628.764	-53634.1	-13681.6	-598.161	178.24	988.301	0	0	0	0	0	0	0	603	903	0
1487	3	0	0	0	0	0	0	200	300	0	-31.7418	19.3155	-632.121	-54091.8	-13254.4	-415.056	179.032	988.572	0	0	0	0	0	0	0	603	903	0
1487	4	0	0	0	0	0	0	200	300	0	-32.3521	20.231	-634.867	-54183.4	-13803.7	-231.95	178.257	988.346	0	0	0	0	0	0	0	603	903	0
1487	5	0	0	0	0	0	0	200	300	0	-32.5047	19.7733	-638.529	-53908.7	-13742.6	-552.385	178.478	987.426	0	0	0	0	0	0	0	603	903	0
1487	6	0	0	0	0	0	0	200	300	0	-31.1314	19.9258	-637.919	-53725.6	-13498.5	-369.28	178.84	987.22	0	0	0	0	0	0	0	603	903	0
1487	7	0	0	0	0	0	0	200	300	0	-30.8263	21.1465	-641.276	-53634.1	-13925.7	-598.161	178.284	986.637	0	0	0	0	0	0	0	603	903	0
1487	8	0	0	0	0	0	0	200	300	0	-31.7418	20.3836	-644.633	-54366.5	-14353	-415.056	177.735	987.337	0	0	0	0	0	0	0	603	903	0
1487	9	0	0	0	0	0	0	200	300	0	-33.1151	21.9095	-647.074	-52627	-13986.8	-643.938	178.385	984.331	0	0	0	0	0	0	0	603	903	0
1488	0	0	0	0	0	0	0	200	300	0	-30.9789	22.3672	-650.126	-53451	-14108.8	-735.49	178.298	985.216	0	0	0	0	0	0	0	603	903	0
1488	1	0	0	0	0	0	0	200	300	0	-31.7418	22.3672	-651.652	-53359.4	-14597.1	-415.056	177.6	984.883	0	0	0	0	0	0	0	603	903	0
1488	2	0	0	0	0	0	0	200	300	0	-31.8944	21.4517	-654.704	-53634.1	-14353	-827.043	178.077	984.921	0	0	0	0	0	0	0	603	903	0
1488	3	0	0	0	0	0	0	200	300	0	-32.8099	23.588	-657.755	-53908.7	-14475.1	-598.161	177.993	984.959	0	0	0	0	0	0	0	603	903	0
1488	4	0	0	0	0	0	0	200	300	0	-33.1151	24.3509	-661.417	-53451	-14658.2	-552.385	177.838	983.813	0	0	0	0	0	0	0	603	903	0
1488	5	0	0	0	0	0	0	200	300	0	-33.2677	24.5035	-664.164	-53817.2	-14963.3	-735.49	177.47	984.03	0	0	0	0	0	0	0	603	903	0
1488	6	0	0	0	0	0	0	200	300	0	-32.3521	24.8087	-666.605	-53542.5	-15573.7	-598.161	176.637	983.321	0	0	0	0	0	0	0	603	903	0
1488	7	0	0	0	0	0	0	200	300	0	-33.4203	25.2664	-669.962	-53359.4	-14963.3	-827.043	177.665	982.645	0	0	0	0	0	0	0	603	903	0
1488	8	0	0	0	0	0	0	200	300	0	-33.1151	26.0294	-671.793	-53634.1	-15390.6	-598.161	177.09	982.837	0	0	0	0	0	0	0	603	903	0
1488	9	0	0	0	0	0	0	200	300	0	-33.878	26.9449	-676.066	-53267.9	-15695.8	-186.174	176.784	981.791	0	0	0	0	0	0	0	603	903	0
1489	0	0	0	0	0	0	0	200	300	0	-32.9625	27.0975	-678.507	-53817.2	-15146.4	-689.714	177.677	982.317	0	0	0	0	0	0	0	603	903	0
1489	1	0	0	0	0	0	0	200	300	0	-34.3358	27.8604	-679.118	-53359.4	-15634.7	-735.49	176.978	981.572	0	0	0	0	0	0	0	603	903	0
1489	2	0	0	0	0	0	0	200	300	0	-33.5728	28.9285	-682.475	-53176.3	-15756.8	-506.608	176.912	980.917	0	0	0	0	0	0	0	603	903	0
1489	3	0	0	0	0	0	0	200	300	0	-33.7254	28.013	-684.916	-53084.7	-16062	-781.267	176.549	980.506	0	0	0	0	0	0	0	603	903	0
1489	4	0	0	0	0	0	0	200	300	0	-34.7935	29.6915	-688.883	-53542.5	-15878.9	-598.161	176.95	980.724	0	0	0	0	0	0	0	603	903	0
1489	5	0	0	0	0	0	0	200	300	0	-34.7935	29.3863	-691.325	-53542.5	-15939.9	-643.938	176.943	980.449	0	0	0	0	0	0	0	603	903	0
1489	6	0	0	0	0	0	0	200	300	0	-35.0987	29.9966	-694.071	-53084.7	-16062	-872.819	176.858	979.483	0	0	0	0	0	0	0	603	903	0
1489	7	0	0	0	0	0	0	200	300	0	-34.1832	30.9122	-695.597	-52627	-16123	-552.385	176.821	978.657	0	0	0	0	0	0	0	603	903	0
1489	8	0	0	0	0	0	0	200	300	0	-33.7254	31.2173	-698.039	-53359.4	-16123	-735.49	176.902	979.442	0	0	0	0	0	0	0	603	903	0
1489	9	0	0	0	0	0	0	200	300	0	-34.7935	31.0648	-700.175	-53542.5	-16550.3	-689.714	176.363	979.47	0	0	0	0	0	0	0	603	903	0
1490	0	0	0	0	0	0	0	200	300	0	-35.0987	31.5225	-702.616	-53542.5	-16733.4	-1010.15	176.184	979.205	0	0	0	0	0	0	0	603	903	0
1490	1	0	0	0	0	0	0	200	300	0	-35.7091	32.438	-706.278	-52718.5	-16306.1	-918.596	176.913	977.643	0	0	0	0	0	0	0	603	903	0
1490	2	0	0	0	0	0	0	200	300	0	-34.9461	32.1329	-707.194	-52443.9	-16733.4	-781.267	176.338	977.158	0	0	0	0	0	0	0	603	903	0
1490	3	0	0	0	0	0	0	200	300	0	-34.3358	33.6588	-711.161	-52901.6	-17160.6	-918.596	175.87	977.388	0	0	0	0	0	0	0	603	903	0
1490	4	0	0	0	0	0	0	200	300	0	-34.3358	34.5743	-712.687	-53267.9	-17221.6	-872.819	175.836	977.742	0	0	0	0	0	0	0	603	903	0
1490	5	0	0	0	0	0	0	200	300	0	-35.2513	34.7269	-712.687	-53176.3	-17038.5	-918.596	176.093	977.614	0	0	0	0	0	0	0	603	903	0
1490	6	0	0	0	0	0	0	200	300	0	-34.9461	35.795	-716.654	-52718.5	-17343.7	-781.267	175.799	976.562	0	0	0	0	0	0	0	603	903	0
1490	7	0	0	0	0	0	0	200	300	0	-34.3358	36.7105	-719.096	-52169.2	-17587.8	-964.372	175.542	975.548	0	0	0	0	0	0	0	603	903	0
1490	8	0	0	0	0	0	0	200	300	0	-34.1832	36.2527	-721.842	-52810.1	-17221.6	-964.372	176.142	976.16	0	0	0	0	0	0	0	603	903	0
1490	9	0	0	0	0	0	0	200	300	0	-34.1832	37.1683	-723.063	-53176.3	-17771	-1010.15	175.423	976.543	0	0	0	0	0	0	0	603	903	0
1491	0	0	0	0	0	0	0	200	300	0	-33.5728	37.9312	-723.063	-53176.3	-18015.1	-1010.15	175.085	976.543	0	0	0	0	0	0	0	603	903	0
1491	1	0	0	0	0	0	0	200	300	0	-34.9461	36.5579	-725.81	-52352.3	-17893	-1055.93	175.347	975.13	0	0	0	0	0	0	0	603	903	0
1491	2	0	0	0	0	0	0	200	300	0	-33.878	39.6097	-729.167	-52535.4	-17526.8	-964.372	175.963	975.049	0	0	0	0	0	0	0	603	903	0
1491	3	0	0	0	0	0	0	200	300	0	-33.7254	39.4571	-730.387	-52718.5	-17893	-1101.7	175.502	975.179	0	0	0	0	0	0	0	603	903	0
1491	4	0	0	0	0	0	0	200	300	0	-35.0987	40.22	-731.303	-51894.6	-18320.3	-1055.93	174.948	973.962	0	0	0	0	0	0	0	603	903	0
1491	5	0	0	0	0	0	0	200	300	0	-33.878	41.2881	-733.439	-52443.9	-17893	-872.819	175.604	974.504	0	0	0	0	0	0	0	603	903	0
1491	6	0	0	0	0	0	0	200	300	0	-35.4039	41.8985	-736.186	-51803	-18198.2	-1010.15	175.28	973.367	0	0	0	0	0	0	0	603	903	0
1491	7	0	0	0	0	0	0	200	300	0	-34.7935	41.8985	-737.406	-51528.4	-18686.5	-964.372	174.659	972.878	0	0	0	0	0	0	0	603	903	0
1491	8	0	0	0	0	0	0	200	300	0	-34.3358	41.1356	-734.049	-52260.8	-18869.6	-552.385	174.294	974.195	0	0	0	0	0	0	0	603	903	0
1491	9	0	0	0	0	0	0	200	300	0	-35.4039	42.814	-738.322	-51894.6	-18320.3	-964.372	175.187	973.287	0	0	0	0	0	0	0	603	903	0
1492	0	0	0	0	0	0	0	200	300	0	-33.878	44.1873	-741.068	-52077.7	-18930.6	-827.043	174.455	973.274	0	0	0	0	0	0	0	603	903	0
1492	1	0	0	0	0	0	0	200	300	0	-34.3358	44.9503	-743.51	-51345.3	-18991.7	-1055.93	174.457	972.058	0	0	0	0	0	0	0	603	903	0
1492	2	0	0	0	0	0	0	200	300	0	-34.4884	45.2554	-745.341	-51162.2	-18686.5	-1147.48	174.929	971.643	0	0	0	0	0	0	0	603	903	0
1492	3	0	0	0	0	0	0	200	300	0	-34.1832	46.171	-745.341	-51711.5	-18991.7	-1193.25	174.52	972.38	0	0	0	0	0	0	0	603	903	0
1492	4	0	0	0	0	0	0	200	300	0	-35.0987	47.0865	-746.867	-50795.9	-19296.8	-1010.15	174.163	971.012	0	0	0	0	0	0	0	603	903	0
1492	5	0	0	0	0	0	0	200	300	0	-34.641	47.6968	-749.308	-51162.2	-19235.8	-1239.03	174.329	971.279	0	0	0	0	0	0	0	603	903	0
1492	6	0	0	0	0	0	0	200	300	0	-33.2677	47.8494	-750.529	-50521.3	-19296.8	-1101.7	174.289	970.314	0	0	0	0	0	0	0	603	903	0
1492	7	0	0	0	0	0	0	200	300	0	-31.8944	47.5443	-748.698	-50612.8	-19174.8	-1239.03	174.389	970.601	0	0	0	0	0	0	0	603	903	0
1492	8	0	0	0	0	0	0	200	300	0	-34.9461	49.2227	-752.36	-50887.5	-19907.2	-1239.03	173.54	970.637	0	0	0	0	0	0	0	603	903	0
1492	9	0	0	0	0	0	0	200	300	0	-35.8617	49.9857	-754.496	-50795.9	-19907.2	-1101.7	173.615	970.324	0	0	0	0	0	0	0	603	903	0
1493	0	0	0	0	0	0	0	200	300	0	-34.641	51.2064	-756.938	-49972	-19541	-1193.25	174.184	969.019	0	0	0	0	0	0	0	603	903	0
1493	1	0	0	0	0	0	0	200	300	0	-34.3358	51.5115	-756.938	-49331.1	-19968.2	-918.596	173.62	968.172	0	0	0	0	0	0	0	603	903	0
1493	2	0	0	0	0	0	0	200	300	0	-34.3358	52.1219	-755.412	-49880.4	-19724.1	-1055.93	173.89	969.031	0	0	0	0	0	0	0	603	903	0
1493	3	0	0	0	0	0	0	200	300	0	-34.641	53.3426	-758.769	-50063.5	-19479.9	-1330.58	174.327	968.98	0	0	0	0	0	0	0	603	903	0
1493	4	0	0	0	0	0	0	200	300	0	-35.8617	51.9693	-759.379	-49697.3	-19846.2	-1239.03	173.865	968.445	0	0	0	0	0	0	0	603	903	0
1493	5	0	0	0	0	0	0	200	300	0	-36.7772	54.7159	-761.515	-49056.4	-20151.3	-1193.25	173.538	967.42	0	0	0	0	0	0	0	603	903	0
1493	6	0	0	0	0	0	0	200	300	0	-35.4039	54.2581	-762.125	-47957.8	-20090.3	-1193.25	173.639	965.926	0	0	0	0	0	0	0	603	903	0
1493	7	0	0	0	0	0	0	200	300	0	-34.641	55.784	-761.21	-48873.3	-20151.3	-1193.25	173.527	967.205	0	0	0	0	0	0	0	603	903	0
1493	8	0	0	0	0	0	0	200	300	0	-34.7935	56.8521	-763.041	-49239.5	-19724.1	-1101.7	174.151	967.531	0	0	0	0	0	0	0	603	903	0
1493	9	0	0	0	0	0	0	200	300	0	-35.2513	57.4625	-763.651	-48964.9	-20151.3	-1055.93	173.612	967.12	0	0	0	0	0	0	0	603	903	0
1494	0	0	0	0	0	0	0	200	300	0	-36.6246	57.4625	-763.041	-48232.5	-20273.4	-1010.15	173.431	966.211	0	0	0	0	0	0	0	603	903	0
1494	1	0	0	0	0	0	0	200	300	0	-35.2513	57.7676	-766.398	-47957.8	-20151.3	-1010.15	173.706	965.576	0	0	0	0	0	0	0	603	903	0
1494	2	0	0	0	0	0	0	200	300	0	-35.7091	59.4461	-763.957	-48140.9	-20395.5	-1147.48	173.303	966.015	0	0	0	0	0	0	0	603	903	0
1494	3	0	0	0	0	0	0	200	300	0	-37.3875	60.8194	-766.398	-48049.4	-21005.8	-1010.15	172.591	965.695	0	0	0	0	0	0	0	603	903	0
1494	4	0	0	0	0	0	0	200	300	0	-35.5565	61.8875	-767.008	-48598.7	-20578.6	-827.043	173.17	966.361	0	0	0	0	0	0	0	603	903	0
1494	5	0	0	0	0	0	0	200	300	0	-36.472	61.5823	-768.229	-47591.6	-20395.5	-872.819	173.451	964.95	0	0	0	0	0	0	0	603	903	0
1494	6	0	0	0	0	0	0	200	300	0	-36.3194	62.3453	-767.924	-47225.4	-21005.8	-872.819	172.646	964.497	0	0	0	0	0	0	0	603	903	0
1494	7	0	0	0	0	0	0	200	300	0	-36.7772	63.7186	-766.093	-47500	-21005.8	-735.49	172.581	965.003	0	0	0	0	0	0	0	603	903	0
1494	8	0	0	0	0	0	0	200	300	0	-37.5401	62.803	-768.229	-47683.2	-20883.7	-918.596	172.816	965.069	0	0	0	0	0	0	0	603	903	0
1494	9	0	0	0	0	0	0	200	300	0	-38.1505	65.8548	-770.365	-47591.6	-21372	-1010.15	172.257	964.778	0	0	0	0	0	0	0	603	903	0
1495	0	0	0	0	0	0	0	200	300	0	-38.4557	65.8548	-769.755	-46584.5	-20700.6	-689.714	173.107	963.519	0	0	0	0	0	0	0	603	903	0
1495	1	0	0	0	0	0	0	200	300	0	-36.7772	67.3807	-770.976	-46218.3	-20944.8	-964.372	172.833	962.948	0	0	0	0	0	0	0	603	903	0
1495	2	0	0	0	0	0	0	200	300	0	-36.0143	68.4488	-770.365	-46492.9	-20944.8	-552.385	172.812	963.352	0	0	0	0	0	0	0	603	903	0
1495	3	0	0	0	0	0	0	200	300	0	-37.3875	69.5169	-770.976	-46676.1	-21066.9	-506.608	172.675	963.542	0	0	0	0	0	0	0	603	903	0
1495	4	0	0	0	0	0	0	200	300	0	-39.066	69.9747	-768.839	-46309.8	-21188.9	-552.385	172.44	963.234	0	0	0	0	0	0	0	603	903	0
1495	5	0	0	0	0	0	0	200	300	0	-38.9134	70.2798	-771.281	-45577.4	-21127.9	-369.28	172.607	962.093	0	0	0	0	0	0	0	603	903	0
1495	6	0	0	0	0	0	0	200	300	0	-39.2186	70.585	-770.06	-45577.4	-21127.9	-415.056	172.563	962.187	0	0	0	0	0	0	0	603	903	0
1495	7	0	0	0	0	0	0	200	300	0	-37.9979	72.4161	-770.06	-45211.2	-21433.1	-231.95	172.167	961.711	0	0	0	0	0	0	0	603	903	0
1495	8	0	0	0	0	0	0	200	300	0	-39.2186	72.4161	-769.145	-45669	-21555.1	-415.056	171.975	962.376	0	0	0	0	0	0	0	603	903	0
1495	9	0	0	0	0	0	0	200	300	0	-40.5919	73.4842	-770.976	-44936.6	-21250	-415.056	172.438	961.285	0	0	0	0	0	0	0	603	903	0
1496	0	0	0	0	0	0	0	200	300	0	-40.7445	74.3997	-770.06	-45211.2	-21982.4	-323.503	171.454	961.711	0	0	0	0	0	0	0	603	903	0
1496	1	0	0	0	0	0	0	200	300	0	-41.2022	74.8575	-768.534	-44112.6	-21555.1	42.7079	171.953	960.398	0	0	0	0	0	0	0	603	903	0
1496	2	0	0	0	0	0	0	200	300	0	-40.1341	76.2308	-765.482	-44112.6	-21433.1	-369.28	172.001	960.627	0	0	0	0	0	0	0	603	903	0
1496	3	0	0	0	0	0	0	200	300	0	-40.2867	76.0782	-767.924	-43746.4	-21738.2	-415.056	171.692	959.967	0	0	0	0	0	0	0	603	903	0
1496	4	0	0	0	0	0	0	200	300	0	-39.8289	78.367	-769.45	-43746.4	-21677.2	-460.832	171.828	959.854	0	0	0	0	0	0	0	603	903	0
1496	5	0	0	0	0	0	0	200	300	0	-41.8126	79.1299	-767.924	-43746.4	-21738.2	-415.056	171.692	959.967	0	0	0	0	0	0	0	603	903	0
1496	6	0	0	0	0	0	0	200	300	0	-41.5074	80.5032	-766.398	-43746.4	-21433.1	-277.727	172.034	960.081	0	0	0	0	0	0	0	603	903	0
1496	7	0	0	0	0	0	0	200	300	0	-39.9815	82.7921	-765.482	-43013.9	-21494.1	-552.385	171.921	959.192	0	0	0	0	0	0	0	603	903	0
1496	8	0	0	0	0	0	0	200	300	0	-40.7445	82.6395	-764.262	-42739.3	-21860.3	-506.608	171.397	958.922	0	0	0	0	0	0	0	603	903	0
1496	9	0	0	0	0	0	0	200	300	0	-40.5919	85.386	-765.177	-43105.5	-21555.1	-415.056	171.83	959.334	0	0	0	0	0	0	0	603	903	0
1497	0	0	0	0	0	0	0	200	300	0	-42.2704	85.8438	-764.567	-42098.4	-21433.1	-231.95	171.967	958.062	0	0	0	0	0	0	0	603	903	0
1497	1	0	0	0	0	0	0	200	300	0	-41.5074	87.0645	-760.6	-42556.2	-21921.3	-460.832	171.179	958.951	0	0	0	0	0	0	0	603	903	0
1497	2	-5.0678	-4.71268	-12.775	-3539.71	1580.25	469.162	323.699	577.082	0	-41.5074	89.6585	-759.989	-41549.1	-21677.2	-552.385	171.477	957.671	0	0	0	0	0	0	0	603	903	0
1497	3	-7.05144	-9.90067	-20.4044	-5279.21	2861.99	194.503	340.264	558.73	0	-40.8971	89.5059	-758.463	-41549.1	-21127.9	-552.385	172.144	957.781	0	0	0	0	0	0	0	603	903	0
1497	4	1.79866	-2.72903	-21.9302	-3814.36	2434.75	-263.26	311.022	473.932	0	-40.8971	92.0999	-758.463	-40999.8	-21494.1	-598.161	171.661	957.056	0	0	0	0	0	0	0	603	903	0
1497	5	3.47713	1.39084	-20.0992	-4638.34	2617.85	194.503	330.247	530.773	0	-41.8126	92.5577	-758.463	-41457.6	-21677.2	-460.832	171.42	957.66	0	0	0	0	0	0	0	603	903	0
1497	6	1.64607	6.27365	-20.4044	-4638.34	2984.06	560.714	346.246	527.321	0	-42.1178	93.931	-755.106	-41457.6	-21677.2	-506.608	171.293	957.903	0	0	0	0	0	0	0	603	903	0
1497	7	1.03572	5.20554	-25.5923	-5004.55	3289.24	469.162	328.524	495.549	0	-41.2022	95.762	-753.275	-40633.6	-21616.2	-689.714	171.304	956.943	0	0	0	0	0	0	0	603	903	0
1497	8	-0.337571	6.57883	-31.6959	-6652.5	3533.38	1018.48	311.478	509.885	0	-41.5074	95.1517	-751.444	-40633.6	-21188.9	-689.714	171.802	957.074	0	0	0	0	0	0	0	603	903	0
1497	9	0.425369	12.9875	-34.1373	-6560.94	3960.63	1659.35	316.021	492.193	0	-40.4393	97.2879	-751.75	-40816.7	-21738.2	-689.714	171.083	957.296	0	0	0	0	0	0	0	603	903	0
1498	0	2.25642	14.9712	-33.8321	-8025.79	4326.84	1613.57	327.892	537.224	0	-41.3548	97.8983	-749.918	-40450.5	-21250	-506.608	171.664	956.94	0	0	0	0	0	0	0	603	903	0
1498	1	2.5616	15.7341	-40.546	-9582.19	4937.19	1293.14	321.768	536.329	0	-42.1178	99.119	-747.172	-40450.5	-21372	-735.49	171.396	957.138	0	0	0	0	0	0	0	603	903	0
1498	2	3.01936	19.091	-48.7857	-9490.63	5852.71	2162.89	319.968	494.537	0	-42.7281	100.187	-745.646	-39534.9	-21372	-827.043	171.338	956.021	0	0	0	0	0	0	0	603	903	0
1498	3	1.49348	21.0747	-58.2461	-12420.3	6707.21	2162.89	315.153	513.239	0	-39.9815	99.2715	-743.51	-39443.4	-21433.1	-643.938	171.173	956.05	0	0	0	0	0	0	0	603	903	0
1498	4	2.40901	22.1428	-60.0772	-13427.4	6646.17	2391.77	310.627	523.502	0	-40.7445	101.103	-744.12	-39718	-21188.9	-735.49	171.525	956.376	0	0	0	0	0	0	0	603	903	0
1498	5	-0.337571	22.6006	-64.3497	-13793.6	6646.17	2895.31	303.282	514.354	0	-41.8126	102.018	-740.763	-38619.4	-21433.1	-689.714	171.066	955.135	0	0	0	0	0	0	0	603	903	0
1498	6	-1.2531	23.3635	-71.9791	-15716.2	8294.12	3124.19	315.23	518.344	0	-41.2022	103.086	-737.711	-39168.7	-21372	-735.49	171.029	956.095	0	0	0	0	0	0	0	603	903	0
1498	7	2.10384	24.5842	-81.4395	-16448.6	8599.3	2895.31	305.591	501.974	0	-39.8289	104.307	-736.186	-38436.3	-20944.8	-781.267	171.55	955.21	0	0	0	0	0	0	0	603	903	0
1498	8	-1.10051	24.4316	-87.2378	-18096.6	9514.83	3215.74	309.068	507.44	0	-38.4557	104.154	-733.134	-37978.6	-21005.8	-781.267	171.348	954.803	0	0	0	0	0	0	0	603	903	0
1498	9	-3.08415	25.042	-91.2051	-20110.8	9881.04	3673.51	308.339	520.5	0	-39.8289	105.68	-732.829	-37887	-21250	-781.267	171.003	954.7	0	0	0	0	0	0	0	603	903	0
1499	0	-0.337571	26.873	-97.3086	-20293.9	10186.2	3581.96	304.679	508.551	0	-40.4393	106.596	-730.082	-37703.9	-21005.8	-1101.7	171.228	954.643	0	0	0	0	0	0	0	603	903	0
1499	1	-3.6945	27.4834	-104.023	-23223.5	11223.8	3948.17	307.898	523.255	0	-39.8289	107.206	-726.115	-36788.4	-20883.7	-1101.7	171.239	953.665	0	0	0	0	0	0	0	603	903	0
1499	2	-3.84709	27.636	-108.905	-23132	11406.9	4085.5	304.742	512.405	0	-38.4557	108.122	-721.537	-35689.7	-21555.1	-1010.15	170.126	952.464	0	0	0	0	0	0	0	603	903	0
1499	3	-3.84709	27.3308	-112.567	-24322.2	12444.5	3902.39	310.552	516.068	0	-39.066	109.342	-720.927	-36605.3	-21066.9	-1193.25	170.778	953.775	0	0	0	0	0	0	0	603	903	0
1499	4	-4.61003	28.5515	-122.638	-26244.8	12688.7	4222.83	303.464	514.002	0	-39.3712	111.173	-719.706	-36696.8	-20456.5	-1147.48	171.577	953.989	0	0	0	0	0	0	0	603	903	0
1499	5	-6.89885	30.0774	-130.268	-26611	13238	4863.69	301.621	504.279	0	-37.3875	110.868	-715.739	-36422.1	-20517.5	-1239.03	171.334	953.888	0	0	0	0	0	0	0	603	903	0
1499	6	-9.49284	25.6523	-136.066	-28350.5	14092.5	5138.35	303.571	508.359	0	-38.3031	110.258	-712.382	-35323.5	-20639.6	-1376.36	171.027	952.585	0	0	0	0	0	0	0	603	903	0
1499	7	-10.8661	25.9575	-138.813	-30273.1	14519.7	5138.35	304.599	518.086	0	-37.235	112.089	-707.499	-35048.9	-20944.8	-1422.14	170.396	952.539	0	0	0	0	0	0	0	603	903	0
1499	8	-11.4765	26.873	-141.559	-31097.1	15069	5046.8	306.45	519.676	0	-36.472	113.462	-704.142	-34774.2	-20151.3	-1376.36	171.382	952.385	0	0	0	0	0	0	0	603	903	0
1499	9	-11.9343	24.7368	-149.189	-32195.7	15008	5184.13	300.598	515.806	0	-36.7772	114.53	-702.616	-34224.9	-20273.4	-1696.79	171.146	951.711	0	0	0	0	0	0	0	603	903	0
1500	0	-11.4765	20.3117	-156.818	-33111.2	15862.5	4589.04	301.152	511.145	0	-34.3358	115.446	-698.039	-33950.2	-20822.7	-1559.47	170.17	951.637	0	0	0	0	0	0	0	603	903	0
1500	1	-13.4601	20.0066	-159.565	-33202.8	16411.8	4726.37	302.854	508.084	0	-36.7772	115.293	-695.292	-33309.4	-19968.2	-1651.02	171.281	950.907	0	0	0	0	0	0	0	603	903	0
1500	2	-14.5282	18.4807	-163.227	-34209.9	16594.9	5001.02	301.668	509.585	0	-34.9461	116.361	-689.494	-33034.7	-20029.3	-1696.79	170.951	950.912	0	0	0	0	0	0	0	603	903	0
1500	3	-14.0705	15.8867	-165.363	-34759.2	16472.8	4405.93	299.616	510.2	0	-34.1832	118.192	-682.78	-32210.7	-19846.2	-1605.24	170.933	950.176	0	0	0	0	0	0	0	603	903	0
1500	4	-17.8852	10.8513	-169.025	-35216.9	16900.1	4268.6	299.986	508.354	0	-35.2513	119.108	-681.864	-32485.4	-19785.1	-1651.02	170.984	950.642	0	0	0	0	0	0	0	603	903	0
1500	5	-16.6645	11.1565	-172.687	-36407.1	17266.3	4314.38	299.986	510.827	0	-34.0306	119.413	-678.507	-31753	-19296.8	-1879.9	171.56	949.798	0	0	0	0	0	0	0	603	903	0
1500	6	-16.3593	9.478	-175.128	-37139.6	17632.5	4131.27	300.683	512.07	0	-33.7254	119.413	-675.15	-31569.9	-19113.7	-1971.45	171.69	949.76	0	0	0	0	0	0	0	603	903	0
1500	7	-17.8852	6.884	-180.622	-37139.6	18120.8	3902.39	300.325	505.621	0	-32.1996	120.481	-669.962	-31295.2	-19052.7	-2200.33	171.562	949.712	0	0	0	0	0	0	0	603	903	0
1500	8	-19.1059	3.37448	-181.537	-38238.2	17876.6	3673.51	298.474	510.636	0	-32.3521	121.549	-664.774	-30745.9	-19174.8	-2108.78	171.156	949.25	0	0	0	0	0	0	0	603	903	0
1500	9	-20.174	2.15378	-186.725	-37780.4	18181.8	3536.18	297.372	502.332	0	-33.4203	123.075	-659.586	-30837.4	-18930.6	-2200.33	171.299	949.753	0	0	0	0	0	0	0	603	903	0
1501	0	-20.3266	-1.05057	-188.556	-39062.2	19097.4	3169.97	301.282	507.165	0	-29.6056	123.991	-656.84	-30105	-18991.7	-2566.54	171.086	948.833	0	0	0	0	0	0	0	603	903	0
1501	1	-21.3947	-4.56009	-192.523	-39153.7	18731.1	2941.09	297.293	503.371	0	-31.7418	124.296	-651.347	-29647.3	-18869.6	-2383.44	171.03	948.517	0	0	0	0	0	0	0	603	903	0
1501	2	-21.2421	-7.76443	-197.406	-39886.1	19829.8	3261.52	300.452	502.051	0	-30.6737	124.143	-647.685	-29189.5	-18259.2	-2612.32	171.808	948.068	0	0	0	0	0	0	0	603	903	0
1501	3	-21.3947	-9.4429	-204.425	-41808.7	19951.8	2574.88	297.6	504.518	0	-30.0633	125.364	-640.055	-28823.3	-18259.2	-2520.77	171.472	948.032	0	0	0	0	0	0	0	603	903	0
1501	4	-22.768	-11.1214	-205.341	-42175	20562.2	2483.32	300.137	505.39	0	-30.0633	124.601	-633.341	-28914.8	-18381.3	-2474.99	170.977	948.654	0	0	0	0	0	0	0	603	903	0
1501	5	-25.362	-14.9361	-213.581	-42998.9	20928.4	2437.55	297.988	501.324	0	-27.9271	127.348	-631.205	-28090.9	-18076.1	-2566.54	171.363	947.504	0	0	0	0	0	0	0	603	903	0
1501	6	-25.362	-17.3775	-217.548	-44280.7	21477.7	2345.99	298.726	503.544	0	-29.453	128.263	-626.322	-27450	-17832	-2932.76	171.529	946.827	0	0	0	0	0	0	0	603	903	0
1501	7	-26.4301	-19.9715	-221.82	-45196.2	22088.1	1934.01	299.576	503.751	0	-28.0797	128.568	-620.829	-26900.7	-17648.9	-2658.1	171.572	946.33	0	0	0	0	0	0	0	603	903	0
1501	8	-25.2094	-22.5655	-230.976	-46294.8	22271.2	1613.57	296.422	500.432	0	-27.0116	127.195	-614.42	-26717.6	-17893	-2703.87	170.878	946.484	0	0	0	0	0	0	0	603	903	0
1501	9	-25.362	-24.3965	-237.995	-46477.9	23491.9	1522.02	298.708	495.29	0	-28.5374	130.094	-608.317	-26534.5	-17526.8	-2841.2	171.188	946.62	0	0	0	0	0	0	0	603	903	0
1502	0	-26.4301	-26.6853	-241.962	-48125.9	24346.4	1155.81	300.621	498.899	0	-25.6383	131.162	-601.908	-26534.5	-16672.3	-2978.53	172.301	947.084	0	0	0	0	0	0	0	603	903	0
1502	1	-27.6508	-27.6009	-256.305	-49316.1	25078.8	926.926	297.847	492.412	0	-26.7064	131.925	-597.636	-25618.9	-17404.7	-3070.08	170.877	945.867	0	0	0	0	0	0	0	603	903	0
1502	2	-26.7353	-30.9578	-260.883	-50597.8	25750.2	789.596	298.704	493.948	0	-24.5702	131.01	-591.837	-25252.7	-17038.5	-3207.41	171.211	945.668	0	0	0	0	0	0	0	603	903	0
1502	3	-27.0405	-33.3992	-267.292	-51696.5	26726.7	698.044	299.991	493.409	0	-23.9598	131.01	-587.26	-24795	-16550.3	-3207.41	171.818	945.221	0	0	0	0	0	0	0	603	903	0
1502	4	-27.193	-34.1621	-277.973	-53344.4	27703.3	194.503	299.662	491.905	0	-24.4176	132.383	-577.494	-24337.2	-16306.1	-3070.08	171.764	945.143	0	0	0	0	0	0	0	603	903	0
1502	5	-26.1249	-36.9087	-288.654	-54900.8	28008.5	-34.3784	297.031	490.196	0	-21.9762	133.909	-572.306	-24062.5	-16611.3	-3619.4	170.975	945.045	0	0	0	0	0	0	0	603	903	0
1502	6	-26.1249	-36.9087	-297.809	-57098.1	29778.5	-400.589	299.992	491.727	0	-22.4339	133.756	-566.813	-23421.7	-16245.1	-3207.41	171.34	944.322	0	0	0	0	0	0	0	603	903	0
1502	7	-27.193	-39.045	-307.27	-58105.1	30388.9	-217.484	298.9	489.102	0	-21.0606	133.604	-557.658	-22780.8	-15878.9	-3573.62	171.526	943.851	0	0	0	0	0	0	0	603	903	0
1502	8	-24.599	-40.1131	-316.12	-59661.5	31670.6	-721.024	300.185	488.731	0	-21.2132	134.672	-552.775	-22689.2	-15756.8	-3802.51	171.495	944.046	0	0	0	0	0	0	0	603	903	0
1502	9	-25.6672	-39.5027	-324.97	-59753.1	33135.4	-1270.34	301.965	483.873	0	-19.9925	134.519	-545.146	-21773.7	-15939.9	-3482.07	170.76	942.941	0	0	0	0	0	0	0	603	903	0
1503	0	-24.4465	-41.3338	-333.515	-62682.8	33806.8	-858.353	301.365	487.946	0	-19.6873	135.74	-538.432	-21865.3	-15573.7	-3894.06	171.076	943.609	0	0	0	0	0	0	0	603	903	0
1503	1	-23.6835	-43.9278	-344.196	-63873	35088.6	-1499.22	301.944	485.572	0	-17.2459	135.13	-532.023	-20949.7	-14963.3	-3756.73	171.875	942.378	0	0	0	0	0	0	0	603	903	0
1503	2	-21.3947	-43.3174	-355.182	-64422.3	36187.2	-1361.89	301.883	481.378	0	-18.0089	134.977	-523.173	-20766.6	-15329.5	-3573.62	170.699	942.694	0	0	0	0	0	0	0	603	903	0
1503	3	-23.3783	-43.7752	-363.727	-66070.2	37102.7	-1728.1	302.007	481.648	0	-16.1778	134.519	-516.459	-20217.3	-15085.4	-4077.17	170.791	942.146	0	0	0	0	0	0	0	603	903	0
1503	4	-20.4792	-46.064	-372.272	-66802.6	38445.5	-2231.64	303.273	479.446	0	-16.483	135.893	-508.83	-20034.2	-14536.1	-3985.61	171.432	942.373	0	0	0	0	0	0	0	603	903	0
1503	5	-21.2421	-47.5899	-379.901	-68542.2	39055.9	-2231.64	302.805	480.421	0	-15.5675	135.282	-500.895	-19668	-14292	-3894.06	171.467	942.266	0	0	0	0	0	0	0	603	903	0
1503	6	-19.5636	-49.1158	-388.141	-69823.9	40459.7	-2506.3	304.24	479.893	0	-14.0416	132.688	-490.214	-18844	-14169.9	-4306.05	171.094	941.44	0	0	0	0	0	0	0	603	903	0
1503	7	-17.8852	-49.7261	-396.686	-71471.8	40947.9	-2185.87	303.225	480.172	0	-10.8372	135.893	-485.026	-18294.7	-14108.8	-4351.82	170.911	940.719	0	0	0	0	0	0	0	603	903	0
1503	8	-16.0541	-50.9468	-404.621	-72936.7	41802.4	-3055.62	303.313	480.259	0	-12.2105	135.13	-475.871	-18020.1	-13254.4	-4397.6	172.147	940.868	0	0	0	0	0	0	0	603	903	0
1503	9	-16.5119	-51.5572	-414.997	-74310	43267.3	-3101.39	304.259	479.062	0	-12.6683	134.672	-466.105	-17928.5	-13437.5	-4901.14	171.171	941.465	0	0	0	0	0	0	0	603	903	0
1504	0	-15.9015	-53.083	-423.847	-75591.7	44488	-3559.16	304.962	478.347	0	-11.6002	135.587	-455.424	-16738.3	-13315.4	-4489.15	170.763	939.753	0	0	0	0	0	0	0	603	903	0
1504	1	-13.4601	-54.7615	-436.969	-76141.1	45647.7	-3742.26	304.464	474.248	0	-9.61655	132.383	-447.184	-15822.8	-12949.2	-4580.71	171.043	938.383	0	0	0	0	0	0	0	603	903	0
1504	2	-8.88249	-56.7451	-446.125	-77331.2	47051.5	-3971.15	305.467	473.34	0	-8.09067	134.825	-441.081	-15731.2	-12338.8	-4580.71	172.026	938.665	0	0	0	0	0	0	0	603	903	0
1504	3	-5.52556	-60.5598	-455.585	-77514.3	48333.2	-4886.67	306.09	470.142	0	-7.93808	133.451	-433.146	-15456.6	-12338.8	-4214.49	171.513	938.684	0	0	0	0	0	0	0	603	903	0
1504	4	-3.23674	-62.6961	-465.045	-79345.4	49431.8	-5435.99	306.295	470.619	0	-9.15878	132.993	-421.854	-14724.1	-12155.7	-4534.93	171.185	937.903	0	0	0	0	0	0	0	603	903	0
1504	5	-2.93157	-64.0694	-472.98	-80993.3	49492.9	-6076.86	304.641	471.24	0	-8.39584	132.993	-410.563	-14357.9	-11423.3	-4534.93	172.177	937.971	0	0	0	0	0	0	0	603	903	0
1504	6	0.425369	-67.2737	-483.051	-82275.1	51140.8	-6443.07	305.87	470.324	0	-6.71738	131.01	-403.849	-14083.3	-11240.2	-4306.05	172.167	937.873	0	0	0	0	0	0	0	603	903	0
1504	7	1.79866	-71.241	-488.849	-82366.6	51873.2	-6809.28	306.113	468.491	0	-6.10703	130.857	-394.999	-13442.4	-11301.2	-4122.94	171.389	937.032	0	0	0	0	0	0	0	603	903	0
1504	8	5.76594	-74.4453	-495.258	-83556.8	53277	-7953.69	307.574	468.714	0	-5.49667	128.568	-384.928	-12893.1	-11118.1	-4443.38	171.116	936.495	0	0	0	0	0	0	0	603	903	0
1504	9	7.29182	-78.4126	-502.582	-84838.5	54253.6	-8594.56	307.95	468.805	0	-5.03891	126.585	-375.773	-12893.1	-11057.1	-4351.82	170.575	937.311	0	0	0	0	0	0	0	603	903	0
1505	0	8.97029	-81.1592	-511.432	-84289.2	54680.9	-9235.43	306.917	464.81	0	-5.34409	125.364	-365.092	-12435.3	-10812.9	-4351.82	170.383	937.061	0	0	0	0	0	0	0	603	903	0
1505	1	9.58064	-86.1946	-515.399	-84747	55413.3	-9326.98	307.515	464.43	0	-5.03891	123.686	-355.631	-11702.9	-10202.6	-4534.93	171.311	935.907	0	0	0	0	0	0	0	603	903	0
1505	2	8.97029	-87.8731	-523.639	-85754.1	56206.7	-10013.6	307.339	463.766	0	-3.05527	120.786	-342.509	-10878.9	-9592.24	-4351.82	171.994	934.763	0	0	0	0	0	0	0	603	903	0
1505	3	9.42805	-90.4671	-528.827	-86120.3	57122.3	-10425.6	308.017	462.852	0	-2.75009	118.192	-335.185	-10421.2	-9653.28	-4351.82	171.2	934.091	0	0	0	0	0	0	0	603	903	0
1505	4	10.0384	-93.0611	-530.048	-87585.1	57427.4	-10746	308.344	465.24	0	-2.44492	116.819	-325.724	-9963.41	-9470.17	-4306.05	170.926	933.589	0	0	0	0	0	0	0	603	903	0
1505	5	10.9539	-94.8921	-537.677	-87768.2	58159.9	-10883.4	308.169	463.236	0	-3.05527	115.751	-315.043	-9963.41	-9103.96	-4214.49	171.102	934.626	0	0	0	0	0	0	0	603	903	0
1505	6	10.6488	-94.8921	-543.476	-88134.5	58465	-11020.7	307.576	462.168	0	-3.20785	113.157	-307.108	-8956.33	-8615.68	-4031.39	171.946	932.163	0	0	0	0	0	0	0	603	903	0
1505	7	11.4117	-96.1128	-548.358	-88958.4	59197.5	-11524.2	307.954	462.227	0	-0.919037	110.105	-298.563	-8773.22	-8249.47	-4031.39	172.369	932.385	0	0	0	0	0	0	0	603	903	0
1505	8	9.73323	-96.2654	-551.41	-88134.5	59563.7	-10974.9	308.021	459.835	0	-0.766449	107.206	-286.051	-8223.91	-8676.71	-4031.39	169.667	931.75	0	0	0	0	0	0	0	603	903	0
1505	9	11.5643	-96.418	-552.021	-89050	59868.8	-11341.1	308.454	461.316	0	-0.00350934	104.002	-273.539	-7674.59	-7822.22	-3756.73	171.404	931.057	0	0	0	0	0	0	0	603	903	0
1506	0	9.58064	-95.9602	-556.598	-88500.7	60174	-11615.8	308.11	459.003	0	-1.07162	100.034	-265.91	-7491.49	-7211.87	-3665.18	172.879	931.173	0	0	0	0	0	0	0	603	903	0
1506	1	10.8013	-96.2654	-558.429	-89141.5	60357.1	-11615.8	308.084	459.629	0	-1.22421	98.9664	-257.06	-6484.41	-7517.05	-3436.3	170.758	928.225	0	0	0	0	0	0	0	603	903	0
1506	2	10.0384	-95.8076	-562.397	-89690.9	61089.5	-11615.8	308.624	459.48	0	-0.156097	95.3043	-248.82	-5568.88	-7456.01	-3207.41	170.035	925.381	0	0	0	0	0	0	0	603	903	0
1506	3	9.27547	-96.1128	-565.753	-89873.9	61089.5	-11661.6	307.979	458.857	0	-0.156097	91.7947	-238.749	-5843.54	-6784.62	-2978.53	171.583	927.476	0	0	0	0	0	0	0	603	903	0
1506	4	10.0384	-94.7395	-563.312	-89050	60845.4	-11753.1	308.014	458.083	0	-0.613861	88.8956	-228.373	-5660.43	-6601.52	-2749.65	171.093	927.786	0	0	0	0	0	0	0	603	903	0
1506	5	8.66511	-95.3499	-571.247	-90423.3	61516.8	-11707.4	307.689	458.291	0	-1.22421	82.4869	-219.828	-5111.11	-6784.62	-2886.98	169.137	926.25	0	0	0	0	0	0	0	603	903	0
1506	6	8.8177	-96.5706	-570.941	-90240.1	62005.1	-12073.6	308.601	458.055	0	-0.156097	82.3343	-213.419	-4470.25	-6052.2	-2520.77	171.642	923.946	0	0	0	0	0	0	0	603	903	0
1506	7	8.66511	-95.9602	-573.078	-89873.9	62249.2	-11615.8	308.623	456.827	0	0.454254	78.0618	-204.874	-4470.25	-5930.13	-2658.1	171.055	924.82	0	0	0	0	0	0	0	603	903	0
1506	8	8.05476	-96.418	-574.298	-90148.6	62676.5	-12531.3	309.136	456.972	0	-0.461273	74.8575	-195.719	-4104.03	-5930.13	-2291.89	169.701	923.969	0	0	0	0	0	0	0	603	903	0
1506	9	10.6488	-97.4861	-580.707	-89690.9	62249.2	-12119.3	307.196	454.451	0	0.75943	72.8738	-186.564	-4104.03	-5685.99	-1788.35	169.523	924.998	0	0	0	0	0	0	0	603	903	0
1507	0	9.42805	-98.5542	-578.571	-89873.9	62920.6	-12165.1	308.752	455.338	0	0.912018	70.1273	-179.545	-3188.51	-5380.81	-2337.66	170.031	920.759	0	0	0	0	0	0	0	603	903	0
1507	1	10.191	-99.4698	-580.402	-90789.5	63286.8	-12806	309.04	456.425	0	1.52237	66.16	-170.084	-3371.61	-5441.85	-2017.23	168.005	922.823	0	0	0	0	0	0	0	603	903	0
1507	2	10.191	-100.233	-582.233	-90697.9	63531	-12760.2	309.116	455.776	0	-0.308685	62.1927	-163.371	-3463.16	-5136.67	-1925.68	168.558	924.198	0	0	0	0	0	0	0	603	903	0
1507	3	10.3436	-101.301	-582.538	-89324.6	63286.8	-12989.1	308.64	453.337	0	0.149079	58.2254	-155.436	-2822.29	-4587.36	-1971.45	170.487	921.157	0	0	0	0	0	0	0	603	903	0
1507	4	11.4117	-101.911	-581.012	-90697.9	63531	-13172.2	309.345	456.103	0	0.912018	55.4788	-147.501	-2181.43	-4770.46	-1742.57	167.658	917.789	0	0	0	0	0	0	0	603	903	0
1507	5	13.2428	-103.742	-585.285	-90789.5	64080.3	-13538.4	309.486	455.12	0	-0.156097	50.2908	-139.872	-2181.43	-4465.29	-1559.47	168.076	918.596	0	0	0	0	0	0	0	603	903	0
1507	6	15.0738	-103.59	-590.778	-90423.3	64507.5	-13492.6	309.191	453.058	0	1.21719	49.8331	-134.074	-1998.32	-4343.22	-1376.36	167.606	917.905	0	0	0	0	0	0	0	603	903	0
1507	7	15.8367	-104.658	-592.914	-90606.4	64385.4	-13675.7	308.592	452.815	0	-0.766449	45.7132	-128.581	-1906.77	-4221.15	-1284.81	167.171	917.829	0	0	0	0	0	0	0	603	903	0
1507	8	16.2945	-105.573	-595.661	-90697.9	64507.5	-13996.2	308.296	452.264	0	1.06461	42.3563	-119.12	-1723.66	-3549.76	-1284.81	170.2	917.47	0	0	0	0	0	0	0	603	903	0
1507	9	17.3626	-106.489	-595.966	-90514.8	65239.9	-14133.5	309.469	451.879	0	0.301666	38.6942	-109.965	-1723.66	-3854.94	-1284.81	164.944	918.675	0	0	0	0	0	0	0	603	903	0
1508	0	19.3463	-106.947	-598.712	-91888.1	65789.2	-14820.1	309.885	453.476	0	-0.461273	38.9993	-108.439	-1357.45	-3427.69	-1239.03	168.391	915.518	0	0	0	0	0	0	0	603	903	0
1508	1	21.1773	-108.167	-601.764	-91979.7	66155.4	-14728.6	309.936	452.85	0	2.59048	37.3209	-102.03	-1265.9	-2817.34	-1147.48	172.387	915.407	0	0	0	0	0	0	0	603	903	0
1508	2	22.0928	-109.235	-605.121	-91064.1	66399.6	-14820.1	309.729	450.489	0	0.75943	35.4898	-96.5371	-899.687	-3183.55	-872.819	167.023	912.32	0	0	0	0	0	0	0	603	903	0
1508	3	23.6187	-109.388	-610.004	-92620.5	67009.9	-15232.1	309.852	451.836	0	0.75943	32.8958	-91.3491	-1082.79	-2817.34	-781.267	169.159	914.853	0	0	0	0	0	0	0	603	903	0
1508	4	24.992	-110.303	-610.919	-92620.5	67620.3	-15506.8	310.686	451.608	0	1.21719	32.2855	-83.1094	-808.135	-2512.16	-643.938	169.773	912.724	0	0	0	0	0	0	0	603	903	0
1508	5	24.992	-111.219	-616.413	-92529	67986.5	-15918.8	310.294	450.109	0	-0.00350934	31.0648	-77.0058	-1174.35	-2390.09	-552.385	168.962	918.25	0	0	0	0	0	0	0	603	903	0
1508	6	27.586	-111.982	-619.159	-92712.1	68474.8	-15964.6	310.593	449.739	0	1.82755	28.7759	-73.9541	-1082.79	-2573.2	-506.608	165.205	917.641	0	0	0	0	0	0	0	603	903	0
1508	7	27.1283	-112.135	-623.127	-92620.5	68718.9	-16193.4	310.281	448.638	0	0.149079	26.0294	-65.104	-533.477	-2145.95	-94.6212	167.038	911.194	0	0	0	0	0	0	0	603	903	0
1508	8	28.6541	-112.897	-626.789	-93353	69390.3	-16239.2	310.708	448.939	0	1.06461	23.8931	-63.2729	-899.687	-2023.88	-48.8449	168.014	917.219	0	0	0	0	0	0	0	603	903	0
1508	9	28.5015	-113.355	-629.84	-94085.4	69878.6	-16376.5	310.947	449.38	0	0.75943	21.6043	-57.1694	-716.582	-1840.78	-140.398	167.801	915.534	0	0	0	0	0	0	0	603	903	0
1509	0	29.2645	-113.966	-635.334	-94726.3	70061.7	-16742.8	310.275	449.097	0	-0.156097	19.9258	-53.2021	-258.818	-1962.85	-3.06848	163.106	907.865	0	0	0	0	0	0	0	603	903	0
1509	1	29.5697	-115.034	-633.197	-95275.6	70611	-16925.9	311.515	450.467	0	-0.461273	18.0948	-51.3711	-625.029	-1291.46	88.4843	174.86	915.167	0	0	0	0	0	0	0	603	903	0
1509	2	29.1119	-114.118	-642.047	-95824.9	70794.1	-16880.1	310.263	449.249	0	-0.00350934	16.5689	-45.2676	-625.029	-1352.49	42.7079	170.122	916.807	0	0	0	0	0	0	0	603	903	0
1509	3	29.5697	-115.034	-643.573	-95824.9	71282.4	-16605.4	310.76	448.895	0	0.149079	14.1275	-44.352	-716.582	-1657.67	134.261	162.625	919.157	0	0	0	0	0	0	0	603	903	0
1509	4	28.6541	-114.576	-643.878	-96648.9	71526.5	-17246.3	311.087	450.104	0	0.454254	12.2964	-39.164	-716.582	-1840.78	-3.06848	152.998	921.297	0	0	0	0	0	0	0	603	903	0
1509	5	29.5697	-114.423	-650.592	-95824.9	72014.8	-16605.4	310.691	447.289	0	-0.461273	11.6861	-36.1123	-533.477	-925.248	-94.6212	174.379	917.773	0	0	0	0	0	0	0	603	903	0
1509	6	31.0955	-115.491	-653.034	-96374.2	72075.9	-16925.9	310.371	447.579	0	-1.07162	10.4654	-34.8916	-625.029	-1291.46	271.59	162.987	920.914	0	0	0	0	0	0	0	603	903	0
1509	7	29.8748	-115.491	-658.832	-96465.7	72259	-17154.7	309.677	446.419	0	-0.308685	8.93951	-31.5346	-716.582	-1230.42	180.037	160.982	925.724	0	0	0	0	0	0	0	603	903	0
1509	8	29.1119	-114.881	-661.884	-96557.3	72808.3	-16925.9	310.002	445.883	0	-0.156097	7.56622	-28.4829	-533.477	-803.178	134.261	171.801	921.73	0	0	0	0	0	0	0	603	903	0
1509	9	29.1119	-115.034	-662.799	-98022.2	73235.5	-17429.4	310.494	447.891	0	0.301666	6.6507	-25.126	-808.135	-803.178	408.919	168.034	935.163	0	0	0	0	0	0	0	603	903	0
1510	0	29.5697	-115.186	-665.851	-98388.4	73967.9	-17337.8	311.088	447.763	0	-0.919037	5.42999	-20.8535	-167.265	-803.178	500.472	161.485	911.021	0	0	0	0	0	0	0	603	903	0
1510	1	30.0274	-115.491	-668.903	-98754.6	73784.8	-17200.5	310.307	447.637	0	0.912018	4.20929	-21.769	-808.135	-681.107	454.695	168.712	940.123	0	0	0	0	0	0	0	603	903	0
1510	2	30.7904	-115.797	-671.955	-98846.1	73784.8	-16880.1	309.806	447.102	0	-0.766449	4.36188	-19.6328	-625.029	-498.002	408.919	174.634	934.836	0	0	0	0	0	0	0	603	903	0
1510	3	30.6378	-115.491	-678.058	-98571.5	74761.4	-17429.4	310.258	445.373	0	1.06461	3.29376	-18.7173	-625.029	-375.931	408.919	179.915	936.393	0	0	0	0	0	0	0	603	903	0
1510	4	30.9429	-115.949	-681.72	-99303.9	75310.7	-17704.1	310.472	445.667	0	0	0	0	0	0	0	200	903	0	0	0	0	0	0	0	603	903	0
1510	5	30.9429	-115.949	-684.772	-99578.6	75676.9	-17658.3	310.514	445.419	0	0	0	0	0	0	0	200	903	0	0	0	0	0	0	0	603	903	0
1510	6	31.7059	-116.712	-686.298	-99761.6	75676.9	-17337.8	310.268	445.362	0	0	0	0	0	0	0	200	903	0	0	0	0	0	0	0	603	903	0
1510	7	32.0111	-115.797	-688.739	-101043	76470.4	-17246.3	311.03	446.708	0	0	0	0	0	0	0	200	903	0	0	0	0	0	0	0	603	903	0
1510	8	32.6214	-114.729	-692.707	-101135	76470.4	-17704.1	310.394	446	0	0	0	0	0	0	0	200	903	0	0	0	0	0	0	0	603	903	0
1510	9	34.9102	-115.491	-698.2	-101776	77202.8	-17612.5	310.574	445.769	0	0	0	0	0	0	0	200	903	0	0	0	0	0	0	0	603	903	0
1511	0	33.3844	-115.339	-702.167	-101867	77508	-17795.6	310.384	445.076	0	0	0	0	0	0	0	200	903	0	0	0	0	0	0	0	603	903	0
1511	1	32.9266	-113.813	-705.829	-101593	77691.1	-17429.4	310.071	443.934	0	0	0	0	0	0	0	200	903	0	0	0	0	0	0	0	603	903	0
1511	2	32.774	-114.271	-709.186	-102050	77996.3	-16971.6	309.98	443.898	0	0	0	0	0	0	0	200	903	0	0	0	0	0	0	0	603	903	0
1511	3	33.3844	-114.118	-710.712	-102874	78423.5	-17475.2	310.345	444.748	0	0	0	0	0	0	0	200	903	0	0	0	0	0	0	0	603	903	0
1511	4	34.4525	-113.508	-714.679	-103698	78972.8	-17612.5	310.501	445.098	0	0	0	0	0	0	0	200	903	0	0	0	0	0	0	0	603	903	0
1511	5	33.3844	-113.05	-716.205	-104706	79094.9	-17521	310.436	446.195	0	0	0	0	0	0	0	200	903	0	0	0	0	0	0	0	603	903	0
1511	6	33.5369	-111.829	-721.088	-104248	79705.2	-17109	310.535	444.57	0	0	0	0	0	0	0	200	903	0	0	0	0	0	0	0	603	903	0
1511	7	33.5369	-112.135	-720.783	-105438	79644.2	-16971.6	310.497	446.283	0	0	0	0	0	0	0	200	903	0	0	0	0	0	0	0	603	903	0
1511	8	32.6214	-110.609	-727.191	-105713	80010.5	-17337.8	310.027	445.371	0	0	0	0	0	0	0	200	903	0	0	0	0	0	0	0	603	903	0
1511	9	33.5369	-110.303	-727.497	-105346	80376.7	-17109	310.484	444.807	0	0	0	0	0	0	0	200	903	0	0	0	0	0	0	0	603	903	0
1512	0	31.8585	-110.609	-729.328	-105529	80193.5	-16834.3	309.955	444.694	0	0	0	0	0	0	0	200	903	0	0	0	0	0	0	0	603	903	0
1512	1	32.0111	-109.693	-733.295	-105896	80803.9	-16422.3	310.193	444.411	0	0	0	0	0	0	0	200	903	0	0	0	0	0	0	0	603	903	0
1512	2	31.8585	-109.083	-737.873	-106537	80681.8	-16559.6	309.344	444.383	0	0	0	0	0	0	0	200	903	0	0	0	0	0	0	0	603	903	0
1512	3	31.4007	-108.167	-739.093	-107177	80926	-16605.4	309.494	445.012	0	0	0	0	0	0	0	200	903	0	0	0	0	0	0	0	603	903	0
1512	4	30.6378	-108.625	-741.84	-108093	81414.2	-16651.2	309.746	445.709	0	0	0	0	0	0	0	200	903	0	0	0	0	0	0	0	603	903	0
1512	5	30.4852	-107.099	-743.061	-107910	81841.5	-16010.3	310.141	445.224	0	0	0	0	0	0	0	200	903	0	0	0	0	0	0	0	603	903	0
1512	6	30.0274	-106.641	-743.366	-108551	81292.2	-16010.3	309.357	446.026	0	0	0	0	0	0	0	200	903	0	0	0	0	0	0	0	603	903	0
1512	7	31.5533	-105.726	-747.028	-107818	82024.6	-16056.1	309.801	444.33	0	0	0	0	0	0	0	200	903	0	0	0	0	0	0	0	603	903	0
1512	8	29.7222	-104.505	-748.249	-108276	82207.7	-16101.9	309.867	444.706	0	0	0	0	0	0	0	200	903	0	0	0	0	0	0	0	603	903	0
1512	9	30.18	-104.047	-752.521	-108551	82634.9	-16010.3	309.811	444.249	0	0	0	0	0	0	0	200	903	0	0	0	0	0	0	0	603	903	0
1513	0	29.8748	-103.742	-750.995	-109008	83062.2	-15506.8	310.603	445.152	0	0	0	0	0	0	0	200	903	0	0	0	0	0	0	0	603	903	0
1513	1	28.8067	-103.284	-757.099	-108917	82634.9	-15140.6	309.147	443.861	0	0	0	0	0	0	0	200	903	0	0	0	0	0	0	0	603	903	0
1513	2	29.5697	-102.216	-758.014	-109924	83062.2	-15232.1	309.579	445.016	0	0	0	0	0	0	0	200	903	0	0	0	0	0	0	0	603	903	0
1513	3	28.1964	-101.606	-759.54	-109832	83367.4	-15277.9	309.76	444.604	0	0	0	0	0	0	0	200	903	0	0	0	0	0	0	0	603	903	0
1513	4	28.5015	-100.385	-761.982	-110565	83672.6	-15277.9	309.809	445.102	0	0	0	0	0	0	0	200	903	0	0	0	0	0	0	0	603	903	0
1513	5	29.5697	-100.843	-764.728	-110382	83794.6	-14957.5	309.574	444.341	0	0	0	0	0	0	0	200	903	0	0	0	0	0	0	0	603	903	0
1513	6	28.1964	-99.012	-768.695	-110473	84160.9	-14316.6	309.485	443.715	0	0	0	0	0	0	0	200	903	0	0	0	0	0	0	0	603	903	0
1513	7	27.2808	-98.7068	-770.221	-110748	83733.6	-14545.5	308.714	443.787	0	0	0	0	0	0	0	200	903	0	0	0	0	0	0	0	603	903	0
1513	8	27.8912	-98.7068	-770.221	-111023	84282.9	-14911.7	309.427	444.144	0	0	0	0	0	0	0	200	903	0	0	0	0	0	0	0	603	903	0
1513	9	26.6705	-97.3335	-772.052	-111114	84771.2	-14728.6	309.8	443.921	0	0	0	0	0	0	0	200	903	0	0	0	0	0	0	0	603	903	0
1514	0	26.9757	-97.0284	-773.883	-112213	84832.2	-14316.6	309.619	445	0	0	0	0	0	0	0	200	903	0	0	0	0	0	0	0	603	903	0
1514	1	27.4334	-95.9602	-777.24	-112579	84405	-14179.3	308.596	444.845	0	0	0	0	0	0	0	200	903	0	0	0	0	0	0	0	603	903	0
1514	2	26.9757	-94.2818	-779.377	-112762	85076.3	-14087.7	309.159	444.682	0	0	0	0	0	0	0	200	903	0	0	0	0	0	0	0	603	903	0
1514	3	26.6705	-95.3499	-781.208	-112854	85259.5	-14042	309.138	444.461	0	0	0	0	0	0	0	200	903	0	0	0	0	0	0	0	603	903	0
1514	4	26.3653	-93.3662	-782.123	-112671	85869.8	-13950.4	309.791	444.057	0	0	0	0	0	0	0	200	903	0	0	0	0	0	0	0	603	903	0
1514	5	25.2972	-92.4507	-781.513	-112854	85686.7	-13721.5	309.642	444.404	0	0	0	0	0	0	0	200	903	0	0	0	0	0	0	0	603	903	0
1514	6	26.6705	-92.2981	-786.09	-113037	85808.8	-13584.2	309.159	443.796	0	0	0	0	0	0	0	200	903	0	0	0	0	0	0	0	603	903	0
1514	7	26.3653	-91.3826	-788.532	-113220	85991.9	-13767.3	309.053	443.583	0	0	0	0	0	0	0	200	903	0	0	0	0	0	0	0	603	903	0
1514	8	25.4498	-90.0093	-789.142	-113861	85625.7	-13126.4	308.505	444.284	0	0	0	0	0	0	0	200	903	0	0	0	0	0	0	0	603	903	0
1514	9	25.1446	-89.8567	-791.889	-114227	86663.3	-13584.2	309.439	444.246	0	0	0	0	0	0	0	200	903	0	0	0	0	0	0	0	603	903	0
1515	0	25.1446	-88.636	-790.973	-114959	86724.3	-13172.2	309.643	445.339	0	0	0	0	0	0	0	200	903	0	0	0	0	0	0	0	603	903	0
1515	1	25.6024	-88.636	-792.194	-114319	86541.2	-12897.5	309.242	444.306	0	0	0	0	0	0	0	200	903	0	0	0	0	0	0	0	603	903	0
1515	2	26.3653	-87.5679	-795.246	-113861	86419.1	-13218	308.67	443.177	0	0	0	0	0	0	0	200	903	0	0	0	0	0	0	0	603	903	0
1515	3	25.4498	-85.7368	-794.94	-113952	86724.3	-12622.9	309.095	443.347	0	0	0	0	0	0	0	200	903	0	0	0	0	0	0	0	603	903	0
1515	4	25.1446	-86.042	-795.551	-113861	86968.5	-12897.5	309.319	443.122	0	0	0	0	0	0	0	200	903	0	0	0	0	0	0	0	603	903	0
1515	5	25.9075	-85.5843	-793.109	-114044	86968.5	-12622.9	309.655	443.793	0	0	0	0	0	0	0	200	903	0	0	0	0	0	0	0	603	903	0
1515	6	24.8394	-84.211	-793.109	-114135	86846.4	-12394	309.501	443.909	0	0	0	0	0	0	0	200	903	0	0	0	0	0	0	0	603	903	0
1515	7	24.3817	-83.7532	-794.33	-114593	87090.5	-12394	309.64	444.264	0	0	0	0	0	0	0	200	903	0	0	0	0	0	0	0	603	903	0
1515	8	24.8394	-82.5325	-795.246	-114593	87334.7	-12485.5	309.821	444.098	0	0	0	0	0	0	0	200	903	0	0	0	0	0	0	0	603	903	0
1515	9	24.6868	-81.4644	-791.278	-114593	86846.4	-12485.5	309.755	444.82	0	0	0	0	0	0	0	200	903	0	0	0	0	0	0	0	603	903	0
1516	0	24.2291	-81.1592	-794.025	-114410	87151.5	-12302.4	309.759	444.089	0	0	0	0	0	0	0	200	903	0	0	0	0	0	0	0	603	903	0
1516	1	23.9239	-79.7859	-792.194	-113678	87090.5	-11386.9	309.936	443.497	0	0	0	0	0	0	0	200	903	0	0	0	0	0	0	0	603	903	0
1516	2	24.992	-79.6333	-790.668	-113220	86846.4	-11707.4	309.839	443.195	0	0	0	0	0	0	0	200	903	0	0	0	0	0	0	0	603	903	0
1516	3	24.3817	-79.023	-788.532	-113311	86846.4	-11844.7	310.137	443.699	0	0	0	0	0	0	0	200	903	0	0	0	0	0	0	0	603	903	0
1516	4	25.1446	-78.4126	-790.668	-113037	86907.4	-11707.4	309.916	442.964	0	0	0	0	0	0	0	200	903	0	0	0	0	0	0	0	603	903	0
1516	5	23.7713	-77.4971	-788.837	-113037	86358.1	-11158	309.475	443.296	0	0	0	0	0	0	0	200	903	0	0	0	0	0	0	0	603	903	0
1516	6	25.1446	-76.2764	-785.175	-113495	86297	-10700.3	309.908	444.547	0	0	0	0	0	0	0	200	903	0	0	0	0	0	0	0	603	903	0
1516	7	23.7713	-74.5979	-783.344	-112121	86297	-10791.8	310.165	443.132	0	0	0	0	0	0	0	200	903	0	0	0	0	0	0	0	603	903	0
1516	8	24.2291	-73.835	-781.818	-112579	86236	-10974.9	310.302	443.996	0	0	0	0	0	0	0	200	903	0	0	0	0	0	0	0	603	903	0
1516	9	24.5343	-74.1402	-782.123	-112030	85991.9	-10700.3	309.947	443.238	0	0	0	0	0	0	0	200	903	0	0	0	0	0	0	0	603	903	0
1517	0	23.6187	-72.3091	-774.494	-111389	85808.8	-10608.7	310.793	443.822	0	0	0	0	0	0	0	200	903	0	0	0	0	0	0	0	603	903	0
1517	1	22.7032	-71.8513	-777.851	-110840	85564.6	-10471.4	310.001	442.495	0	0	0	0	0	0	0	200	903	0	0	0	0	0	0	0	603	903	0
1517	2	23.161	-71.5462	-773.273	-109466	85259.5	-10288.3	310.258	441.562	0	0	0	0	0	0	0	200	903	0	0	0	0	0	0	0	603	903	0
1517	3	23.4661	-70.4781	-769.916	-110382	85137.4	-10288.3	310.58	443.369	0	0	0	0	0	0	0	200	903	0	0	0	0	0	0	0	603	903	0
1517	4	23.9239	-69.4099	-769.001	-109741	85015.3	-10105.2	310.553	442.706	0	0	0	0	0	0	0	200	903	0	0	0	0	0	0	0	603	903	0
1517	5	23.7713	-68.7996	-767.169	-109924	84466	-9876.3	310.101	443.285	0	0	0	0	0	0	0	200	903	0	0	0	0	0	0	0	603	903	0
1517	6	22.8558	-67.1211	-762.897	-108642	84099.8	-9326.98	310.237	442.408	0	0	0	0	0	0	0	200	903	0	0	0	0	0	0	0	603	903	0
1517	7	22.5506	-66.5108	-761.066	-109100	83916.7	-9738.97	310.262	443.352	0	0	0	0	0	0	0	200	903	0	0	0	0	0	0	0	603	903	0
1517	8	23.161	-64.8323	-756.183	-109008	83916.7	-9830.52	310.974	444.156	0	0	0	0	0	0	0	200	903	0	0	0	0	0	0	0	603	903	0
1517	9	22.7032	-64.5271	-754.047	-107361	83855.6	-9876.3	311.207	442.379	0	0	0	0	0	0	0	200	903	0	0	0	0	0	0	0	603	903	0
1518	0	23.6187	-64.3745	-750.69	-106720	83123.2	-9418.53	310.729	442.162	0	0	0	0	0	0	0	200	903	0	0	0	0	0	0	0	603	903	0
1518	1	24.0765	-63.9168	-749.164	-106445	82573.9	-8960.77	310.221	442.085	0	0	0	0	0	0	0	200	903	0	0	0	0	0	0	0	603	903	0
1518	2	23.4661	-62.6961	-742.45	-106170	82207.7	-9464.31	310.725	443	0	0	0	0	0	0	0	200	903	0	0	0	0	0	0	0	603	903	0
1518	3	23.6187	-62.2383	-743.366	-106262	82696	-9326.98	311.245	442.947	0	0	0	0	0	0	0	200	903	0	0	0	0	0	0	0	603	903	0
1518	4	23.6187	-60.4073	-737.873	-105438	82207.7	-9372.76	311.412	442.895	0	0	0	0	0	0	0	200	903	0	0	0	0	0	0	0	603	903	0
1518	5	23.7713	-59.9495	-731.159	-105163	81353.2	-9189.65	311.266	443.831	0	0	0	0	0	0	0	200	903	0	0	0	0	0	0	0	603	903	0
1518	6	24.992	-58.7288	-731.464	-104248	81353.2	-8960.77	311.22	442.519	0	0	0	0	0	0	0	200	903	0	0	0	0	0	0	0	603	903	0
1518	7	24.5343	-58.1184	-729.633	-103149	81231.2	-8731.89	311.332	441.371	0	0	0	0	0	0	0	200	903	0	0	0	0	0	0	0	603	903	0
1518	8	24.992	-57.9659	-724.75	-102691	81170.1	-8869.22	311.997	441.692	0	0	0	0	0	0	0	200	903	0	0	0	0	0	0	0	603	903	0
1518	9	24.5343	-57.3555	-723.224	-102234	80865	-8960.77	311.812	441.358	0	0	0	0	0	0	0	200	903	0	0	0	0	0	0	0	603	903	0
1519	0	24.5343	-56.44	-717.731	-102050	80193.5	-8594.56	311.732	442.185	0	0	0	0	0	0	0	200	903	0	0	0	0	0	0	0	603	903	0
1519	1	25.6024	-56.2874	-714.069	-101776	80376.7	-7999.47	312.562	442.529	0	0	0	0	0	0	0	200	903	0	0	0	0	0	0	0	603	903	0
1519	2	25.4498	-54.7615	-710.407	-100036	79827.3	-8640.33	312.368	440.816	0	0	0	0	0	0	0	200	903	0	0	0	0	0	0	0	603	903	0
1519	3	25.4498	-53.9986	-706.745	-100769	79278	-8457.23	312.174	442.582	0	0	0	0	0	0	0	200	903	0	0	0	0	0	0	0	603	903	0
1519	4	24.3817	-53.5408	-702.777	-99853.2	79217	-8594.56	312.72	442.084	0	0	0	0	0	0	0	200	903	0	0	0	0	0	0	0	603	903	0
1519	5	24.992	-52.7779	-700.641	-98846.1	78728.7	-8319.9	312.367	441.08	0	0	0	0	0	0	0	200	903	0	0	0	0	0	0	0	603	903	0
1519	6	25.4498	-53.2356	-694.538	-98479.9	78484.5	-7907.92	313.003	441.792	0	0	0	0	0	0	0	200	903	0	0	0	0	0	0	0	603	903	0
1519	7	25.755	-52.0149	-689.35	-97747.5	78301.5	-8045.24	313.587	441.797	0	0	0	0	0	0	0	200	903	0	0	0	0	0	0	0	603	903	0
1519	8	26.0601	-51.5572	-687.519	-98113.7	77813.2	-8274.12	313.18	442.707	0	0	0	0	0	0	0	200	903	0	0	0	0	0	0	0	603	903	0
1519	9	26.5179	-50.7942	-685.993	-97198.1	77385.9	-8228.35	312.809	441.69	0	0	0	0	0	0	0	200	903	0	0	0	0	0	0	0	603	903	0
1520	0	26.2127	-49.8787	-682.941	-97106.6	76836.6	-7862.14	312.508	442.189	0	0	0	0	0	0	0	200	903	0	0	0	0	0	0	0	603	903	0
1520	1	26.2127	-50.489	-678.669	-96465.7	76531.4	-7083.94	312.767	442.14	0	0	0	0	0	0	0	200	903	0	0	0	0	0	0	0	603	903	0
1520	2	27.586	-48.3528	-674.396	-94451.6	76592.5	-7816.36	313.572	440.054	0	0	0	0	0	0	0	200	903	0	0	0	0	0	0	0	603	903	0
1520	3	25.9075	-48.2002	-669.818	-94268.5	76348.4	-7770.59	313.984	440.737	0	0	0	0	0	0	0	200	903	0	0	0	0	0	0	0	603	903	0
1520	4	26.9757	-47.8951	-666.461	-92895.2	75921.1	-7816.36	313.917	439.386	0	0	0	0	0	0	0	200	903	0	0	0	0	0	0	0	603	903	0
1520	5	26.5179	-47.2847	-660.968	-92986.8	74944.5	-7541.7	313.386	440.683	0	0	0	0	0	0	0	200	903	0	0	0	0	0	0	0	603	903	0
1520	6	27.586	-46.064	-660.968	-93169.8	75005.6	-7495.93	313.478	440.96	0	0	0	0	0	0	0	200	903	0	0	0	0	0	0	0	603	903	0
1520	7	26.0601	-46.6743	-657.306	-92803.6	75127.6	-7312.82	314.296	441.188	0	0	0	0	0	0	0	200	903	0	0	0	0	0	0	0	603	903	0
1520	8	26.2127	-44.2329	-654.254	-92162.8	74700.4	-7587.48	314.176	440.867	0	0	0	0	0	0	0	200	903	0	0	0	0	0	0	0	603	903	0
1520	9	27.4334	-46.2166	-649.372	-91430.4	74151.1	-7267.04	314.189	440.798	0	0	0	0	0	0	0	200	903	0	0	0	0	0	0	0	603	903	0
1521	0	27.8912	-43.0122	-644.794	-90331.7	72869.3	-7358.6	313.012	440.094	0	0	0	0	0	0	0	200	903	0	0	0	0	0	0	0	603	903	0
1521	1	27.2808	-41.7915	-642.353	-89873.9	72991.4	-7083.94	313.631	439.914	0	0	0	0	0	0	0	200	903	0	0	0	0	0	0	0	603	903	0
1521	2	27.1283	-43.0122	-640.216	-89141.5	73540.7	-6671.95	314.869	439.237	0	0	0	0	0	0	0	200	903	0	0	0	0	0	0	0	603	903	0
1521	3	27.7386	-43.6226	-634.723	-88317.5	73052.4	-7038.16	315.093	439.143	0	0	0	0	0	0	0	200	903	0	0	0	0	0	0	0	603	903	0
1521	4	27.1283	-41.3338	-633.808	-88500.7	72381	-7083.94	314.2	439.633	0	0	0	0	0	0	0	200	903	0	0	0	0	0	0	0	603	903	0
1521	5	28.5015	-41.3338	-627.704	-87951.3	72075.9	-6946.61	314.825	440.116	0	0	0	0	0	0	0	200	903	0	0	0	0	0	0	0	603	903	0
1521	6	27.1283	-39.3501	-624.652	-87585.1	71648.6	-6992.39	314.702	440.214	0	0	0	0	0	0	0	200	903	0	0	0	0	0	0	0	603	903	0
1521	7	27.586	-40.7234	-621.601	-86944.2	71465.5	-6351.52	314.97	439.872	0	0	0	0	0	0	0	200	903	0	0	0	0	0	0	0	603	903	0
1521	8	28.1964	-37.9768	-619.159	-85479.4	71343.4	-6534.62	315.226	438.057	0	0	0	0	0	0	0	200	903	0	0	0	0	0	0	0	603	903	0
1521	9	27.8912	-37.3665	-617.328	-85204.7	70916.2	-6809.28	314.876	438.022	0	0	0	0	0	0	0	200	903	0	0	0	0	0	0	0	603	903	0
1522	0	27.586	-37.9768	-613.971	-84563.9	70550	-6488.85	314.908	437.733	0	0	0	0	0	0	0	200	903	0	0	0	0	0	0	0	603	903	0
1522	1	27.586	-39.1975	-610.614	-83831.5	70611	-6626.18	315.639	437.29	0	0	0	0	0	0	0	200	903	0	0	0	0	0	0	0	603	903	0
1522	2	27.4334	-35.9932	-606.342	-83739.9	70183.8	-6488.85	315.75	438.107	0	0	0	0	0	0	0	200	903	0	0	0	0	0	0	0	603	903	0
1522	3	27.7386	-35.3828	-601.764	-83556.8	70122.7	-6351.52	316.529	438.853	0	0	0	0	0	0	0	200	903	0	0	0	0	0	0	0	603	903	0
1522	4	28.9593	-34.0096	-600.544	-83282.1	69634.5	-6671.95	315.952	438.678	0	0	0	0	0	0	0	200	903	0	0	0	0	0	0	0	603	903	0
1522	5	29.4171	-34.6199	-598.712	-82458.2	69390.3	-6259.96	315.899	437.726	0	0	0	0	0	0	0	200	903	0	0	0	0	0	0	0	603	903	0
1522	6	29.1119	-33.2466	-596.271	-81634.2	69390.3	-6031.08	316.374	436.908	0	0	0	0	0	0	0	200	903	0	0	0	0	0	0	0	603	903	0
1522	7	28.1964	-32.6363	-593.83	-80901.8	69329.3	-6168.41	316.749	436.237	0	0	0	0	0	0	0	200	903	0	0	0	0	0	0	0	603	903	0
1522	8	29.1119	-32.4837	-591.693	-80627.1	68718.9	-6259.96	316.139	436.265	0	0	0	0	0	0	0	200	903	0	0	0	0	0	0	0	603	903	0
1522	9	28.349	-31.263	-586.2	-80352.4	68474.8	-6168.41	316.811	437.073	0	0	0	0	0	0	0	200	903	0	0	0	0	0	0	0	603	903	0
1523	0	29.4171	-31.263	-583.148	-79437	68169.6	-5893.75	316.899	436.221	0	0	0	0	0	0	0	200	903	0	0	0	0	0	0	0	603	903	0
1523	1	29.8748	-30.8052	-583.759	-79620	68291.7	-5893.75	316.986	436.392	0	0	0	0	0	0	0	200	903	0	0	0	0	0	0	0	603	903	0
1523	2	29.2645	-28.9742	-581.012	-78796.1	67925.5	-6031.08	316.909	435.619	0	0	0	0	0	0	0	200	903	0	0	0	0	0	0	0	603	903	0
1523	3	28.8067	-28.8216	-578.876	-79162.3	67498.2	-5619.1	316.602	436.752	0	0	0	0	0	0	0	200	903	0	0	0	0	0	0	0	603	903	0
1523	4	29.8748	-28.3638	-574.298	-77331.2	67498.2	-5619.1	317.532	434.653	0	0	0	0	0	0	0	200	903	0	0	0	0	0	0	0	603	903	0
1523	5	28.5015	-27.7534	-572.773	-77789	67193	-5710.65	317.312	435.811	0	0	0	0	0	0	0	200	903	0	0	0	0	0	0	0	603	903	0
1523	6	29.8748	-27.2957	-570.636	-76049.5	67315.1	-5664.87	317.965	433.271	0	0	0	0	0	0	0	200	903	0	0	0	0	0	0	0	603	903	0
1523	7	30.9429	-27.1431	-569.11	-76965	67071	-5664.87	317.852	435.237	0	0	0	0	0	0	0	200	903	0	0	0	0	0	0	0	603	903	0
1523	8	30.3326	-26.6853	-567.585	-76232.6	66521.7	-4978.23	317.201	434.311	0	0	0	0	0	0	0	200	903	0	0	0	0	0	0	0	603	903	0
1523	9	29.2645	-26.3802	-565.753	-76781.9	66155.4	-5527.54	316.933	435.716	0	0	0	0	0	0	0	200	903	0	0	0	0	0	0	0	603	903	0
1524	0	30.6378	-24.7017	-562.702	-75500.2	66155.4	-5344.44	317.568	434.174	0	0	0	0	0	0	0	200	903	0	0	0	0	0	0	0	603	903	0
1524	1	30.3326	-25.4646	-560.26	-75774.8	66399.6	-5207.11	318.516	435.249	0	0	0	0	0	0	0	200	903	0	0	0	0	0	0	0	603	903	0
1524	2	30.6378	-24.0913	-558.429	-74584.6	66033.4	-5207.11	318.248	433.561	0	0	0	0	0	0	0	200	903	0	0	0	0	0	0	0	603	903	0
1524	3	31.2481	-23.3284	-558.124	-74126.9	65728.2	-5069.78	317.766	432.814	0	0	0	0	0	0	0	200	903	0	0	0	0	0	0	0	603	903	0
1524	4	30.9429	-22.8706	-556.293	-74035.3	65728.2	-4886.67	318.154	433.087	0	0	0	0	0	0	0	200	903	0	0	0	0	0	0	0	603	903	0
1524	5	29.7222	-21.9551	-554.157	-73943.8	65789.2	-4428.91	318.72	433.435	0	0	0	0	0	0	0	200	903	0	0	0	0	0	0	0	603	903	0
1524	6	31.0955	-22.5655	-550.19	-73577.6	65239.9	-4703.57	318.577	433.731	0	0	0	0	0	0	0	200	903	0	0	0	0	0	0	0	603	903	0
1524	7	30.0274	-21.9551	-548.664	-73943.8	65301	-5024	319.018	434.771	0	0	0	0	0	0	0	200	903	0	0	0	0	0	0	0	603	903	0
1524	8	30.4852	-19.6663	-548.053	-72478.9	64934.7	-4703.57	318.483	432.248	0	0	0	0	0	0	0	200	903	0	0	0	0	0	0	0	603	903	0
1524	9	30.6378	-20.1241	-544.391	-72845.2	64873.7	-4520.46	319.167	433.81	0	0	0	0	0	0	0	200	903	0	0	0	0	0	0	0	603	903	0
1525	0	30.7904	-19.0559	-546.833	-71838.1	64812.7	-4566.24	318.524	431.371	0	0	0	0	0	0	0	200	903	0	0	0	0	0	0	0	603	903	0
1525	1	29.4171	-19.2085	-544.086	-71746.5	64507.5	-4566.24	318.561	431.866	0	0	0	0	0	0	0	200	903	0	0	0	0	0	0	0	603	903	0
1525	2	30.0274	-18.293	-542.56	-71105.6	64507.5	-4337.36	318.895	431.056	0	0	0	0	0	0	0	200	903	0	0	0	0	0	0	0	603	903	0
1525	3	29.5697	-19.6663	-538.898	-71105.6	64141.3	-4200.03	319.023	431.946	0	0	0	0	0	0	0	200	903	0	0	0	0	0	0	0	603	903	0
1525	4	29.5697	-17.2249	-536.151	-71380.3	64080.3	-3650.71	319.519	433.135	0	0	0	0	0	0	0	200	903	0	0	0	0	0	0	0	603	903	0
1525	5	30.18	-17.0723	-537.372	-71014.1	64385.4	-3879.59	319.815	432.151	0	0	0	0	0	0	0	200	903	0	0	0	0	0	0	0	603	903	0
1525	6	29.8748	-15.3938	-536.762	-70556.3	64141.3	-4108.48	319.497	431.448	0	0	0	0	0	0	0	200	903	0	0	0	0	0	0	0	603	903	0
1525	7	30.0274	-15.8516	-534.931	-70281.7	63653	-3971.15	318.993	431.385	0	0	0	0	0	0	0	200	903	0	0	0	0	0	0	0	603	903	0
1525	8	29.1119	-14.0205	-533.405	-69457.7	63714.1	-3788.04	319.448	430.216	0	0	0	0	0	0	0	200	903	0	0	0	0	0	0	0	603	903	0
1525	9	30.4852	-13.7154	-531.269	-68816.8	63775.1	-3559.16	320.043	429.533	0	0	0	0	0	0	0	200	903	0	0	0	0	0	0	0	603	903	0
1526	0	28.5015	-14.1731	-530.658	-68359	62798.5	-3421.83	318.341	428.819	0	0	0	0	0	0	0	200	903	0	0	0	0	0	0	0	603	903	0
1526	1	29.4171	-12.0369	-529.438	-68084.4	63592	-3421.83	320.112	428.598	0	0	0	0	0	0	0	200	903	0	0	0	0	0	0	0	603	903	0
1526	2	30.3326	-12.7998	-528.217	-68450.6	63286.8	-3284.5	319.812	429.588	0	0	0	0	0	0	0	200	903	0	0	0	0	0	0	0	603	903	0
1526	3	28.9593	-12.1895	-527.607	-68816.8	63042.7	-3330.28	319.488	430.432	0	0	0	0	0	0	0	200	903	0	0	0	0	0	0	0	603	903	0
1526	4	28.6541	-10.511	-527.912	-67443.5	63469.9	-3192.95	320.228	427.755	0	0	0	0	0	0	0	200	903	0	0	0	0	0	0	0	603	903	0
1526	5	28.1964	-10.0533	-525.775	-68359	63164.7	-3192.95	320.136	430.016	0	0	0	0	0	0	0	200	903	0	0	0	0	0	0	0	603	903	0
1526	6	28.8067	-10.3584	-524.25	-67992.8	62859.6	-2964.07	319.904	429.696	0	0	0	0	0	0	0	200	903	0	0	0	0	0	0	0	603	903	0
1526	7	28.349	-8.37479	-519.977	-66711.1	62859.6	-2735.18	320.889	428.296	0	0	0	0	0	0	0	200	903	0	0	0	0	0	0	0	603	903	0
1526	8	28.9593	-7.76443	-522.419	-66711.1	63103.7	-2414.75	320.791	427.697	0	0	0	0	0	0	0	200	903	0	0	0	0	0	0	0	603	903	0
1526	9	28.349	-8.2222	-522.419	-66711.1	62920.6	-2552.08	320.441	427.697	0	0	0	0	0	0	0	200	903	0	0	0	0	0	0	0	603	903	0
1527	0	28.5015	-7.45926	-518.756	-66344.9	62737.5	-2689.41	320.938	427.892	0	0	0	0	0	0	0	200	903	0	0	0	0	0	0	0	603	903	0
1527	1	27.586	-7.15408	-522.724	-66436.4	62615.4	-2368.97	319.787	427.097	0	0	0	0	0	0	0	200	903	0	0	0	0	0	0	0	603	903	0
1527	2	26.9757	-6.39114	-520.587	-66894.2	62615.4	-2140.09	320.278	428.498	0	0	0	0	0	0	0	200	903	0	0	0	0	0	0	0	603	903	0
1527	3	27.2808	-6.23856	-519.672	-66344.9	62737.5	-1865.43	320.725	427.667	0	0	0	0	0	0	0	200	903	0	0	0	0	0	0	0	603	903	0
1527	4	27.4334	-5.17044	-519.062	-66344.9	62981.6	-2002.76	321.338	427.817	0	0	0	0	0	0	0	200	903	0	0	0	0	0	0	0	603	903	0
1527	5	28.0438	-4.4075	-520.282	-65337.8	62676.5	-1682.33	320.466	425.582	0	0	0	0	0	0	0	200	903	0	0	0	0	0	0	0	603	903	0
1527	6	26.8231	-3.79715	-520.587	-65246.2	62554.4	-1636.55	320.161	425.332	0	0	0	0	0	0	0	200	903	0	0	0	0	0	0	0	603	903	0
1527	7	25.2972	-4.25491	-519.672	-65154.7	62310.2	-1728.1	319.903	425.377	0	0	0	0	0	0	0	200	903	0	0	0	0	0	0	0	603	903	0
1527	8	25.9075	-4.25491	-518.451	-64605.4	62676.5	-1133.01	320.892	424.612	0	0	0	0	0	0	0	200	903	0	0	0	0	0	0	0	603	903	0
1527	9	25.4498	-5.01785	-518.146	-64971.6	62310.2	-1270.34	320.256	425.392	0	0	0	0	0	0	0	200	903	0	0	0	0	0	0	0	603	903	0
1528	0	25.4498	-2.72903	-516.925	-65429.4	62249.2	-904.13	320.422	426.574	0	0	0	0	0	0	0	200	903	0	0	0	0	0	0	0	603	903	0
1528	1	25.2972	-1.81351	-516.01	-65429.4	62127.1	-1041.46	320.399	426.799	0	0	0	0	0	0	0	200	903	0	0	0	0	0	0	0	603	903	0
1528	2	24.992	-1.05057	-518.146	-64788.5	62127.1	-1041.46	319.903	425.039	0	0	0	0	0	0	0	200	903	0	0	0	0	0	0	0	603	903	0
1528	3	24.5343	-1.50833	-515.094	-64696.9	62249.2	-629.471	320.85	425.602	0	0	0	0	0	0	0	200	903	0	0	0	0	0	0	0	603	903	0
1528	4	23.9239	0.017548	-518.146	-63598.3	62249.2	-675.248	320.138	422.742	0	0	0	0	0	0	0	200	903	0	0	0	0	0	0	0	603	903	0
1528	5	23.7713	0.322724	-516.315	-63781.4	62188.2	-492.142	320.446	423.532	0	0	0	0	0	0	0	200	903	0	0	0	0	0	0	0	603	903	0
1528	6	22.7032	0.017548	-514.484	-62682.8	62127.1	-34.3784	320.756	421.836	0	0	0	0	0	0	0	200	903	0	0	0	0	0	0	0	603	903	0
1528	7	23.3136	0.933075	-516.315	-63049	62371.3	-309.037	320.801	422.113	0	0	0	0	0	0	0	200	903	0	0	0	0	0	0	0	603	903	0
1528	8	23.0084	1.39084	-517.841	-63964.5	62676.5	-171.707	321.034	423.522	0	0	0	0	0	0	0	200	903	0	0	0	0	0	0	0	603	903	0
1528	9	23.3136	1.69601	-516.01	-63598.3	62615.4	240.28	321.345	423.25	0	0	0	0	0	0	0	200	903	0	0	0	0	0	0	0	603	903	0
1529	0	22.398	3.22189	-518.756	-62865.9	62249.2	102.951	319.997	421.186	0	0	0	0	0	0	0	200	903	0	0	0	0	0	0	0	603	903	0
1529	1	23.3136	4.29001	-516.62	-63232.1	62310.2	194.503	320.611	422.396	0	0	0	0	0	0	0	200	903	0	0	0	0	0	0	0	603	903	0
1529	2	21.4825	4.74777	-517.841	-63140.5	62737.5	331.833	321.152	421.93	0	0	0	0	0	0	0	200	903	0	0	0	0	0	0	0	603	903	0
1529	3	22.398	5.05295	-517.841	-62865.9	62798.5	423.385	321.27	421.4	0	0	0	0	0	0	0	200	903	0	0	0	0	0	0	0	603	903	0
1529	4	21.6351	4.13742	-516.01	-62408.1	62737.5	606.491	321.582	420.944	0	0	0	0	0	0	0	200	903	0	0	0	0	0	0	0	603	903	0
1529	5	21.7877	5.05295	-521.198	-62316.6	62371.3	560.714	319.669	419.564	0	0	0	0	0	0	0	200	903	0	0	0	0	0	0	0	603	903	0
1529	6	20.8721	4.59518	-521.808	-62133.5	62920.6	1338.91	320.582	419.073	0	0	0	0	0	0	0	200	903	0	0	0	0	0	0	0	603	903	0
1529	7	20.7196	5.96848	-521.808	-62865.9	63103.7	881.149	320.933	420.477	0	0	0	0	0	0	0	200	903	0	0	0	0	0	0	0	603	903	0
1529	8	20.4144	6.73142	-521.198	-62408.1	63347.8	1018.48	321.543	419.74	0	0	0	0	0	0	0	200	903	0	0	0	0	0	0	0	603	903	0
1529	9	19.9566	7.79953	-517.231	-62591.2	63225.8	1201.58	322.239	421.012	0	0	0	0	0	0	0	200	903	0	0	0	0	0	0	0	603	903	0
1530	0	19.804	8.10471	-521.808	-62499.7	62920.6	1110.03	320.582	419.775	0	0	0	0	0	0	0	200	903	0	0	0	0	0	0	0	603	903	0
1530	1	20.4144	8.40988	-524.555	-61217.9	63286.8	1567.79	320.649	416.705	0	0	0	0	0	0	0	200	903	0	0	0	0	0	0	0	603	903	0
1530	2	20.4144	8.10471	-524.555	-61492.6	63592	1476.24	321.23	417.228	0	0	0	0	0	0	0	200	903	0	0	0	0	0	0	0	603	903	0
1530	3	19.4989	8.71506	-526.691	-59936.2	63897.2	1705.12	321.318	413.798	0	0	0	0	0	0	0	200	903	0	0	0	0	0	0	0	603	903	0
1530	4	20.2618	8.86765	-524.555	-61584.2	63531	1750.9	321.114	417.403	0	0	0	0	0	0	0	200	903	0	0	0	0	0	0	0	603	903	0
1530	5	19.0411	9.17282	-526.081	-61492.6	63836.1	1659.35	321.343	416.888	0	0	0	0	0	0	0	200	903	0	0	0	0	0	0	0	603	903	0
1530	6	19.0411	9.93576	-526.996	-62225	64141.3	2208.66	321.711	418.075	0	0	0	0	0	0	0	200	903	0	0	0	0	0	0	0	603	903	0
1530	7	19.6514	9.78317	-529.132	-61767.3	64263.4	2025.56	321.45	416.733	0	0	0	0	0	0	0	200	903	0	0	0	0	0	0	0	603	903	0
1530	8	19.3463	10.6987	-531.574	-61401	64385.4	2071.33	321.122	415.508	0	0	0	0	0	0	0	200	903	0	0	0	0	0	0	0	603	903	0
1530	9	18.5833	11.4616	-529.743	-62133.5	64080.3	2162.89	320.965	417.29	0	0	0	0	0	0	0	200	903	0	0	0	0	0	0	0	603	903	0
1531	0	18.1256	10.6987	-533.1	-61858.8	63958.2	2712.2	319.974	416.036	0	0	0	0	0	0	0	200	903	0	0	0	0	0	0	0	603	903	0
1531	1	19.0411	11.6142	-533.71	-60760.2	64568.5	2300.22	320.981	413.845	0	0	0	0	0	0	0	200	903	0	0	0	0	0	0	0	603	903	0
1531	2	17.973	12.072	-534.626	-60485.5	64995.8	2529.1	321.573	413.136	0	0	0	0	0	0	0	200	903	0	0	0	0	0	0	0	603	903	0
1531	3	18.4307	11.9194	-534.931	-61034.8	64873.7	2529.1	321.275	414.099	0	0	0	0	0	0	0	200	903	0	0	0	0	0	0	0	603	903	0
1531	4	18.2782	12.3772	-538.593	-60210.9	64995.8	2437.55	320.677	411.793	0	0	0	0	0	0	0	200	903	0	0	0	0	0	0	0	603	903	0
1531	5	18.1256	10.6987	-540.119	-60394	64995.8	2849.53	320.336	411.816	0	0	0	0	0	0	0	200	903	0	0	0	0	0	0	0	603	903	0
1531	6	17.5152	13.1401	-541.339	-60851.7	65239.9	2620.65	320.516	412.41	0	0	0	0	0	0	0	200	903	0	0	0	0	0	0	0	603	903	0
1531	7	17.21	13.1401	-543.17	-61126.4	65789.2	2849.53	321.121	412.536	0	0	0	0	0	0	0	200	903	0	0	0	0	0	0	0	603	903	0
1531	8	17.3626	13.7505	-542.56	-59386.9	65850.3	2712.2	321.37	409.457	0	0	0	0	0	0	0	200	903	0	0	0	0	0	0	0	603	903	0
1531	9	18.2782	13.903	-544.086	-60668.6	65850.3	3124.19	321.029	411.506	0	0	0	0	0	0	0	200	903	0	0	0	0	0	0	0	603	903	0
1532	0	17.6678	12.6823	-544.696	-60943.3	65545.1	2941.09	320.333	411.885	0	0	0	0	0	0	0	200	903	0	0	0	0	0	0	0	603	903	0
1532	1	17.8204	14.5134	-548.969	-60851.7	66277.5	2895.31	320.731	410.847	0	0	0	0	0	0	0	200	903	0	0	0	0	0	0	0	603	903	0
1532	2	17.5152	14.8186	-549.274	-59570	66643.7	3261.52	321.331	408.452	0	0	0	0	0	0	0	200	903	0	0	0	0	0	0	0	603	903	0
1532	3	17.5152	13.7505	-550.8	-59661.5	66643.7	3124.19	320.994	408.318	0	0	0	0	0	0	0	200	903	0	0	0	0	0	0	0	603	903	0
1532	4	17.5152	14.666	-551.41	-59386.9	66643.7	3536.18	320.861	407.7	0	0	0	0	0	0	0	200	903	0	0	0	0	0	0	0	603	903	0
1532	5	17.0574	15.2763	-550.495	-59661.5	66887.9	3032.64	321.505	408.378	0	0	0	0	0	0	0	200	903	0	0	0	0	0	0	0	603	903	0
1532	6	18.1256	15.2763	-555.378	-60302.4	67009.9	3215.74	320.657	408.579	0	0	0	0	0	0	0	200	903	0	0	0	0	0	0	0	603	903	0
1532	7	17.5152	15.8867	-558.124	-60027.8	67742.4	3353.07	321.375	407.553	0	0	0	0	0	0	0	200	903	0	0	0	0	0	0	0	603	903	0
1532	8	18.1256	16.8022	-556.903	-59203.8	68047.5	3444.63	322.189	406.309	0	0	0	0	0	0	0	200	903	0	0	0	0	0	0	0	603	903	0
1532	9	17.0574	16.3445	-561.176	-60210.9	68169.6	3398.85	321.476	407.294	0	0	0	0	0	0	0	200	903	0	0	0	0	0	0	0	603	903	0
1533	0	18.1256	16.9548	-562.397	-59661.5	68230.6	3398.85	321.321	406.084	0	0	0	0	0	0	0	200	903	0	0	0	0	0	0	0	603	903	0
1533	1	17.6678	17.4126	-563.312	-58746	68657.9	4085.5	321.883	404.287	0	0	0	0	0	0	0	200	903	0	0	0	0	0	0	0	603	903	0
1533	2	18.7359	17.5652	-565.753	-58837.6	68230.6	3444.63	320.601	403.999	0	0	0	0	0	0	0	200	903	0	0	0	0	0	0	0	603	903	0
1533	3	18.4307	16.8022	-569.11	-58562.9	69634.5	3581.96	322.357	402.903	0	0	0	0	0	0	0	200	903	0	0	0	0	0	0	0	603	903	0
1533	4	19.0411	17.1074	-566.974	-58288.3	69268.2	3581.96	322.172	402.806	0	0	0	0	0	0	0	200	903	0	0	0	0	0	0	0	603	903	0
1533	5	18.8885	17.7177	-572.467	-59020.7	69390.3	3765.06	321.213	403.099	0	0	0	0	0	0	0	200	903	0	0	0	0	0	0	0	603	903	0
1533	6	19.3463	17.5652	-571.857	-59295.3	69756.5	3765.06	321.982	403.689	0	0	0	0	0	0	0	200	903	0	0	0	0	0	0	0	603	903	0
1533	7	18.2782	18.1755	-574.909	-59112.2	69817.6	3856.61	321.441	402.82	0	0	0	0	0	0	0	200	903	0	0	0	0	0	0	0	603	903	0
1533	8	19.3463	18.6333	-576.74	-58471.4	70366.9	3719.28	322.008	401.383	0	0	0	0	0	0	0	200	903	0	0	0	0	0	0	0	603	903	0
1533	9	21.1773	18.7859	-578.571	-58837.6	70183.8	3719.28	321.305	401.695	0	0	0	0	0	0	0	200	903	0	0	0	0	0	0	0	603	903	0
1534	0	20.2618	18.7859	-581.317	-58379.8	70794.1	3856.61	321.782	400.427	0	0	0	0	0	0	0	200	903	0	0	0	0	0	0	0	603	903	0
1534	1	19.3463	19.5488	-583.759	-57830.5	71038.3	4314.38	321.691	399.066	0	0	0	0	0	0	0	200	903	0	0	0	0	0	0	0	603	903	0
1534	2	19.4989	19.7014	-584.674	-57738.9	71343.4	3902.39	322.023	398.754	0	0	0	0	0	0	0	200	903	0	0	0	0	0	0	0	603	903	0
1534	3	19.6514	18.9384	-584.369	-56274.1	71892.8	3948.17	323.026	396.299	0	0	0	0	0	0	0	200	903	0	0	0	0	0	0	0	603	903	0
1534	4	20.7196	19.3962	-588.947	-57372.7	71404.5	4039.72	321.241	397.416	0	0	0	0	0	0	0	200	903	0	0	0	0	0	0	0	603	903	0
1534	5	20.7196	19.5488	-590.168	-57830.5	72014.8	4039.72	322.024	397.99	0	0	0	0	0	0	0	200	903	0	0	0	0	0	0	0	603	903	0
1534	6	20.8721	19.5488	-591.999	-58105.1	72381	3993.94	322.266	398.151	0	0	0	0	0	0	0	200	903	0	0	0	0	0	0	0	603	903	0
1534	7	21.3299	20.1591	-590.473	-57647.4	72564.1	4268.6	322.892	397.629	0	0	0	0	0	0	0	200	903	0	0	0	0	0	0	0	603	903	0
1534	8	20.4144	20.6169	-595.966	-57006.5	72320	3993.94	321.349	395.654	0	0	0	0	0	0	0	200	903	0	0	0	0	0	0	0	603	903	0
1534	9	21.4825	21.0747	-597.187	-57372.7	72625.2	4177.05	321.612	396.072	0	0	0	0	0	0	0	200	903	0	0	0	0	0	0	0	603	903	0
1535	0	20.7196	19.7014	-596.881	-57372.7	73052.4	4451.71	322.39	396.121	0	0	0	0	0	0	0	200	903	0	0	0	0	0	0	0	603	903	0
1535	1	22.0928	21.0747	-600.544	-56274.1	72869.3	4177.05	321.339	393.705	0	0	0	0	0	0	0	200	903	0	0	0	0	0	0	0	603	903	0
1535	2	22.7032	20.4643	-603.9	-56274.1	73662.8	4543.26	321.978	393.184	0	0	0	0	0	0	0	200	903	0	0	0	0	0	0	0	603	903	0
1535	3	22.2454	20.7695	-606.037	-56457.2	73479.7	4772.14	321.246	393.158	0	0	0	0	0	0	0	200	903	0	0	0	0	0	0	0	603	903	0
1535	4	21.1773	21.3799	-609.088	-56182.5	73845.9	4360.15	321.24	392.24	0	0	0	0	0	0	0	200	903	0	0	0	0	0	0	0	603	903	0
1535	5	23.4661	20.9221	-609.088	-56274.1	74273.2	4451.71	321.942	392.391	0	0	0	0	0	0	0	200	903	0	0	0	0	0	0	0	603	903	0
1535	6	21.9403	21.685	-611.225	-56182.5	74700.4	4314.38	322.214	391.918	0	0	0	0	0	0	0	200	903	0	0	0	0	0	0	0	603	903	0
1535	7	22.0928	22.448	-611.835	-56091	74578.3	4589.04	321.893	391.677	0	0	0	0	0	0	0	200	903	0	0	0	0	0	0	0	603	903	0
1535	8	23.3136	22.7531	-612.14	-55907.9	74456.2	4405.93	321.633	391.332	0	0	0	0	0	0	0	200	903	0	0	0	0	0	0	0	603	903	0
1535	9	22.7032	22.7531	-616.718	-55633.2	75005.6	4772.14	321.621	390.209	0	0	0	0	0	0	0	200	903	0	0	0	0	0	0	0	603	903	0
1536	0	22.7032	23.3635	-618.244	-54626.1	75371.8	4543.26	321.913	388.357	0	0	0	0	0	0	0	200	903	0	0	0	0	0	0	0	603	903	0
1536	1	22.2454	23.3635	-620.075	-54809.2	75799	4405.93	322.242	388.391	0	0	0	0	0	0	0	200	903	0	0	0	0	0	0	0	603	903	0
1536	2	21.7877	22.7531	-621.295	-54717.7	75615.9	4772.14	321.707	388.07	0	0	0	0	0	0	0	200	903	0	0	0	0	0	0	0	603	903	0
1536	3	22.5506	23.2109	-622.211	-54443	75921.1	4589.04	322.018	387.499	0	0	0	0	0	0	0	200	903	0	0	0	0	0	0	0	603	903	0
1536	4	23.4661	22.7531	-624.347	-53985.3	76104.2	4726.37	321.894	386.467	0	0	0	0	0	0	0	200	903	0	0	0	0	0	0	0	603	903	0
1536	5	24.3817	24.1264	-628.315	-53802.2	76775.6	4772.14	322.193	385.629	0	0	0	0	0	0	0	200	903	0	0	0	0	0	0	0	603	903	0
1536	6	23.161	23.9738	-630.451	-54534.6	76897.6	4726.37	321.973	386.501	0	0	0	0	0	0	0	200	903	0	0	0	0	0	0	0	603	903	0
1536	7	23.0084	24.4316	-632.892	-54259.9	76714.6	4955.25	321.213	385.733	0	0	0	0	0	0	0	200	903	0	0	0	0	0	0	0	603	903	0
1536	8	23.9239	25.1945	-630.756	-52428.9	76653.5	5229.91	321.526	383.121	0	0	0	0	0	0	0	200	903	0	0	0	0	0	0	0	603	903	0
1536	9	23.0084	25.3471	-633.808	-53985.3	77263.8	4955.25	321.904	385.176	0	0	0	0	0	0	0	200	903	0	0	0	0	0	0	0	603	903	0
1537	0	23.4661	25.6523	-636.554	-53710.6	78179.4	5046.8	322.817	384.377	0	0	0	0	0	0	0	200	903	0	0	0	0	0	0	0	603	903	0
1537	1	23.9239	25.1945	-637.165	-52886.6	77996.3	4726.37	322.411	383.003	0	0	0	0	0	0	0	200	903	0	0	0	0	0	0	0	603	903	0
1537	2	23.4661	25.4997	-640.827	-52428.9	77996.3	5321.46	321.712	381.814	0	0	0	0	0	0	0	200	903	0	0	0	0	0	0	0	603	903	0
1537	3	23.3136	25.8049	-642.047	-52520.4	78240.4	5229.91	321.861	381.802	0	0	0	0	0	0	0	200	903	0	0	0	0	0	0	0	603	903	0
1537	4	23.161	26.2627	-645.71	-52795.1	78240.4	5367.23	321.17	381.763	0	0	0	0	0	0	0	200	903	0	0	0	0	0	0	0	603	903	0
1537	5	23.3136	26.4153	-646.015	-52795.1	79339	5321.46	322.813	381.724	0	0	0	0	0	0	0	200	903	0	0	0	0	0	0	0	603	903	0
1537	6	23.161	27.1782	-643.268	-51788	79278	5229.91	323.243	380.508	0	0	0	0	0	0	0	200	903	0	0	0	0	0	0	0	603	903	0
1537	7	24.0765	27.636	-648.761	-52428.9	79217	5321.46	322.105	380.814	0	0	0	0	0	0	0	200	903	0	0	0	0	0	0	0	603	903	0
1537	8	24.5343	26.4153	-652.118	-52428.9	79522.2	5641.89	321.944	380.398	0	0	0	0	0	0	0	200	903	0	0	0	0	0	0	0	603	903	0
1537	9	24.0765	28.0937	-654.56	-50780.9	79827.3	5550.34	321.956	377.58	0	0	0	0	0	0	0	200	903	0	0	0	0	0	0	0	603	903	0
1538	0	23.4661	27.7885	-656.086	-50597.8	80071.5	5641.89	322.044	377.121	0	0	0	0	0	0	0	200	903	0	0	0	0	0	0	0	603	903	0
1538	1	23.7713	28.0937	-657.611	-50506.3	80254.6	6191.21	322.04	376.803	0	0	0	0	0	0	0	200	903	0	0	0	0	0	0	0	603	903	0
1538	2	22.8558	28.0937	-657.917	-50140.1	80315.6	5825	322.076	376.21	0	0	0	0	0	0	0	200	903	0	0	0	0	0	0	0	603	903	0
1538	3	23.6187	29.3144	-660.053	-50780.9	80620.8	5870.77	322.143	376.935	0	0	0	0	0	0	0	200	903	0	0	0	0	0	0	0	603	903	0
1538	4	25.1446	29.1618	-663.41	-50323.2	80926	6053.88	321.985	375.855	0	0	0	0	0	0	0	200	903	0	0	0	0	0	0	0	603	903	0
1538	5	24.0765	29.9248	-665.851	-50323.2	80803.9	6099.66	321.354	375.577	0	0	0	0	0	0	0	200	903	0	0	0	0	0	0	0	603	903	0
1538	6	23.4661	29.6196	-668.293	-50048.5	81231.2	6236.99	321.55	374.89	0	0	0	0	0	0	0	200	903	0	0	0	0	0	0	0	603	903	0
1538	7	24.3817	30.3825	-668.293	-49041.4	81292.2	6191.21	321.642	373.383	0	0	0	0	0	0	0	200	903	0	0	0	0	0	0	0	603	903	0
1538	8	23.4661	30.5351	-669.818	-49041.4	81536.3	6191.21	321.729	373.216	0	0	0	0	0	0	0	200	903	0	0	0	0	0	0	0	603	903	0
1538	9	23.7713	30.6877	-671.649	-48858.3	81902.5	6420.09	321.942	372.744	0	0	0	0	0	0	0	200	903	0	0	0	0	0	0	0	603	903	0
1539	0	25.4498	31.1455	-675.312	-48583.7	81719.4	6236.99	321.01	371.943	0	0	0	0	0	0	0	200	903	0	0	0	0	0	0	0	603	903	0
1539	1	23.4661	32.061	-677.143	-48858.3	82390.8	6374.31	321.674	372.154	0	0	0	0	0	0	0	200	903	0	0	0	0	0	0	0	603	903	0
1539	2	23.4661	32.2136	-678.974	-48309	82207.7	6374.31	321.076	371.15	0	0	0	0	0	0	0	200	903	0	0	0	0	0	0	0	603	903	0
1539	3	25.2972	33.4343	-679.279	-47393.5	82818.1	6557.42	321.921	369.77	0	0	0	0	0	0	0	200	903	0	0	0	0	0	0	0	603	903	0
1539	4	23.4661	34.0446	-680.805	-48034.3	82757	6374.31	321.558	370.555	0	0	0	0	0	0	0	200	903	0	0	0	0	0	0	0	603	903	0
1539	5	24.6868	32.3662	-682.331	-47576.6	83428.4	6603.2	322.27	369.727	0	0	0	0	0	0	0	200	903	0	0	0	0	0	0	0	603	903	0
1539	6	25.2972	34.655	-686.298	-46477.9	83672.6	6603.2	321.919	367.723	0	0	0	0	0	0	0	200	903	0	0	0	0	0	0	0	603	903	0
1539	7	24.5343	35.2654	-688.129	-46020.2	83550.5	6557.42	321.417	366.877	0	0	0	0	0	0	0	200	903	0	0	0	0	0	0	0	603	903	0
1539	8	24.0765	34.655	-690.265	-46020.2	83611.5	6648.97	321.13	366.67	0	0	0	0	0	0	0	200	903	0	0	0	0	0	0	0	603	903	0
1539	9	25.2972	34.5024	-689.96	-46111.7	84160.9	6694.75	321.979	366.832	0	0	0	0	0	0	0	200	903	0	0	0	0	0	0	0	603	903	0
1540	0	24.2291	35.4179	-689.655	-46661.1	84649.1	6923.63	322.741	367.659	0	0	0	0	0	0	0	200	903	0	0	0	0	0	0	0	603	903	0
1540	1	24.6868	36.4861	-693.622	-46111.7	84832.2	6740.53	322.303	366.48	0	0	0	0	0	0	0	200	903	0	0	0	0	0	0	0	603	903	0
1540	2	24.3817	37.4016	-696.674	-45654	84832.2	6877.85	321.767	365.531	0	0	0	0	0	0	0	200	903	0	0	0	0	0	0	0	603	903	0
1540	3	24.992	36.6386	-693.317	-45104.6	84954.3	7152.51	322.533	365.056	0	0	0	0	0	0	0	200	903	0	0	0	0	0	0	0	603	903	0
1540	4	24.3817	37.5542	-700.641	-44372.2	85137.4	7015.18	321.514	363.331	0	0	0	0	0	0	0	200	903	0	0	0	0	0	0	0	603	903	0
1540	5	24.3817	38.1645	-699.726	-44097.6	85625.7	7015.18	322.37	363.021	0	0	0	0	0	0	0	200	903	0	0	0	0	0	0	0	603	903	0
1540	6	24.8394	38.0119	-700.336	-43548.3	85686.7	6969.41	322.351	362.182	0	0	0	0	0	0	0	200	903	0	0	0	0	0	0	0	603	903	0
1540	7	25.2972	38.1645	-702.777	-43639.8	86175	7106.74	322.621	362.096	0	0	0	0	0	0	0	200	903	0	0	0	0	0	0	0	603	903	0
1540	8	25.755	38.3171	-706.134	-43822.9	85808.8	6923.63	321.519	362.06	0	0	0	0	0	0	0	200	903	0	0	0	0	0	0	0	603	903	0
1540	9	25.9075	38.7749	-705.219	-43365.2	86236	7244.07	322.283	361.492	0	0	0	0	0	0	0	200	903	0	0	0	0	0	0	0	603	903	0
1541	0	24.992	39.5378	-708.881	-42266.5	86663.3	7060.96	322.254	359.624	0	0	0	0	0	0	0	200	903	0	0	0	0	0	0	0	603	903	0
1541	1	25.6024	40.4533	-709.186	-42998.9	86785.3	6923.63	322.373	360.631	0	0	0	0	0	0	0	200	903	0	0	0	0	0	0	0	603	903	0
1541	2	25.2972	39.9956	-711.628	-42083.4	86724.3	7656.05	321.868	359.137	0	0	0	0	0	0	0	200	903	0	0	0	0	0	0	0	603	903	0
1541	3	26.3653	40.9111	-712.238	-41717.2	86907.4	7656.05	322.02	358.572	0	0	0	0	0	0	0	200	903	0	0	0	0	0	0	0	603	903	0
1541	4	27.8912	40.6059	-714.069	-41167.9	87029.5	7289.84	321.878	357.653	0	0	0	0	0	0	0	200	903	0	0	0	0	0	0	0	603	903	0
1541	5	26.9757	41.0637	-716.205	-41076.3	87578.8	7289.84	322.282	357.353	0	0	0	0	0	0	0	200	903	0	0	0	0	0	0	0	603	903	0
1541	6	26.0601	41.5215	-717.121	-41259.4	87639.8	7610.28	322.211	357.535	0	0	0	0	0	0	0	200	903	0	0	0	0	0	0	0	603	903	0
1541	7	25.9075	42.1318	-714.069	-41259.4	87395.7	7472.95	322.391	357.781	0	0	0	0	0	0	0	200	903	0	0	0	0	0	0	0	603	903	0
1541	8	25.755	43.0473	-718.952	-40801.7	87639.8	7793.38	321.899	356.752	0	0	0	0	0	0	0	200	903	0	0	0	0	0	0	0	603	903	0
1541	9	26.5179	43.5051	-719.562	-40618.6	87945	7610.28	322.22	356.449	0	0	0	0	0	0	0	200	903	0	0	0	0	0	0	0	603	903	0
1542	0	26.5179	42.1318	-721.393	-40160.8	88250.2	7610.28	322.333	355.671	0	0	0	0	0	0	0	200	903	0	0	0	0	0	0	0	603	903	0
1542	1	26.6705	43.9629	-725.36	-39428.4	88372.2	7930.71	321.832	354.357	0	0	0	0	0	0	0	200	903	0	0	0	0	0	0	0	603	903	0
1542	2	27.586	45.1836	-725.36	-39336.8	88311.2	7930.71	321.748	354.231	0	0	0	0	0	0	0	200	903	0	0	0	0	0	0	0	603	903	0
1542	3	24.992	45.7939	-728.107	-38970.6	88555.4	8022.27	321.624	353.523	0	0	0	0	0	0	0	200	903	0	0	0	0	0	0	0	603	903	0
1542	4	25.6024	45.3362	-727.191	-38879.1	88738.5	7793.38	322.029	353.465	0	0	0	0	0	0	0	200	903	0	0	0	0	0	0	0	603	903	0
1542	5	26.0601	46.4043	-728.107	-38787.5	88921.6	7884.94	322.127	353.272	0	0	0	0	0	0	0	200	903	0	0	0	0	0	0	0	603	903	0
1542	6	25.6024	47.9301	-730.854	-38787.5	88860.5	8068.04	321.585	353.072	0	0	0	0	0	0	0	200	903	0	0	0	0	0	0	0	603	903	0
1542	7	26.8231	49.1508	-735.126	-37963.5	89226.7	8068.04	321.376	351.642	0	0	0	0	0	0	0	200	903	0	0	0	0	0	0	0	603	903	0
1542	8	26.5179	49.6086	-733.295	-38604.4	89531.9	7976.49	322.095	352.645	0	0	0	0	0	0	0	200	903	0	0	0	0	0	0	0	603	903	0
1542	9	25.9075	50.219	-737.873	-38329.7	89837.1	8296.92	321.751	351.946	0	0	0	0	0	0	0	200	903	0	0	0	0	0	0	0	603	903	0
1543	0	25.755	50.9819	-737.873	-37048	90142.3	8251.15	322.165	350.209	0	0	0	0	0	0	0	200	903	0	0	0	0	0	0	0	603	903	0
1543	1	25.2972	50.8293	-736.652	-36407.1	90325.4	8251.15	322.616	349.422	0	0	0	0	0	0	0	200	903	0	0	0	0	0	0	0	603	903	0
1543	2	26.3653	51.7448	-741.535	-36681.8	90264.4	8388.48	321.726	349.467	0	0	0	0	0	0	0	200	903	0	0	0	0	0	0	0	603	903	0
1543	3	26.5179	51.7448	-743.061	-37231.1	90691.6	8617.36	322.051	350.105	0	0	0	0	0	0	0	200	903	0	0	0	0	0	0	0	603	903	0
1543	4	25.9075	53.7285	-745.197	-36773.4	90874.7	8342.7	321.947	349.347	0	0	0	0	0	0	0	200	903	0	0	0	0	0	0	0	603	903	0
1543	5	25.4498	54.3388	-748.554	-36224	91057.8	8571.58	321.645	348.392	0	0	0	0	0	0	0	200	903	0	0	0	0	0	0	0	603	903	0
1543	6	25.9075	55.2544	-747.333	-36956.5	91240.9	8617.36	322.089	349.451	0	0	0	0	0	0	0	200	903	0	0	0	0	0	0	0	603	903	0
1543	7	24.3817	56.4751	-749.164	-35583.2	91240.9	8892.02	321.79	347.497	0	0	0	0	0	0	0	200	903	0	0	0	0	0	0	0	603	903	0
1543	8	25.2972	57.0854	-752.216	-35674.7	91363	8937.79	321.459	347.426	0	0	0	0	0	0	0	200	903	0	0	0	0	0	0	0	603	903	0
1543	9	24.8394	57.0854	-749.469	-35033.8	91973.4	9212.45	322.718	346.745	0	0	0	0	0	0	0	200	903	0	0	0	0	0	0	0	603	903	0
1544	0	24.6868	57.8484	-756.183	-35308.5	91912.3	8983.57	321.548	346.693	0	0	0	0	0	0	0	200	903	0	0	0	0	0	0	0	603	903	0
1544	1	24.6868	59.2216	-757.709	-36132.5	92339.6	9349.78	321.867	347.686	0	0	0	0	0	0	0	200	903	0	0	0	0	0	0	0	603	903	0
1544	2	24.5343	60.5949	-759.235	-35216.9	92095.4	9258.23	321.3	346.385	0	0	0	0	0	0	0	200	903	0	0	0	0	0	0	0	603	903	0
1544	3	25.1446	61.5105	-758.625	-35766.3	92217.5	9624.44	321.559	347.146	0	0	0	0	0	0	0	200	903	0	0	0	0	0	0	0	603	903	0
1544	4	24.3817	62.426	-760.15	-35583.2	92461.6	9441.33	321.636	346.811	0	0	0	0	0	0	0	200	903	0	0	0	0	0	0	0	603	903	0
1544	5	25.1446	63.4941	-761.066	-34209.9	92827.8	9395.56	321.971	344.95	0	0	0	0	0	0	0	200	903	0	0	0	0	0	0	0	603	903	0
1544	6	26.0601	64.5622	-765.949	-34301.4	92827.8	9670.22	321.193	344.783	0	0	0	0	0	0	0	200	903	0	0	0	0	0	0	0	603	903	0
1544	7	25.4498	64.7148	-765.033	-34209.9	92827.8	10082.2	321.338	344.717	0	0	0	0	0	0	0	200	903	0	0	0	0	0	0	0	603	903	0
1544	8	25.1446	64.257	-766.559	-33935.2	93377.1	9624.44	321.813	344.27	0	0	0	0	0	0	0	200	903	0	0	0	0	0	0	0	603	903	0
1544	9	24.992	66.5459	-767.475	-34667.6	93499.2	9807.54	321.827	345.171	0	0	0	0	0	0	0	200	903	0	0	0	0	0	0	0	603	903	0
1545	0	24.5343	67.1562	-767.169	-34484.5	93621.3	10173.8	322.035	344.95	0	0	0	0	0	0	0	200	903	0	0	0	0	0	0	0	603	903	0
1545	1	25.1446	69.1399	-767.169	-34209.9	93377.1	10036.4	321.716	344.592	0	0	0	0	0	0	0	200	903	0	0	0	0	0	0	0	603	903	0
1545	2	25.6024	68.5295	-768.39	-34026.8	93499.2	10265.3	321.682	344.283	0	0	0	0	0	0	0	200	903	0	0	0	0	0	0	0	603	903	0
1545	3	25.2972	70.208	-770.526	-32561.9	93621.3	10173.8	321.503	342.259	0	0	0	0	0	0	0	200	903	0	0	0	0	0	0	0	603	903	0
1545	4	25.2972	70.8183	-769.001	-33019.7	93743.3	10173.8	321.903	342.938	0	0	0	0	0	0	0	200	903	0	0	0	0	0	0	0	603	903	0
1545	5	24.992	71.1235	-772.052	-32470.4	93865.4	10448.4	321.579	342.057	0	0	0	0	0	0	0	200	903	0	0	0	0	0	0	0	603	903	0
1545	6	25.4498	71.2761	-770.832	-32561.9	93682.3	10448.4	321.534	342.243	0	0	0	0	0	0	0	200	903	0	0	0	0	0	0	0	603	903	0
1545	7	24.2291	72.9546	-771.747	-32561.9	93743.3	10356.9	321.469	342.193	0	0	0	0	0	0	0	200	903	0	0	0	0	0	0	0	603	903	0
1545	8	24.6868	74.1753	-772.663	-32104.2	93865.4	10677.3	321.483	341.55	0	0	0	0	0	0	0	200	903	0	0	0	0	0	0	0	603	903	0
1545	9	25.9075	75.2434	-774.189	-32470.4	93743.3	10585.7	321.086	341.941	0	0	0	0	0	0	0	200	903	0	0	0	0	0	0	0	603	903	0
1546	0	24.5343	74.3279	-774.494	-31829.5	94292.7	10448.4	321.747	341.097	0	0	0	0	0	0	0	200	903	0	0	0	0	0	0	0	603	903	0
1546	1	23.7713	76.6167	-772.968	-30822.4	93865.4	10997.7	321.435	339.875	0	0	0	0	0	0	0	200	903	0	0	0	0	0	0	0	603	903	0
1546	2	25.755	77.6848	-772.052	-30456.2	93743.3	10997.7	321.421	339.448	0	0	0	0	0	0	0	200	903	0	0	0	0	0	0	0	603	903	0
1546	3	23.4661	77.8374	-772.357	-30273.1	94109.5	10631.5	321.847	339.196	0	0	0	0	0	0	0	200	903	0	0	0	0	0	0	0	603	903	0
1546	4	24.992	77.6848	-772.052	-30090	94109.5	10860.4	321.895	338.974	0	0	0	0	0	0	0	200	903	0	0	0	0	0	0	0	603	903	0
1546	5	24.6868	79.2107	-771.442	-30730.9	93682.3	10814.6	321.438	339.836	0	0	0	0	0	0	0	200	903	0	0	0	0	0	0	0	603	903	0
1546	6	25.1446	80.2788	-773.273	-29723.8	93499.2	11089.3	320.914	338.439	0	0	0	0	0	0	0	200	903	0	0	0	0	0	0	0	603	903	0
1546	7	24.8394	81.1943	-769.611	-29449.1	93743.3	11043.5	321.806	338.265	0	0	0	0	0	0	0	200	903	0	0	0	0	0	0	0	603	903	0
1546	8	23.7713	82.1098	-773.578	-29815.3	93804.4	10997.7	321.26	338.542	0	0	0	0	0	0	0	200	903	0	0	0	0	0	0	0	603	903	0
1546	9	25.6024	82.5676	-770.832	-28167.4	93804.4	11043.5	321.693	336.542	0	0	0	0	0	0	0	200	903	0	0	0	0	0	0	0	603	903	0
1547	0	23.6187	83.0254	-769.001	-28442.1	93438.2	11135.1	321.506	336.986	0	0	0	0	0	0	0	200	903	0	0	0	0	0	0	0	603	903	0
1547	1	25.1446	83.6357	-769.306	-26885.7	93682.3	11180.8	321.775	334.948	0	0	0	0	0	0	0	200	903	0	0	0	0	0	0	0	603	903	0
1547	2	24.2291	84.3987	-768.695	-27801.2	93377.1	11135.1	321.475	336.167	0	0	0	0	0	0	0	200	903	0	0	0	0	0	0	0	603	903	0
1547	3	24.2291	85.9245	-770.221	-27984.3	93682.3	11547	321.63	336.333	0	0	0	0	0	0	0	200	903	0	0	0	0	0	0	0	603	903	0
1547	4	24.992	86.5349	-767.475	-27801.2	93621.3	11547	321.986	336.224	0	0	0	0	0	0	0	200	903	0	0	0	0	0	0	0	603	903	0
1547	5	23.7713	85.9245	-768.085	-27343.4	93316.1	11363.9	321.492	335.6	0	0	0	0	0	0	0	200	903	0	0	0	0	0	0	0	603	903	0
1547	6	23.9239	88.2133	-765.949	-27343.4	93194.1	11775.9	321.671	335.699	0	0	0	0	0	0	0	200	903	0	0	0	0	0	0	0	603	903	0
1547	7	23.4661	88.8237	-764.423	-26611	93072	11455.5	321.755	334.812	0	0	0	0	0	0	0	200	903	0	0	0	0	0	0	0	603	903	0
1547	8	23.6187	89.5866	-765.033	-26427.9	92644.7	11684.4	321.099	334.545	0	0	0	0	0	0	0	200	903	0	0	0	0	0	0	0	603	903	0
1547	9	24.8394	90.5022	-763.813	-25420.8	92766.8	11821.7	321.452	333.282	0	0	0	0	0	0	0	200	903	0	0	0	0	0	0	0	603	903	0
1548	0	23.6187	91.1125	-764.118	-25146.2	92461.6	11913.3	321.004	332.909	0	0	0	0	0	0	0	200	903	0	0	0	0	0	0	0	603	903	0
1548	1	23.161	91.7229	-761.982	-25054.6	92522.6	11913.3	321.424	332.881	0	0	0	0	0	0	0	200	903	0	0	0	0	0	0	0	603	903	0
1548	2	22.8558	90.8073	-759.845	-24779.9	92583.7	11821.7	321.845	332.612	0	0	0	0	0	0	0	200	903	0	0	0	0	0	0	0	603	903	0
1548	3	22.5506	92.4858	-758.319	-25420.8	92034.4	12233.7	321.366	333.523	0	0	0	0	0	0	0	200	903	0	0	0	0	0	0	0	603	903	0
1548	4	23.161	94.9272	-758.319	-25146.2	92217.5	12142.1	321.608	333.16	0	0	0	0	0	0	0	200	903	0	0	0	0	0	0	0	603	903	0
1548	5	23.161	94.9272	-756.488	-24871.5	92156.4	12004.8	321.821	332.878	0	0	0	0	0	0	0	200	903	0	0	0	0	0	0	0	603	903	0
1548	6	23.161	93.5539	-757.099	-24139.1	91668.1	12371	321.078	331.884	0	0	0	0	0	0	0	200	903	0	0	0	0	0	0	0	603	903	0
1548	7	23.0084	96.1479	-755.573	-23498.2	91790.2	12462.6	321.484	331.1	0	0	0	0	0	0	0	200	903	0	0	0	0	0	0	0	603	903	0
1548	8	22.2454	97.0634	-753.131	-23040.4	91240.9	12416.8	321.149	330.593	0	0	0	0	0	0	0	200	903	0	0	0	0	0	0	0	603	903	0
1548	9	22.398	97.6738	-751.3	-22948.9	91301.9	12462.6	321.525	330.546	0	0	0	0	0	0	0	200	903	0	0	0	0	0	0	0	603	903	0
1549	0	22.5506	97.216	-749.774	-22491.1	90996.8	12828.8	321.366	329.997	0	0	0	0	0	0	0	200	903	0	0	0	0	0	0	0	603	903	0
1549	1	22.2454	98.4367	-747.638	-23040.4	90691.6	12691.5	321.304	330.818	0	0	0	0	0	0	0	200	903	0	0	0	0	0	0	0	603	903	0
1549	2	22.2454	99.9626	-746.112	-22948.9	90752.6	12828.8	321.634	330.758	0	0	0	0	0	0	0	200	903	0	0	0	0	0	0	0	603	903	0
1549	3	23.0084	101.183	-745.502	-22399.6	90508.5	12828.8	321.406	330.046	0	0	0	0	0	0	0	200	903	0	0	0	0	0	0	0	603	903	0
1549	4	23.9239	100.268	-742.45	-22033.4	90142.3	12691.5	321.412	329.677	0	0	0	0	0	0	0	200	903	0	0	0	0	0	0	0	603	903	0
1549	5	20.2618	103.014	-741.535	-21300.9	89531.9	13103.4	320.739	328.725	0	0	0	0	0	0	0	200	903	0	0	0	0	0	0	0	603	903	0
1549	6	20.567	103.014	-736.652	-20934.7	89470.9	13011.9	321.456	328.419	0	0	0	0	0	0	0	200	903	0	0	0	0	0	0	0	603	903	0
1549	7	20.4144	104.54	-734.211	-20660.1	89470.9	13103.4	321.86	328.139	0	0	0	0	0	0	0	200	903	0	0	0	0	0	0	0	603	903	0
1549	8	21.1773	105.456	-732.685	-20568.5	89043.7	13149.2	321.531	328.073	0	0	0	0	0	0	0	200	903	0	0	0	0	0	0	0	603	903	0
1549	9	22.398	106.676	-731.464	-20751.6	88677.5	13561.2	321.233	328.37	0	0	0	0	0	0	0	200	903	0	0	0	0	0	0	0	603	903	0
1550	0	20.1092	106.829	-728.717	-20477	87945	13240.8	320.685	328.1	0	0	0	0	0	0	0	200	903	0	0	0	0	0	0	0	603	903	0
1550	1	19.9566	109.27	-726.276	-19836.1	88006	13835.9	321.174	327.312	0	0	0	0	0	0	0	200	903	0	0	0	0	0	0	0	603	903	0
1550	2	19.0411	109.728	-723.529	-19927.6	88128.1	13790.1	321.803	327.542	0	0	0	0	0	0	0	200	903	0	0	0	0	0	0	0	603	903	0
1550	3	19.3463	109.728	-720.172	-19378.3	87639.8	13698.5	321.693	326.908	0	0	0	0	0	0	0	200	903	0	0	0	0	0	0	0	603	903	0
1550	4	19.804	111.864	-717.731	-18829	87090.5	13973.2	321.342	326.234	0	0	0	0	0	0	0	200	903	0	0	0	0	0	0	0	603	903	0
1550	5	18.8885	112.627	-714.069	-18737.5	86480.2	13790.1	321.109	326.24	0	0	0	0	0	0	0	200	903	0	0	0	0	0	0	0	603	903	0
1550	6	18.8885	113.39	-713.459	-17638.8	86358.1	14156.3	321.042	324.723	0	0	0	0	0	0	0	200	903	0	0	0	0	0	0	0	603	903	0
1550	7	17.6678	113.543	-710.712	-17913.5	86175	13973.2	321.252	325.205	0	0	0	0	0	0	0	200	903	0	0	0	0	0	0	0	603	903	0
1550	8	17.21	114.001	-707.05	-17638.8	85869.8	14247.9	321.448	324.947	0	0	0	0	0	0	0	200	903	0	0	0	0	0	0	0	603	903	0
1550	9	17.21	115.221	-702.167	-18188.1	85076.3	14293.6	321.163	325.903	0	0	0	0	0	0	0	200	903	0	0	0	0	0	0	0	603	903	0
1551	0	17.3626	116.442	-698.505	-17272.6	84893.3	14385.2	321.536	324.728	0	0	0	0	0	0	0	200	903	0	0	0	0	0	0	0	603	903	0
1551	1	17.6678	117.205	-695.453	-17089.5	83977.7	14705.6	320.753	324.573	0	0	0	0	0	0	0	200	903	0	0	0	0	0	0	0	603	903	0
1551	2	16.5997	117.815	-693.927	-16998	83855.6	14568.3	320.842	324.495	0	0	0	0	0	0	0	200	903	0	0	0	0	0	0	0	603	903	0
1551	3	16.5997	118.273	-689.655	-16357.1	83672.6	14980.3	321.325	323.718	0	0	0	0	0	0	0	200	903	0	0	0	0	0	0	0	603	903	0
1551	4	15.8367	117.815	-685.688	-15899.3	82818.1	14568.3	320.781	323.187	0	0	0	0	0	0	0	200	903	0	0	0	0	0	0	0	603	903	0
1551	5	17.21	117.205	-680.194	-15533.1	82573.9	14797.2	321.398	322.836	0	0	0	0	0	0	0	200	903	0	0	0	0	0	0	0	603	903	0
1551	6	14.9212	116.595	-676.227	-15624.7	82207.7	14705.6	321.568	323.106	0	0	0	0	0	0	0	200	903	0	0	0	0	0	0	0	603	903	0
1551	7	15.379	118.884	-672.26	-15166.9	81719.4	14934.5	321.559	322.561	0	0	0	0	0	0	0	200	903	0	0	0	0	0	0	0	603	903	0
1551	8	16.2945	117.815	-671.344	-15533.1	80254.6	14842.9	319.543	323.137	0	0	0	0	0	0	0	200	903	0	0	0	0	0	0	0	603	903	0
1551	9	15.0738	119.036	-664.325	-14800.7	80071.5	15026.1	320.531	322.279	0	0	0	0	0	0	0	200	903	0	0	0	0	0	0	0	603	903	0
1552	0	13.0902	119.341	-660.053	-14892.2	79888.4	14980.3	321.033	322.562	0	0	0	0	0	0	0	200	903	0	0	0	0	0	0	0	603	903	0
1552	1	13.0902	119.646	-656.391	-14068.3	79461.1	14888.7	321.058	321.433	0	0	0	0	0	0	0	200	903	0	0	0	0	0	0	0	603	903	0
1552	2	13.2428	119.646	-649.677	-13335.8	78850.8	14980.3	321.369	320.527	0	0	0	0	0	0	0	200	903	0	0	0	0	0	0	0	603	903	0
1552	3	11.8695	118.578	-641.742	-12695	77447	14888.7	320.682	319.782	0	0	0	0	0	0	0	200	903	0	0	0	0	0	0	0	603	903	0
1552	4	12.785	119.189	-641.437	-13152.7	77263.8	15300.7	320.454	320.505	0	0	0	0	0	0	0	200	903	0	0	0	0	0	0	0	603	903	0
1552	5	12.3272	119.494	-637.165	-12695	76714.6	15071.8	320.4	319.924	0	0	0	0	0	0	0	200	903	0	0	0	0	0	0	0	603	903	0
1552	6	10.8013	119.646	-631.366	-12603.4	76714.6	14980.3	321.506	319.962	0	0	0	0	0	0	0	200	903	0	0	0	0	0	0	0	603	903	0
1552	7	10.191	119.189	-625.568	-12145.7	75799	15529.6	321.168	319.415	0	0	0	0	0	0	0	200	903	0	0	0	0	0	0	0	603	903	0
1552	8	9.58064	120.409	-620.685	-11779.5	74456.2	15254.9	319.958	318.978	0	0	0	0	0	0	0	200	903	0	0	0	0	0	0	0	603	903	0
1552	9	8.8177	120.715	-612.751	-11871	74151.1	15483.8	321.014	319.373	0	0	0	0	0	0	0	200	903	0	0	0	0	0	0	0	603	903	0
1553	0	8.8177	120.867	-606.952	-11230.1	73235.5	15346.5	320.661	318.503	0	0	0	0	0	0	0	200	903	0	0	0	0	0	0	0	603	903	0
1553	1	8.8177	121.02	-602.069	-10314.6	72686.2	15071.8	320.727	317.132	0	0	0	0	0	0	0	200	903	0	0	0	0	0	0	0	603	903	0
1553	2	7.13924	120.867	-595.05	-9856.84	71526.5	15392.3	320.203	316.565	0	0	0	0	0	0	0	200	903	0	0	0	0	0	0	0	603	903	0
1553	3	7.44441	120.715	-591.999	-9765.29	70916.2	15529.6	319.791	316.495	0	0	0	0	0	0	0	200	903	0	0	0	0	0	0	0	603	903	0
1553	4	5.46077	121.172	-584.064	-9765.29	69756.5	15621.1	319.433	316.72	0	0	0	0	0	0	0	200	903	0	0	0	0	0	0	0	603	903	0
1553	5	5.91853	121.02	-576.74	-9307.53	68902	15804.2	319.468	316.138	0	0	0	0	0	0	0	200	903	0	0	0	0	0	0	0	603	903	0
1553	6	4.85042	120.867	-570.636	-9307.53	68841	15575.4	320.639	316.311	0	0	0	0	0	0	0	200	903	0	0	0	0	0	0	0	603	903	0
1553	7	4.24007	120.257	-563.312	-9307.53	67925.5	15346.5	320.582	316.523	0	0	0	0	0	0	0	200	903	0	0	0	0	0	0	0	603	903	0
1553	8	4.39265	120.867	-557.209	-8300.45	66948.9	15575.4	320.151	314.896	0	0	0	0	0	0	0	200	903	0	0	0	0	0	0	0	603	903	0
1553	9	3.32454	120.867	-552.326	-8666.66	65911.3	15529.6	319.334	315.691	0	0	0	0	0	0	0	200	903	0	0	0	0	0	0	0	603	903	0
1554	0	3.47713	118.884	-546.527	-7934.24	65484.1	15529.6	319.818	314.518	0	0	0	0	0	0	0	200	903	0	0	0	0	0	0	0	603	903	0
1554	1	1.95125	119.341	-540.424	-7934.24	64873.7	15392.3	320.042	314.682	0	0	0	0	0	0	0	200	903	0	0	0	0	0	0	0	603	903	0
1554	2	2.86677	119.494	-531.269	-7201.81	63958.2	15346.5	320.388	313.556	0	0	0	0	0	0	0	200	903	0	0	0	0	0	0	0	603	903	0
1554	3	1.3409	119.646	-523.334	-6652.5	62798.5	15300.7	319.997	312.712	0	0	0	0	0	0	0	200	903	0	0	0	0	0	0	0	603	903	0
1554	4	1.3409	118.273	-517.231	-6469.39	61883	15483.8	319.643	312.508	0	0	0	0	0	0	0	200	903	0	0	0	0	0	0	0	603	903	0
1554	5	1.64607	118.731	-510.517	-6011.63	61455.8	15346.5	320.38	311.776	0	0	0	0	0	0	0	200	903	0	0	0	0	0	0	0	603	903	0
1554	6	0.883132	118.426	-503.803	-6286.29	60479.2	15254.9	320.045	312.478	0	0	0	0	0	0	0	200	903	0	0	0	0	0	0	0	603	903	0
1554	7	0.883132	117.815	-495.868	-6377.84	59380.6	15209.2	319.751	312.862	0	0	0	0	0	0	0	200	903	0	0	0	0	0	0	0	603	903	0
1554	8	-1.55827	117.968	-487.934	-5736.97	58343	15346.5	319.572	311.758	0	0	0	0	0	0	0	200	903	0	0	0	0	0	0	0	603	903	0
1554	9	-1.2531	118.273	-477.863	-5279.21	57366.4	15346.5	320.048	311.048	0	0	0	0	0	0	0	200	903	0	0	0	0	0	0	0	603	903	0
1555	0	-1.86345	118.273	-468.097	-5279.21	56328.8	15071.8	320.336	311.278	0	0	0	0	0	0	0	200	903	0	0	0	0	0	0	0	603	903	0
1555	1	-1.10051	116.137	-462.604	-4821.44	55718.5	15209.2	320.445	310.422	0	0	0	0	0	0	0	200	903	0	0	0	0	0	0	0	603	903	0
1555	2	0.730544	117.815	-455.89	-4089.02	54802.9	15071.8	320.211	308.969	0	0	0	0	0	0	0	200	903	0	0	0	0	0	0	0	603	903	0
1555	3	-1.86345	116.747	-448.566	-3997.47	53582.2	14980.3	319.452	308.912	0	0	0	0	0	0	0	200	903	0	0	0	0	0	0	0	603	903	0
1555	4	-2.77898	115.679	-440.021	-3265.05	52727.7	15026.1	319.83	307.42	0	0	0	0	0	0	0	200	903	0	0	0	0	0	0	0	603	903	0
1555	5	-3.84709	115.527	-431.476	-3722.81	51629.1	15163.4	319.657	308.628	0	0	0	0	0	0	0	200	903	0	0	0	0	0	0	0	603	903	0
1555	6	-3.38933	113.238	-422.016	-3173.49	50469.4	15300.7	319.591	307.52	0	0	0	0	0	0	0	200	903	0	0	0	0	0	0	0	603	903	0
1555	7	-4.91521	114.153	-411.029	-3539.71	49920.1	14980.3	321.451	308.612	0	0	0	0	0	0	0	200	903	0	0	0	0	0	0	0	603	903	0
1555	8	-4.15227	112.627	-404.926	-3539.71	48455.3	14842.9	319.665	308.742	0	0	0	0	0	0	0	200	903	0	0	0	0	0	0	0	603	903	0
1555	9	-2.32121	112.78	-396.686	-3173.49	47295.6	14842.9	319.227	308	0	0	0	0	0	0	0	200	903	0	0	0	0	0	0	0	603	903	0
1556	0	-4.45744	111.102	-388.141	-2441.07	46380.1	14614.1	319.493	306.289	0	0	0	0	0	0	0	200	903	0	0	0	0	0	0	0	603	903	0
1556	1	-5.83074	110.491	-380.817	-2166.41	45281.4	14614.1	318.906	305.689	0	0	0	0	0	0	0	200	903	0	0	0	0	0	0	0	603	903	0
1556	2	-6.13591	109.27	-370.136	-2166.41	44426.9	14568.3	320.029	305.853	0	0	0	0	0	0	0	200	903	0	0	0	0	0	0	0	603	903	0
1556	3	-6.74626	107.592	-360.37	-701.57	43267.3	14110.5	320.063	301.947	0	0	0	0	0	0	0	200	903	0	0	0	0	0	0	0	603	903	0
1556	4	-6.89885	106.219	-348.163	-1617.1	41863.5	14156.3	320.241	304.645	0	0	0	0	0	0	0	200	903	0	0	0	0	0	0	0	603	903	0
1556	5	-5.67815	104.693	-342.06	-1708.65	41009	14339.4	319.888	304.995	0	0	0	0	0	0	0	200	903	0	0	0	0	0	0	0	603	903	0
1556	6	-5.52556	103.32	-335.041	-1617.1	40093.5	13698.5	319.667	304.827	0	0	0	0	0	0	0	200	903	0	0	0	0	0	0	0	603	903	0
1556	7	-5.52556	101.031	-325.885	-1067.78	38750.7	13515.4	318.909	303.277	0	0	0	0	0	0	0	200	903	0	0	0	0	0	0	0	603	903	0
1556	8	-6.13591	100.115	-317.34	-1433.99	37713.1	13240.8	318.841	304.519	0	0	0	0	0	0	0	200	903	0	0	0	0	0	0	0	603	903	0
1556	9	-5.52556	97.0634	-304.828	-976.228	36614.4	12874.6	320.115	303.203	0	0	0	0	0	0	0	200	903	0	0	0	0	0	0	0	603	903	0
1557	0	-6.89885	95.8427	-296.283	122.405	35821	12599.9	320.901	299.587	0	0	0	0	0	0	0	200	903	0	0	0	0	0	0	0	603	903	0
1557	1	-5.52556	92.791	-285.297	30.8518	34478.2	12187.9	320.85	299.892	0	0	0	0	0	0	0	200	903	0	0	0	0	0	0	0	603	903	0
1557	2	-5.0678	91.1125	-276.447	946.379	33440.6	12187.9	320.966	296.577	0	0	0	0	0	0	0	200	903	0	0	0	0	0	0	0	603	903	0
1557	3	-4.76262	88.2133	-268.817	671.721	32280.9	12004.8	320.085	297.501	0	0	0	0	0	0	0	200	903	0	0	0	0	0	0	0	603	903	0
1557	4	-5.22038	84.2461	-259.662	763.274	31182.3	10997.7	320.088	297.061	0	0	0	0	0	0	0	200	903	0	0	0	0	0	0	0	603	903	0
1557	5	-5.37297	82.7202	-249.897	580.168	30388.9	11409.7	321.606	297.678	0	0	0	0	0	0	0	200	903	0	0	0	0	0	0	0	603	903	0
1557	6	-4.91521	80.4314	-239.215	580.168	29229.2	10677.3	322.188	297.575	0	0	0	0	0	0	0	200	903	0	0	0	0	0	0	0	603	903	0
1557	7	-4.45744	78.2951	-229.45	1037.93	28313.7	10356.9	323.398	295.476	0	0	0	0	0	0	0	200	903	0	0	0	0	0	0	0	603	903	0
1557	8	-3.99968	74.7856	-220.6	854.827	26970.9	9899.1	322.262	296.125	0	0	0	0	0	0	0	200	903	0	0	0	0	0	0	0	603	903	0
1557	9	-2.32121	71.4287	-214.801	1129.48	25933.3	9441.33	320.732	294.742	0	0	0	0	0	0	0	200	903	0	0	0	0	0	0	0	603	903	0
1558	0	-2.77898	67.9192	-206.256	1953.46	25261.9	9120.9	322.478	290.529	0	0	0	0	0	0	0	200	903	0	0	0	0	0	0	0	603	903	0
1558	1	-3.23674	64.257	-198.932	1678.8	24407.4	8800.46	322.692	291.561	0	0	0	0	0	0	0	200	903	0	0	0	0	0	0	0	603	903	0
1558	2	-3.6945	62.2734	-191.913	1953.46	24041.2	8388.48	325.271	289.821	0	0	0	0	0	0	0	200	903	0	0	0	0	0	0	0	603	903	0
1558	3	-3.84709	56.9328	-182.148	1861.91	22637.4	7884.94	324.281	289.778	0	0	0	0	0	0	0	200	903	0	0	0	0	0	0	0	603	903	0
1558	4	-2.01604	55.7121	-177.265	1770.35	21660.8	7747.61	322.195	290.013	0	0	0	0	0	0	0	200	903	0	0	0	0	0	0	0	603	903	0
1558	5	-2.01604	50.5241	-170.551	1129.48	21111.5	6832.08	323.784	293.377	0	0	0	0	0	0	0	200	903	0	0	0	0	0	0	0	603	903	0
1558	6	-0.947922	47.9301	-165.058	2136.56	20684.3	6603.2	325.315	287.056	0	0	0	0	0	0	0	200	903	0	0	0	0	0	0	0	603	903	0
1558	7	-0.337571	45.1836	-156.208	1587.25	19280.5	6282.76	323.428	289.839	0	0	0	0	0	0	0	200	903	0	0	0	0	0	0	0	603	903	0
1558	8	-0.795335	43.3525	-152.545	2136.56	18609.1	6420.09	321.99	285.994	0	0	0	0	0	0	0	200	903	0	0	0	0	0	0	0	603	903	0
1558	9	0.425369	41.0637	-143.39	1953.46	17937.7	5596.12	325.097	286.377	0	0	0	0	0	0	0	200	903	0	0	0	0	0	0	0	603	903	0
1559	0	-1.2531	39.08	-136.371	2411.22	17388.4	5458.79	327.508	282.319	0	0	0	0	0	0	0	200	903	0	0	0	0	0	0	0	603	903	0
1559	1	0.272781	38.1645	-129.352	2045.01	16289.7	5458.79	325.933	284.19	0	0	0	0	0	0	0	200	903	0	0	0	0	0	0	0	603	903	0
1559	2	-0.337571	35.8757	-120.807	2228.12	15679.4	5092.58	329.788	281.556	0	0	0	0	0	0	0	200	903	0	0	0	0	0	0	0	603	903	0
1559	3	-0.184983	36.9438	-119.281	1495.7	14580.7	5184.13	322.238	287.461	0	0	0	0	0	0	0	200	903	0	0	0	0	0	0	0	603	903	0
1559	4	0.120193	34.9602	-109.516	946.379	13848.3	4955.25	326.451	291.358	0	0	0	0	0	0	0	200	903	0	0	0	0	0	0	0	603	903	0
1559	5	-1.40569	33.4343	-104.938	1587.25	13238	4726.37	326.15	284.874	0	0	0	0	0	0	0	200	903	0	0	0	0	0	0	0	603	903	0
1559	6	-1.71086	31.4507	-97.3086	1312.59	12383.5	4405.93	327.26	286.511	0	0	0	0	0	0	0	200	903	0	0	0	0	0	0	0	603	903	0
1559	7	-0.337571	29.1618	-91.5103	1312.59	11712.1	4268.6	327.987	285.656	0	0	0	0	0	0	0	200	903	0	0	0	0	0	0	0	603	903	0
1559	8	0.120193	26.2627	-86.3223	1678.8	11101.7	3719.28	328.608	280.552	0	0	0	0	0	0	0	200	903	0	0	0	0	0	0	0	603	903	0
1559	9	1.95125	23.6687	-82.6602	1678.8	10186.2	3444.63	323.23	279.69	0	0	0	0	0	0	0	200	903	0	0	0	0	0	0	0	603	903	0
1560	0	1.49348	20.7695	-79.3033	1495.7	10247.2	3261.52	329.216	281.14	0	0	0	0	0	0	0	200	903	0	0	0	0	0	0	0	603	903	0
1560	1	1.64607	19.5488	-72.8946	1587.25	9270.69	2803.76	327.179	278.225	0	0	0	0	0	0	0	200	903	0	0	0	0	0	0	0	603	903	0
1560	2	1.03572	16.3445	-70.148	1404.14	8782.41	2666.43	325.198	279.983	0	0	0	0	0	0	0	200	903	0	0	0	0	0	0	0	603	903	0
1560	3	1.18831	14.666	-63.129	946.379	8294.12	2391.77	331.384	285.009	0	0	0	0	0	0	0	200	903	0	0	0	0	0	0	0	603	903	0
1560	4	1.49348	13.2927	-55.8047	1129.48	7927.91	2345.99	342.065	279.76	0	0	0	0	0	0	0	200	903	0	0	0	0	0	0	0	603	903	0
1560	5	2.10384	12.2246	-55.1944	946.379	7561.7	2437.55	337.001	282.854	0	0	0	0	0	0	0	200	903	0	0	0	0	0	0	0	603	903	0
1560	6	3.47713	11.0039	-51.5323	854.827	7012.38	1888.23	336.078	283.412	0	0	0	0	0	0	0	200	903	0	0	0	0	0	0	0	603	903	0
1560	7	3.01936	8.56247	-48.7857	1129.48	6524.1	1659.35	333.73	276.848	0	0	0	0	0	0	0	200	903	0	0	0	0	0	0	0	603	903	0
1560	8	1.79866	8.56247	-45.1236	1129.48	6096.86	1430.47	335.115	274.969	0	0	0	0	0	0	0	200	903	0	0	0	0	0	0	0	603	903	0
1560	9	2.25642	7.64694	-43.2925	1129.48	5852.71	1430.47	335.19	273.91	0	0	0	0	0	0	0	200	903	0	0	0	0	0	0	0	603	903	0
1561	0	2.10384	5.6633	-37.4942	1587.25	5181.33	1155.81	338.19	257.667	0	0	0	0	0	0	0	200	903	0	0	0	0	0	0	0	603	903	0
1561	1	3.62971	5.51071	-33.2217	1037.93	4754.08	1338.91	343.102	268.757	0	0	0	0	0	0	0	200	903	0	0	0	0	0	0	0	603	903	0
1561	2	3.17195	3.83225	-31.0855	213.957	4387.87	881.149	341.155	293.117	0	0	0	0	0	0	0	200	903	0	0	0	0	0	0	0	603	903	0
1561	3	2.86677	3.06931	-30.4752	1221.04	4082.7	926.926	333.968	259.933	0	0	0	0	0	0	0	200	903	0	0	0	0	0	0	0	603	903	0
1561	4	2.71419	2.45895	-24.6768	305.51	3533.38	652.267	343.186	287.62	0	0	0	0	0	0	0	200	903	0	0	0	0	0	0	0	603	903	0
1561	5	2.71419	1.54343	-25.2872	305.51	3655.45	606.491	344.558	287.918	0	0	0	0	0	0	0	200	903	0	0	0	0	0	0	0	603	903	0
1561	6	2.5616	0.933075	-21.3199	-60.7009	2984.06	698.044	339.966	302.847	0	0	0	0	0	0	0	200	903	0	0	0	0	0	0	0	603	903	0
1561	7	1.79866	-0.287628	-19.794	213.957	3045.1	377.609	353.839	289.191	0	0	0	0	0	0	0	200	903	0	0	0	0	0	0	0	603	903	0
1561	8	3.32454	-1.50833	-17.3526	397.063	2434.75	240.28	340.31	277.118	0	0	0	0	0	0	0	200	903	0	0	0	0	0	0	0	603	903	0
1561	9	3.01936	-1.81351	-15.8267	397.063	2129.57	148.727	334.556	274.912	0	0	0	0	0	0	0	200	903	0	0	0	0	0	0	0	603	903	0
1562	0	3.47713	-1.81351	-15.8267	488.616	2007.5	286.056	326.843	269.127	0	0	0	0	0	0	0	200	903	0	0	0	0	0	0	0	603	903	0
1562	1	3.17195	-3.94974	-11.2491	-60.7009	1946.46	331.833	373.033	305.396	0	0	0	0	0	0	0	200	903	0	0	0	0	0	0	0	603	903	0
1562	2	2.40901	-3.33939	-11.8594	488.616	1824.39	11.398	353.835	258.799	0	0	0	0	0	0	0	200	903	0	0	0	0	0	0	0	603	903	0
1562	3	5.00301	-4.86526	-10.9439	305.51	1214.04	11.398	310.933	272.084	0	0	0	0	0	0	0	200	903	0	0	0	0	0	0	0	603	903	0
1562	4	2.71419	-5.93338	-8.5025	-60.7009	1153.01	-309.037	335.608	307.139	0	0	0	0	0	0	0	200	903	0	0	0	0	0	0	0	603	903	0
1562	5	0	0	0	0	0	0	200	300	0	0	0	0	0	0	0	200	903	0	0	0	0	0	0	0	603	903	0
1562	6	0	0	0	0	0	0	200	300	0	0	0	0	0	0	0	200	903	0	0	0	0	0	0	0	603	903	0
1562	7	0	0	0	0	0	0	200	300	0	0	0	0	0	0	0	200	903	0	0	0	0	0	0	0	603	903	0
1562	8	0	0	0	0	0	0	200	300	0	0	0	0	0	0	0	200	903	0	0	0	0	0	0	0	603	903	0
1562	9	0	0	0	0	0	0	200	300	0	0	0	0	0	0	0	200	903	0	0	0	0	0	0	0	603	903	0
1563	0	0	0	0	0	0	0	200	300	0	0	0	0	0	0	0	200	903	0	0	0	0	0	0	0	603	903	0
1563	1	0	0	0	0	0	0	200	300	0	0	0	0	0	0	0	200	903	0	0	0	0	0	0	0	603	903	0
1563	2	0	0	0	0	0	0	200	300	0	0	0	0	0	0	0	200	903	0	0	0	0	0	0	0	603	903	0
1563	3	0	0	0	0	0	0	200	300	0	0	0	0	0	0	0	200	903	0	0	0	0	0	0	0	603	903	0
1563	4	0	0	0	0	0	0	200	300	0	0	0	0	0	0	0	200	903	0	0	0	0	0	0	0	603	903	0
1563	5	0	0	0	0	0	0	200	300	0	0	0	0	0	0	0	200	903	0	0	0	0	0	0	0	603	903	0
1563	6	0	0	0	0	0	0	200	300	0	0	0	0	0	0	0	200	903	0	0	0	0	0	0	0	603	903	0
1563	7	0	0	0	0	0	0	200	300	0	0	0	0	0	0	0	200	903	0	0	0	0	0	0	0	603	903	0
1563	8	0	0	0	0	0	0	200	300	0	0	0	0	0	0	0	200	903	0	0	0	0	0	0	0	603	903	0
1563	9	0	0	0	0	0	0	200	300	0	0	0	0	0	0	0	200	903	0	0	0	0	0	0	0	603	903	0
1564	0	0	0	0	0	0	0	200	300	0	0	0	0	0	0	0	200	903	0	0	0	0	0	0	0	603	903	0
1564	1	0	0	0	0	0	0	200	300	0	0	0	0	0	0	0	200	903	0	0	0	0	0	0	0	603	903	0
1564	2	0	0	0	0	0	0	200	300	0	0	0	0	0	0	0	200	903	0	0	0	0	0	0	0	603	903	0
1564	3	0	0	0	0	0	0	200	300	0	0	0	0	0	0	0	200	903	0	0	0	0	0	0	0	603	903	0
1564	4	0	0	0	0	0	0	200	300	0	0	0	0	0	0	0	200	903	0	0	0	0	0	0	0	603	903	0
1564	5	0	0	0	0	0	0	200	300	0	0	0	0	0	0	0	200	903	0	0	0	0	0	0	0	603	903	0
1564	6	0	0	0	0	0	0	200	300	0	0	0	0	0	0	0	200	903	0	0	0	0	0	0	0	603	903	0
1564	7	0	0	0	0	0	0	200	300	0	0	0	0	0	0	0	200	903	0	0	0	0	0	0	0	603	903	0
1564	8	0	0	0	0	0	0	200	300	0	0	0	0	0	0	0	200	903	0	0	0	0	0	0	0	603	903	0
1564	9	0	0	0	0	0	0	200	300	0	0	0	0	0	0	0	200	903	0	0	0	0	0	0	0	603	903	0
1565	0	0	0	0	0	0	0	200	300	0	0	0	0	0	0	0	200	903	0	0	0	0	0	0	0	603	903	0
1565	1	0	0	0	0	0	0	200	300	0	0	0	0	0	0	0	200	903	0	0	0	0	0	0	0	603	903	0
1565	2	0	0	0	0	0	0	200	300	0	0	0	0	0	0	0	200	903	0	0	0	0	0	0	0	603	903	0
1565	3	0	0	0	0	0	0	200	300	0	0	0	0	0	0	0	200	903	0	0	0	0	0	0	0	603	903	0
1565	4	0	0	0	0	0	0	200	300	0	0	0	0	0	0	0	200	903	0	0	0	0	0	0	0	603	903	0
1565	5	0	0	0	0	0	0	200	300	0	0	0	0	0	0	0	200	903	0	0	0	0	0	0	0	603	903	0
1565	6	0	0	0	0	0	0	200	300	0	0	0	0	0	0	0	200	903	0	0	0	0	0	0	0	603	903	0
1565	7	0	0	0	0	0	0	200	300	0	0	0	0	0	0	0	200	903	0	0	0	0	0	0	0	603	903	0
1565	8	0	0	0	0	0	0	200	300	0	0	0	0	0	0	0	200	903	0	0	0	0	0	0	0	603	903	0
1565	9	0	0	0	0	0	0	200	300	0	0	0	0	0	0	0	200	903	0	0	0	0	0	0	0	603	903	0
1566	0	0	0	0	0	0	0	200	300	0	0	0	0	0	0	0	200	903	0	0	0	0	0	0	0	603	903	0
1566	1	0	0	0	0	0	0	200	300	0	0	0	0	0	0	0	200	903	0	0	0	0	0	0	0	603	903	0
1566	2	0	0	0	0	0	0	200	300	0	0	0	0	0	0	0	200	903	0	0	0	0	0	0	0	603	903	0
1566	3	0	0	0	0	0	0	200	300	0	0	0	0	0	0	0	200	903	0	0	0	0	0	0	0	603	903	0
1566	4	0	0	0	0	0	0	200	300	0	0	0	0	0	0	0	200	903	0	0	0	0	0	0	0	603	903	0
1566	5	0	0	0	0	0	0	200	300	0	0	0	0	0	0	0	200	903	0	0	0	0	0	0	0	603	903	0
1566	6	0	0	0	0	0	0	200	300	0	0	0	0	0	0	0	200	903	0	0	0	0	0	0	0	603	903	0
1566	7	0	0	0	0	0	0	200	300	0	0	0	0	0	0	0	200	903	0	0	0	0	0	0	0	603	903	0
1566	8	0	0	0	0	0	0	200	300	0	0	0	0	0	0	0	200	903	0	0	0	0	0	0	0	603	903	0
1566	9	0	0	0	0	0	0	200	300	0	0	0	0	0	0	0	200	903	0	0	0	0	0	0	0	603	903	0
1567	0	0	0	0	0	0	0	200	300	0	0	0	0	0	0	0	200	903	0	0	0	0	0	0	0	603	903	0
1567	1	0	0	0	0	0	0	200	300	0	0	0	0	0	0	0	200	903	0	0	0	0	0	0	0	603	903	0
1567	2	0	0	0	0	0	0	200	300	0	0	0	0	0	0	0	200	903	0	0	0	0	0	0	0	603	903	0
1567	3	0	0	0	0	0	0	200	300	0	0	0	0	0	0	0	200	903	0	0	0	0	0	0	0	603	903	0
1567	4	0	0	0	0	0	0	200	300	0	0	0	0	0	0	0	200	903	0	0	0	0	0	0	0	603	903	0
1567	5	0	0	0	0	0	0	200	300	0	0	0	0	0	0	0	200	903	0	0	0	0	0	0	0	603	903	0
1567	6	0	0	0	0	0	0	200	300	0	0	0	0	0	0	0	200	903	0	0	0	0	0	0	0	603	903	0
1567	7	0	0	0	0	0	0	200	300	0	0	0	0	0	0	0	200	903	0	0	0	0	0	0	0	603	903	0
1567	8	0	0	0	0	0	0	200	300	0	0	0	0	0	0	0	200	903	0	0	0	0	0	0	0	603	903	0
1567	9	0	0	0	0	0	0	200	300	0	0	0	0	0	0	0	200	903	0	0	0	0	0	0	0	603	903	0
1568	0	0	0	0	0	0	0	200	300	0	0	0	0	0	0	0	200	903	0	0	0	0	0	0	0	603	903	0
1568	1	0	0	0	0	0	0	200	300	0	0	0	0	0	0	0	200	903	0	0	0	0	0	0	0	603	903	0
1568	2	0	0	0	0	0	0	200	300	0	0	0	0	0	0	0	200	903	0	0	0	0	0	0	0	603	903	0
1568	3	0	0	0	0	0	0	200	300	0	0	0	0	0	0	0	200	903	0	0	0	0	0	0	0	603	903	0
1568	4	0	0	0	0	0	0	200	300	0	0	0	0	0	0	0	200	903	0	0	0	0	0	0	0	603	903	0
1568	5	0	0	0	0	0	0	200	300	0	0	0	0	0	0	0	200	903	0	0	0	0	0	0	0	603	903	0
1568	6	0	0	0	0	0	0	200	300	0	0	0	0	0	0	0	200	903	0	0	0	0	0	0	0	603	903	0
1568	7	0	0	0	0	0	0	200	300	0	0	0	0	0	0	0	200	903	0	0	0	0	0	0	0	603	903	0
1568	8	0	0	0	0	0	0	200	300	0	0	0	0	0	0	0	200	903	0	0	0	0	0	0	0	603	903	0
1568	9	0	0	0	0	0	0	200	300	0	0	0	0	0	0	0	200	903	0	0	0	0	0	0	0	603	903	0
1569	0	0	0	0	0	0	0	200	300	0	0	0	0	0	0	0	200	903	0	0	0	0	0	0	0	603	903	0
1569	1	0	0	0	0	0	0	200	300	0	0	0	0	0	0	0	200	903	0	0	0	0	0	0	0	603	903	0
1569	2	0	0	0	0	0	0	200	300	0	0	0	0	0	0	0	200	903	0	0	0	0	0	0	0	603	903	0
1569	3	0	0	0	0	0	0	200	300	0	0	0	0	0	0	0	200	903	0	0	0	0	0	0	0	603	903	0
1569	4	0	0	0	0	0	0	200	300	0	0	0	0	0	0	0	200	903	0	0	0	0	0	0	0	603	903	0
1569	5	0	0	0	0	0	0	200	300	0	0	0	0	0	0	0	200	903	0	0	0	0	0	0	0	603	903	0
1569	6	0	0	0	0	0	0	200	300	0	0	0	0	0	0	0	200	903	0	0	0	0	0	0	0	603	903	0
1569	7	0	0	0	0	0	0	200	300	0	0	0	0	0	0	0	200	903	0	0	0	0	0	0	0	603	903	0
1569	8	0	0	0	0	0	0	200	300	0	0	0	0	0	0	0	200	903	0	0	0	0	0	0	0	603	903	0
1569	9	0	0	0	0	0	0	200	300	0	0	0	0	0	0	0	200	903	0	0	0	0	0	0	0	603	903	0
1570	0	0	0	0	0	0	0	200	300	0	0	0	0	0	0	0	200	903	0	0	0	0	0	0	0	603	903	0
1570	1	0	0	0	0	0	0	200	300	0	0	0	0	0	0	0	200	903	0	0	0	0	0	0	0	603	903	0
1570	2	0	0	0	0	0	0	200	300	0	0	0	0	0	0	0	200	903	0	0	0	0	0	0	0	603	903	0
1570	3	0	0	0	0	0	0	200	300	0	0	0	0	0	0	0	200	903	0	0	0	0	0	0	0	603	903	0
1570	4	0	0	0	0	0	0	200	300	0	0	0	0	0	0	0	200	903	0	0	0	0	0	0	0	603	903	0
1570	5	0	0	0	0	0	0	200	300	0	0	0	0	0	0	0	200	903	0	0	0	0	0	0	0	603	903	0
1570	6	0	0	0	0	0	0	200	300	0	0	0	0	0	0	0	200	903	0	0	0	0	0	0	0	603	903	0
1570	7	0	0	0	0	0	0	200	300	0	0	0	0	0	0	0	200	903	0	0	0	0	0	0	0	603	903	0
1570	8	0	0	0	0	0	0	200	300	0	0	0	0	0	0	0	200	903	0	0	0	0	0	0	0	603	903	0
1570	9	0	0	0	0	0	0	200	300	0	0	0	0	0	0	0	200	903	0	0	0	0	0	0	0	603	903	0
1571	0	0	0	0	0	0	0	200	300	0	0	0	0	0	0	0	200	903	0	0	0	0	0	0	0	603	903	0
1571	1	0	0	0	0	0	0	200	300	0	0	0	0	0	0	0	200	903	0	0	0	0	0	0	0	603	903	0
1571	2	0	0	0	0	0	0	200	300	0	0	0	0	0	0	0	200	903	0	0	0	0	0	0	0	603	903	0
1571	3	0	0	0	0	0	0	200	300	0	0	0	0	0	0	0	200	903	0	0	0	0	0	0	0	603	903	0
1571	4	0	0	0	0	0	0	200	300	0	0	0	0	0	0	0	200	903	0	0	0	0	0	0	0	603	903	0
1571	5	0	0	0	0	0	0	200	300	0	0	0	0	0	0	0	200	903	0	0	0	0	0	0	0	603	903	0
1571	6	0	0	0	0	0	0	200	300	0	0	0	0	0	0	0	200	903	0	0	0	0	0	0	0	603	903	0
1571	7	0	0	0	0	0	0	200	300	0	0	0	0	0	0	0	200	903	0	0	0	0	0	0	0	603	903	0
1571	8	0	0	0	0	0	0	200	300	0	0	0	0	0	0	0	200	903	0	0	0	0	0	0	0	603	903	0
1571	9	0	0	0	0	0	0	200	300	0	0	0	0	0	0	0	200	903	0	0	0	0	0	0	0	603	903	0
1572	0	0	0	0	0	0	0	200	300	0	0	0	0	0	0	0	200	903	0	0	0	0	0	0	0	603	903	0
1572	1	0	0	0	0	0	0	200	300	0	0	0	0	0	0	0	200	903	0	0	0	0	0	0	0	603	903	0
1572	2	0	0	0	0	0	0	200	300	0	0	0	0	0	0	0	200	903	0	0	0	0	0	0	0	603	903	0
1572	3	0	0	0	0	0	0	200	300	0	0	0	0	0	0	0	200	903	0	0	0	0	0	0	0	603	903	0
1572	4	0	0	0	0	0	0	200	300	0	0	0	0	0	0	0	200	903	0	0	0	0	0	0	0	603	903	0
1572	5	0	0	0	0	0	0	200	300	0	0	0	0	0	0	0	200	903	0	0	0	0	0	0	0	603	903	0
1572	6	0	0	0	0	0	0	200	300	0	0	0	0	0	0	0	200	903	0	0	0	0	0	0	0	603	903	0
1572	7	0	0	0	0	0	0	200	300	0	0	0	0	0	0	0	200	903	0	0	0	0	0	0	0	603	903	0
1572	8	0	0	0	0	0	0	200	300	0	0	0	0	0	0	0	200	903	0	0	0	0	0	0	0	603	903	0
1572	9	0	0	0	0	0	0	200	300	0	0	0	0	0	0	0	200	903	0	0	0	0	0	0	0	603	903	0
1573	0	0	0	0	0	0	0	200	300	0	0	0	0	0	0	0	200	903	0	0	0	0	0	0	0	603	903	0
1573	1	0	0	0	0	0	0	200	300	0	0	0	0	0	0	0	200	903	0	0	0	0	0	0	0	603	903	0
1573	2	0	0	0	0	0	0	200	300	0	0	0	0	0	0	0	200	903	0	0	0	0	0	0	0	603	903	0
1573	3	0	0	0	0	0	0	200	300	0	0	0	0	0	0	0	200	903	0	0	0	0	0	0	0	603	903	0
1573	4	0	0	0	0	0	0	200	300	0	0	0	0	0	0	0	200	903	0	0	0	0	0	0	0	603	903	0
1573	5	0	0	0	0	0	0	200	300	0	0	0	0	0	0	0	200	903	0	0	0	0	0	0	0	603	903	0
1573	6	0	0	0	0	0	0	200	300	0	0	0	0	0	0	0	200	903	0	0	0	0	0	0	0	603	903	0
1573	7	0	0	0	0	0	0	200	300	0	0	0	0	0	0	0	200	903	0	0	0	0	0	0	0	603	903	0
1573	8	0	0	0	0	0	0	200	300	0	0	0	0	0	0	0	200	903	0	0	0	0	0	0	0	603	903	0
1573	9	0	0	0	0	0	0	200	300	0	0	0	0	0	0	0	200	903	0	0	0	0	0	0	0	603	903	0
1574	0	0	0	0	0	0	0	200	300	0	0	0	0	0	0	0	200	903	0	0	0	0	0	0	0	603	903	0
1574	1	0	0	0	0	0	0	200	300	0	0	0	0	0	0	0	200	903	0	0	0	0	0	0	0	603	903	0
1574	2	0	0	0	0	0	0	200	300	0	0	0	0	0	0	0	200	903	0	0	0	0	0	0	0	603	903	0
1574	3	0	0	0	0	0	0	200	300	0	0	0	0	0	0	0	200	903	0	0	0	0	0	0	0	603	903	0
1574	4	0	0	0	0	0	0	200	300	0	0	0	0	0	0	0	200	903	0	0	0	0	0	0	0	603	903	0
1574	5	0	0	0	0	0	0	200	300	0	0	0	0	0	0	0	200	903	0	0	0	0	0	0	0	603	903	0
1574	6	0	0	0	0	0	0	200	300	0	0	0	0	0	0	0	200	903	0	0	0	0	0	0	0	603	903	0
1574	7	0	0	0	0	0	0	200	300	0	0	0	0	0	0	0	200	903	0	0	0	0	0	0	0	603	903	0
1574	8	0	0	0	0	0	0	200	300	0	0	0	0	0	0	0	200	903	0	0	0	0	0	0	0	603	903	0
1574	9	0	0	0	0	0	0	200	300	0	0	0	0	0	0	0	200	903	0	0	0	0	0	0	0	603	903	0
1575	0	0	0	0	0	0	0	200	300	0	0	0	0	0	0	0	200	903	0	0	0	0	0	0	0	603	903	0
1575	1	0	0	0	0	0	0	200	300	0	0	0	0	0	0	0	200	903	0	0	0	0	0	0	0	603	903	0
1575	2	0	0	0	0	0	0	200	300	0	0	0	0	0	0	0	200	903	0	0	0	0	0	0	0	603	903	0
1575	3	0	0	0	0	0	0	200	300	0	0	0	0	0	0	0	200	903	0	0	0	0	0	0	0	603	903	0
1575	4	0	0	0	0	0	0	200	300	0	0	0	0	0	0	0	200	903	0	0	0	0	0	0	0	603	903	0
1575	5	0	0	0	0	0	0	200	300	0	0	0	0	0	0	0	200	903	0	0	0	0	0	0	0	603	903	0
1575	6	0	0	0	0	0	0	200	300	0	0	0	0	0	0	0	200	903	0	0	0	0	0	0	0	603	903	0
1575	7	0	0	0	0	0	0	200	300	0	0	0	0	0	0	0	200	903	0	0	0	0	0	0	0	603	903	0
1575	8	0	0	0	0	0	0	200	300	0	0	0	0	0	0	0	200	903	0	0	0	0	0	0	0	603	903	0
1575	9	0	0	0	0	0	0	200	300	0	0	0	0	0	0	0	200	903	0	0	0	0	0	0	0	603	903	0
1576	0	0	0	0	0	0	0	200	300	0	0	0	0	0	0	0	200	903	0	0	0	0	0	0	0	603	903	0
1576	1	0	0	0	0	0	0	200	300	0	0	0	0	0	0	0	200	903	0	0	0	0	0	0	0	603	903	0
1576	2	0	0	0	0	0	0	200	300	0	0	0	0	0	0	0	200	903	0	0	0	0	0	0	0	603	903	0
1576	3	0	0	0	0	0	0	200	300	0	0	0	0	0	0	0	200	903	0	0	0	0	0	0	0	603	903	0
1576	4	0	0	0	0	0	0	200	300	0	0	0	0	0	0	0	200	903	0	0	0	0	0	0	0	603	903	0
1576	5	0	0	0	0	0	0	200	300	0	0	0	0	0	0	0	200	903	0	0	0	0	0	0	0	603	903	0
1576	6	0	0	0	0	0	0	200	300	0	0	0	0	0	0	0	200	903	0	0	0	0	0	0	0	603	903	0
1576	7	0	0	0	0	0	0	200	300	0	0	0	0	0	0	0	200	903	0	0	0	0	0	0	0	603	903	0
1576	8	0	0	0	0	0	0	200	300	0	0	0	0	0	0	0	200	903	0	0	0	0	0	0	0	603	903	0
1576	9	0	0	0	0	0	0	200	300	0	0	0	0	0	0	0	200	903	0	0	0	0	0	0	0	603	903	0
1577	0	0	0	0	0	0	0	200	300	0	0	0	0	0	0	0	200	903	0	0	0	0	0	0	0	603	903	0
1577	1	0	0	0	0	0	0	200	300	0	0	0	0	0	0	0	200	903	0	0	0	0	0	0	0	603	903	0
1577	2	0	0	0	0	0	0	200	300	0	0	0	0	0	0	0	200	903	0	0	0	0	0	0	0	603	903	0
1577	3	0	0	0	0	0	0	200	300	0	0	0	0	0	0	0	200	903	0	0	0	0	0	0	0	603	903	0
1577	4	0	0	0	0	0	0	200	300	0	0	0	0	0	0	0	200	903	0	0	0	0	0	0	0	603	903	0
1577	5	0	0	0	0	0	0	200	300	0	0	0	0	0	0	0	200	903	0	0	0	0	0	0	0	603	903	0
1577	6	0	0	0	0	0	0	200	300	0	0	0	0	0	0	0	200	903	0	0	0	0	0	0	0	603	903	0
1577	7	0	0	0	0	0	0	200	300	0	0	0	0	0	0	0	200	903	0	0	0	0	0	0	0	603	903	0
1577	8	0	0	0	0	0	0	200	300	0	0	0	0	0	0	0	200	903	0	0	0	0	0	0	0	603	903	0
1577	9	0	0	0	0	0	0	200	300	0	0	0	0	0	0	0	200	903	0	0	0	0	0	0	0	603	903	0
1578	0	0	0	0	0	0	0	200	300	0	0	0	0	0	0	0	200	903	0	0	0	0	0	0	0	603	903	0
1578	1	0	0	0	0	0	0	200	300	0	0	0	0	0	0	0	200	903	0	0	0	0	0	0	0	603	903	0
1578	2	0	0	0	0	0	0	200	300	0	0	0	0	0	0	0	200	903	0	0	0	0	0	0	0	603	903	0
1578	3	0	0	0	0	0	0	200	300	0	0	0	0	0	0	0	200	903	0	0	0	0	0	0	0	603	903	0
1578	4	0	0	0	0	0	0	200	300	0	0	0	0	0	0	0	200	903	0	0	0	0	0	0	0	603	903	0
1578	5	0	0	0	0	0	0	200	300	0	0	0	0	0	0	0	200	903	0	0	0	0	0	0	0	603	903	0
1578	6	0	0	0	0	0	0	200	300	0	0	0	0	0	0	0	200	903	0	0	0	0	0	0	0	603	903	0
1578	7	0	0	0	0	0	0	200	300	0	0	0	0	0	0	0	200	903	0	0	0	0	0	0	0	603	903	0
1578	8	0	0	0	0	0	0	200	300	0	0	0	0	0	0	0	200	903	0	0	0	0	0	0	0	603	903	0
1578	9	0	0	0	0	0	0	200	300	0	0	0	0	0	0	0	200	903	0	0	0	0	0	0	0	603	903	0
1579	0	0	0	0	0	0	0	200	300	0	0	0	0	0	0	0	200	903	0	0	0	0	0	0	0	603	903	0
1579	1	0	0	0	0	0	0	200	300	0	0	0	0	0	0	0	200	903	0	0	0	0	0	0	0	603	903	0
1579	2	0	0	0	0	0	0	200	300	0	0	0	0	0	0	0	200	903	0	0	0	0	0	0	0	603	903	0
1579	3	0	0	0	0	0	0	200	300	0	0	0	0	0	0	0	200	903	0	0	0	0	0	0	0	603	903	0
1579	4	0	0	0	0	0	0	200	300	0	0	0	0	0	0	0	200	903	0	0	0	0	0	0	0	603	903	0
1579	5	0	0	0	0	0	0	200	300	0	0	0	0	0	0	0	200	903	0	0	0	0	0	0	0	603	903	0
1579	6	0	0	0	0	0	0	200	300	0	0	0	0	0	0	0	200	903	0	0	0	0	0	0	0	603	903	0
1579	7	0	0	0	0	0	0	200	300	0	0	0	0	0	0	0	200	903	0	0	0	0	0	0	0	603	903	0
1579	8	0	0	0	0	0	0	200	300	0	0	0	0	0	0	0	200	903	0	0	0	0	0	0	0	603	903	0
1579	9	0	0	0	0	0	0	200	300	0	0	0	0	0	0	0	200	903	0	0	0	0	0	0	0	603	903	0
1580	0	0	0	0	0	0	0	200	300	0	0	0	0	0	0	0	200	903	0	0	0	0	0	0	0	603	903	0
1580	1	0	0	0	0	0	0	200	300	0	0	0	0	0	0	0	200	903	0	0	0	0	0	0	0	603	903	0
1580	2	0	0	0	0	0	0	200	300	0	0	0	0	0	0	0	200	903	0	0	0	0	0	0	0	603	903	0
1580	3	0	0	0	0	0	0	200	300	0	0	0	0	0	0	0	200	903	0	0	0	0	0	0	0	603	903	0
1580	4	0	0	0	0	0	0	200	300	0	0	0	0	0	0	0	200	903	0	0	0	0	0	0	0	603	903	0
1580	5	0	0	0	0	0	0	200	300	0	0	0	0	0	0	0	200	903	0	0	0	0	0	0	0	603	903	0
1580	6	0	0	0	0	0	0	200	300	0	0	0	0	0	0	0	200	903	0	0	0	0	0	0	0	603	903	0
1580	7	0	0	0	0	0	0	200	300	0	0	0	0	0	0	0	200	903	0	0	0	0	0	0	0	603	903	0
1580	8	0	0	0	0	0	0	200	300	0	0	0	0	0	0	0	200	903	0	0	0	0	0	0	0	603	903	0
1580	9	0	0	0	0	0	0	200	300	0	0	0	0	0	0	0	200	903	0	0	0	0	0	0	0	603	903	0
1581	0	0	0	0	0	0	0	200	300	0	0	0	0	0	0	0	200	903	0	0	0	0	0	0	0	603	903	0
1581	1	0	0	0	0	0	0	200	300	0	0	0	0	0	0	0	200	903	0	0	0	0	0	0	0	603	903	0
1581	2	0	0	0	0	0	0	200	300	0	0	0	0	0	0	0	200	903	0	0	0	0	0	0	0	603	903	0
1581	3	0	0	0	0	0	0	200	300	0	0	0	0	0	0	0	200	903	0	0	0	0	0	0	0	603	903	0
1581	4	0	0	0	0	0	0	200	300	0	0	0	0	0	0	0	200	903	0	0	0	0	0	0	0	603	903	0
1581	5	0	0	0	0	0	0	200	300	0	0	0	0	0	0	0	200	903	0	0	0	0	0	0	0	603	903	0
1581	6	0	0	0	0	0	0	200	300	0	0	0	0	0	0	0	200	903	0	0	0	0	0	0	0	603	903	0
1581	7	0	0	0	0	0	0	200	300	0	0	0	0	0	0	0	200	903	0	0	0	0	0	0	0	603	903	0
1581	8	0	0	0	0	0	0	200	300	0	0	0	0	0	0	0	200	903	0	0	0	0	0	0	0	603	903	0
1581	9	0	0	0	0	0	0	200	300	0	0	0	0	0	0	0	200	903	0	0	0	0	0	0	0	603	903	0
1582	0	0	0	0	0	0	0	200	300	0	0	0	0	0	0	0	200	903	0	0	0	0	0	0	0	603	903	0
1582	1	0	0	0	0	0	0	200	300	0	0	0	0	0	0	0	200	903	0	0	0	0	0	0	0	603	903	0
1582	2	0	0	0	0	0	0	200	300	0	0	0	0	0	0	0	200	903	0	0	0	0	0	0	0	603	903	0
1582	3	0	0	0	0	0	0	200	300	0	0	0	0	0	0	0	200	903	0	0	0	0	0	0	0	603	903	0
1582	4	0	0	0	0	0	0	200	300	0	0	0	0	0	0	0	200	903	0	0	0	0	0	0	0	603	903	0
1582	5	0	0	0	0	0	0	200	300	0	0	0	0	0	0	0	200	903	0	0	0	0	0	0	0	603	903	0
1582	6	0	0	0	0	0	0	200	300	0	0	0	0	0	0	0	200	903	0	0	0	0	0	0	0	603	903	0
1582	7	0	0	0	0	0	0	200	300	0	0	0	0	0	0	0	200	903	0	0	0	0	0	0	0	603	903	0
1582	8	0	0	0	0	0	0	200	300	0	0	0	0	0	0	0	200	903	0	0	0	0	0	0	0	603	903	0
1582	9	0	0	0	0	0	0	200	300	0	0	0	0	0	0	0	200	903	0	0	0	0	0	0	0	603	903	0
1583	0	0	0	0	0	0	0	200	300	0	0	0	0	0	0	0	200	903	0	0	0	0	0	0	0	603	903	0
1583	1	0	0	0	0	0	0	200	300	0	0	0	0	0	0	0	200	903	0	0	0	0	0	0	0	603	903	0
1583	2	0	0	0	0	0	0	200	300	0	0	0	0	0	0	0	200	903	0	0	0	0	0	0	0	603	903	0
1583	3	0	0	0	0	0	0	200	300	0	0	0	0	0	0	0	200	903	0	0	0	0	0	0	0	603	903	0
1583	4	0	0	0	0	0	0	200	300	0	0	0	0	0	0	0	200	903	0	0	0	0	0	0	0	603	903	0
1583	5	0	0	0	0	0	0	200	300	0	0	0	0	0	0	0	200	903	0	0	0	0	0	0	0	603	903	0
1583	6	0	0	0	0	0	0	200	300	0	0	0	0	0	0	0	200	903	0	0	0	0	0	0	0	603	903	0
1583	7	0	0	0	0	0	0	200	300	0	0	0	0	0	0	0	200	903	0	0	0	0	0	0	0	603	903	0
1583	8	0	0	0	0	0	0	200	300	0	0	0	0	0	0	0	200	903	0	0	0	0	0	0	0	603	903	0
1583	9	0	0	0	0	0	0	200	300	0	0	0	0	0	0	0	200	903	0	0	0	0	0	0	0	603	903	0
1584	0	0	0	0	0	0	0	200	300	0	0	0	0	0	0	0	200	903	0	0	0	0	0	0	0	603	903	0
1584	1	0	0	0	0	0	0	200	300	0	0	0	0	0	0	0	200	903	0	0	0	0	0	0	0	603	903	0
1584	2	0	0	0	0	0	0	200	300	0	0	0	0	0	0	0	200	903	0	0	0	0	0	0	0	603	903	0
1584	3	0	0	0	0	0	0	200	300	0	0	0	0	0	0	0	200	903	0	0	0	0	0	0	0	603	903	0
1584	4	0	0	0	0	0	0	200	300	0	0	0	0	0	0	0	200	903	0	0	0	0	0	0	0	603	903	0
1584	5	0	0	0	0	0	0	200	300	0	0	0	0	0	0	0	200	903	0	0	0	0	0	0	0	603	903	0
1584	6	0	0	0	0	0	0	200	300	0	0	0	0	0	0	0	200	903	0	0	0	0	0	0	0	603	903	0
1584	7	0	0	0	0	0	0	200	300	0	0	0	0	0	0	0	200	903	0	0	0	0	0	0	0	603	903	0
1584	8	0	0	0	0	0	0	200	300	0	0	0	0	0	0	0	200	903	0	0	0	0	0	0	0	603	903	0
1584	9	0	0	0	0	0	0	200	300	0	0	0	0	0	0	0	200	903	0	0	0	0	0	0	0	603	903	0
1585	0	0	0	0	0	0	0	200	300	0	0	0	0	0	0	0	200	903	0	0	0	0	0	0	0	603	903	0
1585	1	0	0	0	0	0	0	200	300	0	0	0	0	0	0	0	200	903	0	0	0	0	0	0	0	603	903	0
1585	2	0	0	0	0	0	0	200	300	0	0	0	0	0	0	0	200	903	0	0	0	0	0	0	0	603	903	0
1585	3	0	0	0	0	0	0	200	300	0	0	0	0	0	0	0	200	903	0	0	0	0	0	0	0	603	903	0
1585	4	0	0	0	0	0	0	200	300	0	0	0	0	0	0	0	200	903	0	0	0	0	0	0	0	603	903	0
1585	5	0	0	0	0	0	0	200	300	0	0	0	0	0	0	0	200	903	0	0	0	0	0	0	0	603	903	0
1585	6	0	0	0	0	0	0	200	300	0	0	0	0	0	0	0	200	903	0	0	0	0	0	0	0	603	903	0
1585	7	0	0	0	0	0	0	200	300	0	0	0	0	0	0	0	200	903	0	0	0	0	0	0	0	603	903	0
1585	8	0	0	0	0	0	0	200	300	0	0	0	0	0	0	0	200	903	0	0	0	0	0	0	0	603	903	0
1585	9	0	0	0	0	0	0	200	300	0	0	0	0	0	0	0	200	903	0	0	0	0	0	0	0	603	903	0
1586	0	0	0	0	0	0	0	200	300	0	0	0	0	0	0	0	200	903	0	0	0	0	0	0	0	603	903	0
1586	1	0	0	0	0	0	0	200	300	0	0	0	0	0	0	0	200	903	0	0	0	0	0	0	0	603	903	0
1586	2	0	0	0	0	0	0	200	300	0	0	0	0	0	0	0	200	903	0	0	0	0	0	0	0	603	903	0
1586	3	0	0	0	0	0	0	200	300	0	0	0	0	0	0	0	200	903	0	0	0	0	0	0	0	603	903	0
1586	4	0	0	0	0	0	0	200	300	0	0	0	0	0	0	0	200	903	0	0	0	0	0	0	0	603	903	0
1586	5	0	0	0	0	0	0	200	300	0	0	0	0	0	0	0	200	903	0	0	0	0	0	0	0	603	903	0
1586	6	0	0	0	0	0	0	200	300	0	0	0	0	0	0	0	200	903	0	0	0	0	0	0	0	603	903	0
1586	7	0	0	0	0	0	0	200	300	0	0	0	0	0	0	0	200	903	0	0	0	0	0	0	0	603	903	0
1586	8	0	0	0	0	0	0	200	300	0	0	0	0	0	0	0	200	903	0	0	0	0	0	0	0	603	903	0
1586	9	0	0	0	0	0	0	200	300	0	0	0	0	0	0	0	200	903	0	0	0	0	0	0	0	603	903	0
1587	0	0	0	0	0	0	0	200	300	0	0	0	0	0	0	0	200	903	0	0	0	0	0	0	0	603	903	0
1587	1	0	0	0	0	0	0	200	300	0	0	0	0	0	0	0	200	903	0	0	0	0	0	0	0	603	903	0
1587	2	0	0	0	0	0	0	200	300	0	0	0	0	0	0	0	200	903	0	0	0	0	0	0	0	603	903	0
1587	3	0	0	0	0	0	0	200	300	0	0	0	0	0	0	0	200	903	0	0	0	0	0	0	0	603	903	0
1587	4	0	0	0	0	0	0	200	300	0	0	0	0	0	0	0	200	903	0	0	0	0	0	0	0	603	903	0
1587	5	0	0	0	0	0	0	200	300	0	0	0	0	0	0	0	200	903	0	0	0	0	0	0	0	603	903	0
1587	6	0	0	0	0	0	0	200	300	0	0	0	0	0	0	0	200	903	0	0	0	0	0	0	0	603	903	0
1587	7	0	0	0	0	0	0	200	300	0	0	0	0	0	0	0	200	903	0	0	0	0	0	0	0	603	903	0
1587	8	0	0	0	0	0	0	200	300	0	0	0	0	0	0	0	200	903	0	0	0	0	0	0	0	603	903	0
1587	9	0	0	0	0	0	0	200	300	0	0	0	0	0	0	0	200	903	0	0	0	0	0	0	0	603	903	0
1588	0	0	0	0	0	0	0	200	300	0	0	0	0	0	0	0	200	903	0	0	0	0	0	0	0	603	903	0
1588	1	0	0	0	0	0	0	200	300	0	0	0	0	0	0	0	200	903	0	0	0	0	0	0	0	603	903	0
1588	2	0	0	0	0	0	0	200	300	0	0	0	0	0	0	0	200	903	0	0	0	0	0	0	0	603	903	0
1588	3	0	0	0	0	0	0	200	300	0	0	0	0	0	0	0	200	903	0	0	0	0	0	0	0	603	903	0
1588	4	0	0	0	0	0	0	200	300	0	0	0	0	0	0	0	200	903	0	0	0	0	0	0	0	603	903	0
1588	5	0	0	0	0	0	0	200	300	0	0	0	0	0	0	0	200	903	0	0	0	0	0	0	0	603	903	0
1588	6	0	0	0	0	0	0	200	300	0	0	0	0	0	0	0	200	903	0	0	0	0	0	0	0	603	903	0
1588	7	0	0	0	0	0	0	200	300	0	0	0	0	0	0	0	200	903	0	0	0	0	0	0	0	603	903	0
1588	8	0	0	0	0	0	0	200	300	0	0	0	0	0	0	0	200	903	0	0	0	0	0	0	0	603	903	0
1588	9	0	0	0	0	0	0	200	300	0	0	0	0	0	0	0	200	903	0	0	0	0	0	0	0	603	903	0
1589	0	0	0	0	0	0	0	200	300	0	0	0	0	0	0	0	200	903	0	0	0	0	0	0	0	603	903	0
1589	1	0	0	0	0	0	0	200	300	0	0	0	0	0	0	0	200	903	0	0	0	0	0	0	0	603	903	0
1589	2	0	0	0	0	0	0	200	300	0	0	0	0	0	0	0	200	903	0	0	0	0	0	0	0	603	903	0
1589	3	0	0	0	0	0	0	200	300	0	0	0	0	0	0	0	200	903	0	0	0	0	0	0	0	603	903	0
1589	4	0	0	0	0	0	0	200	300	0	0	0	0	0	0	0	200	903	0	0	0	0	0	0	0	603	903	0
1589	5	0	0	0	0	0	0	200	300	0	0	0	0	0	0	0	200	903	0	0	0	0	0	0	0	603	903	0
1589	6	0	0	0	0	0	0	200	300	0	0	0	0	0	0	0	200	903	0	0	0	0	0	0	0	603	903	0
1589	7	0	0	0	0	0	0	200	300	0	0	0	0	0	0	0	200	903	0	0	0	0	0	0	0	603	903	0
1589	8	0	0	0	0	0	0	200	300	0	0	0	0	0	0	0	200	903	0	0	0	0	0	0	0	603	903	0
1589	9	0	0	0	0	0	0	200	300	0	0	0	0	0	0	0	200	903	0	0	0	0	0	0	0	603	903	0
1590	0	0	0	0	0	0	0	200	300	0	0	0	0	0	0	0	200	903	0	0	0	0	0	0	0	603	903	0
1590	1	0	0	0	0	0	0	200	300	0	0	0	0	0	0	0	200	903	0	0	0	0	0	0	0	603	903	0
1590	2	0	0	0	0	0	0	200	300	0	0	0	0	0	0	0	200	903	0	0	0	0	0	0	0	603	903	0
1590	3	0	0	0	0	0	0	200	300	0	0	0	0	0	0	0	200	903	0	0	0	0	0	0	0	603	903	0
1590	4	0	0	0	0	0	0	200	300	0	0	0	0	0	0	0	200	903	0	0	0	0	0	0	0	603	903	0
1590	5	0	0	0	0	0	0	200	300	0	0	0	0	0	0	0	200	903	0	0	0	0	0	0	0	603	903	0
[truncated: 1,764 more rows]
