# Supplementary material for: The Effects of an Extemporaneous Speech Dual-task on Older Adult Gait Control
Source: Research Square preprint supplement (doi:10.21203/rs.3.rs-7674245/v1), 2025-11-18
Supplement: Supplementary file 103 [file DT9Walk3.xlsx]

## Sheet: Sheet1
Trajectories
		09:LFHD			09:RFHD			09:LBHD			09:RBHD			09:C7			09:T10			09:CLAV			09:STRN			09:RBAK			09:LSHO			09:LUPA			09:LELB			09:LFRM			09:LWRA			09:LWRB			09:LFIN
Frame	Sub Frame	X	Y	Z	X	Y	Z	X	Y	Z	X	Y	Z	X	Y	Z	X	Y	Z	X	Y	Z	X	Y	Z	X	Y	Z	X	Y	Z	X	Y	Z	X	Y	Z	X	Y	Z	X	Y	Z	X	Y	Z	X	Y	Z
		mm	mm	mm	mm	mm	mm	mm	mm	mm	mm	mm	mm	mm	mm	mm	mm	mm	mm	mm	mm	mm	mm	mm	mm	mm	mm	mm	mm	mm	mm	mm	mm	mm	mm	mm	mm	mm	mm	mm	mm	mm	mm	mm	mm	mm	mm	mm	mm
2562	0	188.973	-1701.51	1659.52	285.377	-1693.9	1655.92	178.392	-1858.34	1679.39	322.653	-1839.75	1668	236.157	-1899.11	1499.55	223.582	-1943.94	1239.37	239.253	-1742.26	1427.16	232.012	-1647.04	1220.49	286.583	-1952.14	1298.2	54.075	-1811.79	1463.39	-26.4161	-1810.08	1237.18	-45.826	-1806.61	1136.81	-74.089	-1704.95	992.965	-36.8768	-1651.71	923.22	-93.6911	-1695.36	916.336	-90.2855	-1631.95	865.465
2563	0	188.918	-1689.08	1660.79	284.822	-1681.84	1657.03	178.336	-1846.04	1680.28	322.548	-1827.31	1669.23	236.083	-1886.88	1500.59	224.349	-1931.85	1240.89	238.758	-1730.02	1428.34	231.769	-1635.34	1221.62	287.682	-1939.59	1299.82	53.9641	-1800.36	1464.08	-25.5197	-1802.81	1237.21	-44.2194	-1801.59	1136.66	-73.5058	-1704.29	990.338	-37.2389	-1652.53	919.184	-93.3921	-1697.13	913.349	-90.9144	-1635.4	860.612
2564	0	188.747	-1676.76	1661.62	285.249	-1668.93	1658.42	178.263	-1833.62	1681.02	322.495	-1814.96	1670.11	236.263	-1874.66	1501.75	225.129	-1919.55	1241.79	238.819	-1717.68	1429.36	231.777	-1623.72	1222.58	288.824	-1927.15	1301.08	53.9005	-1788.74	1464.5	-24.3818	-1795.44	1237.06	-42.4569	-1796.65	1136.36	-73.1715	-1703.91	987.675	-37.5279	-1653.55	915.114	-92.6614	-1699.43	910.422	-91.4702	-1639.03	855.946
2565	0	188.572	-1664.38	1662.3	284.929	-1656.55	1659.2	178.408	-1821.31	1681.42	322.593	-1802.36	1670.93	236.697	-1862.02	1502.34	225.842	-1907.24	1242.55	238.705	-1705.21	1430.26	231.849	-1612.1	1223.14	289.833	-1914.7	1301.83	53.8021	-1777.14	1464.6	-23.3463	-1788.1	1236.6	-40.5314	-1791.87	1136.01	-72.6907	-1703.93	985.175	-37.8691	-1654.63	911.208	-91.9933	-1701.77	907.697	-92.1285	-1642.86	851.566
2566	0	188.598	-1651.9	1662.68	284.997	-1644.12	1659.69	178.259	-1808.9	1681.83	322.551	-1789.89	1671.52	236.836	-1849.68	1503.04	226.506	-1895.11	1243.12	238.606	-1692.84	1430.85	231.946	-1600.57	1223.5	290.777	-1902.26	1302.58	53.6858	-1765.36	1464.49	-22.0832	-1780.77	1236.13	-38.5739	-1787.13	1135.64	-72.0708	-1704.16	982.536	-38.362	-1655.91	907.64	-91.2337	-1704.46	904.895	-92.7158	-1646.93	847.474
2567	0	188.345	-1639.58	1662.69	284.355	-1631.87	1659.32	178.345	-1796.6	1681.76	322.519	-1777.48	1671.57	237.146	-1837.03	1503.02	227.106	-1882.88	1243.29	238.654	-1680.41	1430.9	232.212	-1588.85	1223.41	291.615	-1889.84	1302.94	53.7321	-1753.65	1464.11	-20.9227	-1773.38	1235.3	-36.492	-1782.45	1135.07	-71.5063	-1704.36	979.855	-38.8685	-1657.2	903.837	-90.7193	-1707.02	902.311	-93.4098	-1651.15	843.421
2568	0	188.194	-1627.1	1662.41	284.276	-1619.27	1659.27	178.352	-1784.01	1681.43	322.462	-1764.7	1671.43	237.204	-1824.77	1502.9	227.742	-1870.7	1243.19	238.828	-1668.06	1430.89	232.722	-1577.33	1223	292.448	-1877.47	1302.83	53.6939	-1741.97	1463.27	-19.7741	-1766.25	1234.26	-34.3334	-1777.77	1134.18	-70.888	-1704.66	977.338	-39.5286	-1658.66	900.386	-89.9441	-1709.87	899.75	-93.9666	-1655.57	839.37
2569	0	188.092	-1614.46	1661.81	284.572	-1606.25	1659.26	178.387	-1771.5	1680.87	322.453	-1751.83	1671.22	237.646	-1811.93	1502.46	228.365	-1858.54	1242.78	238.752	-1655.58	1430.36	232.879	-1565.65	1221.99	293.079	-1865.11	1302.47	53.7423	-1730.15	1462.31	-18.6003	-1758.99	1233.27	-32.1947	-1772.81	1133.35	-70.2087	-1704.91	974.721	-39.9262	-1659.98	896.873	-88.6884	-1712.88	897.113	-94.5896	-1660.23	835.858
2570	0	188.076	-1601.58	1661.13	284.151	-1593.6	1658.49	178.387	-1758.84	1680.11	322.555	-1739.01	1670.84	237.83	-1799.38	1502.09	228.753	-1846.3	1242.26	238.839	-1643.03	1429.63	233.312	-1553.84	1220.83	293.656	-1852.82	1302.16	53.771	-1718.06	1461.34	-17.3106	-1751.5	1232.29	-30.1051	-1767.58	1132.54	-69.3777	-1705.11	972.587	-40.3523	-1661.1	893.531	-87.1986	-1715.82	894.952	-94.9299	-1664.74	832.51
2571	0	187.698	-1588.95	1659.87	284.12	-1580.5	1657.75	178.476	-1745.85	1679.2	322.239	-1726.09	1669.78	238.358	-1786.39	1501.12	229.013	-1834.11	1241.48	238.954	-1630.66	1428.43	233.764	-1541.63	1219.58	294.081	-1840.58	1301.54	53.8285	-1706.08	1460.03	-16.127	-1744	1231.08	-27.9313	-1762.25	1131.77	-68.7782	-1705.15	970.441	-40.7449	-1662.62	890.196	-85.98	-1718.61	892.88	-95.3316	-1669.34	829.304
2572	0	187.486	-1576	1658.27	284.067	-1567.45	1656.2	178.525	-1732.96	1678.18	322.376	-1712.64	1669.05	238.446	-1773.97	1500.15	229.025	-1822.24	1240.54	239.032	-1617.99	1427.14	234.189	-1529.26	1217.96	294.406	-1828.49	1300.55	53.8401	-1693.88	1458.64	-15.1678	-1736.36	1230	-25.8398	-1756.61	1130.88	-67.8487	-1705.02	968.309	-41.0254	-1663.87	886.972	-84.3231	-1721.47	890.928	-95.5504	-1674.1	826.22
2573	0	187.224	-1562.82	1656.5	283.88	-1554.02	1654.53	178.557	-1719.8	1677.12	322.37	-1699.33	1668.09	238.703	-1760.96	1499.06	228.753	-1810.17	1239.52	239.294	-1605.56	1425.49	234.382	-1516.55	1215.99	294.576	-1816.32	1299.57	53.8465	-1681.65	1457.1	-14.2533	-1728.51	1228.91	-23.7128	-1750.51	1130.26	-67.1661	-1704.66	966.652	-41.2119	-1665.12	883.999	-82.5731	-1723.91	889.513	-95.5551	-1678.74	823.677
2574	0	187.063	-1549.58	1654.3	283.351	-1540.93	1652.07	178.321	-1706.37	1675.8	322.323	-1686.04	1666.73	238.656	-1748.52	1497.85	228.216	-1798.06	1238.43	239.061	-1593	1423.38	234.56	-1503.73	1213.86	294.536	-1804.14	1298.42	53.6371	-1669.09	1455.58	-13.2454	-1720.42	1227.93	-21.918	-1743.87	1129.61	-66.2274	-1704.16	965.074	-41.9521	-1666.31	881.264	-81.1101	-1726.01	888.454	-95.4611	-1683.2	821.129
2575	0	186.904	-1536.23	1651.93	283.226	-1527.39	1649.84	178.261	-1692.95	1674.35	322.243	-1672.37	1665.29	239.327	-1735.14	1496.39	227.59	-1786	1237.05	239.193	-1580.33	1421.51	234.94	-1490.74	1211.95	294.449	-1791.89	1297.07	53.6059	-1656.62	1454.2	-12.1089	-1712.14	1226.93	-19.9673	-1736.95	1128.98	-64.7704	-1703.4	963.493	-42.367	-1667.22	878.908	-79.6004	-1727.78	887.69	-95.2613	-1687.44	819.157
2576	0	186.731	-1522.74	1649.33	283.299	-1513.66	1647.4	178.27	-1679.27	1672.92	322.167	-1658.63	1663.78	239.215	-1722.54	1494.84	226.829	-1773.56	1235.58	239.25	-1567.78	1419.5	235.201	-1477.65	1210.03	294.226	-1779.77	1295.39	53.4737	-1643.86	1452.51	-11.4112	-1703.24	1226.01	-18.0766	-1729.62	1128.3	-63.7841	-1701.98	962.391	-42.3633	-1667.83	876.744	-77.9551	-1729.26	887.289	-94.7323	-1691.38	817.512
2577	0	186.434	-1509.17	1646.67	283.077	-1500.21	1644.72	178.012	-1665.57	1671.37	321.984	-1645.03	1662.14	238.833	-1709.76	1493.27	226.054	-1761.07	1234.1	238.91	-1555.1	1417.34	235.394	-1464.72	1208.06	293.703	-1767.44	1293.66	53.0163	-1631.03	1451.03	-10.6138	-1694.14	1225.16	-16.2823	-1721.74	1127.86	-62.924	-1699.95	961.793	-42.696	-1667.9	874.925	-76.5532	-1729.92	887.428	-94.1094	-1695.03	816.143
2578	0	186.029	-1495.6	1643.83	282.466	-1487.03	1641.42	177.583	-1651.81	1669.81	321.607	-1631.43	1660.25	238.413	-1697.18	1491.51	225.263	-1748.4	1232.39	238.663	-1542.77	1415.11	235.536	-1452.07	1206.16	293.013	-1755.07	1291.87	52.8076	-1618.32	1449.25	-10.1749	-1684.22	1224.07	-14.7288	-1713.44	1127.44	-62.2193	-1697.55	961.241	-42.4746	-1667.72	873.422	-75.2331	-1730.02	887.87	-93.5081	-1698.21	815.1
2579	0	185.772	-1482.07	1640.95	282.297	-1473.4	1638.74	177.082	-1638.08	1668.09	321.061	-1617.98	1658.28	237.931	-1684.65	1489.64	224.499	-1735.83	1230.37	238.444	-1530.1	1412.89	235.501	-1439.11	1204.13	292.344	-1742.71	1289.85	52.4047	-1605.47	1447.46	-9.66213	-1674.19	1222.96	-13.1486	-1704.93	1126.66	-61.5713	-1694.52	960.884	-42.654	-1666.85	872.029	-74.1259	-1729.45	888.496	-92.7656	-1700.75	814.312
2580	0	185.464	-1468.55	1638.22	282.394	-1459.59	1636.27	176.562	-1624.36	1666.33	320.68	-1604.34	1656.59	237.406	-1671.99	1487.66	223.585	-1723.06	1228.21	238.132	-1517.39	1410.89	235.662	-1425.89	1202.85	291.459	-1730.15	1287.7	51.9035	-1592.57	1445.87	-9.87709	-1663.67	1222.09	-11.9799	-1695.53	1126.11	-61.1493	-1690.82	960.99	-43.0868	-1665.28	871.233	-73.1432	-1728.27	889.497	-91.9992	-1702.62	813.932
2581	0	184.913	-1455.13	1635.63	281.71	-1446.62	1633.52	175.76	-1610.67	1664.49	320.015	-1590.97	1654.87	236.723	-1659.3	1485.69	222.717	-1710.17	1226.32	237.633	-1504.64	1408.78	235.453	-1412.89	1201.41	290.516	-1717.61	1285.67	51.2853	-1579.78	1444.16	-9.60118	-1652.65	1220.7	-11.0321	-1686.06	1125.58	-60.9497	-1686.38	960.981	-43.3371	-1663.42	870.369	-72.5	-1725.93	890.759	-91.2925	-1703.85	813.746
2582	0	184.399	-1441.8	1633.08	281.187	-1433.48	1631.12	175.021	-1597.18	1662.77	319.068	-1577.82	1652.81	236.001	-1646.72	1483.67	221.916	-1697.11	1224.27	237.139	-1491.78	1407.1	235.057	-1400.17	1199.76	289.562	-1704.89	1283.59	50.5589	-1567.02	1442.31	-9.60867	-1641.48	1219.31	-10.2481	-1676.02	1124.82	-60.8308	-1681.36	961.061	-43.841	-1660.51	869.708	-71.823	-1723.02	892.01	-90.6569	-1704.29	813.674
2583	0	183.647	-1428.6	1630.86	280.657	-1420.12	1629.1	174.211	-1583.91	1661.09	318.463	-1564.59	1651.4	235.174	-1633.86	1481.75	221.147	-1683.93	1222.06	236.332	-1478.93	1405.12	234.067	-1387.66	1197.94	288.698	-1692.32	1281.54	49.783	-1554.08	1440.3	-9.82982	-1629.92	1217.72	-9.7296	-1665.64	1124.04	-61.0404	-1675.6	961.02	-44.7082	-1656.81	868.981	-71.6424	-1719.17	893.158	-90.1623	-1703.75	813.859
2584	0	182.772	-1415.38	1628.81	279.748	-1407.12	1627.21	173.106	-1570.66	1659.39	317.441	-1551.48	1649.91	234.26	-1621.02	1479.98	220.502	-1670.71	1220.24	235.352	-1466.09	1403.31	232.867	-1375.17	1196.02	287.669	-1679.23	1279.74	48.8928	-1541.24	1438.58	-10.5757	-1618.17	1216.51	-9.51847	-1655	1123.07	-61.1441	-1669.01	961.112	-45.6377	-1652.31	868.701	-71.5726	-1714.26	894.513	-90.0533	-1702.22	814.556
2585	0	181.863	-1402.26	1627.15	278.071	-1394.69	1624.93	171.764	-1557.67	1657.79	315.983	-1538.69	1648.12	233.313	-1607.8	1478.5	219.951	-1657.18	1218.63	234.544	-1452.68	1402.15	231.613	-1362.21	1194.29	286.777	-1666.07	1277.95	47.825	-1528.32	1436.81	-10.7362	-1606.34	1215.02	-9.69171	-1644.22	1122.18	-61.6186	-1661.72	961.117	-46.5244	-1646.92	867.973	-71.9001	-1708.62	895.642	-90.09	-1699.3	815.339
2586	0	180.715	-1389.22	1625.51	277.402	-1381.33	1624.05	170.46	-1544.52	1656.41	314.681	-1526.03	1646.8	232.414	-1594.72	1477.32	219.57	-1643.65	1217.06	233.558	-1439.52	1400.79	230.446	-1348.86	1193.18	286.019	-1652.74	1276.44	46.8571	-1515.49	1435.2	-11.3643	-1594.37	1213.59	-9.83357	-1633.24	1121.19	-62.1387	-1653.71	960.939	-47.5593	-1640.5	867.771	-72.1938	-1702.01	896.569	-90.5024	-1695.28	816.197
2587	0	179.286	-1376.38	1623.99	275.506	-1368.98	1622.57	169.026	-1531.71	1655.04	313.442	-1512.96	1646.17	231.392	-1582.13	1475.73	219.325	-1630.04	1215.69	232.329	-1426.52	1399.56	229.333	-1335.3	1192.46	285.363	-1639.24	1275.07	45.6924	-1502.55	1433.54	-11.8707	-1582.4	1212.34	-10.3514	-1621.84	1120.4	-63.1799	-1645.03	961.007	-48.8018	-1633.15	867.263	-72.7714	-1694.36	897.382	-90.3362	-1690.2	816.474
2588	0	177.77	-1363.61	1622.94	274.234	-1356.06	1621.95	167.284	-1518.87	1653.91	311.786	-1500.26	1645.56	230.178	-1568.59	1474.84	218.92	-1616.24	1214.33	231.149	-1413.27	1398.9	228.034	-1321.73	1192.11	284.611	-1625.78	1273.86	44.3556	-1489.64	1432.47	-12.7497	-1570.27	1211.48	-11.1924	-1610.36	1119.69	-64.0273	-1635.77	961.277	-50.3392	-1624.71	867.279	-73.3317	-1685.84	898.131	-90.4511	-1683.65	817.302
2589	0	176.273	-1350.81	1622.23	272.481	-1343.66	1621.14	165.224	-1506.04	1653.1	309.858	-1487.67	1645.19	228.71	-1555.69	1473.64	218.534	-1602.21	1213.1	229.911	-1399.82	1398.53	226.425	-1308.06	1191.75	283.873	-1612.26	1272.8	42.9021	-1476.67	1431.47	-13.7123	-1558.16	1210.62	-11.9055	-1598.72	1119.34	-64.9702	-1625.75	961.125	-51.6363	-1615.51	867.104	-74.1158	-1676.27	898.661	-91.5291	-1675.48	817.97
2590	0	174.643	-1337.99	1621.8	271.06	-1330.93	1621.33	163.132	-1493.15	1652.59	307.74	-1475.33	1645.02	227.059	-1542.77	1472.8	218.015	-1588.08	1211.87	228.509	-1386.52	1398.42	224.941	-1294.09	1191.72	282.929	-1598.58	1271.77	41.1851	-1463.42	1430.65	-14.7177	-1545.81	1210.29	-12.8301	-1586.74	1118.97	-66.2966	-1614.93	961.521	-53.1638	-1604.97	867.226	-74.9293	-1665.84	898.905	-92.4616	-1665.96	818.351
2591	0	172.965	-1325.15	1621.95	269.543	-1318.36	1621.72	160.924	-1480.39	1652.57	305.631	-1462.9	1645.41	225.082	-1529.74	1472.28	217.202	-1574	1211.02	226.932	-1373.31	1398.71	223.607	-1280.06	1192.06	281.591	-1584.88	1271.14	39.5899	-1450.05	1430.2	-16.1361	-1533.39	1210.22	-13.9542	-1574.31	1118.97	-67.4736	-1603.38	961.57	-54.6295	-1593.45	867.278	-75.7505	-1654.56	899.203	-93.7705	-1654.83	818.983
2592	0	171.322	-1312.27	1622.57	267.75	-1306	1622.44	158.514	-1467.51	1652.9	303.728	-1450.5	1646.14	223.046	-1516.55	1472.46	216.057	-1559.79	1210.78	225.512	-1360.01	1399.26	222.419	-1265.89	1192.84	279.766	-1571.13	1270.94	37.9234	-1436.38	1429.97	-17.4241	-1520.25	1210.68	-15.4138	-1561.19	1118.98	-68.9011	-1590.84	961.964	-56.3346	-1581.05	867.562	-77.0176	-1642.05	899.576	-95.3575	-1642.5	819.199
2593	0	169.532	-1299.41	1623.54	265.902	-1293.61	1623.52	155.936	-1454.62	1653.1	300.929	-1438.53	1646.73	221.036	-1503.34	1472.77	214.661	-1545.62	1210.86	224.176	-1346.44	1400.11	221.525	-1251.66	1193.86	277.725	-1557.35	1271.13	36.296	-1422.62	1429.97	-19.1065	-1506.84	1210.82	-16.8229	-1547.49	1119.35	-70.35	-1577.45	962.349	-57.8419	-1567.32	867.762	-78.5032	-1628.66	899.745	-96.5702	-1628.77	819.141
2594	0	167.547	-1286.55	1624.69	264.089	-1280.99	1625.16	153.452	-1441.72	1653.66	298.478	-1426.24	1647.79	218.949	-1490	1473.03	212.87	-1531.6	1211.27	222.979	-1333.02	1401.27	220.831	-1237.43	1195.1	275.48	-1543.46	1271.52	34.6372	-1408.5	1430.32	-20.5833	-1492.76	1211.41	-18.2599	-1533.19	1119.65	-72.1051	-1562.93	962.701	-59.7117	-1552.45	868.207	-80.0942	-1614.02	899.89	-98.9652	-1613.44	819.246
2595	0	165.509	-1273.7	1626.44	262.153	-1268.34	1627.33	150.752	-1429	1654.18	295.918	-1413.91	1649.13	217.021	-1476.61	1474.15	210.884	-1517.65	1212.1	221.638	-1319.49	1402.42	220.516	-1223.38	1196.56	273.144	-1529.56	1272.44	33.2751	-1394.36	1430.8	-22.1371	-1478.07	1211.96	-20.0176	-1518.38	1120.01	-73.8616	-1547.42	963.055	-61.8407	-1536.54	868.681	-81.8836	-1598.35	899.957	-101.112	-1597.05	819.321
2596	0	163.318	-1260.9	1628.15	259.73	-1255.72	1629.39	148.183	-1416.45	1654.89	292.554	-1402.32	1650.1	215.32	-1463.03	1475.4	208.937	-1503.88	1213.5	220.557	-1306.21	1403.6	220.443	-1209.64	1197.97	271.124	-1515.9	1273.92	32.0056	-1380.18	1431.46	-24.0774	-1462.64	1212.47	-21.9836	-1502.76	1120.58	-75.5408	-1530.98	962.927	-63.8947	-1519.53	868.876	-84.3275	-1581.82	899.893	-103.909	-1578.96	819.652
2597	0	160.977	-1248.27	1629.72	257.418	-1242.78	1631.84	145.883	-1403.71	1655.81	290.97	-1388.74	1652.73	214.06	-1449.5	1477.05	207.185	-1490.37	1215.3	219.738	-1292.88	1405.01	220.443	-1196.18	1199.3	269.483	-1502.48	1275.63	31.1857	-1366.16	1432.42	-25.1587	-1446.99	1212.43	-23.8998	-1487.05	1120.65	-77.7286	-1513.52	963.49	-65.969	-1501.43	869.27	-86.5036	-1563.68	899.435	-106.624	-1559.99	819.281
2598	0	158.663	-1235.5	1631.06	255.202	-1229.77	1634.1	143.763	-1390.96	1656.54	288.48	-1376.21	1654.39	213.023	-1436.05	1478.59	205.509	-1477.16	1217.13	219.152	-1279.61	1406.58	220.626	-1183.22	1200.7	268.369	-1489.25	1277.72	30.4742	-1352.29	1433.73	-26.8055	-1430.83	1213.32	-25.6201	-1470.65	1121.23	-80.0051	-1495.15	963.811	-68.2592	-1482.2	869.569	-89.0767	-1544.72	899.226	-109.467	-1539.7	819.161
2599	0	156.259	-1223.08	1632.05	252.887	-1216.77	1635.95	141.809	-1378.61	1657.02	286.435	-1363.1	1656.39	212.225	-1422.82	1480.34	204.038	-1464.37	1218.84	218.579	-1266.64	1407.84	220.841	-1170.41	1202.04	267.661	-1476.27	1279.74	29.8817	-1338.59	1435.02	-28.1075	-1414.58	1213.83	-27.5505	-1453.89	1121.48	-82.2913	-1475.96	964.047	-70.2623	-1462.19	869.782	-91.7499	-1524.62	898.589	-112.34	-1518.32	818.791
2600	0	154.148	-1210.56	1632.79	250.724	-1203.73	1637.62	140.091	-1366.18	1657.56	284.256	-1350.58	1657.89	211.547	-1409.75	1481.87	202.966	-1451.7	1220.55	218.297	-1253.74	1408.93	220.884	-1157.94	1202.97	267.384	-1463.78	1281.58	29.5112	-1325.08	1436.28	-28.9875	-1398.22	1213.72	-29.4499	-1436.91	1121.69	-84.0967	-1456.06	963.334	-72.451	-1441.08	869.773	-94.4535	-1503.74	897.655	-115.449	-1495.76	817.854
2601	0	152.283	-1198.02	1633.29	249.074	-1190.73	1639.01	138.698	-1353.51	1658.39	282.68	-1337.6	1659.47	210.889	-1397.09	1483.1	202.218	-1439.5	1221.84	218.226	-1241.26	1409.68	220.889	-1145.81	1203.75	267.216	-1451.58	1283.06	29.2276	-1311.9	1437.45	-30.444	-1381.87	1214.33	-31.3225	-1419.78	1121.69	-86.7306	-1435.5	963.394	-74.2391	-1419.11	869.471	-97.0795	-1481.96	896.514	-118.355	-1472.11	817.184
2602	0	151.001	-1185.38	1634.03	247.524	-1177.76	1639.9	137.66	-1340.91	1659.58	281.79	-1324.25	1661.45	210.107	-1384.63	1484.49	201.688	-1427.44	1223.05	218.076	-1228.57	1411.08	221.054	-1133.93	1204.63	266.916	-1439.58	1284.53	28.8753	-1298.77	1438.96	-31.2857	-1365.49	1214.38	-33.1511	-1402.54	1121.66	-88.2606	-1414.54	962.299	-76.021	-1396.42	869.358	-100	-1459.34	895.3	-121.141	-1447.58	816.265
2603	0	150.087	-1172.56	1634.74	246.492	-1164.95	1640.66	136.764	-1327.84	1661.11	280.794	-1311.42	1663.03	209.246	-1372.32	1485.7	201.281	-1415.43	1224.32	217.899	-1216.61	1411.77	221.15	-1122.03	1205.43	266.363	-1427.71	1286.04	28.4519	-1285.47	1440.11	-32.5634	-1349.31	1215.07	-35.1173	-1385.07	1121.59	-90.0419	-1392.95	961.349	-77.5173	-1373.13	868.99	-102.658	-1436.18	893.658	-123.966	-1422.12	815.264
2604	0	149.564	-1159.83	1635.31	245.934	-1152.21	1641.25	136.137	-1314.96	1662.57	279.895	-1298.53	1664.44	208.488	-1359.99	1486.9	200.753	-1403.54	1225.3	217.837	-1204.47	1412.92	221.397	-1110.07	1206.25	265.518	-1416	1287.15	28.1071	-1272.33	1441.17	-33.4248	-1332.81	1215	-37.0986	-1367.57	1121.36	-91.9289	-1370.79	960.837	-79.1457	-1349.2	868.946	-105.172	-1412.24	891.965	-126.765	-1395.5	814.451
2605	0	149.45	-1147.09	1636.21	246.015	-1139.36	1642.01	135.837	-1301.89	1664.43	279.694	-1285.79	1666.01	207.719	-1347.84	1488.21	200.018	-1391.61	1226.69	217.75	-1192.4	1414.19	221.877	-1098.01	1207.3	264.295	-1404.23	1288.38	27.7717	-1259.27	1442.48	-34.7427	-1316.7	1215.68	-38.9243	-1349.92	1121.05	-93.7224	-1348.24	960.335	-80.3994	-1324.44	869.012	-107.475	-1387.68	890.345	-129.125	-1368.28	813.885
2606	0	149.211	-1134.26	1637.13	246.046	-1126.64	1642.76	135.514	-1288.76	1666.57	279.788	-1272.67	1667.85	206.963	-1335.65	1489.68	198.698	-1379.43	1228.19	217.689	-1180.29	1415.59	222.226	-1085.91	1208.37	262.697	-1392.41	1289.8	27.2101	-1246.16	1443.64	-35.8195	-1300.4	1216.16	-40.9666	-1332.23	1121.05	-95.3708	-1325.4	959.677	-81.5031	-1299.41	869.059	-109.96	-1362.59	888.815	-131.48	-1340.14	813.326
2607	0	149.401	-1121.48	1637.99	245.456	-1114.33	1642.82	135.478	-1275.92	1668.52	279.341	-1260.19	1669.25	206.279	-1323.31	1491.42	197.049	-1367.34	1229.79	217.679	-1168.29	1416.89	222.634	-1073.85	1209.47	261.046	-1380.66	1291.33	26.8015	-1233.1	1444.88	-37.1144	-1284.28	1216.84	-43.0288	-1314.4	1121.07	-97.0636	-1302.05	959.255	-82.4826	-1273.68	869.774	-112.241	-1336.75	887.449	-133.107	-1311.32	813.603
2608	0	149.892	-1108.58	1639.09	246.324	-1101.48	1643.95	135.678	-1262.88	1670.58	279.697	-1247.41	1670.46	205.666	-1311.01	1492.98	195.423	-1355.3	1231.67	217.542	-1156.31	1418.12	223.095	-1061.84	1210.67	259.401	-1368.95	1292.99	26.3726	-1220.09	1446.21	-38.3361	-1268.22	1217.72	-45.0743	-1296.57	1120.99	-98.5925	-1278.41	959.458	-83.1467	-1247.6	870.794	-114.137	-1310.59	886.243	-134.738	-1281.89	813.497
2609	0	150.292	-1095.88	1640.22	246.672	-1088.97	1644.49	135.962	-1250.02	1672.62	280.287	-1234.58	1672.18	205.018	-1298.58	1494.63	193.785	-1343.43	1233.35	217.584	-1144.21	1419.66	223.617	-1049.75	1212.22	257.676	-1357.3	1294.52	26.1777	-1207.07	1447.74	-39.7525	-1252.09	1219.18	-47.1159	-1278.66	1121.59	-99.8478	-1254.39	960.049	-83.6108	-1221.01	872.303	-115.589	-1283.71	885.54	-136.114	-1251.76	814.738
2610	0	150.726	-1083.11	1641.51	247.378	-1076.34	1645.25	136.328	-1237	1674.79	280.959	-1221.65	1673.58	204.351	-1286.08	1496.51	192.232	-1331.5	1235.26	217.446	-1132.32	1420.94	224.092	-1037.6	1213.59	256.073	-1345.59	1296.29	25.929	-1193.96	1449.61	-40.8015	-1236.1	1220.65	-49.2399	-1260.65	1122.34	-100.837	-1229.97	960.984	-83.6293	-1194.36	874.511	-117.285	-1256.51	885.748	-137.211	-1221.31	816.601
2611	0	151.233	-1070.53	1642.66	247.571	-1063.98	1645.63	136.673	-1224.35	1676.63	280.932	-1209.3	1674.21	203.752	-1273.79	1497.8	190.875	-1319.77	1236.92	217.331	-1120.18	1422.02	224.476	-1025.33	1214.95	254.652	-1333.82	1297.74	25.6889	-1180.86	1451.33	-42.0746	-1220.09	1222.04	-51.2276	-1242.61	1123.3	-101.937	-1205.41	962.476	-83.7215	-1166.98	877.32	-118.59	-1228.97	886.231	-137.709	-1190.29	818.79
2612	0	151.721	-1058.03	1643.71	248.497	-1051.48	1646.47	137.1	-1211.59	1678.35	281.222	-1197.09	1674.9	203.173	-1261.48	1499.17	189.608	-1308	1238.12	217.198	-1108.13	1423.08	224.793	-1013.31	1216.21	253.383	-1321.91	1298.98	25.5106	-1167.92	1452.9	-43.2855	-1204.22	1223.52	-53.2013	-1224.71	1124.2	-102.613	-1180.75	964.123	-83.5249	-1139.34	880.901	-119.411	-1201.07	887.17	-138.074	-1158.98	821.635
2613	0	152.054	-1045.59	1644.66	248.725	-1039.18	1646.8	137.367	-1199.07	1679.81	281.695	-1184.81	1675.92	202.512	-1249.16	1500.24	188.508	-1296.15	1239.44	217.243	-1095.98	1423.97	224.923	-1001.71	1217.29	252.14	-1309.93	1300.17	25.2111	-1154.98	1454.51	-44.4852	-1188.3	1225.12	-55.3171	-1206.9	1125.27	-103.539	-1155.89	966.365	-83.1899	-1111.74	884.845	-120.228	-1172.8	888.561	-138.082	-1127.45	825.112
2614	0	152.441	-1033.08	1645.71	249.021	-1027.06	1647.3	137.626	-1186.53	1681.15	281.829	-1172.45	1676.28	201.909	-1236.89	1501.26	187.598	-1284.27	1240.63	217.022	-1083.85	1424.69	224.788	-990.405	1217.86	251.071	-1297.8	1301.21	25.1017	-1142.15	1456	-45.7669	-1172.44	1226.58	-57.334	-1189.14	1126.36	-104.308	-1130.86	968.972	-82.6933	-1083.79	889.131	-120.822	-1144.63	890.399	-137.663	-1095.97	829.063
2615	0	152.768	-1020.71	1646.48	249.449	-1014.87	1647.88	137.823	-1174.04	1682.2	281.911	-1160.44	1676.94	201.407	-1224.39	1501.96	186.847	-1272.36	1241.51	216.781	-1071.52	1425.34	224.775	-978.999	1218.55	250.208	-1285.67	1301.96	24.7867	-1129.3	1457.11	-46.9853	-1156.81	1227.69	-59.2676	-1171.36	1126.95	-104.677	-1106.06	971.328	-82.0874	-1055.68	894.321	-121.238	-1116.06	892.462	-137.318	-1064.48	833.435
2616	0	153.024	-1008.33	1647.19	249.892	-1002.53	1648.32	137.912	-1161.73	1682.95	281.959	-1148.3	1677.31	200.928	-1211.96	1502.53	186.202	-1260.42	1241.93	216.617	-1059.25	1425.98	224.579	-967.573	1219.08	249.363	-1273.47	1302.55	24.4566	-1116.49	1458.08	-48.3671	-1140.96	1228.93	-61.28	-1153.59	1127.7	-105.288	-1081.28	974.274	-81.495	-1028.18	899.264	-121.394	-1087.67	894.714	-136.373	-1032.94	838.428
2617	0	153.086	-995.927	1647.73	250.169	-990.267	1648.69	137.724	-1149.24	1683.52	281.955	-1136	1677.57	200.372	-1199.38	1502.87	185.528	-1248.27	1242.61	216.363	-1046.9	1426.23	224.252	-956.035	1219.27	248.503	-1261.23	1303.08	24.1113	-1103.58	1458.68	-49.767	-1125.47	1229.73	-63.2473	-1135.65	1128.05	-105.536	-1056.38	977.09	-80.5701	-1000.65	904.702	-121.581	-1059.28	897.483	-135.413	-1001.79	843.617
2618	0	153.15	-983.491	1647.91	250.248	-978.041	1648.83	137.321	-1136.78	1683.55	281.659	-1124.15	1677.25	199.841	-1186.74	1502.94	184.886	-1236.21	1242.86	215.887	-1034.54	1426.11	223.703	-944.428	1219.02	247.468	-1249.57	1303.37	23.7865	-1090.84	1458.93	-50.8781	-1109.77	1230.12	-65.2143	-1117.68	1128.3	-105.581	-1031.55	980.098	-79.5268	-973.075	910.087	-121.316	-1030.85	900.311	-134.171	-970.565	849.234
2619	0	153.103	-971.049	1647.64	250.327	-965.796	1648.53	137	-1124.47	1683.26	281.271	-1112.06	1677.15	199.398	-1174.12	1502.72	184.359	-1224.2	1242.59	215.582	-1022.08	1425.71	223.288	-932.79	1218.4	246.731	-1237.35	1303.22	23.522	-1078.08	1458.78	-52.2379	-1094.09	1230.11	-67.1444	-1099.49	1128.24	-105.797	-1006.87	982.85	-78.2374	-946.13	915.462	-121.06	-1002.5	903.354	-132.704	-939.851	854.89
2620	0	153.036	-958.548	1647.33	250.4	-953.386	1648.3	136.635	-1111.76	1682.97	280.857	-1099.77	1676.68	199.065	-1161.44	1502.37	183.931	-1212.12	1242.49	215.287	-1009.57	1425.2	222.574	-921.096	1217.32	246.273	-1224.94	1303.07	23.3617	-1065.25	1458.55	-53.2964	-1078.53	1230.16	-68.941	-1081.11	1127.99	-105.581	-982.291	985.863	-76.8352	-919.247	921.341	-120.525	-974.603	906.667	-131.098	-909.502	861.101
2621	0	152.783	-946.063	1646.67	250.153	-941.025	1647.68	136.204	-1099.15	1682.43	280.777	-1087.24	1676.36	198.591	-1148.71	1501.93	183.538	-1199.99	1242.32	214.809	-996.971	1424.43	221.918	-909.27	1216.25	245.671	-1212.64	1302.62	23.1882	-1052.45	1457.98	-54.3598	-1062.76	1230.04	-70.796	-1062.59	1127.78	-105.408	-957.594	988.925	-75.1719	-892.861	927.006	-120.491	-946.785	910.454	-129.329	-879.378	867.558
2622	0	152.38	-933.484	1645.64	249.434	-928.721	1646.54	135.647	-1086.69	1681.34	279.768	-1074.9	1675.38	198.293	-1136.16	1501.09	183.433	-1187.99	1241.62	214.223	-984.474	1423.27	221.099	-897.136	1214.7	245.307	-1200.21	1301.94	22.935	-1039.79	1457.05	-55.5039	-1046.85	1229.63	-72.4617	-1043.92	1127.47	-105.069	-933.176	992.038	-73.7077	-866.593	932.834	-119.91	-919.239	914	-127.446	-849.993	874.064
2623	0	151.943	-920.956	1644.48	249.55	-915.907	1645.86	135.072	-1074	1680.17	279.009	-1062.53	1674.05	198.015	-1123.39	1500.27	183.525	-1176.02	1240.73	213.786	-971.855	1422.09	220.422	-884.73	1213.4	245.221	-1187.7	1301.14	22.6972	-1027.26	1456.01	-56.3654	-1031.06	1229.01	-74.0394	-1024.99	1126.9	-104.652	-908.912	995.365	-71.6994	-840.927	938.635	-119.188	-891.822	918.08	-125.395	-821.001	880.811
2624	0	151.479	-908.291	1643.2	248.893	-903.38	1644.57	134.558	-1061.32	1679	278.875	-1049.81	1673.14	197.78	-1110.48	1499.22	183.816	-1163.96	1239.86	213.427	-959.234	1420.87	219.552	-871.948	1211.87	245.148	-1175.28	1300.2	22.4912	-1014.63	1454.87	-57.3135	-1015.06	1228.63	-75.617	-1005.98	1126.76	-104.132	-884.919	998.871	-69.793	-815.533	944.772	-118.545	-864.776	922.443	-123.357	-792.714	887.807
2625	0	151.11	-895.625	1641.67	248.333	-890.797	1643.12	134.001	-1048.51	1677.69	278.77	-1037.11	1672.23	197.551	-1097.66	1498.11	184.356	-1151.79	1238.92	212.856	-946.651	1419.38	218.664	-858.918	1210.44	245.108	-1162.77	1299.14	22.2932	-1002.1	1453.55	-58.1377	-998.782	1228.07	-77.1315	-986.778	1126.74	-103.548	-861.111	1002.46	-67.8244	-790.917	950.393	-117.963	-838.045	927.191	-121.195	-764.904	894.962
2626	0	150.636	-882.923	1640.12	248.423	-877.843	1641.85	133.496	-1035.72	1676.27	278.113	-1024.64	1670.92	197.556	-1085.11	1496.64	185.117	-1139.55	1237.63	212.469	-933.92	1417.84	217.762	-845.905	1208.67	245.478	-1150.23	1297.87	22.2707	-989.785	1452.2	-58.8341	-982.576	1227.59	-78.4242	-967.71	1126.6	-102.774	-837.642	1006.26	-65.8058	-766.566	956.379	-117.027	-812.039	931.883	-118.996	-737.761	902.112
2627	0	150.324	-870.176	1638.24	247.975	-865.235	1640.02	133.266	-1023.14	1674.67	278.26	-1011.4	1669.9	197.525	-1072.5	1495.1	185.876	-1127.27	1236.01	212.003	-921.351	1416.14	217.017	-832.934	1207.09	245.948	-1137.66	1296.45	22.2776	-977.459	1450.7	-59.0873	-966.135	1227.05	-79.4951	-948.824	1126.62	-101.885	-814.594	1010.15	-63.7459	-742.878	962.01	-116.244	-786.358	936.876	-116.867	-711.337	909.41
2628	0	150.032	-857.474	1636.44	247.557	-852.602	1638.14	132.793	-1010.21	1673.02	277.644	-998.948	1668.16	197.38	-1059.9	1493.48	186.565	-1114.79	1234.38	211.692	-908.568	1414.34	216.196	-820.057	1205.21	246.328	-1125.05	1294.99	22.256	-965.191	1449.22	-59.5441	-949.605	1226.48	-80.637	-930.016	1126.7	-101.048	-791.907	1014.05	-61.7905	-719.822	967.515	-115.463	-761.479	941.87	-114.644	-685.558	916.521
2629	0	149.755	-844.813	1634.41	247.33	-839.881	1636.31	132.393	-997.706	1671.16	276.989	-986.499	1666.05	197.381	-1047.39	1491.49	187.281	-1102.11	1232.55	211.416	-895.85	1412.41	215.217	-807.091	1203.19	246.781	-1112.38	1293.27	22.3158	-952.877	1447.44	-59.6848	-933.234	1225.67	-81.5029	-911.434	1126.63	-100.158	-769.89	1017.78	-59.8589	-697.339	972.73	-114.609	-736.98	946.947	-112.616	-660.516	923.742
2630	0	149.431	-832.259	1632.35	247.151	-827.242	1634.31	132.481	-985.049	1669.33	276.86	-973.906	1664.31	197.575	-1034.89	1489.37	188.035	-1089.25	1230.38	211.248	-883.142	1410.53	214.747	-794.146	1201.57	247.44	-1099.63	1291.24	22.2847	-940.618	1445.74	-59.6303	-916.89	1224.99	-82.044	-893.33	1126.63	-99.2376	-748.327	1021.64	-57.9614	-675.353	978.242	-113.914	-713.301	951.948	-110.491	-636.4	930.789
2631	0	149.353	-819.672	1630.56	247.063	-814.552	1632.53	132.377	-972.408	1667.56	277.807	-960.591	1663.32	197.857	-1022.32	1487.58	188.726	-1076.15	1228.31	211.272	-870.335	1408.79	214.274	-781.23	1199.9	247.99	-1086.71	1289.27	22.5777	-928.248	1444.36	-59.6892	-900.639	1224.45	-82.5662	-875.443	1126.75	-98.4334	-727.374	1025.46	-56.3777	-654.083	983.493	-113.116	-690.361	957.13	-108.64	-612.887	937.842
2632	0	149.222	-807.12	1628.65	246.885	-801.895	1630.78	132.337	-959.919	1665.85	276.959	-948.217	1661.05	198.156	-1009.65	1485.81	189.371	-1062.95	1226.38	211.4	-857.439	1407.12	213.997	-768.238	1198.39	248.539	-1073.61	1287.38	22.8015	-915.778	1442.84	-59.5988	-884.649	1224.06	-82.906	-857.591	1127.06	-97.5954	-707.137	1029.3	-54.8926	-633.328	988.775	-112.432	-668.184	962.265	-107.122	-590.376	944.709
2633	0	149.26	-794.643	1627	247.009	-789.211	1629.2	132.514	-947.422	1663.93	277.091	-935.586	1659.35	198.624	-997.18	1483.97	189.895	-1049.52	1224.27	211.507	-844.537	1405.37	213.828	-755.211	1196.8	249.089	-1060.49	1285.28	23.1668	-903.072	1441.48	-59.4389	-868.929	1223.58	-83.188	-840.665	1127.04	-96.9274	-687.452	1032.84	-53.7899	-613.435	993.572	-111.853	-646.845	967.032	-105.819	-568.725	951.43
2634	0	149.472	-782.117	1625.37	247.078	-776.571	1627.6	132.957	-934.991	1662.3	277.605	-922.892	1657.94	199.076	-984.472	1481.96	190.341	-1036.13	1222.04	211.893	-831.435	1403.93	213.893	-742.097	1195.57	249.639	-1047.25	1283.26	23.629	-890.071	1440.2	-59.1721	-853.56	1223.06	-83.3019	-823.882	1127.21	-96.2638	-668.596	1036.28	-52.6568	-594.103	998.724	-111.304	-626.469	971.65	-104.782	-548.08	957.873
2635	0	149.598	-769.684	1624.03	247.263	-763.98	1626.33	133.58	-922.577	1660.71	278.048	-910.346	1656.19	199.474	-971.59	1480.22	190.633	-1022.57	1220.3	212.373	-818.317	1402.61	214.08	-728.946	1194.17	249.893	-1034.04	1281.36	24.1812	-876.86	1439.2	-58.9211	-838.558	1222.71	-83.4929	-807.549	1127.48	-95.8799	-650.547	1039.54	-52.0017	-575.474	1003.34	-110.796	-607.062	975.925	-104.013	-528.314	964.079
2636	0	150.001	-757.122	1622.85	247.557	-751.387	1625.2	134.052	-910.235	1658.97	278.523	-897.779	1654.82	199.899	-958.556	1478.67	190.802	-1009.17	1218.71	212.833	-805.134	1401.23	214.623	-715.433	1193.15	250.063	-1020.72	1279.56	24.673	-863.501	1438.26	-58.5989	-823.708	1222.33	-83.549	-791.738	1127.44	-95.4972	-633.095	1042.55	-51.3899	-557.488	1007.92	-110.496	-588.295	979.968	-103.565	-509.459	969.717
2637	0	150.694	-744.549	1621.81	248.372	-738.628	1624.17	134.79	-897.735	1657.66	279.176	-885.137	1653.24	200.464	-945.46	1477.16	190.926	-995.559	1217.12	213.59	-791.806	1400.14	215.235	-701.792	1191.94	250.272	-1007.17	1277.91	25.6143	-849.678	1437.48	-58.3525	-809.086	1221.95	-83.4591	-776.441	1127.55	-95.2646	-616.274	1045.15	-51.2364	-540.308	1011.65	-110.44	-570.583	983.409	-103.365	-491.52	974.96
2638	0	151.534	-731.881	1620.98	249.184	-725.984	1623.07	135.683	-885.131	1656.56	279.994	-872.432	1652	201.018	-932.372	1475.8	190.935	-981.711	1215.65	214.464	-778.458	1399.09	216.283	-687.919	1191.21	250.428	-993.636	1276.33	26.4007	-835.874	1436.84	-57.9663	-794.854	1221.59	-83.2782	-761.612	1127.47	-94.9307	-600.291	1047.32	-50.9642	-523.756	1015.19	-109.942	-553.63	986.247	-103.491	-474.375	979.604
2639	0	152.57	-719.11	1620.44	250.133	-713.445	1622.41	136.575	-872.392	1655.7	280.864	-860.053	1651.02	201.499	-919.175	1474.64	190.804	-967.675	1214.36	215.312	-765.104	1398.3	217.427	-673.917	1190.7	250.37	-979.89	1274.95	27.2895	-821.989	1436.29	-57.7544	-780.562	1221.43	-83.3515	-746.932	1127.56	-94.9636	-584.892	1048.96	-51.0203	-507.853	1018.26	-109.935	-537.396	988.536	-103.965	-458.226	983.679
2640	0	153.61	-706.341	1620.07	251.429	-700.636	1622.09	137.479	-859.778	1654.74	281.831	-847.726	1649.86	202.202	-906.051	1473.44	190.625	-953.412	1213.03	216.364	-751.591	1397.83	218.755	-659.76	1190.38	250.502	-965.919	1273.52	28.2465	-808.177	1435.66	-57.4159	-766.648	1221.24	-83.1416	-732.729	1127.44	-94.9796	-569.977	1050.16	-51.3492	-492.697	1019.84	-109.99	-522.08	990.233	-104.502	-442.823	986.968
2641	0	154.895	-693.486	1619.91	252.561	-688.099	1621.78	138.618	-846.989	1654.23	283.024	-835.207	1649.39	203.049	-892.81	1472.51	190.836	-938.738	1211.82	217.429	-738.054	1397.66	220.408	-645.354	1190.44	250.806	-951.687	1272.18	29.4173	-794.326	1435.29	-57.1805	-752.621	1221.32	-83.0578	-718.647	1127.34	-95.1818	-555.709	1050.98	-51.4444	-478.074	1021.53	-110.042	-507.509	991.317	-105.397	-428.384	989.525
2642	0	156.268	-680.831	1620.37	254.193	-675.348	1622.3	139.86	-834.336	1654.17	284.128	-822.41	1649.08	204.02	-879.479	1472.01	190.984	-923.997	1211.05	218.799	-724.427	1397.94	222.046	-630.875	1191.07	251.223	-937.489	1271.21	30.3706	-780.617	1435.42	-56.7521	-738.936	1221.7	-82.5627	-705.062	1127.56	-95.1328	-541.904	1051.54	-52.0536	-464.441	1021.63	-110.338	-493.711	992.067	-106.298	-414.63	991.58
2643	0	157.859	-668.035	1621.15	255.423	-662.701	1622.78	141.196	-821.739	1654.02	285.743	-809.903	1649.19	205.073	-866.182	1471.8	191.326	-909.315	1210.48	219.953	-710.763	1398.4	223.676	-616.15	1191.97	251.807	-923.058	1270.52	31.5667	-766.792	1435.68	-56.4242	-725.291	1222.17	-82.2629	-691.463	1127.96	-95.4377	-528.706	1051.69	-52.4298	-451.034	1022.16	-110.639	-480.6	992.111	-107.397	-401.722	992.677
2644	0	159.309	-655.367	1622.03	256.888	-650.013	1623.65	142.904	-809.208	1654.04	287.305	-797.522	1649.09	206.299	-852.61	1471.55	191.991	-894.697	1209.96	221.169	-696.905	1398.95	225.143	-601.277	1193	252.736	-908.587	1269.93	32.5952	-753.171	1436.07	-56.0008	-711.851	1222.62	-82.0272	-678.539	1128.35	-95.6684	-516.103	1051.27	-52.9155	-438.557	1021.45	-111.08	-468.325	991.812	-108.447	-389.487	992.667
2645	0	160.82	-642.559	1623.44	258.641	-637.225	1624.91	144.536	-796.768	1654.47	288.606	-784.913	1649.21	207.427	-839.007	1471.48	192.828	-880.196	1210.02	222.449	-683.044	1399.7	226.561	-586.255	1194.26	253.671	-894.098	1269.57	33.8236	-739.371	1436.81	-55.2568	-698.683	1223.31	-81.6396	-665.918	1128.93	-95.9868	-504.146	1050.73	-53.543	-426.646	1020.15	-111.87	-456.748	991.095	-109.688	-378.141	991.826
2646	0	162.379	-629.829	1625.17	260.328	-624.345	1626.64	146.117	-784.354	1654.93	290.39	-772.138	1649.35	208.597	-825.355	1472.04	193.381	-865.96	1210.42	223.477	-669.12	1400.54	227.745	-571.338	1195.53	254.575	-879.542	1269.77	34.8135	-725.577	1437.88	-54.6259	-685.579	1224.03	-81.3207	-653.779	1129.59	-96.3028	-492.641	1049.97	-54.2264	-415.426	1018.44	-112.566	-445.968	990.025	-110.953	-367.396	989.928
2647	0	163.991	-617.004	1627.02	261.863	-611.495	1628.26	147.747	-771.914	1655.42	292.293	-759.495	1649.64	209.781	-811.604	1472.89	193.754	-852.354	1211.09	224.442	-655.297	1401.47	228.45	-556.669	1196.63	255.23	-865.236	1270.21	35.9412	-711.655	1439.11	-53.8571	-672.659	1224.88	-80.8459	-641.836	1130.53	-96.6896	-481.849	1048.81	-55.1444	-404.86	1015.9	-113.546	-435.949	988.418	-112.078	-357.467	987.032
2648	0	165.746	-604.045	1629.08	263.596	-598.546	1629.87	149.826	-758.999	1656.55	293.805	-746.834	1649.99	210.812	-797.88	1473.88	194.309	-838.609	1212.21	225.222	-641.586	1402.5	229.032	-542.255	1197.79	255.727	-851.507	1271.18	36.7175	-697.845	1440.54	-52.9769	-659.85	1225.88	-79.9797	-630.28	1131.19	-97.0608	-471.464	1047.47	-56.0246	-394.975	1012.99	-114.419	-426.771	986.267	-113.16	-348.282	983.238
2649	0	167.376	-590.896	1631.02	265.087	-585.568	1631.16	151.599	-746.082	1657.62	295.783	-733.679	1650.62	211.638	-784.139	1475.12	194.533	-825.382	1213.73	225.886	-627.977	1403.56	229.183	-528.047	1198.87	256.171	-838.041	1272.52	37.5765	-684.007	1442.32	-52.1429	-647.331	1227.02	-79.1322	-619.049	1132.17	-97.3884	-461.804	1045.83	-56.843	-385.656	1009.75	-115.189	-418.294	983.846	-114.31	-339.868	978.753
2650	0	168.854	-577.688	1632.92	266.28	-572.494	1632.23	152.902	-733.02	1659.14	297.145	-720.658	1650.94	212.308	-770.557	1476.87	194.621	-812.186	1215.42	226.18	-614.575	1404.56	229.366	-514.081	1200.2	256.343	-824.868	1273.84	38.1901	-670.326	1443.94	-51.4272	-634.95	1228.22	-78.6963	-607.92	1133.21	-97.8978	-452.682	1043.84	-57.7396	-376.957	1006.05	-116.007	-410.512	980.925	-115.412	-332.26	973.47
2651	0	170.052	-564.324	1634.58	267.755	-559.227	1633.42	154.045	-719.768	1660.68	298.05	-707.637	1651.48	212.732	-757.251	1478.02	194.707	-799.092	1216.93	226.335	-601.365	1405.56	229.345	-500.656	1201.38	256.003	-812.068	1275.22	38.56	-657.116	1445.57	-50.7154	-622.786	1229.41	-78.0828	-597.221	1134.21	-98.2772	-444.064	1041.46	-58.6178	-368.996	1001.8	-116.849	-403.478	977.699	-116.546	-325.464	967.349
2652	0	171.172	-550.949	1636.01	268.875	-545.853	1634.42	155.068	-706.286	1662.42	299.125	-694.382	1652.41	213.248	-744.207	1479.61	194.936	-786.173	1218.39	226.553	-588.297	1406.91	229.25	-487.782	1202.51	256.295	-798.865	1276.52	38.9962	-644.182	1447.22	-50.093	-610.999	1230.68	-77.3807	-586.652	1135.16	-98.7788	-435.879	1038.94	-59.4855	-361.593	997.227	-117.29	-397.185	973.94	-117.354	-319.38	960.895
2653	0	171.883	-537.501	1637.38	269.612	-532.461	1635.3	156.047	-692.749	1664.36	299.999	-680.802	1653.79	213.549	-731.425	1481.03	195.135	-773.473	1220	226.689	-575.516	1408.44	228.922	-475.285	1203.78	256.475	-786.07	1277.87	39.3712	-631.534	1448.99	-49.6289	-599.293	1231.99	-76.6391	-576.449	1136.05	-99.153	-428.276	1036.26	-60.3097	-354.894	992.309	-118.219	-391.436	970.141	-118.089	-314.129	954.139
2654	0	172.335	-524.023	1638.28	269.899	-519.102	1636.06	156.404	-679.127	1666.16	300.442	-667.188	1655.47	213.974	-718.894	1482.59	195.486	-760.847	1221.49	226.622	-562.958	1409.75	228.46	-463.178	1204.88	256.785	-773.381	1279.42	39.374	-619.373	1450.5	-49.1999	-587.87	1233.22	-75.9288	-566.342	1137.05	-99.5332	-421.228	1033.03	-61.0455	-348.724	987.181	-118.845	-386.382	965.85	-118.758	-309.606	946.79
2655	0	172.551	-510.537	1639.24	270.181	-505.522	1637.01	156.802	-665.365	1668.25	300.562	-653.532	1657.21	214.393	-706.318	1484.32	196.101	-748.372	1223.03	226.674	-550.487	1411.19	228.008	-450.998	1206.32	257.29	-760.866	1280.9	39.4473	-607.421	1452.02	-48.6927	-576.999	1234.27	-75.0358	-556.669	1137.57	-99.8879	-414.911	1029.66	-61.8035	-343.319	981.707	-119.287	-382.022	961.457	-119.3	-305.796	939.116
2656	0	172.573	-497.154	1640.41	269.776	-492.461	1637.55	157.051	-651.935	1670.04	300.727	-639.884	1659.11	214.644	-693.877	1485.73	196.896	-736.126	1224.54	226.679	-537.961	1412.97	227.568	-438.591	1208.47	258.073	-748.389	1282.39	39.2382	-595.701	1453.58	-48.3922	-566.311	1235.18	-73.9943	-547.539	1138.05	-100.132	-409.179	1026.26	-62.4566	-338.795	975.659	-119.827	-378.129	957.084	-119.737	-302.833	931.34
2657	0	172.326	-483.804	1641.48	270.152	-478.631	1639.48	156.819	-638.323	1672.22	300.757	-626.185	1661.19	214.78	-681.525	1487.86	197.698	-723.894	1226.32	226.504	-525.603	1414.85	226.91	-426.239	1210.05	258.587	-736.065	1284.23	39.0329	-584.202	1454.94	-47.9563	-556.067	1236.04	-73.05	-538.667	1138.5	-100.422	-403.884	1022.78	-63.2893	-334.653	970.186	-120.408	-375.068	952.51	-120.379	-300.7	923.72
2658	0	172.084	-470.34	1642.99	268.802	-465.796	1640.08	156.614	-624.824	1674.45	300.917	-612.644	1663.63	214.904	-669.051	1489.98	198.675	-711.806	1228.33	226.3	-513.198	1416.74	226.259	-413.883	1212.16	259.149	-723.794	1286.32	38.6541	-572.567	1456.39	-47.6146	-546.131	1236.74	-72.0471	-530.357	1138.54	-100.642	-399.281	1019.31	-64.0772	-331.185	964.505	-120.694	-372.836	947.929	-120.794	-299.361	916.144
2659	0	171.796	-457.007	1644.52	268.746	-452.313	1642.03	156.578	-611.384	1676.59	300.782	-599.164	1666.04	215.09	-656.421	1492.15	200.005	-699.603	1230.67	225.929	-500.875	1418.92	225.679	-401.612	1214.38	259.986	-711.43	1288.68	38.2389	-560.928	1457.77	-47.1155	-536.801	1237.34	-70.4807	-522.402	1138.67	-100.623	-395.285	1015.79	-64.7761	-328.336	959.017	-120.525	-370.94	943.686	-121.394	-298.919	908.887
2660	0	171.544	-443.813	1646.29	268.482	-439.025	1643.84	156.394	-597.911	1678.84	300.474	-585.733	1668.54	215.255	-643.665	1494.56	201.388	-687.461	1233.03	225.881	-488.374	1421.1	225.213	-389.545	1216.62	260.765	-699.115	1291.23	37.8968	-549.124	1459.47	-46.6574	-527.798	1238.08	-68.9712	-514.9	1138.87	-100.683	-391.974	1012.61	-65.3222	-325.967	954.023	-120.471	-369.901	939.482	-121.935	-299.155	902.155
2661	0	171.317	-430.656	1648.05	268.034	-425.881	1645.59	156.04	-584.699	1681.11	300.31	-572.35	1670.94	215.358	-630.927	1497.03	202.625	-675.292	1235.37	225.493	-475.899	1423.27	224.528	-377.609	1218.59	261.55	-686.742	1293.82	37.5194	-537.336	1460.84	-45.8266	-519.174	1238.44	-67.5077	-507.67	1138.84	-100.443	-388.977	1009.55	-65.9574	-324.297	948.803	-119.891	-369.714	935.33	-122.518	-300.082	895.659
2662	0	170.977	-417.533	1649.81	267.662	-412.812	1647.45	155.799	-571.631	1682.9	300.146	-559.213	1672.85	215.56	-618.256	1499.16	203.805	-662.968	1237.52	225.479	-463.293	1425.12	224.151	-365.706	1220.63	262.458	-674.321	1296.19	37.3385	-525.368	1462.18	-45.0785	-510.862	1238.74	-65.6332	-500.927	1138.8	-100.131	-386.577	1006.48	-66.5495	-323.085	943.947	-119.52	-369.845	931.435	-123.151	-301.637	889.357
2663	0	170.705	-404.683	1651.32	267.53	-399.819	1649.09	155.601	-558.653	1684.65	299.679	-546.06	1674.77	215.593	-605.426	1500.81	204.807	-650.487	1239.35	225.45	-450.567	1426.87	223.748	-353.776	1222.51	263.441	-661.758	1298.22	37.2117	-513.437	1463.37	-44.1265	-502.78	1238.96	-63.6607	-494.626	1138.68	-99.7689	-384.495	1003.51	-66.9738	-322.258	939.152	-119.269	-370.301	927.918	-123.698	-303.552	883.566
2664	0	170.53	-391.781	1652.97	267.503	-386.85	1650.96	155.373	-545.776	1686.17	299.488	-533.16	1676.63	215.698	-592.692	1502.82	205.639	-637.918	1241.11	225.232	-437.894	1428.53	223.532	-341.689	1224.37	264.559	-649.025	1300.31	37.0749	-501.363	1464.43	-43.0234	-494.849	1239.05	-61.6851	-488.407	1138.6	-99.24	-382.753	1000.58	-67.5423	-321.452	934.873	-118.792	-371.103	924.478	-124.43	-306.067	877.954
2665	0	170.169	-379.006	1654.33	266.775	-373.993	1652.48	155.147	-533.054	1687.34	299.452	-520.239	1678.23	215.996	-579.657	1504.42	206.398	-625.26	1242.96	225.442	-425.146	1429.85	223.314	-329.603	1225.68	265.527	-636.183	1302.22	37.0379	-489.189	1465.33	-41.7794	-487.092	1238.97	-59.7298	-482.426	1138.31	-98.7202	-381.393	997.677	-67.8684	-321.922	929.828	-118.155	-372.347	921.122	-124.782	-309.035	872.529
2666	0	169.739	-366.418	1655.39	266.457	-361.123	1653.86	155.078	-520.419	1688.24	299.332	-507.488	1679.54	216.355	-566.75	1505.71	206.999	-613.275	1244.13	225.355	-412.242	1430.86	223.449	-317.364	1226.89	266.632	-623.203	1303.65	37.185	-476.904	1465.87	-40.6182	-479.15	1238.7	-57.6709	-476.47	1137.98	-98.0931	-380.085	994.864	-68.3063	-321.952	925.345	-117.468	-373.818	917.747	-125.378	-312.027	867.334
2667	0	169.454	-353.74	1656.57	266.1	-348.189	1655.27	155.064	-507.914	1688.77	299.312	-494.584	1680.5	216.594	-553.647	1506.52	207.756	-600.464	1245.26	225.518	-399.4	1431.66	223.579	-305.22	1227.69	267.679	-610.142	1304.79	37.202	-464.547	1466.23	-39.2675	-471.442	1238.38	-55.6165	-470.447	1137.57	-97.5319	-379.041	992.026	-68.6012	-322.308	920.883	-116.242	-375.381	914.378	-125.681	-315.176	862.416
2668	0	168.966	-341.138	1657.37	265.616	-335.355	1656.34	154.922	-495.436	1689.06	298.967	-481.727	1681.08	216.917	-540.638	1507.51	208.251	-587.865	1246.05	225.475	-386.518	1432.21	223.685	-293.147	1228.11	268.445	-597.173	1305.72	37.2576	-452.123	1466.31	-38.0428	-463.488	1237.96	-53.7538	-464.429	1137.26	-97.0366	-377.988	989.253	-69.0987	-322.764	916.473	-115.715	-377.079	911.448	-126.041	-318.641	857.532
2669	0	168.623	-328.468	1657.79	265.066	-322.511	1657.08	154.74	-483.032	1688.9	298.856	-468.859	1681.45	217.35	-527.584	1507.75	208.753	-575.036	1246.57	225.717	-373.527	1432.47	223.879	-281.033	1228.07	269.229	-584.232	1306.25	37.2393	-439.655	1466.08	-36.5897	-455.401	1237.38	-51.869	-458.176	1136.67	-96.3242	-377.025	986.353	-69.4816	-323.314	912.252	-114.895	-378.911	908.428	-126.346	-322.076	852.82
2670	0	168.182	-315.774	1658.02	264.875	-309.463	1657.7	154.849	-470.479	1688.57	298.966	-455.889	1681.6	217.726	-514.377	1507.81	209.331	-562.185	1246.57	225.829	-360.532	1432.42	224.458	-268.902	1227.83	270.154	-571.188	1306.5	37.3606	-427.139	1465.62	-35.6826	-446.933	1236.9	-49.979	-451.755	1135.98	-95.7532	-376.053	983.857	-69.6784	-323.888	908.24	-113.587	-380.474	905.574	-126.507	-325.724	848.463
2671	0	167.83	-303.038	1658.08	264.36	-296.399	1657.82	154.897	-457.699	1688.15	298.99	-442.68	1681.64	218.205	-501.046	1507.65	209.833	-549.312	1246.63	226.056	-347.468	1432.19	224.793	-256.693	1227.02	270.899	-558.314	1306.54	37.5632	-414.449	1464.99	-34.3037	-438.291	1236.02	-48.2296	-445.059	1135.27	-95.038	-374.902	981.032	-70.1347	-324.575	904.127	-112.935	-382.208	903.022	-126.566	-329.393	844.271
2672	0	167.549	-290.186	1657.53	264.082	-283.21	1657.59	154.756	-444.977	1687.35	298.695	-429.472	1681.08	218.54	-487.893	1507.18	210.141	-536.497	1246.35	226.061	-334.447	1431.34	225.127	-244.442	1225.68	271.607	-545.432	1306.37	37.614	-401.681	1464.03	-33.1759	-429.266	1234.92	-46.6614	-438.359	1134.51	-94.2965	-373.523	978.58	-70.2979	-325.278	899.918	-111.731	-383.63	900.574	-126.668	-333.068	840.083
2673	0	167.222	-277.182	1656.5	263.665	-269.966	1656.75	154.778	-431.978	1686.28	298.636	-416.451	1680.27	218.905	-474.548	1506.47	210.443	-523.749	1245.73	226.444	-321.388	1430.21	225.591	-231.864	1223.91	272.286	-532.67	1305.77	37.8426	-388.863	1462.66	-31.5204	-420.042	1233.3	-44.9492	-431.298	1133.52	-93.6867	-372.093	976.015	-70.3277	-326.142	895.613	-110.913	-385.114	898.301	-126.588	-336.666	836.199
2674	0	166.923	-264.075	1655.14	263.305	-256.65	1655.48	154.806	-418.795	1685.17	298.696	-402.729	1679.12	219.313	-461.319	1505.55	210.786	-511.031	1244.96	226.642	-308.355	1428.87	225.914	-219.423	1221.85	272.898	-519.953	1304.93	38.0777	-376.009	1461.17	-30.9833	-410.414	1232.27	-43.3956	-423.961	1132.54	-92.8855	-370.508	973.671	-70.6385	-326.384	892.233	-109.911	-386.345	896.402	-126.472	-340.211	832.561
2675	0	166.688	-250.745	1653.56	263.072	-243.146	1653.99	154.865	-405.377	1683.8	298.667	-389.17	1678.18	219.602	-448.16	1504.52	210.853	-498.375	1243.94	226.731	-295.277	1427.28	225.947	-206.339	1219.41	273.415	-507.218	1304.01	38.2083	-363.03	1459.96	-30.2233	-400.586	1230.96	-41.8025	-416.664	1131.63	-92.3342	-368.896	971.741	-70.747	-326.663	888.672	-108.693	-387.393	894.638	-126.327	-343.559	829.467
2676	0	166.609	-237.281	1651.59	263.079	-229.582	1652.29	154.71	-391.906	1682.44	298.558	-375.572	1676.75	219.825	-434.989	1503.21	210.705	-485.797	1242.7	226.872	-282.285	1425.66	226.337	-192.949	1217.17	273.815	-494.468	1302.85	38.2101	-350.044	1458.28	-29.6492	-390.585	1229.5	-40.2877	-408.885	1130.68	-91.2058	-366.987	969.778	-70.8732	-326.776	885.379	-107.92	-388.068	893.336	-125.96	-346.698	826.408
2677	0	166.458	-223.777	1649.34	262.833	-216.006	1649.99	154.908	-378.2	1680.86	298.618	-361.69	1675.23	220.102	-421.785	1501.68	210.492	-473.268	1241.14	226.583	-269.272	1423.64	226.603	-179.62	1214.84	274.192	-481.586	1301.38	38.2761	-336.988	1456.62	-29.077	-380.551	1228.07	-38.6779	-401.145	1129.56	-90.3561	-364.735	967.734	-70.9818	-326.635	882.546	-106.661	-388.518	892.168	-125.431	-349.581	823.841
2678	0	166.344	-210.061	1647.03	262.727	-202.254	1647.53	154.951	-364.369	1679.36	298.603	-347.68	1673.69	220.132	-408.665	1499.89	210.086	-460.755	1239.59	226.911	-256.228	1421.71	226.837	-166.309	1212.63	274.3	-468.707	1299.76	38.2	-323.897	1454.89	-28.6525	-370.217	1226.42	-37.1434	-393.094	1128.58	-89.6135	-362.251	966.514	-71.4826	-325.979	880.053	-105.458	-388.469	891.392	-125.191	-352.251	821.892
2679	0	166.335	-196.357	1644.53	262.801	-188.526	1645	154.81	-350.503	1677.71	298.568	-333.945	1671.97	220.003	-395.543	1498.33	209.368	-448.148	1238.11	226.612	-243.145	1419.73	227.067	-152.988	1210.49	274.106	-455.947	1298.13	37.8488	-310.848	1453.37	-28.6873	-359.885	1225.28	-36.0504	-384.679	1127.61	-89.1776	-359.42	965.513	-71.6161	-325.377	878.172	-104.407	-388.176	890.837	-124.716	-354.483	820.275
2680	0	166.123	-182.755	1641.69	262.769	-174.85	1642.19	154.682	-336.506	1675.86	298.518	-320.126	1670.04	219.729	-382.464	1496.3	208.501	-435.444	1236.23	226.384	-230.138	1417.35	227.279	-139.741	1208.11	273.811	-443.053	1296.34	37.7468	-297.76	1451.27	-28.4852	-349.616	1223.76	-34.6595	-376.072	1126.53	-88.1827	-356.284	963.936	-71.7202	-324.39	875.989	-103.449	-387.383	890.543	-124.291	-356.199	818.737
2681	0	166.12	-168.955	1638.85	262.597	-161.213	1639.1	154.661	-322.44	1674.25	298.491	-306.224	1667.77	219.616	-369.333	1494.36	207.598	-422.529	1234.2	226.248	-217.001	1415.13	227.319	-126.542	1205.91	273.34	-430.237	1294.37	37.3649	-284.664	1449.49	-28.3067	-339.319	1222.39	-33.3795	-367.301	1125.47	-87.667	-352.603	963.09	-71.7984	-322.552	874.289	-102.33	-385.894	890.544	-123.678	-357.323	817.526
2682	0	165.932	-155.206	1636.35	262.535	-147.486	1636.34	154.672	-308.543	1672.52	298.379	-292.328	1665.86	219.283	-356.183	1492.39	206.782	-409.304	1232.38	225.702	-203.899	1412.97	227.184	-113.228	1203.95	272.741	-417.339	1292.4	37.0424	-271.592	1447.63	-28.0013	-328.825	1220.76	-32.2095	-358.089	1124.6	-87.1573	-348.363	962.701	-72.0554	-320.328	872.641	-101.294	-383.794	890.658	-123.143	-357.753	816.77
2683	0	165.68	-141.589	1633.78	262.22	-133.835	1633.63	154.504	-294.774	1670.66	298.292	-278.484	1663.91	218.691	-343.532	1490.3	206.009	-395.903	1230.31	225.193	-190.772	1410.87	227.024	-100.01	1202.09	272.053	-404.426	1290.56	36.4363	-258.67	1445.76	-27.9308	-318.257	1219.63	-31.3322	-348.707	1123.67	-86.9036	-343.575	962.151	-72.4948	-317.445	871.336	-100.311	-381.105	890.936	-122.811	-357.618	816.17
2684	0	165.237	-128.054	1631.5	261.813	-120.342	1631.15	154.173	-281.19	1669	297.837	-264.938	1661.75	218.213	-330.521	1488.21	205.434	-382.319	1228.19	224.614	-177.54	1409.04	226.738	-86.89	1200.59	271.471	-391.373	1288.44	35.7024	-245.906	1444.01	-27.9065	-307.56	1218.15	-30.7972	-339.136	1122.69	-86.5674	-338.279	961.538	-73.0474	-313.879	870.123	-99.3252	-377.611	891.344	-122.565	-356.636	815.858
2685	0	164.71	-114.625	1629.46	261.288	-106.891	1629.08	153.831	-267.552	1667.37	297.386	-251.262	1659.97	217.549	-317.603	1486.01	205.056	-368.63	1226.32	223.824	-164.252	1407.32	226.112	-73.7167	1199.07	270.874	-378.101	1286.42	35.15	-232.95	1442.12	-27.8345	-296.75	1216.75	-30.1493	-329.229	1121.72	-86.5584	-332.376	961.337	-73.815	-309.413	869.391	-98.6505	-373.378	891.792	-122.273	-354.798	815.733
2686	0	163.847	-101.344	1627.88	260.455	-93.4802	1627.36	153.055	-254.387	1665.71	296.689	-237.959	1658.33	216.659	-304.821	1484.23	204.55	-354.866	1224.38	223.218	-150.865	1405.8	225.314	-60.5928	1197.86	270.262	-364.6	1284.6	34.2849	-220.133	1440.5	-27.9404	-285.769	1215.5	-29.8671	-319.037	1120.88	-86.5626	-325.82	961.167	-74.6702	-304.179	868.708	-98.1891	-368.285	892.368	-122.28	-351.999	815.755
2687	0	163.012	-88.1126	1626.44	259.714	-80.1783	1626.05	152.191	-241.155	1664.21	295.896	-224.608	1656.85	214.944	-292.992	1482.06	204.185	-341.147	1222.67	222.182	-137.366	1404.33	224.345	-47.1722	1196.71	269.692	-350.872	1282.85	33.3509	-207.383	1438.93	-28.1719	-274.567	1214.27	-29.6473	-308.656	1120.14	-86.8874	-318.685	961.056	-75.676	-298.142	868.05	-97.6894	-362.317	892.93	-122.285	-348.035	815.882
2688	0	161.858	-75.0251	1625.36	258.539	-67.0129	1625.07	151.299	-228.168	1662.95	295.134	-211.442	1655.76	215.374	-278.254	1481.01	204.022	-327.319	1221.12	221.311	-123.702	1403.13	223.042	-33.579	1195.88	269.31	-337.003	1281.23	32.4387	-194.52	1437.7	-28.5322	-263.337	1213.31	-29.5859	-297.986	1119.4	-86.9293	-310.697	960.756	-76.7782	-291.124	867.789	-97.4449	-355.434	893.19	-122.459	-342.987	816.364
2689	0	160.679	-61.8932	1624.63	257.246	-53.9362	1624.45	150.205	-215.232	1661.75	293.966	-198.296	1654.97	214.345	-265.098	1479.67	203.926	-313.374	1219.79	220.022	-110.076	1402.2	221.465	-19.6491	1195.35	268.776	-323.134	1279.98	31.3797	-181.634	1436.59	-28.9648	-251.85	1212.51	-29.8241	-287.284	1118.89	-87.466	-302.107	960.8	-77.7658	-283.3	867.433	-97.2466	-347.508	893.519	-122.614	-336.726	816.566
2690	0	159.184	-49.0122	1623.99	255.935	-40.8654	1624.01	148.76	-202.441	1660.65	292.595	-185.397	1654.2	213.078	-252.046	1478.65	203.791	-299.255	1218.72	218.825	-96.3015	1401.45	219.625	-5.61062	1194.75	268.152	-308.965	1278.93	30.2693	-168.735	1435.61	-29.5944	-240.195	1211.97	-30.2891	-275.85	1118.49	-87.8936	-292.659	960.747	-78.5667	-274.314	866.863	-97.3047	-338.794	893.828	-123.036	-329.096	816.825
2691	0	157.886	-36.0679	1623.52	254.509	-27.8772	1623.78	147.102	-189.745	1659.89	290.899	-172.529	1653.5	211.882	-238.866	1477.46	203.743	-284.852	1217.63	217.265	-82.4561	1400.99	217.669	8.59998	1194.38	267.58	-294.807	1277.84	28.9783	-155.742	1434.67	-30.3148	-228.334	1211.43	-30.6733	-264.321	1118.13	-88.2846	-282.437	960.579	-79.3234	-264.443	866.475	-97.2773	-328.999	893.994	-123.319	-320.065	816.874
2692	0	156.563	-23.0399	1623.73	253.15	-15.023	1624.11	145.498	-176.868	1659.49	289.309	-159.865	1653.32	211.023	-225.015	1476.79	203.564	-270.171	1216.7	216.068	-68.5797	1400.9	215.653	22.9662	1194.54	267.087	-280.384	1276.8	27.6754	-142.682	1434.33	-30.9835	-216.116	1211.13	-31.2931	-252.582	1117.88	-88.8411	-271.327	960.498	-80.1111	-253.729	866.322	-97.3615	-318.214	893.973	-123.896	-309.766	817.161
2693	0	154.947	-10.1174	1624.39	251.746	-2.16877	1625.04	143.808	-163.872	1659.52	287.818	-147.199	1653.91	209.958	-211.212	1476.7	203.066	-255.326	1216.11	214.438	-54.7956	1401.28	213.476	37.4473	1195.04	266.153	-265.935	1276.33	26.2307	-129.38	1434.27	-31.9121	-203.56	1211.2	-31.9903	-240.226	1118.03	-89.4962	-259.427	960.712	-80.8298	-241.895	866.323	-97.8117	-306.595	894.179	-124.407	-298.243	817.526
2694	0	153.587	2.96405	1625.22	250.267	10.6179	1626.02	141.992	-150.932	1659.56	285.901	-134.594	1654.21	208.409	-197.93	1476.54	202.298	-240.525	1215.91	213.091	-40.7102	1401.92	211.559	52.3664	1195.85	264.791	-251.378	1276.13	24.8759	-116.03	1434.29	-32.7426	-190.691	1211.62	-33.0168	-227.465	1118.28	-90.1214	-246.849	960.877	-81.4676	-229.032	866.736	-98.3919	-293.896	894.461	-125.026	-285.504	817.57
2695	0	152.102	16.0114	1626.33	248.682	23.4316	1627.43	140.014	-138.14	1659.78	283.92	-122.026	1654.8	206.934	-184.194	1476.78	201.269	-225.619	1215.85	211.514	-26.7808	1402.81	209.703	67.3973	1197.08	263.367	-236.883	1276.12	23.3662	-102.417	1434.55	-33.8975	-177.395	1212.14	-33.886	-214.083	1118.68	-90.8237	-233.326	961.19	-82.1125	-215.473	866.966	-98.8066	-280.245	894.502	-125.799	-271.555	817.994
2696	0	150.476	29.0169	1628.06	247.342	36.339	1629.47	138.122	-125.282	1660.25	282.277	-109.387	1655.92	205.976	-169.866	1477.47	200.052	-210.967	1216.22	210.154	-12.7357	1404.03	208.149	82.3051	1198.58	261.661	-222.443	1276.36	22.0118	-88.648	1435.26	-35.0676	-163.6	1212.8	-35.0752	-200.379	1119.35	-91.7508	-219.073	961.567	-82.7838	-200.754	867.595	-99.595	-265.85	894.568	-126.498	-256.545	818.112
2697	0	148.929	42.2207	1630.01	245.905	49.3614	1631.96	136.255	-112.382	1661.09	280.486	-96.6583	1657.48	204.282	-156.47	1478.26	198.571	-196.496	1217.27	208.503	1.22944	1405.63	206.767	97.0486	1200.31	259.946	-208.154	1277.23	20.6804	-74.8136	1436.34	-36.4796	-149.436	1213.8	-36.3852	-185.901	1120.11	-92.5835	-203.79	962.349	-83.3795	-185.21	868.188	-100.408	-250.218	894.852	-127.342	-240.361	818.478
2698	0	147.309	55.3227	1632.22	244.123	62.5319	1634.4	134.569	-99.372	1661.91	278.84	-83.747	1659.23	203.09	-142.834	1479.48	196.753	-182.314	1218.66	207.58	15.2015	1407.23	205.753	111.63	1201.99	258.5	-193.99	1278.81	19.6512	-60.9038	1437.5	-37.6655	-134.722	1214.79	-37.6514	-170.849	1120.92	-93.5448	-187.803	962.798	-84.0671	-168.639	869.024	-101.714	-233.912	894.81	-128.139	-223.14	818.622
2699	0	145.811	68.4745	1634.3	242.604	75.8454	1636.84	133.168	-86.3229	1662.92	277.323	-70.5386	1660.61	202.978	-127.997	1481.42	195.263	-168.608	1220.49	206.72	29.0097	1408.81	204.723	125.483	1203.37	257.064	-179.905	1280.34	18.8724	-47.1308	1438.84	-38.7187	-119.557	1215.87	-38.9423	-155.553	1121.72	-94.5767	-170.873	963.398	-84.5835	-151.308	869.783	-102.71	-216.383	895.215	-128.764	-204.813	818.737
2700	0	144.371	81.6388	1635.91	240.86	89.1311	1638.81	131.955	-73.3748	1663.89	275.937	-57.1443	1662.05	202.659	-113.326	1483.32	193.751	-155.203	1222.32	205.72	42.7127	1410.33	203.894	139.426	1204.92	256.193	-165.952	1282.56	18.1928	-33.3524	1440.54	-39.7912	-104.258	1217.05	-40.4076	-139.834	1122.79	-95.7008	-153.27	964.001	-84.9676	-132.989	870.412	-104.254	-198.052	895.421	-129.58	-185.404	818.7
2701	0	142.749	94.635	1637.42	239.495	102.604	1640.74	130.91	-60.4557	1664.68	275.264	-43.9273	1663.65	201.902	-99.6503	1485.17	192.359	-142.028	1224.34	205	56.2945	1411.64	203.077	152.933	1206.25	255.573	-152.454	1284.63	17.6867	-19.7129	1442.09	-41.0016	-88.7309	1218.31	-41.8964	-123.981	1123.99	-96.763	-134.899	964.575	-85.4601	-113.747	871.325	-105.916	-178.806	895.687	-130.41	-164.872	818.705
2702	0	141.688	107.762	1638.71	238.146	115.981	1642.17	129.877	-47.7109	1665.56	274.253	-30.3328	1664.61	201.209	-86.5708	1486.4	191.316	-129.022	1225.88	204.366	69.5189	1412.85	202.412	165.856	1207.44	255.343	-139.378	1286.38	17.0789	-6.48114	1444.04	-42.0873	-73.1315	1219.34	-43.301	-107.925	1124.91	-98.079	-115.897	965.079	-85.9563	-93.9289	871.983	-107.723	-158.977	895.684	-131.332	-143.503	818.425
2703	0	140.772	120.874	1640.25	237.206	129.43	1643.62	129.76	-34.4365	1666.88	273.486	-16.8119	1665.71	200.923	-73.2484	1488.24	190.569	-116.301	1227.45	203.631	82.5305	1414.12	201.592	178.317	1208.51	255.458	-126.694	1288.11	16.5809	7.04554	1445.83	-42.9908	-57.5738	1220.45	-44.8064	-91.7481	1125.96	-99.1682	-96.5206	965.592	-86.5184	-73.4503	873.144	-109.385	-138.288	895.434	-132.15	-121.268	818.341
2704	0	140.221	134.079	1641.85	236.718	142.812	1645.12	129.394	-21.4292	1668.34	273.779	-3.43634	1667.35	200.203	-60.8637	1489.73	189.886	-103.804	1229.06	203.2	95.4291	1415.6	200.889	190.579	1209.85	255.116	-114.362	1289.51	16.0688	20.424	1447.77	-44.0236	-41.9483	1221.86	-46.4418	-75.5416	1126.97	-100.467	-76.7395	966.118	-87.1867	-52.1649	874.455	-111.055	-116.928	895.395	-133.102	-98.2325	818.408
2705	0	140.032	147.464	1643.36	236.432	156.073	1646.39	129.352	-8.12781	1669.77	273.518	9.89647	1668.5	199.597	-47.7765	1491.43	189.148	-91.4663	1230.51	202.745	108.106	1417.04	200.323	202.578	1210.75	254.55	-102.107	1291.27	15.5339	33.7506	1449.66	-45.0577	-26.392	1223.16	-48.1822	-59.3201	1127.98	-101.468	-56.3504	966.482	-87.6882	-30.3054	875.515	-112.776	-95.0508	895.025	-134.05	-74.3793	818.542
2706	0	139.967	160.627	1644.76	236.609	169.177	1647.53	129.294	5.09375	1671.5	273.361	23.0696	1669.43	198.908	-34.998	1492.78	188.458	-79.0702	1231.86	202.459	120.764	1418.52	199.628	214.685	1212	253.557	-89.8504	1292.48	15.0004	47.1675	1451.48	-46.2024	-10.9541	1224.51	-49.9684	-43.1507	1128.78	-102.866	-35.656	967.221	-88.0023	-7.81789	876.798	-114.534	-72.5955	894.569	-134.989	-49.6265	818.611
2707	0	140.239	173.726	1646.37	236.915	182.226	1648.66	129.446	18.2489	1673.12	273.535	36.0924	1670.58	198.11	-22.5033	1494.14	187.611	-66.6072	1233.38	201.979	133.161	1419.88	199.578	227.466	1213.38	252.243	-77.6833	1293.85	14.538	60.5163	1453.14	-47.3798	4.26617	1226.01	-51.8297	-27.0374	1129.73	-104.018	-14.7859	967.52	-88.43	14.9396	878.234	-116.047	-49.545	894.154	-135.853	-24.3347	819.061
2708	0	140.647	186.889	1647.91	237.465	195.209	1649.99	129.596	31.53	1674.88	273.92	48.8663	1671.82	197.458	-9.70806	1495.83	186.233	-54.0496	1234.95	201.967	145.714	1421.34	199.405	239.597	1214.65	250.596	-65.5655	1295.33	14.0963	73.8942	1454.84	-48.829	19.5042	1227.49	-53.8205	-10.7856	1130.74	-104.804	6.4013	967.547	-88.5717	38.3549	879.548	-117.645	-25.9306	893.894	-136.583	1.77917	819.608
2709	0	141.243	200.18	1649.49	238.003	208.031	1651.16	129.627	44.5707	1676.63	273.958	61.7581	1672.87	196.663	2.59399	1497.02	184.502	-41.6163	1236.81	201.566	158.065	1422.64	199.28	251.815	1215.5	248.796	-53.5258	1296.67	13.6796	87.217	1456.46	-50.2463	34.613	1228.96	-55.8984	5.44456	1131.56	-106.143	28.1362	968.536	-88.5711	62.2701	881.303	-119.097	-1.95965	893.521	-137.251	28.5534	820.449
2710	0	141.952	213.293	1651.15	238.544	220.843	1652.44	129.906	57.7631	1678.54	274.487	74.3714	1674.47	196.461	15.4602	1499.19	182.595	-29.2098	1238.57	201.602	170.5	1424.14	199.511	264.47	1216.93	247.208	-41.4638	1298.46	13.3454	100.552	1458.24	-51.5754	49.6914	1230.16	-57.9273	21.7228	1132.52	-107.183	50.1234	969.412	-88.551	86.5041	883.239	-120.168	22.6492	893.747	-137.56	55.8549	821.724
2711	0	142.42	226.284	1652.93	239.252	233.623	1653.91	130.258	70.919	1680.55	274.696	87.1548	1675.94	195.889	28.1544	1500.99	180.713	-16.9233	1240.63	201.314	182.684	1425.63	199.721	276.842	1218.45	245.484	-29.4104	1300.09	12.9524	113.871	1460.26	-53.0142	64.9558	1232.11	-59.9748	38.021	1133.67	-108.064	72.3858	970.76	-87.8379	110.5	885.284	-121.608	47.5669	894.32	-138.008	83.625	823.769
2712	0	142.819	239.352	1654.56	239.723	246.348	1655.19	130.278	84.0027	1682.39	274.789	99.8097	1677.29	195.211	40.6451	1502.82	178.849	-4.73514	1242.55	201.311	195.187	1427.1	200.032	289.371	1219.91	243.828	-17.2837	1302.02	12.593	127.063	1462.2	-54.4369	80.1897	1233.68	-62.1825	54.3621	1135	-108.67	94.838	972.125	-88.0914	135.907	888.959	-122.596	72.892	895.349	-138.227	111.83	826.262
2713	0	143.218	252.202	1656.07	240.036	259.06	1656.32	130.223	96.8907	1684.14	274.758	112.438	1678.47	194.344	53.0636	1504.08	177.374	7.39872	1244.44	200.99	207.447	1428.45	200.435	301.899	1221.66	242.294	-5.25619	1303.57	12.2065	140.21	1464.19	-56.0551	95.3466	1235.87	-64.3165	70.9182	1136.46	-109.655	117.477	974.488	-87.9482	161.16	892.56	-123.533	98.2833	896.788	-138.358	140.341	829.485
2714	0	143.472	265.167	1657.6	240.447	271.676	1657.65	130.37	109.962	1685.73	274.826	124.957	1679.78	194.012	65.5672	1505.84	176.142	19.4448	1245.94	200.944	219.837	1429.9	200.461	313.802	1223.19	240.996	6.84871	1305.01	11.8448	153.194	1466.22	-57.3874	110.489	1237.57	-66.3823	87.3641	1137.82	-110.267	140.027	976.95	-87.4683	186.155	897.049	-123.98	124.104	898.697	-138.394	169.011	833.191
2715	0	143.689	277.956	1658.97	240.586	284.358	1658.82	130.419	122.878	1687.33	275.056	137.667	1681.27	193.277	77.8356	1507.31	175.2	31.4547	1247.72	200.596	232.195	1431.34	200.632	325.86	1224.74	239.631	19.0087	1306.55	11.5736	166.011	1468.33	-58.8037	125.626	1239.56	-68.5692	103.88	1139.32	-110.7	162.96	979.698	-87.1091	211.546	901.998	-124.638	150.13	900.943	-138.224	197.804	837.657
2716	0	143.855	290.869	1660.2	240.746	297.031	1659.68	130.116	135.661	1688.85	274.879	150.253	1682.21	192.568	90.3115	1508.65	174.259	43.6146	1249	200.238	244.588	1432.35	200.355	337.491	1225.78	238.379	31.2455	1307.87	11.2362	178.937	1469.94	-60.4049	140.862	1241.55	-70.6582	120.505	1140.74	-111.272	185.828	982.695	-86.6505	237.054	906.897	-125.259	176.323	903.522	-137.793	226.848	842.279
2717	0	143.528	303.616	1661.05	240.622	309.686	1660.24	130.11	148.598	1689.92	274.985	162.889	1683.05	191.981	102.894	1509.61	173.58	55.7525	1250.11	200.143	257.101	1433.33	200.274	349.215	1226.67	237.582	43.5144	1309.04	10.8894	191.931	1471.42	-61.458	156.106	1242.67	-72.7084	137.264	1141.75	-111.874	208.986	985.642	-86.2061	262.439	912.057	-125.594	202.633	906.224	-137.571	255.77	847.257
2718	0	143.47	316.341	1661.84	240.444	322.315	1660.8	129.968	161.484	1690.94	274.444	175.728	1683.53	191.445	115.436	1510.59	172.885	67.7706	1250.93	199.653	269.447	1433.98	200.012	360.74	1227.37	236.683	55.6006	1309.92	10.4944	204.655	1472.52	-63.2596	171.113	1243.83	-74.693	153.991	1142.62	-112.401	232.299	988.681	-85.405	288.162	917.426	-125.826	229.012	909.213	-137.022	284.685	852.258
2719	0	143.43	329.284	1662.41	240.017	335.035	1661.06	129.221	174.15	1691.42	274.136	188.217	1683.89	190.427	127.706	1510.92	172.028	79.9568	1251.69	199.334	281.968	1434.39	199.93	372.508	1227.88	235.617	67.858	1310.62	10.0582	217.426	1473.17	-64.3072	186.546	1244.66	-76.7643	171.106	1143.34	-112.842	255.555	991.57	-84.8757	313.247	922.478	-126.513	255.295	912.154	-136.456	313.49	857.614
2720	0	142.848	342.064	1662.56	239.709	347.822	1661.26	128.845	186.987	1691.68	273.419	201.017	1683.76	189.623	140.297	1511.23	171.329	92.239	1252.04	198.804	294.456	1434.76	199.601	384.208	1228.16	234.679	80.2298	1311.15	9.649	230.263	1473.64	-65.3829	201.751	1245.16	-78.7119	188.342	1143.42	-113.353	278.824	994.569	-84.2869	338.534	927.747	-126.626	281.827	915.319	-135.761	342.086	862.955
2721	0	142.241	354.783	1662.62	239.107	360.541	1661.1	128.459	199.937	1691.9	273.077	213.831	1683.82	188.951	153.113	1511.26	170.805	104.343	1252.36	198.431	306.976	1434.65	199.454	396.147	1227.96	234.054	92.4832	1311.48	9.1557	243.196	1473.84	-66.764	217.019	1245.51	-80.6661	205.675	1143.44	-113.511	301.936	997.416	-83.4432	363.772	932.863	-126.409	308.106	918.448	-134.817	370.589	868.558
2722	0	141.483	367.712	1662.57	238.571	373.383	1660.94	127.633	212.749	1691.64	272.978	226.748	1683.97	188.31	165.78	1511.45	169.993	116.642	1252.47	197.951	319.606	1434.44	198.93	407.691	1227.63	233.208	104.882	1311.63	8.55484	255.947	1473.68	-68.1111	232.345	1245.49	-82.3391	223.71	1143.15	-113.826	325.214	1000.49	-82.6293	388.771	938.147	-126.582	334.314	921.576	-134.056	398.838	874.358
2723	0	140.852	380.637	1662.05	237.854	386.334	1660.56	126.906	225.683	1691.17	271.577	239.291	1683.09	187.179	178.221	1511.22	169.428	128.711	1252.27	197.372	332.108	1434.09	198.592	419.627	1227.11	232.344	117.27	1311.62	8.09576	268.797	1473.44	-69.2669	247.803	1245.42	-84.374	241.742	1142.92	-114.207	348.524	1003.29	-81.8692	413.63	943.298	-126.855	360.476	924.982	-133.161	426.651	880.089
2724	0	140.166	393.615	1661.4	237.089	399.221	1659.86	125.921	238.549	1690.39	270.64	252.302	1682.48	186.39	190.925	1510.62	168.925	140.856	1251.97	196.682	344.771	1433.45	198.004	431.374	1226.3	231.685	129.45	1311.32	7.5354	281.677	1472.96	-70.3959	263.336	1245.02	-86.0762	260.153	1142.33	-114.362	371.649	1006.03	-81.0933	438.384	948.673	-126.737	386.544	928.338	-132.252	454.267	885.892
2725	0	139.207	406.566	1660.45	236.329	412.089	1659.02	125.13	251.621	1689.56	270.109	265.401	1681.95	185.907	203.697	1510.1	168.654	152.92	1251.35	196.302	357.416	1432.68	197.519	443.367	1225.27	231.104	141.99	1310.76	7.04053	294.264	1472.06	-71.5678	279.011	1244.57	-87.8898	278.759	1141.68	-114.573	394.867	1008.89	-79.8729	462.43	953.003	-126.752	412.335	931.651	-131.344	481.51	891.524
2726	0	138.737	419.541	1659.15	235.583	425.13	1657.85	124.314	264.836	1688.46	268.691	278.419	1680.64	185.098	216.275	1509.34	168.368	164.979	1250.66	195.619	370.055	1431.67	196.874	455.825	1223.92	230.597	154.313	1310.13	6.63984	307.102	1471.08	-72.6476	294.923	1243.74	-89.6143	297.591	1141.14	-114.825	418.143	1011.77	-79.2082	486.773	957.969	-126.693	438.033	935.06	-130.356	508.477	897.384
2727	0	137.697	432.664	1657.44	234.717	438.108	1656.13	123.305	277.969	1687.39	267.988	291.431	1679.76	184.462	229.111	1508.18	168.455	177.006	1249.77	194.867	382.554	1430.17	196.537	468.747	1222.59	230.293	166.773	1309.26	6.50028	319.811	1469.57	-73.4557	311.196	1242.88	-91.3345	316.534	1140.48	-114.874	441.165	1014.36	-78.0993	510.613	962.156	-126.814	463.518	938.674	-129.207	535.143	902.954
2728	0	137.256	445.724	1655.45	233.995	451.149	1654.28	122.563	291.144	1686.13	267.244	304.514	1678.57	184.299	241.971	1507	168.733	189.276	1248.43	194.342	395.288	1428.65	195.753	481.318	1220.85	230.332	179.331	1308.16	6.1673	332.453	1468.08	-74.3364	327.636	1241.92	-92.8419	335.456	1139.7	-114.978	464.09	1017.05	-77.2061	534.156	966.755	-127.24	488.514	942.283	-128.177	561.178	908.415
2729	0	136.241	458.818	1653.44	233.352	464.142	1652.41	121.609	304.335	1684.58	266.686	317.618	1677.41	183.762	254.739	1505.81	169.221	201.405	1246.85	193.867	407.831	1427.09	194.915	494.266	1219.2	230.518	191.853	1306.95	5.98727	344.904	1466.41	-74.4938	344.411	1240.66	-94.2857	354.517	1139.08	-114.91	486.532	1019.7	-76.4574	557.564	971.364	-127.632	513.089	945.733	-127.291	586.67	913.834
2730	0	135.85	471.843	1651.33	232.654	477.093	1650.33	120.792	317.501	1682.96	265.492	330.571	1675.79	183.22	267.175	1503.96	169.721	213.834	1245.29	193.177	420.427	1425.4	194.229	507.23	1217.42	230.618	204.36	1305.47	5.75732	357.421	1464.7	-75.6127	360.945	1239.91	-95.7893	373.318	1138.51	-115.011	508.782	1022.46	-75.6432	580.487	975.851	-127.698	537.383	949.569	-126.441	611.702	919.415
2731	0	135.022	484.737	1648.97	231.934	489.979	1648.2	119.988	330.444	1681.16	264.729	343.52	1674.08	182.968	279.856	1502	170.442	226.488	1243.49	192.755	433.127	1423.63	193.643	520.171	1215.62	230.996	217.018	1303.89	5.78177	369.781	1462.73	-76.0188	377.778	1238.72	-97.0403	392.077	1138.01	-115.161	530.608	1025.4	-75.106	602.742	980.155	-127.782	561.211	953.363	-125.63	636.316	925.025
2732	0	134.294	497.579	1646.94	231.33	502.781	1646.33	119.477	343.406	1679.46	264.286	356.414	1672.64	182.971	292.457	1500.22	171.19	239.08	1241.32	192.491	445.838	1421.88	192.902	532.976	1213.96	231.568	229.643	1301.81	5.63072	382.388	1460.92	-76.4727	394.357	1238.05	-97.9717	410.504	1137.4	-115.252	551.948	1028.37	-74.492	624.63	984.79	-127.994	584.341	957.056	-124.933	660.119	930.932
2733	0	133.801	510.209	1645.04	230.667	515.518	1644.52	118.86	356.105	1677.56	264.046	369.4	1671.31	182.656	305.174	1498.32	171.691	252.067	1239.24	192.104	458.64	1420.2	192.36	545.883	1212.34	231.929	242.517	1299.9	5.57859	394.598	1459.38	-76.9222	410.671	1237.24	-98.8723	428.551	1137	-115.392	572.572	1031.22	-74.0924	645.906	989.302	-128.099	607.126	961.392	-124.525	683.341	936.821
2734	0	132.828	522.683	1642.91	230.188	528.233	1642.85	118.368	368.625	1675.62	263.319	381.958	1669.51	182.656	317.592	1496.49	172.429	265.026	1237.24	192.087	471.444	1418.49	191.861	558.871	1210.79	232.474	255.349	1298.07	5.46563	407.23	1457.5	-77.2077	427.122	1236.5	-99.6736	446.216	1136.71	-115.471	592.689	1034	-73.7226	666.679	993.634	-128.39	628.807	965.167	-124.332	705.669	942.598
2735	0	132.383	535.163	1641.18	229.488	540.808	1641.03	118.188	380.961	1673.53	262.788	394.576	1667.6	182.671	330.431	1494.15	172.986	278.393	1234.87	192.038	484.386	1416.69	191.502	571.974	1209.08	232.869	268.552	1295.81	5.65053	419.561	1455.91	-77.4108	442.883	1235.62	-100.236	463.261	1136.29	-115.513	612.062	1036.61	-73.2469	686.78	998.015	-128.452	649.898	968.652	-124.108	727.286	948.185
2736	0	132.053	547.395	1639.53	229.024	553.39	1639.66	118.058	393.079	1671.6	263.172	407.063	1665.99	183.048	343.025	1492.38	173.683	291.79	1232.72	192.273	497.359	1415.05	191.263	585.263	1207.39	233.394	281.71	1293.72	5.98494	432.206	1454.3	-77.3132	458.284	1234.51	-100.811	479.84	1135.98	-115.657	630.81	1039.24	-73.228	706.154	1001.95	-128.749	670.179	972.471	-124.154	748.09	953.928
2737	0	131.886	559.607	1638.55	228.774	565.719	1638.64	117.979	404.95	1669.71	262.54	419.566	1663.92	183.219	355.85	1490.39	174.107	305.577	1230.83	192.364	510.467	1413.58	191.218	598.804	1206.13	233.613	295.23	1291.93	6.13358	445.328	1452.78	-77.0791	473.266	1233.56	-101.149	496.08	1135.74	-115.762	648.923	1041.9	-73.2291	724.849	1005.96	-129.194	689.748	976.137	-124.591	767.928	959.457
2738	0	131.387	571.641	1637.49	228.496	578.102	1637.78	118.377	416.839	1667.98	263.036	431.701	1662.61	183.578	368.733	1488.49	174.552	319.282	1228.86	192.695	523.629	1412.21	191.219	612.324	1204.97	233.964	308.606	1289.88	6.62247	458.314	1451.6	-76.8792	487.854	1232.55	-101.481	511.58	1135.37	-115.973	666.337	1044.37	-73.4353	742.937	1009.83	-129.73	708.173	979.113	-125.103	787.023	964.832
2739	0	131.431	583.649	1636.93	228.741	590.288	1637.3	118.843	428.727	1666.27	263.26	443.843	1661	184.092	381.807	1486.92	174.75	333.285	1226.87	193.024	536.882	1411.01	191.452	625.832	1203.75	234.277	322.405	1287.89	7.12602	471.653	1450.47	-76.9843	502.009	1231.85	-101.464	526.866	1134.75	-116.441	683.118	1046.66	-73.869	760.247	1013.46	-130.375	726.07	982.465	-126.022	805.152	969.721
2740	0	132.045	595.62	1636.69	228.976	602.401	1636.96	119.369	440.477	1664.87	263.969	455.874	1659.71	184.391	394.879	1485.21	174.847	347.451	1225.14	193.449	550.198	1410.05	192.035	639.502	1203.09	234.404	336.151	1286.21	7.58222	484.902	1449.49	-76.847	515.794	1231.04	-101.672	541.518	1134.3	-116.954	699.295	1048.73	-74.6899	776.891	1016.65	-130.76	743.466	985.788	-127.062	822.526	974.458
2741	0	132.419	607.616	1636.43	229.431	614.427	1636.78	119.845	452.131	1663.48	264.329	467.627	1658.31	184.758	407.717	1483.58	174.867	361.501	1223.44	193.971	563.611	1409.24	192.762	653.54	1202.36	234.381	349.84	1284.43	8.0771	498.414	1448.4	-76.7606	529.338	1230.39	-101.765	556.142	1133.91	-117.494	714.96	1050.47	-75.517	793.026	1019.42	-131.681	759.73	988.045	-128.528	839.008	978.256
2742	0	133.4	619.634	1636.59	230.333	626.416	1636.81	120.572	463.855	1662.08	264.974	479.482	1656.92	185.276	421.063	1482.12	175.013	375.947	1221.77	194.687	577.078	1408.65	193.536	667.508	1201.85	234.411	363.941	1282.5	8.64679	511.976	1447.47	-76.771	542.8	1229.57	-101.814	570.382	1133.33	-118.326	730.008	1051.67	-76.5345	808.685	1021.46	-132.576	775.31	989.854	-130.153	854.684	981.331
2743	0	134.096	631.589	1636.96	231.394	638.373	1637.23	121.752	475.714	1661.11	266.021	491.119	1655.94	186.071	434.027	1480.88	175.085	390.696	1220.18	195.599	590.807	1408.26	194.726	681.899	1201.76	234.775	378.269	1280.86	9.40168	525.219	1447	-76.7659	556.208	1229.37	-101.498	584.424	1132.96	-118.917	744.644	1052.63	-77.7478	823.599	1022.85	-133.5	790.288	990.976	-131.872	869.63	983.742
2744	0	135.211	643.542	1637.78	232.565	650.237	1637.9	122.943	487.524	1660.41	267.301	502.959	1655.12	186.779	447.359	1479.74	175.279	405.557	1218.85	196.379	604.344	1408.05	195.777	696.062	1201.76	235.167	392.462	1279.57	10.2017	539.089	1446.35	-76.6254	569.649	1228.96	-101.413	598.392	1132.75	-119.564	758.702	1052.77	-79.0133	837.922	1023.33	-134.536	804.474	991.466	-133.718	883.939	985.234
2745	0	136.409	655.574	1638.72	233.783	662.258	1638.78	124.129	499.239	1659.85	268.567	514.681	1654.35	187.499	460.654	1478.89	175.359	420.375	1217.78	197.301	618.092	1408.03	197.114	710.827	1201.94	235.54	407.079	1278.3	11.0401	552.69	1445.84	-76.4739	583.2	1228.86	-101.295	611.893	1132.73	-120.322	772.312	1052.63	-80.3044	851.976	1023.44	-135.647	818.02	991.703	-135.664	897.456	985.69
2746	0	137.762	667.555	1640.15	235.053	674.255	1639.92	125.523	510.933	1659.39	269.769	526.479	1653.72	188.541	473.967	1478.2	175.67	435.222	1216.91	198.181	631.99	1408.4	198.132	725.615	1202.59	236.079	421.697	1277.12	11.5875	566.289	1445.72	-76.2585	596.52	1228.84	-101.162	625.387	1132.62	-121.277	785.392	1052.32	-81.9097	865.079	1022.77	-136.901	830.916	991.217	-137.748	910.115	985.317
2747	0	139.124	679.44	1641.86	236.548	686.253	1641.67	127.153	522.687	1659.23	271.477	538.384	1653.6	189.404	487.594	1478.01	175.907	449.888	1216.36	198.953	645.791	1409.03	198.904	740.666	1203.45	236.639	436.313	1276.46	12.3731	579.979	1445.95	-75.9603	609.882	1228.82	-100.811	638.411	1132.55	-122.151	797.927	1051.62	-83.4161	877.706	1022.01	-138.013	843.063	990.381	-139.791	922.016	984.114
2748	0	140.532	691.541	1644.08	237.98	698.39	1643.55	128.74	534.458	1659.33	273.084	550.302	1653.54	190.179	500.899	1478.16	176.099	464.576	1216.51	199.855	659.661	1409.87	199.837	756.137	1204.68	237.001	450.905	1276.26	13.0431	594.023	1446.61	-75.4234	623.385	1229.39	-100.493	651.182	1132.88	-123.126	809.98	1050.84	-85.1083	889.646	1020.2	-139.711	854.293	989.332	-141.665	933.326	982.166
2749	0	142.11	703.709	1646.45	239.638	710.628	1645.77	130.42	546.421	1659.7	274.625	562.433	1653.57	190.537	514.376	1479.51	176.296	478.58	1217.22	200.515	673.567	1410.63	200.139	771.257	1205.93	237.259	465.581	1276.5	13.702	607.811	1447.52	-74.8009	636.933	1230.33	-100.205	663.811	1133.71	-124.044	821.413	1049.57	-86.4505	901.086	1017.87	-140.87	864.968	987.662	-143.801	943.425	979.474
2750	0	143.681	715.964	1649.09	241.259	722.881	1648.04	132.228	558.569	1660.23	276.425	574.841	1653.78	191.435	528.098	1480.46	176.327	492.061	1218.26	200.932	687.316	1411.8	200.265	786.135	1207.11	237.465	479.729	1277.2	14.2303	621.923	1449.02	-74.0504	650.16	1231.28	-99.5451	676.104	1134.45	-124.952	832.318	1048.4	-87.7338	911.548	1014.9	-142.09	874.602	985.894	-145.481	952.908	975.965
2751	0	145.274	728.513	1651.81	242.879	735.238	1650.13	133.733	570.942	1661.22	277.931	587	1654.07	191.612	541.553	1481.85	176.059	505.363	1219.84	201.119	700.847	1413.04	200.142	800.539	1208.45	237.426	493.104	1278.59	14.71	635.872	1450.77	-73.3679	663.323	1232.59	-99.0583	688.09	1135.72	-125.514	842.421	1046.64	-88.9833	921.432	1011.83	-143.126	883.492	983.336	-147.082	961.525	971.979
2752	0	146.937	741.219	1654.14	244.567	747.748	1651.9	134.855	583.477	1662.14	278.816	599.339	1653.99	191.917	554.969	1483.5	175.713	518.128	1221.56	201.201	714.206	1414.04	199.953	814.625	1209.51	237.075	506.392	1279.95	14.9025	649.666	1452.38	-72.8943	676.479	1234.01	-98.719	699.835	1137.11	-126.132	852.188	1044.84	-90.0639	930.537	1008	-143.839	891.839	980.571	-148.575	969.305	967.292
2753	0	148.32	753.962	1656.28	245.891	760.36	1653.4	135.821	596.223	1663.31	279.852	611.817	1653.97	191.923	567.908	1484.7	175.284	531.091	1223.35	201.034	727.337	1415	199.617	828.038	1210.3	236.921	519.361	1281.16	15.2066	663.133	1454.08	-72.0754	689.492	1235.49	-98.0906	711.373	1138.57	-126.718	861.503	1042.82	-90.9296	938.917	1003.55	-144.505	899.453	977.385	-149.532	976.527	961.992
2754	0	149.393	766.74	1658.56	247.121	772.935	1655.03	136.746	609.058	1664.79	280.616	624.518	1654.71	192.655	581.109	1486.28	175.022	543.488	1224.96	200.672	740.204	1416.14	199.027	841.002	1211.34	236.84	532.51	1282.72	15.6042	676.074	1455.86	-71.6565	702.292	1236.85	-97.7968	722.682	1140.13	-127.016	870.099	1040.64	-91.5219	946.724	999.188	-145.054	906.422	974.118	-150.561	982.882	956.439
2755	0	150.035	779.665	1660.61	247.875	785.636	1656.64	137.346	621.963	1666.41	280.7	637.214	1655.36	193.136	594.269	1487.91	174.818	555.987	1226.66	200.385	752.772	1417.54	198.41	853.371	1212.6	236.798	545.091	1284.11	15.6793	688.405	1457.62	-71.3491	715.037	1239.02	-97.4325	733.804	1141.89	-127.33	878.4	1038.43	-92.2224	953.915	994.429	-145.421	912.613	970.609	-151.178	988.664	950.556
2756	0	150.509	792.595	1662.43	248.385	798.39	1658.24	137.415	634.898	1668.03	281.145	650.004	1656.88	193.476	606.671	1489.5	175.009	568.271	1228.36	199.963	765.098	1419.06	197.617	865.28	1213.81	237.141	557.628	1285.99	15.7436	700.236	1459.21	-71.1863	727.338	1240.67	-97.2368	744.606	1143.29	-127.576	886.269	1036.07	-92.8484	960.315	989.279	-146.474	918.343	967.392	-151.802	993.741	944.377
2757	0	150.59	805.34	1663.87	248.241	811.15	1659.72	137.589	647.532	1669.69	281.202	662.681	1658.45	193.726	618.462	1491	175.722	580.24	1229.91	199.605	777.332	1420.76	196.671	877.132	1215.35	237.713	569.983	1287.34	15.6601	711.612	1460.86	-71.0969	738.99	1242.41	-96.8714	755.07	1144.64	-127.873	893.534	1033.4	-93.2347	966.193	984.287	-146.826	923.727	963.917	-152.207	998.157	938.024
2758	0	150.465	818.051	1665.6	248.044	823.946	1661.4	137.555	660.267	1671.57	281.267	675.549	1660.53	193.946	630.557	1492.67	176.57	592.28	1231.5	199.266	789.376	1422.67	195.823	889.05	1217.28	238.56	582.07	1289.16	15.1102	722.663	1462.6	-71.1209	750.16	1243.73	-96.2924	765.199	1145.58	-128.193	900.272	1031.03	-94.0221	971.375	979.199	-147.262	928.29	960.319	-152.516	1001.9	931.688
2759	0	149.896	830.622	1667.39	247.456	836.692	1663.24	137.166	672.797	1673.59	280.73	688.289	1662.85	193.984	642.573	1494.77	177.424	604.149	1233.19	198.652	801.335	1424.64	194.646	900.958	1219.38	239.27	593.927	1290.89	14.657	733.506	1464.13	-71.0441	760.808	1245.01	-95.7044	774.486	1146.38	-128.502	906.106	1028.38	-94.5006	976.103	974.632	-148.218	932.292	956.908	-152.951	1004.86	925.41
2760	0	149.231	843.083	1669.16	246.96	849.44	1665.18	136.985	685.241	1675.84	280.394	701.053	1664.97	194.216	654.727	1496.67	178.594	616.146	1234.99	198.27	813.135	1426.89	193.536	912.916	1221.84	240.272	605.884	1292.98	14.0266	744.311	1465.92	-71.1482	770.866	1246.06	-94.8393	783.544	1147.06	-128.602	911.457	1025.74	-95.0021	980.167	969.977	-148.431	935.552	953.516	-153.195	1007.16	919.355
2761	0	148.494	855.475	1671.07	246.308	861.91	1667.21	136.629	697.757	1678.16	280.308	713.633	1667.7	194.413	666.729	1498.96	179.879	628.02	1237.05	197.909	825.043	1429.08	192.605	924.783	1224.28	241.166	617.759	1295.08	13.4711	755.312	1467.48	-71.2073	780.126	1246.9	-93.6863	791.785	1147.34	-128.744	916.371	1023.16	-95.4543	983.774	965.557	-148.549	938.204	950.184	-153.482	1008.66	913.543
2762	0	147.556	867.794	1672.88	245.598	874.424	1669.25	136.109	710.031	1680.64	279.596	726.124	1670.28	194.186	678.722	1501.2	181.115	639.874	1239.43	197.491	837.018	1431.46	191.545	936.551	1226.49	241.805	629.684	1297.46	12.8156	766.376	1469.04	-71.0469	788.727	1247.49	-92.5713	799.524	1147.54	-128.64	920.323	1020.53	-96.2102	986.701	960.973	-148.719	940.263	947.098	-153.925	1009.56	907.948
2763	0	146.942	880.013	1674.73	244.373	886.666	1671.14	135.48	722.118	1682.82	279.126	738.513	1672.5	193.794	690.676	1503.67	182.205	651.777	1241.72	196.992	848.901	1433.58	190.755	948.024	1228.77	242.336	641.463	1300.09	12.2505	777.643	1470.32	-70.6733	797.056	1247.89	-91.3663	806.651	1147.73	-128.496	924.04	1018.05	-96.5391	989.223	956.939	-148.555	941.831	944.016	-154.419	1009.78	902.695
2764	0	146.361	892.16	1676.57	243.967	899.062	1673.1	134.892	734.304	1685.1	278.373	750.79	1674.82	193.844	702.844	1505.68	183.146	663.76	1243.83	196.642	860.85	1435.93	190.045	959.523	1230.85	243.059	653.48	1302.43	11.884	789.021	1471.7	-70.1558	804.777	1248.31	-89.8736	813.319	1147.9	-128.191	927.024	1015.57	-97.1991	991.198	952.811	-148.178	942.82	941.128	-154.85	1009.46	897.729
2765	0	145.837	904.223	1678.56	243.101	910.96	1675.13	134.572	746.391	1686.99	277.908	762.805	1677.04	193.803	714.826	1507.75	183.917	675.792	1245.83	196.164	872.818	1438.01	189.404	971.108	1232.95	243.654	665.514	1304.51	11.4469	800.409	1473.31	-69.376	812.131	1248.65	-88.2398	819.732	1148.22	-128.021	929.77	1013.47	-97.4644	992.821	949.182	-147.842	943.039	938.279	-155.357	1008.59	893.462
2766	0	145.221	916.193	1680.49	242.873	923.057	1677.18	134.181	758.338	1688.99	277.661	774.837	1679.05	193.487	726.85	1509.67	184.248	687.699	1247.68	195.712	884.883	1439.86	188.979	982.717	1235.14	244.281	677.541	1306.94	11.0098	811.814	1474.88	-68.4808	819.318	1249.04	-86.8211	825.781	1148.34	-127.202	931.714	1011.11	-97.7046	994.16	946.117	-147.186	942.983	935.73	-156.009	1007.33	889.424
2767	0	144.703	928.076	1682.11	242.349	935.168	1678.91	133.606	770.236	1690.55	277.215	786.784	1680.74	193.181	738.792	1511.41	184.604	699.799	1249.46	195.453	896.949	1441.61	188.756	994.224	1237.12	244.804	689.727	1308.66	10.7114	823.46	1476.05	-67.5866	826.509	1249.36	-85.3124	831.616	1148.41	-126.702	933.737	1009.21	-98.0399	994.947	942.454	-146.033	942.769	933.06	-156.165	1006.01	885.356
2768	0	144.224	940.062	1683.65	242.008	947.134	1680.56	133.355	782.214	1691.76	276.841	798.802	1682.3	193.228	751.173	1512.76	184.85	711.938	1250.8	195.138	909.059	1443.24	188.613	1005.67	1238.69	245.393	702.042	1310.37	10.3598	835.09	1477.25	-66.6701	833.655	1249.55	-83.5674	837.169	1148.47	-126.204	935.257	1007.16	-98.3707	995.623	939.234	-145.286	942.246	930.547	-156.519	1004.23	881.602
2769	0	143.914	951.912	1684.96	241.648	959.076	1681.91	133.075	794.146	1692.8	276.654	810.725	1683.65	192.991	763.186	1513.97	184.929	724.027	1251.85	194.799	921.211	1444.49	188.522	1017.15	1239.93	245.777	714.399	1311.54	9.99635	846.639	1478.13	-65.603	840.974	1249.74	-81.9619	842.493	1148.47	-125.537	936.956	1005.14	-98.6011	996.247	935.947	-144.524	941.454	928.001	-156.729	1002.5	878.009
2770	0	143.502	963.848	1685.86	241.404	971.238	1683.07	132.697	805.922	1693.56	276.098	822.821	1684.58	192.642	775.073	1514.97	185.037	736.167	1252.96	194.594	933.332	1445.3	188.583	1028.59	1240.68	245.913	726.313	1312.76	9.76233	858.386	1478.48	-64.6284	848.442	1249.69	-80.4189	848.029	1148.55	-124.743	937.959	1002.67	-98.6305	996.573	932.415	-143.174	940.752	925.486	-156.349	1000.46	873.928
2771	0	143.215	975.907	1686.34	241.004	983.349	1683.51	132.588	817.977	1694.06	276.112	834.924	1684.92	192.625	787.498	1515.52	185.237	748.292	1253.64	194.267	945.55	1445.64	188.742	1039.97	1240.79	246.714	738.8	1313.72	9.4505	870.217	1478.64	-63.8785	855.87	1249.36	-78.8499	853.513	1148.36	-123.839	939.432	1000.39	-98.4802	996.899	928.826	-142.245	939.899	922.985	-156.164	998.293	869.88
2772	0	142.95	988.044	1686.62	240.757	995.514	1683.75	132.609	830.093	1694.43	275.863	846.998	1685.22	191.242	798.391	1516.07	185.377	760.235	1253.97	194.173	957.831	1445.68	188.928	1051.69	1240.52	246.839	750.532	1314.09	9.38652	882.209	1478.46	-62.6293	863.83	1248.92	-77.1574	858.994	1147.9	-123.236	940.619	997.995	-98.3183	996.91	924.833	-140.69	939.056	920.245	-155.629	995.955	865.913
2773	0	142.639	1000.19	1686.54	239.982	1007.57	1683.55	132.371	842.285	1694.42	275.6	859.31	1685.39	192.438	812.164	1515.9	185.398	772.224	1254.04	194.058	970.054	1445.5	189.036	1063.46	1240.1	247.009	762.507	1314.33	9.20678	894.259	1478.1	-61.5542	871.84	1248.39	-75.5867	864.806	1147.5	-122.213	942.047	995.66	-98.3536	996.878	921.26	-139.607	938.056	917.927	-155.399	993.504	862.321
2774	0	142.284	1012.53	1686.01	240.104	1020.14	1683.31	131.953	854.477	1694.06	275.438	871.716	1685.13	191.01	823.046	1515.92	185.227	784.063	1253.95	194.001	982.339	1445.1	189.451	1075.51	1239.48	247.145	774.667	1314.23	8.96388	906.443	1477.42	-60.8129	880.222	1247.79	-74.1859	870.773	1146.9	-121.38	943.389	993.347	-97.9154	996.981	917.661	-138.086	937.006	915.011	-154.78	991.064	858.421
2775	0	141.918	1024.75	1685.15	239.744	1032.5	1682.56	131.867	866.806	1693.57	275.283	884.118	1684.71	192.28	837.029	1514.91	185.22	796.132	1253.5	194.008	994.729	1444.46	189.726	1087.65	1238.38	247.222	786.823	1313.7	8.64171	918.757	1476.66	-60.2886	888.643	1246.98	-72.6999	877.062	1146.16	-120.544	944.874	990.958	-98.1628	997.161	914.299	-136.672	936.22	912.82	-154.318	988.545	854.764
2776	0	141.838	1037.34	1684.27	239.634	1045.03	1681.66	131.877	879.272	1693.05	275.274	896.643	1684.3	192.198	849.817	1514.17	185.064	807.881	1252.82	193.688	1007.02	1443.34	189.969	1099.79	1237.16	247.241	798.713	1313.19	8.45869	931.231	1475.85	-59.4026	897.361	1246.1	-71.2726	883.454	1145.52	-119.657	946.408	988.906	-97.7409	997.056	910.838	-135.16	935.45	910.389	-153.591	985.877	851.226
2777	0	141.581	1049.94	1683.12	239.734	1057.76	1680.61	131.675	891.89	1692.2	275.063	909.169	1683.51	191.884	862.186	1513.32	184.71	820.2	1252.01	193.784	1019.56	1442.4	190.104	1111.95	1235.75	247.064	811.147	1312.43	8.17244	943.887	1475.03	-59.2017	906.411	1245.2	-69.947	890.325	1144.95	-118.709	948.07	986.822	-97.4875	996.874	907.406	-133.645	934.632	908.462	-153.049	983.205	848.083
2778	0	141.39	1062.66	1681.45	239.284	1070.19	1678.88	131.308	904.598	1691.04	274.755	921.98	1682.34	191.623	874.721	1512.23	183.829	831.843	1251	193.789	1031.92	1440.83	190.356	1124.25	1233.81	246.388	822.816	1311.43	7.86852	956.626	1473.69	-58.7428	915.565	1244.05	-68.3544	897.781	1144.09	-117.402	950.164	984.232	-97.6486	997.154	904.573	-132.069	934.176	906.472	-151.9	980.316	844.65
2779	0	141.356	1075.53	1679.55	238.78	1082.91	1676.66	131.225	917.655	1689.9	274.599	934.736	1680.94	191.428	887.42	1510.76	182.971	843.838	1249.68	193.309	1044.43	1438.82	190.449	1136.79	1231.33	245.931	835.105	1309.94	7.47742	969.403	1472.33	-58.623	925.37	1242.92	-66.998	905.531	1143.24	-116.508	952.28	982.429	-97.1234	997.31	901.152	-130.452	933.788	904.815	-151.113	977.841	841.568
2780	0	141.184	1088.59	1677.32	239.066	1095.98	1674.49	131.074	930.744	1688.58	274.33	947.491	1679.42	190.798	899.899	1509.18	181.821	855.762	1248.37	193.324	1056.84	1437.01	190.445	1149.34	1228.96	245.143	847.287	1308.47	7.02335	982.465	1470.9	-58.0602	935.235	1241.57	-65.7409	913.539	1142.62	-115.536	954.727	980.415	-96.6877	997.588	897.741	-128.853	933.702	903.4	-150.25	975.452	838.716
2781	0	141.069	1101.57	1674.89	238.506	1108.75	1671.65	130.492	943.752	1687.03	273.97	960.32	1677.53	190.074	912.504	1507.65	180.306	867.82	1246.8	192.883	1069.43	1434.85	190.337	1161.94	1226.61	244.155	859.607	1306.95	6.54273	995.706	1469.36	-58.101	945.309	1240.61	-64.535	922.119	1141.84	-114.47	957.638	978.958	-96.2475	998.185	894.582	-127.507	934.011	902.295	-149.243	973.407	836.191
2782	0	141.355	1114.76	1672.21	238.196	1121.56	1668.71	130.003	957.14	1685.71	273.462	973.25	1675.76	189.494	925.166	1505.73	178.873	880.011	1245.07	192.337	1081.94	1432.54	190.121	1174.58	1224.17	243.242	872.095	1305.08	5.89885	1008.91	1467.77	-58.2119	955.914	1239.5	-63.3148	931.087	1140.9	-113.533	961.112	977.502	-95.837	999.22	891.938	-126.176	934.571	901.566	-148.459	971.519	834.079
2783	0	141.181	1127.8	1669.49	238.525	1134.61	1666.19	129.641	970.656	1684.34	272.993	986.206	1674.22	189.151	938.11	1504.05	177.747	892.643	1243.36	191.702	1094.41	1430.36	189.989	1187.25	1222.17	242.382	884.71	1303.13	5.26374	1022.19	1466.3	-58.4459	966.993	1238.27	-62.1898	940.602	1140.2	-112.615	964.558	976.332	-95.5446	1000.41	889.74	-124.696	935.786	901.099	-147.827	969.807	832.472
2784	0	141.301	1141.12	1666.81	237.531	1147.26	1662.98	128.935	984.037	1682.97	272.733	999.205	1672.98	188.17	950.737	1502.28	176.314	905.163	1241.53	191.524	1106.79	1428.59	189.686	1199.81	1220.26	241.35	897.327	1301.15	4.61124	1035.55	1464.68	-58.5842	978.19	1236.91	-61.2971	950.527	1139.24	-112.133	968.823	975.591	-95.1389	1002.17	887.472	-123.8	937.216	901.054	-147.138	968.626	830.823
2785	0	140.996	1154.45	1663.92	236.807	1159.97	1659.71	127.966	997.6	1681.43	271.681	1012.13	1670.86	187.008	963.237	1500.31	174.609	917.617	1239.54	190.897	1119.33	1426.5	189.18	1212.5	1218.26	239.994	909.904	1299.08	3.61321	1048.58	1462.87	-59.1523	989.872	1235.44	-60.7559	960.885	1138.3	-111.836	973.527	974.693	-95.4899	1004.72	885.656	-122.86	939.5	901.202	-146.645	968.004	829.636
2786	0	140.176	1167.79	1660.94	236.629	1173.13	1656.97	127.021	1011.12	1679.86	270.833	1025.06	1669.52	186.566	976.356	1497.78	173.504	930.505	1237.42	190.339	1131.85	1424.67	188.721	1225.33	1216.66	238.995	922.546	1297.05	2.71752	1061.61	1461.06	-59.8096	1001.8	1234.04	-60.2309	971.613	1137.05	-111.761	978.858	974.209	-96.1028	1007.6	884.165	-122.223	942.589	901.444	-146.368	967.815	828.653
2787	0	139.412	1181.05	1658.38	235.981	1186.05	1654.29	125.93	1024.63	1678.42	269.871	1038.1	1668.14	185.577	988.862	1495.89	172.371	943.402	1235.35	189.477	1144.39	1423.01	188.11	1238.1	1215.15	237.829	935.203	1294.89	1.8361	1074.58	1459.2	-60.3488	1014.01	1232.23	-59.6549	982.727	1135.8	-111.737	984.972	973.49	-97.13	1011.56	882.893	-121.993	946.324	901.899	-146.169	968.46	827.927
2788	0	138.606	1194.34	1655.71	234.877	1198.86	1651.77	124.455	1038.14	1677.22	268.624	1051.08	1666.94	184.362	1001.46	1494.13	171.353	956.511	1233.35	188.446	1157.05	1421.32	187.195	1250.91	1213.61	236.767	947.865	1293.04	0.781607	1087.39	1457.12	-60.8602	1026.48	1230.28	-59.6883	993.966	1134.47	-112.114	991.698	972.865	-97.8051	1015.8	881.239	-122.163	951.021	902.504	-146.015	970.018	827.125
2789	0	137.398	1207.57	1652.99	233.803	1211.89	1649.3	122.907	1051.47	1675.89	266.999	1064.09	1665.66	183.171	1014.12	1492.32	170.539	969.575	1231.51	187.395	1169.82	1419.61	186.219	1263.71	1211.99	235.809	960.675	1291.18	-0.327079	1100.06	1455.11	-61.3537	1038.89	1228.24	-59.7737	1005.56	1132.86	-112.805	999.238	972.445	-99.3333	1021.41	879.954	-122.386	956.626	903.07	-146.497	972.479	826.606
2790	0	136.199	1220.75	1650.65	232.432	1224.79	1647.22	121.184	1064.91	1674.56	265.213	1077.07	1664.75	181.93	1026.82	1490.66	170.131	982.956	1229.57	186.54	1182.73	1418.25	185.353	1276.77	1210.74	235.024	973.592	1289.46	-1.47288	1112.65	1453.19	-61.7556	1051.5	1226.15	-60.1249	1017.22	1131.37	-113.488	1007.34	971.713	-101.389	1028.07	878.795	-122.529	963.319	903.617	-147.005	976.288	826.344
2791	0	134.834	1233.76	1648.62	230.805	1237.61	1645.53	119.142	1078.03	1673.42	263.445	1089.9	1664.22	180.727	1039.46	1489.39	169.672	996.279	1228.02	185.274	1195.57	1417.11	184.485	1289.94	1210.02	234.265	986.685	1288.02	-2.56854	1125.26	1451.38	-62.3922	1064.05	1224.32	-60.6145	1028.89	1130.09	-114.376	1016.3	971.232	-102.951	1035.8	877.683	-123.345	970.87	903.82	-147.833	981.372	826.177
2792	0	132.791	1246.65	1646.71	229.006	1250.41	1644.14	116.665	1091.19	1672.12	261.052	1102.89	1663.78	179.591	1052.41	1487.92	168.831	1009.05	1226.69	184.062	1208.54	1416.07	183.113	1303.08	1208.93	233.525	999.92	1286.67	-3.83826	1137.82	1449.59	-63.3792	1076.18	1222.62	-61.396	1040.5	1128.79	-115.522	1025.76	970.401	-104.544	1044.08	876.523	-124.046	979.561	903.955	-148.807	988.291	825.997
2793	0	130.982	1259.51	1645	226.997	1263.14	1643.03	114.539	1104.2	1671.1	258.895	1115.64	1663.46	178.443	1065.25	1486.83	168.683	1022.82	1225.21	182.941	1221.57	1415.41	181.973	1316.41	1208.43	232.997	1013.45	1285.57	-5.05169	1150.39	1448.16	-64.0764	1088.24	1221.23	-62.1804	1052.2	1127.48	-116.683	1036.09	969.744	-106.392	1053.67	875.632	-125.007	989.248	903.681	-150.179	996.688	826.08
2794	0	128.846	1272.5	1643.75	224.874	1275.81	1642.32	112.06	1117.37	1670.4	256.671	1128.48	1663.75	177.286	1078.23	1486.12	168.631	1036.56	1224.08	181.584	1234.66	1414.95	180.788	1330	1208.22	232.399	1026.94	1284.48	-6.3925	1163	1446.95	-65.01	1099.96	1220.22	-63.039	1063.98	1126.5	-117.765	1046.99	969.164	-108.339	1064.63	874.932	-125.89	1000.07	903.075	-151.772	1006.68	825.94
2795	0	126.578	1285.35	1642.93	222.738	1288.63	1642.17	109.568	1130.27	1670.09	253.986	1141.24	1664.28	175.722	1091.02	1485.55	167.996	1050.04	1223.31	180.232	1247.81	1415.15	179.33	1343.53	1208.56	231.688	1040.54	1283.88	-7.95887	1175.57	1446.27	-66.0489	1111.58	1219.62	-64.2124	1075.88	1125.81	-119.154	1058.78	968.593	-109.835	1076.52	874.413	-127.229	1011.82	902.37	-153.48	1018.36	825.928
2796	0	124.391	1298.24	1642.6	220.399	1301.39	1642.33	106.757	1143.4	1670.14	251.358	1153.99	1665.17	174.146	1104	1485.42	167.206	1063.75	1222.93	178.702	1260.93	1415.6	177.798	1357.46	1208.78	230.773	1054.29	1283.54	-9.61151	1188.21	1445.74	-67.1228	1123.4	1219.35	-65.6325	1088.15	1125.31	-120.634	1071.31	968.096	-111.338	1089.46	874.01	-128.494	1024.54	901.714	-155.289	1031.69	825.654
2797	0	122.071	1311.1	1642.33	218.2	1314.18	1642.71	104.214	1156.36	1670.17	248.722	1166.81	1666.1	172.659	1117.04	1485.49	166.551	1077.68	1222.76	177.313	1274.16	1416.3	176.245	1371.53	1209.42	229.709	1067.96	1283.5	-11.1154	1201.1	1445.63	-68.3695	1135.55	1219.57	-66.884	1100.93	1125.15	-121.855	1084.72	967.711	-112.458	1103.28	873.773	-130.061	1038.49	900.965	-157.318	1046.18	825.218
2798	0	119.778	1323.91	1642.47	216.002	1326.93	1643.37	101.423	1169.29	1670.56	246.228	1179.57	1667.28	171.105	1130.22	1485.71	165.652	1091.93	1222.72	175.786	1287.47	1417.17	175.129	1385.75	1210.78	228.4	1081.77	1283.62	-12.6258	1214.07	1445.63	-69.4164	1148.06	1219.8	-68.1644	1114.07	1125.12	-123.377	1098.97	967.452	-114.044	1118.46	873.782	-131.607	1052.91	900.427	-159.121	1062.34	824.824
2799	0	117.43	1336.74	1643.04	213.634	1339.66	1644.46	98.8457	1182.11	1671.27	243.578	1192.29	1668.75	169.501	1143.29	1486.48	164.161	1105.56	1223.3	174.257	1300.78	1418.23	173.847	1399.95	1212.13	226.798	1095.43	1284.08	-14.0547	1227.25	1445.95	-70.724	1161.13	1220.36	-69.832	1127.81	1125.52	-124.774	1114.21	967.391	-115.249	1134.49	873.919	-133.247	1068.66	899.976	-161.021	1079.58	824.519
2800	0	115.197	1349.56	1644	211.294	1352.58	1645.9	96.3256	1195.06	1672.17	241.099	1205.24	1670.44	168.014	1156.31	1487.38	162.877	1119.55	1224.13	172.785	1313.99	1419.54	172.854	1413.92	1213.6	225.526	1109.17	1285.03	-15.4583	1240.27	1446.74	-72.2392	1175.07	1221.07	-71.2138	1142.21	1125.94	-126.296	1130.23	967.53	-116.619	1151.33	874.304	-134.906	1085.52	899.54	-162.628	1097.96	824.273
2801	0	113.018	1362.37	1645.37	208.898	1365.51	1647.76	94.1787	1207.92	1673.26	238.913	1218.08	1672.36	166.829	1169.59	1488.75	161.586	1133.57	1225.39	171.559	1327.15	1421.29	171.858	1427.66	1215.22	223.921	1122.52	1286.34	-16.6379	1253.5	1447.86	-73.1995	1189.52	1221.71	-73.0084	1157.15	1126.47	-127.538	1147.11	967.682	-117.707	1169.23	874.692	-136.434	1103.16	899.192	-164.516	1117.2	824.052
2802	0	110.923	1375.16	1646.87	206.792	1378.44	1649.91	91.975	1220.74	1674.47	236.672	1230.84	1674.23	165.695	1182.79	1490.34	160.045	1147.21	1227.17	170.402	1340.26	1423.25	171.076	1441.08	1217.09	222.67	1135.98	1288.17	-17.6688	1266.75	1449.34	-74.89	1204.55	1222.67	-74.5663	1172.54	1127.24	-129.063	1164.6	968.284	-119.188	1187.72	875.682	-138.4	1121.54	898.876	-166.246	1137.31	824.149
2803	0	109.054	1387.9	1648.25	204.794	1391.16	1651.85	89.9641	1233.37	1675.51	234.816	1243.77	1676.28	164.684	1195.94	1492.1	158.302	1160.24	1228.96	169.172	1353.25	1424.94	170.577	1454.36	1218.98	221.466	1149.2	1290.12	-18.7274	1279.73	1450.88	-76.5482	1219.93	1223.61	-76.3292	1188.35	1127.91	-130.608	1182.95	968.881	-120.414	1207.26	876.58	-140.077	1140.85	898.652	-167.877	1158.42	824.293
2804	0	107.267	1400.5	1649.56	203.003	1403.89	1653.57	88.4966	1245.83	1676.33	233.203	1256.51	1677.88	163.783	1209.12	1493.73	157.046	1173.48	1230.76	168.336	1366.23	1426.67	169.911	1467.33	1220.77	220.463	1162.22	1291.93	-19.5625	1292.85	1452.67	-77.748	1235.61	1224.8	-77.885	1204.42	1128.82	-132.016	1202.04	969.495	-121.618	1227.58	877.766	-141.674	1160.89	898.328	-169.457	1180.34	824.465
2805	0	105.76	1412.97	1651.05	201.718	1416.66	1655.26	87.4322	1258.43	1677.36	232.012	1269.18	1679.38	162.92	1222.06	1495.18	156.054	1186.39	1232.22	167.481	1379.04	1428.23	169.458	1480.29	1222.6	219.813	1174.98	1293.46	-20.2962	1306.03	1454.56	-78.9689	1251.41	1225.98	-79.4005	1220.84	1129.6	-133.4	1221.49	970.131	-122.909	1248.67	878.97	-143.25	1182.03	898.247	-170.874	1203	824.812
2806	0	104.771	1425.52	1652.37	200.711	1429.44	1656.74	86.3882	1270.88	1678.44	230.991	1281.94	1680.62	161.93	1234.7	1496.56	154.974	1198.68	1233.64	166.845	1391.76	1429.55	168.868	1492.74	1223.83	219.162	1187.34	1294.99	-21.1815	1319.27	1456.19	-80.0641	1267.58	1227.04	-81.0518	1237.35	1130.48	-134.806	1241.67	970.602	-123.93	1270.8	880.03	-144.965	1203.56	897.969	-172.237	1226.5	824.885
2807	0	104.062	1438.2	1653.66	199.874	1441.91	1657.94	85.5764	1283.39	1679.68	230.295	1294.52	1681.56	160.823	1247.07	1497.72	153.846	1210.92	1234.9	166.248	1404.44	1430.55	168.098	1504.74	1224.49	218.234	1199.4	1296.25	-21.9688	1332.62	1457.58	-81.5615	1283.23	1228	-82.7232	1254.08	1130.97	-136.199	1262.35	970.75	-124.797	1293.39	880.862	-146.462	1226.06	897.406	-173.43	1250.82	824.823
2808	0	103.861	1450.86	1654.92	199.592	1454.5	1659.03	85.2691	1296.13	1680.91	229.842	1307	1682.52	159.739	1259.57	1498.83	152.935	1223.21	1236.06	165.674	1416.87	1431.5	167.525	1516.8	1225.12	217.081	1211.43	1297.26	-22.6704	1346.1	1458.96	-82.818	1298.94	1228.74	-84.4453	1270.83	1131.35	-137.325	1283.63	970.87	-125.503	1316.79	881.823	-147.719	1249.41	896.656	-174.375	1275.93	824.948
2809	0	103.899	1463.51	1656.43	199.468	1466.93	1660.13	85.0171	1308.85	1682.48	229.495	1319.39	1683.52	158.592	1272.04	1500.03	151.585	1235.46	1237.12	165.219	1429.32	1432.64	167.014	1528.71	1225.75	215.749	1223.49	1298.41	-23.4251	1359.59	1460.24	-84.1228	1314.71	1229.66	-86.348	1287.6	1131.86	-138.443	1305.33	971.033	-125.99	1340.98	882.897	-148.887	1273.4	896.038	-175.162	1301.66	824.695
2810	0	103.969	1476.23	1657.83	199.701	1479.3	1661.22	84.7607	1321.65	1683.98	229.381	1331.67	1684.5	157.377	1284.46	1501.21	150.109	1247.89	1238.34	164.804	1441.68	1433.75	166.827	1540.63	1226.55	213.749	1235.48	1299.7	-24.1107	1373.21	1461.51	-85.4608	1330.4	1230.63	-88.248	1304.56	1132.27	-139.606	1327.62	971.381	-126.282	1365.36	884.209	-150.191	1297.95	895.421	-175.623	1328.54	825.523
2811	0	104.443	1489.02	1659.31	200.214	1491.83	1662.43	84.611	1334.36	1685.48	229.312	1344.09	1685.59	156.575	1297.05	1502.6	148.514	1260.48	1239.71	164.57	1453.98	1434.84	166.911	1552.74	1227.19	211.878	1247.45	1300.87	-24.6491	1386.65	1462.88	-86.7778	1346.16	1231.49	-90.1706	1321.75	1132.74	-140.642	1350.3	971.673	-126.862	1390.43	886.27	-151.338	1323.26	895.087	-175.945	1356.31	826.229
2812	0	104.905	1501.81	1660.97	200.715	1504.15	1663.88	84.888	1347.32	1687.16	229.445	1356.41	1686.92	155.75	1309.53	1504.02	146.832	1272.94	1241.16	164.404	1466.18	1436.14	167.012	1564.87	1228.15	210.078	1259.38	1302.12	-24.9679	1400.2	1464.52	-88.0764	1362.11	1232.86	-92.2139	1338.78	1133.39	-141.299	1373.51	972.609	-126.307	1415.68	888.474	-152.309	1349.18	895.093	-175.955	1384.69	827.636
2813	0	105.113	1514.63	1662.75	201.313	1516.74	1665.25	84.9012	1360.15	1688.94	229.543	1368.76	1688.23	155.078	1322.02	1505.75	145.187	1285.33	1242.92	164.32	1478.34	1437.44	167.266	1577.06	1229.2	208.128	1271.18	1303.68	-25.408	1413.65	1465.97	-89.4747	1377.96	1234.2	-94.418	1356.14	1134.16	-141.944	1397.04	974.052	-125.058	1441.17	891.166	-153.35	1375.41	895.489	-175.385	1414	829.695
2814	0	105.582	1527.52	1664.12	201.768	1529.29	1666.41	84.9509	1373.06	1690.47	229.676	1381.37	1689.43	154.416	1334.54	1507.39	143.371	1297.31	1244.9	164.372	1490.56	1438.68	167.676	1589.31	1230.18	206.103	1282.86	1305.4	-25.7453	1427.03	1467.69	-90.9299	1393.82	1235.82	-96.9521	1373.49	1135.05	-142.27	1421.13	975.736	-124.026	1467.35	894.561	-153.93	1402.35	896.518	-174.872	1443.68	832.287
2815	0	106.44	1540.53	1665.52	202.439	1542.03	1667.48	85.2043	1385.98	1692.22	230.026	1394.01	1690.56	153.979	1347.27	1509.12	141.737	1309.27	1246.72	164.365	1502.7	1439.8	168.006	1601.61	1231.23	204.568	1294.7	1306.96	-25.9989	1440.42	1469.58	-92.4264	1409.85	1237.62	-99.2058	1391.25	1136.46	-142.554	1445.2	977.953	-121.356	1493.35	898.024	-154.275	1429.51	898.028	-173.58	1474.06	835.756
2816	0	106.822	1553.23	1666.8	203.014	1554.74	1668.5	85.7955	1399.13	1693.95	230.617	1406.76	1691.84	153.537	1359.91	1510.74	140.244	1321.11	1248.48	164.549	1515.05	1441.02	168.457	1614.14	1232.44	203.183	1306.51	1308.46	-25.94	1453.8	1471.47	-93.5206	1426.13	1239.57	-101.529	1408.82	1137.92	-142.383	1469.63	980.595	-119.525	1519.09	902.213	-154.656	1456.82	900.395	-171.939	1504.67	839.827
2817	0	107.376	1566.08	1667.78	203.421	1567.43	1669.11	86.0459	1412.1	1695.51	230.876	1419.57	1692.78	153.061	1372.49	1512.19	138.731	1332.82	1250.26	164.379	1527.33	1441.84	168.635	1626.58	1233.55	201.894	1318.41	1309.97	-26.0292	1467.06	1473.3	-94.7723	1442.38	1241.49	-103.77	1426.82	1139.57	-142.206	1494.11	983.773	-117.033	1545.23	906.885	-154.749	1484.42	903.294	-169.977	1535.52	844.486
2818	0	107.614	1579.27	1668.43	203.993	1580.39	1669.38	86.3364	1425.02	1697.03	231.267	1432.47	1693.55	152.706	1385.02	1513.56	137.566	1344.52	1251.55	164.241	1539.56	1442.65	168.862	1638.94	1234.69	200.628	1330.32	1311.31	-26.1483	1480.18	1475.07	-96.1285	1458.47	1243.45	-105.933	1444.74	1141.41	-141.423	1518.68	986.657	-114.764	1571.53	912.462	-154.525	1512.36	906.771	-167.974	1566.55	850.026
2819	0	108.309	1592.08	1669.19	204.264	1593.2	1669.6	86.8784	1438.14	1698.29	231.59	1445.29	1694.21	152.408	1397.56	1514.57	136.609	1356.26	1252.71	164.33	1551.97	1443.38	168.786	1650.87	1235.63	199.725	1342.6	1312.2	-26.0404	1493.26	1476.79	-97.1202	1474.87	1245.48	-108.049	1462.71	1143.06	-140.946	1543.15	990.507	-112.902	1597.55	918.337	-154.406	1540.08	910.502	-165.505	1597.26	855.903
2820	0	108.456	1604.84	1669.71	204.427	1605.92	1669.82	87.1556	1451.16	1699.38	231.891	1458.21	1694.75	152.063	1409.95	1515.37	135.532	1367.83	1253.76	164.025	1564.13	1443.96	168.285	1662.32	1236.33	198.874	1354.96	1313.1	-26.1863	1506.13	1478.23	-98.3472	1490.96	1247.06	-110.059	1480.78	1144.59	-140.511	1567.51	994.454	-110.292	1623.92	924.958	-153.795	1567.95	914.552	-163.035	1627.78	862.466
2821	0	108.646	1617.8	1670.13	204.836	1618.86	1669.81	87.4043	1464.1	1700.28	232.175	1471.28	1695.03	151.507	1422.16	1515.88	134.452	1379.61	1254.6	163.946	1576.55	1444.36	168.189	1673.66	1236.89	197.831	1366.98	1313.7	-26.337	1518.91	1479.47	-99.6295	1506.88	1248.9	-112.205	1498.7	1146.23	-140.053	1591.76	998.809	-107.926	1649.69	931.543	-153.215	1595.72	918.975	-160.592	1657.97	869.428
2822	0	109.024	1630.8	1670.2	205.089	1631.7	1669.77	87.6849	1477.04	1700.76	232.497	1484.25	1695.09	151.274	1434.76	1516.24	133.652	1391.53	1255.18	163.79	1588.84	1444.62	167.823	1685.18	1237.12	197.077	1379.2	1314.12	-26.2859	1531.75	1480.54	-100.669	1522.81	1250.01	-114.137	1516.85	1147.48	-139.321	1616.03	1003.29	-105.689	1675.49	938.1	-152.706	1623.09	923.571	-157.976	1687.71	876.648
2823	0	109.1	1643.58	1670.23	205.248	1644.57	1669.56	88.0181	1490.09	1701	232.686	1497.22	1694.96	151.265	1447.61	1516.46	133.02	1403.65	1255.36	163.612	1601.28	1444.67	167.317	1696.84	1237.13	196.528	1391.54	1314.25	-26.5215	1544.28	1481.3	-101.908	1538.67	1251.15	-115.816	1535.19	1148.38	-138.565	1640.18	1007.49	-103.353	1701.6	945.166	-151.174	1650.79	928.07	-155.288	1717.2	884.107
2824	0	109.108	1656.51	1670	205.459	1657.59	1669.09	88.1781	1503.1	1700.98	232.705	1510.04	1694.6	150.896	1460.18	1516.38	132.236	1415.8	1255.44	163.325	1613.89	1444.32	166.845	1708.34	1236.96	195.673	1403.75	1314.17	-26.5961	1557.01	1481.58	-103.004	1554.35	1251.74	-117.623	1553.58	1149.24	-137.735	1664.27	1011.61	-101.052	1727.08	952.003	-150.864	1677.78	933.249	-152.736	1746.18	891.617
2825	0	109.285	1669.59	1669.48	205.486	1670.52	1668.37	88.0419	1516.11	1700.56	232.613	1522.94	1693.7	150.583	1472.92	1515.98	131.423	1427.83	1255.23	163.104	1626.45	1443.63	166.186	1719.94	1235.89	195.097	1416.08	1314.03	-26.7477	1569.78	1481.48	-104.068	1570.25	1252.2	-119.311	1572.18	1149.84	-137.001	1688.28	1015.7	-98.8901	1752.54	958.362	-149.067	1705.42	938.258	-150.119	1774.93	899.081
2826	0	109.457	1682.66	1668.82	205.48	1683.6	1667.47	88.0565	1529.16	1699.86	232.757	1535.92	1692.81	150.473	1485.62	1515.31	131.149	1440.17	1254.97	162.774	1639.15	1442.6	165.621	1731.62	1234.57	194.414	1428.25	1313.56	-26.9069	1582.59	1481.09	-105.047	1586.04	1252.15	-120.775	1591.05	1150.07	-136.151	1712.2	1019.75	-96.782	1777.54	964.614	-147.922	1732.2	942.852	-147.474	1803.3	906.707
2827	0	109.51	1695.92	1667.96	205.384	1696.63	1666.51	88.1337	1542.27	1699.14	232.554	1548.79	1691.87	150.575	1499.17	1514.61	131.031	1452.21	1254.2	162.649	1651.88	1441.64	164.91	1743.4	1233.27	194.154	1440.86	1312.7	-26.9159	1595.36	1480.47	-105.938	1602	1252.27	-122.011	1610.18	1150.2	-135.35	1735.8	1023.69	-94.6455	1802.5	971.169	-146.161	1758.89	947.822	-145.162	1831.12	914.255
2828	0	109.377	1708.9	1666.72	205.532	1709.78	1665.3	87.9592	1555.41	1698.12	232.479	1561.93	1690.84	150.303	1511.76	1513.77	131.125	1464.37	1253.52	162.322	1664.57	1440.34	164.177	1755.29	1231.62	193.703	1453.38	1311.91	-26.9647	1608.22	1479.56	-106.751	1617.92	1251.86	-123.399	1629.13	1150.4	-134.558	1759.42	1027.78	-92.6255	1826.78	977.54	-145.766	1785.07	953.031	-142.745	1858.34	921.858
2829	0	109.462	1722.1	1665.31	205.442	1722.76	1663.75	87.8109	1568.72	1696.91	232.515	1575.1	1689.49	150.527	1525.02	1512.85	131.368	1476.68	1252.79	162.066	1677.4	1438.66	163.561	1767.75	1229.65	194.165	1465.77	1311.11	-27.0256	1621.12	1478.72	-107.295	1634.06	1251.58	-124.513	1648.32	1150.42	-133.777	1782.8	1031.7	-90.8991	1851.03	983.349	-144.864	1810.76	957.994	-140.474	1885.17	929.277
2830	0	109.157	1735.3	1663.63	205.165	1735.91	1662.22	87.5845	1582.04	1695.47	232.078	1588.38	1688.29	150.702	1537.99	1511.75	132.016	1489.11	1251.7	161.797	1690.04	1437.2	162.784	1780.5	1227.86	194.38	1478.43	1309.89	-26.8294	1633.95	1477.37	-108.051	1650.12	1251.16	-125.301	1667.85	1150.46	-133.073	1805.77	1035.69	-89.0184	1874.61	989.199	-143.971	1836.17	963.194	-138.238	1911.29	936.83
2831	0	108.81	1748.4	1661.76	204.864	1749.21	1660.46	87.4471	1595.43	1694.17	231.877	1601.69	1686.96	150.748	1550.66	1510.4	132.811	1501.55	1250.37	161.699	1702.85	1435.55	162.108	1793.7	1225.98	194.967	1491.56	1308.67	-26.7371	1646.88	1476.12	-108.283	1666.63	1250.68	-126.334	1687.16	1150.78	-132.391	1828.63	1039.73	-87.4879	1897.47	994.641	-143.087	1860.97	968.048	-136.64	1936.81	944.44
2832	0	108.608	1761.77	1659.88	204.602	1762.62	1658.57	87.0454	1608.57	1692.52	231.817	1615.13	1685.59	151.118	1563.52	1508.94	133.512	1513.95	1249.16	161.459	1715.67	1433.59	161.411	1806.92	1224.05	195.134	1503.97	1307.58	-26.3462	1659.74	1474.74	-108.416	1683.33	1250.43	-127.168	1706.51	1151.14	-131.517	1850.92	1043.59	-85.6449	1920.25	1000.36	-142.373	1885.35	973.249	-134.778	1961.56	951.592
2833	0	108.353	1775.02	1657.57	204.542	1776	1656.52	87.0462	1621.84	1690.81	231.581	1628.5	1684.02	151.478	1576.17	1507.41	134.448	1526.27	1247.8	161.355	1728.46	1431.54	160.912	1820.25	1222.06	195.886	1516.66	1306.14	-25.7693	1672.53	1473.35	-108.51	1700.07	1250.18	-127.452	1725.93	1151.4	-130.654	1872.82	1047.39	-84.0602	1942.38	1005.52	-141.721	1909.02	978.098	-133.162	1985.73	958.501
2834	0	108.077	1788.09	1655.41	204.278	1789.23	1654.55	87.0924	1635.08	1688.96	231.688	1642.09	1682.47	152.188	1589.57	1505.73	135.816	1539.13	1246.16	161.425	1741.32	1429.48	160.319	1833.61	1220.12	196.935	1529.63	1304.45	-25.2323	1685.22	1471.78	-108.286	1716.89	1249.99	-127.989	1744.84	1152.04	-129.866	1894.28	1051.19	-82.5025	1963.99	1010.62	-140.41	1932.09	982.833	-131.584	2009.15	965.358
2835	0	107.983	1801	1653.29	203.929	1802.47	1652.5	86.998	1648.14	1687.13	231.697	1655.42	1680.8	152.421	1602.77	1503.75	136.88	1552.01	1244.38	161.474	1754.17	1427.39	159.881	1847.01	1218.27	198.002	1542.53	1302.81	-24.7551	1697.81	1470.38	-108.453	1733.74	1250.01	-128.14	1763.77	1152.62	-128.986	1915.26	1054.94	-81.1756	1984.93	1015.16	-140.337	1954.6	988.027	-130.321	2031.88	972.117
2836	0	107.553	1814.07	1651.28	203.603	1815.79	1650.53	87.0656	1661.04	1685.26	231.784	1668.87	1679.03	153.173	1614.49	1501.98	138.216	1565.08	1242.59	161.596	1767.18	1425.28	159.451	1860.31	1216.42	198.871	1555.44	1301.02	-24.0309	1710.44	1469.01	-107.875	1750.81	1249.93	-128.54	1781.97	1153.29	-128.292	1935.34	1058.42	-79.9956	2005.6	1019.64	-139.775	1976.34	992.864	-129.298	2053.82	978.243
2837	0	107.492	1826.86	1649.28	203.527	1828.85	1648.69	87.5105	1673.96	1683.38	232.404	1682.31	1677.4	154.05	1628.02	1499.99	139.378	1578.24	1240.55	162.091	1780.07	1423.54	159.367	1873.62	1214.82	200.239	1568.66	1299.27	-23.4026	1723.13	1467.51	-107.249	1767.46	1249.85	-128.26	1800.19	1153.87	-127.85	1955.15	1061.86	-79.1713	2025.42	1023.58	-139.405	1997.29	997.021	-128.598	2074.82	984.309
2838	0	107.802	1839.72	1647.55	203.794	1841.98	1647.14	88.2702	1686.69	1681.73	232.871	1695.53	1675.86	154.779	1640.27	1498.32	140.499	1591.49	1238.86	162.542	1793.01	1421.87	159.335	1886.76	1213.4	201.26	1581.8	1297.43	-22.5738	1735.69	1466.27	-106.899	1783.81	1249.92	-128.098	1817.79	1154.49	-126.854	1974.18	1064.97	-78.0209	2044.71	1027.6	-138.875	2017.58	1001.17	-127.83	2095.09	989.797
2839	0	108.075	1852.48	1645.95	204.201	1855	1645.72	88.8403	1699.34	1679.99	233.435	1708.48	1674.26	155.747	1653.85	1496.78	141.429	1604.93	1236.92	163.199	1806.24	1420.32	159.531	1900.15	1212.02	202.146	1594.98	1295.66	-21.7463	1748.48	1465.18	-106.267	1799.81	1250.04	-127.885	1834.74	1155.35	-126.616	1992.79	1068.08	-77.7768	2063.11	1030.6	-138.73	2036.89	1005.06	-127.428	2114.67	995.086
2840	0	108.803	1865.15	1644.67	204.747	1867.89	1644.15	89.858	1712.01	1678.48	234.498	1721.43	1672.55	156.679	1666.18	1495.01	142.316	1618.31	1235.13	163.932	1819.56	1418.79	160.008	1913.53	1210.65	203.096	1608.31	1293.97	-20.8825	1761.29	1464.25	-105.443	1815.62	1250.27	-127.589	1851.37	1155.82	-126.072	2010.54	1070.56	-77.1528	2081.1	1033.73	-138.782	2055.64	1008.7	-127.097	2133.37	999.892
2841	0	109.715	1877.78	1643.78	205.723	1880.74	1643.23	91.1127	1724.55	1677	235.501	1734.06	1671.11	157.688	1679.21	1493.51	143.032	1631.9	1233.36	164.7	1832.7	1417.64	160.526	1926.83	1209.76	203.984	1621.66	1292.33	-19.9679	1774.26	1463.47	-104.897	1830.73	1250.18	-127.101	1867.64	1156.21	-125.658	2027.61	1073.14	-76.846	2098.27	1036.46	-138.761	2073.55	1011.87	-127.187	2151.3	1004.2
2842	0	110.67	1890.41	1643.08	206.812	1893.34	1642.31	92.1794	1737.01	1675.79	236.542	1746.62	1669.64	158.626	1692.77	1492.04	143.475	1645.5	1232.15	165.671	1845.96	1416.83	161.508	1940.44	1209.2	204.955	1635.34	1290.87	-18.9358	1787.36	1462.99	-104.151	1845.73	1250.58	-126.606	1883.23	1157.02	-125.881	2044.17	1075.35	-76.5869	2114.99	1039.04	-139.019	2090.51	1014.48	-127.434	2168.29	1007.99
2843	0	112.245	1903.06	1642.38	208.164	1905.89	1641.56	93.6102	1749.5	1674.83	238.294	1759.26	1668.38	159.563	1705.11	1490.8	143.725	1659.43	1230.73	166.589	1859.27	1415.73	161.959	1953.48	1208.18	205.492	1648.86	1289.53	-17.8664	1800.79	1462.46	-103.865	1859.82	1250.75	-126.501	1898.21	1157.41	-126	2060.15	1077.07	-76.7534	2131.18	1040.75	-139.446	2106.94	1016.9	-127.817	2184.63	1010.89
2844	0	113.557	1915.57	1641.89	209.826	1918.54	1640.87	95.187	1761.95	1673.9	239.788	1771.73	1667.22	161.02	1718.99	1489.73	144.786	1673.33	1229.64	167.917	1872.61	1415.07	163.164	1967.36	1207.72	206.248	1662.69	1288.25	-16.6275	1814.1	1462	-103.108	1874.07	1250.73	-125.705	1913.2	1157.71	-125.744	2075.27	1078.2	-76.9649	2146.5	1042.02	-139.79	2122.4	1018.67	-128.409	2200.21	1013.18
2845	0	115.283	1928.15	1641.84	211.395	1931.09	1640.53	97.1623	1774.44	1673.41	241.653	1784.1	1666.38	162.415	1731.41	1488.81	145.379	1687.61	1228.46	169.08	1886.09	1414.71	164.677	1981.47	1207.59	206.923	1676.66	1286.87	-15.2839	1827.62	1461.93	-102.459	1887.98	1250.98	-125.049	1927.45	1158.26	-125.785	2090.03	1079.34	-77.1952	2161.49	1043.01	-140.356	2137.09	1019.87	-129.184	2214.83	1014.67
2846	0	116.744	1940.66	1641.98	213.204	1943.61	1640.58	98.9789	1786.7	1673.07	243.629	1796.7	1665.82	163.9	1744.51	1488.18	145.946	1702.1	1227.62	170.412	1899.51	1414.59	166.086	1995.53	1207.66	207.579	1690.53	1285.76	-13.6298	1841.13	1461.83	-101.775	1901.47	1251.21	-124.51	1941.58	1158.95	-126.009	2103.98	1079.83	-77.6617	2175.51	1043.4	-140.948	2150.88	1020.52	-130.16	2228.76	1015.19
2847	0	118.843	1953.13	1642.39	215.113	1956.28	1640.74	100.97	1798.99	1672.74	245.531	1809.19	1665.25	165.292	1757.49	1487.31	146.534	1716.64	1226.9	171.804	1913.03	1414.58	167.644	2010	1208.1	208.49	1704.68	1284.84	-12.0303	1854.55	1462.01	-101.024	1915.07	1251.95	-124.012	1955.33	1159.59	-126.378	2117.38	1079.91	-78.7282	2188.81	1042.62	-141.538	2164.01	1020.68	-131.26	2241.82	1014.98
2848	0	120.951	1965.63	1643.01	217.108	1968.87	1641.25	103.398	1811.34	1672.72	247.62	1821.73	1664.87	167.163	1770.77	1486.85	147.457	1731.32	1226.42	173.345	1926.6	1414.99	169.313	2024.7	1208.83	209.772	1719.02	1284.04	-10.4766	1867.92	1462.59	-100.617	1928.36	1252.87	-123.293	1968.5	1160.3	-126.924	2130.12	1079.76	-79.4794	2201.58	1042	-142.51	2176.29	1020.12	-132.573	2254.06	1013.75
2849	0	122.798	1978.1	1644.05	219.131	1981.53	1642.03	105.984	1823.67	1673.01	249.966	1834.31	1664.72	169.044	1784.02	1486.94	148.355	1745.62	1226.21	174.989	1940.18	1415.61	170.714	2039.24	1210.01	210.998	1733.44	1283.5	-8.75474	1881.31	1463.43	-99.6589	1941.57	1253.84	-122.707	1981.24	1161.14	-126.94	2142.16	1079.39	-80.3742	2213.61	1040.74	-143.368	2187.68	1019.3	-133.559	2265.39	1011.91
2850	0	125.049	1990.59	1645.61	221.383	1994.29	1643.15	108.327	1835.87	1673.54	252.516	1846.82	1664.94	170.682	1797.37	1487.29	149.253	1759.8	1226.44	176.587	1953.91	1416.52	171.91	2054.13	1211.27	211.979	1747.88	1283.22	-7.20889	1894.77	1464.77	-98.6848	1954.77	1254.75	-122.01	1993.67	1162.36	-127.66	2153.52	1078.6	-81.4812	2224.7	1038.79	-144.196	2198.3	1018.06	-135.001	2275.89	1009
2851	0	127.471	2003.08	1647.3	223.771	2007.01	1644.57	111.016	1848.21	1674.38	255.248	1859.66	1665.12	172.343	1810.59	1487.74	149.829	1773.67	1226.77	178.143	1967.49	1417.48	173.091	2068.72	1212.67	213.049	1762.19	1283.37	-5.65423	1908.18	1466.18	-97.5518	1967.65	1256.08	-121.4	2005.38	1163.34	-127.715	2164.13	1077.28	-82.5271	2234.99	1036.16	-145.104	2207.99	1016.33	-136.129	2285.46	1005.73
2852	0	129.867	2015.93	1649.42	226.134	2019.75	1646.02	113.917	1860.74	1675.48	257.858	1872.24	1665.54	174.111	1824.06	1488.74	150.621	1787.32	1227.79	179.353	1981.01	1418.78	173.741	2082.87	1214.2	214.025	1776.29	1283.87	-4.27473	1921.71	1468.22	-96.361	1980.35	1257.42	-120.698	2016.74	1164.14	-128.331	2174.18	1076.08	-83.3122	2244.31	1033.47	-146.001	2216.67	1014.26	-137.352	2293.95	1001.71
2853	0	132.318	2028.77	1651.55	228.551	2032.63	1647.44	116.33	1873.55	1676.86	260.344	1885.03	1665.84	175.322	1837.48	1490	150.861	1800.57	1229.28	180.608	1994.43	1420.28	174.187	2096.48	1215.65	214.62	1789.81	1285.07	-3.37137	1935.19	1470.1	-95.4814	1992.63	1258.82	-120.024	2027.58	1165.37	-128.904	2183.21	1074.22	-84.1971	2252.93	1030.28	-146.891	2224.53	1011.81	-138.433	2301.62	997.224
2854	0	134.977	2041.9	1653.45	230.928	2045.51	1648.68	118.444	1886.08	1678.26	262.428	1897.71	1666.13	176.33	1850.74	1491.09	151.186	1813.7	1231.01	181.355	2007.58	1421.62	174.513	2110.09	1217.05	215.101	1802.81	1286.58	-2.29019	1948.61	1472.16	-94.3323	2004.88	1260.38	-119.475	2038.07	1166.26	-129.256	2191.55	1071.89	-85.0061	2260.82	1026.48	-147.817	2231.68	1009.3	-139.446	2308.26	992.041
2855	0	137.185	2055.03	1655.34	233.265	2058.36	1649.66	120.853	1899.09	1679.87	264.877	1910.63	1666.39	177.521	1864	1492.54	151.385	1826.75	1232.64	182.193	2020.69	1422.85	174.784	2123.51	1218.51	215.31	1815.75	1287.86	-1.22426	1962.1	1474.13	-93.4257	2016.64	1261.51	-118.452	2048.19	1167.19	-129.409	2199.59	1069.64	-85.8685	2267.71	1022.13	-148.426	2238.05	1005.65	-140.357	2314.17	986.253
2856	0	139.246	2068.1	1657.2	235.189	2071.35	1650.53	122.843	1912.18	1681.79	266.615	1923.45	1667	178.529	1877.08	1494.2	151.672	1839.66	1234.34	182.999	2033.68	1424.26	175.039	2136.64	1220.03	215.535	1828.57	1289.25	-0.43512	1975.35	1475.91	-92.2622	2028.4	1262.79	-117.691	2057.88	1168.1	-129.247	2206.8	1066.87	-86.6136	2274	1017.37	-148.723	2243.8	1002.16	-141.211	2319.34	980.362
2857	0	140.796	2081.25	1658.75	236.919	2084.37	1651.54	124.334	1925.22	1683.49	268.211	1936.52	1667.78	179.085	1889.57	1495.82	151.976	1852.11	1236.17	183.178	2046.38	1425.49	175.257	2149.33	1221.34	215.885	1841.32	1290.98	0.475915	1988.09	1477.76	-91.657	2039.09	1263.56	-117.092	2067.28	1168.89	-129.508	2213.69	1064.1	-87.0008	2279.64	1012.36	-149.028	2249.03	998.28	-141.773	2323.52	973.677
2858	0	142.382	2094.3	1660.02	238.296	2097.43	1652.61	125.677	1938.3	1685.31	269.54	1949.6	1668.9	180.015	1902.01	1497.45	152.373	1864.3	1237.79	183.516	2058.89	1426.87	175.556	2161.66	1222.65	216.167	1853.72	1292.26	1.07977	2000.39	1479.35	-90.9057	2050.04	1264.61	-116.398	2076.29	1169.36	-129.65	2219.87	1060.91	-87.3869	2284.45	1007.17	-149.473	2253.25	994.542	-142.051	2327.13	966.926
2859	0	143.341	2107.34	1661.53	239.222	2110.5	1653.87	126.63	1951.39	1687.13	270.352	1962.61	1670.39	180.995	1914.54	1499.14	153.29	1876.39	1239.59	184.112	2071.42	1428.63	175.496	2173.02	1224.02	216.953	1865.96	1293.97	1.6046	2012.47	1480.83	-90.4041	2060.45	1265.59	-115.314	2085.12	1169.82	-129.604	2225.53	1057.81	-87.6002	2288.62	1001.88	-149.986	2256.96	990.284	-142.312	2329.84	960.172
2860	0	144.046	2120.24	1662.87	239.86	2123.39	1655.26	127.772	1964.66	1688.77	271.547	1975.79	1672.41	181.671	1926.96	1500.96	153.858	1888.35	1241.03	184.62	2083.72	1430.45	175.765	2185.32	1225.96	217.736	1878.12	1295.67	2.02697	2024.28	1482.49	-89.7008	2070.35	1266.59	-114.567	2093.14	1170.15	-129.668	2230.5	1054.63	-87.7547	2292.04	996.513	-150.171	2260.09	986.503	-142.559	2331.86	953.385
2861	0	144.357	2133.12	1664.3	240.307	2136.26	1656.73	127.977	1977.07	1690.76	271.782	1988.65	1674.22	182.19	1939.18	1502.86	154.962	1900.56	1242.86	184.985	2095.88	1432.14	175.831	2197.38	1227.69	218.681	1890.29	1297.43	2.22152	2035.98	1484.01	-89.0351	2079.88	1267.09	-113.553	2101.09	1170.19	-129.323	2235.13	1051.12	-87.7789	2295.02	991.106	-150.125	2262.75	981.956	-142.569	2333.27	946.217
2862	0	144.53	2145.8	1665.86	240.474	2148.96	1658.42	129.74	1991.17	1693.05	272.259	2001.57	1676.48	182.601	1951.27	1504.82	156.092	1912.53	1244.51	185.355	2107.97	1433.89	175.955	2209.29	1229.39	219.566	1902.2	1299.04	2.42042	2047.43	1485.23	-88.4572	2089.05	1267.51	-112.662	2108.34	1170	-128.992	2239.11	1047.7	-87.6685	2297.16	985.545	-150.147	2264.75	977.798	-142.422	2334.1	939.385
2863	0	144.857	2158.43	1667.83	240.764	2161.87	1660.6	129.679	2003.57	1694.97	273.421	2014.91	1679.13	183.132	1963.29	1507.01	157.777	1924.86	1246.19	185.811	2120.05	1436.06	176.235	2221.82	1231.85	221.524	1914.83	1301.1	2.55705	2059.09	1486.56	-87.816	2097.94	1267.82	-111.494	2115.37	1169.8	-128.978	2242.56	1044.3	-87.5255	2299.08	980.34	-150.228	2266.15	973.64	-142.364	2334.21	932.666
2864	0	144.787	2171	1669.76	240.83	2174.56	1662.74	129.749	2016.23	1696.95	273.206	2027.45	1681.38	183.407	1975.41	1509.26	158.999	1936.64	1248.38	186.294	2132.05	1438.44	176.294	2233.37	1234.04	222.72	1926.79	1303.57	2.58936	2070.59	1487.61	-87.1416	2106.33	1267.89	-110.536	2121.91	1169.49	-128.507	2245.41	1040.84	-87.5668	2300.2	975.215	-151.052	2266.7	969.442	-142.478	2333.64	925.934
2865	0	144.875	2183.53	1671.4	241.008	2187.15	1664.78	129.707	2028.84	1699.12	273.184	2039.98	1683.74	183.849	1987.65	1511.51	160.404	1948.49	1250.67	186.813	2144.19	1440.36	176.763	2245.51	1235.9	224.034	1938.75	1306.06	2.50155	2082.29	1488.61	-86.6927	2114.15	1267.76	-109.346	2128.14	1169.02	-128.003	2248.06	1037.39	-87.346	2300.93	969.967	-150.104	2267.25	965.344	-142.152	2332.34	919.193
2866	0	145.107	2195.91	1673.23	241.002	2199.28	1666.85	129.899	2041.29	1700.94	273.51	2052.42	1686.02	184.516	2000.01	1513.58	162.047	1960.47	1252.8	187.229	2156.25	1442.34	177.029	2256.84	1237.58	225.063	1950.57	1308.36	2.76231	2093.95	1489.63	-85.8502	2122.02	1267.55	-108.069	2134.03	1168.48	-127.306	2249.92	1033.8	-87.0058	2301.22	964.907	-149.873	2266.97	961.104	-141.775	2330.82	913.151
2867	0	145.181	2208.28	1675.33	241.213	2211.56	1669.02	129.872	2053.45	1702.66	273.622	2064.59	1688.23	184.865	2012.23	1515.6	163.093	1972.3	1254.57	187.532	2168.24	1444.42	177.309	2268.44	1239.63	226.425	1962.71	1310.51	2.73775	2105.71	1490.54	-85.0658	2129.32	1267.63	-106.61	2139.39	1168.1	-126.773	2251.57	1030.8	-86.7853	2301.06	960.264	-149.176	2266.24	957.193	-141.391	2328.51	906.949
2868	0	145.317	2220.22	1677.03	241.275	2223.73	1671.22	129.787	2065.55	1704.23	273.151	2076.55	1690.19	185.302	2024.34	1517.69	164.555	1984.51	1256.62	187.978	2180.43	1446.32	177.676	2280.03	1241.53	227.414	1974.67	1312.68	3.08896	2117.64	1491.48	-84.344	2136.25	1267.54	-105.377	2144.48	1167.82	-125.988	2252.62	1027.59	-86.7705	2300.26	955.628	-148.347	2265.21	953.467	-141.142	2325.78	901.2
2869	0	145.277	2232.49	1678.76	241.301	2235.77	1673.11	129.924	2077.75	1705.55	273.351	2088.63	1691.92	185.63	2036.53	1519.16	165.465	1996.54	1258.13	188.302	2192.55	1447.7	178.226	2291.76	1242.99	228.76	1986.87	1314.72	3.22885	2129.47	1492.31	-83.1776	2143.43	1267.37	-103.938	2149.38	1167.45	-125.257	2253.54	1024.36	-85.7009	2299.8	951.24	-147.602	2263.64	949.897	-140.596	2322.61	895.543
2870	0	145.526	2244.4	1680.4	241.63	2247.94	1675.04	130.083	2089.69	1706.51	273.37	2100.58	1693.07	186.121	2048.82	1520.44	166.602	2008.74	1259.67	189.042	2204.81	1449.24	178.967	2303.51	1244.35	229.926	1999.03	1316.35	3.48762	2141.28	1492.9	-82.0433	2150.41	1267.02	-101.946	2154.46	1166.92	-124.175	2254.08	1021.29	-85.1961	2298.74	946.755	-146.4	2261.81	946.18	-139.831	2319.13	890.024
2871	0	145.663	2256.32	1682.12	241.784	2259.93	1676.93	130.165	2101.54	1707.14	273.242	2112.42	1694.11	186.551	2061.15	1521.53	167.437	2020.77	1260.93	189.095	2216.72	1450.3	179.594	2315.22	1245.61	231.018	2011.22	1317.69	3.70016	2153.24	1493.36	-81.0614	2157.19	1266.62	-100.36	2159	1166.37	-123.355	2254.2	1017.97	-84.6601	2297.11	942.608	-145.387	2259.67	942.784	-139.069	2315.21	884.81
2872	0	146.003	2268.17	1683.37	241.822	2271.86	1678.4	130.634	2113.55	1707.76	273.948	2124.32	1694.97	186.87	2073.33	1522.44	168.207	2032.89	1261.99	189.748	2229.04	1451.07	180.467	2326.96	1246.28	232.01	2023.23	1319.07	4.10809	2165.35	1493.68	-79.5937	2164.24	1266.25	-98.6989	2163.58	1165.89	-122.03	2254.06	1015.12	-83.7203	2296.01	938.651	-143.72	2257.43	939.51	-138.137	2311.17	879.705
2873	0	146.05	2280.48	1684.51	242.028	2283.98	1679.71	130.897	2125.27	1707.79	274.064	2136.39	1695.4	187.405	2085.83	1523.01	169.016	2044.92	1262.62	190.323	2241.25	1451.69	181.347	2338.49	1246.9	233.539	2035.34	1319.89	4.28749	2177.44	1493.56	-78.1334	2171.63	1265.59	-96.6038	2168.32	1165.24	-120.946	2254.15	1012.18	-82.7559	2294.15	934.625	-142.504	2254.78	936.134	-137.136	2306.75	874.731
2874	0	146.443	2292.33	1685.3	242.283	2296.13	1680.69	131.203	2137.07	1707.51	274.566	2148.37	1695.61	187.879	2098.25	1523.26	169.737	2056.91	1262.98	190.682	2253.46	1451.97	182.341	2350.06	1246.81	234.019	2047.33	1320.38	4.76737	2189.69	1493.49	-76.9999	2178.6	1264.99	-94.5808	2172.94	1164.62	-119.552	2254.11	1009.34	-78.5941	2296.63	932.275	-140.526	2252.22	933.057	-135.845	2302.23	870.01
2875	0	146.115	2304.21	1685.69	242.404	2308.24	1681.18	132.022	2149.46	1707.3	273.73	2160.26	1695.39	188.318	2110.51	1523.39	170.18	2068.76	1263.37	190.965	2265.51	1451.79	183.246	2361.51	1246.29	234.827	2059.48	1320.87	4.78411	2201.92	1492.64	-75.4826	2185.98	1264.35	-92.9263	2177.6	1164.13	-118.254	2253.93	1006.39	-77.8084	2295.07	929.117	-139.091	2249.54	930.115	-134.53	2297.72	865.647
2876	0	146.686	2316.35	1685.71	242.526	2320.42	1681.43	132.463	2161.64	1706.49	274.715	2172.74	1694.87	188.182	2124.47	1522.52	170.67	2080.72	1263.37	191.643	2277.84	1451.44	184.323	2372.98	1245.52	235.647	2071.45	1321.09	5.16051	2214.48	1492.16	-74.0123	2193.49	1263.4	-91.0071	2182.43	1163.39	-116.716	2253.82	1003.71	-79.4347	2288.43	923.272	-137.137	2246.75	927.327	-132.933	2292.43	861.126
2877	0	146.731	2328.67	1685.55	242.819	2332.81	1681.22	131.795	2172.64	1705.28	275.207	2185.15	1694.16	188.691	2136.99	1522.24	171.009	2092.44	1262.9	192.207	2290.23	1450.79	185.479	2384.76	1244.41	236.14	2083.41	1320.76	5.38291	2226.74	1490.91	-72.6417	2201.1	1262.42	-88.2548	2187.53	1162.37	-115.237	2253.69	1000.85	-78.2619	2286.59	919.655	-134.242	2243.97	924.42	-131.249	2287.54	856.931
2878	0	146.982	2341.13	1684.89	243.071	2345.39	1680.69	133.07	2185.74	1704.48	276.075	2197.58	1693.28	188.597	2148.42	1521.73	171.335	2104.43	1262.36	193.263	2302.7	1450.12	186.518	2396.74	1242.91	236.549	2095.38	1320.12	5.97641	2239.63	1490.11	-71.1832	2208.66	1261.52	-85.9765	2192.7	1161.71	-113.472	2253.62	998.486	-76.971	2284.81	916.224	-132.353	2241.22	922.336	-129.518	2282.61	853.139
2879	0	146.999	2353.6	1683.79	243.304	2357.99	1679.92	133.567	2198.13	1703.2	275.978	2210.09	1692.07	189.419	2162.1	1521.86	171.322	2116.38	1261.84	193.264	2314.7	1448.76	187.655	2408.85	1241.47	236.716	2107.19	1319.55	6.0884	2252.26	1489.01	-69.7853	2216.75	1260.62	-83.6139	2198.22	1161.13	-112.081	2253.74	996.399	-75.6883	2283.28	913.325	-130.317	2238.47	920.218	-127.891	2277.7	849.996
2880	0	147.555	2366.05	1682.67	243.748	2370.67	1678.69	134.05	2210.93	1701.95	276.481	2222.69	1690.95	187.212	2170.62	1521.03	170.965	2128.26	1260.8	193.708	2326.98	1447.28	188.844	2421.02	1239.8	236.903	2119.04	1318.61	6.39953	2265.07	1487.71	-68.5812	2225.1	1259.81	-81.1826	2204.37	1160.55	-110.192	2254.13	994.53	-74.5161	2281.59	910.44	-127.939	2236.13	918.349	-126.333	2272.84	846.818
2881	0	148.171	2378.83	1681.36	244.229	2383.43	1677.32	134.467	2223.54	1700.48	276.674	2235.4	1689.34	189.02	2184.38	1519.7	170.608	2140.34	1259.77	194.294	2339.48	1445.92	189.979	2433.42	1238.12	236.933	2131.13	1317.48	6.53731	2277.97	1486.34	-67.4395	2233.78	1258.91	-78.8302	2210.55	1159.85	-108.691	2254.69	992.774	-73.2501	2280.51	907.824	-125.759	2233.85	916.994	-124.657	2268.3	844.377
2882	0	148.33	2391.83	1679.82	244.685	2395.95	1675.76	134.527	2236.33	1699.01	277.208	2248.12	1687.8	186.437	2194.74	1518.77	169.924	2152.58	1258.71	194.646	2351.94	1444.24	190.934	2445.72	1236.31	236.727	2142.56	1316.55	6.55084	2290.92	1485.01	-66.7325	2242.2	1258.04	-76.514	2217.23	1159.22	-106.986	2255.62	991.376	-71.8386	2279.7	905.656	-123.789	2232.1	916.065	-123.099	2263.75	842.188
2883	0	148.903	2404.62	1677.83	245.162	2408.71	1673.72	134.802	2249.28	1697.47	277.289	2260.95	1686.13	187.272	2208.14	1517.31	169.072	2164.79	1257.68	195.081	2364.54	1442.33	191.967	2457.92	1234.12	236.556	2154.64	1315.36	6.61427	2304.01	1483.48	-65.9078	2251.42	1257.13	-74.0714	2224.5	1158.64	-105.404	2257.11	990.172	-70.6806	2279.15	903.415	-121.659	2230.9	915.38	-121.445	2259.83	840.218
2884	0	149.344	2417.8	1675.71	245.812	2421.6	1671.51	134.976	2262.6	1695.96	277.576	2273.55	1684.17	187.925	2221.5	1515.64	168.138	2176.93	1256.19	195.374	2377.09	1440.31	193.07	2470.18	1231.95	236.066	2166.62	1313.66	6.43576	2317.03	1481.74	-64.8553	2260.99	1256.14	-71.642	2232.06	1158.15	-103.963	2259.09	988.942	-69.5721	2278.84	901.638	-119.551	2230.31	915.103	-119.764	2256.29	838.603
2885	0	150.167	2430.84	1673.81	246.269	2434.36	1669.35	135.309	2276.02	1694.14	277.798	2286.29	1682.35	185.775	2232.72	1514.35	167.414	2189.48	1254.7	195.512	2389.64	1438.46	193.703	2482.35	1229.99	235.522	2178.71	1312.22	6.52425	2330.61	1480.37	-64.0217	2270.9	1255.08	-69.5871	2240.02	1157.52	-102.428	2261.64	988.096	-68.5467	2279.24	899.961	-117.953	2230.03	915.145	-118.227	2253.23	837.206
2886	0	150.595	2444.11	1671.7	246.715	2447.03	1667.1	135.007	2289.15	1692.53	277.5	2298.9	1680.32	188.022	2249.69	1511.48	166.49	2201.97	1253.23	195.558	2402.25	1436.52	194.359	2494.82	1228.18	234.734	2190.9	1310.74	6.21879	2343.78	1478.43	-63.4623	2280.97	1253.74	-67.8761	2248.58	1156.87	-101.538	2264.56	987.439	-66.434	2284.15	899.636	-117.104	2230.25	915.511	-116.786	2250.97	836.184
2887	0	150.577	2457.13	1669.43	246.834	2459.71	1664.79	134.749	2302.27	1690.54	276.896	2311.57	1678.23	183.124	2255.93	1510.35	165.571	2214.48	1251.68	195.567	2414.8	1434.6	194.871	2507.44	1226.49	234.105	2203.12	1309.04	6.10834	2357.42	1476.85	-62.9554	2291.17	1252.68	-66.1845	2257.62	1156.2	-100.739	2268.35	986.866	-63.9025	2280.85	896.765	-115.584	2232.02	916.093	-115.385	2249.42	835.559
2888	0	150.675	2469.97	1667.27	246.775	2472.4	1662.58	134.313	2315.28	1688.61	276.816	2324.02	1676.24	183.569	2270.46	1508.62	165.006	2227.15	1249.63	195.369	2427.42	1432.79	195.224	2520.18	1224.94	233.213	2215.62	1307.18	5.53332	2370.48	1474.92	-62.1738	2302.09	1251.36	-64.8004	2267.15	1155.24	-100.105	2273.09	986.456	-65.545	2284.25	896.555	-114.595	2234.77	916.689	-114.288	2248.59	835.094
2889	0	150.225	2482.86	1665.25	246.43	2485.06	1660.71	133.484	2328.23	1686.66	275.918	2336.63	1674.63	184.926	2285.11	1506.7	164.392	2239.94	1247.69	195.161	2440.14	1431.23	195.292	2532.92	1223.52	232.624	2228.25	1305.31	5.05947	2383.82	1472.9	-61.9255	2313.15	1249.92	-63.3716	2277.26	1154.52	-99.8807	2278.46	986.1	-65.8055	2287.96	895.978	-114.352	2238.21	917.486	-113.169	2248.92	834.886
2890	0	149.726	2495.66	1663.4	245.985	2497.59	1659.03	132.571	2341.02	1684.81	275.303	2349.19	1673.11	183.985	2297.63	1504.84	163.807	2252.83	1245.78	194.688	2453	1429.76	195.197	2545.55	1222.21	231.816	2241.22	1303.24	4.27019	2396.95	1470.99	-61.6544	2325.1	1248.6	-62.8047	2287.65	1153.46	-99.912	2284.75	985.923	-66.67	2292.47	895.217	-114.449	2242.87	918.348	-112.576	2250.28	834.865
2891	0	148.84	2508.46	1661.68	245.123	2510.01	1657.52	131.444	2353.78	1682.92	273.907	2361.71	1671.4	182.994	2310.31	1503.01	163.442	2265.89	1243.88	194.162	2465.99	1428.37	195.025	2558.26	1220.87	231.241	2253.81	1301.6	3.5699	2410.01	1469	-62.1471	2336.97	1246.79	-62.335	2298.4	1152.29	-100.502	2292.02	985.811	-67.3754	2297.98	894.468	-114.973	2248.44	918.85	-112.788	2252.96	834.864
2892	0	147.758	2520.98	1660.25	244.066	2522.49	1656.45	129.933	2366.51	1681.03	272.417	2373.95	1670.16	182.224	2323.17	1501.26	162.963	2278.96	1241.87	193.663	2478.99	1427.14	194.705	2570.87	1219.64	230.715	2266.91	1299.83	2.81729	2423.13	1467.15	-61.9383	2348.88	1244.97	-61.8963	2309.88	1151.07	-101.414	2300.01	985.568	-69.256	2304.76	893.782	-116.055	2255.17	919.501	-111.981	2256.66	834.764
2893	0	146.387	2533.47	1659	242.695	2535.19	1655.59	128.378	2378.79	1679.1	271.157	2386.37	1668.65	181.175	2335.76	1499.78	162.723	2292.01	1240.5	192.731	2492.12	1425.98	194.057	2583.72	1218.53	230.287	2280.21	1298.48	2.00502	2435.99	1465.23	-62.538	2361.15	1243.21	-62.0299	2321.3	1149.9	-102.787	2308.93	985.07	-70.9673	2312.4	893.034	-117.435	2262.98	920.225	-112.756	2261.98	834.859
2894	0	144.579	2545.84	1657.77	241.058	2547.63	1654.76	126.839	2391.32	1677.48	269.402	2398.9	1667.57	180.112	2348.46	1498.48	162.848	2305.19	1239.26	191.809	2505.36	1425.01	193.315	2596.9	1217.41	230.026	2293.43	1297.24	0.908152	2448.72	1463.4	-63.1479	2373.48	1241.45	-62.5402	2333.18	1148.65	-104.145	2318.8	984.539	-73.0248	2321.12	892.257	-119.226	2271.97	920.352	-114.221	2268.93	835.101
2895	0	142.852	2558.51	1656.77	239.146	2559.92	1654.1	125.222	2403.6	1675.55	267.264	2411.55	1666.5	179.662	2361.68	1497.33	163.141	2318.5	1237.87	190.937	2518.74	1424.12	192.513	2610.13	1216.37	230.244	2306.7	1296.22	0.09109	2461.35	1461.93	-63.3918	2385.91	1239.82	-62.804	2345.61	1147.24	-105.738	2329.35	983.763	-75.031	2330.94	891.285	-120.974	2281.97	920.49	-116.113	2277.3	834.963
2896	0	140.915	2570.79	1655.88	237.178	2572.71	1653.81	123.225	2416.03	1674.23	265.655	2424.02	1665.79	178.969	2374.54	1496.37	163.539	2331.94	1236.61	189.818	2532.07	1423.45	191.46	2623.32	1215.47	230.182	2320.48	1295.46	-0.751484	2474.03	1460.75	-63.8587	2398.58	1238.42	-63.3847	2358.13	1146.01	-107.518	2340.72	983.174	-77.4104	2341.87	890.502	-122.927	2293.06	920.366	-118.42	2287.37	834.849
2897	0	138.535	2583.21	1655.29	235.121	2585.43	1653.57	121.19	2428.38	1673.34	263.704	2436.56	1665.41	177.834	2387.32	1495.54	163.729	2345.45	1235.71	188.306	2545.24	1423.14	190.097	2636.63	1214.86	230.384	2333.73	1294.72	-2.43268	2486.16	1459.53	-64.8883	2411.14	1237.09	-64.6152	2370.91	1144.93	-109.215	2353.03	982.691	-80.1267	2354.02	889.718	-124.641	2305.11	919.994	-121.369	2298.93	834.548
2898	0	136.496	2595.72	1655.06	233.001	2597.86	1653.77	119.063	2440.86	1672.55	261.648	2449.11	1665.42	176.86	2400.23	1494.87	164.063	2359.21	1234.93	187.295	2558.76	1423.09	188.837	2650.44	1214.79	230.736	2347.47	1294.14	-3.4563	2498.76	1458.86	-66.0961	2424	1236.12	-65.7617	2384.02	1143.9	-110.874	2366.34	982.392	-82.4097	2367.19	888.878	-126.997	2317.81	919.296	-124.366	2312.42	834.124
2899	0	134.499	2608.44	1655.25	230.825	2610.6	1654.28	117.024	2453.46	1672.18	259.248	2461.72	1665.45	176.295	2413.55	1494.41	164.201	2373.2	1234.3	185.63	2572.08	1423.7	187.562	2664.53	1215.07	231.104	2361.04	1293.95	-4.70552	2511.32	1458.51	-67.2616	2437.02	1235.2	-67.1262	2397.3	1143.05	-113.156	2379.8	981.792	-85.8594	2381.7	888.518	-128.405	2332.11	918.358	-127.695	2327.18	833.612
2900	0	132.45	2621.16	1655.49	228.522	2623.05	1654.95	114.956	2466.01	1671.98	257.2	2474.38	1666.18	175.54	2429.26	1493.53	163.973	2387.15	1233.94	184.283	2585.35	1424.35	186.355	2678.94	1216.09	230.522	2374.77	1293.69	-5.97355	2523.7	1458.02	-68.2712	2450.36	1235.15	-68.6414	2410.88	1142.55	-115.021	2394.3	981.119	-88.157	2397	887.92	-130.561	2346.77	917.943	-131.033	2343.67	832.976
2901	0	130.102	2633.51	1656.03	226.734	2635.67	1655.8	112.813	2478.64	1672.09	254.538	2486.41	1667.09	173.884	2439.74	1494.64	163.802	2401.17	1234.14	182.947	2598.79	1425.31	185.446	2693.19	1217.12	230.151	2388.44	1294.13	-7.20254	2536.62	1458.24	-69.7655	2463.8	1235.17	-70.231	2424.93	1142.35	-117.172	2409.42	980.496	-91.0863	2413.43	887.569	-132.625	2362.61	917.069	-135.363	2361.41	832.605
2902	0	127.907	2645.94	1656.75	224.833	2648.42	1657.15	110.781	2491.32	1672.37	252.596	2499	1667.93	173.179	2455.39	1494.39	163.388	2415.18	1234.4	181.76	2612.1	1426.55	184.883	2707.4	1218.26	229.629	2402.12	1294.53	-8.47523	2549.42	1458.43	-71.0597	2477.6	1235.12	-71.6066	2439.38	1142.19	-119.094	2425.62	980.462	-90.7452	2435.47	886.597	-134.431	2379.56	915.88	-138.789	2380.44	831.961
2903	0	126.304	2658.98	1658.18	223.122	2661.19	1659.02	108.796	2504.12	1672.98	250.744	2511.93	1669.15	172.07	2468.44	1495.17	162.697	2428.81	1235.16	180.625	2625.43	1428.22	184.198	2721.32	1220.01	228.783	2415.88	1295.41	-9.26195	2562.31	1459.04	-72.5762	2491.34	1235.55	-73.4426	2453.85	1142.02	-121.277	2442.13	980.078	-96.712	2449.34	887.21	-136.691	2396.76	915.094	-142.285	2400.55	831.574
2904	0	124.532	2671.56	1659.76	221.182	2673.74	1661.05	106.782	2516.82	1673.96	248.477	2524.4	1671.06	171.104	2481.16	1496.66	161.835	2442.15	1236.34	179.581	2638.76	1430.15	183.779	2734.69	1221.78	228.13	2428.95	1296.99	-10.1758	2575.12	1459.93	-73.1406	2506.34	1236.15	-74.8158	2469.21	1142.14	-123.131	2459.79	980.32	-102.051	2469.32	887.637	-138.361	2415.48	914.211	-145.809	2421.78	831.187
2905	0	122.842	2683.99	1660.97	219.499	2686.52	1662.77	105.083	2529.56	1674.95	246.895	2536.84	1672.59	170.375	2494.43	1498.02	161.181	2455.28	1238.1	178.681	2651.76	1431.69	183.684	2747.99	1223.38	227.583	2442.46	1299.06	-10.859	2587.88	1460.95	-74.8787	2520.67	1236.78	-76.313	2484.79	1142.27	-125.36	2477.78	980.297	-103.36	2489.52	887.616	-140.782	2434.44	913.477	-149.388	2443.95	831.134
2906	0	121.347	2696.75	1662.21	217.989	2699.21	1664.27	103.612	2542.34	1675.7	245.666	2549.99	1673.87	170.052	2507.35	1499.81	160.744	2468.19	1239.8	177.961	2664.7	1433.39	183.765	2761.47	1225.17	227.39	2455.36	1300.89	-11.3191	2600.52	1462.25	-75.63	2535.72	1237.34	-77.5087	2500.68	1142.66	-127.615	2496.75	980.838	-105.822	2510.77	888	-142.511	2454.52	912.741	-152.648	2467.04	831.177
2907	0	120.073	2709.3	1663.11	216.445	2711.88	1665.72	102.345	2555	1676.54	244.576	2562.64	1675.36	169.317	2517.97	1502.12	160.486	2480.83	1241.57	177.285	2677.53	1435.11	183.719	2774.55	1226.98	227.239	2468.19	1303.18	-11.5968	2613.02	1463.69	-76.3681	2550.96	1238.17	-78.9207	2516.7	1143.04	-129.19	2516.21	980.852	-108.689	2532.97	888.647	-144.116	2475.35	912.176	-155.876	2490.85	831.327
2908	0	118.717	2721.85	1664.05	215.215	2724.64	1666.94	101.275	2567.45	1677.69	243.318	2575.36	1676.85	168.505	2530.07	1503.8	160.24	2493.19	1243.47	176.846	2690.06	1436.77	183.609	2787.11	1228.72	227.449	2480.53	1305.04	-12.1691	2625.42	1465.14	-77.3252	2566.33	1238.99	-80.3364	2532.79	1143.57	-131.177	2536.17	981.22	-111.543	2556	889.685	-145.835	2496.9	911.412	-159.039	2515.37	831.765
2909	0	117.82	2734.28	1665.14	214.447	2737.3	1667.9	100.414	2579.99	1678.64	242.326	2588	1678.54	168.361	2542.64	1505.19	160.139	2505.28	1244.72	176.546	2702.38	1438.39	183.544	2799.14	1230.32	227.987	2492.87	1306.67	-12.3499	2637.95	1466.85	-78.2281	2581.57	1239.83	-81.7062	2549.13	1144.08	-132.948	2556.67	981.976	-113.977	2579.48	890.775	-147.272	2519.27	910.721	-161.903	2540.77	832.309
2910	0	117.137	2746.76	1666.09	213.601	2749.81	1669.01	99.8704	2592.64	1679.93	241.78	2600.47	1680.17	168.139	2554.62	1506.34	160.075	2517.29	1245.96	176.347	2714.46	1439.98	183.516	2810.94	1231.71	228.009	2504.92	1307.98	-12.5855	2650.35	1468.51	-78.4592	2597.06	1241.23	-82.9317	2565.56	1144.51	-134.367	2577.9	982.632	-113.814	2607.21	892.993	-148.527	2542.47	909.794	-164.806	2566.63	833.265
2911	0	116.671	2759.38	1667.04	213.117	2762.35	1670.03	99.1947	2605.19	1681.56	241.242	2613.41	1681.31	167.637	2566.62	1507.36	159.887	2529.17	1247.04	176.148	2726.49	1441.33	183.394	2822.67	1232.97	227.811	2516.74	1309.27	-12.9414	2662.71	1469.96	-78.8567	2612.43	1242.03	-84.2578	2582.11	1144.96	-135.659	2599.52	983.123	-115.65	2631.99	894.465	-149.391	2566.49	909.11	-166.865	2593.52	834.085
2912	0	116.437	2772.02	1667.81	212.85	2774.84	1670.75	98.7077	2617.89	1683.13	240.628	2625.87	1682.55	167.405	2580.71	1508.01	159.504	2541.08	1248.42	176.081	2738.6	1442.62	183.379	2834.2	1234.01	227.192	2528.86	1310.52	-13.1288	2675.26	1471.21	-80.1874	2627.5	1242.78	-86.1052	2598.48	1145.55	-136.964	2621.57	983.431	-117.077	2657.29	896.023	-150.41	2591.25	908.427	-168.625	2621.19	834.966
2913	0	116.519	2784.53	1668.68	212.897	2787.29	1671.58	98.7835	2630.6	1684.47	240.702	2638.11	1683.85	167.037	2590.88	1509.91	159.088	2553.04	1249.44	176.203	2750.62	1444.03	183.665	2845.91	1235.09	226.613	2540.18	1311.84	-13.1085	2687.71	1472.45	-80.8312	2642.65	1243.97	-86.8905	2615.48	1145.85	-138.185	2643.81	983.759	-117.911	2683	897.929	-151.515	2616.21	908.155	-169.812	2649.57	836.226
2914	0	117.054	2797.12	1669.6	213.268	2799.63	1672.52	98.6646	2643.1	1686.07	240.256	2650.33	1685.12	166.839	2602.89	1511.21	158.301	2564.87	1250.83	176.279	2762.49	1445.44	184.244	2857.77	1236.12	225.61	2551.86	1312.98	-12.9562	2700.37	1473.97	-81.0993	2657.77	1245.17	-88.364	2632.04	1146.36	-138.732	2666.84	984.785	-118.455	2709.1	900.19	-152.145	2642.16	908.187	-170.641	2678.61	838.15
2915	0	117.532	2809.54	1670.87	213.75	2811.83	1673.68	98.8224	2655.61	1687.83	240.938	2662.54	1686.82	166.496	2614.78	1513.04	157.314	2576.69	1252.38	176.455	2774.37	1446.91	184.547	2869.42	1237.41	224.752	2563.37	1314.55	-12.9835	2712.79	1475.37	-81.9501	2672.5	1246.26	-89.8842	2648.63	1146.91	-139.267	2690.12	986.139	-118.282	2735.52	903.254	-152.735	2668.5	908.345	-171.153	2708.03	840.688
2916	0	117.947	2821.84	1672.22	214.568	2824.06	1674.87	99.1527	2668.16	1689.52	241.124	2674.82	1687.92	166.627	2626.83	1514.89	156.627	2588.46	1254.23	176.719	2786.19	1448.32	185.081	2881.27	1238.71	223.777	2574.93	1316.3	-12.8609	2725.21	1477.3	-83.5091	2687.08	1247.41	-91.5132	2665.22	1147.5	-140.087	2713.29	987.816	-118.053	2761.86	907.103	-153.378	2695.02	909.32	-171.293	2737.93	843.893
2917	0	118.988	2834.23	1673.92	215.309	2836.04	1676.29	99.5449	2680.6	1691.27	241.57	2686.96	1689.68	166.677	2638.92	1516.25	155.823	2600.04	1255.92	176.996	2798.07	1450.07	185.422	2893.16	1240.29	223.157	2586.54	1317.88	-12.7732	2737.48	1479.08	-83.5123	2702.43	1249.74	-92.6802	2682.25	1148.74	-139.754	2737.09	990.492	-117.725	2788.41	911.985	-152.973	2722.3	910.834	-171.012	2768.05	848.127
2918	0	119.65	2846.31	1675.52	215.692	2847.89	1677.78	100.367	2693	1693.25	242.301	2698.79	1691.36	166.681	2652.2	1517.7	154.991	2611.45	1257.89	177.198	2809.99	1451.87	185.527	2905.09	1242.16	222.121	2598.14	1319.56	-12.394	2750	1481.46	-84.4835	2717.17	1251.69	-93.7171	2699.65	1150.15	-139.842	2760.9	993.646	-116.629	2814.27	917.553	-152.866	2749.41	913.076	-170.055	2798.44	853.215
2919	0	120.497	2858.46	1677.29	216.891	2860.2	1678.81	100.921	2705.18	1695.18	242.948	2710.97	1692.36	166.349	2662.92	1520.2	154.33	2622.92	1259.7	177.359	2821.78	1453.35	185.523	2917.11	1243.86	221.501	2609.79	1321.32	-12.3017	2762.25	1483.73	-85.0817	2732.4	1253.98	-95.8502	2716.33	1151.77	-139.45	2785.01	997.237	-117.276	2837.43	921.663	-152.574	2776.64	916.248	-168.862	2828.82	858.949
2920	0	121.435	2870.73	1678.76	217.512	2872.11	1679.83	101.687	2717.45	1696.81	243.763	2722.84	1693.56	166.521	2675.09	1521.75	153.685	2634.31	1261.55	177.63	2833.67	1454.57	185.588	2929.2	1245.41	221.087	2621.61	1322.87	-12.1667	2774.44	1485.79	-85.8513	2747.55	1256.19	-97.0894	2733.87	1153.57	-138.85	2809.04	1001.07	-114.935	2865.86	928.534	-151.567	2804.06	919.662	-167.169	2859.31	865.337
2921	0	122.493	2883.07	1680.12	218.479	2884.3	1680.64	102.741	2729.53	1698.49	244.741	2734.84	1694.35	166.63	2687.18	1523.07	153.18	2645.88	1263	177.814	2845.7	1455.64	185.495	2941.29	1246.81	220.48	2633.24	1324.35	-11.6999	2786.71	1487.69	-86.2896	2762.78	1258.16	-98.1645	2751.59	1155.65	-137.798	2833.09	1004.76	-111.449	2893.1	934.975	-150.919	2831.4	923.78	-165.115	2889.37	871.759
2922	0	123.619	2895.14	1681.15	219.37	2896.41	1681.33	103.683	2741.5	1700.14	245.61	2746.88	1694.9	166.773	2699.14	1524.35	152.783	2657.59	1264.32	177.938	2857.83	1456.59	185.052	2952.87	1247.88	219.692	2645.05	1325.6	-11.3202	2798.89	1489.37	-86.7509	2778.06	1260.07	-99.8748	2768.83	1157.47	-136.977	2857.34	1009.07	-107.751	2920.41	942.351	-149.968	2859.04	928.811	-162.514	2919.63	878.708
2923	0	124.388	2907.16	1682.19	220.431	2908.65	1681.79	104.476	2753.65	1701.48	246.6	2759.18	1695.22	166.621	2711.28	1525.36	152.341	2669.4	1265.6	178.065	2869.96	1457.21	184.758	2964.47	1248.77	219.267	2656.85	1326.43	-11.0582	2811.1	1490.94	-87.46	2793.36	1261.82	-101.616	2786.32	1159.1	-136.313	2881.25	1013.55	-104.128	2946.94	949.712	-149.29	2886.06	933.707	-160.045	2949.24	885.868
2924	0	124.977	2919.17	1683.17	221.146	2920.71	1682.4	105.068	2765.66	1702.39	247.093	2771.28	1695.54	166.915	2723.67	1526	151.934	2681.29	1266.36	178.195	2882.07	1457.89	184.306	2975.97	1249.58	218.964	2668.73	1327.2	-10.837	2823.33	1492.52	-88.2617	2808.73	1263.51	-102.61	2804.33	1160.9	-135.322	2905.08	1018.47	-102.505	2971.41	957.224	-148.327	2913.29	938.641	-157.445	2978.66	893.807
2925	0	125.233	2931.37	1684.18	221.428	2932.71	1683.03	105.878	2777.95	1703.08	248.03	2783.36	1696.02	166.706	2735.7	1526.39	151.582	2693.07	1267.18	178.185	2894.01	1458.48	183.707	2987.33	1250.12	218.345	2680.59	1327.64	-10.7677	2835.37	1493.81	-89.1463	2824.05	1265.08	-103.945	2821.75	1161.99	-134.717	2928.77	1023.72	-100.471	2996.55	965.02	-146.677	2940.54	943.963	-154.583	3007.62	901.834
2926	0	125.734	2943.5	1684.82	221.951	2944.97	1683.27	106.343	2790.03	1703.49	248.502	2795.12	1696.12	166.59	2747.9	1526.97	151.134	2704.96	1267.87	178.061	2906.17	1458.87	182.936	2998.68	1250.58	218.001	2692.42	1328.14	-10.6073	2847.62	1494.88	-90.0042	2839.38	1266.54	-105.919	2839.21	1163.22	-133.862	2952.23	1028.77	-99.3187	3021.06	972.796	-145.811	2967.52	949.616	-152.094	3036.18	910.128
[truncated: 69 more columns]

## Sheet: Sheet2
Devices
		025370 - Force			025370 - Moment			025370 - CoP			027571 - Force			027571 - Moment			027571 - CoP			037720 - Force			037720 - Moment			037720 - CoP
Frame	Sub Frame	Fx	Fy	Fz	Mx	My	Mz	Cx	Cy	Cz	Fx	Fy	Fz	Mx	My	Mz	Cx	Cy	Cz	Fx	Fy	Fz	Mx	My	Mz	Cx	Cy	Cz
		N	N	N	N.mm	N.mm	N.mm	mm	mm	mm	N	N	N	N.mm	N.mm	N.mm	mm	mm	mm	N	N	N	N.mm	N.mm	N.mm	mm	mm	mm
2562	0	0	0	0	0	0	0	200	300	0	0	0	0	0	0	0	200	903	0	0	0	0	0	0	0	603	903	0
2562	1	0	0	0	0	0	0	200	300	0	0	0	0	0	0	0	200	903	0	0	0	0	0	0	0	603	903	0
2562	2	0	0	0	0	0	0	200	300	0	0	0	0	0	0	0	200	903	0	0	0	0	0	0	0	603	903	0
2562	3	0	0	0	0	0	0	200	300	0	0	0	0	0	0	0	200	903	0	0	0	0	0	0	0	603	903	0
2562	4	0	0	0	0	0	0	200	300	0	0	0	0	0	0	0	200	903	0	0	0	0	0	0	0	603	903	0
2562	5	0	0	0	0	0	0	200	300	0	0	0	0	0	0	0	200	903	0	0	0	0	0	0	0	603	903	0
2562	6	0	0	0	0	0	0	200	300	0	0	0	0	0	0	0	200	903	0	0	0	0	0	0	0	603	903	0
2562	7	0	0	0	0	0	0	200	300	0	0	0	0	0	0	0	200	903	0	0	0	0	0	0	0	603	903	0
2562	8	0	0	0	0	0	0	200	300	0	0	0	0	0	0	0	200	903	0	0	0	0	0	0	0	603	903	0
2562	9	0	0	0	0	0	0	200	300	0	0	0	0	0	0	0	200	903	0	0	0	0	0	0	0	603	903	0
2563	0	0	0	0	0	0	0	200	300	0	0	0	0	0	0	0	200	903	0	0	0	0	0	0	0	603	903	0
2563	1	0	0	0	0	0	0	200	300	0	0	0	0	0	0	0	200	903	0	0	0	0	0	0	0	603	903	0
2563	2	0	0	0	0	0	0	200	300	0	0	0	0	0	0	0	200	903	0	0	0	0	0	0	0	603	903	0
2563	3	0	0	0	0	0	0	200	300	0	0	0	0	0	0	0	200	903	0	0	0	0	0	0	0	603	903	0
2563	4	0	0	0	0	0	0	200	300	0	0	0	0	0	0	0	200	903	0	0	0	0	0	0	0	603	903	0
2563	5	0	0	0	0	0	0	200	300	0	0	0	0	0	0	0	200	903	0	0	0	0	0	0	0	603	903	0
2563	6	0	0	0	0	0	0	200	300	0	0	0	0	0	0	0	200	903	0	0	0	0	0	0	0	603	903	0
2563	7	0	0	0	0	0	0	200	300	0	0	0	0	0	0	0	200	903	0	0	0	0	0	0	0	603	903	0
2563	8	0	0	0	0	0	0	200	300	0	0	0	0	0	0	0	200	903	0	0	0	0	0	0	0	603	903	0
2563	9	0	0	0	0	0	0	200	300	0	0	0	0	0	0	0	200	903	0	0	0	0	0	0	0	603	903	0
2564	0	0	0	0	0	0	0	200	300	0	0	0	0	0	0	0	200	903	0	0	0	0	0	0	0	603	903	0
2564	1	0	0	0	0	0	0	200	300	0	0	0	0	0	0	0	200	903	0	0	0	0	0	0	0	603	903	0
2564	2	0	0	0	0	0	0	200	300	0	0	0	0	0	0	0	200	903	0	0	0	0	0	0	0	603	903	0
2564	3	0	0	0	0	0	0	200	300	0	0	0	0	0	0	0	200	903	0	0	0	0	0	0	0	603	903	0
2564	4	0	0	0	0	0	0	200	300	0	0	0	0	0	0	0	200	903	0	0	0	0	0	0	0	603	903	0
2564	5	0	0	0	0	0	0	200	300	0	0	0	0	0	0	0	200	903	0	0	0	0	0	0	0	603	903	0
2564	6	0	0	0	0	0	0	200	300	0	0	0	0	0	0	0	200	903	0	0	0	0	0	0	0	603	903	0
2564	7	0	0	0	0	0	0	200	300	0	0	0	0	0	0	0	200	903	0	0	0	0	0	0	0	603	903	0
2564	8	0	0	0	0	0	0	200	300	0	0	0	0	0	0	0	200	903	0	0	0	0	0	0	0	603	903	0
2564	9	0	0	0	0	0	0	200	300	0	0	0	0	0	0	0	200	903	0	0	0	0	0	0	0	603	903	0
2565	0	0	0	0	0	0	0	200	300	0	0	0	0	0	0	0	200	903	0	0	0	0	0	0	0	603	903	0
2565	1	0	0	0	0	0	0	200	300	0	0	0	0	0	0	0	200	903	0	0	0	0	0	0	0	603	903	0
2565	2	0	0	0	0	0	0	200	300	0	0	0	0	0	0	0	200	903	0	0	0	0	0	0	0	603	903	0
2565	3	0	0	0	0	0	0	200	300	0	0	0	0	0	0	0	200	903	0	0	0	0	0	0	0	603	903	0
2565	4	0	0	0	0	0	0	200	300	0	0	0	0	0	0	0	200	903	0	0	0	0	0	0	0	603	903	0
2565	5	0	0	0	0	0	0	200	300	0	0	0	0	0	0	0	200	903	0	0	0	0	0	0	0	603	903	0
2565	6	0	0	0	0	0	0	200	300	0	0	0	0	0	0	0	200	903	0	0	0	0	0	0	0	603	903	0
2565	7	0	0	0	0	0	0	200	300	0	0	0	0	0	0	0	200	903	0	0	0	0	0	0	0	603	903	0
2565	8	0	0	0	0	0	0	200	300	0	0	0	0	0	0	0	200	903	0	0	0	0	0	0	0	603	903	0
2565	9	0	0	0	0	0	0	200	300	0	0	0	0	0	0	0	200	903	0	0	0	0	0	0	0	603	903	0
2566	0	0	0	0	0	0	0	200	300	0	0	0	0	0	0	0	200	903	0	0	0	0	0	0	0	603	903	0
2566	1	0	0	0	0	0	0	200	300	0	0	0	0	0	0	0	200	903	0	0	0	0	0	0	0	603	903	0
2566	2	0	0	0	0	0	0	200	300	0	0	0	0	0	0	0	200	903	0	0	0	0	0	0	0	603	903	0
2566	3	0	0	0	0	0	0	200	300	0	0	0	0	0	0	0	200	903	0	0	0	0	0	0	0	603	903	0
2566	4	0	0	0	0	0	0	200	300	0	0	0	0	0	0	0	200	903	0	0	0	0	0	0	0	603	903	0
2566	5	0	0	0	0	0	0	200	300	0	0	0	0	0	0	0	200	903	0	0	0	0	0	0	0	603	903	0
2566	6	0	0	0	0	0	0	200	300	0	0	0	0	0	0	0	200	903	0	0	0	0	0	0	0	603	903	0
2566	7	0	0	0	0	0	0	200	300	0	0	0	0	0	0	0	200	903	0	0	0	0	0	0	0	603	903	0
2566	8	0	0	0	0	0	0	200	300	0	0	0	0	0	0	0	200	903	0	0	0	0	0	0	0	603	903	0
2566	9	0	0	0	0	0	0	200	300	0	0	0	0	0	0	0	200	903	0	0	0	0	0	0	0	603	903	0
2567	0	0	0	0	0	0	0	200	300	0	0	0	0	0	0	0	200	903	0	0	0	0	0	0	0	603	903	0
2567	1	0	0	0	0	0	0	200	300	0	0	0	0	0	0	0	200	903	0	0	0	0	0	0	0	603	903	0
2567	2	0	0	0	0	0	0	200	300	0	0	0	0	0	0	0	200	903	0	0	0	0	0	0	0	603	903	0
2567	3	0	0	0	0	0	0	200	300	0	0	0	0	0	0	0	200	903	0	0	0	0	0	0	0	603	903	0
2567	4	0	0	0	0	0	0	200	300	0	0	0	0	0	0	0	200	903	0	0	0	0	0	0	0	603	903	0
2567	5	0	0	0	0	0	0	200	300	0	0	0	0	0	0	0	200	903	0	0	0	0	0	0	0	603	903	0
2567	6	0	0	0	0	0	0	200	300	0	0	0	0	0	0	0	200	903	0	0	0	0	0	0	0	603	903	0
2567	7	0	0	0	0	0	0	200	300	0	0	0	0	0	0	0	200	903	0	0	0	0	0	0	0	603	903	0
2567	8	0	0	0	0	0	0	200	300	0	0	0	0	0	0	0	200	903	0	0	0	0	0	0	0	603	903	0
2567	9	0	0	0	0	0	0	200	300	0	0	0	0	0	0	0	200	903	0	0	0	0	0	0	0	603	903	0
2568	0	0	0	0	0	0	0	200	300	0	0	0	0	0	0	0	200	903	0	0	0	0	0	0	0	603	903	0
2568	1	0	0	0	0	0	0	200	300	0	0	0	0	0	0	0	200	903	0	0	0	0	0	0	0	603	903	0
2568	2	0	0	0	0	0	0	200	300	0	0	0	0	0	0	0	200	903	0	0	0	0	0	0	0	603	903	0
2568	3	0	0	0	0	0	0	200	300	0	0	0	0	0	0	0	200	903	0	0	0	0	0	0	0	603	903	0
2568	4	0	0	0	0	0	0	200	300	0	0	0	0	0	0	0	200	903	0	0	0	0	0	0	0	603	903	0
2568	5	0	0	0	0	0	0	200	300	0	0	0	0	0	0	0	200	903	0	0	0	0	0	0	0	603	903	0
2568	6	0	0	0	0	0	0	200	300	0	0	0	0	0	0	0	200	903	0	0	0	0	0	0	0	603	903	0
2568	7	0	0	0	0	0	0	200	300	0	0	0	0	0	0	0	200	903	0	0	0	0	0	0	0	603	903	0
2568	8	0	0	0	0	0	0	200	300	0	0	0	0	0	0	0	200	903	0	0	0	0	0	0	0	603	903	0
2568	9	0	0	0	0	0	0	200	300	0	0	0	0	0	0	0	200	903	0	0	0	0	0	0	0	603	903	0
2569	0	0	0	0	0	0	0	200	300	0	0	0	0	0	0	0	200	903	0	0	0	0	0	0	0	603	903	0
2569	1	0	0	0	0	0	0	200	300	0	0	0	0	0	0	0	200	903	0	0	0	0	0	0	0	603	903	0
2569	2	0	0	0	0	0	0	200	300	0	0	0	0	0	0	0	200	903	0	0	0	0	0	0	0	603	903	0
2569	3	0	0	0	0	0	0	200	300	0	0	0	0	0	0	0	200	903	0	0	0	0	0	0	0	603	903	0
2569	4	0	0	0	0	0	0	200	300	0	0	0	0	0	0	0	200	903	0	0	0	0	0	0	0	603	903	0
2569	5	0	0	0	0	0	0	200	300	0	0	0	0	0	0	0	200	903	0	0	0	0	0	0	0	603	903	0
2569	6	0	0	0	0	0	0	200	300	0	0	0	0	0	0	0	200	903	0	0	0	0	0	0	0	603	903	0
2569	7	0	0	0	0	0	0	200	300	0	0	0	0	0	0	0	200	903	0	0	0	0	0	0	0	603	903	0
2569	8	0	0	0	0	0	0	200	300	0	0	0	0	0	0	0	200	903	0	0	0	0	0	0	0	603	903	0
2569	9	0	0	0	0	0	0	200	300	0	0	0	0	0	0	0	200	903	0	0	0	0	0	0	0	603	903	0
2570	0	0	0	0	0	0	0	200	300	0	0	0	0	0	0	0	200	903	0	0	0	0	0	0	0	603	903	0
2570	1	0	0	0	0	0	0	200	300	0	0	0	0	0	0	0	200	903	0	0	0	0	0	0	0	603	903	0
2570	2	0	0	0	0	0	0	200	300	0	0	0	0	0	0	0	200	903	0	0	0	0	0	0	0	603	903	0
2570	3	0	0	0	0	0	0	200	300	0	0	0	0	0	0	0	200	903	0	0	0	0	0	0	0	603	903	0
2570	4	0	0	0	0	0	0	200	300	0	0	0	0	0	0	0	200	903	0	0	0	0	0	0	0	603	903	0
2570	5	0	0	0	0	0	0	200	300	0	0	0	0	0	0	0	200	903	0	0	0	0	0	0	0	603	903	0
2570	6	0	0	0	0	0	0	200	300	0	0	0	0	0	0	0	200	903	0	0	0	0	0	0	0	603	903	0
2570	7	0	0	0	0	0	0	200	300	0	0	0	0	0	0	0	200	903	0	0	0	0	0	0	0	603	903	0
2570	8	0	0	0	0	0	0	200	300	0	0	0	0	0	0	0	200	903	0	0	0	0	0	0	0	603	903	0
2570	9	0	0	0	0	0	0	200	300	0	0	0	0	0	0	0	200	903	0	0	0	0	0	0	0	603	903	0
2571	0	0	0	0	0	0	0	200	300	0	0	0	0	0	0	0	200	903	0	0	0	0	0	0	0	603	903	0
2571	1	0	0	0	0	0	0	200	300	0	0	0	0	0	0	0	200	903	0	0	0	0	0	0	0	603	903	0
2571	2	0	0	0	0	0	0	200	300	0	0	0	0	0	0	0	200	903	0	0	0	0	0	0	0	603	903	0
2571	3	0	0	0	0	0	0	200	300	0	0	0	0	0	0	0	200	903	0	0	0	0	0	0	0	603	903	0
2571	4	0	0	0	0	0	0	200	300	0	0	0	0	0	0	0	200	903	0	0	0	0	0	0	0	603	903	0
2571	5	0	0	0	0	0	0	200	300	0	0	0	0	0	0	0	200	903	0	0	0	0	0	0	0	603	903	0
2571	6	0	0	0	0	0	0	200	300	0	0	0	0	0	0	0	200	903	0	0	0	0	0	0	0	603	903	0
2571	7	0	0	0	0	0	0	200	300	0	0	0	0	0	0	0	200	903	0	0	0	0	0	0	0	603	903	0
2571	8	0	0	0	0	0	0	200	300	0	0	0	0	0	0	0	200	903	0	0	0	0	0	0	0	603	903	0
2571	9	0	0	0	0	0	0	200	300	0	0	0	0	0	0	0	200	903	0	0	0	0	0	0	0	603	903	0
2572	0	0	0	0	0	0	0	200	300	0	0	0	0	0	0	0	200	903	0	0	0	0	0	0	0	603	903	0
2572	1	0	0	0	0	0	0	200	300	0	0	0	0	0	0	0	200	903	0	0	0	0	0	0	0	603	903	0
2572	2	0	0	0	0	0	0	200	300	0	0	0	0	0	0	0	200	903	0	0	0	0	0	0	0	603	903	0
2572	3	0	0	0	0	0	0	200	300	0	0	0	0	0	0	0	200	903	0	0	0	0	0	0	0	603	903	0
2572	4	0	0	0	0	0	0	200	300	0	0	0	0	0	0	0	200	903	0	0	0	0	0	0	0	603	903	0
2572	5	0	0	0	0	0	0	200	300	0	0	0	0	0	0	0	200	903	0	0	0	0	0	0	0	603	903	0
2572	6	0	0	0	0	0	0	200	300	0	0	0	0	0	0	0	200	903	0	0	0	0	0	0	0	603	903	0
2572	7	0	0	0	0	0	0	200	300	0	0	0	0	0	0	0	200	903	0	0	0	0	0	0	0	603	903	0
2572	8	0	0	0	0	0	0	200	300	0	0	0	0	0	0	0	200	903	0	0	0	0	0	0	0	603	903	0
2572	9	0	0	0	0	0	0	200	300	0	0	0	0	0	0	0	200	903	0	0	0	0	0	0	0	603	903	0
2573	0	0	0	0	0	0	0	200	300	0	0	0	0	0	0	0	200	903	0	0	0	0	0	0	0	603	903	0
2573	1	0	0	0	0	0	0	200	300	0	0	0	0	0	0	0	200	903	0	0	0	0	0	0	0	603	903	0
2573	2	0	0	0	0	0	0	200	300	0	0	0	0	0	0	0	200	903	0	0	0	0	0	0	0	603	903	0
2573	3	0	0	0	0	0	0	200	300	0	0	0	0	0	0	0	200	903	0	0	0	0	0	0	0	603	903	0
2573	4	0	0	0	0	0	0	200	300	0	0	0	0	0	0	0	200	903	0	0	0	0	0	0	0	603	903	0
2573	5	0	0	0	0	0	0	200	300	0	0	0	0	0	0	0	200	903	0	0	0	0	0	0	0	603	903	0
2573	6	0	0	0	0	0	0	200	300	0	0	0	0	0	0	0	200	903	0	0	0	0	0	0	0	603	903	0
2573	7	0	0	0	0	0	0	200	300	0	0	0	0	0	0	0	200	903	0	0	0	0	0	0	0	603	903	0
2573	8	0	0	0	0	0	0	200	300	0	0	0	0	0	0	0	200	903	0	0	0	0	0	0	0	603	903	0
2573	9	0	0	0	0	0	0	200	300	0	0	0	0	0	0	0	200	903	0	0	0	0	0	0	0	603	903	0
2574	0	0	0	0	0	0	0	200	300	0	0	0	0	0	0	0	200	903	0	0	0	0	0	0	0	603	903	0
2574	1	0	0	0	0	0	0	200	300	0	0	0	0	0	0	0	200	903	0	0	0	0	0	0	0	603	903	0
2574	2	0	0	0	0	0	0	200	300	0	0	0	0	0	0	0	200	903	0	0	0	0	0	0	0	603	903	0
2574	3	0	0	0	0	0	0	200	300	0	0	0	0	0	0	0	200	903	0	0	0	0	0	0	0	603	903	0
2574	4	0	0	0	0	0	0	200	300	0	0	0	0	0	0	0	200	903	0	0	0	0	0	0	0	603	903	0
2574	5	0	0	0	0	0	0	200	300	0	0	0	0	0	0	0	200	903	0	0	0	0	0	0	0	603	903	0
2574	6	0	0	0	0	0	0	200	300	0	0	0	0	0	0	0	200	903	0	0	0	0	0	0	0	603	903	0
2574	7	0	0	0	0	0	0	200	300	0	0	0	0	0	0	0	200	903	0	0	0	0	0	0	0	603	903	0
2574	8	0	0	0	0	0	0	200	300	0	0	0	0	0	0	0	200	903	0	0	0	0	0	0	0	603	903	0
2574	9	0	0	0	0	0	0	200	300	0	0	0	0	0	0	0	200	903	0	0	0	0	0	0	0	603	903	0
2575	0	0	0	0	0	0	0	200	300	0	0	0	0	0	0	0	200	903	0	0	0	0	0	0	0	603	903	0
2575	1	0	0	0	0	0	0	200	300	0	0	0	0	0	0	0	200	903	0	0	0	0	0	0	0	603	903	0
2575	2	0	0	0	0	0	0	200	300	0	0	0	0	0	0	0	200	903	0	0	0	0	0	0	0	603	903	0
2575	3	0	0	0	0	0	0	200	300	0	0	0	0	0	0	0	200	903	0	0	0	0	0	0	0	603	903	0
2575	4	0	0	0	0	0	0	200	300	0	0	0	0	0	0	0	200	903	0	0	0	0	0	0	0	603	903	0
2575	5	0	0	0	0	0	0	200	300	0	0	0	0	0	0	0	200	903	0	0	0	0	0	0	0	603	903	0
2575	6	0	0	0	0	0	0	200	300	0	0	0	0	0	0	0	200	903	0	0	0	0	0	0	0	603	903	0
2575	7	0	0	0	0	0	0	200	300	0	0	0	0	0	0	0	200	903	0	0	0	0	0	0	0	603	903	0
2575	8	0	0	0	0	0	0	200	300	0	0	0	0	0	0	0	200	903	0	0	0	0	0	0	0	603	903	0
2575	9	0	0	0	0	0	0	200	300	0	0	0	0	0	0	0	200	903	0	0	0	0	0	0	0	603	903	0
2576	0	0	0	0	0	0	0	200	300	0	0	0	0	0	0	0	200	903	0	0	0	0	0	0	0	603	903	0
2576	1	0	0	0	0	0	0	200	300	0	0	0	0	0	0	0	200	903	0	0	0	0	0	0	0	603	903	0
2576	2	0	0	0	0	0	0	200	300	0	0	0	0	0	0	0	200	903	0	0	0	0	0	0	0	603	903	0
2576	3	0	0	0	0	0	0	200	300	0	0	0	0	0	0	0	200	903	0	0	0	0	0	0	0	603	903	0
2576	4	0	0	0	0	0	0	200	300	0	0	0	0	0	0	0	200	903	0	0	0	0	0	0	0	603	903	0
2576	5	0	0	0	0	0	0	200	300	0	0	0	0	0	0	0	200	903	0	0	0	0	0	0	0	603	903	0
2576	6	0	0	0	0	0	0	200	300	0	0	0	0	0	0	0	200	903	0	0	0	0	0	0	0	603	903	0
2576	7	0	0	0	0	0	0	200	300	0	0	0	0	0	0	0	200	903	0	0	0	0	0	0	0	603	903	0
2576	8	0	0	0	0	0	0	200	300	0	0	0	0	0	0	0	200	903	0	0	0	0	0	0	0	603	903	0
2576	9	0	0	0	0	0	0	200	300	0	0	0	0	0	0	0	200	903	0	0	0	0	0	0	0	603	903	0
2577	0	0	0	0	0	0	0	200	300	0	0	0	0	0	0	0	200	903	0	0	0	0	0	0	0	603	903	0
2577	1	0	0	0	0	0	0	200	300	0	0	0	0	0	0	0	200	903	0	0	0	0	0	0	0	603	903	0
2577	2	0	0	0	0	0	0	200	300	0	0	0	0	0	0	0	200	903	0	0	0	0	0	0	0	603	903	0
2577	3	0	0	0	0	0	0	200	300	0	0	0	0	0	0	0	200	903	0	0	0	0	0	0	0	603	903	0
2577	4	0	0	0	0	0	0	200	300	0	0	0	0	0	0	0	200	903	0	0	0	0	0	0	0	603	903	0
2577	5	0	0	0	0	0	0	200	300	0	0	0	0	0	0	0	200	903	0	0	0	0	0	0	0	603	903	0
2577	6	0	0	0	0	0	0	200	300	0	0	0	0	0	0	0	200	903	0	0	0	0	0	0	0	603	903	0
2577	7	0	0	0	0	0	0	200	300	0	0	0	0	0	0	0	200	903	0	0	0	0	0	0	0	603	903	0
2577	8	0	0	0	0	0	0	200	300	0	0	0	0	0	0	0	200	903	0	0	0	0	0	0	0	603	903	0
2577	9	0	0	0	0	0	0	200	300	0	0	0	0	0	0	0	200	903	0	0	0	0	0	0	0	603	903	0
2578	0	0	0	0	0	0	0	200	300	0	0	0	0	0	0	0	200	903	0	0	0	0	0	0	0	603	903	0
2578	1	0	0	0	0	0	0	200	300	0	0	0	0	0	0	0	200	903	0	0	0	0	0	0	0	603	903	0
2578	2	0	0	0	0	0	0	200	300	0	0	0	0	0	0	0	200	903	0	0	0	0	0	0	0	603	903	0
2578	3	0	0	0	0	0	0	200	300	0	0	0	0	0	0	0	200	903	0	0	0	0	0	0	0	603	903	0
2578	4	0	0	0	0	0	0	200	300	0	0	0	0	0	0	0	200	903	0	0	0	0	0	0	0	603	903	0
2578	5	0	0	0	0	0	0	200	300	0	0	0	0	0	0	0	200	903	0	0	0	0	0	0	0	603	903	0
2578	6	0	0	0	0	0	0	200	300	0	0	0	0	0	0	0	200	903	0	0	0	0	0	0	0	603	903	0
2578	7	0	0	0	0	0	0	200	300	0	0	0	0	0	0	0	200	903	0	0	0	0	0	0	0	603	903	0
2578	8	0	0	0	0	0	0	200	300	0	0	0	0	0	0	0	200	903	0	0	0	0	0	0	0	603	903	0
2578	9	0	0	0	0	0	0	200	300	0	0	0	0	0	0	0	200	903	0	0	0	0	0	0	0	603	903	0
2579	0	0	0	0	0	0	0	200	300	0	0	0	0	0	0	0	200	903	0	0	0	0	0	0	0	603	903	0
2579	1	0	0	0	0	0	0	200	300	0	0	0	0	0	0	0	200	903	0	0	0	0	0	0	0	603	903	0
2579	2	0	0	0	0	0	0	200	300	0	0	0	0	0	0	0	200	903	0	0	0	0	0	0	0	603	903	0
2579	3	0	0	0	0	0	0	200	300	0	0	0	0	0	0	0	200	903	0	0	0	0	0	0	0	603	903	0
2579	4	0	0	0	0	0	0	200	300	0	0	0	0	0	0	0	200	903	0	0	0	0	0	0	0	603	903	0
2579	5	0	0	0	0	0	0	200	300	0	0	0	0	0	0	0	200	903	0	0	0	0	0	0	0	603	903	0
2579	6	0	0	0	0	0	0	200	300	0	0	0	0	0	0	0	200	903	0	0	0	0	0	0	0	603	903	0
2579	7	0	0	0	0	0	0	200	300	0	0	0	0	0	0	0	200	903	0	0	0	0	0	0	0	603	903	0
2579	8	0	0	0	0	0	0	200	300	0	0	0	0	0	0	0	200	903	0	0	0	0	0	0	0	603	903	0
2579	9	0	0	0	0	0	0	200	300	0	0	0	0	0	0	0	200	903	0	0	0	0	0	0	0	603	903	0
2580	0	0	0	0	0	0	0	200	300	0	0	0	0	0	0	0	200	903	0	0	0	0	0	0	0	603	903	0
2580	1	0	0	0	0	0	0	200	300	0	0	0	0	0	0	0	200	903	0	0	0	0	0	0	0	603	903	0
2580	2	0	0	0	0	0	0	200	300	0	0	0	0	0	0	0	200	903	0	0	0	0	0	0	0	603	903	0
2580	3	0	0	0	0	0	0	200	300	0	0	0	0	0	0	0	200	903	0	0	0	0	0	0	0	603	903	0
2580	4	0	0	0	0	0	0	200	300	0	0	0	0	0	0	0	200	903	0	0	0	0	0	0	0	603	903	0
2580	5	0	0	0	0	0	0	200	300	0	0	0	0	0	0	0	200	903	0	0	0	0	0	0	0	603	903	0
2580	6	0	0	0	0	0	0	200	300	0	0	0	0	0	0	0	200	903	0	0	0	0	0	0	0	603	903	0
2580	7	0	0	0	0	0	0	200	300	0	0	0	0	0	0	0	200	903	0	0	0	0	0	0	0	603	903	0
2580	8	0	0	0	0	0	0	200	300	0	0	0	0	0	0	0	200	903	0	0	0	0	0	0	0	603	903	0
2580	9	0	0	0	0	0	0	200	300	0	0	0	0	0	0	0	200	903	0	0	0	0	0	0	0	603	903	0
2581	0	0	0	0	0	0	0	200	300	0	0	0	0	0	0	0	200	903	0	0	0	0	0	0	0	603	903	0
2581	1	0	0	0	0	0	0	200	300	0	0	0	0	0	0	0	200	903	0	0	0	0	0	0	0	603	903	0
2581	2	0	0	0	0	0	0	200	300	0	0	0	0	0	0	0	200	903	0	0	0	0	0	0	0	603	903	0
2581	3	0	0	0	0	0	0	200	300	0	0	0	0	0	0	0	200	903	0	0	0	0	0	0	0	603	903	0
2581	4	0	0	0	0	0	0	200	300	0	0	0	0	0	0	0	200	903	0	0	0	0	0	0	0	603	903	0
2581	5	0	0	0	0	0	0	200	300	0	0	0	0	0	0	0	200	903	0	0	0	0	0	0	0	603	903	0
2581	6	0	0	0	0	0	0	200	300	0	0	0	0	0	0	0	200	903	0	0	0	0	0	0	0	603	903	0
2581	7	0	0	0	0	0	0	200	300	0	0	0	0	0	0	0	200	903	0	0	0	0	0	0	0	603	903	0
2581	8	0	0	0	0	0	0	200	300	0	0	0	0	0	0	0	200	903	0	0	0	0	0	0	0	603	903	0
2581	9	0	0	0	0	0	0	200	300	0	0	0	0	0	0	0	200	903	0	0	0	0	0	0	0	603	903	0
2582	0	0	0	0	0	0	0	200	300	0	0	0	0	0	0	0	200	903	0	0	0	0	0	0	0	603	903	0
2582	1	0	0	0	0	0	0	200	300	0	0	0	0	0	0	0	200	903	0	0	0	0	0	0	0	603	903	0
2582	2	0	0	0	0	0	0	200	300	0	0	0	0	0	0	0	200	903	0	0	0	0	0	0	0	603	903	0
2582	3	0	0	0	0	0	0	200	300	0	0	0	0	0	0	0	200	903	0	0	0	0	0	0	0	603	903	0
2582	4	0	0	0	0	0	0	200	300	0	0	0	0	0	0	0	200	903	0	0	0	0	0	0	0	603	903	0
2582	5	0	0	0	0	0	0	200	300	0	0	0	0	0	0	0	200	903	0	0	0	0	0	0	0	603	903	0
2582	6	0	0	0	0	0	0	200	300	0	0	0	0	0	0	0	200	903	0	0	0	0	0	0	0	603	903	0
2582	7	0	0	0	0	0	0	200	300	0	0	0	0	0	0	0	200	903	0	0	0	0	0	0	0	603	903	0
2582	8	0	0	0	0	0	0	200	300	0	0	0	0	0	0	0	200	903	0	0	0	0	0	0	0	603	903	0
2582	9	0	0	0	0	0	0	200	300	0	0	0	0	0	0	0	200	903	0	0	0	0	0	0	0	603	903	0
2583	0	0	0	0	0	0	0	200	300	0	0	0	0	0	0	0	200	903	0	0	0	0	0	0	0	603	903	0
2583	1	0	0	0	0	0	0	200	300	0	0	0	0	0	0	0	200	903	0	0	0	0	0	0	0	603	903	0
2583	2	0	0	0	0	0	0	200	300	0	0	0	0	0	0	0	200	903	0	0	0	0	0	0	0	603	903	0
2583	3	0	0	0	0	0	0	200	300	0	0	0	0	0	0	0	200	903	0	0	0	0	0	0	0	603	903	0
2583	4	0	0	0	0	0	0	200	300	0	0	0	0	0	0	0	200	903	0	0	0	0	0	0	0	603	903	0
2583	5	0	0	0	0	0	0	200	300	0	0	0	0	0	0	0	200	903	0	0	0	0	0	0	0	603	903	0
2583	6	0	0	0	0	0	0	200	300	0	0	0	0	0	0	0	200	903	0	0	0	0	0	0	0	603	903	0
2583	7	0	0	0	0	0	0	200	300	0	0	0	0	0	0	0	200	903	0	0	0	0	0	0	0	603	903	0
2583	8	0	0	0	0	0	0	200	300	0	0	0	0	0	0	0	200	903	0	0	0	0	0	0	0	603	903	0
2583	9	0	0	0	0	0	0	200	300	0	0	0	0	0	0	0	200	903	0	0	0	0	0	0	0	603	903	0
2584	0	0	0	0	0	0	0	200	300	0	0	0	0	0	0	0	200	903	0	0	0	0	0	0	0	603	903	0
2584	1	0	0	0	0	0	0	200	300	0	0	0	0	0	0	0	200	903	0	0	0	0	0	0	0	603	903	0
2584	2	0	0	0	0	0	0	200	300	0	0	0	0	0	0	0	200	903	0	0	0	0	0	0	0	603	903	0
2584	3	0	0	0	0	0	0	200	300	0	0	0	0	0	0	0	200	903	0	0	0	0	0	0	0	603	903	0
2584	4	0	0	0	0	0	0	200	300	0	0	0	0	0	0	0	200	903	0	0	0	0	0	0	0	603	903	0
2584	5	0	0	0	0	0	0	200	300	0	0	0	0	0	0	0	200	903	0	0	0	0	0	0	0	603	903	0
2584	6	0	0	0	0	0	0	200	300	0	0	0	0	0	0	0	200	903	0	0	0	0	0	0	0	603	903	0
2584	7	0	0	0	0	0	0	200	300	0	0	0	0	0	0	0	200	903	0	0	0	0	0	0	0	603	903	0
2584	8	0	0	0	0	0	0	200	300	0	0	0	0	0	0	0	200	903	0	0	0	0	0	0	0	603	903	0
2584	9	0	0	0	0	0	0	200	300	0	0	0	0	0	0	0	200	903	0	0	0	0	0	0	0	603	903	0
2585	0	0	0	0	0	0	0	200	300	0	0	0	0	0	0	0	200	903	0	0	0	0	0	0	0	603	903	0
2585	1	0	0	0	0	0	0	200	300	0	0	0	0	0	0	0	200	903	0	0	0	0	0	0	0	603	903	0
2585	2	0	0	0	0	0	0	200	300	0	0	0	0	0	0	0	200	903	0	0	0	0	0	0	0	603	903	0
2585	3	0	0	0	0	0	0	200	300	0	0	0	0	0	0	0	200	903	0	0	0	0	0	0	0	603	903	0
2585	4	0	0	0	0	0	0	200	300	0	0	0	0	0	0	0	200	903	0	0	0	0	0	0	0	603	903	0
2585	5	0	0	0	0	0	0	200	300	0	0	0	0	0	0	0	200	903	0	0	0	0	0	0	0	603	903	0
2585	6	0	0	0	0	0	0	200	300	0	0	0	0	0	0	0	200	903	0	0	0	0	0	0	0	603	903	0
2585	7	0	0	0	0	0	0	200	300	0	0	0	0	0	0	0	200	903	0	0	0	0	0	0	0	603	903	0
2585	8	0	0	0	0	0	0	200	300	0	0	0	0	0	0	0	200	903	0	0	0	0	0	0	0	603	903	0
2585	9	0	0	0	0	0	0	200	300	0	0	0	0	0	0	0	200	903	0	0	0	0	0	0	0	603	903	0
2586	0	0	0	0	0	0	0	200	300	0	0	0	0	0	0	0	200	903	0	0	0	0	0	0	0	603	903	0
2586	1	0	0	0	0	0	0	200	300	0	0	0	0	0	0	0	200	903	0	0	0	0	0	0	0	603	903	0
2586	2	0	0	0	0	0	0	200	300	0	0	0	0	0	0	0	200	903	0	0	0	0	0	0	0	603	903	0
2586	3	0	0	0	0	0	0	200	300	0	0	0	0	0	0	0	200	903	0	0	0	0	0	0	0	603	903	0
2586	4	0	0	0	0	0	0	200	300	0	0	0	0	0	0	0	200	903	0	0	0	0	0	0	0	603	903	0
2586	5	0	0	0	0	0	0	200	300	0	0	0	0	0	0	0	200	903	0	0	0	0	0	0	0	603	903	0
2586	6	0	0	0	0	0	0	200	300	0	0	0	0	0	0	0	200	903	0	0	0	0	0	0	0	603	903	0
2586	7	0	0	0	0	0	0	200	300	0	0	0	0	0	0	0	200	903	0	0	0	0	0	0	0	603	903	0
2586	8	0	0	0	0	0	0	200	300	0	0	0	0	0	0	0	200	903	0	0	0	0	0	0	0	603	903	0
2586	9	0	0	0	0	0	0	200	300	0	0	0	0	0	0	0	200	903	0	0	0	0	0	0	0	603	903	0
2587	0	0	0	0	0	0	0	200	300	0	0	0	0	0	0	0	200	903	0	0	0	0	0	0	0	603	903	0
2587	1	0	0	0	0	0	0	200	300	0	0	0	0	0	0	0	200	903	0	0	0	0	0	0	0	603	903	0
2587	2	0	0	0	0	0	0	200	300	0	0	0	0	0	0	0	200	903	0	0	0	0	0	0	0	603	903	0
2587	3	0	0	0	0	0	0	200	300	0	0	0	0	0	0	0	200	903	0	0	0	0	0	0	0	603	903	0
2587	4	0	0	0	0	0	0	200	300	0	0	0	0	0	0	0	200	903	0	0	0	0	0	0	0	603	903	0
2587	5	0	0	0	0	0	0	200	300	0	0	0	0	0	0	0	200	903	0	0	0	0	0	0	0	603	903	0
2587	6	0	0	0	0	0	0	200	300	0	0	0	0	0	0	0	200	903	0	0	0	0	0	0	0	603	903	0
2587	7	0	0	0	0	0	0	200	300	0	0	0	0	0	0	0	200	903	0	0	0	0	0	0	0	603	903	0
2587	8	0	0	0	0	0	0	200	300	0	0	0	0	0	0	0	200	903	0	0	0	0	0	0	0	603	903	0
2587	9	0	0	0	0	0	0	200	300	0	0	0	0	0	0	0	200	903	0	0	0	0	0	0	0	603	903	0
2588	0	0	0	0	0	0	0	200	300	0	0	0	0	0	0	0	200	903	0	0	0	0	0	0	0	603	903	0
2588	1	0	0	0	0	0	0	200	300	0	0	0	0	0	0	0	200	903	0	0	0	0	0	0	0	603	903	0
2588	2	0	0	0	0	0	0	200	300	0	0	0	0	0	0	0	200	903	0	0	0	0	0	0	0	603	903	0
2588	3	0	0	0	0	0	0	200	300	0	0	0	0	0	0	0	200	903	0	0	0	0	0	0	0	603	903	0
2588	4	0	0	0	0	0	0	200	300	0	0	0	0	0	0	0	200	903	0	0	0	0	0	0	0	603	903	0
2588	5	0	0	0	0	0	0	200	300	0	0	0	0	0	0	0	200	903	0	0	0	0	0	0	0	603	903	0
2588	6	0	0	0	0	0	0	200	300	0	0	0	0	0	0	0	200	903	0	0	0	0	0	0	0	603	903	0
2588	7	0	0	0	0	0	0	200	300	0	0	0	0	0	0	0	200	903	0	0	0	0	0	0	0	603	903	0
2588	8	0	0	0	0	0	0	200	300	0	0	0	0	0	0	0	200	903	0	0	0	0	0	0	0	603	903	0
2588	9	0	0	0	0	0	0	200	300	0	0	0	0	0	0	0	200	903	0	0	0	0	0	0	0	603	903	0
2589	0	0	0	0	0	0	0	200	300	0	0	0	0	0	0	0	200	903	0	0	0	0	0	0	0	603	903	0
2589	1	0	0	0	0	0	0	200	300	0	0	0	0	0	0	0	200	903	0	0	0	0	0	0	0	603	903	0
2589	2	0	0	0	0	0	0	200	300	0	0	0	0	0	0	0	200	903	0	0	0	0	0	0	0	603	903	0
2589	3	0	0	0	0	0	0	200	300	0	0	0	0	0	0	0	200	903	0	0	0	0	0	0	0	603	903	0
2589	4	0	0	0	0	0	0	200	300	0	0	0	0	0	0	0	200	903	0	0	0	0	0	0	0	603	903	0
2589	5	0	0	0	0	0	0	200	300	0	0	0	0	0	0	0	200	903	0	0	0	0	0	0	0	603	903	0
2589	6	0	0	0	0	0	0	200	300	0	0	0	0	0	0	0	200	903	0	0	0	0	0	0	0	603	903	0
2589	7	0	0	0	0	0	0	200	300	0	0	0	0	0	0	0	200	903	0	0	0	0	0	0	0	603	903	0
2589	8	0	0	0	0	0	0	200	300	0	0	0	0	0	0	0	200	903	0	0	0	0	0	0	0	603	903	0
2589	9	0	0	0	0	0	0	200	300	0	0	0	0	0	0	0	200	903	0	0	0	0	0	0	0	603	903	0
2590	0	0	0	0	0	0	0	200	300	0	0	0	0	0	0	0	200	903	0	0	0	0	0	0	0	603	903	0
2590	1	0	0	0	0	0	0	200	300	0	0	0	0	0	0	0	200	903	0	0	0	0	0	0	0	603	903	0
2590	2	0	0	0	0	0	0	200	300	0	0	0	0	0	0	0	200	903	0	0	0	0	0	0	0	603	903	0
2590	3	0	0	0	0	0	0	200	300	0	0	0	0	0	0	0	200	903	0	0	0	0	0	0	0	603	903	0
2590	4	0	0	0	0	0	0	200	300	0	0	0	0	0	0	0	200	903	0	0	0	0	0	0	0	603	903	0
2590	5	0	0	0	0	0	0	200	300	0	0	0	0	0	0	0	200	903	0	0	0	0	0	0	0	603	903	0
2590	6	0	0	0	0	0	0	200	300	0	0	0	0	0	0	0	200	903	0	0	0	0	0	0	0	603	903	0
2590	7	0	0	0	0	0	0	200	300	0	0	0	0	0	0	0	200	903	0	0	0	0	0	0	0	603	903	0
2590	8	0	0	0	0	0	0	200	300	0	0	0	0	0	0	0	200	903	0	0	0	0	0	0	0	603	903	0
2590	9	0	0	0	0	0	0	200	300	0	0	0	0	0	0	0	200	903	0	0	0	0	0	0	0	603	903	0
2591	0	0	0	0	0	0	0	200	300	0	0	0	0	0	0	0	200	903	0	0	0	0	0	0	0	603	903	0
2591	1	0	0	0	0	0	0	200	300	0	0	0	0	0	0	0	200	903	0	0	0	0	0	0	0	603	903	0
2591	2	0	0	0	0	0	0	200	300	0	0	0	0	0	0	0	200	903	0	0	0	0	0	0	0	603	903	0
2591	3	0	0	0	0	0	0	200	300	0	0	0	0	0	0	0	200	903	0	0	0	0	0	0	0	603	903	0
2591	4	0	0	0	0	0	0	200	300	0	0	0	0	0	0	0	200	903	0	0	0	0	0	0	0	603	903	0
2591	5	0	0	0	0	0	0	200	300	0	0	0	0	0	0	0	200	903	0	0	0	0	0	0	0	603	903	0
2591	6	0	0	0	0	0	0	200	300	0	0	0	0	0	0	0	200	903	0	0	0	0	0	0	0	603	903	0
2591	7	0	0	0	0	0	0	200	300	0	0	0	0	0	0	0	200	903	0	0	0	0	0	0	0	603	903	0
2591	8	0	0	0	0	0	0	200	300	0	0	0	0	0	0	0	200	903	0	0	0	0	0	0	0	603	903	0
2591	9	0	0	0	0	0	0	200	300	0	0	0	0	0	0	0	200	903	0	0	0	0	0	0	0	603	903	0
2592	0	0	0	0	0	0	0	200	300	0	0	0	0	0	0	0	200	903	0	0	0	0	0	0	0	603	903	0
2592	1	0	0	0	0	0	0	200	300	0	0	0	0	0	0	0	200	903	0	0	0	0	0	0	0	603	903	0
2592	2	0	0	0	0	0	0	200	300	0	0	0	0	0	0	0	200	903	0	0	0	0	0	0	0	603	903	0
2592	3	0	0	0	0	0	0	200	300	0	0	0	0	0	0	0	200	903	0	0	0	0	0	0	0	603	903	0
2592	4	0	0	0	0	0	0	200	300	0	0	0	0	0	0	0	200	903	0	0	0	0	0	0	0	603	903	0
2592	5	0	0	0	0	0	0	200	300	0	0	0	0	0	0	0	200	903	0	0	0	0	0	0	0	603	903	0
2592	6	0	0	0	0	0	0	200	300	0	0	0	0	0	0	0	200	903	0	0	0	0	0	0	0	603	903	0
2592	7	0	0	0	0	0	0	200	300	0	0	0	0	0	0	0	200	903	0	0	0	0	0	0	0	603	903	0
2592	8	0	0	0	0	0	0	200	300	0	0	0	0	0	0	0	200	903	0	0	0	0	0	0	0	603	903	0
2592	9	0	0	0	0	0	0	200	300	0	0	0	0	0	0	0	200	903	0	0	0	0	0	0	0	603	903	0
2593	0	0	0	0	0	0	0	200	300	0	0	0	0	0	0	0	200	903	0	0	0	0	0	0	0	603	903	0
2593	1	0	0	0	0	0	0	200	300	0	0	0	0	0	0	0	200	903	0	0	0	0	0	0	0	603	903	0
2593	2	0	0	0	0	0	0	200	300	0	0	0	0	0	0	0	200	903	0	0	0	0	0	0	0	603	903	0
2593	3	0	0	0	0	0	0	200	300	0	0	0	0	0	0	0	200	903	0	0	0	0	0	0	0	603	903	0
2593	4	0	0	0	0	0	0	200	300	0	0	0	0	0	0	0	200	903	0	0	0	0	0	0	0	603	903	0
2593	5	0	0	0	0	0	0	200	300	0	0	0	0	0	0	0	200	903	0	0	0	0	0	0	0	603	903	0
2593	6	0	0	0	0	0	0	200	300	0	0	0	0	0	0	0	200	903	0	0	0	0	0	0	0	603	903	0
2593	7	0	0	0	0	0	0	200	300	0	0	0	0	0	0	0	200	903	0	0	0	0	0	0	0	603	903	0
2593	8	0	0	0	0	0	0	200	300	0	0	0	0	0	0	0	200	903	0	0	0	0	0	0	0	603	903	0
2593	9	0	0	0	0	0	0	200	300	0	0	0	0	0	0	0	200	903	0	0	0	0	0	0	0	603	903	0
2594	0	0	0	0	0	0	0	200	300	0	0	0	0	0	0	0	200	903	0	0	0	0	0	0	0	603	903	0
2594	1	0	0	0	0	0	0	200	300	0	0	0	0	0	0	0	200	903	0	0	0	0	0	0	0	603	903	0
2594	2	0	0	0	0	0	0	200	300	0	0	0	0	0	0	0	200	903	0	0	0	0	0	0	0	603	903	0
2594	3	0	0	0	0	0	0	200	300	0	0	0	0	0	0	0	200	903	0	0	0	0	0	0	0	603	903	0
2594	4	0	0	0	0	0	0	200	300	0	0	0	0	0	0	0	200	903	0	0	0	0	0	0	0	603	903	0
2594	5	0	0	0	0	0	0	200	300	0	0	0	0	0	0	0	200	903	0	0	0	0	0	0	0	603	903	0
2594	6	0	0	0	0	0	0	200	300	0	0	0	0	0	0	0	200	903	0	0	0	0	0	0	0	603	903	0
2594	7	0	0	0	0	0	0	200	300	0	0	0	0	0	0	0	200	903	0	0	0	0	0	0	0	603	903	0
2594	8	0	0	0	0	0	0	200	300	0	0	0	0	0	0	0	200	903	0	0	0	0	0	0	0	603	903	0
2594	9	0	0	0	0	0	0	200	300	0	0	0	0	0	0	0	200	903	0	0	0	0	0	0	0	603	903	0
2595	0	0	0	0	0	0	0	200	300	0	0	0	0	0	0	0	200	903	0	0	0	0	0	0	0	603	903	0
2595	1	0	0	0	0	0	0	200	300	0	0	0	0	0	0	0	200	903	0	0	0	0	0	0	0	603	903	0
2595	2	0	0	0	0	0	0	200	300	0	0	0	0	0	0	0	200	903	0	0	0	0	0	0	0	603	903	0
2595	3	0	0	0	0	0	0	200	300	0	0	0	0	0	0	0	200	903	0	0	0	0	0	0	0	603	903	0
2595	4	0	0	0	0	0	0	200	300	0	0	0	0	0	0	0	200	903	0	0	0	0	0	0	0	603	903	0
2595	5	0	0	0	0	0	0	200	300	0	0	0	0	0	0	0	200	903	0	0	0	0	0	0	0	603	903	0
2595	6	0	0	0	0	0	0	200	300	0	0	0	0	0	0	0	200	903	0	0	0	0	0	0	0	603	903	0
2595	7	0	0	0	0	0	0	200	300	0	0	0	0	0	0	0	200	903	0	0	0	0	0	0	0	603	903	0
2595	8	0	0	0	0	0	0	200	300	0	0	0	0	0	0	0	200	903	0	0	0	0	0	0	0	603	903	0
2595	9	0	0	0	0	0	0	200	300	0	0	0	0	0	0	0	200	903	0	0	0	0	0	0	0	603	903	0
2596	0	0	0	0	0	0	0	200	300	0	0	0	0	0	0	0	200	903	0	0	0	0	0	0	0	603	903	0
2596	1	0	0	0	0	0	0	200	300	0	0	0	0	0	0	0	200	903	0	0	0	0	0	0	0	603	903	0
2596	2	0	0	0	0	0	0	200	300	0	0	0	0	0	0	0	200	903	0	0	0	0	0	0	0	603	903	0
2596	3	0	0	0	0	0	0	200	300	0	0	0	0	0	0	0	200	903	0	0	0	0	0	0	0	603	903	0
2596	4	0	0	0	0	0	0	200	300	0	0	0	0	0	0	0	200	903	0	0	0	0	0	0	0	603	903	0
2596	5	0	0	0	0	0	0	200	300	0	0	0	0	0	0	0	200	903	0	0	0	0	0	0	0	603	903	0
2596	6	0	0	0	0	0	0	200	300	0	0	0	0	0	0	0	200	903	0	0	0	0	0	0	0	603	903	0
2596	7	0	0	0	0	0	0	200	300	0	0	0	0	0	0	0	200	903	0	0	0	0	0	0	0	603	903	0
2596	8	0	0	0	0	0	0	200	300	0	0	0	0	0	0	0	200	903	0	0	0	0	0	0	0	603	903	0
2596	9	0	0	0	0	0	0	200	300	0	0	0	0	0	0	0	200	903	0	0	0	0	0	0	0	603	903	0
2597	0	0	0	0	0	0	0	200	300	0	0	0	0	0	0	0	200	903	0	0	0	0	0	0	0	603	903	0
2597	1	0	0	0	0	0	0	200	300	0	0	0	0	0	0	0	200	903	0	0	0	0	0	0	0	603	903	0
2597	2	0	0	0	0	0	0	200	300	0	0	0	0	0	0	0	200	903	0	0	0	0	0	0	0	603	903	0
2597	3	0	0	0	0	0	0	200	300	0	0	0	0	0	0	0	200	903	0	0	0	0	0	0	0	603	903	0
2597	4	0	0	0	0	0	0	200	300	0	0	0	0	0	0	0	200	903	0	0	0	0	0	0	0	603	903	0
2597	5	0	0	0	0	0	0	200	300	0	0	0	0	0	0	0	200	903	0	0	0	0	0	0	0	603	903	0
2597	6	0	0	0	0	0	0	200	300	0	0	0	0	0	0	0	200	903	0	0	0	0	0	0	0	603	903	0
2597	7	0	0	0	0	0	0	200	300	0	0	0	0	0	0	0	200	903	0	0	0	0	0	0	0	603	903	0
2597	8	0	0	0	0	0	0	200	300	0	0	0	0	0	0	0	200	903	0	0	0	0	0	0	0	603	903	0
2597	9	0	0	0	0	0	0	200	300	0	0	0	0	0	0	0	200	903	0	0	0	0	0	0	0	603	903	0
2598	0	0	0	0	0	0	0	200	300	0	0	0	0	0	0	0	200	903	0	0	0	0	0	0	0	603	903	0
2598	1	0	0	0	0	0	0	200	300	0	0	0	0	0	0	0	200	903	0	0	0	0	0	0	0	603	903	0
2598	2	0	0	0	0	0	0	200	300	0	0	0	0	0	0	0	200	903	0	0	0	0	0	0	0	603	903	0
2598	3	0	0	0	0	0	0	200	300	0	0	0	0	0	0	0	200	903	0	0	0	0	0	0	0	603	903	0
2598	4	0	0	0	0	0	0	200	300	0	0	0	0	0	0	0	200	903	0	0	0	0	0	0	0	603	903	0
2598	5	0	0	0	0	0	0	200	300	0	0	0	0	0	0	0	200	903	0	0	0	0	0	0	0	603	903	0
2598	6	0	0	0	0	0	0	200	300	0	0	0	0	0	0	0	200	903	0	0	0	0	0	0	0	603	903	0
2598	7	0	0	0	0	0	0	200	300	0	0	0	0	0	0	0	200	903	0	0	0	0	0	0	0	603	903	0
2598	8	0	0	0	0	0	0	200	300	0	0	0	0	0	0	0	200	903	0	0	0	0	0	0	0	603	903	0
2598	9	0	0	0	0	0	0	200	300	0	0	0	0	0	0	0	200	903	0	0	0	0	0	0	0	603	903	0
2599	0	0	0	0	0	0	0	200	300	0	0	0	0	0	0	0	200	903	0	0	0	0	0	0	0	603	903	0
2599	1	0	0	0	0	0	0	200	300	0	0	0	0	0	0	0	200	903	0	0	0	0	0	0	0	603	903	0
2599	2	0	0	0	0	0	0	200	300	0	0	0	0	0	0	0	200	903	0	0	0	0	0	0	0	603	903	0
2599	3	0	0	0	0	0	0	200	300	0	0	0	0	0	0	0	200	903	0	0	0	0	0	0	0	603	903	0
2599	4	0	0	0	0	0	0	200	300	0	0	0	0	0	0	0	200	903	0	0	0	0	0	0	0	603	903	0
2599	5	0	0	0	0	0	0	200	300	0	0	0	0	0	0	0	200	903	0	0	0	0	0	0	0	603	903	0
2599	6	0	0	0	0	0	0	200	300	0	0	0	0	0	0	0	200	903	0	0	0	0	0	0	0	603	903	0
2599	7	0	0	0	0	0	0	200	300	0	0	0	0	0	0	0	200	903	0	0	0	0	0	0	0	603	903	0
2599	8	0	0	0	0	0	0	200	300	0	0	0	0	0	0	0	200	903	0	0	0	0	0	0	0	603	903	0
2599	9	0	0	0	0	0	0	200	300	0	0	0	0	0	0	0	200	903	0	0	0	0	0	0	0	603	903	0
2600	0	0	0	0	0	0	0	200	300	0	0	0	0	0	0	0	200	903	0	0	0	0	0	0	0	603	903	0
2600	1	0	0	0	0	0	0	200	300	0	0	0	0	0	0	0	200	903	0	0	0	0	0	0	0	603	903	0
2600	2	0	0	0	0	0	0	200	300	0	0	0	0	0	0	0	200	903	0	0	0	0	0	0	0	603	903	0
2600	3	0	0	0	0	0	0	200	300	0	0	0	0	0	0	0	200	903	0	0	0	0	0	0	0	603	903	0
2600	4	0	0	0	0	0	0	200	300	0	0	0	0	0	0	0	200	903	0	0	0	0	0	0	0	603	903	0
2600	5	0	0	0	0	0	0	200	300	0	0	0	0	0	0	0	200	903	0	0	0	0	0	0	0	603	903	0
2600	6	0	0	0	0	0	0	200	300	0	0	0	0	0	0	0	200	903	0	0	0	0	0	0	0	603	903	0
2600	7	0	0	0	0	0	0	200	300	0	0	0	0	0	0	0	200	903	0	0	0	0	0	0	0	603	903	0
2600	8	0	0	0	0	0	0	200	300	0	0	0	0	0	0	0	200	903	0	0	0	0	0	0	0	603	903	0
2600	9	0	0	0	0	0	0	200	300	0	0	0	0	0	0	0	200	903	0	0	0	0	0	0	0	603	903	0
2601	0	0	0	0	0	0	0	200	300	0	0	0	0	0	0	0	200	903	0	0	0	0	0	0	0	603	903	0
2601	1	0	0	0	0	0	0	200	300	0	0	0	0	0	0	0	200	903	0	0	0	0	0	0	0	603	903	0
2601	2	0	0	0	0	0	0	200	300	0	0	0	0	0	0	0	200	903	0	0	0	0	0	0	0	603	903	0
2601	3	0	0	0	0	0	0	200	300	0	0	0	0	0	0	0	200	903	0	0	0	0	0	0	0	603	903	0
2601	4	0	0	0	0	0	0	200	300	0	0	0	0	0	0	0	200	903	0	0	0	0	0	0	0	603	903	0
2601	5	0	0	0	0	0	0	200	300	0	0	0	0	0	0	0	200	903	0	0	0	0	0	0	0	603	903	0
2601	6	0	0	0	0	0	0	200	300	0	0	0	0	0	0	0	200	903	0	0	0	0	0	0	0	603	903	0
2601	7	0	0	0	0	0	0	200	300	0	0	0	0	0	0	0	200	903	0	0	0	0	0	0	0	603	903	0
2601	8	0	0	0	0	0	0	200	300	0	0	0	0	0	0	0	200	903	0	0	0	0	0	0	0	603	903	0
2601	9	0	0	0	0	0	0	200	300	0	0	0	0	0	0	0	200	903	0	0	0	0	0	0	0	603	903	0
2602	0	0	0	0	0	0	0	200	300	0	0	0	0	0	0	0	200	903	0	0	0	0	0	0	0	603	903	0
2602	1	0	0	0	0	0	0	200	300	0	0	0	0	0	0	0	200	903	0	0	0	0	0	0	0	603	903	0
2602	2	0	0	0	0	0	0	200	300	0	0	0	0	0	0	0	200	903	0	0	0	0	0	0	0	603	903	0
2602	3	0	0	0	0	0	0	200	300	0	0	0	0	0	0	0	200	903	0	0	0	0	0	0	0	603	903	0
2602	4	0	0	0	0	0	0	200	300	0	0	0	0	0	0	0	200	903	0	0	0	0	0	0	0	603	903	0
2602	5	0	0	0	0	0	0	200	300	0	0	0	0	0	0	0	200	903	0	0	0	0	0	0	0	603	903	0
2602	6	0	0	0	0	0	0	200	300	0	0	0	0	0	0	0	200	903	0	0	0	0	0	0	0	603	903	0
2602	7	0	0	0	0	0	0	200	300	0	0	0	0	0	0	0	200	903	0	0	0	0	0	0	0	603	903	0
2602	8	0	0	0	0	0	0	200	300	0	0	0	0	0	0	0	200	903	0	0	0	0	0	0	0	603	903	0
2602	9	0	0	0	0	0	0	200	300	0	0	0	0	0	0	0	200	903	0	0	0	0	0	0	0	603	903	0
2603	0	0	0	0	0	0	0	200	300	0	0	0	0	0	0	0	200	903	0	0	0	0	0	0	0	603	903	0
2603	1	0	0	0	0	0	0	200	300	0	0	0	0	0	0	0	200	903	0	0	0	0	0	0	0	603	903	0
2603	2	0	0	0	0	0	0	200	300	0	0	0	0	0	0	0	200	903	0	0	0	0	0	0	0	603	903	0
2603	3	0	0	0	0	0	0	200	300	0	0	0	0	0	0	0	200	903	0	0	0	0	0	0	0	603	903	0
2603	4	0	0	0	0	0	0	200	300	0	0	0	0	0	0	0	200	903	0	0	0	0	0	0	0	603	903	0
2603	5	0	0	0	0	0	0	200	300	0	0	0	0	0	0	0	200	903	0	0	0	0	0	0	0	603	903	0
2603	6	0	0	0	0	0	0	200	300	0	0	0	0	0	0	0	200	903	0	0	0	0	0	0	0	603	903	0
2603	7	0	0	0	0	0	0	200	300	0	0	0	0	0	0	0	200	903	0	0	0	0	0	0	0	603	903	0
2603	8	0	0	0	0	0	0	200	300	0	0	0	0	0	0	0	200	903	0	0	0	0	0	0	0	603	903	0
2603	9	0	0	0	0	0	0	200	300	0	0	0	0	0	0	0	200	903	0	0	0	0	0	0	0	603	903	0
2604	0	0	0	0	0	0	0	200	300	0	0	0	0	0	0	0	200	903	0	0	0	0	0	0	0	603	903	0
2604	1	0	0	0	0	0	0	200	300	0	0	0	0	0	0	0	200	903	0	0	0	0	0	0	0	603	903	0
2604	2	0	0	0	0	0	0	200	300	0	0	0	0	0	0	0	200	903	0	0	0	0	0	0	0	603	903	0
2604	3	0	0	0	0	0	0	200	300	0	0	0	0	0	0	0	200	903	0	0	0	0	0	0	0	603	903	0
2604	4	0	0	0	0	0	0	200	300	0	0	0	0	0	0	0	200	903	0	0	0	0	0	0	0	603	903	0
2604	5	0	0	0	0	0	0	200	300	0	0	0	0	0	0	0	200	903	0	0	0	0	0	0	0	603	903	0
2604	6	0	0	0	0	0	0	200	300	0	0	0	0	0	0	0	200	903	0	0	0	0	0	0	0	603	903	0
2604	7	0	0	0	0	0	0	200	300	0	0	0	0	0	0	0	200	903	0	0	0	0	0	0	0	603	903	0
2604	8	0	0	0	0	0	0	200	300	0	0	0	0	0	0	0	200	903	0	0	0	0	0	0	0	603	903	0
2604	9	0	0	0	0	0	0	200	300	0	0	0	0	0	0	0	200	903	0	0	0	0	0	0	0	603	903	0
2605	0	0	0	0	0	0	0	200	300	0	0	0	0	0	0	0	200	903	0	0	0	0	0	0	0	603	903	0
2605	1	0	0	0	0	0	0	200	300	0	0	0	0	0	0	0	200	903	0	0	0	0	0	0	0	603	903	0
2605	2	0	0	0	0	0	0	200	300	0	0	0	0	0	0	0	200	903	0	0	0	0	0	0	0	603	903	0
2605	3	0	0	0	0	0	0	200	300	0	0	0	0	0	0	0	200	903	0	0	0	0	0	0	0	603	903	0
2605	4	0	0	0	0	0	0	200	300	0	0	0	0	0	0	0	200	903	0	0	0	0	0	0	0	603	903	0
2605	5	0	0	0	0	0	0	200	300	0	0	0	0	0	0	0	200	903	0	0	0	0	0	0	0	603	903	0
2605	6	0	0	0	0	0	0	200	300	0	0	0	0	0	0	0	200	903	0	0	0	0	0	0	0	603	903	0
2605	7	0	0	0	0	0	0	200	300	0	0	0	0	0	0	0	200	903	0	0	0	0	0	0	0	603	903	0
2605	8	0	0	0	0	0	0	200	300	0	0	0	0	0	0	0	200	903	0	0	0	0	0	0	0	603	903	0
2605	9	0	0	0	0	0	0	200	300	0	0	0	0	0	0	0	200	903	0	0	0	0	0	0	0	603	903	0
2606	0	0	0	0	0	0	0	200	300	0	0	0	0	0	0	0	200	903	0	0	0	0	0	0	0	603	903	0
2606	1	0	0	0	0	0	0	200	300	0	0	0	0	0	0	0	200	903	0	0	0	0	0	0	0	603	903	0
2606	2	0	0	0	0	0	0	200	300	0	0	0	0	0	0	0	200	903	0	0	0	0	0	0	0	603	903	0
2606	3	0	0	0	0	0	0	200	300	0	0	0	0	0	0	0	200	903	0	0	0	0	0	0	0	603	903	0
2606	4	0	0	0	0	0	0	200	300	0	0	0	0	0	0	0	200	903	0	0	0	0	0	0	0	603	903	0
2606	5	0	0	0	0	0	0	200	300	0	0	0	0	0	0	0	200	903	0	0	0	0	0	0	0	603	903	0
2606	6	0	0	0	0	0	0	200	300	0	0	0	0	0	0	0	200	903	0	0	0	0	0	0	0	603	903	0
2606	7	0	0	0	0	0	0	200	300	0	0	0	0	0	0	0	200	903	0	0	0	0	0	0	0	603	903	0
2606	8	0	0	0	0	0	0	200	300	0	0	0	0	0	0	0	200	903	0	0	0	0	0	0	0	603	903	0
2606	9	0	0	0	0	0	0	200	300	0	0	0	0	0	0	0	200	903	0	0	0	0	0	0	0	603	903	0
2607	0	0	0	0	0	0	0	200	300	0	0	0	0	0	0	0	200	903	0	0	0	0	0	0	0	603	903	0
2607	1	0	0	0	0	0	0	200	300	0	0	0	0	0	0	0	200	903	0	0	0	0	0	0	0	603	903	0
2607	2	0	0	0	0	0	0	200	300	0	0	0	0	0	0	0	200	903	0	0	0	0	0	0	0	603	903	0
2607	3	0	0	0	0	0	0	200	300	0	0	0	0	0	0	0	200	903	0	0	0	0	0	0	0	603	903	0
2607	4	0	0	0	0	0	0	200	300	0	0	0	0	0	0	0	200	903	0	0	0	0	0	0	0	603	903	0
2607	5	0	0	0	0	0	0	200	300	0	0	0	0	0	0	0	200	903	0	0	0	0	0	0	0	603	903	0
2607	6	0	0	0	0	0	0	200	300	0	0	0	0	0	0	0	200	903	0	0	0	0	0	0	0	603	903	0
2607	7	0	0	0	0	0	0	200	300	0	0	0	0	0	0	0	200	903	0	0	0	0	0	0	0	603	903	0
2607	8	0	0	0	0	0	0	200	300	0	0	0	0	0	0	0	200	903	0	0	0	0	0	0	0	603	903	0
2607	9	0	0	0	0	0	0	200	300	0	0	0	0	0	0	0	200	903	0	0	0	0	0	0	0	603	903	0
2608	0	0	0	0	0	0	0	200	300	0	0	0	0	0	0	0	200	903	0	0	0	0	0	0	0	603	903	0
2608	1	0	0	0	0	0	0	200	300	0	0	0	0	0	0	0	200	903	0	0	0	0	0	0	0	603	903	0
2608	2	0	0	0	0	0	0	200	300	0	0	0	0	0	0	0	200	903	0	0	0	0	0	0	0	603	903	0
2608	3	0	0	0	0	0	0	200	300	0	0	0	0	0	0	0	200	903	0	0	0	0	0	0	0	603	903	0
2608	4	0	0	0	0	0	0	200	300	0	0	0	0	0	0	0	200	903	0	0	0	0	0	0	0	603	903	0
2608	5	0	0	0	0	0	0	200	300	0	0	0	0	0	0	0	200	903	0	0	0	0	0	0	0	603	903	0
2608	6	0	0	0	0	0	0	200	300	0	0	0	0	0	0	0	200	903	0	0	0	0	0	0	0	603	903	0
2608	7	0	0	0	0	0	0	200	300	0	0	0	0	0	0	0	200	903	0	0	0	0	0	0	0	603	903	0
2608	8	0	0	0	0	0	0	200	300	0	0	0	0	0	0	0	200	903	0	0	0	0	0	0	0	603	903	0
2608	9	0	0	0	0	0	0	200	300	0	0	0	0	0	0	0	200	903	0	0	0	0	0	0	0	603	903	0
2609	0	0	0	0	0	0	0	200	300	0	0	0	0	0	0	0	200	903	0	0	0	0	0	0	0	603	903	0
2609	1	0	0	0	0	0	0	200	300	0	0	0	0	0	0	0	200	903	0	0	0	0	0	0	0	603	903	0
2609	2	0	0	0	0	0	0	200	300	0	0	0	0	0	0	0	200	903	0	0	0	0	0	0	0	603	903	0
2609	3	0	0	0	0	0	0	200	300	0	0	0	0	0	0	0	200	903	0	0	0	0	0	0	0	603	903	0
2609	4	0	0	0	0	0	0	200	300	0	0	0	0	0	0	0	200	903	0	0	0	0	0	0	0	603	903	0
2609	5	0	0	0	0	0	0	200	300	0	0	0	0	0	0	0	200	903	0	0	0	0	0	0	0	603	903	0
2609	6	0	0	0	0	0	0	200	300	0	0	0	0	0	0	0	200	903	0	0	0	0	0	0	0	603	903	0
2609	7	0	0	0	0	0	0	200	300	0	0	0	0	0	0	0	200	903	0	0	0	0	0	0	0	603	903	0
2609	8	0	0	0	0	0	0	200	300	0	0	0	0	0	0	0	200	903	0	0	0	0	0	0	0	603	903	0
2609	9	0	0	0	0	0	0	200	300	0	0	0	0	0	0	0	200	903	0	0	0	0	0	0	0	603	903	0
2610	0	0	0	0	0	0	0	200	300	0	0	0	0	0	0	0	200	903	0	0	0	0	0	0	0	603	903	0
2610	1	0	0	0	0	0	0	200	300	0	0	0	0	0	0	0	200	903	0	0	0	0	0	0	0	603	903	0
2610	2	0	0	0	0	0	0	200	300	0	0	0	0	0	0	0	200	903	0	0	0	0	0	0	0	603	903	0
2610	3	0	0	0	0	0	0	200	300	0	0	0	0	0	0	0	200	903	0	0	0	0	0	0	0	603	903	0
2610	4	0	0	0	0	0	0	200	300	0	0	0	0	0	0	0	200	903	0	0	0	0	0	0	0	603	903	0
2610	5	0	0	0	0	0	0	200	300	0	0	0	0	0	0	0	200	903	0	0	0	0	0	0	0	603	903	0
2610	6	0	0	0	0	0	0	200	300	0	0	0	0	0	0	0	200	903	0	0	0	0	0	0	0	603	903	0
2610	7	0	0	0	0	0	0	200	300	0	0	0	0	0	0	0	200	903	0	0	0	0	0	0	0	603	903	0
2610	8	0	0	0	0	0	0	200	300	0	0	0	0	0	0	0	200	903	0	0	0	0	0	0	0	603	903	0
2610	9	0	0	0	0	0	0	200	300	0	0	0	0	0	0	0	200	903	0	0	0	0	0	0	0	603	903	0
2611	0	0	0	0	0	0	0	200	300	0	0	0	0	0	0	0	200	903	0	0	0	0	0	0	0	603	903	0
2611	1	0	0	0	0	0	0	200	300	0	0	0	0	0	0	0	200	903	0	0	0	0	0	0	0	603	903	0
2611	2	0	0	0	0	0	0	200	300	0	0	0	0	0	0	0	200	903	0	0	0	0	0	0	0	603	903	0
2611	3	0	0	0	0	0	0	200	300	0	0	0	0	0	0	0	200	903	0	0	0	0	0	0	0	603	903	0
2611	4	0	0	0	0	0	0	200	300	0	0	0	0	0	0	0	200	903	0	0	0	0	0	0	0	603	903	0
2611	5	0	0	0	0	0	0	200	300	0	0	0	0	0	0	0	200	903	0	0	0	0	0	0	0	603	903	0
2611	6	0	0	0	0	0	0	200	300	0	0	0	0	0	0	0	200	903	0	0	0	0	0	0	0	603	903	0
2611	7	0	0	0	0	0	0	200	300	0	0	0	0	0	0	0	200	903	0	0	0	0	0	0	0	603	903	0
2611	8	0	0	0	0	0	0	200	300	0	0	0	0	0	0	0	200	903	0	0	0	0	0	0	0	603	903	0
2611	9	0	0	0	0	0	0	200	300	0	0	0	0	0	0	0	200	903	0	0	0	0	0	0	0	603	903	0
2612	0	0	0	0	0	0	0	200	300	0	0	0	0	0	0	0	200	903	0	0	0	0	0	0	0	603	903	0
2612	1	0	0	0	0	0	0	200	300	0	0	0	0	0	0	0	200	903	0	0	0	0	0	0	0	603	903	0
2612	2	0	0	0	0	0	0	200	300	0	0	0	0	0	0	0	200	903	0	0	0	0	0	0	0	603	903	0
2612	3	0	0	0	0	0	0	200	300	0	0	0	0	0	0	0	200	903	0	0	0	0	0	0	0	603	903	0
2612	4	0	0	0	0	0	0	200	300	0	0	0	0	0	0	0	200	903	0	0	0	0	0	0	0	603	903	0
2612	5	0	0	0	0	0	0	200	300	0	0	0	0	0	0	0	200	903	0	0	0	0	0	0	0	603	903	0
2612	6	0	0	0	0	0	0	200	300	0	0	0	0	0	0	0	200	903	0	0	0	0	0	0	0	603	903	0
2612	7	0	0	0	0	0	0	200	300	0	0	0	0	0	0	0	200	903	0	0	0	0	0	0	0	603	903	0
2612	8	0	0	0	0	0	0	200	300	0	0	0	0	0	0	0	200	903	0	0	0	0	0	0	0	603	903	0
2612	9	0	0	0	0	0	0	200	300	0	0	0	0	0	0	0	200	903	0	0	0	0	0	0	0	603	903	0
2613	0	0	0	0	0	0	0	200	300	0	0	0	0	0	0	0	200	903	0	0	0	0	0	0	0	603	903	0
2613	1	0	0	0	0	0	0	200	300	0	0	0	0	0	0	0	200	903	0	0	0	0	0	0	0	603	903	0
2613	2	0	0	0	0	0	0	200	300	0	0	0	0	0	0	0	200	903	0	0	0	0	0	0	0	603	903	0
2613	3	0	0	0	0	0	0	200	300	0	0	0	0	0	0	0	200	903	0	0	0	0	0	0	0	603	903	0
2613	4	0	0	0	0	0	0	200	300	0	0	0	0	0	0	0	200	903	0	0	0	0	0	0	0	603	903	0
2613	5	0	0	0	0	0	0	200	300	0	0	0	0	0	0	0	200	903	0	0	0	0	0	0	0	603	903	0
2613	6	0	0	0	0	0	0	200	300	0	0	0	0	0	0	0	200	903	0	0	0	0	0	0	0	603	903	0
2613	7	0	0	0	0	0	0	200	300	0	0	0	0	0	0	0	200	903	0	0	0	0	0	0	0	603	903	0
2613	8	0	0	0	0	0	0	200	300	0	0	0	0	0	0	0	200	903	0	0	0	0	0	0	0	603	903	0
2613	9	0	0	0	0	0	0	200	300	0	0	0	0	0	0	0	200	903	0	0	0	0	0	0	0	603	903	0
2614	0	0	0	0	0	0	0	200	300	0	0	0	0	0	0	0	200	903	0	0	0	0	0	0	0	603	903	0
2614	1	0	0	0	0	0	0	200	300	0	0	0	0	0	0	0	200	903	0	0	0	0	0	0	0	603	903	0
2614	2	0	0	0	0	0	0	200	300	0	0	0	0	0	0	0	200	903	0	0	0	0	0	0	0	603	903	0
2614	3	0	0	0	0	0	0	200	300	0	0	0	0	0	0	0	200	903	0	0	0	0	0	0	0	603	903	0
2614	4	0	0	0	0	0	0	200	300	0	0	0	0	0	0	0	200	903	0	0	0	0	0	0	0	603	903	0
2614	5	0	0	0	0	0	0	200	300	0	0	0	0	0	0	0	200	903	0	0	0	0	0	0	0	603	903	0
2614	6	0	0	0	0	0	0	200	300	0	0	0	0	0	0	0	200	903	0	0	0	0	0	0	0	603	903	0
2614	7	0	0	0	0	0	0	200	300	0	0	0	0	0	0	0	200	903	0	0	0	0	0	0	0	603	903	0
2614	8	0	0	0	0	0	0	200	300	0	0	0	0	0	0	0	200	903	0	0	0	0	0	0	0	603	903	0
2614	9	0	0	0	0	0	0	200	300	0	0	0	0	0	0	0	200	903	0	0	0	0	0	0	0	603	903	0
2615	0	0	0	0	0	0	0	200	300	0	0	0	0	0	0	0	200	903	0	0	0	0	0	0	0	603	903	0
2615	1	0	0	0	0	0	0	200	300	0	0	0	0	0	0	0	200	903	0	0	0	0	0	0	0	603	903	0
2615	2	0	0	0	0	0	0	200	300	0	0	0	0	0	0	0	200	903	0	0	0	0	0	0	0	603	903	0
2615	3	0	0	0	0	0	0	200	300	0	0	0	0	0	0	0	200	903	0	0	0	0	0	0	0	603	903	0
2615	4	0	0	0	0	0	0	200	300	0	0	0	0	0	0	0	200	903	0	0	0	0	0	0	0	603	903	0
2615	5	0	0	0	0	0	0	200	300	0	0	0	0	0	0	0	200	903	0	0	0	0	0	0	0	603	903	0
2615	6	0	0	0	0	0	0	200	300	0	0	0	0	0	0	0	200	903	0	0	0	0	0	0	0	603	903	0
2615	7	0	0	0	0	0	0	200	300	0	0	0	0	0	0	0	200	903	0	0	0	0	0	0	0	603	903	0
2615	8	0	0	0	0	0	0	200	300	0	0	0	0	0	0	0	200	903	0	0	0	0	0	0	0	603	903	0
2615	9	0	0	0	0	0	0	200	300	0	0	0	0	0	0	0	200	903	0	0	0	0	0	0	0	603	903	0
2616	0	0	0	0	0	0	0	200	300	0	0	0	0	0	0	0	200	903	0	0	0	0	0	0	0	603	903	0
2616	1	0	0	0	0	0	0	200	300	0	0	0	0	0	0	0	200	903	0	0	0	0	0	0	0	603	903	0
2616	2	0	0	0	0	0	0	200	300	0	0	0	0	0	0	0	200	903	0	0	0	0	0	0	0	603	903	0
2616	3	0	0	0	0	0	0	200	300	0	0	0	0	0	0	0	200	903	0	0	0	0	0	0	0	603	903	0
2616	4	0	0	0	0	0	0	200	300	0	0	0	0	0	0	0	200	903	0	0	0	0	0	0	0	603	903	0
2616	5	0	0	0	0	0	0	200	300	0	0	0	0	0	0	0	200	903	0	0	0	0	0	0	0	603	903	0
2616	6	0	0	0	0	0	0	200	300	0	0	0	0	0	0	0	200	903	0	0	0	0	0	0	0	603	903	0
2616	7	0	0	0	0	0	0	200	300	0	0	0	0	0	0	0	200	903	0	0	0	0	0	0	0	603	903	0
2616	8	0	0	0	0	0	0	200	300	0	0	0	0	0	0	0	200	903	0	0	0	0	0	0	0	603	903	0
2616	9	0	0	0	0	0	0	200	300	0	0	0	0	0	0	0	200	903	0	0	0	0	0	0	0	603	903	0
2617	0	0	0	0	0	0	0	200	300	0	0	0	0	0	0	0	200	903	0	0	0	0	0	0	0	603	903	0
2617	1	0	0	0	0	0	0	200	300	0	0	0	0	0	0	0	200	903	0	0	0	0	0	0	0	603	903	0
2617	2	0	0	0	0	0	0	200	300	0	0	0	0	0	0	0	200	903	0	0	0	0	0	0	0	603	903	0
2617	3	0	0	0	0	0	0	200	300	0	0	0	0	0	0	0	200	903	0	0	0	0	0	0	0	603	903	0
2617	4	0	0	0	0	0	0	200	300	0	0	0	0	0	0	0	200	903	0	0	0	0	0	0	0	603	903	0
2617	5	0	0	0	0	0	0	200	300	0	0	0	0	0	0	0	200	903	0	0	0	0	0	0	0	603	903	0
2617	6	0	0	0	0	0	0	200	300	0	0	0	0	0	0	0	200	903	0	0	0	0	0	0	0	603	903	0
2617	7	0	0	0	0	0	0	200	300	0	0	0	0	0	0	0	200	903	0	0	0	0	0	0	0	603	903	0
2617	8	0	0	0	0	0	0	200	300	0	0	0	0	0	0	0	200	903	0	0	0	0	0	0	0	603	903	0
2617	9	0	0	0	0	0	0	200	300	0	0	0	0	0	0	0	200	903	0	0	0	0	0	0	0	603	903	0
2618	0	0	0	0	0	0	0	200	300	0	0	0	0	0	0	0	200	903	0	0	0	0	0	0	0	603	903	0
2618	1	0	0	0	0	0	0	200	300	0	0	0	0	0	0	0	200	903	0	0	0	0	0	0	0	603	903	0
2618	2	0	0	0	0	0	0	200	300	0	0	0	0	0	0	0	200	903	0	0	0	0	0	0	0	603	903	0
2618	3	0	0	0	0	0	0	200	300	0	0	0	0	0	0	0	200	903	0	0	0	0	0	0	0	603	903	0
2618	4	0	0	0	0	0	0	200	300	0	0	0	0	0	0	0	200	903	0	0	0	0	0	0	0	603	903	0
2618	5	0	0	0	0	0	0	200	300	0	0	0	0	0	0	0	200	903	0	0	0	0	0	0	0	603	903	0
2618	6	0	0	0	0	0	0	200	300	0	0	0	0	0	0	0	200	903	0	0	0	0	0	0	0	603	903	0
2618	7	0	0	0	0	0	0	200	300	0	0	0	0	0	0	0	200	903	0	0	0	0	0	0	0	603	903	0
2618	8	0	0	0	0	0	0	200	300	0	0	0	0	0	0	0	200	903	0	0	0	0	0	0	0	603	903	0
2618	9	0	0	0	0	0	0	200	300	0	0	0	0	0	0	0	200	903	0	0	0	0	0	0	0	603	903	0
2619	0	0	0	0	0	0	0	200	300	0	0	0	0	0	0	0	200	903	0	0	0	0	0	0	0	603	903	0
2619	1	0	0	0	0	0	0	200	300	0	0	0	0	0	0	0	200	903	0	0	0	0	0	0	0	603	903	0
2619	2	0	0	0	0	0	0	200	300	0	0	0	0	0	0	0	200	903	0	0	0	0	0	0	0	603	903	0
2619	3	0	0	0	0	0	0	200	300	0	0	0	0	0	0	0	200	903	0	0	0	0	0	0	0	603	903	0
2619	4	0	0	0	0	0	0	200	300	0	0	0	0	0	0	0	200	903	0	0	0	0	0	0	0	603	903	0
2619	5	0	0	0	0	0	0	200	300	0	0	0	0	0	0	0	200	903	0	0	0	0	0	0	0	603	903	0
2619	6	0	0	0	0	0	0	200	300	0	0	0	0	0	0	0	200	903	0	0	0	0	0	0	0	603	903	0
2619	7	0	0	0	0	0	0	200	300	0	0	0	0	0	0	0	200	903	0	0	0	0	0	0	0	603	903	0
2619	8	0	0	0	0	0	0	200	300	0	0	0	0	0	0	0	200	903	0	0	0	0	0	0	0	603	903	0
2619	9	0	0	0	0	0	0	200	300	0	0	0	0	0	0	0	200	903	0	0	0	0	0	0	0	603	903	0
2620	0	0	0	0	0	0	0	200	300	0	0	0	0	0	0	0	200	903	0	0	0	0	0	0	0	603	903	0
2620	1	0	0	0	0	0	0	200	300	0	0	0	0	0	0	0	200	903	0	0	0	0	0	0	0	603	903	0
2620	2	0	0	0	0	0	0	200	300	0	0	0	0	0	0	0	200	903	0	0	0	0	0	0	0	603	903	0
2620	3	0	0	0	0	0	0	200	300	0	0	0	0	0	0	0	200	903	0	0	0	0	0	0	0	603	903	0
2620	4	0	0	0	0	0	0	200	300	0	0	0	0	0	0	0	200	903	0	0	0	0	0	0	0	603	903	0
2620	5	0	0	0	0	0	0	200	300	0	0	0	0	0	0	0	200	903	0	0	0	0	0	0	0	603	903	0
2620	6	0	0	0	0	0	0	200	300	0	0	0	0	0	0	0	200	903	0	0	0	0	0	0	0	603	903	0
2620	7	0	0	0	0	0	0	200	300	0	0	0	0	0	0	0	200	903	0	0	0	0	0	0	0	603	903	0
2620	8	0	0	0	0	0	0	200	300	0	0	0	0	0	0	0	200	903	0	0	0	0	0	0	0	603	903	0
2620	9	0	0	0	0	0	0	200	300	0	0	0	0	0	0	0	200	903	0	0	0	0	0	0	0	603	903	0
2621	0	0	0	0	0	0	0	200	300	0	0	0	0	0	0	0	200	903	0	0	0	0	0	0	0	603	903	0
2621	1	0	0	0	0	0	0	200	300	0	0	0	0	0	0	0	200	903	0	0	0	0	0	0	0	603	903	0
2621	2	0	0	0	0	0	0	200	300	0	0	0	0	0	0	0	200	903	0	0	0	0	0	0	0	603	903	0
2621	3	0	0	0	0	0	0	200	300	0	0	0	0	0	0	0	200	903	0	0	0	0	0	0	0	603	903	0
2621	4	0	0	0	0	0	0	200	300	0	0	0	0	0	0	0	200	903	0	0	0	0	0	0	0	603	903	0
2621	5	0	0	0	0	0	0	200	300	0	0	0	0	0	0	0	200	903	0	0	0	0	0	0	0	603	903	0
2621	6	0	0	0	0	0	0	200	300	0	0	0	0	0	0	0	200	903	0	0	0	0	0	0	0	603	903	0
2621	7	0	0	0	0	0	0	200	300	0	0	0	0	0	0	0	200	903	0	0	0	0	0	0	0	603	903	0
2621	8	0	0	0	0	0	0	200	300	0	0	0	0	0	0	0	200	903	0	0	0	0	0	0	0	603	903	0
2621	9	0	0	0	0	0	0	200	300	0	0	0	0	0	0	0	200	903	0	0	0	0	0	0	0	603	903	0
2622	0	0	0	0	0	0	0	200	300	0	0	0	0	0	0	0	200	903	0	0	0	0	0	0	0	603	903	0
2622	1	0	0	0	0	0	0	200	300	0	0	0	0	0	0	0	200	903	0	0	0	0	0	0	0	603	903	0
2622	2	0	0	0	0	0	0	200	300	0	0	0	0	0	0	0	200	903	0	0	0	0	0	0	0	603	903	0
2622	3	0	0	0	0	0	0	200	300	0	0	0	0	0	0	0	200	903	0	0	0	0	0	0	0	603	903	0
2622	4	0	0	0	0	0	0	200	300	0	0	0	0	0	0	0	200	903	0	0	0	0	0	0	0	603	903	0
2622	5	0	0	0	0	0	0	200	300	0	0	0	0	0	0	0	200	903	0	0	0	0	0	0	0	603	903	0
2622	6	0	0	0	0	0	0	200	300	0	0	0	0	0	0	0	200	903	0	0	0	0	0	0	0	603	903	0
2622	7	0	0	0	0	0	0	200	300	0	0	0	0	0	0	0	200	903	0	0	0	0	0	0	0	603	903	0
2622	8	0	0	0	0	0	0	200	300	0	0	0	0	0	0	0	200	903	0	0	0	0	0	0	0	603	903	0
2622	9	0	0	0	0	0	0	200	300	0	0	0	0	0	0	0	200	903	0	0	0	0	0	0	0	603	903	0
2623	0	0	0	0	0	0	0	200	300	0	0	0	0	0	0	0	200	903	0	0	0	0	0	0	0	603	903	0
2623	1	0	0	0	0	0	0	200	300	0	0	0	0	0	0	0	200	903	0	0	0	0	0	0	0	603	903	0
2623	2	0	0	0	0	0	0	200	300	0	0	0	0	0	0	0	200	903	0	0	0	0	0	0	0	603	903	0
2623	3	0	0	0	0	0	0	200	300	0	0	0	0	0	0	0	200	903	0	0	0	0	0	0	0	603	903	0
2623	4	0	0	0	0	0	0	200	300	0	0	0	0	0	0	0	200	903	0	0	0	0	0	0	0	603	903	0
2623	5	0	0	0	0	0	0	200	300	0	0	0	0	0	0	0	200	903	0	0	0	0	0	0	0	603	903	0
2623	6	0	0	0	0	0	0	200	300	0	0	0	0	0	0	0	200	903	0	0	0	0	0	0	0	603	903	0
2623	7	0	0	0	0	0	0	200	300	0	0	0	0	0	0	0	200	903	0	0	0	0	0	0	0	603	903	0
2623	8	0	0	0	0	0	0	200	300	0	0	0	0	0	0	0	200	903	0	0	0	0	0	0	0	603	903	0
2623	9	0	0	0	0	0	0	200	300	0	0	0	0	0	0	0	200	903	0	0	0	0	0	0	0	603	903	0
2624	0	0	0	0	0	0	0	200	300	0	0	0	0	0	0	0	200	903	0	0	0	0	0	0	0	603	903	0
2624	1	0	0	0	0	0	0	200	300	0	0	0	0	0	0	0	200	903	0	0	0	0	0	0	0	603	903	0
2624	2	0	0	0	0	0	0	200	300	0	0	0	0	0	0	0	200	903	0	0	0	0	0	0	0	603	903	0
2624	3	0	0	0	0	0	0	200	300	0	0	0	0	0	0	0	200	903	0	0	0	0	0	0	0	603	903	0
2624	4	0	0	0	0	0	0	200	300	0	0	0	0	0	0	0	200	903	0	0	0	0	0	0	0	603	903	0
2624	5	0	0	0	0	0	0	200	300	0	0	0	0	0	0	0	200	903	0	0	0	0	0	0	0	603	903	0
2624	6	0	0	0	0	0	0	200	300	0	0	0	0	0	0	0	200	903	0	0	0	0	0	0	0	603	903	0
2624	7	0	0	0	0	0	0	200	300	0	0	0	0	0	0	0	200	903	0	0	0	0	0	0	0	603	903	0
2624	8	0	0	0	0	0	0	200	300	0	0	0	0	0	0	0	200	903	0	0	0	0	0	0	0	603	903	0
2624	9	0	0	0	0	0	0	200	300	0	0	0	0	0	0	0	200	903	0	0	0	0	0	0	0	603	903	0
2625	0	0	0	0	0	0	0	200	300	0	0	0	0	0	0	0	200	903	0	0	0	0	0	0	0	603	903	0
2625	1	0	0	0	0	0	0	200	300	0	0	0	0	0	0	0	200	903	0	0	0	0	0	0	0	603	903	0
2625	2	0	0	0	0	0	0	200	300	0	0	0	0	0	0	0	200	903	0	0	0	0	0	0	0	603	903	0
2625	3	0	0	0	0	0	0	200	300	0	0	0	0	0	0	0	200	903	0	0	0	0	0	0	0	603	903	0
2625	4	0	0	0	0	0	0	200	300	0	0	0	0	0	0	0	200	903	0	0	0	0	0	0	0	603	903	0
2625	5	0	0	0	0	0	0	200	300	0	0	0	0	0	0	0	200	903	0	0	0	0	0	0	0	603	903	0
2625	6	0	0	0	0	0	0	200	300	0	0	0	0	0	0	0	200	903	0	0	0	0	0	0	0	603	903	0
2625	7	0	0	0	0	0	0	200	300	0	0	0	0	0	0	0	200	903	0	0	0	0	0	0	0	603	903	0
2625	8	0	0	0	0	0	0	200	300	0	0	0	0	0	0	0	200	903	0	0	0	0	0	0	0	603	903	0
2625	9	0	0	0	0	0	0	200	300	0	0	0	0	0	0	0	200	903	0	0	0	0	0	0	0	603	903	0
2626	0	0	0	0	0	0	0	200	300	0	0	0	0	0	0	0	200	903	0	0	0	0	0	0	0	603	903	0
2626	1	0	0	0	0	0	0	200	300	0	0	0	0	0	0	0	200	903	0	0	0	0	0	0	0	603	903	0
2626	2	0	0	0	0	0	0	200	300	0	0	0	0	0	0	0	200	903	0	0	0	0	0	0	0	603	903	0
2626	3	0	0	0	0	0	0	200	300	0	0	0	0	0	0	0	200	903	0	0	0	0	0	0	0	603	903	0
2626	4	0	0	0	0	0	0	200	300	0	0	0	0	0	0	0	200	903	0	0	0	0	0	0	0	603	903	0
2626	5	0	0	0	0	0	0	200	300	0	0	0	0	0	0	0	200	903	0	0	0	0	0	0	0	603	903	0
2626	6	0	0	0	0	0	0	200	300	0	0	0	0	0	0	0	200	903	0	0	0	0	0	0	0	603	903	0
2626	7	0	0	0	0	0	0	200	300	0	0	0	0	0	0	0	200	903	0	0	0	0	0	0	0	603	903	0
2626	8	0	0	0	0	0	0	200	300	0	0	0	0	0	0	0	200	903	0	0	0	0	0	0	0	603	903	0
2626	9	0	0	0	0	0	0	200	300	0	0	0	0	0	0	0	200	903	0	0	0	0	0	0	0	603	903	0
2627	0	0	0	0	0	0	0	200	300	0	0	0	0	0	0	0	200	903	0	0	0	0	0	0	0	603	903	0
2627	1	0	0	0	0	0	0	200	300	0	0	0	0	0	0	0	200	903	0	0	0	0	0	0	0	603	903	0
2627	2	0	0	0	0	0	0	200	300	0	0	0	0	0	0	0	200	903	0	0	0	0	0	0	0	603	903	0
2627	3	0	0	0	0	0	0	200	300	0	0	0	0	0	0	0	200	903	0	0	0	0	0	0	0	603	903	0
2627	4	0	0	0	0	0	0	200	300	0	0	0	0	0	0	0	200	903	0	0	0	0	0	0	0	603	903	0
2627	5	0	0	0	0	0	0	200	300	0	0	0	0	0	0	0	200	903	0	0	0	0	0	0	0	603	903	0
2627	6	0	0	0	0	0	0	200	300	0	0	0	0	0	0	0	200	903	0	0	0	0	0	0	0	603	903	0
2627	7	0	0	0	0	0	0	200	300	0	0	0	0	0	0	0	200	903	0	0	0	0	0	0	0	603	903	0
2627	8	0	0	0	0	0	0	200	300	0	0	0	0	0	0	0	200	903	0	0	0	0	0	0	0	603	903	0
2627	9	0	0	0	0	0	0	200	300	0	0	0	0	0	0	0	200	903	0	0	0	0	0	0	0	603	903	0
2628	0	0	0	0	0	0	0	200	300	0	0	0	0	0	0	0	200	903	0	0	0	0	0	0	0	603	903	0
2628	1	0	0	0	0	0	0	200	300	0	0	0	0	0	0	0	200	903	0	0	0	0	0	0	0	603	903	0
2628	2	0	0	0	0	0	0	200	300	0	0	0	0	0	0	0	200	903	0	0	0	0	0	0	0	603	903	0
2628	3	0	0	0	0	0	0	200	300	0	0	0	0	0	0	0	200	903	0	0	0	0	0	0	0	603	903	0
2628	4	0	0	0	0	0	0	200	300	0	0	0	0	0	0	0	200	903	0	0	0	0	0	0	0	603	903	0
2628	5	0	0	0	0	0	0	200	300	0	0	0	0	0	0	0	200	903	0	0	0	0	0	0	0	603	903	0
2628	6	0	0	0	0	0	0	200	300	0	0	0	0	0	0	0	200	903	0	0	0	0	0	0	0	603	903	0
2628	7	0	0	0	0	0	0	200	300	0	0	0	0	0	0	0	200	903	0	0	0	0	0	0	0	603	903	0
2628	8	0	0	0	0	0	0	200	300	0	0	0	0	0	0	0	200	903	0	0	0	0	0	0	0	603	903	0
2628	9	0	0	0	0	0	0	200	300	0	0	0	0	0	0	0	200	903	0	0	0	0	0	0	0	603	903	0
2629	0	0	0	0	0	0	0	200	300	0	0	0	0	0	0	0	200	903	0	0	0	0	0	0	0	603	903	0
2629	1	0	0	0	0	0	0	200	300	0	0	0	0	0	0	0	200	903	0	0	0	0	0	0	0	603	903	0
2629	2	0	0	0	0	0	0	200	300	0	0	0	0	0	0	0	200	903	0	0	0	0	0	0	0	603	903	0
2629	3	0	0	0	0	0	0	200	300	0	0	0	0	0	0	0	200	903	0	0	0	0	0	0	0	603	903	0
2629	4	0	0	0	0	0	0	200	300	0	0	0	0	0	0	0	200	903	0	0	0	0	0	0	0	603	903	0
2629	5	0	0	0	0	0	0	200	300	0	0	0	0	0	0	0	200	903	0	0	0	0	0	0	0	603	903	0
2629	6	0	0	0	0	0	0	200	300	0	0	0	0	0	0	0	200	903	0	0	0	0	0	0	0	603	903	0
2629	7	0	0	0	0	0	0	200	300	0	0	0	0	0	0	0	200	903	0	0	0	0	0	0	0	603	903	0
2629	8	0	0	0	0	0	0	200	300	0	0	0	0	0	0	0	200	903	0	0	0	0	0	0	0	603	903	0
2629	9	0	0	0	0	0	0	200	300	0	0	0	0	0	0	0	200	903	0	0	0	0	0	0	0	603	903	0
2630	0	0	0	0	0	0	0	200	300	0	0	0	0	0	0	0	200	903	0	0	0	0	0	0	0	603	903	0
2630	1	0	0	0	0	0	0	200	300	0	0	0	0	0	0	0	200	903	0	0	0	0	0	0	0	603	903	0
2630	2	0	0	0	0	0	0	200	300	0	0	0	0	0	0	0	200	903	0	0	0	0	0	0	0	603	903	0
2630	3	0	0	0	0	0	0	200	300	0	0	0	0	0	0	0	200	903	0	0	0	0	0	0	0	603	903	0
2630	4	0	0	0	0	0	0	200	300	0	0	0	0	0	0	0	200	903	0	0	0	0	0	0	0	603	903	0
2630	5	0	0	0	0	0	0	200	300	0	0	0	0	0	0	0	200	903	0	0	0	0	0	0	0	603	903	0
2630	6	0	0	0	0	0	0	200	300	0	0	0	0	0	0	0	200	903	0	0	0	0	0	0	0	603	903	0
2630	7	0	0	0	0	0	0	200	300	0	0	0	0	0	0	0	200	903	0	0	0	0	0	0	0	603	903	0
2630	8	0	0	0	0	0	0	200	300	0	0	0	0	0	0	0	200	903	0	0	0	0	0	0	0	603	903	0
2630	9	0	0	0	0	0	0	200	300	0	0	0	0	0	0	0	200	903	0	0	0	0	0	0	0	603	903	0
2631	0	0	0	0	0	0	0	200	300	0	0	0	0	0	0	0	200	903	0	0	0	0	0	0	0	603	903	0
2631	1	0	0	0	0	0	0	200	300	0	0	0	0	0	0	0	200	903	0	0	0	0	0	0	0	603	903	0
2631	2	0	0	0	0	0	0	200	300	0	0	0	0	0	0	0	200	903	0	0	0	0	0	0	0	603	903	0
2631	3	0	0	0	0	0	0	200	300	0	0	0	0	0	0	0	200	903	0	0	0	0	0	0	0	603	903	0
2631	4	0	0	0	0	0	0	200	300	0	0	0	0	0	0	0	200	903	0	0	0	0	0	0	0	603	903	0
2631	5	0	0	0	0	0	0	200	300	0	0	0	0	0	0	0	200	903	0	0	0	0	0	0	0	603	903	0
2631	6	0	0	0	0	0	0	200	300	0	0	0	0	0	0	0	200	903	0	0	0	0	0	0	0	603	903	0
2631	7	0	0	0	0	0	0	200	300	0	0	0	0	0	0	0	200	903	0	0	0	0	0	0	0	603	903	0
2631	8	0	0	0	0	0	0	200	300	0	0	0	0	0	0	0	200	903	0	0	0	0	0	0	0	603	903	0
2631	9	0	0	0	0	0	0	200	300	0	0	0	0	0	0	0	200	903	0	0	0	0	0	0	0	603	903	0
2632	0	0	0	0	0	0	0	200	300	0	0	0	0	0	0	0	200	903	0	0	0	0	0	0	0	603	903	0
2632	1	0	0	0	0	0	0	200	300	0	0	0	0	0	0	0	200	903	0	0	0	0	0	0	0	603	903	0
2632	2	0	0	0	0	0	0	200	300	0	0	0	0	0	0	0	200	903	0	0	0	0	0	0	0	603	903	0
2632	3	0	0	0	0	0	0	200	300	0	0	0	0	0	0	0	200	903	0	0	0	0	0	0	0	603	903	0
2632	4	0	0	0	0	0	0	200	300	0	0	0	0	0	0	0	200	903	0	0	0	0	0	0	0	603	903	0
2632	5	0	0	0	0	0	0	200	300	0	0	0	0	0	0	0	200	903	0	0	0	0	0	0	0	603	903	0
2632	6	0	0	0	0	0	0	200	300	0	0	0	0	0	0	0	200	903	0	0	0	0	0	0	0	603	903	0
2632	7	0	0	0	0	0	0	200	300	0	0	0	0	0	0	0	200	903	0	0	0	0	0	0	0	603	903	0
2632	8	0	0	0	0	0	0	200	300	0	0	0	0	0	0	0	200	903	0	0	0	0	0	0	0	603	903	0
2632	9	0	0	0	0	0	0	200	300	0	0	0	0	0	0	0	200	903	0	0	0	0	0	0	0	603	903	0
2633	0	0	0	0	0	0	0	200	300	0	0	0	0	0	0	0	200	903	0	0	0	0	0	0	0	603	903	0
2633	1	0	0	0	0	0	0	200	300	0	0	0	0	0	0	0	200	903	0	0	0	0	0	0	0	603	903	0
2633	2	0	0	0	0	0	0	200	300	0	0	0	0	0	0	0	200	903	0	0	0	0	0	0	0	603	903	0
2633	3	0	0	0	0	0	0	200	300	0	0	0	0	0	0	0	200	903	0	0	0	0	0	0	0	603	903	0
2633	4	0	0	0	0	0	0	200	300	0	0	0	0	0	0	0	200	903	0	0	0	0	0	0	0	603	903	0
2633	5	0	0	0	0	0	0	200	300	0	0	0	0	0	0	0	200	903	0	0	0	0	0	0	0	603	903	0
2633	6	0	0	0	0	0	0	200	300	0	0	0	0	0	0	0	200	903	0	0	0	0	0	0	0	603	903	0
2633	7	0	0	0	0	0	0	200	300	0	0	0	0	0	0	0	200	903	0	0	0	0	0	0	0	603	903	0
2633	8	0	0	0	0	0	0	200	300	0	0	0	0	0	0	0	200	903	0	0	0	0	0	0	0	603	903	0
2633	9	0	0	0	0	0	0	200	300	0	0	0	0	0	0	0	200	903	0	0	0	0	0	0	0	603	903	0
2634	0	0	0	0	0	0	0	200	300	0	0	0	0	0	0	0	200	903	0	0	0	0	0	0	0	603	903	0
2634	1	0	0	0	0	0	0	200	300	0	0	0	0	0	0	0	200	903	0	0	0	0	0	0	0	603	903	0
2634	2	0	0	0	0	0	0	200	300	0	0	0	0	0	0	0	200	903	0	0	0	0	0	0	0	603	903	0
2634	3	0	0	0	0	0	0	200	300	0	0	0	0	0	0	0	200	903	0	0	0	0	0	0	0	603	903	0
2634	4	0	0	0	0	0	0	200	300	0	0	0	0	0	0	0	200	903	0	0	0	0	0	0	0	603	903	0
2634	5	0	0	0	0	0	0	200	300	0	0	0	0	0	0	0	200	903	0	0	0	0	0	0	0	603	903	0
2634	6	0	0	0	0	0	0	200	300	0	0	0	0	0	0	0	200	903	0	0	0	0	0	0	0	603	903	0
2634	7	0	0	0	0	0	0	200	300	0	0	0	0	0	0	0	200	903	0	0	0	0	0	0	0	603	903	0
2634	8	0	0	0	0	0	0	200	300	0	0	0	0	0	0	0	200	903	0	0	0	0	0	0	0	603	903	0
2634	9	0	0	0	0	0	0	200	300	0	0	0	0	0	0	0	200	903	0	0	0	0	0	0	0	603	903	0
2635	0	0	0	0	0	0	0	200	300	0	0	0	0	0	0	0	200	903	0	0	0	0	0	0	0	603	903	0
2635	1	0	0	0	0	0	0	200	300	0	0	0	0	0	0	0	200	903	0	0	0	0	0	0	0	603	903	0
2635	2	0	0	0	0	0	0	200	300	0	0	0	0	0	0	0	200	903	0	0	0	0	0	0	0	603	903	0
2635	3	0	0	0	0	0	0	200	300	0	0	0	0	0	0	0	200	903	0	0	0	0	0	0	0	603	903	0
2635	4	0	0	0	0	0	0	200	300	0	0	0	0	0	0	0	200	903	0	0	0	0	0	0	0	603	903	0
2635	5	0	0	0	0	0	0	200	300	0	0	0	0	0	0	0	200	903	0	0	0	0	0	0	0	603	903	0
2635	6	0	0	0	0	0	0	200	300	0	0	0	0	0	0	0	200	903	0	0	0	0	0	0	0	603	903	0
2635	7	0	0	0	0	0	0	200	300	0	0	0	0	0	0	0	200	903	0	0	0	0	0	0	0	603	903	0
2635	8	0	0	0	0	0	0	200	300	0	0	0	0	0	0	0	200	903	0	0	0	0	0	0	0	603	903	0
2635	9	0	0	0	0	0	0	200	300	0	0	0	0	0	0	0	200	903	0	0	0	0	0	0	0	603	903	0
2636	0	0	0	0	0	0	0	200	300	0	0	0	0	0	0	0	200	903	0	0	0	0	0	0	0	603	903	0
2636	1	0	0	0	0	0	0	200	300	0	0	0	0	0	0	0	200	903	0	0	0	0	0	0	0	603	903	0
2636	2	0	0	0	0	0	0	200	300	0	0	0	0	0	0	0	200	903	0	0	0	0	0	0	0	603	903	0
2636	3	0	0	0	0	0	0	200	300	0	0	0	0	0	0	0	200	903	0	0	0	0	0	0	0	603	903	0
2636	4	0	0	0	0	0	0	200	300	0	0	0	0	0	0	0	200	903	0	0	0	0	0	0	0	603	903	0
2636	5	0	0	0	0	0	0	200	300	0	0	0	0	0	0	0	200	903	0	0	0	0	0	0	0	603	903	0
2636	6	0	0	0	0	0	0	200	300	0	0	0	0	0	0	0	200	903	0	0	0	0	0	0	0	603	903	0
2636	7	0	0	0	0	0	0	200	300	0	0	0	0	0	0	0	200	903	0	0	0	0	0	0	0	603	903	0
2636	8	0	0	0	0	0	0	200	300	0	0	0	0	0	0	0	200	903	0	0	0	0	0	0	0	603	903	0
2636	9	0	0	0	0	0	0	200	300	0	0	0	0	0	0	0	200	903	0	0	0	0	0	0	0	603	903	0
2637	0	0	0	0	0	0	0	200	300	0	0	0	0	0	0	0	200	903	0	0	0	0	0	0	0	603	903	0
2637	1	0	0	0	0	0	0	200	300	0	0	0	0	0	0	0	200	903	0	0	0	0	0	0	0	603	903	0
2637	2	0	0	0	0	0	0	200	300	0	0	0	0	0	0	0	200	903	0	0	0	0	0	0	0	603	903	0
2637	3	0	0	0	0	0	0	200	300	0	0	0	0	0	0	0	200	903	0	0	0	0	0	0	0	603	903	0
2637	4	0	0	0	0	0	0	200	300	0	0	0	0	0	0	0	200	903	0	0	0	0	0	0	0	603	903	0
2637	5	0	0	0	0	0	0	200	300	0	0	0	0	0	0	0	200	903	0	0	0	0	0	0	0	603	903	0
2637	6	0	0	0	0	0	0	200	300	0	0	0	0	0	0	0	200	903	0	0	0	0	0	0	0	603	903	0
2637	7	0	0	0	0	0	0	200	300	0	0	0	0	0	0	0	200	903	0	0	0	0	0	0	0	603	903	0
2637	8	0	0	0	0	0	0	200	300	0	0	0	0	0	0	0	200	903	0	0	0	0	0	0	0	603	903	0
2637	9	0	0	0	0	0	0	200	300	0	0	0	0	0	0	0	200	903	0	0	0	0	0	0	0	603	903	0
2638	0	0	0	0	0	0	0	200	300	0	0	0	0	0	0	0	200	903	0	0	0	0	0	0	0	603	903	0
2638	1	0	0	0	0	0	0	200	300	0	0	0	0	0	0	0	200	903	0	0	0	0	0	0	0	603	903	0
2638	2	0	0	0	0	0	0	200	300	0	0	0	0	0	0	0	200	903	0	0	0	0	0	0	0	603	903	0
2638	3	0	0	0	0	0	0	200	300	0	0	0	0	0	0	0	200	903	0	0	0	0	0	0	0	603	903	0
2638	4	0	0	0	0	0	0	200	300	0	0	0	0	0	0	0	200	903	0	0	0	0	0	0	0	603	903	0
2638	5	0	0	0	0	0	0	200	300	0	0	0	0	0	0	0	200	903	0	0	0	0	0	0	0	603	903	0
2638	6	0	0	0	0	0	0	200	300	0	0	0	0	0	0	0	200	903	0	0	0	0	0	0	0	603	903	0
2638	7	0	0	0	0	0	0	200	300	0	0	0	0	0	0	0	200	903	0	0	0	0	0	0	0	603	903	0
2638	8	0	0	0	0	0	0	200	300	0	0	0	0	0	0	0	200	903	0	0	0	0	0	0	0	603	903	0
2638	9	0	0	0	0	0	0	200	300	0	0	0	0	0	0	0	200	903	0	0	0	0	0	0	0	603	903	0
2639	0	0	0	0	0	0	0	200	300	0	0	0	0	0	0	0	200	903	0	0	0	0	0	0	0	603	903	0
2639	1	0	0	0	0	0	0	200	300	0	0	0	0	0	0	0	200	903	0	0	0	0	0	0	0	603	903	0
2639	2	0	0	0	0	0	0	200	300	0	0	0	0	0	0	0	200	903	0	0	0	0	0	0	0	603	903	0
2639	3	0	0	0	0	0	0	200	300	0	0	0	0	0	0	0	200	903	0	0	0	0	0	0	0	603	903	0
2639	4	0	0	0	0	0	0	200	300	0	0	0	0	0	0	0	200	903	0	0	0	0	0	0	0	603	903	0
2639	5	0	0	0	0	0	0	200	300	0	0	0	0	0	0	0	200	903	0	0	0	0	0	0	0	603	903	0
2639	6	0	0	0	0	0	0	200	300	0	0	0	0	0	0	0	200	903	0	0	0	0	0	0	0	603	903	0
2639	7	0	0	0	0	0	0	200	300	0	0	0	0	0	0	0	200	903	0	0	0	0	0	0	0	603	903	0
2639	8	0	0	0	0	0	0	200	300	0	0	0	0	0	0	0	200	903	0	0	0	0	0	0	0	603	903	0
2639	9	0	0	0	0	0	0	200	300	0	0	0	0	0	0	0	200	903	0	0	0	0	0	0	0	603	903	0
2640	0	0	0	0	0	0	0	200	300	0	0	0	0	0	0	0	200	903	0	0	0	0	0	0	0	603	903	0
2640	1	0	0	0	0	0	0	200	300	0	0	0	0	0	0	0	200	903	0	0	0	0	0	0	0	603	903	0
2640	2	0	0	0	0	0	0	200	300	0	0	0	0	0	0	0	200	903	0	0	0	0	0	0	0	603	903	0
2640	3	0	0	0	0	0	0	200	300	0	0	0	0	0	0	0	200	903	0	0	0	0	0	0	0	603	903	0
2640	4	0	0	0	0	0	0	200	300	0	0	0	0	0	0	0	200	903	0	0	0	0	0	0	0	603	903	0
2640	5	0	0	0	0	0	0	200	300	0	0	0	0	0	0	0	200	903	0	0	0	0	0	0	0	603	903	0
2640	6	0	0	0	0	0	0	200	300	0	0	0	0	0	0	0	200	903	0	0	0	0	0	0	0	603	903	0
2640	7	0	0	0	0	0	0	200	300	0	0	0	0	0	0	0	200	903	0	0	0	0	0	0	0	603	903	0
2640	8	0	0	0	0	0	0	200	300	0	0	0	0	0	0	0	200	903	0	0	0	0	0	0	0	603	903	0
2640	9	0	0	0	0	0	0	200	300	0	0	0	0	0	0	0	200	903	0	0	0	0	0	0	0	603	903	0
2641	0	0	0	0	0	0	0	200	300	0	0	0	0	0	0	0	200	903	0	0	0	0	0	0	0	603	903	0
2641	1	0	0	0	0	0	0	200	300	0	0	0	0	0	0	0	200	903	0	0	0	0	0	0	0	603	903	0
2641	2	0	0	0	0	0	0	200	300	0	0	0	0	0	0	0	200	903	0	0	0	0	0	0	0	603	903	0
2641	3	0	0	0	0	0	0	200	300	0	0	0	0	0	0	0	200	903	0	0	0	0	0	0	0	603	903	0
2641	4	0	0	0	0	0	0	200	300	0	0	0	0	0	0	0	200	903	0	0	0	0	0	0	0	603	903	0
2641	5	0	0	0	0	0	0	200	300	0	0	0	0	0	0	0	200	903	0	0	0	0	0	0	0	603	903	0
2641	6	0	0	0	0	0	0	200	300	0	0	0	0	0	0	0	200	903	0	0	0	0	0	0	0	603	903	0
2641	7	0	0	0	0	0	0	200	300	0	0	0	0	0	0	0	200	903	0	0	0	0	0	0	0	603	903	0
2641	8	0	0	0	0	0	0	200	300	0	0	0	0	0	0	0	200	903	0	0	0	0	0	0	0	603	903	0
2641	9	0	0	0	0	0	0	200	300	0	0	0	0	0	0	0	200	903	0	0	0	0	0	0	0	603	903	0
2642	0	0	0	0	0	0	0	200	300	0	0	0	0	0	0	0	200	903	0	0	0	0	0	0	0	603	903	0
2642	1	0	0	0	0	0	0	200	300	0	0	0	0	0	0	0	200	903	0	0	0	0	0	0	0	603	903	0
2642	2	0	0	0	0	0	0	200	300	0	0	0	0	0	0	0	200	903	0	0	0	0	0	0	0	603	903	0
2642	3	0	0	0	0	0	0	200	300	0	0	0	0	0	0	0	200	903	0	0	0	0	0	0	0	603	903	0
2642	4	0	0	0	0	0	0	200	300	0	0	0	0	0	0	0	200	903	0	0	0	0	0	0	0	603	903	0
2642	5	0	0	0	0	0	0	200	300	0	0	0	0	0	0	0	200	903	0	0	0	0	0	0	0	603	903	0
2642	6	0	0	0	0	0	0	200	300	0	0	0	0	0	0	0	200	903	0	0	0	0	0	0	0	603	903	0
2642	7	0	0	0	0	0	0	200	300	0	0	0	0	0	0	0	200	903	0	0	0	0	0	0	0	603	903	0
2642	8	0	0	0	0	0	0	200	300	0	0	0	0	0	0	0	200	903	0	0	0	0	0	0	0	603	903	0
2642	9	0	0	0	0	0	0	200	300	0	0	0	0	0	0	0	200	903	0	0	0	0	0	0	0	603	903	0
2643	0	0	0	0	0	0	0	200	300	0	0	0	0	0	0	0	200	903	0	0	0	0	0	0	0	603	903	0
2643	1	0	0	0	0	0	0	200	300	0	0	0	0	0	0	0	200	903	0	0	0	0	0	0	0	603	903	0
2643	2	0	0	0	0	0	0	200	300	0	0	0	0	0	0	0	200	903	0	0	0	0	0	0	0	603	903	0
2643	3	0	0	0	0	0	0	200	300	0	0	0	0	0	0	0	200	903	0	0	0	0	0	0	0	603	903	0
2643	4	0	0	0	0	0	0	200	300	0	0	0	0	0	0	0	200	903	0	0	0	0	0	0	0	603	903	0
2643	5	0	0	0	0	0	0	200	300	0	0	0	0	0	0	0	200	903	0	0	0	0	0	0	0	603	903	0
2643	6	0	0	0	0	0	0	200	300	0	0	0	0	0	0	0	200	903	0	0	0	0	0	0	0	603	903	0
2643	7	0	0	0	0	0	0	200	300	0	0	0	0	0	0	0	200	903	0	0	0	0	0	0	0	603	903	0
2643	8	0	0	0	0	0	0	200	300	0	0	0	0	0	0	0	200	903	0	0	0	0	0	0	0	603	903	0
2643	9	0	0	0	0	0	0	200	300	0	0	0	0	0	0	0	200	903	0	0	0	0	0	0	0	603	903	0
2644	0	0	0	0	0	0	0	200	300	0	0	0	0	0	0	0	200	903	0	0	0	0	0	0	0	603	903	0
2644	1	0	0	0	0	0	0	200	300	0	0	0	0	0	0	0	200	903	0	0	0	0	0	0	0	603	903	0
2644	2	0	0	0	0	0	0	200	300	0	0	0	0	0	0	0	200	903	0	0	0	0	0	0	0	603	903	0
2644	3	0	0	0	0	0	0	200	300	0	0	0	0	0	0	0	200	903	0	0	0	0	0	0	0	603	903	0
2644	4	0	0	0	0	0	0	200	300	0	0	0	0	0	0	0	200	903	0	0	0	0	0	0	0	603	903	0
2644	5	0	0	0	0	0	0	200	300	0	0	0	0	0	0	0	200	903	0	0	0	0	0	0	0	603	903	0
2644	6	0	0	0	0	0	0	200	300	0	0	0	0	0	0	0	200	903	0	0	0	0	0	0	0	603	903	0
2644	7	0	0	0	0	0	0	200	300	0	0	0	0	0	0	0	200	903	0	0	0	0	0	0	0	603	903	0
2644	8	0	0	0	0	0	0	200	300	0	0	0	0	0	0	0	200	903	0	0	0	0	0	0	0	603	903	0
2644	9	0	0	0	0	0	0	200	300	0	0	0	0	0	0	0	200	903	0	0	0	0	0	0	0	603	903	0
2645	0	0	0	0	0	0	0	200	300	0	0	0	0	0	0	0	200	903	0	0	0	0	0	0	0	603	903	0
2645	1	0	0	0	0	0	0	200	300	0	0	0	0	0	0	0	200	903	0	0	0	0	0	0	0	603	903	0
2645	2	0	0	0	0	0	0	200	300	0	0	0	0	0	0	0	200	903	0	0	0	0	0	0	0	603	903	0
2645	3	0	0	0	0	0	0	200	300	0	0	0	0	0	0	0	200	903	0	0	0	0	0	0	0	603	903	0
2645	4	0	0	0	0	0	0	200	300	0	0	0	0	0	0	0	200	903	0	0	0	0	0	0	0	603	903	0
2645	5	0	0	0	0	0	0	200	300	0	0	0	0	0	0	0	200	903	0	0	0	0	0	0	0	603	903	0
2645	6	0	0	0	0	0	0	200	300	0	0	0	0	0	0	0	200	903	0	0	0	0	0	0	0	603	903	0
2645	7	0	0	0	0	0	0	200	300	0	0	0	0	0	0	0	200	903	0	0	0	0	0	0	0	603	903	0
2645	8	0	0	0	0	0	0	200	300	0	0	0	0	0	0	0	200	903	0	0	0	0	0	0	0	603	903	0
2645	9	0	0	0	0	0	0	200	300	0	0	0	0	0	0	0	200	903	0	0	0	0	0	0	0	603	903	0
2646	0	0	0	0	0	0	0	200	300	0	0	0	0	0	0	0	200	903	0	0	0	0	0	0	0	603	903	0
2646	1	0	0	0	0	0	0	200	300	0	0	0	0	0	0	0	200	903	0	0	0	0	0	0	0	603	903	0
2646	2	0	0	0	0	0	0	200	300	0	0	0	0	0	0	0	200	903	0	0	0	0	0	0	0	603	903	0
2646	3	0	0	0	0	0	0	200	300	0	0	0	0	0	0	0	200	903	0	0	0	0	0	0	0	603	903	0
2646	4	0	0	0	0	0	0	200	300	0	0	0	0	0	0	0	200	903	0	0	0	0	0	0	0	603	903	0
2646	5	0	0	0	0	0	0	200	300	0	0	0	0	0	0	0	200	903	0	0	0	0	0	0	0	603	903	0
2646	6	0	0	0	0	0	0	200	300	0	0	0	0	0	0	0	200	903	0	0	0	0	0	0	0	603	903	0
2646	7	0	0	0	0	0	0	200	300	0	0	0	0	0	0	0	200	903	0	0	0	0	0	0	0	603	903	0
2646	8	0	0	0	0	0	0	200	300	0	0	0	0	0	0	0	200	903	0	0	0	0	0	0	0	603	903	0
2646	9	0	0	0	0	0	0	200	300	0	0	0	0	0	0	0	200	903	0	0	0	0	0	0	0	603	903	0
2647	0	0	0	0	0	0	0	200	300	0	0	0	0	0	0	0	200	903	0	0	0	0	0	0	0	603	903	0
2647	1	0	0	0	0	0	0	200	300	0	0	0	0	0	0	0	200	903	0	0	0	0	0	0	0	603	903	0
2647	2	0	0	0	0	0	0	200	300	0	0	0	0	0	0	0	200	903	0	0	0	0	0	0	0	603	903	0
2647	3	0	0	0	0	0	0	200	300	0	0	0	0	0	0	0	200	903	0	0	0	0	0	0	0	603	903	0
2647	4	0	0	0	0	0	0	200	300	0	0	0	0	0	0	0	200	903	0	0	0	0	0	0	0	603	903	0
2647	5	0	0	0	0	0	0	200	300	0	0	0	0	0	0	0	200	903	0	0	0	0	0	0	0	603	903	0
2647	6	0	0	0	0	0	0	200	300	0	0	0	0	0	0	0	200	903	0	0	0	0	0	0	0	603	903	0
2647	7	0	0	0	0	0	0	200	300	0	0	0	0	0	0	0	200	903	0	0	0	0	0	0	0	603	903	0
2647	8	0	0	0	0	0	0	200	300	0	0	0	0	0	0	0	200	903	0	0	0	0	0	0	0	603	903	0
2647	9	0	0	0	0	0	0	200	300	0	0	0	0	0	0	0	200	903	0	0	0	0	0	0	0	603	903	0
2648	0	0	0	0	0	0	0	200	300	0	0	0	0	0	0	0	200	903	0	0	0	0	0	0	0	603	903	0
2648	1	0	0	0	0	0	0	200	300	0	0	0	0	0	0	0	200	903	0	0	0	0	0	0	0	603	903	0
2648	2	0	0	0	0	0	0	200	300	0	0	0	0	0	0	0	200	903	0	0	0	0	0	0	0	603	903	0
2648	3	0	0	0	0	0	0	200	300	0	0	0	0	0	0	0	200	903	0	0	0	0	0	0	0	603	903	0
2648	4	0	0	0	0	0	0	200	300	0	0	0	0	0	0	0	200	903	0	0	0	0	0	0	0	603	903	0
2648	5	0	0	0	0	0	0	200	300	0	0	0	0	0	0	0	200	903	0	0	0	0	0	0	0	603	903	0
2648	6	0	0	0	0	0	0	200	300	0	0	0	0	0	0	0	200	903	0	0	0	0	0	0	0	603	903	0
2648	7	0	0	0	0	0	0	200	300	0	0	0	0	0	0	0	200	903	0	0	0	0	0	0	0	603	903	0
2648	8	0	0	0	0	0	0	200	300	0	0	0	0	0	0	0	200	903	0	0	0	0	0	0	0	603	903	0
2648	9	0	0	0	0	0	0	200	300	0	0	0	0	0	0	0	200	903	0	0	0	0	0	0	0	603	903	0
2649	0	0	0	0	0	0	0	200	300	0	0	0	0	0	0	0	200	903	0	0	0	0	0	0	0	603	903	0
2649	1	0	0	0	0	0	0	200	300	0	0	0	0	0	0	0	200	903	0	0	0	0	0	0	0	603	903	0
2649	2	0	0	0	0	0	0	200	300	0	0	0	0	0	0	0	200	903	0	0	0	0	0	0	0	603	903	0
2649	3	0	0	0	0	0	0	200	300	0	0	0	0	0	0	0	200	903	0	0	0	0	0	0	0	603	903	0
2649	4	0	0	0	0	0	0	200	300	0	0	0	0	0	0	0	200	903	0	0	0	0	0	0	0	603	903	0
2649	5	0	0	0	0	0	0	200	300	0	0	0	0	0	0	0	200	903	0	0	0	0	0	0	0	603	903	0
2649	6	0	0	0	0	0	0	200	300	0	0	0	0	0	0	0	200	903	0	0	0	0	0	0	0	603	903	0
2649	7	0	0	0	0	0	0	200	300	0	0	0	0	0	0	0	200	903	0	0	0	0	0	0	0	603	903	0
2649	8	0	0	0	0	0	0	200	300	0	0	0	0	0	0	0	200	903	0	0	0	0	0	0	0	603	903	0
2649	9	0	0	0	0	0	0	200	300	0	0	0	0	0	0	0	200	903	0	0	0	0	0	0	0	603	903	0
2650	0	0	0	0	0	0	0	200	300	0	0	0	0	0	0	0	200	903	0	0	0	0	0	0	0	603	903	0
2650	1	0	0	0	0	0	0	200	300	0	0	0	0	0	0	0	200	903	0	0	0	0	0	0	0	603	903	0
2650	2	0	0	0	0	0	0	200	300	0	0	0	0	0	0	0	200	903	0	0	0	0	0	0	0	603	903	0
2650	3	0	0	0	0	0	0	200	300	0	0	0	0	0	0	0	200	903	0	0	0	0	0	0	0	603	903	0
2650	4	0	0	0	0	0	0	200	300	0	0	0	0	0	0	0	200	903	0	0	0	0	0	0	0	603	903	0
2650	5	0	0	0	0	0	0	200	300	0	0	0	0	0	0	0	200	903	0	0	0	0	0	0	0	603	903	0
2650	6	0	0	0	0	0	0	200	300	0	0	0	0	0	0	0	200	903	0	0	0	0	0	0	0	603	903	0
2650	7	0	0	0	0	0	0	200	300	0	0	0	0	0	0	0	200	903	0	0	0	0	0	0	0	603	903	0
2650	8	0	0	0	0	0	0	200	300	0	0	0	0	0	0	0	200	903	0	0	0	0	0	0	0	603	903	0
2650	9	0	0	0	0	0	0	200	300	0	0	0	0	0	0	0	200	903	0	0	0	0	0	0	0	603	903	0
2651	0	0	0	0	0	0	0	200	300	0	0	0	0	0	0	0	200	903	0	0	0	0	0	0	0	603	903	0
2651	1	0	0	0	0	0	0	200	300	0	0	0	0	0	0	0	200	903	0	0	0	0	0	0	0	603	903	0
2651	2	0	0	0	0	0	0	200	300	0	0	0	0	0	0	0	200	903	0	0	0	0	0	0	0	603	903	0
2651	3	0	0	0	0	0	0	200	300	0	0	0	0	0	0	0	200	903	0	0	0	0	0	0	0	603	903	0
2651	4	0	0	0	0	0	0	200	300	0	0	0	0	0	0	0	200	903	0	0	0	0	0	0	0	603	903	0
2651	5	0	0	0	0	0	0	200	300	0	0	0	0	0	0	0	200	903	0	0	0	0	0	0	0	603	903	0
2651	6	0	0	0	0	0	0	200	300	0	0	0	0	0	0	0	200	903	0	0	0	0	0	0	0	603	903	0
2651	7	0	0	0	0	0	0	200	300	0	0	0	0	0	0	0	200	903	0	0	0	0	0	0	0	603	903	0
2651	8	0	0	0	0	0	0	200	300	0	0	0	0	0	0	0	200	903	0	0	0	0	0	0	0	603	903	0
2651	9	0	0	0	0	0	0	200	300	0	0	0	0	0	0	0	200	903	0	0	0	0	0	0	0	603	903	0
2652	0	0.425369	9.17282	-5.75591	122.405	-189.766	-1590.78	167.031	278.734	0	0	0	0	0	0	0	200	903	0	0	0	0	0	0	0	603	903	0
2652	1	-1.40569	9.32541	-4.23003	488.616	-128.73	-1270.34	169.568	184.489	0	0	0	0	0	0	0	200	903	0	0	0	0	0	0	0	603	903	0
2652	2	0	0	0	0	0	0	200	300	0	0	0	0	0	0	0	200	903	0	0	0	0	0	0	0	603	903	0
2652	3	0	0	0	0	0	0	200	300	0	0	0	0	0	0	0	200	903	0	0	0	0	0	0	0	603	903	0
2652	4	0	0	0	0	0	0	200	300	0	0	0	0	0	0	0	200	903	0	0	0	0	0	0	0	603	903	0
2652	5	0.272781	9.17282	-5.45074	1495.7	-250.801	-1819.66	153.988	25.5976	0	0	0	0	0	0	0	200	903	0	0	0	0	0	0	0	603	903	0
2652	6	-0.490159	9.478	-6.36626	305.51	-555.977	-1819.66	112.668	252.011	0	0	0	0	0	0	0	200	903	0	0	0	0	0	0	0	603	903	0
2652	7	-0.947922	9.478	-5.75591	671.721	-311.836	-1865.43	145.823	183.299	0	0	0	0	0	0	0	200	903	0	0	0	0	0	0	0	603	903	0
2652	8	0.272781	9.63058	-5.14556	305.51	-494.941	-1956.99	103.812	240.627	0	0	0	0	0	0	0	200	903	0	0	0	0	0	0	0	603	903	0
2652	9	-0.642747	9.17282	-5.45074	671.721	-433.906	-1590.78	120.395	176.765	0	0	0	0	0	0	0	200	903	0	0	0	0	0	0	0	603	903	0
2653	0	-0.184983	9.478	-4.84039	580.168	-555.977	-1728.1	85.138	180.14	0	0	0	0	0	0	0	200	903	0	0	0	0	0	0	0	603	903	0
2653	1	1.3409	8.86765	-6.97662	1129.48	-617.012	-1728.1	111.56	138.104	0	0	0	0	0	0	0	200	903	0	0	0	0	0	0	0	603	903	0
2653	2	-0.184983	7.79953	-6.97662	1495.7	-800.117	-1590.78	85.3145	85.6131	0	0	0	0	0	0	0	200	903	0	0	0	0	0	0	0	603	903	0
2653	3	-1.10051	8.25729	-6.97662	1037.93	-433.906	-1636.55	137.806	151.227	0	0	0	0	0	0	0	200	903	0	0	0	0	0	0	0	603	903	0
2653	4	0	0	0	0	0	0	200	300	0	0	0	0	0	0	0	200	903	0	0	0	0	0	0	0	603	903	0
2653	5	-1.2531	8.10471	-6.06109	1404.14	-678.047	-1682.33	88.1312	68.3349	0	0	0	0	0	0	0	200	903	0	0	0	0	0	0	0	603	903	0
2653	6	-0.184983	8.40988	-6.06109	946.379	-555.977	-1590.78	108.271	143.86	0	0	0	0	0	0	0	200	903	0	0	0	0	0	0	0	603	903	0
2653	7	0.577956	9.478	-6.36626	763.274	-861.153	-1773.88	64.7319	180.106	0	0	0	0	0	0	0	200	903	0	0	0	0	0	0	0	603	903	0
2653	8	-0.184983	8.86765	-7.89214	671.721	-433.906	-1545	145.02	214.887	0	0	0	0	0	0	0	200	903	0	0	0	0	0	0	0	603	903	0
2653	9	-1.55827	8.56247	-6.97662	854.827	-433.906	-1682.33	137.806	177.473	0	0	0	0	0	0	0	200	903	0	0	0	0	0	0	0	603	903	0
2654	0	0.577956	9.17282	-6.36626	2136.56	-739.082	-1545	83.9065	-35.6073	0	0	0	0	0	0	0	200	903	0	0	0	0	0	0	0	603	903	0
2654	1	-1.40569	8.86765	-5.75591	1495.7	-617.012	-1361.89	92.8039	40.1462	0	0	0	0	0	0	0	200	903	0	0	0	0	0	0	0	603	903	0
2654	2	0	0	0	0	0	0	200	300	0	0	0	0	0	0	0	200	903	0	0	0	0	0	0	0	603	903	0
2654	3	0.425369	7.34177	-6.97662	1678.8	-494.941	-1407.67	129.057	59.3674	0	0	0	0	0	0	0	200	903	0	0	0	0	0	0	0	603	903	0
2654	4	0.425369	6.884	-7.28179	1312.59	-678.047	-1499.22	106.885	119.744	0	0	0	0	0	0	0	200	903	0	0	0	0	0	0	0	603	903	0
2654	5	-1.2531	7.03659	-8.19732	1037.93	-372.871	-1453.45	154.513	173.382	0	0	0	0	0	0	0	200	903	0	0	0	0	0	0	0	603	903	0
2654	6	0	0	0	0	0	0	200	300	0	0	0	0	0	0	0	200	903	0	0	0	0	0	0	0	603	903	0
2654	7	0	0	0	0	0	0	200	300	0	0	0	0	0	0	0	200	903	0	0	0	0	0	0	0	603	903	0
2654	8	0	0	0	0	0	0	200	300	0	0	0	0	0	0	0	200	903	0	0	0	0	0	0	0	603	903	0
2654	9	0	0	0	0	0	0	200	300	0	0	0	0	0	0	0	200	903	0	0	0	0	0	0	0	603	903	0
2655	0	0	0	0	0	0	0	200	300	0	0	0	0	0	0	0	200	903	0	0	0	0	0	0	0	603	903	0
2655	1	0	0	0	0	0	0	200	300	0	0	0	0	0	0	0	200	903	0	0	0	0	0	0	0	603	903	0
2655	2	0	0	0	0	0	0	200	300	0	0	0	0	0	0	0	200	903	0	0	0	0	0	0	0	603	903	0
2655	3	0	0	0	0	0	0	200	300	0	0	0	0	0	0	0	200	903	0	0	0	0	0	0	0	603	903	0
2655	4	0	0	0	0	0	0	200	300	0	0	0	0	0	0	0	200	903	0	0	0	0	0	0	0	603	903	0
2655	5	0	0	0	0	0	0	200	300	0	0	0	0	0	0	0	200	903	0	0	0	0	0	0	0	603	903	0
2655	6	0	0	0	0	0	0	200	300	0	0	0	0	0	0	0	200	903	0	0	0	0	0	0	0	603	903	0
2655	7	0	0	0	0	0	0	200	300	0	0	0	0	0	0	0	200	903	0	0	0	0	0	0	0	603	903	0
2655	8	0	0	0	0	0	0	200	300	0	0	0	0	0	0	0	200	903	0	0	0	0	0	0	0	603	903	0
2655	9	0	0	0	0	0	0	200	300	0	0	0	0	0	0	0	200	903	0	0	0	0	0	0	0	603	903	0
2656	0	0	0	0	0	0	0	200	300	0	0	0	0	0	0	0	200	903	0	0	0	0	0	0	0	603	903	0
2656	1	0	0	0	0	0	0	200	300	0	0	0	0	0	0	0	200	903	0	0	0	0	0	0	0	603	903	0
2656	2	0	0	0	0	0	0	200	300	0	0	0	0	0	0	0	200	903	0	0	0	0	0	0	0	603	903	0
2656	3	0	0	0	0	0	0	200	300	0	0	0	0	0	0	0	200	903	0	0	0	0	0	0	0	603	903	0
2656	4	0	0	0	0	0	0	200	300	0	0	0	0	0	0	0	200	903	0	0	0	0	0	0	0	603	903	0
2656	5	0	0	0	0	0	0	200	300	0	0	0	0	0	0	0	200	903	0	0	0	0	0	0	0	603	903	0
2656	6	0	0	0	0	0	0	200	300	0	0	0	0	0	0	0	200	903	0	0	0	0	0	0	0	603	903	0
2656	7	0	0	0	0	0	0	200	300	0	0	0	0	0	0	0	200	903	0	0	0	0	0	0	0	603	903	0
2656	8	0	0	0	0	0	0	200	300	0	0	0	0	0	0	0	200	903	0	0	0	0	0	0	0	603	903	0
2656	9	0	0	0	0	0	0	200	300	0	0	0	0	0	0	0	200	903	0	0	0	0	0	0	0	603	903	0
2657	0	0	0	0	0	0	0	200	300	0	0	0	0	0	0	0	200	903	0	0	0	0	0	0	0	603	903	0
2657	1	0	0	0	0	0	0	200	300	0	0	0	0	0	0	0	200	903	0	0	0	0	0	0	0	603	903	0
2657	2	0	0	0	0	0	0	200	300	0	0	0	0	0	0	0	200	903	0	0	0	0	0	0	0	603	903	0
2657	3	0	0	0	0	0	0	200	300	0	0	0	0	0	0	0	200	903	0	0	0	0	0	0	0	603	903	0
2657	4	0	0	0	0	0	0	200	300	0	0	0	0	0	0	0	200	903	0	0	0	0	0	0	0	603	903	0
2657	5	0	0	0	0	0	0	200	300	0	0	0	0	0	0	0	200	903	0	0	0	0	0	0	0	603	903	0
2657	6	0	0	0	0	0	0	200	300	0	0	0	0	0	0	0	200	903	0	0	0	0	0	0	0	603	903	0
2657	7	0	0	0	0	0	0	200	300	0	0	0	0	0	0	0	200	903	0	0	0	0	0	0	0	603	903	0
2657	8	0	0	0	0	0	0	200	300	0	0	0	0	0	0	0	200	903	0	0	0	0	0	0	0	603	903	0
2657	9	0	0	0	0	0	0	200	300	0	0	0	0	0	0	0	200	903	0	0	0	0	0	0	0	603	903	0
2658	0	0	0	0	0	0	0	200	300	0	0	0	0	0	0	0	200	903	0	0	0	0	0	0	0	603	903	0
2658	1	0	0	0	0	0	0	200	300	0	0	0	0	0	0	0	200	903	0	0	0	0	0	0	0	603	903	0
2658	2	0	0	0	0	0	0	200	300	0	0	0	0	0	0	0	200	903	0	0	0	0	0	0	0	603	903	0
2658	3	0	0	0	0	0	0	200	300	0	0	0	0	0	0	0	200	903	0	0	0	0	0	0	0	603	903	0
2658	4	0	0	0	0	0	0	200	300	0	0	0	0	0	0	0	200	903	0	0	0	0	0	0	0	603	903	0
2658	5	0	0	0	0	0	0	200	300	0	0	0	0	0	0	0	200	903	0	0	0	0	0	0	0	603	903	0
2658	6	0	0	0	0	0	0	200	300	0	0	0	0	0	0	0	200	903	0	0	0	0	0	0	0	603	903	0
2658	7	0	0	0	0	0	0	200	300	0	0	0	0	0	0	0	200	903	0	0	0	0	0	0	0	603	903	0
2658	8	0	0	0	0	0	0	200	300	0	0	0	0	0	0	0	200	903	0	0	0	0	0	0	0	603	903	0
2658	9	0	0	0	0	0	0	200	300	0	0	0	0	0	0	0	200	903	0	0	0	0	0	0	0	603	903	0
2659	0	0	0	0	0	0	0	200	300	0	0	0	0	0	0	0	200	903	0	0	0	0	0	0	0	603	903	0
2659	1	0	0	0	0	0	0	200	300	0	0	0	0	0	0	0	200	903	0	0	0	0	0	0	0	603	903	0
2659	2	0	0	0	0	0	0	200	300	0	0	0	0	0	0	0	200	903	0	0	0	0	0	0	0	603	903	0
2659	3	0	0	0	0	0	0	200	300	0	0	0	0	0	0	0	200	903	0	0	0	0	0	0	0	603	903	0
2659	4	0	0	0	0	0	0	200	300	0	0	0	0	0	0	0	200	903	0	0	0	0	0	0	0	603	903	0
2659	5	0	0	0	0	0	0	200	300	0	0	0	0	0	0	0	200	903	0	0	0	0	0	0	0	603	903	0
2659	6	0	0	0	0	0	0	200	300	0	0	0	0	0	0	0	200	903	0	0	0	0	0	0	0	603	903	0
2659	7	0	0	0	0	0	0	200	300	0	0	0	0	0	0	0	200	903	0	0	0	0	0	0	0	603	903	0
2659	8	0	0	0	0	0	0	200	300	0	0	0	0	0	0	0	200	903	0	0	0	0	0	0	0	603	903	0
2659	9	0	0	0	0	0	0	200	300	0	0	0	0	0	0	0	200	903	0	0	0	0	0	0	0	603	903	0
2660	0	0	0	0	0	0	0	200	300	0	0	0	0	0	0	0	200	903	0	0	0	0	0	0	0	603	903	0
2660	1	0	0	0	0	0	0	200	300	0	0	0	0	0	0	0	200	903	0	0	0	0	0	0	0	603	903	0
2660	2	0	0	0	0	0	0	200	300	0	0	0	0	0	0	0	200	903	0	0	0	0	0	0	0	603	903	0
2660	3	0	0	0	0	0	0	200	300	0	0	0	0	0	0	0	200	903	0	0	0	0	0	0	0	603	903	0
2660	4	0	0	0	0	0	0	200	300	0	0	0	0	0	0	0	200	903	0	0	0	0	0	0	0	603	903	0
2660	5	0	0	0	0	0	0	200	300	0	0	0	0	0	0	0	200	903	0	0	0	0	0	0	0	603	903	0
2660	6	0	0	0	0	0	0	200	300	0	0	0	0	0	0	0	200	903	0	0	0	0	0	0	0	603	903	0
2660	7	0	0	0	0	0	0	200	300	0	0	0	0	0	0	0	200	903	0	0	0	0	0	0	0	603	903	0
2660	8	0	0	0	0	0	0	200	300	0	0	0	0	0	0	0	200	903	0	0	0	0	0	0	0	603	903	0
2660	9	0	0	0	0	0	0	200	300	0	0	0	0	0	0	0	200	903	0	0	0	0	0	0	0	603	903	0
2661	0	0	0	0	0	0	0	200	300	0	0	0	0	0	0	0	200	903	0	0	0	0	0	0	0	603	903	0
2661	1	0	0	0	0	0	0	200	300	0	0	0	0	0	0	0	200	903	0	0	0	0	0	0	0	603	903	0
2661	2	0	0	0	0	0	0	200	300	0	0	0	0	0	0	0	200	903	0	0	0	0	0	0	0	603	903	0
2661	3	0	0	0	0	0	0	200	300	0	0	0	0	0	0	0	200	903	0	0	0	0	0	0	0	603	903	0
2661	4	0	0	0	0	0	0	200	300	0	0	0	0	0	0	0	200	903	0	0	0	0	0	0	0	603	903	0
2661	5	0	0	0	0	0	0	200	300	0	0	0	0	0	0	0	200	903	0	0	0	0	0	0	0	603	903	0
2661	6	0	0	0	0	0	0	200	300	0	0	0	0	0	0	0	200	903	0	0	0	0	0	0	0	603	903	0
2661	7	0	0	0	0	0	0	200	300	0	0	0	0	0	0	0	200	903	0	0	0	0	0	0	0	603	903	0
2661	8	0	0	0	0	0	0	200	300	0	0	0	0	0	0	0	200	903	0	0	0	0	0	0	0	603	903	0
2661	9	0	0	0	0	0	0	200	300	0	0	0	0	0	0	0	200	903	0	0	0	0	0	0	0	603	903	0
2662	0	0	0	0	0	0	0	200	300	0	0	0	0	0	0	0	200	903	0	0	0	0	0	0	0	603	903	0
2662	1	0	0	0	0	0	0	200	300	0	0	0	0	0	0	0	200	903	0	0	0	0	0	0	0	603	903	0
2662	2	0	0	0	0	0	0	200	300	0	0	0	0	0	0	0	200	903	0	0	0	0	0	0	0	603	903	0
2662	3	0	0	0	0	0	0	200	300	0	0	0	0	0	0	0	200	903	0	0	0	0	0	0	0	603	903	0
2662	4	0	0	0	0	0	0	200	300	0	0	0	0	0	0	0	200	903	0	0	0	0	0	0	0	603	903	0
2662	5	0	0	0	0	0	0	200	300	0	0	0	0	0	0	0	200	903	0	0	0	0	0	0	0	603	903	0
2662	6	0	0	0	0	0	0	200	300	0	0	0	0	0	0	0	200	903	0	0	0	0	0	0	0	603	903	0
2662	7	0	0	0	0	0	0	200	300	0	0	0	0	0	0	0	200	903	0	0	0	0	0	0	0	603	903	0
2662	8	0	0	0	0	0	0	200	300	0	0	0	0	0	0	0	200	903	0	0	0	0	0	0	0	603	903	0
2662	9	0	0	0	0	0	0	200	300	0	0	0	0	0	0	0	200	903	0	0	0	0	0	0	0	603	903	0
2663	0	0	0	0	0	0	0	200	300	0	0	0	0	0	0	0	200	903	0	0	0	0	0	0	0	603	903	0
2663	1	0	0	0	0	0	0	200	300	0	0	0	0	0	0	0	200	903	0	0	0	0	0	0	0	603	903	0
2663	2	0	0	0	0	0	0	200	300	0	0	0	0	0	0	0	200	903	0	0	0	0	0	0	0	603	903	0
2663	3	0	0	0	0	0	0	200	300	0	0	0	0	0	0	0	200	903	0	0	0	0	0	0	0	603	903	0
2663	4	0	0	0	0	0	0	200	300	0	0	0	0	0	0	0	200	903	0	0	0	0	0	0	0	603	903	0
2663	5	0	0	0	0	0	0	200	300	0	0	0	0	0	0	0	200	903	0	0	0	0	0	0	0	603	903	0
2663	6	0	0	0	0	0	0	200	300	0	0	0	0	0	0	0	200	903	0	0	0	0	0	0	0	603	903	0
2663	7	0	0	0	0	0	0	200	300	0	0	0	0	0	0	0	200	903	0	0	0	0	0	0	0	603	903	0
2663	8	0	0	0	0	0	0	200	300	0	0	0	0	0	0	0	200	903	0	0	0	0	0	0	0	603	903	0
2663	9	0	0	0	0	0	0	200	300	0	0	0	0	0	0	0	200	903	0	0	0	0	0	0	0	603	903	0
2664	0	0	0	0	0	0	0	200	300	0	0	0	0	0	0	0	200	903	0	0	0	0	0	0	0	603	903	0
2664	1	0	0	0	0	0	0	200	300	0	0	0	0	0	0	0	200	903	0	0	0	0	0	0	0	603	903	0
2664	2	0	0	0	0	0	0	200	300	0	0	0	0	0	0	0	200	903	0	0	0	0	0	0	0	603	903	0
2664	3	0	0	0	0	0	0	200	300	0	0	0	0	0	0	0	200	903	0	0	0	0	0	0	0	603	903	0
2664	4	0	0	0	0	0	0	200	300	0	0	0	0	0	0	0	200	903	0	0	0	0	0	0	0	603	903	0
2664	5	0	0	0	0	0	0	200	300	0	0	0	0	0	0	0	200	903	0	0	0	0	0	0	0	603	903	0
2664	6	0	0	0	0	0	0	200	300	0	0	0	0	0	0	0	200	903	0	0	0	0	0	0	0	603	903	0
2664	7	0	0	0	0	0	0	200	300	0	0	0	0	0	0	0	200	903	0	0	0	0	0	0	0	603	903	0
2664	8	0	0	0	0	0	0	200	300	0	0	0	0	0	0	0	200	903	0	0	0	0	0	0	0	603	903	0
2664	9	0	0	0	0	0	0	200	300	0	0	0	0	0	0	0	200	903	0	0	0	0	0	0	0	603	903	0
2665	0	0	0	0	0	0	0	200	300	0	0	0	0	0	0	0	200	903	0	0	0	0	0	0	0	603	903	0
2665	1	0	0	0	0	0	0	200	300	0	0	0	0	0	0	0	200	903	0	0	0	0	0	0	0	603	903	0
2665	2	0	0	0	0	0	0	200	300	0	0	0	0	0	0	0	200	903	0	0	0	0	0	0	0	603	903	0
2665	3	0	0	0	0	0	0	200	300	0	0	0	0	0	0	0	200	903	0	0	0	0	0	0	0	603	903	0
2665	4	0	0	0	0	0	0	200	300	0	0	0	0	0	0	0	200	903	0	0	0	0	0	0	0	603	903	0
2665	5	0	0	0	0	0	0	200	300	0	0	0	0	0	0	0	200	903	0	0	0	0	0	0	0	603	903	0
2665	6	0	0	0	0	0	0	200	300	0	0	0	0	0	0	0	200	903	0	0	0	0	0	0	0	603	903	0
2665	7	0	0	0	0	0	0	200	300	0	0	0	0	0	0	0	200	903	0	0	0	0	0	0	0	603	903	0
2665	8	0	0	0	0	0	0	200	300	0	0	0	0	0	0	0	200	903	0	0	0	0	0	0	0	603	903	0
2665	9	0	0	0	0	0	0	200	300	0	0	0	0	0	0	0	200	903	0	0	0	0	0	0	0	603	903	0
2666	0	0	0	0	0	0	0	200	300	0	0	0	0	0	0	0	200	903	0	0	0	0	0	0	0	603	903	0
2666	1	0	0	0	0	0	0	200	300	0	0	0	0	0	0	0	200	903	0	0	0	0	0	0	0	603	903	0
2666	2	0	0	0	0	0	0	200	300	0	0	0	0	0	0	0	200	903	0	0	0	0	0	0	0	603	903	0
2666	3	0	0	0	0	0	0	200	300	0	0	0	0	0	0	0	200	903	0	0	0	0	0	0	0	603	903	0
2666	4	0	0	0	0	0	0	200	300	0	0	0	0	0	0	0	200	903	0	0	0	0	0	0	0	603	903	0
2666	5	0	0	0	0	0	0	200	300	0	0	0	0	0	0	0	200	903	0	0	0	0	0	0	0	603	903	0
2666	6	0	0	0	0	0	0	200	300	0	0	0	0	0	0	0	200	903	0	0	0	0	0	0	0	603	903	0
2666	7	0	0	0	0	0	0	200	300	0	0	0	0	0	0	0	200	903	0	0	0	0	0	0	0	603	903	0
2666	8	0	0	0	0	0	0	200	300	0	0	0	0	0	0	0	200	903	0	0	0	0	0	0	0	603	903	0
2666	9	0	0	0	0	0	0	200	300	0	0	0	0	0	0	0	200	903	0	0	0	0	0	0	0	603	903	0
2667	0	0	0	0	0	0	0	200	300	0	0	0	0	0	0	0	200	903	0	0	0	0	0	0	0	603	903	0
2667	1	0	0	0	0	0	0	200	300	0	0	0	0	0	0	0	200	903	0	0	0	0	0	0	0	603	903	0
2667	2	0	0	0	0	0	0	200	300	0	0	0	0	0	0	0	200	903	0	0	0	0	0	0	0	603	903	0
2667	3	0	0	0	0	0	0	200	300	0	0	0	0	0	0	0	200	903	0	0	0	0	0	0	0	603	903	0
2667	4	0	0	0	0	0	0	200	300	0	0	0	0	0	0	0	200	903	0	0	0	0	0	0	0	603	903	0
2667	5	0	0	0	0	0	0	200	300	0	0	0	0	0	0	0	200	903	0	0	0	0	0	0	0	603	903	0
2667	6	0	0	0	0	0	0	200	300	0	0	0	0	0	0	0	200	903	0	0	0	0	0	0	0	603	903	0
2667	7	0	0	0	0	0	0	200	300	0	0	0	0	0	0	0	200	903	0	0	0	0	0	0	0	603	903	0
2667	8	0	0	0	0	0	0	200	300	0	0	0	0	0	0	0	200	903	0	0	0	0	0	0	0	603	903	0
2667	9	0	0	0	0	0	0	200	300	0	0	0	0	0	0	0	200	903	0	0	0	0	0	0	0	603	903	0
2668	0	0	0	0	0	0	0	200	300	0	0	0	0	0	0	0	200	903	0	0	0	0	0	0	0	603	903	0
2668	1	0	0	0	0	0	0	200	300	0	0	0	0	0	0	0	200	903	0	0	0	0	0	0	0	603	903	0
2668	2	0	0	0	0	0	0	200	300	0	0	0	0	0	0	0	200	903	0	0	0	0	0	0	0	603	903	0
2668	3	0	0	0	0	0	0	200	300	0	0	0	0	0	0	0	200	903	0	0	0	0	0	0	0	603	903	0
2668	4	0	0	0	0	0	0	200	300	0	0	0	0	0	0	0	200	903	0	0	0	0	0	0	0	603	903	0
2668	5	0	0	0	0	0	0	200	300	0	0	0	0	0	0	0	200	903	0	0	0	0	0	0	0	603	903	0
2668	6	0	0	0	0	0	0	200	300	0	0	0	0	0	0	0	200	903	0	0	0	0	0	0	0	603	903	0
2668	7	0	0	0	0	0	0	200	300	0	0	0	0	0	0	0	200	903	0	0	0	0	0	0	0	603	903	0
2668	8	0	0	0	0	0	0	200	300	0	0	0	0	0	0	0	200	903	0	0	0	0	0	0	0	603	903	0
2668	9	0	0	0	0	0	0	200	300	0	0	0	0	0	0	0	200	903	0	0	0	0	0	0	0	603	903	0
2669	0	0	0	0	0	0	0	200	300	0	0	0	0	0	0	0	200	903	0	0	0	0	0	0	0	603	903	0
2669	1	0	0	0	0	0	0	200	300	0	0	0	0	0	0	0	200	903	0	0	0	0	0	0	0	603	903	0
2669	2	0	0	0	0	0	0	200	300	0	0	0	0	0	0	0	200	903	0	0	0	0	0	0	0	603	903	0
2669	3	0	0	0	0	0	0	200	300	0	0	0	0	0	0	0	200	903	0	0	0	0	0	0	0	603	903	0
2669	4	0	0	0	0	0	0	200	300	0	0	0	0	0	0	0	200	903	0	0	0	0	0	0	0	603	903	0
2669	5	0	0	0	0	0	0	200	300	0	0	0	0	0	0	0	200	903	0	0	0	0	0	0	0	603	903	0
2669	6	0	0	0	0	0	0	200	300	0	0	0	0	0	0	0	200	903	0	0	0	0	0	0	0	603	903	0
2669	7	0	0	0	0	0	0	200	300	0	0	0	0	0	0	0	200	903	0	0	0	0	0	0	0	603	903	0
2669	8	0	0	0	0	0	0	200	300	0	0	0	0	0	0	0	200	903	0	0	0	0	0	0	0	603	903	0
2669	9	0	0	0	0	0	0	200	300	0	0	0	0	0	0	0	200	903	0	0	0	0	0	0	0	603	903	0
2670	0	0	0	0	0	0	0	200	300	0	0	0	0	0	0	0	200	903	0	0	0	0	0	0	0	603	903	0
2670	1	0	0	0	0	0	0	200	300	0	0	0	0	0	0	0	200	903	0	0	0	0	0	0	0	603	903	0
2670	2	0	0	0	0	0	0	200	300	0	0	0	0	0	0	0	200	903	0	0	0	0	0	0	0	603	903	0
2670	3	0	0	0	0	0	0	200	300	0	0	0	0	0	0	0	200	903	0	0	0	0	0	0	0	603	903	0
2670	4	0	0	0	0	0	0	200	300	0	0	0	0	0	0	0	200	903	0	0	0	0	0	0	0	603	903	0
2670	5	0	0	0	0	0	0	200	300	0	0	0	0	0	0	0	200	903	0	0	0	0	0	0	0	603	903	0
2670	6	0	0	0	0	0	0	200	300	0	0	0	0	0	0	0	200	903	0	0	0	0	0	0	0	603	903	0
2670	7	0	0	0	0	0	0	200	300	0	0	0	0	0	0	0	200	903	0	0	0	0	0	0	0	603	903	0
2670	8	0	0	0	0	0	0	200	300	0	0	0	0	0	0	0	200	903	0	0	0	0	0	0	0	603	903	0
2670	9	0	0	0	0	0	0	200	300	0	0	0	0	0	0	0	200	903	0	0	0	0	0	0	0	603	903	0
2671	0	0	0	0	0	0	0	200	300	0	0	0	0	0	0	0	200	903	0	0	0	0	0	0	0	603	903	0
2671	1	0	0	0	0	0	0	200	300	0	0	0	0	0	0	0	200	903	0	0	0	0	0	0	0	603	903	0
2671	2	0	0	0	0	0	0	200	300	0	0	0	0	0	0	0	200	903	0	0	0	0	0	0	0	603	903	0
2671	3	0	0	0	0	0	0	200	300	0	0	0	0	0	0	0	200	903	0	0	0	0	0	0	0	603	903	0
2671	4	0	0	0	0	0	0	200	300	0	0	0	0	0	0	0	200	903	0	0	0	0	0	0	0	603	903	0
2671	5	0	0	0	0	0	0	200	300	0	0	0	0	0	0	0	200	903	0	0	0	0	0	0	0	603	903	0
2671	6	0	0	0	0	0	0	200	300	0	0	0	0	0	0	0	200	903	0	0	0	0	0	0	0	603	903	0
2671	7	0	0	0	0	0	0	200	300	0	0	0	0	0	0	0	200	903	0	0	0	0	0	0	0	603	903	0
2671	8	0	0	0	0	0	0	200	300	0	0	0	0	0	0	0	200	903	0	0	0	0	0	0	0	603	903	0
2671	9	0	0	0	0	0	0	200	300	0	0	0	0	0	0	0	200	903	0	0	0	0	0	0	0	603	903	0
2672	0	0	0	0	0	0	0	200	300	0	0	0	0	0	0	0	200	903	0	0	0	0	0	0	0	603	903	0
2672	1	0	0	0	0	0	0	200	300	0	0	0	0	0	0	0	200	903	0	0	0	0	0	0	0	603	903	0
2672	2	0	0	0	0	0	0	200	300	0	0	0	0	0	0	0	200	903	0	0	0	0	0	0	0	603	903	0
2672	3	0	0	0	0	0	0	200	300	0	0	0	0	0	0	0	200	903	0	0	0	0	0	0	0	603	903	0
2672	4	0	0	0	0	0	0	200	300	0	0	0	0	0	0	0	200	903	0	0	0	0	0	0	0	603	903	0
2672	5	0	0	0	0	0	0	200	300	0	0	0	0	0	0	0	200	903	0	0	0	0	0	0	0	603	903	0
2672	6	0	0	0	0	0	0	200	300	0	0	0	0	0	0	0	200	903	0	0	0	0	0	0	0	603	903	0
2672	7	0	0	0	0	0	0	200	300	0	0	0	0	0	0	0	200	903	0	0	0	0	0	0	0	603	903	0
2672	8	0	0	0	0	0	0	200	300	0	0	0	0	0	0	0	200	903	0	0	0	0	0	0	0	603	903	0
2672	9	0	0	0	0	0	0	200	300	0	0	0	0	0	0	0	200	903	0	0	0	0	0	0	0	603	903	0
2673	0	0	0	0	0	0	0	200	300	0	0	0	0	0	0	0	200	903	0	0	0	0	0	0	0	603	903	0
2673	1	0	0	0	0	0	0	200	300	0	0	0	0	0	0	0	200	903	0	0	0	0	0	0	0	603	903	0
2673	2	0	0	0	0	0	0	200	300	0	0	0	0	0	0	0	200	903	0	0	0	0	0	0	0	603	903	0
2673	3	0	0	0	0	0	0	200	300	0	0	0	0	0	0	0	200	903	0	0	0	0	0	0	0	603	903	0
2673	4	0	0	0	0	0	0	200	300	0	0	0	0	0	0	0	200	903	0	0	0	0	0	0	0	603	903	0
2673	5	0	0	0	0	0	0	200	300	0	0	0	0	0	0	0	200	903	0	0	0	0	0	0	0	603	903	0
2673	6	0	0	0	0	0	0	200	300	0	0	0	0	0	0	0	200	903	0	0	0	0	0	0	0	603	903	0
2673	7	0	0	0	0	0	0	200	300	0	0	0	0	0	0	0	200	903	0	0	0	0	0	0	0	603	903	0
2673	8	0	0	0	0	0	0	200	300	0	0	0	0	0	0	0	200	903	0	0	0	0	0	0	0	603	903	0
2673	9	0	0	0	0	0	0	200	300	0	0	0	0	0	0	0	200	903	0	0	0	0	0	0	0	603	903	0
2674	0	0	0	0	0	0	0	200	300	0	0	0	0	0	0	0	200	903	0	0	0	0	0	0	0	603	903	0
2674	1	0	0	0	0	0	0	200	300	0	0	0	0	0	0	0	200	903	0	0	0	0	0	0	0	603	903	0
2674	2	0	0	0	0	0	0	200	300	0	0	0	0	0	0	0	200	903	0	0	0	0	0	0	0	603	903	0
2674	3	0	0	0	0	0	0	200	300	0	0	0	0	0	0	0	200	903	0	0	0	0	0	0	0	603	903	0
2674	4	0	0	0	0	0	0	200	300	0	0	0	0	0	0	0	200	903	0	0	0	0	0	0	0	603	903	0
2674	5	0	0	0	0	0	0	200	300	0	0	0	0	0	0	0	200	903	0	0	0	0	0	0	0	603	903	0
2674	6	0	0	0	0	0	0	200	300	0	0	0	0	0	0	0	200	903	0	0	0	0	0	0	0	603	903	0
2674	7	0	0	0	0	0	0	200	300	0	0	0	0	0	0	0	200	903	0	0	0	0	0	0	0	603	903	0
2674	8	0	0	0	0	0	0	200	300	0	0	0	0	0	0	0	200	903	0	0	0	0	0	0	0	603	903	0
2674	9	0	0	0	0	0	0	200	300	0	0	0	0	0	0	0	200	903	0	0	0	0	0	0	0	603	903	0
2675	0	0	0	0	0	0	0	200	300	0	0	0	0	0	0	0	200	903	0	0	0	0	0	0	0	603	903	0
2675	1	0	0	0	0	0	0	200	300	0	0	0	0	0	0	0	200	903	0	0	0	0	0	0	0	603	903	0
2675	2	0	0	0	0	0	0	200	300	0	0	0	0	0	0	0	200	903	0	0	0	0	0	0	0	603	903	0
2675	3	0	0	0	0	0	0	200	300	0	0	0	0	0	0	0	200	903	0	0	0	0	0	0	0	603	903	0
2675	4	0	0	0	0	0	0	200	300	0	0	0	0	0	0	0	200	903	0	0	0	0	0	0	0	603	903	0
2675	5	0	0	0	0	0	0	200	300	0	0	0	0	0	0	0	200	903	0	0	0	0	0	0	0	603	903	0
2675	6	0	0	0	0	0	0	200	300	0	0	0	0	0	0	0	200	903	0	0	0	0	0	0	0	603	903	0
2675	7	0	0	0	0	0	0	200	300	0	0	0	0	0	0	0	200	903	0	0	0	0	0	0	0	603	903	0
2675	8	0	0	0	0	0	0	200	300	0	0	0	0	0	0	0	200	903	0	0	0	0	0	0	0	603	903	0
2675	9	0	0	0	0	0	0	200	300	0	0	0	0	0	0	0	200	903	0	0	0	0	0	0	0	603	903	0
2676	0	0	0	0	0	0	0	200	300	0	0	0	0	0	0	0	200	903	0	0	0	0	0	0	0	603	903	0
2676	1	0	0	0	0	0	0	200	300	0	0	0	0	0	0	0	200	903	0	0	0	0	0	0	0	603	903	0
2676	2	0	0	0	0	0	0	200	300	0	0	0	0	0	0	0	200	903	0	0	0	0	0	0	0	603	903	0
2676	3	0	0	0	0	0	0	200	300	0	0	0	0	0	0	0	200	903	0	0	0	0	0	0	0	603	903	0
2676	4	0	0	0	0	0	0	200	300	0	0	0	0	0	0	0	200	903	0	0	0	0	0	0	0	603	903	0
2676	5	0	0	0	0	0	0	200	300	0	0	0	0	0	0	0	200	903	0	0	0	0	0	0	0	603	903	0
2676	6	0	0	0	0	0	0	200	300	0	0	0	0	0	0	0	200	903	0	0	0	0	0	0	0	603	903	0
2676	7	0	0	0	0	0	0	200	300	0	0	0	0	0	0	0	200	903	0	0	0	0	0	0	0	603	903	0
2676	8	0	0	0	0	0	0	200	300	0	0	0	0	0	0	0	200	903	0	0	0	0	0	0	0	603	903	0
2676	9	0	0	0	0	0	0	200	300	0	0	0	0	0	0	0	200	903	0	0	0	0	0	0	0	603	903	0
2677	0	0	0	0	0	0	0	200	300	0	0	0	0	0	0	0	200	903	0	0	0	0	0	0	0	603	903	0
2677	1	0	0	0	0	0	0	200	300	0	0	0	0	0	0	0	200	903	0	0	0	0	0	0	0	603	903	0
2677	2	0	0	0	0	0	0	200	300	0	0	0	0	0	0	0	200	903	0	0	0	0	0	0	0	603	903	0
2677	3	0	0	0	0	0	0	200	300	0	0	0	0	0	0	0	200	903	0	0	0	0	0	0	0	603	903	0
2677	4	0	0	0	0	0	0	200	300	0	0	0	0	0	0	0	200	903	0	0	0	0	0	0	0	603	903	0
2677	5	0	0	0	0	0	0	200	300	0	0	0	0	0	0	0	200	903	0	0	0	0	0	0	0	603	903	0
2677	6	0	0	0	0	0	0	200	300	0	0	0	0	0	0	0	200	903	0	0	0	0	0	0	0	603	903	0
2677	7	0	0	0	0	0	0	200	300	0	0	0	0	0	0	0	200	903	0	0	0	0	0	0	0	603	903	0
2677	8	0	0	0	0	0	0	200	300	0	0	0	0	0	0	0	200	903	0	0	0	0	0	0	0	603	903	0
2677	9	0	0	0	0	0	0	200	300	0	0	0	0	0	0	0	200	903	0	0	0	0	0	0	0	603	903	0
2678	0	0	0	0	0	0	0	200	300	0	0	0	0	0	0	0	200	903	0	0	0	0	0	0	0	603	903	0
2678	1	0	0	0	0	0	0	200	300	0	0	0	0	0	0	0	200	903	0	0	0	0	0	0	0	603	903	0
2678	2	0	0	0	0	0	0	200	300	0	0	0	0	0	0	0	200	903	0	0	0	0	0	0	0	603	903	0
2678	3	0	0	0	0	0	0	200	300	0	0	0	0	0	0	0	200	903	0	0	0	0	0	0	0	603	903	0
2678	4	0	0	0	0	0	0	200	300	0	0	0	0	0	0	0	200	903	0	0	0	0	0	0	0	603	903	0
2678	5	0	0	0	0	0	0	200	300	0	0	0	0	0	0	0	200	903	0	0	0	0	0	0	0	603	903	0
2678	6	0	0	0	0	0	0	200	300	0	0	0	0	0	0	0	200	903	0	0	0	0	0	0	0	603	903	0
2678	7	0	0	0	0	0	0	200	300	0	0	0	0	0	0	0	200	903	0	0	0	0	0	0	0	603	903	0
2678	8	0	0	0	0	0	0	200	300	0	0	0	0	0	0	0	200	903	0	0	0	0	0	0	0	603	903	0
2678	9	0	0	0	0	0	0	200	300	0	0	0	0	0	0	0	200	903	0	0	0	0	0	0	0	603	903	0
2679	0	0	0	0	0	0	0	200	300	0	0	0	0	0	0	0	200	903	0	0	0	0	0	0	0	603	903	0
2679	1	0	0	0	0	0	0	200	300	0	0	0	0	0	0	0	200	903	0	0	0	0	0	0	0	603	903	0
2679	2	0	0	0	0	0	0	200	300	0	0	0	0	0	0	0	200	903	0	0	0	0	0	0	0	603	903	0
2679	3	0	0	0	0	0	0	200	300	0	0	0	0	0	0	0	200	903	0	0	0	0	0	0	0	603	903	0
2679	4	0	0	0	0	0	0	200	300	0	0	0	0	0	0	0	200	903	0	0	0	0	0	0	0	603	903	0
2679	5	0	0	0	0	0	0	200	300	0	0	0	0	0	0	0	200	903	0	0	0	0	0	0	0	603	903	0
2679	6	0	0	0	0	0	0	200	300	0	0	0	0	0	0	0	200	903	0	0	0	0	0	0	0	603	903	0
2679	7	0	0	0	0	0	0	200	300	0	0	0	0	0	0	0	200	903	0	0	0	0	0	0	0	603	903	0
2679	8	0	0	0	0	0	0	200	300	0	0	0	0	0	0	0	200	903	0	0	0	0	0	0	0	603	903	0
2679	9	0	0	0	0	0	0	200	300	0	0	0	0	0	0	0	200	903	0	0	0	0	0	0	0	603	903	0
2680	0	0	0	0	0	0	0	200	300	0	0	0	0	0	0	0	200	903	0	0	0	0	0	0	0	603	903	0
2680	1	0	0	0	0	0	0	200	300	0	0	0	0	0	0	0	200	903	0	0	0	0	0	0	0	603	903	0
2680	2	0	0	0	0	0	0	200	300	0	0	0	0	0	0	0	200	903	0	0	0	0	0	0	0	603	903	0
2680	3	0	0	0	0	0	0	200	300	0	0	0	0	0	0	0	200	903	0	0	0	0	0	0	0	603	903	0
2680	4	0	0	0	0	0	0	200	300	0	0	0	0	0	0	0	200	903	0	0	0	0	0	0	0	603	903	0
2680	5	0	0	0	0	0	0	200	300	0	0	0	0	0	0	0	200	903	0	0	0	0	0	0	0	603	903	0
2680	6	0	0	0	0	0	0	200	300	0	0	0	0	0	0	0	200	903	0	0	0	0	0	0	0	603	903	0
2680	7	0	0	0	0	0	0	200	300	0	0	0	0	0	0	0	200	903	0	0	0	0	0	0	0	603	903	0
2680	8	0	0	0	0	0	0	200	300	0	0	0	0	0	0	0	200	903	0	0	0	0	0	0	0	603	903	0
2680	9	0	0	0	0	0	0	200	300	0	0	0	0	0	0	0	200	903	0	0	0	0	0	0	0	603	903	0
2681	0	0	0	0	0	0	0	200	300	0	0	0	0	0	0	0	200	903	0	0	0	0	0	0	0	603	903	0
2681	1	0	0	0	0	0	0	200	300	0	0	0	0	0	0	0	200	903	0	0	0	0	0	0	0	603	903	0
2681	2	0	0	0	0	0	0	200	300	0	0	0	0	0	0	0	200	903	0	0	0	0	0	0	0	603	903	0
2681	3	0	0	0	0	0	0	200	300	0	0	0	0	0	0	0	200	903	0	0	0	0	0	0	0	603	903	0
2681	4	0	0	0	0	0	0	200	300	0	0	0	0	0	0	0	200	903	0	0	0	0	0	0	0	603	903	0
2681	5	0	0	0	0	0	0	200	300	0	0	0	0	0	0	0	200	903	0	0	0	0	0	0	0	603	903	0
2681	6	0	0	0	0	0	0	200	300	0	0	0	0	0	0	0	200	903	0	0	0	0	0	0	0	603	903	0
2681	7	0	0	0	0	0	0	200	300	0	0	0	0	0	0	0	200	903	0	0	0	0	0	0	0	603	903	0
2681	8	0	0	0	0	0	0	200	300	0	0	0	0	0	0	0	200	903	0	0	0	0	0	0	0	603	903	0
2681	9	0	0	0	0	0	0	200	300	0	0	0	0	0	0	0	200	903	0	0	0	0	0	0	0	603	903	0
2682	0	0	0	0	0	0	0	200	300	0	0	0	0	0	0	0	200	903	0	0	0	0	0	0	0	603	903	0
2682	1	0	0	0	0	0	0	200	300	0	0	0	0	0	0	0	200	903	0	0	0	0	0	0	0	603	903	0
2682	2	0	0	0	0	0	0	200	300	0	0	0	0	0	0	0	200	903	0	0	0	0	0	0	0	603	903	0
2682	3	0	0	0	0	0	0	200	300	0	0	0	0	0	0	0	200	903	0	0	0	0	0	0	0	603	903	0
2682	4	0	0	0	0	0	0	200	300	0	0	0	0	0	0	0	200	903	0	0	0	0	0	0	0	603	903	0
2682	5	0	0	0	0	0	0	200	300	0	0	0	0	0	0	0	200	903	0	0	0	0	0	0	0	603	903	0
2682	6	0	0	0	0	0	0	200	300	0	0	0	0	0	0	0	200	903	0	0	0	0	0	0	0	603	903	0
2682	7	0	0	0	0	0	0	200	300	0	0	0	0	0	0	0	200	903	0	0	0	0	0	0	0	603	903	0
2682	8	0	0	0	0	0	0	200	300	0	0	0	0	0	0	0	200	903	0	0	0	0	0	0	0	603	903	0
2682	9	0	0	0	0	0	0	200	300	0	0	0	0	0	0	0	200	903	0	0	0	0	0	0	0	603	903	0
2683	0	0	0	0	0	0	0	200	300	0	0	0	0	0	0	0	200	903	0	0	0	0	0	0	0	603	903	0
2683	1	0	0	0	0	0	0	200	300	0	0	0	0	0	0	0	200	903	0	0	0	0	0	0	0	603	903	0
2683	2	0	0	0	0	0	0	200	300	0	0	0	0	0	0	0	200	903	0	0	0	0	0	0	0	603	903	0
2683	3	0	0	0	0	0	0	200	300	0	0	0	0	0	0	0	200	903	0	0	0	0	0	0	0	603	903	0
2683	4	0	0	0	0	0	0	200	300	0	0	0	0	0	0	0	200	903	0	0	0	0	0	0	0	603	903	0
2683	5	0	0	0	0	0	0	200	300	0	0	0	0	0	0	0	200	903	0	0	0	0	0	0	0	603	903	0
2683	6	0	0	0	0	0	0	200	300	0	0	0	0	0	0	0	200	903	0	0	0	0	0	0	0	603	903	0
2683	7	0	0	0	0	0	0	200	300	0	0	0	0	0	0	0	200	903	0	0	0	0	0	0	0	603	903	0
2683	8	0	0	0	0	0	0	200	300	0	0	0	0	0	0	0	200	903	0	0	0	0	0	0	0	603	903	0
2683	9	0	0	0	0	0	0	200	300	0	0	0	0	0	0	0	200	903	0	0	0	0	0	0	0	603	903	0
2684	0	0	0	0	0	0	0	200	300	0	0	0	0	0	0	0	200	903	0	0	0	0	0	0	0	603	903	0
2684	1	0	0	0	0	0	0	200	300	0	0	0	0	0	0	0	200	903	0	0	0	0	0	0	0	603	903	0
2684	2	0	0	0	0	0	0	200	300	0	0	0	0	0	0	0	200	903	0	0	0	0	0	0	0	603	903	0
2684	3	0	0	0	0	0	0	200	300	0	0	0	0	0	0	0	200	903	0	0	0	0	0	0	0	603	903	0
2684	4	0	0	0	0	0	0	200	300	0	0	0	0	0	0	0	200	903	0	0	0	0	0	0	0	603	903	0
2684	5	0	0	0	0	0	0	200	300	0	0	0	0	0	0	0	200	903	0	0	0	0	0	0	0	603	903	0
2684	6	0	0	0	0	0	0	200	300	0	0	0	0	0	0	0	200	903	0	0	0	0	0	0	0	603	903	0
2684	7	0	0	0	0	0	0	200	300	0	0	0	0	0	0	0	200	903	0	0	0	0	0	0	0	603	903	0
2684	8	0	0	0	0	0	0	200	300	0	0	0	0	0	0	0	200	903	0	0	0	0	0	0	0	603	903	0
2684	9	0	0	0	0	0	0	200	300	0	0	0	0	0	0	0	200	903	0	0	0	0	0	0	0	603	903	0
2685	0	0	0	0	0	0	0	200	300	0	0	0	0	0	0	0	200	903	0	0	0	0	0	0	0	603	903	0
2685	1	0	0	0	0	0	0	200	300	0	0	0	0	0	0	0	200	903	0	0	0	0	0	0	0	603	903	0
2685	2	0	0	0	0	0	0	200	300	0	0	0	0	0	0	0	200	903	0	0	0	0	0	0	0	603	903	0
2685	3	0	0	0	0	0	0	200	300	0	0	0	0	0	0	0	200	903	0	0	0	0	0	0	0	603	903	0
2685	4	0	0	0	0	0	0	200	300	0	0	0	0	0	0	0	200	903	0	0	0	0	0	0	0	603	903	0
2685	5	0	0	0	0	0	0	200	300	0	0	0	0	0	0	0	200	903	0	0	0	0	0	0	0	603	903	0
2685	6	0	0	0	0	0	0	200	300	0	0	0	0	0	0	0	200	903	0	0	0	0	0	0	0	603	903	0
2685	7	0	0	0	0	0	0	200	300	0	0	0	0	0	0	0	200	903	0	0	0	0	0	0	0	603	903	0
2685	8	0	0	0	0	0	0	200	300	0	0	0	0	0	0	0	200	903	0	0	0	0	0	0	0	603	903	0
2685	9	0	0	0	0	0	0	200	300	0	0	0	0	0	0	0	200	903	0	0	0	0	0	0	0	603	903	0
2686	0	0	0	0	0	0	0	200	300	0	0	0	0	0	0	0	200	903	0	0	0	0	0	0	0	603	903	0
2686	1	0	0	0	0	0	0	200	300	0	0	0	0	0	0	0	200	903	0	0	0	0	0	0	0	603	903	0
2686	2	0	0	0	0	0	0	200	300	0	0	0	0	0	0	0	200	903	0	0	0	0	0	0	0	603	903	0
2686	3	0	0	0	0	0	0	200	300	0	0	0	0	0	0	0	200	903	0	0	0	0	0	0	0	603	903	0
2686	4	0	0	0	0	0	0	200	300	0	0	0	0	0	0	0	200	903	0	0	0	0	0	0	0	603	903	0
2686	5	0	0	0	0	0	0	200	300	0	0	0	0	0	0	0	200	903	0	0	0	0	0	0	0	603	903	0
2686	6	0	0	0	0	0	0	200	300	0	0	0	0	0	0	0	200	903	0	0	0	0	0	0	0	603	903	0
2686	7	0	0	0	0	0	0	200	300	0	0	0	0	0	0	0	200	903	0	0	0	0	0	0	0	603	903	0
2686	8	0	0	0	0	0	0	200	300	0	0	0	0	0	0	0	200	903	0	0	0	0	0	0	0	603	903	0
2686	9	0	0	0	0	0	0	200	300	0	0	0	0	0	0	0	200	903	0	0	0	0	0	0	0	603	903	0
2687	0	0	0	0	0	0	0	200	300	0	0	0	0	0	0	0	200	903	0	0	0	0	0	0	0	603	903	0
2687	1	0	0	0	0	0	0	200	300	0	0	0	0	0	0	0	200	903	0	0	0	0	0	0	0	603	903	0
2687	2	0	0	0	0	0	0	200	300	0	0	0	0	0	0	0	200	903	0	0	0	0	0	0	0	603	903	0
2687	3	0	0	0	0	0	0	200	300	0	0	0	0	0	0	0	200	903	0	0	0	0	0	0	0	603	903	0
2687	4	0	0	0	0	0	0	200	300	0	0	0	0	0	0	0	200	903	0	0	0	0	0	0	0	603	903	0
2687	5	0	0	0	0	0	0	200	300	0	0	0	0	0	0	0	200	903	0	0	0	0	0	0	0	603	903	0
2687	6	0	0	0	0	0	0	200	300	0	0	0	0	0	0	0	200	903	0	0	0	0	0	0	0	603	903	0
2687	7	0	0	0	0	0	0	200	300	0	0	0	0	0	0	0	200	903	0	0	0	0	0	0	0	603	903	0
2687	8	0	0	0	0	0	0	200	300	0	0	0	0	0	0	0	200	903	0	0	0	0	0	0	0	603	903	0
2687	9	0	0	0	0	0	0	200	300	0	0	0	0	0	0	0	200	903	0	0	0	0	0	0	0	603	903	0
2688	0	0	0	0	0	0	0	200	300	0	0	0	0	0	0	0	200	903	0	0	0	0	0	0	0	603	903	0
2688	1	0	0	0	0	0	0	200	300	0	0	0	0	0	0	0	200	903	0	0	0	0	0	0	0	603	903	0
2688	2	0	0	0	0	0	0	200	300	0	0	0	0	0	0	0	200	903	0	0	0	0	0	0	0	603	903	0
2688	3	0	0	0	0	0	0	200	300	0	0	0	0	0	0	0	200	903	0	0	0	0	0	0	0	603	903	0
2688	4	0	0	0	0	0	0	200	300	0	0	0	0	0	0	0	200	903	0	0	0	0	0	0	0	603	903	0
2688	5	0	0	0	0	0	0	200	300	0	0	0	0	0	0	0	200	903	0	0	0	0	0	0	0	603	903	0
2688	6	0	0	0	0	0	0	200	300	0	0	0	0	0	0	0	200	903	0	0	0	0	0	0	0	603	903	0
2688	7	0	0	0	0	0	0	200	300	0	0	0	0	0	0	0	200	903	0	0	0	0	0	0	0	603	903	0
2688	8	4.24007	4.90036	-12.4698	1678.8	-372.871	698.044	170.098	165.37	0	0	0	0	0	0	0	200	903	0	0	0	0	0	0	0	603	903	0
2688	9	5.46077	5.6633	-15.2164	2502.78	-6.66007	698.044	199.562	135.521	0	0	0	0	0	0	0	200	903	0	0	0	0	0	0	0	603	903	0
2689	0	4.69783	3.67966	-13.6905	1953.46	-311.836	194.503	177.222	157.313	0	0	0	0	0	0	0	200	903	0	0	0	0	0	0	0	603	903	0
2689	1	2.25642	2.30637	-12.1646	1678.8	-311.836	331.833	174.365	161.993	0	0	0	0	0	0	0	200	903	0	0	0	0	0	0	0	603	903	0
2689	2	0.425369	6.57883	-13.0801	1678.8	-189.766	331.833	185.492	171.653	0	0	0	0	0	0	0	200	903	0	0	0	0	0	0	0	603	903	0
2689	3	-0.184983	6.57883	-18.5733	2960.54	-311.836	-263.26	183.211	140.602	0	0	0	0	0	0	0	200	903	0	0	0	0	0	0	0	603	903	0
2689	4	-1.55827	1.69601	-18.5733	3235.2	-494.941	-354.813	173.352	125.815	0	0	0	0	0	0	0	200	903	0	0	0	0	0	0	0	603	903	0
2689	5	-2.4738	-1.05057	-17.0474	3784.51	-678.047	148.727	160.226	78.0007	0	0	0	0	0	0	0	200	903	0	0	0	0	0	0	0	603	903	0
2689	6	-1.2531	-2.72903	-21.3199	3876.07	-617.012	-492.142	171.059	118.195	0	0	0	0	0	0	0	200	903	0	0	0	0	0	0	0	603	903	0
2689	7	-2.4738	-4.4075	-26.5079	3601.41	-983.223	-263.26	162.908	164.138	0	0	0	0	0	0	0	200	903	0	0	0	0	0	0	0	603	903	0
2689	8	-3.99968	-7.61185	-30.17	4700.04	-1105.29	-217.484	163.364	144.215	0	0	0	0	0	0	0	200	903	0	0	0	0	0	0	0	603	903	0
2689	9	-5.37297	-8.37479	-32.9166	5157.81	-1349.43	-217.484	159.004	143.307	0	0	0	0	0	0	0	200	903	0	0	0	0	0	0	0	603	903	0
2690	0	-2.4738	-8.2222	-34.7476	5890.23	-1593.57	-446.366	154.139	130.485	0	0	0	0	0	0	0	200	903	0	0	0	0	0	0	0	603	903	0
2690	1	-4.45744	-7.15408	-39.3252	7080.41	-1410.47	-400.589	164.133	119.952	0	0	0	0	0	0	0	200	903	0	0	0	0	0	0	0	603	903	0
2690	2	-5.22038	-10.6636	-43.2925	7721.28	-1654.61	102.951	161.781	121.649	0	0	0	0	0	0	0	200	903	0	0	0	0	0	0	0	603	903	0
2690	3	-3.99968	-11.1214	-46.0391	8270.6	-1654.61	-125.931	164.061	120.357	0	0	0	0	0	0	0	200	903	0	0	0	0	0	0	0	603	903	0
2690	4	-3.54192	-9.29031	-51.2271	8636.81	-2081.86	-125.931	159.36	131.402	0	0	0	0	0	0	0	200	903	0	0	0	0	0	0	0	603	903	0
2690	5	-3.38933	-10.2058	-52.1426	9643.89	-2142.89	194.503	158.903	115.048	0	0	0	0	0	0	0	200	903	0	0	0	0	0	0	0	603	903	0
2690	6	-4.61003	-12.9524	-60.6876	10101.7	-2020.82	-34.3784	166.701	133.547	0	0	0	0	0	0	0	200	903	0	0	0	0	0	0	0	603	903	0
2690	7	-4.61003	-12.1895	-64.6548	11474.9	-2326	240.28	164.024	122.52	0	0	0	0	0	0	0	200	903	0	0	0	0	0	0	0	603	903	0
2690	8	-3.6945	-14.0205	-69.5377	12298.9	-2631.17	560.714	162.162	123.133	0	0	0	0	0	0	0	200	903	0	0	0	0	0	0	0	603	903	0
2690	9	-1.55827	-14.9361	-75.6412	13672.2	-2692.21	698.044	164.408	119.249	0	0	0	0	0	0	0	200	903	0	0	0	0	0	0	0	603	903	0
2691	0	-1.71086	-18.1404	-79.6085	14862.4	-2814.28	881.149	164.649	113.306	0	0	0	0	0	0	0	200	903	0	0	0	0	0	0	0	603	903	0
2691	1	0.425369	-18.4456	-90.9	16235.7	-2814.28	1247.36	169.04	121.389	0	0	0	0	0	0	0	200	903	0	0	0	0	0	0	0	603	903	0
2691	2	0.730544	-19.8189	-93.0362	17242.8	-2875.31	1155.81	169.095	114.666	0	0	0	0	0	0	0	200	903	0	0	0	0	0	0	0	603	903	0
2691	3	1.03572	-19.6663	-102.191	18066.7	-3241.52	1247.36	168.28	123.207	0	0	0	0	0	0	0	200	903	0	0	0	0	0	0	0	603	903	0
2691	4	2.25642	-20.5818	-107.379	19165.4	-3424.63	1842.45	168.107	121.517	0	0	0	0	0	0	0	200	903	0	0	0	0	0	0	0	603	903	0
2691	5	4.39265	-18.4456	-110.736	20355.6	-3180.49	1888.23	171.279	116.18	0	0	0	0	0	0	0	200	903	0	0	0	0	0	0	0	603	903	0
2691	6	6.3763	-18.4456	-117.145	21362.6	-3241.52	1934.01	172.329	117.639	0	0	0	0	0	0	0	200	903	0	0	0	0	0	0	0	603	903	0
2691	7	7.597	-18.1404	-124.774	22278.2	-3424.63	1979.78	172.553	121.452	0	0	0	0	0	0	0	200	903	0	0	0	0	0	0	0	603	903	0
2691	8	6.98665	-16.6145	-129.047	23285.3	-3729.8	1979.78	171.097	119.56	0	0	0	0	0	0	0	200	903	0	0	0	0	0	0	0	603	903	0
2691	9	6.83406	-16.4619	-135.761	24475.4	-4096.02	2071.33	169.829	119.716	0	0	0	0	0	0	0	200	903	0	0	0	0	0	0	0	603	903	0
2692	0	8.20735	-16.3094	-142.169	25299.4	-3729.8	2345.99	173.765	122.048	0	0	0	0	0	0	0	200	903	0	0	0	0	0	0	0	603	903	0
2692	1	11.5643	-16.1568	-146.137	26123.4	-3302.56	2941.09	177.401	121.24	0	0	0	0	0	0	0	200	903	0	0	0	0	0	0	0	603	903	0
2692	2	14.3109	-14.4783	-149.799	26764.3	-3363.59	2986.86	177.546	121.332	0	0	0	0	0	0	0	200	903	0	0	0	0	0	0	0	603	903	0
2692	3	15.8367	-10.511	-156.513	27405.1	-3729.8	2483.32	176.169	124.902	0	0	0	0	0	0	0	200	903	0	0	0	0	0	0	0	603	903	0
2692	4	17.21	-8.98514	-163.227	28595.3	-3912.91	2803.76	176.028	124.812	0	0	0	0	0	0	0	200	903	0	0	0	0	0	0	0	603	903	0
2692	5	17.3626	-9.29031	-167.499	28870	-3607.73	2986.86	178.461	127.641	0	0	0	0	0	0	0	200	903	0	0	0	0	0	0	0	603	903	0
2692	6	16.9049	-5.6282	-172.687	30334.8	-3485.66	2712.2	179.815	124.337	0	0	0	0	0	0	0	200	903	0	0	0	0	0	0	0	603	903	0
2692	7	21.0247	-3.64456	-174.518	31067.2	-3607.73	2757.98	179.327	121.983	0	0	0	0	0	0	0	200	903	0	0	0	0	0	0	0	603	903	0
2692	8	21.3299	-2.57645	-180.011	31708.1	-3790.84	3169.97	178.941	123.855	0	0	0	0	0	0	0	200	903	0	0	0	0	0	0	0	603	903	0
2692	9	21.9403	-1.05057	-183.673	32165.9	-3607.73	2986.86	180.358	124.875	0	0	0	0	0	0	0	200	903	0	0	0	0	0	0	0	603	903	0
2693	0	23.9239	2.30637	-187.641	33356	-3668.77	2849.53	180.448	122.234	0	0	0	0	0	0	0	200	903	0	0	0	0	0	0	0	603	903	0
2693	1	23.9239	4.29001	-193.134	32898.3	-3851.87	3169.97	180.056	129.661	0	0	0	0	0	0	0	200	903	0	0	0	0	0	0	0	603	903	0
2693	2	24.3817	6.42624	-198.017	33813.8	-3973.95	3124.19	179.931	129.238	0	0	0	0	0	0	0	200	903	0	0	0	0	0	0	0	603	903	0
2693	3	26.2127	8.86765	-201.068	33905.4	-4034.98	2895.31	179.932	131.374	0	0	0	0	0	0	0	200	903	0	0	0	0	0	0	0	603	903	0
2693	4	25.755	11.1565	-204.731	34637.8	-4157.05	3124.19	179.695	130.813	0	0	0	0	0	0	0	200	903	0	0	0	0	0	0	0	603	903	0
2693	5	27.8912	13.903	-210.529	36560.4	-3851.87	3124.19	181.704	126.34	0	0	0	0	0	0	0	200	903	0	0	0	0	0	0	0	603	903	0
2693	6	27.4334	16.1919	-214.191	36835.1	-4340.16	2712.2	179.737	128.027	0	0	0	0	0	0	0	200	903	0	0	0	0	0	0	0	603	903	0
2693	7	29.4171	16.9548	-223.041	37659	-4218.09	2941.09	181.088	131.156	0	0	0	0	0	0	0	200	903	0	0	0	0	0	0	0	603	903	0
2693	8	30.4852	19.2436	-227.924	38025.3	-4523.26	3124.19	180.154	133.167	0	0	0	0	0	0	0	200	903	0	0	0	0	0	0	0	603	903	0
2693	9	30.6378	20.0066	-234.943	38940.8	-4523.26	3169.97	180.747	134.254	0	0	0	0	0	0	0	200	903	0	0	0	0	0	0	0	603	903	0
2694	0	30.9429	23.2109	-238.605	39215.4	-4645.33	3078.42	180.531	135.647	0	0	0	0	0	0	0	200	903	0	0	0	0	0	0	0	603	903	0
2694	1	32.3162	25.6523	-245.014	40130.9	-5011.54	2986.86	179.546	136.209	0	0	0	0	0	0	0	200	903	0	0	0	0	0	0	0	603	903	0
2694	2	32.774	29.0092	-253.864	41412.7	-5133.62	2803.76	179.778	136.87	0	0	0	0	0	0	0	200	903	0	0	0	0	0	0	0	603	903	0
2694	3	33.6895	27.7885	-263.935	42145.1	-5377.76	2620.65	179.625	140.32	0	0	0	0	0	0	0	200	903	0	0	0	0	0	0	0	603	903	0
2694	4	33.5369	31.6032	-272.48	43976.2	-5560.86	2712.2	179.592	138.607	0	0	0	0	0	0	0	200	903	0	0	0	0	0	0	0	603	903	0
2694	5	32.6214	33.1291	-280.414	44891.7	-5682.93	2620.65	179.734	139.909	0	0	0	0	0	0	0	200	903	0	0	0	0	0	0	0	603	903	0
2694	6	33.9947	34.1972	-290.18	45532.6	-6110.18	2574.88	178.943	143.088	0	0	0	0	0	0	0	200	903	0	0	0	0	0	0	0	603	903	0
2694	7	33.3844	35.1128	-299.03	46905.9	-6049.14	2529.1	179.771	143.14	0	0	0	0	0	0	0	200	903	0	0	0	0	0	0	0	603	903	0
2694	8	33.5369	36.3335	-307.575	48645.4	-6720.53	2437.55	178.15	141.842	0	0	0	0	0	0	0	200	903	0	0	0	0	0	0	0	603	903	0
2694	9	33.5369	38.1645	-317.951	49103.1	-6964.67	2300.22	178.095	145.564	0	0	0	0	0	0	0	200	903	0	0	0	0	0	0	0	603	903	0
2695	0	32.774	39.9956	-329.242	49835.5	-7086.74	1934.01	178.476	148.636	0	0	0	0	0	0	0	200	903	0	0	0	0	0	0	0	603	903	0
2695	1	32.1637	41.3689	-335.651	51941.3	-7636.06	2208.66	177.25	145.252	0	0	0	0	0	0	0	200	903	0	0	0	0	0	0	0	603	903	0
2695	2	30.3326	42.1318	-349.384	53589.2	-7819.16	1567.79	177.62	146.618	0	0	0	0	0	0	0	200	903	0	0	0	0	0	0	0	603	903	0
2695	3	29.4171	44.7258	-358.234	54596.3	-8124.34	1659.35	177.321	147.596	0	0	0	0	0	0	0	200	903	0	0	0	0	0	0	0	603	903	0
2695	4	28.1964	45.031	-364.032	55786.5	-8734.69	1659.35	176.006	146.754	0	0	0	0	0	0	0	200	903	0	0	0	0	0	0	0	603	903	0
2695	5	28.0438	46.5569	-377.765	56518.9	-8673.65	1567.79	177.04	150.386	0	0	0	0	0	0	0	200	903	0	0	0	0	0	0	0	603	903	0
2695	6	26.6705	47.1672	-388.446	57892.2	-9284	1155.81	176.1	150.965	0	0	0	0	0	0	0	200	903	0	0	0	0	0	0	0	603	903	0
2695	7	25.755	49.9138	-398.517	59082.4	-9589.18	1338.91	175.938	151.744	0	0	0	0	0	0	0	200	903	0	0	0	0	0	0	0	603	903	0
2695	8	23.3136	51.5923	-406.757	59082.4	-9833.32	1293.14	175.825	154.748	0	0	0	0	0	0	0	200	903	0	0	0	0	0	0	0	603	903	0
2695	9	24.0765	51.1345	-412.86	59997.9	-10260.6	835.373	175.148	154.678	0	0	0	0	0	0	0	200	903	0	0	0	0	0	0	0	603	903	0
2696	0	21.0247	55.7121	-422.321	61005	-10321.6	926.926	175.56	155.548	0	0	0	0	0	0	0	200	903	0	0	0	0	0	0	0	603	903	0
2696	1	20.4144	56.9328	-431.781	61829	-10687.8	789.596	175.247	156.805	0	0	0	0	0	0	0	200	903	0	0	0	0	0	0	0	603	903	0
2696	2	20.8721	59.3742	-444.294	63568.4	-10870.9	698.044	175.532	156.922	0	0	0	0	0	0	0	200	903	0	0	0	0	0	0	0	603	903	0
2696	3	17.3626	59.9846	-457.721	64850.2	-12030.6	652.267	173.716	158.319	0	0	0	0	0	0	0	200	903	0	0	0	0	0	0	0	603	903	0
2696	4	12.785	62.5786	-470.233	65491.1	-12518.9	469.162	173.377	160.727	0	0	0	0	0	0	0	200	903	0	0	0	0	0	0	0	603	903	0
2696	5	9.73323	65.1726	-480.304	66040.4	-12640.9	377.609	173.681	162.503	0	0	0	0	0	0	0	200	903	0	0	0	0	0	0	0	603	903	0
2696	6	6.98665	67.4614	-487.934	67230.6	-13434.4	-217.484	172.467	162.214	0	0	0	0	0	0	0	200	903	0	0	0	0	0	0	0	603	903	0
2696	7	4.85042	66.6985	-498.615	68329.2	-13556.5	-217.484	172.812	162.962	0	0	0	0	0	0	0	200	903	0	0	0	0	0	0	0	603	903	0
2696	8	3.47713	71.8864	-508.075	68146.1	-14044.7	-721.024	172.357	165.874	0	0	0	0	0	0	0	200	903	0	0	0	0	0	0	0	603	903	0
2696	9	-0.337571	76.7693	-519.062	68878.5	-14716.1	-1087.24	171.649	167.302	0	0	0	0	0	0	0	200	903	0	0	0	0	0	0	0	603	903	0
2697	0	-3.38933	80.7365	-526.081	69427.9	-14838.2	-1728.1	171.795	168.028	0	0	0	0	0	0	0	200	903	0	0	0	0	0	0	0	603	903	0
2697	1	-5.52556	83.7883	-535.236	70068.7	-15265.4	-1773.88	171.479	169.088	0	0	0	0	0	0	0	200	903	0	0	0	0	0	0	0	603	903	0
2697	2	-7.05144	87.2978	-540.729	70892.7	-15814.8	-1728.1	170.753	168.894	0	0	0	0	0	0	0	200	903	0	0	0	0	0	0	0	603	903	0
2697	3	-6.44109	90.8073	-545.002	71167.3	-15997.9	-2323.2	170.646	169.418	0	0	0	0	0	0	0	200	903	0	0	0	0	0	0	0	603	903	0
2697	4	-6.2885	93.5539	-554.462	72082.9	-16303	-2735.18	170.597	169.995	0	0	0	0	0	0	0	200	903	0	0	0	0	0	0	0	603	903	0
2697	5	-5.98332	94.9272	-562.091	72998.4	-16486.2	-2872.51	170.67	170.131	0	0	0	0	0	0	0	200	903	0	0	0	0	0	0	0	603	903	0
2697	6	-6.59367	97.3686	-569.721	72998.4	-16425.1	-2552.08	171.17	171.87	0	0	0	0	0	0	0	200	903	0	0	0	0	0	0	0	603	903	0
2697	7	-6.74626	99.1997	-573.688	73181.5	-16852.4	-2964.07	170.625	172.437	0	0	0	0	0	0	0	200	903	0	0	0	0	0	0	0	603	903	0
2697	8	-5.98332	99.6574	-577.961	72723.8	-17035.5	-2964.07	170.525	174.172	0	0	0	0	0	0	0	200	903	0	0	0	0	0	0	0	603	903	0
2697	9	-5.67815	100.115	-579.486	73181.5	-16974.4	-2597.85	170.708	173.713	0	0	0	0	0	0	0	200	903	0	0	0	0	0	0	0	603	903	0
2698	0	-4.45744	100.878	-583.454	74005.5	-16852.4	-3009.84	171.116	173.16	0	0	0	0	0	0	0	200	903	0	0	0	0	0	0	0	603	903	0
2698	1	-3.38933	100.42	-588.031	73639.2	-17096.5	-2964.07	170.926	174.77	0	0	0	0	0	0	0	200	903	0	0	0	0	0	0	0	603	903	0
2698	2	-2.62639	97.3686	-591.999	73547.7	-17096.5	-2918.29	171.121	175.764	0	0	0	0	0	0	0	200	903	0	0	0	0	0	0	0	603	903	0
2698	3	-1.55827	97.6738	-590.778	74737.9	-17096.5	-3101.39	171.061	173.492	0	0	0	0	0	0	0	200	903	0	0	0	0	0	0	0	603	903	0
2698	4	-1.10051	97.0634	-598.407	74280.1	-16730.3	-3009.84	172.042	175.87	0	0	0	0	0	0	0	200	903	0	0	0	0	0	0	0	603	903	0
2698	5	1.49348	96.4531	-597.797	74737.9	-17218.6	-3009.84	171.197	174.978	0	0	0	0	0	0	0	200	903	0	0	0	0	0	0	0	603	903	0
2698	6	-0.337571	94.7746	-599.628	74646.3	-17218.6	-2918.29	171.285	175.512	0	0	0	0	0	0	0	200	903	0	0	0	0	0	0	0	603	903	0
2698	7	1.64607	95.2324	-602.375	74005.5	-17218.6	-2872.51	171.416	177.144	0	0	0	0	0	0	0	200	903	0	0	0	0	0	0	0	603	903	0
2698	8	3.93489	94.4695	-603.9	73730.8	-17218.6	-3101.39	171.488	177.909	0	0	0	0	0	0	0	200	903	0	0	0	0	0	0	0	603	903	0
2698	9	2.71419	95.8427	-604.511	73913.9	-17035.5	-2872.51	171.819	177.729	0	0	0	0	0	0	0	200	903	0	0	0	0	0	0	0	603	903	0
2699	0	1.3409	93.4013	-606.647	73913.9	-17157.5	-3238.72	171.717	178.16	0	0	0	0	0	0	0	200	903	0	0	0	0	0	0	0	603	903	0
2699	1	3.32454	95.8427	-606.342	74463.2	-17157.5	-3055.62	171.703	177.193	0	0	0	0	0	0	0	200	903	0	0	0	0	0	0	0	603	903	0
2699	2	1.49348	96.9109	-606.037	74188.6	-17279.6	-3192.95	171.488	177.584	0	0	0	0	0	0	0	200	903	0	0	0	0	0	0	0	603	903	0
2699	3	1.64607	95.8427	-607.563	73273	-17401.7	-3101.39	171.358	179.398	0	0	0	0	0	0	0	200	903	0	0	0	0	0	0	0	603	903	0
2699	4	1.49348	96.4531	-610.309	73547.7	-17218.6	-3101.39	171.787	179.491	0	0	0	0	0	0	0	200	903	0	0	0	0	0	0	0	603	903	0
2699	5	-0.0323951	96.3005	-610.919	73639.2	-17401.7	-3467.61	171.516	179.462	0	0	0	0	0	0	0	200	903	0	0	0	0	0	0	0	603	903	0
2699	6	-2.62639	98.5893	-613.666	72540.6	-17462.7	-3101.39	171.544	181.791	0	0	0	0	0	0	0	200	903	0	0	0	0	0	0	0	603	903	0
2699	7	-2.32121	98.2841	-611.225	72266	-17767.9	-2918.29	170.931	181.769	0	0	0	0	0	0	0	200	903	0	0	0	0	0	0	0	603	903	0
2699	8	-5.22038	99.6574	-612.751	72998.4	-17890	-3604.93	170.804	180.868	0	0	0	0	0	0	0	200	903	0	0	0	0	0	0	0	603	903	0
2699	9	-5.0678	99.9626	-614.276	72082.9	-17767.9	-3833.82	171.075	182.654	0	0	0	0	0	0	0	200	903	0	0	0	0	0	0	0	603	903	0
2700	0	-6.13591	99.3523	-617.633	72266	-18073.1	-3925.37	170.738	182.995	0	0	0	0	0	0	0	200	903	0	0	0	0	0	0	0	603	903	0
2700	1	-8.72991	101.183	-619.464	72723.8	-18195.1	-4154.25	170.628	182.602	0	0	0	0	0	0	0	200	903	0	0	0	0	0	0	0	603	903	0
2700	2	-11.0187	100.115	-620.99	72357.5	-18683.4	-4154.25	169.914	183.48	0	0	0	0	0	0	0	200	903	0	0	0	0	0	0	0	603	903	0
2700	3	-13.3075	101.641	-622.516	72540.6	-18622.4	-4200.03	170.085	183.472	0	0	0	0	0	0	0	200	903	0	0	0	0	0	0	0	603	903	0
2700	4	-15.4438	102.251	-619.77	72357.5	-18744.5	-4612.02	169.756	183.251	0	0	0	0	0	0	0	200	903	0	0	0	0	0	0	0	603	903	0
2700	5	-14.5282	103.014	-625.263	71808.2	-18622.4	-4840.9	170.217	185.155	0	0	0	0	0	0	0	200	903	0	0	0	0	0	0	0	603	903	0
2700	6	-16.5119	103.472	-629.23	71808.2	-19171.7	-4795.12	169.532	185.879	0	0	0	0	0	0	0	200	903	0	0	0	0	0	0	0	603	903	0
2700	7	-16.8171	104.845	-629.84	71258.9	-19293.8	-4566.24	169.367	186.862	0	0	0	0	0	0	0	200	903	0	0	0	0	0	0	0	603	903	0
2700	8	-20.174	104.845	-634.418	71991.3	-19415.8	-5115.56	169.396	186.524	0	0	0	0	0	0	0	200	903	0	0	0	0	0	0	0	603	903	0
2700	9	-20.9369	105.761	-634.723	72174.4	-19415.8	-5435.99	169.411	186.29	0	0	0	0	0	0	0	200	903	0	0	0	0	0	0	0	603	903	0
2701	0	-20.4792	106.219	-635.028	72632.2	-19476.9	-5390.21	169.329	185.624	0	0	0	0	0	0	0	200	903	0	0	0	0	0	0	0	603	903	0
2701	1	-21.3947	105.608	-638.996	72082.9	-19965.2	-5619.1	168.755	187.194	0	0	0	0	0	0	0	200	903	0	0	0	0	0	0	0	603	903	0
2701	2	-21.2421	105.914	-642.353	72632.2	-19843.1	-5435.99	169.109	186.928	0	0	0	0	0	0	0	200	903	0	0	0	0	0	0	0	603	903	0
2701	3	-22.768	106.371	-643.573	71899.8	-19904.1	-5710.65	169.072	188.28	0	0	0	0	0	0	0	200	903	0	0	0	0	0	0	0	603	903	0
2701	4	-22.9206	106.371	-646.625	71991.3	-19904.1	-5893.75	169.218	188.666	0	0	0	0	0	0	0	200	903	0	0	0	0	0	0	0	603	903	0
2701	5	-23.2258	107.134	-646.015	71258.9	-20026.2	-5939.53	169	189.695	0	0	0	0	0	0	0	200	903	0	0	0	0	0	0	0	603	903	0
2701	6	-22.768	107.134	-649.677	71899.8	-20453.4	-6031.08	168.518	189.33	0	0	0	0	0	0	0	200	903	0	0	0	0	0	0	0	603	903	0
2701	7	-22.9206	106.829	-649.677	72449.1	-20209.3	-5985.31	168.893	188.484	0	0	0	0	0	0	0	200	903	0	0	0	0	0	0	0	603	903	0
2701	8	-23.3783	106.982	-652.423	72174.4	-19843.1	-6076.86	169.586	189.375	0	0	0	0	0	0	0	200	903	0	0	0	0	0	0	0	603	903	0
2701	9	-25.2094	106.219	-653.339	71991.3	-20270.3	-6305.74	168.974	189.81	0	0	0	0	0	0	0	200	903	0	0	0	0	0	0	0	603	903	0
2702	0	-25.2094	106.524	-657.001	71808.2	-20270.3	-6305.74	169.147	190.703	0	0	0	0	0	0	0	200	903	0	0	0	0	0	0	0	603	903	0
2702	1	-24.9042	107.134	-657.917	71899.8	-20514.5	-6259.96	168.819	190.716	0	0	0	0	0	0	0	200	903	0	0	0	0	0	0	0	603	903	0
2702	2	-25.362	106.829	-659.137	71808.2	-20575.5	-6305.74	168.784	191.057	0	0	0	0	0	0	0	200	903	0	0	0	0	0	0	0	603	903	0
2702	3	-24.1413	106.676	-661.579	71258.9	-20575.5	-6443.07	168.899	192.29	0	0	0	0	0	0	0	200	903	0	0	0	0	0	0	0	603	903	0
2702	4	-25.0568	107.439	-664.63	71716.6	-20453.4	-6534.62	169.226	192.095	0	0	0	0	0	0	0	200	903	0	0	0	0	0	0	0	603	903	0
2702	5	-26.2775	107.745	-664.02	71808.2	-20514.5	-6626.18	169.106	191.858	0	0	0	0	0	0	0	200	903	0	0	0	0	0	0	0	603	903	0
2702	6	-27.193	107.439	-668.598	72174.4	-21063.8	-6305.74	168.496	192.051	0	0	0	0	0	0	0	200	903	0	0	0	0	0	0	0	603	903	0
2702	7	-27.956	106.982	-669.513	71350.4	-21002.8	-6305.74	168.63	193.429	0	0	0	0	0	0	0	200	903	0	0	0	0	0	0	0	603	903	0
2702	8	-28.7189	107.592	-668.903	71899.8	-20758.6	-6351.52	168.966	192.511	0	0	0	0	0	0	0	200	903	0	0	0	0	0	0	0	603	903	0
2702	9	-27.8034	107.287	-671.649	72174.4	-21063.8	-6626.18	168.639	192.542	0	0	0	0	0	0	0	200	903	0	0	0	0	0	0	0	603	903	0
2703	0	-29.0241	107.897	-676.837	71258.9	-21246.9	-6580.4	168.609	194.718	0	0	0	0	0	0	0	200	903	0	0	0	0	0	0	0	603	903	0
2703	1	-29.3293	108.508	-676.837	72082.9	-21430	-6351.52	168.338	193.501	0	0	0	0	0	0	0	200	903	0	0	0	0	0	0	0	603	903	0
2703	2	-31.0077	108.813	-680.805	71442	-21185.9	-6351.52	168.881	195.062	0	0	0	0	0	0	0	200	903	0	0	0	0	0	0	0	603	903	0
2703	3	-30.2448	107.745	-680.805	71716.6	-21307.9	-6259.96	168.702	194.659	0	0	0	0	0	0	0	200	903	0	0	0	0	0	0	0	603	903	0
2703	4	-31.9233	108.508	-683.551	72357.5	-21430	-6488.85	168.649	194.145	0	0	0	0	0	0	0	200	903	0	0	0	0	0	0	0	603	903	0
2703	5	-30.8551	108.355	-684.162	72082.9	-21552.1	-6534.62	168.499	194.641	0	0	0	0	0	0	0	200	903	0	0	0	0	0	0	0	603	903	0
2703	6	-30.8551	108.05	-688.129	72174.4	-21613.1	-6626.18	168.591	195.115	0	0	0	0	0	0	0	200	903	0	0	0	0	0	0	0	603	903	0
2703	7	-31.1603	108.355	-690.57	72174.4	-21735.2	-6397.29	168.526	195.486	0	0	0	0	0	0	0	200	903	0	0	0	0	0	0	0	603	903	0
2703	8	-32.5336	106.982	-691.791	71625.1	-21674.1	-6397.29	168.67	196.464	0	0	0	0	0	0	0	200	903	0	0	0	0	0	0	0	603	903	0
2703	9	-30.7026	107.287	-693.317	72082.9	-21369	-6534.62	169.179	196.032	0	0	0	0	0	0	0	200	903	0	0	0	0	0	0	0	603	903	0
2704	0	-32.6862	106.676	-693.622	71716.6	-21979.3	-6534.62	168.312	196.606	0	0	0	0	0	0	0	200	903	0	0	0	0	0	0	0	603	903	0
2704	1	-30.8551	106.524	-695.758	71533.5	-21796.2	-6443.07	168.673	197.186	0	0	0	0	0	0	0	200	903	0	0	0	0	0	0	0	603	903	0
2704	2	-30.55	106.066	-695.453	72632.2	-21552.1	-6397.29	169.01	195.561	0	0	0	0	0	0	0	200	903	0	0	0	0	0	0	0	603	903	0
2704	3	-31.4655	105.303	-700.336	72357.5	-21674.1	-6305.74	169.052	196.682	0	0	0	0	0	0	0	200	903	0	0	0	0	0	0	0	603	903	0
2704	4	-31.0077	104.235	-701.252	71625.1	-21613.1	-6214.19	169.179	197.861	0	0	0	0	0	0	0	200	903	0	0	0	0	0	0	0	603	903	0
2704	5	-31.4655	103.472	-703.083	71991.3	-21918.3	-6397.29	168.825	197.606	0	0	0	0	0	0	0	200	903	0	0	0	0	0	0	0	603	903	0
2704	6	-30.55	103.014	-703.693	71808.2	-21674.1	-6031.08	169.199	197.955	0	0	0	0	0	0	0	200	903	0	0	0	0	0	0	0	603	903	0
2704	7	-29.9396	102.557	-703.998	71350.4	-21613.1	-6168.41	169.299	198.65	0	0	0	0	0	0	0	200	903	0	0	0	0	0	0	0	603	903	0
2704	8	-29.1767	102.862	-706.134	71991.3	-21369	-6351.52	169.738	198.049	0	0	0	0	0	0	0	200	903	0	0	0	0	0	0	0	603	903	0
2704	9	-29.6344	101.794	-709.796	71533.5	-21552.1	-6214.19	169.636	199.22	0	0	0	0	0	0	0	200	903	0	0	0	0	0	0	0	603	903	0
2705	0	-28.4137	101.183	-707.965	71899.8	-21185.9	-5847.98	170.075	198.442	0	0	0	0	0	0	0	200	903	0	0	0	0	0	0	0	603	903	0
2705	1	-29.4819	101.336	-712.848	72174.4	-21735.2	-5756.42	169.509	198.752	0	0	0	0	0	0	0	200	903	0	0	0	0	0	0	0	603	903	0
2705	2	-27.4982	99.81	-712.543	72082.9	-21369	-5985.31	170.01	198.837	0	0	0	0	0	0	0	200	903	0	0	0	0	0	0	0	603	903	0
2705	3	-28.5663	99.3523	-714.984	72357.5	-21369	-5664.87	170.113	198.798	0	0	0	0	0	0	0	200	903	0	0	0	0	0	0	0	603	903	0
2705	4	-27.193	97.3686	-715.29	71991.3	-21735.2	-5710.65	169.613	199.354	0	0	0	0	0	0	0	200	903	0	0	0	0	0	0	0	603	903	0
2705	5	-25.9723	98.4367	-720.172	71442	-21613.1	-5207.11	169.989	200.799	0	0	0	0	0	0	0	200	903	0	0	0	0	0	0	0	603	903	0
2705	6	-26.4301	96.4531	-720.783	71533.5	-21552.1	-5161.33	170.099	200.756	0	0	0	0	0	0	0	200	903	0	0	0	0	0	0	0	603	903	0
2705	7	-27.3456	97.979	-722.919	71716.6	-21185.9	-5298.66	170.694	200.796	0	0	0	0	0	0	0	200	903	0	0	0	0	0	0	0	603	903	0
2705	8	-26.8879	95.6902	-724.445	71899.8	-21613.1	-4978.23	170.166	200.752	0	0	0	0	0	0	0	200	903	0	0	0	0	0	0	0	603	903	0
2705	9	-26.8879	96.9109	-725.971	71899.8	-21491	-5161.33	170.397	200.961	0	0	0	0	0	0	0	200	903	0	0	0	0	0	0	0	603	903	0
2706	0	-25.8197	94.4695	-727.802	72174.4	-21246.9	-4840.9	170.807	200.832	0	0	0	0	0	0	0	200	903	0	0	0	0	0	0	0	603	903	0
2706	1	-24.599	95.385	-728.412	72357.5	-21430	-4749.34	170.58	200.664	0	0	0	0	0	0	0	200	903	0	0	0	0	0	0	0	603	903	0
2706	2	-24.2939	94.7746	-733.295	72449.1	-21307.9	-4657.79	170.942	201.201	0	0	0	0	0	0	0	200	903	0	0	0	0	0	0	0	603	903	0
2706	3	-24.2939	94.9272	-736.957	71899.8	-21185.9	-4703.57	171.252	202.437	0	0	0	0	0	0	0	200	903	0	0	0	0	0	0	0	603	903	0
2706	4	-24.2939	93.7065	-737.873	72082.9	-21430	-4520.46	170.957	202.31	0	0	0	0	0	0	0	200	903	0	0	0	0	0	0	0	603	903	0
2706	5	-21.3947	94.3169	-737.567	72357.5	-21063.8	-4337.36	171.442	201.897	0	0	0	0	0	0	0	200	903	0	0	0	0	0	0	0	603	903	0
2706	6	-23.3783	93.5539	-737.873	72449.1	-21552.1	-3696.49	170.792	201.814	0	0	0	0	0	0	0	200	903	0	0	0	0	0	0	0	603	903	0
2706	7	-21.0895	91.8755	-740.924	72266	-20819.6	-4062.7	171.9	202.465	0	0	0	0	0	0	0	200	903	0	0	0	0	0	0	0	603	903	0
2706	8	-20.9369	92.9436	-743.976	72906.8	-21002.8	-4108.48	171.77	202.004	0	0	0	0	0	0	0	200	903	0	0	0	0	0	0	0	603	903	0
2706	9	-20.4792	91.7229	-744.892	73090	-21307.9	-3925.37	171.395	201.878	0	0	0	0	0	0	0	200	903	0	0	0	0	0	0	0	603	903	0
2707	0	-21.0895	89.5866	-747.333	72998.4	-21185.9	-3696.49	171.651	202.322	0	0	0	0	0	0	0	200	903	0	0	0	0	0	0	0	603	903	0
2707	1	-18.9533	87.1452	-748.554	73090	-20819.6	-3101.39	172.187	202.358	0	0	0	0	0	0	0	200	903	0	0	0	0	0	0	0	603	903	0
2707	2	-20.174	87.9082	-749.774	72449.1	-20697.6	-3192.95	172.395	203.372	0	0	0	0	0	0	0	200	903	0	0	0	0	0	0	0	603	903	0
2707	3	-18.3429	86.2297	-750.995	72540.6	-20514.5	-3330.28	172.684	203.407	0	0	0	0	0	0	0	200	903	0	0	0	0	0	0	0	603	903	0
2707	4	-16.5119	87.4504	-753.131	72540.6	-21063.8	-3284.5	172.032	203.681	0	0	0	0	0	0	0	200	903	0	0	0	0	0	0	0	603	903	0
2707	5	-16.8171	85.3142	-755.878	72723.8	-20941.7	-3101.39	172.295	203.789	0	0	0	0	0	0	0	200	903	0	0	0	0	0	0	0	603	903	0
2707	6	-18.6481	85.6194	-757.709	73273	-20453.4	-2277.42	173.006	203.297	0	0	0	0	0	0	0	200	903	0	0	0	0	0	0	0	603	903	0
2707	7	-15.4438	82.5676	-756.183	73090	-20392.4	-2780.96	173.032	203.344	0	0	0	0	0	0	0	200	903	0	0	0	0	0	0	0	603	903	0
2707	8	-16.9697	83.6357	-757.709	72815.3	-20148.3	-2918.29	173.409	203.901	0	0	0	0	0	0	0	200	903	0	0	0	0	0	0	0	603	903	0
2707	9	-15.2912	80.8891	-758.014	72906.8	-20331.4	-2597.85	173.178	203.819	0	0	0	0	0	0	0	200	903	0	0	0	0	0	0	0	603	903	0
2708	0	-14.986	82.1098	-759.235	72082.9	-20758.6	-2506.3	172.659	205.059	0	0	0	0	0	0	0	200	903	0	0	0	0	0	0	0	603	903	0
2708	1	-14.8334	81.1943	-760.456	72082.9	-20453.4	-2094.31	173.104	205.211	0	0	0	0	0	0	0	200	903	0	0	0	0	0	0	0	603	903	0
2708	2	-15.1386	81.3469	-761.676	72174.4	-20209.3	-2231.64	173.467	205.243	0	0	0	0	0	0	0	200	903	0	0	0	0	0	0	0	603	903	0
2708	3	-14.3757	78.9055	-759.845	72082.9	-20026.2	-2185.87	173.644	205.135	0	0	0	0	0	0	0	200	903	0	0	0	0	0	0	0	603	903	0
2708	4	-15.1386	79.9736	-758.93	72266	-20392.4	-2185.87	173.13	204.779	0	0	0	0	0	0	0	200	903	0	0	0	0	0	0	0	603	903	0
2708	5	-13.9179	79.821	-759.54	72540.6	-20514.5	-1819.66	172.991	204.494	0	0	0	0	0	0	0	200	903	0	0	0	0	0	0	0	603	903	0
2708	6	-12.0868	77.99	-760.456	71991.3	-20331.4	-1819.66	173.264	205.331	0	0	0	0	0	0	0	200	903	0	0	0	0	0	0	0	603	903	0
2708	7	-13.4601	77.5322	-761.676	71899.8	-19904.1	-1773.88	173.868	205.603	0	0	0	0	0	0	0	200	903	0	0	0	0	0	0	0	603	903	0
2708	8	-14.8334	76.4641	-760.456	71075.8	-19782.1	-1956.99	173.987	206.535	0	0	0	0	0	0	0	200	903	0	0	0	0	0	0	0	603	903	0
2708	9	-14.2231	75.5486	-760.15	70801.1	-20087.2	-1865.43	173.575	206.859	0	0	0	0	0	0	0	200	903	0	0	0	0	0	0	0	603	903	0
2709	0	-14.2231	75.5486	-756.488	70526.5	-20087.2	-1956.99	173.447	206.771	0	0	0	0	0	0	0	200	903	0	0	0	0	0	0	0	603	903	0
2709	1	-13.0024	75.2434	-756.183	70251.8	-19843.1	-1361.89	173.759	207.097	0	0	0	0	0	0	0	200	903	0	0	0	0	0	0	0	603	903	0
2709	2	-13.3075	73.2597	-753.742	70434.9	-19415.8	-1316.12	174.241	206.553	0	0	0	0	0	0	0	200	903	0	0	0	0	0	0	0	603	903	0
2709	3	-12.6972	73.4123	-754.352	70618	-19660	-1545	173.938	206.386	0	0	0	0	0	0	0	200	903	0	0	0	0	0	0	0	603	903	0
2709	4	-13.6127	72.6494	-753.131	70434.9	-19660	-1728.1	173.896	206.477	0	0	0	0	0	0	0	200	903	0	0	0	0	0	0	0	603	903	0
2709	5	-14.5282	71.7339	-750.385	69702.5	-20026.2	-1499.22	173.312	207.111	0	0	0	0	0	0	0	200	903	0	0	0	0	0	0	0	603	903	0
2709	6	-14.0705	71.2761	-747.943	69794.1	-19354.8	-1499.22	174.123	206.685	0	0	0	0	0	0	0	200	903	0	0	0	0	0	0	0	603	903	0
2709	7	-13.9179	70.0554	-742.145	69519.4	-19537.9	-1270.34	173.674	206.326	0	0	0	0	0	0	0	200	903	0	0	0	0	0	0	0	603	903	0
2709	8	-12.5446	69.1399	-743.671	68603.9	-19598.9	-1270.34	173.646	207.75	0	0	0	0	0	0	0	200	903	0	0	0	0	0	0	0	603	903	0
2709	9	-11.3239	69.1399	-744.281	68603.9	-19415.8	-1087.24	173.913	207.825	0	0	0	0	0	0	0	200	903	0	0	0	0	0	0	0	603	903	0
2710	0	-12.0868	68.6821	-740.924	67963	-19354.8	-1270.34	173.877	208.273	0	0	0	0	0	0	0	200	903	0	0	0	0	0	0	0	603	903	0
2710	1	-12.6972	67.1562	-738.483	67871.4	-18927.6	-995.682	174.37	208.093	0	0	0	0	0	0	0	200	903	0	0	0	0	0	0	0	603	903	0
2710	2	-12.5446	67.1562	-734.821	67779.9	-18866.5	-904.13	174.325	207.76	0	0	0	0	0	0	0	200	903	0	0	0	0	0	0	0	603	903	0
2710	3	-13.0024	65.9355	-732.074	67779.9	-18988.6	-766.8	174.062	207.414	0	0	0	0	0	0	0	200	903	0	0	0	0	0	0	0	603	903	0
2710	4	-12.6972	64.8674	-725.971	67230.6	-19049.6	-1041.46	173.76	207.392	0	0	0	0	0	0	0	200	903	0	0	0	0	0	0	0	603	903	0
2710	5	-11.1713	63.3415	-726.581	66406.6	-18988.6	-1087.24	173.866	208.604	0	0	0	0	0	0	0	200	903	0	0	0	0	0	0	0	603	903	0
2710	6	-11.3239	62.8838	-724.75	65491.1	-18622.4	-812.577	174.305	209.636	0	0	0	0	0	0	0	200	903	0	0	0	0	0	0	0	603	903	0
2710	7	-11.1713	62.426	-721.698	65216.4	-18683.4	-766.8	174.112	209.635	0	0	0	0	0	0	0	200	903	0	0	0	0	0	0	0	603	903	0
2710	8	-12.392	62.1208	-719.562	64941.7	-18683.4	-675.248	174.035	209.748	0	0	0	0	0	0	0	200	903	0	0	0	0	0	0	0	603	903	0
2710	9	-12.392	60.9001	-711.933	64484	-18439.3	-949.906	174.1	209.424	0	0	0	0	0	0	0	200	903	0	0	0	0	0	0	0	603	903	0
2711	0	-11.9343	61.0527	-710.712	64941.7	-18500.3	-766.8	173.969	208.624	0	0	0	0	0	0	0	200	903	0	0	0	0	0	0	0	603	903	0
2711	1	-11.7817	60.2898	-706.745	63934.7	-18317.2	-766.8	174.082	209.536	0	0	0	0	0	0	0	200	903	0	0	0	0	0	0	0	603	903	0
2711	2	-11.4765	58.6113	-705.524	63202.2	-18073.1	-583.695	174.383	210.418	0	0	0	0	0	0	0	200	903	0	0	0	0	0	0	0	603	903	0
2711	3	-11.1713	58.0009	-702.777	63019.1	-18439.3	-766.8	173.762	210.328	0	0	0	0	0	0	0	200	903	0	0	0	0	0	0	0	603	903	0
2711	4	-10.561	56.9328	-699.726	62378.3	-18073.1	-492.142	174.171	210.853	0	0	0	0	0	0	0	200	903	0	0	0	0	0	0	0	603	903	0
2711	5	-12.0868	56.6277	-696.674	61645.9	-18439.3	-492.142	173.532	211.514	0	0	0	0	0	0	0	200	903	0	0	0	0	0	0	0	603	903	0
2711	6	-12.6972	54.7966	-691.486	61188.1	-17706.9	-354.813	174.393	211.512	0	0	0	0	0	0	0	200	903	0	0	0	0	0	0	0	603	903	0
2711	7	-12.0868	55.1018	-688.434	60913.4	-17828.9	-400.589	174.102	211.519	0	0	0	0	0	0	0	200	903	0	0	0	0	0	0	0	603	903	0
2711	8	-10.4084	55.1018	-686.298	60455.7	-18134.1	-354.813	173.577	211.91	0	0	0	0	0	0	0	200	903	0	0	0	0	0	0	0	603	903	0
2711	9	-11.1713	54.7966	-682.941	59814.8	-18195.1	-354.813	173.358	212.416	0	0	0	0	0	0	0	200	903	0	0	0	0	0	0	0	603	903	0
2712	0	-10.8661	54.0337	-680.805	60089.4	-17706.9	-492.142	173.991	211.738	0	0	0	0	0	0	0	200	903	0	0	0	0	0	0	0	603	903	0
2712	1	-11.1713	52.6604	-677.448	59448.6	-18012	-492.142	173.412	212.246	0	0	0	0	0	0	0	200	903	0	0	0	0	0	0	0	603	903	0
2712	2	-12.8498	51.7448	-674.396	59540.1	-17767.9	-309.037	173.654	211.713	0	0	0	0	0	0	0	200	903	0	0	0	0	0	0	0	603	903	0
2712	3	-12.2394	51.5923	-671.344	58716.2	-17706.9	-400.589	173.625	212.539	0	0	0	0	0	0	0	200	903	0	0	0	0	0	0	0	603	903	0
2712	4	-12.8498	50.8293	-667.072	58075.3	-17706.9	-217.484	173.456	212.94	0	0	0	0	0	0	0	200	903	0	0	0	0	0	0	0	603	903	0
2712	5	-13.155	50.6767	-662.189	57159.8	-17951	-537.919	172.891	213.681	0	0	0	0	0	0	0	200	903	0	0	0	0	0	0	0	603	903	0
2712	6	-12.0868	50.0664	-661.579	57434.4	-17462.7	-537.919	173.604	213.186	0	0	0	0	0	0	0	200	903	0	0	0	0	0	0	0	603	903	0
2712	7	-10.561	49.7612	-658.832	57526	-17828.9	-446.366	172.939	212.685	0	0	0	0	0	0	0	200	903	0	0	0	0	0	0	0	603	903	0
2712	8	-12.0868	49.3034	-657.917	57068.2	-17890	-537.919	172.808	213.259	0	0	0	0	0	0	0	200	903	0	0	0	0	0	0	0	603	903	0
2712	9	-13.0024	48.2353	-654.56	56702	-17584.8	-675.248	173.135	213.374	0	0	0	0	0	0	0	200	903	0	0	0	0	0	0	0	603	903	0
2713	0	-13.6127	47.9301	-652.729	56702	-17706.9	-766.8	172.873	213.131	0	0	0	0	0	0	0	200	903	0	0	0	0	0	0	0	603	903	0
2713	1	-13.7653	47.1672	-647.541	56335.8	-17584.8	-721.024	172.844	213	0	0	0	0	0	0	0	200	903	0	0	0	0	0	0	0	603	903	0
2713	2	-14.0705	46.4043	-642.047	55054.1	-17523.8	-721.024	172.706	214.252	0	0	0	0	0	0	0	200	903	0	0	0	0	0	0	0	603	903	0
2713	3	-13.3075	46.862	-641.742	55145.6	-17890	-675.248	172.123	214.069	0	0	0	0	0	0	0	200	903	0	0	0	0	0	0	0	603	903	0
2713	4	-13.3075	46.4043	-640.522	54413.2	-17890	-766.8	172.07	215.049	0	0	0	0	0	0	0	200	903	0	0	0	0	0	0	0	603	903	0
2713	5	-14.2231	43.1999	-638.385	54321.6	-17462.7	-629.471	172.645	214.908	0	0	0	0	0	0	0	200	903	0	0	0	0	0	0	0	603	903	0
2713	6	-15.2912	44.7258	-635.334	54138.5	-17584.8	-949.906	172.322	214.787	0	0	0	0	0	0	0	200	903	0	0	0	0	0	0	0	603	903	0
2713	7	-15.1386	43.9629	-632.892	53863.9	-17828.9	-721.024	171.829	214.893	0	0	0	0	0	0	0	200	903	0	0	0	0	0	0	0	603	903	0
2713	8	-15.5964	43.1999	-628.315	53497.6	-18073.1	-721.024	171.236	214.855	0	0	0	0	0	0	0	200	903	0	0	0	0	0	0	0	603	903	0
2713	9	-14.3757	42.7422	-627.094	53497.6	-17828.9	-949.906	171.569	214.69	0	0	0	0	0	0	0	200	903	0	0	0	0	0	0	0	603	903	0
2714	0	-15.2912	41.674	-624.958	52673.7	-17401.7	-629.471	172.155	215.716	0	0	0	0	0	0	0	200	903	0	0	0	0	0	0	0	603	903	0
2714	1	-14.986	41.2163	-623.127	51941.3	-17645.8	-904.13	171.682	216.644	0	0	0	0	0	0	0	200	903	0	0	0	0	0	0	0	603	903	0
2714	2	-15.7489	41.8266	-621.295	51666.6	-17767.9	-766.8	171.402	216.841	0	0	0	0	0	0	0	200	903	0	0	0	0	0	0	0	603	903	0
2714	3	-17.7326	40.9111	-617.939	50934.2	-17706.9	-721.024	171.345	217.574	0	0	0	0	0	0	0	200	903	0	0	0	0	0	0	0	603	903	0
2714	4	-15.5964	40.4533	-614.887	50842.6	-17462.7	-1087.24	171.6	217.314	0	0	0	0	0	0	0	200	903	0	0	0	0	0	0	0	603	903	0
2714	5	-18.6481	39.08	-612.751	50934.2	-18012	-766.8	170.605	216.876	0	0	0	0	0	0	0	200	903	0	0	0	0	0	0	0	603	903	0
2714	6	-17.2748	39.08	-610.309	50659.5	-17890	-858.353	170.687	216.994	0	0	0	0	0	0	0	200	903	0	0	0	0	0	0	0	603	903	0
2714	7	-18.0378	37.5542	-608.173	50568	-17645.8	-904.13	170.986	216.853	0	0	0	0	0	0	0	200	903	0	0	0	0	0	0	0	603	903	0
2714	8	-18.6481	36.6386	-607.868	50110.2	-17951	-1087.24	170.469	217.564	0	0	0	0	0	0	0	200	903	0	0	0	0	0	0	0	603	903	0
2714	9	-17.4274	36.1809	-603.595	50110.2	-17951	-949.906	170.26	216.98	0	0	0	0	0	0	0	200	903	0	0	0	0	0	0	0	603	903	0
2715	0	-19.7162	35.7231	-603.595	49011.6	-17828.9	-721.024	170.462	218.801	0	0	0	0	0	0	0	200	903	0	0	0	0	0	0	0	603	903	0
2715	1	-20.174	35.2654	-600.544	48553.8	-18134.1	-904.13	169.804	219.15	0	0	0	0	0	0	0	200	903	0	0	0	0	0	0	0	603	903	0
2715	2	-20.7843	35.2654	-598.407	48462.3	-18012	-949.906	169.9	219.015	0	0	0	0	0	0	0	200	903	0	0	0	0	0	0	0	603	903	0
2715	3	-19.2585	35.2654	-595.966	47729.8	-18256.2	-995.682	169.367	219.912	0	0	0	0	0	0	0	200	903	0	0	0	0	0	0	0	603	903	0
2715	4	-20.0214	34.655	-595.661	47638.3	-18195.1	-1224.56	169.454	220.024	0	0	0	0	0	0	0	200	903	0	0	0	0	0	0	0	603	903	0
2715	5	-20.0214	33.8921	-595.356	47180.5	-18134.1	-858.353	169.541	220.752	0	0	0	0	0	0	0	200	903	0	0	0	0	0	0	0	603	903	0
2715	6	-21.3947	33.4343	-592.914	47546.7	-18195.1	-1224.56	169.312	219.808	0	0	0	0	0	0	0	200	903	0	0	0	0	0	0	0	603	903	0
2715	7	-20.174	31.2981	-587.421	47638.3	-18378.2	-995.682	168.714	218.903	0	0	0	0	0	0	0	200	903	0	0	0	0	0	0	0	603	903	0
2715	8	-21.6999	32.061	-588.336	46905.9	-18134.1	-949.906	169.177	220.274	0	0	0	0	0	0	0	200	903	0	0	0	0	0	0	0	603	903	0
2715	9	-21.2421	30.2299	-584.674	46448.1	-17951	-1407.67	169.297	220.557	0	0	0	0	0	0	0	200	903	0	0	0	0	0	0	0	603	903	0
2716	0	-20.6318	31.6032	-583.759	45990.3	-18744.5	-858.353	167.89	221.217	0	0	0	0	0	0	0	200	903	0	0	0	0	0	0	0	603	903	0
2716	1	-21.2421	31.6032	-583.148	45990.3	-18561.3	-1224.56	168.17	221.134	0	0	0	0	0	0	0	200	903	0	0	0	0	0	0	0	603	903	0
2716	2	-21.2421	31.4507	-579.486	45441	-18378.2	-1178.79	168.285	221.584	0	0	0	0	0	0	0	200	903	0	0	0	0	0	0	0	603	903	0
2716	3	-22.768	29.3144	-581.012	45074.8	-18378.2	-1087.24	168.369	222.42	0	0	0	0	0	0	0	200	903	0	0	0	0	0	0	0	603	903	0
2716	4	-20.9369	30.6877	-577.045	45166.4	-18378.2	-1316.12	168.151	221.728	0	0	0	0	0	0	0	200	903	0	0	0	0	0	0	0	603	903	0
2716	5	-22.768	29.3144	-575.214	44617.1	-18622.4	-812.577	167.625	222.434	0	0	0	0	0	0	0	200	903	0	0	0	0	0	0	0	603	903	0
2716	6	-22.3102	28.3989	-573.993	44433.9	-18561.3	-1224.56	167.663	222.588	0	0	0	0	0	0	0	200	903	0	0	0	0	0	0	0	603	903	0
2716	7	-21.8525	28.8567	-573.078	43976.2	-18195.1	-949.906	168.25	223.263	0	0	0	0	0	0	0	200	903	0	0	0	0	0	0	0	603	903	0
2716	8	-21.6999	27.9411	-572.467	43060.6	-18378.2	-1178.79	167.896	224.781	0	0	0	0	0	0	0	200	903	0	0	0	0	0	0	0	603	903	0
2716	9	-23.3783	27.4834	-568.5	42877.5	-18256.2	-949.906	167.887	224.578	0	0	0	0	0	0	0	200	903	0	0	0	0	0	0	0	603	903	0
2717	0	-23.3783	27.9411	-569.721	42236.7	-18866.5	-1133.01	166.885	225.864	0	0	0	0	0	0	0	200	903	0	0	0	0	0	0	0	603	903	0
2717	1	-22.768	27.7885	-567.279	42419.8	-18805.5	-1361.89	166.85	225.222	0	0	0	0	0	0	0	200	903	0	0	0	0	0	0	0	603	903	0
2717	2	-23.0732	27.3308	-567.585	41778.9	-18805.5	-1087.24	166.868	226.392	0	0	0	0	0	0	0	200	903	0	0	0	0	0	0	0	603	903	0
2717	3	-21.8525	26.2627	-565.753	42511.3	-18561.3	-675.248	167.192	224.859	0	0	0	0	0	0	0	200	903	0	0	0	0	0	0	0	603	903	0
2717	4	-20.174	25.8049	-563.922	42145.1	-18866.5	-995.682	166.544	225.264	0	0	0	0	0	0	0	200	903	0	0	0	0	0	0	0	603	903	0
2717	5	-22.768	25.042	-565.143	41778.9	-18988.6	-1087.24	166.4	226.074	0	0	0	0	0	0	0	200	903	0	0	0	0	0	0	0	603	903	0
2717	6	-23.0732	24.1264	-563.617	41778.9	-18805.5	-1041.46	166.634	225.874	0	0	0	0	0	0	0	200	903	0	0	0	0	0	0	0	603	903	0
2717	7	-21.5473	24.5842	-561.481	40497.2	-19110.7	-1041.46	165.964	227.874	0	0	0	0	0	0	0	200	903	0	0	0	0	0	0	0	603	903	0
2717	8	-23.0732	24.1264	-559.65	40497.2	-19049.6	-858.353	165.962	227.638	0	0	0	0	0	0	0	200	903	0	0	0	0	0	0	0	603	903	0
2717	9	-22.4628	23.8213	-558.734	40222.5	-19171.7	-1270.34	165.687	228.011	0	0	0	0	0	0	0	200	903	0	0	0	0	0	0	0	603	903	0
2718	0	-22.6154	23.6687	-558.429	39398.5	-18805.5	-1041.46	166.324	229.448	0	0	0	0	0	0	0	200	903	0	0	0	0	0	0	0	603	903	0
2718	1	-21.8525	22.6006	-558.734	40039.4	-18866.5	-904.13	166.233	228.339	0	0	0	0	0	0	0	200	903	0	0	0	0	0	0	0	603	903	0
2718	2	-23.6835	23.0583	-554.767	40039.4	-19171.7	-1087.24	165.442	227.827	0	0	0	0	0	0	0	200	903	0	0	0	0	0	0	0	603	903	0
2718	3	-23.5309	21.2273	-558.124	39673.2	-19415.8	-1041.46	165.212	228.917	0	0	0	0	0	0	0	200	903	0	0	0	0	0	0	0	603	903	0
2718	4	-23.3783	21.3799	-554.767	39490.1	-19660	-1041.46	164.562	228.817	0	0	0	0	0	0	0	200	903	0	0	0	0	0	0	0	603	903	0
2718	5	-23.2258	20.7695	-554.462	39123.9	-19415.8	-949.906	164.983	229.438	0	0	0	0	0	0	0	200	903	0	0	0	0	0	0	0	603	903	0
2718	6	-22.1576	20.4643	-552.936	38483	-19598.9	-949.906	164.555	230.402	0	0	0	0	0	0	0	200	903	0	0	0	0	0	0	0	603	903	0
2718	7	-20.6318	20.4643	-552.631	38391.5	-19476.9	-812.577	164.756	230.53	0	0	0	0	0	0	0	200	903	0	0	0	0	0	0	0	603	903	0
2718	8	-22.0051	20.3117	-553.546	38025.3	-19598.9	-766.8	164.594	231.306	0	0	0	0	0	0	0	200	903	0	0	0	0	0	0	0	603	903	0
2718	9	-22.9206	20.0066	-552.326	38116.8	-19782.1	-812.577	164.184	230.989	0	0	0	0	0	0	0	200	903	0	0	0	0	0	0	0	603	903	0
2719	0	-21.5473	19.854	-551.41	37567.5	-19537.9	-812.577	164.567	231.87	0	0	0	0	0	0	0	200	903	0	0	0	0	0	0	0	603	903	0
2719	1	-22.768	19.3962	-550.19	37750.6	-19537.9	-949.906	164.489	231.386	0	0	0	0	0	0	0	200	903	0	0	0	0	0	0	0	603	903	0
2719	2	-21.0895	18.4807	-549.579	38208.4	-20087.2	-675.248	163.45	230.477	0	0	0	0	0	0	0	200	903	0	0	0	0	0	0	0	603	903	0
2719	3	-21.5473	17.26	-548.969	37384.4	-19782.1	-537.919	163.965	231.901	0	0	0	0	0	0	0	200	903	0	0	0	0	0	0	0	603	903	0
2719	4	-21.2421	17.1074	-549.884	37201.3	-19354.8	-812.577	164.802	232.347	0	0	0	0	0	0	0	200	903	0	0	0	0	0	0	0	603	903	0
2719	5	-19.1059	16.3445	-547.748	36926.6	-19965.2	-400.589	163.55	232.585	0	0	0	0	0	0	0	200	903	0	0	0	0	0	0	0	603	903	0
2719	6	-21.5473	16.6496	-548.969	36285.7	-20026.2	-537.919	163.52	233.902	0	0	0	0	0	0	0	200	903	0	0	0	0	0	0	0	603	903	0
2719	7	-21.3947	16.6496	-547.138	35919.5	-20392.4	-492.142	162.729	234.35	0	0	0	0	0	0	0	200	903	0	0	0	0	0	0	0	603	903	0
2719	8	-21.8525	16.1919	-546.222	36102.6	-20392.4	-537.919	162.666	233.905	0	0	0	0	0	0	0	200	903	0	0	0	0	0	0	0	603	903	0
2719	9	-20.7843	14.3608	-547.138	35553.3	-19965.2	-492.142	163.51	235.019	0	0	0	0	0	0	0	200	903	0	0	0	0	0	0	0	603	903	0
2720	0	-18.1904	15.5815	-547.138	35644.9	-20148.3	-446.366	163.175	234.852	0	0	0	0	0	0	0	200	903	0	0	0	0	0	0	0	603	903	0
2720	1	-19.8688	15.4289	-547.748	35553.3	-20514.5	-354.813	162.548	235.092	0	0	0	0	0	0	0	200	903	0	0	0	0	0	0	0	603	903	0
2720	2	-20.6318	13.5979	-548.358	35278.7	-20575.5	-80.1548	162.478	235.665	0	0	0	0	0	0	0	200	903	0	0	0	0	0	0	0	603	903	0
2720	3	-20.3266	13.1401	-548.358	35187.1	-20331.4	-263.26	162.923	235.832	0	0	0	0	0	0	0	200	903	0	0	0	0	0	0	0	603	903	0
2720	4	-20.6318	12.9875	-545.612	34363.1	-20575.5	-354.813	162.289	237.019	0	0	0	0	0	0	0	200	903	0	0	0	0	0	0	0	603	903	0
2720	5	-19.5636	12.2246	-545.917	34363.1	-20148.3	-80.1548	163.093	237.054	0	0	0	0	0	0	0	200	903	0	0	0	0	0	0	0	603	903	0
2720	6	-18.9533	12.2246	-546.222	33905.4	-20575.5	102.951	162.331	237.928	0	0	0	0	0	0	0	200	903	0	0	0	0	0	0	0	603	903	0
2720	7	-19.2585	11.7668	-547.748	33356	-20758.6	-34.3784	162.102	239.103	0	0	0	0	0	0	0	200	903	0	0	0	0	0	0	0	603	903	0
2720	8	-18.6481	11.1565	-545.612	33722.3	-20514.5	240.28	162.401	238.194	0	0	0	0	0	0	0	200	903	0	0	0	0	0	0	0	603	903	0
2720	9	-19.7162	10.8513	-547.443	34454.7	-20880.7	-34.3784	161.858	237.063	0	0	0	0	0	0	0	200	903	0	0	0	0	0	0	0	603	903	0
2721	0	-19.5636	11.0039	-547.748	33630.7	-21124.8	148.727	161.433	238.602	0	0	0	0	0	0	0	200	903	0	0	0	0	0	0	0	603	903	0
2721	1	-20.0214	9.478	-545.612	32989.8	-21063.8	331.833	161.394	239.536	0	0	0	0	0	0	0	200	903	0	0	0	0	0	0	0	603	903	0
2721	2	-18.0378	9.478	-546.527	33264.5	-20880.7	148.727	161.794	239.135	0	0	0	0	0	0	0	200	903	0	0	0	0	0	0	0	603	903	0
2721	3	-18.1904	9.17282	-549.579	33356	-21246.9	240.28	161.34	239.306	0	0	0	0	0	0	0	200	903	0	0	0	0	0	0	0	603	903	0
2721	4	-18.3429	8.71506	-548.969	32440.5	-21063.8	194.503	161.63	240.906	0	0	0	0	0	0	0	200	903	0	0	0	0	0	0	0	603	903	0
2721	5	-19.5636	8.86765	-549.274	32532.1	-21430	331.833	160.985	240.773	0	0	0	0	0	0	0	200	903	0	0	0	0	0	0	0	603	903	0
2721	6	-19.2585	8.25729	-548.969	32349	-21552.1	194.503	160.741	241.073	0	0	0	0	0	0	0	200	903	0	0	0	0	0	0	0	603	903	0
2721	7	-19.1059	7.34177	-548.358	32074.3	-21124.8	377.609	161.476	241.509	0	0	0	0	0	0	0	200	903	0	0	0	0	0	0	0	603	903	0
2721	8	-19.2585	7.79953	-546.833	32257.4	-21124.8	560.714	161.369	241.01	0	0	0	0	0	0	0	200	903	0	0	0	0	0	0	0	603	903	0
2721	9	-17.58	5.35812	-549.884	32623.6	-21246.9	514.938	161.361	240.672	0	0	0	0	0	0	0	200	903	0	0	0	0	0	0	0	603	903	0
2722	0	-17.1222	6.27365	-550.19	32165.9	-21735.2	331.833	160.495	241.537	0	0	0	0	0	0	0	200	903	0	0	0	0	0	0	0	603	903	0
2722	1	-17.8852	4.59518	-551.715	31891.2	-21674.1	514.938	160.715	242.196	0	0	0	0	0	0	0	200	903	0	0	0	0	0	0	0	603	903	0
2722	2	-18.1904	4.74777	-551.105	31158.8	-21674.1	560.714	160.672	243.461	0	0	0	0	0	0	0	200	903	0	0	0	0	0	0	0	603	903	0
2722	3	-18.3429	4.74777	-552.326	30792.6	-21674.1	881.149	160.758	244.249	0	0	0	0	0	0	0	200	903	0	0	0	0	0	0	0	603	903	0
2722	4	-18.0378	5.20554	-550.8	30792.6	-22101.4	743.82	159.874	244.095	0	0	0	0	0	0	0	200	903	0	0	0	0	0	0	0	603	903	0
2722	5	-18.6481	4.29001	-551.715	30334.8	-22345.5	514.938	159.498	245.017	0	0	0	0	0	0	0	200	903	0	0	0	0	0	0	0	603	903	0
2722	6	-17.4274	3.83225	-551.41	31158.8	-22101.4	743.82	159.918	243.493	0	0	0	0	0	0	0	200	903	0	0	0	0	0	0	0	603	903	0
2722	7	-16.9697	3.67966	-552.326	30792.6	-21979.3	698.044	160.206	244.249	0	0	0	0	0	0	0	200	903	0	0	0	0	0	0	0	603	903	0
2722	8	-16.6645	2.61154	-554.767	30060.2	-22040.4	926.926	160.271	245.815	0	0	0	0	0	0	0	200	903	0	0	0	0	0	0	0	603	903	0
2722	9	-17.2748	2.00119	-555.072	29877.1	-22284.5	926.926	159.853	246.175	0	0	0	0	0	0	0	200	903	0	0	0	0	0	0	0	603	903	0
2723	0	-18.0378	1.69601	-555.988	30426.4	-22528.6	743.82	159.48	245.275	0	0	0	0	0	0	0	200	903	0	0	0	0	0	0	0	603	903	0
2723	1	-16.3593	0.6279	-555.378	29236.2	-22101.4	972.702	160.205	247.358	0	0	0	0	0	0	0	200	903	0	0	0	0	0	0	0	603	903	0
2723	2	-17.1222	0.322724	-555.988	29236.2	-22467.6	972.702	159.59	247.416	0	0	0	0	0	0	0	200	903	0	0	0	0	0	0	0	603	903	0
2723	3	-16.2067	0.780487	-556.293	28870	-22406.6	1247.36	159.722	248.103	0	0	0	0	0	0	0	200	903	0	0	0	0	0	0	0	603	903	0
2723	4	-16.6645	-0.897979	-557.514	28320.7	-22772.8	1201.58	159.153	249.202	0	0	0	0	0	0	0	200	903	0	0	0	0	0	0	0	603	903	0
2723	5	-15.7489	-0.592804	-558.734	29053.1	-22650.7	1110.03	159.461	248.002	0	0	0	0	0	0	0	200	903	0	0	0	0	0	0	0	603	903	0
2723	6	-16.0541	-1.05057	-557.209	28870	-22650.7	1338.91	159.35	248.188	0	0	0	0	0	0	0	200	903	0	0	0	0	0	0	0	603	903	0
2723	7	-17.2748	-1.81351	-561.176	28320.7	-22711.7	1567.79	159.528	249.533	0	0	0	0	0	0	0	200	903	0	0	0	0	0	0	0	603	903	0
2723	8	-16.0541	-2.42386	-559.65	28320.7	-23016.9	1430.47	158.873	249.396	0	0	0	0	0	0	0	200	903	0	0	0	0	0	0	0	603	903	0
2723	9	-17.2748	-2.72903	-560.26	28503.8	-23139	1430.47	158.7	249.124	0	0	0	0	0	0	0	200	903	0	0	0	0	0	0	0	603	903	0
2724	0	-16.5119	-4.10232	-561.176	27679.8	-23077.9	1522.02	158.876	250.675	0	0	0	0	0	0	0	200	903	0	0	0	0	0	0	0	603	903	0
2724	1	-16.0541	-5.01785	-562.091	27588.2	-23016.9	1476.24	159.051	250.919	0	0	0	0	0	0	0	200	903	0	0	0	0	0	0	0	603	903	0
2724	2	-15.9015	-3.79715	-564.533	27038.9	-23016.9	1384.69	159.228	252.104	0	0	0	0	0	0	0	200	903	0	0	0	0	0	0	0	603	903	0
2724	3	-16.9697	-4.86526	-563.922	27130.5	-23383.1	1567.79	158.535	251.89	0	0	0	0	0	0	0	200	903	0	0	0	0	0	0	0	603	903	0
2724	4	-16.6645	-5.32303	-565.753	26947.4	-23322.1	1522.02	158.777	252.369	0	0	0	0	0	0	0	200	903	0	0	0	0	0	0	0	603	903	0
2724	5	-18.0378	-5.17044	-564.533	27313.6	-23505.2	1476.24	158.363	251.617	0	0	0	0	0	0	0	200	903	0	0	0	0	0	0	0	603	903	0
2724	6	-17.1222	-6.84891	-563.617	26947.4	-23383.1	1384.69	158.512	252.189	0	0	0	0	0	0	0	200	903	0	0	0	0	0	0	0	603	903	0
2724	7	-16.0541	-7.15408	-567.585	26489.6	-23444.2	1476.24	158.695	253.329	0	0	0	0	0	0	0	200	903	0	0	0	0	0	0	0	603	903	0
2724	8	-16.2067	-8.06961	-571.247	26398	-23993.5	2208.66	157.998	253.789	0	0	0	0	0	0	0	200	903	0	0	0	0	0	0	0	603	903	0
2724	9	-16.5119	-8.06961	-570.941	25665.6	-23932.4	1659.35	158.083	255.047	0	0	0	0	0	0	0	200	903	0	0	0	0	0	0	0	603	903	0
2725	0	-18.8007	-7.91702	-566.974	25574.1	-23688.3	1476.24	158.22	254.894	0	0	0	0	0	0	0	200	903	0	0	0	0	0	0	0	603	903	0
2725	1	-17.8852	-7.76443	-570.941	25757.2	-24115.5	1567.79	157.762	254.887	0	0	0	0	0	0	0	200	903	0	0	0	0	0	0	0	603	903	0
2725	2	-18.3429	-8.06961	-570.331	25024.8	-23810.4	1705.12	158.252	256.122	0	0	0	0	0	0	0	200	903	0	0	0	0	0	0	0	603	903	0
2725	3	-18.1904	-10.2058	-568.805	25024.8	-24115.5	1796.68	157.603	256.005	0	0	0	0	0	0	0	200	903	0	0	0	0	0	0	0	603	903	0
2725	4	-17.58	-9.13773	-572.773	25299.4	-24054.5	1750.9	158.003	255.83	0	0	0	0	0	0	0	200	903	0	0	0	0	0	0	0	603	903	0
2725	5	-17.58	-9.29031	-575.519	25116.3	-23932.4	1750.9	158.416	256.359	0	0	0	0	0	0	0	200	903	0	0	0	0	0	0	0	603	903	0
2725	6	-17.7326	-10.3584	-576.435	24567	-24054.5	2025.56	158.27	257.381	0	0	0	0	0	0	0	200	903	0	0	0	0	0	0	0	603	903	0
2725	7	-18.8007	-10.511	-575.824	24658.5	-24298.7	1934.01	157.802	257.177	0	0	0	0	0	0	0	200	903	0	0	0	0	0	0	0	603	903	0
2725	8	-18.6481	-12.4947	-577.045	24200.8	-24115.5	1979.78	158.209	258.061	0	0	0	0	0	0	0	200	903	0	0	0	0	0	0	0	603	903	0
2725	9	-19.2585	-11.8843	-575.824	23834.6	-24481.8	2071.33	157.484	258.608	0	0	0	0	0	0	0	200	903	0	0	0	0	0	0	0	603	903	0
2726	0	-18.6481	-11.5791	-577.961	23285.3	-24542.8	1979.78	157.536	259.711	0	0	0	0	0	0	0	200	903	0	0	0	0	0	0	0	603	903	0
2726	1	-18.3429	-11.5791	-578.266	23285.3	-24298.7	1934.01	157.98	259.733	0	0	0	0	0	0	0	200	903	0	0	0	0	0	0	0	603	903	0
2726	2	-18.3429	-11.8843	-581.317	23193.7	-24725.9	2345.99	157.466	260.102	0	0	0	0	0	0	0	200	903	0	0	0	0	0	0	0	603	903	0
2726	3	-18.6481	-12.7998	-578.876	22644.4	-24786.9	1979.78	157.181	260.882	0	0	0	0	0	0	0	200	903	0	0	0	0	0	0	0	603	903	0
2726	4	-19.2585	-12.7998	-582.538	22552.8	-24848	1934.01	157.345	261.285	0	0	0	0	0	0	0	200	903	0	0	0	0	0	0	0	603	903	0
2726	5	-19.7162	-12.9524	-582.233	22552.8	-24542.8	2071.33	157.847	261.265	0	0	0	0	0	0	0	200	903	0	0	0	0	0	0	0	603	903	0
2726	6	-19.8688	-13.868	-583.148	22461.3	-24725.9	2208.66	157.599	261.483	0	0	0	0	0	0	0	200	903	0	0	0	0	0	0	0	603	903	0
2726	7	-18.9533	-14.3257	-583.454	22461.3	-24909	2345.99	157.308	261.503	0	0	0	0	0	0	0	200	903	0	0	0	0	0	0	0	603	903	0
2726	8	-17.1222	-14.4783	-587.116	21637.3	-24909	2345.99	157.574	263.146	0	0	0	0	0	0	0	200	903	0	0	0	0	0	0	0	603	903	0
2726	9	-19.1059	-15.0887	-588.947	21179.5	-24786.9	2300.22	157.913	264.038	0	0	0	0	0	0	0	200	903	0	0	0	0	0	0	0	603	903	0
2727	0	-20.3266	-14.9361	-588.947	21088	-24542.8	2345.99	158.328	264.194	0	0	0	0	0	0	0	200	903	0	0	0	0	0	0	0	603	903	0
2727	1	-20.3266	-14.4783	-589.862	21454.2	-24848	2254.44	157.875	263.628	0	0	0	0	0	0	0	200	903	0	0	0	0	0	0	0	603	903	0
2727	2	-20.6318	-15.2412	-588.031	20447.1	-25519.4	2620.65	156.602	265.228	0	0	0	0	0	0	0	200	903	0	0	0	0	0	0	0	603	903	0
2727	3	-20.4792	-16.4619	-588.947	20172.5	-25214.2	2574.88	157.188	265.748	0	0	0	0	0	0	0	200	903	0	0	0	0	0	0	0	603	903	0
2727	4	-20.174	-15.3938	-590.778	20630.2	-24909	2208.66	157.837	265.08	0	0	0	0	0	0	0	200	903	0	0	0	0	0	0	0	603	903	0
2727	5	-20.6318	-16.1568	-594.135	19989.4	-24848	2712.2	158.178	266.356	0	0	0	0	0	0	0	200	903	0	0	0	0	0	0	0	603	903	0
2727	6	-20.0214	-16.7671	-595.05	20172.5	-25397.3	2437.55	157.319	266.1	0	0	0	0	0	0	0	200	903	0	0	0	0	0	0	0	603	903	0
2727	7	-22.0051	-17.2249	-594.745	19440	-25092.1	2849.53	157.81	267.314	0	0	0	0	0	0	0	200	903	0	0	0	0	0	0	0	603	903	0
2727	8	-21.3947	-16.9197	-597.492	19531.6	-25641.4	2757.98	157.085	267.311	0	0	0	0	0	0	0	200	903	0	0	0	0	0	0	0	603	903	0
2727	9	-21.5473	-17.5301	-596.881	18707.6	-25031.1	2208.66	158.064	268.658	0	0	0	0	0	0	0	200	903	0	0	0	0	0	0	0	603	903	0
2728	0	-20.3266	-17.0723	-596.576	18433	-25275.2	2666.43	157.633	269.102	0	0	0	0	0	0	0	200	903	0	0	0	0	0	0	0	603	903	0
2728	1	-19.8688	-17.3775	-599.018	18249.9	-25519.4	2712.2	157.398	269.534	0	0	0	0	0	0	0	200	903	0	0	0	0	0	0	0	603	903	0
2728	2	-20.4792	-19.0559	-601.764	18066.7	-25580.4	2803.76	157.491	269.977	0	0	0	0	0	0	0	200	903	0	0	0	0	0	0	0	603	903	0
2728	3	-19.8688	-17.8352	-599.933	17975.2	-25519.4	2941.09	157.463	270.038	0	0	0	0	0	0	0	200	903	0	0	0	0	0	0	0	603	903	0
2728	4	-20.9369	-17.5301	-603.9	17975.2	-25153.1	2941.09	158.349	270.235	0	0	0	0	0	0	0	200	903	0	0	0	0	0	0	0	603	903	0
2728	5	-19.5636	-18.4456	-603.595	17609	-25458.3	2849.53	157.822	270.827	0	0	0	0	0	0	0	200	903	0	0	0	0	0	0	0	603	903	0
2728	6	-20.6318	-19.0559	-605.426	17151.2	-25641.4	2986.86	157.647	271.671	0	0	0	0	0	0	0	200	903	0	0	0	0	0	0	0	603	903	0
2728	7	-19.2585	-19.5137	-606.342	16601.9	-25763.5	2895.31	157.51	272.62	0	0	0	0	0	0	0	200	903	0	0	0	0	0	0	0	603	903	0
2728	8	-19.7162	-19.6663	-603.595	16601.9	-25458.3	3169.97	157.822	272.495	0	0	0	0	0	0	0	200	903	0	0	0	0	0	0	0	603	903	0
2728	9	-20.0214	-18.9034	-610.919	15869.5	-25275.2	2941.09	158.628	274.024	0	0	0	0	0	0	0	200	903	0	0	0	0	0	0	0	603	903	0
2729	0	-19.2585	-19.0559	-612.751	16052.6	-25214.2	3169.97	158.851	273.802	0	0	0	0	0	0	0	200	903	0	0	0	0	0	0	0	603	903	0
2729	1	-20.0214	-19.8189	-613.361	15320.2	-25580.4	2895.31	158.295	275.023	0	0	0	0	0	0	0	200	903	0	0	0	0	0	0	0	603	903	0
2729	2	-19.8688	-19.3611	-613.361	15777.9	-25336.2	3124.19	158.693	274.276	0	0	0	0	0	0	0	200	903	0	0	0	0	0	0	0	603	903	0
2729	3	-19.8688	-21.3448	-612.14	15686.4	-25763.5	3353.07	157.912	274.375	0	0	0	0	0	0	0	200	903	0	0	0	0	0	0	0	603	903	0
2729	4	-18.9533	-20.7344	-616.413	14862.4	-25458.3	3169.97	158.699	275.889	0	0	0	0	0	0	0	200	903	0	0	0	0	0	0	0	603	903	0
2729	5	-16.6645	-23.0232	-619.464	15137.1	-25580.4	3124.19	158.706	275.564	0	0	0	0	0	0	0	200	903	0	0	0	0	0	0	0	603	903	0
2729	6	-17.8852	-21.3448	-621.295	14496.2	-25885.6	3124.19	158.336	276.668	0	0	0	0	0	0	0	200	903	0	0	0	0	0	0	0	603	903	0
2729	7	-18.6481	-21.0396	-622.211	14130	-26007.6	3490.4	158.201	277.291	0	0	0	0	0	0	0	200	903	0	0	0	0	0	0	0	603	903	0
2729	8	-18.9533	-21.4973	-624.958	13672.2	-25702.5	3490.4	158.873	278.123	0	0	0	0	0	0	0	200	903	0	0	0	0	0	0	0	603	903	0
2729	9	-18.1904	-22.8706	-624.652	13672.2	-25458.3	3490.4	159.244	278.112	0	0	0	0	0	0	0	200	903	0	0	0	0	0	0	0	603	903	0
2730	0	-17.8852	-22.5655	-626.178	13397.6	-25763.5	3490.4	158.856	278.604	0	0	0	0	0	0	0	200	903	0	0	0	0	0	0	0	603	903	0
2730	1	-17.2748	-22.718	-629.535	13672.2	-26007.6	3856.61	158.688	278.282	0	0	0	0	0	0	0	200	903	0	0	0	0	0	0	0	603	903	0
2730	2	-16.3593	-23.6336	-631.671	13489.1	-25824.5	3765.06	159.117	278.645	0	0	0	0	0	0	0	200	903	0	0	0	0	0	0	0	603	903	0
2730	3	-17.2748	-24.2439	-632.892	12848.2	-25946.6	3719.28	159.003	279.699	0	0	0	0	0	0	0	200	903	0	0	0	0	0	0	0	603	903	0
2730	4	-17.8852	-24.5491	-634.113	12207.4	-25641.4	3856.61	159.563	280.749	0	0	0	0	0	0	0	200	903	0	0	0	0	0	0	0	603	903	0
2730	5	-17.7326	-24.7017	-633.197	12024.3	-25885.6	3719.28	159.119	281.01	0	0	0	0	0	0	0	200	903	0	0	0	0	0	0	0	603	903	0
2730	6	-17.4274	-24.3965	-637.47	11749.6	-26129.7	3948.17	159.01	281.568	0	0	0	0	0	0	0	200	903	0	0	0	0	0	0	0	603	903	0
2730	7	-16.9697	-25.4646	-638.996	11474.9	-26068.7	4177.05	159.204	282.042	0	0	0	0	0	0	0	200	903	0	0	0	0	0	0	0	603	903	0
2730	8	-16.0541	-25.1595	-640.827	11749.6	-26068.7	4085.5	159.32	281.665	0	0	0	0	0	0	0	200	903	0	0	0	0	0	0	0	603	903	0
2730	9	-16.3593	-25.7698	-644.794	11474.9	-26007.6	3948.17	159.665	282.204	0	0	0	0	0	0	0	200	903	0	0	0	0	0	0	0	603	903	0
2731	0	-15.7489	-27.4483	-643.268	11566.5	-26007.6	3993.94	159.57	282.019	0	0	0	0	0	0	0	200	903	0	0	0	0	0	0	0	603	903	0
2731	1	-16.8171	-27.7534	-648.761	11108.7	-26190.7	4222.83	159.63	282.877	0	0	0	0	0	0	0	200	903	0	0	0	0	0	0	0	603	903	0
2731	2	-15.7489	-30.0423	-646.93	11017.2	-26312.8	4314.38	159.327	282.97	0	0	0	0	0	0	0	200	903	0	0	0	0	0	0	0	603	903	0
2731	3	-16.3593	-28.669	-650.592	10742.5	-26190.7	4131.27	159.743	283.488	0	0	0	0	0	0	0	200	903	0	0	0	0	0	0	0	603	903	0
2731	4	-15.9015	-28.9742	-651.203	9918.55	-26129.7	4131.27	159.875	284.769	0	0	0	0	0	0	0	200	903	0	0	0	0	0	0	0	603	903	0
2731	5	-14.8334	-28.8216	-653.949	10101.7	-26007.6	4177.05	160.23	284.553	0	0	0	0	0	0	0	200	903	0	0	0	0	0	0	0	603	903	0
2731	6	-15.4438	-29.2793	-657.001	9552.34	-26312.8	4085.5	159.95	285.461	0	0	0	0	0	0	0	200	903	0	0	0	0	0	0	0	603	903	0
2731	7	-15.2912	-30.1949	-658.832	9735.45	-26434.9	4680.59	159.876	285.223	0	0	0	0	0	0	0	200	903	0	0	0	0	0	0	0	603	903	0
2731	8	-16.3593	-30.1949	-660.358	9735.45	-26312.8	4360.15	160.154	285.257	0	0	0	0	0	0	0	200	903	0	0	0	0	0	0	0	603	903	0
2731	9	-14.2231	-30.6526	-661.579	9277.68	-26007.6	4177.05	160.689	285.976	0	0	0	0	0	0	0	200	903	0	0	0	0	0	0	0	603	903	0
2732	0	-16.3593	-31.8733	-663.105	9643.89	-26007.6	4314.38	160.779	285.456	0	0	0	0	0	0	0	200	903	0	0	0	0	0	0	0	603	903	0
2732	1	-14.8334	-32.3311	-663.715	9186.13	-26251.8	4543.26	160.447	286.16	0	0	0	0	0	0	0	200	903	0	0	0	0	0	0	0	603	903	0
2732	2	-14.8334	-33.7044	-666.461	9186.13	-26251.8	4589.04	160.61	286.217	0	0	0	0	0	0	0	200	903	0	0	0	0	0	0	0	603	903	0
2732	3	-14.6808	-34.3147	-669.818	8270.6	-26434.9	4589.04	160.534	287.652	0	0	0	0	0	0	0	200	903	0	0	0	0	0	0	0	603	903	0
2732	4	-13.6127	-34.7725	-667.682	7995.94	-26129.7	4589.04	160.865	288.024	0	0	0	0	0	0	0	200	903	0	0	0	0	0	0	0	603	903	0
2732	5	-14.6808	-34.9251	-674.701	7812.84	-26068.7	4634.81	161.363	288.42	0	0	0	0	0	0	0	200	903	0	0	0	0	0	0	0	603	903	0
2732	6	-14.2231	-35.5354	-674.396	7538.18	-26007.6	4726.37	161.436	288.822	0	0	0	0	0	0	0	200	903	0	0	0	0	0	0	0	603	903	0
2732	7	-14.8334	-35.2303	-676.837	7721.28	-26068.7	4726.37	161.485	288.592	0	0	0	0	0	0	0	200	903	0	0	0	0	0	0	0	603	903	0
2732	8	-13.6127	-36.2984	-678.363	7904.39	-26251.8	4817.92	161.301	288.348	0	0	0	0	0	0	0	200	903	0	0	0	0	0	0	0	603	903	0
2732	9	-13.3075	-37.2139	-678.974	7812.84	-26068.7	4955.25	161.606	288.493	0	0	0	0	0	0	0	200	903	0	0	0	0	0	0	0	603	903	0
2733	0	-13.4601	-38.4346	-683.551	6622.65	-26068.7	4955.25	161.863	290.311	0	0	0	0	0	0	0	200	903	0	0	0	0	0	0	0	603	903	0
2733	1	-13.155	-38.8924	-686.603	6622.65	-26007.6	5046.8	162.121	290.354	0	0	0	0	0	0	0	200	903	0	0	0	0	0	0	0	603	903	0
2733	2	-13.4601	-40.2657	-688.739	6256.44	-26373.8	5092.58	161.707	290.916	0	0	0	0	0	0	0	200	903	0	0	0	0	0	0	0	603	903	0
2733	3	-13.155	-39.8079	-688.434	6622.65	-26312.8	5275.68	161.779	290.38	0	0	0	0	0	0	0	200	903	0	0	0	0	0	0	0	603	903	0
2733	4	-13.4601	-40.2657	-686.908	5981.78	-25946.6	5229.91	162.227	291.292	0	0	0	0	0	0	0	200	903	0	0	0	0	0	0	0	603	903	0
2733	5	-12.2394	-41.0286	-691.791	5798.68	-26007.6	5229.91	162.405	291.618	0	0	0	0	0	0	0	200	903	0	0	0	0	0	0	0	603	903	0
2733	6	-11.0187	-41.6389	-696.369	5890.23	-25824.5	5367.23	162.915	291.542	0	0	0	0	0	0	0	200	903	0	0	0	0	0	0	0	603	903	0
2733	7	-11.4765	-43.0122	-697.284	5890.23	-26434.9	5367.23	162.089	291.553	0	0	0	0	0	0	0	200	903	0	0	0	0	0	0	0	603	903	0
2733	8	-12.5446	-43.47	-699.115	4974.7	-26434.9	5550.34	162.188	292.884	0	0	0	0	0	0	0	200	903	0	0	0	0	0	0	0	603	903	0
2733	9	-12.0868	-45.6062	-701.557	4791.6	-26312.8	5367.23	162.494	293.17	0	0	0	0	0	0	0	200	903	0	0	0	0	0	0	0	603	903	0
2734	0	-12.392	-44.2329	-701.557	4608.49	-26129.7	5275.68	162.755	293.431	0	0	0	0	0	0	0	200	903	0	0	0	0	0	0	0	603	903	0
2734	1	-12.0868	-45.7588	-699.726	4059.17	-26190.7	5550.34	162.57	294.199	0	0	0	0	0	0	0	200	903	0	0	0	0	0	0	0	603	903	0
2734	2	-10.7135	-46.064	-704.303	4242.28	-26373.8	5596.12	162.553	293.977	0	0	0	0	0	0	0	200	903	0	0	0	0	0	0	0	603	903	0
2734	3	-9.18767	-46.2166	-707.66	3876.07	-26495.9	5504.56	162.558	294.523	0	0	0	0	0	0	0	200	903	0	0	0	0	0	0	0	603	903	0
2734	4	-10.4084	-48.2002	-708.881	3692.96	-26373.8	5596.12	162.795	294.79	0	0	0	0	0	0	0	200	903	0	0	0	0	0	0	0	603	903	0
2734	5	-11.4765	-46.9795	-710.712	3876.07	-26068.7	5550.34	163.32	294.546	0	0	0	0	0	0	0	200	903	0	0	0	0	0	0	0	603	903	0
2734	6	-9.64543	-48.0476	-711.017	3509.86	-26251.8	5550.34	163.079	295.064	0	0	0	0	0	0	0	200	903	0	0	0	0	0	0	0	603	903	0
2734	7	-10.561	-49.5735	-712.848	3601.41	-26373.8	5596.12	163.002	294.948	0	0	0	0	0	0	0	200	903	0	0	0	0	0	0	0	603	903	0
2734	8	-9.95061	-50.489	-713.764	3143.64	-26373.8	5825	163.05	295.596	0	0	0	0	0	0	0	200	903	0	0	0	0	0	0	0	603	903	0
2734	9	-9.79802	-50.1839	-714.984	3235.2	-26251.8	5779.22	163.283	295.475	0	0	0	0	0	0	0	200	903	0	0	0	0	0	0	0	603	903	0
2735	0	-9.18767	-51.7097	-718.341	2136.56	-25641.4	5504.56	164.305	297.026	0	0	0	0	0	0	0	200	903	0	0	0	0	0	0	0	603	903	0
2735	1	-9.64543	-51.7097	-720.172	2319.67	-26007.6	5687.67	163.887	296.779	0	0	0	0	0	0	0	200	903	0	0	0	0	0	0	0	603	903	0
2735	2	-9.79802	-52.3201	-721.393	2228.12	-26312.8	5825	163.525	296.911	0	0	0	0	0	0	0	200	903	0	0	0	0	0	0	0	603	903	0
2735	3	-9.64543	-53.9986	-721.698	1587.25	-26312.8	5596.12	163.54	297.801	0	0	0	0	0	0	0	200	903	0	0	0	0	0	0	0	603	903	0
2735	4	-9.64543	-52.7779	-719.562	1770.35	-25885.6	5687.67	164.026	297.54	0	0	0	0	0	0	0	200	903	0	0	0	0	0	0	0	603	903	0
2735	5	-9.03508	-53.846	-722.309	1678.8	-26251.8	5916.55	163.656	297.676	0	0	0	0	0	0	0	200	903	0	0	0	0	0	0	0	603	903	0
2735	6	-6.59367	-55.3719	-725.055	1404.14	-25946.6	6053.88	164.214	298.063	0	0	0	0	0	0	0	200	903	0	0	0	0	0	0	0	603	903	0
2735	7	-8.42473	-56.1348	-726.886	946.379	-26251.8	5962.33	163.885	298.698	0	0	0	0	0	0	0	200	903	0	0	0	0	0	0	0	603	903	0
2735	8	-8.72991	-56.2874	-728.412	580.168	-26312.8	5733.45	163.876	299.204	0	0	0	0	0	0	0	200	903	0	0	0	0	0	0	0	603	903	0
2735	9	-8.42473	-57.5081	-730.854	213.957	-25580.4	5779.22	164.999	299.707	0	0	0	0	0	0	0	200	903	0	0	0	0	0	0	0	603	903	0
2736	0	-9.03508	-57.9659	-728.107	-426.912	-25946.6	5733.45	164.364	300.586	0	0	0	0	0	0	0	200	903	0	0	0	0	0	0	0	603	903	0
2736	1	-7.66179	-57.9659	-731.159	-701.57	-25946.6	5870.77	164.513	300.96	0	0	0	0	0	0	0	200	903	0	0	0	0	0	0	0	603	903	0
2736	2	-7.81438	-59.7969	-731.769	-793.123	-26129.7	5916.55	164.292	301.084	0	0	0	0	0	0	0	200	903	0	0	0	0	0	0	0	603	903	0
2736	3	-6.89885	-59.4917	-733.6	-518.465	-26190.7	5641.89	164.298	300.707	0	0	0	0	0	0	0	200	903	0	0	0	0	0	0	0	603	903	0
2736	4	-7.81438	-60.865	-735.126	-610.017	-25763.5	5733.45	164.954	300.83	0	0	0	0	0	0	0	200	903	0	0	0	0	0	0	0	603	903	0
2736	5	-7.96697	-61.0176	-735.431	-610.017	-25946.6	5870.77	164.719	300.829	0	0	0	0	0	0	0	200	903	0	0	0	0	0	0	0	603	903	0
2736	6	-8.11955	-62.5435	-736.957	-1159.33	-25763.5	5687.67	165.041	301.573	0	0	0	0	0	0	0	200	903	0	0	0	0	0	0	0	603	903	0
2736	7	-8.42473	-63.459	-735.126	-1983.31	-26129.7	5916.55	164.455	302.698	0	0	0	0	0	0	0	200	903	0	0	0	0	0	0	0	603	903	0
2736	8	-7.66179	-64.0694	-732.99	-2349.52	-25946.6	5733.45	164.602	303.205	0	0	0	0	0	0	0	200	903	0	0	0	0	0	0	0	603	903	0
2736	9	-6.89885	-64.0694	-737.567	-2715.73	-26007.6	5733.45	164.739	303.682	0	0	0	0	0	0	0	200	903	0	0	0	0	0	0	0	603	903	0
2737	0	-7.35661	-64.6797	-740.619	-2624.18	-25885.6	5962.33	165.049	303.543	0	0	0	0	0	0	0	200	903	0	0	0	0	0	0	0	603	903	0
2737	1	-7.5092	-65.5952	-741.84	-2807.28	-25946.6	5916.55	165.024	303.784	0	0	0	0	0	0	0	200	903	0	0	0	0	0	0	0	603	903	0
2737	2	-8.72991	-65.7478	-742.145	-2532.63	-26251.8	5687.67	164.627	303.413	0	0	0	0	0	0	0	200	903	0	0	0	0	0	0	0	603	903	0
2737	3	-8.42473	-66.5108	-741.84	-2990.39	-26312.8	5825	164.53	304.031	0	0	0	0	0	0	0	200	903	0	0	0	0	0	0	0	603	903	0
2737	4	-8.88249	-67.4263	-742.145	-2532.63	-26068.7	5596.12	164.874	303.413	0	0	0	0	0	0	0	200	903	0	0	0	0	0	0	0	603	903	0
2737	5	-7.5092	-68.1892	-743.366	-3448.15	-25763.5	5733.45	165.342	304.639	0	0	0	0	0	0	0	200	903	0	0	0	0	0	0	0	603	903	0
2737	6	-7.5092	-69.5625	-742.145	-3814.36	-26007.6	5825	164.956	305.14	0	0	0	0	0	0	0	200	903	0	0	0	0	0	0	0	603	903	0
2737	7	-7.35661	-70.0203	-746.112	-3814.36	-26373.8	5687.67	164.652	305.112	0	0	0	0	0	0	0	200	903	0	0	0	0	0	0	0	603	903	0
2737	8	-8.88249	-70.3255	-740.619	-4089.02	-26373.8	5504.56	164.389	305.521	0	0	0	0	0	0	0	200	903	0	0	0	0	0	0	0	603	903	0
2737	9	-9.95061	-70.9358	-746.723	-3997.47	-25946.6	5550.34	165.253	305.353	0	0	0	0	0	0	0	200	903	0	0	0	0	0	0	0	603	903	0
2738	0	-8.88249	-70.7832	-745.807	-4363.68	-25946.6	5458.79	165.21	305.851	0	0	0	0	0	0	0	200	903	0	0	0	0	0	0	0	603	903	0
2738	1	-10.4084	-72.9195	-744.892	-4821.44	-26068.7	5413.01	165.003	306.473	0	0	0	0	0	0	0	200	903	0	0	0	0	0	0	0	603	903	0
2738	2	-9.03508	-72.9195	-746.723	-4638.34	-26251.8	5825	164.844	306.212	0	0	0	0	0	0	0	200	903	0	0	0	0	0	0	0	603	903	0
2738	3	-9.18767	-73.0721	-748.859	-4729.89	-26373.8	5321.46	164.781	306.316	0	0	0	0	0	0	0	200	903	0	0	0	0	0	0	0	603	903	0
2738	4	-9.18767	-74.9031	-748.249	-4638.34	-25885.6	5641.89	165.405	306.199	0	0	0	0	0	0	0	200	903	0	0	0	0	0	0	0	603	903	0
2738	5	-10.1032	-75.8186	-748.249	-5004.55	-25885.6	5413.01	165.405	306.688	0	0	0	0	0	0	0	200	903	0	0	0	0	0	0	0	603	903	0
2738	6	-10.2558	-77.6497	-747.943	-4821.44	-25763.5	5641.89	165.554	306.446	0	0	0	0	0	0	0	200	903	0	0	0	0	0	0	0	603	903	0
2738	7	-9.95061	-78.1075	-746.112	-6103.18	-26190.7	5413.01	164.897	308.18	0	0	0	0	0	0	0	200	903	0	0	0	0	0	0	0	603	903	0
2738	8	-8.57732	-78.8704	-746.723	-5920.08	-25946.6	5184.13	165.253	307.928	0	0	0	0	0	0	0	200	903	0	0	0	0	0	0	0	603	903	0
2738	9	-9.95061	-79.7859	-745.197	-5736.97	-25824.5	5458.79	165.345	307.699	0	0	0	0	0	0	0	200	903	0	0	0	0	0	0	0	603	903	0
2739	0	-10.7135	-80.5489	-747.943	-6560.94	-26068.7	5275.68	165.146	308.772	0	0	0	0	0	0	0	200	903	0	0	0	0	0	0	0	603	903	0
2739	1	-9.34026	-82.5325	-743.366	-6560.94	-25702.5	5596.12	165.424	308.826	0	0	0	0	0	0	0	200	903	0	0	0	0	0	0	0	603	903	0
2739	2	-11.0187	-82.6851	-746.418	-6377.84	-26068.7	5321.46	165.075	308.545	0	0	0	0	0	0	0	200	903	0	0	0	0	0	0	0	603	903	0
2739	3	-10.561	-83.9058	-745.502	-6469.39	-26007.6	5321.46	165.114	308.678	0	0	0	0	0	0	0	200	903	0	0	0	0	0	0	0	603	903	0
2739	4	-11.0187	-86.042	-744.281	-6469.39	-25702.5	5367.23	165.467	308.692	0	0	0	0	0	0	0	200	903	0	0	0	0	0	0	0	603	903	0
2739	5	-10.1032	-86.9576	-743.976	-6652.5	-25824.5	5367.23	165.289	308.942	0	0	0	0	0	0	0	200	903	0	0	0	0	0	0	0	603	903	0
2739	6	-10.561	-87.8731	-745.197	-7201.81	-25702.5	5367.23	165.509	309.664	0	0	0	0	0	0	0	200	903	0	0	0	0	0	0	0	603	903	0
2739	7	-10.2558	-88.7886	-743.976	-7568.02	-26007.6	5046.8	165.042	310.172	0	0	0	0	0	0	0	200	903	0	0	0	0	0	0	0	603	903	0
2739	8	-11.4765	-89.8567	-743.366	-7476.47	-25885.6	5321.46	165.178	310.058	0	0	0	0	0	0	0	200	903	0	0	0	0	0	0	0	603	903	0
2739	9	-10.7135	-91.3826	-740.924	-7934.24	-25702.5	5229.91	165.31	310.709	0	0	0	0	0	0	0	200	903	0	0	0	0	0	0	0	603	903	0
2740	0	-11.9343	-93.3662	-740.314	-7751.13	-26129.7	5687.67	164.705	310.47	0	0	0	0	0	0	0	200	903	0	0	0	0	0	0	0	603	903	0
2740	1	-12.0868	-92.7559	-739.704	-7659.58	-25519.4	5229.91	165.501	310.355	0	0	0	0	0	0	0	200	903	0	0	0	0	0	0	0	603	903	0
2740	2	-10.8661	-93.824	-739.704	-7568.02	-25763.5	5092.58	165.171	310.231	0	0	0	0	0	0	0	200	903	0	0	0	0	0	0	0	603	903	0
2740	3	-11.3239	-95.5025	-739.704	-7018.71	-25702.5	5184.13	165.253	309.489	0	0	0	0	0	0	0	200	903	0	0	0	0	0	0	0	603	903	0
2740	4	-10.7135	-96.5706	-737.262	-8025.79	-25580.4	5321.46	165.304	310.886	0	0	0	0	0	0	0	200	903	0	0	0	0	0	0	0	603	903	0
2740	5	-12.2394	-97.1809	-737.567	-8117.34	-25031.1	5229.91	166.063	311.006	0	0	0	0	0	0	0	200	903	0	0	0	0	0	0	0	603	903	0
2740	6	-12.5446	-98.4016	-733.6	-8849.76	-25336.2	5138.35	165.463	312.063	0	0	0	0	0	0	0	200	903	0	0	0	0	0	0	0	603	903	0
2740	7	-13.3075	-99.6223	-733.6	-8666.66	-25580.4	5275.68	165.13	311.814	0	0	0	0	0	0	0	200	903	0	0	0	0	0	0	0	603	903	0
2740	8	-12.0868	-100.843	-731.769	-9032.87	-25458.3	5184.13	165.21	312.344	0	0	0	0	0	0	0	200	903	0	0	0	0	0	0	0	603	903	0
2740	9	-10.7135	-102.369	-731.769	-9124.42	-25397.3	5275.68	165.293	312.469	0	0	0	0	0	0	0	200	903	0	0	0	0	0	0	0	603	903	0
2741	0	-12.2394	-102.522	-731.464	-8483.55	-25458.3	5321.46	165.195	311.598	0	0	0	0	0	0	0	200	903	0	0	0	0	0	0	0	603	903	0
2741	1	-13.3075	-103.437	-728.717	-9215.97	-25214.2	5184.13	165.399	312.647	0	0	0	0	0	0	0	200	903	0	0	0	0	0	0	0	603	903	0
2741	2	-13.155	-104.81	-727.802	-9124.42	-25336.2	5092.58	165.188	312.537	0	0	0	0	0	0	0	200	903	0	0	0	0	0	0	0	603	903	0
2741	3	-13.4601	-106.031	-723.529	-8849.76	-25458.3	5138.35	164.814	312.231	0	3.35342	4.97223	-27.2622	2579.32	1333.05	729.354	248.898	808.388	0	0	0	0	0	0	0	603	903	0
2741	4	-12.8498	-106.336	-721.088	-9124.42	-25275.2	5413.01	164.949	312.654	0	6.10001	-3.87787	-33.3657	2487.76	1272.02	820.906	238.124	828.439	0	0	0	0	0	0	0	603	903	0
2741	5	-12.6972	-107.862	-718.341	-9765.29	-25275.2	4955.25	164.814	313.594	0	2.4379	-15.0168	-27.5674	2396.21	1516.16	-415.056	254.998	816.078	0	0	0	0	0	0	0	603	903	0
2741	6	-12.5446	-108.32	-719.562	-9765.29	-24725.9	4909.47	165.638	313.571	0	-1.22421	-12.2702	-26.0415	3037.08	1210.98	-186.174	246.502	786.375	0	0	0	0	0	0	0	603	903	0
2741	7	-13.4601	-108.778	-716.51	-9582.19	-25214.2	5001.02	164.81	313.373	0	3.6586	-9.37103	-38.2485	3677.95	2004.44	88.4843	252.406	806.841	0	0	0	0	0	0	0	603	903	0
2741	8	-13.7653	-109.998	-713.764	-9673.74	-25092.1	5092.58	164.845	313.553	0	5.03189	-18.5263	-45.8779	3494.84	2004.44	-323.503	243.691	826.823	0	0	0	0	0	0	0	603	903	0
2741	9	-11.3239	-110.609	-712.238	-9948.4	-24786.9	5275.68	165.199	313.968	0	1.21719	-22.9514	-46.1831	4410.37	1760.3	-369.28	238.116	807.503	0	0	0	0	0	0	0	603	903	0
2742	0	-13.6127	-110.761	-709.491	-9856.84	-24298.7	4909.47	165.752	313.893	0	-2.13974	-20.6625	-48.9297	5234.35	1943.41	-277.727	239.718	796.023	0	0	0	0	0	0	0	603	903	0
2742	1	-13.9179	-112.287	-705.829	-9856.84	-24481.8	4955.25	165.315	313.965	0	5.94742	-25.8505	-62.3574	6058.32	2919.97	-643.938	246.826	805.845	0	0	0	0	0	0	0	603	903	0
2742	2	-12.0868	-113.203	-701.557	-10223.1	-24542.8	4863.69	165.017	314.572	0	11.4406	-31.1911	-77.6162	7156.95	3164.11	-186.174	240.766	810.79	0	0	0	0	0	0	0	603	903	0
2742	3	-12.8498	-113.66	-701.252	-10314.6	-24420.7	4863.69	165.176	314.709	0	3.50601	-28.4445	-81.2783	7980.93	2919.97	-277.727	235.926	804.807	0	0	0	0	0	0	0	603	903	0
2742	4	-12.392	-114.118	-699.42	-9673.74	-24054.5	5184.13	165.608	313.831	0	-1.22421	-27.529	-84.9404	8713.35	3164.11	-872.819	237.251	800.418	0	0	0	0	0	0	0	603	903	0
2742	5	-12.6972	-115.186	-697.284	-11047	-24176.6	5001.02	165.328	315.843	0	5.94742	-32.1066	-94.706	10086.6	3530.32	-506.608	237.277	796.495	0	0	0	0	0	0	0	603	903	0
2742	6	-11.1713	-115.186	-690.57	-10680.8	-24054.5	4955.25	165.167	315.467	0	7.01553	-30.4282	-105.387	11002.2	3591.35	-552.385	234.078	798.602	0	0	0	0	0	0	0	603	903	0
2742	7	-12.2394	-115.491	-688.434	-11413.2	-23749.3	4909.47	165.502	316.579	0	-1.07162	-25.6979	-112.101	10819.1	4018.6	-918.596	235.848	806.488	0	0	0	0	0	0	0	603	903	0
2742	8	-12.392	-116.254	-685.382	-11321.7	-23810.4	5229.91	165.26	316.519	0	-0.919037	-27.8342	-119.12	12283.9	4018.6	-369.28	233.736	799.878	0	0	0	0	0	0	0	603	903	0
2742	9	-12.0868	-117.475	-682.025	-10863.9	-23627.3	5046.8	165.357	315.929	0	6.40518	-32.1066	-128.581	12741.7	4689.99	-552.385	236.475	803.905	0	0	0	0	0	0	0	603	903	0
2743	0	-11.1713	-117.475	-680.194	-11138.6	-23688.3	5321.46	165.174	316.376	0	-0.461273	-27.8342	-138.346	14023.4	4506.88	-1605.24	232.577	801.635	0	0	0	0	0	0	0	603	903	0
2743	1	-11.1713	-117.475	-674.091	-11047	-23383.1	5092.58	165.312	316.388	0	-5.64926	-27.8342	-145.365	15671.4	4384.81	-1330.58	230.164	795.193	0	0	0	0	0	0	0	603	903	0
2743	2	-12.0868	-118.085	-674.091	-11504.8	-23383.1	4909.47	165.312	317.067	0	-4.58115	-33.7851	-151.164	16129.1	4934.13	-1284.81	232.641	796.3	0	0	0	0	0	0	0	603	903	0
2743	3	-10.7135	-119.306	-668.903	-12054.1	-23444.2	4955.25	164.951	318.021	0	-4.58115	-31.3437	-160.929	16129.1	4934.13	-1788.35	230.66	802.775	0	0	0	0	0	0	0	603	903	0
2743	4	-11.3239	-119.154	-665.241	-12145.7	-22772.8	5092.58	165.768	318.258	0	-5.80185	-24.0195	-167.338	16770	4506.88	-1696.79	226.933	802.784	0	0	0	0	0	0	0	603	903	0
2743	5	-10.8661	-118.391	-660.053	-11413.2	-23016.9	5413.01	165.129	317.291	0	-10.9898	-28.2919	-171.916	17777.1	4934.13	-1788.35	228.701	799.594	0	0	0	0	0	0	0	603	903	0
2743	6	-10.4084	-119.917	-657.917	-12695	-22528.6	4955.25	165.758	319.296	0	-9.0062	-28.1393	-175.578	18234.8	4873.09	-1834.12	227.755	799.144	0	0	0	0	0	0	0	603	903	0
2743	7	-9.79802	-120.679	-655.475	-12420.3	-22650.7	5046.8	165.444	318.949	0	-8.39584	-18.6789	-180.46	18051.7	4689.99	-1834.12	225.989	802.969	0	0	0	0	0	0	0	603	903	0
2743	8	-9.95061	-120.069	-647.846	-12054.1	-22467.6	5275.68	165.32	318.606	0	-12.9735	-15.4745	-185.648	18967.3	4689.99	-1742.57	225.263	800.832	0	0	0	0	0	0	0	603	903	0
2743	9	-9.79802	-120.374	-646.015	-12328.8	-22345.5	5184.13	165.41	319.084	0	-14.9571	-19.2892	-194.193	19058.8	4751.02	-2200.33	224.465	804.857	0	0	0	0	0	0	0	603	903	0
2744	0	-8.42473	-122.205	-639.606	-11779.5	-22223.5	5092.58	165.254	318.417	0	-19.6873	-15.322	-201.518	19608.1	4934.13	-2291.89	224.485	805.698	0	0	0	0	0	0	0	603	903	0
2744	1	-10.4084	-122.205	-637.165	-12420.3	-21491	5046.8	166.271	319.493	0	-20.2977	-6.47186	-206.4	19791.2	4628.95	-1925.68	222.427	807.112	0	0	0	0	0	0	0	603	903	0
2744	2	-8.42473	-122.053	-630.756	-12695	-22162.4	5184.13	164.864	320.127	0	-20.1451	-5.25116	-211.894	20157.4	4567.92	-2108.78	221.558	807.87	0	0	0	0	0	0	0	603	903	0
2744	3	-6.44109	-121.748	-629.23	-13152.7	-21857.2	5092.58	165.264	320.903	0	-21.5184	-4.94598	-217.082	20523.7	4689.99	-1925.68	221.605	808.457	0	0	0	0	0	0	0	603	903	0
2744	4	-7.96697	-123.121	-623.432	-13244.3	-21369	5184.13	165.724	321.244	0	-26.096	2.98859	-223.795	21439.2	5056.2	-1559.47	222.593	807.202	0	0	0	0	0	0	0	603	903	0
2744	5	-8.42473	-123.731	-618.549	-13061.2	-21124.8	5138.35	165.848	321.116	0	-24.5702	7.71881	-225.932	21713.8	4873.09	-1559.47	221.569	806.892	0	0	0	0	0	0	0	603	903	0
2744	6	-8.11955	-122.358	-613.666	-13152.7	-20758.6	4909.47	166.173	321.433	0	-23.502	7.8714	-233.866	21530.7	4751.02	-1834.12	220.315	810.936	0	0	0	0	0	0	0	603	903	0
2744	7	-8.11955	-122.663	-606.647	-13061.2	-21246.9	5046.8	164.977	321.53	0	-28.3849	11.6861	-237.528	22080	5178.27	-1467.91	221.801	810.042	0	0	0	0	0	0	0	603	903	0
2744	8	-8.27214	-123.579	-602.375	-13061.2	-20819.6	5229.91	165.437	321.683	0	-31.4366	19.9258	-242.716	22354.7	4751.02	-1559.47	219.574	810.898	0	0	0	0	0	0	0	603	903	0
2744	9	-6.74626	-122.663	-596.881	-13244.3	-20392.4	4955.25	165.835	322.189	0	-30.2159	19.7733	-249.43	22629.4	4628.95	-1239.03	218.558	812.276	0	0	0	0	0	0	0	603	903	0
2745	0	-5.67815	-121.29	-591.083	-13335.8	-20209.3	5001.02	165.81	322.562	0	-29.1478	24.0457	-255.839	22995.6	4812.06	-1239.03	218.809	813.117	0	0	0	0	0	0	0	603	903	0
2745	1	-5.52556	-122.053	-588.336	-13061.2	-20514.5	5001.02	165.131	322.2	0	-32.047	30.9122	-262.553	23270.2	5239.31	-1422.14	219.955	814.369	0	0	0	0	0	0	0	603	903	0
2745	2	-7.20403	-122.968	-581.012	-13335.8	-19782.1	4726.37	165.952	322.953	0	-33.5728	34.2691	-270.182	23636.4	5117.23	-1101.7	218.94	815.517	0	0	0	0	0	0	0	603	903	0
2745	3	-5.98332	-123.273	-576.435	-13610.5	-19721	4909.47	165.788	323.612	0	-32.8099	35.3372	-277.506	24368.9	5056.2	-964.372	218.22	815.186	0	0	0	0	0	0	0	603	903	0
2745	4	-5.22038	-121.9	-569.11	-13702.1	-19354.8	4863.69	165.991	324.076	0	-33.878	42.2037	-286.662	24460.4	5178.27	-872.819	218.064	817.671	0	0	0	0	0	0	0	603	903	0
2745	5	-5.37297	-122.511	-561.481	-13335.8	-19171.7	5138.35	165.855	323.751	0	-36.3194	46.6287	-295.207	24826.6	5544.48	-1376.36	218.782	818.901	0	0	0	0	0	0	0	603	903	0
2745	6	-3.99968	-123.273	-556.598	-12786.5	-19171.7	4772.14	165.556	322.973	0	-36.472	45.5606	-306.498	25467.5	5849.66	-781.267	219.085	819.908	0	0	0	0	0	0	0	603	903	0
2745	7	-1.71086	-122.511	-552.936	-13335.8	-18866.5	4955.25	165.879	324.118	0	-37.235	46.4761	-315.348	25559.1	5666.55	-735.49	217.969	821.95	0	0	0	0	0	0	0	603	903	0
2745	8	-3.08415	-122.663	-545.917	-13061.2	-18683.4	5092.58	165.776	323.925	0	-39.2186	53.9529	-325.114	26016.8	5849.66	-872.819	217.993	822.976	0	0	0	0	0	0	0	603	903	0
2745	9	-3.99968	-123.121	-540.729	-13335.8	-18378.2	5046.8	166.012	324.663	0	-39.066	55.9366	-335.795	27023.9	5849.66	-827.043	217.42	822.523	0	0	0	0	0	0	0	603	903	0
2746	0	-2.77898	-124.036	-534.015	-13244.3	-17890	5138.35	166.499	324.801	0	-39.066	54.2581	-347.086	27939.4	6460.01	-689.714	218.612	822.503	0	0	0	0	0	0	0	603	903	0
2746	1	-2.01604	-123.579	-523.334	-13427.4	-18073.1	4955.25	165.466	325.657	0	-39.5238	56.6995	-358.378	27481.7	6093.8	-735.49	217.004	826.317	0	0	0	0	0	0	0	603	903	0
2746	2	-1.86345	-123.426	-517.841	-13793.6	-17645.8	5046.8	165.924	326.637	0	-42.8807	59.9039	-371.806	28031	7131.4	-781.267	219.18	827.609	0	0	0	0	0	0	0	603	903	0
2746	3	-1.10051	-123.579	-510.517	-13427.4	-17340.6	5138.35	166.033	326.302	0	-40.8971	57.9202	-383.402	29129.6	7619.68	-689.714	219.874	827.023	0	0	0	0	0	0	0	603	903	0
2746	4	-0.795335	-123.273	-505.329	-13793.6	-16974.4	4909.47	166.409	327.296	0	-39.066	59.1409	-394.389	29770.5	7497.61	-964.372	219.011	827.515	0	0	0	0	0	0	0	603	903	0
2746	5	-0.642747	-123.426	-498.615	-13793.6	-17401.7	4909.47	165.1	327.664	0	-40.8971	60.972	-407.206	30502.9	8107.96	-735.49	219.911	828.092	0	0	0	0	0	0	0	603	903	0
2746	6	-0.795335	-123.273	-491.291	-12878.1	-16242	5046.8	166.94	326.213	0	-40.5919	62.4979	-420.634	30045.1	8474.17	-552.385	220.146	831.572	0	0	0	0	0	0	0	603	903	0
2746	7	1.64607	-124.036	-482.44	-12511.9	-16364.1	5413.01	166.081	325.935	0	-40.2867	60.5142	-430.705	30502.9	8901.42	-643.938	220.667	832.179	0	0	0	0	0	0	0	603	903	0
2746	8	-0.490159	-124.647	-474.811	-13244.3	-16058.9	5275.68	166.178	327.894	0	-39.066	63.8712	-441.081	31418.4	8901.42	-460.832	220.181	831.769	0	0	0	0	0	0	0	603	903	0
2746	9	1.18831	-123.273	-466.877	-13610.5	-15997.9	5138.35	165.734	329.152	0	-38.6082	66.7703	-451.762	31326.9	9267.63	-460.832	220.514	833.656	0	0	0	0	0	0	0	603	903	0
2747	0	1.3409	-123.426	-459.552	-13885.2	-15448.6	4909.47	166.383	330.215	0	-37.5401	65.7022	-461.832	31876.2	9939.01	-735.49	221.521	833.979	0	0	0	0	0	0	0	603	903	0
2747	1	1.79866	-122.968	-454.059	-12511.9	-15204.4	4909.47	166.514	327.556	0	-36.3194	67.5333	-473.124	31784.6	9877.98	-643.938	220.878	835.82	0	0	0	0	0	0	0	603	903	0
2747	2	1.95125	-122.053	-440.021	-13152.7	-15082.3	4909.47	165.724	329.891	0	-36.9298	71.1954	-479.533	32059.3	9755.91	-231.95	220.345	836.145	0	0	0	0	0	0	0	603	903	0
2747	3	1.64607	-121.442	-438.495	-12878.1	-15082.3	5138.35	165.604	329.369	0	-34.641	70.585	-488.993	32150.8	10610.4	-827.043	221.698	837.251	0	0	0	0	0	0	0	603	903	0
2747	4	2.86677	-121.595	-428.119	-12420.3	-14716.1	5092.58	165.626	329.011	0	-33.7254	71.1954	-497.843	32700.2	11098.7	-506.608	222.294	837.316	0	0	0	0	0	0	0	603	903	0
2747	5	1.49348	-120.374	-419.879	-12695	-14044.7	4909.47	166.551	330.235	0	-31.8944	76.8411	-509.44	32883.3	11281.8	-186.174	222.145	838.452	0	0	0	0	0	0	0	603	903	0
2747	6	3.7823	-119.917	-411.335	-12878.1	-13678.5	5046.8	166.746	331.308	0	-30.2159	79.7403	-520.731	32883.3	11770.1	-598.161	222.603	839.852	0	0	0	0	0	0	0	603	903	0
2747	7	5.15559	-119.001	-404.01	-12420.3	-13800.6	5046.8	165.841	330.743	0	-27.6219	78.5196	-530.497	32150.8	12868.7	-369.28	224.258	842.395	0	0	0	0	0	0	0	603	903	0
2747	8	4.08748	-117.78	-397.296	-12695	-13495.4	5001.02	166.032	331.953	0	-22.7391	81.2662	-540.263	31967.7	13173.9	-415.056	224.384	843.829	0	0	0	0	0	0	0	603	903	0
2747	9	3.17195	-117.475	-388.141	-12511.9	-13373.4	5046.8	165.545	332.235	0	-21.2132	86.6068	-549.723	32334	13418	-552.385	224.409	844.181	0	0	0	0	0	0	0	603	903	0
2748	0	3.93489	-115.949	-380.512	-11962.6	-12640.9	4955.25	166.779	331.438	0	-17.8563	89.5059	-558.573	32150.8	13723.2	-231.95	224.568	845.441	0	0	0	0	0	0	0	603	903	0
2748	1	3.32454	-113.355	-369.831	-12420.3	-12579.9	4817.92	165.985	333.584	0	-12.9735	89.0482	-567.118	31784.6	14455.6	225.813	225.49	846.954	0	0	0	0	0	0	0	603	903	0
2748	2	3.32454	-113.355	-357.318	-12145.7	-12457.8	4726.37	165.135	333.991	0	-10.9898	95.762	-575.968	31052.2	14821.8	-48.8449	225.734	849.087	0	0	0	0	0	0	0	603	903	0
2748	3	5.00301	-111.066	-353.351	-11413.2	-12030.6	4680.59	165.953	332.3	0	-9.31137	99.7293	-584.818	30960.7	14821.8	271.59	225.344	850.059	0	0	0	0	0	0	0	603	903	0
2748	4	4.85042	-109.998	-345.417	-11413.2	-11542.3	4405.93	166.584	333.042	0	-3.81821	102.171	-589.091	31326.9	15371.1	1049.79	226.093	849.822	0	0	0	0	0	0	0	603	903	0
2748	5	4.69783	-107.557	-335.651	-11230.1	-10993	4543.26	167.249	333.458	0	-1.68198	106.138	-595.5	31143.8	15249.1	500.472	225.607	850.701	0	0	0	0	0	0	0	603	903	0
2748	6	3.32454	-106.794	-325.885	-11321.7	-10870.9	4405.93	166.642	334.741	0	-1.83456	112.394	-602.519	30411.3	15859.4	912.459	226.322	852.526	0	0	0	0	0	0	0	603	903	0
2748	7	5.00301	-104.047	-316.425	-11504.8	-10565.7	4314.38	166.609	336.359	0	-0.308685	114.378	-608.927	30869.1	16225.6	1049.79	226.646	852.306	0	0	0	0	0	0	0	603	903	0
2748	8	4.39265	-101.759	-306.659	-11047	-10809.9	4039.72	164.75	336.024	0	2.89566	114.683	-611.369	30228.2	16713.9	866.683	227.339	853.557	0	0	0	0	0	0	0	603	903	0
2748	9	5.00301	-99.9275	-296.894	-11504.8	-10016.4	3948.17	166.263	338.751	0	0.912018	118.955	-618.083	30228.2	16897	958.235	227.338	854.094	0	0	0	0	0	0	0	603	903	0
2749	0	4.85042	-99.3172	-286.823	-10497.7	-9650.21	4085.5	166.355	336.6	0	2.28531	120.481	-620.829	29953.6	16958.1	1370.22	227.315	854.752	0	0	0	0	0	0	0	603	903	0
2749	1	4.08748	-95.8076	-280.109	-10497.7	-9345.04	3948.17	166.638	337.477	0	3.35342	121.244	-622.355	30228.2	17202.2	1599.1	227.64	854.429	0	0	0	0	0	0	0	603	903	0
2749	2	3.17195	-92.9085	-269.733	-10039.9	-9039.86	3902.39	166.486	337.222	0	1.82755	120.481	-626.627	29129.6	17629.4	1599.1	228.134	856.514	0	0	0	0	0	0	0	603	903	0
2749	3	3.32454	-90.4671	-261.493	-10131.5	-8917.79	3673.51	165.897	338.745	0	3.04825	123.838	-630.595	29221.2	17934.6	2011.09	228.441	856.661	0	0	0	0	0	0	0	603	903	0
2749	4	3.17195	-87.8731	-250.812	-10039.9	-8490.55	3444.63	166.148	340.03	0	1.52237	122.007	-632.121	28855	17385.3	1736.43	227.503	857.352	0	0	0	0	0	0	0	603	903	0
2749	5	3.32454	-85.7368	-241.352	-10223.1	-8307.44	3353.07	165.58	342.358	0	2.28531	117.582	-634.257	28763.4	17507.4	2285.75	227.603	857.65	0	0	0	0	0	0	0	603	903	0
2749	6	3.62971	-81.3118	-231.891	-10223.1	-7819.16	3215.74	166.281	344.086	0	1.52237	121.397	-633.952	28031	17995.7	2285.75	228.386	858.784	0	0	0	0	0	0	0	603	903	0
2749	7	2.86677	-78.5652	-221.82	-10406.2	-7880.2	3673.51	164.475	346.913	0	-0.613861	121.855	-635.172	28397.2	17995.7	2377.3	228.332	858.292	0	0	0	0	0	0	0	603	903	0
2749	8	3.01936	-75.666	-216.022	-10680.8	-7636.06	3078.42	164.652	349.443	0	-0.156097	119.718	-636.698	27756.3	17324.3	2468.86	227.21	859.406	0	0	0	0	0	0	0	603	903	0
2749	9	2.71419	-73.0721	-206.867	-9856.84	-7208.81	2941.09	165.152	347.648	0	-0.766449	120.481	-636.088	27756.3	17995.7	2606.19	228.291	859.364	0	0	0	0	0	0	0	603	903	0
2750	0	1.79866	-69.8677	-201.679	-9307.53	-7147.78	2849.53	164.559	346.15	0	-0.613861	120.786	-638.834	27481.7	18483.9	2697.74	228.934	859.982	0	0	0	0	0	0	0	603	903	0
2750	1	2.71419	-67.1211	-192.829	-8941.32	-6476.39	2849.53	166.414	346.369	0	-0.156097	119.871	-637.919	26383	17629.4	2926.62	227.636	861.642	0	0	0	0	0	0	0	603	903	0
2750	2	1.79866	-63.1538	-184.284	-8300.45	-6720.53	2620.65	163.532	345.042	0	-1.07162	121.092	-637.003	26566.1	18361.9	3063.95	228.825	861.295	0	0	0	0	0	0	0	603	903	0
2750	3	2.40901	-58.8814	-177.57	-8483.55	-6415.35	2529.1	163.871	347.776	0	-0.919037	122.77	-638.529	25833.7	18483.9	3155.5	228.948	862.542	0	0	0	0	0	0	0	603	903	0
2750	4	1.79866	-55.5244	-172.687	-8117.34	-5866.04	2254.44	166.031	347.006	0	2.28531	123.686	-639.445	25925.3	18606	2926.62	229.097	862.457	0	0	0	0	0	0	0	603	903	0
2750	5	1.64607	-52.7779	-165.668	-8666.66	-5682.93	2208.66	165.697	352.313	0	1.98013	121.855	-638.834	25559.1	18056.7	3521.71	228.265	862.991	0	0	0	0	0	0	0	603	903	0
2750	6	0.120193	-49.7261	-159.259	-8025.79	-5743.97	2437.55	163.933	350.395	0	1.98013	122.312	-641.276	25284.4	18545	3201.28	228.919	863.572	0	0	0	0	0	0	0	603	903	0
2750	7	-0.0323951	-47.5899	-149.799	-8208.89	-5805	2300.22	161.248	354.799	0	2.13272	126.127	-640.971	24368.9	19216.4	3292.83	229.98	864.981	0	0	0	0	0	0	0	603	903	0
2750	8	0.120193	-45.7588	-143.695	-7842.68	-5316.72	2162.89	163	354.579	0	3.35342	126.127	-640.971	24368.9	19094.3	3659.04	229.79	864.981	0	0	0	0	0	0	0	603	903	0
2750	9	0.730544	-45.4536	-136.371	-7293.37	-5133.62	1888.23	162.356	353.482	0	6.10001	123.533	-642.191	24460.4	18850.1	3475.94	229.353	864.911	0	0	0	0	0	0	0	603	903	0
2751	0	0.120193	-43.6226	-129.352	-6744.05	-4584.3	1796.68	164.56	352.137	0	7.93106	129.179	-645.243	23361.8	19033.2	3521.71	229.498	866.794	0	0	0	0	0	0	0	603	903	0
2751	1	0.272781	-44.2329	-124.774	-6560.94	-4767.4	1934.01	161.792	352.582	0	9.76212	129.331	-646.769	23544.9	19521.5	3704.82	230.183	866.596	0	0	0	0	0	0	0	603	903	0
2751	2	0.425369	-44.5381	-116.23	-6286.29	-4462.23	1705.12	161.609	354.085	0	11.5932	129.026	-646.769	22904	19765.7	3475.94	230.561	867.587	0	0	0	0	0	0	0	603	903	0
2751	3	-0.642747	-41.9441	-111.042	-6469.39	-4034.98	1705.12	163.662	358.261	0	14.4923	130.552	-649.516	22720.9	19643.6	3933.7	230.243	868.019	0	0	0	0	0	0	0	603	903	0
2751	4	0.120193	-38.7398	-102.191	-5920.08	-4279.12	1796.68	158.126	357.931	0	14.3398	132.383	-651.347	22537.8	20254	4025.25	231.096	868.398	0	0	0	0	0	0	0	603	903	0
2751	5	-0.337571	-35.688	-97.919	-5736.97	-3729.8	1934.01	161.909	358.589	0	17.6967	132.383	-654.704	22629.4	20192.9	3704.82	230.843	868.436	0	0	0	0	0	0	0	603	903	0
2751	6	-1.10051	-32.7888	-89.9844	-5370.76	-3790.84	1613.57	157.872	359.685	0	19.9855	132.078	-655.619	22263.2	20131.9	3979.48	230.707	869.043	0	0	0	0	0	0	0	603	903	0
2751	7	0.883132	-31.4156	-87.543	-5096.1	-3485.66	1613.57	160.183	358.213	0	20.5959	134.672	-659.586	21530.7	20498.1	4025.25	231.077	870.357	0	0	0	0	0	0	0	603	903	0
2751	8	-1.40569	-27.1431	-82.9654	-4546.78	-3424.63	1064.25	158.722	354.803	0	21.0536	134.214	-660.807	21347.6	20925.3	4299.91	231.666	870.695	0	0	0	0	0	0	0	603	903	0
2751	9	-2.32121	-24.5491	-76.8619	-4272.13	-3119.45	1384.69	159.415	355.582	0	23.1898	135.587	-660.807	20889.9	21169.5	4299.91	232.036	871.387	0	0	0	0	0	0	0	603	903	0
2752	0	-3.6945	-23.1758	-72.8946	-3722.81	-2875.31	1338.91	160.555	351.071	0	24.258	136.656	-666.911	21622.3	20803.3	4711.9	231.193	870.578	0	0	0	0	0	0	0	603	903	0
2752	1	-3.38933	-21.0396	-68.3169	-4089.02	-2936.35	835.373	157.019	359.854	0	27.3097	137.266	-670.268	20798.3	21291.5	4666.12	231.766	871.97	0	0	0	0	0	0	0	603	903	0
2752	2	-3.54192	-21.1922	-61.2979	-3539.71	-2875.31	1018.48	153.093	357.746	0	26.5468	135.893	-673.319	20523.7	21535.7	4528.79	231.984	872.519	0	0	0	0	0	0	0	603	903	0
2752	3	-3.38933	-18.1404	-59.4669	-3905.92	-2509.1	1155.81	157.807	365.682	0	26.2416	136.198	-675.15	20340.5	21474.7	4757.68	231.807	872.873	0	0	0	0	0	0	0	603	903	0
2752	4	-1.71086	-17.0723	-54.8892	-3448.15	-1898.75	835.373	165.408	362.82	0	26.089	137.113	-676.676	20157.4	21596.7	4940.78	231.916	873.211	0	0	0	0	0	0	0	603	903	0
2752	5	-3.08415	-15.2412	-53.0582	-3173.49	-1837.72	1155.81	165.364	359.812	0	27.3097	137.571	-680.033	20340.5	22268.1	4803.45	232.746	873.089	0	0	0	0	0	0	0	603	903	0
2752	6	-2.93157	-13.2576	-49.7012	-3539.71	-1898.75	743.82	161.797	371.22	0	28.3778	138.029	-683.695	19882.8	22024	4940.78	232.213	873.919	0	0	0	0	0	0	0	603	903	0
2752	7	-4.15227	-13.5628	-46.0391	-3173.49	-2203.93	789.596	152.129	368.93	0	27.0045	137.266	-684	19608.1	22085	5032.33	232.288	874.333	0	0	0	0	0	0	0	603	903	0
2752	8	-3.84709	-11.8843	-41.7667	-2624.18	-1959.79	743.82	153.078	362.829	0	27.1571	138.487	-688.578	19516.6	21901.9	5078.11	231.807	874.657	0	0	0	0	0	0	0	603	903	0
2752	9	-4.30486	-11.274	-38.1045	-2532.63	-1349.43	1110.03	164.586	366.465	0	27.9201	137.113	-689.799	19791.2	21718.8	5261.22	231.486	874.309	0	0	0	0	0	0	0	603	903	0
2753	0	-2.93157	-11.7317	-34.1373	-2441.07	-1288.4	698.044	162.258	371.508	0	28.3778	138.181	-692.545	19516.6	22146	5398.54	231.978	874.819	0	0	0	0	0	0	0	603	903	0
2753	1	-1.10051	-10.0533	-33.8321	-1983.31	-1166.33	652.267	165.526	358.622	0	27.7675	137.266	-694.376	19974.3	22329.1	5123.89	232.157	874.234	0	0	0	0	0	0	0	603	903	0
2753	2	-3.23674	-9.59549	-30.7803	-2257.97	-1288.4	606.491	158.142	373.358	0	27.7675	138.487	-697.733	19058.8	22939.5	5398.54	232.877	875.685	0	0	0	0	0	0	0	603	903	0
2753	3	-3.38933	-9.29031	-28.9493	-1891.76	-861.153	606.491	170.253	365.347	0	28.5304	138.029	-699.564	18692.6	22939.5	5627.43	232.791	876.28	0	0	0	0	0	0	0	603	903	0
2753	4	-3.99968	-7.00149	-27.4234	-2257.97	-555.977	926.926	179.726	382.337	0	27.6149	138.334	-700.785	19241.9	22817.4	5581.65	232.56	875.542	0	0	0	0	0	0	0	603	903	0
2753	5	-3.38933	-5.93338	-22.8458	-2166.41	-555.977	560.714	175.664	394.828	0	28.683	139.402	-700.48	18692.6	23000.5	5718.98	232.835	876.315	0	0	0	0	0	0	0	603	903	0
2753	6	-3.6945	-4.10232	-17.3526	-2074.86	-311.836	560.714	182.029	419.571	0	30.9718	138.639	-705.363	18601	23488.8	5673.2	233.3	876.629	0	0	0	0	0	0	0	603	903	0
2753	7	-3.23674	-3.64456	-19.4888	-2349.52	-678.047	286.056	165.208	420.557	0	29.9037	138.792	-707.499	18784.2	23733	5764.76	233.545	876.45	0	0	0	0	0	0	0	603	903	0
2753	8	-2.77898	-3.49197	-18.2681	-1342.44	-433.906	514.938	176.248	373.485	0	29.2934	138.944	-711.161	17960.2	23061.6	5718.98	232.428	877.745	0	0	0	0	0	0	0	603	903	0
2753	9	-3.38933	-2.72903	-16.1319	-1067.78	-372.871	789.596	176.886	366.191	0	28.9882	136.961	-709.025	18326.4	23488.8	5856.31	233.128	877.153	0	0	0	0	0	0	0	603	903	0
2754	0	-3.99968	-3.33939	-15.8267	-518.465	-250.801	514.938	184.153	332.759	0	30.5141	137.724	-713.603	18234.8	23733	5535.87	233.258	877.447	0	0	0	0	0	0	0	603	903	0
2754	1	-2.62639	-3.03421	-12.775	-1342.44	-555.977	194.503	156.479	405.084	0	30.0563	138.944	-716.044	17868.6	23916.1	5856.31	233.4	878.045	0	0	0	0	0	0	0	603	903	0
2754	2	-4.45744	-3.1868	-10.9439	-884.675	-311.836	377.609	171.506	380.837	0	29.5985	138.334	-720.316	17685.5	23549.8	5810.53	232.694	878.448	0	0	0	0	0	0	0	603	903	0
2754	3	0	0	0	0	0	0	200	300	0	29.9037	138.029	-721.232	17502.4	23671.9	5718.98	232.822	878.733	0	0	0	0	0	0	0	603	903	0
2754	4	0	0	0	0	0	0	200	300	0	29.2934	136.656	-725.199	16861.5	24160.2	5764.76	233.315	879.749	0	0	0	0	0	0	0	603	903	0
2754	5	0	0	0	0	0	0	200	300	0	30.2089	136.656	-725.81	17777.1	24038.1	5718.98	233.119	878.507	0	0	0	0	0	0	0	603	903	0
2754	6	0	0	0	0	0	0	200	300	0	30.9718	136.35	-727.03	17319.3	23855	5856.31	232.812	879.178	0	0	0	0	0	0	0	603	903	0
2754	7	0	0	0	0	0	0	200	300	0	30.8192	136.198	-732.218	16312.2	23977.1	5764.76	232.746	880.722	0	0	0	0	0	0	0	603	903	0
2754	8	0	0	0	0	0	0	200	300	0	29.446	135.587	-729.472	16586.9	24099.2	5673.2	233.036	880.262	0	0	0	0	0	0	0	603	903	0
2754	9	0	0	0	0	0	0	200	300	0	30.0563	135.13	-734.354	16770	23977.1	5718.98	232.651	880.164	0	0	0	0	0	0	0	603	903	0
2755	0	0	0	0	0	0	0	200	300	0	30.2089	134.062	-736.491	16861.5	24343.3	6039.41	233.053	880.106	0	0	0	0	0	0	0	603	903	0
2755	1	0	0	0	0	0	0	200	300	0	30.5141	134.977	-738.322	16678.4	24709.5	5902.08	233.467	880.41	0	0	0	0	0	0	0	603	903	0
2755	2	0	0	0	0	0	0	200	300	0	29.7511	133.146	-740.153	16129.1	24770.6	5810.53	233.467	881.208	0	0	0	0	0	0	0	603	903	0
2755	3	0	0	0	0	0	0	200	300	0	29.5985	132.993	-743.51	16129.1	24526.4	5993.64	232.987	881.307	0	0	0	0	0	0	0	603	903	0
2755	4	0	0	0	0	0	0	200	300	0	28.5304	132.078	-744.425	15946	24343.3	5993.64	232.701	881.579	0	0	0	0	0	0	0	603	903	0
2755	5	0	0	0	0	0	0	200	300	0	29.446	132.383	-745.646	16129.1	24892.6	6222.52	233.384	881.369	0	0	0	0	0	0	0	603	903	0
2755	6	0	0	0	0	0	0	200	300	0	30.6667	131.773	-747.172	15854.5	24465.4	6039.41	232.744	881.781	0	0	0	0	0	0	0	603	903	0
2755	7	0	0	0	0	0	0	200	300	0	29.1408	132.078	-749.308	15488.3	24343.3	5947.86	232.488	882.33	0	0	0	0	0	0	0	603	903	0
2755	8	0	0	0	0	0	0	200	300	0	28.3778	132.078	-752.36	15488.3	24892.6	5947.86	233.086	882.414	0	0	0	0	0	0	0	603	903	0
2755	9	0	0	0	0	0	0	200	300	0	28.2253	131.468	-750.224	15122	25075.7	5947.86	233.424	882.843	0	0	0	0	0	0	0	603	903	0
2756	0	0	0	0	0	0	0	200	300	0	28.3778	130.247	-756.938	15396.7	24709.5	5947.86	232.644	882.659	0	0	0	0	0	0	0	603	903	0
2756	1	0	0	0	0	0	0	200	300	0	30.5141	129.179	-755.717	15213.6	24404.3	5810.53	232.293	882.869	0	0	0	0	0	0	0	603	903	0
2756	2	0	0	0	0	0	0	200	300	0	27.4623	130.552	-758.158	14847.4	25197.8	5902.08	233.236	883.417	0	0	0	0	0	0	0	603	903	0
2756	3	0	0	0	0	0	0	200	300	0	26.3942	128.568	-760.6	14755.8	25014.7	5856.31	232.888	883.6	0	0	0	0	0	0	0	603	903	0
2756	4	0	0	0	0	0	0	200	300	0	26.852	128.874	-762.125	14847.4	24831.6	5856.31	232.582	883.518	0	0	0	0	0	0	0	603	903	0
2756	5	0	0	0	0	0	0	200	300	0	25.6313	127.653	-762.431	15122	24587.4	5902.08	232.249	883.166	0	0	0	0	0	0	0	603	903	0
2756	6	0	0	0	0	0	0	200	300	0	25.9364	126.737	-763.651	15030.5	25014.7	5902.08	232.757	883.318	0	0	0	0	0	0	0	603	903	0
2756	7	0	0	0	0	0	0	200	300	0	26.2416	125.974	-764.872	14389.6	24892.6	5764.76	232.545	884.187	0	0	0	0	0	0	0	603	903	0
2756	8	0	0	0	0	0	0	200	300	0	24.4106	125.974	-767.008	14755.8	24953.7	5718.98	232.534	883.762	0	0	0	0	0	0	0	603	903	0
2756	9	0	0	0	0	0	0	200	300	0	25.6313	125.517	-769.145	14389.6	25503	6039.41	233.158	884.291	0	0	0	0	0	0	0	603	903	0
2757	0	0	0	0	0	0	0	200	300	0	23.8002	124.296	-769.145	14481.2	25380.9	5627.43	232.999	884.172	0	0	0	0	0	0	0	603	903	0
2757	1	0	0	0	0	0	0	200	300	0	23.9528	120.939	-771.281	14298.1	25319.9	5581.65	232.828	884.462	0	0	0	0	0	0	0	603	903	0
2757	2	0	0	0	0	0	0	200	300	0	23.8002	122.617	-771.281	14572.7	25136.8	5673.2	232.591	884.106	0	0	0	0	0	0	0	603	903	0
2757	3	0	0	0	0	0	0	200	300	0	21.8166	122.923	-772.807	14023.4	24709.5	5444.32	231.974	884.854	0	0	0	0	0	0	0	603	903	0
2757	4	0	0	0	0	0	0	200	300	0	23.3424	121.092	-774.027	13474.1	25014.7	5535.87	232.318	885.592	0	0	0	0	0	0	0	603	903	0
2757	5	0	0	0	0	0	0	200	300	0	20.5959	119.413	-774.943	14115	25258.8	5902.08	232.594	884.786	0	0	0	0	0	0	0	603	903	0
2757	6	0	0	0	0	0	0	200	300	0	22.1217	119.566	-777.384	13931.9	25564	5718.98	232.885	885.079	0	0	0	0	0	0	0	603	903	0
2757	7	0	0	0	0	0	0	200	300	0	21.2062	117.43	-776.164	12741.7	25319.9	5398.54	232.622	886.584	0	0	0	0	0	0	0	603	903	0
2757	8	0	0	0	0	0	0	200	300	0	19.6803	117.582	-777.689	13840.3	25014.7	5352.77	232.165	885.203	0	0	0	0	0	0	0	603	903	0
2757	9	0	0	0	0	0	0	200	300	0	21.3588	117.43	-779.521	13107.9	25136.8	5444.32	232.246	886.185	0	0	0	0	0	0	0	603	903	0
2758	0	0	0	0	0	0	0	200	300	0	18.7648	115.293	-781.657	13748.8	25625	5306.99	232.783	885.411	0	0	0	0	0	0	0	603	903	0
2758	1	0	0	0	0	0	0	200	300	0	20.5959	113.92	-782.267	13657.2	25441.9	5261.22	232.523	885.542	0	0	0	0	0	0	0	603	903	0
2758	2	0	0	0	0	0	0	200	300	0	19.8329	112.547	-781.352	13199.4	25014.7	5352.77	232.015	886.107	0	0	0	0	0	0	0	603	903	0
2758	3	0	0	0	0	0	0	200	300	0	18.1544	112.089	-781.962	13107.9	24953.7	5306.99	231.912	886.237	0	0	0	0	0	0	0	603	903	0
2758	4	0	0	0	0	0	0	200	300	0	17.8493	112.242	-782.267	12741.7	24953.7	5169.66	231.899	886.712	0	0	0	0	0	0	0	603	903	0
2758	5	0	0	0	0	0	0	200	300	0	19.3752	110.716	-784.708	13291	25503	5123.89	232.5	886.063	0	0	0	0	0	0	0	603	903	0
2758	6	0	0	0	0	0	0	200	300	0	20.5959	109.19	-781.046	13107.9	24709.5	5032.33	231.636	886.218	0	0	0	0	0	0	0	603	903	0
2758	7	0	0	0	0	0	0	200	300	0	18.7648	108.122	-786.234	12833.2	25503	5261.22	232.437	886.678	0	0	0	0	0	0	0	603	903	0
2758	8	0	0	0	0	0	0	200	300	0	18.307	107.206	-784.098	12375.5	25564	4940.78	232.603	887.217	0	0	0	0	0	0	0	603	903	0
2758	9	0	0	0	0	0	0	200	300	0	17.8493	107.511	-785.624	13107.9	25380.9	4757.68	232.307	886.315	0	0	0	0	0	0	0	603	903	0
2759	0	0	0	0	0	0	0	200	300	0	19.3752	104.917	-783.793	12924.8	25136.8	5169.66	232.071	886.51	0	0	0	0	0	0	0	603	903	0
2759	1	0	0	0	0	0	0	200	300	0	19.6803	105.528	-784.098	12558.6	25686.1	4757.68	232.759	886.983	0	0	0	0	0	0	0	603	903	0
2759	2	0	0	0	0	0	0	200	300	0	18.0019	103.239	-783.488	12467	25808.2	4803.45	232.94	887.088	0	0	0	0	0	0	0	603	903	0
2759	3	0	0	0	0	0	0	200	300	0	19.6803	101.408	-784.098	12100.8	25136.8	4711.9	232.058	887.567	0	0	0	0	0	0	0	603	903	0
2759	4	0	0	0	0	0	0	200	300	0	19.3752	101.255	-782.267	12283.9	25319.9	4757.68	232.367	887.297	0	0	0	0	0	0	0	603	903	0
2759	5	0	0	0	0	0	0	200	300	0	19.6803	101.866	-780.131	12009.3	25319.9	4574.57	232.456	887.606	0	0	0	0	0	0	0	603	903	0
2759	6	0	0	0	0	0	0	200	300	0	19.5277	99.8819	-779.826	11551.5	25503	4620.35	232.703	888.187	0	0	0	0	0	0	0	603	903	0
2759	7	0	0	0	0	0	0	200	300	0	19.07	99.5767	-777.689	11917.7	25258.8	4528.79	232.479	887.676	0	0	0	0	0	0	0	603	903	0
2759	8	0	0	0	0	0	0	200	300	0	20.4433	97.8983	-776.469	12009.3	25014.7	4483.02	232.216	887.534	0	0	0	0	0	0	0	603	903	0
2759	9	0	0	0	0	0	0	200	300	0	19.5277	97.2879	-774.333	12100.8	24892.6	4574.57	232.147	887.373	0	0	0	0	0	0	0	603	903	0
2760	0	0	0	0	0	0	0	200	300	0	20.2907	96.2198	-771.586	11826.1	25380.9	4391.46	232.894	887.673	0	0	0	0	0	0	0	603	903	0
2760	1	0	0	0	0	0	0	200	300	0	20.7484	96.2198	-769.755	11368.4	24709.5	4437.24	232.1	888.231	0	0	0	0	0	0	0	603	903	0
2760	2	0	0	0	0	0	0	200	300	0	19.5277	94.6939	-765.482	11368.4	25686.1	4162.58	233.555	888.149	0	0	0	0	0	0	0	603	903	0
2760	3	0	0	0	0	0	0	200	300	0	21.5114	93.7784	-765.482	11276.8	25380.9	4116.81	233.157	888.268	0	0	0	0	0	0	0	603	903	0
2760	4	0	0	0	0	0	0	200	300	0	20.7484	92.4051	-762.736	11185.3	24953.7	4391.46	232.716	888.335	0	0	0	0	0	0	0	603	903	0
2760	5	0	0	0	0	0	0	200	300	0	21.2062	89.8111	-760.294	11093.7	25014.7	4071.03	232.901	888.409	0	0	0	0	0	0	0	603	903	0
2760	6	0	0	0	0	0	0	200	300	0	21.9691	90.4214	-756.632	11093.7	25319.9	4208.36	233.464	888.338	0	0	0	0	0	0	0	603	903	0
2760	7	0	0	0	0	0	0	200	300	0	23.8002	91.0318	-753.581	10361.3	25014.7	4025.25	233.194	889.251	0	0	0	0	0	0	0	603	903	0
2760	8	0	0	0	0	0	0	200	300	0	20.7484	89.8111	-751.139	10269.8	24892.6	4116.81	233.14	889.328	0	0	0	0	0	0	0	603	903	0
2760	9	0	0	0	0	0	0	200	300	0	21.2062	88.4378	-748.698	10452.9	24709.5	3933.7	233.003	889.039	0	0	0	0	0	0	0	603	903	0
2761	0	0	0	0	0	0	0	200	300	0	21.9691	87.0645	-742.899	10819.1	24465.4	3979.48	232.932	888.437	0	0	0	0	0	0	0	603	903	0
2761	1	0	0	0	0	0	0	200	300	0	22.5795	85.2335	-741.984	10819.1	24465.4	4071.03	232.973	888.419	0	0	0	0	0	0	0	603	903	0
2761	2	0	0	0	0	0	0	200	300	0	20.901	84.7757	-738.017	9628.88	24526.4	3887.92	233.233	889.953	0	0	0	0	0	0	0	603	903	0
2761	3	0	0	0	0	0	0	200	300	0	21.3588	84.9283	-733.134	9262.67	24770.6	3750.59	233.787	890.366	0	0	0	0	0	0	0	603	903	0
2761	4	0	0	0	0	0	0	200	300	0	21.9691	83.8602	-732.218	9720.43	24526.4	3750.59	233.496	889.725	0	0	0	0	0	0	0	603	903	0
2761	5	0	0	0	0	0	0	200	300	0	23.0373	82.9446	-730.082	9537.33	24465.4	3704.82	233.51	889.937	0	0	0	0	0	0	0	603	903	0
[truncated: 1,654 more rows]
