# Supplementary material for: The Effects of an Extemporaneous Speech Dual-task on Older Adult Gait Control
Source: Research Square preprint supplement (doi:10.21203/rs.3.rs-7674245/v1), 2025-11-18
Supplement: Supplementary file 105 [file DT9Walk4.xlsx]

## Sheet: Sheet1
Trajectories
		09:LFHD			09:RFHD			09:LBHD			09:RBHD			09:C7			09:T10			09:CLAV			09:STRN			09:RBAK			09:LSHO			09:LUPA			09:LELB			09:LFRM			09:LWRA			09:LWRB			09:LFIN
Frame	Sub Frame	X	Y	Z	X	Y	Z	X	Y	Z	X	Y	Z	X	Y	Z	X	Y	Z	X	Y	Z	X	Y	Z	X	Y	Z	X	Y	Z	X	Y	Z	X	Y	Z	X	Y	Z	X	Y	Z	X	Y	Z	X	Y	Z
		mm	mm	mm	mm	mm	mm	mm	mm	mm	mm	mm	mm	mm	mm	mm	mm	mm	mm	mm	mm	mm	mm	mm	mm	mm	mm	mm	mm	mm	mm	mm	mm	mm	mm	mm	mm	mm	mm	mm	mm	mm	mm	mm	mm	mm	mm	mm	mm
3496	0	258.748	1772.82	1651.29	162.957	1760.81	1652.46	264.028	1926.75	1688.46	120.399	1903.54	1684.57	198.032	1978.71	1506.97	215.811	2020.33	1244.31	193.882	1824.02	1432.95	196.952	1723.58	1228.44	149.981	2032.37	1303.71	383.86	1889.14	1467.51	452.478	1913.13	1235.11	462.753	1930.9	1135.14	509.558	1883.64	976.093	485.509	1843.01	892.855	528.578	1903.07	898.996	537.792	1859.35	829.66
3497	0	258.266	1760.35	1652.66	162.57	1748.76	1653.49	263.837	1914.01	1690.81	120.247	1891.3	1685.71	199.27	1966.91	1508.83	218.09	2008.85	1246.22	194.294	1812.15	1434.72	197.213	1711.95	1230.52	151.964	2021.1	1305.65	384.911	1876.5	1470.18	453.386	1897.29	1237.19	464.245	1913.27	1136.85	509.151	1859.79	978.876	483.304	1816.43	896.89	523.665	1875.09	898.458	536.291	1829.16	833.982
3498	0	258.194	1748.08	1654.19	162.438	1736.74	1654.28	264.011	1901.6	1693.15	120.253	1879.23	1686.95	200.47	1955.09	1510.6	220.056	1997.27	1248.2	194.951	1800.5	1436.36	197.42	1700.58	1232.14	153.974	2009.81	1307.37	385.464	1863.88	1472.59	454.592	1881.71	1239.53	465.929	1895.72	1138.94	508.236	1835.58	982.1	481.305	1789.89	902.183	523.029	1847.99	901.549	534.498	1798.67	839.064
3499	0	257.653	1735.65	1655.41	161.848	1724.69	1654.94	263.682	1888.98	1695.11	120.959	1867.43	1688.25	201.71	1943.17	1511.99	221.859	1985.66	1249.83	195.66	1788.84	1437.8	197.949	1689.83	1233.64	156.056	1998.48	1308.71	386.02	1851.23	1474.93	455.629	1865.96	1241.7	467.497	1878.15	1140.66	507.273	1811.36	985.448	479.177	1763.53	907.703	525.868	1821.19	906.626	531.65	1768.03	844.021
3500	0	257.531	1723.64	1656.58	161.644	1712.88	1655.75	263.741	1876.58	1696.77	120.873	1855.32	1688.92	202.879	1931.49	1513.25	223.475	1974.02	1251.13	196.248	1777.09	1439.05	198.047	1678.47	1235.21	157.833	1986.86	1309.84	385.962	1838.04	1476.7	456.733	1850.33	1243.6	469.056	1860.6	1142.25	506.539	1787.19	989.192	476.749	1737.01	913.376	524.52	1793.55	909.812	529.835	1737.9	850.146
3501	0	257.474	1711.5	1657.35	161.462	1701.07	1656.17	263.741	1864.14	1698.18	120.6	1843.8	1690.06	203.957	1919.27	1514.29	225.12	1962.45	1252.28	196.938	1765.43	1440.01	198.402	1667.28	1236.44	159.622	1975.2	1310.82	387.009	1825.64	1478.55	458.057	1834.79	1245.48	470.906	1843.14	1143.78	505.723	1763.06	992.848	474.237	1710.41	919.424	523.113	1766.15	913.217	527.751	1707.73	856.596
3502	0	257.132	1699.24	1658.12	161.015	1689.29	1656.55	264.09	1851.79	1699.66	120.841	1831.73	1690.42	204.999	1907.27	1515.23	226.712	1950.85	1253.36	197.331	1753.7	1440.88	198.813	1656.24	1237.26	161.295	1963.48	1311.62	387.216	1812.88	1479.93	459.126	1819.13	1247.23	472.483	1825.47	1145.31	504.708	1738.91	996.776	472.092	1684.31	926.176	520.809	1738.25	916.798	524.419	1677.55	862.869
3503	0	256.529	1686.16	1658.69	160.809	1677.52	1656.61	264.341	1839.27	1700.71	120.803	1820.17	1691.48	205.952	1895.34	1516.13	228.071	1939.18	1254.24	197.716	1741.75	1441.5	198.78	1644.59	1237.93	162.885	1951.72	1312.57	387.368	1799.93	1480.98	460.491	1803.61	1248.77	474.286	1807.76	1146.68	503.625	1714.89	1000.76	469.458	1658.27	932.583	517.547	1710.5	919.887	521.123	1647.85	869.5
3504	0	256.584	1674	1658.78	160.589	1665.44	1656.54	264.877	1826.87	1701.5	121.243	1808.23	1691.73	206.893	1883.21	1516.4	229.726	1927.27	1254.78	198.535	1729.85	1441.87	199.247	1633.07	1238.3	164.457	1939.88	1312.91	387.85	1787.25	1481.7	461.905	1787.96	1249.91	475.974	1789.76	1147.61	502.527	1690.83	1004.52	467.041	1632.58	939.122	518.562	1684.04	925.211	517.627	1618.37	875.952
3505	0	257.057	1662.1	1658.65	160.735	1653.58	1656.21	265.423	1814.46	1701.91	121.884	1796.42	1691.92	207.867	1871.18	1516.76	230.929	1915.2	1255.13	199.214	1718.11	1441.85	199.75	1621.63	1238.36	165.885	1928.13	1313.24	388.685	1774.78	1482.36	463.424	1772.7	1250.97	477.491	1771.74	1148.37	501.376	1667.05	1008.37	464.603	1607.06	945.784	515.807	1656.59	929.025	514.634	1589.56	883.159
3506	0	257.033	1649.6	1658.11	160.829	1641.61	1655.61	265.871	1801.85	1702.03	122.303	1784.41	1691.85	208.841	1859.19	1516.65	232.398	1903.47	1255.29	199.424	1706	1441.75	199.929	1610.17	1238.09	167.162	1916.51	1313.06	389.136	1762.17	1482.57	464.698	1757.07	1251.76	479.255	1753.61	1148.98	500.413	1643.49	1012.61	462.111	1581.84	952.557	514.276	1630.03	933.628	511.25	1561.08	890.378
3507	0	257.183	1636.98	1657.01	160.804	1629.51	1654.56	266.639	1789.43	1701.8	123.641	1772.45	1691.4	209.614	1847.05	1516.18	233.5	1891.84	1254.8	199.89	1693.98	1441.08	200.249	1598.78	1237.42	168.463	1904.74	1312.66	389.505	1749.6	1482.26	466.082	1741.44	1251.81	480.601	1735.22	1149.19	499.102	1620.03	1016.15	459.125	1556.78	959.01	510.638	1603.13	937.026	507.357	1532.62	897.358
3508	0	257.453	1625.23	1655.71	161.172	1617.28	1653.3	267.398	1776.87	1701.19	123.634	1760.1	1691.16	210.327	1834.87	1515.47	234.42	1880.16	1254.22	200.253	1681.99	1440.24	200.651	1587.42	1236.25	169.508	1892.85	1311.97	389.508	1736.97	1481.46	466.321	1725.95	1251.21	482.054	1716.72	1149.3	497.87	1596.61	1019.87	456.654	1532.23	965.557	508.131	1576.71	941.193	503.821	1504.95	904.505
3509	0	257.984	1612.67	1654.27	161.698	1605.08	1652.13	268.151	1764.23	1700.29	124.566	1747.9	1690.52	211.01	1822.72	1514.52	234.781	1868.37	1253.26	200.665	1669.93	1439.22	201.194	1576.14	1234.71	170.408	1881	1311.06	389.705	1724.36	1480.66	467.408	1710.09	1251.04	483.405	1698.2	1149.15	496.599	1573.42	1023.58	454.046	1507.94	971.957	505.861	1550.65	945.617	500.271	1477.81	911.542
3510	0	258.209	1600.39	1652.67	162.019	1592.72	1650.73	268.916	1751.55	1699.16	125.345	1735.63	1689.82	211.303	1810.17	1513.4	235.137	1856.85	1252.19	200.991	1657.93	1438.01	201.374	1564.5	1233.21	171.22	1869.47	1310.05	389.738	1711.76	1479.48	468.342	1694.01	1250.76	484.447	1679.51	1148.98	495.19	1550.49	1027.32	451.443	1484.1	978.261	503.87	1525.08	950.305	496.765	1451.05	918.727
3511	0	259.315	1587.98	1651.01	162.732	1580.25	1649.29	269.91	1738.91	1697.9	126.273	1723.12	1688.77	211.962	1798.23	1512.22	235.439	1845.36	1251.06	201.322	1645.7	1436.63	201.921	1552.66	1231.37	171.652	1857.38	1308.94	389.989	1699.17	1478.17	468.986	1677.89	1250.23	485.239	1660.67	1148.75	493.825	1527.79	1030.94	448.909	1460.64	984.297	501.501	1499.65	954.733	493.885	1425.39	925.719
3512	0	259.942	1575.42	1649.17	163.674	1568	1647.73	270.779	1726.3	1696.36	127.065	1710.57	1687.69	212.368	1786.03	1510.91	235.129	1833.31	1249.86	201.521	1633.38	1435	202.337	1540.3	1229.51	172.002	1845.41	1307.76	390.312	1686.53	1476.76	469.436	1661.65	1249.59	486.05	1641.77	1148.54	492.402	1505.38	1034.66	446.123	1437.5	990.025	499.734	1474.76	959.509	490.263	1399.58	932.653
3513	0	260.519	1562.62	1647.18	163.968	1555.31	1645.82	271.688	1713.64	1694.84	127.735	1697.94	1686.38	212.562	1773.37	1509.56	235.12	1821.46	1248.59	201.776	1621.13	1433.18	202.505	1527.55	1227.69	172.137	1833.26	1306.63	390.468	1674.06	1475.02	469.76	1645.39	1248.78	486.492	1622.86	1148.38	490.527	1483.02	1038.25	443.5	1414.94	995.53	497.447	1450.26	964.086	486.868	1374.42	939.423
3514	0	260.865	1550.05	1644.98	164.282	1542.77	1643.83	272.399	1700.9	1693.11	128.313	1685.21	1684.87	212.773	1760.95	1507.98	234.814	1809.23	1247.17	201.938	1608.8	1431.26	202.745	1514.75	1225.79	172.154	1821.13	1305.4	390.009	1661.33	1472.87	469.654	1629.06	1247.88	486.81	1603.97	1148.35	488.737	1461.15	1041.68	440.523	1392.49	1000.76	495.264	1426.37	968.331	483.756	1349.98	946.117
3515	0	261.494	1537.65	1642.8	164.847	1530.26	1641.89	273.053	1688.31	1691.08	128.874	1672.82	1683.41	212.912	1748.38	1506.32	234.535	1797.03	1245.53	202.197	1596.35	1429.25	203.125	1501.91	1223.99	172.129	1809.13	1303.91	390.104	1648.92	1470.94	469.465	1612.81	1246.73	486.934	1585.12	1148.07	487.232	1439.82	1044.91	437.965	1370.75	1005.43	493.302	1402.95	972.553	480.944	1326.19	952.367
3516	0	262.025	1525.3	1640.85	165.39	1517.87	1639.88	273.546	1675.42	1689.35	129.476	1660.23	1681.54	213.16	1736.15	1504.73	233.993	1784.56	1243.89	202.514	1584	1427.3	203.426	1489.4	1221.78	171.905	1796.94	1302.37	390.55	1636.69	1469.35	469.741	1596.38	1246.37	486.656	1566.44	1147.92	485.669	1418.65	1048.27	435.594	1349.41	1010.19	491.909	1380.19	977.318	478.342	1302.91	958.617
3517	0	261.857	1512.8	1638.61	165.671	1505.29	1637.99	273.793	1662.81	1687.34	129.718	1647.76	1680.14	212.898	1723.29	1502.79	233.487	1772.16	1241.94	202.429	1571.54	1425.29	203.576	1477	1219.71	171.502	1784.63	1300.52	390.321	1624.23	1467.41	469.43	1580.26	1245.79	486.255	1547.73	1147.79	483.657	1397.7	1051.72	433.173	1328.31	1014.68	490.563	1357.52	981.964	475.756	1280.27	964.564
3518	0	261.765	1500.37	1636.22	165.658	1492.78	1635.83	273.866	1650.36	1685.17	129.672	1635.18	1678.16	213.169	1711.34	1500.44	232.685	1759.09	1239.52	202.247	1558.95	1423.26	203.723	1464.66	1217.65	171.211	1772.19	1298.34	390.296	1611.92	1465.48	468.749	1564.13	1244.52	485.744	1529.37	1147.53	482.094	1377.45	1054.56	430.972	1307.92	1018.61	488.699	1335.73	985.526	473.361	1258.22	969.942
3519	0	262.343	1487.83	1634.31	165.674	1480.35	1633.82	273.798	1637.8	1683.3	129.827	1622.76	1676.09	213.181	1698.91	1498.47	232.412	1746.41	1237.38	202.163	1546.41	1421.32	203.912	1452.23	1215.79	170.932	1759.61	1296.25	389.918	1599.39	1463.38	467.906	1548.27	1243.4	485.268	1511.52	1147.6	480.575	1357.55	1057.19	428.827	1287.76	1022.36	487.01	1314.33	989.156	471.367	1236.84	975.207
3520	0	262.215	1475.43	1632.5	165.489	1467.77	1631.97	273.651	1625.45	1681.51	129.501	1610.1	1674.25	212.984	1686.41	1496.37	232.076	1733.47	1235.35	202.079	1533.84	1419.46	203.872	1439.59	1213.93	170.613	1746.82	1294.16	389.897	1586.83	1461.88	467.266	1532.33	1242.75	484.411	1493.45	1147.71	479.103	1338	1060.14	427.05	1268.22	1025.99	485.566	1293.67	992.972	469.428	1216.05	980.368
3521	0	261.723	1462.94	1630.74	165.218	1455.49	1630.12	273.329	1612.98	1679.9	129.229	1597.82	1672.65	212.882	1673.83	1494.47	231.573	1720.15	1233.16	201.802	1521.01	1417.77	203.694	1426.74	1212.29	170.264	1733.76	1292.09	389.499	1573.99	1460.28	466.658	1516.84	1242.06	483.604	1475.93	1147.87	477.678	1319.15	1062.66	425.333	1249.17	1029.21	484.485	1273.61	996.468	467.741	1195.97	984.877
3522	0	261.551	1450.66	1629.36	165.09	1443.35	1628.69	272.829	1600.63	1678.1	128.591	1585.33	1670.71	212.665	1661.07	1492.46	231.506	1707.15	1231.15	201.545	1508.15	1416	203.651	1413.9	1210.72	170.073	1720.55	1290.08	389.011	1561	1458.68	465.902	1501.39	1241.4	482.923	1458.9	1148.15	476.54	1300.73	1065	423.843	1230.65	1032.14	483.352	1254.32	999.449	466.641	1176.67	989.219
3523	0	261.065	1438.21	1628.16	164.446	1430.67	1627.29	272.165	1588.23	1676.58	128.029	1572.95	1669.26	212.453	1648.23	1490.73	231.359	1693.98	1229.42	201.417	1495.22	1414.31	203.574	1400.95	1209.09	170.1	1707.38	1288.28	388.863	1547.98	1457.46	465.641	1486.16	1241.17	482.389	1442.23	1148.66	475.541	1283.01	1067.14	422.684	1212.64	1034.83	482.724	1235.82	1002.54	465.747	1158.04	993.111
3524	0	260.229	1425.5	1627.26	163.523	1418.1	1626.36	271.54	1575.78	1675.3	127.323	1560.67	1667.74	212.06	1635.02	1489.16	231.119	1680.46	1227.77	200.802	1481.86	1412.81	203.126	1387.84	1207.48	170.115	1694.13	1286.46	388.033	1534.57	1456.28	464.533	1470.89	1240.59	481.469	1425.84	1148.84	474.569	1265.75	1069.07	421.691	1195.25	1037.21	481.525	1218.17	1004.75	464.946	1140.01	996.734
3525	0	259.082	1412.77	1626.3	162.456	1405.5	1625.41	270.508	1563.32	1673.71	126.155	1548.18	1665.92	211.694	1621.98	1487.59	230.806	1667.05	1226.05	200.326	1468.81	1411.26	202.739	1374.66	1206.05	169.927	1680.53	1284.52	387.064	1520.86	1455.28	463.814	1455.89	1240.15	480.933	1410.05	1148.95	473.698	1249.03	1070.6	420.746	1178.35	1039.22	480.928	1200.72	1006.74	464.162	1122.67	999.61
3526	0	258.281	1400.2	1625.73	161.462	1392.9	1624.76	269.419	1550.97	1672.23	125.349	1535.95	1664.49	211.273	1608.83	1486.02	230.795	1653.65	1224.53	199.557	1455.4	1409.99	202.38	1361.15	1204.83	169.877	1666.81	1282.9	386.46	1507.12	1454.54	463.211	1440.98	1239.91	479.713	1394.82	1148.4	474.011	1233.12	1072.05	420.296	1162.12	1040.82	480.051	1184.35	1007.98	464.135	1106.13	1002.27
3527	0	257.111	1387.55	1625.34	160.47	1380.28	1624.3	268.394	1538.48	1671.12	124.538	1523.67	1663.27	210.676	1595.51	1484.56	230.694	1639.81	1223.11	199.044	1442.09	1408.66	201.741	1347.12	1203.92	170.039	1652.93	1281.31	385.749	1493.15	1453.83	462.66	1426.01	1239.91	479.258	1379.71	1148.51	473.494	1217.54	1072.84	420.351	1146.49	1042.18	480.501	1168.47	1009.84	464.196	1090.31	1004.37
3528	0	255.464	1374.83	1625.28	159.239	1367.81	1623.9	267.175	1525.97	1670.15	123.076	1510.97	1661.94	209.742	1581.98	1483.21	230.546	1625.57	1221.63	197.97	1428.45	1407.63	201.032	1332.89	1203.38	169.846	1638.91	1279.74	384.721	1479.14	1453.3	462.375	1411.48	1240.2	478.735	1365.21	1148.38	473.448	1202.62	1073.51	420.214	1131.35	1043.12	480.722	1153.34	1010.94	464.425	1075	1005.82
3529	0	254.366	1362.06	1625.09	157.67	1354.93	1623.73	265.763	1513.57	1669.12	121.7	1498.61	1660.95	208.855	1568.56	1482.02	230.303	1611.05	1220.33	196.971	1414.8	1406.81	200.057	1318.3	1203.1	169.558	1624.76	1278.25	383.524	1465.28	1452.71	461.858	1396.71	1240.13	478.548	1350.85	1148.58	473.597	1188.28	1073.8	420.256	1116.72	1043.44	480.504	1138.57	1011.06	464.797	1060.38	1006.71
3530	0	252.846	1349.35	1625.2	156.337	1342.3	1623.6	264.179	1500.99	1668.48	120.186	1486.02	1660.09	207.812	1555.05	1481.03	229.815	1596.34	1219.23	195.879	1400.99	1406.41	198.854	1303.65	1202.94	169.024	1610.39	1276.98	382.478	1451.46	1452.49	461.277	1382.27	1240.32	478.178	1336.82	1148.55	473.643	1174.26	1073.65	420.846	1102.81	1043.33	481.279	1124.85	1011.21	465.5	1046.26	1007.2
3531	0	251.26	1336.5	1625.61	154.549	1329.42	1623.87	262.483	1488.36	1668.13	118.497	1473.36	1659.58	206.654	1541.49	1480.4	229.23	1581.23	1218.24	194.671	1387.1	1406.25	197.633	1289.02	1203.13	168.335	1595.75	1275.82	381.217	1437.68	1452.38	460.965	1368.04	1240.95	478.149	1323.18	1148.86	474.113	1160.97	1073.34	421.351	1089.42	1042.77	481.506	1111.47	1010.73	466.485	1033.13	1006.85
3532	0	249.503	1323.67	1626.32	152.845	1316.5	1624.57	260.748	1475.84	1667.96	116.592	1460.79	1659.44	205.287	1527.7	1479.79	228.4	1566.2	1217.46	193.415	1373.14	1406.32	196.427	1274.32	1203.56	167.393	1581.08	1274.82	379.902	1423.83	1452.43	460.464	1353.93	1241.27	477.852	1309.94	1148.91	474.447	1148.07	1072.61	422.062	1076.65	1041.49	482.568	1099.05	1009.91	467.822	1020.69	1006.03
3533	0	247.473	1310.8	1627.18	150.991	1303.69	1625.53	258.818	1463.27	1668	114.811	1448.14	1659.23	203.931	1513.88	1479.37	227.43	1551	1216.95	192.074	1359.02	1406.57	195.447	1259.65	1204.14	166.33	1566.33	1274.16	378.85	1410.06	1452.75	460.123	1340.15	1241.94	478.063	1297.22	1149.17	475.372	1135.98	1071.62	423.154	1064.58	1039.75	483.713	1087.16	1008.82	469.11	1008.73	1004.65
3534	0	245.464	1297.87	1628.79	149.12	1290.88	1626.68	256.726	1450.51	1668.5	112.654	1435.58	1659.28	202.422	1499.96	1479.39	226.459	1536.3	1216.85	191.097	1344.88	1407.2	194.539	1244.77	1204.83	165.195	1551.22	1273.74	377.909	1396.19	1453.5	459.915	1326.79	1242.78	477.846	1284.58	1149.53	476.028	1124.21	1070.37	424.307	1053.08	1037.4	485.274	1076.45	1007.47	470.797	997.664	1002.61
3535	0	243.624	1284.8	1630.66	146.823	1277.8	1628.2	254.548	1437.89	1669.06	110.57	1422.75	1659.22	201.097	1485.96	1479.69	225.304	1521.74	1216.81	189.703	1330.61	1407.9	193.633	1229.72	1205.66	163.847	1536.18	1273.47	376.72	1382.12	1454.42	459.676	1313.59	1243.67	479.675	1272.77	1150.98	476.911	1113.27	1068.73	425.662	1042.44	1034.59	486.736	1065.94	1005.57	472.783	987.433	1000.04
3536	0	241.141	1271.52	1632.6	144.274	1264.52	1629.68	252.094	1425.12	1669.57	108.334	1409.98	1659.3	199.816	1471.88	1480.22	224.578	1507.3	1217.32	188.595	1316.35	1408.68	192.961	1214.78	1206.67	163.008	1521.29	1273.75	375.335	1367.9	1455.26	459.025	1300.91	1243.91	477.896	1261.08	1150.07	477.771	1102.92	1066.7	427.084	1032.39	1031.08	488.113	1056.52	1002.56	474.887	978.041	996.574
3537	0	238.699	1258.07	1634.86	142.102	1251.4	1631.56	249.84	1412.05	1670.62	106.134	1397.14	1659.5	198.578	1457.53	1481.11	224.027	1493.22	1218.39	187.767	1302.14	1409.69	192.544	1199.97	1207.53	162.48	1506.97	1274.67	374.664	1353.74	1456.71	458.429	1288.42	1244.33	477.72	1249.93	1150.19	478.792	1093.2	1064.31	428.728	1023.08	1027.15	489.851	1047.97	999.415	477.38	969.687	992.632
3538	0	236.389	1244.6	1637.43	139.802	1238.05	1633.17	247.642	1398.77	1671.89	104.237	1384.18	1659.36	197.624	1443.12	1482.74	223.703	1479.4	1220.16	187.165	1288.09	1410.68	192.125	1185.39	1208.4	161.991	1493.19	1276.26	373.819	1339.37	1458.53	458.091	1276.14	1245.44	480.442	1239.21	1152.54	480.182	1084.21	1062.02	430.606	1014.53	1023.07	491.972	1040.23	996.775	479.854	962.033	988.033
3539	0	234.403	1231.2	1639.78	137.549	1224.8	1634.65	245.509	1385.33	1673.07	102.166	1371.23	1659.57	196.776	1428.88	1484.4	223.669	1466	1222.07	186.882	1274.26	1411.85	191.82	1171.05	1209.44	161.567	1479.63	1277.78	373.107	1325.19	1460.11	458.274	1264.69	1246.6	477.683	1228.77	1151.44	481.265	1075.81	1059.21	432.579	1006.75	1018.53	494.297	1033.36	993.549	482.613	955.349	982.924
3540	0	232.232	1217.3	1641.78	135.619	1211.3	1635.67	243.61	1371.69	1674.49	100.301	1358	1659.71	195.946	1414.88	1485.77	223.663	1452.83	1224.04	186.713	1260.6	1412.7	191.437	1157.09	1210.31	161.296	1466.3	1279.41	372.245	1311.02	1461.56	456.547	1253.09	1246.33	479.589	1218.98	1152.9	482.672	1067.99	1056.37	434.596	999.614	1013.59	495.667	1027.2	989.228	485.359	949.72	976.896
3541	0	229.967	1203.41	1643.51	133.962	1197.95	1636.5	241.919	1357.91	1676.07	98.638	1344.48	1660.05	195.399	1401.28	1487.75	223.517	1440.2	1226.24	186.523	1247.09	1413.64	191.144	1143.74	1211.06	160.962	1452.97	1281.35	371.823	1297.64	1463.04	457.562	1241.68	1248.09	479.724	1209.35	1153.43	483.947	1060.71	1053.2	436.289	992.906	1008.46	497.848	1021.59	985.159	488.094	944.539	970.558
3542	0	228.73	1189.55	1645.1	132.563	1184.3	1637.34	240.647	1344.05	1677.86	97.5208	1330.9	1660.52	194.853	1388.19	1489.59	222.959	1427.79	1228.38	186.521	1233.88	1414.86	190.745	1130.76	1211.84	160.495	1439.96	1283.28	371.122	1284.46	1464.41	455.683	1230.61	1247.99	477.031	1199.97	1152.42	485.397	1053.91	1050.18	438.833	987.447	1003.32	499.968	1016.68	981.137	490.415	940.111	963.914
3543	0	227.659	1175.74	1646.29	131.639	1170.79	1637.78	239.488	1330.09	1679.46	96.4976	1317.05	1661.41	193.826	1375.05	1491.13	222.234	1415.96	1230.25	186.341	1220.96	1416.03	190.565	1118.34	1212.83	159.746	1427.36	1285.34	370.662	1271.95	1465.66	456.372	1219.69	1249.76	476.824	1191.02	1152.82	486.841	1047.78	1046.99	440.875	982.346	997.831	502.11	1012.43	977.128	492.79	936.597	956.802
3544	0	227.42	1162.01	1647.32	131.314	1157.26	1638.82	238.841	1316.26	1681.09	95.8763	1303.32	1663.02	193.33	1362.44	1492.96	221.453	1403.98	1231.95	186.468	1208.34	1417.49	190.698	1106.25	1214.01	158.528	1415.01	1287.2	370.609	1260.05	1467.04	456.328	1209.3	1250.57	476.756	1182.38	1153.04	488.397	1042.27	1043.7	442.961	977.941	992.168	505.208	1009.12	973.482	495.061	933.819	949.467
3545	0	227.186	1148.63	1648.14	131.406	1143.61	1639.63	238.7	1302.6	1682.89	95.5969	1289.26	1664.53	192.75	1349.91	1494.78	220.3	1392	1233.6	186.494	1195.87	1419.18	190.804	1094.21	1215.4	157.285	1402.92	1288.89	370.806	1248.49	1468.44	456.779	1199.46	1251.63	476.548	1174.28	1153.2	489.847	1037.25	1040.26	444.859	974.19	986.641	507.449	1006.12	969.493	497.266	931.824	942.051
3546	0	227.683	1135.22	1649.11	131.538	1129.98	1640.73	238.329	1289.05	1684.56	95.2787	1275.36	1666.53	192.01	1337.61	1496.43	218.986	1380.31	1235.36	186.086	1183.41	1420.89	191.111	1082.28	1217.16	155.688	1390.99	1290.64	370.803	1237.05	1469.81	456.49	1190.02	1252.29	476.569	1166.54	1153.48	491.254	1032.92	1037.07	446.716	971.244	981.141	509.187	1003.85	965.369	499.279	930.64	934.867
3547	0	227.37	1121.7	1650.09	131.837	1116.42	1642.1	238.184	1275.39	1686.59	95.3137	1261.55	1668.84	191.221	1325.23	1498.36	217.456	1368.4	1237.17	185.661	1171.12	1422.83	191.427	1070.53	1219.04	154.477	1379.15	1292.9	370.425	1225.64	1470.92	456.237	1180.72	1252.69	476.682	1159.42	1153.74	492.295	1028.96	1033.75	448.646	968.999	975.549	510.922	1001.9	961.185	501.019	930.134	927.423
3548	0	228.248	1108.66	1651.64	132.479	1102.92	1643.73	238.583	1262.23	1688.72	95.3797	1247.93	1671.3	190.895	1312.95	1500.64	215.766	1356.64	1239.23	185.74	1159.04	1425.09	192.049	1058.98	1220.95	153.17	1367.32	1295.18	370.274	1214.56	1471.7	456.148	1172.31	1252.86	476.394	1152.64	1153.54	493.784	1025.79	1030.44	450.552	967.26	970.204	512.914	1000.87	957.027	503.043	930.486	920.265
3549	0	229.056	1096.01	1653.3	133.194	1089.71	1645.67	239.011	1249.09	1691.06	95.6923	1234.42	1673.72	190.404	1300.53	1503.29	214.357	1345.08	1241.79	185.633	1146.85	1427.44	192.773	1047.64	1223.04	151.814	1355.49	1297.87	371.046	1203.77	1473.33	456.559	1164.2	1253.55	476.298	1146.28	1153.68	495.118	1023.29	1027.36	452.246	966.476	964.854	514.953	1000.53	953.504	504.889	931.318	913.561
3550	0	229.461	1083.08	1655.11	133.609	1076.59	1647.79	239.372	1236.22	1693.05	95.9068	1221.19	1676.33	190.089	1288.17	1505.83	212.715	1333.73	1244.29	185.401	1134.69	1429.84	193.233	1036.31	1225.11	150.966	1343.92	1300.82	371.055	1192.47	1474.55	456.601	1156.83	1253.85	476.201	1140.47	1153.57	496.166	1021.18	1024.22	454.059	966.355	959.514	516.675	1000.65	949.876	506.725	933.022	907.025
3551	0	230.039	1070.3	1657.07	133.941	1063.82	1649.92	239.473	1223.42	1694.98	96.0162	1208.41	1678.84	189.75	1275.93	1508.13	211.173	1321.84	1246.63	185.309	1122.44	1432.07	193.659	1025.01	1227.01	149.716	1332.2	1303.41	370.746	1181.12	1475.34	455.556	1149.82	1253.2	475.981	1135.12	1153.33	497.172	1019.86	1020.88	455.662	966.51	954.66	517.973	1001.3	946.021	508.412	935.178	900.745
3552	0	230.46	1057.88	1659.04	134.374	1051.33	1652.07	239.681	1210.86	1697.06	96.3229	1195.73	1680.93	189.263	1263.41	1510.44	209.667	1310.24	1249.03	185.253	1110.18	1434.15	193.982	1013.59	1228.87	147.998	1319.72	1305.76	370.803	1169.79	1476.66	455.975	1143.07	1253.75	475.525	1130.03	1153.45	498.168	1018.79	1018.01	457.206	967.127	949.939	519.476	1002.62	942.593	510.078	937.973	894.958
3553	0	230.405	1045.4	1661.03	134.361	1038.84	1654.22	239.864	1198.68	1698.77	96.3013	1183.39	1682.86	188.907	1251.07	1512.33	208.355	1298.22	1251.06	185.286	1097.93	1436.25	194.173	1002.02	1230.83	147.15	1308.06	1308.33	370.886	1158.3	1477.88	455.06	1136.6	1253.36	475.232	1125.38	1153.56	499.025	1018.35	1015.29	458.527	968.166	945.619	520.168	1004.2	939.089	511.573	941.189	889.431
3554	0	229.941	1033.16	1662.78	134.309	1026.56	1656.26	239.715	1186.56	1700	96.465	1171.24	1684.48	188.702	1238.91	1514.12	207.116	1286.27	1252.73	185.037	1085.34	1438.12	194.177	990.29	1232.64	145.185	1295.38	1309.9	370.713	1146.96	1478.62	454.312	1130.33	1252.95	474.835	1121.12	1153.4	499.519	1018.11	1012.44	459.698	969.62	941.494	520.52	1006.43	935.32	512.919	944.808	884.268
3555	0	230.544	1021.15	1664.76	134.437	1014.36	1658.23	239.963	1174.65	1701.29	97.0022	1159.1	1685.61	188.315	1226.53	1515.77	206.422	1274.33	1254.35	185.421	1073.13	1439.78	194.245	978.458	1234.27	144.428	1283.33	1312.11	370.916	1135.57	1479.6	454.005	1124.21	1253.14	474.247	1117.41	1153.1	500.325	1018.36	1009.85	460.783	971.05	937.326	521.92	1009.19	932.855	514.529	948.868	879.394
3556	0	230.495	1009.09	1666.59	134.627	1002.41	1660.03	239.93	1162.71	1702.26	96.8026	1147.34	1687.01	187.911	1214.24	1516.93	205.569	1262.33	1255.81	185.364	1060.66	1441.12	194.312	966.542	1235.71	142.968	1270.89	1313.86	371.205	1124.09	1480.57	453.928	1117.95	1253.55	473.456	1113.56	1153.04	500.925	1018.84	1007.41	462.019	973.302	933.313	522.67	1012.04	930.322	515.752	953.149	874.764
3557	0	230.62	997.129	1667.93	134.584	990.371	1661.47	239.92	1150.82	1702.88	96.8295	1135.36	1687.85	187.925	1201.92	1518.28	204.691	1250.15	1256.97	185.386	1048.26	1442.28	194.023	954.59	1236.81	141.433	1258.2	1314.91	371.027	1112.31	1481.26	452.98	1111.73	1253.4	472.809	1109.94	1153.01	501.203	1019.52	1004.97	462.902	975.501	929.66	522.78	1015.17	927.564	516.932	957.828	870.473
3558	0	230.682	985.075	1668.95	134.56	978.233	1662.56	239.893	1139.11	1703.18	96.673	1123.31	1688.4	187.44	1189.35	1518.86	204.074	1237.98	1257.74	185.004	1035.59	1443.04	193.839	942.795	1237.46	140.276	1245.76	1316.14	370.784	1100.43	1481.33	452.392	1105.38	1253.08	471.734	1106.42	1152.62	501.321	1020.34	1002.35	463.441	977.739	925.896	522.557	1018.49	924.269	517.808	962.701	865.896
3559	0	230.757	973.36	1669.51	134.855	966.172	1663.43	240.042	1127.25	1703.27	96.7876	1111.21	1688.75	187.223	1177.02	1519.46	203.472	1226.12	1258.43	185.015	1023.08	1443.54	193.777	931.226	1237.61	139.514	1233.68	1316.97	370.847	1088.48	1481.43	451.702	1098.81	1252.81	470.654	1102.72	1152.26	501.532	1021.56	999.853	464.409	980.204	922.37	522.663	1022.06	921.541	519.145	967.862	861.998
3560	0	231.111	960.997	1669.94	135.102	953.986	1663.87	240.147	1115.22	1703.29	96.7828	1099.08	1688.92	187.138	1164.76	1519.96	203.084	1214.34	1258.98	185.41	1010.98	1443.86	193.453	919.739	1237.35	138.533	1221.16	1317.78	370.934	1076.57	1481.56	451.125	1092.23	1252.79	469.361	1098.98	1152.34	501.558	1022.8	997.58	465.235	982.931	919.023	522.871	1026.1	919.747	520.164	973.233	858.538
3561	0	231.514	949.113	1669.93	135.443	941.663	1664.07	240.099	1103.22	1702.77	96.8633	1086.81	1688.69	186.455	1151.88	1519.87	203.006	1202.8	1259.39	185.213	998.434	1443.76	193.129	908.237	1236.75	137.665	1208.94	1318	370.829	1064.53	1481.21	450.404	1085.48	1252.46	467.986	1094.8	1152.16	501.6	1024.09	995.627	465.92	985.586	915.894	522.899	1030.06	917.787	520.951	978.731	854.912
3562	0	231.448	936.655	1669.35	135.77	929.159	1663.77	240.243	1091.17	1701.89	97.1189	1074.36	1688.23	186.202	1139.38	1519.23	202.318	1190.56	1258.94	185.075	985.876	1443.32	192.923	896.571	1235.77	136.677	1196.68	1317.63	370.734	1052.3	1480.52	449.565	1078.57	1251.85	466.412	1090.77	1151.64	501.568	1025.48	993.366	466.731	988.338	912.788	522.35	1034.17	915.592	521.998	984.424	851.755
3563	0	232.294	924.455	1668.51	136.222	916.62	1663.09	240.462	1078.9	1700.87	97.1378	1061.6	1687.52	186.001	1127.04	1518.65	202.406	1178.64	1258.55	185.113	973.362	1442.68	192.643	884.724	1234.53	136.134	1184.39	1317.31	370.739	1040.24	1479.7	448.559	1071.51	1251.25	464.854	1086.55	1151.43	501.325	1026.6	991.634	467.296	990.654	909.737	521.838	1038.63	913.625	522.533	990.207	848.532
3564	0	232.487	911.857	1667.27	136.427	903.921	1662	240.544	1066.36	1699.81	97.2634	1048.76	1686.41	185.726	1114.88	1517.86	202.15	1166.61	1257.96	184.798	960.768	1441.79	192.305	872.573	1233.17	135.503	1172.34	1316.69	370.476	1027.91	1478.8	447.425	1064.09	1250.57	463.079	1081.94	1151.32	501.061	1027.55	990.166	467.78	993.228	907.085	521.107	1042.53	912.271	523.117	996.057	845.983
3565	0	232.865	899.028	1665.61	136.922	890.937	1660.57	240.39	1053.59	1698.47	97.4652	1035.79	1685.26	185.198	1101.87	1516.88	201.983	1154.4	1257.05	184.892	948.417	1440.56	192.154	860.457	1231.32	135.19	1160.31	1315.82	370.246	1015.41	1477.56	446.366	1056.46	1249.84	461.231	1077.05	1151.17	499.954	1028.51	988.146	468.044	995.333	904.338	519.928	1046.14	910.839	523.265	1001.77	843.249
3566	0	233.748	886.685	1663.71	137.416	877.998	1658.75	240.758	1040.67	1697.06	97.7026	1022.69	1684.14	185.122	1089.4	1515.63	202.602	1142.42	1256.18	184.78	935.808	1439.11	192.017	847.92	1229.63	134.923	1148.36	1314.79	370.536	1003.12	1476.44	445.464	1048.66	1249.01	459.427	1071.94	1150.84	499.778	1029.16	987.105	468.924	997.641	902.198	519.077	1049.66	910.012	524.014	1007.4	841.363
3567	0	234.194	873.791	1661.49	137.911	864.932	1656.64	240.853	1027.46	1695.53	97.8266	1009.4	1682.72	184.927	1076.98	1514.2	203.049	1130.44	1255.15	185.089	923.563	1437.59	191.833	835.187	1227.78	134.981	1136.44	1313.77	370.807	990.694	1475.26	444.898	1040.63	1248.36	457.389	1066.27	1150.54	498.632	1029.49	985.638	469.757	999.782	900.281	518.433	1053.2	909.939	524.063	1013.26	839.49
3568	0	234.427	860.609	1659.03	138.227	851.716	1654.01	241.338	1014.39	1694.09	98.1626	996.018	1680.83	185.167	1064.71	1512.85	203.683	1118.34	1253.95	184.957	911.205	1435.93	191.739	822.424	1225.91	135.067	1124.53	1312.48	370.943	978.112	1474.01	444.295	1032.31	1247.73	455.427	1060.15	1150.47	497.621	1029.42	984.702	469.6	1001.84	897.812	515.185	1055.84	908.927	523.57	1018.51	837.571
3569	0	234.881	847.587	1656.38	138.518	838.584	1651.21	241.536	1000.88	1692.29	98.3332	982.629	1679.3	185.691	1052.52	1511.36	204.468	1106.1	1252.57	184.845	898.724	1434.1	191.402	809.683	1224.02	135.263	1112.45	1310.89	371.002	965.47	1472.42	443.582	1023.5	1246.92	453.526	1053.54	1150.16	496.034	1028.55	983.448	468.642	1003.19	895.502	514.35	1058.19	909.194	522.947	1023.35	835.918
3570	0	235.341	834.354	1653.45	139.476	825.741	1648.34	241.815	987.36	1690.56	98.6444	969.315	1677.34	186.015	1040.15	1509.49	205.195	1093.95	1250.88	185.342	886.323	1432.13	191.418	797.272	1222.1	135.656	1100.37	1309.12	371.391	952.844	1470.91	443.086	1014.52	1246.22	451.716	1046.47	1149.9	495.398	1027.51	983.162	469.323	1004.07	894.425	513.073	1059.91	909.681	523.001	1028.18	835.279
3571	0	235.946	821.297	1650.77	139.872	812.738	1645.36	242.344	974.059	1688.86	99.1529	955.914	1675.05	186.49	1027.77	1507.45	205.988	1081.82	1248.98	185.698	874.012	1430.08	191.55	784.931	1220.16	136.273	1088.16	1307.22	372.044	940.254	1469.35	442.766	1005.23	1245.39	450.565	1039.46	1149.81	494.86	1026	983.145	469.326	1004.44	893.412	512.38	1061.15	910.972	522.51	1032.3	834.828
3572	0	236.456	808.229	1647.72	140.443	799.766	1642.39	242.909	960.874	1686.63	99.8049	942.931	1673.02	187.229	1015.6	1505.23	206.801	1069.44	1246.59	186.096	861.667	1428.1	191.625	772.174	1218.41	136.919	1075.74	1304.88	372.553	927.605	1467.34	442.37	995.846	1244.19	449.05	1031.46	1149.24	494.171	1023.65	983.023	469.522	1004.26	892.511	510.842	1061.51	911.813	522.492	1036.06	834.833
3573	0	236.754	795.271	1644.94	141.132	786.916	1639.58	243.598	947.704	1684.75	100.532	929.802	1670.8	187.849	1003.05	1502.77	207.881	1056.98	1244.32	186.939	849.47	1425.89	191.781	759.628	1216.77	137.594	1063.34	1302.34	373.532	915.207	1465.47	442.074	985.957	1242.91	447.754	1022.98	1148.39	494.366	1020.95	983.323	470.211	1003.47	891.893	509.763	1060.92	912.718	522.097	1038.94	834.553
3574	0	237.879	782.532	1642.35	141.813	774.081	1636.89	244.369	934.585	1682.77	101.277	916.843	1668.71	188.889	990.678	1500.78	208.648	1044.35	1242	187.681	836.89	1423.91	192.042	746.892	1215.15	138.571	1050.66	1300.32	374.361	902.642	1463.44	441.868	975.792	1241.57	446.982	1013.76	1148.06	493.917	1017.1	983.383	470.925	1001.66	891.36	509.431	1059.57	914.404	521.657	1041.05	834.649
3575	0	238.499	769.638	1639.93	142.441	761.355	1634.66	245.343	921.724	1680.96	102.12	904.175	1666.95	189.734	978.087	1498.53	209.433	1031.33	1239.68	188.357	824.484	1421.99	192.426	734.224	1213.53	139.547	1038	1298.08	375.306	890.03	1461.32	441.653	965.157	1240	445.383	1004.14	1146.81	493.797	1012.64	983.353	471.528	999.088	890.597	509.072	1057.14	915.753	520.898	1042.05	834.606
3576	0	239.309	756.744	1637.74	143.095	748.59	1632.76	246.355	909.029	1678.83	103.227	891.564	1665.36	190.826	965.612	1496.23	210.139	1018.25	1237.4	188.958	811.581	1420.25	192.859	721.597	1212.04	140.465	1025.08	1295.62	376.318	877.568	1458.91	441.742	954.365	1238.02	444.532	994.439	1145.49	493.555	1007.19	982.79	472.54	995.698	889.829	508.671	1053.88	916.659	519.899	1041.95	834.08
3577	0	240.671	744.307	1636.1	144.352	736.18	1631.25	247.772	896.404	1676.84	104.643	879.146	1663.82	192.085	953.057	1494.45	210.765	1004.93	1235.21	190.058	798.908	1418.43	193.609	708.763	1210.25	141.271	1012.15	1293.53	377.461	864.917	1456.59	442.005	943.291	1236.2	444.575	984.499	1144.37	494.049	1001.26	982.642	473.759	991.525	889.273	508.945	1049.55	917.895	520.343	1041.12	834.781
3578	0	241.865	731.674	1634.65	145.734	723.692	1630	249.368	883.708	1675.22	106.281	866.692	1662.43	193.211	940.3	1492.63	211.349	991.595	1233.26	191.183	786.341	1416.41	194.546	695.913	1208.81	142.148	998.98	1291.81	379.019	852.424	1454.66	442.859	932.111	1234.7	444.311	973.88	1143.1	495.336	994.616	983.081	475.67	986.511	889.184	509.46	1044.19	919.016	520.552	1038.77	835.437
3579	0	243.55	719.17	1633.3	147.045	711.246	1628.99	250.998	871.192	1673.46	107.797	854.316	1661.27	194.237	927.368	1490.88	211.796	978.327	1231.48	192.291	773.47	1414.79	195.516	682.776	1207.25	142.801	985.746	1290.11	380.133	839.643	1452.75	443.149	920.388	1232.87	444.604	963.061	1141.78	496.15	986.947	982.781	476.775	980.133	888.502	509.556	1037.65	919.548	520.67	1034.93	835.767
3580	0	244.991	706.599	1631.84	148.382	698.551	1628.02	252.936	858.887	1671.6	109.527	841.994	1660.34	195.516	914.545	1489.33	212.083	964.844	1229.55	193.277	760.527	1413.22	196.4	669.494	1205.84	143.354	972.359	1288.3	381.234	826.96	1450.59	443.549	908.663	1230.85	444.858	951.898	1140.19	496.057	978.026	981.52	477.768	972.589	887.257	510.377	1030.11	919.881	520.588	1029.31	835.451
3581	0	246.641	694.239	1630.61	150.288	686.357	1627.33	255.172	846.53	1670.18	111.308	829.627	1659.45	196.901	901.992	1487.97	212.512	951.257	1228.02	194.641	747.622	1411.72	197.672	655.721	1204.74	143.964	959.099	1286.7	382.152	814.233	1448.3	444.115	896.656	1229.03	445.638	940.454	1138.86	496.829	968.445	980.618	478.778	963.747	886.268	511.372	1021.34	919.917	521.221	1022.23	835.241
3582	0	248.566	681.756	1629.64	152.08	673.858	1626.6	257.049	834.136	1668.91	113.382	817.178	1658.62	198.221	889.187	1486.67	212.806	937.528	1226.33	195.898	734.558	1410.82	198.945	641.886	1203.82	144.478	945.477	1285.24	383.434	801.412	1446.73	445.244	884.6	1227.69	446.487	928.835	1137.76	498.122	958.073	980.216	479.999	954.323	885.589	512.106	1011.27	919.655	522.26	1013.58	835.406
3583	0	250.443	669.221	1629.01	153.685	661.332	1626.48	259.118	821.757	1667.94	115.419	804.904	1658.47	199.914	876.801	1485.56	213.377	923.708	1224.85	197.038	721.336	1410.17	200.3	627.968	1203.31	145.096	931.89	1283.99	384.765	788.403	1445.36	446.122	872.185	1226.63	447.148	916.797	1136.9	499.198	946.71	979.67	481.077	943.359	885.046	513.368	1000.21	919.389	523.114	1002.91	835.086
3584	0	252.481	656.769	1628.76	155.784	648.967	1626.6	261.464	809.264	1667.43	117.71	792.595	1658.46	201.569	863.913	1484.87	214.163	909.665	1223.92	198.564	708.109	1410.01	201.827	613.835	1203.26	146.113	918.229	1283.19	386.697	775.502	1444.85	447.345	859.618	1225.97	448.196	904.206	1136.06	500.586	934.431	979.237	482.347	931.437	884.427	514.38	987.889	918.719	524.412	990.729	834.752
3585	0	254.37	644.383	1628.84	157.617	636.654	1627.01	263.594	796.673	1667.08	120.292	780.238	1658.55	203.195	850.886	1484.48	215.209	895.484	1223.38	199.962	694.993	1410.23	203.286	599.588	1203.61	147.51	904.557	1282.87	388.371	762.436	1444.32	448.989	846.772	1225.9	449.456	891.164	1135.61	502.048	921.383	978.929	483.693	918.063	884.308	515.572	974.486	917.999	526.099	977.085	834.407
3586	0	255.894	631.648	1629.19	159.045	624.023	1627.62	265.686	784.275	1666.92	122.095	768.023	1658.72	204.699	837.663	1484.16	216.42	881.266	1223.05	201.319	681.55	1410.71	204.589	585.332	1204.27	149.06	890.887	1282.5	389.797	749.106	1444.19	449.894	833.075	1225.63	450.941	877.553	1135.45	502.538	906.935	978.013	483.927	903.344	883.496	517.035	960.072	917.563	527.061	961.701	833.252
3587	0	257.576	619.059	1629.97	160.725	611.679	1628.62	267.815	771.905	1666.97	123.996	755.956	1659.44	206.306	824.585	1484.24	217.742	867.203	1222.86	202.458	668.013	1411.4	205.734	571.313	1205.18	150.601	877.215	1282.31	391.275	735.601	1444.53	451.402	819.271	1225.71	452.536	863.526	1135.36	503.555	891.774	977.155	485.318	887.478	882.937	518.401	944.633	916.773	528.401	944.911	832.177
3588	0	259.678	606.576	1631.38	162.666	599.103	1630.18	269.836	759.345	1667.58	125.836	743.458	1660.41	207.901	811.495	1484.9	219.302	853.336	1223.26	204.124	654.886	1412.27	206.602	557.599	1206.13	152.517	863.552	1282.97	392.703	722.17	1444.79	452.954	804.961	1225.99	454.085	848.897	1135.26	505.142	875.819	976.985	486.894	870.8	883.083	520.026	928.187	915.791	530.432	927.047	831.458
3589	0	261.62	593.869	1633.14	164.413	586.49	1632.27	271.797	746.918	1668.32	127.848	731.12	1661.71	209.225	798.4	1485.73	221.021	839.753	1224.18	205.47	641.494	1413.55	207.46	543.898	1207.27	153.914	850.175	1283.59	394.01	708.73	1445.53	454.832	790.626	1226.48	455.77	833.792	1135.36	507.074	859.049	976.904	489.016	853.304	883.196	521.436	910.557	914.617	532.665	908.162	830.896
3590	0	263.192	581.314	1634.79	166.14	573.79	1634.4	273.506	734.578	1668.87	129.608	718.562	1662.98	210.214	785.082	1487.1	222.563	826.499	1225.41	206.447	628.391	1414.95	207.827	530.664	1208.55	155.355	836.974	1284.8	395.129	695.456	1446.59	455.969	775.521	1226.64	457.502	818.151	1135.16	508.632	841.33	976.473	489.86	834.277	882.575	523.353	892.041	913.521	534.466	887.775	829.735
3591	0	264.802	568.773	1636.16	167.914	561.045	1636.12	275.083	722.094	1669.73	131.11	705.916	1664.41	210.983	771.938	1488.37	223.836	813.602	1226.9	207.42	615.332	1416.15	208.223	517.456	1209.53	156.578	823.908	1286.45	395.52	682.057	1447.28	457.2	760.138	1226.75	459.246	802.327	1135.08	509.956	822.737	975.533	491.366	814.531	881.865	525.151	872.456	912.092	536.212	866.363	828.123
3592	0	266.515	556.43	1637.4	169.399	548.348	1637.91	276.37	709.679	1670.37	132.404	693.188	1665.71	211.495	758.718	1489.88	224.633	800.847	1228.41	208.082	602.507	1417.41	208.679	504.773	1210.62	157.381	810.973	1288.31	396.215	669.103	1448.56	458.375	744.591	1227.02	460.869	785.805	1135.06	511.852	803.429	975.053	492.819	793.433	881.567	527.081	851.974	910.554	538.284	843.888	826.947
3593	0	267.715	543.864	1638.41	170.809	535.538	1639.25	277.434	697.424	1671.17	133.476	680.522	1667.28	212.18	746.017	1491.43	225.484	788.308	1229.97	208.58	589.8	1418.51	209.107	491.835	1211.82	157.578	798.42	1289.68	396.521	656.136	1450.04	459.262	728.879	1227.43	462.605	769.232	1135.06	513.332	783.357	974.542	494.789	772.021	881.554	528.927	830.534	909.147	540.132	820.281	825.74
3594	0	268.717	531.513	1639.32	171.873	523.042	1640.63	278.408	685.031	1672.18	134.288	667.629	1668.65	212.527	733.58	1492.64	226.252	776.072	1231.38	208.965	577.348	1419.62	209.432	479.525	1212.9	157.932	786.333	1291.13	396.773	643.372	1451.3	460.332	713.06	1227.72	464.223	752.395	1134.93	514.789	762.639	973.672	495.563	749.646	880.947	531.012	808.478	907.536	542.107	795.91	824.343
3595	0	269.557	519.058	1640.25	172.87	510.504	1641.76	279.043	672.437	1673.2	134.959	655.066	1670.35	213.088	721.479	1493.91	226.803	763.956	1232.46	209.246	565.241	1420.66	210.105	467.614	1213.93	158.278	774.349	1292.36	397.366	630.916	1452.77	461.69	697.179	1228.28	465.865	735.148	1134.72	517.047	741.798	973.489	497.666	726.662	880.886	532.913	785.529	905.61	544.666	770.827	823.508
3596	0	269.98	506.452	1641.33	173.024	498.045	1642.75	279.582	659.801	1674.84	135.243	642.457	1671.68	213.64	709.306	1495.17	227.519	751.998	1233.67	209.401	553.181	1421.85	210.495	455.654	1215.12	158.789	762.618	1293.57	397.75	618.274	1454.37	462.816	681.279	1228.76	467.785	717.922	1134.79	518.523	720.038	972.914	498.102	702.112	880.375	535.232	762.038	904.274	546.527	744.482	822.656
3597	0	269.76	493.877	1642.17	172.853	485.536	1643.42	279.87	647.023	1676.32	135.555	630.113	1673.04	214.488	697.484	1496.46	228.347	740.107	1234.77	209.409	541.231	1423.13	210.575	444.032	1216.03	159.947	750.952	1294.9	397.893	605.691	1455.62	463.435	664.846	1229.01	469.359	700.243	1134.6	519.245	697.423	971.914	498.547	677.279	879.936	536.185	737.471	902.141	547.826	717.321	821.614
3598	0	268.808	481.071	1642.94	172.566	473.259	1644.15	280.078	634.265	1677.91	135.507	617.799	1674.25	215.045	685.402	1497.48	229.292	728.161	1235.74	209.43	529.352	1424.41	210.727	432.669	1216.91	161.236	739.495	1295.65	397.914	593.027	1456.71	464.239	648.56	1229.05	471.106	682.433	1134.39	519.954	674.401	970.857	499.061	652.452	879.599	537.141	712.365	899.96	548.752	689.292	820.309
3599	0	268.626	468.683	1643.98	172.106	461.127	1645.03	280.027	621.525	1679.48	135.519	605.7	1675.77	215.613	673.451	1498.76	230.634	716.285	1237.03	209.531	517.633	1425.68	211.009	421.108	1218.09	162.836	727.918	1296.8	398.439	580.456	1458.02	465.193	632.18	1229.35	472.848	664.632	1133.74	521.204	651.353	970.338	499.549	626.88	879.715	537.875	686.356	897.857	550.325	660.916	820.279
3600	0	267.971	456.12	1645.3	171.542	449.01	1646.13	279.895	608.803	1681.32	135.469	593.52	1677.12	215.999	661.369	1500.15	231.985	704.514	1238.43	209.443	506.039	1427.07	210.669	408.915	1219.57	164.499	716.63	1297.88	398.802	567.957	1459.5	466.258	615.864	1229.98	474.689	646.509	1133.74	522.309	627.726	970.515	499.816	600.845	880.652	539.253	660.387	896.71	551.417	631.845	820.635
3601	0	267.364	443.537	1646.69	170.737	436.705	1647.1	279.536	596.038	1683.01	135.15	581.249	1678.37	216.601	649.445	1501.94	233.434	692.551	1240.13	209.176	494.211	1428.75	210.123	396.842	1221.2	166.199	705.164	1299.38	398.847	555.217	1460.91	467.088	599.226	1230.8	475.725	627.713	1133.42	522.946	603.601	970.713	499.683	574.552	881.886	539.949	633.673	895.652	552.067	602.078	821.555
3602	0	266.555	430.924	1648	169.997	424.427	1648.08	279.228	583.468	1684.93	134.701	569.108	1679.58	217.23	637.45	1503.59	235.178	680.856	1241.99	209.145	482.543	1430.13	209.623	385.033	1222.65	167.893	693.772	1300.98	398.938	542.445	1462.32	467.904	582.566	1231.65	477.963	609.383	1134.12	523.044	578.965	970.977	499.705	548.992	883.322	540.312	606.373	894.996	552.528	571.698	822.963
3603	0	265.824	418.487	1649.46	169.242	412.213	1649.16	278.701	570.737	1686.52	134.196	556.931	1680.93	217.418	625.256	1505.2	236.73	669.076	1243.89	209.036	470.689	1431.44	208.901	373.198	1224	169.814	682.378	1302.89	398.967	529.763	1464.07	468.717	565.764	1232.81	478.437	589.65	1134.14	523.213	554.179	971.958	498.501	520.688	885.848	540.758	578.79	895.105	551.942	541.105	824.726
3604	0	264.823	405.939	1650.7	168.273	400.011	1650.08	278.326	558.056	1688.48	133.753	544.636	1681.97	217.706	613.033	1506.82	238.185	657.358	1245.64	208.928	458.821	1432.8	208.245	361.52	1225.36	171.143	670.794	1304.27	398.853	516.915	1465.77	469.497	548.952	1234.28	479.993	570.729	1134.97	523.276	528.809	973.782	497.178	493.5	888.835	540.833	550.778	895.863	551.334	510.071	827.351
3605	0	264.207	393.354	1652.03	167.415	387.692	1650.83	277.739	545.526	1689.95	133.166	532.524	1683.02	218.085	600.897	1508.22	239.449	645.679	1247.14	208.763	446.992	1433.93	207.777	349.717	1226.74	172.503	659.278	1305.8	398.899	504.045	1467.58	470.372	532.283	1235.86	481.632	551.779	1136.13	522.848	503.484	975.593	495.611	466.066	892.273	540.382	522.275	897.065	550.231	478.665	830.474
3606	0	263.534	380.954	1653.1	166.898	375.457	1651.55	277.356	532.925	1691.51	132.673	520.261	1683.72	218.76	588.901	1509.63	240.682	633.964	1248.6	208.561	435.01	1434.92	207.468	338.207	1227.86	173.876	647.611	1307.18	399.034	491.366	1469.4	471.392	515.482	1237.67	483.203	532.763	1137.33	522.806	478.269	978.236	494.103	438.652	896.227	540.397	493.77	898.747	549.091	447.243	834.451
3607	0	262.844	368.555	1654.16	166.254	363.368	1652.17	276.829	520.372	1692.74	132.2	508.114	1684.32	219.175	576.719	1510.61	241.767	622.287	1249.96	208.828	423.19	1435.71	207.16	326.834	1228.79	174.907	635.986	1308.42	398.989	478.426	1470.96	472.297	498.928	1239.38	484.865	513.852	1138.58	522.475	453.019	980.814	492.259	411.361	900.049	541.595	465.044	902.549	547.364	415.746	838.75
3608	0	262.093	356.021	1654.79	165.313	351.163	1652.42	276.383	507.788	1693.64	131.659	496.022	1684.79	219.517	564.46	1511.38	242.546	610.534	1250.86	208.403	411.042	1436.35	206.692	315.531	1229.47	175.959	624.294	1309.2	398.679	465.401	1472.1	472.7	481.954	1240.53	486.349	495.001	1139.58	521.394	427.337	983.59	489.862	384.072	904.818	538.848	435.766	903.736	545.054	384.102	843.276
3609	0	261.31	343.473	1655.18	164.774	338.92	1652.32	275.963	495.317	1694.34	131.415	483.858	1684.89	219.905	552.137	1511.97	243.263	598.879	1251.45	208.189	398.955	1436.71	206.366	304.298	1229.8	176.773	612.422	1309.74	398.248	452.4	1472.82	473.384	465.358	1241.52	487.909	476.254	1140.36	520.857	401.829	986.501	487.526	356.413	909.499	538.596	406.958	906.536	542.573	352.627	848.038
3610	0	260.887	331.105	1655.56	164.296	326.661	1652.39	275.719	482.654	1694.85	131.174	471.596	1684.77	220.282	539.913	1512.22	244.007	587.048	1251.89	208.296	386.926	1436.92	206.2	292.984	1229.7	177.85	600.712	1310.27	398.484	439.651	1473.52	474.19	448.914	1242.39	489.316	457.424	1140.89	520.253	376.669	989.668	485.491	329.207	914.462	538.209	378.535	910.033	539.983	321.454	853.203
3611	0	260.556	318.583	1655.77	163.616	314.431	1652.32	275.393	470.096	1695.03	131.117	459.38	1684.34	220.611	527.509	1512.34	244.685	575.262	1252.3	208.222	374.79	1436.77	206.116	281.575	1229.47	178.53	588.732	1310.42	398.478	426.887	1473.97	475.24	432.686	1243.37	490.762	438.612	1141.5	519.515	351.657	992.857	483.181	302.05	919.81	537.327	350.099	913.523	537.106	290.535	858.906
3612	0	260.001	306.027	1655.59	163.282	302.13	1651.97	275.302	457.371	1694.82	130.921	447.249	1683.84	220.956	515.023	1512.08	245.389	563.313	1252.2	208.02	362.552	1436.46	205.979	270.075	1229.14	179.225	576.687	1310.25	398.386	414.021	1473.91	476.022	416.38	1243.69	492.133	419.796	1141.49	518.568	326.782	995.921	481.431	275.511	925.262	535.756	321.678	916.722	534.064	259.864	864.658
3613	0	259.642	293.318	1655.04	162.767	289.77	1651.32	275.206	444.827	1694.34	130.915	434.638	1682.77	221.052	502.375	1511.54	245.801	551.258	1251.67	208.051	350.24	1435.68	205.785	258.485	1228.22	179.943	564.759	1309.81	398.176	401.253	1473.23	476.817	400.116	1243.6	493.402	400.903	1141.35	517.287	301.997	998.625	478.86	248.693	930.523	533.699	293.559	919.487	530.807	229.599	870.5
3614	0	259.148	280.633	1654.38	162.45	277.293	1650.45	275.307	432.034	1693.8	130.713	422.493	1682.21	221.401	489.988	1511.16	246.339	539.42	1251.44	207.814	337.889	1434.64	205.691	246.924	1226.77	180.449	552.603	1309.48	398.155	388.555	1472.48	477.597	384.044	1243.57	494.752	382.1	1141.4	516.083	277.46	1001.62	476.056	222.188	936.025	531.908	265.814	923.155	527.592	199.899	876.676
3615	0	258.752	267.727	1653.49	161.936	264.697	1649.32	275.294	419.216	1692.93	130.566	410.103	1681.18	221.623	477.478	1510.46	246.53	527.445	1251.06	208.14	325.689	1433.45	205.64	235.176	1225.34	180.947	540.521	1309.04	397.922	375.786	1471.49	478.127	367.904	1243.12	495.527	362.905	1141.03	514.568	253.042	1004.69	473.261	196.045	941.475	528.945	237.804	926.099	524.035	170.514	883.014
3616	0	258.439	254.976	1652.24	161.767	252.01	1647.95	275.321	406.291	1691.74	130.8	397.518	1679.99	221.631	464.967	1509.51	246.173	515.667	1250.13	207.998	313.244	1432.1	205.548	223.481	1223.56	181.172	528.547	1308.23	397.915	363.199	1470.2	478.638	351.729	1242.57	496.437	343.921	1140.54	513.594	229.21	1007.78	470.503	170.367	946.974	526.839	210.676	929.717	520.552	141.795	889.502
3617	0	258.696	242.185	1650.76	161.92	239.542	1646.63	275.544	393.334	1690.52	131.689	384.39	1678.19	221.602	452.308	1508.47	245.825	503.969	1249.23	208.238	300.866	1430.25	205.939	211.46	1221.7	181.09	516.31	1307.07	397.97	350.783	1468.66	479.297	335.856	1242.03	497.455	325.056	1140.17	511.968	205.299	1010.79	467.837	144.912	952.629	525.407	184.236	934.047	517.261	113.656	896.174
3618	0	258.801	229.442	1649.13	161.985	226.612	1644.84	275.563	380.398	1689.08	131.322	371.842	1677.32	221.375	439.647	1507.23	244.94	492.11	1248.11	208.213	288.503	1428.6	205.938	199.197	1219.92	180.673	504.132	1306.05	397.932	338.5	1467.16	479.776	320.003	1241.49	498.03	305.988	1139.84	510.098	181.707	1014.12	465.105	120.552	958.205	523.45	158.086	938.508	513.743	86.0563	903.02
3619	0	258.671	216.458	1647.02	161.998	213.785	1643.1	275.684	367.473	1687.36	131.446	358.951	1675.84	221.272	427.191	1505.92	243.774	480.137	1246.63	208.107	276.016	1426.75	205.961	186.266	1217.98	180.233	491.869	1304.9	397.337	326.011	1465.07	479.422	303.741	1240.49	497.854	286.744	1139.07	508.216	158.503	1017.59	461.983	96.2624	963.724	520.735	132.194	942.617	510.053	59.1756	909.883
3620	0	258.742	203.558	1644.72	161.975	200.868	1640.62	275.719	354.618	1685.6	131.448	345.846	1674.01	220.74	414.679	1504.17	242.564	468.012	1245.02	208.011	263.685	1424.81	206.077	173.259	1216.23	179.459	479.674	1303.29	396.878	313.882	1463.09	478.982	287.606	1239.42	497.887	267.796	1138.87	506.216	135.602	1021.07	458.993	72.6914	969.319	517.99	106.583	946.791	506.482	33.0263	916.693
3621	0	259.01	190.822	1642.25	162.297	187.899	1638.58	275.732	341.604	1683.59	131.547	332.675	1672.21	220.505	402.263	1502.51	241.377	455.612	1243.28	208.05	251.188	1422.71	206.165	160.41	1214.28	178.555	467.474	1301.77	396.605	302.009	1461.13	478.79	271.666	1238.84	497.902	249.097	1138.84	504.286	113.356	1024.67	455.986	49.5727	974.468	515.828	81.8495	951.623	503.103	7.5949	923.68
3622	0	259.296	178.203	1639.88	162.464	174.838	1636.06	275.555	328.791	1681.58	131.466	319.51	1670.47	219.742	389.721	1500.45	240.174	443.186	1241.28	207.754	238.853	1420.56	206.34	147.547	1212.55	177.33	455.012	1299.77	396.191	290.171	1459.33	478.331	255.912	1238.31	497.735	230.643	1139.01	502.229	91.3644	1028.42	453.177	27.1002	980.021	513.853	57.9291	956.747	499.782	-17.1078	930.636
3623	0	259.38	165.428	1637.24	162.564	161.996	1633.73	275.345	315.886	1679.46	131.061	306.275	1668.65	219.133	377.446	1498.49	238.699	430.538	1238.89	207.472	226.326	1418.71	206.347	135.047	1210.56	176.134	442.484	1297.71	395.554	278.515	1457.43	477.613	240.1	1237.61	497.16	212.276	1138.99	500.156	70.0113	1032.23	450.338	5.14257	985.556	511.581	34.4826	961.622	496.596	-41.0948	937.638
3624	0	259.347	152.671	1634.72	162.465	149.106	1631.28	275.14	303.182	1677.58	130.717	293.311	1666.83	218.423	365.204	1496.47	237.331	417.808	1236.88	206.927	213.974	1416.51	206.371	122.601	1208.67	174.788	429.889	1295.63	394.914	266.815	1455.63	476.854	224.553	1237.26	497.854	195.185	1140.28	498.064	49.1646	1035.95	447.582	-16.1641	990.556	509.674	11.6711	966.751	493.531	-64.336	944.43
3625	0	259.229	140.158	1632.45	162.405	136.225	1628.99	274.691	290.455	1675.52	130.158	280.243	1664.73	217.622	352.96	1494.45	235.953	404.88	1234.49	206.569	201.409	1414.72	206.275	109.88	1207.04	173.375	417.184	1293.48	394.234	255.244	1453.81	475.881	209.165	1236.66	497.009	177.566	1140.47	496.005	28.9475	1039.8	445.044	-36.9033	995.611	507.552	-10.5061	971.606	490.648	-86.8349	951.158
3626	0	258.584	127.427	1629.9	161.978	123.419	1626.77	273.894	277.874	1673.34	129.944	267.391	1662.64	216.49	340.602	1491.88	234.588	391.865	1231.91	205.655	188.841	1412.7	205.895	97.4928	1205.14	172.066	404.241	1290.95	393.173	243.378	1451.98	474.378	193.924	1235.58	496.038	160.313	1140.82	494.179	9.2067	1043.42	442.634	-57.0727	1000.6	505.365	-31.9407	976.125	487.995	-108.442	957.669
3627	0	258.032	114.999	1628.01	161.36	110.687	1624.59	272.886	265.513	1671.23	128.775	254.708	1660.59	215.329	328.084	1489.49	233.295	378.782	1229.23	205.092	175.991	1410.92	205.543	84.3163	1203.76	170.732	391.283	1288.57	392.122	231.589	1450.06	473.133	178.953	1234.71	494.242	142.931	1140.28	492.235	-9.7941	1046.67	440.394	-76.4255	1005.12	503.631	-52.5566	980.72	485.58	-129.381	963.807
3628	0	257.71	102.685	1626.37	160.904	97.9661	1622.99	271.791	253.308	1669.34	127.614	241.98	1658.5	214.064	315.473	1487.19	231.918	365.477	1226.74	204.316	163.239	1409.15	205.559	72.106	1201.81	169.323	378.112	1286.06	391.413	219.683	1448.69	472.512	164.59	1234.39	493.333	126.743	1140.53	490.628	-28.2811	1049.92	438.582	-95.2925	1009.47	502.42	-72.1746	985.3	483.619	-149.45	969.664
3629	0	256.825	90.4555	1625.11	160.108	85.4702	1621.39	270.29	241.194	1667.37	126.531	229.304	1656.48	212.925	302.787	1485.17	230.758	352.139	1224.46	203.53	150.231	1407.49	205.144	59.2973	1200.31	168.046	364.942	1283.85	390.444	207.302	1447.31	471.259	150.266	1233.57	492.153	110.844	1140.48	489.15	-45.913	1053.08	436.928	-113.469	1013.48	500.981	-91.0808	989.439	481.876	-168.646	975.368
3630	0	255.634	77.992	1623.83	159.151	72.9321	1619.92	268.631	229.119	1665.57	124.537	216.656	1654.19	211.512	289.923	1483.06	229.641	338.606	1222.38	202.394	137.122	1406.01	204.475	46.1696	1198.76	166.895	351.699	1281.73	389.092	194.594	1445.97	469.833	135.956	1232.54	491.095	95.4009	1140.6	487.385	-63.0716	1055.4	435.405	-131.037	1017.17	499.501	-109.269	992.766	480.297	-187.084	980.385
3631	0	254.182	65.7331	1622.74	157.548	60.1904	1618.76	266.784	217.117	1663.8	122.738	204.264	1652.3	210.166	276.932	1481.25	228.539	324.934	1220.35	201.26	123.888	1404.4	203.824	32.8242	1197.11	165.834	338.182	1279.72	387.707	181.391	1444.64	468.478	121.935	1231.59	489.782	80.2507	1140.22	486.027	-79.5038	1057.34	434.111	-147.848	1020.26	498.086	-126.538	995.41	479.327	-204.575	984.982
3632	0	252.811	53.4531	1622.27	156.23	47.6306	1617.88	264.994	205.099	1662.57	120.864	191.733	1650.4	208.679	263.837	1479.67	227.599	311.107	1218.89	200.183	110.522	1403.17	202.986	19.2819	1195.93	164.837	324.665	1278.01	386.373	168.212	1443.92	467.446	108.143	1231.29	488.899	65.7674	1140.35	484.952	-95.0726	1058.96	433.094	-164.054	1022.78	496.848	-142.989	997.551	478.55	-221.25	989.004
3633	0	251.199	40.9814	1622.03	154.488	35.1332	1617.46	263.014	193.083	1661.57	118.821	179.345	1649.11	206.944	250.82	1478.49	226.6	297.264	1217.8	198.628	97.1028	1401.99	201.894	5.2853	1194.88	163.744	310.871	1276.51	384.846	154.539	1443.64	466.5	94.4486	1231.21	487.881	51.4649	1140.42	483.891	-110.163	1060.18	432.266	-179.532	1024.76	495.828	-158.554	999.513	478.103	-236.963	992.634
3634	0	249.293	28.6767	1621.92	152.77	22.4341	1617.4	260.756	180.896	1660.54	116.801	166.687	1647.82	205.208	237.697	1477.34	225.733	283.202	1216.55	197.073	83.6012	1401.31	200.831	-9.04733	1194.53	162.797	297.026	1275.1	383.231	141.168	1443.14	465.426	80.6841	1231.07	486.714	37.5814	1140.2	483.023	-124.502	1060.83	431.613	-194.236	1026.23	495.051	-173.227	1000.58	477.839	-251.855	995.178
3635	0	247.418	16.1258	1622.18	150.767	9.83308	1617.63	258.617	168.664	1660.04	114.512	154.245	1647.38	203.343	224.407	1476.34	224.78	269.115	1215.57	195.486	70.1093	1401	199.653	-23.5121	1194.33	161.652	282.942	1273.81	381.48	127.663	1442.7	464.476	67.0214	1231.1	485.732	24.07	1140.04	482.278	-138.255	1060.98	430.897	-208.28	1026.73	494.244	-187.115	1000.85	477.981	-265.764	997.186
3636	0	245.188	3.41272	1622.86	148.537	-2.99441	1618.17	256.314	156.399	1660.02	112.152	141.697	1647.03	201.344	211.117	1475.96	223.722	254.848	1215.08	193.67	56.4612	1401.03	198.203	-38.1769	1194.45	160.229	268.761	1272.91	379.529	114.06	1442.83	463.348	53.4079	1231.44	484.553	10.7522	1140.02	481.462	-151.409	1060.99	430.304	-221.581	1026.96	493.614	-200.208	1001	478.109	-278.923	998.543
3637	0	242.481	-9.29823	1623.75	146.002	-15.9159	1618.82	253.52	143.848	1660.01	109.473	128.888	1646.7	199.331	197.669	1475.87	222.373	240.598	1214.78	191.757	42.7113	1401.29	196.684	-53.0152	1195.02	158.878	254.328	1272.3	377.632	100.247	1443.27	461.781	39.5602	1231.86	483.366	-2.13503	1140.37	480.661	-164.06	1060.53	429.88	-234.111	1026.31	492.928	-212.672	1000.63	478.278	-291.21	999.283
3638	0	240.074	-22.2703	1625	143.688	-28.7609	1619.77	250.79	131.195	1660.46	106.829	116.17	1646.89	197.261	184.035	1476.13	221.244	226.582	1215	190.004	29.1424	1401.95	195.305	-68.0347	1196.17	157.509	239.991	1272.11	375.778	86.6794	1444.28	460.142	25.8934	1232.35	482.194	-14.5962	1140.79	479.975	-175.846	1059.83	429.256	-245.845	1024.94	492.27	-224.317	999.472	478.44	-302.619	998.846
3639	0	237.645	-35.1257	1626.61	141.222	-41.8501	1621.05	247.91	118.484	1661.36	104.377	103.264	1647.36	195.133	170.362	1476.73	220.116	212.782	1215.87	188.428	15.4328	1402.93	194.184	-82.7021	1197.52	156.162	225.689	1272.28	374.14	73.0061	1445.77	459.125	13.2828	1233.88	480.782	-26.8439	1141.35	479.354	-187.1	1058.87	429.107	-256.82	1023.27	492.218	-234.74	998.428	478.852	-313.043	997.974
3640	0	235.089	-47.9918	1628.5	138.698	-54.7993	1622.56	245.211	105.754	1662.82	101.398	90.2116	1648.08	193.072	156.776	1477.82	219.05	199.149	1217.14	186.751	1.84325	1404.24	193.101	-97.0899	1199.18	155.056	211.856	1273.37	372.391	59.379	1447.72	457.711	0.299172	1235.57	479.756	-38.5546	1142.64	478.673	-197.654	1057.92	428.773	-266.946	1021.16	492.137	-244.424	997.291	479.076	-322.713	996.248
3641	0	232.214	-61.3486	1630.45	135.74	-68.1271	1623.78	242.262	92.771	1664.37	98.8804	77.0802	1648.61	191.192	143.217	1479.27	217.944	185.952	1218.67	185.231	-11.6311	1405.67	192.158	-110.924	1200.62	153.725	198.227	1274.61	370.494	45.6545	1449.9	455.979	-12.5026	1237.12	478.823	-49.9179	1144.35	477.957	-207.77	1056.94	428.351	-276.25	1018.53	491.98	-253.46	995.742	479.14	-331.533	993.753
3642	0	229.378	-74.5406	1632.04	133.378	-81.2024	1624.8	239.509	79.7093	1666.21	95.7196	63.8979	1649.11	189.411	129.657	1480.71	216.917	172.793	1220.44	184.048	-25.003	1407.07	191.348	-124.403	1202.04	152.52	184.78	1276	368.571	32.2504	1451.92	454.268	-25.1355	1238.62	477.766	-60.9173	1145.9	477.314	-217.142	1055.67	428.079	-284.93	1015.49	491.65	-261.821	993.386	479.236	-339.705	990.483
3643	0	226.881	-87.829	1633.54	130.986	-94.4248	1625.59	236.654	66.527	1667.86	93.1873	50.7072	1649.66	187.642	116.326	1482.25	215.834	159.906	1222.19	182.913	-38.1558	1408.33	190.745	-137.614	1203.51	151.381	171.562	1277.5	367.101	19.1256	1454.38	452.883	-37.2808	1240.66	476.766	-71.5743	1147.52	476.87	-225.912	1054.51	427.927	-292.879	1012.12	491.945	-269.371	991.275	479.351	-347.215	986.512
3644	0	224.592	-101.005	1635.05	128.723	-107.629	1626.22	233.971	53.2247	1669.5	90.7133	37.4109	1650.24	185.909	103.19	1483.63	214.542	147.169	1223.67	181.928	-51.2055	1409.51	190.175	-150.523	1204.88	150.074	158.319	1278.74	365.308	6.34807	1456.44	451.454	-49.1689	1242.45	475.638	-81.8862	1148.97	476.606	-234.004	1052.87	427.859	-300.112	1008.64	492.252	-276.258	989.052	479.344	-354.005	981.831
3645	0	222.643	-114.302	1636.14	126.819	-120.913	1626.74	231.591	39.8911	1671.18	88.4891	23.9215	1651.06	184.292	90.247	1484.69	213.3	134.592	1225.01	181.314	-64.0642	1410.75	189.665	-163.071	1206.21	148.587	145.306	1279.84	363.627	-6.22035	1458.19	450.202	-60.8627	1244.02	474.742	-91.8411	1150.13	476.451	-241.993	1051.14	427.991	-306.969	1004.68	492.684	-282.709	986.37	479.401	-360.233	976.393
3646	0	221.312	-127.172	1637.25	125.329	-134.051	1627.3	229.865	26.6015	1673.05	86.8216	10.548	1652.24	182.831	77.9168	1486.15	211.779	122.209	1226.29	180.625	-76.6845	1411.95	189.365	-175.432	1207.47	146.863	132.468	1280.98	362.639	-18.123	1460.16	449.293	-71.9631	1245.76	473.855	-101.444	1151.27	476.349	-249.302	1048.94	428.083	-313.288	1000.5	493.21	-288.551	983.357	479.592	-365.774	970.395
3647	0	219.91	-140.378	1638.07	123.98	-147.378	1627.89	228.276	13.3602	1675.03	84.9076	-2.98369	1653.54	181.321	65.5008	1487.63	210.704	110.396	1228.73	180.075	-89.2364	1413.37	188.881	-187.497	1208.65	145.077	119.946	1282.61	361.24	-29.7996	1461.83	448.173	-82.7985	1247.19	472.989	-110.611	1152.12	476.399	-256.184	1046.63	428.373	-318.894	995.925	493.785	-293.817	980.343	479.643	-370.646	963.915
3648	0	218.521	-153.639	1638.59	122.736	-160.695	1628.5	226.674	-0.148682	1676.71	83.5347	-16.5161	1654.99	179.335	52.8801	1489	209.061	98.2881	1230.15	179.147	-101.583	1414.73	188.398	-199.547	1209.84	143.137	107.47	1284.01	359.98	-41.2722	1463.2	446.822	-93.6148	1247.92	470.853	-120.242	1151.83	476.365	-262.484	1044.06	428.786	-324.065	991.59	494.388	-298.556	976.931	479.742	-374.861	957.085
3649	0	217.399	-166.691	1639.06	122.011	-173.818	1629.24	225.517	-13.5016	1678.27	82.426	-29.8338	1656.78	178.193	40.7154	1490.49	207.135	86.2349	1231.29	178.505	-113.841	1416.17	188.359	-211.526	1211.17	141.376	95.2936	1285.45	359.065	-52.6108	1464.38	445.696	-103.751	1248.56	469.714	-128.895	1152.03	476.732	-268.32	1041.21	429.336	-328.599	986.966	494.842	-302.925	972.936	479.95	-378.304	949.654
3650	0	217.119	-179.129	1640.05	121.246	-186.923	1630.08	224.905	-26.5209	1680.27	81.4999	-43.2118	1658.53	176.813	28.4494	1492.24	204.886	73.9329	1232.37	177.661	-126.029	1417.46	188.383	-223.467	1212.66	139.479	83.1002	1287.11	358.47	-63.6956	1465.8	445.735	-112.471	1249.81	469.677	-136.165	1152.76	477.17	-273.486	1038.29	430.025	-332.603	982.128	495.847	-306.322	969.43	480.034	-381.171	942.218
3651	0	216.64	-192.071	1641.37	120.486	-200.006	1631.29	223.952	-39.73	1682.12	80.6295	-56.3764	1660.7	175.625	16.3511	1494.18	202.853	61.9542	1234.01	176.851	-138.262	1419.1	188.507	-235.707	1214.42	137.4	71.0156	1288.89	358.141	-74.6243	1467.26	445.037	-121.639	1250.27	469.086	-143.485	1153.03	477.587	-278.102	1035.36	430.639	-336.139	977.438	496.537	-309.198	965.757	480.68	-382.783	934.967
3652	0	215.791	-205.106	1642.55	119.736	-213.016	1632.74	223.033	-52.9641	1683.89	79.8579	-69.5748	1662.69	174.222	3.91218	1495.96	200.969	50.0773	1235.83	175.918	-150.346	1420.91	188.529	-247.946	1215.96	135.651	59.018	1290.83	357.501	-85.964	1468.47	444.217	-130.076	1250.29	468.026	-150.524	1152.51	477.953	-282.07	1032.17	431.416	-339.003	972.612	497.046	-311.513	961.545	481.146	-383.74	927.643
3653	0	215.176	-217.761	1643.76	119.057	-225.989	1634.15	222.527	-65.9271	1685.75	79.0249	-82.5268	1664.85	173.354	-8.3212	1498.03	199.219	38.3231	1237.81	175.087	-162.579	1422.5	188.507	-260.074	1217.37	133.843	47.1225	1292.91	356.897	-97.5267	1469.18	443.616	-138.044	1250.1	467.418	-156.922	1152.28	478.347	-285.553	1028.82	432.008	-341.253	967.721	497.247	-313.108	956.803	481.667	-384.134	920.184
3654	0	214.281	-230.608	1645.04	118.226	-238.766	1635.52	222.037	-78.7099	1687.79	78.1309	-95.5614	1666.83	172.184	-20.7962	1500.17	197.208	26.5125	1239.88	174.156	-174.691	1424.07	188.285	-272.126	1218.88	132.166	35.3265	1295.23	356.61	-108.77	1470.33	443.131	-145.411	1250.17	466.589	-162.947	1151.92	478.598	-288.423	1025.44	433.099	-342.678	962.693	497.706	-313.838	952.611	482.327	-383.734	913.33
3655	0	213.512	-243.246	1646.4	117.519	-251.461	1637.21	221.041	-91.6101	1689.43	77.6118	-108.545	1668.58	171.163	-33.1461	1502.18	195.317	14.6683	1242	173.287	-186.998	1425.83	187.935	-283.887	1220.48	130.386	23.4576	1297.52	355.763	-120.589	1471.31	442.405	-152.466	1250.1	465.364	-168.645	1151.48	478.859	-290.518	1022.08	433.507	-343.76	957.97	498.105	-313.92	948.441	482.916	-382.598	906.686
3656	0	212.834	-255.718	1648	116.814	-264.056	1638.8	219.843	-104.438	1690.7	76.6803	-121.083	1670.61	170.044	-45.5961	1503.85	193.601	2.60479	1243.58	172.557	-199.142	1427.45	187.64	-295.62	1222.08	128.672	11.4632	1299.35	355.249	-132.239	1472.19	441.802	-159.156	1250.05	463.967	-174.222	1150.83	478.872	-292.337	1018.57	434.245	-344.019	953.041	498.435	-313.264	944.123	483.592	-380.745	900.425
3657	0	212.14	-267.99	1649.25	116.17	-276.533	1640.26	219.422	-116.734	1692.55	75.9286	-133.637	1672.32	168.701	-58.0345	1505.53	192.062	-9.28638	1245.41	171.686	-211.386	1428.74	187.167	-307.264	1223.43	127.087	-0.609429	1301.24	354.608	-143.793	1473.41	441.259	-165.62	1250.28	463.113	-179.114	1150.84	479.004	-293.473	1015.36	434.859	-343.818	948.325	498.76	-311.949	940.233	484.417	-378.428	894.467
3658	0	211.234	-280.46	1650.5	115.292	-288.919	1641.59	218.361	-129.172	1693.83	75.0334	-146.119	1673.85	167.948	-70.3057	1507.1	190.707	-21.3427	1246.89	170.768	-223.651	1430.04	186.288	-318.978	1224.74	125.529	-12.3453	1303.28	353.852	-155.747	1474.44	440.218	-172.333	1250.34	461.995	-183.864	1150.8	478.737	-294.165	1012.13	435.107	-343.194	943.624	498.515	-310.322	936.211	485.117	-375.702	888.756
3659	0	210.034	-292.799	1651.47	114.197	-301.477	1642.6	216.778	-141.698	1694.55	73.7435	-158.652	1675.04	167.016	-82.5155	1508.39	189.49	-33.4897	1248.22	169.628	-235.951	1431.14	185.144	-330.718	1225.8	123.871	-24.6606	1304.65	352.736	-167.731	1475.34	438.544	-179.547	1249.88	460.394	-188.633	1150.48	478.19	-294.623	1008.88	435.306	-342.109	938.853	498.037	-308.344	932.178	485.555	-372.511	883.22
3660	0	209.379	-304.936	1652.45	113.548	-313.697	1643.73	216.005	-153.731	1695.75	72.8371	-170.915	1676.1	165.603	-95.0746	1509.4	188.562	-45.4373	1249.55	168.74	-248.245	1431.96	184.125	-342.418	1226.71	122.426	-36.5014	1306.1	351.827	-179.889	1475.74	436.996	-186.727	1249.52	459.417	-192.988	1150.52	477.63	-294.828	1005.69	435.272	-340.65	934.311	497.559	-305.975	928.31	486.155	-368.931	877.93
3661	0	208.718	-317.102	1653.44	112.749	-325.944	1644.68	215.117	-165.793	1696.49	71.6938	-183.185	1676.93	164.86	-107.409	1510.34	187.469	-57.3804	1250.03	167.807	-260.47	1432.54	182.941	-354.061	1227.43	121.056	-48.7012	1307.22	351.119	-191.845	1476.32	436.687	-193.218	1250.05	457.979	-197.315	1150.28	477.079	-294.405	1002.48	435.362	-338.942	929.879	497.281	-303.072	925.099	486.656	-365.01	872.98
3662	0	207.949	-329.042	1654.12	111.901	-338.149	1645.44	214.042	-177.864	1696.84	70.9304	-195.404	1677.54	163.908	-119.834	1510.87	186.739	-69.2235	1250.89	166.735	-272.746	1432.91	181.567	-365.835	1227.9	119.707	-60.9969	1307.86	350.382	-204.094	1476.73	435	-200.771	1249.62	456.51	-201.808	1150.05	476.416	-294.154	999.605	435.23	-337.141	925.684	496.784	-300.095	921.855	486.939	-360.721	868.069
3663	0	207.025	-341.264	1654.35	111.036	-350.485	1645.84	212.956	-189.945	1696.86	69.8022	-207.735	1677.71	162.653	-132.372	1510.94	185.921	-81.2977	1251.3	165.701	-285.094	1433.08	180.034	-377.596	1227.76	118.483	-73.2329	1308.15	349.462	-216.456	1476.56	433.487	-208.248	1249.13	454.577	-206.49	1149.29	475.672	-293.781	996.633	435.119	-334.527	921.427	496.012	-297.027	918.559	487.035	-356.197	863.073
3664	0	206.02	-353.517	1654.17	110.206	-362.717	1645.94	212.082	-202.009	1696.68	68.8341	-219.973	1677.57	161.598	-144.969	1510.83	185.158	-93.1944	1251.36	164.654	-297.401	1432.76	178.527	-389.519	1227.31	117.278	-85.4764	1308.18	348.497	-229.209	1475.98	432.028	-215.807	1248.39	452.752	-210.89	1148.89	474.657	-293.566	993.469	434.855	-332.543	916.941	495.243	-294.001	915.274	486.981	-351.697	858.169
3665	0	205.092	-365.71	1653.97	109.299	-375.15	1645.79	211.328	-214.119	1696.29	67.8944	-232.414	1677.33	161.109	-157.377	1510.67	184.285	-105.184	1251.24	163.476	-309.833	1432.21	176.858	-401.204	1226.58	116.357	-97.729	1308.08	347.768	-241.835	1475.47	430.588	-223.398	1247.68	450.799	-215.462	1148.39	473.938	-293.105	990.692	434.521	-330	912.823	494.335	-290.753	912.37	486.807	-346.514	853.357
3666	0	204.098	-378.172	1653.33	108.461	-387.359	1645.31	210.288	-226.415	1695.29	66.9779	-244.561	1676.9	160.097	-170.091	1509.9	183.909	-116.966	1250.8	162.226	-322.261	1431.42	175.231	-413.048	1225.36	115.497	-109.967	1307.44	346.936	-254.533	1474.6	428.975	-231.196	1246.66	448.81	-220.274	1147.72	473.053	-292.572	987.868	434.262	-327.856	909.035	493.347	-287.417	909.1	486.584	-341.26	848.642
3667	0	203.653	-390.441	1652.62	107.457	-400.048	1644.6	209.374	-238.809	1694.11	66.1214	-257.178	1676.06	159.242	-182.777	1508.85	183.462	-129.117	1249.88	160.993	-334.718	1430.29	173.472	-424.734	1223.77	114.953	-122.041	1306.66	345.948	-267.664	1473.36	427.582	-238.864	1245.64	446.665	-225.405	1146.86	472.079	-291.991	985.058	433.971	-325.3	905.142	492.11	-284.23	906.347	486.443	-335.948	844.052
3668	0	202.864	-402.923	1651.39	106.792	-412.561	1643.77	208.791	-251.21	1692.95	65.8343	-269.473	1675.27	158.416	-195.55	1507.91	183.342	-141.14	1248.97	159.854	-347.197	1428.76	171.933	-436.767	1222.02	114.368	-134.12	1305.79	345.416	-280.59	1472.21	426.454	-246.57	1244.93	444.259	-230.785	1145.98	471.185	-291.443	982.425	433.745	-323.147	901.41	491.547	-280.764	904.242	486.1	-330.497	839.754
3669	0	202.036	-415.472	1649.95	105.937	-425.273	1642.68	208.175	-263.766	1691.68	65.0693	-282.159	1674.28	157.607	-208.365	1506.79	183.57	-153.503	1248.19	158.646	-359.717	1427.16	170.317	-449.113	1220.08	114.016	-146.131	1304.85	344.446	-294.051	1470.59	425.021	-254.847	1243.93	442.039	-236.627	1145.44	470.035	-291.245	980.262	433.135	-320.262	897.74	490.351	-277.614	902.351	485.847	-325.227	836.089
3670	0	200.808	-428.518	1647.97	104.818	-438.212	1640.9	207.037	-276.671	1689.73	64.3079	-295.256	1672.48	157.042	-221.108	1505.37	183.772	-165.965	1247.01	157.376	-372.227	1425.29	168.383	-461.757	1217.8	113.786	-158.184	1303.58	343.528	-307.738	1469.15	423.357	-263.79	1242.55	439.569	-242.711	1144.76	468.569	-291.565	977.916	432.449	-318.737	894.229	488.904	-274.439	900.45	484.948	-319.374	832.205
3671	0	200.161	-441.318	1646.08	104.126	-451.078	1639.19	206.759	-289.345	1688.22	63.9503	-307.968	1671.09	156.391	-233.971	1503.74	184.123	-178.267	1245.8	156.306	-384.737	1423.24	166.739	-474.537	1215.45	113.682	-170.081	1302.08	342.724	-321.309	1467.18	422.183	-272.698	1241.55	436.86	-249.33	1143.67	467.342	-292.008	975.945	431.143	-317.633	890.259	487.316	-271.654	899.069	484.458	-313.933	828.839
3672	0	199.597	-454.148	1643.99	103.555	-463.8	1637.35	206.132	-302.356	1686.14	63.3949	-321.023	1669.33	155.921	-246.86	1502.09	184.514	-190.841	1244.32	155.293	-397.302	1420.96	165.28	-487.312	1213.08	113.904	-182.198	1300.62	342.158	-334.914	1465.59	421.401	-281.823	1240.93	434.647	-256.356	1143.08	466.239	-292.483	974.683	431.152	-315.431	888.478	485.918	-268.914	898.347	483.638	-308.382	826.224
3673	0	198.896	-467.268	1641.92	102.77	-476.865	1635.31	205.523	-315.533	1684.12	62.2526	-333.951	1667.62	155.425	-259.758	1500.28	184.607	-203.486	1242.48	154.249	-409.989	1418.87	163.813	-499.965	1210.67	114.112	-194.469	1298.93	341.458	-348.828	1464.11	420.186	-291.744	1240.13	432.364	-263.974	1142.88	465.073	-293.653	973.843	430.192	-314.341	886.231	484.757	-267.111	898.283	482.756	-303.33	824.275
3674	0	198.362	-480.499	1639.66	102.026	-490.041	1632.88	204.709	-328.939	1681.59	61.8053	-347.105	1665.54	155.159	-272.573	1498.29	185.29	-216.001	1240.7	153.309	-422.712	1416.59	162.349	-512.563	1208.07	114.353	-206.838	1296.91	340.748	-362.54	1462.03	418.826	-301.972	1239.02	429.806	-272.168	1142.13	463.632	-295.518	972.953	429.355	-313.704	884.696	482.629	-265.693	898.328	481.57	-298.695	822.492
3675	0	197.624	-493.774	1636.85	101.547	-503.14	1630.55	204.547	-342.123	1679.54	61.2136	-360.313	1663.27	154.942	-285.377	1496.21	185.838	-228.649	1238.82	152.515	-435.451	1414.18	160.997	-525.178	1205.38	114.673	-219.467	1294.75	340.109	-376.348	1460.01	418.055	-312.683	1237.85	427.869	-280.641	1141.73	462.175	-298.213	972.102	428.371	-313.674	882.851	481.429	-265.478	898.751	480.247	-294.811	820.957
3676	0	197.002	-507.193	1634.28	100.889	-516.44	1628.04	204.262	-355.456	1677.23	60.8332	-373.582	1661.04	154.919	-298.217	1494.06	186.144	-241.597	1236.64	151.88	-448.376	1411.77	159.743	-537.948	1203.07	115	-232.221	1292.6	339.63	-390.078	1458.13	416.685	-323.55	1236.62	425.821	-289.599	1141.19	461.096	-301.514	971.803	427.938	-314.28	882.092	480.615	-266.251	899.986	478.653	-291.561	819.823
3677	0	196.613	-520.599	1631.86	100.394	-529.661	1625.46	203.92	-368.833	1674.79	60.6371	-386.817	1658.7	155.035	-310.973	1491.84	186.552	-254.501	1234.45	151.165	-461.322	1409.35	158.485	-550.884	1200.82	115.178	-245.056	1290.22	339.104	-403.875	1455.89	415.532	-334.725	1235.09	423.978	-298.768	1140.54	459.983	-305.779	971.453	427.507	-316.292	881.477	479.548	-268.316	900.846	476.75	-289.3	818.72
3678	0	196.394	-533.82	1629.38	100.211	-542.921	1623.03	203.886	-382.246	1672.44	60.5867	-399.955	1656.48	155.037	-324.015	1489.59	186.845	-267.755	1232.31	150.846	-474.273	1407.18	157.666	-563.76	1198.84	115.566	-257.973	1287.99	339.212	-417.294	1453.97	415.118	-345.624	1233.8	422.519	-308.215	1139.76	459.383	-310.926	971.098	426.316	-318.549	880.7	479.166	-271.673	901.534	475.24	-287.743	818.173
3679	0	196.461	-547.083	1627.07	100.264	-556.046	1620.96	204.37	-395.487	1670.25	60.7696	-413.108	1654.44	155.361	-336.867	1487.32	186.775	-281.17	1229.7	150.703	-487.439	1404.96	157.2	-576.813	1197.05	115.86	-271.051	1285.62	339.371	-430.705	1451.65	414.621	-356.658	1232.37	421.389	-317.995	1138.74	459.005	-316.81	970.725	427.351	-321.967	881.437	478.595	-276.041	902.01	473.636	-287.329	817.67
3680	0	196.603	-560.477	1624.93	100.187	-569.298	1618.92	204.79	-408.764	1668.23	60.9884	-426.259	1652.44	155.716	-349.909	1485.02	187.154	-294.594	1227.72	150.487	-500.59	1403.02	156.686	-589.883	1195.38	116.038	-284.284	1283.29	339.47	-444.115	1449.38	413.912	-367.831	1230.84	420.372	-328.006	1137.82	458.598	-323.555	970.27	426.424	-326.646	880.19	478.834	-281.247	902.968	471.952	-288.114	817.432
3681	0	196.807	-573.87	1623.01	100.388	-582.497	1617.09	205.053	-422.164	1665.99	61.4598	-439.358	1650.67	155.991	-363.046	1483.06	186.944	-308.204	1225.46	150.534	-513.947	1401.07	156.309	-603.238	1193.58	116.248	-297.672	1281.28	339.639	-457.498	1447.24	413.326	-379.164	1229.2	419.504	-338.421	1136.65	458.249	-331.233	969.499	425.634	-332.77	878.494	479.235	-287.901	903.439	470.609	-290.267	817.312
3682	0	197.097	-587.174	1621.02	100.963	-595.588	1615.66	205.881	-435.291	1664.11	62.1636	-452.399	1649.12	156.585	-376.144	1481.33	186.449	-321.906	1223.37	150.829	-527.339	1399.43	156.399	-616.639	1192.05	116.178	-311.259	1279.32	340.06	-470.802	1445.05	412.75	-390.776	1227.43	418.81	-349.363	1135.21	458.342	-339.702	968.682	426.819	-338.268	879.298	479.859	-295.118	903.741	469.934	-293.321	817.829
3683	0	198.225	-600.094	1619.86	101.813	-608.776	1614.61	207.282	-448.225	1662.53	63.1534	-465.397	1647.92	157.062	-389.533	1479.62	186.033	-335.499	1221.52	151.08	-540.91	1397.86	156.573	-630.341	1190.73	116.04	-324.999	1277.52	340.473	-483.961	1443.04	412.759	-402.352	1226.09	418.444	-360.516	1134.12	458.652	-348.502	968.174	426.949	-345.86	878.346	480.175	-303.416	903.626	468.849	-298.006	817.92
3684	0	199.186	-613.269	1618.54	102.797	-621.822	1613.8	208.524	-461.094	1660.86	64.2927	-478.304	1646.89	157.305	-402.931	1477.93	185.482	-349.344	1219.87	151.336	-554.29	1396.79	156.976	-644.245	1189.71	115.734	-338.965	1275.83	341.091	-496.909	1441.37	412.674	-414.282	1224.65	418.233	-372.039	1132.92	459.054	-358.036	967.576	427.257	-354.304	877.78	480.973	-312.54	903.635	468.405	-304.511	817.931
3685	0	200.411	-626.23	1617.42	104.013	-634.896	1613.2	209.441	-474.107	1658.99	65.7343	-491.364	1645.99	158.003	-416.183	1476.48	184.877	-363.353	1218.08	151.853	-567.891	1395.65	157.534	-658.363	1188.92	115.329	-353.035	1274.34	341.682	-509.997	1439.81	412.861	-426.439	1223.47	418.125	-384.062	1131.8	459.457	-368.508	966.885	427.535	-363.865	876.893	481.346	-322.066	903.767	468.305	-312.451	817.908
3686	0	201.937	-639.047	1616.47	105.467	-647.915	1612.69	211.097	-486.796	1657.73	67.0048	-504.323	1645.44	158.356	-429.691	1475.2	184.194	-377.644	1216.34	152.511	-581.669	1394.82	158.411	-672.621	1188.19	114.908	-367.294	1272.94	342.289	-523.189	1438.54	413.008	-439.089	1222.24	418.39	-396.455	1130.82	459.989	-379.77	966.135	428.197	-374.548	876.171	482.093	-333.1	903.37	468.626	-322.115	817.696
3687	0	203.807	-651.844	1615.86	106.965	-661.016	1612.63	212.732	-499.635	1656.82	68.4852	-517.353	1645.16	159.192	-443.113	1474.2	183.518	-392.109	1214.96	153.204	-595.473	1394.37	159.059	-687.059	1187.89	114.728	-381.557	1271.89	342.832	-536.56	1437.38	413.063	-452.142	1221.19	418.55	-409.529	1130.08	460.313	-391.837	965.557	428.673	-386.198	875.352	482.61	-344.717	903.071	469.289	-333.151	817.419
3688	0	205.081	-664.782	1615.64	108.532	-674.098	1612.77	214.342	-512.34	1656.39	69.9795	-530.341	1645.38	159.817	-456.519	1473.4	183.273	-406.482	1214	153.865	-609.28	1394.26	160.096	-701.406	1187.79	114.502	-395.915	1270.97	343.548	-550.132	1436.6	413.319	-465.617	1220.48	418.568	-422.981	1129.08	460.591	-404.855	964.893	429.896	-398.74	875.591	482.897	-357.337	902.57	470.444	-345.827	817.336
3689	0	207.056	-677.471	1615.81	110.314	-687.013	1613.43	215.888	-525.298	1655.97	71.5583	-543.345	1645.78	160.678	-470.102	1473.01	183.136	-421.073	1213.2	154.566	-623.218	1394.53	161.154	-716.061	1188.19	114.762	-410.253	1270.34	344.487	-563.408	1436.28	413.767	-479.407	1219.93	419.368	-436.597	1128.84	461.59	-418.372	964.791	430.572	-412.696	874.97	483.609	-370.951	902.364	472.168	-360.439	817.236
3690	0	208.796	-690.609	1616.25	112.169	-699.942	1614.34	217.995	-538.033	1656.09	73.5875	-556.229	1646.7	161.543	-483.803	1472.92	183.035	-436.01	1212.56	155.341	-637.079	1395.06	161.992	-731.027	1189.07	115.207	-424.675	1270.1	345.439	-576.931	1436.15	414.441	-493.648	1219.59	419.706	-451.158	1128.18	462.215	-432.912	964.418	431.431	-427.815	874.36	484.213	-385.659	901.836	473.069	-376.269	815.985
3691	0	210.358	-703.476	1616.86	113.641	-712.985	1615.48	219.88	-550.86	1656.47	75.2716	-569.206	1647.73	162.393	-497.481	1472.92	183.643	-450.398	1212.6	155.924	-651.067	1395.82	162.501	-746.078	1190.12	115.846	-439.109	1269.97	346.15	-590.755	1436.21	415.125	-508.232	1219.53	420.324	-465.943	1128.01	462.872	-448.428	964.295	432.15	-443.808	873.898	484.524	-401.386	901.279	475.079	-393.653	815.845
3692	0	211.852	-716.55	1617.57	114.991	-726.159	1616.75	221.16	-564.05	1656.53	76.5887	-582.505	1648.66	163.287	-511.126	1473.41	183.971	-465.043	1212.43	156.505	-665.025	1396.78	162.596	-761.108	1191.09	116.399	-453.485	1270.07	346.523	-604.663	1436.21	415.411	-523.499	1219.06	421.16	-481.295	1127.85	463.195	-464.98	963.524	432.707	-461.007	873.213	484.908	-418.23	900.365	476.686	-412.193	815.059
3693	0	213.17	-729.839	1618.57	116.455	-739.457	1618.27	222.974	-577.103	1657.21	78.2235	-595.258	1650.45	163.691	-525.029	1473.89	184.719	-479.448	1213.13	156.933	-678.952	1397.79	162.761	-775.573	1192.1	117.162	-467.67	1270.56	346.884	-618.487	1436.46	416.024	-538.786	1218.94	421.916	-497.167	1127.41	463.963	-482.328	962.91	435.341	-480.273	873.754	485.725	-436.189	899.345	477.854	-432.084	813.453
3694	0	214.738	-742.864	1619.78	118.001	-752.757	1620.15	224.715	-590.209	1658.03	79.6817	-608.825	1651.89	164.118	-538.614	1474.95	185.082	-493.615	1213.8	157.24	-692.763	1399.08	162.64	-789.757	1193.08	117.567	-481.813	1271.37	347.095	-632.268	1437.01	416.524	-554.396	1219.11	422.625	-513.623	1126.92	464.776	-500.605	962.271	434.436	-497.885	872.979	486.469	-455.359	897.876	479.374	-453.308	812.25
3695	0	216.053	-756.128	1620.67	119.347	-766.074	1621.71	226.112	-603.361	1658.82	81.1746	-622.277	1653.66	163.977	-552.469	1476.08	185.666	-507.388	1215.22	157.27	-706.413	1400.26	162.291	-803.559	1194.12	117.836	-495.744	1272.79	347.095	-645.913	1437.88	416.977	-570.415	1218.95	423.341	-530.266	1126.37	465.52	-519.619	961.71	435.249	-519.193	871.355	487.374	-475.502	896.582	481.342	-475.795	811.664
3696	0	217.324	-769.166	1621.3	120.631	-779.629	1622.73	226.991	-616.677	1659.29	81.95	-635.789	1655.28	163.629	-566.152	1477.23	185.483	-521.052	1216.16	157.261	-719.903	1401.44	161.905	-817.04	1195.02	117.484	-509.451	1274.06	346.752	-659.35	1438.68	417.246	-586.236	1218.77	424.244	-547.101	1126.11	466.232	-539.524	961.053	437.571	-540.762	872.019	487.976	-496.252	895.332	482.504	-499.389	809.642
3697	0	218.302	-782.352	1621.62	121.841	-793.009	1623.83	227.629	-629.843	1659.83	82.6101	-649.523	1656.97	163.175	-579.708	1478.48	185.491	-534.125	1217.68	157.043	-733.256	1402.28	161.525	-830.243	1195.76	116.881	-522.849	1275.53	346.438	-672.563	1439.76	417.532	-602.563	1219.07	425.015	-564.401	1125.71	466.81	-560.223	960.301	437.397	-562.899	870.595	489.022	-518.608	893.736	483.71	-524.101	808.42
3698	0	218.978	-795.626	1622.02	122.476	-806.752	1624.53	227.955	-643.05	1660.87	83.0876	-663.381	1658.36	162.808	-592.767	1479.95	184.967	-547.125	1218.73	156.727	-746.389	1403.33	161.02	-843.318	1196.47	116.051	-535.832	1276.86	345.847	-685.666	1440.92	417.309	-618.986	1219.02	425.859	-581.75	1125.56	467.214	-581.556	959.648	437.9	-585.77	870.277	489.399	-541.217	892.282	484.512	-549.691	807.153
3699	0	219.13	-808.827	1622.29	122.66	-820.393	1624.92	227.661	-656.695	1661.99	82.6757	-677.219	1660.08	162.229	-605.732	1480.91	184.67	-559.747	1219.76	156.249	-759.333	1404.38	160.433	-856.219	1197.21	115.349	-548.463	1278.08	345.185	-698.835	1441.95	417.325	-635.455	1218.99	426.61	-599.391	1125.22	467.459	-603.39	958.946	438.361	-609.388	870.261	490.063	-564.883	890.775	485.681	-576.129	806.363
3700	0	219.097	-822.188	1622.57	122.624	-833.958	1625.15	227.561	-670.199	1663.54	82.5539	-691.34	1661.18	161.736	-618.449	1481.71	184.471	-572.422	1220.78	155.912	-771.967	1405.46	160.098	-868.816	1198.13	114.8	-560.938	1279.15	344.899	-711.668	1443.26	417.706	-651.797	1219.44	427.589	-617.225	1124.82	467.859	-625.627	958.453	438.267	-633.717	869.682	490.686	-589.145	889.272	486.512	-603.569	805.524
3701	0	218.747	-835.647	1622.92	122.399	-847.093	1625.26	226.883	-684.069	1665.1	81.9135	-704.931	1662.54	161.762	-630.968	1482.98	184.313	-585.059	1221.95	155.538	-784.564	1406.7	159.892	-881.139	1199.21	114.662	-573.32	1280.18	344.597	-724.361	1444.56	417.84	-668.272	1219.75	428.65	-635.313	1124.67	468.142	-648.439	957.978	437.873	-658.9	868.77	490.762	-614.127	887.463	487.052	-631.724	804.889
3702	0	217.851	-849	1623.36	121.485	-860.602	1625.32	226.226	-697.852	1667.25	81.3212	-718.696	1663.82	161.402	-643.677	1484.18	184.312	-597.86	1223.22	155.043	-797.05	1408.09	159.292	-893.667	1200.44	114.912	-585.744	1281.32	344.136	-737.312	1445.95	417.842	-685.004	1220.18	429.716	-653.34	1124.66	468.195	-671.462	958.002	436.76	-683.969	868.991	490.822	-639.52	886.428	487.415	-660.54	805.19
3703	0	216.74	-862.425	1623.92	120.206	-874.07	1625.34	224.858	-711.919	1668.93	79.8066	-732.28	1665.3	161.004	-656.297	1485.43	184.29	-610.626	1224.26	154.455	-809.564	1409.34	158.561	-906.363	1201.61	115.345	-598.12	1282.5	343.568	-750.428	1447.08	417.927	-701.814	1220.65	430.705	-671.611	1124.66	467.849	-695.227	957.706	435.905	-709.83	869.325	490.895	-665.558	885.573	487.181	-689.965	805.25
3704	0	215.532	-875.894	1624.55	119.132	-887.31	1625.64	224.06	-725.472	1671.42	78.5487	-745.612	1666.47	160.848	-668.868	1487.1	184.779	-623.196	1226.13	154.071	-821.98	1410.8	157.963	-918.978	1202.94	116.024	-610.477	1283.89	343.291	-763.333	1448.67	418.232	-718.374	1221.58	431.586	-689.84	1124.8	467.343	-719.281	957.978	433.285	-737.67	868.651	490.061	-692.316	884.496	486.715	-720.168	806.172
3705	0	214.209	-889.517	1625.62	117.773	-900.588	1626.19	222.931	-739.35	1673.67	77.4328	-759.371	1667.78	160.598	-681.687	1488.92	185.42	-635.869	1228.03	153.452	-834.474	1412.32	157.213	-931.683	1204.62	116.769	-622.877	1285.56	342.986	-776.375	1450.39	418.177	-735.182	1222.66	432.443	-708.546	1125.6	466.947	-743.449	959.122	432.199	-764.298	870.519	489.503	-719.291	884.567	485.887	-750.674	807.966
3706	0	212.802	-902.864	1626.95	116.259	-913.644	1626.79	221.553	-753.117	1675.71	76.2929	-772.438	1668.98	160.249	-694.611	1490.62	185.918	-648.381	1229.79	153.002	-847.009	1413.9	156.482	-944.319	1206.36	117.469	-635.3	1287.11	342.334	-788.919	1452.09	418.625	-751.551	1224.15	433.372	-726.883	1126.26	466.294	-767.859	960.517	430.585	-791.227	872.847	488.751	-746.668	885.289	484.751	-781.607	810.522
3707	0	211.323	-916.18	1628.23	114.979	-926.195	1627.73	220.542	-766.652	1677.93	74.7832	-785.668	1670.3	159.917	-707.634	1492.03	186.338	-661.003	1231.26	152.542	-859.669	1415.3	155.925	-956.945	1208.07	118.166	-647.797	1288.64	341.999	-802.024	1453.98	418.993	-767.974	1225.91	434.308	-745.501	1127.36	465.405	-792.616	962.453	429.274	-818.486	876.762	487.451	-774.505	886.178	483.096	-812.925	813.503
3708	0	209.806	-929.48	1629.56	113.498	-939.165	1628.54	219.299	-780.194	1679.61	74.2353	-798.725	1671.2	159.747	-720.558	1493.66	186.88	-673.609	1232.87	152.112	-872.461	1416.57	155.262	-969.559	1209.56	118.823	-660.398	1290.1	341.538	-815.198	1455.91	419.393	-784.353	1227.63	435.188	-764.042	1128.49	464.158	-817.482	964.72	427.581	-845.786	880.668	485.799	-803.004	887.637	481.234	-844.747	817.538
3709	0	208.288	-942.8	1630.96	111.996	-952.088	1629.4	218.105	-793.59	1681.27	72.9084	-811.542	1671.77	159.421	-733.713	1494.97	187.319	-686.184	1234.37	151.599	-885.384	1417.7	154.48	-982.04	1210.85	119.327	-673.105	1291.49	340.96	-828.588	1457.68	419.63	-800.724	1229.43	436.177	-782.545	1129.97	462.857	-842.53	967.445	425.04	-873.649	884.642	483.301	-831.618	889.079	478.623	-876.047	822.01
3710	0	206.852	-956.274	1632.19	110.722	-964.994	1630.52	216.893	-807.033	1682.41	71.8311	-824.298	1672.36	159.052	-746.798	1495.84	187.501	-698.844	1235.62	151.17	-898.441	1418.59	153.938	-994.283	1211.79	119.752	-685.873	1292.59	340.184	-842.231	1459.09	419.775	-817.251	1230.92	437.384	-800.954	1131.59	461.477	-867.568	970.455	422.966	-901.081	889.8	482.414	-859.313	892.891	475.949	-907.671	826.997
3711	0	205.791	-969.43	1633.67	109.393	-977.972	1631.17	216.294	-820.002	1683.65	70.9034	-836.76	1672.75	158.993	-759.903	1496.81	187.471	-711.609	1236.54	150.867	-911.537	1419.23	153.912	-1005.86	1212.38	119.986	-698.732	1293.66	339.922	-855.619	1460.72	420.532	-833.224	1232.76	438.422	-819.557	1132.65	460.137	-892.73	973.456	420.448	-928.99	894.909	480.363	-887.868	895.658	473.034	-939.199	832.39
3712	0	204.728	-982.563	1634.79	108.393	-990.704	1632.01	215.315	-833.149	1684.13	70.4348	-849.589	1672.85	158.752	-773.234	1497.45	187.558	-724.346	1237.43	150.465	-924.673	1419.58	153.603	-1017.87	1212.92	120.215	-711.651	1294.46	339.728	-868.964	1462.15	421.615	-849.35	1234.52	439.636	-838.006	1133.71	459.255	-917.839	977.385	418.274	-956.552	900.621	478.357	-916.375	898.657	469.894	-970.463	838.32
3713	0	203.787	-995.73	1635.82	107.253	-1003.61	1632.74	214.619	-846.23	1684.61	69.6729	-862.178	1673.08	158.53	-786.663	1497.92	187.465	-737.28	1238.02	150.127	-937.883	1419.92	153.118	-1030.12	1213.1	120.251	-724.661	1294.95	339.42	-882.53	1463.23	422.106	-865.461	1235.91	440.849	-856.36	1134.63	457.907	-942.935	980.985	415.846	-984.264	906.615	476.445	-944.936	902.368	466.465	-1001.71	844.466
3714	0	202.801	-1009.16	1636.4	106.237	-1016.73	1633.07	214.131	-859.285	1684.74	68.9889	-874.816	1672.59	158.385	-800.212	1497.98	187.564	-750.112	1238.26	149.86	-951.258	1419.9	152.723	-1042.42	1212.85	120.543	-737.637	1295.41	338.898	-896.282	1463.52	422.779	-881.672	1236.65	442.041	-874.948	1135.49	456.555	-967.9	984.408	413.289	-1012.05	912.436	474.33	-973.397	905.924	462.908	-1032.7	850.658
3715	0	202.018	-1022.44	1636.73	105.514	-1029.81	1633.17	213.852	-872.283	1684.63	69.0384	-887.508	1672.19	158.603	-813.706	1498.16	187.753	-762.887	1238.5	149.673	-964.595	1419.63	152.473	-1054.76	1212.17	120.712	-750.67	1295.57	338.462	-910.191	1463.56	423.171	-898.044	1236.91	443.183	-893.599	1135.6	455.528	-992.672	987.942	410.809	-1039.48	918.335	471.966	-1001.79	909.299	459.297	-1063.31	857.082
3716	0	201.384	-1035.87	1636.79	104.887	-1043.01	1633.09	213.232	-885.745	1683.78	68.4052	-900.407	1671.35	158.536	-827.432	1497.74	187.614	-775.881	1238.33	149.375	-978.181	1418.9	152.34	-1066.84	1211.2	120.689	-763.837	1295.28	338.28	-924.002	1463.32	424.018	-914.226	1237.08	444.012	-912.438	1135.33	454.187	-1017.55	991.19	408.434	-1066.5	924.599	469.85	-1029.86	913.139	455.504	-1093.69	863.524
3717	0	200.821	-1049.47	1636.45	104.384	-1056.29	1632.77	213.178	-898.983	1682.94	68.2758	-913.463	1670.28	158.556	-841.131	1497.07	187.657	-788.8	1237.97	149.135	-991.588	1418.05	151.994	-1079.1	1209.79	120.743	-777.051	1294.84	338.019	-937.987	1462.64	424.526	-930.455	1236.52	444.962	-931.425	1134.96	452.897	-1042.07	994.478	405.869	-1093.42	930.657	467.571	-1057.8	916.967	451.558	-1123.89	870.075
3718	0	200.694	-1062.99	1636.14	104.048	-1069.75	1632.36	212.938	-912.49	1681.53	68.6768	-926.723	1669.08	158.425	-854.716	1496.25	187.22	-801.737	1237.25	148.965	-1005.21	1416.82	152.001	-1091.29	1208.2	121.037	-790.315	1294.4	337.761	-951.887	1461.66	425.042	-946.924	1235.96	445.773	-950.629	1134.33	451.622	-1066.51	997.799	403.259	-1119.97	936.548	465.079	-1085.44	920.75	447.863	-1153.46	876.809
3719	0	200.532	-1076.68	1635.39	104.061	-1083.25	1631.77	213.09	-925.954	1680.4	68.3718	-940.188	1668.02	158.114	-868.579	1495.29	187.015	-814.502	1236.74	148.78	-1018.67	1415.46	151.841	-1103.94	1206.25	120.561	-803.532	1293.51	337.481	-965.846	1460.43	425.56	-963.265	1235.24	446.477	-970.011	1133.87	450.116	-1090.87	1000.86	400.731	-1145.87	942.429	462.758	-1112.96	924.623	443.992	-1182.42	883.686
3720	0	200.259	-1090.6	1634.21	103.679	-1097.18	1630.64	213.094	-939.681	1679.1	68.2119	-954.027	1666.66	157.783	-882.458	1494.32	186.386	-827.289	1235.91	148.595	-1032.31	1413.88	151.581	-1117.2	1204.1	120.349	-816.984	1292.49	336.946	-979.954	1458.87	425.691	-980.085	1234.25	447.05	-989.525	1133.2	448.447	-1115.02	1003.97	397.866	-1171.52	947.91	460.182	-1140.22	928.505	440.181	-1210.93	890.568
3721	0	200.163	-1104.44	1632.87	103.537	-1111.21	1629.25	212.95	-953.551	1677.56	67.8926	-967.717	1665.25	157.581	-896.138	1493.21	185.606	-840.054	1234.99	148.276	-1045.92	1412.14	151.11	-1130.91	1201.96	119.879	-830.145	1291.96	336.092	-994.237	1456.76	425.482	-997.255	1232.81	447.345	-1009.11	1132.42	446.595	-1139.08	1007.07	395.133	-1196.69	953.403	457.71	-1166.77	932.493	436.453	-1238.89	897.328
3722	0	200.31	-1118.45	1631.17	103.694	-1125.05	1627.72	212.923	-967.596	1675.91	68.1829	-981.546	1664.06	157.434	-909.837	1492.3	184.75	-852.917	1234.28	148.179	-1059.5	1410.22	151.206	-1144.66	1199.81	119.305	-843.387	1291.07	335.998	-1007.74	1455.41	425.459	-1014.32	1232	447.336	-1029.09	1131.47	444.77	-1162.82	1010.14	392.219	-1221.44	958.268	455.364	-1193.43	936.69	433.233	-1266.15	904.197
3723	0	200.345	-1132.36	1629.17	103.845	-1139.07	1625.98	213.327	-981.487	1674.31	68.3213	-995.849	1662.55	156.983	-923.417	1491.12	183.457	-865.912	1233.12	147.885	-1072.97	1408.33	151.065	-1158.88	1197.85	118.863	-856.624	1290.06	335.559	-1021.54	1453.78	425.274	-1031.87	1230.91	447.224	-1049.05	1130.74	442.786	-1186.33	1013.16	389.562	-1245.39	963.423	453.26	-1219.38	941.197	429.747	-1292.65	911.11
3724	0	200.356	-1146.34	1627	103.762	-1153.09	1624.02	213.293	-995.706	1672.51	68.6041	-1010.13	1660.84	156.285	-937.241	1489.44	182.354	-878.98	1231.69	147.539	-1086.65	1406.38	150.649	-1172.97	1195.98	117.679	-869.52	1288.61	334.92	-1035.31	1451.98	424.618	-1049.46	1229.96	446.809	-1068.97	1130.21	440.794	-1209.19	1016.38	386.716	-1269.03	968.165	450.661	-1244.02	945.292	426.555	-1318.34	917.819
3725	0	200.248	-1160.4	1624.48	103.78	-1167.14	1621.61	213.52	-1009.59	1671.02	68.1474	-1024.23	1659.32	155.82	-950.768	1487.87	181.096	-892.209	1230.07	147.129	-1100.11	1404.31	150.437	-1186.97	1193.83	116.625	-882.73	1287.34	333.993	-1049.18	1449.85	423.632	-1067.28	1228.72	446.257	-1088.89	1129.73	438.673	-1231.67	1019.31	384.175	-1291.77	972.67	448.141	-1268.28	949.248	423.433	-1343.47	924.005
3726	0	200.1	-1174.5	1621.97	103.495	-1181.29	1619.17	213.315	-1024.02	1669.05	68.0549	-1038.57	1657.57	155.232	-964.188	1486.05	179.763	-905.81	1228.13	146.679	-1113.64	1402.24	150.244	-1200.49	1191.62	115.724	-895.974	1285.8	333.252	-1062.87	1448.05	422.516	-1085.29	1227.66	445.556	-1108.66	1129.38	436.344	-1254.13	1022.11	381.34	-1314.66	976.662	445.924	-1292.03	953.212	420.506	-1367.86	930.075
3727	0	199.822	-1188.54	1619.33	103.268	-1195.32	1616.7	212.851	-1038.69	1667.12	68.0731	-1052.89	1656.06	154.538	-977.809	1484.2	178.973	-919.226	1226.65	146.01	-1126.9	1400.39	149.813	-1213.85	1189.66	114.65	-909.438	1283.76	332.579	-1076.45	1446.65	421.288	-1103.14	1227.06	444.647	-1128.11	1129.23	434.232	-1275.83	1024.93	378.76	-1336.69	980.771	443.965	-1314.9	957.593	418.079	-1391.31	936.13
3728	0	199.504	-1202.44	1616.78	102.922	-1209.35	1614.2	213.005	-1052.56	1665.99	67.6201	-1067.29	1654.58	154.164	-991.224	1482.73	177.84	-932.931	1224.82	145.328	-1140.37	1398.83	149.127	-1227.52	1188.07	114.171	-922.785	1282.47	331.665	-1090.09	1445.01	419.891	-1121.1	1226.32	443.596	-1147.26	1129.29	432.16	-1296.69	1027.7	376.522	-1358.03	984.597	441.767	-1337.97	960.747	415.69	-1414.04	941.459
3729	0	199.217	-1216.36	1614.47	102.619	-1223.22	1611.84	212.552	-1066.93	1664.57	67.2828	-1081.4	1652.95	153.703	-1004.6	1480.89	176.845	-946.773	1222.89	144.593	-1153.71	1397.28	148.772	-1240.8	1186.82	113.486	-936.484	1280.94	331.125	-1103.58	1443.9	418.401	-1138.76	1225.71	442.183	-1166	1128.96	430.349	-1317.03	1030.26	374.515	-1378.77	988.076	440.007	-1359.53	964.448	413.685	-1435.82	946.689
3730	0	198.745	-1230.23	1612.22	102.096	-1237.03	1609.69	211.999	-1080.97	1663.2	66.7737	-1095.26	1651.89	153.19	-1018.17	1479.22	175.991	-960.637	1221.18	143.825	-1167.21	1395.85	147.782	-1254.68	1185.78	112.585	-949.866	1279.03	330.291	-1117.32	1442.8	416.908	-1156.12	1225.6	440.721	-1184.36	1129.05	428.578	-1336.68	1032.69	372.731	-1398.93	991.299	438.231	-1380.38	967.407	411.795	-1456.95	951.295
3731	0	197.926	-1243.79	1610.18	101.275	-1250.75	1607.61	210.998	-1094.9	1662.01	65.855	-1109.17	1650.51	152.608	-1031.63	1478	175.634	-974.592	1220.11	142.804	-1180.65	1394.66	146.55	-1268.62	1184.78	112.119	-963.692	1277.45	329.218	-1131.13	1441.9	415.199	-1173.16	1225.29	439.379	-1202.13	1129.45	426.928	-1355.88	1034.96	370.896	-1418.62	994.245	436.59	-1400.35	970.352	410.326	-1477.29	955.585
3732	0	196.883	-1257.57	1608.32	100.449	-1264.46	1605.61	210.354	-1108.6	1661.04	64.5987	-1123.04	1649.14	151.705	-1045.16	1476.45	174.636	-988.987	1218.2	141.699	-1194.47	1393.48	145.032	-1282.95	1183.81	111.592	-977.337	1276.01	328.007	-1145.24	1440.76	413.472	-1190	1224.85	437.863	-1219.44	1129.52	425.354	-1374.39	1036.77	369.34	-1437.63	996.833	434.9	-1419.6	972.558	408.947	-1496.69	959.2
3733	0	196.057	-1271.05	1607.02	99.4803	-1277.96	1604.1	209.261	-1122.4	1659.84	63.5898	-1136.61	1648.14	150.783	-1058.81	1474.88	174.116	-1003.31	1216.32	140.664	-1208.18	1392.43	144.287	-1296.22	1182.89	111.014	-991.432	1274.32	326.878	-1159.29	1439.78	411.944	-1206.3	1224.38	436.119	-1236.45	1129.28	424.033	-1392.24	1038.24	368.273	-1456.01	998.89	433.524	-1438.15	974.342	408.091	-1515.49	962.17
3734	0	195.018	-1284.49	1605.95	98.3964	-1291.39	1603.13	208.187	-1135.94	1658.86	62.9296	-1150.16	1646.96	150.047	-1072.32	1473.58	173.602	-1017.73	1215.1	139.591	-1222.03	1391.51	142.798	-1310.4	1182.4	111.13	-1005.76	1272.96	325.743	-1173.39	1439.12	410.543	-1222.05	1224.07	434.382	-1253.02	1128.98	422.806	-1409.42	1039.13	367.304	-1473.85	1000.6	432.439	-1455.62	975.819	407.537	-1533.48	964.841
3735	0	193.727	-1297.77	1605.35	96.972	-1304.72	1602.33	206.953	-1149.28	1658.02	61.1819	-1163.46	1646.18	149.014	-1086.02	1472.18	172.896	-1032.61	1213.36	138.213	-1235.86	1390.84	140.847	-1324.92	1182.22	110.111	-1019.99	1271.24	324.576	-1187.44	1438.57	409.481	-1237.43	1224.04	432.734	-1269.1	1128.88	421.632	-1426.16	1039.81	366.578	-1490.91	1001.84	431.522	-1472.55	976.798	407.108	-1550.58	966.713
3736	0	192.271	-1311.24	1604.74	95.6338	-1317.96	1601.73	205.491	-1162.52	1657.28	59.7606	-1176.74	1645.12	147.896	-1099.68	1470.98	171.929	-1047.52	1211.75	136.877	-1249.95	1390.28	139.152	-1339.31	1181.83	108.951	-1034.51	1269.53	323.05	-1201.7	1437.71	407.891	-1252.69	1223.52	431.15	-1284.95	1128.82	420.775	-1442.22	1040.09	365.908	-1507.51	1002.53	430.688	-1488.64	976.958	407.047	-1566.93	967.934
3737	0	190.833	-1324.49	1604.6	94.124	-1331.37	1601.52	204.176	-1175.69	1656.88	58.9673	-1189.95	1644.81	146.612	-1113.51	1470.08	171.35	-1062.54	1210.78	135.297	-1264.09	1389.92	137.27	-1354.39	1181.81	108.513	-1049.04	1268.63	321.498	-1215.9	1437.22	406.522	-1267.67	1223.24	429.393	-1300.44	1128.61	419.868	-1457.75	1039.7	365.474	-1523.45	1002.45	429.915	-1504.09	976.664	407.346	-1582.49	968.412
3738	0	189.096	-1337.93	1604.7	92.5505	-1344.76	1601.81	202.392	-1188.82	1656.56	56.7133	-1203.08	1644.81	145.19	-1127.21	1469.5	169.869	-1077.7	1209.49	133.539	-1278.32	1389.94	135.184	-1369.72	1182.16	107.139	-1063.68	1267.44	319.96	-1230.07	1436.94	405.148	-1282.52	1223.29	427.752	-1315.41	1128.63	419.002	-1472.59	1039.25	365.185	-1538.52	1001.92	429.462	-1518.64	976.065	407.574	-1597.41	968.29
3739	0	187.58	-1351.15	1605.48	90.7244	-1358.25	1602.35	200.529	-1201.83	1656.45	54.9755	-1216.44	1644.61	143.613	-1141.21	1469.24	168.547	-1092.82	1208.88	131.971	-1292.59	1390.16	133.085	-1384.98	1182.8	105.578	-1078.58	1266.63	318.275	-1244.51	1436.82	403.733	-1297.17	1223.3	425.958	-1329.98	1128.58	418.481	-1486.91	1038.6	364.961	-1552.96	1000.87	429.171	-1532.31	975.237	408.191	-1611.16	967.623
3740	0	185.787	-1364.68	1606.34	89.0033	-1371.62	1603.43	198.615	-1215.07	1656.71	53.6056	-1229.89	1644.64	142.216	-1155.26	1469.2	167.486	-1107.74	1209	130.409	-1306.86	1390.57	131.442	-1400.29	1183.64	104.121	-1093.63	1266.24	317.144	-1258.62	1437.43	402.495	-1311.32	1223.65	424.335	-1344.16	1128.53	417.948	-1500.28	1037.36	365.13	-1566.39	999.038	429.064	-1545.22	973.752	409.185	-1624.06	966.212
3741	0	183.935	-1378.14	1607.83	87.1352	-1385.14	1604.68	196.753	-1228.32	1657.3	51.5263	-1243.11	1645.44	140.785	-1169.5	1469.6	166.59	-1122.38	1209.52	128.982	-1321.18	1391.31	129.798	-1415.82	1184.61	103.057	-1108.47	1266.48	315.853	-1272.99	1438.09	401.06	-1325.43	1223.86	422.685	-1357.74	1128.57	417.477	-1512.79	1035.9	365.291	-1579.1	996.937	429.083	-1557.24	971.986	410.009	-1635.99	964.17
3742	0	181.737	-1392.06	1609.51	84.9218	-1398.92	1606.21	194.641	-1241.76	1658.26	49.5075	-1256.58	1645.92	139.341	-1183.76	1470.36	165.662	-1136.77	1210.39	127.474	-1335.6	1392.31	128.16	-1431.37	1185.89	101.893	-1123.38	1266.99	314.439	-1287.6	1438.9	399.457	-1339.22	1224.22	421.117	-1370.68	1128.73	417.122	-1524.56	1034.2	365.464	-1590.9	994.482	429.095	-1568.23	969.91	410.851	-1647.15	961.544
3743	0	179.466	-1405.91	1611.33	82.8696	-1412.72	1607.53	192.471	-1255.5	1659.48	47.4534	-1270.02	1646.33	137.986	-1198.14	1471.31	164.49	-1151.19	1211.15	126.26	-1349.84	1393.34	126.813	-1446.69	1187.03	101.027	-1137.89	1267.87	313.086	-1302.41	1439.75	397.637	-1352.79	1224.38	419.522	-1383.09	1129.12	416.832	-1535.62	1032.28	365.689	-1601.99	991.521	429.173	-1578.26	967.253	411.939	-1657.32	958.027
3744	0	177.404	-1420.07	1613.16	80.8543	-1426.4	1608.8	190.557	-1269.37	1660.67	45.3392	-1283.57	1646.9	136.85	-1212.51	1472.5	164.213	-1165.13	1212.66	125.291	-1363.9	1394.4	125.667	-1461.73	1188.42	100.283	-1151.97	1269.05	312.209	-1316.82	1440.91	396.133	-1366.09	1224.79	417.937	-1395.18	1129.16	416.587	-1545.98	1029.98	366.113	-1612.22	988.176	429.416	-1587.51	964.439	413.2	-1666.19	954.213
3745	0	175.392	-1434.05	1614.87	78.7664	-1440.25	1609.83	188.51	-1283.45	1661.91	43.5077	-1297.33	1647.33	136.098	-1226.73	1474.01	163.602	-1178.75	1214.29	124.553	-1377.91	1395.48	124.854	-1475.89	1189.62	99.9334	-1165.74	1270.55	311.425	-1330.9	1442.47	394.663	-1378.78	1225.69	416.443	-1406.62	1129.6	416.42	-1555.71	1027.88	366.617	-1621.41	984.535	429.772	-1595.95	961.423	414.409	-1674.39	949.635
3746	0	173.766	-1448.1	1616.4	77.1143	-1454.03	1610.67	186.853	-1297.51	1663.58	42.2441	-1311.04	1647.8	135.509	-1240.38	1475.63	162.79	-1192.37	1215.76	123.971	-1391.75	1396.66	123.93	-1489.7	1190.92	99.2686	-1179.53	1271.64	310.534	-1344.71	1443.98	393.391	-1391.24	1226.62	415.293	-1417.69	1130.39	416.233	-1564.71	1025.72	366.972	-1629.96	980.741	430.303	-1603.45	958.946	415.356	-1681.68	944.561
3747	0	172.284	-1462.4	1617.77	75.7516	-1467.99	1611.24	185.423	-1311.79	1665.34	40.5322	-1324.97	1648.87	134.328	-1254.23	1477.03	162.267	-1205.6	1217.58	123.56	-1405.35	1397.68	123.258	-1503.32	1192.12	98.8781	-1193.09	1273.52	309.733	-1358.01	1445.28	392.015	-1403.51	1227.37	414.021	-1428.52	1130.83	416.248	-1573.3	1023.34	367.432	-1637.8	976.645	430.731	-1610.38	955.552	416.199	-1688.33	938.979
3748	0	171.255	-1476.49	1618.63	74.8009	-1481.95	1612	184.15	-1326.2	1667.2	39.3642	-1339.38	1650.2	133.42	-1267.7	1478.6	161.496	-1218.5	1219.37	123.284	-1418.79	1399.08	123.047	-1516.09	1193.4	97.8251	-1206.63	1274.87	309.132	-1370.79	1446.71	390.935	-1415.32	1228.17	413.057	-1438.9	1131.42	416.105	-1581.3	1020.86	367.874	-1644.93	972.356	431.117	-1616.77	952.057	416.977	-1693.96	933.038
3749	0	170.49	-1490.47	1619.42	74.12	-1496.05	1612.78	183.366	-1340.5	1669.12	38.4572	-1353.85	1651.78	132.549	-1280.86	1480.29	160.303	-1231.37	1221.07	122.974	-1432.02	1400.56	122.389	-1529.47	1194.93	96.676	-1219.97	1276.75	308.662	-1383.14	1448.16	389.833	-1426.59	1229.04	411.963	-1448.6	1132.16	415.945	-1588.58	1018.61	368.142	-1651.36	967.881	431.416	-1622.13	948.71	417.582	-1699.07	926.751
3750	0	170.257	-1504.29	1620.21	73.7844	-1510.27	1613.42	182.592	-1354.89	1671.16	37.88	-1368.23	1653.94	131.788	-1293.9	1482.53	159.094	-1244.2	1222.71	122.698	-1445.11	1402.23	121.927	-1542.69	1196.55	95.1709	-1233.02	1278.31	308.432	-1395.18	1449.64	389.264	-1437.47	1229.95	411.22	-1457.95	1132.79	416.195	-1595.32	1016.12	368.559	-1656.93	963.396	431.78	-1627.01	945.319	417.757	-1703.17	920.207
3751	0	170.406	-1517.95	1621.07	73.9181	-1524.21	1614.51	182.227	-1369.01	1673.06	37.4363	-1382.72	1656.12	131.108	-1306.96	1484.23	157.478	-1256.98	1224.34	122.578	-1458.17	1404.09	123.335	-1554.54	1198.5	93.9112	-1246.05	1280.22	308.401	-1406.88	1451.03	388.935	-1447.78	1230.73	410.236	-1466.96	1132.85	416.266	-1601.32	1013.34	369.201	-1661.79	958.864	432.534	-1631.49	941.741	418.301	-1706.56	913.969
3752	0	170.657	-1531.7	1622.13	74.1825	-1538.16	1615.81	182.027	-1383.16	1675.18	37.1399	-1397.22	1658.39	130.431	-1320	1486.41	156.007	-1269.64	1226.24	122.402	-1470.88	1406.15	123.336	-1567.93	1200.72	92.2971	-1258.99	1282.12	308.386	-1418.53	1452.57	388.667	-1457.44	1231.53	409.515	-1475.38	1133.15	416.691	-1606.78	1010.73	369.69	-1665.93	954.368	433.085	-1634.89	938.325	418.642	-1708.95	907.564
3753	0	170.99	-1545.42	1623.52	74.5664	-1552.13	1617.24	181.87	-1397.17	1677.43	37.2953	-1411.57	1660.63	129.711	-1333.02	1488.51	154.138	-1282.35	1228.17	122.299	-1483.86	1408.26	123.735	-1581.04	1202.79	90.6419	-1271.96	1284.16	308.585	-1430.22	1454.17	388.502	-1466.77	1232.27	408.874	-1483.33	1133.74	416.852	-1611.51	1008	370.436	-1668.89	950.018	433.717	-1637.81	935.11	418.807	-1710.84	901.055
3754	0	171.318	-1559.15	1624.89	74.8919	-1566.18	1618.87	182.016	-1410.99	1679.74	37.023	-1425.69	1663.25	129.195	-1346.05	1491.02	152.495	-1294.93	1230.55	122.2	-1496.67	1410.46	124.783	-1593.68	1204.66	89.3312	-1284.76	1286.6	308.592	-1442.11	1455.48	388.281	-1475.93	1232.8	408.346	-1490.77	1134.1	417.169	-1615.8	1005.41	370.911	-1671.6	945.558	434.239	-1640.15	931.488	418.968	-1711.89	894.64
3755	0	171.807	-1572.58	1626.46	75.4466	-1580	1620.71	182.199	-1424.78	1681.9	37.3163	-1439.81	1665.66	128.716	-1359.26	1493.42	151.037	-1307.41	1233.02	122.342	-1509.68	1412.65	125.557	-1606.49	1206.8	88.0901	-1297.51	1289.11	308.769	-1454.04	1456.76	388.37	-1484.43	1233.49	407.813	-1497.93	1134.33	417.614	-1619.52	1002.69	371.488	-1673.79	941.147	434.758	-1641.72	928.146	419.368	-1712.19	888.668
3756	0	172.236	-1586.02	1628.23	75.9469	-1593.59	1622.66	182.431	-1438.39	1683.82	37.6291	-1453.81	1668.17	128.3	-1372.42	1495.87	149.47	-1320.38	1235.38	122.302	-1522.51	1414.8	126.294	-1619.05	1209	87.3486	-1310.28	1292.11	309.087	-1465.82	1458.6	388.351	-1492.71	1234.27	407.376	-1504.64	1134.68	417.776	-1622.42	1000.1	371.973	-1675.26	936.827	435.257	-1642.67	924.911	420.047	-1711.42	882.742
3757	0	172.723	-1599.38	1630.04	76.35	-1607.32	1624.69	182.527	-1451.86	1685.83	37.7392	-1467.6	1670.42	127.552	-1385.66	1497.93	147.992	-1333.04	1237.69	122.627	-1535.33	1416.68	128.983	-1629.65	1210.34	85.9694	-1323.1	1294.65	309.158	-1477.57	1459.95	388.314	-1500.7	1234.95	406.656	-1510.92	1135	418.274	-1625	997.617	372.568	-1676.4	932.829	435.783	-1642.92	921.753	420.536	-1710.44	877.135
3758	0	173.112	-1612.77	1631.59	76.8019	-1620.75	1626.53	182.583	-1465.2	1687.43	37.944	-1481.21	1672.4	127.293	-1398.83	1500.24	146.741	-1345.67	1239.83	122.812	-1548.47	1418.45	129.784	-1641.94	1212.08	84.4691	-1336.25	1296.85	309.232	-1489.66	1461.25	388.233	-1508.55	1235.51	406.065	-1516.83	1135.19	418.701	-1627.11	995.07	373.279	-1676.88	928.842	436.117	-1642.69	918.628	421.003	-1708.88	871.54
3759	0	173.429	-1625.86	1632.93	77.2453	-1634.21	1628.18	182.901	-1478.33	1688.93	38.4414	-1494.79	1674.24	126.717	-1412.04	1502	145.321	-1358.41	1241.57	122.848	-1561.53	1420	130.326	-1654.51	1213.65	83.199	-1349.24	1299.09	309.305	-1501.64	1462.74	387.919	-1516.29	1235.98	405.514	-1522.62	1135.51	418.979	-1628.85	992.618	373.9	-1677.27	924.803	436.678	-1642.25	915.639	421.622	-1707.03	866.207
3760	0	173.721	-1639.13	1634.26	77.3275	-1647.72	1629.53	182.862	-1491.43	1690.07	38.2033	-1508.14	1675.66	126.389	-1425.25	1503.59	144.256	-1371.17	1243.24	122.947	-1574.87	1421.28	130.819	-1666.67	1214.89	81.5832	-1362.49	1300.63	309.179	-1513.61	1463.54	387.561	-1524.08	1236.09	404.681	-1527.91	1135.52	419.107	-1630.29	989.894	374.472	-1677.3	921.022	436.654	-1640.59	912.849	422.363	-1704.68	861.228
3761	0	174.074	-1652.27	1635.33	77.8341	-1660.97	1630.86	182.939	-1504.5	1690.93	38.2499	-1521.47	1676.77	125.789	-1438.52	1504.95	143.09	-1383.86	1244.66	123.164	-1587.95	1422.25	131.307	-1679.12	1215.91	80.1731	-1375.68	1302.36	308.943	-1525.73	1463.76	387.081	-1531.85	1235.89	403.956	-1533.17	1135.28	419.307	-1631.24	987.216	375.208	-1677.19	917.152	437.405	-1639.8	909.749	423.135	-1702.09	856.191
3762	0	174.581	-1665.34	1636.11	78.4132	-1674.24	1631.9	183.028	-1517.4	1691.36	38.6108	-1534.78	1677.43	125.328	-1451.84	1505.59	141.941	-1396.75	1245.53	123.324	-1601.06	1422.94	131.867	-1691.14	1216.57	78.5997	-1389.02	1303.44	309.195	-1537.9	1464.15	387.137	-1539.29	1235.86	403.048	-1538.25	1134.83	419.676	-1632.03	984.427	376.164	-1676.78	913.301	437.68	-1638.35	906.587	424.026	-1699.15	851.133
3763	0	175.033	-1678.14	1636.86	78.941	-1687.55	1632.82	183.08	-1530.23	1691.51	38.7591	-1548.22	1678.04	124.942	-1465.16	1506.06	140.74	-1409.58	1246.23	123.35	-1614.45	1423.45	132.212	-1703.62	1217.14	77.0401	-1402.32	1304.34	309.363	-1550.05	1464.34	386.482	-1546.86	1235.39	402.076	-1543.31	1134.35	420.001	-1632.63	981.893	377.432	-1675.76	909.328	437.842	-1636.57	903.621	425.345	-1695.88	846.553
3764	0	175.504	-1691.3	1637.21	79.4041	-1700.98	1633.41	183.071	-1543.1	1691.43	38.6508	-1561.56	1678.2	124.453	-1478.56	1506.29	139.574	-1422.39	1246.61	123.449	-1627.71	1423.44	132.437	-1716	1217.11	75.6609	-1415.54	1304.93	309.371	-1562.32	1464.08	385.977	-1554.41	1234.76	401.107	-1548.01	1133.85	420.168	-1632.82	978.964	378.312	-1674.91	905.448	438.044	-1634.32	900.742	426.35	-1692.44	841.884
3765	0	175.953	-1704.55	1637.21	79.8069	-1714.6	1633.28	183.413	-1555.94	1691.17	38.6596	-1575	1677.93	123.929	-1491.96	1506.2	138.462	-1435.08	1246.54	123.421	-1641	1423.04	132.65	-1728.96	1216.67	74.3598	-1428.71	1305.18	309.27	-1574.92	1463.04	385.222	-1562.29	1233.42	400.113	-1553.04	1132.99	420.322	-1633.21	976.045	379.255	-1673.87	901.414	438.318	-1632.27	897.854	427.553	-1688.98	837.333
3766	0	176.452	-1717.55	1636.78	80.4121	-1727.97	1633.29	183.196	-1568.8	1690.18	38.7877	-1588.47	1677.18	123.531	-1505.41	1505.73	137.479	-1447.79	1246.2	123.467	-1654.29	1422.34	132.89	-1741.56	1215.87	73.1948	-1441.94	1305.17	309.282	-1587.33	1462.18	384.629	-1569.74	1232.53	399.367	-1557.89	1132.3	420.44	-1633.49	973.03	380.163	-1672.84	897.263	438.392	-1630.07	894.788	428.646	-1685.18	832.863
3767	0	177.113	-1730.65	1636.28	80.9838	-1741.52	1632.95	183.328	-1581.85	1688.95	39.1542	-1602.01	1676.3	123.132	-1518.86	1505.12	136.681	-1460.48	1245.65	123.59	-1667.7	1421.43	133.067	-1754.61	1214.89	72.0752	-1455.11	1304.61	309.423	-1599.88	1461.06	383.92	-1577.32	1231.35	398.355	-1563.19	1131.49	420.727	-1633.76	970.439	381.415	-1672.25	893.805	438.607	-1627.45	892.226	430.012	-1681.26	828.764
3768	0	177.605	-1743.9	1635.43	81.556	-1755.15	1632.26	183.4	-1594.9	1687.62	39.3729	-1615.64	1675.38	122.758	-1532.43	1504.21	136.061	-1473.16	1244.89	123.699	-1681.07	1420.16	133.198	-1767.19	1213.26	71.1121	-1468.25	1303.89	309.439	-1612.5	1459.61	383.309	-1584.87	1230.1	397.04	-1568.58	1130.34	420.827	-1633.94	967.72	382.03	-1670.77	889.558	438.789	-1625.29	889.632	431.063	-1677.15	824.437
3769	0	178.162	-1757.42	1634.21	82.2268	-1768.73	1631.18	183.551	-1608.25	1685.99	39.3971	-1629.22	1674.06	122.289	-1545.97	1502.87	135.639	-1485.92	1243.9	123.819	-1694.36	1418.55	133.362	-1779.99	1211.24	70.4644	-1481.44	1302.93	309.503	-1625.3	1457.74	382.493	-1592.62	1228.62	395.68	-1574.55	1129.01	420.98	-1634.53	965.104	382.944	-1669.66	885.705	438.457	-1622.96	886.828	432.221	-1673.03	820.618
3770	0	178.643	-1770.89	1632.5	82.7211	-1782.53	1629.81	183.898	-1621.64	1684.27	39.7027	-1643.13	1672.57	122.049	-1559.55	1501.5	135.198	-1498.7	1242.63	123.95	-1707.64	1416.78	133.482	-1792.84	1208.89	69.8034	-1494.68	1301.63	309.524	-1638.14	1455.82	381.744	-1600.57	1226.89	394.436	-1580.16	1127.87	420.953	-1635.08	962.381	383.411	-1668.68	881.588	438.509	-1620.72	884.579	433.327	-1669.12	816.791
3771	0	178.962	-1784.5	1630.56	83.1188	-1796.48	1627.99	183.965	-1635.25	1682.27	39.7743	-1656.95	1670.6	121.673	-1573.14	1499.77	135.429	-1511.56	1241.29	124.006	-1721.1	1414.8	133.484	-1805.62	1206.28	69.4074	-1507.75	1300.17	309.466	-1650.94	1453.65	381.018	-1608.65	1225.23	393.167	-1586.34	1126.92	420.848	-1635.77	960.067	383.242	-1668.71	877.408	438.653	-1618.78	882.905	434.249	-1665.22	813.4
3772	0	179.391	-1797.99	1628.19	83.5866	-1810.41	1625.69	184.045	-1649.02	1679.84	40.1813	-1671.07	1668.62	121.509	-1586.73	1498.02	135.503	-1524.72	1239.47	124.177	-1734.48	1412.5	133.572	-1818.89	1203.43	69.0423	-1520.91	1298.52	309.534	-1663.93	1451.49	380.257	-1616.8	1223.83	391.722	-1592.96	1125.66	420.821	-1636.83	957.953	384.048	-1667.91	874.024	438.423	-1617.46	880.983	435.231	-1661.48	810.33
3773	0	180.025	-1811.51	1625.59	84.14	-1824.3	1623.33	184.302	-1662.86	1677.51	40.2093	-1685.03	1666.45	121.531	-1600.18	1496.07	136.316	-1537.84	1237.75	124.59	-1747.79	1410.19	133.795	-1831.96	1200.63	68.9399	-1533.98	1296.65	309.895	-1676.76	1449.34	379.752	-1625.41	1222.14	390.305	-1599.77	1124.42	420.789	-1638.27	955.823	385.599	-1666.69	871.49	437.999	-1615.64	879.484	436.174	-1657.63	807.65
3774	0	180.56	-1825.37	1623.16	84.7529	-1838.28	1620.8	184.552	-1676.89	1675.21	40.6818	-1699.32	1664.08	121.496	-1613.65	1494.02	137.012	-1551.09	1235.76	124.898	-1761.14	1407.77	133.973	-1845.05	1197.88	69.1318	-1547.19	1294.68	310.306	-1689.61	1447.62	378.887	-1633.87	1220.47	388.908	-1607.09	1123.28	420.873	-1639.86	954.381	386.155	-1666.26	868.929	437.664	-1614.55	878.406	437.266	-1654.39	805.316
3775	0	181.063	-1839.25	1620.33	85.2948	-1852.35	1617.93	184.741	-1690.84	1673.08	40.5371	-1713.5	1661.84	121.722	-1626.98	1491.77	137.957	-1564.24	1233.7	125.277	-1774.48	1405.23	134.183	-1858.46	1195.1	69.1029	-1560.48	1292.38	310.655	-1702.57	1445.55	378.544	-1643.09	1219.12	387.304	-1614.37	1122.5	420.693	-1641.76	953.101	386.751	-1666.46	866.34	437.466	-1613.59	877.941	437.983	-1651.03	803.528
3776	0	181.688	-1853.21	1617.32	85.9635	-1866.49	1614.72	184.892	-1704.99	1670.5	41.2767	-1728.13	1659.06	122.153	-1640.24	1489.55	138.666	-1577.45	1231.47	125.784	-1787.85	1402.62	134.375	-1872.03	1192.47	69.5428	-1573.74	1289.95	311.061	-1715.58	1443.39	378.147	-1652.49	1217.58	385.736	-1622.31	1121.26	420.785	-1644.23	951.994	389.269	-1667.13	864.668	437.339	-1613.47	877.747	438.567	-1648.19	801.743
3777	0	182.339	-1867.24	1614.04	86.6732	-1880.71	1611.44	185.37	-1719.11	1668.23	41.2781	-1742.35	1656.52	122.679	-1653.51	1487.27	139.558	-1590.72	1229.02	126.426	-1801.26	1400.03	134.629	-1885.34	1189.77	70.0485	-1587.05	1287.54	311.734	-1728.71	1441.08	377.889	-1662.32	1216.02	384.582	-1630.68	1120.1	420.737	-1647.28	950.895	391.265	-1667.42	864.427	437.213	-1614.2	877.63	439.199	-1645.91	800.235
3778	0	183.119	-1881.07	1611.02	87.4662	-1894.72	1608.17	185.696	-1733.33	1665.89	42.3078	-1756.95	1653.74	123.341	-1666.86	1484.92	140.36	-1604.16	1226.55	127.061	-1814.68	1397.66	134.83	-1898.67	1187.39	70.8861	-1600.45	1284.97	312.418	-1741.77	1438.82	377.633	-1672.19	1214.44	383.747	-1639.45	1119.31	420.884	-1650.65	949.821	392.149	-1668.92	862.991	437.247	-1615.32	877.974	440.143	-1644.16	799.387
3779	0	184.082	-1894.82	1608.3	88.351	-1908.65	1605.25	186.273	-1747.2	1663.75	42.714	-1771.09	1651.31	124.119	-1680.03	1482.36	141.173	-1617.77	1223.84	127.821	-1828.08	1395.37	135.307	-1912.07	1185.39	71.5003	-1614.03	1282.39	313.249	-1754.85	1436.39	377.824	-1682.7	1212.97	382.578	-1648.77	1117.98	421.316	-1654.95	949.502	392.193	-1671.03	860.878	437.36	-1617.48	878.489	440.444	-1642.59	798.545
3780	0	185.12	-1908.52	1605.75	89.486	-1922.44	1602.6	186.997	-1761.26	1661.58	43.8487	-1785.28	1649	125.045	-1693.44	1480.08	142.064	-1631.49	1221.54	128.762	-1841.55	1393.26	135.755	-1925.67	1183.73	72.3136	-1627.51	1279.91	314.189	-1768.07	1434.28	377.904	-1693.45	1211.31	382.121	-1658.37	1116.96	421.973	-1659.91	949.232	393.656	-1674.14	859.965	437.766	-1620.35	879.166	440.967	-1641.55	798.657
3781	0	186.137	-1922.19	1603.32	90.5388	-1936.17	1600.21	188.001	-1774.92	1659.61	44.6398	-1799.25	1646.94	126.172	-1706.82	1478.01	142.845	-1645.58	1219.12	129.767	-1855.13	1391.3	136.303	-1939.5	1182.25	73.1374	-1640.93	1277.75	315.095	-1781.3	1432.14	378.098	-1704.48	1209.89	381.849	-1668.25	1116.35	422.649	-1665.62	949.027	395.007	-1678.17	859.296	438.204	-1624.2	879.968	441.397	-1641.92	798.314
3782	0	187.322	-1935.82	1600.98	91.7348	-1949.8	1598.12	189.105	-1788.71	1657.62	45.5536	-1812.9	1645.19	127.159	-1720.35	1475.91	143.612	-1659.61	1216.88	130.762	-1868.85	1389.45	137.043	-1953.39	1180.79	74.0244	-1655.06	1275.48	316.185	-1794.55	1430.14	378.677	-1716.02	1208.55	381.601	-1678.42	1115.54	423.034	-1671.16	949.487	396.529	-1683.03	858.747	438.965	-1629.09	881.165	441.88	-1643.17	798.592
3783	0	188.679	-1949.38	1599.3	93.0357	-1963.46	1596.35	190.408	-1802.07	1655.87	46.5946	-1826.24	1643.59	128.157	-1733.98	1473.97	144.248	-1673.82	1214.66	132.002	-1882.7	1387.6	138.185	-1967.37	1179.4	74.7826	-1669.14	1273.21	317.453	-1807.81	1428.62	379.125	-1727.73	1207.13	381.278	-1689.47	1114.44	424.254	-1678.53	949.465	398.641	-1688.62	858.61	439.906	-1635	882.057	442.579	-1645.71	799.014
3784	0	190.219	-1962.77	1597.72	94.6667	-1976.86	1595.14	192.135	-1815.35	1654.08	48.6272	-1839.81	1641.97	129.471	-1747.56	1472.03	145.019	-1688.13	1212.72	133.32	-1896.53	1386.13	139.662	-1981.49	1178.24	75.7453	-1683.3	1271.38	318.635	-1821.48	1426.24	379.665	-1739.83	1205.86	381.932	-1700.6	1113.54	425.292	-1686.95	949.066	399.864	-1695.61	857.843	441.154	-1642.07	882.792	443.017	-1649.58	798.759
3785	0	191.912	-1976.01	1596.7	96.2168	-1990.14	1594.28	193.583	-1828.68	1652.2	50.5625	-1853.07	1640.72	130.53	-1761.29	1470.29	145.677	-1702.67	1210.72	134.72	-1910.47	1384.94	141.338	-1995.7	1177.43	76.6273	-1697.62	1269.53	320.072	-1834.89	1424.65	380.552	-1752.34	1204.73	382.365	-1712.22	1112.71	426.535	-1696.05	948.952	401.44	-1703.34	857.508	442.467	-1650.04	883.622	443.312	-1654.55	798.953
3786	0	193.641	-1989.16	1595.8	97.8475	-2003.4	1593.62	195.677	-1841.69	1651.12	52.2938	-1866.08	1639.95	132.178	-1774.83	1468.91	146.179	-1717.36	1209.13	136.124	-1924.43	1384.02	143.332	-2010.32	1176.82	77.4954	-1712.05	1267.99	321.581	-1848.44	1423.64	381.504	-1764.95	1203.85	383.491	-1724.48	1112.29	427.8	-1706.05	948.99	402.769	-1711.98	857.467	443.621	-1659.29	884.3	444.168	-1661.03	799.646
3787	0	195.374	-2002.51	1595.15	99.6587	-2016.56	1593.41	197.674	-1854.73	1650.12	54.2236	-1879.16	1639.39	133.377	-1788.14	1467.48	146.976	-1732.2	1207.56	137.706	-1938.4	1383.37	145.566	-2025.26	1176.54	78.6625	-1726.69	1266.47	322.965	-1862.06	1422.46	382.722	-1778.04	1203.02	384.745	-1737.24	1111.81	429.345	-1717.09	949.071	404.199	-1721.66	857.451	445.259	-1669.57	884.959	444.924	-1669	800.144
3788	0	197.117	-2015.73	1595.13	101.457	-2029.73	1593.65	199.728	-1867.8	1649.72	56.3211	-1892.24	1639.21	135.248	-1802.05	1466.83	147.71	-1747.22	1206.31	139.3	-1952.42	1383.33	147.879	-2040.2	1176.62	79.8303	-1741.18	1265.38	324.64	-1875.7	1421.7	383.979	-1791.54	1202.51	386.112	-1750.36	1111.52	430.697	-1729.06	949.054	405.411	-1732.53	857.378	446.927	-1681	885.59	445.55	-1678.5	800.505
3789	0	199.042	-2028.85	1595.54	103.281	-2042.8	1594.3	201.802	-1880.74	1649.43	58.0661	-1904.96	1639.58	136.699	-1815.66	1466.26	148.687	-1762.29	1205.51	140.861	-1966.46	1383.61	150.128	-2055.31	1177.07	80.9732	-1755.85	1264.47	326.362	-1889.54	1421.55	385.57	-1805.31	1202.36	387.672	-1763.68	1111.55	432.072	-1741.7	949.156	406.45	-1744.44	857.482	448.472	-1693.42	886.161	446.674	-1689.56	801.367
3790	0	201.075	-2041.9	1596.29	105.177	-2055.87	1595.39	203.952	-1893.57	1649.33	60.328	-1917.8	1640.09	138.553	-1829.61	1466.06	149.868	-1777.24	1205.02	142.587	-1980.53	1384.07	152.428	-2070.69	1177.73	82.6388	-1770.59	1264.07	328.062	-1903.28	1421.76	387.24	-1819.4	1202.52	389.244	-1777.52	1111.66	433.911	-1755.37	949.524	407.817	-1757.48	857.636	450.514	-1706.97	886.655	447.608	-1702.07	801.425
3791	0	203.103	-2055.07	1597.52	107.163	-2069.08	1597.01	206.172	-1906.39	1649.67	62.3858	-1930.63	1641.07	140.156	-1843.32	1466.22	151.107	-1792.29	1205.09	144.233	-1994.74	1384.77	154.593	-2085.84	1178.69	84.4111	-1785.04	1264.05	329.61	-1917.4	1421.64	388.922	-1833.92	1202.67	391.013	-1791.82	1111.74	435.587	-1769.94	949.692	409.333	-1771.78	857.799	452.366	-1721.55	886.845	448.806	-1716.25	801.359
3792	0	205.113	-2068.28	1599.15	109.117	-2082.31	1599.1	208.416	-1919.37	1650.14	64.4687	-1943.49	1642.4	141.557	-1857.34	1466.82	152.732	-1806.85	1205.66	145.645	-2008.94	1385.79	156.413	-2101.16	1179.79	85.9735	-1799.54	1264.35	330.863	-1931.44	1422.1	390.595	-1848.45	1203.13	392.956	-1806.38	1112.3	437.47	-1785.14	949.914	410.874	-1786.73	858.523	454.544	-1736.99	887.001	450.502	-1731.71	801.601
3793	0	207.032	-2081.63	1600.93	111.14	-2095.7	1601.33	210.25	-1932.51	1650.71	66.6211	-1956.63	1643.89	142.708	-1871.31	1467.75	154.243	-1821.15	1206.51	146.857	-2022.93	1387.07	157.89	-2116.05	1181.05	87.5026	-1814.39	1265.08	332.062	-1945.33	1422.97	392.013	-1862.91	1203.89	394.638	-1821.21	1112.79	439.122	-1800.47	950.143	412.54	-1802.8	859.032	456.845	-1753.26	887.233	452.205	-1748.26	801.701
3794	0	208.971	-2094.82	1602.51	113.234	-2109.17	1603.43	212.38	-1945.22	1651.62	68.5612	-1970.01	1645.32	143.249	-1885.49	1468.83	155.396	-1835.13	1207.94	148.026	-2036.84	1388.33	159.166	-2130.65	1182.15	88.5995	-1828.85	1266.19	333.021	-1959.19	1423.56	393.543	-1877.89	1204.76	396.714	-1836.67	1113.36	441.344	-1817.45	950.705	415.002	-1821.6	857.09	459.053	-1770.65	887.153	454.332	-1766.38	801.585
3795	0	210.997	-2107.77	1603.8	115.269	-2122.5	1605.46	213.995	-1958.09	1652.16	70.3907	-1983.38	1646.82	143.742	-1899.35	1470.13	156.452	-1848.82	1208.95	149.148	-2050.6	1389.54	160.366	-2144.64	1183.26	89.1106	-1842.94	1267.46	333.762	-1972.77	1425.11	394.953	-1893.1	1205.57	398.679	-1852.3	1114.01	443.429	-1835.02	950.945	417.353	-1839.95	857.555	461.374	-1788.83	886.826	456.715	-1785.85	801.258
3796	0	212.96	-2120.81	1605.2	117.18	-2135.91	1607.28	215.494	-1970.78	1652.74	71.8181	-1996.68	1648.51	144.253	-1912.97	1471.63	157.532	-1862.12	1210.35	149.881	-2064.19	1390.79	161.429	-2158.08	1184.47	89.3973	-1856.55	1269.2	334.31	-1986.03	1426.68	396.141	-1908.21	1206.55	400.217	-1867.92	1114.73	445.405	-1853.04	951.459	419.378	-1859.18	858.306	463.731	-1807.89	886.807	459.147	-1806.14	800.766
3797	0	214.508	-2133.68	1606.37	118.748	-2149.27	1608.89	216.501	-1983.62	1653.81	72.8842	-2010.07	1650.13	144.387	-1926.25	1472.84	158.028	-1875.24	1212.06	150.535	-2077.51	1392.07	162.229	-2171.34	1185.7	89.2669	-1869.82	1270.65	334.728	-1999.08	1428.7	397.157	-1923.15	1207.69	402.177	-1883.88	1115.71	447.504	-1871.65	952.029	421.705	-1879.49	858.847	465.996	-1827.56	886.696	462.631	-1828.24	801.326
3798	0	215.549	-2146.65	1607.25	120.024	-2162.64	1610.1	217.187	-1996.61	1654.82	73.3257	-2023.71	1651.59	144.946	-1939.19	1474.43	158.436	-1888.29	1213.18	151.061	-2090.58	1393.28	162.997	-2184.43	1186.9	89.3604	-1882.3	1272.36	335.044	-2012.16	1430.34	398.331	-1938.45	1208.79	403.921	-1899.72	1116.43	449.522	-1890.83	952.457	423.87	-1900.36	859.178	468.173	-1848.05	886.223	465.252	-1850.99	800.717
3799	0	216.387	-2159.77	1608.44	120.893	-2175.94	1611.2	217.865	-2009.77	1656.37	74.0366	-2037.25	1653.16	145.36	-1951.96	1475.9	159.063	-1901.12	1214.52	151.379	-2103.61	1394.75	163.59	-2197.13	1188.4	89.6278	-1894.87	1274.07	335.432	-2025.14	1432.02	399.472	-1953.88	1209.94	405.933	-1916.23	1117.19	451.545	-1910.69	952.886	425.882	-1922.05	859.847	470.339	-1869.17	885.823	468.322	-1874.86	800.507
3800	0	216.74	-2172.82	1609.5	121.285	-2189.07	1612.18	218.059	-2023	1658.31	74.0855	-2050.58	1654.76	145.913	-1964.67	1477.28	159.564	-1914.03	1215.84	151.628	-2116.31	1396.45	164.006	-2209.73	1190.03	90.3191	-1907.4	1275.26	335.848	-2038.07	1433.99	400.582	-1969.11	1211.2	407.709	-1932.47	1117.97	453.238	-1930.47	953.181	428.122	-1944.2	860.526	472.357	-1890.83	885.319	471.238	-1899.43	800.425
3801	0	216.971	-2185.92	1610.47	121.329	-2202.11	1613.12	218.039	-2036.41	1659.99	74.221	-2063.78	1656.04	146.695	-1977.25	1478.88	160.657	-1926.89	1217.06	151.864	-2128.79	1398.21	164.368	-2222.18	1191.75	91.4463	-1919.85	1276.43	336.311	-2051.07	1435.95	402.01	-1984.53	1212.37	409.6	-1949.15	1118.52	455.179	-1951.38	953.663	430.179	-1966.92	861.242	474.359	-1912.93	884.675	474.55	-1925.29	800.925
3802	0	216.699	-2199.1	1612.26	121.107	-2215.02	1614.27	218.011	-2049.63	1661.98	74.43	-2076.89	1657.42	147.192	-1989.83	1480.42	161.777	-1939.88	1218.7	152.183	-2141.37	1400.02	164.634	-2234.64	1193.54	92.8336	-1932.41	1277.74	336.771	-2064.29	1437.55	403.201	-2000.24	1213.39	411.465	-1966.16	1118.93	457.004	-1972.93	953.647	431.499	-1989.69	862.681	476.103	-1936.19	883.806	476.984	-1951.72	800.672
3803	0	216.117	-2212.16	1614	120.563	-2227.87	1615.61	217.507	-2063.02	1664.09	74.0636	-2089.92	1659.08	147.707	-2002.43	1482.03	163.54	-1952.53	1220.27	152.305	-2153.79	1401.98	164.645	-2247.17	1195.41	94.6941	-1944.53	1279.3	337.242	-2077.35	1439.54	404.549	-2016.01	1214.69	413.415	-1983.3	1119.59	458.52	-1994.46	954.089	433.006	-2013.61	863.626	477.821	-1959.65	883.334	479.775	-1978.98	801.591
3804	0	215.37	-2225.33	1615.72	119.758	-2240.69	1616.98	217.241	-2076	1666.43	73.5853	-2102.62	1660.49	148.398	-2015.06	1483.96	165.216	-1965.26	1222.32	152.333	-2166.25	1403.91	164.363	-2259.86	1197.41	96.6384	-1956.74	1281.07	337.591	-2090.61	1441.4	405.937	-2031.73	1216.33	415.66	-2000.38	1120.65	459.792	-2016.18	954.88	434.115	-2038.16	864.115	479.041	-1983.49	882.922	482.254	-2007.08	802.812
3805	0	214.586	-2238.55	1617.41	118.938	-2253.47	1618.29	216.649	-2089.32	1668.49	72.9296	-2115.23	1661.95	148.97	-2027.77	1486.02	166.877	-1977.9	1224.34	152.416	-2178.82	1405.74	163.971	-2272.9	1199.38	98.6224	-1969.15	1282.62	338.002	-2103.9	1443.63	407.077	-2047.74	1217.73	417.169	-2018.4	1121.08	461.255	-2038.92	955.692	435.423	-2061.48	867.42	480.389	-2008.3	882.763	484.284	-2035.43	804.631
3806	0	213.552	-2251.62	1620.01	117.973	-2266.04	1619.95	216.07	-2102.31	1670.68	72.4831	-2127.88	1663.25	149.691	-2040.53	1487.85	168.657	-1990.42	1226.23	152.687	-2191.2	1407.73	163.578	-2285.63	1201.51	100.415	-1981.69	1284.21	338.436	-2117.57	1445.44	408.341	-2063.9	1219.02	419.226	-2036.3	1121.92	462.405	-2062.11	956.632	435.873	-2088.88	867.752	481.409	-2033.6	882.679	485.954	-2064.91	806.219
3807	0	212.774	-2264.71	1621.99	116.956	-2278.64	1621.58	215.398	-2115.51	1672.43	71.6389	-2140.16	1664.66	150.341	-2053.2	1489.6	170.323	-2003.07	1228.36	152.707	-2203.91	1409.5	163.157	-2298.26	1203.52	102.234	-1993.92	1285.98	338.856	-2131.27	1447.47	409.565	-2080.15	1220.78	421.104	-2054.03	1123.11	463.206	-2085.32	958.058	435.111	-2113	870.857	482.412	-2059.5	883.298	487.625	-2094.63	808.925
3808	0	211.861	-2277.68	1624.23	116.043	-2291.21	1623.1	214.899	-2128.37	1674.76	71.0583	-2152.33	1665.83	150.899	-2065.9	1491.25	172.055	-2015.37	1230.05	152.911	-2216.39	1411.16	162.792	-2310.73	1205.2	103.887	-2006.19	1287.81	339.124	-2144.87	1449.81	411.189	-2096.8	1222.95	423.061	-2071.93	1124.5	463.909	-2109.01	959.906	435.315	-2139.01	873.808	482.956	-2085.52	884.16	488.647	-2124.45	812.289
3809	0	210.825	-2290.56	1626.11	115.106	-2303.75	1624.57	214.526	-2141.2	1676.42	71.1764	-2165.51	1666.26	151.456	-2078.57	1492.71	173.277	-2027.92	1231.94	152.924	-2228.95	1412.4	162.535	-2322.79	1206.41	105.649	-2018.43	1289.77	339.324	-2158.67	1451.8	412.214	-2113.14	1224.47	425.086	-2090.01	1125.78	464.305	-2132.98	961.708	434.995	-2165.33	876.849	483.872	-2112.36	885.625	489.164	-2154.51	815.452
3810	0	210.052	-2303.49	1627.82	114.402	-2316.17	1625.91	214.404	-2153.79	1677.97	70.7646	-2177.31	1667.21	152.1	-2091.32	1494.14	174.554	-2040.48	1233.32	152.969	-2241.69	1413.49	162.172	-2334.66	1207.42	107.046	-2030.82	1291.02	339.431	-2172.49	1453.49	413.487	-2129.82	1226.18	427.127	-2108.18	1127.12	464.876	-2157.26	963.705	436.217	-2191.39	881.452	484.332	-2139.37	887.124	489.339	-2184.84	819.448
3811	0	209.466	-2316.52	1629.28	113.73	-2328.79	1627.03	213.944	-2166.56	1679.1	69.9743	-2189.67	1667.85	152.908	-2103.95	1495.21	175.804	-2052.75	1234.75	152.93	-2254.29	1414.37	161.907	-2346.48	1208.3	108.1	-2043.19	1291.95	339.624	-2186.28	1455.12	414.933	-2146.44	1227.84	428.884	-2126	1128.16	465.046	-2181.34	966.197	435.478	-2217.38	885.203	484.973	-2166.71	889.309	489.105	-2214.78	823.289
3812	0	209.066	-2329.42	1630.88	113.25	-2341.36	1628.05	213.847	-2179.45	1679.8	70.1689	-2202.01	1668.2	153.227	-2116.88	1495.92	176.759	-2065.28	1235.65	153.036	-2266.8	1415.05	161.66	-2358.51	1208.79	109.552	-2055.63	1292.85	339.831	-2199.88	1456.62	416.23	-2163.11	1229.04	431.17	-2144.34	1129.14	465.665	-2206.15	968.317	435.338	-2244.89	889.441	485.079	-2194.16	890.989	488.715	-2245.37	827.341
3813	0	208.703	-2342.33	1631.84	112.969	-2353.87	1628.88	213.74	-2192.34	1680.26	70.1444	-2214.27	1668.43	153.966	-2130.34	1496.44	177.919	-2077.75	1236.18	153.16	-2279.43	1415.45	161.411	-2370.71	1209.17	110.611	-2068.07	1293.19	340.094	-2213.94	1457.27	417.585	-2179.85	1229.85	433.254	-2162.63	1129.43	466.055	-2230.71	970.477	432.804	-2271.01	891.206	485.402	-2222.18	892.903	487.954	-2275.81	831.144
3814	0	208.477	-2355.13	1632.43	112.653	-2366.54	1629.43	213.839	-2204.94	1680.4	70.0499	-2226.53	1668.47	154.511	-2143.24	1496.61	178.655	-2090.28	1236.93	153.172	-2292.06	1415.56	161.063	-2383	1209.45	111.692	-2080.61	1293.45	340.186	-2227.63	1457.78	419.052	-2196.61	1230.62	435.348	-2180.98	1129.84	466.398	-2255.18	972.693	432.167	-2297.92	895.47	485.061	-2249.39	894.513	486.813	-2305.91	835.3
3815	0	208.123	-2368.07	1632.84	112.458	-2379.32	1629.46	213.797	-2217.77	1680.24	68.171	-2238.28	1668.66	155.007	-2155.7	1496.71	179.524	-2102.92	1236.92	153.217	-2304.81	1415.2	160.672	-2395.63	1209.17	113.077	-2092.99	1293.73	340.482	-2241.4	1458	420.346	-2213.09	1231.15	437.504	-2199.39	1130.26	466.72	-2279.65	974.917	431.427	-2324.74	899.787	485.001	-2276.98	896.648	485.843	-2336.34	839.798
3816	0	207.968	-2381.27	1632.7	112.235	-2392.21	1629.23	213.775	-2230.75	1679.87	70.7773	-2251.56	1666.99	155.49	-2169.35	1496.25	180.344	-2115.44	1236.83	153.375	-2317.72	1414.6	160.413	-2408.07	1208.58	113.986	-2105.69	1293.24	340.378	-2254.98	1457.63	421.589	-2229.81	1231.21	439.973	-2217.97	1130.36	466.892	-2304.11	977.015	430.668	-2351.64	903.882	485.061	-2304.88	899.102	483.998	-2366.08	843.886
3817	0	207.933	-2394.38	1632.25	112.262	-2405.03	1628.82	214.2	-2243.69	1679.29	70.2625	-2264.28	1666.61	155.95	-2182.43	1495.73	181.23	-2127.68	1236.58	153.722	-2330.53	1413.65	160.246	-2420.38	1207.72	115.189	-2118.18	1293.22	340.666	-2268.47	1457.01	422.954	-2246.61	1230.9	441.876	-2236.74	1129.57	466.928	-2328.32	979.146	429.701	-2379.05	907.983	484.267	-2332.14	900.73	482.337	-2395.61	848.3
3818	0	208.012	-2407.61	1631.67	112.249	-2417.97	1628.05	214.077	-2256.88	1678.22	70.591	-2276.9	1665.54	156.253	-2195.48	1495.16	181.764	-2139.94	1236.05	153.742	-2343.24	1412.64	160.101	-2432.47	1206.39	115.852	-2130.94	1292.49	340.671	-2281.61	1456.47	424.392	-2263.63	1230.42	443.765	-2255.6	1128.93	467.292	-2352.62	981.251	428.685	-2404.81	912.643	484.252	-2359.76	903.388	480.333	-2424.9	852.761
3819	0	207.948	-2420.65	1630.59	112.502	-2430.77	1626.64	214.578	-2270.06	1677.46	70.7647	-2290.03	1664.47	156.638	-2208.5	1494.18	182.079	-2152.32	1235.25	153.986	-2356.12	1411.38	160.046	-2444.69	1204.66	116.325	-2143.68	1291.65	340.818	-2294.79	1455.39	425.112	-2279.94	1229.7	445.368	-2274.44	1128.04	467.407	-2376.88	983.296	427.641	-2430.79	916.862	483.878	-2387.07	905.862	478.57	-2453.8	857.342
3820	0	208.046	-2433.89	1628.98	112.492	-2444.22	1625.18	214.8	-2283.41	1676.1	71.7206	-2302.6	1662.92	156.671	-2221.46	1493	182.376	-2164.63	1234.12	154.256	-2369.07	1409.74	160.16	-2456.86	1202.68	116.83	-2156.25	1290.52	340.834	-2308.01	1453.74	426.608	-2297.25	1228.84	446.968	-2293.67	1126.78	467.317	-2401.14	985.267	426.642	-2456.65	920.891	483.359	-2414.15	908.329	476.151	-2482.56	862.002
3821	0	208.156	-2447.26	1627.28	112.68	-2457.34	1623.23	215.061	-2296.89	1674.63	71.3996	-2316.36	1661.49	156.929	-2234.49	1491.57	182.312	-2176.95	1232.89	154.401	-2381.99	1408.11	160.201	-2469.33	1200.62	116.531	-2169.17	1288.99	340.751	-2320.99	1452.07	427.549	-2314.18	1227.75	448.603	-2312.82	1125.76	467.046	-2425.08	987.184	425.12	-2481.9	925.264	482.263	-2440.66	910.694	473.998	-2510.74	866.836
3822	0	208.561	-2460.6	1624.86	113.115	-2470.58	1621.19	215.112	-2310.3	1672.94	72.0178	-2329.63	1659.77	156.947	-2247.44	1489.96	181.975	-2189.66	1231.32	154.505	-2394.9	1406.26	160.387	-2482.16	1198.5	116.616	-2181.67	1287.55	340.748	-2334.07	1449.77	427.933	-2330.36	1226.71	450.085	-2332	1124.84	465.825	-2447.7	989.685	423.763	-2507.19	929.177	481.906	-2467.32	913.987	471.745	-2538.37	871.783
3823	0	208.896	-2473.99	1622.98	113.328	-2483.97	1619.03	215.56	-2323.81	1671.2	72.6446	-2342.78	1657.84	156.881	-2260.48	1488.33	181.086	-2202.44	1229.56	154.738	-2407.76	1404.16	160.683	-2495.11	1196.25	116.088	-2194.47	1286.14	340.665	-2346.77	1448.01	428.509	-2347.11	1225.34	451.398	-2351.25	1123.69	465.341	-2471.25	991.755	422.179	-2531.74	933.318	480.872	-2493.5	916.768	469.437	-2565.62	876.852
3824	0	209.018	-2487.06	1620.49	113.573	-2497.2	1616.67	215.694	-2337.34	1669.02	72.6201	-2356.34	1656.26	156.508	-2273.67	1486.03	180.429	-2215.15	1227.67	154.832	-2420.73	1401.98	160.939	-2508.32	1193.99	115.45	-2207.23	1284.34	340.477	-2359.72	1445.77	428.938	-2364.05	1223.73	450.623	-2368.62	1121.97	464.243	-2494.44	993.775	420.266	-2555.73	937.456	479.817	-2519.34	919.868	467.222	-2592.27	881.998
3825	0	209.481	-2500.3	1618.05	113.848	-2510.33	1614.3	215.723	-2350.52	1667	72.8996	-2369.68	1654.32	156.27	-2285.99	1484.26	178.824	-2228.04	1225.34	154.737	-2433.77	1399.96	161.162	-2521.61	1191.89	114.545	-2220.09	1281.93	340.2	-2372.41	1443.6	429.395	-2380.66	1222.5	453.131	-2389.4	1121.76	463.287	-2517.21	996.362	418.52	-2579.32	941.659	479.167	-2544.58	923.721	465.241	-2618.17	887.364
3826	0	209.488	-2513.48	1615.63	113.833	-2523.78	1611.98	215.928	-2363.7	1665.06	73.0943	-2383.2	1652.43	155.728	-2299.05	1482.37	178.058	-2241.18	1223.37	154.566	-2446.8	1397.61	161.328	-2534.85	1189.56	113.992	-2233.27	1280.55	339.806	-2385.08	1441.44	429.085	-2396.71	1221.4	453.311	-2407.53	1121.24	462.617	-2539.63	999.381	416.937	-2602.57	945.595	477.901	-2568.9	927.282	463.007	-2643.39	893.02
3827	0	209.569	-2526.65	1612.86	113.741	-2537.17	1610.03	215.549	-2377.07	1662.7	72.8073	-2396.61	1650.42	155.675	-2311.87	1480.22	177.204	-2254.21	1221.24	154.388	-2459.95	1395.3	161.586	-2548.05	1187.35	113.175	-2246.18	1278.58	339.363	-2398.01	1439.43	428.43	-2412.34	1220.24	453.615	-2426.12	1120.5	461.346	-2561.2	1001.72	415.32	-2625.01	949.588	476.789	-2592.8	930.927	461.154	-2667.79	898.752
3828	0	209.383	-2539.73	1610.77	113.694	-2550.29	1607.88	215.652	-2390.04	1660.88	72.6093	-2409.88	1648.55	155.098	-2325.07	1478.16	176.142	-2267.51	1219.22	154.025	-2473.08	1393.36	161.715	-2561.18	1185.34	112.39	-2259.31	1276.96	338.699	-2410.47	1437.62	428.055	-2428.28	1218.85	453.576	-2444.47	1119.73	460.073	-2582.1	1004.24	413.812	-2646.75	953.676	475.602	-2615.75	934.483	459.272	-2691.25	904.285
3829	0	209.139	-2552.61	1608.82	113.463	-2563.23	1605.95	215.432	-2402.92	1658.94	72.2902	-2422.84	1646.73	154.749	-2337.85	1475.95	175.285	-2280.99	1216.97	153.607	-2486.02	1391.45	161.644	-2574.43	1183.64	111.549	-2272.64	1274.28	338.503	-2423.56	1435.66	427.419	-2443.98	1217.33	453.199	-2461.76	1118.94	459.142	-2602.45	1006.97	412.396	-2667.89	957.794	474.436	-2637.76	937.976	457.902	-2714.27	909.819
3830	0	208.804	-2565.57	1607.11	113.095	-2576.27	1604.1	215.018	-2415.85	1657.05	71.8891	-2435.78	1644.9	154.108	-2350.87	1474.11	174.573	-2294.81	1214.48	153.222	-2499.12	1389.71	161.571	-2587.86	1181.99	110.631	-2286.03	1271.85	337.973	-2436.57	1433.95	426.668	-2459.35	1215.93	452.669	-2478.69	1118.06	458.212	-2622.1	1009.4	411.243	-2688.22	961.629	473.595	-2659.17	941.474	456.582	-2736.19	915.288
3831	0	208.261	-2578.23	1605.11	112.522	-2589.26	1602.4	214.341	-2428.79	1655.19	71.2283	-2448.64	1643	153.732	-2363.84	1471.89	173.908	-2308.45	1212.35	152.562	-2512.57	1387.97	161.34	-2601.45	1180.45	110.037	-2299.48	1269.66	337.4	-2449.78	1432.27	425.692	-2474.37	1214.37	450.339	-2493.39	1116.24	457.598	-2641.38	1011.48	410.277	-2708.04	965.171	472.639	-2679.56	944.461	455.695	-2757.24	920.465
3832	0	207.426	-2591.23	1603.77	111.697	-2602.17	1601.09	213.382	-2441.41	1653.47	70.3255	-2461.41	1641.2	153.131	-2377.01	1470.01	173.327	-2322.18	1210.11	151.932	-2525.79	1386.31	160.844	-2615.03	1179.14	109.955	-2312.91	1268.06	336.687	-2463.14	1430.79	424.807	-2489.08	1213.04	450.842	-2511.12	1115.78	456.153	-2658.93	1013.22	409.475	-2726.97	968.64	471.981	-2699.17	947.59	454.982	-2777.34	925.438
3833	0	206.374	-2604.31	1602.86	110.663	-2614.99	1599.87	212.15	-2454.21	1651.89	69.2848	-2474.2	1639.34	152.605	-2390.28	1468.37	173.123	-2336.21	1208.49	151.183	-2539.15	1384.92	160.128	-2629.01	1177.69	109.22	-2326.67	1265.79	335.988	-2476.89	1429.42	423.362	-2502.99	1212.01	450.057	-2526.77	1115.33	453.638	-2674.37	1014.33	408.849	-2745.38	971.634	471.115	-2717.43	950.09	454.273	-2795.66	930.794
3834	0	205.202	-2617.08	1602.32	109.586	-2627.93	1598.74	211.172	-2466.64	1650.69	68.0512	-2487.12	1637.75	151.784	-2403.4	1466.49	172.524	-2350.01	1206.69	150.171	-2552.83	1383.63	159.404	-2642.92	1176.61	109.17	-2340.31	1264.02	335.069	-2490.51	1428.41	422.429	-2517.4	1210.77	446.941	-2539.75	1113.26	454.464	-2692.73	1016.22	408.429	-2762.99	974.245	468.646	-2733.66	951.179	454.309	-2813.88	934.895
3835	0	203.972	-2629.96	1601.54	108.326	-2640.72	1597.99	209.715	-2479.38	1649.34	66.8517	-2499.53	1636.39	150.619	-2416.67	1465.11	172.632	-2364.1	1205.11	149.379	-2566.19	1382.44	158.439	-2656.98	1175.93	109.164	-2354.27	1262.24	334.193	-2504.46	1427.63	421.787	-2532.25	1209.68	445.677	-2554.99	1112.23	453.771	-2708.82	1016.67	408.137	-2779.84	976.334	468.803	-2751.26	952.421	454.832	-2831.46	938.259
3836	0	202.502	-2642.7	1601.35	106.761	-2653.56	1597.6	208.231	-2492.03	1648.34	65.3158	-2512.15	1635.27	150.193	-2429.84	1464.09	172.133	-2378.38	1203.61	148.302	-2579.7	1381.74	157.232	-2671.32	1175.62	108.843	-2368.25	1260.51	333.122	-2518.32	1426.8	421.078	-2546.65	1209.15	446.526	-2571.68	1112.61	452.851	-2724.07	1016.91	407.962	-2795.99	977.896	468.165	-2767.16	953.194	455.312	-2847.66	941.182
[truncated: 69 more columns]

## Sheet: Sheet2
Devices
		025370 - Force			025370 - Moment			025370 - CoP			027571 - Force			027571 - Moment			027571 - CoP			037720 - Force			037720 - Moment			037720 - CoP
Frame	Sub Frame	Fx	Fy	Fz	Mx	My	Mz	Cx	Cy	Cz	Fx	Fy	Fz	Mx	My	Mz	Cx	Cy	Cz	Fx	Fy	Fz	Mx	My	Mz	Cx	Cy	Cz
		N	N	N	N.mm	N.mm	N.mm	mm	mm	mm	N	N	N	N.mm	N.mm	N.mm	mm	mm	mm	N	N	N	N.mm	N.mm	N.mm	mm	mm	mm
3496	0	0	0	0	0	0	0	200	300	0	0	0	0	0	0	0	200	903	0	0	0	0	0	0	0	603	903	0
3496	1	0	0	0	0	0	0	200	300	0	0	0	0	0	0	0	200	903	0	0	0	0	0	0	0	603	903	0
3496	2	0	0	0	0	0	0	200	300	0	0	0	0	0	0	0	200	903	0	0	0	0	0	0	0	603	903	0
3496	3	0	0	0	0	0	0	200	300	0	0	0	0	0	0	0	200	903	0	0	0	0	0	0	0	603	903	0
3496	4	0	0	0	0	0	0	200	300	0	0	0	0	0	0	0	200	903	0	0	0	0	0	0	0	603	903	0
3496	5	0	0	0	0	0	0	200	300	0	0	0	0	0	0	0	200	903	0	0	0	0	0	0	0	603	903	0
3496	6	0	0	0	0	0	0	200	300	0	0	0	0	0	0	0	200	903	0	0	0	0	0	0	0	603	903	0
3496	7	0	0	0	0	0	0	200	300	0	0	0	0	0	0	0	200	903	0	0	0	0	0	0	0	603	903	0
3496	8	0	0	0	0	0	0	200	300	0	0	0	0	0	0	0	200	903	0	0	0	0	0	0	0	603	903	0
3496	9	0	0	0	0	0	0	200	300	0	0	0	0	0	0	0	200	903	0	0	0	0	0	0	0	603	903	0
3497	0	0	0	0	0	0	0	200	300	0	0	0	0	0	0	0	200	903	0	0	0	0	0	0	0	603	903	0
3497	1	0	0	0	0	0	0	200	300	0	0	0	0	0	0	0	200	903	0	0	0	0	0	0	0	603	903	0
3497	2	0	0	0	0	0	0	200	300	0	0	0	0	0	0	0	200	903	0	0	0	0	0	0	0	603	903	0
3497	3	0	0	0	0	0	0	200	300	0	0	0	0	0	0	0	200	903	0	0	0	0	0	0	0	603	903	0
3497	4	0	0	0	0	0	0	200	300	0	0	0	0	0	0	0	200	903	0	0	0	0	0	0	0	603	903	0
3497	5	0	0	0	0	0	0	200	300	0	0	0	0	0	0	0	200	903	0	0	0	0	0	0	0	603	903	0
3497	6	0	0	0	0	0	0	200	300	0	0	0	0	0	0	0	200	903	0	0	0	0	0	0	0	603	903	0
3497	7	0	0	0	0	0	0	200	300	0	0	0	0	0	0	0	200	903	0	0	0	0	0	0	0	603	903	0
3497	8	0	0	0	0	0	0	200	300	0	0	0	0	0	0	0	200	903	0	0	0	0	0	0	0	603	903	0
3497	9	0	0	0	0	0	0	200	300	0	0	0	0	0	0	0	200	903	0	0	0	0	0	0	0	603	903	0
3498	0	0	0	0	0	0	0	200	300	0	0	0	0	0	0	0	200	903	0	0	0	0	0	0	0	603	903	0
3498	1	0	0	0	0	0	0	200	300	0	0	0	0	0	0	0	200	903	0	0	0	0	0	0	0	603	903	0
3498	2	0	0	0	0	0	0	200	300	0	0	0	0	0	0	0	200	903	0	0	0	0	0	0	0	603	903	0
3498	3	0	0	0	0	0	0	200	300	0	0	0	0	0	0	0	200	903	0	0	0	0	0	0	0	603	903	0
3498	4	0	0	0	0	0	0	200	300	0	0	0	0	0	0	0	200	903	0	0	0	0	0	0	0	603	903	0
3498	5	0	0	0	0	0	0	200	300	0	0	0	0	0	0	0	200	903	0	0	0	0	0	0	0	603	903	0
3498	6	0	0	0	0	0	0	200	300	0	0	0	0	0	0	0	200	903	0	0	0	0	0	0	0	603	903	0
3498	7	0	0	0	0	0	0	200	300	0	0	0	0	0	0	0	200	903	0	0	0	0	0	0	0	603	903	0
3498	8	0	0	0	0	0	0	200	300	0	0	0	0	0	0	0	200	903	0	0	0	0	0	0	0	603	903	0
3498	9	0	0	0	0	0	0	200	300	0	0	0	0	0	0	0	200	903	0	0	0	0	0	0	0	603	903	0
3499	0	0	0	0	0	0	0	200	300	0	0	0	0	0	0	0	200	903	0	0	0	0	0	0	0	603	903	0
3499	1	0	0	0	0	0	0	200	300	0	0	0	0	0	0	0	200	903	0	0	0	0	0	0	0	603	903	0
3499	2	0	0	0	0	0	0	200	300	0	0	0	0	0	0	0	200	903	0	0	0	0	0	0	0	603	903	0
3499	3	0	0	0	0	0	0	200	300	0	0	0	0	0	0	0	200	903	0	0	0	0	0	0	0	603	903	0
3499	4	0	0	0	0	0	0	200	300	0	0	0	0	0	0	0	200	903	0	0	0	0	0	0	0	603	903	0
3499	5	0	0	0	0	0	0	200	300	0	0	0	0	0	0	0	200	903	0	0	0	0	0	0	0	603	903	0
3499	6	0	0	0	0	0	0	200	300	0	0	0	0	0	0	0	200	903	0	0	0	0	0	0	0	603	903	0
3499	7	0	0	0	0	0	0	200	300	0	0	0	0	0	0	0	200	903	0	0	0	0	0	0	0	603	903	0
3499	8	0	0	0	0	0	0	200	300	0	0	0	0	0	0	0	200	903	0	0	0	0	0	0	0	603	903	0
3499	9	0	0	0	0	0	0	200	300	0	0	0	0	0	0	0	200	903	0	0	0	0	0	0	0	603	903	0
3500	0	0	0	0	0	0	0	200	300	0	0	0	0	0	0	0	200	903	0	0	0	0	0	0	0	603	903	0
3500	1	0	0	0	0	0	0	200	300	0	0	0	0	0	0	0	200	903	0	0	0	0	0	0	0	603	903	0
3500	2	0	0	0	0	0	0	200	300	0	0	0	0	0	0	0	200	903	0	0	0	0	0	0	0	603	903	0
3500	3	0	0	0	0	0	0	200	300	0	0	0	0	0	0	0	200	903	0	0	0	0	0	0	0	603	903	0
3500	4	0	0	0	0	0	0	200	300	0	0	0	0	0	0	0	200	903	0	0	0	0	0	0	0	603	903	0
3500	5	0	0	0	0	0	0	200	300	0	0	0	0	0	0	0	200	903	0	0	0	0	0	0	0	603	903	0
3500	6	0	0	0	0	0	0	200	300	0	0	0	0	0	0	0	200	903	0	0	0	0	0	0	0	603	903	0
3500	7	0	0	0	0	0	0	200	300	0	0	0	0	0	0	0	200	903	0	0	0	0	0	0	0	603	903	0
3500	8	0	0	0	0	0	0	200	300	0	0	0	0	0	0	0	200	903	0	0	0	0	0	0	0	603	903	0
3500	9	0	0	0	0	0	0	200	300	0	0	0	0	0	0	0	200	903	0	0	0	0	0	0	0	603	903	0
3501	0	0	0	0	0	0	0	200	300	0	0	0	0	0	0	0	200	903	0	0	0	0	0	0	0	603	903	0
3501	1	0	0	0	0	0	0	200	300	0	0	0	0	0	0	0	200	903	0	0	0	0	0	0	0	603	903	0
3501	2	0	0	0	0	0	0	200	300	0	0	0	0	0	0	0	200	903	0	0	0	0	0	0	0	603	903	0
3501	3	0	0	0	0	0	0	200	300	0	0	0	0	0	0	0	200	903	0	0	0	0	0	0	0	603	903	0
3501	4	0	0	0	0	0	0	200	300	0	0	0	0	0	0	0	200	903	0	0	0	0	0	0	0	603	903	0
3501	5	0	0	0	0	0	0	200	300	0	0	0	0	0	0	0	200	903	0	0	0	0	0	0	0	603	903	0
3501	6	0	0	0	0	0	0	200	300	0	0	0	0	0	0	0	200	903	0	0	0	0	0	0	0	603	903	0
3501	7	0	0	0	0	0	0	200	300	0	0	0	0	0	0	0	200	903	0	0	0	0	0	0	0	603	903	0
3501	8	0	0	0	0	0	0	200	300	0	0	0	0	0	0	0	200	903	0	0	0	0	0	0	0	603	903	0
3501	9	0	0	0	0	0	0	200	300	0	0	0	0	0	0	0	200	903	0	0	0	0	0	0	0	603	903	0
3502	0	0	0	0	0	0	0	200	300	0	0	0	0	0	0	0	200	903	0	0	0	0	0	0	0	603	903	0
3502	1	0	0	0	0	0	0	200	300	0	0	0	0	0	0	0	200	903	0	0	0	0	0	0	0	603	903	0
3502	2	0	0	0	0	0	0	200	300	0	0	0	0	0	0	0	200	903	0	0	0	0	0	0	0	603	903	0
3502	3	0	0	0	0	0	0	200	300	0	0	0	0	0	0	0	200	903	0	0	0	0	0	0	0	603	903	0
3502	4	0	0	0	0	0	0	200	300	0	0	0	0	0	0	0	200	903	0	0	0	0	0	0	0	603	903	0
3502	5	0	0	0	0	0	0	200	300	0	0	0	0	0	0	0	200	903	0	0	0	0	0	0	0	603	903	0
3502	6	0	0	0	0	0	0	200	300	0	0	0	0	0	0	0	200	903	0	0	0	0	0	0	0	603	903	0
3502	7	0	0	0	0	0	0	200	300	0	0	0	0	0	0	0	200	903	0	0	0	0	0	0	0	603	903	0
3502	8	0	0	0	0	0	0	200	300	0	0	0	0	0	0	0	200	903	0	0	0	0	0	0	0	603	903	0
3502	9	0	0	0	0	0	0	200	300	0	0	0	0	0	0	0	200	903	0	0	0	0	0	0	0	603	903	0
3503	0	0	0	0	0	0	0	200	300	0	0	0	0	0	0	0	200	903	0	0	0	0	0	0	0	603	903	0
3503	1	0	0	0	0	0	0	200	300	0	0	0	0	0	0	0	200	903	0	0	0	0	0	0	0	603	903	0
3503	2	0	0	0	0	0	0	200	300	0	0	0	0	0	0	0	200	903	0	0	0	0	0	0	0	603	903	0
3503	3	0	0	0	0	0	0	200	300	0	0	0	0	0	0	0	200	903	0	0	0	0	0	0	0	603	903	0
3503	4	0	0	0	0	0	0	200	300	0	0	0	0	0	0	0	200	903	0	0	0	0	0	0	0	603	903	0
3503	5	0	0	0	0	0	0	200	300	0	0	0	0	0	0	0	200	903	0	0	0	0	0	0	0	603	903	0
3503	6	0	0	0	0	0	0	200	300	0	0	0	0	0	0	0	200	903	0	0	0	0	0	0	0	603	903	0
3503	7	0	0	0	0	0	0	200	300	0	0	0	0	0	0	0	200	903	0	0	0	0	0	0	0	603	903	0
3503	8	0	0	0	0	0	0	200	300	0	0	0	0	0	0	0	200	903	0	0	0	0	0	0	0	603	903	0
3503	9	0	0	0	0	0	0	200	300	0	0	0	0	0	0	0	200	903	0	0	0	0	0	0	0	603	903	0
3504	0	0	0	0	0	0	0	200	300	0	0	0	0	0	0	0	200	903	0	0	0	0	0	0	0	603	903	0
3504	1	0	0	0	0	0	0	200	300	0	0	0	0	0	0	0	200	903	0	0	0	0	0	0	0	603	903	0
3504	2	0	0	0	0	0	0	200	300	0	0	0	0	0	0	0	200	903	0	0	0	0	0	0	0	603	903	0
3504	3	0	0	0	0	0	0	200	300	0	0	0	0	0	0	0	200	903	0	0	0	0	0	0	0	603	903	0
3504	4	0	0	0	0	0	0	200	300	0	0	0	0	0	0	0	200	903	0	0	0	0	0	0	0	603	903	0
3504	5	0	0	0	0	0	0	200	300	0	0	0	0	0	0	0	200	903	0	0	0	0	0	0	0	603	903	0
3504	6	0	0	0	0	0	0	200	300	0	0	0	0	0	0	0	200	903	0	0	0	0	0	0	0	603	903	0
3504	7	0	0	0	0	0	0	200	300	0	0	0	0	0	0	0	200	903	0	0	0	0	0	0	0	603	903	0
3504	8	0	0	0	0	0	0	200	300	0	0	0	0	0	0	0	200	903	0	0	0	0	0	0	0	603	903	0
3504	9	0	0	0	0	0	0	200	300	0	0	0	0	0	0	0	200	903	0	0	0	0	0	0	0	603	903	0
3505	0	0	0	0	0	0	0	200	300	0	0	0	0	0	0	0	200	903	0	0	0	0	0	0	0	603	903	0
3505	1	0	0	0	0	0	0	200	300	0	0	0	0	0	0	0	200	903	0	0	0	0	0	0	0	603	903	0
3505	2	0	0	0	0	0	0	200	300	0	0	0	0	0	0	0	200	903	0	0	0	0	0	0	0	603	903	0
3505	3	0	0	0	0	0	0	200	300	0	0	0	0	0	0	0	200	903	0	0	0	0	0	0	0	603	903	0
3505	4	0	0	0	0	0	0	200	300	0	0	0	0	0	0	0	200	903	0	0	0	0	0	0	0	603	903	0
3505	5	0	0	0	0	0	0	200	300	0	0	0	0	0	0	0	200	903	0	0	0	0	0	0	0	603	903	0
3505	6	0	0	0	0	0	0	200	300	0	0	0	0	0	0	0	200	903	0	0	0	0	0	0	0	603	903	0
3505	7	0	0	0	0	0	0	200	300	0	0	0	0	0	0	0	200	903	0	0	0	0	0	0	0	603	903	0
3505	8	0	0	0	0	0	0	200	300	0	0	0	0	0	0	0	200	903	0	0	0	0	0	0	0	603	903	0
3505	9	0	0	0	0	0	0	200	300	0	0	0	0	0	0	0	200	903	0	0	0	0	0	0	0	603	903	0
3506	0	0	0	0	0	0	0	200	300	0	0	0	0	0	0	0	200	903	0	0	0	0	0	0	0	603	903	0
3506	1	0	0	0	0	0	0	200	300	0	0	0	0	0	0	0	200	903	0	0	0	0	0	0	0	603	903	0
3506	2	0	0	0	0	0	0	200	300	0	0	0	0	0	0	0	200	903	0	0	0	0	0	0	0	603	903	0
3506	3	0	0	0	0	0	0	200	300	0	0	0	0	0	0	0	200	903	0	0	0	0	0	0	0	603	903	0
3506	4	0	0	0	0	0	0	200	300	0	0	0	0	0	0	0	200	903	0	0	0	0	0	0	0	603	903	0
3506	5	0	0	0	0	0	0	200	300	0	0	0	0	0	0	0	200	903	0	0	0	0	0	0	0	603	903	0
3506	6	0	0	0	0	0	0	200	300	0	0	0	0	0	0	0	200	903	0	0	0	0	0	0	0	603	903	0
3506	7	0	0	0	0	0	0	200	300	0	0	0	0	0	0	0	200	903	0	0	0	0	0	0	0	603	903	0
3506	8	0	0	0	0	0	0	200	300	0	0	0	0	0	0	0	200	903	0	0	0	0	0	0	0	603	903	0
3506	9	0	0	0	0	0	0	200	300	0	0	0	0	0	0	0	200	903	0	0	0	0	0	0	0	603	903	0
3507	0	0	0	0	0	0	0	200	300	0	0	0	0	0	0	0	200	903	0	0	0	0	0	0	0	603	903	0
3507	1	0	0	0	0	0	0	200	300	0	0	0	0	0	0	0	200	903	0	0	0	0	0	0	0	603	903	0
3507	2	0	0	0	0	0	0	200	300	0	0	0	0	0	0	0	200	903	0	0	0	0	0	0	0	603	903	0
3507	3	0	0	0	0	0	0	200	300	0	0	0	0	0	0	0	200	903	0	0	0	0	0	0	0	603	903	0
3507	4	0	0	0	0	0	0	200	300	0	0	0	0	0	0	0	200	903	0	0	0	0	0	0	0	603	903	0
3507	5	0	0	0	0	0	0	200	300	0	0	0	0	0	0	0	200	903	0	0	0	0	0	0	0	603	903	0
3507	6	0	0	0	0	0	0	200	300	0	0	0	0	0	0	0	200	903	0	0	0	0	0	0	0	603	903	0
3507	7	0	0	0	0	0	0	200	300	0	0	0	0	0	0	0	200	903	0	0	0	0	0	0	0	603	903	0
3507	8	0	0	0	0	0	0	200	300	0	0	0	0	0	0	0	200	903	0	0	0	0	0	0	0	603	903	0
3507	9	0	0	0	0	0	0	200	300	0	0	0	0	0	0	0	200	903	0	0	0	0	0	0	0	603	903	0
3508	0	0	0	0	0	0	0	200	300	0	0	0	0	0	0	0	200	903	0	0	0	0	0	0	0	603	903	0
3508	1	0	0	0	0	0	0	200	300	0	0	0	0	0	0	0	200	903	0	0	0	0	0	0	0	603	903	0
3508	2	0	0	0	0	0	0	200	300	0	0	0	0	0	0	0	200	903	0	0	0	0	0	0	0	603	903	0
3508	3	0	0	0	0	0	0	200	300	0	0	0	0	0	0	0	200	903	0	0	0	0	0	0	0	603	903	0
3508	4	0	0	0	0	0	0	200	300	0	0	0	0	0	0	0	200	903	0	0	0	0	0	0	0	603	903	0
3508	5	0	0	0	0	0	0	200	300	0	0	0	0	0	0	0	200	903	0	0	0	0	0	0	0	603	903	0
3508	6	0	0	0	0	0	0	200	300	0	0	0	0	0	0	0	200	903	0	0	0	0	0	0	0	603	903	0
3508	7	0	0	0	0	0	0	200	300	0	0	0	0	0	0	0	200	903	0	0	0	0	0	0	0	603	903	0
3508	8	0	0	0	0	0	0	200	300	0	0	0	0	0	0	0	200	903	0	0	0	0	0	0	0	603	903	0
3508	9	0	0	0	0	0	0	200	300	0	0	0	0	0	0	0	200	903	0	0	0	0	0	0	0	603	903	0
3509	0	0	0	0	0	0	0	200	300	0	0	0	0	0	0	0	200	903	0	0	0	0	0	0	0	603	903	0
3509	1	0	0	0	0	0	0	200	300	0	0	0	0	0	0	0	200	903	0	0	0	0	0	0	0	603	903	0
3509	2	0	0	0	0	0	0	200	300	0	0	0	0	0	0	0	200	903	0	0	0	0	0	0	0	603	903	0
3509	3	0	0	0	0	0	0	200	300	0	0	0	0	0	0	0	200	903	0	0	0	0	0	0	0	603	903	0
3509	4	0	0	0	0	0	0	200	300	0	0	0	0	0	0	0	200	903	0	0	0	0	0	0	0	603	903	0
3509	5	0	0	0	0	0	0	200	300	0	0	0	0	0	0	0	200	903	0	0	0	0	0	0	0	603	903	0
3509	6	0	0	0	0	0	0	200	300	0	0	0	0	0	0	0	200	903	0	0	0	0	0	0	0	603	903	0
3509	7	0	0	0	0	0	0	200	300	0	0	0	0	0	0	0	200	903	0	0	0	0	0	0	0	603	903	0
3509	8	0	0	0	0	0	0	200	300	0	0	0	0	0	0	0	200	903	0	0	0	0	0	0	0	603	903	0
3509	9	0	0	0	0	0	0	200	300	0	0	0	0	0	0	0	200	903	0	0	0	0	0	0	0	603	903	0
3510	0	0	0	0	0	0	0	200	300	0	0	0	0	0	0	0	200	903	0	0	0	0	0	0	0	603	903	0
3510	1	0	0	0	0	0	0	200	300	0	0	0	0	0	0	0	200	903	0	0	0	0	0	0	0	603	903	0
3510	2	0	0	0	0	0	0	200	300	0	0	0	0	0	0	0	200	903	0	0	0	0	0	0	0	603	903	0
3510	3	0	0	0	0	0	0	200	300	0	0	0	0	0	0	0	200	903	0	0	0	0	0	0	0	603	903	0
3510	4	0	0	0	0	0	0	200	300	0	0	0	0	0	0	0	200	903	0	0	0	0	0	0	0	603	903	0
3510	5	0	0	0	0	0	0	200	300	0	0	0	0	0	0	0	200	903	0	0	0	0	0	0	0	603	903	0
3510	6	0	0	0	0	0	0	200	300	0	0	0	0	0	0	0	200	903	0	0	0	0	0	0	0	603	903	0
3510	7	0	0	0	0	0	0	200	300	0	0	0	0	0	0	0	200	903	0	0	0	0	0	0	0	603	903	0
3510	8	0	0	0	0	0	0	200	300	0	0	0	0	0	0	0	200	903	0	0	0	0	0	0	0	603	903	0
3510	9	0	0	0	0	0	0	200	300	0	0	0	0	0	0	0	200	903	0	0	0	0	0	0	0	603	903	0
3511	0	0	0	0	0	0	0	200	300	0	0	0	0	0	0	0	200	903	0	0	0	0	0	0	0	603	903	0
3511	1	0	0	0	0	0	0	200	300	0	0	0	0	0	0	0	200	903	0	0	0	0	0	0	0	603	903	0
3511	2	0	0	0	0	0	0	200	300	0	0	0	0	0	0	0	200	903	0	0	0	0	0	0	0	603	903	0
3511	3	0	0	0	0	0	0	200	300	0	0	0	0	0	0	0	200	903	0	0	0	0	0	0	0	603	903	0
3511	4	0	0	0	0	0	0	200	300	0	0	0	0	0	0	0	200	903	0	0	0	0	0	0	0	603	903	0
3511	5	0	0	0	0	0	0	200	300	0	0	0	0	0	0	0	200	903	0	0	0	0	0	0	0	603	903	0
3511	6	0	0	0	0	0	0	200	300	0	0	0	0	0	0	0	200	903	0	0	0	0	0	0	0	603	903	0
3511	7	0	0	0	0	0	0	200	300	0	0	0	0	0	0	0	200	903	0	0	0	0	0	0	0	603	903	0
3511	8	0	0	0	0	0	0	200	300	0	0	0	0	0	0	0	200	903	0	0	0	0	0	0	0	603	903	0
3511	9	0	0	0	0	0	0	200	300	0	0	0	0	0	0	0	200	903	0	0	0	0	0	0	0	603	903	0
3512	0	0	0	0	0	0	0	200	300	0	0	0	0	0	0	0	200	903	0	0	0	0	0	0	0	603	903	0
3512	1	0	0	0	0	0	0	200	300	0	0	0	0	0	0	0	200	903	0	0	0	0	0	0	0	603	903	0
3512	2	0	0	0	0	0	0	200	300	0	0	0	0	0	0	0	200	903	0	0	0	0	0	0	0	603	903	0
3512	3	0	0	0	0	0	0	200	300	0	0	0	0	0	0	0	200	903	0	0	0	0	0	0	0	603	903	0
3512	4	0	0	0	0	0	0	200	300	0	0	0	0	0	0	0	200	903	0	0	0	0	0	0	0	603	903	0
3512	5	0	0	0	0	0	0	200	300	0	0	0	0	0	0	0	200	903	0	0	0	0	0	0	0	603	903	0
3512	6	0	0	0	0	0	0	200	300	0	0	0	0	0	0	0	200	903	0	0	0	0	0	0	0	603	903	0
3512	7	0	0	0	0	0	0	200	300	0	0	0	0	0	0	0	200	903	0	0	0	0	0	0	0	603	903	0
3512	8	0	0	0	0	0	0	200	300	0	0	0	0	0	0	0	200	903	0	0	0	0	0	0	0	603	903	0
3512	9	0	0	0	0	0	0	200	300	0	0	0	0	0	0	0	200	903	0	0	0	0	0	0	0	603	903	0
3513	0	0	0	0	0	0	0	200	300	0	0	0	0	0	0	0	200	903	0	0	0	0	0	0	0	603	903	0
3513	1	0	0	0	0	0	0	200	300	0	0	0	0	0	0	0	200	903	0	0	0	0	0	0	0	603	903	0
3513	2	0	0	0	0	0	0	200	300	0	0	0	0	0	0	0	200	903	0	0	0	0	0	0	0	603	903	0
3513	3	0	0	0	0	0	0	200	300	0	0	0	0	0	0	0	200	903	0	0	0	0	0	0	0	603	903	0
3513	4	0	0	0	0	0	0	200	300	0	0	0	0	0	0	0	200	903	0	0	0	0	0	0	0	603	903	0
3513	5	0	0	0	0	0	0	200	300	0	0	0	0	0	0	0	200	903	0	0	0	0	0	0	0	603	903	0
3513	6	0	0	0	0	0	0	200	300	0	0	0	0	0	0	0	200	903	0	0	0	0	0	0	0	603	903	0
3513	7	0	0	0	0	0	0	200	300	0	0	0	0	0	0	0	200	903	0	0	0	0	0	0	0	603	903	0
3513	8	0	0	0	0	0	0	200	300	0	0	0	0	0	0	0	200	903	0	0	0	0	0	0	0	603	903	0
3513	9	0	0	0	0	0	0	200	300	0	0	0	0	0	0	0	200	903	0	0	0	0	0	0	0	603	903	0
3514	0	0	0	0	0	0	0	200	300	0	0	0	0	0	0	0	200	903	0	0	0	0	0	0	0	603	903	0
3514	1	0	0	0	0	0	0	200	300	0	0	0	0	0	0	0	200	903	0	0	0	0	0	0	0	603	903	0
3514	2	0	0	0	0	0	0	200	300	0	0	0	0	0	0	0	200	903	0	0	0	0	0	0	0	603	903	0
3514	3	0	0	0	0	0	0	200	300	0	0	0	0	0	0	0	200	903	0	0	0	0	0	0	0	603	903	0
3514	4	0	0	0	0	0	0	200	300	0	0	0	0	0	0	0	200	903	0	0	0	0	0	0	0	603	903	0
3514	5	0	0	0	0	0	0	200	300	0	0	0	0	0	0	0	200	903	0	0	0	0	0	0	0	603	903	0
3514	6	0	0	0	0	0	0	200	300	0	0	0	0	0	0	0	200	903	0	0	0	0	0	0	0	603	903	0
3514	7	0	0	0	0	0	0	200	300	0	0	0	0	0	0	0	200	903	0	0	0	0	0	0	0	603	903	0
3514	8	0	0	0	0	0	0	200	300	0	0	0	0	0	0	0	200	903	0	0	0	0	0	0	0	603	903	0
3514	9	0	0	0	0	0	0	200	300	0	0	0	0	0	0	0	200	903	0	0	0	0	0	0	0	603	903	0
3515	0	0	0	0	0	0	0	200	300	0	0	0	0	0	0	0	200	903	0	0	0	0	0	0	0	603	903	0
3515	1	0	0	0	0	0	0	200	300	0	0	0	0	0	0	0	200	903	0	0	0	0	0	0	0	603	903	0
3515	2	0	0	0	0	0	0	200	300	0	0	0	0	0	0	0	200	903	0	0	0	0	0	0	0	603	903	0
3515	3	0	0	0	0	0	0	200	300	0	0	0	0	0	0	0	200	903	0	0	0	0	0	0	0	603	903	0
3515	4	0	0	0	0	0	0	200	300	0	0	0	0	0	0	0	200	903	0	0	0	0	0	0	0	603	903	0
3515	5	0	0	0	0	0	0	200	300	0	0	0	0	0	0	0	200	903	0	0	0	0	0	0	0	603	903	0
3515	6	0	0	0	0	0	0	200	300	0	0	0	0	0	0	0	200	903	0	0	0	0	0	0	0	603	903	0
3515	7	0	0	0	0	0	0	200	300	0	0	0	0	0	0	0	200	903	0	0	0	0	0	0	0	603	903	0
3515	8	0	0	0	0	0	0	200	300	0	0	0	0	0	0	0	200	903	0	0	0	0	0	0	0	603	903	0
3515	9	0	0	0	0	0	0	200	300	0	0	0	0	0	0	0	200	903	0	0	0	0	0	0	0	603	903	0
3516	0	0	0	0	0	0	0	200	300	0	0	0	0	0	0	0	200	903	0	0	0	0	0	0	0	603	903	0
3516	1	0	0	0	0	0	0	200	300	0	0	0	0	0	0	0	200	903	0	0	0	0	0	0	0	603	903	0
3516	2	0	0	0	0	0	0	200	300	0	0	0	0	0	0	0	200	903	0	0	0	0	0	0	0	603	903	0
3516	3	0	0	0	0	0	0	200	300	0	0	0	0	0	0	0	200	903	0	0	0	0	0	0	0	603	903	0
3516	4	0	0	0	0	0	0	200	300	0	0	0	0	0	0	0	200	903	0	0	0	0	0	0	0	603	903	0
3516	5	0	0	0	0	0	0	200	300	0	0	0	0	0	0	0	200	903	0	0	0	0	0	0	0	603	903	0
3516	6	0	0	0	0	0	0	200	300	0	0	0	0	0	0	0	200	903	0	0	0	0	0	0	0	603	903	0
3516	7	0	0	0	0	0	0	200	300	0	0	0	0	0	0	0	200	903	0	0	0	0	0	0	0	603	903	0
3516	8	0	0	0	0	0	0	200	300	0	0	0	0	0	0	0	200	903	0	0	0	0	0	0	0	603	903	0
3516	9	0	0	0	0	0	0	200	300	0	0	0	0	0	0	0	200	903	0	0	0	0	0	0	0	603	903	0
3517	0	0	0	0	0	0	0	200	300	0	0	0	0	0	0	0	200	903	0	0	0	0	0	0	0	603	903	0
3517	1	0	0	0	0	0	0	200	300	0	0	0	0	0	0	0	200	903	0	0	0	0	0	0	0	603	903	0
3517	2	0	0	0	0	0	0	200	300	0	0	0	0	0	0	0	200	903	0	0	0	0	0	0	0	603	903	0
3517	3	0	0	0	0	0	0	200	300	0	0	0	0	0	0	0	200	903	0	0	0	0	0	0	0	603	903	0
3517	4	0	0	0	0	0	0	200	300	0	0	0	0	0	0	0	200	903	0	0	0	0	0	0	0	603	903	0
3517	5	0	0	0	0	0	0	200	300	0	0	0	0	0	0	0	200	903	0	0	0	0	0	0	0	603	903	0
3517	6	0	0	0	0	0	0	200	300	0	0	0	0	0	0	0	200	903	0	0	0	0	0	0	0	603	903	0
3517	7	0	0	0	0	0	0	200	300	0	0	0	0	0	0	0	200	903	0	0	0	0	0	0	0	603	903	0
3517	8	0	0	0	0	0	0	200	300	0	0	0	0	0	0	0	200	903	0	0	0	0	0	0	0	603	903	0
3517	9	0	0	0	0	0	0	200	300	0	0	0	0	0	0	0	200	903	0	0	0	0	0	0	0	603	903	0
3518	0	0	0	0	0	0	0	200	300	0	0	0	0	0	0	0	200	903	0	0	0	0	0	0	0	603	903	0
3518	1	0	0	0	0	0	0	200	300	0	0	0	0	0	0	0	200	903	0	0	0	0	0	0	0	603	903	0
3518	2	0	0	0	0	0	0	200	300	0	0	0	0	0	0	0	200	903	0	0	0	0	0	0	0	603	903	0
3518	3	0	0	0	0	0	0	200	300	0	0	0	0	0	0	0	200	903	0	0	0	0	0	0	0	603	903	0
3518	4	0	0	0	0	0	0	200	300	0	0	0	0	0	0	0	200	903	0	0	0	0	0	0	0	603	903	0
3518	5	0	0	0	0	0	0	200	300	0	0	0	0	0	0	0	200	903	0	0	0	0	0	0	0	603	903	0
3518	6	0	0	0	0	0	0	200	300	0	0	0	0	0	0	0	200	903	0	0	0	0	0	0	0	603	903	0
3518	7	0	0	0	0	0	0	200	300	0	0	0	0	0	0	0	200	903	0	0	0	0	0	0	0	603	903	0
3518	8	0	0	0	0	0	0	200	300	0	0	0	0	0	0	0	200	903	0	0	0	0	0	0	0	603	903	0
3518	9	0	0	0	0	0	0	200	300	0	0	0	0	0	0	0	200	903	0	0	0	0	0	0	0	603	903	0
3519	0	0	0	0	0	0	0	200	300	0	0	0	0	0	0	0	200	903	0	0	0	0	0	0	0	603	903	0
3519	1	0	0	0	0	0	0	200	300	0	0	0	0	0	0	0	200	903	0	0	0	0	0	0	0	603	903	0
3519	2	0	0	0	0	0	0	200	300	0	0	0	0	0	0	0	200	903	0	0	0	0	0	0	0	603	903	0
3519	3	0	0	0	0	0	0	200	300	0	0	0	0	0	0	0	200	903	0	0	0	0	0	0	0	603	903	0
3519	4	0	0	0	0	0	0	200	300	0	0	0	0	0	0	0	200	903	0	0	0	0	0	0	0	603	903	0
3519	5	0	0	0	0	0	0	200	300	0	0	0	0	0	0	0	200	903	0	0	0	0	0	0	0	603	903	0
3519	6	0	0	0	0	0	0	200	300	0	0	0	0	0	0	0	200	903	0	0	0	0	0	0	0	603	903	0
3519	7	0	0	0	0	0	0	200	300	0	0	0	0	0	0	0	200	903	0	0	0	0	0	0	0	603	903	0
3519	8	0	0	0	0	0	0	200	300	0	0	0	0	0	0	0	200	903	0	0	0	0	0	0	0	603	903	0
3519	9	0	0	0	0	0	0	200	300	0	0	0	0	0	0	0	200	903	0	0	0	0	0	0	0	603	903	0
3520	0	0	0	0	0	0	0	200	300	0	0	0	0	0	0	0	200	903	0	0	0	0	0	0	0	603	903	0
3520	1	0	0	0	0	0	0	200	300	0	0	0	0	0	0	0	200	903	0	0	0	0	0	0	0	603	903	0
3520	2	0	0	0	0	0	0	200	300	0	0	0	0	0	0	0	200	903	0	0	0	0	0	0	0	603	903	0
3520	3	0	0	0	0	0	0	200	300	0	0	0	0	0	0	0	200	903	0	0	0	0	0	0	0	603	903	0
3520	4	0	0	0	0	0	0	200	300	0	0	0	0	0	0	0	200	903	0	0	0	0	0	0	0	603	903	0
3520	5	0	0	0	0	0	0	200	300	0	0	0	0	0	0	0	200	903	0	0	0	0	0	0	0	603	903	0
3520	6	0	0	0	0	0	0	200	300	0	0	0	0	0	0	0	200	903	0	0	0	0	0	0	0	603	903	0
3520	7	0	0	0	0	0	0	200	300	0	0	0	0	0	0	0	200	903	0	0	0	0	0	0	0	603	903	0
3520	8	0	0	0	0	0	0	200	300	0	0	0	0	0	0	0	200	903	0	0	0	0	0	0	0	603	903	0
3520	9	0	0	0	0	0	0	200	300	0	0	0	0	0	0	0	200	903	0	0	0	0	0	0	0	603	903	0
3521	0	0	0	0	0	0	0	200	300	0	0	0	0	0	0	0	200	903	0	0	0	0	0	0	0	603	903	0
3521	1	0	0	0	0	0	0	200	300	0	0	0	0	0	0	0	200	903	0	0	0	0	0	0	0	603	903	0
3521	2	0	0	0	0	0	0	200	300	0	0	0	0	0	0	0	200	903	0	0	0	0	0	0	0	603	903	0
3521	3	0	0	0	0	0	0	200	300	0	0	0	0	0	0	0	200	903	0	0	0	0	0	0	0	603	903	0
3521	4	0	0	0	0	0	0	200	300	0	0	0	0	0	0	0	200	903	0	0	0	0	0	0	0	603	903	0
3521	5	0	0	0	0	0	0	200	300	0	0	0	0	0	0	0	200	903	0	0	0	0	0	0	0	603	903	0
3521	6	0	0	0	0	0	0	200	300	0	0	0	0	0	0	0	200	903	0	0	0	0	0	0	0	603	903	0
3521	7	0	0	0	0	0	0	200	300	0	0	0	0	0	0	0	200	903	0	0	0	0	0	0	0	603	903	0
3521	8	0	0	0	0	0	0	200	300	0	0	0	0	0	0	0	200	903	0	0	0	0	0	0	0	603	903	0
3521	9	0	0	0	0	0	0	200	300	0	0	0	0	0	0	0	200	903	0	0	0	0	0	0	0	603	903	0
3522	0	0	0	0	0	0	0	200	300	0	0	0	0	0	0	0	200	903	0	0	0	0	0	0	0	603	903	0
3522	1	0	0	0	0	0	0	200	300	0	0	0	0	0	0	0	200	903	0	0	0	0	0	0	0	603	903	0
3522	2	0	0	0	0	0	0	200	300	0	0	0	0	0	0	0	200	903	0	0	0	0	0	0	0	603	903	0
3522	3	0	0	0	0	0	0	200	300	0	0	0	0	0	0	0	200	903	0	0	0	0	0	0	0	603	903	0
3522	4	0	0	0	0	0	0	200	300	0	0	0	0	0	0	0	200	903	0	0	0	0	0	0	0	603	903	0
3522	5	0	0	0	0	0	0	200	300	0	0	0	0	0	0	0	200	903	0	0	0	0	0	0	0	603	903	0
3522	6	0	0	0	0	0	0	200	300	0	0	0	0	0	0	0	200	903	0	0	0	0	0	0	0	603	903	0
3522	7	0	0	0	0	0	0	200	300	0	0	0	0	0	0	0	200	903	0	0	0	0	0	0	0	603	903	0
3522	8	0	0	0	0	0	0	200	300	0	0	0	0	0	0	0	200	903	0	0	0	0	0	0	0	603	903	0
3522	9	0	0	0	0	0	0	200	300	0	0	0	0	0	0	0	200	903	0	0	0	0	0	0	0	603	903	0
3523	0	0	0	0	0	0	0	200	300	0	0	0	0	0	0	0	200	903	0	0	0	0	0	0	0	603	903	0
3523	1	0	0	0	0	0	0	200	300	0	0	0	0	0	0	0	200	903	0	0	0	0	0	0	0	603	903	0
3523	2	0	0	0	0	0	0	200	300	0	0	0	0	0	0	0	200	903	0	0	0	0	0	0	0	603	903	0
3523	3	0	0	0	0	0	0	200	300	0	0	0	0	0	0	0	200	903	0	0	0	0	0	0	0	603	903	0
3523	4	0	0	0	0	0	0	200	300	0	0	0	0	0	0	0	200	903	0	0	0	0	0	0	0	603	903	0
3523	5	0	0	0	0	0	0	200	300	0	0	0	0	0	0	0	200	903	0	0	0	0	0	0	0	603	903	0
3523	6	0	0	0	0	0	0	200	300	0	0	0	0	0	0	0	200	903	0	0	0	0	0	0	0	603	903	0
3523	7	0	0	0	0	0	0	200	300	0	0	0	0	0	0	0	200	903	0	0	0	0	0	0	0	603	903	0
3523	8	0	0	0	0	0	0	200	300	0	0	0	0	0	0	0	200	903	0	0	0	0	0	0	0	603	903	0
3523	9	0	0	0	0	0	0	200	300	0	0	0	0	0	0	0	200	903	0	0	0	0	0	0	0	603	903	0
3524	0	0	0	0	0	0	0	200	300	0	0	0	0	0	0	0	200	903	0	0	0	0	0	0	0	603	903	0
3524	1	0	0	0	0	0	0	200	300	0	0	0	0	0	0	0	200	903	0	0	0	0	0	0	0	603	903	0
3524	2	0	0	0	0	0	0	200	300	0	0	0	0	0	0	0	200	903	0	0	0	0	0	0	0	603	903	0
3524	3	0	0	0	0	0	0	200	300	0	0	0	0	0	0	0	200	903	0	0	0	0	0	0	0	603	903	0
3524	4	0	0	0	0	0	0	200	300	0	0	0	0	0	0	0	200	903	0	0	0	0	0	0	0	603	903	0
3524	5	0	0	0	0	0	0	200	300	0	0	0	0	0	0	0	200	903	0	0	0	0	0	0	0	603	903	0
3524	6	0	0	0	0	0	0	200	300	0	0	0	0	0	0	0	200	903	0	0	0	0	0	0	0	603	903	0
3524	7	0	0	0	0	0	0	200	300	0	0	0	0	0	0	0	200	903	0	0	0	0	0	0	0	603	903	0
3524	8	0	0	0	0	0	0	200	300	0	0	0	0	0	0	0	200	903	0	0	0	0	0	0	0	603	903	0
3524	9	0	0	0	0	0	0	200	300	0	0	0	0	0	0	0	200	903	0	0	0	0	0	0	0	603	903	0
3525	0	0	0	0	0	0	0	200	300	0	0	0	0	0	0	0	200	903	0	0	0	0	0	0	0	603	903	0
3525	1	0	0	0	0	0	0	200	300	0	0	0	0	0	0	0	200	903	0	0	0	0	0	0	0	603	903	0
3525	2	0	0	0	0	0	0	200	300	0	0	0	0	0	0	0	200	903	0	0	0	0	0	0	0	603	903	0
3525	3	0	0	0	0	0	0	200	300	0	0	0	0	0	0	0	200	903	0	0	0	0	0	0	0	603	903	0
3525	4	0	0	0	0	0	0	200	300	0	0	0	0	0	0	0	200	903	0	0	0	0	0	0	0	603	903	0
3525	5	0	0	0	0	0	0	200	300	0	0	0	0	0	0	0	200	903	0	0	0	0	0	0	0	603	903	0
3525	6	0	0	0	0	0	0	200	300	0	0	0	0	0	0	0	200	903	0	0	0	0	0	0	0	603	903	0
3525	7	0	0	0	0	0	0	200	300	0	0	0	0	0	0	0	200	903	0	0	0	0	0	0	0	603	903	0
3525	8	0	0	0	0	0	0	200	300	0	0	0	0	0	0	0	200	903	0	0	0	0	0	0	0	603	903	0
3525	9	0	0	0	0	0	0	200	300	0	0	0	0	0	0	0	200	903	0	0	0	0	0	0	0	603	903	0
3526	0	0	0	0	0	0	0	200	300	0	0	0	0	0	0	0	200	903	0	0	0	0	0	0	0	603	903	0
3526	1	0	0	0	0	0	0	200	300	0	0	0	0	0	0	0	200	903	0	0	0	0	0	0	0	603	903	0
3526	2	0	0	0	0	0	0	200	300	0	0	0	0	0	0	0	200	903	0	0	0	0	0	0	0	603	903	0
3526	3	0	0	0	0	0	0	200	300	0	0	0	0	0	0	0	200	903	0	0	0	0	0	0	0	603	903	0
3526	4	0	0	0	0	0	0	200	300	0	0	0	0	0	0	0	200	903	0	0	0	0	0	0	0	603	903	0
3526	5	0	0	0	0	0	0	200	300	0	0	0	0	0	0	0	200	903	0	0	0	0	0	0	0	603	903	0
3526	6	0	0	0	0	0	0	200	300	0	0	0	0	0	0	0	200	903	0	0	0	0	0	0	0	603	903	0
3526	7	0	0	0	0	0	0	200	300	0	0	0	0	0	0	0	200	903	0	0	0	0	0	0	0	603	903	0
3526	8	0	0	0	0	0	0	200	300	0	0	0	0	0	0	0	200	903	0	0	0	0	0	0	0	603	903	0
3526	9	0	0	0	0	0	0	200	300	0	0	0	0	0	0	0	200	903	0	0	0	0	0	0	0	603	903	0
3527	0	0	0	0	0	0	0	200	300	0	0	0	0	0	0	0	200	903	0	0	0	0	0	0	0	603	903	0
3527	1	0	0	0	0	0	0	200	300	0	0	0	0	0	0	0	200	903	0	0	0	0	0	0	0	603	903	0
3527	2	0	0	0	0	0	0	200	300	0	0	0	0	0	0	0	200	903	0	0	0	0	0	0	0	603	903	0
3527	3	0	0	0	0	0	0	200	300	0	0	0	0	0	0	0	200	903	0	0	0	0	0	0	0	603	903	0
3527	4	0	0	0	0	0	0	200	300	0	0	0	0	0	0	0	200	903	0	0	0	0	0	0	0	603	903	0
3527	5	0	0	0	0	0	0	200	300	0	0	0	0	0	0	0	200	903	0	0	0	0	0	0	0	603	903	0
3527	6	0	0	0	0	0	0	200	300	0	0	0	0	0	0	0	200	903	0	0	0	0	0	0	0	603	903	0
3527	7	0	0	0	0	0	0	200	300	0	0	0	0	0	0	0	200	903	0	0	0	0	0	0	0	603	903	0
3527	8	0	0	0	0	0	0	200	300	0	0	0	0	0	0	0	200	903	0	0	0	0	0	0	0	603	903	0
3527	9	0	0	0	0	0	0	200	300	0	0	0	0	0	0	0	200	903	0	0	0	0	0	0	0	603	903	0
3528	0	0	0	0	0	0	0	200	300	0	0	0	0	0	0	0	200	903	0	0	0	0	0	0	0	603	903	0
3528	1	0	0	0	0	0	0	200	300	0	0	0	0	0	0	0	200	903	0	0	0	0	0	0	0	603	903	0
3528	2	0	0	0	0	0	0	200	300	0	-1.22421	-2.80975	-24.2104	-7491.49	51.3148	1141.34	202.12	1212.43	0	0	0	0	0	0	0	603	903	0
3528	3	0	0	0	0	0	0	200	300	0	-0.461273	8.17657	-25.7363	-8315.46	-803.178	1187.12	168.792	1226.1	0	0	0	0	0	0	0	603	903	0
3528	4	0	0	0	0	0	0	200	300	0	-2.75009	10.1602	-22.6846	-7674.59	-681.107	-369.28	169.975	1241.32	0	0	0	0	0	0	0	603	903	0
3528	5	0	0	0	0	0	0	200	300	0	-0.766449	7.56622	-26.3467	-9688.75	-803.178	-3.06848	169.515	1270.74	0	0	0	0	0	0	0	603	903	0
3528	6	0	0	0	0	0	0	200	300	0	2.4379	13.212	-32.145	-9963.41	-1352.49	363.142	157.925	1212.95	0	0	0	0	0	0	0	603	903	0
3528	7	0	0	0	0	0	0	200	300	0	0.301666	13.9749	-33.3657	-10695.8	-1047.32	-781.267	168.611	1223.56	0	0	0	0	0	0	0	603	903	0
3528	8	0	0	0	0	0	0	200	300	0	0.75943	14.2801	-39.164	-12710	-803.178	-643.938	179.492	1227.53	0	0	0	0	0	0	0	603	903	0
3528	9	0	0	0	0	0	0	200	300	0	2.74307	19.0103	-44.352	-14266.4	-1047.32	317.366	176.386	1224.66	0	0	0	0	0	0	0	603	903	0
3529	0	0	0	0	0	0	0	200	300	0	-0.766449	24.3509	-51.9814	-16372.1	-1047.32	-689.714	179.852	1217.96	0	0	0	0	0	0	0	603	903	0
3529	1	0	0	0	0	0	0	200	300	0	-2.5975	21.9095	-61.4419	-18111.6	-1291.46	42.7079	178.981	1197.78	0	0	0	0	0	0	0	603	903	0
3529	2	0	0	0	0	0	0	200	300	0	0.912018	19.7733	-65.104	-19576.5	-1169.39	-323.503	182.038	1203.7	0	0	0	0	0	0	0	603	903	0
3529	3	0	0	0	0	0	0	200	300	0	4.57413	22.0621	-73.9541	-21773.7	-742.143	-1422.14	189.965	1197.42	0	0	0	0	0	0	0	603	903	0
3529	4	0	0	0	0	0	0	200	300	0	3.96378	24.3509	-80.0576	-23971	-1230.42	-1651.02	184.631	1202.42	0	0	0	0	0	0	0	603	903	0
3529	5	0	0	0	0	0	0	200	300	0	3.6586	21.1465	-85.8559	-25985.1	-1474.56	-1422.14	182.825	1205.66	0	0	0	0	0	0	0	603	903	0
3529	6	0	0	0	0	0	0	200	300	0	3.04825	19.3155	-93.1802	-27907.8	-1291.46	-2474.99	186.14	1202.5	0	0	0	0	0	0	0	603	903	0
3529	7	0	0	0	0	0	0	200	300	0	7.01553	22.2147	-100.199	-29738.8	-1047.32	-2612.32	189.548	1199.8	0	0	0	0	0	0	0	603	903	0
3529	8	0	0	0	0	0	0	200	300	0	10.9828	21.4517	-109.049	-31661.4	-1352.49	-2154.56	187.597	1193.34	0	0	0	0	0	0	0	603	903	0
3529	9	0	0	0	0	0	0	200	300	0	8.84659	17.637	-114.237	-34408	-1108.35	-3710.95	190.298	1204.2	0	0	0	0	0	0	0	603	903	0
3530	0	0	0	0	0	0	0	200	300	0	9.15176	21.1465	-122.172	-35689.7	-1108.35	-3802.51	190.928	1195.13	0	0	0	0	0	0	0	603	903	0
3530	1	0	0	0	0	0	0	200	300	0	12.6613	22.3672	-130.412	-37154.6	-1291.46	-3985.61	190.097	1187.9	0	0	0	0	0	0	0	603	903	0
3530	2	0	0	0	0	0	0	200	300	0	14.1872	16.7215	-135.6	-38894.1	-1169.39	-4718.03	191.376	1189.83	0	0	0	0	0	0	0	603	903	0
3530	3	0	0	0	0	0	0	200	300	0	14.6449	15.1956	-140.177	-40908.2	-1108.35	-4855.36	192.093	1194.83	0	0	0	0	0	0	0	603	903	0
3530	4	0	0	0	0	0	0	200	300	0	13.4242	17.3318	-145.365	-41091.4	-1108.35	-4306.05	192.375	1185.68	0	0	0	0	0	0	0	603	903	0
3530	5	0	0	0	0	0	0	200	300	0	15.8656	13.9749	-150.553	-43746.4	-1108.35	-5175.8	192.638	1193.57	0	0	0	0	0	0	0	603	903	0
3530	6	0	0	0	0	0	0	200	300	0	20.1381	11.0757	-157.267	-44570.4	-1047.32	-5542.01	193.341	1186.41	0	0	0	0	0	0	0	603	903	0
3530	7	0	0	0	0	0	0	200	300	0	24.1054	10.3128	-162.15	-45760.5	-1047.32	-5633.56	193.541	1185.21	0	0	0	0	0	0	0	603	903	0
3530	8	0	0	0	0	0	0	200	300	0	19.9855	6.34552	-165.812	-47866.3	-681.107	-6228.65	195.892	1191.68	0	0	0	0	0	0	0	603	903	0
3530	9	0	0	0	0	0	0	200	300	0	22.2743	3.44635	-169.474	-48598.7	-925.248	-6457.54	194.54	1189.76	0	0	0	0	0	0	0	603	903	0
3531	0	0	0	0	0	0	0	200	300	0	23.9528	1.46271	-174.662	-48873.3	-742.143	-6182.88	195.751	1182.82	0	0	0	0	0	0	0	603	903	0
3531	1	0	0	0	0	0	0	200	300	0	23.495	-0.978699	-178.019	-50155.1	-498.002	-6365.98	197.203	1184.74	0	0	0	0	0	0	0	603	903	0
3531	2	0	0	0	0	0	0	200	300	0	25.0209	-5.40375	-183.817	-51436.8	-1047.32	-6869.53	194.302	1182.83	0	0	0	0	0	0	0	603	903	0
3531	3	0	0	0	0	0	0	200	300	0	25.7838	-7.69257	-186.869	-52443.9	-864.213	-6320.21	195.375	1183.65	0	0	0	0	0	0	0	603	903	0
3531	4	0	0	0	0	0	0	200	300	0	25.1735	-9.06586	-190.836	-53725.6	-620.072	-7144.18	196.751	1184.53	0	0	0	0	0	0	0	603	903	0
3531	5	0	0	0	0	0	0	200	300	0	26.5468	-11.8124	-196.635	-53634.1	-620.072	-6640.64	196.847	1175.76	0	0	0	0	0	0	0	603	903	0
3531	6	0	0	0	0	0	0	200	300	0	28.2253	-16.3901	-200.602	-54824.3	-925.248	-6228.65	195.388	1176.3	0	0	0	0	0	0	0	603	903	0
3531	7	0	0	0	0	0	0	200	300	0	25.3261	-18.0685	-204.264	-56746.9	-986.283	-6457.54	195.172	1180.81	0	0	0	0	0	0	0	603	903	0
3531	8	0	0	0	0	0	0	200	300	0	26.3942	-18.2211	-205.485	-57754	-1169.39	-6457.54	194.309	1184.06	0	0	0	0	0	0	0	603	903	0
3531	9	0	0	0	0	0	0	200	300	0	25.9364	-24.1721	-214.335	-58577.9	-1047.32	-6274.43	195.114	1176.3	0	0	0	0	0	0	0	603	903	0
3532	0	0	0	0	0	0	0	200	300	0	27.3097	-26.9186	-220.438	-59035.7	-1047.32	-6549.09	195.249	1170.81	0	0	0	0	0	0	0	603	903	0
3532	1	0	0	0	0	0	0	200	300	0	27.7675	-27.9868	-226.542	-61507.6	-803.178	-6640.64	196.455	1174.51	0	0	0	0	0	0	0	603	903	0
3532	2	0	0	0	0	0	0	200	300	0	27.9201	-30.7333	-232.035	-63064	-864.213	-6503.31	196.276	1174.79	0	0	0	0	0	0	0	603	903	0
3532	3	0	0	0	0	0	0	200	300	0	29.7511	-34.0903	-239.97	-65169.7	-1169.39	-6823.75	195.127	1174.57	0	0	0	0	0	0	0	603	903	0
3532	4	0	0	0	0	0	0	200	300	0	28.8356	-35.4636	-244.853	-65902.2	-1291.46	-6365.98	194.726	1172.15	0	0	0	0	0	0	0	603	903	0
3532	5	0	0	0	0	0	0	200	300	0	29.2934	-37.142	-257.365	-68282.5	-1169.39	-6503.31	195.456	1168.31	0	0	0	0	0	0	0	603	903	0
3532	6	0	0	0	0	0	0	200	300	0	29.2934	-40.6516	-267.436	-70846	-1535.6	-6365.98	194.258	1167.91	0	0	0	0	0	0	0	603	903	0
3532	7	0	0	0	0	0	0	200	300	0	30.0563	-43.093	-274.76	-72860.2	-1962.85	-6503.31	192.856	1168.18	0	0	0	0	0	0	0	603	903	0
3532	8	0	0	0	0	0	0	200	300	0	28.3778	-43.2455	-284.831	-73958.8	-1657.67	-6503.31	194.18	1162.66	0	0	0	0	0	0	0	603	903	0
3532	9	0	0	0	0	0	0	200	300	0	29.5985	-44.7714	-294.596	-76613.8	-1901.81	-6365.98	193.544	1163.06	0	0	0	0	0	0	0	603	903	0
3533	0	0	0	0	0	0	0	200	300	0	32.0399	-47.0602	-303.141	-78902.6	-2390.09	-6274.43	192.116	1163.28	0	0	0	0	0	0	0	603	903	0
3533	1	0	0	0	0	0	0	200	300	0	29.1408	-48.4335	-315.043	-81557.7	-2206.99	-6320.21	192.995	1161.88	0	0	0	0	0	0	0	603	903	0
3533	2	0	0	0	0	0	0	200	300	0	28.5304	-50.8749	-325.114	-83663.4	-2512.16	-6274.43	192.273	1160.34	0	0	0	0	0	0	0	603	903	0
3533	3	0	0	0	0	0	0	200	300	0	29.446	-51.0275	-334.269	-85402.9	-2573.2	-5999.77	192.302	1158.49	0	0	0	0	0	0	0	603	903	0
3533	4	0	0	0	0	0	0	200	300	0	29.7511	-51.7905	-344.95	-87050.8	-3183.55	-6137.1	190.771	1155.36	0	0	0	0	0	0	0	603	903	0
3533	5	0	0	0	0	0	0	200	300	0	28.5304	-52.8586	-355.021	-89888.9	-3183.55	-5816.67	191.033	1156.19	0	0	0	0	0	0	0	603	903	0
3533	6	0	0	0	0	0	0	200	300	0	29.446	-54.3845	-365.092	-92727.1	-3183.55	-5404.68	191.28	1156.98	0	0	0	0	0	0	0	603	903	0
3533	7	0	0	0	0	0	0	200	300	0	27.4623	-56.0629	-373.637	-94283.5	-3671.83	-5587.79	190.173	1155.34	0	0	0	0	0	0	0	603	903	0
3533	8	0	0	0	0	0	0	200	300	0	26.5468	-56.8259	-383.402	-96023	-3977.01	-5496.23	189.627	1153.45	0	0	0	0	0	0	0	603	903	0
3533	9	0	0	0	0	0	0	200	300	0	27.0045	-58.5043	-391.642	-97671	-3854.94	-5267.35	190.157	1152.39	0	0	0	0	0	0	0	603	903	0
3534	0	0	0	0	0	0	0	200	300	0	26.2416	-61.4035	-400.492	-100051	-4038.04	-5038.47	189.917	1152.82	0	0	0	0	0	0	0	603	903	0
3534	1	0	0	0	0	0	0	200	300	0	24.4106	-61.5561	-408.122	-101608	-4465.29	-4901.14	189.059	1151.96	0	0	0	0	0	0	0	603	903	0
3534	2	0	0	0	0	0	0	200	300	0	26.089	-62.7768	-416.666	-103439	-4709.43	-4901.14	188.697	1151.25	0	0	0	0	0	0	0	603	903	0
3534	3	0	0	0	0	0	0	200	300	0	21.9691	-65.3708	-424.601	-104080	-4953.57	-4580.71	188.334	1148.12	0	0	0	0	0	0	0	603	903	0
3534	4	0	0	0	0	0	0	200	300	0	23.1898	-68.27	-431.925	-105636	-4770.46	-4397.6	188.955	1147.57	0	0	0	0	0	0	0	603	903	0
3534	5	0	0	0	0	0	0	200	300	0	22.1217	-69.6432	-437.113	-107376	-5380.81	-4260.27	187.69	1148.65	0	0	0	0	0	0	0	603	903	0
3534	6	0	0	0	0	0	0	200	300	0	19.9855	-70.2536	-442.606	-107650	-5563.92	-3619.4	187.429	1146.22	0	0	0	0	0	0	0	603	903	0
3534	7	0	0	0	0	0	0	200	300	0	19.3752	-71.9321	-450.846	-110214	-5441.85	-3756.73	187.93	1147.46	0	0	0	0	0	0	0	603	903	0
3534	8	0	0	0	0	0	0	200	300	0	18.9174	-74.6786	-460.307	-110855	-5930.13	-3390.52	187.117	1143.83	0	0	0	0	0	0	0	603	903	0
3534	9	0	0	0	0	0	0	200	300	0	18.7648	-77.1201	-470.683	-112869	-6601.52	-3115.86	185.975	1142.8	0	0	0	0	0	0	0	603	903	0
3535	0	0	0	0	0	0	0	200	300	0	14.7975	-78.4933	-479.838	-114608	-6662.55	-2566.54	186.115	1141.85	0	0	0	0	0	0	0	603	903	0
3535	1	0	0	0	0	0	0	200	300	0	11.4406	-79.1037	-489.603	-116256	-7211.87	-2246.11	185.27	1140.45	0	0	0	0	0	0	0	603	903	0
3535	2	0	0	0	0	0	0	200	300	0	9.15176	-83.3762	-499.064	-117080	-7883.26	-1559.47	184.204	1137.6	0	0	0	0	0	0	0	603	903	0
3535	3	0	0	0	0	0	0	200	300	0	7.16812	-85.0546	-506.083	-118453	-8188.43	-1193.25	183.82	1137.06	0	0	0	0	0	0	0	603	903	0
3535	4	0	0	0	0	0	0	200	300	0	3.81119	-85.8176	-513.712	-120101	-8188.43	-460.832	184.06	1136.79	0	0	0	0	0	0	0	603	903	0
3535	5	0	0	0	0	0	0	200	300	0	1.06461	-88.1064	-520.121	-121749	-8615.68	134.261	183.435	1137.08	0	0	0	0	0	0	0	603	903	0
3535	6	0	0	0	0	0	0	200	300	0	-2.13974	-92.2263	-529.582	-123031	-9287.06	958.235	182.463	1135.32	0	0	0	0	0	0	0	603	903	0
3535	7	0	0	0	0	0	0	200	300	0	-3.36044	-95.5832	-535.075	-123580	-9470.17	1553.33	182.301	1133.96	0	0	0	0	0	0	0	603	903	0
3535	8	0	0	0	0	0	0	200	300	0	-5.03891	-98.0246	-543.314	-125411	-9653.28	1644.88	182.233	1133.83	0	0	0	0	0	0	0	603	903	0
3535	9	0	0	0	0	0	0	200	300	0	-6.71738	-102.602	-548.197	-126418	-9775.35	2331.53	182.168	1133.61	0	0	0	0	0	0	0	603	903	0
3536	0	0	0	0	0	0	0	200	300	0	-8.09067	-104.586	-553.385	-127700	-10202.6	2377.3	181.563	1133.76	0	0	0	0	0	0	0	603	903	0
3536	1	0	0	0	0	0	0	200	300	0	-10.6847	-105.349	-560.709	-127975	-10141.6	2789.29	181.913	1131.24	0	0	0	0	0	0	0	603	903	0
3536	2	0	0	0	0	0	0	200	300	0	-7.32773	-108.553	-566.203	-128982	-10568.8	2972.4	181.334	1130.8	0	0	0	0	0	0	0	603	903	0
3536	3	0	0	0	0	0	0	200	300	0	-8.09067	-109.774	-568.644	-129348	-10690.9	3063.95	181.199	1130.47	0	0	0	0	0	0	0	603	903	0
3536	4	0	0	0	0	0	0	200	300	0	-10.2269	-110.842	-572.611	-130264	-11057.1	3063.95	180.69	1130.49	0	0	0	0	0	0	0	603	903	0
3536	5	0	0	0	0	0	0	200	300	0	-10.5321	-110.995	-576.884	-130081	-10812.9	3521.71	181.256	1128.49	0	0	0	0	0	0	0	603	903	0
3536	6	0	0	0	0	0	0	200	300	0	-7.93808	-111.452	-580.546	-130813	-11057.1	3567.49	180.954	1128.33	0	0	0	0	0	0	0	603	903	0
3536	7	0	0	0	0	0	0	200	300	0	-8.70102	-113.283	-583.598	-131362	-11606.4	3430.16	180.112	1128.09	0	0	0	0	0	0	0	603	903	0
3536	8	0	0	0	0	0	0	200	300	0	-9.61655	-112.52	-586.955	-131545	-11484.3	3659.04	180.434	1127.12	0	0	0	0	0	0	0	603	903	0
3536	9	0	0	0	0	0	0	200	300	0	-9.15878	-111.758	-586.344	-131362	-11118.1	3567.49	181.038	1127.04	0	0	0	0	0	0	0	603	903	0
3537	0	0	0	0	0	0	0	200	300	0	-7.6329	-112.215	-590.006	-130722	-11240.2	3659.04	180.949	1124.56	0	0	0	0	0	0	0	603	903	0
3537	1	0	0	0	0	0	0	200	300	0	-7.93808	-111.91	-590.006	-131545	-12033.6	3750.59	179.604	1125.96	0	0	0	0	0	0	0	603	903	0
3537	2	0	0	0	0	0	0	200	300	0	-9.15878	-113.283	-593.363	-131729	-11606.4	3933.7	180.44	1125	0	0	0	0	0	0	0	603	903	0
3537	3	0	0	0	0	0	0	200	300	0	-8.70102	-113.589	-593.058	-132186	-11728.5	3842.15	180.224	1125.89	0	0	0	0	0	0	0	603	903	0
3537	4	0	0	0	0	0	0	200	300	0	-6.86996	-112.063	-595.5	-131454	-11850.5	4025.25	180.1	1123.75	0	0	0	0	0	0	0	603	903	0
3537	5	0	0	0	0	0	0	200	300	0	-6.56479	-112.368	-597.331	-131637	-11850.5	3933.7	180.161	1123.38	0	0	0	0	0	0	0	603	903	0
3537	6	0	0	0	0	0	0	200	300	0	-9.15878	-114.962	-598.551	-131637	-11606.4	4116.81	180.609	1122.93	0	0	0	0	0	0	0	603	903	0
3537	7	0	0	0	0	0	0	200	300	0	-8.85361	-115.114	-598.246	-131912	-11789.5	4345.69	180.293	1123.5	0	0	0	0	0	0	0	603	903	0
3537	8	0	0	0	0	0	0	200	300	0	-10.0743	-116.03	-598.551	-131637	-12399.9	4437.24	179.284	1122.93	0	0	0	0	0	0	0	603	903	0
3537	9	0	0	0	0	0	0	200	300	0	-9.92172	-115.725	-599.772	-130905	-12155.7	4849.23	179.733	1121.26	0	0	0	0	0	0	0	603	903	0
3538	0	0	0	0	0	0	0	200	300	0	-10.5321	-117.556	-602.213	-131637	-12583	5078.11	179.105	1121.59	0	0	0	0	0	0	0	603	903	0
3538	1	0	0	0	0	0	0	200	300	0	-12.5157	-118.777	-604.96	-131729	-12644	5352.77	179.099	1120.75	0	0	0	0	0	0	0	603	903	0
3538	2	0	0	0	0	0	0	200	300	0	-14.3468	-119.692	-605.57	-132095	-12644	5398.54	179.121	1121.13	0	0	0	0	0	0	0	603	903	0
3538	3	0	0	0	0	0	0	200	300	0	-14.6519	-119.997	-607.707	-131454	-12827.1	5947.86	178.893	1119.31	0	0	0	0	0	0	0	603	903	0
3538	4	0	0	0	0	0	0	200	300	0	-16.0252	-120.455	-608.317	-132095	-12583	6039.41	179.315	1120.15	0	0	0	0	0	0	0	603	903	0
3538	5	0	0	0	0	0	0	200	300	0	-18.4666	-121.218	-610.148	-132644	-13254.4	6542.95	178.277	1120.4	0	0	0	0	0	0	0	603	903	0
3538	6	0	0	0	0	0	0	200	300	0	-19.5348	-124.117	-615.031	-132827	-13498.5	6771.84	178.052	1118.97	0	0	0	0	0	0	0	603	903	0
3538	7	0	0	0	0	0	0	200	300	0	-20.2977	-125.033	-617.167	-132644	-13010.2	7275.38	178.919	1117.92	0	0	0	0	0	0	0	603	903	0
3538	8	0	0	0	0	0	0	200	300	0	-21.9762	-124.88	-619.303	-133102	-13376.4	7504.26	178.401	1117.92	0	0	0	0	0	0	0	603	903	0
3538	9	0	0	0	0	0	0	200	300	0	-24.8753	-125.338	-623.881	-132186	-13742.6	7687.36	177.972	1114.88	0	0	0	0	0	0	0	603	903	0
3539	0	0	0	0	0	0	0	200	300	0	-25.1805	-125.796	-626.322	-133926	-14414	8007.8	176.986	1116.83	0	0	0	0	0	0	0	603	903	0
3539	1	0	0	0	0	0	0	200	300	0	-25.3331	-128.084	-627.543	-133102	-14108.8	8374.01	177.517	1115.1	0	0	0	0	0	0	0	603	903	0
3539	2	0	0	0	0	0	0	200	300	0	-26.859	-126.711	-630.9	-134384	-14475.1	8557.11	177.056	1116	0	0	0	0	0	0	0	603	903	0
3539	3	0	0	0	0	0	0	200	300	0	-27.1642	-127.779	-633.952	-135208	-14719.2	8694.44	176.782	1116.28	0	0	0	0	0	0	0	603	903	0
3539	4	0	0	0	0	0	0	200	300	0	-28.8426	-127.932	-638.529	-135757	-14169.9	9060.65	177.809	1115.61	0	0	0	0	0	0	0	603	903	0
3539	5	0	0	0	0	0	0	200	300	0	-30.5211	-129.763	-641.581	-135757	-14597.1	8923.32	177.248	1114.6	0	0	0	0	0	0	0	603	903	0
3539	6	0	0	0	0	0	0	200	300	0	-30.3685	-130.678	-643.717	-135024	-14963.3	9014.88	176.755	1112.76	0	0	0	0	0	0	0	603	903	0
3539	7	0	0	0	0	0	0	200	300	0	-30.0633	-130.221	-647.074	-136489	-15146.4	9381.09	176.592	1113.93	0	0	0	0	0	0	0	603	903	0
3539	8	0	0	0	0	0	0	200	300	0	-32.047	-130.068	-650.431	-137039	-14780.2	9655.74	177.276	1113.69	0	0	0	0	0	0	0	603	903	0
3539	9	0	0	0	0	0	0	200	300	0	-31.8944	-130.984	-651.347	-137863	-14780.2	9701.52	177.308	1114.66	0	0	0	0	0	0	0	603	903	0
3540	0	0	0	0	0	0	0	200	300	0	-31.7418	-130.526	-656.229	-137679	-15573.7	9976.18	176.268	1112.8	0	0	0	0	0	0	0	603	903	0
3540	1	0	0	0	0	0	0	200	300	0	-30.0633	-132.357	-658.976	-138320	-15085.4	10113.5	177.108	1112.9	0	0	0	0	0	0	0	603	903	0
3540	2	0	0	0	0	0	0	200	300	0	-32.9625	-131.747	-661.723	-138870	-15207.5	10113.5	177.018	1112.86	0	0	0	0	0	0	0	603	903	0
3540	3	0	0	0	0	0	0	200	300	0	-31.7418	-132.052	-665.69	-139419	-15756.8	10433.9	176.33	1112.44	0	0	0	0	0	0	0	603	903	0
3540	4	0	0	0	0	0	0	200	300	0	-34.1832	-134.188	-668.437	-139511	-15878.9	10250.8	176.245	1111.71	0	0	0	0	0	0	0	603	903	0
3540	5	0	0	0	0	0	0	200	300	0	-33.5728	-134.188	-671.488	-139968	-15573.7	10433.9	176.807	1111.44	0	0	0	0	0	0	0	603	903	0
3540	6	0	0	0	0	0	0	200	300	0	-32.9625	-133.578	-671.488	-141067	-15573.7	10617	176.807	1113.08	0	0	0	0	0	0	0	603	903	0
3540	7	0	0	0	0	0	0	200	300	0	-33.878	-133.272	-677.592	-141067	-15634.7	10617	176.926	1111.19	0	0	0	0	0	0	0	603	903	0
3540	8	0	0	0	0	0	0	200	300	0	-34.3358	-133.883	-680.338	-141525	-15695.8	10800.2	176.929	1111.02	0	0	0	0	0	0	0	603	903	0
3540	9	0	0	0	0	0	0	200	300	0	-33.1151	-135.103	-685.221	-141708	-16000.9	11074.8	176.649	1109.81	0	0	0	0	0	0	0	603	903	0
3541	0	0	0	0	0	0	0	200	300	0	-32.6573	-134.951	-686.137	-142806	-16428.2	10845.9	176.057	1111.13	0	0	0	0	0	0	0	603	903	0
3541	1	0	0	0	0	0	0	200	300	0	-33.4203	-134.951	-689.188	-142806	-16489.2	10937.5	176.074	1110.21	0	0	0	0	0	0	0	603	903	0
3541	2	0	0	0	0	0	0	200	300	0	-32.5047	-135.103	-692.545	-143081	-16489.2	11074.8	176.19	1109.6	0	0	0	0	0	0	0	603	903	0
3541	3	0	0	0	0	0	0	200	300	0	-33.1151	-135.866	-694.376	-143356	-16184	11120.6	176.693	1109.45	0	0	0	0	0	0	0	603	903	0
3541	4	0	0	0	0	0	0	200	300	0	-35.0987	-134.951	-697.428	-144180	-16550.3	11029	176.27	1109.73	0	0	0	0	0	0	0	603	903	0
3541	5	0	0	0	0	0	0	200	300	0	-32.5047	-135.866	-700.175	-144729	-16855.4	11212.1	175.927	1109.7	0	0	0	0	0	0	0	603	903	0
3541	6	0	0	0	0	0	0	200	300	0	-35.7091	-134.951	-703.227	-144912	-16611.3	11166.4	176.378	1109.07	0	0	0	0	0	0	0	603	903	0
3541	7	0	0	0	0	0	0	200	300	0	-34.9461	-134.493	-708.72	-145004	-16794.4	10983.3	176.303	1107.6	0	0	0	0	0	0	0	603	903	0
3541	8	0	0	0	0	0	0	200	300	0	-34.7935	-135.409	-710.246	-145919	-16977.5	11166.4	176.096	1108.45	0	0	0	0	0	0	0	603	903	0
3541	9	0	0	0	0	0	0	200	300	0	-36.0143	-133.73	-710.551	-146835	-16794.4	11257.9	176.364	1109.65	0	0	0	0	0	0	0	603	903	0
3542	0	0	0	0	0	0	0	200	300	0	-36.0143	-134.341	-714.518	-146743	-16672.3	11074.8	176.666	1108.37	0	0	0	0	0	0	0	603	903	0
3542	1	0	0	0	0	0	0	200	300	0	-33.7254	-134.035	-717.265	-147201	-17221.6	11166.4	175.99	1108.23	0	0	0	0	0	0	0	603	903	0
3542	2	0	0	0	0	0	0	200	300	0	-34.4884	-133.578	-721.842	-148116	-17099.6	11166.4	176.311	1108.19	0	0	0	0	0	0	0	603	903	0
3542	3	0	0	0	0	0	0	200	300	0	-35.2513	-133.883	-725.199	-148666	-16733.4	11029	176.926	1108	0	0	0	0	0	0	0	603	903	0
3542	4	0	0	0	0	0	0	200	300	0	-34.9461	-134.493	-727.03	-148574	-16977.5	10983.3	176.648	1107.36	0	0	0	0	0	0	0	603	903	0
3542	5	0	0	0	0	0	0	200	300	0	-33.5728	-132.509	-727.946	-148849	-17343.7	10891.7	176.174	1107.48	0	0	0	0	0	0	0	603	903	0
3542	6	0	0	0	0	0	0	200	300	0	-33.2677	-132.204	-731.608	-150039	-17221.6	10983.3	176.461	1108.08	0	0	0	0	0	0	0	603	903	0
3542	7	0	0	0	0	0	0	200	300	0	-34.1832	-132.052	-734.354	-149398	-16916.5	11212.1	176.964	1106.44	0	0	0	0	0	0	0	603	903	0
3542	8	0	0	0	0	0	0	200	300	0	-34.1832	-131.899	-736.491	-150314	-16855.4	10937.5	177.114	1107.09	0	0	0	0	0	0	0	603	903	0
3542	9	0	0	0	0	0	0	200	300	0	-32.5047	-130.984	-735.88	-150497	-17343.7	10937.5	176.431	1107.51	0	0	0	0	0	0	0	603	903	0
3543	0	0	0	0	0	0	0	200	300	0	-32.3521	-129.305	-740.458	-151138	-17465.8	10708.6	176.412	1107.11	0	0	0	0	0	0	0	603	903	0
3543	1	0	0	0	0	0	0	200	300	0	-33.4203	-128.847	-743.815	-151504	-16916.5	10617	177.257	1106.69	0	0	0	0	0	0	0	603	903	0
3543	2	0	0	0	0	0	0	200	300	0	-32.9625	-129.915	-745.646	-152145	-17282.7	10708.6	176.822	1107.04	0	0	0	0	0	0	0	603	903	0
3543	3	0	0	0	0	0	0	200	300	0	-32.1996	-129.61	-748.087	-151962	-17709.9	10342.4	176.326	1106.13	0	0	0	0	0	0	0	603	903	0
3543	4	0	0	0	0	0	0	200	300	0	-30.8263	-127.016	-748.393	-152511	-17832	10342.4	176.173	1106.78	0	0	0	0	0	0	0	603	903	0
3543	5	0	0	0	0	0	0	200	300	0	-32.3521	-127.779	-752.055	-153152	-17221.6	10525.5	177.101	1106.64	0	0	0	0	0	0	0	603	903	0
3543	6	0	0	0	0	0	0	200	300	0	-29.6056	-127.169	-750.834	-153701	-17160.6	10342.4	177.145	1107.71	0	0	0	0	0	0	0	603	903	0
3543	7	0	0	0	0	0	0	200	300	0	-32.5047	-124.117	-755.717	-153335	-17404.7	10250.8	176.969	1105.9	0	0	0	0	0	0	0	603	903	0
3543	8	0	0	0	0	0	0	200	300	0	-28.69	-125.796	-756.327	-153976	-16672.3	10342.4	177.956	1106.58	0	0	0	0	0	0	0	603	903	0
3543	9	0	0	0	0	0	0	200	300	0	-30.8263	-124.727	-757.548	-154525	-17160.6	10205.1	177.347	1106.98	0	0	0	0	0	0	0	603	903	0
3544	0	0	0	0	0	0	0	200	300	0	-32.047	-123.812	-761.21	-154434	-17648.9	10205.1	176.815	1105.88	0	0	0	0	0	0	0	603	903	0
3544	1	0	0	0	0	0	0	200	300	0	-31.4366	-123.812	-762.431	-154891	-17587.8	9884.63	176.932	1106.15	0	0	0	0	0	0	0	603	903	0
3544	2	0	0	0	0	0	0	200	300	0	-29.7581	-123.812	-763.651	-155258	-17099.6	10113.5	177.608	1106.31	0	0	0	0	0	0	0	603	903	0
3544	3	0	0	0	0	0	0	200	300	0	-29.453	-123.507	-764.872	-155899	-17404.7	10022	177.245	1106.82	0	0	0	0	0	0	0	603	903	0
3544	4	0	0	0	0	0	0	200	300	0	-30.5211	-120.76	-767.008	-155624	-17648.9	9701.52	176.99	1105.9	0	0	0	0	0	0	0	603	903	0
3544	5	0	0	0	0	0	0	200	300	0	-29.7581	-119.845	-769.45	-156814	-17160.6	9472.64	177.698	1106.8	0	0	0	0	0	0	0	603	903	0
3544	6	0	0	0	0	0	0	200	300	0	-28.0797	-119.997	-771.586	-155166	-17465.8	9518.42	177.364	1104.1	0	0	0	0	0	0	0	603	903	0
3544	7	0	0	0	0	0	0	200	300	0	-27.3167	-118.166	-771.891	-156997	-17404.7	9655.74	177.452	1106.39	0	0	0	0	0	0	0	603	903	0
3544	8	0	0	0	0	0	0	200	300	0	-28.8426	-117.251	-774.333	-157730	-17587.8	9335.31	177.286	1106.7	0	0	0	0	0	0	0	603	903	0
3544	9	0	0	0	0	0	0	200	300	0	-27.6219	-114.657	-774.943	-157913	-17099.6	9152.2	177.934	1106.77	0	0	0	0	0	0	0	603	903	0
3545	0	0	0	0	0	0	0	200	300	0	-27.0116	-114.809	-777.689	-157638	-17099.6	8877.55	178.012	1105.7	0	0	0	0	0	0	0	603	903	0
3545	1	0	0	0	0	0	0	200	300	0	-25.3331	-114.657	-779.521	-157821	-17893	8969.1	177.046	1105.46	0	0	0	0	0	0	0	603	903	0
3545	2	0	0	0	0	0	0	200	300	0	-26.5538	-113.589	-778.91	-158920	-17526.8	8831.77	177.498	1107.03	0	0	0	0	0	0	0	603	903	0
3545	3	0	0	0	0	0	0	200	300	0	-25.3331	-111.758	-780.436	-158737	-17160.6	8648.66	178.012	1106.4	0	0	0	0	0	0	0	603	903	0
3545	4	0	0	0	0	0	0	200	300	0	-26.5538	-111.147	-782.572	-158737	-17526.8	8511.33	177.604	1105.84	0	0	0	0	0	0	0	603	903	0
3545	5	0	0	0	0	0	0	200	300	0	-25.3331	-110.842	-785.014	-158920	-17465.8	8419.78	177.751	1105.44	0	0	0	0	0	0	0	603	903	0
3545	6	0	0	0	0	0	0	200	300	0	-25.0279	-108.095	-781.657	-159652	-17526.8	7916.25	177.577	1107.25	0	0	0	0	0	0	0	603	903	0
3545	7	0	0	0	0	0	0	200	300	0	-26.4012	-109.011	-784.098	-158737	-17221.6	8190.9	178.036	1105.45	0	0	0	0	0	0	0	603	903	0
3545	8	0	0	0	0	0	0	200	300	0	-25.7909	-107.332	-785.929	-159927	-17587.8	8007.8	177.622	1106.49	0	0	0	0	0	0	0	603	903	0
3545	9	0	0	0	0	0	0	200	300	0	-25.0279	-106.112	-787.455	-159469	-17343.7	8007.8	177.975	1105.51	0	0	0	0	0	0	0	603	903	0
3546	0	0	0	0	0	0	0	200	300	0	-24.7227	-105.654	-788.065	-159652	-17160.6	7870.47	178.224	1105.59	0	0	0	0	0	0	0	603	903	0
3546	1	0	0	0	0	0	0	200	300	0	-24.265	-104.891	-787.76	-160476	-16977.5	7687.36	178.448	1106.71	0	0	0	0	0	0	0	603	903	0
3546	2	0	0	0	0	0	0	200	300	0	-24.8753	-102.755	-786.845	-160293	-17221.6	7641.59	178.113	1106.72	0	0	0	0	0	0	0	603	903	0
3546	3	0	0	0	0	0	0	200	300	0	-24.8753	-102.297	-789.286	-159927	-17160.6	7412.71	178.258	1105.62	0	0	0	0	0	0	0	603	903	0
3546	4	0	0	0	0	0	0	200	300	0	-23.1969	-100.619	-785.014	-160110	-16794.4	7366.93	178.606	1106.96	0	0	0	0	0	0	0	603	903	0
3546	5	0	0	0	0	0	0	200	300	0	-23.3495	-101.839	-788.065	-160385	-16855.4	7366.93	178.612	1106.52	0	0	0	0	0	0	0	603	903	0
3546	6	0	0	0	0	0	0	200	300	0	-24.1124	-99.8557	-787.455	-160018	-16916.5	7366.93	178.518	1106.21	0	0	0	0	0	0	0	603	903	0
3546	7	0	0	0	0	0	0	200	300	0	-23.8072	-98.1772	-787.455	-160018	-16672.3	7138.05	178.828	1106.21	0	0	0	0	0	0	0	603	903	0
3546	8	0	0	0	0	0	0	200	300	0	-22.8917	-97.5668	-787.455	-159652	-16672.3	7183.82	178.828	1105.74	0	0	0	0	0	0	0	603	903	0
3546	9	0	0	0	0	0	0	200	300	0	-21.9762	-97.4142	-786.54	-159744	-17221.6	6863.39	178.105	1106.1	0	0	0	0	0	0	0	603	903	0
3547	0	0	0	0	0	0	0	200	300	0	-23.6546	-96.041	-783.183	-158554	-17038.5	7229.6	178.245	1105.45	0	0	0	0	0	0	0	603	903	0
3547	1	0	0	0	0	0	0	200	300	0	-23.6546	-94.6677	-782.572	-158920	-16428.2	6909.17	179.007	1106.07	0	0	0	0	0	0	0	603	903	0
3547	2	0	0	0	0	0	0	200	300	0	-21.9762	-93.9047	-781.962	-158096	-16855.4	6771.84	178.445	1105.18	0	0	0	0	0	0	0	603	903	0
3547	3	0	0	0	0	0	0	200	300	0	-21.5184	-93.5995	-777.995	-158187	-16977.5	6909.17	178.178	1106.33	0	0	0	0	0	0	0	603	903	0
3547	4	0	0	0	0	0	0	200	300	0	-23.0443	-90.853	-778.3	-156814	-16428.2	6771.84	178.892	1104.48	0	0	0	0	0	0	0	603	903	0
3547	5	0	0	0	0	0	0	200	300	0	-23.3495	-91.4633	-776.164	-158279	-16245.1	6680.28	179.07	1106.92	0	0	0	0	0	0	0	603	903	0
3547	6	0	0	0	0	0	0	200	300	0	-21.5184	-89.7849	-773.722	-156539	-16611.3	6634.51	178.531	1105.32	0	0	0	0	0	0	0	603	903	0
3547	7	0	0	0	0	0	0	200	300	0	-21.671	-88.5641	-773.112	-156631	-16611.3	6588.73	178.514	1105.6	0	0	0	0	0	0	0	603	903	0
3547	8	0	0	0	0	0	0	200	300	0	-23.1969	-87.6486	-770.06	-155715	-16306.1	6314.07	178.825	1105.21	0	0	0	0	0	0	0	603	903	0
3547	9	0	0	0	0	0	0	200	300	0	-23.0443	-87.3434	-766.398	-155715	-16245.1	6405.62	178.803	1106.18	0	0	0	0	0	0	0	603	903	0
3548	0	0	0	0	0	0	0	200	300	0	-22.2813	-86.4279	-763.346	-154891	-16428.2	6039.41	178.479	1105.91	0	0	0	0	0	0	0	603	903	0
3548	1	0	0	0	0	0	0	200	300	0	-22.4339	-85.0546	-760.294	-154067	-16245.1	6268.3	178.633	1105.64	0	0	0	0	0	0	0	603	903	0
3548	2	0	0	0	0	0	0	200	300	0	-23.3495	-84.1391	-759.379	-153610	-15817.8	6130.97	179.17	1105.28	0	0	0	0	0	0	0	603	903	0
3548	3	0	0	0	0	0	0	200	300	0	-23.0443	-83.5287	-756.632	-153610	-15878.9	5947.86	179.014	1106.02	0	0	0	0	0	0	0	603	903	0
3548	4	0	0	0	0	0	0	200	300	0	-21.8236	-82.1555	-751.139	-152603	-16184	6130.97	178.454	1106.16	0	0	0	0	0	0	0	603	903	0
3548	5	0	0	0	0	0	0	200	300	0	-20.9081	-82.308	-750.224	-152145	-15878.9	5947.86	178.835	1105.8	0	0	0	0	0	0	0	603	903	0
3548	6	0	0	0	0	0	0	200	300	0	-22.8917	-80.6296	-746.256	-151870	-15390.6	5947.86	179.376	1106.51	0	0	0	0	0	0	0	603	903	0
3548	7	0	0	0	0	0	0	200	300	0	-20.7555	-78.9511	-744.12	-151321	-15878.9	5856.31	178.661	1106.36	0	0	0	0	0	0	0	603	903	0
3548	8	0	0	0	0	0	0	200	300	0	-22.4339	-78.3408	-740.458	-150222	-15451.6	5856.31	179.132	1105.88	0	0	0	0	0	0	0	603	903	0
3548	9	0	0	0	0	0	0	200	300	0	-21.8236	-76.9675	-737.101	-149948	-15329.5	5581.65	179.203	1106.43	0	0	0	0	0	0	0	603	903	0
3549	0	0	0	0	0	0	0	200	300	0	-21.2132	-75.7468	-734.049	-149490	-15329.5	5306.99	179.116	1106.65	0	0	0	0	0	0	0	603	903	0
3549	1	0	0	0	0	0	0	200	300	0	-21.671	-74.9838	-731.303	-148300	-15085.4	5718.98	179.372	1105.79	0	0	0	0	0	0	0	603	903	0
3549	2	0	0	0	0	0	0	200	300	0	-22.4339	-72.8476	-724.589	-148391	-14963.3	5718.98	179.349	1107.79	0	0	0	0	0	0	0	603	903	0
3549	3	0	0	0	0	0	0	200	300	0	-21.0606	-74.0683	-724.894	-147109	-14597.1	5673.2	179.863	1105.94	0	0	0	0	0	0	0	603	903	0
3549	4	0	0	0	0	0	0	200	300	0	-20.7555	-72.2372	-721.232	-146743	-15451.6	5490.1	178.576	1106.46	0	0	0	0	0	0	0	603	903	0
3549	5	0	0	0	0	0	0	200	300	0	-21.2132	-70.5588	-717.265	-146285	-14963.3	5535.87	179.138	1106.95	0	0	0	0	0	0	0	603	903	0
3549	6	0	0	0	0	0	0	200	300	0	-20.4503	-70.101	-715.434	-145919	-14597.1	5444.32	179.597	1106.96	0	0	0	0	0	0	0	603	903	0
3549	7	0	0	0	0	0	0	200	300	0	-21.0606	-69.4907	-712.687	-144638	-14475.1	5535.87	179.689	1105.95	0	0	0	0	0	0	0	603	903	0
3549	8	0	0	0	0	0	0	200	300	0	-20.1451	-68.1174	-708.72	-143905	-14841.3	5215.44	179.059	1106.05	0	0	0	0	0	0	0	603	903	0
3549	9	0	0	0	0	0	0	200	300	0	-19.9925	-67.507	-704.447	-143447	-14780.2	5032.33	179.019	1106.63	0	0	0	0	0	0	0	603	903	0
3550	0	0	0	0	0	0	0	200	300	0	-20.6029	-65.2182	-700.175	-142806	-14536.1	5169.66	179.239	1106.96	0	0	0	0	0	0	0	603	903	0
3550	1	0	0	0	0	0	0	200	300	0	-21.3658	-64.3027	-698.649	-141799	-14169.9	5123.89	179.718	1105.96	0	0	0	0	0	0	0	603	903	0
3550	2	0	0	0	0	0	0	200	300	0	-20.1451	-63.9975	-694.682	-141250	-14536.1	4895	179.075	1106.33	0	0	0	0	0	0	0	603	903	0
3550	3	0	0	0	0	0	0	200	300	0	-19.9925	-63.2346	-690.409	-140060	-14475.1	5032.33	179.034	1105.86	0	0	0	0	0	0	0	603	903	0
3550	4	0	0	0	0	0	0	200	300	0	-19.9925	-61.7087	-686.747	-140060	-14047.8	4711.9	179.544	1106.95	0	0	0	0	0	0	0	603	903	0
3550	5	0	0	0	0	0	0	200	300	0	-21.3658	-61.4035	-684.611	-139602	-13864.7	4574.57	179.748	1106.91	0	0	0	0	0	0	0	603	903	0
3550	6	0	0	0	0	0	0	200	300	0	-21.5184	-59.8776	-681.559	-138595	-14292	4666.12	179.031	1106.35	0	0	0	0	0	0	0	603	903	0
3550	7	0	0	0	0	0	0	200	300	0	-19.6873	-59.8776	-676.676	-137771	-14169.9	4483.02	179.06	1106.6	0	0	0	0	0	0	0	603	903	0
3550	8	0	0	0	0	0	0	200	300	0	-18.9244	-58.1992	-673.014	-136947	-13498.5	4483.02	179.943	1106.48	0	0	0	0	0	0	0	603	903	0
3550	9	0	0	0	0	0	0	200	300	0	-19.8399	-57.4362	-668.131	-136398	-13559.5	4437.24	179.705	1107.15	0	0	0	0	0	0	0	603	903	0
3551	0	0	0	0	0	0	0	200	300	0	-20.6029	-56.2155	-665.08	-136123	-13803.7	4345.69	179.245	1107.67	0	0	0	0	0	0	0	603	903	0
3551	1	0	0	0	0	0	0	200	300	0	-20.4503	-56.0629	-661.112	-134841	-13681.6	4483.02	179.305	1106.96	0	0	0	0	0	0	0	603	903	0
3551	2	0	0	0	0	0	0	200	300	0	-19.8399	-55.9103	-658.671	-133102	-13315.4	4208.36	179.784	1105.08	0	0	0	0	0	0	0	603	903	0
3551	3	0	0	0	0	0	0	200	300	0	-19.5348	-54.9948	-656.229	-133193	-13498.5	4208.36	179.43	1105.97	0	0	0	0	0	0	0	603	903	0
3551	4	0	0	0	0	0	0	200	300	0	-19.8399	-54.2319	-652.262	-133010	-13437.5	4437.24	179.399	1106.92	0	0	0	0	0	0	0	603	903	0
3551	5	0	0	0	0	0	0	200	300	0	-18.1615	-53.0112	-649.21	-132461	-13010.2	4483.02	179.96	1107.03	0	0	0	0	0	0	0	603	903	0
3551	6	0	0	0	0	0	0	200	300	0	-20.4503	-52.5534	-646.159	-131454	-13193.3	4437.24	179.582	1106.44	0	0	0	0	0	0	0	603	903	0
3551	7	0	0	0	0	0	0	200	300	0	-19.077	-50.8749	-641.276	-130630	-13376.4	4345.69	179.141	1106.7	0	0	0	0	0	0	0	603	903	0
3551	8	0	0	0	0	0	0	200	300	0	-19.3822	-51.3327	-637.309	-130813	-13437.5	4208.36	178.915	1108.26	0	0	0	0	0	0	0	603	903	0
3551	9	0	0	0	0	0	0	200	300	0	-20.4503	-49.5016	-635.172	-129623	-12827.1	4391.46	179.805	1107.08	0	0	0	0	0	0	0	603	903	0
3552	0	0	0	0	0	0	0	200	300	0	-19.9925	-48.4335	-632.731	-128707	-12949.2	4116.81	179.534	1106.42	0	0	0	0	0	0	0	603	903	0
3552	1	0	0	0	0	0	0	200	300	0	-18.9244	-49.0439	-630.595	-127334	-13132.3	4116.81	179.175	1104.93	0	0	0	0	0	0	0	603	903	0
3552	2	0	0	0	0	0	0	200	300	0	-19.3822	-47.518	-626.017	-127242	-13193.3	4116.81	178.925	1106.26	0	0	0	0	0	0	0	603	903	0
3552	3	0	0	0	0	0	0	200	300	0	-20.2977	-47.0602	-622.965	-126602	-12705	3887.92	179.606	1106.22	0	0	0	0	0	0	0	603	903	0
3552	4	0	0	0	0	0	0	200	300	0	-20.4503	-46.2973	-619.914	-126602	-12583	4345.69	179.702	1107.22	0	0	0	0	0	0	0	603	903	0
3552	5	0	0	0	0	0	0	200	300	0	-17.5511	-44.924	-616.251	-124862	-13132.3	4025.25	178.69	1105.62	0	0	0	0	0	0	0	603	903	0
3552	6	0	0	0	0	0	0	200	300	0	-18.0089	-45.9921	-614.42	-124313	-12399.9	4025.25	179.819	1105.33	0	0	0	0	0	0	0	603	903	0
3552	7	0	0	0	0	0	0	200	300	0	-19.077	-44.0085	-610.453	-124038	-12460.9	4116.81	179.587	1106.19	0	0	0	0	0	0	0	603	903	0
3552	8	0	0	0	0	0	0	200	300	0	-19.9925	-42.7878	-606.486	-123123	-12399.9	4025.25	179.555	1106.01	0	0	0	0	0	0	0	603	903	0
3552	9	0	0	0	0	0	0	200	300	0	-20.1451	-42.33	-604.655	-122390	-12399.9	3750.59	179.493	1105.41	0	0	0	0	0	0	0	603	903	0
3553	0	0	0	0	0	0	0	200	300	0	-19.2296	-42.0248	-602.213	-121658	-12399.9	4025.25	179.41	1105.02	0	0	0	0	0	0	0	603	903	0
3553	1	0	0	0	0	0	0	200	300	0	-18.7718	-41.7197	-597.636	-121566	-12644	3933.7	178.843	1106.41	0	0	0	0	0	0	0	603	903	0
3553	2	0	0	0	0	0	0	200	300	0	-19.9925	-39.8886	-592.448	-120834	-12155.7	4162.58	179.482	1106.96	0	0	0	0	0	0	0	603	903	0
3553	3	0	0	0	0	0	0	200	300	0	-18.3141	-39.8886	-592.448	-120559	-12277.8	3933.7	179.276	1106.49	0	0	0	0	0	0	0	603	903	0
3553	4	0	0	0	0	0	0	200	300	0	-19.8399	-38.8205	-592.143	-119369	-12155.7	3704.82	179.472	1104.59	0	0	0	0	0	0	0	603	903	0
3553	5	0	0	0	0	0	0	200	300	0	-18.6192	-38.2101	-588.48	-118820	-11789.5	3613.27	179.966	1104.91	0	0	0	0	0	0	0	603	903	0
3553	6	0	0	0	0	0	0	200	300	0	-18.6192	-38.0576	-585.429	-118545	-12277.8	3887.92	179.028	1105.49	0	0	0	0	0	0	0	603	903	0
3553	7	0	0	0	0	0	0	200	300	0	-19.8399	-36.8369	-580.241	-117904	-12705	3933.7	178.104	1106.2	0	0	0	0	0	0	0	603	903	0
3553	8	0	0	0	0	0	0	200	300	0	-19.6873	-36.2265	-579.02	-117172	-11789.5	3521.71	179.639	1105.36	0	0	0	0	0	0	0	603	903	0
3553	9	0	0	0	0	0	0	200	300	0	-18.4666	-35.4636	-577.799	-116439	-11911.6	3842.15	179.385	1104.52	0	0	0	0	0	0	0	603	903	0
3554	0	0	0	0	0	0	0	200	300	0	-17.0934	-35.1584	-575.053	-116165	-12094.7	3475.94	178.968	1105.01	0	0	0	0	0	0	0	603	903	0
3554	1	0	0	0	0	0	0	200	300	0	-18.1615	-34.0903	-572.001	-115615	-11972.6	3842.15	179.069	1105.12	0	0	0	0	0	0	0	603	903	0
3554	2	0	0	0	0	0	0	200	300	0	-19.077	-33.3273	-569.254	-115249	-12155.7	3567.49	178.646	1105.46	0	0	0	0	0	0	0	603	903	0
3554	3	0	0	0	0	0	0	200	300	0	-19.6873	-32.5644	-567.118	-114334	-12033.6	3521.71	178.781	1104.6	0	0	0	0	0	0	0	603	903	0
3554	4	0	0	0	0	0	0	200	300	0	-18.0089	-30.7333	-564.982	-113510	-12277.8	3521.71	178.269	1103.91	0	0	0	0	0	0	0	603	903	0
3554	5	0	0	0	0	0	0	200	300	0	-16.3304	-31.4963	-562.541	-113143	-11606.4	3750.59	179.368	1104.13	0	0	0	0	0	0	0	603	903	0
3554	6	0	0	0	0	0	0	200	300	0	-18.4666	-30.7333	-559.794	-112960	-11667.4	3475.94	179.158	1104.79	0	0	0	0	0	0	0	603	903	0
3554	7	0	0	0	0	0	0	200	300	0	-19.9925	-29.8178	-557.658	-112228	-12033.6	3063.95	178.421	1104.25	0	0	0	0	0	0	0	603	903	0
3554	8	0	0	0	0	0	0	200	300	0	-18.7718	-29.2075	-553.69	-111495	-11728.5	3430.16	178.818	1104.37	0	0	0	0	0	0	0	603	903	0
3554	9	0	0	0	0	0	0	200	300	0	-18.3141	-28.5971	-553.996	-111221	-11301.2	3109.73	179.601	1103.76	0	0	0	0	0	0	0	603	903	0
3555	0	0	0	0	0	0	0	200	300	0	-18.0089	-28.4445	-551.249	-110763	-11240.2	3247.05	179.61	1103.93	0	0	0	0	0	0	0	603	903	0
3555	1	0	0	0	0	0	0	200	300	0	-19.077	-26.7661	-548.808	-110763	-11301.2	3247.05	179.408	1104.82	0	0	0	0	0	0	0	603	903	0
3555	2	0	0	0	0	0	0	200	300	0	-19.077	-26.4609	-547.587	-109664	-11240.2	3292.83	179.473	1103.27	0	0	0	0	0	0	0	603	903	0
3555	3	0	0	0	0	0	0	200	300	0	-17.8563	-25.6979	-544.84	-109481	-11423.3	3292.83	179.034	1103.94	0	0	0	0	0	0	0	603	903	0
3555	4	0	0	0	0	0	0	200	300	0	-18.0089	-25.6979	-542.399	-108383	-11423.3	3338.61	178.939	1102.82	0	0	0	0	0	0	0	603	903	0
3555	5	0	0	0	0	0	0	200	300	0	-18.9244	-25.6979	-542.399	-109115	-11484.3	3292.83	178.827	1104.17	0	0	0	0	0	0	0	603	903	0
3555	6	0	0	0	0	0	0	200	300	0	-16.0252	-24.0195	-539.347	-108657	-10996	3155.5	179.612	1104.46	0	0	0	0	0	0	0	603	903	0
3555	7	0	0	0	0	0	0	200	300	0	-18.4666	-23.2565	-538.126	-107742	-11728.5	3155.5	178.205	1103.22	0	0	0	0	0	0	0	603	903	0
3555	8	0	0	0	0	0	0	200	300	0	-18.1615	-22.9514	-537.211	-106460	-11484.3	3292.83	178.622	1101.17	0	0	0	0	0	0	0	603	903	0
3555	9	0	0	0	0	0	0	200	300	0	-17.5511	-21.8832	-535.99	-107101	-10812.9	3109.73	179.826	1102.82	0	0	0	0	0	0	0	603	903	0
3556	0	0	0	0	0	0	0	200	300	0	-18.9244	-22.341	-532.938	-106735	-11362.3	3109.73	178.68	1103.28	0	0	0	0	0	0	0	603	903	0
3556	1	0	0	0	0	0	0	200	300	0	-18.3141	-21.7307	-530.192	-106002	-11423.3	3338.61	178.454	1102.93	0	0	0	0	0	0	0	603	903	0
3556	2	0	0	0	0	0	0	200	300	0	-18.0089	-20.3574	-530.497	-105636	-11179.2	3475.94	178.927	1102.13	0	0	0	0	0	0	0	603	903	0
3556	3	0	0	0	0	0	0	200	300	0	-18.4666	-19.2892	-530.497	-105728	-11179.2	3109.73	178.927	1102.3	0	0	0	0	0	0	0	603	903	0
3556	4	0	0	0	0	0	0	200	300	0	-18.4666	-18.8315	-528.666	-104629	-11789.5	3247.05	177.7	1100.91	0	0	0	0	0	0	0	603	903	0
3556	5	0	0	0	0	0	0	200	300	0	-18.6192	-18.5263	-525.919	-104812	-11606.4	3063.95	177.931	1102.29	0	0	0	0	0	0	0	603	903	0
3556	6	0	0	0	0	0	0	200	300	0	-18.3141	-17.0004	-523.478	-104537	-11423.3	3201.28	178.178	1102.7	0	0	0	0	0	0	0	603	903	0
3556	7	0	0	0	0	0	0	200	300	0	-16.3304	-17.4582	-524.394	-103988	-11240.2	3018.17	178.565	1101.3	0	0	0	0	0	0	0	603	903	0
3556	8	0	0	0	0	0	0	200	300	0	-18.9244	-15.9323	-522.868	-104080	-11362.3	3109.73	178.269	1102.06	0	0	0	0	0	0	0	603	903	0
3556	9	0	0	0	0	0	0	200	300	0	-18.1615	-16.5427	-521.037	-103439	-11179.2	2926.62	178.544	1101.52	0	0	0	0	0	0	0	603	903	0
3557	0	0	0	0	0	0	0	200	300	0	-19.8399	-14.8642	-518.9	-102798	-11240.2	2835.07	178.338	1101.11	0	0	0	0	0	0	0	603	903	0
3557	1	0	0	0	0	0	0	200	300	0	-19.077	-14.2538	-517.985	-102798	-11057.1	2835.07	178.654	1101.46	0	0	0	0	0	0	0	603	903	0
3557	2	0	0	0	0	0	0	200	300	0	-19.077	-13.9487	-516.764	-102889	-10996	2880.84	178.721	1102.1	0	0	0	0	0	0	0	603	903	0
3557	3	0	0	0	0	0	0	200	300	0	-20.1451	-13.7961	-517.069	-102432	-11301.2	2743.51	178.144	1101.1	0	0	0	0	0	0	0	603	903	0
3557	4	0	0	0	0	0	0	200	300	0	-19.5348	-13.7961	-514.628	-101608	-10996	2880.84	178.633	1100.44	0	0	0	0	0	0	0	603	903	0
3557	5	0	0	0	0	0	0	200	300	0	-18.7718	-12.5754	-513.102	-101058	-11240.2	2835.07	178.094	1099.96	0	0	0	0	0	0	0	603	903	0
3557	6	0	0	0	0	0	0	200	300	0	-19.077	-11.6599	-512.187	-101333	-11362.3	2743.51	177.816	1100.84	0	0	0	0	0	0	0	603	903	0
3557	7	0	0	0	0	0	0	200	300	0	-19.8399	-11.2021	-511.576	-101058	-10751.9	2743.51	178.983	1100.54	0	0	0	0	0	0	0	603	903	0
3557	8	0	0	0	0	0	0	200	300	0	-19.8399	-10.8969	-511.881	-100601	-11057.1	2926.62	178.399	1099.53	0	0	0	0	0	0	0	603	903	0
3557	9	0	0	0	0	0	0	200	300	0	-18.9244	-10.5917	-508.83	-100234	-11301.2	2651.96	177.79	1099.99	0	0	0	0	0	0	0	603	903	0
3558	0	0	0	0	0	0	0	200	300	0	-18.6192	-9.8288	-506.999	-100143	-11362.3	2789.29	177.589	1100.52	0	0	0	0	0	0	0	603	903	0
3558	1	0	0	0	0	0	0	200	300	0	-19.077	-10.4391	-508.524	-100692	-11179.2	2743.51	178.016	1101.01	0	0	0	0	0	0	0	603	903	0
3558	2	0	0	0	0	0	0	200	300	0	-19.9925	-8.76068	-509.745	-100234	-11118.1	2697.74	178.189	1099.64	0	0	0	0	0	0	0	603	903	0
3558	3	0	0	0	0	0	0	200	300	0	-16.483	-8.76068	-507.609	-99318.9	-11545.4	2697.74	177.255	1098.66	0	0	0	0	0	0	0	603	903	0
3558	4	0	0	0	0	0	0	200	300	0	-16.3304	-8.30292	-506.693	-99135.8	-11301.2	2789.29	177.696	1098.65	0	0	0	0	0	0	0	603	903	0
3558	5	0	0	0	0	0	0	200	300	0	-19.5348	-7.53998	-506.083	-99410.4	-10935	2560.41	178.393	1099.43	0	0	0	0	0	0	0	603	903	0
3558	6	0	0	0	0	0	0	200	300	0	-19.3822	-7.84515	-506.693	-98769.6	-11545.4	2606.19	177.214	1097.93	0	0	0	0	0	0	0	603	903	0
3558	7	0	0	0	0	0	0	200	300	0	-19.2296	-7.53998	-506.083	-98220.2	-11362.3	2423.08	177.549	1097.08	0	0	0	0	0	0	0	603	903	0
3558	8	0	0	0	0	0	0	200	300	0	-18.3141	-6.62445	-505.167	-98403.4	-10935	2194.2	178.354	1097.79	0	0	0	0	0	0	0	603	903	0
3558	9	0	0	0	0	0	0	200	300	0	-18.0089	-6.47186	-502.421	-98403.4	-11301.2	2377.3	177.506	1098.86	0	0	0	0	0	0	0	603	903	0
3559	0	0	0	0	0	0	0	200	300	0	-19.2296	-6.47186	-502.726	-98403.4	-11606.4	2148.42	176.913	1098.74	0	0	0	0	0	0	0	603	903	0
3559	1	0	0	0	0	0	0	200	300	0	-19.077	-4.94598	-505.473	-97671	-11057.1	2239.97	178.125	1096.23	0	0	0	0	0	0	0	603	903	0
3559	2	0	0	0	0	0	0	200	300	0	-17.8563	-5.09857	-505.167	-97945.6	-11423.3	2423.08	177.387	1096.89	0	0	0	0	0	0	0	603	903	0
3559	3	0	0	0	0	0	0	200	300	0	-17.8563	-5.25116	-503.947	-97671	-10935	2194.2	178.301	1096.81	0	0	0	0	0	0	0	603	903	0
3559	4	0	0	0	0	0	0	200	300	0	-18.6192	-4.03046	-504.252	-97304.8	-11423.3	2056.87	177.346	1095.97	0	0	0	0	0	0	0	603	903	0
3559	5	0	0	0	0	0	0	200	300	0	-19.077	-3.57269	-506.388	-97304.8	-11118.1	1873.76	178.044	1095.15	0	0	0	0	0	0	0	603	903	0
3559	6	0	0	0	0	0	0	200	300	0	-17.3985	-4.18304	-506.388	-97030.1	-11240.2	1827.99	177.803	1094.61	0	0	0	0	0	0	0	603	903	0
3559	7	0	0	0	0	0	0	200	300	0	-17.2459	-4.03046	-506.388	-97304.8	-11423.3	2056.87	177.442	1095.15	0	0	0	0	0	0	0	603	903	0
3559	8	0	0	0	0	0	0	200	300	0	-17.8563	-2.50458	-504.557	-97671	-11057.1	1827.99	178.086	1096.58	0	0	0	0	0	0	0	603	903	0
3559	9	0	0	0	0	0	0	200	300	0	-17.5511	-3.72528	-506.999	-97121.6	-11728.5	1690.66	176.867	1094.56	0	0	0	0	0	0	0	603	903	0
3560	0	0	0	0	0	0	0	200	300	0	-15.8727	-2.1994	-508.524	-96755.4	-11728.5	1965.32	176.936	1093.27	0	0	0	0	0	0	0	603	903	0
3560	1	0	0	0	0	0	0	200	300	0	-15.8727	-1.74164	-509.745	-97030.1	-11667.4	1736.43	177.111	1093.35	0	0	0	0	0	0	0	603	903	0
3560	2	0	0	0	0	0	0	200	300	0	-17.7037	-1.58905	-509.135	-97213.2	-11362.3	1736.43	177.683	1093.94	0	0	0	0	0	0	0	603	903	0
3560	3	0	0	0	0	0	0	200	300	0	-14.0416	-1.74164	-506.999	-97213.2	-11789.5	1873.76	176.746	1094.74	0	0	0	0	0	0	0	603	903	0
3560	4	0	0	0	0	0	0	200	300	0	-15.5675	-2.04681	-510.355	-96389.2	-11789.5	1461.78	176.899	1091.87	0	0	0	0	0	0	0	603	903	0
3560	5	0	0	0	0	0	0	200	300	0	-15.1097	-0.21576	-512.797	-96663.9	-12033.6	1232.89	176.533	1091.5	0	0	0	0	0	0	0	603	903	0
3560	6	0	0	0	0	0	0	200	300	0	-15.1097	-0.673524	-514.018	-97121.6	-11606.4	1278.67	177.42	1091.95	0	0	0	0	0	0	0	603	903	0
3560	7	0	0	0	0	0	0	200	300	0	-16.3304	-0.0631721	-512.492	-97121.6	-11911.6	1004.01	176.758	1092.51	0	0	0	0	0	0	0	603	903	0
3560	8	0	0	0	0	0	0	200	300	0	-16.1778	0.699767	-511.881	-96023	-11789.5	958.235	176.968	1090.59	0	0	0	0	0	0	0	603	903	0
3560	9	0	0	0	0	0	0	200	300	0	-13.889	-0.21576	-514.018	-95656.8	-11728.5	912.459	177.183	1089.1	0	0	0	0	0	0	0	603	903	0
3561	0	0	0	0	0	0	0	200	300	0	-14.0416	0.394592	-516.459	-96114.5	-11545.4	683.577	177.645	1089.1	0	0	0	0	0	0	0	603	903	0
3561	1	0	0	0	0	0	0	200	300	0	-15.4149	0.547179	-517.069	-96389.2	-12033.6	866.683	176.727	1089.41	0	0	0	0	0	0	0	603	903	0
3561	2	0	0	0	0	0	0	200	300	0	-12.6683	1.00494	-517.375	-96847	-11972.6	637.801	176.859	1090.19	0	0	0	0	0	0	0	603	903	0
3561	3	0	0	0	0	0	0	200	300	0	-13.1261	1.31012	-518.595	-96572.3	-11972.6	683.577	176.913	1089.22	0	0	0	0	0	0	0	603	903	0
3561	4	0	0	0	0	0	0	200	300	0	-12.3631	1.61529	-517.375	-96389.2	-11972.6	546.248	176.859	1089.3	0	0	0	0	0	0	0	603	903	0
3561	5	0	0	0	0	0	0	200	300	0	-13.4312	1.46271	-521.342	-96938.5	-12277.8	500.472	176.45	1088.94	0	0	0	0	0	0	0	603	903	0
3561	6	0	0	0	0	0	0	200	300	0	-12.058	1.92047	-522.868	-96847	-12399.9	454.695	176.285	1088.22	0	0	0	0	0	0	0	603	903	0
3561	7	0	0	0	0	0	0	200	300	0	-14.1942	2.37823	-523.173	-96206.1	-12277.8	317.366	176.532	1086.89	0	0	0	0	0	0	0	603	903	0
3561	8	0	0	0	0	0	0	200	300	0	-10.0743	2.836	-523.173	-96389.2	-12155.7	363.142	176.765	1087.24	0	0	0	0	0	0	0	603	903	0
3561	9	0	0	0	0	0	0	200	300	0	-12.058	3.14117	-526.225	-96755.4	-12521.9	454.695	176.204	1086.87	0	0	0	0	0	0	0	603	903	0
3562	0	0	0	0	0	0	0	200	300	0	-11.295	3.29376	-526.225	-97030.1	-12338.8	180.037	176.552	1087.39	0	0	0	0	0	0	0	603	903	0
3562	1	0	0	0	0	0	0	200	300	0	-12.5157	1.92047	-529.887	-96297.7	-12338.8	42.7079	176.714	1084.73	0	0	0	0	0	0	0	603	903	0
3562	2	0	0	0	0	0	0	200	300	0	-11.9054	4.36188	-528.971	-96297.7	-13071.2	88.4843	175.289	1085.05	0	0	0	0	0	0	0	603	903	0
3562	3	0	0	0	0	0	0	200	300	0	-11.1424	4.51446	-530.192	-96663.9	-13010.2	88.4843	175.461	1085.32	0	0	0	0	0	0	0	603	903	0
3562	4	0	0	0	0	0	0	200	300	0	-12.5157	4.81964	-532.328	-95931.5	-12460.9	-3.06848	176.592	1083.21	0	0	0	0	0	0	0	603	903	0
3562	5	0	0	0	0	0	0	200	300	0	-12.9735	5.42999	-533.244	-96023	-13132.3	-94.6212	175.373	1083.07	0	0	0	0	0	0	0	603	903	0
3562	6	0	0	0	0	0	0	200	300	0	-11.295	5.58258	-532.633	-95839.9	-13071.2	-186.174	175.459	1082.94	0	0	0	0	0	0	0	603	903	0
3562	7	0	0	0	0	0	0	200	300	0	-11.4476	6.19293	-533.854	-96297.7	-13071.2	-186.174	175.515	1083.38	0	0	0	0	0	0	0	603	903	0
3562	8	0	0	0	0	0	0	200	300	0	-12.2105	6.49811	-534.77	-96114.5	-13193.3	-323.503	175.329	1082.73	0	0	0	0	0	0	0	603	903	0
3562	9	0	0	0	0	0	0	200	300	0	-11.1424	6.6507	-535.075	-96572.3	-12827.1	-323.503	176.027	1083.48	0	0	0	0	0	0	0	603	903	0
3563	0	0	0	0	0	0	0	200	300	0	-12.058	6.80328	-538.432	-95656.8	-13376.4	-140.398	175.157	1080.66	0	0	0	0	0	0	0	603	903	0
3563	1	0	0	0	0	0	0	200	300	0	-11.7528	6.6507	-536.295	-95931.5	-13681.6	-598.161	174.489	1081.88	0	0	0	0	0	0	0	603	903	0
3563	2	0	0	0	0	0	0	200	300	0	-10.9898	7.56622	-539.347	-96206.1	-13071.2	-415.056	175.765	1081.38	0	0	0	0	0	0	0	603	903	0
3563	3	0	0	0	0	0	0	200	300	0	-12.2105	8.32916	-543.314	-96572.3	-13193.3	-460.832	175.717	1080.75	0	0	0	0	0	0	0	603	903	0
3563	4	0	0	0	0	0	0	200	300	0	-12.2105	7.8714	-542.399	-95748.3	-13559.5	-552.385	175.001	1079.53	0	0	0	0	0	0	0	603	903	0
3563	5	0	0	0	0	0	0	200	300	0	-10.5321	8.17657	-543.009	-94924.3	-13437.5	-643.938	175.254	1077.81	0	0	0	0	0	0	0	603	903	0
3563	6	0	0	0	0	0	0	200	300	0	-10.9898	8.17657	-545.451	-95931.5	-12949.2	-186.174	176.26	1078.88	0	0	0	0	0	0	0	603	903	0
3563	7	0	0	0	0	0	0	200	300	0	-12.2105	8.32916	-543.62	-95748.3	-13986.8	-460.832	174.271	1079.13	0	0	0	0	0	0	0	603	903	0
3563	8	0	0	0	0	0	0	200	300	0	-12.2105	9.24469	-547.282	-95839.9	-13742.6	-598.161	174.889	1078.12	0	0	0	0	0	0	0	603	903	0
3563	9	0	0	0	0	0	0	200	300	0	-10.5321	9.39728	-548.502	-95565.2	-13925.7	-598.161	174.611	1077.23	0	0	0	0	0	0	0	603	903	0
3564	0	0	0	0	0	0	0	200	300	0	-11.295	9.24469	-549.113	-96206.1	-13681.6	-643.938	175.084	1078.2	0	0	0	0	0	0	0	603	903	0
3564	1	0	0	0	0	0	0	200	300	0	-12.8209	10.4654	-550.639	-95931.5	-14169.9	-598.161	174.266	1077.22	0	0	0	0	0	0	0	603	903	0
3564	2	0	0	0	0	0	0	200	300	0	-12.3631	8.78693	-552.165	-95199	-14414	-827.043	173.895	1075.41	0	0	0	0	0	0	0	603	903	0
3564	3	0	0	0	0	0	0	200	300	0	-11.295	10.4654	-553.385	-95290.6	-14047.8	-735.49	174.615	1075.2	0	0	0	0	0	0	0	603	903	0
3564	4	0	0	0	0	0	0	200	300	0	-11.6002	11.3809	-553.69	-95382.1	-14108.8	-1101.7	174.519	1075.27	0	0	0	0	0	0	0	603	903	0
3564	5	0	0	0	0	0	0	200	300	0	-12.6683	10.7706	-555.521	-95199	-14597.1	-781.267	173.724	1074.37	0	0	0	0	0	0	0	603	903	0
3564	6	0	0	0	0	0	0	200	300	0	-13.7364	11.8387	-553.69	-95656.8	-14536.1	-918.596	173.747	1075.76	0	0	0	0	0	0	0	603	903	0
3564	7	0	0	0	0	0	0	200	300	0	-12.6683	11.5335	-557.353	-94741.3	-14353	-1101.7	174.248	1072.98	0	0	0	0	0	0	0	603	903	0
3564	8	0	0	0	0	0	0	200	300	0	-10.8372	12.6016	-560.099	-95015.9	-14414	-781.267	174.265	1072.64	0	0	0	0	0	0	0	603	903	0
3564	9	0	0	0	0	0	0	200	300	0	-14.0416	11.3809	-561.015	-95473.7	-14719.2	-598.161	173.763	1073.18	0	0	0	0	0	0	0	603	903	0
3565	0	0	0	0	0	0	0	200	300	0	-12.8209	12.2964	-559.794	-95382.1	-14597.1	-781.267	173.924	1073.39	0	0	0	0	0	0	0	603	903	0
3565	1	0	0	0	0	0	0	200	300	0	-14.6519	12.2964	-562.541	-94741.3	-14902.3	-689.714	173.509	1071.42	0	0	0	0	0	0	0	603	903	0
3565	2	0	0	0	0	0	0	200	300	0	-13.2787	11.8387	-563.151	-94649.7	-15207.5	-598.161	172.996	1071.07	0	0	0	0	0	0	0	603	903	0
3565	3	0	0	0	0	0	0	200	300	0	-13.5838	12.6016	-565.897	-94008.9	-15268.5	-323.503	173.019	1069.12	0	0	0	0	0	0	0	603	903	0
3565	4	0	0	0	0	0	0	200	300	0	-15.1097	13.212	-566.813	-94832.8	-14963.3	-369.28	173.601	1070.31	0	0	0	0	0	0	0	603	903	0
3565	5	0	0	0	0	0	0	200	300	0	-15.4149	13.0594	-566.813	-95107.5	-15207.5	-552.385	173.17	1070.79	0	0	0	0	0	0	0	603	903	0
3565	6	0	0	0	0	0	0	200	300	0	-12.3631	13.9749	-564.982	-94558.1	-15512.7	-598.161	172.543	1070.36	0	0	0	0	0	0	0	603	903	0
3565	7	0	0	0	0	0	0	200	300	0	-14.0416	14.2801	-569.865	-94466.6	-15817.8	-598.161	172.243	1068.77	0	0	0	0	0	0	0	603	903	0
3565	8	0	0	0	0	0	0	200	300	0	-14.8045	14.7379	-572.611	-94741.3	-15756.8	-415.056	172.483	1068.45	0	0	0	0	0	0	0	603	903	0
3565	9	0	0	0	0	0	0	200	300	0	-16.1778	14.2801	-573.527	-94649.7	-15939.9	-460.832	172.207	1068.03	0	0	0	0	0	0	0	603	903	0
3566	0	0	0	0	0	0	0	200	300	0	-16.1778	15.043	-573.832	-94100.4	-16184	-323.503	171.797	1066.99	0	0	0	0	0	0	0	603	903	0
3566	1	0	0	0	0	0	0	200	300	0	-15.4149	15.3482	-574.748	-94008.9	-16000.9	-369.28	172.16	1066.57	0	0	0	0	0	0	0	603	903	0
3566	2	0	0	0	0	0	0	200	300	0	-16.1778	15.806	-576.884	-94558.1	-16062	-598.161	172.157	1066.91	0	0	0	0	0	0	0	603	903	0
3566	3	0	0	0	0	0	0	200	300	0	-17.0934	16.2637	-578.715	-93642.6	-16306.1	-460.832	171.824	1064.81	0	0	0	0	0	0	0	603	903	0
3566	4	0	0	0	0	0	0	200	300	0	-17.0934	15.806	-580.851	-94466.6	-16855.4	-460.832	170.981	1065.63	0	0	0	0	0	0	0	603	903	0
3566	5	0	0	0	0	0	0	200	300	0	-16.6356	15.043	-582.377	-93642.6	-16306.1	-369.28	172.001	1063.79	0	0	0	0	0	0	0	603	903	0
3566	6	0	0	0	0	0	0	200	300	0	-17.5511	16.8741	-583.292	-93825.7	-16489.2	-643.938	171.731	1063.86	0	0	0	0	0	0	0	603	903	0
3566	7	0	0	0	0	0	0	200	300	0	-16.9408	17.637	-584.208	-94008.9	-16916.5	-323.503	171.044	1063.92	0	0	0	0	0	0	0	603	903	0
3566	8	0	0	0	0	0	0	200	300	0	-16.7882	17.7896	-586.649	-93917.3	-16855.4	-643.938	171.268	1063.09	0	0	0	0	0	0	0	603	903	0
3566	9	0	0	0	0	0	0	200	300	0	-18.4666	17.9422	-587.87	-93276.4	-16977.5	-552.385	171.12	1061.67	0	0	0	0	0	0	0	603	903	0
3567	0	0	0	0	0	0	0	200	300	0	-17.8563	17.7896	-588.48	-93368	-17160.6	-460.832	170.839	1061.66	0	0	0	0	0	0	0	603	903	0
3567	1	0	0	0	0	0	0	200	300	0	-18.9244	18.2474	-589.091	-94100.4	-17038.5	-415.056	171.077	1062.74	0	0	0	0	0	0	0	603	903	0
3567	2	0	0	0	0	0	0	200	300	0	-18.7718	17.4844	-590.922	-93642.6	-17099.6	-415.056	171.063	1061.47	0	0	0	0	0	0	0	603	903	0
3567	3	0	0	0	0	0	0	200	300	0	-20.4503	19.9258	-592.448	-93459.5	-17343.7	-460.832	170.725	1060.75	0	0	0	0	0	0	0	603	903	0
3567	4	0	0	0	0	0	0	200	300	0	-19.3822	19.6207	-594.889	-93184.8	-17587.8	-506.608	170.435	1059.64	0	0	0	0	0	0	0	603	903	0
3567	5	0	0	0	0	0	0	200	300	0	-19.8399	18.7051	-595.5	-93368	-17954.1	-369.28	169.85	1059.79	0	0	0	0	0	0	0	603	903	0
3567	6	0	0	0	0	0	0	200	300	0	-20.9081	18.8577	-599.162	-93368	-17587.8	-186.174	170.646	1058.83	0	0	0	0	0	0	0	603	903	0
3567	7	0	0	0	0	0	0	200	300	0	-21.5184	20.3836	-598.856	-93093.3	-17709.9	-323.503	170.427	1058.45	0	0	0	0	0	0	0	603	903	0
3567	8	0	0	0	0	0	0	200	300	0	-20.2977	20.5362	-599.772	-92635.6	-18076.1	88.4843	169.862	1057.45	0	0	0	0	0	0	0	603	903	0
3567	9	0	0	0	0	0	0	200	300	0	-20.7555	19.6207	-601.603	-93368	-18259.2	-231.95	169.649	1058.2	0	0	0	0	0	0	0	603	903	0
3568	0	0	0	0	0	0	0	200	300	0	-22.1288	21.7569	-605.265	-93276.4	-18442.3	-94.6212	169.53	1057.11	0	0	0	0	0	0	0	603	903	0
3568	1	0	0	0	0	0	0	200	300	0	-21.671	21.4517	-604.96	-92544	-18930.6	42.7079	168.708	1055.98	0	0	0	0	0	0	0	603	903	0
3568	2	0	0	0	0	0	0	200	300	0	-21.9762	21.4517	-605.875	-91628.4	-18869.6	-186.174	168.856	1054.23	0	0	0	0	0	0	0	603	903	0
3568	3	0	0	0	0	0	0	200	300	0	-21.0606	23.1302	-607.707	-92544	-18747.5	-140.398	169.15	1055.28	0	0	0	0	0	0	0	603	903	0
3568	4	0	0	0	0	0	0	200	300	0	-21.671	21.6043	-610.148	-93001.8	-19113.7	-231.95	168.674	1055.42	0	0	0	0	0	0	0	603	903	0
3568	5	0	0	0	0	0	0	200	300	0	-22.1288	23.8931	-612.284	-92635.6	-19174.8	-323.503	168.683	1054.3	0	0	0	0	0	0	0	603	903	0
3568	6	0	0	0	0	0	0	200	300	0	-23.1969	24.0457	-613.505	-91720	-19357.9	-231.95	168.447	1052.5	0	0	0	0	0	0	0	603	903	0
3568	7	0	0	0	0	0	0	200	300	0	-22.1288	23.7405	-613.505	-91811.6	-18869.6	-277.727	169.243	1052.65	0	0	0	0	0	0	0	603	903	0
3568	8	0	0	0	0	0	0	200	300	0	-22.5865	25.419	-611.979	-92360.9	-19113.7	-369.28	168.767	1053.92	0	0	0	0	0	0	0	603	903	0
3568	9	0	0	0	0	0	0	200	300	0	-23.9598	24.3509	-616.557	-92086.2	-19418.9	-277.727	168.504	1052.36	0	0	0	0	0	0	0	603	903	0
3569	0	0	0	0	0	0	0	200	300	0	-24.265	25.419	-619.914	-91536.9	-19541	-48.8449	168.478	1050.66	0	0	0	0	0	0	0	603	903	0
3569	1	0	0	0	0	0	0	200	300	0	-23.502	25.2664	-620.829	-90621.4	-19357.9	-369.28	168.819	1048.97	0	0	0	0	0	0	0	603	903	0
3569	2	0	0	0	0	0	0	200	300	0	-23.502	26.1819	-622.05	-91445.4	-19479.9	-506.608	168.684	1050.01	0	0	0	0	0	0	0	603	903	0
3569	3	0	0	0	0	0	0	200	300	0	-24.5702	25.7242	-622.355	-91079.2	-20151.3	-231.95	167.621	1049.35	0	0	0	0	0	0	0	603	903	0
3569	4	0	0	0	0	0	0	200	300	0	-24.7227	27.0975	-624.186	-91628.4	-19602	-415.056	168.596	1049.8	0	0	0	0	0	0	0	603	903	0
3569	5	0	0	0	0	0	0	200	300	0	-24.5702	27.5552	-627.848	-90896	-19541	-369.28	168.876	1047.77	0	0	0	0	0	0	0	603	903	0
3569	6	0	0	0	0	0	0	200	300	0	-22.7391	27.2501	-628.458	-90713	-20334.4	-369.28	167.644	1047.34	0	0	0	0	0	0	0	603	903	0
3569	7	0	0	0	0	0	0	200	300	0	-25.7909	25.2664	-628.458	-90896	-20151.3	-186.174	167.935	1047.63	0	0	0	0	0	0	0	603	903	0
3569	8	0	0	0	0	0	0	200	300	0	-25.1805	27.7078	-629.984	-90896	-20029.3	-369.28	168.207	1047.28	0	0	0	0	0	0	0	603	903	0
3569	9	0	0	0	0	0	0	200	300	0	-26.096	29.0811	-631.51	-90438.3	-20212.4	-415.056	167.994	1046.21	0	0	0	0	0	0	0	603	903	0
3570	0	0	0	0	0	0	0	200	300	0	-25.6383	29.0811	-634.562	-90072.1	-20395.5	-369.28	167.859	1044.94	0	0	0	0	0	0	0	603	903	0
3570	1	0	0	0	0	0	0	200	300	0	-25.3331	29.0811	-634.867	-90529.8	-20578.6	-323.503	167.586	1045.6	0	0	0	0	0	0	0	603	903	0
3570	2	0	0	0	0	0	0	200	300	0	-26.859	29.3863	-637.614	-90255.2	-20761.7	-140.398	167.438	1044.55	0	0	0	0	0	0	0	603	903	0
3570	3	0	0	0	0	0	0	200	300	0	-26.7064	29.8441	-637.614	-89888.9	-20639.6	-231.95	167.63	1043.98	0	0	0	0	0	0	0	603	903	0
3570	4	0	0	0	0	0	0	200	300	0	-25.4857	30.9122	-639.75	-89614.3	-21127.9	-415.056	166.975	1043.08	0	0	0	0	0	0	0	603	903	0
3570	5	0	0	0	0	0	0	200	300	0	-25.6383	29.8441	-639.75	-89705.9	-21372	-323.503	166.593	1043.22	0	0	0	0	0	0	0	603	903	0
3570	6	0	0	0	0	0	0	200	300	0	-27.0116	31.6751	-642.802	-89614.3	-21066.9	-460.832	167.227	1042.41	0	0	0	0	0	0	0	603	903	0
3570	7	0	0	0	0	0	0	200	300	0	-27.3167	31.5225	-644.328	-89156.5	-21311	-460.832	166.925	1041.37	0	0	0	0	0	0	0	603	903	0
3570	8	0	0	0	0	0	0	200	300	0	-26.4012	31.3699	-645.548	-88241	-21921.3	-415.056	166.042	1039.69	0	0	0	0	0	0	0	603	903	0
3570	9	0	0	0	0	0	0	200	300	0	-26.7064	33.3536	-646.769	-88790.3	-22104.5	-415.056	165.823	1040.28	0	0	0	0	0	0	0	603	903	0
3571	0	0	0	0	0	0	0	200	300	0	-28.3849	32.2855	-648.295	-88424.1	-21677.2	-643.938	166.563	1039.4	0	0	0	0	0	0	0	603	903	0
3571	1	0	0	0	0	0	0	200	300	0	-28.0797	34.1165	-650.736	-88332.5	-22104.5	-643.938	166.032	1038.74	0	0	0	0	0	0	0	603	903	0
3571	2	0	0	0	0	0	0	200	300	0	-27.4693	33.9639	-652.873	-88515.7	-22592.7	-598.161	165.395	1038.58	0	0	0	0	0	0	0	603	903	0
3571	3	0	0	0	0	0	0	200	300	0	-26.096	34.1165	-652.873	-87874.8	-22470.7	-552.385	165.582	1037.6	0	0	0	0	0	0	0	603	903	0
3571	4	0	0	0	0	0	0	200	300	0	-28.5374	35.4898	-655.009	-88149.5	-22226.5	-598.161	166.067	1037.58	0	0	0	0	0	0	0	603	903	0
3571	5	0	0	0	0	0	0	200	300	0	-29.1478	34.1165	-656.229	-88332.5	-22287.6	-735.49	166.037	1037.61	0	0	0	0	0	0	0	603	903	0
3571	6	0	0	0	0	0	0	200	300	0	-29.3004	35.3372	-657.755	-87233.9	-22714.8	-415.056	165.466	1035.62	0	0	0	0	0	0	0	603	903	0
3571	7	0	0	0	0	0	0	200	300	0	-28.3849	35.032	-660.197	-87783.3	-22409.6	-643.938	166.056	1035.97	0	0	0	0	0	0	0	603	903	0
3571	8	0	0	0	0	0	0	200	300	0	-28.3849	35.9476	-661.417	-86593	-22409.6	-735.49	166.119	1033.92	0	0	0	0	0	0	0	603	903	0
3571	9	0	0	0	0	0	0	200	300	0	-30.0633	37.1683	-662.638	-87325.5	-23386.2	-735.49	164.707	1034.78	0	0	0	0	0	0	0	603	903	0
3572	0	0	0	0	0	0	0	200	300	0	-29.1478	37.1683	-666.605	-87233.9	-23386.2	-598.161	164.917	1033.86	0	0	0	0	0	0	0	603	903	0
3572	1	0	0	0	0	0	0	200	300	0	-29.6056	37.1683	-667.826	-86959.3	-23020	-643.938	165.53	1033.21	0	0	0	0	0	0	0	603	903	0
3572	2	0	0	0	0	0	0	200	300	0	-28.9952	36.8631	-669.047	-86501.5	-23264.1	-735.49	165.228	1032.29	0	0	0	0	0	0	0	603	903	0
3572	3	0	0	0	0	0	0	200	300	0	-29.453	37.7786	-669.352	-86776.2	-23752.4	-643.938	164.514	1032.64	0	0	0	0	0	0	0	603	903	0
3572	4	0	0	0	0	0	0	200	300	0	-31.1314	37.9312	-672.099	-85769.1	-23691.4	-552.385	164.75	1030.61	0	0	0	0	0	0	0	603	903	0
3572	5	0	0	0	0	0	0	200	300	0	-31.1314	38.8467	-673.625	-86226.8	-23630.3	-506.608	164.921	1031	0	0	0	0	0	0	0	603	903	0
3572	6	0	0	0	0	0	0	200	300	0	-30.0633	38.5416	-675.761	-85952.2	-23752.4	-598.161	164.851	1030.19	0	0	0	0	0	0	0	603	903	0
3572	7	0	0	0	0	0	0	200	300	0	-28.69	38.8467	-677.592	-85494.4	-24301.7	-552.385	164.135	1029.17	0	0	0	0	0	0	0	603	903	0
3572	8	0	0	0	0	0	0	200	300	0	-31.1314	39.6097	-677.592	-85952.2	-24423.8	-506.608	163.955	1029.85	0	0	0	0	0	0	0	603	903	0
3572	9	0	0	0	0	0	0	200	300	0	-31.7418	40.22	-680.644	-85494.4	-24301.7	-323.503	164.296	1028.61	0	0	0	0	0	0	0	603	903	0
3573	0	0	0	0	0	0	0	200	300	0	-31.4366	40.8304	-681.254	-85311.3	-24484.8	-506.608	164.059	1028.23	0	0	0	0	0	0	0	603	903	0
3573	1	0	0	0	0	0	0	200	300	0	-30.9789	39.6097	-679.728	-84670.4	-25034.1	-323.503	163.17	1027.57	0	0	0	0	0	0	0	603	903	0
3573	2	0	0	0	0	0	0	200	300	0	-30.5211	40.983	-685.526	-85219.8	-25644.5	-277.727	162.592	1027.31	0	0	0	0	0	0	0	603	903	0
3573	3	0	0	0	0	0	0	200	300	0	-32.1996	40.983	-687.357	-84670.4	-24729	-506.608	164.023	1026.18	0	0	0	0	0	0	0	603	903	0
3573	4	0	0	0	0	0	0	200	300	0	-32.3521	42.5089	-688.273	-84945.1	-24973.1	-689.714	163.716	1026.42	0	0	0	0	0	0	0	603	903	0
3573	5	0	0	0	0	0	0	200	300	0	-32.1996	42.3563	-690.714	-83571.8	-25705.5	-460.832	162.784	1023.99	0	0	0	0	0	0	0	603	903	0
3573	6	0	0	0	0	0	0	200	300	0	-30.6737	42.0511	-690.714	-83388.7	-25766.6	-369.28	162.696	1023.73	0	0	0	0	0	0	0	603	903	0
3573	7	0	0	0	0	0	0	200	300	0	-32.6573	40.8304	-693.461	-83297.1	-25217.2	-415.056	163.636	1023.12	0	0	0	0	0	0	0	603	903	0
3573	8	0	0	0	0	0	0	200	300	0	-32.8099	42.0511	-692.851	-83114.1	-25827.6	-506.608	162.723	1022.96	0	0	0	0	0	0	0	603	903	0
3573	9	0	0	0	0	0	0	200	300	0	-33.5728	43.577	-694.071	-82656.3	-26254.8	-506.608	162.173	1022.09	0	0	0	0	0	0	0	603	903	0
3574	0	0	0	0	0	0	0	200	300	0	-32.8099	43.577	-698.039	-82473.2	-25583.5	-506.608	163.35	1021.15	0	0	0	0	0	0	0	603	903	0
3574	1	0	0	0	0	0	0	200	300	0	-32.3521	43.1192	-695.597	-82656.3	-25949.7	-506.608	162.694	1021.83	0	0	0	0	0	0	0	603	903	0
3574	2	0	0	0	0	0	0	200	300	0	-33.7254	43.1192	-701.396	-82839.4	-26437.9	-415.056	162.307	1021.11	0	0	0	0	0	0	0	603	903	0
3574	3	0	0	0	0	0	0	200	300	0	-34.1832	43.8821	-700.48	-82015.4	-26315.9	-323.503	162.432	1020.08	0	0	0	0	0	0	0	603	903	0
3574	4	0	0	0	0	0	0	200	300	0	-33.2677	44.6451	-702.921	-81557.7	-26376.9	-323.503	162.475	1019.03	0	0	0	0	0	0	0	603	903	0
3574	5	0	0	0	0	0	0	200	300	0	-33.4203	45.408	-706.278	-81832.3	-26376.9	-323.503	162.654	1018.86	0	0	0	0	0	0	0	603	903	0
3574	6	0	0	0	0	0	0	200	300	0	-34.9461	44.4925	-706.583	-82015.4	-26804.2	42.7079	162.065	1019.07	0	0	0	0	0	0	0	603	903	0
3574	7	0	0	0	0	0	0	200	300	0	-34.9461	43.7296	-709.025	-80550.6	-26682.1	-140.398	162.368	1016.61	0	0	0	0	0	0	0	603	903	0
3574	8	0	0	0	0	0	0	200	300	0	-34.1832	46.3235	-708.72	-79909.7	-26682.1	-94.6212	162.352	1015.75	0	0	0	0	0	0	0	603	903	0
3574	9	0	0	0	0	0	0	200	300	0	-33.7254	47.5443	-710.856	-80916.8	-27048.3	-3.06848	161.95	1016.83	0	0	0	0	0	0	0	603	903	0
3575	0	0	0	0	0	0	0	200	300	0	-35.4039	47.8494	-713.603	-81283	-27536.6	-186.174	161.412	1016.91	0	0	0	0	0	0	0	603	903	0
3575	1	0	0	0	0	0	0	200	300	0	-34.0306	47.6968	-712.687	-81008.3	-27475.5	-186.174	161.448	1016.67	0	0	0	0	0	0	0	603	903	0
3575	2	0	0	0	0	0	0	200	300	0	-34.1832	46.0184	-715.739	-80092.8	-27475.5	592.024	161.612	1014.9	0	0	0	0	0	0	0	603	903	0
3575	3	0	0	0	0	0	0	200	300	0	-34.0306	48.3072	-715.739	-79909.7	-27780.7	88.4843	161.186	1014.65	0	0	0	0	0	0	0	603	903	0
3575	4	0	0	0	0	0	0	200	300	0	-34.3358	50.2908	-717.875	-79909.7	-28085.9	-3.06848	160.876	1014.31	0	0	0	0	0	0	0	603	903	0
3575	5	0	0	0	0	0	0	200	300	0	-35.5565	49.5279	-720.316	-79635	-27780.7	88.4843	161.433	1013.56	0	0	0	0	0	0	0	603	903	0
3575	6	0	0	0	0	0	0	200	300	0	-35.2513	49.2227	-721.842	-79268.8	-27780.7	42.7079	161.514	1012.81	0	0	0	0	0	0	0	603	903	0
3575	7	0	0	0	0	0	0	200	300	0	-34.641	49.6805	-721.537	-78170.2	-28269	225.813	160.821	1011.34	0	0	0	0	0	0	0	603	903	0
3575	8	0	0	0	0	0	0	200	300	0	-34.641	49.6805	-719.706	-78902.6	-28391.1	271.59	160.552	1012.63	0	0	0	0	0	0	0	603	903	0
3575	9	0	0	0	0	0	0	200	300	0	-35.5565	50.4434	-724.589	-77620.9	-27963.8	42.7079	161.407	1010.12	0	0	0	0	0	0	0	603	903	0
3576	0	0	0	0	0	0	0	200	300	0	-35.4039	51.2064	-726.725	-78902.6	-28024.9	-3.06848	161.437	1011.57	0	0	0	0	0	0	0	603	903	0
3576	1	0	0	0	0	0	0	200	300	0	-34.7935	50.9012	-727.946	-77071.6	-28696.2	-48.8449	160.579	1008.88	0	0	0	0	0	0	0	603	903	0
3576	2	0	0	0	0	0	0	200	300	0	-34.1832	50.7486	-728.556	-77529.4	-28208	-3.06848	161.282	1009.42	0	0	0	0	0	0	0	603	903	0
3576	3	0	0	0	0	0	0	200	300	0	-35.0987	51.9693	-729.472	-77712.4	-28269	-140.398	161.247	1009.53	0	0	0	0	0	0	0	603	903	0
3576	4	0	0	0	0	0	0	200	300	0	-35.2513	53.0374	-731.303	-78078.6	-28757.3	363.142	160.677	1009.77	0	0	0	0	0	0	0	603	903	0
3576	5	0	0	0	0	0	0	200	300	0	-34.3358	52.5797	-730.082	-77254.7	-28940.4	-140.398	160.36	1008.82	0	0	0	0	0	0	0	603	903	0
3576	6	0	0	0	0	0	0	200	300	0	-32.5047	52.8848	-733.744	-76980	-28452.1	-460.832	161.223	1007.91	0	0	0	0	0	0	0	603	903	0
3576	7	0	0	0	0	0	0	200	300	0	-33.5728	53.6478	-733.134	-77437.8	-28452.1	-231.95	161.191	1008.63	0	0	0	0	0	0	0	603	903	0
3576	8	0	0	0	0	0	0	200	300	0	-35.8617	54.5633	-734.66	-76705.4	-29245.6	-506.608	160.192	1007.41	0	0	0	0	0	0	0	603	903	0
3576	9	0	0	0	0	0	0	200	300	0	-34.4884	55.3262	-736.186	-76064.5	-29306.6	-231.95	160.191	1006.32	0	0	0	0	0	0	0	603	903	0
3577	0	0	0	0	0	0	0	200	300	0	-33.878	54.8685	-736.796	-75606.7	-28818.3	-231.95	160.887	1005.62	0	0	0	0	0	0	0	603	903	0
3577	1	0	0	0	0	0	0	200	300	0	-32.6573	55.6314	-737.406	-75789.9	-28940.4	88.4843	160.754	1005.78	0	0	0	0	0	0	0	603	903	0
3577	2	0	0	0	0	0	0	200	300	0	-32.6573	56.6995	-737.711	-75789.9	-29611.8	-94.6212	159.86	1005.74	0	0	0	0	0	0	0	603	903	0
3577	3	0	0	0	0	0	0	200	300	0	-34.7935	57.1573	-740.763	-75789.9	-29489.7	-94.6212	160.19	1005.31	0	0	0	0	0	0	0	603	903	0
3577	4	0	0	0	0	0	0	200	300	0	-34.0306	55.784	-733.439	-75149	-29184.5	-94.6212	160.209	1005.46	0	0	0	0	0	0	0	603	903	0
3577	5	0	0	0	0	0	0	200	300	0	-33.1151	57.3099	-741.679	-73958.8	-29367.6	-186.174	160.404	1002.72	0	0	0	0	0	0	0	603	903	0
3577	6	0	0	0	0	0	0	200	300	0	-32.8099	58.5306	-741.374	-74508.1	-30161.1	-323.503	159.317	1003.5	0	0	0	0	0	0	0	603	903	0
3577	7	0	0	0	0	0	0	200	300	0	-33.7254	60.0565	-742.289	-74965.9	-29794.9	-231.95	159.861	1003.99	0	0	0	0	0	0	0	603	903	0
3577	8	0	0	0	0	0	0	200	300	0	-32.047	60.209	-745.036	-74691.2	-29550.7	-506.608	160.336	1003.25	0	0	0	0	0	0	0	603	903	0
3577	9	0	0	0	0	0	0	200	300	0	-33.7254	60.0565	-745.036	-73592.6	-29794.9	-598.161	160.009	1001.78	0	0	0	0	0	0	0	603	903	0
3578	0	0	0	0	0	0	0	200	300	0	-32.5047	60.5142	-746.562	-73684.1	-29489.7	-460.832	160.499	1001.7	0	0	0	0	0	0	0	603	903	0
3578	1	0	0	0	0	0	0	200	300	0	-32.3521	62.3453	-745.951	-73958.8	-29184.5	-506.608	160.876	1002.15	0	0	0	0	0	0	0	603	903	0
3578	2	0	0	0	0	0	0	200	300	0	-33.4203	63.2608	-745.646	-73409.5	-29550.7	-460.832	160.369	1001.45	0	0	0	0	0	0	0	603	903	0
3578	3	0	0	0	0	0	0	200	300	0	-33.1151	63.566	-744.425	-73043.2	-30039	-827.043	159.648	1001.12	0	0	0	0	0	0	0	603	903	0
3578	4	0	0	0	0	0	0	200	300	0	-31.8944	62.803	-749.918	-72768.6	-29978	-643.938	160.025	1000.04	0	0	0	0	0	0	0	603	903	0
3578	5	0	0	0	0	0	0	200	300	0	-31.8944	64.3289	-748.393	-72768.6	-29917	-598.161	160.025	1000.23	0	0	0	0	0	0	0	603	903	0
3578	6	0	0	0	0	0	0	200	300	0	-32.6573	65.5496	-750.224	-72860.2	-29733.8	-506.608	160.367	1000.12	0	0	0	0	0	0	0	603	903	0
3578	7	0	0	0	0	0	0	200	300	0	-30.5211	65.7022	-749.613	-72585.5	-30344.2	-506.608	159.52	999.831	0	0	0	0	0	0	0	603	903	0
3578	8	0	0	0	0	0	0	200	300	0	-33.1151	65.5496	-751.139	-71944.6	-30466.3	-231.95	159.44	998.781	0	0	0	0	0	0	0	603	903	0
3578	9	0	0	0	0	0	0	200	300	0	-30.9789	67.0755	-749.613	-71578.4	-29855.9	-323.503	160.172	998.487	0	0	0	0	0	0	0	603	903	0
3579	0	0	0	0	0	0	0	200	300	0	-30.9789	68.4488	-749.918	-71944.6	-30161.1	-552.385	159.781	998.937	0	0	0	0	0	0	0	603	903	0
3579	1	0	0	0	0	0	0	200	300	0	-32.1996	69.3643	-752.36	-70754.4	-30710.4	-643.938	159.181	997.043	0	0	0	0	0	0	0	603	903	0
3579	2	0	0	0	0	0	0	200	300	0	-32.3521	69.8221	-751.139	-71853.1	-30344.2	-643.938	159.602	998.659	0	0	0	0	0	0	0	603	903	0
3579	3	0	0	0	0	0	0	200	300	0	-29.3004	69.0591	-753.581	-70754.4	-30100.1	-415.056	160.057	996.891	0	0	0	0	0	0	0	603	903	0
3579	4	0	0	0	0	0	0	200	300	0	-30.6737	70.7376	-749.613	-70754.4	-30161.1	-598.161	159.764	997.388	0	0	0	0	0	0	0	603	903	0
3579	5	0	0	0	0	0	0	200	300	0	-30.6737	73.0264	-751.139	-70754.4	-30222.1	-598.161	159.765	997.196	0	0	0	0	0	0	0	603	903	0
3579	6	0	0	0	0	0	0	200	300	0	-31.7418	73.4842	-751.444	-70846	-30161.1	-872.819	159.863	997.28	0	0	0	0	0	0	0	603	903	0
3579	7	0	0	0	0	0	0	200	300	0	-31.7418	73.7894	-751.75	-69930.5	-29855.9	-781.267	160.285	996.024	0	0	0	0	0	0	0	603	903	0
3579	8	0	0	0	0	0	0	200	300	0	-30.5211	74.8575	-750.834	-68648.7	-30954.5	-689.714	158.773	994.43	0	0	0	0	0	0	0	603	903	0
3579	9	0	0	0	0	0	0	200	300	0	-30.3685	76.2308	-749.918	-69747.3	-30710.4	-827.043	159.048	996.007	0	0	0	0	0	0	0	603	903	0
3580	0	0	0	0	0	0	0	200	300	0	-30.9789	77.4515	-750.834	-69472.7	-30283.2	-781.267	159.667	995.527	0	0	0	0	0	0	0	603	903	0
3580	1	0	0	0	0	0	0	200	300	0	-31.7418	77.4515	-745.646	-69198.1	-30283.2	-689.714	159.387	995.803	0	0	0	0	0	0	0	603	903	0
3580	2	0	0	0	0	0	0	200	300	0	-32.047	77.7567	-750.224	-68282.5	-31076.6	-827.043	158.577	994.016	0	0	0	0	0	0	0	603	903	0
3580	3	0	0	0	0	0	0	200	300	0	-31.4366	78.2144	-746.867	-68007.9	-30649.4	-918.596	158.963	994.058	0	0	0	0	0	0	0	603	903	0
3580	4	0	0	0	0	0	0	200	300	0	-30.8263	79.2825	-746.562	-68007.9	-30222.1	-643.938	159.518	994.095	0	0	0	0	0	0	0	603	903	0
3580	5	0	0	0	0	0	0	200	300	0	-32.047	80.961	-747.172	-67641.7	-30344.2	-964.372	159.388	993.53	0	0	0	0	0	0	0	603	903	0
3580	6	0	0	0	0	0	0	200	300	0	-30.5211	80.961	-745.646	-67550.1	-30649.4	-918.596	158.896	993.593	0	0	0	0	0	0	0	603	903	0
3580	7	-4.61003	-11.274	-17.6578	-5004.55	2312.68	835.373	330.972	583.419	0	-32.047	81.4188	-743.51	-66817.7	-30039	-735.49	159.598	992.868	0	0	0	0	0	0	0	603	903	0
3580	8	-1.71086	-9.59549	-22.8458	-4455.23	1946.46	-400.589	285.2	495.014	0	-30.9789	82.7921	-744.12	-66817.7	-29978	-964.372	159.714	992.794	0	0	0	0	0	0	0	603	903	0
3580	9	0.730544	-2.42386	-19.794	-4455.23	1458.18	-721.024	273.668	525.08	0	-30.3685	83.2498	-741.984	-66909.2	-30466.3	-1147.48	158.939	993.176	0	0	0	0	0	0	0	603	903	0
3581	0	0.120193	0.475312	-17.0474	-5370.76	2251.64	-34.3784	332.081	615.048	0	-31.5892	85.5386	-741.679	-66543	-30405.2	-1055.93	159.005	992.72	0	0	0	0	0	0	0	603	903	0
3581	1	3.47713	2.61154	-19.4888	-5462.31	2617.85	-171.707	334.326	580.279	0	-29.1478	86.9119	-741.068	-66634.6	-29855.9	-1147.48	159.712	992.917	0	0	0	0	0	0	0	603	903	0
3581	2	0.883132	3.83225	-29.2544	-7293.37	2923.03	-80.1548	299.917	549.308	0	-30.3685	87.98	-737.101	-65535.9	-29917	-1284.81	159.413	991.91	0	0	0	0	0	0	0	603	903	0
3581	3	1.18831	7.64694	-33.2217	-8117.34	2800.96	102.951	284.311	544.338	0	-29.3004	89.9637	-737.406	-65261.3	-30466.3	-1101.7	158.685	991.501	0	0	0	0	0	0	0	603	903	0
3581	4	4.85042	12.6823	-34.7476	-7842.68	3045.1	1064.25	287.635	525.704	0	-29.3004	91.6422	-737.406	-65993.7	-30283.2	-1193.25	158.933	992.494	0	0	0	0	0	0	0	603	903	0
3581	5	1.95125	13.5979	-36.2735	-9399.08	3533.38	469.162	297.409	559.117	0	-29.6056	92.4051	-734.66	-64986.6	-29611.8	-1742.57	159.693	991.458	0	0	0	0	0	0	0	603	903	0
3581	6	3.62971	15.4289	-44.8184	-11230.1	4387.87	286.056	297.903	550.57	0	-29.9107	93.7784	-731.913	-64620.4	-29855.9	-1422.14	159.208	991.29	0	0	0	0	0	0	0	603	903	0
3581	7	5.30818	16.9548	-53.6685	-13244.3	5181.33	560.714	296.543	546.78	0	-28.8426	95.4568	-730.082	-64254.2	-30222.1	-1422.14	158.604	991.01	0	0	0	0	0	0	0	603	903	0
3581	8	4.69783	19.2436	-58.5513	-14526	4815.12	606.491	282.238	548.091	0	-28.69	96.8301	-729.472	-64162.6	-30344.2	-1513.69	158.402	990.958	0	0	0	0	0	0	0	603	903	0
3581	9	2.25642	19.854	-60.9927	-15899.3	5303.4	698.044	286.951	560.676	0	-29.6056	96.6776	-725.81	-63888	-29672.8	-1239.03	159.118	991.023	0	0	0	0	0	0	0	603	903	0
3582	0	1.3409	18.1755	-67.7066	-17730.4	6402.03	1110.03	294.556	561.871	0	-28.3849	96.525	-728.556	-63613.3	-30161.1	-1193.25	158.602	990.314	0	0	0	0	0	0	0	603	903	0
3582	1	3.7823	19.7014	-78.0826	-18829	6829.28	1430.47	287.462	541.142	0	-28.8426	99.5767	-721.537	-63155.5	-29794.9	-1742.57	158.706	990.529	0	0	0	0	0	0	0	603	903	0
3582	2	2.86677	20.9221	-85.712	-20751.6	7561.7	1705.12	288.222	542.109	0	-29.453	101.56	-721.537	-62697.8	-29245.6	-1879.9	159.468	989.895	0	0	0	0	0	0	0	603	903	0
3582	3	1.18831	21.9902	-89.9844	-22216.5	8172.05	1796.68	290.816	546.892	0	-28.5374	102.171	-720.011	-62606.2	-29367.6	-1971.45	159.212	989.952	0	0	0	0	0	0	0	603	903	0
3582	4	1.79866	22.6006	-95.1724	-23132	8111.02	1750.9	285.224	543.054	0	-29.3004	101.255	-717.875	-62240	-29672.8	-1971.45	158.666	989.7	0	0	0	0	0	0	0	603	903	0
3582	5	0.120193	24.8894	-102.802	-25329.3	9026.55	2071.33	287.805	546.389	0	-29.3004	103.391	-714.823	-61416.1	-29550.7	-2154.56	158.66	988.918	0	0	0	0	0	0	0	603	903	0
3582	6	0.272781	25.1945	-108.6	-26611	9636.9	2254.44	288.737	545.037	0	-28.0797	104.307	-711.466	-61049.9	-29001.4	-2017.23	159.237	988.809	0	0	0	0	0	0	0	603	903	0
3582	7	1.03572	25.1945	-114.093	-27892.7	10003.1	2208.66	287.675	544.473	0	-28.5374	104.765	-711.161	-61141.4	-29001.4	-2154.56	159.22	988.974	0	0	0	0	0	0	0	603	903	0
3582	8	0.120193	24.8894	-121.723	-29449.1	10430.4	2529.1	285.69	541.936	0	-29.7581	104.612	-704.752	-59493.4	-29123.5	-2017.23	158.676	987.418	0	0	0	0	0	0	0	603	903	0
3582	9	-1.10051	26.7204	-123.554	-30914	10735.5	2574.88	286.89	550.207	0	-28.3849	104.765	-704.142	-59768.1	-29062.5	-2246.11	158.726	987.881	0	0	0	0	0	0	0	603	903	0
3583	0	-1.55827	25.6523	-134.235	-32561.9	11468	3032.64	285.432	542.574	0	-28.0797	106.291	-698.954	-59768.1	-28452.1	-2383.44	159.293	988.511	0	0	0	0	0	0	0	603	903	0
3583	1	-0.490159	23.3635	-139.118	-34576.1	11773.1	3032.64	284.627	548.538	0	-27.9271	107.054	-697.123	-58577.9	-28513.1	-2291.89	159.099	987.028	0	0	0	0	0	0	0	603	903	0
3583	2	-4.45744	24.7368	-144.306	-34850.7	12261.4	3353.07	284.968	541.506	0	-27.7745	108.427	-695.292	-58944.1	-28818.3	-2474.99	158.552	987.776	0	0	0	0	0	0	0	603	903	0
3583	3	-5.22038	22.1428	-151.325	-36407.1	12200.4	3307.3	280.624	540.59	0	-27.6219	108.427	-691.935	-58394.8	-28574.2	-2474.99	158.704	987.394	0	0	0	0	0	0	0	603	903	0
3583	4	-4.61003	20.7695	-154.071	-37780.4	12566.6	3673.51	281.563	545.214	0	-27.0116	109.19	-687.052	-57479.3	-28085.9	-2520.77	159.121	986.661	0	0	0	0	0	0	0	603	903	0
3583	5	-6.59367	19.3962	-162.006	-39153.7	13299	3490.4	282.09	541.681	0	-26.4012	110.716	-683.085	-56838.4	-28085.9	-2429.22	158.884	986.208	0	0	0	0	0	0	0	603	903	0
3583	6	-8.11955	17.8703	-167.194	-40069.3	12871.8	3581.96	276.987	539.657	0	-26.096	111.479	-682.169	-57113.1	-28391.1	-2474.99	158.381	986.723	0	0	0	0	0	0	0	603	903	0
3583	7	-8.11955	13.5979	-170.856	-40984.8	13482.1	3261.52	278.909	539.879	0	-27.1642	111.173	-677.287	-56472.2	-28085.9	-2383.44	158.532	986.38	0	0	0	0	0	0	0	603	903	0
3583	8	-9.79802	12.9875	-172.992	-41900.3	13726.3	3444.63	279.346	542.209	0	-25.7909	112.547	-671.793	-56472.2	-27475.5	-2795.43	159.101	987.062	0	0	0	0	0	0	0	603	903	0
3583	9	-10.561	11.1565	-173.603	-43273.6	14153.5	3169.97	281.528	549.268	0	-25.3331	113.615	-668.131	-55373.6	-27902.8	-2749.65	158.238	985.878	0	0	0	0	0	0	0	603	903	0
3584	0	-9.03508	8.25729	-180.927	-44006	13909.4	3032.64	276.878	543.225	0	-23.9598	112.394	-663.249	-54458.1	-27353.5	-2749.65	158.758	985.108	0	0	0	0	0	0	0	603	903	0
3584	1	-10.561	6.42624	-185.81	-44921.5	14947	3353.07	280.442	541.761	0	-24.4176	114.836	-661.417	-54549.6	-27048.3	-3070.08	159.106	985.474	0	0	0	0	0	0	0	603	903	0
3584	2	-11.7817	4.90036	-189.472	-45562.4	15008	3032.64	279.21	540.471	0	-24.4176	115.598	-655.924	-53817.2	-27109.3	-2932.76	158.67	985.048	0	0	0	0	0	0	0	603	903	0
3584	3	-12.5446	1.23825	-192.829	-46020.2	14763.9	2895.31	276.565	538.659	0	-24.5702	115.751	-650.431	-53176.3	-27231.4	-3298.97	158.133	984.755	0	0	0	0	0	0	0	603	903	0
3584	4	-12.6972	-0.592804	-194.355	-46935.7	14947	2895.31	276.906	541.495	0	-22.5865	116.972	-646.769	-52443.9	-26987.3	-3298.97	158.274	984.086	0	0	0	0	0	0	0	603	903	0
3584	5	-13.9179	-4.4075	-196.796	-47301.9	15862.5	2895.31	280.604	540.36	0	-20.1451	117.43	-641.581	-52169.2	-26315.9	-3298.97	158.983	984.314	0	0	0	0	0	0	0	603	903	0
3584	6	-13.155	-6.08597	-201.068	-48309	15435.2	2437.55	276.766	540.262	0	-22.2813	118.345	-637.614	-51711.5	-26315.9	-3344.74	158.728	984.102	0	0	0	0	0	0	0	603	903	0
3584	7	-13.3075	-7.91702	-206.256	-48492.1	16411.8	2254.44	279.57	535.106	0	-23.1969	118.498	-631.815	-51162.2	-26621.1	-3619.4	157.866	983.977	0	0	0	0	0	0	0	603	903	0
3584	8	-13.9179	-10.2058	-211.139	-50140.1	16411.8	2529.1	277.73	537.474	0	-22.4339	118.803	-627.543	-50063.5	-26071.7	-3573.62	158.454	982.777	0	0	0	0	0	0	0	603	903	0
3584	9	-14.8334	-13.5628	-217.548	-50964	16717	2345.99	276.843	534.266	0	-21.0606	120.329	-621.745	-48781.8	-25644.5	-3482.07	158.754	981.46	0	0	0	0	0	0	0	603	903	0
3585	0	-15.7489	-15.8516	-223.957	-52154.2	17510.4	1934.01	278.187	532.876	0	-20.4503	120.176	-615.336	-48964.9	-25461.4	-3894.06	158.622	982.574	0	0	0	0	0	0	0	603	903	0
3585	1	-14.6808	-17.8352	-229.145	-53161.3	17876.6	2025.56	278.015	531.999	0	-20.6029	120.481	-612.284	-49056.4	-25705.5	-3894.06	158.017	983.12	0	0	0	0	0	0	0	603	903	0
3585	2	-17.2748	-19.2085	-234.333	-54809.2	18120.8	1888.23	277.329	533.895	0	-19.9925	121.244	-606.486	-48415.6	-25400.3	-4122.94	158.119	982.83	0	0	0	0	0	0	0	603	903	0
3585	3	-16.3593	-24.0913	-239.521	-56457.2	18487	1659.35	277.183	535.709	0	-19.5348	122.465	-599.467	-46950.7	-24729	-4031.39	158.748	981.321	0	0	0	0	0	0	0	603	903	0
3585	4	-15.7489	-26.2276	-251.117	-57372.7	19646.7	1522.02	278.237	528.47	0	-18.0089	123.38	-596.415	-46767.6	-24606.9	-4168.72	158.742	981.415	0	0	0	0	0	0	0	603	903	0
3585	5	-16.9697	-28.2112	-258.136	-59020.7	19829.8	1430.47	276.819	528.642	0	-18.7718	122.77	-590.617	-46309.8	-24362.8	-4168.72	158.75	981.409	0	0	0	0	0	0	0	603	903	0
3585	6	-16.8171	-29.5845	-267.902	-60851.7	20623.2	926.926	276.981	527.142	0	-19.077	123.533	-583.903	-45852.1	-24423.8	-4443.38	158.171	981.527	0	0	0	0	0	0	0	603	903	0
3585	7	-18.0378	-31.8733	-275.531	-62499.7	21599.8	881.149	278.393	526.833	0	-18.4666	124.449	-575.053	-44845	-23691.4	-4351.82	158.801	980.984	0	0	0	0	0	0	0	603	903	0
3585	8	-18.4955	-33.3992	-282.856	-63323.6	22210.1	835.373	278.521	523.873	0	-16.6356	122.617	-569.56	-44478.8	-23569.3	-4534.93	158.618	981.093	0	0	0	0	0	0	0	603	903	0
3585	9	-17.8852	-36.451	-292.621	-65246.2	23003.6	606.491	278.612	522.972	0	-16.483	125.669	-567.423	-44112.6	-23508.3	-4534.93	158.57	980.742	0	0	0	0	0	0	0	603	903	0
3586	0	-16.5119	-36.7561	-301.776	-67077.3	23797.1	286.056	278.857	522.275	0	-16.483	125.364	-560.404	-43471.7	-22897.9	-4718.03	159.14	980.572	0	0	0	0	0	0	0	603	903	0
3586	1	-17.2748	-37.9768	-314.899	-68999.9	24529.5	-125.931	277.896	519.118	0	-15.8727	125.364	-552.47	-42190	-22592.7	-4672.26	159.106	979.366	0	0	0	0	0	0	0	603	903	0
3586	2	-15.9015	-40.5708	-322.528	-71014.1	24956.7	148.727	277.378	520.179	0	-14.8045	126.127	-546.977	-41549.1	-22592.7	-4809.59	158.695	978.961	0	0	0	0	0	0	0	603	903	0
3586	3	-17.2748	-42.5545	-335.346	-73028.2	26238.5	-446.366	278.243	517.77	0	-14.1942	127.043	-541.483	-41732.2	-22287.6	-5038.47	158.84	980.07	0	0	0	0	0	0	0	603	903	0
3586	4	-17.8852	-42.8596	-344.806	-75225.5	27459.2	-904.13	279.637	518.167	0	-14.4994	126.28	-533.244	-41182.9	-21860.3	-4946.92	159.005	980.231	0	0	0	0	0	0	0	603	903	0
3586	5	-15.5964	-45.3011	-356.403	-76781.9	28557.8	-1087.24	280.128	515.436	0	-13.889	126.432	-526.225	-39809.6	-21799.3	-5130.02	158.574	978.651	0	0	0	0	0	0	0	603	903	0
3586	6	-14.0705	-47.8951	-366.474	-78979.2	29107.1	-1270.34	279.425	515.511	0	-12.058	127.348	-519.816	-39534.9	-21494.1	-5221.57	158.651	979.056	0	0	0	0	0	0	0	603	903	0
3586	7	-13.9179	-48.5054	-378.376	-80352.4	29961.6	-1316.12	279.185	512.362	0	-9.61655	127.043	-512.492	-38619.4	-20944.8	-5130.02	159.131	978.356	0	0	0	0	0	0	0	603	903	0
3586	8	-13.3075	-50.3365	-388.446	-82183.5	30877.1	-1773.88	279.489	511.57	0	-10.6847	126.585	-502.421	-38070.1	-20700.6	-5267.35	158.798	978.773	0	0	0	0	0	0	0	603	903	0
3586	9	-13.0024	-51.5572	-399.433	-84838.5	32158.9	-2140.09	280.511	512.398	0	-11.295	125.974	-498.454	-37246.1	-20883.7	-5404.68	158.103	977.723	0	0	0	0	0	0	0	603	903	0
3587	0	-12.8498	-54.3037	-408.588	-86395	32952.3	-2140.09	280.649	511.448	0	-12.2105	125.974	-489.603	-36422.1	-20578.6	-5542.01	157.969	977.391	0	0	0	0	0	0	0	603	903	0
3587	1	-11.6291	-55.8296	-417.133	-87768.2	33440.6	-2277.42	280.168	510.408	0	-10.2269	126.737	-481.364	-35598.2	-19785.1	-5542.01	158.898	976.953	0	0	0	0	0	0	0	603	903	0
3587	2	-8.27214	-57.6607	-426.593	-89782.4	34478.2	-2872.51	280.822	510.464	0	-9.31137	126.737	-473.429	-34865.8	-19663	-5633.56	158.467	976.645	0	0	0	0	0	0	0	603	903	0
3587	3	-8.27214	-59.3391	-435.138	-91338.8	35515.8	-3330.28	281.62	509.907	0	-9.31137	126.127	-467.936	-34316.5	-19357.9	-5358.9	158.631	976.336	0	0	0	0	0	0	0	603	903	0
3587	4	-9.18767	-61.3228	-449.176	-92803.6	36675.5	-2918.29	281.651	506.608	0	-9.46396	125.517	-457.56	-33126.2	-19113.7	-5633.56	158.227	975.398	0	0	0	0	0	0	0	603	903	0
3587	5	-5.98332	-62.5435	-462.604	-95916.4	37957.2	-3101.39	282.051	507.34	0	-7.17514	125.211	-449.015	-32485.4	-18564.4	-5587.79	158.655	975.348	0	0	0	0	0	0	0	603	903	0
3587	6	-3.99968	-64.0694	-473.896	-97289.7	39116.9	-4154.25	282.543	505.298	0	-6.71738	123.991	-441.996	-32119.2	-18137.2	-5679.34	158.965	975.669	0	0	0	0	0	0	0	603	903	0
3587	7	0.120193	-67.1211	-484.272	-99395.4	40032.4	-4291.58	282.665	505.247	0	-7.78549	123.533	-433.756	-30929	-18137.2	-5679.34	158.186	974.305	0	0	0	0	0	0	0	603	903	0
3587	8	1.79866	-70.4781	-495.258	-101043	41436.2	-5161.33	283.666	504.022	0	-7.02255	123.38	-423.686	-30105	-17893	-5725.11	157.768	974.055	0	0	0	0	0	0	0	603	903	0
3587	9	5.61336	-71.6988	-505.023	-102508	42046.6	-5619.1	283.257	502.977	0	-5.03891	123.38	-415.751	-29281	-17038.5	-5679.34	159.017	973.429	0	0	0	0	0	0	0	603	903	0
3588	0	6.98665	-73.3772	-514.789	-103973	43145.2	-6259.96	283.811	501.972	0	-4.27597	123.838	-406.901	-28640.2	-16855.4	-5725.11	158.576	973.386	0	0	0	0	0	0	0	603	903	0
3588	1	10.191	-79.1756	-526.996	-105438	43877.6	-7129.72	283.26	500.073	0	-4.27597	123.38	-398.966	-28457.1	-16855.4	-5862.44	157.752	974.327	0	0	0	0	0	0	0	603	903	0
3588	2	12.785	-83.9058	-536.151	-106628	44915.2	-7679.03	283.773	498.877	0	-1.98715	121.092	-388.895	-27633.1	-16000.9	-5770.89	158.855	974.055	0	0	0	0	0	0	0	603	903	0
3588	3	15.0738	-85.4317	-544.391	-106903	46074.9	-8548.78	284.636	496.371	0	-3.51303	119.718	-380.656	-26442.9	-15695.8	-5542.01	158.767	972.467	0	0	0	0	0	0	0	603	903	0
3588	4	17.0574	-88.7886	-551.105	-108459	46441.1	-8548.78	284.269	496.803	0	-1.52939	119.871	-371.195	-25893.6	-15512.7	-5862.44	158.209	972.757	0	0	0	0	0	0	0	603	903	0
3588	5	17.3626	-93.824	-554.157	-109924	46929.4	-9510.09	284.686	498.363	0	-1.52939	118.955	-362.956	-25618.9	-15207.5	-5816.67	158.101	973.584	0	0	0	0	0	0	0	603	903	0
3588	6	17.6678	-96.2654	-565.143	-110840	47967	-10196.7	284.876	496.127	0	-1.68198	117.124	-354.411	-24520.3	-14475.1	-5587.79	159.157	972.186	0	0	0	0	0	0	0	603	903	0
3588	7	20.567	-98.0965	-573.993	-111755	48394.2	-10608.7	284.312	494.698	0	-2.29233	115.446	-345.255	-23238.6	-14414	-5816.67	158.251	970.308	0	0	0	0	0	0	0	603	903	0
3588	8	20.7196	-101.606	-579.792	-112487	49370.8	-10654.5	285.153	494.014	0	-0.766449	112.242	-337.626	-21773.7	-13925.7	-5542.01	158.754	967.491	0	0	0	0	0	0	0	603	903	0
3588	9	19.0411	-104.505	-585.59	-112945	49614.9	-10562.9	284.726	492.874	0	0.454254	111.326	-325.724	-21865.3	-13681.6	-5542.01	157.996	970.128	0	0	0	0	0	0	0	603	903	0
3589	0	19.6514	-105.116	-588.947	-113586	49859.1	-10746	284.658	492.863	0	-2.29233	109.648	-316.569	-21224.4	-12705	-5450.46	159.866	970.045	0	0	0	0	0	0	0	603	903	0
3589	1	20.2618	-104.505	-591.999	-114227	49920.1	-11158	284.325	492.952	0	0.606842	108.579	-307.719	-20492	-13132.3	-5175.8	157.324	969.593	0	0	0	0	0	0	0	603	903	0
3589	2	19.9566	-106.031	-596.271	-113769	50652.5	-11524.2	284.949	490.801	0	-0.613861	104.917	-297.038	-19484.9	-12644	-5038.47	157.433	968.597	0	0	0	0	0	0	0	603	903	0
3589	3	19.1937	-106.641	-599.933	-114319	51201.9	-11203.8	285.346	490.552	0	0.454254	102.781	-290.629	-18477.8	-12094.7	-5267.35	158.384	966.579	0	0	0	0	0	0	0	603	903	0
3589	4	19.9566	-105.878	-604.816	-114776	51507	-11249.6	285.162	489.771	0	0.75943	100.95	-279.032	-18020.1	-11972.6	-4992.69	157.092	967.581	0	0	0	0	0	0	0	603	903	0
3589	5	18.8885	-105.116	-606.952	-115051	51140.8	-11249.6	284.258	489.555	0	-0.308685	99.119	-270.792	-16921.4	-11545.4	-4901.14	157.365	965.489	0	0	0	0	0	0	0	603	903	0
3589	6	18.1256	-105.726	-608.478	-115234	51140.8	-11066.5	284.047	489.381	0	-0.613861	96.2198	-261.942	-16555.2	-11362.3	-4946.92	156.623	966.202	0	0	0	0	0	0	0	603	903	0
3589	7	16.9049	-105.421	-608.478	-115692	51568.1	-11295.4	284.749	490.133	0	-0.461273	93.3206	-253.703	-15456.6	-10812.9	-4718.03	157.379	963.924	0	0	0	0	0	0	0	603	903	0
3589	8	17.21	-103.59	-610.309	-115051	51934.3	-10929.2	285.095	488.513	0	1.21719	90.8792	-243.021	-14998.8	-10507.8	-4306.05	156.762	964.718	0	0	0	0	0	0	0	603	903	0
3589	9	16.9049	-103.284	-613.056	-115234	51995.3	-11158	284.813	487.967	0	0.454254	88.1326	-232.035	-14449.5	-10141.6	-4260.27	156.293	965.273	0	0	0	0	0	0	0	603	903	0
3590	0	17.3626	-104.047	-615.497	-115417	51812.2	-11432.7	284.179	487.519	0	0.454254	84.3179	-227.152	-13808.6	-9775.35	-4031.39	156.966	963.79	0	0	0	0	0	0	0	603	903	0
3590	1	16.7523	-104.353	-612.751	-115051	51934.3	-10288.3	284.756	487.762	0	0.301666	82.1817	-218.913	-13076.2	-9287.06	-3802.51	157.576	962.733	0	0	0	0	0	0	0	603	903	0
3590	2	15.2264	-103.742	-617.023	-115326	51751.2	-11020.7	283.872	486.907	0	0.912018	78.5196	-209.757	-11336.7	-9042.92	-3573.62	156.889	957.047	0	0	0	0	0	0	0	603	903	0
3590	3	15.379	-103.437	-615.192	-115326	52178.4	-10883.4	284.816	487.463	0	0.606842	75.0101	-201.518	-11611.4	-8676.71	-3390.52	156.943	960.62	0	0	0	0	0	0	0	603	903	0
3590	4	15.0738	-104.353	-615.192	-115783	52178.4	-11020.7	284.816	488.207	0	0.454254	72.4161	-194.499	-11428.3	-8493.61	-3344.74	156.331	961.758	0	0	0	0	0	0	0	603	903	0
3590	5	15.8367	-104.505	-617.023	-115326	51934.3	-11020.7	284.169	486.907	0	3.35342	69.3643	-188.7	-10878.9	-8005.33	-3344.74	157.576	960.652	0	0	0	0	0	0	0	603	903	0
3590	6	16.7523	-105.116	-618.549	-115234	51446	-11341.1	283.172	486.297	0	0.454254	66.4651	-180.46	-10055	-7761.19	-2841.2	156.992	958.718	0	0	0	0	0	0	0	603	903	0
3590	7	16.5997	-104.963	-617.633	-114410	52056.3	-11341.1	284.284	485.239	0	0.606842	63.2608	-174.052	-10055	-7700.15	-2703.87	155.759	960.77	0	0	0	0	0	0	0	603	903	0
3590	8	14.9212	-106.031	-617.939	-114502	52056.3	-11295.4	284.242	485.296	0	1.36978	60.209	-164.896	-9230.99	-7456.01	-2841.2	154.784	958.981	0	0	0	0	0	0	0	603	903	0
3590	9	18.1256	-105.421	-614.887	-114410	52178.4	-11524.2	284.859	486.067	0	0.606842	59.1409	-158.793	-8956.33	-6784.62	-2429.22	157.274	959.403	0	0	0	0	0	0	0	603	903	0
3591	0	17.8204	-106.336	-616.413	-114227	52117.4	-11982	284.549	485.309	0	0.301666	54.7159	-151.774	-7857.7	-6540.48	-2291.89	156.906	954.772	0	0	0	0	0	0	0	603	903	0
3591	1	19.6514	-107.404	-616.413	-113952	51995.3	-11798.9	284.351	484.864	0	1.52237	50.596	-144.755	-7583.04	-6235.31	-2383.44	156.925	955.385	0	0	0	0	0	0	0	603	903	0
3591	2	20.8721	-107.862	-618.244	-113495	52300.5	-12027.8	284.595	483.576	0	0.912018	47.2391	-139.872	-6850.62	-6113.24	-2154.56	156.294	951.978	0	0	0	0	0	0	0	603	903	0
3591	3	21.4825	-108.167	-620.075	-113861	52605.7	-12256.7	284.838	483.624	0	-0.00350934	44.1873	-131.327	-6850.62	-5624.95	-1605.24	157.168	955.165	0	0	0	0	0	0	0	603	903	0
3591	4	21.6351	-108.167	-621.601	-112854	52788.8	-12668.7	284.924	481.553	0	0.301666	41.1356	-124.918	-6484.41	-5563.92	-1971.45	155.46	954.909	0	0	0	0	0	0	0	603	903	0
3591	5	23.7713	-109.235	-620.38	-112762	52727.7	-12577.1	284.993	481.763	0	-0.156097	39.6097	-120.951	-5935.09	-5502.88	-1651.02	154.503	952.07	0	0	0	0	0	0	0	603	903	0
3591	6	23.9239	-109.541	-620.38	-112671	52544.6	-12989.1	284.698	481.616	0	1.36978	35.6424	-114.848	-5660.43	-5197.71	-1467.91	154.743	952.286	0	0	0	0	0	0	0	603	903	0
3591	7	25.9075	-109.541	-620.99	-112762	52910.8	-13034.9	285.204	481.584	0	1.06461	31.0648	-106.608	-5111.11	-4953.57	-1193.25	153.535	950.943	0	0	0	0	0	0	0	603	903	0
3591	8	26.8231	-109.541	-621.906	-113037	53460.2	-13218	285.962	481.759	0	-0.00350934	32.2855	-100.199	-4378.69	-4648.39	-1376.36	153.609	946.7	0	0	0	0	0	0	0	603	903	0
3591	9	27.7386	-110.761	-624.347	-112579	53704.3	-13767.3	286.017	480.315	0	-0.156097	29.6915	-95.6216	-4561.8	-4892.53	-1010.15	148.834	950.707	0	0	0	0	0	0	0	603	903	0
3592	0	28.8067	-111.066	-626.789	-113403	53582.2	-13904.6	285.487	480.927	0	0.912018	28.9285	-91.0439	-4012.48	-4099.08	-1284.81	154.977	947.072	0	0	0	0	0	0	0	603	903	0
3592	1	28.8067	-111.066	-629.23	-112945	53521.2	-13996.2	285.058	479.498	0	0.912018	27.4026	-85.8559	-3829.38	-4038.04	-1055.93	152.967	947.602	0	0	0	0	0	0	0	603	903	0
3592	2	29.7222	-112.135	-629.535	-113220	54192.6	-13950.4	286.083	479.847	0	0.912018	26.3345	-78.2265	-4012.48	-3793.9	-1101.7	151.501	954.293	0	0	0	0	0	0	0	603	903	0
3592	3	31.2481	-111.677	-629.535	-113403	54497.8	-14133.5	286.568	480.138	0	2.28531	25.5716	-73.9541	-4012.48	-3549.76	-1055.93	152.001	957.256	0	0	0	0	0	0	0	603	903	0
3592	4	31.2481	-112.287	-632.892	-113678	54619.8	-14637	286.302	479.616	0	0.149079	22.9776	-68.7661	-2639.19	-3122.51	-735.49	154.592	941.379	0	0	0	0	0	0	0	603	903	0
3592	5	32.6214	-112.745	-638.69	-113678	54619.8	-14774.4	285.518	477.986	0	1.06461	19.7733	-62.3574	-3096.95	-3000.44	-552.385	151.883	952.665	0	0	0	0	0	0	0	603	903	0
3592	6	32.6214	-113.508	-639.301	-113952	54131.5	-14591.3	284.673	478.245	0	0.75943	19.3155	-60.5263	-3096.95	-2634.23	-460.832	156.478	954.167	0	0	0	0	0	0	0	603	903	0
3592	7	32.6214	-112.897	-641.437	-114776	54864	-14591.3	285.533	478.936	0	-0.461273	18.8577	-53.5073	-3005.4	-2756.3	-506.608	148.487	959.168	0	0	0	0	0	0	0	603	903	0
3592	8	33.6895	-113.66	-640.827	-114868	55352.2	-15140.6	286.376	479.25	0	-0.613861	17.637	-50.7607	-2456.08	-2206.99	-231.95	156.522	951.386	0	0	0	0	0	0	0	603	903	0
3592	9	32.6214	-113.66	-642.963	-114959	55535.3	-14545.5	286.374	478.796	0	0.606842	15.9586	-48.6245	-1723.66	-2023.88	-231.95	158.377	938.448	0	0	0	0	0	0	0	603	903	0
3593	0	33.5369	-113.813	-644.489	-115142	55169.1	-15186.4	285.601	478.657	0	0.149079	14.1275	-45.5727	-2364.53	-2206.99	-415.056	151.572	954.885	0	0	0	0	0	0	0	603	903	0
3593	1	33.9947	-113.508	-647.846	-115600	55535.3	-15232.1	285.723	478.438	0	-0.613861	12.6016	-38.2485	-2456.08	-2206.99	-140.398	142.299	967.214	0	0	0	0	0	0	0	603	903	0
3593	2	33.9947	-113.813	-651.508	-115417	55779.5	-15232.1	285.616	477.154	0	1.36978	11.6861	-37.333	-2272.98	-1596.64	225.813	157.233	963.884	0	0	0	0	0	0	0	603	903	0
3593	3	33.9947	-113.813	-650.592	-115966	55779.5	-15415.2	285.736	478.248	0	1.36978	10.9232	-35.1968	-1906.77	-1474.56	42.7079	158.105	957.175	0	0	0	0	0	0	0	603	903	0
3593	4	34.6051	-113.813	-657.001	-116150	56206.7	-15552.6	285.55	476.788	0	1.52237	9.54986	-31.8398	-1815.21	-1718.71	-48.8449	146.02	960.011	0	0	0	0	0	0	0	603	903	0
3593	5	34.2999	-113.508	-656.696	-115966	56084.7	-15735.7	285.404	476.591	0	-0.156097	7.71881	-30.0088	-1906.77	-1413.53	134.261	152.896	966.54	0	0	0	0	0	0	0	603	903	0
3593	6	35.2154	-113.508	-657.306	-115600	56084.7	-14957.5	285.325	475.87	0	-0.766449	6.95587	-27.2622	-1723.66	-1291.46	134.261	152.628	966.225	0	0	0	0	0	0	0	603	903	0
3593	7	35.6732	-114.118	-659.748	-116424	56695	-15552.6	285.934	476.468	0	-1.07162	6.95587	-24.8208	-1632.11	-925.248	271.59	162.723	968.756	0	0	0	0	0	0	0	603	903	0
3593	8	36.4361	-113.203	-664.02	-116333	57183.3	-15918.8	286.117	475.195	0	-0.156097	5.88776	-22.9897	-1449	-1413.53	317.366	138.515	966.028	0	0	0	0	0	0	0	603	903	0
3593	9	36.4361	-113.966	-666.156	-116058	57183.3	-15735.7	285.841	474.22	0	-0.00350934	4.81964	-22.0742	-1540.56	-925.248	180.037	158.085	972.79	0	0	0	0	0	0	0	603	903	0
3594	0	36.4361	-113.966	-668.293	-117248	57183.3	-15689.9	285.566	475.444	0	-0.461273	3.14117	-19.6328	-1449	-803.178	546.248	159.09	976.805	0	0	0	0	0	0	0	603	903	0
3594	1	37.1991	-113.813	-668.598	-117248	56817.1	-15552.6	284.979	475.364	0	0	0	0	0	0	0	200	903	0	0	0	0	0	0	0	603	903	0
3594	2	37.5042	-113.508	-672.26	-117706	57610.5	-15918.8	285.697	475.09	0	0	0	0	0	0	0	200	903	0	0	0	0	0	0	0	603	903	0
3594	3	39.3353	-113.66	-676.837	-117798	58037.8	-16147.7	285.748	474.041	0	0	0	0	0	0	0	200	903	0	0	0	0	0	0	0	603	903	0
3594	4	38.7249	-113.508	-676.227	-119079	58281.9	-15964.6	286.187	476.094	0	0	0	0	0	0	0	200	903	0	0	0	0	0	0	0	603	903	0
3594	5	38.8775	-113.05	-679.279	-118896	58098.8	-15369.5	285.53	475.033	0	0	0	0	0	0	0	200	903	0	0	0	0	0	0	0	603	903	0
3594	6	38.4198	-112.897	-681.415	-119903	58159.9	-15735.7	285.352	475.962	0	0	0	0	0	0	0	200	903	0	0	0	0	0	0	0	603	903	0
3594	7	39.1827	-111.982	-681.11	-119720	58526.1	-15323.7	285.927	475.772	0	0	0	0	0	0	0	200	903	0	0	0	0	0	0	0	603	903	0
3594	8	38.8775	-111.219	-684.772	-120361	58709.2	-15827.2	285.735	475.768	0	0	0	0	0	0	0	200	903	0	0	0	0	0	0	0	603	903	0
3594	9	40.0982	-110.761	-686.603	-120819	58953.3	-15140.6	285.862	475.966	0	0	0	0	0	0	0	200	903	0	0	0	0	0	0	0	603	903	0
3595	0	40.2508	-110.456	-689.96	-121002	59075.4	-15827.2	285.621	475.375	0	0	0	0	0	0	0	200	903	0	0	0	0	0	0	0	603	903	0
3595	1	39.4879	-109.846	-688.434	-121093	58770.2	-16010.3	285.368	475.897	0	0	0	0	0	0	0	200	903	0	0	0	0	0	0	0	603	903	0
3595	2	39.3353	-109.846	-693.927	-121734	58953.3	-15689.9	284.956	475.428	0	0	0	0	0	0	0	200	903	0	0	0	0	0	0	0	603	903	0
3595	3	39.793	-108.625	-695.148	-121093	59380.6	-15461	285.421	474.198	0	0	0	0	0	0	0	200	903	0	0	0	0	0	0	0	603	903	0
3595	4	38.5723	-107.862	-696.979	-121734	59502.6	-15369.5	285.372	474.66	0	0	0	0	0	0	0	200	903	0	0	0	0	0	0	0	603	903	0
3595	5	38.8775	-106.947	-699.115	-121917	59563.7	-15506.8	285.199	474.388	0	0	0	0	0	0	0	200	903	0	0	0	0	0	0	0	603	903	0
3595	6	40.7086	-107.404	-701.557	-121277	59685.7	-15552.6	285.076	472.868	0	0	0	0	0	0	0	200	903	0	0	0	0	0	0	0	603	903	0
3595	7	38.1146	-106.336	-704.608	-122741	59685.7	-14865.9	284.708	474.198	0	0	0	0	0	0	0	200	903	0	0	0	0	0	0	0	603	903	0
3595	8	38.2672	-105.421	-707.355	-122924	59807.8	-15094.8	284.551	473.781	0	0	0	0	0	0	0	200	903	0	0	0	0	0	0	0	603	903	0
3595	9	37.3516	-106.184	-708.271	-123108	60540.2	-15049	285.476	473.814	0	0	0	0	0	0	0	200	903	0	0	0	0	0	0	0	603	903	0
3596	0	37.3516	-104.2	-707.66	-123474	60296.1	-15003.3	285.205	474.482	0	0	0	0	0	0	0	200	903	0	0	0	0	0	0	0	603	903	0
3596	1	37.6568	-103.437	-709.186	-124481	60235.1	-15094.8	284.936	475.526	0	0	0	0	0	0	0	200	903	0	0	0	0	0	0	0	603	903	0
3596	2	37.6568	-102.522	-712.543	-124939	60479.2	-14682.8	284.878	475.342	0	0	0	0	0	0	0	200	903	0	0	0	0	0	0	0	603	903	0
3596	3	37.3516	-102.064	-715.9	-124756	60418.2	-13996.2	284.395	474.264	0	0	0	0	0	0	0	200	903	0	0	0	0	0	0	0	603	903	0
3596	4	36.8939	-100.843	-718.647	-124572	60784.4	-14499.7	284.582	473.343	0	0	0	0	0	0	0	200	903	0	0	0	0	0	0	0	603	903	0
3596	5	35.8258	-100.233	-721.088	-125763	61028.5	-14453.9	284.634	474.407	0	0	0	0	0	0	0	200	903	0	0	0	0	0	0	0	603	903	0
3596	6	37.5042	-99.3172	-719.867	-125854	60906.4	-14591.3	284.608	474.83	0	0	0	0	0	0	0	200	903	0	0	0	0	0	0	0	603	903	0
3596	7	35.5206	-99.1646	-722.003	-126220	60845.4	-14087.7	284.273	474.82	0	0	0	0	0	0	0	200	903	0	0	0	0	0	0	0	603	903	0
3596	8	35.5206	-97.6387	-724.14	-127777	61150.6	-13950.4	284.446	476.453	0	0	0	0	0	0	0	200	903	0	0	0	0	0	0	0	603	903	0
3596	9	36.2835	-96.7232	-728.107	-126312	61333.7	-13996.2	284.237	473.48	0	0	0	0	0	0	0	200	903	0	0	0	0	0	0	0	603	903	0
3597	0	35.9783	-96.418	-729.633	-126770	61516.8	-13904.6	284.312	473.745	0	0	0	0	0	0	0	200	903	0	0	0	0	0	0	0	603	903	0
3597	1	34.7576	-95.0447	-733.295	-127227	61455.8	-13584.2	283.808	473.501	0	0	0	0	0	0	0	200	903	0	0	0	0	0	0	0	603	903	0
3597	2	33.8421	-95.0447	-730.548	-127685	61333.7	-12760.2	283.956	474.78	0	0	0	0	0	0	0	200	903	0	0	0	0	0	0	0	603	903	0
3597	3	33.6895	-94.4344	-733.905	-126953	61577.8	-13401.1	283.904	472.983	0	0	0	0	0	0	0	200	903	0	0	0	0	0	0	0	603	903	0
3597	4	34.4525	-93.6714	-736.042	-128051	61944	-13126.4	284.158	473.973	0	0	0	0	0	0	0	200	903	0	0	0	0	0	0	0	603	903	0
3597	5	33.5369	-93.3662	-738.178	-128784	62005.1	-13172.2	283.997	474.462	0	0	0	0	0	0	0	200	903	0	0	0	0	0	0	0	603	903	0
3597	6	33.3844	-92.4507	-743.061	-129058	61883	-12760.2	283.281	473.685	0	0	0	0	0	0	0	200	903	0	0	0	0	0	0	0	603	903	0
3597	7	33.3844	-91.23	-744.281	-129425	61760.9	-12622.9	282.981	473.892	0	0	0	0	0	0	0	200	903	0	0	0	0	0	0	0	603	903	0
3597	8	32.9266	-89.399	-745.502	-130066	62310.2	-12531.3	283.582	474.467	0	0	0	0	0	0	0	200	903	0	0	0	0	0	0	0	603	903	0
3597	9	31.7059	-88.9412	-745.807	-130615	62310.2	-12394	283.547	475.132	0	0	0	0	0	0	0	200	903	0	0	0	0	0	0	0	603	903	0
3598	0	32.9266	-88.1783	-747.638	-130798	62493.4	-12073.6	283.588	474.948	0	0	0	0	0	0	0	200	903	0	0	0	0	0	0	0	603	903	0
3598	1	31.8585	-86.9576	-748.554	-131164	62798.5	-12119.3	283.893	475.224	0	0	0	0	0	0	0	200	903	0	0	0	0	0	0	0	603	903	0
3598	2	32.0111	-85.4317	-752.216	-130615	62310.2	-12073.6	282.836	473.64	0	0	0	0	0	0	0	200	903	0	0	0	0	0	0	0	603	903	0
3598	3	31.2481	-84.5161	-752.216	-131622	62676.5	-11890.5	283.322	474.979	0	0	0	0	0	0	0	200	903	0	0	0	0	0	0	0	603	903	0
3598	4	30.9429	-83.1429	-756.794	-132263	63042.7	-11890.5	283.302	474.767	0	0	0	0	0	0	0	200	903	0	0	0	0	0	0	0	603	903	0
3598	5	31.7059	-83.2954	-755.573	-132263	63225.8	-11432.7	283.679	475.05	0	0	0	0	0	0	0	200	903	0	0	0	0	0	0	0	603	903	0
3598	6	29.5697	-81.4644	-756.488	-132080	63042.7	-11478.5	283.336	474.596	0	0	0	0	0	0	0	200	903	0	0	0	0	0	0	0	603	903	0
3598	7	30.9429	-81.0066	-758.319	-132354	63103.7	-11432.7	283.215	474.537	0	0	0	0	0	0	0	200	903	0	0	0	0	0	0	0	603	903	0
3598	8	32.1637	-79.6333	-760.15	-132446	63042.7	-11249.6	282.934	474.237	0	0	0	0	0	0	0	200	903	0	0	0	0	0	0	0	603	903	0
3598	9	30.9429	-79.1756	-761.066	-132446	63469.9	-10791.8	283.396	474.027	0	0	0	0	0	0	0	200	903	0	0	0	0	0	0	0	603	903	0
3599	0	29.7222	-78.26	-762.287	-133270	63042.7	-10837.6	282.702	474.829	0	0	0	0	0	0	0	200	903	0	0	0	0	0	0	0	603	903	0
3599	1	29.7222	-77.3445	-765.033	-132080	63531	-10837.6	283.043	472.646	0	0	0	0	0	0	0	200	903	0	0	0	0	0	0	0	603	903	0
3599	2	30.0274	-76.8867	-761.982	-132812	63408.9	-10379.8	283.216	474.298	0	0	0	0	0	0	0	200	903	0	0	0	0	0	0	0	603	903	0
3599	3	30.7904	-75.9712	-763.202	-132995	63286.8	-10562.9	282.923	474.26	0	0	0	0	0	0	0	200	903	0	0	0	0	0	0	0	603	903	0
3599	4	30.4852	-74.9031	-762.897	-132629	63469.9	-10379.8	283.196	473.849	0	0	0	0	0	0	0	200	903	0	0	0	0	0	0	0	603	903	0
3599	5	30.18	-73.6824	-764.728	-133819	63653	-10151	283.236	474.989	0	0	0	0	0	0	0	200	903	0	0	0	0	0	0	0	603	903	0
3599	6	28.9593	-73.3772	-763.813	-133270	63531	-10013.6	283.176	474.48	0	0	0	0	0	0	0	200	903	0	0	0	0	0	0	0	603	903	0
3599	7	28.5015	-72.7669	-764.118	-133453	63408.9	-10288.3	282.983	474.65	0	0	0	0	0	0	0	200	903	0	0	0	0	0	0	0	603	903	0
3599	8	28.5015	-70.4781	-761.371	-133087	63469.9	-9830.52	283.363	474.799	0	0	0	0	0	0	0	200	903	0	0	0	0	0	0	0	603	903	0
3599	9	30.0274	-70.7832	-759.845	-132446	63164.7	-9784.74	283.128	474.307	0	0	0	0	0	0	0	200	903	0	0	0	0	0	0	0	603	903	0
3600	0	30.0274	-69.2574	-759.54	-132721	63408.9	-10013.6	283.483	474.738	0	0	0	0	0	0	0	200	903	0	0	0	0	0	0	0	603	903	0
3600	1	29.1119	-68.647	-759.54	-132354	62981.6	-9830.52	282.921	474.256	0	0	0	0	0	0	0	200	903	0	0	0	0	0	0	0	603	903	0
3600	2	29.8748	-68.3418	-755.573	-132446	63469.9	-9510.09	284.002	475.292	0	0	0	0	0	0	0	200	903	0	0	0	0	0	0	0	603	903	0
3600	3	28.9593	-66.5108	-757.404	-130523	62676.5	-9555.86	282.752	472.33	0	0	0	0	0	0	0	200	903	0	0	0	0	0	0	0	603	903	0
3600	4	28.8067	-64.9849	-754.047	-130707	62554.4	-9418.53	282.958	473.34	0	0	0	0	0	0	0	200	903	0	0	0	0	0	0	0	603	903	0
3600	5	28.9593	-64.222	-753.131	-130615	62798.5	-9510.09	283.383	473.429	0	0	0	0	0	0	0	200	903	0	0	0	0	0	0	0	603	903	0
3600	6	29.2645	-64.5271	-749.774	-130340	62493.4	-9418.53	283.35	473.839	0	0	0	0	0	0	0	200	903	0	0	0	0	0	0	0	603	903	0
3600	7	30.18	-63.1538	-749.469	-128692	62371.3	-9143.88	283.221	471.711	0	0	0	0	0	0	0	200	903	0	0	0	0	0	0	0	603	903	0
3600	8	28.9593	-62.5435	-746.418	-129974	62127.1	-9098.1	283.234	474.131	0	0	0	0	0	0	0	200	903	0	0	0	0	0	0	0	603	903	0
3600	9	28.349	-61.628	-745.807	-128509	62188.2	-9052.32	283.384	472.309	0	0	0	0	0	0	0	200	903	0	0	0	0	0	0	0	603	903	0
3601	0	27.7386	-60.4073	-742.45	-128326	61883	-8960.77	283.35	472.841	0	0	0	0	0	0	0	200	903	0	0	0	0	0	0	0	603	903	0
3601	1	28.349	-60.4073	-738.483	-127868	61822	-8777.66	283.715	473.15	0	0	0	0	0	0	0	200	903	0	0	0	0	0	0	0	603	903	0
3601	2	27.8912	-59.3391	-732.685	-128143	61455.8	-8594.56	283.878	474.895	0	0	0	0	0	0	0	200	903	0	0	0	0	0	0	0	603	903	0
3601	3	28.5015	-58.1184	-733.6	-127777	61150.6	-8548.78	283.357	474.178	0	0	0	0	0	0	0	200	903	0	0	0	0	0	0	0	603	903	0
3601	4	28.6541	-57.3555	-732.074	-127136	61089.5	-8594.56	283.447	473.665	0	0	0	0	0	0	0	200	903	0	0	0	0	0	0	0	603	903	0
3601	5	28.8067	-55.677	-727.191	-125946	60845.4	-8457.23	283.672	473.195	0	0	0	0	0	0	0	200	903	0	0	0	0	0	0	0	603	903	0
3601	6	27.7386	-55.0667	-725.36	-125671	60906.4	-8091.02	283.967	473.253	0	0	0	0	0	0	0	200	903	0	0	0	0	0	0	0	603	903	0
3601	7	28.0438	-54.4563	-721.088	-125580	60357.1	-7724.81	283.703	474.153	0	0	0	0	0	0	0	200	903	0	0	0	0	0	0	0	603	903	0
3601	8	28.0438	-54.6089	-718.036	-124847	60113	-8182.57	283.719	473.873	0	0	0	0	0	0	0	200	903	0	0	0	0	0	0	0	603	903	0
3601	9	28.1964	-52.7779	-714.069	-124115	59807.8	-8319.9	283.756	473.813	0	0	0	0	0	0	0	200	903	0	0	0	0	0	0	0	603	903	0
3602	0	28.1964	-52.1675	-711.322	-123016	59746.8	-7816.36	283.994	472.94	0	0	0	0	0	0	0	200	903	0	0	0	0	0	0	0	603	903	0
3602	1	28.6541	-51.0994	-709.796	-122284	59624.7	-7587.48	284.003	472.28	0	0	0	0	0	0	0	200	903	0	0	0	0	0	0	0	603	903	0
3602	2	27.586	-51.4046	-707.355	-121734	59136.4	-7724.81	283.602	472.098	0	0	0	0	0	0	0	200	903	0	0	0	0	0	0	0	603	903	0
3602	3	27.586	-50.9468	-704.303	-121185	58892.3	-7816.36	283.618	472.064	0	0	0	0	0	0	0	200	903	0	0	0	0	0	0	0	603	903	0
3602	4	26.8231	-50.0313	-698.2	-120453	58465	-7267.04	283.737	472.519	0	0	0	0	0	0	0	200	903	0	0	0	0	0	0	0	603	903	0
3602	5	26.5179	-49.4209	-694.538	-119903	58404	-7450.15	284.09	472.638	0	0	0	0	0	0	0	200	903	0	0	0	0	0	0	0	603	903	0
3602	6	28.5015	-50.0313	-692.096	-119079	58037.8	-7541.7	283.858	472.056	0	0	0	0	0	0	0	200	903	0	0	0	0	0	0	0	603	903	0
3602	7	27.8912	-47.5899	-689.655	-118805	57976.8	-7312.82	284.066	472.267	0	0	0	0	0	0	0	200	903	0	0	0	0	0	0	0	603	903	0
3602	8	27.586	-46.9795	-687.519	-118347	57610.5	-7587.48	283.795	472.136	0	0	0	0	0	0	0	200	903	0	0	0	0	0	0	0	603	903	0
3602	9	27.586	-46.5218	-683.551	-117523	57244.3	-7404.38	283.745	471.93	0	0	0	0	0	0	0	200	903	0	0	0	0	0	0	0	603	903	0
3603	0	28.5015	-45.9114	-677.448	-116882	56939.2	-7312.82	284.049	472.533	0	0	0	0	0	0	0	200	903	0	0	0	0	0	0	0	603	903	0
3603	1	27.7386	-44.5381	-674.091	-115234	56939.2	-7312.82	284.468	470.947	0	0	0	0	0	0	0	200	903	0	0	0	0	0	0	0	603	903	0
3603	2	27.586	-44.0804	-670.429	-115234	56939.2	-7358.6	284.929	471.881	0	0	0	0	0	0	0	200	903	0	0	0	0	0	0	0	603	903	0
3603	3	30.0274	-44.0804	-669.513	-114959	56267.8	-7358.6	284.043	471.706	0	0	0	0	0	0	0	200	903	0	0	0	0	0	0	0	603	903	0
3603	4	28.8067	-44.2329	-665.546	-113769	55962.6	-6855.06	284.085	470.941	0	0	0	0	0	0	0	200	903	0	0	0	0	0	0	0	603	903	0
3603	5	27.2808	-42.4019	-662.494	-113220	55779.5	-7129.72	284.196	470.899	0	0	0	0	0	0	0	200	903	0	0	0	0	0	0	0	603	903	0
3603	6	29.1119	-42.2493	-657.611	-112213	55901.6	-7267.04	285.007	470.637	0	0	0	0	0	0	0	200	903	0	0	0	0	0	0	0	603	903	0
3603	7	28.1964	-41.0286	-653.034	-111480	55291.2	-6855.06	284.668	470.711	0	0	0	0	0	0	0	200	903	0	0	0	0	0	0	0	603	903	0
3603	8	28.8067	-41.4864	-650.287	-110840	55596.4	-7221.27	285.495	470.447	0	0	0	0	0	0	0	200	903	0	0	0	0	0	0	0	603	903	0
3603	9	29.8748	-41.3338	-649.677	-110382	54864	-6946.61	284.448	469.903	0	0	0	0	0	0	0	200	903	0	0	0	0	0	0	0	603	903	0
3604	0	29.4171	-39.9605	-645.099	-108368	54680.9	-7038.16	284.764	467.986	0	0	0	0	0	0	0	200	903	0	0	0	0	0	0	0	603	903	0
3604	1	28.5015	-40.7234	-642.047	-109008	54680.9	-7129.72	285.166	469.783	0	0	0	0	0	0	0	200	903	0	0	0	0	0	0	0	603	903	0
3604	2	29.5697	-39.6553	-638.69	-108093	54497.8	-6580.4	285.327	469.242	0	0	0	0	0	0	0	200	903	0	0	0	0	0	0	0	603	903	0
3604	3	28.8067	-39.3501	-634.113	-107818	54314.6	-7083.94	285.655	470.03	0	0	0	0	0	0	0	200	903	0	0	0	0	0	0	0	603	903	0
3604	4	29.4171	-38.282	-630.451	-106628	53826.4	-6763.5	285.378	469.13	0	0	0	0	0	0	0	200	903	0	0	0	0	0	0	0	603	903	0
3604	5	30.18	-38.5872	-628.009	-106903	53582.2	-6671.95	285.321	470.225	0	0	0	0	0	0	0	200	903	0	0	0	0	0	0	0	603	903	0
3604	6	29.5697	-37.9768	-625.568	-106170	53032.9	-6855.06	284.776	469.718	0	0	0	0	0	0	0	200	903	0	0	0	0	0	0	0	603	903	0
3604	7	28.8067	-36.7561	-624.042	-105713	53338.1	-6534.62	285.472	469.4	0	0	0	0	0	0	0	200	903	0	0	0	0	0	0	0	603	903	0
3604	8	28.8067	-36.6035	-620.38	-105163	52727.7	-6443.07	284.993	469.514	0	0	0	0	0	0	0	200	903	0	0	0	0	0	0	0	603	903	0
3604	9	28.9593	-35.688	-616.413	-104065	52605.7	-6488.85	285.342	468.823	0	0	0	0	0	0	0	200	903	0	0	0	0	0	0	0	603	903	0
3605	0	29.5697	-35.2303	-612.14	-103149	52300.5	-6443.07	285.439	468.506	0	0	0	0	0	0	0	200	903	0	0	0	0	0	0	0	603	903	0
3605	1	29.7222	-34.3147	-610.614	-102966	52056.3	-6534.62	285.252	468.627	0	0	0	0	0	0	0	200	903	0	0	0	0	0	0	0	603	903	0
3605	2	29.4171	-33.5518	-608.783	-102325	52422.6	-6580.4	286.11	468.081	0	0	0	0	0	0	0	200	903	0	0	0	0	0	0	0	603	903	0
3605	3	29.8748	-33.2466	-606.037	-101776	51934.3	-6763.5	285.695	467.937	0	0	0	0	0	0	0	200	903	0	0	0	0	0	0	0	603	903	0
3605	4	28.8067	-33.3992	-604.816	-101135	52239.4	-6397.29	286.372	467.216	0	0	0	0	0	0	0	200	903	0	0	0	0	0	0	0	603	903	0
3605	5	29.1119	-32.0259	-599.323	-99487	51385	-6443.07	285.738	465.999	0	0	0	0	0	0	0	200	903	0	0	0	0	0	0	0	603	903	0
3605	6	29.8748	-31.7207	-595.05	-98846.1	51140.8	-6443.07	285.944	466.114	0	0	0	0	0	0	0	200	903	0	0	0	0	0	0	0	603	903	0
3605	7	29.7222	-30.9578	-593.219	-99029.2	51385	-6351.52	286.621	466.935	0	0	0	0	0	0	0	200	903	0	0	0	0	0	0	0	603	903	0
3605	8	29.8748	-31.263	-593.524	-98113.7	51385	-6214.19	286.576	465.307	0	0	0	0	0	0	0	200	903	0	0	0	0	0	0	0	603	903	0
3605	9	29.5697	-30.8052	-588.947	-97015.1	50774.6	-5802.2	286.213	464.726	0	0	0	0	0	0	0	200	903	0	0	0	0	0	0	0	603	903	0
3606	0	29.7222	-30.0423	-588.336	-97472.8	50713.6	-6214.19	286.198	465.675	0	0	0	0	0	0	0	200	903	0	0	0	0	0	0	0	603	903	0
3606	1	29.5697	-29.4319	-584.064	-96740.4	50347.4	-5985.31	286.202	465.633	0	0	0	0	0	0	0	200	903	0	0	0	0	0	0	0	603	903	0
3606	2	30.4852	-28.669	-583.148	-96465.7	50530.5	-6076.86	286.651	465.422	0	0	0	0	0	0	0	200	903	0	0	0	0	0	0	0	603	903	0
3606	3	30.3326	-29.1267	-580.402	-96557.3	50408.4	-6076.86	286.851	466.363	0	0	0	0	0	0	0	200	903	0	0	0	0	0	0	0	603	903	0
3606	4	30.9429	-28.2112	-579.792	-96191.1	50286.3	-5893.75	286.732	465.906	0	0	0	0	0	0	0	200	903	0	0	0	0	0	0	0	603	903	0
3606	5	29.4171	-27.6009	-575.824	-95641.8	49798	-6031.08	286.481	466.095	0	0	0	0	0	0	0	200	903	0	0	0	0	0	0	0	603	903	0
3606	6	29.4171	-26.6853	-575.519	-95367.1	49981.1	-5664.87	286.845	465.706	0	0	0	0	0	0	0	200	903	0	0	0	0	0	0	0	603	903	0
3606	7	30.18	-26.8379	-571.552	-94817.8	49920.1	-5893.75	287.341	465.895	0	0	0	0	0	0	0	200	903	0	0	0	0	0	0	0	603	903	0
3606	8	31.2481	-25.6172	-570.331	-94268.5	49248.7	-5619.1	286.351	465.287	0	0	0	0	0	0	0	200	903	0	0	0	0	0	0	0	603	903	0
3606	9	30.7904	-25.4646	-568.5	-93627.6	49492.9	-5573.32	287.059	464.692	0	0	0	0	0	0	0	200	903	0	0	0	0	0	0	0	603	903	0
3607	0	30.3326	-25.1595	-568.5	-92712.1	49187.7	-5527.54	286.522	463.082	0	0	0	0	0	0	0	200	903	0	0	0	0	0	0	0	603	903	0
3607	1	29.8748	-24.3965	-567.279	-92071.2	49004.6	-5664.87	286.385	462.303	0	0	0	0	0	0	0	200	903	0	0	0	0	0	0	0	603	903	0
3607	2	29.8748	-23.3284	-566.059	-91888.1	49187.7	-5573.32	286.895	462.33	0	0	0	0	0	0	0	200	903	0	0	0	0	0	0	0	603	903	0
3607	3	30.3326	-23.481	-561.481	-91155.7	48577.3	-5481.77	286.516	462.349	0	0	0	0	0	0	0	200	903	0	0	0	0	0	0	0	603	903	0
3607	4	29.7222	-23.0232	-558.734	-90972.6	49004.6	-5344.44	287.706	462.819	0	0	0	0	0	0	0	200	903	0	0	0	0	0	0	0	603	903	0
3607	5	30.3326	-23.0232	-558.429	-90331.7	48638.4	-5344.44	287.099	461.76	0	0	0	0	0	0	0	200	903	0	0	0	0	0	0	0	603	903	0
3607	6	30.6378	-22.4129	-559.345	-90331.7	48699.4	-5161.33	287.065	461.496	0	0	0	0	0	0	0	200	903	0	0	0	0	0	0	0	603	903	0
3607	7	30.18	-21.6499	-556.293	-90423.3	48638.4	-5435.99	287.433	462.546	0	0	0	0	0	0	0	200	903	0	0	0	0	0	0	0	603	903	0
3607	8	30.18	-21.4973	-557.514	-90240.1	48455.3	-5298.66	286.913	461.862	0	0	0	0	0	0	0	200	903	0	0	0	0	0	0	0	603	903	0
3607	9	29.8748	-20.1241	-552.936	-89782.4	48455.3	-5344.44	287.633	462.374	0	0	0	0	0	0	0	200	903	0	0	0	0	0	0	0	603	903	0
3608	0	29.5697	-19.5137	-551.41	-89233.1	48211.1	-5161.33	287.432	461.827	0	0	0	0	0	0	0	200	903	0	0	0	0	0	0	0	603	903	0
3608	1	30.6378	-19.5137	-551.41	-89233.1	48272.2	-4978.23	287.543	461.827	0	0	0	0	0	0	0	200	903	0	0	0	0	0	0	0	603	903	0
3608	2	31.2481	-20.2766	-551.715	-88775.3	48638.4	-5344.44	288.158	460.908	0	0	0	0	0	0	0	200	903	0	0	0	0	0	0	0	603	903	0
3608	3	30.18	-18.4456	-550.19	-88683.8	48577.3	-5024	288.292	461.188	0	0	0	0	0	0	0	200	903	0	0	0	0	0	0	0	603	903	0
3608	4	29.8748	-18.1404	-549.884	-87402	48150.1	-5161.33	287.564	458.946	0	0	0	0	0	0	0	200	903	0	0	0	0	0	0	0	603	903	0
3608	5	29.7222	-17.3775	-548.358	-87127.4	48272.2	-4932.45	288.03	458.888	0	0	0	0	0	0	0	200	903	0	0	0	0	0	0	0	603	903	0
3608	6	29.5697	-17.9878	-545.917	-86578	47783.9	-5069.78	287.53	458.592	0	0	0	0	0	0	0	200	903	0	0	0	0	0	0	0	603	903	0
3608	7	29.7222	-17.5301	-545.612	-85845.6	48272.2	-4703.57	288.473	457.338	0	0	0	0	0	0	0	200	903	0	0	0	0	0	0	0	603	903	0
3608	8	30.0274	-17.0723	-544.086	-86120.3	48394.2	-4749.34	288.946	458.284	0	0	0	0	0	0	0	200	903	0	0	0	0	0	0	0	603	903	0
3608	9	30.6378	-16.7671	-545.917	-86028.8	48150.1	-4703.57	288.2	457.586	0	0	0	0	0	0	0	200	903	0	0	0	0	0	0	0	603	903	0
3609	0	30.6378	-16.3094	-541.034	-86120.3	47906	-4703.57	288.545	459.177	0	0	0	0	0	0	0	200	903	0	0	0	0	0	0	0	603	903	0
3609	1	30.3326	-15.5464	-543.17	-85021.6	47722.8	-4703.57	287.86	456.529	0	0	0	0	0	0	0	200	903	0	0	0	0	0	0	0	603	903	0
3609	2	30.7904	-15.0887	-541.034	-85571	47722.8	-4428.91	288.207	458.162	0	0	0	0	0	0	0	200	903	0	0	0	0	0	0	0	603	903	0
3609	3	29.2645	-14.3257	-541.034	-85662.5	48028	-4428.91	288.771	458.331	0	0	0	0	0	0	0	200	903	0	0	0	0	0	0	0	603	903	0
3609	4	30.4852	-15.0887	-540.729	-85296.3	47844.9	-4337.36	288.482	457.743	0	0	0	0	0	0	0	200	903	0	0	0	0	0	0	0	603	903	0
3609	5	30.18	-13.2576	-539.203	-84472.3	47539.7	-4016.92	288.167	456.661	0	0	0	0	0	0	0	200	903	0	0	0	0	0	0	0	603	903	0
3609	6	30.18	-12.7998	-540.729	-84838.5	46990.4	-3925.37	286.902	456.897	0	0	0	0	0	0	0	200	903	0	0	0	0	0	0	0	603	903	0
3609	7	30.0274	-12.6472	-540.119	-84747	47600.8	-4154.25	288.13	456.904	0	0	0	0	0	0	0	200	903	0	0	0	0	0	0	0	603	903	0
3609	8	29.7222	-13.4102	-541.034	-84014.6	47783.9	-4016.92	288.32	455.285	0	0	0	0	0	0	0	200	903	0	0	0	0	0	0	0	603	903	0
3609	9	28.9593	-11.7317	-538.898	-82824.4	47661.8	-4154.25	288.443	453.692	0	0	0	0	0	0	0	200	903	0	0	0	0	0	0	0	603	903	0
3610	0	30.0274	-11.8843	-537.372	-82915.9	47173.5	-3971.15	287.786	454.299	0	0	0	0	0	0	0	200	903	0	0	0	0	0	0	0	603	903	0
3610	1	29.2645	-10.9688	-537.982	-82915.9	47783.9	-3833.82	288.821	454.124	0	0	0	0	0	0	0	200	903	0	0	0	0	0	0	0	603	903	0
3610	2	29.8748	-11.1214	-540.119	-82458.2	47600.8	-3833.82	288.13	452.667	0	0	0	0	0	0	0	200	903	0	0	0	0	0	0	0	603	903	0
3610	3	29.5697	-10.511	-540.119	-82549.7	47906	-3879.59	288.695	452.836	0	0	0	0	0	0	0	200	903	0	0	0	0	0	0	0	603	903	0
3610	4	28.9593	-9.90067	-538.898	-82549.7	47906	-3559.16	288.896	453.182	0	0	0	0	0	0	0	200	903	0	0	0	0	0	0	0	603	903	0
3610	5	30.18	-9.59549	-538.593	-81908.8	47661.8	-3513.38	288.493	452.079	0	0	0	0	0	0	0	200	903	0	0	0	0	0	0	0	603	903	0
3610	6	28.349	-10.9688	-537.067	-82092	47478.7	-3376.05	288.404	452.852	0	0	0	0	0	0	0	200	903	0	0	0	0	0	0	0	603	903	0
3610	7	29.2645	-8.98514	-537.677	-82275.1	47906	-3467.61	289.098	453.019	0	0	0	0	0	0	0	200	903	0	0	0	0	0	0	0	603	903	0
3610	8	30.18	-8.98514	-538.288	-82183.5	47967	-3604.93	289.11	452.676	0	0	0	0	0	0	0	200	903	0	0	0	0	0	0	0	603	903	0
3610	9	29.2645	-7.91702	-539.508	-82000.4	47722.8	-3009.84	288.456	451.991	0	0	0	0	0	0	0	200	903	0	0	0	0	0	0	0	603	903	0
3611	0	28.349	-6.84891	-537.372	-81268	48089.1	-3147.17	289.489	451.232	0	0	0	0	0	0	0	200	903	0	0	0	0	0	0	0	603	903	0
3611	1	29.1119	-6.54373	-537.982	-81634.2	47783.9	-3009.84	288.821	451.741	0	0	0	0	0	0	0	200	903	0	0	0	0	0	0	0	603	903	0
3611	2	27.8912	-7.30667	-537.982	-81725.8	47844.9	-2872.51	288.934	451.912	0	0	0	0	0	0	0	200	903	0	0	0	0	0	0	0	603	903	0
3611	3	28.8067	-5.93338	-537.067	-82092	48150.1	-3009.84	289.654	452.852	0	0	0	0	0	0	0	200	903	0	0	0	0	0	0	0	603	903	0
3611	4	28.9593	-5.93338	-539.203	-80627.1	47295.6	-2460.53	287.714	449.53	0	0	0	0	0	0	0	200	903	0	0	0	0	0	0	0	603	903	0
3611	5	27.7386	-4.86526	-540.119	-80535.6	48028	-2826.74	288.921	449.107	0	0	0	0	0	0	0	200	903	0	0	0	0	0	0	0	603	903	0
3611	6	27.2808	-5.32303	-540.729	-80535.6	48150.1	-2277.42	289.047	448.939	0	0	0	0	0	0	0	200	903	0	0	0	0	0	0	0	603	903	0
3611	7	26.9757	-5.17044	-539.814	-80260.9	47844.9	-2323.2	288.632	448.683	0	0	0	0	0	0	0	200	903	0	0	0	0	0	0	0	603	903	0
3611	8	26.2127	-3.94974	-540.119	-80260.9	48211.1	-2277.42	289.26	448.599	0	0	0	0	0	0	0	200	903	0	0	0	0	0	0	0	603	903	0
3611	9	27.4334	-4.4075	-540.119	-80169.4	48272.2	-2368.97	289.373	448.429	0	0	0	0	0	0	0	200	903	0	0	0	0	0	0	0	603	903	0
3612	0	26.5179	-3.79715	-542.865	-80352.4	48150.1	-2140.09	288.696	448.015	0	0	0	0	0	0	0	200	903	0	0	0	0	0	0	0	603	903	0
3612	1	26.2127	-3.79715	-543.476	-80627.1	48028	-2002.76	288.372	448.355	0	0	0	0	0	0	0	200	903	0	0	0	0	0	0	0	603	903	0
3612	2	25.9075	-2.88162	-544.696	-80901.8	48028	-2002.76	288.174	448.526	0	0	0	0	0	0	0	200	903	0	0	0	0	0	0	0	603	903	0
3612	3	26.5179	-1.96609	-543.17	-80077.8	48089.1	-1911.21	288.534	447.427	0	0	0	0	0	0	0	200	903	0	0	0	0	0	0	0	603	903	0
3612	4	24.6868	-1.20316	-544.391	-79894.7	48455.3	-1865.43	289.008	446.76	0	0	0	0	0	0	0	200	903	0	0	0	0	0	0	0	603	903	0
3612	5	25.6024	-1.05057	-545.002	-79894.7	48577.3	-1865.43	289.132	446.595	0	0	0	0	0	0	0	200	903	0	0	0	0	0	0	0	603	903	0
3612	6	24.6868	-1.81351	-546.222	-80077.8	48394.2	-1728.1	288.598	446.603	0	0	0	0	0	0	0	200	903	0	0	0	0	0	0	0	603	903	0
3612	7	25.2972	0.017548	-548.664	-78796.1	48516.3	-1682.33	288.426	443.615	0	0	0	0	0	0	0	200	903	0	0	0	0	0	0	0	603	903	0
3612	8	23.7713	0.475312	-545.917	-79253.8	48760.4	-1453.45	289.318	445.176	0	0	0	0	0	0	0	200	903	0	0	0	0	0	0	0	603	903	0
3612	9	24.3817	0.322724	-550.495	-78796.1	49309.8	-1316.12	289.574	443.137	0	0	0	0	0	0	0	200	903	0	0	0	0	0	0	0	603	903	0
3613	0	23.3136	0.017548	-549.579	-78521.4	48882.5	-1224.56	288.945	442.876	0	0	0	0	0	0	0	200	903	0	0	0	0	0	0	0	603	903	0
3613	1	23.6187	0.475312	-548.358	-79070.7	49187.7	-1361.89	289.7	444.195	0	0	0	0	0	0	0	200	903	0	0	0	0	0	0	0	603	903	0
3613	2	23.9239	1.23825	-550.8	-78704.5	49187.7	-1087.24	289.302	442.891	0	0	0	0	0	0	0	200	903	0	0	0	0	0	0	0	603	903	0
3613	3	23.3136	-0.13504	-554.462	-78979.2	49126.7	-1133.01	288.602	442.443	0	0	0	0	0	0	0	200	903	0	0	0	0	0	0	0	603	903	0
3613	4	23.4661	1.39084	-555.072	-78521.4	49737	-1041.46	289.605	441.462	0	0	0	0	0	0	0	200	903	0	0	0	0	0	0	0	603	903	0
3613	5	22.8558	2.15378	-555.988	-79437	49737	-949.906	289.457	442.875	0	0	0	0	0	0	0	200	903	0	0	0	0	0	0	0	603	903	0
3613	6	23.3136	2.00119	-557.209	-79253.8	49920.1	-995.682	289.59	442.234	0	0	0	0	0	0	0	200	903	0	0	0	0	0	0	0	603	903	0
3613	7	22.5506	1.69601	-558.429	-79803.2	49798	-537.919	289.175	442.907	0	0	0	0	0	0	0	200	903	0	0	0	0	0	0	0	603	903	0
3613	8	23.161	3.67966	-559.04	-78246.7	49981.1	-949.906	289.405	439.966	0	0	0	0	0	0	0	200	903	0	0	0	0	0	0	0	603	903	0
3613	9	23.4661	3.67966	-560.26	-79437	50286.3	-675.248	289.755	441.786	0	0	0	0	0	0	0	200	903	0	0	0	0	0	0	0	603	903	0
3614	0	23.161	4.13742	-564.228	-79345.4	50408.4	-400.589	289.341	440.627	0	0	0	0	0	0	0	200	903	0	0	0	0	0	0	0	603	903	0
3614	1	22.0928	3.52707	-565.753	-79345.4	50774.6	-446.366	289.747	440.247	0	0	0	0	0	0	0	200	903	0	0	0	0	0	0	0	603	903	0
3614	2	21.7877	5.05295	-567.585	-78887.6	50103.2	-446.366	288.275	438.988	0	0	0	0	0	0	0	200	903	0	0	0	0	0	0	0	603	903	0
3614	3	22.398	5.05295	-566.364	-78246.7	50591.5	-125.931	289.327	438.156	0	0	0	0	0	0	0	200	903	0	0	0	0	0	0	0	603	903	0
3614	4	22.7032	5.35812	-568.5	-78246.7	50835.6	57.1744	289.421	437.637	0	0	0	0	0	0	0	200	903	0	0	0	0	0	0	0	603	903	0
3614	5	22.398	5.51071	-568.195	-77880.5	50713.6	57.1744	289.254	437.067	0	0	0	0	0	0	0	200	903	0	0	0	0	0	0	0	603	903	0
3614	6	22.2454	5.6633	-572.773	-78338.3	51018.7	-263.26	289.073	436.77	0	0	0	0	0	0	0	200	903	0	0	0	0	0	0	0	603	903	0
3614	7	22.2454	4.74777	-574.298	-78155.2	51079.8	-80.1548	288.943	436.088	0	0	0	0	0	0	0	200	903	0	0	0	0	0	0	0	603	903	0
3614	8	21.0247	6.57883	-572.773	-78612.9	51079.8	-34.3784	289.18	437.25	0	0	0	0	0	0	0	200	903	0	0	0	0	0	0	0	603	903	0
3614	9	21.0247	6.73142	-574.909	-78612.9	51446	240.28	289.485	436.74	0	0	0	0	0	0	0	200	903	0	0	0	0	0	0	0	603	903	0
3615	0	22.5506	7.64694	-577.045	-77422.8	51751.2	57.1744	289.683	434.171	0	0	0	0	0	0	0	200	903	0	0	0	0	0	0	0	603	903	0
3615	1	21.4825	8.40988	-576.74	-78338.3	51812.2	194.503	289.836	435.83	0	0	0	0	0	0	0	200	903	0	0	0	0	0	0	0	603	903	0
3615	2	21.7877	9.02023	-580.097	-78429.9	51751.2	194.503	289.211	435.201	0	0	0	0	0	0	0	200	903	0	0	0	0	0	0	0	603	903	0
3615	3	21.1773	8.10471	-582.233	-78429.9	51995.3	560.714	289.303	434.705	0	0	0	0	0	0	0	200	903	0	0	0	0	0	0	0	603	903	0
3615	4	22.398	9.478	-581.623	-77331.2	52544.6	469.162	290.341	432.958	0	0	0	0	0	0	0	200	903	0	0	0	0	0	0	0	603	903	0
3615	5	20.8721	10.2409	-582.233	-77605.9	51812.2	469.162	288.989	433.29	0	0	0	0	0	0	0	200	903	0	0	0	0	0	0	0	603	903	0
3615	6	21.7877	10.2409	-583.759	-77148.1	52788.8	469.162	290.429	432.158	0	0	0	0	0	0	0	200	903	0	0	0	0	0	0	0	603	903	0
3615	7	22.8558	9.63058	-588.031	-77697.4	52666.7	423.385	289.564	432.132	0	0	0	0	0	0	0	200	903	0	0	0	0	0	0	0	603	903	0
3615	8	21.4825	10.3935	-588.031	-77239.7	52788.8	331.833	289.772	431.353	0	0	0	0	0	0	0	200	903	0	0	0	0	0	0	0	603	903	0
3615	9	21.0247	10.6987	-589.862	-77697.4	53032.9	469.162	289.907	431.721	0	0	0	0	0	0	0	200	903	0	0	0	0	0	0	0	603	903	0
3616	0	21.4825	11.0039	-590.168	-77331.2	52727.7	469.162	289.344	431.033	0	0	0	0	0	0	0	200	903	0	0	0	0	0	0	0	603	903	0
3616	1	21.3299	10.8513	-591.083	-77697.4	53460.2	560.714	290.444	431.449	0	0	0	0	0	0	0	200	903	0	0	0	0	0	0	0	603	903	0
3616	2	22.7032	11.4616	-592.304	-78063.6	53399.1	789.596	290.155	431.797	0	0	0	0	0	0	0	200	903	0	0	0	0	0	0	0	603	903	0
3616	3	22.398	12.2246	-593.219	-77605.9	53521.2	1201.58	290.222	430.822	0	0	0	0	0	0	0	200	903	0	0	0	0	0	0	0	603	903	0
3616	4	22.5506	12.5298	-596.881	-77880.5	53216	835.373	289.157	430.479	0	0	0	0	0	0	0	200	903	0	0	0	0	0	0	0	603	903	0
3616	5	23.0084	12.8349	-597.797	-76873.5	54009.5	743.82	290.348	428.595	0	0	0	0	0	0	0	200	903	0	0	0	0	0	0	0	603	903	0
3616	6	21.6351	13.4453	-599.628	-77514.3	54009.5	926.926	290.072	429.271	0	0	0	0	0	0	0	200	903	0	0	0	0	0	0	0	603	903	0
3616	7	22.2454	13.7505	-598.712	-77331.2	54192.6	881.149	290.515	429.163	0	0	0	0	0	0	0	200	903	0	0	0	0	0	0	0	603	903	0
3616	8	23.161	13.5979	-599.018	-77422.8	54375.7	835.373	290.775	429.25	0	0	0	0	0	0	0	200	903	0	0	0	0	0	0	0	603	903	0
3616	9	23.6187	14.9712	-602.375	-77056.5	54741.9	698.044	290.877	427.921	0	0	0	0	0	0	0	200	903	0	0	0	0	0	0	0	603	903	0
3617	0	23.6187	14.666	-603.595	-76049.5	54741.9	1018.48	290.693	425.994	0	0	0	0	0	0	0	200	903	0	0	0	0	0	0	0	603	903	0
3617	1	23.9239	15.2763	-602.985	-75957.9	54802.9	881.149	290.886	425.97	0	0	0	0	0	0	0	200	903	0	0	0	0	0	0	0	603	903	0
3617	2	23.0084	15.2763	-606.342	-76232.6	54802.9	743.82	290.383	425.725	0	0	0	0	0	0	0	200	903	0	0	0	0	0	0	0	603	903	0
3617	3	24.0765	17.1074	-607.563	-75591.7	54558.8	1201.58	289.799	424.418	0	0	0	0	0	0	0	200	903	0	0	0	0	0	0	0	603	903	0
3617	4	24.3817	15.7341	-608.783	-74859.3	55291.2	926.926	290.823	422.965	0	0	0	0	0	0	0	200	903	0	0	0	0	0	0	0	603	903	0
3617	5	24.2291	16.0393	-609.088	-75591.7	55535.3	835.373	291.178	424.106	0	0	0	0	0	0	0	200	903	0	0	0	0	0	0	0	603	903	0
3617	6	24.3817	15.8867	-610.919	-75225.5	55840.5	1018.48	291.404	423.135	0	0	0	0	0	0	0	200	903	0	0	0	0	0	0	0	603	903	0
3617	7	25.1446	16.6496	-612.14	-74950.8	55657.4	881.149	290.923	422.441	0	0	0	0	0	0	0	200	903	0	0	0	0	0	0	0	603	903	0
3617	8	25.2972	16.0393	-613.056	-74859.3	55413.3	972.702	290.389	422.108	0	0	0	0	0	0	0	200	903	0	0	0	0	0	0	0	603	903	0
3617	9	24.992	16.6496	-614.582	-75225.5	55840.5	972.702	290.859	422.401	0	0	0	0	0	0	0	200	903	0	0	0	0	0	0	0	603	903	0
3618	0	25.1446	17.26	-614.582	-75408.6	56511.9	972.702	291.952	422.699	0	0	0	0	0	0	0	200	903	0	0	0	0	0	0	0	603	903	0
3618	1	25.9075	17.4126	-613.056	-75042.4	56450.9	835.373	292.081	422.407	0	0	0	0	0	0	0	200	903	0	0	0	0	0	0	0	603	903	0
3618	2	26.8231	18.3281	-616.718	-74767.7	56450.9	926.926	291.534	421.235	0	0	0	0	0	0	0	200	903	0	0	0	0	0	0	0	603	903	0
3618	3	27.8912	17.4126	-620.38	-74950.8	56695	835.373	291.388	420.814	0	0	0	0	0	0	0	200	903	0	0	0	0	0	0	0	603	903	0
3618	4	27.586	18.7859	-620.99	-74035.3	56695	1293.14	291.298	419.221	0	0	0	0	0	0	0	200	903	0	0	0	0	0	0	0	603	903	0
3618	5	26.9757	18.9384	-622.516	-74401.5	57122.3	881.149	291.76	419.517	0	0	0	0	0	0	0	200	903	0	0	0	0	0	0	0	603	903	0
3618	6	27.7386	19.091	-622.516	-74584.6	57427.4	1064.25	292.251	419.812	0	0	0	0	0	0	0	200	903	0	0	0	0	0	0	0	603	903	0
3618	7	27.1283	19.2436	-623.127	-73852.2	57122.3	1018.48	291.67	418.519	0	0	0	0	0	0	0	200	903	0	0	0	0	0	0	0	603	903	0
3618	8	28.1964	19.2436	-624.652	-73760.6	57122.3	926.926	291.446	418.083	0	0	0	0	0	0	0	200	903	0	0	0	0	0	0	0	603	903	0
3618	9	30.0274	18.3281	-626.789	-73669.1	57366.4	1110.03	291.524	417.534	0	0	0	0	0	0	0	200	903	0	0	0	0	0	0	0	603	903	0
3619	0	28.5015	18.4807	-628.009	-73577.6	57793.6	881.149	292.027	417.16	0	0	0	0	0	0	0	200	903	0	0	0	0	0	0	0	603	903	0
3619	1	28.5015	20.1591	-628.925	-72662	57793.6	926.926	291.893	415.534	0	0	0	0	0	0	0	200	903	0	0	0	0	0	0	0	603	903	0
3619	2	29.5697	19.854	-628.009	-72021.1	57793.6	881.149	292.027	414.682	0	0	0	0	0	0	0	200	903	0	0	0	0	0	0	0	603	903	0
3619	3	29.1119	20.6169	-629.23	-72021.1	57671.6	743.82	291.654	414.459	0	0	0	0	0	0	0	200	903	0	0	0	0	0	0	0	603	903	0
3619	4	29.7222	20.9221	-629.535	-71654.9	58037.8	698.044	292.191	413.822	0	0	0	0	0	0	0	200	903	0	0	0	0	0	0	0	603	903	0
3619	5	30.4852	20.4643	-631.977	-71471.8	58098.8	1018.48	291.932	413.093	0	0	0	0	0	0	0	200	903	0	0	0	0	0	0	0	603	903	0
3619	6	30.4852	20.3117	-630.756	-71014.1	58220.9	1018.48	292.303	412.586	0	0	0	0	0	0	0	200	903	0	0	0	0	0	0	0	603	903	0
3619	7	29.1119	20.4643	-635.028	-71288.7	58465	835.373	292.067	412.261	0	0	0	0	0	0	0	200	903	0	0	0	0	0	0	0	603	903	0
3619	8	30.6378	20.9221	-633.808	-69823.9	58526.1	1018.48	292.34	410.166	0	0	0	0	0	0	0	200	903	0	0	0	0	0	0	0	603	903	0
3619	9	30.6378	20.7695	-629.84	-70007	58526.1	789.596	292.922	411.15	0	0	0	0	0	0	0	200	903	0	0	0	0	0	0	0	603	903	0
3620	0	31.2481	21.685	-635.639	-69732.3	58831.2	835.373	292.555	409.704	0	0	0	0	0	0	0	200	903	0	0	0	0	0	0	0	603	903	0
3620	1	31.5533	21.3799	-636.859	-69549.3	58709.2	926.926	292.185	409.207	0	0	0	0	0	0	0	200	903	0	0	0	0	0	0	0	603	903	0
3620	2	33.8421	19.854	-635.639	-69366.1	59075.4	1018.48	292.939	409.128	0	0	0	0	0	0	0	200	903	0	0	0	0	0	0	0	603	903	0
3620	3	32.0111	21.5324	-637.775	-69091.5	58953.3	1064.25	292.436	408.332	0	0	0	0	0	0	0	200	903	0	0	0	0	0	0	0	603	903	0
3620	4	31.4007	21.8376	-638.385	-69366.1	59197.5	698.044	292.73	408.659	0	0	0	0	0	0	0	200	903	0	0	0	0	0	0	0	603	903	0
3620	5	32.6214	21.8376	-637.47	-69274.6	59197.5	926.926	292.863	408.671	0	0	0	0	0	0	0	200	903	0	0	0	0	0	0	0	603	903	0
3620	6	32.9266	21.8376	-639.301	-69091.5	59502.6	1110.03	293.075	408.074	0	0	0	0	0	0	0	200	903	0	0	0	0	0	0	0	603	903	0
3620	7	33.3844	22.6006	-641.742	-68542.2	59868.8	1155.81	293.291	406.806	0	0	0	0	0	0	0	200	903	0	0	0	0	0	0	0	603	903	0
3620	8	32.774	23.6687	-642.963	-67809.7	59258.5	1064.25	292.165	405.465	0	0	0	0	0	0	0	200	903	0	0	0	0	0	0	0	603	903	0
3620	9	32.774	23.6687	-643.268	-67992.8	59624.7	1064.25	292.69	405.699	0	0	0	0	0	0	0	200	903	0	0	0	0	0	0	0	603	903	0
3621	0	32.9266	23.2109	-642.047	-67443.5	59319.5	1201.58	292.391	405.044	0	0	0	0	0	0	0	200	903	0	0	0	0	0	0	0	603	903	0
3621	1	34.7576	23.9738	-642.963	-67260.4	59807.8	1338.91	293.019	404.61	0	0	0	0	0	0	0	200	903	0	0	0	0	0	0	0	603	903	0
3621	2	33.9947	22.1428	-643.268	-66985.8	59990.9	1155.81	293.26	404.134	0	0	0	0	0	0	0	200	903	0	0	0	0	0	0	0	603	903	0
3621	3	33.6895	24.1264	-646.625	-67077.3	59746.8	1247.36	292.398	403.734	0	0	0	0	0	0	0	200	903	0	0	0	0	0	0	0	603	903	0
3621	4	33.5369	24.279	-646.625	-65704	59563.7	1338.91	292.115	401.611	0	0	0	0	0	0	0	200	903	0	0	0	0	0	0	0	603	903	0
3621	5	33.8421	24.5842	-647.235	-65429.4	59807.8	1384.69	292.405	401.091	0	0	0	0	0	0	0	200	903	0	0	0	0	0	0	0	603	903	0
3621	6	33.8421	23.9738	-647.235	-64696.9	60235.1	1384.69	293.065	399.959	0	0	0	0	0	0	0	200	903	0	0	0	0	0	0	0	603	903	0
3621	7	34.4525	24.4316	-647.541	-64239.2	60235.1	1338.91	293.021	399.205	0	0	0	0	0	0	0	200	903	0	0	0	0	0	0	0	603	903	0
3621	8	34.4525	24.1264	-648.761	-63964.5	60113	1293.14	292.658	398.595	0	0	0	0	0	0	0	200	903	0	0	0	0	0	0	0	603	903	0
3621	9	34.2999	24.279	-651.203	-64330.7	59746.8	1247.36	291.748	398.788	0	0	0	0	0	0	0	200	903	0	0	0	0	0	0	0	603	903	0
3622	0	34.6051	24.279	-648.761	-63598.3	60479.2	1338.91	293.223	398.03	0	0	0	0	0	0	0	200	903	0	0	0	0	0	0	0	603	903	0
3622	1	35.0628	24.279	-652.729	-63323.6	60662.3	1247.36	292.936	397.014	0	0	0	0	0	0	0	200	903	0	0	0	0	0	0	0	603	903	0
3622	2	34.4525	25.3471	-651.813	-63140.5	60723.3	1476.24	293.161	396.869	0	0	0	0	0	0	0	200	903	0	0	0	0	0	0	0	603	903	0
3622	3	35.6732	25.1945	-653.949	-63232.1	60296.1	1430.47	292.203	396.693	0	0	0	0	0	0	0	200	903	0	0	0	0	0	0	0	603	903	0
3622	4	35.8258	25.1945	-654.56	-63140.5	60662.3	1384.69	292.677	396.463	0	0	0	0	0	0	0	200	903	0	0	0	0	0	0	0	603	903	0
3622	5	35.6732	25.3471	-656.086	-62682.8	60601.3	1384.69	292.368	395.541	0	0	0	0	0	0	0	200	903	0	0	0	0	0	0	0	603	903	0
3622	6	35.9783	25.8049	-658.222	-62774.3	60967.5	1613.57	292.625	395.37	0	0	0	0	0	0	0	200	903	0	0	0	0	0	0	0	603	903	0
3622	7	35.9783	25.042	-659.137	-62316.6	61272.7	1567.79	292.959	394.543	0	0	0	0	0	0	0	200	903	0	0	0	0	0	0	0	603	903	0
3622	8	36.4361	26.873	-657.001	-61492.6	61089.5	1476.24	292.982	393.596	0	0	0	0	0	0	0	200	903	0	0	0	0	0	0	0	603	903	0
3622	9	36.5887	27.3308	-658.832	-61492.6	61150.6	1979.78	292.817	393.336	0	0	0	0	0	0	0	200	903	0	0	0	0	0	0	0	603	903	0
3623	0	36.7413	26.873	-660.663	-60668.6	61089.5	2300.22	292.467	391.83	0	0	0	0	0	0	0	200	903	0	0	0	0	0	0	0	603	903	0
3623	1	37.5042	27.4834	-661.273	-60851.7	61516.8	1888.23	293.028	392.022	0	0	0	0	0	0	0	200	903	0	0	0	0	0	0	0	603	903	0
3623	2	37.8094	28.2463	-663.41	-60577.1	60845.4	1705.12	291.716	391.312	0	0	0	0	0	0	0	200	903	0	0	0	0	0	0	0	603	903	0
3623	3	37.3516	27.7885	-666.461	-60302.4	61455.8	1888.23	292.212	390.482	0	0	0	0	0	0	0	200	903	0	0	0	0	0	0	0	603	903	0
3623	4	37.1991	27.4834	-663.715	-60210.9	61333.7	1705.12	292.41	390.718	0	0	0	0	0	0	0	200	903	0	0	0	0	0	0	0	603	903	0
3623	5	37.3516	28.3989	-665.851	-59753.1	61577.8	2117.11	292.48	389.739	0	0	0	0	0	0	0	200	903	0	0	0	0	0	0	0	603	903	0
3623	6	37.6568	28.2463	-666.767	-59478.4	61760.9	2025.56	292.628	389.204	0	0	0	0	0	0	0	200	903	0	0	0	0	0	0	0	603	903	0
3623	7	38.1146	27.4834	-669.513	-59661.5	61883	2071.33	292.43	389.112	0	0	0	0	0	0	0	200	903	0	0	0	0	0	0	0	603	903	0
3623	8	37.5042	29.1618	-671.039	-58837.6	61822	1796.68	292.129	387.681	0	0	0	0	0	0	0	200	903	0	0	0	0	0	0	0	603	903	0
3623	9	37.8094	29.467	-673.175	-57830.5	61455.8	2117.11	291.292	385.907	0	0	0	0	0	0	0	200	903	0	0	0	0	0	0	0	603	903	0
3624	0	37.3516	29.9248	-672.565	-57647.4	61333.7	1934.01	291.194	385.713	0	0	0	0	0	0	0	200	903	0	0	0	0	0	0	0	603	903	0
3624	1	37.3516	29.9248	-673.786	-57464.3	61883	1842.45	291.844	385.286	0	0	0	0	0	0	0	200	903	0	0	0	0	0	0	0	603	903	0
3624	2	38.5723	29.6196	-674.701	-57098.1	62249.2	1979.78	292.262	384.627	0	0	0	0	0	0	0	200	903	0	0	0	0	0	0	0	603	903	0
3624	3	38.2672	30.2299	-677.448	-57098.1	62432.3	1979.78	292.158	384.284	0	0	0	0	0	0	0	200	903	0	0	0	0	0	0	0	603	903	0
3624	4	37.8094	30.6877	-678.974	-55267	62371.3	2254.44	291.861	381.398	0	0	0	0	0	0	0	200	903	0	0	0	0	0	0	0	603	903	0
3624	5	37.3516	30.5351	-679.889	-56091	62188.2	2117.11	291.468	382.5	0	0	0	0	0	0	0	200	903	0	0	0	0	0	0	0	603	903	0
3624	6	38.1146	31.1455	-679.889	-56091	62493.4	2162.89	291.917	382.5	0	0	0	0	0	0	0	200	903	0	0	0	0	0	0	0	603	903	0
3624	7	37.962	30.9929	-679.889	-56182.5	62432.3	2391.77	291.827	382.635	0	0	0	0	0	0	0	200	903	0	0	0	0	0	0	0	603	903	0
3624	8	38.5723	30.9929	-683.551	-55633.2	63042.7	2162.89	292.228	381.389	0	0	0	0	0	0	0	200	903	0	0	0	0	0	0	0	603	903	0
3624	9	38.7249	32.9765	-687.824	-55724.8	63164.7	2345.99	291.833	381.016	0	0	0	0	0	0	0	200	903	0	0	0	0	0	0	0	603	903	0
3625	0	39.1827	32.8239	-686.908	-56274.1	62981.6	2391.77	291.689	381.924	0	0	0	0	0	0	0	200	903	0	0	0	0	0	0	0	603	903	0
3625	1	37.8094	34.8076	-690.57	-55907.9	63408.9	2483.32	291.821	380.959	0	0	0	0	0	0	0	200	903	0	0	0	0	0	0	0	603	903	0
3625	2	38.5723	34.3498	-689.655	-56365.6	63286.8	2574.88	291.766	381.73	0	0	0	0	0	0	0	200	903	0	0	0	0	0	0	0	603	903	0
3625	3	38.8775	35.4179	-691.791	-55907.9	63775.1	3032.64	292.188	380.816	0	0	0	0	0	0	0	200	903	0	0	0	0	0	0	0	603	903	0
3625	4	38.8775	35.8757	-693.622	-55267	63592	2895.31	291.681	379.679	0	0	0	0	0	0	0	200	903	0	0	0	0	0	0	0	603	903	0
3625	5	38.4198	36.3335	-693.622	-54809.2	63164.7	2986.86	291.065	379.019	0	0	0	0	0	0	0	200	903	0	0	0	0	0	0	0	603	903	0
3625	6	38.5723	37.0964	-698.81	-55541.7	63897.2	2941.09	291.437	379.48	0	0	0	0	0	0	0	200	903	0	0	0	0	0	0	0	603	903	0
3625	7	38.1146	37.8593	-699.726	-55083.9	63775.1	2803.76	291.143	378.722	0	0	0	0	0	0	0	200	903	0	0	0	0	0	0	0	603	903	0
3625	8	37.3516	37.7068	-703.998	-54717.7	64263.4	3124.19	291.283	377.724	0	0	0	0	0	0	0	200	903	0	0	0	0	0	0	0	603	903	0
3625	9	37.0465	37.7068	-702.777	-54992.4	64080.3	3124.19	291.181	378.25	0	0	0	0	0	0	0	200	903	0	0	0	0	0	0	0	603	903	0
3626	0	37.3516	39.3852	-704.914	-54076.8	64385.4	3078.42	291.338	376.714	0	0	0	0	0	0	0	200	903	0	0	0	0	0	0	0	603	903	0
3626	1	37.6568	39.9956	-706.745	-53985.3	64141.3	3215.74	290.756	376.386	0	0	0	0	0	0	0	200	903	0	0	0	0	0	0	0	603	903	0
3626	2	37.8094	40.4533	-711.628	-53527.5	64263.4	3261.52	290.305	375.218	0	0	0	0	0	0	0	200	903	0	0	0	0	0	0	0	603	903	0
3626	3	36.8939	40.9111	-708.271	-53527.5	64446.5	3169.97	290.991	375.575	0	0	0	0	0	0	0	200	903	0	0	0	0	0	0	0	603	903	0
3626	4	35.9783	41.3689	-714.069	-53252.8	64873.7	3719.28	290.851	374.577	0	0	0	0	0	0	0	200	903	0	0	0	0	0	0	0	603	903	0
3626	5	35.9783	40.6059	-713.459	-53161.3	65239.9	3444.63	291.442	374.512	0	0	0	0	0	0	0	200	903	0	0	0	0	0	0	0	603	903	0
3626	6	36.5887	41.674	-714.374	-51788	64934.7	3490.4	290.897	372.494	0	0	0	0	0	0	0	200	903	0	0	0	0	0	0	0	603	903	0
3626	7	36.2835	42.7422	-717.426	-53344.4	65178.9	3673.51	290.851	374.355	0	0	0	0	0	0	0	200	903	0	0	0	0	0	0	0	603	903	0
3626	8	36.5887	43.1999	-722.003	-52703.5	65056.8	3810.84	290.106	372.996	0	0	0	0	0	0	0	200	903	0	0	0	0	0	0	0	603	903	0
3626	9	36.4361	43.5051	-722.003	-52612	65423	3948.17	290.613	372.869	0	0	0	0	0	0	0	200	903	0	0	0	0	0	0	0	603	903	0
3627	0	34.9102	42.8947	-724.445	-52703.5	65789.2	3856.61	290.813	372.75	0	0	0	0	0	0	0	200	903	0	0	0	0	0	0	0	603	903	0
3627	1	35.6732	44.8784	-723.835	-52795.1	65484.1	4039.72	290.468	372.938	0	0	0	0	0	0	0	200	903	0	0	0	0	0	0	0	603	903	0
3627	2	35.2154	45.031	-725.36	-53161.3	65301	4268.6	290.026	373.289	0	0	0	0	0	0	0	200	903	0	0	0	0	0	0	0	603	903	0
3627	3	35.0628	46.2517	-726.886	-52978.2	65850.3	4726.37	290.592	372.884	0	0	0	0	0	0	0	200	903	0	0	0	0	0	0	0	603	903	0
3627	4	35.9783	47.625	-729.328	-53436	65728.2	4589.04	290.122	373.267	0	0	0	0	0	0	0	200	903	0	0	0	0	0	0	0	603	903	0
3627	5	35.5206	48.5405	-732.379	-52337.3	66155.4	4451.71	290.329	371.462	0	0	0	0	0	0	0	200	903	0	0	0	0	0	0	0	603	903	0
3627	6	34.9102	49.1508	-734.516	-52703.5	65667.2	4543.26	289.402	371.753	0	0	0	0	0	0	0	200	903	0	0	0	0	0	0	0	603	903	0
3627	7	33.9947	49.7612	-736.652	-52612	65789.2	5001.02	289.308	371.42	0	0	0	0	0	0	0	200	903	0	0	0	0	0	0	0	603	903	0
3627	8	33.8421	50.0664	-734.821	-52612	66277.5	4955.25	290.195	371.598	0	0	0	0	0	0	0	200	903	0	0	0	0	0	0	0	603	903	0
3627	9	33.6895	50.0664	-734.821	-52154.2	65789.2	4772.14	289.531	370.975	0	0	0	0	0	0	0	200	903	0	0	0	0	0	0	0	603	903	0
3628	0	34.2999	51.5923	-736.957	-51330.2	65972.3	5092.58	289.52	369.652	0	0	0	0	0	0	0	200	903	0	0	0	0	0	0	0	603	903	0
3628	1	34.9102	52.3552	-741.535	-51513.4	66033.4	5046.8	289.05	369.469	0	0	0	0	0	0	0	200	903	0	0	0	0	0	0	0	603	903	0
3628	2	33.5369	53.5759	-742.145	-50872.5	66399.6	5092.58	289.47	368.548	0	0	0	0	0	0	0	200	903	0	0	0	0	0	0	0	603	903	0
3628	3	33.8421	54.4914	-744.281	-50964	66155.4	5138.35	288.885	368.474	0	0	0	0	0	0	0	200	903	0	0	0	0	0	0	0	603	903	0
3628	4	34.7576	54.3388	-742.145	-50231.6	66643.7	5046.8	289.799	367.684	0	0	0	0	0	0	0	200	903	0	0	0	0	0	0	0	603	903	0
3628	5	33.6895	55.1018	-743.366	-50597.8	66643.7	4909.47	289.651	368.066	0	0	0	0	0	0	0	200	903	0	0	0	0	0	0	0	603	903	0
3628	6	33.5369	56.0173	-745.502	-50506.3	66338.6	5367.23	288.985	367.748	0	0	0	0	0	0	0	200	903	0	0	0	0	0	0	0	603	903	0
3628	7	34.2999	57.0854	-746.418	-50140.1	66643.7	5367.23	289.285	367.174	0	0	0	0	0	0	0	200	903	0	0	0	0	0	0	0	603	903	0
3628	8	34.2999	56.1699	-749.164	-49956.9	66704.8	5550.34	289.039	366.684	0	0	0	0	0	0	0	200	903	0	0	0	0	0	0	0	603	903	0
3628	9	33.6895	58.0009	-749.164	-50597.8	67071	5275.68	289.528	367.539	0	0	0	0	0	0	0	200	903	0	0	0	0	0	0	0	603	903	0
3629	0	34.4525	58.9165	-751.911	-50323.2	67193	5870.77	289.363	366.927	0	0	0	0	0	0	0	200	903	0	0	0	0	0	0	0	603	903	0
3629	1	34.2999	59.3742	-750.08	-50323.2	67071	5596.12	289.418	367.09	0	0	0	0	0	0	0	200	903	0	0	0	0	0	0	0	603	903	0
3629	2	34.2999	60.9001	-751.3	-49956.9	66765.8	5779.22	288.867	366.494	0	0	0	0	0	0	0	200	903	0	0	0	0	0	0	0	603	903	0
3629	3	34.2999	61.8156	-752.521	-49316.1	67132	5504.56	289.209	365.535	0	0	0	0	0	0	0	200	903	0	0	0	0	0	0	0	603	903	0
3629	4	35.368	62.426	-750.69	-49682.3	67437.2	5687.67	289.834	366.182	0	0	0	0	0	0	0	200	903	0	0	0	0	0	0	0	603	903	0
3629	5	34.7576	64.1045	-756.488	-49407.6	67681.3	5825	289.468	365.312	0	0	0	0	0	0	0	200	903	0	0	0	0	0	0	0	603	903	0
3629	6	34.6051	63.9519	-756.183	-49773.8	67376.1	5687.67	289.1	365.822	0	0	0	0	0	0	0	200	903	0	0	0	0	0	0	0	603	903	0
3629	7	34.4525	65.3252	-756.488	-49316.1	67254.1	5825	288.903	365.191	0	0	0	0	0	0	0	200	903	0	0	0	0	0	0	0	603	903	0
3629	8	33.9947	65.7829	-755.878	-48675.2	67315.1	5962.33	289.056	364.396	0	0	0	0	0	0	0	200	903	0	0	0	0	0	0	0	603	903	0
3629	9	34.2999	67.0036	-754.657	-48400.6	67681.3	6099.66	289.685	364.136	0	0	0	0	0	0	0	200	903	0	0	0	0	0	0	0	603	903	0
3630	0	35.0628	67.4614	-755.878	-48309	67559.3	6053.88	289.379	363.911	0	0	0	0	0	0	0	200	903	0	0	0	0	0	0	0	603	903	0
3630	1	36.2835	68.6821	-758.93	-48034.3	67315.1	6145.43	288.697	363.292	0	0	0	0	0	0	0	200	903	0	0	0	0	0	0	0	603	903	0
3630	2	35.2154	69.445	-758.625	-47393.5	67315.1	6236.99	288.733	362.473	0	0	0	0	0	0	0	200	903	0	0	0	0	0	0	0	603	903	0
3630	3	34.6051	69.5976	-759.845	-47668.1	67315.1	6099.66	288.591	362.734	0	0	0	0	0	0	0	200	903	0	0	0	0	0	0	0	603	903	0
3630	4	34.6051	70.3606	-759.235	-47393.5	67498.2	6099.66	288.903	362.423	0	0	0	0	0	0	0	200	903	0	0	0	0	0	0	0	603	903	0
3630	5	35.2154	70.6657	-757.709	-47210.4	67498.2	6099.66	289.082	362.307	0	0	0	0	0	0	0	200	903	0	0	0	0	0	0	0	603	903	0
3630	6	36.5887	72.1916	-758.014	-47027.3	67559.3	6099.66	289.127	362.04	0	0	0	0	0	0	0	200	903	0	0	0	0	0	0	0	603	903	0
3630	7	35.8258	71.4287	-758.93	-47576.6	67437.2	6236.99	288.858	362.689	0	0	0	0	0	0	0	200	903	0	0	0	0	0	0	0	603	903	0
3630	8	36.1309	73.5649	-760.761	-46752.6	66582.7	6511.64	287.521	361.455	0	0	0	0	0	0	0	200	903	0	0	0	0	0	0	0	603	903	0
3630	9	35.8258	74.3279	-755.268	-47485	67315.1	6236.99	289.128	362.872	0	0	0	0	0	0	0	200	903	0	0	0	0	0	0	0	603	903	0
3631	0	36.8939	75.7011	-760.761	-46752.6	67620.3	6557.42	288.885	361.455	0	0	0	0	0	0	0	200	903	0	0	0	0	0	0	0	603	903	0
3631	1	36.1309	76.7693	-759.235	-46752.6	67498.2	6603.2	288.903	361.579	0	0	0	0	0	0	0	200	903	0	0	0	0	0	0	0	603	903	0
3631	2	35.9783	78.2951	-758.625	-46569.5	67803.4	6282.76	289.377	361.387	0	0	0	0	0	0	0	200	903	0	0	0	0	0	0	0	603	903	0
3631	3	36.8939	78.7529	-757.709	-46386.4	67254.1	6328.54	288.76	361.219	0	0	0	0	0	0	0	200	903	0	0	0	0	0	0	0	603	903	0
3631	4	37.6568	80.2788	-759.235	-45654	67498.2	6557.42	288.903	360.132	0	0	0	0	0	0	0	200	903	0	0	0	0	0	0	0	603	903	0
3631	5	37.0465	82.415	-757.709	-45104.6	67742.4	6648.97	289.404	359.528	0	0	0	0	0	0	0	200	903	0	0	0	0	0	0	0	603	903	0
3631	6	36.8939	83.4831	-757.099	-45654	67376.1	6557.42	288.993	360.301	0	0	0	0	0	0	0	200	903	0	0	0	0	0	0	0	603	903	0
3631	7	36.8939	84.3987	-756.794	-45745.5	67498.2	6740.53	289.19	360.447	0	0	0	0	0	0	0	200	903	0	0	0	0	0	0	0	603	903	0
3631	8	36.7413	85.1616	-754.657	-45928.6	66887.9	6740.53	288.633	360.86	0	0	0	0	0	0	0	200	903	0	0	0	0	0	0	0	603	903	0
3631	9	37.962	85.6194	-754.352	-45196.2	66826.8	6832.08	288.588	359.914	0	0	0	0	0	0	0	200	903	0	0	0	0	0	0	0	603	903	0
3632	0	37.5042	87.9082	-752.826	-45104.6	66826.8	6832.08	288.768	359.914	0	0	0	0	0	0	0	200	903	0	0	0	0	0	0	0	603	903	0
3632	1	38.2672	88.5185	-753.437	-44189.1	67132	7106.74	289.101	358.65	0	0	0	0	0	0	0	200	903	0	0	0	0	0	0	0	603	903	0
3632	2	38.8775	89.7392	-751.911	-44006	66887.9	7198.29	288.957	358.526	0	0	0	0	0	0	0	200	903	0	0	0	0	0	0	0	603	903	0
3632	3	37.5042	91.7229	-752.521	-43731.4	66826.8	6969.41	288.804	358.113	0	0	0	0	0	0	0	200	903	0	0	0	0	0	0	0	603	903	0
3632	4	37.6568	91.7229	-748.859	-43548.3	66338.6	7564.5	288.586	358.153	0	0	0	0	0	0	0	200	903	0	0	0	0	0	0	0	603	903	0
3632	5	36.4361	92.4858	-746.723	-42358.1	65728.2	7244.07	288.022	356.725	0	0	0	0	0	0	0	200	903	0	0	0	0	0	0	0	603	903	0
3632	6	37.6568	94.3169	-747.028	-43090.5	66277.5	7427.17	288.722	357.683	0	0	0	0	0	0	0	200	903	0	0	0	0	0	0	0	603	903	0
3632	7	38.4198	95.385	-747.028	-43090.5	66277.5	7610.28	288.722	357.683	0	0	0	0	0	0	0	200	903	0	0	0	0	0	0	0	603	903	0
3632	8	40.0982	96.7583	-744.281	-42541.2	66155.4	7610.28	288.885	357.157	0	0	0	0	0	0	0	200	903	0	0	0	0	0	0	0	603	903	0
3632	9	37.3516	96.9109	-743.366	-42083.4	65972.3	7472.95	288.748	356.612	0	0	0	0	0	0	0	200	903	0	0	0	0	0	0	0	603	903	0
3633	0	37.962	99.0471	-741.23	-42815.8	65606.1	7701.83	288.51	357.763	0	0	0	0	0	0	0	200	903	0	0	0	0	0	0	0	603	903	0
3633	1	37.0465	99.81	-736.652	-42724.3	65301	8068.04	288.646	357.998	0	0	0	0	0	0	0	200	903	0	0	0	0	0	0	0	603	903	0
3633	2	38.1146	101.183	-736.347	-41991.9	65239.9	7884.94	288.599	357.027	0	0	0	0	0	0	0	200	903	0	0	0	0	0	0	0	603	903	0
3633	3	39.3353	101.336	-734.516	-41717.2	65362	8113.82	288.987	356.796	0	0	0	0	0	0	0	200	903	0	0	0	0	0	0	0	603	903	0
3633	4	38.5723	103.167	-734.211	-41167.9	65056.8	8022.27	288.608	356.071	0	0	0	0	0	0	0	200	903	0	0	0	0	0	0	0	603	903	0
3633	5	37.6568	104.693	-730.243	-40710.1	64568.5	8205.37	288.421	355.749	0	0	0	0	0	0	0	200	903	0	0	0	0	0	0	0	603	903	0
3633	6	37.3516	104.845	-729.023	-40984.8	64446.5	8617.36	288.401	356.219	0	0	0	0	0	0	0	200	903	0	0	0	0	0	0	0	603	903	0
3633	7	36.7413	105.914	-725.971	-40893.2	64385.4	8159.6	288.689	356.329	0	0	0	0	0	0	0	200	903	0	0	0	0	0	0	0	603	903	0
3633	8	36.8939	106.982	-722.003	-40435.5	64446.5	8068.04	289.261	356.005	0	0	0	0	0	0	0	200	903	0	0	0	0	0	0	0	603	903	0
3633	9	37.962	106.524	-721.698	-40252.4	63408.9	8846.24	287.861	355.775	0	0	0	0	0	0	0	200	903	0	0	0	0	0	0	0	603	903	0
3634	0	38.2672	108.508	-721.088	-38787.5	63714.1	8434.25	288.358	353.79	0	0	0	0	0	0	0	200	903	0	0	0	0	0	0	0	603	903	0
3634	1	37.5042	109.27	-717.426	-38512.8	63225.8	8434.25	288.129	353.682	0	0	0	0	0	0	0	200	903	0	0	0	0	0	0	0	603	903	0
3634	2	36.7413	109.423	-714.679	-38787.5	62798.5	8663.14	287.87	354.273	0	0	0	0	0	0	0	200	903	0	0	0	0	0	0	0	603	903	0
3634	3	36.8939	110.186	-711.322	-38238.2	62859.6	8708.91	288.37	353.757	0	0	0	0	0	0	0	200	903	0	0	0	0	0	0	0	603	903	0
3634	4	35.5206	109.728	-706.745	-38146.6	62615.4	8800.46	288.597	353.975	0	0	0	0	0	0	0	200	903	0	0	0	0	0	0	0	603	903	0
3634	5	35.6732	110.949	-703.998	-36864.9	62310.2	8846.24	288.509	352.365	0	0	0	0	0	0	0	200	903	0	0	0	0	0	0	0	603	903	0
3634	6	35.8258	111.254	-699.42	-37139.6	61638.9	9029.35	288.129	353.1	0	0	0	0	0	0	0	200	903	0	0	0	0	0	0	0	603	903	0
3634	7	35.368	111.864	-697.589	-36956.5	61211.6	8892.02	287.747	352.977	0	0	0	0	0	0	0	200	903	0	0	0	0	0	0	0	603	903	0
3634	8	34.7576	113.085	-694.232	-36224	60723.3	9395.56	287.468	352.179	0	0	0	0	0	0	0	200	903	0	0	0	0	0	0	0	603	903	0
3634	9	34.1473	113.238	-689.655	-36132.5	60784.4	9166.68	288.137	352.392	0	0	0	0	0	0	0	200	903	0	0	0	0	0	0	0	603	903	0
3635	0	32.774	113.085	-683.857	-35674.7	60662.3	9349.78	288.706	352.167	0	0	0	0	0	0	0	200	903	0	0	0	0	0	0	0	603	903	0
3635	1	34.1473	113.848	-679.889	-35583.2	59624.7	9075.12	287.698	352.337	0	0	0	0	0	0	0	200	903	0	0	0	0	0	0	0	603	903	0
3635	2	33.5369	114.916	-676.837	-35033.8	58770.2	9532.89	286.831	351.761	0	0	0	0	0	0	0	200	903	0	0	0	0	0	0	0	603	903	0
3635	3	33.0792	115.374	-673.481	-35216.9	58831.2	9395.56	287.354	352.291	0	0	0	0	0	0	0	200	903	0	0	0	0	0	0	0	603	903	0
3635	4	33.0792	116.747	-668.293	-34301.4	58892.3	9624.44	288.124	351.327	0	0	0	0	0	0	0	200	903	0	0	0	0	0	0	0	603	903	0
3635	5	30.7904	116.747	-664.63	-34118.3	58404	9670.22	287.874	351.334	0	0	0	0	0	0	0	200	903	0	0	0	0	0	0	0	603	903	0
3635	6	30.7904	115.832	-658.527	-34118.3	57610.5	9715.99	287.484	351.81	0	0	0	0	0	0	0	200	903	0	0	0	0	0	0	0	603	903	0
3635	7	30.6378	117.51	-653.034	-32928.1	57122.3	9624.44	287.472	350.423	0	0	0	0	0	0	0	200	903	0	0	0	0	0	0	0	603	903	0
3635	8	29.8748	119.036	-647.846	-31554.8	57122.3	9853.32	288.173	348.707	0	0	0	0	0	0	0	200	903	0	0	0	0	0	0	0	603	903	0
3635	9	29.5697	118.731	-644.794	-32378.8	56450.9	9853.32	287.549	350.216	0	0	0	0	0	0	0	200	903	0	0	0	0	0	0	0	603	903	0
3636	0	28.9593	119.036	-634.113	-32195.7	55779.5	10036.4	287.965	350.773	0	0	0	0	0	0	0	200	903	0	0	0	0	0	0	0	603	903	0
3636	1	27.586	119.799	-634.418	-31554.8	55413.3	10402.6	287.345	349.738	0	0	0	0	0	0	0	200	903	0	0	0	0	0	0	0	603	903	0
3636	2	26.6705	119.189	-627.094	-31280.2	54802.9	10494.2	287.392	349.881	0	0	0	0	0	0	0	200	903	0	0	0	0	0	0	0	603	903	0
3636	3	26.0601	120.562	-621.295	-30822.4	54619.8	10311.1	287.913	349.61	0	0	0	0	0	0	0	200	903	0	0	0	0	0	0	0	603	903	0
3636	4	26.0601	120.104	-617.633	-29632.2	53887.4	10219.5	287.248	347.977	0	0	0	0	0	0	0	200	903	0	0	0	0	0	0	0	603	903	0
3636	5	27.7386	120.715	-615.497	-29082.9	53277	10402.6	286.559	347.251	0	0	0	0	0	0	0	200	903	0	0	0	0	0	0	0	603	903	0
3636	6	25.2972	120.867	-607.563	-28625.2	52727.7	10906.2	286.786	347.115	0	0	0	0	0	0	0	200	903	0	0	0	0	0	0	0	603	903	0
3636	7	24.2291	120.409	-601.764	-28625.2	52483.6	10814.6	287.216	347.569	0	0	0	0	0	0	0	200	903	0	0	0	0	0	0	0	603	903	0
3636	8	24.3817	120.562	-592.304	-26885.7	51262.9	10723.1	286.548	345.392	0	0	0	0	0	0	0	200	903	0	0	0	0	0	0	0	603	903	0
3636	9	23.161	120.562	-589.252	-27435	51446	10906.2	287.307	346.559	0	0	0	0	0	0	0	200	903	0	0	0	0	0	0	0	603	903	0
3637	0	22.8558	120.715	-583.759	-26519.4	50652.5	11089.3	286.77	345.429	0	0	0	0	0	0	0	200	903	0	0	0	0	0	0	0	603	903	0
3637	1	23.0084	121.172	-580.402	-26336.3	49981.1	11135.1	286.115	345.376	0	0	0	0	0	0	0	200	903	0	0	0	0	0	0	0	603	903	0
3637	2	22.8558	120.104	-573.383	-25420.8	49676	10906.2	286.637	344.335	0	0	0	0	0	0	0	200	903	0	0	0	0	0	0	0	603	903	0
3637	3	20.1092	121.478	-566.974	-25603.9	48882.5	10952	286.216	345.159	0	0	0	0	0	0	0	200	903	0	0	0	0	0	0	0	603	903	0
3637	4	20.1092	120.715	-560.26	-25054.6	48089.1	11135.1	285.833	344.72	0	0	0	0	0	0	0	200	903	0	0	0	0	0	0	0	603	903	0
3637	5	18.1256	120.715	-552.021	-24779.9	47722.8	11318.2	286.451	344.89	0	0	0	0	0	0	0	200	903	0	0	0	0	0	0	0	603	903	0
3637	6	18.8885	122.24	-545.002	-24139.1	47295.6	11043.5	286.781	344.292	0	0	0	0	0	0	0	200	903	0	0	0	0	0	0	0	603	903	0
3637	7	18.4307	121.783	-540.119	-23498.2	46807.3	11226.6	286.661	343.506	0	0	0	0	0	0	0	200	903	0	0	0	0	0	0	0	603	903	0
3637	8	17.5152	121.783	-534.015	-22399.6	46502.1	10997.7	287.08	341.946	0	0	0	0	0	0	0	200	903	0	0	0	0	0	0	0	603	903	0
3637	9	16.9049	121.325	-521.198	-22765.8	45098.3	11318.2	286.528	343.68	0	0	0	0	0	0	0	200	903	0	0	0	0	0	0	0	603	903	0
3638	0	15.379	121.783	-518.756	-22399.6	44488	11409.7	285.759	343.179	0	0	0	0	0	0	0	200	903	0	0	0	0	0	0	0	603	903	0
3638	1	15.0738	120.257	-510.822	-21758.7	44365.9	11226.6	286.852	342.595	0	0	0	0	0	0	0	200	903	0	0	0	0	0	0	0	603	903	0
3638	2	14.0057	120.867	-502.582	-21209.4	43511.4	11272.4	286.576	342.201	0	0	0	0	0	0	0	200	903	0	0	0	0	0	0	0	603	903	0
3638	3	14.616	121.02	-496.479	-20202.3	42534.9	11547	285.673	340.691	0	0	0	0	0	0	0	200	903	0	0	0	0	0	0	0	603	903	0
3638	4	13.7005	120.715	-488.544	-20110.8	41680.4	11318.2	285.316	341.165	0	0	0	0	0	0	0	200	903	0	0	0	0	0	0	0	603	903	0
3638	5	13.0902	120.715	-481.83	-19561.4	41314.2	11775.9	285.744	340.598	0	0	0	0	0	0	0	200	903	0	0	0	0	0	0	0	603	903	0
3638	6	10.6488	119.646	-474.201	-19195.2	40764.8	11730.2	285.965	340.479	0	0	0	0	0	0	0	200	903	0	0	0	0	0	0	0	603	903	0
3638	7	12.3272	119.494	-465.045	-17821.9	39788.3	11592.8	285.558	338.323	0	0	0	0	0	0	0	200	903	0	0	0	0	0	0	0	603	903	0
3638	8	9.88582	118.884	-457.111	-18005	38933.8	11501.3	285.174	339.389	0	0	0	0	0	0	0	200	903	0	0	0	0	0	0	0	603	903	0
3638	9	10.0384	118.426	-448.261	-17638.8	38201.4	11455.5	285.221	339.35	0	0	0	0	0	0	0	200	903	0	0	0	0	0	0	0	603	903	0
3639	0	11.2591	118.121	-441.547	-16906.4	38079.3	11592.8	286.241	338.289	0	0	0	0	0	0	0	200	903	0	0	0	0	0	0	0	603	903	0
3639	1	9.12288	117.815	-433.918	-16174	36858.6	11363.9	284.944	337.274	0	0	0	0	0	0	0	200	903	0	0	0	0	0	0	0	603	903	0
3639	2	7.29182	116.29	-425.983	-16723.3	36187.2	11547	284.95	339.258	0	0	0	0	0	0	0	200	903	0	0	0	0	0	0	0	603	903	0
3639	3	6.52888	115.527	-414.997	-15990.9	35149.6	11501.3	284.699	338.533	0	0	0	0	0	0	0	200	903	0	0	0	0	0	0	0	603	903	0
3639	4	6.22371	115.069	-407.062	-15624.7	34661.3	11684.4	285.15	338.384	0	0	0	0	0	0	0	200	903	0	0	0	0	0	0	0	603	903	0
3639	5	6.3763	115.221	-398.517	-14800.7	33379.6	11409.7	283.759	337.139	0	0	0	0	0	0	0	200	903	0	0	0	0	0	0	0	603	903	0
3639	6	6.07112	114.001	-388.141	-14526	33013.4	11226.6	285.055	337.425	0	0	0	0	0	0	0	200	903	0	0	0	0	0	0	0	603	903	0
3639	7	5.46077	112.78	-380.817	-14159.8	31975.8	11226.6	283.966	337.183	0	0	0	0	0	0	0	200	903	0	0	0	0	0	0	0	603	903	0
3639	8	4.54524	112.322	-372.577	-13519	31060.2	11089.3	283.366	336.285	0	0	0	0	0	0	0	200	903	0	0	0	0	0	0	0	603	903	0
3639	9	3.93489	110.186	-363.422	-13244.3	30755.1	11043.5	284.626	336.443	0	0	0	0	0	0	0	200	903	0	0	0	0	0	0	0	603	903	0
3640	0	3.47713	108.813	-352.741	-12603.4	29534.4	10814.6	283.728	335.73	0	0	0	0	0	0	0	200	903	0	0	0	0	0	0	0	603	903	0
3640	1	4.08748	107.897	-341.754	-11047	29046.1	10860.4	284.991	332.324	0	0	0	0	0	0	0	200	903	0	0	0	0	0	0	0	603	903	0
3640	2	3.93489	106.524	-333.21	-11047	28191.6	10814.6	284.606	333.153	0	0	0	0	0	0	0	200	903	0	0	0	0	0	0	0	603	903	0
3640	3	4.39265	105.303	-324.665	-10497.7	27337.1	10311.1	284.201	332.334	0	0	0	0	0	0	0	200	903	0	0	0	0	0	0	0	603	903	0
3640	4	3.47713	101.794	-313.068	-10314.6	26665.7	10265.3	285.176	332.947	0	0	0	0	0	0	0	200	903	0	0	0	0	0	0	0	603	903	0
3640	5	2.25642	100.42	-306.354	-8849.76	25872.3	10082.2	284.452	328.887	0	0	0	0	0	0	0	200	903	0	0	0	0	0	0	0	603	903	0
3640	6	2.25642	98.5893	-293.842	-9399.08	25017.8	9761.77	285.14	331.987	0	0	0	0	0	0	0	200	903	0	0	0	0	0	0	0	603	903	0
3640	7	2.25642	95.9953	-285.602	-8758.21	23797.1	9532.89	283.322	330.666	0	0	0	0	0	0	0	200	903	0	0	0	0	0	0	0	603	903	0
3640	8	2.86677	92.791	-274.005	-8117.34	23308.8	9212.45	285.067	329.625	0	0	0	0	0	0	0	200	903	0	0	0	0	0	0	0	603	903	0
3640	9	4.24007	89.5866	-268.512	-7751.13	22698.4	9349.78	284.534	328.867	0	0	0	0	0	0	0	200	903	0	0	0	0	0	0	0	603	903	0
3641	0	3.17195	88.6711	-257.831	-7384.92	22027	8846.24	285.432	328.642	0	0	0	0	0	0	0	200	903	0	0	0	0	0	0	0	603	903	0
3641	1	1.03572	85.1616	-249.591	-7476.47	21294.6	8617.36	285.318	329.955	0	0	0	0	0	0	0	200	903	0	0	0	0	0	0	0	603	903	0
3641	2	2.25642	82.2624	-239.521	-6560.94	20501.2	8800.46	285.592	327.392	0	0	0	0	0	0	0	200	903	0	0	0	0	0	0	0	603	903	0
3641	3	1.49348	80.1262	-230.365	-6560.94	19585.6	8068.04	285.02	328.481	0	0	0	0	0	0	0	200	903	0	0	0	0	0	0	0	603	903	0
3641	4	2.10384	77.99	-222.126	-5553.86	18975.3	7930.71	285.426	325.003	0	0	0	0	0	0	0	200	903	0	0	0	0	0	0	0	603	903	0
3641	5	3.17195	73.7175	-214.801	-5370.76	18364.9	7747.61	285.497	325.003	0	0	0	0	0	0	0	200	903	0	0	0	0	0	0	0	603	903	0
3641	6	1.64607	70.5132	-207.477	-5187.65	17693.5	7060.96	285.279	325.004	0	0	0	0	0	0	0	200	903	0	0	0	0	0	0	0	603	903	0
3641	7	0.730544	67.3088	-200.153	-4546.78	16533.9	6786.3	282.606	322.717	0	0	0	0	0	0	0	200	903	0	0	0	0	0	0	0	603	903	0
3641	8	1.49348	64.8674	-188.251	-4546.78	15923.5	6511.64	284.587	324.153	0	0	0	0	0	0	0	200	903	0	0	0	0	0	0	0	603	903	0
3641	9	1.18831	60.1372	-181.842	-4363.68	15252.1	6191.21	283.876	323.997	0	0	0	0	0	0	0	200	903	0	0	0	0	0	0	0	603	903	0
3642	0	1.49348	58.6113	-173.297	-3905.92	14763.9	5825	285.194	322.539	0	0	0	0	0	0	0	200	903	0	0	0	0	0	0	0	603	903	0
3642	1	1.95125	55.8647	-167.194	-3265.05	14031.4	5641.89	283.923	319.529	0	0	0	0	0	0	0	200	903	0	0	0	0	0	0	0	603	903	0
3642	2	1.49348	51.8974	-161.396	-3081.94	13726.3	5046.8	285.047	319.096	0	0	0	0	0	0	0	200	903	0	0	0	0	0	0	0	603	903	0
3642	3	0.425369	48.0827	-151.325	-2715.73	13238	4955.25	287.481	317.946	0	0	0	0	0	0	0	200	903	0	0	0	0	0	0	0	603	903	0
3642	4	1.03572	44.7258	-147.357	-2715.73	12566.6	4497.48	285.28	318.43	0	0	0	0	0	0	0	200	903	0	0	0	0	0	0	0	603	903	0
3642	5	1.3409	43.0473	-137.897	-1525.55	12444.5	4543.26	290.245	311.063	0	0	0	0	0	0	0	200	903	0	0	0	0	0	0	0	603	903	0
3642	6	0.577956	38.9275	-129.047	-1433.99	11712.1	4589.04	290.758	311.112	0	0	0	0	0	0	0	200	903	0	0	0	0	0	0	0	603	903	0
3642	7	0.425369	36.4861	-125.385	-1708.65	11529	4039.72	291.949	313.627	0	0	0	0	0	0	0	200	903	0	0	0	0	0	0	0	603	903	0
3642	8	0.883132	34.0446	-120.502	-1617.1	10552.4	4222.83	287.571	313.42	0	0	0	0	0	0	0	200	903	0	0	0	0	0	0	0	603	903	0
3642	9	1.49348	33.2817	-112.873	-1525.55	9942.07	3490.4	288.082	313.516	0	0	0	0	0	0	0	200	903	0	0	0	0	0	0	0	603	903	0
3643	0	0.272781	30.8403	-109.516	-1342.44	9514.83	3765.06	286.881	312.258	0	0	0	0	0	0	0	200	903	0	0	0	0	0	0	0	603	903	0
3643	1	-0.337571	29.6196	-100.971	-1250.89	9148.62	3124.19	290.607	312.389	0	0	0	0	0	0	0	200	903	0	0	0	0	0	0	0	603	903	0
3643	2	0.120193	28.5515	-93.0362	-1342.44	8782.41	2986.86	294.398	314.429	0	0	0	0	0	0	0	200	903	0	0	0	0	0	0	0	603	903	0
3643	3	0.883132	27.0256	-88.7637	-1708.65	8172.05	2895.31	292.065	319.249	0	0	0	0	0	0	0	200	903	0	0	0	0	0	0	0	603	903	0
3643	4	1.3409	24.279	-86.0171	-1708.65	7317.56	2666.43	285.071	319.864	0	0	0	0	0	0	0	200	903	0	0	0	0	0	0	0	603	903	0
3643	5	1.3409	23.2109	-76.5567	-1250.89	6890.31	2620.65	290.003	316.339	0	0	0	0	0	0	0	200	903	0	0	0	0	0	0	0	603	903	0
3643	6	0.883132	21.685	-74.4205	-884.675	6768.24	2437.55	290.946	311.888	0	0	0	0	0	0	0	200	903	0	0	0	0	0	0	0	603	903	0
3643	7	0.577956	19.2436	-68.9273	-1159.33	6463.07	2162.89	293.766	316.82	0	0	0	0	0	0	0	200	903	0	0	0	0	0	0	0	603	903	0
3643	8	0.730544	17.4126	-64.6548	-1433.99	6218.93	2025.56	296.187	322.179	0	0	0	0	0	0	0	200	903	0	0	0	0	0	0	0	603	903	0
3643	9	1.3409	14.8186	-59.772	-976.228	5608.57	1842.45	293.833	316.333	0	0	0	0	0	0	0	200	903	0	0	0	0	0	0	0	603	903	0
3644	0	1.95125	13.7505	-57.6358	-976.228	4876.15	1796.68	284.603	316.938	0	0	0	0	0	0	0	200	903	0	0	0	0	0	0	0	603	903	0
3644	1	1.03572	12.2246	-54.584	-518.465	4693.05	1522.02	285.978	309.498	0	0	0	0	0	0	0	200	903	0	0	0	0	0	0	0	603	903	0
3644	2	1.95125	10.2409	-48.7857	-243.806	4815.12	1293.14	298.699	304.997	0	0	0	0	0	0	0	200	903	0	0	0	0	0	0	0	603	903	0
3644	3	1.64607	9.478	-44.2081	-426.912	4387.87	1155.81	299.255	309.657	0	0	0	0	0	0	0	200	903	0	0	0	0	0	0	0	603	903	0
3644	4	1.64607	4.90036	-40.8511	-426.912	3716.49	1567.79	290.976	310.45	0	0	0	0	0	0	0	200	903	0	0	0	0	0	0	0	603	903	0
3644	5	2.71419	5.05295	-40.2408	-152.254	3411.31	1018.48	284.772	303.784	0	0	0	0	0	0	0	200	903	0	0	0	0	0	0	0	603	903	0
3644	6	2.86677	3.98483	-39.0201	-243.806	3472.34	652.267	288.989	306.248	0	0	0	0	0	0	0	200	903	0	0	0	0	0	0	0	603	903	0
3644	7	3.01936	2.61154	-36.2735	-243.806	3167.17	560.714	287.314	306.721	0	0	0	0	0	0	0	200	903	0	0	0	0	0	0	0	603	903	0
3644	8	1.3409	2.30637	-33.8321	-152.254	2800.96	698.044	282.79	304.5	0	0	0	0	0	0	0	200	903	0	0	0	0	0	0	0	603	903	0
3644	9	1.49348	0.017548	-28.9493	-152.254	2678.89	560.714	292.537	305.259	0	0	0	0	0	0	0	200	903	0	0	0	0	0	0	0	603	903	0
3645	0	1.49348	0.933075	-27.7286	-518.465	2373.71	331.833	285.605	318.698	0	0	0	0	0	0	0	200	903	0	0	0	0	0	0	0	603	903	0
3645	1	1.79866	0.933075	-25.5923	-243.806	2312.68	240.28	290.366	309.527	0	0	0	0	0	0	0	200	903	0	0	0	0	0	0	0	603	903	0
3645	2	2.86677	0.475312	-25.2872	30.8518	2312.68	240.28	291.457	298.78	0	0	0	0	0	0	0	200	903	0	0	0	0	0	0	0	603	903	0
3645	3	1.3409	-1.35574	-22.2354	-335.359	1763.36	194.503	279.304	315.082	0	0	0	0	0	0	0	200	903	0	0	0	0	0	0	0	603	903	0
3645	4	1.3409	-1.50833	-22.2354	-518.465	2251.64	-125.931	301.264	323.317	0	0	0	0	0	0	0	200	903	0	0	0	0	0	0	0	603	903	0
3645	5	1.49348	-1.35574	-19.1836	580.168	1763.36	102.951	291.92	269.757	0	0	0	0	0	0	0	200	903	0	0	0	0	0	0	0	603	903	0
3645	6	1.79866	-2.11868	-17.6578	-152.254	1458.18	57.1744	282.58	308.622	0	0	0	0	0	0	0	200	903	0	0	0	0	0	0	0	603	903	0
3645	7	2.25642	-2.42386	-16.1319	-335.359	1946.46	-34.3784	320.659	320.789	0	0	0	0	0	0	0	200	903	0	0	0	0	0	0	0	603	903	0
3645	8	2.5616	-5.32303	-15.8267	-335.359	1641.29	-263.26	303.704	321.189	0	0	0	0	0	0	0	200	903	0	0	0	0	0	0	0	603	903	0
3645	9	3.01936	-4.10232	-13.6905	-426.912	1580.25	-125.931	315.427	331.183	0	0	0	0	0	0	0	200	903	0	0	0	0	0	0	0	603	903	0
3646	0	1.95125	-4.4075	-13.6905	-335.359	1336.11	-125.931	297.594	324.496	0	0	0	0	0	0	0	200	903	0	0	0	0	0	0	0	603	903	0
3646	1	0.883132	-4.86526	-11.2491	-243.806	1275.08	-492.142	313.35	321.673	0	0	0	0	0	0	0	200	903	0	0	0	0	0	0	0	603	903	0
3646	2	1.95125	-6.23856	-9.41802	-243.806	1275.08	-263.26	335.387	325.887	0	0	0	0	0	0	0	200	903	0	0	0	0	0	0	0	603	903	0
3646	3	2.71419	-5.6282	-7.89214	397.063	1336.11	-171.707	369.297	249.689	0	0	0	0	0	0	0	200	903	0	0	0	0	0	0	0	603	903	0
3646	4	0	0	0	0	0	0	200	300	0	0	0	0	0	0	0	200	903	0	0	0	0	0	0	0	603	903	0
3646	5	0	0	0	0	0	0	200	300	0	0	0	0	0	0	0	200	903	0	0	0	0	0	0	0	603	903	0
3646	6	0	0	0	0	0	0	200	300	0	0	0	0	0	0	0	200	903	0	0	0	0	0	0	0	603	903	0
3646	7	0	0	0	0	0	0	200	300	0	0	0	0	0	0	0	200	903	0	0	0	0	0	0	0	603	903	0
3646	8	0	0	0	0	0	0	200	300	0	0	0	0	0	0	0	200	903	0	0	0	0	0	0	0	603	903	0
3646	9	0	0	0	0	0	0	200	300	0	0	0	0	0	0	0	200	903	0	0	0	0	0	0	0	603	903	0
3647	0	0	0	0	0	0	0	200	300	0	0	0	0	0	0	0	200	903	0	0	0	0	0	0	0	603	903	0
3647	1	0	0	0	0	0	0	200	300	0	0	0	0	0	0	0	200	903	0	0	0	0	0	0	0	603	903	0
3647	2	0	0	0	0	0	0	200	300	0	0	0	0	0	0	0	200	903	0	0	0	0	0	0	0	603	903	0
3647	3	0	0	0	0	0	0	200	300	0	0	0	0	0	0	0	200	903	0	0	0	0	0	0	0	603	903	0
3647	4	0	0	0	0	0	0	200	300	0	0	0	0	0	0	0	200	903	0	0	0	0	0	0	0	603	903	0
3647	5	0	0	0	0	0	0	200	300	0	0	0	0	0	0	0	200	903	0	0	0	0	0	0	0	603	903	0
3647	6	0	0	0	0	0	0	200	300	0	0	0	0	0	0	0	200	903	0	0	0	0	0	0	0	603	903	0
3647	7	0	0	0	0	0	0	200	300	0	0	0	0	0	0	0	200	903	0	0	0	0	0	0	0	603	903	0
3647	8	0	0	0	0	0	0	200	300	0	0	0	0	0	0	0	200	903	0	0	0	0	0	0	0	603	903	0
3647	9	0	0	0	0	0	0	200	300	0	0	0	0	0	0	0	200	903	0	0	0	0	0	0	0	603	903	0
3648	0	0	0	0	0	0	0	200	300	0	0	0	0	0	0	0	200	903	0	0	0	0	0	0	0	603	903	0
3648	1	0	0	0	0	0	0	200	300	0	0	0	0	0	0	0	200	903	0	0	0	0	0	0	0	603	903	0
3648	2	0	0	0	0	0	0	200	300	0	0	0	0	0	0	0	200	903	0	0	0	0	0	0	0	603	903	0
3648	3	0	0	0	0	0	0	200	300	0	0	0	0	0	0	0	200	903	0	0	0	0	0	0	0	603	903	0
3648	4	0	0	0	0	0	0	200	300	0	0	0	0	0	0	0	200	903	0	0	0	0	0	0	0	603	903	0
3648	5	0	0	0	0	0	0	200	300	0	0	0	0	0	0	0	200	903	0	0	0	0	0	0	0	603	903	0
3648	6	0	0	0	0	0	0	200	300	0	0	0	0	0	0	0	200	903	0	0	0	0	0	0	0	603	903	0
3648	7	0	0	0	0	0	0	200	300	0	0	0	0	0	0	0	200	903	0	0	0	0	0	0	0	603	903	0
3648	8	0	0	0	0	0	0	200	300	0	0	0	0	0	0	0	200	903	0	0	0	0	0	0	0	603	903	0
3648	9	0	0	0	0	0	0	200	300	0	0	0	0	0	0	0	200	903	0	0	0	0	0	0	0	603	903	0
3649	0	0	0	0	0	0	0	200	300	0	0	0	0	0	0	0	200	903	0	0	0	0	0	0	0	603	903	0
3649	1	0	0	0	0	0	0	200	300	0	0	0	0	0	0	0	200	903	0	0	0	0	0	0	0	603	903	0
3649	2	0	0	0	0	0	0	200	300	0	0	0	0	0	0	0	200	903	0	0	0	0	0	0	0	603	903	0
3649	3	0	0	0	0	0	0	200	300	0	0	0	0	0	0	0	200	903	0	0	0	0	0	0	0	603	903	0
3649	4	0	0	0	0	0	0	200	300	0	0	0	0	0	0	0	200	903	0	0	0	0	0	0	0	603	903	0
3649	5	0	0	0	0	0	0	200	300	0	0	0	0	0	0	0	200	903	0	0	0	0	0	0	0	603	903	0
3649	6	0	0	0	0	0	0	200	300	0	0	0	0	0	0	0	200	903	0	0	0	0	0	0	0	603	903	0
3649	7	0	0	0	0	0	0	200	300	0	0	0	0	0	0	0	200	903	0	0	0	0	0	0	0	603	903	0
3649	8	0	0	0	0	0	0	200	300	0	0	0	0	0	0	0	200	903	0	0	0	0	0	0	0	603	903	0
3649	9	0	0	0	0	0	0	200	300	0	0	0	0	0	0	0	200	903	0	0	0	0	0	0	0	603	903	0
3650	0	0	0	0	0	0	0	200	300	0	0	0	0	0	0	0	200	903	0	0	0	0	0	0	0	603	903	0
3650	1	0	0	0	0	0	0	200	300	0	0	0	0	0	0	0	200	903	0	0	0	0	0	0	0	603	903	0
3650	2	0	0	0	0	0	0	200	300	0	0	0	0	0	0	0	200	903	0	0	0	0	0	0	0	603	903	0
3650	3	0	0	0	0	0	0	200	300	0	0	0	0	0	0	0	200	903	0	0	0	0	0	0	0	603	903	0
3650	4	0	0	0	0	0	0	200	300	0	0	0	0	0	0	0	200	903	0	0	0	0	0	0	0	603	903	0
3650	5	0	0	0	0	0	0	200	300	0	0	0	0	0	0	0	200	903	0	0	0	0	0	0	0	603	903	0
3650	6	0	0	0	0	0	0	200	300	0	0	0	0	0	0	0	200	903	0	0	0	0	0	0	0	603	903	0
3650	7	0	0	0	0	0	0	200	300	0	0	0	0	0	0	0	200	903	0	0	0	0	0	0	0	603	903	0
3650	8	0	0	0	0	0	0	200	300	0	0	0	0	0	0	0	200	903	0	0	0	0	0	0	0	603	903	0
3650	9	0	0	0	0	0	0	200	300	0	0	0	0	0	0	0	200	903	0	0	0	0	0	0	0	603	903	0
3651	0	0	0	0	0	0	0	200	300	0	0	0	0	0	0	0	200	903	0	0	0	0	0	0	0	603	903	0
3651	1	0	0	0	0	0	0	200	300	0	0	0	0	0	0	0	200	903	0	0	0	0	0	0	0	603	903	0
3651	2	0	0	0	0	0	0	200	300	0	0	0	0	0	0	0	200	903	0	0	0	0	0	0	0	603	903	0
3651	3	0	0	0	0	0	0	200	300	0	0	0	0	0	0	0	200	903	0	0	0	0	0	0	0	603	903	0
3651	4	0	0	0	0	0	0	200	300	0	0	0	0	0	0	0	200	903	0	0	0	0	0	0	0	603	903	0
3651	5	0	0	0	0	0	0	200	300	0	0	0	0	0	0	0	200	903	0	0	0	0	0	0	0	603	903	0
3651	6	0	0	0	0	0	0	200	300	0	0	0	0	0	0	0	200	903	0	0	0	0	0	0	0	603	903	0
3651	7	0	0	0	0	0	0	200	300	0	0	0	0	0	0	0	200	903	0	0	0	0	0	0	0	603	903	0
3651	8	0	0	0	0	0	0	200	300	0	0	0	0	0	0	0	200	903	0	0	0	0	0	0	0	603	903	0
3651	9	0	0	0	0	0	0	200	300	0	0	0	0	0	0	0	200	903	0	0	0	0	0	0	0	603	903	0
3652	0	0	0	0	0	0	0	200	300	0	0	0	0	0	0	0	200	903	0	0	0	0	0	0	0	603	903	0
3652	1	0	0	0	0	0	0	200	300	0	0	0	0	0	0	0	200	903	0	0	0	0	0	0	0	603	903	0
3652	2	0	0	0	0	0	0	200	300	0	0	0	0	0	0	0	200	903	0	0	0	0	0	0	0	603	903	0
3652	3	0	0	0	0	0	0	200	300	0	0	0	0	0	0	0	200	903	0	0	0	0	0	0	0	603	903	0
3652	4	0	0	0	0	0	0	200	300	0	0	0	0	0	0	0	200	903	0	0	0	0	0	0	0	603	903	0
3652	5	0	0	0	0	0	0	200	300	0	0	0	0	0	0	0	200	903	0	0	0	0	0	0	0	603	903	0
3652	6	0	0	0	0	0	0	200	300	0	0	0	0	0	0	0	200	903	0	0	0	0	0	0	0	603	903	0
3652	7	0	0	0	0	0	0	200	300	0	0	0	0	0	0	0	200	903	0	0	0	0	0	0	0	603	903	0
3652	8	0	0	0	0	0	0	200	300	0	0	0	0	0	0	0	200	903	0	0	0	0	0	0	0	603	903	0
3652	9	0	0	0	0	0	0	200	300	0	0	0	0	0	0	0	200	903	0	0	0	0	0	0	0	603	903	0
3653	0	0	0	0	0	0	0	200	300	0	0	0	0	0	0	0	200	903	0	0	0	0	0	0	0	603	903	0
3653	1	0	0	0	0	0	0	200	300	0	0	0	0	0	0	0	200	903	0	0	0	0	0	0	0	603	903	0
3653	2	0	0	0	0	0	0	200	300	0	0	0	0	0	0	0	200	903	0	0	0	0	0	0	0	603	903	0
3653	3	0	0	0	0	0	0	200	300	0	0	0	0	0	0	0	200	903	0	0	0	0	0	0	0	603	903	0
3653	4	0	0	0	0	0	0	200	300	0	0	0	0	0	0	0	200	903	0	0	0	0	0	0	0	603	903	0
3653	5	0	0	0	0	0	0	200	300	0	0	0	0	0	0	0	200	903	0	0	0	0	0	0	0	603	903	0
3653	6	0	0	0	0	0	0	200	300	0	0	0	0	0	0	0	200	903	0	0	0	0	0	0	0	603	903	0
3653	7	0	0	0	0	0	0	200	300	0	0	0	0	0	0	0	200	903	0	0	0	0	0	0	0	603	903	0
3653	8	0	0	0	0	0	0	200	300	0	0	0	0	0	0	0	200	903	0	0	0	0	0	0	0	603	903	0
3653	9	0	0	0	0	0	0	200	300	0	0	0	0	0	0	0	200	903	0	0	0	0	0	0	0	603	903	0
3654	0	0	0	0	0	0	0	200	300	0	0	0	0	0	0	0	200	903	0	0	0	0	0	0	0	603	903	0
3654	1	0	0	0	0	0	0	200	300	0	0	0	0	0	0	0	200	903	0	0	0	0	0	0	0	603	903	0
3654	2	0	0	0	0	0	0	200	300	0	0	0	0	0	0	0	200	903	0	0	0	0	0	0	0	603	903	0
3654	3	0	0	0	0	0	0	200	300	0	0	0	0	0	0	0	200	903	0	0	0	0	0	0	0	603	903	0
3654	4	0	0	0	0	0	0	200	300	0	0	0	0	0	0	0	200	903	0	0	0	0	0	0	0	603	903	0
3654	5	0	0	0	0	0	0	200	300	0	0	0	0	0	0	0	200	903	0	0	0	0	0	0	0	603	903	0
3654	6	0	0	0	0	0	0	200	300	0	0	0	0	0	0	0	200	903	0	0	0	0	0	0	0	603	903	0
3654	7	0	0	0	0	0	0	200	300	0	0	0	0	0	0	0	200	903	0	0	0	0	0	0	0	603	903	0
3654	8	0	0	0	0	0	0	200	300	0	0	0	0	0	0	0	200	903	0	0	0	0	0	0	0	603	903	0
3654	9	0	0	0	0	0	0	200	300	0	0	0	0	0	0	0	200	903	0	0	0	0	0	0	0	603	903	0
3655	0	0	0	0	0	0	0	200	300	0	0	0	0	0	0	0	200	903	0	0	0	0	0	0	0	603	903	0
3655	1	0	0	0	0	0	0	200	300	0	0	0	0	0	0	0	200	903	0	0	0	0	0	0	0	603	903	0
3655	2	0	0	0	0	0	0	200	300	0	0	0	0	0	0	0	200	903	0	0	0	0	0	0	0	603	903	0
3655	3	0	0	0	0	0	0	200	300	0	0	0	0	0	0	0	200	903	0	0	0	0	0	0	0	603	903	0
3655	4	0	0	0	0	0	0	200	300	0	0	0	0	0	0	0	200	903	0	0	0	0	0	0	0	603	903	0
3655	5	0	0	0	0	0	0	200	300	0	0	0	0	0	0	0	200	903	0	0	0	0	0	0	0	603	903	0
3655	6	0	0	0	0	0	0	200	300	0	0	0	0	0	0	0	200	903	0	0	0	0	0	0	0	603	903	0
3655	7	0	0	0	0	0	0	200	300	0	0	0	0	0	0	0	200	903	0	0	0	0	0	0	0	603	903	0
3655	8	0	0	0	0	0	0	200	300	0	0	0	0	0	0	0	200	903	0	0	0	0	0	0	0	603	903	0
3655	9	0	0	0	0	0	0	200	300	0	0	0	0	0	0	0	200	903	0	0	0	0	0	0	0	603	903	0
3656	0	0	0	0	0	0	0	200	300	0	0	0	0	0	0	0	200	903	0	0	0	0	0	0	0	603	903	0
3656	1	0	0	0	0	0	0	200	300	0	0	0	0	0	0	0	200	903	0	0	0	0	0	0	0	603	903	0
3656	2	0	0	0	0	0	0	200	300	0	0	0	0	0	0	0	200	903	0	0	0	0	0	0	0	603	903	0
3656	3	0	0	0	0	0	0	200	300	0	0	0	0	0	0	0	200	903	0	0	0	0	0	0	0	603	903	0
3656	4	0	0	0	0	0	0	200	300	0	0	0	0	0	0	0	200	903	0	0	0	0	0	0	0	603	903	0
3656	5	0	0	0	0	0	0	200	300	0	0	0	0	0	0	0	200	903	0	0	0	0	0	0	0	603	903	0
3656	6	0	0	0	0	0	0	200	300	0	0	0	0	0	0	0	200	903	0	0	0	0	0	0	0	603	903	0
3656	7	0	0	0	0	0	0	200	300	0	0	0	0	0	0	0	200	903	0	0	0	0	0	0	0	603	903	0
3656	8	0	0	0	0	0	0	200	300	0	0	0	0	0	0	0	200	903	0	0	0	0	0	0	0	603	903	0
3656	9	0	0	0	0	0	0	200	300	0	0	0	0	0	0	0	200	903	0	0	0	0	0	0	0	603	903	0
3657	0	0	0	0	0	0	0	200	300	0	0	0	0	0	0	0	200	903	0	0	0	0	0	0	0	603	903	0
3657	1	0	0	0	0	0	0	200	300	0	0	0	0	0	0	0	200	903	0	0	0	0	0	0	0	603	903	0
3657	2	0	0	0	0	0	0	200	300	0	0	0	0	0	0	0	200	903	0	0	0	0	0	0	0	603	903	0
3657	3	0	0	0	0	0	0	200	300	0	0	0	0	0	0	0	200	903	0	0	0	0	0	0	0	603	903	0
3657	4	0	0	0	0	0	0	200	300	0	0	0	0	0	0	0	200	903	0	0	0	0	0	0	0	603	903	0
3657	5	0	0	0	0	0	0	200	300	0	0	0	0	0	0	0	200	903	0	0	0	0	0	0	0	603	903	0
3657	6	0	0	0	0	0	0	200	300	0	0	0	0	0	0	0	200	903	0	0	0	0	0	0	0	603	903	0
3657	7	0	0	0	0	0	0	200	300	0	0	0	0	0	0	0	200	903	0	0	0	0	0	0	0	603	903	0
3657	8	0	0	0	0	0	0	200	300	0	0	0	0	0	0	0	200	903	0	0	0	0	0	0	0	603	903	0
3657	9	0	0	0	0	0	0	200	300	0	0	0	0	0	0	0	200	903	0	0	0	0	0	0	0	603	903	0
3658	0	0	0	0	0	0	0	200	300	0	0	0	0	0	0	0	200	903	0	0	0	0	0	0	0	603	903	0
3658	1	0	0	0	0	0	0	200	300	0	0	0	0	0	0	0	200	903	0	0	0	0	0	0	0	603	903	0
3658	2	0	0	0	0	0	0	200	300	0	0	0	0	0	0	0	200	903	0	0	0	0	0	0	0	603	903	0
3658	3	0	0	0	0	0	0	200	300	0	0	0	0	0	0	0	200	903	0	0	0	0	0	0	0	603	903	0
3658	4	0	0	0	0	0	0	200	300	0	0	0	0	0	0	0	200	903	0	0	0	0	0	0	0	603	903	0
3658	5	0	0	0	0	0	0	200	300	0	0	0	0	0	0	0	200	903	0	0	0	0	0	0	0	603	903	0
3658	6	0	0	0	0	0	0	200	300	0	0	0	0	0	0	0	200	903	0	0	0	0	0	0	0	603	903	0
3658	7	0	0	0	0	0	0	200	300	0	0	0	0	0	0	0	200	903	0	0	0	0	0	0	0	603	903	0
3658	8	0	0	0	0	0	0	200	300	0	0	0	0	0	0	0	200	903	0	0	0	0	0	0	0	603	903	0
3658	9	0	0	0	0	0	0	200	300	0	0	0	0	0	0	0	200	903	0	0	0	0	0	0	0	603	903	0
3659	0	0	0	0	0	0	0	200	300	0	0	0	0	0	0	0	200	903	0	0	0	0	0	0	0	603	903	0
3659	1	0	0	0	0	0	0	200	300	0	0	0	0	0	0	0	200	903	0	0	0	0	0	0	0	603	903	0
3659	2	0	0	0	0	0	0	200	300	0	0	0	0	0	0	0	200	903	0	0	0	0	0	0	0	603	903	0
3659	3	0	0	0	0	0	0	200	300	0	0	0	0	0	0	0	200	903	0	0	0	0	0	0	0	603	903	0
3659	4	0	0	0	0	0	0	200	300	0	0	0	0	0	0	0	200	903	0	0	0	0	0	0	0	603	903	0
3659	5	0	0	0	0	0	0	200	300	0	0	0	0	0	0	0	200	903	0	0	0	0	0	0	0	603	903	0
3659	6	0	0	0	0	0	0	200	300	0	0	0	0	0	0	0	200	903	0	0	0	0	0	0	0	603	903	0
3659	7	0	0	0	0	0	0	200	300	0	0	0	0	0	0	0	200	903	0	0	0	0	0	0	0	603	903	0
3659	8	0	0	0	0	0	0	200	300	0	0	0	0	0	0	0	200	903	0	0	0	0	0	0	0	603	903	0
3659	9	0	0	0	0	0	0	200	300	0	0	0	0	0	0	0	200	903	0	0	0	0	0	0	0	603	903	0
3660	0	0	0	0	0	0	0	200	300	0	0	0	0	0	0	0	200	903	0	0	0	0	0	0	0	603	903	0
3660	1	0	0	0	0	0	0	200	300	0	0	0	0	0	0	0	200	903	0	0	0	0	0	0	0	603	903	0
3660	2	0	0	0	0	0	0	200	300	0	0	0	0	0	0	0	200	903	0	0	0	0	0	0	0	603	903	0
3660	3	0	0	0	0	0	0	200	300	0	0	0	0	0	0	0	200	903	0	0	0	0	0	0	0	603	903	0
3660	4	0	0	0	0	0	0	200	300	0	0	0	0	0	0	0	200	903	0	0	0	0	0	0	0	603	903	0
3660	5	0	0	0	0	0	0	200	300	0	0	0	0	0	0	0	200	903	0	0	0	0	0	0	0	603	903	0
3660	6	0	0	0	0	0	0	200	300	0	0	0	0	0	0	0	200	903	0	0	0	0	0	0	0	603	903	0
3660	7	0	0	0	0	0	0	200	300	0	0	0	0	0	0	0	200	903	0	0	0	0	0	0	0	603	903	0
3660	8	0	0	0	0	0	0	200	300	0	0	0	0	0	0	0	200	903	0	0	0	0	0	0	0	603	903	0
3660	9	0	0	0	0	0	0	200	300	0	0	0	0	0	0	0	200	903	0	0	0	0	0	0	0	603	903	0
3661	0	0	0	0	0	0	0	200	300	0	0	0	0	0	0	0	200	903	0	0	0	0	0	0	0	603	903	0
3661	1	0	0	0	0	0	0	200	300	0	0	0	0	0	0	0	200	903	0	0	0	0	0	0	0	603	903	0
3661	2	0	0	0	0	0	0	200	300	0	0	0	0	0	0	0	200	903	0	0	0	0	0	0	0	603	903	0
3661	3	0	0	0	0	0	0	200	300	0	0	0	0	0	0	0	200	903	0	0	0	0	0	0	0	603	903	0
3661	4	0	0	0	0	0	0	200	300	0	0	0	0	0	0	0	200	903	0	0	0	0	0	0	0	603	903	0
3661	5	0	0	0	0	0	0	200	300	0	0	0	0	0	0	0	200	903	0	0	0	0	0	0	0	603	903	0
3661	6	0	0	0	0	0	0	200	300	0	0	0	0	0	0	0	200	903	0	0	0	0	0	0	0	603	903	0
3661	7	0	0	0	0	0	0	200	300	0	0	0	0	0	0	0	200	903	0	0	0	0	0	0	0	603	903	0
3661	8	0	0	0	0	0	0	200	300	0	0	0	0	0	0	0	200	903	0	0	0	0	0	0	0	603	903	0
3661	9	0	0	0	0	0	0	200	300	0	0	0	0	0	0	0	200	903	0	0	0	0	0	0	0	603	903	0
3662	0	0	0	0	0	0	0	200	300	0	0	0	0	0	0	0	200	903	0	0	0	0	0	0	0	603	903	0
3662	1	0	0	0	0	0	0	200	300	0	0	0	0	0	0	0	200	903	0	0	0	0	0	0	0	603	903	0
3662	2	0	0	0	0	0	0	200	300	0	0	0	0	0	0	0	200	903	0	0	0	0	0	0	0	603	903	0
3662	3	0	0	0	0	0	0	200	300	0	0	0	0	0	0	0	200	903	0	0	0	0	0	0	0	603	903	0
3662	4	0	0	0	0	0	0	200	300	0	0	0	0	0	0	0	200	903	0	0	0	0	0	0	0	603	903	0
3662	5	0	0	0	0	0	0	200	300	0	0	0	0	0	0	0	200	903	0	0	0	0	0	0	0	603	903	0
3662	6	0	0	0	0	0	0	200	300	0	0	0	0	0	0	0	200	903	0	0	0	0	0	0	0	603	903	0
3662	7	0	0	0	0	0	0	200	300	0	0	0	0	0	0	0	200	903	0	0	0	0	0	0	0	603	903	0
3662	8	0	0	0	0	0	0	200	300	0	0	0	0	0	0	0	200	903	0	0	0	0	0	0	0	603	903	0
3662	9	0	0	0	0	0	0	200	300	0	0	0	0	0	0	0	200	903	0	0	0	0	0	0	0	603	903	0
3663	0	0	0	0	0	0	0	200	300	0	0	0	0	0	0	0	200	903	0	0	0	0	0	0	0	603	903	0
3663	1	0	0	0	0	0	0	200	300	0	0	0	0	0	0	0	200	903	0	0	0	0	0	0	0	603	903	0
3663	2	0	0	0	0	0	0	200	300	0	0	0	0	0	0	0	200	903	0	0	0	0	0	0	0	603	903	0
3663	3	0	0	0	0	0	0	200	300	0	0	0	0	0	0	0	200	903	0	0	0	0	0	0	0	603	903	0
3663	4	0	0	0	0	0	0	200	300	0	0	0	0	0	0	0	200	903	0	0	0	0	0	0	0	603	903	0
3663	5	0	0	0	0	0	0	200	300	0	0	0	0	0	0	0	200	903	0	0	0	0	0	0	0	603	903	0
3663	6	0	0	0	0	0	0	200	300	0	0	0	0	0	0	0	200	903	0	0	0	0	0	0	0	603	903	0
3663	7	0	0	0	0	0	0	200	300	0	0	0	0	0	0	0	200	903	0	0	0	0	0	0	0	603	903	0
3663	8	0	0	0	0	0	0	200	300	0	0	0	0	0	0	0	200	903	0	0	0	0	0	0	0	603	903	0
3663	9	0	0	0	0	0	0	200	300	0	0	0	0	0	0	0	200	903	0	0	0	0	0	0	0	603	903	0
3664	0	0	0	0	0	0	0	200	300	0	0	0	0	0	0	0	200	903	0	0	0	0	0	0	0	603	903	0
3664	1	0	0	0	0	0	0	200	300	0	0	0	0	0	0	0	200	903	0	0	0	0	0	0	0	603	903	0
3664	2	0	0	0	0	0	0	200	300	0	0	0	0	0	0	0	200	903	0	0	0	0	0	0	0	603	903	0
3664	3	0	0	0	0	0	0	200	300	0	0	0	0	0	0	0	200	903	0	0	0	0	0	0	0	603	903	0
3664	4	0	0	0	0	0	0	200	300	0	0	0	0	0	0	0	200	903	0	0	0	0	0	0	0	603	903	0
3664	5	0	0	0	0	0	0	200	300	0	0	0	0	0	0	0	200	903	0	0	0	0	0	0	0	603	903	0
3664	6	0	0	0	0	0	0	200	300	0	0	0	0	0	0	0	200	903	0	0	0	0	0	0	0	603	903	0
3664	7	0	0	0	0	0	0	200	300	0	0	0	0	0	0	0	200	903	0	0	0	0	0	0	0	603	903	0
3664	8	0	0	0	0	0	0	200	300	0	0	0	0	0	0	0	200	903	0	0	0	0	0	0	0	603	903	0
3664	9	0	0	0	0	0	0	200	300	0	0	0	0	0	0	0	200	903	0	0	0	0	0	0	0	603	903	0
3665	0	0	0	0	0	0	0	200	300	0	0	0	0	0	0	0	200	903	0	0	0	0	0	0	0	603	903	0
3665	1	0	0	0	0	0	0	200	300	0	0	0	0	0	0	0	200	903	0	0	0	0	0	0	0	603	903	0
3665	2	0	0	0	0	0	0	200	300	0	0	0	0	0	0	0	200	903	0	0	0	0	0	0	0	603	903	0
3665	3	0	0	0	0	0	0	200	300	0	0	0	0	0	0	0	200	903	0	0	0	0	0	0	0	603	903	0
3665	4	0	0	0	0	0	0	200	300	0	0	0	0	0	0	0	200	903	0	0	0	0	0	0	0	603	903	0
3665	5	0	0	0	0	0	0	200	300	0	0	0	0	0	0	0	200	903	0	0	0	0	0	0	0	603	903	0
3665	6	0	0	0	0	0	0	200	300	0	0	0	0	0	0	0	200	903	0	0	0	0	0	0	0	603	903	0
3665	7	0	0	0	0	0	0	200	300	0	0	0	0	0	0	0	200	903	0	0	0	0	0	0	0	603	903	0
3665	8	0	0	0	0	0	0	200	300	0	0	0	0	0	0	0	200	903	0	0	0	0	0	0	0	603	903	0
3665	9	0	0	0	0	0	0	200	300	0	0	0	0	0	0	0	200	903	0	0	0	0	0	0	0	603	903	0
3666	0	0	0	0	0	0	0	200	300	0	0	0	0	0	0	0	200	903	0	0	0	0	0	0	0	603	903	0
3666	1	0	0	0	0	0	0	200	300	0	0	0	0	0	0	0	200	903	0	0	0	0	0	0	0	603	903	0
3666	2	0	0	0	0	0	0	200	300	0	0	0	0	0	0	0	200	903	0	0	0	0	0	0	0	603	903	0
3666	3	0	0	0	0	0	0	200	300	0	0	0	0	0	0	0	200	903	0	0	0	0	0	0	0	603	903	0
3666	4	0	0	0	0	0	0	200	300	0	0	0	0	0	0	0	200	903	0	0	0	0	0	0	0	603	903	0
3666	5	0	0	0	0	0	0	200	300	0	0	0	0	0	0	0	200	903	0	0	0	0	0	0	0	603	903	0
3666	6	0	0	0	0	0	0	200	300	0	0	0	0	0	0	0	200	903	0	0	0	0	0	0	0	603	903	0
3666	7	0	0	0	0	0	0	200	300	0	0	0	0	0	0	0	200	903	0	0	0	0	0	0	0	603	903	0
3666	8	0	0	0	0	0	0	200	300	0	0	0	0	0	0	0	200	903	0	0	0	0	0	0	0	603	903	0
3666	9	0	0	0	0	0	0	200	300	0	0	0	0	0	0	0	200	903	0	0	0	0	0	0	0	603	903	0
3667	0	0	0	0	0	0	0	200	300	0	0	0	0	0	0	0	200	903	0	0	0	0	0	0	0	603	903	0
3667	1	0	0	0	0	0	0	200	300	0	0	0	0	0	0	0	200	903	0	0	0	0	0	0	0	603	903	0
3667	2	0	0	0	0	0	0	200	300	0	0	0	0	0	0	0	200	903	0	0	0	0	0	0	0	603	903	0
3667	3	0	0	0	0	0	0	200	300	0	0	0	0	0	0	0	200	903	0	0	0	0	0	0	0	603	903	0
3667	4	0	0	0	0	0	0	200	300	0	0	0	0	0	0	0	200	903	0	0	0	0	0	0	0	603	903	0
3667	5	0	0	0	0	0	0	200	300	0	0	0	0	0	0	0	200	903	0	0	0	0	0	0	0	603	903	0
3667	6	0	0	0	0	0	0	200	300	0	0	0	0	0	0	0	200	903	0	0	0	0	0	0	0	603	903	0
3667	7	0	0	0	0	0	0	200	300	0	0	0	0	0	0	0	200	903	0	0	0	0	0	0	0	603	903	0
3667	8	0	0	0	0	0	0	200	300	0	0	0	0	0	0	0	200	903	0	0	0	0	0	0	0	603	903	0
3667	9	0	0	0	0	0	0	200	300	0	0	0	0	0	0	0	200	903	0	0	0	0	0	0	0	603	903	0
3668	0	0	0	0	0	0	0	200	300	0	0	0	0	0	0	0	200	903	0	0	0	0	0	0	0	603	903	0
3668	1	0	0	0	0	0	0	200	300	0	0	0	0	0	0	0	200	903	0	0	0	0	0	0	0	603	903	0
3668	2	0	0	0	0	0	0	200	300	0	0	0	0	0	0	0	200	903	0	0	0	0	0	0	0	603	903	0
3668	3	0	0	0	0	0	0	200	300	0	0	0	0	0	0	0	200	903	0	0	0	0	0	0	0	603	903	0
3668	4	0	0	0	0	0	0	200	300	0	0	0	0	0	0	0	200	903	0	0	0	0	0	0	0	603	903	0
3668	5	0	0	0	0	0	0	200	300	0	0	0	0	0	0	0	200	903	0	0	0	0	0	0	0	603	903	0
3668	6	0	0	0	0	0	0	200	300	0	0	0	0	0	0	0	200	903	0	0	0	0	0	0	0	603	903	0
3668	7	0	0	0	0	0	0	200	300	0	0	0	0	0	0	0	200	903	0	0	0	0	0	0	0	603	903	0
3668	8	0	0	0	0	0	0	200	300	0	0	0	0	0	0	0	200	903	0	0	0	0	0	0	0	603	903	0
3668	9	0	0	0	0	0	0	200	300	0	0	0	0	0	0	0	200	903	0	0	0	0	0	0	0	603	903	0
3669	0	0	0	0	0	0	0	200	300	0	0	0	0	0	0	0	200	903	0	0	0	0	0	0	0	603	903	0
3669	1	0	0	0	0	0	0	200	300	0	0	0	0	0	0	0	200	903	0	0	0	0	0	0	0	603	903	0
3669	2	0	0	0	0	0	0	200	300	0	0	0	0	0	0	0	200	903	0	0	0	0	0	0	0	603	903	0
3669	3	0	0	0	0	0	0	200	300	0	0	0	0	0	0	0	200	903	0	0	0	0	0	0	0	603	903	0
3669	4	0	0	0	0	0	0	200	300	0	0	0	0	0	0	0	200	903	0	0	0	0	0	0	0	603	903	0
3669	5	0	0	0	0	0	0	200	300	0	0	0	0	0	0	0	200	903	0	0	0	0	0	0	0	603	903	0
3669	6	0	0	0	0	0	0	200	300	0	0	0	0	0	0	0	200	903	0	0	0	0	0	0	0	603	903	0
3669	7	0	0	0	0	0	0	200	300	0	0	0	0	0	0	0	200	903	0	0	0	0	0	0	0	603	903	0
3669	8	0	0	0	0	0	0	200	300	0	0	0	0	0	0	0	200	903	0	0	0	0	0	0	0	603	903	0
3669	9	0	0	0	0	0	0	200	300	0	0	0	0	0	0	0	200	903	0	0	0	0	0	0	0	603	903	0
3670	0	0	0	0	0	0	0	200	300	0	0	0	0	0	0	0	200	903	0	0	0	0	0	0	0	603	903	0
3670	1	0	0	0	0	0	0	200	300	0	0	0	0	0	0	0	200	903	0	0	0	0	0	0	0	603	903	0
3670	2	0	0	0	0	0	0	200	300	0	0	0	0	0	0	0	200	903	0	0	0	0	0	0	0	603	903	0
3670	3	0	0	0	0	0	0	200	300	0	0	0	0	0	0	0	200	903	0	0	0	0	0	0	0	603	903	0
3670	4	0	0	0	0	0	0	200	300	0	0	0	0	0	0	0	200	903	0	0	0	0	0	0	0	603	903	0
3670	5	0	0	0	0	0	0	200	300	0	0	0	0	0	0	0	200	903	0	0	0	0	0	0	0	603	903	0
3670	6	0	0	0	0	0	0	200	300	0	0	0	0	0	0	0	200	903	0	0	0	0	0	0	0	603	903	0
3670	7	0	0	0	0	0	0	200	300	0	0	0	0	0	0	0	200	903	0	0	0	0	0	0	0	603	903	0
3670	8	0	0	0	0	0	0	200	300	0	0	0	0	0	0	0	200	903	0	0	0	0	0	0	0	603	903	0
3670	9	0	0	0	0	0	0	200	300	0	0	0	0	0	0	0	200	903	0	0	0	0	0	0	0	603	903	0
3671	0	0	0	0	0	0	0	200	300	0	0	0	0	0	0	0	200	903	0	0	0	0	0	0	0	603	903	0
3671	1	0	0	0	0	0	0	200	300	0	0	0	0	0	0	0	200	903	0	0	0	0	0	0	0	603	903	0
3671	2	0	0	0	0	0	0	200	300	0	0	0	0	0	0	0	200	903	0	0	0	0	0	0	0	603	903	0
3671	3	0	0	0	0	0	0	200	300	0	0	0	0	0	0	0	200	903	0	0	0	0	0	0	0	603	903	0
3671	4	0	0	0	0	0	0	200	300	0	0	0	0	0	0	0	200	903	0	0	0	0	0	0	0	603	903	0
3671	5	0	0	0	0	0	0	200	300	0	0	0	0	0	0	0	200	903	0	0	0	0	0	0	0	603	903	0
3671	6	0	0	0	0	0	0	200	300	0	0	0	0	0	0	0	200	903	0	0	0	0	0	0	0	603	903	0
3671	7	0	0	0	0	0	0	200	300	0	0	0	0	0	0	0	200	903	0	0	0	0	0	0	0	603	903	0
3671	8	0	0	0	0	0	0	200	300	0	0	0	0	0	0	0	200	903	0	0	0	0	0	0	0	603	903	0
3671	9	0	0	0	0	0	0	200	300	0	0	0	0	0	0	0	200	903	0	0	0	0	0	0	0	603	903	0
3672	0	0	0	0	0	0	0	200	300	0	0	0	0	0	0	0	200	903	0	0	0	0	0	0	0	603	903	0
3672	1	0	0	0	0	0	0	200	300	0	0	0	0	0	0	0	200	903	0	0	0	0	0	0	0	603	903	0
3672	2	0	0	0	0	0	0	200	300	0	0	0	0	0	0	0	200	903	0	0	0	0	0	0	0	603	903	0
3672	3	0	0	0	0	0	0	200	300	0	0	0	0	0	0	0	200	903	0	0	0	0	0	0	0	603	903	0
3672	4	0	0	0	0	0	0	200	300	0	0	0	0	0	0	0	200	903	0	0	0	0	0	0	0	603	903	0
3672	5	0	0	0	0	0	0	200	300	0	0	0	0	0	0	0	200	903	0	0	0	0	0	0	0	603	903	0
3672	6	0	0	0	0	0	0	200	300	0	0	0	0	0	0	0	200	903	0	0	0	0	0	0	0	603	903	0
3672	7	0	0	0	0	0	0	200	300	0	0	0	0	0	0	0	200	903	0	0	0	0	0	0	0	603	903	0
3672	8	0	0	0	0	0	0	200	300	0	0	0	0	0	0	0	200	903	0	0	0	0	0	0	0	603	903	0
3672	9	0	0	0	0	0	0	200	300	0	0	0	0	0	0	0	200	903	0	0	0	0	0	0	0	603	903	0
3673	0	0	0	0	0	0	0	200	300	0	0	0	0	0	0	0	200	903	0	0	0	0	0	0	0	603	903	0
3673	1	0	0	0	0	0	0	200	300	0	0	0	0	0	0	0	200	903	0	0	0	0	0	0	0	603	903	0
3673	2	0	0	0	0	0	0	200	300	0	0	0	0	0	0	0	200	903	0	0	0	0	0	0	0	603	903	0
3673	3	0	0	0	0	0	0	200	300	0	0	0	0	0	0	0	200	903	0	0	0	0	0	0	0	603	903	0
3673	4	0	0	0	0	0	0	200	300	0	0	0	0	0	0	0	200	903	0	0	0	0	0	0	0	603	903	0
3673	5	0	0	0	0	0	0	200	300	0	0	0	0	0	0	0	200	903	0	0	0	0	0	0	0	603	903	0
3673	6	0	0	0	0	0	0	200	300	0	0	0	0	0	0	0	200	903	0	0	0	0	0	0	0	603	903	0
3673	7	0	0	0	0	0	0	200	300	0	0	0	0	0	0	0	200	903	0	0	0	0	0	0	0	603	903	0
3673	8	0	0	0	0	0	0	200	300	0	0	0	0	0	0	0	200	903	0	0	0	0	0	0	0	603	903	0
3673	9	0	0	0	0	0	0	200	300	0	0	0	0	0	0	0	200	903	0	0	0	0	0	0	0	603	903	0
3674	0	0	0	0	0	0	0	200	300	0	0	0	0	0	0	0	200	903	0	0	0	0	0	0	0	603	903	0
3674	1	0	0	0	0	0	0	200	300	0	0	0	0	0	0	0	200	903	0	0	0	0	0	0	0	603	903	0
3674	2	0	0	0	0	0	0	200	300	0	0	0	0	0	0	0	200	903	0	0	0	0	0	0	0	603	903	0
3674	3	0	0	0	0	0	0	200	300	0	0	0	0	0	0	0	200	903	0	0	0	0	0	0	0	603	903	0
3674	4	0	0	0	0	0	0	200	300	0	0	0	0	0	0	0	200	903	0	0	0	0	0	0	0	603	903	0
3674	5	0	0	0	0	0	0	200	300	0	0	0	0	0	0	0	200	903	0	0	0	0	0	0	0	603	903	0
3674	6	0	0	0	0	0	0	200	300	0	0	0	0	0	0	0	200	903	0	0	0	0	0	0	0	603	903	0
3674	7	0	0	0	0	0	0	200	300	0	0	0	0	0	0	0	200	903	0	0	0	0	0	0	0	603	903	0
3674	8	0	0	0	0	0	0	200	300	0	0	0	0	0	0	0	200	903	0	0	0	0	0	0	0	603	903	0
3674	9	0	0	0	0	0	0	200	300	0	0	0	0	0	0	0	200	903	0	0	0	0	0	0	0	603	903	0
3675	0	0	0	0	0	0	0	200	300	0	0	0	0	0	0	0	200	903	0	0	0	0	0	0	0	603	903	0
3675	1	0	0	0	0	0	0	200	300	0	0	0	0	0	0	0	200	903	0	0	0	0	0	0	0	603	903	0
3675	2	0	0	0	0	0	0	200	300	0	0	0	0	0	0	0	200	903	0	0	0	0	0	0	0	603	903	0
3675	3	0	0	0	0	0	0	200	300	0	0	0	0	0	0	0	200	903	0	0	0	0	0	0	0	603	903	0
3675	4	0	0	0	0	0	0	200	300	0	0	0	0	0	0	0	200	903	0	0	0	0	0	0	0	603	903	0
3675	5	0	0	0	0	0	0	200	300	0	0	0	0	0	0	0	200	903	0	0	0	0	0	0	0	603	903	0
3675	6	0	0	0	0	0	0	200	300	0	0	0	0	0	0	0	200	903	0	0	0	0	0	0	0	603	903	0
3675	7	0	0	0	0	0	0	200	300	0	0	0	0	0	0	0	200	903	0	0	0	0	0	0	0	603	903	0
3675	8	0	0	0	0	0	0	200	300	0	0	0	0	0	0	0	200	903	0	0	0	0	0	0	0	603	903	0
3675	9	0	0	0	0	0	0	200	300	0	0	0	0	0	0	0	200	903	0	0	0	0	0	0	0	603	903	0
3676	0	0	0	0	0	0	0	200	300	0	0	0	0	0	0	0	200	903	0	0	0	0	0	0	0	603	903	0
3676	1	0	0	0	0	0	0	200	300	0	0	0	0	0	0	0	200	903	0	0	0	0	0	0	0	603	903	0
3676	2	0	0	0	0	0	0	200	300	0	0	0	0	0	0	0	200	903	0	0	0	0	0	0	0	603	903	0
3676	3	0	0	0	0	0	0	200	300	0	0	0	0	0	0	0	200	903	0	0	0	0	0	0	0	603	903	0
3676	4	0	0	0	0	0	0	200	300	0	0	0	0	0	0	0	200	903	0	0	0	0	0	0	0	603	903	0
3676	5	0	0	0	0	0	0	200	300	0	0	0	0	0	0	0	200	903	0	0	0	0	0	0	0	603	903	0
3676	6	0	0	0	0	0	0	200	300	0	0	0	0	0	0	0	200	903	0	0	0	0	0	0	0	603	903	0
3676	7	0	0	0	0	0	0	200	300	0	0	0	0	0	0	0	200	903	0	0	0	0	0	0	0	603	903	0
3676	8	0	0	0	0	0	0	200	300	0	0	0	0	0	0	0	200	903	0	0	0	0	0	0	0	603	903	0
3676	9	0	0	0	0	0	0	200	300	0	0	0	0	0	0	0	200	903	0	0	0	0	0	0	0	603	903	0
3677	0	0	0	0	0	0	0	200	300	0	0	0	0	0	0	0	200	903	0	0	0	0	0	0	0	603	903	0
3677	1	0	0	0	0	0	0	200	300	0	0	0	0	0	0	0	200	903	0	0	0	0	0	0	0	603	903	0
3677	2	0	0	0	0	0	0	200	300	0	0	0	0	0	0	0	200	903	0	0	0	0	0	0	0	603	903	0
3677	3	0	0	0	0	0	0	200	300	0	0	0	0	0	0	0	200	903	0	0	0	0	0	0	0	603	903	0
3677	4	0	0	0	0	0	0	200	300	0	0	0	0	0	0	0	200	903	0	0	0	0	0	0	0	603	903	0
3677	5	0	0	0	0	0	0	200	300	0	0	0	0	0	0	0	200	903	0	0	0	0	0	0	0	603	903	0
3677	6	0	0	0	0	0	0	200	300	0	0	0	0	0	0	0	200	903	0	0	0	0	0	0	0	603	903	0
3677	7	0	0	0	0	0	0	200	300	0	0	0	0	0	0	0	200	903	0	0	0	0	0	0	0	603	903	0
3677	8	0	0	0	0	0	0	200	300	0	0	0	0	0	0	0	200	903	0	0	0	0	0	0	0	603	903	0
3677	9	0	0	0	0	0	0	200	300	0	0	0	0	0	0	0	200	903	0	0	0	0	0	0	0	603	903	0
3678	0	0	0	0	0	0	0	200	300	0	0	0	0	0	0	0	200	903	0	0	0	0	0	0	0	603	903	0
3678	1	0	0	0	0	0	0	200	300	0	0	0	0	0	0	0	200	903	0	0	0	0	0	0	0	603	903	0
3678	2	0	0	0	0	0	0	200	300	0	0	0	0	0	0	0	200	903	0	0	0	0	0	0	0	603	903	0
3678	3	0	0	0	0	0	0	200	300	0	0	0	0	0	0	0	200	903	0	0	0	0	0	0	0	603	903	0
3678	4	0	0	0	0	0	0	200	300	0	0	0	0	0	0	0	200	903	0	0	0	0	0	0	0	603	903	0
3678	5	0	0	0	0	0	0	200	300	0	0	0	0	0	0	0	200	903	0	0	0	0	0	0	0	603	903	0
3678	6	0	0	0	0	0	0	200	300	0	0	0	0	0	0	0	200	903	0	0	0	0	0	0	0	603	903	0
3678	7	0	0	0	0	0	0	200	300	0	0	0	0	0	0	0	200	903	0	0	0	0	0	0	0	603	903	0
3678	8	0	0	0	0	0	0	200	300	0	0	0	0	0	0	0	200	903	0	0	0	0	0	0	0	603	903	0
3678	9	0	0	0	0	0	0	200	300	0	0	0	0	0	0	0	200	903	0	0	0	0	0	0	0	603	903	0
3679	0	0	0	0	0	0	0	200	300	0	0	0	0	0	0	0	200	903	0	0	0	0	0	0	0	603	903	0
3679	1	0	0	0	0	0	0	200	300	0	0	0	0	0	0	0	200	903	0	0	0	0	0	0	0	603	903	0
3679	2	0	0	0	0	0	0	200	300	0	0	0	0	0	0	0	200	903	0	0	0	0	0	0	0	603	903	0
3679	3	0	0	0	0	0	0	200	300	0	0	0	0	0	0	0	200	903	0	0	0	0	0	0	0	603	903	0
3679	4	0	0	0	0	0	0	200	300	0	0	0	0	0	0	0	200	903	0	0	0	0	0	0	0	603	903	0
3679	5	0	0	0	0	0	0	200	300	0	0	0	0	0	0	0	200	903	0	0	0	0	0	0	0	603	903	0
3679	6	0	0	0	0	0	0	200	300	0	0	0	0	0	0	0	200	903	0	0	0	0	0	0	0	603	903	0
3679	7	0	0	0	0	0	0	200	300	0	0	0	0	0	0	0	200	903	0	0	0	0	0	0	0	603	903	0
3679	8	0	0	0	0	0	0	200	300	0	0	0	0	0	0	0	200	903	0	0	0	0	0	0	0	603	903	0
3679	9	0	0	0	0	0	0	200	300	0	0	0	0	0	0	0	200	903	0	0	0	0	0	0	0	603	903	0
3680	0	0	0	0	0	0	0	200	300	0	0	0	0	0	0	0	200	903	0	0	0	0	0	0	0	603	903	0
3680	1	0	0	0	0	0	0	200	300	0	0	0	0	0	0	0	200	903	0	0	0	0	0	0	0	603	903	0
3680	2	0	0	0	0	0	0	200	300	0	0	0	0	0	0	0	200	903	0	0	0	0	0	0	0	603	903	0
3680	3	0	0	0	0	0	0	200	300	0	0	0	0	0	0	0	200	903	0	0	0	0	0	0	0	603	903	0
3680	4	0	0	0	0	0	0	200	300	0	0	0	0	0	0	0	200	903	0	0	0	0	0	0	0	603	903	0
3680	5	0	0	0	0	0	0	200	300	0	0	0	0	0	0	0	200	903	0	0	0	0	0	0	0	603	903	0
3680	6	0	0	0	0	0	0	200	300	0	0	0	0	0	0	0	200	903	0	0	0	0	0	0	0	603	903	0
3680	7	0	0	0	0	0	0	200	300	0	0	0	0	0	0	0	200	903	0	0	0	0	0	0	0	603	903	0
3680	8	0	0	0	0	0	0	200	300	0	0	0	0	0	0	0	200	903	0	0	0	0	0	0	0	603	903	0
3680	9	0	0	0	0	0	0	200	300	0	0	0	0	0	0	0	200	903	0	0	0	0	0	0	0	603	903	0
3681	0	0	0	0	0	0	0	200	300	0	0	0	0	0	0	0	200	903	0	0	0	0	0	0	0	603	903	0
3681	1	0	0	0	0	0	0	200	300	0	0	0	0	0	0	0	200	903	0	0	0	0	0	0	0	603	903	0
3681	2	0	0	0	0	0	0	200	300	0	0	0	0	0	0	0	200	903	0	0	0	0	0	0	0	603	903	0
3681	3	0	0	0	0	0	0	200	300	0	0	0	0	0	0	0	200	903	0	0	0	0	0	0	0	603	903	0
3681	4	0	0	0	0	0	0	200	300	0	0	0	0	0	0	0	200	903	0	0	0	0	0	0	0	603	903	0
3681	5	0	0	0	0	0	0	200	300	0	0	0	0	0	0	0	200	903	0	0	0	0	0	0	0	603	903	0
3681	6	0	0	0	0	0	0	200	300	0	0	0	0	0	0	0	200	903	0	0	0	0	0	0	0	603	903	0
3681	7	0	0	0	0	0	0	200	300	0	0	0	0	0	0	0	200	903	0	0	0	0	0	0	0	603	903	0
3681	8	0	0	0	0	0	0	200	300	0	0	0	0	0	0	0	200	903	0	0	0	0	0	0	0	603	903	0
3681	9	0	0	0	0	0	0	200	300	0	0	0	0	0	0	0	200	903	0	0	0	0	0	0	0	603	903	0
3682	0	0	0	0	0	0	0	200	300	0	0	0	0	0	0	0	200	903	0	0	0	0	0	0	0	603	903	0
3682	1	0	0	0	0	0	0	200	300	0	0	0	0	0	0	0	200	903	0	0	0	0	0	0	0	603	903	0
3682	2	0	0	0	0	0	0	200	300	0	0	0	0	0	0	0	200	903	0	0	0	0	0	0	0	603	903	0
3682	3	0	0	0	0	0	0	200	300	0	0	0	0	0	0	0	200	903	0	0	0	0	0	0	0	603	903	0
3682	4	0	0	0	0	0	0	200	300	0	0	0	0	0	0	0	200	903	0	0	0	0	0	0	0	603	903	0
3682	5	0	0	0	0	0	0	200	300	0	0	0	0	0	0	0	200	903	0	0	0	0	0	0	0	603	903	0
3682	6	0	0	0	0	0	0	200	300	0	0	0	0	0	0	0	200	903	0	0	0	0	0	0	0	603	903	0
3682	7	0	0	0	0	0	0	200	300	0	0	0	0	0	0	0	200	903	0	0	0	0	0	0	0	603	903	0
3682	8	0	0	0	0	0	0	200	300	0	0	0	0	0	0	0	200	903	0	0	0	0	0	0	0	603	903	0
3682	9	0	0	0	0	0	0	200	300	0	0	0	0	0	0	0	200	903	0	0	0	0	0	0	0	603	903	0
3683	0	0	0	0	0	0	0	200	300	0	0	0	0	0	0	0	200	903	0	0	0	0	0	0	0	603	903	0
3683	1	0	0	0	0	0	0	200	300	0	0	0	0	0	0	0	200	903	0	0	0	0	0	0	0	603	903	0
3683	2	0	0	0	0	0	0	200	300	0	0	0	0	0	0	0	200	903	0	0	0	0	0	0	0	603	903	0
3683	3	0	0	0	0	0	0	200	300	0	0	0	0	0	0	0	200	903	0	0	0	0	0	0	0	603	903	0
3683	4	0	0	0	0	0	0	200	300	0	0	0	0	0	0	0	200	903	0	0	0	0	0	0	0	603	903	0
3683	5	0	0	0	0	0	0	200	300	0	0	0	0	0	0	0	200	903	0	0	0	0	0	0	0	603	903	0
3683	6	0	0	0	0	0	0	200	300	0	0	0	0	0	0	0	200	903	0	0	0	0	0	0	0	603	903	0
3683	7	0	0	0	0	0	0	200	300	0	0	0	0	0	0	0	200	903	0	0	0	0	0	0	0	603	903	0
3683	8	0	0	0	0	0	0	200	300	0	0	0	0	0	0	0	200	903	0	0	0	0	0	0	0	603	903	0
3683	9	0	0	0	0	0	0	200	300	0	0	0	0	0	0	0	200	903	0	0	0	0	0	0	0	603	903	0
3684	0	0	0	0	0	0	0	200	300	0	0	0	0	0	0	0	200	903	0	0	0	0	0	0	0	603	903	0
3684	1	0	0	0	0	0	0	200	300	0	0	0	0	0	0	0	200	903	0	0	0	0	0	0	0	603	903	0
3684	2	0	0	0	0	0	0	200	300	0	0	0	0	0	0	0	200	903	0	0	0	0	0	0	0	603	903	0
3684	3	0	0	0	0	0	0	200	300	0	0	0	0	0	0	0	200	903	0	0	0	0	0	0	0	603	903	0
3684	4	0	0	0	0	0	0	200	300	0	0	0	0	0	0	0	200	903	0	0	0	0	0	0	0	603	903	0
3684	5	0	0	0	0	0	0	200	300	0	0	0	0	0	0	0	200	903	0	0	0	0	0	0	0	603	903	0
3684	6	0	0	0	0	0	0	200	300	0	0	0	0	0	0	0	200	903	0	0	0	0	0	0	0	603	903	0
3684	7	0	0	0	0	0	0	200	300	0	0	0	0	0	0	0	200	903	0	0	0	0	0	0	0	603	903	0
3684	8	0	0	0	0	0	0	200	300	0	0	0	0	0	0	0	200	903	0	0	0	0	0	0	0	603	903	0
3684	9	0	0	0	0	0	0	200	300	0	0	0	0	0	0	0	200	903	0	0	0	0	0	0	0	603	903	0
3685	0	0	0	0	0	0	0	200	300	0	0	0	0	0	0	0	200	903	0	0	0	0	0	0	0	603	903	0
3685	1	0	0	0	0	0	0	200	300	0	0	0	0	0	0	0	200	903	0	0	0	0	0	0	0	603	903	0
3685	2	0	0	0	0	0	0	200	300	0	0	0	0	0	0	0	200	903	0	0	0	0	0	0	0	603	903	0
3685	3	0	0	0	0	0	0	200	300	0	0	0	0	0	0	0	200	903	0	0	0	0	0	0	0	603	903	0
3685	4	0	0	0	0	0	0	200	300	0	0	0	0	0	0	0	200	903	0	0	0	0	0	0	0	603	903	0
3685	5	0	0	0	0	0	0	200	300	0	0	0	0	0	0	0	200	903	0	0	0	0	0	0	0	603	903	0
3685	6	0	0	0	0	0	0	200	300	0	0	0	0	0	0	0	200	903	0	0	0	0	0	0	0	603	903	0
3685	7	0	0	0	0	0	0	200	300	0	0	0	0	0	0	0	200	903	0	0	0	0	0	0	0	603	903	0
3685	8	0	0	0	0	0	0	200	300	0	0	0	0	0	0	0	200	903	0	0	0	0	0	0	0	603	903	0
3685	9	0	0	0	0	0	0	200	300	0	0	0	0	0	0	0	200	903	0	0	0	0	0	0	0	603	903	0
3686	0	0	0	0	0	0	0	200	300	0	0	0	0	0	0	0	200	903	0	0	0	0	0	0	0	603	903	0
3686	1	0	0	0	0	0	0	200	300	0	0	0	0	0	0	0	200	903	0	0	0	0	0	0	0	603	903	0
3686	2	0	0	0	0	0	0	200	300	0	0	0	0	0	0	0	200	903	0	0	0	0	0	0	0	603	903	0
3686	3	0	0	0	0	0	0	200	300	0	0	0	0	0	0	0	200	903	0	0	0	0	0	0	0	603	903	0
3686	4	0	0	0	0	0	0	200	300	0	0	0	0	0	0	0	200	903	0	0	0	0	0	0	0	603	903	0
3686	5	0	0	0	0	0	0	200	300	0	0	0	0	0	0	0	200	903	0	0	0	0	0	0	0	603	903	0
3686	6	0	0	0	0	0	0	200	300	0	0	0	0	0	0	0	200	903	0	0	0	0	0	0	0	603	903	0
3686	7	0	0	0	0	0	0	200	300	0	0	0	0	0	0	0	200	903	0	0	0	0	0	0	0	603	903	0
3686	8	0	0	0	0	0	0	200	300	0	0	0	0	0	0	0	200	903	0	0	0	0	0	0	0	603	903	0
3686	9	0	0	0	0	0	0	200	300	0	0	0	0	0	0	0	200	903	0	0	0	0	0	0	0	603	903	0
3687	0	0	0	0	0	0	0	200	300	0	0	0	0	0	0	0	200	903	0	0	0	0	0	0	0	603	903	0
3687	1	0	0	0	0	0	0	200	300	0	0	0	0	0	0	0	200	903	0	0	0	0	0	0	0	603	903	0
3687	2	0	0	0	0	0	0	200	300	0	0	0	0	0	0	0	200	903	0	0	0	0	0	0	0	603	903	0
3687	3	0	0	0	0	0	0	200	300	0	0	0	0	0	0	0	200	903	0	0	0	0	0	0	0	603	903	0
3687	4	0	0	0	0	0	0	200	300	0	0	0	0	0	0	0	200	903	0	0	0	0	0	0	0	603	903	0
3687	5	0	0	0	0	0	0	200	300	0	0	0	0	0	0	0	200	903	0	0	0	0	0	0	0	603	903	0
3687	6	0	0	0	0	0	0	200	300	0	0	0	0	0	0	0	200	903	0	0	0	0	0	0	0	603	903	0
3687	7	0	0	0	0	0	0	200	300	0	0	0	0	0	0	0	200	903	0	0	0	0	0	0	0	603	903	0
3687	8	0	0	0	0	0	0	200	300	0	0	0	0	0	0	0	200	903	0	0	0	0	0	0	0	603	903	0
3687	9	0	0	0	0	0	0	200	300	0	0	0	0	0	0	0	200	903	0	0	0	0	0	0	0	603	903	0
3688	0	0	0	0	0	0	0	200	300	0	0	0	0	0	0	0	200	903	0	0	0	0	0	0	0	603	903	0
3688	1	0	0	0	0	0	0	200	300	0	0	0	0	0	0	0	200	903	0	0	0	0	0	0	0	603	903	0
3688	2	0	0	0	0	0	0	200	300	0	0	0	0	0	0	0	200	903	0	0	0	0	0	0	0	603	903	0
3688	3	0	0	0	0	0	0	200	300	0	0	0	0	0	0	0	200	903	0	0	0	0	0	0	0	603	903	0
3688	4	0	0	0	0	0	0	200	300	0	0	0	0	0	0	0	200	903	0	0	0	0	0	0	0	603	903	0
3688	5	0	0	0	0	0	0	200	300	0	0	0	0	0	0	0	200	903	0	0	0	0	0	0	0	603	903	0
3688	6	0	0	0	0	0	0	200	300	0	0	0	0	0	0	0	200	903	0	0	0	0	0	0	0	603	903	0
3688	7	0	0	0	0	0	0	200	300	0	0	0	0	0	0	0	200	903	0	0	0	0	0	0	0	603	903	0
3688	8	0	0	0	0	0	0	200	300	0	0	0	0	0	0	0	200	903	0	0	0	0	0	0	0	603	903	0
3688	9	0	0	0	0	0	0	200	300	0	0	0	0	0	0	0	200	903	0	0	0	0	0	0	0	603	903	0
3689	0	0	0	0	0	0	0	200	300	0	0	0	0	0	0	0	200	903	0	0	0	0	0	0	0	603	903	0
3689	1	0	0	0	0	0	0	200	300	0	0	0	0	0	0	0	200	903	0	0	0	0	0	0	0	603	903	0
3689	2	0	0	0	0	0	0	200	300	0	0	0	0	0	0	0	200	903	0	0	0	0	0	0	0	603	903	0
3689	3	0	0	0	0	0	0	200	300	0	0	0	0	0	0	0	200	903	0	0	0	0	0	0	0	603	903	0
3689	4	0	0	0	0	0	0	200	300	0	0	0	0	0	0	0	200	903	0	0	0	0	0	0	0	603	903	0
3689	5	0	0	0	0	0	0	200	300	0	0	0	0	0	0	0	200	903	0	0	0	0	0	0	0	603	903	0
3689	6	-1.71086	9.93576	0.652778	-518.465	420.586	-2048.54	200	300	0	0	0	0	0	0	0	200	903	0	0	0	0	0	0	0	603	903	0
3689	7	-1.10051	10.2409	0.0424264	-793.123	420.586	-2277.42	200	300	0	0	0	0	0	0	0	200	903	0	0	0	0	0	0	0	603	903	0
3689	8	-0.795335	10.6987	-0.873101	-701.57	603.692	-2323.2	200	300	0	0	0	0	0	0	0	200	903	0	0	0	0	0	0	0	603	903	0
3689	9	-1.55827	10.0883	-1.17828	-1250.89	603.692	-2231.64	712.351	1361.62	0	0	0	0	0	0	0	200	903	0	0	0	0	0	0	0	603	903	0
3690	0	0	0	0	0	0	0	200	300	0	0	0	0	0	0	0	200	903	0	0	0	0	0	0	0	603	903	0
3690	1	-1.2531	11.1565	1.26313	-1067.78	664.727	-1728.1	200	300	0	0	0	0	0	0	0	200	903	0	0	0	0	0	0	0	603	903	0
3690	2	-0.490159	11.1565	1.26313	-701.57	847.832	-1956.99	200	300	0	0	0	0	0	0	0	200	903	0	0	0	0	0	0	0	603	903	0
3690	3	0.272781	11.3091	-0.262749	-701.57	786.797	-2414.75	200	300	0	0	0	0	0	0	0	200	903	0	0	0	0	0	0	0	603	903	0
3690	4	0.120193	11.3091	0.0424264	-793.123	786.797	-2506.3	200	300	0	0	0	0	0	0	0	200	903	0	0	0	0	0	0	0	603	903	0
3690	5	-1.55827	12.3772	-0.262749	-976.228	1091.97	-2506.3	200	300	0	0	0	0	0	0	0	200	903	0	0	0	0	0	0	0	603	903	0
3690	6	0.272781	11.1565	1.87348	-884.675	664.727	-2643.63	200	300	0	0	0	0	0	0	0	200	903	0	0	0	0	0	0	0	603	903	0
3690	7	-0.490159	11.3091	2.17866	-152.254	1091.97	-2643.63	200	300	0	0	0	0	0	0	0	200	903	0	0	0	0	0	0	0	603	903	0
3690	8	-0.642747	11.4616	1.87348	-1342.44	786.797	-2552.08	200	300	0	0	0	0	0	0	0	200	903	0	0	0	0	0	0	0	603	903	0
3690	9	1.03572	11.4616	1.26313	-1433.99	908.867	-2506.3	200	300	0	0	0	0	0	0	0	200	903	0	0	0	0	0	0	0	603	903	0
3691	0	-0.642747	11.7668	1.56831	-1250.89	1030.94	-2689.41	200	300	0	0	0	0	0	0	0	200	903	0	0	0	0	0	0	0	603	903	0
3691	1	-1.55827	10.5461	1.56831	-1159.33	908.867	-2735.18	200	300	0	0	0	0	0	0	0	200	903	0	0	0	0	0	0	0	603	903	0
3691	2	0.120193	11.9194	1.56831	-1708.65	1153.01	-2597.85	200	300	0	0	0	0	0	0	0	200	903	0	0	0	0	0	0	0	603	903	0
3691	3	-1.86345	12.072	1.87348	-1800.2	908.867	-2780.96	200	300	0	0	0	0	0	0	0	200	903	0	0	0	0	0	0	0	603	903	0
3691	4	-1.71086	11.4616	2.48383	-1800.2	969.903	-2826.74	200	300	0	0	0	0	0	0	0	200	903	0	0	0	0	0	0	0	603	903	0
3691	5	-1.2531	13.2927	1.56831	-1525.55	1275.08	-3238.72	200	300	0	0	0	0	0	0	0	200	903	0	0	0	0	0	0	0	603	903	0
3691	6	-1.40569	13.4453	2.17866	-1708.65	1336.11	-2964.07	200	300	0	0	0	0	0	0	0	200	903	0	0	0	0	0	0	0	603	903	0
3691	7	-3.08415	13.5979	2.17866	-1525.55	1153.01	-3009.84	200	300	0	0	0	0	0	0	0	200	903	0	0	0	0	0	0	0	603	903	0
3691	8	-0.0323951	13.1401	2.48383	-1800.2	1153.01	-2826.74	200	300	0	0	0	0	0	0	0	200	903	0	0	0	0	0	0	0	603	903	0
3691	9	-2.62639	14.2082	3.09418	-2166.41	847.832	-3055.62	200	300	0	0	0	0	0	0	0	200	903	0	0	0	0	0	0	0	603	903	0
3692	0	-2.01604	15.4289	3.70454	-1342.44	1091.97	-3376.05	200	300	0	0	0	0	0	0	0	200	903	0	0	0	0	0	0	0	603	903	0
3692	1	-1.86345	14.8186	2.48383	-1708.65	1641.29	-3284.5	200	300	0	0	0	0	0	0	0	200	903	0	0	0	0	0	0	0	603	903	0
3692	2	-2.16863	14.8186	4.92524	-1983.31	1580.25	-3330.28	200	300	0	0	0	0	0	0	0	200	903	0	0	0	0	0	0	0	603	903	0
3692	3	-3.08415	14.0556	4.31489	-1891.76	1458.18	-3467.61	200	300	0	0	0	0	0	0	0	200	903	0	0	0	0	0	0	0	603	903	0
3692	4	-3.84709	13.7505	4.92524	-1250.89	1275.08	-3604.93	200	300	0	0	0	0	0	0	0	200	903	0	0	0	0	0	0	0	603	903	0
3692	5	-0.490159	13.903	6.45112	-2257.97	1763.36	-3421.83	200	300	0	0	0	0	0	0	0	200	903	0	0	0	0	0	0	0	603	903	0
3692	6	-2.93157	13.7505	6.14594	-1983.31	1702.32	-3604.93	200	300	0	0	0	0	0	0	0	200	903	0	0	0	0	0	0	0	603	903	0
3692	7	-2.4738	11.7668	5.53559	-2349.52	2007.5	-3467.61	200	300	0	0	0	0	0	0	0	200	903	0	0	0	0	0	0	0	603	903	0
3692	8	-3.38933	13.4453	6.14594	-2441.07	1275.08	-3376.05	200	300	0	0	0	0	0	0	0	200	903	0	0	0	0	0	0	0	603	903	0
3692	9	-3.38933	12.6823	5.23041	-2624.18	1519.22	-3330.28	200	300	0	0	0	0	0	0	0	200	903	0	0	0	0	0	0	0	603	903	0
3693	0	-3.08415	11.4616	6.75629	-2898.84	1580.25	-2964.07	200	300	0	0	0	0	0	0	0	200	903	0	0	0	0	0	0	0	603	903	0
3693	1	-1.86345	10.3935	5.53559	-2807.28	1946.46	-2597.85	200	300	0	0	0	0	0	0	0	200	903	0	0	0	0	0	0	0	603	903	0
3693	2	-1.55827	9.93576	5.53559	-2624.18	1885.43	-2506.3	200	300	0	0	0	0	0	0	0	200	903	0	0	0	0	0	0	0	603	903	0
3693	3	0	0	0	0	0	0	200	300	0	0	0	0	0	0	0	200	903	0	0	0	0	0	0	0	603	903	0
3693	4	0	0	0	0	0	0	200	300	0	0	0	0	0	0	0	200	903	0	0	0	0	0	0	0	603	903	0
3693	5	0	0	0	0	0	0	200	300	0	0	0	0	0	0	0	200	903	0	0	0	0	0	0	0	603	903	0
3693	6	0	0	0	0	0	0	200	300	0	0	0	0	0	0	0	200	903	0	0	0	0	0	0	0	603	903	0
3693	7	0	0	0	0	0	0	200	300	0	0	0	0	0	0	0	200	903	0	0	0	0	0	0	0	603	903	0
3693	8	0	0	0	0	0	0	200	300	0	0	0	0	0	0	0	200	903	0	0	0	0	0	0	0	603	903	0
3693	9	0	0	0	0	0	0	200	300	0	0	0	0	0	0	0	200	903	0	0	0	0	0	0	0	603	903	0
3694	0	0	0	0	0	0	0	200	300	0	0	0	0	0	0	0	200	903	0	0	0	0	0	0	0	603	903	0
3694	1	0	0	0	0	0	0	200	300	0	0	0	0	0	0	0	200	903	0	0	0	0	0	0	0	603	903	0
3694	2	0	0	0	0	0	0	200	300	0	0	0	0	0	0	0	200	903	0	0	0	0	0	0	0	603	903	0
3694	3	0	0	0	0	0	0	200	300	0	0	0	0	0	0	0	200	903	0	0	0	0	0	0	0	603	903	0
3694	4	0	0	0	0	0	0	200	300	0	0	0	0	0	0	0	200	903	0	0	0	0	0	0	0	603	903	0
3694	5	0	0	0	0	0	0	200	300	0	0	0	0	0	0	0	200	903	0	0	0	0	0	0	0	603	903	0
3694	6	0	0	0	0	0	0	200	300	0	0	0	0	0	0	0	200	903	0	0	0	0	0	0	0	603	903	0
3694	7	0	0	0	0	0	0	200	300	0	0	0	0	0	0	0	200	903	0	0	0	0	0	0	0	603	903	0
3694	8	0	0	0	0	0	0	200	300	0	0	0	0	0	0	0	200	903	0	0	0	0	0	0	0	603	903	0
3694	9	0	0	0	0	0	0	200	300	0	0	0	0	0	0	0	200	903	0	0	0	0	0	0	0	603	903	0
3695	0	0	0	0	0	0	0	200	300	0	0	0	0	0	0	0	200	903	0	0	0	0	0	0	0	603	903	0
3695	1	0	0	0	0	0	0	200	300	0	0	0	0	0	0	0	200	903	0	0	0	0	0	0	0	603	903	0
3695	2	0	0	0	0	0	0	200	300	0	0	0	0	0	0	0	200	903	0	0	0	0	0	0	0	603	903	0
3695	3	0	0	0	0	0	0	200	300	0	0	0	0	0	0	0	200	903	0	0	0	0	0	0	0	603	903	0
3695	4	0	0	0	0	0	0	200	300	0	0	0	0	0	0	0	200	903	0	0	0	0	0	0	0	603	903	0
3695	5	0	0	0	0	0	0	200	300	0	0	0	0	0	0	0	200	903	0	0	0	0	0	0	0	603	903	0
[truncated: 1,414 more rows]
