# Supplementary material for: The Effects of an Extemporaneous Speech Dual-task on Older Adult Gait Control
Source: Research Square preprint supplement (doi:10.21203/rs.3.rs-7674245/v1), 2025-11-18
Supplement: Supplementary file 107 [file DT9Walk5.xlsx]

## Sheet: Sheet1
Trajectories
		09:LFHD			09:RFHD			09:LBHD			09:RBHD			09:C7			09:T10			09:CLAV			09:STRN			09:RBAK			09:LSHO			09:LUPA			09:LELB			09:LFRM			09:LWRA			09:LWRB			09:LFIN
Frame	Sub Frame	X	Y	Z	X	Y	Z	X	Y	Z	X	Y	Z	X	Y	Z	X	Y	Z	X	Y	Z	X	Y	Z	X	Y	Z	X	Y	Z	X	Y	Z	X	Y	Z	X	Y	Z	X	Y	Z	X	Y	Z	X	Y	Z
		mm	mm	mm	mm	mm	mm	mm	mm	mm	mm	mm	mm	mm	mm	mm	mm	mm	mm	mm	mm	mm	mm	mm	mm	mm	mm	mm	mm	mm	mm	mm	mm	mm	mm	mm	mm	mm	mm	mm	mm	mm	mm	mm	mm	mm	mm	mm	mm
4635	0	184.752	-1943.54	1617.27	281.387	-1936.78	1615.65	170.215	-2097.69	1651.21	315.588	-2083	1640.68	228.897	-2143.11	1465.86	205.201	-2184.5	1204.84	236.902	-1988.65	1390.66	233.452	-1890.84	1184.21	268.696	-2197.8	1261.85	52.0002	-2043.04	1436.55	-39.2812	-1986.85	1226.73	-63.0887	-1945.52	1134.9	-60.1939	-1778.55	1065.52	-10.283	-1705.64	1036.74	-73.2	-1726.8	1009.37	-60.0776	-1649.31	1012.31
4636	0	186.121	-1929.92	1618.09	282.67	-1923.32	1616.12	171.616	-2083.88	1652.32	317.377	-2069.46	1641.94	229.887	-2129.18	1466.44	205.864	-2169.71	1205.13	237.981	-1974.46	1391.68	234.982	-1875.57	1185.61	269.533	-2182.95	1262.06	53.0777	-2028.97	1437.55	-38.5347	-1972.37	1227.85	-62.6734	-1931.55	1135.8	-60.5543	-1764.98	1065.91	-11.0732	-1692	1036.56	-74.0273	-1713.53	1009.46	-61.0917	-1636.03	1012.02
4637	0	187.393	-1916.15	1619.27	284.162	-1909.54	1617.39	173.069	-2070.07	1653.73	318.425	-2055.62	1642.93	230.816	-2115.1	1467.55	206.544	-2155.12	1205.94	239.162	-1960.29	1393.21	236.209	-1860.41	1187.36	270.283	-2168.07	1262.68	53.9322	-2014.92	1438.98	-37.803	-1958.05	1229.24	-62.3871	-1918.08	1137	-61.1435	-1752.12	1066	-11.9327	-1679.18	1035.78	-74.9865	-1701.19	1009.12	-62.3929	-1623.67	1010.84
4638	0	188.858	-1902.34	1620.67	285.473	-1895.77	1618.7	174.545	-2056.3	1655.26	319.929	-2041.88	1643.96	231.762	-2100.97	1468.75	207.198	-2140.68	1207.3	239.739	-1946.72	1393.85	237.14	-1845.62	1188.99	270.98	-2153.31	1263.78	54.6489	-2000.92	1440.14	-36.7263	-1944.03	1230.7	-61.8896	-1905.22	1138.22	-61.7369	-1740.09	1065.41	-13.0648	-1667.2	1034.3	-76.0599	-1689.88	1008.08	-63.8379	-1612.24	1008.61
4639	0	190.315	-1888.29	1622.21	286.856	-1881.8	1619.7	176.154	-2042.29	1657.06	321.718	-2027.9	1645.29	232.691	-2086.81	1470.29	207.737	-2126.59	1208.91	240.329	-1932.45	1395.22	237.695	-1830.97	1190.79	271.621	-2138.92	1265.2	55.5672	-1986.79	1442.08	-35.8035	-1930.3	1232.38	-61.1394	-1892.86	1139.64	-62.2804	-1728.75	1064.44	-14.8338	-1655.91	1031.94	-77.1902	-1679.5	1006.39	-65.546	-1601.78	1005.62
4640	0	191.879	-1874.19	1624.09	288.406	-1867.81	1620.62	177.845	-2028.1	1659.09	323.017	-2013.67	1646.26	233.478	-2072.69	1472.06	208.123	-2112.77	1210.82	240.898	-1918.59	1396.8	237.97	-1816.68	1192.43	272.166	-2124.89	1266.97	56.4858	-1972.87	1444.36	-34.7698	-1916.76	1234.33	-60.3825	-1881.06	1141.39	-63.122	-1718.19	1063.28	-16.1832	-1645.77	1029.19	-78.4148	-1670.07	1004.53	-67.3163	-1592.31	1001.92
4641	0	193.047	-1859.92	1625.68	289.576	-1853.77	1621.8	179.135	-2013.96	1661.02	324.379	-1999.5	1647.11	234.148	-2058.64	1473.93	208.45	-2099.17	1212.89	240.888	-1904.72	1398.1	238.247	-1802.89	1194.46	272.634	-2111.09	1268.89	57.0075	-1959.17	1446.85	-33.422	-1903.8	1236.14	-59.7387	-1869.49	1143.05	-63.9338	-1708.49	1061.77	-17.7251	-1636.18	1026.2	-79.7934	-1661.75	1001.71	-69.3056	-1583.85	997.602
4642	0	194.077	-1845.79	1627.14	290.278	-1839.9	1622.32	180.403	-1999.66	1662.96	325.486	-1985.23	1648.11	234.844	-2044.87	1475.67	208.848	-2085.75	1214.91	240.943	-1891.02	1399.68	237.847	-1789.44	1195.95	273.159	-2097.38	1270.76	57.4852	-1945.86	1449.05	-32.6365	-1891	1238.16	-58.9911	-1858.44	1144.78	-64.7983	-1699.4	1059.72	-19.3354	-1627.39	1022.58	-81.1202	-1654.15	998.694	-71.4616	-1576.24	992.332
4643	0	194.726	-1831.71	1628.29	290.772	-1825.95	1622.97	181.348	-1985.53	1664.78	326.33	-1970.95	1648.98	235.448	-2031.37	1477.23	209.414	-2072.47	1216.77	240.791	-1877.41	1400.94	237.839	-1776.19	1197.87	273.822	-2083.9	1272.36	57.9759	-1932.87	1451.12	-31.7456	-1878.76	1239.65	-57.9923	-1848.05	1145.88	-65.8608	-1691.03	1057.26	-21.0523	-1619.21	1018.7	-82.6114	-1647.39	995.006	-73.6558	-1569.54	986.482
4644	0	195.076	-1817.62	1629.31	291.308	-1811.32	1623.93	181.961	-1971.25	1666.83	326.853	-1956.54	1650.57	235.995	-2018.1	1478.94	210.051	-2059.55	1218.71	240.471	-1863.77	1402.65	237.408	-1763.33	1199.86	274.562	-2070.46	1274.17	58.2974	-1920.27	1453.1	-30.9824	-1866.9	1241.37	-57.5868	-1837.82	1147.24	-67.03	-1683.3	1054.69	-23.0633	-1611.93	1014.07	-84.3116	-1641.44	991.175	-76.0398	-1563.72	980.272
4645	0	194.912	-1803.58	1630.21	290.802	-1797.77	1624.47	182.238	-1957.1	1668.65	327.096	-1942.01	1652.34	236.51	-2004.9	1480.64	210.857	-2046.79	1220.5	240.299	-1850.78	1404.21	236.814	-1750.57	1201.63	275.502	-2057.24	1275.95	58.3748	-1908.02	1455.21	-30.4461	-1855.61	1242.64	-56.6168	-1828.29	1147.76	-68.3206	-1676.17	1051.59	-25.1816	-1605.4	1008.89	-86.1137	-1636.24	987	-78.4927	-1558.74	973.53
4646	0	194.422	-1789.73	1630.78	290.388	-1783.17	1625.13	182.377	-1942.9	1670.36	327.234	-1927.48	1654.37	237.168	-1991.86	1482.4	211.853	-2034.12	1222.08	240.099	-1837.63	1405.83	236.52	-1737.89	1203.38	276.504	-2044.19	1277.61	58.4073	-1895.68	1456.83	-29.9165	-1844.81	1243.57	-55.9805	-1819.09	1148.27	-69.5437	-1669.71	1048.19	-27.1914	-1599.48	1003.72	-87.9612	-1631.71	982.538	-80.9577	-1554.56	966.326
4647	0	194.069	-1775.79	1631.61	290.181	-1768.99	1626.38	182.23	-1928.78	1672.21	326.994	-1913	1656.38	237.613	-1978.88	1484.19	212.847	-2021.49	1223.7	239.923	-1824.82	1407.5	235.661	-1725.47	1204.79	277.495	-2031.33	1279.33	58.2411	-1884.2	1458.14	-29.5167	-1834.61	1244.16	-55.017	-1810.59	1148.21	-71.0623	-1663.97	1044.62	-29.4218	-1594.27	998.266	-89.9069	-1627.9	978.026	-83.6108	-1551.27	958.905
4648	0	193.244	-1762.11	1632.32	289.359	-1755.22	1627.28	181.767	-1914.83	1674	326.37	-1898.65	1658.53	237.898	-1965.84	1485.88	213.862	-2008.96	1225.33	239.573	-1811.9	1408.94	234.766	-1712.9	1206.21	278.424	-2018.51	1281.06	58	-1872.3	1459.49	-29.3161	-1824.87	1244.5	-54.3557	-1802.5	1148.04	-72.4314	-1658.95	1040.7	-31.9609	-1590.25	991.499	-91.9785	-1624.86	973.171	-86.4092	-1548.82	951.349
4649	0	192.522	-1748.46	1633.3	287.719	-1742.45	1627.36	181.007	-1901.01	1675.75	325.775	-1884.9	1660.51	238.063	-1952.86	1487.68	214.984	-1996.24	1226.93	239.521	-1798.88	1411.07	233.77	-1700.03	1207.87	279.419	-2005.76	1282.79	57.3394	-1860.65	1460.38	-29.1543	-1815.72	1244.26	-53.4423	-1795.16	1147.34	-73.9027	-1654.56	1036.63	-34.3658	-1586.35	985.795	-93.8779	-1622.67	968.062	-89.3624	-1547.29	943.621
4650	0	191.859	-1734.74	1634.65	287.836	-1727.79	1629.99	180.371	-1887.18	1677.57	324.986	-1870.99	1662.62	238.093	-1939.94	1489.46	216.181	-1983.86	1228.57	239.096	-1786.24	1412.56	232.687	-1686.98	1209.47	280.24	-1993.08	1284.59	56.7968	-1848.85	1461.5	-29.1765	-1807.28	1243.74	-52.6684	-1788.15	1146.57	-75.3411	-1650.76	1032.55	-36.8837	-1583.38	979.642	-95.5497	-1621.11	963.016	-92.4284	-1546.57	935.933
4651	0	191.107	-1721.3	1636.29	286.335	-1715.18	1631.01	179.474	-1873.66	1679.28	324.083	-1857.26	1664.75	237.867	-1926.85	1491.42	217.179	-1971.33	1230.38	238.96	-1772.99	1414.79	231.554	-1674.32	1211.15	280.875	-1980.48	1286.7	55.9438	-1836.81	1462.31	-29.2519	-1799.1	1243.29	-52.5235	-1781.91	1145.62	-76.9948	-1647.61	1028.27	-39.3574	-1581.2	973.38	-97.5419	-1620.16	957.872	-95.5429	-1546.63	928.612
4652	0	190.335	-1708.02	1638.09	285.556	-1701.97	1633.25	178.646	-1860.25	1680.93	323.464	-1844.01	1667.14	237.624	-1913.69	1493.61	218.244	-1958.93	1232.52	238.583	-1760.17	1416.67	230.683	-1661.62	1212.73	281.319	-1967.82	1289.04	55.2124	-1824.51	1463.24	-29.3707	-1791.5	1242.62	-52.0266	-1775.78	1144.66	-78.434	-1645.11	1024.02	-42.0545	-1579.48	967.247	-99.5891	-1620.05	952.946	-98.7137	-1547.35	921.347
4653	0	189.664	-1694.87	1639.93	285.441	-1688.44	1635.93	177.779	-1847.11	1682.6	322.582	-1831.09	1668.96	237.364	-1900.51	1495.48	219.292	-1946.43	1234.44	237.889	-1747.24	1418.39	229.66	-1649.05	1214.19	281.766	-1955.22	1291.35	54.411	-1812.07	1463.94	-29.4191	-1784.31	1241.92	-51.1608	-1769.94	1143.52	-80.1527	-1643.21	1019.67	-44.7177	-1578.43	961.302	-101.185	-1620.52	947.756	-102.002	-1548.89	914.391
4654	0	188.754	-1682.13	1641.89	284.497	-1675.5	1637.98	177.115	-1834.4	1683.69	321.858	-1818.12	1670.74	236.961	-1887.25	1497.41	220.179	-1933.7	1236.39	237.732	-1734.08	1420.09	228.943	-1636.65	1215.53	282.206	-1942.44	1293.34	53.7387	-1799.39	1464.51	-29.5597	-1777.45	1241.29	-50.63	-1764.57	1142.4	-81.7671	-1642	1015.42	-47.4554	-1578	955.441	-103.087	-1621.75	942.571	-105.256	-1551.09	907.299
4655	0	188.023	-1669.26	1643.72	283.871	-1662.56	1640.45	176.221	-1821.97	1684.81	320.952	-1805.5	1672.22	236.498	-1873.97	1499.09	220.921	-1921.09	1238.18	237.087	-1721.2	1421.46	228.141	-1624.27	1216.82	282.63	-1929.66	1295.29	53.0398	-1786.7	1465.2	-29.6561	-1770.54	1240.79	-49.7287	-1759.17	1141.53	-83.3146	-1641.04	1011.31	-49.9151	-1578.18	949.434	-104.687	-1623.64	937.819	-108.398	-1554	900.515
4656	0	187.118	-1656.7	1645.53	282.487	-1650.25	1641.62	175.581	-1809.5	1685.77	319.997	-1792.81	1673.42	236.067	-1860.84	1500.66	221.473	-1908.07	1239.88	236.536	-1708.18	1422.44	227.523	-1611.83	1217.82	283.103	-1916.56	1297.15	52.4723	-1773.93	1465.81	-29.7102	-1763.72	1240.3	-49.2491	-1754.18	1140.85	-84.645	-1640.51	1007.3	-52.6112	-1578.77	943.554	-106.428	-1625.73	932.941	-111.464	-1557.4	893.819
4657	0	186.29	-1644.16	1647.06	281.478	-1637.5	1643.46	174.82	-1797.4	1686.34	319.481	-1780.38	1674.35	235.728	-1847.75	1501.65	221.821	-1895.2	1241.1	236.361	-1695.24	1423.38	227.057	-1599.47	1218.6	283.563	-1903.56	1298.56	51.9942	-1761.16	1466.02	-29.815	-1756.66	1239.87	-48.511	-1748.82	1140.16	-86.1075	-1640.25	1003.37	-55.1916	-1579.88	937.702	-107.74	-1628.46	928.108	-114.258	-1561.2	887.102
4658	0	185.451	-1631.75	1648.39	281.182	-1624.52	1645.87	174.317	-1784.99	1686.84	318.999	-1767.66	1675.55	235.295	-1834.58	1502.77	221.909	-1882.34	1241.87	235.854	-1682.24	1424.3	226.67	-1587.1	1219.32	283.968	-1890.46	1299.76	51.3986	-1748.35	1466.21	-29.7044	-1749.31	1239.63	-47.992	-1743.69	1139.63	-87.6105	-1640.28	999.726	-57.6421	-1581.32	931.956	-109.231	-1631.09	923.896	-116.998	-1565.53	880.644
4659	0	184.57	-1619.23	1649.39	280.117	-1612	1646.59	173.434	-1772.9	1687.14	318.251	-1755.12	1676.1	234.731	-1821.47	1503.37	221.819	-1869.38	1242.6	235.346	-1669.37	1424.65	226.599	-1574.62	1219.88	284.233	-1877.4	1300.69	50.8833	-1735.7	1466.33	-29.6773	-1741.75	1239.27	-47.5953	-1738.19	1139.14	-89.0048	-1640.38	996.111	-59.8765	-1582.76	926.711	-110.372	-1634.14	919.906	-119.762	-1570.37	874.378
4660	0	183.507	-1606.74	1649.97	278.828	-1599.44	1647.01	172.908	-1760.47	1687.1	317.236	-1742.5	1676.17	234.341	-1808.47	1503.84	221.733	-1856.57	1242.98	235.029	-1656.25	1425.15	226.49	-1562.15	1220.03	284.484	-1864.32	1301.29	50.3485	-1722.94	1466.06	-29.6567	-1733.73	1238.76	-46.9775	-1732.6	1138.74	-90.2617	-1640.73	992.551	-62.7491	-1584.92	921.023	-111.453	-1637.64	916.003	-122.502	-1575.54	868.093
4661	0	182.41	-1594.19	1650.07	277.749	-1586.57	1647.26	172.1	-1747.93	1686.82	316.601	-1729.74	1676.24	233.859	-1795.34	1503.76	221.624	-1843.54	1243.21	234.56	-1643.4	1425.2	226.291	-1549.63	1220.05	284.675	-1851.38	1301.59	49.7595	-1710.19	1465.62	-29.6296	-1725.28	1238.17	-46.6155	-1726.49	1138.28	-91.8545	-1640.77	989.449	-65.5032	-1587.04	915.718	-113.183	-1640.96	912.746	-125.116	-1581.06	862.21
4662	0	181.703	-1581.35	1649.86	277.049	-1573.63	1647.53	171.433	-1735.26	1686.4	315.702	-1716.65	1676.11	233.339	-1782.18	1503.59	221.461	-1830.9	1242.88	233.907	-1630.67	1424.79	226.496	-1537.04	1219.7	284.737	-1838.34	1301.54	49.1014	-1697.38	1465.15	-29.4418	-1716.6	1237.62	-46.2259	-1720.12	1137.89	-93.3291	-1640.88	986.76	-68.0644	-1589.21	910.939	-114.299	-1644.39	909.571	-127.917	-1586.76	856.893
4663	0	180.576	-1568.43	1649.34	276.314	-1560.46	1647.19	170.715	-1722.36	1685.83	315.019	-1703.55	1675.89	232.825	-1769.12	1503.18	221.202	-1818.02	1242.39	233.545	-1617.76	1424.37	226.485	-1524.45	1218.9	284.644	-1825.46	1301.3	48.4933	-1684.7	1464.43	-29.633	-1707.4	1236.93	-45.8554	-1713.6	1137.38	-94.9185	-1640.86	983.976	-70.9714	-1591.42	906.261	-116.112	-1647.7	907.07	-130.655	-1592.69	851.846
4664	0	179.654	-1555.29	1648.09	275.427	-1547.12	1646.41	169.848	-1709.1	1684.89	314.158	-1690.1	1675.31	232.281	-1756.09	1502.39	220.862	-1805.31	1241.75	233.12	-1604.73	1423.85	226.677	-1512.06	1217.83	284.455	-1812.66	1300.63	48.0398	-1671.79	1463.31	-29.7821	-1697.91	1236	-45.515	-1706.69	1136.76	-96.5076	-1640.79	981.618	-74.4123	-1593.41	902.512	-117.56	-1651.03	904.711	-133.374	-1598.67	847.213
4665	0	178.927	-1541.89	1646.72	274.534	-1533.7	1644.91	169.15	-1695.52	1683.93	313.42	-1676.48	1674.19	231.673	-1742.96	1501.33	220.345	-1792.6	1240.67	232.556	-1591.83	1422.86	226.799	-1499.99	1216.37	284.154	-1799.84	1299.67	47.3043	-1658.79	1462.1	-29.85	-1688.03	1234.96	-45.0921	-1699.62	1136.03	-98.1714	-1640.6	979.434	-77.1102	-1595.53	898.25	-118.936	-1654.33	902.751	-136.447	-1604.76	843.333
4666	0	177.974	-1528.33	1644.77	273.837	-1519.92	1642.99	168.309	-1681.87	1682.78	312.579	-1662.81	1673.17	231.005	-1729.98	1500.05	219.631	-1779.88	1239.5	232.007	-1578.87	1421.22	226.813	-1487.77	1214.42	283.716	-1787.11	1298.61	46.6481	-1645.86	1460.6	-30.0957	-1678.15	1233.74	-44.7692	-1692.46	1135.27	-99.7311	-1640.19	977.429	-80.5245	-1597.43	894.795	-120.338	-1657.17	901.231	-139.387	-1610.72	839.902
4667	0	177.084	-1514.58	1642.29	272.604	-1506.33	1640.6	167.438	-1667.87	1681.36	310.884	-1649.74	1671.07	230.231	-1716.95	1498.63	218.79	-1767.16	1238.12	231.831	-1565.92	1419.76	227.233	-1474.94	1212.59	283.085	-1774.37	1297.29	46.0007	-1632.71	1458.89	-30.3392	-1668.06	1232.4	-44.5644	-1685.2	1134.27	-101.454	-1639.48	975.856	-83.8869	-1598.94	891.556	-121.814	-1659.66	900.339	-142.469	-1616.26	836.936
4668	0	176.212	-1500.61	1639.74	271.676	-1492.35	1637.8	166.636	-1653.6	1679.63	310.862	-1634.66	1670.08	229.606	-1703.7	1497.08	217.785	-1754.47	1236.48	231.149	-1553.14	1417.07	226.896	-1462.11	1209.97	282.486	-1761.71	1295.68	45.3191	-1619.8	1456.93	-30.5703	-1657.87	1230.85	-44.2814	-1677.77	1133.32	-102.928	-1638.44	974.467	-86.98	-1600.15	888.534	-123.209	-1661.7	899.623	-145.381	-1621.21	834.642
4669	0	175.508	-1486.48	1636.88	271.323	-1478.07	1635.26	165.763	-1639.21	1677.83	309.834	-1620.71	1667.96	228.879	-1690.64	1495.31	216.631	-1741.75	1234.83	230.606	-1540.09	1415.05	227.081	-1448.38	1207.83	281.646	-1749.09	1293.99	44.4871	-1606.57	1454.83	-31.3061	-1647.83	1229.39	-44.1448	-1670.19	1132.37	-104.493	-1636.77	973.244	-90.2052	-1600.88	886.296	-124.452	-1663.02	899.233	-148.224	-1625.49	833.108
4670	0	174.661	-1472.31	1633.79	270.455	-1463.91	1632.13	164.838	-1624.75	1675.84	308.798	-1606.42	1665.83	227.999	-1677.55	1493.28	215.233	-1728.8	1233.02	229.822	-1527.16	1412.49	227.034	-1434.62	1205.7	280.603	-1736.35	1292.11	43.76	-1593.36	1452.85	-32.0492	-1637.82	1227.9	-44.1686	-1662.49	1131.41	-106.066	-1635.05	972.412	-93.3271	-1600.9	884.263	-125.745	-1663.67	899.208	-150.935	-1629.02	832.046
4671	0	173.842	-1458.08	1630.37	269.416	-1449.99	1628.78	163.869	-1610.23	1673.5	307.335	-1592.38	1663.34	227.162	-1664.36	1491.13	213.794	-1715.96	1230.87	229.29	-1514.34	1409.74	227.322	-1420.71	1203.67	279.589	-1723.54	1289.97	42.9946	-1580.07	1450.49	-32.7005	-1628.05	1226.22	-44.6166	-1654.45	1130.47	-107.843	-1632.33	971.344	-96.4076	-1600.29	882.477	-126.997	-1663.53	899.234	-153.64	-1631.5	831.187
4672	0	172.954	-1443.83	1627.07	268.825	-1435.59	1625.7	162.959	-1595.69	1671.32	306.556	-1578.04	1661.06	226.217	-1651.25	1488.81	212.251	-1703.02	1228.56	228.845	-1501.03	1407.35	227.22	-1407.37	1201.3	278.414	-1710.75	1287.44	42.2023	-1566.86	1448.45	-33.6468	-1618.34	1224.89	-45.4513	-1645.67	1129.97	-109.339	-1629.26	970.74	-99.2077	-1599.19	880.98	-128.311	-1662.4	899.54	-156.183	-1633.16	830.636
4673	0	172.033	-1429.7	1623.91	267.77	-1421.58	1622.2	161.943	-1581.22	1669.08	305.908	-1563.32	1659.12	225.175	-1638.13	1486.47	210.57	-1689.77	1226.23	228.1	-1487.76	1404.65	226.939	-1394.46	1198.7	277.098	-1697.74	1285.14	41.1661	-1553.4	1446.3	-34.3857	-1608.51	1223.61	-45.6997	-1637.21	1129.13	-111.244	-1625.38	970.414	-102.376	-1597.03	879.716	-129.717	-1660.67	899.889	-158.766	-1633.52	830.632
4674	0	170.968	-1415.65	1620.81	266.574	-1407.84	1619.21	160.75	-1566.94	1666.92	304.533	-1549.49	1656.61	224.003	-1624.83	1484.23	208.81	-1676.45	1223.75	227.149	-1474.32	1402.21	226.603	-1381.49	1196.15	275.683	-1684.69	1282.71	39.9552	-1540.02	1444.1	-35.5798	-1598.69	1222.55	-46.7436	-1627.93	1128.47	-112.866	-1620.9	970.11	-105.651	-1593.99	878.982	-131.479	-1657.93	900.328	-161.212	-1633.02	830.388
4675	0	169.812	-1401.84	1618.04	265.432	-1394.09	1616.29	159.449	-1553.02	1664.5	303.206	-1535.71	1654.24	222.773	-1611.43	1481.68	207.304	-1662.85	1221.5	226.215	-1460.8	1399.8	226.244	-1368.57	1193.91	274.194	-1671.34	1280.26	38.9228	-1526.53	1441.73	-36.245	-1588.54	1221.02	-47.4971	-1618.26	1127.59	-115.065	-1615.46	969.796	-108.568	-1590.17	877.919	-133.182	-1654.08	900.896	-163.885	-1631.32	830.298
4676	0	168.581	-1388.1	1615.67	264.61	-1380.27	1614.51	158.014	-1539.14	1662.39	302.01	-1521.89	1652.32	221.422	-1598.04	1479.57	205.758	-1649.26	1218.92	224.987	-1447.27	1397.48	225.751	-1355.31	1191.84	272.645	-1657.95	1277.8	37.5875	-1513.09	1439.64	-37.1508	-1578.13	1219.87	-48.7473	-1608.22	1126.59	-117.386	-1609.23	969.92	-112.053	-1585.38	877.581	-134.812	-1649.41	901.603	-166.564	-1628.54	830.54
4677	0	167.134	-1374.49	1613.81	263.092	-1367	1612.3	156.3	-1525.73	1660.2	300.004	-1508.6	1649.9	219.88	-1584.53	1477.3	204.319	-1635.31	1216.91	223.868	-1433.64	1395.82	225.457	-1341.65	1190.48	271.092	-1644.39	1275.72	36.2904	-1499.43	1437.91	-37.8174	-1567.27	1218.66	-50.1383	-1597.39	1125.8	-119.814	-1602.1	970.086	-115.746	-1579.31	877.303	-137.03	-1643.71	902.243	-169.419	-1624.82	831.069
4678	0	165.41	-1361.09	1611.97	261.232	-1353.72	1610.55	154.391	-1512.45	1658.07	298.135	-1495.57	1648.09	218.358	-1571.02	1475.28	203.032	-1621.29	1215	222.538	-1419.87	1393.91	224.634	-1327.98	1188.67	269.714	-1630.66	1273.87	34.8955	-1485.85	1435.69	-38.9745	-1555.73	1217.36	-51.4433	-1586.06	1124.85	-121.919	-1594.01	969.903	-119.606	-1572.18	877.275	-138.908	-1636.9	902.905	-172.438	-1619.95	831.368
4679	0	163.345	-1347.88	1610.48	259.517	-1340.41	1609.52	152.269	-1499.39	1656.04	296.159	-1482.51	1646.47	216.922	-1557.38	1473.39	201.869	-1607.3	1212.85	221.17	-1406.03	1392.25	223.832	-1314.23	1187.38	268.507	-1616.82	1271.9	33.6384	-1472.24	1433.72	-40.3893	-1543.39	1216.15	-53.1167	-1573.87	1123.74	-124.493	-1584.74	970.098	-123.691	-1564.02	876.818	-140.967	-1629.24	903.464	-175.381	-1613.84	831.694
4680	0	161.368	-1334.64	1609.39	257.346	-1327.23	1608.7	150.07	-1486.24	1654.22	294.232	-1469.11	1645.45	215.355	-1543.75	1471.67	200.754	-1593.27	1211.07	219.599	-1392.25	1390.81	222.532	-1300.68	1185.97	267.549	-1602.89	1270.23	32.1646	-1458.64	1432.02	-41.8622	-1530.27	1214.71	-54.6944	-1561.27	1122.67	-126.773	-1574.51	969.923	-127.49	-1554.7	876.706	-142.943	-1620.05	903.797	-178.376	-1606.38	832.347
4681	0	158.726	-1321.74	1608.36	254.758	-1314.13	1608.05	147.451	-1473.59	1652.56	291.563	-1456.24	1644.19	213.813	-1530.16	1470.36	199.78	-1579.14	1209.74	217.746	-1378.46	1389.73	220.912	-1286.91	1185.03	266.6	-1588.63	1268.94	30.5646	-1445.14	1430.62	-43.6838	-1516.43	1213.28	-56.491	-1548.11	1121.63	-129.41	-1563.26	969.983	-131.471	-1544.09	876.47	-144.743	-1609.7	903.9	-181.659	-1597.46	832.992
4682	0	156.026	-1308.79	1607.51	252.167	-1300.98	1607.94	144.977	-1460.76	1651.18	288.797	-1443.46	1643.76	212.131	-1516.81	1469.11	199.038	-1565.05	1208.35	216.099	-1364.56	1389.04	218.933	-1272.71	1184.17	265.708	-1574.28	1267.85	28.9113	-1431.79	1429.18	-45.6876	-1501.99	1211.78	-58.3163	-1534.31	1120.59	-131.822	-1550.97	969.579	-135.089	-1532.28	875.983	-146.596	-1597.89	903.886	-184.446	-1587.15	833.429
4683	0	153.429	-1295.77	1607.15	249.461	-1287.74	1608	142.327	-1447.86	1650.28	285.902	-1430.43	1643.44	210.419	-1503.31	1468.44	198.317	-1550.81	1207.27	214.335	-1350.67	1388.73	216.978	-1258.32	1183.91	264.803	-1559.95	1266.93	27.1245	-1418.31	1428.22	-47.721	-1487.16	1210.43	-60.3525	-1520.07	1119.53	-134.563	-1537.26	969.429	-138.428	-1519.11	875.68	-148.416	-1585.15	903.473	-187.4	-1575.07	833.743
4684	0	150.745	-1282.68	1607.27	246.728	-1274.52	1608.33	139.508	-1434.87	1649.99	283.557	-1417.08	1643.84	208.521	-1489.74	1468.14	197.446	-1536.47	1206.73	212.486	-1336.8	1389.08	214.642	-1243.53	1184.22	263.648	-1545.54	1266.59	25.1738	-1404.87	1427.72	-50.0015	-1471.77	1209.68	-61.9748	-1505.47	1118.68	-136.19	-1523.01	969.211	-141.297	-1504.74	875.431	-150.076	-1570.59	903.11	-190.068	-1561.23	834.002
4685	0	148.011	-1269.61	1607.67	243.864	-1261.39	1608.89	136.762	-1421.71	1649.93	280.822	-1403.94	1644.44	206.503	-1476.11	1468.05	196.456	-1521.99	1206.7	210.341	-1323.03	1389.6	212.066	-1228.72	1184.8	262.236	-1531.26	1266.54	23.3113	-1391.37	1427.49	-51.8328	-1456.42	1208.78	-63.659	-1490.5	1118.04	-138.078	-1507.63	968.75	-143.81	-1488.86	874.953	-151.929	-1554.94	902.666	-192.688	-1545.64	834.194
4686	0	145.516	-1256.23	1608.52	241.397	-1248.13	1610.08	133.952	-1408.6	1650.36	278.121	-1390.84	1645.36	204.554	-1462.56	1468.53	195.237	-1507.68	1206.75	208.402	-1309.15	1390.48	209.563	-1214.04	1185.64	260.769	-1517.37	1266.75	21.1661	-1377.95	1427.68	-53.8735	-1440.89	1208.65	-65.6485	-1474.89	1117.54	-139.723	-1491.19	968.155	-146.011	-1471.7	874.683	-153.212	-1538.01	901.827	-194.916	-1528.44	833.638
4687	0	142.928	-1242.97	1609.57	239.265	-1234.59	1612.02	131.476	-1395.23	1651.28	275.497	-1377.6	1646.96	202.58	-1448.94	1469.35	193.75	-1493.53	1207.47	206.447	-1295.36	1391.77	207.21	-1199.52	1186.92	259.161	-1503.33	1267.59	19.2549	-1364.45	1428.2	-55.7334	-1425.64	1208.77	-67.2964	-1459.19	1116.99	-141.46	-1473.71	967.646	-148.057	-1453.3	874.441	-155.008	-1519.91	900.663	-196.813	-1509.44	833.091
4688	0	140.465	-1229.65	1611.22	236.456	-1221.39	1613.6	128.749	-1381.92	1652.15	272.628	-1364.44	1648.5	200.661	-1435.3	1470.67	192.083	-1479.68	1208.74	204.478	-1281.55	1393.61	204.912	-1185.17	1188.4	257.456	-1489.65	1268.93	17.5469	-1351.14	1429.13	-57.6063	-1410.23	1209.02	-69.2105	-1443.13	1116.98	-142.972	-1455.3	967.094	-148.918	-1433.82	874.098	-156.656	-1500.54	899.525	-198.568	-1488.92	832.376
4689	0	138.087	-1216.27	1612.59	233.985	-1207.97	1615.54	126.346	-1368.61	1653.45	270.168	-1351.07	1649.94	198.984	-1421.75	1472.18	190.489	-1466.05	1210.54	202.677	-1268.28	1395.16	202.825	-1171.05	1190.08	255.898	-1475.86	1270.81	15.6738	-1337.82	1430.23	-59.1173	-1395.14	1209.77	-71.021	-1426.57	1117.37	-144.54	-1435.96	966.832	-149.654	-1412.99	874.015	-158.703	-1480.09	898.625	-199.912	-1466.87	831.282
4690	0	135.805	-1203.04	1614.02	231.667	-1194.36	1617.25	124.333	-1355.21	1654.64	267.957	-1337.69	1651.8	197.662	-1408.22	1474.07	188.974	-1452.68	1212.16	201.046	-1254.92	1396.81	200.992	-1157.37	1191.77	254.484	-1462.4	1272.64	14.2404	-1324.47	1431.82	-60.3758	-1379.89	1210.29	-72.5371	-1410.1	1117.48	-145.762	-1415.99	966.47	-150.139	-1391.31	873.975	-159.941	-1458.7	897.47	-200.853	-1443.38	830.224
4691	0	133.727	-1189.79	1615.36	229.55	-1180.86	1618.74	122.352	-1342.23	1655.84	266.113	-1324.06	1653.49	196.191	-1394.77	1475.76	187.467	-1439.59	1213.73	199.27	-1241.77	1398.31	199.297	-1144.05	1193.44	253.29	-1449.15	1274.66	12.8326	-1311.31	1433.58	-62.0121	-1364.76	1211.8	-73.9347	-1393.58	1118.02	-146.861	-1395.35	966.294	-150.375	-1368.7	874.469	-161.509	-1436.3	896.274	-201.575	-1418.78	829.133
4692	0	131.659	-1176.67	1616.56	227.511	-1167.45	1620.07	120.441	-1329.06	1657.21	264.512	-1310.5	1654.95	194.712	-1381.67	1477.57	186.03	-1426.64	1215.62	197.772	-1228.77	1399.68	197.658	-1131.27	1194.88	252.074	-1436.31	1276.47	11.3858	-1298.28	1435.38	-63.165	-1349.78	1212.92	-75.7341	-1376.83	1118.51	-147.98	-1374.11	966.245	-150.417	-1345.26	875.016	-163.036	-1413.27	895.248	-202.093	-1392.94	828.156
4693	0	129.823	-1163.49	1617.75	225.631	-1154.27	1621.26	119.113	-1315.75	1658.65	262.84	-1297.15	1656.55	193.217	-1368.93	1479.22	184.577	-1413.77	1217.13	196.606	-1215.95	1401.29	196.382	-1118.66	1196.27	250.886	-1423.83	1278.22	10.2409	-1284.94	1437.03	-64.519	-1334.53	1214	-77.3409	-1359.91	1119.28	-148.899	-1352.39	966.412	-150.165	-1321.08	875.601	-164.31	-1389.24	894.229	-202.382	-1366.27	827.145
4694	0	128.468	-1150.3	1619.1	224.506	-1140.82	1622.7	117.71	-1302.37	1660.46	261.619	-1283.74	1658.25	191.694	-1356.45	1480.51	183.095	-1401.22	1218.53	195.421	-1203.34	1402.96	195.114	-1106.51	1197.9	249.55	-1411.63	1279.79	8.90093	-1271.78	1438.93	-65.5096	-1319.41	1215.24	-78.8657	-1342.86	1119.75	-149.89	-1330.24	966.207	-149.727	-1296.33	876.625	-165.362	-1364.71	893.038	-202.308	-1338.62	826.566
4695	0	127.319	-1137.11	1620.57	223.126	-1127.81	1623.84	116.448	-1289.06	1662.52	260.279	-1270.54	1659.88	190.048	-1343.93	1482.29	181.473	-1388.44	1220.19	194.314	-1190.9	1404.6	194.072	-1094.46	1199.56	247.698	-1399.41	1281.39	7.60536	-1258.65	1440.8	-66.7607	-1304.27	1216.58	-80.5269	-1325.78	1120.42	-150.525	-1307.69	966.24	-148.973	-1271.15	878.057	-166.229	-1339.55	892.116	-201.869	-1310.29	826.216
4696	0	126.448	-1124.02	1622.06	222.42	-1114.77	1625.27	115.523	-1275.89	1664.42	259.373	-1257.46	1661.66	188.483	-1331.46	1483.99	179.671	-1375.87	1221.84	193.435	-1178.47	1406.3	193.313	-1082.31	1201.19	245.639	-1387.07	1282.98	6.54997	-1245.37	1442.52	-67.9587	-1288.82	1217.84	-82.1843	-1308.38	1121.09	-151.076	-1284.56	966.596	-148.007	-1245.37	879.438	-166.968	-1313.85	891.336	-201.214	-1281.23	826.232
4697	0	125.891	-1110.98	1623.6	222.016	-1101.87	1626.85	114.633	-1262.65	1666.39	258.515	-1244.72	1663.45	187.053	-1318.76	1485.6	177.799	-1363.07	1223.45	192.59	-1165.98	1408.18	192.498	-1070.27	1202.64	243.355	-1374.99	1284.51	5.36363	-1232.04	1444.3	-69.3303	-1273.29	1219.17	-83.9206	-1291.09	1121.56	-150.905	-1261.22	966.729	-146.812	-1219.17	881.416	-167.351	-1287.75	890.83	-200.277	-1251.77	826.725
4698	0	125.433	-1097.94	1625.39	221.878	-1088.98	1628.63	113.695	-1249.34	1668.49	257.94	-1231.94	1665.45	185.614	-1306.32	1487.46	175.674	-1350.51	1225.39	191.635	-1153.62	1410.07	191.936	-1058.07	1204.27	240.938	-1362.86	1286.17	4.14574	-1218.67	1446.11	-70.7005	-1257.55	1220.63	-85.4514	-1273.79	1122.47	-151.055	-1237.35	967.466	-144.938	-1192.65	883.651	-167.227	-1261.06	890.672	-199.019	-1221.93	828.164
4699	0	125.179	-1084.87	1627.42	221.784	-1076.42	1630.54	112.779	-1236.31	1670.67	256.631	-1219.61	1667.1	184.143	-1293.69	1489.39	173.441	-1338.04	1227.49	190.883	-1141.15	1411.85	191.576	-1045.78	1205.92	238.388	-1350.7	1287.94	3.00011	-1205.44	1448.05	-72.132	-1241.74	1222.14	-86.9591	-1256.2	1123.24	-150.682	-1213.25	968.715	-142.916	-1166.13	886.49	-167.532	-1233.8	891.107	-197.749	-1191.63	830.39
4700	0	124.831	-1071.93	1629.2	221.415	-1064.12	1632.09	111.898	-1223.53	1672.45	256.13	-1207.44	1668.82	182.792	-1281.25	1491.33	171.138	-1325.77	1229.6	189.998	-1128.84	1413.72	191.568	-1033.26	1207.76	235.936	-1338.5	1289.98	2.1245	-1191.98	1449.89	-73.4872	-1225.47	1223.53	-88.4601	-1238.36	1124.37	-150.101	-1188.88	970.105	-140.574	-1139.32	889.662	-166.698	-1206.44	891.788	-195.59	-1161.07	833.194
4701	0	124.908	-1058.91	1631.33	221.48	-1051.53	1634.08	111.236	-1210.25	1674.71	255.203	-1194.9	1670.39	181.563	-1268.46	1493.57	168.952	-1313.64	1231.87	189.306	-1116.47	1415.45	191.377	-1020.56	1209.48	233.591	-1326.24	1292.06	1.28724	-1178.39	1451.93	-74.3808	-1209.25	1224.91	-89.9749	-1220.54	1125.47	-149.226	-1164.38	971.891	-137.719	-1112.5	893.502	-165.752	-1178.94	893.155	-193.226	-1130.56	836.262
4702	0	124.805	-1046.14	1633.48	221.419	-1039.12	1635.79	110.468	-1197.4	1676.93	254.715	-1182.66	1672.27	180.272	-1255.88	1495.75	166.789	-1301.5	1234.1	188.448	-1104.22	1417.17	191.216	-1007.9	1211.24	231.235	-1314.13	1294.13	0.401419	-1164.9	1454.2	-75.965	-1192.64	1227.11	-91.392	-1202.56	1126.9	-148.38	-1139.66	974.42	-134.743	-1085.83	897.909	-164.542	-1151.22	895.182	-190.449	-1100.28	840.111
4703	0	124.697	-1033.27	1635.46	221.024	-1026.95	1637.33	109.719	-1184.61	1679.06	254.007	-1170.45	1673.82	178.976	-1243.17	1497.71	164.734	-1289.44	1236.36	187.725	-1091.72	1418.84	190.845	-995.37	1212.91	229.096	-1302.05	1296.24	-0.506374	-1151.35	1456.41	-76.9286	-1175.78	1228.73	-92.8111	-1184.41	1128.58	-147.143	-1115.09	977.326	-131.634	-1058.98	903.077	-163.371	-1123.53	897.845	-187.522	-1070.05	844.598
4704	0	124.411	-1020.65	1637.16	221.157	-1014.54	1639.15	108.819	-1171.96	1680.74	253.178	-1158.55	1675.09	177.733	-1230.65	1499.52	162.84	-1277.45	1238.18	186.777	-1079.41	1420.39	190.685	-983.246	1214.58	227.216	-1290.07	1298.03	-1.30391	-1138.08	1458.52	-78.2517	-1159.24	1230.81	-94.135	-1166.19	1130.17	-145.892	-1090.42	980.727	-128.591	-1032.39	908.398	-161.677	-1096	900.858	-184.266	-1039.99	849.558
4705	0	123.983	-1008.02	1638.99	220.712	-1002.23	1640.5	108.295	-1159.22	1682.62	252.757	-1146.25	1676.59	176.429	-1218.12	1501.27	160.995	-1265.35	1239.97	185.907	-1067.19	1421.95	190.082	-971.422	1215.88	225.422	-1277.66	1299.59	-2.17656	-1124.84	1460.57	-79.4353	-1142.39	1232.69	-95.4309	-1147.84	1131.85	-144.744	-1065.95	984.657	-125.218	-1005.97	914.409	-160.109	-1068.5	904.379	-180.796	-1010.02	854.872
4706	0	123.483	-995.42	1640.5	220.494	-989.893	1641.99	107.414	-1146.48	1684.26	252.67	-1133.64	1678.43	175.132	-1205.75	1502.68	159.203	-1253.36	1241.65	185.084	-1054.93	1423.31	189.654	-959.641	1217.36	223.743	-1265.31	1301.19	-2.96331	-1111.57	1462.59	-80.4857	-1125.38	1234.52	-96.7973	-1129.21	1133.61	-143.285	-1041.57	988.412	-122.038	-979.742	920.256	-158.284	-1040.94	908.181	-177.481	-980.34	860.53
4707	0	122.877	-982.884	1641.83	220.044	-977.514	1643.12	106.535	-1134.04	1685.58	251.228	-1121.92	1679.31	173.955	-1193.17	1504.05	157.623	-1241.33	1243.01	184.174	-1042.61	1424.38	189.029	-947.952	1218.5	222.255	-1252.86	1302.43	-3.74944	-1098.56	1464.07	-81.6843	-1108.64	1236.13	-98.1974	-1110.37	1135.22	-141.85	-1017.09	992.314	-118.769	-953.556	926.391	-156.515	-1013.43	912.179	-173.87	-951.024	866.473
4708	0	122.112	-970.427	1642.76	219.299	-965.248	1643.88	105.598	-1121.46	1686.59	250.344	-1109.64	1680.15	172.75	-1180.88	1504.96	156.119	-1229.22	1243.96	183.332	-1030.32	1425.33	188.479	-936.046	1219.48	220.886	-1240.52	1303.44	-4.59292	-1085.72	1465.39	-82.4864	-1091.87	1237.68	-99.3524	-1091.39	1136.41	-140.299	-992.575	996.071	-115.655	-927.564	932.547	-154.591	-986.137	916.165	-170.178	-921.837	872.358
4709	0	121.192	-957.965	1643.47	218.436	-953.005	1644.47	104.668	-1108.92	1687.49	249.601	-1097.06	1680.76	171.572	-1168.32	1505.78	154.817	-1217.11	1244.83	182.377	-1018.12	1425.96	187.852	-924.038	1220.37	219.484	-1228.27	1304.24	-5.44501	-1073.02	1466.27	-83.604	-1075.05	1238.75	-100.502	-1072.5	1137.36	-138.993	-968.371	1000.1	-112.466	-901.585	938.849	-153.621	-959.26	920.704	-166.696	-892.819	878.406
4710	0	120.33	-945.536	1643.76	217.451	-940.819	1644.73	103.403	-1096.42	1687.9	248.017	-1085.26	1680.71	170.412	-1155.88	1506.17	153.625	-1204.88	1245.26	181.232	-1005.79	1426.11	187.179	-912.034	1220.95	218.064	-1216.33	1304.89	-6.43083	-1060.6	1466.74	-84.6051	-1058.51	1239.5	-101.607	-1053.14	1138.3	-137.415	-944.029	1003.8	-109.466	-875.969	944.738	-151.717	-932.13	924.729	-163.092	-864.197	884.568
4711	0	119.251	-933.103	1643.83	216.314	-928.489	1644.68	102.196	-1084.04	1687.98	246.782	-1073	1680.74	169.275	-1143.52	1506.29	152.736	-1192.59	1245.77	180.245	-993.489	1426.1	186.488	-899.938	1221.13	216.67	-1204.65	1305.09	-7.23041	-1048.17	1466.89	-85.564	-1041.76	1240.13	-102.901	-1033.46	1139.09	-136.083	-919.687	1007.65	-106.384	-850.495	950.614	-149.845	-904.977	929.133	-159.621	-835.932	890.614
4712	0	118.244	-920.643	1643.76	215.498	-915.959	1644.74	100.927	-1071.55	1687.79	245.627	-1060.67	1680.64	168.289	-1130.82	1505.93	152.131	-1180.74	1245.66	179.422	-981.161	1426.06	185.779	-887.999	1221.07	215.823	-1192.27	1305.1	-7.91654	-1035.86	1466.89	-86.5737	-1025.17	1240.37	-103.919	-1013.88	1139.42	-134.729	-895.367	1011.66	-103.543	-825.141	956.729	-148.49	-878.116	933.611	-156.317	-807.758	896.859
4713	0	117.034	-908.123	1643.37	214.43	-903.524	1644.54	99.525	-1059.04	1687.26	244.55	-1048.08	1680.77	167.27	-1118.34	1505.71	151.653	-1168.75	1245.24	178.502	-968.752	1425.71	184.923	-876.211	1220.61	214.948	-1180.04	1304.73	-8.73826	-1023.73	1466.4	-87.3961	-1008.51	1240.58	-104.765	-994.062	1139.99	-133.51	-871.315	1015.45	-100.952	-800.072	962.664	-146.612	-851.47	938.002	-153.33	-780.022	903.147
4714	0	115.779	-895.636	1642.68	213.218	-891.03	1644.02	98.1305	-1046.57	1686.54	242.875	-1035.97	1680	166.21	-1105.86	1504.99	151.373	-1156.7	1244.57	177.502	-956.394	1424.91	184.05	-864.336	1219.97	214.105	-1167.72	1304.17	-9.70671	-1011.61	1465.57	-88.2619	-991.79	1240.43	-105.763	-973.997	1140.23	-132.382	-847.231	1019.3	-98.5654	-775.08	968.671	-145.496	-825.015	942.692	-150.524	-752.657	909.638
4715	0	114.557	-883.076	1641.65	211.972	-878.608	1643.19	96.6721	-1033.88	1685.47	241.338	-1023.68	1679.24	165.313	-1093.46	1503.94	151.325	-1144.69	1243.53	176.631	-943.958	1424.08	183.232	-852.472	1218.97	213.626	-1155.25	1303.24	-10.6097	-999.628	1464.32	-88.975	-975.043	1240.24	-106.53	-954.123	1140.57	-131.297	-823.48	1023.01	-96.2195	-750.527	974.455	-143.807	-798.818	947.281	-147.977	-725.535	916.345
4716	0	113.514	-870.544	1640.34	210.749	-866.2	1642.17	95.2615	-1021.5	1684.01	240.035	-1011.15	1678.3	164.363	-1081.11	1502.71	151.371	-1132.48	1242.32	175.813	-931.511	1423.15	182.268	-840.384	1217.83	213.22	-1142.8	1302.09	-11.426	-987.458	1462.97	-89.7365	-958.162	1239.83	-107.354	-934.192	1140.92	-130.126	-799.825	1027.12	-94.195	-726.132	980.512	-142.862	-772.917	952.16	-145.656	-698.848	922.989
4717	0	112.119	-857.9	1639.08	209.564	-853.605	1641.04	93.6623	-1008.78	1682.6	238.586	-998.673	1677.16	163.458	-1068.53	1501.57	151.466	-1120.15	1241.01	174.915	-919.095	1421.71	181.219	-828.159	1216.27	212.842	-1130.4	1300.89	-12.2673	-975.268	1461.37	-90.3232	-941.342	1239.11	-108.697	-914.329	1141.43	-129.388	-776.522	1030.97	-92.4066	-702.151	986.164	-141.995	-747.49	956.908	-143.493	-672.576	929.862
4718	0	110.771	-845.462	1637.18	208.13	-841.097	1639.43	92.4316	-996.371	1680.71	237.562	-985.998	1675.82	162.695	-1055.94	1500.02	151.788	-1107.71	1239.45	174.069	-906.585	1420.18	180.282	-815.674	1214.59	212.744	-1117.79	1299.48	-12.9466	-962.92	1459.39	-90.8206	-924.504	1238.53	-109.34	-894.56	1141.71	-128.404	-753.336	1035.02	-90.6593	-678.446	992.042	-141.217	-722.156	961.934	-141.812	-646.72	936.762
4719	0	109.626	-832.865	1635.33	206.907	-828.438	1637.88	91.0867	-983.686	1678.8	235.903	-973.491	1674.31	162.098	-1043.53	1498.11	152.293	-1095.15	1237.52	173.434	-893.934	1418.38	179.305	-802.955	1212.65	212.771	-1105.15	1297.83	-13.5614	-950.486	1457.37	-91.2175	-907.654	1237.9	-109.812	-875.257	1141.71	-127.667	-730.68	1038.95	-89.0106	-655.242	997.77	-140.184	-697.318	966.985	-140.002	-621.319	943.891
4720	0	108.121	-820.484	1633.18	205.369	-815.856	1635.95	89.8633	-971.283	1676.61	235.605	-960.343	1673.11	161.471	-1030.76	1496.31	152.783	-1082.52	1235.46	172.812	-881.259	1416.48	178.407	-790.11	1210.68	212.873	-1092.42	1296.18	-14.0364	-938.009	1455.28	-91.6755	-891.043	1237.22	-110.238	-855.933	1141.99	-127.166	-708.443	1043	-87.6635	-632.526	1003.48	-139.489	-673.212	971.959	-138.634	-596.576	951.065
4721	0	106.574	-808.102	1631.01	203.912	-803.201	1634.27	88.6458	-959.102	1674.23	233.439	-947.978	1670.64	161.12	-1018.14	1494.23	153.389	-1069.6	1233.56	172.145	-868.527	1414.21	177.5	-777.097	1208.59	212.96	-1079.74	1294.09	-14.3562	-925.393	1453.05	-92.2346	-874.418	1236.7	-111.503	-837.147	1142.6	-126.706	-686.629	1047.09	-86.5409	-610.3	1009.39	-139.037	-649.35	977.145	-137.607	-572.35	958.396
4722	0	105.117	-795.919	1628.68	202.458	-790.473	1632.4	87.4963	-947.024	1671.39	232.191	-935.305	1668.77	160.984	-1005.82	1492.09	154.072	-1056.57	1231.25	171.724	-855.594	1411.9	176.765	-764.072	1206.16	213.305	-1066.84	1291.86	-14.4911	-912.797	1450.71	-92.5625	-858.121	1235.89	-112.08	-818.286	1143.08	-126.343	-665.295	1051.25	-85.4729	-588.596	1015.21	-138.859	-626.191	982.463	-136.506	-548.785	965.822
4723	0	103.727	-783.624	1626.49	201.051	-777.808	1630.57	86.8196	-934.753	1668.91	231.299	-922.524	1666.45	160.848	-993.055	1489.52	154.74	-1043.55	1228.66	171.528	-842.63	1409.56	176.041	-750.939	1203.85	213.862	-1053.79	1289.51	-14.122	-900.144	1448.3	-92.8476	-842.042	1235.35	-112.941	-799.987	1143.45	-126.187	-644.535	1055.51	-84.7167	-567.384	1021.12	-138.86	-603.642	988.114	-135.79	-525.809	973.242
4724	0	102.549	-771.421	1624.54	199.818	-765.105	1628.78	86.1607	-922.726	1666.4	230.848	-909.694	1664.74	160.869	-980.197	1487.29	155.431	-1030.3	1226.31	171.24	-829.578	1407.19	175.557	-737.854	1201.66	214.385	-1040.54	1287.21	-14.0777	-887.492	1446.23	-93.2677	-826.118	1234.91	-113.665	-782.276	1143.99	-126.098	-624.353	1059.66	-84.0882	-546.802	1026.94	-138.977	-581.612	993.441	-135.293	-503.587	980.6
4725	0	101.828	-759.201	1622.66	198.762	-752.425	1627.16	85.6974	-910.777	1663.62	230.282	-897.093	1662.43	160.981	-967.228	1484.79	155.984	-1016.85	1223.83	171.125	-816.449	1405.03	174.94	-724.56	1199.37	214.897	-1027.22	1284.83	-13.8771	-874.491	1444.22	-93.6628	-810.582	1234.43	-114.512	-764.714	1144.56	-126.369	-604.697	1063.99	-83.8694	-526.915	1032.55	-139.239	-560.471	999.145	-134.947	-482.105	988.028
4726	0	100.879	-746.925	1620.87	198.109	-739.846	1625.67	85.6585	-898.667	1661.37	229.999	-884.59	1660.52	161.194	-954.314	1482.41	156.541	-1003.35	1221.11	171.015	-803.261	1402.99	174.545	-711.092	1197.16	215.418	-1013.76	1282.35	-13.688	-861.519	1442.27	-94.2934	-795.342	1234.07	-115.137	-747.831	1145.15	-126.641	-585.725	1068.02	-83.9417	-507.541	1038.25	-139.935	-539.922	1004.53	-134.996	-461.357	995.135
4727	0	100.618	-734.634	1619.53	197.712	-727.274	1624.21	85.6594	-886.712	1658.99	230.348	-872.256	1658.48	161.44	-941.279	1480.04	157.021	-989.666	1218.77	171.13	-789.966	1400.93	174.351	-697.537	1195.27	215.846	-1000.27	1280	-13.5016	-848.481	1440.63	-94.7426	-780.243	1233.75	-115.964	-731.119	1145.55	-127.267	-567.429	1072.03	-84.3019	-488.924	1043.6	-140.887	-520.279	1009.62	-135.497	-441.471	1001.92
4728	0	100.658	-722.261	1618.18	197.714	-714.709	1623.04	86.0135	-874.462	1657.1	230.309	-859.729	1656.5	161.653	-928.069	1477.89	157.294	-975.724	1216.73	171.308	-776.656	1399.07	174.22	-683.825	1193.23	216.111	-986.72	1277.77	-13.265	-835.346	1439	-95.4765	-765.344	1233.25	-116.941	-714.955	1146.01	-127.969	-549.756	1075.65	-85.1517	-470.98	1048.07	-141.943	-501.298	1014.41	-136.307	-422.414	1008.23
4729	0	101.058	-709.786	1617.02	198.175	-702.109	1621.97	86.5966	-862.254	1655.09	230.842	-847.379	1654.59	162.123	-914.783	1476.14	157.449	-961.775	1214.61	171.645	-763.208	1397.36	174.307	-669.902	1191.58	216.381	-972.917	1275.64	-12.7975	-821.891	1437.73	-96.2549	-750.55	1233.25	-117.685	-699.079	1146.54	-128.85	-532.752	1078.84	-86.1838	-453.552	1052.42	-143.274	-483.223	1018.51	-137.614	-404.164	1013.84
4730	0	101.83	-697.216	1616.18	198.949	-689.561	1620.91	87.4132	-849.932	1653.56	232.635	-834.637	1653.43	162.646	-901.492	1474.16	157.457	-947.825	1212.42	171.912	-749.742	1395.77	174.697	-655.861	1190.12	216.664	-958.925	1273.71	-12.1705	-808.378	1436.52	-97.2148	-735.718	1233.57	-118.363	-683.543	1147.01	-130.109	-516.419	1081.56	-87.5605	-436.668	1056.1	-144.63	-466.062	1021.91	-139.261	-386.853	1018.86
4731	0	102.684	-684.631	1615.54	199.685	-677.091	1619.84	88.4778	-837.42	1652.33	232.957	-822.181	1651.4	163.209	-888.2	1472.54	157.387	-933.661	1210.78	172.459	-736.246	1394.52	175.369	-641.569	1189.18	216.698	-944.977	1271.8	-11.5855	-794.776	1435.73	-98.1285	-720.957	1234.14	-119.091	-668.222	1147.81	-131.493	-500.48	1083.92	-89.3634	-420.479	1059.2	-146.467	-449.721	1024.77	-141.437	-370.432	1022.87
4732	0	103.742	-671.998	1614.95	200.908	-664.474	1619.1	89.6836	-825.112	1651.12	234.155	-809.985	1649.54	163.864	-874.996	1471.04	157.152	-919.35	1209.12	173.169	-722.6	1393.64	176.24	-627.138	1188.38	216.558	-931.138	1270.03	-10.749	-781.103	1434.97	-98.8959	-706.324	1234.74	-119.845	-653.365	1148.38	-132.929	-485.201	1085.79	-91.3073	-404.778	1061.65	-148.323	-434.005	1027.1	-143.897	-354.805	1026.13
4733	0	104.977	-659.408	1614.52	202.15	-651.854	1618.45	91.1058	-812.689	1650.22	235.482	-797.654	1648.47	164.709	-861.687	1469.52	157.171	-904.669	1207.46	173.892	-708.927	1392.84	177.22	-612.538	1188.12	216.644	-916.995	1268	-9.87285	-767.528	1434.4	-99.2843	-691.651	1235.4	-120.584	-638.66	1149.26	-134.854	-470.359	1087.12	-93.6471	-389.739	1063.17	-150.521	-419.049	1028.77	-146.766	-339.937	1028.44
4734	0	106.437	-646.71	1614.67	203.807	-639.076	1618.39	92.7366	-800.112	1649.9	237.041	-784.906	1647.69	165.775	-848.477	1468.31	157.149	-889.765	1205.88	174.962	-695.093	1392.66	178.362	-597.818	1188.31	217.126	-902.396	1266.39	-8.87138	-753.849	1434.1	-99.4759	-676.814	1236.3	-121.375	-624.288	1150.05	-136.753	-456.151	1088.3	-96.0574	-375.243	1064.34	-153.114	-404.86	1030.09	-149.903	-325.738	1029.79
4735	0	108.042	-634.09	1615.23	205.226	-626.341	1618.54	94.6174	-787.58	1649.92	238.794	-772.222	1647.04	166.948	-835.152	1467.52	157.337	-874.766	1204.89	175.975	-681.329	1392.84	179.658	-582.923	1188.94	217.604	-887.955	1265.01	-7.79429	-740.274	1434.34	-99.1766	-662.376	1237.28	-122.193	-610.382	1151.2	-138.715	-442.518	1089.02	-98.8234	-361.44	1064.75	-155.88	-391.518	1031.06	-153.134	-312.522	1030.41
4736	0	109.62	-621.488	1615.98	206.947	-613.572	1619.29	96.455	-775.207	1649.79	240.906	-759.703	1646.89	168.221	-821.548	1467.01	157.394	-859.874	1204.03	177.169	-667.425	1393.23	180.814	-568.009	1189.86	218.366	-872.989	1263.96	-6.70759	-726.508	1434.79	-98.7987	-648.152	1238.29	-123.311	-597.012	1152.41	-140.982	-429.581	1089.35	-101.621	-348.361	1064.45	-158.836	-378.986	1031.47	-156.516	-299.908	1029.99
4737	0	111.496	-608.808	1617.27	208.891	-600.769	1620.3	98.5907	-762.773	1650.06	242.837	-747.076	1646.51	169.568	-807.858	1466.66	157.802	-845.112	1203.39	178.24	-653.42	1393.76	181.99	-552.972	1190.96	218.921	-858.466	1263.2	-5.57538	-712.831	1435.51	-98.3734	-634.376	1239.2	-123.797	-584.211	1153.38	-143.172	-417.398	1089.19	-104.561	-336.072	1063.38	-161.778	-367.381	1031.15	-159.96	-288.351	1028.79
4738	0	113.422	-596.027	1619.21	210.897	-587.999	1621.71	100.932	-750.336	1650.64	245.548	-734.278	1646.81	170.802	-793.982	1466.66	158.323	-830.482	1203.46	179.442	-639.259	1394.55	182.787	-538.001	1192.16	219.588	-843.307	1262.85	-4.39801	-698.91	1436.67	-98.0525	-620.948	1240.26	-123.615	-572.071	1153.88	-145.458	-405.957	1088.61	-107.495	-324.512	1061.97	-164.751	-356.592	1030.15	-163.431	-277.583	1026.96
4739	0	115.558	-583.182	1621.38	212.948	-575.167	1623.42	103.136	-738.031	1651.11	247.434	-721.936	1646.44	172.064	-780.064	1467.38	158.721	-816.169	1204	180.426	-625.116	1395.44	183.206	-523.182	1193.4	219.902	-828.552	1262.94	-3.46483	-684.941	1438.07	-97.7198	-607.918	1241.18	-124.834	-560.393	1154.93	-147.596	-395.182	1087.55	-110.713	-313.891	1059.44	-167.877	-346.731	1028.62	-167.092	-267.752	1024.22
4740	0	117.932	-570.326	1623.63	215.262	-562.316	1625.24	105.587	-725.357	1652.02	249.782	-709.363	1646.44	173.197	-765.956	1468.08	158.822	-802.462	1204.75	181.263	-611.036	1396.35	183.381	-508.556	1194.54	220.519	-813.421	1263.49	-2.25965	-670.818	1439.62	-97.66	-595.314	1242.11	-125.332	-549.093	1155.32	-149.85	-385.106	1085.99	-113.597	-303.922	1056.32	-170.776	-337.71	1026.55	-170.685	-258.881	1020.62
4741	0	120.327	-557.144	1626.18	217.798	-549.39	1626.96	108.059	-712.659	1653.04	252.054	-696.736	1646.3	174.263	-751.91	1469.26	159.014	-788.699	1206.15	181.806	-597.107	1397.12	183.386	-494.07	1195.73	220.543	-799.417	1264.5	-1.55992	-656.789	1441.48	-97.5116	-583.146	1242.93	-125.758	-538.169	1155.72	-152.012	-375.726	1083.83	-116.434	-294.762	1052.74	-173.353	-329.453	1023.9	-174.04	-250.724	1016.6
4742	0	122.816	-544.004	1628.73	219.853	-536.681	1628.28	110.325	-699.808	1654.26	254.156	-684.06	1646.14	174.921	-737.941	1470.52	158.781	-775.395	1207.81	182.227	-583.395	1398.08	183.181	-479.709	1196.83	220.424	-786.45	1265.78	-0.924729	-642.786	1443.37	-97.6577	-571.385	1243.79	-126.004	-527.996	1156.16	-154.033	-366.982	1081.46	-119.135	-286.419	1048.55	-176.019	-322.033	1020.71	-177.362	-243.472	1011.84
4743	0	124.995	-530.809	1631.11	222.269	-523.673	1630.01	112.139	-686.932	1655.56	256.234	-671.324	1646.07	175.367	-724.261	1472.11	158.458	-762.3	1209.26	182.345	-569.783	1398.96	182.862	-465.704	1197.99	220.188	-773.389	1267.02	-0.736449	-629.118	1445.02	-97.8446	-560.211	1244.36	-126.639	-517.965	1156.46	-155.966	-358.828	1078.68	-121.821	-278.643	1043.74	-178.209	-315.397	1017.16	-180.609	-236.977	1006.28
4744	0	127.057	-517.493	1633.61	224.239	-510.609	1631.59	113.995	-673.731	1657.19	257.612	-658.474	1645.97	175.685	-710.963	1473.57	158.562	-748.97	1211.01	182.301	-556.495	1399.97	182.498	-452.118	1199.14	220.117	-760.252	1268.41	-0.47211	-615.572	1446.67	-98.0557	-549.278	1245	-126.813	-508.44	1156.35	-157.816	-351.172	1075.51	-124.284	-271.573	1038.64	-180.888	-309.278	1013.04	-183.55	-231.231	1000.26
4745	0	128.749	-504.155	1635.88	226.102	-497.434	1633.11	115.702	-660.489	1659.05	259.17	-645.54	1646.59	175.889	-697.855	1475	158.629	-736.19	1212.86	182.294	-543.536	1401.28	182.054	-439.143	1200.22	220.08	-747.097	1269.97	-0.318007	-602.514	1448.27	-98.3771	-538.59	1245.82	-126.99	-499.145	1156.37	-159.423	-344.19	1072	-126.638	-265.456	1032.79	-183.029	-304.062	1008.42	-186.154	-226.322	993.779
4746	0	130.061	-490.991	1637.94	227.268	-484.389	1634.57	116.722	-647.268	1660.98	260.603	-632.466	1647.68	176.002	-685.055	1476.94	158.769	-723.558	1214.74	182.253	-530.779	1402.75	181.665	-426.6	1201.34	219.891	-734.391	1271.62	-0.424699	-589.836	1449.79	-98.6737	-528.545	1246.31	-127.237	-490.228	1156.43	-161.011	-337.788	1068.22	-128.677	-259.964	1026.8	-184.83	-299.562	1003.83	-188.582	-222.254	986.841
4747	0	131.042	-477.847	1639.99	227.855	-471.462	1635.77	117.662	-634.163	1662.93	261.6	-619.433	1648.93	176.207	-672.269	1478.42	159.13	-711.139	1216.33	182.124	-518.187	1404.18	181.287	-414.324	1202.62	219.945	-721.927	1273.34	-0.57856	-577.607	1451.31	-98.8243	-518.597	1246.89	-127.246	-481.671	1156.38	-162.474	-332.029	1064.36	-130.697	-255.293	1020.4	-187.108	-295.705	999.007	-190.82	-219	979.531
4748	0	131.595	-464.85	1641.88	228.827	-458.207	1637.77	118.628	-621.107	1664.83	262.365	-606.42	1650.66	176.508	-659.826	1480.38	159.608	-698.634	1218.13	182.091	-505.677	1405.9	181	-402.105	1204.3	220.438	-709.544	1275.02	-0.721666	-565.59	1452.9	-98.8839	-509.121	1247.37	-127.1	-473.859	1156.09	-163.688	-326.899	1060.4	-132.331	-251.455	1013.63	-188.752	-292.553	994.115	-192.821	-216.526	971.902
4749	0	131.827	-451.992	1644	228.816	-445.253	1639.55	118.939	-608.252	1667.09	262.965	-593.129	1652.61	176.522	-647.404	1482.42	160.156	-686.302	1220.12	182.072	-493.162	1407.83	180.436	-389.952	1206.21	220.828	-697.239	1276.86	-0.983998	-553.778	1454.58	-98.8758	-499.907	1247.7	-126.764	-466.34	1155.76	-164.734	-322.554	1056.31	-133.884	-248.471	1006.67	-190.35	-290.2	989.056	-194.521	-214.881	964.259
4750	0	131.796	-439.203	1646.3	228.831	-432.259	1641.76	119.235	-595.528	1669.38	263.019	-580.222	1654.4	176.56	-634.843	1484.52	160.69	-674.143	1222.24	181.975	-480.759	1409.92	179.951	-377.665	1208.36	221.12	-685.078	1278.98	-1.42266	-542.032	1456.05	-98.7279	-491.087	1247.81	-126.488	-459.243	1155.35	-165.623	-318.842	1052.05	-135.445	-245.899	1000.1	-191.97	-288.644	984.077	-196.22	-214.126	956.395
4751	0	131.734	-426.511	1648.75	228.394	-419.595	1644.09	119.446	-582.882	1671.78	262.938	-567.272	1656.82	176.757	-622.302	1487.03	161.6	-661.846	1224.48	182.117	-468.365	1412.31	179.442	-365.405	1210.63	221.428	-672.966	1281.4	-1.84284	-530.172	1457.56	-98.3515	-482.484	1247.93	-125.718	-452.875	1154.65	-166.525	-315.785	1047.65	-136.75	-244.205	993.406	-192.851	-287.656	979.109	-197.74	-214.143	948.722
4752	0	131.57	-413.924	1651.2	228.633	-406.556	1646.77	119.645	-570.331	1674.08	262.997	-554.478	1659.21	176.932	-609.746	1489.55	162.683	-649.695	1227.02	182.052	-455.949	1414.65	179.147	-353.084	1213.27	221.971	-660.703	1284	-2.08433	-518.24	1459.38	-97.89	-474.423	1248.05	-124.774	-446.765	1154	-167.23	-313.675	1043.29	-137.873	-243.291	986.778	-193.515	-287.393	973.789	-199.143	-214.995	941.247
4753	0	131.219	-401.451	1653.89	228.262	-393.923	1649.57	119.621	-557.88	1676.49	263.357	-541.685	1661.96	177.029	-597.088	1492.2	163.735	-637.461	1229.66	182.169	-443.392	1417.18	178.8	-341.039	1215.68	222.232	-648.59	1286.8	-2.43701	-506.275	1461.25	-97.2586	-466.656	1248.25	-123.789	-441.027	1153.33	-167.662	-311.975	1039.02	-139.125	-242.898	980.465	-194.307	-288.036	968.931	-200.63	-216.698	934.01
4754	0	130.969	-389.1	1656.31	227.217	-381.876	1651.79	119.288	-545.642	1678.51	263.027	-529.223	1664.54	177.314	-584.426	1494.82	164.709	-625.155	1232.16	182.25	-430.976	1419.72	178.71	-329.002	1218.27	222.807	-636.306	1289.43	-2.5095	-494.125	1463.02	-96.6587	-459.117	1248.32	-122.563	-435.843	1152.7	-167.956	-310.908	1034.94	-140.23	-243.114	974.324	-194.678	-289.24	964.042	-201.917	-219.199	927.057
4755	0	130.72	-376.815	1658.7	226.758	-369.696	1654.12	119.228	-533.304	1680.37	262.826	-516.888	1666.48	177.507	-571.861	1496.85	165.656	-612.702	1234.47	182.566	-418.31	1422.07	178.471	-317.106	1220.59	223.723	-623.747	1292	-2.47998	-481.865	1464.69	-95.9364	-452.04	1248.44	-121.024	-431.006	1151.95	-168.122	-310.345	1030.88	-141.125	-243.886	968.253	-194.67	-291.155	959.203	-203.267	-222.194	920.236
4756	0	130.591	-364.486	1661.13	226.655	-357.314	1656.77	119.145	-521.071	1682.06	262.75	-504.583	1668.95	177.631	-559.157	1498.95	166.363	-600.206	1236.69	182.642	-405.721	1424.13	178.417	-305.252	1222.79	224.588	-611.169	1294.28	-2.41946	-469.623	1466.32	-95.0157	-444.919	1248.55	-119.278	-426.379	1151.24	-168.166	-310.206	1026.88	-142.012	-244.954	962.368	-194.545	-293.695	954.442	-204.548	-225.963	913.712
4757	0	130.516	-352.294	1662.97	227.048	-344.825	1659.3	118.917	-508.876	1683.6	262.653	-492.413	1670.9	177.951	-546.392	1501.03	166.877	-587.84	1238.81	182.86	-393.163	1426.05	178.539	-293.36	1224.74	225.479	-598.467	1296.5	-2.28859	-457.272	1467.61	-93.5137	-437.765	1248.1	-117.505	-421.939	1150.57	-167.976	-310.41	1022.76	-142.82	-246.468	956.671	-194.333	-296.589	949.615	-205.663	-230.264	907.264
4758	0	130.574	-339.965	1664.88	226.663	-332.871	1661	118.73	-496.708	1684.74	262.444	-480.33	1672.2	178.155	-533.61	1502.51	167.262	-575.751	1240.38	183.239	-380.523	1427.74	178.82	-281.349	1226.32	226.591	-585.626	1298.33	-2.1988	-444.919	1468.64	-92.2973	-430.679	1247.88	-115.555	-417.485	1149.79	-167.497	-310.862	1018.77	-143.57	-248.303	951.012	-193.816	-299.718	944.941	-206.436	-235.093	900.648
4759	0	130.551	-327.721	1666.29	226.608	-320.754	1662.59	118.757	-484.452	1685.64	262.425	-468.183	1673.33	178.529	-520.883	1503.87	167.995	-562.872	1241.68	183.505	-367.839	1429.18	179.007	-269.376	1227.56	227.756	-572.689	1299.93	-1.90979	-432.491	1469.61	-91.0143	-423.671	1247.68	-113.619	-412.92	1149.09	-166.762	-311.649	1014.71	-144.472	-250.327	945.779	-192.881	-303.359	940.434	-206.978	-240.281	894.259
4760	0	130.569	-315.46	1667.53	226.694	-308.552	1664.04	118.705	-472.213	1686.2	262.468	-455.938	1674.4	178.821	-508.076	1504.75	168.821	-549.805	1242.84	183.715	-355.167	1430.33	179.577	-257.242	1228.56	228.9	-559.794	1301.2	-1.70295	-420.043	1470.11	-89.7727	-416.395	1247.3	-111.862	-408.479	1148.38	-166.191	-312.459	1010.91	-144.537	-252.61	940.109	-192.046	-307.104	936.073	-207.38	-245.786	888.022
4761	0	130.604	-303.205	1668.27	226.833	-296.226	1665.02	118.488	-460.048	1686.26	262.261	-443.676	1674.95	179.153	-495.313	1505.73	168.894	-537.397	1243.56	184.155	-342.403	1431.18	180.13	-245.46	1228.99	229.911	-547.011	1302.14	-1.353	-407.561	1470.43	-88.1103	-409.265	1246.56	-109.988	-403.791	1147.69	-165.673	-313.295	1007.28	-144.97	-255.169	934.709	-190.698	-310.961	931.854	-207.518	-251.458	881.902
4762	0	130.702	-290.834	1668.62	226.775	-283.766	1665.54	118.694	-447.639	1686.13	262.568	-431.355	1675.18	179.675	-482.514	1505.91	169.567	-524.554	1244.2	184.427	-329.63	1431.64	180.812	-233.812	1229.06	231.106	-534.291	1302.84	-1.10307	-395.012	1470.38	-86.5868	-401.733	1245.88	-107.937	-398.835	1146.93	-164.77	-314.073	1003.51	-145.271	-258.116	929.255	-189.582	-314.849	928.043	-207.512	-257.401	876.052
4763	0	130.841	-278.429	1668.77	226.903	-271.216	1665.81	119.097	-435.203	1685.92	262.935	-418.733	1675.31	180.174	-469.758	1505.84	170.084	-511.891	1244.34	184.898	-316.819	1431.69	181.752	-222.061	1228.63	232.337	-521.748	1303.21	-0.736378	-382.495	1470.26	-85.0667	-394.155	1245.22	-105.97	-393.68	1146.07	-163.857	-314.994	1000.22	-145.142	-261.2	923.867	-188.069	-318.815	924.192	-207.069	-263.457	870.352
4764	0	130.904	-265.889	1668.48	227.106	-258.552	1665.84	119.473	-422.77	1685.4	263.245	-406.052	1675.25	180.651	-456.932	1505.62	170.413	-499.32	1244.22	185.252	-304.032	1431.43	182.572	-210.216	1227.75	233.396	-509.24	1303.44	-0.39797	-369.904	1469.88	-83.5257	-386.26	1244.48	-104.072	-388.32	1145.31	-162.882	-315.865	996.991	-145.24	-263.958	919.149	-186.613	-322.538	920.993	-206.551	-269.687	865.128
4765	0	131.169	-253.271	1667.89	227.187	-245.812	1665.28	119.876	-410.219	1684.61	263.493	-393.173	1674.63	181.176	-444.237	1505.13	170.692	-486.846	1243.83	185.694	-291.123	1431.01	183.493	-197.932	1226.74	234.264	-496.812	1303.26	0.005441	-357.135	1469.3	-82.1129	-378.036	1243.6	-102.049	-382.712	1144.51	-161.652	-316.483	993.95	-145.012	-266.84	914.545	-185.453	-326.487	918.306	-205.877	-275.949	860.193
4766	0	131.207	-240.537	1667.05	227.546	-232.861	1664.47	120.48	-397.539	1683.68	264.076	-380.314	1673.84	181.725	-431.413	1504.37	170.927	-474.428	1243.16	186.146	-278.268	1430.11	184.414	-185.386	1225.33	235.032	-484.485	1302.61	0.197016	-344.487	1468.5	-80.7244	-369.633	1242.46	-99.9234	-376.964	1143.48	-160.579	-317.068	991.391	-144.681	-269.749	910.352	-182.692	-330.283	915.366	-205.031	-282.128	855.849
4767	0	131.696	-227.653	1665.83	227.919	-219.805	1663.34	121.164	-384.687	1682.64	264.773	-367.409	1672.65	182.156	-418.775	1503.45	170.948	-462.085	1242.38	186.814	-265.421	1429	185.43	-172.435	1223.68	235.638	-472.272	1301.89	0.512869	-331.593	1467.61	-79.4515	-361.063	1241.5	-97.7271	-371.022	1142.59	-159.307	-317.683	989.026	-144.12	-272.451	906.345	-180.76	-333.911	913.219	-204.091	-288.378	852.121
4768	0	132.293	-214.719	1664.19	228.21	-206.732	1661.44	121.803	-371.754	1681.44	265.381	-354.113	1671.37	182.508	-405.921	1502.5	170.652	-449.851	1241.49	187.159	-252.528	1427.71	186.384	-159.202	1221.88	235.901	-460.005	1301.05	0.786785	-318.677	1466.41	-78.0579	-352.228	1240.41	-95.4489	-364.809	1141.87	-157.417	-317.934	986.724	-143.502	-275.756	902.409	-178.913	-337.254	911.66	-202.726	-294.334	848.535
4769	0	132.846	-201.685	1662.56	228.982	-193.577	1659.75	122.567	-358.639	1680.19	265.976	-340.845	1669.57	182.894	-393.134	1501.23	170.189	-437.684	1240.31	187.568	-239.662	1426.04	187.318	-145.885	1220.06	236.128	-447.67	1299.79	1.07232	-305.66	1465.25	-76.8147	-343.09	1239.27	-93.041	-358.35	1141.02	-155.382	-318.014	985.036	-142.861	-277.7	899.194	-176.709	-340.42	910.292	-201.634	-300.264	845.61
4770	0	133.515	-188.432	1660.62	229.516	-180.478	1657.37	123.519	-345.291	1678.81	266.824	-327.539	1667.86	183.071	-380.357	1499.58	169.53	-425.407	1238.92	188.093	-226.823	1424.36	188.253	-132.875	1218.09	235.999	-435.354	1298.18	1.27055	-292.551	1464.02	-75.4876	-333.727	1238.15	-90.7016	-351.636	1140.29	-154.542	-317.826	983.738	-142.231	-279.993	896.308	-174.257	-343.201	909.345	-200.009	-305.819	843.385
4771	0	134.281	-175.151	1658.61	230.446	-167.234	1655.13	124.303	-332.027	1677.28	267.69	-314.296	1665.76	183.192	-367.72	1498.05	168.408	-413.014	1237.3	188.545	-213.872	1422.66	188.988	-120.165	1215.94	235.639	-423.002	1296.6	1.37743	-279.386	1462.69	-74.4592	-324.265	1237.03	-88.3437	-344.656	1139.64	-152.682	-317.322	982.49	-141.172	-281.9	894.045	-171.619	-345.653	908.874	-198.75	-311.126	841.685
4772	0	135.087	-161.88	1656.36	231.061	-154.143	1652.47	124.812	-318.785	1675.53	268.208	-301.169	1663.43	183.147	-355.158	1496.52	167.057	-400.349	1235.61	188.967	-200.913	1420.62	189.608	-107.243	1213.73	234.898	-410.542	1294.59	1.45429	-266.223	1461.15	-73.6065	-314.484	1235.89	-85.9899	-337.427	1139.02	-150.592	-316.393	981.579	-140.522	-283.219	892.048	-168.853	-347.59	908.945	-197.087	-315.866	840.503
4773	0	135.88	-148.797	1654.03	231.9	-140.997	1649.86	125.625	-305.423	1673.62	268.841	-288.133	1661.03	183.046	-342.518	1494.16	165.749	-387.49	1233.81	189.065	-188.028	1418.66	190.186	-94.3152	1211.89	234.139	-397.867	1292.5	1.40523	-253.08	1459.59	-72.9446	-304.538	1234.59	-83.8746	-329.53	1138.5	-148.844	-314.941	980.859	-139.556	-284.323	890.428	-166.129	-348.738	909.059	-195.027	-320.366	839.494
4774	0	136.546	-135.674	1651.76	232.711	-127.95	1647.39	126.136	-292.117	1671.79	269.45	-275.11	1658.66	182.937	-329.729	1492.3	164.677	-374.415	1231.77	189.419	-174.969	1416.82	190.732	-81.2515	1210.42	233.42	-385.16	1290.38	1.35075	-239.713	1458.21	-72.3527	-294.369	1233.6	-81.7814	-321.383	1137.9	-147.091	-312.879	980.513	-138.63	-284.492	889.218	-163.529	-349.407	909.484	-193.07	-323.966	838.848
4775	0	137.01	-122.354	1649.65	233.117	-114.981	1644.91	126.303	-278.909	1669.89	269.604	-262.033	1656.52	182.55	-316.833	1490.32	163.702	-361.329	1229.77	189.44	-162.09	1415.02	191.234	-68.0596	1209.13	232.624	-372.328	1288.26	1.07205	-226.503	1456.72	-71.9012	-284.067	1232.72	-80.2882	-312.824	1137.48	-145.568	-310.064	980.48	-138.092	-284.123	888.405	-160.96	-349.025	910.48	-191.06	-326.826	838.59
4776	0	137.288	-109.172	1647.49	233.685	-101.956	1642.91	126.303	-265.766	1667.94	269.55	-249.254	1654.46	182.174	-304.18	1488.29	162.986	-348.199	1227.88	189.376	-149.032	1413.61	191.66	-54.9269	1208.09	231.867	-359.503	1286.17	0.667687	-213.241	1455.15	-71.6901	-273.635	1231.82	-78.9677	-303.378	1137.38	-144.353	-306.585	980.711	-137.758	-282.938	887.875	-158.651	-347.987	911.408	-189.259	-328.843	838.721
4777	0	137.302	-96.1738	1645.56	233.667	-89.2078	1640.78	126.209	-252.548	1666.13	269.442	-236.558	1652.52	181.679	-291.238	1486.17	162.489	-334.947	1225.57	189.282	-135.96	1412.19	191.621	-42.002	1206.91	231.176	-346.55	1283.98	0.279686	-200.083	1453.62	-71.4136	-262.742	1230.69	-77.6279	-293.726	1136.73	-143.194	-302.238	980.989	-137.278	-280.607	887.526	-156.336	-345.574	912.445	-187.497	-329.621	839.148
4778	0	137.314	-83.181	1643.73	233.651	-76.3449	1638.96	125.766	-239.543	1664.36	269.241	-223.666	1650.76	181.059	-278.365	1484.18	162.1	-321.586	1223.64	188.993	-122.87	1410.87	191.492	-29.1475	1205.56	230.657	-333.387	1282.09	-0.107444	-186.801	1452.01	-71.2774	-251.584	1229.74	-76.5654	-283.917	1136.02	-142.094	-297.062	981.162	-136.993	-277.37	887.144	-154.351	-342.176	913.881	-185.458	-329.304	839.497
4779	0	136.963	-70.2506	1642.21	233.188	-63.5646	1637.39	125.12	-226.645	1662.57	268.584	-210.851	1649.04	180.512	-265.337	1482.75	161.866	-308.055	1221.99	188.462	-109.466	1409.75	191.114	-16.1847	1204.4	230.134	-320.043	1280.39	-0.639288	-173.63	1450.48	-71.1818	-240.129	1228.58	-75.6726	-273.785	1135.56	-141.197	-290.985	981.302	-136.824	-273.006	886.758	-152.819	-337.691	915.04	-183.945	-327.544	839.902
4780	0	136.398	-57.3357	1640.87	232.849	-50.7752	1636.25	124.401	-213.754	1660.92	267.805	-198.236	1647.42	179.916	-252.199	1480.84	161.717	-294.42	1220.31	188.296	-96.0983	1408.68	190.532	-2.96022	1203.28	229.833	-306.522	1278.75	-1.07508	-160.363	1448.94	-71.0194	-228.327	1227.42	-75.195	-263.408	1135.01	-140.467	-283.934	981.477	-136.825	-267.528	886.552	-151.381	-332.054	916.027	-182.43	-324.329	840.414
4781	0	135.656	-44.4168	1639.79	231.974	-38.0462	1635.17	123.674	-200.884	1659.44	267.048	-185.605	1646.38	179.313	-239.051	1479.37	161.853	-280.668	1218.75	187.58	-82.5686	1407.77	189.907	10.5686	1202.35	229.731	-292.801	1277.35	-1.79748	-147.116	1447.61	-70.9869	-216.324	1226.45	-74.7723	-252.83	1134.43	-139.772	-276.088	981.623	-136.531	-260.932	886.46	-149.99	-325.173	916.75	-181.393	-319.595	840.955
4782	0	134.629	-31.6609	1638.85	231.096	-25.2919	1634.54	122.716	-188.179	1658.05	266.115	-172.821	1645.44	178.696	-225.789	1478.51	161.971	-266.763	1217.5	186.873	-68.887	1407.14	189.142	24.3228	1201.8	229.616	-279.006	1276.31	-2.58923	-133.982	1446.33	-71.3584	-204.508	1225.54	-74.5859	-242.098	1133.99	-139.4	-267.403	981.574	-136.301	-253.102	885.926	-149.049	-317.247	917.308	-180.746	-313.182	841.679
4783	0	133.496	-18.9169	1638.04	230.134	-12.4163	1634.12	121.473	-175.465	1656.77	264.926	-160.109	1644.44	177.987	-212.466	1477.49	162.098	-252.714	1216.36	185.875	-55.22	1406.58	188.057	38.2504	1201.18	229.44	-265.206	1275.39	-3.47544	-120.79	1445.18	-71.6767	-192.62	1224.72	-74.7235	-230.969	1133.55	-139.224	-257.673	981.341	-136.529	-243.957	885.704	-148.557	-308.21	917.386	-180.009	-305.049	841.734
4784	0	132.417	-6.01172	1637.65	228.948	0.424783	1633.95	120.485	-162.608	1655.88	263.605	-147.322	1643.99	177.283	-199.042	1476.46	162.333	-238.576	1215.39	185.069	-41.4115	1406.26	186.84	52.4318	1200.88	229.657	-250.971	1274.45	-4.4812	-107.539	1444.31	-72.0751	-180.423	1224.2	-74.745	-219.886	1132.96	-138.992	-247.196	981.026	-136.625	-233.74	885.452	-148.054	-297.943	917.239	-179.864	-295.323	841.787
4785	0	131.249	6.82259	1637.76	227.903	13.4476	1634.29	119.284	-149.766	1655.55	262.756	-134.306	1644.14	176.468	-185.688	1475.87	162.59	-224.301	1214.6	184.208	-27.6176	1406.5	185.546	66.7714	1200.96	229.662	-236.673	1273.77	-5.38409	-94.3355	1443.7	-72.4421	-168.464	1223.87	-74.9303	-208.077	1132.56	-138.934	-235.905	980.668	-136.77	-222.428	885.037	-147.521	-286.782	916.815	-179.969	-284.154	841.744
4786	0	130.042	19.8484	1638.21	226.6	26.5161	1634.89	118.075	-136.817	1655.42	261.525	-121.287	1644.38	175.581	-172.182	1475.66	162.515	-209.952	1214.24	182.998	-13.8613	1406.77	184.057	81.4149	1201.34	229.407	-222.316	1273.44	-6.32822	-81.0821	1443.27	-72.6162	-156.275	1223.71	-75.31	-195.86	1132.24	-139.18	-223.611	980.299	-137.144	-209.963	884.678	-147.606	-274.478	916.341	-180.261	-271.51	841.329
4787	0	128.758	32.8335	1638.73	225.471	39.5938	1635.67	116.978	-123.751	1655.46	260.328	-108.219	1644.73	174.756	-158.659	1475.78	162.256	-195.43	1214.27	181.956	0.073377	1407.53	182.81	96.2702	1202.2	228.954	-208.037	1273.49	-7.22899	-67.8718	1443.07	-73.2566	-143.558	1223.71	-75.7945	-183.174	1132	-139.344	-210.46	979.88	-137.286	-196.385	884.52	-147.731	-261.009	915.608	-180.707	-257.375	840.826
4788	0	127.728	46.011	1639.57	224.326	52.8014	1636.58	115.897	-110.714	1655.86	259.311	-95.0732	1645.28	173.993	-145.019	1476.08	161.889	-180.913	1214.43	180.83	13.8865	1408.46	181.539	111.305	1203.21	228.453	-193.835	1273.74	-8.24239	-54.6448	1443.16	-73.7644	-130.643	1223.7	-76.0859	-169.856	1131.86	-139.646	-196.344	979.449	-137.417	-181.676	884.308	-147.943	-246.517	914.828	-181.116	-241.939	840.206
4789	0	126.522	59.1239	1640.7	223.176	66.0763	1637.88	114.936	-97.4747	1656.52	258.3	-81.7062	1646.17	173.121	-131.278	1476.78	161.406	-166.482	1214.84	179.867	27.7845	1409.67	180.473	126.263	1204.55	227.719	-179.646	1274.32	-9.17918	-41.3597	1443.6	-74.1826	-117.196	1223.97	-76.789	-156.075	1131.83	-139.892	-181.481	978.951	-137.681	-165.921	883.922	-148.39	-231.041	913.892	-181.477	-225.446	839.693
4790	0	125.46	72.3844	1642.06	222.121	79.5143	1639.42	113.824	-84.4029	1657.4	257.407	-68.2748	1647.35	172.441	-117.47	1477.65	160.764	-152.286	1215.87	178.635	41.5382	1411.14	179.429	140.965	1205.97	226.899	-165.589	1275.11	-9.87654	-28.1157	1444.15	-74.8109	-103.374	1224.4	-77.4128	-141.615	1132.01	-140.123	-165.538	978.573	-137.725	-149.138	883.739	-148.819	-214.458	913.138	-182.355	-207.571	838.955
4791	0	124.402	85.689	1643.47	221.086	93.1188	1640.94	113.3	-71.0375	1658.57	256.688	-54.6265	1648.59	171.976	-103.806	1479.02	160.146	-138.21	1216.95	178.1	55.3041	1412.65	178.569	155.305	1207.48	226.476	-151.599	1276.58	-10.3682	-14.783	1445.17	-75.2014	-88.9415	1225	-78.0397	-126.57	1132.13	-140.561	-148.601	978.24	-137.912	-131.315	883.742	-149.413	-197.016	912.284	-182.77	-188.557	838.246
4792	0	123.674	99.1381	1644.94	220.01	106.633	1642.44	112.891	-57.6485	1659.9	256.295	-40.9494	1650.19	171.733	-90.1565	1480.34	159.393	-124.455	1218.62	177.42	68.8052	1414.27	177.891	169.443	1209.19	226.062	-137.819	1278.06	-10.729	-1.48304	1446.66	-75.585	-74.0426	1225.7	-78.5627	-110.987	1132.49	-140.86	-130.876	978.187	-137.529	-112.606	883.664	-149.888	-178.324	911.522	-183.225	-168.518	837.712
4793	0	122.804	112.332	1646.3	219.258	120.315	1643.96	112.325	-44.384	1661.25	255.901	-27.2054	1651.83	171.704	-76.6953	1482.19	158.742	-111.085	1220.3	176.897	82.1629	1416.06	177.362	183.283	1211.1	225.821	-124.241	1279.95	-10.8818	11.7074	1448.26	-76.1538	-58.7825	1226.5	-79.2587	-94.9378	1133.13	-141.292	-112.318	978.128	-137.811	-92.583	883.962	-150.45	-158.649	910.827	-183.667	-147.331	837.123
4794	0	122.186	125.623	1647.2	218.593	134.001	1645.03	112.131	-31.3144	1662.16	255.772	-13.4522	1653.02	171.75	-63.2148	1483.57	158.258	-98.0339	1222.07	176.611	95.3485	1417.47	176.932	196.976	1212.89	225.686	-110.924	1281.44	-10.9393	24.8864	1449.97	-76.598	-43.1249	1227.42	-79.8974	-78.5576	1133.69	-141.753	-92.7882	978.253	-137.67	-71.72	884.535	-151.219	-138.017	910.071	-183.766	-125.04	836.155
4795	0	121.947	139.004	1648.09	218.344	147.602	1646.08	112.368	-17.9232	1663.33	255.713	0.235782	1654.19	171.941	-50.0609	1484.8	158.016	-85.2029	1223.3	176.625	108.499	1418.85	176.38	209.982	1214.39	225.944	-97.8944	1282.88	-10.755	38.055	1451.88	-76.9357	-27.3231	1228.52	-80.5267	-61.8935	1134.33	-142.153	-72.6298	978.318	-137.558	-49.9251	884.836	-151.989	-116.502	909.254	-184.275	-101.729	835.925
4796	0	121.811	152.411	1649.14	218.156	161.087	1646.87	112.615	-4.51944	1664.7	255.826	13.9381	1655.33	172.101	-37.2095	1486.19	157.765	-72.5722	1224.67	176.652	121.376	1420.11	175.727	222.496	1215.38	226.038	-85.2313	1284	-10.6634	51.4201	1453.77	-77.3718	-11.5315	1229.51	-81.0209	-44.6638	1134.85	-142.52	-51.8266	978.239	-136.914	-27.5222	885.222	-152.411	-94.2311	908.286	-184.265	-77.5614	834.799
4797	0	122.129	165.888	1650.26	218.505	174.574	1647.76	112.992	8.86916	1666.24	256.469	27.5169	1656.5	172.042	-24.1936	1487.3	157.284	-60.0973	1225.77	176.818	134.142	1421.27	175.568	234.97	1216.64	225.818	-72.7112	1285.21	-10.4821	64.8943	1455.72	-77.7475	4.54122	1230.62	-81.8528	-27.483	1135.34	-142.722	-30.3878	978.058	-137.012	-4.08474	886.119	-153.307	-71.1046	907.156	-184.464	-52.2589	834.319
4798	0	122.808	179.331	1651.42	219.25	188.014	1648.67	113.305	22.3138	1667.7	257.02	40.8292	1657.58	172.043	-11.2309	1488.55	156.721	-47.7788	1227.05	177.273	146.999	1422.52	175.173	247.026	1217.25	225.162	-60.3055	1286.16	-10.3733	78.3664	1457.53	-78.1446	20.7413	1231.67	-82.8856	-10.209	1135.93	-143.089	-8.42116	977.9	-136.309	19.9042	886.693	-154.186	-47.1923	906.094	-184.222	-26.1147	833.585
4799	0	123.685	192.903	1652.45	220.234	201.304	1649.4	113.932	35.9776	1669.36	257.539	54.0546	1658.58	171.971	1.52644	1489.74	155.916	-35.4627	1228.33	177.545	159.534	1423.66	175.211	259.188	1218.04	224.264	-48.1349	1287.32	-10.0993	92.0558	1459.33	-78.5363	37.0363	1232.72	-83.7055	7.44757	1136.5	-143.051	14.3924	977.688	-135.348	44.6745	887.331	-154.837	-22.5626	905.167	-183.858	1.10403	833.183
4800	0	124.722	206.507	1653.57	221.283	214.561	1650.14	114.625	49.5787	1670.96	258.172	67.3817	1659.6	171.877	14.2412	1491.2	154.796	-22.9831	1229.77	178.091	171.971	1424.74	175.207	271.193	1218.39	223.064	-36.0275	1288.61	-9.836	105.928	1460.97	-79.1128	53.4197	1233.77	-84.9588	25.2467	1136.99	-143.164	37.4535	977.614	-134.283	69.865	888.278	-155.503	2.85034	904.19	-183.38	29.1484	832.909
4801	0	126.058	219.994	1654.85	222.461	227.771	1651.03	115.23	63.0639	1672.55	259.107	80.4374	1660.8	172.002	27.1006	1492.98	153.576	-10.3966	1231.54	178.703	184.531	1425.88	175.832	283.795	1219.1	221.602	-23.9873	1289.98	-9.36398	119.653	1462.65	-79.8517	69.8951	1234.92	-86.3643	43.1271	1137.62	-142.863	61.0565	977.195	-132.832	95.7399	889.366	-156.213	28.6802	903.315	-182.587	58.0166	832.829
4802	0	127.245	233.499	1656.3	223.791	240.999	1652.28	116.298	76.6815	1674.25	260.158	93.3651	1662.11	172.237	40.2497	1494.52	152.342	2.08892	1233.28	179.286	197.056	1427.08	176.399	295.741	1219.93	220.429	-11.9907	1291.56	-8.72971	133.335	1464.28	-80.1523	86.7568	1235.73	-87.5953	61.3533	1138.28	-142.927	85.2932	977.891	-130.955	121.897	891.119	-156.661	55.5479	902.966	-181.292	87.6384	833.137
4803	0	128.686	246.885	1658.04	225.123	254.146	1653.63	117.442	90.1548	1676.01	261.096	106.665	1663.35	172.511	53.0637	1496.4	151.086	14.2876	1235.14	179.796	209.394	1428.25	177.117	308.008	1220.88	219.365	-0.042995	1292.96	-8.13548	146.918	1466.21	-81.0097	103.687	1237.38	-89.0727	79.5755	1139.16	-142.561	109.836	978.765	-128.788	148.445	893.097	-156.762	82.8188	902.69	-180.017	117.975	834.544
4804	0	129.849	260.244	1659.6	226.44	267.173	1654.92	118.42	103.485	1677.84	262.216	119.732	1664.8	172.682	65.7135	1498.26	149.783	26.101	1237.29	180.51	221.898	1429.29	177.726	320.089	1221.61	218.35	11.7713	1294.97	-7.52883	160.586	1468.34	-81.6239	120.723	1238.76	-90.742	98.0937	1140.17	-142.094	134.765	979.922	-126.129	174.977	895.297	-156.731	110.584	902.941	-178.428	148.86	836.263
4805	0	131.24	273.446	1661.18	227.935	280.203	1656.21	119.425	116.739	1679.63	263.484	132.516	1665.99	172.919	78.7092	1500.1	148.668	37.8815	1239.23	181.032	234.426	1430.36	178.792	333.128	1222.91	217.32	23.8305	1296.71	-7.05845	174.193	1470.09	-82.3498	137.936	1240.66	-92.4787	116.504	1141.28	-140.949	160.081	981.188	-123.541	202.656	898.58	-156.366	138.706	903.695	-176.344	180.371	838.732
4806	0	132.605	286.605	1662.88	229.174	293.117	1657.22	120.608	129.888	1681.49	264.416	145.366	1666.95	173.132	91.7768	1501.69	147.787	49.8818	1241.27	181.463	246.902	1431.36	179.759	346.035	1224.2	216.458	35.8806	1298.4	-6.54638	187.711	1472.15	-83.1322	155.055	1242.44	-93.9613	135.155	1142.54	-140.235	185.543	983.56	-120.372	230.03	902.284	-155.565	167.293	904.975	-173.858	212.011	841.641
4807	0	133.998	299.697	1664.51	230.54	305.939	1658.28	121.69	142.975	1683.33	265.824	158.239	1668.01	173.061	103.814	1503.33	147.076	61.8647	1242.83	182.114	259.338	1432.36	180.399	358.461	1225.33	215.734	47.9923	1299.92	-5.9973	200.979	1473.91	-83.6844	172.468	1244.2	-95.5428	153.894	1144.04	-138.755	211.112	985.522	-117.317	257.439	906.421	-154.646	196.065	906.644	-171.125	243.806	845.23
4808	0	135.225	312.687	1665.93	231.733	318.668	1659.06	122.531	155.888	1684.88	266.082	170.985	1668.22	172.978	116.427	1504.75	146.397	73.8295	1244.62	182.558	271.916	1433.12	180.89	370.462	1226.22	214.914	60.134	1301.49	-5.55491	214.256	1475.71	-83.9653	189.767	1245.67	-97.0938	172.65	1145.5	-137.546	236.701	988.089	-114.242	284.879	910.954	-153.62	224.793	908.939	-167.871	275.805	849.183
4809	0	136.249	325.493	1667.1	232.734	331.37	1659.78	123.49	168.728	1686.29	267.284	183.432	1669.07	173.066	129.7	1506	145.624	86.0215	1245.68	182.955	284.509	1433.8	181.286	382.224	1226.9	214.108	72.3292	1302.59	-5.47461	227.364	1477.21	-84.3807	206.969	1247.06	-98.3049	191.721	1146.65	-136.415	262.36	991.275	-110.702	312.644	916.139	-152.246	253.806	911.521	-164.578	307.506	853.855
4810	0	137.16	338.355	1668.27	233.683	343.958	1660.47	124.25	181.657	1687.44	267.691	196.069	1669.37	172.903	142.035	1506.69	145.136	98.2334	1246.71	183.318	297.054	1434.33	181.537	393.913	1227.57	213.439	84.5688	1303.44	-5.1947	240.512	1478.47	-85.1157	223.92	1248.73	-99.5528	210.672	1147.84	-135.012	288.066	994.476	-107.556	339.935	921.318	-150.712	282.818	914.416	-160.942	339.216	859.054
4811	0	137.937	350.99	1669.29	234.289	356.57	1661.2	124.697	194.308	1688.22	268.304	208.557	1669.97	171.671	153.436	1507.48	144.565	110.579	1247.56	183.425	309.607	1434.7	181.622	405.555	1228.15	212.777	96.9649	1304.4	-5.0102	253.499	1479.51	-85.6261	240.812	1249.87	-101.159	229.386	1148.88	-133.569	313.323	997.843	-104.481	367.43	927.268	-148.733	311.688	917.617	-157.378	370.678	864.628
4812	0	138.198	363.683	1669.93	234.809	369.052	1661.73	124.771	206.908	1688.73	268.161	220.857	1670.03	172.324	167.759	1507.67	143.951	123.1	1248.12	183.605	322.405	1434.77	181.941	417.579	1228.49	211.865	109.357	1304.88	-5.02121	266.77	1480.21	-86.4425	257.434	1251.2	-102.542	248.355	1149.82	-132.08	338.523	1001.35	-101.2	394.894	933.117	-146.765	340.594	921.125	-153.764	401.736	870.59
4813	0	138.529	376.23	1670.25	235.057	381.413	1661.94	124.731	219.585	1688.89	268.377	233.363	1670.21	172.247	180.231	1507.88	143.618	135.478	1248.4	183.806	335.121	1434.75	181.914	429.39	1228.46	211.377	121.826	1305.1	-4.80123	279.796	1480.55	-87.0282	274.026	1251.88	-103.65	267.417	1150.3	-130.533	363.892	1004.85	-98.1157	422.084	939.307	-144.165	369.381	924.641	-150.023	432.879	877.058
4814	0	138.568	388.9	1670.4	235.31	393.911	1662.21	124.762	232.357	1688.79	268.619	245.86	1670.42	172.201	192.976	1508.01	143.414	148.167	1248.62	183.825	347.812	1434.61	181.897	441.291	1228.16	210.825	134.353	1305.15	-4.72129	292.852	1480.88	-87.9262	290.29	1252.69	-104.838	286.624	1150.6	-128.809	389.104	1008.69	-94.6991	449.361	945.974	-142.19	398.038	928.816	-146.019	463.571	883.604
4815	0	138.867	401.597	1670.31	235.38	406.435	1662.22	124.38	245.086	1688.56	268.411	257.972	1670.39	171.978	206.209	1507.94	143.233	160.575	1248.6	183.887	360.54	1434.3	181.954	453.091	1227.54	210.29	146.938	1305.07	-4.76389	305.915	1480.79	-88.4234	306.726	1253.02	-106.004	305.92	1150.83	-127.297	414.231	1012.37	-91.6354	476.17	952.358	-139.597	426.634	932.905	-142.329	493.865	890.73
4816	0	138.759	414.43	1669.95	235.061	419.018	1661.85	123.844	257.684	1687.99	267.748	270.595	1669.95	171.506	218.05	1507.35	143.277	172.847	1248.28	183.721	373.253	1433.61	181.853	464.882	1226.62	210.124	159.46	1304.83	-4.59395	318.81	1480.22	-89.1363	323.106	1253.04	-106.868	325.536	1150.85	-125.577	439.307	1016	-88.321	502.713	958.611	-138.386	454.51	937.49	-138.403	523.886	897.756
4817	0	138.31	427.127	1669.11	235.02	431.625	1661.26	123.58	270.529	1687.36	267.692	283.166	1669.55	171.521	231.237	1506.68	143.494	185.251	1247.95	183.793	385.955	1432.74	181.59	476.996	1225.19	209.904	172.113	1304.25	-4.61806	331.72	1479.33	-89.4634	339.416	1252.74	-107.599	345.334	1150.73	-123.881	464.35	1019.86	-84.8168	528.948	964.665	-135.437	482.703	941.417	-134.205	553.635	904.841
4818	0	137.917	439.765	1668.16	234.616	444.242	1660.23	123.196	283.333	1686.53	267.158	295.98	1668.89	171.491	243.868	1505.94	143.882	197.443	1247.29	183.715	398.764	1431.68	181.515	489.387	1223.84	210.001	184.466	1303.55	-4.39542	344.428	1478.13	-89.8676	355.716	1252.19	-108.401	365.285	1150.46	-122.092	489.387	1023.68	-81.5302	555.202	971.491	-132.937	510.693	946.124	-130.292	582.871	912.332
4819	0	137.658	452.438	1666.99	234.354	456.983	1659.23	122.666	296.005	1685.43	266.635	308.428	1667.9	171.136	255.988	1505.09	144.534	209.488	1246.47	183.525	411.334	1430.41	181.03	502.084	1222.27	210.147	197.164	1302.85	-4.34353	357.193	1476.75	-89.9598	372.118	1251.53	-109.031	385.163	1150.24	-120.015	514.033	1027.49	-78.0911	580.531	977.443	-130.622	538.457	951.166	-126.365	611.61	919.813
4820	0	137.216	465.135	1665.63	233.904	469.674	1657.91	122.194	308.768	1684.32	266.083	321.211	1666.81	171.41	268.877	1503.97	145.366	221.854	1245.23	183.337	424.124	1429.16	180.855	515.174	1220.97	210.754	209.62	1301.91	-4.18192	369.731	1475.39	-90.2138	388.601	1250.91	-109.466	405.16	1150.17	-118.166	538.616	1031.8	-74.5693	605.959	983.72	-128.507	565.72	956.509	-122.608	639.899	927.744
4821	0	136.666	477.821	1664.16	233.577	482.421	1656.71	122.083	321.475	1682.93	266.351	334.087	1666.09	171.634	281.766	1502.65	146.409	234.249	1243.93	183.17	436.734	1427.61	180.792	528.383	1219.84	211.3	222.183	1300.8	-4.00804	382.405	1473.76	-90.2086	405.115	1250.41	-109.402	425.41	1150.4	-116.107	562.59	1035.96	-71.2259	630.593	990.095	-126.186	592.773	962.038	-118.748	667.705	935.798
4822	0	136.689	490.461	1662.57	233.19	495.035	1655.36	121.521	334.056	1681.25	265.625	346.582	1664.63	171.237	293.792	1501.08	147.642	246.668	1242.45	182.943	449.565	1426.04	180.129	541.481	1218.11	212.2	234.76	1299.56	-3.96885	394.925	1472.26	-89.9845	421.841	1249.58	-109.845	445.109	1150.32	-114.217	586.29	1040.33	-68.0357	654.799	996.53	-124.24	619.094	967.656	-115.098	694.695	943.87
4823	0	135.863	503.102	1660.95	232.642	507.713	1653.94	121.162	346.607	1679.72	265.112	359.365	1663	171.48	306.744	1499.68	148.716	259.312	1240.76	183.055	462.375	1424.35	179.902	554.59	1216.7	212.996	247.376	1297.99	-3.76365	407.572	1470.44	-89.5235	438.425	1248.84	-109.779	464.747	1150.36	-112.187	609.747	1044.81	-64.8755	678.428	1002.73	-122.155	644.796	973.602	-111.799	721.017	952.252
4824	0	135.449	515.494	1659.49	232.374	520.289	1652.76	120.89	359.09	1677.84	265.115	371.884	1661.93	171.761	319.139	1497.84	150.123	272.192	1239.09	183.154	475.383	1422.73	179.701	567.71	1215.41	213.914	260.331	1296.32	-3.62709	420.293	1468.83	-88.9674	455.061	1248.13	-109.436	484.193	1150.7	-110.18	632.431	1049.45	-61.9903	701.411	1009.04	-120.59	669.627	979.323	-108.525	746.503	960.621
4825	0	134.979	527.952	1658.07	231.932	532.759	1651.51	120.686	371.486	1675.98	265.084	384.554	1660.54	172.047	332.334	1496.11	151.523	284.999	1237.38	183.386	488.24	1421.25	179.196	580.615	1213.72	214.886	273.092	1294.75	-3.2128	432.888	1467.19	-88.52	471.729	1247.68	-109.224	503.323	1150.95	-108.232	654.573	1053.99	-59.0774	723.777	1015.31	-118.494	694.272	985.953	-105.554	771.104	969.052
4826	0	134.741	540.314	1656.57	231.832	545.274	1650.38	120.412	383.905	1674.1	264.784	396.837	1659	172.334	344.821	1494.65	152.544	298.141	1235.6	183.632	501.243	1419.57	179.099	593.205	1212.02	215.553	286.204	1293.22	-2.77772	445.785	1465.64	-87.8444	488.229	1247.08	-108.721	521.953	1151.23	-106.367	675.939	1058.46	-56.4469	745.564	1021.33	-116.325	717.792	991.672	-102.895	794.913	977.189
4827	0	134.689	552.658	1655.09	231.722	557.7	1649.05	120.242	396.13	1672.23	264.47	409.283	1657.32	172.444	357.434	1492.71	153.748	311.497	1233.78	184.094	514.247	1418.19	179.285	606.424	1210.72	216.406	299.247	1291.58	-2.34732	458.686	1464.1	-87.1144	504.633	1246.75	-108.171	540.527	1151.96	-104.656	696.696	1062.83	-54.1523	766.631	1027.02	-114.493	740.562	997.513	-100.395	817.882	985.162
4828	0	134.837	565.031	1653.79	231.866	570.097	1648	120.362	408.44	1670.51	264.844	421.646	1656.12	172.916	370.279	1490.87	154.802	324.909	1231.78	184.716	527.327	1416.78	179.479	619.067	1208.91	217.065	312.605	1289.58	-1.52775	471.677	1462.61	-86.2067	520.863	1246.49	-107.474	558.493	1152.25	-102.805	716.912	1067.19	-52.0975	787.152	1032.7	-113.144	762.433	1003.22	-98.2729	839.833	993.026
4829	0	134.864	577.396	1652.54	231.987	582.325	1647.07	120.416	420.758	1668.74	264.885	433.907	1654.73	173.54	383.246	1489.35	155.507	338.518	1230.16	185.255	540.609	1415.51	179.977	632.229	1207.76	217.77	326.008	1287.84	-0.892387	484.694	1461.57	-85.385	536.978	1246.2	-106.851	575.822	1152.74	-101.471	736.317	1071.09	-50.2827	807.056	1038.27	-111.707	783.3	1008.47	-96.4654	861.094	1000.49
4830	0	135.59	589.742	1651.58	232.41	594.754	1646.28	120.611	432.903	1667.13	264.97	446.092	1653.37	174.027	396.179	1487.6	156.227	352.191	1228.44	185.91	553.699	1414.24	180.575	645.459	1206.71	218.351	339.483	1286.23	-0.043339	497.846	1460.5	-84.5876	552.848	1246.1	-106.205	592.783	1153.2	-100.043	755.162	1074.97	-48.6097	826.253	1043.51	-110.111	803.407	1013.39	-95.0102	881.26	1007.55
4831	0	135.838	602.004	1650.63	232.757	606.969	1645.4	121.24	445.184	1665.47	265.567	458.519	1652.22	174.829	409.136	1485.97	156.898	366.027	1226.7	186.769	567.107	1413.23	181.149	658.787	1205.73	219.166	353.069	1284.53	0.896278	511.072	1459.66	-83.7641	568.5	1246.24	-105.452	609.4	1153.64	-98.8446	773.21	1078.57	-47.2742	844.883	1048.45	-108.946	822.88	1018.2	-93.7131	900.741	1014.02
4832	0	136.665	614.311	1650.05	233.426	619.412	1645.07	121.857	457.519	1664.3	266.779	471.223	1651.49	175.447	422.142	1484.65	157.385	379.98	1225.08	187.626	580.314	1412.53	182.185	672.605	1205.29	219.689	366.83	1282.79	1.79788	524.605	1459.13	-83.0922	583.835	1246.5	-104.714	625.628	1154.31	-97.7877	790.73	1081.97	-46.2191	862.875	1053.19	-107.93	841.347	1022.47	-92.8923	919.211	1020.16
4833	0	137.119	626.694	1649.45	234.222	631.688	1644.6	122.477	469.828	1663.11	267.574	483.376	1650.49	176.267	435.317	1483.45	157.96	393.998	1223.59	188.654	593.667	1411.86	183.377	686.67	1204.98	220.187	380.516	1281.23	2.97866	538.118	1458.5	-82.2726	598.965	1246.72	-103.87	641.496	1154.45	-97.0017	807.523	1084.88	-45.482	880.073	1057.22	-107.128	858.987	1026.18	-92.2707	936.968	1025.48
4834	0	138.143	639.079	1648.94	235.004	644.121	1644.2	123.303	482.118	1662	267.711	495.598	1649.46	177.117	448.092	1481.99	158.387	408.286	1222.35	189.849	607.115	1411.33	184.711	700.764	1204.76	220.689	394.538	1279.83	4.04719	551.792	1457.97	-81.6052	613.962	1246.96	-103.161	656.808	1155.19	-96.347	823.728	1086.98	-44.7178	896.723	1060.52	-106.404	875.705	1028.93	-91.9978	953.821	1029.84
4835	0	138.74	651.485	1648.67	236.034	656.536	1644	124.387	494.474	1661.29	269.697	508.49	1649.26	178.169	461.592	1480.94	159.032	422.612	1221.17	191.213	620.684	1410.87	186.127	714.975	1204.39	221.438	408.655	1278.63	5.37868	565.641	1457.62	-81.0496	628.734	1247.27	-102.335	671.828	1155.8	-95.7834	839.354	1088.72	-44.6211	912.581	1063.02	-105.783	891.733	1031.09	-92.0058	969.828	1033.57
4836	0	139.825	663.95	1648.69	237.148	669.097	1644.11	125.487	506.954	1660.91	269.85	520.56	1648.66	179.408	475.132	1480.36	159.715	437.163	1220.28	192.468	634.222	1410.88	187.979	729.49	1204.63	222.114	423.016	1277.56	6.73065	579.383	1457.68	-80.0273	643.304	1247.79	-101.649	686.736	1156.27	-95.3813	854.19	1089.81	-44.4529	927.767	1064.78	-105.174	907.07	1032.46	-92.2737	985.012	1036.24
4837	0	141.172	676.544	1648.89	238.391	681.653	1644.39	126.544	519.53	1660.75	270.952	532.973	1648.61	180.429	488.271	1479.82	160.148	451.841	1219.59	194.01	647.956	1411.08	189.85	743.964	1205.08	222.739	437.328	1276.79	8.05286	593.272	1457.79	-79.3345	657.86	1248.53	-100.73	701	1156.85	-95.1479	868.74	1090.59	-44.3149	942.361	1065.59	-105.124	921.526	1033.31	-92.78	999.337	1038.05
4838	0	142.73	689.292	1649.33	239.853	694.335	1644.99	127.89	532.201	1660.96	272.155	545.408	1648.82	181.708	501.955	1479.55	160.927	466.662	1219.24	195.401	661.51	1411.52	191.662	758.667	1205.96	223.617	451.644	1276.18	9.4518	607.186	1458.15	-78.4937	672.005	1249.17	-100.153	715.142	1157.53	-94.9845	882.372	1090.65	-44.4382	956.139	1065.6	-105.085	935.094	1033.52	-93.4092	1012.9	1039.02
4839	0	144.409	702.073	1650.11	241.493	706.861	1645.72	129.362	544.962	1661.43	273.938	558.207	1649.57	183.086	515.372	1479.63	161.662	481.101	1219.1	197.044	675.408	1412.53	193.839	773.609	1207.31	224.264	466.172	1275.76	10.7718	621.175	1458.89	-77.6308	686.199	1250.07	-99.3849	728.595	1157.9	-94.9548	895.613	1090.49	-44.5683	969.277	1064.86	-105.636	947.93	1033.43	-94.1497	1025.81	1039.05
4840	0	146.331	714.998	1651.29	243.556	719.717	1646.8	130.918	557.935	1662.29	275.175	570.794	1650.19	184.095	528.966	1480.22	162.229	495.65	1219.51	198.47	689.186	1413.49	195.728	788.655	1208.71	225.07	480.474	1275.8	11.9963	635.235	1459.8	-76.6221	699.964	1250.8	-98.6864	741.693	1158.63	-95.0009	908.207	1089.95	-44.979	981.842	1063.55	-106.21	959.997	1032.79	-94.9944	1037.87	1037.85
4841	0	148.255	728.225	1652.37	245.497	732.548	1647.88	132.495	571.155	1663.34	276.654	583.549	1651.12	185.23	542.6	1481.07	162.703	509.762	1220.28	199.779	702.875	1414.63	197.431	803.492	1210.14	225.526	494.395	1276.55	13.2763	649.433	1460.9	-75.4827	713.541	1251.52	-97.9926	754.415	1159.27	-95.1096	920.11	1088.85	-45.4755	993.542	1061.2	-106.621	971.471	1031.14	-95.8924	1049.3	1035.61
4842	0	150.288	741.486	1654	247.732	745.481	1649.19	134.084	584.548	1664.66	278.366	596.384	1651.97	186.313	556.385	1482.1	163.154	523.54	1221.45	201.014	716.594	1415.84	198.787	818.017	1211.58	226.165	508.497	1277.45	14.3321	663.639	1462.26	-74.3319	726.979	1252.45	-97.2027	766.654	1159.63	-95.4696	931.427	1087.32	-46.1155	1004.65	1058.32	-107.543	982.003	1029.41	-96.9311	1059.91	1032.25
4843	0	152.623	755.02	1655.52	249.815	758.551	1650.27	135.876	598.029	1666.19	280.151	609.425	1652.89	187.302	570.37	1483.77	163.331	537.124	1223.06	201.992	730.065	1417.29	200.136	832.459	1213.14	226.382	522.802	1278.55	15.4008	677.759	1463.67	-73.2934	739.899	1253.25	-96.3481	778.46	1160.41	-95.6985	941.959	1085.45	-46.8436	1015.08	1054.85	-108.421	991.745	1026.69	-97.9118	1069.71	1028.14
4844	0	154.685	768.548	1657.16	251.857	771.686	1651.28	137.322	611.53	1667.46	281.338	622.364	1653.42	187.891	583.819	1485.19	163.747	550.351	1224.78	202.991	743.376	1418.41	201.311	846.488	1214.66	226.915	535.279	1280.39	16.3132	691.755	1465.14	-72.09	752.501	1254.04	-95.7983	789.773	1161.21	-96.0598	952.146	1083.14	-47.64	1024.74	1050.85	-109.345	1000.58	1023.55	-99.0473	1078.76	1022.96
4845	0	156.768	782.181	1658.54	253.658	785.001	1652.03	138.429	625.081	1668.97	282.416	635.661	1653.95	188.723	597.438	1486.64	164.033	563.453	1226.57	203.712	756.814	1419.46	202.289	860.126	1215.88	227.132	548.395	1281.97	17.2293	705.429	1466.32	-71.1337	764.965	1254.8	-94.9401	800.846	1161.59	-96.4591	961.626	1080.49	-48.3891	1033.82	1046.16	-110.28	1008.71	1019.65	-100.191	1086.95	1016.92
4846	0	157.977	795.702	1659.86	254.908	798.391	1652.94	139.905	638.783	1670.65	283.776	648.979	1654.96	189.744	610.953	1487.91	164.679	576.157	1228.24	204.278	769.841	1420.64	203.106	873.104	1217.26	227.85	561.587	1283.41	18.0968	718.662	1467.73	-70.144	776.949	1255.62	-94.2358	811.564	1162.24	-96.9631	970.546	1077.6	-49.2012	1042.06	1041.3	-111.244	1016.35	1015.97	-101.286	1094.41	1010.35
4847	0	159.342	809.317	1661.2	255.916	811.923	1654.21	140.742	652.381	1672.31	284.887	662.469	1656.66	190.419	624.167	1489.43	165.567	588.465	1229.91	204.695	782.683	1421.86	203.747	885.779	1218.58	228.661	574.343	1284.88	18.728	731.467	1469.07	-69.4226	788.709	1256.65	-93.5476	822.111	1162.94	-97.3181	978.92	1074.64	-50.0375	1049.77	1036.17	-112.357	1023.13	1011.8	-102.431	1100.95	1003.32
4848	0	159.672	822.759	1662.35	256.25	825.399	1655.17	141.384	665.88	1674.07	285.245	676.109	1658.15	191.026	635.339	1490.87	166.741	600.988	1231.52	205.016	795.51	1423.31	204.316	898.196	1219.95	229.847	587.036	1286.56	19.2823	743.775	1470.21	-68.6729	800.086	1257.49	-92.9523	832.138	1163.24	-97.9442	986.727	1071.34	-51.1214	1056.65	1030.6	-113.59	1029.07	1007.38	-103.403	1106.84	995.782
4849	0	160.096	836.175	1663.2	256.848	839.03	1656.38	141.902	679.268	1675.69	285.835	689.608	1659.94	192.326	648.581	1492.38	167.921	613.099	1233	205.499	808.169	1424.81	204.46	910.411	1221.18	230.954	599.281	1288.33	19.7865	755.817	1471.36	-68.1741	811.127	1258.24	-92.1175	841.612	1163.25	-98.5789	993.834	1067.68	-52.1574	1062.9	1025	-114.621	1034.42	1002.78	-104.435	1111.79	987.751
4850	0	159.762	849.534	1664.11	256.839	852.495	1657.55	142.143	692.689	1677.46	286.212	703.243	1662.17	193.317	661.436	1494.03	169.537	625.471	1234.44	205.874	820.642	1426.41	204.591	922.602	1222.72	232.406	611.705	1289.95	20.0901	767.407	1472.64	-67.5566	821.568	1258.81	-91.3895	850.849	1163.41	-99.0295	1000.26	1063.93	-53.2239	1068.2	1019.16	-115.47	1039.08	997.854	-105.335	1115.88	979.702
4851	0	159.338	862.713	1665.08	256.846	866.068	1658.98	142.346	705.863	1679.44	286.119	716.704	1664.12	194.183	674.164	1496.05	171.113	637.69	1236.07	206.177	833.217	1427.98	204.629	934.875	1224.43	234.185	624.287	1291.74	20.2444	778.931	1473.85	-66.7638	831.451	1259.09	-90.6413	859.346	1163.48	-99.6094	1006.02	1060.06	-54.2231	1073.05	1012.87	-116.645	1043.02	993.161	-106.17	1119.18	971.455
4852	0	159.264	875.754	1666.35	256.222	879.333	1660.38	142.014	719.067	1681.28	286.027	730.056	1666.76	194.82	686.523	1497.98	172.869	649.661	1237.9	206.491	845.546	1429.75	204.282	947.208	1226.02	235.6	636.232	1293.75	20.2661	790.401	1474.78	-66.2151	841.011	1259.12	-89.6966	867.321	1163.21	-100.122	1011.2	1055.91	-55.236	1077.12	1006.49	-117.662	1046.19	987.788	-107.188	1121.5	963.021
4853	0	158.897	888.813	1667.82	255.75	892.399	1662	142.135	732.073	1683.6	285.961	743.273	1669.31	195.869	699.336	1500.02	174.684	661.715	1239.64	206.536	857.902	1431.52	204.087	959.37	1227.71	237.546	648.841	1295.84	20.1814	801.933	1475.93	-65.6856	849.949	1259.12	-88.7552	874.879	1162.62	-100.58	1015.58	1051.73	-56.1721	1080.48	1000.27	-118.273	1048.78	982.567	-108.11	1122.92	954.741
4854	0	158.465	901.726	1669.26	255.196	905.406	1663.96	141.783	745.133	1685.65	285.695	756.327	1671.95	196.416	711.816	1502.35	176.508	673.667	1241.87	206.88	870.201	1433.78	203.839	971.357	1229.45	238.987	660.558	1298.57	20.2888	813.551	1477.15	-65.2091	858.495	1259.17	-87.6738	881.841	1161.95	-101.045	1019.34	1047.61	-57.2157	1083.17	993.933	-119.06	1050.26	977.52	-108.941	1123.65	946.599
4855	0	158.162	914.561	1670.85	254.855	918.277	1666.03	141.413	757.841	1687.81	285.481	769.2	1674.84	196.742	723.874	1504.64	178.488	685.529	1244.16	207.026	882.465	1435.93	203.702	983.35	1231.35	240.624	672.929	1301.19	20.3161	825.163	1478.24	-64.6385	866.403	1258.95	-86.5829	888.392	1161.39	-101.487	1022.36	1043.3	-58.072	1084.98	987.923	-119.217	1051.27	972.116	-110.026	1123.39	938.584
4856	0	157.474	927.131	1672.42	254.247	930.779	1668.03	141.144	770.53	1689.77	285.303	781.834	1677.4	197.429	736.411	1506.65	180.128	697.383	1246.43	207.098	894.798	1438	203.684	995.318	1233.43	242.033	685.088	1303.65	20.3163	836.729	1479.67	-64.0755	874.065	1258.83	-85.2368	894.453	1160.7	-101.817	1024.8	1039.23	-58.9881	1086.33	981.842	-119.592	1051.32	967.052	-111.036	1122.46	931.023
4857	0	157.294	939.666	1674.04	254.45	943.388	1670.2	140.946	783.18	1691.72	285.044	794.469	1680.12	198.414	749.183	1509	181.848	709.63	1248.63	207.473	907.115	1440.25	203.66	1007.34	1235.52	243.732	697.294	1306.14	20.4871	848.2	1480.9	-63.437	881.262	1258.69	-83.7337	900.34	1160.1	-101.849	1026.66	1035.31	-59.7775	1086.95	975.82	-120.039	1050.56	961.926	-112.062	1120.79	923.65
4858	0	157.084	952.16	1675.58	254.539	955.951	1672.09	140.813	795.584	1693.5	284.895	806.974	1682.45	199.043	761.592	1510.99	183.23	721.796	1250.56	207.584	919.505	1441.94	203.736	1019.42	1237.38	245.29	709.867	1308.26	20.5477	859.934	1482.02	-62.6605	888.31	1258.54	-82.2949	905.524	1159.23	-101.78	1027.9	1031.09	-60.387	1086.94	969.828	-120.074	1049.39	956.904	-113.002	1118.46	916.501
4859	0	156.826	964.546	1677.01	253.037	967.917	1673.43	140.623	807.823	1694.86	284.95	819.358	1684.59	199.492	773.84	1512.8	184.424	734.199	1252.25	207.805	931.896	1443.61	204.034	1031.38	1239.1	246.829	722.403	1310.36	20.914	871.299	1482.93	-62.0029	895.251	1258.46	-80.7039	910.617	1158.52	-101.52	1028.85	1026.97	-61.0543	1086.44	963.898	-119.89	1047.78	951.922	-114.067	1115.54	909.585
4860	0	156.681	976.823	1678.25	253.826	980.589	1675.3	140.716	820.144	1696.2	284.967	831.905	1686.31	200.231	786.26	1514.21	185.72	746.432	1253.83	207.969	944.299	1445.09	204.272	1043.13	1240.64	248.576	734.735	1312.36	21.1657	882.996	1483.85	-60.8624	902.249	1258.17	-79.0588	915.644	1157.91	-101.011	1029.44	1023.05	-61.6572	1085.4	957.838	-119.806	1045.58	947.252	-114.847	1112.09	902.946
4861	0	156.641	989.013	1679.14	254.486	993.345	1676.97	140.85	832.349	1697.22	285.126	844.298	1687.81	201.074	798.913	1515.68	186.926	758.764	1255.09	208.495	956.636	1446.37	204.536	1054.76	1241.7	250.026	747.181	1313.79	21.4929	894.733	1484.38	-59.3306	909.375	1257.39	-77.2239	920.173	1157.1	-100.191	1029.5	1018.71	-61.6707	1084.18	952.446	-119.118	1042.9	942.389	-115.652	1108.18	896.36
4862	0	156.571	1001.32	1679.93	253.126	1005.41	1677.4	141.007	844.612	1698.01	285.259	856.93	1688.93	201.36	810.999	1516.43	187.91	771.13	1255.94	208.743	969.066	1447.31	204.916	1066.46	1242.49	251.39	759.667	1315.04	21.6856	906.512	1484.76	-58.0859	916.606	1256.56	-75.6353	924.961	1156.25	-99.6262	1029.29	1014.62	-62.1122	1082.52	946.395	-118.617	1039.88	937.832	-116.255	1104.03	889.928
4863	0	156.765	1013.58	1680.42	253.867	1018.37	1678.32	141.394	856.904	1698.61	285.451	869.617	1689.77	202.199	823.609	1517.19	188.888	782.971	1256.73	209.035	981.406	1447.71	205.337	1078.1	1242.84	252.734	771.914	1316.06	22.0343	918.369	1484.88	-56.8108	923.802	1255.83	-73.5774	929.511	1155.34	-99.0178	1028.97	1010.66	-62.1373	1080.57	940.717	-117.793	1037.08	933.439	-116.557	1099.6	883.644
4864	0	156.612	1025.91	1680.69	253.215	1030.76	1678.47	141.889	869.081	1698.68	285.924	882.416	1690.21	202.996	836.397	1517.5	189.93	795.274	1257.1	209.122	993.964	1447.92	205.86	1089.92	1242.99	254.205	784.454	1316.62	22.3451	930.235	1484.75	-55.3726	931.179	1255.01	-71.7622	934.012	1154.19	-98.2845	1028.48	1006.84	-62.1796	1078.89	935.317	-117.119	1033.55	929.2	-116.718	1094.78	877.663
4865	0	156.118	1038.28	1680.57	253.278	1043.57	1678.75	142.314	881.379	1698.66	286.33	895.155	1690.61	203.611	848.816	1517.68	190.773	807.323	1257.3	209.673	1006.24	1448.24	206.372	1101.69	1242.84	255.16	796.995	1316.78	22.5405	942.189	1484.49	-54.124	938.549	1254.07	-69.7943	938.501	1153.18	-97.4064	1027.74	1003.34	-62.0027	1076.61	930.371	-116.32	1029.91	925.217	-116.662	1089.97	871.714
4866	0	156.154	1050.3	1680.1	253.047	1056.29	1678.55	142.756	893.775	1698.22	286.816	908.235	1690.47	204.774	861.105	1517.42	191.423	819.289	1257.28	209.976	1018.64	1447.92	206.936	1113.43	1242.4	256.154	809.653	1316.73	22.6521	954.253	1483.85	-52.8969	945.961	1252.98	-67.9753	943.135	1151.97	-96.7031	1027.04	999.716	-61.5289	1074.36	925.601	-115.21	1026.33	921.431	-116.557	1084.41	865.924
4867	0	156.475	1063.05	1679.44	252.816	1069.22	1677.84	143.395	906.43	1697.57	287.39	921.305	1690	204.489	873.603	1516.71	192.197	831.537	1256.73	210.098	1031.32	1447.16	207.496	1125.3	1241.13	257.085	821.864	1316.57	22.9214	966.517	1483.08	-51.5438	953.445	1251.74	-65.8891	947.877	1150.7	-95.7342	1026.17	996.104	-61.5127	1071.92	920.669	-113.991	1022.47	917.555	-116.436	1078.8	860.449
4868	0	156.297	1075.93	1678.31	252.489	1082.25	1676.94	143.973	919.16	1696.59	287.746	934.586	1689.26	205.38	886.433	1516.22	192.758	843.631	1256.23	210.43	1043.95	1446.07	207.895	1137.32	1239.69	257.904	834.316	1315.94	23.2353	978.902	1481.72	-50.2744	961.084	1250.58	-63.7214	952.626	1149.52	-94.4969	1025.15	992.472	-61.2173	1069.26	915.76	-112.387	1018.76	913.942	-115.896	1073.11	854.851
4869	0	155.934	1088.63	1677.22	252.311	1095.4	1675.73	144.315	931.951	1695.63	288.187	947.907	1688.17	205.675	898.874	1515.38	193.096	856.046	1255.55	210.747	1056.59	1444.74	208.468	1149.55	1237.81	258.343	846.6	1315.1	23.3727	991.255	1480.35	-49.0185	968.635	1248.84	-61.6859	957.623	1148.36	-93.5554	1024.52	989.369	-61.1452	1066.7	910.95	-110.705	1015.15	910.825	-115.406	1067.27	849.689
4870	0	156.423	1101.74	1675.62	252.137	1108.78	1674.2	144.811	944.937	1694.21	288.618	961.339	1686.89	206.352	911.862	1514.31	193.117	868.237	1254.66	211.143	1069.26	1442.97	208.871	1162.15	1235.47	258.799	858.891	1314.19	23.5461	1003.81	1478.68	-47.8132	976.319	1247.16	-59.5756	962.724	1147.06	-92.2544	1023.88	986.097	-61.1993	1064.25	906.207	-109.395	1011.27	907.672	-114.83	1061.24	844.762
4871	0	156.135	1114.74	1673.75	251.908	1122.03	1672.36	145.269	958.136	1692.75	288.89	974.875	1685.29	206.814	924.759	1513.01	193.129	880.492	1253.52	211.673	1081.91	1441.11	209.286	1174.87	1233.09	259.07	871.108	1312.99	23.7359	1016.73	1476.96	-46.6638	984.23	1245.58	-57.4662	968.11	1145.82	-91.0392	1023.44	983.153	-60.6993	1061.79	902.06	-107.413	1007.91	905.164	-113.907	1055.28	840.193
4872	0	156.112	1127.98	1671.92	252.151	1135.54	1670.58	145.613	971.366	1691.15	289.28	988.463	1683.82	206.966	937.743	1511.59	192.93	892.772	1252.26	211.964	1094.65	1439.14	209.533	1187.69	1230.64	259.087	883.403	1311.72	23.7286	1029.7	1475.17	-45.8152	992.233	1244.17	-55.2353	973.757	1144.7	-89.8009	1023.19	980.416	-60.3236	1059.65	898.34	-105.744	1004.55	902.798	-112.885	1049.43	836.235
4873	0	156.075	1141.24	1669.72	251.842	1148.78	1668.36	145.806	984.602	1689.39	289.486	1001.91	1682.1	206.346	949.929	1510.06	192.497	905.095	1250.99	212.189	1107.35	1437.06	210.1	1200.66	1228.36	258.968	895.75	1310.33	23.6993	1042.84	1473.37	-44.952	1000.52	1242.96	-53.1207	979.917	1143.59	-88.5627	1023.03	978.267	-59.9589	1057.99	894.99	-103.895	1001.59	901.144	-111.88	1043.7	832.876
4874	0	156.547	1154.72	1667.51	251.973	1162.25	1666.11	146.025	997.901	1687.7	289.697	1015.36	1680.32	205.665	962.222	1508.47	191.825	917.312	1249.62	212.219	1120.16	1434.86	210.215	1213.38	1225.75	258.691	908.137	1308.89	23.5438	1056.12	1471.44	-44.5634	1008.83	1241.76	-50.9646	985.895	1142.33	-87.3077	1023.31	976.461	-59.3015	1056.12	892.021	-102.302	998.991	899.817	-110.879	1038.18	829.991
4875	0	156.219	1167.97	1665.21	252.005	1175.59	1663.7	146.254	1011.46	1685.92	289.978	1028.75	1678.77	205.643	975.405	1506.78	191.214	929.979	1248	212.289	1132.95	1432.89	210.793	1226.43	1223.66	258.322	920.633	1307.17	23.4027	1069.35	1469.89	-43.799	1017.68	1240.77	-48.9229	992.734	1141.6	-86.4664	1024.16	975.467	-58.8022	1054.89	889.695	-99.9804	996.548	898.653	-109.68	1033.41	827.952
4876	0	156.293	1181.48	1662.77	252.252	1189.02	1661.31	146.115	1025.07	1684.37	290.013	1042.22	1676.9	205.251	988.346	1505.37	190.321	942.75	1246.28	212.41	1145.82	1430.96	210.938	1239.27	1221.56	257.854	933.332	1305.38	23.1568	1082.75	1468.24	-43.2637	1026.93	1239.89	-47.1213	999.968	1141.22	-85.2721	1025.3	974.51	-58.1337	1054.1	888.07	-98.0332	995.279	898.568	-108.063	1028.77	825.847
4877	0	156.572	1194.94	1660.3	252.046	1202.28	1658.5	145.722	1038.62	1682.54	289.804	1055.58	1675.13	205.554	1002.13	1503.52	189.489	955.392	1244.65	212.183	1158.8	1428.87	211.203	1252.17	1219.58	257.214	945.935	1303.56	22.7368	1095.95	1466.5	-42.7654	1036.51	1238.92	-45.7627	1007.41	1140.74	-84.2727	1027.13	973.666	-57.6221	1053.85	886.226	-96.5197	994.498	898.626	-106.43	1025.01	824.359
4878	0	156.393	1208.34	1657.65	251.939	1215.6	1655.76	145.42	1052.11	1680.91	289.459	1068.9	1673.07	205.091	1015.77	1501.43	188.818	968.667	1242.63	211.866	1171.66	1426.79	211.366	1265.04	1217.6	256.657	958.667	1301.67	22.2579	1109.4	1464.45	-42.3651	1046.45	1237.78	-44.062	1015.53	1140.2	-83.329	1029.83	973.086	-56.692	1054.32	884.602	-94.9226	994.797	899.288	-105.018	1021.98	823.32
4879	0	155.748	1221.79	1655.11	251.38	1228.69	1653.15	144.832	1065.63	1679.35	288.937	1082.21	1671.55	205.119	1029.38	1499.43	187.828	981.346	1240.66	211.265	1184.59	1424.82	211.317	1277.81	1215.9	255.889	971.514	1299.73	21.5352	1122.6	1462.59	-41.7745	1056.87	1236.67	-42.7983	1024	1139.86	-82.5178	1033.31	972.731	-56.3406	1055.75	883.377	-93.8737	995.975	899.991	-103.451	1019.97	822.356
4880	0	155.204	1235.08	1652.83	250.863	1241.92	1650.88	143.815	1079.17	1677.9	287.726	1095.42	1669.53	204.007	1042.18	1497.74	187.222	994.598	1238.94	210.744	1197.63	1423.27	211.151	1290.72	1214.12	255.113	984.497	1298.03	20.9387	1136.07	1460.64	-41.5594	1067.64	1235.59	-41.6414	1032.97	1139.51	-81.9115	1037.47	972.29	-56.5773	1058.13	882.423	-93.1304	998.166	901.157	-101.934	1018.91	821.773
4881	0	154.337	1248.37	1650.68	250.023	1254.98	1648.85	142.678	1092.43	1676.56	286.826	1108.45	1668.54	203.887	1056.44	1494.63	186.735	1007.79	1237.24	210.066	1210.7	1421.79	210.876	1303.51	1212.55	254.326	997.722	1296.35	20.079	1149.44	1458.72	-41.4437	1078.58	1234.46	-40.7483	1042.47	1138.94	-81.7512	1042.38	972.222	-56.5264	1061.14	881.695	-92.7006	1001.29	902.322	-100.962	1018.93	821.611
4882	0	153.716	1261.58	1648.97	248.827	1267.83	1647.25	141.32	1105.77	1675.05	285.513	1121.36	1667.51	202.711	1069.69	1494.03	186.386	1021.19	1235.61	209.196	1223.88	1420.38	210.483	1316.41	1211.55	253.62	1011.02	1294.82	19.1397	1162.74	1456.99	-41.4792	1089.77	1233.13	-40.1773	1052.36	1138.32	-81.6615	1048.5	972.587	-56.9946	1065.36	881.516	-92.5798	1005.32	903.304	-100.15	1020.4	821.594
4883	0	152.187	1274.61	1647.5	247.766	1280.8	1646.24	139.563	1118.98	1673.83	283.692	1134.33	1666.62	198.108	1078.22	1493.84	185.963	1034.46	1234.14	208.548	1237	1419.64	210.027	1329.6	1210.85	253.03	1024.46	1293.61	18.2024	1176.07	1455.41	-41.5914	1101.34	1232.11	-39.749	1062.68	1137.84	-82.2312	1055.02	973.048	-57.6832	1070.22	881.224	-92.6959	1010.47	904.581	-99.8758	1022.81	822.152
4884	0	150.469	1287.64	1646.19	246.152	1293.69	1645.51	137.62	1131.99	1672.37	281.894	1147.13	1666.23	200.668	1095.91	1491.08	185.617	1047.96	1233.01	207.742	1250.3	1418.94	209.229	1342.82	1210.24	252.579	1038.05	1292.63	17.0043	1189.01	1453.94	-42.0275	1113.01	1231.13	-39.7915	1073.49	1137.19	-82.6494	1062.34	972.734	-59.073	1076.32	881.107	-93.3319	1016.53	905.388	-99.9944	1026.54	822.524
4885	0	148.782	1300.66	1645.15	244.454	1306.54	1644.89	135.393	1145.06	1671.16	279.84	1159.9	1665.82	199.447	1108.87	1490.17	185.502	1061.65	1231.89	206.61	1263.63	1418.21	208.484	1356.41	1209.92	252.153	1051.54	1291.76	15.9523	1202.04	1452.6	-42.6497	1124.92	1230.01	-39.9926	1084.72	1136.43	-83.5767	1070.79	973.237	-61.0396	1083.48	881.318	-93.8386	1023.89	906.184	-100.578	1031.94	823.088
4886	0	146.788	1313.49	1644.11	242.335	1319.26	1644.35	133.294	1157.92	1670.19	277.853	1172.73	1665.62	198.38	1122.05	1489.58	185.648	1075.51	1230.89	205.561	1276.99	1417.78	207.315	1370.02	1209.48	252.14	1065.33	1291.07	14.6991	1214.91	1451.55	-43.0423	1137.14	1228.93	-40.3805	1096.24	1135.76	-84.291	1080.14	973.461	-62.1873	1091.63	881.061	-94.5908	1032.07	906.964	-101.513	1038.6	823.478
4887	0	144.843	1326.38	1643.55	240.364	1332.02	1644.4	130.945	1170.86	1669.36	275.275	1185.26	1665.73	197.09	1135.12	1488.89	185.828	1089.67	1230.08	204.171	1290.51	1417.64	206.062	1383.76	1209.52	252.128	1079.22	1290.54	13.195	1227.63	1450.58	-43.6905	1149.51	1228.19	-40.818	1108.25	1135.36	-85.1744	1090.24	973.14	-62.0366	1100.72	880.258	-95.6405	1041.46	907.565	-102.877	1046.98	824.057
4888	0	142.788	1339.14	1643.39	238.246	1344.63	1644.68	128.283	1183.61	1668.99	273.078	1197.9	1665.86	195.552	1148.21	1488.2	185.895	1103.75	1229.46	202.554	1303.94	1417.49	204.575	1397.56	1209.59	251.76	1093.15	1290.07	11.8206	1240.47	1449.82	-44.6307	1162.04	1227.37	-41.7856	1120.29	1134.86	-86.2532	1101.3	973.225	-63.8337	1111.27	880.013	-96.8182	1051.85	907.985	-104.572	1056.75	824.403
4889	0	140.727	1351.92	1643.64	236.101	1357.31	1645.31	125.994	1196.34	1668.92	270.566	1210.42	1666.35	194.127	1161.46	1488.04	185.924	1118.22	1228.92	201.015	1317.47	1417.91	203.196	1411.89	1209.97	251.235	1107.12	1289.78	10.3068	1253.42	1449.24	-45.3576	1174.9	1226.96	-42.6711	1132.92	1134.53	-87.505	1113.12	972.985	-67.539	1123.49	880.645	-97.9748	1063.37	908.218	-106.257	1068.32	824.599
4890	0	138.548	1364.68	1644.21	233.843	1369.96	1646.21	123.493	1209.03	1668.87	267.984	1222.9	1666.92	192.625	1174.65	1488.25	185.44	1132.56	1228.59	199.736	1331.01	1418.66	201.847	1426.35	1210.83	250.449	1121.21	1289.72	8.94312	1266.63	1448.92	-46.2762	1187.67	1226.44	-43.718	1145.86	1134.5	-88.8703	1125.91	972.977	-68.4849	1136.21	880.358	-99.2	1076.1	908.448	-108.232	1081.18	824.778
4891	0	136.26	1377.25	1644.96	231.563	1382.48	1647.44	120.982	1221.4	1668.68	265.708	1235.38	1667.6	190.295	1187.32	1488.44	184.485	1146.87	1228.51	198.248	1344.59	1419.52	200.828	1440.93	1212.12	249.438	1135.38	1289.95	7.24966	1279.9	1448.74	-47.5082	1200.76	1226.6	-45.0171	1159.29	1134.58	-90.3699	1139.49	972.859	-70.4636	1150.11	880.435	-100.817	1089.86	908.354	-110.702	1095.36	825.059
4892	0	133.885	1389.73	1646.24	229.272	1395.13	1649.25	118.632	1233.77	1668.73	263.146	1247.8	1668.31	189.471	1201.31	1488.56	183.501	1161.22	1228.62	196.874	1358.21	1420.74	200.106	1455.58	1213.64	248.123	1149.27	1290.33	6.10918	1293.12	1448.71	-48.9191	1214.09	1226.76	-46.3303	1173.17	1134.64	-92.0795	1153.78	972.731	-73.0385	1165.44	880.397	-102.554	1104.54	908.176	-113.049	1110.81	825.011
4893	0	131.491	1402.31	1647.95	227.107	1407.7	1651.6	116.406	1246.16	1669.04	260.961	1260.14	1669.52	188.04	1214.69	1489.35	182.311	1175.35	1228.99	195.67	1371.84	1422.03	199.657	1469.68	1215.18	246.824	1163.37	1290.66	4.75358	1306.54	1449.14	-50.1041	1228	1227.38	-47.8237	1187.5	1134.75	-94.1414	1169.08	972.981	-75.0436	1181.47	880.743	-104.177	1120.5	907.829	-115.676	1127.54	825.105
4894	0	129.188	1414.84	1649.94	224.929	1420.25	1654.01	114.288	1258.53	1669.29	258.745	1272.6	1670.84	186.688	1228.02	1490.26	181.102	1189.44	1229.75	194.617	1385.28	1423.46	199.334	1483.41	1216.62	245.535	1177.21	1291.52	3.73062	1320.03	1449.73	-51.5288	1242.08	1227.8	-49.5887	1202.33	1134.67	-96.2264	1185.36	973.344	-77.3689	1198.51	880.815	-106.308	1137.21	907.228	-118.351	1145.56	824.915
4895	0	127.058	1427.32	1651.67	222.67	1432.98	1656.3	112.247	1270.98	1669.64	256.608	1285.26	1672.04	185.576	1241.4	1490.94	179.757	1203.23	1230.81	193.628	1398.71	1424.59	199.247	1497.12	1217.77	244.207	1190.86	1292.69	2.74436	1333.42	1450.08	-52.2831	1256.38	1227.7	-51.371	1217.57	1134.57	-98.347	1202.31	973.052	-79.7938	1216.53	880.748	-108.689	1154.92	906.333	-121.165	1164.59	824.529
4896	0	125.111	1439.87	1653.03	220.557	1445.74	1658.36	110.384	1283.44	1669.78	254.863	1297.96	1673.16	184.951	1254.76	1492.22	178.698	1216.6	1232.29	192.729	1412.01	1425.64	199.229	1510.57	1218.86	243.432	1204.36	1294.3	2.17253	1346.88	1450.67	-53.8529	1271.47	1228.02	-53.125	1233.14	1134.43	-100.431	1220.19	972.592	-81.6116	1235.78	880.3	-110.821	1173.79	905.386	-123.886	1184.72	823.467
4897	0	123.282	1452.52	1654.18	218.551	1458.54	1660.03	108.992	1295.96	1670.03	253.406	1310.8	1674.41	184.51	1267.83	1493.84	177.929	1229.75	1233.57	192.078	1425.3	1426.66	199.131	1523.89	1219.82	242.917	1217.59	1295.87	1.73889	1359.88	1451.18	-54.9611	1286.59	1227.91	-54.9701	1248.98	1134.16	-102.478	1238.7	971.656	-84.0353	1255.68	879.829	-113.411	1193.32	904.058	-126.365	1206.05	822.444
4898	0	121.868	1465.16	1655.14	217.017	1471.47	1661.55	107.73	1308.46	1670.22	251.945	1323.6	1675.54	184.073	1280.86	1495.06	177.177	1242.1	1235.04	191.609	1438.26	1427.47	198.884	1536.88	1220.28	242.752	1230.54	1297.52	1.50952	1372.99	1451.67	-56.1462	1301.93	1227.92	-56.8251	1265.25	1133.79	-104.544	1258.13	971.128	-85.834	1276.52	879.362	-115.886	1213.76	902.768	-128.995	1228.55	821.273
4899	0	120.795	1477.86	1656.04	216.021	1484.43	1662.89	106.839	1321.12	1670.68	251.099	1336.49	1676.56	183.645	1293.9	1496.2	176.826	1254.46	1236.26	191.212	1451.08	1428.24	199.067	1549.6	1220.82	242.742	1243.2	1298.84	1.13965	1385.74	1452.31	-57.0528	1317.51	1227.67	-58.6699	1281.75	1133.37	-106.554	1277.96	970.299	-87.9179	1298.13	878.888	-118.147	1235.29	900.914	-131.628	1251.86	820.304
4900	0	120.32	1490.84	1657.09	215.244	1497.16	1664.09	106.144	1333.92	1671.36	250.309	1349.41	1677.49	183.39	1306.78	1496.93	176.688	1266.87	1237.16	190.965	1463.7	1429.05	198.968	1561.95	1221.2	243.072	1255.67	1299.88	0.862078	1398.69	1453.16	-58.2243	1333.21	1227.53	-60.5076	1298.43	1132.9	-108.452	1298.38	969.564	-89.323	1320.36	878.009	-120.364	1257.24	899.456	-134.081	1276.06	819.162
4901	0	119.937	1503.81	1658.18	215.196	1510.05	1665.28	105.871	1347.06	1672.43	249.955	1362.19	1678.64	182.695	1319.42	1498.01	176.508	1279.21	1238.06	190.863	1476.04	1430.22	198.833	1574.1	1221.86	243.036	1267.83	1300.94	0.565559	1411.31	1454	-59.1863	1349.12	1227.54	-62.4031	1315.47	1132.41	-110.195	1319.48	968.903	-91.2804	1343.13	878.202	-122.625	1279.99	897.683	-136.479	1301.04	818.506
4902	0	119.646	1516.79	1659.1	215.217	1522.75	1666.13	105.569	1360.09	1673.57	249.831	1374.89	1679.53	182.022	1332.03	1498.92	175.723	1291.04	1239.23	190.684	1488.31	1431.14	198.356	1586.07	1222.4	242.481	1279.69	1301.93	0.171817	1424.27	1455	-60.3451	1365.16	1227.56	-64.2941	1332.76	1131.89	-111.774	1341.03	968.333	-92.1436	1366.13	878.032	-124.511	1303.34	896.246	-138.749	1326.97	818.119
4903	0	120.376	1529.87	1660.37	215.846	1535.62	1666.9	105.685	1373.22	1674.97	249.881	1387.69	1680.53	181.636	1344.5	1500.03	175.027	1303.2	1240.26	190.751	1500.46	1432.2	198.705	1598.37	1223.47	241.648	1291.49	1302.92	-0.182746	1436.94	1456.26	-61.3274	1381.32	1227.89	-66.0471	1350.19	1131.6	-113.165	1363.2	968.264	-93.5225	1390.55	878.733	-126.45	1327.46	894.9	-140.749	1353.65	818.195
4904	0	121.081	1542.89	1661.73	216.785	1548.45	1667.77	106.127	1386.43	1676.64	250.32	1400.38	1681.63	181.322	1356.34	1501.59	174.306	1315.38	1241.45	190.736	1512.52	1433.35	198.821	1610.52	1224.51	240.851	1303.36	1303.98	-0.275544	1449.94	1457.72	-62.1854	1397.57	1228.56	-67.7286	1367.83	1131.41	-114.235	1385.71	968.274	-94.1769	1415.17	879.84	-127.672	1352.25	893.705	-142.234	1380.86	818.485
4905	0	121.913	1555.97	1663.09	217.603	1561.17	1668.81	106.48	1399.62	1678.39	251.024	1413.16	1682.76	180.687	1368.67	1503.16	173.141	1327.32	1242.94	190.911	1524.66	1434.65	198.982	1622.5	1225.59	239.534	1315.15	1305.23	-0.52791	1462.71	1459.3	-63.2466	1413.97	1229.42	-69.4028	1385.73	1131.68	-115.284	1408.73	968.513	-94.8621	1440.33	880.815	-128.801	1377.93	892.956	-143.555	1409.06	819.492
4906	0	122.853	1569.12	1664.7	218.689	1574.05	1669.86	107.07	1412.72	1680.24	251.411	1425.97	1683.84	180.295	1381.02	1504.6	171.71	1339.1	1244.56	191.024	1536.63	1436.01	199.029	1634.46	1226.68	237.962	1326.88	1306.58	-0.563707	1475.68	1460.76	-64.4778	1430.22	1230.21	-71.1336	1403.65	1132.12	-115.723	1432.64	969.28	-94.7834	1466.1	882.796	-129.698	1404.01	892.721	-144.354	1437.89	820.829
4907	0	124.207	1582.18	1666.27	220.03	1586.94	1670.89	107.919	1425.81	1682.18	252.378	1438.73	1684.63	180.157	1393.27	1506.37	170.326	1350.85	1246.25	191.11	1548.54	1437.2	199.12	1646.54	1227.84	236.467	1338.62	1308.12	-0.547412	1488.48	1462.52	-65.1978	1446.88	1231.59	-72.4886	1421.92	1132.86	-116.22	1456.38	970.303	-94.3213	1492.37	884.807	-130.13	1430.59	892.974	-144.621	1467.26	822.455
4908	0	125.459	1595.27	1668	221.156	1599.56	1672	108.88	1438.91	1684.3	253.327	1451.38	1685.35	180.049	1405.67	1508.26	169.319	1363.16	1247.92	191.352	1560.68	1438.55	198.852	1658.46	1229.11	234.788	1350.23	1309.68	-0.364022	1501.29	1464.64	-66.1788	1463.16	1232.98	-73.9084	1440.27	1133.92	-116.296	1480.75	971.984	-93.6335	1518.84	887.604	-130.484	1457.48	894.057	-144.495	1497.1	825.147
4909	0	126.836	1608.18	1669.92	222.362	1612.14	1673.06	109.709	1451.83	1686.26	254.367	1463.83	1686.37	179.788	1417.96	1509.85	167.787	1374.7	1249.88	191.379	1572.74	1439.8	199.092	1670.65	1230.89	233.471	1361.91	1311.22	-0.273442	1514.17	1466.86	-66.5996	1480.02	1235.16	-75.2643	1458.91	1135.32	-116.318	1505.4	974.29	-92.2814	1545.5	891.132	-130.633	1484.99	895.48	-144.008	1527.39	828.523
4910	0	128.22	1620.95	1671.76	223.772	1624.79	1674.16	110.569	1464.75	1688.04	255.236	1476.31	1687.04	179.641	1430.22	1511.46	166.549	1386.51	1251.61	191.527	1584.83	1440.92	199.183	1682.69	1232.47	232.207	1373.7	1312.78	-0.255113	1526.87	1469.2	-67.626	1496.27	1237.24	-76.6497	1477.26	1136.81	-115.64	1530.25	976.358	-91.2728	1572.77	895.836	-130.482	1512.73	897.616	-143.086	1558	832.337
4911	0	129.412	1633.71	1673.66	225.156	1637.09	1675.48	111.424	1477.57	1689.64	256.07	1488.49	1687.77	179.485	1442.47	1512.91	165.635	1398.41	1253.01	191.698	1597.02	1442.19	199.251	1694.43	1234.12	231.155	1385.61	1314.04	-0.103249	1539.73	1471.37	-68.3263	1512.69	1239.25	-78.2145	1495.57	1138.56	-115.372	1555.1	979.429	-90.0308	1600.46	900.554	-130.198	1540.81	900.238	-141.682	1588.85	836.788
4912	0	130.553	1646.43	1675.3	226.524	1649.38	1676.68	112.282	1490.37	1691.09	256.937	1500.64	1688.33	179.106	1454.93	1514.03	164.629	1410.33	1254.28	191.658	1609.17	1443.22	199.148	1705.95	1235.36	230.045	1397.47	1315.21	-0.09512	1552.52	1473.47	-69.3895	1528.88	1241.31	-79.4487	1514.08	1139.94	-115.069	1580.1	982.89	-88.5804	1627.77	906.169	-129.729	1569.12	902.92	-140.033	1619.87	841.598
4913	0	131.99	1659.14	1676.83	227.81	1661.73	1677.49	112.848	1503.06	1692.26	257.435	1512.76	1688.59	178.646	1467.17	1515.64	163.842	1422.32	1255.56	191.692	1621.46	1444.03	198.899	1717.51	1236.14	228.943	1409.55	1316.25	-0.022745	1565.22	1475.13	-70.3484	1545.22	1243.41	-80.9409	1532.46	1141.29	-114.615	1605.08	986.259	-86.7717	1655.24	911.634	-128.932	1597.62	906.027	-138.131	1651.26	846.804
4914	0	133.074	1671.81	1678.13	228.803	1673.97	1678.15	113.459	1515.72	1693.1	258.067	1525.09	1688.8	178.395	1479.71	1516.38	163.099	1434.36	1256.46	191.757	1633.73	1444.7	198.628	1728.94	1236.83	228.035	1421.6	1317.17	0.013178	1578.1	1476.68	-71.1187	1561.51	1244.99	-82.3705	1550.86	1142.59	-114.138	1630.01	989.865	-85.1049	1682.76	917.492	-128.07	1625.99	909.06	-135.763	1682.36	852.342
4915	0	133.66	1684.35	1679.12	229.787	1686.43	1678.7	114.063	1528.36	1693.74	258.602	1537.29	1688.77	178.08	1492.26	1516.97	162.455	1446.47	1257.21	191.81	1645.98	1445.14	198.278	1740.42	1237.05	227.22	1433.75	1317.71	0.151226	1590.95	1477.59	-72.0877	1577.55	1245.93	-83.6645	1569.36	1143.46	-113.559	1655.09	993.357	-83.1446	1710.32	923.719	-126.755	1654.65	912.449	-133.254	1713.47	858.18
4916	0	134.653	1697.14	1679.47	230.531	1698.86	1678.89	114.635	1541.2	1694.15	258.99	1549.52	1688.37	177.71	1504.84	1517.44	161.711	1458.6	1257.71	191.549	1658.38	1445.1	198.074	1751.95	1237.03	226.191	1445.82	1318.09	0.099459	1603.65	1478.1	-72.6812	1593.86	1246.61	-85.251	1587.9	1144.09	-112.797	1679.97	996.544	-81.0671	1737.73	929.76	-125.663	1682.99	915.88	-130.197	1744.19	863.807
4917	0	135.447	1709.92	1679.58	231.153	1711.37	1678.52	114.837	1553.86	1694.22	259.545	1562.24	1687.65	177.309	1517.59	1517.51	160.911	1470.74	1257.99	191.326	1670.84	1444.63	197.733	1763.61	1236.23	225.251	1457.99	1318.33	0.155626	1616.55	1478.15	-73.6893	1609.93	1247.46	-86.64	1606.63	1144.43	-111.841	1705.04	999.859	-78.7746	1764.83	935.777	-124.329	1711.41	919.591	-127.186	1774.99	869.983
4918	0	136.018	1722.9	1679.44	231.709	1724.24	1677.95	115.111	1566.61	1693.99	259.672	1574.78	1686.91	177.097	1530.31	1517.27	160.365	1483.13	1257.79	191.276	1683.28	1444.26	197.414	1775.26	1235.47	224.897	1470.45	1318.23	0.243191	1629.45	1477.92	-74.4364	1626.03	1247.53	-87.9858	1625.45	1144.71	-111.044	1729.74	1003.29	-76.3329	1791.66	942.077	-122.558	1739.83	923.324	-124.172	1805.75	876.635
4919	0	136.173	1735.6	1678.99	231.869	1736.99	1677.2	115.295	1579.44	1693.57	259.797	1587.59	1686.23	176.95	1543.23	1516.87	159.832	1495.25	1257.68	191.099	1695.71	1443.53	196.995	1786.9	1234.3	224.114	1482.6	1317.81	0.203016	1642.1	1477.77	-75.2597	1641.9	1247.62	-89.354	1644.38	1144.84	-109.98	1754.56	1007.02	-73.8886	1818.12	948.698	-121.029	1767.81	927.705	-121.001	1835.96	883.742
4920	0	136.197	1748.57	1678.42	231.996	1749.91	1676.42	115.408	1592.52	1693.01	259.872	1600.44	1685.42	176.603	1555.76	1516.38	159.566	1507.31	1257.2	190.734	1708.18	1442.86	196.539	1798.66	1233.06	223.706	1494.81	1317.32	0.245635	1654.95	1477.15	-76.1622	1657.99	1247.8	-90.605	1663.6	1144.88	-108.902	1779.13	1010.89	-71.8682	1844.29	955.345	-119.447	1795.7	932.077	-117.924	1865.55	891.237
4921	0	135.718	1761.72	1677.1	231.955	1762.93	1675.15	115.376	1605.7	1692.3	259.809	1613.57	1684.38	175.221	1566.82	1515.76	159.624	1519.12	1256.77	190.426	1720.67	1441.6	196.256	1810.72	1231.61	223.605	1507.12	1316.68	0.349333	1667.77	1476.52	-76.8416	1674.1	1247.76	-91.7763	1682.74	1144.9	-107.809	1803.51	1014.87	-68.9681	1870.14	962.077	-117.353	1823.75	936.905	-114.617	1894.92	898.809
4922	0	135.91	1775	1675.99	231.907	1776.14	1673.76	115.2	1618.88	1691.24	259.738	1626.75	1683.26	176.57	1580.91	1514.59	160.556	1531.14	1255.8	190.441	1733.11	1440.6	195.87	1822.98	1230.19	224.032	1519.64	1315.85	0.491604	1680.37	1475.5	-77.5612	1690.15	1247.58	-92.7049	1701.94	1144.96	-106.852	1827.7	1019.15	-66.3256	1895.31	968.719	-115.657	1850.89	941.679	-111.425	1923.5	906.731
4923	0	135.674	1788.3	1674.39	231.764	1789.53	1672.3	115.092	1632.36	1690.14	259.446	1640.12	1682.15	176.627	1593.55	1513.48	161.505	1543.08	1254.86	190.395	1745.63	1439.47	195.495	1835.69	1228.62	223.954	1531.84	1314.78	0.648607	1692.83	1474.24	-77.8196	1706.53	1247.14	-93.5555	1721.17	1145.05	-105.393	1851.65	1023.31	-63.4205	1920.01	975.389	-115.952	1877.66	948.207	-108.4	1951.58	914.855
4924	0	135.325	1801.57	1672.46	231.443	1803.01	1670.45	114.757	1645.7	1688.75	259.222	1653.42	1680.67	176.719	1606.29	1512.36	162.297	1555.08	1253.85	190.002	1758.06	1437.79	194.994	1848.51	1226.82	224.428	1544.27	1313.68	0.953599	1705.44	1472.79	-78.2915	1722.95	1246.61	-94.2521	1740.38	1145.24	-103.758	1875.14	1027.28	-60.5437	1944.17	981.906	-112.875	1903.72	952.406	-105.304	1978.9	923.03
4925	0	135.116	1814.91	1670.49	230.951	1816.25	1668.41	114.411	1658.92	1687.19	258.953	1667.04	1679.12	177.075	1619.18	1510.93	163.456	1567.1	1252.59	190.075	1770.84	1435.91	194.711	1861.51	1224.89	225.345	1556.65	1312.54	1.42494	1717.98	1471.19	-78.2981	1739.4	1246.09	-94.6379	1759.41	1145.31	-102.133	1898.18	1031.59	-57.9514	1967.44	987.943	-112.128	1929.49	958.538	-102.347	2005.42	931.375
4926	0	134.832	1828.01	1668.41	230.675	1829.44	1666.4	114.32	1672.27	1685.45	258.561	1680.26	1677.37	177.471	1631.9	1509.33	164.902	1579.35	1251.21	190.046	1783.63	1433.88	194.429	1874.55	1223.07	226.231	1568.99	1311.11	1.86963	1730.44	1469.62	-78.2239	1755.77	1246.02	-94.9158	1778.23	1145.69	-100.414	1920.72	1035.96	-55.507	1990.12	993.643	-110.39	1954.48	964.155	-99.3035	2031.19	939.606
4927	0	134.534	1841.33	1666.45	230.207	1842.66	1664.52	113.983	1685.48	1683.62	258.268	1693.91	1676.01	177.691	1644.43	1507.64	166.194	1591.87	1249.4	190.119	1796.49	1431.91	194.124	1887.51	1221.19	227.015	1581.59	1309.75	2.36164	1742.9	1468.15	-77.9991	1772.18	1245.58	-95.3997	1796.84	1146.03	-98.7804	1942.57	1040.32	-52.6127	2012.52	1000.09	-108.104	1978.6	969.783	-96.7511	2056.1	947.97
4928	0	134.17	1854.34	1664.16	230.157	1855.99	1662.61	113.707	1698.46	1681.67	258.358	1706.96	1674.39	178.252	1657.42	1506.14	167.492	1604.7	1247.82	190.405	1809.41	1429.95	194.102	1900.41	1219.28	228.236	1594.42	1308.15	2.83899	1755.43	1466.55	-77.6215	1788.5	1245.23	-95.4303	1815.33	1146.57	-97.3031	1964.01	1044.84	-50.7127	2033.78	1005.62	-107.384	2002.12	975.586	-94.1781	2080.07	955.972
4929	0	134.121	1867.23	1662.05	230.201	1868.98	1660.85	113.804	1711.48	1679.64	258.116	1719.91	1672.95	178.934	1670.54	1503.94	168.865	1617.69	1245.81	191.035	1822.38	1428.25	194.342	1913.35	1217.51	229.247	1607.43	1306.36	3.49254	1767.97	1464.9	-76.9853	1804.79	1244.84	-95.2737	1833.25	1146.56	-95.868	1984.64	1049.06	-47.6901	2054.91	1011.88	-106.145	2024.84	981.515	-91.893	2103.04	963.774
4930	0	134.367	1880.01	1660.04	230.139	1881.63	1659.27	114.016	1724.25	1677.83	258.435	1732.74	1671.66	179.548	1683.08	1502.14	170.208	1630.81	1243.94	191.419	1835.24	1426.52	194.731	1926.14	1215.99	230.014	1620.35	1304.61	4.21732	1780.53	1463.7	-76.2452	1820.84	1244.39	-94.9073	1850.69	1147.12	-94.686	2004.57	1053.12	-46.0945	2075.15	1017.22	-104.808	2046.48	986.512	-89.7071	2125.14	971.242
4931	0	134.493	1892.61	1658.42	230.406	1894.36	1657.79	114.121	1736.83	1675.81	258.753	1745.49	1670.16	180.204	1695.81	1500.6	171.11	1644.27	1242.12	192.045	1848.25	1424.99	195.254	1939.05	1214.8	231.191	1633.4	1302.96	4.88163	1793.07	1462.47	-75.4008	1836.81	1244.22	-94.6753	1867.77	1147.16	-93.5042	2023.85	1057	-44.436	2094.53	1022.24	-103.813	2067.3	991.565	-88.1878	2146.35	978.29
4932	0	134.93	1905.12	1656.65	230.925	1906.98	1656.43	114.617	1749.3	1674.01	259.211	1758.05	1668.72	181.233	1708.82	1498.59	171.86	1657.89	1240.22	192.96	1861.39	1423.54	196.133	1952.34	1213.63	232.049	1646.48	1301.02	5.76384	1805.94	1461.24	-74.6118	1852.49	1243.99	-94.0425	1884.51	1147.46	-92.6629	2042.34	1060.38	-43.4321	2113.48	1026.77	-102.904	2087.28	996.016	-87.0903	2166.3	984.673
4933	0	135.702	1917.7	1655.28	231.7	1919.64	1655	115.702	1761.87	1672.21	260.099	1770.62	1667.36	182.136	1721.52	1496.76	172.802	1671.67	1238.49	193.734	1874.44	1422.17	196.326	1964.58	1212.11	232.946	1659.89	1299.17	6.84779	1818.84	1460.34	-73.8193	1867.46	1243.93	-93.106	1900.79	1147.5	-91.7341	2060.16	1063.29	-42.4357	2131.77	1030.92	-102.062	2106.13	999.924	-86.3723	2185.54	990.446
4934	0	136.585	1930.11	1653.83	232.736	1932.23	1653.75	116.6	1774.29	1670.66	261.072	1783.09	1665.68	180.683	1731.74	1495.92	173.265	1685.39	1236.77	194.662	1887.57	1420.78	197.367	1977.95	1210.92	233.585	1673.17	1297.42	7.89078	1832.17	1459.09	-72.9725	1882.49	1243.34	-92.7618	1916.55	1147.8	-91.1273	2077.32	1065.57	-41.8553	2149.37	1034.36	-101.416	2124.18	1002.92	-86.1185	2203.79	995.33
4935	0	137.812	1942.56	1652.62	233.709	1944.55	1652.51	117.57	1786.46	1669.32	262.279	1795.62	1664.23	183.892	1746.89	1493.78	173.549	1699.07	1235.2	195.78	1900.83	1419.57	198.563	1991.23	1209.88	234.149	1686.56	1295.8	9.22499	1845.62	1458.41	-72.037	1897.24	1243.05	-91.9317	1932.23	1147.89	-90.1816	2093.45	1066.91	-41.4666	2166.39	1037.17	-101.047	2141.32	1005.25	-86.4877	2221.09	999.361
4936	0	139.178	1954.89	1651.53	235.115	1956.92	1651.41	119.068	1798.76	1668.19	263.749	1807.9	1662.88	183.06	1757.55	1492.65	173.938	1712.81	1233.63	197.257	1914.15	1418.75	200.021	2004.83	1209.01	234.685	1699.91	1294.28	10.5973	1859.24	1457.66	-71.2035	1911.77	1242.89	-90.9535	1947.51	1148.14	-90.0012	2109.53	1068.7	-41.2826	2182.61	1039.39	-100.775	2157.6	1007.23	-86.9433	2237.38	1002.68
4937	0	140.828	1967.27	1650.78	236.687	1969.18	1650.5	120.899	1811.03	1667.2	265.236	1820.12	1661.85	186.224	1772.77	1490.82	174.306	1726.75	1232.23	198.815	1927.41	1418.25	201.638	2018.34	1208.75	235.133	1713.44	1292.66	12.1279	1872.73	1457.35	-69.9331	1926.35	1243.03	-90.2238	1962.17	1148.39	-89.7161	2124.7	1069.77	-41.1391	2198.15	1041.27	-100.575	2173.03	1008.66	-87.6375	2252.88	1005.3
4938	0	142.502	1979.5	1650.11	238.553	1981.6	1649.75	122.535	1823.35	1666.54	267.119	1832.43	1661.17	187.644	1785.25	1490.08	174.832	1740.96	1231.03	200.428	1940.62	1417.96	203.542	2032.55	1208.73	235.705	1727.13	1291.36	13.709	1886.16	1457.22	-69.3191	1940.55	1243.68	-89.4101	1976.7	1148.52	-89.6902	2139.23	1070.66	-41.518	2213.17	1042.26	-100.814	2187.77	1009.8	-88.7409	2267.52	1006.8
4939	0	144.427	1991.59	1649.66	240.308	1993.91	1649.06	124.497	1835.51	1666	269.245	1844.9	1660.59	189.073	1798.16	1489.02	175.273	1755.3	1229.7	202.152	1953.9	1417.87	205.432	2046.65	1208.83	236.369	1740.77	1290.08	15.5128	1899.54	1457.11	-68.5292	1954.32	1243.9	-88.6594	1990.62	1148.96	-89.7599	2153.41	1071.19	-42.0154	2227.39	1042.56	-101.219	2201.73	1010.15	-89.705	2281.5	1007.34
4940	0	146.153	2003.84	1649.47	242.254	2006.33	1648.87	127.016	1847.8	1665.8	271.377	1857.33	1660.2	191.02	1810.76	1487.62	175.989	1769.77	1228.47	203.994	1967.27	1418.07	207.452	2060.8	1209.29	237.478	1754.67	1288.86	17.2729	1912.77	1457.22	-67.2412	1968.45	1244.35	-87.4327	2004.51	1149.42	-89.8277	2166.95	1071.23	-42.6718	2241.15	1042.04	-101.906	2214.89	1010.08	-90.9422	2294.71	1006.89
4941	0	148.165	2015.95	1649.72	244.262	2018.65	1648.87	129.624	1859.92	1665.74	273.888	1869.79	1659.79	192.897	1823.87	1487.06	176.82	1784.3	1227.56	205.886	1980.79	1418.52	209.472	2075.17	1210.17	238.809	1768.7	1287.74	19.1409	1926.03	1457.54	-66.0412	1982.12	1244.82	-86.2788	2018.05	1149.99	-90.2619	2179.81	1070.68	-43.6515	2254.14	1040.95	-102.47	2227.42	1009.39	-92.2938	2307.12	1005.58
4942	0	150.507	2028.11	1650.04	246.365	2031.13	1649.18	132.003	1871.68	1665.73	276.472	1882.27	1659.43	195.196	1837.09	1486.56	177.855	1798.76	1227.13	207.971	1994.32	1419.12	211.32	2089.69	1211.15	240.208	1782.8	1286.9	20.9865	1939.24	1458.13	-64.8356	1995.33	1245.41	-85.3794	2031.06	1150.64	-90.3832	2192.22	1070.13	-44.2347	2266.53	1039.34	-103.682	2239.18	1008.7	-93.5248	2318.81	1003.27
4943	0	152.559	2040.19	1650.96	248.729	2043.64	1649.65	134.876	1883.57	1666.05	279.347	1894.79	1659.2	197.178	1850.17	1486.97	179.116	1812.97	1226.96	209.684	2007.76	1419.71	213.013	2104.28	1212.23	241.947	1796.92	1286.38	22.7979	1952.58	1459.07	-63.1525	2008.68	1246.57	-84.0008	2043.77	1151.43	-90.6545	2203.83	1068.91	-45.2584	2278.14	1036.82	-104.492	2249.8	1006.84	-94.9803	2329.46	1000.16
4944	0	154.859	2052.48	1652.31	251.025	2056.13	1650.69	137.761	1895.5	1666.51	282.1	1907.32	1659.15	197.575	1861.35	1487.51	180.43	1826.87	1227.3	211.447	2021.43	1420.7	214.267	2119.13	1213.57	243.813	1811.05	1286.11	24.6497	1965.85	1460.42	-61.7854	2021.4	1247.26	-82.8596	2056	1152.34	-91.2201	2214.73	1067.48	-46.2637	2288.74	1033.89	-105.574	2259.56	1004.83	-96.3624	2339.05	996.464
4945	0	157.563	2064.85	1654.25	253.742	2068.71	1652.21	140.731	1907.82	1667.36	284.926	1919.86	1659.4	199.487	1875	1488.16	181.631	1840.3	1228.03	213.021	2035.04	1422.04	214.948	2133.52	1215.08	245.233	1825.29	1286.5	26.2772	1979.18	1462.46	-60.3623	2033.92	1248.6	-81.9249	2067.46	1153.49	-91.5976	2224.81	1065.76	-47.683	2298.41	1030.33	-106.709	2268.32	1002.18	-98.2126	2347.54	992.088
4946	0	160.226	2077.34	1655.94	256.285	2081.2	1653.43	143.315	1920.12	1668.35	287.324	1932.15	1659.33	202.879	1889.88	1489.15	182.838	1853.45	1229.27	214.515	2048.62	1423.25	215.364	2148.02	1216.36	246.588	1839.61	1287.24	27.803	1992.58	1464.45	-58.8908	2046.19	1250.07	-80.6222	2078.84	1154.77	-91.9825	2234.15	1063.71	-48.6567	2307.26	1026.35	-107.775	2275.97	999.231	-99.801	2354.99	987.024
4947	0	163.173	2090.2	1657.98	259.064	2093.82	1654.43	146.23	1932.77	1669.65	290.255	1944.96	1659.67	203.71	1902.36	1490.63	183.721	1866.14	1231.09	215.642	2062.01	1424.55	215.652	2162.16	1217.79	247.629	1853.55	1288.33	29.4087	2006.11	1466.91	-57.6813	2057.97	1251.61	-79.3789	2089.56	1156.01	-92.3458	2242.53	1061.33	-49.9405	2315	1021.77	-108.514	2282.65	995.915	-101.448	2361.34	981.571
4948	0	165.761	2103.09	1659.53	261.789	2106.42	1655.37	149.011	1945.79	1671.07	292.538	1957.41	1659.92	205.288	1915.34	1492.14	184.699	1878.9	1232.76	216.804	2075.19	1426.05	215.826	2176.3	1219.48	248.762	1866.94	1289.82	30.7895	2019.46	1469.15	-56.1606	2069.77	1253.06	-77.8343	2100.28	1157.48	-92.281	2250.01	1058.65	-51.3998	2321.91	1016.59	-109.492	2288.37	992.184	-102.769	2366.69	975.547
4949	0	168.459	2116.06	1660.99	264.423	2119.25	1656.08	150.576	1958.66	1672.57	294.901	1970.36	1660.6	207.497	1929.34	1493.67	185.332	1891.43	1234.78	217.431	2088.07	1427.36	215.651	2189.29	1220.89	249.213	1879.44	1291.16	32.2046	2032.52	1471.53	-55.1331	2081.25	1254.76	-76.9065	2110.29	1158.82	-92.5882	2257.13	1056.11	-52.1984	2328.03	1011.48	-109.997	2293.49	988.252	-104.328	2371.02	968.956
4950	0	170.631	2129.25	1662.13	266.524	2132.19	1656.69	152.993	1972.05	1674.25	296.691	1983.21	1661.47	209.027	1942.2	1495.29	185.982	1904.1	1236.56	218.055	2100.82	1428.57	215.681	2202.88	1222.44	250.354	1891.81	1292.84	33.2804	2045.29	1473.58	-54.1009	2092.45	1256.2	-75.9446	2120.03	1160.02	-93.0234	2263.66	1053.22	-53.084	2333.44	1006.09	-110.729	2297.8	984.394	-105.456	2374.68	961.883
4951	0	172.241	2142.3	1663.09	268.218	2145.34	1657.11	154.433	1985.16	1676.07	299.004	1996.73	1662.77	210.561	1954.67	1496.68	186.958	1916.3	1238.23	218.404	2113.27	1429.84	215.518	2215.36	1223.8	251.593	1904.07	1294.22	34.4679	2057.41	1475.47	-53.0195	2103.74	1257.68	-74.5973	2129.58	1160.97	-93.0139	2269.81	1050.39	-53.8754	2338.18	1000.39	-110.228	2301.36	979.744	-106.703	2377.36	954.661
4952	0	173.623	2155.4	1663.71	269.484	2158.52	1657.66	155.842	1998.26	1677.82	299.511	2009.29	1663.9	211.949	1967.17	1497.95	188.236	1928.49	1240.02	218.994	2125.64	1431.37	215.245	2227.18	1225.22	252.957	1916.28	1295.67	35.3014	2069.17	1477.24	-52.1811	2114.51	1259.25	-73.6014	2138.51	1161.71	-93.1975	2275.33	1047.53	-54.6476	2342.11	994.718	-110.957	2304.56	975.897	-107.328	2379.41	947.317
4953	0	174.642	2168.62	1664.14	270.434	2171.68	1657.95	158.34	2012.08	1679.93	302.005	2023.35	1665.9	213.175	1979.11	1499.73	189.972	1940.7	1241.48	219.382	2137.77	1432.89	214.962	2238.66	1226.64	255.101	1929.18	1297.15	36.0414	2080.43	1478.79	-51.0114	2125.24	1260.5	-72.1148	2146.94	1162.15	-93.3232	2280.24	1044.4	-55.261	2345.58	988.887	-112.455	2307.24	972.424	-107.919	2380.69	939.757
4954	0	175.241	2181.39	1664.77	271.052	2184.92	1658.57	160.028	2025.37	1682.07	303.196	2036.95	1667.61	210.852	1986	1502.37	191.46	1952.58	1243.06	220.019	2149.65	1434.56	214.886	2250.52	1228.38	256.842	1941.35	1298.61	36.5568	2091.32	1480.38	-50.049	2135.46	1261.38	-70.843	2155.06	1162.68	-93.4159	2284.52	1041.46	-55.6312	2348.01	983.113	-113.329	2309.05	968.683	-108.321	2381.12	932.402
4955	0	175.744	2194.23	1665.66	271.494	2198.13	1659.49	161.316	2038.38	1684.04	304.17	2050.27	1669.47	215.704	2003.15	1502.87	193.194	1964.21	1244.27	220.565	2161.54	1436.51	214.688	2262.62	1230.55	258.438	1953.26	1299.98	36.9571	2102.07	1482	-49.1358	2145.04	1262.27	-69.6989	2162.33	1162.94	-93.49	2288.19	1038.57	-56.0894	2350.06	977.93	-113.482	2310.58	964.887	-108.565	2381.05	925.383
4956	0	175.876	2206.78	1666.89	271.795	2211.19	1660.6	162.1	2050.73	1686.27	305.51	2063.73	1671.61	213.499	2009.82	1505.67	194.761	1975.75	1245.82	221.021	2173.33	1438.61	214.183	2274.72	1232.69	260.321	1964.89	1301.72	37.1216	2112.49	1483.19	-48.4446	2154.09	1263.01	-68.7244	2169.14	1163.21	-93.4551	2291.14	1035.55	-56.4863	2351.42	972.885	-114.103	2311.46	961.559	-108.96	2380.15	918.653
4957	0	176.282	2219.34	1668.16	272.03	2224.37	1661.85	162.824	2063.18	1688.44	305.91	2076.84	1673.94	214.318	2021.69	1507.65	196.757	1987.41	1247.68	221.649	2185.23	1440.73	214.091	2286.92	1235.06	262.224	1976.53	1303.72	37.3481	2123.13	1484.64	-47.3266	2162.68	1263.47	-67.6717	2175.22	1163.14	-93.5175	2293.67	1032.73	-56.791	2352.06	967.695	-114.443	2311.75	958.172	-109.182	2378.55	912.052
4958	0	176.43	2231.82	1669.68	272.124	2237.1	1663.35	164.167	2075.93	1690.8	307	2089.85	1675.77	215.529	2033.42	1509.33	198.993	1998.98	1249.66	221.906	2196.83	1442.86	213.927	2298.55	1237.43	264.424	1988.34	1305.94	37.4709	2133.8	1486.05	-46.8517	2170.19	1263.79	-66.3142	2180.72	1162.96	-93.5069	2295.57	1030.05	-56.8609	2352.32	962.957	-114.368	2311.51	954.718	-109.571	2376.44	906.142
4959	0	177.088	2244.03	1671.23	272.424	2249.46	1665.01	164.605	2087.92	1693.08	307.938	2102.65	1678.31	216.397	2045.3	1512.12	200.849	2010.4	1251.58	222.39	2208.52	1445.38	213.865	2310.07	1239.63	266.357	2000.06	1308.24	37.6937	2144.47	1487.48	-45.9156	2177.11	1264.11	-64.8309	2186.14	1163.14	-93.4065	2296.81	1027.27	-57.211	2351.91	958.785	-114.211	2310.57	951.64	-109.736	2373.86	900.892
4960	0	177.084	2256.12	1672.83	272.702	2261.69	1666.58	165.582	2100.46	1695.42	308.464	2114.98	1680.41	220.66	2061.57	1513.36	202.739	2022.1	1254.03	222.703	2220.25	1447.7	213.895	2321.51	1242.08	268.092	2011.79	1310.78	38.0859	2155.52	1489.12	-45.4939	2183.23	1264.23	-63.7048	2190.7	1163.3	-93.259	2297.42	1024.67	-57.4422	2350.98	954.797	-114.569	2309.01	948.96	-110.041	2370.78	895.917
4961	0	177.753	2268.15	1674.42	273.438	2274	1668.27	165.844	2112.02	1697.27	309.024	2127.21	1682.22	217.99	2068.82	1516.58	204.575	2033.79	1256	223.194	2232.07	1449.92	214.182	2333.15	1244.38	269.929	2023.59	1313.3	38.5564	2166.67	1490.59	-44.6556	2189.04	1264.62	-62.2454	2194.92	1163.24	-92.8293	2297.61	1022.26	-57.4503	2349.76	950.981	-115.296	2307.04	946.038	-110.157	2367.44	891.469
4962	0	178.381	2280.26	1676.04	274.034	2285.9	1669.88	166.651	2124.2	1699.01	309.912	2139.23	1684.22	218.943	2080.67	1518.39	206.227	2045.52	1257.89	223.802	2243.97	1451.91	214.608	2344.58	1246.44	271.973	2035.56	1315.31	38.989	2177.71	1491.75	-43.6277	2194.48	1264.6	-60.9286	2198.6	1163.34	-92.3363	2297.47	1019.91	-57.3109	2348.37	947.372	-113.93	2304.8	943.691	-110.131	2363.79	887.426
4963	0	179.427	2292.08	1677.56	274.621	2297.59	1671.5	167.15	2135.91	1700.64	310.181	2150.9	1685.8	219.572	2092.18	1520.07	207.549	2057.33	1259.68	223.915	2255.61	1453.72	215.304	2355.9	1248.59	273.722	2047.76	1317.47	39.6355	2189.05	1493.19	-42.4222	2199.71	1264.85	-59.235	2202.35	1163.71	-91.5781	2297.14	1017.93	-57.1059	2346.38	944.163	-112.087	2301.58	940.69	-110.112	2359.9	883.782
4964	0	179.551	2303.9	1678.99	275.564	2309.55	1673.17	166.907	2147.22	1701.81	310.707	2162.55	1687.16	220.138	2103.87	1522.12	208.819	2069.19	1261.35	224.671	2267.62	1455.69	216.002	2366.81	1250.39	275.295	2059.68	1319.24	40.2339	2200.32	1494.59	-41.4442	2204.52	1265.29	-57.7543	2205.77	1164.05	-90.9636	2296.39	1015.96	-56.9292	2344.56	941.303	-110.992	2298.76	938.927	-110.463	2355.53	880.462
4965	0	180.379	2315.67	1680.49	276.231	2320.95	1674.83	167.859	2159.08	1702.81	311.386	2174.18	1688.56	221.159	2115.83	1523.03	210.049	2081.09	1262.65	225.465	2279.51	1457.28	216.876	2377.68	1251.84	277.223	2071.56	1320.88	40.7301	2211.6	1495.64	-39.7946	2210.08	1266.11	-56.2553	2208.73	1164.21	-90.11	2295.54	1014.58	-56.5374	2342.22	938.532	-109.644	2295.58	937.047	-109.826	2351.16	877.387
4966	0	181.394	2327.33	1681.97	276.949	2332.51	1676.36	168.573	2170.84	1703.65	312.875	2185.58	1689.77	221.582	2127.27	1524.03	211.244	2092.91	1263.62	226.274	2291.37	1458.74	218.004	2388.72	1253.16	278.545	2083.66	1322.04	41.5226	2223.32	1496.74	-39.1071	2215.14	1266.3	-54.1697	2212.07	1164.9	-89.0901	2294.49	1013.21	-56.1751	2340.01	936.244	-108.291	2292.32	934.917	-109.3	2346.4	874.719
4967	0	181.91	2338.99	1682.92	277.746	2344.2	1677.63	168.936	2182.44	1704.12	312.443	2197.01	1690.68	226.583	2144.76	1523.87	212.247	2104.73	1264.65	226.742	2303.31	1459.68	219.188	2399.58	1253.89	280.094	2095.61	1323.13	42.1599	2234.81	1497.27	-37.6086	2220.9	1266.86	-52.5429	2215.52	1165.52	-88.0834	2293.35	1011.93	-55.7834	2337.12	934.162	-107.081	2288.78	933.065	-108.922	2341.64	871.94
4968	0	182.314	2350.66	1683.43	278.174	2355.85	1678.28	169.467	2194.14	1704.35	313.068	2208.62	1691.14	223.191	2151.21	1525.66	213.15	2116.56	1265.53	227.786	2315.55	1460.21	220.62	2410.92	1254.16	281.284	2107.51	1323.96	42.7971	2246.73	1497.44	-36.2286	2226.98	1267.16	-50.5323	2219.17	1165.96	-87.1711	2292.3	1010.38	-55.3339	2334.73	931.417	-105.363	2285.41	931.835	-108.069	2336.25	869.055
4969	0	183.166	2362.57	1683.66	278.829	2367.74	1678.76	169.584	2205.57	1704.25	314.036	2220.6	1691.28	223.98	2163.14	1526.17	214.317	2128.36	1265.82	228.603	2327.62	1460.34	222.09	2422.48	1254.01	282.577	2119.38	1324.54	43.2968	2258.59	1497.23	-35.1337	2233.33	1267.41	-48.6257	2222.78	1166.25	-86.022	2291.24	1008.6	-54.5794	2332.57	929.154	-103.536	2281.91	930.408	-107.216	2331.18	866.123
4970	0	183.648	2374.44	1683.54	279.453	2379.74	1679.01	170.507	2217.59	1703.83	314.021	2232.49	1691.36	225.351	2175.92	1526.15	214.889	2140.22	1266.04	229.043	2339.55	1459.81	223.486	2434.15	1253.31	283.471	2131.13	1324.74	44.3661	2270.75	1497.04	-33.7704	2240.09	1267.49	-46.1962	2227.16	1166.83	-84.7575	2290.36	1007.19	-54.1402	2330.09	926.489	-102.004	2278.47	929.148	-106.098	2326.28	863.609
4971	0	184.226	2386.36	1683.23	279.986	2391.88	1678.78	170.893	2229.4	1703.31	315.059	2244.48	1691.04	227.096	2189.28	1525.53	215.43	2151.88	1266.03	230.091	2351.72	1459.35	225.105	2445.99	1252.35	284.191	2142.88	1324.78	45.1156	2283.07	1496.5	-32.1778	2247.42	1267.48	-44.1665	2231.66	1167.33	-83.4068	2289.61	1005.86	-53.4151	2327.84	924.148	-100.359	2275.1	928.205	-105.194	2320.94	860.901
4972	0	184.762	2398.59	1682.45	280.381	2404.03	1678.2	171.562	2241.56	1702.71	315.404	2256.94	1690.48	230.953	2205.82	1524.28	215.884	2163.69	1265.78	231.033	2363.92	1458.35	226.622	2457.74	1250.99	285.089	2154.5	1324.6	45.9091	2295.4	1495.92	-30.9227	2254.81	1267.2	-41.8618	2236.52	1167.44	-82.2496	2289.01	1004.68	-52.4346	2326.14	922.022	-98.4499	2271.98	927.406	-104.024	2315.81	858.517
4973	0	185.284	2410.77	1681.63	281.145	2416.58	1677.64	172.61	2253.88	1701.69	316.276	2269.16	1689.95	231.721	2218.15	1523.68	215.888	2175.26	1265.27	232.646	2376.25	1457.56	228.001	2469.79	1249.79	285.652	2166.09	1324.1	46.6111	2307.54	1494.81	-29.3606	2263.1	1266.99	-39.3498	2242.12	1167.76	-80.8451	2288.84	1003.77	-49.6404	2328.17	921.29	-96.0363	2269.43	926.838	-102.863	2310.63	856.57
4974	0	185.86	2423.14	1680.38	281.618	2428.95	1676.55	173.367	2266.45	1700.7	316.734	2281.69	1689.3	232.492	2230.17	1522.86	216.192	2186.92	1264.83	233.7	2388.22	1456.23	229.492	2481.9	1248.39	285.84	2177.81	1323.33	47.2799	2320.18	1493.95	-28.1752	2271.58	1266.75	-37.1375	2247.98	1167.76	-79.4651	2288.98	1003.11	-51.2817	2322.6	918.077	-94.5164	2266.67	926.044	-101.664	2305.66	854.868
4975	0	186.376	2435.6	1678.84	282.314	2441.58	1675.16	173.26	2278.64	1699.68	317.596	2294.33	1688.24	233.079	2242.58	1521.88	215.953	2198.75	1264.02	234.78	2400.21	1454.74	230.967	2494.2	1246.9	286.077	2189.31	1322.37	48.3646	2333.1	1492.98	-27.4382	2280.25	1266.8	-34.6384	2254.69	1167.74	-78.0073	2289.61	1002.48	-48.8979	2324.34	917.732	-92.8005	2264.32	926.049	-100.469	2300.76	853.39
4976	0	186.931	2448.17	1677.32	283.126	2454.21	1673.46	174.297	2291.64	1698.46	318.461	2307.08	1686.79	233.861	2254.69	1520.99	215.808	2210.46	1262.86	235.724	2412.08	1453.25	232.368	2506.44	1245.31	286.149	2200.51	1321.16	49.0485	2345.84	1491.92	-26.0685	2289.45	1265.97	-32.2752	2261.92	1167.62	-76.2757	2290.77	1002.17	-47.856	2323.15	916.284	-90.6045	2262.67	926.341	-99.0929	2296.26	852.176
4977	0	187.886	2461.07	1675.34	283.876	2467	1671.36	175.388	2304.93	1697.15	318.634	2319.93	1685.56	230.031	2261.24	1520.5	215.353	2222.36	1261.5	236.729	2424.05	1451.59	233.628	2518.64	1243.47	286.101	2212.07	1319.71	49.3939	2358.71	1490.36	-24.2954	2299.16	1265.37	-29.967	2269.86	1167.38	-74.5682	2292.32	1001.45	-46.4558	2322.53	914.613	-88.5625	2261.75	926.684	-97.4306	2292.26	851.322
4978	0	188.661	2474.34	1672.7	284.557	2479.99	1668.8	175.641	2317.89	1695.68	319.592	2332.83	1684.01	231.259	2274.45	1518.64	214.943	2234.2	1260.09	237.439	2435.99	1449.5	234.992	2530.88	1241.37	285.748	2223.7	1318.36	50.0132	2371.88	1488.59	-23.6665	2309.03	1264.17	-27.7648	2278.23	1167.16	-72.8666	2294.86	1000.87	-45.7708	2322.04	912.766	-86.8203	2261.33	927.285	-95.7627	2288.79	850.301
4979	0	189.392	2487.51	1670.14	285.397	2492.82	1666.02	175.725	2330.94	1694.21	319.742	2345.65	1681.84	234.518	2291.04	1516.24	214.344	2246.38	1258.6	238.108	2448.09	1447.15	236.421	2543.2	1239.19	285.423	2235.43	1316.52	50.3801	2385.06	1486.74	-22.2156	2319.42	1262.95	-26.0847	2286.89	1166.51	-70.8228	2298.26	1000.42	-44.515	2321.93	911.075	-84.878	2261.83	928.325	-94.1887	2285.93	849.495
4980	0	190.404	2500.22	1667.32	286.239	2505.46	1663.24	176.591	2344.38	1692.45	320.785	2358.48	1680.07	234.419	2303.44	1514.08	214.006	2258.33	1256.46	239.001	2460.36	1444.92	237.891	2555.5	1237.19	285.021	2247.39	1314.61	50.8307	2398.25	1484.79	-21.2352	2330.41	1261.38	-23.8672	2296.25	1165.86	-69.4239	2301.95	999.831	-43.4387	2322.88	909.61	-83.1009	2263.12	929.058	-92.1861	2283.83	848.728
4981	0	191.076	2513.24	1664.83	286.913	2518.11	1660.69	176.471	2357.38	1690.81	320.158	2371.11	1677.99	231.61	2311.5	1513.12	213.241	2270.74	1254.48	239.6	2472.64	1442.74	239.078	2567.63	1235.41	284.28	2259.17	1312.52	51.0133	2411.34	1482.69	-20.6163	2341.49	1259.68	-21.7144	2305.97	1165.3	-67.9587	2306.64	999.541	-41.4149	2325.52	908.878	-81.8887	2265.58	930.326	-90.2565	2282.68	848.608
4982	0	191.417	2526.3	1662.68	287.612	2530.71	1658.43	176.235	2370.24	1688.89	320.333	2383.59	1676.1	231.299	2324.17	1511.03	212.642	2282.97	1252.45	239.851	2484.81	1440.69	240.135	2579.76	1233.8	283.57	2271.38	1310.45	50.965	2424.41	1480.66	-19.7853	2352.73	1258.49	-20.6199	2316.12	1164.48	-67.0329	2311.89	999.417	-40.9199	2327.8	908.286	-80.6259	2269.16	931.201	-88.6245	2282.6	848.6
4983	0	192.183	2539.13	1660.76	288.212	2543.22	1656.39	176.226	2383.25	1687.04	320.575	2395.98	1674.37	231.825	2337.42	1508.63	212.261	2295.64	1250.31	240.303	2497.23	1438.76	241.06	2591.86	1232.01	283.081	2283.51	1308.28	51.0055	2437.81	1478.69	-19.0602	2364.5	1257.1	-19.4472	2326.22	1163.16	-66.1195	2318.07	999.038	-42.6838	2329.76	907.319	-80.0307	2273.6	931.97	-87.0016	2283.5	848.693
4984	0	192.033	2551.84	1658.79	288.537	2555.68	1654.62	176.502	2396.32	1685.21	320.324	2408.3	1672.51	232.877	2353.03	1505.93	211.868	2308.34	1248.04	240.376	2509.75	1436.77	241.769	2604.1	1230.26	282.495	2295.99	1306.11	51.0455	2451.04	1476.59	-18.1789	2376.04	1255.48	-18.0586	2337.13	1161.89	-65.4688	2325.12	999.062	-44.7766	2334.53	906.055	-79.4852	2279.15	932.614	-85.6381	2285.81	848.89
[truncated: 69 more columns]

## Sheet: Sheet2
Devices
		025370 - Force			025370 - Moment			025370 - CoP			027571 - Force			027571 - Moment			027571 - CoP			037720 - Force			037720 - Moment			037720 - CoP
Frame	Sub Frame	Fx	Fy	Fz	Mx	My	Mz	Cx	Cy	Cz	Fx	Fy	Fz	Mx	My	Mz	Cx	Cy	Cz	Fx	Fy	Fz	Mx	My	Mz	Cx	Cy	Cz
		N	N	N	N.mm	N.mm	N.mm	mm	mm	mm	N	N	N	N.mm	N.mm	N.mm	mm	mm	mm	N	N	N	N.mm	N.mm	N.mm	mm	mm	mm
4635	0	0	0	0	0	0	0	200	300	0	0	0	0	0	0	0	200	903	0	0	0	0	0	0	0	603	903	0
4635	1	0	0	0	0	0	0	200	300	0	0	0	0	0	0	0	200	903	0	0	0	0	0	0	0	603	903	0
4635	2	0	0	0	0	0	0	200	300	0	0	0	0	0	0	0	200	903	0	0	0	0	0	0	0	603	903	0
4635	3	0	0	0	0	0	0	200	300	0	0	0	0	0	0	0	200	903	0	0	0	0	0	0	0	603	903	0
4635	4	0	0	0	0	0	0	200	300	0	0	0	0	0	0	0	200	903	0	0	0	0	0	0	0	603	903	0
4635	5	0	0	0	0	0	0	200	300	0	0	0	0	0	0	0	200	903	0	0	0	0	0	0	0	603	903	0
4635	6	0	0	0	0	0	0	200	300	0	0	0	0	0	0	0	200	903	0	0	0	0	0	0	0	603	903	0
4635	7	0	0	0	0	0	0	200	300	0	0	0	0	0	0	0	200	903	0	0	0	0	0	0	0	603	903	0
4635	8	0	0	0	0	0	0	200	300	0	0	0	0	0	0	0	200	903	0	0	0	0	0	0	0	603	903	0
4635	9	0	0	0	0	0	0	200	300	0	0	0	0	0	0	0	200	903	0	0	0	0	0	0	0	603	903	0
4636	0	0	0	0	0	0	0	200	300	0	0	0	0	0	0	0	200	903	0	0	0	0	0	0	0	603	903	0
4636	1	0	0	0	0	0	0	200	300	0	0	0	0	0	0	0	200	903	0	0	0	0	0	0	0	603	903	0
4636	2	0	0	0	0	0	0	200	300	0	0	0	0	0	0	0	200	903	0	0	0	0	0	0	0	603	903	0
4636	3	0	0	0	0	0	0	200	300	0	0	0	0	0	0	0	200	903	0	0	0	0	0	0	0	603	903	0
4636	4	0	0	0	0	0	0	200	300	0	0	0	0	0	0	0	200	903	0	0	0	0	0	0	0	603	903	0
4636	5	0	0	0	0	0	0	200	300	0	0	0	0	0	0	0	200	903	0	0	0	0	0	0	0	603	903	0
4636	6	0	0	0	0	0	0	200	300	0	0	0	0	0	0	0	200	903	0	0	0	0	0	0	0	603	903	0
4636	7	0	0	0	0	0	0	200	300	0	0	0	0	0	0	0	200	903	0	0	0	0	0	0	0	603	903	0
4636	8	0	0	0	0	0	0	200	300	0	0	0	0	0	0	0	200	903	0	0	0	0	0	0	0	603	903	0
4636	9	0	0	0	0	0	0	200	300	0	0	0	0	0	0	0	200	903	0	0	0	0	0	0	0	603	903	0
4637	0	0	0	0	0	0	0	200	300	0	0	0	0	0	0	0	200	903	0	0	0	0	0	0	0	603	903	0
4637	1	0	0	0	0	0	0	200	300	0	0	0	0	0	0	0	200	903	0	0	0	0	0	0	0	603	903	0
4637	2	0	0	0	0	0	0	200	300	0	0	0	0	0	0	0	200	903	0	0	0	0	0	0	0	603	903	0
4637	3	0	0	0	0	0	0	200	300	0	0	0	0	0	0	0	200	903	0	0	0	0	0	0	0	603	903	0
4637	4	0	0	0	0	0	0	200	300	0	0	0	0	0	0	0	200	903	0	0	0	0	0	0	0	603	903	0
4637	5	0	0	0	0	0	0	200	300	0	0	0	0	0	0	0	200	903	0	0	0	0	0	0	0	603	903	0
4637	6	0	0	0	0	0	0	200	300	0	0	0	0	0	0	0	200	903	0	0	0	0	0	0	0	603	903	0
4637	7	0	0	0	0	0	0	200	300	0	0	0	0	0	0	0	200	903	0	0	0	0	0	0	0	603	903	0
4637	8	0	0	0	0	0	0	200	300	0	0	0	0	0	0	0	200	903	0	0	0	0	0	0	0	603	903	0
4637	9	0	0	0	0	0	0	200	300	0	0	0	0	0	0	0	200	903	0	0	0	0	0	0	0	603	903	0
4638	0	0	0	0	0	0	0	200	300	0	0	0	0	0	0	0	200	903	0	0	0	0	0	0	0	603	903	0
4638	1	0	0	0	0	0	0	200	300	0	0	0	0	0	0	0	200	903	0	0	0	0	0	0	0	603	903	0
4638	2	0	0	0	0	0	0	200	300	0	0	0	0	0	0	0	200	903	0	0	0	0	0	0	0	603	903	0
4638	3	0	0	0	0	0	0	200	300	0	0	0	0	0	0	0	200	903	0	0	0	0	0	0	0	603	903	0
4638	4	0	0	0	0	0	0	200	300	0	0	0	0	0	0	0	200	903	0	0	0	0	0	0	0	603	903	0
4638	5	0	0	0	0	0	0	200	300	0	0	0	0	0	0	0	200	903	0	0	0	0	0	0	0	603	903	0
4638	6	0	0	0	0	0	0	200	300	0	0	0	0	0	0	0	200	903	0	0	0	0	0	0	0	603	903	0
4638	7	0	0	0	0	0	0	200	300	0	0	0	0	0	0	0	200	903	0	0	0	0	0	0	0	603	903	0
4638	8	0	0	0	0	0	0	200	300	0	0	0	0	0	0	0	200	903	0	0	0	0	0	0	0	603	903	0
4638	9	0	0	0	0	0	0	200	300	0	0	0	0	0	0	0	200	903	0	0	0	0	0	0	0	603	903	0
4639	0	0	0	0	0	0	0	200	300	0	0	0	0	0	0	0	200	903	0	0	0	0	0	0	0	603	903	0
4639	1	0	0	0	0	0	0	200	300	0	0	0	0	0	0	0	200	903	0	0	0	0	0	0	0	603	903	0
4639	2	0	0	0	0	0	0	200	300	0	0	0	0	0	0	0	200	903	0	0	0	0	0	0	0	603	903	0
4639	3	0	0	0	0	0	0	200	300	0	0	0	0	0	0	0	200	903	0	0	0	0	0	0	0	603	903	0
4639	4	0	0	0	0	0	0	200	300	0	0	0	0	0	0	0	200	903	0	0	0	0	0	0	0	603	903	0
4639	5	0	0	0	0	0	0	200	300	0	0	0	0	0	0	0	200	903	0	0	0	0	0	0	0	603	903	0
4639	6	0	0	0	0	0	0	200	300	0	0	0	0	0	0	0	200	903	0	0	0	0	0	0	0	603	903	0
4639	7	0	0	0	0	0	0	200	300	0	0	0	0	0	0	0	200	903	0	0	0	0	0	0	0	603	903	0
4639	8	0	0	0	0	0	0	200	300	0	0	0	0	0	0	0	200	903	0	0	0	0	0	0	0	603	903	0
4639	9	0	0	0	0	0	0	200	300	0	0	0	0	0	0	0	200	903	0	0	0	0	0	0	0	603	903	0
4640	0	0	0	0	0	0	0	200	300	0	0	0	0	0	0	0	200	903	0	0	0	0	0	0	0	603	903	0
4640	1	0	0	0	0	0	0	200	300	0	0	0	0	0	0	0	200	903	0	0	0	0	0	0	0	603	903	0
4640	2	0	0	0	0	0	0	200	300	0	0	0	0	0	0	0	200	903	0	0	0	0	0	0	0	603	903	0
4640	3	0	0	0	0	0	0	200	300	0	0	0	0	0	0	0	200	903	0	0	0	0	0	0	0	603	903	0
4640	4	0	0	0	0	0	0	200	300	0	0	0	0	0	0	0	200	903	0	0	0	0	0	0	0	603	903	0
4640	5	0	0	0	0	0	0	200	300	0	0	0	0	0	0	0	200	903	0	0	0	0	0	0	0	603	903	0
4640	6	0	0	0	0	0	0	200	300	0	0	0	0	0	0	0	200	903	0	0	0	0	0	0	0	603	903	0
4640	7	0	0	0	0	0	0	200	300	0	0	0	0	0	0	0	200	903	0	0	0	0	0	0	0	603	903	0
4640	8	0	0	0	0	0	0	200	300	0	0	0	0	0	0	0	200	903	0	0	0	0	0	0	0	603	903	0
4640	9	0	0	0	0	0	0	200	300	0	0	0	0	0	0	0	200	903	0	0	0	0	0	0	0	603	903	0
4641	0	0	0	0	0	0	0	200	300	0	0	0	0	0	0	0	200	903	0	0	0	0	0	0	0	603	903	0
4641	1	0	0	0	0	0	0	200	300	0	0	0	0	0	0	0	200	903	0	0	0	0	0	0	0	603	903	0
4641	2	0	0	0	0	0	0	200	300	0	0	0	0	0	0	0	200	903	0	0	0	0	0	0	0	603	903	0
4641	3	0	0	0	0	0	0	200	300	0	0	0	0	0	0	0	200	903	0	0	0	0	0	0	0	603	903	0
4641	4	0	0	0	0	0	0	200	300	0	0	0	0	0	0	0	200	903	0	0	0	0	0	0	0	603	903	0
4641	5	0	0	0	0	0	0	200	300	0	0	0	0	0	0	0	200	903	0	0	0	0	0	0	0	603	903	0
4641	6	0	0	0	0	0	0	200	300	0	0	0	0	0	0	0	200	903	0	0	0	0	0	0	0	603	903	0
4641	7	0	0	0	0	0	0	200	300	0	0	0	0	0	0	0	200	903	0	0	0	0	0	0	0	603	903	0
4641	8	0	0	0	0	0	0	200	300	0	0	0	0	0	0	0	200	903	0	0	0	0	0	0	0	603	903	0
4641	9	0	0	0	0	0	0	200	300	0	0	0	0	0	0	0	200	903	0	0	0	0	0	0	0	603	903	0
4642	0	0	0	0	0	0	0	200	300	0	0	0	0	0	0	0	200	903	0	0	0	0	0	0	0	603	903	0
4642	1	0	0	0	0	0	0	200	300	0	0	0	0	0	0	0	200	903	0	0	0	0	0	0	0	603	903	0
4642	2	0	0	0	0	0	0	200	300	0	0	0	0	0	0	0	200	903	0	0	0	0	0	0	0	603	903	0
4642	3	0	0	0	0	0	0	200	300	0	0	0	0	0	0	0	200	903	0	0	0	0	0	0	0	603	903	0
4642	4	0	0	0	0	0	0	200	300	0	0	0	0	0	0	0	200	903	0	0	0	0	0	0	0	603	903	0
4642	5	0	0	0	0	0	0	200	300	0	0	0	0	0	0	0	200	903	0	0	0	0	0	0	0	603	903	0
4642	6	0	0	0	0	0	0	200	300	0	0	0	0	0	0	0	200	903	0	0	0	0	0	0	0	603	903	0
4642	7	0	0	0	0	0	0	200	300	0	0	0	0	0	0	0	200	903	0	0	0	0	0	0	0	603	903	0
4642	8	0	0	0	0	0	0	200	300	0	0	0	0	0	0	0	200	903	0	0	0	0	0	0	0	603	903	0
4642	9	0	0	0	0	0	0	200	300	0	0	0	0	0	0	0	200	903	0	0	0	0	0	0	0	603	903	0
4643	0	0	0	0	0	0	0	200	300	0	0	0	0	0	0	0	200	903	0	0	0	0	0	0	0	603	903	0
4643	1	0	0	0	0	0	0	200	300	0	0	0	0	0	0	0	200	903	0	0	0	0	0	0	0	603	903	0
4643	2	0	0	0	0	0	0	200	300	0	0	0	0	0	0	0	200	903	0	0	0	0	0	0	0	603	903	0
4643	3	0	0	0	0	0	0	200	300	0	0	0	0	0	0	0	200	903	0	0	0	0	0	0	0	603	903	0
4643	4	0	0	0	0	0	0	200	300	0	0	0	0	0	0	0	200	903	0	0	0	0	0	0	0	603	903	0
4643	5	0	0	0	0	0	0	200	300	0	0	0	0	0	0	0	200	903	0	0	0	0	0	0	0	603	903	0
4643	6	0	0	0	0	0	0	200	300	0	0	0	0	0	0	0	200	903	0	0	0	0	0	0	0	603	903	0
4643	7	0	0	0	0	0	0	200	300	0	0	0	0	0	0	0	200	903	0	0	0	0	0	0	0	603	903	0
4643	8	0	0	0	0	0	0	200	300	0	0	0	0	0	0	0	200	903	0	0	0	0	0	0	0	603	903	0
4643	9	0	0	0	0	0	0	200	300	0	0	0	0	0	0	0	200	903	0	0	0	0	0	0	0	603	903	0
4644	0	0	0	0	0	0	0	200	300	0	0	0	0	0	0	0	200	903	0	0	0	0	0	0	0	603	903	0
4644	1	0	0	0	0	0	0	200	300	0	0	0	0	0	0	0	200	903	0	0	0	0	0	0	0	603	903	0
4644	2	0	0	0	0	0	0	200	300	0	0	0	0	0	0	0	200	903	0	0	0	0	0	0	0	603	903	0
4644	3	0	0	0	0	0	0	200	300	0	0	0	0	0	0	0	200	903	0	0	0	0	0	0	0	603	903	0
4644	4	0	0	0	0	0	0	200	300	0	0	0	0	0	0	0	200	903	0	0	0	0	0	0	0	603	903	0
4644	5	0	0	0	0	0	0	200	300	0	0	0	0	0	0	0	200	903	0	0	0	0	0	0	0	603	903	0
4644	6	0	0	0	0	0	0	200	300	0	0	0	0	0	0	0	200	903	0	0	0	0	0	0	0	603	903	0
4644	7	0	0	0	0	0	0	200	300	0	0	0	0	0	0	0	200	903	0	0	0	0	0	0	0	603	903	0
4644	8	0	0	0	0	0	0	200	300	0	0	0	0	0	0	0	200	903	0	0	0	0	0	0	0	603	903	0
4644	9	0	0	0	0	0	0	200	300	0	0	0	0	0	0	0	200	903	0	0	0	0	0	0	0	603	903	0
4645	0	0	0	0	0	0	0	200	300	0	0	0	0	0	0	0	200	903	0	0	0	0	0	0	0	603	903	0
4645	1	0	0	0	0	0	0	200	300	0	0	0	0	0	0	0	200	903	0	0	0	0	0	0	0	603	903	0
4645	2	0	0	0	0	0	0	200	300	0	0	0	0	0	0	0	200	903	0	0	0	0	0	0	0	603	903	0
4645	3	0	0	0	0	0	0	200	300	0	0	0	0	0	0	0	200	903	0	0	0	0	0	0	0	603	903	0
4645	4	0	0	0	0	0	0	200	300	0	0	0	0	0	0	0	200	903	0	0	0	0	0	0	0	603	903	0
4645	5	0	0	0	0	0	0	200	300	0	0	0	0	0	0	0	200	903	0	0	0	0	0	0	0	603	903	0
4645	6	0	0	0	0	0	0	200	300	0	0	0	0	0	0	0	200	903	0	0	0	0	0	0	0	603	903	0
4645	7	0	0	0	0	0	0	200	300	0	0	0	0	0	0	0	200	903	0	0	0	0	0	0	0	603	903	0
4645	8	0	0	0	0	0	0	200	300	0	0	0	0	0	0	0	200	903	0	0	0	0	0	0	0	603	903	0
4645	9	0	0	0	0	0	0	200	300	0	0	0	0	0	0	0	200	903	0	0	0	0	0	0	0	603	903	0
4646	0	0	0	0	0	0	0	200	300	0	0	0	0	0	0	0	200	903	0	0	0	0	0	0	0	603	903	0
4646	1	0	0	0	0	0	0	200	300	0	0	0	0	0	0	0	200	903	0	0	0	0	0	0	0	603	903	0
4646	2	0	0	0	0	0	0	200	300	0	0	0	0	0	0	0	200	903	0	0	0	0	0	0	0	603	903	0
4646	3	0	0	0	0	0	0	200	300	0	0	0	0	0	0	0	200	903	0	0	0	0	0	0	0	603	903	0
4646	4	0	0	0	0	0	0	200	300	0	0	0	0	0	0	0	200	903	0	0	0	0	0	0	0	603	903	0
4646	5	0	0	0	0	0	0	200	300	0	0	0	0	0	0	0	200	903	0	0	0	0	0	0	0	603	903	0
4646	6	0	0	0	0	0	0	200	300	0	0	0	0	0	0	0	200	903	0	0	0	0	0	0	0	603	903	0
4646	7	0	0	0	0	0	0	200	300	0	0	0	0	0	0	0	200	903	0	0	0	0	0	0	0	603	903	0
4646	8	0	0	0	0	0	0	200	300	0	0	0	0	0	0	0	200	903	0	0	0	0	0	0	0	603	903	0
4646	9	0	0	0	0	0	0	200	300	0	0	0	0	0	0	0	200	903	0	0	0	0	0	0	0	603	903	0
4647	0	0	0	0	0	0	0	200	300	0	0	0	0	0	0	0	200	903	0	0	0	0	0	0	0	603	903	0
4647	1	0	0	0	0	0	0	200	300	0	0	0	0	0	0	0	200	903	0	0	0	0	0	0	0	603	903	0
4647	2	0	0	0	0	0	0	200	300	0	0	0	0	0	0	0	200	903	0	0	0	0	0	0	0	603	903	0
4647	3	0	0	0	0	0	0	200	300	0	0	0	0	0	0	0	200	903	0	0	0	0	0	0	0	603	903	0
4647	4	0	0	0	0	0	0	200	300	0	0	0	0	0	0	0	200	903	0	0	0	0	0	0	0	603	903	0
4647	5	0	0	0	0	0	0	200	300	0	0	0	0	0	0	0	200	903	0	0	0	0	0	0	0	603	903	0
4647	6	0	0	0	0	0	0	200	300	0	0	0	0	0	0	0	200	903	0	0	0	0	0	0	0	603	903	0
4647	7	0	0	0	0	0	0	200	300	0	0	0	0	0	0	0	200	903	0	0	0	0	0	0	0	603	903	0
4647	8	0	0	0	0	0	0	200	300	0	0	0	0	0	0	0	200	903	0	0	0	0	0	0	0	603	903	0
4647	9	0	0	0	0	0	0	200	300	0	0	0	0	0	0	0	200	903	0	0	0	0	0	0	0	603	903	0
4648	0	0	0	0	0	0	0	200	300	0	0	0	0	0	0	0	200	903	0	0	0	0	0	0	0	603	903	0
4648	1	0	0	0	0	0	0	200	300	0	0	0	0	0	0	0	200	903	0	0	0	0	0	0	0	603	903	0
4648	2	0	0	0	0	0	0	200	300	0	0	0	0	0	0	0	200	903	0	0	0	0	0	0	0	603	903	0
4648	3	0	0	0	0	0	0	200	300	0	0	0	0	0	0	0	200	903	0	0	0	0	0	0	0	603	903	0
4648	4	0	0	0	0	0	0	200	300	0	0	0	0	0	0	0	200	903	0	0	0	0	0	0	0	603	903	0
4648	5	0	0	0	0	0	0	200	300	0	0	0	0	0	0	0	200	903	0	0	0	0	0	0	0	603	903	0
4648	6	0	0	0	0	0	0	200	300	0	0	0	0	0	0	0	200	903	0	0	0	0	0	0	0	603	903	0
4648	7	0	0	0	0	0	0	200	300	0	0	0	0	0	0	0	200	903	0	0	0	0	0	0	0	603	903	0
4648	8	0	0	0	0	0	0	200	300	0	0	0	0	0	0	0	200	903	0	0	0	0	0	0	0	603	903	0
4648	9	0	0	0	0	0	0	200	300	0	0	0	0	0	0	0	200	903	0	0	0	0	0	0	0	603	903	0
4649	0	0	0	0	0	0	0	200	300	0	0	0	0	0	0	0	200	903	0	0	0	0	0	0	0	603	903	0
4649	1	0	0	0	0	0	0	200	300	0	0	0	0	0	0	0	200	903	0	0	0	0	0	0	0	603	903	0
4649	2	0	0	0	0	0	0	200	300	0	0	0	0	0	0	0	200	903	0	0	0	0	0	0	0	603	903	0
4649	3	0	0	0	0	0	0	200	300	0	0	0	0	0	0	0	200	903	0	0	0	0	0	0	0	603	903	0
4649	4	0	0	0	0	0	0	200	300	0	0	0	0	0	0	0	200	903	0	0	0	0	0	0	0	603	903	0
4649	5	0	0	0	0	0	0	200	300	0	0	0	0	0	0	0	200	903	0	0	0	0	0	0	0	603	903	0
4649	6	0	0	0	0	0	0	200	300	0	0	0	0	0	0	0	200	903	0	0	0	0	0	0	0	603	903	0
4649	7	0	0	0	0	0	0	200	300	0	0	0	0	0	0	0	200	903	0	0	0	0	0	0	0	603	903	0
4649	8	0	0	0	0	0	0	200	300	0	0	0	0	0	0	0	200	903	0	0	0	0	0	0	0	603	903	0
4649	9	0	0	0	0	0	0	200	300	0	0	0	0	0	0	0	200	903	0	0	0	0	0	0	0	603	903	0
4650	0	0	0	0	0	0	0	200	300	0	0	0	0	0	0	0	200	903	0	0	0	0	0	0	0	603	903	0
4650	1	0	0	0	0	0	0	200	300	0	0	0	0	0	0	0	200	903	0	0	0	0	0	0	0	603	903	0
4650	2	0	0	0	0	0	0	200	300	0	0	0	0	0	0	0	200	903	0	0	0	0	0	0	0	603	903	0
4650	3	0	0	0	0	0	0	200	300	0	0	0	0	0	0	0	200	903	0	0	0	0	0	0	0	603	903	0
4650	4	0	0	0	0	0	0	200	300	0	0	0	0	0	0	0	200	903	0	0	0	0	0	0	0	603	903	0
4650	5	0	0	0	0	0	0	200	300	0	0	0	0	0	0	0	200	903	0	0	0	0	0	0	0	603	903	0
4650	6	0	0	0	0	0	0	200	300	0	0	0	0	0	0	0	200	903	0	0	0	0	0	0	0	603	903	0
4650	7	0	0	0	0	0	0	200	300	0	0	0	0	0	0	0	200	903	0	0	0	0	0	0	0	603	903	0
4650	8	0	0	0	0	0	0	200	300	0	0	0	0	0	0	0	200	903	0	0	0	0	0	0	0	603	903	0
4650	9	0	0	0	0	0	0	200	300	0	0	0	0	0	0	0	200	903	0	0	0	0	0	0	0	603	903	0
4651	0	0	0	0	0	0	0	200	300	0	0	0	0	0	0	0	200	903	0	0	0	0	0	0	0	603	903	0
4651	1	0	0	0	0	0	0	200	300	0	0	0	0	0	0	0	200	903	0	0	0	0	0	0	0	603	903	0
4651	2	0	0	0	0	0	0	200	300	0	0	0	0	0	0	0	200	903	0	0	0	0	0	0	0	603	903	0
4651	3	0	0	0	0	0	0	200	300	0	0	0	0	0	0	0	200	903	0	0	0	0	0	0	0	603	903	0
4651	4	0	0	0	0	0	0	200	300	0	0	0	0	0	0	0	200	903	0	0	0	0	0	0	0	603	903	0
4651	5	0	0	0	0	0	0	200	300	0	0	0	0	0	0	0	200	903	0	0	0	0	0	0	0	603	903	0
4651	6	0	0	0	0	0	0	200	300	0	0	0	0	0	0	0	200	903	0	0	0	0	0	0	0	603	903	0
4651	7	0	0	0	0	0	0	200	300	0	0	0	0	0	0	0	200	903	0	0	0	0	0	0	0	603	903	0
4651	8	0	0	0	0	0	0	200	300	0	0	0	0	0	0	0	200	903	0	0	0	0	0	0	0	603	903	0
4651	9	0	0	0	0	0	0	200	300	0	0	0	0	0	0	0	200	903	0	0	0	0	0	0	0	603	903	0
4652	0	0	0	0	0	0	0	200	300	0	0	0	0	0	0	0	200	903	0	0	0	0	0	0	0	603	903	0
4652	1	0	0	0	0	0	0	200	300	0	0	0	0	0	0	0	200	903	0	0	0	0	0	0	0	603	903	0
4652	2	0	0	0	0	0	0	200	300	0	0	0	0	0	0	0	200	903	0	0	0	0	0	0	0	603	903	0
4652	3	0	0	0	0	0	0	200	300	0	0	0	0	0	0	0	200	903	0	0	0	0	0	0	0	603	903	0
4652	4	0	0	0	0	0	0	200	300	0	0	0	0	0	0	0	200	903	0	0	0	0	0	0	0	603	903	0
4652	5	0	0	0	0	0	0	200	300	0	0	0	0	0	0	0	200	903	0	0	0	0	0	0	0	603	903	0
4652	6	0	0	0	0	0	0	200	300	0	0	0	0	0	0	0	200	903	0	0	0	0	0	0	0	603	903	0
4652	7	0	0	0	0	0	0	200	300	0	0	0	0	0	0	0	200	903	0	0	0	0	0	0	0	603	903	0
4652	8	0	0	0	0	0	0	200	300	0	0	0	0	0	0	0	200	903	0	0	0	0	0	0	0	603	903	0
4652	9	0	0	0	0	0	0	200	300	0	0	0	0	0	0	0	200	903	0	0	0	0	0	0	0	603	903	0
4653	0	0	0	0	0	0	0	200	300	0	0	0	0	0	0	0	200	903	0	0	0	0	0	0	0	603	903	0
4653	1	0	0	0	0	0	0	200	300	0	0	0	0	0	0	0	200	903	0	0	0	0	0	0	0	603	903	0
4653	2	0	0	0	0	0	0	200	300	0	0	0	0	0	0	0	200	903	0	0	0	0	0	0	0	603	903	0
4653	3	0	0	0	0	0	0	200	300	0	0	0	0	0	0	0	200	903	0	0	0	0	0	0	0	603	903	0
4653	4	0	0	0	0	0	0	200	300	0	0	0	0	0	0	0	200	903	0	0	0	0	0	0	0	603	903	0
4653	5	0	0	0	0	0	0	200	300	0	0	0	0	0	0	0	200	903	0	0	0	0	0	0	0	603	903	0
4653	6	0	0	0	0	0	0	200	300	0	0	0	0	0	0	0	200	903	0	0	0	0	0	0	0	603	903	0
4653	7	0	0	0	0	0	0	200	300	0	0	0	0	0	0	0	200	903	0	0	0	0	0	0	0	603	903	0
4653	8	0	0	0	0	0	0	200	300	0	0	0	0	0	0	0	200	903	0	0	0	0	0	0	0	603	903	0
4653	9	0	0	0	0	0	0	200	300	0	0	0	0	0	0	0	200	903	0	0	0	0	0	0	0	603	903	0
4654	0	0	0	0	0	0	0	200	300	0	0	0	0	0	0	0	200	903	0	0	0	0	0	0	0	603	903	0
4654	1	0	0	0	0	0	0	200	300	0	0	0	0	0	0	0	200	903	0	0	0	0	0	0	0	603	903	0
4654	2	0	0	0	0	0	0	200	300	0	0	0	0	0	0	0	200	903	0	0	0	0	0	0	0	603	903	0
4654	3	0	0	0	0	0	0	200	300	0	0	0	0	0	0	0	200	903	0	0	0	0	0	0	0	603	903	0
4654	4	0	0	0	0	0	0	200	300	0	0	0	0	0	0	0	200	903	0	0	0	0	0	0	0	603	903	0
4654	5	0	0	0	0	0	0	200	300	0	0	0	0	0	0	0	200	903	0	0	0	0	0	0	0	603	903	0
4654	6	0	0	0	0	0	0	200	300	0	0	0	0	0	0	0	200	903	0	0	0	0	0	0	0	603	903	0
4654	7	0	0	0	0	0	0	200	300	0	0	0	0	0	0	0	200	903	0	0	0	0	0	0	0	603	903	0
4654	8	0	0	0	0	0	0	200	300	0	0	0	0	0	0	0	200	903	0	0	0	0	0	0	0	603	903	0
4654	9	0	0	0	0	0	0	200	300	0	0	0	0	0	0	0	200	903	0	0	0	0	0	0	0	603	903	0
4655	0	0	0	0	0	0	0	200	300	0	0	0	0	0	0	0	200	903	0	0	0	0	0	0	0	603	903	0
4655	1	0	0	0	0	0	0	200	300	0	0	0	0	0	0	0	200	903	0	0	0	0	0	0	0	603	903	0
4655	2	0	0	0	0	0	0	200	300	0	0	0	0	0	0	0	200	903	0	0	0	0	0	0	0	603	903	0
4655	3	0	0	0	0	0	0	200	300	0	0	0	0	0	0	0	200	903	0	0	0	0	0	0	0	603	903	0
4655	4	0	0	0	0	0	0	200	300	0	0	0	0	0	0	0	200	903	0	0	0	0	0	0	0	603	903	0
4655	5	0	0	0	0	0	0	200	300	0	0	0	0	0	0	0	200	903	0	0	0	0	0	0	0	603	903	0
4655	6	0	0	0	0	0	0	200	300	0	0	0	0	0	0	0	200	903	0	0	0	0	0	0	0	603	903	0
4655	7	0	0	0	0	0	0	200	300	0	0	0	0	0	0	0	200	903	0	0	0	0	0	0	0	603	903	0
4655	8	0	0	0	0	0	0	200	300	0	0	0	0	0	0	0	200	903	0	0	0	0	0	0	0	603	903	0
4655	9	0	0	0	0	0	0	200	300	0	0	0	0	0	0	0	200	903	0	0	0	0	0	0	0	603	903	0
4656	0	0	0	0	0	0	0	200	300	0	0	0	0	0	0	0	200	903	0	0	0	0	0	0	0	603	903	0
4656	1	0	0	0	0	0	0	200	300	0	0	0	0	0	0	0	200	903	0	0	0	0	0	0	0	603	903	0
4656	2	0	0	0	0	0	0	200	300	0	0	0	0	0	0	0	200	903	0	0	0	0	0	0	0	603	903	0
4656	3	0	0	0	0	0	0	200	300	0	0	0	0	0	0	0	200	903	0	0	0	0	0	0	0	603	903	0
4656	4	0	0	0	0	0	0	200	300	0	0	0	0	0	0	0	200	903	0	0	0	0	0	0	0	603	903	0
4656	5	0	0	0	0	0	0	200	300	0	0	0	0	0	0	0	200	903	0	0	0	0	0	0	0	603	903	0
4656	6	0	0	0	0	0	0	200	300	0	0	0	0	0	0	0	200	903	0	0	0	0	0	0	0	603	903	0
4656	7	0	0	0	0	0	0	200	300	0	0	0	0	0	0	0	200	903	0	0	0	0	0	0	0	603	903	0
4656	8	0	0	0	0	0	0	200	300	0	0	0	0	0	0	0	200	903	0	0	0	0	0	0	0	603	903	0
4656	9	0	0	0	0	0	0	200	300	0	0	0	0	0	0	0	200	903	0	0	0	0	0	0	0	603	903	0
4657	0	0	0	0	0	0	0	200	300	0	0	0	0	0	0	0	200	903	0	0	0	0	0	0	0	603	903	0
4657	1	0	0	0	0	0	0	200	300	0	0	0	0	0	0	0	200	903	0	0	0	0	0	0	0	603	903	0
4657	2	0	0	0	0	0	0	200	300	0	0	0	0	0	0	0	200	903	0	0	0	0	0	0	0	603	903	0
4657	3	0	0	0	0	0	0	200	300	0	0	0	0	0	0	0	200	903	0	0	0	0	0	0	0	603	903	0
4657	4	0	0	0	0	0	0	200	300	0	0	0	0	0	0	0	200	903	0	0	0	0	0	0	0	603	903	0
4657	5	0	0	0	0	0	0	200	300	0	0	0	0	0	0	0	200	903	0	0	0	0	0	0	0	603	903	0
4657	6	0	0	0	0	0	0	200	300	0	0	0	0	0	0	0	200	903	0	0	0	0	0	0	0	603	903	0
4657	7	0	0	0	0	0	0	200	300	0	0	0	0	0	0	0	200	903	0	0	0	0	0	0	0	603	903	0
4657	8	0	0	0	0	0	0	200	300	0	0	0	0	0	0	0	200	903	0	0	0	0	0	0	0	603	903	0
4657	9	0	0	0	0	0	0	200	300	0	0	0	0	0	0	0	200	903	0	0	0	0	0	0	0	603	903	0
4658	0	0	0	0	0	0	0	200	300	0	0	0	0	0	0	0	200	903	0	0	0	0	0	0	0	603	903	0
4658	1	0	0	0	0	0	0	200	300	0	0	0	0	0	0	0	200	903	0	0	0	0	0	0	0	603	903	0
4658	2	0	0	0	0	0	0	200	300	0	0	0	0	0	0	0	200	903	0	0	0	0	0	0	0	603	903	0
4658	3	0	0	0	0	0	0	200	300	0	0	0	0	0	0	0	200	903	0	0	0	0	0	0	0	603	903	0
4658	4	0	0	0	0	0	0	200	300	0	0	0	0	0	0	0	200	903	0	0	0	0	0	0	0	603	903	0
4658	5	0	0	0	0	0	0	200	300	0	0	0	0	0	0	0	200	903	0	0	0	0	0	0	0	603	903	0
4658	6	0	0	0	0	0	0	200	300	0	0	0	0	0	0	0	200	903	0	0	0	0	0	0	0	603	903	0
4658	7	0	0	0	0	0	0	200	300	0	0	0	0	0	0	0	200	903	0	0	0	0	0	0	0	603	903	0
4658	8	0	0	0	0	0	0	200	300	0	0	0	0	0	0	0	200	903	0	0	0	0	0	0	0	603	903	0
4658	9	0	0	0	0	0	0	200	300	0	0	0	0	0	0	0	200	903	0	0	0	0	0	0	0	603	903	0
4659	0	0	0	0	0	0	0	200	300	0	0	0	0	0	0	0	200	903	0	0	0	0	0	0	0	603	903	0
4659	1	0	0	0	0	0	0	200	300	0	0	0	0	0	0	0	200	903	0	0	0	0	0	0	0	603	903	0
4659	2	0	0	0	0	0	0	200	300	0	0	0	0	0	0	0	200	903	0	0	0	0	0	0	0	603	903	0
4659	3	0	0	0	0	0	0	200	300	0	0	0	0	0	0	0	200	903	0	0	0	0	0	0	0	603	903	0
4659	4	0	0	0	0	0	0	200	300	0	0	0	0	0	0	0	200	903	0	0	0	0	0	0	0	603	903	0
4659	5	0	0	0	0	0	0	200	300	0	0	0	0	0	0	0	200	903	0	0	0	0	0	0	0	603	903	0
4659	6	0	0	0	0	0	0	200	300	0	0	0	0	0	0	0	200	903	0	0	0	0	0	0	0	603	903	0
4659	7	0	0	0	0	0	0	200	300	0	0	0	0	0	0	0	200	903	0	0	0	0	0	0	0	603	903	0
4659	8	0	0	0	0	0	0	200	300	0	0	0	0	0	0	0	200	903	0	0	0	0	0	0	0	603	903	0
4659	9	0	0	0	0	0	0	200	300	0	0	0	0	0	0	0	200	903	0	0	0	0	0	0	0	603	903	0
4660	0	0	0	0	0	0	0	200	300	0	0	0	0	0	0	0	200	903	0	0	0	0	0	0	0	603	903	0
4660	1	0	0	0	0	0	0	200	300	0	0	0	0	0	0	0	200	903	0	0	0	0	0	0	0	603	903	0
4660	2	0	0	0	0	0	0	200	300	0	0	0	0	0	0	0	200	903	0	0	0	0	0	0	0	603	903	0
4660	3	0	0	0	0	0	0	200	300	0	0	0	0	0	0	0	200	903	0	0	0	0	0	0	0	603	903	0
4660	4	0	0	0	0	0	0	200	300	0	0	0	0	0	0	0	200	903	0	0	0	0	0	0	0	603	903	0
4660	5	0	0	0	0	0	0	200	300	0	0	0	0	0	0	0	200	903	0	0	0	0	0	0	0	603	903	0
4660	6	0	0	0	0	0	0	200	300	0	0	0	0	0	0	0	200	903	0	0	0	0	0	0	0	603	903	0
4660	7	0	0	0	0	0	0	200	300	0	0	0	0	0	0	0	200	903	0	0	0	0	0	0	0	603	903	0
4660	8	0	0	0	0	0	0	200	300	0	0	0	0	0	0	0	200	903	0	0	0	0	0	0	0	603	903	0
4660	9	0	0	0	0	0	0	200	300	0	0	0	0	0	0	0	200	903	0	0	0	0	0	0	0	603	903	0
4661	0	0	0	0	0	0	0	200	300	0	0	0	0	0	0	0	200	903	0	0	0	0	0	0	0	603	903	0
4661	1	0	0	0	0	0	0	200	300	0	0	0	0	0	0	0	200	903	0	0	0	0	0	0	0	603	903	0
4661	2	0	0	0	0	0	0	200	300	0	0	0	0	0	0	0	200	903	0	0	0	0	0	0	0	603	903	0
4661	3	0	0	0	0	0	0	200	300	0	0	0	0	0	0	0	200	903	0	0	0	0	0	0	0	603	903	0
4661	4	0	0	0	0	0	0	200	300	0	0	0	0	0	0	0	200	903	0	0	0	0	0	0	0	603	903	0
4661	5	0	0	0	0	0	0	200	300	0	0	0	0	0	0	0	200	903	0	0	0	0	0	0	0	603	903	0
4661	6	0	0	0	0	0	0	200	300	0	0	0	0	0	0	0	200	903	0	0	0	0	0	0	0	603	903	0
4661	7	0	0	0	0	0	0	200	300	0	0	0	0	0	0	0	200	903	0	0	0	0	0	0	0	603	903	0
4661	8	0	0	0	0	0	0	200	300	0	0	0	0	0	0	0	200	903	0	0	0	0	0	0	0	603	903	0
4661	9	0	0	0	0	0	0	200	300	0	0	0	0	0	0	0	200	903	0	0	0	0	0	0	0	603	903	0
4662	0	0	0	0	0	0	0	200	300	0	0	0	0	0	0	0	200	903	0	0	0	0	0	0	0	603	903	0
4662	1	0	0	0	0	0	0	200	300	0	0	0	0	0	0	0	200	903	0	0	0	0	0	0	0	603	903	0
4662	2	0	0	0	0	0	0	200	300	0	0	0	0	0	0	0	200	903	0	0	0	0	0	0	0	603	903	0
4662	3	0	0	0	0	0	0	200	300	0	0	0	0	0	0	0	200	903	0	0	0	0	0	0	0	603	903	0
4662	4	0	0	0	0	0	0	200	300	0	0	0	0	0	0	0	200	903	0	0	0	0	0	0	0	603	903	0
4662	5	0	0	0	0	0	0	200	300	0	0	0	0	0	0	0	200	903	0	0	0	0	0	0	0	603	903	0
4662	6	0	0	0	0	0	0	200	300	0	0	0	0	0	0	0	200	903	0	0	0	0	0	0	0	603	903	0
4662	7	0	0	0	0	0	0	200	300	0	0	0	0	0	0	0	200	903	0	0	0	0	0	0	0	603	903	0
4662	8	0	0	0	0	0	0	200	300	0	0	0	0	0	0	0	200	903	0	0	0	0	0	0	0	603	903	0
4662	9	0	0	0	0	0	0	200	300	0	0	0	0	0	0	0	200	903	0	0	0	0	0	0	0	603	903	0
4663	0	0	0	0	0	0	0	200	300	0	0	0	0	0	0	0	200	903	0	0	0	0	0	0	0	603	903	0
4663	1	0	0	0	0	0	0	200	300	0	0	0	0	0	0	0	200	903	0	0	0	0	0	0	0	603	903	0
4663	2	0	0	0	0	0	0	200	300	0	0	0	0	0	0	0	200	903	0	0	0	0	0	0	0	603	903	0
4663	3	0	0	0	0	0	0	200	300	0	0	0	0	0	0	0	200	903	0	0	0	0	0	0	0	603	903	0
4663	4	0	0	0	0	0	0	200	300	0	0	0	0	0	0	0	200	903	0	0	0	0	0	0	0	603	903	0
4663	5	0	0	0	0	0	0	200	300	0	0	0	0	0	0	0	200	903	0	0	0	0	0	0	0	603	903	0
4663	6	0	0	0	0	0	0	200	300	0	0	0	0	0	0	0	200	903	0	0	0	0	0	0	0	603	903	0
4663	7	0	0	0	0	0	0	200	300	0	0	0	0	0	0	0	200	903	0	0	0	0	0	0	0	603	903	0
4663	8	0	0	0	0	0	0	200	300	0	0	0	0	0	0	0	200	903	0	0	0	0	0	0	0	603	903	0
4663	9	0	0	0	0	0	0	200	300	0	0	0	0	0	0	0	200	903	0	0	0	0	0	0	0	603	903	0
4664	0	0	0	0	0	0	0	200	300	0	0	0	0	0	0	0	200	903	0	0	0	0	0	0	0	603	903	0
4664	1	0	0	0	0	0	0	200	300	0	0	0	0	0	0	0	200	903	0	0	0	0	0	0	0	603	903	0
4664	2	0	0	0	0	0	0	200	300	0	0	0	0	0	0	0	200	903	0	0	0	0	0	0	0	603	903	0
4664	3	0	0	0	0	0	0	200	300	0	0	0	0	0	0	0	200	903	0	0	0	0	0	0	0	603	903	0
4664	4	0	0	0	0	0	0	200	300	0	0	0	0	0	0	0	200	903	0	0	0	0	0	0	0	603	903	0
4664	5	0	0	0	0	0	0	200	300	0	0	0	0	0	0	0	200	903	0	0	0	0	0	0	0	603	903	0
4664	6	0	0	0	0	0	0	200	300	0	0	0	0	0	0	0	200	903	0	0	0	0	0	0	0	603	903	0
4664	7	0	0	0	0	0	0	200	300	0	0	0	0	0	0	0	200	903	0	0	0	0	0	0	0	603	903	0
4664	8	0	0	0	0	0	0	200	300	0	0	0	0	0	0	0	200	903	0	0	0	0	0	0	0	603	903	0
4664	9	0	0	0	0	0	0	200	300	0	0	0	0	0	0	0	200	903	0	0	0	0	0	0	0	603	903	0
4665	0	0	0	0	0	0	0	200	300	0	0	0	0	0	0	0	200	903	0	0	0	0	0	0	0	603	903	0
4665	1	0	0	0	0	0	0	200	300	0	0	0	0	0	0	0	200	903	0	0	0	0	0	0	0	603	903	0
4665	2	0	0	0	0	0	0	200	300	0	0	0	0	0	0	0	200	903	0	0	0	0	0	0	0	603	903	0
4665	3	0	0	0	0	0	0	200	300	0	0	0	0	0	0	0	200	903	0	0	0	0	0	0	0	603	903	0
4665	4	0	0	0	0	0	0	200	300	0	0	0	0	0	0	0	200	903	0	0	0	0	0	0	0	603	903	0
4665	5	0	0	0	0	0	0	200	300	0	0	0	0	0	0	0	200	903	0	0	0	0	0	0	0	603	903	0
4665	6	0	0	0	0	0	0	200	300	0	0	0	0	0	0	0	200	903	0	0	0	0	0	0	0	603	903	0
4665	7	0	0	0	0	0	0	200	300	0	0	0	0	0	0	0	200	903	0	0	0	0	0	0	0	603	903	0
4665	8	0	0	0	0	0	0	200	300	0	0	0	0	0	0	0	200	903	0	0	0	0	0	0	0	603	903	0
4665	9	0	0	0	0	0	0	200	300	0	0	0	0	0	0	0	200	903	0	0	0	0	0	0	0	603	903	0
4666	0	0	0	0	0	0	0	200	300	0	0	0	0	0	0	0	200	903	0	0	0	0	0	0	0	603	903	0
4666	1	0	0	0	0	0	0	200	300	0	0	0	0	0	0	0	200	903	0	0	0	0	0	0	0	603	903	0
4666	2	0	0	0	0	0	0	200	300	0	0	0	0	0	0	0	200	903	0	0	0	0	0	0	0	603	903	0
4666	3	0	0	0	0	0	0	200	300	0	0	0	0	0	0	0	200	903	0	0	0	0	0	0	0	603	903	0
4666	4	0	0	0	0	0	0	200	300	0	0	0	0	0	0	0	200	903	0	0	0	0	0	0	0	603	903	0
4666	5	0	0	0	0	0	0	200	300	0	0	0	0	0	0	0	200	903	0	0	0	0	0	0	0	603	903	0
4666	6	0	0	0	0	0	0	200	300	0	0	0	0	0	0	0	200	903	0	0	0	0	0	0	0	603	903	0
4666	7	0	0	0	0	0	0	200	300	0	0	0	0	0	0	0	200	903	0	0	0	0	0	0	0	603	903	0
4666	8	0	0	0	0	0	0	200	300	0	0	0	0	0	0	0	200	903	0	0	0	0	0	0	0	603	903	0
4666	9	0	0	0	0	0	0	200	300	0	0	0	0	0	0	0	200	903	0	0	0	0	0	0	0	603	903	0
4667	0	0	0	0	0	0	0	200	300	0	0	0	0	0	0	0	200	903	0	0	0	0	0	0	0	603	903	0
4667	1	0	0	0	0	0	0	200	300	0	0	0	0	0	0	0	200	903	0	0	0	0	0	0	0	603	903	0
4667	2	0	0	0	0	0	0	200	300	0	0	0	0	0	0	0	200	903	0	0	0	0	0	0	0	603	903	0
4667	3	0	0	0	0	0	0	200	300	0	0	0	0	0	0	0	200	903	0	0	0	0	0	0	0	603	903	0
4667	4	0	0	0	0	0	0	200	300	0	0	0	0	0	0	0	200	903	0	0	0	0	0	0	0	603	903	0
4667	5	0	0	0	0	0	0	200	300	0	0	0	0	0	0	0	200	903	0	0	0	0	0	0	0	603	903	0
4667	6	0	0	0	0	0	0	200	300	0	0	0	0	0	0	0	200	903	0	0	0	0	0	0	0	603	903	0
4667	7	0	0	0	0	0	0	200	300	0	0	0	0	0	0	0	200	903	0	0	0	0	0	0	0	603	903	0
4667	8	0	0	0	0	0	0	200	300	0	0	0	0	0	0	0	200	903	0	0	0	0	0	0	0	603	903	0
4667	9	0	0	0	0	0	0	200	300	0	0	0	0	0	0	0	200	903	0	0	0	0	0	0	0	603	903	0
4668	0	0	0	0	0	0	0	200	300	0	0	0	0	0	0	0	200	903	0	0	0	0	0	0	0	603	903	0
4668	1	0	0	0	0	0	0	200	300	0	0	0	0	0	0	0	200	903	0	0	0	0	0	0	0	603	903	0
4668	2	0	0	0	0	0	0	200	300	0	0	0	0	0	0	0	200	903	0	0	0	0	0	0	0	603	903	0
4668	3	0	0	0	0	0	0	200	300	0	0	0	0	0	0	0	200	903	0	0	0	0	0	0	0	603	903	0
4668	4	0	0	0	0	0	0	200	300	0	0	0	0	0	0	0	200	903	0	0	0	0	0	0	0	603	903	0
4668	5	0	0	0	0	0	0	200	300	0	0	0	0	0	0	0	200	903	0	0	0	0	0	0	0	603	903	0
4668	6	0	0	0	0	0	0	200	300	0	0	0	0	0	0	0	200	903	0	0	0	0	0	0	0	603	903	0
4668	7	0	0	0	0	0	0	200	300	0	0	0	0	0	0	0	200	903	0	0	0	0	0	0	0	603	903	0
4668	8	0	0	0	0	0	0	200	300	0	0	0	0	0	0	0	200	903	0	0	0	0	0	0	0	603	903	0
4668	9	0	0	0	0	0	0	200	300	0	0	0	0	0	0	0	200	903	0	0	0	0	0	0	0	603	903	0
4669	0	0	0	0	0	0	0	200	300	0	0	0	0	0	0	0	200	903	0	0	0	0	0	0	0	603	903	0
4669	1	0	0	0	0	0	0	200	300	0	0	0	0	0	0	0	200	903	0	0	0	0	0	0	0	603	903	0
4669	2	0	0	0	0	0	0	200	300	0	0	0	0	0	0	0	200	903	0	0	0	0	0	0	0	603	903	0
4669	3	0	0	0	0	0	0	200	300	0	0	0	0	0	0	0	200	903	0	0	0	0	0	0	0	603	903	0
4669	4	0	0	0	0	0	0	200	300	0	0	0	0	0	0	0	200	903	0	0	0	0	0	0	0	603	903	0
4669	5	0	0	0	0	0	0	200	300	0	0	0	0	0	0	0	200	903	0	0	0	0	0	0	0	603	903	0
4669	6	0	0	0	0	0	0	200	300	0	0	0	0	0	0	0	200	903	0	0	0	0	0	0	0	603	903	0
4669	7	0	0	0	0	0	0	200	300	0	0	0	0	0	0	0	200	903	0	0	0	0	0	0	0	603	903	0
4669	8	0	0	0	0	0	0	200	300	0	0	0	0	0	0	0	200	903	0	0	0	0	0	0	0	603	903	0
4669	9	0	0	0	0	0	0	200	300	0	0	0	0	0	0	0	200	903	0	0	0	0	0	0	0	603	903	0
4670	0	0	0	0	0	0	0	200	300	0	0	0	0	0	0	0	200	903	0	0	0	0	0	0	0	603	903	0
4670	1	0	0	0	0	0	0	200	300	0	0	0	0	0	0	0	200	903	0	0	0	0	0	0	0	603	903	0
4670	2	0	0	0	0	0	0	200	300	0	0	0	0	0	0	0	200	903	0	0	0	0	0	0	0	603	903	0
4670	3	0	0	0	0	0	0	200	300	0	0	0	0	0	0	0	200	903	0	0	0	0	0	0	0	603	903	0
4670	4	0	0	0	0	0	0	200	300	0	0	0	0	0	0	0	200	903	0	0	0	0	0	0	0	603	903	0
4670	5	0	0	0	0	0	0	200	300	0	0	0	0	0	0	0	200	903	0	0	0	0	0	0	0	603	903	0
4670	6	0	0	0	0	0	0	200	300	0	0	0	0	0	0	0	200	903	0	0	0	0	0	0	0	603	903	0
4670	7	0	0	0	0	0	0	200	300	0	0	0	0	0	0	0	200	903	0	0	0	0	0	0	0	603	903	0
4670	8	0	0	0	0	0	0	200	300	0	0	0	0	0	0	0	200	903	0	0	0	0	0	0	0	603	903	0
4670	9	0	0	0	0	0	0	200	300	0	0	0	0	0	0	0	200	903	0	0	0	0	0	0	0	603	903	0
4671	0	0	0	0	0	0	0	200	300	0	0	0	0	0	0	0	200	903	0	0	0	0	0	0	0	603	903	0
4671	1	0	0	0	0	0	0	200	300	0	0	0	0	0	0	0	200	903	0	0	0	0	0	0	0	603	903	0
4671	2	0	0	0	0	0	0	200	300	0	0	0	0	0	0	0	200	903	0	0	0	0	0	0	0	603	903	0
4671	3	0	0	0	0	0	0	200	300	0	0	0	0	0	0	0	200	903	0	0	0	0	0	0	0	603	903	0
4671	4	0	0	0	0	0	0	200	300	0	0	0	0	0	0	0	200	903	0	0	0	0	0	0	0	603	903	0
4671	5	0	0	0	0	0	0	200	300	0	0	0	0	0	0	0	200	903	0	0	0	0	0	0	0	603	903	0
4671	6	0	0	0	0	0	0	200	300	0	0	0	0	0	0	0	200	903	0	0	0	0	0	0	0	603	903	0
4671	7	0	0	0	0	0	0	200	300	0	0	0	0	0	0	0	200	903	0	0	0	0	0	0	0	603	903	0
4671	8	0	0	0	0	0	0	200	300	0	0	0	0	0	0	0	200	903	0	0	0	0	0	0	0	603	903	0
4671	9	0	0	0	0	0	0	200	300	0	0	0	0	0	0	0	200	903	0	0	0	0	0	0	0	603	903	0
4672	0	0	0	0	0	0	0	200	300	0	0	0	0	0	0	0	200	903	0	0	0	0	0	0	0	603	903	0
4672	1	0	0	0	0	0	0	200	300	0	0	0	0	0	0	0	200	903	0	0	0	0	0	0	0	603	903	0
4672	2	0	0	0	0	0	0	200	300	0	0	0	0	0	0	0	200	903	0	0	0	0	0	0	0	603	903	0
4672	3	0	0	0	0	0	0	200	300	0	0	0	0	0	0	0	200	903	0	0	0	0	0	0	0	603	903	0
4672	4	0	0	0	0	0	0	200	300	0	0	0	0	0	0	0	200	903	0	0	0	0	0	0	0	603	903	0
4672	5	0	0	0	0	0	0	200	300	0	0	0	0	0	0	0	200	903	0	0	0	0	0	0	0	603	903	0
4672	6	0	0	0	0	0	0	200	300	0	0	0	0	0	0	0	200	903	0	0	0	0	0	0	0	603	903	0
4672	7	0	0	0	0	0	0	200	300	0	0	0	0	0	0	0	200	903	0	0	0	0	0	0	0	603	903	0
4672	8	0	0	0	0	0	0	200	300	0	0	0	0	0	0	0	200	903	0	0	0	0	0	0	0	603	903	0
4672	9	0	0	0	0	0	0	200	300	0	0	0	0	0	0	0	200	903	0	0	0	0	0	0	0	603	903	0
4673	0	0	0	0	0	0	0	200	300	0	0	0	0	0	0	0	200	903	0	0	0	0	0	0	0	603	903	0
4673	1	0	0	0	0	0	0	200	300	0	0	0	0	0	0	0	200	903	0	0	0	0	0	0	0	603	903	0
4673	2	0	0	0	0	0	0	200	300	0	0	0	0	0	0	0	200	903	0	0	0	0	0	0	0	603	903	0
4673	3	0	0	0	0	0	0	200	300	0	0	0	0	0	0	0	200	903	0	0	0	0	0	0	0	603	903	0
4673	4	0	0	0	0	0	0	200	300	0	0	0	0	0	0	0	200	903	0	0	0	0	0	0	0	603	903	0
4673	5	0	0	0	0	0	0	200	300	0	0	0	0	0	0	0	200	903	0	0	0	0	0	0	0	603	903	0
4673	6	0	0	0	0	0	0	200	300	0	0	0	0	0	0	0	200	903	0	0	0	0	0	0	0	603	903	0
4673	7	0	0	0	0	0	0	200	300	0	0	0	0	0	0	0	200	903	0	0	0	0	0	0	0	603	903	0
4673	8	0	0	0	0	0	0	200	300	0	0	0	0	0	0	0	200	903	0	0	0	0	0	0	0	603	903	0
4673	9	0	0	0	0	0	0	200	300	0	0	0	0	0	0	0	200	903	0	0	0	0	0	0	0	603	903	0
4674	0	0	0	0	0	0	0	200	300	0	0	0	0	0	0	0	200	903	0	0	0	0	0	0	0	603	903	0
4674	1	0	0	0	0	0	0	200	300	0	0	0	0	0	0	0	200	903	0	0	0	0	0	0	0	603	903	0
4674	2	0	0	0	0	0	0	200	300	0	0	0	0	0	0	0	200	903	0	0	0	0	0	0	0	603	903	0
4674	3	0	0	0	0	0	0	200	300	0	0	0	0	0	0	0	200	903	0	0	0	0	0	0	0	603	903	0
4674	4	0	0	0	0	0	0	200	300	0	0	0	0	0	0	0	200	903	0	0	0	0	0	0	0	603	903	0
4674	5	0	0	0	0	0	0	200	300	0	0	0	0	0	0	0	200	903	0	0	0	0	0	0	0	603	903	0
4674	6	0	0	0	0	0	0	200	300	0	0	0	0	0	0	0	200	903	0	0	0	0	0	0	0	603	903	0
4674	7	0	0	0	0	0	0	200	300	0	0	0	0	0	0	0	200	903	0	0	0	0	0	0	0	603	903	0
4674	8	0	0	0	0	0	0	200	300	0	0	0	0	0	0	0	200	903	0	0	0	0	0	0	0	603	903	0
4674	9	0	0	0	0	0	0	200	300	0	0	0	0	0	0	0	200	903	0	0	0	0	0	0	0	603	903	0
4675	0	0	0	0	0	0	0	200	300	0	0	0	0	0	0	0	200	903	0	0	0	0	0	0	0	603	903	0
4675	1	0	0	0	0	0	0	200	300	0	0	0	0	0	0	0	200	903	0	0	0	0	0	0	0	603	903	0
4675	2	0	0	0	0	0	0	200	300	0	0	0	0	0	0	0	200	903	0	0	0	0	0	0	0	603	903	0
4675	3	0	0	0	0	0	0	200	300	0	0	0	0	0	0	0	200	903	0	0	0	0	0	0	0	603	903	0
4675	4	0	0	0	0	0	0	200	300	0	0	0	0	0	0	0	200	903	0	0	0	0	0	0	0	603	903	0
4675	5	0	0	0	0	0	0	200	300	0	0	0	0	0	0	0	200	903	0	0	0	0	0	0	0	603	903	0
4675	6	0	0	0	0	0	0	200	300	0	0	0	0	0	0	0	200	903	0	0	0	0	0	0	0	603	903	0
4675	7	0	0	0	0	0	0	200	300	0	0	0	0	0	0	0	200	903	0	0	0	0	0	0	0	603	903	0
4675	8	0	0	0	0	0	0	200	300	0	0	0	0	0	0	0	200	903	0	0	0	0	0	0	0	603	903	0
4675	9	0	0	0	0	0	0	200	300	0	0	0	0	0	0	0	200	903	0	0	0	0	0	0	0	603	903	0
4676	0	0	0	0	0	0	0	200	300	0	0	0	0	0	0	0	200	903	0	0	0	0	0	0	0	603	903	0
4676	1	0	0	0	0	0	0	200	300	0	0	0	0	0	0	0	200	903	0	0	0	0	0	0	0	603	903	0
4676	2	0	0	0	0	0	0	200	300	0	0	0	0	0	0	0	200	903	0	0	0	0	0	0	0	603	903	0
4676	3	0	0	0	0	0	0	200	300	0	0	0	0	0	0	0	200	903	0	0	0	0	0	0	0	603	903	0
4676	4	0	0	0	0	0	0	200	300	0	0	0	0	0	0	0	200	903	0	0	0	0	0	0	0	603	903	0
4676	5	0	0	0	0	0	0	200	300	0	0	0	0	0	0	0	200	903	0	0	0	0	0	0	0	603	903	0
4676	6	0	0	0	0	0	0	200	300	0	0	0	0	0	0	0	200	903	0	0	0	0	0	0	0	603	903	0
4676	7	0	0	0	0	0	0	200	300	0	0	0	0	0	0	0	200	903	0	0	0	0	0	0	0	603	903	0
4676	8	0	0	0	0	0	0	200	300	0	0	0	0	0	0	0	200	903	0	0	0	0	0	0	0	603	903	0
4676	9	0	0	0	0	0	0	200	300	0	0	0	0	0	0	0	200	903	0	0	0	0	0	0	0	603	903	0
4677	0	0	0	0	0	0	0	200	300	0	0	0	0	0	0	0	200	903	0	0	0	0	0	0	0	603	903	0
4677	1	0	0	0	0	0	0	200	300	0	0	0	0	0	0	0	200	903	0	0	0	0	0	0	0	603	903	0
4677	2	0	0	0	0	0	0	200	300	0	0	0	0	0	0	0	200	903	0	0	0	0	0	0	0	603	903	0
4677	3	0	0	0	0	0	0	200	300	0	0	0	0	0	0	0	200	903	0	0	0	0	0	0	0	603	903	0
4677	4	0	0	0	0	0	0	200	300	0	0	0	0	0	0	0	200	903	0	0	0	0	0	0	0	603	903	0
4677	5	0	0	0	0	0	0	200	300	0	0	0	0	0	0	0	200	903	0	0	0	0	0	0	0	603	903	0
4677	6	0	0	0	0	0	0	200	300	0	0	0	0	0	0	0	200	903	0	0	0	0	0	0	0	603	903	0
4677	7	0	0	0	0	0	0	200	300	0	0	0	0	0	0	0	200	903	0	0	0	0	0	0	0	603	903	0
4677	8	0	0	0	0	0	0	200	300	0	0	0	0	0	0	0	200	903	0	0	0	0	0	0	0	603	903	0
4677	9	0	0	0	0	0	0	200	300	0	0	0	0	0	0	0	200	903	0	0	0	0	0	0	0	603	903	0
4678	0	0	0	0	0	0	0	200	300	0	0	0	0	0	0	0	200	903	0	0	0	0	0	0	0	603	903	0
4678	1	0	0	0	0	0	0	200	300	0	0	0	0	0	0	0	200	903	0	0	0	0	0	0	0	603	903	0
4678	2	0	0	0	0	0	0	200	300	0	0	0	0	0	0	0	200	903	0	0	0	0	0	0	0	603	903	0
4678	3	0	0	0	0	0	0	200	300	0	0	0	0	0	0	0	200	903	0	0	0	0	0	0	0	603	903	0
4678	4	0	0	0	0	0	0	200	300	0	0	0	0	0	0	0	200	903	0	0	0	0	0	0	0	603	903	0
4678	5	0	0	0	0	0	0	200	300	0	0	0	0	0	0	0	200	903	0	0	0	0	0	0	0	603	903	0
4678	6	0	0	0	0	0	0	200	300	0	0	0	0	0	0	0	200	903	0	0	0	0	0	0	0	603	903	0
4678	7	0	0	0	0	0	0	200	300	0	0	0	0	0	0	0	200	903	0	0	0	0	0	0	0	603	903	0
4678	8	0	0	0	0	0	0	200	300	0	0	0	0	0	0	0	200	903	0	0	0	0	0	0	0	603	903	0
4678	9	0	0	0	0	0	0	200	300	0	0	0	0	0	0	0	200	903	0	0	0	0	0	0	0	603	903	0
4679	0	0	0	0	0	0	0	200	300	0	0	0	0	0	0	0	200	903	0	0	0	0	0	0	0	603	903	0
4679	1	0	0	0	0	0	0	200	300	0	0	0	0	0	0	0	200	903	0	0	0	0	0	0	0	603	903	0
4679	2	0	0	0	0	0	0	200	300	0	0	0	0	0	0	0	200	903	0	0	0	0	0	0	0	603	903	0
4679	3	0	0	0	0	0	0	200	300	0	0	0	0	0	0	0	200	903	0	0	0	0	0	0	0	603	903	0
4679	4	0	0	0	0	0	0	200	300	0	0	0	0	0	0	0	200	903	0	0	0	0	0	0	0	603	903	0
4679	5	0	0	0	0	0	0	200	300	0	0	0	0	0	0	0	200	903	0	0	0	0	0	0	0	603	903	0
4679	6	0	0	0	0	0	0	200	300	0	0	0	0	0	0	0	200	903	0	0	0	0	0	0	0	603	903	0
4679	7	0	0	0	0	0	0	200	300	0	0	0	0	0	0	0	200	903	0	0	0	0	0	0	0	603	903	0
4679	8	0	0	0	0	0	0	200	300	0	0	0	0	0	0	0	200	903	0	0	0	0	0	0	0	603	903	0
4679	9	0	0	0	0	0	0	200	300	0	0	0	0	0	0	0	200	903	0	0	0	0	0	0	0	603	903	0
4680	0	0	0	0	0	0	0	200	300	0	0	0	0	0	0	0	200	903	0	0	0	0	0	0	0	603	903	0
4680	1	0	0	0	0	0	0	200	300	0	0	0	0	0	0	0	200	903	0	0	0	0	0	0	0	603	903	0
4680	2	0	0	0	0	0	0	200	300	0	0	0	0	0	0	0	200	903	0	0	0	0	0	0	0	603	903	0
4680	3	0	0	0	0	0	0	200	300	0	0	0	0	0	0	0	200	903	0	0	0	0	0	0	0	603	903	0
4680	4	0	0	0	0	0	0	200	300	0	0	0	0	0	0	0	200	903	0	0	0	0	0	0	0	603	903	0
4680	5	0	0	0	0	0	0	200	300	0	0	0	0	0	0	0	200	903	0	0	0	0	0	0	0	603	903	0
4680	6	0	0	0	0	0	0	200	300	0	0	0	0	0	0	0	200	903	0	0	0	0	0	0	0	603	903	0
4680	7	0	0	0	0	0	0	200	300	0	0	0	0	0	0	0	200	903	0	0	0	0	0	0	0	603	903	0
4680	8	0	0	0	0	0	0	200	300	0	0	0	0	0	0	0	200	903	0	0	0	0	0	0	0	603	903	0
4680	9	0	0	0	0	0	0	200	300	0	0	0	0	0	0	0	200	903	0	0	0	0	0	0	0	603	903	0
4681	0	0	0	0	0	0	0	200	300	0	0	0	0	0	0	0	200	903	0	0	0	0	0	0	0	603	903	0
4681	1	0	0	0	0	0	0	200	300	0	0	0	0	0	0	0	200	903	0	0	0	0	0	0	0	603	903	0
4681	2	0	0	0	0	0	0	200	300	0	0	0	0	0	0	0	200	903	0	0	0	0	0	0	0	603	903	0
4681	3	0	0	0	0	0	0	200	300	0	0	0	0	0	0	0	200	903	0	0	0	0	0	0	0	603	903	0
4681	4	0	0	0	0	0	0	200	300	0	0	0	0	0	0	0	200	903	0	0	0	0	0	0	0	603	903	0
4681	5	0	0	0	0	0	0	200	300	0	0	0	0	0	0	0	200	903	0	0	0	0	0	0	0	603	903	0
4681	6	0	0	0	0	0	0	200	300	0	0	0	0	0	0	0	200	903	0	0	0	0	0	0	0	603	903	0
4681	7	0	0	0	0	0	0	200	300	0	0	0	0	0	0	0	200	903	0	0	0	0	0	0	0	603	903	0
4681	8	0	0	0	0	0	0	200	300	0	0	0	0	0	0	0	200	903	0	0	0	0	0	0	0	603	903	0
4681	9	0	0	0	0	0	0	200	300	0	0	0	0	0	0	0	200	903	0	0	0	0	0	0	0	603	903	0
4682	0	0	0	0	0	0	0	200	300	0	0	0	0	0	0	0	200	903	0	0	0	0	0	0	0	603	903	0
4682	1	0	0	0	0	0	0	200	300	0	0	0	0	0	0	0	200	903	0	0	0	0	0	0	0	603	903	0
4682	2	0	0	0	0	0	0	200	300	0	0	0	0	0	0	0	200	903	0	0	0	0	0	0	0	603	903	0
4682	3	0	0	0	0	0	0	200	300	0	0	0	0	0	0	0	200	903	0	0	0	0	0	0	0	603	903	0
4682	4	0	0	0	0	0	0	200	300	0	0	0	0	0	0	0	200	903	0	0	0	0	0	0	0	603	903	0
4682	5	0	0	0	0	0	0	200	300	0	0	0	0	0	0	0	200	903	0	0	0	0	0	0	0	603	903	0
4682	6	0	0	0	0	0	0	200	300	0	0	0	0	0	0	0	200	903	0	0	0	0	0	0	0	603	903	0
4682	7	0	0	0	0	0	0	200	300	0	0	0	0	0	0	0	200	903	0	0	0	0	0	0	0	603	903	0
4682	8	0	0	0	0	0	0	200	300	0	0	0	0	0	0	0	200	903	0	0	0	0	0	0	0	603	903	0
4682	9	0	0	0	0	0	0	200	300	0	0	0	0	0	0	0	200	903	0	0	0	0	0	0	0	603	903	0
4683	0	0	0	0	0	0	0	200	300	0	0	0	0	0	0	0	200	903	0	0	0	0	0	0	0	603	903	0
4683	1	0	0	0	0	0	0	200	300	0	0	0	0	0	0	0	200	903	0	0	0	0	0	0	0	603	903	0
4683	2	0	0	0	0	0	0	200	300	0	0	0	0	0	0	0	200	903	0	0	0	0	0	0	0	603	903	0
4683	3	0	0	0	0	0	0	200	300	0	0	0	0	0	0	0	200	903	0	0	0	0	0	0	0	603	903	0
4683	4	0	0	0	0	0	0	200	300	0	0	0	0	0	0	0	200	903	0	0	0	0	0	0	0	603	903	0
4683	5	0	0	0	0	0	0	200	300	0	0	0	0	0	0	0	200	903	0	0	0	0	0	0	0	603	903	0
4683	6	0	0	0	0	0	0	200	300	0	0	0	0	0	0	0	200	903	0	0	0	0	0	0	0	603	903	0
4683	7	0	0	0	0	0	0	200	300	0	0	0	0	0	0	0	200	903	0	0	0	0	0	0	0	603	903	0
4683	8	0	0	0	0	0	0	200	300	0	0	0	0	0	0	0	200	903	0	0	0	0	0	0	0	603	903	0
4683	9	0	0	0	0	0	0	200	300	0	0	0	0	0	0	0	200	903	0	0	0	0	0	0	0	603	903	0
4684	0	0	0	0	0	0	0	200	300	0	0	0	0	0	0	0	200	903	0	0	0	0	0	0	0	603	903	0
4684	1	0	0	0	0	0	0	200	300	0	0	0	0	0	0	0	200	903	0	0	0	0	0	0	0	603	903	0
4684	2	0	0	0	0	0	0	200	300	0	0	0	0	0	0	0	200	903	0	0	0	0	0	0	0	603	903	0
4684	3	0	0	0	0	0	0	200	300	0	0	0	0	0	0	0	200	903	0	0	0	0	0	0	0	603	903	0
4684	4	0	0	0	0	0	0	200	300	0	0	0	0	0	0	0	200	903	0	0	0	0	0	0	0	603	903	0
4684	5	0	0	0	0	0	0	200	300	0	0	0	0	0	0	0	200	903	0	0	0	0	0	0	0	603	903	0
4684	6	0	0	0	0	0	0	200	300	0	0	0	0	0	0	0	200	903	0	0	0	0	0	0	0	603	903	0
4684	7	0	0	0	0	0	0	200	300	0	0	0	0	0	0	0	200	903	0	0	0	0	0	0	0	603	903	0
4684	8	0	0	0	0	0	0	200	300	0	0	0	0	0	0	0	200	903	0	0	0	0	0	0	0	603	903	0
4684	9	0	0	0	0	0	0	200	300	0	0	0	0	0	0	0	200	903	0	0	0	0	0	0	0	603	903	0
4685	0	0	0	0	0	0	0	200	300	0	0	0	0	0	0	0	200	903	0	0	0	0	0	0	0	603	903	0
4685	1	0	0	0	0	0	0	200	300	0	0	0	0	0	0	0	200	903	0	0	0	0	0	0	0	603	903	0
4685	2	0	0	0	0	0	0	200	300	0	0	0	0	0	0	0	200	903	0	0	0	0	0	0	0	603	903	0
4685	3	0	0	0	0	0	0	200	300	0	0	0	0	0	0	0	200	903	0	0	0	0	0	0	0	603	903	0
4685	4	0	0	0	0	0	0	200	300	0	0	0	0	0	0	0	200	903	0	0	0	0	0	0	0	603	903	0
4685	5	0	0	0	0	0	0	200	300	0	0	0	0	0	0	0	200	903	0	0	0	0	0	0	0	603	903	0
4685	6	0	0	0	0	0	0	200	300	0	0	0	0	0	0	0	200	903	0	0	0	0	0	0	0	603	903	0
4685	7	0	0	0	0	0	0	200	300	0	0	0	0	0	0	0	200	903	0	0	0	0	0	0	0	603	903	0
4685	8	0	0	0	0	0	0	200	300	0	0	0	0	0	0	0	200	903	0	0	0	0	0	0	0	603	903	0
4685	9	0	0	0	0	0	0	200	300	0	0	0	0	0	0	0	200	903	0	0	0	0	0	0	0	603	903	0
4686	0	0	0	0	0	0	0	200	300	0	0	0	0	0	0	0	200	903	0	0	0	0	0	0	0	603	903	0
4686	1	0	0	0	0	0	0	200	300	0	0	0	0	0	0	0	200	903	0	0	0	0	0	0	0	603	903	0
4686	2	0	0	0	0	0	0	200	300	0	0	0	0	0	0	0	200	903	0	0	0	0	0	0	0	603	903	0
4686	3	0	0	0	0	0	0	200	300	0	0	0	0	0	0	0	200	903	0	0	0	0	0	0	0	603	903	0
4686	4	0	0	0	0	0	0	200	300	0	0	0	0	0	0	0	200	903	0	0	0	0	0	0	0	603	903	0
4686	5	0	0	0	0	0	0	200	300	0	0	0	0	0	0	0	200	903	0	0	0	0	0	0	0	603	903	0
4686	6	0	0	0	0	0	0	200	300	0	0	0	0	0	0	0	200	903	0	0	0	0	0	0	0	603	903	0
4686	7	0	0	0	0	0	0	200	300	0	0	0	0	0	0	0	200	903	0	0	0	0	0	0	0	603	903	0
4686	8	0	0	0	0	0	0	200	300	0	0	0	0	0	0	0	200	903	0	0	0	0	0	0	0	603	903	0
4686	9	0	0	0	0	0	0	200	300	0	0	0	0	0	0	0	200	903	0	0	0	0	0	0	0	603	903	0
4687	0	0	0	0	0	0	0	200	300	0	0	0	0	0	0	0	200	903	0	0	0	0	0	0	0	603	903	0
4687	1	0	0	0	0	0	0	200	300	0	0	0	0	0	0	0	200	903	0	0	0	0	0	0	0	603	903	0
4687	2	0	0	0	0	0	0	200	300	0	0	0	0	0	0	0	200	903	0	0	0	0	0	0	0	603	903	0
4687	3	0	0	0	0	0	0	200	300	0	0	0	0	0	0	0	200	903	0	0	0	0	0	0	0	603	903	0
4687	4	0	0	0	0	0	0	200	300	0	0	0	0	0	0	0	200	903	0	0	0	0	0	0	0	603	903	0
4687	5	0	0	0	0	0	0	200	300	0	0	0	0	0	0	0	200	903	0	0	0	0	0	0	0	603	903	0
4687	6	0	0	0	0	0	0	200	300	0	0	0	0	0	0	0	200	903	0	0	0	0	0	0	0	603	903	0
4687	7	0	0	0	0	0	0	200	300	0	0	0	0	0	0	0	200	903	0	0	0	0	0	0	0	603	903	0
4687	8	0	0	0	0	0	0	200	300	0	0	0	0	0	0	0	200	903	0	0	0	0	0	0	0	603	903	0
4687	9	0	0	0	0	0	0	200	300	0	0	0	0	0	0	0	200	903	0	0	0	0	0	0	0	603	903	0
4688	0	0	0	0	0	0	0	200	300	0	0	0	0	0	0	0	200	903	0	0	0	0	0	0	0	603	903	0
4688	1	0	0	0	0	0	0	200	300	0	0	0	0	0	0	0	200	903	0	0	0	0	0	0	0	603	903	0
4688	2	0	0	0	0	0	0	200	300	0	0	0	0	0	0	0	200	903	0	0	0	0	0	0	0	603	903	0
4688	3	0	0	0	0	0	0	200	300	0	0	0	0	0	0	0	200	903	0	0	0	0	0	0	0	603	903	0
4688	4	0	0	0	0	0	0	200	300	0	0	0	0	0	0	0	200	903	0	0	0	0	0	0	0	603	903	0
4688	5	0	0	0	0	0	0	200	300	0	0	0	0	0	0	0	200	903	0	0	0	0	0	0	0	603	903	0
4688	6	0	0	0	0	0	0	200	300	0	0	0	0	0	0	0	200	903	0	0	0	0	0	0	0	603	903	0
4688	7	0	0	0	0	0	0	200	300	0	0	0	0	0	0	0	200	903	0	0	0	0	0	0	0	603	903	0
4688	8	0	0	0	0	0	0	200	300	0	0	0	0	0	0	0	200	903	0	0	0	0	0	0	0	603	903	0
4688	9	0	0	0	0	0	0	200	300	0	0	0	0	0	0	0	200	903	0	0	0	0	0	0	0	603	903	0
4689	0	0	0	0	0	0	0	200	300	0	0	0	0	0	0	0	200	903	0	0	0	0	0	0	0	603	903	0
4689	1	0	0	0	0	0	0	200	300	0	0	0	0	0	0	0	200	903	0	0	0	0	0	0	0	603	903	0
4689	2	0	0	0	0	0	0	200	300	0	0	0	0	0	0	0	200	903	0	0	0	0	0	0	0	603	903	0
4689	3	0	0	0	0	0	0	200	300	0	0	0	0	0	0	0	200	903	0	0	0	0	0	0	0	603	903	0
4689	4	0	0	0	0	0	0	200	300	0	0	0	0	0	0	0	200	903	0	0	0	0	0	0	0	603	903	0
4689	5	0	0	0	0	0	0	200	300	0	0	0	0	0	0	0	200	903	0	0	0	0	0	0	0	603	903	0
4689	6	0	0	0	0	0	0	200	300	0	0	0	0	0	0	0	200	903	0	0	0	0	0	0	0	603	903	0
4689	7	0	0	0	0	0	0	200	300	0	0	0	0	0	0	0	200	903	0	0	0	0	0	0	0	603	903	0
4689	8	0	0	0	0	0	0	200	300	0	0	0	0	0	0	0	200	903	0	0	0	0	0	0	0	603	903	0
4689	9	0	0	0	0	0	0	200	300	0	0	0	0	0	0	0	200	903	0	0	0	0	0	0	0	603	903	0
4690	0	0	0	0	0	0	0	200	300	0	0	0	0	0	0	0	200	903	0	0	0	0	0	0	0	603	903	0
4690	1	0	0	0	0	0	0	200	300	0	0	0	0	0	0	0	200	903	0	0	0	0	0	0	0	603	903	0
4690	2	0	0	0	0	0	0	200	300	0	0	0	0	0	0	0	200	903	0	0	0	0	0	0	0	603	903	0
4690	3	0	0	0	0	0	0	200	300	0	0	0	0	0	0	0	200	903	0	0	0	0	0	0	0	603	903	0
4690	4	0	0	0	0	0	0	200	300	0	0	0	0	0	0	0	200	903	0	0	0	0	0	0	0	603	903	0
4690	5	0	0	0	0	0	0	200	300	0	0	0	0	0	0	0	200	903	0	0	0	0	0	0	0	603	903	0
4690	6	0	0	0	0	0	0	200	300	0	0	0	0	0	0	0	200	903	0	0	0	0	0	0	0	603	903	0
4690	7	0	0	0	0	0	0	200	300	0	0	0	0	0	0	0	200	903	0	0	0	0	0	0	0	603	903	0
4690	8	0	0	0	0	0	0	200	300	0	0	0	0	0	0	0	200	903	0	0	0	0	0	0	0	603	903	0
4690	9	0	0	0	0	0	0	200	300	0	0	0	0	0	0	0	200	903	0	0	0	0	0	0	0	603	903	0
4691	0	0	0	0	0	0	0	200	300	0	0	0	0	0	0	0	200	903	0	0	0	0	0	0	0	603	903	0
4691	1	0	0	0	0	0	0	200	300	0	0	0	0	0	0	0	200	903	0	0	0	0	0	0	0	603	903	0
4691	2	0	0	0	0	0	0	200	300	0	0	0	0	0	0	0	200	903	0	0	0	0	0	0	0	603	903	0
4691	3	0	0	0	0	0	0	200	300	0	0	0	0	0	0	0	200	903	0	0	0	0	0	0	0	603	903	0
4691	4	0	0	0	0	0	0	200	300	0	0	0	0	0	0	0	200	903	0	0	0	0	0	0	0	603	903	0
4691	5	0	0	0	0	0	0	200	300	0	0	0	0	0	0	0	200	903	0	0	0	0	0	0	0	603	903	0
4691	6	0	0	0	0	0	0	200	300	0	0	0	0	0	0	0	200	903	0	0	0	0	0	0	0	603	903	0
4691	7	0	0	0	0	0	0	200	300	0	0	0	0	0	0	0	200	903	0	0	0	0	0	0	0	603	903	0
4691	8	0	0	0	0	0	0	200	300	0	0	0	0	0	0	0	200	903	0	0	0	0	0	0	0	603	903	0
4691	9	0	0	0	0	0	0	200	300	0	0	0	0	0	0	0	200	903	0	0	0	0	0	0	0	603	903	0
4692	0	0	0	0	0	0	0	200	300	0	0	0	0	0	0	0	200	903	0	0	0	0	0	0	0	603	903	0
4692	1	0	0	0	0	0	0	200	300	0	0	0	0	0	0	0	200	903	0	0	0	0	0	0	0	603	903	0
4692	2	0	0	0	0	0	0	200	300	0	0	0	0	0	0	0	200	903	0	0	0	0	0	0	0	603	903	0
4692	3	0	0	0	0	0	0	200	300	0	0	0	0	0	0	0	200	903	0	0	0	0	0	0	0	603	903	0
4692	4	0	0	0	0	0	0	200	300	0	0	0	0	0	0	0	200	903	0	0	0	0	0	0	0	603	903	0
4692	5	0	0	0	0	0	0	200	300	0	0	0	0	0	0	0	200	903	0	0	0	0	0	0	0	603	903	0
4692	6	0	0	0	0	0	0	200	300	0	0	0	0	0	0	0	200	903	0	0	0	0	0	0	0	603	903	0
4692	7	0	0	0	0	0	0	200	300	0	0	0	0	0	0	0	200	903	0	0	0	0	0	0	0	603	903	0
4692	8	0	0	0	0	0	0	200	300	0	0	0	0	0	0	0	200	903	0	0	0	0	0	0	0	603	903	0
4692	9	0	0	0	0	0	0	200	300	0	0	0	0	0	0	0	200	903	0	0	0	0	0	0	0	603	903	0
4693	0	0	0	0	0	0	0	200	300	0	0	0	0	0	0	0	200	903	0	0	0	0	0	0	0	603	903	0
4693	1	0	0	0	0	0	0	200	300	0	0	0	0	0	0	0	200	903	0	0	0	0	0	0	0	603	903	0
4693	2	0	0	0	0	0	0	200	300	0	0	0	0	0	0	0	200	903	0	0	0	0	0	0	0	603	903	0
4693	3	0	0	0	0	0	0	200	300	0	0	0	0	0	0	0	200	903	0	0	0	0	0	0	0	603	903	0
4693	4	0	0	0	0	0	0	200	300	0	0	0	0	0	0	0	200	903	0	0	0	0	0	0	0	603	903	0
4693	5	0	0	0	0	0	0	200	300	0	0	0	0	0	0	0	200	903	0	0	0	0	0	0	0	603	903	0
4693	6	0	0	0	0	0	0	200	300	0	0	0	0	0	0	0	200	903	0	0	0	0	0	0	0	603	903	0
4693	7	0	0	0	0	0	0	200	300	0	0	0	0	0	0	0	200	903	0	0	0	0	0	0	0	603	903	0
4693	8	0	0	0	0	0	0	200	300	0	0	0	0	0	0	0	200	903	0	0	0	0	0	0	0	603	903	0
4693	9	0	0	0	0	0	0	200	300	0	0	0	0	0	0	0	200	903	0	0	0	0	0	0	0	603	903	0
4694	0	0	0	0	0	0	0	200	300	0	0	0	0	0	0	0	200	903	0	0	0	0	0	0	0	603	903	0
4694	1	0	0	0	0	0	0	200	300	0	0	0	0	0	0	0	200	903	0	0	0	0	0	0	0	603	903	0
4694	2	0	0	0	0	0	0	200	300	0	0	0	0	0	0	0	200	903	0	0	0	0	0	0	0	603	903	0
4694	3	0	0	0	0	0	0	200	300	0	0	0	0	0	0	0	200	903	0	0	0	0	0	0	0	603	903	0
4694	4	0	0	0	0	0	0	200	300	0	0	0	0	0	0	0	200	903	0	0	0	0	0	0	0	603	903	0
4694	5	0	0	0	0	0	0	200	300	0	0	0	0	0	0	0	200	903	0	0	0	0	0	0	0	603	903	0
4694	6	0	0	0	0	0	0	200	300	0	0	0	0	0	0	0	200	903	0	0	0	0	0	0	0	603	903	0
4694	7	0	0	0	0	0	0	200	300	0	0	0	0	0	0	0	200	903	0	0	0	0	0	0	0	603	903	0
4694	8	0	0	0	0	0	0	200	300	0	0	0	0	0	0	0	200	903	0	0	0	0	0	0	0	603	903	0
4694	9	0	0	0	0	0	0	200	300	0	0	0	0	0	0	0	200	903	0	0	0	0	0	0	0	603	903	0
4695	0	0	0	0	0	0	0	200	300	0	0	0	0	0	0	0	200	903	0	0	0	0	0	0	0	603	903	0
4695	1	0	0	0	0	0	0	200	300	0	0	0	0	0	0	0	200	903	0	0	0	0	0	0	0	603	903	0
4695	2	0	0	0	0	0	0	200	300	0	0	0	0	0	0	0	200	903	0	0	0	0	0	0	0	603	903	0
4695	3	0	0	0	0	0	0	200	300	0	0	0	0	0	0	0	200	903	0	0	0	0	0	0	0	603	903	0
4695	4	0	0	0	0	0	0	200	300	0	0	0	0	0	0	0	200	903	0	0	0	0	0	0	0	603	903	0
4695	5	0	0	0	0	0	0	200	300	0	0	0	0	0	0	0	200	903	0	0	0	0	0	0	0	603	903	0
4695	6	0	0	0	0	0	0	200	300	0	0	0	0	0	0	0	200	903	0	0	0	0	0	0	0	603	903	0
4695	7	0	0	0	0	0	0	200	300	0	0	0	0	0	0	0	200	903	0	0	0	0	0	0	0	603	903	0
4695	8	0	0	0	0	0	0	200	300	0	0	0	0	0	0	0	200	903	0	0	0	0	0	0	0	603	903	0
4695	9	0	0	0	0	0	0	200	300	0	0	0	0	0	0	0	200	903	0	0	0	0	0	0	0	603	903	0
4696	0	0	0	0	0	0	0	200	300	0	0	0	0	0	0	0	200	903	0	0	0	0	0	0	0	603	903	0
4696	1	0	0	0	0	0	0	200	300	0	0	0	0	0	0	0	200	903	0	0	0	0	0	0	0	603	903	0
4696	2	0	0	0	0	0	0	200	300	0	0	0	0	0	0	0	200	903	0	0	0	0	0	0	0	603	903	0
4696	3	0	0	0	0	0	0	200	300	0	0	0	0	0	0	0	200	903	0	0	0	0	0	0	0	603	903	0
4696	4	0	0	0	0	0	0	200	300	0	0	0	0	0	0	0	200	903	0	0	0	0	0	0	0	603	903	0
4696	5	0	0	0	0	0	0	200	300	0	0	0	0	0	0	0	200	903	0	0	0	0	0	0	0	603	903	0
4696	6	0	0	0	0	0	0	200	300	0	0	0	0	0	0	0	200	903	0	0	0	0	0	0	0	603	903	0
4696	7	0	0	0	0	0	0	200	300	0	0	0	0	0	0	0	200	903	0	0	0	0	0	0	0	603	903	0
4696	8	0	0	0	0	0	0	200	300	0	0	0	0	0	0	0	200	903	0	0	0	0	0	0	0	603	903	0
4696	9	0	0	0	0	0	0	200	300	0	0	0	0	0	0	0	200	903	0	0	0	0	0	0	0	603	903	0
4697	0	0	0	0	0	0	0	200	300	0	0	0	0	0	0	0	200	903	0	0	0	0	0	0	0	603	903	0
4697	1	0	0	0	0	0	0	200	300	0	0	0	0	0	0	0	200	903	0	0	0	0	0	0	0	603	903	0
4697	2	0	0	0	0	0	0	200	300	0	0	0	0	0	0	0	200	903	0	0	0	0	0	0	0	603	903	0
4697	3	0	0	0	0	0	0	200	300	0	0	0	0	0	0	0	200	903	0	0	0	0	0	0	0	603	903	0
4697	4	0	0	0	0	0	0	200	300	0	0	0	0	0	0	0	200	903	0	0	0	0	0	0	0	603	903	0
4697	5	0	0	0	0	0	0	200	300	0	0	0	0	0	0	0	200	903	0	0	0	0	0	0	0	603	903	0
4697	6	0	0	0	0	0	0	200	300	0	0	0	0	0	0	0	200	903	0	0	0	0	0	0	0	603	903	0
4697	7	0	0	0	0	0	0	200	300	0	0	0	0	0	0	0	200	903	0	0	0	0	0	0	0	603	903	0
4697	8	0	0	0	0	0	0	200	300	0	0	0	0	0	0	0	200	903	0	0	0	0	0	0	0	603	903	0
4697	9	0	0	0	0	0	0	200	300	0	0	0	0	0	0	0	200	903	0	0	0	0	0	0	0	603	903	0
4698	0	0	0	0	0	0	0	200	300	0	0	0	0	0	0	0	200	903	0	0	0	0	0	0	0	603	903	0
4698	1	0	0	0	0	0	0	200	300	0	0	0	0	0	0	0	200	903	0	0	0	0	0	0	0	603	903	0
4698	2	0	0	0	0	0	0	200	300	0	0	0	0	0	0	0	200	903	0	0	0	0	0	0	0	603	903	0
4698	3	0	0	0	0	0	0	200	300	0	0	0	0	0	0	0	200	903	0	0	0	0	0	0	0	603	903	0
4698	4	0	0	0	0	0	0	200	300	0	0	0	0	0	0	0	200	903	0	0	0	0	0	0	0	603	903	0
4698	5	0	0	0	0	0	0	200	300	0	0	0	0	0	0	0	200	903	0	0	0	0	0	0	0	603	903	0
4698	6	0	0	0	0	0	0	200	300	0	0	0	0	0	0	0	200	903	0	0	0	0	0	0	0	603	903	0
4698	7	0	0	0	0	0	0	200	300	0	0	0	0	0	0	0	200	903	0	0	0	0	0	0	0	603	903	0
4698	8	0	0	0	0	0	0	200	300	0	0	0	0	0	0	0	200	903	0	0	0	0	0	0	0	603	903	0
4698	9	0	0	0	0	0	0	200	300	0	0	0	0	0	0	0	200	903	0	0	0	0	0	0	0	603	903	0
4699	0	0	0	0	0	0	0	200	300	0	0	0	0	0	0	0	200	903	0	0	0	0	0	0	0	603	903	0
4699	1	0	0	0	0	0	0	200	300	0	0	0	0	0	0	0	200	903	0	0	0	0	0	0	0	603	903	0
4699	2	0	0	0	0	0	0	200	300	0	0	0	0	0	0	0	200	903	0	0	0	0	0	0	0	603	903	0
4699	3	0	0	0	0	0	0	200	300	0	0	0	0	0	0	0	200	903	0	0	0	0	0	0	0	603	903	0
4699	4	0	0	0	0	0	0	200	300	0	0	0	0	0	0	0	200	903	0	0	0	0	0	0	0	603	903	0
4699	5	0	0	0	0	0	0	200	300	0	0	0	0	0	0	0	200	903	0	0	0	0	0	0	0	603	903	0
4699	6	0	0	0	0	0	0	200	300	0	0	0	0	0	0	0	200	903	0	0	0	0	0	0	0	603	903	0
4699	7	0	0	0	0	0	0	200	300	0	0	0	0	0	0	0	200	903	0	0	0	0	0	0	0	603	903	0
4699	8	0	0	0	0	0	0	200	300	0	0	0	0	0	0	0	200	903	0	0	0	0	0	0	0	603	903	0
4699	9	0	0	0	0	0	0	200	300	0	0	0	0	0	0	0	200	903	0	0	0	0	0	0	0	603	903	0
4700	0	0	0	0	0	0	0	200	300	0	0	0	0	0	0	0	200	903	0	0	0	0	0	0	0	603	903	0
4700	1	0	0	0	0	0	0	200	300	0	0	0	0	0	0	0	200	903	0	0	0	0	0	0	0	603	903	0
4700	2	0	0	0	0	0	0	200	300	0	0	0	0	0	0	0	200	903	0	0	0	0	0	0	0	603	903	0
4700	3	0	0	0	0	0	0	200	300	0	0	0	0	0	0	0	200	903	0	0	0	0	0	0	0	603	903	0
4700	4	0	0	0	0	0	0	200	300	0	0	0	0	0	0	0	200	903	0	0	0	0	0	0	0	603	903	0
4700	5	0	0	0	0	0	0	200	300	0	0	0	0	0	0	0	200	903	0	0	0	0	0	0	0	603	903	0
4700	6	0	0	0	0	0	0	200	300	0	0	0	0	0	0	0	200	903	0	0	0	0	0	0	0	603	903	0
4700	7	0	0	0	0	0	0	200	300	0	0	0	0	0	0	0	200	903	0	0	0	0	0	0	0	603	903	0
4700	8	0	0	0	0	0	0	200	300	0	0	0	0	0	0	0	200	903	0	0	0	0	0	0	0	603	903	0
4700	9	0	0	0	0	0	0	200	300	0	0	0	0	0	0	0	200	903	0	0	0	0	0	0	0	603	903	0
4701	0	0	0	0	0	0	0	200	300	0	0	0	0	0	0	0	200	903	0	0	0	0	0	0	0	603	903	0
4701	1	0	0	0	0	0	0	200	300	0	0	0	0	0	0	0	200	903	0	0	0	0	0	0	0	603	903	0
4701	2	0	0	0	0	0	0	200	300	0	0	0	0	0	0	0	200	903	0	0	0	0	0	0	0	603	903	0
4701	3	0	0	0	0	0	0	200	300	0	0	0	0	0	0	0	200	903	0	0	0	0	0	0	0	603	903	0
4701	4	0	0	0	0	0	0	200	300	0	0	0	0	0	0	0	200	903	0	0	0	0	0	0	0	603	903	0
4701	5	0	0	0	0	0	0	200	300	0	0	0	0	0	0	0	200	903	0	0	0	0	0	0	0	603	903	0
4701	6	0	0	0	0	0	0	200	300	0	0	0	0	0	0	0	200	903	0	0	0	0	0	0	0	603	903	0
4701	7	0	0	0	0	0	0	200	300	0	0	0	0	0	0	0	200	903	0	0	0	0	0	0	0	603	903	0
4701	8	0	0	0	0	0	0	200	300	0	0	0	0	0	0	0	200	903	0	0	0	0	0	0	0	603	903	0
4701	9	0	0	0	0	0	0	200	300	0	0	0	0	0	0	0	200	903	0	0	0	0	0	0	0	603	903	0
4702	0	0	0	0	0	0	0	200	300	0	0	0	0	0	0	0	200	903	0	0	0	0	0	0	0	603	903	0
4702	1	0	0	0	0	0	0	200	300	0	0	0	0	0	0	0	200	903	0	0	0	0	0	0	0	603	903	0
4702	2	0	0	0	0	0	0	200	300	0	0	0	0	0	0	0	200	903	0	0	0	0	0	0	0	603	903	0
4702	3	0	0	0	0	0	0	200	300	0	0	0	0	0	0	0	200	903	0	0	0	0	0	0	0	603	903	0
4702	4	0	0	0	0	0	0	200	300	0	0	0	0	0	0	0	200	903	0	0	0	0	0	0	0	603	903	0
4702	5	0	0	0	0	0	0	200	300	0	0	0	0	0	0	0	200	903	0	0	0	0	0	0	0	603	903	0
4702	6	0	0	0	0	0	0	200	300	0	0	0	0	0	0	0	200	903	0	0	0	0	0	0	0	603	903	0
4702	7	0	0	0	0	0	0	200	300	0	0	0	0	0	0	0	200	903	0	0	0	0	0	0	0	603	903	0
4702	8	0	0	0	0	0	0	200	300	0	0	0	0	0	0	0	200	903	0	0	0	0	0	0	0	603	903	0
4702	9	0	0	0	0	0	0	200	300	0	0	0	0	0	0	0	200	903	0	0	0	0	0	0	0	603	903	0
4703	0	0	0	0	0	0	0	200	300	0	0	0	0	0	0	0	200	903	0	0	0	0	0	0	0	603	903	0
4703	1	0	0	0	0	0	0	200	300	0	0	0	0	0	0	0	200	903	0	0	0	0	0	0	0	603	903	0
4703	2	0	0	0	0	0	0	200	300	0	0	0	0	0	0	0	200	903	0	0	0	0	0	0	0	603	903	0
4703	3	0	0	0	0	0	0	200	300	0	0	0	0	0	0	0	200	903	0	0	0	0	0	0	0	603	903	0
4703	4	0	0	0	0	0	0	200	300	0	0	0	0	0	0	0	200	903	0	0	0	0	0	0	0	603	903	0
4703	5	0	0	0	0	0	0	200	300	0	0	0	0	0	0	0	200	903	0	0	0	0	0	0	0	603	903	0
4703	6	0	0	0	0	0	0	200	300	0	0	0	0	0	0	0	200	903	0	0	0	0	0	0	0	603	903	0
4703	7	0	0	0	0	0	0	200	300	0	0	0	0	0	0	0	200	903	0	0	0	0	0	0	0	603	903	0
4703	8	0	0	0	0	0	0	200	300	0	0	0	0	0	0	0	200	903	0	0	0	0	0	0	0	603	903	0
4703	9	0	0	0	0	0	0	200	300	0	0	0	0	0	0	0	200	903	0	0	0	0	0	0	0	603	903	0
4704	0	0	0	0	0	0	0	200	300	0	0	0	0	0	0	0	200	903	0	0	0	0	0	0	0	603	903	0
4704	1	0	0	0	0	0	0	200	300	0	0	0	0	0	0	0	200	903	0	0	0	0	0	0	0	603	903	0
4704	2	0	0	0	0	0	0	200	300	0	0	0	0	0	0	0	200	903	0	0	0	0	0	0	0	603	903	0
4704	3	0	0	0	0	0	0	200	300	0	0	0	0	0	0	0	200	903	0	0	0	0	0	0	0	603	903	0
4704	4	0	0	0	0	0	0	200	300	0	0	0	0	0	0	0	200	903	0	0	0	0	0	0	0	603	903	0
4704	5	0	0	0	0	0	0	200	300	0	0	0	0	0	0	0	200	903	0	0	0	0	0	0	0	603	903	0
4704	6	0	0	0	0	0	0	200	300	0	0	0	0	0	0	0	200	903	0	0	0	0	0	0	0	603	903	0
4704	7	0	0	0	0	0	0	200	300	0	0	0	0	0	0	0	200	903	0	0	0	0	0	0	0	603	903	0
4704	8	0	0	0	0	0	0	200	300	0	0	0	0	0	0	0	200	903	0	0	0	0	0	0	0	603	903	0
4704	9	0	0	0	0	0	0	200	300	0	0	0	0	0	0	0	200	903	0	0	0	0	0	0	0	603	903	0
4705	0	0	0	0	0	0	0	200	300	0	0	0	0	0	0	0	200	903	0	0	0	0	0	0	0	603	903	0
4705	1	0	0	0	0	0	0	200	300	0	0	0	0	0	0	0	200	903	0	0	0	0	0	0	0	603	903	0
4705	2	0	0	0	0	0	0	200	300	0	0	0	0	0	0	0	200	903	0	0	0	0	0	0	0	603	903	0
4705	3	0	0	0	0	0	0	200	300	0	0	0	0	0	0	0	200	903	0	0	0	0	0	0	0	603	903	0
4705	4	0	0	0	0	0	0	200	300	0	0	0	0	0	0	0	200	903	0	0	0	0	0	0	0	603	903	0
4705	5	0	0	0	0	0	0	200	300	0	0	0	0	0	0	0	200	903	0	0	0	0	0	0	0	603	903	0
4705	6	0	0	0	0	0	0	200	300	0	0	0	0	0	0	0	200	903	0	0	0	0	0	0	0	603	903	0
4705	7	0	0	0	0	0	0	200	300	0	0	0	0	0	0	0	200	903	0	0	0	0	0	0	0	603	903	0
4705	8	0	0	0	0	0	0	200	300	0	0	0	0	0	0	0	200	903	0	0	0	0	0	0	0	603	903	0
4705	9	0	0	0	0	0	0	200	300	0	0	0	0	0	0	0	200	903	0	0	0	0	0	0	0	603	903	0
4706	0	0	0	0	0	0	0	200	300	0	0	0	0	0	0	0	200	903	0	0	0	0	0	0	0	603	903	0
4706	1	0	0	0	0	0	0	200	300	0	0	0	0	0	0	0	200	903	0	0	0	0	0	0	0	603	903	0
4706	2	0	0	0	0	0	0	200	300	0	0	0	0	0	0	0	200	903	0	0	0	0	0	0	0	603	903	0
4706	3	0	0	0	0	0	0	200	300	0	0	0	0	0	0	0	200	903	0	0	0	0	0	0	0	603	903	0
4706	4	0	0	0	0	0	0	200	300	0	0	0	0	0	0	0	200	903	0	0	0	0	0	0	0	603	903	0
4706	5	0	0	0	0	0	0	200	300	0	0	0	0	0	0	0	200	903	0	0	0	0	0	0	0	603	903	0
4706	6	0	0	0	0	0	0	200	300	0	0	0	0	0	0	0	200	903	0	0	0	0	0	0	0	603	903	0
4706	7	0	0	0	0	0	0	200	300	0	0	0	0	0	0	0	200	903	0	0	0	0	0	0	0	603	903	0
4706	8	0	0	0	0	0	0	200	300	0	0	0	0	0	0	0	200	903	0	0	0	0	0	0	0	603	903	0
4706	9	0	0	0	0	0	0	200	300	0	0	0	0	0	0	0	200	903	0	0	0	0	0	0	0	603	903	0
4707	0	0	0	0	0	0	0	200	300	0	0	0	0	0	0	0	200	903	0	0	0	0	0	0	0	603	903	0
4707	1	0	0	0	0	0	0	200	300	0	0	0	0	0	0	0	200	903	0	0	0	0	0	0	0	603	903	0
4707	2	0	0	0	0	0	0	200	300	0	0	0	0	0	0	0	200	903	0	0	0	0	0	0	0	603	903	0
4707	3	0	0	0	0	0	0	200	300	0	0	0	0	0	0	0	200	903	0	0	0	0	0	0	0	603	903	0
4707	4	0	0	0	0	0	0	200	300	0	0	0	0	0	0	0	200	903	0	0	0	0	0	0	0	603	903	0
4707	5	0	0	0	0	0	0	200	300	0	0	0	0	0	0	0	200	903	0	0	0	0	0	0	0	603	903	0
4707	6	0	0	0	0	0	0	200	300	0	0	0	0	0	0	0	200	903	0	0	0	0	0	0	0	603	903	0
4707	7	0	0	0	0	0	0	200	300	0	0	0	0	0	0	0	200	903	0	0	0	0	0	0	0	603	903	0
4707	8	0	0	0	0	0	0	200	300	0	0	0	0	0	0	0	200	903	0	0	0	0	0	0	0	603	903	0
4707	9	0	0	0	0	0	0	200	300	0	0	0	0	0	0	0	200	903	0	0	0	0	0	0	0	603	903	0
4708	0	0	0	0	0	0	0	200	300	0	0	0	0	0	0	0	200	903	0	0	0	0	0	0	0	603	903	0
4708	1	0	0	0	0	0	0	200	300	0	0	0	0	0	0	0	200	903	0	0	0	0	0	0	0	603	903	0
4708	2	0	0	0	0	0	0	200	300	0	0	0	0	0	0	0	200	903	0	0	0	0	0	0	0	603	903	0
4708	3	0	0	0	0	0	0	200	300	0	0	0	0	0	0	0	200	903	0	0	0	0	0	0	0	603	903	0
4708	4	0	0	0	0	0	0	200	300	0	0	0	0	0	0	0	200	903	0	0	0	0	0	0	0	603	903	0
4708	5	0	0	0	0	0	0	200	300	0	0	0	0	0	0	0	200	903	0	0	0	0	0	0	0	603	903	0
4708	6	0	0	0	0	0	0	200	300	0	0	0	0	0	0	0	200	903	0	0	0	0	0	0	0	603	903	0
4708	7	0	0	0	0	0	0	200	300	0	0	0	0	0	0	0	200	903	0	0	0	0	0	0	0	603	903	0
4708	8	0	0	0	0	0	0	200	300	0	0	0	0	0	0	0	200	903	0	0	0	0	0	0	0	603	903	0
4708	9	0	0	0	0	0	0	200	300	0	0	0	0	0	0	0	200	903	0	0	0	0	0	0	0	603	903	0
4709	0	0	0	0	0	0	0	200	300	0	0	0	0	0	0	0	200	903	0	0	0	0	0	0	0	603	903	0
4709	1	0	0	0	0	0	0	200	300	0	0	0	0	0	0	0	200	903	0	0	0	0	0	0	0	603	903	0
4709	2	0	0	0	0	0	0	200	300	0	0	0	0	0	0	0	200	903	0	0	0	0	0	0	0	603	903	0
4709	3	0	0	0	0	0	0	200	300	0	0	0	0	0	0	0	200	903	0	0	0	0	0	0	0	603	903	0
4709	4	0	0	0	0	0	0	200	300	0	0	0	0	0	0	0	200	903	0	0	0	0	0	0	0	603	903	0
4709	5	0	0	0	0	0	0	200	300	0	0	0	0	0	0	0	200	903	0	0	0	0	0	0	0	603	903	0
4709	6	0	0	0	0	0	0	200	300	0	0	0	0	0	0	0	200	903	0	0	0	0	0	0	0	603	903	0
4709	7	0	0	0	0	0	0	200	300	0	0	0	0	0	0	0	200	903	0	0	0	0	0	0	0	603	903	0
4709	8	0	0	0	0	0	0	200	300	0	0	0	0	0	0	0	200	903	0	0	0	0	0	0	0	603	903	0
4709	9	0	0	0	0	0	0	200	300	0	0	0	0	0	0	0	200	903	0	0	0	0	0	0	0	603	903	0
4710	0	0	0	0	0	0	0	200	300	0	0	0	0	0	0	0	200	903	0	0	0	0	0	0	0	603	903	0
4710	1	0	0	0	0	0	0	200	300	0	0	0	0	0	0	0	200	903	0	0	0	0	0	0	0	603	903	0
4710	2	0	0	0	0	0	0	200	300	0	0	0	0	0	0	0	200	903	0	0	0	0	0	0	0	603	903	0
4710	3	0	0	0	0	0	0	200	300	0	0	0	0	0	0	0	200	903	0	0	0	0	0	0	0	603	903	0
4710	4	0	0	0	0	0	0	200	300	0	0	0	0	0	0	0	200	903	0	0	0	0	0	0	0	603	903	0
4710	5	0	0	0	0	0	0	200	300	0	0	0	0	0	0	0	200	903	0	0	0	0	0	0	0	603	903	0
4710	6	0	0	0	0	0	0	200	300	0	0	0	0	0	0	0	200	903	0	0	0	0	0	0	0	603	903	0
4710	7	0	0	0	0	0	0	200	300	0	0	0	0	0	0	0	200	903	0	0	0	0	0	0	0	603	903	0
4710	8	0	0	0	0	0	0	200	300	0	0	0	0	0	0	0	200	903	0	0	0	0	0	0	0	603	903	0
4710	9	0	0	0	0	0	0	200	300	0	0	0	0	0	0	0	200	903	0	0	0	0	0	0	0	603	903	0
4711	0	0	0	0	0	0	0	200	300	0	0	0	0	0	0	0	200	903	0	0	0	0	0	0	0	603	903	0
4711	1	0	0	0	0	0	0	200	300	0	0	0	0	0	0	0	200	903	0	0	0	0	0	0	0	603	903	0
4711	2	0	0	0	0	0	0	200	300	0	0	0	0	0	0	0	200	903	0	0	0	0	0	0	0	603	903	0
4711	3	0	0	0	0	0	0	200	300	0	0	0	0	0	0	0	200	903	0	0	0	0	0	0	0	603	903	0
4711	4	0	0	0	0	0	0	200	300	0	0	0	0	0	0	0	200	903	0	0	0	0	0	0	0	603	903	0
4711	5	0	0	0	0	0	0	200	300	0	0	0	0	0	0	0	200	903	0	0	0	0	0	0	0	603	903	0
4711	6	0	0	0	0	0	0	200	300	0	0	0	0	0	0	0	200	903	0	0	0	0	0	0	0	603	903	0
4711	7	0	0	0	0	0	0	200	300	0	0	0	0	0	0	0	200	903	0	0	0	0	0	0	0	603	903	0
4711	8	0	0	0	0	0	0	200	300	0	0	0	0	0	0	0	200	903	0	0	0	0	0	0	0	603	903	0
4711	9	0	0	0	0	0	0	200	300	0	0	0	0	0	0	0	200	903	0	0	0	0	0	0	0	603	903	0
4712	0	0	0	0	0	0	0	200	300	0	0	0	0	0	0	0	200	903	0	0	0	0	0	0	0	603	903	0
4712	1	0	0	0	0	0	0	200	300	0	0	0	0	0	0	0	200	903	0	0	0	0	0	0	0	603	903	0
4712	2	0	0	0	0	0	0	200	300	0	0	0	0	0	0	0	200	903	0	0	0	0	0	0	0	603	903	0
4712	3	0	0	0	0	0	0	200	300	0	0	0	0	0	0	0	200	903	0	0	0	0	0	0	0	603	903	0
4712	4	0	0	0	0	0	0	200	300	0	0	0	0	0	0	0	200	903	0	0	0	0	0	0	0	603	903	0
4712	5	0	0	0	0	0	0	200	300	0	0	0	0	0	0	0	200	903	0	0	0	0	0	0	0	603	903	0
4712	6	0	0	0	0	0	0	200	300	0	0	0	0	0	0	0	200	903	0	0	0	0	0	0	0	603	903	0
4712	7	0	0	0	0	0	0	200	300	0	0	0	0	0	0	0	200	903	0	0	0	0	0	0	0	603	903	0
4712	8	0	0	0	0	0	0	200	300	0	0	0	0	0	0	0	200	903	0	0	0	0	0	0	0	603	903	0
4712	9	0	0	0	0	0	0	200	300	0	0	0	0	0	0	0	200	903	0	0	0	0	0	0	0	603	903	0
4713	0	0	0	0	0	0	0	200	300	0	0	0	0	0	0	0	200	903	0	0	0	0	0	0	0	603	903	0
4713	1	0	0	0	0	0	0	200	300	0	0	0	0	0	0	0	200	903	0	0	0	0	0	0	0	603	903	0
4713	2	0	0	0	0	0	0	200	300	0	0	0	0	0	0	0	200	903	0	0	0	0	0	0	0	603	903	0
4713	3	0	0	0	0	0	0	200	300	0	0	0	0	0	0	0	200	903	0	0	0	0	0	0	0	603	903	0
4713	4	0	0	0	0	0	0	200	300	0	0	0	0	0	0	0	200	903	0	0	0	0	0	0	0	603	903	0
4713	5	0	0	0	0	0	0	200	300	0	0	0	0	0	0	0	200	903	0	0	0	0	0	0	0	603	903	0
4713	6	0	0	0	0	0	0	200	300	0	0	0	0	0	0	0	200	903	0	0	0	0	0	0	0	603	903	0
4713	7	0	0	0	0	0	0	200	300	0	0	0	0	0	0	0	200	903	0	0	0	0	0	0	0	603	903	0
4713	8	0	0	0	0	0	0	200	300	0	0	0	0	0	0	0	200	903	0	0	0	0	0	0	0	603	903	0
4713	9	0	0	0	0	0	0	200	300	0	0	0	0	0	0	0	200	903	0	0	0	0	0	0	0	603	903	0
4714	0	0	0	0	0	0	0	200	300	0	0	0	0	0	0	0	200	903	0	0	0	0	0	0	0	603	903	0
4714	1	0	0	0	0	0	0	200	300	0	0	0	0	0	0	0	200	903	0	0	0	0	0	0	0	603	903	0
4714	2	0	0	0	0	0	0	200	300	0	0	0	0	0	0	0	200	903	0	0	0	0	0	0	0	603	903	0
4714	3	0	0	0	0	0	0	200	300	0	0	0	0	0	0	0	200	903	0	0	0	0	0	0	0	603	903	0
4714	4	0	0	0	0	0	0	200	300	0	0	0	0	0	0	0	200	903	0	0	0	0	0	0	0	603	903	0
4714	5	0	0	0	0	0	0	200	300	0	0	0	0	0	0	0	200	903	0	0	0	0	0	0	0	603	903	0
4714	6	0	0	0	0	0	0	200	300	0	0	0	0	0	0	0	200	903	0	0	0	0	0	0	0	603	903	0
4714	7	0	0	0	0	0	0	200	300	0	0	0	0	0	0	0	200	903	0	0	0	0	0	0	0	603	903	0
4714	8	0	0	0	0	0	0	200	300	0	0	0	0	0	0	0	200	903	0	0	0	0	0	0	0	603	903	0
4714	9	0	0	0	0	0	0	200	300	0	0	0	0	0	0	0	200	903	0	0	0	0	0	0	0	603	903	0
4715	0	0	0	0	0	0	0	200	300	0	0	0	0	0	0	0	200	903	0	0	0	0	0	0	0	603	903	0
4715	1	0	0	0	0	0	0	200	300	0	0	0	0	0	0	0	200	903	0	0	0	0	0	0	0	603	903	0
4715	2	0	0	0	0	0	0	200	300	0	0	0	0	0	0	0	200	903	0	0	0	0	0	0	0	603	903	0
4715	3	0	0	0	0	0	0	200	300	0	0	0	0	0	0	0	200	903	0	0	0	0	0	0	0	603	903	0
4715	4	0	0	0	0	0	0	200	300	0	0	0	0	0	0	0	200	903	0	0	0	0	0	0	0	603	903	0
4715	5	0	0	0	0	0	0	200	300	0	0	0	0	0	0	0	200	903	0	0	0	0	0	0	0	603	903	0
4715	6	0	0	0	0	0	0	200	300	0	0	0	0	0	0	0	200	903	0	0	0	0	0	0	0	603	903	0
4715	7	0	0	0	0	0	0	200	300	0	0	0	0	0	0	0	200	903	0	0	0	0	0	0	0	603	903	0
4715	8	0	0	0	0	0	0	200	300	0	0	0	0	0	0	0	200	903	0	0	0	0	0	0	0	603	903	0
4715	9	0	0	0	0	0	0	200	300	0	0	0	0	0	0	0	200	903	0	0	0	0	0	0	0	603	903	0
4716	0	0	0	0	0	0	0	200	300	0	0	0	0	0	0	0	200	903	0	0	0	0	0	0	0	603	903	0
4716	1	0	0	0	0	0	0	200	300	0	0	0	0	0	0	0	200	903	0	0	0	0	0	0	0	603	903	0
4716	2	0	0	0	0	0	0	200	300	0	0	0	0	0	0	0	200	903	0	0	0	0	0	0	0	603	903	0
4716	3	0	0	0	0	0	0	200	300	0	0	0	0	0	0	0	200	903	0	0	0	0	0	0	0	603	903	0
4716	4	0	0	0	0	0	0	200	300	0	0	0	0	0	0	0	200	903	0	0	0	0	0	0	0	603	903	0
4716	5	0	0	0	0	0	0	200	300	0	0	0	0	0	0	0	200	903	0	0	0	0	0	0	0	603	903	0
4716	6	0	0	0	0	0	0	200	300	0	0	0	0	0	0	0	200	903	0	0	0	0	0	0	0	603	903	0
4716	7	0	0	0	0	0	0	200	300	0	0	0	0	0	0	0	200	903	0	0	0	0	0	0	0	603	903	0
4716	8	0	0	0	0	0	0	200	300	0	0	0	0	0	0	0	200	903	0	0	0	0	0	0	0	603	903	0
4716	9	0	0	0	0	0	0	200	300	0	0	0	0	0	0	0	200	903	0	0	0	0	0	0	0	603	903	0
4717	0	0	0	0	0	0	0	200	300	0	0	0	0	0	0	0	200	903	0	0	0	0	0	0	0	603	903	0
4717	1	0	0	0	0	0	0	200	300	0	0	0	0	0	0	0	200	903	0	0	0	0	0	0	0	603	903	0
4717	2	0	0	0	0	0	0	200	300	0	0	0	0	0	0	0	200	903	0	0	0	0	0	0	0	603	903	0
4717	3	0	0	0	0	0	0	200	300	0	0	0	0	0	0	0	200	903	0	0	0	0	0	0	0	603	903	0
4717	4	0	0	0	0	0	0	200	300	0	0	0	0	0	0	0	200	903	0	0	0	0	0	0	0	603	903	0
4717	5	0	0	0	0	0	0	200	300	0	0	0	0	0	0	0	200	903	0	0	0	0	0	0	0	603	903	0
4717	6	0	0	0	0	0	0	200	300	0	0	0	0	0	0	0	200	903	0	0	0	0	0	0	0	603	903	0
4717	7	0	0	0	0	0	0	200	300	0	0	0	0	0	0	0	200	903	0	0	0	0	0	0	0	603	903	0
4717	8	0	0	0	0	0	0	200	300	0	0	0	0	0	0	0	200	903	0	0	0	0	0	0	0	603	903	0
4717	9	0	0	0	0	0	0	200	300	0	0	0	0	0	0	0	200	903	0	0	0	0	0	0	0	603	903	0
4718	0	0	0	0	0	0	0	200	300	0	0	0	0	0	0	0	200	903	0	0	0	0	0	0	0	603	903	0
4718	1	0	0	0	0	0	0	200	300	0	0	0	0	0	0	0	200	903	0	0	0	0	0	0	0	603	903	0
4718	2	0	0	0	0	0	0	200	300	0	0	0	0	0	0	0	200	903	0	0	0	0	0	0	0	603	903	0
4718	3	0	0	0	0	0	0	200	300	0	0	0	0	0	0	0	200	903	0	0	0	0	0	0	0	603	903	0
4718	4	0	0	0	0	0	0	200	300	0	0	0	0	0	0	0	200	903	0	0	0	0	0	0	0	603	903	0
4718	5	0	0	0	0	0	0	200	300	0	0	0	0	0	0	0	200	903	0	0	0	0	0	0	0	603	903	0
4718	6	0	0	0	0	0	0	200	300	0	0	0	0	0	0	0	200	903	0	0	0	0	0	0	0	603	903	0
4718	7	0	0	0	0	0	0	200	300	0	0	0	0	0	0	0	200	903	0	0	0	0	0	0	0	603	903	0
4718	8	0	0	0	0	0	0	200	300	0	0	0	0	0	0	0	200	903	0	0	0	0	0	0	0	603	903	0
4718	9	0	0	0	0	0	0	200	300	0	0	0	0	0	0	0	200	903	0	0	0	0	0	0	0	603	903	0
4719	0	0	0	0	0	0	0	200	300	0	0	0	0	0	0	0	200	903	0	0	0	0	0	0	0	603	903	0
4719	1	0	0	0	0	0	0	200	300	0	0	0	0	0	0	0	200	903	0	0	0	0	0	0	0	603	903	0
4719	2	0	0	0	0	0	0	200	300	0	0	0	0	0	0	0	200	903	0	0	0	0	0	0	0	603	903	0
4719	3	0	0	0	0	0	0	200	300	0	0	0	0	0	0	0	200	903	0	0	0	0	0	0	0	603	903	0
4719	4	0	0	0	0	0	0	200	300	0	0	0	0	0	0	0	200	903	0	0	0	0	0	0	0	603	903	0
4719	5	0	0	0	0	0	0	200	300	0	0	0	0	0	0	0	200	903	0	0	0	0	0	0	0	603	903	0
4719	6	0	0	0	0	0	0	200	300	0	0	0	0	0	0	0	200	903	0	0	0	0	0	0	0	603	903	0
4719	7	0	0	0	0	0	0	200	300	0	0	0	0	0	0	0	200	903	0	0	0	0	0	0	0	603	903	0
4719	8	0	0	0	0	0	0	200	300	0	0	0	0	0	0	0	200	903	0	0	0	0	0	0	0	603	903	0
4719	9	0	0	0	0	0	0	200	300	0	0	0	0	0	0	0	200	903	0	0	0	0	0	0	0	603	903	0
4720	0	0	0	0	0	0	0	200	300	0	0	0	0	0	0	0	200	903	0	0	0	0	0	0	0	603	903	0
4720	1	0	0	0	0	0	0	200	300	0	0	0	0	0	0	0	200	903	0	0	0	0	0	0	0	603	903	0
4720	2	0	0	0	0	0	0	200	300	0	0	0	0	0	0	0	200	903	0	0	0	0	0	0	0	603	903	0
4720	3	0	0	0	0	0	0	200	300	0	0	0	0	0	0	0	200	903	0	0	0	0	0	0	0	603	903	0
4720	4	0	0	0	0	0	0	200	300	0	0	0	0	0	0	0	200	903	0	0	0	0	0	0	0	603	903	0
4720	5	0	0	0	0	0	0	200	300	0	0	0	0	0	0	0	200	903	0	0	0	0	0	0	0	603	903	0
4720	6	0	0	0	0	0	0	200	300	0	0	0	0	0	0	0	200	903	0	0	0	0	0	0	0	603	903	0
4720	7	0	0	0	0	0	0	200	300	0	0	0	0	0	0	0	200	903	0	0	0	0	0	0	0	603	903	0
4720	8	0	0	0	0	0	0	200	300	0	0	0	0	0	0	0	200	903	0	0	0	0	0	0	0	603	903	0
4720	9	0	0	0	0	0	0	200	300	0	0	0	0	0	0	0	200	903	0	0	0	0	0	0	0	603	903	0
4721	0	0	0	0	0	0	0	200	300	0	0	0	0	0	0	0	200	903	0	0	0	0	0	0	0	603	903	0
4721	1	0	0	0	0	0	0	200	300	0	0	0	0	0	0	0	200	903	0	0	0	0	0	0	0	603	903	0
4721	2	0	0	0	0	0	0	200	300	0	0	0	0	0	0	0	200	903	0	0	0	0	0	0	0	603	903	0
4721	3	0	0	0	0	0	0	200	300	0	0	0	0	0	0	0	200	903	0	0	0	0	0	0	0	603	903	0
4721	4	0	0	0	0	0	0	200	300	0	0	0	0	0	0	0	200	903	0	0	0	0	0	0	0	603	903	0
4721	5	0	0	0	0	0	0	200	300	0	0	0	0	0	0	0	200	903	0	0	0	0	0	0	0	603	903	0
4721	6	0	0	0	0	0	0	200	300	0	0	0	0	0	0	0	200	903	0	0	0	0	0	0	0	603	903	0
4721	7	0	0	0	0	0	0	200	300	0	0	0	0	0	0	0	200	903	0	0	0	0	0	0	0	603	903	0
4721	8	0	0	0	0	0	0	200	300	0	0	0	0	0	0	0	200	903	0	0	0	0	0	0	0	603	903	0
4721	9	0	0	0	0	0	0	200	300	0	0	0	0	0	0	0	200	903	0	0	0	0	0	0	0	603	903	0
4722	0	0	0	0	0	0	0	200	300	0	0	0	0	0	0	0	200	903	0	0	0	0	0	0	0	603	903	0
4722	1	0	0	0	0	0	0	200	300	0	0	0	0	0	0	0	200	903	0	0	0	0	0	0	0	603	903	0
4722	2	0	0	0	0	0	0	200	300	0	0	0	0	0	0	0	200	903	0	0	0	0	0	0	0	603	903	0
4722	3	0	0	0	0	0	0	200	300	0	0	0	0	0	0	0	200	903	0	0	0	0	0	0	0	603	903	0
4722	4	0	0	0	0	0	0	200	300	0	0	0	0	0	0	0	200	903	0	0	0	0	0	0	0	603	903	0
4722	5	0	0	0	0	0	0	200	300	0	0	0	0	0	0	0	200	903	0	0	0	0	0	0	0	603	903	0
4722	6	0	0	0	0	0	0	200	300	0	0	0	0	0	0	0	200	903	0	0	0	0	0	0	0	603	903	0
4722	7	0	0	0	0	0	0	200	300	0	0	0	0	0	0	0	200	903	0	0	0	0	0	0	0	603	903	0
4722	8	0	0	0	0	0	0	200	300	0	0	0	0	0	0	0	200	903	0	0	0	0	0	0	0	603	903	0
4722	9	0	0	0	0	0	0	200	300	0	0	0	0	0	0	0	200	903	0	0	0	0	0	0	0	603	903	0
4723	0	0	0	0	0	0	0	200	300	0	0	0	0	0	0	0	200	903	0	0	0	0	0	0	0	603	903	0
4723	1	0	0	0	0	0	0	200	300	0	0	0	0	0	0	0	200	903	0	0	0	0	0	0	0	603	903	0
4723	2	0	0	0	0	0	0	200	300	0	0	0	0	0	0	0	200	903	0	0	0	0	0	0	0	603	903	0
4723	3	0	0	0	0	0	0	200	300	0	0	0	0	0	0	0	200	903	0	0	0	0	0	0	0	603	903	0
4723	4	0	0	0	0	0	0	200	300	0	0	0	0	0	0	0	200	903	0	0	0	0	0	0	0	603	903	0
4723	5	0	0	0	0	0	0	200	300	0	0	0	0	0	0	0	200	903	0	0	0	0	0	0	0	603	903	0
4723	6	0	0	0	0	0	0	200	300	0	0	0	0	0	0	0	200	903	0	0	0	0	0	0	0	603	903	0
4723	7	0	0	0	0	0	0	200	300	0	0	0	0	0	0	0	200	903	0	0	0	0	0	0	0	603	903	0
4723	8	0	0	0	0	0	0	200	300	0	0	0	0	0	0	0	200	903	0	0	0	0	0	0	0	603	903	0
4723	9	0	0	0	0	0	0	200	300	0	0	0	0	0	0	0	200	903	0	0	0	0	0	0	0	603	903	0
4724	0	0	0	0	0	0	0	200	300	0	0	0	0	0	0	0	200	903	0	0	0	0	0	0	0	603	903	0
4724	1	0	0	0	0	0	0	200	300	0	0	0	0	0	0	0	200	903	0	0	0	0	0	0	0	603	903	0
4724	2	0	0	0	0	0	0	200	300	0	0	0	0	0	0	0	200	903	0	0	0	0	0	0	0	603	903	0
4724	3	0	0	0	0	0	0	200	300	0	0	0	0	0	0	0	200	903	0	0	0	0	0	0	0	603	903	0
4724	4	0	0	0	0	0	0	200	300	0	0	0	0	0	0	0	200	903	0	0	0	0	0	0	0	603	903	0
4724	5	0	0	0	0	0	0	200	300	0	0	0	0	0	0	0	200	903	0	0	0	0	0	0	0	603	903	0
4724	6	0	0	0	0	0	0	200	300	0	0	0	0	0	0	0	200	903	0	0	0	0	0	0	0	603	903	0
4724	7	0	0	0	0	0	0	200	300	0	0	0	0	0	0	0	200	903	0	0	0	0	0	0	0	603	903	0
4724	8	0	0	0	0	0	0	200	300	0	0	0	0	0	0	0	200	903	0	0	0	0	0	0	0	603	903	0
4724	9	0	0	0	0	0	0	200	300	0	0	0	0	0	0	0	200	903	0	0	0	0	0	0	0	603	903	0
4725	0	0	0	0	0	0	0	200	300	0	0	0	0	0	0	0	200	903	0	0	0	0	0	0	0	603	903	0
4725	1	0	0	0	0	0	0	200	300	0	0	0	0	0	0	0	200	903	0	0	0	0	0	0	0	603	903	0
4725	2	0	0	0	0	0	0	200	300	0	0	0	0	0	0	0	200	903	0	0	0	0	0	0	0	603	903	0
4725	3	0	0	0	0	0	0	200	300	0	0	0	0	0	0	0	200	903	0	0	0	0	0	0	0	603	903	0
4725	4	0	0	0	0	0	0	200	300	0	0	0	0	0	0	0	200	903	0	0	0	0	0	0	0	603	903	0
4725	5	0	0	0	0	0	0	200	300	0	0	0	0	0	0	0	200	903	0	0	0	0	0	0	0	603	903	0
4725	6	0	0	0	0	0	0	200	300	0	0	0	0	0	0	0	200	903	0	0	0	0	0	0	0	603	903	0
4725	7	0	0	0	0	0	0	200	300	0	0	0	0	0	0	0	200	903	0	0	0	0	0	0	0	603	903	0
4725	8	0	0	0	0	0	0	200	300	0	0	0	0	0	0	0	200	903	0	0	0	0	0	0	0	603	903	0
4725	9	0	0	0	0	0	0	200	300	0	0	0	0	0	0	0	200	903	0	0	0	0	0	0	0	603	903	0
4726	0	0	0	0	0	0	0	200	300	0	0	0	0	0	0	0	200	903	0	0	0	0	0	0	0	603	903	0
4726	1	0	0	0	0	0	0	200	300	0	0	0	0	0	0	0	200	903	0	0	0	0	0	0	0	603	903	0
4726	2	0	0	0	0	0	0	200	300	0	0	0	0	0	0	0	200	903	0	0	0	0	0	0	0	603	903	0
4726	3	0	0	0	0	0	0	200	300	0	0	0	0	0	0	0	200	903	0	0	0	0	0	0	0	603	903	0
4726	4	0	0	0	0	0	0	200	300	0	0	0	0	0	0	0	200	903	0	0	0	0	0	0	0	603	903	0
4726	5	0	0	0	0	0	0	200	300	0	0	0	0	0	0	0	200	903	0	0	0	0	0	0	0	603	903	0
4726	6	0	0	0	0	0	0	200	300	0	0	0	0	0	0	0	200	903	0	0	0	0	0	0	0	603	903	0
4726	7	0	0	0	0	0	0	200	300	0	0	0	0	0	0	0	200	903	0	0	0	0	0	0	0	603	903	0
4726	8	0	0	0	0	0	0	200	300	0	0	0	0	0	0	0	200	903	0	0	0	0	0	0	0	603	903	0
4726	9	0	0	0	0	0	0	200	300	0	0	0	0	0	0	0	200	903	0	0	0	0	0	0	0	603	903	0
4727	0	0	0	0	0	0	0	200	300	0	0	0	0	0	0	0	200	903	0	0	0	0	0	0	0	603	903	0
4727	1	0	0	0	0	0	0	200	300	0	0	0	0	0	0	0	200	903	0	0	0	0	0	0	0	603	903	0
4727	2	0	0	0	0	0	0	200	300	0	0	0	0	0	0	0	200	903	0	0	0	0	0	0	0	603	903	0
4727	3	0	0	0	0	0	0	200	300	0	0	0	0	0	0	0	200	903	0	0	0	0	0	0	0	603	903	0
4727	4	0	0	0	0	0	0	200	300	0	0	0	0	0	0	0	200	903	0	0	0	0	0	0	0	603	903	0
4727	5	0	0	0	0	0	0	200	300	0	0	0	0	0	0	0	200	903	0	0	0	0	0	0	0	603	903	0
4727	6	0	0	0	0	0	0	200	300	0	0	0	0	0	0	0	200	903	0	0	0	0	0	0	0	603	903	0
4727	7	0	0	0	0	0	0	200	300	0	0	0	0	0	0	0	200	903	0	0	0	0	0	0	0	603	903	0
4727	8	0	0	0	0	0	0	200	300	0	0	0	0	0	0	0	200	903	0	0	0	0	0	0	0	603	903	0
4727	9	0	0	0	0	0	0	200	300	0	0	0	0	0	0	0	200	903	0	0	0	0	0	0	0	603	903	0
4728	0	0	0	0	0	0	0	200	300	0	0	0	0	0	0	0	200	903	0	0	0	0	0	0	0	603	903	0
4728	1	0	0	0	0	0	0	200	300	0	0	0	0	0	0	0	200	903	0	0	0	0	0	0	0	603	903	0
4728	2	0	0	0	0	0	0	200	300	0	0	0	0	0	0	0	200	903	0	0	0	0	0	0	0	603	903	0
4728	3	0	0	0	0	0	0	200	300	0	0	0	0	0	0	0	200	903	0	0	0	0	0	0	0	603	903	0
4728	4	0	0	0	0	0	0	200	300	0	0	0	0	0	0	0	200	903	0	0	0	0	0	0	0	603	903	0
4728	5	0	0	0	0	0	0	200	300	0	0	0	0	0	0	0	200	903	0	0	0	0	0	0	0	603	903	0
4728	6	0	0	0	0	0	0	200	300	0	0	0	0	0	0	0	200	903	0	0	0	0	0	0	0	603	903	0
4728	7	0	0	0	0	0	0	200	300	0	0	0	0	0	0	0	200	903	0	0	0	0	0	0	0	603	903	0
4728	8	0	0	0	0	0	0	200	300	0	0	0	0	0	0	0	200	903	0	0	0	0	0	0	0	603	903	0
4728	9	0	0	0	0	0	0	200	300	0	0	0	0	0	0	0	200	903	0	0	0	0	0	0	0	603	903	0
4729	0	0	0	0	0	0	0	200	300	0	0	0	0	0	0	0	200	903	0	0	0	0	0	0	0	603	903	0
4729	1	0	0	0	0	0	0	200	300	0	0	0	0	0	0	0	200	903	0	0	0	0	0	0	0	603	903	0
4729	2	0	0	0	0	0	0	200	300	0	0	0	0	0	0	0	200	903	0	0	0	0	0	0	0	603	903	0
4729	3	0	0	0	0	0	0	200	300	0	0	0	0	0	0	0	200	903	0	0	0	0	0	0	0	603	903	0
4729	4	0	0	0	0	0	0	200	300	0	0	0	0	0	0	0	200	903	0	0	0	0	0	0	0	603	903	0
4729	5	0	0	0	0	0	0	200	300	0	0	0	0	0	0	0	200	903	0	0	0	0	0	0	0	603	903	0
4729	6	0	0	0	0	0	0	200	300	0	0	0	0	0	0	0	200	903	0	0	0	0	0	0	0	603	903	0
4729	7	0	0	0	0	0	0	200	300	0	0	0	0	0	0	0	200	903	0	0	0	0	0	0	0	603	903	0
4729	8	0	0	0	0	0	0	200	300	0	0	0	0	0	0	0	200	903	0	0	0	0	0	0	0	603	903	0
4729	9	0	0	0	0	0	0	200	300	0	0	0	0	0	0	0	200	903	0	0	0	0	0	0	0	603	903	0
4730	0	0	0	0	0	0	0	200	300	0	0	0	0	0	0	0	200	903	0	0	0	0	0	0	0	603	903	0
4730	1	0	0	0	0	0	0	200	300	0	0	0	0	0	0	0	200	903	0	0	0	0	0	0	0	603	903	0
4730	2	0	0	0	0	0	0	200	300	0	0	0	0	0	0	0	200	903	0	0	0	0	0	0	0	603	903	0
4730	3	0	0	0	0	0	0	200	300	0	0	0	0	0	0	0	200	903	0	0	0	0	0	0	0	603	903	0
4730	4	0	0	0	0	0	0	200	300	0	0	0	0	0	0	0	200	903	0	0	0	0	0	0	0	603	903	0
4730	5	0	0	0	0	0	0	200	300	0	0	0	0	0	0	0	200	903	0	0	0	0	0	0	0	603	903	0
4730	6	0	0	0	0	0	0	200	300	0	0	0	0	0	0	0	200	903	0	0	0	0	0	0	0	603	903	0
4730	7	0	0	0	0	0	0	200	300	0	0	0	0	0	0	0	200	903	0	0	0	0	0	0	0	603	903	0
4730	8	0	0	0	0	0	0	200	300	0	0	0	0	0	0	0	200	903	0	0	0	0	0	0	0	603	903	0
4730	9	0	0	0	0	0	0	200	300	0	0	0	0	0	0	0	200	903	0	0	0	0	0	0	0	603	903	0
4731	0	0	0	0	0	0	0	200	300	0	0	0	0	0	0	0	200	903	0	0	0	0	0	0	0	603	903	0
4731	1	0	0	0	0	0	0	200	300	0	0	0	0	0	0	0	200	903	0	0	0	0	0	0	0	603	903	0
4731	2	0	0	0	0	0	0	200	300	0	0	0	0	0	0	0	200	903	0	0	0	0	0	0	0	603	903	0
4731	3	0	0	0	0	0	0	200	300	0	0	0	0	0	0	0	200	903	0	0	0	0	0	0	0	603	903	0
4731	4	0	0	0	0	0	0	200	300	0	0	0	0	0	0	0	200	903	0	0	0	0	0	0	0	603	903	0
4731	5	0	0	0	0	0	0	200	300	0	0	0	0	0	0	0	200	903	0	0	0	0	0	0	0	603	903	0
4731	6	0	0	0	0	0	0	200	300	0	0	0	0	0	0	0	200	903	0	0	0	0	0	0	0	603	903	0
4731	7	0	0	0	0	0	0	200	300	0	0	0	0	0	0	0	200	903	0	0	0	0	0	0	0	603	903	0
4731	8	0	0	0	0	0	0	200	300	0	0	0	0	0	0	0	200	903	0	0	0	0	0	0	0	603	903	0
4731	9	0	0	0	0	0	0	200	300	0	0	0	0	0	0	0	200	903	0	0	0	0	0	0	0	603	903	0
4732	0	0	0	0	0	0	0	200	300	0	0	0	0	0	0	0	200	903	0	0	0	0	0	0	0	603	903	0
4732	1	0	0	0	0	0	0	200	300	0	0	0	0	0	0	0	200	903	0	0	0	0	0	0	0	603	903	0
4732	2	0	0	0	0	0	0	200	300	0	0	0	0	0	0	0	200	903	0	0	0	0	0	0	0	603	903	0
4732	3	0	0	0	0	0	0	200	300	0	0	0	0	0	0	0	200	903	0	0	0	0	0	0	0	603	903	0
4732	4	0	0	0	0	0	0	200	300	0	0	0	0	0	0	0	200	903	0	0	0	0	0	0	0	603	903	0
4732	5	0	0	0	0	0	0	200	300	0	0	0	0	0	0	0	200	903	0	0	0	0	0	0	0	603	903	0
4732	6	0	0	0	0	0	0	200	300	0	0	0	0	0	0	0	200	903	0	0	0	0	0	0	0	603	903	0
4732	7	0	0	0	0	0	0	200	300	0	0	0	0	0	0	0	200	903	0	0	0	0	0	0	0	603	903	0
4732	8	0	0	0	0	0	0	200	300	0	0	0	0	0	0	0	200	903	0	0	0	0	0	0	0	603	903	0
4732	9	0	0	0	0	0	0	200	300	0	0	0	0	0	0	0	200	903	0	0	0	0	0	0	0	603	903	0
4733	0	0	0	0	0	0	0	200	300	0	0	0	0	0	0	0	200	903	0	0	0	0	0	0	0	603	903	0
4733	1	0	0	0	0	0	0	200	300	0	0	0	0	0	0	0	200	903	0	0	0	0	0	0	0	603	903	0
4733	2	0	0	0	0	0	0	200	300	0	0	0	0	0	0	0	200	903	0	0	0	0	0	0	0	603	903	0
4733	3	0	0	0	0	0	0	200	300	0	0	0	0	0	0	0	200	903	0	0	0	0	0	0	0	603	903	0
4733	4	0	0	0	0	0	0	200	300	0	0	0	0	0	0	0	200	903	0	0	0	0	0	0	0	603	903	0
4733	5	0	0	0	0	0	0	200	300	0	0	0	0	0	0	0	200	903	0	0	0	0	0	0	0	603	903	0
4733	6	0	0	0	0	0	0	200	300	0	0	0	0	0	0	0	200	903	0	0	0	0	0	0	0	603	903	0
4733	7	0	0	0	0	0	0	200	300	0	0	0	0	0	0	0	200	903	0	0	0	0	0	0	0	603	903	0
4733	8	0	0	0	0	0	0	200	300	0	0	0	0	0	0	0	200	903	0	0	0	0	0	0	0	603	903	0
4733	9	0	0	0	0	0	0	200	300	0	0	0	0	0	0	0	200	903	0	0	0	0	0	0	0	603	903	0
4734	0	0	0	0	0	0	0	200	300	0	0	0	0	0	0	0	200	903	0	0	0	0	0	0	0	603	903	0
4734	1	0	0	0	0	0	0	200	300	0	0	0	0	0	0	0	200	903	0	0	0	0	0	0	0	603	903	0
4734	2	0	0	0	0	0	0	200	300	0	0	0	0	0	0	0	200	903	0	0	0	0	0	0	0	603	903	0
4734	3	0	0	0	0	0	0	200	300	0	0	0	0	0	0	0	200	903	0	0	0	0	0	0	0	603	903	0
4734	4	0	0	0	0	0	0	200	300	0	0	0	0	0	0	0	200	903	0	0	0	0	0	0	0	603	903	0
4734	5	0	0	0	0	0	0	200	300	0	0	0	0	0	0	0	200	903	0	0	0	0	0	0	0	603	903	0
4734	6	0	0	0	0	0	0	200	300	0	0	0	0	0	0	0	200	903	0	0	0	0	0	0	0	603	903	0
4734	7	0	0	0	0	0	0	200	300	0	0	0	0	0	0	0	200	903	0	0	0	0	0	0	0	603	903	0
4734	8	0	0	0	0	0	0	200	300	0	0	0	0	0	0	0	200	903	0	0	0	0	0	0	0	603	903	0
4734	9	0	0	0	0	0	0	200	300	0	0	0	0	0	0	0	200	903	0	0	0	0	0	0	0	603	903	0
4735	0	0	0	0	0	0	0	200	300	0	0	0	0	0	0	0	200	903	0	0	0	0	0	0	0	603	903	0
4735	1	0	0	0	0	0	0	200	300	0	0	0	0	0	0	0	200	903	0	0	0	0	0	0	0	603	903	0
4735	2	0	0	0	0	0	0	200	300	0	0	0	0	0	0	0	200	903	0	0	0	0	0	0	0	603	903	0
4735	3	0	0	0	0	0	0	200	300	0	0	0	0	0	0	0	200	903	0	0	0	0	0	0	0	603	903	0
4735	4	0	0	0	0	0	0	200	300	0	0	0	0	0	0	0	200	903	0	0	0	0	0	0	0	603	903	0
4735	5	0	0	0	0	0	0	200	300	0	0	0	0	0	0	0	200	903	0	0	0	0	0	0	0	603	903	0
4735	6	0	0	0	0	0	0	200	300	0	0	0	0	0	0	0	200	903	0	0	0	0	0	0	0	603	903	0
4735	7	0	0	0	0	0	0	200	300	0	0	0	0	0	0	0	200	903	0	0	0	0	0	0	0	603	903	0
4735	8	0	0	0	0	0	0	200	300	0	0	0	0	0	0	0	200	903	0	0	0	0	0	0	0	603	903	0
4735	9	0	0	0	0	0	0	200	300	0	0	0	0	0	0	0	200	903	0	0	0	0	0	0	0	603	903	0
4736	0	0	0	0	0	0	0	200	300	0	0	0	0	0	0	0	200	903	0	0	0	0	0	0	0	603	903	0
4736	1	0	0	0	0	0	0	200	300	0	0	0	0	0	0	0	200	903	0	0	0	0	0	0	0	603	903	0
4736	2	0	0	0	0	0	0	200	300	0	0	0	0	0	0	0	200	903	0	0	0	0	0	0	0	603	903	0
4736	3	0	0	0	0	0	0	200	300	0	0	0	0	0	0	0	200	903	0	0	0	0	0	0	0	603	903	0
4736	4	0	0	0	0	0	0	200	300	0	0	0	0	0	0	0	200	903	0	0	0	0	0	0	0	603	903	0
4736	5	0	0	0	0	0	0	200	300	0	0	0	0	0	0	0	200	903	0	0	0	0	0	0	0	603	903	0
4736	6	0	0	0	0	0	0	200	300	0	0	0	0	0	0	0	200	903	0	0	0	0	0	0	0	603	903	0
4736	7	0	0	0	0	0	0	200	300	0	0	0	0	0	0	0	200	903	0	0	0	0	0	0	0	603	903	0
4736	8	0	0	0	0	0	0	200	300	0	0	0	0	0	0	0	200	903	0	0	0	0	0	0	0	603	903	0
4736	9	0	0	0	0	0	0	200	300	0	0	0	0	0	0	0	200	903	0	0	0	0	0	0	0	603	903	0
4737	0	0	0	0	0	0	0	200	300	0	0	0	0	0	0	0	200	903	0	0	0	0	0	0	0	603	903	0
4737	1	0	0	0	0	0	0	200	300	0	0	0	0	0	0	0	200	903	0	0	0	0	0	0	0	603	903	0
4737	2	0	0	0	0	0	0	200	300	0	0	0	0	0	0	0	200	903	0	0	0	0	0	0	0	603	903	0
4737	3	0	0	0	0	0	0	200	300	0	0	0	0	0	0	0	200	903	0	0	0	0	0	0	0	603	903	0
4737	4	0	0	0	0	0	0	200	300	0	0	0	0	0	0	0	200	903	0	0	0	0	0	0	0	603	903	0
4737	5	0	0	0	0	0	0	200	300	0	0	0	0	0	0	0	200	903	0	0	0	0	0	0	0	603	903	0
4737	6	0	0	0	0	0	0	200	300	0	0	0	0	0	0	0	200	903	0	0	0	0	0	0	0	603	903	0
4737	7	0	0	0	0	0	0	200	300	0	0	0	0	0	0	0	200	903	0	0	0	0	0	0	0	603	903	0
4737	8	0	0	0	0	0	0	200	300	0	0	0	0	0	0	0	200	903	0	0	0	0	0	0	0	603	903	0
4737	9	0	0	0	0	0	0	200	300	0	0	0	0	0	0	0	200	903	0	0	0	0	0	0	0	603	903	0
4738	0	0	0	0	0	0	0	200	300	0	0	0	0	0	0	0	200	903	0	0	0	0	0	0	0	603	903	0
4738	1	0	0	0	0	0	0	200	300	0	0	0	0	0	0	0	200	903	0	0	0	0	0	0	0	603	903	0
4738	2	0	0	0	0	0	0	200	300	0	0	0	0	0	0	0	200	903	0	0	0	0	0	0	0	603	903	0
4738	3	0	0	0	0	0	0	200	300	0	0	0	0	0	0	0	200	903	0	0	0	0	0	0	0	603	903	0
4738	4	0	0	0	0	0	0	200	300	0	0	0	0	0	0	0	200	903	0	0	0	0	0	0	0	603	903	0
4738	5	0	0	0	0	0	0	200	300	0	0	0	0	0	0	0	200	903	0	0	0	0	0	0	0	603	903	0
4738	6	0	0	0	0	0	0	200	300	0	0	0	0	0	0	0	200	903	0	0	0	0	0	0	0	603	903	0
4738	7	0	0	0	0	0	0	200	300	0	0	0	0	0	0	0	200	903	0	0	0	0	0	0	0	603	903	0
4738	8	0	0	0	0	0	0	200	300	0	0	0	0	0	0	0	200	903	0	0	0	0	0	0	0	603	903	0
4738	9	0	0	0	0	0	0	200	300	0	0	0	0	0	0	0	200	903	0	0	0	0	0	0	0	603	903	0
4739	0	0	0	0	0	0	0	200	300	0	0	0	0	0	0	0	200	903	0	0	0	0	0	0	0	603	903	0
4739	1	0	0	0	0	0	0	200	300	0	0	0	0	0	0	0	200	903	0	0	0	0	0	0	0	603	903	0
4739	2	0	0	0	0	0	0	200	300	0	0	0	0	0	0	0	200	903	0	0	0	0	0	0	0	603	903	0
4739	3	0	0	0	0	0	0	200	300	0	0	0	0	0	0	0	200	903	0	0	0	0	0	0	0	603	903	0
4739	4	0	0	0	0	0	0	200	300	0	0	0	0	0	0	0	200	903	0	0	0	0	0	0	0	603	903	0
4739	5	0	0	0	0	0	0	200	300	0	0	0	0	0	0	0	200	903	0	0	0	0	0	0	0	603	903	0
4739	6	0	0	0	0	0	0	200	300	0	0	0	0	0	0	0	200	903	0	0	0	0	0	0	0	603	903	0
4739	7	0	0	0	0	0	0	200	300	0	0	0	0	0	0	0	200	903	0	0	0	0	0	0	0	603	903	0
4739	8	0	0	0	0	0	0	200	300	0	0	0	0	0	0	0	200	903	0	0	0	0	0	0	0	603	903	0
4739	9	0	0	0	0	0	0	200	300	0	0	0	0	0	0	0	200	903	0	0	0	0	0	0	0	603	903	0
4740	0	0	0	0	0	0	0	200	300	0	0	0	0	0	0	0	200	903	0	0	0	0	0	0	0	603	903	0
4740	1	0	0	0	0	0	0	200	300	0	0	0	0	0	0	0	200	903	0	0	0	0	0	0	0	603	903	0
4740	2	0	0	0	0	0	0	200	300	0	0	0	0	0	0	0	200	903	0	0	0	0	0	0	0	603	903	0
4740	3	0	0	0	0	0	0	200	300	0	0	0	0	0	0	0	200	903	0	0	0	0	0	0	0	603	903	0
4740	4	0	0	0	0	0	0	200	300	0	0	0	0	0	0	0	200	903	0	0	0	0	0	0	0	603	903	0
4740	5	0	0	0	0	0	0	200	300	0	0	0	0	0	0	0	200	903	0	0	0	0	0	0	0	603	903	0
4740	6	0	0	0	0	0	0	200	300	0	0	0	0	0	0	0	200	903	0	0	0	0	0	0	0	603	903	0
4740	7	0	0	0	0	0	0	200	300	0	0	0	0	0	0	0	200	903	0	0	0	0	0	0	0	603	903	0
4740	8	0	0	0	0	0	0	200	300	0	0	0	0	0	0	0	200	903	0	0	0	0	0	0	0	603	903	0
4740	9	0	0	0	0	0	0	200	300	0	0	0	0	0	0	0	200	903	0	0	0	0	0	0	0	603	903	0
4741	0	0	0	0	0	0	0	200	300	0	0	0	0	0	0	0	200	903	0	0	0	0	0	0	0	603	903	0
4741	1	0	0	0	0	0	0	200	300	0	0	0	0	0	0	0	200	903	0	0	0	0	0	0	0	603	903	0
4741	2	0	0	0	0	0	0	200	300	0	0	0	0	0	0	0	200	903	0	0	0	0	0	0	0	603	903	0
4741	3	0	0	0	0	0	0	200	300	0	0	0	0	0	0	0	200	903	0	0	0	0	0	0	0	603	903	0
4741	4	-1.40569	9.02023	-5.45074	580.168	-128.73	-1636.55	176.383	193.562	0	0	0	0	0	0	0	200	903	0	0	0	0	0	0	0	603	903	0
4741	5	-1.10051	9.478	-5.14556	-152.254	115.41	-1911.21	222.429	329.589	0	0	0	0	0	0	0	200	903	0	0	0	0	0	0	0	603	903	0
4741	6	0.272781	10.2409	-2.0938	671.721	-311.836	-2094.31	51.0673	-20.8138	0	0	0	0	0	0	0	200	903	0	0	0	0	0	0	0	603	903	0
4741	7	-0.490159	10.6987	-4.23003	397.063	-250.801	-2048.54	140.71	206.132	0	0	0	0	0	0	0	200	903	0	0	0	0	0	0	0	603	903	0
4741	8	0.730544	12.2246	-4.23003	488.616	115.41	-2231.64	227.284	184.489	0	0	0	0	0	0	0	200	903	0	0	0	0	0	0	0	603	903	0
4741	9	1.03572	13.4453	-3.00933	580.168	-189.766	-2368.97	136.941	107.21	0	0	0	0	0	0	0	200	903	0	0	0	0	0	0	0	603	903	0
4742	0	1.49348	14.666	-6.06109	1129.48	-494.941	-2323.2	118.341	113.65	0	0	0	0	0	0	0	200	903	0	0	0	0	0	0	0	603	903	0
4742	1	1.18831	15.4289	-4.84039	671.721	-617.012	-2552.08	72.5284	161.226	0	0	0	0	0	0	0	200	903	0	0	0	0	0	0	0	603	903	0
4742	2	1.18831	15.5815	-6.06109	946.379	-311.836	-2780.96	148.551	143.86	0	0	0	0	0	0	0	200	903	0	0	0	0	0	0	0	603	903	0
4742	3	3.32454	16.3445	-6.06109	946.379	-372.871	-2918.29	138.481	143.86	0	0	0	0	0	0	0	200	903	0	0	0	0	0	0	0	603	903	0
4742	4	1.03572	17.4126	-5.45074	854.827	-250.801	-2918.29	153.988	143.172	0	0	0	0	0	0	0	200	903	0	0	0	0	0	0	0	603	903	0
4742	5	1.3409	18.1755	-4.53521	1037.93	-433.906	-3101.39	104.325	71.1392	0	0	0	0	0	0	0	200	903	0	0	0	0	0	0	0	603	903	0
4742	6	1.64607	17.4126	-5.14556	1221.04	-678.047	-3101.39	68.2269	62.7009	0	0	0	0	0	0	0	200	903	0	0	0	0	0	0	0	603	903	0
4742	7	3.32454	19.091	-7.28179	397.063	-555.977	-3009.84	123.648	245.472	0	0	0	0	0	0	0	200	903	0	0	0	0	0	0	0	603	903	0
4742	8	2.10384	20.1591	-6.67144	763.274	-494.941	-3376.05	125.812	185.591	0	0	0	0	0	0	0	200	903	0	0	0	0	0	0	0	603	903	0
4742	9	3.01936	20.4643	-3.31451	397.063	-678.047	-3513.38	-4.56941	180.205	0	0	0	0	0	0	0	200	903	0	0	0	0	0	0	0	603	903	0
4743	0	1.79866	22.1428	-7.28179	1037.93	-739.082	-3513.38	98.5027	157.462	0	0	0	0	0	0	0	200	903	0	0	0	0	0	0	0	603	903	0
4743	1	3.62971	22.9057	-5.75591	2136.56	-250.801	-3696.49	156.427	-71.1948	0	0	0	0	0	0	0	200	903	0	0	0	0	0	0	0	603	903	0
4743	2	1.95125	24.279	-5.14556	854.827	-739.082	-3971.15	56.3651	133.871	0	0	0	0	0	0	0	200	903	0	0	0	0	0	0	0	603	903	0
4743	3	2.71419	25.1945	-5.14556	1221.04	-678.047	-3742.26	68.2269	62.7009	0	0	0	0	0	0	0	200	903	0	0	0	0	0	0	0	603	903	0
4743	4	3.32454	24.8894	-6.06109	763.274	-617.012	-4062.7	98.2012	174.07	0	0	0	0	0	0	0	200	903	0	0	0	0	0	0	0	603	903	0
4743	5	4.54524	27.3308	-6.06109	854.827	-433.906	-4291.58	128.411	158.965	0	0	0	0	0	0	0	200	903	0	0	0	0	0	0	0	603	903	0
4743	6	3.47713	27.7885	-7.28179	1678.8	-861.153	-4200.03	81.7389	69.4522	0	0	0	0	0	0	0	200	903	0	0	0	0	0	0	0	603	903	0
4743	7	3.7823	28.7041	-8.5025	1495.7	-617.012	-4337.36	127.432	124.087	0	0	0	0	0	0	0	200	903	0	0	0	0	0	0	0	603	903	0
4743	8	3.32454	28.7041	-7.58697	1587.25	-372.871	-4566.24	150.854	90.7928	0	0	0	0	0	0	0	200	903	0	0	0	0	0	0	0	603	903	0
4743	9	3.62971	29.6196	-6.67144	1587.25	-678.047	-4337.36	98.3658	62.0831	0	0	0	0	0	0	0	200	903	0	0	0	0	0	0	0	603	903	0
4744	0	3.01936	29.1618	-7.28179	1312.59	-861.153	-4795.12	81.7389	119.744	0	0	0	0	0	0	0	200	903	0	0	0	0	0	0	0	603	903	0
4744	1	4.54524	29.6196	-7.58697	1678.8	-739.082	-4612.02	102.585	78.7257	0	0	0	0	0	0	0	200	903	0	0	0	0	0	0	0	603	903	0
4744	2	3.32454	29.6196	-6.36626	1495.7	-372.871	-4657.79	141.43	65.0592	0	0	0	0	0	0	0	200	903	0	0	0	0	0	0	0	603	903	0
4744	3	4.69783	29.1618	-7.58697	1770.35	-617.012	-5115.56	118.675	66.6586	0	0	0	0	0	0	0	200	903	0	0	0	0	0	0	0	603	903	0
4744	4	3.17195	28.2463	-9.41802	1495.7	-1410.47	-4886.67	50.2372	141.188	0	0	0	0	0	0	0	200	903	0	0	0	0	0	0	0	603	903	0
4744	5	1.79866	30.2299	-6.36626	1953.46	-739.082	-5069.78	83.9065	-6.84543	0	0	0	0	0	0	0	200	903	0	0	0	0	0	0	0	603	903	0
4744	6	1.49348	30.6877	-8.80767	1495.7	-739.082	-4795.12	116.087	130.183	0	0	0	0	0	0	0	200	903	0	0	0	0	0	0	0	603	903	0
4744	7	2.71419	30.6877	-7.28179	1221.04	-1227.36	-5161.33	31.4476	132.316	0	0	0	0	0	0	0	200	903	0	0	0	0	0	0	0	603	903	0
4744	8	1.49348	31.7558	-6.97662	1495.7	-1166.33	-5481.77	32.8232	85.6131	0	0	0	0	0	0	0	200	903	0	0	0	0	0	0	0	603	903	0
4744	9	1.18831	32.2136	-6.06109	1587.25	-1044.26	-5619.1	27.7111	38.1249	0	0	0	0	0	0	0	200	903	0	0	0	0	0	0	0	603	903	0
4745	0	2.71419	32.2136	-9.11285	2228.12	-800.117	-5527.54	112.199	55.4971	0	0	0	0	0	0	0	200	903	0	0	0	0	0	0	0	603	903	0
4745	1	3.32454	32.5188	-8.19732	1312.59	-800.117	-5527.54	102.393	139.876	0	0	0	0	0	0	0	200	903	0	0	0	0	0	0	0	603	903	0
4745	2	2.5616	33.1291	-8.80767	1861.91	-983.223	-5847.98	88.3675	88.604	0	0	0	0	0	0	0	200	903	0	0	0	0	0	0	0	603	903	0
4745	3	1.79866	33.2817	-7.58697	1953.46	-1044.26	-5710.65	62.3616	42.5244	0	0	0	0	0	0	0	200	903	0	0	0	0	0	0	0	603	903	0
4745	4	1.95125	32.9765	-9.11285	1587.25	-983.223	-5664.87	92.1059	125.823	0	0	0	0	0	0	0	200	903	0	0	0	0	0	0	0	603	903	0
4745	5	2.25642	33.7395	-7.89214	2045.01	-922.188	-5756.42	83.1512	40.88	0	0	0	0	0	0	0	200	903	0	0	0	0	0	0	0	603	903	0
4745	6	1.3409	33.5869	-7.58697	2045.01	-861.153	-5939.53	86.4958	30.4573	0	0	0	0	0	0	0	200	903	0	0	0	0	0	0	0	603	903	0
4745	7	2.86677	33.4343	-9.11285	1861.91	-617.012	-5847.98	132.292	95.6833	0	0	0	0	0	0	0	200	903	0	0	0	0	0	0	0	603	903	0
4745	8	3.01936	32.9765	-7.28179	2045.01	-1044.26	-5664.87	56.5933	19.1609	0	0	0	0	0	0	0	200	903	0	0	0	0	0	0	0	603	903	0
4745	9	2.71419	32.8239	-9.41802	2960.54	-861.153	-5115.56	108.563	-14.3483	0	0	0	0	0	0	0	200	903	0	0	0	0	0	0	0	603	903	0
4746	0	2.71419	32.5188	-6.36626	2319.67	-617.012	-5527.54	103.081	-64.3691	0	0	0	0	0	0	0	200	903	0	0	0	0	0	0	0	603	903	0
4746	1	2.40901	32.061	-9.7232	2136.56	-739.082	-5664.87	123.988	80.2611	0	0	0	0	0	0	0	200	903	0	0	0	0	0	0	0	603	903	0
4746	2	3.47713	32.061	-8.80767	1953.46	-1105.29	-5756.42	74.5079	78.2094	0	0	0	0	0	0	0	200	903	0	0	0	0	0	0	0	603	903	0
4746	3	1.3409	30.0774	-9.7232	2045.01	-983.223	-5435.99	98.8787	89.677	0	0	0	0	0	0	0	200	903	0	0	0	0	0	0	0	603	903	0
4746	4	2.5616	31.4507	-8.5025	1953.46	-739.082	-5435.99	113.075	70.2487	0	0	0	0	0	0	0	200	903	0	0	0	0	0	0	0	603	903	0
4746	5	2.71419	30.9929	-9.11285	1770.35	-800.117	-5573.32	112.199	105.73	0	0	0	0	0	0	0	200	903	0	0	0	0	0	0	0	603	903	0
4746	6	2.25642	30.3825	-10.3336	1770.35	-1349.43	-5344.44	69.4124	128.679	0	0	0	0	0	0	0	200	903	0	0	0	0	0	0	0	603	903	0
4746	7	2.40901	30.3825	-10.6387	1678.8	-1471.5	-5435.99	61.6842	142.199	0	0	0	0	0	0	0	200	903	0	0	0	0	0	0	0	603	903	0
4746	8	1.3409	30.9929	-10.3336	1678.8	-1227.36	-5024	81.2254	137.539	0	0	0	0	0	0	0	200	903	0	0	0	0	0	0	0	603	903	0
4746	9	2.86677	30.6877	-9.7232	1587.25	-1044.26	-5161.33	92.6014	136.757	0	0	0	0	0	0	0	200	903	0	0	0	0	0	0	0	603	903	0
4747	0	0.883132	30.3825	-10.6387	2045.01	-1105.29	-5069.78	96.1066	107.777	0	0	0	0	0	0	0	200	903	0	0	0	0	0	0	0	603	903	0
4747	1	1.64607	30.9929	-8.80767	2411.22	-1166.33	-5435.99	67.5781	26.2361	0	0	0	0	0	0	0	200	903	0	0	0	0	0	0	0	603	903	0
4747	2	2.40901	29.7722	-7.89214	2411.22	-1166.33	-5024	52.2165	-5.52194	0	0	0	0	0	0	0	200	903	0	0	0	0	0	0	0	603	903	0
4747	3	1.3409	29.3144	-10.9439	2045.01	-1105.29	-5207.11	99.0037	113.137	0	0	0	0	0	0	0	200	903	0	0	0	0	0	0	0	603	903	0
4747	4	1.49348	29.3144	-10.3336	2319.67	-739.082	-5207.11	128.477	75.5205	0	0	0	0	0	0	0	200	903	0	0	0	0	0	0	0	603	903	0
4747	5	0.577956	27.636	-9.41802	1861.91	-1227.36	-5161.33	69.6793	102.304	0	0	0	0	0	0	0	200	903	0	0	0	0	0	0	0	603	903	0
4747	6	2.10384	28.2463	-9.41802	1953.46	-1166.33	-4840.9	76.16	92.5829	0	0	0	0	0	0	0	200	903	0	0	0	0	0	0	0	603	903	0
4747	7	0.577956	28.0937	-8.19732	2868.99	-678.047	-4886.67	117.284	-49.9908	0	0	0	0	0	0	0	200	903	0	0	0	0	0	0	0	603	903	0
4747	8	1.64607	27.9411	-7.58697	2594.33	-1227.36	-5069.78	38.2274	-41.9453	0	0	0	0	0	0	0	200	903	0	0	0	0	0	0	0	603	903	0
4747	9	1.95125	27.0256	-9.11285	1861.91	-1105.29	-4291.58	78.7104	95.6833	0	0	0	0	0	0	0	200	903	0	0	0	0	0	0	0	603	903	0
4748	0	1.79866	26.1101	-9.7232	2228.12	-1166.33	-4703.57	80.0468	70.8452	0	0	0	0	0	0	0	200	903	0	0	0	0	0	0	0	603	903	0
4748	1	1.49348	25.042	-9.7232	2685.88	-1105.29	-4520.46	86.3241	23.7657	0	0	0	0	0	0	0	200	903	0	0	0	0	0	0	0	603	903	0
4748	2	0.425369	25.042	-10.6387	1861.91	-1166.33	-4566.24	90.3696	124.988	0	0	0	0	0	0	0	200	903	0	0	0	0	0	0	0	603	903	0
4748	3	1.64607	24.279	-10.3336	2228.12	-922.188	-4383.13	110.758	84.3803	0	0	0	0	0	0	0	200	903	0	0	0	0	0	0	0	603	903	0
4748	4	0.577956	24.1264	-8.80767	2228.12	-1166.33	-4428.91	67.5781	47.0254	0	0	0	0	0	0	0	200	903	0	0	0	0	0	0	0	603	903	0
4748	5	1.03572	23.6687	-9.11285	2228.12	-1105.29	-4154.25	78.7104	55.4971	0	0	0	0	0	0	0	200	903	0	0	0	0	0	0	0	603	903	0
4748	6	1.18831	20.7695	-10.6387	1953.46	-1105.29	-4154.25	96.1066	116.382	0	0	0	0	0	0	0	200	903	0	0	0	0	0	0	0	603	903	0
4748	7	1.79866	23.0583	-10.6387	2411.22	-861.153	-4108.48	119.055	73.3542	0	0	0	0	0	0	0	200	903	0	0	0	0	0	0	0	603	903	0
4748	8	1.49348	21.9902	-10.9439	1678.8	-1227.36	-4016.92	87.8495	146.599	0	0	0	0	0	0	0	200	903	0	0	0	0	0	0	0	603	903	0
4748	9	0.425369	21.5324	-11.2491	1861.91	-1288.4	-3833.82	85.4663	134.484	0	0	0	0	0	0	0	200	903	0	0	0	0	0	0	0	603	903	0
4749	0	0.577956	21.8376	-10.6387	1678.8	-1288.4	-3650.71	78.8954	142.199	0	0	0	0	0	0	0	200	903	0	0	0	0	0	0	0	603	903	0
4749	1	0.730544	21.2273	-9.11285	2045.01	-1227.36	-3742.26	65.315	75.5902	0	0	0	0	0	0	0	200	903	0	0	0	0	0	0	0	603	903	0
4749	2	0.272781	20.6169	-7.28179	1861.91	-983.223	-3376.05	64.9752	44.3066	0	0	0	0	0	0	0	200	903	0	0	0	0	0	0	0	603	903	0
4749	3	2.10384	21.2273	-8.80767	2685.88	-1471.5	-3467.61	32.9293	-4.94791	0	0	0	0	0	0	0	200	903	0	0	0	0	0	0	0	603	903	0
4749	4	3.17195	19.854	-10.3336	2136.56	-1105.29	-3284.5	93.0384	93.24	0	0	0	0	0	0	0	200	903	0	0	0	0	0	0	0	603	903	0
4749	5	1.79866	19.3962	-10.3336	1861.91	-983.223	-3284.5	104.851	119.819	0	0	0	0	0	0	0	200	903	0	0	0	0	0	0	0	603	903	0
4749	6	2.25642	18.9384	-9.11285	1861.91	-922.188	-3147.17	98.8036	95.6833	0	0	0	0	0	0	0	200	903	0	0	0	0	0	0	0	603	903	0
4749	7	0.730544	18.6333	-10.0284	1770.35	-1349.43	-2918.29	65.4384	123.466	0	0	0	0	0	0	0	200	903	0	0	0	0	0	0	0	603	903	0
4749	8	1.49348	17.26	-8.5025	1861.91	-1166.33	-2735.18	62.8252	81.0165	0	0	0	0	0	0	0	200	903	0	0	0	0	0	0	0	603	903	0
4749	9	1.49348	16.3445	-8.5025	1495.7	-1166.33	-2735.18	62.8252	124.087	0	0	0	0	0	0	0	200	903	0	0	0	0	0	0	0	603	903	0
4750	0	3.17195	16.8022	-9.11285	1587.25	-861.153	-2735.18	105.501	125.823	0	0	0	0	0	0	0	200	903	0	0	0	0	0	0	0	603	903	0
4750	1	2.25642	16.497	-9.7232	2136.56	-1044.26	-2597.85	92.6014	80.2611	0	0	0	0	0	0	0	200	903	0	0	0	0	0	0	0	603	903	0
4750	2	2.5616	16.0393	-11.5543	2228.12	-1349.43	-1911.21	83.2089	107.16	0	0	0	0	0	0	0	200	903	0	0	0	0	0	0	0	603	903	0
4750	3	3.47713	14.8186	-6.97662	2319.67	-1166.33	-2140.09	32.8232	-32.4922	0	0	0	0	0	0	0	200	903	0	0	0	0	0	0	0	603	903	0
4750	4	2.25642	14.666	-10.0284	2411.22	-1044.26	-2048.54	95.8697	59.56	0	0	0	0	0	0	0	200	903	0	0	0	0	0	0	0	603	903	0
4750	5	2.71419	13.5979	-8.19732	2319.67	-861.153	-2185.87	94.9471	17.0209	0	0	0	0	0	0	0	200	903	0	0	0	0	0	0	0	603	903	0
4750	6	1.79866	13.2927	-8.80767	2228.12	-1349.43	-1956.99	46.7888	47.0254	0	0	0	0	0	0	0	200	903	0	0	0	0	0	0	0	603	903	0
4750	7	2.5616	12.6823	-8.5025	1953.46	-1593.57	-1728.1	12.5757	70.2487	0	0	0	0	0	0	0	200	903	0	0	0	0	0	0	0	603	903	0
4750	8	2.5616	12.5298	-6.97662	2136.56	-983.223	-1407.67	59.0688	-6.24655	0	0	0	0	0	0	0	200	903	0	0	0	0	0	0	0	603	903	0
4750	9	3.01936	12.3772	-10.9439	1953.46	-800.117	-1682.33	126.889	121.502	0	0	0	0	0	0	0	200	903	0	0	0	0	0	0	0	603	903	0
4751	0	1.64607	11.6142	-8.80767	1495.7	-1044.26	-1682.33	81.4377	130.183	0	0	0	0	0	0	0	200	903	0	0	0	0	0	0	0	603	903	0
4751	1	1.95125	11.7668	-9.7232	1678.8	-1227.36	-1636.55	73.7696	127.341	0	0	0	0	0	0	0	200	903	0	0	0	0	0	0	0	603	903	0
4751	2	1.95125	11.6142	-6.97662	1587.25	-1105.29	-1682.33	41.5717	72.4902	0	0	0	0	0	0	0	200	903	0	0	0	0	0	0	0	603	903	0
4751	3	1.03572	11.6142	-8.5025	2136.56	-922.188	-1545	91.5392	48.7132	0	0	0	0	0	0	0	200	903	0	0	0	0	0	0	0	603	903	0
4751	4	2.10384	10.8513	-7.58697	2045.01	-739.082	-1499.22	102.585	30.4573	0	0	0	0	0	0	0	200	903	0	0	0	0	0	0	0	603	903	0
4751	5	2.40901	10.5461	-6.67144	1587.25	-1044.26	-1407.67	43.4734	62.0831	0	0	0	0	0	0	0	200	903	0	0	0	0	0	0	0	603	903	0
4751	6	2.25642	8.56247	-7.28179	1587.25	-1105.29	-1407.67	48.2114	82.025	0	0	0	0	0	0	0	200	903	0	0	0	0	0	0	0	603	903	0
4751	7	1.49348	10.0883	-6.36626	1587.25	-800.117	-1316.12	74.3192	50.6782	0	0	0	0	0	0	0	200	903	0	0	0	0	0	0	0	603	903	0
4751	8	0.883132	9.478	-8.19732	1678.8	-800.117	-1545	102.393	95.2012	0	0	0	0	0	0	0	200	903	0	0	0	0	0	0	0	603	903	0
4751	9	3.47713	8.40988	-6.36626	1953.46	-1105.29	-904.13	26.3828	-6.84543	0	0	0	0	0	0	0	200	903	0	0	0	0	0	0	0	603	903	0
4752	0	1.3409	8.71506	-6.67144	1587.25	-861.153	-949.906	70.9195	62.0831	0	0	0	0	0	0	0	200	903	0	0	0	0	0	0	0	603	903	0
4752	1	1.79866	7.18918	-7.28179	1221.04	-555.977	-949.906	123.648	132.316	0	0	0	0	0	0	0	200	903	0	0	0	0	0	0	0	603	903	0
4752	2	0	0	0	0	0	0	200	300	0	0	0	0	0	0	0	200	903	0	0	0	0	0	0	0	603	903	0
4752	3	1.64607	6.57883	-7.89214	1587.25	-861.153	-766.801	90.8848	98.8825	0	0	0	0	0	0	0	200	903	0	0	0	0	0	0	0	603	903	0
4752	4	0	0	0	0	0	0	200	300	0	0	0	0	0	0	0	200	903	0	0	0	0	0	0	0	603	903	0
4752	5	0	0	0	0	0	0	200	300	0	0	0	0	0	0	0	200	903	0	0	0	0	0	0	0	603	903	0
4752	6	0	0	0	0	0	0	200	300	0	0	0	0	0	0	0	200	903	0	0	0	0	0	0	0	603	903	0
4752	7	0	0	0	0	0	0	200	300	0	0	0	0	0	0	0	200	903	0	0	0	0	0	0	0	603	903	0
4752	8	0	0	0	0	0	0	200	300	0	0	0	0	0	0	0	200	903	0	0	0	0	0	0	0	603	903	0
4752	9	0	0	0	0	0	0	200	300	0	0	0	0	0	0	0	200	903	0	0	0	0	0	0	0	603	903	0
4753	0	0	0	0	0	0	0	200	300	0	0	0	0	0	0	0	200	903	0	0	0	0	0	0	0	603	903	0
4753	1	0	0	0	0	0	0	200	300	0	0	0	0	0	0	0	200	903	0	0	0	0	0	0	0	603	903	0
4753	2	0	0	0	0	0	0	200	300	0	0	0	0	0	0	0	200	903	0	0	0	0	0	0	0	603	903	0
4753	3	0	0	0	0	0	0	200	300	0	0	0	0	0	0	0	200	903	0	0	0	0	0	0	0	603	903	0
4753	4	0	0	0	0	0	0	200	300	0	0	0	0	0	0	0	200	903	0	0	0	0	0	0	0	603	903	0
4753	5	0	0	0	0	0	0	200	300	0	0	0	0	0	0	0	200	903	0	0	0	0	0	0	0	603	903	0
4753	6	0	0	0	0	0	0	200	300	0	0	0	0	0	0	0	200	903	0	0	0	0	0	0	0	603	903	0
4753	7	0	0	0	0	0	0	200	300	0	0	0	0	0	0	0	200	903	0	0	0	0	0	0	0	603	903	0
4753	8	0	0	0	0	0	0	200	300	0	0	0	0	0	0	0	200	903	0	0	0	0	0	0	0	603	903	0
4753	9	0	0	0	0	0	0	200	300	0	0	0	0	0	0	0	200	903	0	0	0	0	0	0	0	603	903	0
4754	0	0	0	0	0	0	0	200	300	0	0	0	0	0	0	0	200	903	0	0	0	0	0	0	0	603	903	0
4754	1	0	0	0	0	0	0	200	300	0	0	0	0	0	0	0	200	903	0	0	0	0	0	0	0	603	903	0
4754	2	0	0	0	0	0	0	200	300	0	0	0	0	0	0	0	200	903	0	0	0	0	0	0	0	603	903	0
4754	3	0	0	0	0	0	0	200	300	0	0	0	0	0	0	0	200	903	0	0	0	0	0	0	0	603	903	0
4754	4	0	0	0	0	0	0	200	300	0	0	0	0	0	0	0	200	903	0	0	0	0	0	0	0	603	903	0
4754	5	0	0	0	0	0	0	200	300	0	0	0	0	0	0	0	200	903	0	0	0	0	0	0	0	603	903	0
4754	6	0	0	0	0	0	0	200	300	0	0	0	0	0	0	0	200	903	0	0	0	0	0	0	0	603	903	0
4754	7	0	0	0	0	0	0	200	300	0	0	0	0	0	0	0	200	903	0	0	0	0	0	0	0	603	903	0
4754	8	0	0	0	0	0	0	200	300	0	0	0	0	0	0	0	200	903	0	0	0	0	0	0	0	603	903	0
4754	9	0	0	0	0	0	0	200	300	0	0	0	0	0	0	0	200	903	0	0	0	0	0	0	0	603	903	0
4755	0	0	0	0	0	0	0	200	300	0	0	0	0	0	0	0	200	903	0	0	0	0	0	0	0	603	903	0
4755	1	0	0	0	0	0	0	200	300	0	0	0	0	0	0	0	200	903	0	0	0	0	0	0	0	603	903	0
4755	2	0	0	0	0	0	0	200	300	0	0	0	0	0	0	0	200	903	0	0	0	0	0	0	0	603	903	0
4755	3	0	0	0	0	0	0	200	300	0	0	0	0	0	0	0	200	903	0	0	0	0	0	0	0	603	903	0
4755	4	0	0	0	0	0	0	200	300	0	0	0	0	0	0	0	200	903	0	0	0	0	0	0	0	603	903	0
4755	5	0	0	0	0	0	0	200	300	0	0	0	0	0	0	0	200	903	0	0	0	0	0	0	0	603	903	0
4755	6	0	0	0	0	0	0	200	300	0	0	0	0	0	0	0	200	903	0	0	0	0	0	0	0	603	903	0
4755	7	0	0	0	0	0	0	200	300	0	0	0	0	0	0	0	200	903	0	0	0	0	0	0	0	603	903	0
4755	8	0	0	0	0	0	0	200	300	0	0	0	0	0	0	0	200	903	0	0	0	0	0	0	0	603	903	0
4755	9	0	0	0	0	0	0	200	300	0	0	0	0	0	0	0	200	903	0	0	0	0	0	0	0	603	903	0
4756	0	0	0	0	0	0	0	200	300	0	0	0	0	0	0	0	200	903	0	0	0	0	0	0	0	603	903	0
4756	1	0	0	0	0	0	0	200	300	0	0	0	0	0	0	0	200	903	0	0	0	0	0	0	0	603	903	0
4756	2	0	0	0	0	0	0	200	300	0	0	0	0	0	0	0	200	903	0	0	0	0	0	0	0	603	903	0
4756	3	0	0	0	0	0	0	200	300	0	0	0	0	0	0	0	200	903	0	0	0	0	0	0	0	603	903	0
4756	4	0	0	0	0	0	0	200	300	0	0	0	0	0	0	0	200	903	0	0	0	0	0	0	0	603	903	0
4756	5	0	0	0	0	0	0	200	300	0	0	0	0	0	0	0	200	903	0	0	0	0	0	0	0	603	903	0
4756	6	0	0	0	0	0	0	200	300	0	0	0	0	0	0	0	200	903	0	0	0	0	0	0	0	603	903	0
4756	7	0	0	0	0	0	0	200	300	0	0	0	0	0	0	0	200	903	0	0	0	0	0	0	0	603	903	0
4756	8	0	0	0	0	0	0	200	300	0	0	0	0	0	0	0	200	903	0	0	0	0	0	0	0	603	903	0
4756	9	0	0	0	0	0	0	200	300	0	0	0	0	0	0	0	200	903	0	0	0	0	0	0	0	603	903	0
4757	0	0	0	0	0	0	0	200	300	0	0	0	0	0	0	0	200	903	0	0	0	0	0	0	0	603	903	0
4757	1	0	0	0	0	0	0	200	300	0	0	0	0	0	0	0	200	903	0	0	0	0	0	0	0	603	903	0
4757	2	0	0	0	0	0	0	200	300	0	0	0	0	0	0	0	200	903	0	0	0	0	0	0	0	603	903	0
4757	3	0	0	0	0	0	0	200	300	0	0	0	0	0	0	0	200	903	0	0	0	0	0	0	0	603	903	0
4757	4	0	0	0	0	0	0	200	300	0	0	0	0	0	0	0	200	903	0	0	0	0	0	0	0	603	903	0
4757	5	0	0	0	0	0	0	200	300	0	0	0	0	0	0	0	200	903	0	0	0	0	0	0	0	603	903	0
4757	6	0	0	0	0	0	0	200	300	0	0	0	0	0	0	0	200	903	0	0	0	0	0	0	0	603	903	0
4757	7	0	0	0	0	0	0	200	300	0	0	0	0	0	0	0	200	903	0	0	0	0	0	0	0	603	903	0
4757	8	0	0	0	0	0	0	200	300	0	0	0	0	0	0	0	200	903	0	0	0	0	0	0	0	603	903	0
4757	9	0	0	0	0	0	0	200	300	0	0	0	0	0	0	0	200	903	0	0	0	0	0	0	0	603	903	0
4758	0	0	0	0	0	0	0	200	300	0	0	0	0	0	0	0	200	903	0	0	0	0	0	0	0	603	903	0
4758	1	0	0	0	0	0	0	200	300	0	0	0	0	0	0	0	200	903	0	0	0	0	0	0	0	603	903	0
4758	2	0	0	0	0	0	0	200	300	0	0	0	0	0	0	0	200	903	0	0	0	0	0	0	0	603	903	0
4758	3	0	0	0	0	0	0	200	300	0	0	0	0	0	0	0	200	903	0	0	0	0	0	0	0	603	903	0
4758	4	0	0	0	0	0	0	200	300	0	0	0	0	0	0	0	200	903	0	0	0	0	0	0	0	603	903	0
4758	5	0	0	0	0	0	0	200	300	0	0	0	0	0	0	0	200	903	0	0	0	0	0	0	0	603	903	0
4758	6	0	0	0	0	0	0	200	300	0	0	0	0	0	0	0	200	903	0	0	0	0	0	0	0	603	903	0
4758	7	0	0	0	0	0	0	200	300	0	0	0	0	0	0	0	200	903	0	0	0	0	0	0	0	603	903	0
4758	8	0	0	0	0	0	0	200	300	0	0	0	0	0	0	0	200	903	0	0	0	0	0	0	0	603	903	0
4758	9	0	0	0	0	0	0	200	300	0	0	0	0	0	0	0	200	903	0	0	0	0	0	0	0	603	903	0
4759	0	0	0	0	0	0	0	200	300	0	0	0	0	0	0	0	200	903	0	0	0	0	0	0	0	603	903	0
4759	1	0	0	0	0	0	0	200	300	0	0	0	0	0	0	0	200	903	0	0	0	0	0	0	0	603	903	0
4759	2	0	0	0	0	0	0	200	300	0	0	0	0	0	0	0	200	903	0	0	0	0	0	0	0	603	903	0
4759	3	0	0	0	0	0	0	200	300	0	0	0	0	0	0	0	200	903	0	0	0	0	0	0	0	603	903	0
4759	4	0	0	0	0	0	0	200	300	0	0	0	0	0	0	0	200	903	0	0	0	0	0	0	0	603	903	0
4759	5	0	0	0	0	0	0	200	300	0	0	0	0	0	0	0	200	903	0	0	0	0	0	0	0	603	903	0
4759	6	0	0	0	0	0	0	200	300	0	0	0	0	0	0	0	200	903	0	0	0	0	0	0	0	603	903	0
4759	7	0	0	0	0	0	0	200	300	0	0	0	0	0	0	0	200	903	0	0	0	0	0	0	0	603	903	0
4759	8	0	0	0	0	0	0	200	300	0	0	0	0	0	0	0	200	903	0	0	0	0	0	0	0	603	903	0
4759	9	0	0	0	0	0	0	200	300	0	0	0	0	0	0	0	200	903	0	0	0	0	0	0	0	603	903	0
4760	0	0	0	0	0	0	0	200	300	0	0	0	0	0	0	0	200	903	0	0	0	0	0	0	0	603	903	0
4760	1	0	0	0	0	0	0	200	300	0	0	0	0	0	0	0	200	903	0	0	0	0	0	0	0	603	903	0
4760	2	0	0	0	0	0	0	200	300	0	0	0	0	0	0	0	200	903	0	0	0	0	0	0	0	603	903	0
4760	3	0	0	0	0	0	0	200	300	0	0	0	0	0	0	0	200	903	0	0	0	0	0	0	0	603	903	0
4760	4	0	0	0	0	0	0	200	300	0	0	0	0	0	0	0	200	903	0	0	0	0	0	0	0	603	903	0
4760	5	0	0	0	0	0	0	200	300	0	0	0	0	0	0	0	200	903	0	0	0	0	0	0	0	603	903	0
4760	6	0	0	0	0	0	0	200	300	0	0	0	0	0	0	0	200	903	0	0	0	0	0	0	0	603	903	0
4760	7	0	0	0	0	0	0	200	300	0	0	0	0	0	0	0	200	903	0	0	0	0	0	0	0	603	903	0
4760	8	0	0	0	0	0	0	200	300	0	0	0	0	0	0	0	200	903	0	0	0	0	0	0	0	603	903	0
4760	9	0	0	0	0	0	0	200	300	0	0	0	0	0	0	0	200	903	0	0	0	0	0	0	0	603	903	0
4761	0	0	0	0	0	0	0	200	300	0	0	0	0	0	0	0	200	903	0	0	0	0	0	0	0	603	903	0
4761	1	0	0	0	0	0	0	200	300	0	0	0	0	0	0	0	200	903	0	0	0	0	0	0	0	603	903	0
4761	2	0	0	0	0	0	0	200	300	0	0	0	0	0	0	0	200	903	0	0	0	0	0	0	0	603	903	0
4761	3	0	0	0	0	0	0	200	300	0	0	0	0	0	0	0	200	903	0	0	0	0	0	0	0	603	903	0
4761	4	0	0	0	0	0	0	200	300	0	0	0	0	0	0	0	200	903	0	0	0	0	0	0	0	603	903	0
4761	5	0	0	0	0	0	0	200	300	0	0	0	0	0	0	0	200	903	0	0	0	0	0	0	0	603	903	0
4761	6	0	0	0	0	0	0	200	300	0	0	0	0	0	0	0	200	903	0	0	0	0	0	0	0	603	903	0
4761	7	0	0	0	0	0	0	200	300	0	0	0	0	0	0	0	200	903	0	0	0	0	0	0	0	603	903	0
4761	8	0	0	0	0	0	0	200	300	0	0	0	0	0	0	0	200	903	0	0	0	0	0	0	0	603	903	0
4761	9	0	0	0	0	0	0	200	300	0	0	0	0	0	0	0	200	903	0	0	0	0	0	0	0	603	903	0
4762	0	0	0	0	0	0	0	200	300	0	0	0	0	0	0	0	200	903	0	0	0	0	0	0	0	603	903	0
4762	1	0	0	0	0	0	0	200	300	0	0	0	0	0	0	0	200	903	0	0	0	0	0	0	0	603	903	0
4762	2	0	0	0	0	0	0	200	300	0	0	0	0	0	0	0	200	903	0	0	0	0	0	0	0	603	903	0
4762	3	0	0	0	0	0	0	200	300	0	0	0	0	0	0	0	200	903	0	0	0	0	0	0	0	603	903	0
4762	4	0	0	0	0	0	0	200	300	0	0	0	0	0	0	0	200	903	0	0	0	0	0	0	0	603	903	0
4762	5	0	0	0	0	0	0	200	300	0	0	0	0	0	0	0	200	903	0	0	0	0	0	0	0	603	903	0
4762	6	0	0	0	0	0	0	200	300	0	0	0	0	0	0	0	200	903	0	0	0	0	0	0	0	603	903	0
4762	7	0	0	0	0	0	0	200	300	0	0	0	0	0	0	0	200	903	0	0	0	0	0	0	0	603	903	0
4762	8	0	0	0	0	0	0	200	300	0	0	0	0	0	0	0	200	903	0	0	0	0	0	0	0	603	903	0
4762	9	0	0	0	0	0	0	200	300	0	0	0	0	0	0	0	200	903	0	0	0	0	0	0	0	603	903	0
4763	0	0	0	0	0	0	0	200	300	0	0	0	0	0	0	0	200	903	0	0	0	0	0	0	0	603	903	0
4763	1	0	0	0	0	0	0	200	300	0	0	0	0	0	0	0	200	903	0	0	0	0	0	0	0	603	903	0
4763	2	0	0	0	0	0	0	200	300	0	0	0	0	0	0	0	200	903	0	0	0	0	0	0	0	603	903	0
4763	3	0	0	0	0	0	0	200	300	0	0	0	0	0	0	0	200	903	0	0	0	0	0	0	0	603	903	0
4763	4	0	0	0	0	0	0	200	300	0	0	0	0	0	0	0	200	903	0	0	0	0	0	0	0	603	903	0
4763	5	0	0	0	0	0	0	200	300	0	0	0	0	0	0	0	200	903	0	0	0	0	0	0	0	603	903	0
4763	6	0	0	0	0	0	0	200	300	0	0	0	0	0	0	0	200	903	0	0	0	0	0	0	0	603	903	0
4763	7	0	0	0	0	0	0	200	300	0	0	0	0	0	0	0	200	903	0	0	0	0	0	0	0	603	903	0
4763	8	0	0	0	0	0	0	200	300	0	0	0	0	0	0	0	200	903	0	0	0	0	0	0	0	603	903	0
4763	9	0	0	0	0	0	0	200	300	0	0	0	0	0	0	0	200	903	0	0	0	0	0	0	0	603	903	0
4764	0	0	0	0	0	0	0	200	300	0	0	0	0	0	0	0	200	903	0	0	0	0	0	0	0	603	903	0
4764	1	0	0	0	0	0	0	200	300	0	0	0	0	0	0	0	200	903	0	0	0	0	0	0	0	603	903	0
4764	2	0	0	0	0	0	0	200	300	0	0	0	0	0	0	0	200	903	0	0	0	0	0	0	0	603	903	0
4764	3	0	0	0	0	0	0	200	300	0	0	0	0	0	0	0	200	903	0	0	0	0	0	0	0	603	903	0
4764	4	0	0	0	0	0	0	200	300	0	0	0	0	0	0	0	200	903	0	0	0	0	0	0	0	603	903	0
4764	5	0	0	0	0	0	0	200	300	0	0	0	0	0	0	0	200	903	0	0	0	0	0	0	0	603	903	0
4764	6	0	0	0	0	0	0	200	300	0	0	0	0	0	0	0	200	903	0	0	0	0	0	0	0	603	903	0
4764	7	0	0	0	0	0	0	200	300	0	0	0	0	0	0	0	200	903	0	0	0	0	0	0	0	603	903	0
4764	8	0	0	0	0	0	0	200	300	0	0	0	0	0	0	0	200	903	0	0	0	0	0	0	0	603	903	0
4764	9	0	0	0	0	0	0	200	300	0	0	0	0	0	0	0	200	903	0	0	0	0	0	0	0	603	903	0
4765	0	0	0	0	0	0	0	200	300	0	0	0	0	0	0	0	200	903	0	0	0	0	0	0	0	603	903	0
4765	1	0	0	0	0	0	0	200	300	0	0	0	0	0	0	0	200	903	0	0	0	0	0	0	0	603	903	0
4765	2	0	0	0	0	0	0	200	300	0	0	0	0	0	0	0	200	903	0	0	0	0	0	0	0	603	903	0
4765	3	0	0	0	0	0	0	200	300	0	0	0	0	0	0	0	200	903	0	0	0	0	0	0	0	603	903	0
4765	4	0	0	0	0	0	0	200	300	0	0	0	0	0	0	0	200	903	0	0	0	0	0	0	0	603	903	0
4765	5	0	0	0	0	0	0	200	300	0	0	0	0	0	0	0	200	903	0	0	0	0	0	0	0	603	903	0
4765	6	0	0	0	0	0	0	200	300	0	0	0	0	0	0	0	200	903	0	0	0	0	0	0	0	603	903	0
4765	7	0	0	0	0	0	0	200	300	0	0	0	0	0	0	0	200	903	0	0	0	0	0	0	0	603	903	0
4765	8	0	0	0	0	0	0	200	300	0	0	0	0	0	0	0	200	903	0	0	0	0	0	0	0	603	903	0
4765	9	0	0	0	0	0	0	200	300	0	0	0	0	0	0	0	200	903	0	0	0	0	0	0	0	603	903	0
4766	0	0	0	0	0	0	0	200	300	0	0	0	0	0	0	0	200	903	0	0	0	0	0	0	0	603	903	0
4766	1	0	0	0	0	0	0	200	300	0	0	0	0	0	0	0	200	903	0	0	0	0	0	0	0	603	903	0
4766	2	0	0	0	0	0	0	200	300	0	0	0	0	0	0	0	200	903	0	0	0	0	0	0	0	603	903	0
4766	3	0	0	0	0	0	0	200	300	0	0	0	0	0	0	0	200	903	0	0	0	0	0	0	0	603	903	0
4766	4	0	0	0	0	0	0	200	300	0	0	0	0	0	0	0	200	903	0	0	0	0	0	0	0	603	903	0
4766	5	0	0	0	0	0	0	200	300	0	0	0	0	0	0	0	200	903	0	0	0	0	0	0	0	603	903	0
4766	6	0	0	0	0	0	0	200	300	0	0	0	0	0	0	0	200	903	0	0	0	0	0	0	0	603	903	0
4766	7	0	0	0	0	0	0	200	300	0	0	0	0	0	0	0	200	903	0	0	0	0	0	0	0	603	903	0
4766	8	0	0	0	0	0	0	200	300	0	0	0	0	0	0	0	200	903	0	0	0	0	0	0	0	603	903	0
4766	9	0	0	0	0	0	0	200	300	0	0	0	0	0	0	0	200	903	0	0	0	0	0	0	0	603	903	0
4767	0	0	0	0	0	0	0	200	300	0	0	0	0	0	0	0	200	903	0	0	0	0	0	0	0	603	903	0
4767	1	0	0	0	0	0	0	200	300	0	0	0	0	0	0	0	200	903	0	0	0	0	0	0	0	603	903	0
4767	2	0	0	0	0	0	0	200	300	0	0	0	0	0	0	0	200	903	0	0	0	0	0	0	0	603	903	0
4767	3	0	0	0	0	0	0	200	300	0	0	0	0	0	0	0	200	903	0	0	0	0	0	0	0	603	903	0
4767	4	0	0	0	0	0	0	200	300	0	0	0	0	0	0	0	200	903	0	0	0	0	0	0	0	603	903	0
4767	5	0	0	0	0	0	0	200	300	0	0	0	0	0	0	0	200	903	0	0	0	0	0	0	0	603	903	0
4767	6	0	0	0	0	0	0	200	300	0	0	0	0	0	0	0	200	903	0	0	0	0	0	0	0	603	903	0
4767	7	0	0	0	0	0	0	200	300	0	0	0	0	0	0	0	200	903	0	0	0	0	0	0	0	603	903	0
4767	8	0	0	0	0	0	0	200	300	0	0	0	0	0	0	0	200	903	0	0	0	0	0	0	0	603	903	0
4767	9	0	0	0	0	0	0	200	300	0	0	0	0	0	0	0	200	903	0	0	0	0	0	0	0	603	903	0
4768	0	0	0	0	0	0	0	200	300	0	0	0	0	0	0	0	200	903	0	0	0	0	0	0	0	603	903	0
4768	1	0	0	0	0	0	0	200	300	0	0	0	0	0	0	0	200	903	0	0	0	0	0	0	0	603	903	0
4768	2	0	0	0	0	0	0	200	300	0	0	0	0	0	0	0	200	903	0	0	0	0	0	0	0	603	903	0
4768	3	0	0	0	0	0	0	200	300	0	0	0	0	0	0	0	200	903	0	0	0	0	0	0	0	603	903	0
4768	4	0	0	0	0	0	0	200	300	0	0	0	0	0	0	0	200	903	0	0	0	0	0	0	0	603	903	0
4768	5	0	0	0	0	0	0	200	300	0	0	0	0	0	0	0	200	903	0	0	0	0	0	0	0	603	903	0
4768	6	0	0	0	0	0	0	200	300	0	0	0	0	0	0	0	200	903	0	0	0	0	0	0	0	603	903	0
4768	7	0	0	0	0	0	0	200	300	0	0	0	0	0	0	0	200	903	0	0	0	0	0	0	0	603	903	0
4768	8	0	0	0	0	0	0	200	300	0	0	0	0	0	0	0	200	903	0	0	0	0	0	0	0	603	903	0
4768	9	0	0	0	0	0	0	200	300	0	0	0	0	0	0	0	200	903	0	0	0	0	0	0	0	603	903	0
4769	0	0	0	0	0	0	0	200	300	0	0	0	0	0	0	0	200	903	0	0	0	0	0	0	0	603	903	0
4769	1	0	0	0	0	0	0	200	300	0	0	0	0	0	0	0	200	903	0	0	0	0	0	0	0	603	903	0
4769	2	0	0	0	0	0	0	200	300	0	0	0	0	0	0	0	200	903	0	0	0	0	0	0	0	603	903	0
4769	3	0	0	0	0	0	0	200	300	0	0	0	0	0	0	0	200	903	0	0	0	0	0	0	0	603	903	0
4769	4	0	0	0	0	0	0	200	300	0	0	0	0	0	0	0	200	903	0	0	0	0	0	0	0	603	903	0
4769	5	0	0	0	0	0	0	200	300	0	0	0	0	0	0	0	200	903	0	0	0	0	0	0	0	603	903	0
4769	6	0	0	0	0	0	0	200	300	0	0	0	0	0	0	0	200	903	0	0	0	0	0	0	0	603	903	0
4769	7	0	0	0	0	0	0	200	300	0	0	0	0	0	0	0	200	903	0	0	0	0	0	0	0	603	903	0
4769	8	0	0	0	0	0	0	200	300	0	0	0	0	0	0	0	200	903	0	0	0	0	0	0	0	603	903	0
4769	9	0	0	0	0	0	0	200	300	0	0	0	0	0	0	0	200	903	0	0	0	0	0	0	0	603	903	0
4770	0	0	0	0	0	0	0	200	300	0	0	0	0	0	0	0	200	903	0	0	0	0	0	0	0	603	903	0
4770	1	0	0	0	0	0	0	200	300	0	0	0	0	0	0	0	200	903	0	0	0	0	0	0	0	603	903	0
4770	2	0	0	0	0	0	0	200	300	0	0	0	0	0	0	0	200	903	0	0	0	0	0	0	0	603	903	0
4770	3	0	0	0	0	0	0	200	300	0	0	0	0	0	0	0	200	903	0	0	0	0	0	0	0	603	903	0
4770	4	0	0	0	0	0	0	200	300	0	0	0	0	0	0	0	200	903	0	0	0	0	0	0	0	603	903	0
4770	5	0	0	0	0	0	0	200	300	0	0	0	0	0	0	0	200	903	0	0	0	0	0	0	0	603	903	0
4770	6	0	0	0	0	0	0	200	300	0	0	0	0	0	0	0	200	903	0	0	0	0	0	0	0	603	903	0
4770	7	0	0	0	0	0	0	200	300	0	0	0	0	0	0	0	200	903	0	0	0	0	0	0	0	603	903	0
4770	8	0	0	0	0	0	0	200	300	0	0	0	0	0	0	0	200	903	0	0	0	0	0	0	0	603	903	0
4770	9	0	0	0	0	0	0	200	300	0	0	0	0	0	0	0	200	903	0	0	0	0	0	0	0	603	903	0
4771	0	0	0	0	0	0	0	200	300	0	0	0	0	0	0	0	200	903	0	0	0	0	0	0	0	603	903	0
4771	1	0	0	0	0	0	0	200	300	0	0	0	0	0	0	0	200	903	0	0	0	0	0	0	0	603	903	0
4771	2	0	0	0	0	0	0	200	300	0	0	0	0	0	0	0	200	903	0	0	0	0	0	0	0	603	903	0
4771	3	0	0	0	0	0	0	200	300	0	0	0	0	0	0	0	200	903	0	0	0	0	0	0	0	603	903	0
4771	4	0	0	0	0	0	0	200	300	0	0	0	0	0	0	0	200	903	0	0	0	0	0	0	0	603	903	0
4771	5	0	0	0	0	0	0	200	300	0	0	0	0	0	0	0	200	903	0	0	0	0	0	0	0	603	903	0
4771	6	0	0	0	0	0	0	200	300	0	0	0	0	0	0	0	200	903	0	0	0	0	0	0	0	603	903	0
4771	7	0	0	0	0	0	0	200	300	0	0	0	0	0	0	0	200	903	0	0	0	0	0	0	0	603	903	0
4771	8	0	0	0	0	0	0	200	300	0	0	0	0	0	0	0	200	903	0	0	0	0	0	0	0	603	903	0
4771	9	0	0	0	0	0	0	200	300	0	0	0	0	0	0	0	200	903	0	0	0	0	0	0	0	603	903	0
4772	0	0	0	0	0	0	0	200	300	0	0	0	0	0	0	0	200	903	0	0	0	0	0	0	0	603	903	0
4772	1	0	0	0	0	0	0	200	300	0	0	0	0	0	0	0	200	903	0	0	0	0	0	0	0	603	903	0
4772	2	0	0	0	0	0	0	200	300	0	0	0	0	0	0	0	200	903	0	0	0	0	0	0	0	603	903	0
4772	3	0	0	0	0	0	0	200	300	0	0	0	0	0	0	0	200	903	0	0	0	0	0	0	0	603	903	0
4772	4	0	0	0	0	0	0	200	300	0	0	0	0	0	0	0	200	903	0	0	0	0	0	0	0	603	903	0
4772	5	0	0	0	0	0	0	200	300	0	0	0	0	0	0	0	200	903	0	0	0	0	0	0	0	603	903	0
4772	6	0	0	0	0	0	0	200	300	0	0	0	0	0	0	0	200	903	0	0	0	0	0	0	0	603	903	0
4772	7	0	0	0	0	0	0	200	300	0	0	0	0	0	0	0	200	903	0	0	0	0	0	0	0	603	903	0
4772	8	0	0	0	0	0	0	200	300	0	0	0	0	0	0	0	200	903	0	0	0	0	0	0	0	603	903	0
4772	9	0	0	0	0	0	0	200	300	0	0	0	0	0	0	0	200	903	0	0	0	0	0	0	0	603	903	0
4773	0	0	0	0	0	0	0	200	300	0	0	0	0	0	0	0	200	903	0	0	0	0	0	0	0	603	903	0
4773	1	0	0	0	0	0	0	200	300	0	0	0	0	0	0	0	200	903	0	0	0	0	0	0	0	603	903	0
4773	2	0	0	0	0	0	0	200	300	0	0	0	0	0	0	0	200	903	0	0	0	0	0	0	0	603	903	0
4773	3	0	0	0	0	0	0	200	300	0	0	0	0	0	0	0	200	903	0	0	0	0	0	0	0	603	903	0
4773	4	0	0	0	0	0	0	200	300	0	0	0	0	0	0	0	200	903	0	0	0	0	0	0	0	603	903	0
4773	5	0	0	0	0	0	0	200	300	0	0	0	0	0	0	0	200	903	0	0	0	0	0	0	0	603	903	0
4773	6	0	0	0	0	0	0	200	300	0	0	0	0	0	0	0	200	903	0	0	0	0	0	0	0	603	903	0
4773	7	0	0	0	0	0	0	200	300	0	0	0	0	0	0	0	200	903	0	0	0	0	0	0	0	603	903	0
4773	8	0	0	0	0	0	0	200	300	0	0	0	0	0	0	0	200	903	0	0	0	0	0	0	0	603	903	0
4773	9	0	0	0	0	0	0	200	300	0	0	0	0	0	0	0	200	903	0	0	0	0	0	0	0	603	903	0
4774	0	0	0	0	0	0	0	200	300	0	0	0	0	0	0	0	200	903	0	0	0	0	0	0	0	603	903	0
4774	1	0	0	0	0	0	0	200	300	0	0	0	0	0	0	0	200	903	0	0	0	0	0	0	0	603	903	0
4774	2	0	0	0	0	0	0	200	300	0	0	0	0	0	0	0	200	903	0	0	0	0	0	0	0	603	903	0
4774	3	0	0	0	0	0	0	200	300	0	0	0	0	0	0	0	200	903	0	0	0	0	0	0	0	603	903	0
4774	4	0	0	0	0	0	0	200	300	0	0	0	0	0	0	0	200	903	0	0	0	0	0	0	0	603	903	0
4774	5	0	0	0	0	0	0	200	300	0	0	0	0	0	0	0	200	903	0	0	0	0	0	0	0	603	903	0
4774	6	0	0	0	0	0	0	200	300	0	0	0	0	0	0	0	200	903	0	0	0	0	0	0	0	603	903	0
4774	7	0	0	0	0	0	0	200	300	0	0	0	0	0	0	0	200	903	0	0	0	0	0	0	0	603	903	0
4774	8	0	0	0	0	0	0	200	300	0	0	0	0	0	0	0	200	903	0	0	0	0	0	0	0	603	903	0
4774	9	0	0	0	0	0	0	200	300	0	0	0	0	0	0	0	200	903	0	0	0	0	0	0	0	603	903	0
4775	0	0	0	0	0	0	0	200	300	0	0	0	0	0	0	0	200	903	0	0	0	0	0	0	0	603	903	0
4775	1	0	0	0	0	0	0	200	300	0	0	0	0	0	0	0	200	903	0	0	0	0	0	0	0	603	903	0
4775	2	0	0	0	0	0	0	200	300	0	0	0	0	0	0	0	200	903	0	0	0	0	0	0	0	603	903	0
4775	3	0	0	0	0	0	0	200	300	0	0	0	0	0	0	0	200	903	0	0	0	0	0	0	0	603	903	0
4775	4	0	0	0	0	0	0	200	300	0	0	0	0	0	0	0	200	903	0	0	0	0	0	0	0	603	903	0
4775	5	0	0	0	0	0	0	200	300	0	0	0	0	0	0	0	200	903	0	0	0	0	0	0	0	603	903	0
4775	6	0	0	0	0	0	0	200	300	0	0	0	0	0	0	0	200	903	0	0	0	0	0	0	0	603	903	0
4775	7	0	0	0	0	0	0	200	300	0	0	0	0	0	0	0	200	903	0	0	0	0	0	0	0	603	903	0
4775	8	0	0	0	0	0	0	200	300	0	0	0	0	0	0	0	200	903	0	0	0	0	0	0	0	603	903	0
4775	9	0	0	0	0	0	0	200	300	0	0	0	0	0	0	0	200	903	0	0	0	0	0	0	0	603	903	0
4776	0	0	0	0	0	0	0	200	300	0	0	0	0	0	0	0	200	903	0	0	0	0	0	0	0	603	903	0
4776	1	0	0	0	0	0	0	200	300	0	0	0	0	0	0	0	200	903	0	0	0	0	0	0	0	603	903	0
4776	2	0	0	0	0	0	0	200	300	0	0	0	0	0	0	0	200	903	0	0	0	0	0	0	0	603	903	0
4776	3	0	0	0	0	0	0	200	300	0	0	0	0	0	0	0	200	903	0	0	0	0	0	0	0	603	903	0
4776	4	0	0	0	0	0	0	200	300	0	0	0	0	0	0	0	200	903	0	0	0	0	0	0	0	603	903	0
4776	5	0	0	0	0	0	0	200	300	0	0	0	0	0	0	0	200	903	0	0	0	0	0	0	0	603	903	0
4776	6	0	0	0	0	0	0	200	300	0	0	0	0	0	0	0	200	903	0	0	0	0	0	0	0	603	903	0
4776	7	0	0	0	0	0	0	200	300	0	0	0	0	0	0	0	200	903	0	0	0	0	0	0	0	603	903	0
4776	8	0	0	0	0	0	0	200	300	0	0	0	0	0	0	0	200	903	0	0	0	0	0	0	0	603	903	0
4776	9	0	0	0	0	0	0	200	300	0	0	0	0	0	0	0	200	903	0	0	0	0	0	0	0	603	903	0
4777	0	0	0	0	0	0	0	200	300	0	0	0	0	0	0	0	200	903	0	0	0	0	0	0	0	603	903	0
4777	1	0	0	0	0	0	0	200	300	0	0	0	0	0	0	0	200	903	0	0	0	0	0	0	0	603	903	0
4777	2	0	0	0	0	0	0	200	300	0	0	0	0	0	0	0	200	903	0	0	0	0	0	0	0	603	903	0
4777	3	0	0	0	0	0	0	200	300	0	0	0	0	0	0	0	200	903	0	0	0	0	0	0	0	603	903	0
4777	4	0	0	0	0	0	0	200	300	0	0	0	0	0	0	0	200	903	0	0	0	0	0	0	0	603	903	0
4777	5	0	0	0	0	0	0	200	300	0	0	0	0	0	0	0	200	903	0	0	0	0	0	0	0	603	903	0
4777	6	0	0	0	0	0	0	200	300	0	0	0	0	0	0	0	200	903	0	0	0	0	0	0	0	603	903	0
4777	7	0	0	0	0	0	0	200	300	0	0	0	0	0	0	0	200	903	0	0	0	0	0	0	0	603	903	0
4777	8	0	0	0	0	0	0	200	300	0	0	0	0	0	0	0	200	903	0	0	0	0	0	0	0	603	903	0
4777	9	0	0	0	0	0	0	200	300	0	0	0	0	0	0	0	200	903	0	0	0	0	0	0	0	603	903	0
4778	0	0	0	0	0	0	0	200	300	0	0	0	0	0	0	0	200	903	0	0	0	0	0	0	0	603	903	0
4778	1	0	0	0	0	0	0	200	300	0	0	0	0	0	0	0	200	903	0	0	0	0	0	0	0	603	903	0
4778	2	0	0	0	0	0	0	200	300	0	0	0	0	0	0	0	200	903	0	0	0	0	0	0	0	603	903	0
4778	3	0	0	0	0	0	0	200	300	0	0	0	0	0	0	0	200	903	0	0	0	0	0	0	0	603	903	0
4778	4	0	0	0	0	0	0	200	300	0	0	0	0	0	0	0	200	903	0	0	0	0	0	0	0	603	903	0
4778	5	0	0	0	0	0	0	200	300	0	0	0	0	0	0	0	200	903	0	0	0	0	0	0	0	603	903	0
4778	6	0	0	0	0	0	0	200	300	0	0	0	0	0	0	0	200	903	0	0	0	0	0	0	0	603	903	0
4778	7	0	0	0	0	0	0	200	300	0	0	0	0	0	0	0	200	903	0	0	0	0	0	0	0	603	903	0
4778	8	0	0	0	0	0	0	200	300	0	0	0	0	0	0	0	200	903	0	0	0	0	0	0	0	603	903	0
4778	9	0	0	0	0	0	0	200	300	0	0	0	0	0	0	0	200	903	0	0	0	0	0	0	0	603	903	0
4779	0	0	0	0	0	0	0	200	300	0	0	0	0	0	0	0	200	903	0	0	0	0	0	0	0	603	903	0
4779	1	0	0	0	0	0	0	200	300	0	0	0	0	0	0	0	200	903	0	0	0	0	0	0	0	603	903	0
4779	2	0	0	0	0	0	0	200	300	0	0	0	0	0	0	0	200	903	0	0	0	0	0	0	0	603	903	0
4779	3	0	0	0	0	0	0	200	300	0	0	0	0	0	0	0	200	903	0	0	0	0	0	0	0	603	903	0
4779	4	0	0	0	0	0	0	200	300	0	0	0	0	0	0	0	200	903	0	0	0	0	0	0	0	603	903	0
4779	5	0	0	0	0	0	0	200	300	0	0	0	0	0	0	0	200	903	0	0	0	0	0	0	0	603	903	0
4779	6	0	0	0	0	0	0	200	300	0	0	0	0	0	0	0	200	903	0	0	0	0	0	0	0	603	903	0
4779	7	0	0	0	0	0	0	200	300	0	0	0	0	0	0	0	200	903	0	0	0	0	0	0	0	603	903	0
4779	8	0	0	0	0	0	0	200	300	0	0	0	0	0	0	0	200	903	0	0	0	0	0	0	0	603	903	0
4779	9	0	0	0	0	0	0	200	300	0	0	0	0	0	0	0	200	903	0	0	0	0	0	0	0	603	903	0
4780	0	0	0	0	0	0	0	200	300	0	0	0	0	0	0	0	200	903	0	0	0	0	0	0	0	603	903	0
4780	1	0	0	0	0	0	0	200	300	0	0	0	0	0	0	0	200	903	0	0	0	0	0	0	0	603	903	0
4780	2	0	0	0	0	0	0	200	300	0	0	0	0	0	0	0	200	903	0	0	0	0	0	0	0	603	903	0
4780	3	0	0	0	0	0	0	200	300	0	0	0	0	0	0	0	200	903	0	0	0	0	0	0	0	603	903	0
4780	4	0	0	0	0	0	0	200	300	0	0	0	0	0	0	0	200	903	0	0	0	0	0	0	0	603	903	0
4780	5	0	0	0	0	0	0	200	300	0	0	0	0	0	0	0	200	903	0	0	0	0	0	0	0	603	903	0
4780	6	0	0	0	0	0	0	200	300	0	0	0	0	0	0	0	200	903	0	0	0	0	0	0	0	603	903	0
4780	7	0	0	0	0	0	0	200	300	0	0	0	0	0	0	0	200	903	0	0	0	0	0	0	0	603	903	0
4780	8	0	0	0	0	0	0	200	300	0	0	0	0	0	0	0	200	903	0	0	0	0	0	0	0	603	903	0
4780	9	0	0	0	0	0	0	200	300	0	0	0	0	0	0	0	200	903	0	0	0	0	0	0	0	603	903	0
4781	0	0	0	0	0	0	0	200	300	0	0	0	0	0	0	0	200	903	0	0	0	0	0	0	0	603	903	0
4781	1	0	0	0	0	0	0	200	300	0	0	0	0	0	0	0	200	903	0	0	0	0	0	0	0	603	903	0
4781	2	0	0	0	0	0	0	200	300	0	0	0	0	0	0	0	200	903	0	0	0	0	0	0	0	603	903	0
4781	3	0	0	0	0	0	0	200	300	0	0	0	0	0	0	0	200	903	0	0	0	0	0	0	0	603	903	0
4781	4	0	0	0	0	0	0	200	300	0	0	0	0	0	0	0	200	903	0	0	0	0	0	0	0	603	903	0
4781	5	3.7823	3.98483	-13.6905	1861.91	-922.188	102.951	132.64	164	0	0	0	0	0	0	0	200	903	0	0	0	0	0	0	0	603	903	0
4781	6	4.24007	5.51071	-16.4371	671.721	-494.941	148.727	169.889	259.134	0	0	0	0	0	0	0	200	903	0	0	0	0	0	0	0	603	903	0
4781	7	1.03572	2.00119	-11.8594	671.721	-555.977	-34.3784	153.119	243.36	0	0	0	0	0	0	0	200	903	0	0	0	0	0	0	0	603	903	0
4781	8	0	0	0	0	0	0	200	300	0	0	0	0	0	0	0	200	903	0	0	0	0	0	0	0	603	903	0
4781	9	2.25642	4.74777	-9.7232	1221.04	-494.941	57.1744	149.097	174.42	0	0	0	0	0	0	0	200	903	0	0	0	0	0	0	0	603	903	0
4782	0	3.93489	7.34177	-16.1319	1678.8	-555.977	-263.26	165.536	195.933	0	0	0	0	0	0	0	200	903	0	0	0	0	0	0	0	603	903	0
4782	1	1.95125	4.29001	-15.5215	1495.7	-494.941	-125.931	168.113	203.637	0	0	0	0	0	0	0	200	903	0	0	0	0	0	0	0	603	903	0
4782	2	0.730544	4.4426	-14.606	1678.8	-617.012	148.727	157.756	185.061	0	0	0	0	0	0	0	200	903	0	0	0	0	0	0	0	603	903	0
4782	3	2.40901	7.18918	-11.8594	1861.91	-800.117	-354.813	132.533	143.002	0	0	0	0	0	0	0	200	903	0	0	0	0	0	0	0	603	903	0
4782	4	-0.337571	7.95212	-15.8267	1953.46	-1288.4	-583.695	118.593	176.572	0	0	0	0	0	0	0	200	903	0	0	0	0	0	0	0	603	903	0
4782	5	-0.490159	4.29001	-19.794	2685.88	-983.223	11.398	150.327	164.308	0	0	0	0	0	0	0	200	903	0	0	0	0	0	0	0	603	903	0
4782	6	-1.55827	2.00119	-20.4044	2868.99	-1105.29	-537.919	145.831	159.393	0	0	0	0	0	0	0	200	903	0	0	0	0	0	0	0	603	903	0
4782	7	-2.4738	3.06931	-24.982	2960.54	-1410.47	-766.801	143.541	181.493	0	0	0	0	0	0	0	200	903	0	0	0	0	0	0	0	603	903	0
4782	8	-2.62639	0.170136	-28.6441	3418.3	-1959.79	-446.366	131.582	180.663	0	0	0	0	0	0	0	200	903	0	0	0	0	0	0	0	603	903	0
4782	9	-3.6945	-4.71268	-32.9166	4425.38	-2020.82	57.1744	138.608	165.557	0	0	0	0	0	0	0	200	903	0	0	0	0	0	0	0	603	903	0
4783	0	-3.38933	-5.17044	-35.6631	4700.04	-2326	57.1744	134.779	168.21	0	0	0	0	0	0	0	200	903	0	0	0	0	0	0	0	603	903	0
4783	1	-2.16863	-4.56009	-35.6631	4425.38	-2326	-171.707	134.779	175.912	0	0	0	0	0	0	0	200	903	0	0	0	0	0	0	0	603	903	0
4783	2	-1.71086	-5.93338	-44.2081	5615.57	-2448.07	-125.931	144.624	172.974	0	0	0	0	0	0	0	200	903	0	0	0	0	0	0	0	603	903	0
4783	3	-2.77898	-8.52737	-52.1426	6347.99	-3119.45	606.491	140.175	178.257	0	0	0	0	0	0	0	200	903	0	0	0	0	0	0	0	603	903	0
4783	4	-1.10051	-9.4429	-59.772	6531.1	-3607.73	1064.25	139.642	190.733	0	0	0	0	0	0	0	200	903	0	0	0	0	0	0	0	603	903	0
4783	5	1.18831	-9.13773	-64.0445	7263.52	-3790.84	972.702	140.809	186.586	0	0	0	0	0	0	0	200	903	0	0	0	0	0	0	0	603	903	0
4783	6	3.47713	-12.9524	-67.4014	8179.05	-3607.73	1064.25	146.474	178.652	0	0	0	0	0	0	0	200	903	0	0	0	0	0	0	0	603	903	0
4783	7	2.25642	-14.1731	-71.9791	9277.68	-4218.09	1384.69	141.398	171.106	0	0	0	0	0	0	0	200	903	0	0	0	0	0	0	0	603	903	0
4783	8	4.08748	-14.3257	-80.524	9643.89	-4584.3	1522.02	143.069	180.236	0	0	0	0	0	0	0	200	903	0	0	0	0	0	0	0	603	903	0
4783	9	4.39265	-14.4783	-86.9327	10559.4	-5194.65	1750.9	140.245	178.533	0	0	0	0	0	0	0	200	903	0	0	0	0	0	0	0	603	903	0
4784	0	5.61336	-17.2249	-92.731	12115.8	-5560.86	1888.23	140.032	169.344	0	0	0	0	0	0	0	200	903	0	0	0	0	0	0	0	603	903	0
4784	1	6.98665	-19.5137	-99.7501	13306	-5438.79	2391.77	145.476	166.607	0	0	0	0	0	0	0	200	903	0	0	0	0	0	0	0	603	903	0
4784	2	6.68147	-19.2085	-106.159	13672.2	-5743.97	2254.44	145.893	171.21	0	0	0	0	0	0	0	200	903	0	0	0	0	0	0	0	603	903	0
4784	3	8.05476	-19.5137	-111.042	14770.8	-6171.21	2437.55	144.424	166.979	0	0	0	0	0	0	0	200	903	0	0	0	0	0	0	0	603	903	0
4784	4	7.90217	-21.0396	-118.366	15411.7	-6720.53	2483.32	143.222	169.796	0	0	0	0	0	0	0	200	903	0	0	0	0	0	0	0	603	903	0
4784	5	10.3436	-24.2439	-124.469	16968.1	-6720.53	2757.98	146.007	163.676	0	0	0	0	0	0	0	200	903	0	0	0	0	0	0	0	603	903	0
4784	6	13.0902	-23.9388	-132.709	16968.1	-7208.81	2941.09	145.68	172.14	0	0	0	0	0	0	0	200	903	0	0	0	0	0	0	0	603	903	0
4784	7	14.7686	-23.0232	-137.287	17975.2	-6903.64	3169.97	149.714	169.068	0	0	0	0	0	0	0	200	903	0	0	0	0	0	0	0	603	903	0
4784	8	15.0738	-23.3284	-143.085	18249.9	-7269.85	3261.52	149.192	172.454	0	0	0	0	0	0	0	200	903	0	0	0	0	0	0	0	603	903	0
4784	9	15.8367	-22.5655	-147.357	19531.6	-7819.16	2895.31	146.937	167.454	0	0	0	0	0	0	0	200	903	0	0	0	0	0	0	0	603	903	0
4785	0	15.9893	-20.887	-150.104	19256.9	-8246.41	3078.42	145.062	171.709	0	0	0	0	0	0	0	200	903	0	0	0	0	0	0	0	603	903	0
4785	1	17.6678	-19.5137	-157.733	19623.1	-8246.41	2986.86	147.719	175.593	0	0	0	0	0	0	0	200	903	0	0	0	0	0	0	0	603	903	0
4785	2	18.1256	-19.0559	-163.227	20447.1	-8124.34	2895.31	150.227	174.732	0	0	0	0	0	0	0	200	903	0	0	0	0	0	0	0	603	903	0
4785	3	19.1937	-17.6826	-164.753	20538.7	-8368.48	2712.2	149.206	175.336	0	0	0	0	0	0	0	200	903	0	0	0	0	0	0	0	603	903	0
4785	4	19.1937	-14.3257	-172.382	21362.6	-8795.72	2895.31	148.975	176.074	0	0	0	0	0	0	0	200	903	0	0	0	0	0	0	0	603	903	0
4785	5	19.6514	-12.1895	-172.992	21179.5	-9039.86	2574.88	147.744	177.569	0	0	0	0	0	0	0	200	903	0	0	0	0	0	0	0	603	903	0
4785	6	19.4989	-11.7317	-176.349	21545.8	-9039.86	2620.65	148.739	177.823	0	0	0	0	0	0	0	200	903	0	0	0	0	0	0	0	603	903	0
4785	7	21.6351	-11.4265	-179.706	21820.4	-8917.79	2345.99	150.376	178.577	0	0	0	0	0	0	0	200	903	0	0	0	0	0	0	0	603	903	0
4785	8	24.0765	-7.30667	-182.453	22003.5	-9161.93	2483.32	149.785	179.402	0	0	0	0	0	0	0	200	903	0	0	0	0	0	0	0	603	903	0
4785	9	23.161	-5.78079	-187.641	22644.4	-9161.93	2254.44	151.173	179.32	0	0	0	0	0	0	0	200	903	0	0	0	0	0	0	0	603	903	0
4786	0	22.7032	-3.94974	-189.167	23285.3	-9467.11	2117.11	149.954	176.906	0	0	0	0	0	0	0	200	903	0	0	0	0	0	0	0	603	903	0
4786	1	23.3136	-1.81351	-191.913	23285.3	-9528.14	2071.33	150.352	178.668	0	0	0	0	0	0	0	200	903	0	0	0	0	0	0	0	603	903	0
4786	2	25.1446	1.39084	-192.829	23834.6	-9222.97	2162.89	152.17	176.395	0	0	0	0	0	0	0	200	903	0	0	0	0	0	0	0	603	903	0
4786	3	26.9757	2.76413	-196.186	23926.1	-9711.25	2117.11	150.5	178.043	0	0	0	0	0	0	0	200	903	0	0	0	0	0	0	0	603	903	0
4786	4	27.586	3.98483	-198.627	24475.4	-9467.11	1934.01	152.337	176.777	0	0	0	0	0	0	0	200	903	0	0	0	0	0	0	0	603	903	0
4786	5	28.349	7.03659	-204.425	24841.7	-10199.5	1934.01	150.106	178.481	0	0	0	0	0	0	0	200	903	0	0	0	0	0	0	0	603	903	0
4786	6	27.4334	9.32541	-205.646	24567	-10382.6	1659.35	149.512	180.538	0	0	0	0	0	0	0	200	903	0	0	0	0	0	0	0	603	903	0
4786	7	28.5015	10.6987	-215.107	24567	-10199.5	1522.02	152.584	185.791	0	0	0	0	0	0	0	200	903	0	0	0	0	0	0	0	603	903	0
4786	8	29.5697	12.6823	-216.938	25299.4	-10626.8	1476.24	151.015	183.379	0	0	0	0	0	0	0	200	903	0	0	0	0	0	0	0	603	903	0
4786	9	31.0955	13.4453	-220.905	25665.6	-10748.8	1476.24	151.342	183.816	0	0	0	0	0	0	0	200	903	0	0	0	0	0	0	0	603	903	0
4787	0	31.2481	16.8022	-226.703	25391	-11237.1	881.149	150.432	187.999	0	0	0	0	0	0	0	200	903	0	0	0	0	0	0	0	603	903	0
4787	1	32.0111	17.26	-234.638	25940.3	-11542.3	1110.03	150.808	189.445	0	0	0	0	0	0	0	200	903	0	0	0	0	0	0	0	603	903	0
4787	2	31.4007	19.5488	-241.046	26214.9	-11786.4	926.926	151.103	191.245	0	0	0	0	0	0	0	200	903	0	0	0	0	0	0	0	603	903	0
4787	3	31.5533	21.685	-248.676	26947.4	-12396.8	606.491	150.149	191.637	0	0	0	0	0	0	0	200	903	0	0	0	0	0	0	0	603	903	0
4787	4	31.7059	23.5161	-254.169	27496.7	-12518.9	286.056	150.746	191.817	0	0	0	0	0	0	0	200	903	0	0	0	0	0	0	0	603	903	0
4787	5	30.6378	23.8213	-261.493	28137.6	-13434.4	652.267	148.624	192.397	0	0	0	0	0	0	0	200	903	0	0	0	0	0	0	0	603	903	0
4787	6	31.5533	25.1945	-268.817	28686.9	-13922.7	698.044	148.208	193.285	0	0	0	0	0	0	0	200	903	0	0	0	0	0	0	0	603	903	0
4787	7	30.7904	27.0256	-277.057	28870	-14227.9	698.044	148.647	195.798	0	0	0	0	0	0	0	200	903	0	0	0	0	0	0	0	603	903	0
4787	8	30.7904	26.5678	-285.907	29510.8	-14533	148.727	149.169	196.782	0	0	0	0	0	0	0	200	903	0	0	0	0	0	0	0	603	903	0
4787	9	30.3326	28.2463	-293.537	29877.1	-15448.6	-34.3784	147.371	198.217	0	0	0	0	0	0	0	200	903	0	0	0	0	0	0	0	603	903	0
4788	0	29.2645	29.6196	-302.387	31525	-15814.8	-125.931	147.7	195.746	0	0	0	0	0	0	0	200	903	0	0	0	0	0	0	0	603	903	0
4788	1	28.5015	30.9929	-307.88	31708.1	-16425.1	102.951	146.651	197.011	0	0	0	0	0	0	0	200	903	0	0	0	0	0	0	0	603	903	0
4788	2	27.8912	31.2981	-313.678	32165.9	-16913.4	-217.484	146.08	197.456	0	0	0	0	0	0	0	200	903	0	0	0	0	0	0	0	603	903	0
4788	3	28.1964	31.9084	-324.054	32623.6	-17462.7	-492.142	146.112	199.327	0	0	0	0	0	0	0	200	903	0	0	0	0	0	0	0	603	903	0
4788	4	27.8912	33.8921	-334.125	33539.2	-17890	-675.248	146.457	199.621	0	0	0	0	0	0	0	200	903	0	0	0	0	0	0	0	603	903	0
4788	5	27.1283	33.4343	-342.67	33996.9	-18683.4	-766.801	145.477	200.788	0	0	0	0	0	0	0	200	903	0	0	0	0	0	0	0	603	903	0
4788	6	26.0601	34.9602	-350.91	34271.6	-19171.7	-1224.56	145.366	202.335	0	0	0	0	0	0	0	200	903	0	0	0	0	0	0	0	603	903	0
4788	7	26.2127	36.1809	-356.098	34820.9	-19354.8	-1041.46	145.647	202.215	0	0	0	0	0	0	0	200	903	0	0	0	0	0	0	0	603	903	0
4788	8	23.161	37.5542	-364.032	34912.4	-20026.2	-1224.56	144.988	204.095	0	0	0	0	0	0	0	200	903	0	0	0	0	0	0	0	603	903	0
4788	9	23.9239	38.4697	-371.051	35095.6	-20148.3	-1270.34	145.7	205.416	0	0	0	0	0	0	0	200	903	0	0	0	0	0	0	0	603	903	0
4789	0	24.992	38.9275	-377.765	35187.1	-21430	-1590.78	143.272	206.855	0	0	0	0	0	0	0	200	903	0	0	0	0	0	0	0	603	903	0
4789	1	22.5506	40.9111	-385.395	35553.3	-21552.1	-1361.89	144.078	207.748	0	0	0	0	0	0	0	200	903	0	0	0	0	0	0	0	603	903	0
4789	2	20.7196	42.8947	-391.803	34912.4	-22162.4	-1270.34	143.435	210.893	0	0	0	0	0	0	0	200	903	0	0	0	0	0	0	0	603	903	0
4789	3	20.567	43.8103	-396.991	35644.9	-22284.5	-1773.88	143.867	210.212	0	0	0	0	0	0	0	200	903	0	0	0	0	0	0	0	603	903	0
4789	4	18.2782	44.8784	-402.179	35553.3	-22772.8	-1911.21	143.377	211.598	0	0	0	0	0	0	0	200	903	0	0	0	0	0	0	0	603	903	0
4789	5	19.1937	46.5569	-411.335	36011.1	-23688.3	-1865.43	142.411	212.453	0	0	0	0	0	0	0	200	903	0	0	0	0	0	0	0	603	903	0
4789	6	17.6678	48.3879	-420.795	35919.5	-24054.5	-2002.76	142.836	214.639	0	0	0	0	0	0	0	200	903	0	0	0	0	0	0	0	603	903	0
4789	7	13.2428	50.219	-430.561	35644.9	-24298.7	-2368.97	143.565	217.213	0	0	0	0	0	0	0	200	903	0	0	0	0	0	0	0	603	903	0
4789	8	9.88582	55.1018	-438.495	36377.3	-25336.2	-2597.85	142.22	217.041	0	0	0	0	0	0	0	200	903	0	0	0	0	0	0	0	603	903	0
4789	9	9.58064	57.238	-444.294	36285.7	-26068.7	-2872.51	141.326	218.329	0	0	0	0	0	0	0	200	903	0	0	0	0	0	0	0	603	903	0
4790	0	5.91853	58.3061	-451.923	36651.9	-26923.2	-3101.39	140.425	218.898	0	0	0	0	0	0	0	200	903	0	0	0	0	0	0	0	603	903	0
4790	1	5.00301	60.4424	-457.721	36560.4	-27655.6	-3284.5	139.58	220.125	0	0	0	0	0	0	0	200	903	0	0	0	0	0	0	0	603	903	0
4790	2	3.93489	64.8674	-465.045	36743.5	-27533.5	-3879.59	140.794	220.989	0	0	0	0	0	0	0	200	903	0	0	0	0	0	0	0	603	903	0
4790	3	-0.337571	66.6985	-471.149	36560.4	-28449.1	-4520.46	139.618	222.402	0	0	0	0	0	0	0	200	903	0	0	0	0	0	0	0	603	903	0
4790	4	-2.93157	70.6657	-476.032	36835.1	-28571.1	-4383.13	139.981	222.621	0	0	0	0	0	0	0	200	903	0	0	0	0	0	0	0	603	903	0
4790	5	-2.16863	72.9546	-478.473	37292.8	-29181.5	-4840.9	139.011	222.059	0	0	0	0	0	0	0	200	903	0	0	0	0	0	0	0	603	903	0
4790	6	-3.6945	77.0744	-486.103	37659	-29669.8	-4795.12	138.964	222.529	0	0	0	0	0	0	0	200	903	0	0	0	0	0	0	0	603	903	0
4790	7	-4.61003	79.3633	-490.375	37201.3	-30097	-5024	138.625	224.137	0	0	0	0	0	0	0	200	903	0	0	0	0	0	0	0	603	903	0
4790	8	-2.93157	78.9055	-496.784	37567.5	-29913.9	-5527.54	139.785	224.379	0	0	0	0	0	0	0	200	903	0	0	0	0	0	0	0	603	903	0
4790	9	-4.45744	81.8047	-501.056	37384.4	-30280.1	-5481.77	139.567	225.389	0	0	0	0	0	0	0	200	903	0	0	0	0	0	0	0	603	903	0
4791	0	-5.83074	83.9409	-504.108	36926.6	-30768.4	-5756.42	138.965	226.749	0	0	0	0	0	0	0	200	903	0	0	0	0	0	0	0	603	903	0
4791	1	-5.98332	84.2461	-505.634	37018.2	-31073.6	-5939.53	138.545	226.789	0	0	0	0	0	0	0	200	903	0	0	0	0	0	0	0	603	903	0
4791	2	-5.83074	85.009	-508.686	36743.5	-31561.8	-6122.64	137.954	227.768	0	0	0	0	0	0	0	200	903	0	0	0	0	0	0	0	603	903	0
4791	3	-6.2885	85.9245	-511.127	36743.5	-31195.6	-5847.98	138.967	228.113	0	0	0	0	0	0	0	200	903	0	0	0	0	0	0	0	603	903	0
4791	4	-5.98332	86.0771	-515.399	36468.8	-31317.7	-6076.86	139.236	229.242	0	0	0	0	0	0	0	200	903	0	0	0	0	0	0	0	603	903	0
4791	5	-5.22038	85.7719	-518.451	36835.1	-31500.8	-6214.19	139.241	228.952	0	0	0	0	0	0	0	200	903	0	0	0	0	0	0	0	603	903	0
4791	6	-6.13591	84.7038	-519.062	36285.7	-31928.1	-6351.52	138.489	230.094	0	0	0	0	0	0	0	200	903	0	0	0	0	0	0	0	603	903	0
4791	7	-6.2885	83.4831	-524.555	36560.4	-31928.1	-6076.86	139.133	230.302	0	0	0	0	0	0	0	200	903	0	0	0	0	0	0	0	603	903	0
4791	8	-6.74626	84.5512	-523.029	35919.5	-31867	-5756.42	139.072	231.324	0	0	0	0	0	0	0	200	903	0	0	0	0	0	0	0	603	903	0
4791	9	-7.35661	83.9409	-524.86	35553.3	-31928.1	-6305.74	139.168	232.261	0	0	0	0	0	0	0	200	903	0	0	0	0	0	0	0	603	903	0
4792	0	-6.59367	83.3305	-526.081	35644.9	-32904.6	-5985.31	137.453	232.244	0	0	0	0	0	0	0	200	903	0	0	0	0	0	0	0	603	903	0
4792	1	-5.52556	83.3305	-529.132	35461.8	-32477.4	-6443.07	138.621	232.981	0	0	0	0	0	0	0	200	903	0	0	0	0	0	0	0	603	903	0
4792	2	-6.74626	83.3305	-525.165	35278.7	-32355.3	-6534.62	138.39	232.824	0	0	0	0	0	0	0	200	903	0	0	0	0	0	0	0	603	903	0
4792	3	-8.27214	83.4831	-532.489	35370.2	-32660.5	-6351.52	138.665	233.576	0	0	0	0	0	0	0	200	903	0	0	0	0	0	0	0	603	903	0
4792	4	-8.88249	83.7883	-531.879	35187.1	-32355.3	-6809.28	139.168	233.844	0	0	0	0	0	0	0	200	903	0	0	0	0	0	0	0	603	903	0
4792	5	-9.34026	85.7719	-530.353	35004	-33209.8	-6992.39	137.382	233.999	0	0	0	0	0	0	0	200	903	0	0	0	0	0	0	0	603	903	0
4792	6	-8.42473	86.2297	-534.626	34454.7	-33148.8	-6580.4	137.996	235.554	0	0	0	0	0	0	0	200	903	0	0	0	0	0	0	0	603	903	0
4792	7	-9.95061	86.2297	-536.151	34729.3	-32843.6	-6855.06	138.742	235.225	0	0	0	0	0	0	0	200	903	0	0	0	0	0	0	0	603	903	0
4792	8	-9.64543	88.2133	-533.1	34729.3	-32782.5	-7083.94	138.506	234.854	0	0	0	0	0	0	0	200	903	0	0	0	0	0	0	0	603	903	0
4792	9	-12.0868	87.9082	-540.119	34454.7	-33392.9	-7221.27	138.175	236.209	0	0	0	0	0	0	0	200	903	0	0	0	0	0	0	0	603	903	0
4793	0	-12.6972	86.8401	-540.424	34454.7	-33759.1	-7038.16	137.532	236.245	0	0	0	0	0	0	0	200	903	0	0	0	0	0	0	0	603	903	0
4793	1	-12.6972	89.5866	-543.476	34180	-33392.9	-7267.04	138.557	237.108	0	0	0	0	0	0	0	200	903	0	0	0	0	0	0	0	603	903	0
4793	2	-13.3075	91.1125	-544.696	34454.7	-33515	-7495.93	138.47	236.745	0	0	0	0	0	0	0	200	903	0	0	0	0	0	0	0	603	903	0
4793	3	-14.5282	91.7229	-549.579	34088.5	-33942.2	-7541.71	138.24	237.974	0	0	0	0	0	0	0	200	903	0	0	0	0	0	0	0	603	903	0
4793	4	-16.0541	93.0962	-551.41	34180	-34186.3	-7587.48	138.002	238.013	0	0	0	0	0	0	0	200	903	0	0	0	0	0	0	0	603	903	0
4793	5	-18.0378	93.0962	-554.157	33813.8	-33881.2	-7221.27	138.86	238.982	0	0	0	0	0	0	0	200	903	0	0	0	0	0	0	0	603	903	0
4793	6	-18.8007	94.0117	-555.378	33630.7	-34308.4	-7267.04	138.225	239.445	0	0	0	0	0	0	0	200	903	0	0	0	0	0	0	0	603	903	0
4793	7	-18.4955	94.4695	-558.429	33905.4	-34918.8	-7358.6	137.47	239.284	0	0	0	0	0	0	0	200	903	0	0	0	0	0	0	0	603	903	0
4793	8	-19.8688	94.4695	-560.871	33722.3	-35346	-7953.69	136.98	239.875	0	0	0	0	0	0	0	200	903	0	0	0	0	0	0	0	603	903	0
4793	9	-20.3266	96.9109	-566.974	34180	-35101.9	-7267.04	138.089	239.715	0	0	0	0	0	0	0	200	903	0	0	0	0	0	0	0	603	903	0
4794	0	-21.8525	97.0634	-569.11	32989.8	-35285	-7862.14	138	242.033	0	0	0	0	0	0	0	200	903	0	0	0	0	0	0	0	603	903	0
4794	1	-23.0732	97.979	-571.552	32806.7	-35834.3	-8045.24	137.303	242.601	0	0	0	0	0	0	0	200	903	0	0	0	0	0	0	0	603	903	0
4794	2	-23.3783	97.8264	-575.214	33264.5	-36078.4	-8228.35	137.278	242.17	0	0	0	0	0	0	0	200	903	0	0	0	0	0	0	0	603	903	0
4794	3	-22.3102	99.6574	-578.266	33539.2	-35895.3	-8228.35	137.926	242	0	0	0	0	0	0	0	200	903	0	0	0	0	0	0	0	603	903	0
4794	4	-22.9206	100.115	-581.928	32898.3	-35895.3	-8319.9	138.317	243.467	0	0	0	0	0	0	0	200	903	0	0	0	0	0	0	0	603	903	0
4794	5	-22.9206	99.6574	-586.811	33081.4	-36688.8	-8731.89	137.478	243.625	0	0	0	0	0	0	0	200	903	0	0	0	0	0	0	0	603	903	0
4794	6	-22.768	98.1316	-589.252	33356	-37055	-8731.89	137.115	243.393	0	0	0	0	0	0	0	200	903	0	0	0	0	0	0	0	603	903	0
4794	7	-24.7516	101.336	-594.745	33172.9	-37177.1	-8731.89	137.491	244.223	0	0	0	0	0	0	0	200	903	0	0	0	0	0	0	0	603	903	0
4794	8	-24.7516	102.251	-596.271	34088.5	-36994	-7999.47	137.958	242.831	0	0	0	0	0	0	0	200	903	0	0	0	0	0	0	0	603	903	0
4794	9	-24.9042	101.488	-597.492	33813.8	-37238.1	-8503.01	137.676	243.407	0	0	0	0	0	0	0	200	903	0	0	0	0	0	0	0	603	903	0
4795	0	-23.8361	101.488	-603.29	34729.3	-37665.4	-8731.89	137.567	242.433	0	0	0	0	0	0	0	200	903	0	0	0	0	0	0	0	603	903	0
4795	1	-23.8361	101.946	-608.783	33630.7	-37848.5	-8777.66	137.829	244.758	0	0	0	0	0	0	0	200	903	0	0	0	0	0	0	0	603	903	0
4795	2	-23.5309	101.794	-612.751	33905.4	-37543.3	-8686.11	138.73	244.667	0	0	0	0	0	0	0	200	903	0	0	0	0	0	0	0	603	903	0
4795	3	-24.7516	100.878	-616.413	33813.8	-37909.5	-8731.89	138.5	245.144	0	0	0	0	0	0	0	200	903	0	0	0	0	0	0	0	603	903	0
4795	4	-23.3783	102.709	-620.38	34454.7	-38702.9	-8777.66	137.614	244.462	0	0	0	0	0	0	0	200	903	0	0	0	0	0	0	0	603	903	0
4795	5	-25.362	102.709	-623.432	33264.5	-38580.9	-8823.44	138.115	246.643	0	0	0	0	0	0	0	200	903	0	0	0	0	0	0	0	603	903	0
4795	6	-23.6835	103.167	-626.483	33264.5	-38458.8	-8731.89	138.612	246.903	0	0	0	0	0	0	0	200	903	0	0	0	0	0	0	0	603	903	0
4795	7	-24.599	102.862	-631.366	33813.8	-38702.9	-8640.33	138.7	246.443	0	0	0	0	0	0	0	200	903	0	0	0	0	0	0	0	603	903	0
4795	8	-23.9887	104.235	-636.554	33539.2	-39313.3	-8960.77	138.24	247.311	0	0	0	0	0	0	0	200	903	0	0	0	0	0	0	0	603	903	0
4795	9	-24.1413	104.388	-640.522	33447.6	-38947.1	-8411.45	139.195	247.781	0	0	0	0	0	0	0	200	903	0	0	0	0	0	0	0	603	903	0
4796	0	-25.2094	104.082	-644.794	33447.6	-40045.7	-8731.89	137.894	248.127	0	0	0	0	0	0	0	200	903	0	0	0	0	0	0	0	603	903	0
4796	1	-24.7516	104.235	-647.846	33630.7	-39618.5	-8503.01	138.846	248.088	0	0	0	0	0	0	0	200	903	0	0	0	0	0	0	0	603	903	0
4796	2	-23.8361	103.014	-652.423	33722.3	-39496.4	-8411.45	139.462	248.312	0	0	0	0	0	0	0	200	903	0	0	0	0	0	0	0	603	903	0
4796	3	-23.9887	104.54	-655.78	33813.8	-40473	-8686.11	138.283	248.437	0	0	0	0	0	0	0	200	903	0	0	0	0	0	0	0	603	903	0
4796	4	-24.1413	104.082	-661.273	34454.7	-40534	-8457.23	138.703	247.896	0	0	0	0	0	0	0	200	903	0	0	0	0	0	0	0	603	903	0
4796	5	-23.2258	104.845	-662.494	34180	-40167.8	-8457.23	139.369	248.407	0	0	0	0	0	0	0	200	903	0	0	0	0	0	0	0	603	903	0
4796	6	-24.599	104.54	-669.208	34363.1	-40350.9	-8457.23	139.704	248.651	0	0	0	0	0	0	0	200	903	0	0	0	0	0	0	0	603	903	0
4796	7	-24.2939	104.388	-671.039	34912.4	-41266.4	-8503.01	138.504	247.973	0	0	0	0	0	0	0	200	903	0	0	0	0	0	0	0	603	903	0
4796	8	-24.2939	103.167	-671.955	35095.6	-41022.3	-8365.68	138.951	247.771	0	0	0	0	0	0	0	200	903	0	0	0	0	0	0	0	603	903	0
4796	9	-22.768	103.167	-679.889	34912.4	-41022.3	-8365.68	139.663	248.65	0	0	0	0	0	0	0	200	903	0	0	0	0	0	0	0	603	903	0
4797	0	-21.5473	103.167	-684.772	34820.9	-40839.2	-7724.81	140.361	249.15	0	0	0	0	0	0	0	200	903	0	0	0	0	0	0	0	603	903	0
4797	1	-22.1576	102.099	-688.434	35004	-41144.4	-8274.12	140.235	249.154	0	0	0	0	0	0	0	200	903	0	0	0	0	0	0	0	603	903	0
4797	2	-22.6154	101.641	-691.791	35644.9	-41449.5	-7770.59	140.084	248.474	0	0	0	0	0	0	0	200	903	0	0	0	0	0	0	0	603	903	0
4797	3	-20.7843	102.099	-693.927	35553.3	-41754.7	-8228.35	139.828	248.765	0	0	0	0	0	0	0	200	903	0	0	0	0	0	0	0	603	903	0
4797	4	-21.3947	101.794	-694.538	35004	-41510.6	-7724.81	140.233	249.601	0	0	0	0	0	0	0	200	903	0	0	0	0	0	0	0	603	903	0
4797	5	-20.3266	101.336	-699.42	34912.4	-41449.5	-7724.81	140.737	250.084	0	0	0	0	0	0	0	200	903	0	0	0	0	0	0	0	603	903	0
4797	6	-19.5636	101.336	-703.083	34820.9	-41815.7	-7862.14	140.525	250.474	0	0	0	0	0	0	0	200	903	0	0	0	0	0	0	0	603	903	0
4797	7	-18.8007	100.726	-708.881	35004	-42243	-8091.02	140.409	250.621	0	0	0	0	0	0	0	200	903	0	0	0	0	0	0	0	603	903	0
4797	8	-19.4111	101.031	-711.933	35644.9	-42243	-7679.03	140.664	249.932	0	0	0	0	0	0	0	200	903	0	0	0	0	0	0	0	603	903	0
4797	9	-19.8688	99.9626	-715.595	35004	-42059.9	-7541.71	141.224	251.084	0	0	0	0	0	0	0	200	903	0	0	0	0	0	0	0	603	903	0
4798	0	-19.5636	99.81	-716.815	35095.6	-41998.8	-7633.26	141.409	251.04	0	0	0	0	0	0	0	200	903	0	0	0	0	0	0	0	603	903	0
4798	1	-16.5119	98.8945	-719.257	35370.2	-42059.9	-6855.06	141.523	250.824	0	0	0	0	0	0	0	200	903	0	0	0	0	0	0	0	603	903	0
4798	2	-16.8171	98.8945	-722.614	35278.7	-42792.3	-7358.6	140.781	251.179	0	0	0	0	0	0	0	200	903	0	0	0	0	0	0	0	603	903	0
4798	3	-16.9697	98.5893	-728.107	36102.6	-42609.2	-7129.72	141.479	250.416	0	0	0	0	0	0	0	200	903	0	0	0	0	0	0	0	603	903	0
4798	4	-17.1222	97.3686	-728.412	36285.7	-42548.2	-7038.16	141.588	250.185	0	0	0	0	0	0	0	200	903	0	0	0	0	0	0	0	603	903	0
4798	5	-17.58	96.7583	-732.379	36560.4	-42792.3	-7175.49	141.571	250.08	0	0	0	0	0	0	0	200	903	0	0	0	0	0	0	0	603	903	0
4798	6	-17.1222	95.8427	-734.516	36468.8	-42914.4	-7083.94	141.575	250.35	0	0	0	0	0	0	0	200	903	0	0	0	0	0	0	0	603	903	0
4798	7	-17.2748	95.5376	-737.262	36743.5	-43280.6	-6580.4	141.296	250.162	0	0	0	0	0	0	0	200	903	0	0	0	0	0	0	0	603	903	0
4798	8	-16.0541	94.622	-739.398	36285.7	-43341.6	-6259.96	141.383	250.925	0	0	0	0	0	0	0	200	903	0	0	0	0	0	0	0	603	903	0
4798	9	-14.6808	94.0117	-744.281	36560.4	-43585.8	-6534.62	141.439	250.878	0	0	0	0	0	0	0	200	903	0	0	0	0	0	0	0	603	903	0
4799	0	-15.2912	93.4013	-747.638	36468.8	-42914.4	-6534.62	142.6	251.221	0	0	0	0	0	0	0	200	903	0	0	0	0	0	0	0	603	903	0
4799	1	-16.0541	92.9436	-749.774	36835.1	-43158.5	-6626.18	142.438	250.872	0	0	0	0	0	0	0	200	903	0	0	0	0	0	0	0	603	903	0
4799	2	-13.9179	92.028	-748.554	36011.1	-43524.7	-6259.96	141.855	251.892	0	0	0	0	0	0	0	200	903	0	0	0	0	0	0	0	603	903	0
4799	3	-15.1386	91.2651	-751.3	35919.5	-43707.8	-6259.96	141.824	252.19	0	0	0	0	0	0	0	200	903	0	0	0	0	0	0	0	603	903	0
4799	4	-13.7653	90.9599	-753.742	36194.2	-43646.8	-6305.74	142.093	251.981	0	0	0	0	0	0	0	200	903	0	0	0	0	0	0	0	603	903	0
4799	5	-13.155	90.0444	-757.709	36194.2	-43402.7	-6122.64	142.719	252.232	0	0	0	0	0	0	0	200	903	0	0	0	0	0	0	0	603	903	0
4799	6	-13.155	90.0444	-759.235	35828	-43402.7	-5847.98	142.834	252.81	0	0	0	0	0	0	0	200	903	0	0	0	0	0	0	0	603	903	0
4799	7	-13.6127	88.9763	-761.676	36285.7	-43829.9	-5802.2	142.456	252.361	0	0	0	0	0	0	0	200	903	0	0	0	0	0	0	0	603	903	0
4799	8	-10.8661	88.6711	-762.287	35919.5	-43829.9	-5893.75	142.502	252.879	0	0	0	0	0	0	0	200	903	0	0	0	0	0	0	0	603	903	0
4799	9	-12.392	87.7556	-764.423	35919.5	-43585.8	-5161.33	142.982	253.011	0	0	0	0	0	0	0	200	903	0	0	0	0	0	0	0	603	903	0
4800	0	-10.7135	85.009	-766.864	36285.7	-43768.9	-5344.44	142.925	252.683	0	0	0	0	0	0	0	200	903	0	0	0	0	0	0	0	603	903	0
4800	1	-10.1032	85.9245	-768.695	36377.3	-43524.7	-4612.02	143.378	252.677	0	0	0	0	0	0	0	200	903	0	0	0	0	0	0	0	603	903	0
4800	2	-10.8661	85.009	-771.137	36651.9	-44074	-4749.34	142.845	252.47	0	0	0	0	0	0	0	200	903	0	0	0	0	0	0	0	603	903	0
4800	3	-10.8661	84.2461	-772.052	37109.7	-43768.9	-4474.69	143.308	251.934	0	0	0	0	0	0	0	200	903	0	0	0	0	0	0	0	603	903	0
4800	4	-10.7135	83.0254	-771.747	36926.6	-43524.7	-4703.57	143.602	252.152	0	0	0	0	0	0	0	200	903	0	0	0	0	0	0	0	603	903	0
4800	5	-11.0187	81.9572	-773.883	37109.7	-43707.8	-4291.58	143.521	252.047	0	0	0	0	0	0	0	200	903	0	0	0	0	0	0	0	603	903	0
4800	6	-10.1032	81.6521	-773.578	37109.7	-44196.1	-4428.91	142.868	252.028	0	0	0	0	0	0	0	200	903	0	0	0	0	0	0	0	603	903	0
4800	7	-9.03508	80.7365	-776.02	37201.3	-44135.1	-4566.24	143.126	252.061	0	0	0	0	0	0	0	200	903	0	0	0	0	0	0	0	603	903	0
4800	8	-9.95061	79.5158	-778.766	36835.1	-44013	-4383.13	143.484	252.701	0	0	0	0	0	0	0	200	903	0	0	0	0	0	0	0	603	903	0
4800	9	-10.561	78.2951	-776.02	37109.7	-43890.9	-4200.03	143.441	252.179	0	0	0	0	0	0	0	200	903	0	0	0	0	0	0	0	603	903	0
4801	0	-10.561	77.99	-779.071	36835.1	-44379.2	-4154.25	143.036	252.719	0	0	0	0	0	0	0	200	903	0	0	0	0	0	0	0	603	903	0
4801	1	-10.2558	77.0744	-778.156	36651.9	-44379.2	-4016.92	142.969	252.899	0	0	0	0	0	0	0	200	903	0	0	0	0	0	0	0	603	903	0
4801	2	-10.2558	75.7011	-775.714	36285.7	-44135.1	-3925.37	143.104	253.223	0	0	0	0	0	0	0	200	903	0	0	0	0	0	0	0	603	903	0
4801	3	-8.42473	75.0908	-778.461	36285.7	-43768.9	-3788.04	143.775	253.388	0	0	0	0	0	0	0	200	903	0	0	0	0	0	0	0	603	903	0
4801	4	-9.18767	74.3279	-779.987	36285.7	-43829.9	-3604.93	143.807	253.479	0	0	0	0	0	0	0	200	903	0	0	0	0	0	0	0	603	903	0
4801	5	-9.03508	72.802	-779.682	36194.2	-43829.9	-3696.49	143.785	253.578	0	0	0	0	0	0	0	200	903	0	0	0	0	0	0	0	603	903	0
4801	6	-9.95061	73.5649	-778.766	36468.8	-44013	-3559.16	143.484	253.171	0	0	0	0	0	0	0	200	903	0	0	0	0	0	0	0	603	903	0
4801	7	-9.64543	71.7339	-773.578	35553.3	-43341.6	-3330.28	143.973	254.04	0	0	0	0	0	0	0	200	903	0	0	0	0	0	0	0	603	903	0
4801	8	-9.79802	71.1235	-775.714	36377.3	-43219.6	-3055.62	144.284	253.105	0	0	0	0	0	0	0	200	903	0	0	0	0	0	0	0	603	903	0
4801	9	-9.64543	70.3606	-775.104	35828	-43463.7	-3238.72	143.925	253.777	0	0	0	0	0	0	0	200	903	0	0	0	0	0	0	0	603	903	0
4802	0	-8.27214	69.1399	-772.663	35644.9	-43402.7	-3055.62	143.827	253.867	0	0	0	0	0	0	0	200	903	0	0	0	0	0	0	0	603	903	0
4802	1	-9.34026	66.851	-773.273	35461.8	-43524.7	-2964.07	143.714	254.141	0	0	0	0	0	0	0	200	903	0	0	0	0	0	0	0	603	903	0
4802	2	-8.11955	67.9192	-770.832	35736.4	-42853.3	-2597.85	144.406	253.639	0	0	0	0	0	0	0	200	903	0	0	0	0	0	0	0	603	903	0
4802	3	-9.79802	66.851	-769.611	36011.1	-43036.4	-2918.29	144.08	253.209	0	0	0	0	0	0	0	200	903	0	0	0	0	0	0	0	603	903	0
4802	4	-9.18767	66.0881	-765.338	35828	-43158.5	-3101.39	143.609	253.187	0	0	0	0	0	0	0	200	903	0	0	0	0	0	0	0	603	903	0
4802	5	-10.4084	64.8674	-763.813	35736.4	-42670.2	-2048.54	144.135	253.213	0	0	0	0	0	0	0	200	903	0	0	0	0	0	0	0	603	903	0
4802	6	-9.03508	64.1045	-762.897	35004	-42792.3	-2323.2	143.908	254.117	0	0	0	0	0	0	0	200	903	0	0	0	0	0	0	0	603	903	0
4802	7	-10.1032	64.257	-759.54	35187.1	-42304	-2277.42	144.303	253.673	0	0	0	0	0	0	0	200	903	0	0	0	0	0	0	0	603	903	0
4802	8	-9.64543	62.2734	-758.625	35370.2	-42670.2	-2277.42	143.753	253.376	0	0	0	0	0	0	0	200	903	0	0	0	0	0	0	0	603	903	0
4802	9	-10.8661	60.5949	-755.268	35187.1	-42426.1	-2277.42	143.826	253.411	0	0	0	0	0	0	0	200	903	0	0	0	0	0	0	0	603	903	0
4803	0	-11.7817	60.1372	-753.131	34637.8	-42304	-2231.64	143.829	254.008	0	0	0	0	0	0	0	200	903	0	0	0	0	0	0	0	603	903	0
4803	1	-11.3239	59.0691	-749.469	34729.3	-41815.7	-2048.54	144.206	253.661	0	0	0	0	0	0	0	200	903	0	0	0	0	0	0	0	603	903	0
4803	2	-10.561	56.7802	-745.807	34271.6	-41754.7	-1865.43	144.014	254.048	0	0	0	0	0	0	0	200	903	0	0	0	0	0	0	0	603	903	0
4803	3	-10.561	58.6113	-741.23	34546.2	-41449.5	-2140.09	144.08	253.393	0	0	0	0	0	0	0	200	903	0	0	0	0	0	0	0	603	903	0
4803	4	-11.1713	57.6958	-739.398	33630.7	-41754.7	-1682.33	143.529	254.516	0	0	0	0	0	0	0	200	903	0	0	0	0	0	0	0	603	903	0
4803	5	-11.0187	56.7802	-733.6	32715.2	-41205.4	-1819.66	143.831	255.405	0	0	0	0	0	0	0	200	903	0	0	0	0	0	0	0	603	903	0
4803	6	-12.2394	56.0173	-732.685	32898.3	-40717.1	-1865.43	144.428	255.099	0	0	0	0	0	0	0	200	903	0	0	0	0	0	0	0	603	903	0
4803	7	-10.2558	56.7802	-728.717	32623.6	-40473	-1865.43	144.46	255.231	0	0	0	0	0	0	0	200	903	0	0	0	0	0	0	0	603	903	0
4803	8	-12.392	55.2544	-724.445	31982.8	-41022.3	-1545	143.374	255.852	0	0	0	0	0	0	0	200	903	0	0	0	0	0	0	0	603	903	0
4803	9	-12.5446	54.7966	-720.783	32165.9	-40717.1	-1590.78	143.51	255.374	0	0	0	0	0	0	0	200	903	0	0	0	0	0	0	0	603	903	0
4804	0	-11.6291	54.4914	-714.679	31708.1	-40228.8	-1728.1	143.711	255.633	0	0	0	0	0	0	0	200	903	0	0	0	0	0	0	0	603	903	0
4804	1	-12.6972	52.6604	-714.984	31250.3	-39984.7	-1590.78	144.076	256.292	0	0	0	0	0	0	0	200	903	0	0	0	0	0	0	0	603	903	0
4804	2	-12.8498	51.1345	-711.628	31158.8	-40106.8	-1316.12	143.641	256.215	0	0	0	0	0	0	0	200	903	0	0	0	0	0	0	0	603	903	0
4804	3	-14.0705	52.3552	-707.965	31799.7	-40045.7	-1270.34	143.435	255.083	0	0	0	0	0	0	0	200	903	0	0	0	0	0	0	0	603	903	0
4804	4	-14.2231	51.4397	-701.862	31067.2	-39130.2	-1224.56	144.248	255.736	0	0	0	0	0	0	0	200	903	0	0	0	0	0	0	0	603	903	0
4804	5	-14.2231	50.3716	-698.2	30792.6	-39313.3	-1361.89	143.693	255.897	0	0	0	0	0	0	0	200	903	0	0	0	0	0	0	0	603	903	0
4804	6	-13.9179	49.7612	-693.927	30792.6	-39313.3	-1270.34	143.347	255.626	0	0	0	0	0	0	0	200	903	0	0	0	0	0	0	0	603	903	0
4804	7	-14.5282	48.3879	-691.791	30060.2	-39313.3	-1178.79	143.172	256.547	0	0	0	0	0	0	0	200	903	0	0	0	0	0	0	0	603	903	0
4804	8	-14.986	48.2353	-685.077	30060.2	-38519.8	-1087.24	143.773	256.122	0	0	0	0	0	0	0	200	903	0	0	0	0	0	0	0	603	903	0
4804	9	-16.3593	47.7776	-683.857	29602.4	-38031.6	-1087.24	144.387	256.713	0	0	0	0	0	0	0	200	903	0	0	0	0	0	0	0	603	903	0
4805	0	-14.2231	47.1672	-677.448	29693.9	-38397.8	-1224.56	143.32	256.168	0	0	0	0	0	0	0	200	903	0	0	0	0	0	0	0	603	903	0
4805	1	-16.6645	45.1836	-673.786	29053.1	-37726.4	-1178.79	144.008	256.881	0	0	0	0	0	0	0	200	903	0	0	0	0	0	0	0	603	903	0
4805	2	-15.9015	46.0991	-670.124	28961.5	-38092.6	-1270.34	143.156	256.782	0	0	0	0	0	0	0	200	903	0	0	0	0	0	0	0	603	903	0
4805	3	-14.3757	45.3362	-668.293	28046	-37665.4	-995.682	143.639	258.033	0	0	0	0	0	0	0	200	903	0	0	0	0	0	0	0	603	903	0
4805	4	-16.6645	45.031	-663.715	27588.2	-37482.2	-1041.46	143.527	258.434	0	0	0	0	0	0	0	200	903	0	0	0	0	0	0	0	603	903	0
4805	5	-17.8852	45.1836	-660.053	27679.8	-37421.2	-1133.01	143.306	258.064	0	0	0	0	0	0	0	200	903	0	0	0	0	0	0	0	603	903	0
4805	6	-18.1904	44.4206	-654.865	27496.7	-37421.2	-995.682	142.857	258.012	0	0	0	0	0	0	0	200	903	0	0	0	0	0	0	0	603	903	0
4805	7	-18.8007	43.8103	-651.508	26123.4	-36810.9	-1041.46	143.499	259.903	0	0	0	0	0	0	0	200	903	0	0	0	0	0	0	0	603	903	0
4805	8	-19.1059	43.1999	-645.404	26214.9	-36749.8	-721.024	143.059	259.382	0	0	0	0	0	0	0	200	903	0	0	0	0	0	0	0	603	903	0
4805	9	-18.6481	43.1999	-643.878	26398	-36932.9	-949.906	142.64	259.001	0	0	0	0	0	0	0	200	903	0	0	0	0	0	0	0	603	903	0
4806	0	-16.8171	41.3689	-641.742	25757.2	-36627.8	-721.024	142.924	259.864	0	0	0	0	0	0	0	200	903	0	0	0	0	0	0	0	603	903	0
4806	1	-18.6481	42.2844	-638.69	25482.5	-36078.4	-675.248	143.512	260.102	0	0	0	0	0	0	0	200	903	0	0	0	0	0	0	0	603	903	0
4806	2	-20.0214	41.2163	-635.028	25757.2	-35895.3	-721.024	143.474	259.439	0	0	0	0	0	0	0	200	903	0	0	0	0	0	0	0	603	903	0
4806	3	-20.6318	41.0637	-632.892	25299.4	-35712.2	-721.024	143.573	260.026	0	0	0	0	0	0	0	200	903	0	0	0	0	0	0	0	603	903	0
4806	4	-20.174	39.6904	-627.094	25116.3	-36017.4	-446.366	142.565	259.948	0	0	0	0	0	0	0	200	903	0	0	0	0	0	0	0	603	903	0
4806	5	-20.6318	39.2326	-623.737	25299.4	-36017.4	-400.589	142.255	259.439	0	0	0	0	0	0	0	200	903	0	0	0	0	0	0	0	603	903	0
4806	6	-20.174	39.08	-621.906	24567	-35407.1	-583.695	143.067	260.497	0	0	0	0	0	0	0	200	903	0	0	0	0	0	0	0	603	903	0
4806	7	-20.6318	38.3171	-620.075	24109.2	-35407.1	-80.1548	142.899	261.119	0	0	0	0	0	0	0	200	903	0	0	0	0	0	0	0	603	903	0
4806	8	-20.9369	37.5542	-615.802	23926.1	-35529.1	-629.471	142.304	261.146	0	0	0	0	0	0	0	200	903	0	0	0	0	0	0	0	603	903	0
4806	9	-22.6154	37.4016	-614.276	23376.8	-35590.2	-675.248	142.062	261.944	0	0	0	0	0	0	0	200	903	0	0	0	0	0	0	0	603	903	0
4807	0	-21.8525	36.7912	-610.309	22919	-35162.9	-537.919	142.385	262.447	0	0	0	0	0	0	0	200	903	0	0	0	0	0	0	0	603	903	0
4807	1	-20.4792	36.3335	-607.868	22186.6	-34979.8	-400.589	142.455	263.501	0	0	0	0	0	0	0	200	903	0	0	0	0	0	0	0	603	903	0
4807	2	-21.3947	36.4861	-603.9	22552.8	-34735.7	-492.142	142.481	262.655	0	0	0	0	0	0	0	200	903	0	0	0	0	0	0	0	603	903	0
4807	3	-22.4628	34.8076	-603.595	22186.6	-35101.9	-583.695	141.845	263.243	0	0	0	0	0	0	0	200	903	0	0	0	0	0	0	0	603	903	0
4807	4	-23.8361	35.8757	-599.323	21912	-34674.6	-675.248	142.144	263.439	0	0	0	0	0	0	0	200	903	0	0	0	0	0	0	0	603	903	0
4807	5	-23.3783	34.9602	-598.407	22186.6	-35040.8	-263.26	141.443	262.924	0	0	0	0	0	0	0	200	903	0	0	0	0	0	0	0	603	903	0
4807	6	-24.9042	34.3498	-593.524	21637.3	-34491.5	-263.26	141.887	263.544	0	0	0	0	0	0	0	200	903	0	0	0	0	0	0	0	603	903	0
4807	7	-24.4465	33.1291	-588.947	21362.6	-34064.3	-400.589	142.161	263.727	0	0	0	0	0	0	0	200	903	0	0	0	0	0	0	0	603	903	0
4807	8	-23.5309	33.4343	-588.947	21179.5	-34369.5	-400.589	141.643	264.038	0	0	0	0	0	0	0	200	903	0	0	0	0	0	0	0	603	903	0
4807	9	-23.6835	32.9765	-588.947	20996.4	-34247.4	-217.484	141.85	264.349	0	0	0	0	0	0	0	200	903	0	0	0	0	0	0	0	603	903	0
4808	0	-23.9887	32.2136	-583.454	20721.8	-34308.4	-171.707	141.198	264.484	0	0	0	0	0	0	0	200	903	0	0	0	0	0	0	0	603	903	0
4808	1	-24.7516	32.061	-584.98	20721.8	-33881.2	-309.037	142.081	264.577	0	0	0	0	0	0	0	200	903	0	0	0	0	0	0	0	603	903	0
4808	2	-25.2094	30.5351	-581.317	20447.1	-33820.1	-217.484	141.822	264.826	0	0	0	0	0	0	0	200	903	0	0	0	0	0	0	0	603	903	0
4808	3	-24.7516	28.8567	-577.35	20538.7	-34369.5	11.398	140.47	264.426	0	0	0	0	0	0	0	200	903	0	0	0	0	0	0	0	603	903	0
4808	4	-24.599	29.6196	-577.655	19714.7	-33881.2	-125.931	141.347	265.871	0	0	0	0	0	0	0	200	903	0	0	0	0	0	0	0	603	903	0
4808	5	-25.2094	29.1618	-577.961	20172.5	-33942.2	-34.3784	141.272	265.097	0	0	0	0	0	0	0	200	903	0	0	0	0	0	0	0	603	903	0
4808	6	-24.7516	28.3989	-572.467	19806.3	-33759.1	-34.3784	141.029	265.402	0	0	0	0	0	0	0	200	903	0	0	0	0	0	0	0	603	903	0
4808	7	-26.1249	27.9411	-573.993	18982.3	-33759.1	-34.3784	141.186	266.929	0	0	0	0	0	0	0	200	903	0	0	0	0	0	0	0	603	903	0
4808	8	-26.8879	27.4834	-572.162	19073.8	-33453.9	-34.3784	141.531	266.664	0	0	0	0	0	0	0	200	903	0	0	0	0	0	0	0	603	903	0
4808	9	-26.7353	25.042	-569.11	18799.2	-34003.2	-80.1548	140.252	266.967	0	0	0	0	0	0	0	200	903	0	0	0	0	0	0	0	603	903	0
4809	0	-25.9723	26.5678	-568.805	18341.4	-33637	377.609	140.864	267.755	0	0	0	0	0	0	0	200	903	0	0	0	0	0	0	0	603	903	0
4809	1	-27.3456	26.1101	-569.11	17609	-33270.8	11.398	141.539	269.059	0	0	0	0	0	0	0	200	903	0	0	0	0	0	0	0	603	903	0
4809	2	-26.5827	25.3471	-565.143	17609	-33453.9	148.727	140.805	268.842	0	0	0	0	0	0	0	200	903	0	0	0	0	0	0	0	603	903	0
4809	3	-27.8034	25.3471	-565.448	17609	-33698.1	331.833	140.405	268.858	0	0	0	0	0	0	0	200	903	0	0	0	0	0	0	0	603	903	0
4809	4	-27.193	25.3471	-563.312	17792.1	-33759.1	57.1744	140.07	268.415	0	0	0	0	0	0	0	200	903	0	0	0	0	0	0	0	603	903	0
4809	5	-27.8034	23.5161	-562.702	17609	-33515	148.727	140.439	268.706	0	0	0	0	0	0	0	200	903	0	0	0	0	0	0	0	603	903	0
4809	6	-26.5827	24.7368	-561.176	17517.4	-33148.8	102.951	140.93	268.784	0	0	0	0	0	0	0	200	903	0	0	0	0	0	0	0	603	903	0
4809	7	-26.7353	23.9738	-561.481	17151.2	-33270.8	148.727	140.745	269.454	0	0	0	0	0	0	0	200	903	0	0	0	0	0	0	0	603	903	0
4809	8	-27.6508	24.1264	-557.819	16510.4	-33209.8	102.951	140.465	270.402	0	0	0	0	0	0	0	200	903	0	0	0	0	0	0	0	603	903	0
4809	9	-28.2612	23.9738	-560.26	16510.4	-33270.8	240.28	140.615	270.531	0	0	0	0	0	0	0	200	903	0	0	0	0	0	0	0	603	903	0
4810	0	-26.8879	22.7531	-555.378	16418.8	-33576	331.833	139.544	270.437	0	0	0	0	0	0	0	200	903	0	0	0	0	0	0	0	603	903	0
4810	1	-28.2612	21.2273	-555.988	16144.1	-33087.7	331.833	140.488	270.963	0	0	0	0	0	0	0	200	903	0	0	0	0	0	0	0	603	903	0
4810	2	-27.3456	22.6006	-555.072	16876.6	-33148.8	148.727	140.28	269.596	0	0	0	0	0	0	0	200	903	0	0	0	0	0	0	0	603	903	0
4810	3	-27.193	21.9902	-552.021	16235.7	-33331.9	286.056	139.618	270.589	0	0	0	0	0	0	0	200	903	0	0	0	0	0	0	0	603	903	0
4810	4	-27.0405	21.685	-555.683	15594.8	-33331.9	331.833	140.016	271.936	0	0	0	0	0	0	0	200	903	0	0	0	0	0	0	0	603	903	0
4810	5	-27.3456	21.3799	-555.683	15594.8	-33637	469.162	139.467	271.936	0	0	0	0	0	0	0	200	903	0	0	0	0	0	0	0	603	903	0
4810	6	-27.4982	20.1591	-553.852	15869.5	-32843.6	606.491	140.7	271.347	0	0	0	0	0	0	0	200	903	0	0	0	0	0	0	0	603	903	0
4810	7	-27.4982	19.5488	-552.631	15137.1	-32965.6	469.162	140.348	272.609	0	0	0	0	0	0	0	200	903	0	0	0	0	0	0	0	603	903	0
4810	8	-26.7353	19.3962	-551.715	15228.6	-32904.6	698.044	140.359	272.398	0	0	0	0	0	0	0	200	903	0	0	0	0	0	0	0	603	903	0
4810	9	-26.1249	19.3962	-551.105	14587.7	-33392.9	698.044	139.407	273.53	0	0	0	0	0	0	0	200	903	0	0	0	0	0	0	0	603	903	0
4811	0	-26.5827	17.1074	-552.631	14496.2	-33392.9	652.267	139.575	273.769	0	0	0	0	0	0	0	200	903	0	0	0	0	0	0	0	603	903	0
4811	1	-27.3456	18.1755	-552.021	14496.2	-33148.8	652.267	139.95	273.74	0	0	0	0	0	0	0	200	903	0	0	0	0	0	0	0	603	903	0
4811	2	-25.362	17.4126	-550.19	14130	-32965.6	423.385	140.083	274.318	0	0	0	0	0	0	0	200	903	0	0	0	0	0	0	0	603	903	0
4811	3	-27.4982	17.7177	-549.274	13855.3	-33209.8	743.82	139.539	274.775	0	0	0	0	0	0	0	200	903	0	0	0	0	0	0	0	603	903	0
4811	4	-25.5146	17.4126	-550.19	13672.2	-33759.1	1201.58	138.641	275.15	0	0	0	0	0	0	0	200	903	0	0	0	0	0	0	0	603	903	0
4811	5	-25.362	14.5134	-547.443	13397.6	-33392.9	743.82	139.002	275.527	0	0	0	0	0	0	0	200	903	0	0	0	0	0	0	0	603	903	0
4811	6	-25.2094	17.26	-548.969	14679.3	-33270.8	881.149	139.394	273.26	0	0	0	0	0	0	0	200	903	0	0	0	0	0	0	0	603	903	0
4811	7	-25.362	16.1919	-548.969	13031.3	-33026.7	972.702	139.839	276.262	0	0	0	0	0	0	0	200	903	0	0	0	0	0	0	0	603	903	0
4811	8	-25.5146	15.8867	-549.579	12848.2	-33392.9	1018.48	139.239	276.622	0	0	0	0	0	0	0	200	903	0	0	0	0	0	0	0	603	903	0
4811	9	-25.5146	15.7341	-547.138	13122.9	-33331.9	1110.03	139.08	276.015	0	0	0	0	0	0	0	200	903	0	0	0	0	0	0	0	603	903	0
4812	0	-23.9887	14.3608	-546.527	12665.1	-33515	1155.81	138.677	276.826	0	0	0	0	0	0	0	200	903	0	0	0	0	0	0	0	603	903	0
4812	1	-22.3102	12.8349	-551.41	12482	-33087.7	1155.81	139.994	277.363	0	0	0	0	0	0	0	200	903	0	0	0	0	0	0	0	603	903	0
4812	2	-23.3783	13.5979	-547.748	12207.4	-33392.9	1201.58	139.036	277.714	0	0	0	0	0	0	0	200	903	0	0	0	0	0	0	0	603	903	0
4812	3	-23.9887	13.5979	-548.664	12482	-33637	1338.91	138.693	277.25	0	0	0	0	0	0	0	200	903	0	0	0	0	0	0	0	603	903	0
4812	4	-20.4792	13.4453	-547.748	11841.2	-33392.9	1384.69	139.036	278.382	0	0	0	0	0	0	0	200	903	0	0	0	0	0	0	0	603	903	0
4812	5	-23.2258	12.6823	-546.222	12207.4	-33087.7	1338.91	139.424	277.651	0	0	0	0	0	0	0	200	903	0	0	0	0	0	0	0	603	903	0
4812	6	-22.3102	12.6823	-546.833	11566.5	-33087.7	1522.02	139.492	278.848	0	0	0	0	0	0	0	200	903	0	0	0	0	0	0	0	603	903	0
4812	7	-21.2421	10.8513	-548.969	12024.3	-33453.9	1705.12	139.06	278.097	0	0	0	0	0	0	0	200	903	0	0	0	0	0	0	0	603	903	0
4812	8	-21.6999	11.0039	-548.969	11383.4	-33026.7	1613.57	139.839	279.264	0	0	0	0	0	0	0	200	903	0	0	0	0	0	0	0	603	903	0
4812	9	-22.768	10.5461	-548.664	11291.8	-33820.1	1705.12	138.359	279.419	0	0	0	0	0	0	0	200	903	0	0	0	0	0	0	0	603	903	0
4813	0	-22.3102	9.93576	-548.358	11017.2	-33698.1	2025.56	138.547	279.909	0	0	0	0	0	0	0	200	903	0	0	0	0	0	0	0	603	903	0
4813	1	-21.8525	9.478	-546.527	10742.5	-33392.9	1888.23	138.9	280.344	0	0	0	0	0	0	0	200	903	0	0	0	0	0	0	0	603	903	0
4813	2	-20.4792	9.32541	-548.969	10834.1	-33576	1888.23	138.838	280.265	0	0	0	0	0	0	0	200	903	0	0	0	0	0	0	0	603	903	0
4813	3	-20.7843	8.71506	-550.19	10193.2	-33698.1	1934.01	138.752	281.473	0	0	0	0	0	0	0	200	903	0	0	0	0	0	0	0	603	903	0
4813	4	-20.4792	8.25729	-550.19	10101.7	-33820.1	2071.33	138.53	281.64	0	0	0	0	0	0	0	200	903	0	0	0	0	0	0	0	603	903	0
4813	5	-21.8525	8.25729	-552.021	9643.89	-34003.2	2025.56	138.402	282.53	0	0	0	0	0	0	0	200	903	0	0	0	0	0	0	0	603	903	0
4813	6	-19.2585	7.64694	-550.495	9918.55	-34003.2	2025.56	138.231	281.982	0	0	0	0	0	0	0	200	903	0	0	0	0	0	0	0	603	903	0
4813	7	-20.174	7.64694	-550.8	9552.34	-33637	1796.68	138.931	282.657	0	0	0	0	0	0	0	200	903	0	0	0	0	0	0	0	603	903	0
4813	8	-19.1059	8.10471	-552.631	9643.89	-33637	2162.89	139.133	282.549	0	0	0	0	0	0	0	200	903	0	0	0	0	0	0	0	603	903	0
4813	9	-18.9533	7.49435	-552.326	9277.68	-34064.3	2300.22	138.326	283.203	0	0	0	0	0	0	0	200	903	0	0	0	0	0	0	0	603	903	0
4814	0	-18.1904	6.12106	-553.546	9094.58	-34186.3	2208.66	138.241	283.57	0	0	0	0	0	0	0	200	903	0	0	0	0	0	0	0	603	903	0
4814	1	-18.4955	6.27365	-553.241	9643.89	-34186.3	2437.55	138.207	282.568	0	0	0	0	0	0	0	200	903	0	0	0	0	0	0	0	603	903	0
4814	2	-19.4111	5.6633	-555.683	9094.58	-33820.1	2300.22	139.138	283.634	0	0	0	0	0	0	0	200	903	0	0	0	0	0	0	0	603	903	0
4814	3	-18.6481	5.05295	-555.988	8636.81	-33881.2	2345.99	139.061	284.466	0	0	0	0	0	0	0	200	903	0	0	0	0	0	0	0	603	903	0
4814	4	-18.6481	4.29001	-555.683	8819.92	-34308.4	2437.55	138.259	284.128	0	0	0	0	0	0	0	200	903	0	0	0	0	0	0	0	603	903	0
4814	5	-17.1222	4.13742	-556.903	8636.81	-34064.3	2529.1	138.833	284.491	0	0	0	0	0	0	0	200	903	0	0	0	0	0	0	0	603	903	0
4814	6	-16.8171	3.52707	-559.65	8179.05	-34491.5	2345.99	138.369	285.385	0	0	0	0	0	0	0	200	903	0	0	0	0	0	0	0	603	903	0
4814	7	-16.3593	3.37448	-559.65	7995.94	-34125.3	2529.1	139.024	285.713	0	0	0	0	0	0	0	200	903	0	0	0	0	0	0	0	603	903	0
4814	8	-18.1904	1.69601	-561.481	7629.73	-34125.3	2666.43	139.223	286.411	0	0	0	0	0	0	0	200	903	0	0	0	0	0	0	0	603	903	0
4814	9	-17.7326	2.76413	-562.091	7355.07	-34491.5	2849.53	138.637	286.915	0	0	0	0	0	0	0	200	903	0	0	0	0	0	0	0	603	903	0
4815	0	-17.58	1.39084	-561.176	6897.31	-34491.5	2986.86	138.537	287.709	0	0	0	0	0	0	0	200	903	0	0	0	0	0	0	0	603	903	0
4815	1	-16.2067	1.8486	-560.871	6805.76	-34918.8	2620.65	137.742	287.866	0	0	0	0	0	0	0	200	903	0	0	0	0	0	0	0	603	903	0
4815	2	-16.0541	1.54343	-562.091	6805.76	-34369.5	2849.53	138.854	287.892	0	0	0	0	0	0	0	200	903	0	0	0	0	0	0	0	603	903	0
4815	3	-15.9015	1.69601	-564.533	6897.31	-34857.7	2941.09	138.254	287.782	0	0	0	0	0	0	0	200	903	0	0	0	0	0	0	0	603	903	0
4815	4	-16.2067	0.933075	-559.955	6164.89	-34613.6	2757.98	138.185	288.99	0	0	0	0	0	0	0	200	903	0	0	0	0	0	0	0	603	903	0
4815	5	-16.8171	0.780487	-566.974	5890.23	-35285	2757.98	137.766	289.611	0	0	0	0	0	0	0	200	903	0	0	0	0	0	0	0	603	903	0
4815	6	-16.8171	0.933075	-565.143	5707.12	-35285	2895.31	137.565	289.901	0	0	0	0	0	0	0	200	903	0	0	0	0	0	0	0	603	903	0
4815	7	-17.2748	-0.745391	-566.974	5707.12	-35223.9	2941.09	137.874	289.934	0	0	0	0	0	0	0	200	903	0	0	0	0	0	0	0	603	903	0
4815	8	-15.4438	-0.13504	-567.279	6531.1	-35223.9	2895.31	137.907	288.487	0	0	0	0	0	0	0	200	903	0	0	0	0	0	0	0	603	903	0
4815	9	-13.155	-0.440216	-568.5	5249.36	-34918.8	3078.42	138.577	290.766	0	0	0	0	0	0	0	200	903	0	0	0	0	0	0	0	603	903	0
4816	0	-14.986	-0.13504	-569.11	5340.91	-35590.2	3169.97	137.464	290.615	0	0	0	0	0	0	0	200	903	0	0	0	0	0	0	0	603	903	0
4816	1	-16.2067	-0.897979	-570.636	4791.6	-35285	3215.74	138.166	291.603	0	0	0	0	0	0	0	200	903	0	0	0	0	0	0	0	603	903	0
4816	2	-16.2067	-1.50833	-567.585	4608.49	-35773.3	3261.52	136.973	291.881	0	0	0	0	0	0	0	200	903	0	0	0	0	0	0	0	603	903	0
4816	3	-15.9015	-2.11868	-571.552	4974.7	-35590.2	3215.74	137.731	291.296	0	0	0	0	0	0	0	200	903	0	0	0	0	0	0	0	603	903	0
4816	4	-15.5964	-2.42386	-570.636	4333.83	-35712.2	3215.74	137.417	292.405	0	0	0	0	0	0	0	200	903	0	0	0	0	0	0	0	603	903	0
4816	5	-14.8334	-3.33939	-571.857	3967.62	-35834.3	3444.63	137.337	293.062	0	0	0	0	0	0	0	200	903	0	0	0	0	0	0	0	603	903	0
4816	6	-14.8334	-4.56009	-573.688	3418.3	-36017.4	3169.97	137.218	294.042	0	0	0	0	0	0	0	200	903	0	0	0	0	0	0	0	603	903	0
4816	7	-15.5964	-2.88162	-575.214	3052.09	-35773.3	3444.63	137.809	294.694	0	0	0	0	0	0	0	200	903	0	0	0	0	0	0	0	603	903	0
4816	8	-16.3593	-3.49197	-575.519	1953.46	-35529.1	3536.18	138.266	296.606	0	0	0	0	0	0	0	200	903	0	0	0	0	0	0	0	603	903	0
4816	9	-15.7489	-4.25491	-574.909	2228.12	-35223.9	3719.28	138.731	296.124	0	0	0	0	0	0	0	200	903	0	0	0	0	0	0	0	603	903	0
4817	0	-16.2067	-4.25491	-573.383	1861.91	-35712.2	3627.73	137.717	296.753	0	0	0	0	0	0	0	200	903	0	0	0	0	0	0	0	603	903	0
4817	1	-15.1386	-4.4075	-576.129	1678.8	-36078.4	3627.73	137.378	297.086	0	0	0	0	0	0	0	200	903	0	0	0	0	0	0	0	603	903	0
4817	2	-15.7489	-4.71268	-577.35	1861.91	-35895.3	3902.39	137.827	296.775	0	0	0	0	0	0	0	200	903	0	0	0	0	0	0	0	603	903	0
4817	3	-15.2912	-4.71268	-578.571	763.274	-35834.3	3810.84	138.064	298.681	0	0	0	0	0	0	0	200	903	0	0	0	0	0	0	0	603	903	0
4817	4	-16.6645	-5.32303	-580.707	488.616	-36078.4	3902.39	137.872	299.159	0	0	0	0	0	0	0	200	903	0	0	0	0	0	0	0	603	903	0
4817	5	-14.986	-5.32303	-578.571	580.168	-36139.5	3810.84	137.537	298.997	0	0	0	0	0	0	0	200	903	0	0	0	0	0	0	0	603	903	0
4817	6	-18.0378	-5.47562	-579.792	397.063	-36261.5	3993.94	137.458	299.315	0	0	0	0	0	0	0	200	903	0	0	0	0	0	0	0	603	903	0
4817	7	-16.2067	-7.61185	-579.792	30.8518	-36627.8	4085.5	136.826	299.947	0	0	0	0	0	0	0	200	903	0	0	0	0	0	0	0	603	903	0
4817	8	-14.5282	-6.08597	-583.454	-152.254	-36322.6	3765.06	137.746	300.261	0	0	0	0	0	0	0	200	903	0	0	0	0	0	0	0	603	903	0
4817	9	-17.4274	-5.6282	-582.538	397.063	-36505.7	3810.84	137.333	299.318	0	0	0	0	0	0	0	200	903	0	0	0	0	0	0	0	603	903	0
4818	0	-18.1904	-6.69632	-584.674	-60.7009	-36383.6	4085.5	137.771	300.104	0	0	0	0	0	0	0	200	903	0	0	0	0	0	0	0	603	903	0
4818	1	-18.8007	-7.00149	-583.148	-701.57	-36749.8	3993.94	136.98	301.203	0	0	0	0	0	0	0	200	903	0	0	0	0	0	0	0	603	903	0
4818	2	-18.8007	-7.15408	-584.674	-976.228	-36749.8	3902.39	137.145	301.67	0	0	0	0	0	0	0	200	903	0	0	0	0	0	0	0	603	903	0
4818	3	-17.58	-8.06961	-585.285	-1067.78	-36932.9	3993.94	136.898	301.824	0	0	0	0	0	0	0	200	903	0	0	0	0	0	0	0	603	903	0
4818	4	-17.7326	-7.91702	-586.2	-976.228	-36688.8	4039.72	137.413	301.665	0	0	0	0	0	0	0	200	903	0	0	0	0	0	0	0	603	903	0
4818	5	-18.4955	-8.98514	-587.116	-2166.42	-36688.8	4131.27	137.51	303.69	0	0	0	0	0	0	0	200	903	0	0	0	0	0	0	0	603	903	0
4818	6	-18.3429	-8.83255	-589.557	-2166.42	-36994	3948.17	137.251	303.675	0	0	0	0	0	0	0	200	903	0	0	0	0	0	0	0	603	903	0
4818	7	-19.2585	-9.59549	-590.168	-2898.84	-37177.1	3993.94	137.006	304.912	0	0	0	0	0	0	0	200	903	0	0	0	0	0	0	0	603	903	0
4818	8	-18.0378	-10.9688	-586.505	-3173.5	-37360.2	4039.72	136.3	305.411	0	0	0	0	0	0	0	200	903	0	0	0	0	0	0	0	603	903	0
4818	9	-20.0214	-9.59549	-589.557	-4363.68	-36932.9	4222.83	137.355	307.402	0	0	0	0	0	0	0	200	903	0	0	0	0	0	0	0	603	903	0
4819	0	-19.5636	-9.90067	-591.388	-4455.23	-37116	3719.28	137.239	307.534	0	0	0	0	0	0	0	200	903	0	0	0	0	0	0	0	603	903	0
4819	1	-18.9533	-9.90067	-591.388	-4455.23	-37421.2	4131.27	136.723	307.534	0	0	0	0	0	0	0	200	903	0	0	0	0	0	0	0	603	903	0
4819	2	-19.4111	-10.511	-594.44	-4729.89	-37665.4	4314.38	136.637	307.957	0	0	0	0	0	0	0	200	903	0	0	0	0	0	0	0	603	903	0
4819	3	-19.8688	-9.29031	-597.187	-4180.57	-37421.2	4497.48	137.338	307	0	0	0	0	0	0	0	200	903	0	0	0	0	0	0	0	603	903	0
4819	4	-20.4792	-9.90067	-597.187	-5736.97	-37482.2	4222.83	137.235	309.607	0	0	0	0	0	0	0	200	903	0	0	0	0	0	0	0	603	903	0
4819	5	-20.0214	-10.2058	-597.492	-6011.63	-37604.3	3993.94	137.063	310.061	0	0	0	0	0	0	0	200	903	0	0	0	0	0	0	0	603	903	0
4819	6	-22.4628	-10.6636	-597.797	-6469.39	-38336.7	4222.83	135.87	310.822	0	0	0	0	0	0	0	200	903	0	0	0	0	0	0	0	603	903	0
4819	7	-20.9369	-11.5791	-600.849	-6377.84	-37848.5	4589.04	137.008	310.615	0	0	0	0	0	0	0	200	903	0	0	0	0	0	0	0	603	903	0
4819	8	-21.8525	-10.511	-599.628	-6652.5	-38275.7	4314.38	136.168	311.094	0	0	0	0	0	0	0	200	903	0	0	0	0	0	0	0	603	903	0
4819	9	-21.3947	-11.1214	-603.29	-6744.05	-37970.5	4268.6	137.061	311.179	0	0	0	0	0	0	0	200	903	0	0	0	0	0	0	0	603	903	0
4820	0	-21.6999	-10.6636	-602.069	-6835.6	-38092.6	4314.38	136.731	311.354	0	0	0	0	0	0	0	200	903	0	0	0	0	0	0	0	603	903	0
4820	1	-23.2258	-10.2058	-606.647	-7568.02	-38519.8	4314.38	136.504	312.475	0	0	0	0	0	0	0	200	903	0	0	0	0	0	0	0	603	903	0
4820	2	-20.9369	-11.8843	-606.647	-6927.16	-38825	4405.93	136.001	311.419	0	0	0	0	0	0	0	200	903	0	0	0	0	0	0	0	603	903	0
4820	3	-22.768	-12.7998	-606.647	-8208.89	-38886.1	4314.38	135.9	313.532	0	0	0	0	0	0	0	200	903	0	0	0	0	0	0	0	603	903	0
4820	4	-22.1576	-12.9524	-608.478	-8392	-38397.8	4314.38	136.895	313.792	0	0	0	0	0	0	0	200	903	0	0	0	0	0	0	0	603	903	0
4820	5	-22.6154	-14.4783	-610.004	-9032.87	-38886.1	4451.71	136.253	314.808	0	0	0	0	0	0	0	200	903	0	0	0	0	0	0	0	603	903	0
4820	6	-22.1576	-13.5628	-613.056	-9490.63	-38764	4497.48	136.769	315.481	0	0	0	0	0	0	0	200	903	0	0	0	0	0	0	0	603	903	0
4820	7	-22.768	-14.0205	-614.276	-10223.1	-39313.3	4451.71	136.001	316.642	0	0	0	0	0	0	0	200	903	0	0	0	0	0	0	0	603	903	0
4820	8	-23.6835	-14.1731	-616.718	-10680.8	-39496.4	4314.38	135.957	317.319	0	0	0	0	0	0	0	200	903	0	0	0	0	0	0	0	603	903	0
4820	9	-24.1413	-14.6309	-615.192	-11138.6	-39618.5	4589.04	135.6	318.106	0	0	0	0	0	0	0	200	903	0	0	0	0	0	0	0	603	903	0
4821	0	-23.5309	-14.3257	-616.413	-10772.4	-39435.4	4726.37	136.024	317.476	0	0	0	0	0	0	0	200	903	0	0	0	0	0	0	0	603	903	0
4821	1	-22.768	-14.4783	-619.77	-11962.6	-39313.3	4680.59	136.568	319.302	0	0	0	0	0	0	0	200	903	0	0	0	0	0	0	0	603	903	0
4821	2	-21.5473	-14.6309	-620.99	-12420.3	-40228.8	4680.59	135.218	320.001	0	0	0	0	0	0	0	200	903	0	0	0	0	0	0	0	603	903	0
4821	3	-22.9206	-15.699	-624.042	-12511.9	-39740.5	4909.47	136.318	320.05	0	0	0	0	0	0	0	200	903	0	0	0	0	0	0	0	603	903	0
4821	4	-24.1413	-15.699	-625.873	-12328.8	-40167.8	4817.92	135.821	319.699	0	0	0	0	0	0	0	200	903	0	0	0	0	0	0	0	603	903	0
4821	5	-24.2939	-15.3938	-628.009	-12969.6	-39984.7	5092.58	136.331	320.652	0	0	0	0	0	0	0	200	903	0	0	0	0	0	0	0	603	903	0
4821	6	-24.4465	-16.1568	-627.094	-13335.8	-40106.8	4680.59	136.043	321.266	0	0	0	0	0	0	0	200	903	0	0	0	0	0	0	0	603	903	0
4821	7	-24.9042	-16.1568	-627.704	-13244.3	-40534	4955.25	135.425	321.1	0	0	0	0	0	0	0	200	903	0	0	0	0	0	0	0	603	903	0
4821	8	-23.9887	-17.3775	-631.671	-13610.5	-40534	4955.25	135.831	321.547	0	0	0	0	0	0	0	200	903	0	0	0	0	0	0	0	603	903	0
4821	9	-21.6999	-17.0723	-635.028	-13610.5	-40778.1	4863.7	135.785	321.433	0	0	0	0	0	0	0	200	903	0	0	0	0	0	0	0	603	903	0
4822	0	-23.5309	-17.0723	-636.554	-14617.6	-40473	4863.7	136.419	322.964	0	0	0	0	0	0	0	200	903	0	0	0	0	0	0	0	603	903	0
4822	1	-24.599	-17.0723	-637.47	-14709.1	-40717.1	5046.8	136.127	323.074	0	0	0	0	0	0	0	200	903	0	0	0	0	0	0	0	603	903	0
4822	2	-25.2094	-19.5137	-640.522	-15533.1	-40778.1	5092.58	136.336	324.251	0	0	0	0	0	0	0	200	903	0	0	0	0	0	0	0	603	903	0
4822	3	-25.0568	-17.6826	-640.522	-16265.5	-41327.5	4909.47	135.478	325.394	0	0	0	0	0	0	0	200	903	0	0	0	0	0	0	0	603	903	0
4822	4	-24.2939	-18.4456	-641.132	-16631.7	-41632.6	4817.92	135.064	325.941	0	0	0	0	0	0	0	200	903	0	0	0	0	0	0	0	603	903	0
4822	5	-23.8361	-18.5982	-642.963	-17364.2	-41205.4	4909.47	135.913	327.007	0	0	0	0	0	0	0	200	903	0	0	0	0	0	0	0	603	903	0
4822	6	-23.5309	-19.2085	-647.541	-17547.3	-41205.4	4863.7	136.366	327.098	0	0	0	0	0	0	0	200	903	0	0	0	0	0	0	0	603	903	0
4822	7	-24.2939	-18.4456	-645.099	-17821.9	-41632.6	4955.25	135.463	327.627	0	0	0	0	0	0	0	200	903	0	0	0	0	0	0	0	603	903	0
4822	8	-24.7516	-18.5982	-651.508	-19012.1	-41815.7	5184.13	135.817	329.182	0	0	0	0	0	0	0	200	903	0	0	0	0	0	0	0	603	903	0
4822	9	-22.4628	-19.5137	-650.592	-19195.2	-41693.7	5092.58	135.914	329.504	0	0	0	0	0	0	0	200	903	0	0	0	0	0	0	0	603	903	0
4823	0	-24.2939	-19.0559	-652.423	-19286.8	-41754.7	5046.8	136.001	329.562	0	0	0	0	0	0	0	200	903	0	0	0	0	0	0	0	603	903	0
4823	1	-23.8361	-20.1241	-655.17	-19469.9	-41998.8	5184.13	135.896	329.717	0	0	0	0	0	0	0	200	903	0	0	0	0	0	0	0	603	903	0
4823	2	-23.5309	-21.0396	-656.086	-20019.2	-42548.2	5138.35	135.148	330.513	0	0	0	0	0	0	0	200	903	0	0	0	0	0	0	0	603	903	0
4823	3	-23.8361	-21.4973	-659.137	-20293.9	-42670.2	5229.91	135.264	330.789	0	0	0	0	0	0	0	200	903	0	0	0	0	0	0	0	603	903	0
4823	4	-24.599	-21.8025	-661.884	-20751.6	-42792.3	5092.58	135.348	331.352	0	0	0	0	0	0	0	200	903	0	0	0	0	0	0	0	603	903	0
4823	5	-24.4465	-22.718	-664.936	-21026.3	-42609.2	5504.56	135.92	331.622	0	0	0	0	0	0	0	200	903	0	0	0	0	0	0	0	603	903	0
4823	6	-24.7516	-23.0232	-664.325	-21484	-42853.3	5550.34	135.493	332.34	0	0	0	0	0	0	0	200	903	0	0	0	0	0	0	0	603	903	0
4823	7	-25.0568	-24.8543	-666.767	-21850.3	-42914.4	5413.01	135.638	332.77	0	0	0	0	0	0	0	200	903	0	0	0	0	0	0	0	603	903	0
4823	8	-24.1413	-23.7862	-667.682	-22491.1	-43280.6	5413.01	135.178	333.685	0	0	0	0	0	0	0	200	903	0	0	0	0	0	0	0	603	903	0
4823	9	-22.6154	-23.9388	-672.87	-23040.4	-43524.7	5367.24	135.315	334.242	0	0	0	0	0	0	0	200	903	0	0	0	0	0	0	0	603	903	0
4824	0	-24.7516	-25.0069	-675.006	-23589.8	-43524.7	5458.79	135.52	334.947	0	0	0	0	0	0	0	200	903	0	0	0	0	0	0	0	603	903	0
4824	1	-25.2094	-24.8543	-676.532	-24230.6	-43280.6	5229.91	136.026	335.816	0	0	0	0	0	0	0	200	903	0	0	0	0	0	0	0	603	903	0
4824	2	-25.9723	-24.7017	-678.363	-24230.6	-43707.8	5367.24	135.569	335.719	0	0	0	0	0	0	0	200	903	0	0	0	0	0	0	0	603	903	0
4824	3	-25.362	-25.4646	-678.974	-24688.4	-44318.2	5687.67	134.728	336.361	0	0	0	0	0	0	0	200	903	0	0	0	0	0	0	0	603	903	0
4824	4	-23.6835	-26.5327	-681.72	-25054.6	-44440.3	5687.67	134.812	336.752	0	0	0	0	0	0	0	200	903	0	0	0	0	0	0	0	603	903	0
4824	5	-24.2939	-26.9905	-682.941	-25512.4	-44501.3	5413.01	134.839	337.357	0	0	0	0	0	0	0	200	903	0	0	0	0	0	0	0	603	903	0
4824	6	-24.7516	-27.1431	-686.603	-25237.7	-44379.2	5596.12	135.364	336.757	0	0	0	0	0	0	0	200	903	0	0	0	0	0	0	0	603	903	0
4824	7	-25.0568	-27.4483	-688.434	-25603.9	-44623.4	5596.12	135.181	337.192	0	0	0	0	0	0	0	200	903	0	0	0	0	0	0	0	603	903	0
4824	8	-25.5146	-27.7534	-691.181	-26061.7	-44867.5	5916.55	135.086	337.706	0	0	0	0	0	0	0	200	903	0	0	0	0	0	0	0	603	903	0
4824	9	-23.8361	-29.7371	-690.57	-26519.5	-44989.6	5641.89	134.852	338.402	0	0	0	0	0	0	0	200	903	0	0	0	0	0	0	0	603	903	0
4825	0	-25.9723	-30.0423	-692.707	-26244.8	-45111.6	5733.45	134.876	337.887	0	0	0	0	0	0	0	200	903	0	0	0	0	0	0	0	603	903	0
4825	1	-23.3783	-30.3474	-695.148	-27526.5	-44867.5	5825	135.456	339.598	0	0	0	0	0	0	0	200	903	0	0	0	0	0	0	0	603	903	0
4825	2	-23.9887	-30.6526	-697.284	-27709.6	-45050.6	5641.89	135.391	339.739	0	0	0	0	0	0	0	200	903	0	0	0	0	0	0	0	603	903	0
4825	3	-24.1413	-32.9414	-700.641	-28442.1	-45477.9	5825	135.091	340.594	0	0	0	0	0	0	0	200	903	0	0	0	0	0	0	0	603	903	0
4825	4	-23.8361	-32.1785	-701.557	-29174.5	-45233.7	5870.78	135.524	341.585	0	0	0	0	0	0	0	200	903	0	0	0	0	0	0	0	603	903	0
4825	5	-25.2094	-32.3311	-703.083	-29449.1	-45905.1	5825	134.709	341.886	0	0	0	0	0	0	0	200	903	0	0	0	0	0	0	0	603	903	0
4825	6	-25.362	-32.7888	-707.355	-29998.5	-45844.1	6328.54	135.189	342.409	0	0	0	0	0	0	0	200	903	0	0	0	0	0	0	0	603	903	0
4825	7	-25.2094	-33.3992	-706.745	-29906.9	-45783	6191.21	135.22	342.316	0	0	0	0	0	0	0	200	903	0	0	0	0	0	0	0	603	903	0
4825	8	-24.2939	-33.7044	-707.355	-30547.8	-46576.5	6053.88	134.154	343.186	0	0	0	0	0	0	0	200	903	0	0	0	0	0	0	0	603	903	0
4825	9	-24.4465	-34.1621	-709.796	-31371.7	-46393.4	6282.76	134.638	344.198	0	0	0	0	0	0	0	200	903	0	0	0	0	0	0	0	603	903	0
4826	0	-24.599	-35.3828	-712.848	-31554.9	-46942.7	6099.66	134.148	344.266	0	0	0	0	0	0	0	200	903	0	0	0	0	0	0	0	603	903	0
4826	1	-24.2939	-35.2303	-714.679	-31097.1	-46271.3	6236.99	135.256	343.512	0	0	0	0	0	0	0	200	903	0	0	0	0	0	0	0	603	903	0
4826	2	-25.2094	-36.451	-716.51	-31371.7	-46393.4	6099.66	135.251	343.784	0	0	0	0	0	0	0	200	903	0	0	0	0	0	0	0	603	903	0
4826	3	-22.0051	-35.9932	-716.205	-31829.5	-46637.5	6282.76	134.882	344.442	0	0	0	0	0	0	0	200	903	0	0	0	0	0	0	0	603	903	0
4826	4	-24.9042	-37.8242	-717.121	-32012.6	-46942.7	6191.21	134.54	344.641	0	0	0	0	0	0	0	200	903	0	0	0	0	0	0	0	603	903	0
4826	5	-23.3783	-38.1294	-718.952	-32012.6	-47003.8	6557.42	134.622	344.527	0	0	0	0	0	0	0	200	903	0	0	0	0	0	0	0	603	903	0
4826	6	-21.2421	-39.1975	-722.919	-32745	-46942.7	6420.09	135.065	345.296	0	0	0	0	0	0	0	200	903	0	0	0	0	0	0	0	603	903	0
4826	7	-22.9206	-39.8079	-724.445	-33294.4	-46942.7	6191.21	135.202	345.958	0	0	0	0	0	0	0	200	903	0	0	0	0	0	0	0	603	903	0
4826	8	-23.9887	-42.0967	-725.666	-33477.5	-46759.6	6282.76	135.563	346.133	0	0	0	0	0	0	0	200	903	0	0	0	0	0	0	0	603	903	0
4826	9	-23.8361	-41.0286	-727.497	-33752.1	-47492	6694.75	134.719	346.395	0	0	0	0	0	0	0	200	903	0	0	0	0	0	0	0	603	903	0
4827	0	-23.5309	-41.6389	-727.802	-35033.8	-47308.9	6648.97	134.998	348.137	0	0	0	0	0	0	0	200	903	0	0	0	0	0	0	0	603	903	0
4827	1	-22.1576	-43.0122	-728.412	-35400.1	-47553.1	6694.75	134.717	348.599	0	0	0	0	0	0	0	200	903	0	0	0	0	0	0	0	603	903	0
4827	2	-21.6999	-41.7915	-730.548	-35308.5	-47308.9	6740.53	135.242	348.332	0	0	0	0	0	0	0	200	903	0	0	0	0	0	0	0	603	903	0
4827	3	-22.4628	-43.0122	-734.211	-36681.8	-47247.9	6694.75	135.648	349.961	0	0	0	0	0	0	0	200	903	0	0	0	0	0	0	0	603	903	0
4827	4	-20.9369	-42.8596	-733.905	-36681.8	-47492	7015.18	135.289	349.982	0	0	0	0	0	0	0	200	903	0	0	0	0	0	0	0	603	903	0
4827	5	-21.6999	-44.0804	-737.262	-36773.4	-47675.1	6969.41	135.335	349.878	0	0	0	0	0	0	0	200	903	0	0	0	0	0	0	0	603	903	0
4827	6	-21.2421	-44.2329	-736.957	-36498.7	-47919.3	6969.41	134.977	349.526	0	0	0	0	0	0	0	200	903	0	0	0	0	0	0	0	603	903	0
4827	7	-21.8525	-45.3011	-738.483	-37048	-47553.1	6877.86	135.607	350.168	0	0	0	0	0	0	0	200	903	0	0	0	0	0	0	0	603	903	0
4827	8	-21.5473	-45.7588	-735.736	-36956.5	-47675.1	7015.18	135.201	350.231	0	0	0	0	0	0	0	200	903	0	0	0	0	0	0	0	603	903	0
4827	9	-20.3266	-47.4373	-740.924	-36864.9	-48407.6	7106.74	134.666	349.755	0	0	0	0	0	0	0	200	903	0	0	0	0	0	0	0	603	903	0
4828	0	-20.0214	-47.7425	-743.366	-38238.2	-48468.6	7198.29	134.798	351.439	0	0	0	0	0	0	0	200	903	0	0	0	0	0	0	0	603	903	0
4828	1	-19.4111	-48.5054	-746.112	-37780.4	-48102.4	6786.3	135.529	350.636	0	0	0	0	0	0	0	200	903	0	0	0	0	0	0	0	603	903	0
4828	2	-20.9369	-50.6416	-746.723	-38238.2	-48163.4	7244.07	135.5	351.208	0	0	0	0	0	0	0	200	903	0	0	0	0	0	0	0	603	903	0
4828	3	-17.7326	-49.8787	-746.112	-39153.7	-47614.1	7381.4	136.184	352.477	0	0	0	0	0	0	0	200	903	0	0	0	0	0	0	0	603	903	0
4828	4	-20.174	-50.9468	-747.028	-39794.6	-47797.2	7244.07	136.017	353.271	0	0	0	0	0	0	0	200	903	0	0	0	0	0	0	0	603	903	0
4828	5	-18.9533	-51.0994	-747.028	-39611.5	-48346.5	7427.17	135.282	353.025	0	0	0	0	0	0	0	200	903	0	0	0	0	0	0	0	603	903	0
4828	6	-18.4955	-51.7097	-748.554	-40343.9	-48285.5	7381.4	135.495	353.896	0	0	0	0	0	0	0	200	903	0	0	0	0	0	0	0	603	903	0
4828	7	-18.9533	-51.5572	-751.3	-40069.3	-47858.2	7472.95	136.299	353.333	0	0	0	0	0	0	0	200	903	0	0	0	0	0	0	0	603	903	0
4828	8	-20.174	-52.3201	-751.911	-40893.2	-47980.3	7472.95	136.189	354.386	0	0	0	0	0	0	0	200	903	0	0	0	0	0	0	0	603	903	0
4828	9	-19.4111	-52.7779	-752.826	-41351	-47858.2	7656.05	136.429	354.928	0	0	0	0	0	0	0	200	903	0	0	0	0	0	0	0	603	903	0
4829	0	-19.7162	-53.846	-750.69	-41625.6	-48407.6	7472.95	135.516	355.45	0	0	0	0	0	0	0	200	903	0	0	0	0	0	0	0	603	903	0
4829	1	-19.7162	-55.677	-749.469	-41259.4	-47980.3	7518.72	135.981	355.052	0	0	0	0	0	0	0	200	903	0	0	0	0	0	0	0	603	903	0
4829	2	-18.1904	-55.3719	-752.826	-40527	-48346.5	7656.05	135.78	353.833	0	0	0	0	0	0	0	200	903	0	0	0	0	0	0	0	603	903	0
4829	3	-18.3429	-55.9822	-755.268	-41717.2	-48224.5	7701.83	136.149	355.235	0	0	0	0	0	0	0	200	903	0	0	0	0	0	0	0	603	903	0
4829	4	-18.1904	-56.8977	-757.099	-41991.9	-48102.4	7656.05	136.465	355.464	0	0	0	0	0	0	0	200	903	0	0	0	0	0	0	0	603	903	0
4829	5	-19.2585	-58.4236	-756.794	-42266.5	-48102.4	7564.5	136.439	355.85	0	0	0	0	0	0	0	200	903	0	0	0	0	0	0	0	603	903	0
4829	6	-17.4274	-59.7969	-755.878	-41808.7	-48163.4	7930.71	136.282	355.312	0	0	0	0	0	0	0	200	903	0	0	0	0	0	0	0	603	903	0
4829	7	-19.2585	-60.1021	-756.183	-42449.6	-48712.7	8113.82	135.581	356.137	0	0	0	0	0	0	0	200	903	0	0	0	0	0	0	0	603	903	0
4829	8	-17.8852	-60.865	-757.404	-43182	-48224.5	7930.71	136.329	357.013	0	0	0	0	0	0	0	200	903	0	0	0	0	0	0	0	603	903	0
4829	9	-16.6645	-63.0013	-760.456	-43456.7	-48529.6	7976.49	136.184	357.146	0	0	0	0	0	0	0	200	903	0	0	0	0	0	0	0	603	903	0
4830	0	-18.1904	-62.0857	-759.235	-43639.8	-48285.5	7930.71	136.402	357.479	0	0	0	0	0	0	0	200	903	0	0	0	0	0	0	0	603	903	0
4830	1	-20.0214	-63.3064	-759.845	-44372.2	-48834.8	7976.49	135.731	358.396	0	0	0	0	0	0	0	200	903	0	0	0	0	0	0	0	603	903	0
4830	2	-18.3429	-63.459	-759.845	-44738.4	-48407.6	7793.38	136.293	358.878	0	0	0	0	0	0	0	200	903	0	0	0	0	0	0	0	603	903	0
4830	3	-19.7162	-63.459	-758.014	-44646.9	-48895.8	7930.71	135.495	358.9	0	0	0	0	0	0	0	200	903	0	0	0	0	0	0	0	603	903	0
4830	4	-18.8007	-64.5271	-758.625	-45013.1	-48224.5	8159.6	136.432	359.335	0	0	0	0	0	0	0	200	903	0	0	0	0	0	0	0	603	903	0
4830	5	-17.1222	-65.5952	-761.982	-45470.9	-48346.5	7839.16	136.552	359.674	0	0	0	0	0	0	0	200	903	0	0	0	0	0	0	0	603	903	0
4830	6	-19.7162	-66.6634	-761.066	-45562.4	-48529.6	7976.49	136.235	359.867	0	0	0	0	0	0	0	200	903	0	0	0	0	0	0	0	603	903	0
4830	7	-20.4792	-67.1211	-759.235	-45562.4	-48712.7	8205.37	135.84	360.011	0	0	0	0	0	0	0	200	903	0	0	0	0	0	0	0	603	903	0
4830	8	-20.6318	-67.8841	-759.235	-44830	-48651.7	7839.16	135.92	359.046	0	0	0	0	0	0	0	200	903	0	0	0	0	0	0	0	603	903	0
4830	9	-20.4792	-68.0367	-759.235	-45013.1	-47797.2	8022.27	137.046	359.287	0	0	0	0	0	0	0	200	903	0	0	0	0	0	0	0	603	903	0
4831	0	-19.8688	-69.2574	-758.319	-45470.9	-48529.6	7884.94	136.004	359.963	0	0	0	0	0	0	0	200	903	0	0	0	0	0	0	0	603	903	0
4831	1	-19.5636	-70.9358	-758.625	-45928.6	-48163.4	8251.15	136.512	360.542	0	0	0	0	0	0	0	200	903	0	0	0	0	0	0	0	603	903	0
4831	2	-20.0214	-70.9358	-761.371	-45928.6	-48651.7	8205.37	136.1	360.324	0	0	0	0	0	0	0	200	903	0	0	0	0	0	0	0	603	903	0
4831	3	-20.174	-72.1565	-760.761	-45928.6	-48773.8	8022.27	135.888	360.372	0	0	0	0	0	0	0	200	903	0	0	0	0	0	0	0	603	903	0
4831	4	-20.9369	-73.5298	-761.371	-46386.4	-48651.7	8296.93	136.1	360.925	0	0	0	0	0	0	0	200	903	0	0	0	0	0	0	0	603	903	0
4831	5	-20.4792	-75.5135	-758.319	-46477.9	-48224.5	8296.93	136.406	361.291	0	0	0	0	0	0	0	200	903	0	0	0	0	0	0	0	603	903	0
4831	6	-20.3266	-75.0557	-758.014	-47027.3	-48163.4	8205.37	136.461	362.04	0	0	0	0	0	0	0	200	903	0	0	0	0	0	0	0	603	903	0
4831	7	-18.9533	-75.666	-759.845	-47393.5	-48163.4	8159.6	136.614	362.373	0	0	0	0	0	0	0	200	903	0	0	0	0	0	0	0	603	903	0
4831	8	-20.4792	-77.8023	-758.625	-47668.1	-48529.6	8388.48	136.029	362.835	0	0	0	0	0	0	0	200	903	0	0	0	0	0	0	0	603	903	0
4831	9	-21.6999	-79.4807	-759.54	-47668.1	-47919.3	8296.93	136.91	362.759	0	0	0	0	0	0	0	200	903	0	0	0	0	0	0	0	603	903	0
4832	0	-19.7162	-79.4807	-756.488	-47668.1	-48285.5	8754.69	136.172	363.012	0	0	0	0	0	0	0	200	903	0	0	0	0	0	0	0	603	903	0
4832	1	-21.3947	-80.5489	-755.573	-47576.6	-48163.4	8617.36	136.256	362.968	0	0	0	0	0	0	0	200	903	0	0	0	0	0	0	0	603	903	0
4832	2	-20.9369	-81.4644	-754.352	-47668.1	-47736.2	8388.48	136.719	363.191	0	0	0	0	0	0	0	200	903	0	0	0	0	0	0	0	603	903	0
4832	3	-21.2421	-83.448	-755.573	-48034.4	-47919.3	8388.48	136.579	363.573	0	0	0	0	0	0	0	200	903	0	0	0	0	0	0	0	603	903	0
4832	4	-20.174	-84.9739	-755.573	-48125.9	-48285.5	8525.81	136.094	363.695	0	0	0	0	0	0	0	200	903	0	0	0	0	0	0	0	603	903	0
4832	5	-21.8525	-85.7368	-753.437	-47485	-48041.3	8617.36	136.237	363.025	0	0	0	0	0	0	0	200	903	0	0	0	0	0	0	0	603	903	0
4832	6	-21.8525	-86.1946	-751.606	-47027.3	-47858.2	8617.36	136.325	362.569	0	0	0	0	0	0	0	200	903	0	0	0	0	0	0	0	603	903	0
4832	7	-22.4628	-87.8731	-750.995	-47668.1	-47736.2	8708.91	136.436	363.473	0	0	0	0	0	0	0	200	903	0	0	0	0	0	0	0	603	903	0
4832	8	-20.7843	-88.9412	-749.164	-47668.1	-47492	8800.47	136.607	363.628	0	0	0	0	0	0	0	200	903	0	0	0	0	0	0	0	603	903	0
4832	9	-20.4792	-90.3145	-749.164	-47485	-47736.2	8708.91	136.281	363.384	0	0	0	0	0	0	0	200	903	0	0	0	0	0	0	0	603	903	0
4833	0	-20.9369	-91.8404	-747.638	-47759.7	-47858.2	8800.47	135.987	363.881	0	0	0	0	0	0	0	200	903	0	0	0	0	0	0	0	603	903	0
4833	1	-22.1576	-93.5188	-745.807	-47851.2	-47614.1	8892.02	136.158	364.16	0	0	0	0	0	0	0	200	903	0	0	0	0	0	0	0	603	903	0
4833	2	-20.7843	-93.2137	-742.755	-48217.5	-47125.8	8525.81	136.553	364.917	0	0	0	0	0	0	0	200	903	0	0	0	0	0	0	0	603	903	0
4833	3	-22.3102	-94.4344	-741.84	-48766.8	-46942.7	8983.57	136.721	365.738	0	0	0	0	0	0	0	200	903	0	0	0	0	0	0	0	603	903	0
4833	4	-20.6318	-96.1128	-739.704	-49041.4	-47125.8	8937.79	136.291	366.299	0	1.21719	2.836	-19.6328	1022.92	1272.02	225.813	264.79	850.897	0	0	0	0	0	0	0	603	903	0
4833	5	-19.7162	-96.7232	-739.704	-48675.2	-47064.8	8937.79	136.373	365.804	0	3.04825	-2.65717	-22.6846	1297.58	1149.95	225.813	250.693	845.799	0	0	0	0	0	0	0	603	903	0
4833	6	-20.4792	-97.1809	-737.567	-48400.6	-47125.8	9120.9	136.106	365.622	0	1.36978	-2.04681	-28.1777	1389.13	1699.26	-48.8449	260.305	853.701	0	0	0	0	0	0	0	603	903	0
4833	7	-22.4628	-98.2491	-737.873	-48125.9	-47003.8	9166.68	136.298	365.223	0	1.06461	-2.80975	-30.6191	2121.55	1943.41	-277.727	263.47	833.711	0	0	0	0	0	0	0	603	903	0
4833	8	-22.1576	-98.8594	-732.99	-48858.3	-46637.5	9120.9	136.374	366.656	0	2.28531	-7.2348	-35.1968	2030	2187.55	42.7079	262.152	845.324	0	0	0	0	0	0	0	603	903	0
4833	9	-21.6999	-99.6223	-730.548	-48217.5	-46637.5	9075.12	136.161	366.002	0	1.98013	-6.47186	-41.6054	2853.98	2187.55	-140.398	252.578	834.404	0	0	0	0	0	0	0	603	903	0
4834	0	-21.5473	-101.148	-729.328	-48675.2	-46332.3	9120.9	136.473	366.74	0	1.67496	-5.25116	-44.9624	3220.19	2309.62	-460.832	251.368	831.38	0	0	0	0	0	0	0	603	903	0
4834	1	-21.0895	-102.674	-728.717	-48949.9	-46576.5	9624.44	136.084	367.173	0	1.67496	-7.99774	-50.1504	3220.19	2797.9	-186.174	255.79	838.789	0	0	0	0	0	0	0	603	903	0
4834	2	-22.6154	-101.911	-725.666	-48400.6	-46088.2	9166.68	136.488	366.698	0	1.06461	-10.7443	-57.4746	3769.5	2919.97	-552.385	250.805	837.414	0	0	0	0	0	0	0	603	903	0
4834	3	-21.3947	-103.132	-719.562	-48309	-46332.3	9441.33	135.61	367.137	0	-1.83456	-9.52362	-65.4092	4410.37	2797.9	-598.161	242.775	835.573	0	0	0	0	0	0	0	603	903	0
4834	4	-21.8525	-103.895	-720.478	-47576.6	-45844.1	9349.78	136.37	366.035	0	-1.83456	-11.0495	-72.7334	4593.48	3408.25	-552.385	246.86	839.845	0	0	0	0	0	0	0	603	903	0
4834	5	-21.5473	-104.658	-717.121	-48125.9	-45844.1	9166.68	136.072	367.11	0	-0.766449	-15.4745	-77.311	5325.9	3591.35	-735.49	246.453	834.111	0	0	0	0	0	0	0	603	903	0
[truncated: 1,504 more rows]
