# Supplementary material for: The Effects of an Extemporaneous Speech Dual-task on Older Adult Gait Control
Source: Research Square preprint supplement (doi:10.21203/rs.3.rs-7674245/v1), 2025-11-18
Supplement: Supplementary file 109 [file DT9Walk7.xlsx]

## Sheet: Sheet1
Trajectories
		09:LFHD			09:RFHD			09:LBHD			09:RBHD			09:C7			09:T10			09:CLAV			09:STRN			09:RBAK			09:LSHO			09:LUPA			09:LELB			09:LFRM			09:LWRA			09:LWRB			09:LFIN
Frame	Sub Frame	X	Y	Z	X	Y	Z	X	Y	Z	X	Y	Z	X	Y	Z	X	Y	Z	X	Y	Z	X	Y	Z	X	Y	Z	X	Y	Z	X	Y	Z	X	Y	Z	X	Y	Z	X	Y	Z	X	Y	Z	X	Y	Z
		mm	mm	mm	mm	mm	mm	mm	mm	mm	mm	mm	mm	mm	mm	mm	mm	mm	mm	mm	mm	mm	mm	mm	mm	mm	mm	mm	mm	mm	mm	mm	mm	mm	mm	mm	mm	mm	mm	mm	mm	mm	mm	mm	mm	mm	mm	mm	mm
6660	0	88.8612	-2236.38	1624.82	185.507	-2230.96	1627.59	70.3425	-2388.08	1663.77	215.904	-2377.45	1660.54	141.257	-2441.19	1482.85	134.122	-2491.17	1222.87	148.96	-2291.41	1401.83	151.516	-2197.22	1194.5	193.876	-2501.02	1283.32	-37.3224	-2348.12	1440.83	-120.084	-2310.62	1220.97	-141.638	-2278.07	1124.86	-137.918	-2121.33	1034.99	-86.5227	-2050.93	1002.12	-146.624	-2076.35	970.312	-128.53	-1997.28	958.318
6661	0	88.8802	-2223.29	1622.57	185.476	-2217.76	1625.81	70.1924	-2374.99	1661.84	216.016	-2364.31	1658.37	141.744	-2428.43	1480.97	135.151	-2478.29	1221.12	149.316	-2278.63	1399.91	151.42	-2184.57	1192.55	194.702	-2488.13	1281.66	-36.7449	-2335.47	1439.15	-119.732	-2294.73	1220.4	-141.536	-2260.99	1124.71	-137.525	-2102.69	1038.1	-85.5963	-2032.08	1005.96	-146.133	-2056.3	974.468	-127.567	-1976.99	964.247
6662	0	88.8258	-2210.4	1620.43	185.637	-2204.65	1623.99	70.4994	-2361.93	1660.01	216.387	-2350.12	1655.73	142.295	-2415.67	1479.12	136.145	-2465.12	1219.39	149.797	-2265.88	1398.04	151.508	-2171.52	1190.8	195.56	-2475.23	1279.91	-36.1095	-2322.56	1437.51	-119.14	-2278.98	1219.63	-141.226	-2244.08	1124.56	-136.919	-2084.56	1040.62	-84.9447	-2013.78	1009.32	-145.641	-2037.03	978.077	-127.035	-1957.53	969.682
6663	0	89.3465	-2197.32	1618.75	186.105	-2191.66	1622.21	70.9891	-2348.96	1658.31	217.443	-2337.03	1654.09	143.008	-2402.8	1477.46	136.879	-2451.99	1217.56	150.624	-2252.84	1396.34	151.885	-2158.38	1189.25	196.297	-2462.37	1278.14	-35.4224	-2309.75	1436.27	-118.437	-2263.54	1219.24	-140.645	-2227.71	1124.62	-136.257	-2066.93	1042.82	-84.3508	-1995.95	1012.28	-145.245	-2018.39	981.012	-126.861	-1938.81	974.53
6664	0	89.963	-2184.44	1617.12	186.672	-2178.63	1620.4	71.66	-2336.11	1656.77	217.679	-2324.3	1653.46	143.666	-2389.81	1475.97	137.446	-2438.77	1215.85	151.254	-2239.85	1394.72	152.429	-2145.29	1187.57	196.96	-2449.31	1276.51	-34.7099	-2296.72	1435.08	-117.603	-2248.27	1218.81	-139.972	-2211.76	1124.59	-135.577	-2049.93	1044.51	-83.8756	-1978.56	1014.97	-145.029	-2000.59	983.57	-126.747	-1920.9	978.673
6665	0	90.9723	-2171.43	1615.85	187.691	-2165.65	1619.2	72.6747	-2323.2	1655.53	218.36	-2311.47	1651.96	144.382	-2376.74	1474.51	137.838	-2425.43	1214.34	152.172	-2226.69	1393.34	153.337	-2132.19	1186.58	197.435	-2436.23	1275.03	-33.7565	-2283.35	1434.22	-116.726	-2233.4	1218.3	-139.219	-2196.04	1124.49	-135.135	-2033.53	1045.77	-83.5977	-1961.82	1016.95	-144.821	-1983.58	985.38	-127.093	-1903.86	982.11
6666	0	92.0981	-2158.53	1615	188.719	-2152.74	1618	73.7365	-2310.4	1654.34	219.313	-2298.92	1650.56	145.034	-2363.67	1473.21	138.055	-2412.06	1212.95	153.022	-2213.54	1392.25	154.298	-2119.2	1185.35	197.762	-2423.16	1273.52	-32.7561	-2269.92	1433.17	-115.8	-2218.82	1217.62	-138.295	-2180.74	1124.28	-134.736	-2017.76	1046.33	-83.6814	-1945.62	1018.1	-144.476	-1967.52	986.418	-127.525	-1887.66	984.349
6667	0	93.5401	-2145.49	1614.22	190.089	-2139.92	1616.94	75.0533	-2297.48	1653.36	220.707	-2286	1649.03	145.688	-2350.6	1471.99	138.193	-2398.63	1211.75	153.941	-2200.18	1391.39	155.406	-2105.99	1184.29	197.882	-2409.96	1272.1	-32.0954	-2256.24	1432.46	-114.907	-2204.22	1217.25	-137.11	-2165.97	1123.79	-134.576	-2002.48	1046.78	-83.5733	-1930.08	1019.17	-144.316	-1952.11	987.13	-128.159	-1872.24	986.125
6668	0	95.2117	-2132.5	1613.72	191.909	-2127.01	1616.31	76.5221	-2284.49	1652.63	222.268	-2273.46	1647.78	146.362	-2337.34	1471.02	138.163	-2385.04	1210.66	155.068	-2186.83	1390.76	156.976	-2092.29	1184.03	197.882	-2396.59	1271.02	-31.1877	-2242.29	1432.05	-113.729	-2190.08	1216.79	-136.342	-2151.48	1123.67	-134.139	-1988.02	1046.87	-83.6566	-1915	1019.61	-143.845	-1937.49	987.142	-129.079	-1857.61	987.364
6669	0	97.1747	-2119.45	1613.48	193.912	-2114.28	1615.74	78.1883	-2271.56	1652.11	224.211	-2260.82	1646.91	147.189	-2324.15	1470.35	138.165	-2371.31	1209.65	156.221	-2173.56	1390.07	158.544	-2078.39	1183.81	197.896	-2383.13	1269.84	-29.8755	-2228.17	1431.5	-112.783	-2175.85	1216.52	-135.128	-2137.5	1123.22	-133.949	-1973.99	1046.66	-83.9606	-1900.6	1019.44	-143.643	-1923.52	986.812	-129.923	-1843.65	987.525
6670	0	99.2593	-2106.41	1613.29	196.05	-2101.72	1615.1	79.9805	-2258.63	1651.74	226.04	-2248.26	1646.37	148.227	-2311.04	1469.41	138.295	-2357.24	1208.69	157.892	-2160.16	1389.84	160.319	-2064.28	1183.98	198.004	-2369.43	1268.75	-28.5033	-2214.17	1431.18	-111.428	-2161.77	1216.33	-133.936	-2123.66	1122.94	-133.518	-1960.34	1045.86	-83.9289	-1886.72	1018.7	-143.419	-1910.24	985.891	-130.777	-1830.33	987.118
6671	0	101.384	-2093.56	1613.2	197.995	-2089.02	1614.73	81.7322	-2245.81	1651.53	227.666	-2235.44	1645.76	149.343	-2297.91	1468.72	138.376	-2342.89	1207.91	159.402	-2146.74	1389.77	162.435	-2049.98	1184.1	198.203	-2355.63	1267.62	-26.9906	-2200.15	1431.32	-110.228	-2147.87	1216.34	-132.745	-2110.38	1122.85	-133.074	-1947.39	1044.87	-83.8791	-1873.49	1017.42	-143.598	-1897.61	984.619	-131.585	-1817.82	985.922
6672	0	103.242	-2080.83	1613.25	200.011	-2076.25	1614.9	83.7036	-2233.05	1651.46	229.801	-2222.97	1645.8	150.722	-2284.99	1468.1	138.805	-2328.39	1207.1	161.118	-2133.24	1389.83	164.554	-2035.66	1184.63	198.679	-2341.73	1266.59	-25.2904	-2186.54	1431.18	-108.895	-2134.37	1216.53	-131.782	-2097.29	1122.8	-132.843	-1934.93	1043.58	-84.063	-1861	1015.58	-143.082	-1885.98	982.924	-132.247	-1806.06	983.888
6673	0	105.297	-2068.21	1613.56	202.031	-2063.61	1615.2	85.7567	-2220.61	1651.37	231.745	-2210.65	1645.64	152.404	-2272	1467.67	139.399	-2313.73	1206.35	162.868	-2119.82	1390.46	166.523	-2021.3	1185.71	199.529	-2327.67	1265.57	-23.575	-2173.07	1431.36	-107.499	-2121.28	1216.59	-130.52	-2084.72	1122.88	-132.344	-1923.1	1041.97	-83.8531	-1849.2	1013.08	-143.002	-1874.6	980.797	-132.852	-1794.99	981.404
6674	0	107.217	-2055.75	1614.32	203.83	-2050.87	1615.68	88.0352	-2208.22	1651.79	234.02	-2197.68	1645.92	154.288	-2258.84	1467.47	140.365	-2299.01	1206.06	164.74	-2106.21	1390.98	168.692	-2006.78	1186.86	200.755	-2313.45	1264.97	-21.7319	-2159.65	1432.2	-106.232	-2108.31	1217.19	-129.376	-2072.53	1123.19	-131.91	-1911.78	1040.43	-83.6768	-1838.14	1010.43	-142.722	-1864.29	978.666	-133.252	-1784.64	978.288
6675	0	109.369	-2043.16	1615.42	205.863	-2038.38	1616.71	90.3767	-2196.01	1652.17	236.347	-2185.27	1646.48	156.217	-2245.56	1467.6	141.585	-2284.63	1205.92	166.621	-2092.65	1391.55	170.449	-1992.06	1188.15	202.246	-2299.14	1264.71	-19.9556	-2146.41	1433.33	-104.76	-2095.69	1217.9	-128.314	-2060.34	1123.86	-131.301	-1901.04	1038.53	-83.5447	-1827.69	1007.3	-142.562	-1854.48	976.208	-133.316	-1774.99	974.657
6676	0	111.43	-2030.65	1617.19	207.766	-2025.69	1618.12	92.7498	-2183.79	1652.78	238.801	-2172.49	1647.01	158.282	-2232.11	1468.08	143.061	-2270.33	1206.12	168.432	-2078.9	1392.88	172.039	-1977.56	1189.54	203.887	-2284.78	1264.69	-18.0755	-2133.02	1434.67	-103.403	-2083.34	1218.8	-127.158	-2048.72	1124.62	-130.761	-1890.96	1036.71	-83.191	-1818	1003.69	-142.599	-1845.52	973.526	-133.457	-1766.21	970.515
6677	0	113.565	-2018.15	1619	210.006	-2013.05	1619.93	95.3081	-2171.62	1653.56	240.995	-2159.85	1647.59	160.279	-2218.64	1468.67	144.573	-2256.48	1206.73	170.151	-2065.11	1394.12	173.103	-1963.27	1190.89	205.502	-2270.3	1264.91	-16.5689	-2119.62	1436.28	-102.177	-2071.38	1219.79	-125.784	-2037.6	1125.4	-129.995	-1881.37	1034.43	-83.392	-1809.54	999.23	-142.444	-1837.25	970.413	-133.438	-1758.13	965.847
6678	0	115.577	-2005.49	1620.99	212.37	-2000.05	1621.88	97.935	-2159.22	1654.5	243.452	-2147.31	1647.87	162.175	-2205.12	1469.47	145.948	-2242.98	1207.85	171.606	-2051.48	1395.31	173.891	-1949.47	1192.21	206.993	-2256.06	1265.45	-14.8343	-2106.06	1438.14	-100.913	-2059.69	1220.77	-124.559	-2026.82	1126.17	-129.519	-1872.42	1032.42	-82.9119	-1801.51	995.143	-142.422	-1829.76	967.453	-133.159	-1750.75	960.623
6679	0	117.889	-1992.74	1622.98	214.492	-1987.27	1623.44	100.315	-2146.91	1655.45	246.251	-2134.85	1648.4	163.888	-2191.41	1470.66	146.983	-2229.85	1209.18	172.838	-2037.96	1396.4	174.222	-1935.86	1193.04	208.399	-2242.14	1266.56	-13.4131	-2092.64	1439.9	-99.7643	-2048.06	1221.93	-123.434	-2016.31	1126.95	-128.893	-1864.28	1029.75	-82.6653	-1794.19	990.199	-142.386	-1823.06	963.881	-132.799	-1744.31	954.816
6680	0	120.188	-1979.77	1624.78	217.057	-1974.37	1624.63	102.883	-2134.04	1656.56	248.339	-2121.96	1648.39	165.448	-2177.86	1472	147.783	-2216.78	1210.65	173.685	-2024.43	1397.47	174.503	-1922.38	1193.83	209.418	-2228.9	1267.9	-12.0324	-2079.28	1441.86	-98.5574	-2036.56	1223.09	-122.065	-2006.08	1127.82	-128.305	-1856.56	1026.85	-82.0759	-1787.52	985.142	-142.111	-1817.13	959.979	-132.556	-1738.49	948.616
6681	0	122.546	-1966.54	1626.52	219.299	-1961.41	1625.37	105.19	-2120.97	1658.09	250.706	-2108.99	1648.73	166.875	-2164.55	1473.38	148.445	-2204.03	1212.09	174.421	-2011.27	1398.4	174.459	-1908.88	1194.73	210.262	-2216.07	1269.24	-10.6776	-2066.23	1443.71	-97.2985	-2025.06	1224.33	-120.778	-1996.1	1128.99	-127.564	-1849.32	1024.01	-81.662	-1781.55	979.73	-141.991	-1811.68	955.942	-131.977	-1733.45	941.851
6682	0	124.873	-1953.28	1628.09	221.274	-1948.52	1625.85	107.347	-2107.62	1659.92	252.748	-2095.86	1649.3	168.166	-2151.48	1474.85	149.057	-2191.27	1213.57	174.832	-1998.58	1399.38	174.747	-1895.69	1195.9	210.858	-2203.26	1270.48	-9.356	-2053.21	1445.57	-96.1966	-2013.84	1225.66	-119.407	-1986.4	1129.69	-126.908	-1842.64	1020.93	-81.2519	-1776.44	974.198	-141.772	-1807.04	951.696	-131.497	-1729.19	934.938
6683	0	126.7	-1939.96	1629.16	223.08	-1935.22	1626.42	109.297	-2094.12	1661.67	254.561	-2082.67	1650.05	169.304	-2138.68	1476.14	149.609	-2178.89	1215.12	174.881	-1985.42	1400.53	174.734	-1882.64	1197.01	211.408	-2190.59	1271.75	-8.42651	-2040.73	1446.97	-95.0391	-2002.78	1226.73	-118.153	-1976.92	1130.21	-126.347	-1836.42	1017.52	-80.9402	-1771.68	968.35	-141.512	-1802.87	947.309	-131.072	-1725.74	927.472
6684	0	128.203	-1926.55	1629.79	224.861	-1921.68	1626.84	110.789	-2080.73	1663.41	256.179	-2069.24	1651.01	170.335	-2126.33	1477.5	150.276	-2166.71	1216.64	175.17	-1973.85	1400.68	174.736	-1870.23	1198.01	212.186	-2178.25	1273.07	-7.66663	-2028.93	1448.48	-94.0598	-1991.85	1227.96	-116.605	-1967.71	1130.72	-125.722	-1830.76	1013.9	-80.5403	-1767.75	962.278	-141.26	-1799.48	942.65	-130.429	-1723.15	919.638
6685	0	129.469	-1913.05	1630.36	226.09	-1908.31	1626.83	112.526	-2066.91	1665.4	257.663	-2055.49	1652.15	171.363	-2114.02	1478.9	151.086	-2154.82	1217.97	175.482	-1961.26	1402.37	174.625	-1858.19	1199.03	213.157	-2166.12	1274.36	-6.85525	-2017.18	1449.78	-93.0025	-1981.02	1228.8	-115.084	-1958.94	1131.12	-125.069	-1825.69	1010.77	-80.1482	-1764.13	956.668	-141.022	-1796.66	938.245	-129.854	-1721.25	912.005
6686	0	130.437	-1899.73	1630.66	226.939	-1894.73	1626.88	113.785	-2053.25	1667.4	258.986	-2041.52	1653.77	172.233	-2101.99	1480.38	151.936	-2142.92	1219.44	175.935	-1949.24	1403.85	174.473	-1846.35	1200.44	214.127	-2154.13	1275.86	-6.52846	-2005.86	1451.32	-92.0081	-1970.38	1229.72	-113.807	-1950.48	1131.66	-124.43	-1821.12	1007.37	-79.8872	-1761.57	950.646	-140.792	-1794.23	933.918	-129.241	-1719.97	904.241
6687	0	131.11	-1886.32	1631.17	227.56	-1881.35	1626.92	115.048	-2039.49	1669.55	260.138	-2027.46	1655.6	172.971	-2090.04	1482.08	152.865	-2130.92	1220.94	176.323	-1937.07	1405.64	174.208	-1834.36	1201.96	215.115	-2142.16	1277.34	-6.27963	-1994.86	1452.58	-90.8905	-1960.1	1230.64	-112.532	-1942.46	1132.01	-123.751	-1816.96	1004.01	-79.2611	-1758.96	945.4	-140.522	-1792.44	929.758	-128.518	-1719.46	896.593
6688	0	131.987	-1872.98	1631.73	228.221	-1867.81	1627.33	115.987	-2025.78	1671.79	261.397	-2013.65	1657.8	173.604	-2078.13	1483.8	153.922	-2119.24	1222.58	176.638	-1924.94	1407.7	173.962	-1822.19	1203.86	216.073	-2130.4	1278.95	-6.27589	-1983.74	1453.85	-89.8396	-1950.32	1231.12	-111.089	-1934.81	1132.1	-123.106	-1813.39	1000.77	-78.9143	-1757.4	939.655	-140.097	-1791.04	925.677	-127.747	-1719.65	889.037
6689	0	132.43	-1859.61	1632.34	228.791	-1854.4	1627.98	116.736	-2012.01	1674.12	261.881	-1999.87	1659.52	174.126	-2066.35	1485.72	155.012	-2107.63	1224.36	177.253	-1913.21	1409.44	173.826	-1810.1	1205.91	216.91	-2118.8	1280.69	-6.50534	-1972.86	1455.04	-88.7551	-1941.02	1231.58	-109.707	-1927.94	1131.93	-122.454	-1810.36	997.647	-78.2969	-1756.24	934.574	-139.737	-1790.41	921.793	-127.02	-1720.61	881.688
6690	0	132.95	-1846.46	1633.25	229.326	-1841.16	1628.99	117.285	-1998.41	1676.33	262.517	-1986.3	1661.51	174.617	-2054.26	1487.79	156.202	-2095.9	1226.43	177.565	-1901.35	1411.32	173.522	-1797.99	1208.24	217.64	-2107.19	1282.79	-6.49225	-1961.61	1456.22	-87.7327	-1932.33	1231.75	-108.298	-1921.31	1132.04	-121.683	-1807.87	994.426	-77.8799	-1755.6	929.435	-139.165	-1790.2	918.007	-126.326	-1722.12	874.734
6691	0	133.569	-1833.3	1634.11	229.856	-1828.28	1630.09	117.939	-1984.84	1678.53	263.077	-1972.99	1663.66	175.167	-2042.25	1489.91	157.543	-2084.06	1228.48	178.068	-1889.38	1413.32	173.271	-1786.12	1210.31	218.601	-2095.57	1285.02	-6.49817	-1950.34	1457.25	-86.7621	-1924	1232.06	-106.764	-1915.23	1131.95	-120.692	-1805.83	991.798	-77.2502	-1755.39	924.656	-138.613	-1790.32	914.576	-125.36	-1724.17	868.272
6692	0	134.358	-1820.28	1635.18	230.569	-1815.4	1630.74	118.34	-1971.45	1680.7	263.716	-1959.79	1665.83	175.684	-2029.99	1492	158.954	-2072.19	1230.49	178.621	-1877.41	1415.35	172.996	-1774.68	1212.23	219.604	-2083.99	1287.14	-6.37365	-1938.88	1458.52	-85.9279	-1916.28	1232.39	-105.319	-1909.49	1131.93	-119.929	-1804.21	989	-76.4834	-1755.6	920.243	-137.952	-1791.1	911.467	-124.43	-1726.82	862.271
6693	0	135.091	-1807.37	1636.28	231.191	-1802.66	1631.74	118.756	-1958.18	1682.52	264.312	-1946.96	1667.9	176.093	-2017.77	1493.98	160.242	-2060.29	1232.47	178.975	-1865.26	1417.08	173.053	-1763.5	1214.12	220.556	-2072.19	1289.29	-6.25329	-1927.03	1459.79	-85.1665	-1908.97	1232.66	-103.65	-1904.37	1132.13	-118.995	-1803.1	986.464	-75.7469	-1756.31	916.121	-137.058	-1792.3	908.45	-123.596	-1729.72	856.681
6694	0	135.623	-1794.67	1637.31	231.704	-1790.31	1633.09	119.052	-1945.25	1684.09	264.426	-1934.27	1669.59	176.426	-2005.59	1495.79	161.297	-2048.18	1234.3	179.257	-1853.26	1418.57	173.117	-1752.43	1215.82	221.523	-2060.31	1291.19	-6.11877	-1915.33	1460.84	-84.4877	-1901.99	1232.73	-102.485	-1899.31	1132.13	-118.039	-1802.14	983.922	-75.0643	-1757.39	912.179	-136.198	-1793.63	905.73	-122.677	-1733.14	851.559
6695	0	136.129	-1782.15	1638.28	232.73	-1777.59	1634.54	119.37	-1932.65	1685.48	264.703	-1921.94	1671.05	176.798	-1993.37	1497.21	162.177	-2036.07	1235.86	179.919	-1841.13	1420.08	173.271	-1741.14	1217.75	222.545	-2048.2	1292.93	-6.04776	-1903.21	1461.77	-83.6654	-1895.31	1232.77	-101.052	-1894.54	1132.14	-117.029	-1801.63	981.585	-74.1499	-1758.79	908.643	-135.204	-1795.61	902.95	-121.814	-1736.73	846.815
6696	0	136.728	-1769.73	1639.32	233.105	-1765.45	1635.54	119.643	-1920.19	1686.49	265.023	-1909.58	1672.43	177.077	-1981.09	1498.38	162.875	-2024.2	1237.17	180.598	-1828.54	1421.5	173.807	-1729.68	1219.1	223.535	-2036.04	1294.4	-5.8139	-1891.29	1462.61	-82.3943	-1888.94	1232.93	-99.4993	-1890.17	1132.32	-116.004	-1801.41	979.101	-73.1367	-1760.43	905.254	-134.214	-1797.67	900.572	-120.776	-1740.6	842.357
6697	0	137.314	-1757.3	1640.21	233.624	-1753.37	1636.56	120	-1907.65	1687.42	265.438	-1897.47	1673.62	177.49	-1968.58	1499.64	163.409	-2011.99	1238.27	181.244	-1816.41	1422.44	174.594	-1717.91	1220.3	224.432	-2023.75	1295.64	-5.52065	-1878.94	1463.13	-81.4702	-1882.26	1232.96	-98.0035	-1885.63	1132.37	-114.792	-1801.47	977.111	-72.1525	-1762.32	901.686	-132.886	-1800.03	898.223	-119.789	-1744.43	838.32
6698	0	137.692	-1744.98	1641.09	234.109	-1741.22	1637.59	120.291	-1895.49	1688.07	265.565	-1885.14	1674.54	177.934	-1956.14	1500.52	163.91	-1999.94	1239.11	181.715	-1804.18	1422.76	175.253	-1706.06	1221.21	225.374	-2011.4	1296.71	-5.11012	-1866.59	1463.72	-80.4482	-1875.52	1232.94	-96.4332	-1881.15	1132.34	-113.724	-1801.62	974.894	-71.2524	-1764.03	898.751	-131.626	-1802.67	896.025	-118.906	-1748.66	834.474
6699	0	138.183	-1732.72	1641.7	234.557	-1729.05	1638.26	120.566	-1883.1	1688.33	265.782	-1872.96	1675.03	178.375	-1943.62	1501.05	164.296	-1987.69	1239.66	182.441	-1791.89	1422.94	176.205	-1694.11	1221.62	226.234	-1999.12	1297.5	-4.70429	-1854.11	1463.75	-79.3324	-1868.68	1232.92	-94.7874	-1876.59	1132.57	-112.518	-1801.84	972.822	-70.484	-1765.87	895.623	-130.17	-1805.29	893.9	-117.762	-1752.97	830.896
6700	0	138.568	-1720.41	1642.05	234.83	-1716.93	1638.74	120.806	-1871.11	1688.24	266.1	-1860.82	1675.47	178.606	-1930.99	1501.33	164.574	-1975.37	1240.06	183.256	-1779.36	1423.13	177.439	-1681.96	1221.68	226.961	-1986.7	1297.89	-4.44501	-1841.53	1463.51	-78.2846	-1861.62	1232.73	-93.1878	-1871.99	1132.55	-111.204	-1802.2	970.943	-69.4005	-1768.19	892.989	-128.656	-1808.18	891.867	-116.942	-1757.23	827.474
6701	0	138.681	-1708.21	1642.13	235.055	-1704.64	1638.98	120.864	-1858.95	1687.83	266.067	-1848.83	1674.99	178.944	-1918.45	1501.31	164.822	-1963.12	1240.13	183.68	-1767.17	1422.64	178.699	-1669.96	1221.23	227.645	-1974.37	1298.26	-4.12473	-1828.93	1462.95	-77.199	-1854.39	1232.33	-91.3673	-1867.33	1132.47	-110.198	-1802.37	968.981	-68.7961	-1770.03	890.051	-127.454	-1810.99	890.003	-116.045	-1761.75	824.334
6702	0	138.943	-1695.88	1641.9	235.286	-1692.39	1639	121.253	-1846.77	1687.21	266.304	-1836.58	1674.88	179.366	-1905.61	1500.9	165.011	-1950.76	1239.76	184.227	-1754.77	1421.97	179.88	-1658.47	1220.03	228.312	-1962.06	1298.05	-3.63006	-1816.2	1462.33	-76.0222	-1846.84	1231.97	-89.5107	-1862.41	1132.44	-109.086	-1802.51	967.062	-67.8947	-1771.85	887.768	-125.93	-1813.8	888.373	-115.222	-1766.18	821.387
6703	0	139.121	-1683.34	1641.56	235.643	-1679.6	1638.88	121.513	-1834.25	1686.62	266.728	-1823.81	1674.69	179.776	-1892.94	1500.32	165.216	-1938.61	1239.48	184.965	-1742.16	1421.16	181.116	-1647.07	1218.56	228.905	-1949.73	1297.75	-3.29587	-1803.25	1461.6	-74.8384	-1838.97	1231.67	-87.8318	-1857.04	1132.53	-107.968	-1802.52	965.689	-67.5755	-1773.58	885.312	-124.633	-1816.24	887.26	-114.271	-1770.48	818.643
6704	0	139.36	-1670.69	1641.01	235.615	-1667.17	1638.34	121.714	-1821.92	1685.58	266.951	-1811.16	1673.86	180.07	-1880.08	1499.66	165.082	-1926.35	1238.85	185.708	-1729.41	1420.3	182.487	-1635.29	1217.11	229.317	-1937.46	1297.3	-3.018	-1790.16	1460.61	-73.7448	-1830.92	1231.25	-85.7809	-1851.53	1132.37	-106.915	-1802.21	964.489	-67.0566	-1773.55	883.912	-123.097	-1818.78	886.204	-113.642	-1774.69	816.358
6705	0	139.225	-1658.11	1640	235.581	-1654.29	1637.45	121.9	-1809.24	1684.31	267.13	-1798.21	1672.99	180.333	-1867.08	1498.8	164.775	-1914.4	1238.09	186.333	-1716.77	1419.18	183.501	-1623.26	1214.84	229.481	-1925.16	1296.47	-2.75212	-1777.12	1459.24	-72.9761	-1822.64	1230.46	-83.8546	-1845.51	1132.32	-105.622	-1801.69	962.957	-66.5813	-1774.61	881.786	-121.865	-1820.77	885.266	-113.626	-1778.51	814.711
6706	0	139.152	-1645.27	1638.55	235.6	-1641.39	1636.36	122.015	-1796.53	1682.83	267.381	-1785.34	1671.87	180.518	-1854.27	1497.76	164.172	-1902.37	1237.19	186.771	-1703.88	1417.54	184.876	-1610.82	1212.83	229.59	-1912.97	1295.52	-2.41275	-1763.66	1457.7	-72.1639	-1813.96	1229.67	-81.7897	-1839.2	1131.98	-104.356	-1800.91	961.73	-65.961	-1775.52	879.758	-120.301	-1822.77	884.535	-112.7	-1782.58	812.353
6707	0	139.124	-1632.35	1636.77	235.55	-1628.28	1634.59	122.05	-1783.61	1681.28	267.225	-1772.03	1670.38	180.578	-1841.27	1496.49	163.517	-1890.16	1236.3	187.734	-1691.15	1416.16	186.132	-1597.98	1210.52	229.514	-1900.8	1294.5	-2.11468	-1750.5	1455.64	-71.2264	-1805.06	1228.77	-79.7565	-1832.48	1131.54	-103.188	-1799.69	960.712	-65.3158	-1776.22	877.844	-118.999	-1823.98	884.314	-111.784	-1786.4	810.436
6708	0	139.093	-1619.16	1634.94	235.3	-1615.28	1632.45	122.129	-1770.45	1679.66	267.485	-1758.86	1668.94	180.62	-1828.17	1495.18	162.743	-1877.92	1235.19	187.849	-1678.42	1413.96	187.306	-1585	1208.21	229.198	-1888.6	1293.47	-1.90394	-1736.97	1453.72	-70.528	-1795.74	1228.01	-77.8708	-1825.2	1131.19	-102.067	-1797.77	959.841	-64.7609	-1776.35	876.032	-118.092	-1824.56	884.411	-111.291	-1789.74	808.726
6709	0	139.091	-1605.77	1632.88	235.329	-1601.78	1630.55	122.108	-1756.92	1677.86	267.504	-1745.34	1667.39	180.497	-1815.19	1493.71	161.994	-1865.42	1233.94	188.217	-1665.78	1412	188.363	-1572.16	1205.94	228.92	-1876.41	1292.21	-1.69915	-1723.41	1452.12	-69.8868	-1786.13	1227.01	-75.986	-1817.36	1130.7	-101.156	-1795.45	958.905	-64.4704	-1776.27	874.292	-117.148	-1824.71	884.37	-110.313	-1792.91	807.172
6710	0	139.067	-1592.32	1630.5	235.385	-1588.33	1628.23	122.14	-1743.15	1676	267.38	-1731.65	1665.5	180.39	-1802.12	1492.11	161.303	-1852.81	1232.56	188.494	-1652.86	1409.76	189.659	-1559.45	1203.64	228.494	-1864.14	1290.8	-1.63171	-1709.94	1450.14	-68.9506	-1776.17	1225.85	-74.1282	-1808.96	1129.91	-100.239	-1792.45	958.21	-63.8074	-1775.42	872.88	-116.214	-1824.19	884.6	-109.728	-1795.27	805.853
6711	0	138.989	-1578.77	1627.96	235.248	-1575.04	1625.54	121.83	-1729.4	1674.08	267.271	-1718.21	1663.45	179.921	-1789.1	1490.37	160.463	-1840.29	1230.95	188.637	-1640.06	1407.65	190.1	-1547.19	1200.82	227.957	-1851.73	1289.19	-1.94976	-1696.62	1448.07	-68.2829	-1766.14	1224.48	-72.5192	-1800.28	1129.11	-99.6122	-1788.86	957.557	-63.6231	-1773.95	871.427	-114.82	-1823	885.243	-108.957	-1797.21	805.011
6712	0	138.95	-1565.03	1625.18	235.089	-1561.48	1622.92	121.382	-1715.48	1672.07	266.644	-1704.63	1661.22	179.397	-1776.21	1488.56	159.686	-1827.53	1229.08	188.663	-1627.16	1405.5	190.544	-1534.82	1198.36	227.324	-1839.16	1287.44	-2.26749	-1683.35	1445.89	-67.6585	-1755.48	1222.88	-70.9471	-1791.07	1128.06	-99.0387	-1784.66	956.98	-63.3365	-1772.09	870.52	-114.199	-1821.06	885.705	-108.486	-1798.26	804.201
6713	0	138.708	-1551.32	1622.32	235.001	-1547.95	1620.33	120.918	-1701.53	1669.89	266.096	-1691.2	1658.97	178.966	-1763.27	1486.44	158.992	-1814.85	1227.05	188.542	-1614.29	1403.31	191.116	-1522.21	1196.45	226.844	-1826.54	1285.43	-2.63643	-1670.16	1443.74	-67.0651	-1744.52	1221.29	-69.5975	-1781.49	1127.12	-98.5303	-1779.63	956.415	-63.0858	-1769.03	869.478	-113.967	-1818	886.173	-108.057	-1798.65	803.673
6714	0	138.308	-1537.47	1619.6	234.748	-1534.16	1617.63	120.411	-1687.47	1668.07	265.748	-1677.12	1657.17	178.377	-1750.16	1484.4	158.411	-1801.84	1225.08	188.074	-1601.28	1401.26	191.497	-1509.39	1194.54	226.286	-1813.68	1283.3	-3.04831	-1657.03	1441.81	-66.4857	-1733.27	1219.72	-68.3545	-1771.33	1125.99	-98.5231	-1773.88	956.083	-63.3507	-1765.68	868.575	-113.849	-1814.13	886.862	-107.727	-1798.22	803.244
6715	0	137.968	-1523.66	1616.84	234.498	-1520.54	1615.18	119.676	-1673.33	1666.21	265.041	-1663.21	1655.6	177.644	-1737.26	1482.53	157.919	-1788.78	1223.11	187.813	-1588.36	1399.26	191.618	-1496.53	1192.83	225.691	-1800.85	1281.36	-3.63775	-1644.05	1439.64	-66.0981	-1721.76	1217.92	-67.4618	-1760.84	1124.88	-98.4995	-1767.22	955.634	-63.5531	-1761.07	867.614	-114.152	-1809.22	887.504	-107.267	-1796.77	802.866
6716	0	137.133	-1509.93	1614.17	233.673	-1507.22	1612.41	118.635	-1659.33	1664.19	264.248	-1649.53	1653.96	176.876	-1724.19	1480.54	157.487	-1775.58	1221.13	187.275	-1575.33	1397.25	191.75	-1483.67	1191.15	225.136	-1787.69	1279.43	-4.38998	-1630.98	1437.3	-66.1042	-1709.94	1216.08	-66.7263	-1749.92	1123.51	-98.9042	-1759.92	954.926	-64.3149	-1755.31	866.839	-114.953	-1803.26	888.046	-107.225	-1794.43	802.506
6717	0	136.188	-1496.24	1611.57	232.788	-1493.54	1610.09	117.634	-1645.33	1662.46	262.812	-1635.81	1651.94	176.092	-1711.02	1478.49	157.147	-1762.29	1218.95	186.682	-1562.04	1395.41	191.421	-1470.85	1189.4	224.649	-1774.57	1277.48	-5.04328	-1618.02	1435.03	-65.9522	-1698.09	1214.07	-66.1806	-1738.74	1121.99	-99.4705	-1751.71	954.196	-65.3967	-1748.81	865.898	-115.476	-1796.46	888.643	-107.271	-1790.88	802.358
6718	0	135.036	-1482.64	1609.45	231.735	-1479.9	1608.22	116.232	-1631.65	1660.57	261.555	-1622.03	1650.77	175.232	-1697.81	1476.79	156.856	-1748.74	1217.14	186.081	-1548.8	1393.71	191.009	-1458.08	1187.75	224.23	-1761.34	1275.68	-5.74761	-1604.95	1432.84	-66.0043	-1685.96	1212.04	-65.9726	-1727.14	1120.54	-100.216	-1742.9	953.536	-66.5073	-1741.21	864.901	-116.775	-1788.43	888.964	-107.777	-1786.23	801.935
6719	0	133.665	-1469.05	1607.72	230.55	-1466.2	1606.89	114.556	-1618.06	1658.67	260.378	-1608.3	1649.82	174.419	-1684.41	1475.38	156.714	-1735.24	1215.62	185.319	-1535.27	1392.39	190.348	-1445.12	1186.23	223.904	-1747.95	1274.3	-6.566	-1591.86	1431.05	-66.2495	-1673.65	1210.31	-66.0401	-1715.09	1119.02	-101.305	-1732.98	952.834	-68.0183	-1732.92	864.064	-118.324	-1779.58	889.013	-108.424	-1780.29	802.057
6720	0	131.998	-1455.48	1606.05	228.816	-1452.67	1605.62	113.112	-1604.35	1657.17	258.785	-1594.66	1648.84	173.641	-1671.01	1474.05	156.747	-1721.66	1214.2	184.309	-1521.83	1390.88	189.696	-1431.74	1184.9	223.712	-1734.27	1272.92	-7.49417	-1578.77	1429.14	-66.6153	-1660.99	1208.6	-66.0089	-1702.83	1117.78	-102.51	-1722.32	952.262	-68.7282	-1724.57	863.35	-119.441	-1769.68	889.04	-109.374	-1773	802.18
6721	0	130.331	-1442.04	1604.81	227.063	-1439.22	1604.65	111.271	-1590.96	1655.76	257.038	-1581.13	1648.02	172.889	-1657.51	1472.89	156.826	-1707.94	1212.92	183.575	-1508.23	1389.97	188.628	-1417.87	1183.8	223.626	-1720.64	1271.82	-8.37148	-1565.44	1427.51	-66.808	-1648.36	1207.11	-66.4411	-1690.32	1116.28	-103.885	-1710.94	951.491	-69.4532	-1714.46	862.412	-121.136	-1758.73	888.794	-110.702	-1764.38	801.875
6722	0	128.492	-1428.65	1603.7	225.296	-1425.63	1604.14	109.234	-1577.65	1654.35	255.099	-1567.67	1647.47	171.836	-1643.98	1471.76	156.872	-1694.01	1211.65	182.566	-1494.57	1388.99	187.696	-1403.52	1183.29	223.454	-1706.82	1270.88	-9.52795	-1552.35	1426.23	-67.5272	-1635.36	1205.75	-67.1871	-1677.42	1114.97	-105.387	-1698.95	950.62	-72.8159	-1701.85	861.481	-123.14	-1747.03	888.493	-112.504	-1754.31	801.808
6723	0	126.306	-1415.46	1602.94	223.345	-1412.28	1603.97	107.145	-1564.36	1653.35	252.531	-1554.58	1646.7	170.62	-1630.55	1470.82	156.866	-1680.04	1210.62	181.4	-1480.8	1388.67	186.314	-1389.16	1182.7	223.241	-1692.91	1270.16	-10.7118	-1539.11	1425.03	-68.3055	-1622.23	1204.44	-68.227	-1664.23	1113.91	-106.832	-1686.2	949.759	-74.5966	-1689.21	860.652	-124.524	-1734.38	888.089	-114.024	-1742.79	801.51
6724	0	124.409	-1402.16	1602.54	221.421	-1399	1604.06	104.988	-1551.3	1652.63	249.791	-1542.22	1646.14	169.352	-1617.12	1470.2	156.817	-1665.89	1209.78	180.211	-1467.02	1388.54	185	-1374.8	1182.38	222.872	-1678.8	1269.5	-11.9042	-1525.68	1423.95	-69.1017	-1608.68	1203.35	-69.227	-1650.63	1112.96	-108.261	-1672.68	948.818	-75.7407	-1676.59	859.758	-126.206	-1720.94	887.369	-115.951	-1729.7	800.904
6725	0	122.556	-1388.84	1602.74	219.397	-1385.69	1604.42	102.913	-1538.04	1652.46	248.609	-1528	1647.29	167.951	-1603.52	1469.94	156.487	-1651.65	1209.13	178.92	-1453.33	1388.62	183.58	-1360.41	1182.44	222.215	-1664.55	1269.09	-13.2282	-1512.22	1423.43	-70.168	-1594.81	1202.69	-70.4895	-1636.58	1112.13	-109.807	-1658.5	948.116	-77.8408	-1661.53	858.686	-127.476	-1706.81	886.61	-118.107	-1715.27	800.096
6726	0	120.337	-1375.71	1603.19	217.314	-1372.57	1605.36	100.739	-1524.97	1652.58	246.128	-1515.26	1647.65	166.435	-1589.87	1470	155.79	-1637.26	1208.79	177.762	-1439.39	1389.17	182.298	-1345.87	1183	221.205	-1650.35	1269.1	-14.5934	-1498.57	1423.14	-71.436	-1580.67	1202.28	-71.9447	-1622.27	1111.58	-111.411	-1643.53	947.525	-79.5445	-1645.82	857.815	-129.192	-1691.78	885.856	-120.128	-1699.42	799.227
6727	0	118.404	-1362.47	1604.18	215.4	-1359.24	1606.73	98.5498	-1512.04	1652.85	243.77	-1502.49	1648.37	164.869	-1576.18	1470.21	154.848	-1622.71	1208.82	176.609	-1425.42	1390.09	181.279	-1331.1	1184.07	219.964	-1636.02	1269.27	-15.9575	-1484.71	1423.07	-72.8778	-1566.13	1202.07	-73.5046	-1607.53	1111.22	-113.024	-1627.9	947.121	-80.9033	-1629.59	857.592	-130.547	-1675.59	885.153	-122.349	-1682.11	798.373
6728	0	116.212	-1349.33	1605.46	213.255	-1346.08	1608.42	96.2775	-1499.11	1653.32	241.389	-1489.58	1649.36	163.25	-1562.5	1470.68	153.613	-1608.15	1209.2	175.242	-1411.52	1391.27	180.537	-1316.21	1185.56	218.472	-1621.79	1269.49	-17.2901	-1470.75	1423.34	-74.4665	-1551.12	1202.11	-75.1714	-1592.17	1111.05	-114.657	-1611.52	946.574	-83.0572	-1612.25	856.951	-132.256	-1658.73	884.243	-124.902	-1663.55	797.827
6729	0	114.057	-1336.1	1607.15	211.033	-1332.82	1610.56	93.9832	-1486.27	1653.92	238.776	-1476.85	1650.54	161.657	-1548.82	1471.6	152.115	-1593.76	1209.96	173.903	-1397.62	1392.65	179.828	-1301.57	1187	216.848	-1607.69	1270.18	-18.5008	-1456.85	1423.67	-75.782	-1535.98	1202.15	-76.7972	-1576.64	1110.79	-116.5	-1594.37	946.374	-84.9346	-1593.81	856.662	-133.876	-1641.03	883.19	-127.302	-1643.67	796.823
6730	0	111.761	-1322.93	1609	208.644	-1319.56	1612.72	91.9872	-1473.21	1654.96	236.732	-1463.68	1652.31	160.412	-1535.05	1472.99	150.645	-1579.7	1211.37	172.803	-1383.83	1394.23	179.394	-1287.28	1188.48	215.368	-1593.64	1271.48	-19.6041	-1442.95	1424.44	-77.3842	-1520.42	1202.6	-78.6002	-1560.55	1110.66	-118.304	-1576.55	946.167	-87.0497	-1574.5	856.483	-135.995	-1622.12	882.369	-129.712	-1622.73	795.934
6731	0	109.841	-1309.77	1610.79	206.464	-1306.08	1615.03	89.9279	-1460.28	1655.86	234.569	-1450.35	1653.89	159.435	-1521.14	1474.38	149.244	-1565.99	1212.94	171.998	-1370.05	1395.83	179.079	-1273.5	1189.9	214.164	-1579.7	1273.14	-20.3909	-1429.11	1425.42	-78.6245	-1504.69	1202.9	-80.2144	-1543.95	1110.81	-119.992	-1557.87	945.768	-88.2986	-1555.53	856.144	-137.517	-1602.7	881.349	-132.378	-1600.58	795.113
6732	0	107.807	-1296.73	1612.27	204.292	-1292.73	1616.86	88.2952	-1447.23	1656.74	233.431	-1436.55	1656.22	158.734	-1507.36	1475.98	148.01	-1552.56	1214.47	170.961	-1356.52	1397.25	179.117	-1259.75	1191.63	213.235	-1566.03	1274.99	-20.9507	-1415.52	1426.66	-79.8668	-1488.8	1203.53	-81.9628	-1527.28	1110.81	-121.719	-1538.39	945.617	-90.1237	-1534.61	855.845	-139.231	-1582.27	880.045	-135.094	-1577.43	794.296
6733	0	105.881	-1283.73	1613.5	202.634	-1279.37	1618.82	86.6066	-1434.52	1657.64	231.646	-1423.26	1657.61	157.974	-1493.86	1477.59	147.143	-1539.38	1216.08	170.108	-1343.14	1398.54	178.716	-1246.9	1192.61	212.578	-1552.56	1276.8	-21.5563	-1402.18	1427.81	-81.0627	-1472.61	1203.81	-83.7343	-1510.26	1110.86	-123.485	-1518.3	945.256	-92.7452	-1512.07	855.621	-141.039	-1560.79	878.984	-137.431	-1553.46	793.361
6734	0	104.189	-1270.76	1614.45	199.948	-1266.55	1619.56	85.3224	-1421.68	1658.47	229.818	-1410.22	1658.54	157.281	-1480.79	1478.99	146.471	-1526.3	1217.57	169.36	-1329.99	1399.76	178.089	-1234.03	1193.58	212.293	-1539.36	1278.6	-22.1552	-1389.01	1429.13	-82.0039	-1456.61	1204.15	-85.4127	-1493.07	1111	-125.028	-1497.63	944.842	-94.695	-1489.3	855.312	-143.222	-1538.63	877.832	-139.995	-1528.48	792.65
6735	0	102.728	-1257.86	1615.51	199.1	-1252.99	1621.2	84.0995	-1408.61	1659.68	228.378	-1396.95	1660.16	156.682	-1467.99	1480.37	146.117	-1513.63	1219	168.986	-1317.05	1401.21	177.732	-1221.27	1194.66	212.24	-1526.66	1280.24	-22.6307	-1375.94	1430.5	-82.9805	-1440.34	1204.41	-87.3027	-1475.82	1110.87	-126.642	-1476.35	944.504	-96.2789	-1465.76	855.087	-144.731	-1515.79	876.637	-142.461	-1502.55	791.929
6736	0	101.858	-1244.82	1616.54	198.133	-1239.94	1622.43	83.0947	-1395.44	1661.11	227.631	-1383.45	1661.84	156.063	-1455.1	1481.94	145.788	-1500.94	1220.23	168.626	-1304.18	1402.76	177.359	-1208.84	1195.75	212.077	-1514.1	1281.83	-23.064	-1362.76	1432.11	-83.9219	-1423.78	1205.19	-88.9844	-1458.24	1111.22	-127.932	-1454.56	944.365	-97.6835	-1441.86	855.218	-146.427	-1492.25	875.291	-144.367	-1475.98	791.494
6737	0	101.294	-1231.64	1617.76	197.353	-1226.93	1623.44	82.5538	-1382.09	1662.97	226.982	-1370.29	1663.76	155.411	-1442.49	1483.52	145.546	-1488.46	1221.98	168.233	-1291.46	1404.35	176.963	-1196.66	1197.12	211.651	-1501.84	1283.57	-23.4962	-1349.76	1433.81	-85.0166	-1407.4	1206.1	-90.7529	-1440.65	1111.47	-129.294	-1432.24	944.387	-99.0644	-1417.63	855.76	-147.749	-1467.96	874.362	-146.803	-1448.75	791.808
6738	0	100.853	-1218.65	1618.85	197.564	-1213.94	1624.76	82.1337	-1368.95	1664.63	226.707	-1357.14	1665.59	154.809	-1429.72	1485.16	145.099	-1475.72	1223.61	167.656	-1278.8	1405.9	176.61	-1184.59	1198.55	210.99	-1489.53	1285.21	-23.9358	-1336.73	1435.47	-85.9772	-1390.9	1207.06	-92.5282	-1422.94	1111.79	-130.725	-1409.49	944.69	-100.27	-1392.21	856.458	-149.188	-1443.05	873.428	-148.681	-1420.58	792.185
6739	0	100.591	-1205.63	1619.98	197.023	-1200.87	1625.68	81.8139	-1355.63	1666.34	226.367	-1344.03	1667.06	154.138	-1417.25	1486.87	144.423	-1463.25	1225.2	167.379	-1266.31	1407.83	176.305	-1172.45	1199.96	210.062	-1477.39	1286.89	-24.3879	-1323.61	1437.14	-87.1002	-1374.4	1208.31	-94.5056	-1405.25	1112.13	-131.811	-1386.51	945.096	-101.422	-1366.5	857.577	-150.24	-1417.68	872.916	-150.346	-1391.86	793.322
6740	0	100.65	-1192.59	1621.25	197.113	-1187.78	1626.69	81.7332	-1342.3	1668.37	226.318	-1331.13	1668.81	153.441	-1404.59	1488.46	143.445	-1450.68	1226.99	167.213	-1253.84	1409.62	176.29	-1160.29	1201.56	208.99	-1465.29	1288.67	-24.9531	-1310.54	1438.88	-88.2083	-1358.05	1209.56	-96.4245	-1387.53	1113.07	-132.771	-1363.22	946.056	-101.953	-1340.36	859.103	-151.304	-1391.68	872.696	-151.591	-1362.63	794.799
6741	0	100.769	-1179.56	1622.62	197.098	-1174.85	1627.73	81.6435	-1329.23	1670.35	226.281	-1318.01	1670.24	152.936	-1392.16	1490.45	142.393	-1438.43	1229.09	166.91	-1241.31	1411.36	176.359	-1147.92	1203.24	207.813	-1453.06	1290.55	-25.0777	-1297.31	1440.64	-89.1988	-1341.91	1211.07	-98.1949	-1369.72	1113.77	-133.631	-1339.5	946.972	-102.45	-1313.78	861.466	-152.134	-1365.12	872.827	-152.551	-1332.84	796.573
6742	0	101.192	-1166.41	1624.04	197.806	-1161.91	1629.15	82.1054	-1315.89	1672.58	226.594	-1305.17	1672.09	152.569	-1379.42	1492.5	141.273	-1426.19	1231.22	166.774	-1228.88	1413.31	176.412	-1135.4	1204.94	206.703	-1440.96	1292.56	-25.3116	-1284.15	1442.74	-90.3401	-1325.73	1212.85	-100.025	-1351.94	1114.87	-134.254	-1315.72	948.456	-102.628	-1287.05	864.033	-152.597	-1338.41	873.249	-153.207	-1302.61	799.377
6743	0	101.881	-1153.38	1625.73	198.426	-1149.04	1630.31	82.3141	-1302.63	1674.76	227.255	-1291.95	1673.57	152.227	-1366.82	1494.68	140.182	-1414.19	1233.43	166.573	-1216.64	1414.98	176.698	-1122.82	1206.89	205.575	-1428.84	1294.68	-25.4203	-1270.77	1445.02	-91.4329	-1309.73	1214.89	-101.735	-1334.18	1116.26	-134.938	-1291.57	950.715	-101.921	-1261.41	866.548	-152.433	-1311.47	874.247	-153.364	-1272.21	802.762
6744	0	102.383	-1140.45	1627.35	198.931	-1136.3	1631.44	82.8635	-1289.55	1677	227.423	-1279.28	1674.93	151.696	-1354.07	1496.62	139.02	-1402.12	1235.62	166.496	-1204.09	1416.83	176.961	-1110.32	1208.88	204.35	-1416.68	1296.78	-25.5729	-1257.51	1447.26	-92.5555	-1293.95	1216.98	-103.535	-1316.36	1117.9	-135.3	-1267.37	953.085	-101.6	-1233.79	870.936	-152.281	-1284.49	875.854	-153.554	-1241.5	806.729
6745	0	102.743	-1127.54	1628.73	199.371	-1123.56	1632.54	83.0897	-1276.53	1678.94	227.951	-1266.62	1676.15	151.141	-1341.66	1498.38	137.869	-1390.03	1237.54	166.3	-1191.67	1418.6	177.012	-1098.08	1210.65	203.165	-1404.62	1298.66	-25.7512	-1244.44	1449.51	-93.7591	-1278.1	1219.2	-105.416	-1298.54	1119.51	-135.5	-1243.2	956.14	-101.308	-1207.47	874.958	-152.611	-1256.73	878.246	-153.246	-1210.56	811.473
6746	0	103.257	-1114.87	1630.26	199.913	-1111.05	1633.56	83.6003	-1263.58	1681.03	228.082	-1254.07	1676.88	150.764	-1329.03	1500.15	137.048	-1378.03	1239.35	166.128	-1179.12	1420.14	176.901	-1086.08	1212.07	202.146	-1392.36	1300.32	-25.6751	-1231.15	1451.76	-94.8767	-1262.4	1221.38	-107.222	-1280.81	1121.22	-135.563	-1218.61	959.545	-100.692	-1180.23	879.86	-152.166	-1229.37	880.988	-152.617	-1179.66	817.016
6747	0	103.571	-1102.27	1631.79	200.376	-1098.41	1634.48	84.0163	-1250.86	1682.68	228.571	-1241.56	1678.04	150.385	-1316.59	1501.68	136.329	-1365.98	1240.94	166.002	-1166.62	1421.44	176.998	-1074.16	1213.73	201.289	-1379.99	1301.9	-25.8904	-1218.08	1453.92	-96.1774	-1246.73	1223.75	-108.958	-1262.92	1122.95	-135.972	-1194.37	963.197	-100.297	-1152.61	885.867	-151.969	-1201.53	884.282	-151.798	-1149.03	822.714
6748	0	103.835	-1089.58	1633.28	200.518	-1085.83	1635.43	84.4307	-1238.23	1684.11	228.944	-1229.05	1679.07	149.957	-1303.8	1502.86	135.758	-1353.69	1242.43	165.635	-1154.03	1422.75	176.787	-1062.16	1215.17	200.494	-1367.66	1303.25	-25.9208	-1204.91	1455.84	-97.4015	-1230.92	1225.82	-110.759	-1244.96	1124.74	-136.166	-1169.99	967.126	-99.6927	-1125.64	891.844	-151.697	-1173.92	887.869	-150.834	-1118.42	828.972
6749	0	104.042	-1076.93	1634.65	200.912	-1073.34	1636.62	84.65	-1225.69	1685.28	229.351	-1216.7	1679.66	149.735	-1291.27	1504.02	135.489	-1341.59	1243.53	165.427	-1141.34	1424.02	176.595	-1050.24	1216.53	199.795	-1355.17	1304.29	-25.979	-1191.84	1457.7	-98.5818	-1215.12	1227.73	-112.474	-1227.02	1126.25	-136.238	-1145.64	971.302	-99.0752	-1098.27	898.519	-151.198	-1146.44	891.751	-149.707	-1087.91	835.524
6750	0	104.213	-1064.47	1635.77	201.258	-1060.89	1637.46	84.8329	-1213.45	1685.87	229.371	-1204.48	1680.26	149.37	-1278.51	1504.6	135.246	-1329.29	1244.47	165.35	-1128.68	1424.99	176.538	-1038.16	1217.75	199.098	-1342.76	1305.14	-26.2076	-1178.95	1459.25	-99.6512	-1199.38	1229.25	-113.983	-1209.09	1127.42	-136.289	-1121.51	975.305	-98.3855	-1070.97	905.205	-150.863	-1118.71	895.724	-148.543	-1057.81	842.357
6751	0	104.463	-1052.04	1636.64	201.162	-1048.59	1638.07	84.8117	-1201.24	1686.06	229.431	-1192.4	1680.07	148.996	-1265.94	1505.04	134.839	-1317	1244.96	165.121	-1116	1425.45	176.161	-1025.91	1218.36	198.379	-1330.46	1305.85	-26.2811	-1166.05	1460.16	-100.809	-1183.62	1230.36	-115.661	-1191.1	1128.25	-136.527	-1097.33	979.246	-97.2993	-1044.59	911.431	-150.54	-1091.44	899.837	-146.606	-1028.18	848.92
6752	0	104.499	-1039.49	1637.22	201.082	-1036.12	1638.46	84.6855	-1188.95	1685.97	229.315	-1180.25	1679.45	148.841	-1253.01	1505.41	134.508	-1304.6	1245.64	164.934	-1103.26	1425.47	175.743	-1013.69	1218.47	197.618	-1318.32	1306.29	-26.343	-1153.22	1460.8	-101.831	-1167.71	1231.15	-117.135	-1172.8	1129.05	-136.494	-1073.24	983.026	-96.6574	-1018.02	917.84	-150.18	-1064.42	903.721	-145.321	-998.729	855.611
6753	0	104.484	-1026.9	1637.64	201.363	-1023.58	1638.95	84.8366	-1176.76	1685.62	229.433	-1168.01	1678.93	148.696	-1240.09	1505.32	134.071	-1292.13	1245.69	164.804	-1090.46	1425.24	175.473	-1001.49	1218.28	197.167	-1305.9	1306.53	-26.4126	-1140.37	1461.19	-102.762	-1151.87	1231.58	-118.653	-1154.44	1129.62	-136.364	-1049.17	986.831	-95.7536	-991.719	924.242	-148.775	-1037.28	907.731	-143.618	-969.501	862.43
6754	0	104.482	-1014.35	1637.94	201.466	-1011.04	1638.98	84.9729	-1164.46	1685.05	229.851	-1155.33	1678.35	148.614	-1227.23	1505.12	133.616	-1279.66	1245.57	164.539	-1077.49	1424.74	174.918	-989.665	1217.49	196.886	-1293.22	1306.62	-26.35	-1127.62	1461.33	-103.714	-1135.78	1232.16	-120.036	-1135.68	1130.1	-136.072	-1025.02	990.599	-94.5617	-965.838	930.448	-148.388	-1010.18	912.223	-141.808	-940.709	869.474
6755	0	104.323	-1001.82	1637.83	201.203	-998.544	1638.64	84.8722	-1152.03	1684.11	229.377	-1143.12	1676.83	148.418	-1214.28	1504.67	133.384	-1267.36	1245.25	164.202	-1064.53	1424.04	174.326	-977.914	1216.54	196.653	-1280.67	1306.36	-26.48	-1114.91	1461.07	-104.474	-1119.81	1232.25	-121.487	-1116.77	1130.32	-135.928	-1001.21	994.549	-93.5406	-940.142	936.699	-147.635	-983.485	916.591	-140.329	-912.449	876.339
6756	0	103.998	-989.275	1637.12	200.706	-985.903	1637.9	84.727	-1139.75	1682.76	229.156	-1130.79	1675.41	148.286	-1201.53	1503.8	133.552	-1255.01	1244.63	163.847	-1051.55	1423.17	173.631	-966.091	1215.29	196.624	-1268.08	1305.84	-26.6149	-1102.26	1460.3	-105.335	-1103.51	1231.95	-122.905	-1097.84	1130.32	-135.747	-977.537	998.142	-92.5789	-914.81	942.706	-147.045	-956.888	920.9	-138.609	-884.516	883.247
6757	0	103.66	-976.649	1636.21	200.656	-972.993	1637.14	84.6391	-1127.32	1681.41	229.023	-1118.23	1674.25	148.26	-1188.57	1502.86	134.248	-1242.65	1243.87	163.703	-1038.51	1422.21	172.908	-953.912	1213.82	196.923	-1255.45	1305.08	-26.6297	-1089.62	1459.49	-106.084	-1087.34	1231.66	-123.914	-1078.75	1130.11	-135.543	-953.774	1001.78	-91.4406	-889.652	949.037	-146.478	-930.391	925.612	-137.095	-857.103	890.161
6758	0	103.325	-963.975	1635	200.164	-960.155	1635.76	84.4901	-1114.54	1680.14	229.089	-1105.36	1672.92	148.405	-1175.85	1501.81	135.253	-1230.29	1242.95	163.336	-1025.58	1421.14	172.073	-941.367	1212.33	197.379	-1242.8	1304.21	-26.628	-1076.99	1458.52	-106.629	-1070.85	1231.43	-124.96	-1059.5	1130.06	-134.828	-930.471	1005.5	-90.3453	-865.069	955.086	-145.852	-904.641	930.131	-135.599	-830.204	897.221
6759	0	102.954	-951.202	1633.44	199.72	-947.161	1634.13	84.453	-1101.79	1678.47	228.847	-1092.3	1671.74	148.498	-1162.86	1500.58	136.354	-1217.92	1241.83	163.096	-1012.58	1419.93	171.332	-928.144	1210.86	198.003	-1230.05	1303.25	-26.4727	-1064.32	1457.27	-107.042	-1054.4	1231.04	-125.918	-1040.15	1129.83	-134.762	-907.33	1009.37	-89.2654	-840.924	960.866	-145.23	-879.05	934.93	-134.117	-803.83	904.174
6760	0	102.587	-938.254	1631.34	199.57	-934.114	1632.26	84.2359	-1088.77	1676.88	228.92	-1078.98	1670.19	148.762	-1149.92	1499.19	137.721	-1205.53	1240.53	162.971	-999.558	1418.37	170.582	-914.574	1209.08	198.933	-1217.17	1302.06	-26.3036	-1051.72	1455.85	-107.327	-1037.63	1230.41	-126.538	-1020.96	1129.65	-134.256	-884.488	1012.99	-88.1056	-817.261	966.338	-144.632	-853.914	939.618	-132.783	-778.107	910.835
6761	0	102.33	-925.321	1629.09	199.234	-921.066	1629.98	84.2155	-1075.76	1675.11	228.918	-1065.76	1668.27	149.055	-1137.26	1497.43	138.925	-1193.05	1238.83	162.867	-986.594	1416.53	170.091	-900.853	1207.27	199.926	-1204.36	1300.65	-25.9542	-1039.34	1454.37	-107.228	-1020.99	1229.79	-127.026	-1001.93	1129.48	-133.679	-862.115	1016.48	-86.945	-794.138	971.447	-144.219	-829.403	944.323	-131.5	-752.99	917.412
6762	0	102.095	-912.281	1626.42	198.947	-907.99	1627.37	83.8272	-1062.68	1672.92	228.458	-1052.78	1666.03	149.332	-1124.49	1495.65	140.077	-1180.3	1237.01	162.706	-973.578	1414.36	169.312	-887.486	1205.11	200.94	-1191.45	1299.08	-25.5761	-1026.87	1452.39	-107.07	-1004.3	1228.97	-127.437	-983.201	1129.25	-133.112	-840.111	1019.86	-86.1197	-771.761	976.099	-143.876	-805.499	948.733	-130.44	-728.555	923.844
6763	0	102.189	-899.237	1623.93	198.903	-894.946	1624.73	83.8398	-1049.34	1670.96	228.31	-1039.57	1663.73	149.683	-1111.71	1493.73	141.372	-1167.3	1234.93	162.823	-960.51	1412.56	168.639	-874.34	1202.8	202.159	-1178.45	1297.38	-25.112	-1014.5	1450.55	-106.851	-987.55	1228.17	-127.657	-964.234	1129.54	-132.591	-818.804	1023.31	-85.0426	-749.757	980.929	-143.541	-782.321	953.038	-129.591	-704.879	930.137
6764	0	102.29	-886.126	1621.31	199.298	-881.776	1622.54	83.7968	-1036.09	1668.65	228.25	-1026.49	1661.67	150.292	-1099	1491.67	142.748	-1154.13	1232.83	162.835	-947.338	1410.4	168.361	-861.145	1201.01	203.524	-1165.46	1295.51	-24.6766	-1002.05	1448.98	-106.364	-971.004	1227.59	-127.884	-945.86	1129.46	-132.078	-797.982	1026.71	-84.2499	-728.441	985.332	-142.979	-759.673	957.445	-128.875	-682.04	936.366
6765	0	102.525	-872.848	1618.87	199.663	-868.592	1620.13	83.9315	-1022.72	1666.6	228.315	-1013.16	1659.55	150.874	-1086.09	1489.58	144.077	-1140.9	1230.78	162.945	-934.206	1408.6	168.047	-847.772	1198.97	204.809	-1152.29	1293.61	-24.218	-989.479	1447.42	-105.973	-954.54	1227.21	-127.945	-927.853	1129.66	-131.596	-777.669	1029.91	-83.6213	-707.775	989.673	-142.886	-737.808	961.945	-128.194	-659.83	942.475
6766	0	102.842	-859.634	1616.51	199.879	-855.513	1617.75	84.1699	-1009.49	1664.31	228.483	-1000.05	1657.52	151.414	-1073.2	1487.56	145.255	-1127.61	1228.68	163.367	-920.847	1406.84	167.897	-834.113	1197.54	205.896	-1139.15	1291.71	-23.8235	-976.934	1445.95	-105.496	-938.271	1226.75	-127.793	-910.393	1129.81	-131.246	-758.124	1033.03	-82.835	-687.71	994.505	-142.886	-716.892	966.175	-128.005	-638.484	948.484
6767	0	103.151	-846.621	1614.52	200.386	-842.349	1615.93	84.4562	-996.226	1662.3	228.871	-987.133	1655.78	152.063	-1060.21	1485.26	146.337	-1114.13	1226.46	163.849	-907.453	1405.42	167.94	-820.767	1196.11	206.966	-1125.95	1289.73	-23.2271	-964.107	1444.56	-105.027	-922.344	1226.37	-127.58	-893.167	1129.66	-131.009	-739.404	1035.91	-82.7044	-668.295	998.624	-143.015	-696.833	970.1	-127.966	-618.044	954.166
6768	0	103.867	-833.422	1612.52	201.221	-829.225	1614.09	85.1516	-983.349	1660.06	229.803	-974.264	1653.8	152.879	-1047.15	1483.21	147.304	-1100.59	1224.03	164.536	-893.97	1403.9	168.277	-807.308	1194.84	207.902	-1112.59	1287.74	-22.5034	-951.106	1443.24	-104.465	-906.978	1225.89	-127.631	-876.699	1129.67	-130.834	-721.281	1038.64	-82.5822	-649.633	1002.59	-143.099	-677.5	974.026	-128.106	-598.568	959.471
6769	0	104.776	-820.435	1611	201.969	-816.153	1612.49	86.0911	-970.327	1658.32	230.869	-961.305	1651.97	153.615	-1033.91	1481.31	148	-1086.88	1222.05	165.189	-880.324	1402.4	168.842	-793.754	1193.32	208.712	-1099.04	1285.87	-21.6862	-937.792	1442.02	-103.73	-891.845	1225.27	-127.342	-860.734	1129.68	-130.791	-703.827	1041.03	-82.535	-631.626	1006.01	-143.266	-659.12	977.09	-128.597	-579.901	964.213
6770	0	105.764	-807.425	1609.56	203.078	-803.093	1611.06	87.3013	-957.29	1656.74	231.892	-948.348	1649.97	154.571	-1020.41	1479.66	148.613	-1072.77	1220.3	166.021	-866.596	1400.77	169.44	-779.858	1192.16	209.275	-1085.47	1284.02	-20.7217	-924.285	1440.98	-103.119	-877.132	1224.6	-126.79	-845.191	1129.35	-130.724	-687.123	1042.87	-82.7081	-614.271	1008.93	-143.35	-641.518	979.675	-129.151	-562.069	968.45
6771	0	107.156	-794.375	1608.41	204.363	-790.153	1609.74	88.6258	-944.503	1655.22	233.22	-935.381	1648.13	155.581	-1006.96	1477.9	149.116	-1058.56	1218.62	167.087	-852.853	1399.46	170.339	-765.672	1190.75	209.902	-1071.55	1282.33	-19.5589	-910.476	1439.84	-102.554	-862.58	1223.92	-126.678	-830.237	1129.2	-130.748	-671.082	1044.28	-83.2316	-597.891	1011.12	-143.275	-624.613	981.758	-129.934	-545.045	972.114
6772	0	108.618	-781.474	1607.64	206.059	-777.247	1608.95	90.2479	-931.688	1653.92	234.924	-922.646	1646.09	156.532	-993.389	1476.27	149.383	-1044.23	1216.92	168.335	-838.966	1398.36	171.578	-751.343	1189.99	210.253	-1057.84	1280.65	-18.4827	-896.67	1439	-101.842	-848.694	1223.23	-126.271	-815.787	1128.85	-130.711	-655.7	1045.4	-83.4372	-581.769	1013.28	-143.32	-608.746	983.173	-130.863	-528.996	975.282
6773	0	110.313	-768.471	1607.23	207.788	-764.227	1608.25	91.7678	-919.081	1652.84	236.722	-909.979	1644.72	157.634	-979.725	1474.84	149.572	-1029.88	1215.33	169.674	-825.04	1397.6	172.801	-736.942	1189.41	210.564	-1043.77	1278.95	-17.1319	-882.688	1438.28	-101.292	-834.873	1222.59	-126.069	-801.47	1128.49	-131.016	-641.019	1046.14	-84.2439	-566.725	1014.24	-143.662	-593.675	984.236	-132.096	-513.764	977.792
6774	0	111.99	-755.591	1606.99	209.374	-751.424	1607.87	93.671	-906.493	1651.97	238.197	-897.373	1643.16	158.967	-966.261	1473.58	149.848	-1015.2	1213.87	170.998	-811.129	1396.89	174.279	-722.243	1189.03	210.849	-1029.58	1277.32	-15.866	-868.81	1437.64	-100.965	-821.42	1222.14	-125.607	-787.588	1128.13	-131.224	-626.783	1046.37	-84.7907	-551.981	1015.43	-143.841	-579.304	984.571	-133.554	-499.399	979.568
6775	0	113.992	-742.774	1607.29	211.45	-738.452	1608.06	95.8976	-893.983	1651.4	240.642	-884.752	1642.56	160.564	-952.563	1472.37	150.258	-1000.39	1212.34	172.608	-797.08	1396.52	175.815	-707.402	1188.94	211.465	-1015.07	1275.67	-14.2833	-854.813	1437.25	-100.428	-808.031	1222.17	-125.056	-773.929	1127.88	-131.502	-613.138	1046.4	-85.6153	-538.006	1015.84	-144.333	-565.854	984.694	-135.08	-485.804	980.755
6776	0	115.928	-729.985	1608.2	213.415	-725.59	1608.58	98.4875	-881.351	1651.26	243.148	-871.751	1642.32	162.293	-938.83	1471.33	150.924	-985.182	1211.18	174.029	-782.944	1396.39	177.34	-692.242	1189.24	212.273	-1000.3	1274.26	-12.8777	-840.964	1437.3	-99.9781	-794.674	1222.32	-124.447	-760.656	1127.8	-131.871	-600.107	1046.08	-86.3654	-524.594	1015.77	-144.698	-552.917	984.334	-136.431	-472.922	981.117
6777	0	118.04	-717.24	1609.28	215.522	-712.616	1609.55	100.776	-869.05	1651.31	245.5	-858.965	1641.96	164.069	-925.052	1470.67	151.491	-970.139	1210.27	175.795	-768.777	1396.64	178.666	-677.004	1189.78	213.22	-985.521	1272.97	-11.2291	-827.014	1437.56	-99.1521	-781.568	1222.57	-123.627	-747.814	1127.72	-132.132	-587.595	1045.43	-87.2775	-511.914	1015.04	-145.278	-540.889	983.419	-138.165	-460.929	980.754
6778	0	120.016	-704.572	1610.58	217.4	-699.829	1610.65	103.107	-856.954	1651.25	248.649	-846.385	1641.92	165.868	-911.209	1470.3	152.122	-955.388	1209.51	177.354	-754.503	1396.94	179.812	-661.479	1190.44	214.329	-970.57	1271.72	-9.76887	-813.04	1438.02	-98.4955	-768.681	1222.77	-122.7	-735.185	1127.82	-132.422	-575.782	1044.22	-88.2813	-499.883	1013.52	-145.865	-529.608	981.793	-139.834	-449.715	979.438
6779	0	122.246	-691.871	1612.15	219.626	-686.875	1611.96	105.993	-844.717	1651.66	250.457	-834.022	1641.49	167.669	-897.128	1470.37	152.898	-940.782	1209.16	178.821	-740.237	1397.19	180.777	-645.805	1191.08	215.634	-955.501	1270.75	-8.37531	-798.927	1438.8	-97.5269	-755.681	1223.09	-121.644	-722.883	1127.88	-132.634	-564.483	1042.69	-89.1749	-488.575	1011.18	-146.33	-519.019	979.791	-141.41	-439.219	977.199
6780	0	124.355	-679.145	1614.12	221.756	-673.85	1613.63	108.566	-832.302	1652.59	252.972	-821.116	1641.54	169.336	-882.98	1470.74	153.845	-926.015	1209.68	180.112	-725.94	1397.74	181.532	-630.125	1191.97	216.986	-940.1	1270.08	-6.83336	-784.633	1439.95	-96.3735	-742.747	1223.75	-120.44	-710.768	1128.37	-132.96	-553.837	1040.91	-90.1525	-478.005	1008.26	-146.911	-509.308	977.301	-143.028	-429.657	974.025
6781	0	126.532	-666.219	1616.63	223.877	-660.937	1615.51	111.068	-819.885	1653.61	255.447	-808.251	1641.91	170.953	-868.727	1471.72	154.432	-911.939	1210.42	181.342	-711.685	1398.54	181.569	-614.783	1192.8	217.743	-925.034	1270.11	-5.54409	-770.23	1441.64	-95.3437	-729.967	1224.69	-119.411	-698.95	1129.12	-133.118	-543.671	1038.94	-91.1069	-468.076	1004.95	-147.549	-500.483	974.507	-144.632	-420.906	970.219
6782	0	128.85	-653.261	1619.24	226.249	-647.831	1617.66	113.467	-807.206	1654.89	257.826	-795.382	1642.5	172.318	-854.348	1472.68	155.09	-897.658	1211.86	182.19	-697.681	1399.43	181.717	-599.768	1193.93	218.29	-909.523	1270.69	-4.34483	-755.825	1443.49	-94.0836	-717.09	1225.94	-118.329	-687.484	1130.22	-133.189	-534.07	1037	-91.8653	-458.924	1001.27	-148.128	-492.399	971.466	-146.119	-412.973	965.829
6783	0	131.057	-640.188	1621.72	228.397	-634.902	1619.5	115.829	-794.368	1656.33	260.349	-782.569	1642.81	173.375	-840.289	1474.06	155.347	-884.024	1213.75	183.056	-683.685	1400.65	181.733	-585.167	1195.1	218.32	-894.56	1271.71	-3.40509	-741.401	1445.62	-92.9453	-704.134	1227.43	-117.153	-676.28	1131.33	-133.364	-525.078	1034.69	-92.7877	-450.571	996.979	-148.776	-485.274	968.3	-147.606	-406.076	960.433
6784	0	132.9	-627.055	1624.08	230.273	-621.912	1621.14	117.885	-781.451	1657.57	261.827	-769.97	1643.03	174.161	-826.307	1475.61	155.285	-870.76	1215.64	183.553	-669.99	1401.82	181.446	-570.892	1196.38	217.775	-881.293	1273.24	-2.62054	-727.224	1447.71	-91.8497	-691.215	1229.01	-116.256	-665.067	1132.64	-133.581	-516.702	1032.25	-93.7251	-442.689	992.385	-149.439	-478.705	964.706	-148.895	-399.818	954.535
6785	0	134.673	-613.829	1626.24	231.969	-609.057	1622.65	119.237	-768.525	1659.4	263.555	-757.215	1643.48	174.8	-812.811	1476.98	155.076	-857.693	1217.36	183.88	-656.525	1403.12	181.35	-557.054	1197.75	217.465	-868.424	1274.49	-1.99707	-713.329	1449.73	-90.7555	-678.33	1230.47	-115.015	-654.046	1133.83	-133.697	-508.64	1029.65	-94.5173	-435.567	987.463	-150.046	-472.765	960.845	-150.068	-394.336	947.994
6786	0	136.18	-600.652	1628.2	233.643	-595.952	1624.21	120.672	-755.458	1661.01	264.451	-744.403	1644.28	175.524	-799.379	1478.73	155.331	-844.545	1219.13	184.07	-643.287	1404.39	181.379	-543.874	1198.9	217.811	-855.276	1275.91	-1.29851	-699.848	1451.56	-89.5542	-665.415	1231.83	-113.696	-643.152	1134.89	-133.791	-501.058	1026.81	-95.0129	-428.951	982.234	-150.572	-467.441	956.928	-150.917	-389.562	940.983
6787	0	137.493	-587.396	1630.16	234.504	-583.172	1625.38	121.568	-742.031	1662.99	265.957	-731.317	1646.22	176.02	-786.23	1480.12	155.664	-831.704	1221.09	184.372	-630.321	1405.82	181.194	-531.207	1200.03	218.209	-842.257	1277.48	-0.976265	-686.713	1453.24	-88.5155	-652.662	1233.26	-112.67	-632.535	1136	-133.781	-493.921	1023.84	-95.5371	-423.161	976.49	-151.138	-462.668	952.808	-151.4	-385.477	933.493
6788	0	138.205	-574.231	1631.64	234.801	-570.606	1626.25	122.19	-728.669	1664.96	266.306	-718.331	1647.9	176.587	-773.378	1482.02	156.208	-819.145	1222.98	184.457	-617.516	1407.37	181.079	-518.652	1201.35	218.707	-829.285	1279.25	-0.634475	-674.027	1454.78	-87.5883	-640.235	1234.5	-111.67	-622.132	1137.05	-133.67	-487.455	1020.44	-95.9653	-418.23	970.104	-151.544	-458.42	948.561	-151.724	-381.999	925.696
6789	0	138.696	-561.116	1633.21	235.06	-557.846	1627.55	122.374	-715.617	1666.73	266.241	-705.559	1649.44	176.98	-760.766	1483.8	156.773	-806.758	1224.45	184.648	-604.828	1409.15	181.122	-506.221	1203.11	219.345	-816.469	1281	-0.550809	-661.668	1456.21	-86.6996	-628.147	1235.57	-110.683	-612.249	1137.69	-133.575	-481.328	1017.25	-96.2031	-413.499	964.5	-151.8	-454.574	944.53	-151.765	-379.465	917.842
6790	0	138.733	-548.153	1634.66	234.935	-545.089	1628.96	122.731	-702.553	1668.53	266.396	-692.757	1651.48	177.168	-748.322	1485.56	157.567	-794.233	1226.19	184.81	-592.352	1411.05	181.156	-493.759	1205.1	220.042	-803.976	1282.78	-0.762851	-649.622	1457.67	-86.1077	-616.628	1236.63	-109.647	-602.81	1138.25	-133.623	-475.912	1014.06	-96.3608	-409.647	958.661	-152.239	-451.436	940.659	-151.715	-377.457	909.954
6791	0	138.811	-535.192	1636.5	235.685	-531.823	1631.53	122.27	-689.413	1670.94	266.167	-679.832	1653.87	177.211	-735.848	1487.65	158.386	-781.849	1228.25	184.965	-579.905	1413.28	181.031	-481.265	1207.21	220.905	-791.683	1284.78	-0.938254	-637.764	1459	-85.6155	-605.815	1237.26	-108.629	-593.703	1138.58	-133.639	-470.911	1010.87	-96.3903	-406.543	952.856	-152.674	-448.744	936.841	-151.382	-376.234	902.228
6792	0	138.738	-522.216	1638.65	235.45	-519.01	1633.63	121.973	-676.341	1673.2	265.957	-666.961	1656.39	177.38	-723.297	1490.07	159.443	-769.523	1230.36	184.898	-567.575	1415.58	180.905	-468.833	1209.67	221.886	-779.285	1287.29	-1.17951	-625.744	1460.49	-85.2426	-595.526	1238.15	-107.546	-585.25	1138.74	-133.34	-466.401	1007.92	-96.2606	-403.923	947.398	-152.812	-446.498	933.529	-150.975	-375.649	894.78
6793	0	138.635	-509.406	1640.93	235.239	-506.504	1636.04	121.694	-663.532	1675.5	265.651	-654.256	1659.33	177.498	-710.76	1492.61	160.705	-757.18	1232.73	185.014	-555.172	1418.15	180.695	-456.767	1211.99	222.848	-767.012	1289.86	-1.4976	-613.719	1462.05	-84.8476	-585.934	1238.74	-106.164	-577.208	1138.92	-132.857	-462.363	1005.18	-95.9539	-401.928	942.119	-152.52	-444.939	929.716	-150.166	-375.708	887.885
6794	0	138.498	-496.739	1643.34	234.724	-494.067	1638.22	121.269	-650.63	1677.91	265.347	-641.508	1662.04	177.428	-698.184	1495.06	161.925	-744.794	1235.28	185.153	-542.891	1420.62	180.59	-444.927	1214.21	223.648	-754.765	1292.62	-1.79529	-601.632	1463.47	-84.5702	-576.991	1239.26	-104.969	-569.621	1139.15	-132.483	-458.98	1002.5	-95.5699	-400.594	937.115	-151.861	-443.864	926.262	-149.45	-376.546	881.341
6795	0	138.1	-484.191	1645.71	234.554	-481.735	1641.15	120.516	-638.13	1679.97	264.871	-629.385	1664.7	177.281	-685.56	1497.42	162.891	-732.505	1237.8	185.293	-530.404	1423.29	180.597	-433.155	1216.61	224.345	-742.338	1295.34	-2.03926	-589.305	1464.97	-84.2887	-568.857	1239.71	-103.633	-562.525	1139.25	-131.899	-456.243	999.805	-95.0675	-399.778	932.568	-151.524	-443.344	923.326	-148.732	-377.925	875.288
6796	0	137.864	-471.828	1647.92	234.497	-469.223	1643.75	119.934	-625.667	1681.84	264.535	-617.109	1667.02	177.265	-672.968	1499.74	163.815	-720.171	1239.98	185.012	-518.121	1425.55	180.613	-421.366	1218.69	225.071	-729.987	1297.9	-2.14142	-576.978	1466.23	-83.6607	-561.029	1240	-102.219	-555.777	1139.5	-131.054	-453.769	997.327	-94.3562	-399.279	928.239	-150.897	-443.344	920.492	-147.926	-379.77	869.676
6797	0	138.084	-459.396	1650.28	234.08	-457.109	1646	119.581	-613.43	1683.7	263.86	-605.025	1669.09	177.317	-660.458	1501.94	164.794	-707.625	1242.05	185.164	-505.649	1427.53	180.91	-409.357	1220.78	226.041	-717.371	1300.31	-2.21079	-564.581	1467.61	-82.9515	-553.416	1240.22	-100.432	-549.422	1139.73	-130.12	-451.654	994.983	-93.7901	-399.307	924.316	-149.987	-443.678	917.752	-147.144	-381.948	864.471
6798	0	137.58	-447.176	1652.36	234.062	-444.725	1648.65	119.135	-601.169	1685.28	263.683	-592.85	1671.42	177.384	-647.913	1503.83	165.584	-695.268	1243.95	185.215	-493.175	1429.37	181.286	-397.278	1222.79	226.9	-704.696	1302.44	-2.2098	-552.198	1468.82	-81.9623	-545.844	1240.48	-98.7484	-543.322	1139.88	-129.239	-449.8	992.84	-93.2732	-399.551	920.414	-149.181	-444.363	915.355	-146.491	-384.699	859.702
6799	0	137.318	-435.05	1654.28	233.635	-432.701	1650.6	118.862	-589.109	1686.67	263.284	-580.708	1673.22	177.507	-635.113	1505.51	166.351	-682.325	1245.77	185.342	-480.589	1430.92	181.722	-385.228	1224.43	227.928	-691.931	1304.45	-2.12919	-539.854	1469.82	-80.8556	-538.455	1240.78	-96.9443	-537.49	1140.02	-128.112	-448.317	990.807	-92.5353	-399.794	916.764	-148.032	-445.174	913.128	-145.73	-387.552	855.336
6800	0	137.113	-422.884	1656.01	233.553	-420.502	1652.82	118.481	-577.128	1687.73	262.969	-568.7	1674.49	177.603	-622.557	1506.9	167.048	-670.125	1247.06	185.578	-467.972	1432.35	182.151	-373.251	1225.73	228.764	-679.171	1305.99	-2.14777	-527.412	1470.65	-79.5663	-530.816	1240.77	-94.9384	-531.815	1140.1	-127.025	-447.134	988.824	-91.859	-400.141	913.589	-146.947	-446.426	910.974	-145.143	-390.535	851.392
6801	0	136.794	-410.884	1657.43	233.162	-408.438	1654.51	118.09	-565.2	1688.36	262.745	-556.667	1675.78	177.74	-609.839	1507.75	167.613	-657.508	1247.97	185.861	-455.35	1433.36	182.856	-361.224	1226.82	229.65	-666.345	1307.15	-2.11138	-514.923	1471.22	-78.3726	-523.281	1240.73	-92.9629	-526.381	1140.02	-126.033	-446.193	986.68	-91.3099	-400.61	910.417	-145.707	-447.87	908.996	-144.652	-393.736	847.633
6802	0	136.402	-398.821	1658.57	232.722	-396.295	1655.89	117.67	-553.417	1688.7	262.345	-544.583	1676.72	177.949	-597.078	1508.33	168.01	-645.209	1248.87	186.118	-442.684	1434.11	183.656	-349.186	1227.5	230.544	-653.564	1308.13	-2.00961	-502.481	1471.39	-76.9356	-515.52	1240.63	-90.8938	-520.913	1139.9	-125.113	-445.301	984.969	-91.0998	-400.95	907.521	-144.347	-449.478	906.966	-144.278	-397.01	844.116
6803	0	135.982	-386.8	1659.34	232.447	-383.991	1657.13	117.367	-541.56	1688.78	262.096	-532.3	1677.39	178.253	-584.253	1508.76	168.528	-632.56	1249.18	186.526	-429.907	1434.55	184.421	-337.176	1227.64	231.414	-640.771	1308.65	-1.89749	-489.962	1471.37	-75.5934	-507.515	1240.37	-88.7405	-515.341	1139.65	-124.083	-444.622	982.874	-90.661	-401.44	904.881	-142.998	-451.334	905.067	-143.989	-400.416	840.942
6804	0	135.618	-374.643	1659.9	232.165	-371.643	1657.93	117.424	-529.48	1688.68	261.997	-519.984	1677.85	178.751	-571.455	1508.85	169.192	-619.872	1249.26	186.863	-417.185	1434.58	185.387	-324.982	1227.53	232.418	-627.927	1308.95	-1.67925	-477.357	1471.11	-74.1588	-499.135	1240.04	-86.4244	-509.528	1139.59	-122.691	-443.716	980.85	-90.1137	-401.907	901.708	-141.147	-452.975	903.22	-143.678	-403.721	838.011
6805	0	135.164	-362.396	1660.09	231.751	-359.101	1658.41	117.451	-517.331	1688.32	262.215	-507.358	1678.23	179.137	-558.563	1508.57	169.749	-607.159	1249.14	187.172	-404.374	1434.29	186.356	-312.655	1227.01	233.404	-615.032	1309.03	-1.29	-464.674	1470.72	-72.7424	-490.961	1239.55	-84.2692	-503.627	1139.28	-121.507	-442.893	979.122	-89.9926	-402.396	898.76	-139.604	-454.574	901.614	-143.293	-407.063	835.256
6806	0	134.623	-350.128	1659.86	231.042	-346.683	1658.35	117.065	-505.198	1687.57	261.525	-494.897	1677.72	179.511	-545.585	1508.23	170.059	-594.508	1248.76	187.713	-391.506	1433.6	187.358	-300.223	1225.91	234.166	-602.251	1308.67	-1.20905	-451.966	1469.72	-71.3697	-482.368	1238.65	-82.1302	-497.691	1138.74	-120.325	-442.099	977.098	-89.8617	-402.524	895.983	-137.647	-456.311	899.811	-142.974	-410.375	832.481
6807	0	134.2	-337.656	1659.14	230.556	-334.026	1658.06	116.747	-493.023	1686.58	261.146	-482.457	1677	179.977	-532.717	1507.36	170.351	-581.787	1248.12	188.181	-378.585	1432.61	187.808	-287.965	1224.06	234.879	-589.514	1308.02	-0.908364	-439.154	1468.58	-70.002	-473.452	1237.66	-80.0207	-491.306	1138.32	-119.067	-440.677	975.391	-89.8482	-402.796	893.268	-136.207	-457.58	898.448	-142.527	-413.473	829.807
6808	0	133.772	-325.116	1658.37	230.144	-321.28	1657.46	116.623	-480.459	1685.52	260.945	-469.513	1676.66	180.295	-519.807	1506.56	170.667	-569.032	1247.27	188.483	-365.679	1431.69	188.827	-275.215	1222.51	235.566	-576.776	1307.23	-0.558714	-426.166	1467.37	-68.6063	-464.148	1236.57	-77.9446	-484.71	1137.84	-117.586	-439.407	973.847	-89.4605	-402.893	890.321	-134.062	-458.702	897.248	-141.816	-416.396	827.49
6809	0	133.506	-312.348	1657.34	229.863	-308.414	1656.55	116.576	-467.595	1684.25	260.883	-456.522	1675.98	180.735	-506.682	1505.44	170.861	-556.264	1246.39	188.939	-352.781	1430.34	189.591	-262.272	1220.7	236.136	-564.097	1306.34	-0.315507	-413.274	1466.16	-67.9588	-454.881	1235.78	-75.9989	-477.778	1137.4	-116.533	-437.725	972.397	-89.1374	-402.474	888.148	-132.589	-459.436	896.211	-141.276	-419.173	825.436
6810	0	133.348	-299.398	1655.93	229.762	-295.447	1655.48	116.296	-454.634	1682.91	260.34	-443.48	1674.79	180.971	-493.578	1504.34	170.956	-543.509	1245.46	189.45	-339.841	1428.83	190.284	-249.206	1218.82	236.543	-551.399	1305.5	-0.171554	-400.15	1464.74	-67.0955	-445.253	1234.81	-73.9863	-470.405	1136.97	-115.333	-435.396	971.124	-88.9109	-401.95	885.995	-130.554	-459.952	895.485	-140.502	-421.552	823.717
6811	0	132.986	-286.253	1654.23	229.692	-282.378	1653.94	116.026	-441.526	1681.31	260.38	-430.534	1673.6	181.157	-480.453	1502.93	170.917	-530.774	1244.12	189.757	-326.869	1427.19	190.9	-236.016	1216.9	236.868	-538.755	1304.24	-0.171407	-387.082	1463.1	-66.5522	-435.525	1233.89	-72.3403	-462.712	1136.32	-114.359	-433.019	970.31	-89.1962	-400.607	884.741	-128.745	-459.679	894.889	-139.738	-423.655	822.134
6812	0	133.25	-273.2	1652.01	229.762	-269.284	1652.17	115.807	-428.213	1679.55	260.314	-417.483	1672.3	181.194	-467.545	1501.46	170.787	-518.012	1242.53	189.911	-313.85	1425.61	191.657	-222.755	1214.96	237.151	-526.041	1302.89	-0.084926	-374.055	1461.65	-65.9443	-425.796	1232.96	-70.5899	-454.682	1135.6	-113.379	-430.085	969.377	-89.1845	-399.359	883.095	-127.197	-459.122	894.564	-139.009	-425.394	820.867
6813	0	133.09	-259.967	1649.8	229.578	-256.153	1649.9	115.373	-414.901	1677.87	259.863	-404.171	1670.45	181.234	-454.452	1499.93	170.421	-505.194	1240.94	190.042	-300.802	1423.71	192.087	-209.576	1213.04	237.133	-513.403	1301.36	-0.285014	-360.938	1460.02	-65.4514	-415.888	1231.93	-69.1444	-446.214	1134.91	-112.385	-426.549	968.456	-88.8285	-397.727	881.351	-125.999	-457.864	894.598	-138.068	-426.595	819.579
6814	0	133.05	-246.646	1647.29	229.492	-242.954	1647.33	115.271	-401.46	1675.92	259.624	-390.941	1668.8	181.061	-441.518	1497.96	170.006	-492.251	1239.24	189.991	-287.75	1421.78	192.513	-196.342	1211.01	237.115	-500.633	1299.54	-0.221192	-347.778	1458.16	-64.7901	-405.694	1230.71	-67.8379	-437.261	1134.33	-111.473	-422.357	967.787	-88.399	-395.511	879.758	-124.798	-455.951	894.677	-137.101	-427.007	818.466
6815	0	133.634	-233.175	1644.68	229.331	-229.807	1644.42	115.196	-387.968	1674.17	259.706	-377.546	1666.79	181.091	-428.57	1496.24	169.492	-479.181	1237.17	190.011	-274.693	1419.65	192.903	-183.175	1208.88	237.182	-487.597	1297.57	-0.265315	-334.631	1456.32	-63.9934	-395.249	1229.26	-66.6398	-427.912	1133.62	-111.014	-417.585	967.381	-88.1175	-392.698	878.323	-123.79	-453.1	895.208	-136.08	-426.94	817.373
6816	0	133.11	-219.892	1642.2	229.357	-216.438	1641.85	115.062	-374.364	1672.39	259.456	-364.222	1665.02	180.81	-415.619	1494.14	168.908	-466.005	1235.12	189.804	-261.571	1417.72	193.121	-170.029	1207.22	237.115	-474.431	1295.68	-0.481296	-321.54	1454.57	-63.6408	-384.642	1228.14	-65.688	-418.123	1132.85	-110.547	-412.146	966.963	-88.1181	-389.278	877.372	-123.227	-449.697	895.65	-135.323	-426.16	816.605
6817	0	132.772	-206.666	1639.67	229.103	-203.216	1639.45	114.522	-361.024	1670.45	259.101	-350.851	1663.03	180.409	-402.771	1492.18	168.352	-452.601	1233.2	189.521	-248.435	1415.97	193.238	-156.745	1205.83	236.861	-461.225	1293.57	-0.976282	-308.594	1452.68	-63.5544	-373.687	1226.82	-64.8972	-407.994	1131.94	-110.443	-406.118	966.412	-88.4286	-385.063	876.369	-122.956	-445.508	896.067	-134.632	-424.611	815.9
6818	0	132.292	-193.424	1637.15	228.482	-190.137	1636.85	113.977	-347.753	1668.46	258.324	-337.708	1661.01	179.826	-389.913	1489.97	167.846	-439.109	1230.74	189.124	-235.319	1414.27	193.295	-143.488	1204.5	236.551	-447.884	1291.3	-1.48176	-295.549	1450.81	-63.7226	-362.466	1225.53	-64.4058	-397.493	1130.83	-110.663	-399.459	966.028	-89.1813	-380.059	875.468	-123.111	-440.368	896.576	-134.184	-422.414	815.234
6819	0	131.607	-180.348	1634.99	227.795	-177.042	1634.59	113.249	-334.529	1666.58	257.699	-324.388	1659.01	179.045	-377.125	1487.62	167.446	-425.437	1228.25	188.777	-222.101	1412.63	193.129	-130.246	1203.16	236.202	-434.477	1288.97	-2.08353	-282.513	1448.62	-63.6593	-350.769	1223.84	-64.1159	-386.656	1129.59	-111.414	-392.013	965.896	-90.0218	-374.35	874.635	-123.436	-434.544	896.953	-133.972	-419.155	814.811
6820	0	130.53	-167.381	1632.8	226.726	-163.937	1632.69	112.296	-321.45	1664.71	256.603	-311.252	1657.57	178.179	-364.156	1485.4	167.077	-411.54	1226	188.061	-208.876	1410.91	192.992	-116.854	1201.87	235.661	-420.956	1286.53	-2.80661	-269.418	1446.69	-64.2971	-338.647	1222.53	-63.9813	-375.126	1128.33	-112.191	-383.868	965.463	-91.4406	-367.72	873.698	-124.165	-427.755	897.571	-134.006	-415.102	814.403
6821	0	129.302	-154.349	1631.07	225.518	-150.999	1631.03	111.03	-308.426	1662.83	255.819	-298.56	1656.38	177.318	-351.108	1483.41	166.599	-397.675	1223.57	187.444	-195.509	1409.4	192.692	-103.424	1200.7	235.135	-407.227	1284.45	-3.58383	-256.047	1444.67	-64.5677	-326.122	1220.8	-64.1626	-362.907	1127.06	-113.269	-374.829	965.149	-92.9175	-360.143	872.848	-125.116	-419.971	898.127	-134.542	-410.016	814.116
6822	0	127.698	-141.583	1629.18	224.034	-138.101	1629.8	109.47	-295.698	1660.75	254.181	-285.453	1654.87	176.357	-337.996	1481.31	166.406	-383.67	1221.48	186.927	-182.174	1407.89	192.402	-89.8576	1199.41	234.434	-393.536	1282.16	-4.29656	-242.625	1442.57	-65.1187	-313.113	1218.98	-64.5302	-350.171	1125.56	-114.305	-365.067	964.607	-94.7709	-351.735	871.812	-126.207	-411.35	898.357	-135.294	-403.767	813.774
6823	0	126.397	-128.818	1627.77	222.426	-125.228	1628.76	107.623	-283.087	1658.68	252.403	-272.762	1653.75	175.277	-324.86	1479.3	166.179	-369.647	1219.34	186.272	-168.633	1406.54	191.854	-75.9706	1198.16	233.759	-379.666	1280.14	-5.11827	-229.111	1440.52	-65.7493	-299.739	1217.11	-65.0527	-337.098	1124.12	-115.569	-354.412	963.557	-95.7324	-343.025	870.525	-127.79	-401.656	898.403	-136.428	-396.298	813.473
6824	0	124.483	-116.091	1626.09	220.217	-112.499	1627.58	105.6	-270.568	1656.61	250.305	-260.04	1652.47	174.147	-311.688	1477.67	165.78	-355.576	1217.33	185.451	-155.154	1405.16	191.494	-61.8914	1197.05	232.968	-365.689	1278.48	-5.96937	-215.438	1438.61	-66.4611	-285.828	1215.08	-65.8956	-323.564	1122.47	-116.935	-342.755	962.89	-98.2283	-332.055	869.536	-129.406	-390.881	898.365	-137.979	-387.44	813.088
6825	0	122.001	-103.371	1624.86	218.398	-99.6484	1627.18	103.52	-257.923	1654.78	248.122	-247.341	1651.56	173.013	-298.451	1475.83	165.46	-341.182	1215.71	184.562	-141.497	1404.11	190.693	-47.5778	1196.21	232.233	-351.58	1276.76	-6.89441	-201.817	1436.85	-67.1986	-271.554	1212.88	-66.8726	-309.551	1120.89	-118.562	-330.146	961.902	-100.274	-320.409	868.274	-131.131	-378.848	898.04	-139.715	-377.044	812.675
6826	0	120.299	-90.5824	1624.12	216.322	-86.8048	1626.89	101.55	-245.168	1653.33	246.304	-234.654	1651.19	171.955	-284.956	1474.67	165.197	-326.793	1214.18	183.506	-127.778	1403.42	189.868	-33.0763	1195.49	231.725	-337.438	1275.24	-7.91344	-188.226	1435.49	-68.1555	-256.866	1211.1	-68.0192	-295.17	1119.33	-119.899	-316.554	960.799	-101.692	-307.653	866.799	-132.953	-365.69	897.346	-141.645	-365.029	812.223
6827	0	117.792	-77.7273	1623.83	214.375	-73.9548	1627.15	99.2009	-232.313	1652.32	243.821	-221.802	1651.11	170.571	-271.465	1473.91	164.79	-312.3	1212.89	182.388	-114.085	1402.95	188.93	-18.4648	1195.05	230.969	-323.212	1274.13	-9.01019	-174.539	1434.21	-69.1514	-242.012	1209.48	-69.5417	-280.516	1118.29	-121.443	-302.043	959.835	-103.197	-293.568	865.563	-134.73	-351.434	896.374	-143.736	-351.294	811.525
6828	0	115.895	-64.693	1623.78	212.285	-61.0738	1627.67	96.9172	-219.389	1651.63	241.903	-209.138	1651.48	169.171	-257.857	1473.33	164.165	-297.661	1212.05	181.389	-100.279	1403.01	187.864	-3.64282	1195.03	229.958	-308.899	1273.36	-10.232	-160.835	1433.32	-70.5085	-226.985	1208.45	-70.9362	-265.427	1117.14	-123.036	-286.771	958.502	-105.085	-278.26	864.516	-136.552	-335.724	895.249	-146.16	-335.901	810.688
6829	0	114.276	-51.6552	1624.04	210.275	-48.0618	1628.49	94.599	-206.51	1651.17	239.62	-196.254	1651.94	167.918	-244.315	1473.14	163.562	-282.907	1211.64	180.2	-86.5421	1403.34	186.777	11.4501	1195.52	228.801	-294.736	1272.9	-11.4096	-146.901	1432.6	-71.7635	-211.949	1207.59	-72.3728	-250.197	1116.11	-124.448	-270.371	957.495	-106.101	-261.926	863.328	-138.282	-319.058	893.826	-148.265	-318.806	809.602
6830	0	111.805	-38.6005	1624.81	208.292	-34.8801	1629.84	92.4421	-193.473	1651.14	237.302	-183.297	1652.82	166.694	-230.756	1473.25	162.9	-268.421	1211.46	179.258	-72.6395	1404.11	185.906	26.5929	1196.42	227.708	-280.656	1272.84	-12.5687	-133.147	1432.4	-72.7426	-196.834	1206.58	-73.7389	-234.777	1115.25	-125.531	-253.319	955.972	-107.139	-244.351	862.144	-140.011	-301.349	892.288	-150.509	-300.172	808.449
6831	0	109.717	-25.405	1625.76	206.067	-21.5538	1631.42	90.2678	-180.366	1651.48	235.423	-170.183	1654.25	165.486	-217.009	1473.78	162.064	-254.049	1211.88	178.211	-58.986	1405.2	185.047	41.4133	1197.52	226.766	-266.559	1273.48	-13.5874	-119.594	1432.56	-73.7895	-181.664	1206.39	-75.0963	-218.823	1114.69	-127.109	-235.435	955.286	-108.116	-225.704	861.311	-141.803	-282.519	890.837	-152.715	-279.934	807.351
6832	0	108.165	-11.9463	1627.07	203.871	-8.03288	1633.23	88.6626	-167.021	1652.28	233.492	-156.55	1655.95	164.739	-203.095	1475.11	161.294	-240.009	1213.28	177.352	-45.1903	1406.59	184.21	55.8334	1198.73	225.824	-252.574	1274.74	-14.3054	-105.957	1433.28	-74.9164	-166.315	1206.98	-76.6133	-202.532	1114.33	-127.83	-216.673	954.225	-109.284	-205.928	861.091	-143.324	-262.837	889.577	-154.738	-258.229	806.512
6833	0	106.126	1.27202	1628.32	201.903	5.56293	1635.26	87.0273	-153.748	1653.25	231.891	-142.811	1657.78	164.343	-189.365	1476.83	160.575	-226.419	1214.92	176.483	-31.523	1408.23	183.624	69.8121	1200.31	225.269	-238.83	1276.53	-14.942	-92.5706	1434.52	-75.7903	-150.861	1207.54	-77.6851	-186.074	1114.51	-129.189	-197.24	954.211	-109.424	-185.809	860.632	-144.744	-242.187	888.509	-156.629	-235.213	805.841
6834	0	104.044	14.4727	1629.74	199.928	19.1262	1637	85.6162	-140.684	1654.15	230.388	-129.147	1659.61	163.874	-176.093	1478.53	160.042	-213.175	1216.92	175.659	-17.9279	1409.96	183.166	83.3577	1202.28	224.867	-225.282	1278.51	-15.5594	-79.4911	1436.05	-76.4131	-135.269	1208.2	-78.8073	-169.488	1114.7	-130.137	-177.167	954.073	-110.504	-163.652	861.253	-146.016	-220.667	887.57	-158.393	-211.066	805.431
6835	0	103.018	27.7126	1630.89	198.434	32.8417	1638.59	84.6727	-127.488	1655.26	229.469	-115.5	1661.52	163.454	-162.784	1480.29	159.676	-200.028	1218.82	175.04	-4.57621	1411.71	182.509	96.8016	1204.13	224.795	-211.931	1280.85	-16.0177	-66.4128	1438.18	-77.0457	-119.663	1209.49	-80.0524	-152.641	1115.45	-131.097	-156.602	954.387	-111.206	-140.957	862.108	-147.264	-198.489	886.8	-160.001	-185.979	805.31
6836	0	101.652	40.8177	1631.96	197.422	46.4419	1640.03	84.0097	-114.355	1656.57	228.694	-101.627	1663.16	163.159	-149.552	1482.08	159.238	-187.107	1220.56	174.384	8.64679	1413.26	182.135	109.714	1206.15	224.803	-198.84	1282.88	-16.3477	-53.3527	1440.28	-77.6923	-104.017	1210.93	-81.1563	-135.628	1116.52	-131.555	-135.354	954.75	-111.917	-117.633	863.158	-148.176	-175.552	886.253	-161.521	-159.833	805.631
6837	0	100.724	54.0676	1633.09	196.472	59.9069	1641.17	83.8746	-100.914	1658.38	228.433	-88.0265	1664.99	162.922	-136.44	1483.73	158.992	-174.219	1222.5	174.072	21.7198	1414.89	181.459	122.271	1207.85	224.857	-185.955	1284.57	-16.484	-40.1844	1442.56	-78.5967	-88.3152	1212.84	-82.1907	-118.536	1117.49	-132.596	-113.714	955.676	-112.386	-93.6312	864.315	-148.851	-151.854	885.629	-162.692	-132.74	806.068
6838	0	100.704	67.3445	1634.62	196.111	73.2876	1642.31	83.7455	-87.648	1660.34	228.963	-74.2956	1667.2	162.65	-123.499	1485.49	158.446	-161.484	1224.08	173.722	34.506	1416.6	180.934	134.524	1209.55	224.649	-173.444	1286.5	-16.857	-27.0046	1444.86	-78.9263	-72.5773	1214.37	-83.4009	-101.406	1118.51	-133.319	-91.6264	956.609	-112.655	-69.0946	865.82	-149.487	-127.418	885.39	-163.61	-104.949	806.809
6839	0	100.249	80.5142	1635.98	196.238	86.5685	1643.7	83.7129	-74.3402	1662.42	228.54	-61.0737	1668.74	162.185	-110.831	1486.98	157.865	-148.863	1226.02	173.591	47.2966	1418.4	180.573	146.597	1211.15	224.032	-161.113	1288.19	-16.9885	-13.7433	1447.12	-79.6234	-56.9216	1216.22	-84.5764	-84.1512	1119.59	-133.977	-69.1752	957.46	-113.386	-43.2007	868.033	-150.058	-102.46	885.096	-164.362	-76.7223	807.824
6840	0	100.997	93.7387	1637.54	196.597	99.7155	1644.98	83.9056	-61.0224	1664.57	228.803	-48.011	1670.42	161.843	-98.2094	1488.72	157.063	-136.233	1227.65	173.463	59.8426	1420.21	180.245	158.418	1212.6	223.123	-148.723	1289.79	-17.2215	-0.471758	1449.17	-80.3789	-41.3313	1217.94	-85.7916	-66.8695	1120.73	-134.471	-46.3011	958.437	-113.604	-17.256	870.083	-150.369	-77.063	884.742	-164.67	-47.8492	808.952
6841	0	101.746	107.005	1639.37	197.276	112.82	1646.37	84.3943	-47.7023	1666.86	229.361	-34.7627	1672.18	161.477	-85.5556	1490.4	156.095	-123.677	1229.42	173.612	72.5237	1422.09	180.35	170.673	1214.1	221.901	-136.353	1291.42	-17.249	12.9888	1451.35	-81.0752	-25.6281	1219.76	-87.1268	-49.6629	1121.85	-134.911	-23.0123	959.732	-113.627	9.19486	872.405	-150.637	-51.0721	884.685	-164.894	-18.1677	810.958
6842	0	102.367	120.24	1641.31	198.138	125.867	1647.9	85.0437	-34.3276	1669.16	230.032	-21.5978	1674.01	161.349	-72.7454	1492.56	154.985	-111.072	1231.55	173.693	85.0812	1423.92	180.283	182.488	1215.26	220.518	-124.057	1293.22	-17.1102	26.494	1453.49	-81.8063	-9.86234	1221.64	-88.4944	-32.3809	1123.22	-134.997	0.648812	961.023	-112.979	35.5142	874.909	-150.607	-24.354	885.12	-164.374	11.7461	812.905
6843	0	103.376	133.441	1643.42	199.073	138.866	1649.57	85.8813	-20.9848	1671.54	231.094	-8.57001	1675.99	161.198	-59.8719	1494.51	153.588	-98.6124	1233.58	174.089	97.7763	1425.62	180.918	194.926	1216.46	219.099	-111.828	1295.08	-16.8601	40.0879	1455.52	-82.4856	5.956	1223.73	-89.6804	-15.0247	1124.61	-134.972	24.7295	962.6	-112.671	63.3162	878.438	-150.427	2.74281	885.867	-163.719	42.3468	815.51
6844	0	104.234	146.669	1645.58	200.279	151.922	1651.39	86.9005	-7.58737	1674.01	231.749	4.4823	1677.49	161.354	-46.7674	1497.01	152.301	-86.3469	1236	174.499	110.366	1427.35	181.514	207.214	1217.94	217.883	-99.7476	1297.17	-16.5995	53.6495	1458	-83.4771	21.7272	1226.11	-90.615	2.64849	1125.93	-134.983	48.8749	964.961	-111.527	90.7293	882.434	-149.893	30.2957	887.052	-162.748	73.2969	819.021
6845	0	105.287	159.957	1647.73	201.475	164.914	1653.12	87.7542	5.68239	1676.35	233.035	17.5138	1679.44	161.336	-33.6709	1499.22	150.989	-74.202	1238.46	174.848	122.931	1429.08	182.22	219.562	1219.55	216.656	-87.7367	1299.36	-16.3146	67.2545	1460.33	-84.2446	37.5296	1228.29	-92.0669	20.0703	1127.59	-134.385	73.3216	967.602	-109.917	117.771	886.989	-149.115	58.2435	888.931	-161.132	104.33	823.377
6846	0	106.729	173.197	1649.9	202.818	177.965	1654.7	88.5559	18.9277	1678.43	233.641	30.4122	1680.7	161.305	-20.7212	1501.28	149.697	-62.1685	1240.93	175.482	135.712	1430.79	182.979	232.177	1221.21	215.457	-75.7284	1301.59	-15.8803	80.9048	1462.77	-85.1995	53.242	1230.57	-93.4684	37.5316	1129.62	-133.771	97.9119	970.856	-108.209	145.549	892.831	-148.195	86.2898	891.539	-159.715	135.565	828.694
6847	0	108.223	186.567	1651.78	204.244	191.001	1656.16	89.6023	32.3309	1680.56	234.707	43.4529	1682.1	161.625	-7.75803	1503.7	148.579	-50.2949	1243.24	175.876	148.412	1432.35	183.646	244.815	1222.92	214.47	-63.5969	1303.87	-15.3453	94.4456	1465.21	-85.5158	69.2833	1233.1	-94.8193	55.3452	1131.59	-132.883	122.666	974.664	-106.006	172.814	898.874	-146.978	114.583	894.764	-157.361	167.002	834.713
6848	0	109.635	199.934	1653.58	205.518	204.003	1657.24	90.6824	45.7744	1682.88	236.221	56.4504	1683.57	161.819	5.08066	1505.36	147.856	-38.3513	1245.47	176.183	160.94	1433.71	184.023	257.212	1224.4	213.702	-51.3272	1305.67	-14.9249	107.934	1467.95	-86.3808	85.2898	1235.82	-96.238	73.2235	1133.6	-131.785	147.503	978.79	-103.25	200.025	905.533	-145.201	142.934	898.65	-154.497	198.334	841.244
6849	0	110.69	213.127	1654.92	206.878	217.085	1658.04	91.9629	59.3508	1684.89	237.408	69.6348	1684.68	162.007	18.181	1507.39	146.973	-26.201	1247.33	176.439	173.391	1434.85	184.552	269.657	1225.95	213.001	-39.1659	1307.38	-14.3266	121.496	1470.38	-86.9226	101.385	1238.39	-97.7499	91.2002	1135.98	-130.559	172.23	983.294	-100.248	226.977	912.491	-143.445	171.236	902.941	-151.444	229.557	848.41
6850	0	111.977	226.688	1656.15	208.336	230.223	1658.69	92.8768	72.7614	1686.52	238.246	82.6935	1685.4	161.996	30.9862	1508.62	146.251	-13.938	1249.28	176.842	186.146	1435.93	184.822	281.853	1227.04	212.285	-26.9367	1308.91	-14.2341	134.729	1472.5	-87.2598	117.716	1240.51	-99.232	109.371	1138.08	-128.929	197.139	987.989	-96.8497	253.661	919.689	-141.79	199.685	907.866	-147.955	260.699	856.01
6851	0	113.708	240.055	1656.98	209.473	243.391	1658.92	93.8621	86.2852	1687.92	239.156	95.8155	1685.92	162.244	43.9632	1509.96	145.509	-1.84979	1250.34	177.074	198.592	1436.52	184.842	293.599	1227.82	211.605	-14.6249	1310.13	-13.757	148.073	1474.32	-87.9545	133.842	1242.59	-100.67	127.57	1140.01	-127.269	221.925	992.796	-93.2922	280.17	927.143	-139.781	227.999	912.889	-144.299	291.44	864.025
6852	0	114.846	253.523	1657.57	210.706	256.573	1659.1	94.8362	99.8447	1689.15	240.043	109.11	1686.24	162.187	56.2418	1510.41	145.021	10.4001	1251.49	177.245	211.245	1437	185.021	305.348	1228.52	210.988	-2.26921	1311.06	-13.3466	161.177	1475.88	-88.592	150.018	1244.5	-101.922	145.996	1141.87	-125.708	246.713	998.099	-89.5773	306.166	934.386	-137.739	256.158	918.224	-140.173	321.867	872.161
6853	0	115.575	266.941	1657.75	211.746	269.776	1658.94	95.5337	113.379	1689.92	241.016	122.294	1686.5	162.263	69.3092	1511.04	144.343	22.854	1252.4	177.605	223.971	1437.31	184.765	316.93	1228.74	210.363	9.89057	1311.64	-12.926	174.325	1477.31	-89.0577	166.38	1246.04	-103.221	164.487	1143.48	-124.021	271.345	1003.12	-86.1006	332.383	942.341	-135.548	284.284	923.985	-136.089	351.793	880.604
6854	0	116.52	280.397	1657.75	212.629	283.05	1658.53	96.2388	126.971	1690.37	241.545	135.556	1686.28	161.675	80.7355	1510.8	143.778	35.211	1252.82	177.838	236.626	1437.32	184.756	328.748	1228.71	209.849	22.132	1312.3	-12.5464	187.547	1478.13	-89.4664	182.86	1247.33	-104.319	183.089	1144.83	-122.214	295.774	1008.17	-82.5564	358.067	949.812	-134.072	311.566	929.764	-131.748	381.368	889.001
6855	0	117.276	293.929	1657.47	213.502	296.25	1657.9	96.957	140.557	1690.51	242.585	149.141	1685.97	162.991	95.1065	1511.65	143.523	47.551	1253.16	177.967	249.326	1436.81	184.61	340.395	1228.34	209.336	34.5865	1312.4	-12.0482	200.294	1478.78	-90.1206	199.071	1248.46	-105.139	202.044	1145.91	-120.056	320.062	1013.09	-79.0113	383.38	957.206	-131.344	339.191	935.289	-127.281	410.508	897.425
6856	0	118.105	307.272	1656.95	214.267	309.628	1657.19	97.4214	154.092	1690.26	243.113	162.326	1685.45	162.628	107.204	1510.93	143.232	59.8949	1253.22	178.22	262.161	1436.22	184.642	352.23	1227.76	209.139	46.9788	1312.34	-11.7403	213.246	1479.19	-90.482	215.455	1249.22	-105.933	221.04	1146.66	-118.427	344.017	1018.26	-75.7462	408.68	965.022	-128.989	366.329	941.175	-123.151	438.842	905.954
6857	0	118.534	320.841	1656.13	215.01	323.023	1656.34	97.7799	167.654	1689.75	243.208	175.708	1684.68	162.544	119.636	1510.18	143.164	72.0409	1253.02	178.478	274.947	1435.39	184.337	364.02	1226.94	208.687	59.3716	1312.04	-11.3794	226.211	1479.27	-90.9813	231.754	1249.78	-106.687	240.139	1147.34	-116.414	367.924	1023.08	-72.2187	433.46	972.085	-126.473	393.113	946.904	-118.998	466.748	914.356
6858	0	119.184	334.278	1655.06	215.517	336.426	1655.04	98.3206	181.294	1689.03	243.626	189.017	1683.66	163.054	132.525	1509.49	143.241	84.1964	1252.63	178.574	287.773	1434.24	184.212	376.061	1225.57	208.676	71.9136	1311.35	-10.7459	239.008	1478.87	-91.2113	248.335	1250.03	-107.19	259.438	1147.71	-114.695	391.496	1027.88	-68.9058	458.146	979.304	-123.863	419.532	952.686	-114.817	493.991	922.037
6859	0	119.616	347.78	1653.59	216.075	349.91	1653.51	98.8661	194.89	1688.1	244.319	202.632	1682.74	163.732	145.96	1508.83	143.697	96.1559	1251.91	178.889	300.483	1432.9	183.894	387.816	1223.71	208.934	84.3252	1310.62	-10.2198	251.926	1478.03	-91.2245	264.859	1249.75	-107.382	278.836	1147.87	-112.317	414.958	1032.17	-65.4871	482.417	986.144	-121.078	445.492	958.13	-110.639	520.96	930.072
6860	0	120.022	361.071	1651.82	216.301	363.33	1651.62	99.3156	208.316	1687.08	245.175	216.359	1681.69	164.516	158.87	1507.94	144.286	108.366	1251.11	178.992	313.231	1431.25	183.42	400.064	1221.75	209.305	97.0006	1309.68	-9.53519	264.61	1476.97	-90.9927	281.598	1249.37	-107.331	298.485	1148.07	-110.216	438.156	1036.44	-62.3907	506.346	992.567	-118.44	471.157	963.434	-106.691	547.287	937.862
6861	0	120.303	374.448	1649.87	216.567	376.767	1649.66	99.8725	221.848	1685.86	245.267	229.946	1680.11	165.169	171.814	1507	145.191	120.33	1250.15	179.254	325.885	1429.46	183.312	413.065	1219.86	209.979	109.473	1308.61	-8.86834	277.304	1475.64	-90.7853	298.38	1248.85	-107.302	317.955	1148.1	-108.058	461.045	1040.51	-59.2219	529.853	999.001	-115.82	496.271	968.645	-102.729	573.051	945.273
6862	0	120.512	387.615	1647.78	216.79	390.164	1647.58	100.335	235.025	1684.29	245.912	243.43	1678.57	166.02	184.546	1505.47	146.189	132.611	1248.63	179.677	338.631	1427.72	183.108	426.23	1218.03	210.728	122.097	1307.17	-8.2552	289.898	1474.13	-90.4607	315.191	1248.29	-107.175	337.243	1147.86	-105.951	483.618	1044.36	-56.2057	552.977	1005.12	-113.139	521.05	973.851	-99.0242	598.237	952.547
6863	0	120.488	400.681	1645.57	216.993	403.517	1645.34	100.955	248.246	1682.77	246.551	257.067	1677.18	166.791	197.456	1503.7	147.454	145.139	1247.19	180.005	351.324	1425.76	182.969	439.45	1216.24	211.844	134.727	1305.7	-7.4564	302.209	1472.46	-89.7627	331.979	1247.57	-106.772	356.52	1147.87	-103.881	505.685	1048.2	-53.1623	575.577	1010.88	-110.244	545.124	978.748	-95.4936	622.762	959.517
6864	0	120.935	413.657	1643.32	217.268	416.772	1643.29	101.428	261.206	1680.9	246.846	270.322	1675.08	167.599	210.126	1502.1	148.892	157.579	1245.45	180.348	364.043	1423.76	182.832	452.888	1214.38	213.085	147.277	1304.13	-6.81811	314.573	1470.59	-88.845	348.882	1246.98	-106.094	375.742	1147.92	-101.79	527.374	1051.93	-50.1941	597.637	1016.48	-108.048	568.51	983.379	-92.2475	646.534	966.516
6865	0	121.14	426.635	1641.17	217.504	429.821	1641.09	102.068	274.226	1679.23	247.797	283.73	1673.83	168.559	222.984	1500.58	150.622	170.345	1243.74	180.645	376.783	1421.69	182.666	466.219	1212.55	214.594	160.164	1302.68	-5.97338	326.979	1468.99	-87.8736	365.676	1246.73	-105.419	394.634	1147.99	-99.5094	548.617	1055.54	-47.4072	619.168	1021.88	-105.452	591.556	988.675	-89.0691	669.587	973.303
6866	0	121.65	439.342	1639.14	217.882	442.861	1639.17	102.893	287.054	1677.37	248.482	296.814	1672.1	169.806	235.918	1498.89	152.33	183.348	1241.83	181.344	389.497	1419.89	182.48	479.12	1210.79	216.216	172.823	1300.86	-5.0479	339.16	1467.39	-86.67	382.312	1246.23	-104.521	413.375	1148.13	-97.3186	569.227	1059.18	-44.5192	640.071	1027.01	-102.979	613.809	993.472	-86.0864	691.918	980.14
6867	0	122.372	452.116	1637.41	218.304	455.689	1637.4	103.436	299.765	1675.51	249.065	309.726	1670.37	170.935	248.676	1497	154.128	196.224	1239.75	181.768	402.318	1418.12	182.313	491.948	1209.15	217.651	185.71	1298.9	-4.19996	351.369	1465.64	-85.4829	398.656	1245.86	-103.734	431.526	1148.38	-95.1026	589.563	1062.81	-41.8985	660.3	1031.86	-100.691	635.27	998.154	-83.3514	713.527	986.551
6868	0	122.912	464.756	1635.54	219.054	468.495	1635.88	104.081	312.325	1673.49	249.689	322.364	1668.69	171.685	261.309	1495.05	155.626	209.338	1237.61	182.534	415.098	1416.25	182.424	504.876	1207.59	218.937	198.751	1296.95	-3.34118	363.721	1464.16	-84.3197	414.866	1245.5	-102.497	449.731	1148.79	-93.1777	608.761	1066.13	-39.3321	679.93	1036.41	-98.7504	656.033	1002.61	-80.8654	734.445	992.543
6869	0	123.645	477.392	1633.96	219.814	481.05	1634.19	104.892	324.746	1671.62	250.198	334.964	1666.6	172.784	274.014	1493	157.168	222.65	1235.58	183.381	427.994	1414.62	182.559	517.701	1205.67	220.436	211.73	1295.03	-2.35031	376.181	1462.55	-82.9218	430.756	1245.11	-101.651	467.294	1149.62	-91.2097	627.863	1069.2	-37.0404	698.944	1040.52	-96.7912	676.163	1006.76	-78.4159	754.521	998.216
6870	0	124.747	489.781	1632.43	220.859	493.614	1632.83	106.044	337.306	1669.99	251.612	347.463	1665.13	174.191	286.912	1491.43	158.697	235.894	1233.69	184.273	440.929	1412.84	183.024	530.8	1204.32	221.717	224.97	1293.16	-1.28307	388.536	1461.15	-81.4904	446.389	1244.69	-100.481	484.353	1149.91	-89.0839	646.138	1072.04	-34.6239	717.317	1044.16	-94.5559	695.553	1010.14	-76.2341	773.89	1003.58
6871	0	125.829	502.336	1631.27	221.932	506.076	1631.55	107.162	349.632	1668.26	252.543	359.848	1663.38	175.139	299.88	1489.81	159.824	249.415	1231.81	185.176	454.005	1411.32	183.565	543.997	1202.88	222.951	238.279	1291.24	-0.201598	401.264	1459.84	-80.0818	461.791	1244.34	-99.3387	500.998	1150.22	-87.2269	663.881	1074.67	-32.558	735.166	1047.54	-92.9018	714.182	1013.78	-74.3978	792.428	1008.58
6872	0	126.93	514.841	1630.38	223.139	518.437	1630.59	108.354	361.942	1666.73	253.79	372.067	1661.59	176.214	312.515	1488.1	160.987	262.854	1230.06	186.057	467.05	1409.98	184.465	557.451	1202	223.917	251.605	1289.33	0.750436	414.259	1458.84	-78.9316	476.706	1243.89	-98.1122	517.127	1150.51	-85.5999	681.02	1077.04	-30.8134	752.371	1050.29	-91.3294	732.12	1016.67	-72.751	810.334	1012.91
6873	0	128.628	527.308	1629.64	224.603	530.87	1629.84	109.834	374.201	1665.39	255.4	384.328	1660.36	177.368	325.428	1486.46	161.829	276.758	1228.32	187.17	480.147	1408.87	185.395	570.961	1201.02	224.81	265.17	1287.72	1.91956	427.371	1457.99	-77.7603	491.109	1243.35	-96.7719	532.701	1150.61	-84.0904	697.475	1078.91	-29.2258	768.858	1052.79	-89.9304	749.077	1019.28	-71.5292	827.284	1016.67
6874	0	129.918	539.725	1629.15	226.241	543.239	1629.34	111.309	386.433	1664.09	256.734	396.472	1658.86	178.357	338.479	1485.15	162.685	290.429	1226.79	188.489	493.394	1408.07	186.607	584.66	1200.59	225.574	278.797	1286.18	3.25387	440.693	1457.22	-76.8645	505.23	1243.13	-95.6841	547.804	1150.73	-82.7735	713.247	1080.47	-27.9438	784.723	1054.76	-88.9467	765.385	1021.54	-70.4557	843.602	1019.93
6875	0	131.229	552.052	1628.83	227.797	555.556	1628.92	112.757	398.626	1662.92	257.858	408.731	1657.28	179.57	351.275	1483.91	163.381	304.493	1225.39	189.77	506.659	1407.32	188.006	598.492	1200.3	226.325	292.453	1284.53	4.60889	454.111	1456.52	-75.6663	518.958	1242.75	-94.4506	562.667	1150.86	-81.6906	728.59	1081.54	-26.8415	800.121	1056.16	-87.9312	780.929	1022.88	-69.8899	859.104	1022.37
6876	0	132.857	564.467	1628.68	229.41	568.043	1628.61	114.532	410.889	1662.12	259.684	421.012	1656.51	180.962	364.299	1482.55	164.289	318.78	1224.16	191.338	520.025	1406.93	189.669	612.95	1200.23	227.005	306.44	1282.86	6.05346	467.355	1456.16	-74.9158	532.743	1242.65	-93.0421	577.188	1150.77	-80.6637	743.348	1082.14	-26.1297	814.948	1056.89	-86.8606	795.897	1023.49	-69.4232	874.053	1024.08
6877	0	134.471	576.868	1628.68	231.171	580.452	1628.64	116.462	423.159	1661.63	261.586	433.393	1656.08	182.65	377.469	1481.72	165.37	333.134	1222.8	192.859	533.322	1406.62	191.28	627.382	1200.36	228.119	320.392	1281.42	7.78608	480.746	1455.9	-73.736	546.303	1242.81	-91.6175	591.277	1150.78	-79.8545	757.474	1082.15	-25.64	829.226	1057.1	-86.3282	809.943	1023.45	-69.4661	888.064	1024.87
6878	0	136.323	589.233	1628.98	232.893	593.021	1629.01	118.37	435.328	1661.31	263.561	445.797	1655.68	184.235	390.704	1481.02	166.366	347.804	1221.85	194.672	546.864	1406.8	192.956	641.787	1200.81	229.173	334.725	1280.16	9.37845	494.126	1455.9	-72.7291	559.936	1242.99	-90.3462	604.992	1151	-79.2095	771.082	1081.61	-25.2145	843.019	1056.55	-85.6996	823.399	1022.87	-69.7328	901.494	1024.73
6879	0	138.431	601.677	1629.61	234.619	605.616	1629.66	120.349	447.479	1661.18	265.486	458.201	1655.46	185.817	403.55	1480.26	167.496	362.382	1221.02	196.404	560.346	1407	194.991	656.354	1201.58	230.347	348.998	1279.05	11.0397	507.465	1456.11	-71.7112	573.503	1243.32	-88.9743	618.371	1151.28	-78.747	783.944	1080.6	-25.1999	856.05	1055.1	-85.5873	835.84	1021.53	-70.3301	914.106	1023.73
6880	0	140.412	614.115	1630.73	236.447	618.073	1630.53	122.577	459.71	1661.19	267.539	470.691	1655.41	187.406	416.866	1479.79	168.782	376.871	1220.54	198.137	573.879	1407.6	196.635	670.861	1202.52	231.718	363.456	1278.34	12.7489	521.02	1456.66	-70.4718	587.114	1244.02	-87.5979	631.197	1151.35	-78.5075	796.189	1079.44	-25.3275	868.457	1053.41	-85.6642	847.674	1019.91	-71.2429	925.833	1021.95
6881	0	142.012	626.452	1632.12	238.741	630.721	1631.9	125.074	472.004	1661.66	269.834	483.132	1655.64	189.392	430.523	1480.3	170.017	391.585	1220.35	200.001	587.664	1408.42	198.266	685.6	1203.72	232.979	378.139	1277.83	14.3688	534.661	1457.37	-69.111	600.768	1244.63	-86.2741	643.814	1151.74	-78.2402	807.915	1077.69	-25.6936	880.253	1050.95	-85.6892	858.638	1017.74	-72.1942	936.827	1019.2
6882	0	144.452	639.086	1634.13	241.124	643.477	1633.58	127.55	484.324	1662.43	272.455	495.584	1656.07	190.971	443.957	1480.75	171.193	405.775	1220.66	201.636	601.293	1409.32	199.864	700.462	1205.2	234.258	392.438	1277.96	15.989	548.35	1458.54	-67.6729	614.183	1245.46	-84.9332	656.068	1152.2	-78.0964	819.025	1075.8	-26.2082	891.238	1047.81	-86.1579	868.741	1015.05	-73.2792	947.087	1015.74
6883	0	146.866	651.88	1636.32	243.583	656.05	1635.4	129.985	496.729	1663.52	275.157	508.028	1656.7	192.474	457.714	1481.53	172.21	419.868	1221.76	203.202	615.068	1410.45	201.011	714.848	1206.47	235.265	406.697	1278.61	17.5743	562.332	1459.89	-65.9303	627.498	1246.26	-83.6502	667.863	1152.46	-78.1039	829.606	1073.85	-26.7557	901.64	1044.25	-86.6773	878.128	1012.2	-74.3187	956.584	1011.58
6884	0	149.639	664.594	1638.83	246.197	668.574	1637.27	132.612	509.389	1664.73	277.391	520.446	1656.97	193.928	471.249	1482.78	172.931	433.856	1222.82	204.71	628.731	1411.74	202.347	729.203	1207.9	235.992	420.489	1279.3	18.868	576.31	1461.59	-64.3198	640.54	1247.1	-82.8089	678.943	1152.85	-78.2008	839.421	1071.3	-27.466	911.19	1040.2	-87.3387	886.852	1009.07	-75.59	965.143	1006.58
6885	0	152.66	677.583	1641.34	248.865	681.331	1638.98	135.045	522.197	1666.08	279.664	532.893	1657.23	194.476	484.725	1484.54	173.502	447.226	1224.45	205.75	642.142	1412.93	203.293	743.216	1209.12	236.615	433.975	1280.66	20.2387	590.36	1463.12	-62.7908	653.491	1248.29	-81.5542	690.184	1153.56	-78.3872	848.699	1068.6	-28.0953	920.158	1035.68	-87.9764	894.642	1005.34	-76.7974	972.98	1000.97
6886	0	155.084	690.592	1643.44	251.528	694.007	1640.43	137.109	534.959	1667.37	281.854	545.386	1657.44	193.779	496.044	1486.02	173.665	460.364	1226.14	206.658	655.537	1414.1	204.602	757.247	1210.62	236.975	447.353	1282.15	21.2636	604.129	1464.84	-61.385	666.169	1249.15	-80.6767	701.04	1154.11	-78.6141	857.525	1065.67	-28.5821	928.416	1030.66	-88.7566	901.863	1001.27	-77.9743	980.024	994.599
6887	0	157.238	703.682	1645.29	253.871	706.792	1641.51	139.214	548.036	1669.16	283.619	558.128	1657.65	196.286	511.191	1487.35	174.279	473.048	1227.91	207.524	668.707	1415.08	205.454	770.702	1211.88	237.546	460.514	1283.77	22.4258	617.649	1466.37	-60.0456	678.582	1250.25	-80.0158	711.474	1154.99	-78.7776	865.909	1062.41	-29.2232	936.034	1025.14	-89.4819	908.606	996.939	-78.9024	986.421	987.607
6888	0	159.207	716.956	1646.97	255.882	719.677	1642.52	140.975	561.296	1670.78	285.194	570.971	1658.53	196.942	523.851	1488.71	175.172	486.003	1229.5	208.106	681.733	1416.16	206.288	783.516	1212.96	238.29	473.64	1285.08	23.4859	630.84	1467.72	-58.8452	690.581	1251.14	-78.9406	721.923	1155.63	-78.8403	873.66	1059.04	-29.9368	942.66	1019.2	-90.448	914.451	992.511	-79.7736	992.021	980.203
6889	0	160.509	730.02	1648.56	256.974	732.677	1643.59	142.412	574.604	1672.71	286.857	583.926	1660.09	197.855	536.387	1490.27	175.929	498.43	1231.08	208.637	694.374	1417.42	206.94	796.022	1214.15	239.256	486.662	1286.4	24.2984	643.433	1469.31	-57.779	702.201	1252.25	-77.8156	732.027	1156.04	-79.055	880.941	1055.6	-30.2716	948.947	1013.15	-91.2639	919.857	987.906	-80.4426	996.937	972.522
6890	0	161.706	743.267	1649.66	258.357	745.789	1644.64	143.312	587.727	1674.42	287.71	597.057	1661.53	197.857	548.34	1491.6	176.737	510.543	1232.52	209.025	706.959	1418.92	207.682	808.274	1215.48	240.359	499.174	1287.89	24.8858	655.431	1470.64	-56.9549	713.445	1253.23	-77.1188	741.922	1156.67	-79.2402	887.789	1051.88	-30.9821	954.312	1006.82	-92.2185	924.626	983.233	-81.11	1001.04	964.414
6891	0	162.787	756.418	1650.65	259.119	759.165	1645.6	144.118	601.018	1676.32	288.558	610.425	1663.22	199.795	561.777	1493.01	177.635	522.579	1233.91	209.366	719.206	1420.29	208.049	820.578	1216.81	241.416	511.555	1289.2	25.3079	667.105	1471.77	-56.2888	724.234	1254.02	-76.1518	751.331	1157.08	-79.4439	894.102	1048.12	-31.3511	959.18	1000.42	-93.3715	928.813	978.503	-81.538	1004.38	956.227
6892	0	162.804	769.496	1651.57	259.327	772.415	1646.54	144.802	614.242	1678.37	289.051	623.815	1665.25	200.781	574.276	1494.61	178.892	534.7	1235.41	209.629	731.378	1421.8	208.106	832.919	1218.36	242.764	523.846	1290.8	25.6336	678.433	1473.03	-55.5717	734.545	1254.78	-75.3365	760.373	1157.32	-79.7524	899.71	1044.56	-32.0907	963.056	993.896	-94.2853	932.257	973.907	-81.8737	1007.06	948.163
6893	0	162.751	782.476	1652.59	259.328	785.745	1647.8	145.183	627.386	1680.52	289.619	637.28	1667.71	202.572	587.261	1496.03	180.401	546.684	1236.96	210.02	743.536	1423.73	208.152	845.519	1220.44	244.229	535.918	1292.55	25.8763	689.706	1474.26	-55.2477	744.459	1255.41	-74.4927	768.743	1157.36	-79.9688	904.728	1040.93	-32.755	966.156	987.406	-95.1036	935.054	968.995	-82.2642	1008.63	939.929
6894	0	162.405	795.413	1653.9	258.923	799.006	1649.23	145.266	640.454	1682.77	289.661	650.829	1670.31	202.714	598.759	1498.23	182.074	558.511	1238.85	210.172	755.514	1425.64	207.815	857.913	1222.53	245.717	547.978	1294.39	25.8092	700.77	1475.49	-54.771	753.754	1255.79	-73.7798	776.71	1157.52	-80.1062	909.057	1037.41	-33.3502	968.816	981.144	-95.891	937.547	964.804	-82.6423	1009.67	931.969
6895	0	161.868	808.272	1655.31	258.206	812.112	1650.86	145.452	653.387	1685.1	289.946	664.234	1672.97	203.52	610.93	1500.5	183.86	570.269	1240.91	210.466	767.354	1427.81	207.449	869.87	1224.53	247.261	559.916	1296.77	25.7269	711.902	1476.76	-54.3516	762.355	1255.97	-72.8132	784.044	1157.49	-80.2073	912.714	1033.78	-33.8914	970.458	974.913	-96.816	938.951	960.321	-82.7267	1009.78	923.972
6896	0	161.361	820.977	1656.8	258.127	825.225	1652.75	145.237	666.275	1687.4	289.748	677.461	1675.75	204.143	623.227	1502.66	185.663	582.119	1243.17	210.819	779.422	1430.22	207.087	881.539	1226.55	248.75	571.802	1299.33	25.8446	723.281	1478.05	-53.9062	770.307	1255.99	-71.7647	790.937	1157.27	-80.6733	915.793	1030.24	-34.5341	971.554	968.887	-97.8186	939.883	956.176	-83.4174	1008.83	916.531
6897	0	160.759	833.547	1658.4	257.539	838.093	1654.67	145.066	678.808	1689.55	289.636	690.437	1678.49	204.648	635.356	1505.09	187.244	593.929	1245.56	211.161	791.433	1432.62	206.673	893.21	1228.69	250.267	583.652	1301.94	25.969	734.555	1479.3	-53.5822	777.998	1256.04	-70.8635	797.102	1156.9	-80.9457	918.234	1026.75	-35.0478	972.117	963.581	-98.2484	940.04	951.92	-83.9126	1007.47	909.351
6898	0	160.28	846.107	1660.05	256.651	850.639	1656.53	145.005	691.471	1691.78	289.526	703.397	1681.01	205.536	647.556	1507.36	189.094	605.989	1247.75	211.335	803.582	1434.85	206.325	905.273	1230.81	251.895	595.605	1304.4	25.9861	745.756	1480.65	-52.8282	785.195	1255.9	-69.7059	802.869	1156.56	-81.0847	920.166	1023.52	-36.0028	971.874	957.776	-98.8242	939.877	948.125	-84.2913	1005.72	902.49
6899	0	159.8	858.4	1661.75	256.491	863.293	1658.51	144.924	703.852	1693.7	289.389	716.031	1683.46	206.37	660.049	1509.67	190.851	618.292	1249.76	211.695	815.643	1436.85	206.305	917.266	1233.05	253.653	607.725	1306.95	26.1963	757.169	1481.66	-52.2103	792.106	1255.78	-68.4253	808.131	1156.06	-81.2995	921.651	1020.23	-36.3701	971.731	953.041	-98.9099	939.251	944.046	-84.9252	1003.29	896.105
6900	0	159.611	870.572	1663.41	255.718	875.291	1660.31	144.943	715.96	1695.49	289.535	728.358	1685.61	206.766	672.211	1511.5	192.123	630.265	1251.63	211.961	828.001	1438.96	206.388	929.436	1235.29	255.117	619.979	1309.01	26.2386	768.53	1482.71	-51.5369	798.846	1255.56	-67.0505	813.349	1155.75	-81.5428	922.634	1016.99	-37.04	971.011	947.988	-99.2624	938.032	940.279	-85.4544	1000.5	889.968
6901	0	159.489	882.749	1665.05	255.422	887.441	1662.07	144.815	728.005	1696.94	289.206	740.647	1687.24	207.201	684.512	1513.09	193.361	642.638	1253.22	211.992	840.294	1440.59	206.514	941.238	1237.05	256.546	632.409	1310.94	26.2235	780.028	1483.53	-50.8849	805.435	1255.17	-66.4789	817.615	1154.94	-81.5365	923.28	1013.75	-37.6696	970.006	943.234	-99.8094	936.283	936.695	-86.1089	997.264	883.931
6902	0	159.498	894.716	1666.82	256.359	899.848	1664.24	144.746	739.899	1698.02	289.288	752.478	1688.65	208.156	697.394	1514.39	194.572	654.831	1254.56	212.138	852.755	1442.04	206.708	953.041	1238.62	258.082	644.835	1312.82	26.1552	791.396	1484.34	-50.2751	811.88	1254.68	-65.4602	821.586	1154.11	-81.4966	923.779	1010.6	-38.3734	968.815	938.852	-99.8192	934.358	933.037	-86.8479	993.65	878.405
6903	0	159.289	906.548	1668.35	256.214	911.72	1665.97	144.637	751.668	1698.8	288.989	764.34	1689.63	208.717	709.736	1515.63	195.616	666.884	1255.67	212.144	865.4	1443.46	206.969	964.722	1240.03	259.441	657.433	1314	26.004	803.045	1484.7	-49.4541	818.326	1253.98	-64.4682	825.763	1153.33	-81.3962	923.66	1007.29	-38.589	967.481	934.541	-99.9342	931.789	929.39	-87.5984	989.775	873.069
6904	0	159.213	918.416	1669.65	256.349	923.788	1667.52	144.688	763.355	1699.49	289.142	776.138	1690.48	209.075	722.213	1516.48	196.773	679.365	1256.53	212.169	877.953	1444.35	207.263	976.483	1240.74	260.75	669.933	1315.26	26.0312	814.858	1484.86	-48.8268	824.792	1253.29	-63.3654	829.52	1152.49	-81.0917	923.149	1003.64	-39.0715	965.769	930.005	-99.4849	929.213	925.741	-88.1187	985.581	867.974
6905	0	159.131	930.257	1670.85	256.238	935.581	1668.86	144.799	774.915	1699.74	289.032	787.984	1690.74	209.458	734.816	1517.16	197.827	691.568	1257.1	212.398	890.536	1445.04	207.497	988.384	1241.16	262.311	682.997	1316.19	26.235	826.473	1484.81	-48.1407	831.271	1252.61	-62.374	833.488	1151.76	-80.923	922.752	1000.41	-39.5865	964.035	925.381	-99.3218	926.098	922.219	-88.5585	981.342	862.991
6906	0	159.052	941.984	1672	255.348	947.195	1669.62	144.895	786.594	1699.61	289.179	799.78	1691.15	209.822	747.45	1517.35	198.719	703.876	1257.48	212.297	903.194	1445.39	207.729	1000.18	1241.27	263.265	695.194	1316.86	26.1928	838.518	1484.46	-47.6971	837.834	1251.99	-61.1996	837.257	1150.74	-80.7505	921.972	997.361	-39.4876	962.245	921.484	-98.5907	922.906	918.661	-88.8044	977.12	858.191
6907	0	158.58	953.873	1672.71	255.487	959.422	1670.81	144.85	798.235	1699.17	288.99	811.754	1691	210.076	759.959	1517.16	199.482	716.208	1257.42	212.469	915.945	1445.66	208.291	1011.82	1241.16	263.311	706.706	1317.47	26.1047	850.596	1483.84	-47.1711	844.415	1251.08	-60.3111	841.322	1149.73	-80.5151	920.94	994.083	-39.84	960.038	917.631	-98.0013	919.358	915.221	-89.1471	972.321	853.599
6908	0	158.298	965.878	1673.07	254.77	971.364	1671.35	144.838	810.001	1698.48	288.985	823.828	1690.69	210.207	772.632	1516.84	199.992	728.552	1257.29	212.61	928.494	1445.4	208.602	1023.53	1240.14	265.188	720.571	1317.08	25.9854	862.843	1483.04	-46.484	851.271	1250.22	-59.3035	845.065	1149	-80.1035	920.1	991.118	-39.1629	958.118	914.065	-97.4942	915.671	912.211	-89.2917	967.398	849.166
6909	0	158.068	977.948	1673.18	254.851	983.786	1671.58	144.991	821.901	1697.51	288.892	836.007	1690.04	210.635	785.538	1516.29	200.66	741.249	1256.96	212.586	941.207	1444.78	209.207	1035.4	1239.03	266.309	733.18	1316.94	25.9176	875.236	1481.98	-45.7799	858.336	1249.26	-58.1622	849.34	1148.08	-79.882	919.093	988.272	-39.639	955.503	909.908	-96.5457	912.124	909.087	-89.4238	962.469	845.019
6910	0	157.728	990.256	1672.96	254.185	996.165	1671.45	144.826	833.878	1696.24	288.828	848.444	1689.18	210.778	798.425	1515.7	201.058	753.641	1256.36	212.415	954.203	1443.65	209.427	1047.63	1237.28	266.875	746.345	1316.23	25.9649	887.783	1480.64	-45.1219	865.457	1248.25	-56.8579	853.695	1147.27	-79.1685	918.081	985.323	-39.5461	954.181	906.993	-95.6317	908.821	906.356	-89.3743	957.52	841.109
6911	0	157.158	1002.66	1672.24	253.339	1008.76	1671.04	144.634	846.169	1694.8	288.697	861.175	1688.19	210.935	811.336	1515	201.269	766.143	1255.63	212.723	966.992	1442.62	209.702	1060.23	1235.5	266.959	758.268	1315.72	25.9848	900.503	1479.3	-44.38	872.778	1246.77	-55.816	858.411	1146.63	-78.5737	917.52	982.807	-39.9913	950.639	902.653	-94.8964	905.317	904.014	-89.1423	952.452	837.433
6912	0	156.754	1015.05	1671.23	253.133	1021.8	1670.26	144.419	858.579	1693.26	288.405	873.965	1686.76	210.872	824.15	1513.41	201.306	778.541	1254.58	212.328	979.806	1440.79	209.988	1073.15	1233.62	267.245	770.966	1314.63	25.8712	913.285	1477.69	-43.8968	880.32	1245.63	-54.5233	863.417	1145.93	-78.1566	916.99	980.372	-40.0727	948.258	899.059	-93.6439	902.029	901.894	-88.9223	947.479	833.916
6913	0	156.624	1027.92	1669.88	252.6	1034.65	1669.07	144.02	871.297	1691.48	288.06	886.904	1685.36	211.018	837.294	1511.95	201.267	790.953	1253.34	212.508	992.706	1439.13	210.456	1086.47	1231.66	267.39	783.69	1313.32	25.7563	926.125	1475.93	-43.41	888.039	1244.67	-53.1937	868.706	1145.23	-77.7937	916.794	978.359	-40.039	946.219	896.159	-92.9916	899.112	900.128	-88.7593	942.601	830.799
6914	0	156.056	1040.5	1668.01	251.985	1047.72	1667.54	143.733	884.17	1689.72	287.67	900.015	1683.89	210.656	850.212	1510.42	200.94	803.584	1251.9	212.616	1005.37	1437.37	210.558	1099.61	1229.6	267.732	796.091	1312.1	25.3884	938.976	1474.23	-43.0185	896.195	1243.55	-52.006	874.537	1144.55	-77.2537	916.995	976.679	-39.9375	944.738	893.769	-92.387	896.586	898.899	-88.3667	937.826	827.839
6915	0	155.443	1053.67	1666.14	251.628	1061.06	1665.8	143.322	897.359	1687.89	287.299	913.284	1682.41	210.198	862.941	1508.99	200.353	816.211	1250.4	212.502	1018.3	1435.43	210.513	1112.75	1227.23	267.6	808.831	1310.7	25.1045	952.167	1472.38	-42.7988	904.727	1242.77	-50.6443	880.823	1143.95	-76.7156	917.526	975.05	-40.1524	943.173	891.058	-91.3714	894.287	897.943	-88.1051	933.296	825.477
6916	0	154.999	1067.08	1663.77	251.116	1074.39	1663.62	142.732	910.927	1686.13	286.733	926.774	1680.79	209.953	876.142	1507.31	199.899	829.084	1248.68	211.998	1031.03	1433.15	210.821	1125.9	1225.11	267.151	821.558	1309.02	24.7222	965.375	1470.66	-42.3913	913.402	1241.63	-49.2573	887.466	1143.4	-76.3044	918.855	974.027	-39.9852	942.503	889.437	-90.4645	892.879	897.387	-87.8352	928.992	823.423
6917	0	154.223	1080.56	1661.28	250.544	1087.8	1661.23	142.108	924.51	1684.17	286.063	940.232	1679.03	209.417	889.435	1505.42	199.109	841.895	1246.74	211.811	1043.93	1431.15	210.611	1138.78	1222.62	266.648	834.388	1307.09	24.1024	978.515	1468.83	-42.3417	922.736	1240.88	-47.9253	894.687	1142.93	-76.0047	920.574	973.392	-40.288	941.676	887.409	-90.1604	891.989	897.298	-87.6054	925.046	821.671
6918	0	153.575	1094.26	1658.54	250.119	1101.33	1658.64	141.188	938.191	1682.18	285.504	953.625	1677.2	208.718	902.362	1503.32	198.018	854.852	1244.76	211.379	1056.8	1428.72	210.455	1151.55	1220.11	265.701	847.267	1304.98	23.6033	991.737	1466.86	-42.0807	932.31	1239.69	-46.7192	902.399	1142.37	-75.7226	922.721	972.407	-40.3937	941.49	885.72	-89.8735	891.657	897.39	-87.6409	921.49	820.36
6919	0	152.898	1107.92	1655.56	248.872	1114.62	1655.48	140.259	952.104	1680.08	284.526	967.36	1675.21	207.999	915.364	1500.97	196.988	867.808	1242.57	210.984	1069.78	1426.54	210.663	1164.76	1218.17	264.797	860.131	1302.82	22.9116	1005.04	1464.74	-41.9964	942.429	1238.31	-45.5123	910.626	1141.55	-75.681	925.779	971.699	-40.7532	942.616	884.224	-89.8001	892.088	897.782	-87.4636	918.727	819.097
6920	0	152.338	1121.74	1652.57	247.986	1128.01	1652.5	139.303	965.976	1678.01	283.565	980.967	1673.16	207.208	928.38	1498.81	195.86	880.893	1240.36	210.364	1082.74	1424.32	210.349	1177.76	1216.1	263.935	873.228	1300.56	22.0124	1018.13	1462.51	-41.943	952.862	1236.74	-44.3938	919.365	1140.7	-75.7686	929.326	971.146	-41.3304	943.987	883.021	-89.8112	893.196	898.283	-87.444	916.539	817.98
6921	0	151.804	1135.46	1649.79	247.181	1141.55	1649.54	138.195	979.995	1676.27	282.459	994.523	1671.19	206.1	941.448	1496.76	194.682	894.162	1238.1	209.637	1095.8	1422.26	210.273	1190.92	1214.44	262.777	886.254	1298.19	21.0954	1031.28	1460.29	-41.83	963.658	1235.09	-43.4836	928.853	1139.72	-76.1485	933.619	970.564	-42.3817	946.337	881.517	-89.992	895.144	899.076	-87.6498	914.775	817.181
6922	0	150.782	1149.14	1647.17	246.071	1154.89	1646.86	136.963	993.795	1674.43	281.011	1008.06	1669.55	204.835	954.467	1494.83	193.539	907.473	1235.9	208.625	1109	1420.36	209.781	1203.89	1212.82	261.634	899.458	1295.99	20.0421	1044.55	1458.11	-41.9303	974.81	1233.46	-42.776	938.725	1138.77	-76.7236	938.672	970.146	-43.9873	949.53	880.9	-90.6944	898.029	900.006	-88.2673	913.839	816.839
6923	0	149.876	1162.69	1644.87	245.083	1168.38	1644.64	135.283	1007.46	1672.61	279.868	1021.43	1667.89	203.385	967.529	1492.61	192.468	920.914	1233.83	207.411	1122.27	1418.44	209.165	1216.75	1211.25	260.384	912.751	1293.97	18.7166	1057.72	1455.78	-42.2	986.336	1231.65	-42.4296	949.226	1137.62	-78.0544	944.272	970.038	-46.3521	953.71	879.932	-91.6604	901.922	901.062	-89.0532	913.903	816.815
6924	0	148.583	1176.25	1643.06	243.799	1181.6	1642.83	133.85	1020.99	1670.68	278.278	1034.65	1666.22	201.905	980.486	1490.71	191.526	934.427	1231.75	206.173	1135.53	1416.78	208.325	1229.87	1209.78	259.132	926.114	1292	17.1845	1070.75	1453.72	-42.8088	998.092	1229.87	-42.1237	960.426	1136.18	-79.1253	951.099	969.813	-49.1138	958.774	879.6	-92.8309	906.823	902.047	-90.0603	914.921	817.15
6925	0	146.913	1189.5	1641.34	242.092	1194.62	1641.45	131.895	1034.36	1669.04	276.508	1047.73	1664.97	200.27	993.516	1488.93	190.554	947.808	1230.08	205.136	1149	1415.64	207.459	1243.17	1208.61	258.087	939.665	1290.32	15.8299	1083.95	1451.74	-43.3837	1010.33	1228.04	-42.3051	971.788	1134.82	-80.8679	958.636	969.907	-48.9897	964.368	878.379	-94.2521	912.762	902.929	-91.1643	917.461	817.713
6926	0	144.932	1202.55	1639.84	240.197	1207.84	1640.14	129.969	1047.35	1667.24	274.579	1060.94	1663.72	198.808	1006.8	1487.62	189.851	961.599	1228.54	203.656	1162.52	1414.23	206.211	1256.74	1207.59	257.105	953.246	1288.95	14.5082	1097.15	1449.74	-43.9296	1022.9	1226.16	-42.5907	983.682	1133.37	-82.2879	967.449	969.631	-50.858	971.531	877.668	-96.0775	920.244	904.118	-92.651	921.148	818.365
6927	0	142.836	1215.57	1638.39	238.117	1220.83	1639.23	127.788	1060.36	1665.81	272.321	1073.92	1662.61	197.525	1020.41	1486.32	189.022	975.197	1227.05	201.963	1175.92	1412.82	204.927	1270.77	1206.74	256.404	967.111	1287.73	12.9318	1110.32	1448.04	-44.896	1035.58	1224.4	-43.1418	995.841	1132.36	-83.8687	977.383	969.376	-52.134	980.341	877.376	-97.974	928.656	904.96	-94.0467	926.733	819.003
6928	0	140.586	1228.29	1637.38	235.82	1233.83	1638.39	125.616	1072.97	1664.44	270.203	1086.85	1661.91	195.816	1033.8	1485.3	188.593	989.363	1225.68	200.657	1189.5	1412.32	203.184	1284.86	1206.01	255.683	981.007	1286.63	11.2689	1123.37	1446.73	-45.684	1048.78	1223.04	-43.8556	1008.54	1131.35	-85.9235	987.999	969.075	-54.6848	989.888	876.604	-99.8935	938.593	905.392	-95.7606	934.033	819.622
6929	0	137.999	1240.94	1636.69	233.251	1246.52	1638.24	122.974	1085.65	1663.49	267.613	1099.38	1661.5	193.877	1047.07	1484.03	187.999	1003.91	1224.39	198.645	1203.06	1411.71	201.551	1299.15	1206.01	254.602	995.026	1285.53	9.27333	1136.58	1445.51	-46.9435	1061.85	1221.68	-45.4761	1021.31	1130.47	-87.5964	999.796	968.737	-58.5968	1000.66	875.886	-102.004	949.782	905.583	-97.7268	942.996	819.983
6930	0	135.508	1253.6	1636.71	230.732	1259.04	1638.64	120.253	1098.09	1662.79	264.978	1111.93	1661.34	191.554	1060.08	1483.01	186.916	1018.26	1223.31	196.93	1216.7	1411.82	199.418	1313.41	1205.96	253.392	1009.19	1284.78	7.40578	1150.04	1444.57	-48.755	1075.27	1220.82	-47.2584	1034.82	1129.82	-89.7275	1012.25	967.995	-58.2297	1013.51	875.847	-104.057	962.132	905.734	-99.9342	953.712	820.455
6931	0	132.992	1266.15	1636.95	228.23	1271.51	1639.22	117.562	1110.57	1662.15	262.113	1124.23	1661.29	189.513	1074.03	1482.41	185.595	1032.43	1222.5	195.047	1230.32	1412.01	197.71	1327.85	1206.36	251.775	1023.28	1284.09	5.37697	1163.63	1443.94	-50.5252	1088.98	1220.27	-49.0479	1048.59	1129.15	-92.009	1025.94	967.607	-62.2872	1026.1	874.87	-106.371	975.886	905.479	-101.735	966.526	820.291
6932	0	130.477	1278.63	1637.52	225.638	1283.73	1640.14	114.751	1122.97	1661.83	259.465	1136.36	1661.6	186.972	1087.35	1482.08	184.469	1047.33	1221.86	193.06	1243.96	1412.36	195.823	1342.29	1206.93	249.858	1037.39	1283.62	3.38449	1177.27	1443.6	-52.4804	1102.97	1220.07	-51.2035	1062.53	1128.77	-94.2172	1040.53	967.238	-62.261	1041.48	874.745	-108.827	990.676	904.934	-104.043	980.958	819.997
6933	0	127.76	1291.14	1638.34	223	1296	1641.46	111.854	1135.29	1661.56	256.367	1148.51	1662.04	185.051	1100.15	1481.64	182.522	1061.64	1221.56	191.127	1257.61	1413.02	194.041	1356.86	1207.64	247.781	1051.5	1283.43	1.36822	1191.18	1443.44	-54.6604	1117.26	1220.11	-53.6486	1077.14	1128.59	-96.4401	1056.01	966.954	-64.6922	1057.24	874.445	-111.468	1006.55	904.199	-106.217	997.169	819.197
6934	0	124.985	1303.65	1639.69	220.328	1308.36	1643.19	108.642	1147.65	1661.39	253.393	1160.45	1662.69	183.102	1113.82	1481.75	180.383	1075.65	1221.59	189.449	1271.25	1413.99	192.727	1371.18	1208.81	245.404	1065.3	1283.4	-0.474292	1205.07	1443.42	-57.0614	1131.74	1220.2	-56.1991	1091.97	1128.29	-99.1165	1072.12	966.428	-67.0438	1074.02	873.898	-114.18	1023.36	903.363	-108.91	1014.75	818.23
6935	0	122.362	1316.2	1641.16	217.866	1320.93	1645.24	105.755	1160.06	1661.41	250.301	1172.78	1663.76	181.085	1127.13	1482.3	178.594	1090.11	1221.93	187.773	1284.82	1414.99	191.648	1385.32	1209.63	243.448	1079.06	1283.86	-2.20522	1218.86	1443.56	-59.5426	1146.46	1220.08	-58.8003	1107.32	1127.9	-101.452	1089.32	965.62	-69.195	1092.06	873.411	-116.917	1041.09	902.108	-111.637	1033.88	816.88
6936	0	119.621	1328.78	1642.48	215.23	1333.64	1647.34	102.809	1172.62	1661.75	247.489	1185.22	1664.91	179.337	1140.49	1483.04	176.339	1103.41	1223.01	186.236	1298.19	1416.04	190.644	1398.86	1210.2	241.313	1092.4	1284.75	-3.61823	1232.62	1443.83	-61.4581	1161.83	1220.18	-61.4565	1123.04	1127.48	-104.46	1107.03	965.216	-72.1196	1110.94	873.01	-119.941	1059.94	900.69	-114.677	1054.25	815.167
6937	0	117.107	1341.4	1643.65	212.344	1346.36	1649.19	100.311	1185.21	1662.03	244.725	1198.06	1666.31	178.11	1153.81	1484.83	174.685	1116.69	1224.44	184.721	1311.35	1417.16	189.848	1412.19	1210.89	239.808	1105.71	1286.16	-4.81906	1245.87	1444.38	-63.4907	1177.22	1220.15	-64.1854	1139.09	1127.2	-107.075	1125.66	964.396	-76.0736	1130.3	872.154	-122.953	1079.33	899.194	-118.063	1076.19	813.509
6938	0	114.583	1354.02	1644.56	209.663	1359.1	1650.65	97.9366	1197.91	1662.41	242.464	1210.84	1667.78	177.147	1166.93	1486.41	173.547	1129.5	1225.91	183.464	1324.26	1418.35	188.821	1424.87	1211.27	238.796	1118.68	1287.84	-5.80861	1259.01	1445.22	-65.3331	1192.75	1220.18	-66.6803	1155.45	1126.96	-109.328	1145.09	963.666	-77.3165	1151.64	871.801	-125.69	1099.88	897.882	-121.467	1099.37	811.967
6939	0	112.043	1366.71	1645.19	207.276	1372.12	1651.88	96.1495	1210.46	1662.95	240.536	1223.87	1669.42	176.08	1179.93	1487.79	172.431	1141.77	1227.38	182.218	1336.97	1419.38	188.176	1437.64	1212.13	238.357	1131.56	1289.55	-6.73183	1271.68	1446.25	-66.7461	1208.57	1220.29	-69.0729	1172.04	1126.69	-112.117	1164.72	963.108	-81.8241	1173.35	871.285	-128.647	1120.96	896.129	-125.212	1123.46	810.471
6940	0	110.297	1379.49	1645.71	205.139	1385.22	1652.88	94.4544	1223.22	1663.82	238.793	1237.08	1670.95	174.96	1192.73	1489.02	171.756	1154.06	1228.84	181.181	1349.5	1420.5	187.611	1450.17	1213.06	237.871	1143.88	1291.15	-7.67887	1284.04	1447.29	-68.6593	1224.18	1220.47	-71.28	1189.04	1126.25	-114.585	1185.1	962.503	-84.2028	1195.82	871.065	-131.247	1143.04	894.607	-129.08	1148.91	809.243
6941	0	108.746	1392.21	1646.29	203.515	1398.28	1653.61	93.0728	1236.09	1665.12	237.599	1250.29	1672.51	174.024	1204.88	1490.39	170.761	1165.75	1230.11	180.271	1361.78	1421.63	186.92	1462.3	1214.03	237.594	1156.07	1292.64	-8.56708	1296.27	1448.51	-70.2187	1239.96	1220.73	-73.7081	1205.88	1126.04	-116.773	1206.13	961.973	-86.6081	1219.07	870.901	-133.59	1165.79	892.756	-132.709	1175.24	808.24
6942	0	107.372	1404.97	1646.91	202.281	1411.11	1654.18	92.1603	1249.03	1666.81	236.56	1263.51	1673.98	173.105	1216.89	1491.68	169.952	1177.7	1231.16	179.395	1373.85	1422.89	186.261	1474.14	1215.2	236.792	1167.87	1293.96	-9.43921	1308.41	1449.82	-71.5953	1255.74	1221	-75.7366	1223.05	1125.9	-118.797	1227.66	961.698	-88.6738	1242.96	870.775	-135.63	1189.05	891.097	-136.382	1202.42	807.729
6943	0	106.845	1417.79	1647.6	201.689	1423.96	1654.63	91.6334	1261.98	1668.68	235.782	1276.38	1675.4	171.985	1228.69	1492.85	168.942	1189.8	1232.23	178.536	1385.68	1424.2	185.435	1485.84	1216.54	236.065	1179.65	1295.19	-10.3101	1320.5	1451.22	-72.8517	1271.62	1221.43	-77.7316	1240.26	1125.76	-120.499	1249.45	961.307	-90.7525	1267.1	870.804	-137.553	1212.95	889.633	-139.731	1230.57	807.622
6944	0	106.607	1430.51	1648.42	201.446	1436.66	1655.08	91.2337	1274.83	1670.8	235.681	1289.26	1676.96	171.037	1240.17	1494.43	168.092	1201.47	1233.65	177.713	1397.37	1425.57	184.655	1497.58	1217.9	234.639	1191.16	1296.3	-11.2115	1332.63	1452.73	-74.0123	1287.53	1221.88	-79.5899	1257.78	1125.64	-122.148	1271.7	961.293	-93.7207	1291.73	871.122	-139.082	1237.39	888.661	-142.781	1259.31	807.997
6945	0	106.646	1443.17	1649.66	201.461	1449.13	1655.82	91.1366	1287.65	1673.03	235.517	1301.78	1678.38	169.89	1251.67	1495.89	166.734	1213.28	1235.01	177.271	1408.97	1427.35	184.128	1509.38	1219.6	233.145	1202.71	1297.55	-12.2351	1344.56	1454.26	-75.3832	1303.19	1222.73	-81.4441	1275.47	1125.77	-123.31	1294.41	961.651	-94.9334	1316.98	872.026	-140.338	1262.49	887.649	-145.69	1288.56	809.297
6946	0	106.804	1455.5	1651.38	201.769	1461.47	1656.98	91.2095	1300.24	1675.54	235.678	1314.24	1679.93	169.053	1263.37	1497.74	165.165	1225.06	1236.61	176.7	1420.58	1429.3	183.805	1521.3	1221.83	231.193	1214.17	1298.79	-13.1227	1356.63	1456.13	-76.7261	1318.9	1223.88	-83.2954	1293.02	1126.13	-124.597	1317.2	962.276	-96.7846	1342.34	873.473	-141.381	1287.92	887.167	-148.04	1318.33	810.923
6947	0	107.172	1467.85	1653.52	202.023	1473.53	1658.41	91.3893	1312.49	1678.08	235.749	1326.3	1681.52	167.903	1275.15	1499.6	163.299	1236.59	1238.46	175.946	1432.17	1431.23	183.352	1533.33	1224.29	229.072	1225.6	1300.54	-14.0185	1368.68	1458.04	-78.0422	1334.72	1225.58	-84.9843	1310.89	1126.8	-124.868	1340.84	962.888	-97.7593	1369.2	876.438	-142.06	1313.83	887.085	-149.981	1348.57	813.635
6948	0	107.539	1479.84	1655.6	202.565	1485.46	1659.85	91.6207	1324.65	1680.74	236.279	1338.29	1683.1	166.936	1287.09	1501.73	161.397	1248.11	1240.64	175.443	1443.76	1433.18	182.83	1545.44	1226.41	226.849	1236.99	1302.35	-14.7687	1380.95	1460.27	-79.2213	1350.43	1227.35	-86.6674	1328.74	1127.91	-125.521	1364.54	964.418	-98.1402	1395.8	878.88	-142.536	1340.43	887.609	-151.497	1379.08	817.074
6949	0	107.983	1491.86	1657.97	202.943	1497.22	1661.37	92.1208	1336.58	1683.35	236.675	1350.02	1684.45	166.152	1299.07	1503.71	159.648	1259.79	1242.65	175.054	1455.42	1435.17	182.355	1557.44	1228.67	224.937	1248.47	1304.13	-15.3199	1393.38	1462.61	-80.3857	1366.05	1229.42	-88.1633	1346.68	1129.33	-125.945	1388.66	966.678	-98.3256	1422.83	882.303	-142.508	1367.57	888.913	-152.559	1409.87	821.186
6950	0	108.413	1503.57	1660.35	203.311	1508.89	1663.3	92.4358	1348.27	1685.7	237.209	1361.59	1685.96	165.292	1310.97	1505.65	158.061	1271.77	1244.53	174.39	1467.09	1436.96	181.86	1569.2	1230.95	222.943	1260	1305.93	-15.8215	1405.6	1465.14	-81.5598	1381.58	1231.62	-89.661	1364.58	1131.13	-126.328	1413.1	969.555	-98.2425	1450.17	886.495	-142.797	1394.92	891.043	-153.056	1440.66	826.004
6951	0	108.363	1515.16	1662.79	203.468	1520.3	1665.25	92.6614	1359.77	1687.87	237.218	1373.02	1687.27	164.466	1322.97	1507.53	156.247	1283.46	1246.57	173.902	1478.88	1438.91	181.089	1580.64	1232.84	221.001	1271.45	1307.76	-16.3789	1417.93	1467.73	-82.7377	1397.12	1234.06	-91.4821	1382.3	1133.05	-126.549	1437.69	972.871	-97.9694	1477.87	891.52	-142.809	1422.77	894.023	-153.029	1471.81	831.377
6952	0	108.7	1526.63	1665.44	203.84	1531.69	1667.36	92.7439	1371.17	1689.68	237.354	1384.27	1688.49	163.773	1334.85	1509.16	154.559	1294.95	1248.54	173.332	1490.61	1440.58	180.369	1592.03	1234.53	219.57	1283.19	1309.56	-16.6665	1430.38	1470.25	-83.8557	1412.81	1236.85	-93.0118	1400.17	1135.28	-126.729	1462.47	976.651	-97.611	1505.84	897.17	-142.731	1450.99	897.267	-152.761	1503.13	837.466
6953	0	108.663	1538.13	1667.73	203.94	1542.99	1669.29	92.9861	1382.54	1691.3	237.464	1395.5	1689.45	163.436	1346.72	1510.82	153.188	1306.51	1250.14	173.036	1502.38	1442.09	179.695	1603.4	1236.17	218.116	1294.9	1310.99	-17.0921	1442.66	1472.64	-85.0739	1428.18	1239.38	-94.6679	1418.01	1137.44	-126.93	1487.38	980.887	-97.0372	1533.64	903.52	-142.648	1479.33	901.176	-151.871	1534.3	843.695
6954	0	108.849	1549.51	1670.08	204.089	1554.5	1671.23	92.9688	1393.85	1692.59	237.549	1406.58	1690.28	162.773	1358.71	1512.02	152.022	1318.28	1251.67	172.533	1514.26	1443.4	178.911	1614.81	1237.64	217.004	1306.69	1312.34	-17.2891	1455	1474.95	-86.2718	1443.54	1241.95	-96.5325	1435.51	1139.67	-127.173	1512.38	985.55	-96.6335	1561.36	910.286	-142.302	1508.02	905.496	-150.567	1565.39	850.345
6955	0	108.727	1561.11	1671.99	204.179	1565.85	1673.23	92.6882	1405.23	1693.69	237.31	1417.91	1691.18	162.272	1370.75	1513.36	150.944	1330.26	1253	171.952	1526.09	1444.58	178.298	1626.21	1239.03	215.68	1318.56	1313.51	-17.5548	1467.43	1476.92	-87.3089	1459.09	1244.2	-98.2865	1453.52	1141.62	-127.314	1537.3	990.492	-95.6903	1589.39	918.004	-142.013	1536.66	909.944	-149.02	1596.44	857.451
6956	0	108.542	1572.66	1673.92	203.961	1577.18	1674.73	92.5391	1416.73	1694.34	237.055	1429.18	1691.7	161.882	1382.8	1514.33	149.934	1342.07	1254.12	171.482	1538.01	1445.48	177.694	1637.67	1239.95	214.569	1330.41	1314.45	-17.7847	1479.65	1478.53	-88.611	1474.43	1246.24	-100.337	1471.23	1143.48	-127.604	1562.08	995.272	-94.6582	1617.25	926.055	-141.665	1565.27	914.954	-147.031	1627.31	864.669
6957	0	108.414	1584.22	1675.44	203.772	1588.72	1676.05	92.2771	1428.2	1694.7	236.594	1440.56	1691.8	161.386	1394.85	1514.78	148.974	1353.97	1254.79	170.963	1549.88	1446.03	177.059	1649.1	1240.51	213.468	1342.23	1315.13	-18.0322	1491.92	1479.64	-89.9647	1489.74	1248	-102.378	1489.18	1145.11	-127.867	1586.88	1000.12	-93.4648	1644.55	933.67	-141.779	1593.5	920.026	-144.772	1658.04	872.17
6958	0	108.26	1596.02	1676.4	203.567	1600.51	1676.96	91.928	1439.74	1694.7	236.41	1452.06	1691.68	160.711	1407.03	1514.81	147.923	1365.95	1255.37	170.415	1561.79	1446.2	176.103	1660.08	1240.45	212.462	1354.29	1315.57	-18.2829	1504.03	1480.33	-91.4065	1505.1	1249.33	-104.574	1507.17	1146.28	-128.018	1611.52	1005.07	-92.3199	1671.94	941.75	-140.905	1622.13	925.323	-142.412	1688.53	879.517
6959	0	107.718	1607.88	1676.94	203.22	1612.39	1677.51	91.4556	1451.45	1694.51	235.909	1463.82	1691.19	160.254	1419.09	1514.79	147.045	1377.82	1255.67	169.716	1573.85	1445.79	175.182	1671.17	1239.72	211.387	1366.23	1315.54	-18.6467	1516.09	1480.59	-92.9825	1520.45	1250.3	-106.809	1525.46	1147.37	-128.337	1636.22	1009.99	-91.1657	1698.6	949.697	-140.962	1650.27	930.561	-139.872	1718.79	887.418
6960	0	107.3	1619.8	1677.3	202.678	1624.41	1677.62	91.2852	1463.47	1694.05	235.537	1475.8	1690.87	160.104	1431.33	1514.77	146.677	1389.72	1255.65	169.208	1585.95	1445.53	174.472	1682.4	1239.09	210.915	1378.22	1315.67	-18.808	1528.08	1480.46	-94.3496	1535.87	1250.86	-108.841	1543.98	1148.02	-128.297	1660.68	1014.78	-89.8638	1725	957.722	-140.021	1678.82	936.735	-137.198	1748.8	895.718
6961	0	106.965	1631.98	1677.16	202.011	1636.54	1677.49	90.8573	1475.44	1693.43	235.13	1488.04	1690.18	159.782	1443.64	1514.52	146.449	1401.4	1255.26	168.299	1597.94	1444.56	173.721	1693.69	1237.92	210.56	1390.3	1315.32	-19.1756	1539.94	1479.93	-95.7975	1551.29	1251.19	-111.018	1562.56	1148.58	-128.373	1684.99	1020	-88.5654	1751.08	965.76	-139.025	1706.66	942.346	-134.446	1778.2	904.125
6962	0	105.992	1644.28	1676.47	201.527	1649.04	1676.97	90.2906	1487.59	1692.61	234.666	1500.5	1689.39	159.454	1455.8	1513.89	146.596	1413	1254.78	167.865	1610.06	1443.78	172.965	1705.19	1236.61	210.226	1402.42	1314.83	-19.5699	1551.75	1479.12	-97.4884	1566.75	1250.95	-113.34	1581.21	1148.92	-128.207	1709.16	1024.87	-86.933	1776.57	973.904	-138.831	1734.1	948.465	-131.748	1807.3	912.932
6963	0	105.269	1656.71	1675.43	200.56	1661.62	1675.82	89.836	1499.98	1691.36	234.089	1513.25	1688.29	159.015	1468.01	1512.63	147.039	1424.66	1254.13	167.118	1622.26	1442.29	172.137	1717.04	1235.06	210.101	1414.35	1314.1	-19.924	1563.7	1477.92	-98.7604	1582.48	1250.92	-115.402	1600.16	1149.2	-128.05	1732.97	1029.7	-85.3631	1801.42	981.334	-138.207	1761.22	954.775	-129.432	1835.36	921.674
6964	0	104.493	1669.24	1674.04	199.845	1674.62	1674.58	89.3984	1512.48	1690.26	233.619	1526.04	1687.2	159.028	1480.49	1511.55	147.683	1436.09	1253.15	166.581	1634.4	1440.73	171.393	1729.24	1233.41	210.63	1426.45	1313.24	-20.2571	1575.41	1476.43	-100.106	1597.82	1250.66	-117.177	1619.08	1149.48	-127.666	1756.58	1035.13	-83.8454	1825.85	989.42	-137.739	1787.61	961.22	-126.855	1863.31	931.235
6965	0	103.525	1681.95	1672.27	198.981	1687.43	1672.91	89.0691	1525.34	1688.93	233.17	1539.26	1686.05	159.14	1493	1510.6	148.461	1447.78	1252.01	166.07	1646.67	1439.07	170.544	1741.6	1231.59	211.074	1438.53	1312.22	-20.4171	1587.17	1474.64	-101.014	1613.61	1250.13	-118.928	1637.89	1149.96	-127.077	1779.69	1040.11	-82.0733	1849.92	997.193	-136.947	1813.61	967.881	-124.761	1890.04	940.639
6966	0	102.703	1694.84	1670.19	198.048	1700.57	1670.82	88.5531	1538.21	1687.49	232.622	1552.42	1684.55	159.095	1505.41	1509.54	149.497	1459.8	1250.72	165.504	1658.84	1437.04	169.794	1754.03	1229.45	212.007	1450.96	1311.1	-20.5716	1598.89	1472.88	-101.897	1629.23	1249.68	-120.487	1656.51	1150.43	-126.393	1802.38	1045.3	-80.2531	1873.14	1004.66	-136.004	1839.07	974.842	-122.688	1916.22	950.236
6967	0	102.009	1707.82	1667.59	197.35	1714	1668.44	88.1113	1551.25	1685.98	232.278	1565.89	1683.08	159.226	1517.94	1508.19	150.74	1471.73	1249.37	165.284	1671.18	1434.89	169.063	1766.4	1227.16	212.86	1463.07	1309.91	-20.6678	1610.53	1470.81	-102.529	1644.99	1249.23	-121.537	1675.18	1150.91	-125.761	1824.97	1050.8	-78.4963	1895.67	1011.94	-135.313	1863.76	981.343	-120.615	1941.57	959.7
6968	0	101.059	1721.07	1665.03	196.662	1727.25	1665.96	87.7179	1564.55	1684.32	231.726	1579.32	1681.47	159.447	1530.52	1506.72	152.161	1483.97	1247.77	164.859	1683.58	1432.52	168.374	1778.62	1224.82	213.961	1475.23	1308.6	-20.6209	1622.27	1468.67	-102.714	1660.74	1248.61	-122.523	1693.34	1151.26	-124.952	1846.14	1056	-76.8514	1917.51	1019.09	-134.302	1887.55	988.104	-119.048	1965.85	969.195
6969	0	100.681	1734.2	1662.44	195.96	1740.4	1663.51	87.1107	1577.78	1682.45	231.216	1592.8	1679.92	159.328	1543.03	1504.67	153.442	1496.35	1246.11	164.692	1696.03	1430.39	167.807	1790.75	1222.44	214.925	1487.42	1307.31	-20.7265	1634.04	1466.49	-103.072	1676.26	1248.1	-123.402	1711.2	1151.65	-124.263	1866.91	1061.15	-75.3186	1938.74	1026.27	-133.755	1910.68	994.975	-117.405	1989.35	978.612
6970	0	100.164	1747.34	1659.77	195.507	1753.77	1661	86.7172	1591.07	1680.61	230.848	1606.23	1678.18	159.536	1555.59	1502.76	154.822	1508.97	1244.37	164.406	1708.51	1427.94	167.474	1802.8	1219.95	215.81	1499.59	1305.86	-20.4729	1645.92	1464.34	-103.467	1691.5	1247.37	-124.04	1728.59	1152.29	-123.484	1887.08	1066.15	-73.8088	1959.13	1033.04	-133.02	1932.99	1001.64	-115.91	2012.02	987.815
6971	0	99.8105	1760.55	1657.18	195.181	1767.07	1658.55	86.4823	1604.29	1678.68	230.658	1619.53	1676.52	160.202	1568.25	1501.34	156.05	1521.61	1242.4	164.454	1721.06	1425.61	167.247	1815.01	1217.62	216.951	1511.94	1304.16	-20.1581	1657.79	1462.48	-103.014	1706.93	1246.81	-124.205	1745.85	1152.6	-122.785	1906.53	1071.08	-72.5366	1978.9	1039.37	-132.485	1954.46	1008.03	-114.849	2033.54	996.739
6972	0	99.6878	1773.63	1654.53	195.044	1780.38	1656.16	86.5204	1617.73	1676.91	230.944	1632.99	1675.09	160.505	1580.92	1499.4	157.226	1534.65	1240.41	164.436	1733.55	1423.36	167.184	1827.48	1215.34	217.792	1524.43	1302.37	-19.7853	1669.95	1460.41	-102.997	1721.89	1246.17	-124.296	1762.63	1152.89	-122.165	1925.2	1075.36	-71.4535	1997.95	1045.28	-132.106	1974.86	1013.92	-113.9	2054.3	1005.22
6973	0	99.5246	1786.82	1652.12	195.211	1793.51	1654	86.5461	1630.92	1675	230.767	1646.08	1673.35	160.813	1593.59	1497.62	157.922	1547.68	1238.52	164.784	1746.24	1421.36	167.271	1840.03	1213.51	218.352	1536.92	1300.7	-19.359	1682.2	1458.78	-102.464	1736.77	1245.41	-124.522	1778.9	1152.93	-121.691	1943.41	1079.71	-70.7045	2016.43	1050.89	-131.798	1994.5	1019.55	-113.453	2074.09	1013.18
6974	0	100.085	1799.76	1649.99	195.445	1806.47	1651.91	86.7382	1644.06	1673.18	230.956	1659.28	1671.79	161.333	1606.4	1495.77	158.485	1560.46	1236.71	165.265	1758.96	1419.54	167.513	1852.78	1211.83	218.94	1549.52	1298.83	-18.9384	1694.63	1457.33	-102.157	1751.3	1244.66	-124.574	1794.54	1153.02	-121.297	1960.94	1083.27	-70.1843	2034.13	1055.91	-131.619	2013.3	1024.45	-113.194	2092.87	1020.69
6975	0	100.541	1812.86	1648.22	196.036	1819.58	1650.12	87.3376	1657.12	1671.48	231.374	1672.33	1670.28	161.785	1619.36	1493.95	158.883	1573.37	1234.8	165.671	1771.67	1417.75	167.968	1865.73	1210.19	219.433	1562.24	1296.98	-18.4699	1707.31	1455.71	-101.894	1765.38	1244.07	-123.84	1810.32	1152.59	-120.993	1977.63	1086.31	-69.7996	2051.29	1060.48	-131.195	2031.18	1028.83	-113.315	2110.75	1027.42
6976	0	101.328	1825.86	1646.61	196.802	1832.58	1648.54	87.9695	1670.16	1670.05	232.204	1685.52	1668.61	162.302	1632.21	1492.34	159.107	1586.38	1233	166.286	1784.57	1416.09	168.612	1878.76	1208.77	219.573	1575.05	1295.3	-17.8113	1720.25	1454.24	-101.455	1779.44	1243.06	-123.758	1825.29	1152.35	-120.844	1993.8	1088.53	-69.8043	2067.84	1064.23	-131.043	2048.21	1031.95	-113.741	2127.89	1033.1
6977	0	102.308	1838.94	1645.13	197.686	1845.43	1646.95	88.8778	1683.13	1668.91	233.054	1698.46	1667.18	162.783	1645.18	1490.77	159.177	1599.27	1231.57	167.009	1797.47	1414.54	169.434	1891.76	1207.5	219.76	1588.17	1293.73	-17.1528	1733.66	1453.2	-100.919	1793.31	1242.03	-123.681	1839.78	1151.94	-120.583	2009.46	1090.36	-69.8251	2083.92	1067.3	-130.861	2064.63	1034.56	-114.174	2144.2	1037.97
6978	0	103.679	1851.83	1644.03	198.97	1858.3	1645.64	90.1131	1696.11	1667.92	234.27	1711.21	1665.92	163.511	1658.17	1489.61	159.151	1612.48	1230.07	167.973	1810.52	1413.35	170.456	1904.82	1206.31	219.756	1601.34	1292.1	-16.4293	1747.11	1452.17	-100.31	1807.27	1241.53	-123.06	1854.25	1151.63	-120.545	2024.51	1091.59	-70.0438	2099.34	1069.65	-130.544	2080.1	1036.36	-114.974	2159.71	1041.79
6979	0	105.014	1864.66	1643.1	200.353	1870.95	1644.65	91.3226	1708.95	1667.06	235.568	1723.89	1664.77	164.165	1671.23	1488.53	158.882	1625.78	1228.85	169.177	1823.71	1412.57	171.666	1918.15	1205.52	219.27	1614.46	1290.61	-15.5225	1760.77	1451.59	-100.08	1820.89	1240.98	-122.598	1868.3	1151.22	-120.41	2038.86	1092.23	-70.2809	2114.15	1071.42	-130.517	2094.83	1037.21	-115.963	2174.33	1044.74
6980	0	106.466	1877.43	1642.6	202.019	1883.72	1643.87	92.5247	1721.67	1666.37	236.8	1736.52	1663.89	164.786	1684.24	1487.16	158.503	1639.35	1227.71	170.165	1836.65	1412.06	173.131	1931.84	1205.21	219.158	1627.95	1289.25	-14.5218	1774.56	1450.97	-99.8396	1834.32	1240.61	-122.199	1882.07	1150.76	-120.518	2052.78	1092.29	-70.7043	2128.47	1072.43	-130.67	2108.84	1037.74	-117.146	2188.32	1046.58
6981	0	108.12	1890.17	1642.08	203.549	1896.29	1643.17	94.0665	1734.39	1665.89	238.413	1749.12	1663.08	165.726	1697.16	1486.4	158.377	1653.2	1226.66	171.519	1849.85	1411.62	174.43	1945.66	1204.85	219.429	1641.68	1287.97	-13.5151	1788.35	1450.85	-99.4408	1847.76	1240.5	-121.627	1895.54	1150.71	-120.664	2066.23	1092.09	-71.4921	2142.22	1072.43	-130.837	2122.39	1037.57	-118.255	2201.61	1047.19
6982	0	109.751	1902.71	1641.97	205.234	1909.05	1642.97	95.8133	1747.02	1665.76	240.321	1761.76	1662.86	166.898	1710.23	1485.81	158.988	1667.79	1225.73	172.794	1863.16	1411.29	175.59	1959.33	1204.72	219.386	1655.41	1286.71	-12.3133	1802.05	1450.73	-98.776	1861.37	1240.7	-120.869	1908.67	1150.52	-120.659	2079.35	1091.26	-72.0075	2155.5	1071.69	-131.237	2135.18	1036.48	-119.473	2214.28	1046.7
6983	0	111.497	1915.36	1642.14	206.988	1921.74	1643.06	97.7727	1759.55	1665.91	241.977	1774.47	1662.62	167.976	1723.24	1485.23	158.803	1681.76	1225.16	173.996	1876.33	1411.46	177.08	1973.68	1205.24	219.804	1669.37	1285.64	-10.8929	1815.73	1451.07	-98.0566	1875.03	1241.1	-120.181	1921.65	1150.52	-120.565	2091.86	1089.95	-72.6222	2168.18	1070.04	-130.523	2147.23	1034.13	-120.666	2226.39	1045.05
6984	0	112.921	1927.95	1642.63	208.829	1934.41	1643.41	99.7406	1771.97	1666.13	244.016	1787.04	1662.78	169.28	1736.42	1485.18	159.153	1695.86	1224.76	175.433	1889.72	1411.77	178.558	1988.1	1206.09	220.172	1683.2	1284.99	-9.50566	1829.49	1451.73	-97.1608	1888.66	1241.77	-119.335	1934.36	1150.87	-120.694	2103.96	1088.52	-73.1367	2180.14	1067.71	-131.464	2158.44	1032.62	-121.62	2237.77	1042.33
6985	0	115.284	1940.61	1643.66	210.759	1946.96	1644.01	101.89	1784.48	1666.62	246.109	1799.72	1662.71	170.611	1749.65	1485.03	159.856	1710.03	1224.77	177.077	1903.18	1412.47	179.957	2002.55	1207.08	220.645	1697.3	1284.47	-8.21931	1843.23	1452.65	-96.3498	1901.98	1242.38	-118.426	1946.76	1151.19	-120.572	2115.11	1086.35	-73.5783	2191.52	1064.69	-132.288	2169.07	1030.23	-122.528	2248.52	1038.52
6986	0	117.289	1953.17	1644.99	212.812	1959.69	1645.07	104.238	1797.02	1667.48	248.771	1812.78	1663.35	171.936	1762.94	1485.36	160.448	1724	1224.94	178.65	1916.62	1413.35	181.081	2016.9	1208.28	221.286	1711.48	1284.32	-6.83751	1856.88	1454.06	-95.1916	1915.23	1243.42	-117.495	1958.76	1151.7	-120.845	2126.05	1084.28	-73.9572	2202.26	1061	-132.898	2178.89	1026.95	-123.535	2258.56	1033.66
6987	0	119.263	1965.84	1646.69	215.024	1972.53	1646.6	106.371	1809.51	1668.49	250.492	1825.01	1663.83	173.294	1776.29	1486.11	161.031	1737.6	1225.59	179.831	1930.08	1414.5	181.797	2031.33	1209.65	221.752	1725.59	1284.61	-5.60761	1870.51	1455.62	-93.9908	1928.33	1244.64	-116.892	1970.36	1152.51	-120.965	2136.42	1081.89	-74.5613	2212.3	1056.43	-132.781	2187.98	1022.95	-124.401	2267.68	1027.89
6988	0	121.644	1978.77	1648.86	217.25	1985.31	1648.25	108.605	1822.27	1669.79	252.64	1837.72	1664.59	174.637	1789.72	1487.28	161.651	1751.14	1227.02	180.916	1943.55	1415.86	182.279	2045.3	1211.09	222.136	1739.77	1285.46	-4.38657	1884.41	1457.69	-92.9015	1941.08	1245.93	-116.04	1981.94	1153.41	-120.956	2146.13	1079.06	-75.0496	2221.45	1051.43	-133.872	2196.21	1019.42	-124.965	2276.01	1021.5
6989	0	124.068	1991.69	1650.87	219.63	1998.04	1649.69	111.142	1835.29	1671.46	254.937	1850.43	1665.25	175.865	1803.16	1488.75	162.071	1764.27	1228.45	181.81	1956.81	1417.17	182.657	2059.23	1212.6	222.482	1753.36	1286.62	-3.32438	1898.06	1459.98	-91.7484	1953.8	1247.29	-114.951	1993.02	1154.58	-120.877	2155.3	1076	-75.3519	2229.89	1045.73	-134.5	2203.53	1014.99	-125.372	2283.32	1014.25
6990	0	126.598	2004.9	1653.04	222.276	2011.02	1651.05	113.019	1848.31	1673.1	257.239	1863.26	1665.98	176.808	1816.69	1490.14	162.293	1777.32	1230.24	182.858	1970.07	1418.65	182.851	2072.99	1214.1	222.624	1766.54	1287.95	-2.42498	1911.76	1461.97	-90.5715	1966.24	1248.94	-114.137	2003.92	1155.72	-120.983	2163.69	1072.53	-75.5179	2237.47	1039.6	-134.921	2210.15	1010.08	-125.82	2289.9	1006.39
6991	0	129.06	2018.13	1654.65	224.63	2023.84	1652.11	114.853	1861.48	1674.78	258.882	1875.88	1666.45	177.606	1829.84	1491.46	162.358	1790.17	1232.16	183.606	1983.17	1419.89	183.194	2086.53	1215.59	222.638	1779.23	1289.46	-1.27672	1925.3	1464.02	-89.5126	1978.56	1250.38	-113.638	2014.34	1156.83	-120.91	2171.67	1068.85	-75.7279	2244.4	1033.01	-135.298	2215.97	1004.78	-125.951	2295.58	997.846
6992	0	131.156	2031.52	1656.15	226.72	2036.72	1652.72	116.55	1874.98	1676.68	260.532	1888.83	1666.94	178.559	1843.06	1492.61	162.465	1802.88	1233.88	184.184	1996.13	1421.07	183.395	2099.75	1217.13	222.942	1791.85	1291.13	-0.422841	1938.45	1465.82	-88.3987	1990.69	1251.76	-112.562	2024.75	1158	-120.711	2178.92	1064.73	-75.6167	2250.67	1026.1	-135.742	2221.26	999.433	-126.284	2300.3	988.732
6993	0	133.188	2045.04	1657.26	228.608	2049.73	1653.19	118.375	1888.74	1678.47	262.861	1902.27	1667.92	179.308	1855.53	1495.61	162.743	1815.59	1235.38	184.404	2008.74	1422.07	183.645	2112.65	1218.5	222.901	1804.45	1292.36	0.491789	1951.35	1467.54	-87.7614	2002.27	1253.11	-111.578	2035.06	1158.87	-120.511	2185.97	1060.68	-76.1779	2255.74	1018.11	-136.204	2225.7	993.955	-126.036	2304.29	979.387
6994	0	134.524	2058.51	1658.22	230.053	2062.77	1653.74	119.591	1902.14	1680.37	263.244	1915.04	1668.89	180.135	1867.96	1496.35	163.142	1827.84	1237.08	184.545	2021.07	1423.08	183.815	2125	1219.63	223.149	1816.8	1293.62	1.27564	1963.66	1469.21	-86.6738	2014.08	1254.39	-110.718	2044.84	1159.5	-120.273	2192.22	1056.31	-76.5739	2260.25	1010.29	-136.139	2229.71	988.214	-125.992	2307.45	969.699
6995	0	135.888	2071.72	1658.98	231.08	2076.09	1654.23	120.159	1915.37	1682.26	264.517	1928.34	1670.42	177.976	1876.13	1498.8	163.721	1839.87	1238.81	184.876	2033.44	1424.27	183.838	2136.77	1220.7	223.827	1829.17	1295.1	1.74596	1975.52	1470.68	-86.2081	2025.06	1255.32	-110.101	2054.31	1159.93	-119.769	2197.96	1051.94	-76.3918	2264.16	1002.7	-136.743	2233.05	982.547	-125.775	2309.71	960.115
6996	0	136.301	2084.95	1659.66	231.61	2089.39	1654.87	121.115	1928.94	1683.99	264.87	1941.73	1671.86	181.149	1890.63	1499.65	164.272	1851.51	1240.18	185.071	2045.44	1425.56	184.073	2148.58	1221.94	224.765	1841.15	1296.41	2.15786	1987.01	1471.82	-85.5676	2035.82	1256.17	-108.377	2063.29	1159.77	-119.545	2203.25	1047.5	-76.1025	2267.08	994.974	-136.817	2235.81	977.134	-124.998	2311.39	950.477
6997	0	136.518	2098.11	1660.32	232.025	2102.54	1655.54	121.779	1942.07	1685.72	266.345	1955.67	1673.73	181.578	1902.63	1500.89	165.2	1863.23	1241.59	185.395	2057.39	1427.05	183.862	2159.73	1223.15	225.89	1853.07	1297.76	2.40971	1998.2	1473.02	-84.8651	2046.08	1256.72	-107.412	2071.82	1159.81	-119.24	2207.67	1043.03	-75.7689	2269.56	987.507	-137.131	2237.84	971.311	-124.69	2312.01	940.649
6998	0	136.763	2110.87	1660.98	232.098	2115.85	1656.3	121.888	1954.86	1687.49	266.087	1968.65	1675.23	182.335	1914.89	1502.48	166.28	1874.81	1242.9	185.571	2069.2	1428.46	183.689	2171.5	1224.49	227.013	1864.84	1299.45	2.45086	2009.19	1474.03	-84.0663	2055.87	1257.13	-106.239	2079.81	1159.41	-118.761	2211.55	1038.39	-75.5881	2271.27	980.061	-137.195	2239.33	965.804	-124.044	2311.92	931.096
6999	0	136.44	2123.77	1661.86	231.881	2129.05	1657.34	122.268	1967.95	1689.38	266.891	1982.22	1677.4	182.928	1926.92	1504.18	167.489	1886.45	1244.27	185.417	2080.84	1429.86	183.259	2183.25	1225.91	227.807	1876.49	1300.91	2.41364	2020.2	1474.99	-83.4094	2065.14	1257.08	-104.784	2087.6	1158.76	-118.619	2215.08	1034.1	-75.2592	2272.32	972.909	-137.47	2240.15	960.504	-123.77	2310.98	921.841
7000	0	136.193	2136.5	1663.09	231.723	2141.96	1658.54	122.633	1980.8	1691.42	267.187	1995.45	1679.41	183.368	1938.62	1506.12	168.847	1897.94	1245.92	185.934	2092.84	1431.59	182.844	2195.26	1227.57	229.154	1888.28	1302.72	2.25492	2031.27	1476.21	-82.5689	2073.89	1256.74	-103.229	2094.47	1158.12	-117.85	2217.86	1029.93	-74.6517	2272.9	965.963	-137.428	2240.58	955.456	-122.985	2309.46	913.148
7001	0	135.736	2149.2	1664.31	231.447	2154.94	1659.9	124.258	1994.41	1693.64	267.127	2008.63	1681.43	183.767	1950.58	1508.2	170.193	1909.46	1247.82	185.751	2104.45	1433.34	182.151	2206.74	1229.14	230.201	1899.93	1304.84	1.993	2042.45	1477.1	-81.6111	2082.31	1256.33	-101.743	2100.9	1157.19	-116.725	2220.61	1026.04	-74.4155	2272.49	959.581	-137.342	2240.2	950.404	-122.809	2307.06	904.827
7002	0	135.634	2161.8	1665.72	231.254	2167.87	1661.34	123.995	2007.1	1695.72	267.434	2021.8	1683.78	183.83	1962.71	1510.15	171.47	1921.01	1249.96	185.818	2116.34	1435.1	181.522	2218.17	1230.6	231.791	1912.03	1306.97	1.75911	2053.87	1478.08	-80.9478	2089.61	1255.83	-100.356	2106.55	1156.05	-116.874	2221.43	1021.53	-73.8715	2271.68	953.238	-137.774	2239.08	945.779	-122.594	2304.1	897.272
7003	0	135.652	2174.36	1667.15	231.335	2180.64	1662.85	123.419	2019.13	1697.6	267.509	2034.59	1685.71	184.231	1974.85	1512.22	173.196	1933.07	1252	185.909	2128.13	1436.76	181.098	2229.64	1232.05	232.653	1923.46	1309.42	1.52004	2065.26	1478.97	-79.8402	2096.89	1255.08	-98.4664	2111.96	1155.35	-115.94	2222.48	1017.74	-73.5813	2270.48	947.428	-136.741	2237.77	941.41	-122.015	2300.38	889.684
7004	0	135.965	2186.72	1668.52	231.304	2192.89	1664.39	123.897	2031.9	1699.31	267.805	2047.25	1687.46	184.935	1987.14	1514.26	174.457	1944.86	1253.87	186.175	2140.21	1438.37	180.64	2241.02	1233.33	233.843	1935.13	1311.49	1.55089	2076.91	1479.9	-78.7184	2103.81	1254.49	-96.6007	2117.06	1154.31	-114.799	2222.93	1013.85	-72.7004	2268.87	941.874	-136.016	2235.69	937.076	-121.697	2296.42	883.024
7005	0	136.019	2199.28	1669.87	231.438	2205.19	1665.9	124.224	2044.74	1700.91	267.691	2059.48	1689.1	185.17	1999.3	1516.08	175.267	1956.65	1255.57	185.893	2152.02	1439.72	180.352	2252.28	1234.69	234.686	1946.98	1313.54	1.52565	2088.49	1480.81	-77.66	2110.43	1254.15	-94.5973	2121.64	1153.64	-113.878	2222.93	1010.21	-72.1841	2266.81	936.723	-135.294	2232.95	932.997	-121.337	2292	876.837
7006	0	136.308	2211.63	1671.23	231.674	2217.45	1667.39	124.121	2057.13	1702.39	267.831	2071.65	1690.83	185.45	2011.36	1517.76	176.169	1968.65	1257.35	185.849	2163.99	1441	180.316	2263.8	1236.08	235.399	1958.81	1315.31	1.25839	2100.02	1481.59	-76.4442	2116.86	1253.65	-92.8947	2125.74	1152.98	-112.547	2222.61	1006.67	-71.5631	2264.43	931.818	-134.228	2230	929.116	-120.822	2287.29	871.346
7007	0	136.536	2223.79	1672.65	232.176	2229.68	1668.91	123.979	2069.21	1703.51	267.964	2083.68	1692.25	185.861	2023.9	1519.22	176.634	1980.51	1258.66	186.192	2176.09	1442.3	180.497	2275.19	1237.39	236.548	1971.03	1317.09	1.42315	2111.95	1482.53	-75.22	2123.29	1253.16	-91.0253	2129.47	1152.3	-111.36	2221.7	1003.54	-70.3091	2261.97	927.623	-132.641	2226.58	925.697	-120.326	2282.2	866.232
7008	0	136.979	2236.09	1673.83	232.329	2241.55	1670.27	123.772	2081.27	1704.52	268.016	2095.65	1693.38	185.984	2035.74	1520.4	177.035	1992.35	1259.78	186.306	2188.02	1443.25	180.858	2286.81	1238.63	237.45	1983.08	1318.49	1.37102	2123.76	1483.26	-74.1358	2129.64	1252.75	-89.212	2133.05	1151.59	-109.966	2220.05	1000.37	-69.3146	2259.22	923.596	-131.03	2222.73	922.275	-119.687	2276.78	861.481
7009	0	137.121	2248.24	1674.84	232.8	2253.7	1671.37	124.021	2093.54	1705.14	267.751	2107.45	1694.29	186.089	2047.99	1521.44	177.47	2004.33	1260.98	186.727	2200.14	1444.13	181.21	2298.33	1239.64	238.231	1995.31	1319.67	1.31964	2135.65	1483.67	-72.9665	2135.91	1252.34	-87.3838	2136.47	1151.03	-108.505	2218.63	997.392	-68.5164	2255.93	919.482	-129.499	2218.67	919.239	-118.773	2271.29	857.053
7010	0	137.603	2260.54	1675.62	232.972	2265.79	1672.31	123.917	2105.62	1705.72	267.716	2119.48	1695.06	186.167	2060.22	1522.1	177.654	2016.27	1261.7	187.138	2212.39	1444.87	181.767	2310.2	1240.32	238.953	2007.5	1320.81	1.26782	2147.73	1484.01	-71.7095	2142.62	1252.29	-85.8446	2139.66	1150.63	-106.948	2217.14	994.852	-67.2836	2252.85	915.948	-127.217	2214.37	916.261	-117.602	2265.75	853.236
7011	0	137.469	2272.56	1676.18	233.064	2277.79	1673.08	123.52	2117.35	1705.79	268.022	2131.6	1695.42	186.542	2072.54	1522.58	178.356	2028.39	1262.29	187.632	2224.56	1445.1	182.532	2322.11	1240.69	239.913	2019.73	1321.33	1.34715	2160.05	1483.82	-70.6009	2149.05	1251.37	-83.7956	2143.16	1150.37	-105.406	2215.46	992.162	-65.88	2249.09	912.563	-125.185	2210.07	913.681	-116.301	2259.98	849.616
7012	0	137.664	2284.49	1676.26	233.195	2289.99	1673.45	124.385	2129.96	1705.75	267.997	2143.7	1695.69	186.864	2085.41	1522.74	178.498	2040.39	1262.52	187.755	2236.68	1444.8	183.249	2333.86	1240.45	240.507	2032.11	1321.69	1.61433	2172.45	1483.66	-69.1911	2155.77	1251.03	-82.0943	2146.64	1150.05	-103.772	2213.81	989.636	-64.4044	2246.12	909.48	-122.249	2205.67	910.94	-114.701	2253.84	845.941
7013	0	137.503	2296.75	1676.4	233.315	2302.48	1673.67	123.769	2141.69	1705.32	267.836	2155.93	1695.55	186.55	2097.38	1522.49	178.313	2052.2	1262.59	188.358	2249.03	1444.51	184.171	2345.84	1240.05	240.983	2044.27	1321.78	1.67543	2184.96	1482.95	-68.3812	2162.19	1250.63	-80.5259	2150.19	1149.78	-102.142	2212.21	987.39	-59.7599	2247.89	908.538	-120.251	2201.31	908.897	-112.761	2248.08	842.479
7014	0	137.908	2309.1	1676.23	233.261	2314.6	1673.65	123.982	2153.89	1704.93	268.055	2168.22	1695.38	186.88	2109.73	1522.4	178.605	2064.26	1262.49	188.95	2261.5	1443.86	185.016	2357.43	1238.97	241.285	2056.33	1321.81	1.78007	2197.46	1482.34	-67.4401	2169.04	1250.12	-78.9389	2153.85	1149.69	-100.459	2210.67	985.499	-58.3143	2244.87	905.872	-117.623	2197.22	906.727	-110.84	2242.14	839.25
7015	0	137.468	2321.6	1675.9	233.078	2326.9	1673.59	124.106	2166.29	1703.94	268.08	2180.53	1694.87	187.119	2122.39	1521.73	178.383	2076.24	1261.93	189.299	2273.86	1443.18	185.992	2368.96	1237.82	241.972	2068.43	1321.56	1.94795	2210.15	1481.23	-66.4237	2176.14	1249.54	-76.791	2158.16	1149.68	-99.0186	2209.27	983.538	-56.9317	2241.89	903.532	-114.614	2193.09	905.078	-108.595	2236.28	836.398
7016	0	137.535	2334	1675.18	232.975	2339.42	1673.24	123.866	2178.42	1702.83	267.716	2193.01	1694.26	187.459	2135.45	1521.09	177.987	2088.13	1261.42	189.737	2286.2	1442.27	186.973	2380.65	1236.43	242.118	2080.55	1321.08	2.01969	2222.98	1480.24	-65.6676	2183.1	1249.18	-75.17	2162.28	1149.66	-97.3775	2208.18	982.326	-58.5815	2233.98	899.653	-112.399	2189.31	903.843	-106.474	2230.53	833.803
7017	0	137.227	2346.53	1674.23	232.935	2352.13	1672.52	123.573	2190.85	1701.71	267.843	2205.68	1693.3	187.436	2148.4	1520.18	177.814	2100.13	1260.95	190.627	2298.8	1441.2	187.98	2392.49	1234.67	242.196	2092.44	1320.5	2.17503	2236.01	1479.23	-64.891	2190.41	1249.06	-73.2919	2167.09	1149.68	-96.0439	2207.32	981.362	-56.9514	2231.73	897.854	-110.145	2185.74	903.213	-104.236	2224.8	831.594
7018	0	137.463	2358.99	1673.14	232.877	2364.84	1671.44	123.945	2203.68	1700.38	268.253	2218.54	1692.35	187.44	2160.97	1519.19	177.045	2111.92	1259.97	190.832	2311.2	1439.73	188.943	2404.65	1232.74	242.138	2104.39	1319.85	2.13294	2249.09	1477.9	-64.2206	2198.31	1248.5	-71.2851	2172.23	1149.67	-94.3476	2206.88	980.691	-55.3649	2229.9	896.603	-107.765	2182.75	902.704	-101.837	2219.43	829.805
7019	0	137.247	2371.89	1671.73	232.999	2377.65	1670.11	123.686	2216.67	1699.06	267.904	2231.25	1691.06	187.21	2173.64	1517.96	176.293	2123.84	1259.07	190.826	2323.6	1438.05	189.811	2417.24	1230.79	241.799	2116.24	1318.74	2.50587	2262.68	1476.61	-63.8087	2206.28	1248.24	-69.3894	2177.81	1149.81	-92.6883	2206.98	979.871	-53.9913	2228.35	895.299	-105.427	2180.27	902.498	-99.5665	2214.35	828.192
7020	0	137.61	2384.97	1669.8	233.226	2390.61	1668.34	123.037	2229.42	1697.44	267.439	2244.13	1689.35	186.757	2186.32	1516.59	175.263	2135.79	1258.06	190.957	2336.15	1436.17	190.695	2429.87	1228.7	241.313	2128.34	1317.79	1.68427	2275.43	1474.53	-63.4821	2214.66	1247.51	-67.6998	2183.95	1149.86	-91.3086	2207.62	979.291	-52.9126	2227.31	894.008	-103.307	2178.42	902.752	-97.3213	2209.6	826.727
7021	0	137.7	2398.54	1667.78	233.365	2403.69	1666.1	122.945	2242.76	1695.97	267.175	2257.04	1687.63	186.621	2199.06	1515.12	174.459	2148.08	1256.83	190.907	2348.6	1434	191.507	2442.55	1226.35	240.872	2140.34	1316.46	2.09254	2289.16	1473.07	-62.7292	2223.72	1246.99	-65.689	2190.77	1150.09	-89.5607	2209.03	978.771	-49.2078	2225.64	892.049	-101.258	2176.94	903.323	-95.1573	2205.34	825.555
7022	0	138.054	2411.65	1665.4	233.593	2416.69	1663.56	122.996	2256.59	1694.53	267.157	2270.23	1685.68	186.309	2212.02	1513.73	173.702	2160.67	1255.27	190.775	2361.02	1431.67	192.219	2455.09	1223.91	240.395	2152.48	1314.93	1.68417	2302.38	1471.25	-61.804	2233.13	1246.51	-63.4662	2198.34	1149.95	-87.8759	2211.09	978.618	-47.8458	2225.45	891.28	-99.1611	2176.57	904.311	-92.7821	2201.93	825.157
7023	0	137.699	2425.23	1662.62	233.7	2429.6	1660.99	123.14	2270.35	1692.79	266.47	2283.3	1684.1	185.556	2224.77	1512.01	172.452	2173.05	1253.63	190.586	2373.51	1429.59	192.735	2467.41	1221.76	239.595	2164.7	1313.06	1.65451	2315.86	1469.49	-61.2477	2242.71	1245.52	-61.9047	2206.26	1149.89	-86.4643	2213.93	978.613	-46.0477	2225.77	890.705	-97.9009	2176.77	905.462	-90.7791	2199.09	824.612
7024	0	137.903	2438.64	1659.91	233.728	2442.67	1658.35	121.871	2283.58	1691.04	266.347	2296.27	1682.05	184.803	2237.39	1510.33	171.582	2185.34	1252.17	190.388	2386.04	1427.51	192.97	2479.62	1219.7	238.698	2176.86	1311.57	0.829958	2328.87	1467.52	-60.7623	2252.78	1244.53	-60.3524	2214.76	1149.68	-85.4295	2217.38	978.652	-46.1115	2227.41	890.866	-96.531	2178.23	906.749	-89.1864	2196.99	824.521
7025	0	137.821	2451.84	1657.35	233.759	2455.8	1655.8	121.762	2297.23	1688.74	265.442	2309.34	1680.03	184.034	2249.77	1508.14	170.857	2197.97	1250.42	190.312	2398.73	1425.52	193.343	2492.19	1217.82	237.823	2189.27	1309.45	0.595741	2342.13	1465.82	-60.1054	2263.27	1243.45	-59.0336	2223.69	1148.95	-84.5849	2221.69	978.583	-45.3257	2229.4	890.538	-95.5718	2180.47	907.711	-86.2139	2195.76	824.432
7026	0	137.707	2465.29	1655.03	233.811	2468.73	1653.33	121.474	2311.11	1687.02	265.048	2322.43	1678.37	183.231	2262.46	1506.38	169.295	2210.81	1248.05	190.047	2411.43	1423.67	193.46	2504.78	1216.22	236.779	2201.76	1307.39	-0.293604	2354.98	1463.87	-59.5829	2274.15	1242.36	-57.6617	2233.39	1148.18	-83.9463	2226.91	978.667	-44.0281	2232.22	890.218	-94.8667	2184.13	908.627	-84.7042	2195.65	824.668
7027	0	137.609	2478.88	1652.56	233.536	2481.74	1650.97	120.876	2324.89	1685.19	264.472	2335.48	1676.7	182.291	2275.25	1504.4	168.43	2223.75	1246.02	189.602	2424.25	1421.88	193.359	2517.41	1214.71	235.464	2214.8	1305.1	-1.03364	2368.04	1461.96	-59.3469	2285.31	1240.67	-56.8195	2243.56	1147.4	-83.1284	2233.29	978.341	-43.1393	2236.09	889.858	-94.5811	2188.75	909.648	-83.0277	2196.92	825.196
7028	0	137.003	2492.06	1650.28	233.045	2494.91	1648.7	119.759	2338.29	1683.43	263.339	2348.33	1674.96	181.231	2288.04	1502.56	167.571	2236.68	1244.01	188.709	2436.97	1419.9	193.043	2530.12	1213.11	234.598	2227.17	1303.12	-1.77018	2380.92	1459.71	-59.3862	2296.71	1238.92	-56.0918	2253.93	1146.48	-83.2893	2240.26	978.076	-42.9309	2241	889.264	-94.4231	2194.72	910.205	-82.0611	2199.14	825.059
7029	0	136.198	2505.2	1648.15	232.462	2507.89	1646.69	118.382	2351.52	1681.5	262.244	2361.39	1673.28	180.58	2301.33	1500.63	167.179	2249.73	1242.01	187.997	2449.83	1418.03	192.578	2542.69	1211.4	233.828	2240.08	1301.09	-2.48902	2394.07	1457.67	-59.2226	2308.45	1237.14	-55.4729	2264.81	1145.14	-83.3139	2248.19	977.394	-43.052	2247.12	888.695	-95.0701	2201.39	910.815	-81.1692	2202.89	825.058
7030	0	135.119	2518.46	1646.16	231.327	2520.69	1645.03	116.951	2364.71	1679.6	260.78	2374.34	1671.86	179.644	2314.31	1498.83	166.676	2262.66	1240.13	187.262	2462.89	1416.23	191.753	2555.22	1209.67	233.068	2253.09	1299.34	-3.44654	2406.86	1455.41	-59.3228	2320.55	1235.17	-55.2973	2276.1	1143.62	-83.8954	2257.09	976.657	-43.5429	2254.24	888.098	-96.033	2209.37	910.832	-81.1514	2207.91	825.409
7031	0	133.865	2531.47	1644.41	230.073	2533.73	1643.59	115.409	2377.88	1677.88	259.475	2387.39	1670.26	178.662	2327.27	1497.3	166.568	2275.71	1238.74	186.287	2475.95	1414.5	190.807	2568.09	1208	232.618	2266.19	1298.04	-4.41023	2419.55	1453.31	-59.7197	2332.52	1233.26	-55.4649	2287.78	1142.16	-84.7698	2266.75	975.712	-44.5055	2262.3	887.297	-97.3841	2218.46	910.856	-81.4533	2214.28	824.87
7032	0	132.585	2544.46	1643.07	228.639	2546.61	1642.5	113.288	2390.66	1676.24	257.43	2400.02	1669.14	177.9	2340.29	1496.11	166.481	2288.84	1237.29	185.277	2489.06	1413.1	189.569	2581.5	1206.62	232.312	2279.27	1296.82	-5.37165	2432.15	1451.55	-60.1856	2344.96	1231.58	-55.7761	2299.66	1140.61	-85.5682	2277.52	974.716	-45.6032	2271.7	886.329	-98.9086	2228.51	910.332	-82.1692	2222.36	824.484
7033	0	131.203	2557.61	1641.93	227.166	2559.55	1641.71	111.81	2403.73	1674.96	255.794	2413.06	1668.62	177.141	2353.33	1494.97	166.633	2302.23	1235.94	184.139	2502.11	1411.99	188.105	2594.9	1205.61	231.995	2292.44	1295.69	-6.32885	2444.63	1450.03	-60.4834	2357.29	1229.85	-56.4309	2311.97	1139.1	-87.0617	2288.81	973.721	-46.8856	2282.25	885.232	-100.242	2239.55	909.972	-83.6011	2232	824.572
7034	0	129.213	2570.3	1640.95	225.503	2572.39	1641.39	111.434	2418.22	1674.17	253.91	2425.66	1668.28	176.151	2366.27	1494.25	166.75	2315.68	1234.84	183.038	2515.23	1411.36	186.46	2608.41	1205.16	231.96	2305.7	1294.92	-7.4989	2457.06	1448.96	-61.1964	2369.93	1228.52	-57.0784	2324.9	1137.84	-88.7114	2300.99	972.76	-48.3934	2294.29	884.18	-102.243	2251.51	909.319	-85.5055	2243.2	823.691
7035	0	127.551	2583.01	1640.45	223.966	2585.17	1641.4	108.083	2430.02	1673.48	251.826	2438.3	1668.5	175.066	2379.14	1493.79	166.979	2329.28	1234.23	181.845	2528.46	1411.36	184.612	2622.27	1204.92	231.695	2319.44	1294.27	-8.75503	2469.29	1448.11	-62.3268	2382.87	1227.27	-58.3209	2337.98	1136.73	-90.4538	2314.12	971.995	-50.5494	2307.4	883.231	-104.148	2264.52	908.63	-88.1488	2255.98	823.011
7036	0	125.951	2595.96	1640.62	222.355	2597.75	1641.84	107.211	2444.12	1673.42	249.202	2450.48	1669.05	173.747	2391.75	1493.63	167.01	2343.02	1233.58	180.622	2541.58	1411.53	182.897	2636.05	1205.23	231.395	2332.61	1293.94	-10.0145	2481.64	1447.78	-63.283	2396.21	1226.48	-59.6562	2351.36	1135.67	-92.4427	2327.95	971.383	-52.8966	2321.7	882.028	-106.219	2278.44	907.663	-90.9838	2270.59	822.041
7037	0	124.444	2609.13	1641.14	220.636	2610.4	1642.72	105.192	2457.07	1673.64	247.363	2463.18	1669.86	172.642	2404.82	1493.87	166.986	2356.79	1233.53	179.266	2554.64	1412.37	181.243	2650.19	1206	230.847	2346.08	1294.03	-11.3243	2494.04	1447.6	-64.8189	2409.73	1226.08	-60.7973	2365.64	1135.14	-94.7041	2342.67	970.928	-56.0312	2337.36	881.086	-107.885	2293.81	906.932	-94.1107	2286.9	821.395
7038	0	122.601	2621.47	1641.74	219.015	2622.96	1643.93	102.884	2469.81	1674.12	245.401	2475.76	1671.09	171.416	2417.8	1494.4	166.405	2370.54	1233.82	178.096	2567.92	1413.43	179.796	2664.32	1207.28	229.976	2359.51	1294.49	-12.2464	2506.88	1447.92	-65.9324	2423.53	1226.12	-62.471	2380.01	1134.84	-96.494	2358.29	970.205	-58.8235	2354.15	880.488	-110.048	2309.87	906.086	-97.6427	2304.56	820.184
7039	0	121.113	2634.23	1642.93	217.465	2635.54	1645.47	100.906	2482.67	1675.01	243.41	2488.16	1672.45	170.359	2430.73	1495.43	165.447	2384.21	1234.58	177.026	2581.02	1414.6	178.817	2678.34	1208.64	229.051	2373.01	1295.15	-13.4459	2519.42	1448.36	-67.3763	2437.59	1226.16	-64.2589	2394.71	1134.68	-98.2406	2374.88	969.495	-61.3948	2371.86	879.938	-112.137	2327.01	905.25	-100.937	2324.01	819.373
7040	0	119.638	2647.08	1644.73	215.858	2648.24	1647.57	99.1207	2495.5	1676.18	241.657	2500.67	1674.28	169.492	2443.83	1496.72	164.258	2397.73	1235.79	176.007	2594.04	1416.19	178.349	2692.2	1210.35	227.816	2386.74	1296.22	-14.3606	2532.24	1449.29	-68.4688	2452.24	1226.71	-66.0095	2410.09	1134.8	-100.343	2392.33	969.306	-63.6979	2391.01	879.459	-114.356	2345.43	904.285	-104.639	2344.8	818.598
7041	0	118.144	2659.58	1646.56	214.34	2660.76	1649.87	97.2858	2508.08	1677.64	239.96	2513.13	1676.36	168.669	2456.82	1498.45	162.724	2411	1237.4	174.949	2606.96	1418.1	177.889	2705.5	1212.21	226.967	2399.89	1297.91	-14.9763	2545.14	1450.89	-69.854	2466.95	1227.33	-68.0034	2425.93	1134.94	-102.687	2410.63	969.275	-65.6104	2411.04	879.22	-116.811	2364.69	903.446	-108.321	2366.77	817.931
7042	0	116.675	2671.95	1648.32	212.991	2673.22	1651.99	95.6194	2520.51	1678.91	238.443	2525.59	1678.19	168.016	2469.71	1500.17	161.273	2424.07	1239.25	174.058	2619.63	1419.91	177.56	2718.26	1214.05	226.03	2413.1	1299.7	-15.8183	2557.58	1452.41	-71.7557	2481.72	1228.44	-70.226	2441.99	1135.48	-105.011	2429.84	969.358	-67.9653	2431.87	879.223	-119.326	2385.07	902.698	-112	2390.15	817.744
7043	0	115.55	2684.45	1649.98	211.222	2685.49	1653.98	94.404	2532.83	1680	237.099	2537.96	1680.04	167.428	2482.41	1501.81	160.049	2437.02	1240.58	173.383	2632.28	1421.58	177.216	2730.71	1215.83	225.479	2426.54	1301.45	-16.2548	2570.25	1454.33	-73.06	2497.15	1229.4	-72.3666	2458.34	1136.08	-107.363	2449.76	969.615	-70.9682	2453.92	879.422	-121.526	2406.5	901.771	-115.667	2414.61	817.371
7044	0	114.494	2696.76	1651.55	210.398	2698	1655.58	93.5393	2545.16	1681.3	236.03	2550.1	1681.6	166.951	2494.9	1503.36	159.218	2449.79	1242.22	172.816	2644.81	1423.18	176.976	2743.15	1217.7	225.268	2439.04	1302.94	-16.5306	2583.03	1456.31	-74.3352	2512.78	1230.6	-74.3537	2475.02	1136.59	-109.444	2470.39	969.953	-74.4608	2476.96	879.899	-124.055	2428.84	901.218	-119.185	2440.09	816.989
7045	0	113.488	2708.73	1652.78	209.547	2710.26	1657.12	92.3828	2557.38	1682.93	234.705	2562.28	1683.3	166.07	2506.99	1504.82	158.31	2462.15	1243.57	172.339	2657.16	1424.73	176.707	2755.48	1219.55	225.006	2451.41	1304.57	-17.2511	2595.42	1457.94	-75.6444	2528.43	1231.91	-76.9094	2491.75	1137.25	-111.947	2491.52	970.213	-77.484	2500.68	880.254	-126.335	2451.91	900.377	-123.239	2466.47	817.267
7046	0	112.944	2720.83	1654.11	208.865	2722.2	1658.54	91.6088	2569.53	1684.39	234.326	2574.21	1684.93	165.219	2519.05	1506.12	157.483	2474.33	1244.8	171.868	2669.24	1426.19	176.548	2767.86	1221.39	224.487	2463.58	1306.09	-17.7456	2608.03	1459.57	-76.7791	2544.47	1232.97	-79.3479	2508.85	1137.88	-114.035	2513.4	970.343	-78.7578	2524.47	880.533	-128.607	2475.87	899.125	-126.425	2493.48	817.308
7047	0	112.456	2733.05	1655.55	208.518	2734.24	1659.85	91.1229	2581.86	1685.9	233.45	2586.74	1686.19	164.337	2530.77	1507.48	156.905	2486.45	1245.86	171.674	2681.18	1427.62	176.407	2779.83	1222.87	223.807	2475.4	1307.33	-17.9005	2621.02	1461.4	-78.327	2560.23	1233.99	-81.6958	2526.22	1138.23	-116.115	2535.66	970.513	-80.4503	2549.13	881.124	-131.005	2499.95	898.388	-129.42	2521.32	817.527
7048	0	112.381	2745.16	1656.87	208.352	2746.22	1661	90.8125	2594.07	1687.47	233.215	2598.56	1687.56	163.552	2542.7	1508.68	156.149	2498.57	1247.12	171.337	2692.88	1428.97	176.22	2791.67	1224.11	222.687	2487.16	1308.37	-18.4596	2633.67	1462.93	-79.9601	2576.26	1234.75	-84.477	2543.52	1138.33	-117.801	2558.6	970.736	-84.1311	2578.87	882.944	-132.939	2525.13	897.322	-132.23	2549.71	818.059
7049	0	112.447	2757.35	1658	208.055	2758.09	1662.08	90.3644	2606.37	1689.09	232.967	2610.52	1688.74	162.537	2554.47	1510.07	155.165	2510.64	1248.38	171.206	2704.91	1430.35	176.058	2803.36	1225.22	221.296	2498.91	1309.49	-18.9354	2646.17	1464.04	-81.5184	2592.39	1235.64	-86.923	2561.44	1138.71	-119.818	2581.57	970.796	-82.5954	2599.69	882.367	-135.259	2550.53	896.426	-134.721	2578.61	818.574
7050	0	112.582	2769.37	1659.41	208.552	2770.07	1663.15	90.209	2618.41	1690.68	232.298	2622.17	1689.92	161.927	2566.29	1511.36	153.886	2522.74	1249.71	171.047	2716.67	1431.72	176.133	2815.06	1226.26	219.571	2510.61	1310.5	-19.1385	2658.97	1465.49	-82.8767	2608.78	1236.5	-89.6162	2579.11	1138.98	-121.806	2605.08	971.236	-86.3025	2630.86	885.167	-137.118	2576.45	896.079	-136.925	2608.08	819.92
7051	0	112.748	2781.27	1660.91	208.688	2781.76	1664.53	90.1773	2630.52	1692.26	232.436	2633.79	1691.19	161.314	2578.14	1512.76	152.683	2535	1250.99	170.75	2728.33	1433.17	176.365	2826.87	1227.36	218.104	2522.19	1311.63	-19.1337	2671.69	1466.96	-84.6001	2625.22	1237.35	-91.6628	2597.61	1139.65	-123.405	2628.7	972.265	-87.5707	2657.79	887.146	-139.317	2602.47	896.148	-139.105	2637.76	821.613
7052	0	113.081	2793.17	1662.39	209.021	2793.44	1666.02	89.9568	2642.4	1693.86	232.733	2645.65	1692.67	160.819	2589.94	1514.19	151.525	2547.06	1252.45	170.807	2740.13	1434.54	176.794	2838.77	1228.66	216.532	2533.77	1312.76	-19.3685	2684.2	1468.31	-85.7225	2641.77	1238.72	-94.1409	2615.49	1140.08	-125.289	2652.55	973.323	-90.4132	2679.84	888.322	-140.864	2629.34	896.149	-140.949	2667.68	823.764
7053	0	113.328	2805.2	1664.12	209.414	2805.18	1667.63	90.0222	2654.34	1695.41	232.469	2656.98	1693.95	160.401	2601.78	1515.85	150.296	2558.85	1254.08	170.797	2751.78	1435.87	177.332	2850.66	1229.91	215.189	2545.24	1314.28	-19.5321	2696.74	1469.9	-87.5643	2657.91	1239.74	-96.984	2633.47	1140.61	-127.146	2676.52	974.872	-92.8461	2705.96	891.096	-142.608	2656.15	896.585	-142.586	2697.86	826.631
7054	0	113.653	2817.03	1666.05	209.89	2817	1669.23	90.0363	2666.37	1696.95	232.532	2668.82	1695.64	160.244	2613.67	1517.41	149.165	2570.35	1255.82	170.735	2763.28	1437.34	177.782	2862.44	1231.32	213.636	2556.85	1315.69	-19.5371	2709.25	1471.69	-88.5604	2674.58	1241.59	-99.1203	2651.99	1141.29	-128.632	2700.78	976.886	-94.4744	2732.69	894.43	-143.775	2683.68	897.973	-144.156	2727.98	830.07
7055	0	114.156	2828.95	1667.87	210.313	2828.89	1670.91	90.4176	2678.35	1698.2	232.72	2680.42	1696.72	159.964	2625.69	1518.88	148.157	2581.9	1257.24	170.622	2774.84	1438.83	177.976	2874.22	1232.76	212.359	2568.22	1317.1	-19.5811	2721.64	1473.57	-89.7197	2691.03	1243.45	-101.152	2670.58	1142.2	-130.071	2725.03	979.717	-95.7974	2759.9	898.793	-145.169	2710.73	899.615	-145.466	2758.18	834.367
7056	0	114.568	2840.99	1669.31	210.769	2840.63	1672.16	90.6819	2690.42	1699.73	232.9	2692.1	1698.03	159.74	2637.62	1520.44	147.072	2593.23	1258.97	170.646	2786.51	1440.06	178.094	2886.07	1234.2	211.384	2579.62	1318.56	-19.6541	2733.88	1475.36	-91.0008	2707.25	1245.19	-103.254	2689.02	1143.46	-131.378	2749.44	982.353	-96.3921	2787.05	902.983	-146.341	2737.97	902.058	-146.587	2788.34	839.049
7057	0	115.101	2853.04	1670.66	211.224	2852.4	1673.1	90.8717	2702.45	1701.25	233.769	2703.93	1698.83	159.298	2649.42	1521.88	146.155	2604.76	1260.43	170.659	2798.07	1440.94	178.251	2897.7	1235.22	210.686	2591.18	1319.87	-19.6	2746.11	1477.06	-92.2121	2723.34	1246.89	-104.984	2707.91	1144.84	-132.513	2773.93	985.424	-93.4669	2820.42	909.23	-147.6	2765.16	904.681	-147.424	2818.38	844.088
7058	0	115.656	2864.99	1671.64	211.844	2864.3	1673.81	91.2387	2714.56	1702.69	233.682	2715.84	1699.56	159.35	2661.38	1522.98	145.408	2616.19	1261.82	170.477	2809.76	1441.81	178.229	2909.25	1236.17	210.017	2602.87	1321.24	-19.4336	2758.32	1478.72	-93.0666	2739.68	1248.61	-106.797	2726.52	1146.36	-133.275	2798.5	988.838	-98.2557	2841.21	912.782	-148.476	2792.66	908.094	-148.197	2848.27	849.604
7059	0	116.106	2877.01	1672.12	212.41	2876.1	1674.33	91.6909	2726.77	1703.75	233.667	2727.4	1700.02	159.185	2673.14	1524.02	144.819	2627.74	1262.78	170.441	2821.6	1442.57	178.022	2920.91	1237.15	209.351	2614.47	1322.11	-19.4272	2770.44	1480.1	-94.0485	2755.74	1250.21	-108.249	2745.48	1147.88	-134.099	2822.96	992.466	-95.016	2874.59	920.353	-149.749	2819.82	912.166	-148.602	2877.83	855.434
7060	0	116.826	2889.17	1673.04	212.776	2888.11	1674.8	91.6398	2738.88	1704.89	233.966	2739.42	1700.52	158.847	2684.97	1524.88	144.447	2639.33	1263.84	170.162	2833.3	1443.08	177.481	2932	1237.94	208.663	2626	1323.14	-19.4109	2782.43	1481.55	-94.9633	2771.55	1251.81	-110.141	2763.87	1149.44	-134.643	2847.52	996.665	-98.8596	2895.19	924.086	-149.967	2847.34	916.387	-148.959	2907.26	861.698
7061	0	117.275	2901.27	1673.71	213.517	2900.05	1674.93	92.1208	2751.18	1705.62	234.034	2751.26	1700.99	158.776	2696.88	1525.45	144.079	2650.87	1264.5	169.616	2844.94	1443.59	177.053	2943.27	1238.5	208.222	2638.04	1323.63	-19.4057	2794.32	1482.86	-95.712	2787.42	1253.63	-111.547	2782.69	1151.44	-135.337	2871.82	1001.13	-99.2822	2922.06	930.363	-150.472	2874.63	920.963	-149.178	2936.37	868.461
7062	0	117.638	2913.32	1674.36	213.937	2912.06	1675.12	92.5526	2763.33	1706.17	234.563	2763.12	1701.14	158.743	2708.62	1525.85	143.817	2662.52	1264.94	169.385	2856.72	1443.96	176.363	2954.22	1239.15	207.734	2649.66	1323.89	-19.5605	2806.08	1484.07	-96.5331	2803.23	1255.26	-112.578	2801.23	1152.79	-136.059	2895.67	1005.63	-99.4265	2948.36	937.041	-150.99	2901.66	925.421	-149.114	2965.24	875.732
7063	0	117.912	2925.41	1674.57	214.299	2924.12	1675.14	92.4274	2775.51	1706.65	234.576	2774.87	1701.29	158.402	2720.61	1526.09	143.373	2673.96	1265.27	168.978	2868.63	1444.33	175.791	2965.37	1239.59	207.14	2661.4	1324.07	-19.7094	2817.88	1484.89	-97.3083	2819.02	1256.67	-114.368	2819.38	1154.32	-136.414	2919.44	1010.15	-99.4073	2974.35	943.833	-151.22	2928.45	930.348	-148.899	2993.89	883.012
7064	0	118.055	2937.37	1674.64	214.432	2936.21	1675.11	92.3729	2787.62	1706.67	234.691	2786.79	1701.14	158.139	2732.53	1526.03	142.758	2685.47	1265.38	168.589	2880.44	1444.15	174.962	2976.43	1239.58	206.646	2673.19	1324.11	-19.9755	2829.67	1485.37	-98.4428	2834.42	1257.43	-116.207	2837.04	1154.76	-137.037	2942.91	1014.85	-99.3552	2999.89	950.516	-152.081	2954.62	935.394	-148.618	3021.88	890.432
7065	0	118.12	2949.71	1674.64	214.007	2947.66	1674.82	92.663	2799.68	1706.42	234.678	2798.9	1700.7	158.134	2744.6	1525.85	142.602	2696.97	1265.31	168.227	2892.37	1443.9	174.496	2987.83	1239.16	206.404	2685.27	1324.05	-20.0773	2841.51	1485.42	-98.9695	2849.99	1258.43	-116.444	2855.67	1156.84	-137.334	2966.14	1019.19	-99.0302	3025.11	957.272	-151.923	2981.21	940.612	-147.966	3049.89	898.058
7066	0	118.101	2961.84	1674.1	214.305	2960.28	1674.26	92.4894	2811.85	1706.02	234.749	2811	1700.01	158.158	2756.84	1525.37	142.577	2708.48	1265.04	167.913	2904.49	1443.22	173.975	2999.1	1238.33	206.26	2696.91	1323.65	-19.992	2853.61	1485.18	-99.7867	2865.31	1258.81	-118.522	2873.11	1157.49	-137.293	2989.13	1023.6	-98.1535	3050.06	963.985	-151.291	3007.15	945.529	-147.067	3077.24	905.648
7067	0	118.213	2974.25	1673.53	214.329	2972.64	1673.49	92.2876	2824.1	1705.28	234.841	2823.17	1698.95	158.348	2769.15	1524.87	142.698	2719.93	1264.53	167.709	2916.83	1442.23	173.292	3010.37	1237.05	206.073	2708.99	1323.11	-19.9299	2865.48	1484.5	-100.615	2880.45	1259.18	-119.878	2890.83	1158.69	-137.351	3011.59	1027.62	-97.5226	3074.26	970.534	-151.268	3032.52	950.723	-146.217	3103.96	913.236
7068	0	117.863	2986.43	1672.77	213.945	2984.86	1673.07	92.2608	2836.24	1704.08	234.529	2835.69	1698.06	158.394	2781.46	1524.07	143.433	2731.51	1264.16	167.516	2928.97	1441.2	172.496	3021.52	1235.64	206.017	2721.63	1322.4	-19.6776	2877.74	1483.87	-101.371	2895.62	1259.41	-120.331	2908.06	1158.86	-137.47	3033.78	1032.1	-94.8881	3099.98	978.396	-151.915	3057.34	956.535	-145.093	3130.25	921.313
7069	0	117.573	2998.68	1671.99	213.811	2997.29	1672.12	92.3519	2848.36	1702.97	234.155	2848.02	1696.85	158.748	2793.99	1523.22	144.411	2743.32	1263.2	167.548	2941.28	1440.14	171.972	3033.2	1234.15	206.529	2733.76	1321.69	-19.5181	2889.74	1483.08	-101.845	2910.56	1259.65	-121.358	2925.45	1159.16	-137.483	3055.35	1036.4	-94.3739	3122.76	984.949	-151.577	3081.76	962.085	-144.103	3155.8	929.332
7070	0	117.273	3011.01	1671.12	214.087	3010.21	1671.5	92.1869	2860.59	1701.78	234.546	2860.31	1695.83	159.021	2806.32	1522.09	145.167	2754.91	1262.35	167.462	2953.45	1439	171.306	3045.01	1232.58	207.052	2745.45	1320.9	-19.3448	2901.86	1482.3	-102.58	2925.23	1259.83	-122.373	2942.45	1159.41	-138.056	3076.5	1040.85	-95.3379	3143.5	990.633	-151.594	3105.42	967.263	-143.223	3180.68	937.406
7071	0	117.194	3023.22	1670.12	213.942	3022.7	1670.8	91.9322	2872.84	1700.11	233.939	2872.64	1694.67	159.391	2818.76	1520.84	145.542	2766.58	1261.07	167.399	2965.78	1437.67	170.681	3057.3	1231.01	207.644	2757.81	1320	-18.993	2914.07	1481.09	-103.651	2939.58	1259.41	-123.289	2959.68	1159.87	-137.617	3097.14	1045.08	-94.6085	3165.33	997.047	-151.065	3128.47	972.407	-142.109	3204.67	945.383
7072	0	117.076	3035.48	1668.7	213.627	3035.05	1669.36	91.9911	2885.12	1698.64	234.719	2885.81	1693.42	159.83	2831.2	1519.86	147.036	2778.62	1260.29	167.397	2978.09	1436.1	170.188	3070.07	1229.47	208.428	2770.03	1318.86	-18.5105	2926.29	1479.82	-103.597	2954.24	1259.23	-124.141	2976.69	1160.25	-137.693	3117.27	1049.29	-93.6591	3186.6	1003.37	-152.337	3150.89	978.039	-141.152	3227.88	953.165
7073	0	116.993	3047.81	1667.25	213.761	3047.59	1667.95	92.0556	2897.35	1696.68	234.69	2897.48	1691.93	160.356	2843.58	1518.42	148.399	2790.74	1258.66	167.527	2990.54	1434.39	169.757	3082.97	1227.81	209.415	2782.35	1317.62	-17.9612	2938.44	1478.36	-103.727	2968.62	1258.87	-124.799	2993.11	1160.11	-137.52	3137.01	1052.78	-93.121	3207.05	1009.01	-149.49	3172.77	982.179	-140.275	3250.48	960.703
7074	0	116.941	3060.25	1665.51	213.777	3059.99	1666.56	88.8552	2907.01	1695.27	234.499	2909.77	1690.25	160.823	2856	1516.66	149.594	2802.91	1257.51	167.743	3002.95	1432.67	169.486	3095.82	1225.99	210.52	2794.74	1316.27	-17.391	2950.53	1476.65	-103.915	2983.23	1258.27	-125.463	3009.4	1160.02	-136.905	3156.08	1056.37	-92.6344	3226.7	1014.37	-151.138	3193.56	987.539	-139.761	3272.01	967.738
7075	0	117.282	3072.58	1663.65	213.843	3072.4	1664.73	89.2107	2919.23	1693.46	234.735	2922.81	1688.34	161.424	2868.17	1515.17	150.69	2815.15	1255.76	168.044	3015.38	1430.83	169.307	3108.33	1223.84	211.583	2807.14	1314.98	-16.8687	2962.73	1474.95	-103.913	2997.69	1257.73	-125.789	3025.94	1160.47	-136.725	3174.59	1059.6	-92.1447	3246.04	1019.24	-151.367	3213.53	991.711	-139.786	3292.63	974.094
7076	0	117.401	3085.01	1661.74	214.019	3084.73	1662.89	90.4139	2932.03	1691.37	234.973	2935.27	1686.75	162.432	2880.63	1513.66	152.347	2827.72	1253.99	168.427	3027.8	1429.08	169.136	3120.61	1221.71	212.979	2819.52	1313.27	-16.062	2974.76	1473.27	-103.835	3012.11	1256.99	-126.079	3041.47	1160.33	-136.54	3192.57	1062.54	-91.7882	3264.53	1023.63	-150.524	3233.04	995.478	-139.253	3312.47	980.139
7077	0	117.744	3097.23	1659.66	214.37	3097.14	1661.18	91.1223	2944.33	1689.52	235.5	2947.44	1685	163.17	2892.78	1511.45	153.575	2840.32	1252.15	168.938	3040.21	1427.46	169.118	3132.98	1219.96	213.903	2832.2	1311.33	-15.4939	2986.7	1471.53	-103.579	3026.31	1256.1	-125.987	3056.92	1159.85	-136.764	3209.95	1065.05	-92.0217	3282.3	1027.47	-150.852	3251.49	998.896	-139.241	3331.39	985.746
7078	0	118.308	3109.4	1657.86	215.099	3109.58	1659.57	91.6226	2956.48	1687.86	236.165	2959.52	1683.31	164.029	2905.04	1509.67	154.779	2853.19	1250.03	169.61	3052.64	1425.93	169.497	3145.63	1218.43	215.057	2844.82	1309.44	-14.4419	2998.62	1470.14	-103.023	3040.43	1255.67	-126.009	3072.32	1160.03	-136.524	3226.45	1067.33	-91.9703	3299.56	1031.09	-150.798	3269.16	1002.03	-139.474	3349.26	990.55
7079	0	118.911	3121.39	1656.16	215.786	3121.86	1657.91	91.9641	2968.2	1686.25	236.981	2971.93	1681.63	165.044	2917.09	1507.9	156.115	2866.01	1248.1	170.358	3065.07	1424.47	170.035	3158.35	1217.18	216.42	2857.29	1307.5	-13.4542	3010.53	1468.9	-102.191	3054.55	1255.19	-126.031	3087	1159.9	-136.314	3242.67	1069.4	-91.9874	3316.04	1034.3	-150.746	3285.99	1004.69	-139.933	3366.48	994.903
7080	0	119.812	3133.51	1654.83	216.49	3134.01	1656.28	93.4985	2980.45	1684.3	239.111	2984.71	1680.32	165.774	2928.94	1506.22	157.194	2879.03	1245.84	171.37	3077.64	1423.06	170.774	3171.31	1216.06	217.596	2869.98	1305.56	-12.7129	3022.44	1467.57	-101.7	3068.31	1254.54	-125.607	3101.16	1159.31	-136.236	3257.99	1071.2	-92.0324	3331.89	1037.08	-150.423	3302.28	1007.06	-140.205	3382.99	998.754
7081	0	120.632	3145.42	1653.19	217.502	3146.24	1654.67	94.7969	2992.38	1682.31	239.798	2997.06	1678.55	167.093	2941.56	1504.13	157.605	2891.69	1244.65	172.368	3090.25	1421.74	171.579	3184.29	1214.99	218.941	2883.02	1303.69	-11.4756	3034.6	1466.32	-101.096	3081.8	1253.95	-124.985	3115.38	1158.99	-136.101	3272.59	1072.35	-92.1339	3347.13	1039.31	-151.297	3317.64	1008.76	-140.687	3398.38	1001.6
7082	0	121.499	3157.23	1651.72	218.322	3157.99	1653.18	96.0563	3004.16	1680.96	241.753	3009.03	1676.5	168.559	2953.87	1502.51	158.729	2905.03	1242.33	173.438	3102.96	1420.33	172.51	3197.23	1213.76	220.131	2895.83	1301.75	-10.2685	3046.9	1465.09	-100.293	3095.2	1253.04	-124.65	3128.57	1158.43	-135.722	3286.78	1073.11	-92.3735	3361.76	1040.86	-152.216	3332.49	1010.43	-141.463	3413.15	1003.84
7083	0	123.058	3169.36	1650.56	219.489	3169.95	1651.73	97.7451	3015.81	1679.52	243.244	3021.65	1675.13	169.9	2966.35	1500.68	159.666	2918.02	1240.42	174.628	3115.67	1418.98	173.639	3210.18	1212.48	220.668	2908.07	1300.02	-9.00811	3059.43	1463.93	-99.2757	3108.18	1252.1	-122.031	3143.67	1158.51	-135.657	3300.29	1073.55	-92.7356	3375.63	1041.65	-148.325	3346.42	1009.37	-142.018	3426.88	1005
7084	0	124.327	3181.12	1649.47	221.04	3182.21	1650.48	99.5634	3027.68	1678.41	244.367	3033.47	1673.06	171.21	2978.58	1499.36	160.375	2931.25	1239.13	175.948	3128.46	1417.71	174.926	3223.21	1211.32	222.018	2921.54	1298.22	-7.49356	3072.3	1463.05	-98.0845	3121.19	1251.24	-122.979	3154.47	1157.04	-135.659	3313.2	1073.33	-92.9469	3389.04	1041.93	-152.026	3359.42	1011.09	-142.507	3440.25	1005.37
7085	0	125.962	3192.97	1648.86	222.882	3194.47	1649.83	101.258	3039.21	1676.93	246.686	3045.47	1671.97	172.624	2990.94	1497.78	161.351	2944.71	1237.23	177.462	3141.48	1416.85	176.628	3236.65	1210.7	222.855	2934.43	1296.7	-6.41614	3084.72	1461.8	-96.9068	3133.73	1250.45	-121.47	3167.33	1156.64	-135.872	3325.69	1072.52	-93.3962	3401.7	1041.44	-150.293	3371.76	1009.23	-143.173	3452.52	1004.95
7086	0	128.143	3204.76	1648.71	224.473	3206.63	1649.47	103.136	3050.86	1676.39	248.414	3057.54	1671.12	174.098	3003.22	1496.74	161.875	2958.08	1236.39	178.998	3154.35	1416.4	178.249	3250.18	1210.33	223.641	2947.39	1295.41	-4.74469	3097.57	1461.59	-95.7954	3145.86	1249.92	-119.337	3180.27	1156.47	-135.89	3337.24	1071.37	-94.0957	3413.55	1040.35	-150.481	3383.33	1007.85	-144.178	3463.94	1003.72
7087	0	129.279	3216.64	1648.99	226.395	3218.88	1649.61	105.239	3062.64	1675.59	250.106	3069.3	1670.08	175.454	3015.62	1496.33	162.723	2972.03	1235.18	180.589	3167.18	1416.18	179.941	3263.82	1210.54	224.465	2960.8	1294.4	-3.44743	3110.56	1461.22	-95.3806	3157.57	1249.11	-118.959	3191.07	1155.33	-135.839	3348.47	1069.83	-94.6279	3424.86	1038.66	-150.402	3393.8	1005.75	-145.096	3474.71	1001.51
7088	0	131.187	3228.37	1649.33	228.311	3230.94	1650	108.061	3074.55	1675.36	252.557	3081.4	1669.91	177.075	3028.21	1495.58	163.19	2985.78	1234.48	182.132	3180.08	1416.17	181.616	3277.84	1211.12	225.095	2973.77	1293.62	-1.94803	3123.54	1461.57	-93.7975	3169.5	1249.27	-117.786	3202.49	1154.66	-135.761	3358.79	1067.82	-95.2133	3435.68	1036.29	-150.151	3403.47	1003.09	-146.054	3484.4	998.606
7089	0	132.911	3240.41	1650.24	230.42	3243.17	1650.83	110.441	3086.22	1675.57	254.798	3093.37	1669.84	178.893	3041.07	1495.55	162.729	2998.74	1234.87	183.817	3192.97	1416.65	183.247	3291.81	1211.83	225.676	2987.13	1293.63	-0.565329	3136.7	1462.24	-92.7666	3181.09	1249.24	-116.267	3213.57	1154.5	-135.713	3368.85	1065.6	-95.6959	3445.42	1033.12	-150.625	3412.32	1000.16	-147.004	3492.98	994.631
[truncated: 69 more columns]

## Sheet: Sheet2
Devices
		025370 - Force			025370 - Moment			025370 - CoP			027571 - Force			027571 - Moment			027571 - CoP			037720 - Force			037720 - Moment			037720 - CoP
Frame	Sub Frame	Fx	Fy	Fz	Mx	My	Mz	Cx	Cy	Cz	Fx	Fy	Fz	Mx	My	Mz	Cx	Cy	Cz	Fx	Fy	Fz	Mx	My	Mz	Cx	Cy	Cz
		N	N	N	N.mm	N.mm	N.mm	mm	mm	mm	N	N	N	N.mm	N.mm	N.mm	mm	mm	mm	N	N	N	N.mm	N.mm	N.mm	mm	mm	mm
6660	0	0	0	0	0	0	0	200	300	0	0	0	0	0	0	0	200	903	0	0	0	0	0	0	0	603	903	0
6660	1	0	0	0	0	0	0	200	300	0	0	0	0	0	0	0	200	903	0	0	0	0	0	0	0	603	903	0
6660	2	0	0	0	0	0	0	200	300	0	0	0	0	0	0	0	200	903	0	0	0	0	0	0	0	603	903	0
6660	3	0	0	0	0	0	0	200	300	0	0	0	0	0	0	0	200	903	0	0	0	0	0	0	0	603	903	0
6660	4	0	0	0	0	0	0	200	300	0	0	0	0	0	0	0	200	903	0	0	0	0	0	0	0	603	903	0
6660	5	0	0	0	0	0	0	200	300	0	0	0	0	0	0	0	200	903	0	0	0	0	0	0	0	603	903	0
6660	6	0	0	0	0	0	0	200	300	0	0	0	0	0	0	0	200	903	0	0	0	0	0	0	0	603	903	0
6660	7	0	0	0	0	0	0	200	300	0	0	0	0	0	0	0	200	903	0	0	0	0	0	0	0	603	903	0
6660	8	0	0	0	0	0	0	200	300	0	0	0	0	0	0	0	200	903	0	0	0	0	0	0	0	603	903	0
6660	9	0	0	0	0	0	0	200	300	0	0	0	0	0	0	0	200	903	0	0	0	0	0	0	0	603	903	0
6661	0	0	0	0	0	0	0	200	300	0	0	0	0	0	0	0	200	903	0	0	0	0	0	0	0	603	903	0
6661	1	0	0	0	0	0	0	200	300	0	0	0	0	0	0	0	200	903	0	0	0	0	0	0	0	603	903	0
6661	2	0	0	0	0	0	0	200	300	0	0	0	0	0	0	0	200	903	0	0	0	0	0	0	0	603	903	0
6661	3	0	0	0	0	0	0	200	300	0	0	0	0	0	0	0	200	903	0	0	0	0	0	0	0	603	903	0
6661	4	0	0	0	0	0	0	200	300	0	0	0	0	0	0	0	200	903	0	0	0	0	0	0	0	603	903	0
6661	5	0	0	0	0	0	0	200	300	0	0	0	0	0	0	0	200	903	0	0	0	0	0	0	0	603	903	0
6661	6	0	0	0	0	0	0	200	300	0	0	0	0	0	0	0	200	903	0	0	0	0	0	0	0	603	903	0
6661	7	0	0	0	0	0	0	200	300	0	0	0	0	0	0	0	200	903	0	0	0	0	0	0	0	603	903	0
6661	8	0	0	0	0	0	0	200	300	0	0	0	0	0	0	0	200	903	0	0	0	0	0	0	0	603	903	0
6661	9	0	0	0	0	0	0	200	300	0	0	0	0	0	0	0	200	903	0	0	0	0	0	0	0	603	903	0
6662	0	0	0	0	0	0	0	200	300	0	0	0	0	0	0	0	200	903	0	0	0	0	0	0	0	603	903	0
6662	1	0	0	0	0	0	0	200	300	0	0	0	0	0	0	0	200	903	0	0	0	0	0	0	0	603	903	0
6662	2	0	0	0	0	0	0	200	300	0	0	0	0	0	0	0	200	903	0	0	0	0	0	0	0	603	903	0
6662	3	0	0	0	0	0	0	200	300	0	0	0	0	0	0	0	200	903	0	0	0	0	0	0	0	603	903	0
6662	4	0	0	0	0	0	0	200	300	0	0	0	0	0	0	0	200	903	0	0	0	0	0	0	0	603	903	0
6662	5	0	0	0	0	0	0	200	300	0	0	0	0	0	0	0	200	903	0	0	0	0	0	0	0	603	903	0
6662	6	0	0	0	0	0	0	200	300	0	0	0	0	0	0	0	200	903	0	0	0	0	0	0	0	603	903	0
6662	7	0	0	0	0	0	0	200	300	0	0	0	0	0	0	0	200	903	0	0	0	0	0	0	0	603	903	0
6662	8	0	0	0	0	0	0	200	300	0	0	0	0	0	0	0	200	903	0	0	0	0	0	0	0	603	903	0
6662	9	0	0	0	0	0	0	200	300	0	0	0	0	0	0	0	200	903	0	0	0	0	0	0	0	603	903	0
6663	0	0	0	0	0	0	0	200	300	0	0	0	0	0	0	0	200	903	0	0	0	0	0	0	0	603	903	0
6663	1	0	0	0	0	0	0	200	300	0	0	0	0	0	0	0	200	903	0	0	0	0	0	0	0	603	903	0
6663	2	0	0	0	0	0	0	200	300	0	0	0	0	0	0	0	200	903	0	0	0	0	0	0	0	603	903	0
6663	3	0	0	0	0	0	0	200	300	0	0	0	0	0	0	0	200	903	0	0	0	0	0	0	0	603	903	0
6663	4	0	0	0	0	0	0	200	300	0	0	0	0	0	0	0	200	903	0	0	0	0	0	0	0	603	903	0
6663	5	0	0	0	0	0	0	200	300	0	0	0	0	0	0	0	200	903	0	0	0	0	0	0	0	603	903	0
6663	6	0	0	0	0	0	0	200	300	0	0	0	0	0	0	0	200	903	0	0	0	0	0	0	0	603	903	0
6663	7	0	0	0	0	0	0	200	300	0	0	0	0	0	0	0	200	903	0	0	0	0	0	0	0	603	903	0
6663	8	0	0	0	0	0	0	200	300	0	0	0	0	0	0	0	200	903	0	0	0	0	0	0	0	603	903	0
6663	9	0	0	0	0	0	0	200	300	0	0	0	0	0	0	0	200	903	0	0	0	0	0	0	0	603	903	0
6664	0	0	0	0	0	0	0	200	300	0	0	0	0	0	0	0	200	903	0	0	0	0	0	0	0	603	903	0
6664	1	0	0	0	0	0	0	200	300	0	0	0	0	0	0	0	200	903	0	0	0	0	0	0	0	603	903	0
6664	2	0	0	0	0	0	0	200	300	0	0	0	0	0	0	0	200	903	0	0	0	0	0	0	0	603	903	0
6664	3	0	0	0	0	0	0	200	300	0	0	0	0	0	0	0	200	903	0	0	0	0	0	0	0	603	903	0
6664	4	0	0	0	0	0	0	200	300	0	0	0	0	0	0	0	200	903	0	0	0	0	0	0	0	603	903	0
6664	5	0	0	0	0	0	0	200	300	0	0	0	0	0	0	0	200	903	0	0	0	0	0	0	0	603	903	0
6664	6	0	0	0	0	0	0	200	300	0	0	0	0	0	0	0	200	903	0	0	0	0	0	0	0	603	903	0
6664	7	0	0	0	0	0	0	200	300	0	0	0	0	0	0	0	200	903	0	0	0	0	0	0	0	603	903	0
6664	8	0	0	0	0	0	0	200	300	0	0	0	0	0	0	0	200	903	0	0	0	0	0	0	0	603	903	0
6664	9	0	0	0	0	0	0	200	300	0	0	0	0	0	0	0	200	903	0	0	0	0	0	0	0	603	903	0
6665	0	0	0	0	0	0	0	200	300	0	0	0	0	0	0	0	200	903	0	0	0	0	0	0	0	603	903	0
6665	1	0	0	0	0	0	0	200	300	0	0	0	0	0	0	0	200	903	0	0	0	0	0	0	0	603	903	0
6665	2	0	0	0	0	0	0	200	300	0	0	0	0	0	0	0	200	903	0	0	0	0	0	0	0	603	903	0
6665	3	0	0	0	0	0	0	200	300	0	0	0	0	0	0	0	200	903	0	0	0	0	0	0	0	603	903	0
6665	4	0	0	0	0	0	0	200	300	0	0	0	0	0	0	0	200	903	0	0	0	0	0	0	0	603	903	0
6665	5	0	0	0	0	0	0	200	300	0	0	0	0	0	0	0	200	903	0	0	0	0	0	0	0	603	903	0
6665	6	0	0	0	0	0	0	200	300	0	0	0	0	0	0	0	200	903	0	0	0	0	0	0	0	603	903	0
6665	7	0	0	0	0	0	0	200	300	0	0	0	0	0	0	0	200	903	0	0	0	0	0	0	0	603	903	0
6665	8	0	0	0	0	0	0	200	300	0	0	0	0	0	0	0	200	903	0	0	0	0	0	0	0	603	903	0
6665	9	0	0	0	0	0	0	200	300	0	0	0	0	0	0	0	200	903	0	0	0	0	0	0	0	603	903	0
6666	0	0	0	0	0	0	0	200	300	0	0	0	0	0	0	0	200	903	0	0	0	0	0	0	0	603	903	0
6666	1	0	0	0	0	0	0	200	300	0	0	0	0	0	0	0	200	903	0	0	0	0	0	0	0	603	903	0
6666	2	0	0	0	0	0	0	200	300	0	0	0	0	0	0	0	200	903	0	0	0	0	0	0	0	603	903	0
6666	3	0	0	0	0	0	0	200	300	0	0	0	0	0	0	0	200	903	0	0	0	0	0	0	0	603	903	0
6666	4	0	0	0	0	0	0	200	300	0	0	0	0	0	0	0	200	903	0	0	0	0	0	0	0	603	903	0
6666	5	0	0	0	0	0	0	200	300	0	0	0	0	0	0	0	200	903	0	0	0	0	0	0	0	603	903	0
6666	6	0	0	0	0	0	0	200	300	0	0	0	0	0	0	0	200	903	0	0	0	0	0	0	0	603	903	0
6666	7	0	0	0	0	0	0	200	300	0	0	0	0	0	0	0	200	903	0	0	0	0	0	0	0	603	903	0
6666	8	0	0	0	0	0	0	200	300	0	0	0	0	0	0	0	200	903	0	0	0	0	0	0	0	603	903	0
6666	9	0	0	0	0	0	0	200	300	0	0	0	0	0	0	0	200	903	0	0	0	0	0	0	0	603	903	0
6667	0	0	0	0	0	0	0	200	300	0	0	0	0	0	0	0	200	903	0	0	0	0	0	0	0	603	903	0
6667	1	0	0	0	0	0	0	200	300	0	0	0	0	0	0	0	200	903	0	0	0	0	0	0	0	603	903	0
6667	2	0	0	0	0	0	0	200	300	0	0	0	0	0	0	0	200	903	0	0	0	0	0	0	0	603	903	0
6667	3	0	0	0	0	0	0	200	300	0	0	0	0	0	0	0	200	903	0	0	0	0	0	0	0	603	903	0
6667	4	0	0	0	0	0	0	200	300	0	0	0	0	0	0	0	200	903	0	0	0	0	0	0	0	603	903	0
6667	5	0	0	0	0	0	0	200	300	0	0	0	0	0	0	0	200	903	0	0	0	0	0	0	0	603	903	0
6667	6	0	0	0	0	0	0	200	300	0	0	0	0	0	0	0	200	903	0	0	0	0	0	0	0	603	903	0
6667	7	0	0	0	0	0	0	200	300	0	0	0	0	0	0	0	200	903	0	0	0	0	0	0	0	603	903	0
6667	8	0	0	0	0	0	0	200	300	0	0	0	0	0	0	0	200	903	0	0	0	0	0	0	0	603	903	0
6667	9	0	0	0	0	0	0	200	300	0	0	0	0	0	0	0	200	903	0	0	0	0	0	0	0	603	903	0
6668	0	0	0	0	0	0	0	200	300	0	0	0	0	0	0	0	200	903	0	0	0	0	0	0	0	603	903	0
6668	1	0	0	0	0	0	0	200	300	0	0	0	0	0	0	0	200	903	0	0	0	0	0	0	0	603	903	0
6668	2	0	0	0	0	0	0	200	300	0	0	0	0	0	0	0	200	903	0	0	0	0	0	0	0	603	903	0
6668	3	0	0	0	0	0	0	200	300	0	0	0	0	0	0	0	200	903	0	0	0	0	0	0	0	603	903	0
6668	4	0	0	0	0	0	0	200	300	0	0	0	0	0	0	0	200	903	0	0	0	0	0	0	0	603	903	0
6668	5	0	0	0	0	0	0	200	300	0	0	0	0	0	0	0	200	903	0	0	0	0	0	0	0	603	903	0
6668	6	0	0	0	0	0	0	200	300	0	0	0	0	0	0	0	200	903	0	0	0	0	0	0	0	603	903	0
6668	7	0	0	0	0	0	0	200	300	0	0	0	0	0	0	0	200	903	0	0	0	0	0	0	0	603	903	0
6668	8	0	0	0	0	0	0	200	300	0	0	0	0	0	0	0	200	903	0	0	0	0	0	0	0	603	903	0
6668	9	0	0	0	0	0	0	200	300	0	0	0	0	0	0	0	200	903	0	0	0	0	0	0	0	603	903	0
6669	0	0	0	0	0	0	0	200	300	0	0	0	0	0	0	0	200	903	0	0	0	0	0	0	0	603	903	0
6669	1	0	0	0	0	0	0	200	300	0	0	0	0	0	0	0	200	903	0	0	0	0	0	0	0	603	903	0
6669	2	0	0	0	0	0	0	200	300	0	0	0	0	0	0	0	200	903	0	0	0	0	0	0	0	603	903	0
6669	3	0	0	0	0	0	0	200	300	0	0	0	0	0	0	0	200	903	0	0	0	0	0	0	0	603	903	0
6669	4	0	0	0	0	0	0	200	300	0	0	0	0	0	0	0	200	903	0	0	0	0	0	0	0	603	903	0
6669	5	0	0	0	0	0	0	200	300	0	0	0	0	0	0	0	200	903	0	0	0	0	0	0	0	603	903	0
6669	6	0	0	0	0	0	0	200	300	0	0	0	0	0	0	0	200	903	0	0	0	0	0	0	0	603	903	0
6669	7	0	0	0	0	0	0	200	300	0	0	0	0	0	0	0	200	903	0	0	0	0	0	0	0	603	903	0
6669	8	0	0	0	0	0	0	200	300	0	0	0	0	0	0	0	200	903	0	0	0	0	0	0	0	603	903	0
6669	9	0	0	0	0	0	0	200	300	0	0	0	0	0	0	0	200	903	0	0	0	0	0	0	0	603	903	0
6670	0	0	0	0	0	0	0	200	300	0	0	0	0	0	0	0	200	903	0	0	0	0	0	0	0	603	903	0
6670	1	0	0	0	0	0	0	200	300	0	0	0	0	0	0	0	200	903	0	0	0	0	0	0	0	603	903	0
6670	2	0	0	0	0	0	0	200	300	0	0	0	0	0	0	0	200	903	0	0	0	0	0	0	0	603	903	0
6670	3	0	0	0	0	0	0	200	300	0	0	0	0	0	0	0	200	903	0	0	0	0	0	0	0	603	903	0
6670	4	0	0	0	0	0	0	200	300	0	0	0	0	0	0	0	200	903	0	0	0	0	0	0	0	603	903	0
6670	5	0	0	0	0	0	0	200	300	0	0	0	0	0	0	0	200	903	0	0	0	0	0	0	0	603	903	0
6670	6	0	0	0	0	0	0	200	300	0	0	0	0	0	0	0	200	903	0	0	0	0	0	0	0	603	903	0
6670	7	0	0	0	0	0	0	200	300	0	0	0	0	0	0	0	200	903	0	0	0	0	0	0	0	603	903	0
6670	8	0	0	0	0	0	0	200	300	0	0	0	0	0	0	0	200	903	0	0	0	0	0	0	0	603	903	0
6670	9	0	0	0	0	0	0	200	300	0	0	0	0	0	0	0	200	903	0	0	0	0	0	0	0	603	903	0
6671	0	0	0	0	0	0	0	200	300	0	0	0	0	0	0	0	200	903	0	0	0	0	0	0	0	603	903	0
6671	1	0	0	0	0	0	0	200	300	0	0	0	0	0	0	0	200	903	0	0	0	0	0	0	0	603	903	0
6671	2	0	0	0	0	0	0	200	300	0	0	0	0	0	0	0	200	903	0	0	0	0	0	0	0	603	903	0
6671	3	0	0	0	0	0	0	200	300	0	0	0	0	0	0	0	200	903	0	0	0	0	0	0	0	603	903	0
6671	4	0	0	0	0	0	0	200	300	0	0	0	0	0	0	0	200	903	0	0	0	0	0	0	0	603	903	0
6671	5	0	0	0	0	0	0	200	300	0	0	0	0	0	0	0	200	903	0	0	0	0	0	0	0	603	903	0
6671	6	0	0	0	0	0	0	200	300	0	0	0	0	0	0	0	200	903	0	0	0	0	0	0	0	603	903	0
6671	7	0	0	0	0	0	0	200	300	0	0	0	0	0	0	0	200	903	0	0	0	0	0	0	0	603	903	0
6671	8	0	0	0	0	0	0	200	300	0	0	0	0	0	0	0	200	903	0	0	0	0	0	0	0	603	903	0
6671	9	0	0	0	0	0	0	200	300	0	0	0	0	0	0	0	200	903	0	0	0	0	0	0	0	603	903	0
6672	0	0	0	0	0	0	0	200	300	0	0	0	0	0	0	0	200	903	0	0	0	0	0	0	0	603	903	0
6672	1	0	0	0	0	0	0	200	300	0	0	0	0	0	0	0	200	903	0	0	0	0	0	0	0	603	903	0
6672	2	0	0	0	0	0	0	200	300	0	0	0	0	0	0	0	200	903	0	0	0	0	0	0	0	603	903	0
6672	3	0	0	0	0	0	0	200	300	0	0	0	0	0	0	0	200	903	0	0	0	0	0	0	0	603	903	0
6672	4	0	0	0	0	0	0	200	300	0	0	0	0	0	0	0	200	903	0	0	0	0	0	0	0	603	903	0
6672	5	0	0	0	0	0	0	200	300	0	0	0	0	0	0	0	200	903	0	0	0	0	0	0	0	603	903	0
6672	6	0	0	0	0	0	0	200	300	0	0	0	0	0	0	0	200	903	0	0	0	0	0	0	0	603	903	0
6672	7	0	0	0	0	0	0	200	300	0	0	0	0	0	0	0	200	903	0	0	0	0	0	0	0	603	903	0
6672	8	0	0	0	0	0	0	200	300	0	0	0	0	0	0	0	200	903	0	0	0	0	0	0	0	603	903	0
6672	9	0	0	0	0	0	0	200	300	0	0	0	0	0	0	0	200	903	0	0	0	0	0	0	0	603	903	0
6673	0	0	0	0	0	0	0	200	300	0	0	0	0	0	0	0	200	903	0	0	0	0	0	0	0	603	903	0
6673	1	0	0	0	0	0	0	200	300	0	0	0	0	0	0	0	200	903	0	0	0	0	0	0	0	603	903	0
6673	2	0	0	0	0	0	0	200	300	0	0	0	0	0	0	0	200	903	0	0	0	0	0	0	0	603	903	0
6673	3	0	0	0	0	0	0	200	300	0	0	0	0	0	0	0	200	903	0	0	0	0	0	0	0	603	903	0
6673	4	0	0	0	0	0	0	200	300	0	0	0	0	0	0	0	200	903	0	0	0	0	0	0	0	603	903	0
6673	5	0	0	0	0	0	0	200	300	0	0	0	0	0	0	0	200	903	0	0	0	0	0	0	0	603	903	0
6673	6	0	0	0	0	0	0	200	300	0	0	0	0	0	0	0	200	903	0	0	0	0	0	0	0	603	903	0
6673	7	0	0	0	0	0	0	200	300	0	0	0	0	0	0	0	200	903	0	0	0	0	0	0	0	603	903	0
6673	8	0	0	0	0	0	0	200	300	0	0	0	0	0	0	0	200	903	0	0	0	0	0	0	0	603	903	0
6673	9	0	0	0	0	0	0	200	300	0	0	0	0	0	0	0	200	903	0	0	0	0	0	0	0	603	903	0
6674	0	0	0	0	0	0	0	200	300	0	0	0	0	0	0	0	200	903	0	0	0	0	0	0	0	603	903	0
6674	1	0	0	0	0	0	0	200	300	0	0	0	0	0	0	0	200	903	0	0	0	0	0	0	0	603	903	0
6674	2	0	0	0	0	0	0	200	300	0	0	0	0	0	0	0	200	903	0	0	0	0	0	0	0	603	903	0
6674	3	0	0	0	0	0	0	200	300	0	0	0	0	0	0	0	200	903	0	0	0	0	0	0	0	603	903	0
6674	4	0	0	0	0	0	0	200	300	0	0	0	0	0	0	0	200	903	0	0	0	0	0	0	0	603	903	0
6674	5	0	0	0	0	0	0	200	300	0	0	0	0	0	0	0	200	903	0	0	0	0	0	0	0	603	903	0
6674	6	0	0	0	0	0	0	200	300	0	0	0	0	0	0	0	200	903	0	0	0	0	0	0	0	603	903	0
6674	7	0	0	0	0	0	0	200	300	0	0	0	0	0	0	0	200	903	0	0	0	0	0	0	0	603	903	0
6674	8	0	0	0	0	0	0	200	300	0	0	0	0	0	0	0	200	903	0	0	0	0	0	0	0	603	903	0
6674	9	0	0	0	0	0	0	200	300	0	0	0	0	0	0	0	200	903	0	0	0	0	0	0	0	603	903	0
6675	0	0	0	0	0	0	0	200	300	0	0	0	0	0	0	0	200	903	0	0	0	0	0	0	0	603	903	0
6675	1	0	0	0	0	0	0	200	300	0	0	0	0	0	0	0	200	903	0	0	0	0	0	0	0	603	903	0
6675	2	0	0	0	0	0	0	200	300	0	0	0	0	0	0	0	200	903	0	0	0	0	0	0	0	603	903	0
6675	3	0	0	0	0	0	0	200	300	0	0	0	0	0	0	0	200	903	0	0	0	0	0	0	0	603	903	0
6675	4	0	0	0	0	0	0	200	300	0	0	0	0	0	0	0	200	903	0	0	0	0	0	0	0	603	903	0
6675	5	0	0	0	0	0	0	200	300	0	0	0	0	0	0	0	200	903	0	0	0	0	0	0	0	603	903	0
6675	6	0	0	0	0	0	0	200	300	0	0	0	0	0	0	0	200	903	0	0	0	0	0	0	0	603	903	0
6675	7	0	0	0	0	0	0	200	300	0	0	0	0	0	0	0	200	903	0	0	0	0	0	0	0	603	903	0
6675	8	0	0	0	0	0	0	200	300	0	0	0	0	0	0	0	200	903	0	0	0	0	0	0	0	603	903	0
6675	9	0	0	0	0	0	0	200	300	0	0	0	0	0	0	0	200	903	0	0	0	0	0	0	0	603	903	0
6676	0	0	0	0	0	0	0	200	300	0	0	0	0	0	0	0	200	903	0	0	0	0	0	0	0	603	903	0
6676	1	0	0	0	0	0	0	200	300	0	0	0	0	0	0	0	200	903	0	0	0	0	0	0	0	603	903	0
6676	2	0	0	0	0	0	0	200	300	0	0	0	0	0	0	0	200	903	0	0	0	0	0	0	0	603	903	0
6676	3	0	0	0	0	0	0	200	300	0	0	0	0	0	0	0	200	903	0	0	0	0	0	0	0	603	903	0
6676	4	0	0	0	0	0	0	200	300	0	0	0	0	0	0	0	200	903	0	0	0	0	0	0	0	603	903	0
6676	5	0	0	0	0	0	0	200	300	0	0	0	0	0	0	0	200	903	0	0	0	0	0	0	0	603	903	0
6676	6	0	0	0	0	0	0	200	300	0	0	0	0	0	0	0	200	903	0	0	0	0	0	0	0	603	903	0
6676	7	0	0	0	0	0	0	200	300	0	0	0	0	0	0	0	200	903	0	0	0	0	0	0	0	603	903	0
6676	8	0	0	0	0	0	0	200	300	0	0	0	0	0	0	0	200	903	0	0	0	0	0	0	0	603	903	0
6676	9	0	0	0	0	0	0	200	300	0	0	0	0	0	0	0	200	903	0	0	0	0	0	0	0	603	903	0
6677	0	0	0	0	0	0	0	200	300	0	0	0	0	0	0	0	200	903	0	0	0	0	0	0	0	603	903	0
6677	1	0	0	0	0	0	0	200	300	0	0	0	0	0	0	0	200	903	0	0	0	0	0	0	0	603	903	0
6677	2	0	0	0	0	0	0	200	300	0	0	0	0	0	0	0	200	903	0	0	0	0	0	0	0	603	903	0
6677	3	0	0	0	0	0	0	200	300	0	0	0	0	0	0	0	200	903	0	0	0	0	0	0	0	603	903	0
6677	4	0	0	0	0	0	0	200	300	0	0	0	0	0	0	0	200	903	0	0	0	0	0	0	0	603	903	0
6677	5	0	0	0	0	0	0	200	300	0	0	0	0	0	0	0	200	903	0	0	0	0	0	0	0	603	903	0
6677	6	0	0	0	0	0	0	200	300	0	0	0	0	0	0	0	200	903	0	0	0	0	0	0	0	603	903	0
6677	7	0	0	0	0	0	0	200	300	0	0	0	0	0	0	0	200	903	0	0	0	0	0	0	0	603	903	0
6677	8	0	0	0	0	0	0	200	300	0	0	0	0	0	0	0	200	903	0	0	0	0	0	0	0	603	903	0
6677	9	0	0	0	0	0	0	200	300	0	0	0	0	0	0	0	200	903	0	0	0	0	0	0	0	603	903	0
6678	0	0	0	0	0	0	0	200	300	0	0	0	0	0	0	0	200	903	0	0	0	0	0	0	0	603	903	0
6678	1	0	0	0	0	0	0	200	300	0	0	0	0	0	0	0	200	903	0	0	0	0	0	0	0	603	903	0
6678	2	0	0	0	0	0	0	200	300	0	0	0	0	0	0	0	200	903	0	0	0	0	0	0	0	603	903	0
6678	3	0	0	0	0	0	0	200	300	0	0	0	0	0	0	0	200	903	0	0	0	0	0	0	0	603	903	0
6678	4	0	0	0	0	0	0	200	300	0	0	0	0	0	0	0	200	903	0	0	0	0	0	0	0	603	903	0
6678	5	0	0	0	0	0	0	200	300	0	0	0	0	0	0	0	200	903	0	0	0	0	0	0	0	603	903	0
6678	6	0	0	0	0	0	0	200	300	0	0	0	0	0	0	0	200	903	0	0	0	0	0	0	0	603	903	0
6678	7	0	0	0	0	0	0	200	300	0	0	0	0	0	0	0	200	903	0	0	0	0	0	0	0	603	903	0
6678	8	0	0	0	0	0	0	200	300	0	0	0	0	0	0	0	200	903	0	0	0	0	0	0	0	603	903	0
6678	9	0	0	0	0	0	0	200	300	0	0	0	0	0	0	0	200	903	0	0	0	0	0	0	0	603	903	0
6679	0	0	0	0	0	0	0	200	300	0	0	0	0	0	0	0	200	903	0	0	0	0	0	0	0	603	903	0
6679	1	0	0	0	0	0	0	200	300	0	0	0	0	0	0	0	200	903	0	0	0	0	0	0	0	603	903	0
6679	2	0	0	0	0	0	0	200	300	0	0	0	0	0	0	0	200	903	0	0	0	0	0	0	0	603	903	0
6679	3	0	0	0	0	0	0	200	300	0	0	0	0	0	0	0	200	903	0	0	0	0	0	0	0	603	903	0
6679	4	0	0	0	0	0	0	200	300	0	0	0	0	0	0	0	200	903	0	0	0	0	0	0	0	603	903	0
6679	5	0	0	0	0	0	0	200	300	0	0	0	0	0	0	0	200	903	0	0	0	0	0	0	0	603	903	0
6679	6	0	0	0	0	0	0	200	300	0	0	0	0	0	0	0	200	903	0	0	0	0	0	0	0	603	903	0
6679	7	0	0	0	0	0	0	200	300	0	0	0	0	0	0	0	200	903	0	0	0	0	0	0	0	603	903	0
6679	8	0	0	0	0	0	0	200	300	0	0	0	0	0	0	0	200	903	0	0	0	0	0	0	0	603	903	0
6679	9	0	0	0	0	0	0	200	300	0	0	0	0	0	0	0	200	903	0	0	0	0	0	0	0	603	903	0
6680	0	0	0	0	0	0	0	200	300	0	0	0	0	0	0	0	200	903	0	0	0	0	0	0	0	603	903	0
6680	1	0	0	0	0	0	0	200	300	0	0	0	0	0	0	0	200	903	0	0	0	0	0	0	0	603	903	0
6680	2	0	0	0	0	0	0	200	300	0	0	0	0	0	0	0	200	903	0	0	0	0	0	0	0	603	903	0
6680	3	0	0	0	0	0	0	200	300	0	0	0	0	0	0	0	200	903	0	0	0	0	0	0	0	603	903	0
6680	4	0	0	0	0	0	0	200	300	0	0	0	0	0	0	0	200	903	0	0	0	0	0	0	0	603	903	0
6680	5	0	0	0	0	0	0	200	300	0	0	0	0	0	0	0	200	903	0	0	0	0	0	0	0	603	903	0
6680	6	0	0	0	0	0	0	200	300	0	0	0	0	0	0	0	200	903	0	0	0	0	0	0	0	603	903	0
6680	7	0	0	0	0	0	0	200	300	0	0	0	0	0	0	0	200	903	0	0	0	0	0	0	0	603	903	0
6680	8	0	0	0	0	0	0	200	300	0	0	0	0	0	0	0	200	903	0	0	0	0	0	0	0	603	903	0
6680	9	0	0	0	0	0	0	200	300	0	0	0	0	0	0	0	200	903	0	0	0	0	0	0	0	603	903	0
6681	0	0	0	0	0	0	0	200	300	0	0	0	0	0	0	0	200	903	0	0	0	0	0	0	0	603	903	0
6681	1	0	0	0	0	0	0	200	300	0	0	0	0	0	0	0	200	903	0	0	0	0	0	0	0	603	903	0
6681	2	0	0	0	0	0	0	200	300	0	0	0	0	0	0	0	200	903	0	0	0	0	0	0	0	603	903	0
6681	3	0	0	0	0	0	0	200	300	0	0	0	0	0	0	0	200	903	0	0	0	0	0	0	0	603	903	0
6681	4	0	0	0	0	0	0	200	300	0	0	0	0	0	0	0	200	903	0	0	0	0	0	0	0	603	903	0
6681	5	0	0	0	0	0	0	200	300	0	0	0	0	0	0	0	200	903	0	0	0	0	0	0	0	603	903	0
6681	6	0	0	0	0	0	0	200	300	0	0	0	0	0	0	0	200	903	0	0	0	0	0	0	0	603	903	0
6681	7	0	0	0	0	0	0	200	300	0	0	0	0	0	0	0	200	903	0	0	0	0	0	0	0	603	903	0
6681	8	0	0	0	0	0	0	200	300	0	0	0	0	0	0	0	200	903	0	0	0	0	0	0	0	603	903	0
6681	9	0	0	0	0	0	0	200	300	0	0	0	0	0	0	0	200	903	0	0	0	0	0	0	0	603	903	0
6682	0	0	0	0	0	0	0	200	300	0	0	0	0	0	0	0	200	903	0	0	0	0	0	0	0	603	903	0
6682	1	0	0	0	0	0	0	200	300	0	0	0	0	0	0	0	200	903	0	0	0	0	0	0	0	603	903	0
6682	2	0	0	0	0	0	0	200	300	0	0	0	0	0	0	0	200	903	0	0	0	0	0	0	0	603	903	0
6682	3	0	0	0	0	0	0	200	300	0	0	0	0	0	0	0	200	903	0	0	0	0	0	0	0	603	903	0
6682	4	0	0	0	0	0	0	200	300	0	0	0	0	0	0	0	200	903	0	0	0	0	0	0	0	603	903	0
6682	5	0	0	0	0	0	0	200	300	0	0	0	0	0	0	0	200	903	0	0	0	0	0	0	0	603	903	0
6682	6	0	0	0	0	0	0	200	300	0	0	0	0	0	0	0	200	903	0	0	0	0	0	0	0	603	903	0
6682	7	0	0	0	0	0	0	200	300	0	0	0	0	0	0	0	200	903	0	0	0	0	0	0	0	603	903	0
6682	8	0	0	0	0	0	0	200	300	0	0	0	0	0	0	0	200	903	0	0	0	0	0	0	0	603	903	0
6682	9	0	0	0	0	0	0	200	300	0	0	0	0	0	0	0	200	903	0	0	0	0	0	0	0	603	903	0
6683	0	0	0	0	0	0	0	200	300	0	0	0	0	0	0	0	200	903	0	0	0	0	0	0	0	603	903	0
6683	1	0	0	0	0	0	0	200	300	0	0	0	0	0	0	0	200	903	0	0	0	0	0	0	0	603	903	0
6683	2	0	0	0	0	0	0	200	300	0	0	0	0	0	0	0	200	903	0	0	0	0	0	0	0	603	903	0
6683	3	0	0	0	0	0	0	200	300	0	0	0	0	0	0	0	200	903	0	0	0	0	0	0	0	603	903	0
6683	4	0	0	0	0	0	0	200	300	0	0	0	0	0	0	0	200	903	0	0	0	0	0	0	0	603	903	0
6683	5	0	0	0	0	0	0	200	300	0	0	0	0	0	0	0	200	903	0	0	0	0	0	0	0	603	903	0
6683	6	0	0	0	0	0	0	200	300	0	0	0	0	0	0	0	200	903	0	0	0	0	0	0	0	603	903	0
6683	7	0	0	0	0	0	0	200	300	0	0	0	0	0	0	0	200	903	0	0	0	0	0	0	0	603	903	0
6683	8	0	0	0	0	0	0	200	300	0	0	0	0	0	0	0	200	903	0	0	0	0	0	0	0	603	903	0
6683	9	0	0	0	0	0	0	200	300	0	0	0	0	0	0	0	200	903	0	0	0	0	0	0	0	603	903	0
6684	0	0	0	0	0	0	0	200	300	0	0	0	0	0	0	0	200	903	0	0	0	0	0	0	0	603	903	0
6684	1	0	0	0	0	0	0	200	300	0	0	0	0	0	0	0	200	903	0	0	0	0	0	0	0	603	903	0
6684	2	0	0	0	0	0	0	200	300	0	0	0	0	0	0	0	200	903	0	0	0	0	0	0	0	603	903	0
6684	3	0	0	0	0	0	0	200	300	0	0	0	0	0	0	0	200	903	0	0	0	0	0	0	0	603	903	0
6684	4	0	0	0	0	0	0	200	300	0	0	0	0	0	0	0	200	903	0	0	0	0	0	0	0	603	903	0
6684	5	0	0	0	0	0	0	200	300	0	0	0	0	0	0	0	200	903	0	0	0	0	0	0	0	603	903	0
6684	6	0	0	0	0	0	0	200	300	0	0	0	0	0	0	0	200	903	0	0	0	0	0	0	0	603	903	0
6684	7	0	0	0	0	0	0	200	300	0	0	0	0	0	0	0	200	903	0	0	0	0	0	0	0	603	903	0
6684	8	0	0	0	0	0	0	200	300	0	0	0	0	0	0	0	200	903	0	0	0	0	0	0	0	603	903	0
6684	9	0	0	0	0	0	0	200	300	0	0	0	0	0	0	0	200	903	0	0	0	0	0	0	0	603	903	0
6685	0	0	0	0	0	0	0	200	300	0	0	0	0	0	0	0	200	903	0	0	0	0	0	0	0	603	903	0
6685	1	0	0	0	0	0	0	200	300	0	0	0	0	0	0	0	200	903	0	0	0	0	0	0	0	603	903	0
6685	2	0	0	0	0	0	0	200	300	0	0	0	0	0	0	0	200	903	0	0	0	0	0	0	0	603	903	0
6685	3	0	0	0	0	0	0	200	300	0	0	0	0	0	0	0	200	903	0	0	0	0	0	0	0	603	903	0
6685	4	0	0	0	0	0	0	200	300	0	0	0	0	0	0	0	200	903	0	0	0	0	0	0	0	603	903	0
6685	5	0	0	0	0	0	0	200	300	0	0	0	0	0	0	0	200	903	0	0	0	0	0	0	0	603	903	0
6685	6	0	0	0	0	0	0	200	300	0	0	0	0	0	0	0	200	903	0	0	0	0	0	0	0	603	903	0
6685	7	0	0	0	0	0	0	200	300	0	0	0	0	0	0	0	200	903	0	0	0	0	0	0	0	603	903	0
6685	8	0	0	0	0	0	0	200	300	0	0	0	0	0	0	0	200	903	0	0	0	0	0	0	0	603	903	0
6685	9	0	0	0	0	0	0	200	300	0	0	0	0	0	0	0	200	903	0	0	0	0	0	0	0	603	903	0
6686	0	0	0	0	0	0	0	200	300	0	0	0	0	0	0	0	200	903	0	0	0	0	0	0	0	603	903	0
6686	1	0	0	0	0	0	0	200	300	0	0	0	0	0	0	0	200	903	0	0	0	0	0	0	0	603	903	0
6686	2	0	0	0	0	0	0	200	300	0	0	0	0	0	0	0	200	903	0	0	0	0	0	0	0	603	903	0
6686	3	0	0	0	0	0	0	200	300	0	0	0	0	0	0	0	200	903	0	0	0	0	0	0	0	603	903	0
6686	4	0	0	0	0	0	0	200	300	0	0	0	0	0	0	0	200	903	0	0	0	0	0	0	0	603	903	0
6686	5	0	0	0	0	0	0	200	300	0	0	0	0	0	0	0	200	903	0	0	0	0	0	0	0	603	903	0
6686	6	0	0	0	0	0	0	200	300	0	0	0	0	0	0	0	200	903	0	0	0	0	0	0	0	603	903	0
6686	7	0	0	0	0	0	0	200	300	0	0	0	0	0	0	0	200	903	0	0	0	0	0	0	0	603	903	0
6686	8	0	0	0	0	0	0	200	300	0	0	0	0	0	0	0	200	903	0	0	0	0	0	0	0	603	903	0
6686	9	0	0	0	0	0	0	200	300	0	0	0	0	0	0	0	200	903	0	0	0	0	0	0	0	603	903	0
6687	0	0	0	0	0	0	0	200	300	0	0	0	0	0	0	0	200	903	0	0	0	0	0	0	0	603	903	0
6687	1	0	0	0	0	0	0	200	300	0	0	0	0	0	0	0	200	903	0	0	0	0	0	0	0	603	903	0
6687	2	0	0	0	0	0	0	200	300	0	0	0	0	0	0	0	200	903	0	0	0	0	0	0	0	603	903	0
6687	3	0	0	0	0	0	0	200	300	0	0	0	0	0	0	0	200	903	0	0	0	0	0	0	0	603	903	0
6687	4	0	0	0	0	0	0	200	300	0	0	0	0	0	0	0	200	903	0	0	0	0	0	0	0	603	903	0
6687	5	0	0	0	0	0	0	200	300	0	0	0	0	0	0	0	200	903	0	0	0	0	0	0	0	603	903	0
6687	6	0	0	0	0	0	0	200	300	0	0	0	0	0	0	0	200	903	0	0	0	0	0	0	0	603	903	0
6687	7	0	0	0	0	0	0	200	300	0	0	0	0	0	0	0	200	903	0	0	0	0	0	0	0	603	903	0
6687	8	0	0	0	0	0	0	200	300	0	0	0	0	0	0	0	200	903	0	0	0	0	0	0	0	603	903	0
6687	9	0	0	0	0	0	0	200	300	0	0	0	0	0	0	0	200	903	0	0	0	0	0	0	0	603	903	0
6688	0	0	0	0	0	0	0	200	300	0	0	0	0	0	0	0	200	903	0	0	0	0	0	0	0	603	903	0
6688	1	0	0	0	0	0	0	200	300	0	0	0	0	0	0	0	200	903	0	0	0	0	0	0	0	603	903	0
6688	2	0	0	0	0	0	0	200	300	0	0	0	0	0	0	0	200	903	0	0	0	0	0	0	0	603	903	0
6688	3	0	0	0	0	0	0	200	300	0	0	0	0	0	0	0	200	903	0	0	0	0	0	0	0	603	903	0
6688	4	0	0	0	0	0	0	200	300	0	0	0	0	0	0	0	200	903	0	0	0	0	0	0	0	603	903	0
6688	5	0	0	0	0	0	0	200	300	0	0	0	0	0	0	0	200	903	0	0	0	0	0	0	0	603	903	0
6688	6	0	0	0	0	0	0	200	300	0	0	0	0	0	0	0	200	903	0	0	0	0	0	0	0	603	903	0
6688	7	0	0	0	0	0	0	200	300	0	0	0	0	0	0	0	200	903	0	0	0	0	0	0	0	603	903	0
6688	8	0	0	0	0	0	0	200	300	0	0	0	0	0	0	0	200	903	0	0	0	0	0	0	0	603	903	0
6688	9	0	0	0	0	0	0	200	300	0	0	0	0	0	0	0	200	903	0	0	0	0	0	0	0	603	903	0
6689	0	0	0	0	0	0	0	200	300	0	0	0	0	0	0	0	200	903	0	0	0	0	0	0	0	603	903	0
6689	1	0	0	0	0	0	0	200	300	0	0	0	0	0	0	0	200	903	0	0	0	0	0	0	0	603	903	0
6689	2	0	0	0	0	0	0	200	300	0	0	0	0	0	0	0	200	903	0	0	0	0	0	0	0	603	903	0
6689	3	0	0	0	0	0	0	200	300	0	0	0	0	0	0	0	200	903	0	0	0	0	0	0	0	603	903	0
6689	4	0	0	0	0	0	0	200	300	0	0	0	0	0	0	0	200	903	0	0	0	0	0	0	0	603	903	0
6689	5	0	0	0	0	0	0	200	300	0	0	0	0	0	0	0	200	903	0	0	0	0	0	0	0	603	903	0
6689	6	0	0	0	0	0	0	200	300	0	0	0	0	0	0	0	200	903	0	0	0	0	0	0	0	603	903	0
6689	7	0	0	0	0	0	0	200	300	0	0	0	0	0	0	0	200	903	0	0	0	0	0	0	0	603	903	0
6689	8	0	0	0	0	0	0	200	300	0	0	0	0	0	0	0	200	903	0	0	0	0	0	0	0	603	903	0
6689	9	0	0	0	0	0	0	200	300	0	0	0	0	0	0	0	200	903	0	0	0	0	0	0	0	603	903	0
6690	0	0	0	0	0	0	0	200	300	0	0	0	0	0	0	0	200	903	0	0	0	0	0	0	0	603	903	0
6690	1	0	0	0	0	0	0	200	300	0	0	0	0	0	0	0	200	903	0	0	0	0	0	0	0	603	903	0
6690	2	0	0	0	0	0	0	200	300	0	0	0	0	0	0	0	200	903	0	0	0	0	0	0	0	603	903	0
6690	3	0	0	0	0	0	0	200	300	0	0	0	0	0	0	0	200	903	0	0	0	0	0	0	0	603	903	0
6690	4	0	0	0	0	0	0	200	300	0	0	0	0	0	0	0	200	903	0	0	0	0	0	0	0	603	903	0
6690	5	0	0	0	0	0	0	200	300	0	0	0	0	0	0	0	200	903	0	0	0	0	0	0	0	603	903	0
6690	6	0	0	0	0	0	0	200	300	0	0	0	0	0	0	0	200	903	0	0	0	0	0	0	0	603	903	0
6690	7	0	0	0	0	0	0	200	300	0	0	0	0	0	0	0	200	903	0	0	0	0	0	0	0	603	903	0
6690	8	0	0	0	0	0	0	200	300	0	0	0	0	0	0	0	200	903	0	0	0	0	0	0	0	603	903	0
6690	9	0	0	0	0	0	0	200	300	0	0	0	0	0	0	0	200	903	0	0	0	0	0	0	0	603	903	0
6691	0	0	0	0	0	0	0	200	300	0	0	0	0	0	0	0	200	903	0	0	0	0	0	0	0	603	903	0
6691	1	0	0	0	0	0	0	200	300	0	0	0	0	0	0	0	200	903	0	0	0	0	0	0	0	603	903	0
6691	2	0	0	0	0	0	0	200	300	0	0	0	0	0	0	0	200	903	0	0	0	0	0	0	0	603	903	0
6691	3	0	0	0	0	0	0	200	300	0	0	0	0	0	0	0	200	903	0	0	0	0	0	0	0	603	903	0
6691	4	0	0	0	0	0	0	200	300	0	0	0	0	0	0	0	200	903	0	0	0	0	0	0	0	603	903	0
6691	5	0	0	0	0	0	0	200	300	0	0	0	0	0	0	0	200	903	0	0	0	0	0	0	0	603	903	0
6691	6	0	0	0	0	0	0	200	300	0	0	0	0	0	0	0	200	903	0	0	0	0	0	0	0	603	903	0
6691	7	0	0	0	0	0	0	200	300	0	0	0	0	0	0	0	200	903	0	0	0	0	0	0	0	603	903	0
6691	8	0	0	0	0	0	0	200	300	0	0	0	0	0	0	0	200	903	0	0	0	0	0	0	0	603	903	0
6691	9	0	0	0	0	0	0	200	300	0	0	0	0	0	0	0	200	903	0	0	0	0	0	0	0	603	903	0
6692	0	0	0	0	0	0	0	200	300	0	0	0	0	0	0	0	200	903	0	0	0	0	0	0	0	603	903	0
6692	1	0	0	0	0	0	0	200	300	0	0	0	0	0	0	0	200	903	0	0	0	0	0	0	0	603	903	0
6692	2	0	0	0	0	0	0	200	300	0	0	0	0	0	0	0	200	903	0	0	0	0	0	0	0	603	903	0
6692	3	0	0	0	0	0	0	200	300	0	0	0	0	0	0	0	200	903	0	0	0	0	0	0	0	603	903	0
6692	4	0	0	0	0	0	0	200	300	0	0	0	0	0	0	0	200	903	0	0	0	0	0	0	0	603	903	0
6692	5	0	0	0	0	0	0	200	300	0	0	0	0	0	0	0	200	903	0	0	0	0	0	0	0	603	903	0
6692	6	0	0	0	0	0	0	200	300	0	0	0	0	0	0	0	200	903	0	0	0	0	0	0	0	603	903	0
6692	7	0	0	0	0	0	0	200	300	0	0	0	0	0	0	0	200	903	0	0	0	0	0	0	0	603	903	0
6692	8	0	0	0	0	0	0	200	300	0	0	0	0	0	0	0	200	903	0	0	0	0	0	0	0	603	903	0
6692	9	0	0	0	0	0	0	200	300	0	0	0	0	0	0	0	200	903	0	0	0	0	0	0	0	603	903	0
6693	0	0	0	0	0	0	0	200	300	0	0	0	0	0	0	0	200	903	0	0	0	0	0	0	0	603	903	0
6693	1	0	0	0	0	0	0	200	300	0	0	0	0	0	0	0	200	903	0	0	0	0	0	0	0	603	903	0
6693	2	0	0	0	0	0	0	200	300	0	0	0	0	0	0	0	200	903	0	0	0	0	0	0	0	603	903	0
6693	3	0	0	0	0	0	0	200	300	0	0	0	0	0	0	0	200	903	0	0	0	0	0	0	0	603	903	0
6693	4	0	0	0	0	0	0	200	300	0	0	0	0	0	0	0	200	903	0	0	0	0	0	0	0	603	903	0
6693	5	0	0	0	0	0	0	200	300	0	0	0	0	0	0	0	200	903	0	0	0	0	0	0	0	603	903	0
6693	6	0	0	0	0	0	0	200	300	0	0	0	0	0	0	0	200	903	0	0	0	0	0	0	0	603	903	0
6693	7	0	0	0	0	0	0	200	300	0	0	0	0	0	0	0	200	903	0	0	0	0	0	0	0	603	903	0
6693	8	0	0	0	0	0	0	200	300	0	0	0	0	0	0	0	200	903	0	0	0	0	0	0	0	603	903	0
6693	9	0	0	0	0	0	0	200	300	0	0	0	0	0	0	0	200	903	0	0	0	0	0	0	0	603	903	0
6694	0	0	0	0	0	0	0	200	300	0	0	0	0	0	0	0	200	903	0	0	0	0	0	0	0	603	903	0
6694	1	0	0	0	0	0	0	200	300	0	0	0	0	0	0	0	200	903	0	0	0	0	0	0	0	603	903	0
6694	2	0	0	0	0	0	0	200	300	0	0	0	0	0	0	0	200	903	0	0	0	0	0	0	0	603	903	0
6694	3	0	0	0	0	0	0	200	300	0	0	0	0	0	0	0	200	903	0	0	0	0	0	0	0	603	903	0
6694	4	0	0	0	0	0	0	200	300	0	0	0	0	0	0	0	200	903	0	0	0	0	0	0	0	603	903	0
6694	5	0	0	0	0	0	0	200	300	0	0	0	0	0	0	0	200	903	0	0	0	0	0	0	0	603	903	0
6694	6	0	0	0	0	0	0	200	300	0	0	0	0	0	0	0	200	903	0	0	0	0	0	0	0	603	903	0
6694	7	0	0	0	0	0	0	200	300	0	0	0	0	0	0	0	200	903	0	0	0	0	0	0	0	603	903	0
6694	8	0	0	0	0	0	0	200	300	0	0	0	0	0	0	0	200	903	0	0	0	0	0	0	0	603	903	0
6694	9	0	0	0	0	0	0	200	300	0	0	0	0	0	0	0	200	903	0	0	0	0	0	0	0	603	903	0
6695	0	0	0	0	0	0	0	200	300	0	0	0	0	0	0	0	200	903	0	0	0	0	0	0	0	603	903	0
6695	1	0	0	0	0	0	0	200	300	0	0	0	0	0	0	0	200	903	0	0	0	0	0	0	0	603	903	0
6695	2	0	0	0	0	0	0	200	300	0	0	0	0	0	0	0	200	903	0	0	0	0	0	0	0	603	903	0
6695	3	0	0	0	0	0	0	200	300	0	0	0	0	0	0	0	200	903	0	0	0	0	0	0	0	603	903	0
6695	4	0	0	0	0	0	0	200	300	0	0	0	0	0	0	0	200	903	0	0	0	0	0	0	0	603	903	0
6695	5	0	0	0	0	0	0	200	300	0	0	0	0	0	0	0	200	903	0	0	0	0	0	0	0	603	903	0
6695	6	0	0	0	0	0	0	200	300	0	0	0	0	0	0	0	200	903	0	0	0	0	0	0	0	603	903	0
6695	7	0	0	0	0	0	0	200	300	0	0	0	0	0	0	0	200	903	0	0	0	0	0	0	0	603	903	0
6695	8	0	0	0	0	0	0	200	300	0	0	0	0	0	0	0	200	903	0	0	0	0	0	0	0	603	903	0
6695	9	0	0	0	0	0	0	200	300	0	0	0	0	0	0	0	200	903	0	0	0	0	0	0	0	603	903	0
6696	0	0	0	0	0	0	0	200	300	0	0	0	0	0	0	0	200	903	0	0	0	0	0	0	0	603	903	0
6696	1	0	0	0	0	0	0	200	300	0	0	0	0	0	0	0	200	903	0	0	0	0	0	0	0	603	903	0
6696	2	0	0	0	0	0	0	200	300	0	0	0	0	0	0	0	200	903	0	0	0	0	0	0	0	603	903	0
6696	3	0	0	0	0	0	0	200	300	0	0	0	0	0	0	0	200	903	0	0	0	0	0	0	0	603	903	0
6696	4	0	0	0	0	0	0	200	300	0	0	0	0	0	0	0	200	903	0	0	0	0	0	0	0	603	903	0
6696	5	0	0	0	0	0	0	200	300	0	0	0	0	0	0	0	200	903	0	0	0	0	0	0	0	603	903	0
6696	6	0	0	0	0	0	0	200	300	0	0	0	0	0	0	0	200	903	0	0	0	0	0	0	0	603	903	0
6696	7	0	0	0	0	0	0	200	300	0	0	0	0	0	0	0	200	903	0	0	0	0	0	0	0	603	903	0
6696	8	0	0	0	0	0	0	200	300	0	0	0	0	0	0	0	200	903	0	0	0	0	0	0	0	603	903	0
6696	9	0	0	0	0	0	0	200	300	0	0	0	0	0	0	0	200	903	0	0	0	0	0	0	0	603	903	0
6697	0	0	0	0	0	0	0	200	300	0	0	0	0	0	0	0	200	903	0	0	0	0	0	0	0	603	903	0
6697	1	0	0	0	0	0	0	200	300	0	0	0	0	0	0	0	200	903	0	0	0	0	0	0	0	603	903	0
6697	2	0	0	0	0	0	0	200	300	0	0	0	0	0	0	0	200	903	0	0	0	0	0	0	0	603	903	0
6697	3	0	0	0	0	0	0	200	300	0	0	0	0	0	0	0	200	903	0	0	0	0	0	0	0	603	903	0
6697	4	0	0	0	0	0	0	200	300	0	0	0	0	0	0	0	200	903	0	0	0	0	0	0	0	603	903	0
6697	5	0	0	0	0	0	0	200	300	0	0	0	0	0	0	0	200	903	0	0	0	0	0	0	0	603	903	0
6697	6	0	0	0	0	0	0	200	300	0	0	0	0	0	0	0	200	903	0	0	0	0	0	0	0	603	903	0
6697	7	0	0	0	0	0	0	200	300	0	0	0	0	0	0	0	200	903	0	0	0	0	0	0	0	603	903	0
6697	8	0	0	0	0	0	0	200	300	0	0	0	0	0	0	0	200	903	0	0	0	0	0	0	0	603	903	0
6697	9	0	0	0	0	0	0	200	300	0	0	0	0	0	0	0	200	903	0	0	0	0	0	0	0	603	903	0
6698	0	0	0	0	0	0	0	200	300	0	0	0	0	0	0	0	200	903	0	0	0	0	0	0	0	603	903	0
6698	1	0	0	0	0	0	0	200	300	0	0	0	0	0	0	0	200	903	0	0	0	0	0	0	0	603	903	0
6698	2	0	0	0	0	0	0	200	300	0	0	0	0	0	0	0	200	903	0	0	0	0	0	0	0	603	903	0
6698	3	0	0	0	0	0	0	200	300	0	0	0	0	0	0	0	200	903	0	0	0	0	0	0	0	603	903	0
6698	4	0	0	0	0	0	0	200	300	0	0	0	0	0	0	0	200	903	0	0	0	0	0	0	0	603	903	0
6698	5	0	0	0	0	0	0	200	300	0	0	0	0	0	0	0	200	903	0	0	0	0	0	0	0	603	903	0
6698	6	0	0	0	0	0	0	200	300	0	0	0	0	0	0	0	200	903	0	0	0	0	0	0	0	603	903	0
6698	7	0	0	0	0	0	0	200	300	0	0	0	0	0	0	0	200	903	0	0	0	0	0	0	0	603	903	0
6698	8	0	0	0	0	0	0	200	300	0	0	0	0	0	0	0	200	903	0	0	0	0	0	0	0	603	903	0
6698	9	0	0	0	0	0	0	200	300	0	0	0	0	0	0	0	200	903	0	0	0	0	0	0	0	603	903	0
6699	0	0	0	0	0	0	0	200	300	0	0	0	0	0	0	0	200	903	0	0	0	0	0	0	0	603	903	0
6699	1	0	0	0	0	0	0	200	300	0	0	0	0	0	0	0	200	903	0	0	0	0	0	0	0	603	903	0
6699	2	0	0	0	0	0	0	200	300	0	0	0	0	0	0	0	200	903	0	0	0	0	0	0	0	603	903	0
6699	3	0	0	0	0	0	0	200	300	0	0	0	0	0	0	0	200	903	0	0	0	0	0	0	0	603	903	0
6699	4	0	0	0	0	0	0	200	300	0	0	0	0	0	0	0	200	903	0	0	0	0	0	0	0	603	903	0
6699	5	0	0	0	0	0	0	200	300	0	0	0	0	0	0	0	200	903	0	0	0	0	0	0	0	603	903	0
6699	6	0	0	0	0	0	0	200	300	0	0	0	0	0	0	0	200	903	0	0	0	0	0	0	0	603	903	0
6699	7	0	0	0	0	0	0	200	300	0	0	0	0	0	0	0	200	903	0	0	0	0	0	0	0	603	903	0
6699	8	0	0	0	0	0	0	200	300	0	0	0	0	0	0	0	200	903	0	0	0	0	0	0	0	603	903	0
6699	9	0	0	0	0	0	0	200	300	0	0	0	0	0	0	0	200	903	0	0	0	0	0	0	0	603	903	0
6700	0	0	0	0	0	0	0	200	300	0	0	0	0	0	0	0	200	903	0	0	0	0	0	0	0	603	903	0
6700	1	0	0	0	0	0	0	200	300	0	0	0	0	0	0	0	200	903	0	0	0	0	0	0	0	603	903	0
6700	2	0	0	0	0	0	0	200	300	0	0	0	0	0	0	0	200	903	0	0	0	0	0	0	0	603	903	0
6700	3	0	0	0	0	0	0	200	300	0	0	0	0	0	0	0	200	903	0	0	0	0	0	0	0	603	903	0
6700	4	0	0	0	0	0	0	200	300	0	0	0	0	0	0	0	200	903	0	0	0	0	0	0	0	603	903	0
6700	5	0	0	0	0	0	0	200	300	0	0	0	0	0	0	0	200	903	0	0	0	0	0	0	0	603	903	0
6700	6	0	0	0	0	0	0	200	300	0	0	0	0	0	0	0	200	903	0	0	0	0	0	0	0	603	903	0
6700	7	0	0	0	0	0	0	200	300	0	0	0	0	0	0	0	200	903	0	0	0	0	0	0	0	603	903	0
6700	8	0	0	0	0	0	0	200	300	0	0	0	0	0	0	0	200	903	0	0	0	0	0	0	0	603	903	0
6700	9	0	0	0	0	0	0	200	300	0	0	0	0	0	0	0	200	903	0	0	0	0	0	0	0	603	903	0
6701	0	0	0	0	0	0	0	200	300	0	0	0	0	0	0	0	200	903	0	0	0	0	0	0	0	603	903	0
6701	1	0	0	0	0	0	0	200	300	0	0	0	0	0	0	0	200	903	0	0	0	0	0	0	0	603	903	0
6701	2	0	0	0	0	0	0	200	300	0	0	0	0	0	0	0	200	903	0	0	0	0	0	0	0	603	903	0
6701	3	0	0	0	0	0	0	200	300	0	0	0	0	0	0	0	200	903	0	0	0	0	0	0	0	603	903	0
6701	4	0	0	0	0	0	0	200	300	0	0	0	0	0	0	0	200	903	0	0	0	0	0	0	0	603	903	0
6701	5	0	0	0	0	0	0	200	300	0	0	0	0	0	0	0	200	903	0	0	0	0	0	0	0	603	903	0
6701	6	0	0	0	0	0	0	200	300	0	0	0	0	0	0	0	200	903	0	0	0	0	0	0	0	603	903	0
6701	7	0	0	0	0	0	0	200	300	0	0	0	0	0	0	0	200	903	0	0	0	0	0	0	0	603	903	0
6701	8	0	0	0	0	0	0	200	300	0	0	0	0	0	0	0	200	903	0	0	0	0	0	0	0	603	903	0
6701	9	0	0	0	0	0	0	200	300	0	0	0	0	0	0	0	200	903	0	0	0	0	0	0	0	603	903	0
6702	0	0	0	0	0	0	0	200	300	0	0	0	0	0	0	0	200	903	0	0	0	0	0	0	0	603	903	0
6702	1	0	0	0	0	0	0	200	300	0	0	0	0	0	0	0	200	903	0	0	0	0	0	0	0	603	903	0
6702	2	0	0	0	0	0	0	200	300	0	0	0	0	0	0	0	200	903	0	0	0	0	0	0	0	603	903	0
6702	3	0	0	0	0	0	0	200	300	0	0	0	0	0	0	0	200	903	0	0	0	0	0	0	0	603	903	0
6702	4	0	0	0	0	0	0	200	300	0	0	0	0	0	0	0	200	903	0	0	0	0	0	0	0	603	903	0
6702	5	0	0	0	0	0	0	200	300	0	0	0	0	0	0	0	200	903	0	0	0	0	0	0	0	603	903	0
6702	6	0	0	0	0	0	0	200	300	0	0	0	0	0	0	0	200	903	0	0	0	0	0	0	0	603	903	0
6702	7	0	0	0	0	0	0	200	300	0	0	0	0	0	0	0	200	903	0	0	0	0	0	0	0	603	903	0
6702	8	0	0	0	0	0	0	200	300	0	0	0	0	0	0	0	200	903	0	0	0	0	0	0	0	603	903	0
6702	9	0	0	0	0	0	0	200	300	0	0	0	0	0	0	0	200	903	0	0	0	0	0	0	0	603	903	0
6703	0	0	0	0	0	0	0	200	300	0	0	0	0	0	0	0	200	903	0	0	0	0	0	0	0	603	903	0
6703	1	0	0	0	0	0	0	200	300	0	0	0	0	0	0	0	200	903	0	0	0	0	0	0	0	603	903	0
6703	2	0	0	0	0	0	0	200	300	0	0	0	0	0	0	0	200	903	0	0	0	0	0	0	0	603	903	0
6703	3	0	0	0	0	0	0	200	300	0	0	0	0	0	0	0	200	903	0	0	0	0	0	0	0	603	903	0
6703	4	0	0	0	0	0	0	200	300	0	0	0	0	0	0	0	200	903	0	0	0	0	0	0	0	603	903	0
6703	5	0	0	0	0	0	0	200	300	0	0	0	0	0	0	0	200	903	0	0	0	0	0	0	0	603	903	0
6703	6	0	0	0	0	0	0	200	300	0	0	0	0	0	0	0	200	903	0	0	0	0	0	0	0	603	903	0
6703	7	0	0	0	0	0	0	200	300	0	0	0	0	0	0	0	200	903	0	0	0	0	0	0	0	603	903	0
6703	8	0	0	0	0	0	0	200	300	0	0	0	0	0	0	0	200	903	0	0	0	0	0	0	0	603	903	0
6703	9	0	0	0	0	0	0	200	300	0	0	0	0	0	0	0	200	903	0	0	0	0	0	0	0	603	903	0
6704	0	0	0	0	0	0	0	200	300	0	0	0	0	0	0	0	200	903	0	0	0	0	0	0	0	603	903	0
6704	1	0	0	0	0	0	0	200	300	0	0	0	0	0	0	0	200	903	0	0	0	0	0	0	0	603	903	0
6704	2	0	0	0	0	0	0	200	300	0	0	0	0	0	0	0	200	903	0	0	0	0	0	0	0	603	903	0
6704	3	0	0	0	0	0	0	200	300	0	0	0	0	0	0	0	200	903	0	0	0	0	0	0	0	603	903	0
6704	4	0	0	0	0	0	0	200	300	0	0	0	0	0	0	0	200	903	0	0	0	0	0	0	0	603	903	0
6704	5	0	0	0	0	0	0	200	300	0	0	0	0	0	0	0	200	903	0	0	0	0	0	0	0	603	903	0
6704	6	0	0	0	0	0	0	200	300	0	0	0	0	0	0	0	200	903	0	0	0	0	0	0	0	603	903	0
6704	7	0	0	0	0	0	0	200	300	0	0	0	0	0	0	0	200	903	0	0	0	0	0	0	0	603	903	0
6704	8	0	0	0	0	0	0	200	300	0	0	0	0	0	0	0	200	903	0	0	0	0	0	0	0	603	903	0
6704	9	0	0	0	0	0	0	200	300	0	0	0	0	0	0	0	200	903	0	0	0	0	0	0	0	603	903	0
6705	0	0	0	0	0	0	0	200	300	0	0	0	0	0	0	0	200	903	0	0	0	0	0	0	0	603	903	0
6705	1	0	0	0	0	0	0	200	300	0	0	0	0	0	0	0	200	903	0	0	0	0	0	0	0	603	903	0
6705	2	0	0	0	0	0	0	200	300	0	0	0	0	0	0	0	200	903	0	0	0	0	0	0	0	603	903	0
6705	3	0	0	0	0	0	0	200	300	0	0	0	0	0	0	0	200	903	0	0	0	0	0	0	0	603	903	0
6705	4	0	0	0	0	0	0	200	300	0	0	0	0	0	0	0	200	903	0	0	0	0	0	0	0	603	903	0
6705	5	0	0	0	0	0	0	200	300	0	0	0	0	0	0	0	200	903	0	0	0	0	0	0	0	603	903	0
6705	6	0	0	0	0	0	0	200	300	0	0	0	0	0	0	0	200	903	0	0	0	0	0	0	0	603	903	0
6705	7	0	0	0	0	0	0	200	300	0	0	0	0	0	0	0	200	903	0	0	0	0	0	0	0	603	903	0
6705	8	0	0	0	0	0	0	200	300	0	0	0	0	0	0	0	200	903	0	0	0	0	0	0	0	603	903	0
6705	9	0	0	0	0	0	0	200	300	0	0	0	0	0	0	0	200	903	0	0	0	0	0	0	0	603	903	0
6706	0	0	0	0	0	0	0	200	300	0	0	0	0	0	0	0	200	903	0	0	0	0	0	0	0	603	903	0
6706	1	0	0	0	0	0	0	200	300	0	0	0	0	0	0	0	200	903	0	0	0	0	0	0	0	603	903	0
6706	2	0	0	0	0	0	0	200	300	0	0	0	0	0	0	0	200	903	0	0	0	0	0	0	0	603	903	0
6706	3	0	0	0	0	0	0	200	300	0	0	0	0	0	0	0	200	903	0	0	0	0	0	0	0	603	903	0
6706	4	0	0	0	0	0	0	200	300	0	0	0	0	0	0	0	200	903	0	0	0	0	0	0	0	603	903	0
6706	5	0	0	0	0	0	0	200	300	0	0	0	0	0	0	0	200	903	0	0	0	0	0	0	0	603	903	0
6706	6	0	0	0	0	0	0	200	300	0	0	0	0	0	0	0	200	903	0	0	0	0	0	0	0	603	903	0
6706	7	0	0	0	0	0	0	200	300	0	0	0	0	0	0	0	200	903	0	0	0	0	0	0	0	603	903	0
6706	8	0	0	0	0	0	0	200	300	0	0	0	0	0	0	0	200	903	0	0	0	0	0	0	0	603	903	0
6706	9	0	0	0	0	0	0	200	300	0	0	0	0	0	0	0	200	903	0	0	0	0	0	0	0	603	903	0
6707	0	0	0	0	0	0	0	200	300	0	0	0	0	0	0	0	200	903	0	0	0	0	0	0	0	603	903	0
6707	1	0	0	0	0	0	0	200	300	0	0	0	0	0	0	0	200	903	0	0	0	0	0	0	0	603	903	0
6707	2	0	0	0	0	0	0	200	300	0	0	0	0	0	0	0	200	903	0	0	0	0	0	0	0	603	903	0
6707	3	0	0	0	0	0	0	200	300	0	0	0	0	0	0	0	200	903	0	0	0	0	0	0	0	603	903	0
6707	4	0	0	0	0	0	0	200	300	0	0	0	0	0	0	0	200	903	0	0	0	0	0	0	0	603	903	0
6707	5	0	0	0	0	0	0	200	300	0	0	0	0	0	0	0	200	903	0	0	0	0	0	0	0	603	903	0
6707	6	0	0	0	0	0	0	200	300	0	0	0	0	0	0	0	200	903	0	0	0	0	0	0	0	603	903	0
6707	7	0	0	0	0	0	0	200	300	0	0	0	0	0	0	0	200	903	0	0	0	0	0	0	0	603	903	0
6707	8	0	0	0	0	0	0	200	300	0	0	0	0	0	0	0	200	903	0	0	0	0	0	0	0	603	903	0
6707	9	0	0	0	0	0	0	200	300	0	0	0	0	0	0	0	200	903	0	0	0	0	0	0	0	603	903	0
6708	0	0	0	0	0	0	0	200	300	0	0	0	0	0	0	0	200	903	0	0	0	0	0	0	0	603	903	0
6708	1	0	0	0	0	0	0	200	300	0	0	0	0	0	0	0	200	903	0	0	0	0	0	0	0	603	903	0
6708	2	0	0	0	0	0	0	200	300	0	0	0	0	0	0	0	200	903	0	0	0	0	0	0	0	603	903	0
6708	3	0	0	0	0	0	0	200	300	0	0	0	0	0	0	0	200	903	0	0	0	0	0	0	0	603	903	0
6708	4	0	0	0	0	0	0	200	300	0	0	0	0	0	0	0	200	903	0	0	0	0	0	0	0	603	903	0
6708	5	0	0	0	0	0	0	200	300	0	0	0	0	0	0	0	200	903	0	0	0	0	0	0	0	603	903	0
6708	6	0	0	0	0	0	0	200	300	0	0	0	0	0	0	0	200	903	0	0	0	0	0	0	0	603	903	0
6708	7	0	0	0	0	0	0	200	300	0	0	0	0	0	0	0	200	903	0	0	0	0	0	0	0	603	903	0
6708	8	0	0	0	0	0	0	200	300	0	0	0	0	0	0	0	200	903	0	0	0	0	0	0	0	603	903	0
6708	9	0	0	0	0	0	0	200	300	0	0	0	0	0	0	0	200	903	0	0	0	0	0	0	0	603	903	0
6709	0	0	0	0	0	0	0	200	300	0	0	0	0	0	0	0	200	903	0	0	0	0	0	0	0	603	903	0
6709	1	0	0	0	0	0	0	200	300	0	0	0	0	0	0	0	200	903	0	0	0	0	0	0	0	603	903	0
6709	2	0	0	0	0	0	0	200	300	0	0	0	0	0	0	0	200	903	0	0	0	0	0	0	0	603	903	0
6709	3	0	0	0	0	0	0	200	300	0	0	0	0	0	0	0	200	903	0	0	0	0	0	0	0	603	903	0
6709	4	0	0	0	0	0	0	200	300	0	0	0	0	0	0	0	200	903	0	0	0	0	0	0	0	603	903	0
6709	5	0	0	0	0	0	0	200	300	0	0	0	0	0	0	0	200	903	0	0	0	0	0	0	0	603	903	0
6709	6	0	0	0	0	0	0	200	300	0	0	0	0	0	0	0	200	903	0	0	0	0	0	0	0	603	903	0
6709	7	0	0	0	0	0	0	200	300	0	0	0	0	0	0	0	200	903	0	0	0	0	0	0	0	603	903	0
6709	8	0	0	0	0	0	0	200	300	0	0	0	0	0	0	0	200	903	0	0	0	0	0	0	0	603	903	0
6709	9	0	0	0	0	0	0	200	300	0	0	0	0	0	0	0	200	903	0	0	0	0	0	0	0	603	903	0
6710	0	0	0	0	0	0	0	200	300	0	0	0	0	0	0	0	200	903	0	0	0	0	0	0	0	603	903	0
6710	1	0	0	0	0	0	0	200	300	0	0	0	0	0	0	0	200	903	0	0	0	0	0	0	0	603	903	0
6710	2	0	0	0	0	0	0	200	300	0	0	0	0	0	0	0	200	903	0	0	0	0	0	0	0	603	903	0
6710	3	0	0	0	0	0	0	200	300	0	0	0	0	0	0	0	200	903	0	0	0	0	0	0	0	603	903	0
6710	4	0	0	0	0	0	0	200	300	0	0	0	0	0	0	0	200	903	0	0	0	0	0	0	0	603	903	0
6710	5	0	0	0	0	0	0	200	300	0	0	0	0	0	0	0	200	903	0	0	0	0	0	0	0	603	903	0
6710	6	0	0	0	0	0	0	200	300	0	0	0	0	0	0	0	200	903	0	0	0	0	0	0	0	603	903	0
6710	7	0	0	0	0	0	0	200	300	0	0	0	0	0	0	0	200	903	0	0	0	0	0	0	0	603	903	0
6710	8	0	0	0	0	0	0	200	300	0	0	0	0	0	0	0	200	903	0	0	0	0	0	0	0	603	903	0
6710	9	0	0	0	0	0	0	200	300	0	0	0	0	0	0	0	200	903	0	0	0	0	0	0	0	603	903	0
6711	0	0	0	0	0	0	0	200	300	0	0	0	0	0	0	0	200	903	0	0	0	0	0	0	0	603	903	0
6711	1	0	0	0	0	0	0	200	300	0	0	0	0	0	0	0	200	903	0	0	0	0	0	0	0	603	903	0
6711	2	0	0	0	0	0	0	200	300	0	0	0	0	0	0	0	200	903	0	0	0	0	0	0	0	603	903	0
6711	3	0	0	0	0	0	0	200	300	0	0	0	0	0	0	0	200	903	0	0	0	0	0	0	0	603	903	0
6711	4	0	0	0	0	0	0	200	300	0	0	0	0	0	0	0	200	903	0	0	0	0	0	0	0	603	903	0
6711	5	0	0	0	0	0	0	200	300	0	0	0	0	0	0	0	200	903	0	0	0	0	0	0	0	603	903	0
6711	6	0	0	0	0	0	0	200	300	0	0	0	0	0	0	0	200	903	0	0	0	0	0	0	0	603	903	0
6711	7	0	0	0	0	0	0	200	300	0	0	0	0	0	0	0	200	903	0	0	0	0	0	0	0	603	903	0
6711	8	0	0	0	0	0	0	200	300	0	0	0	0	0	0	0	200	903	0	0	0	0	0	0	0	603	903	0
6711	9	0	0	0	0	0	0	200	300	0	0	0	0	0	0	0	200	903	0	0	0	0	0	0	0	603	903	0
6712	0	0	0	0	0	0	0	200	300	0	0	0	0	0	0	0	200	903	0	0	0	0	0	0	0	603	903	0
6712	1	0	0	0	0	0	0	200	300	0	0	0	0	0	0	0	200	903	0	0	0	0	0	0	0	603	903	0
6712	2	0	0	0	0	0	0	200	300	0	0	0	0	0	0	0	200	903	0	0	0	0	0	0	0	603	903	0
6712	3	0	0	0	0	0	0	200	300	0	0	0	0	0	0	0	200	903	0	0	0	0	0	0	0	603	903	0
6712	4	0	0	0	0	0	0	200	300	0	0	0	0	0	0	0	200	903	0	0	0	0	0	0	0	603	903	0
6712	5	0	0	0	0	0	0	200	300	0	0	0	0	0	0	0	200	903	0	0	0	0	0	0	0	603	903	0
6712	6	0	0	0	0	0	0	200	300	0	0	0	0	0	0	0	200	903	0	0	0	0	0	0	0	603	903	0
6712	7	0	0	0	0	0	0	200	300	0	0	0	0	0	0	0	200	903	0	0	0	0	0	0	0	603	903	0
6712	8	0	0	0	0	0	0	200	300	0	0	0	0	0	0	0	200	903	0	0	0	0	0	0	0	603	903	0
6712	9	0	0	0	0	0	0	200	300	0	0	0	0	0	0	0	200	903	0	0	0	0	0	0	0	603	903	0
6713	0	0	0	0	0	0	0	200	300	0	0	0	0	0	0	0	200	903	0	0	0	0	0	0	0	603	903	0
6713	1	0	0	0	0	0	0	200	300	0	0	0	0	0	0	0	200	903	0	0	0	0	0	0	0	603	903	0
6713	2	0	0	0	0	0	0	200	300	0	0	0	0	0	0	0	200	903	0	0	0	0	0	0	0	603	903	0
6713	3	0	0	0	0	0	0	200	300	0	0	0	0	0	0	0	200	903	0	0	0	0	0	0	0	603	903	0
6713	4	0	0	0	0	0	0	200	300	0	0	0	0	0	0	0	200	903	0	0	0	0	0	0	0	603	903	0
6713	5	0	0	0	0	0	0	200	300	0	0	0	0	0	0	0	200	903	0	0	0	0	0	0	0	603	903	0
6713	6	0	0	0	0	0	0	200	300	0	0	0	0	0	0	0	200	903	0	0	0	0	0	0	0	603	903	0
6713	7	0	0	0	0	0	0	200	300	0	0	0	0	0	0	0	200	903	0	0	0	0	0	0	0	603	903	0
6713	8	0	0	0	0	0	0	200	300	0	0	0	0	0	0	0	200	903	0	0	0	0	0	0	0	603	903	0
6713	9	0	0	0	0	0	0	200	300	0	0	0	0	0	0	0	200	903	0	0	0	0	0	0	0	603	903	0
6714	0	0	0	0	0	0	0	200	300	0	0	0	0	0	0	0	200	903	0	0	0	0	0	0	0	603	903	0
6714	1	0	0	0	0	0	0	200	300	0	0	0	0	0	0	0	200	903	0	0	0	0	0	0	0	603	903	0
6714	2	0	0	0	0	0	0	200	300	0	0	0	0	0	0	0	200	903	0	0	0	0	0	0	0	603	903	0
6714	3	0	0	0	0	0	0	200	300	0	0	0	0	0	0	0	200	903	0	0	0	0	0	0	0	603	903	0
6714	4	0	0	0	0	0	0	200	300	0	0	0	0	0	0	0	200	903	0	0	0	0	0	0	0	603	903	0
6714	5	0	0	0	0	0	0	200	300	0	0	0	0	0	0	0	200	903	0	0	0	0	0	0	0	603	903	0
6714	6	0	0	0	0	0	0	200	300	0	0	0	0	0	0	0	200	903	0	0	0	0	0	0	0	603	903	0
6714	7	0	0	0	0	0	0	200	300	0	0	0	0	0	0	0	200	903	0	0	0	0	0	0	0	603	903	0
6714	8	0	0	0	0	0	0	200	300	0	0	0	0	0	0	0	200	903	0	0	0	0	0	0	0	603	903	0
6714	9	0	0	0	0	0	0	200	300	0	0	0	0	0	0	0	200	903	0	0	0	0	0	0	0	603	903	0
6715	0	0	0	0	0	0	0	200	300	0	0	0	0	0	0	0	200	903	0	0	0	0	0	0	0	603	903	0
6715	1	0	0	0	0	0	0	200	300	0	0	0	0	0	0	0	200	903	0	0	0	0	0	0	0	603	903	0
6715	2	0	0	0	0	0	0	200	300	0	0	0	0	0	0	0	200	903	0	0	0	0	0	0	0	603	903	0
6715	3	0	0	0	0	0	0	200	300	0	0	0	0	0	0	0	200	903	0	0	0	0	0	0	0	603	903	0
6715	4	0	0	0	0	0	0	200	300	0	0	0	0	0	0	0	200	903	0	0	0	0	0	0	0	603	903	0
6715	5	0	0	0	0	0	0	200	300	0	0	0	0	0	0	0	200	903	0	0	0	0	0	0	0	603	903	0
6715	6	0	0	0	0	0	0	200	300	0	0	0	0	0	0	0	200	903	0	0	0	0	0	0	0	603	903	0
6715	7	0	0	0	0	0	0	200	300	0	0	0	0	0	0	0	200	903	0	0	0	0	0	0	0	603	903	0
6715	8	0	0	0	0	0	0	200	300	0	0	0	0	0	0	0	200	903	0	0	0	0	0	0	0	603	903	0
6715	9	0	0	0	0	0	0	200	300	0	0	0	0	0	0	0	200	903	0	0	0	0	0	0	0	603	903	0
6716	0	0	0	0	0	0	0	200	300	0	0	0	0	0	0	0	200	903	0	0	0	0	0	0	0	603	903	0
6716	1	0	0	0	0	0	0	200	300	0	0	0	0	0	0	0	200	903	0	0	0	0	0	0	0	603	903	0
6716	2	0	0	0	0	0	0	200	300	0	0	0	0	0	0	0	200	903	0	0	0	0	0	0	0	603	903	0
6716	3	0	0	0	0	0	0	200	300	0	0	0	0	0	0	0	200	903	0	0	0	0	0	0	0	603	903	0
6716	4	0	0	0	0	0	0	200	300	0	0	0	0	0	0	0	200	903	0	0	0	0	0	0	0	603	903	0
6716	5	0	0	0	0	0	0	200	300	0	0	0	0	0	0	0	200	903	0	0	0	0	0	0	0	603	903	0
6716	6	0	0	0	0	0	0	200	300	0	0	0	0	0	0	0	200	903	0	0	0	0	0	0	0	603	903	0
6716	7	0	0	0	0	0	0	200	300	0	0	0	0	0	0	0	200	903	0	0	0	0	0	0	0	603	903	0
6716	8	0	0	0	0	0	0	200	300	0	0	0	0	0	0	0	200	903	0	0	0	0	0	0	0	603	903	0
6716	9	0	0	0	0	0	0	200	300	0	0	0	0	0	0	0	200	903	0	0	0	0	0	0	0	603	903	0
6717	0	0	0	0	0	0	0	200	300	0	0	0	0	0	0	0	200	903	0	0	0	0	0	0	0	603	903	0
6717	1	0	0	0	0	0	0	200	300	0	0	0	0	0	0	0	200	903	0	0	0	0	0	0	0	603	903	0
6717	2	0	0	0	0	0	0	200	300	0	0	0	0	0	0	0	200	903	0	0	0	0	0	0	0	603	903	0
6717	3	0	0	0	0	0	0	200	300	0	0	0	0	0	0	0	200	903	0	0	0	0	0	0	0	603	903	0
6717	4	0	0	0	0	0	0	200	300	0	0	0	0	0	0	0	200	903	0	0	0	0	0	0	0	603	903	0
6717	5	0	0	0	0	0	0	200	300	0	0	0	0	0	0	0	200	903	0	0	0	0	0	0	0	603	903	0
6717	6	0	0	0	0	0	0	200	300	0	0	0	0	0	0	0	200	903	0	0	0	0	0	0	0	603	903	0
6717	7	0	0	0	0	0	0	200	300	0	0	0	0	0	0	0	200	903	0	0	0	0	0	0	0	603	903	0
6717	8	0	0	0	0	0	0	200	300	0	0	0	0	0	0	0	200	903	0	0	0	0	0	0	0	603	903	0
6717	9	0	0	0	0	0	0	200	300	0	0	0	0	0	0	0	200	903	0	0	0	0	0	0	0	603	903	0
6718	0	0	0	0	0	0	0	200	300	0	0	0	0	0	0	0	200	903	0	0	0	0	0	0	0	603	903	0
6718	1	0	0	0	0	0	0	200	300	0	0	0	0	0	0	0	200	903	0	0	0	0	0	0	0	603	903	0
6718	2	0	0	0	0	0	0	200	300	0	0	0	0	0	0	0	200	903	0	0	0	0	0	0	0	603	903	0
6718	3	0	0	0	0	0	0	200	300	0	0	0	0	0	0	0	200	903	0	0	0	0	0	0	0	603	903	0
6718	4	0	0	0	0	0	0	200	300	0	0	0	0	0	0	0	200	903	0	0	0	0	0	0	0	603	903	0
6718	5	0	0	0	0	0	0	200	300	0	0	0	0	0	0	0	200	903	0	0	0	0	0	0	0	603	903	0
6718	6	0	0	0	0	0	0	200	300	0	0	0	0	0	0	0	200	903	0	0	0	0	0	0	0	603	903	0
6718	7	0	0	0	0	0	0	200	300	0	0	0	0	0	0	0	200	903	0	0	0	0	0	0	0	603	903	0
6718	8	0	0	0	0	0	0	200	300	0	0	0	0	0	0	0	200	903	0	0	0	0	0	0	0	603	903	0
6718	9	0	0	0	0	0	0	200	300	0	0	0	0	0	0	0	200	903	0	0	0	0	0	0	0	603	903	0
6719	0	0	0	0	0	0	0	200	300	0	0	0	0	0	0	0	200	903	0	0	0	0	0	0	0	603	903	0
6719	1	0	0	0	0	0	0	200	300	0	0	0	0	0	0	0	200	903	0	0	0	0	0	0	0	603	903	0
6719	2	0	0	0	0	0	0	200	300	0	0	0	0	0	0	0	200	903	0	0	0	0	0	0	0	603	903	0
6719	3	0	0	0	0	0	0	200	300	0	0	0	0	0	0	0	200	903	0	0	0	0	0	0	0	603	903	0
6719	4	0	0	0	0	0	0	200	300	0	0	0	0	0	0	0	200	903	0	0	0	0	0	0	0	603	903	0
6719	5	0	0	0	0	0	0	200	300	0	0	0	0	0	0	0	200	903	0	0	0	0	0	0	0	603	903	0
6719	6	0	0	0	0	0	0	200	300	0	0	0	0	0	0	0	200	903	0	0	0	0	0	0	0	603	903	0
6719	7	0	0	0	0	0	0	200	300	0	0	0	0	0	0	0	200	903	0	0	0	0	0	0	0	603	903	0
6719	8	0	0	0	0	0	0	200	300	0	0	0	0	0	0	0	200	903	0	0	0	0	0	0	0	603	903	0
6719	9	0	0	0	0	0	0	200	300	0	0	0	0	0	0	0	200	903	0	0	0	0	0	0	0	603	903	0
6720	0	0	0	0	0	0	0	200	300	0	0	0	0	0	0	0	200	903	0	0	0	0	0	0	0	603	903	0
6720	1	0	0	0	0	0	0	200	300	0	0	0	0	0	0	0	200	903	0	0	0	0	0	0	0	603	903	0
6720	2	0	0	0	0	0	0	200	300	0	0	0	0	0	0	0	200	903	0	0	0	0	0	0	0	603	903	0
6720	3	0	0	0	0	0	0	200	300	0	0	0	0	0	0	0	200	903	0	0	0	0	0	0	0	603	903	0
6720	4	0	0	0	0	0	0	200	300	0	0	0	0	0	0	0	200	903	0	0	0	0	0	0	0	603	903	0
6720	5	0	0	0	0	0	0	200	300	0	0	0	0	0	0	0	200	903	0	0	0	0	0	0	0	603	903	0
6720	6	0	0	0	0	0	0	200	300	0	0	0	0	0	0	0	200	903	0	0	0	0	0	0	0	603	903	0
6720	7	0	0	0	0	0	0	200	300	0	0	0	0	0	0	0	200	903	0	0	0	0	0	0	0	603	903	0
6720	8	0	0	0	0	0	0	200	300	0	0	0	0	0	0	0	200	903	0	0	0	0	0	0	0	603	903	0
6720	9	0	0	0	0	0	0	200	300	0	0	0	0	0	0	0	200	903	0	0	0	0	0	0	0	603	903	0
6721	0	0	0	0	0	0	0	200	300	0	0	0	0	0	0	0	200	903	0	0	0	0	0	0	0	603	903	0
6721	1	0	0	0	0	0	0	200	300	0	0	0	0	0	0	0	200	903	0	0	0	0	0	0	0	603	903	0
6721	2	0	0	0	0	0	0	200	300	0	0	0	0	0	0	0	200	903	0	0	0	0	0	0	0	603	903	0
6721	3	0	0	0	0	0	0	200	300	0	0	0	0	0	0	0	200	903	0	0	0	0	0	0	0	603	903	0
6721	4	0	0	0	0	0	0	200	300	0	0	0	0	0	0	0	200	903	0	0	0	0	0	0	0	603	903	0
6721	5	0	0	0	0	0	0	200	300	0	0	0	0	0	0	0	200	903	0	0	0	0	0	0	0	603	903	0
6721	6	0	0	0	0	0	0	200	300	0	0	0	0	0	0	0	200	903	0	0	0	0	0	0	0	603	903	0
6721	7	0	0	0	0	0	0	200	300	0	0	0	0	0	0	0	200	903	0	0	0	0	0	0	0	603	903	0
6721	8	0	0	0	0	0	0	200	300	0	0	0	0	0	0	0	200	903	0	0	0	0	0	0	0	603	903	0
6721	9	0	0	0	0	0	0	200	300	0	0	0	0	0	0	0	200	903	0	0	0	0	0	0	0	603	903	0
6722	0	0	0	0	0	0	0	200	300	0	0	0	0	0	0	0	200	903	0	0	0	0	0	0	0	603	903	0
6722	1	0	0	0	0	0	0	200	300	0	0	0	0	0	0	0	200	903	0	0	0	0	0	0	0	603	903	0
6722	2	0	0	0	0	0	0	200	300	0	0	0	0	0	0	0	200	903	0	0	0	0	0	0	0	603	903	0
6722	3	0	0	0	0	0	0	200	300	0	0	0	0	0	0	0	200	903	0	0	0	0	0	0	0	603	903	0
6722	4	0	0	0	0	0	0	200	300	0	0	0	0	0	0	0	200	903	0	0	0	0	0	0	0	603	903	0
6722	5	0	0	0	0	0	0	200	300	0	0	0	0	0	0	0	200	903	0	0	0	0	0	0	0	603	903	0
6722	6	0	0	0	0	0	0	200	300	0	0	0	0	0	0	0	200	903	0	0	0	0	0	0	0	603	903	0
6722	7	0	0	0	0	0	0	200	300	0	0	0	0	0	0	0	200	903	0	0	0	0	0	0	0	603	903	0
6722	8	0	0	0	0	0	0	200	300	0	0	0	0	0	0	0	200	903	0	0	0	0	0	0	0	603	903	0
6722	9	0	0	0	0	0	0	200	300	0	0	0	0	0	0	0	200	903	0	0	0	0	0	0	0	603	903	0
6723	0	0	0	0	0	0	0	200	300	0	0	0	0	0	0	0	200	903	0	0	0	0	0	0	0	603	903	0
6723	1	0	0	0	0	0	0	200	300	0	0	0	0	0	0	0	200	903	0	0	0	0	0	0	0	603	903	0
6723	2	0	0	0	0	0	0	200	300	0	0	0	0	0	0	0	200	903	0	0	0	0	0	0	0	603	903	0
6723	3	0	0	0	0	0	0	200	300	0	0	0	0	0	0	0	200	903	0	0	0	0	0	0	0	603	903	0
6723	4	0	0	0	0	0	0	200	300	0	0	0	0	0	0	0	200	903	0	0	0	0	0	0	0	603	903	0
6723	5	0	0	0	0	0	0	200	300	0	0	0	0	0	0	0	200	903	0	0	0	0	0	0	0	603	903	0
6723	6	0	0	0	0	0	0	200	300	0	0	0	0	0	0	0	200	903	0	0	0	0	0	0	0	603	903	0
6723	7	0	0	0	0	0	0	200	300	0	0	0	0	0	0	0	200	903	0	0	0	0	0	0	0	603	903	0
6723	8	0	0	0	0	0	0	200	300	0	0	0	0	0	0	0	200	903	0	0	0	0	0	0	0	603	903	0
6723	9	0	0	0	0	0	0	200	300	0	0	0	0	0	0	0	200	903	0	0	0	0	0	0	0	603	903	0
6724	0	0	0	0	0	0	0	200	300	0	0	0	0	0	0	0	200	903	0	0	0	0	0	0	0	603	903	0
6724	1	0	0	0	0	0	0	200	300	0	0	0	0	0	0	0	200	903	0	0	0	0	0	0	0	603	903	0
6724	2	0	0	0	0	0	0	200	300	0	0	0	0	0	0	0	200	903	0	0	0	0	0	0	0	603	903	0
6724	3	0	0	0	0	0	0	200	300	0	0	0	0	0	0	0	200	903	0	0	0	0	0	0	0	603	903	0
6724	4	0	0	0	0	0	0	200	300	0	0	0	0	0	0	0	200	903	0	0	0	0	0	0	0	603	903	0
6724	5	0	0	0	0	0	0	200	300	0	0	0	0	0	0	0	200	903	0	0	0	0	0	0	0	603	903	0
6724	6	0	0	0	0	0	0	200	300	0	0	0	0	0	0	0	200	903	0	0	0	0	0	0	0	603	903	0
6724	7	0	0	0	0	0	0	200	300	0	0	0	0	0	0	0	200	903	0	0	0	0	0	0	0	603	903	0
6724	8	0	0	0	0	0	0	200	300	0	0	0	0	0	0	0	200	903	0	0	0	0	0	0	0	603	903	0
6724	9	0	0	0	0	0	0	200	300	0	0	0	0	0	0	0	200	903	0	0	0	0	0	0	0	603	903	0
6725	0	0	0	0	0	0	0	200	300	0	0	0	0	0	0	0	200	903	0	0	0	0	0	0	0	603	903	0
6725	1	0	0	0	0	0	0	200	300	0	0	0	0	0	0	0	200	903	0	0	0	0	0	0	0	603	903	0
6725	2	0	0	0	0	0	0	200	300	0	0	0	0	0	0	0	200	903	0	0	0	0	0	0	0	603	903	0
6725	3	0	0	0	0	0	0	200	300	0	0	0	0	0	0	0	200	903	0	0	0	0	0	0	0	603	903	0
6725	4	0	0	0	0	0	0	200	300	0	0	0	0	0	0	0	200	903	0	0	0	0	0	0	0	603	903	0
6725	5	0	0	0	0	0	0	200	300	0	0	0	0	0	0	0	200	903	0	0	0	0	0	0	0	603	903	0
6725	6	0	0	0	0	0	0	200	300	0	0	0	0	0	0	0	200	903	0	0	0	0	0	0	0	603	903	0
6725	7	0	0	0	0	0	0	200	300	0	0	0	0	0	0	0	200	903	0	0	0	0	0	0	0	603	903	0
6725	8	0	0	0	0	0	0	200	300	0	0	0	0	0	0	0	200	903	0	0	0	0	0	0	0	603	903	0
6725	9	0	0	0	0	0	0	200	300	0	0	0	0	0	0	0	200	903	0	0	0	0	0	0	0	603	903	0
6726	0	0	0	0	0	0	0	200	300	0	0	0	0	0	0	0	200	903	0	0	0	0	0	0	0	603	903	0
6726	1	0	0	0	0	0	0	200	300	0	0	0	0	0	0	0	200	903	0	0	0	0	0	0	0	603	903	0
6726	2	0	0	0	0	0	0	200	300	0	0	0	0	0	0	0	200	903	0	0	0	0	0	0	0	603	903	0
6726	3	0	0	0	0	0	0	200	300	0	0	0	0	0	0	0	200	903	0	0	0	0	0	0	0	603	903	0
6726	4	0	0	0	0	0	0	200	300	0	0	0	0	0	0	0	200	903	0	0	0	0	0	0	0	603	903	0
6726	5	0	0	0	0	0	0	200	300	0	0	0	0	0	0	0	200	903	0	0	0	0	0	0	0	603	903	0
6726	6	0	0	0	0	0	0	200	300	0	0	0	0	0	0	0	200	903	0	0	0	0	0	0	0	603	903	0
6726	7	0	0	0	0	0	0	200	300	0	0	0	0	0	0	0	200	903	0	0	0	0	0	0	0	603	903	0
6726	8	0	0	0	0	0	0	200	300	0	0	0	0	0	0	0	200	903	0	0	0	0	0	0	0	603	903	0
6726	9	0	0	0	0	0	0	200	300	0	0	0	0	0	0	0	200	903	0	0	0	0	0	0	0	603	903	0
6727	0	0	0	0	0	0	0	200	300	0	0	0	0	0	0	0	200	903	0	0	0	0	0	0	0	603	903	0
6727	1	0	0	0	0	0	0	200	300	0	0	0	0	0	0	0	200	903	0	0	0	0	0	0	0	603	903	0
6727	2	0	0	0	0	0	0	200	300	0	0	0	0	0	0	0	200	903	0	0	0	0	0	0	0	603	903	0
6727	3	0	0	0	0	0	0	200	300	0	0	0	0	0	0	0	200	903	0	0	0	0	0	0	0	603	903	0
6727	4	0	0	0	0	0	0	200	300	0	0	0	0	0	0	0	200	903	0	0	0	0	0	0	0	603	903	0
6727	5	0	0	0	0	0	0	200	300	0	0	0	0	0	0	0	200	903	0	0	0	0	0	0	0	603	903	0
6727	6	0	0	0	0	0	0	200	300	0	0	0	0	0	0	0	200	903	0	0	0	0	0	0	0	603	903	0
6727	7	0	0	0	0	0	0	200	300	0	0	0	0	0	0	0	200	903	0	0	0	0	0	0	0	603	903	0
6727	8	0	0	0	0	0	0	200	300	0	0	0	0	0	0	0	200	903	0	0	0	0	0	0	0	603	903	0
6727	9	0	0	0	0	0	0	200	300	0	0	0	0	0	0	0	200	903	0	0	0	0	0	0	0	603	903	0
6728	0	0	0	0	0	0	0	200	300	0	0	0	0	0	0	0	200	903	0	0	0	0	0	0	0	603	903	0
6728	1	0	0	0	0	0	0	200	300	0	0	0	0	0	0	0	200	903	0	0	0	0	0	0	0	603	903	0
6728	2	0	0	0	0	0	0	200	300	0	0	0	0	0	0	0	200	903	0	0	0	0	0	0	0	603	903	0
6728	3	0	0	0	0	0	0	200	300	0	0	0	0	0	0	0	200	903	0	0	0	0	0	0	0	603	903	0
6728	4	0	0	0	0	0	0	200	300	0	0	0	0	0	0	0	200	903	0	0	0	0	0	0	0	603	903	0
6728	5	0	0	0	0	0	0	200	300	0	0	0	0	0	0	0	200	903	0	0	0	0	0	0	0	603	903	0
6728	6	0	0	0	0	0	0	200	300	0	0	0	0	0	0	0	200	903	0	0	0	0	0	0	0	603	903	0
6728	7	0	0	0	0	0	0	200	300	0	0	0	0	0	0	0	200	903	0	0	0	0	0	0	0	603	903	0
6728	8	0	0	0	0	0	0	200	300	0	0	0	0	0	0	0	200	903	0	0	0	0	0	0	0	603	903	0
6728	9	0	0	0	0	0	0	200	300	0	0	0	0	0	0	0	200	903	0	0	0	0	0	0	0	603	903	0
6729	0	0	0	0	0	0	0	200	300	0	0	0	0	0	0	0	200	903	0	0	0	0	0	0	0	603	903	0
6729	1	0	0	0	0	0	0	200	300	0	0	0	0	0	0	0	200	903	0	0	0	0	0	0	0	603	903	0
6729	2	0	0	0	0	0	0	200	300	0	0	0	0	0	0	0	200	903	0	0	0	0	0	0	0	603	903	0
6729	3	0	0	0	0	0	0	200	300	0	0	0	0	0	0	0	200	903	0	0	0	0	0	0	0	603	903	0
6729	4	0	0	0	0	0	0	200	300	0	0	0	0	0	0	0	200	903	0	0	0	0	0	0	0	603	903	0
6729	5	0	0	0	0	0	0	200	300	0	0	0	0	0	0	0	200	903	0	0	0	0	0	0	0	603	903	0
6729	6	0	0	0	0	0	0	200	300	0	0	0	0	0	0	0	200	903	0	0	0	0	0	0	0	603	903	0
6729	7	0	0	0	0	0	0	200	300	0	0	0	0	0	0	0	200	903	0	0	0	0	0	0	0	603	903	0
6729	8	0	0	0	0	0	0	200	300	0	0	0	0	0	0	0	200	903	0	0	0	0	0	0	0	603	903	0
6729	9	0	0	0	0	0	0	200	300	0	0	0	0	0	0	0	200	903	0	0	0	0	0	0	0	603	903	0
6730	0	0	0	0	0	0	0	200	300	0	0	0	0	0	0	0	200	903	0	0	0	0	0	0	0	603	903	0
6730	1	0	0	0	0	0	0	200	300	0	0	0	0	0	0	0	200	903	0	0	0	0	0	0	0	603	903	0
6730	2	0	0	0	0	0	0	200	300	0	0	0	0	0	0	0	200	903	0	0	0	0	0	0	0	603	903	0
6730	3	0	0	0	0	0	0	200	300	0	0	0	0	0	0	0	200	903	0	0	0	0	0	0	0	603	903	0
6730	4	0	0	0	0	0	0	200	300	0	0	0	0	0	0	0	200	903	0	0	0	0	0	0	0	603	903	0
6730	5	0	0	0	0	0	0	200	300	0	0	0	0	0	0	0	200	903	0	0	0	0	0	0	0	603	903	0
6730	6	0	0	0	0	0	0	200	300	0	0	0	0	0	0	0	200	903	0	0	0	0	0	0	0	603	903	0
6730	7	0	0	0	0	0	0	200	300	0	0	0	0	0	0	0	200	903	0	0	0	0	0	0	0	603	903	0
6730	8	0	0	0	0	0	0	200	300	0	0	0	0	0	0	0	200	903	0	0	0	0	0	0	0	603	903	0
6730	9	0	0	0	0	0	0	200	300	0	0	0	0	0	0	0	200	903	0	0	0	0	0	0	0	603	903	0
6731	0	0	0	0	0	0	0	200	300	0	0	0	0	0	0	0	200	903	0	0	0	0	0	0	0	603	903	0
6731	1	0	0	0	0	0	0	200	300	0	0	0	0	0	0	0	200	903	0	0	0	0	0	0	0	603	903	0
6731	2	0	0	0	0	0	0	200	300	0	0	0	0	0	0	0	200	903	0	0	0	0	0	0	0	603	903	0
6731	3	0	0	0	0	0	0	200	300	0	0	0	0	0	0	0	200	903	0	0	0	0	0	0	0	603	903	0
6731	4	0	0	0	0	0	0	200	300	0	0	0	0	0	0	0	200	903	0	0	0	0	0	0	0	603	903	0
6731	5	0	0	0	0	0	0	200	300	0	0	0	0	0	0	0	200	903	0	0	0	0	0	0	0	603	903	0
6731	6	0	0	0	0	0	0	200	300	0	0	0	0	0	0	0	200	903	0	0	0	0	0	0	0	603	903	0
6731	7	0	0	0	0	0	0	200	300	0	0	0	0	0	0	0	200	903	0	0	0	0	0	0	0	603	903	0
6731	8	0	0	0	0	0	0	200	300	0	0	0	0	0	0	0	200	903	0	0	0	0	0	0	0	603	903	0
6731	9	0	0	0	0	0	0	200	300	0	0	0	0	0	0	0	200	903	0	0	0	0	0	0	0	603	903	0
6732	0	0	0	0	0	0	0	200	300	0	0	0	0	0	0	0	200	903	0	0	0	0	0	0	0	603	903	0
6732	1	0	0	0	0	0	0	200	300	0	0	0	0	0	0	0	200	903	0	0	0	0	0	0	0	603	903	0
6732	2	0	0	0	0	0	0	200	300	0	0	0	0	0	0	0	200	903	0	0	0	0	0	0	0	603	903	0
6732	3	0	0	0	0	0	0	200	300	0	0	0	0	0	0	0	200	903	0	0	0	0	0	0	0	603	903	0
6732	4	0	0	0	0	0	0	200	300	0	0	0	0	0	0	0	200	903	0	0	0	0	0	0	0	603	903	0
6732	5	0	0	0	0	0	0	200	300	0	0	0	0	0	0	0	200	903	0	0	0	0	0	0	0	603	903	0
6732	6	0	0	0	0	0	0	200	300	0	0	0	0	0	0	0	200	903	0	0	0	0	0	0	0	603	903	0
6732	7	0	0	0	0	0	0	200	300	0	0	0	0	0	0	0	200	903	0	0	0	0	0	0	0	603	903	0
6732	8	0	0	0	0	0	0	200	300	0	0	0	0	0	0	0	200	903	0	0	0	0	0	0	0	603	903	0
6732	9	0	0	0	0	0	0	200	300	0	0	0	0	0	0	0	200	903	0	0	0	0	0	0	0	603	903	0
6733	0	0	0	0	0	0	0	200	300	0	0	0	0	0	0	0	200	903	0	0	0	0	0	0	0	603	903	0
6733	1	0	0	0	0	0	0	200	300	0	0	0	0	0	0	0	200	903	0	0	0	0	0	0	0	603	903	0
6733	2	0	0	0	0	0	0	200	300	0	0	0	0	0	0	0	200	903	0	0	0	0	0	0	0	603	903	0
6733	3	0	0	0	0	0	0	200	300	0	0	0	0	0	0	0	200	903	0	0	0	0	0	0	0	603	903	0
6733	4	0	0	0	0	0	0	200	300	0	0	0	0	0	0	0	200	903	0	0	0	0	0	0	0	603	903	0
6733	5	0	0	0	0	0	0	200	300	0	0	0	0	0	0	0	200	903	0	0	0	0	0	0	0	603	903	0
6733	6	0	0	0	0	0	0	200	300	0	0	0	0	0	0	0	200	903	0	0	0	0	0	0	0	603	903	0
6733	7	0	0	0	0	0	0	200	300	0	0	0	0	0	0	0	200	903	0	0	0	0	0	0	0	603	903	0
6733	8	0	0	0	0	0	0	200	300	0	0	0	0	0	0	0	200	903	0	0	0	0	0	0	0	603	903	0
6733	9	0	0	0	0	0	0	200	300	0	0	0	0	0	0	0	200	903	0	0	0	0	0	0	0	603	903	0
6734	0	0	0	0	0	0	0	200	300	0	0	0	0	0	0	0	200	903	0	0	0	0	0	0	0	603	903	0
6734	1	0	0	0	0	0	0	200	300	0	0	0	0	0	0	0	200	903	0	0	0	0	0	0	0	603	903	0
6734	2	0	0	0	0	0	0	200	300	0	0	0	0	0	0	0	200	903	0	0	0	0	0	0	0	603	903	0
6734	3	0	0	0	0	0	0	200	300	0	0	0	0	0	0	0	200	903	0	0	0	0	0	0	0	603	903	0
6734	4	0	0	0	0	0	0	200	300	0	0	0	0	0	0	0	200	903	0	0	0	0	0	0	0	603	903	0
6734	5	0	0	0	0	0	0	200	300	0	0	0	0	0	0	0	200	903	0	0	0	0	0	0	0	603	903	0
6734	6	0	0	0	0	0	0	200	300	0	0	0	0	0	0	0	200	903	0	0	0	0	0	0	0	603	903	0
6734	7	0	0	0	0	0	0	200	300	0	0	0	0	0	0	0	200	903	0	0	0	0	0	0	0	603	903	0
6734	8	0	0	0	0	0	0	200	300	0	0	0	0	0	0	0	200	903	0	0	0	0	0	0	0	603	903	0
6734	9	0	0	0	0	0	0	200	300	0	0	0	0	0	0	0	200	903	0	0	0	0	0	0	0	603	903	0
6735	0	0	0	0	0	0	0	200	300	0	0	0	0	0	0	0	200	903	0	0	0	0	0	0	0	603	903	0
6735	1	0	0	0	0	0	0	200	300	0	0	0	0	0	0	0	200	903	0	0	0	0	0	0	0	603	903	0
6735	2	0	0	0	0	0	0	200	300	0	0	0	0	0	0	0	200	903	0	0	0	0	0	0	0	603	903	0
6735	3	0	0	0	0	0	0	200	300	0	0	0	0	0	0	0	200	903	0	0	0	0	0	0	0	603	903	0
6735	4	0	0	0	0	0	0	200	300	0	0	0	0	0	0	0	200	903	0	0	0	0	0	0	0	603	903	0
6735	5	0	0	0	0	0	0	200	300	0	0	0	0	0	0	0	200	903	0	0	0	0	0	0	0	603	903	0
6735	6	0	0	0	0	0	0	200	300	0	0	0	0	0	0	0	200	903	0	0	0	0	0	0	0	603	903	0
6735	7	0	0	0	0	0	0	200	300	0	0	0	0	0	0	0	200	903	0	0	0	0	0	0	0	603	903	0
6735	8	0	0	0	0	0	0	200	300	0	0	0	0	0	0	0	200	903	0	0	0	0	0	0	0	603	903	0
6735	9	0	0	0	0	0	0	200	300	0	0	0	0	0	0	0	200	903	0	0	0	0	0	0	0	603	903	0
6736	0	0	0	0	0	0	0	200	300	0	0	0	0	0	0	0	200	903	0	0	0	0	0	0	0	603	903	0
6736	1	0	0	0	0	0	0	200	300	0	0	0	0	0	0	0	200	903	0	0	0	0	0	0	0	603	903	0
6736	2	0	0	0	0	0	0	200	300	0	0	0	0	0	0	0	200	903	0	0	0	0	0	0	0	603	903	0
6736	3	0	0	0	0	0	0	200	300	0	0	0	0	0	0	0	200	903	0	0	0	0	0	0	0	603	903	0
6736	4	0	0	0	0	0	0	200	300	0	0	0	0	0	0	0	200	903	0	0	0	0	0	0	0	603	903	0
6736	5	0	0	0	0	0	0	200	300	0	0	0	0	0	0	0	200	903	0	0	0	0	0	0	0	603	903	0
6736	6	0	0	0	0	0	0	200	300	0	0	0	0	0	0	0	200	903	0	0	0	0	0	0	0	603	903	0
6736	7	0	0	0	0	0	0	200	300	0	0	0	0	0	0	0	200	903	0	0	0	0	0	0	0	603	903	0
6736	8	0	0	0	0	0	0	200	300	0	0	0	0	0	0	0	200	903	0	0	0	0	0	0	0	603	903	0
6736	9	0	0	0	0	0	0	200	300	0	0	0	0	0	0	0	200	903	0	0	0	0	0	0	0	603	903	0
6737	0	0	0	0	0	0	0	200	300	0	0	0	0	0	0	0	200	903	0	0	0	0	0	0	0	603	903	0
6737	1	0	0	0	0	0	0	200	300	0	0	0	0	0	0	0	200	903	0	0	0	0	0	0	0	603	903	0
6737	2	0	0	0	0	0	0	200	300	0	0	0	0	0	0	0	200	903	0	0	0	0	0	0	0	603	903	0
6737	3	0	0	0	0	0	0	200	300	0	0	0	0	0	0	0	200	903	0	0	0	0	0	0	0	603	903	0
6737	4	0	0	0	0	0	0	200	300	0	0	0	0	0	0	0	200	903	0	0	0	0	0	0	0	603	903	0
6737	5	0	0	0	0	0	0	200	300	0	0	0	0	0	0	0	200	903	0	0	0	0	0	0	0	603	903	0
6737	6	0	0	0	0	0	0	200	300	0	0	0	0	0	0	0	200	903	0	0	0	0	0	0	0	603	903	0
6737	7	0	0	0	0	0	0	200	300	0	0	0	0	0	0	0	200	903	0	0	0	0	0	0	0	603	903	0
6737	8	0	0	0	0	0	0	200	300	0	0	0	0	0	0	0	200	903	0	0	0	0	0	0	0	603	903	0
6737	9	0	0	0	0	0	0	200	300	0	0	0	0	0	0	0	200	903	0	0	0	0	0	0	0	603	903	0
6738	0	0	0	0	0	0	0	200	300	0	0	0	0	0	0	0	200	903	0	0	0	0	0	0	0	603	903	0
6738	1	0	0	0	0	0	0	200	300	0	0	0	0	0	0	0	200	903	0	0	0	0	0	0	0	603	903	0
6738	2	0	0	0	0	0	0	200	300	0	0	0	0	0	0	0	200	903	0	0	0	0	0	0	0	603	903	0
6738	3	0	0	0	0	0	0	200	300	0	0	0	0	0	0	0	200	903	0	0	0	0	0	0	0	603	903	0
6738	4	0	0	0	0	0	0	200	300	0	0	0	0	0	0	0	200	903	0	0	0	0	0	0	0	603	903	0
6738	5	0	0	0	0	0	0	200	300	0	0	0	0	0	0	0	200	903	0	0	0	0	0	0	0	603	903	0
6738	6	0	0	0	0	0	0	200	300	0	0	0	0	0	0	0	200	903	0	0	0	0	0	0	0	603	903	0
6738	7	0	0	0	0	0	0	200	300	0	0	0	0	0	0	0	200	903	0	0	0	0	0	0	0	603	903	0
6738	8	0	0	0	0	0	0	200	300	0	0	0	0	0	0	0	200	903	0	0	0	0	0	0	0	603	903	0
6738	9	0	0	0	0	0	0	200	300	0	0	0	0	0	0	0	200	903	0	0	0	0	0	0	0	603	903	0
6739	0	0	0	0	0	0	0	200	300	0	0	0	0	0	0	0	200	903	0	0	0	0	0	0	0	603	903	0
6739	1	0	0	0	0	0	0	200	300	0	0	0	0	0	0	0	200	903	0	0	0	0	0	0	0	603	903	0
6739	2	0	0	0	0	0	0	200	300	0	0	0	0	0	0	0	200	903	0	0	0	0	0	0	0	603	903	0
6739	3	0	0	0	0	0	0	200	300	0	0	0	0	0	0	0	200	903	0	0	0	0	0	0	0	603	903	0
6739	4	0	0	0	0	0	0	200	300	0	0	0	0	0	0	0	200	903	0	0	0	0	0	0	0	603	903	0
6739	5	0	0	0	0	0	0	200	300	0	0	0	0	0	0	0	200	903	0	0	0	0	0	0	0	603	903	0
6739	6	0	0	0	0	0	0	200	300	0	0	0	0	0	0	0	200	903	0	0	0	0	0	0	0	603	903	0
6739	7	0	0	0	0	0	0	200	300	0	0	0	0	0	0	0	200	903	0	0	0	0	0	0	0	603	903	0
6739	8	0	0	0	0	0	0	200	300	0	0	0	0	0	0	0	200	903	0	0	0	0	0	0	0	603	903	0
6739	9	0	0	0	0	0	0	200	300	0	0	0	0	0	0	0	200	903	0	0	0	0	0	0	0	603	903	0
6740	0	0	0	0	0	0	0	200	300	0	0	0	0	0	0	0	200	903	0	0	0	0	0	0	0	603	903	0
6740	1	0	0	0	0	0	0	200	300	0	0	0	0	0	0	0	200	903	0	0	0	0	0	0	0	603	903	0
6740	2	0	0	0	0	0	0	200	300	0	0	0	0	0	0	0	200	903	0	0	0	0	0	0	0	603	903	0
6740	3	0	0	0	0	0	0	200	300	0	0	0	0	0	0	0	200	903	0	0	0	0	0	0	0	603	903	0
6740	4	0	0	0	0	0	0	200	300	0	0	0	0	0	0	0	200	903	0	0	0	0	0	0	0	603	903	0
6740	5	0	0	0	0	0	0	200	300	0	0	0	0	0	0	0	200	903	0	0	0	0	0	0	0	603	903	0
6740	6	0	0	0	0	0	0	200	300	0	0	0	0	0	0	0	200	903	0	0	0	0	0	0	0	603	903	0
6740	7	0	0	0	0	0	0	200	300	0	0	0	0	0	0	0	200	903	0	0	0	0	0	0	0	603	903	0
6740	8	0	0	0	0	0	0	200	300	0	0	0	0	0	0	0	200	903	0	0	0	0	0	0	0	603	903	0
6740	9	0	0	0	0	0	0	200	300	0	0	0	0	0	0	0	200	903	0	0	0	0	0	0	0	603	903	0
6741	0	0	0	0	0	0	0	200	300	0	0	0	0	0	0	0	200	903	0	0	0	0	0	0	0	603	903	0
6741	1	0	0	0	0	0	0	200	300	0	0	0	0	0	0	0	200	903	0	0	0	0	0	0	0	603	903	0
6741	2	0	0	0	0	0	0	200	300	0	0	0	0	0	0	0	200	903	0	0	0	0	0	0	0	603	903	0
6741	3	0	0	0	0	0	0	200	300	0	0	0	0	0	0	0	200	903	0	0	0	0	0	0	0	603	903	0
6741	4	0	0	0	0	0	0	200	300	0	0	0	0	0	0	0	200	903	0	0	0	0	0	0	0	603	903	0
6741	5	0	0	0	0	0	0	200	300	0	0	0	0	0	0	0	200	903	0	0	0	0	0	0	0	603	903	0
6741	6	0	0	0	0	0	0	200	300	0	0	0	0	0	0	0	200	903	0	0	0	0	0	0	0	603	903	0
6741	7	0	0	0	0	0	0	200	300	0	0	0	0	0	0	0	200	903	0	0	0	0	0	0	0	603	903	0
6741	8	0	0	0	0	0	0	200	300	0	0	0	0	0	0	0	200	903	0	0	0	0	0	0	0	603	903	0
6741	9	0	0	0	0	0	0	200	300	0	0	0	0	0	0	0	200	903	0	0	0	0	0	0	0	603	903	0
6742	0	0	0	0	0	0	0	200	300	0	0	0	0	0	0	0	200	903	0	0	0	0	0	0	0	603	903	0
6742	1	0	0	0	0	0	0	200	300	0	0	0	0	0	0	0	200	903	0	0	0	0	0	0	0	603	903	0
6742	2	0	0	0	0	0	0	200	300	0	0	0	0	0	0	0	200	903	0	0	0	0	0	0	0	603	903	0
6742	3	0	0	0	0	0	0	200	300	0	0	0	0	0	0	0	200	903	0	0	0	0	0	0	0	603	903	0
6742	4	0	0	0	0	0	0	200	300	0	0	0	0	0	0	0	200	903	0	0	0	0	0	0	0	603	903	0
6742	5	0	0	0	0	0	0	200	300	0	0	0	0	0	0	0	200	903	0	0	0	0	0	0	0	603	903	0
6742	6	0	0	0	0	0	0	200	300	0	0	0	0	0	0	0	200	903	0	0	0	0	0	0	0	603	903	0
6742	7	0	0	0	0	0	0	200	300	0	0	0	0	0	0	0	200	903	0	0	0	0	0	0	0	603	903	0
6742	8	0	0	0	0	0	0	200	300	0	0	0	0	0	0	0	200	903	0	0	0	0	0	0	0	603	903	0
6742	9	0	0	0	0	0	0	200	300	0	0	0	0	0	0	0	200	903	0	0	0	0	0	0	0	603	903	0
6743	0	0	0	0	0	0	0	200	300	0	0	0	0	0	0	0	200	903	0	0	0	0	0	0	0	603	903	0
6743	1	0	0	0	0	0	0	200	300	0	0	0	0	0	0	0	200	903	0	0	0	0	0	0	0	603	903	0
6743	2	0	0	0	0	0	0	200	300	0	0	0	0	0	0	0	200	903	0	0	0	0	0	0	0	603	903	0
6743	3	0	0	0	0	0	0	200	300	0	0	0	0	0	0	0	200	903	0	0	0	0	0	0	0	603	903	0
6743	4	0	0	0	0	0	0	200	300	0	0	0	0	0	0	0	200	903	0	0	0	0	0	0	0	603	903	0
6743	5	0	0	0	0	0	0	200	300	0	0	0	0	0	0	0	200	903	0	0	0	0	0	0	0	603	903	0
6743	6	0	0	0	0	0	0	200	300	0	0	0	0	0	0	0	200	903	0	0	0	0	0	0	0	603	903	0
6743	7	0	0	0	0	0	0	200	300	0	0	0	0	0	0	0	200	903	0	0	0	0	0	0	0	603	903	0
6743	8	0	0	0	0	0	0	200	300	0	0	0	0	0	0	0	200	903	0	0	0	0	0	0	0	603	903	0
6743	9	0	0	0	0	0	0	200	300	0	0	0	0	0	0	0	200	903	0	0	0	0	0	0	0	603	903	0
6744	0	0	0	0	0	0	0	200	300	0	0	0	0	0	0	0	200	903	0	0	0	0	0	0	0	603	903	0
6744	1	0	0	0	0	0	0	200	300	0	0	0	0	0	0	0	200	903	0	0	0	0	0	0	0	603	903	0
6744	2	0	0	0	0	0	0	200	300	0	0	0	0	0	0	0	200	903	0	0	0	0	0	0	0	603	903	0
6744	3	0	0	0	0	0	0	200	300	0	0	0	0	0	0	0	200	903	0	0	0	0	0	0	0	603	903	0
6744	4	0	0	0	0	0	0	200	300	0	0	0	0	0	0	0	200	903	0	0	0	0	0	0	0	603	903	0
6744	5	0	0	0	0	0	0	200	300	0	0	0	0	0	0	0	200	903	0	0	0	0	0	0	0	603	903	0
6744	6	0	0	0	0	0	0	200	300	0	0	0	0	0	0	0	200	903	0	0	0	0	0	0	0	603	903	0
6744	7	0	0	0	0	0	0	200	300	0	0	0	0	0	0	0	200	903	0	0	0	0	0	0	0	603	903	0
6744	8	0	0	0	0	0	0	200	300	0	0	0	0	0	0	0	200	903	0	0	0	0	0	0	0	603	903	0
6744	9	0	0	0	0	0	0	200	300	0	0	0	0	0	0	0	200	903	0	0	0	0	0	0	0	603	903	0
6745	0	0	0	0	0	0	0	200	300	0	0	0	0	0	0	0	200	903	0	0	0	0	0	0	0	603	903	0
6745	1	0	0	0	0	0	0	200	300	0	0	0	0	0	0	0	200	903	0	0	0	0	0	0	0	603	903	0
6745	2	0	0	0	0	0	0	200	300	0	0	0	0	0	0	0	200	903	0	0	0	0	0	0	0	603	903	0
6745	3	0	0	0	0	0	0	200	300	0	0	0	0	0	0	0	200	903	0	0	0	0	0	0	0	603	903	0
6745	4	0	0	0	0	0	0	200	300	0	0	0	0	0	0	0	200	903	0	0	0	0	0	0	0	603	903	0
6745	5	0	0	0	0	0	0	200	300	0	0	0	0	0	0	0	200	903	0	0	0	0	0	0	0	603	903	0
6745	6	0	0	0	0	0	0	200	300	0	0	0	0	0	0	0	200	903	0	0	0	0	0	0	0	603	903	0
6745	7	0	0	0	0	0	0	200	300	0	0	0	0	0	0	0	200	903	0	0	0	0	0	0	0	603	903	0
6745	8	0	0	0	0	0	0	200	300	0	0	0	0	0	0	0	200	903	0	0	0	0	0	0	0	603	903	0
6745	9	0	0	0	0	0	0	200	300	0	0	0	0	0	0	0	200	903	0	0	0	0	0	0	0	603	903	0
6746	0	0	0	0	0	0	0	200	300	0	0	0	0	0	0	0	200	903	0	0	0	0	0	0	0	603	903	0
6746	1	0	0	0	0	0	0	200	300	0	0	0	0	0	0	0	200	903	0	0	0	0	0	0	0	603	903	0
6746	2	0	0	0	0	0	0	200	300	0	0	0	0	0	0	0	200	903	0	0	0	0	0	0	0	603	903	0
6746	3	0	0	0	0	0	0	200	300	0	0	0	0	0	0	0	200	903	0	0	0	0	0	0	0	603	903	0
6746	4	0	0	0	0	0	0	200	300	0	0	0	0	0	0	0	200	903	0	0	0	0	0	0	0	603	903	0
6746	5	0	0	0	0	0	0	200	300	0	0	0	0	0	0	0	200	903	0	0	0	0	0	0	0	603	903	0
6746	6	0	0	0	0	0	0	200	300	0	0	0	0	0	0	0	200	903	0	0	0	0	0	0	0	603	903	0
6746	7	0	0	0	0	0	0	200	300	0	0	0	0	0	0	0	200	903	0	0	0	0	0	0	0	603	903	0
6746	8	0	0	0	0	0	0	200	300	0	0	0	0	0	0	0	200	903	0	0	0	0	0	0	0	603	903	0
6746	9	0	0	0	0	0	0	200	300	0	0	0	0	0	0	0	200	903	0	0	0	0	0	0	0	603	903	0
6747	0	0	0	0	0	0	0	200	300	0	0	0	0	0	0	0	200	903	0	0	0	0	0	0	0	603	903	0
6747	1	0	0	0	0	0	0	200	300	0	0	0	0	0	0	0	200	903	0	0	0	0	0	0	0	603	903	0
6747	2	0	0	0	0	0	0	200	300	0	0	0	0	0	0	0	200	903	0	0	0	0	0	0	0	603	903	0
6747	3	0	0	0	0	0	0	200	300	0	0	0	0	0	0	0	200	903	0	0	0	0	0	0	0	603	903	0
6747	4	0	0	0	0	0	0	200	300	0	0	0	0	0	0	0	200	903	0	0	0	0	0	0	0	603	903	0
6747	5	0	0	0	0	0	0	200	300	0	0	0	0	0	0	0	200	903	0	0	0	0	0	0	0	603	903	0
6747	6	0	0	0	0	0	0	200	300	0	0	0	0	0	0	0	200	903	0	0	0	0	0	0	0	603	903	0
6747	7	0	0	0	0	0	0	200	300	0	0	0	0	0	0	0	200	903	0	0	0	0	0	0	0	603	903	0
6747	8	0	0	0	0	0	0	200	300	0	0	0	0	0	0	0	200	903	0	0	0	0	0	0	0	603	903	0
6747	9	0	0	0	0	0	0	200	300	0	0	0	0	0	0	0	200	903	0	0	0	0	0	0	0	603	903	0
6748	0	0	0	0	0	0	0	200	300	0	0	0	0	0	0	0	200	903	0	0	0	0	0	0	0	603	903	0
6748	1	0	0	0	0	0	0	200	300	0	0	0	0	0	0	0	200	903	0	0	0	0	0	0	0	603	903	0
6748	2	0	0	0	0	0	0	200	300	0	0	0	0	0	0	0	200	903	0	0	0	0	0	0	0	603	903	0
6748	3	0	0	0	0	0	0	200	300	0	0	0	0	0	0	0	200	903	0	0	0	0	0	0	0	603	903	0
6748	4	0	0	0	0	0	0	200	300	0	0	0	0	0	0	0	200	903	0	0	0	0	0	0	0	603	903	0
6748	5	0	0	0	0	0	0	200	300	0	0	0	0	0	0	0	200	903	0	0	0	0	0	0	0	603	903	0
6748	6	0	0	0	0	0	0	200	300	0	0	0	0	0	0	0	200	903	0	0	0	0	0	0	0	603	903	0
6748	7	0	0	0	0	0	0	200	300	0	0	0	0	0	0	0	200	903	0	0	0	0	0	0	0	603	903	0
6748	8	0	0	0	0	0	0	200	300	0	0	0	0	0	0	0	200	903	0	0	0	0	0	0	0	603	903	0
6748	9	0	0	0	0	0	0	200	300	0	0	0	0	0	0	0	200	903	0	0	0	0	0	0	0	603	903	0
6749	0	0	0	0	0	0	0	200	300	0	0	0	0	0	0	0	200	903	0	0	0	0	0	0	0	603	903	0
6749	1	0	0	0	0	0	0	200	300	0	0	0	0	0	0	0	200	903	0	0	0	0	0	0	0	603	903	0
6749	2	0	0	0	0	0	0	200	300	0	0	0	0	0	0	0	200	903	0	0	0	0	0	0	0	603	903	0
6749	3	0	0	0	0	0	0	200	300	0	0	0	0	0	0	0	200	903	0	0	0	0	0	0	0	603	903	0
6749	4	0	0	0	0	0	0	200	300	0	0	0	0	0	0	0	200	903	0	0	0	0	0	0	0	603	903	0
6749	5	0	0	0	0	0	0	200	300	0	0	0	0	0	0	0	200	903	0	0	0	0	0	0	0	603	903	0
6749	6	0	0	0	0	0	0	200	300	0	0	0	0	0	0	0	200	903	0	0	0	0	0	0	0	603	903	0
6749	7	0	0	0	0	0	0	200	300	0	0	0	0	0	0	0	200	903	0	0	0	0	0	0	0	603	903	0
6749	8	0	0	0	0	0	0	200	300	0	0	0	0	0	0	0	200	903	0	0	0	0	0	0	0	603	903	0
6749	9	0	0	0	0	0	0	200	300	0	0	0	0	0	0	0	200	903	0	0	0	0	0	0	0	603	903	0
6750	0	0	0	0	0	0	0	200	300	0	0	0	0	0	0	0	200	903	0	0	0	0	0	0	0	603	903	0
6750	1	0	0	0	0	0	0	200	300	0	0	0	0	0	0	0	200	903	0	0	0	0	0	0	0	603	903	0
6750	2	0	0	0	0	0	0	200	300	0	0	0	0	0	0	0	200	903	0	0	0	0	0	0	0	603	903	0
6750	3	0	0	0	0	0	0	200	300	0	0	0	0	0	0	0	200	903	0	0	0	0	0	0	0	603	903	0
6750	4	0	0	0	0	0	0	200	300	0	0	0	0	0	0	0	200	903	0	0	0	0	0	0	0	603	903	0
6750	5	0	0	0	0	0	0	200	300	0	0	0	0	0	0	0	200	903	0	0	0	0	0	0	0	603	903	0
6750	6	0	0	0	0	0	0	200	300	0	0	0	0	0	0	0	200	903	0	0	0	0	0	0	0	603	903	0
6750	7	0	0	0	0	0	0	200	300	0	0	0	0	0	0	0	200	903	0	0	0	0	0	0	0	603	903	0
6750	8	0	0	0	0	0	0	200	300	0	0	0	0	0	0	0	200	903	0	0	0	0	0	0	0	603	903	0
6750	9	0	0	0	0	0	0	200	300	0	0	0	0	0	0	0	200	903	0	0	0	0	0	0	0	603	903	0
6751	0	0	0	0	0	0	0	200	300	0	0	0	0	0	0	0	200	903	0	0	0	0	0	0	0	603	903	0
6751	1	0	0	0	0	0	0	200	300	0	0	0	0	0	0	0	200	903	0	0	0	0	0	0	0	603	903	0
6751	2	0	0	0	0	0	0	200	300	0	0	0	0	0	0	0	200	903	0	0	0	0	0	0	0	603	903	0
6751	3	0	0	0	0	0	0	200	300	0	0	0	0	0	0	0	200	903	0	0	0	0	0	0	0	603	903	0
6751	4	0	0	0	0	0	0	200	300	0	0	0	0	0	0	0	200	903	0	0	0	0	0	0	0	603	903	0
6751	5	0	0	0	0	0	0	200	300	0	0	0	0	0	0	0	200	903	0	0	0	0	0	0	0	603	903	0
6751	6	0	0	0	0	0	0	200	300	0	0	0	0	0	0	0	200	903	0	0	0	0	0	0	0	603	903	0
6751	7	0	0	0	0	0	0	200	300	0	0	0	0	0	0	0	200	903	0	0	0	0	0	0	0	603	903	0
6751	8	0	0	0	0	0	0	200	300	0	0	0	0	0	0	0	200	903	0	0	0	0	0	0	0	603	903	0
6751	9	0	0	0	0	0	0	200	300	0	0	0	0	0	0	0	200	903	0	0	0	0	0	0	0	603	903	0
6752	0	0	0	0	0	0	0	200	300	0	0	0	0	0	0	0	200	903	0	0	0	0	0	0	0	603	903	0
6752	1	0	0	0	0	0	0	200	300	0	0	0	0	0	0	0	200	903	0	0	0	0	0	0	0	603	903	0
6752	2	0	0	0	0	0	0	200	300	0	0	0	0	0	0	0	200	903	0	0	0	0	0	0	0	603	903	0
6752	3	0	0	0	0	0	0	200	300	0	0	0	0	0	0	0	200	903	0	0	0	0	0	0	0	603	903	0
6752	4	0	0	0	0	0	0	200	300	0	0	0	0	0	0	0	200	903	0	0	0	0	0	0	0	603	903	0
6752	5	0	0	0	0	0	0	200	300	0	0	0	0	0	0	0	200	903	0	0	0	0	0	0	0	603	903	0
6752	6	0	0	0	0	0	0	200	300	0	0	0	0	0	0	0	200	903	0	0	0	0	0	0	0	603	903	0
6752	7	0	0	0	0	0	0	200	300	0	0	0	0	0	0	0	200	903	0	0	0	0	0	0	0	603	903	0
6752	8	0	0	0	0	0	0	200	300	0	0	0	0	0	0	0	200	903	0	0	0	0	0	0	0	603	903	0
6752	9	0	0	0	0	0	0	200	300	0	0	0	0	0	0	0	200	903	0	0	0	0	0	0	0	603	903	0
6753	0	0	0	0	0	0	0	200	300	0	0	0	0	0	0	0	200	903	0	0	0	0	0	0	0	603	903	0
6753	1	0	0	0	0	0	0	200	300	0	0	0	0	0	0	0	200	903	0	0	0	0	0	0	0	603	903	0
6753	2	0	0	0	0	0	0	200	300	0	0	0	0	0	0	0	200	903	0	0	0	0	0	0	0	603	903	0
6753	3	0	0	0	0	0	0	200	300	0	0	0	0	0	0	0	200	903	0	0	0	0	0	0	0	603	903	0
6753	4	0	0	0	0	0	0	200	300	0	0	0	0	0	0	0	200	903	0	0	0	0	0	0	0	603	903	0
6753	5	0	0	0	0	0	0	200	300	0	0	0	0	0	0	0	200	903	0	0	0	0	0	0	0	603	903	0
6753	6	0	0	0	0	0	0	200	300	0	0	0	0	0	0	0	200	903	0	0	0	0	0	0	0	603	903	0
6753	7	0	0	0	0	0	0	200	300	0	0	0	0	0	0	0	200	903	0	0	0	0	0	0	0	603	903	0
6753	8	0	0	0	0	0	0	200	300	0	0	0	0	0	0	0	200	903	0	0	0	0	0	0	0	603	903	0
6753	9	0	0	0	0	0	0	200	300	0	0	0	0	0	0	0	200	903	0	0	0	0	0	0	0	603	903	0
6754	0	0	0	0	0	0	0	200	300	0	0	0	0	0	0	0	200	903	0	0	0	0	0	0	0	603	903	0
6754	1	0	0	0	0	0	0	200	300	0	0	0	0	0	0	0	200	903	0	0	0	0	0	0	0	603	903	0
6754	2	0	0	0	0	0	0	200	300	0	0	0	0	0	0	0	200	903	0	0	0	0	0	0	0	603	903	0
6754	3	0	0	0	0	0	0	200	300	0	0	0	0	0	0	0	200	903	0	0	0	0	0	0	0	603	903	0
6754	4	0	0	0	0	0	0	200	300	0	0	0	0	0	0	0	200	903	0	0	0	0	0	0	0	603	903	0
6754	5	0	0	0	0	0	0	200	300	0	0	0	0	0	0	0	200	903	0	0	0	0	0	0	0	603	903	0
6754	6	0	0	0	0	0	0	200	300	0	0	0	0	0	0	0	200	903	0	0	0	0	0	0	0	603	903	0
6754	7	0	0	0	0	0	0	200	300	0	0	0	0	0	0	0	200	903	0	0	0	0	0	0	0	603	903	0
6754	8	0	0	0	0	0	0	200	300	0	0	0	0	0	0	0	200	903	0	0	0	0	0	0	0	603	903	0
6754	9	0	0	0	0	0	0	200	300	0	0	0	0	0	0	0	200	903	0	0	0	0	0	0	0	603	903	0
6755	0	0	0	0	0	0	0	200	300	0	0	0	0	0	0	0	200	903	0	0	0	0	0	0	0	603	903	0
6755	1	0	0	0	0	0	0	200	300	0	0	0	0	0	0	0	200	903	0	0	0	0	0	0	0	603	903	0
6755	2	0	0	0	0	0	0	200	300	0	0	0	0	0	0	0	200	903	0	0	0	0	0	0	0	603	903	0
6755	3	0	0	0	0	0	0	200	300	0	0	0	0	0	0	0	200	903	0	0	0	0	0	0	0	603	903	0
6755	4	0	0	0	0	0	0	200	300	0	0	0	0	0	0	0	200	903	0	0	0	0	0	0	0	603	903	0
6755	5	0	0	0	0	0	0	200	300	0	0	0	0	0	0	0	200	903	0	0	0	0	0	0	0	603	903	0
6755	6	0	0	0	0	0	0	200	300	0	0	0	0	0	0	0	200	903	0	0	0	0	0	0	0	603	903	0
6755	7	0	0	0	0	0	0	200	300	0	0	0	0	0	0	0	200	903	0	0	0	0	0	0	0	603	903	0
6755	8	0	0	0	0	0	0	200	300	0	0	0	0	0	0	0	200	903	0	0	0	0	0	0	0	603	903	0
6755	9	0	0	0	0	0	0	200	300	0	0	0	0	0	0	0	200	903	0	0	0	0	0	0	0	603	903	0
6756	0	0	0	0	0	0	0	200	300	0	0	0	0	0	0	0	200	903	0	0	0	0	0	0	0	603	903	0
6756	1	0	0	0	0	0	0	200	300	0	0	0	0	0	0	0	200	903	0	0	0	0	0	0	0	603	903	0
6756	2	0	0	0	0	0	0	200	300	0	0	0	0	0	0	0	200	903	0	0	0	0	0	0	0	603	903	0
6756	3	0	0	0	0	0	0	200	300	0	0	0	0	0	0	0	200	903	0	0	0	0	0	0	0	603	903	0
6756	4	0	0	0	0	0	0	200	300	0	0	0	0	0	0	0	200	903	0	0	0	0	0	0	0	603	903	0
6756	5	0	0	0	0	0	0	200	300	0	0	0	0	0	0	0	200	903	0	0	0	0	0	0	0	603	903	0
6756	6	0	0	0	0	0	0	200	300	0	0	0	0	0	0	0	200	903	0	0	0	0	0	0	0	603	903	0
6756	7	0	0	0	0	0	0	200	300	0	0	0	0	0	0	0	200	903	0	0	0	0	0	0	0	603	903	0
6756	8	0	0	0	0	0	0	200	300	0	0	0	0	0	0	0	200	903	0	0	0	0	0	0	0	603	903	0
6756	9	0	0	0	0	0	0	200	300	0	0	0	0	0	0	0	200	903	0	0	0	0	0	0	0	603	903	0
6757	0	0	0	0	0	0	0	200	300	0	0	0	0	0	0	0	200	903	0	0	0	0	0	0	0	603	903	0
6757	1	0	0	0	0	0	0	200	300	0	0	0	0	0	0	0	200	903	0	0	0	0	0	0	0	603	903	0
6757	2	0	0	0	0	0	0	200	300	0	0	0	0	0	0	0	200	903	0	0	0	0	0	0	0	603	903	0
6757	3	0	0	0	0	0	0	200	300	0	0	0	0	0	0	0	200	903	0	0	0	0	0	0	0	603	903	0
6757	4	0	0	0	0	0	0	200	300	0	0	0	0	0	0	0	200	903	0	0	0	0	0	0	0	603	903	0
6757	5	0	0	0	0	0	0	200	300	0	0	0	0	0	0	0	200	903	0	0	0	0	0	0	0	603	903	0
6757	6	0	0	0	0	0	0	200	300	0	0	0	0	0	0	0	200	903	0	0	0	0	0	0	0	603	903	0
6757	7	0	0	0	0	0	0	200	300	0	0	0	0	0	0	0	200	903	0	0	0	0	0	0	0	603	903	0
6757	8	0	0	0	0	0	0	200	300	0	0	0	0	0	0	0	200	903	0	0	0	0	0	0	0	603	903	0
6757	9	0	0	0	0	0	0	200	300	0	0	0	0	0	0	0	200	903	0	0	0	0	0	0	0	603	903	0
6758	0	0	0	0	0	0	0	200	300	0	0	0	0	0	0	0	200	903	0	0	0	0	0	0	0	603	903	0
6758	1	0	0	0	0	0	0	200	300	0	0	0	0	0	0	0	200	903	0	0	0	0	0	0	0	603	903	0
6758	2	0	0	0	0	0	0	200	300	0	0	0	0	0	0	0	200	903	0	0	0	0	0	0	0	603	903	0
6758	3	0	0	0	0	0	0	200	300	0	0	0	0	0	0	0	200	903	0	0	0	0	0	0	0	603	903	0
6758	4	0	0	0	0	0	0	200	300	0	0	0	0	0	0	0	200	903	0	0	0	0	0	0	0	603	903	0
6758	5	0	0	0	0	0	0	200	300	0	0	0	0	0	0	0	200	903	0	0	0	0	0	0	0	603	903	0
6758	6	0	0	0	0	0	0	200	300	0	0	0	0	0	0	0	200	903	0	0	0	0	0	0	0	603	903	0
6758	7	0	0	0	0	0	0	200	300	0	0	0	0	0	0	0	200	903	0	0	0	0	0	0	0	603	903	0
6758	8	0	0	0	0	0	0	200	300	0	0	0	0	0	0	0	200	903	0	0	0	0	0	0	0	603	903	0
6758	9	0	0	0	0	0	0	200	300	0	0	0	0	0	0	0	200	903	0	0	0	0	0	0	0	603	903	0
6759	0	0	0	0	0	0	0	200	300	0	0	0	0	0	0	0	200	903	0	0	0	0	0	0	0	603	903	0
6759	1	0	0	0	0	0	0	200	300	0	0	0	0	0	0	0	200	903	0	0	0	0	0	0	0	603	903	0
6759	2	0	0	0	0	0	0	200	300	0	0	0	0	0	0	0	200	903	0	0	0	0	0	0	0	603	903	0
6759	3	0	0	0	0	0	0	200	300	0	0	0	0	0	0	0	200	903	0	0	0	0	0	0	0	603	903	0
6759	4	0	0	0	0	0	0	200	300	0	0	0	0	0	0	0	200	903	0	0	0	0	0	0	0	603	903	0
6759	5	0	0	0	0	0	0	200	300	0	0	0	0	0	0	0	200	903	0	0	0	0	0	0	0	603	903	0
6759	6	0	0	0	0	0	0	200	300	0	0	0	0	0	0	0	200	903	0	0	0	0	0	0	0	603	903	0
6759	7	0	0	0	0	0	0	200	300	0	0	0	0	0	0	0	200	903	0	0	0	0	0	0	0	603	903	0
6759	8	0	0	0	0	0	0	200	300	0	0	0	0	0	0	0	200	903	0	0	0	0	0	0	0	603	903	0
6759	9	0	0	0	0	0	0	200	300	0	0	0	0	0	0	0	200	903	0	0	0	0	0	0	0	603	903	0
6760	0	0	0	0	0	0	0	200	300	0	0	0	0	0	0	0	200	903	0	0	0	0	0	0	0	603	903	0
6760	1	0	0	0	0	0	0	200	300	0	0	0	0	0	0	0	200	903	0	0	0	0	0	0	0	603	903	0
6760	2	0	0	0	0	0	0	200	300	0	0	0	0	0	0	0	200	903	0	0	0	0	0	0	0	603	903	0
6760	3	0	0	0	0	0	0	200	300	0	0	0	0	0	0	0	200	903	0	0	0	0	0	0	0	603	903	0
6760	4	0	0	0	0	0	0	200	300	0	0	0	0	0	0	0	200	903	0	0	0	0	0	0	0	603	903	0
6760	5	0	0	0	0	0	0	200	300	0	0	0	0	0	0	0	200	903	0	0	0	0	0	0	0	603	903	0
6760	6	0	0	0	0	0	0	200	300	0	0	0	0	0	0	0	200	903	0	0	0	0	0	0	0	603	903	0
6760	7	0	0	0	0	0	0	200	300	0	0	0	0	0	0	0	200	903	0	0	0	0	0	0	0	603	903	0
6760	8	0	0	0	0	0	0	200	300	0	0	0	0	0	0	0	200	903	0	0	0	0	0	0	0	603	903	0
6760	9	0	0	0	0	0	0	200	300	0	0	0	0	0	0	0	200	903	0	0	0	0	0	0	0	603	903	0
6761	0	0	0	0	0	0	0	200	300	0	0	0	0	0	0	0	200	903	0	0	0	0	0	0	0	603	903	0
6761	1	0	0	0	0	0	0	200	300	0	0	0	0	0	0	0	200	903	0	0	0	0	0	0	0	603	903	0
6761	2	0	0	0	0	0	0	200	300	0	0	0	0	0	0	0	200	903	0	0	0	0	0	0	0	603	903	0
6761	3	0	0	0	0	0	0	200	300	0	0	0	0	0	0	0	200	903	0	0	0	0	0	0	0	603	903	0
6761	4	0	0	0	0	0	0	200	300	0	0	0	0	0	0	0	200	903	0	0	0	0	0	0	0	603	903	0
6761	5	0	0	0	0	0	0	200	300	0	0	0	0	0	0	0	200	903	0	0	0	0	0	0	0	603	903	0
6761	6	0	0	0	0	0	0	200	300	0	0	0	0	0	0	0	200	903	0	0	0	0	0	0	0	603	903	0
6761	7	0	0	0	0	0	0	200	300	0	0	0	0	0	0	0	200	903	0	0	0	0	0	0	0	603	903	0
6761	8	0	0	0	0	0	0	200	300	0	0	0	0	0	0	0	200	903	0	0	0	0	0	0	0	603	903	0
6761	9	0	0	0	0	0	0	200	300	0	0	0	0	0	0	0	200	903	0	0	0	0	0	0	0	603	903	0
6762	0	0	0	0	0	0	0	200	300	0	0	0	0	0	0	0	200	903	0	0	0	0	0	0	0	603	903	0
6762	1	0	0	0	0	0	0	200	300	0	0	0	0	0	0	0	200	903	0	0	0	0	0	0	0	603	903	0
6762	2	0	0	0	0	0	0	200	300	0	0	0	0	0	0	0	200	903	0	0	0	0	0	0	0	603	903	0
6762	3	0	0	0	0	0	0	200	300	0	0	0	0	0	0	0	200	903	0	0	0	0	0	0	0	603	903	0
6762	4	0	0	0	0	0	0	200	300	0	0	0	0	0	0	0	200	903	0	0	0	0	0	0	0	603	903	0
6762	5	0	0	0	0	0	0	200	300	0	0	0	0	0	0	0	200	903	0	0	0	0	0	0	0	603	903	0
6762	6	0	0	0	0	0	0	200	300	0	0	0	0	0	0	0	200	903	0	0	0	0	0	0	0	603	903	0
6762	7	0	0	0	0	0	0	200	300	0	0	0	0	0	0	0	200	903	0	0	0	0	0	0	0	603	903	0
6762	8	0	0	0	0	0	0	200	300	0	0	0	0	0	0	0	200	903	0	0	0	0	0	0	0	603	903	0
6762	9	0	0	0	0	0	0	200	300	0	0	0	0	0	0	0	200	903	0	0	0	0	0	0	0	603	903	0
6763	0	0	0	0	0	0	0	200	300	0	0	0	0	0	0	0	200	903	0	0	0	0	0	0	0	603	903	0
6763	1	0	0	0	0	0	0	200	300	0	0	0	0	0	0	0	200	903	0	0	0	0	0	0	0	603	903	0
6763	2	0	0	0	0	0	0	200	300	0	0	0	0	0	0	0	200	903	0	0	0	0	0	0	0	603	903	0
6763	3	0	0	0	0	0	0	200	300	0	0	0	0	0	0	0	200	903	0	0	0	0	0	0	0	603	903	0
6763	4	0	0	0	0	0	0	200	300	0	0	0	0	0	0	0	200	903	0	0	0	0	0	0	0	603	903	0
6763	5	0	0	0	0	0	0	200	300	0	0	0	0	0	0	0	200	903	0	0	0	0	0	0	0	603	903	0
6763	6	0	0	0	0	0	0	200	300	0	0	0	0	0	0	0	200	903	0	0	0	0	0	0	0	603	903	0
6763	7	0	0	0	0	0	0	200	300	0	0	0	0	0	0	0	200	903	0	0	0	0	0	0	0	603	903	0
6763	8	0	0	0	0	0	0	200	300	0	0	0	0	0	0	0	200	903	0	0	0	0	0	0	0	603	903	0
6763	9	0	0	0	0	0	0	200	300	0	0	0	0	0	0	0	200	903	0	0	0	0	0	0	0	603	903	0
6764	0	0	0	0	0	0	0	200	300	0	0	0	0	0	0	0	200	903	0	0	0	0	0	0	0	603	903	0
6764	1	0	0	0	0	0	0	200	300	0	0	0	0	0	0	0	200	903	0	0	0	0	0	0	0	603	903	0
6764	2	0	0	0	0	0	0	200	300	0	0	0	0	0	0	0	200	903	0	0	0	0	0	0	0	603	903	0
6764	3	0	0	0	0	0	0	200	300	0	0	0	0	0	0	0	200	903	0	0	0	0	0	0	0	603	903	0
6764	4	0	0	0	0	0	0	200	300	0	0	0	0	0	0	0	200	903	0	0	0	0	0	0	0	603	903	0
6764	5	0	0	0	0	0	0	200	300	0	0	0	0	0	0	0	200	903	0	0	0	0	0	0	0	603	903	0
6764	6	0	0	0	0	0	0	200	300	0	0	0	0	0	0	0	200	903	0	0	0	0	0	0	0	603	903	0
6764	7	0	0	0	0	0	0	200	300	0	0	0	0	0	0	0	200	903	0	0	0	0	0	0	0	603	903	0
6764	8	0	0	0	0	0	0	200	300	0	0	0	0	0	0	0	200	903	0	0	0	0	0	0	0	603	903	0
6764	9	0	0	0	0	0	0	200	300	0	0	0	0	0	0	0	200	903	0	0	0	0	0	0	0	603	903	0
6765	0	0	0	0	0	0	0	200	300	0	0	0	0	0	0	0	200	903	0	0	0	0	0	0	0	603	903	0
6765	1	0	0	0	0	0	0	200	300	0	0	0	0	0	0	0	200	903	0	0	0	0	0	0	0	603	903	0
6765	2	0	0	0	0	0	0	200	300	0	0	0	0	0	0	0	200	903	0	0	0	0	0	0	0	603	903	0
6765	3	0	0	0	0	0	0	200	300	0	0	0	0	0	0	0	200	903	0	0	0	0	0	0	0	603	903	0
6765	4	0	0	0	0	0	0	200	300	0	0	0	0	0	0	0	200	903	0	0	0	0	0	0	0	603	903	0
6765	5	0	0	0	0	0	0	200	300	0	0	0	0	0	0	0	200	903	0	0	0	0	0	0	0	603	903	0
6765	6	0	0	0	0	0	0	200	300	0	0	0	0	0	0	0	200	903	0	0	0	0	0	0	0	603	903	0
6765	7	0	0	0	0	0	0	200	300	0	0	0	0	0	0	0	200	903	0	0	0	0	0	0	0	603	903	0
6765	8	0	0	0	0	0	0	200	300	0	0	0	0	0	0	0	200	903	0	0	0	0	0	0	0	603	903	0
6765	9	0	0	0	0	0	0	200	300	0	0	0	0	0	0	0	200	903	0	0	0	0	0	0	0	603	903	0
6766	0	0	0	0	0	0	0	200	300	0	0	0	0	0	0	0	200	903	0	0	0	0	0	0	0	603	903	0
6766	1	0	0	0	0	0	0	200	300	0	0	0	0	0	0	0	200	903	0	0	0	0	0	0	0	603	903	0
6766	2	0	0	0	0	0	0	200	300	0	0	0	0	0	0	0	200	903	0	0	0	0	0	0	0	603	903	0
6766	3	0	0	0	0	0	0	200	300	0	0	0	0	0	0	0	200	903	0	0	0	0	0	0	0	603	903	0
6766	4	0	0	0	0	0	0	200	300	0	0	0	0	0	0	0	200	903	0	0	0	0	0	0	0	603	903	0
6766	5	0	0	0	0	0	0	200	300	0	0	0	0	0	0	0	200	903	0	0	0	0	0	0	0	603	903	0
6766	6	0	0	0	0	0	0	200	300	0	0	0	0	0	0	0	200	903	0	0	0	0	0	0	0	603	903	0
6766	7	0	0	0	0	0	0	200	300	0	0	0	0	0	0	0	200	903	0	0	0	0	0	0	0	603	903	0
6766	8	0	0	0	0	0	0	200	300	0	0	0	0	0	0	0	200	903	0	0	0	0	0	0	0	603	903	0
6766	9	0	0	0	0	0	0	200	300	0	0	0	0	0	0	0	200	903	0	0	0	0	0	0	0	603	903	0
6767	0	0	0	0	0	0	0	200	300	0	0	0	0	0	0	0	200	903	0	0	0	0	0	0	0	603	903	0
6767	1	0	0	0	0	0	0	200	300	0	0	0	0	0	0	0	200	903	0	0	0	0	0	0	0	603	903	0
6767	2	0	0	0	0	0	0	200	300	0	0	0	0	0	0	0	200	903	0	0	0	0	0	0	0	603	903	0
6767	3	0	0	0	0	0	0	200	300	0	0	0	0	0	0	0	200	903	0	0	0	0	0	0	0	603	903	0
6767	4	0	0	0	0	0	0	200	300	0	0	0	0	0	0	0	200	903	0	0	0	0	0	0	0	603	903	0
6767	5	0	0	0	0	0	0	200	300	0	0	0	0	0	0	0	200	903	0	0	0	0	0	0	0	603	903	0
6767	6	0	0	0	0	0	0	200	300	0	0	0	0	0	0	0	200	903	0	0	0	0	0	0	0	603	903	0
6767	7	0	0	0	0	0	0	200	300	0	0	0	0	0	0	0	200	903	0	0	0	0	0	0	0	603	903	0
6767	8	0	0	0	0	0	0	200	300	0	0	0	0	0	0	0	200	903	0	0	0	0	0	0	0	603	903	0
6767	9	0	0	0	0	0	0	200	300	0	0	0	0	0	0	0	200	903	0	0	0	0	0	0	0	603	903	0
6768	0	0	0	0	0	0	0	200	300	0	0	0	0	0	0	0	200	903	0	0	0	0	0	0	0	603	903	0
6768	1	0	0	0	0	0	0	200	300	0	0	0	0	0	0	0	200	903	0	0	0	0	0	0	0	603	903	0
6768	2	0	0	0	0	0	0	200	300	0	0	0	0	0	0	0	200	903	0	0	0	0	0	0	0	603	903	0
6768	3	0	0	0	0	0	0	200	300	0	0	0	0	0	0	0	200	903	0	0	0	0	0	0	0	603	903	0
6768	4	0	0	0	0	0	0	200	300	0	0	0	0	0	0	0	200	903	0	0	0	0	0	0	0	603	903	0
6768	5	0	0	0	0	0	0	200	300	0	0	0	0	0	0	0	200	903	0	0	0	0	0	0	0	603	903	0
6768	6	0	0	0	0	0	0	200	300	0	0	0	0	0	0	0	200	903	0	0	0	0	0	0	0	603	903	0
6768	7	0	0	0	0	0	0	200	300	0	0	0	0	0	0	0	200	903	0	0	0	0	0	0	0	603	903	0
6768	8	0	0	0	0	0	0	200	300	0	0	0	0	0	0	0	200	903	0	0	0	0	0	0	0	603	903	0
6768	9	0	0	0	0	0	0	200	300	0	0	0	0	0	0	0	200	903	0	0	0	0	0	0	0	603	903	0
6769	0	0	0	0	0	0	0	200	300	0	0	0	0	0	0	0	200	903	0	0	0	0	0	0	0	603	903	0
6769	1	0	0	0	0	0	0	200	300	0	0	0	0	0	0	0	200	903	0	0	0	0	0	0	0	603	903	0
6769	2	0	0	0	0	0	0	200	300	0	0	0	0	0	0	0	200	903	0	0	0	0	0	0	0	603	903	0
6769	3	0	0	0	0	0	0	200	300	0	0	0	0	0	0	0	200	903	0	0	0	0	0	0	0	603	903	0
6769	4	0	0	0	0	0	0	200	300	0	0	0	0	0	0	0	200	903	0	0	0	0	0	0	0	603	903	0
6769	5	0	0	0	0	0	0	200	300	0	0	0	0	0	0	0	200	903	0	0	0	0	0	0	0	603	903	0
6769	6	0	0	0	0	0	0	200	300	0	0	0	0	0	0	0	200	903	0	0	0	0	0	0	0	603	903	0
6769	7	0	0	0	0	0	0	200	300	0	0	0	0	0	0	0	200	903	0	0	0	0	0	0	0	603	903	0
6769	8	0	0	0	0	0	0	200	300	0	0	0	0	0	0	0	200	903	0	0	0	0	0	0	0	603	903	0
6769	9	0	0	0	0	0	0	200	300	0	0	0	0	0	0	0	200	903	0	0	0	0	0	0	0	603	903	0
6770	0	0	0	0	0	0	0	200	300	0	0	0	0	0	0	0	200	903	0	0	0	0	0	0	0	603	903	0
6770	1	0	0	0	0	0	0	200	300	0	0	0	0	0	0	0	200	903	0	0	0	0	0	0	0	603	903	0
6770	2	0	0	0	0	0	0	200	300	0	0	0	0	0	0	0	200	903	0	0	0	0	0	0	0	603	903	0
6770	3	0	0	0	0	0	0	200	300	0	0	0	0	0	0	0	200	903	0	0	0	0	0	0	0	603	903	0
6770	4	0	0	0	0	0	0	200	300	0	0	0	0	0	0	0	200	903	0	0	0	0	0	0	0	603	903	0
6770	5	0	0	0	0	0	0	200	300	0	0	0	0	0	0	0	200	903	0	0	0	0	0	0	0	603	903	0
6770	6	0	0	0	0	0	0	200	300	0	0	0	0	0	0	0	200	903	0	0	0	0	0	0	0	603	903	0
6770	7	0	0	0	0	0	0	200	300	0	0	0	0	0	0	0	200	903	0	0	0	0	0	0	0	603	903	0
6770	8	0	0	0	0	0	0	200	300	0	0	0	0	0	0	0	200	903	0	0	0	0	0	0	0	603	903	0
6770	9	0	0	0	0	0	0	200	300	0	0	0	0	0	0	0	200	903	0	0	0	0	0	0	0	603	903	0
6771	0	0	0	0	0	0	0	200	300	0	0	0	0	0	0	0	200	903	0	0	0	0	0	0	0	603	903	0
6771	1	0	0	0	0	0	0	200	300	0	0	0	0	0	0	0	200	903	0	0	0	0	0	0	0	603	903	0
6771	2	0	0	0	0	0	0	200	300	0	0	0	0	0	0	0	200	903	0	0	0	0	0	0	0	603	903	0
6771	3	0	0	0	0	0	0	200	300	0	0	0	0	0	0	0	200	903	0	0	0	0	0	0	0	603	903	0
6771	4	0	0	0	0	0	0	200	300	0	0	0	0	0	0	0	200	903	0	0	0	0	0	0	0	603	903	0
6771	5	0	0	0	0	0	0	200	300	0	0	0	0	0	0	0	200	903	0	0	0	0	0	0	0	603	903	0
6771	6	0	0	0	0	0	0	200	300	0	0	0	0	0	0	0	200	903	0	0	0	0	0	0	0	603	903	0
6771	7	0	0	0	0	0	0	200	300	0	0	0	0	0	0	0	200	903	0	0	0	0	0	0	0	603	903	0
6771	8	0	0	0	0	0	0	200	300	0	0	0	0	0	0	0	200	903	0	0	0	0	0	0	0	603	903	0
6771	9	0	0	0	0	0	0	200	300	0	0	0	0	0	0	0	200	903	0	0	0	0	0	0	0	603	903	0
6772	0	0	0	0	0	0	0	200	300	0	0	0	0	0	0	0	200	903	0	0	0	0	0	0	0	603	903	0
6772	1	0	0	0	0	0	0	200	300	0	0	0	0	0	0	0	200	903	0	0	0	0	0	0	0	603	903	0
6772	2	0	0	0	0	0	0	200	300	0	0	0	0	0	0	0	200	903	0	0	0	0	0	0	0	603	903	0
6772	3	0	0	0	0	0	0	200	300	0	0	0	0	0	0	0	200	903	0	0	0	0	0	0	0	603	903	0
6772	4	0	0	0	0	0	0	200	300	0	0	0	0	0	0	0	200	903	0	0	0	0	0	0	0	603	903	0
6772	5	0	0	0	0	0	0	200	300	0	0	0	0	0	0	0	200	903	0	0	0	0	0	0	0	603	903	0
6772	6	0	0	0	0	0	0	200	300	0	0	0	0	0	0	0	200	903	0	0	0	0	0	0	0	603	903	0
6772	7	0	0	0	0	0	0	200	300	0	0	0	0	0	0	0	200	903	0	0	0	0	0	0	0	603	903	0
6772	8	0	0	0	0	0	0	200	300	0	0	0	0	0	0	0	200	903	0	0	0	0	0	0	0	603	903	0
6772	9	0	0	0	0	0	0	200	300	0	0	0	0	0	0	0	200	903	0	0	0	0	0	0	0	603	903	0
6773	0	0	0	0	0	0	0	200	300	0	0	0	0	0	0	0	200	903	0	0	0	0	0	0	0	603	903	0
6773	1	0	0	0	0	0	0	200	300	0	0	0	0	0	0	0	200	903	0	0	0	0	0	0	0	603	903	0
6773	2	0	0	0	0	0	0	200	300	0	0	0	0	0	0	0	200	903	0	0	0	0	0	0	0	603	903	0
6773	3	0	0	0	0	0	0	200	300	0	0	0	0	0	0	0	200	903	0	0	0	0	0	0	0	603	903	0
6773	4	0	0	0	0	0	0	200	300	0	0	0	0	0	0	0	200	903	0	0	0	0	0	0	0	603	903	0
6773	5	0	0	0	0	0	0	200	300	0	0	0	0	0	0	0	200	903	0	0	0	0	0	0	0	603	903	0
6773	6	0	0	0	0	0	0	200	300	0	0	0	0	0	0	0	200	903	0	0	0	0	0	0	0	603	903	0
6773	7	0	0	0	0	0	0	200	300	0	0	0	0	0	0	0	200	903	0	0	0	0	0	0	0	603	903	0
6773	8	0	0	0	0	0	0	200	300	0	0	0	0	0	0	0	200	903	0	0	0	0	0	0	0	603	903	0
6773	9	0	0	0	0	0	0	200	300	0	0	0	0	0	0	0	200	903	0	0	0	0	0	0	0	603	903	0
6774	0	0	0	0	0	0	0	200	300	0	0	0	0	0	0	0	200	903	0	0	0	0	0	0	0	603	903	0
6774	1	0	0	0	0	0	0	200	300	0	0	0	0	0	0	0	200	903	0	0	0	0	0	0	0	603	903	0
6774	2	0	0	0	0	0	0	200	300	0	0	0	0	0	0	0	200	903	0	0	0	0	0	0	0	603	903	0
6774	3	0	0	0	0	0	0	200	300	0	0	0	0	0	0	0	200	903	0	0	0	0	0	0	0	603	903	0
6774	4	0	0	0	0	0	0	200	300	0	0	0	0	0	0	0	200	903	0	0	0	0	0	0	0	603	903	0
6774	5	0	0	0	0	0	0	200	300	0	0	0	0	0	0	0	200	903	0	0	0	0	0	0	0	603	903	0
6774	6	0	0	0	0	0	0	200	300	0	0	0	0	0	0	0	200	903	0	0	0	0	0	0	0	603	903	0
6774	7	0	0	0	0	0	0	200	300	0	0	0	0	0	0	0	200	903	0	0	0	0	0	0	0	603	903	0
6774	8	0	0	0	0	0	0	200	300	0	0	0	0	0	0	0	200	903	0	0	0	0	0	0	0	603	903	0
6774	9	0	0	0	0	0	0	200	300	0	0	0	0	0	0	0	200	903	0	0	0	0	0	0	0	603	903	0
6775	0	0	0	0	0	0	0	200	300	0	0	0	0	0	0	0	200	903	0	0	0	0	0	0	0	603	903	0
6775	1	0	0	0	0	0	0	200	300	0	0	0	0	0	0	0	200	903	0	0	0	0	0	0	0	603	903	0
6775	2	0	0	0	0	0	0	200	300	0	0	0	0	0	0	0	200	903	0	0	0	0	0	0	0	603	903	0
6775	3	0	0	0	0	0	0	200	300	0	0	0	0	0	0	0	200	903	0	0	0	0	0	0	0	603	903	0
6775	4	0	0	0	0	0	0	200	300	0	0	0	0	0	0	0	200	903	0	0	0	0	0	0	0	603	903	0
6775	5	0	0	0	0	0	0	200	300	0	0	0	0	0	0	0	200	903	0	0	0	0	0	0	0	603	903	0
6775	6	0	0	0	0	0	0	200	300	0	0	0	0	0	0	0	200	903	0	0	0	0	0	0	0	603	903	0
6775	7	0	0	0	0	0	0	200	300	0	0	0	0	0	0	0	200	903	0	0	0	0	0	0	0	603	903	0
6775	8	0	0	0	0	0	0	200	300	0	0	0	0	0	0	0	200	903	0	0	0	0	0	0	0	603	903	0
6775	9	0	0	0	0	0	0	200	300	0	0	0	0	0	0	0	200	903	0	0	0	0	0	0	0	603	903	0
6776	0	0	0	0	0	0	0	200	300	0	0	0	0	0	0	0	200	903	0	0	0	0	0	0	0	603	903	0
6776	1	0	0	0	0	0	0	200	300	0	0	0	0	0	0	0	200	903	0	0	0	0	0	0	0	603	903	0
6776	2	0	0	0	0	0	0	200	300	0	0	0	0	0	0	0	200	903	0	0	0	0	0	0	0	603	903	0
6776	3	0	0	0	0	0	0	200	300	0	0	0	0	0	0	0	200	903	0	0	0	0	0	0	0	603	903	0
6776	4	0	0	0	0	0	0	200	300	0	0	0	0	0	0	0	200	903	0	0	0	0	0	0	0	603	903	0
6776	5	0	0	0	0	0	0	200	300	0	0	0	0	0	0	0	200	903	0	0	0	0	0	0	0	603	903	0
6776	6	0	0	0	0	0	0	200	300	0	0	0	0	0	0	0	200	903	0	0	0	0	0	0	0	603	903	0
6776	7	0	0	0	0	0	0	200	300	0	0	0	0	0	0	0	200	903	0	0	0	0	0	0	0	603	903	0
6776	8	0	0	0	0	0	0	200	300	0	0	0	0	0	0	0	200	903	0	0	0	0	0	0	0	603	903	0
6776	9	0	0	0	0	0	0	200	300	0	0	0	0	0	0	0	200	903	0	0	0	0	0	0	0	603	903	0
6777	0	0	0	0	0	0	0	200	300	0	0	0	0	0	0	0	200	903	0	0	0	0	0	0	0	603	903	0
6777	1	0	0	0	0	0	0	200	300	0	0	0	0	0	0	0	200	903	0	0	0	0	0	0	0	603	903	0
6777	2	0	0	0	0	0	0	200	300	0	0	0	0	0	0	0	200	903	0	0	0	0	0	0	0	603	903	0
6777	3	0	0	0	0	0	0	200	300	0	0	0	0	0	0	0	200	903	0	0	0	0	0	0	0	603	903	0
6777	4	0	0	0	0	0	0	200	300	0	0	0	0	0	0	0	200	903	0	0	0	0	0	0	0	603	903	0
6777	5	0	0	0	0	0	0	200	300	0	0	0	0	0	0	0	200	903	0	0	0	0	0	0	0	603	903	0
6777	6	0	0	0	0	0	0	200	300	0	0	0	0	0	0	0	200	903	0	0	0	0	0	0	0	603	903	0
6777	7	0	0	0	0	0	0	200	300	0	0	0	0	0	0	0	200	903	0	0	0	0	0	0	0	603	903	0
6777	8	0	0	0	0	0	0	200	300	0	0	0	0	0	0	0	200	903	0	0	0	0	0	0	0	603	903	0
6777	9	0	0	0	0	0	0	200	300	0	0	0	0	0	0	0	200	903	0	0	0	0	0	0	0	603	903	0
6778	0	0	0	0	0	0	0	200	300	0	0	0	0	0	0	0	200	903	0	0	0	0	0	0	0	603	903	0
6778	1	0	0	0	0	0	0	200	300	0	0	0	0	0	0	0	200	903	0	0	0	0	0	0	0	603	903	0
6778	2	0	0	0	0	0	0	200	300	0	0	0	0	0	0	0	200	903	0	0	0	0	0	0	0	603	903	0
6778	3	0	0	0	0	0	0	200	300	0	0	0	0	0	0	0	200	903	0	0	0	0	0	0	0	603	903	0
6778	4	0	0	0	0	0	0	200	300	0	0	0	0	0	0	0	200	903	0	0	0	0	0	0	0	603	903	0
6778	5	0	0	0	0	0	0	200	300	0	0	0	0	0	0	0	200	903	0	0	0	0	0	0	0	603	903	0
6778	6	0	0	0	0	0	0	200	300	0	0	0	0	0	0	0	200	903	0	0	0	0	0	0	0	603	903	0
6778	7	0	0	0	0	0	0	200	300	0	0	0	0	0	0	0	200	903	0	0	0	0	0	0	0	603	903	0
6778	8	0	0	0	0	0	0	200	300	0	0	0	0	0	0	0	200	903	0	0	0	0	0	0	0	603	903	0
6778	9	0	0	0	0	0	0	200	300	0	0	0	0	0	0	0	200	903	0	0	0	0	0	0	0	603	903	0
6779	0	0	0	0	0	0	0	200	300	0	0	0	0	0	0	0	200	903	0	0	0	0	0	0	0	603	903	0
6779	1	0	0	0	0	0	0	200	300	0	0	0	0	0	0	0	200	903	0	0	0	0	0	0	0	603	903	0
6779	2	0	0	0	0	0	0	200	300	0	0	0	0	0	0	0	200	903	0	0	0	0	0	0	0	603	903	0
6779	3	0	0	0	0	0	0	200	300	0	0	0	0	0	0	0	200	903	0	0	0	0	0	0	0	603	903	0
6779	4	0	0	0	0	0	0	200	300	0	0	0	0	0	0	0	200	903	0	0	0	0	0	0	0	603	903	0
6779	5	0	0	0	0	0	0	200	300	0	0	0	0	0	0	0	200	903	0	0	0	0	0	0	0	603	903	0
6779	6	0	0	0	0	0	0	200	300	0	0	0	0	0	0	0	200	903	0	0	0	0	0	0	0	603	903	0
6779	7	0	0	0	0	0	0	200	300	0	0	0	0	0	0	0	200	903	0	0	0	0	0	0	0	603	903	0
6779	8	0	0	0	0	0	0	200	300	0	0	0	0	0	0	0	200	903	0	0	0	0	0	0	0	603	903	0
6779	9	0	0	0	0	0	0	200	300	0	0	0	0	0	0	0	200	903	0	0	0	0	0	0	0	603	903	0
6780	0	0	0	0	0	0	0	200	300	0	0	0	0	0	0	0	200	903	0	0	0	0	0	0	0	603	903	0
6780	1	0	0	0	0	0	0	200	300	0	0	0	0	0	0	0	200	903	0	0	0	0	0	0	0	603	903	0
6780	2	0	0	0	0	0	0	200	300	0	0	0	0	0	0	0	200	903	0	0	0	0	0	0	0	603	903	0
6780	3	0	0	0	0	0	0	200	300	0	0	0	0	0	0	0	200	903	0	0	0	0	0	0	0	603	903	0
6780	4	0	0	0	0	0	0	200	300	0	0	0	0	0	0	0	200	903	0	0	0	0	0	0	0	603	903	0
6780	5	0	0	0	0	0	0	200	300	0	0	0	0	0	0	0	200	903	0	0	0	0	0	0	0	603	903	0
6780	6	0	0	0	0	0	0	200	300	0	0	0	0	0	0	0	200	903	0	0	0	0	0	0	0	603	903	0
6780	7	0	0	0	0	0	0	200	300	0	0	0	0	0	0	0	200	903	0	0	0	0	0	0	0	603	903	0
6780	8	0	0	0	0	0	0	200	300	0	0	0	0	0	0	0	200	903	0	0	0	0	0	0	0	603	903	0
6780	9	0	0	0	0	0	0	200	300	0	0	0	0	0	0	0	200	903	0	0	0	0	0	0	0	603	903	0
6781	0	0	0	0	0	0	0	200	300	0	0	0	0	0	0	0	200	903	0	0	0	0	0	0	0	603	903	0
6781	1	0	0	0	0	0	0	200	300	0	0	0	0	0	0	0	200	903	0	0	0	0	0	0	0	603	903	0
6781	2	0	0	0	0	0	0	200	300	0	0	0	0	0	0	0	200	903	0	0	0	0	0	0	0	603	903	0
6781	3	0	0	0	0	0	0	200	300	0	0	0	0	0	0	0	200	903	0	0	0	0	0	0	0	603	903	0
6781	4	0	0	0	0	0	0	200	300	0	0	0	0	0	0	0	200	903	0	0	0	0	0	0	0	603	903	0
6781	5	0	0	0	0	0	0	200	300	0	0	0	0	0	0	0	200	903	0	0	0	0	0	0	0	603	903	0
6781	6	0	0	0	0	0	0	200	300	0	0	0	0	0	0	0	200	903	0	0	0	0	0	0	0	603	903	0
6781	7	0	0	0	0	0	0	200	300	0	0	0	0	0	0	0	200	903	0	0	0	0	0	0	0	603	903	0
6781	8	0	0	0	0	0	0	200	300	0	0	0	0	0	0	0	200	903	0	0	0	0	0	0	0	603	903	0
6781	9	0	0	0	0	0	0	200	300	0	0	0	0	0	0	0	200	903	0	0	0	0	0	0	0	603	903	0
6782	0	0	0	0	0	0	0	200	300	0	0	0	0	0	0	0	200	903	0	0	0	0	0	0	0	603	903	0
6782	1	0	0	0	0	0	0	200	300	0	0	0	0	0	0	0	200	903	0	0	0	0	0	0	0	603	903	0
6782	2	0	0	0	0	0	0	200	300	0	0	0	0	0	0	0	200	903	0	0	0	0	0	0	0	603	903	0
6782	3	0	0	0	0	0	0	200	300	0	0	0	0	0	0	0	200	903	0	0	0	0	0	0	0	603	903	0
6782	4	0	0	0	0	0	0	200	300	0	0	0	0	0	0	0	200	903	0	0	0	0	0	0	0	603	903	0
6782	5	0	0	0	0	0	0	200	300	0	0	0	0	0	0	0	200	903	0	0	0	0	0	0	0	603	903	0
6782	6	0	0	0	0	0	0	200	300	0	0	0	0	0	0	0	200	903	0	0	0	0	0	0	0	603	903	0
6782	7	0	0	0	0	0	0	200	300	0	0	0	0	0	0	0	200	903	0	0	0	0	0	0	0	603	903	0
6782	8	0	0	0	0	0	0	200	300	0	0	0	0	0	0	0	200	903	0	0	0	0	0	0	0	603	903	0
6782	9	0	0	0	0	0	0	200	300	0	0	0	0	0	0	0	200	903	0	0	0	0	0	0	0	603	903	0
6783	0	0	0	0	0	0	0	200	300	0	0	0	0	0	0	0	200	903	0	0	0	0	0	0	0	603	903	0
6783	1	0	0	0	0	0	0	200	300	0	0	0	0	0	0	0	200	903	0	0	0	0	0	0	0	603	903	0
6783	2	0	0	0	0	0	0	200	300	0	0	0	0	0	0	0	200	903	0	0	0	0	0	0	0	603	903	0
6783	3	0	0	0	0	0	0	200	300	0	0	0	0	0	0	0	200	903	0	0	0	0	0	0	0	603	903	0
6783	4	0	0	0	0	0	0	200	300	0	0	0	0	0	0	0	200	903	0	0	0	0	0	0	0	603	903	0
6783	5	0	0	0	0	0	0	200	300	0	0	0	0	0	0	0	200	903	0	0	0	0	0	0	0	603	903	0
6783	6	0	0	0	0	0	0	200	300	0	0	0	0	0	0	0	200	903	0	0	0	0	0	0	0	603	903	0
6783	7	0	0	0	0	0	0	200	300	0	0	0	0	0	0	0	200	903	0	0	0	0	0	0	0	603	903	0
6783	8	0	0	0	0	0	0	200	300	0	0	0	0	0	0	0	200	903	0	0	0	0	0	0	0	603	903	0
6783	9	0	0	0	0	0	0	200	300	0	0	0	0	0	0	0	200	903	0	0	0	0	0	0	0	603	903	0
6784	0	0	0	0	0	0	0	200	300	0	0	0	0	0	0	0	200	903	0	0	0	0	0	0	0	603	903	0
6784	1	0	0	0	0	0	0	200	300	0	0	0	0	0	0	0	200	903	0	0	0	0	0	0	0	603	903	0
6784	2	0	0	0	0	0	0	200	300	0	0	0	0	0	0	0	200	903	0	0	0	0	0	0	0	603	903	0
6784	3	0	0	0	0	0	0	200	300	0	0	0	0	0	0	0	200	903	0	0	0	0	0	0	0	603	903	0
6784	4	0	0	0	0	0	0	200	300	0	0	0	0	0	0	0	200	903	0	0	0	0	0	0	0	603	903	0
6784	5	0	0	0	0	0	0	200	300	0	0	0	0	0	0	0	200	903	0	0	0	0	0	0	0	603	903	0
6784	6	0	0	0	0	0	0	200	300	0	0	0	0	0	0	0	200	903	0	0	0	0	0	0	0	603	903	0
6784	7	0	0	0	0	0	0	200	300	0	0	0	0	0	0	0	200	903	0	0	0	0	0	0	0	603	903	0
6784	8	0	0	0	0	0	0	200	300	0	0	0	0	0	0	0	200	903	0	0	0	0	0	0	0	603	903	0
6784	9	0	0	0	0	0	0	200	300	0	0	0	0	0	0	0	200	903	0	0	0	0	0	0	0	603	903	0
6785	0	0	0	0	0	0	0	200	300	0	0	0	0	0	0	0	200	903	0	0	0	0	0	0	0	603	903	0
6785	1	0	0	0	0	0	0	200	300	0	0	0	0	0	0	0	200	903	0	0	0	0	0	0	0	603	903	0
6785	2	0	0	0	0	0	0	200	300	0	0	0	0	0	0	0	200	903	0	0	0	0	0	0	0	603	903	0
6785	3	0	0	0	0	0	0	200	300	0	0	0	0	0	0	0	200	903	0	0	0	0	0	0	0	603	903	0
6785	4	0	0	0	0	0	0	200	300	0	0	0	0	0	0	0	200	903	0	0	0	0	0	0	0	603	903	0
6785	5	0	0	0	0	0	0	200	300	0	0	0	0	0	0	0	200	903	0	0	0	0	0	0	0	603	903	0
6785	6	0	0	0	0	0	0	200	300	0	0	0	0	0	0	0	200	903	0	0	0	0	0	0	0	603	903	0
6785	7	0	0	0	0	0	0	200	300	0	0	0	0	0	0	0	200	903	0	0	0	0	0	0	0	603	903	0
6785	8	0	0	0	0	0	0	200	300	0	0	0	0	0	0	0	200	903	0	0	0	0	0	0	0	603	903	0
6785	9	0	0	0	0	0	0	200	300	0	0	0	0	0	0	0	200	903	0	0	0	0	0	0	0	603	903	0
6786	0	0	0	0	0	0	0	200	300	0	0	0	0	0	0	0	200	903	0	0	0	0	0	0	0	603	903	0
6786	1	-1.2531	9.478	-4.84039	854.827	-311.836	-1865.43	135.576	123.397	0	0	0	0	0	0	0	200	903	0	0	0	0	0	0	0	603	903	0
6786	2	0	0	0	0	0	0	200	300	0	0	0	0	0	0	0	200	903	0	0	0	0	0	0	0	603	903	0
6786	3	-0.184983	8.86765	-5.45074	1037.93	-250.801	-1865.43	153.988	109.58	0	0	0	0	0	0	0	200	903	0	0	0	0	0	0	0	603	903	0
6786	4	-0.642747	9.63058	-4.84039	763.274	-433.906	-2002.76	110.357	142.311	0	0	0	0	0	0	0	200	903	0	0	0	0	0	0	0	603	903	0
6786	5	-0.0323951	10.2409	-5.75591	854.827	-372.871	-1865.43	135.219	151.487	0	0	0	0	0	0	0	200	903	0	0	0	0	0	0	0	603	903	0
6786	6	-1.10051	9.78317	-3.92486	580.168	-250.801	-2048.54	136.099	152.181	0	0	0	0	0	0	0	200	903	0	0	0	0	0	0	0	603	903	0
6786	7	-1.10051	10.3935	-5.45074	488.616	54.3751	-2277.42	209.976	210.358	0	0	0	0	0	0	0	200	903	0	0	0	0	0	0	0	603	903	0
6786	8	-1.40569	9.78317	-4.53521	1221.04	-494.941	-2185.87	90.867	30.765	0	0	0	0	0	0	0	200	903	0	0	0	0	0	0	0	603	903	0
6786	9	-0.795335	11.0039	-3.92486	1312.59	-617.012	-2048.54	42.7939	-34.4299	0	0	0	0	0	0	0	200	903	0	0	0	0	0	0	0	603	903	0
6787	0	-0.490159	10.6987	-5.14556	1221.04	-1105.29	-2002.76	-14.8052	62.7009	0	0	0	0	0	0	0	200	903	0	0	0	0	0	0	0	603	903	0
6787	1	0.425369	10.5461	-5.75591	763.274	-800.117	-2231.64	60.9921	167.393	0	0	0	0	0	0	0	200	903	0	0	0	0	0	0	0	603	903	0
6787	2	-0.184983	11.0039	-6.67144	763.274	-372.871	-2048.54	144.109	185.591	0	0	0	0	0	0	0	200	903	0	0	0	0	0	0	0	603	903	0
6787	3	-0.490159	10.8513	-6.67144	488.616	-189.766	-1865.43	171.556	226.76	0	0	0	0	0	0	0	200	903	0	0	0	0	0	0	0	603	903	0
6787	4	1.03572	9.78317	-5.45074	854.827	-739.082	-2002.76	64.407	143.172	0	0	0	0	0	0	0	200	903	0	0	0	0	0	0	0	603	903	0
6787	5	-0.642747	9.17282	-5.45074	488.616	-800.117	-2140.09	53.2094	210.358	0	0	0	0	0	0	0	200	903	0	0	0	0	0	0	0	603	903	0
6787	6	0.425369	10.2409	-6.06109	1037.93	-617.012	-1865.43	98.2012	128.755	0	0	0	0	0	0	0	200	903	0	0	0	0	0	0	0	603	903	0
6787	7	0.120193	10.0883	-5.14556	1495.7	-494.941	-1728.1	103.812	9.32318	0	0	0	0	0	0	0	200	903	0	0	0	0	0	0	0	603	903	0
6787	8	0.120193	10.2409	-7.28179	1037.93	-739.082	-1819.66	98.5027	157.462	0	0	0	0	0	0	0	200	903	0	0	0	0	0	0	0	603	903	0
6787	9	0.120193	9.93576	-6.67144	1312.59	-433.906	-1956.99	134.961	103.252	0	0	0	0	0	0	0	200	903	0	0	0	0	0	0	0	603	903	0
6788	0	-0.795335	9.32541	-7.89214	1129.48	-555.977	-1453.45	129.553	156.885	0	0	0	0	0	0	0	200	903	0	0	0	0	0	0	0	603	903	0
6788	1	-1.10051	9.63058	-6.36626	1312.59	-617.012	-1453.45	103.081	93.821	0	0	0	0	0	0	0	200	903	0	0	0	0	0	0	0	603	903	0
6788	2	0	0	0	0	0	0	200	300	0	0	0	0	0	0	0	200	903	0	0	0	0	0	0	0	603	903	0
6788	3	0.120193	9.32541	-6.06109	1770.35	-739.082	-1728.1	78.0612	7.91489	0	0	0	0	0	0	0	200	903	0	0	0	0	0	0	0	603	903	0
6788	4	-0.337571	8.25729	-7.58697	1221.04	-678.047	-1407.67	110.63	139.061	0	0	0	0	0	0	0	200	903	0	0	0	0	0	0	0	603	903	0
6788	5	0	0	0	0	0	0	200	300	0	0	0	0	0	0	0	200	903	0	0	0	0	0	0	0	603	903	0
6788	6	-1.10051	7.79953	-7.58697	1312.59	-861.153	-1545	86.4958	126.994	0	0	0	0	0	0	0	200	903	0	0	0	0	0	0	0	603	903	0
6788	7	0	0	0	0	0	0	200	300	0	0	0	0	0	0	0	200	903	0	0	0	0	0	0	0	603	903	0
6788	8	0	0	0	0	0	0	200	300	0	0	0	0	0	0	0	200	903	0	0	0	0	0	0	0	603	903	0
6788	9	0	0	0	0	0	0	200	300	0	0	0	0	0	0	0	200	903	0	0	0	0	0	0	0	603	903	0
6789	0	0.272781	6.42624	-7.89214	1404.14	-311.836	-1407.67	160.488	122.083	0	0	0	0	0	0	0	200	903	0	0	0	0	0	0	0	603	903	0
6789	1	0	0	0	0	0	0	200	300	0	0	0	0	0	0	0	200	903	0	0	0	0	0	0	0	603	903	0
6789	2	0	0	0	0	0	0	200	300	0	0	0	0	0	0	0	200	903	0	0	0	0	0	0	0	603	903	0
6789	3	0	0	0	0	0	0	200	300	0	0	0	0	0	0	0	200	903	0	0	0	0	0	0	0	603	903	0
6789	4	0	0	0	0	0	0	200	300	0	0	0	0	0	0	0	200	903	0	0	0	0	0	0	0	603	903	0
6789	5	0	0	0	0	0	0	200	300	0	0	0	0	0	0	0	200	903	0	0	0	0	0	0	0	603	903	0
6789	6	0	0	0	0	0	0	200	300	0	0	0	0	0	0	0	200	903	0	0	0	0	0	0	0	603	903	0
6789	7	0	0	0	0	0	0	200	300	0	0	0	0	0	0	0	200	903	0	0	0	0	0	0	0	603	903	0
6789	8	0	0	0	0	0	0	200	300	0	0	0	0	0	0	0	200	903	0	0	0	0	0	0	0	603	903	0
6789	9	0	0	0	0	0	0	200	300	0	0	0	0	0	0	0	200	903	0	0	0	0	0	0	0	603	903	0
6790	0	0	0	0	0	0	0	200	300	0	0	0	0	0	0	0	200	903	0	0	0	0	0	0	0	603	903	0
6790	1	0	0	0	0	0	0	200	300	0	0	0	0	0	0	0	200	903	0	0	0	0	0	0	0	603	903	0
6790	2	0	0	0	0	0	0	200	300	0	0	0	0	0	0	0	200	903	0	0	0	0	0	0	0	603	903	0
6790	3	0	0	0	0	0	0	200	300	0	0	0	0	0	0	0	200	903	0	0	0	0	0	0	0	603	903	0
6790	4	0	0	0	0	0	0	200	300	0	0	0	0	0	0	0	200	903	0	0	0	0	0	0	0	603	903	0
6790	5	0	0	0	0	0	0	200	300	0	0	0	0	0	0	0	200	903	0	0	0	0	0	0	0	603	903	0
6790	6	0	0	0	0	0	0	200	300	0	0	0	0	0	0	0	200	903	0	0	0	0	0	0	0	603	903	0
6790	7	0	0	0	0	0	0	200	300	0	0	0	0	0	0	0	200	903	0	0	0	0	0	0	0	603	903	0
6790	8	0	0	0	0	0	0	200	300	0	0	0	0	0	0	0	200	903	0	0	0	0	0	0	0	603	903	0
6790	9	0	0	0	0	0	0	200	300	0	0	0	0	0	0	0	200	903	0	0	0	0	0	0	0	603	903	0
6791	0	0	0	0	0	0	0	200	300	0	0	0	0	0	0	0	200	903	0	0	0	0	0	0	0	603	903	0
6791	1	0	0	0	0	0	0	200	300	0	0	0	0	0	0	0	200	903	0	0	0	0	0	0	0	603	903	0
6791	2	0	0	0	0	0	0	200	300	0	0	0	0	0	0	0	200	903	0	0	0	0	0	0	0	603	903	0
6791	3	0	0	0	0	0	0	200	300	0	0	0	0	0	0	0	200	903	0	0	0	0	0	0	0	603	903	0
6791	4	0	0	0	0	0	0	200	300	0	0	0	0	0	0	0	200	903	0	0	0	0	0	0	0	603	903	0
6791	5	0	0	0	0	0	0	200	300	0	0	0	0	0	0	0	200	903	0	0	0	0	0	0	0	603	903	0
6791	6	0	0	0	0	0	0	200	300	0	0	0	0	0	0	0	200	903	0	0	0	0	0	0	0	603	903	0
6791	7	0	0	0	0	0	0	200	300	0	0	0	0	0	0	0	200	903	0	0	0	0	0	0	0	603	903	0
6791	8	0	0	0	0	0	0	200	300	0	0	0	0	0	0	0	200	903	0	0	0	0	0	0	0	603	903	0
6791	9	0	0	0	0	0	0	200	300	0	0	0	0	0	0	0	200	903	0	0	0	0	0	0	0	603	903	0
6792	0	0	0	0	0	0	0	200	300	0	0	0	0	0	0	0	200	903	0	0	0	0	0	0	0	603	903	0
6792	1	0	0	0	0	0	0	200	300	0	0	0	0	0	0	0	200	903	0	0	0	0	0	0	0	603	903	0
6792	2	0	0	0	0	0	0	200	300	0	0	0	0	0	0	0	200	903	0	0	0	0	0	0	0	603	903	0
6792	3	0	0	0	0	0	0	200	300	0	0	0	0	0	0	0	200	903	0	0	0	0	0	0	0	603	903	0
6792	4	0	0	0	0	0	0	200	300	0	0	0	0	0	0	0	200	903	0	0	0	0	0	0	0	603	903	0
6792	5	0	0	0	0	0	0	200	300	0	0	0	0	0	0	0	200	903	0	0	0	0	0	0	0	603	903	0
6792	6	0	0	0	0	0	0	200	300	0	0	0	0	0	0	0	200	903	0	0	0	0	0	0	0	603	903	0
6792	7	0	0	0	0	0	0	200	300	0	0	0	0	0	0	0	200	903	0	0	0	0	0	0	0	603	903	0
6792	8	0	0	0	0	0	0	200	300	0	0	0	0	0	0	0	200	903	0	0	0	0	0	0	0	603	903	0
6792	9	0	0	0	0	0	0	200	300	0	0	0	0	0	0	0	200	903	0	0	0	0	0	0	0	603	903	0
6793	0	0	0	0	0	0	0	200	300	0	0	0	0	0	0	0	200	903	0	0	0	0	0	0	0	603	903	0
6793	1	0	0	0	0	0	0	200	300	0	0	0	0	0	0	0	200	903	0	0	0	0	0	0	0	603	903	0
6793	2	0	0	0	0	0	0	200	300	0	0	0	0	0	0	0	200	903	0	0	0	0	0	0	0	603	903	0
6793	3	0	0	0	0	0	0	200	300	0	0	0	0	0	0	0	200	903	0	0	0	0	0	0	0	603	903	0
6793	4	0	0	0	0	0	0	200	300	0	0	0	0	0	0	0	200	903	0	0	0	0	0	0	0	603	903	0
6793	5	0	0	0	0	0	0	200	300	0	0	0	0	0	0	0	200	903	0	0	0	0	0	0	0	603	903	0
6793	6	0	0	0	0	0	0	200	300	0	0	0	0	0	0	0	200	903	0	0	0	0	0	0	0	603	903	0
6793	7	0	0	0	0	0	0	200	300	0	0	0	0	0	0	0	200	903	0	0	0	0	0	0	0	603	903	0
6793	8	0	0	0	0	0	0	200	300	0	0	0	0	0	0	0	200	903	0	0	0	0	0	0	0	603	903	0
6793	9	0	0	0	0	0	0	200	300	0	0	0	0	0	0	0	200	903	0	0	0	0	0	0	0	603	903	0
6794	0	0	0	0	0	0	0	200	300	0	0	0	0	0	0	0	200	903	0	0	0	0	0	0	0	603	903	0
6794	1	0	0	0	0	0	0	200	300	0	0	0	0	0	0	0	200	903	0	0	0	0	0	0	0	603	903	0
6794	2	0	0	0	0	0	0	200	300	0	0	0	0	0	0	0	200	903	0	0	0	0	0	0	0	603	903	0
6794	3	0	0	0	0	0	0	200	300	0	0	0	0	0	0	0	200	903	0	0	0	0	0	0	0	603	903	0
6794	4	0	0	0	0	0	0	200	300	0	0	0	0	0	0	0	200	903	0	0	0	0	0	0	0	603	903	0
6794	5	0	0	0	0	0	0	200	300	0	0	0	0	0	0	0	200	903	0	0	0	0	0	0	0	603	903	0
6794	6	0	0	0	0	0	0	200	300	0	0	0	0	0	0	0	200	903	0	0	0	0	0	0	0	603	903	0
6794	7	0	0	0	0	0	0	200	300	0	0	0	0	0	0	0	200	903	0	0	0	0	0	0	0	603	903	0
6794	8	0	0	0	0	0	0	200	300	0	0	0	0	0	0	0	200	903	0	0	0	0	0	0	0	603	903	0
6794	9	0	0	0	0	0	0	200	300	0	0	0	0	0	0	0	200	903	0	0	0	0	0	0	0	603	903	0
6795	0	0	0	0	0	0	0	200	300	0	0	0	0	0	0	0	200	903	0	0	0	0	0	0	0	603	903	0
6795	1	0	0	0	0	0	0	200	300	0	0	0	0	0	0	0	200	903	0	0	0	0	0	0	0	603	903	0
6795	2	0	0	0	0	0	0	200	300	0	0	0	0	0	0	0	200	903	0	0	0	0	0	0	0	603	903	0
6795	3	0	0	0	0	0	0	200	300	0	0	0	0	0	0	0	200	903	0	0	0	0	0	0	0	603	903	0
6795	4	0	0	0	0	0	0	200	300	0	0	0	0	0	0	0	200	903	0	0	0	0	0	0	0	603	903	0
6795	5	0	0	0	0	0	0	200	300	0	0	0	0	0	0	0	200	903	0	0	0	0	0	0	0	603	903	0
6795	6	0	0	0	0	0	0	200	300	0	0	0	0	0	0	0	200	903	0	0	0	0	0	0	0	603	903	0
6795	7	0	0	0	0	0	0	200	300	0	0	0	0	0	0	0	200	903	0	0	0	0	0	0	0	603	903	0
6795	8	0	0	0	0	0	0	200	300	0	0	0	0	0	0	0	200	903	0	0	0	0	0	0	0	603	903	0
6795	9	0	0	0	0	0	0	200	300	0	0	0	0	0	0	0	200	903	0	0	0	0	0	0	0	603	903	0
6796	0	0	0	0	0	0	0	200	300	0	0	0	0	0	0	0	200	903	0	0	0	0	0	0	0	603	903	0
6796	1	0	0	0	0	0	0	200	300	0	0	0	0	0	0	0	200	903	0	0	0	0	0	0	0	603	903	0
6796	2	0	0	0	0	0	0	200	300	0	0	0	0	0	0	0	200	903	0	0	0	0	0	0	0	603	903	0
6796	3	0	0	0	0	0	0	200	300	0	0	0	0	0	0	0	200	903	0	0	0	0	0	0	0	603	903	0
6796	4	0	0	0	0	0	0	200	300	0	0	0	0	0	0	0	200	903	0	0	0	0	0	0	0	603	903	0
6796	5	0	0	0	0	0	0	200	300	0	0	0	0	0	0	0	200	903	0	0	0	0	0	0	0	603	903	0
6796	6	0	0	0	0	0	0	200	300	0	0	0	0	0	0	0	200	903	0	0	0	0	0	0	0	603	903	0
6796	7	0	0	0	0	0	0	200	300	0	0	0	0	0	0	0	200	903	0	0	0	0	0	0	0	603	903	0
6796	8	0	0	0	0	0	0	200	300	0	0	0	0	0	0	0	200	903	0	0	0	0	0	0	0	603	903	0
6796	9	0	0	0	0	0	0	200	300	0	0	0	0	0	0	0	200	903	0	0	0	0	0	0	0	603	903	0
6797	0	0	0	0	0	0	0	200	300	0	0	0	0	0	0	0	200	903	0	0	0	0	0	0	0	603	903	0
6797	1	0	0	0	0	0	0	200	300	0	0	0	0	0	0	0	200	903	0	0	0	0	0	0	0	603	903	0
6797	2	0	0	0	0	0	0	200	300	0	0	0	0	0	0	0	200	903	0	0	0	0	0	0	0	603	903	0
6797	3	0	0	0	0	0	0	200	300	0	0	0	0	0	0	0	200	903	0	0	0	0	0	0	0	603	903	0
6797	4	0	0	0	0	0	0	200	300	0	0	0	0	0	0	0	200	903	0	0	0	0	0	0	0	603	903	0
6797	5	0	0	0	0	0	0	200	300	0	0	0	0	0	0	0	200	903	0	0	0	0	0	0	0	603	903	0
6797	6	0	0	0	0	0	0	200	300	0	0	0	0	0	0	0	200	903	0	0	0	0	0	0	0	603	903	0
6797	7	0	0	0	0	0	0	200	300	0	0	0	0	0	0	0	200	903	0	0	0	0	0	0	0	603	903	0
6797	8	0	0	0	0	0	0	200	300	0	0	0	0	0	0	0	200	903	0	0	0	0	0	0	0	603	903	0
6797	9	0	0	0	0	0	0	200	300	0	0	0	0	0	0	0	200	903	0	0	0	0	0	0	0	603	903	0
6798	0	0	0	0	0	0	0	200	300	0	0	0	0	0	0	0	200	903	0	0	0	0	0	0	0	603	903	0
6798	1	0	0	0	0	0	0	200	300	0	0	0	0	0	0	0	200	903	0	0	0	0	0	0	0	603	903	0
6798	2	0	0	0	0	0	0	200	300	0	0	0	0	0	0	0	200	903	0	0	0	0	0	0	0	603	903	0
6798	3	0	0	0	0	0	0	200	300	0	0	0	0	0	0	0	200	903	0	0	0	0	0	0	0	603	903	0
6798	4	0	0	0	0	0	0	200	300	0	0	0	0	0	0	0	200	903	0	0	0	0	0	0	0	603	903	0
6798	5	0	0	0	0	0	0	200	300	0	0	0	0	0	0	0	200	903	0	0	0	0	0	0	0	603	903	0
6798	6	0	0	0	0	0	0	200	300	0	0	0	0	0	0	0	200	903	0	0	0	0	0	0	0	603	903	0
6798	7	0	0	0	0	0	0	200	300	0	0	0	0	0	0	0	200	903	0	0	0	0	0	0	0	603	903	0
6798	8	0	0	0	0	0	0	200	300	0	0	0	0	0	0	0	200	903	0	0	0	0	0	0	0	603	903	0
6798	9	0	0	0	0	0	0	200	300	0	0	0	0	0	0	0	200	903	0	0	0	0	0	0	0	603	903	0
6799	0	0	0	0	0	0	0	200	300	0	0	0	0	0	0	0	200	903	0	0	0	0	0	0	0	603	903	0
6799	1	0	0	0	0	0	0	200	300	0	0	0	0	0	0	0	200	903	0	0	0	0	0	0	0	603	903	0
6799	2	0	0	0	0	0	0	200	300	0	0	0	0	0	0	0	200	903	0	0	0	0	0	0	0	603	903	0
6799	3	0	0	0	0	0	0	200	300	0	0	0	0	0	0	0	200	903	0	0	0	0	0	0	0	603	903	0
6799	4	0	0	0	0	0	0	200	300	0	0	0	0	0	0	0	200	903	0	0	0	0	0	0	0	603	903	0
6799	5	0	0	0	0	0	0	200	300	0	0	0	0	0	0	0	200	903	0	0	0	0	0	0	0	603	903	0
6799	6	0	0	0	0	0	0	200	300	0	0	0	0	0	0	0	200	903	0	0	0	0	0	0	0	603	903	0
6799	7	0	0	0	0	0	0	200	300	0	0	0	0	0	0	0	200	903	0	0	0	0	0	0	0	603	903	0
6799	8	0	0	0	0	0	0	200	300	0	0	0	0	0	0	0	200	903	0	0	0	0	0	0	0	603	903	0
6799	9	0	0	0	0	0	0	200	300	0	0	0	0	0	0	0	200	903	0	0	0	0	0	0	0	603	903	0
6800	0	0	0	0	0	0	0	200	300	0	0	0	0	0	0	0	200	903	0	0	0	0	0	0	0	603	903	0
6800	1	0	0	0	0	0	0	200	300	0	0	0	0	0	0	0	200	903	0	0	0	0	0	0	0	603	903	0
6800	2	0	0	0	0	0	0	200	300	0	0	0	0	0	0	0	200	903	0	0	0	0	0	0	0	603	903	0
6800	3	0	0	0	0	0	0	200	300	0	0	0	0	0	0	0	200	903	0	0	0	0	0	0	0	603	903	0
6800	4	0	0	0	0	0	0	200	300	0	0	0	0	0	0	0	200	903	0	0	0	0	0	0	0	603	903	0
6800	5	0	0	0	0	0	0	200	300	0	0	0	0	0	0	0	200	903	0	0	0	0	0	0	0	603	903	0
6800	6	0	0	0	0	0	0	200	300	0	0	0	0	0	0	0	200	903	0	0	0	0	0	0	0	603	903	0
6800	7	0	0	0	0	0	0	200	300	0	0	0	0	0	0	0	200	903	0	0	0	0	0	0	0	603	903	0
6800	8	0	0	0	0	0	0	200	300	0	0	0	0	0	0	0	200	903	0	0	0	0	0	0	0	603	903	0
6800	9	0	0	0	0	0	0	200	300	0	0	0	0	0	0	0	200	903	0	0	0	0	0	0	0	603	903	0
6801	0	0	0	0	0	0	0	200	300	0	0	0	0	0	0	0	200	903	0	0	0	0	0	0	0	603	903	0
6801	1	0	0	0	0	0	0	200	300	0	0	0	0	0	0	0	200	903	0	0	0	0	0	0	0	603	903	0
6801	2	0	0	0	0	0	0	200	300	0	0	0	0	0	0	0	200	903	0	0	0	0	0	0	0	603	903	0
6801	3	0	0	0	0	0	0	200	300	0	0	0	0	0	0	0	200	903	0	0	0	0	0	0	0	603	903	0
6801	4	0	0	0	0	0	0	200	300	0	0	0	0	0	0	0	200	903	0	0	0	0	0	0	0	603	903	0
6801	5	0	0	0	0	0	0	200	300	0	0	0	0	0	0	0	200	903	0	0	0	0	0	0	0	603	903	0
6801	6	0	0	0	0	0	0	200	300	0	0	0	0	0	0	0	200	903	0	0	0	0	0	0	0	603	903	0
6801	7	0	0	0	0	0	0	200	300	0	0	0	0	0	0	0	200	903	0	0	0	0	0	0	0	603	903	0
6801	8	0	0	0	0	0	0	200	300	0	0	0	0	0	0	0	200	903	0	0	0	0	0	0	0	603	903	0
6801	9	0	0	0	0	0	0	200	300	0	0	0	0	0	0	0	200	903	0	0	0	0	0	0	0	603	903	0
6802	0	0	0	0	0	0	0	200	300	0	0	0	0	0	0	0	200	903	0	0	0	0	0	0	0	603	903	0
6802	1	0	0	0	0	0	0	200	300	0	0	0	0	0	0	0	200	903	0	0	0	0	0	0	0	603	903	0
6802	2	0	0	0	0	0	0	200	300	0	0	0	0	0	0	0	200	903	0	0	0	0	0	0	0	603	903	0
6802	3	0	0	0	0	0	0	200	300	0	0	0	0	0	0	0	200	903	0	0	0	0	0	0	0	603	903	0
6802	4	0	0	0	0	0	0	200	300	0	0	0	0	0	0	0	200	903	0	0	0	0	0	0	0	603	903	0
6802	5	0	0	0	0	0	0	200	300	0	0	0	0	0	0	0	200	903	0	0	0	0	0	0	0	603	903	0
6802	6	0	0	0	0	0	0	200	300	0	0	0	0	0	0	0	200	903	0	0	0	0	0	0	0	603	903	0
6802	7	0	0	0	0	0	0	200	300	0	0	0	0	0	0	0	200	903	0	0	0	0	0	0	0	603	903	0
6802	8	0	0	0	0	0	0	200	300	0	0	0	0	0	0	0	200	903	0	0	0	0	0	0	0	603	903	0
6802	9	0	0	0	0	0	0	200	300	0	0	0	0	0	0	0	200	903	0	0	0	0	0	0	0	603	903	0
6803	0	0	0	0	0	0	0	200	300	0	0	0	0	0	0	0	200	903	0	0	0	0	0	0	0	603	903	0
6803	1	0	0	0	0	0	0	200	300	0	0	0	0	0	0	0	200	903	0	0	0	0	0	0	0	603	903	0
6803	2	0	0	0	0	0	0	200	300	0	0	0	0	0	0	0	200	903	0	0	0	0	0	0	0	603	903	0
6803	3	0	0	0	0	0	0	200	300	0	0	0	0	0	0	0	200	903	0	0	0	0	0	0	0	603	903	0
6803	4	0	0	0	0	0	0	200	300	0	0	0	0	0	0	0	200	903	0	0	0	0	0	0	0	603	903	0
6803	5	0	0	0	0	0	0	200	300	0	0	0	0	0	0	0	200	903	0	0	0	0	0	0	0	603	903	0
6803	6	0	0	0	0	0	0	200	300	0	0	0	0	0	0	0	200	903	0	0	0	0	0	0	0	603	903	0
6803	7	0	0	0	0	0	0	200	300	0	0	0	0	0	0	0	200	903	0	0	0	0	0	0	0	603	903	0
6803	8	0	0	0	0	0	0	200	300	0	0	0	0	0	0	0	200	903	0	0	0	0	0	0	0	603	903	0
6803	9	0	0	0	0	0	0	200	300	0	0	0	0	0	0	0	200	903	0	0	0	0	0	0	0	603	903	0
6804	0	0	0	0	0	0	0	200	300	0	0	0	0	0	0	0	200	903	0	0	0	0	0	0	0	603	903	0
6804	1	0	0	0	0	0	0	200	300	0	0	0	0	0	0	0	200	903	0	0	0	0	0	0	0	603	903	0
6804	2	0	0	0	0	0	0	200	300	0	0	0	0	0	0	0	200	903	0	0	0	0	0	0	0	603	903	0
6804	3	0	0	0	0	0	0	200	300	0	0	0	0	0	0	0	200	903	0	0	0	0	0	0	0	603	903	0
6804	4	0	0	0	0	0	0	200	300	0	0	0	0	0	0	0	200	903	0	0	0	0	0	0	0	603	903	0
6804	5	0	0	0	0	0	0	200	300	0	0	0	0	0	0	0	200	903	0	0	0	0	0	0	0	603	903	0
6804	6	0	0	0	0	0	0	200	300	0	0	0	0	0	0	0	200	903	0	0	0	0	0	0	0	603	903	0
6804	7	0	0	0	0	0	0	200	300	0	0	0	0	0	0	0	200	903	0	0	0	0	0	0	0	603	903	0
6804	8	0	0	0	0	0	0	200	300	0	0	0	0	0	0	0	200	903	0	0	0	0	0	0	0	603	903	0
6804	9	0	0	0	0	0	0	200	300	0	0	0	0	0	0	0	200	903	0	0	0	0	0	0	0	603	903	0
6805	0	0	0	0	0	0	0	200	300	0	0	0	0	0	0	0	200	903	0	0	0	0	0	0	0	603	903	0
6805	1	0	0	0	0	0	0	200	300	0	0	0	0	0	0	0	200	903	0	0	0	0	0	0	0	603	903	0
6805	2	0	0	0	0	0	0	200	300	0	0	0	0	0	0	0	200	903	0	0	0	0	0	0	0	603	903	0
6805	3	0	0	0	0	0	0	200	300	0	0	0	0	0	0	0	200	903	0	0	0	0	0	0	0	603	903	0
6805	4	0	0	0	0	0	0	200	300	0	0	0	0	0	0	0	200	903	0	0	0	0	0	0	0	603	903	0
6805	5	0	0	0	0	0	0	200	300	0	0	0	0	0	0	0	200	903	0	0	0	0	0	0	0	603	903	0
6805	6	0	0	0	0	0	0	200	300	0	0	0	0	0	0	0	200	903	0	0	0	0	0	0	0	603	903	0
6805	7	0	0	0	0	0	0	200	300	0	0	0	0	0	0	0	200	903	0	0	0	0	0	0	0	603	903	0
6805	8	0	0	0	0	0	0	200	300	0	0	0	0	0	0	0	200	903	0	0	0	0	0	0	0	603	903	0
6805	9	0	0	0	0	0	0	200	300	0	0	0	0	0	0	0	200	903	0	0	0	0	0	0	0	603	903	0
6806	0	0	0	0	0	0	0	200	300	0	0	0	0	0	0	0	200	903	0	0	0	0	0	0	0	603	903	0
6806	1	0	0	0	0	0	0	200	300	0	0	0	0	0	0	0	200	903	0	0	0	0	0	0	0	603	903	0
6806	2	0	0	0	0	0	0	200	300	0	0	0	0	0	0	0	200	903	0	0	0	0	0	0	0	603	903	0
6806	3	0	0	0	0	0	0	200	300	0	0	0	0	0	0	0	200	903	0	0	0	0	0	0	0	603	903	0
6806	4	0	0	0	0	0	0	200	300	0	0	0	0	0	0	0	200	903	0	0	0	0	0	0	0	603	903	0
6806	5	0	0	0	0	0	0	200	300	0	0	0	0	0	0	0	200	903	0	0	0	0	0	0	0	603	903	0
6806	6	0	0	0	0	0	0	200	300	0	0	0	0	0	0	0	200	903	0	0	0	0	0	0	0	603	903	0
6806	7	0	0	0	0	0	0	200	300	0	0	0	0	0	0	0	200	903	0	0	0	0	0	0	0	603	903	0
6806	8	0	0	0	0	0	0	200	300	0	0	0	0	0	0	0	200	903	0	0	0	0	0	0	0	603	903	0
6806	9	0	0	0	0	0	0	200	300	0	0	0	0	0	0	0	200	903	0	0	0	0	0	0	0	603	903	0
6807	0	0	0	0	0	0	0	200	300	0	0	0	0	0	0	0	200	903	0	0	0	0	0	0	0	603	903	0
6807	1	0	0	0	0	0	0	200	300	0	0	0	0	0	0	0	200	903	0	0	0	0	0	0	0	603	903	0
6807	2	0	0	0	0	0	0	200	300	0	0	0	0	0	0	0	200	903	0	0	0	0	0	0	0	603	903	0
6807	3	0	0	0	0	0	0	200	300	0	0	0	0	0	0	0	200	903	0	0	0	0	0	0	0	603	903	0
6807	4	0	0	0	0	0	0	200	300	0	0	0	0	0	0	0	200	903	0	0	0	0	0	0	0	603	903	0
6807	5	0	0	0	0	0	0	200	300	0	0	0	0	0	0	0	200	903	0	0	0	0	0	0	0	603	903	0
6807	6	0	0	0	0	0	0	200	300	0	0	0	0	0	0	0	200	903	0	0	0	0	0	0	0	603	903	0
6807	7	0	0	0	0	0	0	200	300	0	0	0	0	0	0	0	200	903	0	0	0	0	0	0	0	603	903	0
6807	8	0	0	0	0	0	0	200	300	0	0	0	0	0	0	0	200	903	0	0	0	0	0	0	0	603	903	0
6807	9	0	0	0	0	0	0	200	300	0	0	0	0	0	0	0	200	903	0	0	0	0	0	0	0	603	903	0
6808	0	0	0	0	0	0	0	200	300	0	0	0	0	0	0	0	200	903	0	0	0	0	0	0	0	603	903	0
6808	1	0	0	0	0	0	0	200	300	0	0	0	0	0	0	0	200	903	0	0	0	0	0	0	0	603	903	0
6808	2	0	0	0	0	0	0	200	300	0	0	0	0	0	0	0	200	903	0	0	0	0	0	0	0	603	903	0
6808	3	0	0	0	0	0	0	200	300	0	0	0	0	0	0	0	200	903	0	0	0	0	0	0	0	603	903	0
6808	4	0	0	0	0	0	0	200	300	0	0	0	0	0	0	0	200	903	0	0	0	0	0	0	0	603	903	0
6808	5	0	0	0	0	0	0	200	300	0	0	0	0	0	0	0	200	903	0	0	0	0	0	0	0	603	903	0
6808	6	0	0	0	0	0	0	200	300	0	0	0	0	0	0	0	200	903	0	0	0	0	0	0	0	603	903	0
6808	7	0	0	0	0	0	0	200	300	0	0	0	0	0	0	0	200	903	0	0	0	0	0	0	0	603	903	0
6808	8	0	0	0	0	0	0	200	300	0	0	0	0	0	0	0	200	903	0	0	0	0	0	0	0	603	903	0
6808	9	0	0	0	0	0	0	200	300	0	0	0	0	0	0	0	200	903	0	0	0	0	0	0	0	603	903	0
6809	0	0	0	0	0	0	0	200	300	0	0	0	0	0	0	0	200	903	0	0	0	0	0	0	0	603	903	0
6809	1	0	0	0	0	0	0	200	300	0	0	0	0	0	0	0	200	903	0	0	0	0	0	0	0	603	903	0
6809	2	0	0	0	0	0	0	200	300	0	0	0	0	0	0	0	200	903	0	0	0	0	0	0	0	603	903	0
6809	3	0	0	0	0	0	0	200	300	0	0	0	0	0	0	0	200	903	0	0	0	0	0	0	0	603	903	0
6809	4	0	0	0	0	0	0	200	300	0	0	0	0	0	0	0	200	903	0	0	0	0	0	0	0	603	903	0
6809	5	0	0	0	0	0	0	200	300	0	0	0	0	0	0	0	200	903	0	0	0	0	0	0	0	603	903	0
6809	6	0	0	0	0	0	0	200	300	0	0	0	0	0	0	0	200	903	0	0	0	0	0	0	0	603	903	0
6809	7	0	0	0	0	0	0	200	300	0	0	0	0	0	0	0	200	903	0	0	0	0	0	0	0	603	903	0
6809	8	0	0	0	0	0	0	200	300	0	0	0	0	0	0	0	200	903	0	0	0	0	0	0	0	603	903	0
6809	9	0	0	0	0	0	0	200	300	0	0	0	0	0	0	0	200	903	0	0	0	0	0	0	0	603	903	0
6810	0	0	0	0	0	0	0	200	300	0	0	0	0	0	0	0	200	903	0	0	0	0	0	0	0	603	903	0
6810	1	0	0	0	0	0	0	200	300	0	0	0	0	0	0	0	200	903	0	0	0	0	0	0	0	603	903	0
6810	2	0	0	0	0	0	0	200	300	0	0	0	0	0	0	0	200	903	0	0	0	0	0	0	0	603	903	0
6810	3	0	0	0	0	0	0	200	300	0	0	0	0	0	0	0	200	903	0	0	0	0	0	0	0	603	903	0
6810	4	0	0	0	0	0	0	200	300	0	0	0	0	0	0	0	200	903	0	0	0	0	0	0	0	603	903	0
6810	5	0	0	0	0	0	0	200	300	0	0	0	0	0	0	0	200	903	0	0	0	0	0	0	0	603	903	0
6810	6	0	0	0	0	0	0	200	300	0	0	0	0	0	0	0	200	903	0	0	0	0	0	0	0	603	903	0
6810	7	0	0	0	0	0	0	200	300	0	0	0	0	0	0	0	200	903	0	0	0	0	0	0	0	603	903	0
6810	8	0	0	0	0	0	0	200	300	0	0	0	0	0	0	0	200	903	0	0	0	0	0	0	0	603	903	0
6810	9	0	0	0	0	0	0	200	300	0	0	0	0	0	0	0	200	903	0	0	0	0	0	0	0	603	903	0
6811	0	0	0	0	0	0	0	200	300	0	0	0	0	0	0	0	200	903	0	0	0	0	0	0	0	603	903	0
6811	1	0	0	0	0	0	0	200	300	0	0	0	0	0	0	0	200	903	0	0	0	0	0	0	0	603	903	0
6811	2	0	0	0	0	0	0	200	300	0	0	0	0	0	0	0	200	903	0	0	0	0	0	0	0	603	903	0
6811	3	0	0	0	0	0	0	200	300	0	0	0	0	0	0	0	200	903	0	0	0	0	0	0	0	603	903	0
6811	4	0	0	0	0	0	0	200	300	0	0	0	0	0	0	0	200	903	0	0	0	0	0	0	0	603	903	0
6811	5	0	0	0	0	0	0	200	300	0	0	0	0	0	0	0	200	903	0	0	0	0	0	0	0	603	903	0
6811	6	0	0	0	0	0	0	200	300	0	0	0	0	0	0	0	200	903	0	0	0	0	0	0	0	603	903	0
6811	7	0	0	0	0	0	0	200	300	0	0	0	0	0	0	0	200	903	0	0	0	0	0	0	0	603	903	0
6811	8	0	0	0	0	0	0	200	300	0	0	0	0	0	0	0	200	903	0	0	0	0	0	0	0	603	903	0
6811	9	0	0	0	0	0	0	200	300	0	0	0	0	0	0	0	200	903	0	0	0	0	0	0	0	603	903	0
6812	0	0	0	0	0	0	0	200	300	0	0	0	0	0	0	0	200	903	0	0	0	0	0	0	0	603	903	0
6812	1	0	0	0	0	0	0	200	300	0	0	0	0	0	0	0	200	903	0	0	0	0	0	0	0	603	903	0
6812	2	0	0	0	0	0	0	200	300	0	0	0	0	0	0	0	200	903	0	0	0	0	0	0	0	603	903	0
6812	3	0	0	0	0	0	0	200	300	0	0	0	0	0	0	0	200	903	0	0	0	0	0	0	0	603	903	0
6812	4	0	0	0	0	0	0	200	300	0	0	0	0	0	0	0	200	903	0	0	0	0	0	0	0	603	903	0
6812	5	0	0	0	0	0	0	200	300	0	0	0	0	0	0	0	200	903	0	0	0	0	0	0	0	603	903	0
6812	6	0	0	0	0	0	0	200	300	0	0	0	0	0	0	0	200	903	0	0	0	0	0	0	0	603	903	0
6812	7	0	0	0	0	0	0	200	300	0	0	0	0	0	0	0	200	903	0	0	0	0	0	0	0	603	903	0
6812	8	0	0	0	0	0	0	200	300	0	0	0	0	0	0	0	200	903	0	0	0	0	0	0	0	603	903	0
6812	9	0	0	0	0	0	0	200	300	0	0	0	0	0	0	0	200	903	0	0	0	0	0	0	0	603	903	0
6813	0	0	0	0	0	0	0	200	300	0	0	0	0	0	0	0	200	903	0	0	0	0	0	0	0	603	903	0
6813	1	0	0	0	0	0	0	200	300	0	0	0	0	0	0	0	200	903	0	0	0	0	0	0	0	603	903	0
6813	2	0	0	0	0	0	0	200	300	0	0	0	0	0	0	0	200	903	0	0	0	0	0	0	0	603	903	0
6813	3	0	0	0	0	0	0	200	300	0	0	0	0	0	0	0	200	903	0	0	0	0	0	0	0	603	903	0
6813	4	0	0	0	0	0	0	200	300	0	0	0	0	0	0	0	200	903	0	0	0	0	0	0	0	603	903	0
6813	5	0	0	0	0	0	0	200	300	0	0	0	0	0	0	0	200	903	0	0	0	0	0	0	0	603	903	0
6813	6	0	0	0	0	0	0	200	300	0	0	0	0	0	0	0	200	903	0	0	0	0	0	0	0	603	903	0
6813	7	0	0	0	0	0	0	200	300	0	0	0	0	0	0	0	200	903	0	0	0	0	0	0	0	603	903	0
6813	8	0	0	0	0	0	0	200	300	0	0	0	0	0	0	0	200	903	0	0	0	0	0	0	0	603	903	0
6813	9	0	0	0	0	0	0	200	300	0	0	0	0	0	0	0	200	903	0	0	0	0	0	0	0	603	903	0
6814	0	0	0	0	0	0	0	200	300	0	0	0	0	0	0	0	200	903	0	0	0	0	0	0	0	603	903	0
6814	1	0	0	0	0	0	0	200	300	0	0	0	0	0	0	0	200	903	0	0	0	0	0	0	0	603	903	0
6814	2	0	0	0	0	0	0	200	300	0	0	0	0	0	0	0	200	903	0	0	0	0	0	0	0	603	903	0
6814	3	0	0	0	0	0	0	200	300	0	0	0	0	0	0	0	200	903	0	0	0	0	0	0	0	603	903	0
6814	4	0	0	0	0	0	0	200	300	0	0	0	0	0	0	0	200	903	0	0	0	0	0	0	0	603	903	0
6814	5	0	0	0	0	0	0	200	300	0	0	0	0	0	0	0	200	903	0	0	0	0	0	0	0	603	903	0
6814	6	0	0	0	0	0	0	200	300	0	0	0	0	0	0	0	200	903	0	0	0	0	0	0	0	603	903	0
6814	7	0	0	0	0	0	0	200	300	0	0	0	0	0	0	0	200	903	0	0	0	0	0	0	0	603	903	0
6814	8	0	0	0	0	0	0	200	300	0	0	0	0	0	0	0	200	903	0	0	0	0	0	0	0	603	903	0
6814	9	0	0	0	0	0	0	200	300	0	0	0	0	0	0	0	200	903	0	0	0	0	0	0	0	603	903	0
6815	0	0	0	0	0	0	0	200	300	0	0	0	0	0	0	0	200	903	0	0	0	0	0	0	0	603	903	0
6815	1	0	0	0	0	0	0	200	300	0	0	0	0	0	0	0	200	903	0	0	0	0	0	0	0	603	903	0
6815	2	0	0	0	0	0	0	200	300	0	0	0	0	0	0	0	200	903	0	0	0	0	0	0	0	603	903	0
6815	3	0	0	0	0	0	0	200	300	0	0	0	0	0	0	0	200	903	0	0	0	0	0	0	0	603	903	0
6815	4	0	0	0	0	0	0	200	300	0	0	0	0	0	0	0	200	903	0	0	0	0	0	0	0	603	903	0
6815	5	0	0	0	0	0	0	200	300	0	0	0	0	0	0	0	200	903	0	0	0	0	0	0	0	603	903	0
6815	6	0	0	0	0	0	0	200	300	0	0	0	0	0	0	0	200	903	0	0	0	0	0	0	0	603	903	0
6815	7	0	0	0	0	0	0	200	300	0	0	0	0	0	0	0	200	903	0	0	0	0	0	0	0	603	903	0
6815	8	0	0	0	0	0	0	200	300	0	0	0	0	0	0	0	200	903	0	0	0	0	0	0	0	603	903	0
6815	9	0	0	0	0	0	0	200	300	0	0	0	0	0	0	0	200	903	0	0	0	0	0	0	0	603	903	0
6816	0	0	0	0	0	0	0	200	300	0	0	0	0	0	0	0	200	903	0	0	0	0	0	0	0	603	903	0
6816	1	0	0	0	0	0	0	200	300	0	0	0	0	0	0	0	200	903	0	0	0	0	0	0	0	603	903	0
6816	2	0	0	0	0	0	0	200	300	0	0	0	0	0	0	0	200	903	0	0	0	0	0	0	0	603	903	0
6816	3	0	0	0	0	0	0	200	300	0	0	0	0	0	0	0	200	903	0	0	0	0	0	0	0	603	903	0
6816	4	0	0	0	0	0	0	200	300	0	0	0	0	0	0	0	200	903	0	0	0	0	0	0	0	603	903	0
6816	5	0	0	0	0	0	0	200	300	0	0	0	0	0	0	0	200	903	0	0	0	0	0	0	0	603	903	0
6816	6	0	0	0	0	0	0	200	300	0	0	0	0	0	0	0	200	903	0	0	0	0	0	0	0	603	903	0
6816	7	0	0	0	0	0	0	200	300	0	0	0	0	0	0	0	200	903	0	0	0	0	0	0	0	603	903	0
6816	8	0	0	0	0	0	0	200	300	0	0	0	0	0	0	0	200	903	0	0	0	0	0	0	0	603	903	0
6816	9	0	0	0	0	0	0	200	300	0	0	0	0	0	0	0	200	903	0	0	0	0	0	0	0	603	903	0
6817	0	0	0	0	0	0	0	200	300	0	0	0	0	0	0	0	200	903	0	0	0	0	0	0	0	603	903	0
6817	1	0	0	0	0	0	0	200	300	0	0	0	0	0	0	0	200	903	0	0	0	0	0	0	0	603	903	0
6817	2	0	0	0	0	0	0	200	300	0	0	0	0	0	0	0	200	903	0	0	0	0	0	0	0	603	903	0
6817	3	0	0	0	0	0	0	200	300	0	0	0	0	0	0	0	200	903	0	0	0	0	0	0	0	603	903	0
6817	4	0	0	0	0	0	0	200	300	0	0	0	0	0	0	0	200	903	0	0	0	0	0	0	0	603	903	0
6817	5	0	0	0	0	0	0	200	300	0	0	0	0	0	0	0	200	903	0	0	0	0	0	0	0	603	903	0
6817	6	0	0	0	0	0	0	200	300	0	0	0	0	0	0	0	200	903	0	0	0	0	0	0	0	603	903	0
6817	7	0	0	0	0	0	0	200	300	0	0	0	0	0	0	0	200	903	0	0	0	0	0	0	0	603	903	0
6817	8	0	0	0	0	0	0	200	300	0	0	0	0	0	0	0	200	903	0	0	0	0	0	0	0	603	903	0
6817	9	0	0	0	0	0	0	200	300	0	0	0	0	0	0	0	200	903	0	0	0	0	0	0	0	603	903	0
6818	0	0	0	0	0	0	0	200	300	0	0	0	0	0	0	0	200	903	0	0	0	0	0	0	0	603	903	0
6818	1	0	0	0	0	0	0	200	300	0	0	0	0	0	0	0	200	903	0	0	0	0	0	0	0	603	903	0
6818	2	0	0	0	0	0	0	200	300	0	0	0	0	0	0	0	200	903	0	0	0	0	0	0	0	603	903	0
6818	3	0	0	0	0	0	0	200	300	0	0	0	0	0	0	0	200	903	0	0	0	0	0	0	0	603	903	0
6818	4	0	0	0	0	0	0	200	300	0	0	0	0	0	0	0	200	903	0	0	0	0	0	0	0	603	903	0
6818	5	0	0	0	0	0	0	200	300	0	0	0	0	0	0	0	200	903	0	0	0	0	0	0	0	603	903	0
6818	6	0	0	0	0	0	0	200	300	0	0	0	0	0	0	0	200	903	0	0	0	0	0	0	0	603	903	0
6818	7	0	0	0	0	0	0	200	300	0	0	0	0	0	0	0	200	903	0	0	0	0	0	0	0	603	903	0
6818	8	0	0	0	0	0	0	200	300	0	0	0	0	0	0	0	200	903	0	0	0	0	0	0	0	603	903	0
6818	9	0	0	0	0	0	0	200	300	0	0	0	0	0	0	0	200	903	0	0	0	0	0	0	0	603	903	0
6819	0	0	0	0	0	0	0	200	300	0	0	0	0	0	0	0	200	903	0	0	0	0	0	0	0	603	903	0
6819	1	0	0	0	0	0	0	200	300	0	0	0	0	0	0	0	200	903	0	0	0	0	0	0	0	603	903	0
6819	2	0	0	0	0	0	0	200	300	0	0	0	0	0	0	0	200	903	0	0	0	0	0	0	0	603	903	0
6819	3	0	0	0	0	0	0	200	300	0	0	0	0	0	0	0	200	903	0	0	0	0	0	0	0	603	903	0
6819	4	0	0	0	0	0	0	200	300	0	0	0	0	0	0	0	200	903	0	0	0	0	0	0	0	603	903	0
6819	5	0	0	0	0	0	0	200	300	0	0	0	0	0	0	0	200	903	0	0	0	0	0	0	0	603	903	0
6819	6	0	0	0	0	0	0	200	300	0	0	0	0	0	0	0	200	903	0	0	0	0	0	0	0	603	903	0
6819	7	0	0	0	0	0	0	200	300	0	0	0	0	0	0	0	200	903	0	0	0	0	0	0	0	603	903	0
6819	8	0	0	0	0	0	0	200	300	0	0	0	0	0	0	0	200	903	0	0	0	0	0	0	0	603	903	0
6819	9	0	0	0	0	0	0	200	300	0	0	0	0	0	0	0	200	903	0	0	0	0	0	0	0	603	903	0
6820	0	0	0	0	0	0	0	200	300	0	0	0	0	0	0	0	200	903	0	0	0	0	0	0	0	603	903	0
6820	1	0	0	0	0	0	0	200	300	0	0	0	0	0	0	0	200	903	0	0	0	0	0	0	0	603	903	0
6820	2	0	0	0	0	0	0	200	300	0	0	0	0	0	0	0	200	903	0	0	0	0	0	0	0	603	903	0
6820	3	0	0	0	0	0	0	200	300	0	0	0	0	0	0	0	200	903	0	0	0	0	0	0	0	603	903	0
6820	4	0	0	0	0	0	0	200	300	0	0	0	0	0	0	0	200	903	0	0	0	0	0	0	0	603	903	0
6820	5	0	0	0	0	0	0	200	300	0	0	0	0	0	0	0	200	903	0	0	0	0	0	0	0	603	903	0
6820	6	0	0	0	0	0	0	200	300	0	0	0	0	0	0	0	200	903	0	0	0	0	0	0	0	603	903	0
6820	7	0	0	0	0	0	0	200	300	0	0	0	0	0	0	0	200	903	0	0	0	0	0	0	0	603	903	0
6820	8	0	0	0	0	0	0	200	300	0	0	0	0	0	0	0	200	903	0	0	0	0	0	0	0	603	903	0
6820	9	0	0	0	0	0	0	200	300	0	0	0	0	0	0	0	200	903	0	0	0	0	0	0	0	603	903	0
6821	0	0	0	0	0	0	0	200	300	0	0	0	0	0	0	0	200	903	0	0	0	0	0	0	0	603	903	0
6821	1	0	0	0	0	0	0	200	300	0	0	0	0	0	0	0	200	903	0	0	0	0	0	0	0	603	903	0
6821	2	0	0	0	0	0	0	200	300	0	0	0	0	0	0	0	200	903	0	0	0	0	0	0	0	603	903	0
6821	3	0	0	0	0	0	0	200	300	0	0	0	0	0	0	0	200	903	0	0	0	0	0	0	0	603	903	0
6821	4	0	0	0	0	0	0	200	300	0	0	0	0	0	0	0	200	903	0	0	0	0	0	0	0	603	903	0
6821	5	0	0	0	0	0	0	200	300	0	0	0	0	0	0	0	200	903	0	0	0	0	0	0	0	603	903	0
6821	6	0	0	0	0	0	0	200	300	0	0	0	0	0	0	0	200	903	0	0	0	0	0	0	0	603	903	0
6821	7	0	0	0	0	0	0	200	300	0	0	0	0	0	0	0	200	903	0	0	0	0	0	0	0	603	903	0
6821	8	0	0	0	0	0	0	200	300	0	0	0	0	0	0	0	200	903	0	0	0	0	0	0	0	603	903	0
6821	9	0	0	0	0	0	0	200	300	0	0	0	0	0	0	0	200	903	0	0	0	0	0	0	0	603	903	0
6822	0	0	0	0	0	0	0	200	300	0	0	0	0	0	0	0	200	903	0	0	0	0	0	0	0	603	903	0
6822	1	0	0	0	0	0	0	200	300	0	0	0	0	0	0	0	200	903	0	0	0	0	0	0	0	603	903	0
6822	2	0	0	0	0	0	0	200	300	0	0	0	0	0	0	0	200	903	0	0	0	0	0	0	0	603	903	0
6822	3	0	0	0	0	0	0	200	300	0	0	0	0	0	0	0	200	903	0	0	0	0	0	0	0	603	903	0
6822	4	0	0	0	0	0	0	200	300	0	0	0	0	0	0	0	200	903	0	0	0	0	0	0	0	603	903	0
6822	5	0	0	0	0	0	0	200	300	0	0	0	0	0	0	0	200	903	0	0	0	0	0	0	0	603	903	0
6822	6	0	0	0	0	0	0	200	300	0	0	0	0	0	0	0	200	903	0	0	0	0	0	0	0	603	903	0
6822	7	0	0	0	0	0	0	200	300	0	0	0	0	0	0	0	200	903	0	0	0	0	0	0	0	603	903	0
6822	8	0	0	0	0	0	0	200	300	0	0	0	0	0	0	0	200	903	0	0	0	0	0	0	0	603	903	0
6822	9	0	0	0	0	0	0	200	300	0	0	0	0	0	0	0	200	903	0	0	0	0	0	0	0	603	903	0
6823	0	0	0	0	0	0	0	200	300	0	0	0	0	0	0	0	200	903	0	0	0	0	0	0	0	603	903	0
6823	1	0	0	0	0	0	0	200	300	0	0	0	0	0	0	0	200	903	0	0	0	0	0	0	0	603	903	0
6823	2	2.25642	1.23825	-10.3336	2228.12	-372.871	881.149	163.916	84.3803	0	0	0	0	0	0	0	200	903	0	0	0	0	0	0	0	603	903	0
6823	3	5.46077	7.95212	-17.3526	4059.17	-1166.33	743.82	132.787	66.0769	0	0	0	0	0	0	0	200	903	0	0	0	0	0	0	0	603	903	0
6823	4	4.54524	6.73142	-20.0992	2868.99	-678.047	514.938	166.265	157.258	0	0	0	0	0	0	0	200	903	0	0	0	0	0	0	0	603	903	0
6823	5	3.01936	3.22189	-12.1646	2594.33	-617.012	240.28	149.278	86.7314	0	0	0	0	0	0	0	200	903	0	0	0	0	0	0	0	603	903	0
6823	6	0	0	0	0	0	0	200	300	0	0	0	0	0	0	0	200	903	0	0	0	0	0	0	0	603	903	0
6823	7	1.3409	7.03659	-12.1646	2319.67	-739.082	286.056	139.243	109.31	0	0	0	0	0	0	0	200	903	0	0	0	0	0	0	0	603	903	0
6823	8	3.93489	6.57883	-19.1836	3418.3	-1044.26	-217.484	145.565	121.812	0	0	0	0	0	0	0	200	903	0	0	0	0	0	0	0	603	903	0
6823	9	2.86677	5.35812	-19.794	3967.62	-983.223	11.398	150.327	99.5544	0	0	0	0	0	0	0	200	903	0	0	0	0	0	0	0	603	903	0
6824	0	1.18831	6.57883	-15.8267	3326.75	-800.117	57.1744	149.445	89.8015	0	0	0	0	0	0	0	200	903	0	0	0	0	0	0	0	603	903	0
6824	1	2.10384	10.2409	-17.3526	3418.3	-800.117	-583.695	153.891	103.009	0	0	0	0	0	0	0	200	903	0	0	0	0	0	0	0	603	903	0
6824	2	0.883132	8.56247	-20.7095	3967.62	-1166.33	-1041.46	143.682	108.416	0	0	0	0	0	0	0	200	903	0	0	0	0	0	0	0	603	903	0
6824	3	-2.01604	5.6633	-25.8975	5432.46	-1471.5	-354.813	143.18	90.2322	0	0	0	0	0	0	0	200	903	0	0	0	0	0	0	0	603	903	0
6824	4	-0.947922	2.91672	-29.5596	5890.23	-1715.64	-80.1548	141.96	100.734	0	0	0	0	0	0	0	200	903	0	0	0	0	0	0	0	603	903	0
6824	5	1.64607	2.30637	-33.8321	7446.62	-2264.96	-171.707	133.053	79.8946	0	0	0	0	0	0	0	200	903	0	0	0	0	0	0	0	603	903	0
6824	6	1.95125	-0.440216	-43.2925	9643.89	-2387.03	469.162	144.863	77.2389	0	0	0	0	0	0	0	200	903	0	0	0	0	0	0	0	603	903	0
6824	7	1.18831	-4.71268	-47.2598	10467.9	-2753.24	1018.48	141.742	78.5039	0	0	0	0	0	0	0	200	903	0	0	0	0	0	0	0	603	903	0
6824	8	1.03572	-5.6282	-56.1099	11749.6	-3546.7	698.044	136.79	90.5966	0	0	0	0	0	0	0	200	903	0	0	0	0	0	0	0	603	903	0
6824	9	1.3409	-3.49197	-60.3824	12848.2	-3729.8	1201.58	138.23	87.2188	0	0	0	0	0	0	0	200	903	0	0	0	0	0	0	0	603	903	0
6825	0	0.883132	-6.08597	-67.7066	14404.6	-4218.09	1476.24	137.701	87.2492	0	0	0	0	0	0	0	200	903	0	0	0	0	0	0	0	603	903	0
6825	1	3.32454	-8.2222	-75.336	16144.1	-4706.37	1384.69	137.528	85.7048	0	0	0	0	0	0	0	200	903	0	0	0	0	0	0	0	603	903	0
6825	2	4.08748	-7.61185	-83.5757	18066.7	-5072.58	1842.45	139.306	83.8278	0	0	0	0	0	0	0	200	903	0	0	0	0	0	0	0	603	903	0
6825	3	4.39265	-8.2222	-90.9	19440	-5682.93	2117.11	137.481	86.1381	0	0	0	0	0	0	0	200	903	0	0	0	0	0	0	0	603	903	0
6825	4	3.17195	-9.90067	-99.4449	21271.1	-6293.28	1979.78	136.716	86.1017	0	0	0	0	0	0	0	200	903	0	0	0	0	0	0	0	603	903	0
6825	5	2.40901	-13.4102	-108.905	23376.8	-6903.63	2391.77	136.609	85.3474	0	0	0	0	0	0	0	200	903	0	0	0	0	0	0	0	603	903	0
6825	6	4.54524	-14.1731	-117.145	25665.6	-7636.06	3124.19	134.815	80.9073	0	0	0	0	0	0	0	200	903	0	0	0	0	0	0	0	603	903	0
6825	7	7.44441	-17.3775	-127.216	27954.4	-7880.2	3581.96	138.057	80.2598	0	0	0	0	0	0	0	200	903	0	0	0	0	0	0	0	603	903	0
6825	8	10.4962	-20.4292	-134.235	29785.5	-8856.76	4085.5	134.02	78.1092	0	0	0	0	0	0	0	200	903	0	0	0	0	0	0	0	603	903	0
6825	9	8.97029	-21.8025	-144.306	31982.8	-9100.9	3948.17	136.933	78.368	0	0	0	0	0	0	0	200	903	0	0	0	0	0	0	0	603	903	0
6826	0	9.88582	-22.2603	-155.597	33630.7	-9894.36	4405.93	136.41	83.8605	0	0	0	0	0	0	0	200	903	0	0	0	0	0	0	0	603	903	0
6826	1	11.1065	-22.718	-163.227	35553.3	-10321.6	4360.15	136.765	82.1843	0	0	0	0	0	0	0	200	903	0	0	0	0	0	0	0	603	903	0
6826	2	12.1746	-24.3965	-167.499	37018.2	-10626.8	4314.38	136.556	78.9949	0	0	0	0	0	0	0	200	903	0	0	0	0	0	0	0	603	903	0
6826	3	10.8013	-24.2439	-175.128	39307	-11359.2	4451.71	135.138	75.5534	0	0	0	0	0	0	0	200	903	0	0	0	0	0	0	0	603	903	0
6826	4	12.3272	-24.2439	-182.453	39856.3	-12030.6	4360.15	134.062	81.5527	0	0	0	0	0	0	0	200	903	0	0	0	0	0	0	0	603	903	0
6826	5	10.9539	-22.1077	-188.251	40954.9	-12579.9	4222.83	133.175	82.4451	0	0	0	0	0	0	0	200	903	0	0	0	0	0	0	0	603	903	0
6826	6	11.1065	-21.6499	-194.66	42786	-12824	4497.48	134.121	80.2011	0	0	0	0	0	0	0	200	903	0	0	0	0	0	0	0	603	903	0
6826	7	13.0902	-20.4292	-198.932	43610	-13129.2	4131.27	134.002	80.7798	0	0	0	0	0	0	0	200	903	0	0	0	0	0	0	0	603	903	0
6826	8	11.2591	-17.5301	-206.562	44342.4	-13373.4	3856.61	135.257	85.331	0	0	0	0	0	0	0	200	903	0	0	0	0	0	0	0	603	903	0
6826	9	11.5643	-15.3938	-209.003	45074.8	-13861.6	3719.28	133.677	84.3342	0	0	0	0	0	0	0	200	903	0	0	0	0	0	0	0	603	903	0
6827	0	12.1746	-14.1731	-212.97	45898.8	-14288.9	3490.4	132.907	84.4827	0	0	0	0	0	0	0	200	903	0	0	0	0	0	0	0	603	903	0
6827	1	13.0902	-12.7998	-216.022	46539.6	-14166.8	3490.4	134.42	84.5607	0	0	0	0	0	0	0	200	903	0	0	0	0	0	0	0	603	903	0
6827	2	13.8531	-7.61185	-223.346	47180.5	-14472	3078.42	135.204	88.7561	0	0	0	0	0	0	0	200	903	0	0	0	0	0	0	0	603	903	0
6827	3	14.7686	-6.08597	-229.145	48187.6	-14777.2	3581.96	135.512	89.7066	0	0	0	0	0	0	0	200	903	0	0	0	0	0	0	0	603	903	0
6827	4	14.3109	-3.03421	-233.112	48370.7	-15631.7	2986.86	132.944	92.5001	0	0	0	0	0	0	0	200	903	0	0	0	0	0	0	0	603	903	0
6827	5	13.2428	1.08566	-239.521	49194.7	-15509.6	2757.98	135.247	94.6119	0	0	0	0	0	0	0	200	903	0	0	0	0	0	0	0	603	903	0
6827	6	14.0057	5.05295	-241.657	50018.6	-15692.7	2849.53	135.062	93.0178	0	0	0	0	0	0	0	200	903	0	0	0	0	0	0	0	603	903	0
6827	7	16.1419	8.40988	-249.591	51300.4	-16058.9	2345.99	135.659	94.4625	0	0	0	0	0	0	0	200	903	0	0	0	0	0	0	0	603	903	0
6827	8	15.8367	11.4616	-253.864	52032.8	-16852.4	2117.11	133.617	95.0366	0	0	0	0	0	0	0	200	903	0	0	0	0	0	0	0	603	903	0
6827	9	17.3626	15.2763	-262.104	53131.4	-17157.5	2345.99	134.539	97.2884	0	0	0	0	0	0	0	200	903	0	0	0	0	0	0	0	603	903	0
6828	0	16.5997	18.4807	-265.766	54413.2	-17584.8	2071.33	133.833	95.2588	0	0	0	0	0	0	0	200	903	0	0	0	0	0	0	0	603	903	0
6828	1	16.4471	23.0583	-275.836	54321.6	-17951	1613.57	134.922	103.066	0	0	0	0	0	0	0	200	903	0	0	0	0	0	0	0	603	903	0
6828	2	16.7523	26.2627	-281.635	56244.2	-18378.2	1476.24	134.744	100.294	0	0	0	0	0	0	0	200	903	0	0	0	0	0	0	0	603	903	0
6828	3	17.3626	30.0774	-287.738	57617.5	-19049.6	1430.47	133.795	99.7572	0	0	0	0	0	0	0	200	903	0	0	0	0	0	0	0	603	903	0
6828	4	17.8204	33.5869	-298.725	58716.2	-19721	881.149	133.983	103.444	0	0	0	0	0	0	0	200	903	0	0	0	0	0	0	0	603	903	0
6828	5	18.7359	36.4861	-308.49	60089.4	-20514.5	514.938	133.5	105.214	0	0	0	0	0	0	0	200	903	0	0	0	0	0	0	0	603	903	0
6828	6	18.5833	39.3852	-317.646	61645.9	-20880.7	102.951	134.264	105.929	0	0	0	0	0	0	0	200	903	0	0	0	0	0	0	0	603	903	0
6828	7	16.7523	41.5215	-325.885	62836	-21613.1	-263.26	133.679	107.184	0	0	0	0	0	0	0	200	903	0	0	0	0	0	0	0	603	903	0
6828	8	18.5833	45.7939	-336.566	64300.9	-22284.5	-492.142	133.789	108.95	0	0	0	0	0	0	0	200	903	0	0	0	0	0	0	0	603	903	0
6828	9	17.5152	48.8457	-343.586	65948.8	-23261.1	-858.353	132.299	108.057	0	0	0	0	0	0	0	200	903	0	0	0	0	0	0	0	603	903	0
6829	0	17.8204	53.1181	-353.961	67596.8	-24298.7	-1316.12	131.352	109.028	0	0	0	0	0	0	0	200	903	0	0	0	0	0	0	0	603	903	0
6829	1	17.21	54.4914	-367.389	69153.2	-24970	-1178.79	132.034	111.771	0	0	0	0	0	0	0	200	903	0	0	0	0	0	0	0	603	903	0
6829	2	17.0574	57.0854	-375.934	70526.5	-25580.4	-1956.99	131.955	112.397	0	0	0	0	0	0	0	200	903	0	0	0	0	0	0	0	603	903	0
6829	3	16.2945	59.6794	-384.174	72449.1	-26251.8	-1819.66	131.667	111.416	0	0	0	0	0	0	0	200	903	0	0	0	0	0	0	0	603	903	0
6829	4	14.7686	61.0527	-396.686	73822.4	-26984.2	-2368.97	131.976	113.902	0	0	0	0	0	0	0	200	903	0	0	0	0	0	0	0	603	903	0
6829	5	15.379	62.426	-404.315	75745	-27716.6	-2643.63	131.448	112.659	0	0	0	0	0	0	0	200	903	0	0	0	0	0	0	0	603	903	0
6829	6	14.3109	64.1045	-414.386	77209.8	-28815.3	-2780.96	130.463	113.677	0	0	0	0	0	0	0	200	903	0	0	0	0	0	0	0	603	903	0
6829	7	14.1583	65.9355	-424.457	78216.9	-29486.6	-2872.51	130.531	115.725	0	0	0	0	0	0	0	200	903	0	0	0	0	0	0	0	603	903	0
6829	8	13.7005	66.6985	-435.138	79590.2	-29974.9	-3101.39	131.114	117.092	0	0	0	0	0	0	0	200	903	0	0	0	0	0	0	0	603	903	0
6829	9	14.0057	67.3088	-444.294	80963.5	-30646.3	-3376.05	131.022	117.77	0	0	0	0	0	0	0	200	903	0	0	0	0	0	0	0	603	903	0
6830	0	11.7169	68.2243	-452.533	82611.5	-31867	-2826.74	129.581	117.447	0	0	0	0	0	0	0	200	903	0	0	0	0	0	0	0	603	903	0
6830	1	11.4117	69.2924	-467.792	84625.6	-33087.7	-3879.59	129.268	119.096	0	0	0	0	0	0	0	200	903	0	0	0	0	0	0	0	603	903	0
6830	2	9.42805	70.3606	-480.915	85998.9	-34369.5	-4016.92	128.533	121.176	0	0	0	0	0	0	0	200	903	0	0	0	0	0	0	0	603	903	0
6830	3	5.00301	73.2597	-493.427	87006	-35040.8	-4383.13	128.985	123.67	0	0	0	0	0	0	0	200	903	0	0	0	0	0	0	0	603	903	0
6830	4	4.39265	76.0063	-504.108	88562.3	-36017.4	-5115.56	128.552	124.319	0	0	0	0	0	0	0	200	903	0	0	0	0	0	0	0	603	903	0
6830	5	1.3409	76.3115	-510.517	89844.1	-37116	-5481.77	127.297	124.013	0	0	0	0	0	0	0	200	903	0	0	0	0	0	0	0	603	903	0
6830	6	-1.40569	77.99	-525.775	91125.8	-38214.7	-5893.75	127.318	126.683	0	0	0	0	0	0	0	200	903	0	0	0	0	0	0	0	603	903	0
6830	7	-4.91521	83.6357	-534.626	92041.4	-38764	-6671.95	127.493	127.84	0	0	0	0	0	0	0	200	903	0	0	0	0	0	0	0	603	903	0
6830	8	-7.35661	86.2297	-541.95	93048.4	-39374.3	-7221.27	127.347	128.308	0	0	0	0	0	0	0	200	903	0	0	0	0	0	0	0	603	903	0
6830	9	-10.561	88.9763	-548.053	94055.5	-40350.9	-7587.48	126.374	128.383	0	0	0	0	0	0	0	200	903	0	0	0	0	0	0	0	603	903	0
6831	0	-12.392	93.4013	-554.767	94787.9	-40534	-8686.11	126.935	129.139	0	0	0	0	0	0	0	200	903	0	0	0	0	0	0	0	603	903	0
6831	1	-11.0187	98.1316	-561.786	94513.3	-41266.4	-8731.89	126.544	131.763	0	0	0	0	0	0	0	200	903	0	0	0	0	0	0	0	603	903	0
6831	2	-9.49284	100.573	-569.416	94513.3	-42120.9	-9098.1	126.028	134.017	0	0	0	0	0	0	0	200	903	0	0	0	0	0	0	0	603	903	0
6831	3	-13.4601	102.862	-575.824	95886.6	-42365.1	-9647.42	126.427	133.479	0	0	0	0	0	0	0	200	903	0	0	0	0	0	0	0	603	903	0
6831	4	-16.5119	104.082	-579.486	96161.3	-42670.2	-9784.74	126.365	134.058	0	0	0	0	0	0	0	200	903	0	0	0	0	0	0	0	603	903	0
6831	5	-14.3757	106.829	-584.98	95978.1	-42731.3	-9830.52	126.953	135.929	0	0	0	0	0	0	0	200	903	0	0	0	0	0	0	0	603	903	0
6831	6	-14.5282	108.05	-584.369	96619	-43158.5	-9464.31	126.145	134.661	0	0	0	0	0	0	0	200	903	0	0	0	0	0	0	0	603	903	0
6831	7	-13.3075	107.439	-587.116	97351.4	-43463.7	-10288.3	125.971	134.187	0	0	0	0	0	0	0	200	903	0	0	0	0	0	0	0	603	903	0
6831	8	-14.6808	107.897	-591.083	97351.4	-43646.8	-10196.7	126.158	135.3	0	0	0	0	0	0	0	200	903	0	0	0	0	0	0	0	603	903	0
6831	9	-14.2231	108.965	-593.83	97168.3	-43097.5	-10608.7	127.425	136.37	0	0	0	0	0	0	0	200	903	0	0	0	0	0	0	0	603	903	0
6832	0	-14.6808	108.05	-594.44	97351.4	-43463.7	-10334.1	126.883	136.23	0	0	0	0	0	0	0	200	903	0	0	0	0	0	0	0	603	903	0
6832	1	-14.986	106.829	-595.966	97168.3	-43585.8	-10288.3	126.865	136.957	0	0	0	0	0	0	0	200	903	0	0	0	0	0	0	0	603	903	0
6832	2	-14.0705	106.676	-596.271	96802.1	-43707.8	-10379.8	126.698	137.654	0	0	0	0	0	0	0	200	903	0	0	0	0	0	0	0	603	903	0
6832	3	-13.9179	107.134	-594.745	96527.5	-44013	-10425.6	125.997	137.699	0	0	0	0	0	0	0	200	903	0	0	0	0	0	0	0	603	903	0
6832	4	-12.6972	106.066	-593.83	96161.3	-43585.8	-10242.5	126.602	138.066	0	0	0	0	0	0	0	200	903	0	0	0	0	0	0	0	603	903	0
6832	5	-11.4765	104.845	-593.83	95795	-43768.9	-10059.4	126.294	138.683	0	0	0	0	0	0	0	200	903	0	0	0	0	0	0	0	603	903	0
6832	6	-8.57732	106.219	-595.05	95703.5	-43524.7	-10517.2	126.855	139.167	0	0	0	0	0	0	0	200	903	0	0	0	0	0	0	0	603	903	0
6832	7	-9.64543	105.914	-595.661	95062.6	-43768.9	-10654.5	126.52	140.408	0	0	0	0	0	0	0	200	903	0	0	0	0	0	0	0	603	903	0
6832	8	-10.4084	105.608	-594.745	94971.1	-43707.8	-10379.8	126.51	140.316	0	0	0	0	0	0	0	200	903	0	0	0	0	0	0	0	603	903	0
6832	9	-11.1713	106.066	-593.83	94513.3	-43280.6	-10471.4	127.116	140.841	0	0	0	0	0	0	0	200	903	0	0	0	0	0	0	0	603	903	0
6833	0	-10.2558	107.134	-591.693	93506.2	-42975.4	-10700.3	127.369	141.968	0	0	0	0	0	0	0	200	903	0	0	0	0	0	0	0	603	903	0
6833	1	-10.4084	107.439	-589.557	93689.3	-43036.4	-10791.8	127.002	141.085	0	0	0	0	0	0	0	200	903	0	0	0	0	0	0	0	603	903	0
6833	2	-9.79802	108.202	-588.947	93231.6	-43341.6	-10562.9	126.408	141.698	0	0	0	0	0	0	0	200	903	0	0	0	0	0	0	0	603	903	0
6833	3	-9.95061	109.27	-588.947	92773.8	-43524.7	-10608.7	126.097	142.475	0	0	0	0	0	0	0	200	903	0	0	0	0	0	0	0	603	903	0
6833	4	-10.8661	110.339	-589.252	92316	-42975.4	-10929.2	127.068	143.334	0	0	0	0	0	0	0	200	903	0	0	0	0	0	0	0	603	903	0
6833	5	-13.3075	110.796	-586.811	91949.8	-43341.6	-11432.7	126.14	143.306	0	0	0	0	0	0	0	200	903	0	0	0	0	0	0	0	603	903	0
6833	6	-13.9179	110.796	-588.336	91492	-43219.6	-11341.1	126.539	144.49	0	0	0	0	0	0	0	200	903	0	0	0	0	0	0	0	603	903	0
6833	7	-13.9179	110.644	-585.59	91309	-43524.7	-11524.2	125.674	144.074	0	0	0	0	0	0	0	200	903	0	0	0	0	0	0	0	603	903	0
6833	8	-16.2067	112.322	-587.116	90851.2	-43280.6	-11798.9	126.283	145.259	0	0	0	0	0	0	0	200	903	0	0	0	0	0	0	0	603	903	0
6833	9	-16.6645	112.017	-586.505	90485	-43890.9	-12302.4	125.165	145.722	0	0	0	0	0	0	0	200	903	0	0	0	0	0	0	0	603	903	0
6834	0	-17.58	112.475	-590.168	90576.5	-43402.7	-12439.8	126.457	146.524	0	0	0	0	0	0	0	200	903	0	0	0	0	0	0	0	603	903	0
6834	1	-19.4111	113.848	-589.862	89935.7	-43707.8	-12531.3	125.902	147.531	0	0	0	0	0	0	0	200	903	0	0	0	0	0	0	0	603	903	0
6834	2	-21.3947	116.29	-591.083	90027.2	-43952	-12073.6	125.642	147.691	0	0	0	0	0	0	0	200	903	0	0	0	0	0	0	0	603	903	0
6834	3	-22.6154	116.29	-591.388	89111.7	-44013	-12943.3	125.577	149.318	0	0	0	0	0	0	0	200	903	0	0	0	0	0	0	0	603	903	0
6834	4	-24.1413	117.663	-591.083	89477.9	-44318.2	-12806	125.022	148.62	0	0	0	0	0	0	0	200	903	0	0	0	0	0	0	0	603	903	0
6834	5	-25.362	118.273	-591.388	89203.2	-44074	-13538.4	125.474	149.163	0	0	0	0	0	0	0	200	903	0	0	0	0	0	0	0	603	903	0
6834	6	-25.0568	119.036	-594.745	89111.7	-44379.2	-13538.4	125.381	150.168	0	0	0	0	0	0	0	200	903	0	0	0	0	0	0	0	603	903	0
6834	7	-23.9887	119.952	-596.576	89569.5	-44867.5	-13767.3	124.792	149.861	0	0	0	0	0	0	0	200	903	0	0	0	0	0	0	0	603	903	0
6834	8	-27.0405	120.409	-599.323	89020.1	-45355.8	-13950.4	124.322	151.466	0	0	0	0	0	0	0	200	903	0	0	0	0	0	0	0	603	903	0
6834	9	-28.8715	120.104	-602.985	89203.2	-45355.8	-14270.8	124.781	152.064	0	0	0	0	0	0	0	200	903	0	0	0	0	0	0	0	603	903	0
6835	0	-30.0922	122.24	-604.816	89386.3	-45355.8	-14408.2	125.009	152.209	0	0	0	0	0	0	0	200	903	0	0	0	0	0	0	0	603	903	0
6835	1	-29.9396	122.546	-605.121	89386.3	-45172.7	-14545.5	125.349	152.284	0	0	0	0	0	0	0	200	903	0	0	0	0	0	0	0	603	903	0
6835	2	-30.7026	122.851	-605.121	89020.1	-45722	-14911.7	124.442	152.889	0	0	0	0	0	0	0	200	903	0	0	0	0	0	0	0	603	903	0
6835	3	-29.787	123.919	-610.004	89386.3	-46271.3	-15232.1	124.146	153.466	0	0	0	0	0	0	0	200	903	0	0	0	0	0	0	0	603	903	0
6835	4	-29.0241	123.309	-614.276	89569.5	-46271.3	-14911.7	124.673	154.187	0	0	0	0	0	0	0	200	903	0	0	0	0	0	0	0	603	903	0
6835	5	-30.8551	124.072	-616.413	90027.2	-46393.4	-14957.5	124.737	153.95	0	0	0	0	0	0	0	200	903	0	0	0	0	0	0	0	603	903	0
6835	6	-31.9233	124.529	-619.159	90576.5	-46698.6	-15232.1	124.577	153.71	0	0	0	0	0	0	0	200	903	0	0	0	0	0	0	0	603	903	0
6835	7	-32.2284	122.698	-622.211	90027.2	-46698.6	-14911.7	124.947	155.311	0	0	0	0	0	0	0	200	903	0	0	0	0	0	0	0	603	903	0
6835	8	-31.7707	122.546	-623.737	90393.4	-47064.8	-15369.5	124.544	155.078	0	0	0	0	0	0	0	200	903	0	0	0	0	0	0	0	603	903	0
6835	9	-32.381	124.529	-627.399	90576.5	-47614.1	-15277.9	124.109	155.632	0	0	0	0	0	0	0	200	903	0	0	0	0	0	0	0	603	903	0
6836	0	-31.0077	124.987	-628.925	91583.6	-47858.2	-15186.4	123.905	154.381	0	0	0	0	0	0	0	200	903	0	0	0	0	0	0	0	603	903	0
6836	1	-30.0922	124.987	-633.808	92224.5	-47431	-15552.6	125.165	154.491	0	0	0	0	0	0	0	200	903	0	0	0	0	0	0	0	603	903	0
6836	2	-31.9233	125.597	-637.165	91675.2	-47797.2	-15506.8	124.985	156.12	0	0	0	0	0	0	0	200	903	0	0	0	0	0	0	0	603	903	0
6836	3	-31.3129	125.14	-639.301	92224.5	-47919.3	-15232.1	125.044	155.742	0	0	0	0	0	0	0	200	903	0	0	0	0	0	0	0	603	903	0
6836	4	-33.144	125.75	-643.878	92407.6	-48529.6	-14911.7	124.629	156.483	0	0	0	0	0	0	0	200	903	0	0	0	0	0	0	0	603	903	0
6836	5	-32.6862	125.75	-645.404	92956.9	-48712.7	-15323.7	124.524	155.971	0	0	0	0	0	0	0	200	903	0	0	0	0	0	0	0	603	903	0
6836	6	-33.6017	124.529	-648.456	93323.1	-48956.9	-15232.1	124.502	156.084	0	0	0	0	0	0	0	200	903	0	0	0	0	0	0	0	603	903	0
6836	7	-33.2966	124.834	-652.118	93506.2	-48834.8	-15644.1	125.114	156.612	0	0	0	0	0	0	0	200	903	0	0	0	0	0	0	0	603	903	0
6836	8	-33.4491	124.987	-654.56	93780.9	-49262	-15186.4	124.74	156.727	0	0	0	0	0	0	0	200	903	0	0	0	0	0	0	0	603	903	0
6836	9	-33.144	124.682	-660.053	94147.1	-49750.3	-15323.7	124.627	157.364	0	0	0	0	0	0	0	200	903	0	0	0	0	0	0	0	603	903	0
6837	0	-33.2966	123.919	-660.663	94787.9	-50116.5	-15552.6	124.142	156.526	0	0	0	0	0	0	0	200	903	0	0	0	0	0	0	0	603	903	0
6837	1	-35.2802	124.072	-666.156	95337.3	-50604.8	-15552.6	124.035	156.885	0	0	0	0	0	0	0	200	903	0	0	0	0	0	0	0	603	903	0
6837	2	-32.0759	123.461	-669.208	95611.9	-49933.4	-15186.4	125.384	157.127	0	0	0	0	0	0	0	200	903	0	0	0	0	0	0	0	603	903	0
6837	3	-34.975	123.156	-672.87	95978.1	-50116.5	-15461	125.518	157.36	0	0	0	0	0	0	0	200	903	0	0	0	0	0	0	0	603	903	0
6837	4	-33.4491	123.003	-677.143	96252.8	-50482.8	-15323.7	125.447	157.855	0	0	0	0	0	0	0	200	903	0	0	0	0	0	0	0	603	903	0
6837	5	-33.7543	121.935	-679.889	96710.5	-50787.9	-15323.7	125.3	157.755	0	0	0	0	0	0	0	200	903	0	0	0	0	0	0	0	603	903	0
6837	6	-33.6017	121.783	-685.688	97259.9	-51337.2	-15049	125.13	158.157	0	0	0	0	0	0	0	200	903	0	0	0	0	0	0	0	603	903	0
6837	7	-34.8224	119.341	-688.739	97626.1	-51764.5	-14911.7	124.842	158.254	0	0	0	0	0	0	0	200	903	0	0	0	0	0	0	0	603	903	0
6837	8	-34.3647	118.884	-691.791	97534.5	-51215.2	-14957.5	125.967	159.012	0	0	0	0	0	0	0	200	903	0	0	0	0	0	0	0	603	903	0
6837	9	-34.0595	119.952	-694.232	98633.2	-51642.4	-15003.3	125.612	157.925	0	0	0	0	0	0	0	200	903	0	0	0	0	0	0	0	603	903	0
6838	0	-33.9069	118.884	-697.895	98541.6	-52252.8	-15003.3	125.128	158.802	0	0	0	0	0	0	0	200	903	0	0	0	0	0	0	0	603	903	0
6838	1	-32.381	118.426	-701.252	98816.2	-51947.6	-14637	125.922	159.086	0	0	0	0	0	0	0	200	903	0	0	0	0	0	0	0	603	903	0
6838	2	-30.2448	118.121	-706.745	98907.8	-52496.9	-14682.8	125.72	160.052	0	0	0	0	0	0	0	200	903	0	0	0	0	0	0	0	603	903	0
6838	3	-31.4655	117.358	-710.102	99365.6	-52252.8	-14453.9	126.415	160.068	0	0	0	0	0	0	0	200	903	0	0	0	0	0	0	0	603	903	0
6838	4	-31.7707	117.205	-711.933	99457.2	-52435.9	-14499.7	126.347	160.3	0	0	0	0	0	0	0	200	903	0	0	0	0	0	0	0	603	903	0
6838	5	-31.1603	116.442	-715.29	100281	-52985.2	-14453.9	125.925	159.804	0	0	0	0	0	0	0	200	903	0	0	0	0	0	0	0	603	903	0
6838	6	-30.8551	115.832	-717.426	99914.9	-53229.3	-13492.6	125.805	160.731	0	0	0	0	0	0	0	200	903	0	0	0	0	0	0	0	603	903	0
6838	7	-29.6344	113.696	-717.121	100922	-53290.4	-13858.8	125.688	159.268	0	0	0	0	0	0	0	200	903	0	0	0	0	0	0	0	603	903	0
6838	8	-29.0241	113.39	-724.14	101197	-52924.2	-13950.4	126.914	160.253	0	0	0	0	0	0	0	200	903	0	0	0	0	0	0	0	603	903	0
6838	9	-28.5663	111.254	-727.802	101014	-53046.2	-13904.6	127.114	161.207	0	0	0	0	0	0	0	200	903	0	0	0	0	0	0	0	603	903	0
6839	0	-27.6508	112.627	-731.159	102204	-53290.4	-13492.6	127.115	160.217	0	0	0	0	0	0	0	200	903	0	0	0	0	0	0	0	603	903	0
6839	1	-28.2612	111.864	-733.905	101746	-53961.8	-13309.5	126.473	161.364	0	0	0	0	0	0	0	200	903	0	0	0	0	0	0	0	603	903	0
6839	2	-26.5827	110.949	-735.126	102021	-54022.8	-13126.4	126.512	161.22	0	0	0	0	0	0	0	200	903	0	0	0	0	0	0	0	603	903	0
6839	3	-27.6508	110.186	-736.957	102662	-53778.6	-13080.6	127.026	160.695	0	0	0	0	0	0	0	200	903	0	0	0	0	0	0	0	603	903	0
6839	4	-26.4301	109.728	-740.619	102845	-54144.9	-12851.8	126.892	161.137	0	0	0	0	0	0	0	200	903	0	0	0	0	0	0	0	603	903	0
6839	5	-25.9723	108.355	-743.061	103302	-54328	-12622.9	126.886	160.977	0	0	0	0	0	0	0	200	903	0	0	0	0	0	0	0	603	903	0
6839	6	-25.5146	108.202	-747.333	103302	-54511.1	-12806	127.059	161.772	0	0	0	0	0	0	0	200	903	0	0	0	0	0	0	0	603	903	0
6839	7	-25.8197	107.745	-750.69	103760	-54633.1	-12760.2	127.223	161.78	0	0	0	0	0	0	0	200	903	0	0	0	0	0	0	0	603	903	0
6839	8	-26.2775	104.998	-751.606	103852	-54938.3	-12302.4	126.905	161.827	0	0	0	0	0	0	0	200	903	0	0	0	0	0	0	0	603	903	0
6839	9	-26.4301	104.388	-752.826	104493	-54328	-11890.5	127.835	161.2	0	0	0	0	0	0	0	200	903	0	0	0	0	0	0	0	603	903	0
6840	0	-25.6672	104.388	-752.826	104676	-54755.2	-12439.8	127.267	160.956	0	0	0	0	0	0	0	200	903	0	0	0	0	0	0	0	603	903	0
6840	1	-23.9887	104.54	-756.794	104584	-55304.5	-11798.9	126.923	161.806	0	0	0	0	0	0	0	200	903	0	0	0	0	0	0	0	603	903	0
6840	2	-23.3783	103.777	-760.15	105774	-54877.3	-11982	127.807	160.851	0	0	0	0	0	0	0	200	903	0	0	0	0	0	0	0	603	903	0
6840	3	-23.0732	102.862	-761.982	106049	-55426.6	-11615.8	127.26	160.825	0	0	0	0	0	0	0	200	903	0	0	0	0	0	0	0	603	903	0
6840	4	-24.1413	101.488	-765.644	106049	-55182.5	-11615.8	127.927	161.49	0	0	0	0	0	0	0	200	903	0	0	0	0	0	0	0	603	903	0
6840	5	-22.768	101.031	-762.897	106049	-54999.4	-11753.1	127.907	160.992	0	0	0	0	0	0	0	200	903	0	0	0	0	0	0	0	603	903	0
6840	6	-23.3783	100.573	-765.644	106781	-55365.6	-11386.9	127.688	160.534	0	0	0	0	0	0	0	200	903	0	0	0	0	0	0	0	603	903	0
6840	7	-21.2421	100.115	-766.864	106781	-55670.7	-11203.8	127.405	160.756	0	0	0	0	0	0	0	200	903	0	0	0	0	0	0	0	603	903	0
6840	8	-21.8525	98.1316	-768.085	106781	-55060.4	-10929.2	128.315	160.977	0	0	0	0	0	0	0	200	903	0	0	0	0	0	0	0	603	903	0
6840	9	-22.0051	96.7583	-771.137	106507	-55060.4	-10974.9	128.598	161.884	0	0	0	0	0	0	0	200	903	0	0	0	0	0	0	0	603	903	0
6841	0	-22.6154	95.9953	-771.747	106964	-55365.6	-10379.8	128.259	161.4	0	0	0	0	0	0	0	200	903	0	0	0	0	0	0	0	603	903	0
6841	1	-22.6154	94.9272	-774.494	107056	-55548.7	-10608.7	128.277	161.773	0	0	0	0	0	0	0	200	903	0	0	0	0	0	0	0	603	903	0
6841	2	-22.1576	94.622	-773.883	107239	-55731.8	-10471.4	127.984	161.427	0	0	0	0	0	0	0	200	903	0	0	0	0	0	0	0	603	903	0
6841	3	-21.5473	93.7065	-775.409	107422	-55548.7	-10379.8	128.362	161.464	0	0	0	0	0	0	0	200	903	0	0	0	0	0	0	0	603	903	0
6841	4	-20.0214	92.4858	-776.325	107514	-55914.9	-10379.8	127.975	161.509	0	0	0	0	0	0	0	200	903	0	0	0	0	0	0	0	603	903	0
6841	5	-20.3266	91.8755	-774.799	108155	-55548.7	-10288.3	128.306	160.409	0	0	0	0	0	0	0	200	903	0	0	0	0	0	0	0	603	903	0
6841	6	-20.6318	90.9599	-778.766	107697	-55487.6	-10059.4	128.749	161.708	0	0	0	0	0	0	0	200	903	0	0	0	0	0	0	0	603	903	0
6841	7	-19.2585	89.7392	-779.987	107148	-56098	-9876.3	128.078	162.629	0	0	0	0	0	0	0	200	903	0	0	0	0	0	0	0	603	903	0
6841	8	-21.0895	88.9763	-781.513	107056	-56220.1	-10013.6	128.063	163.014	0	0	0	0	0	0	0	200	903	0	0	0	0	0	0	0	603	903	0
6841	9	-20.7843	88.3659	-780.597	106873	-55914.9	-9784.74	128.369	163.088	0	0	0	0	0	0	0	200	903	0	0	0	0	0	0	0	603	903	0
6842	0	-20.6318	87.603	-775.104	107056	-55304.5	-9464.31	128.649	161.882	0	0	0	0	0	0	0	200	903	0	0	0	0	0	0	0	603	903	0
6842	1	-19.8688	86.3823	-779.682	106873	-55731.8	-9281.2	128.52	162.928	0	0	0	0	0	0	0	200	903	0	0	0	0	0	0	0	603	903	0
6842	2	-19.5636	85.4668	-781.208	106873	-55792.8	-9235.43	128.581	163.195	0	0	0	0	0	0	0	200	903	0	0	0	0	0	0	0	603	903	0
6842	3	-20.3266	83.9409	-780.597	106598	-55731.8	-9372.76	128.604	163.44	0	0	0	0	0	0	0	200	903	0	0	0	0	0	0	0	603	903	0
6842	4	-21.3947	84.0935	-780.902	106415	-55487.6	-8869.22	128.944	163.728	0	0	0	0	0	0	0	200	903	0	0	0	0	0	0	0	603	903	0
6842	5	-21.8525	82.5676	-778.766	106781	-55792.8	-8960.77	128.357	162.884	0	0	0	0	0	0	0	200	903	0	0	0	0	0	0	0	603	903	0
6842	6	-22.1576	81.9572	-777.24	106049	-54938.3	-9052.32	129.316	163.557	0	0	0	0	0	0	0	200	903	0	0	0	0	0	0	0	603	903	0
6842	7	-21.3947	80.584	-774.799	105500	-54999.4	-8503.01	129.015	163.836	0	0	0	0	0	0	0	200	903	0	0	0	0	0	0	0	603	903	0
6842	8	-20.9369	80.584	-773.883	105500	-55243.5	-8594.56	128.615	163.675	0	0	0	0	0	0	0	200	903	0	0	0	0	0	0	0	603	903	0
6842	9	-20.9369	79.0581	-773.273	105133	-55487.6	-8640.33	128.243	164.041	0	0	0	0	0	0	0	200	903	0	0	0	0	0	0	0	603	903	0
6843	0	-21.5473	77.3796	-772.052	105133	-55426.6	-8365.68	128.209	163.826	0	0	0	0	0	0	0	200	903	0	0	0	0	0	0	0	603	903	0
6843	1	-23.0732	76.7693	-770.221	105042	-55426.6	-8594.56	128.038	163.621	0	0	0	0	0	0	0	200	903	0	0	0	0	0	0	0	603	903	0
6843	2	-23.2258	75.5486	-767.475	104401	-54572.1	-8503.01	128.894	163.968	0	0	0	0	0	0	0	200	903	0	0	0	0	0	0	0	603	903	0
6843	3	-23.2258	73.8701	-765.338	104309	-54266.9	-8411.45	129.094	163.708	0	0	0	0	0	0	0	200	903	0	0	0	0	0	0	0	603	903	0
6843	4	-22.4628	73.7175	-760.456	103394	-54572.1	-8136.79	128.238	164.037	0	0	0	0	0	0	0	200	903	0	0	0	0	0	0	0	603	903	0
6843	5	-22.6154	73.4123	-758.014	104126	-54450	-8091.02	128.168	162.633	0	0	0	0	0	0	0	200	903	0	0	0	0	0	0	0	603	903	0
6843	6	-22.6154	71.7339	-756.488	103485	-54083.8	-8182.57	128.507	163.203	0	0	0	0	0	0	0	200	903	0	0	0	0	0	0	0	603	903	0
6843	7	-23.2258	71.1235	-750.69	102845	-53473.5	-8045.24	128.768	163	0	0	0	0	0	0	0	200	903	0	0	0	0	0	0	0	603	903	0
6843	8	-24.599	69.5976	-750.385	102753	-53595.5	-7862.14	128.576	163.066	0	0	0	0	0	0	0	200	903	0	0	0	0	0	0	0	603	903	0
6843	9	-22.3102	68.6821	-746.418	101654	-53168.3	-8091.02	128.769	163.81	0	0	0	0	0	0	0	200	903	0	0	0	0	0	0	0	603	903	0
6844	0	-25.5146	68.0717	-741.84	101654	-53046.2	-7312.82	128.494	162.97	0	0	0	0	0	0	0	200	903	0	0	0	0	0	0	0	603	903	0
6844	1	-24.9042	67.0036	-737.567	101105	-53290.4	-7862.14	127.748	162.921	0	0	0	0	0	0	0	200	903	0	0	0	0	0	0	0	603	903	0
6844	2	-24.2939	66.5459	-735.431	100190	-52496.9	-7587.48	128.618	163.768	0	0	0	0	0	0	0	200	903	0	0	0	0	0	0	0	603	903	0
6844	3	-24.7516	64.257	-732.074	99457.2	-52496.9	-7541.7	128.29	164.143	0	0	0	0	0	0	0	200	903	0	0	0	0	0	0	0	603	903	0
6844	4	-24.599	63.6467	-728.412	98541.6	-52008.6	-7724.81	128.6	164.717	0	0	0	0	0	0	0	200	903	0	0	0	0	0	0	0	603	903	0
6844	5	-26.2775	62.7312	-725.055	97992.3	-52130.7	-7587.48	128.101	164.849	0	0	0	0	0	0	0	200	903	0	0	0	0	0	0	0	603	903	0
6844	6	-24.599	61.9682	-718.341	97900.8	-51581.4	-7450.15	128.194	163.713	0	0	0	0	0	0	0	200	903	0	0	0	0	0	0	0	603	903	0
6844	7	-26.5827	61.8156	-715.595	97534.5	-51642.4	-7267.04	127.833	163.701	0	0	0	0	0	0	0	200	903	0	0	0	0	0	0	0	603	903	0
6844	8	-25.8197	60.7475	-713.153	96435.9	-51093.1	-7450.15	128.356	164.775	0	0	0	0	0	0	0	200	903	0	0	0	0	0	0	0	603	903	0
6844	9	-25.2094	58.6113	-707.355	95978.1	-50543.8	-6900.83	128.545	164.314	0	0	0	0	0	0	0	200	903	0	0	0	0	0	0	0	603	903	0
6845	0	-26.5827	59.0691	-705.829	95062.6	-50849	-7312.82	127.959	165.318	0	0	0	0	0	0	0	200	903	0	0	0	0	0	0	0	603	903	0
6845	1	-25.6672	58.0009	-702.472	94238.6	-50726.9	-6992.39	127.788	165.847	0	0	0	0	0	0	0	200	903	0	0	0	0	0	0	0	603	903	0
6845	2	-27.3456	57.3906	-698.2	93414.6	-50421.7	-7083.94	127.783	166.206	0	0	0	0	0	0	0	200	903	0	0	0	0	0	0	0	603	903	0
6845	3	-27.3456	56.6277	-695.453	92773.8	-49567.2	-7358.6	128.727	166.6	0	0	0	0	0	0	0	200	903	0	0	0	0	0	0	0	603	903	0
6845	4	-27.3456	56.0173	-687.824	91949.8	-49078.9	-7038.16	128.646	166.318	0	0	0	0	0	0	0	200	903	0	0	0	0	0	0	0	603	903	0
6845	5	-26.4301	56.3225	-684.772	91217.4	-49262	-6763.5	128.061	166.792	0	0	0	0	0	0	0	200	903	0	0	0	0	0	0	0	603	903	0
6845	6	-26.7353	55.2544	-681.11	91125.8	-49078.9	-6580.4	127.943	166.21	0	0	0	0	0	0	0	200	903	0	0	0	0	0	0	0	603	903	0
6845	7	-27.0405	54.4914	-678.669	90210.3	-48834.8	-6717.73	128.043	167.077	0	0	0	0	0	0	0	200	903	0	0	0	0	0	0	0	603	903	0
6845	8	-27.3456	52.813	-672.26	89752.5	-48102.4	-6855.06	128.447	166.491	0	0	0	0	0	0	0	200	903	0	0	0	0	0	0	0	603	903	0
6845	9	-28.5663	53.5759	-670.124	88837	-48346.5	-6626.18	127.854	167.432	0	0	0	0	0	0	0	200	903	0	0	0	0	0	0	0	603	903	0
6846	0	-25.5146	51.8974	-665.241	87921.5	-47736.2	-6443.07	128.242	167.835	0	0	0	0	0	0	0	200	903	0	0	0	0	0	0	0	603	903	0
6846	1	-29.1767	51.8974	-660.053	88379.3	-47736.2	-6488.85	127.678	166.103	0	0	0	0	0	0	0	200	903	0	0	0	0	0	0	0	603	903	0
6846	2	-27.956	51.4397	-656.696	87921.5	-47675.1	-6534.62	127.402	166.115	0	0	0	0	0	0	0	200	903	0	0	0	0	0	0	0	603	903	0
6846	3	-27.3456	50.5241	-652.423	87280.6	-46942.7	-6076.86	128.049	166.221	0	0	0	0	0	0	0	200	903	0	0	0	0	0	0	0	603	903	0
6846	4	-28.4137	49.6086	-651.203	86273.6	-46942.7	-6488.85	127.914	167.517	0	0	0	0	0	0	0	200	903	0	0	0	0	0	0	0	603	903	0
6846	5	-27.8034	48.8457	-646.93	86365.1	-46515.4	-6305.74	128.098	166.5	0	0	0	0	0	0	0	200	903	0	0	0	0	0	0	0	603	903	0
6846	6	-29.1767	48.2353	-642.047	85174.9	-46149.2	-6397.29	128.122	167.339	0	0	0	0	0	0	0	200	903	0	0	0	0	0	0	0	603	903	0
6846	7	-29.3293	48.2353	-637.165	84259.4	-46210.3	-6397.29	127.475	167.759	0	0	0	0	0	0	0	200	903	0	0	0	0	0	0	0	603	903	0
6846	8	-29.9396	46.4043	-634.418	84076.3	-45844.1	-6259.96	127.738	167.475	0	0	0	0	0	0	0	200	903	0	0	0	0	0	0	0	603	903	0
6846	9	-28.8715	46.7094	-629.535	83618.5	-45294.7	-5893.75	128.051	167.174	0	0	0	0	0	0	0	200	903	0	0	0	0	0	0	0	603	903	0
6847	0	-28.7189	46.0991	-626.483	82977.7	-45416.8	-5756.42	127.505	167.55	0	0	0	0	0	0	0	200	903	0	0	0	0	0	0	0	603	903	0
6847	1	-29.0241	45.6413	-624.652	82611.5	-44928.5	-5893.75	128.074	167.748	0	0	0	0	0	0	0	200	903	0	0	0	0	0	0	0	603	903	0
6847	2	-29.0241	43.1999	-621.295	82062.1	-44684.4	-6214.19	128.079	167.918	0	0	0	0	0	0	0	200	903	0	0	0	0	0	0	0	603	903	0
6847	3	-30.7026	43.8103	-617.328	81512.8	-44318.2	-6259.96	128.21	167.959	0	0	0	0	0	0	0	200	903	0	0	0	0	0	0	0	603	903	0
6847	4	-29.3293	44.268	-612.751	79498.6	-44379.2	-5710.65	127.574	170.259	0	0	0	0	0	0	0	200	903	0	0	0	0	0	0	0	603	903	0
6847	5	-31.1603	42.8947	-608.783	79407.1	-44013	-5573.32	127.703	169.564	0	0	0	0	0	0	0	200	903	0	0	0	0	0	0	0	603	903	0
6847	6	-29.0241	42.8947	-606.342	79132.4	-43646.8	-5985.31	128.016	169.492	0	0	0	0	0	0	0	200	903	0	0	0	0	0	0	0	603	903	0
6847	7	-29.9396	42.7422	-603.9	78400	-43646.8	-5664.87	127.725	170.177	0	0	0	0	0	0	0	200	903	0	0	0	0	0	0	0	603	903	0
6847	8	-30.3974	41.5215	-600.544	78033.8	-43646.8	-5847.98	127.321	170.061	0	0	0	0	0	0	0	200	903	0	0	0	0	0	0	0	603	903	0
6847	9	-30.0922	40.4533	-599.018	77759.2	-43219.6	-5527.54	127.849	170.189	0	0	0	0	0	0	0	200	903	0	0	0	0	0	0	0	603	903	0
6848	0	-31.6181	40.6059	-595.966	76202.7	-42548.2	-5527.54	128.606	172.136	0	0	0	0	0	0	0	200	903	0	0	0	0	0	0	0	603	903	0
6848	1	-30.7026	39.6904	-591.999	76385.9	-42182	-5481.77	128.747	170.97	0	0	0	0	0	0	0	200	903	0	0	0	0	0	0	0	603	903	0
6848	2	-31.4655	38.9275	-588.642	75745	-42426.1	-5573.32	127.925	171.322	0	0	0	0	0	0	0	200	903	0	0	0	0	0	0	0	603	903	0
6848	3	-31.3129	38.6223	-582.538	75378.8	-42609.2	-5252.88	126.856	170.603	0	0	0	0	0	0	0	200	903	0	0	0	0	0	0	0	603	903	0
6848	4	-30.2448	36.9438	-582.538	74921	-41937.8	-5207.11	128.008	171.389	0	0	0	0	0	0	0	200	903	0	0	0	0	0	0	0	603	903	0
6848	5	-30.2448	38.0119	-583.148	75012.5	-42120.9	-5252.88	127.77	171.366	0	0	0	0	0	0	0	200	903	0	0	0	0	0	0	0	603	903	0
6848	6	-30.0922	36.9438	-580.707	74554.8	-41754.7	-5207.11	128.097	171.614	0	0	0	0	0	0	0	200	903	0	0	0	0	0	0	0	603	903	0
6848	7	-31.4655	36.1809	-577.045	74188.6	-41815.7	-5161.33	127.535	171.434	0	0	0	0	0	0	0	200	903	0	0	0	0	0	0	0	603	903	0
6848	8	-31.4655	36.0283	-575.824	73730.8	-41937.8	-5024	127.169	171.956	0	0	0	0	0	0	0	200	903	0	0	0	0	0	0	0	603	903	0
6848	9	-31.9233	34.9602	-571.247	72998.4	-41510.6	-4978.23	127.333	172.212	0	0	0	0	0	0	0	200	903	0	0	0	0	0	0	0	603	903	0
6849	0	-31.7707	34.5024	-566.059	72906.8	-41205.4	-4795.12	127.207	171.203	0	0	0	0	0	0	0	200	903	0	0	0	0	0	0	0	603	903	0
6849	1	-31.3129	31.7558	-566.974	72357.5	-40961.2	-4657.79	127.755	172.379	0	0	0	0	0	0	0	200	903	0	0	0	0	0	0	0	603	903	0
6849	2	-29.6344	33.2817	-565.753	72357.5	-40839.2	-4932.45	127.815	172.104	0	0	0	0	0	0	0	200	903	0	0	0	0	0	0	0	603	903	0
6849	3	-31.4655	32.2136	-565.753	70801.1	-41205.4	-4840.9	127.167	174.855	0	0	0	0	0	0	0	200	903	0	0	0	0	0	0	0	603	903	0
6849	4	-32.381	32.061	-562.091	71258.9	-41205.4	-4703.57	126.693	173.225	0	0	0	0	0	0	0	200	903	0	0	0	0	0	0	0	603	903	0
6849	5	-32.2284	31.6032	-560.565	70801.1	-40473	-4749.34	127.8	173.697	0	0	0	0	0	0	0	200	903	0	0	0	0	0	0	0	603	903	0
6849	6	-32.8388	31.1455	-556.293	70526.5	-40228.8	-4932.45	127.684	173.221	0	0	0	0	0	0	0	200	903	0	0	0	0	0	0	0	603	903	0
6849	7	-32.5336	29.9248	-555.378	70160.3	-40167.8	-4520.46	127.675	173.671	0	0	0	0	0	0	0	200	903	0	0	0	0	0	0	0	603	903	0
6849	8	-31.6181	29.9248	-553.241	69977.1	-40534	-4566.24	126.734	173.514	0	0	0	0	0	0	0	200	903	0	0	0	0	0	0	0	603	903	0
6849	9	-29.787	29.7722	-555.378	69885.6	-40228.8	-4612.02	127.565	174.166	0	0	0	0	0	0	0	200	903	0	0	0	0	0	0	0	603	903	0
6850	0	-31.4655	28.7041	-552.326	69244.7	-39923.7	-4383.13	127.717	174.631	0	0	0	0	0	0	0	200	903	0	0	0	0	0	0	0	603	903	0
6850	1	-32.5336	26.873	-548.358	68603.9	-39435.4	-4428.91	128.085	174.892	0	0	0	0	0	0	0	200	903	0	0	0	0	0	0	0	603	903	0
6850	2	-32.381	27.9411	-547.443	69153.2	-39679.5	-3742.26	127.518	173.68	0	0	0	0	0	0	0	200	903	0	0	0	0	0	0	0	603	903	0
6850	3	-31.4655	27.4834	-545.002	68787	-39862.6	-4245.8	126.858	173.786	0	0	0	0	0	0	0	200	903	0	0	0	0	0	0	0	603	903	0
6850	4	-32.5336	26.7204	-543.17	67413.7	-39435.4	-4245.8	127.398	175.889	0	0	0	0	0	0	0	200	903	0	0	0	0	0	0	0	603	903	0
6850	5	-31.6181	26.5678	-540.729	66955.9	-39374.3	-4291.58	127.183	176.175	0	0	0	0	0	0	0	200	903	0	0	0	0	0	0	0	603	903	0
6850	6	-29.787	26.2627	-541.95	66681.2	-38947.1	-4062.7	128.135	176.96	0	0	0	0	0	0	0	200	903	0	0	0	0	0	0	0	603	903	0
6850	7	-31.6181	25.6523	-541.034	66315	-39191.2	-3742.26	127.562	177.429	0	0	0	0	0	0	0	200	903	0	0	0	0	0	0	0	603	903	0
6850	8	-32.6862	24.8894	-539.508	66406.6	-39496.4	-3971.15	126.792	176.913	0	0	0	0	0	0	0	200	903	0	0	0	0	0	0	0	603	903	0
6850	9	-32.5336	24.279	-538.898	65948.8	-39374.3	-3604.93	126.935	177.623	0	0	0	0	0	0	0	200	903	0	0	0	0	0	0	0	603	903	0
6851	0	-31.4655	24.7368	-535.846	65857.3	-38580.9	-3650.71	128	177.097	0	0	0	0	0	0	0	200	903	0	0	0	0	0	0	0	603	903	0
6851	1	-30.55	23.9738	-535.541	65124.8	-38641.9	-3696.49	127.845	178.394	0	0	0	0	0	0	0	200	903	0	0	0	0	0	0	0	603	903	0
6851	2	-31.0077	23.5161	-535.236	64392.4	-38764	-3604.93	127.576	179.693	0	0	0	0	0	0	0	200	903	0	0	0	0	0	0	0	603	903	0
6851	3	-30.3974	22.9057	-536.151	64850.2	-39130.2	-3604.93	127.017	179.045	0	0	0	0	0	0	0	200	903	0	0	0	0	0	0	0	603	903	0
6851	4	-30.8551	22.1428	-526.691	64575.5	-39069.2	-3604.93	125.821	177.394	0	0	0	0	0	0	0	200	903	0	0	0	0	0	0	0	603	903	0
6851	5	-31.4655	22.1428	-534.015	64300.9	-38825	-3330.28	127.296	179.59	0	0	0	0	0	0	0	200	903	0	0	0	0	0	0	0	603	903	0
6851	6	-31.4655	21.8376	-530.048	64026.2	-38519.8	-3284.5	127.328	179.207	0	0	0	0	0	0	0	200	903	0	0	0	0	0	0	0	603	903	0
6851	7	-31.6181	21.2273	-529.743	64117.8	-38641.9	-3467.61	127.055	178.964	0	0	0	0	0	0	0	200	903	0	0	0	0	0	0	0	603	903	0
6851	8	-30.8551	20.3117	-529.438	63751.6	-38336.7	-3284.5	127.59	179.586	0	0	0	0	0	0	0	200	903	0	0	0	0	0	0	0	603	903	0
6851	9	-29.6344	20.6169	-530.353	63385.3	-38764	-3055.62	126.909	180.485	0	0	0	0	0	0	0	200	903	0	0	0	0	0	0	0	603	903	0
6852	0	-31.0077	18.7859	-530.658	63568.4	-38519.8	-2735.18	127.411	180.208	0	0	0	0	0	0	0	200	903	0	0	0	0	0	0	0	603	903	0
6852	1	-31.9233	17.7177	-528.827	63385.3	-38580.9	-2918.29	127.044	180.14	0	0	0	0	0	0	0	200	903	0	0	0	0	0	0	0	603	903	0
6852	2	-30.2448	16.9548	-526.996	63110.7	-38153.6	-2506.3	127.602	180.244	0	0	0	0	0	0	0	200	903	0	0	0	0	0	0	0	603	903	0
6852	3	-31.7707	16.6496	-526.386	62836	-38519.8	-2964.07	126.822	180.627	0	0	0	0	0	0	0	200	903	0	0	0	0	0	0	0	603	903	0
6852	4	-29.6344	18.0229	-527.912	63019.1	-38458.8	-2689.41	127.149	180.626	0	0	0	0	0	0	0	200	903	0	0	0	0	0	0	0	603	903	0
6852	5	-30.2448	17.4126	-525.775	62652.9	-38397.8	-2689.41	126.969	180.837	0	0	0	0	0	0	0	200	903	0	0	0	0	0	0	0	603	903	0
6852	6	-30.2448	17.7177	-526.691	62927.6	-37970.5	-2597.85	127.907	180.523	0	0	0	0	0	0	0	200	903	0	0	0	0	0	0	0	603	903	0
6852	7	-30.2448	16.3445	-526.996	62744.5	-38397.8	-2689.41	127.138	180.939	0	0	0	0	0	0	0	200	903	0	0	0	0	0	0	0	603	903	0
6852	8	-30.55	16.9548	-526.081	62652.9	-38092.6	-2597.85	127.592	180.906	0	0	0	0	0	0	0	200	903	0	0	0	0	0	0	0	603	903	0
6852	9	-30.7026	16.0393	-526.081	62652.9	-38397.8	-2231.64	127.012	180.906	0	0	0	0	0	0	0	200	903	0	0	0	0	0	0	0	603	903	0
6853	0	-30.8551	15.5815	-524.555	62378.3	-38336.7	-2048.54	126.916	181.083	0	0	0	0	0	0	0	200	903	0	0	0	0	0	0	0	603	903	0
6853	1	-29.0241	15.8867	-525.165	62195.2	-37787.4	-1911.21	128.047	181.57	0	0	0	0	0	0	0	200	903	0	0	0	0	0	0	0	603	903	0
6853	2	-29.1767	14.8186	-522.724	61829	-38092.6	-2231.64	127.127	181.718	0	0	0	0	0	0	0	200	903	0	0	0	0	0	0	0	603	903	0
6853	3	-28.5663	14.8186	-525.775	61645.9	-38031.6	-2185.87	127.666	182.753	0	0	0	0	0	0	0	200	903	0	0	0	0	0	0	0	603	903	0
6853	4	-28.7189	14.0556	-524.25	61279.6	-38458.8	-1865.43	126.64	183.11	0	0	0	0	0	0	0	200	903	0	0	0	0	0	0	0	603	903	0
6853	5	-29.1767	13.5979	-525.47	61645.9	-38397.8	-1911.21	126.927	182.684	0	0	0	0	0	0	0	200	903	0	0	0	0	0	0	0	603	903	0
6853	6	-29.6344	13.903	-525.47	61188.1	-37970.5	-1636.55	127.74	183.556	0	0	0	0	0	0	0	200	903	0	0	0	0	0	0	0	603	903	0
6853	7	-28.7189	12.2246	-523.334	61554.3	-38275.7	-1728.1	126.862	182.38	0	0	0	0	0	0	0	200	903	0	0	0	0	0	0	0	603	903	0
6853	8	-28.4137	12.3772	-523.029	60455.7	-37970.5	-1499.22	127.403	184.412	0	0	0	0	0	0	0	200	903	0	0	0	0	0	0	0	603	903	0
6853	9	-27.3456	11.9194	-523.334	60364.1	-38397.8	-1270.34	126.629	184.655	0	0	0	0	0	0	0	200	903	0	0	0	0	0	0	0	603	903	0
6854	0	-25.362	11.0039	-527.301	60455.7	-38336.7	-1041.46	127.296	185.349	0	0	0	0	0	0	0	200	903	0	0	0	0	0	0	0	603	903	0
6854	1	-26.8879	10.3935	-526.386	59997.9	-38214.7	-1087.24	127.402	186.019	0	0	0	0	0	0	0	200	903	0	0	0	0	0	0	0	603	903	0
6854	2	-26.5827	10.8513	-526.691	60272.6	-37970.5	-766.8	127.907	185.564	0	0	0	0	0	0	0	200	903	0	0	0	0	0	0	0	603	903	0
6854	3	-27.193	8.71506	-526.996	60089.4	-37848.5	-949.906	128.181	185.977	0	0	0	0	0	0	0	200	903	0	0	0	0	0	0	0	603	903	0
6854	4	-26.7353	10.0883	-526.081	60089.4	-37848.5	-766.8	128.056	185.779	0	0	0	0	0	0	0	200	903	0	0	0	0	0	0	0	603	903	0
6854	5	-26.5827	9.17282	-526.691	59814.8	-38336.7	-675.248	127.212	186.433	0	0	0	0	0	0	0	200	903	0	0	0	0	0	0	0	603	903	0
6854	6	-25.362	9.17282	-526.081	59082.4	-38458.8	-721.024	126.896	187.693	0	0	0	0	0	0	0	200	903	0	0	0	0	0	0	0	603	903	0
6854	7	-25.0568	8.71506	-525.47	59173.9	-38153.6	11.398	127.391	187.389	0	0	0	0	0	0	0	200	903	0	0	0	0	0	0	0	603	903	0
6854	8	-25.0568	9.02023	-529.438	58990.8	-37970.5	-125.931	128.281	188.578	0	0	0	0	0	0	0	200	903	0	0	0	0	0	0	0	603	903	0
6854	9	-25.5146	9.02023	-530.048	59173.9	-38092.6	-125.931	128.134	188.361	0	0	0	0	0	0	0	200	903	0	0	0	0	0	0	0	603	903	0
6855	0	-25.8197	8.25729	-530.658	58624.6	-38580.9	-217.484	127.296	189.525	0	0	0	0	0	0	0	200	903	0	0	0	0	0	0	0	603	903	0
6855	1	-25.362	7.79953	-529.132	58716.2	-38580.9	-217.484	127.087	189.033	0	0	0	0	0	0	0	200	903	0	0	0	0	0	0	0	603	903	0
6855	2	-25.2094	6.57883	-529.743	58533.1	-38519.8	-34.3784	127.286	189.507	0	0	0	0	0	0	0	200	903	0	0	0	0	0	0	0	603	903	0
6855	3	-23.6835	6.884	-530.963	57983.8	-38214.7	11.398	128.028	190.795	0	0	0	0	0	0	0	200	903	0	0	0	0	0	0	0	603	903	0
6855	4	-22.3102	6.884	-531.879	58990.8	-38580.9	11.398	127.463	189.09	0	0	0	0	0	0	0	200	903	0	0	0	0	0	0	0	603	903	0
6855	5	-24.2939	6.884	-533.1	58716.2	-38825	194.503	127.171	189.859	0	0	0	0	0	0	0	200	903	0	0	0	0	0	0	0	603	903	0
6855	6	-24.4465	5.05295	-534.32	58990.8	-38702.9	606.491	127.566	189.597	0	0	0	0	0	0	0	200	903	0	0	0	0	0	0	0	603	903	0
6855	7	-24.7516	4.90036	-534.931	58166.9	-38825	148.727	127.42	191.263	0	0	0	0	0	0	0	200	903	0	0	0	0	0	0	0	603	903	0
6855	8	-23.9887	5.05295	-534.626	58624.6	-38580.9	331.833	127.836	190.345	0	0	0	0	0	0	0	200	903	0	0	0	0	0	0	0	603	903	0
6855	9	-24.1413	4.13742	-536.151	58075.3	-38519.8	560.714	128.155	191.681	0	0	0	0	0	0	0	200	903	0	0	0	0	0	0	0	603	903	0
6856	0	-23.2258	2.76413	-535.846	58350	-39252.3	423.385	126.747	191.107	0	0	0	0	0	0	0	200	903	0	0	0	0	0	0	0	603	903	0
6856	1	-21.0895	3.67966	-539.203	57800.6	-39008.1	789.596	127.656	192.804	0	0	0	0	0	0	0	200	903	0	0	0	0	0	0	0	603	903	0
6856	2	-23.0732	2.91672	-538.593	57617.5	-39008.1	606.491	127.574	193.022	0	0	0	0	0	0	0	200	903	0	0	0	0	0	0	0	603	903	0
6856	3	-23.8361	2.76413	-539.814	57617.5	-38580.9	698.044	128.529	193.264	0	0	0	0	0	0	0	200	903	0	0	0	0	0	0	0	603	903	0
6856	4	-24.1413	2.76413	-540.729	57617.5	-39008.1	972.702	127.86	193.445	0	0	0	0	0	0	0	200	903	0	0	0	0	0	0	0	603	903	0
6856	5	-23.8361	2.76413	-541.034	57434.4	-38764	1384.69	128.352	193.843	0	0	0	0	0	0	0	200	903	0	0	0	0	0	0	0	603	903	0
6856	6	-23.6835	2.30637	-540.424	57342.9	-39191.2	1018.48	127.481	193.893	0	0	0	0	0	0	0	200	903	0	0	0	0	0	0	0	603	903	0
6856	7	-22.6154	1.69601	-543.17	57526	-38886.1	1110.03	128.409	194.092	0	0	0	0	0	0	0	200	903	0	0	0	0	0	0	0	603	903	0
6856	8	-22.4628	1.23825	-543.476	57617.5	-39191.2	1155.81	127.888	193.983	0	0	0	0	0	0	0	200	903	0	0	0	0	0	0	0	603	903	0
6856	9	-22.1576	0.322724	-544.391	57526	-39313.3	1247.36	127.785	194.33	0	0	0	0	0	0	0	200	903	0	0	0	0	0	0	0	603	903	0
6857	0	-23.6835	0.170136	-544.086	57068.2	-39252.3	1659.35	127.857	195.112	0	0	0	0	0	0	0	200	903	0	0	0	0	0	0	0	603	903	0
6857	1	-23.2258	-0.745391	-547.138	57251.3	-39374.3	1476.24	128.036	195.362	0	0	0	0	0	0	0	200	903	0	0	0	0	0	0	0	603	903	0
6857	2	-21.3947	-2.11868	-547.748	57342.9	-39496.4	1613.57	127.893	195.312	0	0	0	0	0	0	0	200	903	0	0	0	0	0	0	0	603	903	0
6857	3	-23.3783	-1.50833	-548.358	57526	-39801.6	1567.79	127.417	195.094	0	0	0	0	0	0	0	200	903	0	0	0	0	0	0	0	603	903	0
6857	4	-21.2421	-1.81351	-549.884	56610.4	-39740.5	1613.57	127.729	197.05	0	0	0	0	0	0	0	200	903	0	0	0	0	0	0	0	603	903	0
6857	5	-21.5473	-2.11868	-551.105	56610.4	-39862.6	1750.9	127.668	197.278	0	0	0	0	0	0	0	200	903	0	0	0	0	0	0	0	603	903	0
6857	6	-21.6999	-3.03421	-553.546	56427.3	-39557.4	1750.9	128.538	198.062	0	0	0	0	0	0	0	200	903	0	0	0	0	0	0	0	603	903	0
6857	7	-20.9369	-3.79715	-552.326	56427.3	-39923.7	1888.23	127.717	197.837	0	0	0	0	0	0	0	200	903	0	0	0	0	0	0	0	603	903	0
6857	8	-22.4628	-3.03421	-554.767	56610.4	-39862.6	1750.9	128.145	197.956	0	0	0	0	0	0	0	200	903	0	0	0	0	0	0	0	603	903	0
6857	9	-21.8525	-3.1868	-555.683	55969.6	-40289.9	2117.11	127.495	199.278	0	0	0	0	0	0	0	200	903	0	0	0	0	0	0	0	603	903	0
6858	0	-22.4628	-4.25491	-556.598	55694.9	-39923.7	1979.78	128.272	199.937	0	0	0	0	0	0	0	200	903	0	0	0	0	0	0	0	603	903	0
6858	1	-21.2421	-4.25491	-558.734	56061.1	-40228.8	2025.56	128	199.664	0	0	0	0	0	0	0	200	903	0	0	0	0	0	0	0	603	903	0
6858	2	-22.0051	-4.71268	-558.124	55786.5	-40717.1	2254.44	127.046	200.046	0	0	0	0	0	0	0	200	903	0	0	0	0	0	0	0	603	903	0
6858	3	-21.2421	-4.71268	-562.397	55694.9	-41083.3	2254.44	126.95	200.969	0	0	0	0	0	0	0	200	903	0	0	0	0	0	0	0	603	903	0
6858	4	-22.0051	-7.00149	-561.176	55603.4	-40900.2	2345.99	127.117	200.916	0	0	0	0	0	0	0	200	903	0	0	0	0	0	0	0	603	903	0
6858	5	-22.9206	-6.08597	-564.838	55328.7	-40717.1	2254.44	127.914	202.045	0	0	0	0	0	0	0	200	903	0	0	0	0	0	0	0	603	903	0
6858	6	-20.6318	-5.6282	-565.143	56061.1	-40961.2	2345.99	127.521	200.802	0	0	0	0	0	0	0	200	903	0	0	0	0	0	0	0	603	903	0
6858	7	-24.1413	-6.54373	-565.143	55603.4	-40900.2	2391.77	127.629	201.612	0	0	0	0	0	0	0	200	903	0	0	0	0	0	0	0	603	903	0
6858	8	-22.4628	-6.39114	-567.585	55969.6	-41205.4	2437.55	127.402	201.39	0	0	0	0	0	0	0	200	903	0	0	0	0	0	0	0	603	903	0
6858	9	-22.9206	-7.00149	-568.5	55878	-41449.5	2391.77	127.09	201.71	0	0	0	0	0	0	0	200	903	0	0	0	0	0	0	0	603	903	0
6859	0	-22.768	-6.84891	-571.247	55786.5	-41693.7	2254.44	127.013	202.343	0	0	0	0	0	0	0	200	903	0	0	0	0	0	0	0	603	903	0
6859	1	-22.6154	-7.91702	-570.331	54962.5	-41449.5	2529.1	127.324	203.631	0	0	0	0	0	0	0	200	903	0	0	0	0	0	0	0	603	903	0
6859	2	-24.599	-7.91702	-574.604	55237.2	-41449.5	2345.99	127.864	203.869	0	0	0	0	0	0	0	200	903	0	0	0	0	0	0	0	603	903	0
6859	3	-21.8525	-8.67996	-573.688	55694.9	-42059.9	2529.1	126.685	202.918	0	0	0	0	0	0	0	200	903	0	0	0	0	0	0	0	603	903	0
6859	4	-24.1413	-8.37479	-573.993	55054.1	-42120.9	2574.88	126.618	204.086	0	0	0	0	0	0	0	200	903	0	0	0	0	0	0	0	603	903	0
6859	5	-23.9887	-9.90067	-575.824	55328.7	-41998.8	2574.88	127.063	203.914	0	0	0	0	0	0	0	200	903	0	0	0	0	0	0	0	603	903	0
[truncated: 2,304 more rows]
