# Supplementary material for: The Effects of an Extemporaneous Speech Dual-task on Older Adult Gait Control
Source: Research Square preprint supplement (doi:10.21203/rs.3.rs-7674245/v1), 2025-11-18
Supplement: Supplementary file 111 [file DT9Walk8.xlsx]

## Sheet: Sheet1
Trajectories
		09:LFHD			09:RFHD			09:LBHD			09:RBHD			09:C7			09:T10			09:CLAV			09:STRN			09:RBAK			09:LSHO			09:LUPA			09:LELB			09:LFRM			09:LWRA			09:LWRB			09:LFIN
Frame	Sub Frame	X	Y	Z	X	Y	Z	X	Y	Z	X	Y	Z	X	Y	Z	X	Y	Z	X	Y	Z	X	Y	Z	X	Y	Z	X	Y	Z	X	Y	Z	X	Y	Z	X	Y	Z	X	Y	Z	X	Y	Z	X	Y	Z
		mm	mm	mm	mm	mm	mm	mm	mm	mm	mm	mm	mm	mm	mm	mm	mm	mm	mm	mm	mm	mm	mm	mm	mm	mm	mm	mm	mm	mm	mm	mm	mm	mm	mm	mm	mm	mm	mm	mm	mm	mm	mm	mm	mm	mm	mm	mm	mm
7618	0	245.72	2166.33	1640.48	150.701	2155.15	1639.78	252.323	2315.13	1696.09	107.242	2292.91	1687.97	185.211	2380.15	1515.11	199.226	2437.47	1256.68	185.759	2230.91	1432.71	189.074	2142.61	1226.86	131.295	2444.6	1316.75	372.423	2300.87	1472.26	439.535	2368.65	1249.04	446.938	2401.37	1152.86	486.83	2375.88	983.89	459.503	2348.05	898.199	502.566	2404.37	909.444	507.546	2369.69	834.359
7619	0	246.236	2153.67	1637.48	150.957	2142.27	1637.01	252.778	2302.06	1693.66	108.202	2279.91	1685.45	185.704	2368	1512.78	200.162	2425.27	1254.35	185.762	2218.56	1430.26	189.048	2130.17	1224.43	131.949	2432.61	1314.23	372.336	2288.7	1469.98	439.256	2359.16	1247.57	446.082	2393.07	1151.85	487.669	2373.25	983.039	461.338	2347.46	896.375	503.596	2404.62	909.327	508.78	2372.44	832.959
7620	0	247.205	2140.65	1634.7	151.71	2129.43	1634.01	253.565	2288.95	1691.22	108.739	2266.82	1683.12	186.246	2355.66	1510.37	201.313	2413.12	1252	186.683	2206.36	1427.96	189.338	2117.7	1221.79	132.657	2420.36	1311.81	373.031	2276.21	1468.01	439.22	2349.08	1246.05	445.306	2384.2	1150.83	488.55	2370.09	982.474	463.392	2346.56	894.685	504.457	2403.94	909.804	510.435	2374.56	832.048
7621	0	247.639	2127.73	1631.7	152.369	2116.61	1631.28	254.468	2275.85	1688.92	109.554	2253.76	1680.36	186.773	2343.38	1508.19	202.347	2400.76	1249.77	186.969	2193.92	1425.52	189.55	2105.24	1219.4	133.495	2408.11	1309.5	373.643	2263.66	1466.04	439.374	2338.67	1244.63	445.074	2374.86	1150.23	489.468	2366.23	982.305	464.656	2344.95	892.959	505.012	2402.5	910.468	512.361	2376.12	831.812
7622	0	248.426	2114.76	1629.04	152.724	2103.63	1628.27	255.25	2262.61	1686.71	110.382	2240.79	1678.48	187.644	2331.15	1506.04	203.314	2388.09	1247.43	187.362	2181.45	1423.26	189.517	2092.55	1217.13	134.411	2395.77	1307.17	374.127	2251.21	1463.85	439.519	2327.7	1243.04	444.704	2365	1149.28	490.612	2361.75	982.176	466.884	2342.85	891.929	506.34	2400.48	911.636	514.013	2377.08	831.659
7623	0	249.229	2101.58	1626.36	153.778	2090.9	1625.72	256.377	2249.59	1684.4	111.306	2227.92	1676.16	188.562	2318.76	1503.75	204.405	2375.65	1245.18	188.291	2169.06	1420.87	189.839	2079.89	1215.09	135.525	2383.37	1304.72	375.047	2238.78	1461.65	440.079	2316.4	1241.11	444.724	2354.65	1147.97	491.888	2356.4	981.786	469.337	2339.87	890.722	507.589	2397.58	912.448	516.196	2377.48	831.667
7624	0	250.138	2088.88	1623.99	154.711	2078.12	1623.43	257.607	2236.57	1682.2	112.282	2215.03	1674.18	189.638	2306.15	1501.58	205.461	2363.06	1242.97	188.867	2156.44	1418.49	190.333	2067.38	1212.77	136.517	2370.62	1302.54	376.053	2226.16	1459.38	440.685	2304.95	1239.12	444.615	2344.05	1146.46	493.354	2350.66	981.628	471.958	2336.27	889.669	509.332	2393.72	913.581	518.26	2377.01	831.723
7625	0	251.301	2075.92	1621.95	155.763	2065.29	1621.38	258.87	2223.78	1680.11	113.651	2202.29	1671.93	190.748	2293.47	1499.51	206.133	2350.18	1240.83	189.873	2143.84	1416.62	190.578	2054.82	1210.86	137.569	2357.95	1300.33	376.782	2213.57	1456.8	441.393	2293.19	1237.07	444.908	2333.24	1145.02	495.151	2344.1	981.461	474.257	2331.63	888.773	510.854	2388.97	914.68	520.077	2375.75	831.975
7626	0	252.752	2063.03	1620.17	157.089	2052.54	1619.73	260.214	2210.95	1677.89	115.172	2189.74	1670.28	191.873	2280.81	1497.42	207.26	2337.05	1238.76	190.566	2130.97	1414.58	191.258	2042.33	1209.14	138.432	2345.04	1298.27	378.024	2201.07	1454.42	442.075	2281.18	1234.83	444.999	2321.97	1143.11	496.918	2336.77	981.044	477.294	2326.22	888.05	512.549	2383.35	915.368	522.076	2373.18	832.088
7627	0	254.282	2050.45	1618.43	158.8	2040	1618.38	262.012	2198.56	1675.87	116.932	2177.15	1668.63	193.08	2268.24	1495.61	207.174	2324.37	1236.5	191.729	2118.11	1412.66	192.139	2029.49	1207.33	139.114	2332.21	1296.47	379.136	2188.52	1452.09	443.089	2269.18	1232.66	445.869	2310.75	1141.48	498.781	2328.82	980.523	480.103	2319.85	887.012	514.511	2376.67	916.154	524.559	2369.78	832.508
7628	0	256.203	2038.28	1616.9	160.643	2027.32	1617.27	263.652	2186.04	1673.99	118.59	2164.53	1667.24	194.308	2255.35	1493.85	207.537	2311.29	1234.7	192.966	2105.25	1411.11	193.403	2016.48	1206.1	139.733	2319.17	1294.86	380.386	2176.12	1449.81	443.988	2257.2	1230.6	446.562	2298.97	1139.66	500.873	2319.97	980.016	482.836	2312.53	886.19	516.365	2368.99	916.537	526.788	2365.09	832.83
7629	0	258.064	2025.61	1615.78	162.337	2014.65	1616.43	265.599	2173.86	1672.37	120.327	2152.03	1665.92	195.659	2242.6	1492.38	207.803	2297.9	1233.16	194.119	2092.32	1409.95	194.571	2002.96	1205.24	140.182	2305.81	1293.36	381.772	2163.58	1447.94	444.822	2245.02	1228.7	447.707	2286.92	1138.14	502.542	2310.37	979.464	485.417	2304.2	885.413	518.446	2360.43	916.879	528.663	2358.87	833.081
7630	0	260.149	2013.08	1614.85	164.164	2002.01	1615.74	267.571	2161.5	1671.04	122.647	2139.81	1665.35	197.138	2230	1491.1	208.43	2284.39	1231.49	195.744	2079.37	1409.03	196.286	1989.45	1204.66	140.673	2292.39	1292.01	383.374	2150.99	1446.4	445.737	2232.57	1226.99	448.846	2274.51	1136.74	504.577	2299.8	978.889	487.219	2294.59	884.4	520.23	2350.54	917.185	530.745	2351.14	833.444
7631	0	262.564	2000.97	1614.34	166.52	1989.59	1615.56	270.237	2149.47	1670.31	125.021	2127.42	1665.2	198.81	2217.27	1490.22	208.368	2270.92	1230.26	197.424	2066.42	1408.55	198.168	1975.92	1204.23	141.413	2279.01	1291.02	385.088	2138.31	1445.2	447.279	2219.96	1225.83	450.807	2262.34	1136	506.634	2288.48	978.598	489.576	2283.96	883.914	522.336	2339.62	917.346	532.771	2341.57	833.648
7632	0	264.75	1988.48	1614.5	168.761	1977.16	1615.95	272.672	2137.1	1669.95	127.545	2115.06	1665.02	200.697	2204.38	1489.72	209.629	2257	1229.12	198.785	2053.37	1408.47	199.915	1962.23	1204.22	142.364	2265.17	1290.34	386.756	2125.38	1444.36	448.771	2207.13	1225.23	452.023	2249.11	1135.2	508.481	2276.23	978.318	491.989	2272.23	883.676	524.248	2327.5	917.359	534.916	2330.59	834.02
7633	0	267.208	1976.16	1614.93	171.14	1964.83	1616.72	275.311	2124.96	1669.68	129.997	2102.94	1665.39	202.539	2191.56	1489.47	210.357	2243.27	1228.56	200.356	2040.31	1408.72	201.426	1948.14	1204.68	143.716	2251.67	1289.78	388.448	2112.49	1443.78	450.349	2193.87	1224.78	453.872	2236.05	1134.84	510.542	2263.13	978.083	493.521	2259.28	882.951	526.527	2314.54	917.186	536.993	2318.02	833.897
7634	0	269.638	1963.71	1615.52	173.516	1952.54	1617.77	278.023	2112.94	1669.56	132.716	2090.94	1666.19	204.42	2178.73	1489.21	211.764	2229.14	1228.02	201.913	2027.15	1409.05	203.121	1933.96	1205.4	145.506	2238.06	1289.49	390.263	2099.34	1443.43	452.112	2180.66	1224.38	455.514	2222.54	1134.33	512.159	2249.31	977.544	495.115	2245.22	882.498	528.338	2300.51	916.688	538.753	2303.84	833.351
7635	0	272.141	1951.54	1616.46	175.915	1940.19	1619.17	280.545	2100.87	1669.62	135.409	2079	1666.91	206.276	2165.77	1489.46	213.087	2215.35	1228.13	203.318	2013.95	1409.78	204.527	1919.78	1206.4	147.299	2224.41	1289.33	391.89	2086.12	1443.35	453.88	2166.93	1224.42	457.145	2208.68	1134.08	514.213	2234.84	977.175	496.474	2229.96	882.035	530.404	2285.61	916.107	540.615	2288.31	832.545
7636	0	274.603	1939.33	1617.93	178.266	1927.87	1621.06	283.182	2088.89	1669.95	138.29	2066.96	1668	208.083	2152.93	1489.89	214.75	2201.38	1228.44	204.918	2000.81	1411.01	205.442	1905.83	1207.54	149.136	2210.94	1289.67	393.485	2072.78	1443.54	455.622	2153.07	1224.52	459.021	2194.4	1133.86	516.061	2219.47	976.953	498.053	2213.95	881.957	532.231	2269.85	915.363	542.308	2271.59	831.733
7637	0	277.007	1927.04	1619.26	180.921	1915.45	1623.26	285.862	2076.92	1670.45	140.893	2054.87	1669.54	209.879	2140	1490.62	216.341	2188	1229.24	206.445	1987.7	1412.2	206.394	1892.31	1208.66	151.063	2197.35	1290.42	395.043	2059.55	1443.92	457.298	2138.89	1224.82	460.79	2179.66	1133.73	517.481	2203.18	976.268	499.732	2196.73	881.515	533.833	2252.94	914.232	544.622	2253.6	830.707
7638	0	279.778	1914.95	1621.01	183.534	1903.06	1625.44	287.69	2064.48	1670.73	143.566	2042.66	1671	211.552	2126.86	1491.78	218.739	2174.78	1230.24	207.67	1974.65	1413.24	207.135	1879.14	1209.82	152.921	2184.13	1291.54	396.583	2046.45	1444.57	459.099	2124.33	1224.94	462.658	2164.55	1133.55	519.508	2186.35	975.878	501.372	2178.72	881.089	536.047	2235.58	913.283	546.694	2234.39	829.543
7639	0	282.132	1902.73	1622.66	185.973	1890.58	1627.62	290.709	2052.67	1671.93	145.711	2030.37	1672.87	212.941	2113.8	1493.33	220.602	2161.69	1231.51	209.166	1961.95	1414.66	207.176	1865.75	1210.92	154.408	2170.89	1293.21	397.845	2033.36	1445.52	460.729	2109.5	1225.38	464.506	2149.08	1133.79	521.15	2168.65	975.623	503.344	2159.73	881.036	537.796	2217.1	912.241	549.037	2214.23	828.679
7640	0	284.257	1890.33	1624.2	187.957	1878.05	1629.29	292.96	2040.66	1672.69	147.894	2017.98	1674.07	214.014	2100.96	1494.82	221.572	2149.08	1233.07	210.132	1949.07	1415.99	208.34	1853.41	1211.96	155.663	2157.92	1294.94	398.776	2020.34	1446.77	462.149	2094.37	1226.03	466.391	2133.35	1133.94	521.74	2149.44	974.735	504.775	2139.8	880.696	539.537	2197.68	911.061	550.768	2192.47	827.458
7641	0	286.322	1878.32	1625.22	190.21	1865.69	1630.92	294.676	2028.49	1673.35	149.89	2005.75	1676.05	215.208	2088.41	1496.12	222.987	2136.67	1234.34	211.433	1936.48	1417.08	208.854	1840.45	1213.24	156.61	2145.22	1296.42	399.882	2007.48	1447.74	463.579	2079.25	1226.35	468.122	2117.43	1133.88	524.657	2131.44	974.734	506.844	2119.3	880.283	541.05	2177.34	909.267	552.662	2170	825.959
7642	0	288.235	1866.21	1626.11	192.077	1853.31	1632.1	296.498	2016.47	1674.08	151.525	1993.33	1677.1	216.37	2076.03	1497.25	224.148	2124.71	1234.82	212.627	1924.09	1418	209.544	1827.89	1214.56	157.368	2132.92	1297.71	401.017	1994.79	1448.64	465.163	2064.12	1226.57	469.575	2100.78	1133.25	525.161	2110.97	973.344	508.391	2097.84	879.785	543.131	2156.79	907.612	554.915	2146.97	824.836
7643	0	289.421	1853.81	1626.81	193.666	1841.02	1633.14	297.668	2003.97	1675.02	153.148	1980.98	1678.4	217.767	2064.07	1498.43	225.107	2112.34	1236.16	213.437	1911.93	1419.2	210.126	1815.78	1215.61	158.11	2120.92	1298.9	402.175	1982.29	1449.77	466.577	2048.95	1226.76	471.411	2084.47	1132.96	526.589	2090.84	972.437	509.683	2075.62	879.299	544.109	2134.75	905.377	557.103	2122.71	823.426
7644	0	290.748	1841.67	1627.81	194.808	1828.76	1634.12	299.095	1991.75	1676.32	154.429	1968.35	1679.5	218.959	2052.22	1499.42	226.025	2100.21	1237.31	214.27	1899.96	1420.57	210.776	1803.94	1216.72	158.996	2109.36	1300.03	403.096	1969.73	1450.8	466.366	2032.52	1226.27	473.21	2067.95	1132.57	528.123	2070.3	971.57	510.925	2052.75	879.021	545.378	2112.32	903.041	557.576	2096.71	821.284
7645	0	291.578	1829.45	1628.38	195.585	1816.52	1634.73	300.152	1979.37	1677.53	155.623	1956.14	1680.74	220.415	2040.31	1500.21	227.905	2088.06	1238.32	215.069	1888.14	1421.8	211.524	1792.13	1217.72	160.458	2098.01	1301.17	404.15	1957.3	1451.71	467.665	2017.2	1226.42	475.066	2051.47	1131.98	529.48	2049.26	970.553	512.169	2029.41	878.688	546.945	2089.25	900.935	559.267	2070.67	820.029
7646	0	292.391	1817.18	1629.11	196.364	1804.47	1635.56	301.352	1966.89	1679.03	156.429	1944.08	1682.34	221.76	2029.13	1501.72	228.933	2076.28	1239.64	215.812	1876.43	1423.13	211.891	1780.45	1218.87	161.866	2086.48	1302.4	405.202	1944.82	1452.75	468.975	2001.7	1226.67	477.073	2034.56	1131.76	530.665	2027.62	969.618	512.451	2005.29	878.445	548.478	2065.69	898.992	560.901	2043.94	819.276
7647	0	292.793	1804.88	1630.28	196.577	1792.31	1636.23	301.502	1954.21	1680.58	156.97	1931.79	1683.33	223.063	2016.85	1502.74	230.118	2064.22	1241.08	216.415	1864.81	1424.67	212.305	1768.85	1220.13	163.674	2075.1	1303.56	406.148	1932.2	1454.03	470.396	1986.31	1227.08	479.102	2017.84	1131.51	531.696	2005.62	969.004	513.059	1981.07	878.764	549.588	2041.33	897.133	561.46	2016	818.392
7648	0	292.783	1792.53	1631.25	196.649	1780.28	1637.21	302.194	1941.76	1682.45	157.696	1919.61	1684.97	224.217	2005.04	1504.27	231.778	2052.38	1242.61	217.038	1853.07	1426.15	212.359	1756.91	1221.35	165.596	2063.75	1304.95	407.001	1919.71	1455.23	471.673	1970.88	1227.83	481.096	2000.63	1131.61	532.793	1983	968.796	512.676	1956.05	878.902	550.5	2016.29	895.6	562.838	1987.85	818.762
7649	0	292.989	1780.29	1632.74	196.792	1768.36	1638.24	302.873	1929.25	1684.72	157.636	1907.62	1686.71	225.244	1993.39	1506.12	233.76	2040.95	1244.45	217.498	1841.45	1427.83	212.463	1745.23	1222.82	167.521	2052.27	1306.78	407.833	1907.25	1456.83	473.007	1955.26	1229.03	483.083	1983.26	1131.91	533.38	1959.78	968.981	513.536	1930.93	880.773	551.365	1990.61	894.583	563.705	1959.12	819.675
7650	0	293.243	1768.19	1634.6	196.755	1756.3	1639.43	303.071	1916.81	1687.03	157.833	1895.38	1688.09	226.257	1981.71	1507.79	235.368	2029.59	1246.15	218.038	1829.93	1429.57	212.381	1733.38	1224.39	169.426	2041.03	1308.72	408.512	1894.73	1458.81	474.436	1939.62	1230.62	485.22	1965.75	1132.61	534.337	1936.44	970.001	512.712	1905.29	882.466	552.198	1964.74	894.262	563.778	1929.61	821.078
7651	0	292.599	1755.69	1636.05	196.419	1744.4	1640.68	303.109	1904.47	1689.19	157.503	1883.38	1690.1	227.146	1970.02	1509.76	237.831	2018.12	1248.13	218.301	1818.15	1431.22	212.46	1721.58	1226.33	171.341	2029.75	1310.54	409.048	1882.15	1460.56	475.724	1924.03	1232.02	487.228	1948.34	1133.34	534.771	1912.95	970.994	511.633	1879.63	884.55	552.846	1938.28	894.274	563.625	1899.91	823.127
7652	0	292.093	1743.59	1637.5	196.287	1732.55	1641.85	302.917	1892.14	1691.34	157.611	1871.52	1691.37	228.008	1957.97	1511.68	238.972	2006.88	1250.18	218.973	1806.74	1433.05	212.528	1709.85	1228.09	173.114	2018.59	1312.29	409.788	1869.81	1462.7	476.856	1908.35	1233.52	489.19	1930.47	1134.39	534.483	1889	972.21	510.626	1853.73	887.464	552.386	1911.47	894.668	562.879	1869.84	825.638
7653	0	292.208	1731.57	1639.4	196.248	1720.75	1643.14	302.809	1880.09	1693.41	157.459	1859.67	1692.44	228.849	1946.29	1513.48	239.987	1995.37	1252.34	219.324	1795.15	1434.72	212.855	1698.26	1229.92	174.659	2007.32	1314.13	410.079	1857.38	1464.82	478.373	1892.92	1235.45	491.008	1912.76	1135.63	534.737	1865.44	974.461	509.447	1827.48	891.292	552.008	1884.04	896.061	562.047	1839.79	829.074
7654	0	291.803	1719.54	1640.9	195.843	1709	1644.36	302.463	1867.91	1695.4	157.1	1847.8	1693.83	229.773	1934.62	1515.14	241.195	1983.86	1254.32	219.762	1783.55	1436.32	213.105	1686.7	1231.9	176.317	1996.04	1315.65	409.976	1844.33	1466.98	479.658	1877.2	1237.3	492.924	1894.99	1137.02	534.426	1841.36	976.93	507.81	1801.14	895.466	552.177	1856.94	897.958	560.452	1809.27	832.879
7655	0	290.839	1706.89	1642.26	195.718	1697.22	1645.56	301.858	1855.81	1697.12	157.344	1836.26	1694.87	230.568	1922.76	1516.58	242.648	1972.44	1255.92	220.272	1771.99	1437.72	213.915	1676.08	1233.27	177.728	1984.79	1317.05	410.201	1831.85	1468.88	480.855	1861.6	1239.15	494.722	1877.18	1138.6	534.184	1817.26	979.717	506.347	1774.67	900.148	551.682	1829.57	900.06	559.196	1779.28	837.479
7656	0	290.71	1695.01	1643.71	195.181	1685.19	1646.28	301.706	1843.71	1698.77	156.869	1824.44	1696.01	231.274	1910.98	1517.86	244.398	1960.86	1257.36	220.842	1760.46	1438.84	214.905	1665.11	1234.9	179.185	1973.33	1318.36	410.633	1819.68	1471.01	482.095	1845.88	1241.04	496.439	1859.48	1140.1	534.08	1793.15	982.893	505.051	1748.36	905.105	551.537	1802.3	902.945	557.774	1749.21	842.384
7657	0	290.289	1683.09	1644.95	194.927	1673.54	1647.24	301.967	1831.83	1700.37	157.089	1812.74	1696.97	231.966	1899.37	1519.24	245.205	1949.27	1258.65	221.327	1748.91	1440.01	215.255	1653.85	1236.08	180.399	1961.91	1319.64	411.158	1807.57	1473.05	483.309	1830.06	1242.99	498.109	1841.57	1141.8	533.757	1768.74	986.357	503.549	1721.93	910.533	552.143	1775.54	906.77	556.148	1719.15	847.858
7658	0	290.583	1671.19	1646.15	194.74	1661.81	1648	301.48	1819.59	1701.64	156.856	1801.07	1698.09	232.521	1887.41	1520.58	245.563	1937.64	1259.85	221.768	1737.25	1440.99	215.477	1642.53	1237.37	181.679	1950.15	1320.78	411.219	1795.16	1474.64	484.521	1814.31	1244.77	499.775	1823.92	1143.3	533.68	1744.79	990.136	502.619	1695.88	916.398	550.466	1747.72	909.753	554.503	1689.58	853.779
7659	0	290.572	1659.43	1646.95	194.543	1650.16	1648.43	302.302	1807.89	1702.83	157.081	1789.4	1698.37	233.229	1875.81	1521.1	246.793	1926.03	1260.54	222.438	1725.65	1441.7	216.212	1631.37	1238.13	182.805	1938.55	1321.4	411.793	1783.17	1476.09	485.683	1798.56	1246.23	501.546	1805.97	1144.59	533.706	1721.07	993.963	501.236	1669.41	922.379	550.239	1720.28	913.519	552.506	1660.16	859.557
7660	0	290.569	1647.36	1647.51	194.814	1638.56	1648.95	302.25	1795.59	1703.32	157.277	1777.59	1698.63	234.02	1864.14	1521.95	247.707	1914.61	1261.14	222.992	1714.03	1442	216.858	1620.23	1238.65	184.097	1926.84	1321.95	412.236	1771.21	1477.09	486.983	1782.94	1247.56	503.044	1788.08	1145.68	533.754	1697.32	997.69	500.144	1643.72	928.216	550.802	1694.32	917.874	550.593	1631.12	865.562
7661	0	290.663	1635.33	1647.74	194.674	1626.68	1648.95	302.689	1783.72	1703.72	157.379	1766.04	1699	234.453	1852.11	1521.97	248.26	1903.12	1261.38	223.204	1702.28	1442.11	217.466	1609.13	1238.73	185.088	1915.17	1322.17	412.763	1759.32	1477.78	488.212	1767.36	1248.55	504.83	1770.12	1146.51	533.607	1673.52	1001.45	498.456	1617.67	934.189	548.919	1666.77	921.24	548.639	1602.38	871.761
7662	0	290.519	1623.33	1647.43	194.506	1614.85	1648.68	302.234	1771.47	1703.29	157.617	1754.33	1698.84	234.968	1840.47	1521.81	248.745	1891.56	1261.48	223.721	1690.61	1441.9	218.211	1598.05	1238.64	186.049	1903.38	1321.94	412.759	1747.38	1477.77	489.321	1752.01	1249.04	506.425	1751.94	1146.93	533.066	1650.03	1004.9	496.919	1592.15	940.076	547.93	1639.99	924.928	546.349	1574.1	877.737
7663	0	290.628	1611.47	1646.97	194.734	1603.03	1648.32	302.524	1759.39	1702.8	158.402	1742.59	1698.31	235.41	1828.5	1521.37	249.436	1879.98	1261.23	224.321	1678.84	1441.48	218.962	1587.08	1237.91	186.798	1891.7	1321.49	412.974	1735.65	1477.49	490.424	1736.48	1249.23	507.955	1733.84	1147.08	532.684	1626.55	1008.41	495.746	1567.03	946.09	547.035	1613.8	928.66	544.317	1546.13	883.906
7664	0	290.851	1599.44	1646.2	194.896	1591.08	1647.56	302.813	1747.24	1702.01	158.593	1730.69	1697.46	235.968	1816.71	1520.6	249.959	1868.48	1260.72	224.666	1667	1440.69	219.847	1576.08	1236.89	187.451	1880.14	1320.68	413.445	1724.06	1476.95	491.514	1721	1249.24	509.497	1715.39	1147.02	532.326	1603.06	1011.68	494.26	1542.08	951.937	546.198	1587.53	932.504	542.131	1518.33	890.024
7665	0	291.284	1587.39	1645.33	195.047	1579.1	1646.51	303.196	1735.05	1701.25	159.101	1718.95	1696.68	236.359	1805.03	1519.83	250.112	1857.14	1259.97	225.046	1655.13	1439.68	220.635	1564.84	1235.63	187.932	1868.28	1319.91	413.743	1712.12	1476.18	492.52	1705.5	1249.11	510.95	1696.89	1147.18	531.852	1579.84	1015.19	492.643	1517.45	957.681	545.348	1561.54	936.684	540.164	1491.13	896.588
7666	0	291.636	1575.17	1644.17	195.477	1567.03	1645.31	303.659	1722.88	1700.3	159.354	1706.55	1695.7	236.589	1792.99	1518.92	249.178	1845.71	1259.02	225.702	1643.33	1438.53	221.477	1553.29	1234.18	188.3	1856.57	1319.12	414.049	1700.41	1475.18	493.552	1689.95	1249	512.445	1678.44	1147.31	531.379	1556.79	1018.77	490.994	1493.21	963.226	544.643	1535.68	941.169	538.166	1464.11	903.237
7667	0	291.938	1563	1642.58	195.712	1554.86	1643.63	304.077	1710.48	1699.23	159.67	1694.59	1694.75	236.773	1780.99	1517.95	248.916	1834.12	1257.96	226.367	1631.43	1437.19	222.34	1541.25	1232.72	188.336	1844.7	1318.27	414.425	1688.59	1474.03	494.33	1674.16	1248.55	513.829	1659.84	1147.43	530.95	1533.94	1022.55	489.634	1469.47	968.799	544.02	1510.21	945.727	536.021	1437.57	909.858
7668	0	292.337	1550.84	1640.88	196.116	1542.65	1641.88	304.576	1698.2	1697.94	160.135	1682.21	1693.33	236.907	1769.06	1516.76	248.486	1822.71	1256.87	226.879	1619.55	1435.66	223.266	1528.99	1230.9	188.079	1832.68	1317.19	414.587	1676.63	1472.65	495.135	1658.64	1248.25	514.879	1641.08	1147.6	530.287	1511.38	1026.17	488.255	1446.14	974.342	543.334	1485.11	950.381	534.484	1411.79	916.747
7669	0	292.895	1538.86	1639.01	196.725	1530.56	1640.17	304.727	1685.91	1696.18	160.446	1669.74	1691.78	236.841	1756.87	1515.2	247.629	1811.07	1255.45	227.076	1607.57	1433.65	223.924	1516.61	1229.14	187.838	1821.15	1315.91	414.929	1664.77	1471.09	495.79	1643.16	1247.53	515.866	1622.75	1147.57	529.822	1489.29	1029.78	486.788	1423.26	979.556	542.797	1460.65	955.006	532.766	1386.52	923.384
7670	0	293.284	1526.71	1636.77	197.038	1518.2	1638.02	305.119	1673.45	1694.3	161.007	1657.49	1689.95	237.184	1745.08	1513.56	246.511	1799.39	1253.65	227.542	1595.59	1431.69	224.602	1504.39	1227.05	187.252	1809.23	1314.42	415.087	1652.93	1469.26	496.227	1627.59	1246.71	516.855	1604.45	1147.47	529.281	1467.35	1033.24	485.495	1400.85	984.673	542.329	1436.67	959.577	531.048	1361.58	929.862
7671	0	293.818	1514.56	1634.49	197.677	1505.96	1635.89	305.409	1661.2	1692.17	161.404	1645.16	1688.06	237.048	1732.94	1511.58	245.778	1787.44	1251.83	227.633	1583.36	1429.56	225.391	1492.5	1224.61	186.736	1797.54	1312.93	414.775	1640.89	1467.21	496.491	1612.23	1245.86	517.476	1586.34	1147.42	529.017	1446.19	1036.96	484.25	1378.99	989.603	541.8	1413.11	964.082	529.888	1337.74	936.414
7672	0	293.819	1502.38	1632.33	198.222	1493.88	1633.88	305.909	1649.19	1689.93	161.589	1632.85	1686.22	236.611	1720.54	1509.58	244.24	1775.28	1250	227.657	1571.07	1427.28	226.009	1480.45	1222.25	185.962	1785.52	1311.08	414.548	1628.88	1465.22	496.936	1596.85	1244.96	518.028	1568.3	1147.29	528.324	1425.3	1040.26	483.222	1357.63	994.57	541.543	1390.23	968.637	528.65	1314.33	942.874
7673	0	294.218	1490.07	1630.06	198.609	1481.76	1631.8	306.194	1637.04	1687.53	161.99	1620.61	1683.96	236.045	1707.81	1507.44	243.661	1762.96	1247.75	227.793	1558.85	1425.12	226.267	1468.13	1219.82	185.137	1773.35	1308.88	414.342	1616.89	1462.96	498.106	1581.85	1244.44	518.418	1550.76	1146.97	527.974	1404.82	1043.65	481.642	1336.38	998.88	541.573	1367.79	973.108	527.893	1291.56	949.192
7674	0	294.841	1478.2	1627.71	198.886	1469.5	1629.83	306.429	1625.01	1685.03	162.392	1608.35	1681.85	235.76	1695.6	1504.94	242.986	1750.54	1245.47	227.498	1546.38	1422.7	226.644	1455.81	1217.48	184.37	1760.87	1306.79	413.96	1604.7	1460.75	496.649	1566.38	1242.63	518.743	1533.43	1146.74	527.542	1384.96	1046.7	481.459	1316.48	1003.17	541.24	1346.29	977.116	527.077	1269.53	955.086
7675	0	294.963	1465.93	1625.61	199.126	1457.22	1627.85	306.4	1612.76	1682.7	162.426	1596.13	1679.98	235.454	1683.56	1503.07	242.139	1737.99	1243.32	227.455	1533.98	1420.71	226.832	1443.36	1215.28	183.599	1748.4	1304.68	413.377	1592.82	1458.59	496.649	1551.23	1241.86	518.98	1516.24	1146.7	527.439	1365.73	1049.83	480.954	1296.72	1007.3	541.324	1325.39	981.475	526.655	1248.19	960.927
7676	0	295.066	1453.8	1623.72	199.099	1444.9	1626.07	306.508	1600.59	1680.7	162.322	1583.85	1677.92	235.042	1671.27	1500.93	241.395	1725.44	1241.11	227.036	1521.4	1418.65	226.566	1430.65	1213.06	182.839	1735.76	1302.55	412.829	1580.52	1456.74	496.576	1536.1	1241.17	519.15	1499.36	1146.71	527.312	1346.92	1052.92	480.603	1277.51	1011.22	541.418	1305.27	985.492	526.753	1227.63	966.725
7677	0	294.427	1441.38	1621.9	198.823	1432.53	1624.3	306.371	1588.45	1678.63	161.892	1571.62	1676.29	234.512	1658.62	1499.01	240.662	1712.5	1239.04	226.574	1508.75	1416.57	226.399	1418.18	1211.06	182.271	1722.92	1300.63	412.361	1568	1455.12	496.233	1521.26	1240.09	519.338	1482.85	1146.94	526.976	1328.68	1055.4	480.105	1258.69	1014.65	541.47	1285.84	989.028	526.714	1207.96	971.991
7678	0	294.68	1429.29	1620.35	198.62	1420.24	1622.85	305.903	1576.32	1676.64	161.603	1559.4	1674.5	234.008	1646.27	1496.94	240.309	1699.79	1236.87	226.147	1495.96	1414.76	226.028	1405.56	1209.02	181.877	1710.3	1298.51	411.941	1555.52	1453.49	495.87	1506.37	1239.27	519.34	1466.75	1146.91	527.062	1311.12	1057.88	480.381	1240.74	1017.92	541.754	1267.19	992.314	527.12	1189.05	976.797
7679	0	293.864	1417	1618.9	198.035	1407.97	1621.54	305.285	1564.2	1674.78	160.887	1547.16	1672.6	233.315	1633.48	1494.81	239.91	1686.76	1234.7	225.756	1483.28	1412.99	225.566	1392.76	1207.22	181.365	1697.34	1296.33	411.223	1542.6	1452.02	495.491	1491.99	1238.64	518.897	1451	1146.51	527.394	1294.33	1060.03	480.56	1223.21	1020.78	542.02	1249.4	995.166	527.472	1170.82	981.139
7680	0	293.028	1404.72	1617.84	197.088	1395.57	1620.41	304.225	1552.1	1673.03	160.038	1535.28	1670.94	232.953	1621.18	1493.19	239.452	1673.46	1232.82	224.825	1470.28	1411.45	224.869	1379.63	1205.76	180.816	1683.91	1294.35	410.516	1529.7	1450.79	495.191	1477.36	1238.16	519.708	1435.69	1146.89	527.198	1277.88	1061.59	480.75	1206.33	1023.35	542.247	1232.36	997.435	528.058	1153.44	985.019
7681	0	291.713	1392.28	1616.96	195.959	1383.21	1619.42	303.211	1539.98	1671.52	158.956	1523.01	1669.12	231.872	1607.79	1491.02	239.461	1660.54	1231	224.098	1457.38	1409.84	223.957	1366.13	1204.52	180.693	1671.1	1292.41	409.561	1516.45	1449.56	494.598	1463.19	1237.54	517.618	1420.85	1145.83	527.525	1262.23	1062.95	481.297	1190.16	1025.49	542.599	1216.08	999.254	528.97	1136.85	988.305
7682	0	290.774	1379.89	1616.25	194.787	1370.94	1618.49	301.797	1527.72	1670.08	157.786	1510.95	1667.51	231.198	1595.04	1489.4	239.464	1647.27	1229.3	223.225	1444.31	1408.68	223.015	1352.7	1203.39	180.409	1657.89	1290.39	408.696	1502.99	1448.58	494.251	1448.89	1237.12	517.367	1406.26	1145.69	527.898	1247.14	1064.05	482.033	1174.57	1027.06	542.971	1200.52	1000.62	530.15	1121.02	990.95
7683	0	289.196	1367.51	1615.71	193.141	1358.62	1617.9	300.398	1515.6	1669.03	156.427	1498.81	1666.06	230.524	1582.42	1488.2	239.335	1633.46	1227.73	222.08	1431.04	1407.79	221.709	1339.04	1202.48	180.166	1644.3	1288.63	407.616	1489.43	1447.98	493.89	1434.8	1237.04	516.903	1391.95	1145.63	528.291	1232.59	1064.72	482.668	1159.54	1028.2	543.632	1185.74	1001.67	531.445	1106.11	993.022
7684	0	287.322	1355.01	1615.3	191.414	1346.3	1617.3	298.674	1503.21	1668.15	154.628	1486.74	1665.03	229.798	1570.02	1486.95	239.322	1619.47	1226.24	220.858	1417.87	1406.9	220.522	1325.39	1201.93	179.998	1630.45	1287.05	406.331	1475.66	1447.52	493.133	1420.75	1236.79	516.463	1378.13	1145.42	528.435	1218.39	1064.94	483.39	1145.21	1028.53	544.221	1171.62	1001.99	532.998	1091.97	994.487
7685	0	285.646	1342.59	1615.34	189.607	1334.01	1617.03	297.021	1491.07	1667.68	152.648	1474.6	1664.23	228.735	1557.01	1485.73	239.361	1605.51	1224.94	219.677	1404.62	1406.36	219.157	1311.46	1201.54	179.832	1616.57	1285.44	405.095	1461.96	1447.44	492.612	1406.84	1236.84	516.065	1364.2	1145.57	528.872	1204.84	1064.91	484.188	1131.4	1028.34	544.832	1158.03	1002	534.499	1078.5	995.191
7686	0	283.433	1330.05	1615.71	187.663	1321.67	1617.08	295.086	1478.78	1667.58	150.702	1462.57	1663.72	227.224	1543.66	1484.74	239.203	1591.44	1224.04	218.259	1391.28	1405.99	217.792	1297.3	1201.47	179.385	1602.57	1283.99	403.893	1448.32	1447.65	492.032	1392.81	1237.23	515.956	1350.75	1145.85	529.187	1191.67	1064.61	484.996	1118.27	1027.52	545.312	1145.39	1001.34	535.781	1065.68	995.002
7687	0	281.649	1317.64	1616.42	185.399	1309.1	1617.54	292.875	1466.55	1667.45	148.665	1450.33	1663.31	225.945	1530.82	1484.19	238.773	1576.8	1223.14	216.7	1377.81	1405.91	216.378	1282.9	1201.9	178.793	1588.35	1282.77	402.54	1434.51	1448.09	491.49	1379.09	1237.71	515.318	1337.36	1146.11	529.682	1179.11	1063.89	485.6	1105.72	1026.09	546.165	1133.25	1000.6	537.189	1053.64	994.217
7688	0	279.464	1305.2	1617.36	183.409	1296.75	1618.29	290.632	1454.42	1667.51	146.335	1438.18	1663.05	224.328	1517.23	1483.46	238.388	1562.52	1222.49	215.356	1364.33	1406.26	215.203	1268.37	1202.46	178.136	1573.97	1281.72	400.99	1420.72	1448.62	490.782	1365.54	1238.3	514.939	1324.42	1146.6	529.829	1167.02	1062.76	486.319	1093.97	1024.16	546.796	1121.86	999.183	538.582	1042.51	992.507
7689	0	277.415	1292.85	1618.64	181.324	1284.43	1619.31	288.11	1442.34	1667.72	143.969	1426.06	1662.89	222.768	1503.87	1483.34	237.607	1548.22	1222.05	214.053	1350.81	1406.64	214.214	1253.76	1203.17	177.414	1559.48	1280.88	399.542	1407.02	1449.52	489.79	1351.92	1239.28	514.394	1311.68	1147.17	530.215	1155.44	1061.61	487.02	1082.82	1021.82	547.545	1111.12	997.547	539.696	1031.89	990.182
7690	0	274.715	1279.93	1620.33	178.842	1271.69	1620.72	285.505	1430.16	1668.34	141.544	1413.8	1663	221.267	1490.45	1483.39	236.957	1533.99	1221.9	212.412	1337.1	1407.2	213.313	1239.13	1204.08	176.612	1545.08	1280.33	398.019	1393.14	1450.8	489.017	1338.53	1240.39	513.707	1299.28	1148.08	531.028	1144.54	1060.6	487.534	1072.29	1019.07	548.181	1101.15	995.571	540.542	1022.02	986.869
7691	0	272.384	1267.23	1622.38	176.347	1259.02	1622.41	283.001	1417.85	1669.29	138.931	1401.42	1663.21	219.686	1477.05	1483.88	236.5	1520.05	1222.4	210.93	1323.51	1408.12	212.764	1224.69	1205.33	175.783	1530.77	1280.09	396.435	1379.16	1452.28	488.08	1325.31	1241.51	513.382	1287.39	1149.16	531.073	1134.08	1058.98	487.92	1062.45	1016.05	548.9	1092.06	993.308	541.352	1013.04	983.079
7692	0	270.041	1254.56	1624.6	173.844	1246.33	1624.19	280.278	1405.44	1670.26	136.305	1389.08	1663.64	218.479	1463.55	1484.62	236.12	1506.34	1223.22	209.85	1310.08	1408.79	212.267	1210.26	1206.35	175.398	1517.01	1280.61	395.15	1365.27	1454.13	487.222	1312.41	1242.69	512.937	1275.62	1150.1	531.251	1124.25	1057.23	488.78	1053.76	1012.61	549.624	1083.43	990.841	542.11	1004.74	978.718
7693	0	267.615	1241.53	1627.02	171.407	1233.76	1625.79	277.533	1392.71	1671.59	133.771	1376.77	1663.94	217.296	1450.06	1485.96	235.967	1492.86	1224.71	209.056	1296.74	1409.78	212.013	1196.04	1207.57	175.121	1503.71	1281.58	394.211	1351.39	1456.41	486.15	1299.66	1244.26	511.875	1264.35	1151.06	531.256	1115.05	1055.27	489.227	1045.57	1008.77	550.219	1075.66	988.374	542.624	997.403	973.89
7694	0	264.652	1228.52	1629.27	168.676	1221.08	1627.12	275.132	1379.93	1673.25	131.369	1364.34	1664.17	216.199	1436.61	1487.43	236.056	1479.82	1226.41	208.299	1283.47	1410.87	211.571	1182.01	1208.99	174.868	1490.23	1282.88	393.157	1337.44	1458.76	485.485	1287.02	1246.12	511.196	1253.08	1152.58	531.115	1106.31	1053.42	489.392	1038.06	1004.6	550.683	1068.45	985.715	543.136	991.052	968.488
7695	0	261.927	1215.27	1631.13	166.088	1208.31	1628.2	272.818	1366.98	1674.84	128.945	1351.81	1664.34	215.074	1423.31	1488.78	236.123	1466.67	1227.94	207.922	1270.57	1411.89	211.394	1168.59	1210.23	174.718	1477.07	1283.94	392.153	1323.91	1460.77	484.589	1274.66	1247.55	510.238	1242.32	1153.7	530.854	1098.03	1051.14	489.572	1031.3	1000.21	551.15	1061.88	982.82	543.501	985.156	962.804
7696	0	259.772	1202.16	1632.78	163.854	1195.57	1628.94	270.801	1353.82	1676.63	126.924	1339.28	1664.95	214.422	1410.65	1490.32	236.252	1454.05	1229.52	207.655	1257.8	1412.9	211.149	1155.52	1211.36	174.716	1464.28	1285.09	391.289	1310.74	1462.73	483.52	1262.54	1248.89	509.577	1231.79	1154.64	530.842	1090.42	1048.76	489.74	1025.16	995.413	551.356	1056.09	979.316	543.543	980.058	956.561
7697	0	257.763	1188.99	1634.32	162.098	1183.06	1629.53	268.892	1340.51	1678.44	125.237	1326.45	1665.53	213.458	1398.02	1491.62	236.106	1441.54	1231.31	207.301	1245.15	1413.97	210.932	1143.01	1212.5	174.637	1451.52	1286.55	390.729	1298.28	1464.72	482.989	1250.59	1250.74	508.602	1221.46	1155.68	530.342	1083.22	1046.16	489.328	1019.45	990.68	551.592	1050.81	976.084	543.629	975.634	950.114
7698	0	256.428	1175.95	1635.56	160.38	1170.16	1630.1	267.294	1327.15	1680.15	123.792	1313.59	1666.33	212.536	1385.63	1493.08	235.591	1429.45	1232.8	207.18	1232.94	1415.22	210.762	1130.86	1213.69	174.147	1439.19	1287.81	389.76	1286.17	1466.2	482.638	1238.79	1252.54	507.674	1211.6	1156.8	529.988	1076.48	1043.74	489.172	1014.41	985.934	551.772	1045.84	972.895	543.299	971.889	943.664
7699	0	255.218	1162.89	1636.38	159.262	1157.31	1630.74	266.321	1314.07	1681.96	122.514	1300.61	1667.47	211.572	1373.11	1494.31	234.943	1417.67	1234.23	206.91	1220.73	1416.53	210.643	1118.74	1215.02	173.249	1427	1289.06	389.213	1274.64	1467.65	481.946	1227.64	1253.86	506.91	1202.28	1157.48	529.436	1070.21	1041.02	488.794	1009.84	981.065	551.921	1041.5	969.73	542.855	968.792	936.829
7700	0	254.686	1150.23	1637.15	158.638	1144.58	1631.15	265.462	1301.38	1683.42	121.699	1287.39	1668.73	210.973	1361.39	1495.92	234.185	1405.8	1235.43	206.85	1208.73	1417.84	210.751	1106.77	1216.55	172.074	1414.92	1290.57	389.043	1263.37	1469.08	481.475	1216.83	1255.07	505.745	1193.34	1157.75	528.987	1064.65	1038.16	488.585	1006.41	975.676	551.429	1037.69	965.845	542.27	966.329	930.15
7701	0	254.13	1137.43	1637.94	158.191	1131.76	1631.95	264.579	1288.28	1685.21	121.011	1274.29	1670.26	209.985	1349.2	1497.42	233.004	1393.98	1236.8	206.411	1196.7	1419.49	210.927	1094.79	1218.17	170.89	1403.39	1291.84	388.61	1252.32	1470.22	480.881	1206.77	1255.82	504.803	1185.02	1157.93	528.383	1059.42	1035.49	488.099	1003.06	970.998	551.675	1034.44	962.928	541.477	964.434	923.373
7702	0	253.855	1124.99	1638.91	157.808	1118.84	1633.03	264.216	1275.48	1687.15	120.85	1261.06	1672.13	209.223	1337.37	1499.05	231.769	1382.17	1238.36	206.094	1184.87	1421.22	211.201	1082.88	1219.94	169.354	1391.51	1293.59	388.266	1241.29	1471.52	480.04	1197.14	1256.3	503.642	1177.23	1158.09	527.765	1054.83	1032.65	487.475	1000.13	966.477	550.74	1031.43	958.928	540.586	963.16	916.949
7703	0	253.342	1112.35	1639.98	157.705	1106.05	1634.27	263.617	1262.46	1688.96	120.326	1248.11	1674.28	208.767	1325.39	1501.13	230.372	1370.65	1240.19	205.618	1172.97	1423.03	211.409	1070.97	1221.43	168.246	1380.02	1295.77	388.282	1230.26	1472.78	479.361	1188.16	1256.49	502.283	1169.98	1157.53	526.77	1050.7	1029.35	486.925	997.799	962.023	550.193	1028.98	955.401	539.664	962.432	910.72
7704	0	253.757	1099.76	1641.41	157.834	1093.48	1635.79	263.579	1249.51	1691.04	119.899	1235.16	1676.57	208.003	1313.17	1503.43	228.777	1358.9	1242.32	205.317	1161.17	1425.07	211.858	1059.45	1223.17	166.978	1368.65	1298.19	388.253	1218.97	1474.15	478.909	1180.05	1256.69	501.117	1163.42	1157.13	526.041	1047.18	1026.62	486.166	995.863	957.714	550.099	1027.12	952.55	538.706	962.278	904.764
7705	0	253.765	1087.68	1642.94	157.666	1080.87	1637.46	263.511	1236.89	1693.07	119.836	1222.36	1678.69	207.368	1301.25	1505.69	227.123	1347.31	1244.56	204.881	1149.41	1427.18	212.362	1048.16	1224.97	165.314	1356.8	1300.49	388.055	1207.8	1475.39	478.2	1172.43	1256.72	499.676	1157.2	1156.68	524.951	1044.15	1023.7	485.185	994.406	953.584	548.661	1026.01	948.827	537.509	962.613	899.173
7706	0	253.13	1075.26	1644.32	157.549	1068.48	1639.24	262.918	1224.37	1694.65	119.641	1209.9	1680.86	206.686	1289.04	1507.74	225.673	1335.8	1246.69	204.285	1137.56	1429.01	212.611	1036.82	1226.72	164.165	1345.46	1302.99	387.962	1196.38	1476.82	475.684	1165.53	1255.14	498.534	1151.6	1156.32	523.804	1041.55	1020.92	484.006	993.396	949.691	547.459	1025.36	945.522	536.508	963.433	894.025
7707	0	253.364	1063.03	1646.06	157.461	1056.25	1641.17	262.954	1212.18	1696.42	119.468	1197.55	1682.92	205.963	1276.8	1509.73	224.159	1324.06	1248.73	203.977	1125.67	1430.77	212.772	1025.37	1228.31	163.084	1333.93	1305.34	387.749	1184.84	1477.9	474.774	1158.78	1255.04	496.851	1146.23	1155.84	522.995	1039.76	1018.25	483.025	992.856	945.991	546.699	1024.78	942.7	535.409	964.528	889.258
7708	0	253.002	1050.91	1647.76	157.124	1044.1	1642.99	262.957	1200.12	1698.07	119.088	1185.47	1684.85	205.589	1264.89	1511.77	222.873	1312.4	1250.7	203.283	1113.4	1432.36	212.675	1013.8	1229.98	161.383	1321.71	1307.42	387.426	1173.29	1479.03	474.215	1152.09	1255.29	495.664	1141.26	1155.69	521.466	1038.07	1015.53	481.482	992.552	942.355	544.363	1025.35	939.118	533.908	965.851	884.769
7709	0	252.484	1038.8	1649.31	156.542	1031.99	1644.76	262.635	1188	1699.43	118.756	1173.52	1686.22	204.939	1252.74	1513.2	221.961	1300.69	1252.29	202.904	1101.43	1433.8	212.318	1002.16	1231.62	160.155	1309.79	1309.24	387.048	1161.65	1479.79	472.892	1145.71	1254.74	493.31	1136.52	1154.83	519.96	1036.71	1012.91	479.617	991.984	938.908	543.004	1025.98	936.133	532.253	967.568	880.339
7710	0	251.792	1026.79	1650.98	156.028	1019.97	1646.43	262.17	1176.05	1700.42	118.405	1161.72	1687.69	204.465	1240.42	1514.49	221.181	1288.93	1253.51	202.456	1089.29	1434.97	211.911	990.441	1233.04	159.146	1297.83	1310.66	386.615	1149.99	1480.39	471.572	1139.23	1254.21	492.598	1132.09	1154.47	518.359	1035.62	1009.96	478.039	992.679	934.987	540.932	1026.93	932.636	530.613	969.337	876.069
7711	0	251.557	1014.87	1652.43	155.457	1008.03	1648.03	261.801	1164.24	1701.54	118.023	1150.01	1688.82	204.15	1228.46	1516	220.563	1276.82	1254.89	202.208	1077.36	1436.09	211.409	978.742	1234.27	157.934	1285.66	1312.3	386.642	1138.4	1481.1	470.099	1132.7	1254.07	491.29	1128.24	1154.12	516.69	1034.98	1007.24	476.109	993.146	931.527	538.967	1027.84	929.884	528.547	971.461	871.777
7712	0	250.852	1002.76	1653.85	154.746	996.121	1649.37	261.313	1152.4	1702.38	117.54	1138.16	1689.54	203.677	1216.22	1517.02	219.794	1264.76	1256.07	201.6	1065.19	1436.81	210.636	967.098	1235.25	156.999	1273.59	1313.66	386.373	1126.45	1481.6	469.306	1126.02	1253.92	489.808	1123.96	1153.81	514.632	1034.21	1004.51	474.114	994.063	928.127	536.499	1029.19	926.729	526.523	973.795	867.906
7713	0	249.726	990.638	1654.89	154.041	984.234	1650.44	260.733	1140.67	1702.75	116.903	1126.47	1690.22	203.191	1203.93	1517.71	219.498	1252.82	1256.9	200.783	1052.93	1437.32	209.725	955.44	1235.79	156.174	1261.49	1314.62	386.056	1114.45	1481.68	468.281	1119.37	1253.4	488.329	1119.73	1153.25	512.626	1033.75	1001.73	471.822	994.993	924.792	533.895	1030.72	923.513	524.138	976.374	863.948
7714	0	249.55	978.862	1655.73	153.473	972.369	1651.39	260.198	1128.8	1703.03	115.981	1114.77	1690.62	202.822	1191.61	1518.23	219.109	1240.73	1257.35	200.579	1040.99	1437.62	208.991	943.932	1236.02	155.648	1249.54	1315.44	385.944	1102.52	1481.51	467.198	1112.65	1252.84	486.646	1115.52	1152.55	510.744	1033.51	999.036	469.844	996.512	921.379	531.157	1032.62	920.213	521.76	979.14	860.073
7715	0	249.092	966.868	1656.35	152.979	960.396	1651.97	259.61	1116.92	1703.14	115.637	1102.88	1690.43	202.474	1179.42	1518.48	218.85	1228.74	1257.79	199.96	1028.74	1437.59	208.075	932.343	1235.78	155.088	1237.47	1315.99	385.724	1090.29	1481.33	466.077	1105.58	1252.39	484.955	1110.74	1152.04	508.454	1033.26	996.167	467.326	997.812	918.102	528.551	1034.37	917.37	519.208	982.087	856.306
7716	0	247.83	954.609	1656.5	152.178	948.143	1652.2	258.956	1105.01	1702.9	115.031	1090.92	1690.27	201.854	1166.99	1518.27	218.61	1216.58	1257.8	199.448	1016.67	1437.29	207.012	920.802	1235.19	154.473	1225.63	1316.15	385.422	1077.99	1480.94	464.886	1098.37	1251.96	483.205	1106.19	1151.54	506.28	1033.06	993.696	464.802	999.387	914.932	526.238	1036.39	915.055	516.17	985.14	852.647
7717	0	247.809	942.562	1656.53	151.524	935.908	1652.12	258.301	1093.01	1702.32	114.514	1078.92	1689.92	201.36	1154.55	1517.95	218.747	1204.53	1257.62	198.876	1004.48	1436.76	205.814	909.1	1234.25	153.751	1213.66	1315.82	385.078	1065.7	1480.19	463.683	1090.87	1251.28	481.602	1101.54	1151.05	504.02	1032.73	991.094	462.144	1000.73	911.86	522.978	1038.2	912.098	513.11	988.339	848.907
7718	0	247.398	930.461	1656.1	151.605	923.99	1651.88	257.776	1080.99	1701.49	113.813	1066.63	1689.26	200.908	1142.03	1517.27	218.93	1192.63	1257.1	197.97	992.02	1435.88	204.93	897.422	1233.11	153.712	1201.8	1315.5	384.78	1053.34	1479.2	462.523	1083.3	1250.34	479.82	1096.62	1150.35	501.745	1032.37	988.537	459.641	1002.26	908.89	520.598	1040.34	909.509	509.867	991.759	844.934
7719	0	246.95	918.287	1655.43	151.106	911.643	1651.13	257.121	1068.86	1700.55	113.227	1054.25	1688.25	200.664	1129.88	1516.57	219.49	1180.84	1256.7	197.425	979.994	1434.8	203.724	885.455	1231.66	153.354	1189.89	1314.68	384.294	1040.71	1478.02	461.387	1075.53	1249.48	477.978	1091.5	1149.83	499.162	1031.71	986.196	457.463	1002.94	906.635	517.38	1041.93	907.106	506.655	995.225	841.332
7720	0	246.292	905.74	1654.41	150.635	899.182	1650.17	256.563	1056.53	1699.52	112.755	1041.92	1687.05	200.183	1117.41	1515.59	220.033	1168.77	1255.98	196.874	967.868	1433.62	202.599	873.341	1230.13	153.373	1177.96	1313.83	383.904	1027.86	1476.8	460.239	1067.55	1248.63	475.956	1085.96	1149.21	497.051	1031.12	984.065	456.27	1003.46	905.078	514.919	1043.59	905.229	503.526	998.406	837.954
7721	0	245.505	893.18	1653.21	150.241	886.615	1648.85	255.874	1043.94	1698.22	112.607	1029.26	1685.77	199.916	1104.8	1514.64	220.354	1156.54	1255	196.299	955.6	1432.18	201.605	861.167	1228.36	153.754	1166.22	1313.09	383.608	1015.07	1475.6	459.146	1059.25	1247.81	473.917	1079.82	1148.81	494.632	1029.97	981.97	452.487	1004.65	901.284	511.988	1045.1	903.206	499.966	1002.08	834.164
7722	0	245.656	880.888	1651.72	149.936	874.092	1647.33	255.22	1031.3	1696.87	111.581	1016.51	1684.29	199.821	1092.29	1513.44	221.386	1144.61	1254.14	195.896	943.559	1430.6	200.734	849.004	1226.48	154.107	1154.46	1311.95	383.509	1002.28	1474.29	458.248	1050.68	1246.99	471.729	1073.88	1148.29	492.672	1028.96	980.156	449.907	1005.05	898.706	509.509	1046.2	901.854	496.557	1005.56	830.552
7723	0	244.838	868.091	1650	149.242	861.334	1645.41	254.766	1018.64	1695.43	111.161	1003.77	1682.3	199.811	1079.99	1511.93	221.918	1132.16	1252.64	195.432	931.26	1428.76	199.702	836.748	1224.49	154.678	1142.6	1310.54	383.418	989.344	1472.82	457.473	1041.87	1246.2	469.515	1067.33	1147.78	489.835	1027	977.979	447.386	1005.06	896.37	506.97	1047.13	900.521	493.615	1008.97	827.705
7724	0	244.651	855.345	1648.11	148.769	848.579	1643.24	254.321	1005.85	1693.77	110.686	991.041	1680.56	199.946	1067.63	1510.36	222.822	1119.86	1251.14	194.804	918.784	1426.97	198.809	824.539	1222.41	155.169	1130.73	1309.06	383.384	976.404	1471.39	456.594	1032.51	1245.31	467.149	1060.32	1147.3	487.855	1025.23	976.585	444.403	1004.06	894.121	504.768	1047.83	899.709	490.437	1012.14	824.797
7725	0	244.376	842.544	1646.02	148.426	835.869	1640.94	253.936	992.784	1692.09	110.316	978.175	1678.48	200.373	1055.23	1508.78	223.627	1107.55	1249.49	194.713	906.501	1424.92	198.162	812.468	1220.29	156.102	1118.8	1307.45	383.343	963.362	1469.75	455.854	1022.78	1244.41	464.758	1052.83	1146.69	485.854	1022.58	975.394	443.99	1005.38	892.223	502.492	1047.91	898.759	487.759	1015.02	822.642
7726	0	244.101	829.639	1643.74	148.12	823.029	1638.43	253.689	979.754	1690.24	110.577	965.201	1676.13	200.597	1042.68	1506.72	224.789	1095.31	1247.77	194.625	894.154	1422.86	197.49	800.447	1218.11	157.005	1106.68	1305.57	383.461	950.271	1468.08	455.319	1012.95	1243.4	462.478	1044.8	1146.16	484.855	1020.43	974.671	441.68	1004.59	889.857	500.553	1047.6	898.545	485.014	1017.54	820.618
7727	0	243.48	816.72	1641.28	147.819	810.319	1635.97	253.565	966.911	1688.13	110.118	952.572	1673.99	201.316	1030.52	1504.59	225.612	1082.78	1245.63	194.477	881.739	1420.77	196.884	788.081	1216.11	157.604	1094.3	1303.16	383.741	937.302	1466.19	454.598	1002.65	1242.04	460.343	1036.42	1145.2	482.571	1016.54	973.482	440.972	1002.8	889.062	498.131	1046.24	897.997	482.11	1019.45	818.504
7728	0	243.911	803.997	1638.83	147.854	797.445	1633.34	253.653	953.981	1686.05	110.158	939.742	1671.92	201.563	1017.74	1502.49	226.515	1070.12	1243.5	194.488	869.204	1418.59	196.432	775.68	1214.25	158.567	1081.97	1301.04	383.734	924.086	1464.12	453.804	992.235	1240.5	458.456	1027.48	1144.14	480.809	1012.39	972.22	438.335	1001.27	887.538	496.18	1044.16	897.634	479.884	1020.91	816.925
7729	0	244.093	791.191	1636.41	148.065	784.685	1630.97	253.855	940.901	1683.85	110.102	926.916	1670.13	202.146	1005.28	1500.17	227.219	1057.22	1241.31	194.605	856.441	1416.44	196.048	763.232	1212.32	159.351	1069.47	1298.82	384.298	911.197	1462.17	453.076	981.608	1239	456.916	1018.12	1143.17	479.757	1007.59	971.518	436.464	998.719	885.89	494.972	1041.27	897.599	477.727	1021.69	815.774
7730	0	244.419	778.205	1634.1	148.281	771.884	1628.6	254.21	927.899	1681.92	110.269	914.009	1668.15	202.599	992.407	1498.21	227.784	1044.15	1239.12	194.762	843.68	1414.34	195.926	750.548	1210.52	160.075	1056.76	1296.5	384.821	898.25	1460.11	452.425	970.905	1237.35	455.542	1008.36	1142.05	478.702	1001.92	970.668	435.592	995.365	884.849	493.814	1037.46	897.69	475.674	1021.68	814.739
7731	0	244.915	765.331	1631.89	148.731	758.996	1626.44	254.692	914.988	1679.74	111.038	901.099	1665.86	203.478	979.812	1495.97	228.365	1030.91	1236.86	195.014	830.854	1412.45	196.08	737.77	1208.72	160.889	1043.9	1294.16	385.274	885.176	1457.75	451.866	959.851	1235.41	454.572	998.343	1140.66	477.475	995.348	969.204	433.492	991.156	882.853	492.82	1032.62	897.265	473.317	1020.46	813.117
7732	0	245.78	752.517	1629.87	149.34	746.187	1624.46	255.365	902.004	1677.93	111.763	888.064	1664.13	203.992	966.765	1494	228.822	1017.52	1234.74	196.076	818.383	1410.57	196.24	724.88	1207.01	161.694	1030.95	1292.17	386.191	872.464	1455.42	451.474	948.583	1233.44	453.859	987.974	1139.17	476.997	988.134	967.935	433.321	986.054	881.831	492.723	1026.82	896.78	472.56	1018.58	812.634
7733	0	246.612	739.631	1628.04	150.321	733.229	1622.79	256.375	889.13	1675.99	112.767	875.354	1662.65	205.02	953.878	1492.21	229.195	1004.09	1232.85	196.368	805.084	1408.78	196.675	711.709	1205.2	162.228	1017.77	1290.16	387.196	859.577	1453.26	451.534	937.149	1231.58	453.419	977.189	1137.7	476.469	979.983	966.498	432.499	980.696	880.219	492.421	1020.07	896.391	471.225	1015.68	812.393
7734	0	247.708	726.694	1626.5	151.181	720.316	1621.43	257.631	876.359	1674.2	113.948	862.483	1660.94	205.808	940.79	1490.4	229.281	990.613	1230.95	196.952	791.786	1407.02	197.15	698.527	1203.72	162.642	1004.58	1288.29	387.884	846.449	1451.03	451.572	925.622	1229.69	453.157	966.23	1136.1	476.792	971.216	965.502	432.453	973.007	879.035	492.913	1012.07	896.169	469.415	1011.27	811.178
7735	0	249.153	713.863	1625.05	152.412	707.267	1620.33	259.311	863.595	1672.44	115.196	849.672	1659.6	206.507	927.549	1488.5	229.216	977.089	1229.11	197.673	778.384	1405.6	197.987	685.019	1202.12	163.052	991.202	1286.54	388.564	833.556	1448.59	451.55	913.658	1227.47	453.118	954.903	1134.19	476.675	961.632	963.756	432.784	965.153	877.743	493.547	1003.06	895.049	468.855	1005.73	810.464
7736	0	250.603	700.878	1623.62	153.963	694.419	1619.45	260.857	850.97	1670.43	117.022	836.855	1658.3	207.521	914.406	1486.83	229.267	963.648	1227.16	198.71	764.981	1404.27	198.801	671.462	1200.72	163.239	977.568	1284.89	389.486	820.595	1446.27	451.899	901.63	1225.36	453.279	943.22	1132.22	477.218	951.385	962.127	433.884	955.852	876.654	494.696	993.769	894.254	466.965	998.457	808.154
7737	0	252.115	688.004	1622.47	155.66	681.595	1618.81	262.494	838.108	1668.92	118.79	824.14	1657.3	208.509	901.202	1485.45	229.204	949.942	1225.54	199.77	751.688	1403.09	199.885	657.693	1199.66	163.181	963.932	1283.33	390.898	807.931	1444.64	452.323	889.339	1223.65	453.852	931.238	1130.76	478.276	940.526	961.24	435.089	946.359	875.926	495.796	983.18	893.664	469.735	990.53	809.534
7738	0	253.797	675.024	1621.69	157.383	668.615	1618.21	264.417	825.279	1667.78	120.664	811.228	1656.53	209.602	887.963	1484.29	228.988	936.154	1224.23	201.023	737.969	1402.32	201.202	643.714	1198.65	163.141	950.149	1282.16	391.901	794.613	1443.21	452.975	876.778	1222.33	454.553	918.828	1129.57	479.106	928.808	960.157	435.6	936.124	874.82	496.787	971.596	893.033	468.688	980.466	807.43
7739	0	255.768	662.123	1621.32	159.158	655.655	1618.2	266.544	812.445	1667.04	122.523	798.36	1656.26	210.939	874.644	1483.52	229.099	922.378	1223.2	202.202	724.348	1401.87	202.458	629.587	1198.01	163.189	936.058	1281.29	393.467	781.624	1442.16	453.67	863.666	1221.16	455.169	905.852	1128.5	480.57	916.645	959.417	437.398	924.285	873.821	498.454	960.022	892.218	470.311	969.374	806.856
7740	0	258.068	649.086	1621.45	161.228	642.588	1618.67	268.842	799.615	1666.56	124.478	785.385	1656.52	212.233	861.1	1483	229.219	908.29	1222.49	203.576	710.77	1401.68	203.644	615.391	1197.69	163.862	922.201	1280.95	394.836	768.336	1441.3	454.935	850.503	1220.46	456.217	892.569	1127.78	482.322	903.772	958.562	439.579	911.301	873.08	500.501	947.373	891.841	472.312	956.727	806.142
7741	0	259.965	636.107	1621.76	163.248	629.634	1619.37	271.107	786.742	1666.18	126.832	772.586	1656.82	213.613	847.607	1482.79	229.589	894.017	1221.96	204.791	696.748	1402.06	204.861	601.097	1197.91	164.4	908.155	1280.63	396.096	754.881	1440.75	455.877	836.772	1219.77	457.47	878.943	1127.21	483.952	890.301	958.089	441.928	897.459	872.625	502.189	933.806	891.472	474.882	942.835	805.639
7742	0	261.634	623.115	1622.29	165.262	616.651	1620.29	273.232	773.914	1665.87	129.155	759.762	1657.3	214.728	833.884	1482.53	230.247	879.658	1221.67	206.02	682.943	1402.51	205.854	586.527	1198.48	165.07	893.96	1280.37	397.201	741.32	1440.24	457.141	822.756	1219.25	459.05	864.942	1126.9	485.811	875.942	957.896	444.209	882.374	871.828	504.096	919.405	891.091	477.925	927.634	805.257
7743	0	263.849	610.174	1623.26	167.427	603.481	1621.77	275.636	761.254	1665.83	131.459	746.941	1657.94	216.283	820.331	1482.75	231.018	865.183	1221.6	207.342	669.158	1403.23	206.765	572.079	1199.16	166.272	879.917	1280.6	398.479	727.606	1440.11	458.263	808.4	1218.9	460.343	850.364	1126.45	488.409	861.032	957.864	447.413	866.727	871.687	506.258	904.504	891.104	481.166	910.922	804.687
7744	0	266.425	597.152	1624.83	169.779	590.277	1623.85	277.926	748.587	1666.11	133.663	733.88	1658.9	217.618	806.592	1483.28	232.119	850.854	1221.98	208.512	655.279	1404.2	207.355	557.732	1200.21	166.862	865.572	1280.44	399.812	713.961	1440.19	459.677	793.799	1218.73	461.706	835.231	1125.88	490.503	845.201	957.711	450.337	849.87	871.41	508.53	888.158	890.605	484.985	893.243	804.372
7745	0	268.427	584.031	1626.44	171.846	577.115	1626.09	279.956	735.831	1666.52	135.663	721.013	1660.35	218.711	792.801	1484.03	233.385	836.885	1222.97	209.519	641.395	1405.4	207.614	543.713	1201.31	167.899	851.498	1281.59	400.806	700.094	1440.54	460.811	778.602	1218.61	463.356	819.703	1125.65	492.796	828.703	957.715	453.225	832.396	871.29	510.952	871.266	890.231	488.456	874.238	803.617
7746	0	270.636	571.165	1628.42	174.077	563.954	1628.52	281.851	723.181	1666.94	137.819	707.859	1661.57	219.724	779.106	1485.23	234.626	823.213	1224.23	210.363	627.644	1406.7	207.867	529.951	1202.4	168.858	837.659	1282.91	401.745	686.447	1441.15	462.014	763.132	1218.69	464.952	803.857	1125.47	495.033	811.317	957.522	455.825	813.754	870.622	513.302	853.268	889.701	493.808	854.096	804.123
7747	0	272.88	558.336	1630.19	176.332	550.733	1630.75	283.862	710.662	1667.46	139.798	694.882	1662.61	220.606	765.533	1486.58	235.85	809.93	1225.89	211.536	613.984	1408.06	207.892	516.637	1203.43	169.566	824.191	1284.57	402.359	672.796	1441.84	463.206	747.467	1218.84	467.208	787.769	1125.79	497.278	793.18	957.479	458.13	794.443	869.652	515.966	834.563	889.171	497.187	832.753	803.341
7748	0	274.822	545.471	1631.88	178.239	537.417	1632.84	285.469	698.13	1667.97	141.138	681.923	1664.12	221.096	752	1488.14	236.765	797.025	1227.71	212.163	600.621	1409.31	207.935	503.387	1204.45	170.25	810.886	1287.04	402.586	659.163	1442.86	464.426	731.503	1219.38	468.469	770.691	1125.93	499.77	774.376	957.69	461.219	773.918	869.841	518.516	814.667	888.788	501.026	810.588	803.064
7749	0	276.356	532.65	1633.24	180.015	524.391	1634.82	286.741	685.567	1668.35	142.371	668.833	1665.26	221.491	738.809	1489.75	237.484	784.387	1229.34	212.764	587.185	1410.37	207.876	490.433	1205.42	170.343	797.95	1289.04	402.954	645.671	1443.76	465.405	715.415	1219.62	470.398	753.96	1126.08	501.855	754.765	957.608	463.591	753.233	869.452	520.948	793.971	888.085	504.717	787.366	802.564
7750	0	277.987	519.903	1634.55	181.514	511.401	1636.4	287.955	673.001	1668.87	143.567	655.839	1666.54	222.08	725.792	1490.92	237.869	771.918	1230.61	213.239	574.079	1411.49	207.993	477.91	1206.23	170.367	785.361	1290.79	403.782	632.564	1445.04	466.586	699.294	1219.98	472.29	737.017	1126.19	504.139	734.813	957.477	466.34	732.31	869.394	523.829	772.654	887.395	508.742	763.241	802.267
7751	0	279.268	507.225	1635.75	182.856	498.381	1637.83	288.994	660.407	1669.75	144.575	642.92	1667.81	222.899	712.834	1492.28	238.085	759.682	1231.98	213.85	561.177	1412.82	208.209	465.458	1206.99	170.232	773.229	1292.35	403.957	619.323	1446.05	467.79	683.294	1220.45	474.88	720.415	1126.63	506.552	714.319	957.623	469.969	708.904	869.378	526.452	750.64	886.768	512.871	738.634	802.443
7752	0	280.086	494.369	1636.83	183.521	485.625	1639.02	289.663	647.655	1670.72	145.356	629.942	1668.76	223.618	700.186	1493.27	238.106	747.543	1233.12	214.036	548.587	1414.18	208.18	453.342	1207.85	170.462	761.224	1293.89	404.257	606.332	1447.05	468.69	667.081	1220.63	476.611	703.104	1126.35	508.457	693.261	957.635	471.38	687.219	869.015	528.628	728.008	885.954	516.419	712.992	802.593
7753	0	280.503	481.574	1637.67	184.042	472.717	1639.95	290.315	634.735	1671.88	146.041	617.115	1669.68	224.246	687.62	1494.57	238.315	735.455	1234.37	214.331	536.068	1415.61	208.236	441.697	1208.67	170.881	749.3	1295.31	404.467	593.263	1448.06	469.553	650.725	1220.88	478.227	685.537	1126.06	510.387	671.805	957.603	473.365	663.48	869.103	531.197	704.904	885.466	519.577	686.575	802.73
7754	0	280.737	468.673	1638.57	184.163	460.132	1640.75	290.772	621.7	1673.36	146.458	604.382	1671.17	225.135	675.308	1495.88	238.937	723.361	1235.74	214.776	523.739	1417.22	208.453	429.811	1209.77	171.632	737.238	1296.72	405.205	580.619	1449.41	470.584	634.461	1221.47	480.383	668.13	1126.19	512.426	650.074	957.961	475.737	639.682	869.728	533.393	681.244	885.001	523.102	659.903	803.579
7755	0	280.88	456.002	1639.6	184.28	447.516	1641.57	291.078	608.744	1674.94	146.704	591.782	1672.39	225.715	663.138	1497.35	239.797	711.179	1237.11	214.87	511.6	1418.82	208.4	417.873	1210.94	172.633	725.298	1298.37	405.545	567.886	1450.81	471.676	618.194	1222.26	482.129	650.374	1126.26	514.385	628.195	958.578	477.932	615.66	870.585	535.414	657.207	884.83	526.344	632.694	804.842
7756	0	280.646	443.064	1640.71	183.954	434.889	1642.53	291.013	595.748	1676.71	146.842	579.135	1674.07	226.35	651.083	1499.14	240.833	699.28	1239.01	214.951	499.449	1420.56	208.091	405.976	1212.51	173.723	713.471	1300.02	405.76	555.286	1452.39	472.729	602.024	1223.45	483.785	632.453	1126.68	516.231	605.87	959.539	479.605	591.353	871.577	537.276	632.702	885.039	529.278	604.971	806.658
7757	0	280.283	430.362	1642.06	183.567	422.499	1643.54	291.107	582.825	1678.75	146.634	566.673	1675.43	226.665	638.895	1500.86	241.756	687.413	1240.88	215.331	487.393	1422.49	207.69	393.992	1214.14	174.782	701.541	1301.79	405.802	542.621	1454.1	473.911	585.905	1224.75	485.229	614.358	1127.35	517.889	583.302	960.766	482.971	565.579	875.112	539.253	608.266	885.512	532.051	577.027	808.9
7758	0	280.101	417.615	1643.49	183.236	409.904	1644.55	290.87	569.966	1680.61	146.156	554.175	1677.14	227.209	626.82	1502.99	242.918	675.973	1243.12	215.473	475.429	1424.4	207.412	382.033	1215.85	175.675	689.699	1303.7	405.999	530.295	1456.13	474.983	569.805	1226.45	487.037	596.436	1128.39	519.789	560.937	962.276	484.488	540.143	877.096	540.819	583.299	886.429	534.414	548.671	811.677
7759	0	279.479	404.961	1645.11	182.78	397.469	1645.86	290.611	557.257	1682.83	145.815	541.531	1678.49	227.091	614.413	1505	243.912	664.49	1245.38	215.473	463.45	1426.32	207.297	369.977	1217.92	176.754	678.001	1305.88	406.13	517.834	1458.42	476.026	553.76	1228.59	488.974	578.593	1130.04	521.181	537.531	964.857	485.625	514.255	879.732	541.944	557.631	888.2	536.557	520.129	815.164
7760	0	278.497	392.436	1646.72	182.118	385.147	1647.09	290.177	544.593	1684.76	145.62	529.327	1679.88	227.309	602.39	1506.83	244.626	653.072	1247.41	215.594	451.348	1428.3	207.4	358.182	1220.03	177.638	666.349	1307.9	406.091	505.527	1460.62	476.862	537.63	1230.77	490.304	560.53	1131.12	522.642	514.502	967.584	486.843	488.571	883.022	543.297	532.223	890.069	538.531	491.395	819.274
7761	0	277.968	379.987	1648.21	181.7	372.769	1648.21	289.735	532.164	1686.51	145.057	517.013	1681.15	227.732	590.298	1508.76	245.432	641.448	1249.37	215.98	439.252	1430.03	207.556	346.539	1221.76	178.339	654.418	1309.78	406.356	493.411	1463.08	477.896	522.122	1233.01	491.823	542.66	1132.92	523.845	491.101	970.651	488.306	462.19	887.356	543.042	505.943	891.738	540.137	462.311	823.942
7762	0	277.661	367.649	1649.91	181.307	360.485	1649.43	289.278	519.81	1688.2	144.715	504.877	1682.12	228.077	578.406	1510.41	245.997	629.78	1251.06	216.001	427.109	1431.59	208.048	334.815	1223.67	179.039	642.788	1311.46	406.267	481.195	1465.32	479.08	506.897	1235.38	493.962	525.12	1135.54	525.03	467.882	974.144	489.091	435.373	891.894	545.296	480.263	895.613	541.421	433.451	828.973
7763	0	277.103	355.266	1651.35	180.738	348.434	1650.5	288.769	507.574	1689.59	144.345	492.785	1682.8	228.12	566.197	1511.64	246.46	618.121	1252.56	216.188	414.951	1433.18	208.583	323.233	1225.43	179.639	630.858	1312.77	406.325	468.898	1467.48	479.991	491.524	1237.42	496.007	507.695	1137.66	525.808	444.254	977.767	489.862	408.702	897.07	546.463	453.869	899.583	542.31	404.487	834.468
7764	0	276.574	343.052	1652.6	180.403	336.308	1651.49	288.34	495.336	1690.58	144.196	480.629	1683.26	228.157	554.055	1512.62	246.801	606.366	1253.64	216.406	402.667	1434.36	209.189	311.82	1226.8	179.973	618.891	1313.85	406.28	456.624	1469.24	480.953	476.422	1239.41	496.699	490.071	1138.78	526.91	420.903	981.856	490.489	382.256	902.648	546.801	427.313	903.382	542.802	375.322	840.28
7765	0	276.661	330.89	1653.86	180.279	324.185	1652.32	288.103	483.201	1691.57	144.05	468.559	1683.72	228.259	541.775	1513.57	246.903	594.58	1254.75	216.758	390.509	1435.43	209.954	300.471	1227.71	180.649	606.943	1315.05	406.622	444.479	1471.19	481.922	461.32	1241.4	499.111	473.099	1141.09	527.687	397.096	985.933	491.062	355.819	908.481	546.925	401.009	907.498	543.13	346.336	846.354
7766	0	276.469	318.736	1654.82	180.003	312.183	1653.03	288.176	471.072	1692.54	143.714	456.494	1684.03	228.647	529.593	1514.47	247.428	582.763	1255.96	217	378.178	1436.27	210.942	289.221	1228.46	181.272	595.148	1316.2	406.722	432.22	1472.78	483.134	446.403	1243.46	501.171	455.901	1143.15	528.291	373.689	989.991	491.04	329.294	914.838	547.344	374.352	911.479	543.093	317.33	852.934
7767	0	276.36	306.616	1655.51	179.973	300.011	1653.4	288.139	459.004	1692.97	143.876	444.729	1684.2	229.017	517.45	1515.25	247.831	570.993	1256.97	217.317	365.752	1437.01	211.743	278.129	1228.98	181.765	583.058	1317.09	406.776	419.758	1474.02	484.434	431.552	1245.37	503.175	438.893	1144.67	529.049	350.571	994.323	490.782	303.13	921.124	547.238	347.844	915.482	542.635	288.482	859.698
7768	0	276.424	294.215	1655.85	179.962	287.806	1653.68	288.363	446.816	1693.13	143.951	432.622	1684.35	228.838	504.984	1515.55	248.28	558.947	1257.29	217.684	353.389	1437.36	212.935	267.015	1229.01	182.398	571.028	1317.65	406.917	407.451	1474.94	485.745	416.674	1246.67	504.053	421.456	1144.8	529.495	327.363	998.029	491.115	277.768	927.668	547.183	321.508	919.539	541.916	259.826	866.445
7769	0	276.689	282.149	1655.95	180.28	275.698	1653.86	288.595	434.505	1692.95	144.283	420.349	1684.2	228.993	492.437	1515.6	248.656	547.074	1257.89	218.046	340.879	1437.25	213.843	255.306	1228.71	182.941	558.901	1318.16	407.016	395.047	1475.38	487.221	401.993	1247.89	507.377	404.734	1146.68	530.131	304.546	1002.18	490.647	252.446	933.948	547.247	295.232	923.962	540.853	231.328	873.453
7770	0	276.953	269.665	1655.72	180.495	263.355	1653.54	289.002	422.267	1692.63	144.558	408.222	1683.8	229.084	480.008	1515.48	248.999	535.101	1258.01	218.256	328.404	1437.02	214.603	243.695	1228.21	183.215	546.787	1318.23	407.267	382.75	1475.55	488.588	387.329	1248.63	509.074	387.629	1147.08	530.453	281.614	1006.2	489.749	227.303	940.478	547.21	269.159	928.604	539.641	203.164	880.85
7771	0	277.1	257.216	1655.16	180.697	250.873	1653.02	289.363	409.904	1691.94	145.071	395.875	1683.02	229.374	467.566	1515.08	248.872	523.206	1257.65	218.696	315.822	1436.55	215.762	231.838	1227.53	183.253	534.466	1317.8	407.245	370.353	1475.13	489.832	372.566	1248.83	511.219	370.476	1147.73	530.863	258.964	1010.16	489.046	202.582	946.94	546.968	243.206	933.115	538.397	175.361	888.345
7772	0	277.735	244.72	1654.36	181.144	238.458	1652.26	289.822	397.294	1690.9	145.571	383.225	1682.18	229.668	455.153	1514.36	248.772	511.424	1257.22	219.221	303.239	1435.91	216.742	219.863	1226.24	183.487	522.3	1317.38	407.499	357.967	1474.37	491.145	357.997	1248.69	513.314	353.31	1147.85	531.216	236.5	1014.03	488.285	178.452	953.161	545.406	216.944	936.601	536.994	148.046	895.765
7773	0	278.308	232.185	1653.29	181.644	225.773	1651.26	290.238	384.776	1689.7	146.254	370.701	1681.25	229.748	442.449	1513.59	248.26	499.712	1256.59	219.643	290.687	1434.97	217.718	207.775	1224.88	183.423	510.135	1316.93	407.737	345.829	1473.54	492.551	343.437	1248.51	515.384	336.244	1148.04	531.165	214.269	1017.73	487.414	154.676	959.375	546.463	192.447	942.305	535.509	121.085	903.484
7774	0	278.42	219.472	1651.86	181.968	213.082	1649.92	290.658	371.927	1688.46	146.693	358.037	1680.18	229.8	429.83	1512.72	247.52	487.873	1255.93	220.125	277.99	1433.81	218.628	195.529	1223.15	183.064	497.835	1316.41	407.904	333.501	1472.38	493.592	328.64	1248.1	517.435	318.977	1148.39	531.128	192.31	1021.6	486.334	131.415	965.54	545.444	167.14	946.649	534.052	94.9499	911.267
7775	0	278.95	206.642	1650.23	182.362	200.387	1648.18	290.951	359.137	1687.16	146.983	344.973	1678.64	230.062	417.27	1511.83	246.685	476.135	1255.12	220.436	265.551	1432.43	219.406	183.147	1221.4	182.576	485.546	1315.92	407.983	321.185	1471.05	494.659	313.817	1247.69	518.779	301.639	1148.07	531.022	170.633	1025.44	485.253	108.786	971.522	544.826	142.804	951.438	532.619	69.4286	918.968
7776	0	279.388	193.9	1648.33	182.863	187.425	1646.46	291.35	346.189	1685.73	147.192	332.037	1677.27	230.348	404.793	1510.76	245.927	464.034	1254.35	220.995	252.836	1430.94	220.188	170.297	1219.75	182.017	473.173	1315.31	408.303	309.064	1469.73	495.91	299.187	1247.4	520.636	284.403	1148.18	530.874	149.373	1029.23	484.194	86.5064	977.176	544.57	118.934	956.524	531.24	44.6208	926.619
7777	0	279.673	181.042	1646.25	183.218	174.539	1644.23	291.673	333.29	1684.05	147.515	319.207	1675.64	230.076	391.502	1509.28	245.141	451.845	1253.25	221.359	240.097	1429.06	220.848	157.28	1218	181.525	460.841	1314.38	408.479	296.825	1468.25	496.617	284.232	1246.72	522.035	267.193	1148.11	530.58	128.553	1033.04	483.058	64.8711	982.804	544.335	95.8996	961.582	529.908	20.6185	934.228
7778	0	279.96	168.103	1644.06	183.435	161.714	1642.04	291.908	320.332	1682.29	147.773	306.217	1673.65	230.267	379.003	1507.87	244.296	439.505	1251.77	221.661	227.468	1427.34	221.461	144.603	1216.05	180.899	448.519	1313.32	408.507	284.58	1466.63	497.128	269.285	1245.92	523.722	250.202	1148.17	530.071	108.049	1036.75	481.873	43.5773	988.308	543.69	73.0815	966.436	528.584	-2.813	941.612
7779	0	280.239	155.156	1641.57	183.569	148.723	1639.47	292.073	307.237	1680.24	147.789	293.034	1671.66	230.471	366.52	1506.32	243.395	426.881	1250.16	222.164	214.864	1425.26	222.007	131.841	1214.37	180.304	436.001	1311.97	408.625	272.347	1464.92	497.854	254.38	1245.11	524.751	233.097	1147.88	529.611	88.0596	1040.33	481.091	23.1929	993.55	543.235	51.0814	971.151	527.397	-25.3476	948.778
7780	0	280.356	142.105	1638.88	183.932	135.855	1637.02	292.266	294.3	1678.24	148.029	279.968	1669.46	230.479	353.935	1504.19	242.635	414.343	1248.28	222.291	201.862	1423.32	222.361	119.194	1212.31	179.866	423.588	1310.41	408.531	260.099	1463.02	498.286	239.443	1244.19	526.003	216.441	1147.78	529.255	68.7433	1043.66	480.227	3.25677	998.225	542.906	29.6811	975.73	526.289	-47.2052	955.52
7781	0	280.369	129.307	1636.57	183.872	122.879	1634.53	292.432	281.295	1676.11	148.136	267.178	1667.46	230.266	341.235	1502.02	241.968	401.729	1246.09	222.151	189.066	1421.22	222.577	106.41	1210.59	179.103	410.993	1308.39	408.573	247.881	1461.37	498.293	224.329	1243.11	527.479	200.457	1147.68	528.93	49.7951	1046.87	479.443	-16.2342	1002.75	542.558	9.03798	980.116	525.334	-68.2327	962.076
7782	0	280.268	116.31	1633.96	183.75	110.076	1631.97	292.352	268.275	1673.91	148.205	254.267	1665.15	229.977	328.499	1499.61	241.375	388.869	1243.62	222.183	176.194	1419.25	222.542	93.8845	1208.53	178.578	398.184	1306.2	408.151	235.473	1459.27	498.309	209.492	1241.9	527.564	184.436	1146.99	528.688	31.584	1049.77	478.856	-35.2274	1007.07	542.374	-10.9991	984.273	524.584	-88.5552	968.089
7783	0	280.227	103.465	1631.53	183.664	97.2558	1629.61	292.254	255.239	1671.56	148.176	241.351	1663.05	230.007	315.926	1497.3	240.977	375.975	1241.32	222.176	163.292	1417.21	222.683	81.3467	1206.63	178.123	385.489	1304.11	408.146	223.005	1457.57	498.157	194.704	1240.59	527.873	168.67	1146.13	528.495	13.8728	1052.09	478.346	-53.5022	1010.68	542.087	-30.1697	987.787	524.09	-108.106	973.51
7784	0	280.1	90.6794	1629.38	183.495	84.3603	1627.37	292.146	242.433	1669.53	148.07	228.319	1660.89	229.685	303.276	1495.08	240.415	362.863	1238.69	221.776	150.335	1415.03	222.544	68.506	1204.83	177.764	372.544	1301.74	407.765	210.427	1455.78	498.579	180.383	1239.81	528.054	152.919	1145.31	528.322	-3.31072	1054.21	478.233	-71.3059	1014.16	542.258	-48.5609	991.185	523.908	-126.901	978.712
7785	0	279.716	77.808	1627.24	183.216	71.5623	1625.41	291.92	229.62	1667.48	147.934	215.669	1659	229.313	290.269	1492.83	240.351	349.607	1236.57	221.546	137.208	1413.27	222.001	55.6954	1202.72	177.714	359.55	1299.68	407.333	197.289	1454.23	498.005	165.751	1238.38	527.644	137.811	1144.15	528.349	-20.0457	1056	478.044	-88.5085	1016.92	542.118	-66.3379	993.762	523.939	-144.85	983.078
7786	0	279.288	64.9497	1625.29	182.795	58.7986	1623.54	291.521	216.795	1665.47	147.436	202.863	1657.03	228.893	277.209	1490.7	240.153	336.155	1234.2	221.055	124.042	1411.21	221.538	42.5624	1200.83	177.482	346.242	1297.27	406.707	184.26	1452.27	497.957	151.553	1237.12	527.487	122.863	1143.06	528.28	-36.084	1057.13	478.19	-105.245	1019.26	542.211	-83.321	995.635	524.278	-162.087	986.667
7787	0	278.9	52.3196	1623.77	182.339	45.8826	1621.99	290.911	204.127	1663.65	146.809	189.868	1655.23	228.477	264.308	1488.94	240.016	322.555	1232.05	220.525	110.97	1409.39	221.069	29.237	1199.06	177.295	332.934	1295.07	406.315	171.099	1450.89	497.731	137.61	1236.01	527.496	108.343	1142.01	528.385	-51.6455	1057.67	478.402	-121.376	1020.87	542.122	-99.603	996.82	524.954	-178.581	989.636
7788	0	278.14	39.4394	1622.37	181.642	33.068	1620.53	290.378	191.446	1662.25	145.855	177.152	1653.65	228.107	251.174	1487.22	240.098	308.9	1230.41	219.759	97.704	1407.69	220.032	15.6182	1197.2	177.291	319.478	1293.16	405.542	157.436	1449.37	497.572	123.645	1235.02	526.965	93.9568	1141	528.49	-66.7503	1057.98	478.67	-137.072	1021.8	542.474	-115.01	997.697	525.787	-194.297	992.029
7789	0	277.411	26.7135	1621.24	180.776	20.3183	1619.32	289.61	178.866	1660.76	145.018	164.539	1652.31	227.389	238.016	1485.45	239.974	295.067	1228.58	218.889	84.3292	1406.11	219.014	1.89322	1195.83	177.34	305.964	1291.27	404.627	143.895	1447.93	496.877	109.775	1233.77	526.465	79.645	1140	528.602	-81.4378	1057.71	479.212	-152.12	1022.21	542.468	-130.029	997.589	526.925	-209.222	993.592
7790	0	276.588	14.0921	1620.15	180.064	7.4628	1618.2	288.527	166.214	1659.32	144.193	151.788	1650.77	226.664	224.741	1483.72	239.754	280.912	1226.5	217.913	71.0104	1404.79	217.941	-12.1557	1194.5	177.237	292.187	1289.11	403.772	130.297	1446.41	496.757	96.076	1232.85	525.578	65.5613	1138.56	528.763	-95.6343	1056.92	479.649	-166.837	1021.89	542.882	-144.259	996.973	528.182	-223.507	994.054
7791	0	275.698	1.39056	1619.33	179.002	-5.32457	1617.51	287.411	153.651	1658.15	143.851	139.001	1649.57	225.583	211.566	1482.08	239.486	266.68	1224.68	216.793	57.6137	1403.67	216.776	-26.4549	1193.66	177.007	278.273	1287.1	402.798	116.762	1445.23	495.912	82.2802	1231.82	524.841	51.7641	1137.49	528.862	-109.357	1055.58	480.432	-180.869	1020.91	543.248	-157.791	995.698	529.597	-237.09	993.779
7792	0	274.507	-11.2546	1618.88	177.961	-18.176	1617.21	286.062	141.153	1657.27	142.569	126.136	1648.95	224.32	198.345	1480.67	239.034	252.394	1223.07	215.42	44.071	1402.81	215.403	-41.0755	1193.13	176.451	264.231	1285.19	401.389	103.309	1444.14	494.917	68.4079	1230.91	523.777	38.067	1136.52	529.095	-122.621	1054.34	481.009	-194.327	1019.15	543.852	-170.658	994.209	530.864	-250.057	992.654
7793	0	273.443	-23.9851	1618.74	177.006	-31.0781	1617.14	284.574	128.619	1656.64	140.619	113.259	1648.64	223.316	185.213	1479.63	238.477	238.028	1221.64	214.064	30.5873	1402.48	214.149	-55.8072	1193.01	175.668	249.999	1283.22	400.177	89.7707	1443.33	493.459	54.4665	1229.88	523.082	24.9677	1136.07	529.159	-135.554	1052.47	481.799	-207.122	1016.67	544.393	-183.011	992.131	532.409	-262.304	990.675
7794	0	272.293	-36.4141	1618.99	175.806	-43.8569	1617.38	283.047	116.25	1656.6	138.97	100.294	1648.31	221.683	171.963	1478.87	237.849	223.729	1220.65	212.848	16.8988	1402.34	213.127	-70.6917	1193.15	174.632	235.609	1281.71	399.007	76.4625	1443.14	492.67	41.179	1229.85	521.239	11.6114	1135.17	529.331	-147.715	1050.41	482.722	-219.432	1013.97	545.01	-194.502	989.653	533.971	-273.731	987.887
7795	0	271.054	-49.1881	1619.61	174.67	-56.7693	1617.82	281.326	103.874	1656.98	137.157	87.3071	1648.45	219.932	158.453	1478.59	236.91	209.388	1220.15	211.492	3.15081	1402.45	212.225	-85.7867	1193.64	173.634	221.099	1280.55	397.779	62.9497	1443.6	491.349	27.7214	1229.87	519.861	-0.933824	1135.08	529.472	-159.461	1048.36	483.381	-230.952	1010.79	545.686	-205.114	986.991	535.486	-284.314	984.256
7796	0	269.256	-61.9017	1620.38	172.822	-69.9064	1618.62	279.278	91.2639	1657.53	135.452	74.1808	1648.69	218.726	144.973	1478.75	235.993	195.175	1220.26	210.206	-10.5402	1403.06	211.681	-100.72	1194.42	172.405	206.438	1279.83	396.639	49.2271	1444.35	489.723	14.4439	1230.03	518.307	-13.64	1135.27	529.507	-170.409	1046.19	484.448	-241.776	1006.99	546.358	-214.893	984.124	536.958	-294.084	979.982
7797	0	267.586	-75.026	1621.73	171.328	-82.9734	1619.72	277.546	78.6309	1658.77	133.414	61.1573	1649.34	217.042	131.167	1479.46	235.016	181.223	1220.72	209.143	-24.213	1403.85	211.605	-115.373	1195.28	171.723	191.743	1279.8	395.232	35.4729	1445.42	488.007	1.30187	1230.63	517.151	-25.6662	1135.91	529.438	-180.871	1043.66	484.773	-251.995	1002.82	546.889	-223.963	980.788	538.41	-302.916	975.004
7798	0	265.912	-87.9419	1623.31	169.8	-96.0103	1620.99	275.458	65.6247	1659.96	131.395	48.2224	1650.16	215.772	117.509	1480.55	234.559	167.604	1222.21	208.326	-37.8581	1404.91	211.782	-129.604	1196.3	171.251	177.23	1280.6	394.513	21.9129	1447.31	486.714	-11.5663	1231.69	515.607	-37.6435	1136.89	529.374	-190.687	1041.16	485.437	-260.905	998.12	547.317	-232.119	977.344	539.558	-310.866	969.367
7799	0	263.987	-101.235	1625.08	167.51	-109.228	1622.1	273.694	52.5507	1661.43	129.486	35.1945	1650.8	214.515	103.674	1481.76	234.305	154.369	1223.69	207.607	-51.3471	1406.12	212.033	-143.635	1197.5	170.89	163.627	1281.46	393.526	8.02931	1449.19	485.333	-24.1308	1232.96	513.876	-49.4867	1137.86	529.036	-199.927	1038.73	485.764	-269.335	993.399	547.784	-239.345	973.834	540.584	-317.9	963.324
7800	0	261.798	-114.632	1626.41	165.589	-122.397	1622.99	271.588	39.0736	1662.48	127.835	22.2801	1651.34	213.557	90.1782	1483.01	234.212	141.248	1225.06	207.16	-64.5913	1407.34	212.397	-157.551	1198.89	170.864	150.548	1282.53	392.622	-5.4822	1451.22	483.851	-36.9276	1234.12	512.466	-60.9505	1139.16	528.71	-208.538	1036.19	486.035	-276.876	988.548	547.912	-245.987	970.035	541.242	-324.014	956.53
7801	0	260.089	-127.909	1627.91	163.852	-135.288	1623.75	270.298	25.8896	1664.36	126.312	9.24461	1651.83	212.655	76.9243	1484.27	234.167	128.305	1226.62	206.861	-77.6645	1408.33	212.918	-171.097	1200.28	170.567	137.593	1283.61	392.158	-18.6166	1453.34	482.78	-49.2404	1235.64	511.238	-72.2138	1140.6	528.38	-216.602	1033.43	486.097	-283.596	983.29	547.99	-251.853	966.117	541.675	-329.382	949.615
7802	0	258.594	-141.35	1629.23	162.492	-148.329	1624.43	269.049	12.3344	1666.21	124.899	-3.81782	1652.56	211.802	63.8708	1485.46	234.122	115.716	1228.26	206.728	-90.6971	1409.43	213.285	-184.187	1201.54	170.243	124.677	1284.95	391.258	-31.8701	1455.39	481.719	-61.6142	1237.23	509.942	-83.3466	1141.84	527.728	-224.408	1030.63	486.064	-289.764	977.866	548.069	-257.211	962.222	541.829	-334.03	942.371
7803	0	257.081	-154.702	1630.29	161.049	-161.494	1625.12	267.556	-1.44348	1667.74	123.743	-17.0741	1653.65	211.122	51.2289	1486.82	234.062	103.601	1229.75	206.813	-103.558	1410.67	213.589	-196.799	1202.76	169.818	111.619	1286.18	390.394	-44.3238	1456.9	480.868	-73.8096	1238.83	508.79	-94.2487	1143.18	527.222	-231.584	1027.83	485.94	-295.262	972.625	548.187	-262.01	958.488	541.638	-337.988	934.834
7804	0	256.007	-167.926	1631.04	160.166	-174.576	1625.7	266.418	-14.9494	1669.42	122.805	-30.534	1654.73	210.461	38.8563	1488.24	233.129	90.9112	1230.87	206.807	-115.995	1412.19	213.996	-208.918	1204.11	169.13	98.7885	1287.39	389.864	-56.5062	1458.72	479.897	-85.9726	1240.06	507.666	-104.792	1144.19	526.893	-238.323	1024.99	485.549	-300.125	966.992	548.143	-266.624	954.615	541.191	-341.319	927.013
7805	0	255.56	-180.955	1632.12	159.634	-187.736	1626.36	266.076	-28.2045	1671.55	122.03	-43.6167	1656.58	209.832	26.5728	1489.8	232.726	78.8177	1232.76	206.855	-128.492	1413.62	214.38	-220.877	1205.58	168.193	86.2806	1289.01	390.027	-67.737	1460.47	479.695	-97.3767	1241.87	506.529	-114.9	1145.1	526.518	-244.683	1022.23	485.443	-304.296	961.747	548.247	-270.613	950.921	540.449	-344.018	918.986
7806	0	255.469	-193.886	1632.95	159.378	-200.864	1627.12	265.528	-41.4219	1673.62	121.474	-57.0936	1658.33	209.255	14.273	1491.63	231.84	66.6033	1234.28	206.872	-140.821	1415.1	214.816	-233.008	1207.31	167.357	73.9891	1290.82	389.834	-79.2	1462.03	479.61	-108.416	1243.44	505.835	-124.558	1146.07	526.033	-250.541	1019.43	484.885	-308.155	956.461	548.215	-274.429	947.388	539.452	-346.116	911.169
7807	0	255.42	-206.518	1633.92	159.265	-214.136	1627.96	264.817	-54.5944	1675.31	121.149	-70.462	1660.28	209.088	2.12298	1493.34	231.173	54.6955	1235.96	206.713	-153.058	1416.88	215.207	-245.386	1209.02	166.252	61.7177	1292.4	389.882	-90.7264	1463.48	479.059	-119.466	1244.31	504.765	-133.781	1146.59	525.73	-256.115	1016.71	484.486	-310.963	950.933	547.955	-277.903	943.756	538.217	-347.576	903.389
7808	0	255.777	-219.188	1635.16	159.571	-227.191	1629.36	264.669	-67.6372	1677.43	120.878	-83.9479	1662.25	208.724	-10.0449	1495.23	230.05	42.5104	1237.51	206.869	-165.374	1418.67	215.712	-257.775	1210.79	165.225	49.5435	1294.15	389.932	-101.994	1464.83	478.871	-129.752	1244.95	503.838	-142.725	1146.74	525.321	-261.121	1013.94	484.143	-313.535	946.137	547.834	-280.767	940.352	536.955	-348.441	895.747
7809	0	256.049	-231.956	1636.47	159.858	-240.253	1630.75	264.699	-80.5547	1679.54	120.782	-97.5233	1664.22	208.112	-22.5664	1497.05	228.677	30.1692	1239.32	206.774	-177.664	1420.36	216.198	-269.891	1212.69	164.087	37.3164	1296.09	390.14	-113.599	1465.93	478.646	-139.473	1245.46	502.916	-150.842	1146.72	524.87	-265.48	1011.08	483.497	-315.842	941.559	547.433	-283.267	936.866	535.666	-348.6	888.561
7810	0	256.265	-244.595	1638.01	160.161	-253.346	1632.34	264.354	-93.5073	1681.53	120.624	-110.548	1666.73	208.013	-34.8358	1499.27	227.301	18.0147	1241.26	206.617	-189.798	1422.45	216.641	-281.888	1214.46	163.124	25.2207	1298.34	390.504	-125.04	1466.98	478.218	-148.822	1245.82	502.007	-158.571	1146.89	524.097	-269.524	1008.45	482.855	-317.692	937.313	547.198	-285.21	933.975	534.313	-348.177	882.034
7811	0	256.479	-257.396	1639.55	160.408	-266.287	1634.08	264.39	-106.428	1683.53	120.674	-123.536	1669	207.685	-47.3861	1501.39	226.078	5.93832	1243.44	206.656	-202.133	1424.53	216.803	-293.663	1216.06	161.986	13.1428	1300.61	390.558	-137.042	1468.21	477.45	-157.634	1245.82	500.777	-165.917	1146.74	523.479	-272.951	1006	481.987	-319.081	933.323	546.601	-286.705	931.103	532.973	-347.3	876
7812	0	256.832	-270.076	1641.16	160.632	-279.04	1635.82	264.555	-119.225	1685.4	120.837	-136.562	1671.14	207.409	-60.086	1503.4	225.096	-6.08299	1245.49	206.557	-214.449	1426.19	217.064	-305.385	1217.75	161.069	1.26119	1302.98	390.622	-148.913	1469.05	477.142	-165.947	1246.07	499.424	-172.995	1146.46	522.692	-276.089	1003.6	481.226	-320.016	929.549	545.796	-287.671	928.064	531.821	-346.008	870.467
7813	0	256.677	-282.811	1642.42	160.704	-291.773	1637.49	264.596	-131.95	1687.15	120.811	-149.569	1673.21	207.172	-72.6546	1505.4	223.881	-18.3766	1247.27	206.497	-226.58	1428.08	217.167	-317.255	1219.6	160.177	-10.8426	1305.31	390.762	-161.044	1470.25	476.166	-173.977	1246.04	498.115	-179.458	1146.33	521.542	-278.585	1001.13	480.634	-320.631	925.982	544.746	-288.204	925.296	530.695	-344.427	865.618
7814	0	256.787	-295.378	1643.98	160.638	-304.468	1639.18	264.678	-144.691	1688.75	121.209	-162.43	1675.1	206.894	-85.2774	1507.23	223.118	-30.5851	1249.33	206.317	-239.25	1429.74	216.756	-329.227	1221.22	159.19	-22.7864	1307.54	390.733	-173.068	1471.59	475.233	-181.77	1246.26	496.961	-185.395	1146.7	520.144	-280.834	998.844	479.374	-320.973	922.625	543.715	-288.144	923.189	529.525	-342.557	861.351
7815	0	256.668	-307.97	1645.26	160.476	-317.144	1640.52	264.391	-157.537	1690.01	120.818	-174.967	1676.82	206.548	-97.8683	1508.85	222.49	-42.8939	1250.83	206.105	-251.773	1430.98	216.318	-341.298	1222.62	158.135	-35.2899	1309.4	390.428	-185.346	1472.47	474.278	-189.533	1246.44	495.538	-191.281	1146.9	518.822	-282.455	996.819	478.027	-320.93	919.45	542.331	-287.881	920.61	528.418	-340.638	857.484
7816	0	256.413	-320.582	1646.13	160.284	-329.819	1641.64	264.854	-169.902	1691.64	120.68	-187.571	1678.26	206.27	-110.389	1510.32	221.75	-55.2588	1252.31	205.808	-264.215	1432	215.834	-353.31	1223.71	157.256	-47.7824	1311.05	390.281	-197.566	1473.39	473.394	-197.131	1246.71	494.044	-196.905	1146.93	517.354	-283.972	994.788	476.655	-320.761	916.352	540.474	-287.272	918.165	527.275	-338.503	854.056
7817	0	256.122	-333.308	1646.93	159.99	-342.516	1642.64	264.469	-182.625	1692.39	120.531	-200.218	1679.34	205.924	-123.054	1511.46	221.496	-67.4418	1253.5	205.552	-276.792	1432.91	215.173	-365.095	1224.65	156.41	-60.3451	1312.3	390.019	-209.802	1473.99	472.331	-204.67	1246.86	492.399	-202.355	1146.98	515.746	-285.128	992.765	475.412	-320.158	913.74	539.013	-286.206	916.004	526.085	-336.481	850.872
7818	0	255.861	-345.995	1647.6	159.784	-355.078	1643.45	264.33	-195.307	1693.13	120.325	-212.909	1680.08	205.328	-135.94	1511.98	221.153	-79.4855	1254.25	205.145	-289.402	1433.42	214.257	-376.921	1225.05	155.593	-72.8938	1313.01	389.709	-222.315	1474.39	471.058	-212.421	1246.69	490.248	-208.004	1146.39	513.891	-286.218	990.682	473.797	-319.622	911.089	536.828	-285.444	913.851	524.647	-334.561	848.055
7819	0	255.607	-358.583	1647.87	159.484	-367.836	1643.84	263.913	-207.997	1693.22	119.893	-225.673	1680.46	205.181	-148.572	1512.43	220.979	-91.9441	1254.65	204.847	-302.054	1433.63	213.526	-388.645	1225.43	154.91	-85.4166	1313.61	389.473	-234.831	1474.44	469.789	-220.161	1246.32	489.074	-212.667	1146.72	512.086	-287.176	988.522	471.909	-318.651	907.992	534.623	-284.218	911.504	523.627	-331.832	845.276
7820	0	255.316	-371.227	1647.84	159.474	-380.32	1643.95	263.803	-220.584	1693.35	119.646	-238.598	1680.38	204.738	-161.418	1512.61	220.631	-104.371	1254.82	204.543	-314.822	1433.62	212.669	-400.477	1225.16	154.247	-97.9756	1313.96	389.236	-247.347	1474.32	468.568	-227.995	1245.84	487.382	-217.98	1146.45	510.074	-288.135	986.29	469.946	-317.895	905.084	532.6	-282.796	909.4	521.809	-329.794	842.603
7821	0	255.049	-383.962	1647.72	158.861	-393.404	1643.74	263.109	-233.405	1692.84	119.097	-251.304	1680.3	204.347	-174.302	1512.34	220.638	-116.161	1254.98	203.943	-327.468	1433.31	211.565	-412.421	1224.54	153.567	-110.559	1313.83	388.815	-260.191	1473.72	467.356	-236.059	1245.24	485.495	-223.151	1146.13	508.176	-289.051	984.239	468.102	-316.489	902.622	530.03	-281.649	907.282	519.906	-327.418	839.853
7822	0	254.766	-396.811	1647.21	158.474	-406.42	1643.1	262.088	-246.445	1691.86	118.674	-264.304	1679.76	203.545	-187.511	1511.73	220.325	-128.712	1254.39	203.432	-340.212	1432.63	210.534	-424.424	1223.61	153.19	-123.017	1313.56	388.48	-273.226	1472.91	465.825	-244.286	1244.26	483.517	-228.652	1145.51	506.317	-289.87	982.149	465.861	-315.613	900.091	527.199	-280.77	904.566	517.822	-325.279	837.247
7823	0	254.65	-409.616	1646.47	158.386	-419.457	1642.47	261.958	-259.091	1691.38	118.425	-277.124	1679.31	203.249	-200.548	1511.15	220.304	-140.989	1253.99	203.065	-352.988	1431.59	209.645	-436.526	1222.12	152.81	-135.546	1313	388.282	-286.143	1472.03	464.85	-252.063	1243.66	481.999	-234.206	1145.22	503.845	-291.036	979.819	463.59	-315.699	897.411	524.966	-279.349	902.885	515.454	-323.092	834.584
7824	0	254.233	-422.655	1645.56	157.96	-432.68	1641.48	261.072	-272.296	1690.19	117.882	-290.371	1678.24	203.158	-213.423	1510.56	220.539	-153.317	1253.63	202.532	-366.073	1430.4	208.735	-448.741	1220.27	152.642	-147.859	1312.64	387.981	-299.231	1470.97	464.121	-260.076	1243.31	480.148	-240.005	1144.94	501.79	-292.239	978.123	461.264	-315.078	894.976	522.724	-278.307	901.521	513.052	-320.92	832.118
7825	0	253.866	-435.863	1644.51	157.644	-445.86	1640.14	260.716	-285.334	1689.31	117.351	-303.665	1676.9	202.726	-226.623	1509.59	220.692	-165.751	1252.87	201.852	-378.81	1428.91	207.714	-461.095	1218.42	152.461	-160.272	1311.81	387.603	-312.549	1469.71	463.071	-268.568	1242.53	478.402	-245.856	1144.78	499.791	-293.688	976.49	458.993	-314.779	892.8	520.025	-277.472	899.598	510.44	-318.748	829.672
7826	0	253.425	-449.232	1642.97	157.234	-459.262	1638.61	260.069	-298.695	1687.73	116.718	-317.061	1675.53	202.223	-239.92	1508.34	221.364	-178.222	1251.81	201.423	-391.825	1427.1	206.844	-473.739	1216.26	152.542	-172.682	1310.85	387.321	-325.918	1468.19	462.29	-277.045	1241.63	476.527	-252.111	1144.16	497.912	-295.422	974.578	456.706	-314.938	890.242	517.817	-276.996	898.358	507.872	-316.751	827.065
7827	0	253.043	-462.632	1641.24	156.981	-472.657	1636.83	259.639	-312.061	1686.09	116.217	-330.542	1673.64	202.241	-253.136	1506.92	222.014	-190.828	1250.72	200.777	-404.674	1425.32	205.993	-486.629	1213.88	152.708	-185.217	1309.57	387.219	-339.419	1466.49	461.705	-285.357	1240.63	474.647	-258.754	1143.4	496.032	-297.395	972.894	454.393	-315.695	888.186	514.871	-276.833	896.47	505.304	-314.664	824.548
7828	0	252.563	-476.325	1639.26	156.522	-486.247	1634.83	259.065	-325.72	1684.21	116.119	-344.454	1671.24	202.202	-266.457	1505.32	222.338	-203.672	1249.15	200.363	-417.566	1423.18	205.262	-499.58	1211.61	153.051	-197.775	1308.25	387.096	-353.082	1464.85	461.08	-294.753	1240.04	472.676	-265.79	1142.82	494.399	-299.638	971.72	452.768	-316.366	886.93	512.832	-276.773	895.65	502.749	-312.732	822.284
7829	0	252.246	-490.13	1637.44	155.952	-499.914	1632.63	258.505	-339.667	1682.23	115.651	-357.928	1669.38	202.144	-279.841	1503.74	223.333	-216.213	1247.97	199.916	-430.579	1420.98	204.501	-512.646	1209.16	153.365	-210.364	1306.81	386.969	-366.925	1463.24	460.381	-304.098	1239.3	470.893	-273.208	1142.54	492.758	-302.476	970.657	450.686	-317.892	885.146	510.358	-277.327	894.833	500.166	-311.38	820.29
7830	0	251.834	-503.838	1635.13	155.525	-513.754	1630.08	258.368	-353.542	1680.41	115.224	-371.712	1667.25	202.419	-293.106	1502.1	224.248	-229.006	1246.73	199.791	-443.684	1418.76	203.98	-525.694	1206.6	153.883	-223.142	1305.33	387.103	-380.737	1461.47	459.932	-313.671	1238.59	469.147	-281.114	1142.24	491.132	-305.864	969.718	450.331	-319.722	884.758	508.45	-278.462	894.488	497.835	-310.103	818.498
7831	0	251.264	-517.701	1632.34	155.53	-527.295	1627.77	258.253	-367.509	1678.47	114.755	-385.427	1665.05	202.785	-306.482	1500.25	225.018	-241.941	1245.14	199.582	-456.861	1416.48	203.456	-538.841	1204.25	154.432	-236.064	1303.55	387.19	-394.452	1459.76	459.601	-323.431	1238.06	467.391	-289.413	1141.59	489.754	-309.756	968.98	448.467	-321.46	884.047	506.633	-279.836	894.584	495.645	-309.098	817.064
7832	0	250.996	-531.845	1629.98	154.863	-541.257	1624.89	258.301	-381.627	1676.41	114.741	-399.217	1662.68	203.148	-319.799	1498.37	225.719	-254.834	1243.37	199.42	-470.083	1414.1	202.852	-552.155	1202.09	155.062	-248.92	1301.82	387.203	-408.433	1457.86	458.898	-333.793	1236.88	465.979	-298.347	1141.39	488.521	-314.254	968.565	447.829	-324.049	883.868	505.155	-282.221	894.815	493.246	-308.696	815.548
7833	0	250.902	-545.851	1627.4	154.711	-555.032	1622.05	258.406	-395.779	1674.19	115.621	-413.161	1659.92	203.699	-333.098	1496.46	226.53	-267.718	1241.41	199.512	-483.35	1411.73	202.538	-565.223	1200.26	155.74	-261.909	1299.9	387.511	-422.425	1455.98	458.323	-345.079	1236.06	464.505	-307.788	1140.82	487.475	-319.52	967.955	446.804	-328.064	882.899	503.741	-285.363	895.148	491.306	-308.957	814.266
7834	0	250.886	-559.828	1624.5	154.753	-568.828	1619.29	258.784	-409.99	1671.89	115.532	-426.978	1657.56	204.439	-346.251	1494.28	227.25	-281.279	1239.26	199.77	-496.642	1409.57	202.446	-578.335	1198.2	156.438	-275.046	1297.72	388.004	-436.376	1453.85	458.111	-356.446	1234.84	463.328	-317.833	1140.02	486.779	-325.545	967.396	446.192	-332.578	881.98	502.447	-289.577	895.24	489.446	-309.8	813.246
7835	0	251.05	-573.938	1621.61	154.796	-582.598	1616.48	259.203	-424.261	1669.41	115.897	-440.725	1655.32	205.325	-359.461	1491.94	228.096	-294.412	1237.06	200.01	-510.016	1407.36	202.364	-591.821	1196.23	157.256	-288.222	1295.51	388.461	-450.236	1451.58	457.965	-368.13	1233.45	462.311	-328.33	1139.01	485.947	-332.426	966.5	445.384	-337.844	880.751	501.712	-294.676	895.364	488.273	-311.18	812.729
7836	0	251.271	-587.711	1618.74	155.064	-596.307	1613.75	259.755	-438.481	1666.98	116.448	-454.821	1652.81	206.272	-372.603	1489.62	228.539	-308.049	1234.4	200.368	-523.392	1405.33	202.476	-605.215	1194.45	157.994	-301.61	1293.04	389.207	-464.104	1449.45	457.885	-380.531	1231.48	461.688	-339.446	1137.76	486.026	-340	965.935	445.197	-343.413	879.913	501.168	-300.85	895.142	486.708	-313.391	812.225
7837	0	251.991	-601.747	1616.46	155.765	-610.061	1611.48	260.666	-452.49	1664.58	117.369	-468.508	1650.81	207.437	-385.885	1487.35	228.927	-321.904	1231.97	200.944	-536.915	1403.44	202.74	-618.666	1192.73	158.574	-315.145	1290.65	389.84	-478.169	1446.99	457.882	-393.263	1229.35	461.13	-351.247	1136.22	485.715	-348.617	964.565	445.277	-350.263	878.939	501.401	-308.142	894.94	485.173	-316.753	810.768
7838	0	252.788	-615.48	1614.25	156.536	-623.762	1609.49	262.256	-466.146	1662.72	118.329	-482.029	1649.2	208.406	-399.4	1485.19	229.595	-335.598	1229.82	201.506	-550.516	1401.46	203.122	-632.279	1190.92	159.477	-328.775	1288.67	390.727	-492.005	1444.76	458.292	-406.128	1227.63	461.316	-363.251	1134.91	486.027	-357.93	963.566	445.708	-358.021	878.012	502.262	-316.237	894.77	484.963	-321.442	810.67
7839	0	253.853	-629.252	1612.28	157.482	-637.401	1607.8	263.465	-479.855	1660.63	119.77	-495.56	1647.45	209.2	-413.449	1482.96	229.775	-349.566	1227.68	202.069	-564.296	1399.68	203.489	-646.103	1189.31	159.997	-342.632	1286.65	391.636	-505.893	1442.71	458.683	-419.53	1225.6	461.739	-375.613	1133.48	486.617	-368.18	962.414	445.98	-366.68	876.558	503.133	-325.653	894.312	484.192	-327.223	809.614
7840	0	255.127	-642.852	1610.71	158.709	-651.001	1606.59	264.986	-493.343	1658.55	121.009	-508.946	1645.89	210.997	-426.639	1481.7	229.956	-363.584	1225.75	202.829	-578.113	1398.08	203.94	-660.089	1187.81	160.626	-356.653	1284.86	392.463	-520.049	1440.41	458.949	-433.129	1223.37	462.107	-388.451	1131.69	487.402	-379.359	960.969	447.046	-376.145	875.775	504.261	-336.031	893.523	483.968	-334.439	808.694
7841	0	256.657	-656.417	1609.27	160.32	-664.53	1605.58	266.852	-506.548	1656.91	122.693	-522.345	1644.67	211.92	-440.559	1480.05	230.316	-377.763	1224.24	203.764	-592.002	1396.49	204.624	-674.265	1186.17	161.131	-370.744	1283.36	393.472	-533.861	1438.34	459.782	-446.798	1221.54	462.934	-401.751	1130.16	488.521	-391.127	959.602	448.143	-386.794	874.108	505.924	-347.347	892.746	484.656	-343.292	808.168
7842	0	258.401	-669.665	1608.18	162.029	-677.985	1604.85	268.881	-519.586	1655.45	124.593	-536.014	1643.15	213.103	-454.321	1478.62	230.483	-392.018	1222.58	204.741	-605.986	1395.21	205.405	-688.725	1185.03	161.612	-384.921	1281.94	394.698	-547.746	1436.66	460.683	-460.533	1219.78	463.75	-415.55	1128.25	489.845	-403.657	958.386	449.5	-398.247	872.755	507.791	-359.616	891.746	485.6	-353.383	807.357
7843	0	260.154	-682.958	1607.48	163.685	-691.479	1604.46	270.373	-532.844	1653.78	126.058	-548.893	1642.72	214.461	-468.035	1477.31	230.494	-406.646	1220.9	205.691	-620.019	1394.24	206.157	-703.296	1184.1	162.11	-399.177	1280.65	395.76	-561.78	1434.9	461.624	-474.678	1217.93	464.972	-429.278	1126.66	491.303	-417.015	956.995	450.848	-410.643	871.268	509.511	-372.47	890.926	487.169	-365.116	806.662
7844	0	262.12	-696.314	1607.39	165.529	-704.921	1604.63	272.347	-545.957	1652.93	127.935	-562.081	1642.38	216.057	-481.543	1476.39	230.932	-421.35	1219.58	206.778	-634.013	1393.68	207.286	-717.784	1183.28	162.728	-413.412	1279.56	396.974	-575.591	1433.47	462.437	-489.012	1216.14	466.001	-443.724	1124.96	492.946	-431.091	955.479	452.974	-424.172	870.155	511.506	-386.531	889.518	489.031	-378.16	805.11
7845	0	263.909	-709.604	1607.41	167.427	-718.206	1605.07	274.595	-558.91	1652.5	130.053	-575.393	1642.4	217.507	-495.36	1475.56	231.254	-436.14	1218.29	207.981	-648.01	1393.57	208.146	-732.784	1183.08	163.488	-427.77	1278.63	398.226	-589.509	1432.25	463.564	-503.506	1214.67	467.344	-458.454	1123.46	494.772	-445.89	954.205	455.35	-438.69	868.988	513.85	-401.37	888.48	491.854	-393.006	804.197
7846	0	265.852	-722.823	1607.96	169.423	-731.395	1606.12	276.59	-571.948	1652.17	131.709	-588.332	1642.71	218.604	-509.448	1475.09	231.932	-451	1217.72	209.05	-662.068	1393.82	208.884	-747.898	1183.31	164.45	-442.188	1278.2	399.506	-603.325	1431.54	464.756	-518.313	1213.66	468.851	-473.647	1122.32	496.705	-461.317	953.199	457.183	-454.467	867.13	516.274	-417.273	887.24	494.617	-409.113	802.645
7847	0	267.693	-736.01	1608.7	171.085	-744.687	1607.32	278.587	-584.956	1652.07	133.651	-601.463	1643.31	220.048	-523.207	1475.01	232.83	-465.739	1217.49	210.084	-676.204	1394.32	209.504	-763.108	1183.77	165.457	-456.562	1278.15	400.666	-617.324	1431.12	466.016	-533.403	1212.9	470.169	-489.225	1121.26	498.658	-477.587	952.352	460.072	-470.8	866.969	518.448	-433.973	886.302	498.403	-426.858	802.215
7848	0	269.723	-749.375	1609.86	173.021	-758.065	1608.79	280.697	-597.996	1652.32	136.494	-614.779	1644.28	221.268	-536.818	1475.38	233.583	-480.376	1217.44	211.01	-690.257	1394.97	209.842	-777.962	1184.61	166.241	-470.907	1278.09	401.675	-631.231	1431	467.092	-548.785	1212.25	471.605	-505.265	1120.58	500.739	-494.664	951.536	462.636	-488.749	865.659	520.937	-451.506	885.471	502.119	-446.037	801.2
7849	0	271.586	-762.404	1611.2	174.877	-771.42	1610.87	283.044	-610.927	1653.2	137.941	-627.809	1645.92	222.13	-550.666	1476.3	234.494	-494.692	1217.97	211.842	-704.231	1395.95	210.115	-792.591	1185.66	167.224	-485.034	1278.81	402.447	-644.987	1431.29	467.95	-564.426	1211.94	473.041	-521.533	1119.95	502.982	-512.448	951.128	465.047	-507.305	864.557	523.405	-469.865	884.604	505.969	-466.587	800.132
7850	0	273.409	-775.85	1612.5	176.817	-784.836	1612.86	284.771	-624.025	1653.94	140.003	-641.248	1647.87	222.408	-564.721	1477.49	235.288	-508.611	1219.47	212.405	-718.096	1397.21	210.072	-806.892	1186.93	167.671	-499.251	1280.08	402.598	-658.166	1431.77	468.843	-580.351	1212.02	474.416	-538.233	1119.55	505.014	-531.131	950.9	467.959	-527.08	864.027	525.706	-489.187	884.057	509.951	-488.156	799.377
7851	0	275.268	-788.816	1613.71	178.68	-798.189	1614.78	286.542	-637.041	1654.82	141.629	-654.743	1649.77	222.391	-578.563	1479.09	235.581	-522.434	1220.91	212.873	-731.779	1398.76	209.846	-820.833	1188.17	167.954	-513.161	1281.67	402.806	-671.399	1432.89	469.726	-596.308	1212.36	475.727	-555.431	1119.51	507.197	-550.548	950.779	470.566	-547.656	863.737	528.454	-509.515	883.617	514.123	-511.268	798.827
7852	0	277.129	-801.636	1614.7	180.651	-811.553	1616.39	288.049	-649.809	1655.43	143.225	-668.062	1651.48	222.173	-592.336	1480.45	235.728	-535.786	1222.46	213.263	-745.296	1400.05	209.927	-834.342	1189.43	167.714	-527.004	1283.26	402.763	-684.508	1433.95	470.242	-612.421	1212.43	476.96	-572.725	1119.25	509.335	-570.626	950.727	473.516	-569.37	863.602	531.043	-530.835	883.03	517.824	-535.616	797.797
7853	0	278.65	-814.414	1615.36	182.259	-824.842	1617.91	289.214	-662.467	1656.16	144.037	-681.517	1653.27	221.811	-605.302	1481.83	235.355	-549.087	1223.6	213.489	-758.545	1401.33	209.97	-847.666	1190.71	167.195	-540.401	1284.71	402.635	-697.126	1435.34	470.602	-628.865	1212.71	478.542	-589.869	1119.48	511.305	-591.404	950.883	476.019	-592.01	863.116	533.527	-553.399	882.326	521.582	-560.684	797.742
7854	0	279.838	-827.085	1616.11	183.542	-838.134	1619	289.473	-675.347	1656.77	144.729	-695.255	1654.79	221.469	-618.018	1483.06	235.309	-561.931	1224.81	213.52	-771.597	1402.61	209.911	-860.742	1192.07	166.391	-553.564	1286.03	402.477	-709.618	1436.91	471.013	-645.216	1213.1	479.713	-607.274	1119.48	513.227	-612.846	950.967	478.558	-615.238	863.5	535.488	-576.585	881.32	525.513	-586.758	797.782
7855	0	280.777	-839.893	1616.89	184.484	-851.277	1619.85	289.698	-688.355	1658	145.141	-708.579	1656.53	221.258	-630.561	1483.89	234.979	-574.775	1225.74	213.508	-784.391	1403.87	210.021	-873.369	1193.44	165.849	-566.363	1287.08	402.186	-722.141	1438.08	471.354	-661.525	1213.5	481.09	-624.685	1119.5	514.978	-634.692	951.133	480.894	-639.405	863.685	537.817	-599.958	880.935	529.168	-613.77	798.378
7856	0	281.224	-852.734	1617.67	185.189	-864.271	1620.81	289.788	-701.294	1659.63	145.288	-721.977	1658.05	220.877	-643.668	1484.77	234.568	-587.649	1226.45	213.434	-797.007	1405.35	210.58	-885.268	1194.84	165.436	-579.018	1288.25	402.235	-734.359	1439.92	471.787	-677.689	1214.24	482.221	-642.383	1119.56	516.783	-656.837	951.605	482.704	-664.775	862.982	539.649	-624.158	880.634	532.34	-641.523	798.518
7857	0	281.369	-865.426	1618.66	185.343	-877.264	1621.48	289.888	-714.026	1661.66	144.981	-735.018	1659.68	221.182	-655.16	1486.34	234.754	-600.353	1227.79	213.259	-809.43	1406.99	210.453	-898.004	1196.4	165.2	-591.641	1289.11	402.067	-746.763	1441.46	472.257	-693.838	1215.17	483.567	-659.942	1120.11	518.317	-679.484	952.237	484.33	-689.686	864	541.516	-649.064	880.568	535.253	-669.909	799.705
7858	0	281.158	-878.136	1619.62	185.084	-890.157	1622.22	289.295	-727.021	1663.55	144.497	-748.266	1661.26	220.749	-667.958	1487.31	234.617	-613.122	1228.86	212.908	-821.787	1408.53	210.542	-910.037	1197.81	165.444	-604.023	1290.22	401.865	-759.142	1443.19	472.765	-709.777	1216.44	484.736	-677.701	1120.51	519.727	-702.389	953.219	484.763	-716.918	863.506	542.914	-674.037	880.748	537.991	-698.797	801.096
7859	0	280.9	-890.766	1621.07	184.657	-902.806	1623.43	288.606	-739.901	1665.56	144.146	-761.251	1662.82	220.798	-680.182	1489.03	234.921	-625.91	1230.41	212.651	-834.132	1410.23	210.531	-922.495	1199.4	166.013	-616.466	1291.57	401.757	-771.751	1444.94	473.498	-725.402	1218	486.274	-694.809	1121.44	521.199	-725.457	954.633	486.277	-743.142	865.258	544.07	-699.948	881.042	540.516	-728.221	803.375
7860	0	280.139	-903.468	1622.48	183.899	-915.586	1624.59	288.094	-752.624	1668.06	142.886	-774.012	1664.69	220.73	-692.531	1490.63	235.446	-638.798	1232.01	212.343	-846.47	1411.89	210.247	-935.168	1201.18	166.76	-628.758	1293.01	401.607	-784.327	1446.91	474.111	-740.926	1219.75	487.738	-712.19	1122.44	522.441	-748.797	956.425	487.551	-770.086	867.581	545.059	-725.748	882.233	542.548	-758.194	806.195
7861	0	279.104	-916.264	1624.06	182.92	-928.308	1625.79	286.91	-765.626	1670.2	141.964	-786.871	1666.28	220.513	-705.029	1492.67	236.308	-651.272	1234.02	211.846	-858.805	1413.75	209.749	-948.04	1203.07	167.442	-641.154	1294.7	401.34	-797.181	1448.81	474.795	-756.257	1221.52	488.879	-729.571	1123.46	523.447	-772.249	958.415	488.841	-797.185	870.682	545.756	-752.077	883.226	544.014	-788.483	809.899
7862	0	278.018	-929.011	1625.9	181.794	-940.849	1627.04	286.002	-778.523	1672.55	140.996	-799.547	1667.74	220.234	-717.593	1494.27	237.029	-663.784	1235.68	211.33	-871.222	1415.54	209.309	-960.822	1205.08	168.353	-653.502	1296.07	400.973	-810.247	1450.68	475.483	-771.347	1223.32	489.923	-747.054	1124.45	524.165	-795.947	960.673	490.17	-824.328	875.049	546.047	-778.777	884.762	545.119	-818.935	813.664
7863	0	276.744	-941.778	1627.73	180.383	-953.6	1628.43	284.56	-791.58	1674.39	139.563	-811.986	1669.05	219.831	-730.276	1495.84	237.728	-676.243	1237.37	210.988	-883.592	1417.39	208.968	-973.527	1207.07	169.322	-665.782	1297.76	400.628	-823.355	1452.56	476.235	-786.324	1225.48	490.932	-764.555	1125.74	524.779	-819.618	963.356	490.079	-852.404	878.945	545.964	-805.619	886.596	545.817	-849.559	818.283
7864	0	275.246	-954.669	1629.55	178.917	-966.06	1629.66	283.572	-804.381	1676.58	138.632	-824.615	1670.35	219.806	-742.802	1497.61	238.375	-688.644	1239.11	210.546	-896.159	1419.02	208.584	-986.214	1209	170.191	-678.2	1299.36	400.244	-836.549	1454.75	476.909	-801.185	1227.56	492.147	-781.996	1127.31	525.017	-843.613	966.495	491.076	-879.413	884.689	544.122	-834.033	887.754	546.005	-880.259	823.764
7865	0	273.68	-967.623	1631.34	177.548	-978.09	1631.04	282.039	-817.539	1678.28	137.688	-836.976	1671.54	219.458	-755.576	1499.15	239.006	-701.086	1240.76	210.114	-908.738	1420.6	208.164	-998.893	1210.78	171.035	-690.695	1300.78	399.862	-849.812	1457.01	477.61	-816.083	1230.08	493.312	-799.561	1129.16	525.074	-867.702	970.174	490.533	-907.045	890.542	545.341	-859.86	893.1	545.691	-911.01	829.825
7866	0	272.197	-980.411	1633.14	175.882	-990.553	1632.2	280.145	-830.94	1679.41	136.351	-849.403	1672.24	219.275	-768.374	1500.59	239.725	-713.609	1242.5	209.826	-921.323	1421.9	207.998	-1011.41	1212.48	171.716	-703.186	1302.16	399.517	-863.014	1459.24	478.187	-831.201	1232.22	494.635	-817.174	1131.13	525.049	-891.814	974.129	489.988	-934.436	896.583	542.956	-888.317	894.618	544.928	-941.702	836.514
7867	0	270.715	-993.316	1634.55	174.341	-1003.02	1633.09	279.918	-843.224	1681.88	134.966	-861.448	1672.94	219.137	-781.194	1501.91	240.215	-726.176	1243.73	209.455	-934.068	1422.95	207.922	-1023.75	1213.99	172.399	-715.745	1303.3	399.139	-876.209	1461.31	478.8	-846.376	1234.33	495.726	-835.005	1132.83	524.935	-916.258	978.656	489.191	-961.844	903.084	541.714	-916.16	898.547	543.639	-972.302	843.506
7868	0	269.252	-1006.32	1635.92	172.909	-1015.52	1633.84	278.312	-856.5	1682.88	133.626	-873.877	1673.43	219.126	-794.075	1503	240.735	-738.753	1245.13	209.098	-946.822	1423.81	207.817	-1036	1215.24	173.096	-728.344	1304.36	398.71	-889.539	1463.26	479.544	-861.677	1236.62	497.096	-852.859	1134.7	524.381	-940.61	983.073	487.746	-989.108	909.982	542.346	-942.889	904.753	541.917	-1002.9	850.869
7869	0	267.801	-1019.31	1636.96	171.409	-1028.03	1634.47	277.3	-869.466	1683.94	132.695	-886.281	1673.93	219.056	-806.951	1503.92	241.169	-751.482	1246.04	208.797	-959.633	1424.41	207.86	-1048.05	1215.95	173.683	-741.008	1305.15	398.358	-902.82	1464.85	480.178	-877.145	1238.5	498.595	-870.781	1136.6	523.913	-965.083	987.811	486.08	-1015.98	916.959	541.002	-970.691	909.489	539.662	-1033.26	858.426
7870	0	266.524	-1032.3	1637.66	170.125	-1040.73	1634.83	276.733	-882.208	1684.91	132.124	-898.845	1673.79	218.809	-819.813	1504.34	241.386	-764.288	1246.47	208.453	-972.479	1424.71	207.896	-1060.12	1216.19	174.276	-753.767	1305.49	397.886	-916.222	1465.96	480.85	-893.032	1239.87	499.927	-888.862	1137.87	522.983	-989.315	992.313	484.119	-1042.59	924.019	539.82	-998.433	914.26	536.996	-1063.36	866.232
7871	0	265.346	-1045.32	1638.13	168.855	-1053.48	1634.84	275.346	-895.602	1684.67	130.62	-910.992	1673.76	218.804	-832.771	1504.78	241.863	-777.114	1246.74	208.148	-985.412	1424.58	208.028	-1072.16	1216.19	174.816	-766.573	1305.42	397.469	-929.551	1466.62	481.535	-908.978	1240.89	501.36	-907.031	1138.85	522.219	-1013.74	996.753	481.934	-1068.9	931.142	538.338	-1026.32	919.277	533.929	-1093.18	873.96
7872	0	264.287	-1058.35	1638.39	167.741	-1066.3	1634.67	274.848	-908.484	1684.66	130.087	-923.602	1673.13	218.821	-846.228	1504.31	242.391	-789.929	1246.65	207.858	-998.5	1424.29	208.25	-1084.19	1215.79	175.258	-779.43	1305	396.983	-943.038	1466.79	482.206	-925.196	1241.56	502.717	-925.492	1139.38	521.105	-1037.93	1001.25	479.512	-1094.84	938.295	534.936	-1054.95	922.862	530.425	-1122.91	881.737
7873	0	263.375	-1071.62	1638.21	166.933	-1079.1	1634.21	274.215	-921.657	1684.26	129.711	-936.591	1672.26	218.594	-859.234	1503.84	242.804	-802.837	1246.28	207.654	-1011.6	1423.64	208.457	-1096.38	1214.91	175.846	-792.259	1304.74	396.704	-956.379	1466.79	482.894	-941.587	1241.84	504.053	-944.178	1139.66	519.925	-1062.04	1005.56	476.887	-1120.57	945.386	534.995	-1081.44	929.435	526.738	-1152	889.725
7874	0	262.608	-1084.87	1637.52	166.215	-1092.16	1633.55	273.854	-934.779	1683.66	129.402	-949.55	1671.34	218.235	-872.642	1502.96	243.138	-815.388	1245.95	207.404	-1024.73	1422.59	208.672	-1108.73	1213.79	176.156	-805.264	1304.15	396.304	-969.871	1466.3	483.705	-958.039	1241.92	505.612	-962.824	1140.02	518.829	-1085.95	1009.94	474.129	-1145.9	952.132	532.939	-1108.7	934.493	522.934	-1180.45	897.717
7875	0	262.047	-1098.15	1636.67	165.734	-1105.23	1632.85	272.646	-948.607	1681.94	129.088	-962.682	1670.06	217.661	-886.048	1502.02	242.827	-828.35	1244.91	207.175	-1037.99	1421.25	208.806	-1121.35	1212.19	176.326	-818.318	1303.39	395.91	-983.216	1465.46	484.381	-974.743	1241.57	507.14	-981.506	1140.29	517.387	-1109.69	1014.11	471.297	-1170.58	958.698	531.09	-1135.61	939.581	519.017	-1208.58	905.612
7876	0	261.503	-1111.66	1635.3	165.016	-1118.68	1631.37	272.865	-961.66	1681.32	129.152	-975.662	1668.82	217.184	-899.543	1500.98	242.548	-840.758	1244.39	206.856	-1051.27	1419.72	209.08	-1133.98	1210.24	175.853	-831.402	1302.24	395.288	-996.703	1464.11	484.849	-991.518	1240.97	508.585	-1000.14	1140.33	515.777	-1133.04	1018.08	468.224	-1194.85	964.997	528.958	-1162.07	944.751	514.885	-1236.14	913.432
7877	0	261.304	-1124.95	1633.88	164.872	-1131.98	1629.96	273.129	-974.657	1680.44	128.289	-989.134	1667.59	216.792	-912.642	1499.9	241.656	-853.354	1243.59	206.669	-1064.58	1418.03	209.234	-1147.07	1208.13	175.211	-844.619	1301.16	394.759	-1009.9	1462.78	485.206	-1008.47	1240.33	509.46	-1019.34	1140.18	514.207	-1156.33	1021.96	465.409	-1218.75	971.124	527.327	-1188.07	950.259	510.867	-1262.94	921.171
7878	0	261.035	-1138.58	1631.95	164.591	-1145.59	1628.12	272.853	-988.497	1678.85	128.166	-1002.78	1666.22	216.071	-926.228	1498.68	239.865	-866.102	1242.09	206.409	-1077.92	1416.1	209.537	-1160.15	1205.85	174.326	-857.474	1300.01	394.214	-1023.08	1461.18	485.505	-1025.33	1239.66	510.259	-1038.52	1139.78	512.556	-1179.07	1025.73	462.503	-1241.99	976.877	524.727	-1213.49	954.894	506.752	-1289.09	928.639
7879	0	260.919	-1151.93	1629.86	164.419	-1159.21	1626.08	272.843	-1001.83	1677.42	127.634	-1016.47	1664.99	215.17	-939.922	1497.3	238.684	-878.754	1241.02	206.086	-1091.16	1414.17	209.604	-1173.73	1203.59	173.27	-870.607	1298.85	393.491	-1036.05	1459.29	485.563	-1042.4	1238.89	510.838	-1057.59	1139.32	510.768	-1201.47	1029.44	459.511	-1264.88	982.353	522.703	-1238.55	960.154	502.819	-1314.46	935.828
7880	0	260.688	-1165.52	1627.4	164.299	-1172.87	1623.79	272.631	-1015.54	1675.63	127.575	-1030.36	1663.22	214.605	-953.207	1495.85	237.184	-891.523	1239.84	205.818	-1104.52	1412.13	209.864	-1187.24	1201.18	171.777	-883.945	1297.29	392.818	-1049.16	1457.33	485.246	-1059.5	1237.79	510.98	-1076.74	1138.9	509.04	-1223.38	1032.9	456.739	-1287.18	987.535	520.608	-1262.46	964.853	499.236	-1339.02	942.799
7881	0	260.516	-1179.11	1624.86	164.217	-1186.44	1621.59	272.384	-1029.29	1673.57	127.283	-1044.15	1661.42	213.788	-966.57	1494.04	234.932	-904.615	1238.05	205.44	-1117.84	1410.08	209.982	-1201.11	1198.93	170.27	-897.037	1295.78	392.061	-1062.04	1455.21	484.781	-1076.52	1236.74	511.055	-1095.74	1138.3	507.153	-1244.9	1035.94	454.024	-1308.96	992.179	518.815	-1285.58	969.825	496.09	-1362.81	949.596
7882	0	260.335	-1192.63	1622.38	163.989	-1200.05	1619.22	272.106	-1042.97	1671.31	127.075	-1058.07	1659.81	212.772	-979.964	1492.02	233.882	-917.735	1236.18	205.014	-1131.26	1407.88	209.947	-1215.1	1196.81	168.49	-910.321	1294.08	391.25	-1074.79	1453.04	484.092	-1093.39	1235.68	510.589	-1114.36	1137.64	505.156	-1265.84	1038.82	451.565	-1330.05	996.703	516.527	-1308.13	973.752	492.994	-1385.76	956.019
7883	0	260.084	-1206.13	1619.88	163.592	-1213.69	1616.78	272.002	-1056.64	1669.25	126.806	-1071.53	1657.8	211.686	-993.346	1489.62	231.465	-931.124	1233.94	204.376	-1144.62	1405.73	209.614	-1229.11	1194.74	166.651	-923.858	1291.87	390.398	-1087.64	1450.86	483.039	-1110.17	1234.39	509.985	-1132.68	1136.99	503.424	-1286.09	1041.75	449.13	-1350.69	1000.77	514.605	-1329.8	977.924	490.118	-1407.91	961.827
7884	0	259.719	-1219.47	1617.5	163.222	-1227.22	1614.48	271.818	-1069.95	1667.2	126.485	-1085.38	1655.59	210.637	-1006.76	1487.24	229.445	-944.63	1231.38	203.709	-1158.04	1403.6	209.456	-1242.7	1192.65	164.996	-937.298	1289.96	389.376	-1100.54	1448.64	481.79	-1126.84	1233.11	509.147	-1150.61	1136.32	501.56	-1305.69	1044.25	447.089	-1370.78	1004.64	512.324	-1351.53	980.669	487.602	-1429.26	967.253
7885	0	259.226	-1232.9	1615.04	162.852	-1240.75	1612.38	271.176	-1083.33	1665.01	125.671	-1098.93	1654.04	209.669	-1020.02	1485.09	227.912	-958.238	1229.3	202.911	-1171.53	1401.61	208.955	-1256.24	1190.83	163.122	-950.929	1287.57	388.491	-1113.12	1446.68	480.465	-1142.98	1231.95	507.933	-1168.08	1135.52	499.888	-1324.87	1046.3	445.194	-1390.27	1008.09	510.601	-1371.74	983.85	485.615	-1449.7	972.179
7886	0	258.545	-1246.02	1612.91	162.225	-1254.13	1610.4	270.256	-1096.48	1662.9	124.729	-1112.53	1652.09	208.624	-1033.32	1483.16	226.215	-972.283	1226.94	201.959	-1184.96	1399.79	207.845	-1270.14	1189.2	162.463	-964.492	1286.33	387.469	-1126.05	1444.99	479.085	-1158.8	1231.03	506.722	-1185	1134.95	498.209	-1343.15	1048.28	443.436	-1409.14	1011.12	509.015	-1391.19	986.83	483.866	-1469.31	976.509
7887	0	257.63	-1259.26	1610.91	161.426	-1267.45	1608.61	269.123	-1109.51	1660.89	123.77	-1125.73	1650.36	207.147	-1046.76	1480.97	224.814	-986.026	1225	200.8	-1198.67	1398.06	206.176	-1284.33	1187.73	160.438	-978.212	1283.96	386.283	-1139.05	1443.34	477.175	-1174.39	1229.82	505.311	-1201.41	1134.44	496.598	-1360.82	1049.95	441.848	-1427.44	1013.69	507.443	-1409.9	989.091	482.354	-1488.12	980.475
7888	0	256.627	-1272.3	1609.24	160.384	-1280.71	1606.98	267.894	-1122.47	1658.99	122.555	-1138.92	1648.39	205.929	-1060.23	1479.07	223.274	-1000.11	1222.66	199.69	-1212.11	1396.23	204.93	-1298.38	1186.37	159.097	-991.982	1281.81	384.859	-1152.24	1441.78	475.45	-1189.48	1228.64	503.68	-1217.39	1133.51	495.268	-1377.94	1051.25	440.652	-1445.05	1015.76	506.092	-1427.8	991.008	481.361	-1506.15	983.794
7889	0	255.434	-1285.25	1607.82	159.05	-1293.91	1605.66	266.488	-1135.13	1657.07	121.082	-1152.05	1646.6	204.574	-1073.7	1477.03	222.287	-1014.13	1220.55	198.326	-1225.89	1394.63	203.989	-1311.79	1184.85	158.036	-1005.91	1279.87	383.558	-1165.74	1440.3	473.663	-1204.13	1227.24	502.026	-1232.95	1132.51	493.853	-1394.27	1051.7	439.602	-1462.02	1017.27	504.822	-1444.77	992.169	480.718	-1523.36	986.319
7890	0	253.812	-1298.19	1606.68	157.465	-1307.04	1604.53	264.671	-1147.88	1655.33	118.969	-1165.12	1644.96	203.012	-1087.2	1475.21	221.395	-1028.15	1218.45	196.74	-1239.59	1393.24	202.287	-1325.68	1183.7	156.665	-1019.64	1277.47	381.978	-1179.39	1439.15	471.784	-1218.3	1225.94	500.316	-1247.89	1131.63	492.716	-1410.17	1052.18	438.576	-1478.39	1018.38	503.643	-1460.89	992.939	480.164	-1539.76	988.183
7891	0	252.071	-1311.24	1606.09	155.657	-1320.13	1603.54	262.611	-1160.54	1653.89	117	-1177.73	1643.19	201.342	-1100.78	1473.21	220.194	-1042.78	1216.15	195.169	-1253.3	1391.79	200.447	-1339.84	1182.52	155.667	-1033.66	1275.44	380.191	-1193.23	1437.6	470.183	-1232.33	1224.51	498.471	-1262.52	1130.46	491.499	-1425.46	1051.97	437.815	-1494.12	1018.96	502.624	-1476.34	993.172	479.906	-1555.38	989.321
7892	0	249.941	-1324.06	1605.4	153.763	-1333	1602.98	260.433	-1173.19	1652.31	115.235	-1190.54	1641.62	199.706	-1114.43	1471.33	219.604	-1057.3	1214.36	193.251	-1267.24	1390.78	198.515	-1354.22	1181.51	154.803	-1047.78	1273.35	378.42	-1207.43	1436.41	468.481	-1246.08	1223.13	496.834	-1276.86	1129.18	490.627	-1439.99	1051.36	437.221	-1509.25	1018.79	501.709	-1491.04	992.629	479.814	-1570.2	989.66
7893	0	247.681	-1336.98	1605.39	151.346	-1346.03	1602.76	257.863	-1185.78	1651.07	113.188	-1203.45	1639.77	197.626	-1128.17	1469.8	218.656	-1072.16	1212.59	191.261	-1281.3	1389.91	196.363	-1368.67	1180.88	153.723	-1062.27	1271.4	376.618	-1221.53	1435.52	466.823	-1259.48	1222.06	495.018	-1290.63	1127.98	489.683	-1453.95	1050.4	436.475	-1523.62	1018.16	500.814	-1504.92	991.789	479.913	-1584.11	989.512
7894	0	245.251	-1349.84	1605.74	148.924	-1359.02	1602.94	255.474	-1198.21	1650.5	109.981	-1216.16	1639.04	195.457	-1141.84	1468.29	217.725	-1086.98	1211.12	188.997	-1295.22	1389.45	194.059	-1383.58	1180.43	152.736	-1076.68	1269.68	374.392	-1235.73	1434.72	465.158	-1272.85	1221.08	493.504	-1304.17	1127.22	488.621	-1467.41	1049.04	435.847	-1537.35	1016.92	499.789	-1518.08	990.014	479.897	-1597.57	988.388
7895	0	242.587	-1362.84	1606.26	146.27	-1371.98	1603.34	252.372	-1210.7	1649.66	107.487	-1228.75	1638.26	193.19	-1155.77	1467.39	216.478	-1102.04	1209.97	186.957	-1309.15	1389.05	192.029	-1398.65	1180.13	151.633	-1091.21	1268.41	372.358	-1250.02	1434.39	463.474	-1285.99	1220.4	491.77	-1317.4	1126.52	487.533	-1480.33	1047.29	435.093	-1550.24	1014.93	498.755	-1530.71	987.898	480.097	-1609.93	986.961
7896	0	239.793	-1375.73	1607.29	143.465	-1385.02	1604.29	249.22	-1223.17	1649.36	104.592	-1241.53	1637.73	190.968	-1169.59	1467.07	215.389	-1116.89	1209.43	184.655	-1323.43	1389.16	189.985	-1413.92	1180.56	150.064	-1105.98	1267.22	370.186	-1264.13	1434.71	462.036	-1298.81	1220.34	490.119	-1330.42	1126.18	486.48	-1492.68	1045.4	434.375	-1562.46	1012.43	497.945	-1542.19	985.781	480.01	-1621.46	984.688
7897	0	236.771	-1388.57	1608.92	140.41	-1398.08	1605.57	245.713	-1235.82	1649.53	101.241	-1254.38	1637.69	188.508	-1183.65	1467.05	214.25	-1131.61	1209.67	182.434	-1337.63	1389.46	188.113	-1429.5	1181.22	148.429	-1120.91	1266.81	368.032	-1278.27	1435.52	460.392	-1311.52	1220.88	488.414	-1342.99	1126.52	485.381	-1504.29	1043.55	433.664	-1573.64	1009.19	497.039	-1553.01	983.036	479.745	-1632.13	981.755
7898	0	233.666	-1401.84	1611.15	137.033	-1411.32	1607.18	242.403	-1248.43	1650.08	97.6127	-1267.28	1637.48	186.937	-1196.87	1468.13	212.871	-1146.01	1210.12	180.357	-1351.92	1390.08	186.365	-1445.12	1182.03	147.197	-1135.8	1266.62	365.914	-1292.68	1436.58	458.809	-1324.46	1221.63	486.996	-1355.42	1127.2	484.138	-1515.33	1041.48	432.728	-1584.19	1005.59	496.29	-1563.04	980.321	479.186	-1642.18	977.96
7899	0	230.158	-1415.24	1613.3	133.815	-1424.53	1609	238.695	-1261.46	1650.99	94.35	-1280.16	1637.94	184.639	-1210.91	1468.9	211.457	-1160.12	1211.18	178.572	-1366.03	1390.95	185.383	-1460.03	1183.09	145.365	-1150.55	1267.12	363.998	-1306.81	1438.29	457.278	-1337.16	1222.71	485.231	-1367.54	1128	483.239	-1525.53	1039.09	431.93	-1593.77	1001.73	495.547	-1572.27	977.127	478.726	-1651.06	973.641
7900	0	226.595	-1428.68	1615.7	130.393	-1437.73	1610.77	235.331	-1274.53	1652.3	90.7538	-1293.26	1638.02	182.941	-1224.82	1470.25	210.011	-1174.05	1212.3	176.933	-1380.15	1392.12	184.109	-1475.02	1184.43	144.213	-1164.66	1268.35	362.04	-1321.02	1440.23	455.724	-1350.01	1224.28	483.67	-1379.34	1129.32	482.116	-1535.18	1036.92	430.979	-1602.59	997.537	494.931	-1580.5	973.843	477.904	-1659.22	968.547
7901	0	223.164	-1442.08	1618.27	126.984	-1451.04	1612.2	231.955	-1287.92	1653.75	87.7088	-1306.19	1638.23	180.285	-1239.5	1471.41	209.198	-1187.54	1214.41	175.38	-1394.01	1393.46	182.901	-1489.54	1185.81	143.109	-1178.29	1269.78	360.279	-1335.28	1442.48	454.12	-1362.79	1226.34	482.346	-1390.73	1131.2	480.96	-1544.27	1034.77	429.942	-1610.52	993.04	494.245	-1588.26	970.559	476.937	-1666.6	962.95
7902	0	219.94	-1455.79	1620.4	123.82	-1464.22	1613.38	228.799	-1301.24	1655.53	84.6989	-1319.32	1638.52	178.808	-1252.97	1473.24	208.47	-1200.9	1216.29	174.106	-1407.68	1394.73	182.121	-1503.37	1187.23	142.313	-1191.74	1271.43	358.58	-1349.36	1445.05	452.569	-1375.73	1228.38	480.72	-1402.04	1132.97	479.965	-1552.9	1032.57	429.088	-1617.6	988.388	493.837	-1595.14	967.188	476.023	-1672.93	956.887
7903	0	217.003	-1469.31	1622.14	121.03	-1477.53	1614.31	225.857	-1314.9	1657.15	82.1503	-1332.51	1638.78	177.113	-1266.53	1474.65	207.29	-1214.07	1218.17	173.077	-1421.14	1395.94	181.591	-1516.59	1188.65	141.285	-1205.07	1272.92	356.789	-1362.86	1447.46	451.002	-1388.56	1230.64	479.436	-1413	1135.07	478.947	-1560.91	1030.22	428.272	-1623.99	983.727	493.507	-1601.07	964.077	474.923	-1678.61	950.033
7904	0	214.573	-1482.82	1623.71	118.571	-1490.83	1615.23	223.374	-1328.4	1659.24	79.7135	-1345.82	1639.78	175.241	-1279.79	1476.48	206.244	-1226.99	1219.96	172.057	-1434.37	1397.33	180.869	-1529.81	1190.44	140.288	-1218.15	1274.45	355.029	-1375.85	1449.74	449.448	-1401.4	1232.97	478.135	-1423.72	1137.24	478.032	-1568.45	1028.2	427.396	-1629.85	978.891	493.109	-1606.55	960.756	473.712	-1683.43	942.771
7905	0	212.551	-1496.32	1625.07	116.446	-1504.35	1616.07	221.276	-1342.08	1661.18	77.3864	-1359.5	1641.15	173.277	-1292.64	1477.94	205.17	-1239.77	1222.02	171.111	-1447.3	1398.86	182.447	-1539.9	1191.22	138.925	-1231.27	1276.28	353.413	-1388.36	1452.31	447.889	-1414.08	1235.43	476.867	-1434.14	1139.26	477.156	-1575.69	1026.05	426.344	-1635.33	974.007	492.784	-1611.71	957.468	472.339	-1687.52	935.2
7906	0	211.011	-1509.56	1626.19	115.083	-1517.59	1617.1	219.61	-1355.59	1663.21	75.9811	-1372.85	1642.86	171.863	-1305.34	1479.89	203.665	-1251.99	1223.92	170.231	-1460	1400.46	182.055	-1552.1	1192.83	136.969	-1244.21	1277.79	352.001	-1400.56	1454.44	446.366	-1426.63	1237.53	475.704	-1444.43	1141.28	476.327	-1582.27	1023.65	426.058	-1639.34	969.09	492.243	-1616.24	953.576	471.043	-1690.9	927.58
7907	0	209.959	-1522.79	1627.18	114.149	-1530.9	1618.19	218.204	-1369.06	1665.15	74.4333	-1386.59	1644.8	170.103	-1317.91	1481.71	202.358	-1264.32	1225.73	169.364	-1472.51	1402.24	181.519	-1564.7	1194.46	135.151	-1256.83	1279.26	350.781	-1412.11	1456.45	444.893	-1438.67	1239.49	474.403	-1454.35	1142.78	475.709	-1588.46	1021.16	425.394	-1643.49	963.957	491.933	-1620.3	949.962	469.979	-1693.34	919.69
7908	0	209.085	-1535.74	1628.3	113.163	-1544.09	1619.42	217.255	-1382.33	1667.17	73.465	-1399.92	1646.82	168.735	-1330.49	1483.43	200.365	-1276.53	1227.4	168.445	-1484.75	1404.11	181.418	-1576.53	1196.77	133.409	-1269.08	1281.24	349.88	-1423.39	1458.4	443.572	-1450.22	1241.32	473.159	-1463.87	1144.24	475.012	-1594.2	1018.66	424.796	-1646.99	959.17	491.797	-1623.67	946.505	468.896	-1695.06	911.953
7909	0	208.501	-1548.68	1629.56	112.547	-1557.13	1620.93	216.187	-1395.47	1669.21	72.508	-1413.15	1649.1	166.908	-1342.87	1485.24	198.462	-1288.88	1228.86	167.532	-1497.1	1406.15	181.34	-1588.68	1198.99	131.309	-1281.37	1282.81	349.036	-1434.56	1460.29	442.341	-1461.25	1242.73	471.817	-1472.86	1145.49	474.36	-1599.28	1015.93	424.272	-1650.1	954.369	491.565	-1626.66	943.267	467.817	-1696.09	904.107
7910	0	207.996	-1561.34	1631.16	112.055	-1570.09	1622.58	215.363	-1408.45	1671.21	71.4838	-1426.52	1651.46	165.864	-1355.13	1487.64	196.293	-1300.94	1230.67	166.714	-1509.24	1408.22	181.396	-1601.16	1201.26	129.375	-1293.43	1284.83	348.383	-1445.82	1461.82	441.27	-1471.37	1244	470.44	-1481.43	1146.17	473.762	-1603.84	1013.14	423.907	-1652.57	949.684	491.376	-1629.15	939.591	467.171	-1695.93	896.798
7911	0	207.514	-1574.03	1632.89	111.522	-1582.86	1624.52	214.856	-1421.19	1673.58	71.0445	-1439.37	1653.96	164.372	-1367.38	1489.41	194.336	-1312.9	1232.76	165.824	-1521.3	1410.47	181.291	-1613.46	1203.52	127.295	-1305.63	1286.87	347.811	-1457.18	1463.29	440.214	-1481.06	1244.77	468.889	-1489.3	1146.68	473.349	-1607.95	1010.51	423.607	-1654.66	945.21	491.297	-1631	936.363	466.579	-1695.42	889.836
7912	0	206.962	-1586.32	1634.77	111.164	-1595.39	1626.79	213.903	-1433.85	1675.73	70.4839	-1452.13	1656.56	163.616	-1379.55	1492.29	192.442	-1324.8	1235.09	164.922	-1533.22	1412.77	181.078	-1625.39	1205.84	125.621	-1317.43	1289.74	347.217	-1468.59	1464.85	439.346	-1490.11	1245.61	467.243	-1496.76	1147.05	472.696	-1611.28	1007.94	423.163	-1656.23	940.841	491.137	-1632.07	933.241	466.285	-1694.41	883.536
7913	0	206.38	-1598.68	1636.64	110.533	-1607.81	1628.98	213.282	-1446.3	1678.1	69.673	-1464.68	1659.09	162.424	-1391.77	1494.46	190.467	-1336.63	1237.55	164.233	-1545.21	1415.07	180.91	-1637.21	1208.13	123.844	-1329.29	1292.16	346.845	-1480.29	1466.32	438.492	-1498.44	1246.28	465.524	-1503.63	1147.43	472.074	-1614.16	1005.58	421.727	-1658.4	936.68	491.066	-1632.72	930.187	465.984	-1692.94	877.472
7914	0	205.73	-1610.83	1638.88	109.778	-1620.07	1631.11	212.581	-1458.44	1680.37	68.7386	-1476.86	1661.72	161.729	-1403.96	1497.12	188.956	-1348.69	1240.14	163.539	-1557.21	1417.21	180.481	-1648.82	1210.2	122.46	-1341.12	1295.13	346.275	-1491.86	1467.99	437.436	-1506.22	1246.87	463.593	-1510.1	1147.64	471.441	-1616.61	1003.11	422.756	-1657.9	932.792	490.447	-1632.66	927.017	466.06	-1690.9	872.126
7915	0	204.916	-1622.75	1640.92	109.123	-1632.08	1633.33	211.774	-1470.43	1682.48	68.1326	-1489.01	1663.8	160.662	-1416.07	1499.23	187.337	-1360.74	1242.33	162.808	-1569.07	1419.32	179.858	-1660.38	1212.23	120.885	-1353	1297.84	345.678	-1503.62	1469.46	436.393	-1513.65	1247.46	461.684	-1516.24	1148.13	470.452	-1618.43	1000.89	422.417	-1658.12	928.734	490.09	-1632.06	924.49	466.277	-1688.65	867.399
7916	0	203.943	-1634.67	1643.02	108.112	-1644.03	1635.36	210.875	-1482.37	1684.47	67.2974	-1500.86	1665.83	160.006	-1427.98	1501.47	186.001	-1372.65	1244.44	161.692	-1581.09	1421.33	179.049	-1671.93	1214.26	119.455	-1364.94	1299.9	344.947	-1515.35	1470.88	435.082	-1520.81	1248.01	459.515	-1522.04	1148.56	469.449	-1619.93	998.925	422.022	-1657.65	925.134	489.545	-1630.97	922.015	466.488	-1685.88	863.101
7917	0	203.057	-1646.52	1644.99	107.081	-1655.79	1637.28	209.943	-1494.15	1686.17	66.1748	-1512.56	1667.61	159.162	-1439.79	1503.2	184.817	-1384.59	1246.04	160.82	-1592.92	1423.08	178.058	-1683.53	1216.14	117.894	-1376.89	1301.79	344.222	-1527.06	1472.05	433.544	-1527.82	1248.18	457.318	-1527.63	1148.88	468.486	-1621.1	996.849	421.81	-1656.7	921.626	488.802	-1629.59	919.36	466.807	-1682.92	859.168
7918	0	202.048	-1658.31	1646.73	106.141	-1667.45	1639.22	209.037	-1505.74	1687.66	65.3706	-1524.04	1669.29	158.556	-1451.63	1504.85	183.66	-1396.56	1247.6	159.933	-1604.87	1424.64	176.844	-1695.15	1217.97	116.651	-1389	1303.43	343.482	-1538.77	1472.84	432.11	-1534.71	1248.71	455.042	-1532.99	1149.08	467.447	-1621.92	994.851	421.45	-1655.81	918.646	488.009	-1627.6	917.354	467.033	-1679.85	855.537
7919	0	200.98	-1669.87	1648.46	105.003	-1679.16	1640.94	208.115	-1517.29	1688.86	64.2449	-1535.55	1670.52	157.61	-1463.38	1506.1	182.909	-1408.42	1248.8	158.903	-1616.82	1426.02	175.382	-1706.71	1219.58	115.361	-1400.83	1305	342.741	-1550.58	1474.12	430.465	-1541.88	1248.94	452.723	-1538.2	1149.6	465.905	-1621.94	992.903	421.135	-1653.95	915.713	487.349	-1625.84	915.484	467.31	-1676.57	852.46
7920	0	199.985	-1681.38	1649.98	103.941	-1690.72	1642.31	206.965	-1528.77	1689.94	63.3794	-1546.98	1671.45	156.676	-1475.4	1506.84	182.045	-1420.35	1249.84	157.914	-1628.56	1427.03	173.813	-1718.37	1220.72	113.996	-1412.91	1306.05	341.996	-1562.48	1474.9	428.621	-1549.13	1249.19	450.557	-1543.27	1149.86	464.689	-1622.3	991.295	420.173	-1653.14	912.979	486.311	-1623.58	913.707	467.47	-1673.23	849.588
7921	0	198.959	-1692.91	1651.04	103.023	-1702.2	1643.44	205.976	-1540.28	1690.52	62.49	-1558.54	1672.27	155.58	-1487.4	1507.36	181.409	-1432.12	1250.61	156.729	-1640.45	1427.68	172.15	-1730	1221.55	113.007	-1424.86	1306.86	341.066	-1574.47	1475.21	426.793	-1556.59	1248.98	448.128	-1548.41	1149.79	463.408	-1622.79	989.289	419.878	-1650.78	909.824	485.161	-1621.28	911.954	467.412	-1669.89	846.656
7922	0	198.054	-1704.5	1651.91	102.167	-1713.76	1644.35	205.109	-1551.66	1690.98	61.428	-1570.02	1672.75	154.673	-1499.36	1507.67	180.519	-1443.93	1251.09	155.541	-1652.33	1428.2	170.485	-1741.6	1222.13	112.141	-1436.62	1307.53	340.24	-1586.56	1475.22	425.044	-1564.14	1248.94	445.777	-1553.42	1150.01	462.104	-1623.16	987.586	419.106	-1649.25	907.13	483.631	-1618.59	910.562	467.35	-1666.39	843.992
7923	0	197.121	-1716.2	1652.34	101.125	-1725.48	1644.98	204.087	-1563.04	1691	60.3499	-1581.61	1673.1	153.884	-1511.2	1508.04	179.893	-1455.88	1251.39	154.302	-1664.17	1428.33	168.607	-1753.14	1222.29	111.04	-1448.54	1307.73	339.316	-1598.69	1475.13	423.306	-1571.72	1248.91	443.44	-1558.43	1150.27	460.849	-1623.53	986.246	418.277	-1647.84	904.804	482.523	-1616.28	909.287	466.892	-1662.46	841.433
7924	0	196.295	-1727.75	1652.52	100.431	-1737.11	1645.07	203.044	-1574.65	1690.67	59.5439	-1593.2	1672.9	153.194	-1523.09	1507.99	179.097	-1467.69	1251.28	153.011	-1676.11	1428.16	166.854	-1764.74	1222.06	110.17	-1460.44	1307.79	338.257	-1610.86	1474.9	421.554	-1579.28	1248.84	441.027	-1563.55	1150.31	459.461	-1623.8	984.886	417.579	-1646.64	902.671	481.792	-1614.14	908.161	466.455	-1658.89	838.916
7925	0	195.615	-1739.27	1652.33	99.6148	-1748.91	1645.02	202.293	-1586.14	1690.19	58.7468	-1605.32	1672.52	152.026	-1534.96	1507.29	178.783	-1479.48	1251.04	151.784	-1687.98	1427.63	165.064	-1776.46	1221.38	109.675	-1472.22	1307.37	337.485	-1623.22	1474.13	420.033	-1587.09	1248.21	438.798	-1568.83	1150.27	458.295	-1624.34	983.423	416.787	-1645.65	900.367	480.379	-1612.05	906.696	466.185	-1655.4	836.281
7926	0	194.916	-1751.08	1651.61	99.0072	-1760.71	1644.8	201.403	-1597.82	1689.43	57.9099	-1616.94	1672.09	151.558	-1546.6	1506.94	178.072	-1491.44	1250.24	150.46	-1699.74	1426.84	163.174	-1788.16	1220.57	108.933	-1483.9	1306.53	336.498	-1635.49	1473.2	418.545	-1594.91	1247.84	436.172	-1574.21	1150	457.324	-1624.96	982.14	416.089	-1645.01	898.707	479.252	-1610.46	905.811	465.656	-1651.61	833.874
7927	0	194.059	-1763	1650.7	98.0183	-1772.76	1643.85	200.618	-1609.68	1688.31	57.1699	-1628.85	1671.1	150.441	-1558.76	1505.52	177.942	-1503.34	1249.3	149.077	-1711.69	1425.91	161.355	-1800.12	1219.34	108.289	-1495.74	1305.4	335.564	-1647.95	1472.01	417.156	-1603.08	1247.2	433.944	-1579.6	1150.11	456.304	-1625.86	980.866	414.837	-1646.16	896.369	478.226	-1608.96	905.027	465.071	-1648.25	831.771
7928	0	193.415	-1775.03	1649.51	97.5106	-1784.7	1642.62	199.781	-1621.75	1686.89	56.3634	-1640.9	1670.11	149.619	-1570.75	1504.32	177.581	-1515.45	1247.91	147.934	-1723.55	1424.54	159.658	-1812.04	1217.72	107.737	-1507.41	1304.02	334.571	-1660.32	1470.63	415.873	-1611.26	1246.63	431.27	-1585.68	1149.42	455.303	-1626.99	979.598	415.413	-1644.31	895.072	476.936	-1607.6	904.035	464.49	-1644.89	829.349
7929	0	192.594	-1787.08	1647.75	96.7509	-1796.9	1641.4	199.089	-1633.87	1685.52	55.6669	-1653.17	1668.88	148.998	-1582.71	1503.13	177.639	-1527.65	1246.61	146.67	-1735.62	1423.12	157.96	-1823.93	1215.92	107.559	-1519.22	1302.59	333.707	-1672.68	1469.2	414.529	-1619.54	1245.86	428.675	-1592.09	1148.74	454.345	-1628.39	978.539	415.114	-1647.54	893.304	475.534	-1606.53	903.17	464.041	-1641.65	827.509
7930	0	191.766	-1799.39	1645.93	95.7733	-1809.13	1639.65	198.344	-1646.23	1683.79	54.7718	-1665.46	1667.39	148.349	-1594.69	1501.47	177.516	-1539.81	1245.1	145.454	-1747.54	1421.35	156.331	-1836.12	1214.08	107.142	-1530.99	1300.92	332.839	-1684.98	1467.55	413.304	-1627.83	1245.26	426.282	-1598.58	1148.41	453.448	-1630.11	977.76	417.965	-1648.57	892.94	474.002	-1605.58	902.892	463.374	-1638.63	825.896
7931	0	190.985	-1811.69	1643.83	94.9749	-1821.44	1637.45	197.593	-1658.56	1682.12	53.9856	-1677.73	1665.69	147.478	-1606.78	1499.85	177.634	-1552.06	1243.48	144.347	-1759.73	1419.44	154.794	-1848.47	1212.02	106.736	-1542.85	1299.19	332.039	-1697.51	1466.01	411.923	-1636.5	1244.42	424.043	-1605.61	1148.11	452.564	-1632.41	977.001	415.337	-1650.13	889.181	472.868	-1605.36	902.697	462.836	-1636.24	824.22
7932	0	190.067	-1824.37	1641.64	94.0772	-1833.86	1635.23	196.921	-1671.22	1680.39	53.3935	-1690.3	1663.69	146.253	-1619.68	1497.42	177.782	-1564.32	1241.75	143.551	-1771.85	1417.4	153.371	-1860.57	1209.9	106.666	-1554.78	1297.39	331.309	-1709.95	1464.31	410.423	-1645.16	1243.66	421.868	-1613.16	1147.38	451.627	-1635.36	976.274	415.174	-1651.47	888.206	471.062	-1605.92	902.173	462.041	-1634.09	822.925
7933	0	189.094	-1836.75	1639.08	93.1798	-1846.37	1632.77	196.013	-1684.01	1678.33	52.4872	-1702.74	1661.85	146.286	-1631.41	1495.87	178.015	-1576.58	1239.78	142.618	-1784.04	1415.36	152.102	-1872.81	1207.75	106.651	-1566.76	1295.46	330.796	-1722.51	1462.59	409.112	-1654.27	1242.74	419.698	-1621.04	1146.77	450.712	-1638.54	975.797	414.858	-1653.4	886.941	470.035	-1607.07	902.641	461.5	-1632.6	822.103
7934	0	188.277	-1849.77	1636.6	92.3409	-1858.99	1630.1	195.523	-1696.91	1676.56	52.0037	-1715.44	1659.59	146.041	-1643.78	1493.88	178.147	-1589.05	1237.7	141.827	-1796.48	1413.23	150.965	-1885.3	1205.63	106.547	-1578.9	1293.18	330.294	-1735.13	1460.76	407.822	-1663.73	1241.75	417.772	-1629.38	1146.12	449.765	-1642.48	975.353	414.695	-1655.85	885.998	469.068	-1608.57	903.095	461.072	-1631.14	822.21
7935	0	187.531	-1862.53	1634.09	91.6718	-1871.46	1627.5	194.98	-1709.85	1674.68	51.27	-1728.01	1657.73	145.607	-1656.33	1491.55	178.487	-1601.45	1235.78	141.364	-1808.58	1411.06	150.02	-1897.42	1203.58	106.561	-1591.26	1290.98	329.967	-1747.92	1458.65	406.436	-1673.44	1240.38	416.042	-1638.25	1145.44	449.096	-1647.41	974.863	414.314	-1658.17	885.244	468.282	-1611.73	903.597	460.165	-1631.13	821.53
7936	0	186.971	-1875.33	1631.47	90.986	-1884.14	1624.73	194.589	-1722.95	1672.41	50.9472	-1740.7	1655.46	145.612	-1668.85	1489.32	178.763	-1614.14	1233.4	140.827	-1821.25	1408.97	149.327	-1910.05	1201.59	106.789	-1603.5	1288.82	329.784	-1760.7	1456.85	405.573	-1683.89	1239.11	414.523	-1647.42	1144.52	448.424	-1652.7	974.361	414.41	-1662.22	884.337	467.615	-1615.5	903.851	459.359	-1632.08	820.826
7937	0	186.452	-1888.25	1628.81	90.4129	-1896.86	1622.08	194.264	-1735.95	1670.41	50.6442	-1753.33	1653.35	145.703	-1681.1	1487.23	178.861	-1626.92	1231.11	140.322	-1833.78	1406.92	148.709	-1922.48	1199.8	106.982	-1616.13	1286.46	329.574	-1773.63	1454.91	404.94	-1694.44	1237.96	413.057	-1656.96	1143.79	448.016	-1658.92	973.946	414.287	-1666.89	883.738	466.925	-1620.1	904.241	458.725	-1633.82	820.691
7938	0	186.112	-1901.22	1626.36	90.1981	-1909.43	1619.64	194.343	-1748.94	1668.51	50.6819	-1766.17	1651.15	145.696	-1693.87	1484.76	179.087	-1639.8	1228.77	140.272	-1846.4	1404.8	148.295	-1935.37	1198.02	107.042	-1628.79	1283.99	329.471	-1786.63	1452.79	404.611	-1705.58	1236.92	412.082	-1666.9	1143.02	447.448	-1665.19	973.973	412.03	-1669.48	885.444	466.774	-1625.81	904.756	457.959	-1636.43	820.341
7939	0	186.118	-1913.97	1624.07	89.9391	-1922.22	1617.41	194.668	-1761.71	1666.76	51.0534	-1778.96	1649.32	146.159	-1706.14	1482.9	179.123	-1652.74	1226.57	140.106	-1859.14	1402.98	148.121	-1948.09	1196.25	107.422	-1641.59	1281.83	329.609	-1799.63	1450.6	404.249	-1716.99	1235.26	411.322	-1677.37	1141.89	447.308	-1672.98	973.257	414.187	-1678.77	881.931	466.666	-1632.48	904.832	457.394	-1640.23	819.787
7940	0	186.217	-1926.74	1622.02	90.1549	-1934.81	1615.67	195.043	-1774.64	1664.69	51.3271	-1791.58	1647.84	146.345	-1719.01	1480.66	178.983	-1665.96	1224.37	140.118	-1872.02	1401.23	148.014	-1961.21	1194.81	107.575	-1654.67	1279.7	329.642	-1812.42	1448.37	403.785	-1728.55	1233.56	410.538	-1688.02	1140.53	447.437	-1681.58	972.529	414.464	-1686.24	880.952	466.962	-1640.15	904.826	456.727	-1644.99	818.93
7941	0	186.537	-1939.56	1620.31	90.3433	-1947.56	1614.12	195.669	-1787.42	1663.04	51.5508	-1804.06	1646.55	146.476	-1731.83	1478.97	178.697	-1679.24	1222.57	140.25	-1885.07	1399.57	148.103	-1974.24	1193.39	107.649	-1667.77	1277.74	329.867	-1825.23	1446.71	403.884	-1740.71	1232.08	410.474	-1699.36	1139.43	447.6	-1690.93	971.703	414.586	-1693.8	880.239	467.562	-1648.66	904.853	456.426	-1650.92	818.591
7942	0	187.099	-1952.31	1618.83	90.9444	-1960.15	1613.02	196.378	-1800.21	1661.2	52.3298	-1816.71	1645.18	147.015	-1744.54	1477.38	178.416	-1692.5	1220.44	140.37	-1898.27	1398.12	148.308	-1987.54	1191.93	107.586	-1681.29	1275.84	330.064	-1838.09	1444.51	403.842	-1752.98	1230.24	410.697	-1711.18	1138.02	448.057	-1701.07	970.55	412.939	-1700.47	881.325	468.155	-1658.24	904.187	456.321	-1657.93	817.934
7943	0	187.78	-1965.24	1617.58	91.6422	-1972.96	1612.17	197.418	-1813.01	1659.26	53.4035	-1829.37	1644.08	147.027	-1757.91	1475.68	177.887	-1705.92	1218.74	140.913	-1911.3	1396.52	148.717	-2001.05	1190.6	107.223	-1694.77	1274.13	330.423	-1850.8	1442.56	403.87	-1765.44	1228.38	410.693	-1723.04	1136.53	448.754	-1712.2	969.234	413.576	-1710.5	880.046	469.146	-1668.87	903.347	456.331	-1666.31	816.875
7944	0	188.666	-1978.02	1616.56	92.4226	-1985.9	1611.32	198.43	-1825.64	1657.77	54.2371	-1842.04	1642.9	147.164	-1770.95	1474.17	177.318	-1719.4	1217.17	141.262	-1924.72	1395.46	149.236	-2014.81	1189.45	106.786	-1708.39	1272.37	330.757	-1863.46	1440.88	403.962	-1778.06	1226.42	411.024	-1735.74	1134.67	449.365	-1723.83	967.772	414.613	-1721.46	878.831	470.271	-1680.32	902.399	456.713	-1675.94	815.977
7945	0	189.698	-1990.77	1615.64	93.6263	-1998.61	1610.83	199.511	-1838.32	1656.31	55.5296	-1854.89	1642.17	147.341	-1784.2	1472.73	176.648	-1733.16	1215.49	141.938	-1938.03	1394.39	150.055	-2028.57	1188.66	106.337	-1722.27	1271.07	331.125	-1876.02	1439.25	404.165	-1790.76	1224.81	411.411	-1748.32	1133.09	450.247	-1736.26	966.501	415.528	-1733.26	877.519	471.404	-1692.55	901.295	457.538	-1686.76	815.304
7946	0	191.07	-2003.25	1614.68	94.8944	-2011.5	1610.43	200.804	-1850.88	1655.18	56.6225	-1867.66	1641.31	147.846	-1797.23	1471.82	175.624	-1747.23	1213.85	142.67	-1951.53	1393.63	150.994	-2042.49	1187.86	105.762	-1736.19	1269.82	331.798	-1888.58	1438.01	404.288	-1803.5	1223.05	411.806	-1761.26	1131.52	450.935	-1749.22	965.059	416.796	-1746.06	876.091	472.596	-1705.71	900.129	458.426	-1699.03	813.992
7947	0	192.451	-2015.95	1614.36	96.2739	-2024.34	1610.27	202.103	-1863.32	1654.56	57.8142	-1880.6	1641.27	148.006	-1810.48	1470.25	174.969	-1761.43	1212.62	143.434	-1965.04	1393.21	152.012	-2056.68	1187.52	105.22	-1750.28	1268.73	332.571	-1901.15	1437.03	404.777	-1816.92	1221.79	412.346	-1774.97	1130.09	451.82	-1763.03	963.766	417.787	-1759.81	874.675	473.683	-1719.53	898.846	459.541	-1712.61	812.791
7948	0	193.928	-2028.23	1614.05	97.7136	-2037.29	1610.34	203.209	-1875.98	1653.82	59.1535	-1893.54	1641.23	148.845	-1823.69	1469.72	174.447	-1775.76	1211.38	144.202	-1978.54	1393.19	152.98	-2070.87	1187.49	104.792	-1764.37	1267.85	333.3	-1913.88	1436.3	405.175	-1830.16	1220.82	412.647	-1788.58	1128.92	452.746	-1777.25	962.796	418.84	-1774.36	873.551	474.586	-1733.97	897.736	461.04	-1727.33	811.701
7949	0	195.519	-2041.1	1614.24	99.2267	-2050.29	1610.68	204.518	-1888.69	1653.8	60.4034	-1906.53	1641.37	149.489	-1836.9	1469.14	174.267	-1790.13	1210.58	144.87	-1992.11	1393.34	153.902	-2085.39	1188.02	104.655	-1778.55	1267.11	334.083	-1926.88	1435.84	405.598	-1843.91	1220.03	413.309	-1802.96	1128	453.689	-1792.25	961.969	419.796	-1789.76	872.598	475.505	-1749.14	896.729	462.688	-1743.39	810.641
7950	0	197.115	-2053.65	1614.37	100.908	-2063.15	1611.26	205.872	-1901.24	1653.67	61.6193	-1919.44	1641.84	150.331	-1850.1	1469.06	174.191	-1804.64	1209.98	145.708	-2005.69	1393.83	154.674	-2100.1	1188.74	105.093	-1792.75	1266.74	334.677	-1940.09	1435.31	406.082	-1858.14	1219.43	413.902	-1817.81	1127.09	454.428	-1807.87	961.117	420.912	-1806	871.496	476.266	-1765.11	895.639	464.424	-1760.81	809.497
7951	0	198.629	-2066.32	1614.91	102.411	-2076.1	1612.23	207.245	-1913.77	1653.59	63.0485	-1932.32	1642.45	150.954	-1863.73	1468.62	174.405	-1819.15	1209.52	146.317	-2019.41	1394.32	155.097	-2114.97	1189.61	105.536	-1807.09	1266.34	335.655	-1953.43	1435.51	406.694	-1872.74	1218.96	414.362	-1833.01	1126.18	455.073	-1824.07	960.263	422.16	-1823.17	870.665	476.77	-1781.74	894.339	466.128	-1779.31	808.355
7952	0	200.215	-2079.06	1615.57	103.939	-2089.11	1613.51	208.613	-1926.5	1653.77	64.5671	-1945.28	1643.16	150.937	-1877.76	1468.1	174.894	-1833.52	1209.32	146.804	-2033.14	1395.05	155.32	-2129.69	1190.55	105.994	-1821.23	1266.02	336.025	-1966.87	1435.54	407.241	-1887.71	1218.58	414.973	-1848.66	1125.44	456.259	-1841.11	959.534	423.374	-1841.1	870.139	477.629	-1799.35	893.503	467.992	-1798.86	807.468
7953	0	201.652	-2091.94	1616.57	105.353	-2102.22	1614.88	210.054	-1939.11	1653.95	65.4928	-1958.01	1644.22	151.6	-1891.03	1468.59	175.429	-1847.77	1209.14	147.302	-2046.85	1395.86	155.419	-2144.1	1191.36	106.654	-1835.2	1266.11	336.436	-1980.61	1435.54	407.699	-1903.23	1218.03	415.595	-1864.88	1124.67	456.722	-1858.78	958.677	424.368	-1860.03	869.279	478.162	-1817.55	892.007	469.669	-1819.5	806.206
7954	0	203.037	-2104.93	1617.73	106.781	-2115.22	1616.47	211.147	-1951.96	1654.14	67.1243	-1971.25	1645.18	151.958	-1904.52	1469.18	176.037	-1861.6	1209.72	147.645	-2060.41	1396.8	155.317	-2158.06	1192.35	107.05	-1849.21	1266.51	336.705	-1994.2	1436.09	407.917	-1918.91	1217.44	416.284	-1881.43	1123.99	457.278	-1877.1	957.682	425.746	-1879.75	868.743	478.969	-1837.01	890.555	471.47	-1841.29	805.077
7955	0	204.085	-2117.81	1618.56	107.963	-2128.46	1617.83	212.334	-1964.87	1654.36	67.8898	-1984.27	1646.34	152.054	-1917.78	1469.94	176.176	-1875.52	1210.54	147.764	-2073.9	1397.72	155.008	-2171.68	1193.1	107.442	-1863	1267.51	336.575	-2007.68	1436.34	408.256	-1935.09	1217.07	417.046	-1898.45	1123.5	458.203	-1896.58	957.174	426.189	-1900.38	867.761	479.737	-1857.26	889.411	473.114	-1863.87	803.992
7956	0	205.066	-2130.75	1619.21	108.952	-2141.64	1619.08	213.066	-1977.67	1654.77	68.818	-1997.57	1647.42	151.671	-1931.72	1470.78	176.425	-1888.97	1211.6	147.671	-2087.27	1398.47	154.588	-2184.95	1193.63	107.189	-1876.56	1268.52	336.277	-2021.02	1436.9	408.683	-1951.52	1217.01	417.579	-1915.43	1122.89	458.669	-1916.35	956.553	427.251	-1921.78	867.461	480.597	-1878.3	888.192	474.595	-1887.51	803.225
7957	0	205.857	-2143.88	1619.85	109.656	-2154.89	1620.13	213.531	-1990.7	1654.92	69.2378	-2010.88	1648.54	151.486	-1944.99	1471.54	176.398	-1902.2	1212.31	147.492	-2100.59	1399.19	154.235	-2198.08	1194.12	106.743	-1889.74	1269.59	336.062	-2034.35	1437.87	408.852	-1968.03	1216.56	418.242	-1932.75	1122.38	459.246	-1937.4	955.612	427.698	-1944.06	866.631	481.159	-1900.23	886.643	475.886	-1911.99	802.129
7958	0	206.252	-2157.02	1620.41	110.191	-2168.22	1621.06	213.84	-2003.89	1655.71	69.6775	-2024.35	1649.86	151.249	-1958.02	1472.64	176.302	-1914.92	1213.58	147.109	-2113.56	1399.97	153.715	-2211.08	1194.74	105.981	-1902.58	1270.62	335.744	-2047.56	1438.84	409.02	-1984.91	1216.49	418.829	-1950.32	1121.75	459.672	-1958.76	955.022	428.423	-1967.24	866.224	481.804	-1923.23	885.204	477.253	-1937.72	801.753
7959	0	206.278	-2170.22	1620.94	110.212	-2181.58	1621.74	214.109	-2017.02	1657.03	69.5546	-2037.92	1651.18	151.053	-1970.58	1474.26	176.104	-1927.47	1215.12	146.615	-2126.24	1400.96	153.126	-2223.67	1195.11	105.542	-1914.95	1272.04	335.267	-2060.69	1439.9	409.068	-2001.54	1216.63	419.63	-1968.18	1121.54	459.875	-1980.49	954.59	428.372	-1990.94	865.998	482.272	-1946.84	884.013	478.039	-1963.81	801.373
7960	0	205.931	-2183.65	1621.39	109.889	-2194.98	1622.07	213.559	-2030.77	1658.2	68.7033	-2051.61	1652.29	150.555	-1983.37	1475.24	175.718	-1940.17	1215.83	145.928	-2138.96	1401.96	152.487	-2236.27	1195.8	105.138	-1927.31	1272.91	334.769	-2073.87	1440.87	408.815	-2017.92	1216.82	420.448	-1985.84	1121.42	459.928	-2002.93	954.492	428.086	-2015.29	866.051	482.564	-1971.31	883.156	478.731	-1991	801.515
7961	0	205.293	-2197.12	1621.56	109.301	-2208.43	1622.24	213.099	-2044.39	1659.62	68.3393	-2064.97	1653.56	150.455	-1995.92	1476.49	175.629	-1952.76	1216.7	145.295	-2151.41	1403.07	151.87	-2248.61	1196.6	105.243	-1939.65	1273.95	334.189	-2087.07	1441.92	408.814	-2034.68	1217.19	421.724	-2004.03	1121.42	459.869	-2025.94	954.36	427.758	-2039.03	866.445	482.58	-1996.39	882.178	478.503	-2019.07	801.032
7962	0	204.359	-2210.59	1622.26	108.305	-2221.76	1622.63	212.74	-2058.05	1661.42	67.8648	-2078.62	1654.71	150.188	-2008.26	1477.77	175.414	-1965.44	1218.11	144.551	-2163.9	1404.26	150.91	-2261.24	1197.63	105.491	-1951.92	1275.27	333.669	-2100.3	1443.12	408.915	-2051.26	1217.71	422.571	-2021.87	1121.26	459.864	-2049.46	954.645	427.46	-2065.59	867.593	482.422	-2021.97	881.617	478.222	-2047.63	801.943
7963	0	203.263	-2224.26	1622.96	107.187	-2235.18	1623.11	211.378	-2072.07	1663	66.9373	-2092.36	1656.02	149.896	-2021.19	1479.2	175.616	-1978.17	1219.28	143.638	-2176.42	1405.6	149.866	-2273.62	1198.85	105.752	-1964.34	1276.27	332.974	-2113.45	1444.51	409.224	-2067.94	1218.63	423.477	-2039.57	1121.88	459.508	-2073.17	955.447	427.079	-2092.17	869.657	482.077	-2048.17	881.519	477.77	-2077.17	803.444
7964	0	202.035	-2237.83	1623.75	105.908	-2248.6	1623.56	210.25	-2086.13	1664.82	65.72	-2105.94	1657.4	149.538	-2033.84	1480.75	176.089	-1990.57	1221.03	142.792	-2188.7	1407.01	148.77	-2286.21	1200.15	106.435	-1976.43	1277.73	332.402	-2126.76	1445.98	409.576	-2084.46	1220.1	424.621	-2057.61	1122.62	458.76	-2097.05	956.671	425.382	-2118.61	871.116	481.599	-2075.43	882.188	477.117	-2107.39	805.729
7965	0	200.534	-2251.53	1624.92	104.511	-2262.02	1624.16	209.267	-2099.75	1666.95	64.6242	-2119.64	1658.74	148.974	-2046.32	1482.55	176.568	-2003	1222.9	141.891	-2201.16	1408.49	147.544	-2298.65	1201.79	106.919	-1988.48	1279.33	331.541	-2140.09	1448.01	409.862	-2100.84	1221.5	425.14	-2075.21	1123.09	458.155	-2121.4	958.523	423.897	-2145.61	874.133	480.665	-2102.84	883.261	475.635	-2138.12	808.175
7966	0	199.168	-2265.26	1625.83	102.992	-2275.46	1624.98	207.824	-2113.7	1669.07	63.2309	-2133.21	1660.04	148.68	-2059.41	1484.32	176.672	-2015.53	1224.1	140.89	-2213.53	1410.06	146.215	-2311.27	1203.46	107.678	-2000.69	1280.95	330.731	-2153.37	1449.95	410.082	-2116.75	1223.54	425.845	-2093.11	1124.54	457.358	-2145.72	960.949	421.859	-2172.15	877.776	479.201	-2130.09	884.778	473.614	-2169	812.206
7967	0	197.403	-2278.77	1627.1	101.461	-2288.87	1625.49	206.134	-2127.82	1670.76	61.7638	-2146.65	1661.19	147.923	-2072.43	1486.17	177.449	-2027.84	1226.52	139.981	-2226.07	1411.44	144.975	-2324.03	1205.33	108.323	-2013.19	1282.99	329.823	-2166.75	1452.27	410.2	-2132.62	1225.94	426.889	-2110.77	1126.44	456.23	-2169.96	963.854	419.748	-2199.5	881.994	477.622	-2157.73	887.269	471.363	-2200.18	816.863
7968	0	195.866	-2292.3	1628.43	99.972	-2302.14	1626.18	204.648	-2141.5	1672.93	60.2642	-2160.04	1662.3	147.441	-2085.32	1487.88	178.023	-2040.07	1228.53	139.176	-2238.59	1412.67	143.824	-2336.53	1207.09	109.003	-2025.44	1284.65	328.974	-2179.96	1454.6	410.451	-2148.5	1228.35	427.606	-2128.8	1128.59	455.009	-2194.42	967.571	417.547	-2227.28	886.966	475.942	-2185.91	890.487	469.064	-2231.96	822.211
7969	0	194.391	-2305.85	1629.66	98.5383	-2315.38	1626.94	203.518	-2154.82	1674.74	59.3702	-2174.17	1663.04	146.977	-2098.34	1489.47	178.536	-2052.62	1230.56	138.419	-2251.29	1413.79	142.715	-2348.93	1208.7	109.351	-2037.97	1286.37	328.172	-2193.32	1456.86	410.641	-2164.3	1230.7	428.744	-2146.52	1130.51	453.978	-2218.91	971.5	415.393	-2255.49	892.654	473.909	-2213.68	893.806	466.342	-2263.6	828.238
7970	0	193.054	-2319.28	1630.71	97.1224	-2328.46	1627.48	202.113	-2168.36	1676.15	57.7706	-2186.98	1663.79	146.381	-2111.35	1490.74	178.459	-2065.34	1232.46	137.662	-2264.11	1414.63	141.839	-2360.83	1209.99	109.575	-2050.54	1287.27	327.269	-2206.53	1458.81	411.043	-2180.02	1232.96	429.343	-2163.94	1132.34	452.495	-2243.13	975.737	413.125	-2282.71	899.952	471.909	-2241.75	898.033	463.072	-2295.51	835.085
7971	0	191.554	-2332.68	1631.68	95.7521	-2341.65	1628.03	200.698	-2181.97	1677.37	56.5213	-2199.83	1664.14	145.915	-2124.57	1491.75	178.725	-2077.9	1232.82	136.995	-2276.89	1415.25	141.1	-2372.59	1210.89	109.633	-2063.43	1288.43	326.519	-2219.91	1460.54	411.251	-2195.77	1234.74	430.399	-2181.69	1134.08	451.411	-2268.01	979.997	410.635	-2310.94	906.003	469.357	-2269.8	902.046	459.913	-2326.74	842.523
7972	0	190.331	-2345.98	1632.52	94.4862	-2354.83	1628.55	199.71	-2195.26	1677.95	55.7214	-2213.21	1664.34	145.403	-2137.78	1492.39	178.488	-2090.69	1233.25	136.436	-2289.87	1415.72	140.411	-2384.47	1211.35	109.962	-2076.03	1289.24	325.846	-2233.33	1461.84	411.554	-2211.51	1236.37	431.405	-2199.42	1135.35	449.474	-2291.81	984.439	408.259	-2338.59	913.194	467.181	-2297.96	906.446	456.451	-2358.03	850.083
7973	0	189.318	-2359.24	1633.28	93.4421	-2367.84	1629.04	198.712	-2208.42	1678.37	54.7291	-2225.99	1664.49	144.807	-2151.24	1492.65	178.543	-2103.32	1234.01	135.758	-2303.1	1415.93	139.837	-2396.45	1211.74	110.057	-2088.78	1289.83	325.069	-2246.53	1462.83	411.73	-2226.93	1237.61	431.993	-2217.02	1136.38	448.56	-2316.69	989.172	405.639	-2366.38	921.054	464.632	-2325.94	911.167	452.995	-2388.95	858.202
7974	0	188.184	-2372.47	1633.79	92.4241	-2380.85	1629.16	197.779	-2221.54	1678.44	53.9448	-2238.94	1664.21	144.28	-2164.72	1492.59	178.414	-2116.2	1234.35	135.216	-2316.25	1415.78	139.304	-2408.54	1211.69	109.708	-2102.06	1289.76	324.393	-2260.01	1463.5	412.1	-2242.58	1238.54	432.932	-2234.86	1137.18	447.01	-2340.86	993.519	403.166	-2393.46	928.578	462.338	-2354.03	916.164	449.449	-2419.67	866.412
7975	0	187.405	-2385.79	1633.89	91.7309	-2393.95	1629.19	195.97	-2236.09	1676.54	53.5054	-2251.61	1663.52	143.673	-2178.23	1492.34	178.07	-2129.06	1234.29	134.69	-2329.6	1415.29	138.922	-2420.82	1211.11	109.528	-2115.16	1289.49	323.691	-2273.6	1463.62	412.466	-2258.19	1238.79	433.781	-2253.1	1137.75	445.449	-2365.18	997.974	400.288	-2420.24	936.186	459.714	-2381.99	921.029	445.682	-2450.08	874.749
7976	0	186.99	-2399.27	1633.8	91.1214	-2407.04	1629.04	196.793	-2247.98	1677.37	53.0297	-2264.45	1662.78	143.197	-2191.79	1491.85	177.558	-2142.13	1233.74	134.145	-2343.06	1414.54	138.612	-2433.07	1210.09	109.326	-2128.25	1289.47	322.932	-2287.13	1463.55	412.68	-2273.88	1239.1	434.413	-2271.45	1137.75	443.948	-2389.73	1002.53	397.663	-2446.87	943.592	457.077	-2409.92	926.094	441.887	-2479.86	883.395
7977	0	186.26	-2412.39	1633.56	90.5093	-2420.33	1628.93	195.661	-2261.83	1675.74	52.6034	-2277.51	1662.06	142.466	-2205.56	1491.11	176.892	-2154.95	1233.36	133.658	-2356.47	1413.66	138.268	-2445.42	1208.61	108.691	-2141.63	1288.89	322.35	-2300.87	1463.02	412.529	-2289.12	1239	435.116	-2289.86	1137.65	442.338	-2413.83	1006.71	394.704	-2472.96	950.984	454.473	-2437.55	931.544	437.984	-2509.33	892.185
7978	0	185.899	-2425.93	1633.09	90.2591	-2433.85	1628.52	195.33	-2275.18	1674.13	52.3588	-2290.77	1661.24	141.614	-2219.18	1490.28	176.369	-2167.74	1232.76	133.143	-2370	1412.31	138.044	-2457.89	1206.83	108.194	-2154.87	1288.38	321.61	-2314.62	1462.14	412.646	-2304.89	1238.42	435.594	-2308.62	1137.13	439.934	-2437.13	1011.39	391.753	-2498.72	958.169	452.237	-2465.01	937.302	434.104	-2538.43	900.949
7979	0	185.776	-2439.48	1632	89.9035	-2447.39	1627.67	195.507	-2288	1673.49	49.3819	-2303.44	1660.92	141.065	-2232.84	1489	175.51	-2180.6	1232.06	132.667	-2383.67	1410.75	137.862	-2470.65	1204.64	107.34	-2168.2	1287.72	320.592	-2328.33	1460.93	412.059	-2320.17	1237.7	436.416	-2327.53	1136.59	437.984	-2461.05	1015.37	388.777	-2523.94	965.14	449.417	-2492.08	942.362	430.452	-2566.72	909.861
7980	0	185.453	-2452.92	1630.93	89.8615	-2460.8	1626.71	195.044	-2301.51	1671.65	49.5441	-2317.14	1659.82	140.556	-2246.55	1488.11	174.438	-2193.89	1231.37	132.247	-2397.28	1409.23	137.587	-2483.89	1202.45	106.238	-2181.68	1286.5	319.996	-2342.2	1459.28	411.887	-2336.42	1236.53	436.516	-2346.81	1135.69	436.158	-2484.99	1019.44	385.689	-2548.67	971.729	446.55	-2518.87	947.806	426.431	-2594.56	918.439
7981	0	185.273	-2466.4	1629.42	89.7042	-2474.57	1625.46	194.434	-2315.41	1669.22	49.467	-2330.57	1658.28	139.691	-2260.08	1486.95	172.871	-2206.74	1230.18	131.697	-2410.85	1407.46	137.364	-2497.28	1200.03	104.985	-2194.95	1285.02	319.068	-2355.68	1457.65	411.551	-2352.82	1235.42	436.116	-2366.17	1134.4	434.539	-2508.84	1023.54	382.755	-2573.05	978.005	443.632	-2544.8	953.306	422.458	-2621.46	927.226
7982	0	185.182	-2480	1627.42	89.4431	-2488.48	1623.83	194.224	-2328.69	1668.01	47.7809	-2344.69	1656.52	138.894	-2273.78	1485.76	171.388	-2219.84	1228.83	131.268	-2424.4	1405.56	137.135	-2511.17	1197.44	103.837	-2208.33	1284.33	318.075	-2369.39	1455.86	410.867	-2369.59	1234.16	436.567	-2385.65	1134.02	432.217	-2531.57	1027.54	379.427	-2596.67	984.132	440.845	-2570.21	958.125	419.007	-2648.03	935.342
7983	0	184.96	-2493.9	1625.69	89.3242	-2502.2	1622.02	193.608	-2342.56	1665.34	50.7998	-2358.54	1654.08	137.836	-2287.38	1484.04	169.797	-2232.98	1227.61	130.793	-2437.99	1403.47	136.89	-2525.39	1195.06	102.51	-2221.42	1283.29	317.019	-2382.8	1453.56	410.092	-2386.7	1232.63	436.35	-2405.44	1133.29	430.057	-2554.62	1030.72	376.429	-2619.88	989.787	438.757	-2595.77	963.721	415.556	-2673.53	943.383
7984	0	184.473	-2507.3	1623.24	88.8774	-2516.32	1620.2	193.589	-2355.55	1664.13	50.617	-2372.59	1652.13	136.897	-2300.85	1482.41	167.741	-2246.14	1225.85	130.282	-2451.45	1401.31	136.557	-2539.81	1192.82	100.351	-2234.76	1281.46	316.075	-2396.39	1451.69	409.341	-2404.16	1231.68	435.687	-2425.16	1132.67	427.42	-2576.47	1034.44	373.356	-2642.51	995.076	436.399	-2620.19	968.952	412.29	-2698.29	951.325
[truncated: 69 more columns]

## Sheet: Sheet2
Devices
		025370 - Force			025370 - Moment			025370 - CoP			027571 - Force			027571 - Moment			027571 - CoP			037720 - Force			037720 - Moment			037720 - CoP
Frame	Sub Frame	Fx	Fy	Fz	Mx	My	Mz	Cx	Cy	Cz	Fx	Fy	Fz	Mx	My	Mz	Cx	Cy	Cz	Fx	Fy	Fz	Mx	My	Mz	Cx	Cy	Cz
		N	N	N	N.mm	N.mm	N.mm	mm	mm	mm	N	N	N	N.mm	N.mm	N.mm	mm	mm	mm	N	N	N	N.mm	N.mm	N.mm	mm	mm	mm
7618	0	0	0	0	0	0	0	200	300	0	0	0	0	0	0	0	200	903	0	0	0	0	0	0	0	603	903	0
7618	1	0	0	0	0	0	0	200	300	0	0	0	0	0	0	0	200	903	0	0	0	0	0	0	0	603	903	0
7618	2	0	0	0	0	0	0	200	300	0	0	0	0	0	0	0	200	903	0	0	0	0	0	0	0	603	903	0
7618	3	0	0	0	0	0	0	200	300	0	0	0	0	0	0	0	200	903	0	0	0	0	0	0	0	603	903	0
7618	4	0	0	0	0	0	0	200	300	0	0	0	0	0	0	0	200	903	0	0	0	0	0	0	0	603	903	0
7618	5	0	0	0	0	0	0	200	300	0	0	0	0	0	0	0	200	903	0	0	0	0	0	0	0	603	903	0
7618	6	0	0	0	0	0	0	200	300	0	0	0	0	0	0	0	200	903	0	0	0	0	0	0	0	603	903	0
7618	7	0	0	0	0	0	0	200	300	0	0	0	0	0	0	0	200	903	0	0	0	0	0	0	0	603	903	0
7618	8	0	0	0	0	0	0	200	300	0	0	0	0	0	0	0	200	903	0	0	0	0	0	0	0	603	903	0
7618	9	0	0	0	0	0	0	200	300	0	0	0	0	0	0	0	200	903	0	0	0	0	0	0	0	603	903	0
7619	0	0	0	0	0	0	0	200	300	0	0	0	0	0	0	0	200	903	0	0	0	0	0	0	0	603	903	0
7619	1	0	0	0	0	0	0	200	300	0	0	0	0	0	0	0	200	903	0	0	0	0	0	0	0	603	903	0
7619	2	0	0	0	0	0	0	200	300	0	0	0	0	0	0	0	200	903	0	0	0	0	0	0	0	603	903	0
7619	3	0	0	0	0	0	0	200	300	0	0	0	0	0	0	0	200	903	0	0	0	0	0	0	0	603	903	0
7619	4	0	0	0	0	0	0	200	300	0	0	0	0	0	0	0	200	903	0	0	0	0	0	0	0	603	903	0
7619	5	0	0	0	0	0	0	200	300	0	0	0	0	0	0	0	200	903	0	0	0	0	0	0	0	603	903	0
7619	6	0	0	0	0	0	0	200	300	0	0	0	0	0	0	0	200	903	0	0	0	0	0	0	0	603	903	0
7619	7	0	0	0	0	0	0	200	300	0	0	0	0	0	0	0	200	903	0	0	0	0	0	0	0	603	903	0
7619	8	0	0	0	0	0	0	200	300	0	0	0	0	0	0	0	200	903	0	0	0	0	0	0	0	603	903	0
7619	9	0	0	0	0	0	0	200	300	0	0	0	0	0	0	0	200	903	0	0	0	0	0	0	0	603	903	0
7620	0	0	0	0	0	0	0	200	300	0	0	0	0	0	0	0	200	903	0	0	0	0	0	0	0	603	903	0
7620	1	0	0	0	0	0	0	200	300	0	0	0	0	0	0	0	200	903	0	0	0	0	0	0	0	603	903	0
7620	2	0	0	0	0	0	0	200	300	0	0	0	0	0	0	0	200	903	0	0	0	0	0	0	0	603	903	0
7620	3	0	0	0	0	0	0	200	300	0	0	0	0	0	0	0	200	903	0	0	0	0	0	0	0	603	903	0
7620	4	0	0	0	0	0	0	200	300	0	0	0	0	0	0	0	200	903	0	0	0	0	0	0	0	603	903	0
7620	5	0	0	0	0	0	0	200	300	0	0	0	0	0	0	0	200	903	0	0	0	0	0	0	0	603	903	0
7620	6	0	0	0	0	0	0	200	300	0	0	0	0	0	0	0	200	903	0	0	0	0	0	0	0	603	903	0
7620	7	0	0	0	0	0	0	200	300	0	0	0	0	0	0	0	200	903	0	0	0	0	0	0	0	603	903	0
7620	8	0	0	0	0	0	0	200	300	0	0	0	0	0	0	0	200	903	0	0	0	0	0	0	0	603	903	0
7620	9	0	0	0	0	0	0	200	300	0	0	0	0	0	0	0	200	903	0	0	0	0	0	0	0	603	903	0
7621	0	0	0	0	0	0	0	200	300	0	0	0	0	0	0	0	200	903	0	0	0	0	0	0	0	603	903	0
7621	1	0	0	0	0	0	0	200	300	0	0	0	0	0	0	0	200	903	0	0	0	0	0	0	0	603	903	0
7621	2	0	0	0	0	0	0	200	300	0	0	0	0	0	0	0	200	903	0	0	0	0	0	0	0	603	903	0
7621	3	0	0	0	0	0	0	200	300	0	0	0	0	0	0	0	200	903	0	0	0	0	0	0	0	603	903	0
7621	4	0	0	0	0	0	0	200	300	0	0	0	0	0	0	0	200	903	0	0	0	0	0	0	0	603	903	0
7621	5	0	0	0	0	0	0	200	300	0	0	0	0	0	0	0	200	903	0	0	0	0	0	0	0	603	903	0
7621	6	0	0	0	0	0	0	200	300	0	0	0	0	0	0	0	200	903	0	0	0	0	0	0	0	603	903	0
7621	7	0	0	0	0	0	0	200	300	0	0	0	0	0	0	0	200	903	0	0	0	0	0	0	0	603	903	0
7621	8	0	0	0	0	0	0	200	300	0	0	0	0	0	0	0	200	903	0	0	0	0	0	0	0	603	903	0
7621	9	0	0	0	0	0	0	200	300	0	0	0	0	0	0	0	200	903	0	0	0	0	0	0	0	603	903	0
7622	0	0	0	0	0	0	0	200	300	0	0	0	0	0	0	0	200	903	0	0	0	0	0	0	0	603	903	0
7622	1	0	0	0	0	0	0	200	300	0	0	0	0	0	0	0	200	903	0	0	0	0	0	0	0	603	903	0
7622	2	0	0	0	0	0	0	200	300	0	0	0	0	0	0	0	200	903	0	0	0	0	0	0	0	603	903	0
7622	3	0	0	0	0	0	0	200	300	0	0	0	0	0	0	0	200	903	0	0	0	0	0	0	0	603	903	0
7622	4	0	0	0	0	0	0	200	300	0	0	0	0	0	0	0	200	903	0	0	0	0	0	0	0	603	903	0
7622	5	0	0	0	0	0	0	200	300	0	0	0	0	0	0	0	200	903	0	0	0	0	0	0	0	603	903	0
7622	6	0	0	0	0	0	0	200	300	0	0	0	0	0	0	0	200	903	0	0	0	0	0	0	0	603	903	0
7622	7	0	0	0	0	0	0	200	300	0	0	0	0	0	0	0	200	903	0	0	0	0	0	0	0	603	903	0
7622	8	0	0	0	0	0	0	200	300	0	0	0	0	0	0	0	200	903	0	0	0	0	0	0	0	603	903	0
7622	9	0	0	0	0	0	0	200	300	0	0	0	0	0	0	0	200	903	0	0	0	0	0	0	0	603	903	0
7623	0	0	0	0	0	0	0	200	300	0	0	0	0	0	0	0	200	903	0	0	0	0	0	0	0	603	903	0
7623	1	0	0	0	0	0	0	200	300	0	0	0	0	0	0	0	200	903	0	0	0	0	0	0	0	603	903	0
7623	2	0	0	0	0	0	0	200	300	0	0	0	0	0	0	0	200	903	0	0	0	0	0	0	0	603	903	0
7623	3	0	0	0	0	0	0	200	300	0	0	0	0	0	0	0	200	903	0	0	0	0	0	0	0	603	903	0
7623	4	0	0	0	0	0	0	200	300	0	0	0	0	0	0	0	200	903	0	0	0	0	0	0	0	603	903	0
7623	5	0	0	0	0	0	0	200	300	0	0	0	0	0	0	0	200	903	0	0	0	0	0	0	0	603	903	0
7623	6	0	0	0	0	0	0	200	300	0	0	0	0	0	0	0	200	903	0	0	0	0	0	0	0	603	903	0
7623	7	0	0	0	0	0	0	200	300	0	0	0	0	0	0	0	200	903	0	0	0	0	0	0	0	603	903	0
7623	8	0	0	0	0	0	0	200	300	0	0	0	0	0	0	0	200	903	0	0	0	0	0	0	0	603	903	0
7623	9	0	0	0	0	0	0	200	300	0	0	0	0	0	0	0	200	903	0	0	0	0	0	0	0	603	903	0
7624	0	0	0	0	0	0	0	200	300	0	0	0	0	0	0	0	200	903	0	0	0	0	0	0	0	603	903	0
7624	1	0	0	0	0	0	0	200	300	0	0	0	0	0	0	0	200	903	0	0	0	0	0	0	0	603	903	0
7624	2	0	0	0	0	0	0	200	300	0	0	0	0	0	0	0	200	903	0	0	0	0	0	0	0	603	903	0
7624	3	0	0	0	0	0	0	200	300	0	0	0	0	0	0	0	200	903	0	0	0	0	0	0	0	603	903	0
7624	4	0	0	0	0	0	0	200	300	0	0	0	0	0	0	0	200	903	0	0	0	0	0	0	0	603	903	0
7624	5	0	0	0	0	0	0	200	300	0	0	0	0	0	0	0	200	903	0	0	0	0	0	0	0	603	903	0
7624	6	0	0	0	0	0	0	200	300	0	0	0	0	0	0	0	200	903	0	0	0	0	0	0	0	603	903	0
7624	7	0	0	0	0	0	0	200	300	0	0	0	0	0	0	0	200	903	0	0	0	0	0	0	0	603	903	0
7624	8	0	0	0	0	0	0	200	300	0	0	0	0	0	0	0	200	903	0	0	0	0	0	0	0	603	903	0
7624	9	0	0	0	0	0	0	200	300	0	0	0	0	0	0	0	200	903	0	0	0	0	0	0	0	603	903	0
7625	0	0	0	0	0	0	0	200	300	0	0	0	0	0	0	0	200	903	0	0	0	0	0	0	0	603	903	0
7625	1	0	0	0	0	0	0	200	300	0	0	0	0	0	0	0	200	903	0	0	0	0	0	0	0	603	903	0
7625	2	0	0	0	0	0	0	200	300	0	0	0	0	0	0	0	200	903	0	0	0	0	0	0	0	603	903	0
7625	3	0	0	0	0	0	0	200	300	0	0	0	0	0	0	0	200	903	0	0	0	0	0	0	0	603	903	0
7625	4	0	0	0	0	0	0	200	300	0	0	0	0	0	0	0	200	903	0	0	0	0	0	0	0	603	903	0
7625	5	0	0	0	0	0	0	200	300	0	0	0	0	0	0	0	200	903	0	0	0	0	0	0	0	603	903	0
7625	6	0	0	0	0	0	0	200	300	0	0	0	0	0	0	0	200	903	0	0	0	0	0	0	0	603	903	0
7625	7	0	0	0	0	0	0	200	300	0	0	0	0	0	0	0	200	903	0	0	0	0	0	0	0	603	903	0
7625	8	0	0	0	0	0	0	200	300	0	0	0	0	0	0	0	200	903	0	0	0	0	0	0	0	603	903	0
7625	9	0	0	0	0	0	0	200	300	0	0	0	0	0	0	0	200	903	0	0	0	0	0	0	0	603	903	0
7626	0	0	0	0	0	0	0	200	300	0	0	0	0	0	0	0	200	903	0	0	0	0	0	0	0	603	903	0
7626	1	0	0	0	0	0	0	200	300	0	0	0	0	0	0	0	200	903	0	0	0	0	0	0	0	603	903	0
7626	2	0	0	0	0	0	0	200	300	0	0	0	0	0	0	0	200	903	0	0	0	0	0	0	0	603	903	0
7626	3	0	0	0	0	0	0	200	300	0	0	0	0	0	0	0	200	903	0	0	0	0	0	0	0	603	903	0
7626	4	0	0	0	0	0	0	200	300	0	0	0	0	0	0	0	200	903	0	0	0	0	0	0	0	603	903	0
7626	5	0	0	0	0	0	0	200	300	0	0	0	0	0	0	0	200	903	0	0	0	0	0	0	0	603	903	0
7626	6	0	0	0	0	0	0	200	300	0	0	0	0	0	0	0	200	903	0	0	0	0	0	0	0	603	903	0
7626	7	0	0	0	0	0	0	200	300	0	0	0	0	0	0	0	200	903	0	0	0	0	0	0	0	603	903	0
7626	8	0	0	0	0	0	0	200	300	0	0	0	0	0	0	0	200	903	0	0	0	0	0	0	0	603	903	0
7626	9	0	0	0	0	0	0	200	300	0	0	0	0	0	0	0	200	903	0	0	0	0	0	0	0	603	903	0
7627	0	0	0	0	0	0	0	200	300	0	0	0	0	0	0	0	200	903	0	0	0	0	0	0	0	603	903	0
7627	1	0	0	0	0	0	0	200	300	0	0	0	0	0	0	0	200	903	0	0	0	0	0	0	0	603	903	0
7627	2	0	0	0	0	0	0	200	300	0	0	0	0	0	0	0	200	903	0	0	0	0	0	0	0	603	903	0
7627	3	0	0	0	0	0	0	200	300	0	0	0	0	0	0	0	200	903	0	0	0	0	0	0	0	603	903	0
7627	4	0	0	0	0	0	0	200	300	0	0	0	0	0	0	0	200	903	0	0	0	0	0	0	0	603	903	0
7627	5	0	0	0	0	0	0	200	300	0	0	0	0	0	0	0	200	903	0	0	0	0	0	0	0	603	903	0
7627	6	0	0	0	0	0	0	200	300	0	0	0	0	0	0	0	200	903	0	0	0	0	0	0	0	603	903	0
7627	7	0	0	0	0	0	0	200	300	0	0	0	0	0	0	0	200	903	0	0	0	0	0	0	0	603	903	0
7627	8	0	0	0	0	0	0	200	300	0	0	0	0	0	0	0	200	903	0	0	0	0	0	0	0	603	903	0
7627	9	0	0	0	0	0	0	200	300	0	0	0	0	0	0	0	200	903	0	0	0	0	0	0	0	603	903	0
7628	0	0	0	0	0	0	0	200	300	0	0	0	0	0	0	0	200	903	0	0	0	0	0	0	0	603	903	0
7628	1	0	0	0	0	0	0	200	300	0	0	0	0	0	0	0	200	903	0	0	0	0	0	0	0	603	903	0
7628	2	0	0	0	0	0	0	200	300	0	0	0	0	0	0	0	200	903	0	0	0	0	0	0	0	603	903	0
7628	3	0	0	0	0	0	0	200	300	0	0	0	0	0	0	0	200	903	0	0	0	0	0	0	0	603	903	0
7628	4	0	0	0	0	0	0	200	300	0	0	0	0	0	0	0	200	903	0	0	0	0	0	0	0	603	903	0
7628	5	0	0	0	0	0	0	200	300	0	0	0	0	0	0	0	200	903	0	0	0	0	0	0	0	603	903	0
7628	6	0	0	0	0	0	0	200	300	0	0	0	0	0	0	0	200	903	0	0	0	0	0	0	0	603	903	0
7628	7	0	0	0	0	0	0	200	300	0	0	0	0	0	0	0	200	903	0	0	0	0	0	0	0	603	903	0
7628	8	0	0	0	0	0	0	200	300	0	0	0	0	0	0	0	200	903	0	0	0	0	0	0	0	603	903	0
7628	9	0	0	0	0	0	0	200	300	0	0	0	0	0	0	0	200	903	0	0	0	0	0	0	0	603	903	0
7629	0	0	0	0	0	0	0	200	300	0	0	0	0	0	0	0	200	903	0	0	0	0	0	0	0	603	903	0
7629	1	0	0	0	0	0	0	200	300	0	0	0	0	0	0	0	200	903	0	0	0	0	0	0	0	603	903	0
7629	2	0	0	0	0	0	0	200	300	0	0	0	0	0	0	0	200	903	0	0	0	0	0	0	0	603	903	0
7629	3	0	0	0	0	0	0	200	300	0	0	0	0	0	0	0	200	903	0	0	0	0	0	0	0	603	903	0
7629	4	0	0	0	0	0	0	200	300	0	0	0	0	0	0	0	200	903	0	0	0	0	0	0	0	603	903	0
7629	5	0	0	0	0	0	0	200	300	0	0	0	0	0	0	0	200	903	0	0	0	0	0	0	0	603	903	0
7629	6	0	0	0	0	0	0	200	300	0	0	0	0	0	0	0	200	903	0	0	0	0	0	0	0	603	903	0
7629	7	0	0	0	0	0	0	200	300	0	0	0	0	0	0	0	200	903	0	0	0	0	0	0	0	603	903	0
7629	8	0	0	0	0	0	0	200	300	0	0	0	0	0	0	0	200	903	0	0	0	0	0	0	0	603	903	0
7629	9	0	0	0	0	0	0	200	300	0	0	0	0	0	0	0	200	903	0	0	0	0	0	0	0	603	903	0
7630	0	0	0	0	0	0	0	200	300	0	0	0	0	0	0	0	200	903	0	0	0	0	0	0	0	603	903	0
7630	1	0	0	0	0	0	0	200	300	0	0	0	0	0	0	0	200	903	0	0	0	0	0	0	0	603	903	0
7630	2	0	0	0	0	0	0	200	300	0	0	0	0	0	0	0	200	903	0	0	0	0	0	0	0	603	903	0
7630	3	0	0	0	0	0	0	200	300	0	0	0	0	0	0	0	200	903	0	0	0	0	0	0	0	603	903	0
7630	4	0	0	0	0	0	0	200	300	0	0	0	0	0	0	0	200	903	0	0	0	0	0	0	0	603	903	0
7630	5	0	0	0	0	0	0	200	300	0	0	0	0	0	0	0	200	903	0	0	0	0	0	0	0	603	903	0
7630	6	0	0	0	0	0	0	200	300	0	0	0	0	0	0	0	200	903	0	0	0	0	0	0	0	603	903	0
7630	7	0	0	0	0	0	0	200	300	0	0	0	0	0	0	0	200	903	0	0	0	0	0	0	0	603	903	0
7630	8	0	0	0	0	0	0	200	300	0	0	0	0	0	0	0	200	903	0	0	0	0	0	0	0	603	903	0
7630	9	0	0	0	0	0	0	200	300	0	0	0	0	0	0	0	200	903	0	0	0	0	0	0	0	603	903	0
7631	0	0	0	0	0	0	0	200	300	0	0	0	0	0	0	0	200	903	0	0	0	0	0	0	0	603	903	0
7631	1	0	0	0	0	0	0	200	300	0	0	0	0	0	0	0	200	903	0	0	0	0	0	0	0	603	903	0
7631	2	0	0	0	0	0	0	200	300	0	0	0	0	0	0	0	200	903	0	0	0	0	0	0	0	603	903	0
7631	3	0	0	0	0	0	0	200	300	0	0	0	0	0	0	0	200	903	0	0	0	0	0	0	0	603	903	0
7631	4	0	0	0	0	0	0	200	300	0	0	0	0	0	0	0	200	903	0	0	0	0	0	0	0	603	903	0
7631	5	0	0	0	0	0	0	200	300	0	0	0	0	0	0	0	200	903	0	0	0	0	0	0	0	603	903	0
7631	6	0	0	0	0	0	0	200	300	0	0	0	0	0	0	0	200	903	0	0	0	0	0	0	0	603	903	0
7631	7	0	0	0	0	0	0	200	300	0	0	0	0	0	0	0	200	903	0	0	0	0	0	0	0	603	903	0
7631	8	0	0	0	0	0	0	200	300	0	0	0	0	0	0	0	200	903	0	0	0	0	0	0	0	603	903	0
7631	9	0	0	0	0	0	0	200	300	0	0	0	0	0	0	0	200	903	0	0	0	0	0	0	0	603	903	0
7632	0	0	0	0	0	0	0	200	300	0	0	0	0	0	0	0	200	903	0	0	0	0	0	0	0	603	903	0
7632	1	0	0	0	0	0	0	200	300	0	0	0	0	0	0	0	200	903	0	0	0	0	0	0	0	603	903	0
7632	2	0	0	0	0	0	0	200	300	0	0	0	0	0	0	0	200	903	0	0	0	0	0	0	0	603	903	0
7632	3	0	0	0	0	0	0	200	300	0	0	0	0	0	0	0	200	903	0	0	0	0	0	0	0	603	903	0
7632	4	0	0	0	0	0	0	200	300	0	0	0	0	0	0	0	200	903	0	0	0	0	0	0	0	603	903	0
7632	5	0	0	0	0	0	0	200	300	0	0	0	0	0	0	0	200	903	0	0	0	0	0	0	0	603	903	0
7632	6	0	0	0	0	0	0	200	300	0	0	0	0	0	0	0	200	903	0	0	0	0	0	0	0	603	903	0
7632	7	0	0	0	0	0	0	200	300	0	0	0	0	0	0	0	200	903	0	0	0	0	0	0	0	603	903	0
7632	8	0	0	0	0	0	0	200	300	0	0	0	0	0	0	0	200	903	0	0	0	0	0	0	0	603	903	0
7632	9	0	0	0	0	0	0	200	300	0	0	0	0	0	0	0	200	903	0	0	0	0	0	0	0	603	903	0
7633	0	0	0	0	0	0	0	200	300	0	0	0	0	0	0	0	200	903	0	0	0	0	0	0	0	603	903	0
7633	1	0	0	0	0	0	0	200	300	0	0	0	0	0	0	0	200	903	0	0	0	0	0	0	0	603	903	0
7633	2	0	0	0	0	0	0	200	300	0	0	0	0	0	0	0	200	903	0	0	0	0	0	0	0	603	903	0
7633	3	0	0	0	0	0	0	200	300	0	0	0	0	0	0	0	200	903	0	0	0	0	0	0	0	603	903	0
7633	4	0	0	0	0	0	0	200	300	0	0	0	0	0	0	0	200	903	0	0	0	0	0	0	0	603	903	0
7633	5	0	0	0	0	0	0	200	300	0	0	0	0	0	0	0	200	903	0	0	0	0	0	0	0	603	903	0
7633	6	0	0	0	0	0	0	200	300	0	0	0	0	0	0	0	200	903	0	0	0	0	0	0	0	603	903	0
7633	7	0	0	0	0	0	0	200	300	0	0	0	0	0	0	0	200	903	0	0	0	0	0	0	0	603	903	0
7633	8	0	0	0	0	0	0	200	300	0	0	0	0	0	0	0	200	903	0	0	0	0	0	0	0	603	903	0
7633	9	0	0	0	0	0	0	200	300	0	0	0	0	0	0	0	200	903	0	0	0	0	0	0	0	603	903	0
7634	0	0	0	0	0	0	0	200	300	0	0	0	0	0	0	0	200	903	0	0	0	0	0	0	0	603	903	0
7634	1	0	0	0	0	0	0	200	300	0	0	0	0	0	0	0	200	903	0	0	0	0	0	0	0	603	903	0
7634	2	0	0	0	0	0	0	200	300	0	0	0	0	0	0	0	200	903	0	0	0	0	0	0	0	603	903	0
7634	3	0	0	0	0	0	0	200	300	0	0	0	0	0	0	0	200	903	0	0	0	0	0	0	0	603	903	0
7634	4	0	0	0	0	0	0	200	300	0	0	0	0	0	0	0	200	903	0	0	0	0	0	0	0	603	903	0
7634	5	0	0	0	0	0	0	200	300	0	0	0	0	0	0	0	200	903	0	0	0	0	0	0	0	603	903	0
7634	6	0	0	0	0	0	0	200	300	0	0	0	0	0	0	0	200	903	0	0	0	0	0	0	0	603	903	0
7634	7	0	0	0	0	0	0	200	300	0	0	0	0	0	0	0	200	903	0	0	0	0	0	0	0	603	903	0
7634	8	0	0	0	0	0	0	200	300	0	0	0	0	0	0	0	200	903	0	0	0	0	0	0	0	603	903	0
7634	9	0	0	0	0	0	0	200	300	0	0	0	0	0	0	0	200	903	0	0	0	0	0	0	0	603	903	0
7635	0	0	0	0	0	0	0	200	300	0	0	0	0	0	0	0	200	903	0	0	0	0	0	0	0	603	903	0
7635	1	0	0	0	0	0	0	200	300	0	0	0	0	0	0	0	200	903	0	0	0	0	0	0	0	603	903	0
7635	2	0	0	0	0	0	0	200	300	0	0	0	0	0	0	0	200	903	0	0	0	0	0	0	0	603	903	0
7635	3	0	0	0	0	0	0	200	300	0	0	0	0	0	0	0	200	903	0	0	0	0	0	0	0	603	903	0
7635	4	0	0	0	0	0	0	200	300	0	0	0	0	0	0	0	200	903	0	0	0	0	0	0	0	603	903	0
7635	5	0	0	0	0	0	0	200	300	0	0	0	0	0	0	0	200	903	0	0	0	0	0	0	0	603	903	0
7635	6	0	0	0	0	0	0	200	300	0	0	0	0	0	0	0	200	903	0	0	0	0	0	0	0	603	903	0
7635	7	0	0	0	0	0	0	200	300	0	0	0	0	0	0	0	200	903	0	0	0	0	0	0	0	603	903	0
7635	8	0	0	0	0	0	0	200	300	0	0	0	0	0	0	0	200	903	0	0	0	0	0	0	0	603	903	0
7635	9	0	0	0	0	0	0	200	300	0	0	0	0	0	0	0	200	903	0	0	0	0	0	0	0	603	903	0
7636	0	0	0	0	0	0	0	200	300	0	0	0	0	0	0	0	200	903	0	0	0	0	0	0	0	603	903	0
7636	1	0	0	0	0	0	0	200	300	0	0	0	0	0	0	0	200	903	0	0	0	0	0	0	0	603	903	0
7636	2	0	0	0	0	0	0	200	300	0	0	0	0	0	0	0	200	903	0	0	0	0	0	0	0	603	903	0
7636	3	0	0	0	0	0	0	200	300	0	0	0	0	0	0	0	200	903	0	0	0	0	0	0	0	603	903	0
7636	4	0	0	0	0	0	0	200	300	0	0	0	0	0	0	0	200	903	0	0	0	0	0	0	0	603	903	0
7636	5	0	0	0	0	0	0	200	300	0	0	0	0	0	0	0	200	903	0	0	0	0	0	0	0	603	903	0
7636	6	0	0	0	0	0	0	200	300	0	0	0	0	0	0	0	200	903	0	0	0	0	0	0	0	603	903	0
7636	7	0	0	0	0	0	0	200	300	0	0	0	0	0	0	0	200	903	0	0	0	0	0	0	0	603	903	0
7636	8	0	0	0	0	0	0	200	300	0	0	0	0	0	0	0	200	903	0	0	0	0	0	0	0	603	903	0
7636	9	0	0	0	0	0	0	200	300	0	0	0	0	0	0	0	200	903	0	0	0	0	0	0	0	603	903	0
7637	0	0	0	0	0	0	0	200	300	0	0	0	0	0	0	0	200	903	0	0	0	0	0	0	0	603	903	0
7637	1	0	0	0	0	0	0	200	300	0	0	0	0	0	0	0	200	903	0	0	0	0	0	0	0	603	903	0
7637	2	0	0	0	0	0	0	200	300	0	0	0	0	0	0	0	200	903	0	0	0	0	0	0	0	603	903	0
7637	3	0	0	0	0	0	0	200	300	0	0	0	0	0	0	0	200	903	0	0	0	0	0	0	0	603	903	0
7637	4	0	0	0	0	0	0	200	300	0	0	0	0	0	0	0	200	903	0	0	0	0	0	0	0	603	903	0
7637	5	0	0	0	0	0	0	200	300	0	0	0	0	0	0	0	200	903	0	0	0	0	0	0	0	603	903	0
7637	6	0	0	0	0	0	0	200	300	0	0	0	0	0	0	0	200	903	0	0	0	0	0	0	0	603	903	0
7637	7	0	0	0	0	0	0	200	300	0	0	0	0	0	0	0	200	903	0	0	0	0	0	0	0	603	903	0
7637	8	0	0	0	0	0	0	200	300	0	0	0	0	0	0	0	200	903	0	0	0	0	0	0	0	603	903	0
7637	9	0	0	0	0	0	0	200	300	0	0	0	0	0	0	0	200	903	0	0	0	0	0	0	0	603	903	0
7638	0	0	0	0	0	0	0	200	300	0	0	0	0	0	0	0	200	903	0	0	0	0	0	0	0	603	903	0
7638	1	0	0	0	0	0	0	200	300	0	0	0	0	0	0	0	200	903	0	0	0	0	0	0	0	603	903	0
7638	2	0	0	0	0	0	0	200	300	0	0	0	0	0	0	0	200	903	0	0	0	0	0	0	0	603	903	0
7638	3	0	0	0	0	0	0	200	300	0	0	0	0	0	0	0	200	903	0	0	0	0	0	0	0	603	903	0
7638	4	0	0	0	0	0	0	200	300	0	0	0	0	0	0	0	200	903	0	0	0	0	0	0	0	603	903	0
7638	5	0	0	0	0	0	0	200	300	0	0	0	0	0	0	0	200	903	0	0	0	0	0	0	0	603	903	0
7638	6	0	0	0	0	0	0	200	300	0	0	0	0	0	0	0	200	903	0	0	0	0	0	0	0	603	903	0
7638	7	0	0	0	0	0	0	200	300	0	0	0	0	0	0	0	200	903	0	0	0	0	0	0	0	603	903	0
7638	8	0	0	0	0	0	0	200	300	0	0	0	0	0	0	0	200	903	0	0	0	0	0	0	0	603	903	0
7638	9	0	0	0	0	0	0	200	300	0	0	0	0	0	0	0	200	903	0	0	0	0	0	0	0	603	903	0
7639	0	0	0	0	0	0	0	200	300	0	0	0	0	0	0	0	200	903	0	0	0	0	0	0	0	603	903	0
7639	1	0	0	0	0	0	0	200	300	0	0	0	0	0	0	0	200	903	0	0	0	0	0	0	0	603	903	0
7639	2	0	0	0	0	0	0	200	300	0	0	0	0	0	0	0	200	903	0	0	0	0	0	0	0	603	903	0
7639	3	0	0	0	0	0	0	200	300	0	0	0	0	0	0	0	200	903	0	0	0	0	0	0	0	603	903	0
7639	4	0	0	0	0	0	0	200	300	0	0	0	0	0	0	0	200	903	0	0	0	0	0	0	0	603	903	0
7639	5	0	0	0	0	0	0	200	300	0	0	0	0	0	0	0	200	903	0	0	0	0	0	0	0	603	903	0
7639	6	0	0	0	0	0	0	200	300	0	0	0	0	0	0	0	200	903	0	0	0	0	0	0	0	603	903	0
7639	7	0	0	0	0	0	0	200	300	0	0	0	0	0	0	0	200	903	0	0	0	0	0	0	0	603	903	0
7639	8	0	0	0	0	0	0	200	300	0	0	0	0	0	0	0	200	903	0	0	0	0	0	0	0	603	903	0
7639	9	0	0	0	0	0	0	200	300	0	0	0	0	0	0	0	200	903	0	0	0	0	0	0	0	603	903	0
7640	0	0	0	0	0	0	0	200	300	0	0	0	0	0	0	0	200	903	0	0	0	0	0	0	0	603	903	0
7640	1	0	0	0	0	0	0	200	300	0	0	0	0	0	0	0	200	903	0	0	0	0	0	0	0	603	903	0
7640	2	0	0	0	0	0	0	200	300	0	0	0	0	0	0	0	200	903	0	0	0	0	0	0	0	603	903	0
7640	3	0	0	0	0	0	0	200	300	0	0	0	0	0	0	0	200	903	0	0	0	0	0	0	0	603	903	0
7640	4	0	0	0	0	0	0	200	300	0	0	0	0	0	0	0	200	903	0	0	0	0	0	0	0	603	903	0
7640	5	0	0	0	0	0	0	200	300	0	0	0	0	0	0	0	200	903	0	0	0	0	0	0	0	603	903	0
7640	6	0	0	0	0	0	0	200	300	0	0	0	0	0	0	0	200	903	0	0	0	0	0	0	0	603	903	0
7640	7	0	0	0	0	0	0	200	300	0	0	0	0	0	0	0	200	903	0	0	0	0	0	0	0	603	903	0
7640	8	0	0	0	0	0	0	200	300	0	0	0	0	0	0	0	200	903	0	0	0	0	0	0	0	603	903	0
7640	9	0	0	0	0	0	0	200	300	0	0	0	0	0	0	0	200	903	0	0	0	0	0	0	0	603	903	0
7641	0	0	0	0	0	0	0	200	300	0	0	0	0	0	0	0	200	903	0	0	0	0	0	0	0	603	903	0
7641	1	0	0	0	0	0	0	200	300	0	0	0	0	0	0	0	200	903	0	0	0	0	0	0	0	603	903	0
7641	2	0	0	0	0	0	0	200	300	0	0	0	0	0	0	0	200	903	0	0	0	0	0	0	0	603	903	0
7641	3	0	0	0	0	0	0	200	300	0	0	0	0	0	0	0	200	903	0	0	0	0	0	0	0	603	903	0
7641	4	0	0	0	0	0	0	200	300	0	0	0	0	0	0	0	200	903	0	0	0	0	0	0	0	603	903	0
7641	5	0	0	0	0	0	0	200	300	0	0	0	0	0	0	0	200	903	0	0	0	0	0	0	0	603	903	0
7641	6	0	0	0	0	0	0	200	300	0	0	0	0	0	0	0	200	903	0	0	0	0	0	0	0	603	903	0
7641	7	0	0	0	0	0	0	200	300	0	0	0	0	0	0	0	200	903	0	0	0	0	0	0	0	603	903	0
7641	8	0	0	0	0	0	0	200	300	0	0	0	0	0	0	0	200	903	0	0	0	0	0	0	0	603	903	0
7641	9	0	0	0	0	0	0	200	300	0	0	0	0	0	0	0	200	903	0	0	0	0	0	0	0	603	903	0
7642	0	0	0	0	0	0	0	200	300	0	0	0	0	0	0	0	200	903	0	0	0	0	0	0	0	603	903	0
7642	1	0	0	0	0	0	0	200	300	0	0	0	0	0	0	0	200	903	0	0	0	0	0	0	0	603	903	0
7642	2	0	0	0	0	0	0	200	300	0	0	0	0	0	0	0	200	903	0	0	0	0	0	0	0	603	903	0
7642	3	0	0	0	0	0	0	200	300	0	0	0	0	0	0	0	200	903	0	0	0	0	0	0	0	603	903	0
7642	4	0	0	0	0	0	0	200	300	0	0	0	0	0	0	0	200	903	0	0	0	0	0	0	0	603	903	0
7642	5	0	0	0	0	0	0	200	300	0	0	0	0	0	0	0	200	903	0	0	0	0	0	0	0	603	903	0
7642	6	0	0	0	0	0	0	200	300	0	0	0	0	0	0	0	200	903	0	0	0	0	0	0	0	603	903	0
7642	7	0	0	0	0	0	0	200	300	0	0	0	0	0	0	0	200	903	0	0	0	0	0	0	0	603	903	0
7642	8	0	0	0	0	0	0	200	300	0	0	0	0	0	0	0	200	903	0	0	0	0	0	0	0	603	903	0
7642	9	0	0	0	0	0	0	200	300	0	0	0	0	0	0	0	200	903	0	0	0	0	0	0	0	603	903	0
7643	0	0	0	0	0	0	0	200	300	0	0	0	0	0	0	0	200	903	0	0	0	0	0	0	0	603	903	0
7643	1	0	0	0	0	0	0	200	300	0	0	0	0	0	0	0	200	903	0	0	0	0	0	0	0	603	903	0
7643	2	0	0	0	0	0	0	200	300	0	0	0	0	0	0	0	200	903	0	0	0	0	0	0	0	603	903	0
7643	3	0	0	0	0	0	0	200	300	0	0	0	0	0	0	0	200	903	0	0	0	0	0	0	0	603	903	0
7643	4	0	0	0	0	0	0	200	300	0	0	0	0	0	0	0	200	903	0	0	0	0	0	0	0	603	903	0
7643	5	0	0	0	0	0	0	200	300	0	0	0	0	0	0	0	200	903	0	0	0	0	0	0	0	603	903	0
7643	6	0	0	0	0	0	0	200	300	0	0	0	0	0	0	0	200	903	0	0	0	0	0	0	0	603	903	0
7643	7	0	0	0	0	0	0	200	300	0	0	0	0	0	0	0	200	903	0	0	0	0	0	0	0	603	903	0
7643	8	0	0	0	0	0	0	200	300	0	0	0	0	0	0	0	200	903	0	0	0	0	0	0	0	603	903	0
7643	9	0	0	0	0	0	0	200	300	0	0	0	0	0	0	0	200	903	0	0	0	0	0	0	0	603	903	0
7644	0	0	0	0	0	0	0	200	300	0	0	0	0	0	0	0	200	903	0	0	0	0	0	0	0	603	903	0
7644	1	0	0	0	0	0	0	200	300	0	0	0	0	0	0	0	200	903	0	0	0	0	0	0	0	603	903	0
7644	2	0	0	0	0	0	0	200	300	0	0	0	0	0	0	0	200	903	0	0	0	0	0	0	0	603	903	0
7644	3	0	0	0	0	0	0	200	300	0	0	0	0	0	0	0	200	903	0	0	0	0	0	0	0	603	903	0
7644	4	0	0	0	0	0	0	200	300	0	0	0	0	0	0	0	200	903	0	0	0	0	0	0	0	603	903	0
7644	5	0	0	0	0	0	0	200	300	0	0	0	0	0	0	0	200	903	0	0	0	0	0	0	0	603	903	0
7644	6	0	0	0	0	0	0	200	300	0	0	0	0	0	0	0	200	903	0	0	0	0	0	0	0	603	903	0
7644	7	0	0	0	0	0	0	200	300	0	0	0	0	0	0	0	200	903	0	0	0	0	0	0	0	603	903	0
7644	8	0	0	0	0	0	0	200	300	0	0	0	0	0	0	0	200	903	0	0	0	0	0	0	0	603	903	0
7644	9	0	0	0	0	0	0	200	300	0	0	0	0	0	0	0	200	903	0	0	0	0	0	0	0	603	903	0
7645	0	0	0	0	0	0	0	200	300	0	0	0	0	0	0	0	200	903	0	0	0	0	0	0	0	603	903	0
7645	1	0	0	0	0	0	0	200	300	0	0	0	0	0	0	0	200	903	0	0	0	0	0	0	0	603	903	0
7645	2	0	0	0	0	0	0	200	300	0	0	0	0	0	0	0	200	903	0	0	0	0	0	0	0	603	903	0
7645	3	0	0	0	0	0	0	200	300	0	0	0	0	0	0	0	200	903	0	0	0	0	0	0	0	603	903	0
7645	4	0	0	0	0	0	0	200	300	0	0	0	0	0	0	0	200	903	0	0	0	0	0	0	0	603	903	0
7645	5	0	0	0	0	0	0	200	300	0	0	0	0	0	0	0	200	903	0	0	0	0	0	0	0	603	903	0
7645	6	0	0	0	0	0	0	200	300	0	0	0	0	0	0	0	200	903	0	0	0	0	0	0	0	603	903	0
7645	7	0	0	0	0	0	0	200	300	0	0	0	0	0	0	0	200	903	0	0	0	0	0	0	0	603	903	0
7645	8	0	0	0	0	0	0	200	300	0	0	0	0	0	0	0	200	903	0	0	0	0	0	0	0	603	903	0
7645	9	0	0	0	0	0	0	200	300	0	0	0	0	0	0	0	200	903	0	0	0	0	0	0	0	603	903	0
7646	0	0	0	0	0	0	0	200	300	0	0	0	0	0	0	0	200	903	0	0	0	0	0	0	0	603	903	0
7646	1	0	0	0	0	0	0	200	300	0	0	0	0	0	0	0	200	903	0	0	0	0	0	0	0	603	903	0
7646	2	0	0	0	0	0	0	200	300	0	0	0	0	0	0	0	200	903	0	0	0	0	0	0	0	603	903	0
7646	3	0	0	0	0	0	0	200	300	0	0	0	0	0	0	0	200	903	0	0	0	0	0	0	0	603	903	0
7646	4	0	0	0	0	0	0	200	300	0	0	0	0	0	0	0	200	903	0	0	0	0	0	0	0	603	903	0
7646	5	0	0	0	0	0	0	200	300	0	0	0	0	0	0	0	200	903	0	0	0	0	0	0	0	603	903	0
7646	6	0	0	0	0	0	0	200	300	0	0	0	0	0	0	0	200	903	0	0	0	0	0	0	0	603	903	0
7646	7	0	0	0	0	0	0	200	300	0	0	0	0	0	0	0	200	903	0	0	0	0	0	0	0	603	903	0
7646	8	0	0	0	0	0	0	200	300	0	0	0	0	0	0	0	200	903	0	0	0	0	0	0	0	603	903	0
7646	9	0	0	0	0	0	0	200	300	0	0	0	0	0	0	0	200	903	0	0	0	0	0	0	0	603	903	0
7647	0	0	0	0	0	0	0	200	300	0	0	0	0	0	0	0	200	903	0	0	0	0	0	0	0	603	903	0
7647	1	0	0	0	0	0	0	200	300	0	0	0	0	0	0	0	200	903	0	0	0	0	0	0	0	603	903	0
7647	2	0	0	0	0	0	0	200	300	0	0	0	0	0	0	0	200	903	0	0	0	0	0	0	0	603	903	0
7647	3	0	0	0	0	0	0	200	300	0	0	0	0	0	0	0	200	903	0	0	0	0	0	0	0	603	903	0
7647	4	0	0	0	0	0	0	200	300	0	0	0	0	0	0	0	200	903	0	0	0	0	0	0	0	603	903	0
7647	5	0	0	0	0	0	0	200	300	0	0	0	0	0	0	0	200	903	0	0	0	0	0	0	0	603	903	0
7647	6	0	0	0	0	0	0	200	300	0	0	0	0	0	0	0	200	903	0	0	0	0	0	0	0	603	903	0
7647	7	0	0	0	0	0	0	200	300	0	0	0	0	0	0	0	200	903	0	0	0	0	0	0	0	603	903	0
7647	8	0	0	0	0	0	0	200	300	0	0	0	0	0	0	0	200	903	0	0	0	0	0	0	0	603	903	0
7647	9	0	0	0	0	0	0	200	300	0	0	0	0	0	0	0	200	903	0	0	0	0	0	0	0	603	903	0
7648	0	0	0	0	0	0	0	200	300	0	0	0	0	0	0	0	200	903	0	0	0	0	0	0	0	603	903	0
7648	1	0	0	0	0	0	0	200	300	0	0	0	0	0	0	0	200	903	0	0	0	0	0	0	0	603	903	0
7648	2	0	0	0	0	0	0	200	300	0	0	0	0	0	0	0	200	903	0	0	0	0	0	0	0	603	903	0
7648	3	0	0	0	0	0	0	200	300	0	0	0	0	0	0	0	200	903	0	0	0	0	0	0	0	603	903	0
7648	4	0	0	0	0	0	0	200	300	0	0	0	0	0	0	0	200	903	0	0	0	0	0	0	0	603	903	0
7648	5	0	0	0	0	0	0	200	300	0	0	0	0	0	0	0	200	903	0	0	0	0	0	0	0	603	903	0
7648	6	0	0	0	0	0	0	200	300	0	0	0	0	0	0	0	200	903	0	0	0	0	0	0	0	603	903	0
7648	7	0	0	0	0	0	0	200	300	0	0	0	0	0	0	0	200	903	0	0	0	0	0	0	0	603	903	0
7648	8	0	0	0	0	0	0	200	300	0	0	0	0	0	0	0	200	903	0	0	0	0	0	0	0	603	903	0
7648	9	0	0	0	0	0	0	200	300	0	0	0	0	0	0	0	200	903	0	0	0	0	0	0	0	603	903	0
7649	0	0	0	0	0	0	0	200	300	0	0	0	0	0	0	0	200	903	0	0	0	0	0	0	0	603	903	0
7649	1	0	0	0	0	0	0	200	300	0	0	0	0	0	0	0	200	903	0	0	0	0	0	0	0	603	903	0
7649	2	0	0	0	0	0	0	200	300	0	0	0	0	0	0	0	200	903	0	0	0	0	0	0	0	603	903	0
7649	3	0	0	0	0	0	0	200	300	0	0	0	0	0	0	0	200	903	0	0	0	0	0	0	0	603	903	0
7649	4	0	0	0	0	0	0	200	300	0	0	0	0	0	0	0	200	903	0	0	0	0	0	0	0	603	903	0
7649	5	0	0	0	0	0	0	200	300	0	0	0	0	0	0	0	200	903	0	0	0	0	0	0	0	603	903	0
7649	6	0	0	0	0	0	0	200	300	0	0	0	0	0	0	0	200	903	0	0	0	0	0	0	0	603	903	0
7649	7	0	0	0	0	0	0	200	300	0	0	0	0	0	0	0	200	903	0	0	0	0	0	0	0	603	903	0
7649	8	0	0	0	0	0	0	200	300	0	0	0	0	0	0	0	200	903	0	0	0	0	0	0	0	603	903	0
7649	9	0	0	0	0	0	0	200	300	0	0	0	0	0	0	0	200	903	0	0	0	0	0	0	0	603	903	0
7650	0	0	0	0	0	0	0	200	300	0	0	0	0	0	0	0	200	903	0	0	0	0	0	0	0	603	903	0
7650	1	0	0	0	0	0	0	200	300	0	0	0	0	0	0	0	200	903	0	0	0	0	0	0	0	603	903	0
7650	2	0	0	0	0	0	0	200	300	0	0	0	0	0	0	0	200	903	0	0	0	0	0	0	0	603	903	0
7650	3	0	0	0	0	0	0	200	300	0	0	0	0	0	0	0	200	903	0	0	0	0	0	0	0	603	903	0
7650	4	0	0	0	0	0	0	200	300	0	0	0	0	0	0	0	200	903	0	0	0	0	0	0	0	603	903	0
7650	5	0	0	0	0	0	0	200	300	0	0	0	0	0	0	0	200	903	0	0	0	0	0	0	0	603	903	0
7650	6	0	0	0	0	0	0	200	300	0	0	0	0	0	0	0	200	903	0	0	0	0	0	0	0	603	903	0
7650	7	0	0	0	0	0	0	200	300	0	0	0	0	0	0	0	200	903	0	0	0	0	0	0	0	603	903	0
7650	8	0	0	0	0	0	0	200	300	0	0	0	0	0	0	0	200	903	0	0	0	0	0	0	0	603	903	0
7650	9	0	0	0	0	0	0	200	300	0	0	0	0	0	0	0	200	903	0	0	0	0	0	0	0	603	903	0
7651	0	0	0	0	0	0	0	200	300	0	0	0	0	0	0	0	200	903	0	0	0	0	0	0	0	603	903	0
7651	1	0	0	0	0	0	0	200	300	0	0	0	0	0	0	0	200	903	0	0	0	0	0	0	0	603	903	0
7651	2	0	0	0	0	0	0	200	300	0	0	0	0	0	0	0	200	903	0	0	0	0	0	0	0	603	903	0
7651	3	0	0	0	0	0	0	200	300	0	0	0	0	0	0	0	200	903	0	0	0	0	0	0	0	603	903	0
7651	4	0	0	0	0	0	0	200	300	0	0	0	0	0	0	0	200	903	0	0	0	0	0	0	0	603	903	0
7651	5	0	0	0	0	0	0	200	300	0	0	0	0	0	0	0	200	903	0	0	0	0	0	0	0	603	903	0
7651	6	0	0	0	0	0	0	200	300	0	0	0	0	0	0	0	200	903	0	0	0	0	0	0	0	603	903	0
7651	7	0	0	0	0	0	0	200	300	0	0	0	0	0	0	0	200	903	0	0	0	0	0	0	0	603	903	0
7651	8	0	0	0	0	0	0	200	300	0	0	0	0	0	0	0	200	903	0	0	0	0	0	0	0	603	903	0
7651	9	0	0	0	0	0	0	200	300	0	0	0	0	0	0	0	200	903	0	0	0	0	0	0	0	603	903	0
7652	0	0	0	0	0	0	0	200	300	0	0	0	0	0	0	0	200	903	0	0	0	0	0	0	0	603	903	0
7652	1	0	0	0	0	0	0	200	300	0	0	0	0	0	0	0	200	903	0	0	0	0	0	0	0	603	903	0
7652	2	0	0	0	0	0	0	200	300	0	0	0	0	0	0	0	200	903	0	0	0	0	0	0	0	603	903	0
7652	3	0	0	0	0	0	0	200	300	0	0	0	0	0	0	0	200	903	0	0	0	0	0	0	0	603	903	0
7652	4	0	0	0	0	0	0	200	300	0	0	0	0	0	0	0	200	903	0	0	0	0	0	0	0	603	903	0
7652	5	0	0	0	0	0	0	200	300	0	0	0	0	0	0	0	200	903	0	0	0	0	0	0	0	603	903	0
7652	6	0	0	0	0	0	0	200	300	0	0	0	0	0	0	0	200	903	0	0	0	0	0	0	0	603	903	0
7652	7	0	0	0	0	0	0	200	300	0	0	0	0	0	0	0	200	903	0	0	0	0	0	0	0	603	903	0
7652	8	0	0	0	0	0	0	200	300	0	0	0	0	0	0	0	200	903	0	0	0	0	0	0	0	603	903	0
7652	9	0	0	0	0	0	0	200	300	0	0	0	0	0	0	0	200	903	0	0	0	0	0	0	0	603	903	0
7653	0	0	0	0	0	0	0	200	300	0	0	0	0	0	0	0	200	903	0	0	0	0	0	0	0	603	903	0
7653	1	0	0	0	0	0	0	200	300	0	0	0	0	0	0	0	200	903	0	0	0	0	0	0	0	603	903	0
7653	2	0	0	0	0	0	0	200	300	0	0	0	0	0	0	0	200	903	0	0	0	0	0	0	0	603	903	0
7653	3	0	0	0	0	0	0	200	300	0	0	0	0	0	0	0	200	903	0	0	0	0	0	0	0	603	903	0
7653	4	0	0	0	0	0	0	200	300	0	0	0	0	0	0	0	200	903	0	0	0	0	0	0	0	603	903	0
7653	5	0	0	0	0	0	0	200	300	0	0	0	0	0	0	0	200	903	0	0	0	0	0	0	0	603	903	0
7653	6	0	0	0	0	0	0	200	300	0	0	0	0	0	0	0	200	903	0	0	0	0	0	0	0	603	903	0
7653	7	0	0	0	0	0	0	200	300	0	0	0	0	0	0	0	200	903	0	0	0	0	0	0	0	603	903	0
7653	8	0	0	0	0	0	0	200	300	0	0	0	0	0	0	0	200	903	0	0	0	0	0	0	0	603	903	0
7653	9	0	0	0	0	0	0	200	300	0	0	0	0	0	0	0	200	903	0	0	0	0	0	0	0	603	903	0
7654	0	0	0	0	0	0	0	200	300	0	0	0	0	0	0	0	200	903	0	0	0	0	0	0	0	603	903	0
7654	1	0	0	0	0	0	0	200	300	0	0	0	0	0	0	0	200	903	0	0	0	0	0	0	0	603	903	0
7654	2	0	0	0	0	0	0	200	300	0	0	0	0	0	0	0	200	903	0	0	0	0	0	0	0	603	903	0
7654	3	0	0	0	0	0	0	200	300	0	0	0	0	0	0	0	200	903	0	0	0	0	0	0	0	603	903	0
7654	4	0	0	0	0	0	0	200	300	0	0	0	0	0	0	0	200	903	0	0	0	0	0	0	0	603	903	0
7654	5	0	0	0	0	0	0	200	300	0	0	0	0	0	0	0	200	903	0	0	0	0	0	0	0	603	903	0
7654	6	0	0	0	0	0	0	200	300	0	0	0	0	0	0	0	200	903	0	0	0	0	0	0	0	603	903	0
7654	7	0	0	0	0	0	0	200	300	0	0	0	0	0	0	0	200	903	0	0	0	0	0	0	0	603	903	0
7654	8	0	0	0	0	0	0	200	300	0	0	0	0	0	0	0	200	903	0	0	0	0	0	0	0	603	903	0
7654	9	0	0	0	0	0	0	200	300	0	0	0	0	0	0	0	200	903	0	0	0	0	0	0	0	603	903	0
7655	0	0	0	0	0	0	0	200	300	0	0	0	0	0	0	0	200	903	0	0	0	0	0	0	0	603	903	0
7655	1	0	0	0	0	0	0	200	300	0	0	0	0	0	0	0	200	903	0	0	0	0	0	0	0	603	903	0
7655	2	0	0	0	0	0	0	200	300	0	0	0	0	0	0	0	200	903	0	0	0	0	0	0	0	603	903	0
7655	3	0	0	0	0	0	0	200	300	0	0	0	0	0	0	0	200	903	0	0	0	0	0	0	0	603	903	0
7655	4	0	0	0	0	0	0	200	300	0	0	0	0	0	0	0	200	903	0	0	0	0	0	0	0	603	903	0
7655	5	0	0	0	0	0	0	200	300	0	0	0	0	0	0	0	200	903	0	0	0	0	0	0	0	603	903	0
7655	6	0	0	0	0	0	0	200	300	0	0	0	0	0	0	0	200	903	0	0	0	0	0	0	0	603	903	0
7655	7	0	0	0	0	0	0	200	300	0	0	0	0	0	0	0	200	903	0	0	0	0	0	0	0	603	903	0
7655	8	0	0	0	0	0	0	200	300	0	0	0	0	0	0	0	200	903	0	0	0	0	0	0	0	603	903	0
7655	9	0	0	0	0	0	0	200	300	0	0	0	0	0	0	0	200	903	0	0	0	0	0	0	0	603	903	0
7656	0	0	0	0	0	0	0	200	300	0	0	0	0	0	0	0	200	903	0	0	0	0	0	0	0	603	903	0
7656	1	0	0	0	0	0	0	200	300	0	0	0	0	0	0	0	200	903	0	0	0	0	0	0	0	603	903	0
7656	2	0	0	0	0	0	0	200	300	0	0	0	0	0	0	0	200	903	0	0	0	0	0	0	0	603	903	0
7656	3	0	0	0	0	0	0	200	300	0	0	0	0	0	0	0	200	903	0	0	0	0	0	0	0	603	903	0
7656	4	0	0	0	0	0	0	200	300	0	0	0	0	0	0	0	200	903	0	0	0	0	0	0	0	603	903	0
7656	5	0	0	0	0	0	0	200	300	0	0	0	0	0	0	0	200	903	0	0	0	0	0	0	0	603	903	0
7656	6	0	0	0	0	0	0	200	300	0	0	0	0	0	0	0	200	903	0	0	0	0	0	0	0	603	903	0
7656	7	0	0	0	0	0	0	200	300	0	0	0	0	0	0	0	200	903	0	0	0	0	0	0	0	603	903	0
7656	8	0	0	0	0	0	0	200	300	0	0	0	0	0	0	0	200	903	0	0	0	0	0	0	0	603	903	0
7656	9	0	0	0	0	0	0	200	300	0	0	0	0	0	0	0	200	903	0	0	0	0	0	0	0	603	903	0
7657	0	0	0	0	0	0	0	200	300	0	0	0	0	0	0	0	200	903	0	0	0	0	0	0	0	603	903	0
7657	1	0	0	0	0	0	0	200	300	0	0	0	0	0	0	0	200	903	0	0	0	0	0	0	0	603	903	0
7657	2	0	0	0	0	0	0	200	300	0	0	0	0	0	0	0	200	903	0	0	0	0	0	0	0	603	903	0
7657	3	0	0	0	0	0	0	200	300	0	0	0	0	0	0	0	200	903	0	0	0	0	0	0	0	603	903	0
7657	4	0	0	0	0	0	0	200	300	0	0	0	0	0	0	0	200	903	0	0	0	0	0	0	0	603	903	0
7657	5	0	0	0	0	0	0	200	300	0	0	0	0	0	0	0	200	903	0	0	0	0	0	0	0	603	903	0
7657	6	0	0	0	0	0	0	200	300	0	0	0	0	0	0	0	200	903	0	0	0	0	0	0	0	603	903	0
7657	7	0	0	0	0	0	0	200	300	0	0	0	0	0	0	0	200	903	0	0	0	0	0	0	0	603	903	0
7657	8	0	0	0	0	0	0	200	300	0	0	0	0	0	0	0	200	903	0	0	0	0	0	0	0	603	903	0
7657	9	0	0	0	0	0	0	200	300	0	0	0	0	0	0	0	200	903	0	0	0	0	0	0	0	603	903	0
7658	0	0	0	0	0	0	0	200	300	0	0	0	0	0	0	0	200	903	0	0	0	0	0	0	0	603	903	0
7658	1	0	0	0	0	0	0	200	300	0	0	0	0	0	0	0	200	903	0	0	0	0	0	0	0	603	903	0
7658	2	0	0	0	0	0	0	200	300	0	0	0	0	0	0	0	200	903	0	0	0	0	0	0	0	603	903	0
7658	3	0	0	0	0	0	0	200	300	0	0	0	0	0	0	0	200	903	0	0	0	0	0	0	0	603	903	0
7658	4	0	0	0	0	0	0	200	300	0	0	0	0	0	0	0	200	903	0	0	0	0	0	0	0	603	903	0
7658	5	0	0	0	0	0	0	200	300	0	0	0	0	0	0	0	200	903	0	0	0	0	0	0	0	603	903	0
7658	6	0	0	0	0	0	0	200	300	0	0	0	0	0	0	0	200	903	0	0	0	0	0	0	0	603	903	0
7658	7	0	0	0	0	0	0	200	300	0	0	0	0	0	0	0	200	903	0	0	0	0	0	0	0	603	903	0
7658	8	0	0	0	0	0	0	200	300	0	0	0	0	0	0	0	200	903	0	0	0	0	0	0	0	603	903	0
7658	9	0	0	0	0	0	0	200	300	0	0	0	0	0	0	0	200	903	0	0	0	0	0	0	0	603	903	0
7659	0	0	0	0	0	0	0	200	300	0	0	0	0	0	0	0	200	903	0	0	0	0	0	0	0	603	903	0
7659	1	0	0	0	0	0	0	200	300	0	0	0	0	0	0	0	200	903	0	0	0	0	0	0	0	603	903	0
7659	2	0	0	0	0	0	0	200	300	0	0	0	0	0	0	0	200	903	0	0	0	0	0	0	0	603	903	0
7659	3	0	0	0	0	0	0	200	300	0	0	0	0	0	0	0	200	903	0	0	0	0	0	0	0	603	903	0
7659	4	0	0	0	0	0	0	200	300	0	0	0	0	0	0	0	200	903	0	0	0	0	0	0	0	603	903	0
7659	5	0	0	0	0	0	0	200	300	0	0	0	0	0	0	0	200	903	0	0	0	0	0	0	0	603	903	0
7659	6	0	0	0	0	0	0	200	300	0	0	0	0	0	0	0	200	903	0	0	0	0	0	0	0	603	903	0
7659	7	0	0	0	0	0	0	200	300	0	0	0	0	0	0	0	200	903	0	0	0	0	0	0	0	603	903	0
7659	8	0	0	0	0	0	0	200	300	0	0	0	0	0	0	0	200	903	0	0	0	0	0	0	0	603	903	0
7659	9	0	0	0	0	0	0	200	300	0	0	0	0	0	0	0	200	903	0	0	0	0	0	0	0	603	903	0
7660	0	0	0	0	0	0	0	200	300	0	0	0	0	0	0	0	200	903	0	0	0	0	0	0	0	603	903	0
7660	1	0	0	0	0	0	0	200	300	0	0	0	0	0	0	0	200	903	0	0	0	0	0	0	0	603	903	0
7660	2	0	0	0	0	0	0	200	300	0	0	0	0	0	0	0	200	903	0	0	0	0	0	0	0	603	903	0
7660	3	0	0	0	0	0	0	200	300	0	0	0	0	0	0	0	200	903	0	0	0	0	0	0	0	603	903	0
7660	4	0	0	0	0	0	0	200	300	0	0	0	0	0	0	0	200	903	0	0	0	0	0	0	0	603	903	0
7660	5	0	0	0	0	0	0	200	300	0	0	0	0	0	0	0	200	903	0	0	0	0	0	0	0	603	903	0
7660	6	0	0	0	0	0	0	200	300	0	0	0	0	0	0	0	200	903	0	0	0	0	0	0	0	603	903	0
7660	7	0	0	0	0	0	0	200	300	0	0	0	0	0	0	0	200	903	0	0	0	0	0	0	0	603	903	0
7660	8	0	0	0	0	0	0	200	300	0	0	0	0	0	0	0	200	903	0	0	0	0	0	0	0	603	903	0
7660	9	0	0	0	0	0	0	200	300	0	0	0	0	0	0	0	200	903	0	0	0	0	0	0	0	603	903	0
7661	0	0	0	0	0	0	0	200	300	0	0	0	0	0	0	0	200	903	0	0	0	0	0	0	0	603	903	0
7661	1	0	0	0	0	0	0	200	300	0	0	0	0	0	0	0	200	903	0	0	0	0	0	0	0	603	903	0
7661	2	0	0	0	0	0	0	200	300	0	0	0	0	0	0	0	200	903	0	0	0	0	0	0	0	603	903	0
7661	3	0	0	0	0	0	0	200	300	0	0	0	0	0	0	0	200	903	0	0	0	0	0	0	0	603	903	0
7661	4	0	0	0	0	0	0	200	300	0	0	0	0	0	0	0	200	903	0	0	0	0	0	0	0	603	903	0
7661	5	0	0	0	0	0	0	200	300	0	0	0	0	0	0	0	200	903	0	0	0	0	0	0	0	603	903	0
7661	6	0	0	0	0	0	0	200	300	0	0	0	0	0	0	0	200	903	0	0	0	0	0	0	0	603	903	0
7661	7	0	0	0	0	0	0	200	300	0	0	0	0	0	0	0	200	903	0	0	0	0	0	0	0	603	903	0
7661	8	0	0	0	0	0	0	200	300	0	0	0	0	0	0	0	200	903	0	0	0	0	0	0	0	603	903	0
7661	9	0	0	0	0	0	0	200	300	0	0	0	0	0	0	0	200	903	0	0	0	0	0	0	0	603	903	0
7662	0	0	0	0	0	0	0	200	300	0	0	0	0	0	0	0	200	903	0	0	0	0	0	0	0	603	903	0
7662	1	0	0	0	0	0	0	200	300	0	0	0	0	0	0	0	200	903	0	0	0	0	0	0	0	603	903	0
7662	2	0	0	0	0	0	0	200	300	0	0	0	0	0	0	0	200	903	0	0	0	0	0	0	0	603	903	0
7662	3	0	0	0	0	0	0	200	300	0	0	0	0	0	0	0	200	903	0	0	0	0	0	0	0	603	903	0
7662	4	0	0	0	0	0	0	200	300	0	0	0	0	0	0	0	200	903	0	0	0	0	0	0	0	603	903	0
7662	5	0	0	0	0	0	0	200	300	0	0	0	0	0	0	0	200	903	0	0	0	0	0	0	0	603	903	0
7662	6	0	0	0	0	0	0	200	300	0	0	0	0	0	0	0	200	903	0	0	0	0	0	0	0	603	903	0
7662	7	0	0	0	0	0	0	200	300	0	0	0	0	0	0	0	200	903	0	0	0	0	0	0	0	603	903	0
7662	8	0	0	0	0	0	0	200	300	0	0	0	0	0	0	0	200	903	0	0	0	0	0	0	0	603	903	0
7662	9	0	0	0	0	0	0	200	300	0	0	0	0	0	0	0	200	903	0	0	0	0	0	0	0	603	903	0
7663	0	0	0	0	0	0	0	200	300	0	0	0	0	0	0	0	200	903	0	0	0	0	0	0	0	603	903	0
7663	1	0	0	0	0	0	0	200	300	0	0	0	0	0	0	0	200	903	0	0	0	0	0	0	0	603	903	0
7663	2	0	0	0	0	0	0	200	300	0	0	0	0	0	0	0	200	903	0	0	0	0	0	0	0	603	903	0
7663	3	0	0	0	0	0	0	200	300	0	0	0	0	0	0	0	200	903	0	0	0	0	0	0	0	603	903	0
7663	4	0	0	0	0	0	0	200	300	0	0	0	0	0	0	0	200	903	0	0	0	0	0	0	0	603	903	0
7663	5	0	0	0	0	0	0	200	300	0	0	0	0	0	0	0	200	903	0	0	0	0	0	0	0	603	903	0
7663	6	0	0	0	0	0	0	200	300	0	0	0	0	0	0	0	200	903	0	0	0	0	0	0	0	603	903	0
7663	7	0	0	0	0	0	0	200	300	0	0	0	0	0	0	0	200	903	0	0	0	0	0	0	0	603	903	0
7663	8	0	0	0	0	0	0	200	300	0	0	0	0	0	0	0	200	903	0	0	0	0	0	0	0	603	903	0
7663	9	0	0	0	0	0	0	200	300	0	0	0	0	0	0	0	200	903	0	0	0	0	0	0	0	603	903	0
7664	0	0	0	0	0	0	0	200	300	0	0	0	0	0	0	0	200	903	0	0	0	0	0	0	0	603	903	0
7664	1	0	0	0	0	0	0	200	300	0	0	0	0	0	0	0	200	903	0	0	0	0	0	0	0	603	903	0
7664	2	0	0	0	0	0	0	200	300	0	0	0	0	0	0	0	200	903	0	0	0	0	0	0	0	603	903	0
7664	3	0	0	0	0	0	0	200	300	0	0	0	0	0	0	0	200	903	0	0	0	0	0	0	0	603	903	0
7664	4	0	0	0	0	0	0	200	300	0	0	0	0	0	0	0	200	903	0	0	0	0	0	0	0	603	903	0
7664	5	0	0	0	0	0	0	200	300	0	0	0	0	0	0	0	200	903	0	0	0	0	0	0	0	603	903	0
7664	6	0	0	0	0	0	0	200	300	0	0	0	0	0	0	0	200	903	0	0	0	0	0	0	0	603	903	0
7664	7	0	0	0	0	0	0	200	300	0	0	0	0	0	0	0	200	903	0	0	0	0	0	0	0	603	903	0
7664	8	0	0	0	0	0	0	200	300	0	0	0	0	0	0	0	200	903	0	0	0	0	0	0	0	603	903	0
7664	9	0	0	0	0	0	0	200	300	0	0	0	0	0	0	0	200	903	0	0	0	0	0	0	0	603	903	0
7665	0	0	0	0	0	0	0	200	300	0	0	0	0	0	0	0	200	903	0	0	0	0	0	0	0	603	903	0
7665	1	0	0	0	0	0	0	200	300	0	0	0	0	0	0	0	200	903	0	0	0	0	0	0	0	603	903	0
7665	2	0	0	0	0	0	0	200	300	0	0	0	0	0	0	0	200	903	0	0	0	0	0	0	0	603	903	0
7665	3	0	0	0	0	0	0	200	300	0	0	0	0	0	0	0	200	903	0	0	0	0	0	0	0	603	903	0
7665	4	0	0	0	0	0	0	200	300	0	0	0	0	0	0	0	200	903	0	0	0	0	0	0	0	603	903	0
7665	5	0	0	0	0	0	0	200	300	0	0	0	0	0	0	0	200	903	0	0	0	0	0	0	0	603	903	0
7665	6	0	0	0	0	0	0	200	300	0	0	0	0	0	0	0	200	903	0	0	0	0	0	0	0	603	903	0
7665	7	0	0	0	0	0	0	200	300	0	0	0	0	0	0	0	200	903	0	0	0	0	0	0	0	603	903	0
7665	8	0	0	0	0	0	0	200	300	0	0	0	0	0	0	0	200	903	0	0	0	0	0	0	0	603	903	0
7665	9	0	0	0	0	0	0	200	300	0	0	0	0	0	0	0	200	903	0	0	0	0	0	0	0	603	903	0
7666	0	0	0	0	0	0	0	200	300	0	0	0	0	0	0	0	200	903	0	0	0	0	0	0	0	603	903	0
7666	1	0	0	0	0	0	0	200	300	0	0	0	0	0	0	0	200	903	0	0	0	0	0	0	0	603	903	0
7666	2	0	0	0	0	0	0	200	300	0	0	0	0	0	0	0	200	903	0	0	0	0	0	0	0	603	903	0
7666	3	0	0	0	0	0	0	200	300	0	0	0	0	0	0	0	200	903	0	0	0	0	0	0	0	603	903	0
7666	4	0	0	0	0	0	0	200	300	0	0	0	0	0	0	0	200	903	0	0	0	0	0	0	0	603	903	0
7666	5	0	0	0	0	0	0	200	300	0	0	0	0	0	0	0	200	903	0	0	0	0	0	0	0	603	903	0
7666	6	0	0	0	0	0	0	200	300	0	0	0	0	0	0	0	200	903	0	0	0	0	0	0	0	603	903	0
7666	7	0	0	0	0	0	0	200	300	0	0	0	0	0	0	0	200	903	0	0	0	0	0	0	0	603	903	0
7666	8	0	0	0	0	0	0	200	300	0	0	0	0	0	0	0	200	903	0	0	0	0	0	0	0	603	903	0
7666	9	0	0	0	0	0	0	200	300	0	0	0	0	0	0	0	200	903	0	0	0	0	0	0	0	603	903	0
7667	0	0	0	0	0	0	0	200	300	0	0	0	0	0	0	0	200	903	0	0	0	0	0	0	0	603	903	0
7667	1	0	0	0	0	0	0	200	300	0	0	0	0	0	0	0	200	903	0	0	0	0	0	0	0	603	903	0
7667	2	0	0	0	0	0	0	200	300	0	0	0	0	0	0	0	200	903	0	0	0	0	0	0	0	603	903	0
7667	3	0	0	0	0	0	0	200	300	0	0	0	0	0	0	0	200	903	0	0	0	0	0	0	0	603	903	0
7667	4	0	0	0	0	0	0	200	300	0	0	0	0	0	0	0	200	903	0	0	0	0	0	0	0	603	903	0
7667	5	0	0	0	0	0	0	200	300	0	0	0	0	0	0	0	200	903	0	0	0	0	0	0	0	603	903	0
7667	6	0	0	0	0	0	0	200	300	0	0	0	0	0	0	0	200	903	0	0	0	0	0	0	0	603	903	0
7667	7	0	0	0	0	0	0	200	300	0	0	0	0	0	0	0	200	903	0	0	0	0	0	0	0	603	903	0
7667	8	0	0	0	0	0	0	200	300	0	0	0	0	0	0	0	200	903	0	0	0	0	0	0	0	603	903	0
7667	9	0	0	0	0	0	0	200	300	0	0	0	0	0	0	0	200	903	0	0	0	0	0	0	0	603	903	0
7668	0	0	0	0	0	0	0	200	300	0	0	0	0	0	0	0	200	903	0	0	0	0	0	0	0	603	903	0
7668	1	0	0	0	0	0	0	200	300	0	0	0	0	0	0	0	200	903	0	0	0	0	0	0	0	603	903	0
7668	2	0	0	0	0	0	0	200	300	0	0	0	0	0	0	0	200	903	0	0	0	0	0	0	0	603	903	0
7668	3	0	0	0	0	0	0	200	300	0	0	0	0	0	0	0	200	903	0	0	0	0	0	0	0	603	903	0
7668	4	0	0	0	0	0	0	200	300	0	0	0	0	0	0	0	200	903	0	0	0	0	0	0	0	603	903	0
7668	5	0	0	0	0	0	0	200	300	0	0	0	0	0	0	0	200	903	0	0	0	0	0	0	0	603	903	0
7668	6	0	0	0	0	0	0	200	300	0	0	0	0	0	0	0	200	903	0	0	0	0	0	0	0	603	903	0
7668	7	0	0	0	0	0	0	200	300	0	0	0	0	0	0	0	200	903	0	0	0	0	0	0	0	603	903	0
7668	8	0	0	0	0	0	0	200	300	0	0	0	0	0	0	0	200	903	0	0	0	0	0	0	0	603	903	0
7668	9	0	0	0	0	0	0	200	300	0	0	0	0	0	0	0	200	903	0	0	0	0	0	0	0	603	903	0
7669	0	0	0	0	0	0	0	200	300	0	0	0	0	0	0	0	200	903	0	0	0	0	0	0	0	603	903	0
7669	1	0	0	0	0	0	0	200	300	0	0	0	0	0	0	0	200	903	0	0	0	0	0	0	0	603	903	0
7669	2	0	0	0	0	0	0	200	300	0	0	0	0	0	0	0	200	903	0	0	0	0	0	0	0	603	903	0
7669	3	0	0	0	0	0	0	200	300	0	0	0	0	0	0	0	200	903	0	0	0	0	0	0	0	603	903	0
7669	4	0	0	0	0	0	0	200	300	0	0	0	0	0	0	0	200	903	0	0	0	0	0	0	0	603	903	0
7669	5	0	0	0	0	0	0	200	300	0	0	0	0	0	0	0	200	903	0	0	0	0	0	0	0	603	903	0
7669	6	0	0	0	0	0	0	200	300	0	0	0	0	0	0	0	200	903	0	0	0	0	0	0	0	603	903	0
7669	7	0	0	0	0	0	0	200	300	0	0	0	0	0	0	0	200	903	0	0	0	0	0	0	0	603	903	0
7669	8	0	0	0	0	0	0	200	300	0	0	0	0	0	0	0	200	903	0	0	0	0	0	0	0	603	903	0
7669	9	0	0	0	0	0	0	200	300	0	0	0	0	0	0	0	200	903	0	0	0	0	0	0	0	603	903	0
7670	0	0	0	0	0	0	0	200	300	0	0	0	0	0	0	0	200	903	0	0	0	0	0	0	0	603	903	0
7670	1	0	0	0	0	0	0	200	300	0	0	0	0	0	0	0	200	903	0	0	0	0	0	0	0	603	903	0
7670	2	0	0	0	0	0	0	200	300	0	0	0	0	0	0	0	200	903	0	0	0	0	0	0	0	603	903	0
7670	3	0	0	0	0	0	0	200	300	0	0	0	0	0	0	0	200	903	0	0	0	0	0	0	0	603	903	0
7670	4	0	0	0	0	0	0	200	300	0	0	0	0	0	0	0	200	903	0	0	0	0	0	0	0	603	903	0
7670	5	0	0	0	0	0	0	200	300	0	0	0	0	0	0	0	200	903	0	0	0	0	0	0	0	603	903	0
7670	6	0	0	0	0	0	0	200	300	0	0	0	0	0	0	0	200	903	0	0	0	0	0	0	0	603	903	0
7670	7	0	0	0	0	0	0	200	300	0	0	0	0	0	0	0	200	903	0	0	0	0	0	0	0	603	903	0
7670	8	0	0	0	0	0	0	200	300	0	0	0	0	0	0	0	200	903	0	0	0	0	0	0	0	603	903	0
7670	9	0	0	0	0	0	0	200	300	0	0	0	0	0	0	0	200	903	0	0	0	0	0	0	0	603	903	0
7671	0	0	0	0	0	0	0	200	300	0	0	0	0	0	0	0	200	903	0	0	0	0	0	0	0	603	903	0
7671	1	0	0	0	0	0	0	200	300	0	0	0	0	0	0	0	200	903	0	0	0	0	0	0	0	603	903	0
7671	2	0	0	0	0	0	0	200	300	0	0	0	0	0	0	0	200	903	0	0	0	0	0	0	0	603	903	0
7671	3	0	0	0	0	0	0	200	300	0	0	0	0	0	0	0	200	903	0	0	0	0	0	0	0	603	903	0
7671	4	0	0	0	0	0	0	200	300	0	0	0	0	0	0	0	200	903	0	0	0	0	0	0	0	603	903	0
7671	5	0	0	0	0	0	0	200	300	0	0	0	0	0	0	0	200	903	0	0	0	0	0	0	0	603	903	0
7671	6	0	0	0	0	0	0	200	300	0	0	0	0	0	0	0	200	903	0	0	0	0	0	0	0	603	903	0
7671	7	0	0	0	0	0	0	200	300	0	0	0	0	0	0	0	200	903	0	0	0	0	0	0	0	603	903	0
7671	8	0	0	0	0	0	0	200	300	0	0	0	0	0	0	0	200	903	0	0	0	0	0	0	0	603	903	0
7671	9	0	0	0	0	0	0	200	300	0	0	0	0	0	0	0	200	903	0	0	0	0	0	0	0	603	903	0
7672	0	0	0	0	0	0	0	200	300	0	0	0	0	0	0	0	200	903	0	0	0	0	0	0	0	603	903	0
7672	1	0	0	0	0	0	0	200	300	0	0	0	0	0	0	0	200	903	0	0	0	0	0	0	0	603	903	0
7672	2	0	0	0	0	0	0	200	300	0	0	0	0	0	0	0	200	903	0	0	0	0	0	0	0	603	903	0
7672	3	0	0	0	0	0	0	200	300	0	0	0	0	0	0	0	200	903	0	0	0	0	0	0	0	603	903	0
7672	4	0	0	0	0	0	0	200	300	0	0	0	0	0	0	0	200	903	0	0	0	0	0	0	0	603	903	0
7672	5	0	0	0	0	0	0	200	300	0	0	0	0	0	0	0	200	903	0	0	0	0	0	0	0	603	903	0
7672	6	0	0	0	0	0	0	200	300	0	0	0	0	0	0	0	200	903	0	0	0	0	0	0	0	603	903	0
7672	7	0	0	0	0	0	0	200	300	0	0	0	0	0	0	0	200	903	0	0	0	0	0	0	0	603	903	0
7672	8	0	0	0	0	0	0	200	300	0	0	0	0	0	0	0	200	903	0	0	0	0	0	0	0	603	903	0
7672	9	0	0	0	0	0	0	200	300	0	0	0	0	0	0	0	200	903	0	0	0	0	0	0	0	603	903	0
7673	0	0	0	0	0	0	0	200	300	0	0	0	0	0	0	0	200	903	0	0	0	0	0	0	0	603	903	0
7673	1	0	0	0	0	0	0	200	300	0	0	0	0	0	0	0	200	903	0	0	0	0	0	0	0	603	903	0
7673	2	0	0	0	0	0	0	200	300	0	0	0	0	0	0	0	200	903	0	0	0	0	0	0	0	603	903	0
7673	3	0	0	0	0	0	0	200	300	0	0	0	0	0	0	0	200	903	0	0	0	0	0	0	0	603	903	0
7673	4	0	0	0	0	0	0	200	300	0	0	0	0	0	0	0	200	903	0	0	0	0	0	0	0	603	903	0
7673	5	0	0	0	0	0	0	200	300	0	0	0	0	0	0	0	200	903	0	0	0	0	0	0	0	603	903	0
7673	6	0	0	0	0	0	0	200	300	0	0	0	0	0	0	0	200	903	0	0	0	0	0	0	0	603	903	0
7673	7	0	0	0	0	0	0	200	300	0	0	0	0	0	0	0	200	903	0	0	0	0	0	0	0	603	903	0
7673	8	0	0	0	0	0	0	200	300	0	0	0	0	0	0	0	200	903	0	0	0	0	0	0	0	603	903	0
7673	9	0	0	0	0	0	0	200	300	0	0	0	0	0	0	0	200	903	0	0	0	0	0	0	0	603	903	0
7674	0	0	0	0	0	0	0	200	300	0	0	0	0	0	0	0	200	903	0	0	0	0	0	0	0	603	903	0
7674	1	0	0	0	0	0	0	200	300	0	0	0	0	0	0	0	200	903	0	0	0	0	0	0	0	603	903	0
7674	2	0	0	0	0	0	0	200	300	0	0	0	0	0	0	0	200	903	0	0	0	0	0	0	0	603	903	0
7674	3	0	0	0	0	0	0	200	300	0	0	0	0	0	0	0	200	903	0	0	0	0	0	0	0	603	903	0
7674	4	0	0	0	0	0	0	200	300	0	0	0	0	0	0	0	200	903	0	0	0	0	0	0	0	603	903	0
7674	5	0	0	0	0	0	0	200	300	0	0	0	0	0	0	0	200	903	0	0	0	0	0	0	0	603	903	0
7674	6	0	0	0	0	0	0	200	300	0	0	0	0	0	0	0	200	903	0	0	0	0	0	0	0	603	903	0
7674	7	0	0	0	0	0	0	200	300	0	0	0	0	0	0	0	200	903	0	0	0	0	0	0	0	603	903	0
7674	8	0	0	0	0	0	0	200	300	0	0	0	0	0	0	0	200	903	0	0	0	0	0	0	0	603	903	0
7674	9	0	0	0	0	0	0	200	300	0	0	0	0	0	0	0	200	903	0	0	0	0	0	0	0	603	903	0
7675	0	0	0	0	0	0	0	200	300	0	0	0	0	0	0	0	200	903	0	0	0	0	0	0	0	603	903	0
7675	1	0	0	0	0	0	0	200	300	0	0	0	0	0	0	0	200	903	0	0	0	0	0	0	0	603	903	0
7675	2	0	0	0	0	0	0	200	300	0	0	0	0	0	0	0	200	903	0	0	0	0	0	0	0	603	903	0
7675	3	0	0	0	0	0	0	200	300	0	0	0	0	0	0	0	200	903	0	0	0	0	0	0	0	603	903	0
7675	4	0	0	0	0	0	0	200	300	0	0	0	0	0	0	0	200	903	0	0	0	0	0	0	0	603	903	0
7675	5	0	0	0	0	0	0	200	300	0	0	0	0	0	0	0	200	903	0	0	0	0	0	0	0	603	903	0
7675	6	0	0	0	0	0	0	200	300	0	0	0	0	0	0	0	200	903	0	0	0	0	0	0	0	603	903	0
7675	7	0	0	0	0	0	0	200	300	0	0	0	0	0	0	0	200	903	0	0	0	0	0	0	0	603	903	0
7675	8	0	0	0	0	0	0	200	300	0	0	0	0	0	0	0	200	903	0	0	0	0	0	0	0	603	903	0
7675	9	0	0	0	0	0	0	200	300	0	0	0	0	0	0	0	200	903	0	0	0	0	0	0	0	603	903	0
7676	0	0	0	0	0	0	0	200	300	0	0	0	0	0	0	0	200	903	0	0	0	0	0	0	0	603	903	0
7676	1	0	0	0	0	0	0	200	300	0	0	0	0	0	0	0	200	903	0	0	0	0	0	0	0	603	903	0
7676	2	0	0	0	0	0	0	200	300	0	0	0	0	0	0	0	200	903	0	0	0	0	0	0	0	603	903	0
7676	3	0	0	0	0	0	0	200	300	0	0	0	0	0	0	0	200	903	0	0	0	0	0	0	0	603	903	0
7676	4	0	0	0	0	0	0	200	300	0	0	0	0	0	0	0	200	903	0	0	0	0	0	0	0	603	903	0
7676	5	0	0	0	0	0	0	200	300	0	0	0	0	0	0	0	200	903	0	0	0	0	0	0	0	603	903	0
7676	6	0	0	0	0	0	0	200	300	0	0	0	0	0	0	0	200	903	0	0	0	0	0	0	0	603	903	0
7676	7	0	0	0	0	0	0	200	300	0	0	0	0	0	0	0	200	903	0	0	0	0	0	0	0	603	903	0
7676	8	0	0	0	0	0	0	200	300	0	0	0	0	0	0	0	200	903	0	0	0	0	0	0	0	603	903	0
7676	9	0	0	0	0	0	0	200	300	0	0	0	0	0	0	0	200	903	0	0	0	0	0	0	0	603	903	0
7677	0	0	0	0	0	0	0	200	300	0	0	0	0	0	0	0	200	903	0	0	0	0	0	0	0	603	903	0
7677	1	0	0	0	0	0	0	200	300	0	0	0	0	0	0	0	200	903	0	0	0	0	0	0	0	603	903	0
7677	2	0	0	0	0	0	0	200	300	0	0	0	0	0	0	0	200	903	0	0	0	0	0	0	0	603	903	0
7677	3	0	0	0	0	0	0	200	300	0	0	0	0	0	0	0	200	903	0	0	0	0	0	0	0	603	903	0
7677	4	0	0	0	0	0	0	200	300	0	0	0	0	0	0	0	200	903	0	0	0	0	0	0	0	603	903	0
7677	5	0	0	0	0	0	0	200	300	0	0	0	0	0	0	0	200	903	0	0	0	0	0	0	0	603	903	0
7677	6	0	0	0	0	0	0	200	300	0	0	0	0	0	0	0	200	903	0	0	0	0	0	0	0	603	903	0
7677	7	0	0	0	0	0	0	200	300	0	0	0	0	0	0	0	200	903	0	0	0	0	0	0	0	603	903	0
7677	8	0	0	0	0	0	0	200	300	0	0	0	0	0	0	0	200	903	0	0	0	0	0	0	0	603	903	0
7677	9	0	0	0	0	0	0	200	300	0	0	0	0	0	0	0	200	903	0	0	0	0	0	0	0	603	903	0
7678	0	0	0	0	0	0	0	200	300	0	0	0	0	0	0	0	200	903	0	0	0	0	0	0	0	603	903	0
7678	1	0	0	0	0	0	0	200	300	0	0	0	0	0	0	0	200	903	0	0	0	0	0	0	0	603	903	0
7678	2	0	0	0	0	0	0	200	300	0	0	0	0	0	0	0	200	903	0	0	0	0	0	0	0	603	903	0
7678	3	0	0	0	0	0	0	200	300	0	0	0	0	0	0	0	200	903	0	0	0	0	0	0	0	603	903	0
7678	4	0	0	0	0	0	0	200	300	0	0	0	0	0	0	0	200	903	0	0	0	0	0	0	0	603	903	0
7678	5	0	0	0	0	0	0	200	300	0	0	0	0	0	0	0	200	903	0	0	0	0	0	0	0	603	903	0
7678	6	0	0	0	0	0	0	200	300	0	0	0	0	0	0	0	200	903	0	0	0	0	0	0	0	603	903	0
7678	7	0	0	0	0	0	0	200	300	0	0	0	0	0	0	0	200	903	0	0	0	0	0	0	0	603	903	0
7678	8	0	0	0	0	0	0	200	300	0	0	0	0	0	0	0	200	903	0	0	0	0	0	0	0	603	903	0
7678	9	0	0	0	0	0	0	200	300	0	0	0	0	0	0	0	200	903	0	0	0	0	0	0	0	603	903	0
7679	0	0	0	0	0	0	0	200	300	0	0	0	0	0	0	0	200	903	0	0	0	0	0	0	0	603	903	0
7679	1	0	0	0	0	0	0	200	300	0	0	0	0	0	0	0	200	903	0	0	0	0	0	0	0	603	903	0
7679	2	0	0	0	0	0	0	200	300	0	0	0	0	0	0	0	200	903	0	0	0	0	0	0	0	603	903	0
7679	3	0	0	0	0	0	0	200	300	0	0	0	0	0	0	0	200	903	0	0	0	0	0	0	0	603	903	0
7679	4	0	0	0	0	0	0	200	300	0	0	0	0	0	0	0	200	903	0	0	0	0	0	0	0	603	903	0
7679	5	0	0	0	0	0	0	200	300	0	0	0	0	0	0	0	200	903	0	0	0	0	0	0	0	603	903	0
7679	6	0	0	0	0	0	0	200	300	0	0	0	0	0	0	0	200	903	0	0	0	0	0	0	0	603	903	0
7679	7	0	0	0	0	0	0	200	300	0	0	0	0	0	0	0	200	903	0	0	0	0	0	0	0	603	903	0
7679	8	0	0	0	0	0	0	200	300	0	0	0	0	0	0	0	200	903	0	0	0	0	0	0	0	603	903	0
7679	9	0	0	0	0	0	0	200	300	0	0	0	0	0	0	0	200	903	0	0	0	0	0	0	0	603	903	0
7680	0	0	0	0	0	0	0	200	300	0	0	0	0	0	0	0	200	903	0	0	0	0	0	0	0	603	903	0
7680	1	0	0	0	0	0	0	200	300	0	0	0	0	0	0	0	200	903	0	0	0	0	0	0	0	603	903	0
7680	2	0	0	0	0	0	0	200	300	0	0	0	0	0	0	0	200	903	0	0	0	0	0	0	0	603	903	0
7680	3	0	0	0	0	0	0	200	300	0	0	0	0	0	0	0	200	903	0	0	0	0	0	0	0	603	903	0
7680	4	0	0	0	0	0	0	200	300	0	0	0	0	0	0	0	200	903	0	0	0	0	0	0	0	603	903	0
7680	5	0	0	0	0	0	0	200	300	0	0	0	0	0	0	0	200	903	0	0	0	0	0	0	0	603	903	0
7680	6	0	0	0	0	0	0	200	300	0	0	0	0	0	0	0	200	903	0	0	0	0	0	0	0	603	903	0
7680	7	0	0	0	0	0	0	200	300	0	0	0	0	0	0	0	200	903	0	0	0	0	0	0	0	603	903	0
7680	8	0	0	0	0	0	0	200	300	0	0	0	0	0	0	0	200	903	0	0	0	0	0	0	0	603	903	0
7680	9	0	0	0	0	0	0	200	300	0	0	0	0	0	0	0	200	903	0	0	0	0	0	0	0	603	903	0
7681	0	0	0	0	0	0	0	200	300	0	0	0	0	0	0	0	200	903	0	0	0	0	0	0	0	603	903	0
7681	1	0	0	0	0	0	0	200	300	0	0	0	0	0	0	0	200	903	0	0	0	0	0	0	0	603	903	0
7681	2	0	0	0	0	0	0	200	300	0	0	0	0	0	0	0	200	903	0	0	0	0	0	0	0	603	903	0
7681	3	0	0	0	0	0	0	200	300	0	0	0	0	0	0	0	200	903	0	0	0	0	0	0	0	603	903	0
7681	4	0	0	0	0	0	0	200	300	0	0	0	0	0	0	0	200	903	0	0	0	0	0	0	0	603	903	0
7681	5	0	0	0	0	0	0	200	300	0	0	0	0	0	0	0	200	903	0	0	0	0	0	0	0	603	903	0
7681	6	0	0	0	0	0	0	200	300	0	0	0	0	0	0	0	200	903	0	0	0	0	0	0	0	603	903	0
7681	7	0	0	0	0	0	0	200	300	0	0	0	0	0	0	0	200	903	0	0	0	0	0	0	0	603	903	0
7681	8	0	0	0	0	0	0	200	300	0	0	0	0	0	0	0	200	903	0	0	0	0	0	0	0	603	903	0
7681	9	0	0	0	0	0	0	200	300	0	0	0	0	0	0	0	200	903	0	0	0	0	0	0	0	603	903	0
7682	0	0	0	0	0	0	0	200	300	0	0	0	0	0	0	0	200	903	0	0	0	0	0	0	0	603	903	0
7682	1	0	0	0	0	0	0	200	300	0	0	0	0	0	0	0	200	903	0	0	0	0	0	0	0	603	903	0
7682	2	0	0	0	0	0	0	200	300	0	0	0	0	0	0	0	200	903	0	0	0	0	0	0	0	603	903	0
7682	3	0	0	0	0	0	0	200	300	0	0	0	0	0	0	0	200	903	0	0	0	0	0	0	0	603	903	0
7682	4	0	0	0	0	0	0	200	300	0	0	0	0	0	0	0	200	903	0	0	0	0	0	0	0	603	903	0
7682	5	0	0	0	0	0	0	200	300	0	0	0	0	0	0	0	200	903	0	0	0	0	0	0	0	603	903	0
7682	6	0	0	0	0	0	0	200	300	0	0	0	0	0	0	0	200	903	0	0	0	0	0	0	0	603	903	0
7682	7	0	0	0	0	0	0	200	300	0	0	0	0	0	0	0	200	903	0	0	0	0	0	0	0	603	903	0
7682	8	0	0	0	0	0	0	200	300	0	0	0	0	0	0	0	200	903	0	0	0	0	0	0	0	603	903	0
7682	9	0	0	0	0	0	0	200	300	0	0	0	0	0	0	0	200	903	0	0	0	0	0	0	0	603	903	0
7683	0	0	0	0	0	0	0	200	300	0	0	0	0	0	0	0	200	903	0	0	0	0	0	0	0	603	903	0
7683	1	0	0	0	0	0	0	200	300	0	0	0	0	0	0	0	200	903	0	0	0	0	0	0	0	603	903	0
7683	2	0	0	0	0	0	0	200	300	0	0	0	0	0	0	0	200	903	0	0	0	0	0	0	0	603	903	0
7683	3	0	0	0	0	0	0	200	300	0	4.26895	-0.826112	-20.8535	-7766.14	417.526	-506.608	220.022	1275.41	0	0	0	0	0	0	0	603	903	0
7683	4	0	0	0	0	0	0	200	300	0	0.149079	6.6507	-24.8208	-8132.35	356.491	1095.56	214.363	1230.64	0	0	0	0	0	0	0	603	903	0
7683	5	0	0	0	0	0	0	200	300	0	-3.66562	10.3128	-21.4638	-8773.22	234.42	363.142	210.922	1311.74	0	0	0	0	0	0	0	603	903	0
7683	6	0	0	0	0	0	0	200	300	0	-0.308685	10.0076	-28.4829	-9780.3	234.42	42.7079	208.23	1246.37	0	0	0	0	0	0	0	603	903	0
7683	7	0	0	0	0	0	0	200	300	0	3.04825	13.5171	-30.6191	-11153.6	722.701	637.801	223.603	1267.27	0	0	0	0	0	0	0	603	903	0
7683	8	0	0	0	0	0	0	200	300	0	0.149079	17.3318	-34.8916	-11611.4	539.596	-140.398	215.465	1235.78	0	0	0	0	0	0	0	603	903	0
7683	9	0	0	0	0	0	0	200	300	0	-0.308685	16.4163	-38.8589	-12893.1	295.455	-735.49	207.603	1234.79	0	0	0	0	0	0	0	603	903	0
7684	0	0	0	0	0	0	0	200	300	0	1.82755	19.3155	-45.2676	-14541	844.772	408.919	218.662	1224.22	0	0	0	0	0	0	0	603	903	0
7684	1	0	0	0	0	0	0	200	300	0	0.912018	23.4354	-55.0332	-17653.8	966.842	42.7079	217.568	1223.79	0	0	0	0	0	0	0	603	903	0
7684	2	0	0	0	0	0	0	200	300	0	-1.22421	25.2664	-63.8833	-20034.2	783.737	-231.95	212.268	1216.61	0	0	0	0	0	0	0	603	903	0
7684	3	0	0	0	0	0	0	200	300	0	2.28531	26.1819	-71.5127	-21499.1	1027.88	-369.28	214.373	1203.63	0	0	0	0	0	0	0	603	903	0
7684	4	0	0	0	0	0	0	200	300	0	6.86295	27.4026	-77.6162	-24886.5	1638.23	-1467.91	221.107	1223.64	0	0	0	0	0	0	0	603	903	0
7684	5	0	0	0	0	0	0	200	300	0	6.55777	29.3863	-84.0249	-26442.9	2309.62	-2246.11	227.487	1217.7	0	0	0	0	0	0	0	603	903	0
7684	6	0	0	0	0	0	0	200	300	0	7.4733	29.3863	-93.4853	-29281	2126.51	-2017.23	222.747	1216.22	0	0	0	0	0	0	0	603	903	0
7684	7	0	0	0	0	0	0	200	300	0	9.60953	26.1819	-103.251	-31295.2	2431.69	-2978.53	223.551	1206.1	0	0	0	0	0	0	0	603	903	0
7684	8	0	0	0	0	0	0	200	300	0	14.3398	27.4026	-111.186	-33767.1	2981	-3619.4	226.811	1206.7	0	0	0	0	0	0	0	603	903	0
7684	9	0	0	0	0	0	0	200	300	0	13.2716	30.1492	-118.815	-36879.9	3042.04	-3436.3	225.603	1213.4	0	0	0	0	0	0	0	603	903	0
7685	0	0	0	0	0	0	0	200	300	0	14.0346	28.1656	-125.224	-38894.1	3530.32	-4260.27	228.192	1213.6	0	0	0	0	0	0	0	603	903	0
7685	1	0	0	0	0	0	0	200	300	0	15.713	26.4871	-133.463	-40725.1	3896.53	-4946.92	229.196	1208.14	0	0	0	0	0	0	0	603	903	0
7685	2	0	0	0	0	0	0	200	300	0	19.2226	30.3018	-141.398	-42556.2	4262.74	-4626.48	230.147	1203.97	0	0	0	0	0	0	0	603	903	0
7685	3	0	0	0	0	0	0	200	300	0	19.3752	28.4708	-146.891	-44570.4	3957.57	-5725.11	226.942	1206.42	0	0	0	0	0	0	0	603	903	0
7685	4	0	0	0	0	0	0	200	300	0	19.2226	25.419	-152.079	-46676.1	4567.92	-6137.1	230.036	1209.92	0	0	0	0	0	0	0	603	903	0
7685	5	0	0	0	0	0	0	200	300	0	23.9528	26.4871	-158.793	-48507.1	4934.13	-6182.88	231.073	1208.47	0	0	0	0	0	0	0	603	903	0
7685	6	0	0	0	0	0	0	200	300	0	25.1735	26.1819	-164.896	-49331.1	5239.31	-7556.17	231.773	1202.16	0	0	0	0	0	0	0	603	903	0
7685	7	0	0	0	0	0	0	200	300	0	29.1408	20.994	-170.084	-50612.8	5178.27	-8197.04	230.445	1200.57	0	0	0	0	0	0	0	603	903	0
7685	8	0	0	0	0	0	0	200	300	0	28.0727	16.2637	-173.747	-51711.5	5422.41	-7693.5	231.209	1200.63	0	0	0	0	0	0	0	603	903	0
7685	9	0	0	0	0	0	0	200	300	0	28.0727	16.4163	-178.629	-53542.5	5727.59	-8517.48	232.064	1202.74	0	0	0	0	0	0	0	603	903	0
7686	0	0	0	0	0	0	0	200	300	0	32.1925	12.9068	-182.291	-54824.3	5910.69	-9021.02	232.424	1203.75	0	0	0	0	0	0	0	603	903	0
7686	1	0	0	0	0	0	0	200	300	0	31.5822	7.71881	-183.512	-54549.6	6337.94	-8334.37	234.537	1200.25	0	0	0	0	0	0	0	603	903	0
7686	2	0	0	0	0	0	0	200	300	0	31.277	7.10846	-187.785	-55831.3	6398.97	-8883.69	234.076	1200.32	0	0	0	0	0	0	0	603	903	0
7686	3	0	0	0	0	0	0	200	300	0	33.2607	4.20929	-191.752	-56380.6	6154.83	-9707.66	232.098	1197.03	0	0	0	0	0	0	0	603	903	0
7686	4	0	0	0	0	0	0	200	300	0	34.3288	-0.978699	-193.278	-56106	6460.01	-9158.35	233.423	1193.29	0	0	0	0	0	0	0	603	903	0
7686	5	0	0	0	0	0	0	200	300	0	33.2607	-4.64081	-196.024	-58028.6	6948.29	-9661.89	235.446	1199.03	0	0	0	0	0	0	0	603	903	0
7686	6	0	0	0	0	0	0	200	300	0	35.2443	-5.40375	-198.161	-58211.7	6398.97	-9890.77	232.292	1196.76	0	0	0	0	0	0	0	603	903	0
7686	7	0	0	0	0	0	0	200	300	0	35.5495	-9.37103	-202.738	-59127.2	6643.11	-9249.9	232.767	1194.64	0	0	0	0	0	0	0	603	903	0
7686	8	0	0	0	0	0	0	200	300	0	35.3969	-13.1857	-204.569	-60225.9	7253.47	-9661.89	235.457	1197.4	0	0	0	0	0	0	0	603	903	0
7686	9	0	0	0	0	0	0	200	300	0	34.1762	-14.559	-209.147	-61324.5	6765.18	-10119.6	232.347	1196.21	0	0	0	0	0	0	0	603	903	0
7687	0	0	0	0	0	0	0	200	300	0	33.5658	-17.7634	-215.25	-62240	6948.29	-9570.33	232.28	1192.15	0	0	0	0	0	0	0	603	903	0
7687	1	0	0	0	0	0	0	200	300	0	35.5495	-23.4091	-221.049	-63155.5	7253.47	-10348.5	232.814	1188.71	0	0	0	0	0	0	0	603	903	0
7687	2	0	0	0	0	0	0	200	300	0	37.9909	-24.1721	-225.932	-64254.2	7497.61	-10577.4	233.185	1187.4	0	0	0	0	0	0	0	603	903	0
7687	3	0	0	0	0	0	0	200	300	0	37.8383	-26.6135	-231.12	-66268.4	7558.64	-10119.6	232.704	1189.73	0	0	0	0	0	0	0	603	903	0
7687	4	0	0	0	0	0	0	200	300	0	37.3805	-31.1911	-237.223	-67733.2	7619.68	-10989.4	232.12	1188.53	0	0	0	0	0	0	0	603	903	0
7687	5	0	0	0	0	0	0	200	300	0	42.7211	-33.6325	-246.378	-69838.9	7985.89	-11630.3	232.413	1186.46	0	0	0	0	0	0	0	603	903	0
7687	6	0	0	0	0	0	0	200	300	0	39.5168	-34.7006	-254.923	-71303.8	8535.21	-11172.5	233.481	1182.71	0	0	0	0	0	0	0	603	903	0
7687	7	0	0	0	0	0	0	200	300	0	39.3642	-38.0576	-264.994	-73043.2	8413.13	-10943.6	231.748	1178.64	0	0	0	0	0	0	0	603	903	0
7687	8	0	0	0	0	0	0	200	300	0	43.0263	-40.0412	-271.403	-75972.9	8291.06	-11630.3	230.549	1182.93	0	0	0	0	0	0	0	603	903	0
7687	9	0	0	0	0	0	0	200	300	0	40.1271	-42.1774	-282.389	-78811.1	9206.59	-10943.6	232.603	1182.09	0	0	0	0	0	0	0	603	903	0
7688	0	0	0	0	0	0	0	200	300	0	39.059	-42.0248	-291.544	-81191.5	9267.63	-11447.2	231.788	1181.49	0	0	0	0	0	0	0	603	903	0
7688	1	0	0	0	0	0	0	200	300	0	41.0426	-44.6188	-302.836	-83663.4	9267.63	-11813.4	230.603	1179.27	0	0	0	0	0	0	0	603	903	0
7688	2	0	0	0	0	0	0	200	300	0	41.5004	-46.4499	-314.127	-85952.2	9816.94	-11447.2	231.251	1176.62	0	0	0	0	0	0	0	603	903	0
7688	3	0	0	0	0	0	0	200	300	0	39.6693	-47.3654	-324.198	-88332.5	9816.94	-11447.2	230.281	1175.46	0	0	0	0	0	0	0	603	903	0
7688	4	0	0	0	0	0	0	200	300	0	41.3478	-48.2809	-333.048	-91445.4	9755.91	-11813.4	229.293	1177.57	0	0	0	0	0	0	0	603	903	0
7688	5	0	0	0	0	0	0	200	300	0	40.7375	-49.5016	-344.34	-93642.6	9939.01	-11218.3	228.864	1174.95	0	0	0	0	0	0	0	603	903	0
7688	6	0	0	0	0	0	0	200	300	0	41.5004	-50.7224	-355.936	-96206.1	10671.4	-10989.4	229.981	1173.29	0	0	0	0	0	0	0	603	903	0
7688	7	0	0	0	0	0	0	200	300	0	39.3642	-51.0275	-366.618	-98128.7	10488.3	-11492.9	228.608	1170.66	0	0	0	0	0	0	0	603	903	0
7688	8	0	0	0	0	0	0	200	300	0	39.3642	-53.4689	-375.163	-99776.6	10366.3	-10989.4	227.631	1168.96	0	0	0	0	0	0	0	603	903	0
7688	9	0	0	0	0	0	0	200	300	0	38.7538	-54.537	-384.623	-102615	10610.4	-11035.2	227.586	1169.79	0	0	0	0	0	0	0	603	903	0
7689	0	0	0	0	0	0	0	200	300	0	38.6012	-54.0793	-394.694	-104721	10854.5	-11035.2	227.501	1168.32	0	0	0	0	0	0	0	603	903	0
7689	1	0	0	0	0	0	0	200	300	0	36.0072	-54.8422	-401.408	-106918	10732.5	-10852.1	226.737	1169.36	0	0	0	0	0	0	0	603	903	0
7689	2	0	0	0	0	0	0	200	300	0	34.9391	-58.0466	-410.868	-107559	10732.5	-10577.4	226.121	1164.78	0	0	0	0	0	0	0	603	903	0
7689	3	0	0	0	0	0	0	200	300	0	36.3124	-60.0302	-420.023	-110031	10915.6	-10531.6	225.988	1164.96	0	0	0	0	0	0	0	603	903	0
7689	4	0	0	0	0	0	0	200	300	0	35.8546	-61.4035	-427.042	-111404	11098.7	-10394.3	225.99	1163.87	0	0	0	0	0	0	0	603	903	0
7689	5	0	0	0	0	0	0	200	300	0	33.2607	-64.1501	-433.146	-113510	10915.6	-9982.32	225.201	1165.06	0	0	0	0	0	0	0	603	903	0
7689	6	0	0	0	0	0	0	200	300	0	31.8874	-64.913	-439.86	-114517	10976.6	-10348.5	224.955	1163.35	0	0	0	0	0	0	0	603	903	0
7689	7	0	0	0	0	0	0	200	300	0	30.2089	-66.1337	-445.963	-116073	11464.9	-10028.1	225.708	1163.28	0	0	0	0	0	0	0	603	903	0
7689	8	0	0	0	0	0	0	200	300	0	29.446	-68.4225	-450.846	-116897	11098.7	-9158.35	224.617	1162.28	0	0	0	0	0	0	0	603	903	0
7689	9	0	0	0	0	0	0	200	300	0	29.2934	-71.1691	-458.781	-117904	11098.7	-9753.44	224.192	1159.99	0	0	0	0	0	0	0	603	903	0
7690	0	0	0	0	0	0	0	200	300	0	27.1571	-72.695	-465.495	-119918	11342.8	-9478.78	224.367	1160.61	0	0	0	0	0	0	0	603	903	0
7690	1	0	0	0	0	0	0	200	300	0	23.6476	-73.6105	-475.871	-120925	11159.7	-8654.81	223.451	1157.11	0	0	0	0	0	0	0	603	903	0
7690	2	0	0	0	0	0	0	200	300	0	21.3588	-74.0683	-485.331	-123306	10793.5	-8288.59	222.239	1157.07	0	0	0	0	0	0	0	603	903	0
7690	3	0	0	0	0	0	0	200	300	0	20.2907	-78.6459	-494.791	-124404	10732.5	-8471.7	221.691	1154.43	0	0	0	0	0	0	0	603	903	0
7690	4	0	0	0	0	0	0	200	300	0	17.5441	-81.8503	-500.59	-125137	10915.6	-7464.62	221.805	1152.98	0	0	0	0	0	0	0	603	903	0
7690	5	0	0	0	0	0	0	200	300	0	14.4923	-82.308	-506.999	-127426	10915.6	-7189.96	221.53	1154.33	0	0	0	0	0	0	0	603	903	0
7690	6	0	0	0	0	0	0	200	300	0	10.8302	-83.6813	-514.018	-128707	10427.3	-6503.31	220.286	1153.39	0	0	0	0	0	0	0	603	903	0
7690	7	0	0	0	0	0	0	200	300	0	8.38882	-88.259	-518.9	-129714	10549.4	-5725.11	220.33	1152.98	0	0	0	0	0	0	0	603	903	0
7690	8	0	0	0	0	0	0	200	300	0	5.94742	-92.0737	-526.225	-130538	10549.4	-5313.13	220.047	1151.07	0	0	0	0	0	0	0	603	903	0
7690	9	0	0	0	0	0	0	200	300	0	4.8793	-92.8366	-532.938	-131637	10122.1	-4534.93	218.993	1150	0	0	0	0	0	0	0	603	903	0
7691	0	0	0	0	0	0	0	200	300	0	3.35342	-96.8039	-538.126	-132919	10244.2	-4351.82	219.037	1150	0	0	0	0	0	0	0	603	903	0
7691	1	0	0	0	0	0	0	200	300	0	1.67496	-101.534	-542.704	-133193	10244.2	-4397.6	218.876	1148.43	0	0	0	0	0	0	0	603	903	0
7691	2	0	0	0	0	0	0	200	300	0	0.301666	-103.213	-546.671	-134658	10122.1	-4168.72	218.516	1149.32	0	0	0	0	0	0	0	603	903	0
7691	3	0	0	0	0	0	0	200	300	0	0.149079	-103.365	-553.08	-135024	10061.1	-3756.73	218.191	1147.13	0	0	0	0	0	0	0	603	903	0
7691	4	0	0	0	0	0	0	200	300	0	1.98013	-105.196	-556.437	-135940	10305.2	-3710.95	218.52	1147.3	0	0	0	0	0	0	0	603	903	0
7691	5	0	0	0	0	0	0	200	300	0	2.13272	-107.332	-559.794	-136856	10244.2	-3527.85	218.3	1147.47	0	0	0	0	0	0	0	603	903	0
7691	6	0	0	0	0	0	0	200	300	0	-0.00350934	-107.332	-564.677	-137130	9572.8	-3207.41	216.953	1145.85	0	0	0	0	0	0	0	603	903	0
7691	7	0	0	0	0	0	0	200	300	0	2.59048	-109.164	-566.203	-137771	9877.98	-3115.86	217.446	1146.32	0	0	0	0	0	0	0	603	903	0
7691	8	0	0	0	0	0	0	200	300	0	1.82755	-109.774	-568.034	-137405	10183.2	-3070.08	217.927	1144.9	0	0	0	0	0	0	0	603	903	0
7691	9	0	0	0	0	0	0	200	300	0	2.28531	-108.858	-570.475	-136672	10061.1	-3070.08	217.636	1142.58	0	0	0	0	0	0	0	603	903	0
7692	0	0	0	0	0	0	0	200	300	0	2.13272	-108.553	-573.832	-137771	9694.87	-2978.53	216.895	1143.09	0	0	0	0	0	0	0	603	903	0
7692	1	0	0	0	0	0	0	200	300	0	2.28531	-110.079	-573.527	-138412	9694.87	-2978.53	216.904	1144.33	0	0	0	0	0	0	0	603	903	0
7692	2	0	0	0	0	0	0	200	300	0	2.4379	-110.079	-576.273	-138595	9877.98	-2383.44	217.141	1143.5	0	0	0	0	0	0	0	603	903	0
7692	3	0	0	0	0	0	0	200	300	0	2.28531	-109.316	-577.494	-138412	9450.73	-2795.43	216.365	1142.68	0	0	0	0	0	0	0	603	903	0
7692	4	0	0	0	0	0	0	200	300	0	2.89566	-111.147	-579.936	-137496	9511.77	-2749.65	216.401	1140.09	0	0	0	0	0	0	0	603	903	0
7692	5	0	0	0	0	0	0	200	300	0	3.04825	-109.621	-580.851	-138229	9389.7	-2337.66	216.165	1140.98	0	0	0	0	0	0	0	603	903	0
7692	6	0	0	0	0	0	0	200	300	0	2.13272	-109.469	-582.682	-138504	9755.91	-2429.22	216.743	1140.7	0	0	0	0	0	0	0	603	903	0
7692	7	0	0	0	0	0	0	200	300	0	1.06461	-109.164	-579.325	-138229	9511.77	-2200.33	216.419	1141.6	0	0	0	0	0	0	0	603	903	0
7692	8	0	0	0	0	0	0	200	300	0	0.149079	-112.673	-583.903	-137954	9023.49	-1788.35	215.454	1139.26	0	0	0	0	0	0	0	603	903	0
7692	9	0	0	0	0	0	0	200	300	0	0.75943	-113.741	-585.429	-137496	9389.7	-1834.12	216.039	1137.86	0	0	0	0	0	0	0	603	903	0
7693	0	0	0	0	0	0	0	200	300	0	-0.156097	-112.215	-584.208	-138046	8962.45	-1651.02	215.341	1139.3	0	0	0	0	0	0	0	603	903	0
7693	1	0	0	0	0	0	0	200	300	0	-1.22421	-115.114	-585.429	-138320	8779.35	-1147.48	214.996	1139.27	0	0	0	0	0	0	0	603	903	0
7693	2	0	0	0	0	0	0	200	300	0	-3.97079	-115.267	-588.175	-138687	8840.38	-872.819	215.03	1138.79	0	0	0	0	0	0	0	603	903	0
7693	3	0	0	0	0	0	0	200	300	0	-6.10703	-116.64	-590.312	-137771	8596.24	-506.608	214.562	1136.39	0	0	0	0	0	0	0	603	903	0
7693	4	0	0	0	0	0	0	200	300	0	-6.25961	-116.945	-591.532	-137771	8535.21	-140.398	214.429	1135.91	0	0	0	0	0	0	0	603	903	0
7693	5	0	0	0	0	0	0	200	300	0	-7.93808	-119.692	-593.363	-138320	8535.21	88.4843	214.384	1136.11	0	0	0	0	0	0	0	603	903	0
7693	6	0	0	0	0	0	0	200	300	0	-9.76913	-119.387	-595.194	-138778	8291.06	408.919	213.93	1136.16	0	0	0	0	0	0	0	603	903	0
7693	7	0	0	0	0	0	0	200	300	0	-12.5157	-119.234	-598.856	-138229	8352.1	866.683	213.947	1133.82	0	0	0	0	0	0	0	603	903	0
7693	8	0	0	0	0	0	0	200	300	0	-11.7528	-122.439	-599.162	-139602	8168.99	1095.56	213.634	1136	0	0	0	0	0	0	0	603	903	0
7693	9	0	0	0	0	0	0	200	300	0	-15.5675	-123.507	-601.908	-139419	7863.82	1461.78	213.065	1134.63	0	0	0	0	0	0	0	603	903	0
7694	0	0	0	0	0	0	0	200	300	0	-16.0252	-123.965	-606.791	-139053	8046.92	1965.32	213.261	1132.16	0	0	0	0	0	0	0	603	903	0
7694	1	0	0	0	0	0	0	200	300	0	-15.8727	-123.659	-608.622	-140609	7863.82	2102.65	212.921	1134.03	0	0	0	0	0	0	0	603	903	0
7694	2	0	0	0	0	0	0	200	300	0	-18.6192	-125.033	-611.369	-141342	7741.75	2377.3	212.663	1134.19	0	0	0	0	0	0	0	603	903	0
7694	3	0	0	0	0	0	0	200	300	0	-21.2132	-125.643	-616.557	-141799	7802.78	2835.07	212.655	1132.99	0	0	0	0	0	0	0	603	903	0
7694	4	0	0	0	0	0	0	200	300	0	-22.1288	-127.169	-620.524	-142166	7619.68	3109.73	212.279	1132.11	0	0	0	0	0	0	0	603	903	0
7694	5	0	0	0	0	0	0	200	300	0	-21.671	-127.932	-621.134	-142257	7619.68	3063.95	212.267	1132.03	0	0	0	0	0	0	0	603	903	0
7694	6	0	0	0	0	0	0	200	300	0	-21.8236	-127.932	-625.712	-143081	7680.71	3475.94	212.275	1131.67	0	0	0	0	0	0	0	603	903	0
7694	7	0	0	0	0	0	0	200	300	0	-22.5865	-127.932	-628.458	-143173	7558.64	3842.15	212.027	1130.82	0	0	0	0	0	0	0	603	903	0
7694	8	0	0	0	0	0	0	200	300	0	-24.1124	-128.695	-632.426	-144454	7314.5	3659.04	211.566	1131.41	0	0	0	0	0	0	0	603	903	0
7694	9	0	0	0	0	0	0	200	300	0	-22.4339	-129.458	-634.867	-144821	7375.54	4208.36	211.617	1131.11	0	0	0	0	0	0	0	603	903	0
7695	0	0	0	0	0	0	0	200	300	0	-23.9598	-130.068	-638.224	-145187	7680.71	4025.25	212.035	1130.49	0	0	0	0	0	0	0	603	903	0
7695	1	0	0	0	0	0	0	200	300	0	-23.0443	-129.763	-641.276	-145095	7436.57	3933.7	211.597	1129.26	0	0	0	0	0	0	0	603	903	0
7695	2	0	0	0	0	0	0	200	300	0	-22.7391	-131.136	-644.633	-145736	7009.32	4254.14	210.873	1129.08	0	0	0	0	0	0	0	603	903	0
7695	3	0	0	0	0	0	0	200	300	0	-23.9598	-130.526	-648.295	-147750	7253.47	4254.14	211.189	1130.91	0	0	0	0	0	0	0	603	903	0
7695	4	0	0	0	0	0	0	200	300	0	-22.2813	-130.068	-652.567	-147659	7497.61	4299.91	211.489	1129.27	0	0	0	0	0	0	0	603	903	0
7695	5	0	0	0	0	0	0	200	300	0	-23.8072	-130.831	-652.567	-147933	7375.54	4437.24	211.302	1129.69	0	0	0	0	0	0	0	603	903	0
7695	6	0	0	0	0	0	0	200	300	0	-22.5865	-132.509	-658.671	-148391	7070.36	4528.79	210.734	1128.29	0	0	0	0	0	0	0	603	903	0
7695	7	0	0	0	0	0	0	200	300	0	-22.7391	-131.136	-660.197	-149124	7314.5	4116.81	211.079	1128.88	0	0	0	0	0	0	0	603	903	0
7695	8	0	0	0	0	0	0	200	300	0	-23.3495	-130.831	-663.249	-149856	7619.68	4437.24	211.488	1128.94	0	0	0	0	0	0	0	603	903	0
7695	9	0	0	0	0	0	0	200	300	0	-23.6546	-130.526	-666.911	-150588	7558.64	4757.68	211.334	1128.8	0	0	0	0	0	0	0	603	903	0
7696	0	0	0	0	0	0	0	200	300	0	-24.265	-130.984	-670.268	-150772	7558.64	4574.57	211.277	1127.94	0	0	0	0	0	0	0	603	903	0
7696	1	0	0	0	0	0	0	200	300	0	-21.2132	-132.052	-674.235	-151046	7680.71	4620.35	211.392	1127.03	0	0	0	0	0	0	0	603	903	0
7696	2	0	0	0	0	0	0	200	300	0	-23.1969	-131.594	-676.676	-151779	7741.75	4391.46	211.441	1127.3	0	0	0	0	0	0	0	603	903	0
7696	3	0	0	0	0	0	0	200	300	0	-22.5865	-132.509	-679.118	-152236	7436.57	4483.02	210.95	1127.17	0	0	0	0	0	0	0	603	903	0
7696	4	0	0	0	0	0	0	200	300	0	-23.9598	-130.373	-681.864	-153335	7558.64	4437.24	211.085	1127.88	0	0	0	0	0	0	0	603	903	0
7696	5	0	0	0	0	0	0	200	300	0	-23.6546	-130.373	-685.832	-153793	7558.64	4345.69	211.021	1127.24	0	0	0	0	0	0	0	603	903	0
7696	6	0	0	0	0	0	0	200	300	0	-23.502	-131.594	-686.137	-153976	7558.64	4254.14	211.016	1127.41	0	0	0	0	0	0	0	603	903	0
7696	7	0	0	0	0	0	0	200	300	0	-22.7391	-131.441	-692.545	-154708	7924.85	4345.69	211.443	1126.39	0	0	0	0	0	0	0	603	903	0
7696	8	0	0	0	0	0	0	200	300	0	-20.2977	-130.831	-693.461	-155349	7924.85	4391.46	211.428	1127.02	0	0	0	0	0	0	0	603	903	0
7696	9	0	0	0	0	0	0	200	300	0	-21.9762	-129.458	-697.123	-156356	7924.85	4025.25	211.368	1127.29	0	0	0	0	0	0	0	603	903	0
7697	0	0	0	0	0	0	0	200	300	0	-22.4339	-128.237	-698.954	-156997	7802.78	4345.69	211.164	1127.62	0	0	0	0	0	0	0	603	903	0
7697	1	0	0	0	0	0	0	200	300	0	-22.5865	-128.695	-702.616	-157455	7802.78	4299.91	211.105	1127.1	0	0	0	0	0	0	0	603	903	0
7697	2	0	0	0	0	0	0	200	300	0	-21.5184	-128.695	-706.583	-157455	8168.99	4208.36	211.561	1125.84	0	0	0	0	0	0	0	603	903	0
7697	3	0	0	0	0	0	0	200	300	0	-21.0606	-128.695	-709.33	-158737	8474.17	4345.69	211.947	1126.78	0	0	0	0	0	0	0	603	903	0
7697	4	0	0	0	0	0	0	200	300	0	-20.6029	-127.932	-710.856	-158737	8168.99	4162.58	211.492	1126.3	0	0	0	0	0	0	0	603	903	0
7697	5	0	0	0	0	0	0	200	300	0	-21.5184	-126.406	-713.908	-158828	8230.03	3704.82	211.528	1125.48	0	0	0	0	0	0	0	603	903	0
7697	6	0	0	0	0	0	0	200	300	0	-20.7555	-125.033	-715.434	-160293	8352.1	4162.58	211.674	1127.05	0	0	0	0	0	0	0	603	903	0
7697	7	0	0	0	0	0	0	200	300	0	-19.6873	-125.185	-720.622	-160385	8474.17	4116.81	211.76	1125.56	0	0	0	0	0	0	0	603	903	0
7697	8	0	0	0	0	0	0	200	300	0	-19.3822	-125.49	-723.063	-161117	8291.06	3887.92	211.467	1125.83	0	0	0	0	0	0	0	603	903	0
7697	9	0	0	0	0	0	0	200	300	0	-18.4666	-124.117	-724.894	-161849	8596.24	4116.81	211.859	1126.27	0	0	0	0	0	0	0	603	903	0
7698	0	0	0	0	0	0	0	200	300	0	-19.3822	-124.727	-727.335	-161941	8474.17	4025.25	211.651	1125.65	0	0	0	0	0	0	0	603	903	0
7698	1	0	0	0	0	0	0	200	300	0	-18.9244	-122.896	-730.998	-163040	8352.1	3979.48	211.426	1126.04	0	0	0	0	0	0	0	603	903	0
7698	2	0	0	0	0	0	0	200	300	0	-17.0934	-120.76	-731.913	-163406	8352.1	3750.59	211.411	1126.26	0	0	0	0	0	0	0	603	903	0
7698	3	0	0	0	0	0	0	200	300	0	-17.0934	-122.286	-737.711	-163406	8474.17	3659.04	211.487	1124.5	0	0	0	0	0	0	0	603	903	0
7698	4	0	0	0	0	0	0	200	300	0	-15.8727	-121.218	-739.542	-164596	8230.03	3567.49	211.129	1125.56	0	0	0	0	0	0	0	603	903	0
7698	5	0	0	0	0	0	0	200	300	0	-17.7037	-120.608	-740.763	-164504	8107.96	3475.94	210.945	1125.07	0	0	0	0	0	0	0	603	903	0
7698	6	0	0	0	0	0	0	200	300	0	-15.8727	-119.234	-742.289	-165695	8596.24	3430.16	211.581	1126.22	0	0	0	0	0	0	0	603	903	0
7698	7	0	0	0	0	0	0	200	300	0	-16.1778	-119.234	-745.951	-165512	8535.21	3384.38	211.442	1124.88	0	0	0	0	0	0	0	603	903	0
7698	8	0	0	0	0	0	0	200	300	0	-15.8727	-117.861	-749.308	-165969	8474.17	3201.28	211.309	1124.5	0	0	0	0	0	0	0	603	903	0
7698	9	0	0	0	0	0	0	200	300	0	-15.2623	-116.335	-746.256	-167068	8657.28	2926.62	211.601	1126.87	0	0	0	0	0	0	0	603	903	0
7699	0	0	0	0	0	0	0	200	300	0	-15.5675	-117.251	-752.36	-166885	8657.28	3018.17	211.507	1124.82	0	0	0	0	0	0	0	603	903	0
7699	1	0	0	0	0	0	0	200	300	0	-15.1097	-116.335	-753.275	-167251	8901.42	2880.84	211.817	1125.03	0	0	0	0	0	0	0	603	903	0
7699	2	0	0	0	0	0	0	200	300	0	-14.3468	-114.809	-756.938	-166427	8901.42	2835.07	211.76	1122.87	0	0	0	0	0	0	0	603	903	0
7699	3	0	0	0	0	0	0	200	300	0	-13.5838	-113.131	-757.853	-168258	9145.56	2560.41	212.068	1125.02	0	0	0	0	0	0	0	603	903	0
7699	4	0	0	0	0	0	0	200	300	0	-12.5157	-113.436	-762.125	-168807	9145.56	2468.86	212	1124.5	0	0	0	0	0	0	0	603	903	0
7699	5	0	0	0	0	0	0	200	300	0	-11.295	-113.131	-762.431	-168991	8962.45	2423.08	211.755	1124.65	0	0	0	0	0	0	0	603	903	0
7699	6	0	0	0	0	0	0	200	300	0	-13.2787	-112.215	-763.651	-168899	8779.35	2331.53	211.497	1124.17	0	0	0	0	0	0	0	603	903	0
7699	7	0	0	0	0	0	0	200	300	0	-11.6002	-110.537	-765.177	-169723	9145.56	2560.41	211.952	1124.81	0	0	0	0	0	0	0	603	903	0
7699	8	0	0	0	0	0	0	200	300	0	-11.1424	-109.316	-767.313	-170455	8840.38	2102.65	211.521	1125.15	0	0	0	0	0	0	0	603	903	0
7699	9	0	0	0	0	0	0	200	300	0	-11.9054	-108.095	-769.755	-168899	9084.52	2148.42	211.802	1122.42	0	0	0	0	0	0	0	603	903	0
7700	0	0	0	0	0	0	0	200	300	0	-11.7528	-108.706	-771.891	-171279	9206.59	2011.09	211.927	1124.9	0	0	0	0	0	0	0	603	903	0
7700	1	0	0	0	0	0	0	200	300	0	-10.2269	-107.79	-771.891	-170730	9389.7	2056.87	212.165	1124.18	0	0	0	0	0	0	0	603	903	0
7700	2	0	0	0	0	0	0	200	300	0	-7.93808	-106.112	-772.807	-171188	9084.52	2011.09	211.755	1124.51	0	0	0	0	0	0	0	603	903	0
7700	3	0	0	0	0	0	0	200	300	0	-9.61655	-105.807	-776.164	-172012	9084.52	1873.76	211.704	1124.62	0	0	0	0	0	0	0	603	903	0
7700	4	0	0	0	0	0	0	200	300	0	-9.46396	-104.738	-773.722	-172195	9206.59	1827.99	211.899	1125.55	0	0	0	0	0	0	0	603	903	0
7700	5	0	0	0	0	0	0	200	300	0	-9.46396	-104.586	-778.605	-171829	9633.84	1690.66	212.373	1123.69	0	0	0	0	0	0	0	603	903	0
7700	6	0	0	0	0	0	0	200	300	0	-7.78549	-104.281	-778.3	-171829	9267.63	1919.54	211.908	1123.77	0	0	0	0	0	0	0	603	903	0
7700	7	0	0	0	0	0	0	200	300	0	-8.09067	-102.45	-777.079	-172470	9145.56	1965.32	211.769	1124.95	0	0	0	0	0	0	0	603	903	0
7700	8	0	0	0	0	0	0	200	300	0	-6.71738	-101.534	-781.657	-172836	9328.66	1690.66	211.934	1124.11	0	0	0	0	0	0	0	603	903	0
7700	9	0	0	0	0	0	0	200	300	0	-6.10703	-100.008	-779.215	-173019	9084.52	1461.78	211.659	1125.04	0	0	0	0	0	0	0	603	903	0
7701	0	0	0	0	0	0	0	200	300	0	-8.24326	-101.076	-782.572	-172470	9023.49	1553.33	211.531	1123.39	0	0	0	0	0	0	0	603	903	0
7701	1	0	0	0	0	0	0	200	300	0	-6.86996	-99.0927	-781.352	-172378	9206.59	1690.66	211.783	1123.62	0	0	0	0	0	0	0	603	903	0
7701	2	0	0	0	0	0	0	200	300	0	-6.71738	-98.0246	-782.572	-173202	8962.45	1141.34	211.453	1124.32	0	0	0	0	0	0	0	603	903	0
7701	3	0	0	0	0	0	0	200	300	0	-8.09067	-95.7358	-779.826	-171920	8657.28	1278.67	211.102	1123.46	0	0	0	0	0	0	0	603	903	0
7701	4	0	0	0	0	0	0	200	300	0	-7.6329	-96.6513	-783.183	-171829	8840.38	1278.67	211.288	1122.4	0	0	0	0	0	0	0	603	903	0
7701	5	0	0	0	0	0	0	200	300	0	-6.4122	-96.4987	-782.572	-172103	9145.56	1324.45	211.687	1122.92	0	0	0	0	0	0	0	603	903	0
7701	6	0	0	0	0	0	0	200	300	0	-6.71738	-95.1254	-780.741	-172012	8962.45	912.459	211.479	1123.32	0	0	0	0	0	0	0	603	903	0
7701	7	0	0	0	0	0	0	200	300	0	-7.48032	-93.9047	-777.689	-172103	8779.35	1141.34	211.289	1124.3	0	0	0	0	0	0	0	603	903	0
7701	8	0	0	0	0	0	0	200	300	0	-6.56479	-93.5995	-778.91	-172103	9023.49	1004.01	211.585	1123.95	0	0	0	0	0	0	0	603	903	0
7701	9	0	0	0	0	0	0	200	300	0	-8.54843	-91.9211	-778.91	-171005	8840.38	1141.34	211.35	1122.54	0	0	0	0	0	0	0	603	903	0
7702	0	0	0	0	0	0	0	200	300	0	-6.86996	-91.7685	-777.689	-170730	8168.99	1141.34	210.504	1122.54	0	0	0	0	0	0	0	603	903	0
7702	1	0	0	0	0	0	0	200	300	0	-7.32773	-91.6159	-776.164	-171371	9023.49	775.13	211.626	1123.79	0	0	0	0	0	0	0	603	903	0
7702	2	0	0	0	0	0	0	200	300	0	-8.09067	-89.0219	-770.67	-168991	8779.35	1004.01	211.392	1122.28	0	0	0	0	0	0	0	603	903	0
7702	3	0	0	0	0	0	0	200	300	0	-6.25961	-89.1745	-772.196	-169998	8596.24	775.13	211.132	1123.15	0	0	0	0	0	0	0	603	903	0
7702	4	0	0	0	0	0	0	200	300	0	-8.70102	-87.8012	-771.891	-169265	8657.28	1049.79	211.216	1122.29	0	0	0	0	0	0	0	603	903	0
7702	5	0	0	0	0	0	0	200	300	0	-7.48032	-88.1064	-769.45	-168716	8474.17	1232.89	211.013	1122.27	0	0	0	0	0	0	0	603	903	0
7702	6	0	0	0	0	0	0	200	300	0	-7.6329	-86.5805	-766.703	-167709	8413.13	1095.56	210.973	1121.74	0	0	0	0	0	0	0	603	903	0
7702	7	0	0	0	0	0	0	200	300	0	-9.31137	-84.902	-761.515	-168167	7863.82	1095.56	210.327	1123.83	0	0	0	0	0	0	0	603	903	0
7702	8	0	0	0	0	0	0	200	300	0	-7.32773	-84.4443	-761.515	-167983	8535.21	1141.34	211.208	1123.59	0	0	0	0	0	0	0	603	903	0
7702	9	0	0	0	0	0	0	200	300	0	-9.31137	-82.9184	-761.21	-166519	8352.1	1324.45	210.972	1121.76	0	0	0	0	0	0	0	603	903	0
7703	0	0	0	0	0	0	0	200	300	0	-8.24326	-83.3762	-757.853	-166244	7924.85	1324.45	210.457	1122.36	0	0	0	0	0	0	0	603	903	0
7703	1	0	0	0	0	0	0	200	300	0	-9.0062	-82.6132	-755.717	-166061	8046.92	1507.55	210.648	1122.74	0	0	0	0	0	0	0	603	903	0
7703	2	0	0	0	0	0	0	200	300	0	-9.61655	-79.8666	-748.698	-164138	7924.85	1370.22	210.585	1122.23	0	0	0	0	0	0	0	603	903	0
7703	3	0	0	0	0	0	0	200	300	0	-9.76913	-80.1718	-749.918	-164871	8107.96	1278.67	210.812	1122.85	0	0	0	0	0	0	0	603	903	0
7703	4	0	0	0	0	0	0	200	300	0	-8.70102	-78.4933	-748.087	-163955	7436.57	1324.45	209.941	1122.17	0	0	0	0	0	0	0	603	903	0
7703	5	0	0	0	0	0	0	200	300	0	-7.78549	-78.7985	-745.951	-163223	7192.43	1599.1	209.642	1121.81	0	0	0	0	0	0	0	603	903	0
7703	6	0	0	0	0	0	0	200	300	0	-8.54843	-77.2726	-741.984	-162856	7314.5	1461.78	209.858	1122.49	0	0	0	0	0	0	0	603	903	0
7703	7	0	0	0	0	0	0	200	300	0	-9.76913	-75.5942	-736.491	-162124	7436.57	1416	210.097	1123.13	0	0	0	0	0	0	0	603	903	0
7703	8	0	0	0	0	0	0	200	300	0	-9.61655	-74.9838	-734.354	-161117	6765.18	1599.1	209.212	1122.4	0	0	0	0	0	0	0	603	903	0
7703	9	0	0	0	0	0	0	200	300	0	-9.0062	-74.3735	-733.439	-160018	7375.54	1553.33	210.056	1121.18	0	0	0	0	0	0	0	603	903	0
7704	0	0	0	0	0	0	0	200	300	0	-7.48032	-73.6105	-731.303	-159835	7314.5	1644.88	210.002	1121.56	0	0	0	0	0	0	0	603	903	0
7704	1	0	0	0	0	0	0	200	300	0	-9.92172	-72.3898	-726.42	-159561	6887.25	1553.33	209.481	1122.65	0	0	0	0	0	0	0	603	903	0
7704	2	0	0	0	0	0	0	200	300	0	-10.3795	-71.4743	-722.758	-158737	7009.32	1461.78	209.698	1122.63	0	0	0	0	0	0	0	603	903	0
7704	3	0	0	0	0	0	0	200	300	0	-10.8372	-70.2536	-720.622	-157089	6948.29	1461.78	209.642	1120.99	0	0	0	0	0	0	0	603	903	0
7704	4	0	0	0	0	0	0	200	300	0	-9.76913	-69.1855	-720.011	-157089	7009.32	1599.1	209.735	1121.18	0	0	0	0	0	0	0	603	903	0
7704	5	0	0	0	0	0	0	200	300	0	-7.48032	-68.7277	-715.128	-156082	6582.08	1644.88	209.204	1121.26	0	0	0	0	0	0	0	603	903	0
7704	6	0	0	0	0	0	0	200	300	0	-10.5321	-68.7277	-711.466	-155624	6460.01	1599.1	209.08	1121.74	0	0	0	0	0	0	0	603	903	0
7704	7	0	0	0	0	0	0	200	300	0	-10.6847	-66.7441	-705.668	-154617	6582.08	1736.43	209.327	1122.11	0	0	0	0	0	0	0	603	903	0
7704	8	0	0	0	0	0	0	200	300	0	-11.9054	-66.7441	-705.058	-154342	6276.9	1416	208.903	1121.91	0	0	0	0	0	0	0	603	903	0
7704	9	0	0	0	0	0	0	200	300	0	-10.5321	-65.676	-703.532	-152969	6276.9	1919.54	208.922	1120.43	0	0	0	0	0	0	0	603	903	0
7705	0	0	0	0	0	0	0	200	300	0	-9.61655	-65.5234	-700.48	-152145	6460.01	1644.88	209.222	1120.2	0	0	0	0	0	0	0	603	903	0
7705	1	0	0	0	0	0	0	200	300	0	-11.1424	-64.3027	-694.682	-151687	6337.94	1644.88	209.124	1121.35	0	0	0	0	0	0	0	603	903	0
7705	2	0	0	0	0	0	0	200	300	0	-11.6002	-62.9294	-690.104	-150772	5910.69	2102.65	208.565	1121.48	0	0	0	0	0	0	0	603	903	0
7705	3	0	0	0	0	0	0	200	300	0	-12.3631	-63.3871	-689.494	-149948	5910.69	1827.99	208.573	1120.48	0	0	0	0	0	0	0	603	903	0
7705	4	0	0	0	0	0	0	200	300	0	-9.92172	-61.5561	-686.747	-148940	5971.73	1919.54	208.696	1119.88	0	0	0	0	0	0	0	603	903	0
7705	5	0	0	0	0	0	0	200	300	0	-11.9054	-61.2509	-683.695	-148391	5910.69	2011.09	208.645	1120.04	0	0	0	0	0	0	0	603	903	0
7705	6	0	0	0	0	0	0	200	300	0	-10.9898	-61.0983	-679.423	-147750	5849.66	2056.87	208.61	1120.46	0	0	0	0	0	0	0	603	903	0
7705	7	0	0	0	0	0	0	200	300	0	-12.6683	-59.5724	-675.15	-146285	5605.52	2056.87	208.303	1119.67	0	0	0	0	0	0	0	603	903	0
7705	8	0	0	0	0	0	0	200	300	0	-12.9735	-58.9621	-673.625	-146194	5483.45	2239.97	208.14	1120.03	0	0	0	0	0	0	0	603	903	0
7705	9	0	0	0	0	0	0	200	300	0	-12.3631	-58.3517	-670.878	-145370	4995.16	2194.2	207.446	1119.69	0	0	0	0	0	0	0	603	903	0
7706	0	0	0	0	0	0	0	200	300	0	-11.7528	-58.1992	-666.911	-143997	5239.31	2331.53	207.856	1118.92	0	0	0	0	0	0	0	603	903	0
7706	1	0	0	0	0	0	0	200	300	0	-12.058	-57.5888	-662.943	-143356	5422.41	1965.32	208.179	1119.24	0	0	0	0	0	0	0	603	903	0
7706	2	0	0	0	0	0	0	200	300	0	-12.9735	-56.5207	-658.976	-143264	5178.27	2194.2	207.858	1120.4	0	0	0	0	0	0	0	603	903	0
7706	3	0	0	0	0	0	0	200	300	0	-12.9735	-55.3	-657.45	-142532	5178.27	2239.97	207.876	1119.79	0	0	0	0	0	0	0	603	903	0
7706	4	0	0	0	0	0	0	200	300	0	-13.889	-54.0793	-651.957	-141250	4751.02	2239.97	207.287	1119.66	0	0	0	0	0	0	0	603	903	0
7706	5	0	0	0	0	0	0	200	300	0	-11.7528	-54.9948	-650.126	-140151	4934.13	2331.53	207.59	1118.58	0	0	0	0	0	0	0	603	903	0
7706	6	0	0	0	0	0	0	200	300	0	-9.76913	-53.4689	-647.074	-139602	4812.06	2331.53	207.437	1118.74	0	0	0	0	0	0	0	603	903	0
7706	7	0	0	0	0	0	0	200	300	0	-13.5838	-52.2482	-644.022	-139053	4384.81	2606.19	206.808	1118.91	0	0	0	0	0	0	0	603	903	0
7706	8	0	0	0	0	0	0	200	300	0	-13.4312	-51.9431	-642.497	-138504	4628.95	2606.19	207.205	1118.57	0	0	0	0	0	0	0	603	903	0
7706	9	0	0	0	0	0	0	200	300	0	-14.3468	-51.1801	-640.36	-137313	4445.85	2423.08	206.943	1117.43	0	0	0	0	0	0	0	603	903	0
7707	0	0	0	0	0	0	0	200	300	0	-12.5157	-50.112	-635.478	-135208	3957.57	2743.51	206.228	1115.77	0	0	0	0	0	0	0	603	903	0
7707	1	0	0	0	0	0	0	200	300	0	-12.8209	-50.5698	-632.426	-135757	4079.64	2377.3	206.451	1117.66	0	0	0	0	0	0	0	603	903	0
7707	2	0	0	0	0	0	0	200	300	0	-13.5838	-49.3491	-630.29	-135299	4018.6	2423.08	206.376	1117.66	0	0	0	0	0	0	0	603	903	0
7707	3	0	0	0	0	0	0	200	300	0	-14.1942	-48.7387	-627.848	-134475	3957.57	2468.86	206.303	1117.18	0	0	0	0	0	0	0	603	903	0
7707	4	0	0	0	0	0	0	200	300	0	-14.1942	-48.5861	-625.712	-133285	3835.5	2423.08	206.13	1116.01	0	0	0	0	0	0	0	603	903	0
7707	5	0	0	0	0	0	0	200	300	0	-14.1942	-47.8232	-622.05	-131454	3469.28	2514.63	205.577	1114.32	0	0	0	0	0	0	0	603	903	0
7707	6	0	0	0	0	0	0	200	300	0	-13.4312	-47.9758	-618.998	-131820	3713.42	2606.19	205.999	1115.96	0	0	0	0	0	0	0	603	903	0
7707	7	0	0	0	0	0	0	200	300	0	-13.7364	-46.7551	-617.472	-131545	3591.35	2560.41	205.816	1116.04	0	0	0	0	0	0	0	603	903	0
7707	8	0	0	0	0	0	0	200	300	0	-15.1097	-46.6025	-613.81	-130813	3286.18	2606.19	205.354	1116.12	0	0	0	0	0	0	0	603	903	0
7707	9	0	0	0	0	0	0	200	300	0	-15.2623	-45.8395	-612.589	-129531	3286.18	2606.19	205.364	1114.45	0	0	0	0	0	0	0	603	903	0
7708	0	0	0	0	0	0	0	200	300	0	-14.4994	-45.0766	-608.012	-128158	3103.07	2468.86	205.104	1113.78	0	0	0	0	0	0	0	603	903	0
7708	1	0	0	0	0	0	0	200	300	0	-14.1942	-45.687	-604.96	-128158	3408.25	2835.07	205.634	1114.85	0	0	0	0	0	0	0	603	903	0
7708	2	0	0	0	0	0	0	200	300	0	-15.2623	-44.1611	-603.434	-128158	2675.83	2697.74	204.434	1115.38	0	0	0	0	0	0	0	603	903	0
7708	3	0	0	0	0	0	0	200	300	0	-15.8727	-43.3981	-602.519	-127151	3225.14	2606.19	205.353	1114.03	0	0	0	0	0	0	0	603	903	0
7708	4	0	0	0	0	0	0	200	300	0	-15.4149	-42.4826	-599.467	-125778	2736.86	3109.73	204.565	1112.82	0	0	0	0	0	0	0	603	903	0
7708	5	0	0	0	0	0	0	200	300	0	-14.1942	-43.093	-595.805	-125595	2736.86	2697.74	204.594	1113.8	0	0	0	0	0	0	0	603	903	0
7708	6	0	0	0	0	0	0	200	300	0	-13.5838	-41.2619	-593.058	-125045	2614.79	2880.84	204.409	1113.85	0	0	0	0	0	0	0	603	903	0
7708	7	0	0	0	0	0	0	200	300	0	-14.9571	-40.499	-592.448	-124954	2797.9	2926.62	204.723	1113.91	0	0	0	0	0	0	0	603	903	0
7708	8	0	0	0	0	0	0	200	300	0	-16.3304	-40.499	-589.701	-124496	2981	2972.4	205.055	1114.12	0	0	0	0	0	0	0	603	903	0
7708	9	0	0	0	0	0	0	200	300	0	-15.8727	-40.499	-587.87	-123306	2492.72	2926.62	204.24	1112.75	0	0	0	0	0	0	0	603	903	0
7709	0	0	0	0	0	0	0	200	300	0	-14.9571	-39.736	-585.429	-122024	2370.65	3292.83	204.049	1111.44	0	0	0	0	0	0	0	603	903	0
7709	1	0	0	0	0	0	0	200	300	0	-15.7201	-39.736	-581.156	-122390	2309.62	3201.28	203.974	1113.6	0	0	0	0	0	0	0	603	903	0
7709	2	0	0	0	0	0	0	200	300	0	-16.483	-38.9731	-581.156	-122116	2065.48	2926.62	203.554	1113.13	0	0	0	0	0	0	0	603	903	0
7709	3	0	0	0	0	0	0	200	300	0	-14.1942	-37.4472	-579.325	-121749	2126.51	3109.73	203.671	1113.16	0	0	0	0	0	0	0	603	903	0
7709	4	0	0	0	0	0	0	200	300	0	-16.483	-37.7524	-576.884	-120468	2004.44	3338.61	203.475	1111.82	0	0	0	0	0	0	0	603	903	0
7709	5	0	0	0	0	0	0	200	300	0	-15.8727	-36.6843	-575.053	-120010	2187.55	3338.61	203.804	1111.69	0	0	0	0	0	0	0	603	903	0
7709	6	0	0	0	0	0	0	200	300	0	-15.7201	-36.3791	-572.306	-120101	1760.3	3109.73	203.076	1112.86	0	0	0	0	0	0	0	603	903	0
7709	7	0	0	0	0	0	0	200	300	0	-16.6356	-35.0058	-570.475	-119369	1882.37	3292.83	203.3	1112.24	0	0	0	0	0	0	0	603	903	0
7709	8	0	0	0	0	0	0	200	300	0	-16.7882	-34.548	-569.56	-118545	1821.33	3247.05	203.198	1111.13	0	0	0	0	0	0	0	603	903	0
7709	9	0	0	0	0	0	0	200	300	0	-16.0252	-35.0058	-569.865	-117446	1882.37	3521.71	203.303	1109.1	0	0	0	0	0	0	0	603	903	0
7710	0	0	0	0	0	0	0	200	300	0	-15.5675	-33.6325	-565.287	-117996	1455.12	3247.05	202.574	1111.74	0	0	0	0	0	0	0	603	903	0
7710	1	0	0	0	0	0	0	200	300	0	-16.7882	-33.1747	-564.066	-117446	1394.09	3292.83	202.472	1111.21	0	0	0	0	0	0	0	603	903	0
7710	2	0	0	0	0	0	0	200	300	0	-16.7882	-32.4118	-562.235	-116805	1088.91	3659.04	201.937	1110.75	0	0	0	0	0	0	0	603	903	0
7710	3	0	0	0	0	0	0	200	300	0	-17.2459	-31.6489	-562.235	-115982	1149.95	3430.16	202.045	1109.29	0	0	0	0	0	0	0	603	903	0
7710	4	0	0	0	0	0	0	200	300	0	-16.1778	-31.1911	-560.709	-115524	1210.98	3659.04	202.16	1109.03	0	0	0	0	0	0	0	603	903	0
7710	5	0	0	0	0	0	0	200	300	0	-15.8727	-30.5807	-558.268	-114791	1394.09	3521.71	202.497	1108.62	0	0	0	0	0	0	0	603	903	0
7710	6	0	0	0	0	0	0	200	300	0	-17.2459	-30.7333	-555.827	-113876	1088.91	3567.49	201.959	1107.88	0	0	0	0	0	0	0	603	903	0
7710	7	0	0	0	0	0	0	200	300	0	-17.7037	-29.2075	-554.606	-114425	722.701	3384.38	201.303	1109.32	0	0	0	0	0	0	0	603	903	0
7710	8	0	0	0	0	0	0	200	300	0	-17.5511	-29.0549	-553.996	-113784	844.772	3475.94	201.525	1108.39	0	0	0	0	0	0	0	603	903	0
7710	9	0	0	0	0	0	0	200	300	0	-17.8563	-29.36	-552.775	-113052	1027.88	3430.16	201.859	1107.52	0	0	0	0	0	0	0	603	903	0
7711	0	0	0	0	0	0	0	200	300	0	-16.9408	-28.4445	-547.892	-112960	722.701	3384.38	201.319	1109.17	0	0	0	0	0	0	0	603	903	0
7711	1	0	0	0	0	0	0	200	300	0	-17.7037	-27.2238	-549.723	-111770	478.561	3613.27	200.871	1106.32	0	0	0	0	0	0	0	603	903	0
7711	2	0	0	0	0	0	0	200	300	0	-18.1615	-26.9186	-547.892	-111770	600.631	3475.94	201.096	1107	0	0	0	0	0	0	0	603	903	0
7711	3	0	0	0	0	0	0	200	300	0	-16.9408	-26.7661	-547.282	-111129	1027.88	3475.94	201.878	1106.06	0	0	0	0	0	0	0	603	903	0
7711	4	0	0	0	0	0	0	200	300	0	-15.7201	-26.3083	-545.756	-110580	478.561	3796.37	200.877	1105.62	0	0	0	0	0	0	0	603	903	0
7711	5	0	0	0	0	0	0	200	300	0	-17.5511	-25.8505	-544.23	-110580	417.526	3704.82	200.767	1106.19	0	0	0	0	0	0	0	603	903	0
7711	6	0	0	0	0	0	0	200	300	0	-18.1615	-25.3928	-541.178	-110122	539.596	3567.49	200.997	1106.49	0	0	0	0	0	0	0	603	903	0
7711	7	0	0	0	0	0	0	200	300	0	-18.3141	-25.5453	-541.178	-109756	417.526	3430.16	200.772	1105.81	0	0	0	0	0	0	0	603	903	0
7711	8	0	0	0	0	0	0	200	300	0	-16.7882	-24.3246	-539.652	-108932	173.385	3521.71	200.321	1104.86	0	0	0	0	0	0	0	603	903	0
7711	9	0	0	0	0	0	0	200	300	0	-16.3304	-23.7143	-539.347	-108932	-70.7556	3475.94	199.869	1104.97	0	0	0	0	0	0	0	603	903	0
7712	0	0	0	0	0	0	0	200	300	0	-17.8563	-23.5617	-537.821	-109115	661.666	3338.61	201.23	1105.88	0	0	0	0	0	0	0	603	903	0
7712	1	0	0	0	0	0	0	200	300	0	-15.5675	-22.4936	-533.549	-108566	51.3148	3338.61	200.096	1106.48	0	0	0	0	0	0	0	603	903	0
7712	2	0	0	0	0	0	0	200	300	0	-17.0934	-23.4091	-534.464	-108108	-9.7204	3247.05	199.982	1105.27	0	0	0	0	0	0	0	603	903	0
7712	3	0	0	0	0	0	0	200	300	0	-16.483	-22.341	-534.77	-107742	234.42	3201.28	200.438	1104.47	0	0	0	0	0	0	0	603	903	0
7712	4	0	0	0	0	0	0	200	300	0	-16.6356	-21.7307	-534.464	-107833	51.3148	3018.17	200.096	1104.76	0	0	0	0	0	0	0	603	903	0
7712	5	0	0	0	0	0	0	200	300	0	-16.7882	-21.5781	-533.244	-107284	51.3148	3201.28	200.096	1104.19	0	0	0	0	0	0	0	603	903	0
7712	6	0	0	0	0	0	0	200	300	0	-16.483	-21.1203	-531.107	-106368	539.596	3109.73	201.016	1103.28	0	0	0	0	0	0	0	603	903	0
7712	7	0	0	0	0	0	0	200	300	0	-15.7201	-20.5099	-531.107	-104995	-70.7556	3155.5	199.867	1100.69	0	0	0	0	0	0	0	603	903	0
7712	8	0	0	0	0	0	0	200	300	0	-15.5675	-19.2892	-532.023	-106094	-253.861	3018.17	199.523	1102.42	0	0	0	0	0	0	0	603	903	0
7712	9	0	0	0	0	0	0	200	300	0	-14.6519	-19.4418	-530.802	-106094	-131.791	3063.95	199.752	1102.87	0	0	0	0	0	0	0	603	903	0
7713	0	0	0	0	0	0	0	200	300	0	-15.1097	-19.1367	-529.887	-106094	-192.826	2743.51	199.636	1103.22	0	0	0	0	0	0	0	603	903	0
7713	1	0	0	0	0	0	0	200	300	0	-15.8727	-17.7634	-528.361	-104812	-192.826	3018.17	199.635	1101.37	0	0	0	0	0	0	0	603	903	0
7713	2	0	0	0	0	0	0	200	300	0	-14.0416	-17.0004	-529.276	-105178	-436.967	2743.51	199.174	1101.72	0	0	0	0	0	0	0	603	903	0
7713	3	0	0	0	0	0	0	200	300	0	-12.8209	-17.4582	-527.75	-104721	-681.107	2926.62	198.709	1101.43	0	0	0	0	0	0	0	603	903	0
7713	4	0	0	0	0	0	0	200	300	0	-14.1942	-16.6953	-526.835	-104904	-498.002	2972.4	199.055	1102.12	0	0	0	0	0	0	0	603	903	0
7713	5	0	0	0	0	0	0	200	300	0	-14.3468	-17.3056	-523.783	-104629	-620.072	2514.63	198.816	1102.76	0	0	0	0	0	0	0	603	903	0
7713	6	0	0	0	0	0	0	200	300	0	-14.3468	-15.9323	-525.004	-104080	-559.037	2331.53	198.935	1101.25	0	0	0	0	0	0	0	603	903	0
7713	7	0	0	0	0	0	0	200	300	0	-12.6683	-15.1694	-525.309	-102981	-620.072	2331.53	198.82	1099.04	0	0	0	0	0	0	0	603	903	0
7713	8	0	0	0	0	0	0	200	300	0	-12.058	-14.8642	-525.614	-103530	-375.931	2514.63	199.285	1099.97	0	0	0	0	0	0	0	603	903	0
7713	9	0	0	0	0	0	0	200	300	0	-11.9054	-13.9487	-524.394	-103897	-498.002	2011.09	199.05	1101.13	0	0	0	0	0	0	0	603	903	0
7714	0	0	0	0	0	0	0	200	300	0	-12.6683	-15.1694	-525.309	-103439	-559.037	2011.09	198.936	1099.91	0	0	0	0	0	0	0	603	903	0
7714	1	0	0	0	0	0	0	200	300	0	-12.2105	-13.4909	-524.699	-102798	-375.931	1827.99	199.284	1098.92	0	0	0	0	0	0	0	603	903	0
7714	2	0	0	0	0	0	0	200	300	0	-11.9054	-13.3383	-525.004	-102615	-864.213	1782.21	198.354	1098.46	0	0	0	0	0	0	0	603	903	0
7714	3	0	0	0	0	0	0	200	300	0	-10.5321	-12.8806	-526.225	-102523	-742.143	1690.66	198.59	1097.83	0	0	0	0	0	0	0	603	903	0
7714	4	0	0	0	0	0	0	200	300	0	-11.295	-12.1176	-522.868	-102798	-498.002	1416	199.048	1099.6	0	0	0	0	0	0	0	603	903	0
7714	5	0	0	0	0	0	0	200	300	0	-9.46396	-12.2702	-525.004	-102157	-498.002	1599.1	199.051	1097.58	0	0	0	0	0	0	0	603	903	0
7714	6	0	0	0	0	0	0	200	300	0	-10.2269	-11.6599	-524.699	-102065	-803.178	1324.45	198.469	1097.52	0	0	0	0	0	0	0	603	903	0
7714	7	0	0	0	0	0	0	200	300	0	-9.76913	-11.3547	-525.309	-101791	-742.143	1324.45	198.587	1096.77	0	0	0	0	0	0	0	603	903	0
7714	8	0	0	0	0	0	0	200	300	0	-8.85361	-10.5917	-525.919	-102340	-498.002	1187.12	199.053	1097.59	0	0	0	0	0	0	0	603	903	0
7714	9	0	0	0	0	0	0	200	300	0	-9.46396	-10.2866	-524.699	-101333	-742.143	1278.67	198.586	1096.13	0	0	0	0	0	0	0	603	903	0
7715	0	0	0	0	0	0	0	200	300	0	-9.15878	-10.2866	-522.257	-101699	-803.178	1278.67	198.462	1097.73	0	0	0	0	0	0	0	603	903	0
7715	1	0	0	0	0	0	0	200	300	0	-8.85361	-9.67621	-523.478	-101699	-681.107	775.13	198.699	1097.28	0	0	0	0	0	0	0	603	903	0
7715	2	0	0	0	0	0	0	200	300	0	-7.02255	-9.52362	-526.835	-101333	-436.967	820.906	199.171	1095.34	0	0	0	0	0	0	0	603	903	0
7715	3	0	0	0	0	0	0	200	300	0	-6.4122	-10.4391	-525.309	-101974	-986.283	592.024	198.122	1097.12	0	0	0	0	0	0	0	603	903	0
7715	4	0	0	0	0	0	0	200	300	0	-7.6329	-8.76068	-526.225	-100601	-498.002	637.801	199.054	1094.17	0	0	0	0	0	0	0	603	903	0
7715	5	0	0	0	0	0	0	200	300	0	-7.02255	-7.53998	-526.53	-101882	-681.107	363.142	198.706	1096.5	0	0	0	0	0	0	0	603	903	0
7715	6	0	0	0	0	0	0	200	300	0	-4.73373	-7.84515	-527.75	-100875	-803.178	271.59	198.478	1094.14	0	0	0	0	0	0	0	603	903	0
7715	7	0	0	0	0	0	0	200	300	0	-5.95444	-7.99774	-523.783	-101150	-742.143	180.037	198.583	1096.11	0	0	0	0	0	0	0	603	903	0
7715	8	0	0	0	0	0	0	200	300	0	-5.1915	-8.76068	-528.361	-101241	-681.107	134.261	198.711	1094.61	0	0	0	0	0	0	0	603	903	0
7715	9	0	0	0	0	0	0	200	300	0	-5.49667	-6.62445	-527.14	-100692	-498.002	180.037	199.055	1094.02	0	0	0	0	0	0	0	603	903	0
7716	0	0	0	0	0	0	0	200	300	0	-4.88632	-5.70892	-529.276	-101608	-925.248	-94.6212	198.252	1094.97	0	0	0	0	0	0	0	603	903	0
7716	1	0	0	0	0	0	0	200	300	0	-3.05527	-5.70892	-531.413	-100692	-620.072	-186.174	198.833	1092.48	0	0	0	0	0	0	0	603	903	0
7716	2	0	0	0	0	0	0	200	300	0	-3.36044	-5.70892	-530.497	-100875	-620.072	-369.28	198.831	1093.15	0	0	0	0	0	0	0	603	903	0
7716	3	0	0	0	0	0	0	200	300	0	-3.05527	-5.25116	-530.497	-101333	-986.283	-186.174	198.141	1094.02	0	0	0	0	0	0	0	603	903	0
7716	4	0	0	0	0	0	0	200	300	0	-2.90268	-4.48822	-532.023	-101333	-986.283	-552.385	198.146	1093.47	0	0	0	0	0	0	0	603	903	0
7716	5	0	0	0	0	0	0	200	300	0	-3.20785	-4.64081	-531.413	-100875	-620.072	-369.28	198.833	1092.82	0	0	0	0	0	0	0	603	903	0
7716	6	0	0	0	0	0	0	200	300	0	-1.68198	-3.42011	-533.244	-100051	-681.107	-460.832	198.723	1090.63	0	0	0	0	0	0	0	603	903	0
7716	7	0	0	0	0	0	0	200	300	0	-1.52939	-3.11493	-533.854	-100509	-1169.39	-643.938	197.81	1091.27	0	0	0	0	0	0	0	603	903	0
7716	8	0	0	0	0	0	0	200	300	0	-1.68198	-2.65717	-533.549	-100875	-925.248	-735.49	198.266	1092.06	0	0	0	0	0	0	0	603	903	0
7716	9	0	0	0	0	0	0	200	300	0	-2.44492	-2.04681	-533.549	-101333	-925.248	-781.267	198.266	1092.92	0	0	0	0	0	0	0	603	903	0
7717	0	0	0	0	0	0	0	200	300	0	-2.29233	-1.13129	-535.685	-101241	-864.213	-552.385	198.387	1091.99	0	0	0	0	0	0	0	603	903	0
7717	1	0	0	0	0	0	0	200	300	0	-0.766449	-1.13129	-536.601	-100326	-1169.39	-964.372	197.821	1089.97	0	0	0	0	0	0	0	603	903	0
7717	2	0	0	0	0	0	0	200	300	0	-0.461273	-0.826112	-535.99	-100418	-925.248	-918.596	198.274	1090.35	0	0	0	0	0	0	0	603	903	0
7717	3	0	0	0	0	0	0	200	300	0	-0.766449	0.394592	-535.075	-100784	-864.213	-1101.7	198.385	1091.35	0	0	0	0	0	0	0	603	903	0
7717	4	0	0	0	0	0	0	200	300	0	-1.68198	-0.520936	-537.516	-100692	-1535.6	-918.596	197.143	1090.33	0	0	0	0	0	0	0	603	903	0
7717	5	0	0	0	0	0	0	200	300	0	-1.83456	0.852355	-539.347	-100234	-986.283	-1101.7	198.171	1088.84	0	0	0	0	0	0	0	603	903	0
7717	6	0	0	0	0	0	0	200	300	0	-1.07162	1.31012	-539.958	-100234	-1230.42	-1376.36	197.721	1088.63	0	0	0	0	0	0	0	603	903	0
7717	7	0	0	0	0	0	0	200	300	0	1.36978	1.46271	-540.568	-99959.8	-1169.39	-1422.14	197.837	1087.92	0	0	0	0	0	0	0	603	903	0
7717	8	0	0	0	0	0	0	200	300	0	-0.308685	2.37823	-540.263	-100601	-1230.42	-1376.36	197.723	1089.21	0	0	0	0	0	0	0	603	903	0
7717	9	0	0	0	0	0	0	200	300	0	-1.68198	2.68341	-542.399	-100326	-864.213	-1284.81	198.407	1087.97	0	0	0	0	0	0	0	603	903	0
7718	0	0	0	0	0	0	0	200	300	0	-1.3768	3.59894	-543.62	-100784	-1108.35	-1513.69	197.961	1088.39	0	0	0	0	0	0	0	603	903	0
7718	1	0	0	0	0	0	0	200	300	0	-0.613861	3.29376	-543.925	-100234	-1230.42	-1239.03	197.738	1087.28	0	0	0	0	0	0	0	603	903	0
7718	2	0	0	0	0	0	0	200	300	0	0.912018	3.44635	-543.314	-99959.8	-1291.46	-1513.69	197.623	1086.98	0	0	0	0	0	0	0	603	903	0
7718	3	0	0	0	0	0	0	200	300	0	-0.308685	4.66705	-544.535	-100418	-1230.42	-1559.47	197.74	1087.41	0	0	0	0	0	0	0	603	903	0
7718	4	0	0	0	0	0	0	200	300	0	-1.83456	4.20929	-545.146	-99959.8	-986.283	-1513.69	198.191	1086.36	0	0	0	0	0	0	0	603	903	0
7718	5	0	0	0	0	0	0	200	300	0	-1.98715	5.12482	-547.892	-99685.1	-1291.46	-1559.47	197.643	1084.94	0	0	0	0	0	0	0	603	903	0
7718	6	0	0	0	0	0	0	200	300	0	-1.68198	4.97223	-548.197	-98678	-1291.46	-1467.91	197.644	1083	0	0	0	0	0	0	0	603	903	0
7718	7	0	0	0	0	0	0	200	300	0	-1.22421	5.88776	-546.977	-99776.6	-1169.39	-1422.14	197.862	1085.41	0	0	0	0	0	0	0	603	903	0
7718	8	0	0	0	0	0	0	200	300	0	-1.07162	6.04034	-547.892	-100143	-1718.71	-1284.81	196.863	1085.78	0	0	0	0	0	0	0	603	903	0
7718	9	0	0	0	0	0	0	200	300	0	-2.29233	5.42999	-549.723	-100143	-1596.64	-1284.81	197.096	1085.17	0	0	0	0	0	0	0	603	903	0
7719	0	0	0	0	0	0	0	200	300	0	-2.5975	6.6507	-549.418	-100051	-1474.56	-1330.58	197.316	1085.1	0	0	0	0	0	0	0	603	903	0
7719	1	0	0	0	0	0	0	200	300	0	-2.5975	6.80328	-551.249	-98678	-1718.71	-1330.58	196.882	1082.01	0	0	0	0	0	0	0	603	903	0
7719	2	0	0	0	0	0	0	200	300	0	-1.52939	6.95587	-549.723	-100051	-1779.74	-1239.03	196.762	1085	0	0	0	0	0	0	0	603	903	0
7719	3	0	0	0	0	0	0	200	300	0	-3.05527	7.71881	-551.859	-99959.8	-1718.71	-1101.7	196.886	1084.13	0	0	0	0	0	0	0	603	903	0
7719	4	0	0	0	0	0	0	200	300	0	-3.20785	8.93951	-553.69	-99959.8	-1657.67	-1330.58	197.006	1083.53	0	0	0	0	0	0	0	603	903	0
7719	5	0	0	0	0	0	0	200	300	0	-3.81821	8.48175	-554.301	-99227.4	-1901.81	-1422.14	196.569	1082.01	0	0	0	0	0	0	0	603	903	0
7719	6	0	0	0	0	0	0	200	300	0	-3.20785	8.32916	-555.216	-99410.4	-1718.71	-1239.03	196.904	1082.05	0	0	0	0	0	0	0	603	903	0
7719	7	0	0	0	0	0	0	200	300	0	-2.13974	8.93951	-554.911	-99410.4	-2268.02	-1101.7	195.913	1082.15	0	0	0	0	0	0	0	603	903	0
7719	8	0	0	0	0	0	0	200	300	0	-3.66562	9.39728	-555.827	-99410.4	-1474.56	-1147.48	197.347	1081.85	0	0	0	0	0	0	0	603	903	0
7719	9	0	0	0	0	0	0	200	300	0	-4.73373	10.3128	-557.658	-99776.6	-2023.88	-1193.25	196.371	1081.92	0	0	0	0	0	0	0	603	903	0
7720	0	0	0	0	0	0	0	200	300	0	-4.88632	10.0076	-554.911	-98952.7	-2145.95	-1239.03	196.133	1081.32	0	0	0	0	0	0	0	603	903	0
7720	1	0	0	0	0	0	0	200	300	0	-3.66562	10.3128	-559.184	-99044.2	-2084.92	-1193.25	196.272	1080.12	0	0	0	0	0	0	0	603	903	0
7720	2	0	0	0	0	0	0	200	300	0	-4.42856	10.618	-559.794	-99044.2	-2206.99	-1239.03	196.058	1079.93	0	0	0	0	0	0	0	603	903	0
7720	3	0	0	0	0	0	0	200	300	0	-5.49667	11.5335	-560.099	-99135.8	-2695.27	-964.372	195.188	1080	0	0	0	0	0	0	0	603	903	0
7720	4	0	0	0	0	0	0	200	300	0	-4.42856	11.5335	-561.93	-99502	-2512.16	-1010.15	195.529	1080.07	0	0	0	0	0	0	0	603	903	0
7720	5	0	0	0	0	0	0	200	300	0	-6.25961	11.6861	-563.761	-98586.5	-2329.06	-964.372	195.869	1077.87	0	0	0	0	0	0	0	603	903	0
7720	6	0	0	0	0	0	0	200	300	0	-5.03891	11.8387	-562.541	-98403.4	-2512.16	-1055.93	195.534	1077.93	0	0	0	0	0	0	0	603	903	0
7720	7	0	0	0	0	0	0	200	300	0	-5.1915	12.6016	-565.592	-98952.7	-2817.34	-872.819	195.019	1077.95	0	0	0	0	0	0	0	603	903	0
7720	8	0	0	0	0	0	0	200	300	0	-7.02255	12.7542	-564.066	-98220.2	-2634.23	-1055.93	195.33	1077.13	0	0	0	0	0	0	0	603	903	0
7720	9	0	0	0	0	0	0	200	300	0	-7.02255	13.212	-567.118	-98586.5	-2512.16	-827.043	195.57	1076.84	0	0	0	0	0	0	0	603	903	0
7721	0	0	0	0	0	0	0	200	300	0	-5.95444	13.0594	-567.729	-98403.4	-2817.34	-1010.15	195.038	1076.33	0	0	0	0	0	0	0	603	903	0
7721	1	0	0	0	0	0	0	200	300	0	-7.02255	13.5171	-567.423	-98128.7	-2817.34	-781.267	195.035	1075.94	0	0	0	0	0	0	0	603	903	0
7721	2	0	0	0	0	0	0	200	300	0	-7.17514	14.2801	-565.592	-98861.1	-2695.27	-918.596	195.235	1077.79	0	0	0	0	0	0	0	603	903	0
7721	3	0	0	0	0	0	0	200	300	0	-8.54843	13.5171	-570.17	-98311.8	-2573.2	-643.938	195.487	1075.43	0	0	0	0	0	0	0	603	903	0
7721	4	0	0	0	0	0	0	200	300	0	-8.70102	14.4327	-572.001	-97762.5	-2939.41	-781.267	194.861	1073.91	0	0	0	0	0	0	0	603	903	0
7721	5	0	0	0	0	0	0	200	300	0	-7.93808	14.7379	-572.611	-98128.7	-3000.44	-918.596	194.76	1074.37	0	0	0	0	0	0	0	603	903	0
7721	6	0	0	0	0	0	0	200	300	0	-6.86996	15.043	-573.222	-98037.2	-2695.27	-827.043	195.298	1074.03	0	0	0	0	0	0	0	603	903	0
7721	7	0	0	0	0	0	0	200	300	0	-8.39584	16.2637	-570.78	-98494.9	-3000.44	-598.161	194.743	1075.56	0	0	0	0	0	0	0	603	903	0
7721	8	0	0	0	0	0	0	200	300	0	-9.92172	16.4163	-575.053	-98403.4	-3122.51	-735.49	194.57	1074.12	0	0	0	0	0	0	0	603	903	0
7721	9	0	0	0	0	0	0	200	300	0	-10.6847	16.5689	-575.663	-97579.4	-3183.55	-827.043	194.47	1072.51	0	0	0	0	0	0	0	603	903	0
7722	0	0	0	0	0	0	0	200	300	0	-9.15878	16.2637	-578.715	-98128.7	-3000.44	-735.49	194.815	1072.56	0	0	0	0	0	0	0	603	903	0
7722	1	0	0	0	0	0	0	200	300	0	-9.15878	16.5689	-579.325	-97854	-3183.55	-552.385	194.505	1071.91	0	0	0	0	0	0	0	603	903	0
7722	2	0	0	0	0	0	0	200	300	0	-9.0062	16.5689	-579.02	-98311.8	-3549.76	-735.49	193.869	1072.79	0	0	0	0	0	0	0	603	903	0
7722	3	0	0	0	0	0	0	200	300	0	-10.9898	17.637	-580.241	-98220.2	-3549.76	-552.385	193.882	1072.28	0	0	0	0	0	0	0	603	903	0
7722	4	0	0	0	0	0	0	200	300	0	-10.9898	18.2474	-583.903	-97945.6	-3305.62	-460.832	194.339	1070.74	0	0	0	0	0	0	0	603	903	0
7722	5	0	0	0	0	0	0	200	300	0	-10.0743	17.637	-584.818	-97762.5	-3244.58	-689.714	194.452	1070.17	0	0	0	0	0	0	0	603	903	0
7722	6	0	0	0	0	0	0	200	300	0	-8.70102	17.3318	-589.091	-97671	-3488.72	-506.608	194.078	1068.8	0	0	0	0	0	0	0	603	903	0
7722	7	0	0	0	0	0	0	200	300	0	-10.5321	18.7051	-586.649	-98128.7	-3183.55	-460.832	194.573	1070.27	0	0	0	0	0	0	0	603	903	0
7722	8	0	0	0	0	0	0	200	300	0	-12.3631	19.7733	-587.26	-97945.6	-3183.55	-598.161	194.579	1069.78	0	0	0	0	0	0	0	603	903	0
7722	9	0	0	0	0	0	0	200	300	0	-11.7528	19.9258	-590.312	-97487.8	-3671.83	-689.714	193.78	1068.15	0	0	0	0	0	0	0	603	903	0
7723	0	0	0	0	0	0	0	200	300	0	-10.6847	19.4681	-590.006	-96480.7	-3732.86	-552.385	193.673	1066.53	0	0	0	0	0	0	0	603	903	0
7723	1	0	0	0	0	0	0	200	300	0	-11.1424	19.1629	-592.143	-97396.3	-3305.62	-506.608	194.418	1067.48	0	0	0	0	0	0	0	603	903	0
7723	2	0	0	0	0	0	0	200	300	0	-12.2105	20.0784	-593.668	-97854	-3671.83	-323.503	193.815	1067.83	0	0	0	0	0	0	0	603	903	0
7723	3	0	0	0	0	0	0	200	300	0	-11.9054	21.1465	-593.058	-98220.2	-3793.9	-552.385	193.603	1068.62	0	0	0	0	0	0	0	603	903	0
7723	4	0	0	0	0	0	0	200	300	0	-11.295	22.0621	-595.805	-97304.8	-3977.01	-643.938	193.325	1066.32	0	0	0	0	0	0	0	603	903	0
7723	5	0	0	0	0	0	0	200	300	0	-10.9898	21.4517	-597.941	-97487.8	-3854.94	-552.385	193.553	1066.04	0	0	0	0	0	0	0	603	903	0
7723	6	0	0	0	0	0	0	200	300	0	-11.6002	20.3836	-598.551	-98037.2	-3732.86	-460.832	193.764	1066.79	0	0	0	0	0	0	0	603	903	0
7723	7	0	0	0	0	0	0	200	300	0	-13.2787	22.3672	-599.467	-97671	-4221.15	-598.161	192.959	1065.93	0	0	0	0	0	0	0	603	903	0
7723	8	0	0	0	0	0	0	200	300	0	-12.9735	23.4354	-600.077	-97030.1	-4526.32	-643.938	192.457	1064.7	0	0	0	0	0	0	0	603	903	0
7723	9	0	0	0	0	0	0	200	300	0	-12.3631	23.4354	-604.044	-96572.3	-3732.86	-460.832	193.82	1062.88	0	0	0	0	0	0	0	603	903	0
7724	0	0	0	0	0	0	0	200	300	0	-11.4476	23.4354	-604.96	-97030.1	-4343.22	-689.714	192.821	1063.39	0	0	0	0	0	0	0	603	903	0
7724	1	0	0	0	0	0	0	200	300	0	-11.9054	22.6724	-606.791	-97304.8	-4343.22	-598.161	192.842	1063.36	0	0	0	0	0	0	0	603	903	0
7724	2	0	0	0	0	0	0	200	300	0	-13.5838	23.8931	-606.181	-97487.8	-3793.9	-781.267	193.741	1063.82	0	0	0	0	0	0	0	603	903	0
7724	3	0	0	0	0	0	0	200	300	0	-13.7364	24.9612	-607.401	-96480.7	-4160.11	-781.267	193.151	1061.84	0	0	0	0	0	0	0	603	903	0
7724	4	0	0	0	0	0	0	200	300	0	-12.3631	25.1138	-610.453	-97121.6	-4465.29	-872.819	192.685	1062.1	0	0	0	0	0	0	0	603	903	0
7724	5	0	0	0	0	0	0	200	300	0	-11.295	24.6561	-611.674	-97213.2	-4343.22	-918.596	192.899	1061.93	0	0	0	0	0	0	0	603	903	0
7724	6	0	0	0	0	0	0	200	300	0	-12.9735	24.0457	-614.42	-97030.1	-4404.25	-598.161	192.832	1060.92	0	0	0	0	0	0	0	603	903	0
7724	7	0	0	0	0	0	0	200	300	0	-13.5838	25.5716	-614.115	-97579.4	-4282.18	-1101.7	193.027	1061.89	0	0	0	0	0	0	0	603	903	0
7724	8	0	0	0	0	0	0	200	300	0	-14.1942	26.4871	-615.641	-96572.3	-4343.22	-964.372	192.945	1059.86	0	0	0	0	0	0	0	603	903	0
7724	9	0	0	0	0	0	0	200	300	0	-13.1261	26.9449	-618.388	-96114.5	-4282.18	-964.372	193.075	1058.43	0	0	0	0	0	0	0	603	903	0
7725	0	0	0	0	0	0	0	200	300	0	-12.6683	25.8768	-620.524	-96847	-4160.11	-781.267	193.296	1059.07	0	0	0	0	0	0	0	603	903	0
7725	1	0	0	0	0	0	0	200	300	0	-13.5838	26.0294	-617.472	-97213.2	-4709.43	-1147.48	192.373	1060.44	0	0	0	0	0	0	0	603	903	0
7725	2	0	0	0	0	0	0	200	300	0	-14.6519	27.2501	-622.05	-96938.5	-4465.29	-1010.15	192.822	1058.84	0	0	0	0	0	0	0	603	903	0
7725	3	0	0	0	0	0	0	200	300	0	-14.1942	27.7078	-624.796	-96663.9	-4038.04	-872.819	193.537	1057.71	0	0	0	0	0	0	0	603	903	0
7725	4	0	0	0	0	0	0	200	300	0	-12.6683	28.013	-627.238	-96114.5	-4404.25	-872.819	192.978	1056.23	0	0	0	0	0	0	0	603	903	0
7725	5	0	0	0	0	0	0	200	300	0	-12.9735	27.7078	-629.069	-96663.9	-4648.39	-643.938	192.611	1056.66	0	0	0	0	0	0	0	603	903	0
7725	6	0	0	0	0	0	0	200	300	0	-12.2105	27.8604	-630.595	-97762.5	-4770.46	-1010.15	192.435	1058.03	0	0	0	0	0	0	0	603	903	0
7725	7	0	0	0	0	0	0	200	300	0	-14.4994	28.4708	-629.679	-97304.8	-4831.5	-1330.58	192.327	1057.53	0	0	0	0	0	0	0	603	903	0
7725	8	0	0	0	0	0	0	200	300	0	-14.0416	28.013	-633.341	-96847	-5075.64	-1010.15	191.986	1055.91	0	0	0	0	0	0	0	603	903	0
7725	9	0	0	0	0	0	0	200	300	0	-12.9735	29.3863	-636.698	-96297.7	-4831.5	-827.043	192.412	1054.25	0	0	0	0	0	0	0	603	903	0
7726	0	0	0	0	0	0	0	200	300	0	-13.5838	29.0811	-637.614	-96938.5	-4526.32	-1055.93	192.901	1055.03	0	0	0	0	0	0	0	603	903	0
7726	1	0	0	0	0	0	0	200	300	0	-14.6519	29.6915	-639.75	-97304.8	-4587.36	-1147.48	192.829	1055.1	0	0	0	0	0	0	0	603	903	0
7726	2	0	0	0	0	0	0	200	300	0	-12.9735	30.4544	-639.75	-97030.1	-4953.57	-1010.15	192.257	1054.67	0	0	0	0	0	0	0	603	903	0
7726	3	0	0	0	0	0	0	200	300	0	-13.889	31.0648	-643.412	-96663.9	-4953.57	-964.372	192.301	1053.24	0	0	0	0	0	0	0	603	903	0
7726	4	0	0	0	0	0	0	200	300	0	-13.4312	30.4544	-642.802	-96480.7	-4709.43	-964.372	192.674	1053.09	0	0	0	0	0	0	0	603	903	0
7726	5	0	0	0	0	0	0	200	300	0	-13.5838	29.8441	-645.854	-96847	-4831.5	-1147.48	192.519	1052.95	0	0	0	0	0	0	0	603	903	0
7726	6	0	0	0	0	0	0	200	300	0	-14.9571	31.2173	-647.379	-96938.5	-5319.78	-1101.7	191.783	1052.74	0	0	0	0	0	0	0	603	903	0
7726	7	0	0	0	0	0	0	200	300	0	-14.0416	32.5906	-649.821	-96480.7	-4831.5	-460.832	192.565	1051.47	0	0	0	0	0	0	0	603	903	0
7726	8	0	0	0	0	0	0	200	300	0	-15.1097	32.2855	-653.483	-96389.2	-5136.67	-1101.7	192.14	1050.5	0	0	0	0	0	0	0	603	903	0
7726	9	0	0	0	0	0	0	200	300	0	-13.7364	33.0484	-654.398	-95839.9	-5502.88	-964.372	191.591	1049.46	0	0	0	0	0	0	0	603	903	0
7727	0	0	0	0	0	0	0	200	300	0	-13.5838	31.6751	-655.314	-96480.7	-5563.92	-781.267	191.51	1050.23	0	0	0	0	0	0	0	603	903	0
7727	1	0	0	0	0	0	0	200	300	0	-14.4994	32.5906	-656.535	-96755.4	-5380.81	-1147.48	191.804	1050.37	0	0	0	0	0	0	0	603	903	0
7727	2	0	0	0	0	0	0	200	300	0	-13.5838	34.2691	-658.366	-96480.7	-5624.95	-964.372	191.456	1049.55	0	0	0	0	0	0	0	603	903	0
7727	3	0	0	0	0	0	0	200	300	0	-14.8045	35.032	-662.028	-96023	-5563.92	-964.372	191.596	1048.04	0	0	0	0	0	0	0	603	903	0
7727	4	0	0	0	0	0	0	200	300	0	-14.6519	34.8795	-660.502	-96297.7	-5747.02	-1101.7	191.299	1048.79	0	0	0	0	0	0	0	603	903	0
7727	5	0	0	0	0	0	0	200	300	0	-15.1097	34.8795	-663.859	-96206.1	-5563.92	-964.372	191.619	1047.92	0	0	0	0	0	0	0	603	903	0
7727	6	0	0	0	0	0	0	200	300	0	-16.0252	35.795	-666.605	-96206.1	-5808.06	-964.372	191.287	1047.32	0	0	0	0	0	0	0	603	903	0
7727	7	0	0	0	0	0	0	200	300	0	-16.6356	36.7105	-668.131	-95839.9	-5930.13	-918.596	191.124	1046.44	0	0	0	0	0	0	0	603	903	0
7727	8	0	0	0	0	0	0	200	300	0	-15.7201	37.0157	-670.573	-95748.3	-5869.1	-1010.15	191.248	1045.79	0	0	0	0	0	0	0	603	903	0
7727	9	0	0	0	0	0	0	200	300	0	-15.7201	36.4053	-669.657	-95382.1	-5808.06	-1010.15	191.327	1045.43	0	0	0	0	0	0	0	603	903	0
7728	0	0	0	0	0	0	0	200	300	0	-18.0089	36.2527	-673.625	-95565.2	-5991.17	-827.043	191.106	1044.87	0	0	0	0	0	0	0	603	903	0
7728	1	0	0	0	0	0	0	200	300	0	-17.3985	37.7786	-675.15	-96114.5	-6235.31	-918.596	190.765	1045.36	0	0	0	0	0	0	0	603	903	0
7728	2	0	0	0	0	0	0	200	300	0	-15.8727	38.6942	-676.371	-95656.8	-5869.1	-918.596	191.323	1044.43	0	0	0	0	0	0	0	603	903	0
7728	3	0	0	0	0	0	0	200	300	0	-15.4149	38.8467	-678.202	-95382.1	-6174.27	-689.714	190.896	1043.64	0	0	0	0	0	0	0	603	903	0
7728	4	0	0	0	0	0	0	200	300	0	-17.0934	39.3045	-680.644	-95656.8	-6601.52	-689.714	190.301	1043.54	0	0	0	0	0	0	0	603	903	0
7728	5	0	0	0	0	0	0	200	300	0	-18.1615	38.6942	-681.559	-95931.5	-6113.24	-552.385	191.031	1043.75	0	0	0	0	0	0	0	603	903	0
7728	6	0	0	0	0	0	0	200	300	0	-17.7037	38.6942	-684.916	-95473.7	-5930.13	-689.714	191.342	1042.39	0	0	0	0	0	0	0	603	903	0
7728	7	0	0	0	0	0	0	200	300	0	-17.5511	40.22	-685.832	-94924.3	-6296.34	-552.385	190.819	1041.41	0	0	0	0	0	0	0	603	903	0
7728	8	0	0	0	0	0	0	200	300	0	-17.5511	40.8304	-687.052	-95473.7	-6479.45	-460.832	190.569	1041.96	0	0	0	0	0	0	0	603	903	0
7728	9	0	0	0	0	0	0	200	300	0	-18.6192	40.22	-690.409	-95473.7	-6174.27	-781.267	191.057	1041.29	0	0	0	0	0	0	0	603	903	0
7729	0	0	0	0	0	0	0	200	300	0	-16.0252	41.1356	-690.714	-96023	-6235.31	-689.714	190.973	1042.02	0	0	0	0	0	0	0	603	903	0
7729	1	0	0	0	0	0	0	200	300	0	-18.9244	41.4407	-689.494	-95290.6	-6723.59	-506.608	190.249	1041.2	0	0	0	0	0	0	0	603	903	0
7729	2	0	0	0	0	0	0	200	300	0	-18.4666	42.6614	-693.766	-95290.6	-6540.48	-415.056	190.572	1040.35	0	0	0	0	0	0	0	603	903	0
7729	3	0	0	0	0	0	0	200	300	0	-18.1615	43.4244	-697.428	-95199	-7150.83	-369.28	189.747	1039.5	0	0	0	0	0	0	0	603	903	0
7729	4	0	0	0	0	0	0	200	300	0	-19.2296	42.6614	-698.344	-95382.1	-7211.87	-689.714	189.673	1039.58	0	0	0	0	0	0	0	603	903	0
7729	5	0	0	0	0	0	0	200	300	0	-17.0934	43.7296	-699.564	-95382.1	-7211.87	-460.832	189.691	1039.34	0	0	0	0	0	0	0	603	903	0
7729	6	0	0	0	0	0	0	200	300	0	-19.3822	44.3399	-701.396	-94741.3	-6906.69	-277.727	190.153	1038.08	0	0	0	0	0	0	0	603	903	0
7729	7	0	0	0	0	0	0	200	300	0	-18.1615	43.577	-702.311	-94832.8	-6662.55	-369.28	190.513	1038.03	0	0	0	0	0	0	0	603	903	0
7729	8	0	0	0	0	0	0	200	300	0	-18.7718	45.5606	-705.363	-94741.3	-7150.83	-140.398	189.862	1037.32	0	0	0	0	0	0	0	603	903	0
7729	9	0	0	0	0	0	0	200	300	0	-19.8399	45.7132	-706.889	-94741.3	-7150.83	-48.8449	189.884	1037.03	0	0	0	0	0	0	0	603	903	0
7730	0	0	0	0	0	0	0	200	300	0	-18.1615	45.8658	-707.194	-94924.3	-7028.76	-369.28	190.061	1037.23	0	0	0	0	0	0	0	603	903	0
7730	1	0	0	0	0	0	0	200	300	0	-19.9925	47.5443	-709.635	-94191.9	-7028.76	42.7079	190.095	1035.73	0	0	0	0	0	0	0	603	903	0
7730	2	0	0	0	0	0	0	200	300	0	-18.4666	48.1546	-711.161	-94191.9	-7639.12	-3.06848	189.258	1035.45	0	0	0	0	0	0	0	603	903	0
7730	3	0	0	0	0	0	0	200	300	0	-19.3822	48.6124	-709.635	-94375.1	-7272.9	-48.8449	189.751	1035.99	0	0	0	0	0	0	0	603	903	0
7730	4	0	0	0	0	0	0	200	300	0	-20.1451	48.9175	-715.128	-94375.1	-7578.08	363.142	189.403	1034.97	0	0	0	0	0	0	0	603	903	0
7730	5	0	0	0	0	0	0	200	300	0	-18.4666	49.3753	-715.434	-94283.5	-7333.94	-48.8449	189.749	1034.79	0	0	0	0	0	0	0	603	903	0
7730	6	0	0	0	0	0	0	200	300	0	-19.9925	50.596	-716.654	-93917.3	-7517.05	-186.174	189.511	1034.05	0	0	0	0	0	0	0	603	903	0
7730	7	0	0	0	0	0	0	200	300	0	-19.6873	51.6641	-719.096	-93825.7	-7700.15	-186.174	189.292	1033.48	0	0	0	0	0	0	0	603	903	0
7730	8	0	0	0	0	0	0	200	300	0	-19.077	51.0538	-718.485	-94008.9	-7456.01	-140.398	189.623	1033.84	0	0	0	0	0	0	0	603	903	0
7730	9	0	0	0	0	0	0	200	300	0	-21.2132	51.2064	-723.979	-93184.8	-7700.15	-94.6212	189.364	1031.71	0	0	0	0	0	0	0	603	903	0
7731	0	0	0	0	0	0	0	200	300	0	-20.4503	52.2745	-723.979	-93917.3	-7700.15	42.7079	189.364	1032.72	0	0	0	0	0	0	0	603	903	0
7731	1	0	0	0	0	0	0	200	300	0	-19.2296	54.1055	-724.284	-93734.2	-7578.08	134.261	189.537	1032.42	0	0	0	0	0	0	0	603	903	0
7731	2	0	0	0	0	0	0	200	300	0	-18.7718	54.4107	-727.335	-93093.3	-7578.08	-140.398	189.581	1030.99	0	0	0	0	0	0	0	603	903	0
7731	3	0	0	0	0	0	0	200	300	0	-19.2296	55.1736	-729.472	-93825.7	-7456.01	-231.95	189.779	1031.62	0	0	0	0	0	0	0	603	903	0
7731	4	0	0	0	0	0	0	200	300	0	-20.7555	55.4788	-729.777	-94100.4	-7272.9	88.4843	190.034	1031.94	0	0	0	0	0	0	0	603	903	0
7731	5	0	0	0	0	0	0	200	300	0	-19.8399	57.1573	-729.777	-93276.4	-7883.26	-3.06848	189.198	1030.82	0	0	0	0	0	0	0	603	903	0
7731	6	0	0	0	0	0	0	200	300	0	-19.2296	57.7676	-731.608	-92452.4	-7883.26	-3.06848	189.225	1029.37	0	0	0	0	0	0	0	603	903	0
7731	7	0	0	0	0	0	0	200	300	0	-19.3822	58.378	-734.66	-93368	-7761.19	42.7079	189.436	1030.09	0	0	0	0	0	0	0	603	903	0
7731	8	0	0	0	0	0	0	200	300	0	-19.9925	58.5306	-734.965	-93001.8	-7700.15	-186.174	189.523	1029.54	0	0	0	0	0	0	0	603	903	0
7731	9	0	0	0	0	0	0	200	300	0	-19.8399	59.2935	-735.575	-93642.6	-7700.15	42.7079	189.532	1030.31	0	0	0	0	0	0	0	603	903	0
7732	0	0	0	0	0	0	0	200	300	0	-17.5511	60.209	-737.101	-93368	-7578.08	42.7079	189.719	1029.67	0	0	0	0	0	0	0	603	903	0
7732	1	0	0	0	0	0	0	200	300	0	-18.6192	61.4297	-739.237	-93276.4	-7822.22	-140.398	189.419	1029.18	0	0	0	0	0	0	0	603	903	0
7732	2	0	0	0	0	0	0	200	300	0	-18.4666	62.6505	-741.679	-93642.6	-7822.22	-3.06848	189.453	1029.26	0	0	0	0	0	0	0	603	903	0
7732	3	0	0	0	0	0	0	200	300	0	-19.9925	62.0401	-741.374	-93551.1	-8127.4	134.261	189.037	1029.19	0	0	0	0	0	0	0	603	903	0
7732	4	0	0	0	0	0	0	200	300	0	-19.9925	64.1763	-742.594	-92727.1	-8127.4	271.59	189.055	1027.87	0	0	0	0	0	0	0	603	903	0
7732	5	0	0	0	0	0	0	200	300	0	-18.3141	65.2444	-741.374	-92177.8	-7883.26	-186.174	189.367	1027.33	0	0	0	0	0	0	0	603	903	0
7732	6	0	0	0	0	0	0	200	300	0	-18.6192	63.566	-742.899	-92727.1	-7822.22	180.037	189.471	1027.82	0	0	0	0	0	0	0	603	903	0
7732	7	0	0	0	0	0	0	200	300	0	-19.2296	66.4651	-746.562	-93001.8	-8493.61	-3.06848	188.623	1027.57	0	0	0	0	0	0	0	603	903	0
7732	8	0	0	0	0	0	0	200	300	0	-17.5511	66.3126	-748.087	-93001.8	-8493.61	134.261	188.646	1027.32	0	0	0	0	0	0	0	603	903	0
7732	9	0	0	0	0	0	0	200	300	0	-17.3985	67.2281	-747.172	-92177.8	-8432.57	-3.06848	188.714	1026.37	0	0	0	0	0	0	0	603	903	0
7733	0	0	0	0	0	0	0	200	300	0	-18.4666	68.754	-748.087	-92360.9	-8615.68	134.261	188.483	1026.46	0	0	0	0	0	0	0	603	903	0
7733	1	0	0	0	0	0	0	200	300	0	-17.3985	69.0591	-749.308	-92727.1	-8310.5	180.037	188.909	1026.75	0	0	0	0	0	0	0	603	903	0
7733	2	0	0	0	0	0	0	200	300	0	-18.7718	69.3643	-749.308	-91994.7	-8188.43	-3.06848	189.072	1025.77	0	0	0	0	0	0	0	603	903	0
7733	3	0	0	0	0	0	0	200	300	0	-19.3822	70.1273	-750.224	-91994.7	-8188.43	-186.174	189.085	1025.62	0	0	0	0	0	0	0	603	903	0
7733	4	0	0	0	0	0	0	200	300	0	-17.8563	71.0428	-746.867	-91994.7	-8615.68	-277.727	188.464	1026.17	0	0	0	0	0	0	0	603	903	0
7733	5	0	0	0	0	0	0	200	300	0	-17.3985	71.1954	-750.529	-91628.4	-8493.61	134.261	188.683	1025.09	0	0	0	0	0	0	0	603	903	0
7733	6	0	0	0	0	0	0	200	300	0	-17.7037	73.0264	-752.97	-91903.1	-8493.61	88.4843	188.72	1025.05	0	0	0	0	0	0	0	603	903	0
7733	7	0	0	0	0	0	0	200	300	0	-19.077	72.8738	-753.886	-90529.8	-8432.57	88.4843	188.815	1023.08	0	0	0	0	0	0	0	603	903	0
7733	8	0	0	0	0	0	0	200	300	0	-18.9244	73.4842	-752.665	-91353.8	-8676.71	88.4843	188.472	1024.37	0	0	0	0	0	0	0	603	903	0
7733	9	0	0	0	0	0	0	200	300	0	-18.0089	74.5523	-753.275	-90255.2	-8737.75	88.4843	188.4	1022.82	0	0	0	0	0	0	0	603	903	0
7734	0	0	0	0	0	0	0	200	300	0	-15.4149	75.6204	-754.496	-90529.8	-8615.68	363.142	188.581	1022.99	0	0	0	0	0	0	0	603	903	0
7734	1	0	0	0	0	0	0	200	300	0	-19.077	76.2308	-755.106	-90896	-8554.64	88.4843	188.671	1023.38	0	0	0	0	0	0	0	603	903	0
7734	2	0	0	0	0	0	0	200	300	0	-19.3822	74.0945	-754.801	-89980.5	-8676.71	88.4843	188.505	1022.21	0	0	0	0	0	0	0	603	903	0
7734	3	0	0	0	0	0	0	200	300	0	-18.7718	78.5196	-752.36	-89705.9	-8310.5	134.261	188.954	1022.23	0	0	0	0	0	0	0	603	903	0
7734	4	0	0	0	0	0	0	200	300	0	-19.077	79.4351	-753.275	-89156.5	-8249.47	363.142	189.049	1021.36	0	0	0	0	0	0	0	603	903	0
7734	5	0	0	0	0	0	0	200	300	0	-18.0089	79.5877	-754.191	-88881.9	-8676.71	225.813	188.495	1020.85	0	0	0	0	0	0	0	603	903	0
7734	6	0	0	0	0	0	0	200	300	0	-19.3822	79.4351	-754.191	-89248.1	-8554.64	180.037	188.657	1021.34	0	0	0	0	0	0	0	603	903	0
7734	7	0	0	0	0	0	0	200	300	0	-17.8563	80.5032	-752.97	-88881.9	-8310.5	180.037	188.963	1021.04	0	0	0	0	0	0	0	603	903	0
7734	8	0	0	0	0	0	0	200	300	0	-19.3822	81.4188	-749.613	-88332.5	-8432.57	775.13	188.751	1020.84	0	0	0	0	0	0	0	603	903	0
7734	9	0	0	0	0	0	0	200	300	0	-18.0089	80.8084	-753.581	-87966.3	-8676.71	225.813	188.486	1019.73	0	0	0	0	0	0	0	603	903	0
7735	0	0	0	0	0	0	0	200	300	0	-18.3141	83.0972	-751.444	-88057.9	-8493.61	271.59	188.697	1020.18	0	0	0	0	0	0	0	603	903	0
7735	1	0	0	0	0	0	0	200	300	0	-19.6873	83.7076	-752.055	-86867.7	-8371.54	592.024	188.868	1018.51	0	0	0	0	0	0	0	603	903	0
7735	2	0	0	0	0	0	0	200	300	0	-19.8399	84.4705	-750.834	-87783.3	-8676.71	408.919	188.444	1019.91	0	0	0	0	0	0	0	603	903	0
7735	3	0	0	0	0	0	0	200	300	0	-19.077	85.8438	-750.834	-87142.4	-8859.82	683.577	188.2	1019.06	0	0	0	0	0	0	0	603	903	0
7735	4	0	0	0	0	0	0	200	300	0	-16.6356	86.4542	-751.139	-86867.7	-8371.54	683.577	188.855	1018.65	0	0	0	0	0	0	0	603	903	0
7735	5	0	0	0	0	0	0	200	300	0	-19.5348	85.2335	-745.646	-86867.7	-8493.61	637.801	188.609	1019.5	0	0	0	0	0	0	0	603	903	0
7735	6	0	0	0	0	0	0	200	300	0	-19.9925	86.4542	-750.834	-86410	-8798.78	729.354	188.281	1018.09	0	0	0	0	0	0	0	603	903	0
7735	7	0	0	0	0	0	0	200	300	0	-19.6873	87.98	-749.003	-86226.8	-8737.75	820.906	188.334	1018.12	0	0	0	0	0	0	0	603	903	0
7735	8	0	0	0	0	0	0	200	300	0	-18.6192	89.5059	-748.087	-84670.4	-8554.64	729.354	188.565	1016.18	0	0	0	0	0	0	0	603	903	0
7735	9	0	0	0	0	0	0	200	300	0	-18.4666	89.9637	-748.393	-85036.6	-8859.82	820.906	188.162	1016.63	0	0	0	0	0	0	0	603	903	0
7736	0	0	0	0	0	0	0	200	300	0	-19.9925	90.4214	-747.782	-85402.9	-8798.78	912.459	188.233	1017.21	0	0	0	0	0	0	0	603	903	0
7736	1	0	0	0	0	0	0	200	300	0	-19.5348	91.337	-745.036	-85219.8	-8554.64	683.577	188.518	1017.38	0	0	0	0	0	0	0	603	903	0
7736	2	-5.22038	-3.94974	-10.9439	-2990.39	1275.08	1018.48	316.51	573.247	0	-19.9925	93.4732	-742.899	-84304.2	-8493.61	958.235	188.567	1016.48	0	0	0	0	0	0	0	603	903	0
7736	3	-6.89885	-7.45926	-15.2164	-3814.36	1153.01	1384.69	275.774	550.675	0	-17.7037	92.2525	-743.815	-83114.1	-9164.99	912.459	187.678	1014.74	0	0	0	0	0	0	0	603	903	0
7736	4	-5.22038	-4.71268	-16.7422	-2349.52	603.692	652.267	236.058	440.335	0	-18.4666	94.3887	-744.73	-83754.9	-8676.71	592.024	188.349	1015.46	0	0	0	0	0	0	0	603	903	0
7736	5	-4.15227	-2.72903	-15.2164	-3905.92	1153.01	148.727	275.774	556.692	0	-19.3822	95.1517	-743.205	-83754.9	-8493.61	729.354	188.572	1015.69	0	0	0	0	0	0	0	603	903	0
7736	6	0.425369	1.23825	-15.5215	-3905.92	1580.25	-80.1548	301.81	551.645	0	-19.6873	96.0672	-741.984	-83663.4	-9042.92	958.235	187.812	1015.76	0	0	0	0	0	0	0	603	903	0
7736	7	5.76594	3.06931	-18.8785	-4272.13	1885.43	-217.484	299.872	526.296	0	-19.5348	97.2879	-739.848	-82564.7	-8798.78	912.459	188.107	1014.6	0	0	0	0	0	0	0	603	903	0
7736	8	2.10384	3.83225	-25.2872	-5920.08	1946.46	-721.024	276.974	534.114	0	-18.1615	99.8819	-740.458	-82381.7	-8859.82	820.906	188.035	1014.26	0	0	0	0	0	0	0	603	903	0
7736	9	1.95125	8.10471	-27.7286	-6560.94	1763.36	102.951	263.594	536.613	0	-18.1615	100.34	-738.017	-82015.4	-8798.78	820.906	188.078	1014.13	0	0	0	0	0	0	0	603	903	0
7737	0	1.49348	12.072	-29.8648	-7476.47	1824.39	423.385	261.089	550.344	0	-18.7718	100.34	-737.101	-82107	-8859.82	820.906	187.98	1014.39	0	0	0	0	0	0	0	603	903	0
7737	1	1.03572	13.903	-32.9166	-7751.13	2556.82	469.162	277.676	535.478	0	-20.1451	100.95	-735.27	-81283	-9470.17	866.683	187.12	1013.55	0	0	0	0	0	0	0	603	903	0
7737	2	2.71419	14.0556	-37.7994	-8666.66	2556.82	148.727	267.642	529.281	0	-19.5348	103.849	-733.744	-80642.1	-8737.75	912.459	188.092	1012.91	0	0	0	0	0	0	0	603	903	0
7737	3	5.00301	14.9712	-41.7667	-9948.4	2984.06	514.938	271.446	538.19	0	-18.6192	104.307	-733.439	-79818.2	-8981.89	729.354	187.754	1011.83	0	0	0	0	0	0	0	603	903	0
7737	4	3.32454	16.3445	-45.4288	-10772.4	2984.06	194.503	265.687	537.127	0	-19.077	104.917	-732.218	-80092.8	-8981.89	820.906	187.733	1012.38	0	0	0	0	0	0	0	603	903	0
7737	5	1.3409	17.5652	-52.4478	-13152.7	3594.42	240.28	268.533	550.778	0	-20.1451	105.833	-730.692	-80092.8	-8737.75	958.235	188.042	1012.61	0	0	0	0	0	0	0	603	903	0
7737	6	1.79866	18.0229	-60.6876	-14617.6	3716.49	1384.69	261.24	540.866	0	-16.6356	106.748	-724.589	-80001.2	-8554.64	912.459	188.194	1013.41	0	0	0	0	0	0	0	603	903	0
7737	7	-0.795335	20.4643	-67.7066	-15533.1	4021.66	1613.57	259.398	529.418	0	-19.2296	107.816	-726.115	-78994.2	-8920.85	775.13	187.714	1011.79	0	0	0	0	0	0	0	603	903	0
7737	8	-2.4738	20.0066	-71.9791	-17181.1	4143.73	1796.68	257.569	538.695	0	-18.3141	109.648	-725.199	-78628	-8127.4	1004.01	188.793	1011.42	0	0	0	0	0	0	0	603	903	0
7737	9	-0.642747	21.5324	-76.5567	-19103.7	4204.77	2162.89	254.924	549.536	0	-17.8563	109.19	-723.673	-77712.4	-8310.5	1141.34	188.516	1010.39	0	0	0	0	0	0	0	603	903	0
7738	0	-3.99968	22.1428	-82.6602	-21117.8	4937.19	2757.98	259.729	555.478	0	-19.2296	111.479	-721.232	-77254.7	-8859.82	820.906	187.716	1010.12	0	0	0	0	0	0	0	603	903	0
7738	1	-6.2885	24.1264	-90.9	-22765.8	4693.05	2620.65	251.629	550.449	0	-18.6192	112.547	-718.18	-77987.1	-8615.68	820.906	188.003	1011.59	0	0	0	0	0	0	0	603	903	0
7738	2	-4.45744	25.042	-98.5294	-24322.2	4815.12	3078.42	248.87	546.852	0	-17.5511	113.31	-717.265	-77346.2	-8493.61	500.472	188.158	1010.84	0	0	0	0	0	0	0	603	903	0
7738	3	-7.20403	25.4997	-104.328	-25787	5181.33	3719.28	249.664	547.173	0	-16.0252	113.615	-712.687	-76888.5	-8249.47	1095.56	188.425	1010.89	0	0	0	0	0	0	0	603	903	0
7738	4	-8.42473	26.873	-110.431	-26885.7	5364.43	3490.4	248.577	543.461	0	-15.7201	113.004	-712.992	-76980	-8493.61	729.354	188.087	1010.97	0	0	0	0	0	0	0	603	903	0
7738	5	-7.5092	25.8049	-115.314	-28808.3	5730.64	3536.18	249.696	549.825	0	-16.3304	115.293	-710.246	-76430.7	-8432.57	454.695	188.127	1010.61	0	0	0	0	0	0	0	603	903	0
7738	6	-10.2558	25.4997	-121.112	-29998.5	5852.71	3948.17	248.325	547.691	0	-16.6356	116.514	-706.889	-75881.4	-8310.5	500.472	188.244	1010.35	0	0	0	0	0	0	0	603	903	0
7738	7	-10.4084	24.4316	-126.3	-31280.2	5791.68	4177.05	245.856	547.665	0	-15.7201	117.124	-706.583	-75149	-8615.68	271.59	187.807	1009.36	0	0	0	0	0	0	0	603	903	0
7738	8	-9.79802	24.7368	-133.014	-32836.6	5913.75	4268.6	244.46	546.865	0	-15.1097	117.735	-703.837	-75240.5	-8371.54	454.695	188.106	1009.9	0	0	0	0	0	0	0	603	903	0
7738	9	-12.0868	24.5842	-139.118	-32928.1	6279.96	4497.48	245.141	536.693	0	-16.0252	119.261	-700.48	-74325	-8249.47	225.813	188.223	1009.11	0	0	0	0	0	0	0	603	903	0
7739	0	-15.1386	23.0583	-145.832	-34484.5	6279.96	4955.25	243.063	536.468	0	-15.2623	118.345	-698.039	-73684.1	-8066.36	88.4843	188.444	1008.56	0	0	0	0	0	0	0	603	903	0
7739	1	-14.2231	21.0747	-148.578	-35766.3	6646.17	4772.14	244.732	540.724	0	-14.3468	120.786	-694.376	-73684.1	-8554.64	408.919	187.68	1009.12	0	0	0	0	0	0	0	603	903	0
7739	2	-16.8171	19.091	-151.325	-36956.5	6402.03	4863.69	242.307	544.22	0	-12.2105	121.244	-693.156	-72860.2	-7822.22	180.037	188.715	1008.11	0	0	0	0	0	0	0	603	903	0
7739	3	-16.0541	18.4807	-157.733	-37963.5	6646.17	5275.68	242.135	540.682	0	-14.1942	121.092	-690.104	-72860.2	-8005.33	-3.06848	188.4	1008.58	0	0	0	0	0	0	0	603	903	0
7739	4	-14.8334	15.8867	-164.142	-37780.4	7012.38	4772.14	242.721	530.169	0	-14.3468	119.871	-687.663	-72494	-8371.54	-94.6212	187.826	1008.42	0	0	0	0	0	0	0	603	903	0
7739	5	-17.8852	13.7505	-168.109	-39794.6	7134.45	4726.37	242.439	536.718	0	-13.4312	121.702	-682.169	-71303.8	-8188.43	88.4843	187.997	1007.53	0	0	0	0	0	0	0	603	903	0
7739	6	-20.0214	12.2246	-171.161	-40710.1	7073.42	5413.01	241.326	537.847	0	-12.8209	122.617	-677.897	-70205.1	-8005.33	-140.398	188.191	1006.56	0	0	0	0	0	0	0	603	903	0
7739	7	-20.174	10.2409	-173.297	-41625.6	6951.35	5321.46	240.112	540.198	0	-12.058	123.38	-676.676	-70205.1	-7700.15	363.142	188.621	1006.75	0	0	0	0	0	0	0	603	903	0
7739	8	-22.4628	5.51071	-178.791	-42358.1	7256.52	4955.25	240.587	536.914	0	-11.9054	122.923	-673.014	-70388.2	-8188.43	-48.8449	187.833	1007.59	0	0	0	0	0	0	0	603	903	0
7739	9	-22.6154	3.52707	-181.842	-42998.9	7256.52	5275.68	239.906	536.463	0	-12.3631	121.244	-669.657	-69289.6	-8005.33	-140.398	188.046	1006.47	0	0	0	0	0	0	0	603	903	0
7740	0	-20.3266	3.22189	-186.725	-44097.6	7622.73	5275.68	240.823	536.163	0	-11.1424	123.686	-665.385	-68557.2	-7883.26	-369.28	188.152	1006.03	0	0	0	0	0	0	0	603	903	0
7740	1	-22.6154	0.6279	-189.472	-44921.5	7500.66	5092.58	239.587	537.088	0	-9.76913	124.449	-660.807	-68374.1	-7578.08	-460.832	188.532	1006.47	0	0	0	0	0	0	0	603	903	0
7740	2	-25.2094	-1.35574	-193.134	-45928.6	7439.63	5092.58	238.521	537.807	0	-9.76913	124.754	-658.061	-67275.5	-7822.22	-552.385	188.113	1005.23	0	0	0	0	0	0	0	603	903	0
7740	3	-24.9042	-2.88162	-195.88	-46477.9	7744.8	5550.34	239.538	537.277	0	-10.0743	123.686	-648.6	-66726.1	-7761.19	-598.161	188.034	1005.88	0	0	0	0	0	0	0	603	903	0
7740	4	-25.8197	-5.01785	-198.322	-47210.4	7805.84	5184.13	239.359	538.049	0	-9.46396	124.601	-649.21	-66359.9	-7578.08	-735.49	188.327	1005.22	0	0	0	0	0	0	0	603	903	0
7740	5	-25.362	-8.37479	-203.205	-48125.9	8049.98	5184.13	239.615	536.835	0	-8.09067	125.364	-643.412	-65444.4	-7700.15	-964.372	188.032	1004.71	0	0	0	0	0	0	0	603	903	0
7740	6	-24.2939	-8.98514	-206.256	-47851.2	8111.02	5504.56	239.325	531.999	0	-7.02255	125.669	-639.445	-64620.4	-7456.01	-964.372	188.34	1004.06	0	0	0	0	0	0	0	603	903	0
7740	7	-26.7353	-10.8162	-213.275	-48949.9	7805.84	5275.68	236.6	529.515	0	-6.25961	126.89	-635.478	-64528.8	-7333.94	-1010.15	188.459	1004.54	0	0	0	0	0	0	0	603	903	0
7740	8	-29.4819	-12.4947	-217.548	-50780.9	8233.09	5367.23	237.845	533.424	0	-7.6329	127.043	-627.543	-63704.9	-7272.9	-1193.25	188.411	1004.51	0	0	0	0	0	0	0	603	903	0
7740	9	-28.2612	-15.2412	-221.21	-52062.7	8538.27	5458.79	238.598	535.354	0	-6.25961	126.737	-626.017	-62789.3	-7456.01	-1284.81	188.09	1003.3	0	0	0	0	0	0	0	603	903	0
7741	0	-30.2448	-17.8352	-228.229	-53069.7	8843.44	5458.79	238.748	532.528	0	-5.34409	126.89	-619.914	-61507.6	-7211.87	-1467.91	188.366	1002.22	0	0	0	0	0	0	0	603	903	0
7741	1	-29.787	-19.3611	-234.333	-54076.8	9209.65	5138.35	239.302	530.77	0	-5.03891	128.416	-614.42	-60866.7	-6906.69	-1513.69	188.759	1002.06	0	0	0	0	0	0	0	603	903	0
7741	2	-29.0241	-20.2766	-241.962	-55175.5	9270.69	5321.46	238.315	528.034	0	-4.73373	127.5	-608.927	-61233	-7028.76	-1605.24	188.457	1003.56	0	0	0	0	0	0	0	603	903	0
7741	3	-30.8551	-22.718	-248.981	-55999.4	9392.76	5367.23	237.725	524.914	0	-2.5975	129.179	-606.181	-60500.5	-6784.62	-1605.24	188.808	1002.81	0	0	0	0	0	0	0	603	903	0
7741	4	-33.144	-23.6336	-256.305	-57647.4	9942.07	5458.79	238.79	524.917	0	-3.36044	128.874	-599.772	-59127.2	-7089.8	-1925.68	188.179	1001.58	0	0	0	0	0	0	0	603	903	0
7741	5	-33.2966	-25.1595	-262.409	-59295.3	10491.4	5321.46	239.981	525.966	0	-1.83456	129.637	-593.668	-58761	-6601.52	-2017.23	188.88	1001.98	0	0	0	0	0	0	0	603	903	0
7741	6	-33.6017	-28.2112	-268.512	-60760.2	10857.6	5275.68	240.436	526.285	0	-1.07162	129.789	-586.344	-58486.4	-6479.45	-2063	188.949	1002.75	0	0	0	0	0	0	0	603	903	0
7741	7	-32.5336	-30.3474	-278.278	-61675.7	10735.5	5229.91	238.578	521.633	0	-1.52939	130.857	-582.682	-56472.2	-6906.69	-2108.78	188.147	999.918	0	0	0	0	0	0	0	603	903	0
7741	8	-32.8388	-31.263	-289.569	-63964.5	11529	4863.69	239.814	520.895	0	-0.919037	131.01	-578.715	-57021.5	-6723.59	-2246.11	188.382	1001.53	0	0	0	0	0	0	0	603	903	0
7741	9	-32.6862	-32.0259	-299.335	-65612.5	12017.3	4955.25	240.147	519.194	0	0.606842	131.01	-570.17	-55831.3	-6601.52	-2383.44	188.422	1000.92	0	0	0	0	0	0	0	603	903	0
7742	0	-33.4491	-34.4673	-309.101	-67626.6	12627.6	4589.04	240.853	518.785	0	1.98013	130.247	-566.203	-54915.8	-6479.45	-2291.89	188.556	999.99	0	0	0	0	0	0	0	603	903	0
7742	1	-30.7026	-36.9087	-317.035	-69183	13238	4360.15	241.756	518.219	0	1.36978	130.247	-558.573	-55007.4	-6418.41	-2383.44	188.509	1001.48	0	0	0	0	0	0	0	603	903	0
7742	2	-33.4491	-37.2139	-326.801	-71471.8	13054.9	4268.6	239.947	518.702	0	1.36978	130.247	-551.554	-53817.2	-6113.24	-2246.11	188.916	1000.57	0	0	0	0	0	0	0	603	903	0
7742	3	-30.7026	-38.7398	-335.956	-73394.4	13421.1	4131.27	239.949	518.464	0	1.82755	131.315	-546.977	-52718.5	-6296.34	-2291.89	188.489	999.382	0	0	0	0	0	0	0	603	903	0
7742	4	-29.9396	-40.5708	-346.942	-75317	14702.8	3719.28	242.378	517.088	0	3.20084	131.162	-541.483	-51070.6	-6357.38	-2474.99	188.259	997.316	0	0	0	0	0	0	0	603	903	0
7742	5	-31.0077	-41.9441	-356.403	-76781.9	14947	3810.84	241.938	515.436	0	4.72672	131.01	-533.244	-51436.8	-6296.34	-2795.43	188.192	999.46	0	0	0	0	0	0	0	603	903	0
7742	6	-30.55	-43.9278	-366.474	-78612.9	15557.3	3673.51	242.451	514.512	0	4.57413	129.484	-529.276	-50795.9	-5930.13	-2841.2	188.796	998.972	0	0	0	0	0	0	0	603	903	0
7742	7	-30.7026	-44.3855	-371.662	-79253.8	15862.5	2986.86	242.68	513.242	0	4.57413	131.315	-519.511	-49972	-5930.13	-2703.87	188.585	999.19	0	0	0	0	0	0	0	603	903	0
7742	8	-29.1767	-46.6743	-383.258	-81725.8	16472.8	3032.64	242.981	513.239	0	5.79483	132.536	-513.712	-48598.7	-6052.2	-3115.86	188.219	997.603	0	0	0	0	0	0	0	603	903	0
7742	9	-27.0405	-47.2847	-392.414	-83556.8	17205.3	2941.09	243.845	512.93	0	6.25259	132.688	-506.693	-47774.7	-5563.92	-2795.43	189.019	997.287	0	0	0	0	0	0	0	603	903	0
7743	0	-26.4301	-49.5735	-400.959	-84838.5	17510.4	2757.98	243.671	511.589	0	9.60953	132.078	-495.707	-47316.9	-5624.95	-3207.41	188.653	998.453	0	0	0	0	0	0	0	603	903	0
7743	1	-25.9723	-52.7779	-412.25	-86303.4	18181.8	2620.65	244.104	509.347	0	8.08365	131.62	-491.74	-46584.5	-5930.13	-3253.19	187.941	997.734	0	0	0	0	0	0	0	603	903	0
7743	2	-25.5146	-53.5408	-420.185	-87859.8	18487	2574.88	243.997	509.098	0	7.93106	131.468	-481.364	-45760.5	-5624.95	-3161.64	188.315	998.064	0	0	0	0	0	0	0	603	903	0
7743	3	-25.362	-55.5244	-428.73	-88317.5	18670.1	2208.66	243.548	505.998	0	7.93106	131.315	-474.04	-44661.9	-5441.85	-3482.07	188.52	997.216	0	0	0	0	0	0	0	603	903	0
7743	4	-24.7516	-57.3555	-434.223	-89782.4	19646.7	1842.45	245.246	506.766	0	9.45694	129.789	-462.748	-43654.8	-5319.78	-3527.85	188.504	997.338	0	0	0	0	0	0	0	603	903	0
7743	5	-23.0732	-58.4236	-439.411	-90972.6	19524.6	1888.23	244.434	507.033	0	9.45694	130.705	-459.086	-42098.4	-5502.88	-3436.3	188.013	994.701	0	0	0	0	0	0	0	603	903	0
7743	6	-21.2421	-61.0176	-447.345	-91613.4	20134.9	1476.24	245.01	504.794	0	10.5251	130.399	-450.541	-42006.9	-5502.88	-3619.4	187.786	996.237	0	0	0	0	0	0	0	603	903	0
7743	7	-20.3266	-62.3909	-456.806	-93078.3	20684.3	1384.69	245.28	503.759	0	9.76212	129.789	-441.081	-40633.6	-5258.74	-3665.18	188.078	995.123	0	0	0	0	0	0	0	603	903	0
7743	8	-19.5636	-64.222	-465.045	-94360	21111.5	1155.81	245.397	502.905	0	11.288	129.179	-433.146	-39992.7	-5075.64	-3619.4	188.282	995.331	0	0	0	0	0	0	0	603	903	0
7743	9	-18.6481	-65.5952	-476.337	-96008	22027	1247.36	246.243	501.555	0	12.8139	129.789	-426.127	-39168.7	-4709.43	-3665.18	188.948	994.918	0	0	0	0	0	0	0	603	903	0
7744	0	-15.1386	-67.1211	-483.661	-97289.7	22820.5	377.609	247.183	501.153	0	12.6613	128.263	-415.751	-37429.2	-4526.32	-3344.74	189.113	993.028	0	0	0	0	0	0	0	603	903	0
7744	1	-13.7653	-69.5625	-494.953	-98479.9	23308.8	11.398	247.093	498.968	0	13.2716	127.195	-407.511	-37063	-4709.43	-3665.18	188.443	993.95	0	0	0	0	0	0	0	603	903	0
7744	2	-10.2558	-72.9195	-502.277	-99578.6	23797.1	-171.707	247.378	498.254	0	15.1027	125.822	-397.746	-36330.6	-4953.57	-3802.51	187.546	994.341	0	0	0	0	0	0	0	603	903	0
7744	3	-7.81438	-73.2246	-512.958	-101318	24529.5	-904.13	247.82	497.517	0	13.7294	125.669	-388.59	-34774.2	-3977.01	-3756.73	189.766	992.488	0	0	0	0	0	0	0	603	903	0
7744	4	-6.74626	-75.0557	-521.808	-102508	25445	-1407.67	248.763	496.448	0	14.3398	124.601	-380.656	-34041.8	-4648.39	-3756.73	187.788	992.429	0	0	0	0	0	0	0	603	903	0
7744	5	-5.52556	-78.8704	-528.827	-103424	25750.2	-1819.66	248.693	495.572	0	15.2553	122.923	-370.28	-33400.9	-4160.11	-3939.84	188.765	993.205	0	0	0	0	0	0	0	603	903	0
7744	6	-1.40569	-82.5325	-534.931	-104248	25811.2	-2368.97	248.252	494.881	0	14.9501	120.329	-361.735	-32302.3	-4221.15	-4122.94	188.331	992.298	0	0	0	0	0	0	0	603	903	0
7744	7	-0.947922	-85.4317	-540.729	-105346	26604.7	-2872.51	249.202	494.823	0	14.7975	118.955	-352.885	-30837.4	-3977.01	-3802.51	188.73	990.387	0	0	0	0	0	0	0	603	903	0
7744	8	0.577956	-88.1783	-547.748	-105804	27154	-3513.38	249.574	493.162	0	15.2553	117.582	-341.898	-30013.5	-4343.22	-3527.85	187.297	990.785	0	0	0	0	0	0	0	603	903	0
7744	9	0.730544	-92.2981	-549.579	-105896	27031.9	-3559.16	249.187	492.685	0	15.1027	115.751	-333.048	-29006.4	-4099.08	-3894.06	187.692	990.094	0	0	0	0	0	0	0	603	903	0
7745	0	0.577956	-94.1292	-559.65	-106170	27703.3	-3833.82	249.501	489.709	0	14.7975	113.157	-325.419	-28457.1	-3427.69	-3756.73	189.467	990.448	0	0	0	0	0	0	0	603	903	0
7745	1	-0.184983	-95.6551	-565.448	-107818	27825.4	-4062.7	249.209	490.678	0	16.476	110.258	-315.348	-27358.4	-3915.97	-3619.4	187.582	989.756	0	0	0	0	0	0	0	603	903	0
7745	2	0.272781	-98.4016	-570.026	-108368	28069.5	-4154.25	249.243	490.11	0	14.6449	106.596	-307.414	-26076.7	-3610.79	-3756.73	188.254	987.826	0	0	0	0	0	0	0	603	903	0
7745	3	-0.490159	-99.6223	-572.467	-108368	28863	-4520.46	250.419	489.299	0	15.4079	105.68	-295.207	-25435.8	-3305.62	-3665.18	188.802	989.163	0	0	0	0	0	0	0	603	903	0
7745	4	-0.184983	-101.606	-575.214	-108734	28679.9	-4703.57	249.859	489.032	0	15.8656	103.697	-285.441	-24337.2	-3000.44	-3436.3	189.488	988.262	0	0	0	0	0	0	0	603	903	0
7745	5	-0.337571	-100.996	-579.181	-109375	28801.9	-4428.91	249.729	488.844	0	13.5768	100.797	-277.506	-23238.6	-3732.86	-3436.3	186.549	986.741	0	0	0	0	0	0	0	603	903	0
7745	6	-0.795335	-101.453	-582.843	-109649	28924	-4749.34	249.626	488.128	0	12.9665	97.2879	-267.741	-21773.7	-3183.55	-3115.86	188.11	984.324	0	0	0	0	0	0	0	603	903	0
7745	7	-1.71086	-102.064	-584.674	-108825	28679.9	-4840.9	249.053	486.13	0	14.4923	92.4051	-257.67	-20858.2	-3061.48	-2841.2	188.119	983.949	0	0	0	0	0	0	0	603	903	0
7745	8	-2.01604	-101.453	-588.947	-109008	29534.4	-4795.12	250.148	485.091	0	14.0346	92.4051	-247.904	-20492	-3305.62	-3024.31	186.666	985.661	0	0	0	0	0	0	0	603	903	0
7745	9	-2.77898	-99.7749	-588.336	-109100	29534.4	-4703.57	250.2	485.438	0	13.119	89.5059	-237.223	-19576.5	-3183.55	-2749.65	186.58	985.523	0	0	0	0	0	0	0	603	903	0
7746	0	-2.77898	-99.9275	-588.642	-109008	29473.3	-4428.91	250.07	485.187	0	14.1872	85.9964	-229.594	-18752.5	-2878.37	-2658.1	187.463	984.677	0	0	0	0	0	0	0	603	903	0
7746	1	-3.08415	-100.233	-590.168	-109192	29046.1	-4703.57	249.217	485.018	0	11.5932	82.4869	-221.354	-17196.1	-2634.23	-2063	188.099	980.686	0	0	0	0	0	0	0	603	903	0
7746	2	-2.77898	-99.7749	-595.05	-109100	29595.4	-5024	249.736	483.346	0	12.3561	77.6041	-210.978	-16646.8	-3305.62	-2474.99	184.332	981.903	0	0	0	0	0	0	0	603	903	0
7746	3	-3.23674	-99.012	-591.999	-109100	29961.6	-5024	250.611	484.291	0	10.9828	75.0101	-200.907	-15914.3	-2634.23	-2337.66	186.888	982.212	0	0	0	0	0	0	0	603	903	0
7746	4	-3.84709	-100.08	-595.661	-108917	30022.6	-5069.78	250.402	482.851	0	9.60953	73.0264	-193.278	-14266.4	-2756.3	-2017.23	185.739	976.813	0	0	0	0	0	0	0	603	903	0
7746	5	-3.54192	-99.7749	-594.44	-108551	29961.6	-5069.78	250.403	482.61	0	8.99918	70.585	-186.564	-14449.5	-2634.23	-1971.45	185.88	980.451	0	0	0	0	0	0	0	603	903	0
7746	6	-3.54192	-99.9275	-592.609	-108825	30083.7	-5481.77	250.765	483.638	0	9.15176	66.4651	-176.798	-12984.6	-2634.23	-1925.68	185.1	976.443	0	0	0	0	0	0	0	603	903	0
7746	7	-2.32121	-101.301	-595.356	-108734	29900.6	-5435.99	250.223	482.637	0	8.99918	62.4979	-169.779	-12435.3	-2634.23	-1834.12	184.484	976.244	0	0	0	0	0	0	0	603	903	0
7746	8	0.272781	-101.148	-597.492	-108825	30388.9	-5573.32	250.861	482.137	0	8.38882	58.6832	-161.845	-12069.1	-2573.2	-1376.36	184.101	977.572	0	0	0	0	0	0	0	603	903	0
7746	9	-0.642747	-101.606	-599.323	-108551	30755.1	-5619.1	251.316	481.122	0	5.94742	54.8685	-154.52	-11336.7	-2451.13	-1559.47	184.137	976.367	0	0	0	0	0	0	0	603	903	0
7747	0	-1.55827	-101.453	-598.407	-108917	30510.9	-5527.54	250.987	482.011	0	5.94742	51.6641	-149.638	-10787.4	-2145.95	-1147.48	185.659	975.09	0	0	0	0	0	0	0	603	903	0
7747	1	-0.490159	-102.369	-597.187	-108734	30572	-5985.31	251.193	482.077	0	5.94742	46.9339	-141.398	-10055	-2084.92	-1284.81	185.255	974.111	0	0	0	0	0	0	0	603	903	0
7747	2	0.425369	-103.284	-600.544	-108825	30999.2	-6397.29	251.619	481.211	0	6.40518	43.1192	-135.905	-9322.54	-2329.06	-735.49	182.863	971.596	0	0	0	0	0	0	0	603	903	0
7747	3	3.47713	-104.2	-602.375	-108825	30755.1	-6397.29	251.056	480.661	0	5.03189	41.1356	-128.275	-9139.43	-2145.95	-598.161	183.271	974.249	0	0	0	0	0	0	0	603	903	0
7747	4	3.7823	-104.658	-603.595	-108642	31365.4	-6717.73	251.964	479.992	0	3.96378	39.9149	-122.172	-8773.22	-1962.85	-918.596	183.934	974.811	0	0	0	0	0	0	0	603	903	0
7747	5	5.46077	-105.878	-608.478	-109100	31426.5	-7038.16	251.648	479.3	0	3.96378	38.6942	-116.679	-7949.25	-1718.71	-781.267	185.27	971.129	0	0	0	0	0	0	0	603	903	0
7747	6	6.22371	-106.641	-604.206	-108459	31731.6	-7083.94	252.518	479.507	0	5.18448	36.5579	-109.965	-7583.04	-2084.92	-918.596	181.04	971.959	0	0	0	0	0	0	0	603	903	0
7747	7	6.07112	-107.099	-610.004	-108551	31548.5	-7450.15	251.719	477.951	0	4.42154	35.1846	-106.303	-7033.72	-1291.46	-643.938	187.851	969.167	0	0	0	0	0	0	0	603	903	0
7747	8	8.20735	-107.557	-610.919	-107086	32280.9	-7404.38	252.84	475.286	0	5.64224	35.1846	-98.063	-7033.72	-1535.6	-1147.48	184.341	974.727	0	0	0	0	0	0	0	603	903	0
7747	9	8.51253	-109.083	-612.445	-108368	32280.9	-7907.92	252.708	476.943	0	4.72672	33.5062	-94.0957	-6118.19	-1596.64	-643.938	183.032	968.021	0	0	0	0	0	0	0	603	903	0
7748	0	9.88582	-110.456	-614.887	-109192	32158.9	-8319.9	252.301	477.58	0	4.11636	29.6915	-86.4663	-6118.19	-1657.67	-643.938	180.829	973.758	0	0	0	0	0	0	0	603	903	0
7748	1	12.1746	-111.524	-619.159	-109100	32158.9	-7999.47	251.94	476.207	0	4.11636	28.7759	-84.0249	-5111.11	-1291.46	-735.49	184.63	963.829	0	0	0	0	0	0	0	603	903	0
7748	2	12.022	-111.982	-622.516	-109466	32464	-8411.45	252.15	475.845	0	4.11636	27.0975	-79.4473	-5294.22	-1413.53	-506.608	182.208	969.638	0	0	0	0	0	0	0	603	903	0
7748	3	11.2591	-113.203	-624.958	-109558	33135.4	-8823.44	253.02	475.304	0	3.20084	24.0457	-72.4282	-5294.22	-1718.71	-506.608	176.27	976.096	0	0	0	0	0	0	0	603	903	0
7748	4	14.1583	-114.881	-626.789	-109924	33196.5	-8823.44	252.963	475.377	0	2.13272	22.825	-65.4092	-4744.9	-1352.49	-369.28	179.323	975.542	0	0	0	0	0	0	0	603	903	0
7748	5	12.1746	-114.423	-628.925	-109558	33440.6	-8823.44	253.171	474.199	0	0.606842	21.2991	-63.5781	-4561.8	-1291.46	-323.503	179.687	974.751	0	0	0	0	0	0	0	603	903	0
7748	6	12.9376	-114.729	-631.977	-109832	32952.3	-9098.1	252.142	473.792	0	2.28531	19.4681	-61.1367	-3463.16	-1291.46	-48.8449	178.876	959.646	0	0	0	0	0	0	0	603	903	0
7748	7	13.8531	-115.339	-637.775	-109192	33501.6	-9372.76	252.529	471.207	0	1.67496	17.637	-57.1694	-3920.93	-1169.39	-48.8449	179.545	971.584	0	0	0	0	0	0	0	603	903	0
7748	8	13.7005	-115.644	-639.301	-110016	34295.1	-9601.64	253.645	472.087	0	1.52237	15.806	-53.5073	-3829.38	-1352.49	42.7079	174.723	974.567	0	0	0	0	0	0	0	603	903	0
7748	9	13.3953	-115.644	-641.437	-109741	33928.9	-9418.53	252.895	471.086	0	1.06461	15.043	-50.4555	-4012.48	-1230.42	134.261	175.614	982.525	0	0	0	0	0	0	0	603	903	0
7749	0	12.9376	-116.254	-645.404	-110107	34234.1	-9372.76	253.043	470.602	0	-0.308685	14.2801	-46.4883	-3371.61	-1108.35	225.813	176.158	975.526	0	0	0	0	0	0	0	603	903	0
7749	1	12.4798	-116.407	-645.404	-110748	34112	-9693.19	252.854	471.595	0	1.21719	13.3646	-45.2676	-3005.4	-864.213	592.024	180.909	969.392	0	0	0	0	0	0	0	603	903	0
7749	2	13.7005	-115.949	-647.235	-110840	34600.3	-9693.19	253.459	471.251	0	-0.00350934	12.1439	-40.3847	-2913.85	-986.283	88.4843	175.578	975.152	0	0	0	0	0	0	0	603	903	0
7749	3	13.3953	-117.933	-649.982	-111206	34966.5	-9555.86	253.796	471.091	0	-1.22421	11.9913	-39.164	-2730.74	-986.283	225.813	174.817	972.726	0	0	0	0	0	0	0	603	903	0
7749	4	14.0057	-116.865	-655.17	-111572	35210.6	-9464.31	253.743	470.295	0	-0.613861	11.0757	-34.2812	-2822.29	-803.178	225.813	176.571	985.328	0	0	0	0	0	0	0	603	903	0
7749	5	13.2428	-117.017	-657.306	-111023	35088.6	-9601.64	253.382	468.906	0	-0.156097	10.618	-30.9243	-2272.98	-681.107	271.59	177.975	976.501	0	0	0	0	0	0	0	603	903	0
7749	6	13.0902	-117.017	-660.663	-111206	35332.7	-9830.52	253.481	468.324	0	-0.308685	10.3128	-28.7881	-2181.43	-986.283	-94.6212	165.74	978.775	0	0	0	0	0	0	0	603	903	0
7749	7	13.7005	-116.407	-660.358	-112030	35393.7	-9464.31	253.598	469.65	0	-0.156097	9.54986	-27.8725	-2364.53	-803.178	134.261	171.184	987.834	0	0	0	0	0	0	0	603	903	0
7749	8	12.1746	-117.17	-664.936	-112396	35698.9	-9601.64	253.688	469.033	0	-1.83456	8.17657	-25.7363	-1723.66	-375.931	-3.06848	185.393	969.974	0	0	0	0	0	0	0	603	903	0
7749	9	12.785	-117.17	-668.598	-113128	36126.2	-9967.85	254.033	469.202	0	-0.461273	8.32916	-22.3794	-1906.77	-436.967	317.366	180.475	988.202	0	0	0	0	0	0	0	603	903	0
7750	0	13.3953	-117.17	-670.734	-113128	35821	-9784.74	253.406	468.664	0	0.454254	8.32916	-17.8017	-1906.77	-681.107	225.813	161.739	1010.11	0	0	0	0	0	0	0	603	903	0
7750	1	13.5479	-117.323	-675.312	-113586	36248.2	-9510.09	253.676	468.198	0	-0.613861	6.49811	-18.1069	-1632.11	-192.826	-48.8449	189.351	993.137	0	0	0	0	0	0	0	603	903	0
7750	2	12.785	-116.712	-678.363	-114502	36309.3	-9693.19	253.525	468.791	0	0	0	0	0	0	0	200	903	0	0	0	0	0	0	0	603	903	0
7750	3	12.9376	-117.323	-681.415	-114868	36797.6	-9967.85	254.002	468.573	0	0	0	0	0	0	0	200	903	0	0	0	0	0	0	0	603	903	0
7750	4	12.9376	-116.865	-682.941	-115692	36431.3	-9693.19	253.345	469.402	0	0	0	0	0	0	0	200	903	0	0	0	0	0	0	0	603	903	0
7750	5	13.2428	-117.17	-684.772	-115600	36919.6	-9784.74	253.915	468.816	0	0	0	0	0	0	0	200	903	0	0	0	0	0	0	0	603	903	0
7750	6	14.1583	-117.475	-689.35	-116058	37224.8	-9372.76	254	468.359	0	0	0	0	0	0	0	200	903	0	0	0	0	0	0	0	603	903	0
7750	7	14.3109	-117.17	-694.232	-116699	36736.5	-9418.53	252.917	468.098	0	0	0	0	0	0	0	200	903	0	0	0	0	0	0	0	603	903	0
7750	8	14.1583	-116.56	-696.674	-116333	37591	-9555.86	253.958	466.983	0	0	0	0	0	0	0	200	903	0	0	0	0	0	0	0	603	903	0
7750	9	13.0902	-116.56	-700.031	-116150	37468.9	-9647.42	253.525	465.921	0	0	0	0	0	0	0	200	903	0	0	0	0	0	0	0	603	903	0
7751	0	14.0057	-115.797	-702.167	-117614	37468.9	-9098.1	253.362	467.502	0	0	0	0	0	0	0	200	903	0	0	0	0	0	0	0	603	903	0
7751	1	12.785	-115.339	-703.998	-117798	37957.2	-9235.43	253.917	467.327	0	0	0	0	0	0	0	200	903	0	0	0	0	0	0	0	603	903	0
7751	2	12.6324	-115.949	-707.66	-117981	37713.1	-9647.42	253.293	466.719	0	0	0	0	0	0	0	200	903	0	0	0	0	0	0	0	603	903	0
7751	3	12.022	-114.729	-709.796	-118347	38018.3	-8960.77	253.562	466.734	0	0	0	0	0	0	0	200	903	0	0	0	0	0	0	0	603	903	0
7751	4	12.1746	-114.271	-714.679	-117798	37957.2	-9006.55	253.111	464.826	0	0	0	0	0	0	0	200	903	0	0	0	0	0	0	0	603	903	0
7751	5	11.8695	-113.508	-713.764	-118072	38262.4	-8777.66	253.607	465.422	0	0	0	0	0	0	0	200	903	0	0	0	0	0	0	0	603	903	0
7751	6	10.8013	-113.508	-718.341	-118622	38323.4	-8914.99	253.35	465.133	0	0	0	0	0	0	0	200	903	0	0	0	0	0	0	0	603	903	0
7751	7	11.1065	-112.44	-718.647	-118530	38628.6	-8960.77	253.752	464.935	0	0	0	0	0	0	0	200	903	0	0	0	0	0	0	0	603	903	0
7751	8	9.42805	-112.135	-720.478	-119354	38201.4	-8823.44	253.022	465.659	0	0	0	0	0	0	0	200	903	0	0	0	0	0	0	0	603	903	0
7751	9	10.4962	-111.372	-723.835	-119537	38689.6	-8686.11	253.451	465.144	0	0	0	0	0	0	0	200	903	0	0	0	0	0	0	0	603	903	0
7752	0	9.58064	-111.066	-728.412	-119629	38811.7	-8640.33	253.283	464.232	0	0	0	0	0	0	0	200	903	0	0	0	0	0	0	0	603	903	0
7752	1	9.12288	-110.456	-730.243	-119720	38933.8	-8411.45	253.316	463.946	0	0	0	0	0	0	0	200	903	0	0	0	0	0	0	0	603	903	0
7752	2	7.597	-109.235	-734.211	-119354	39116.9	-8228.35	253.277	462.561	0	0	0	0	0	0	0	200	903	0	0	0	0	0	0	0	603	903	0
7752	3	8.20735	-108.93	-732.379	-120544	38994.8	-8274.12	253.244	464.592	0	0	0	0	0	0	0	200	903	0	0	0	0	0	0	0	603	903	0
7752	4	6.52888	-108.625	-736.957	-120819	39116.9	-7862.14	253.079	463.943	0	0	0	0	0	0	0	200	903	0	0	0	0	0	0	0	603	903	0
7752	5	6.83406	-107.71	-738.483	-121185	39300	-7953.69	253.217	464.1	0	0	0	0	0	0	0	200	903	0	0	0	0	0	0	0	603	903	0
7752	6	7.597	-106.489	-741.23	-121093	39300	-7999.47	253.02	463.368	0	0	0	0	0	0	0	200	903	0	0	0	0	0	0	0	603	903	0
7752	7	5.91853	-106.947	-744.892	-121460	39727.2	-7679.03	253.333	463.057	0	0	0	0	0	0	0	200	903	0	0	0	0	0	0	0	603	903	0
7752	8	4.85042	-106.336	-747.028	-122100	39483.1	-7541.7	252.854	463.448	0	0	0	0	0	0	0	200	903	0	0	0	0	0	0	0	603	903	0
7752	9	4.54524	-105.116	-748.859	-122558	39727.2	-7404.38	253.05	463.66	0	0	0	0	0	0	0	200	903	0	0	0	0	0	0	0	603	903	0
7753	0	3.47713	-104.353	-750.385	-123291	39910.3	-7495.93	253.187	464.303	0	0	0	0	0	0	0	200	903	0	0	0	0	0	0	0	603	903	0
7753	1	3.93489	-103.742	-753.437	-123382	40398.6	-7038.16	253.619	463.759	0	0	0	0	0	0	0	200	903	0	0	0	0	0	0	0	603	903	0
7753	2	3.62971	-103.437	-755.878	-124115	39605.2	-7267.04	252.396	464.199	0	0	0	0	0	0	0	200	903	0	0	0	0	0	0	0	603	903	0
7753	3	3.93489	-102.674	-759.235	-124115	40276.6	-6992.39	253.049	463.473	0	0	0	0	0	0	0	200	903	0	0	0	0	0	0	0	603	903	0
7753	4	3.17195	-101.911	-758.014	-124389	40398.6	-6809.28	253.295	464.099	0	0	0	0	0	0	0	200	903	0	0	0	0	0	0	0	603	903	0
7753	5	2.10384	-101.606	-764.728	-124389	40337.6	-6855.06	252.748	462.658	0	0	0	0	0	0	0	200	903	0	0	0	0	0	0	0	603	903	0
7753	6	3.17195	-100.233	-765.033	-124939	40520.7	-6397.29	252.966	463.311	0	0	0	0	0	0	0	200	903	0	0	0	0	0	0	0	603	903	0
7753	7	1.95125	-99.7749	-767.169	-124389	40581.7	-6671.95	252.898	462.141	0	0	0	0	0	0	0	200	903	0	0	0	0	0	0	0	603	903	0
7753	8	2.10384	-99.1646	-768.695	-125396	40581.7	-6031.08	252.793	463.129	0	0	0	0	0	0	0	200	903	0	0	0	0	0	0	0	603	903	0
7753	9	1.3409	-98.4016	-767.78	-125763	41070	-6351.52	253.492	463.8	0	0	0	0	0	0	0	200	903	0	0	0	0	0	0	0	603	903	0
7754	0	1.49348	-97.6387	-775.714	-126037	41192.1	-6031.08	253.102	462.479	0	0	0	0	0	0	0	200	903	0	0	0	0	0	0	0	603	903	0
7754	1	0.577956	-98.0965	-776.63	-126037	40764.8	-6122.64	252.489	462.287	0	0	0	0	0	0	0	200	903	0	0	0	0	0	0	0	603	903	0
7754	2	-0.0323951	-96.418	-780.597	-126037	40886.9	-5847.98	252.379	461.463	0	0	0	0	0	0	0	200	903	0	0	0	0	0	0	0	603	903	0
7754	3	-0.337571	-95.8076	-779.071	-126220	41436.2	-5893.75	253.187	462.014	0	0	0	0	0	0	0	200	903	0	0	0	0	0	0	0	603	903	0
7754	4	-1.10051	-94.7395	-779.682	-125763	41009	-5756.42	252.597	461.3	0	0	0	0	0	0	0	200	903	0	0	0	0	0	0	0	603	903	0
7754	5	0.120193	-94.8921	-782.123	-126129	41375.2	-5481.77	252.901	461.265	0	0	0	0	0	0	0	200	903	0	0	0	0	0	0	0	603	903	0
7754	6	-0.490159	-93.824	-785.785	-126403	41314.2	-5756.42	252.577	460.863	0	0	0	0	0	0	0	200	903	0	0	0	0	0	0	0	603	903	0
7754	7	0.120193	-92.4507	-787.616	-126495	41436.2	-5573.32	252.61	460.605	0	0	0	0	0	0	0	200	903	0	0	0	0	0	0	0	603	903	0
7754	8	-0.947922	-91.3826	-788.532	-126770	41558.3	-5435.99	252.703	460.767	0	0	0	0	0	0	0	200	903	0	0	0	0	0	0	0	603	903	0
7754	9	-1.10051	-91.3826	-788.227	-126953	41802.4	-5069.78	253.034	461.061	0	0	0	0	0	0	0	200	903	0	0	0	0	0	0	0	603	903	0
7755	0	-2.16863	-90.6197	-788.532	-126678	41619.3	-5207.11	252.781	460.651	0	0	0	0	0	0	0	200	903	0	0	0	0	0	0	0	603	903	0
7755	1	-0.642747	-89.5515	-788.532	-126678	41619.3	-5252.88	252.781	460.651	0	0	0	0	0	0	0	200	903	0	0	0	0	0	0	0	603	903	0
7755	2	-0.184983	-88.4834	-790.973	-126953	41802.4	-5161.33	252.849	460.502	0	0	0	0	0	0	0	200	903	0	0	0	0	0	0	0	603	903	0
7755	3	-0.337571	-87.7205	-793.109	-126770	41863.5	-4932.45	252.784	459.839	0	0	0	0	0	0	0	200	903	0	0	0	0	0	0	0	603	903	0
7755	4	-0.184983	-87.8731	-792.804	-126587	42107.6	-4795.12	253.112	459.669	0	0	0	0	0	0	0	200	903	0	0	0	0	0	0	0	603	903	0
7755	5	-1.40569	-85.8894	-793.109	-126861	41863.5	-5161.33	252.784	459.954	0	0	0	0	0	0	0	200	903	0	0	0	0	0	0	0	603	903	0
7755	6	-0.947922	-84.9739	-791.584	-126770	41802.4	-4978.23	252.809	460.147	0	0	0	0	0	0	0	200	903	0	0	0	0	0	0	0	603	903	0
7755	7	-1.55827	-84.5161	-791.889	-127227	41985.5	-4657.79	253.02	460.663	0	0	0	0	0	0	0	200	903	0	0	0	0	0	0	0	603	903	0
7755	8	0.425369	-82.9903	-791.278	-126587	42290.7	-4932.45	253.446	459.977	0	0	0	0	0	0	0	200	903	0	0	0	0	0	0	0	603	903	0
7755	9	0.425369	-82.5325	-792.194	-126770	42290.7	-5024	253.384	460.024	0	0	0	0	0	0	0	200	903	0	0	0	0	0	0	0	603	903	0
7756	0	0.883132	-81.7696	-788.837	-126678	42107.6	-4932.45	253.379	460.589	0	0	0	0	0	0	0	200	903	0	0	0	0	0	0	0	603	903	0
7756	1	0.272781	-81.4644	-790.363	-126129	42046.6	-4795.12	253.199	459.583	0	0	0	0	0	0	0	200	903	0	0	0	0	0	0	0	603	903	0
7756	2	0.883132	-80.5489	-788.532	-126220	42290.7	-4840.9	253.632	460.07	0	0	0	0	0	0	0	200	903	0	0	0	0	0	0	0	603	903	0
7756	3	0.425369	-78.8704	-786.701	-124206	42534.9	-4978.23	254.067	457.882	0	0	0	0	0	0	0	200	903	0	0	0	0	0	0	0	603	903	0
7756	4	1.49348	-78.5652	-785.175	-125488	42473.8	-4886.67	254.095	459.822	0	0	0	0	0	0	0	200	903	0	0	0	0	0	0	0	603	903	0
7756	5	3.93489	-77.8023	-787.311	-125213	42168.6	-4703.57	253.56	459.039	0	0	0	0	0	0	0	200	903	0	0	0	0	0	0	0	603	903	0
7756	6	2.71419	-76.5816	-783.649	-124756	42168.6	-4566.24	253.811	459.198	0	0	0	0	0	0	0	200	903	0	0	0	0	0	0	0	603	903	0
7756	7	1.95125	-76.5816	-782.733	-124023	42351.8	-4749.34	254.107	458.449	0	0	0	0	0	0	0	200	903	0	0	0	0	0	0	0	603	903	0
7756	8	1.3409	-75.9712	-780.292	-124115	42107.6	-4840.9	253.964	459.062	0	0	0	0	0	0	0	200	903	0	0	0	0	0	0	0	603	903	0
7756	9	2.40901	-74.4453	-776.02	-123565	42168.6	-4657.79	254.34	459.23	0	0	0	0	0	0	0	200	903	0	0	0	0	0	0	0	603	903	0
7757	0	3.01936	-73.5298	-774.494	-122192	41924.5	-4291.58	254.132	457.77	0	0	0	0	0	0	0	200	903	0	0	0	0	0	0	0	603	903	0
7757	1	3.62971	-73.2246	-771.747	-121917	41802.4	-4703.57	254.166	457.976	0	0	0	0	0	0	0	200	903	0	0	0	0	0	0	0	603	903	0
7757	2	4.85042	-73.2246	-770.832	-121185	42107.6	-4749.34	254.626	457.213	0	0	0	0	0	0	0	200	903	0	0	0	0	0	0	0	603	903	0
7757	3	3.7823	-72.4617	-769.001	-120910	41802.4	-4657.79	254.359	457.23	0	0	0	0	0	0	0	200	903	0	0	0	0	0	0	0	603	903	0
7757	4	3.93489	-71.5462	-766.559	-119812	41924.5	-4245.8	254.692	456.298	0	0	0	0	0	0	0	200	903	0	0	0	0	0	0	0	603	903	0
7757	5	4.08748	-70.7832	-761.066	-119537	41619.3	-4428.91	254.686	457.065	0	0	0	0	0	0	0	200	903	0	0	0	0	0	0	0	603	903	0
7757	6	4.39265	-69.7151	-758.319	-119354	41314.2	-4703.57	254.481	457.393	0	0	0	0	0	0	0	200	903	0	0	0	0	0	0	0	603	903	0
7757	7	5.61336	-69.5625	-754.657	-118713	41558.3	-4520.46	255.069	457.307	0	0	0	0	0	0	0	200	903	0	0	0	0	0	0	0	603	903	0
7757	8	5.00301	-67.8841	-753.437	-118164	41253.1	-4474.69	254.753	456.833	0	0	0	0	0	0	0	200	903	0	0	0	0	0	0	0	603	903	0
7757	9	5.46077	-67.8841	-751.606	-117706	41070	-4245.8	254.643	456.606	0	0	0	0	0	0	0	200	903	0	0	0	0	0	0	0	603	903	0
7758	0	4.85042	-66.6634	-747.943	-116699	40947.9	-4383.13	254.747	456.026	0	0	0	0	0	0	0	200	903	0	0	0	0	0	0	0	603	903	0
7758	1	4.39265	-65.4427	-742.145	-116333	40947.9	-4474.69	255.175	456.752	0	0	0	0	0	0	0	200	903	0	0	0	0	0	0	0	603	903	0
7758	2	6.52888	-65.1375	-738.483	-116150	40825.9	-4108.48	255.283	457.281	0	0	0	0	0	0	0	200	903	0	0	0	0	0	0	0	603	903	0
7758	3	5.30818	-64.222	-736.347	-115875	40825.9	-4154.25	255.444	457.365	0	0	0	0	0	0	0	200	903	0	0	0	0	0	0	0	603	903	0
7758	4	5.91853	-63.0013	-733.6	-114868	40459.7	-4245.8	255.152	456.581	0	0	0	0	0	0	0	200	903	0	0	0	0	0	0	0	603	903	0
7758	5	5.91853	-62.0857	-724.445	-114044	40154.5	-4291.58	255.428	457.422	0	0	0	0	0	0	0	200	903	0	0	0	0	0	0	0	603	903	0
7758	6	5.46077	-61.0176	-727.191	-113495	40459.7	-4200.03	255.638	456.072	0	0	0	0	0	0	0	200	903	0	0	0	0	0	0	0	603	903	0
7758	7	5.15559	-60.4073	-721.393	-113037	40154.5	-4245.8	255.662	456.692	0	0	0	0	0	0	0	200	903	0	0	0	0	0	0	0	603	903	0
7758	8	6.83406	-60.4073	-717.121	-111938	40093.5	-4200.03	255.909	456.094	0	0	0	0	0	0	0	200	903	0	0	0	0	0	0	0	603	903	0
7758	9	6.52888	-59.034	-713.764	-111389	39971.4	-4291.58	256.001	456.058	0	0	0	0	0	0	0	200	903	0	0	0	0	0	0	0	603	903	0
7759	0	7.13924	-57.6607	-711.628	-110656	39544.1	-4016.92	255.569	455.498	0	0	0	0	0	0	0	200	903	0	0	0	0	0	0	0	603	903	0
7759	1	5.46077	-57.2029	-705.524	-109924	39910.3	-3971.15	256.568	455.805	0	0	0	0	0	0	0	200	903	0	0	0	0	0	0	0	603	903	0
7759	2	5.91853	-56.1348	-703.998	-108368	39666.2	-4245.8	256.344	453.932	0	0	0	0	0	0	0	200	903	0	0	0	0	0	0	0	603	903	0
7759	3	6.68147	-55.5244	-699.115	-106903	39361	-4245.8	256.301	452.912	0	0	0	0	0	0	0	200	903	0	0	0	0	0	0	0	603	903	0
7759	4	6.98665	-55.0667	-695.453	-107635	38750.7	-4108.48	255.72	454.77	0	0	0	0	0	0	0	200	903	0	0	0	0	0	0	0	603	903	0
7759	5	7.74959	-53.846	-693.012	-107361	39239	-4108.48	256.621	454.919	0	0	0	0	0	0	0	200	903	0	0	0	0	0	0	0	603	903	0
7759	6	7.74959	-53.3882	-689.655	-106811	39361	-4154.25	257.074	454.876	0	0	0	0	0	0	0	200	903	0	0	0	0	0	0	0	603	903	0
7759	7	8.51253	-53.083	-681.415	-106079	39361	-4108.48	257.764	455.674	0	0	0	0	0	0	0	200	903	0	0	0	0	0	0	0	603	903	0
7759	8	7.44441	-52.0149	-682.025	-105072	38872.8	-4108.48	256.996	454.058	0	0	0	0	0	0	0	200	903	0	0	0	0	0	0	0	603	903	0
7759	9	7.44441	-52.0149	-677.143	-104797	38689.6	-3971.15	257.137	454.764	0	0	0	0	0	0	0	200	903	0	0	0	0	0	0	0	603	903	0
7760	0	9.12288	-53.2356	-674.701	-104156	38872.8	-3925.37	257.615	454.374	0	0	0	0	0	0	0	200	903	0	0	0	0	0	0	0	603	903	0
7760	1	9.58064	-51.252	-670.734	-102966	38201.4	-4200.03	256.955	453.512	0	0	0	0	0	0	0	200	903	0	0	0	0	0	0	0	603	903	0
7760	2	9.73323	-48.9632	-670.124	-102508	38567.6	-4062.7	257.553	452.969	0	0	0	0	0	0	0	200	903	0	0	0	0	0	0	0	603	903	0
7760	3	8.66511	-48.658	-666.461	-102050	38201.4	-3696.49	257.32	453.123	0	0	0	0	0	0	0	200	903	0	0	0	0	0	0	0	603	903	0
7760	4	9.42805	-47.8951	-663.41	-100860	38323.4	-3971.15	257.767	452.033	0	0	0	0	0	0	0	200	903	0	0	0	0	0	0	0	603	903	0
7760	5	9.12288	-48.0476	-657.306	-100403	38140.3	-4154.25	258.025	452.749	0	0	0	0	0	0	0	200	903	0	0	0	0	0	0	0	603	903	0
7760	6	10.191	-47.4373	-650.592	-99578.6	38445.5	-3971.15	259.093	453.058	0	0	0	0	0	0	0	200	903	0	0	0	0	0	0	0	603	903	0
7760	7	10.6488	-46.6743	-651.203	-99120.8	38201.4	-4108.48	258.663	452.212	0	0	0	0	0	0	0	200	903	0	0	0	0	0	0	0	603	903	0
7760	8	10.3436	-46.064	-649.372	-98388.4	37957.2	-3971.15	258.452	451.513	0	0	0	0	0	0	0	200	903	0	0	0	0	0	0	0	603	903	0
7760	9	11.2591	-45.9114	-645.71	-97564.4	37591	-3971.15	258.217	451.096	0	0	0	0	0	0	0	200	903	0	0	0	0	0	0	0	603	903	0
7761	0	10.3436	-44.9959	-643.573	-97106.6	37652	-4016.92	258.505	450.887	0	0	0	0	0	0	0	200	903	0	0	0	0	0	0	0	603	903	0
7761	1	11.5643	-44.6907	-639.606	-96923.5	37713.1	-3879.59	258.963	451.536	0	0	0	0	0	0	0	200	903	0	0	0	0	0	0	0	603	903	0
7761	2	10.9539	-44.3855	-635.944	-95550.2	37224.8	-3696.49	258.535	450.249	0	0	0	0	0	0	0	200	903	0	0	0	0	0	0	0	603	903	0
7761	3	11.7169	-43.47	-634.113	-95367.1	36919.6	-3833.82	258.223	450.395	0	0	0	0	0	0	0	200	903	0	0	0	0	0	0	0	603	903	0
7761	4	13.0902	-43.6226	-630.146	-94817.8	37163.8	-3833.82	258.977	450.47	0	0	0	0	0	0	0	200	903	0	0	0	0	0	0	0	603	903	0
7761	5	12.3272	-42.5545	-627.704	-94451.6	37224.8	-3925.37	259.303	450.472	0	0	0	0	0	0	0	200	903	0	0	0	0	0	0	0	603	903	0
7761	6	11.5643	-41.1812	-625.568	-93261.4	37224.8	-4016.92	259.506	449.083	0	0	0	0	0	0	0	200	903	0	0	0	0	0	0	0	603	903	0
7761	7	11.7169	-41.9441	-623.432	-92986.8	36675.5	-3971.15	258.828	449.153	0	0	0	0	0	0	0	200	903	0	0	0	0	0	0	0	603	903	0
7761	8	12.3272	-42.5545	-618.854	-92254.3	36553.4	-4016.92	259.066	449.073	0	0	0	0	0	0	0	200	903	0	0	0	0	0	0	0	603	903	0
7761	9	12.785	-39.5027	-614.887	-91979.7	36126.2	-3879.59	258.753	449.588	0	0	0	0	0	0	0	200	903	0	0	0	0	0	0	0	603	903	0
7762	0	13.7005	-39.045	-612.751	-91613.4	36553.4	-3971.15	259.655	449.512	0	0	0	0	0	0	0	200	903	0	0	0	0	0	0	0	603	903	0
7762	1	13.3953	-38.5872	-611.53	-91705	36919.6	-3650.71	260.373	449.96	0	0	0	0	0	0	0	200	903	0	0	0	0	0	0	0	603	903	0
7762	2	12.4798	-37.5191	-606.037	-90789.5	36431.3	-4016.92	260.114	449.809	0	0	0	0	0	0	0	200	903	0	0	0	0	0	0	0	603	903	0
7762	3	13.3953	-36.7561	-607.563	-90697.9	36248.2	-3696.49	259.662	449.282	0	0	0	0	0	0	0	200	903	0	0	0	0	0	0	0	603	903	0
7762	4	13.2428	-35.9932	-602.375	-90057.1	36065.1	-4108.48	259.872	449.503	0	0	0	0	0	0	0	200	903	0	0	0	0	0	0	0	603	903	0
7762	5	13.8531	-35.8406	-597.187	-88500.7	36553.4	-3879.59	261.209	448.196	0	0	0	0	0	0	0	200	903	0	0	0	0	0	0	0	603	903	0
7762	6	14.9212	-34.9251	-597.797	-89050	36553.4	-3788.04	261.147	448.964	0	0	0	0	0	0	0	200	903	0	0	0	0	0	0	0	603	903	0
7762	7	14.7686	-33.3992	-596.271	-88042.9	36126.2	-4016.92	260.587	447.656	0	0	0	0	0	0	0	200	903	0	0	0	0	0	0	0	603	903	0
7762	8	14.616	-33.7044	-591.388	-88134.5	35821	-3971.15	260.571	449.03	0	0	0	0	0	0	0	200	903	0	0	0	0	0	0	0	603	903	0
7762	9	14.4635	-34.1621	-592.304	-87402	36065.1	-3742.26	260.89	447.563	0	0	0	0	0	0	0	200	903	0	0	0	0	0	0	0	603	903	0
7763	0	16.1419	-32.7888	-588.336	-86486.5	35943.1	-3788.04	261.093	447.002	0	0	0	0	0	0	0	200	903	0	0	0	0	0	0	0	603	903	0
7763	1	15.2264	-31.8733	-586.811	-85845.6	36004.1	-3971.15	261.356	446.292	0	0	0	0	0	0	0	200	903	0	0	0	0	0	0	0	603	903	0
7763	2	15.5316	-31.1104	-583.454	-85571	35943.1	-3513.38	261.604	446.663	0	0	0	0	0	0	0	200	903	0	0	0	0	0	0	0	603	903	0
7763	3	16.5997	-30.9578	-582.538	-85021.6	35576.9	-3971.15	261.072	445.95	0	0	0	0	0	0	0	200	903	0	0	0	0	0	0	0	603	903	0
7763	4	15.9893	-30.6526	-582.233	-84655.4	35943.1	-3742.26	261.733	445.398	0	0	0	0	0	0	0	200	903	0	0	0	0	0	0	0	603	903	0
7763	5	15.2264	-30.5	-579.181	-84930.1	36004.1	-3833.82	262.164	446.638	0	0	0	0	0	0	0	200	903	0	0	0	0	0	0	0	603	903	0
7763	6	16.9049	-30.0423	-575.824	-82732.9	35821	-3696.49	262.208	443.677	0	0	0	0	0	0	0	200	903	0	0	0	0	0	0	0	603	903	0
7763	7	15.5316	-29.7371	-574.604	-83648.3	35332.7	-3696.49	261.491	445.576	0	0	0	0	0	0	0	200	903	0	0	0	0	0	0	0	603	903	0
7763	8	16.7523	-28.9742	-571.552	-82915.9	35393.7	-3604.93	261.926	445.072	0	0	0	0	0	0	0	200	903	0	0	0	0	0	0	0	603	903	0
7763	9	16.7523	-28.5164	-569.416	-82549.7	35821	-3513.38	262.908	444.973	0	0	0	0	0	0	0	200	903	0	0	0	0	0	0	0	603	903	0
7764	0	17.0574	-28.3638	-570.331	-82549.7	35637.9	-3559.16	262.486	444.74	0	0	0	0	0	0	0	200	903	0	0	0	0	0	0	0	603	903	0
7764	1	17.3626	-29.1267	-569.11	-81908.8	35576.9	-3467.61	262.513	443.924	0	0	0	0	0	0	0	200	903	0	0	0	0	0	0	0	603	903	0
7764	2	16.1419	-27.1431	-566.669	-81359.5	35027.5	-3559.16	261.813	443.575	0	0	0	0	0	0	0	200	903	0	0	0	0	0	0	0	603	903	0
7764	3	16.1419	-26.6853	-563.617	-81908.8	35149.6	-3284.5	262.364	445.327	0	0	0	0	0	0	0	200	903	0	0	0	0	0	0	0	603	903	0
7764	4	17.3626	-26.8379	-561.481	-81359.5	35088.6	-3513.38	262.493	444.902	0	0	0	0	0	0	0	200	903	0	0	0	0	0	0	0	603	903	0
7764	5	16.7523	-25.7698	-560.871	-81084.9	35271.7	-3513.38	262.887	444.57	0	0	0	0	0	0	0	200	903	0	0	0	0	0	0	0	603	903	0
7764	6	16.7523	-25.4646	-560.26	-80444	35210.6	-3147.17	262.847	443.583	0	0	0	0	0	0	0	200	903	0	0	0	0	0	0	0	603	903	0
7764	7	16.2945	-25.1595	-558.734	-80260.9	35027.5	-3284.5	262.691	443.648	0	0	0	0	0	0	0	200	903	0	0	0	0	0	0	0	603	903	0
7764	8	15.379	-24.3965	-557.819	-79986.2	35088.6	-3192.95	262.903	443.391	0	0	0	0	0	0	0	200	903	0	0	0	0	0	0	0	603	903	0
7764	9	16.1419	-23.9388	-553.852	-79803.2	34783.4	-3009.84	262.803	444.088	0	0	0	0	0	0	0	200	903	0	0	0	0	0	0	0	603	903	0
7765	0	16.7523	-22.4129	-555.072	-79162.3	35332.7	-2918.29	263.654	442.616	0	0	0	0	0	0	0	200	903	0	0	0	0	0	0	0	603	903	0
7765	1	15.5316	-21.8025	-551.105	-78246.7	34783.4	-2597.85	263.116	441.982	0	0	0	0	0	0	0	200	903	0	0	0	0	0	0	0	603	903	0
7765	2	16.2945	-22.1077	-552.631	-78063.6	34600.3	-2872.51	262.61	441.258	0	0	0	0	0	0	0	200	903	0	0	0	0	0	0	0	603	903	0
7765	3	15.8367	-21.1922	-544.391	-78246.7	34722.4	-2964.07	263.782	443.733	0	0	0	0	0	0	0	200	903	0	0	0	0	0	0	0	603	903	0
7765	4	14.9212	-20.7344	-550.19	-77972.1	34295.1	-2780.96	262.333	441.719	0	0	0	0	0	0	0	200	903	0	0	0	0	0	0	0	603	903	0
7765	5	14.9212	-20.4292	-548.053	-77514.3	34722.4	-2689.41	263.356	441.436	0	0	0	0	0	0	0	200	903	0	0	0	0	0	0	0	603	903	0
7765	6	14.4635	-19.9715	-542.56	-77514.3	34600.3	-2460.53	263.772	442.868	0	0	0	0	0	0	0	200	903	0	0	0	0	0	0	0	603	903	0
7765	7	15.6842	-19.6663	-545.307	-76965	34539.3	-2460.53	263.339	441.141	0	0	0	0	0	0	0	200	903	0	0	0	0	0	0	0	603	903	0
7765	8	15.0738	-19.2085	-545.917	-77056.5	34295.1	-2414.75	262.821	441.151	0	0	0	0	0	0	0	200	903	0	0	0	0	0	0	0	603	903	0
7765	9	14.3109	-19.2085	-545.612	-76415.7	34356.1	-2277.42	262.968	440.055	0	0	0	0	0	0	0	200	903	0	0	0	0	0	0	0	603	903	0
7766	0	13.5479	-18.1404	-543.781	-76141.1	34600.3	-2185.87	263.629	440.022	0	0	0	0	0	0	0	200	903	0	0	0	0	0	0	0	603	903	0
7766	1	15.2264	-17.0723	-541.034	-75317	34295.1	-2323.2	263.388	439.209	0	0	0	0	0	0	0	200	903	0	0	0	0	0	0	0	603	903	0
7766	2	13.0902	-16.9197	-541.645	-74950.8	34539.3	-1773.88	263.767	438.376	0	0	0	0	0	0	0	200	903	0	0	0	0	0	0	0	603	903	0
7766	3	13.3953	-16.6145	-540.424	-75225.5	34356.1	-2140.09	263.573	439.197	0	0	0	0	0	0	0	200	903	0	0	0	0	0	0	0	603	903	0
7766	4	13.7005	-15.8516	-539.203	-74401.5	34478.2	-1773.88	263.943	437.984	0	0	0	0	0	0	0	200	903	0	0	0	0	0	0	0	603	903	0
7766	5	13.2428	-15.8516	-540.729	-74401.5	34417.2	-2002.76	263.65	437.595	0	0	0	0	0	0	0	200	903	0	0	0	0	0	0	0	603	903	0
7766	6	13.3953	-14.9361	-540.424	-74401.5	34539.3	-1682.33	263.911	437.673	0	0	0	0	0	0	0	200	903	0	0	0	0	0	0	0	603	903	0
7766	7	11.8695	-15.3938	-539.203	-74126.9	34600.3	-1590.78	264.169	437.475	0	0	0	0	0	0	0	200	903	0	0	0	0	0	0	0	603	903	0
7766	8	11.1065	-14.7835	-537.982	-73577.6	34417.2	-1361.89	263.975	436.766	0	0	0	0	0	0	0	200	903	0	0	0	0	0	0	0	603	903	0
7766	9	11.2591	-14.9361	-535.541	-73852.2	34539.3	-1316.12	264.494	437.902	0	0	0	0	0	0	0	200	903	0	0	0	0	0	0	0	603	903	0
7767	0	11.8695	-13.868	-536.457	-73486	34539.3	-1316.12	264.384	436.984	0	0	0	0	0	0	0	200	903	0	0	0	0	0	0	0	603	903	0
7767	1	11.5643	-13.868	-538.898	-73211.4	34661.3	-995.682	264.319	435.854	0	0	0	0	0	0	0	200	903	0	0	0	0	0	0	0	603	903	0
7767	2	11.1065	-14.6309	-539.508	-73486	34661.3	-858.353	264.246	436.209	0	0	0	0	0	0	0	200	903	0	0	0	0	0	0	0	603	903	0
7767	3	10.3436	-13.2576	-538.288	-73486	34478.2	-537.919	264.052	436.518	0	0	0	0	0	0	0	200	903	0	0	0	0	0	0	0	603	903	0
7767	4	10.9539	-13.2576	-537.067	-74035.3	34356.1	-766.8	263.97	437.851	0	0	0	0	0	0	0	200	903	0	0	0	0	0	0	0	603	903	0
7767	5	9.88582	-12.0369	-537.372	-73577.6	34295.1	-675.248	263.82	436.921	0	0	0	0	0	0	0	200	903	0	0	0	0	0	0	0	603	903	0
7767	6	9.73323	-11.7317	-536.457	-73669.1	34783.4	-492.142	264.839	437.325	0	0	0	0	0	0	0	200	903	0	0	0	0	0	0	0	603	903	0
7767	7	9.58064	-11.5791	-540.119	-73486	34722.4	-492.142	264.287	436.055	0	0	0	0	0	0	0	200	903	0	0	0	0	0	0	0	603	903	0
7767	8	9.42805	-10.9688	-540.119	-73119.8	34539.3	-400.589	263.948	435.377	0	0	0	0	0	0	0	200	903	0	0	0	0	0	0	0	603	903	0
7767	9	7.74959	-10.3584	-539.203	-72570.5	33989.9	-400.589	263.037	434.588	0	0	0	0	0	0	0	200	903	0	0	0	0	0	0	0	603	903	0
7768	0	8.51253	-9.4429	-540.119	-72112.7	34600.3	11.398	264.061	433.513	0	0	0	0	0	0	0	200	903	0	0	0	0	0	0	0	603	903	0
7768	1	6.98665	-9.4429	-536.151	-72936.7	34905.5	-125.931	265.104	436.038	0	0	0	0	0	0	0	200	903	0	0	0	0	0	0	0	603	903	0
7768	2	7.44441	-8.37479	-539.203	-73028.2	35088.6	-125.931	265.075	435.437	0	0	0	0	0	0	0	200	903	0	0	0	0	0	0	0	603	903	0
7768	3	7.90217	-8.98514	-542.56	-72936.7	34600.3	194.503	263.772	434.431	0	0	0	0	0	0	0	200	903	0	0	0	0	0	0	0	603	903	0
7768	4	7.13924	-9.4429	-538.593	-72845.2	34722.4	148.727	264.469	435.251	0	0	0	0	0	0	0	200	903	0	0	0	0	0	0	0	603	903	0
7768	5	5.76594	-7.91702	-543.781	-72753.6	34539.3	286.056	263.517	433.792	0	0	0	0	0	0	0	200	903	0	0	0	0	0	0	0	603	903	0
7768	6	6.83406	-7.45926	-542.255	-73486	34783.4	331.833	264.146	435.519	0	0	0	0	0	0	0	200	903	0	0	0	0	0	0	0	603	903	0
7768	7	5.91853	-6.54373	-543.476	-71654.9	34966.5	514.938	264.339	431.846	0	0	0	0	0	0	0	200	903	0	0	0	0	0	0	0	603	903	0
7768	8	5.46077	-5.78079	-543.781	-71838.1	34539.3	606.491	263.517	432.108	0	0	0	0	0	0	0	200	903	0	0	0	0	0	0	0	603	903	0
7768	9	6.83406	-5.78079	-547.748	-72021.1	34905.5	652.267	263.725	431.486	0	0	0	0	0	0	0	200	903	0	0	0	0	0	0	0	603	903	0
7769	0	5.00301	-5.6282	-547.138	-71838.1	34844.4	652.267	263.685	431.298	0	0	0	0	0	0	0	200	903	0	0	0	0	0	0	0	603	903	0
7769	1	4.39265	-5.17044	-548.053	-72204.3	35088.6	1201.58	264.024	431.747	0	0	0	0	0	0	0	200	903	0	0	0	0	0	0	0	603	903	0
7769	2	3.62971	-5.01785	-548.664	-70647.9	35393.7	1110.03	264.509	428.764	0	0	0	0	0	0	0	200	903	0	0	0	0	0	0	0	603	903	0
7769	3	3.01936	-4.25491	-548.969	-71746.5	35027.5	926.926	263.806	430.693	0	0	0	0	0	0	0	200	903	0	0	0	0	0	0	0	603	903	0
7769	4	4.08748	-4.10232	-548.053	-71380.3	34966.5	1155.81	263.801	430.243	0	0	0	0	0	0	0	200	903	0	0	0	0	0	0	0	603	903	0
7769	5	3.7823	-3.49197	-549.274	-71746.5	35210.6	1110.03	264.104	430.621	0	0	0	0	0	0	0	200	903	0	0	0	0	0	0	0	603	903	0
7769	6	3.7823	-3.94974	-551.41	-71380.3	35515.8	1293.14	264.409	429.45	0	0	0	0	0	0	0	200	903	0	0	0	0	0	0	0	603	903	0
7769	7	3.47713	-2.57645	-549.274	-72112.7	35515.8	1384.69	264.66	431.287	0	0	0	0	0	0	0	200	903	0	0	0	0	0	0	0	603	903	0
7769	8	2.5616	-2.57645	-553.852	-72112.7	35393.7	1613.57	263.905	430.202	0	0	0	0	0	0	0	200	903	0	0	0	0	0	0	0	603	903	0
7769	9	2.71419	-1.96609	-553.241	-71929.6	35332.7	1659.35	263.865	430.015	0	0	0	0	0	0	0	200	903	0	0	0	0	0	0	0	603	903	0
7770	0	1.3409	-1.66092	-554.462	-72204.3	35760	1476.24	264.495	430.224	0	0	0	0	0	0	0	200	903	0	0	0	0	0	0	0	603	903	0
7770	1	2.86677	-1.05057	-556.293	-72295.8	36004.1	1659.35	264.721	429.96	0	0	0	0	0	0	0	200	903	0	0	0	0	0	0	0	603	903	0
7770	2	3.17195	-0.13504	-556.903	-70831	35882	1613.57	264.431	427.187	0	0	0	0	0	0	0	200	903	0	0	0	0	0	0	0	603	903	0
7770	3	2.5616	0.017548	-558.429	-72021.1	35515.8	1842.45	263.599	428.971	0	0	0	0	0	0	0	200	903	0	0	0	0	0	0	0	603	903	0
7770	4	0.577956	0.780487	-558.429	-72295.8	35760	1888.23	264.037	429.463	0	0	0	0	0	0	0	200	903	0	0	0	0	0	0	0	603	903	0
7770	5	3.01936	1.39084	-559.955	-72204.3	35821	1888.23	263.971	428.947	0	0	0	0	0	0	0	200	903	0	0	0	0	0	0	0	603	903	0
7770	6	0.577956	0.780487	-560.871	-72112.7	36126.2	2208.66	264.411	428.573	0	0	0	0	0	0	0	200	903	0	0	0	0	0	0	0	603	903	0
7770	7	1.3409	0.6279	-560.565	-71838.1	36309.3	2391.77	264.773	428.153	0	0	0	0	0	0	0	200	903	0	0	0	0	0	0	0	603	903	0
7770	8	2.86677	2.45895	-561.176	-71563.4	36187.2	2345.99	264.485	427.524	0	0	0	0	0	0	0	200	903	0	0	0	0	0	0	0	603	903	0
7770	9	1.18831	2.76413	-564.838	-71471.8	36248.2	2254.44	264.175	426.535	0	0	0	0	0	0	0	200	903	0	0	0	0	0	0	0	603	903	0
7771	0	0.577956	2.91672	-565.753	-71105.6	36431.3	2300.22	264.394	425.683	0	0	0	0	0	0	0	200	903	0	0	0	0	0	0	0	603	903	0
7771	1	-0.184983	3.67966	-564.228	-71380.3	36736.5	2437.55	265.109	426.51	0	0	0	0	0	0	0	200	903	0	0	0	0	0	0	0	603	903	0
7771	2	-0.0323951	3.98483	-566.364	-71197.2	36553.4	2712.2	264.541	425.709	0	0	0	0	0	0	0	200	903	0	0	0	0	0	0	0	603	903	0
7771	3	1.18831	4.13742	-567.585	-70922.5	36736.5	2483.32	264.724	424.955	0	0	0	0	0	0	0	200	903	0	0	0	0	0	0	0	603	903	0
7771	4	0.730544	3.83225	-565.753	-71197.2	36614.4	2483.32	264.718	425.845	0	0	0	0	0	0	0	200	903	0	0	0	0	0	0	0	603	903	0
7771	5	0.730544	3.67966	-570.026	-71014.1	36431.3	2712.2	263.912	424.58	0	0	0	0	0	0	0	200	903	0	0	0	0	0	0	0	603	903	0
7771	6	-0.184983	4.29001	-571.247	-70831	36980.7	2986.86	264.737	423.994	0	0	0	0	0	0	0	200	903	0	0	0	0	0	0	0	603	903	0
7771	7	0.730544	5.51071	-570.941	-70739.4	36675.5	2803.76	264.237	423.9	0	0	0	0	0	0	0	200	903	0	0	0	0	0	0	0	603	903	0
7771	8	-0.490159	4.59518	-570.941	-70556.3	36858.6	2757.98	264.558	423.579	0	0	0	0	0	0	0	200	903	0	0	0	0	0	0	0	603	903	0
7771	9	0.577956	4.4426	-572.162	-70647.9	36919.6	2529.1	264.527	423.475	0	0	0	0	0	0	0	200	903	0	0	0	0	0	0	0	603	903	0
7772	0	1.49348	6.27365	-574.909	-71014.1	36675.5	2712.2	263.794	423.522	0	0	0	0	0	0	0	200	903	0	0	0	0	0	0	0	603	903	0
7772	1	0.730544	6.42624	-575.519	-71288.7	37163.8	2757.98	264.574	423.869	0	0	0	0	0	0	0	200	903	0	0	0	0	0	0	0	603	903	0
7772	2	-0.642747	7.18918	-576.129	-70647.9	37041.7	2529.1	264.294	422.625	0	0	0	0	0	0	0	200	903	0	0	0	0	0	0	0	603	903	0
7772	3	-0.184983	7.34177	-574.909	-70556.3	36858.6	3124.19	264.112	422.726	0	0	0	0	0	0	0	200	903	0	0	0	0	0	0	0	603	903	0
7772	4	-0.490159	8.25729	-574.909	-70647.9	37285.8	2895.31	264.855	422.885	0	0	0	0	0	0	0	200	903	0	0	0	0	0	0	0	603	903	0
7772	5	0.577956	8.40988	-576.74	-70556.3	37285.8	2849.53	264.649	422.336	0	0	0	0	0	0	0	200	903	0	0	0	0	0	0	0	603	903	0
7772	6	0.730544	9.32541	-579.486	-70190.1	37591	2986.86	264.87	421.125	0	0	0	0	0	0	0	200	903	0	0	0	0	0	0	0	603	903	0
7772	7	0.577956	9.93576	-580.402	-69732.3	37652	2849.53	264.872	420.145	0	0	0	0	0	0	0	200	903	0	0	0	0	0	0	0	603	903	0
7772	8	-0.490159	10.0883	-581.012	-70007	37713.1	2986.86	264.909	420.491	0	0	0	0	0	0	0	200	903	0	0	0	0	0	0	0	603	903	0
7772	9	1.18831	10.0883	-580.707	-70281.7	37652	2986.86	264.838	421.028	0	0	0	0	0	0	0	200	903	0	0	0	0	0	0	0	603	903	0
7773	0	0.120193	10.6987	-581.012	-70098.5	37713.1	3078.42	264.909	420.649	0	0	0	0	0	0	0	200	903	0	0	0	0	0	0	0	603	903	0
7773	1	1.03572	9.02023	-581.623	-69549.3	37957.2	2895.31	265.261	419.578	0	0	0	0	0	0	0	200	903	0	0	0	0	0	0	0	603	903	0
7773	2	0.577956	10.8513	-584.369	-69274.6	38140.3	2941.09	265.268	418.546	0	0	0	0	0	0	0	200	903	0	0	0	0	0	0	0	603	903	0
7773	3	1.3409	11.9194	-582.538	-68999.9	38140.3	2986.86	265.473	418.447	0	0	0	0	0	0	0	200	903	0	0	0	0	0	0	0	603	903	0
7773	4	0.425369	12.072	-585.59	-68908.4	37835.2	2941.09	264.61	417.673	0	0	0	0	0	0	0	200	903	0	0	0	0	0	0	0	603	903	0
7773	5	0.577956	12.3772	-585.59	-69091.5	38140.3	3169.97	265.131	417.986	0	0	0	0	0	0	0	200	903	0	0	0	0	0	0	0	603	903	0
7773	6	0.120193	12.3772	-581.623	-68908.4	38445.5	3490.4	266.1	418.476	0	0	0	0	0	0	0	200	903	0	0	0	0	0	0	0	603	903	0
7773	7	1.3409	13.1401	-586.2	-68542.2	38506.5	3307.3	265.688	416.926	0	0	0	0	0	0	0	200	903	0	0	0	0	0	0	0	603	903	0
7773	8	1.79866	12.6823	-588.642	-68633.7	38384.5	3215.74	265.209	416.597	0	0	0	0	0	0	0	200	903	0	0	0	0	0	0	0	603	903	0
7773	9	2.40901	13.2927	-585.895	-68816.8	38018.3	3490.4	264.889	417.456	0	0	0	0	0	0	0	200	903	0	0	0	0	0	0	0	603	903	0
7774	0	1.49348	14.0556	-590.168	-67260.4	38628.6	3124.19	265.454	413.968	0	0	0	0	0	0	0	200	903	0	0	0	0	0	0	0	603	903	0
7774	1	1.3409	14.0556	-589.252	-67992.8	38811.7	3124.19	265.866	415.388	0	0	0	0	0	0	0	200	903	0	0	0	0	0	0	0	603	903	0
7774	2	1.79866	14.5134	-587.726	-68267.5	39055.9	3124.19	266.452	416.155	0	0	0	0	0	0	0	200	903	0	0	0	0	0	0	0	603	903	0
7774	3	2.71419	14.5134	-591.083	-68084.4	38872.8	3169.97	265.765	415.186	0	0	0	0	0	0	0	200	903	0	0	0	0	0	0	0	603	903	0
7774	4	3.01936	15.1237	-594.44	-68084.4	38994.8	3444.63	265.599	414.535	0	0	0	0	0	0	0	200	903	0	0	0	0	0	0	0	603	903	0
7774	5	3.17195	15.7341	-591.388	-68084.4	39300	3169.97	266.454	415.126	0	0	0	0	0	0	0	200	903	0	0	0	0	0	0	0	603	903	0
7774	6	2.10384	15.8867	-595.661	-67809.7	39361	3124.19	266.08	413.84	0	0	0	0	0	0	0	200	903	0	0	0	0	0	0	0	603	903	0
7774	7	2.5616	16.3445	-593.83	-67352	39177.9	3353.07	265.975	413.42	0	0	0	0	0	0	0	200	903	0	0	0	0	0	0	0	603	903	0
7774	8	1.95125	16.9548	-590.778	-67535.1	39177.9	3490.4	266.316	414.316	0	0	0	0	0	0	0	200	903	0	0	0	0	0	0	0	603	903	0
7774	9	3.32454	16.497	-595.966	-67260.4	39239	3307.3	265.841	412.86	0	0	0	0	0	0	0	200	903	0	0	0	0	0	0	0	603	903	0
7775	0	4.24007	14.9712	-598.102	-67352	39239	3627.73	265.606	412.61	0	0	0	0	0	0	0	200	903	0	0	0	0	0	0	0	603	903	0
7775	1	3.7823	18.1755	-598.102	-67260.4	39605.2	3261.52	266.218	412.456	0	0	0	0	0	0	0	200	903	0	0	0	0	0	0	0	603	903	0
7775	2	2.10384	18.4807	-600.238	-67626.6	39666.2	3627.73	266.084	412.666	0	0	0	0	0	0	0	200	903	0	0	0	0	0	0	0	603	903	0
7775	3	4.39265	18.4807	-599.933	-67535.1	39483.1	3444.63	265.813	412.571	0	0	0	0	0	0	0	200	903	0	0	0	0	0	0	0	603	903	0
7775	4	2.86677	19.091	-600.238	-67443.5	39788.3	3261.52	266.287	412.361	0	0	0	0	0	0	0	200	903	0	0	0	0	0	0	0	603	903	0
7775	5	4.39265	20.0066	-601.154	-66894.2	40032.4	3398.85	266.593	411.276	0	0	0	0	0	0	0	200	903	0	0	0	0	0	0	0	603	903	0
7775	6	5.15559	19.5488	-602.985	-66894.2	39910.3	3673.51	266.188	410.938	0	0	0	0	0	0	0	200	903	0	0	0	0	0	0	0	603	903	0
7775	7	4.39265	21.0747	-605.121	-66253.4	39849.3	3261.52	265.853	409.488	0	0	0	0	0	0	0	200	903	0	0	0	0	0	0	0	603	903	0
7775	8	3.93489	21.2273	-605.121	-66619.6	39910.3	3490.4	265.954	410.093	0	0	0	0	0	0	0	200	903	0	0	0	0	0	0	0	603	903	0
7775	9	5.61336	21.9902	-605.121	-66619.6	40093.5	3673.51	266.257	410.093	0	0	0	0	0	0	0	200	903	0	0	0	0	0	0	0	603	903	0
7776	0	3.93489	22.2954	-604.816	-66253.4	40276.6	3398.85	266.593	409.543	0	0	0	0	0	0	0	200	903	0	0	0	0	0	0	0	603	903	0
7776	1	4.85042	20.3117	-606.647	-66161.8	40459.7	3490.4	266.694	409.061	0	0	0	0	0	0	0	200	903	0	0	0	0	0	0	0	603	903	0
7776	2	5.46077	22.9057	-608.478	-65978.7	40886.9	3353.07	267.195	408.432	0	0	0	0	0	0	0	200	903	0	0	0	0	0	0	0	603	903	0
7776	3	5.61336	23.0583	-605.732	-65063.1	40215.5	3490.4	266.392	407.413	0	0	0	0	0	0	0	200	903	0	0	0	0	0	0	0	603	903	0
7776	4	4.08748	23.8213	-610.614	-65246.2	40459.7	3490.4	266.261	406.853	0	0	0	0	0	0	0	200	903	0	0	0	0	0	0	0	603	903	0
7776	5	4.85042	24.279	-609.699	-64971.6	41009	3581.96	267.261	406.563	0	0	0	0	0	0	0	200	903	0	0	0	0	0	0	0	603	903	0
7776	6	4.69783	24.279	-609.088	-64788.5	40642.8	3307.3	266.727	406.37	0	0	0	0	0	0	0	200	903	0	0	0	0	0	0	0	603	903	0
7776	7	6.07112	24.5842	-611.835	-64971.6	40947.9	3902.39	266.926	406.191	0	0	0	0	0	0	0	200	903	0	0	0	0	0	0	0	603	903	0
7776	8	6.07112	23.9738	-613.361	-64696.9	40825.9	3810.84	266.561	405.479	0	0	0	0	0	0	0	200	903	0	0	0	0	0	0	0	603	903	0
7776	9	6.52888	24.8894	-611.835	-63689.9	40886.9	3490.4	266.827	404.096	0	0	0	0	0	0	0	200	903	0	0	0	0	0	0	0	603	903	0
7777	0	5.61336	24.7368	-615.497	-64422.3	41131.1	3673.51	266.826	404.667	0	0	0	0	0	0	0	200	903	0	0	0	0	0	0	0	603	903	0
7777	1	6.3763	25.4997	-613.971	-63964.5	41131.1	3581.96	266.992	404.182	0	0	0	0	0	0	0	200	903	0	0	0	0	0	0	0	603	903	0
7777	2	5.46077	25.4997	-613.361	-63964.5	41192.1	3627.73	267.158	404.285	0	0	0	0	0	0	0	200	903	0	0	0	0	0	0	0	603	903	0
7777	3	6.22371	25.1945	-617.633	-64147.6	41253.1	3719.28	266.792	403.86	0	0	0	0	0	0	0	200	903	0	0	0	0	0	0	0	603	903	0
7777	4	6.68147	25.6523	-619.159	-63323.6	41253.1	3673.51	266.628	402.274	0	0	0	0	0	0	0	200	903	0	0	0	0	0	0	0	603	903	0
7777	5	6.98665	26.7204	-617.939	-64422.3	41619.3	3719.28	267.352	404.254	0	0	0	0	0	0	0	200	903	0	0	0	0	0	0	0	603	903	0
7777	6	6.07112	26.7204	-621.906	-63964.5	41497.3	3902.39	266.726	402.852	0	0	0	0	0	0	0	200	903	0	0	0	0	0	0	0	603	903	0
7777	7	6.3763	26.873	-620.38	-63964.5	41863.5	3765.06	267.48	403.105	0	0	0	0	0	0	0	200	903	0	0	0	0	0	0	0	603	903	0
7777	8	6.07112	27.7885	-620.38	-63689.9	41619.3	3627.73	267.087	402.663	0	0	0	0	0	0	0	200	903	0	0	0	0	0	0	0	603	903	0
7777	9	6.98665	27.9411	-622.821	-63415.2	41741.4	3948.17	267.02	401.819	0	0	0	0	0	0	0	200	903	0	0	0	0	0	0	0	603	903	0
7778	0	7.44441	28.5515	-625.568	-62591.2	41924.5	3673.51	267.018	400.055	0	0	0	0	0	0	0	200	903	0	0	0	0	0	0	0	603	903	0
7778	1	7.13924	29.467	-621.906	-62499.7	42046.6	3856.61	267.609	400.497	0	0	0	0	0	0	0	200	903	0	0	0	0	0	0	0	603	903	0
7778	2	6.52888	29.7722	-627.399	-63323.6	41985.5	3993.94	266.92	400.93	0	0	0	0	0	0	0	200	903	0	0	0	0	0	0	0	603	903	0
7778	3	7.13924	30.0774	-627.704	-62774.3	42046.6	3810.84	266.985	400.006	0	0	0	0	0	0	0	200	903	0	0	0	0	0	0	0	603	903	0
7778	4	6.22371	29.7722	-627.704	-62774.3	41802.4	3810.84	266.596	400.006	0	0	0	0	0	0	0	200	903	0	0	0	0	0	0	0	603	903	0
7778	5	8.05476	28.7041	-630.451	-62591.2	42473.8	3765.06	267.371	399.28	0	0	0	0	0	0	0	200	903	0	0	0	0	0	0	0	603	903	0
7778	6	8.35994	30.3825	-631.977	-62316.6	41924.5	4039.72	266.339	398.606	0	0	0	0	0	0	0	200	903	0	0	0	0	0	0	0	603	903	0
7778	7	8.66511	31.2981	-630.451	-61950.4	42473.8	3948.17	267.371	398.264	0	0	0	0	0	0	0	200	903	0	0	0	0	0	0	0	603	903	0
7778	8	7.74959	31.9084	-635.334	-62408.1	42412.8	4085.5	266.757	398.229	0	0	0	0	0	0	0	200	903	0	0	0	0	0	0	0	603	903	0
7778	9	8.05476	32.061	-634.113	-61126.4	42534.9	3765.06	267.078	396.397	0	0	0	0	0	0	0	200	903	0	0	0	0	0	0	0	603	903	0
7779	0	7.44441	32.6714	-635.944	-61217.9	42840	4131.27	267.365	396.263	0	0	0	0	0	0	0	200	903	0	0	0	0	0	0	0	603	903	0
7779	1	9.27547	32.8239	-637.47	-60577.1	42412.8	4085.5	266.533	395.027	0	0	0	0	0	0	0	200	903	0	0	0	0	0	0	0	603	903	0
7779	2	9.73323	33.4343	-640.827	-60394	43145.2	3993.94	267.327	394.244	0	0	0	0	0	0	0	200	903	0	0	0	0	0	0	0	603	903	0
7779	3	9.42805	32.6714	-641.132	-60851.7	42962.1	3993.94	267.01	394.913	0	0	0	0	0	0	0	200	903	0	0	0	0	0	0	0	603	903	0
7779	4	8.51253	33.2817	-642.047	-59753.1	43145.2	4039.72	267.199	393.066	0	0	0	0	0	0	0	200	903	0	0	0	0	0	0	0	603	903	0
7779	5	10.8013	33.2817	-641.132	-60027.8	43572.5	4039.72	267.962	393.628	0	0	0	0	0	0	0	200	903	0	0	0	0	0	0	0	603	903	0
7779	6	8.66511	33.8921	-643.268	-60119.3	43511.4	3856.61	267.641	393.459	0	0	0	0	0	0	0	200	903	0	0	0	0	0	0	0	603	903	0
7779	7	9.42805	34.1972	-644.489	-60027.8	43755.6	4177.05	267.892	393.14	0	0	0	0	0	0	0	200	903	0	0	0	0	0	0	0	603	903	0
7779	8	11.8695	34.3498	-645.71	-60302.4	43450.4	4039.72	267.291	393.389	0	0	0	0	0	0	0	200	903	0	0	0	0	0	0	0	603	903	0
7779	9	10.0384	34.9602	-648.151	-60302.4	43816.6	4497.48	267.602	393.038	0	0	0	0	0	0	0	200	903	0	0	0	0	0	0	0	603	903	0
7780	0	9.12288	35.5705	-649.372	-60394	43999.7	4222.83	267.757	393.004	0	0	0	0	0	0	0	200	903	0	0	0	0	0	0	0	603	903	0
7780	1	12.3272	35.4179	-649.372	-60210.9	43938.7	4085.5	267.663	392.722	0	0	0	0	0	0	0	200	903	0	0	0	0	0	0	0	603	903	0
7780	2	9.73323	36.1809	-650.898	-60027.8	44182.8	4085.5	267.88	392.223	0	0	0	0	0	0	0	200	903	0	0	0	0	0	0	0	603	903	0
7780	3	11.5643	36.9438	-652.118	-59753.1	44121.8	4268.6	267.659	391.629	0	0	0	0	0	0	0	200	903	0	0	0	0	0	0	0	603	903	0
7780	4	11.7169	37.5542	-655.475	-59112.2	44182.8	4314.38	267.406	390.182	0	0	0	0	0	0	0	200	903	0	0	0	0	0	0	0	603	903	0
7780	5	10.9539	37.8593	-658.222	-59386.9	44549	4222.83	267.681	390.223	0	0	0	0	0	0	0	200	903	0	0	0	0	0	0	0	603	903	0
7780	6	11.4117	37.5542	-659.748	-59295.3	44732.1	4314.38	267.802	389.876	0	0	0	0	0	0	0	200	903	0	0	0	0	0	0	0	603	903	0
7780	7	11.2591	38.6223	-657.917	-59386.9	44610.1	4497.48	267.805	390.265	0	0	0	0	0	0	0	200	903	0	0	0	0	0	0	0	603	903	0
7780	8	11.1065	38.0119	-656.696	-58929.1	44671.1	4405.93	268.024	389.736	0	0	0	0	0	0	0	200	903	0	0	0	0	0	0	0	603	903	0
7780	9	11.5643	37.8593	-660.358	-58929.1	44488	4268.6	267.37	389.238	0	0	0	0	0	0	0	200	903	0	0	0	0	0	0	0	603	903	0
7781	0	12.1746	39.2326	-663.41	-58379.8	45098.3	4177.05	267.98	388	0	0	0	0	0	0	0	200	903	0	0	0	0	0	0	0	603	903	0
7781	1	11.4117	40.1482	-661.884	-57647.4	44426.9	4314.38	267.122	387.096	0	0	0	0	0	0	0	200	903	0	0	0	0	0	0	0	603	903	0
7781	2	11.5643	39.3852	-665.851	-57555.8	45098.3	4405.93	267.73	386.44	0	0	0	0	0	0	0	200	903	0	0	0	0	0	0	0	603	903	0
7781	3	10.9539	41.3689	-665.851	-57098.1	44854.2	4222.83	267.364	385.752	0	0	0	0	0	0	0	200	903	0	0	0	0	0	0	0	603	903	0
7781	4	11.4117	41.2163	-664.02	-57006.5	44976.3	4085.5	267.733	385.851	0	0	0	0	0	0	0	200	903	0	0	0	0	0	0	0	603	903	0
7781	5	12.4798	42.1318	-668.903	-56823.4	45464.5	4360.15	267.969	384.95	0	0	0	0	0	0	0	200	903	0	0	0	0	0	0	0	603	903	0
7781	6	11.7169	41.3689	-672.565	-57098.1	45403.5	4268.6	267.508	384.896	0	0	0	0	0	0	0	200	903	0	0	0	0	0	0	0	603	903	0
7781	7	12.4798	41.8266	-672.87	-55907.9	45708.7	4451.71	267.931	383.089	0	0	0	0	0	0	0	200	903	0	0	0	0	0	0	0	603	903	0
7781	8	11.1065	42.437	-674.701	-55358.6	45281.4	4268.6	267.113	382.049	0	0	0	0	0	0	0	200	903	0	0	0	0	0	0	0	603	903	0
7781	9	12.9376	43.5051	-675.006	-55999.4	45464.5	4314.38	267.354	382.961	0	0	0	0	0	0	0	200	903	0	0	0	0	0	0	0	603	903	0
7782	0	11.7169	43.1999	-677.448	-56091	45830.8	4314.38	267.652	382.798	0	0	0	0	0	0	0	200	903	0	0	0	0	0	0	0	603	903	0
7782	1	12.6324	44.4206	-678.363	-55907.9	46074.9	4405.93	267.921	382.416	0	0	0	0	0	0	0	200	903	0	0	0	0	0	0	0	603	903	0
7782	2	12.785	44.5732	-681.72	-55633.2	45647.7	4497.48	266.96	381.607	0	0	0	0	0	0	0	200	903	0	0	0	0	0	0	0	603	903	0
7782	3	12.4798	45.031	-682.636	-56548.7	46197	4451.71	267.674	382.839	0	0	0	0	0	0	0	200	903	0	0	0	0	0	0	0	603	903	0
7782	4	12.3272	45.7939	-684.772	-56182.5	46135.9	4634.81	267.374	382.046	0	0	0	0	0	0	0	200	903	0	0	0	0	0	0	0	603	903	0
7782	5	11.5643	46.7094	-686.603	-55999.4	46380.1	4497.48	267.55	381.56	0	0	0	0	0	0	0	200	903	0	0	0	0	0	0	0	603	903	0
7782	6	11.8695	47.625	-685.382	-56182.5	46563.2	4589.04	267.938	381.973	0	0	0	0	0	0	0	200	903	0	0	0	0	0	0	0	603	903	0
7782	7	12.6324	48.0827	-685.993	-55633.2	46197	4497.48	267.343	381.099	0	0	0	0	0	0	0	200	903	0	0	0	0	0	0	0	603	903	0
7782	8	12.785	47.625	-688.434	-55907.9	46258	4451.71	267.193	381.21	0	0	0	0	0	0	0	200	903	0	0	0	0	0	0	0	603	903	0
7782	9	12.6324	48.5405	-692.096	-55083.9	46746.3	4589.04	267.543	379.59	0	0	0	0	0	0	0	200	903	0	0	0	0	0	0	0	603	903	0
7783	0	11.8695	49.7612	-692.401	-54626.1	46990.4	4589.04	267.866	378.894	0	0	0	0	0	0	0	200	903	0	0	0	0	0	0	0	603	903	0
7783	1	12.022	49.7612	-695.453	-54717.7	47173.5	4589.04	267.831	378.679	0	0	0	0	0	0	0	200	903	0	0	0	0	0	0	0	603	903	0
7783	2	11.7169	50.219	-695.453	-55175.5	46807.3	4726.37	267.305	379.337	0	0	0	0	0	0	0	200	903	0	0	0	0	0	0	0	603	903	0
7783	3	13.0902	50.9819	-696.979	-54534.6	47173.5	4405.93	267.683	378.244	0	0	0	0	0	0	0	200	903	0	0	0	0	0	0	0	603	903	0
7783	4	13.5479	50.9819	-701.862	-54351.5	46929.4	5001.02	266.864	377.439	0	0	0	0	0	0	0	200	903	0	0	0	0	0	0	0	603	903	0
7783	5	13.2428	50.5241	-702.777	-54259.9	47295.6	4863.69	267.298	377.208	0	0	0	0	0	0	0	200	903	0	0	0	0	0	0	0	603	903	0
7783	6	11.8695	52.3552	-703.693	-54992.4	47417.7	4680.59	267.384	378.148	0	0	0	0	0	0	0	200	903	0	0	0	0	0	0	0	603	903	0
7783	7	13.2428	52.9655	-703.998	-54900.8	47234.6	5001.02	267.095	377.984	0	0	0	0	0	0	0	200	903	0	0	0	0	0	0	0	603	903	0
7783	8	12.4798	53.4233	-704.303	-54534.6	46929.4	4955.25	266.632	377.431	0	0	0	0	0	0	0	200	903	0	0	0	0	0	0	0	603	903	0
7783	9	12.4798	54.644	-705.524	-54534.6	47295.6	4955.25	267.036	377.297	0	0	0	0	0	0	0	200	903	0	0	0	0	0	0	0	603	903	0
7784	0	13.7005	55.8647	-709.491	-52886.6	47906	5001.02	267.522	374.542	0	0	0	0	0	0	0	200	903	0	0	0	0	0	0	0	603	903	0
7784	1	12.3272	55.5595	-710.712	-54626.1	47722.8	4955.25	267.148	376.861	0	0	0	0	0	0	0	200	903	0	0	0	0	0	0	0	603	903	0
7784	2	11.4117	57.0854	-711.933	-53985.3	47844.9	5138.35	267.204	375.829	0	0	0	0	0	0	0	200	903	0	0	0	0	0	0	0	603	903	0
7784	3	12.785	57.3906	-712.848	-53985.3	47478.7	5138.35	266.604	375.732	0	0	0	0	0	0	0	200	903	0	0	0	0	0	0	0	603	903	0
7784	4	11.8695	55.8647	-713.764	-54351.5	48089.1	5504.56	267.374	376.148	0	0	0	0	0	0	0	200	903	0	0	0	0	0	0	0	603	903	0
7784	5	11.8695	57.8484	-715.595	-53893.7	47539.7	5046.8	266.434	375.313	0	0	0	0	0	0	0	200	903	0	0	0	0	0	0	0	603	903	0
7784	6	12.022	59.9846	-718.036	-53436	47967	5001.02	266.803	374.42	0	0	0	0	0	0	0	200	903	0	0	0	0	0	0	0	603	903	0
7784	7	12.022	60.4424	-718.952	-52703.5	47783.9	5275.68	266.463	373.306	0	0	0	0	0	0	0	200	903	0	0	0	0	0	0	0	603	903	0
7784	8	11.2591	61.5105	-721.088	-52978.2	48089.1	5184.13	266.69	373.47	0	0	0	0	0	0	0	200	903	0	0	0	0	0	0	0	603	903	0
7784	9	11.7169	61.8156	-720.783	-52795.1	48394.2	5367.23	267.141	373.247	0	0	0	0	0	0	0	200	903	0	0	0	0	0	0	0	603	903	0
7785	0	10.6488	62.5786	-721.393	-52612	47783.9	5275.68	266.238	372.931	0	0	0	0	0	0	0	200	903	0	0	0	0	0	0	0	603	903	0
7785	1	11.8695	63.7993	-722.614	-51971.1	48455.3	5458.79	267.056	371.921	0	0	0	0	0	0	0	200	903	0	0	0	0	0	0	0	603	903	0
7785	2	11.8695	63.3415	-724.75	-52612	48394.2	5458.79	266.774	372.593	0	0	0	0	0	0	0	200	903	0	0	0	0	0	0	0	603	903	0
7785	3	11.4117	64.257	-720.478	-51147.1	48394.2	5687.67	267.17	370.991	0	0	0	0	0	0	0	200	903	0	0	0	0	0	0	0	603	903	0
7785	4	10.4962	65.1726	-727.802	-51971.1	48638.4	5825	266.829	371.408	0	0	0	0	0	0	0	200	903	0	0	0	0	0	0	0	603	903	0
7785	5	10.0384	65.7829	-726.581	-51788	48821.5	5413.01	267.193	371.276	0	0	0	0	0	0	0	200	903	0	0	0	0	0	0	0	603	903	0
7785	6	10.4962	66.6985	-725.36	-51696.5	48821.5	5825	267.307	371.27	0	0	0	0	0	0	0	200	903	0	0	0	0	0	0	0	603	903	0
7785	7	11.2591	66.851	-727.802	-51330.2	48699.4	5687.67	266.913	370.528	0	0	0	0	0	0	0	200	903	0	0	0	0	0	0	0	603	903	0
7785	8	11.4117	68.9873	-730.854	-51513.4	48638.4	5550.34	266.55	370.484	0	0	0	0	0	0	0	200	903	0	0	0	0	0	0	0	603	903	0
7785	9	11.1065	68.2243	-730.854	-51330.2	49126.7	5687.67	267.218	370.233	0	0	0	0	0	0	0	200	903	0	0	0	0	0	0	0	603	903	0
7786	0	10.4962	69.7502	-732.379	-51238.7	49065.6	5641.89	266.995	369.962	0	0	0	0	0	0	0	200	903	0	0	0	0	0	0	0	603	903	0
7786	1	12.022	69.9028	-731.464	-51879.6	49553.9	5687.67	267.746	370.926	0	0	0	0	0	0	0	200	903	0	0	0	0	0	0	0	603	903	0
7786	2	10.9539	71.1235	-731.769	-51238.7	48882.5	5779.22	266.801	370.02	0	0	0	0	0	0	0	200	903	0	0	0	0	0	0	0	603	903	0
7786	3	11.4117	71.8864	-732.379	-50964	49187.7	5916.55	267.162	369.587	0	0	0	0	0	0	0	200	903	0	0	0	0	0	0	0	603	903	0
7786	4	11.4117	73.7175	-734.516	-51330.2	49187.7	5641.89	266.966	369.883	0	0	0	0	0	0	0	200	903	0	0	0	0	0	0	0	603	903	0
7786	5	11.8695	74.4804	-733.295	-50140.1	49309.8	6053.88	267.244	368.376	0	0	0	0	0	0	0	200	903	0	0	0	0	0	0	0	603	903	0
7786	6	10.4962	75.396	-736.652	-50506.3	48821.5	6191.21	266.275	368.562	0	0	0	0	0	0	0	200	903	0	0	0	0	0	0	0	603	903	0
7786	7	11.8695	76.3115	-734.821	-50231.6	49370.8	6053.88	267.188	368.359	0	0	0	0	0	0	0	200	903	0	0	0	0	0	0	0	603	903	0
7786	8	10.9539	76.6167	-734.516	-50323.2	49248.7	5962.33	267.049	368.512	0	0	0	0	0	0	0	200	903	0	0	0	0	0	0	0	603	903	0
7786	9	11.8695	76.1589	-735.126	-50048.5	49492.9	6191.21	267.326	368.082	0	0	0	0	0	0	0	200	903	0	0	0	0	0	0	0	603	903	0
7787	0	12.1746	77.6848	-737.567	-49133	49126.7	6008.1	266.606	366.615	0	0	0	0	0	0	0	200	903	0	0	0	0	0	0	0	603	903	0
7787	1	11.7169	79.5158	-737.262	-48766.8	49187.7	5916.55	266.717	366.146	0	0	0	0	0	0	0	200	903	0	0	0	0	0	0	0	603	903	0
7787	2	10.9539	80.2788	-737.262	-48675.2	48516.3	5962.33	265.806	366.022	0	0	0	0	0	0	0	200	903	0	0	0	0	0	0	0	603	903	0
7787	3	13.3953	80.2788	-734.211	-48583.7	49004.6	6145.43	266.745	366.171	0	0	0	0	0	0	0	200	903	0	0	0	0	0	0	0	603	903	0
7787	4	11.2591	80.7365	-734.821	-48675.2	49187.7	6236.99	266.938	366.241	0	0	0	0	0	0	0	200	903	0	0	0	0	0	0	0	603	903	0
7787	5	11.4117	81.8047	-735.431	-46752.6	49309.8	6053.88	267.049	363.572	0	0	0	0	0	0	0	200	903	0	0	0	0	0	0	0	603	903	0
7787	6	12.022	83.0254	-732.074	-47576.6	48943.6	6008.1	266.856	364.989	0	0	0	0	0	0	0	200	903	0	0	0	0	0	0	0	603	903	0
7787	7	12.1746	83.9409	-735.736	-47301.9	49126.7	6008.1	266.772	364.292	0	0	0	0	0	0	0	200	903	0	0	0	0	0	0	0	603	903	0
7787	8	10.9539	84.7038	-734.821	-47027.3	48882.5	5962.33	266.523	363.998	0	0	0	0	0	0	0	200	903	0	0	0	0	0	0	0	603	903	0
7787	9	10.9539	83.0254	-734.821	-46569.5	48943.6	6191.21	266.606	363.375	0	0	0	0	0	0	0	200	903	0	0	0	0	0	0	0	603	903	0
7788	0	11.1065	85.009	-732.074	-46477.9	48943.6	5870.77	266.856	363.488	0	0	0	0	0	0	0	200	903	0	0	0	0	0	0	0	603	903	0
7788	1	11.7169	86.6875	-729.938	-46569.5	48821.5	6099.66	266.884	363.799	0	0	0	0	0	0	0	200	903	0	0	0	0	0	0	0	603	903	0
7788	2	11.7169	87.7556	-730.243	-46477.9	48821.5	6236.99	266.857	363.647	0	0	0	0	0	0	0	200	903	0	0	0	0	0	0	0	603	903	0
7788	3	12.6324	89.7392	-732.379	-46111.7	49065.6	6053.88	266.995	362.962	0	0	0	0	0	0	0	200	903	0	0	0	0	0	0	0	603	903	0
7788	4	11.8695	89.2815	-731.159	-45837.1	48943.6	5870.77	266.94	362.691	0	0	0	0	0	0	0	200	903	0	0	0	0	0	0	0	603	903	0
7788	5	11.7169	90.5022	-731.159	-45837.1	48577.3	6191.21	266.439	362.691	0	0	0	0	0	0	0	200	903	0	0	0	0	0	0	0	603	903	0
7788	6	11.4117	91.5703	-727.191	-44555.3	48638.4	6374.31	266.885	361.27	0	0	0	0	0	0	0	200	903	0	0	0	0	0	0	0	603	903	0
7788	7	11.8695	92.3332	-725.971	-44646.9	48516.3	6282.76	266.83	361.5	0	0	0	0	0	0	0	200	903	0	0	0	0	0	0	0	603	903	0
7788	8	12.1746	93.2487	-725.971	-45104.6	48821.5	6236.99	267.25	362.13	0	0	0	0	0	0	0	200	903	0	0	0	0	0	0	0	603	903	0
7788	9	12.785	94.3169	-726.276	-44555.3	48394.2	6511.64	266.633	361.348	0	0	0	0	0	0	0	200	903	0	0	0	0	0	0	0	603	903	0
7789	0	12.9376	94.4695	-725.055	-44372.2	48394.2	6420.09	266.746	361.198	0	0	0	0	0	0	0	200	903	0	0	0	0	0	0	0	603	903	0
7789	1	11.5643	95.9953	-723.835	-44372.2	48211.1	6374.31	266.605	361.302	0	0	0	0	0	0	0	200	903	0	0	0	0	0	0	0	603	903	0
7789	2	12.022	97.216	-721.393	-42632.7	48272.2	6236.99	266.915	359.098	0	0	0	0	0	0	0	200	903	0	0	0	0	0	0	0	603	903	0
7789	3	14.4635	97.6738	-722.003	-42907.4	48333.2	6145.43	266.943	359.428	0	0	0	0	0	0	0	200	903	0	0	0	0	0	0	0	603	903	0
7789	4	13.5479	98.8945	-719.562	-42449.6	47906	6740.53	266.577	358.994	0	0	0	0	0	0	0	200	903	0	0	0	0	0	0	0	603	903	0
7789	5	13.5479	99.0471	-719.867	-42632.7	47295.6	6465.87	265.7	359.223	0	0	0	0	0	0	0	200	903	0	0	0	0	0	0	0	603	903	0
7789	6	13.3953	99.9626	-714.069	-42449.6	47844.9	6374.31	267.003	359.448	0	0	0	0	0	0	0	200	903	0	0	0	0	0	0	0	603	903	0
7789	7	12.4798	100.268	-717.121	-41442.5	48028	6328.54	266.973	357.79	0	0	0	0	0	0	0	200	903	0	0	0	0	0	0	0	603	903	0
7789	8	12.6324	101.336	-712.848	-40984.8	47600.8	6603.2	266.775	357.494	0	0	0	0	0	0	0	200	903	0	0	0	0	0	0	0	603	903	0
7789	9	13.2428	102.251	-712.543	-41259.4	47417.7	6511.64	266.547	357.904	0	0	0	0	0	0	0	200	903	0	0	0	0	0	0	0	603	903	0
7790	0	13.5479	102.862	-711.017	-41167.9	47478.7	6511.64	266.776	357.9	0	0	0	0	0	0	0	200	903	0	0	0	0	0	0	0	603	903	0
7790	1	13.2428	103.777	-710.407	-40710.1	47539.7	6511.64	266.919	357.305	0	0	0	0	0	0	0	200	903	0	0	0	0	0	0	0	603	903	0
7790	2	12.6324	102.404	-709.186	-40343.9	47234.6	6740.53	266.604	356.888	0	0	0	0	0	0	0	200	903	0	0	0	0	0	0	0	603	903	0
7790	3	12.3272	105.914	-707.05	-40801.7	46868.4	6511.64	266.287	357.707	0	0	0	0	0	0	0	200	903	0	0	0	0	0	0	0	603	903	0
7790	4	12.022	105.761	-704.608	-40527	46929.4	6648.97	266.604	357.517	0	0	0	0	0	0	0	200	903	0	0	0	0	0	0	0	603	903	0
7790	5	12.9376	106.676	-701.557	-40252.4	46502.1	6877.85	266.284	357.376	0	0	0	0	0	0	0	200	903	0	0	0	0	0	0	0	603	903	0
7790	6	14.4635	108.355	-701.557	-39794.6	46624.2	6786.3	266.458	356.723	0	0	0	0	0	0	0	200	903	0	0	0	0	0	0	0	603	903	0
7790	7	12.3272	109.118	-699.42	-39245.3	46319	7015.18	266.225	356.111	0	0	0	0	0	0	0	200	903	0	0	0	0	0	0	0	603	903	0
7790	8	11.8695	108.05	-697.589	-38970.6	46013.9	6969.41	265.961	355.865	0	0	0	0	0	0	0	200	903	0	0	0	0	0	0	0	603	903	0
7790	9	12.4798	111.102	-694.232	-38787.5	45891.8	6877.85	266.104	355.871	0	0	0	0	0	0	0	200	903	0	0	0	0	0	0	0	603	903	0
7791	0	10.8013	112.322	-690.265	-37597.3	46013.9	7060.96	266.661	354.468	0	0	0	0	0	0	0	200	903	0	0	0	0	0	0	0	603	903	0
7791	1	11.5643	113.543	-688.739	-37322.7	45891.8	7335.62	266.632	354.19	0	0	0	0	0	0	0	200	903	0	0	0	0	0	0	0	603	903	0
7791	2	11.2591	114.611	-687.519	-38055.1	45281.4	7152.51	265.862	355.351	0	0	0	0	0	0	0	200	903	0	0	0	0	0	0	0	603	903	0
7791	3	11.5643	114.764	-682.331	-37414.2	45159.4	7244.07	266.184	354.833	0	0	0	0	0	0	0	200	903	0	0	0	0	0	0	0	603	903	0
7791	4	10.0384	115.374	-682.941	-37231.1	45281.4	7381.4	266.304	354.516	0	0	0	0	0	0	0	200	903	0	0	0	0	0	0	0	603	903	0
7791	5	9.88582	117.205	-679.279	-36590.2	45098.3	7472.95	266.391	353.866	0	0	0	0	0	0	0	200	903	0	0	0	0	0	0	0	603	903	0
7791	6	9.42805	116.747	-675.006	-36590.2	44549	7518.72	265.998	354.207	0	0	0	0	0	0	0	200	903	0	0	0	0	0	0	0	603	903	0
7791	7	9.88582	116.137	-673.786	-36132.5	43877.6	7289.84	265.121	353.626	0	0	0	0	0	0	0	200	903	0	0	0	0	0	0	0	603	903	0
7791	8	8.97029	116.595	-671.649	-35491.6	44304.9	7839.16	265.964	352.842	0	0	0	0	0	0	0	200	903	0	0	0	0	0	0	0	603	903	0
7791	9	9.27547	118.884	-666.156	-34850.7	43877.6	7656.05	265.867	352.316	0	0	0	0	0	0	0	200	903	0	0	0	0	0	0	0	603	903	0
7792	0	7.74959	119.952	-666.156	-34759.2	44121.8	7976.49	266.233	352.179	0	0	0	0	0	0	0	200	903	0	0	0	0	0	0	0	603	903	0
7792	1	7.90217	119.189	-660.663	-34026.8	43572.5	7747.61	265.953	351.504	0	0	0	0	0	0	0	200	903	0	0	0	0	0	0	0	603	903	0
7792	2	8.05476	120.104	-654.865	-33752.1	43389.4	7839.16	266.257	351.541	0	0	0	0	0	0	0	200	903	0	0	0	0	0	0	0	603	903	0
7792	3	7.74959	120.257	-653.949	-33294.4	43206.2	7976.49	266.07	350.913	0	0	0	0	0	0	0	200	903	0	0	0	0	0	0	0	603	903	0
7792	4	7.90217	120.867	-653.034	-33111.2	43023.1	7884.94	265.882	350.704	0	0	0	0	0	0	0	200	903	0	0	0	0	0	0	0	603	903	0
7792	5	7.44441	121.478	-649.677	-32745	42534.9	7884.94	265.471	350.402	0	0	0	0	0	0	0	200	903	0	0	0	0	0	0	0	603	903	0
7792	6	6.52888	120.409	-645.404	-32653.5	42107.6	8022.27	265.242	350.594	0	0	0	0	0	0	0	200	903	0	0	0	0	0	0	0	603	903	0
7792	7	5.61336	120.867	-639.911	-31005.5	42290.7	8205.37	266.088	348.453	0	0	0	0	0	0	0	200	903	0	0	0	0	0	0	0	603	903	0
7792	8	6.83406	121.325	-636.554	-31829.5	41802.4	8159.6	265.67	350.003	0	0	0	0	0	0	0	200	903	0	0	0	0	0	0	0	603	903	0
7792	9	5.76594	121.478	-632.282	-31097.1	41436.2	8113.82	265.534	349.182	0	0	0	0	0	0	0	200	903	0	0	0	0	0	0	0	603	903	0
7793	0	5.00301	121.325	-629.84	-30914	41131.1	8296.92	265.304	349.082	0	0	0	0	0	0	0	200	903	0	0	0	0	0	0	0	603	903	0
7793	1	5.15559	121.783	-625.568	-30273.1	40886.9	8296.92	265.36	348.393	0	0	0	0	0	0	0	200	903	0	0	0	0	0	0	0	603	903	0
7793	2	3.17195	122.393	-619.77	-29998.5	40520.7	8251.15	265.38	348.403	0	0	0	0	0	0	0	200	903	0	0	0	0	0	0	0	603	903	0
7793	3	3.01936	122.24	-613.666	-29632.2	39910.3	8434.25	265.036	348.287	0	0	0	0	0	0	0	200	903	0	0	0	0	0	0	0	603	903	0
7793	4	1.3409	121.935	-609.394	-29632.2	39666.2	8617.36	265.091	348.626	0	0	0	0	0	0	0	200	903	0	0	0	0	0	0	0	603	903	0
7793	5	2.25642	123.003	-604.511	-29266	39239	8480.03	264.91	348.413	0	0	0	0	0	0	0	200	903	0	0	0	0	0	0	0	603	903	0
7793	6	1.79866	123.461	-601.764	-28533.6	38933.8	8708.91	264.699	347.417	0	0	0	0	0	0	0	200	903	0	0	0	0	0	0	0	603	903	0
7793	7	0.120193	122.698	-592.609	-28442.1	38628.6	8708.91	265.184	347.995	0	0	0	0	0	0	0	200	903	0	0	0	0	0	0	0	603	903	0
7793	8	-0.642747	123.003	-590.168	-27526.5	38201.4	8846.24	264.73	346.642	0	0	0	0	0	0	0	200	903	0	0	0	0	0	0	0	603	903	0
7793	9	-1.71086	124.834	-584.064	-26611	37652	9029.35	264.466	345.562	0	0	0	0	0	0	0	200	903	0	0	0	0	0	0	0	603	903	0
7794	0	-1.10051	124.682	-577.961	-27068.8	37652	8754.69	265.146	346.835	0	0	0	0	0	0	0	200	903	0	0	0	0	0	0	0	603	903	0
7794	1	-1.10051	124.377	-572.467	-26244.8	37224.8	8617.36	265.025	345.845	0	0	0	0	0	0	0	200	903	0	0	0	0	0	0	0	603	903	0
7794	2	-1.40569	124.529	-567.89	-25878.6	36492.4	8892.02	264.26	345.57	0	0	0	0	0	0	0	200	903	0	0	0	0	0	0	0	603	903	0
7794	3	-2.77898	124.682	-562.397	-25237.7	36065.1	9029.35	264.128	344.875	0	0	0	0	0	0	0	200	903	0	0	0	0	0	0	0	603	903	0
7794	4	-3.6945	122.698	-556.598	-24779.9	35821	8800.46	264.357	344.52	0	0	0	0	0	0	0	200	903	0	0	0	0	0	0	0	603	903	0
7794	5	-4.61003	123.766	-548.969	-23315.1	35698.9	8937.79	265.029	342.471	0	0	0	0	0	0	0	200	903	0	0	0	0	0	0	0	603	903	0
7794	6	-3.84709	123.309	-544.086	-23406.6	34905.5	8983.57	264.154	343.02	0	0	0	0	0	0	0	200	903	0	0	0	0	0	0	0	603	903	0
7794	7	-4.45744	124.834	-536.151	-22765.8	34600.3	9166.68	264.535	342.461	0	0	0	0	0	0	0	200	903	0	0	0	0	0	0	0	603	903	0
7794	8	-4.45744	124.072	-533.405	-22399.6	34417.2	9029.35	264.524	341.994	0	0	0	0	0	0	0	200	903	0	0	0	0	0	0	0	603	903	0
7794	9	-5.52556	123.309	-527.301	-22399.6	33989.9	8892.02	264.46	342.48	0	0	0	0	0	0	0	200	903	0	0	0	0	0	0	0	603	903	0
7795	0	-6.44109	123.003	-519.977	-20660.1	33257.5	9120.9	263.96	339.733	0	0	0	0	0	0	0	200	903	0	0	0	0	0	0	0	603	903	0
7795	1	-7.35661	123.156	-511.737	-20751.6	32158.9	9166.68	262.843	340.551	0	0	0	0	0	0	0	200	903	0	0	0	0	0	0	0	603	903	0
7795	2	-6.74626	123.461	-505.634	-20202.3	32708.2	9120.9	264.688	339.954	0	0	0	0	0	0	0	200	903	0	0	0	0	0	0	0	603	903	0
7795	3	-6.59367	123.156	-497.699	-20019.2	31365.4	9075.12	263.021	340.223	0	0	0	0	0	0	0	200	903	0	0	0	0	0	0	0	603	903	0
7795	4	-7.05144	122.546	-492.511	-19836.1	31670.6	9120.9	264.304	340.275	0	0	0	0	0	0	0	200	903	0	0	0	0	0	0	0	603	903	0
7795	5	-8.27214	121.935	-485.187	-19744.5	30816.1	8983.57	263.514	340.695	0	0	0	0	0	0	0	200	903	0	0	0	0	0	0	0	603	903	0
7795	6	-9.03508	122.698	-478.778	-19195.2	30633	9075.12	263.982	340.092	0	0	0	0	0	0	0	200	903	0	0	0	0	0	0	0	603	903	0
7795	7	-8.88249	122.24	-469.318	-18096.6	30449.9	9349.78	264.881	338.559	0	0	0	0	0	0	0	200	903	0	0	0	0	0	0	0	603	903	0
7795	8	-8.72991	121.783	-461.383	-18188.1	29961.6	9029.35	264.939	339.421	0	0	0	0	0	0	0	200	903	0	0	0	0	0	0	0	603	903	0
7795	9	-8.57732	122.088	-454.975	-17913.5	29168.2	9075.12	264.109	339.373	0	0	0	0	0	0	0	200	903	0	0	0	0	0	0	0	603	903	0
7796	0	-9.49284	120.715	-448.566	-17913.5	28740.9	9166.68	264.073	339.935	0	0	0	0	0	0	0	200	903	0	0	0	0	0	0	0	603	903	0
7796	1	-10.1032	120.562	-440.326	-16906.4	28557.8	9120.9	264.856	338.395	0	0	0	0	0	0	0	200	903	0	0	0	0	0	0	0	603	903	0
7796	2	-11.0187	118.731	-432.086	-16631.7	27825.4	8983.57	264.398	338.492	0	0	0	0	0	0	0	200	903	0	0	0	0	0	0	0	603	903	0
7796	3	-11.1713	119.799	-422.931	-15258.5	27031.9	9304	263.916	336.078	0	0	0	0	0	0	0	200	903	0	0	0	0	0	0	0	603	903	0
7796	4	-10.561	118.884	-413.166	-14342.9	26116.4	8937.79	263.211	334.715	0	0	0	0	0	0	0	200	903	0	0	0	0	0	0	0	603	903	0
7796	5	-11.1713	117.663	-404.926	-14983.8	26421.6	8983.57	265.25	337.004	0	0	0	0	0	0	0	200	903	0	0	0	0	0	0	0	603	903	0
7796	6	-11.1713	116.595	-399.128	-14709.1	25872.3	9029.35	264.822	336.853	0	0	0	0	0	0	0	200	903	0	0	0	0	0	0	0	603	903	0
7796	7	-12.0868	115.679	-390.583	-14159.8	25139.8	8892.02	264.365	336.253	0	0	0	0	0	0	0	200	903	0	0	0	0	0	0	0	603	903	0
7796	8	-11.4765	113.085	-380.817	-13519	24468.4	9029.35	264.253	335.5	0	0	0	0	0	0	0	200	903	0	0	0	0	0	0	0	603	903	0
7796	9	-12.8498	112.627	-370.441	-12878.1	23919.1	8708.91	264.569	334.764	0	0	0	0	0	0	0	200	903	0	0	0	0	0	0	0	603	903	0
7797	0	-12.0868	111.712	-362.506	-11871	23491.9	8617.36	264.804	332.747	0	0	0	0	0	0	0	200	903	0	0	0	0	0	0	0	603	903	0
7797	1	-12.392	110.186	-354.572	-11413.2	22759.5	8617.36	264.189	332.189	0	0	0	0	0	0	0	200	903	0	0	0	0	0	0	0	603	903	0
7797	2	-12.5446	108.202	-341.144	-10863.9	22271.2	8754.69	265.284	331.846	0	0	0	0	0	0	0	200	903	0	0	0	0	0	0	0	603	903	0
7797	3	-14.0705	107.439	-337.177	-10406.2	21233.6	8480.03	262.975	330.863	0	0	0	0	0	0	0	200	903	0	0	0	0	0	0	0	603	903	0
7797	4	-13.155	105.608	-327.716	-9856.84	21050.5	8342.7	264.234	330.077	0	0	0	0	0	0	0	200	903	0	0	0	0	0	0	0	603	903	0
7797	5	-11.3239	103.014	-319.171	-8666.66	20501.2	8113.82	264.232	327.154	0	0	0	0	0	0	0	200	903	0	0	0	0	0	0	0	603	903	0
7797	6	-12.392	100.726	-308.795	-9582.19	20379.1	7793.38	265.995	331.031	0	0	0	0	0	0	0	200	903	0	0	0	0	0	0	0	603	903	0
7797	7	-11.3239	98.2841	-302.692	-8117.34	19463.6	7793.38	264.302	326.817	0	0	0	0	0	0	0	200	903	0	0	0	0	0	0	0	603	903	0
7797	8	-11.3239	96.1479	-288.349	-8208.89	18975.3	7472.95	265.807	328.469	0	0	0	0	0	0	0	200	903	0	0	0	0	0	0	0	603	903	0
7797	9	-11.9343	94.0117	-283.466	-7476.47	18609.1	7518.72	265.648	326.375	0	0	0	0	0	0	0	200	903	0	0	0	0	0	0	0	603	903	0
7798	0	-11.9343	90.5022	-271.259	-6560.94	17815.6	6969.41	265.678	324.187	0	0	0	0	0	0	0	200	903	0	0	0	0	0	0	0	603	903	0
7798	1	-11.0187	87.9082	-260.578	-7110.26	17571.5	6832.08	267.433	327.287	0	0	0	0	0	0	0	200	903	0	0	0	0	0	0	0	603	903	0
7798	2	-9.49284	85.3142	-253.559	-6377.84	16533.9	7015.18	265.207	325.153	0	0	0	0	0	0	0	200	903	0	0	0	0	0	0	0	603	903	0
7798	3	-9.64543	81.8047	-245.929	-6377.84	16045.6	6648.97	265.245	325.934	0	0	0	0	0	0	0	200	903	0	0	0	0	0	0	0	603	903	0
7798	4	-8.27214	78.9055	-237.69	-5920.08	16167.7	5870.77	268.02	324.907	0	0	0	0	0	0	0	200	903	0	0	0	0	0	0	0	603	903	0
7798	5	-9.03508	76.6167	-228.534	-4455.23	15374.2	6099.66	267.273	319.495	0	0	0	0	0	0	0	200	903	0	0	0	0	0	0	0	603	903	0
7798	6	-6.89885	73.4123	-219.684	-5279.21	14702.8	5779.22	266.927	324.031	0	0	0	0	0	0	0	200	903	0	0	0	0	0	0	0	603	903	0
7798	7	-7.66179	69.7502	-210.834	-4729.89	14153.5	5413.01	267.131	322.434	0	0	0	0	0	0	0	200	903	0	0	0	0	0	0	0	603	903	0
7798	8	-6.2885	67.614	-202.899	-4272.13	13176.9	5001.02	264.943	321.055	0	0	0	0	0	0	0	200	903	0	0	0	0	0	0	0	603	903	0
7798	9	-4.45744	63.4941	-195.27	-3722.81	13176.9	4909.47	267.481	319.065	0	0	0	0	0	0	0	200	903	0	0	0	0	0	0	0	603	903	0
7799	0	-5.83074	59.5268	-188.861	-3814.36	12993.8	4589.04	268.801	320.197	0	0	0	0	0	0	0	200	903	0	0	0	0	0	0	0	603	903	0
7799	1	-7.05144	57.238	-183.368	-2807.28	12444.5	4268.6	267.866	315.31	0	0	0	0	0	0	0	200	903	0	0	0	0	0	0	0	603	903	0
7799	2	-4.91521	52.3552	-175.434	-2990.39	12017.3	3993.94	268.5	317.046	0	0	0	0	0	0	0	200	903	0	0	0	0	0	0	0	603	903	0
7799	3	-4.76262	48.9983	-167.804	-2532.63	11834.2	3948.17	270.524	315.093	0	0	0	0	0	0	0	200	903	0	0	0	0	0	0	0	603	903	0
7799	4	-3.99968	44.8784	-161.396	-2257.97	11468	3627.73	271.055	313.99	0	0	0	0	0	0	0	200	903	0	0	0	0	0	0	0	603	903	0
7799	5	-1.71086	43.0473	-157.123	-2257.97	10796.6	3215.74	268.714	314.371	0	0	0	0	0	0	0	200	903	0	0	0	0	0	0	0	603	903	0
7799	6	-2.93157	39.9956	-150.409	-1433.99	10613.5	3169.97	270.564	309.534	0	0	0	0	0	0	0	200	903	0	0	0	0	0	0	0	603	903	0
7799	7	-3.84709	38.6223	-144.916	-2166.41	10369.3	3032.64	271.554	314.949	0	0	0	0	0	0	0	200	903	0	0	0	0	0	0	0	603	903	0
7799	8	-1.71086	37.5542	-135.456	-1617.1	9820	2941.09	272.496	311.938	0	0	0	0	0	0	0	200	903	0	0	0	0	0	0	0	603	903	0
7799	9	-3.54192	36.4861	-128.437	-1159.33	9453.79	2757.98	273.607	309.027	0	0	0	0	0	0	0	200	903	0	0	0	0	0	0	0	603	903	0
7800	0	-2.32121	35.8757	-121.723	-1342.44	8843.44	2849.53	272.652	311.029	0	0	0	0	0	0	0	200	903	0	0	0	0	0	0	0	603	903	0
7800	1	-2.32121	34.9602	-116.535	-1800.2	8416.2	2895.31	272.22	315.448	0	0	0	0	0	0	0	200	903	0	0	0	0	0	0	0	603	903	0
7800	2	-2.62639	33.5869	-107.685	-1708.65	8111.02	2620.65	275.322	315.867	0	0	0	0	0	0	0	200	903	0	0	0	0	0	0	0	603	903	0
7800	3	-3.54192	30.8403	-103.717	-1067.78	7500.66	2803.76	272.318	310.295	0	0	0	0	0	0	0	200	903	0	0	0	0	0	0	0	603	903	0
7800	4	-2.62639	29.0092	-96.3931	-1525.55	7378.59	2345.99	276.547	315.826	0	0	0	0	0	0	0	200	903	0	0	0	0	0	0	0	603	903	0
7800	5	-0.947922	27.4834	-90.5948	-1433.99	6829.28	2208.66	275.383	315.829	0	0	0	0	0	0	0	200	903	0	0	0	0	0	0	0	603	903	0
7800	6	-0.337571	24.5842	-86.6275	-1433.99	6402.03	1979.78	273.903	316.554	0	0	0	0	0	0	0	200	903	0	0	0	0	0	0	0	603	903	0
7800	7	0.425369	21.8376	-82.0499	-884.675	6218.93	1888.23	275.794	310.782	0	0	0	0	0	0	0	200	903	0	0	0	0	0	0	0	603	903	0
7800	8	-1.40569	21.0747	-77.4722	-793.123	5974.79	1522.02	277.122	310.238	0	0	0	0	0	0	0	200	903	0	0	0	0	0	0	0	603	903	0
7800	9	-0.490159	19.5488	-74.4205	-793.123	5303.4	1979.78	271.263	310.657	0	0	0	0	0	0	0	200	903	0	0	0	0	0	0	0	603	903	0
7801	0	0.272781	16.8022	-67.7066	-884.675	5608.57	1338.91	282.836	313.066	0	0	0	0	0	0	0	200	903	0	0	0	0	0	0	0	603	903	0
7801	1	0.730544	14.9712	-63.129	-426.912	5120.29	1430.47	281.108	306.763	0	0	0	0	0	0	0	200	903	0	0	0	0	0	0	0	603	903	0
7801	2	1.79866	13.903	-59.4669	-793.123	4998.22	1201.58	284.051	313.337	0	0	0	0	0	0	0	200	903	0	0	0	0	0	0	0	603	903	0
7801	3	2.40901	11.6142	-57.6358	-793.123	4693.05	881.149	281.426	313.761	0	0	0	0	0	0	0	200	903	0	0	0	0	0	0	0	603	903	0
7801	4	1.49348	11.9194	-51.2271	-335.359	4143.73	1110.03	280.889	306.547	0	0	0	0	0	0	0	200	903	0	0	0	0	0	0	0	603	903	0
7801	5	1.64607	10.3935	-49.7012	-335.359	3960.63	1018.48	279.689	306.748	0	0	0	0	0	0	0	200	903	0	0	0	0	0	0	0	603	903	0
7801	6	1.79866	9.78317	-45.1236	-152.254	3838.56	881.149	285.068	303.374	0	0	0	0	0	0	0	200	903	0	0	0	0	0	0	0	603	903	0
7801	7	3.01936	9.78317	-42.377	-60.7009	3472.34	698.044	281.939	301.432	0	0	0	0	0	0	0	200	903	0	0	0	0	0	0	0	603	903	0
7801	8	2.5616	8.25729	-39.3252	30.8518	3350.27	789.596	285.194	299.215	0	0	0	0	0	0	0	200	903	0	0	0	0	0	0	0	603	903	0
7801	9	2.40901	5.6633	-36.2735	-152.254	2984.06	743.82	282.266	304.197	0	0	0	0	0	0	0	200	903	0	0	0	0	0	0	0	603	903	0
7802	0	2.25642	6.12106	-32.001	-152.254	2861.99	698.044	289.434	304.758	0	0	0	0	0	0	0	200	903	0	0	0	0	0	0	0	603	903	0
7802	1	1.95125	4.74777	-31.6959	-426.912	2861.99	606.491	290.296	313.469	0	0	0	0	0	0	0	200	903	0	0	0	0	0	0	0	603	903	0
7802	2	2.10384	2.76413	-26.2027	-60.7009	2068.54	331.833	278.944	302.317	0	0	0	0	0	0	0	200	903	0	0	0	0	0	0	0	603	903	0
7802	3	2.86677	1.69601	-24.3716	-152.254	2434.75	514.938	299.901	306.247	0	0	0	0	0	0	0	200	903	0	0	0	0	0	0	0	603	903	0
7802	4	2.86677	1.39084	-23.1509	-335.359	1824.39	469.162	278.804	314.486	0	0	0	0	0	0	0	200	903	0	0	0	0	0	0	0	603	903	0
7802	5	3.01936	0.933075	-22.2354	-610.017	1763.36	331.833	279.304	327.435	0	0	0	0	0	0	0	200	903	0	0	0	0	0	0	0	603	903	0
7802	6	2.71419	-0.897979	-18.2681	-610.017	1763.36	148.727	296.527	333.392	0	0	0	0	0	0	0	200	903	0	0	0	0	0	0	0	603	903	0
7802	7	2.71419	-1.96609	-18.5733	-518.465	1580.25	286.056	285.082	327.915	0	0	0	0	0	0	0	200	903	0	0	0	0	0	0	0	603	903	0
7802	8	5.30818	-1.81351	-14.3008	-518.465	1458.18	102.951	301.965	336.254	0	0	0	0	0	0	0	200	903	0	0	0	0	0	0	0	603	903	0
7802	9	2.5616	-1.66092	-12.1646	-426.912	725.762	194.503	259.662	335.095	0	0	0	0	0	0	0	200	903	0	0	0	0	0	0	0	603	903	0
7803	0	3.17195	-2.72903	-10.9439	-152.254	969.903	194.503	288.625	313.912	0	0	0	0	0	0	0	200	903	0	0	0	0	0	0	0	603	903	0
7803	1	3.7823	-3.03421	-9.41802	-976.228	847.832	-34.3784	290.022	403.655	0	0	0	0	0	0	0	200	903	0	0	0	0	0	0	0	603	903	0
7803	2	0	0	0	0	0	0	200	300	0	0	0	0	0	0	0	200	903	0	0	0	0	0	0	0	603	903	0
7803	3	0	0	0	0	0	0	200	300	0	0	0	0	0	0	0	200	903	0	0	0	0	0	0	0	603	903	0
7803	4	0	0	0	0	0	0	200	300	0	0	0	0	0	0	0	200	903	0	0	0	0	0	0	0	603	903	0
7803	5	0	0	0	0	0	0	200	300	0	0	0	0	0	0	0	200	903	0	0	0	0	0	0	0	603	903	0
7803	6	0	0	0	0	0	0	200	300	0	0	0	0	0	0	0	200	903	0	0	0	0	0	0	0	603	903	0
7803	7	0	0	0	0	0	0	200	300	0	0	0	0	0	0	0	200	903	0	0	0	0	0	0	0	603	903	0
7803	8	0	0	0	0	0	0	200	300	0	0	0	0	0	0	0	200	903	0	0	0	0	0	0	0	603	903	0
7803	9	0	0	0	0	0	0	200	300	0	0	0	0	0	0	0	200	903	0	0	0	0	0	0	0	603	903	0
7804	0	0	0	0	0	0	0	200	300	0	0	0	0	0	0	0	200	903	0	0	0	0	0	0	0	603	903	0
7804	1	0	0	0	0	0	0	200	300	0	0	0	0	0	0	0	200	903	0	0	0	0	0	0	0	603	903	0
7804	2	0	0	0	0	0	0	200	300	0	0	0	0	0	0	0	200	903	0	0	0	0	0	0	0	603	903	0
7804	3	0	0	0	0	0	0	200	300	0	0	0	0	0	0	0	200	903	0	0	0	0	0	0	0	603	903	0
7804	4	0	0	0	0	0	0	200	300	0	0	0	0	0	0	0	200	903	0	0	0	0	0	0	0	603	903	0
7804	5	0	0	0	0	0	0	200	300	0	0	0	0	0	0	0	200	903	0	0	0	0	0	0	0	603	903	0
7804	6	0	0	0	0	0	0	200	300	0	0	0	0	0	0	0	200	903	0	0	0	0	0	0	0	603	903	0
7804	7	0	0	0	0	0	0	200	300	0	0	0	0	0	0	0	200	903	0	0	0	0	0	0	0	603	903	0
7804	8	0	0	0	0	0	0	200	300	0	0	0	0	0	0	0	200	903	0	0	0	0	0	0	0	603	903	0
7804	9	0	0	0	0	0	0	200	300	0	0	0	0	0	0	0	200	903	0	0	0	0	0	0	0	603	903	0
7805	0	0	0	0	0	0	0	200	300	0	0	0	0	0	0	0	200	903	0	0	0	0	0	0	0	603	903	0
7805	1	0	0	0	0	0	0	200	300	0	0	0	0	0	0	0	200	903	0	0	0	0	0	0	0	603	903	0
7805	2	0	0	0	0	0	0	200	300	0	0	0	0	0	0	0	200	903	0	0	0	0	0	0	0	603	903	0
7805	3	0	0	0	0	0	0	200	300	0	0	0	0	0	0	0	200	903	0	0	0	0	0	0	0	603	903	0
7805	4	0	0	0	0	0	0	200	300	0	0	0	0	0	0	0	200	903	0	0	0	0	0	0	0	603	903	0
7805	5	0	0	0	0	0	0	200	300	0	0	0	0	0	0	0	200	903	0	0	0	0	0	0	0	603	903	0
7805	6	0	0	0	0	0	0	200	300	0	0	0	0	0	0	0	200	903	0	0	0	0	0	0	0	603	903	0
7805	7	0	0	0	0	0	0	200	300	0	0	0	0	0	0	0	200	903	0	0	0	0	0	0	0	603	903	0
7805	8	0	0	0	0	0	0	200	300	0	0	0	0	0	0	0	200	903	0	0	0	0	0	0	0	603	903	0
7805	9	0	0	0	0	0	0	200	300	0	0	0	0	0	0	0	200	903	0	0	0	0	0	0	0	603	903	0
7806	0	0	0	0	0	0	0	200	300	0	0	0	0	0	0	0	200	903	0	0	0	0	0	0	0	603	903	0
7806	1	0	0	0	0	0	0	200	300	0	0	0	0	0	0	0	200	903	0	0	0	0	0	0	0	603	903	0
7806	2	0	0	0	0	0	0	200	300	0	0	0	0	0	0	0	200	903	0	0	0	0	0	0	0	603	903	0
7806	3	0	0	0	0	0	0	200	300	0	0	0	0	0	0	0	200	903	0	0	0	0	0	0	0	603	903	0
7806	4	0	0	0	0	0	0	200	300	0	0	0	0	0	0	0	200	903	0	0	0	0	0	0	0	603	903	0
7806	5	0	0	0	0	0	0	200	300	0	0	0	0	0	0	0	200	903	0	0	0	0	0	0	0	603	903	0
7806	6	0	0	0	0	0	0	200	300	0	0	0	0	0	0	0	200	903	0	0	0	0	0	0	0	603	903	0
7806	7	0	0	0	0	0	0	200	300	0	0	0	0	0	0	0	200	903	0	0	0	0	0	0	0	603	903	0
7806	8	0	0	0	0	0	0	200	300	0	0	0	0	0	0	0	200	903	0	0	0	0	0	0	0	603	903	0
7806	9	0	0	0	0	0	0	200	300	0	0	0	0	0	0	0	200	903	0	0	0	0	0	0	0	603	903	0
7807	0	0	0	0	0	0	0	200	300	0	0	0	0	0	0	0	200	903	0	0	0	0	0	0	0	603	903	0
7807	1	0	0	0	0	0	0	200	300	0	0	0	0	0	0	0	200	903	0	0	0	0	0	0	0	603	903	0
7807	2	0	0	0	0	0	0	200	300	0	0	0	0	0	0	0	200	903	0	0	0	0	0	0	0	603	903	0
7807	3	0	0	0	0	0	0	200	300	0	0	0	0	0	0	0	200	903	0	0	0	0	0	0	0	603	903	0
7807	4	0	0	0	0	0	0	200	300	0	0	0	0	0	0	0	200	903	0	0	0	0	0	0	0	603	903	0
7807	5	0	0	0	0	0	0	200	300	0	0	0	0	0	0	0	200	903	0	0	0	0	0	0	0	603	903	0
7807	6	0	0	0	0	0	0	200	300	0	0	0	0	0	0	0	200	903	0	0	0	0	0	0	0	603	903	0
7807	7	0	0	0	0	0	0	200	300	0	0	0	0	0	0	0	200	903	0	0	0	0	0	0	0	603	903	0
7807	8	0	0	0	0	0	0	200	300	0	0	0	0	0	0	0	200	903	0	0	0	0	0	0	0	603	903	0
7807	9	0	0	0	0	0	0	200	300	0	0	0	0	0	0	0	200	903	0	0	0	0	0	0	0	603	903	0
7808	0	0	0	0	0	0	0	200	300	0	0	0	0	0	0	0	200	903	0	0	0	0	0	0	0	603	903	0
7808	1	0	0	0	0	0	0	200	300	0	0	0	0	0	0	0	200	903	0	0	0	0	0	0	0	603	903	0
7808	2	0	0	0	0	0	0	200	300	0	0	0	0	0	0	0	200	903	0	0	0	0	0	0	0	603	903	0
7808	3	0	0	0	0	0	0	200	300	0	0	0	0	0	0	0	200	903	0	0	0	0	0	0	0	603	903	0
7808	4	0	0	0	0	0	0	200	300	0	0	0	0	0	0	0	200	903	0	0	0	0	0	0	0	603	903	0
7808	5	0	0	0	0	0	0	200	300	0	0	0	0	0	0	0	200	903	0	0	0	0	0	0	0	603	903	0
7808	6	0	0	0	0	0	0	200	300	0	0	0	0	0	0	0	200	903	0	0	0	0	0	0	0	603	903	0
7808	7	0	0	0	0	0	0	200	300	0	0	0	0	0	0	0	200	903	0	0	0	0	0	0	0	603	903	0
7808	8	0	0	0	0	0	0	200	300	0	0	0	0	0	0	0	200	903	0	0	0	0	0	0	0	603	903	0
7808	9	0	0	0	0	0	0	200	300	0	0	0	0	0	0	0	200	903	0	0	0	0	0	0	0	603	903	0
7809	0	0	0	0	0	0	0	200	300	0	0	0	0	0	0	0	200	903	0	0	0	0	0	0	0	603	903	0
7809	1	0	0	0	0	0	0	200	300	0	0	0	0	0	0	0	200	903	0	0	0	0	0	0	0	603	903	0
7809	2	0	0	0	0	0	0	200	300	0	0	0	0	0	0	0	200	903	0	0	0	0	0	0	0	603	903	0
7809	3	0	0	0	0	0	0	200	300	0	0	0	0	0	0	0	200	903	0	0	0	0	0	0	0	603	903	0
7809	4	0	0	0	0	0	0	200	300	0	0	0	0	0	0	0	200	903	0	0	0	0	0	0	0	603	903	0
7809	5	0	0	0	0	0	0	200	300	0	0	0	0	0	0	0	200	903	0	0	0	0	0	0	0	603	903	0
7809	6	0	0	0	0	0	0	200	300	0	0	0	0	0	0	0	200	903	0	0	0	0	0	0	0	603	903	0
7809	7	0	0	0	0	0	0	200	300	0	0	0	0	0	0	0	200	903	0	0	0	0	0	0	0	603	903	0
7809	8	0	0	0	0	0	0	200	300	0	0	0	0	0	0	0	200	903	0	0	0	0	0	0	0	603	903	0
7809	9	0	0	0	0	0	0	200	300	0	0	0	0	0	0	0	200	903	0	0	0	0	0	0	0	603	903	0
7810	0	0	0	0	0	0	0	200	300	0	0	0	0	0	0	0	200	903	0	0	0	0	0	0	0	603	903	0
7810	1	0	0	0	0	0	0	200	300	0	0	0	0	0	0	0	200	903	0	0	0	0	0	0	0	603	903	0
7810	2	0	0	0	0	0	0	200	300	0	0	0	0	0	0	0	200	903	0	0	0	0	0	0	0	603	903	0
7810	3	0	0	0	0	0	0	200	300	0	0	0	0	0	0	0	200	903	0	0	0	0	0	0	0	603	903	0
7810	4	0	0	0	0	0	0	200	300	0	0	0	0	0	0	0	200	903	0	0	0	0	0	0	0	603	903	0
7810	5	0	0	0	0	0	0	200	300	0	0	0	0	0	0	0	200	903	0	0	0	0	0	0	0	603	903	0
7810	6	0	0	0	0	0	0	200	300	0	0	0	0	0	0	0	200	903	0	0	0	0	0	0	0	603	903	0
7810	7	0	0	0	0	0	0	200	300	0	0	0	0	0	0	0	200	903	0	0	0	0	0	0	0	603	903	0
7810	8	0	0	0	0	0	0	200	300	0	0	0	0	0	0	0	200	903	0	0	0	0	0	0	0	603	903	0
7810	9	0	0	0	0	0	0	200	300	0	0	0	0	0	0	0	200	903	0	0	0	0	0	0	0	603	903	0
7811	0	0	0	0	0	0	0	200	300	0	0	0	0	0	0	0	200	903	0	0	0	0	0	0	0	603	903	0
7811	1	0	0	0	0	0	0	200	300	0	0	0	0	0	0	0	200	903	0	0	0	0	0	0	0	603	903	0
7811	2	0	0	0	0	0	0	200	300	0	0	0	0	0	0	0	200	903	0	0	0	0	0	0	0	603	903	0
7811	3	0	0	0	0	0	0	200	300	0	0	0	0	0	0	0	200	903	0	0	0	0	0	0	0	603	903	0
7811	4	0	0	0	0	0	0	200	300	0	0	0	0	0	0	0	200	903	0	0	0	0	0	0	0	603	903	0
7811	5	0	0	0	0	0	0	200	300	0	0	0	0	0	0	0	200	903	0	0	0	0	0	0	0	603	903	0
7811	6	0	0	0	0	0	0	200	300	0	0	0	0	0	0	0	200	903	0	0	0	0	0	0	0	603	903	0
7811	7	0	0	0	0	0	0	200	300	0	0	0	0	0	0	0	200	903	0	0	0	0	0	0	0	603	903	0
7811	8	0	0	0	0	0	0	200	300	0	0	0	0	0	0	0	200	903	0	0	0	0	0	0	0	603	903	0
7811	9	0	0	0	0	0	0	200	300	0	0	0	0	0	0	0	200	903	0	0	0	0	0	0	0	603	903	0
7812	0	0	0	0	0	0	0	200	300	0	0	0	0	0	0	0	200	903	0	0	0	0	0	0	0	603	903	0
7812	1	0	0	0	0	0	0	200	300	0	0	0	0	0	0	0	200	903	0	0	0	0	0	0	0	603	903	0
7812	2	0	0	0	0	0	0	200	300	0	0	0	0	0	0	0	200	903	0	0	0	0	0	0	0	603	903	0
7812	3	0	0	0	0	0	0	200	300	0	0	0	0	0	0	0	200	903	0	0	0	0	0	0	0	603	903	0
7812	4	0	0	0	0	0	0	200	300	0	0	0	0	0	0	0	200	903	0	0	0	0	0	0	0	603	903	0
7812	5	0	0	0	0	0	0	200	300	0	0	0	0	0	0	0	200	903	0	0	0	0	0	0	0	603	903	0
7812	6	0	0	0	0	0	0	200	300	0	0	0	0	0	0	0	200	903	0	0	0	0	0	0	0	603	903	0
7812	7	0	0	0	0	0	0	200	300	0	0	0	0	0	0	0	200	903	0	0	0	0	0	0	0	603	903	0
7812	8	0	0	0	0	0	0	200	300	0	0	0	0	0	0	0	200	903	0	0	0	0	0	0	0	603	903	0
7812	9	0	0	0	0	0	0	200	300	0	0	0	0	0	0	0	200	903	0	0	0	0	0	0	0	603	903	0
7813	0	0	0	0	0	0	0	200	300	0	0	0	0	0	0	0	200	903	0	0	0	0	0	0	0	603	903	0
7813	1	0	0	0	0	0	0	200	300	0	0	0	0	0	0	0	200	903	0	0	0	0	0	0	0	603	903	0
7813	2	0	0	0	0	0	0	200	300	0	0	0	0	0	0	0	200	903	0	0	0	0	0	0	0	603	903	0
7813	3	0	0	0	0	0	0	200	300	0	0	0	0	0	0	0	200	903	0	0	0	0	0	0	0	603	903	0
7813	4	0	0	0	0	0	0	200	300	0	0	0	0	0	0	0	200	903	0	0	0	0	0	0	0	603	903	0
7813	5	0	0	0	0	0	0	200	300	0	0	0	0	0	0	0	200	903	0	0	0	0	0	0	0	603	903	0
7813	6	0	0	0	0	0	0	200	300	0	0	0	0	0	0	0	200	903	0	0	0	0	0	0	0	603	903	0
7813	7	0	0	0	0	0	0	200	300	0	0	0	0	0	0	0	200	903	0	0	0	0	0	0	0	603	903	0
7813	8	0	0	0	0	0	0	200	300	0	0	0	0	0	0	0	200	903	0	0	0	0	0	0	0	603	903	0
7813	9	0	0	0	0	0	0	200	300	0	0	0	0	0	0	0	200	903	0	0	0	0	0	0	0	603	903	0
7814	0	0	0	0	0	0	0	200	300	0	0	0	0	0	0	0	200	903	0	0	0	0	0	0	0	603	903	0
7814	1	0	0	0	0	0	0	200	300	0	0	0	0	0	0	0	200	903	0	0	0	0	0	0	0	603	903	0
7814	2	0	0	0	0	0	0	200	300	0	0	0	0	0	0	0	200	903	0	0	0	0	0	0	0	603	903	0
7814	3	0	0	0	0	0	0	200	300	0	0	0	0	0	0	0	200	903	0	0	0	0	0	0	0	603	903	0
7814	4	0	0	0	0	0	0	200	300	0	0	0	0	0	0	0	200	903	0	0	0	0	0	0	0	603	903	0
7814	5	0	0	0	0	0	0	200	300	0	0	0	0	0	0	0	200	903	0	0	0	0	0	0	0	603	903	0
7814	6	0	0	0	0	0	0	200	300	0	0	0	0	0	0	0	200	903	0	0	0	0	0	0	0	603	903	0
7814	7	0	0	0	0	0	0	200	300	0	0	0	0	0	0	0	200	903	0	0	0	0	0	0	0	603	903	0
7814	8	0	0	0	0	0	0	200	300	0	0	0	0	0	0	0	200	903	0	0	0	0	0	0	0	603	903	0
7814	9	0	0	0	0	0	0	200	300	0	0	0	0	0	0	0	200	903	0	0	0	0	0	0	0	603	903	0
7815	0	0	0	0	0	0	0	200	300	0	0	0	0	0	0	0	200	903	0	0	0	0	0	0	0	603	903	0
7815	1	0	0	0	0	0	0	200	300	0	0	0	0	0	0	0	200	903	0	0	0	0	0	0	0	603	903	0
7815	2	0	0	0	0	0	0	200	300	0	0	0	0	0	0	0	200	903	0	0	0	0	0	0	0	603	903	0
7815	3	0	0	0	0	0	0	200	300	0	0	0	0	0	0	0	200	903	0	0	0	0	0	0	0	603	903	0
7815	4	0	0	0	0	0	0	200	300	0	0	0	0	0	0	0	200	903	0	0	0	0	0	0	0	603	903	0
7815	5	0	0	0	0	0	0	200	300	0	0	0	0	0	0	0	200	903	0	0	0	0	0	0	0	603	903	0
7815	6	0	0	0	0	0	0	200	300	0	0	0	0	0	0	0	200	903	0	0	0	0	0	0	0	603	903	0
7815	7	0	0	0	0	0	0	200	300	0	0	0	0	0	0	0	200	903	0	0	0	0	0	0	0	603	903	0
7815	8	0	0	0	0	0	0	200	300	0	0	0	0	0	0	0	200	903	0	0	0	0	0	0	0	603	903	0
7815	9	0	0	0	0	0	0	200	300	0	0	0	0	0	0	0	200	903	0	0	0	0	0	0	0	603	903	0
7816	0	0	0	0	0	0	0	200	300	0	0	0	0	0	0	0	200	903	0	0	0	0	0	0	0	603	903	0
7816	1	0	0	0	0	0	0	200	300	0	0	0	0	0	0	0	200	903	0	0	0	0	0	0	0	603	903	0
7816	2	0	0	0	0	0	0	200	300	0	0	0	0	0	0	0	200	903	0	0	0	0	0	0	0	603	903	0
7816	3	0	0	0	0	0	0	200	300	0	0	0	0	0	0	0	200	903	0	0	0	0	0	0	0	603	903	0
7816	4	0	0	0	0	0	0	200	300	0	0	0	0	0	0	0	200	903	0	0	0	0	0	0	0	603	903	0
7816	5	0	0	0	0	0	0	200	300	0	0	0	0	0	0	0	200	903	0	0	0	0	0	0	0	603	903	0
7816	6	0	0	0	0	0	0	200	300	0	0	0	0	0	0	0	200	903	0	0	0	0	0	0	0	603	903	0
7816	7	0	0	0	0	0	0	200	300	0	0	0	0	0	0	0	200	903	0	0	0	0	0	0	0	603	903	0
7816	8	0	0	0	0	0	0	200	300	0	0	0	0	0	0	0	200	903	0	0	0	0	0	0	0	603	903	0
7816	9	0	0	0	0	0	0	200	300	0	0	0	0	0	0	0	200	903	0	0	0	0	0	0	0	603	903	0
7817	0	0	0	0	0	0	0	200	300	0	0	0	0	0	0	0	200	903	0	0	0	0	0	0	0	603	903	0
7817	1	0	0	0	0	0	0	200	300	0	0	0	0	0	0	0	200	903	0	0	0	0	0	0	0	603	903	0
7817	2	0	0	0	0	0	0	200	300	0	0	0	0	0	0	0	200	903	0	0	0	0	0	0	0	603	903	0
7817	3	0	0	0	0	0	0	200	300	0	0	0	0	0	0	0	200	903	0	0	0	0	0	0	0	603	903	0
7817	4	0	0	0	0	0	0	200	300	0	0	0	0	0	0	0	200	903	0	0	0	0	0	0	0	603	903	0
7817	5	0	0	0	0	0	0	200	300	0	0	0	0	0	0	0	200	903	0	0	0	0	0	0	0	603	903	0
[truncated: 1,674 more rows]
